# Supplementary material for: The Social Cost of Fossil and Industrial CO2 Emissions from 1950 to 2018
Source: Research Square preprint supplement (doi:10.21203/rs.3.rs-2244259/v1), 2022-11-17
Supplement: Supplementary file 2 [file 20THCENTURY_MIDYEAR_CONCENTRATIONS.xls]

## Sheet: 20THCENTURY_MIDYEAR_CONCENTRAT
PRE2005__MIDYEAR__CONCENTRATIONS____________________________
CONTENT: CMIP5 RECOMMENDATIONS FOR ANNUAL AVERAGE, GLOBAL MEAN CONCENTRATIONS.
RUN: PRE-2005 DATA, FINAL RELEASE, 26 Nov. 2009
CONTACT: Malte Meinshausen (malte.meinshausen@pik-potsdam.de)
DATE: 26/11/2009 11:29:06
MAGICC-VERSION: 6.3.09, 25 November 2009
FILE PRODUCED BY: RCP Concentration Calculation & Data Group, M. Meinshausen, S. Smith, K. Riahi, D. van Vuuren
DOCUMENTATION: M. Meinshausen, S. Smith et al. (2011) "The RCP GHG concentrations and their extension from 1765 to 2300", DOI 10.1007/s10584-011-0156-z, Climatic Change.
CMIP5 INFO: http://cmip-pcmdi.llnl.gov/cmip5/
RCP DATABASE: http://www.iiasa.ac.at/web-apps/tnt/RcpDb
FURTHER INFO: For data sources, aknowledgements and further information, see http://www.pik-potsdam.de/~mmalte/rcps.
NOTE: The PRE2005 data is included as well in the RCP3PD, RCP45, RCP85 files for convenience.
COLUMN_DESCRIPTION________________________________________
1. CO2EQ - (For Information only, not CMIP5 recommendation) CO2 equivalence concentrations using CO2 radiative forcing relationship Q = 3.71/ln(2)*ln(C/278), aggregating all (efficacy-adjusted) anthropogenic forcings, including greenhouse gases listed below (i.e. columns 3,4,5 and 8-35), and aerosols, trop. ozone etc. (not listed below).
2. KYOTO-CO2EQ - (For information only, not CMIP5 recommendation) As column 1, but only aggregating greenhouse gases controlled under the Kyoto Protocol (columns 3,4,5 and 8-19).
3. CO2 - Atmospheric CO2 concentrations
4. CH4 - Atmospheric CH4 concentrations
5. N2O - Atmospheric N2O concentrations
6. FGASSUMHFC134AEQ - All flourinated gases controlled under the Kyoto Protocol, i.e. HFCs, PFCs, and SF6 (columns 8-19) expressed as HFC134a equivalence concentrations.
7. MHALOSUMCFC12EQ - All flourinated gases controlled under the Montreal Protocol, i.e. CFCs, HCFCs, Halons, CCl4, CH3Br, CH3Cl (columns 20-35) expressed as CFC-12 equivalence concentrations.
8. - 19. - Flourinated Gases controlled under the Kyoto Protocol
20. - 35. - Ozone Depleting Substances controlled under the Montreal Protocol
&THISFILE_SPECIFICATIONS
THISFILE_DATACOLUMNS	35
THISFILE_FIRSTYEAR	1765
THISFILE_LASTYEAR	2005
THISFILE_ANNUALSTEPS	1
THISFILE_FIRSTDATAROW	40
THISFILE_UNITS	SEE ROW 38
THISFILE_DATTYPE	RCPDAT
/
COLUMN:	1	2	3	4	5	6	7	8	9	10	11	12	13	14	15	16	17	18	19	20	21	22	23	24	25	26	27	28	29	30	31	32	33	34	35
UNITS:	ppm	ppm	ppm	ppb	ppb	ppt	ppt	ppt	ppt	ppt	ppt	ppt	ppt	ppt	ppt	ppt	ppt	ppt	ppt	ppt	ppt	ppt	ppt	ppt	ppt	ppt	ppt	ppt	ppt	ppt	ppt	ppt	ppt	ppt	ppt
v YEARS/GAS >	CO2EQ	KYOTO-CO2EQ	CO2	CH4	N2O	FGASSUMHFC134AEQ	MHALOSUMCFC12EQ	CF4	C2F6	C6F14	HFC23	HFC32	HFC43_10	HFC125	HFC134a	HFC143a	HFC227ea	HFC245fa	SF6	CFC_11	CFC_12	CFC_113	CFC_114	CFC_115	CARB_TET	MCF	HCFC_22	HCFC_141B	HCFC_142B	HALON1211	HALON1202	HALON1301	HALON2402	CH3BR	CH3CL
1765	277.015	277.015	278.052	721.894	272.96	0	0	35	0	0	0	0	0	0	0	0	0	0	0	0	0	0	0	0	0	0	0	0	0	0	0	0	0	5.8	480
1766	277.839	277.815	278.106	722.256	272.971	0	0	35	0	0	0	0	0	0	0	0	0	0	0	0	0	0	0	0	0	0	0	0	0	0	0	0	0	5.8	480
1767	278.694	278.687	278.22	722.971	272.994	0	0	35	0	0	0	0	0	0	0	0	0	0	0	0	0	0	0	0	0	0	0	0	0	0	0	0	0	5.8	480
1768	278.748	278.836	278.343	723.668	273.017	0	0	35	0	0	0	0	0	0	0	0	0	0	0	0	0	0	0	0	0	0	0	0	0	0	0	0	0	5.8	480
1769	278.796	278.989	278.471	724.343	273.039	0	0	35	0	0	0	0	0	0	0	0	0	0	0	0	0	0	0	0	0	0	0	0	0	0	0	0	0	5.8	480
1770	278.849	279.143	278.6	724.995	273.061	0	0	35	0	0	0	0	0	0	0	0	0	0	0	0	0	0	0	0	0	0	0	0	0	0	0	0	0	5.8	480
1771	278.884	279.299	278.733	725.629	273.083	0	0	35	0	0	0	0	0	0	0	0	0	0	0	0	0	0	0	0	0	0	0	0	0	0	0	0	0	5.8	480
1772	278.925	279.459	278.869	726.25	273.104	0	0	35	0	0	0	0	0	0	0	0	0	0	0	0	0	0	0	0	0	0	0	0	0	0	0	0	0	5.8	480
1773	278.994	279.622	279.009	726.859	273.125	0	0	35	0	0	0	0	0	0	0	0	0	0	0	0	0	0	0	0	0	0	0	0	0	0	0	0	0	5.8	480
1774	279.069	279.789	279.153	727.455	273.146	0	0	35	0	0	0	0	0	0	0	0	0	0	0	0	0	0	0	0	0	0	0	0	0	0	0	0	0	5.8	480
1775	279.151	279.96	279.302	728.037	273.166	0	0	35	0	0	0	0	0	0	0	0	0	0	0	0	0	0	0	0	0	0	0	0	0	0	0	0	0	5.8	480
1776	279.242	280.137	279.457	728.604	273.187	0	0	35	0	0	0	0	0	0	0	0	0	0	0	0	0	0	0	0	0	0	0	0	0	0	0	0	0	5.8	480
1777	279.342	280.319	279.618	729.154	273.207	0	0	35	0	0	0	0	0	0	0	0	0	0	0	0	0	0	0	0	0	0	0	0	0	0	0	0	0	5.8	480
1778	279.447	280.504	279.782	729.687	273.227	0	0	35	0	0	0	0	0	0	0	0	0	0	0	0	0	0	0	0	0	0	0	0	0	0	0	0	0	5.8	480
1779	279.551	280.685	279.943	730.201	273.247	0	0	35	0	0	0	0	0	0	0	0	0	0	0	0	0	0	0	0	0	0	0	0	0	0	0	0	0	5.8	480
1780	279.65	280.859	280.097	730.692	273.266	0	0	35	0	0	0	0	0	0	0	0	0	0	0	0	0	0	0	0	0	0	0	0	0	0	0	0	0	5.8	480
1781	279.718	281.022	280.243	731.154	273.286	0	0	35	0	0	0	0	0	0	0	0	0	0	0	0	0	0	0	0	0	0	0	0	0	0	0	0	0	5.8	480
1782	279.782	281.179	280.382	731.584	273.306	0	0	35	0	0	0	0	0	0	0	0	0	0	0	0	0	0	0	0	0	0	0	0	0	0	0	0	0	5.8	480
1783	279.868	281.332	280.518	731.989	273.325	0	0	35	0	0	0	0	0	0	0	0	0	0	0	0	0	0	0	0	0	0	0	0	0	0	0	0	0	5.8	480
1784	279.959	281.487	280.657	732.378	273.345	0	0	35	0	0	0	0	0	0	0	0	0	0	0	0	0	0	0	0	0	0	0	0	0	0	0	0	0	5.8	480
1785	280.058	281.648	280.803	732.76	273.365	0	0	35	0	0	0	0	0	0	0	0	0	0	0	0	0	0	0	0	0	0	0	0	0	0	0	0	0	5.8	480
1786	280.17	281.819	280.957	733.146	273.384	0	0	35	0	0	0	0	0	0	0	0	0	0	0	0	0	0	0	0	0	0	0	0	0	0	0	0	0	5.8	480
1787	280.291	281.996	281.118	733.544	273.404	0	0	35	0	0	0	0	0	0	0	0	0	0	0	0	0	0	0	0	0	0	0	0	0	0	0	0	0	5.8	480
1788	280.419	282.177	281.282	733.965	273.424	0	0	35	0	0	0	0	0	0	0	0	0	0	0	0	0	0	0	0	0	0	0	0	0	0	0	0	0	5.8	480
1789	280.548	282.357	281.443	734.418	273.444	0	0	35	0	0	0	0	0	0	0	0	0	0	0	0	0	0	0	0	0	0	0	0	0	0	0	0	0	5.8	480
1790	280.676	282.532	281.598	734.911	273.464	0	0	35	0	0	0	0	0	0	0	0	0	0	0	0	0	0	0	0	0	0	0	0	0	0	0	0	0	5.8	480
1791	280.778	282.701	281.747	735.445	273.484	0	0	35	0	0	0	0	0	0	0	0	0	0	0	0	0	0	0	0	0	0	0	0	0	0	0	0	0	5.8	480
1792	280.879	282.867	281.891	736.018	273.504	0	0	35	0	0	0	0	0	0	0	0	0	0	0	0	0	0	0	0	0	0	0	0	0	0	0	0	0	5.8	480
1793	281.005	283.031	282.031	736.626	273.525	0	0	35	0	0	0	0	0	0	0	0	0	0	0	0	0	0	0	0	0	0	0	0	0	0	0	0	0	5.8	480
1794	281.13	283.191	282.167	737.265	273.545	0	0	35	0	0	0	0	0	0	0	0	0	0	0	0	0	0	0	0	0	0	0	0	0	0	0	0	0	5.8	480
1795	281.254	283.348	282.299	737.933	273.566	0	0	35	0	0	0	0	0	0	0	0	0	0	0	0	0	0	0	0	0	0	0	0	0	0	0	0	0	5.8	480
1796	281.378	283.502	282.427	738.627	273.587	0	0	35	0	0	0	0	0	0	0	0	0	0	0	0	0	0	0	0	0	0	0	0	0	0	0	0	0	5.8	480
1797	281.478	283.653	282.551	739.343	273.609	0	0	35	0	0	0	0	0	0	0	0	0	0	0	0	0	0	0	0	0	0	0	0	0	0	0	0	0	5.8	480
1798	281.577	283.801	282.671	740.08	273.63	0	0	35	0	0	0	0	0	0	0	0	0	0	0	0	0	0	0	0	0	0	0	0	0	0	0	0	0	5.8	480
1799	281.699	283.945	282.787	740.834	273.652	0	0	35	0	0	0	0	0	0	0	0	0	0	0	0	0	0	0	0	0	0	0	0	0	0	0	0	0	5.8	480
1800	281.795	284.086	282.899	741.608	273.675	0	0	35	0	0	0	0	0	0	0	0	0	0	0	0	0	0	0	0	0	0	0	0	0	0	0	0	0	5.8	480
1801	281.891	284.224	283.007	742.413	273.698	0	0	35	0	0	0	0	0	0	0	0	0	0	0	0	0	0	0	0	0	0	0	0	0	0	0	0	0	5.8	480
1802	281.964	284.359	283.111	743.26	273.721	0	0	35	0	0	0	0	0	0	0	0	0	0	0	0	0	0	0	0	0	0	0	0	0	0	0	0	0	5.8	480
1803	282.061	284.492	283.211	744.146	273.744	0	0	35	0	0	0	0	0	0	0	0	0	0	0	0	0	0	0	0	0	0	0	0	0	0	0	0	0	5.8	480
1804	282.204	284.622	283.307	745.063	273.768	0	0	35	0	0	0	0	0	0	0	0	0	0	0	0	0	0	0	0	0	0	0	0	0	0	0	0	0	5.8	480
1805	282.323	284.748	283.4	746.005	273.793	0	0	35	0	0	0	0	0	0	0	0	0	0	0	0	0	0	0	0	0	0	0	0	0	0	0	0	0	5.8	480
1806	282.418	284.873	283.49	746.962	273.818	0	0	35	0	0	0	0	0	0	0	0	0	0	0	0	0	0	0	0	0	0	0	0	0	0	0	0	0	5.8	480
1807	282.514	284.997	283.578	747.927	273.843	0	0	35	0	0	0	0	0	0	0	0	0	0	0	0	0	0	0	0	0	0	0	0	0	0	0	0	0	5.8	480
1808	282.631	285.115	283.661	748.893	273.869	0	0	35	0	0	0	0	0	0	0	0	0	0	0	0	0	0	0	0	0	0	0	0	0	0	0	0	0	5.8	480
1809	282.739	285.225	283.735	749.851	273.895	0	0	35	0	0	0	0	0	0	0	0	0	0	0	0	0	0	0	0	0	0	0	0	0	0	0	0	0	5.8	480
1810	282.836	285.321	283.797	750.798	273.922	0	0	35	0	0	0	0	0	0	0	0	0	0	0	0	0	0	0	0	0	0	0	0	0	0	0	0	0	5.8	480
1811	282.9	285.406	283.847	751.739	273.95	0	0	35	0	0	0	0	0	0	0	0	0	0	0	0	0	0	0	0	0	0	0	0	0	0	0	0	0	5.8	480
1812	282.957	285.483	283.889	752.682	273.978	0	0	35	0	0	0	0	0	0	0	0	0	0	0	0	0	0	0	0	0	0	0	0	0	0	0	0	0	5.8	480
1813	283.036	285.555	283.926	753.628	274.007	0	0	35	0	0	0	0	0	0	0	0	0	0	0	0	0	0	0	0	0	0	0	0	0	0	0	0	0	5.8	480
1814	283.115	285.627	283.963	754.579	274.036	0	0	35	0	0	0	0	0	0	0	0	0	0	0	0	0	0	0	0	0	0	0	0	0	0	0	0	0	5.8	480
1815	283.174	285.701	284.001	755.531	274.066	0	0	35	0	0	0	0	0	0	0	0	0	0	0	0	0	0	0	0	0	0	0	0	0	0	0	0	0	5.8	480
1816	283.215	285.778	284.043	756.486	274.097	0	0	35	0	0	0	0	0	0	0	0	0	0	0	0	0	0	0	0	0	0	0	0	0	0	0	0	0	5.8	480
1817	283.259	285.858	284.086	757.44	274.128	0	0	35	0	0	0	0	0	0	0	0	0	0	0	0	0	0	0	0	0	0	0	0	0	0	0	0	0	5.8	480
1818	283.327	285.936	284.129	758.395	274.16	0	0	35	0	0	0	0	0	0	0	0	0	0	0	0	0	0	0	0	0	0	0	0	0	0	0	0	0	5.8	480
1819	283.415	286.01	284.167	759.348	274.193	0	0	35	0	0	0	0	0	0	0	0	0	0	0	0	0	0	0	0	0	0	0	0	0	0	0	0	0	5.8	480
1820	283.498	286.078	284.198	760.3	274.227	0	0	35	0	0	0	0	0	0	0	0	0	0	0	0	0	0	0	0	0	0	0	0	0	0	0	0	0	5.8	480
1821	283.575	286.139	284.223	761.249	274.261	0	0	35	0	0	0	0	0	0	0	0	0	0	0	0	0	0	0	0	0	0	0	0	0	0	0	0	0	5.8	480
1822	283.627	286.196	284.244	762.198	274.296	0	0	35	0	0	0	0	0	0	0	0	0	0	0	0	0	0	0	0	0	0	0	0	0	0	0	0	0	5.8	480
1823	283.655	286.251	284.263	763.147	274.332	0	0	35	0	0	0	0	0	0	0	0	0	0	0	0	0	0	0	0	0	0	0	0	0	0	0	0	0	5.8	480
1824	283.706	286.306	284.281	764.095	274.368	0	0	35	0	0	0	0	0	0	0	0	0	0	0	0	0	0	0	0	0	0	0	0	0	0	0	0	0	5.8	480
1825	283.76	286.361	284.3	765.044	274.406	0	0	35	0	0	0	0	0	0	0	0	0	0	0	0	0	0	0	0	0	0	0	0	0	0	0	0	0	5.8	480
1826	283.816	286.418	284.32	765.993	274.444	0	0	35	0	0	0	0	0	0	0	0	0	0	0	0	0	0	0	0	0	0	0	0	0	0	0	0	0	5.8	480
1827	283.873	286.475	284.34	766.943	274.484	0	0	35	0	0	0	0	0	0	0	0	0	0	0	0	0	0	0	0	0	0	0	0	0	0	0	0	0	5.8	480
1828	283.931	286.532	284.36	767.894	274.524	0	0	35	0	0	0	0	0	0	0	0	0	0	0	0	0	0	0	0	0	0	0	0	0	0	0	0	0	5.8	480
1829	284.013	286.589	284.38	768.846	274.565	0	0	35	0	0	0	0	0	0	0	0	0	0	0	0	0	0	0	0	0	0	0	0	0	0	0	0	0	5.8	480
1830	283.962	286.647	284.4	769.798	274.606	0	0	35	0	0	0	0	0	0	0	0	0	0	0	0	0	0	0	0	0	0	0	0	0	0	0	0	0	5.8	480
1831	283.9	286.669	284.385	770.745	274.649	0	0	35	0	0	0	0	0	0	0	0	0	0	0	0	0	0	0	0	0	0	0	0	0	0	0	0	0	5.8	480
1832	283.882	286.6	284.28	771.683	274.693	0	0	35	0	0	0	0	0	0	0	0	0	0	0	0	0	0	0	0	0	0	0	0	0	0	0	0	0	5.8	480
1833	283.77	286.481	284.125	772.615	274.738	0	0	35	0	0	0	0	0	0	0	0	0	0	0	0	0	0	0	0	0	0	0	0	0	0	0	0	0	5.8	480
1834	283.664	286.367	283.975	773.547	274.784	0	0	35	0	0	0	0	0	0	0	0	0	0	0	0	0	0	0	0	0	0	0	0	0	0	0	0	0	5.8	480
1835	283.56	286.253	283.825	774.483	274.83	0	0	35	0	0	0	0	0	0	0	0	0	0	0	0	0	0	0	0	0	0	0	0	0	0	0	0	0	5.8	480
1836	283.369	286.14	283.675	775.428	274.878	0	0	35	0	0	0	0	0	0	0	0	0	0	0	0	0	0	0	0	0	0	0	0	0	0	0	0	0	5.8	480
1837	283.203	286.027	283.525	776.389	274.927	0	0	35	0	0	0	0	0	0	0	0	0	0	0	0	0	0	0	0	0	0	0	0	0	0	0	0	0	5.8	480
1838	283.153	285.966	283.425	777.369	274.977	0	0	35	0	0	0	0	0	0	0	0	0	0	0	0	0	0	0	0	0	0	0	0	0	0	0	0	0	5.8	480
1839	283.159	285.981	283.4	778.374	275.027	0	0	35	0	0	0	0	0	0	0	0	0	0	0	0	0	0	0	0	0	0	0	0	0	0	0	0	0	5.8	480
1840	283.17	286.022	283.4	779.412	275.08	0	0	35	0	0	0	0	0	0	0	0	0	0	0	0	0	0	0	0	0	0	0	0	0	0	0	0	0	5.8	480
1841	283.211	286.091	283.425	780.494	275.136	0	0	35	0	0	0	0	0	0	0	0	0	0	0	0	0	0	0	0	0	0	0	0	0	0	0	0	0	5.8	480
1842	283.306	286.214	283.5	781.624	275.202	0	0	35	0	0	0	0	0	0	0	0	0	0	0	0	0	0	0	0	0	0	0	0	0	0	0	0	0	5.8	480
1843	283.429	286.364	283.6	782.793	275.273	0	0	35	0	0	0	0	0	0	0	0	0	0	0	0	0	0	0	0	0	0	0	0	0	0	0	0	0	5.8	480
1844	283.579	286.538	283.725	783.989	275.337	0	0	35	0	0	0	0	0	0	0	0	0	0	0	0	0	0	0	0	0	0	0	0	0	0	0	0	0	5.8	480
1845	283.713	286.76	283.9	785.197	275.38	0	0	35	0	0	0	0	0	0	0	0	0	0	0	0	0	0	0	0	0	0	0	0	0	0	0	0	0	5.8	480
1846	283.885	286.977	284.075	786.406	275.398	0	0	35	0	0	0	0	0	0	0	0	0	0	0	0	0	0	0	0	0	0	0	0	0	0	0	0	0	5.8	480
1847	284.051	287.166	284.225	787.602	275.401	0	0	35	0	0	0	0	0	0	0	0	0	0	0	0	0	0	0	0	0	0	0	0	0	0	0	0	0	5.8	480
1848	284.22	287.379	284.4	788.773	275.401	0	0	35	0	0	0	0	0	0	0	0	0	0	0	0	0	0	0	0	0	0	0	0	0	0	0	0	0	5.8	480
1849	284.388	287.591	284.575	789.904	275.4	0	0	35	0	0	0	0	0	0	0	0	0	0	0	0	0	0	0	0	0	0	0	0	0	0	0	0	0	5.8	480
1850	284.478	287.78	284.725	790.979	275.425	0	0	35	0	0	0	0	0	0	0	0	0	0	0	0	0	0	0	0	0	0	0	0	0	0	0	0	0	5.8	480
1851	284.678	287.984	284.875	792.25	275.5	0	0.0105361	35	0	0	0	0	0	0	0	0	0	0	0	0	0	0	0	0	0.025935	0	0	0	0	0	0	0	0	5.8	480
1852	284.494	288.175	285	793.75	275.6	0	0.0316002	35	0	0	0	0	0	0	0	0	0	0	0	0	0	0	0	0	0.077785	0	0	0	0	0	0	0	0	5.8	480
1853	284.254	288.366	285.125	795.25	275.7	0	0.0526703	35	0	0	0	0	0	0	0	0	0	0	0	0	0	0	0	0	0.12965	0	0	0	0	0	0	0	0	5.8	480
1854	284.317	288.582	285.275	796.75	275.8	0	0.0737547	35	0	0	0	0	0	0	0	0	0	0	0	0	0	0	0	0	0.18155	0	0	0	0	0	0	0	0	5.8	480
1855	284.378	288.791	285.425	798	275.9	0	0.0948391	35	0	0	0	0	0	0	0	0	0	0	0	0	0	0	0	0	0.23345	0	0	0	0	0	0	0	0	5.8	480
1856	284.487	289	285.575	799.25	276	0	0.115903	35	0	0	0	0	0	0	0	0	0	0	0	0	0	0	0	0	0.2853	0	0	0	0	0	0	0	0	5.8	480
1857	284.571	289.216	285.725	800.75	276.1	0	0.136967	35	0	0	0	0	0	0	0	0	0	0	0	0	0	0	0	0	0.33715	0	0	0	0	0	0	0	0	5.8	480
1858	284.758	289.458	285.9	802.25	276.2	0	0.158052	35	0	0	0	0	0	0	0	0	0	0	0	0	0	0	0	0	0.38905	0	0	0	0	0	0	0	0	5.8	480
1859	284.872	289.7	286.075	803.75	276.3	0	0.179116	35	0	0	0	0	0	0	0	0	0	0	0	0	0	0	0	0	0.4409	0	0	0	0	0	0	0	0	5.8	480
1860	284.54	289.916	286.225	805.25	276.4	0	0.20018	35	0	0	0	0	0	0	0	0	0	0	0	0	0	0	0	0	0.49275	0	0	0	0	0	0	0	0	5.8	480
1861	283.91	290.132	286.375	806.75	276.5	0	0.221264	35	0	0	0	0	0	0	0	0	0	0	0	0	0	0	0	0	0.54465	0	0	0	0	0	0	0	0	5.8	480
1862	284.24	290.324	286.5	808.25	276.6	0	0.242328	35	0	0	0	0	0	0	0	0	0	0	0	0	0	0	0	0	0.5965	0	0	0	0	0	0	0	0	5.8	480
1863	284.827	290.515	286.625	809.75	276.7	0	0.263392	35	0	0	0	0	0	0	0	0	0	0	0	0	0	0	0	0	0.64835	0	0	0	0	0	0	0	0	5.8	480
1864	284.929	290.732	286.775	811.25	276.8	0	0.284477	35	0	0	0	0	0	0	0	0	0	0	0	0	0	0	0	0	0.70025	0	0	0	0	0	0	0	0	5.8	480
1865	284.907	290.93	286.9	813	276.9	0	0.305561	35	0	0	0	0	0	0	0	0	0	0	0	0	0	0	0	0	0.75215	0	0	0	0	0	0	0	0	5.8	480
1866	284.538	291.104	287	814.75	277	0	0.326625	35	0	0	0	0	0	0	0	0	0	0	0	0	0	0	0	0	0.804	0	0	0	0	0	0	0	0	5.8	480
1867	284.133	291.27	287.1	816.25	277.1	0	0.347689	35	0	0	0	0	0	0	0	0	0	0	0	0	0	0	0	0	0.85585	0	0	0	0	0	0	0	0	5.8	480
1868	284.156	291.461	287.225	817.75	277.2	0	0.368773	35	0	0	0	0	0	0	0	0	0	0	0	0	0	0	0	0	0.90775	0	0	0	0	0	0	0	0	5.8	480
1869	284.51	291.678	287.375	819.25	277.3	0	0.389838	35	0	0	0	0	0	0	0	0	0	0	0	0	0	0	0	0	0.9596	0	0	0	0	0	0	0	0	5.8	480
1870	284.76	291.898	287.525	821	277.375	0	0.41082	35	0	0	0	0	0	0	0	0	0	0	0	0	0	0	0	0	1.01125	0	0	0	0	0	0	0	0	5.8	480
1871	284.422	292.138	287.7	822.75	277.425	0	0.431844	35	0	0	0	0	0	0	0	0	0	0	0	0	0	0	0	0	1.063	0	0	0	0	0	0	0	0	5.8	480
1872	283.277	292.401	287.9	824.25	277.5	0	0.452969	35	0	0	0	0	0	0	0	0	0	0	0	0	0	0	0	0	1.115	0	0	0	0	0	0	0	0	5.8	480
1873	282.357	292.694	288.125	825.75	277.6	0	0.474094	35	0	0	0	0	0	0	0	0	0	0	0	0	0	0	0	0	1.167	0	0	0	0	0	0	0	0	5.8	480
1874	282.412	293.038	288.4	827.25	277.7	0	0.495219	35	0	0	0	0	0	0	0	0	0	0	0	0	0	0	0	0	1.219	0	0	0	0	0	0	0	0	5.8	480
1875	282.738	293.411	288.7	829	277.775	0	0.516344	35	0	0	0	0	0	0	0	0	0	0	0	0	0	0	0	0	1.271	0	0	0	0	0	0	0	0	5.8	480
1876	283.196	293.804	289.025	830.75	277.825	0	0.538484	35	0	0	0	0	0	0	0	0	0	0	0	0	0	0	0	0	1.3255	0	0	0	0	0	0	0	0	5.8	480
1877	283.933	294.245	289.4	832.25	277.9	0	0.56225	35	0	0	0	0	0	0	0	0	0	0	0	0	0	0	0	0	1.384	0	0	0	0	0	0	0	0	5.8	480
1878	284.511	294.717	289.8	833.75	278	0	0.587234	35	0	0	0	0	0	0	0	0	0	0	0	0	0	0	0	0	1.4455	0	0	0	0	0	0	0	0	5.8	480
1879	284.747	295.214	290.225	835.25	278.1	0	0.613437	35	0	0	0	0	0	0	0	0	0	0	0	0	0	0	0	0	1.51	0	0	0	0	0	0	0	0	5.8	480
1880	284.541	295.769	290.7	837	278.2	0	0.640656	35	0	0	0	0	0	0	0	0	0	0	0	0	0	0	0	0	1.577	0	0	0	0	0	0	0	0	5.8	480
1881	284.58	296.359	291.2	839	278.3	0	0.669094	35	0	0	0	0	0	0	0	0	0	0	0	0	0	0	0	0	1.647	0	0	0	0	0	0	0	0	5.8	480
1882	285.216	296.922	291.675	841	278.4	0	0.698953	35	0	0	0	0	0	0	0	0	0	0	0	0	0	0	0	0	1.7205	0	0	0	0	0	0	0	0	5.8	480
1883	285.702	297.461	292.125	843	278.5	0	0.730031	35	0	0	0	0	0	0	0	0	0	0	0	0	0	0	0	0	1.797	0	0	0	0	0	0	0	0	5.8	480
1884	286.076	297.992	292.575	844.75	278.6	0	0.762328	35	0	0	0	0	0	0	0	0	0	0	0	0	0	0	0	0	1.8765	0	0	0	0	0	0	0	0	5.8	480
1885	286.62	298.465	292.975	846.25	278.7	0	0.796047	35	0	0	0	0	0	0	0	0	0	0	0	0	0	0	0	0	1.9595	0	0	0	0	0	0	0	0	5.8	480
1886	287.061	298.869	293.3	848	278.8	0	0.831391	35	0	0	0	0	0	0	0	0	0	0	0	0	0	0	0	0	2.0465	0	0	0	0	0	0	0	0	5.8	480
1887	287.225	299.225	293.575	850	278.875	0	0.868359	35	0	0	0	0	0	0	0	0	0	0	0	0	0	0	0	0	2.1375	0	0	0	0	0	0	0	0	5.8	480
1888	286.962	299.525	293.8	852	278.925	0	0.906953	35	0	0	0	0	0	0	0	0	0	0	0	0	0	0	0	0	2.2325	0	0	0	0	0	0	0	0	5.8	480
1889	286.965	299.805	294	854	279	0	0.947172	35	0	0	0	0	0	0	0	0	0	0	0	0	0	0	0	0	2.3315	0	0	0	0	0	0	0	0	5.8	480
1890	287.046	300.064	294.175	856	279.1	0	0.989219	35	0	0	0	0	0	0	0	0	0	0	0	0	0	0	0	0	2.435	0	0	0	0	0	0	0	0	5.8	480
1891	286.867	300.305	294.325	858.25	279.2	0	1.03309	35	0	0	0	0	0	0	0	0	0	0	0	0	0	0	0	0	2.543	0	0	0	0	0	0	0	0	5.8	480
1892	286.801	300.554	294.475	860.75	279.3	0	1.0788	35	0	0	0	0	0	0	0	0	0	0	0	0	0	0	0	0	2.6555	0	0	0	0	0	0	0	0	5.8	480
1893	286.764	300.765	294.6	863	279.375	0	1.12673	35	0	0	0	0	0	0	0	0	0	0	0	0	0	0	0	0	2.7735	0	0	0	0	0	0	0	0	5.8	480
1894	286.661	300.939	294.7	865	279.425	0	1.17691	35	0	0	0	0	0	0	0	0	0	0	0	0	0	0	0	0	2.897	0	0	0	0	0	0	0	0	5.8	480
1895	286.452	301.119	294.8	867.25	279.475	0	1.22911	35	0	0	0	0	0	0	0	0	0	0	0	0	0	0	0	0	3.0255	0	0	0	0	0	0	0	0	5.8	480
1896	286.397	301.308	294.9	869.75	279.525	0	1.28355	35	0	0	0	0	0	0	0	0	0	0	0	0	0	0	0	0	3.1595	0	0	0	0	0	0	0	0	5.8	480
1897	286.487	301.519	295.025	872	279.6	0	1.34062	35	0	0	0	0	0	0	0	0	0	0	0	0	0	0	0	0	3.3	0	0	0	0	0	0	0	0	5.8	480
1898	286.588	301.806	295.225	874.25	279.675	0	1.40014	35	0	0	0	0	0	0	0	0	0	0	0	0	0	0	0	0	3.4465	0	0	0	0	0	0	0	0	5.8	480
1899	286.676	302.174	295.5	876.75	279.725	0	1.4623	35	0	0	0	0	0	0	0	0	0	0	0	0	0	0	0	0	3.5995	0	0	0	0	0	0	0	0	5.8	480
1900	286.799	302.579	295.8	879.5	279.8	0.0329065	1.5273	35	0.0202502	0	0	0	0	0	0	0	0	0	0	0	0	0	0	0	3.7595	0	0	0	0	0	0	0	0	5.8	480
1901	286.77	303.038	296.125	883	279.9	0.067545	1.59494	35	0.0415662	0	0	0	0	0	0	0	0	0	0	0	0	0	0	0	3.926	0	0	0	0	0	0	0	0	5.8	480
1902	286.768	303.538	296.475	887	280	0.0711	1.66359	35	0.0437538	0	0	0	0	0	0	0	0	0	0	0	0	0	0	0	4.095	0	0	0	0	0	0	0	0	5.8	480
1903	286.797	304.046	296.825	891.25	280.1	0.0748421	1.73184	35	0.0460567	0	0	0	0	0	0	0	0	0	0	0	0	0	0	0	4.263	0	0	0	0	0	0	0	0	5.8	480
1904	286.845	304.587	297.2	895.75	280.2	0.0787812	1.79989	35	0.0484807	0	0	0	0	0	0	0	0	0	0	0	0	0	0	0	4.4305	0	0	0	0	0	0	0	0	5.8	480
1905	287.014	305.179	297.625	900.25	280.3	0.0829275	1.86794	35	0.0510323	0	0	0	0	0	0	0	0	0	0	0	0	0	0	0	4.598	0	0	0	0	0	0	0	0	5.8	480
1906	287.053	305.797	298.075	904.75	280.4	0.0872921	1.93883	35	0.0537182	0	0	0	0	0	0	0	0	0	0	0	0	0	0	0	4.7725	0	0	0	0	0	0	0	0	5.8	480
1907	287.071	306.395	298.5	909.25	280.525	0.0918865	2.02962	35	0.0565455	0	0	0	0	0	0	0	0	0	0	0	0	0	0	0	4.996	0	0	0	0	0	0	0	0	5.8	480
1908	287.536	306.979	298.9	914	280.675	0.0967226	2.13769	35	0.0595216	0	0	0	0	0	0	0	0	0	0	0	0	0	0	0	5.262	0	0	0	0	0	0	0	0	5.8	480
1909	288.179	307.571	299.3	919	280.825	0.101813	2.24575	35	0.0626543	0	0	0	0	0	0	0	0	0	0	0	0	0	0	0	5.528	0	0	0	0	0	0	0	0	5.8	480
1910	288.48	308.156	299.7	923.75	280.975	0.107172	2.35381	35	0.0659519	0	0	0	0	0	0	0	0	0	0	0	0	0	0	0	5.794	0	0	0	0	0	0	0	0	5.8	480
1911	288.963	308.708	300.075	928.25	281.125	0.112812	2.46167	35	0.0694231	0	0	0	0	0	0	0	0	0	0	0	0	0	0	0	6.0595	0	0	0	0	0	0	0	0	5.8	480
1912	289.664	309.247	300.425	933	281.3	0.11875	2.5738	35	0.0730769	0	0	0	0	0	0	0	0	0	0	0	0	0	0	0	6.3355	0	0	0	0	0	0	0	0	5.8	480
1913	290.202	309.8	300.775	938.25	281.475	0.125	2.73306	35	0.0769231	0	0	0	0	0	0	0	0	0	0	0	0	0	0	0	6.7265	0	0	0	0	0	0	0	0	5.8135	480
1914	290.933	310.331	301.1	943.75	281.625	0.131579	2.92466	35	0.0809716	0	0	0	0	0	0	0	0	0	0	0	0	0	0	0	7.196	0	0	0	0	0	0	0	0	5.841	480
1915	291.784	310.841	301.4	949.25	281.8	0.138504	3.04253	35	0.0852333	0	0	0	0	0	0	0	0	0	0	0	0	0	0	0	7.484	0	0	0	0	0	0	0	0	5.869	480
1916	292.238	311.382	301.725	954.75	282	0.145794	3.09705	35	0.0897193	0	0	0	0	0	0	0	0	0	0	0	0	0	0	0	7.616	0	0	0	0	0	0	0	0	5.8975	480
1917	292.544	311.954	302.075	960.25	282.225	0.153467	3.20642	35	0.0944413	0	0	0	0	0	0	0	0	0	0	0	0	0	0	0	7.883	0	0	0	0	0	0	0	0	5.9265	480
1918	292.992	312.512	302.4	966	282.475	0.161544	3.3942	35	0.0994119	0	0	0	0	0	0	0	0	0	0	0	0	0	0	0	8.343	0	0	0	0	0	0	0	0	5.9555	480
1919	293.813	313.047	302.7	972	282.7	0.170047	3.60575	35	0.104644	0	0	0	0	0	0	0	0	0	0	0	0	0	0	0	8.8615	0	0	0	0	0	0	0	0	5.9845	480
1920	294.371	313.601	303.025	977.75	282.925	0.178997	3.8173	35	0.110152	0	0	0	0	0	0	0	0	0	0	0	0	0	0	0	9.38	0	0	0	0	0	0	0	0	6.0135	480
1921	294.952	314.204	303.4	983.25	283.175	0.188417	4.02925	35	0.115949	0	0	0	0	0	0	0	0	0	0	0	0	0	0	0	9.8995	0	0	0	0	0	0	0	0	6.0425	480
1922	295.684	314.809	303.775	989	283.4	0.198334	4.24161	35	0.122052	0	0	0	0	0	0	0	0	0	0	0	0	0	0	0	10.42	0	0	0	0	0	0	0	0	6.0715	480
1923	295.586	315.392	304.125	995	283.6	0.229097	4.45175	35.0325	0.128476	0	0	0	0	0	0	0	0	0	0	0	0	0	0	0	10.935	0	0	0	0	0	0	0	0	6.101	480
1924	295.655	316.027	304.525	1001	283.8	0.284506	4.66191	35.1036	0.135237	0	0	0	0	0	0	0	0	0	0	0	0	0	0	0	11.45	0	0	0	0	0	0	0	0	6.131	480
1925	296.251	316.714	304.975	1007	284	0.345533	4.87408	35.1827	0.142355	0	0	0	0	0	0	0	0	0	0	0	0	0	0	0	11.97	0	0	0	0	0	0	0	0	6.1605	480
1926	296.811	317.38	305.4	1013	284.225	0.409771	5.10453	35.266	0.149848	0	0	0	0	0	0	0	0	0	0	0	0	0	0	0	12.535	0	0	0	0	0	0	0	0	6.19	480
1927	297.141	318.046	305.825	1019	284.45	0.477391	5.35328	35.3537	0.157734	0	0	0	0	0	0	0	0	0	0	0	0	0	0	0	13.145	0	0	0	0	0	0	0	0	6.22	480
1928	297.497	318.755	306.3	1025	284.625	0.548569	5.60205	35.446	0.166036	0	0	0	0	0	0	0	0	0	0	0	0	0	0	0	13.755	0	0	0	0	0	0	0	0	6.2505	480
1929	297.965	319.456	306.775	1030.75	284.8	0.623494	5.85081	35.5432	0.174775	0	0	0	0	0	0	0	0	0	0	0	0	0	0	0	14.365	0	0	0	0	0	0	0	0	6.281	480
1930	298.618	320.124	307.225	1036.25	284.975	0.702362	6.10161	35.6454	0.183974	0	0	0	0	0	0	0	0	0	0	0	0	0	0	0	14.98	0	0	0	0	0	0	0	0	6.3115	480
1931	299.65	320.814	307.7	1041.75	285.125	0.823121	6.35241	35.7531	0.193656	0	0.0317813	0	0	0	0	0	0	0	0	0	0	0	0	0	15.595	0	0	0	0	0	0	0	0	6.342	480
1932	300.716	321.51	308.175	1047.25	285.3	0.951532	6.6036	35.8664	0.203849	0	0.0663262	0	0	0	0	0	0	0	0	0	0.0024255	0	0	0	16.205	0	0	0	0	0	0	0	0	6.3725	480
1933	301.45	322.158	308.6	1052.75	285.5	1.05037	6.8633	35.9857	0.214578	0	0.0720937	0	0	0	0	0	0	0	0	0	0.0072525	0	0	0	16.83	0	0	0	0	0	0	0	0	6.4035	480
1934	301.835	322.773	309	1058	285.7	1.15464	7.18389	36.1113	0.225871	0	0.0783628	0	0	0	0	0	0	0	0	0	0.012032	0	0	0	17.605	0	0	0	0	0	0	0	0	6.4345	480
1935	302.244	323.381	309.4	1063	285.9	1.26466	7.56373	36.2434	0.237759	0	0.0851769	0	0	0	0	0	0	0	0	0	0.01919	0	0.0020765	0	18.515	0	0	0	0	0	0	0	0	6.466	480
1936	302.533	323.937	309.75	1068	286.1	1.38075	7.95036	36.3826	0.250273	0	0.0925836	0	0	0	0	0	0	0	0	0	0.031125	0	0.0062225	0	19.425	0	0	0	0	0	0	0	0	6.4975	480
1937	302.823	324.383	310	1073	286.275	1.50324	8.34413	36.529	0.263445	0	0.100634	0	0	0	0	0	0	0	0	0	0.05022	0	0.010356	0	20.335	0	0	0	0	0	0	0	0	6.529	480
1938	303.562	324.746	310.175	1078	286.425	1.63252	8.75517	36.6832	0.277311	0	0.109385	0	0	0	0	0	0	0	0	0	0.08123	0	0.01655	0	21.245	0	0.005345	0	0	0	0	0	0	6.561	480
1939	304.106	325.056	310.3	1083	286.575	1.76895	9.1942	36.8455	0.291906	0	0.118897	0	0	0	0	0	0	0	0	0.0035225	0.12895	0	0.0248	0	22.155	0	0.021155	0	0	0	0	0	0	6.593	480
1940	304.101	325.322	310.375	1088.25	286.725	1.91295	9.66556	37.0163	0.307269	0	0.129236	0	0	0	0	0	0	0	0	0.0104875	0.19805	0	0.0351	0	23.065	0	0.046995	0	0	0	0	0	0	6.625	480
1941	303.847	325.521	310.375	1093.75	286.9	2.06495	10.191	37.1961	0.323441	0	0.140474	0	0	0	0	0	0	0	0	0.0173	0.2931	0	0.049515	0	24.02	0	0.082435	0	0	0	0	0	0	6.657	480
1942	303.564	325.639	310.3	1099	287.1	2.22541	10.7811	37.3853	0.340465	0	0.152689	0	0	0	0	0	0	0	0	0.023965	0.41875	0	0.06804	0	25.035	0	0.1271	0	0	0	0	0	0	6.689	480
1943	303.426	325.723	310.2	1104	287.3	2.3934	11.4233	37.5846	0.35751	0	0.165966	0	0	0	0	0	0	0	0	0.030485	0.5771	0	0.092715	0	26.07	0	0.1806	0	0	0	0	0	0	6.7215	480
1944	303.267	325.845	310.125	1109.25	287.525	2.56807	12.1183	37.7943	0.373795	0	0.180398	0	0	0	0	0	0	0	0	0.040385	0.77025	0	0.1277	0	27.105	0	0.24255	0	0	0	0	0	0	6.7545	480
1945	303.234	326.032	310.1	1114.75	287.775	2.75008	12.8871	38.015	0.389432	0	0.196085	0	0	0	0	0	0	0	0	0.053585	1.01955	0	0.17505	0	28.135	0	0.3126	0	0	0	0	0	0	6.787	480
1946	303.004	326.279	310.125	1120.5	288.025	2.94006	13.8202	38.2474	0.404511	0	0.213136	0	0	0	0	0	0	0	0	0.070015	1.3515	0.030115	0.27	0	29.165	0	0.39045	0	0	0	0	0	0	6.8195	480
1947	302.458	326.593	310.2	1126.75	288.275	3.13868	15.1102	38.492	0.419121	0	0.231669	0	0	0	0	0	0	0	0	0.10016	1.8695	0.127615	0.44975	0	30.22	0	0.47575	0	0	0	0	0	0	6.853	480
1948	302.011	326.966	310.325	1133.25	288.525	3.34665	16.9117	38.7495	0.433351	0	0.251814	0	0	0	0	0	0	0	0	0.1649	2.7045	0.2767	0.68285	0	31.43	0	0.56815	0	0	0	0	0	0	6.8865	480
1949	301.97	327.399	310.5	1140	288.775	3.5647	19.1118	39.0205	0.44729	0	0.273711	0	0	0	0	0	0	0	0	0.2881	3.7955	0.45415	0.9317	0	32.765	0	0.6674	0	0	0	0	0	0	6.9195	480
1950	301.92	327.921	310.75	1147.25	289	3.79359	21.7426	39.3058	0.461029	0	0.297512	0	0	0	0	0	0	0	0	0.4966	5.0045	0.6521	1.1945	0	34.615	0	0.7732	0	0	0	0	0	0	6.953	480
1951	300.877	328.558	311.1	1155	289.2	4.0504	24.5705	39.6061	0.474657	0	0.323383	0	0	0	0	0	0	0	0.005	0.8132	6.314	0.87715	1.4705	0	36.385	0	0.88935	0	0	0	0	0	0	6.987	480
1952	299.885	329.275	311.5	1163.5	289.425	4.33597	27.235	39.9222	0.488262	0	0.351503	0	0	0	0	0	0	0	0.015	1.1675	7.8115	1.0245	1.7345	0	37.53	0	0.9375	0	0	0	0	0	0	7.021	480
1953	299.764	330.045	311.925	1172.75	289.675	4.63495	29.9757	40.255	0.501935	0	0.382068	0	0	0	0	0	0	0	0.025	1.577	9.4615	1.0775	1.9845	0	38.73	0	0.922	0	0	0	0	0	0	7.0535	480
1954	299.77	330.896	312.425	1182.25	289.9	4.94829	33.0609	40.6052	0.515765	0	0.415292	0	0	0	0	0	0	0	0.035	2.149	11.24	1.139	2.239	0	40.08	0	0.932	0	0	0	0	0	0	7.0845	480
1955	299.81	331.835	313	1192	290.125	5.27698	36.6113	40.9739	0.529841	0	0.451404	0	0	0	0	0	0	0	0.045	2.886	13.24	1.21	2.495	0	41.57	0.025	0.9705	0	0	0	0	0	0	7.1155	480.8
1956	299.88	332.821	313.6	1202.25	290.375	5.62208	40.6989	41.362	0.544253	0	0.490656	0	0	0	0	0	0	0	0.055	3.795	15.485	1.2925	2.75	0	43.2	0.118	1.057	0	0	0	0	0	0	7.1465	483.15
1957	300.018	333.842	314.225	1213	290.6	5.98468	45.4175	41.7705	0.559089	0	0.533322	0	0	0	0	0	0	0	0.065	4.921	18.055	1.3895	3.0015	0	44.96	0.2975	1.19	0	0	0	0	0	0	7.1785	486.4
1958	300.426	334.869	314.848	1224	290.825	6.36597	50.7782	42.2006	0.57444	0	0.579698	0	0	0	0	0	0	0	0.075	6.2365	21.01	1.502	3.2495	0	46.85	0.5675	1.3555	0	0	0	0	0	0	7.212	489.9
1959	301.366	335.945	315.5	1235.25	291.1	6.76717	56.515	42.6532	0.590395	0	0.630107	0	0	0	0	0	0	0	0.085	7.557	24.215	1.6305	3.4955	0	48.865	0.883	1.593	0	0	0	0	0	0	7.246	493.55
1960	302.541	337.17	316.272	1247	291.4	7.18959	62.5823	43.1297	0.607043	0	0.684898	0	0	0	0	0	0	0	0.095	8.8185	27.675	1.779	3.7395	0	50.99	1.2495	1.9065	0	0	0	0	0	0	7.2805	497.3
1961	302.717	338.437	317.075	1259.25	291.675	7.65086	69.4618	43.6313	0.624474	0	0.744455	0	0	0	0	0	0	0	0.11	10.2955	31.685	1.9505	3.9715	0	53.23	1.7055	2.25	0	0	0	0	0	0	7.3165	501.1
1962	302.623	339.626	317.795	1272	291.925	8.15246	77.4216	44.1593	0.642776	0	0.80919	0	0	0	0	0	0	0	0.13	12.235	36.315	2.1465	4.1975	0	55.585	2.19	2.646	0	0	0	0	0	0	7.3535	504.8
1963	303.114	340.707	318.397	1285	292.225	8.69591	86.5951	44.715	0.66204	0	0.879554	0	0	0	0	0	0	0	0.155	14.715	41.585	2.3705	4.433	0	58.025	2.7905	3.1425	0	0	0	0	0	0	7.3915	508.4
1964	303.609	341.733	318.925	1298.25	292.6	9.39162	97.2808	45.5	0.682355	0	0.956037	0	0	0	0	0	0	0	0.18	17.795	47.735	2.6285	4.677	0	60.525	3.517	3.767	0	0	0	0	0	0	7.4305	511.85
1965	304.42	342.989	319.647	1312	293	10.184	109.645	46.45	0.70381	0	1.03917	0	0	0	0	0	0	0	0.2	21.495	54.93	2.9255	4.9295	0.0045	63.085	4.2765	4.517	0	0	0.0005	0	0	0	7.4705	515.05
1966	305.564	344.551	320.647	1326	293.4	10.9556	123.662	47.35	0.726495	0	1.12953	0	0	0	0	0	0	0	0.22	25.775	63.155	3.2665	5.1915	0.0175	65.625	5.242	5.413	0	0	0.0015	0	0	0.0005	7.512	518
1967	306.594	346.076	321.605	1340.25	293.8	11.7388	139.328	48.25	0.750499	0	1.22775	0	0	0	0	0	0	0	0.24	30.575	72.39	3.6585	5.4635	0.0385	68.07	6.722	6.4985	0	0	0.003	0	0.0005	0.0015	7.5545	520.7
1968	307.808	347.7	322.635	1355	294.225	12.5668	156.887	49.15	0.775911	0	1.33452	0	0	0	0	0	0	0	0.27	35.955	82.77	4.1085	5.7455	0.0675	70.425	8.886	7.8105	0	0	0.0055	0.0005	0.001	0.003	7.5985	523.15
1969	309.598	349.607	323.902	1370.25	294.7	13.4084	176.605	50.05	0.802821	0	1.45056	0	0	0	0	0	0	0	0.3	42.05	94.435	4.6245	6.0385	0.1045	72.69	11.59	9.411	0	0	0.0095	0.001	0.0015	0.005	7.644	525.3
1970	311.808	351.328	324.985	1385.75	295.2	14.2482	198.618	50.95	0.831319	0	1.5767	0	0	0	0	0	0	0	0.325	49.05	107.45	5.2165	6.3435	0.15	74.87	14.645	11.21	0	0	0.016	0.001	0.0025	0.0075	7.6905	527.2
1971	314.087	352.822	325.855	1401.25	295.7	15.1011	222.885	51.8	0.861493	0	1.7138	0	0	0.00146	0	0.0125	0	0	0.355	57.065	121.8	5.8955	6.66	0.205	76.97	17.695	13.115	0	0	0.025	0.0015	0.0035	0.011	7.738	528.85
1972	316.193	354.781	327.14	1417	296.225	15.9994	249.194	52.65	0.893433	0	1.86283	0	0	0.00438	0	0.0375	0	0	0.39	65.965	137.3	6.674	6.988	0.2705	78.99	20.92	15.145	0	0.018	0.0375	0.002	0.006	0.0155	7.787	530.3
1973	318.115	357.034	328.678	1433	296.8	16.9475	277.927	53.55	0.927228	0	2.02481	0	0	0.0073	0	0.0625	0	0	0.425	75.835	154.05	7.5685	7.329	0.348	80.93	25.065	17.39	0	0.053	0.055	0.0025	0.0115	0.0215	7.838	531.55
1974	319.6	358.783	329.743	1449	297.4	17.9154	309.889	54.45	0.962969	0	2.20088	0	0	0.01022	0	0.0875	0	0	0.46	87.04	172.45	8.595	7.684	0.4385	82.8	30.44	19.935	0	0.086	0.078	0.0035	0.0205	0.0285	7.8905	532.6
1975	320.882	360.292	330.585	1465	298	18.8898	344.976	55.3	1.00074	0	2.39226	0	0	0.01314	0	0.1125	0	0	0.5	99.56	192.6	9.7715	8.052	0.5445	84.6	36.73	22.54	0	0.1175	0.1075	0.0045	0.0335	0.0365	7.9445	533.5
1976	322.191	362.163	331.748	1481	298.65	19.8874	380.802	56.15	1.04064	0	2.60029	0	0	0.01606	0	0.1375	0	0	0.54	112.3	213.15	11.12	8.4335	0.6685	86.33	42.765	25.225	0	0.1475	0.1445	0.0055	0.051	0.0465	8.0005	534.25
1977	323.874	364.454	333.272	1497.25	299.36	20.9739	416.056	57.05	1.08275	0	2.8264	0	0	0.01898	0	0.1625	0	0	0.59	124.7	232.9	12.67	8.8305	0.8125	87.995	49.29	28.23	0	0.1755	0.1915	0.0065	0.0765	0.0575	8.058	534.9
1978	326.21	366.815	334.848	1513.75	300.082	22.1267	451.017	57.9	1.12717	0	3.09048	0	0	0.0219	0	0.1875	0	0	0.655	136.7	251.9	14.445	9.243	0.9795	89.595	57.79	31.51	0	0.202	0.2475	0.0075	0.112	0.0695	8.117	535.4
1979	328.74	369.278	336.525	1530.25	300.74	23.3668	486.546	58.75	1.17397	0	3.39237	0	0	0.02482	0	0.2	0	0	0.735	148.8	270.5	16.475	9.6705	1.174	91.14	68.985	34.985	0	0.227	0.3125	0.0085	0.156	0.083	8.178	535.85
1980	330.864	371.945	338.36	1547.75	301.382	24.6879	519.303	59.6	1.22326	0	3.71278	0	0	0.02774	0	0.2	0	0	0.835	159.4	287.35	18.805	10.114	1.401	92.625	78.725	38.64	0	0.2505	0.3895	0.0095	0.21	0.0975	8.241	536.25
1981	332.228	374.19	339.728	1566.75	302.22	26.102	550.904	60.45	1.27512	0	4.0517	0	0	0.0292	0	0.225	0	0	0.95	168.55	304.25	21.475	10.575	1.6605	93.95	85.94	42.44	0	0.273	0.4795	0.011	0.275	0.113	8.306	536.55
1982	333.034	376.129	340.793	1586.25	303.098	27.595	583.135	61.3	1.32963	0	4.40914	0	0	0.03045	0	0.275	0	0	1.075	177.85	321.7	24.45	11.045	1.9495	94.9	92.165	46.17	0	0.313	0.582	0.0125	0.351	0.1295	8.373	536.8
1983	334.244	378.41	342.197	1605.85	303.805	29.1286	613.196	62.15	1.3869	0	4.78509	0	0	0.0331	0	0.3	0	0	1.21	185.8	338.15	27.605	11.505	2.2655	95.855	96.325	50	0	0.361	0.6975	0.014	0.4425	0.1475	8.442	537
1984	336.145	380.82	343.783	1623.7	304.397	30.7215	644.36	63	1.44701	0	5.17956	0	0	0.03585	0	0.325	0	0	1.355	193.75	355	30.985	11.965	2.6105	97.27	100.75	54.17	0	0.404	0.828	0.016	0.5495	0.1665	8.513	537.2
1985	338.198	383.063	345.283	1637.99	305.087	32.3442	678.379	63.8	1.51004	0	5.59254	0	0	0.03705	0	0.375	0	0	1.505	202.85	372.5	35.43	12.44	2.981	98.845	105.7	58.465	0	0.4555	0.9775	0.018	0.6715	0.186	8.5865	537.35
1986	340.223	385.274	346.798	1650.43	305.772	34.0163	712.084	64.6	1.57609	0	6.02403	0	0	0.03415	0	0.4	0	0	1.67	212.1	389.8	39.95	12.94	3.363	99.855	109.6	62.85	0	0.4995	1.152	0.0195	0.8125	0.207	8.6625	537.45
1987	342.409	387.795	348.645	1662.2	306.262	35.814	748.374	65.45	1.64525	0	6.47404	0	0	0.03285	0	0.425	0	0	1.855	222.8	408.65	44.285	13.47	3.7535	101.1	112.15	67.415	0	0.6075	1.3545	0.021	0.974	0.229	8.7405	537.55
1988	345.085	390.673	350.738	1673.07	307.195	37.6894	789.249	66.3	1.71761	0	6.94256	0	0	0.0384	0	0.5	0	0	2.04	234.9	428.45	50.53	14.01	4.1635	102.45	116.3	72.44	0	0.791	1.591	0.023	1.1555	0.251	8.8205	537.65
1989	347.729	393.252	352.488	1683.47	308.507	39.5645	830.2	67.1	1.79325	0	7.4296	0	0	0.04655	0	0.575	0	0	2.225	244.9	448.25	57.92	14.55	4.5995	103.45	121.7	78.21	0	0.99	1.869	0.0245	1.3565	0.2755	8.903	537.75
1990	349.911	395.324	353.855	1693.63	309.485	41.5256	866.564	67.9	1.87227	0	7.93515	0	0	0.0547	0.03	0.625	0	0	2.425	252.75	466.15	64.485	15.075	5.0635	104.45	124.45	84.305	0	1.249	2.1645	0.026	1.562	0.3015	8.988	537.8
1991	351.189	397.088	355.017	1703.82	310.113	43.5792	899.397	68.7	1.95632	0	8.45922	0	0	0.0627	0.09	0.675	0	0	2.635	260.15	481.3	70.3	15.555	5.545	105.6	127.9	90.44	0	1.696	2.4485	0.028	1.753	0.326	9.0755	537.85
1992	351.548	398.429	355.885	1711.8	310.603	45.7214	927.681	69.5	2.05	0	9.0018	0	0	0.0705	0.185	0.725	8.12405e-05	0	2.85	264.95	494.4	75.96	15.99	6.0235	105.75	130.9	96.715	0	2.424	2.7125	0.0295	1.9125	0.35	9.1655	537.9
1993	352.275	399.699	356.777	1716.29	311.077	48.0312	948.8	70.3	2.15	0	9.5629	0	0	0.08075	0.375	0.8	0.00024139	0	3.07	267.75	504.8	80.235	16.355	6.4945	104.9	130.5	102.14	0	3.3945	2.9185	0.031	2.0215	0.3725	9.258	537.9
1994	353.737	401.505	358.127	1721.01	311.603	50.6326	963.903	71.1	2.25	0	10.1425	0	0	0.09555	0.75	0.925	0.00350655	0	3.3	269.5	513.1	82.345	16.63	6.957	104.35	126	106.6	0.5695	4.487	3.09	0.0335	2.114	0.393	9.353	537.95
1995	355.939	403.782	359.837	1726.35	312.295	53.8504	973.652	71.9	2.35	0	10.7406	0	0	0.1503	1.645	1.125	0.00973579	0	3.515	269.5	519.55	83.46	16.83	7.3995	103.55	115.9	110.45	1.9145	5.658	3.247	0.037	2.2455	0.4125	9.45	538
1996	358.263	405.945	361.462	1730.01	313.048	57.9728	982.03	72.65	2.45	0	11.4585	0	0	0.27175	3.155	1.45	0.01432	0	3.725	268.95	525.05	83.84	16.965	7.7905	102.8	104.09	115.85	3.587	6.818	3.3915	0.0415	2.3885	0.4265	9.2995	538
1997	359.83	408.22	363.155	1734.82	313.76	62.9186	988.498	73.4	2.55	0	12.2869	0	0	0.43105	5.17	1.85	0.0231704	0	3.955	268.2	529.15	83.68	17.045	8.1025	101.95	91.215	121.95	5.523	7.939	3.556	0.0465	2.4875	0.43	9.08	538
1998	361.471	411.144	365.322	1742.71	314.533	68.4136	992.182	74.2	2.65	0	13.1153	0	0	0.64745	7.71	2.25	0.0370779	0	4.155	266.95	532.4	83.45	17.075	8.3425	100.9	77.815	126.35	7.377	8.946	3.7085	0.0515	2.5565	0.4265	9.155	538
1999	363.283	413.868	367.348	1749.24	315.257	74.4061	995.415	75	2.75	0	13.9438	0.0045173	0	0.95615	10.68	2.65	0.0590527	0	4.33	265.2	534.95	83.015	17.075	8.5275	100.155	65.605	131.7	9.206	9.938	3.8355	0.0535	2.6205	0.422	9.26	538
2000	364.367	415.858	368.865	1751.02	315.85	80.9399	998.627	75.75	2.85	0	14.7722	0.0488482	0	1.32805	13.965	3.05	0.0967079	0	4.54	263.45	537.05	82.515	17.055	8.6705	99.37	54.83	137.4	11.075	11.04	3.953	0.051	2.679	0.417	9.0845	538
2001	365.653	417.91	370.467	1750.71	316.488	88.6304	1001.03	76.5	2.95	0.00398966	15.6006	0.287349	0	1.7224	17.51	3.43758	0.150915	0.373294	4.765	261.9	538.85	82.07	17.02	8.782	98.4	45.785	141.95	12.695	12.035	4.0455	0.046	2.733	0.41	8.689	538
2002	367.978	420.573	372.522	1752.19	317.245	97.4707	1003.21	77.25	3.05124	0.011991	16.429	0.720208	0.00740544	2.13305	21.365	3.85333	0.208567	1.11091	4.985	260.1	539.95	81.595	16.98	8.869	97.385	38.14	147.45	14.18	12.975	4.112	0.04	2.7825	0.402	8.349	538
2003	370.52	423.488	374.76	1754.76	318.017	106.775	1004	77.9915	3.15494	0.0195016	17.2574	1.21745	0.0291657	2.60335	25.44	4.34892	0.274155	1.83169	5.215	257.95	540.05	80.93	16.94	8.936	96.325	31.78	152.95	15.565	13.755	4.1695	0.0345	2.828	0.3935	8.194	538
2004	372.785	426.116	376.812	1755.07	318.71	116.584	1003.93	78.772	3.26099	0.0263954	18.0858	1.7671	0.0644009	3.12045	29.775	4.92206	0.367093	2.53767	5.445	256.05	539.9	80.12	16.9	8.988	95.385	26.475	157.45	16.605	14.35	4.207	0.0295	2.87	0.384	8.0885	538
2005	375.107	428.653	378.812	1753.73	319.44	126.769	1003.58	79.5471	3.3693	0.0332905	18.9129	2.35921	0.112284	3.62618	34.36	5.57096	0.487703	3.23048	5.675	254.1	539.4	79.31	16.855	9.0285	94.435	22.075	162.25	17.195	14.94	4.2265	0.0255	2.908	0.3735	7.933	538
