# Supplementary material for: The Social Cost of Fossil and Industrial CO2 Emissions from 1950 to 2018
Source: Research Square preprint supplement (doi:10.21203/rs.3.rs-2244259/v1), 2022-11-17
Supplement: Supplementary file 4 [file calibration_econ_variables.xlsx]

## Sheet: Nordhaus
Params	deltaK	0.0369791										Psi:=0.00236	Theta	2.6				gamma	0.36507
											0	0.00236
Year	capital	depreciation	Inv	Implied sav	Labor		NOutput	O_Emissions	M_Temp	O_Temp	ImpactT	Omega_N	mu	pback	Goutput	Sigma	gamma	BasicOutput	required A_N	muO	GrossE	Sigma	Consum	Consum/cap		RCP85		0.044	4.4
1950	21.6015	0.0369791	2.49181	0.226837	2536431	2.53643	10.985	1.6087	0.231999	0.0766667	0.231999	0.000127023	0	764.368	10.9864	0.536505	0.36507	5.54413	1.98163	0	1.6087	0.536505	8.49321	3348.49	0	0	0.019562	0.0234744	0.0384744
1951	23.2945	0.0369791	2.83786	0.244647	2584034	2.58403	11.5998	1.73496	0.233463	0.206667	0.233463	0.000128632	0	760.508	11.6013	0.547945	0.36507	5.76665	2.0118	0	1.73496	0.547945	8.76198	3390.81	1	0		0.0674744
1952	25.2709	0.0369791	2.7708	0.230185	2630862	2.63086	12.0373	1.75806	0.233784	0.273333	0.233784	0.000128985	0	756.666	12.0388	0.535062	0.36507	6.0088	2.00353	0	1.75806	0.535062	9.26648	3522.22	2	0		6.74744	3.84744
1953	27.1072	0.0369791	2.90562	0.230563	2677609	2.67761	12.6023	1.80691	0.233909	0.35	0.233909	0.000129124	0	752.845	12.6039	0.525274	0.36507	6.23399	2.02181	0	1.80691	0.525274	9.69667	3621.39	3	0		calib	Expert	Nordhaus
1954	29.0104	0.0369791	2.98438	0.231086	2724847	2.72485	12.9146	1.84527	0.23447	0.13	0.23447	0.000129744	0	749.042	12.9163	0.523454	0.36507	6.4617	1.9989	0	1.84527	0.523454	9.9302	3644.31	4	0		1.2	1.35	1.45
1955	30.922	0.0369791	3.31892	0.243704	2773020	2.77302	13.6187	2.02245	0.235422	0.0966667	0.235422	0.0001308	0	745.259	13.6204	0.544054	0.36507	6.688	2.03655	0	2.02245	0.544054	10.2997	3714.27	5	0		0.044	0.011	0.015
1956	33.0975	0.0369791	3.49889	0.247538	2822443	2.82244	14.1347	2.1529	0.236787	0.0333333	0.236787	0.000132321	0	741.495	14.1366	0.557999	0.36507	6.93341	2.03891	0	2.1529	0.557999	10.6359	3768.32	6	0		0.0234744	0.0264087	0.028365
1957	35.3725	0.0369791	3.63838	0.248463	2873306	2.87331	14.6436	2.22377	0.238607	0.286667	0.238607	0.000134363	0	737.75	14.6455	0.556339	0.36507	7.18475	2.03842	0	2.22377	0.556339	11.0052	3830.14	7	0		0.0674744	0.0374087	0.043365
1958	37.7028	0.0369791	3.63492	0.242209	2925687	2.92569	15.0074	2.28662	0.241095	0.323333	0.241095	0.000137179	0	734.024	15.0095	0.558194	0.36507	7.4389	2.0177	0	2.28662	0.558194	11.3725	3887.12	8	0		6.74744	3.74087	4.3365
1959	39.9435	0.0369791	3.99302	0.255228	2979576	2.97958	15.6449	2.415	0.244867	0.29	0.244867	0.000141505	0	730.316	15.6471	0.565507	0.36507	7.6859	2.03582	0	2.415	0.565507	11.6519	3910.59	9	0
1960	42.4595	0.0369791	4.21759	0.257422	3034950	3.03495	16.3839	2.548	0.250208	0.243333	0.250208	0.000147746	0	726.628	16.3864	0.569734	0.36507	7.95165	2.06075	0	2.548	0.569734	12.1664	4008.75	10	0
1961	45.1069	0.0369791	4.28472	0.253388	3091844	3.09184	16.9097	2.553	0.255954	0.31	0.255954	0.000154609	0	722.957	16.9123	0.553099	0.36507	8.22562	2.05606	0	2.553	0.553099	12.625	4083.32	11	0
1962	47.7236	0.0369791	4.42519	0.250038	3150421	3.15042	17.6981	2.644	0.260993	0.3	0.260993	0.000160757	0	719.306	17.7009	0.547294	0.36507	8.49737	2.08311	0	2.644	0.547294	13.2729	4213.06	12	0
1963	50.3841	0.0369791	4.68133	0.252153	3211001	3.211	18.5654	2.794	0.265959	0.32	0.265959	0.000166933	0	715.673	18.5685	0.55132	0.36507	8.77278	2.11661	0	2.794	0.55132	13.8841	4323.92	13	0
1964	53.2022	0.0369791	5.15039	0.262056	3273978	3.27398	19.6538	2.939	0.271597	0.06	0.271597	0.000174085	0	712.058	19.6572	0.547814	0.36507	9.05988	2.1697	0	2.939	0.547814	14.5034	4429.9	14	0
1965	56.3853	0.0369791	5.48176	0.265955	3339584	3.33958	20.6116	3.076	0.278051	0.143333	0.278051	0.000182457	0	708.462	20.6154	0.546701	0.36507	9.37143	2.19981	0	3.076	0.546701	15.1299	4530.47	15	0
1966	59.7819	0.0369791	5.76038	0.26714	3407923	3.40792	21.5631	3.219	0.285393	0.203333	0.285393	0.00019222	0	704.884	21.5673	0.546866	0.36507	9.69764	2.22397	0	3.219	0.546866	15.8027	4637.06	16	0
1967	63.3316	0.0369791	5.75587	0.257622	3478770	3.47877	22.3423	3.322	0.293461	0.216667	0.293461	0.000203242	0	701.323	22.3469	0.544677	0.36507	10.0343	2.22706	0	3.322	0.544677	16.5864	4767.91	17	0
1968	66.7456	0.0369791	6.0798	0.25875	3551599	3.5516	23.4968	3.503	0.302172	0.173333	0.302172	0.000215486	0	697.781	23.5019	0.546127	0.36507	10.3639	2.26767	0	3.503	0.546127	17.417	4903.99	18	0
1969	70.3572	0.0369791	6.5509	0.264177	3625681	3.62568	24.7974	3.737	0.311885	0.313333	0.311885	0.000229562	0	694.257	24.8031	0.552042	0.36507	10.7046	2.31706	0	3.737	0.552042	18.2465	5032.58	19	0
1970	74.3063	0.0369791	6.93692	0.269819	3700437	3.70044	25.7095	4.047	0.32341	0.266667	0.32341	0.000246841	0	690.75	25.7159	0.576616	0.36507	11.0626	2.32458	0	4.047	0.576616	18.7726	5073.08	20	0
1971	78.4955	0.0369791	7.17897	0.267122	3775760	3.77576	26.8752	4.21	0.337274	0.136667	0.337274	0.000268458	0	687.261	26.8824	0.573811	0.36507	11.4316	2.35158	0	4.21	0.573811	19.6962	5216.5	21	0
1972	82.7717	0.0369791	7.57451	0.268155	3851651	3.85165	28.2467	4.406	0.352591	0.243333	0.352591	0.000293397	0	683.79	28.255	0.571353	0.36507	11.8034	2.39381	0	4.406	0.571353	20.6722	5367.11	22	0
1973	87.2854	0.0369791	8.37677	0.279473	3927781	3.92778	29.9735	4.64	0.368073	0.386667	0.368073	0.000319728	0	680.337	29.9831	0.567018	0.36507	12.1849	2.46068	0	4.64	0.567018	21.5967	5498.45	23	0
1974	92.4345	0.0369791	8.59405	0.279318	4003794	4.00379	30.768	4.62	0.383429	0.133333	0.383429	0.000346963	0	676.9	30.7787	0.549981	0.36507	12.5949	2.44374	0	4.62	0.549981	22.1739	5538.23	24	0
1975	97.6104	0.0369791	8.18156	0.262441	4079480	4.07948	31.1749	4.613	0.398711	0.2	0.398711	0.000375171	0	673.482	31.1866	0.541965	0.36507	13.0016	2.39867	0	4.613	0.541965	22.9933	5636.34	25	0
1976	102.182	0.0369791	9.03061	0.275982	4154667	4.15467	32.7217	4.858	0.413619	0.11	0.413619	0.00040375	0	670.08	32.7349	0.543753	0.36507	13.3749	2.44749	0	4.858	0.543753	23.6911	5702.29	26	0
1977	107.434	0.0369791	9.50325	0.279134	4229506	4.22951	34.0454	4.991	0.428141	0.393333	0.428141	0.0004326	0	666.696	34.0601	0.536904	0.36507	13.7772	2.47222	0	4.991	0.536904	24.5422	5802.61	27	0
1978	112.965	0.0369791	9.93387	0.280407	4304534	4.30453	35.4266	5.174	0.44306	0.29	0.44306	0.000463273	0	663.328	35.443	0.534874	0.36507	14.1895	2.49784	0	5.174	0.534874	25.4927	5922.29	28	0
1979	118.721	0.0369791	10.3148	0.279842	4380506	4.38051	36.8593	5.312	0.459019	0.396667	0.459019	0.000497249	0	659.978	36.8776	0.527777	0.36507	14.6107	2.52401	0	5.312	0.527777	26.5445	6059.69	29	0
1980	124.646	0.0369791	10.44	0.276992	4458003	4.458	37.6908	5.286	0.475463	0.46	0.475463	0.000533513	0	656.645	37.7109	0.513589	0.36507	15.0393	2.50749	0	5.286	0.513589	27.2507	6112.77	30	0
1981	130.477	0.0369791	10.4598	0.272264	4536997	4.537	38.4179	5.142	0.491416	0.51	0.491416	0.000569917	0	653.328	38.4398	0.490124	0.36507	15.4639	2.48577	0	5.142	0.490124	27.9581	6162.25	31	0
1982	136.112	0.0369791	9.97386	0.257681	4617387	4.61739	38.7063	5.104	0.506407	0.363333	0.506407	0.000605217	0	650.028	38.7297	0.482861	0.36507	15.8806	2.43881	0	5.104	0.482861	28.7324	6222.65	32	0
1983	141.052	0.0369791	10.0441	0.252498	4699569	4.69957	39.7788	5.152	0.520506	0.536667	0.520506	0.000639387	0	646.745	39.8042	0.474245	0.36507	16.2699	2.4465	0	5.152	0.474245	29.7347	6327.11	33	0
1984	145.88	0.0369791	10.77	0.259055	4784012	4.78401	41.5742	5.302	0.534449	0.353333	0.534449	0.0006741	0	643.478	41.6022	0.466959	0.36507	16.6583	2.49739	0	5.302	0.466959	30.8042	6438.98	34	0
1985	151.256	0.0369791	10.8743	0.252626	4870922	4.87092	43.0453	5.49	0.548983	0.333333	0.548983	0.000711263	0	640.228	43.0759	0.466975	0.36507	17.0739	2.52291	0	5.49	0.466975	32.1709	6604.69	35	0
1986	156.537	0.0369791	11.1543	0.250286	4960568	4.96057	44.5664	5.568	0.564241	0.403333	0.564241	0.000751348	0	636.995	44.5999	0.457426	0.36507	17.4905	2.54995	0	5.568	0.457426	33.4121	6735.53	36	0
1987	161.902	0.0369791	11.653	0.251557	5052522	5.05252	46.3233	5.749	0.579921	0.546667	0.579921	0.000793687	0	633.777	46.3601	0.454364	0.36507	17.9147	2.58782	0	5.749	0.454364	34.6703	6861.98	37	0
1988	167.568	0.0369791	12.5907	0.260467	5145426	5.14543	48.3389	5.968	0.596071	0.57	0.596071	0.000838509	0	630.576	48.3795	0.451984	0.36507	18.3522	2.63616	0	5.968	0.451984	35.7482	6947.57	38	0
1989	173.963	0.0369791	13.1307	0.262487	5237441	5.23744	50.0243	6.057	0.613179	0.473333	0.613179	0.000887333	0	627.392	50.0687	0.443248	0.36507	18.8154	2.66105	0	6.057	0.443248	36.8936	7044.19	39	0
1990	180.66	0.0369791	13.3245	0.25829	5327231	5.32723	51.5875	6.195	0.631281	0.646667	0.631281	0.000940498	0	624.223	51.636	0.439586	0.36507	19.2837	2.6777	0	6.195	0.439586	38.2629	7182.52	40	0
1991	187.304	0.0369791	13.1057	0.251589	5414289	5.41429	52.0917	6.324	0.64954	0.596667	0.64954	0.000995691	0	621.07	52.1436	0.444372	0.36507	19.7418	2.64128	0	6.324	0.444372	38.986	7200.58	41	0
1992	193.484	0.0369791	12.981	0.245593	5498920	5.49892	52.8559	6.126	0.667044	0.436667	0.667044	0.00105008	0	617.933	52.9115	0.424212	0.36507	20.1748	2.62265	0	6.126	0.424212	39.8749	7251.4	42	0
1993	199.31	0.0369791	12.9163	0.240289	5581598	5.5816	53.7533	6.191	0.683797	0.466667	0.683797	0.00110349	0	614.812	53.8127	0.421533	0.36507	20.5887	2.6137	0	6.191	0.421533	40.837	7316.36	43	0
1994	204.856	0.0369791	13.385	0.24236	5663150	5.66315	55.2279	6.235	0.700292	0.536667	0.700292	0.00115736	0	611.707	55.2918	0.413172	0.36507	20.9884	2.6344	0	6.235	0.413172	41.8429	7388.62	44	0
1995	210.665	0.0369791	13.9075	0.243973	5744213	5.74421	57.0043	6.368	0.717063	0.663333	0.717063	0.00121346	0	608.617	57.0735	0.408812	0.36507	21.396	2.66749	0	6.368	0.408812	43.0968	7502.64	45	0
1996	216.783	0.0369791	14.3148	0.241934	5824892	5.82489	59.168	6.564	0.734526	0.526667	0.734526	0.00127329	0	605.543	59.2435	0.40596	0.36507	21.8131	2.71596	0	6.564	0.40596	44.8533	7700.28	46	0
1997	223.081	0.0369791	14.7831	0.240689	5905046	5.90505	61.42	6.602	0.75198	0.706667	0.75198	0.00133452	0	602.485	61.5021	0.393315	0.36507	22.2344	2.76607	0	6.602	0.393315	46.6369	7897.8	47	0
1998	229.615	0.0369791	14.8286	0.236478	5984794	5.98479	62.7062	6.581	0.768332	0.846667	0.768332	0.00139319	0	599.442	62.7937	0.384	0.36507	22.6622	2.77085	0	6.581	0.384	47.8776	7999.87	48	0
1999	235.952	0.0369791	15.2077	0.23448	6064239	6.06424	64.8572	6.668	0.783634	0.626667	0.783634	0.00144923	0	596.414	64.9514	0.376151	0.36507	23.081	2.81406	0	6.668	0.376151	49.6495	8187.26	49	0
2000	242.435	0.0369791	16.1374	0.237837	6143494	6.14349	67.8507	6.856	0.798135	0.623333	0.798135	0.00150336	0	593.402	67.9529	0.369674	0.36507	23.5035	2.89118	0	6.856	0.369674	51.7133	8417.58	50	0
2001	249.607	0.0369791	15.9119	0.229006	6222627	6.22263	69.4823	6.914	0.811999	0.766667	0.811999	0.00155605	0	590.405	69.5905	0.364028	0.36507	23.9488	2.9058	0	6.914	0.364028	53.5704	8608.96	51	0
2002	256.289	0.0369791	15.9342	0.222781	6301773	6.30177	71.5242	7.072	0.825989	0.83	0.825989	0.00161013	0	587.423	71.6395	0.361697	0.36507	24.3757	2.93897	0	7.072	0.361697	55.59	8821.32	52	0
2003	262.746	0.0369791	16.6361	0.2244	6381185	6.38119	74.1362	7.417	0.840621	0.836667	0.840621	0.00166768	0	584.456	74.26	0.365956	0.36507	24.7945	2.99502	0	7.417	0.365956	57.5	9010.87	53	0
2004	269.666	0.0369791	18.0096	0.231015	6461159	6.46116	77.9584	7.77	0.855848	0.77	0.855848	0.00172864	0	581.504	78.0934	0.364554	0.36507	25.2297	3.0953	0	7.77	0.364554	59.9488	9278.34	54	0
2005	277.703	0.0369791	19.0412	0.233599	6541907	6.54191	81.5121	8.027	0.871815	0.88	0.871815	0.00179375	0	578.567	81.6585	0.36017	0.36507	25.7036	3.17693	0	8.027	0.36017	62.4709	9549.34	55	7.971
2006	286.475	0.0369791	20.357	0.237578	6623518	6.62352	85.6855	8.29	0.88907	0.843333	0.88907	0.00186545	0	575.645	85.8456	0.353828	0.36507	26.2025	3.27624	0	8.29	0.353828	65.3285	9863.11	56	8.1615
2007	296.239	0.0369791	21.6348	0.240786	6705947	6.70595	89.8506	8.541	0.908048	0.84	0.908048	0.00194594	0	572.737	90.0258	0.347614	0.36507	26.7342	3.36744	0	8.541	0.347614	68.2159	10172.4	57	8.3523
2008	306.919	0.0369791	22.022	0.239366	6789089	6.78909	92.0012	8.719	0.928753	0.74	0.928753	0.00203569	0	569.844	92.1889	0.346532	0.36507	27.2948	3.37753	0	8.719	0.346532	69.9793	10307.6	58	8.5434
2009	317.591	0.0369791	19.8294	0.216701	6872767	6.87277	91.5057	8.587	0.950998	0.853333	0.950998	0.00213438	0.0168871	566.966	91.7016	0.3431	0.36507	27.8533	3.2923	0.0168871	8.7345	0.348993	71.6763	10429	59	8.7345
2010	325.676	0.0369791	21.9593	0.228135	6956824	6.95682	96.2555	9.043	0.974295	0.923333	0.974295	0.00224023	0	564.103	96.4717	0.343454	0.36507	28.3279	3.40553	0	9.043	0.343454	74.2963	10679.6	60	8.9256
2011	335.592	0.0369791	23.2025	0.232334	7041194	7.04119	99.867	9.337	0.998	0.786667	0.998	0.00235057	0	561.253	100.102	0.341758	0.36507	28.8599	3.46856	0	9.337	0.341758	76.6645	10888	61	9.18679
2012	346.385	0.0369791	23.7332	0.231966	7125828	7.12583	102.313	9.487	1.02181	0.833333	1.02181	0.00246406	0	558.419	102.566	0.338907	0.36507	29.4176	3.48655	0	9.487	0.338907	78.5801	11027.5	62	9.44798
2013	357.309	0.0369791	24.4532	0.231382	7210582	7.21058	105.683	9.549	1.04576	0.873333	1.04576	0.0025809	0.0164968	555.598	105.957	0.330206	0.36507	29.9772	3.53458	0.0164968	9.70917	0.335744	81.23	11265.4	63	9.70917
2014	368.549	0.0369791	25.4796	0.233092	7295291	7.29529	109.311	9.619	1.0699	0.936667	1.0699	0.00270147	0.0352405	552.792	109.609	0.321544	0.36507	30.5437	3.58858	0.0352405	9.97036	0.333289	83.8317	11491.2	64	9.97036
2015	380.4	0.0369791	26.241	0.23325	7379797	7.3798	112.502	9.61	1.09425	1.11333	1.09425	0.00282582	0.0607484	550	112.826	0.312084	0.36507	31.1255	3.62486	0.0607484	10.2316	0.332269	86.2606	11688.7	65	10.2316
2016	392.574	0.0369791	26.2948	0.227276	7464022	7.46402	115.696	9.613	1.11878	1.18333	1.11878	0.00295395	0.0838427	547.222	116.05	0.303507	0.36507	31.7132	3.65937	0.0838427	10.4927	0.331283	89.4008	11977.6	66	10.4927
2017	404.352	0.0369791	27.6185	0.231469	7547859	7.54786	119.319	9.742	1.14348	1.08333	1.14348	0.00308582	0.0940986	544.458	119.704	0.298191	0.36507	32.2854	3.70768	0.0940986	10.7539	0.329165	91.7	12149.1	67	10.7539
2018	417.018	0.0369791	28.7803	0.235223	7631091	7.63109	122.353	9.94	1.16838	1.00667	1.16838	0.00322165	0.097604	541.708	122.767	0.296662	0.36507	32.8792	3.73387	0.097604	11.0151	0.328749	93.5729	12262.1	68	11.0151
2019	430.378	0.0369791			7713468	7.71347	125.24	9.94562	1.19275	1.13667	1.19275	0.00335746	0.118007	538.972	125.692	0.289922	0.36507	33.4874	3.75341	0.118007	11.2763	0.328712	97.87	12688.2	69	11.2763

## Sheet: Howard_Sterner
Params	deltaK	0.0369791										Psi:=0.007438	Theta	2.6				gamma	0.36507
											0	0.007438
Year	capital		Inv	Implied sav	Labor		NOutput	Emissions	M_Temp	O_Temp	ImpactT	Omega_N	mu	pback	GOutput3	Sigma	gamma	BasicOutput	required A_N	muO	GrossE	Sigma
1950	21.6015	0.0369791	2.49181	0.226837	2536431	2.53643	10.985	1.6087	0.231999	0.0766667	0.231999	0.000400338	0	764.368	10.9894	0.536358	0.36507	5.54413	1.98217	0	1.6087	0.536358
1951	23.2945	0.0369791	2.83786	0.244647	2584034	2.58403	11.5998	1.73496	0.233463	0.206667	0.233463	0.000405408	0	760.508	11.6045	0.547793	0.36507	5.76665	2.01235	0	1.73496	0.547793
1952	25.2709	0.0369791	2.7708	0.230185	2630862	2.63086	12.0373	1.75806	0.233784	0.273333	0.233784	0.000406523	0	756.666	12.0422	0.534913	0.36507	6.0088	2.00409	0	1.75806	0.534913
1953	27.1072	0.0369791	2.90562	0.230563	2677609	2.67761	12.6023	1.80691	0.233909	0.35	0.233909	0.00040696	0	752.845	12.6074	0.525128	0.36507	6.23399	2.02237	0	1.80691	0.525128
1954	29.0104	0.0369791	2.98438	0.231086	2724847	2.72485	12.9146	1.84527	0.23447	0.13	0.23447	0.000408912	0	749.042	12.9199	0.523307	0.36507	6.4617	1.99945	0	1.84527	0.523307
1955	30.922	0.0369791	3.31892	0.243704	2773020	2.77302	13.6187	2.02245	0.235422	0.0966667	0.235422	0.000412242	0	745.259	13.6243	0.5439	0.36507	6.688	2.03712	0	2.02245	0.5439
1956	33.0975	0.0369791	3.49889	0.247538	2822443	2.82244	14.1347	2.1529	0.236787	0.0333333	0.236787	0.000417036	0	741.495	14.1406	0.55784	0.36507	6.93341	2.03949	0	2.1529	0.55784
1957	35.3725	0.0369791	3.63838	0.248463	2873306	2.87331	14.6436	2.22377	0.238607	0.286667	0.238607	0.000423471	0	737.75	14.6498	0.556179	0.36507	7.18475	2.03901	0	2.22377	0.556179
1958	37.7028	0.0369791	3.63492	0.242209	2925687	2.92569	15.0074	2.28662	0.241095	0.323333	0.241095	0.000432348	0	734.024	15.0139	0.558029	0.36507	7.4389	2.01829	0	2.28662	0.558029
1959	39.9435	0.0369791	3.99302	0.255228	2979576	2.97958	15.6449	2.415	0.244867	0.29	0.244867	0.00044598	0	730.316	15.6519	0.565334	0.36507	7.6859	2.03644	0	2.415	0.565334
1960	42.4595	0.0369791	4.21759	0.257422	3034950	3.03495	16.3839	2.548	0.250208	0.243333	0.250208	0.00046565	0	726.628	16.3916	0.569553	0.36507	7.95165	2.06141	0	2.548	0.569553
1961	45.1069	0.0369791	4.28472	0.253388	3091844	3.09184	16.9097	2.553	0.255954	0.31	0.255954	0.00048728	0	722.957	16.918	0.552915	0.36507	8.22562	2.05674	0	2.553	0.552915
1962	47.7236	0.0369791	4.42519	0.250038	3150421	3.15042	17.6981	2.644	0.260993	0.3	0.260993	0.000506658	0	719.306	17.7071	0.547105	0.36507	8.49737	2.08383	0	2.644	0.547105
1963	50.3841	0.0369791	4.68133	0.252153	3211001	3.211	18.5654	2.794	0.265959	0.32	0.265959	0.000526122	0	715.673	18.5752	0.551122	0.36507	8.77278	2.11737	0	2.794	0.551122
1964	53.2022	0.0369791	5.15039	0.262056	3273978	3.27398	19.6538	2.939	0.271597	0.06	0.271597	0.000548663	0	712.058	19.6646	0.547608	0.36507	9.05988	2.17051	0	2.939	0.547608
1965	56.3853	0.0369791	5.48176	0.265955	3339584	3.33958	20.6116	3.076	0.278051	0.143333	0.278051	0.00057505	0	708.462	20.6235	0.546487	0.36507	9.37143	2.20068	0	3.076	0.546487
1966	59.7819	0.0369791	5.76038	0.26714	3407923	3.40792	21.5631	3.219	0.285393	0.203333	0.285393	0.000605819	0	704.884	21.5762	0.54664	0.36507	9.69764	2.22489	0	3.219	0.54664
1967	63.3316	0.0369791	5.75587	0.257622	3478770	3.47877	22.3423	3.322	0.293461	0.216667	0.293461	0.000640558	0	701.323	22.3566	0.544438	0.36507	10.0343	2.22803	0	3.322	0.544438
1968	66.7456	0.0369791	6.0798	0.25875	3551599	3.5516	23.4968	3.503	0.302172	0.173333	0.302172	0.000679147	0	697.781	23.5128	0.545873	0.36507	10.3639	2.26872	0	3.503	0.545873
1969	70.3572	0.0369791	6.5509	0.264177	3625681	3.62568	24.7974	3.737	0.311885	0.313333	0.311885	0.000723509	0	694.257	24.8154	0.551769	0.36507	10.7046	2.3182	0	3.737	0.551769
1970	74.3063	0.0369791	6.93692	0.269819	3700437	3.70044	25.7095	4.047	0.32341	0.266667	0.32341	0.000777968	0	690.75	25.7296	0.57631	0.36507	11.0626	2.32582	0	4.047	0.57631
1971	78.4955	0.0369791	7.17897	0.267122	3775760	3.77576	26.8752	4.21	0.337274	0.136667	0.337274	0.000846099	0	687.261	26.898	0.57348	0.36507	11.4316	2.35294	0	4.21	0.57348
1972	82.7717	0.0369791	7.57451	0.268155	3851651	3.85165	28.2467	4.406	0.352591	0.243333	0.352591	0.000924697	0	683.79	28.2729	0.570992	0.36507	11.8034	2.39532	0	4.406	0.570992
1973	87.2854	0.0369791	8.37677	0.279473	3927781	3.92778	29.9735	4.64	0.368073	0.386667	0.368073	0.00100768	0	680.337	30.0037	0.566628	0.36507	12.1849	2.46237	0	4.64	0.566628
1974	92.4345	0.0369791	8.59405	0.279318	4003794	4.00379	30.768	4.62	0.383429	0.133333	0.383429	0.00109352	0	676.9	30.8017	0.54957	0.36507	12.5949	2.44557	0	4.62	0.54957
1975	97.6104	0.0369791	8.18156	0.262441	4079480	4.07948	31.1749	4.613	0.398711	0.2	0.398711	0.00118242	0	673.482	31.2118	0.541527	0.36507	13.0016	2.40061	0	4.613	0.541527
1976	102.182	0.0369791	9.03061	0.275982	4154667	4.15467	32.7217	4.858	0.413619	0.11	0.413619	0.0012725	0	670.08	32.7634	0.54328	0.36507	13.3749	2.44962	0	4.858	0.54328
1977	107.434	0.0369791	9.50325	0.279134	4229506	4.22951	34.0454	4.991	0.428141	0.393333	0.428141	0.00136342	0	666.696	34.0919	0.536404	0.36507	13.7772	2.47452	0	4.991	0.536404
1978	112.965	0.0369791	9.93387	0.280407	4304534	4.30453	35.4266	5.174	0.44306	0.29	0.44306	0.0014601	0	663.328	35.4784	0.53434	0.36507	14.1895	2.50033	0	5.174	0.53434
1979	118.721	0.0369791	10.3148	0.279842	4380506	4.38051	36.8593	5.312	0.459019	0.396667	0.459019	0.00156718	0	659.978	36.9171	0.527212	0.36507	14.6107	2.52672	0	5.312	0.527212
1980	124.646	0.0369791	10.44	0.276992	4458003	4.458	37.6908	5.286	0.475463	0.46	0.475463	0.00168147	0	656.645	37.7543	0.512999	0.36507	15.0393	2.51037	0	5.286	0.512999
1981	130.477	0.0369791	10.4598	0.272264	4536997	4.537	38.4179	5.142	0.491416	0.51	0.491416	0.0017962	0	653.328	38.487	0.489523	0.36507	15.4639	2.48883	0	5.142	0.489523
1982	136.112	0.0369791	9.97386	0.257681	4617387	4.61739	38.7063	5.104	0.506407	0.363333	0.506407	0.00190746	0	650.028	38.7802	0.482232	0.36507	15.8806	2.44199	0	5.104	0.482232
1983	141.052	0.0369791	10.0441	0.252498	4699569	4.69957	39.7788	5.152	0.520506	0.536667	0.520506	0.00201515	0	646.745	39.8591	0.473592	0.36507	16.2699	2.44987	0	5.152	0.473592
1984	145.88	0.0369791	10.77	0.259055	4784012	4.78401	41.5742	5.302	0.534449	0.353333	0.534449	0.00212456	0	643.478	41.6627	0.466281	0.36507	16.6583	2.50102	0	5.302	0.466281
1985	151.256	0.0369791	10.8743	0.252626	4870922	4.87092	43.0453	5.49	0.548983	0.333333	0.548983	0.00224168	0	640.228	43.142	0.46626	0.36507	17.0739	2.52678	0	5.49	0.46626
1986	156.537	0.0369791	11.1543	0.250286	4960568	4.96057	44.5664	5.568	0.564241	0.403333	0.564241	0.00236802	0	636.995	44.6722	0.456686	0.36507	17.4905	2.55408	0	5.568	0.456686
1987	161.902	0.0369791	11.653	0.251557	5052522	5.05252	46.3233	5.749	0.579921	0.546667	0.579921	0.00250146	0	633.777	46.4395	0.453587	0.36507	17.9147	2.59225	0	5.749	0.453587
1988	167.568	0.0369791	12.5907	0.260467	5145426	5.14543	48.3389	5.968	0.596071	0.57	0.596071	0.00264272	0	630.576	48.467	0.451168	0.36507	18.3522	2.64093	0	5.968	0.451168
1989	173.963	0.0369791	13.1307	0.262487	5237441	5.23744	50.0243	6.057	0.613179	0.473333	0.613179	0.0027966	0	627.392	50.1646	0.442401	0.36507	18.8154	2.66614	0	6.057	0.442401
1990	180.66	0.0369791	13.3245	0.25829	5327231	5.32723	51.5875	6.195	0.631281	0.646667	0.631281	0.00296416	0	624.223	51.7408	0.438696	0.36507	19.2837	2.68314	0	6.195	0.438696
1991	187.304	0.0369791	13.1057	0.251589	5414289	5.41429	52.0917	6.324	0.64954	0.596667	0.64954	0.00313811	0	621.07	52.2556	0.443419	0.36507	19.7418	2.64696	0	6.324	0.443419
1992	193.484	0.0369791	12.981	0.245593	5498920	5.49892	52.8559	6.126	0.667044	0.436667	0.667044	0.00330952	0	617.933	53.0314	0.423252	0.36507	20.1748	2.6286	0	6.126	0.423252
1993	199.31	0.0369791	12.9163	0.240289	5581598	5.5816	53.7533	6.191	0.683797	0.466667	0.683797	0.00347785	0	614.812	53.9409	0.420531	0.36507	20.5887	2.61993	0	6.191	0.420531
1994	204.856	0.0369791	13.385	0.24236	5663150	5.66315	55.2279	6.235	0.700292	0.536667	0.700292	0.00364766	0	611.707	55.43	0.412142	0.36507	20.9884	2.64098	0	6.235	0.412142
1995	210.665	0.0369791	13.9075	0.243973	5744213	5.74421	57.0043	6.368	0.717063	0.663333	0.717063	0.00382446	0	608.617	57.2231	0.407743	0.36507	21.396	2.67448	0	6.368	0.407743
1996	216.783	0.0369791	14.3148	0.241934	5824892	5.82489	59.168	6.564	0.734526	0.526667	0.734526	0.00401302	0	605.543	59.4064	0.404847	0.36507	21.8131	2.72343	0	6.564	0.404847
1997	223.081	0.0369791	14.7831	0.240689	5905046	5.90505	61.42	6.602	0.75198	0.706667	0.75198	0.004206	0	602.485	61.6795	0.392185	0.36507	22.2344	2.77405	0	6.602	0.392185
1998	229.615	0.0369791	14.8286	0.236478	5984794	5.98479	62.7062	6.581	0.768332	0.846667	0.768332	0.0043909	0	599.442	62.9827	0.382847	0.36507	22.6622	2.7792	0	6.581	0.382847
1999	235.952	0.0369791	15.2077	0.23448	6064239	6.06424	64.8572	6.668	0.783634	0.626667	0.783634	0.00456754	0	596.414	65.1548	0.374977	0.36507	23.081	2.82287	0	6.668	0.374977
2000	242.435	0.0369791	16.1374	0.237837	6143494	6.14349	67.8507	6.856	0.798135	0.623333	0.798135	0.00473815	0	593.402	68.1737	0.368476	0.36507	23.5035	2.90058	0	6.856	0.368476
2001	249.607	0.0369791	15.9119	0.229006	6222627	6.22263	69.4823	6.914	0.811999	0.766667	0.811999	0.00490418	0	590.405	69.8247	0.362807	0.36507	23.9488	2.91558	0	6.914	0.362807
2002	256.289	0.0369791	15.9342	0.222781	6301773	6.30177	71.5242	7.072	0.825989	0.83	0.825989	0.00507463	0	587.423	71.889	0.360442	0.36507	24.3757	2.9492	0	7.072	0.360442
2003	262.746	0.0369791	16.6361	0.2244	6381185	6.38119	74.1362	7.417	0.840621	0.836667	0.840621	0.00525601	0	584.456	74.5279	0.36464	0.36507	24.7945	3.00582	0	7.417	0.36464
2004	269.666	0.0369791	18.0096	0.231015	6461159	6.46116	77.9584	7.77	0.855848	0.77	0.855848	0.00544816	0	581.504	78.3855	0.363196	0.36507	25.2297	3.10687	0	7.77	0.363196
2005	277.703	0.0369791	19.0412	0.233599	6541907	6.54191	81.5121	8.027	0.871815	0.88	0.871815	0.00565334	0	578.567	81.9755	0.358777	0.36507	25.7036	3.18927	0	8.027	0.358777	7.971
2006	286.475	0.0369791	20.357	0.237578	6623518	6.62352	85.6855	8.29	0.88907	0.843333	0.88907	0.00587934	0	575.645	86.1922	0.352405	0.36507	26.2025	3.28947	0	8.29	0.352405	8.1615
2007	296.239	0.0369791	21.6348	0.240786	6705947	6.70595	89.8506	8.541	0.908048	0.84	0.908048	0.00613302	0	572.737	90.4051	0.346156	0.36507	26.7342	3.38163	0	8.541	0.346156	8.3523
2008	306.919	0.0369791	22.022	0.239366	6789089	6.78909	92.0012	8.719	0.928753	0.74	0.928753	0.00641589	0	569.844	92.5953	0.345011	0.36507	27.2948	3.39242	0	8.719	0.345011	8.5434
2009	317.591	0.0369791	19.8294	0.216701	6872767	6.87277	91.5057	8.587	0.950998	0.853333	0.950998	0.00672691	0.0168871	566.966	92.1256	0.34152	0.36507	27.8533	3.30752	0.0168871	8.7345	0.347387	8.7345
2010	325.676	0.0369791	21.9593	0.228135	6956824	6.95682	96.2555	9.043	0.974295	0.923333	0.974295	0.00706052	0	564.103	96.94	0.341794	0.36507	28.3279	3.42206	0	9.043	0.341794	8.9256
2011	335.592	0.0369791	23.2025	0.232334	7041194	7.04119	99.867	9.337	0.998	0.786667	0.998	0.00740829	0	561.253	100.612	0.340026	0.36507	28.8599	3.48624	0	9.337	0.340026	9.18679
2012	346.385	0.0369791	23.7332	0.231966	7125828	7.12583	102.313	9.487	1.02181	0.833333	1.02181	0.00776596	0	558.419	103.114	0.337106	0.36507	29.4176	3.50518	0	9.487	0.337106	9.44798
2013	357.309	0.0369791	24.4532	0.231382	7210582	7.21058	105.683	9.549	1.04576	0.873333	1.04576	0.00813422	0.0164968	555.598	106.55	0.328367	0.36507	29.9772	3.55437	0.0164968	9.70917	0.333875	9.70917
2014	368.549	0.0369791	25.4796	0.233092	7295291	7.29529	109.311	9.619	1.0699	0.936667	1.0699	0.00851422	0.0352405	552.792	110.251	0.31967	0.36507	30.5437	3.60962	0.0352405	9.97036	0.331347	9.97036
2015	380.4	0.0369791	26.241	0.23325	7379797	7.3798	112.502	9.61	1.09425	1.11333	1.09425	0.00890611	0.0607484	550	113.518	0.310181	0.36507	31.1255	3.6471	0.0607484	10.2316	0.330243	10.2316
2016	392.574	0.0369791	26.2948	0.227276	7464022	7.46402	115.696	9.613	1.11878	1.18333	1.11878	0.00930996	0.0838427	547.222	116.795	0.301572	0.36507	31.7132	3.68285	0.0838427	10.4927	0.329171	10.4927
2017	404.352	0.0369791	27.6185	0.231469	7547859	7.54786	119.319	9.742	1.14348	1.08333	1.14348	0.00972555	0.0940986	544.458	120.507	0.296205	0.36507	32.2854	3.73254	0.0940986	10.7539	0.326973	10.7539
2018	417.018	0.0369791	28.7803	0.235223	7631091	7.63109	122.353	9.94	1.16838	1.00667	1.16838	0.0101537	0.097604	541.708	123.626	0.294599	0.36507	32.8792	3.76002	0.097604	11.0151	0.326463	11.0151
2019	430.378	0.0369791			7713468	7.71347	125.24	9.94562	1.19275	1.13667	1.19275	0.0105817	0.118007	538.972	126.609	0.28782	0.36507	33.4874	3.78081	0.118007	11.2763	0.32633	11.2763

## Sheet: Weitzman
Params	deltaK	0.0369791							1-(1/((1+(TAT[t]/20.5847)^2)+(TAT[t]/6.081)^(6.754)));					Theta	2.6				gamma	0.36507
									20.5847	6.081	0	6.754
Year	capital		Inv	Implied sav	Labor		NOutput	Emissions	M_Temp	O_Temp	ImpactT	Omega_N	Omega_W	mu	pback	Goutput	Sigma	gamma	BasicOutput	required A_N	muO	GrossE	Sigma	RCP85
1950	21.6015	0.0369791	2.49181	0.226837	2536431	2.53643	10.985	1.6087	0.231999	0.0766667	0.231999	0.000127023	0.000127007	0	764.368	10.9864	0.536505	0.36507	5.54413	1.98163	0	1.6087	0.536505
1951	23.2945	0.0369791	2.83786	0.244647	2584034	2.58403	11.5998	1.73496	0.233463	0.206667	0.233463	0.000128632	0.000128615	0	760.508	11.6013	0.547945	0.36507	5.76665	2.0118	0	1.73496	0.547945
1952	25.2709	0.0369791	2.7708	0.230185	2630862	2.63086	12.0373	1.75806	0.233784	0.273333	0.233784	0.000128985	0.000128969	0	756.666	12.0388	0.535062	0.36507	6.0088	2.00353	0	1.75806	0.535062
1953	27.1072	0.0369791	2.90562	0.230563	2677609	2.67761	12.6023	1.80691	0.233909	0.35	0.233909	0.000129124	0.000129107	0	752.845	12.6039	0.525274	0.36507	6.23399	2.02181	0	1.80691	0.525274
1954	29.0104	0.0369791	2.98438	0.231086	2724847	2.72485	12.9146	1.84527	0.23447	0.13	0.23447	0.000129744	0.000129727	0	749.042	12.9163	0.523454	0.36507	6.4617	1.9989	0	1.84527	0.523454
1955	30.922	0.0369791	3.31892	0.243704	2773020	2.77302	13.6187	2.02245	0.235422	0.0966667	0.235422	0.0001308	0.000130783	0	745.259	13.6204	0.544054	0.36507	6.688	2.03655	0	2.02245	0.544054
1956	33.0975	0.0369791	3.49889	0.247538	2822443	2.82244	14.1347	2.1529	0.236787	0.0333333	0.236787	0.000132321	0.000132304	0	741.495	14.1366	0.557999	0.36507	6.93341	2.03891	0	2.1529	0.557999
1957	35.3725	0.0369791	3.63838	0.248463	2873306	2.87331	14.6436	2.22377	0.238607	0.286667	0.238607	0.000134363	0.000134345	0	737.75	14.6455	0.55634	0.36507	7.18475	2.03842	0	2.22377	0.55634
1958	37.7028	0.0369791	3.63492	0.242209	2925687	2.92569	15.0074	2.28662	0.241095	0.323333	0.241095	0.000137179	0.000137161	0	734.024	15.0095	0.558194	0.36507	7.4389	2.0177	0	2.28662	0.558194
1959	39.9435	0.0369791	3.99302	0.255228	2979576	2.97958	15.6449	2.415	0.244867	0.29	0.244867	0.000141505	0.000141485	0	730.316	15.6471	0.565507	0.36507	7.6859	2.03582	0	2.415	0.565507
1960	42.4595	0.0369791	4.21759	0.257422	3034950	3.03495	16.3839	2.548	0.250208	0.243333	0.250208	0.000147746	0.000147724	0	726.628	16.3864	0.569734	0.36507	7.95165	2.06075	0	2.548	0.569734
1961	45.1069	0.0369791	4.28472	0.253388	3091844	3.09184	16.9097	2.553	0.255954	0.31	0.255954	0.000154609	0.000154585	0	722.957	16.9123	0.553099	0.36507	8.22562	2.05606	0	2.553	0.553099
1962	47.7236	0.0369791	4.42519	0.250038	3150421	3.15042	17.6981	2.644	0.260993	0.3	0.260993	0.000160757	0.000160732	0	719.306	17.7009	0.547294	0.36507	8.49737	2.08311	0	2.644	0.547294
1963	50.3841	0.0369791	4.68133	0.252153	3211001	3.211	18.5654	2.794	0.265959	0.32	0.265959	0.000166933	0.000166905	0	715.673	18.5685	0.55132	0.36507	8.77278	2.11661	0	2.794	0.55132
1964	53.2022	0.0369791	5.15039	0.262056	3273978	3.27398	19.6538	2.939	0.271597	0.06	0.271597	0.000174085	0.000174055	0	712.058	19.6572	0.547814	0.36507	9.05988	2.1697	0	2.939	0.547814
1965	56.3853	0.0369791	5.48176	0.265955	3339584	3.33958	20.6116	3.076	0.278051	0.143333	0.278051	0.000182457	0.000182424	0	708.462	20.6154	0.546701	0.36507	9.37143	2.19981	0	3.076	0.546701
1966	59.7819	0.0369791	5.76038	0.26714	3407923	3.40792	21.5631	3.219	0.285393	0.203333	0.285393	0.00019222	0.000192184	0	704.884	21.5673	0.546866	0.36507	9.69764	2.22397	0	3.219	0.546866
1967	63.3316	0.0369791	5.75587	0.257622	3478770	3.47877	22.3423	3.322	0.293461	0.216667	0.293461	0.000203242	0.000203202	0	701.323	22.3469	0.544677	0.36507	10.0343	2.22706	0	3.322	0.544677
1968	66.7456	0.0369791	6.0798	0.25875	3551599	3.5516	23.4968	3.503	0.302172	0.173333	0.302172	0.000215486	0.000215441	0	697.781	23.5019	0.546127	0.36507	10.3639	2.26767	0	3.503	0.546127
1969	70.3572	0.0369791	6.5509	0.264177	3625681	3.62568	24.7974	3.737	0.311885	0.313333	0.311885	0.000229562	0.000229511	0	694.257	24.8031	0.552042	0.36507	10.7046	2.31706	0	3.737	0.552042
1970	74.3063	0.0369791	6.93692	0.269819	3700437	3.70044	25.7095	4.047	0.32341	0.266667	0.32341	0.000246841	0.000246782	0	690.75	25.7159	0.576616	0.36507	11.0626	2.32458	0	4.047	0.576616
1971	78.4955	0.0369791	7.17897	0.267122	3775760	3.77576	26.8752	4.21	0.337274	0.136667	0.337274	0.000268458	0.000268389	0	687.261	26.8824	0.573811	0.36507	11.4316	2.35158	0	4.21	0.573811
1972	82.7717	0.0369791	7.57451	0.268155	3851651	3.85165	28.2467	4.406	0.352591	0.243333	0.352591	0.000293397	0.000293314	0	683.79	28.255	0.571353	0.36507	11.8034	2.39381	0	4.406	0.571353
1973	87.2854	0.0369791	8.37677	0.279473	3927781	3.92778	29.9735	4.64	0.368073	0.386667	0.368073	0.000319728	0.000319631	0	680.337	29.9831	0.567018	0.36507	12.1849	2.46068	0	4.64	0.567018
1974	92.4345	0.0369791	8.59405	0.279318	4003794	4.00379	30.768	4.62	0.383429	0.133333	0.383429	0.000346963	0.000346849	0	676.9	30.7787	0.549981	0.36507	12.5949	2.44374	0	4.62	0.549981
1975	97.6104	0.0369791	8.18156	0.262441	4079480	4.07948	31.1749	4.613	0.398711	0.2	0.398711	0.000375171	0.000375039	0	673.482	31.1866	0.541965	0.36507	13.0016	2.39867	0	4.613	0.541965
1976	102.182	0.0369791	9.03061	0.275982	4154667	4.15467	32.7217	4.858	0.413619	0.11	0.413619	0.00040375	0.000403599	0	670.08	32.7349	0.543753	0.36507	13.3749	2.44749	0	4.858	0.543753
1977	107.434	0.0369791	9.50325	0.279134	4229506	4.22951	34.0454	4.991	0.428141	0.393333	0.428141	0.0004326	0.000432428	0	666.696	34.0601	0.536904	0.36507	13.7772	2.47222	0	4.991	0.536904
1978	112.965	0.0369791	9.93387	0.280407	4304534	4.30453	35.4266	5.174	0.44306	0.29	0.44306	0.000463273	0.000463078	0	663.328	35.443	0.534874	0.36507	14.1895	2.49784	0	5.174	0.534874
1979	118.721	0.0369791	10.3148	0.279842	4380506	4.38051	36.8593	5.312	0.459019	0.396667	0.459019	0.000497249	0.000497027	0	659.978	36.8776	0.527777	0.36507	14.6107	2.52401	0	5.312	0.527777
1980	124.646	0.0369791	10.44	0.276992	4458003	4.458	37.6908	5.286	0.475463	0.46	0.475463	0.000533513	0.000533261	0	656.645	37.7109	0.513589	0.36507	15.0393	2.50749	0	5.286	0.513589
1981	130.477	0.0369791	10.4598	0.272264	4536997	4.537	38.4179	5.142	0.491416	0.51	0.491416	0.000569917	0.000569632	0	653.328	38.4398	0.490125	0.36507	15.4639	2.48577	0	5.142	0.490125
1982	136.112	0.0369791	9.97386	0.257681	4617387	4.61739	38.7063	5.104	0.506407	0.363333	0.506407	0.000605217	0.0006049	0	650.028	38.7297	0.482861	0.36507	15.8806	2.43881	0	5.104	0.482861
1983	141.052	0.0369791	10.0441	0.252498	4699569	4.69957	39.7788	5.152	0.520506	0.536667	0.520506	0.000639387	0.000639038	0	646.745	39.8042	0.474245	0.36507	16.2699	2.4465	0	5.152	0.474245
1984	145.88	0.0369791	10.77	0.259055	4784012	4.78401	41.5742	5.302	0.534449	0.353333	0.534449	0.0006741	0.000673718	0	643.478	41.6022	0.466959	0.36507	16.6583	2.49738	0	5.302	0.466959
1985	151.256	0.0369791	10.8743	0.252626	4870922	4.87092	43.0453	5.49	0.548983	0.333333	0.548983	0.000711263	0.000710844	0	640.228	43.0759	0.466975	0.36507	17.0739	2.52291	0	5.49	0.466975
1986	156.537	0.0369791	11.1543	0.250286	4960568	4.96057	44.5664	5.568	0.564241	0.403333	0.564241	0.000751348	0.000750888	0	636.995	44.5999	0.457426	0.36507	17.4905	2.54995	0	5.568	0.457426
1987	161.902	0.0369791	11.653	0.251557	5052522	5.05252	46.3233	5.749	0.579921	0.546667	0.579921	0.000793687	0.000793183	0	633.777	46.3601	0.454364	0.36507	17.9147	2.58782	0	5.749	0.454364
1988	167.568	0.0369791	12.5907	0.260467	5145426	5.14543	48.3389	5.968	0.596071	0.57	0.596071	0.000838509	0.000837958	0	630.576	48.3794	0.451984	0.36507	18.3522	2.63616	0	5.968	0.451984
1989	173.963	0.0369791	13.1307	0.262487	5237441	5.23744	50.0243	6.057	0.613179	0.473333	0.613179	0.000887333	0.00088673	0	627.392	50.0687	0.443248	0.36507	18.8154	2.66105	0	6.057	0.443248
1990	180.66	0.0369791	13.3245	0.25829	5327231	5.32723	51.5875	6.195	0.631281	0.646667	0.631281	0.000940498	0.000939838	0	624.223	51.636	0.439586	0.36507	19.2837	2.6777	0	6.195	0.439586
1991	187.304	0.0369791	13.1057	0.251589	5414289	5.41429	52.0917	6.324	0.64954	0.596667	0.64954	0.000995691	0.000994972	0	621.07	52.1435	0.444372	0.36507	19.7418	2.64128	0	6.324	0.444372
1992	193.484	0.0369791	12.981	0.245593	5498920	5.49892	52.8559	6.126	0.667044	0.436667	0.667044	0.00105008	0.0010493	0	617.933	52.9114	0.424212	0.36507	20.1748	2.62265	0	6.126	0.424212
1993	199.31	0.0369791	12.9163	0.240289	5581598	5.5816	53.7533	6.191	0.683797	0.466667	0.683797	0.00110349	0.00110266	0	614.812	53.8127	0.421533	0.36507	20.5887	2.6137	0	6.191	0.421533
1994	204.856	0.0369791	13.385	0.24236	5663150	5.66315	55.2279	6.235	0.700292	0.536667	0.700292	0.00115736	0.00115648	0	611.707	55.2918	0.413172	0.36507	20.9884	2.6344	0	6.235	0.413172
1995	210.665	0.0369791	13.9075	0.243973	5744213	5.74421	57.0043	6.368	0.717063	0.663333	0.717063	0.00121346	0.00121252	0	608.617	57.0735	0.408812	0.36507	21.396	2.66749	0	6.368	0.408812
1996	216.783	0.0369791	14.3148	0.241934	5824892	5.82489	59.168	6.564	0.734526	0.526667	0.734526	0.00127329	0.0012723	0	605.543	59.2434	0.405961	0.36507	21.8131	2.71596	0	6.564	0.405961
1997	223.081	0.0369791	14.7831	0.240689	5905046	5.90505	61.42	6.602	0.75198	0.706667	0.75198	0.00133452	0.00133348	0	602.485	61.502	0.393316	0.36507	22.2344	2.76607	0	6.602	0.393316
1998	229.615	0.0369791	14.8286	0.236478	5984794	5.98479	62.7062	6.581	0.768332	0.846667	0.768332	0.00139319	0.0013921	0	599.442	62.7936	0.384001	0.36507	22.6622	2.77085	0	6.581	0.384001
1999	235.952	0.0369791	15.2077	0.23448	6064239	6.06424	64.8572	6.668	0.783634	0.626667	0.783634	0.00144923	0.00144811	0	596.414	64.9513	0.376152	0.36507	23.081	2.81406	0	6.668	0.376152
2000	242.435	0.0369791	16.1374	0.237837	6143494	6.14349	67.8507	6.856	0.798135	0.623333	0.798135	0.00150336	0.00150221	0	593.402	67.9528	0.369674	0.36507	23.5035	2.89118	0	6.856	0.369674
2001	249.607	0.0369791	15.9119	0.229006	6222627	6.22263	69.4823	6.914	0.811999	0.766667	0.811999	0.00155605	0.00155486	0	590.405	69.5905	0.364028	0.36507	23.9488	2.9058	0	6.914	0.364028
2002	256.289	0.0369791	15.9342	0.222781	6301773	6.30177	71.5242	7.072	0.825989	0.83	0.825989	0.00161013	0.00160892	0	587.423	71.6394	0.361698	0.36507	24.3757	2.93896	0	7.072	0.361698
2003	262.746	0.0369791	16.6361	0.2244	6381185	6.38119	74.1362	7.417	0.840621	0.836667	0.840621	0.00166768	0.00166646	0	584.456	74.2599	0.365956	0.36507	24.7945	2.99501	0	7.417	0.365956
2004	269.666	0.0369791	18.0096	0.231015	6461159	6.46116	77.9584	7.77	0.855848	0.77	0.855848	0.00172864	0.00172742	0	581.504	78.0933	0.364555	0.36507	25.2297	3.09529	0	7.77	0.364555
2005	277.703	0.0369791	19.0412	0.233599	6541907	6.54191	81.5121	8.027	0.871815	0.88	0.871815	0.00179375	0.00179253	0	578.567	81.6585	0.36017	0.36507	25.7036	3.17693	0	8.027	0.36017	7.971
2006	286.475	0.0369791	20.357	0.237578	6623518	6.62352	85.6855	8.29	0.88907	0.843333	0.88907	0.00186545	0.00186426	0	575.645	85.8455	0.353828	0.36507	26.2025	3.27623	0	8.29	0.353828	8.1615
2007	296.239	0.0369791	21.6348	0.240786	6705947	6.70595	89.8506	8.541	0.908048	0.84	0.908048	0.00194594	0.00194479	0	572.737	90.0257	0.347614	0.36507	26.7342	3.36744	0	8.541	0.347614	8.3523
2008	306.919	0.0369791	22.022	0.239366	6789089	6.78909	92.0012	8.719	0.928753	0.74	0.928753	0.00203569	0.00203462	0	569.844	92.1888	0.346533	0.36507	27.2948	3.37752	0	8.719	0.346533	8.5434
2009	317.591	0.0369791	19.8294	0.216701	6872767	6.87277	91.5057	8.587	0.950998	0.853333	0.950998	0.00213438	0.00213342	0.0168871	566.966	91.7015	0.3431	0.36507	27.8533	3.2923	0.0168871	8.7345	0.348993	8.7345
2010	325.676	0.0369791	21.9593	0.228135	6956824	6.95682	96.2555	9.043	0.974295	0.923333	0.974295	0.00224023	0.00223945	0	564.103	96.4716	0.343454	0.36507	28.3279	3.40553	0	9.043	0.343454	8.9256
2011	335.592	0.0369791	23.2025	0.232334	7041194	7.04119	99.867	9.337	0.998	0.786667	0.998	0.00235057	0.00235003	0	561.253	100.102	0.341758	0.36507	28.8599	3.46856	0	9.337	0.341758	9.18679
2012	346.385	0.0369791	23.7332	0.231966	7125828	7.12583	102.313	9.487	1.02181	0.833333	1.02181	0.00246406	0.00246383	0	558.419	102.566	0.338907	0.36507	29.4176	3.48655	0	9.487	0.338907	9.44798
2013	357.309	0.0369791	24.4532	0.231382	7210582	7.21058	105.683	9.549	1.04576	0.873333	1.04576	0.0025809	0.00258108	0.0164968	555.598	105.957	0.330206	0.36507	29.9772	3.53458	0.0164968	9.70917	0.335744	9.70917
2014	368.549	0.0369791	25.4796	0.233092	7295291	7.29529	109.311	9.619	1.0699	0.936667	1.0699	0.00270147	0.00270215	0.0352405	552.792	109.609	0.321544	0.36507	30.5437	3.58858	0.0352405	9.97036	0.333289	9.97036
2015	380.4	0.0369791	26.241	0.23325	7379797	7.3798	112.502	9.61	1.09425	1.11333	1.09425	0.00282582	0.00282711	0.0607484	550	112.826	0.312083	0.36507	31.1255	3.62487	0.0607484	10.2316	0.332268	10.2316
2016	392.574	0.0369791	26.2948	0.227276	7464022	7.46402	115.696	9.613	1.11878	1.18333	1.11878	0.00295395	0.002956	0.0838427	547.222	116.05	0.303506	0.36507	31.7132	3.65938	0.0838427	10.4927	0.331282	10.4927
2017	404.352	0.0369791	27.6185	0.231469	7547859	7.54786	119.319	9.742	1.14348	1.08333	1.14348	0.00308582	0.00308878	0.0940986	544.458	119.704	0.29819	0.36507	32.2854	3.70769	0.0940986	10.7539	0.329164	10.7539
2018	417.018	0.0369791	28.7803	0.235223	7631091	7.63109	122.353	9.94	1.16838	1.00667	1.16838	0.00322165	0.00322571	0.097604	541.708	122.767	0.29666	0.36507	32.8792	3.73389	0.097604	11.0151	0.328748	11.0151
2019	430.378	0.0369791			7713468	7.71347	125.24	9.94562	1.19275	1.13667	1.19275	0.00335746	0.00336278	0.118007	538.972	125.692	0.28992	0.36507	33.4874	3.75343	0.118007	11.2763	0.328711	11.2763
																3.39682
																0.294393
																0.107474	0.0883178

## Sheet: TFP_Nordhaus
		Nordhaus							gA	DICE	SSP1	SSP2	SSP3	SSP4	SSP5				DICE	SSP1	SSP1	SSP3	SSP4	SSP5
1950	0	1.98163	1.98163	1.98163	1.98163	1.98163	1.98163			-0.005	-0.005	-0.005	-0.005	-0.005	-0.005
1951	1	2.0118	2.0118	2.0118	2.0118	2.0118	2.0118		2019	0.0158416	0.00990099	0.0108803	0.00596421	0.0118577	0.015748			2019	3.75341	3.75341	3.75341	3.75341	3.75341	3.75341
1952	2	2.00353	2.00353	2.00353	2.00353	2.00353	2.00353		2020	0.0157626	0.00985161	0.0108261	0.00593446	0.0117986	0.0156695			2020	3.81382	3.79094	3.79469	3.77593	3.79845	3.81346
1953	3	2.02181	2.02181	2.02181	2.02181	2.02181	2.02181		2021	0.015684	0.00980247	0.0107721	0.00590487	0.0117397	0.0155913			2021	3.8749	3.82866	3.83623	3.79847	3.8438	3.87417
1954	4	1.9989	1.9989	1.9989	1.9989	1.9989	1.9989		2022	0.0156057	0.00975358	0.0107183	0.00587541	0.0116812	0.0155136			2022	3.93664	3.86656	3.878	3.82103	3.88946	3.93553
1955	5	2.03655	2.03655	2.03655	2.03655	2.03655	2.03655		2023	0.0155279	0.00970494	0.0106649	0.00584611	0.0116229	0.0154362			2023	3.99905	3.90465	3.92002	3.84361	3.93543	3.99754
1956	6	2.03891	2.03891	2.03891	2.03891	2.03891	2.03891		2024	0.0154505	0.00965653	0.0106117	0.00581695	0.0115649	0.0153592			2024	4.06213	3.94291	3.96227	3.86622	3.98171	4.06022
1957	7	2.03842	2.03842	2.03842	2.03842	2.03842	2.03842		2025	0.0153734	0.00960837	0.0105588	0.00578794	0.0115073	0.0152826			2025	4.12588	3.98136	4.00477	3.88884	4.0283	4.12355
1958	8	2.0177	2.0177	2.0177	2.0177	2.0177	2.0177		2026	0.0152967	0.00956045	0.0105061	0.00575907	0.0114499	0.0152064			2026	4.1903	4.01998	4.04751	3.91148	4.07519	4.18755
1959	9	2.03582	2.03582	2.03582	2.03582	2.03582	2.03582		2027	0.0152204	0.00951277	0.0104537	0.00573035	0.0113928	0.0151305			2027	4.25539	4.05879	4.09048	3.93413	4.12239	4.25221
1960	10	2.06075	2.06075	2.06075	2.06075	2.06075	2.06075		2028	0.0151445	0.00946532	0.0104016	0.00570177	0.0113359	0.0150551			2028	4.32116	4.09777	4.13369	3.95681	4.1699	4.31754
1961	11	2.05606	2.05606	2.05606	2.05606	2.05606	2.05606		2029	0.015069	0.00941811	0.0103497	0.00567333	0.0112794	0.01498			2029	4.38761	4.13693	4.17714	3.9795	4.21771	4.38353
1962	12	2.08311	2.08311	2.08311	2.08311	2.08311	2.08311		2030	0.0149938	0.00937114	0.0102981	0.00564504	0.0112231	0.0149053			2030	4.45474	4.17626	4.22083	4.0022	4.26583	4.45019
1963	13	2.11661	2.11661	2.11661	2.11661	2.11661	2.11661		2031	0.0149191	0.0093244	0.0102467	0.00561688	0.0111672	0.0148309			2031	4.52255	4.21576	4.26475	4.02493	4.31425	4.51753
1964	14	2.1697	2.1697	2.1697	2.1697	2.1697	2.1697		2032	0.0148446	0.0092779	0.0101956	0.00558887	0.0111115	0.014757			2032	4.59104	4.25544	4.3089	4.04766	4.36297	4.58554
1965	15	2.19981	2.19981	2.19981	2.19981	2.19981	2.19981		2033	0.0147706	0.00923162	0.0101447	0.00556099	0.0110561	0.0146834			2033	4.66022	4.29529	4.35328	4.07041	4.41199	4.65422
1966	16	2.22397	2.22397	2.22397	2.22397	2.22397	2.22397		2034	0.0146969	0.00918558	0.0100941	0.00553326	0.0110009	0.0146101			2034	4.73009	4.33532	4.3979	4.09317	4.46132	4.72358
1967	17	2.22706	2.22706	2.22706	2.22706	2.22706	2.22706		2035	0.0146236	0.00913977	0.0100438	0.00550566	0.010946	0.0145373			2035	4.80064	4.37551	4.44274	4.11595	4.51094	4.79361
1968	18	2.26767	2.26767	2.26767	2.26767	2.26767	2.26767		2036	0.0145507	0.00909418	0.00999371	0.0054782	0.0108915	0.0144648			2036	4.87188	4.41587	4.48782	4.13873	4.56086	4.86433
1969	19	2.31706	2.31706	2.31706	2.31706	2.31706	2.31706		2037	0.0144781	0.00904882	0.00994386	0.00545088	0.0108371	0.0143926			2037	4.94382	4.4564	4.53312	4.16153	4.61109	4.93572
1970	20	2.32458	2.32458	2.32458	2.32458	2.32458	2.32458		2038	0.0144059	0.00900369	0.00989427	0.00542369	0.0107831	0.0143208			2038	5.01645	4.49709	4.57865	4.18434	4.6616	5.0078
1971	21	2.35158	2.35158	2.35158	2.35158	2.35158	2.35158		2039	0.0143341	0.00895879	0.00984492	0.00539664	0.0107293	0.0142494			2039	5.08977	4.53795	4.62441	4.20716	4.71242	5.08055
1972	22	2.39381	2.39381	2.39381	2.39381	2.39381	2.39381		2040	0.0142626	0.0089141	0.00979582	0.00536972	0.0106758	0.0141783			2040	5.16379	4.57897	4.67038	4.22998	4.76353	5.154
1973	23	2.46068	2.46068	2.46068	2.46068	2.46068	2.46068		2041	0.0141914	0.00886964	0.00974696	0.00534294	0.0106225	0.0141076			2041	5.2385	4.62015	4.71659	4.25282	4.81493	5.22812
1974	24	2.44374	2.44374	2.44374	2.44374	2.44374	2.44374		2042	0.0141207	0.00882541	0.00969835	0.00531629	0.0105696	0.0140373			2042	5.31392	4.6615	4.76301	4.27567	4.86663	5.30293
1975	25	2.39867	2.39867	2.39867	2.39867	2.39867	2.39867		2043	0.0140502	0.00878139	0.00964998	0.00528978	0.0105168	0.0139672			2043	5.39003	4.70301	4.80966	4.29852	4.91861	5.37843
1976	26	2.44749	2.44749	2.44749	2.44749	2.44749	2.44749		2044	0.0139802	0.00873759	0.00960185	0.0052634	0.0104644	0.0138976			2044	5.46684	4.74467	4.85652	4.32138	4.97089	5.45462
1977	27	2.47222	2.47222	2.47222	2.47222	2.47222	2.47222		2045	0.0139104	0.00869401	0.00955396	0.00523715	0.0104122	0.0138283			2045	5.54435	4.78649	4.90361	4.34424	5.02346	5.53149
1978	28	2.49784	2.49784	2.49784	2.49784	2.49784	2.49784		2046	0.0138411	0.00865065	0.00950631	0.00521103	0.0103603	0.0137593			2046	5.62256	4.82847	4.95091	4.36711	5.07632	5.60906
1979	29	2.52401	2.52401	2.52401	2.52401	2.52401	2.52401		2047	0.013772	0.00860751	0.0094589	0.00518504	0.0103086	0.0136907			2047	5.70148	4.87061	4.99842	4.38999	5.12946	5.68731
1980	30	2.50749	2.50749	2.50749	2.50749	2.50749	2.50749		2048	0.0137033	0.00856458	0.00941172	0.00515917	0.0102572	0.0136224			2048	5.78109	4.91289	5.04616	4.41287	5.18289	5.76625
1981	31	2.48577	2.48577	2.48577	2.48577	2.48577	2.48577		2049	0.013635	0.00852186	0.00936478	0.00513344	0.010206	0.0135545			2049	5.86141	4.95533	5.0941	4.43576	5.2366	5.84589
1982	32	2.43881	2.43881	2.43881	2.43881	2.43881	2.43881		2050	0.013567	0.00847936	0.00931807	0.00510784	0.0101551	0.0134869			2050	5.94244	4.99793	5.14226	4.45864	5.29059	5.92622
1983	33	2.4465	2.4465	2.4465	2.4465	2.4465	2.4465		2051	0.0134993	0.00843707	0.0092716	0.00508236	0.0101045	0.0134196			2051	6.02417	5.04067	5.19062	4.48153	5.34487	6.00723
1984	34	2.49739	2.49739	2.49739	2.49739	2.49739	2.49739		2052	0.013432	0.00839499	0.00922535	0.00505702	0.0100541	0.0133527			2052	6.1066	5.08356	5.2392	4.50443	5.39943	6.08894
1985	35	2.52291	2.52291	2.52291	2.52291	2.52291	2.52291		2053	0.013365	0.00835312	0.00917934	0.00503179	0.0100039	0.0132861			2053	6.18974	5.12659	5.28798	4.52732	5.45427	6.17135
1986	36	2.54995	2.54995	2.54995	2.54995	2.54995	2.54995		2054	0.0132983	0.00831146	0.00913356	0.0050067	0.00995404	0.0132198			2054	6.27359	5.16978	5.33697	4.55022	5.50938	6.25445
1987	37	2.58782	2.58782	2.58782	2.58782	2.58782	2.58782		2055	0.013232	0.00827	0.00908801	0.00498173	0.00990439	0.0131539			2055	6.35814	5.21311	5.38617	4.57311	5.56478	6.33824
1988	38	2.63616	2.63616	2.63616	2.63616	2.63616	2.63616		2056	0.013166	0.00822876	0.00904268	0.00495688	0.00985499	0.0130883			2056	6.4434	5.25658	5.43557	4.59601	5.62044	6.42272
1989	39	2.66105	2.66105	2.66105	2.66105	2.66105	2.66105		2057	0.0131004	0.00818771	0.00899758	0.00493216	0.00980584	0.013023			2057	6.52937	5.30019	5.48517	4.61891	5.67638	6.5079
1990	40	2.6777	2.6777	2.6777	2.6777	2.6777	2.6777		2058	0.013035	0.00814688	0.0089527	0.00490756	0.00975693	0.012958			2058	6.61604	5.34395	5.53497	4.6418	5.7326	6.59377
1991	41	2.64128	2.64128	2.64128	2.64128	2.64128	2.64128		2059	0.01297	0.00810624	0.00890805	0.00488308	0.00970827	0.0128934			2059	6.70342	5.38784	5.58497	4.66469	5.78908	6.68033
1992	42	2.62265	2.62265	2.62265	2.62265	2.62265	2.62265		2060	0.0129053	0.00806581	0.00886362	0.00485873	0.00965985	0.0128291			2060	6.79151	5.43187	5.63517	4.68758	5.84583	6.76759
1993	43	2.6137	2.6137	2.6137	2.6137	2.6137	2.6137		2061	0.012841	0.00802559	0.00881942	0.00483449	0.00961167	0.0127651			2061	6.8803	5.47604	5.68556	4.71047	5.90285	6.85554
1994	44	2.6344	2.6344	2.6344	2.6344	2.6344	2.6344		2062	0.0127769	0.00798556	0.00877543	0.00481038	0.00956373	0.0127014			2062	6.9698	5.52035	5.73615	4.73335	5.96014	6.94418
1995	45	2.66749	2.66749	2.66749	2.66749	2.66749	2.66749		2063	0.0127132	0.00794573	0.00873166	0.00478639	0.00951604	0.0126381			2063	7.06	5.56478	5.78693	4.75623	6.01769	7.03352
1996	46	2.71596	2.71596	2.71596	2.71596	2.71596	2.71596		2064	0.0126498	0.0079061	0.00868811	0.00476252	0.00946857	0.0125751			2064	7.15091	5.60936	5.83791	4.77911	6.07551	7.12355
1997	47	2.76607	2.76607	2.76607	2.76607	2.76607	2.76607		2065	0.0125867	0.00786667	0.00864478	0.00473877	0.00942135	0.0125123			2065	7.24253	5.65406	5.88907	4.80198	6.13358	7.21427
1998	48	2.77085	2.77085	2.77085	2.77085	2.77085	2.77085		2066	0.0125239	0.00782743	0.00860166	0.00471513	0.00937436	0.0124499			2066	7.33485	5.69889	5.94043	4.82484	6.19192	7.30568
1999	49	2.81406	2.81406	2.81406	2.81406	2.81406	2.81406		2067	0.0124614	0.00778839	0.00855876	0.00469161	0.00932761	0.0123878			2067	7.42788	5.74385	5.99197	4.8477	6.25051	7.39778
2000	50	2.89118	2.89118	2.89118	2.89118	2.89118	2.89118		2068	0.0123993	0.00774955	0.00851608	0.00466821	0.00928108	0.0123261			2068	7.52161	5.78893	6.04369	4.87055	6.30937	7.49057
2001	51	2.9058	2.9058	2.9058	2.9058	2.9058	2.9058		2069	0.0123375	0.0077109	0.0084736	0.00464493	0.00923479	0.0122646			2069	7.61604	5.83415	6.0956	4.89339	6.36847	7.58405
2002	52	2.93897	2.93897	2.93897	2.93897	2.93897	2.93897		2070	0.0122759	0.00767244	0.00843134	0.00462176	0.00918874	0.0122034			2070	7.71118	5.87948	6.1477	4.91623	6.42783	7.67822
2003	53	2.99502	2.99502	2.99502	2.99502	2.99502	2.99502		2071	0.0122147	0.00763417	0.00838929	0.00459871	0.00914291	0.0121425			2071	7.80702	5.92494	6.19997	4.93905	6.48744	7.77308
2004	54	3.0953	3.0953	3.0953	3.0953	3.0953	3.0953		2072	0.0121538	0.0075961	0.00834745	0.00457578	0.00909731	0.012082			2072	7.90356	5.97052	6.25242	4.96187	6.5473	7.86862
2005	55	3.17693	3.17693	3.17693	3.17693	3.17693	3.17693		2073	0.0120932	0.00755821	0.00830581	0.00455296	0.00905193	0.0120217			2073	8.0008	6.01622	6.30506	4.98468	6.60741	7.96486
2006	56	3.27624	3.27624	3.27624	3.27624	3.27624	3.27624		2074	0.0120328	0.00752052	0.00826439	0.00453025	0.00900679	0.0119618			2074	8.09873	6.06204	6.35786	5.00748	6.66777	8.06177
2007	57	3.36744	3.36744	3.36744	3.36744	3.36744	3.36744		2075	0.0119728	0.00748301	0.00822317	0.00450765	0.00896186	0.0119021			2075	8.19737	6.10797	6.41084	5.03027	6.72837	8.15937
2008	58	3.37753	3.37753	3.37753	3.37753	3.37753	3.37753		2076	0.0119131	0.00744569	0.00818216	0.00448517	0.00891717	0.0118427			2076	8.29671	6.15402	6.464	5.05305	6.78922	8.25766
2009	59	3.2923	3.2923	3.2923	3.2923	3.2923	3.2923		2077	0.0118537	0.00740855	0.00814135	0.0044628	0.00887269	0.0117837			2077	8.39674	6.20019	6.51733	5.07581	6.8503	8.35662
2010	60	3.40553	3.40553	3.40553	3.40553	3.40553	3.40553		2078	0.0117946	0.0073716	0.00810074	0.00444054	0.00882844	0.0117249			2078	8.49746	6.24647	6.57082	5.09857	6.91163	8.45627
2011	61	3.46856	3.46856	3.46856	3.46856	3.46856	3.46856		2079	0.0117357	0.00733483	0.00806034	0.0044184	0.00878441	0.0116664			2079	8.59888	6.29285	6.62448	5.12131	6.97319	8.55659
2012	62	3.48655	3.48655	3.48655	3.48655	3.48655	3.48655		2080	0.0116772	0.00729825	0.00802014	0.00439636	0.0087406	0.0116082			2080	8.701	6.33935	6.67831	5.14404	7.03499	8.6576
2013	63	3.53458	3.53458	3.53458	3.53458	3.53458	3.53458		2081	0.011619	0.00726185	0.00798014	0.00437443	0.008697	0.0115503			2081	8.8038	6.38596	6.73231	5.16675	7.09702	8.75928
2014	64	3.58858	3.58858	3.58858	3.58858	3.58858	3.58858		2082	0.011561	0.00722563	0.00794034	0.00435261	0.00865362	0.0114927			2082	8.90729	6.43267	6.78646	5.18945	7.15928	8.86163
2015	65	3.62486	3.62486	3.62486	3.62486	3.62486	3.62486		2083	0.0115034	0.00718959	0.00790073	0.00433091	0.00861046	0.0114354			2083	9.01148	6.47949	6.84078	5.21214	7.22178	8.96466
2016	66	3.65937	3.65937	3.65937	3.65937	3.65937	3.65937		2084	0.011446	0.00715374	0.00786133	0.0043093	0.00856752	0.0113784			2084	9.11635	6.52641	6.89526	5.23481	7.2845	9.06836
2017	67	3.70768	3.70768	3.70768	3.70768	3.70768	3.70768		2085	0.0113889	0.00711806	0.00782212	0.00428781	0.00852479	0.0113216			2085	9.2219	6.57344	6.9499	5.25747	7.34745	9.17273
2018	68	3.73387	3.73387	3.73387	3.73387	3.73387	3.73387		2086	0.0113321	0.00708256	0.00778311	0.00426643	0.00848227	0.0112652			2086	9.32814	6.62056	7.00469	5.28011	7.41062	9.27777
2019	69	3.75341	3.75341	3.75341	3.75341	3.75341	3.75341		2087	0.0112756	0.00704723	0.00774429	0.00424515	0.00843997	0.011209			2087	9.43506	6.66779	7.05963	5.30273	7.47402	9.38348
2020	70	3.81382	3.79094	3.79469	3.77593	3.79845	3.81346		2088	0.0112193	0.00701208	0.00770566	0.00422397	0.00839787	0.0111531			2088	9.54265	6.71511	7.11473	5.32534	7.53764	9.48985
2021	71	3.8749	3.82866	3.83623	3.79847	3.8438	3.87417		2089	0.0111634	0.00697711	0.00766723	0.00420291	0.00835599	0.0110974			2089	9.65093	6.76253	7.16998	5.34793	7.60147	9.59688
2022	72	3.93664	3.86656	3.878	3.82103	3.88946	3.93553		2090	0.0111077	0.00694231	0.00762899	0.00418195	0.00831431	0.0110421			2090	9.75988	6.81005	7.22538	5.3705	7.66553	9.70458
2023	73	3.99905	3.90465	3.92002	3.84361	3.93543	3.99754		2091	0.0110523	0.00690769	0.00759094	0.00416109	0.00827284	0.010987			2091	9.86951	6.85765	7.28093	5.39305	7.72979	9.81293
2024	74	4.06213	3.94291	3.96227	3.86622	3.98171	4.06022		2092	0.0109972	0.00687323	0.00755308	0.00414033	0.00823158	0.0109322			2092	9.97981	6.90535	7.33662	5.41559	7.79428	9.92195
2025	75	4.12588	3.98136	4.00477	3.88884	4.0283	4.12355		2093	0.0109423	0.00683895	0.00751541	0.00411968	0.00819053	0.0108777			2093	10.0908	6.95314	7.39245	5.4381	7.85897	10.0316
2026	76	4.1903	4.01998	4.04751	3.91148	4.07519	4.18755		2094	0.0108878	0.00680484	0.00747793	0.00409914	0.00814968	0.0108235			2094	10.2024	7.00102	7.44843	5.4606	7.92387	10.1419
2027	77	4.25539	4.05879	4.09048	3.93413	4.12239	4.25221		2095	0.0108335	0.0067709	0.00744063	0.00407869	0.00810903	0.0107695			2095	10.3147	7.04899	7.50455	5.48307	7.98898	10.2529
2028	78	4.32116	4.09777	4.13369	3.95681	4.1699	4.31754		2096	0.0107794	0.00673713	0.00740352	0.00405835	0.00806859	0.0107158			2096	10.4277	7.09704	7.56081	5.50553	8.05429	10.3645
2029	79	4.38761	4.13693	4.17714	3.9795	4.21771	4.38353		2097	0.0107257	0.00670353	0.0073666	0.00403811	0.00802834	0.0106623			2097	10.5413	7.14518	7.6172	5.52796	8.1198	10.4768
2030	80	4.45474	4.17626	4.22083	4.0022	4.26583	4.45019		2098	0.0106722	0.0066701	0.00732985	0.00401797	0.0079883	0.0106091			2098	10.6556	7.1934	7.67373	5.55038	8.18552	10.5897
2031	81	4.52255	4.21576	4.26475	4.02493	4.31425	4.51753		2099	0.0106189	0.00663683	0.0072933	0.00399793	0.00794846	0.0105562			2099	10.7706	7.24171	7.73039	5.57277	8.25143	10.7033
2032	82	4.59104	4.25544	4.3089	4.04766	4.36297	4.58554		2100	0.010566	0.00660373	0.00725692	0.00397799	0.00790882	0.0105036			2100	10.8862	7.29009	7.78719	5.59514	8.31755	10.8174
2033	83	4.66022	4.29529	4.35328	4.07041	4.41199	4.65422		2101	0.0105133	0.00657079	0.00722073	0.00395815	0.00786937	0.0104512			2101	11.0024	7.33855	7.84411	5.61748	8.38385	10.9323
2034	84	4.73009	4.33532	4.3979	4.09317	4.46132	4.72358		2102	0.0104608	0.00653802	0.00718471	0.00393841	0.00783012	0.0103991			2102	11.1193	7.38709	7.90116	5.6398	8.45035	11.0477
2035	85	4.80064	4.37551	4.44274	4.11595	4.51094	4.79361		2103	0.0104087	0.00650541	0.00714888	0.00391877	0.00779107	0.0103472			2103	11.2369	7.4357	7.95834	5.6621	8.51704	11.1638
2036	86	4.87188	4.41587	4.48782	4.13873	4.56086	4.86433		2104	0.0103568	0.00647297	0.00711322	0.00389922	0.00775221	0.0102956			2104	11.355	7.48439	8.01564	5.68438	8.58392	11.2806
2037	87	4.94382	4.4564	4.53312	4.16153	4.61109	4.93572		2105	0.0103051	0.00644068	0.00707775	0.00387977	0.00771355	0.0102442			2105	11.4739	7.53316	8.07307	5.70663	8.65098	11.3979
2038	88	5.01645	4.49709	4.57865	4.18434	4.6616	5.0078		2106	0.0102537	0.00640856	0.00704245	0.00386042	0.00767508	0.0101931			2106	11.5933	7.58199	8.13062	5.72886	8.71823	11.5159
2039	89	5.08977	4.53795	4.62441	4.20716	4.71242	5.08055		2107	0.0102026	0.0063766	0.00700732	0.00384117	0.0076368	0.0101423			2107	11.7135	7.63089	8.18828	5.75106	8.78566	11.6345
2040	90	5.16379	4.57897	4.67038	4.22998	4.76353	5.154		2108	0.0101517	0.00634479	0.00697237	0.00382201	0.00759871	0.0100917			2108	11.8342	7.67986	8.24606	5.77324	8.85327	11.7537
2041	91	5.2385	4.62015	4.71659	4.25282	4.81493	5.22812		2109	0.0101011	0.00631315	0.0069376	0.00380295	0.00756081	0.0100414			2109	11.9556	7.7289	8.30396	5.79539	8.92106	11.8735
2042	92	5.31392	4.6615	4.76301	4.27567	4.86663	5.30293		2110	0.0100507	0.00628166	0.006903	0.00378398	0.0075231	0.00999131			2110	12.0776	7.77801	8.36198	5.81751	8.98903	11.9939
2043	93	5.39003	4.70301	4.80966	4.29852	4.91861	5.37843		2111	0.0100005	0.00625033	0.00686857	0.00376511	0.00748558	0.00994147			2111	12.2002	7.82717	8.4201	5.83961	9.05716	12.115
2044	94	5.46684	4.74467	4.85652	4.32138	4.97089	5.45462		2112	0.00995067	0.00621916	0.00683431	0.00374633	0.00744824	0.00989189			2112	12.3234	7.8764	8.47833	5.86168	9.12547	12.2366
2045	95	5.54435	4.78649	4.90361	4.34424	5.02346	5.53149		2113	0.00990104	0.00618814	0.00680022	0.00372764	0.0074111	0.00984255			2113	12.4473	7.92569	8.53668	5.88372	9.19395	12.3589
2046	96	5.62256	4.82847	4.95091	4.36711	5.07632	5.60906		2114	0.00985165	0.00615728	0.00676631	0.00370905	0.00737413	0.00979346			2114	12.5718	7.97505	8.59512	5.90573	9.2626	12.4817
2047	97	5.70148	4.87061	4.99842	4.38999	5.12946	5.68731		2115	0.00980252	0.00612657	0.00673256	0.00369055	0.00733735	0.00974462			2115	12.6968	8.02445	8.65368	5.92772	9.33141	12.6052
2048	98	5.78109	4.91289	5.04616	4.41287	5.18289	5.76625		2116	0.00975363	0.00609601	0.00669898	0.00367215	0.00730076	0.00969602			2116	12.8225	8.07392	8.71233	5.94968	9.40038	12.7292
2049	99	5.86141	4.95533	5.0941	4.43576	5.2366	5.84589		2117	0.00970498	0.00606561	0.00666557	0.00365383	0.00726435	0.00964766			2117	12.9488	8.12344	8.77109	5.97161	9.46952	12.8539
2050	100	5.94244	4.99793	5.14226	4.45864	5.29059	5.92622		2118	0.00965658	0.00603536	0.00663233	0.00363561	0.00722812	0.00959954			2118	13.0757	8.17301	8.82995	5.99351	9.53881	12.9791
2051	101	6.02417	5.04067	5.19062	4.48153	5.34487	6.00723		2119	0.00960842	0.00600525	0.00659925	0.00361748	0.00719206	0.00955166			2119	13.2032	8.22264	8.8889	6.01537	9.60826	13.1049
2052	102	6.1066	5.08356	5.2392	4.50443	5.39943	6.08894		2120	0.00956049	0.0059753	0.00656633	0.00359943	0.00715619	0.00950402			2120	13.3313	8.27232	8.94795	6.03721	9.67786	13.2313
2053	103	6.18974	5.12659	5.28798	4.52732	5.45427	6.17135		2121	0.00951281	0.0059455	0.00653358	0.00358148	0.0071205	0.00945662			2121	13.46	8.32204	9.0071	6.05902	9.74762	13.3582
2054	104	6.27359	5.16978	5.33697	4.55022	5.50938	6.25445		2122	0.00946537	0.00591585	0.006501	0.00356362	0.00708499	0.00940946			2122	13.5893	8.37182	9.06633	6.0808	9.81753	13.4857
2055	105	6.35814	5.21311	5.38617	4.57311	5.56478	6.33824		2123	0.00941816	0.00588634	0.00646857	0.00354585	0.00704965	0.00936253			2123	13.7191	8.42164	9.12566	6.10255	9.88758	13.6138
2056	106	6.4434	5.25658	5.43557	4.59601	5.62044	6.42272		2124	0.00937118	0.00585698	0.00643631	0.00352816	0.00701449	0.00931583			2124	13.8496	8.47151	9.18507	6.12426	9.95778	13.7425
2057	107	6.52937	5.30019	5.48517	4.61891	5.67638	6.5079		2125	0.00932444	0.00582777	0.00640421	0.00351056	0.00697951	0.00926937			2125	13.9806	8.52142	9.24457	6.14595	10.0281	13.8717
2058	108	6.61604	5.34395	5.53497	4.6418	5.7326	6.59377		2126	0.00927794	0.00579871	0.00637227	0.00349305	0.0069447	0.00922314			2126	14.1122	8.57137	9.30416	6.1676	10.0986	14.0015
2059	109	6.70342	5.38784	5.58497	4.66469	5.78908	6.68033		2127	0.00923166	0.00576978	0.00634049	0.00347563	0.00691006	0.00917714			2127	14.2443	8.62136	9.36383	6.18922	10.1692	14.1319
2060	110	6.79151	5.43187	5.63517	4.68758	5.84583	6.76759		2128	0.00918562	0.00574101	0.00630886	0.0034583	0.0068756	0.00913137			2128	14.3771	8.67139	9.42358	6.21081	10.24	14.2627
2061	111	6.8803	5.47604	5.68556	4.71047	5.90285	6.85554		2129	0.00913981	0.00571237	0.0062774	0.00344105	0.0068413	0.00908582			2129	14.5103	8.72146	9.48341	6.23236	10.3109	14.3942
2062	112	6.9698	5.52035	5.73615	4.73335	5.96014	6.94418		2130	0.00909422	0.00568388	0.00624609	0.00342389	0.00680718	0.00904051			2130	14.6442	8.77157	9.54331	6.25388	10.3819	14.5262
2063	113	7.06	5.56478	5.78693	4.75623	6.01769	7.03352		2131	0.00904887	0.00565554	0.00621494	0.00340681	0.00677323	0.00899542			2131	14.7786	8.82171	9.6033	6.27537	10.4531	14.6587
2064	114	7.15091	5.60936	5.83791	4.77911	6.07551	7.12355		2132	0.00900373	0.00562733	0.00618394	0.00338982	0.00673945	0.00895055			2132	14.9135	8.87189	9.66335	6.29682	10.5243	14.7917
2065	115	7.24253	5.65406	5.88907	4.80198	6.13358	7.21427		2133	0.00895883	0.00559926	0.0061531	0.00337291	0.00670584	0.00890591			2133	15.049	8.92209	9.72348	6.31823	10.5958	14.9253
2066	116	7.33485	5.69889	5.94043	4.82484	6.19192	7.30568		2134	0.00891415	0.00557134	0.00612241	0.00335609	0.00667239	0.00886149			2134	15.1851	8.97233	9.78368	6.33962	10.6673	15.0595
2067	117	7.42788	5.74385	5.99197	4.8477	6.25051	7.39778		2135	0.00886969	0.00554355	0.00609187	0.00333935	0.00663911	0.0088173			2135	15.3217	9.0226	9.84395	6.36097	10.7389	15.1941
2068	118	7.52161	5.78893	6.04369	4.87055	6.30937	7.49057		2136	0.00882545	0.0055159	0.00606149	0.0033227	0.006606	0.00877332			2136	15.4588	9.0729	9.90429	6.38228	10.8107	15.3293
2069	119	7.61604	5.83415	6.0956	4.89339	6.36847	7.58405		2137	0.00878143	0.00548839	0.00603126	0.00330612	0.00657305	0.00872956			2137	15.5964	9.12322	9.96469	6.40356	10.8826	15.4649
2070	120	7.71118	5.87948	6.1477	4.91623	6.42783	7.67822		2138	0.00873763	0.00546102	0.00600118	0.00328963	0.00654027	0.00868602			2138	15.7346	9.17357	10.0252	6.4248	10.9546	15.6011
2071	121	7.80702	5.92494	6.19997	4.93905	6.48744	7.77308		2139	0.00869405	0.00543378	0.00597125	0.00327323	0.00650765	0.0086427			2139	15.8733	9.22394	10.0857	6.446	11.0267	15.7378
2072	122	7.90356	5.97052	6.25242	4.96187	6.5473	7.86862		2140	0.00865069	0.00540668	0.00594146	0.0032569	0.00647519	0.0085996			2140	16.0125	9.27433	10.1463	6.46717	11.099	15.875
2073	123	8.0008	6.01622	6.30506	4.98468	6.60741	7.96486		2141	0.00860755	0.00537971	0.00591183	0.00324066	0.0064429	0.00855671			2141	16.1522	9.32475	10.2069	6.4883	11.1713	16.0127
2074	124	8.09873	6.06204	6.35786	5.00748	6.66777	8.06177		2142	0.00856462	0.00535288	0.00588235	0.0032245	0.00641076	0.00851403			2142	16.2925	9.37519	10.2676	6.5094	11.2437	16.1509
2075	125	8.19737	6.10797	6.41084	5.03027	6.72837	8.15937		2143	0.0085219	0.00532618	0.00585301	0.00320841	0.00637879	0.00847157			2143	16.4332	9.42564	10.3284	6.53045	11.3163	16.2896
2076	126	8.29671	6.15402	6.464	5.05305	6.78922	8.25766		2144	0.0084794	0.00529962	0.00582382	0.00319241	0.00634697	0.00842931			2144	16.5744	9.47611	10.3892	6.55147	11.3889	16.4288
2077	127	8.39674	6.20019	6.51733	5.07581	6.8503	8.35662		2145	0.00843711	0.00527319	0.00579477	0.00317649	0.00631532	0.00838727			2145	16.7162	9.5266	10.45	6.57246	11.4617	16.5685
2078	128	8.49746	6.24647	6.57082	5.09857	6.91163	8.45627		2146	0.00839503	0.00524689	0.00576587	0.00316065	0.00628382	0.00834544			2146	16.8584	9.5771	10.5109	6.5934	11.5345	16.7086
2079	129	8.59888	6.29285	6.62448	5.12131	6.97319	8.55659		2147	0.00835316	0.00522072	0.00573711	0.00314488	0.00625248	0.00830382			2147	17.0012	9.62762	10.5719	6.61431	11.6075	16.8492
2080	130	8.701	6.33935	6.67831	5.14404	7.03499	8.6576		2148	0.00831149	0.00519468	0.0057085	0.0031292	0.0062213	0.0082624			2148	17.1444	9.67814	10.6329	6.63517	11.6805	16.9903
2081	131	8.8038	6.38596	6.73231	5.16675	7.09702	8.75928		2149	0.00827004	0.00516877	0.00568003	0.00311359	0.00619027	0.00822119			2149	17.2881	9.72868	10.6939	6.656	11.7536	17.1319
2082	132	8.90729	6.43267	6.78646	5.18945	7.15928	8.86163		2150	0.00822879	0.00514299	0.0056517	0.00309806	0.00615939	0.00818019			2150	17.4322	9.77923	10.755	6.67679	11.8268	17.2739
2083	133	9.01148	6.47949	6.84078	5.21214	7.22178	8.96466		2151	0.00818775	0.00511734	0.00562351	0.00308261	0.00612867	0.00813939			2151	17.5769	9.82978	10.8162	6.69754	11.9001	17.4163
2084	134	9.11635	6.52641	6.89526	5.23481	7.2845	9.06836		2152	0.00814692	0.00509182	0.00559546	0.00306724	0.00609811	0.00809879			2152	17.722	9.88034	10.8773	6.71825	11.9735	17.5593
2085	135	9.2219	6.57344	6.9499	5.25747	7.34745	9.17273		2153	0.00810628	0.00506642	0.00556755	0.00305194	0.00606769	0.0080584			2153	17.8675	9.93091	10.9385	6.73892	12.047	17.7026
2086	136	9.32814	6.62056	7.00469	5.28011	7.41062	9.27777		2154	0.00806585	0.00504115	0.00553978	0.00303672	0.00603743	0.00801821			2154	18.0135	9.98148	10.9998	6.75955	12.1205	17.8464
2087	137	9.43506	6.66779	7.05963	5.30273	7.47402	9.38348		2155	0.00802562	0.00501601	0.00551215	0.00302157	0.00600732	0.00797822			2155	18.16	10.0321	11.0611	6.78014	12.1941	17.9907
2088	138	9.54265	6.71511	7.11473	5.32534	7.53764	9.48985		2156	0.0079856	0.00499099	0.00548466	0.0030065	0.00597736	0.00793843			2156	18.3069	10.0826	11.1224	6.80069	12.2678	18.1354
2089	139	9.65093	6.76253	7.16998	5.34793	7.60147	9.59688		2157	0.00794577	0.0049661	0.00545731	0.00299151	0.00594754	0.00789883			2157	18.4543	10.1332	11.1837	6.82119	12.3416	18.2805
2090	140	9.75988	6.81005	7.22538	5.3705	7.66553	9.70458		2158	0.00790614	0.00494133	0.00543009	0.00297658	0.00591788	0.00785944			2158	18.6021	10.1838	11.2451	6.84166	12.4154	18.426
2091	141	9.86951	6.85765	7.28093	5.39305	7.72979	9.81293		2159	0.00786671	0.00491669	0.00540301	0.00296174	0.00588836	0.00782024			2159	18.7504	10.2343	11.3065	6.86209	12.4894	18.572
2092	142	9.97981	6.90535	7.33662	5.41559	7.79428	9.92195		2160	0.00782747	0.00489216	0.00537606	0.00294697	0.005859	0.00778124			2160	18.899	10.2849	11.3679	6.88247	12.5633	18.7184
2093	143	10.0908	6.95314	7.39245	5.4381	7.85897	10.0316		2161	0.00778843	0.00486776	0.00534925	0.00293227	0.00582977	0.00774243			2161	19.0481	10.3355	11.4293	6.90281	12.6374	18.8652
2094	144	10.2024	7.00102	7.44843	5.4606	7.92387	10.1419		2162	0.00774959	0.00484349	0.00532257	0.00291764	0.0058007	0.00770381			2162	19.1977	10.386	11.4908	6.92311	12.7115	19.0124
2095	145	10.3147	7.04899	7.50455	5.48307	7.98898	10.2529		2163	0.00771093	0.00481933	0.00529602	0.00290309	0.00577177	0.00766539			2163	19.3476	10.4366	11.5523	6.94337	12.7856	19.16
2096	146	10.4277	7.09704	7.56081	5.50553	8.05429	10.3645		2164	0.00767248	0.00479529	0.00526961	0.00288861	0.00574298	0.00762716			2164	19.4979	10.4871	11.6138	6.96359	12.8599	19.308
2097	147	10.5413	7.14518	7.6172	5.52796	8.1198	10.4768		2165	0.00763421	0.00477138	0.00524332	0.00287421	0.00571434	0.00758912			2165	19.6487	10.5377	11.6753	6.98376	12.9341	19.4564
2098	148	10.6556	7.1934	7.67373	5.55038	8.18552	10.5897		2166	0.00759613	0.00474758	0.00521717	0.00285987	0.00568584	0.00755127			2166	19.7999	10.5882	11.7369	7.00389	13.0085	19.6052
2099	149	10.7706	7.24171	7.73039	5.57277	8.25143	10.7033		2167	0.00755825	0.0047239	0.00519115	0.00284561	0.00565748	0.0075136			2167	19.9514	10.6387	11.7984	7.02398	13.0829	19.7543
2100	150	10.8862	7.29009	7.78719	5.59514	8.31755	10.8174		2168	0.00752055	0.00470034	0.00516526	0.00283142	0.00562926	0.00747613			2168	20.1034	10.6892	11.86	7.04402	13.1573	19.9039
2101	151	11.0024	7.33855	7.84411	5.61748	8.38385	10.9323		2169	0.00748304	0.0046769	0.0051395	0.00281729	0.00560119	0.00743884			2169	20.2557	10.7397	11.9216	7.06402	13.2318	20.0538
2102	152	11.1193	7.38709	7.90116	5.6398	8.45035	11.0477		2170	0.00744572	0.00465357	0.00511387	0.00280324	0.00557325	0.00740174			2170	20.4084	10.7901	11.9831	7.08398	13.3063	20.2041
2103	153	11.2369	7.4357	7.95834	5.6621	8.51704	11.1638		2171	0.00740858	0.00463036	0.00508836	0.00278926	0.00554545	0.00736482			2171	20.5615	10.8406	12.0447	7.1039	13.3809	20.3548
2104	154	11.355	7.48439	8.01564	5.68438	8.58392	11.2806		2172	0.00737163	0.00460727	0.00506298	0.00277535	0.00551779	0.00732809			2172	20.715	10.891	12.1063	7.12377	13.4555	20.5058
2105	155	11.4739	7.53316	8.07307	5.70663	8.65098	11.3979		2173	0.00733487	0.00458429	0.00503773	0.00276151	0.00549027	0.00729154			2173	20.8688	10.9414	12.1679	7.14359	13.5302	20.6572
2106	156	11.5933	7.58199	8.13062	5.72886	8.71823	11.5159		2174	0.00729829	0.00456142	0.0050126	0.00274773	0.00546289	0.00725518			2174	21.023	10.9918	12.2296	7.16337	13.6049	20.8089
2107	157	11.7135	7.63089	8.18828	5.75106	8.78566	11.6345		2175	0.00726188	0.00453867	0.0049876	0.00273403	0.00543565	0.00721899			2175	21.1776	11.0422	12.2912	7.18311	13.6796	20.961
2108	158	11.8342	7.67986	8.24606	5.77324	8.85327	11.7537		2176	0.00722567	0.00451604	0.00496273	0.00272039	0.00540854	0.00718299			2176	21.3325	11.0925	12.3528	7.2028	13.7544	21.1134
2109	159	11.9556	7.7289	8.30396	5.79539	8.92106	11.8735		2177	0.00718963	0.00449351	0.00493798	0.00270683	0.00538156	0.00714716			2177	21.4877	11.1428	12.4144	7.22245	13.8292	21.2662
2110	160	12.0776	7.77801	8.36198	5.81751	8.98903	11.9939		2178	0.00715377	0.0044711	0.00491335	0.00269333	0.00535472	0.00711151			2178	21.6433	11.1931	12.476	7.24205	13.904	21.4192
2111	161	12.2002	7.82717	8.4201	5.83961	9.05716	12.115		2179	0.00711809	0.0044488	0.00488884	0.00267989	0.00532801	0.00707605			2179	21.7993	11.2434	12.5376	7.26161	13.9788	21.5727
2112	162	12.3234	7.8764	8.47833	5.86168	9.12547	12.2366		2180	0.00708259	0.00442661	0.00486446	0.00266653	0.00530144	0.00704075			2180	21.9556	11.2936	12.5992	7.28113	14.0537	21.7264
2113	163	12.4473	7.92569	8.53668	5.88372	9.19395	12.3589		2181	0.00704726	0.00440454	0.0048402	0.00265323	0.005275	0.00700564			2181	22.1122	11.3439	12.6608	7.30059	14.1286	21.8804
2114	164	12.5718	7.97505	8.59512	5.90573	9.2626	12.4817		2182	0.00701212	0.00438257	0.00481606	0.00263999	0.00524869	0.0069707			2182	22.2691	11.394	12.7224	7.32001	14.2035	22.0348
2115	165	12.6968	8.02445	8.65368	5.92772	9.33141	12.6052		2183	0.00697714	0.00436071	0.00479204	0.00262683	0.00522251	0.00693593			2183	22.4264	11.4442	12.7839	7.33939	14.2785	22.1895
2116	166	12.8225	8.07392	8.71233	5.94968	9.40038	12.7292		2184	0.00694234	0.00433896	0.00476814	0.00261373	0.00519646	0.00690134			2184	22.584	11.4943	12.8455	7.35872	14.3534	22.3445
2117	167	12.9488	8.12344	8.77109	5.97161	9.46952	12.8539		2185	0.00690772	0.00431732	0.00474436	0.00260069	0.00517055	0.00686692			2185	22.7418	11.5444	12.907	7.378	14.4284	22.4998
2118	168	13.0757	8.17301	8.82995	5.99351	9.53881	12.9791		2186	0.00687327	0.00429579	0.00472069	0.00258772	0.00514476	0.00683267			2186	22.9	11.5945	12.9685	7.39724	14.5034	22.6553
2119	169	13.2032	8.22264	8.8889	6.01537	9.60826	13.1049		2187	0.00683899	0.00427436	0.00469715	0.00257481	0.0051191	0.00679859			2187	23.0585	11.6445	13.0301	7.41643	14.5784	22.8112
2120	170	13.3313	8.27232	8.94795	6.03721	9.67786	13.2313		2188	0.00680488	0.00425304	0.00467372	0.00256197	0.00509357	0.00676468			2188	23.2173	11.6945	13.0916	7.43558	14.6534	22.9673
2121	171	13.46	8.32204	9.0071	6.05902	9.74762	13.3582		2189	0.00677094	0.00423183	0.00465041	0.00254919	0.00506816	0.00673094			2189	23.3764	11.7444	13.153	7.45468	14.7284	23.1238
2122	172	13.5893	8.37182	9.06633	6.0808	9.81753	13.4857		2190	0.00673717	0.00421072	0.00462722	0.00253648	0.00504288	0.00669737			2190	23.5357	11.7943	13.2145	7.47373	14.8035	23.2805
2123	173	13.7191	8.42164	9.12566	6.10255	9.88758	13.6138		2191	0.00670356	0.00418972	0.00460414	0.00252383	0.00501773	0.00666397			2191	23.6954	11.8442	13.2759	7.49273	14.8785	23.4374
2124	174	13.8496	8.47151	9.18507	6.12426	9.95778	13.7425		2192	0.00667013	0.00416883	0.00458118	0.00251124	0.00499271	0.00663073			2192	23.8553	11.894	13.3373	7.51169	14.9535	23.5947
2125	175	13.9806	8.52142	9.24457	6.14595	10.0281	13.8717		2193	0.00663686	0.00414804	0.00455833	0.00249872	0.00496781	0.00659766			2193	24.0155	11.9438	13.3987	7.5306	15.0286	23.7522
2126	176	14.1122	8.57137	9.30416	6.1676	10.0986	14.0015		2194	0.00660376	0.00412735	0.00453559	0.00248625	0.00494303	0.00656476			2194	24.1759	11.9936	13.4601	7.54947	15.1036	23.9099
2127	177	14.2443	8.62136	9.36383	6.18922	10.1692	14.1319		2195	0.00657082	0.00410676	0.00451297	0.00247385	0.00491838	0.00653201			2195	24.3366	12.0433	13.5214	7.56828	15.1786	24.0679
2128	178	14.3771	8.67139	9.42358	6.21081	10.24	14.2627		2196	0.00653805	0.00408628	0.00449046	0.00246151	0.00489384	0.00649944			2196	24.4976	12.093	13.5827	7.58705	15.2536	24.2261
2129	179	14.5103	8.72146	9.48341	6.23236	10.3109	14.3942		2197	0.00650544	0.0040659	0.00446807	0.00244924	0.00486944	0.00646702			2197	24.6588	12.1426	13.6439	7.60578	15.3287	24.3846
2130	180	14.6442	8.77157	9.54331	6.25388	10.3819	14.5262		2198	0.006473	0.00404562	0.00444578	0.00243702	0.00484515	0.00643476			2198	24.8203	12.1921	13.7052	7.62445	15.4037	24.5434
2131	181	14.7786	8.82171	9.6033	6.27537	10.4531	14.6587		2199	0.00644071	0.00402544	0.00442361	0.00242487	0.00482099	0.00640267			2199	24.982	12.2417	13.7664	7.64308	15.4787	24.7023
2132	182	14.9135	8.87189	9.66335	6.29682	10.5243	14.7917		2200	0.00640859	0.00400537	0.00440155	0.00241277	0.00479694	0.00637074			2200	25.1439	12.2911	13.8276	7.66165	15.5537	24.8615
2133	183	15.049	8.92209	9.72348	6.31823	10.5958	14.9253		2201	0.00637663	0.00398539	0.00437959	0.00240074	0.00477302	0.00633896			2201	25.3061	12.3406	13.8887	7.68019	15.6286	25.0209
2134	184	15.1851	8.97233	9.78368	6.33962	10.6673	15.0595		2202	0.00634482	0.00396551	0.00435775	0.00238877	0.00474921	0.00630735			2202	25.4685	12.39	13.9498	7.69867	15.7036	25.1805
2135	185	15.3217	9.0226	9.84395	6.36097	10.7389	15.1941		2203	0.00631318	0.00394573	0.00433601	0.00237685	0.00472552	0.00627589			2203	25.6311	12.4393	14.0108	7.7171	15.7785	25.3403
2136	186	15.4588	9.0729	9.90429	6.38228	10.8107	15.3293		2204	0.00628169	0.00392605	0.00431439	0.002365	0.00470195	0.00624459			2204	25.794	12.4886	14.0719	7.73549	15.8534	25.5004
2137	187	15.5964	9.12322	9.96469	6.40356	10.8826	15.4649		2205	0.00625036	0.00390647	0.00429287	0.0023532	0.0046785	0.00621344			2205	25.957	12.5378	14.1328	7.75383	15.9283	25.6606
2138	188	15.7346	9.17357	10.0252	6.4248	10.9546	15.6011		2206	0.00621919	0.00388699	0.00427146	0.00234146	0.00465517	0.00618245			2206	26.1203	12.587	14.1938	7.77212	16.0032	25.8211
2139	189	15.8733	9.22394	10.0857	6.446	11.0267	15.7378		2207	0.00618817	0.0038676	0.00425016	0.00232979	0.00463195	0.00615162			2207	26.2838	12.6361	14.2546	7.79036	16.078	25.9817
2140	190	16.0125	9.27433	10.1463	6.46717	11.099	15.875		2208	0.00615731	0.00384831	0.00422896	0.00231817	0.00460885	0.00612094			2208	26.4474	12.6851	14.3155	7.80855	16.1529	26.1425
2141	191	16.1522	9.32475	10.2069	6.4883	11.1713	16.0127		2209	0.0061266	0.00382912	0.00420787	0.0023066	0.00458586	0.00609041			2209	26.6113	12.7341	14.3763	7.82669	16.2276	26.3035
2142	192	16.2925	9.37519	10.2676	6.5094	11.2437	16.1509		2210	0.00609604	0.00381002	0.00418688	0.0022951	0.00456299	0.00606003			2210	26.7753	12.7831	14.437	7.84479	16.3024	26.4647
2143	193	16.4332	9.42564	10.3284	6.53045	11.3163	16.2896		2211	0.00606564	0.00379102	0.004166	0.00228365	0.00454023	0.00602981			2211	26.9395	12.832	14.4977	7.86283	16.3771	26.626
2144	194	16.5744	9.47611	10.3892	6.55147	11.3889	16.4288		2212	0.00603538	0.00377211	0.00414522	0.00227226	0.00451759	0.00599973			2212	27.104	12.8808	14.5584	7.88083	16.4518	26.7876
2145	195	16.7162	9.5266	10.45	6.57246	11.4617	16.5685		2213	0.00600528	0.0037533	0.00412454	0.00226093	0.00449506	0.00596981			2213	27.2685	12.9296	14.619	7.89878	16.5265	26.9493
2146	196	16.8584	9.5771	10.5109	6.5934	11.5345	16.7086		2214	0.00597533	0.00373458	0.00410397	0.00224965	0.00447264	0.00594004			2214	27.4333	12.9783	14.6795	7.91668	16.6011	27.1111
2147	197	17.0012	9.62762	10.5719	6.61431	11.6075	16.8492		2215	0.00594553	0.00371595	0.0040835	0.00223843	0.00445033	0.00591041			2215	27.5982	13.0269	14.74	7.93453	16.6757	27.2731
2148	198	17.1444	9.67814	10.6329	6.63517	11.6805	16.9903		2216	0.00591587	0.00369742	0.00406314	0.00222727	0.00442813	0.00588093			2216	27.7632	13.0755	14.8005	7.95233	16.7502	27.4353
2149	199	17.2881	9.72868	10.6939	6.656	11.7536	17.1319		2217	0.00588637	0.00367898	0.00404287	0.00221616	0.00440605	0.0058516			2217	27.9285	13.1241	14.8608	7.97008	16.8247	27.5976
2150	200	17.4322	9.77923	10.755	6.67679	11.8268	17.2739		2218	0.00585701	0.00366063	0.00402271	0.00220511	0.00438407	0.00582242			2218	28.0938	13.1725	14.9212	7.98778	16.8992	27.76
2151	201	17.5769	9.82978	10.8162	6.69754	11.9001	17.4163		2219	0.0058278	0.00364237	0.00400265	0.00219411	0.00436221	0.00579338			2219	28.2594	13.2209	14.9814	8.00543	16.9736	27.9226
2152	202	17.722	9.88034	10.8773	6.71825	11.9735	17.5593		2220	0.00579873	0.0036242	0.00398268	0.00218317	0.00434045	0.00576448			2220	28.425	13.2692	15.0416	8.02304	17.048	28.0853
2153	203	17.8675	9.93091	10.9385	6.73892	12.047	17.7026		2221	0.00576981	0.00360613	0.00396282	0.00217228	0.0043188	0.00573573			2221	28.5908	13.3175	15.1018	8.04059	17.1223	28.2481
2154	204	18.0135	9.98148	10.9998	6.75955	12.1205	17.8464		2222	0.00574103	0.00358814	0.00394305	0.00216144	0.00429726	0.00570712			2222	28.7567	13.3657	15.1619	8.0581	17.1966	28.4111
2155	205	18.16	10.0321	11.0611	6.78014	12.1941	17.9907		2223	0.0057124	0.00357025	0.00392339	0.00215066	0.00427583	0.00567866			2223	28.9228	13.4138	15.2219	8.07555	17.2708	28.5742
2156	206	18.3069	10.0826	11.1224	6.80069	12.2678	18.1354		2224	0.00568391	0.00355244	0.00390382	0.00213994	0.0042545	0.00565034			2224	29.0889	13.4619	15.2818	8.09296	17.345	28.7373
2157	207	18.4543	10.1332	11.1837	6.82119	12.3416	18.2805		2225	0.00565556	0.00353472	0.00388435	0.00212926	0.00423329	0.00562216			2225	29.2552	13.5099	15.3417	8.11031	17.4191	28.9006
2158	208	18.6021	10.1838	11.2451	6.84166	12.4154	18.426		2226	0.00562735	0.00351709	0.00386498	0.00211864	0.00421217	0.00559412			2226	29.4216	13.5578	15.4016	8.12762	17.4931	29.064
2159	209	18.7504	10.2343	11.3065	6.86209	12.4894	18.572		2227	0.00559929	0.00349955	0.0038457	0.00210808	0.00419116	0.00556621			2227	29.5881	13.6057	15.4613	8.14487	17.5671	29.2275
2160	210	18.899	10.2849	11.3679	6.88247	12.5633	18.7184		2228	0.00557136	0.0034821	0.00382652	0.00209756	0.00417026	0.00553845			2228	29.7547	13.6534	15.521	8.16208	17.641	29.3911
2161	211	19.0481	10.3355	11.4293	6.90281	12.6374	18.8652		2229	0.00554357	0.00346473	0.00380743	0.0020871	0.00414946	0.00551083			2229	29.9214	13.7012	15.5806	8.17924	17.7149	29.5548
2162	212	19.1977	10.386	11.4908	6.92311	12.7115	19.0124		2230	0.00551593	0.00344745	0.00378845	0.00207669	0.00412876	0.00548334			2230	30.0882	13.7488	15.6402	8.19634	17.7887	29.7186
2163	213	19.3476	10.4366	11.5523	6.94337	12.7856	19.16		2231	0.00548841	0.00343026	0.00376955	0.00206634	0.00410817	0.005456			2231	30.2551	13.7964	15.6997	8.2134	17.8625	29.8825
2164	214	19.4979	10.4871	11.6138	6.96359	12.8599	19.308		2232	0.00546104	0.00341315	0.00375075	0.00205603	0.00408768	0.00542878			2232	30.4221	13.8438	15.7591	8.23041	17.9362	30.0464
2165	215	19.6487	10.5377	11.6753	6.98376	12.9341	19.4564		2233	0.0054338	0.00339612	0.00373204	0.00204577	0.0040673	0.00540171			2233	30.5891	13.8913	15.8184	8.24736	18.0098	30.2104
2166	216	19.7999	10.5882	11.7369	7.00389	13.0085	19.6052		2234	0.0054067	0.00337919	0.00371343	0.00203557	0.00404701	0.00537477			2234	30.7562	13.9386	15.8776	8.26427	18.0833	30.3745
2167	217	19.9514	10.6387	11.7984	7.02398	13.0829	19.7543		2235	0.00537974	0.00336233	0.00369491	0.00202542	0.00402683	0.00534796			2235	30.9234	13.9859	15.9368	8.28113	18.1568	30.5386
2168	218	20.1034	10.6892	11.86	7.04402	13.1573	19.9039		2236	0.0053529	0.00334556	0.00367648	0.00201532	0.00400674	0.00532129			2236	31.0907	14.033	15.9959	8.29793	18.2302	30.7028
2169	219	20.2557	10.7397	11.9216	7.06402	13.2318	20.0538		2237	0.00532621	0.00332888	0.00365814	0.00200527	0.00398676	0.00529475			2237	31.258	14.0801	16.055	8.31469	18.3036	30.8671
2170	220	20.4084	10.7901	11.9831	7.08398	13.3063	20.2041		2238	0.00529964	0.00331227	0.0036399	0.00199526	0.00396687	0.00526834			2238	31.4254	14.1272	16.1139	8.3314	18.3768	31.0314
2171	221	20.5615	10.8406	12.0447	7.1039	13.3809	20.3548		2239	0.00527321	0.00329575	0.00362174	0.00198531	0.00394709	0.00524206			2239	31.5928	14.1741	16.1728	8.34805	18.45	31.1957
2172	222	20.715	10.891	12.1063	7.12377	13.4555	20.5058		2240	0.00524691	0.00327932	0.00360368	0.00197541	0.0039274	0.00521592			2240	31.7603	14.221	16.2316	8.36466	18.5231	31.3601
2173	223	20.8688	10.9414	12.1679	7.14359	13.5302	20.6572		2241	0.00522074	0.00326296	0.00358571	0.00196556	0.00390781	0.0051899			2241	31.9278	14.2678	16.2903	8.38122	18.5962	31.5245
2174	224	21.023	10.9918	12.2296	7.16337	13.6049	20.8089		2242	0.0051947	0.00324669	0.00356782	0.00195576	0.00388832	0.00516402			2242	32.0954	14.3145	16.3489	8.39772	18.6691	31.689
2175	225	21.1776	11.0422	12.2912	7.18311	13.6796	20.961		2243	0.00516879	0.00323049	0.00355003	0.001946	0.00386893	0.00513826			2243	32.263	14.3611	16.4074	8.41418	18.742	31.8535
2176	226	21.3325	11.0925	12.3528	7.2028	13.7544	21.1134		2244	0.00514301	0.00321438	0.00353232	0.0019363	0.00384963	0.00511264			2244	32.4306	14.4077	16.4659	8.43058	18.8148	32.018
2177	227	21.4877	11.1428	12.4144	7.22245	13.8292	21.2662		2245	0.00511736	0.00319835	0.00351471	0.00192664	0.00383043	0.00508714			2245	32.5983	14.4541	16.5242	8.44694	18.8875	32.1825
2178	228	21.6433	11.1931	12.476	7.24205	13.904	21.4192		2246	0.00509184	0.0031824	0.00349718	0.00191703	0.00381133	0.00506177			2246	32.7659	14.5005	16.5825	8.46325	18.9601	32.3471
2179	229	21.7993	11.2434	12.5376	7.26161	13.9788	21.5727		2247	0.00506645	0.00316652	0.00347973	0.00190747	0.00379232	0.00503652			2247	32.9336	14.5468	16.6407	8.4795	19.0327	32.5117
2180	230	21.9556	11.2936	12.5992	7.28113	14.0537	21.7264		2248	0.00504118	0.00315073	0.00346238	0.00189795	0.00377341	0.0050114			2248	33.1013	14.593	16.6988	8.49571	19.1051	32.6762
2181	231	22.1122	11.3439	12.6608	7.30059	14.1286	21.8804		2249	0.00501603	0.00313502	0.00344511	0.00188849	0.00375459	0.00498641			2249	33.2691	14.6391	16.7569	8.51186	19.1775	32.8408
2182	232	22.2691	11.394	12.7224	7.32001	14.2035	22.0348		2250	0.00499102	0.00311938	0.00342793	0.00187907	0.00373586	0.00496154			2250	33.4368	14.6852	16.8148	8.52797	19.2498	33.0054
2183	233	22.4264	11.4442	12.7839	7.33939	14.2785	22.1895		2251	0.00496612	0.00310382	0.00341083	0.0018697	0.00371723	0.00493679			2251	33.6045	14.7311	16.8726	8.54402	19.3219	33.17
2184	234	22.584	11.4943	12.8455	7.35872	14.3534	22.3445		2252	0.00494135	0.00308834	0.00339382	0.00186037	0.00369869	0.00491217			2252	33.7722	14.777	16.9304	8.56003	19.394	33.3345
2185	235	22.7418	11.5444	12.907	7.378	14.4284	22.4998		2253	0.00491671	0.00307294	0.00337689	0.00185109	0.00368024	0.00488767			2253	33.9399	14.8228	16.988	8.57598	19.466	33.4991
2186	236	22.9	11.5945	12.9685	7.39724	14.5034	22.6553		2254	0.00489219	0.00305761	0.00336005	0.00184186	0.00366189	0.00486329			2254	34.1076	14.8684	17.0456	8.59189	19.5379	33.6636
2187	237	23.0585	11.6445	13.0301	7.41643	14.5784	22.8112		2255	0.00486779	0.00304236	0.00334329	0.00183267	0.00364362	0.00483903			2255	34.2753	14.914	17.103	8.60774	19.6097	33.8281
2188	238	23.2173	11.6945	13.0916	7.43558	14.6534	22.9673		2256	0.00484351	0.00302719	0.00332662	0.00182353	0.00362545	0.0048149			2256	34.443	14.9596	17.1604	8.62354	19.6815	33.9926
2189	239	23.3764	11.7444	13.153	7.45468	14.7284	23.1238		2257	0.00481935	0.00301209	0.00331002	0.00181444	0.00360737	0.00479089			2257	34.6106	15.005	17.2177	8.6393	19.7531	34.1571
2190	240	23.5357	11.7943	13.2145	7.47373	14.8035	23.2805		2258	0.00479531	0.00299707	0.00329352	0.00180539	0.00358938	0.00476699			2258	34.7782	15.0503	17.2749	8.655	19.8246	34.3215
2191	241	23.6954	11.8442	13.2759	7.49273	14.8785	23.4374		2259	0.0047714	0.00298212	0.00327709	0.00179639	0.00357147	0.00474322			2259	34.9458	15.0956	17.332	8.67066	19.896	34.4859
2192	242	23.8553	11.894	13.3373	7.51169	14.9535	23.5947		2260	0.0047476	0.00296725	0.00326074	0.00178743	0.00355366	0.00471956			2260	35.1133	15.1407	17.3889	8.68626	19.9673	34.6503
2193	243	24.0155	11.9438	13.3987	7.5306	15.0286	23.7522		2261	0.00472392	0.00295245	0.00324448	0.00177851	0.00353594	0.00469602			2261	35.2808	15.1858	17.4458	8.70181	20.0385	34.8146
2194	244	24.1759	11.9936	13.4601	7.54947	15.1036	23.9099		2262	0.00470036	0.00293772	0.0032283	0.00176964	0.0035183	0.0046726			2262	35.4483	15.2307	17.5026	8.71732	20.1096	34.9788
2195	245	24.3366	12.0433	13.5214	7.56828	15.1786	24.0679		2263	0.00467692	0.00292307	0.0032122	0.00176081	0.00350075	0.00464929			2263	35.6157	15.2756	17.5593	8.73277	20.1806	35.1431
2196	246	24.4976	12.093	13.5827	7.58705	15.2536	24.2261		2264	0.00465359	0.00290849	0.00319618	0.00175203	0.00348329	0.00462611			2264	35.783	15.3204	17.6159	8.74818	20.2515	35.3072
2197	247	24.6588	12.1426	13.6439	7.60578	15.3287	24.3846		2265	0.00463038	0.00289399	0.00318024	0.00174329	0.00346592	0.00460303			2265	35.9503	15.3651	17.6724	8.76353	20.3223	35.4713
2198	248	24.8203	12.1921	13.7052	7.62445	15.4037	24.5434		2266	0.00460729	0.00287955	0.00316438	0.0017346	0.00344863	0.00458007			2266	36.1176	15.4097	17.7288	8.77883	20.393	35.6353
2199	249	24.982	12.2417	13.7664	7.64308	15.4787	24.7023		2267	0.00458431	0.00286519	0.00314859	0.00172595	0.00343143	0.00455723			2267	36.2848	15.4542	17.785	8.79409	20.4636	35.7993
2200	250	25.1439	12.2911	13.8276	7.66165	15.5537	24.8615		2268	0.00456144	0.0028509	0.00313289	0.00171734	0.00341432	0.0045345			2268	36.4519	15.4986	17.8412	8.80929	20.534	35.9632
2201	251	25.3061	12.3406	13.8887	7.68019	15.6286	25.0209		2269	0.00453869	0.00283668	0.00311726	0.00170877	0.00339729	0.00451189			2269	36.6189	15.5429	17.8973	8.82445	20.6044	36.127
2202	252	25.4685	12.39	13.9498	7.69867	15.7036	25.1805		2270	0.00451606	0.00282253	0.00310172	0.00170025	0.00338035	0.00448938			2270	36.7859	15.5871	17.9532	8.83955	20.6746	36.2907
2203	253	25.6311	12.4393	14.0108	7.7171	15.7785	25.3403		2271	0.00449353	0.00280846	0.00308625	0.00169177	0.00336349	0.00446699			2271	36.9527	15.6312	18.0091	8.85461	20.7447	36.4544
2204	254	25.794	12.4886	14.0719	7.73549	15.8534	25.5004		2272	0.00447112	0.00279445	0.00307085	0.00168333	0.00334671	0.00444471			2272	37.1195	15.6753	18.0649	8.86961	20.8148	36.618
2205	255	25.957	12.5378	14.1328	7.75383	15.9283	25.6606		2273	0.00444882	0.00278051	0.00305554	0.00167494	0.00333002	0.00442254			2273	37.2862	15.7192	18.1205	8.88457	20.8846	36.7815
2206	256	26.1203	12.587	14.1938	7.77212	16.0032	25.8211		2274	0.00442663	0.00276664	0.0030403	0.00166658	0.00331341	0.00440049			2274	37.4529	15.763	18.176	8.89947	20.9544	36.9449
2207	257	26.2838	12.6361	14.2546	7.79036	16.078	25.9817		2275	0.00440456	0.00275284	0.00302513	0.00165827	0.00329689	0.00437854			2275	37.6194	15.8067	18.2315	8.91433	21.0241	37.1081
2208	258	26.4474	12.6851	14.3155	7.80855	16.1529	26.1425		2276	0.00438259	0.00273911	0.00301005	0.00165	0.00328044	0.0043567			2276	37.7858	15.8504	18.2868	8.92914	21.0936	37.2713
2209	259	26.6113	12.7341	14.3763	7.82669	16.2276	26.3035		2277	0.00436073	0.00272545	0.00299503	0.00164177	0.00326408	0.00433497			2277	37.9522	15.8939	18.342	8.94389	21.1631	37.4344
2210	260	26.7753	12.7831	14.437	7.84479	16.3024	26.4647		2278	0.00433898	0.00271186	0.0029801	0.00163358	0.0032478	0.00431335			2278	38.1184	15.9373	18.3971	8.9586	21.2324	37.5974
2211	261	26.9395	12.832	14.4977	7.86283	16.3771	26.626		2279	0.00431734	0.00269833	0.00296523	0.00162544	0.0032316	0.00429184			2279	38.2845	15.9807	18.4521	8.97326	21.3015	37.7603
2212	262	27.104	12.8808	14.5584	7.88083	16.4518	26.7876		2280	0.00429581	0.00268488	0.00295044	0.00161733	0.00321549	0.00427043			2280	38.4505	16.0239	18.507	8.98787	21.3706	37.923
2213	263	27.2685	12.9296	14.619	7.89878	16.5265	26.9493		2281	0.00427438	0.00267149	0.00293573	0.00160926	0.00319945	0.00424913			2281	38.6164	16.0671	18.5617	9.00243	21.4395	38.0857
2214	264	27.4333	12.9783	14.6795	7.91668	16.6011	27.1111		2282	0.00425306	0.00265816	0.00292109	0.00160124	0.00318349	0.00422794			2282	38.7822	16.1101	18.6164	9.01694	21.5084	38.2482
2215	265	27.5982	13.0269	14.74	7.93453	16.6757	27.2731		2283	0.00423185	0.0026449	0.00290652	0.00159325	0.00316761	0.00420685			2283	38.9478	16.153	18.6709	9.0314	21.577	38.4106
2216	266	27.7632	13.0755	14.8005	7.95233	16.7502	27.4353		2284	0.00421074	0.00263171	0.00289202	0.0015853	0.00315181	0.00418587			2284	39.1133	16.1959	18.7253	9.04581	21.6456	38.5729
2217	267	27.9285	13.1241	14.8608	7.97008	16.8247	27.5976		2285	0.00418974	0.00261859	0.0028776	0.0015774	0.00313609	0.004165			2285	39.2787	16.2386	18.7797	9.06018	21.7141	38.735
2218	268	28.0938	13.1725	14.9212	7.98778	16.8992	27.76		2286	0.00416885	0.00260553	0.00286325	0.00156953	0.00312045	0.00414422			2286	39.444	16.2812	18.8339	9.07449	21.7824	38.897
2219	269	28.2594	13.2209	14.9814	8.00543	16.9736	27.9226		2287	0.00414805	0.00259253	0.00284896	0.0015617	0.00310489	0.00412355			2287	39.6091	16.3238	18.8879	9.08876	21.8505	39.0589
2220	270	28.425	13.2692	15.0416	8.02304	17.048	28.0853		2288	0.00412737	0.0025796	0.00283476	0.00155391	0.0030894	0.00410299			2288	39.7741	16.3662	18.9419	9.10297	21.9186	39.2206
2221	271	28.5908	13.3175	15.1018	8.04059	17.1223	28.2481		2289	0.00410678	0.00256674	0.00282062	0.00154616	0.003074	0.00408252			2289	39.9389	16.4085	18.9957	9.11714	21.9865	39.3822
2222	272	28.7567	13.3657	15.1619	8.0581	17.1966	28.4111		2290	0.0040863	0.00255393	0.00280655	0.00153845	0.00305866	0.00406216			2290	40.1036	16.4508	19.0495	9.13126	22.0543	39.5436
2223	273	28.9228	13.4138	15.2219	8.07555	17.2708	28.5742		2291	0.00406592	0.0025412	0.00279255	0.00153078	0.00304341	0.0040419			2291	40.2682	16.4929	19.1031	9.14533	22.122	39.7049
2224	274	29.0889	13.4619	15.2818	8.09296	17.345	28.7373		2292	0.00404564	0.00252852	0.00277862	0.00152314	0.00302823	0.00402174			2292	40.4326	16.5349	19.1566	9.15935	22.1895	39.8661
2225	275	29.2552	13.5099	15.3417	8.11031	17.4191	28.9006		2293	0.00402546	0.00251591	0.00276477	0.00151555	0.00301313	0.00400168			2293	40.5968	16.5768	19.21	9.17332	22.2569	40.027
2226	276	29.4216	13.5578	15.4016	8.12762	17.4931	29.064		2294	0.00400538	0.00250336	0.00275098	0.00150799	0.0029981	0.00398173			2294	40.7609	16.6186	19.2632	9.18724	22.3242	40.1879
2227	277	29.5881	13.6057	15.4613	8.14487	17.5671	29.2275		2295	0.00398541	0.00249088	0.00273726	0.00150047	0.00298315	0.00396187			2295	40.9248	16.6603	19.3164	9.20112	22.3913	40.3485
2228	278	29.7547	13.6534	15.521	8.16208	17.641	29.3911		2296	0.00396553	0.00247845	0.0027236	0.00149298	0.00296827	0.00394211			2296	41.0886	16.7019	19.3694	9.21495	22.4583	40.509
2229	279	29.9214	13.7012	15.5806	8.17924	17.7149	29.5548		2297	0.00394575	0.00246609	0.00271002	0.00148554	0.00295346	0.00392245			2297	41.2522	16.7434	19.4223	9.22873	22.5252	40.6693
2230	280	30.0882	13.7488	15.6402	8.19634	17.7887	29.7186		2298	0.00392607	0.00245379	0.0026965	0.00147813	0.00293873	0.00390288			2298	41.4156	16.7848	19.4751	9.24246	22.5919	40.8295
2231	281	30.2551	13.7964	15.6997	8.2134	17.8625	29.8825		2299	0.00390649	0.00244155	0.00268305	0.00147076	0.00292408	0.00388342			2299	41.5788	16.8261	19.5277	9.25614	22.6585	40.9895
2232	282	30.4221	13.8438	15.7591	8.23041	17.9362	30.0464		2300	0.00388701	0.00242938	0.00266967	0.00146342	0.00290949	0.00386405			2300	41.7419	16.8673	19.5802	9.26977	22.7249	41.1493
2233	283	30.5891	13.8913	15.8184	8.24736	18.0098	30.2104		2301	0.00386762	0.00241726	0.00265636	0.00145612	0.00289498	0.00384478			2301	41.9048	16.9084	19.6327	9.28336	22.7912	41.3089
2234	284	30.7562	13.9386	15.8776	8.26427	18.0833	30.3745		2302	0.00384833	0.0024052	0.00264311	0.00144886	0.00288054	0.0038256			2302	42.0675	16.9493	19.685	9.29689	22.8574	41.4683
2235	285	30.9234	13.9859	15.9368	8.28113	18.1568	30.5386		2303	0.00382914	0.00239321	0.00262993	0.00144163	0.00286617	0.00380652			2303	42.23	16.9902	19.7371	9.31038	22.9234	41.6276
2236	286	31.0907	14.033	15.9959	8.29793	18.2302	30.7028		2304	0.00381004	0.00238127	0.00261681	0.00143444	0.00285188	0.00378753			2304	42.3923	17.031	19.7892	9.32382	22.9893	41.7866
2237	287	31.258	14.0801	16.055	8.31469	18.3036	30.8671		2305	0.00379104	0.0023694	0.00260376	0.00142729	0.00283766	0.00376864			2305	42.5544	17.0716	19.8411	9.33722	23.0551	41.9455
2238	288	31.4254	14.1272	16.1139	8.3314	18.3768	31.0314		2306	0.00377213	0.00235758	0.00259077	0.00142017	0.0028235	0.00374985			2306	42.7164	17.1122	19.8929	9.35056	23.1207	42.1042
2239	289	31.5928	14.1741	16.1728	8.34805	18.45	31.1957		2307	0.00375331	0.00234582	0.00257785	0.00141309	0.00280942	0.00373115			2307	42.8781	17.1526	19.9446	9.36386	23.1862	42.2627
2240	290	31.7603	14.221	16.2316	8.36466	18.5231	31.3601		2308	0.0037346	0.00233412	0.00256499	0.00140604	0.00279541	0.00371254			2308	43.0397	17.1929	19.9961	9.37711	23.2515	42.4209
2241	291	31.9278	14.2678	16.2903	8.38122	18.5962	31.5245		2309	0.00371597	0.00232248	0.0025522	0.00139903	0.00278147	0.00369402			2309	43.201	17.2332	20.0475	9.39032	23.3167	42.579
2242	292	32.0954	14.3145	16.3489	8.39772	18.6691	31.689		2310	0.00369744	0.00231089	0.00253947	0.00139205	0.00276759	0.0036756			2310	43.3621	17.2733	20.0988	9.40347	23.3817	42.7369
2243	293	32.263	14.3611	16.4074	8.41418	18.742	31.8535		2311	0.00367899	0.00229937	0.0025268	0.00138511	0.00275379	0.00365726			2311	43.523	17.3133	20.15	9.41658	23.4466	42.8945
2244	294	32.4306	14.4077	16.4659	8.43058	18.8148	32.018		2312	0.00366065	0.0022879	0.0025142	0.0013782	0.00274006	0.00363902			2312	43.6838	17.3532	20.201	9.42964	23.5113	43.052
2245	295	32.5983	14.4541	16.5242	8.44694	18.8875	32.1825		2313	0.00364239	0.00227649	0.00250166	0.00137132	0.00272639	0.00362087			2313	43.8443	17.393	20.2519	9.44266	23.5759	43.2092
2246	296	32.7659	14.5005	16.5825	8.46325	18.9601	32.3471		2314	0.00362422	0.00226514	0.00248919	0.00136448	0.00271279	0.00360281			2314	44.0045	17.4327	20.3027	9.45562	23.6404	43.3663
2247	297	32.9336	14.5468	16.6407	8.4795	19.0327	32.5117		2315	0.00360615	0.00225384	0.00247677	0.00135768	0.00269926	0.00358485			2315	44.1646	17.4722	20.3534	9.46854	23.7047	43.5231
2248	298	33.1013	14.593	16.6988	8.49571	19.1051	32.6762		2316	0.00358816	0.0022426	0.00246442	0.00135091	0.0026858	0.00356697			2316	44.3244	17.5117	20.4039	9.48141	23.7689	43.6797
2249	299	33.2691	14.6391	16.7569	8.51186	19.1775	32.8408		2317	0.00357026	0.00223141	0.00245213	0.00134417	0.0026724	0.00354918			2317	44.4841	17.5511	20.4543	9.49424	23.8329	43.836
2250	300	33.4368	14.6852	16.8148	8.52797	19.2498	33.0054		2318	0.00355246	0.00222028	0.0024399	0.00133747	0.00265907	0.00353147			2318	44.6434	17.5903	20.5046	9.50702	23.8967	43.9921
2251	301	33.6045	14.7311	16.8726	8.54402	19.3219	33.17		2319	0.00353474	0.00220921	0.00242773	0.0013308	0.00264581	0.00351386			2319	44.8026	17.6295	20.5548	9.51975	23.9604	44.1481
2252	302	33.7722	14.777	16.9304	8.56003	19.394	33.3345		2320	0.00351711	0.00219819	0.00241562	0.00132416	0.00263262	0.00349634			2320	44.9615	17.6685	20.6048	9.53244	24.024	44.3037
2253	303	33.9399	14.8228	16.988	8.57598	19.466	33.4991		2321	0.00349957	0.00218723	0.00240357	0.00131755	0.00261949	0.0034789			2321	45.1202	17.7074	20.6547	9.54508	24.0874	44.4592
2254	304	34.1076	14.8684	17.0456	8.59189	19.5379	33.6636		2322	0.00348211	0.00217632	0.00239158	0.00131098	0.00260642	0.00346155			2322	45.2787	17.7462	20.7045	9.55767	24.1507	44.6144
2255	305	34.2753	14.914	17.103	8.60774	19.6097	33.8281		2323	0.00346475	0.00216546	0.00237966	0.00130444	0.00259342	0.00344428			2323	45.4369	17.7849	20.7541	9.57022	24.2138	44.7694
2256	306	34.443	14.9596	17.1604	8.62354	19.6815	33.9926		2324	0.00344747	0.00215466	0.00236779	0.00129794	0.00258049	0.0034271			2324	45.5949	17.8235	20.8036	9.58272	24.2767	44.9241
2257	307	34.6106	15.005	17.2177	8.6393	19.7531	34.1571		2325	0.00343027	0.00214392	0.00235598	0.00129146	0.00256762	0.00341001			2325	45.7526	17.862	20.853	9.59517	24.3396	45.0786
2258	308	34.7782	15.0503	17.2749	8.655	19.8246	34.3215		2326	0.00341316	0.00213322	0.00234423	0.00128502	0.00255481	0.003393			2326	45.9101	17.9004	20.9022	9.60758	24.4022	45.2328
2259	309	34.9458	15.0956	17.332	8.67066	19.896	34.4859		2327	0.00339614	0.00212259	0.00233253	0.00127861	0.00254207	0.00337608			2327	46.0673	17.9387	20.9513	9.61994	24.4647	45.3868
2260	310	35.1133	15.1407	17.3889	8.68626	19.9673	34.6503		2328	0.0033792	0.002112	0.0023209	0.00127224	0.00252939	0.00335924			2328	46.2243	17.9768	21.0003	9.63226	24.5271	45.5406
2261	311	35.2808	15.1858	17.4458	8.70181	20.0385	34.8146		2329	0.00336235	0.00210147	0.00230933	0.00126589	0.00251677	0.00334249			2329	46.381	18.0149	21.0492	9.64453	24.5893	45.6941
2262	312	35.4483	15.2307	17.5026	8.71732	20.1096	34.9788		2330	0.00334558	0.00209098	0.00229781	0.00125958	0.00250422	0.00332582			2330	46.5375	18.0528	21.0979	9.65675	24.6513	45.8473
2263	313	35.6157	15.2756	17.5593	8.73277	20.1806	35.1431		2331	0.00332889	0.00208056	0.00228635	0.0012533	0.00249173	0.00330923			2331	46.6937	18.0906	21.1465	9.66893	24.7132	46.0003
2264	314	35.783	15.3204	17.6159	8.74818	20.2515	35.3072		2332	0.00331229	0.00207018	0.00227494	0.00124704	0.00247931	0.00329272			2332	46.8497	18.1284	21.1949	9.68106	24.7749	46.153
2265	315	35.9503	15.3651	17.6724	8.76353	20.3223	35.4713		2333	0.00329577	0.00205985	0.0022636	0.00124083	0.00246694	0.0032763			2333	47.0054	18.166	21.2433	9.69315	24.8365	46.3055
2266	316	36.1176	15.4097	17.7288	8.77883	20.393	35.6353		2334	0.00327933	0.00204958	0.00225231	0.00123464	0.00245464	0.00325996			2334	47.1608	18.2035	21.2915	9.70519	24.8979	46.4577
2267	317	36.2848	15.4542	17.785	8.79409	20.4636	35.7993		2335	0.00326298	0.00203936	0.00224107	0.00122848	0.00244239	0.0032437			2335	47.316	18.2408	21.3395	9.71719	24.9592	46.6097
2268	318	36.4519	15.4986	17.8412	8.80929	20.534	35.9632		2336	0.0032467	0.00202919	0.0022299	0.00122235	0.00243021	0.00322752			2336	47.4709	18.2781	21.3875	9.72914	25.0203	46.7613
2269	319	36.6189	15.5429	17.8973	8.82445	20.6044	36.127		2337	0.00323051	0.00201907	0.00221878	0.00121626	0.00241809	0.00321143			2337	47.6255	18.3153	21.4353	9.74105	25.0812	46.9127
2270	320	36.7859	15.5871	17.9532	8.83955	20.6746	36.2907		2338	0.0032144	0.002009	0.00220771	0.00121019	0.00240603	0.00319541			2338	47.7799	18.3523	21.4829	9.75291	25.142	47.0639
2271	321	36.9527	15.6312	18.0091	8.85461	20.7447	36.4544		2339	0.00319836	0.00199898	0.0021967	0.00120415	0.00239403	0.00317947			2339	47.9339	18.3893	21.5305	9.76473	25.2027	47.2148
2272	322	37.1195	15.6753	18.0649	8.86961	20.8148	36.618		2340	0.00318241	0.00198901	0.00218574	0.00119815	0.00238209	0.00316361			2340	48.0877	18.4261	21.5779	9.7765	25.2632	47.3654
2273	323	37.2862	15.7192	18.1205	8.88457	20.8846	36.7815		2341	0.00316654	0.00197909	0.00217484	0.00119217	0.00237021	0.00314784			2341	48.2413	18.4628	21.6251	9.78823	25.3235	47.5157
2274	324	37.4529	15.763	18.176	8.89947	20.9544	36.9449		2342	0.00315075	0.00196921	0.00216399	0.00118623	0.00235839	0.00313214			2342	48.3945	18.4995	21.6723	9.79991	25.3836	47.6657
2275	325	37.6194	15.8067	18.2315	8.91433	21.0241	37.1081		2343	0.00313503	0.00195939	0.0021532	0.00118031	0.00234663	0.00311651			2343	48.5475	18.536	21.7193	9.81155	25.4437	47.8155
2276	326	37.7858	15.8504	18.2868	8.92914	21.0936	37.2713		2344	0.0031194	0.00194962	0.00214246	0.00117442	0.00233492	0.00310097			2344	48.7001	18.5723	21.7661	9.82314	25.5035	47.965
2277	327	37.9522	15.8939	18.342	8.94389	21.1631	37.4344		2345	0.00310384	0.0019399	0.00213178	0.00116857	0.00232328	0.0030855			2345	48.8525	18.6086	21.8129	9.83469	25.5632	48.1142
2278	328	38.1184	15.9373	18.3971	8.9586	21.2324	37.5974		2346	0.00308836	0.00193022	0.00212114	0.00116274	0.00231169	0.00307012			2346	49.0046	18.6448	21.8595	9.8462	25.6227	48.2631
2279	329	38.2845	15.9807	18.4521	8.97326	21.3015	37.7603		2347	0.00307295	0.00192059	0.00211056	0.00115694	0.00230016	0.0030548			2347	49.1564	18.6808	21.9059	9.85766	25.6821	48.4117
2280	330	38.4505	16.0239	18.507	8.98787	21.3706	37.923		2348	0.00305763	0.00191102	0.00210004	0.00115117	0.00228869	0.00303957			2348	49.308	18.7168	21.9523	9.86908	25.7413	48.5601
2281	331	38.6164	16.0671	18.5617	9.00243	21.4395	38.0857		2349	0.00304238	0.00190148	0.00208956	0.00114543	0.00227727	0.00302441			2349	49.4592	18.7526	21.9985	9.88045	25.8003	48.7081
2282	332	38.7822	16.1101	18.6164	9.01694	21.5084	38.2482		2350	0.0030272	0.001892	0.00207914	0.00113971	0.00226591	0.00300932			2350	49.6101	18.7884	22.0445	9.89178	25.8592	48.8559
2283	333	38.9478	16.153	18.6709	9.0314	21.577	38.4106		2351	0.00301211	0.00188256	0.00206877	0.00113403	0.00225461	0.00299431			2351	49.7608	18.824	22.0904	9.90307	25.918	49.0033
2284	334	39.1133	16.1959	18.7253	9.04581	21.6456	38.5729		2352	0.00299708	0.00187317	0.00205845	0.00112837	0.00224337	0.00297938			2352	49.9111	18.8595	22.1362	9.91431	25.9765	49.1505
2285	335	39.2787	16.2386	18.7797	9.06018	21.7141	38.735		2353	0.00298213	0.00186383	0.00204819	0.00112275	0.00223218	0.00296452			2353	50.0611	18.8949	22.1819	9.92551	26.0349	49.2974
2286	336	39.444	16.2812	18.8339	9.07449	21.7824	38.897		2354	0.00296726	0.00185454	0.00203797	0.00111715	0.00222105	0.00294973			2354	50.2109	18.9302	22.2274	9.93667	26.0932	49.444
2287	337	39.6091	16.3238	18.8879	9.08876	21.8505	39.0589		2355	0.00295246	0.00184529	0.00202781	0.00111157	0.00220997	0.00293502			2355	50.3603	18.9653	22.2728	9.94778	26.1513	49.5902
2288	338	39.7741	16.3662	18.9419	9.10297	21.9186	39.2206		2356	0.00293774	0.00183608	0.00201769	0.00110603	0.00219895	0.00292038			2356	50.5094	19.0004	22.3181	9.95885	26.2092	49.7362
2289	339	39.9389	16.4085	18.9957	9.11714	21.9865	39.3822		2357	0.00292308	0.00182693	0.00200763	0.00110051	0.00218798	0.00290582			2357	50.6583	19.0353	22.3632	9.96988	26.2669	49.8819
2290	340	40.1036	16.4508	19.0495	9.13126	22.0543	39.5436		2358	0.00290851	0.00181781	0.00199762	0.00109502	0.00217707	0.00289133			2358	50.8068	19.0702	22.4082	9.98086	26.3245	50.0273
2291	341	40.2682	16.4929	19.1031	9.14533	22.122	39.7049		2359	0.002894	0.00180875	0.00198766	0.00108956	0.00216621	0.00287691			2359	50.955	19.1049	22.453	9.99181	26.382	50.1723
2292	342	40.4326	16.5349	19.1566	9.15935	22.1895	39.8661		2360	0.00287957	0.00179973	0.00197774	0.00108413	0.0021554	0.00286256			2360	51.1029	19.1395	22.4978	10.0027	26.4392	50.3171
2293	343	40.5968	16.5768	19.21	9.17332	22.2569	40.027		2361	0.0028652	0.00179075	0.00196788	0.00107872	0.00214465	0.00284828			2361	51.2504	19.174	22.5423	10.0136	26.4964	50.4615
2294	344	40.7609	16.6186	19.2632	9.18724	22.3242	40.1879		2362	0.00285091	0.00178182	0.00195806	0.00107334	0.00213396	0.00283407			2362	51.3977	19.2084	22.5868	10.0244	26.5533	50.6057
2295	345	40.9248	16.6603	19.3164	9.20112	22.3913	40.3485		2363	0.00283669	0.00177293	0.0019483	0.00106799	0.00212331	0.00281994			2363	51.5447	19.2427	22.6311	10.0351	26.6101	50.7495
2296	346	41.0886	16.7019	19.3694	9.21495	22.4583	40.509		2364	0.00282255	0.00176409	0.00193858	0.00106266	0.00211272	0.00280587			2364	51.6913	19.2769	22.6753	10.0459	26.6667	50.893
2297	347	41.2522	16.7434	19.4223	9.22873	22.5252	40.6693		2365	0.00280847	0.00175529	0.00192891	0.00105736	0.00210219	0.00279188			2365	51.8376	19.311	22.7193	10.0566	26.7232	51.0362
2298	348	41.4156	16.7848	19.4751	9.24246	22.5919	40.8295		2366	0.00279446	0.00174654	0.00191929	0.00105209	0.0020917	0.00277796			2366	51.9836	19.3449	22.7632	10.0672	26.7795	51.1791
2299	349	41.5788	16.8261	19.5277	9.25614	22.6585	40.9895		2367	0.00278052	0.00173783	0.00190972	0.00104684	0.00208127	0.0027641			2367	52.1293	19.3788	22.807	10.0778	26.8356	51.3217
2300	350	41.7419	16.8673	19.5802	9.26977	22.7249	41.1493		2368	0.00276666	0.00172916	0.00190019	0.00104162	0.00207089	0.00275031			2368	52.2746	19.4125	22.8506	10.0884	26.8916	51.4639
2301	351	41.9048	16.9084	19.6327	9.28336	22.7912	41.3089		2369	0.00275286	0.00172053	0.00189072	0.00103642	0.00206056	0.0027366			2369	52.4196	19.4461	22.8941	10.0989	26.9474	51.6059
2302	352	42.0675	16.9493	19.685	9.29689	22.8574	41.4683		2370	0.00273913	0.00171195	0.00188129	0.00103126	0.00205028	0.00272295			2370	52.5643	19.4796	22.9375	10.1094	27.003	51.7475
2303	353	42.23	16.9902	19.7371	9.31038	22.9234	41.6276		2371	0.00272547	0.00170341	0.0018719	0.00102611	0.00204006	0.00270937			2371	52.7087	19.513	22.9807	10.1198	27.0585	51.8888
2304	354	42.3923	17.031	19.7892	9.32382	22.9893	41.7866		2372	0.00271187	0.00169492	0.00186257	0.00102099	0.00202988	0.00269585			2372	52.8528	19.5463	23.0238	10.1302	27.1138	52.0297
2305	355	42.5544	17.0716	19.8411	9.33722	23.0551	41.9455		2373	0.00269835	0.00168647	0.00185328	0.0010159	0.00201976	0.00268241			2373	52.9965	19.5795	23.0668	10.1405	27.169	52.1704
2306	356	42.7164	17.1122	19.8929	9.35056	23.1207	42.1042		2374	0.00268489	0.00167805	0.00184403	0.00101083	0.00200969	0.00266903			2374	53.1399	19.6126	23.1096	10.1509	27.2239	52.3107
2307	357	42.8781	17.1526	19.9446	9.36386	23.1862	42.2627		2375	0.0026715	0.00166968	0.00183484	0.00100579	0.00199966	0.00265572			2375	53.2829	19.6456	23.1523	10.1611	27.2788	52.4507
2308	358	43.0397	17.1929	19.9961	9.37711	23.2515	42.4209		2376	0.00265817	0.00166136	0.00182569	0.00100078	0.00198969	0.00264247			2376	53.4257	19.6784	23.1949	10.1714	27.3334	52.5903
2309	359	43.201	17.2332	20.0475	9.39032	23.3167	42.579		2377	0.00264492	0.00165307	0.00181658	0.000995786	0.00197977	0.00262929			2377	53.5681	19.7112	23.2373	10.1816	27.3879	52.7297
2310	360	43.3621	17.2733	20.0988	9.40347	23.3817	42.7369		2378	0.00263172	0.00164483	0.00180752	0.000990819	0.00196989	0.00261618			2378	53.7101	19.7438	23.2796	10.1917	27.4422	52.8687
2311	361	43.523	17.3133	20.15	9.41658	23.4466	42.8945		2379	0.0026186	0.00163662	0.0017985	0.000985877	0.00196007	0.00260313			2379	53.8518	19.7763	23.3218	10.2018	27.4964	53.0074
2312	362	43.6838	17.3532	20.201	9.42964	23.5113	43.052		2380	0.00260554	0.00162846	0.00178953	0.00098096	0.00195029	0.00259015			2380	53.9932	19.8088	23.3638	10.2119	27.5504	53.1457
2313	363	43.8443	17.393	20.2519	9.44266	23.5759	43.2092		2381	0.00259254	0.00162034	0.00178061	0.000976068	0.00194056	0.00257723			2381	54.1343	19.8411	23.4057	10.2219	27.6042	53.2837
2314	364	44.0045	17.4327	20.3027	9.45562	23.6404	43.3663		2382	0.00257961	0.00161226	0.00177173	0.000971199	0.00193088	0.00256438			2382	54.275	19.8733	23.4474	10.2319	27.6579	53.4214
2315	365	44.1646	17.4722	20.3534	9.46854	23.7047	43.5231		2383	0.00256675	0.00160422	0.00176289	0.000966356	0.00192125	0.00255159			2383	54.4154	19.9054	23.489	10.2418	27.7114	53.5587
2316	366	44.3244	17.5117	20.4039	9.48141	23.7689	43.6797		2384	0.00255395	0.00159621	0.0017541	0.000961536	0.00191167	0.00253886			2384	54.5554	19.9373	23.5305	10.2517	27.7648	53.6958
2317	367	44.4841	17.5511	20.4543	9.49424	23.8329	43.836		2385	0.00254121	0.00158825	0.00174535	0.00095674	0.00190214	0.0025262			2385	54.6951	19.9692	23.5719	10.2616	27.8179	53.8324
2318	368	44.6434	17.5903	20.5046	9.50702	23.8967	43.9921		2386	0.00252853	0.00158033	0.00173665	0.000951968	0.00189265	0.0025136			2386	54.8344	20.001	23.6131	10.2714	27.871	53.9688
2319	369	44.8026	17.6295	20.5548	9.51975	23.9604	44.1481		2387	0.00251592	0.00157245	0.00172798	0.00094722	0.00188321	0.00250106			2387	54.9734	20.0326	23.6541	10.2812	27.9238	54.1048
2320	370	44.9615	17.6685	20.6048	9.53244	24.024	44.3037		2388	0.00250337	0.00156461	0.00171937	0.000942496	0.00187382	0.00248859			2388	55.1121	20.0642	23.6951	10.291	27.9765	54.2404
2321	371	45.1202	17.7074	20.6547	9.54508	24.0874	44.4592		2389	0.00249089	0.0015568	0.00171079	0.000937795	0.00186447	0.00247618			2389	55.2504	20.0956	23.7359	10.3007	28.029	54.3757
2322	372	45.2787	17.7462	20.7045	9.55767	24.1507	44.6144		2390	0.00247846	0.00154904	0.00170226	0.000933118	0.00185517	0.00246383			2390	55.3884	20.127	23.7766	10.3104	28.0814	54.5107
2323	373	45.4369	17.7849	20.7541	9.57022	24.2138	44.7694		2391	0.0024661	0.00154131	0.00169377	0.000928464	0.00184592	0.00245154			2391	55.526	20.1582	23.8171	10.32	28.1336	54.6454
2324	374	45.5949	17.8235	20.8036	9.58272	24.2767	44.9241		2392	0.0024538	0.00153363	0.00168532	0.000923834	0.00183671	0.00243931			2392	55.6633	20.1893	23.8575	10.3296	28.1856	54.7797
2325	375	45.7526	17.862	20.853	9.59517	24.3396	45.0786		2393	0.00244157	0.00152598	0.00167691	0.000919226	0.00182755	0.00242714			2393	55.8002	20.2203	23.8978	10.3391	28.2375	54.9136
2326	376	45.9101	17.9004	20.9022	9.60758	24.4022	45.2328		2394	0.00242939	0.00151837	0.00166855	0.000914641	0.00181844	0.00241504			2394	55.9367	20.2512	23.938	10.3486	28.2892	55.0472
2327	377	46.0673	17.9387	20.9513	9.61994	24.4647	45.3868		2395	0.00241727	0.00151079	0.00166023	0.000910079	0.00180937	0.00240299			2395	56.073	20.282	23.978	10.3581	28.3407	55.1805
2328	378	46.2243	17.9768	21.0003	9.63226	24.5271	45.5406		2396	0.00240522	0.00150326	0.00165195	0.00090554	0.00180034	0.00239101			2396	56.2088	20.3127	24.0178	10.3675	28.3921	55.3134
2329	379	46.381	18.0149	21.0492	9.64453	24.5893	45.6941		2397	0.00239322	0.00149576	0.00164371	0.000901024	0.00179137	0.00237908			2397	56.3444	20.3433	24.0576	10.3769	28.4433	55.446
2330	380	46.5375	18.0528	21.0979	9.65675	24.6513	45.8473		2398	0.00238128	0.0014883	0.00163551	0.00089653	0.00178243	0.00236722			2398	56.4795	20.3738	24.0972	10.3863	28.4943	55.5782
2331	381	46.6937	18.0906	21.1465	9.66893	24.7132	46.0003		2399	0.00236941	0.00148088	0.00162735	0.000892059	0.00177354	0.00235541			2399	56.6143	20.4041	24.1367	10.3956	28.5452	55.7101
2332	382	46.8497	18.1284	21.1949	9.68106	24.7749	46.153		2400	0.00235759	0.00147349	0.00161924	0.000887609	0.0017647	0.00234366			2400	56.7488	20.4344	24.176	10.4049	28.5959	55.8416
2333	383	47.0054	18.166	21.2433	9.69315	24.8365	46.3055		2401	0.00234583	0.00146614	0.00161116	0.000883183	0.00175589	0.00233197			2401	56.8829	20.4646	24.2152	10.4141	28.6465	55.9728
2334	384	47.1608	18.2035	21.2915	9.70519	24.8979	46.4577		2402	0.00233413	0.00145883	0.00160313	0.000878778	0.00174714	0.00232034			2402	57.0167	20.4946	24.2543	10.4234	28.6969	56.1036
2335	385	47.316	18.2408	21.3395	9.71719	24.9592	46.6097		2403	0.00232249	0.00145155	0.00159513	0.000874395	0.00173842	0.00230877			2403	57.1501	20.5245	24.2932	10.4325	28.7471	56.2341
2336	386	47.4709	18.2781	21.3875	9.72914	25.0203	46.7613		2404	0.00231091	0.00144431	0.00158717	0.000870034	0.00172975	0.00229726			2404	57.2831	20.5544	24.3321	10.4416	28.7971	56.3642
2337	387	47.6255	18.3153	21.4353	9.74105	25.0812	46.9127		2405	0.00229938	0.00143711	0.00157926	0.000865694	0.00172113	0.0022858			2405	57.4158	20.5841	24.3707	10.4507	28.847	56.494
2338	388	47.7799	18.3523	21.4829	9.75291	25.142	47.0639		2406	0.00228791	0.00142994	0.00157138	0.000861377	0.00171254	0.0022744			2406	57.5481	20.6137	24.4093	10.4598	28.8968	56.6234
2339	389	47.9339	18.3893	21.5305	9.76473	25.2027	47.2148		2407	0.0022765	0.00142281	0.00156354	0.000857081	0.001704	0.00226305			2407	57.6801	20.6432	24.4477	10.4688	28.9463	56.7525
2340	390	48.0877	18.4261	21.5779	9.7765	25.2632	47.3654		2408	0.00226515	0.00141572	0.00155575	0.000852806	0.0016955	0.00225177			2408	57.8117	20.6727	24.486	10.4778	28.9958	56.8812
2341	391	48.2413	18.4628	21.6251	9.78823	25.3235	47.5157		2409	0.00225385	0.00140865	0.00154799	0.000848552	0.00168704	0.00224054			2409	57.9429	20.702	24.5241	10.4867	29.045	57.0096
2342	392	48.3945	18.4995	21.6723	9.79991	25.3836	47.6657		2410	0.00224261	0.00140163	0.00154027	0.00084432	0.00167863	0.00222936			2410	58.0738	20.7312	24.5622	10.4956	29.0941	57.1376
2343	393	48.5475	18.536	21.7193	9.81155	25.4437	47.8155		2411	0.00223142	0.00139464	0.00153258	0.000840109	0.00167026	0.00221824			2411	58.2044	20.7603	24.6	10.5045	29.143	57.2653
2344	394	48.7001	18.5723	21.7661	9.82314	25.5035	47.965		2412	0.00222029	0.00138768	0.00152494	0.000835919	0.00166193	0.00220718			2412	58.3345	20.7893	24.6378	10.5133	29.1918	57.3926
2345	395	48.8525	18.6086	21.8129	9.83469	25.5632	48.1142		2413	0.00220922	0.00138076	0.00151734	0.00083175	0.00165364	0.00219617			2413	58.4643	20.8182	24.6754	10.5221	29.2404	57.5196
2346	396	49.0046	18.6448	21.8595	9.8462	25.6227	48.2631		2414	0.0021982	0.00137387	0.00150977	0.000827602	0.00164539	0.00218522			2414	58.5938	20.8469	24.7129	10.5309	29.2888	57.6462
2347	397	49.1564	18.6808	21.9059	9.85766	25.6821	48.4117		2415	0.00218724	0.00136702	0.00150224	0.000823474	0.00163718	0.00217432			2415	58.7229	20.8756	24.7503	10.5396	29.3371	57.7724
2348	398	49.308	18.7168	21.9523	9.86908	25.7413	48.5601		2416	0.00217633	0.0013602	0.00149475	0.000819367	0.00162902	0.00216347			2416	58.8516	20.9042	24.7875	10.5483	29.3852	57.8983
2349	399	49.4592	18.7526	21.9985	9.88045	25.8003	48.7081		2417	0.00216547	0.00135342	0.00148729	0.00081528	0.00162089	0.00215268			2417	58.9799	20.9327	24.8246	10.557	29.4331	58.0238
2350	400	49.6101	18.7884	22.0445	9.89178	25.8592	48.8559		2418	0.00215467	0.00134667	0.00147987	0.000811214	0.00161281	0.00214195			2418	59.1079	20.961	24.8616	10.5656	29.4809	58.149
2351	401	49.7608	18.824	22.0904	9.90307	25.918	49.0033		2419	0.00214393	0.00133995	0.00147249	0.000807168	0.00160477	0.00213126			2419	59.2356	20.9893	24.8985	10.5742	29.5285	58.2738
2352	402	49.9111	18.8595	22.1362	9.91431	25.9765	49.1505		2420	0.00213323	0.00133327	0.00146515	0.000803142	0.00159676	0.00212063			2420	59.3628	21.0175	24.9352	10.5827	29.576	58.3983
2353	403	50.0611	18.8949	22.1819	9.92551	26.0349	49.2974		2421	0.00212259	0.00132662	0.00145784	0.000799137	0.0015888	0.00211006			2421	59.4897	21.0455	24.9718	10.5912	29.6233	58.5224
2354	404	50.2109	18.9302	22.2274	9.93667	26.0932	49.444		2422	0.00211201	0.00132	0.00145057	0.000795151	0.00158087	0.00209953			2422	59.6163	21.0735	25.0082	10.5997	29.6704	58.6461
2355	405	50.3603	18.9653	22.2728	9.94778	26.1513	49.5902		2423	0.00210147	0.00131342	0.00144333	0.000791185	0.00157299	0.00208906			2423	59.7425	21.1013	25.0446	10.6081	29.7174	58.7695
2356	406	50.5094	19.0004	22.3181	9.95885	26.2092	49.7362		2424	0.00209099	0.00130687	0.00143614	0.000787239	0.00156514	0.00207864			2424	59.8683	21.1291	25.0808	10.6165	29.7642	58.8926
2357	407	50.6583	19.0353	22.3632	9.96988	26.2669	49.8819		2425	0.00208056	0.00130035	0.00142897	0.000783313	0.00155734	0.00206828			2425	59.9937	21.1567	25.1168	10.6249	29.8109	59.0152
2358	408	50.8068	19.0702	22.4082	9.98086	26.3245	50.0273		2426	0.00207019	0.00129387	0.00142185	0.000779406	0.00154957	0.00205796			2426	60.1188	21.1843	25.1528	10.6332	29.8574	59.1375
2359	409	50.955	19.1049	22.453	9.99181	26.382	50.1723		2427	0.00205986	0.00128741	0.00141475	0.000775519	0.00154184	0.0020477			2427	60.2435	21.2117	25.1886	10.6415	29.9037	59.2595
2360	410	51.1029	19.1395	22.4978	10.0027	26.4392	50.3171		2428	0.00204959	0.00128099	0.0014077	0.000771651	0.00153415	0.00203748			2428	60.3679	21.2391	25.2243	10.6498	29.9499	59.3811
2361	411	51.2504	19.174	22.5423	10.0136	26.4964	50.4615		2429	0.00203937	0.0012746	0.00140068	0.000767802	0.0015265	0.00202732			2429	60.4919	21.2663	25.2598	10.658	29.9959	59.5023
2362	412	51.3977	19.2084	22.5868	10.0244	26.5533	50.6057		2430	0.0020292	0.00126825	0.00139369	0.000763973	0.00151889	0.00201721			2430	60.6155	21.2935	25.2953	10.6662	30.0418	59.6232
2363	413	51.5447	19.2427	22.6311	10.0351	26.6101	50.7495		2431	0.00201907	0.00126192	0.00138674	0.000760162	0.00151131	0.00200715			2431	60.7387	21.3205	25.3306	10.6743	30.0875	59.7437
2364	414	51.6913	19.2769	22.6753	10.0459	26.6667	50.893		2432	0.002009	0.00125563	0.00137982	0.000756371	0.00150377	0.00199714			2432	60.8616	21.3474	25.3657	10.6824	30.133	59.8639
2365	415	51.8376	19.311	22.7193	10.0566	26.7232	51.0362		2433	0.00199898	0.00124936	0.00137294	0.000752599	0.00149627	0.00198718			2433	60.9841	21.3743	25.4008	10.6905	30.1784	59.9837
2366	416	51.9836	19.3449	22.7632	10.0672	26.7795	51.1791		2434	0.00198901	0.00124313	0.00136609	0.000748845	0.00148881	0.00197727			2434	61.1063	21.401	25.4357	10.6986	30.2236	60.1031
2367	417	52.1293	19.3788	22.807	10.0778	26.8356	51.3217		2435	0.00197909	0.00123693	0.00135928	0.00074511	0.00148139	0.0019674			2435	61.2281	21.4276	25.4705	10.7066	30.2687	60.2222
2368	418	52.2746	19.4125	22.8506	10.0884	26.8916	51.4639		2436	0.00196922	0.00123076	0.0013525	0.000741394	0.001474	0.00195759			2436	61.3495	21.4542	25.5052	10.7146	30.3136	60.3409
2369	419	52.4196	19.4461	22.8941	10.0989	26.9474	51.6059		2437	0.0019594	0.00122463	0.00134576	0.000737696	0.00146665	0.00194783			2437	61.4705	21.4806	25.5397	10.7225	30.3583	60.4592
2370	420	52.5643	19.4796	22.9375	10.1094	27.003	51.7475		2438	0.00194963	0.00121852	0.00133904	0.000734017	0.00145933	0.00193811			2438	61.5912	21.507	25.5741	10.7304	30.4029	60.5772
2371	421	52.7087	19.513	22.9807	10.1198	27.0585	51.8888		2439	0.00193991	0.00121244	0.00133237	0.000730356	0.00145205	0.00192845			2439	61.7115	21.5332	25.6084	10.7383	30.4474	60.6949
2372	422	52.8528	19.5463	23.0238	10.1302	27.1138	52.0297		2440	0.00193023	0.00120639	0.00132572	0.000726713	0.00144481	0.00191883			2440	61.8315	21.5593	25.6426	10.7462	30.4916	60.8121
2373	423	52.9965	19.5795	23.0668	10.1405	27.169	52.1704		2441	0.0019206	0.00120038	0.00131911	0.000723089	0.0014376	0.00190926			2441	61.951	21.5854	25.6766	10.754	30.5358	60.9291
2374	424	53.1399	19.6126	23.1096	10.1509	27.2239	52.3107		2442	0.00191102	0.00119439	0.00131253	0.000719482	0.00143043	0.00189974			2442	62.0703	21.6113	25.7105	10.7618	30.5797	61.0456
2375	425	53.2829	19.6456	23.1523	10.1611	27.2788	52.4507		2443	0.00190149	0.00118843	0.00130598	0.000715894	0.0014233	0.00189026			2443	62.1891	21.6372	25.7443	10.7695	30.6235	61.1618
2376	426	53.4257	19.6784	23.1949	10.1714	27.3334	52.5903		2444	0.00189201	0.0011825	0.00129947	0.000712323	0.0014162	0.00188083			2444	62.3076	21.6629	25.778	10.7772	30.6672	61.2776
2377	427	53.5681	19.7112	23.2373	10.1816	27.3879	52.7297		2445	0.00188257	0.00117661	0.00129299	0.000708771	0.00140914	0.00187145			2445	62.4257	21.6886	25.8115	10.7849	30.7107	61.3931
2378	428	53.7101	19.7438	23.2796	10.1917	27.4422	52.8687		2446	0.00187318	0.00117074	0.00128654	0.000705236	0.00140211	0.00186212			2446	62.5434	21.7141	25.845	10.7926	30.754	61.5082
2379	429	53.8518	19.7763	23.3218	10.2018	27.4964	53.0074		2447	0.00186384	0.0011649	0.00128012	0.000701718	0.00139512	0.00185283			2447	62.6608	21.7396	25.8783	10.8002	30.7972	61.623
2380	430	53.9932	19.8088	23.3638	10.2119	27.5504	53.1457		2448	0.00185455	0.00115909	0.00127374	0.000698218	0.00138816	0.00184359			2448	62.7778	21.7649	25.9114	10.8078	30.8402	61.7374
2381	431	54.1343	19.8411	23.4057	10.2219	27.6042	53.2837		2449	0.0018453	0.00115331	0.00126738	0.000694736	0.00138124	0.0018344			2449	62.8945	21.7902	25.9445	10.8153	30.8831	61.8514
2382	432	54.275	19.8733	23.4474	10.2319	27.6579	53.4214		2450	0.00183609	0.00114756	0.00126106	0.000691271	0.00137435	0.00182525			2450	63.0107	21.8153	25.9774	10.8228	30.9258	61.9651
2383	433	54.4154	19.9054	23.489	10.2418	27.7114	53.5587		2451	0.00182693	0.00114183	0.00125477	0.000687823	0.00136749	0.00181614			2451	63.1266	21.8404	26.0102	10.8303	30.9684	62.0784
2384	434	54.5554	19.9373	23.5305	10.2517	27.7648	53.6958		2452	0.00181782	0.00113614	0.00124852	0.000684393	0.00136067	0.00180709			2452	63.2422	21.8654	26.0429	10.8378	31.0108	62.1913
2385	435	54.6951	19.9692	23.5719	10.2616	27.8179	53.8324		2453	0.00180876	0.00113047	0.00124229	0.000680979	0.00135389	0.00179807			2453	63.3573	21.8902	26.0754	10.8452	31.053	62.3039
2386	436	54.8344	20.001	23.6131	10.2714	27.871	53.9688		2454	0.00179973	0.00112483	0.00123609	0.000677583	0.00134713	0.0017891			2454	63.4722	21.915	26.1079	10.8526	31.0951	62.4161
2387	437	54.9734	20.0326	23.6541	10.2812	27.9238	54.1048		2455	0.00179076	0.00111922	0.00122993	0.000674203	0.00134041	0.00178018			2455	63.5866	21.9397	26.1402	10.86	31.1371	62.528
2388	438	55.1121	20.0642	23.6951	10.291	27.9765	54.2404		2456	0.00178183	0.00111364	0.00122379	0.000670841	0.00133373	0.0017713			2456	63.7007	21.9643	26.1724	10.8673	31.1789	62.6395
2389	439	55.2504	20.0956	23.7359	10.3007	28.029	54.3757		2457	0.00177294	0.00110809	0.00121769	0.000667495	0.00132708	0.00176247			2457	63.8144	21.9887	26.2044	10.8746	31.2205	62.7507
2390	440	55.3884	20.127	23.7766	10.3104	28.0814	54.5107		2458	0.0017641	0.00110256	0.00121162	0.000664166	0.00132046	0.00175368			2458	63.9277	22.0131	26.2364	10.8818	31.262	62.8614
2391	441	55.526	20.1582	23.8171	10.32	28.1336	54.6454		2459	0.0017553	0.00109706	0.00120557	0.000660853	0.00131387	0.00174493			2459	64.0407	22.0374	26.2682	10.8891	31.3033	62.9719
2392	442	55.6633	20.1893	23.8575	10.3296	28.1856	54.7797		2460	0.00174654	0.00109159	0.00119956	0.000657557	0.00130732	0.00173623			2460	64.1533	22.0616	26.2999	10.8963	31.3445	63.082
2393	443	55.8002	20.2203	23.8978	10.3391	28.2375	54.9136		2461	0.00173783	0.00108615	0.00119358	0.000654278	0.0013008	0.00172757			2461	64.2655	22.0857	26.3315	10.9034	31.3855	63.1917
2394	444	55.9367	20.2512	23.938	10.3486	28.2892	55.0472		2462	0.00172917	0.00108073	0.00118763	0.000651014	0.00129431	0.00171895			2462	64.3774	22.1098	26.363	10.9106	31.4264	63.301
2395	445	56.073	20.282	23.978	10.3581	28.3407	55.1805		2463	0.00172054	0.00107534	0.0011817	0.000647768	0.00128786	0.00171038			2463	64.4889	22.1337	26.3943	10.9177	31.4671	63.41
2396	446	56.2088	20.3127	24.0178	10.3675	28.3921	55.3134		2464	0.00171196	0.00106997	0.00117581	0.000644537	0.00128143	0.00170185			2464	64.6001	22.1575	26.4255	10.9248	31.5077	63.5187
2397	447	56.3444	20.3433	24.0576	10.3769	28.4433	55.446		2465	0.00170342	0.00106464	0.00116994	0.000641322	0.00127504	0.00169336			2465	64.7109	22.1812	26.4566	10.9318	31.5481	63.6269
2398	448	56.4795	20.3738	24.0972	10.3863	28.4943	55.5782		2466	0.00169493	0.00105933	0.00116411	0.000638124	0.00126868	0.00168492			2466	64.8213	22.2049	26.4876	10.9388	31.5884	63.7349
2399	449	56.6143	20.4041	24.1367	10.3956	28.5452	55.7101		2467	0.00168647	0.00105404	0.0011583	0.000634941	0.00126235	0.00167651			2467	64.9313	22.2284	26.5185	10.9458	31.6285	63.8424
2400	450	56.7488	20.4344	24.176	10.4049	28.5959	55.8416		2468	0.00167806	0.00104879	0.00115253	0.000631774	0.00125606	0.00166815			2468	65.041	22.2519	26.5493	10.9528	31.6685	63.9497
2401	451	56.8829	20.4646	24.2152	10.4141	28.6465	55.9728		2469	0.00166969	0.00104356	0.00114678	0.000628623	0.00124979	0.00165983			2469	65.1503	22.2752	26.5799	10.9597	31.7084	64.0565
2402	452	57.0167	20.4946	24.2543	10.4234	28.6969	56.1036		2470	0.00166136	0.00103835	0.00114106	0.000625488	0.00124356	0.00165155			2470	65.2593	22.2985	26.6104	10.9666	31.748	64.163
2403	453	57.1501	20.5245	24.2932	10.4325	28.7471	56.2341		2471	0.00165308	0.00103317	0.00113537	0.000622368	0.00123736	0.00164331			2471	65.3679	22.3217	26.6408	10.9734	31.7876	64.2692
2404	454	57.2831	20.5544	24.3321	10.4416	28.7971	56.3642		2472	0.00164483	0.00102802	0.0011297	0.000619264	0.00123119	0.00163512			2472	65.4761	22.3448	26.6711	10.9803	31.8269	64.3749
2405	455	57.4158	20.5841	24.3707	10.4507	28.847	56.494		2473	0.00163663	0.00102289	0.00112407	0.000616176	0.00122505	0.00162696			2473	65.584	22.3678	26.7013	10.9871	31.8662	64.4804
2406	456	57.5481	20.6137	24.4093	10.4598	28.8968	56.6234		2474	0.00162847	0.00101779	0.00111846	0.000613102	0.00121894	0.00161885			2474	65.6915	22.3907	26.7313	10.9939	31.9053	64.5855
2407	457	57.6801	20.6432	24.4477	10.4688	28.9463	56.7525		2475	0.00162035	0.00101271	0.00111288	0.000610044	0.00121286	0.00161077			2475	65.7987	22.4135	26.7612	11.0006	31.9442	64.6902
2408	458	57.8117	20.6727	24.486	10.4778	28.9958	56.8812		2476	0.00161226	0.00100766	0.00110733	0.000607002	0.00120681	0.00160274			2476	65.9055	22.4362	26.791	11.0073	31.983	64.7945
2409	459	57.9429	20.702	24.5241	10.4867	29.045	57.0096		2477	0.00160422	0.00100264	0.00110181	0.000603974	0.00120079	0.00159475			2477	66.0119	22.4588	26.8207	11.014	32.0216	64.8986
2410	460	58.0738	20.7312	24.5622	10.4956	29.0941	57.1376		2478	0.00159622	0.000997638	0.00109632	0.000600962	0.0011948	0.00158679			2478	66.118	22.4814	26.8503	11.0207	32.0601	65.0022
2411	461	58.2044	20.7603	24.6	10.5045	29.143	57.2653		2479	0.00158826	0.000992662	0.00109085	0.000597965	0.00118884	0.00157888			2479	66.2237	22.5038	26.8798	11.0273	32.0985	65.1055
2412	462	58.3345	20.7893	24.6378	10.5133	29.1918	57.3926		2480	0.00158034	0.000987711	0.00108541	0.000594982	0.00118291	0.001571			2480	66.329	22.5262	26.9092	11.0339	32.1367	65.2085
2413	463	58.4643	20.8182	24.6754	10.5221	29.2404	57.5196		2481	0.00157246	0.000982785	0.00107999	0.000592015	0.00117701	0.00156317			2481	66.434	22.5485	26.9384	11.0405	32.1747	65.3111
2414	464	58.5938	20.8469	24.7129	10.5309	29.2888	57.6462		2482	0.00156461	0.000977883	0.00107461	0.000589062	0.00117114	0.00155537			2482	66.5386	22.5706	26.9675	11.047	32.2127	65.4133
2415	465	58.7229	20.8756	24.7503	10.5396	29.3371	57.7724		2483	0.00155681	0.000973006	0.00106925	0.000586124	0.0011653	0.00154762			2483	66.6429	22.5927	26.9965	11.0535	32.2504	65.5152
2416	466	58.8516	20.9042	24.7875	10.5483	29.3852	57.8983		2484	0.00154905	0.000968153	0.00106392	0.000583201	0.00115949	0.0015399			2484	66.7468	22.6147	27.0254	11.06	32.2881	65.6168
2417	467	58.9799	20.9327	24.8246	10.557	29.4331	58.0238		2485	0.00154132	0.000963324	0.00105861	0.000580292	0.0011537	0.00153222			2485	66.8504	22.6367	27.0542	11.0664	32.3255	65.718
2418	468	59.1079	20.961	24.8616	10.5656	29.4809	58.149		2486	0.00153363	0.00095852	0.00105333	0.000577398	0.00114795	0.00152457			2486	66.9536	22.6585	27.0829	11.0729	32.3629	65.8188
2419	469	59.2356	20.9893	24.8985	10.5742	29.5285	58.2738		2487	0.00152598	0.000953739	0.00104808	0.000574518	0.00114223	0.00151697			2487	67.0564	22.6802	27.1114	11.0793	32.4001	65.9193
2420	470	59.3628	21.0175	24.9352	10.5827	29.576	58.3983		2488	0.00151837	0.000948982	0.00104285	0.000571653	0.00113653	0.0015094			2488	67.1589	22.7019	27.1399	11.0856	32.4371	66.0195
2421	471	59.4897	21.0455	24.9718	10.5912	29.6233	58.5224		2489	0.0015108	0.000944249	0.00103765	0.000568802	0.00113086	0.00150188			2489	67.261	22.7234	27.1682	11.092	32.474	66.1193
2422	472	59.6163	21.0735	25.0082	10.5997	29.6704	58.6461		2490	0.00150326	0.00093954	0.00103247	0.000565965	0.00112522	0.00149439			2490	67.3628	22.7449	27.1964	11.0983	32.5108	66.2187
2423	473	59.7425	21.1013	25.0446	10.6081	29.7174	58.7695
2424	474	59.8683	21.1291	25.0808	10.6165	29.7642	58.8926
2425	475	59.9937	21.1567	25.1168	10.6249	29.8109	59.0152
2426	476	60.1188	21.1843	25.1528	10.6332	29.8574	59.1375
2427	477	60.2435	21.2117	25.1886	10.6415	29.9037	59.2595
2428	478	60.3679	21.2391	25.2243	10.6498	29.9499	59.3811
2429	479	60.4919	21.2663	25.2598	10.658	29.9959	59.5023
2430	480	60.6155	21.2935	25.2953	10.6662	30.0418	59.6232
2431	481	60.7387	21.3205	25.3306	10.6743	30.0875	59.7437
2432	482	60.8616	21.3474	25.3657	10.6824	30.133	59.8639
2433	483	60.9841	21.3743	25.4008	10.6905	30.1784	59.9837
2434	484	61.1063	21.401	25.4357	10.6986	30.2236	60.1031
2435	485	61.2281	21.4276	25.4705	10.7066	30.2687	60.2222
2436	486	61.3495	21.4542	25.5052	10.7146	30.3136	60.3409
2437	487	61.4705	21.4806	25.5397	10.7225	30.3583	60.4592
2438	488	61.5912	21.507	25.5741	10.7304	30.4029	60.5772
2439	489	61.7115	21.5332	25.6084	10.7383	30.4474	60.6949
2440	490	61.8315	21.5593	25.6426	10.7462	30.4916	60.8121
2441	491	61.951	21.5854	25.6766	10.754	30.5358	60.9291
2442	492	62.0703	21.6113	25.7105	10.7618	30.5797	61.0456
2443	493	62.1891	21.6372	25.7443	10.7695	30.6235	61.1618
2444	494	62.3076	21.6629	25.778	10.7772	30.6672	61.2776
2445	495	62.4257	21.6886	25.8115	10.7849	30.7107	61.3931
2446	496	62.5434	21.7141	25.845	10.7926	30.754	61.5082
2447	497	62.6608	21.7396	25.8783	10.8002	30.7972	61.623
2448	498	62.7778	21.7649	25.9114	10.8078	30.8402	61.7374
2449	499	62.8945	21.7902	25.9445	10.8153	30.8831	61.8514
2450	500	63.0107	21.8153	25.9774	10.8228	30.9258	61.9651
2451	501	63.1266	21.8404	26.0102	10.8303	30.9684	62.0784
2452	502	63.2422	21.8654	26.0429	10.8378	31.0108	62.1913
2453	503	63.3573	21.8902	26.0754	10.8452	31.053	62.3039
2454	504	63.4722	21.915	26.1079	10.8526	31.0951	62.4161
2455	505	63.5866	21.9397	26.1402	10.86	31.1371	62.528
2456	506	63.7007	21.9643	26.1724	10.8673	31.1789	62.6395
2457	507	63.8144	21.9887	26.2044	10.8746	31.2205	62.7507
2458	508	63.9277	22.0131	26.2364	10.8818	31.262	62.8614
2459	509	64.0407	22.0374	26.2682	10.8891	31.3033	62.9719
2460	510	64.1533	22.0616	26.2999	10.8963	31.3445	63.082
2461	511	64.2655	22.0857	26.3315	10.9034	31.3855	63.1917
2462	512	64.3774	22.1098	26.363	10.9106	31.4264	63.301
2463	513	64.4889	22.1337	26.3943	10.9177	31.4671	63.41
2464	514	64.6001	22.1575	26.4255	10.9248	31.5077	63.5187
2465	515	64.7109	22.1812	26.4566	10.9318	31.5481	63.6269
2466	516	64.8213	22.2049	26.4876	10.9388	31.5884	63.7349
2467	517	64.9313	22.2284	26.5185	10.9458	31.6285	63.8424
2468	518	65.041	22.2519	26.5493	10.9528	31.6685	63.9497
2469	519	65.1503	22.2752	26.5799	10.9597	31.7084	64.0565
2470	520	65.2593	22.2985	26.6104	10.9666	31.748	64.163
2471	521	65.3679	22.3217	26.6408	10.9734	31.7876	64.2692
2472	522	65.4761	22.3448	26.6711	10.9803	31.8269	64.3749
2473	523	65.584	22.3678	26.7013	10.9871	31.8662	64.4804
2474	524	65.6915	22.3907	26.7313	10.9939	31.9053	64.5855
2475	525	65.7987	22.4135	26.7612	11.0006	31.9442	64.6902
2476	526	65.9055	22.4362	26.791	11.0073	31.983	64.7945
2477	527	66.0119	22.4588	26.8207	11.014	32.0216	64.8986
2478	528	66.118	22.4814	26.8503	11.0207	32.0601	65.0022
2479	529	66.2237	22.5038	26.8798	11.0273	32.0985	65.1055
2480	530	66.329	22.5262	26.9092	11.0339	32.1367	65.2085
2481	531	66.434	22.5485	26.9384	11.0405	32.1747	65.3111
2482	532	66.5386	22.5706	26.9675	11.047	32.2127	65.4133
2483	533	66.6429	22.5927	26.9965	11.0535	32.2504	65.5152
2484	534	66.7468	22.6147	27.0254	11.06	32.2881	65.6168
2485	535	66.8504	22.6367	27.0542	11.0664	32.3255	65.718
2486	536	66.9536	22.6585	27.0829	11.0729	32.3629	65.8188
2487	537	67.0564	22.6802	27.1114	11.0793	32.4001	65.9193
2488	538	67.1589	22.7019	27.1399	11.0856	32.4371	66.0195
2489	539	67.261	22.7234	27.1682	11.092	32.474	66.1193
2490	540	67.3628	22.7449	27.1964	11.0983	32.5108	66.2187
2491
2492
2493
2494
2495
2496
2497
2498
2499
2500

## Sheet: TFP_Howard_Sterner
		Sterner							gA	DICE	SSP1	SSP2	SSP3	SSP4	SSP5				DICE	SSP1	SSP1	SSP3	SSP4	SSP5
1950	0	1.98217	1.98217	1.98217	1.98217	1.98217	1.98217			-0.005	-0.005	-0.005	-0.005	-0.005	-0.005
1951	1	2.01235	2.01235	2.01235	2.01235	2.01235	2.01235		2019	0.0158416	0.00990099	0.0108803	0.00596421	0.0118577	0.015748			2019	3.78081	3.78081	3.78081	3.78081	3.78081	3.78081
1952	2	2.00409	2.00409	2.00409	2.00409	2.00409	2.00409		2020	0.0157626	0.00985161	0.0108261	0.00593446	0.0117986	0.0156695			2020	3.84167	3.81862	3.8224	3.8035	3.82618	3.84131
1953	3	2.02237	2.02237	2.02237	2.02237	2.02237	2.02237		2021	0.015684	0.00980247	0.0107721	0.00590487	0.0117397	0.0155913			2021	3.90319	3.85661	3.86424	3.8262	3.87186	3.90245
1954	4	1.99945	1.99945	1.99945	1.99945	1.99945	1.99945		2022	0.0156057	0.00975358	0.0107183	0.00587541	0.0116812	0.0155136			2022	3.96539	3.89479	3.90631	3.84893	3.91786	3.96426
1955	5	2.03712	2.03712	2.03712	2.03712	2.03712	2.03712		2023	0.0155279	0.00970494	0.0106649	0.00584611	0.0116229	0.0154362			2023	4.02825	3.93316	3.94864	3.87168	3.96417	4.02673
1956	6	2.03949	2.03949	2.03949	2.03949	2.03949	2.03949		2024	0.0154505	0.00965653	0.0106117	0.00581695	0.0115649	0.0153592			2024	4.09179	3.9717	3.9912	3.89445	4.01078	4.08986
1957	7	2.03901	2.03901	2.03901	2.03901	2.03901	2.03901		2025	0.0153734	0.00960837	0.0105588	0.00578794	0.0115073	0.0152826			2025	4.156	4.01043	4.03401	3.91723	4.05771	4.15366
1958	8	2.01829	2.01829	2.01829	2.01829	2.01829	2.01829		2026	0.0152967	0.00956045	0.0105061	0.00575907	0.0114499	0.0152064			2026	4.22089	4.04933	4.07706	3.94004	4.10495	4.21812
1959	9	2.03644	2.03644	2.03644	2.03644	2.03644	2.03644		2027	0.0152204	0.00951277	0.0104537	0.00573035	0.0113928	0.0151305			2027	4.28646	4.08842	4.12035	3.96286	4.15249	4.28326
1960	10	2.06141	2.06141	2.06141	2.06141	2.06141	2.06141		2028	0.0151445	0.00946532	0.0104016	0.00570177	0.0113359	0.0150551			2028	4.35271	4.12769	4.16388	3.9857	4.20035	4.34906
1961	11	2.05674	2.05674	2.05674	2.05674	2.05674	2.05674		2029	0.015069	0.00941811	0.0103497	0.00567333	0.0112794	0.01498			2029	4.41964	4.16713	4.20764	4.00855	4.24851	4.41554
1962	12	2.08383	2.08383	2.08383	2.08383	2.08383	2.08383		2030	0.0149938	0.00937114	0.0102981	0.00564504	0.0112231	0.0149053			2030	4.48726	4.20675	4.25165	4.03143	4.29697	4.48269
1963	13	2.11737	2.11737	2.11737	2.11737	2.11737	2.11737		2031	0.0149191	0.0093244	0.0102467	0.00561688	0.0111672	0.0148309			2031	4.55557	4.24655	4.29588	4.05431	4.34575	4.55051
1964	14	2.17051	2.17051	2.17051	2.17051	2.17051	2.17051		2032	0.0148446	0.0092779	0.0101956	0.00558887	0.0111115	0.014757			2032	4.62456	4.28651	4.34036	4.07721	4.39482	4.61902
1965	15	2.20068	2.20068	2.20068	2.20068	2.20068	2.20068		2033	0.0147706	0.00923162	0.0101447	0.00556099	0.0110561	0.0146834			2033	4.69425	4.32666	4.38507	4.10013	4.44421	4.6882
1966	16	2.22489	2.22489	2.22489	2.22489	2.22489	2.22489		2034	0.0146969	0.00918558	0.0100941	0.00553326	0.0110009	0.0146101			2034	4.76462	4.36697	4.43001	4.12306	4.49389	4.75807
1967	17	2.22803	2.22803	2.22803	2.22803	2.22803	2.22803		2035	0.0146236	0.00913977	0.0100438	0.00550566	0.010946	0.0145373			2035	4.83569	4.40746	4.47518	4.146	4.54388	4.82861
1968	18	2.26872	2.26872	2.26872	2.26872	2.26872	2.26872		2036	0.0145507	0.00909418	0.00999371	0.0054782	0.0108915	0.0144648			2036	4.90746	4.44811	4.52059	4.16895	4.59416	4.89984
1969	19	2.3182	2.3182	2.3182	2.3182	2.3182	2.3182		2037	0.0144781	0.00904882	0.00994386	0.00545088	0.0108371	0.0143926			2037	4.97992	4.48893	4.56622	4.19192	4.64475	4.97176
1970	20	2.32582	2.32582	2.32582	2.32582	2.32582	2.32582		2038	0.0144059	0.00900369	0.00989427	0.00542369	0.0107831	0.0143208			2038	5.05308	4.52992	4.61208	4.21489	4.69564	5.04436
1971	21	2.35294	2.35294	2.35294	2.35294	2.35294	2.35294		2039	0.0143341	0.00895879	0.00984492	0.00539664	0.0107293	0.0142494			2039	5.12694	4.57108	4.65817	4.23788	4.74683	5.11765
1972	22	2.39532	2.39532	2.39532	2.39532	2.39532	2.39532		2040	0.0142626	0.0089141	0.00979582	0.00536972	0.0106758	0.0141783			2040	5.20149	4.6124	4.70449	4.26087	4.79831	5.19163
1973	23	2.46237	2.46237	2.46237	2.46237	2.46237	2.46237		2041	0.0141914	0.00886964	0.00974696	0.00534294	0.0106225	0.0141076			2041	5.27675	4.65389	4.75103	4.28387	4.85009	5.2663
1974	24	2.44557	2.44557	2.44557	2.44557	2.44557	2.44557		2042	0.0141207	0.00882541	0.00969835	0.00531629	0.0105696	0.0140373			2042	5.35272	4.69554	4.79779	4.30688	4.90216	5.34165
1975	25	2.40061	2.40061	2.40061	2.40061	2.40061	2.40061		2043	0.0140502	0.00878139	0.00964998	0.00528978	0.0105168	0.0139672			2043	5.42938	4.73734	4.84478	4.3299	4.95453	5.4177
1976	26	2.44962	2.44962	2.44962	2.44962	2.44962	2.44962		2044	0.0139802	0.00873759	0.00960185	0.0052634	0.0104644	0.0138976			2044	5.50675	4.77931	4.89198	4.35293	5.00719	5.49445
1977	27	2.47452	2.47452	2.47452	2.47452	2.47452	2.47452		2045	0.0139104	0.00869401	0.00955396	0.00523715	0.0104122	0.0138283			2045	5.58483	4.82144	4.93941	4.37596	5.06014	5.57188
1978	28	2.50033	2.50033	2.50033	2.50033	2.50033	2.50033		2046	0.0138411	0.00865065	0.00950631	0.00521103	0.0103603	0.0137593			2046	5.66361	4.86373	4.98706	4.399	5.11338	5.65001
1979	29	2.52672	2.52672	2.52672	2.52672	2.52672	2.52672		2047	0.013772	0.00860751	0.0094589	0.00518504	0.0103086	0.0136907			2047	5.74311	4.90617	5.03492	4.42204	5.16691	5.72884
1980	30	2.51037	2.51037	2.51037	2.51037	2.51037	2.51037		2048	0.0137033	0.00856458	0.00941172	0.00515917	0.0102572	0.0136224			2048	5.8233	4.94876	5.083	4.44509	5.22073	5.80836
1981	31	2.48883	2.48883	2.48883	2.48883	2.48883	2.48883		2049	0.013635	0.00852186	0.00936478	0.00513344	0.010206	0.0135545			2049	5.90421	4.99151	5.13129	4.46814	5.27483	5.88857
1982	32	2.44199	2.44199	2.44199	2.44199	2.44199	2.44199		2050	0.013567	0.00847936	0.00931807	0.00510784	0.0101551	0.0134869			2050	5.98583	5.03442	5.1798	4.4912	5.32922	5.96949
1983	33	2.44987	2.44987	2.44987	2.44987	2.44987	2.44987		2051	0.0134993	0.00843707	0.0092716	0.00508236	0.0101045	0.0134196			2051	6.06815	5.07747	5.22852	4.51426	5.3839	6.0511
1984	34	2.50102	2.50102	2.50102	2.50102	2.50102	2.50102		2052	0.013432	0.00839499	0.00922535	0.00505702	0.0100541	0.0133527			2052	6.15119	5.12067	5.27745	4.53732	5.43885	6.1334
1985	35	2.52678	2.52678	2.52678	2.52678	2.52678	2.52678		2053	0.013365	0.00835312	0.00917934	0.00503179	0.0100039	0.0132861			2053	6.23494	5.16403	5.32659	4.56038	5.49409	6.21641
1986	36	2.55408	2.55408	2.55408	2.55408	2.55408	2.55408		2054	0.0132983	0.00831146	0.00913356	0.0050067	0.00995404	0.0132198			2054	6.3194	5.20753	5.37594	4.58344	5.54961	6.30011
1987	37	2.59225	2.59225	2.59225	2.59225	2.59225	2.59225		2055	0.013232	0.00827	0.00908801	0.00498173	0.00990439	0.0131539			2055	6.40457	5.25117	5.42549	4.60651	5.60541	6.38451
1988	38	2.64093	2.64093	2.64093	2.64093	2.64093	2.64093		2056	0.013166	0.00822876	0.00904268	0.00495688	0.00985499	0.0130883			2056	6.49045	5.29496	5.47525	4.62957	5.66148	6.46961
1989	39	2.66614	2.66614	2.66614	2.66614	2.66614	2.66614		2057	0.0131004	0.00818771	0.00899758	0.00493216	0.00980584	0.013023			2057	6.57704	5.33889	5.52522	4.65263	5.71783	6.55541
1990	40	2.68314	2.68314	2.68314	2.68314	2.68314	2.68314		2058	0.013035	0.00814688	0.0089527	0.00490756	0.00975693	0.012958			2058	6.66435	5.38297	5.57538	4.67569	5.77445	6.64191
1991	41	2.64696	2.64696	2.64696	2.64696	2.64696	2.64696		2059	0.01297	0.00810624	0.00890805	0.00488308	0.00970827	0.0128934			2059	6.75237	5.42718	5.62575	4.69875	5.83135	6.72911
1992	42	2.6286	2.6286	2.6286	2.6286	2.6286	2.6286		2060	0.0129053	0.00806581	0.00886362	0.00485873	0.00965985	0.0128291			2060	6.84109	5.47153	5.67631	4.72181	5.88852	6.817
1993	43	2.61993	2.61993	2.61993	2.61993	2.61993	2.61993		2061	0.012841	0.00802559	0.00881942	0.00483449	0.00961167	0.0127651			2061	6.93054	5.51603	5.72707	4.74486	5.94595	6.90559
1994	44	2.64098	2.64098	2.64098	2.64098	2.64098	2.64098		2062	0.0127769	0.00798556	0.00877543	0.00481038	0.00956373	0.0127014			2062	7.02069	5.56065	5.77803	4.76791	6.00366	6.99488
1995	45	2.67448	2.67448	2.67448	2.67448	2.67448	2.67448		2063	0.0127132	0.00794573	0.00873166	0.00478639	0.00951604	0.0126381			2063	7.11155	5.60542	5.82919	4.79096	6.06163	7.08487
1996	46	2.72343	2.72343	2.72343	2.72343	2.72343	2.72343		2064	0.0126498	0.0079061	0.00868811	0.00476252	0.00946857	0.0125751			2064	7.20313	5.65031	5.88053	4.814	6.11987	7.17556
1997	47	2.77405	2.77405	2.77405	2.77405	2.77405	2.77405		2065	0.0125867	0.00786667	0.00864478	0.00473877	0.00942135	0.0125123			2065	7.29541	5.69534	5.93207	4.83704	6.17837	7.26694
1998	48	2.7792	2.7792	2.7792	2.7792	2.7792	2.7792		2066	0.0125239	0.00782743	0.00860166	0.00471513	0.00937436	0.0124499			2066	7.38841	5.7405	5.9838	4.86007	6.23713	7.35902
1999	49	2.82287	2.82287	2.82287	2.82287	2.82287	2.82287		2067	0.0124614	0.00778839	0.00855876	0.00469161	0.00932761	0.0123878			2067	7.48211	5.78579	6.03572	4.88309	6.29615	7.45179
2000	50	2.90058	2.90058	2.90058	2.90058	2.90058	2.90058		2068	0.0123993	0.00774955	0.00851608	0.00466821	0.00928108	0.0123261			2068	7.57653	5.8312	6.08782	4.90611	6.35543	7.54526
2001	51	2.91558	2.91558	2.91558	2.91558	2.91558	2.91558		2069	0.0123375	0.0077109	0.0084736	0.00464493	0.00923479	0.0122646			2069	7.67165	5.87674	6.14011	4.92912	6.41497	7.63943
2002	52	2.9492	2.9492	2.9492	2.9492	2.9492	2.9492		2070	0.0122759	0.00767244	0.00843134	0.00462176	0.00918874	0.0122034			2070	7.76748	5.92241	6.19258	4.95212	6.47476	7.73428
2003	53	3.00582	3.00582	3.00582	3.00582	3.00582	3.00582		2071	0.0122147	0.00763417	0.00838929	0.00459871	0.00914291	0.0121425			2071	7.86402	5.9682	6.24524	4.97512	6.53481	7.82983
2004	54	3.10687	3.10687	3.10687	3.10687	3.10687	3.10687		2072	0.0121538	0.0075961	0.00834745	0.00457578	0.00909731	0.012082			2072	7.96126	6.01411	6.29808	4.9981	6.59511	7.92608
2005	55	3.18927	3.18927	3.18927	3.18927	3.18927	3.18927		2073	0.0120932	0.00755821	0.00830581	0.00455296	0.00905193	0.0120217			2073	8.05921	6.06015	6.35109	5.02108	6.65566	8.02301
2006	56	3.28947	3.28947	3.28947	3.28947	3.28947	3.28947		2074	0.0120328	0.00752052	0.00826439	0.00453025	0.00900679	0.0119618			2074	8.15787	6.1063	6.40429	5.04404	6.71646	8.12064
2007	57	3.38163	3.38163	3.38163	3.38163	3.38163	3.38163		2075	0.0119728	0.00748301	0.00822317	0.00450765	0.00896186	0.0119021			2075	8.25723	6.15257	6.45765	5.067	6.7775	8.21895
2008	58	3.39242	3.39242	3.39242	3.39242	3.39242	3.39242		2076	0.0119131	0.00744569	0.00818216	0.00448517	0.00891717	0.0118427			2076	8.35729	6.19896	6.5112	5.08994	6.83879	8.31795
2009	59	3.30752	3.30752	3.30752	3.30752	3.30752	3.30752		2077	0.0118537	0.00740855	0.00814135	0.0044628	0.00887269	0.0117837			2077	8.45805	6.24546	6.56491	5.11287	6.90032	8.41764
2010	60	3.42206	3.42206	3.42206	3.42206	3.42206	3.42206		2078	0.0117946	0.0073716	0.00810074	0.00444054	0.00882844	0.0117249			2078	8.55951	6.29208	6.6188	5.13579	6.96209	8.51801
2011	61	3.48624	3.48624	3.48624	3.48624	3.48624	3.48624		2079	0.0117357	0.00733483	0.00806034	0.0044184	0.00878441	0.0116664			2079	8.66167	6.3388	6.67285	5.1587	7.0241	8.61907
2012	62	3.50518	3.50518	3.50518	3.50518	3.50518	3.50518		2080	0.0116772	0.00729825	0.00802014	0.00439636	0.0087406	0.0116082			2080	8.76453	6.38564	6.72707	5.18159	7.08635	8.72081
2013	63	3.55437	3.55437	3.55437	3.55437	3.55437	3.55437		2081	0.011619	0.00726185	0.00798014	0.00437443	0.008697	0.0115503			2081	8.86808	6.43259	6.78146	5.20448	7.14884	8.82323
2014	64	3.60962	3.60962	3.60962	3.60962	3.60962	3.60962		2082	0.011561	0.00722563	0.00794034	0.00435261	0.00865362	0.0114927			2082	8.97233	6.47964	6.83602	5.22734	7.21156	8.92633
2015	65	3.6471	3.6471	3.6471	3.6471	3.6471	3.6471		2083	0.0115034	0.00718959	0.00790073	0.00433091	0.00861046	0.0114354			2083	9.07727	6.5268	6.89073	5.25019	7.27451	9.03011
2016	66	3.68285	3.68285	3.68285	3.68285	3.68285	3.68285		2084	0.011446	0.00715374	0.00786133	0.0043093	0.00856752	0.0113784			2084	9.18291	6.57407	6.94561	5.27303	7.33769	9.13457
2017	67	3.73254	3.73254	3.73254	3.73254	3.73254	3.73254		2085	0.0113889	0.00711806	0.00782212	0.00428781	0.00852479	0.0113216			2085	9.28923	6.62143	7.00064	5.29585	7.4011	9.23971
2018	68	3.76002	3.76002	3.76002	3.76002	3.76002	3.76002		2086	0.0113321	0.00708256	0.00778311	0.00426643	0.00848227	0.0112652			2086	9.39625	6.6689	7.05583	5.31866	7.46473	9.34551
2019	69	3.78081	3.78081	3.78081	3.78081	3.78081	3.78081		2087	0.0112756	0.00704723	0.00774429	0.00424515	0.00843997	0.011209			2087	9.50395	6.71647	7.11118	5.34145	7.52859	9.45199
2020	70	3.84167	3.81862	3.8224	3.8035	3.82618	3.84131		2088	0.0112193	0.00701208	0.00770566	0.00422397	0.00839787	0.0111531			2088	9.61233	6.76414	7.16668	5.36422	7.59267	9.55914
2021	71	3.90319	3.85661	3.86424	3.8262	3.87186	3.90245		2089	0.0111634	0.00697711	0.00766723	0.00420291	0.00835599	0.0110974			2089	9.7214	6.81191	7.22233	5.38697	7.65698	9.66695
2022	72	3.96539	3.89479	3.90631	3.84893	3.91786	3.96426		2090	0.0111077	0.00694231	0.00762899	0.00418195	0.00831431	0.0110421			2090	9.83115	6.85977	7.27814	5.40971	7.7215	9.77544
2023	73	4.02825	3.93316	3.94864	3.87168	3.96417	4.02673		2091	0.0110523	0.00690769	0.00759094	0.00416109	0.00827284	0.010987			2091	9.94157	6.90772	7.33409	5.43243	7.78623	9.88458
2024	74	4.09179	3.9717	3.9912	3.89445	4.01078	4.08986		2092	0.0109972	0.00687323	0.00755308	0.00414033	0.00823158	0.0109322			2092	10.0527	6.95577	7.39019	5.45513	7.85119	9.99439
2025	75	4.156	4.01043	4.03401	3.91723	4.05771	4.15366		2093	0.0109423	0.00683895	0.00751541	0.00411968	0.00819053	0.0108777			2093	10.1645	7.00391	7.44643	5.47781	7.91635	10.1049
2026	76	4.22089	4.04933	4.07706	3.94004	4.10495	4.21812		2094	0.0108878	0.00680484	0.00747793	0.00409914	0.00814968	0.0108235			2094	10.2769	7.05214	7.50282	5.50047	7.98172	10.216
2027	77	4.28646	4.08842	4.12035	3.96286	4.15249	4.28326		2095	0.0108335	0.0067709	0.00744063	0.00407869	0.00810903	0.0107695			2095	10.39	7.10046	7.55934	5.52311	8.04731	10.3278
2028	78	4.35271	4.12769	4.16388	3.9857	4.20035	4.34906		2096	0.0107794	0.00673713	0.00740352	0.00405835	0.00806859	0.0107158			2096	10.5038	7.14886	7.61601	5.54573	8.1131	10.4402
2029	79	4.41964	4.16713	4.20764	4.00855	4.24851	4.41554		2097	0.0107257	0.00670353	0.0073666	0.00403811	0.00802834	0.0106623			2097	10.6183	7.19735	7.67282	5.56832	8.17909	10.5533
2030	80	4.48726	4.20675	4.25165	4.03143	4.29697	4.48269		2098	0.0106722	0.0066701	0.00732985	0.00401797	0.0079883	0.0106091			2098	10.7334	7.24593	7.72976	5.5909	8.24529	10.667
2031	81	4.55557	4.24655	4.29588	4.05431	4.34575	4.55051		2099	0.0106189	0.00663683	0.0072933	0.00399793	0.00794846	0.0105562			2099	10.8492	7.29458	7.78684	5.61346	8.31168	10.7814
2032	82	4.62456	4.28651	4.34036	4.07721	4.39482	4.61902		2100	0.010566	0.00660373	0.00725692	0.00397799	0.00790882	0.0105036			2100	10.9656	7.34332	7.84405	5.63599	8.37828	10.8964
2033	83	4.69425	4.32666	4.38507	4.10013	4.44421	4.6882		2101	0.0105133	0.00657079	0.00722073	0.00395815	0.00786937	0.0104512			2101	11.0827	7.39213	7.90138	5.6585	8.44507	11.0121
2034	84	4.76462	4.36697	4.43001	4.12306	4.49389	4.75807		2102	0.0104608	0.00653802	0.00718471	0.00393841	0.00783012	0.0103991			2102	11.2005	7.44103	7.95885	5.68098	8.51205	11.1284
2035	85	4.83569	4.40746	4.47518	4.146	4.54388	4.82861		2103	0.0104087	0.00650541	0.00714888	0.00391877	0.00779107	0.0103472			2103	11.3189	7.49	8.01645	5.70345	8.57923	11.2453
2036	86	4.90746	4.44811	4.52059	4.16895	4.59416	4.89984		2104	0.0103568	0.00647297	0.00711322	0.00389922	0.00775221	0.0102956			2104	11.438	7.53904	8.07417	5.72588	8.64659	11.3629
2037	87	4.97992	4.48893	4.56622	4.19192	4.64475	4.97176		2105	0.0103051	0.00644068	0.00707775	0.00387977	0.00771355	0.0102442			2105	11.5577	7.58816	8.13202	5.7483	8.71415	11.4811
2038	88	5.05308	4.52992	4.61208	4.21489	4.69564	5.04436		2106	0.0102537	0.00640856	0.00704245	0.00386042	0.00767508	0.0101931			2106	11.678	7.63735	8.18998	5.77069	8.78189	11.6
2039	89	5.12694	4.57108	4.65817	4.23788	4.74683	5.11765		2107	0.0102026	0.0063766	0.00700732	0.00384117	0.0076368	0.0101423			2107	11.799	7.68661	8.24807	5.79305	8.84981	11.7194
2040	90	5.20149	4.6124	4.70449	4.26087	4.79831	5.19163		2108	0.0101517	0.00634479	0.00697237	0.00382201	0.00759871	0.0100917			2108	11.9206	7.73594	8.30627	5.81539	8.91792	11.8395
2041	91	5.27675	4.65389	4.75103	4.28387	4.85009	5.2663		2109	0.0101011	0.00631315	0.0069376	0.00380295	0.00756081	0.0100414			2109	12.0429	7.78533	8.36459	5.8377	8.9862	11.9602
2042	92	5.35272	4.69554	4.79779	4.30688	4.90216	5.34165		2110	0.0100507	0.00628166	0.006903	0.00378398	0.0075231	0.00999131			2110	12.1657	7.8348	8.42303	5.85999	9.05466	12.0815
2043	93	5.42938	4.73734	4.84478	4.3299	4.95453	5.4177		2111	0.0100005	0.00625033	0.00686857	0.00376511	0.00748558	0.00994147			2111	12.2893	7.88432	8.48158	5.88224	9.12329	12.2034
2044	94	5.50675	4.77931	4.89198	4.35293	5.00719	5.49445		2112	0.00995067	0.00621916	0.00683431	0.00374633	0.00744824	0.00989189			2112	12.4134	7.93391	8.54024	5.90448	9.1921	12.326
2045	95	5.58483	4.82144	4.93941	4.37596	5.06014	5.57188		2113	0.00990104	0.00618814	0.00680022	0.00372764	0.0074111	0.00984255			2113	12.5382	7.98356	8.59901	5.92668	9.26108	12.4491
2046	96	5.66361	4.86373	4.98706	4.399	5.11338	5.65001		2114	0.00985165	0.00615728	0.00676631	0.00370905	0.00737413	0.00979346			2114	12.6635	8.03327	8.65788	5.94885	9.33023	12.5729
2047	97	5.74311	4.90617	5.03492	4.42204	5.16691	5.72884		2115	0.00980252	0.00612657	0.00673256	0.00369055	0.00733735	0.00974462			2115	12.7895	8.08304	8.71686	5.971	9.39954	12.6972
2048	98	5.8233	4.94876	5.083	4.44509	5.22073	5.80836		2116	0.00975363	0.00609601	0.00669898	0.00367215	0.00730076	0.00969602			2116	12.9162	8.13287	8.77595	5.99312	9.46902	12.8222
2049	99	5.90421	4.99151	5.13129	4.46814	5.27483	5.88857		2117	0.00970498	0.00606561	0.00666557	0.00365383	0.00726435	0.00964766			2117	13.0434	8.18275	8.83513	6.01521	9.53866	12.9477
2050	100	5.98583	5.03442	5.1798	4.4912	5.32922	5.96949		2118	0.00965658	0.00603536	0.00663233	0.00363561	0.00722812	0.00959954			2118	13.1712	8.23269	8.89442	6.03727	9.60846	13.0738
2051	101	6.06815	5.07747	5.22852	4.51426	5.3839	6.0511		2119	0.00960842	0.00600525	0.00659925	0.00361748	0.00719206	0.00955166			2119	13.2996	8.28268	8.9538	6.0593	9.67842	13.2006
2052	102	6.15119	5.12067	5.27745	4.53732	5.43885	6.1334		2120	0.00956049	0.0059753	0.00656633	0.00359943	0.00715619	0.00950402			2120	13.4287	8.33272	9.01329	6.08129	9.74853	13.3279
2053	103	6.23494	5.16403	5.32659	4.56038	5.49409	6.21641		2121	0.00951281	0.0059455	0.00653358	0.00358148	0.0071205	0.00945662			2121	13.5583	8.38281	9.07286	6.10326	9.81879	13.4557
2054	104	6.3194	5.20753	5.37594	4.58344	5.54961	6.30011		2122	0.00946537	0.00591585	0.006501	0.00356362	0.00708499	0.00940946			2122	13.6885	8.43295	9.13253	6.1252	9.88921	13.5842
2055	105	6.40457	5.25117	5.42549	4.60651	5.60541	6.38451		2123	0.00941816	0.00588634	0.00646857	0.00354585	0.00704965	0.00936253			2123	13.8193	8.48313	9.19229	6.14711	9.95977	13.7132
2056	106	6.49045	5.29496	5.47525	4.62957	5.66148	6.46961		2124	0.00937118	0.00585698	0.00643631	0.00352816	0.00701449	0.00931583			2124	13.9507	8.53336	9.25214	6.16898	10.0305	13.8428
2057	107	6.57704	5.33889	5.52522	4.65263	5.71783	6.55541		2125	0.00932444	0.00582777	0.00640421	0.00351056	0.00697951	0.00926937			2125	14.0827	8.58364	9.31207	6.19082	10.1013	13.973
2058	108	6.66435	5.38297	5.57538	4.67569	5.77445	6.64191		2126	0.00927794	0.00579871	0.00637227	0.00349305	0.0069447	0.00922314			2126	14.2152	8.63395	9.37209	6.21263	10.1723	14.1037
2059	109	6.75237	5.42718	5.62575	4.69875	5.83135	6.72911		2127	0.00923166	0.00576978	0.00634049	0.00347563	0.00691006	0.00917714			2127	14.3483	8.68431	9.4322	6.23441	10.2435	14.235
2060	110	6.84109	5.47153	5.67631	4.72181	5.88852	6.817		2128	0.00918562	0.00574101	0.00630886	0.0034583	0.0068756	0.00913137			2128	14.482	8.73471	9.49238	6.25615	10.3148	14.3669
2061	111	6.93054	5.51603	5.72707	4.74486	5.94595	6.90559		2129	0.00913981	0.00571237	0.0062774	0.00344105	0.0068413	0.00908582			2129	14.6163	8.78514	9.55265	6.27786	10.3862	14.4993
2062	112	7.02069	5.56065	5.77803	4.76791	6.00366	6.99488		2130	0.00909422	0.00568388	0.00624609	0.00342389	0.00680718	0.00904051			2130	14.7511	8.83562	9.61299	6.29954	10.4577	14.6322
2063	113	7.11155	5.60542	5.82919	4.79096	6.06163	7.08487		2131	0.00904887	0.00565554	0.00621494	0.00340681	0.00677323	0.00899542			2131	14.8865	8.88612	9.67342	6.32118	10.5294	14.7657
2064	114	7.20313	5.65031	5.88053	4.814	6.11987	7.17556		2132	0.00900373	0.00562733	0.00618394	0.00338982	0.00673945	0.00895055			2132	15.0224	8.93666	9.73391	6.34279	10.6012	14.8998
2065	115	7.29541	5.69534	5.93207	4.83704	6.17837	7.26694		2133	0.00895883	0.00559926	0.0061531	0.00337291	0.00670584	0.00890591			2133	15.1589	8.98724	9.79448	6.36437	10.6731	15.0343
2066	116	7.38841	5.7405	5.9838	4.86007	6.23713	7.35902		2134	0.00891415	0.00557134	0.00612241	0.00335609	0.00667239	0.00886149			2134	15.2959	9.03784	9.85512	6.38591	10.7452	15.1694
2067	117	7.48211	5.78579	6.03572	4.88309	6.29615	7.45179		2135	0.00886969	0.00554355	0.00609187	0.00333935	0.00663911	0.0088173			2135	15.4335	9.08848	9.91583	6.40741	10.8174	15.305
2068	118	7.57653	5.8312	6.08782	4.90611	6.35543	7.54526		2136	0.00882545	0.0055159	0.00606149	0.0033227	0.006606	0.00877332			2136	15.5716	9.13914	9.9766	6.42888	10.8896	15.4412
2069	119	7.67165	5.87674	6.14011	4.92912	6.41497	7.63943		2137	0.00878143	0.00548839	0.00603126	0.00330612	0.00657305	0.00872956			2137	15.7103	9.18983	10.0374	6.45031	10.9621	15.5779
2070	120	7.76748	5.92241	6.19258	4.95212	6.47476	7.73428		2138	0.00873763	0.00546102	0.00600118	0.00328963	0.00654027	0.00868602			2138	15.8495	9.24055	10.0984	6.47171	11.0346	15.715
2071	121	7.86402	5.9682	6.24524	4.97512	6.53481	7.82983		2139	0.00869405	0.00543378	0.00597125	0.00327323	0.00650765	0.0086427			2139	15.9892	9.29129	10.1593	6.49307	11.1072	15.8527
2072	122	7.96126	6.01411	6.29808	4.9981	6.59511	7.92608		2140	0.00865069	0.00540668	0.00594146	0.0032569	0.00647519	0.0085996			2140	16.1294	9.34205	10.2203	6.51439	11.18	15.9909
2073	123	8.05921	6.06015	6.35109	5.02108	6.65566	8.02301		2141	0.00860755	0.00537971	0.00591183	0.00324066	0.0064429	0.00855671			2141	16.2702	9.39284	10.2814	6.53568	11.2529	16.1297
2074	124	8.15787	6.1063	6.40429	5.04404	6.71646	8.12064		2142	0.00856462	0.00535288	0.00588235	0.0032245	0.00641076	0.00851403			2142	16.4114	9.44364	10.3426	6.55693	11.3258	16.2689
2075	125	8.25723	6.15257	6.45765	5.067	6.7775	8.21895		2143	0.0085219	0.00532618	0.00585301	0.00320841	0.00637879	0.00847157			2143	16.5532	9.49446	10.4038	6.57814	11.3989	16.4086
2076	126	8.35729	6.19896	6.5112	5.08994	6.83879	8.31795		2144	0.0084794	0.00529962	0.00582382	0.00319241	0.00634697	0.00842931			2144	16.6955	9.5453	10.465	6.59931	11.4721	16.5488
2077	127	8.45805	6.24546	6.56491	5.11287	6.90032	8.41764		2145	0.00843711	0.00527319	0.00579477	0.00317649	0.00631532	0.00838727			2145	16.8382	9.59616	10.5263	6.62044	11.5454	16.6894
2078	128	8.55951	6.29208	6.6188	5.13579	6.96209	8.51801		2146	0.00839503	0.00524689	0.00576587	0.00316065	0.00628382	0.00834544			2146	16.9815	9.64703	10.5877	6.64154	11.6187	16.8306
2079	129	8.66167	6.3388	6.67285	5.1587	7.0241	8.61907		2147	0.00835316	0.00522072	0.00573711	0.00314488	0.00625248	0.00830382			2147	17.1253	9.69791	10.6491	6.6626	11.6922	16.9722
2080	130	8.76453	6.38564	6.72707	5.18159	7.08635	8.72081		2148	0.00831149	0.00519468	0.0057085	0.0031292	0.0062213	0.0082624			2148	17.2695	9.74881	10.7105	6.68362	11.7658	17.1144
2081	131	8.86808	6.43259	6.78146	5.20448	7.14884	8.82323		2149	0.00827004	0.00516877	0.00568003	0.00311359	0.00619027	0.00822119			2149	17.4143	9.79971	10.772	6.7046	11.8394	17.2569
2082	132	8.97233	6.47964	6.83602	5.22734	7.21156	8.92633		2150	0.00822879	0.00514299	0.0056517	0.00309806	0.00615939	0.00818019			2150	17.5595	9.85063	10.8336	6.72554	11.9132	17.4
2083	133	9.07727	6.5268	6.89073	5.25019	7.27451	9.03011		2151	0.00818775	0.00511734	0.00562351	0.00308261	0.00612867	0.00813939			2151	17.7052	9.90155	10.8951	6.74644	11.987	17.5435
2084	134	9.18291	6.57407	6.94561	5.27303	7.33769	9.13457		2152	0.00814692	0.00509182	0.00559546	0.00306724	0.00609811	0.00809879			2152	17.8514	9.95248	10.9568	6.7673	12.0609	17.6875
2085	135	9.28923	6.62143	7.00064	5.29585	7.4011	9.23971		2153	0.00810628	0.00506642	0.00556755	0.00305194	0.00606769	0.0080584			2153	17.998	10.0034	11.0184	6.78812	12.1349	17.8319
2086	136	9.39625	6.6689	7.05583	5.31866	7.46473	9.34551		2154	0.00806585	0.00504115	0.00553978	0.00303672	0.00603743	0.00801821			2154	18.1451	10.0544	11.0801	6.8089	12.209	17.9767
2087	137	9.50395	6.71647	7.11118	5.34145	7.52859	9.45199		2155	0.00802562	0.00501601	0.00551215	0.00302157	0.00600732	0.00797822			2155	18.2926	10.1053	11.1418	6.82964	12.2832	18.1221
2088	138	9.61233	6.76414	7.16668	5.36422	7.59267	9.55914		2156	0.0079856	0.00499099	0.00548466	0.0030065	0.00597736	0.00793843			2156	18.4406	10.1562	11.2036	6.85034	12.3574	18.2678
2089	139	9.7214	6.81191	7.22233	5.38697	7.65698	9.66695		2157	0.00794577	0.0049661	0.00545731	0.00299151	0.00594754	0.00789883			2157	18.5891	10.2072	11.2654	6.871	12.4317	18.414
2090	140	9.83115	6.85977	7.27814	5.40971	7.7215	9.77544		2158	0.00790614	0.00494133	0.00543009	0.00297658	0.00591788	0.00785944			2158	18.7379	10.2581	11.3272	6.89161	12.5061	18.5606
2091	141	9.94157	6.90772	7.33409	5.43243	7.78623	9.88458		2159	0.00786671	0.00491669	0.00540301	0.00296174	0.00588836	0.00782024			2159	18.8873	10.3091	11.389	6.91219	12.5805	18.7076
2092	142	10.0527	6.95577	7.39019	5.45513	7.85119	9.99439		2160	0.00782747	0.00489216	0.00537606	0.00294697	0.005859	0.00778124			2160	19.037	10.36	11.4509	6.93272	12.6551	18.8551
2093	143	10.1645	7.00391	7.44643	5.47781	7.91635	10.1049		2161	0.00778843	0.00486776	0.00534925	0.00293227	0.00582977	0.00774243			2161	19.1872	10.4109	11.5128	6.95321	12.7296	19.0029
2094	144	10.2769	7.05214	7.50282	5.50047	7.98172	10.216		2162	0.00774959	0.00484349	0.00532257	0.00291764	0.0058007	0.00770381			2162	19.3378	10.4619	11.5747	6.97366	12.8043	19.1512
2095	145	10.39	7.10046	7.55934	5.52311	8.04731	10.3278		2163	0.00771093	0.00481933	0.00529602	0.00290309	0.00577177	0.00766539			2163	19.4889	10.5128	11.6366	6.99407	12.879	19.2999
2096	146	10.5038	7.14886	7.61601	5.54573	8.1131	10.4402		2164	0.00767248	0.00479529	0.00526961	0.00288861	0.00574298	0.00762716			2164	19.6403	10.5637	11.6986	7.01443	12.9538	19.449
2097	147	10.6183	7.19735	7.67282	5.56832	8.17909	10.5533		2165	0.00763421	0.00477138	0.00524332	0.00287421	0.00571434	0.00758912			2165	19.7922	10.6146	11.7606	7.03475	13.0286	19.5985
2098	148	10.7334	7.24593	7.72976	5.5909	8.24529	10.667		2166	0.00759613	0.00474758	0.00521717	0.00285987	0.00568584	0.00755127			2166	19.9444	10.6655	11.8226	7.05503	13.1035	19.7483
2099	149	10.8492	7.29458	7.78684	5.61346	8.31168	10.7814		2167	0.00755825	0.0047239	0.00519115	0.00284561	0.00565748	0.0075136			2167	20.0971	10.7164	11.8846	7.07526	13.1784	19.8986
2100	150	10.9656	7.34332	7.84405	5.63599	8.37828	10.8964		2168	0.00752055	0.00470034	0.00516526	0.00283142	0.00562926	0.00747613			2168	20.2501	10.7672	11.9466	7.09546	13.2534	20.0492
2101	151	11.0827	7.39213	7.90138	5.6585	8.44507	11.0121		2169	0.00748304	0.0046769	0.0051395	0.00281729	0.00560119	0.00743884			2169	20.4036	10.8181	12.0086	7.1156	13.3284	20.2002
2102	152	11.2005	7.44103	7.95885	5.68098	8.51205	11.1284		2170	0.00744572	0.00465357	0.00511387	0.00280324	0.00557325	0.00740174			2170	20.5574	10.8689	12.0706	7.13571	13.4035	20.3516
2103	153	11.3189	7.49	8.01645	5.70345	8.57923	11.2453		2171	0.00740858	0.00463036	0.00508836	0.00278926	0.00554545	0.00736482			2171	20.7116	10.9197	12.1327	7.15577	13.4786	20.5034
2104	154	11.438	7.53904	8.07417	5.72588	8.64659	11.3629		2172	0.00737163	0.00460727	0.00506298	0.00277535	0.00551779	0.00732809			2172	20.8662	10.9705	12.1947	7.17578	13.5538	20.6555
2105	155	11.5577	7.58816	8.13202	5.7483	8.71415	11.4811		2173	0.00733487	0.00458429	0.00503773	0.00276151	0.00549027	0.00729154			2173	21.0212	11.0213	12.2568	7.19575	13.629	20.808
2106	156	11.678	7.63735	8.18998	5.77069	8.78189	11.6		2174	0.00729829	0.00456142	0.0050126	0.00274773	0.00546289	0.00725518			2174	21.1765	11.0721	12.3188	7.21568	13.7042	20.9608
2107	157	11.799	7.68661	8.24807	5.79305	8.84981	11.7194		2175	0.00726188	0.00453867	0.0049876	0.00273403	0.00543565	0.00721899			2175	21.3322	11.1228	12.3809	7.23556	13.7795	21.114
2108	158	11.9206	7.73594	8.30627	5.81539	8.91792	11.8395		2176	0.00722567	0.00451604	0.00496273	0.00272039	0.00540854	0.00718299			2176	21.4882	11.1735	12.443	7.25539	13.8548	21.2676
2109	159	12.0429	7.78533	8.36459	5.8377	8.9862	11.9602		2177	0.00718963	0.00449351	0.00493798	0.00270683	0.00538156	0.00714716			2177	21.6446	11.2242	12.505	7.27519	13.9301	21.4214
2110	160	12.1657	7.8348	8.42303	5.85999	9.05466	12.0815		2178	0.00715377	0.0044711	0.00491335	0.00269333	0.00535472	0.00711151			2178	21.8014	11.2749	12.5671	7.29493	14.0055	21.5756
2111	161	12.2893	7.88432	8.48158	5.88224	9.12329	12.2034		2179	0.00711809	0.0044488	0.00488884	0.00267989	0.00532801	0.00707605			2179	21.9585	11.3255	12.6291	7.31463	14.0809	21.7302
2112	162	12.4134	7.93391	8.54024	5.90448	9.1921	12.326		2180	0.00708259	0.00442661	0.00486446	0.00266653	0.00530144	0.00704075			2180	22.1159	11.3761	12.6912	7.33429	14.1563	21.885
2113	163	12.5382	7.98356	8.59901	5.92668	9.26108	12.4491		2181	0.00704726	0.00440454	0.0048402	0.00265323	0.005275	0.00700564			2181	22.2736	11.4267	12.7532	7.3539	14.2318	22.0402
2114	164	12.6635	8.03327	8.65788	5.94885	9.33023	12.5729		2182	0.00701212	0.00438257	0.00481606	0.00263999	0.00524869	0.0069707			2182	22.4317	11.4772	12.8152	7.37346	14.3072	22.1957
2115	165	12.7895	8.08304	8.71686	5.971	9.39954	12.6972		2183	0.00697714	0.00436071	0.00479204	0.00262683	0.00522251	0.00693593			2183	22.5901	11.5278	12.8773	7.39298	14.3827	22.3515
2116	166	12.9162	8.13287	8.77595	5.99312	9.46902	12.8222		2184	0.00694234	0.00433896	0.00476814	0.00261373	0.00519646	0.00690134			2184	22.7489	11.5782	12.9393	7.41245	14.4582	22.5076
2117	167	13.0434	8.18275	8.83513	6.01521	9.53866	12.9477		2185	0.00690772	0.00431732	0.00474436	0.00260069	0.00517055	0.00686692			2185	22.9079	11.6287	13.0013	7.43187	14.5338	22.664
2118	168	13.1712	8.23269	8.89442	6.03727	9.60846	13.0738		2186	0.00687327	0.00429579	0.00472069	0.00258772	0.00514476	0.00683267			2186	23.0672	11.6791	13.0632	7.45125	14.6093	22.8207
2119	169	13.2996	8.28268	8.9538	6.0593	9.67842	13.2006		2187	0.00683899	0.00427436	0.00469715	0.00257481	0.0051191	0.00679859			2187	23.2269	11.7295	13.1252	7.47058	14.6849	22.9777
2120	170	13.4287	8.33272	9.01329	6.08129	9.74853	13.3279		2188	0.00680488	0.00425304	0.00467372	0.00256197	0.00509357	0.00676468			2188	23.3868	11.7799	13.1871	7.48987	14.7604	23.135
2121	171	13.5583	8.38281	9.07286	6.10326	9.81879	13.4557		2189	0.00677094	0.00423183	0.00465041	0.00254919	0.00506816	0.00673094			2189	23.547	11.8302	13.2491	7.50911	14.836	23.2926
2122	172	13.6885	8.43295	9.13253	6.1252	9.88921	13.5842		2190	0.00673717	0.00421072	0.00462722	0.00253648	0.00504288	0.00669737			2190	23.7076	11.8805	13.311	7.5283	14.9116	23.4504
2123	173	13.8193	8.48313	9.19229	6.14711	9.95977	13.7132		2191	0.00670356	0.00418972	0.00460414	0.00252383	0.00501773	0.00666397			2191	23.8684	11.9307	13.3728	7.54744	14.9871	23.6086
2124	174	13.9507	8.53336	9.25214	6.16898	10.0305	13.8428		2192	0.00667013	0.00416883	0.00458118	0.00251124	0.00499271	0.00663073			2192	24.0295	11.9809	13.4347	7.56654	15.0627	23.7669
2125	175	14.0827	8.58364	9.31207	6.19082	10.1013	13.973		2193	0.00663686	0.00414804	0.00455833	0.00249872	0.00496781	0.00659766			2193	24.1908	12.031	13.4965	7.58559	15.1383	23.9256
2126	176	14.2152	8.63395	9.37209	6.21263	10.1723	14.1037		2194	0.00660376	0.00412735	0.00453559	0.00248625	0.00494303	0.00656476			2194	24.3524	12.0812	13.5583	7.60459	15.2139	24.0845
2127	177	14.3483	8.68431	9.4322	6.23441	10.2435	14.235		2195	0.00657082	0.00410676	0.00451297	0.00247385	0.00491838	0.00653201			2195	24.5143	12.1312	13.6201	7.62354	15.2895	24.2436
2128	178	14.482	8.73471	9.49238	6.25615	10.3148	14.3669		2196	0.00653805	0.00408628	0.00449046	0.00246151	0.00489384	0.00649944			2196	24.6765	12.1813	13.6819	7.64245	15.365	24.403
2129	179	14.6163	8.78514	9.55265	6.27786	10.3862	14.4993		2197	0.00650544	0.0040659	0.00446807	0.00244924	0.00486944	0.00646702			2197	24.8389	12.2312	13.7436	7.66131	15.4406	24.5627
2130	180	14.7511	8.83562	9.61299	6.29954	10.4577	14.6322		2198	0.006473	0.00404562	0.00444578	0.00243702	0.00484515	0.00643476			2198	25.0015	12.2812	13.8053	7.68012	15.5161	24.7226
2131	181	14.8865	8.88612	9.67342	6.32118	10.5294	14.7657		2199	0.00644071	0.00402544	0.00442361	0.00242487	0.00482099	0.00640267			2199	25.1644	12.3311	13.8669	7.69888	15.5917	24.8827
2132	182	15.0224	8.93666	9.73391	6.34279	10.6012	14.8998		2200	0.00640859	0.00400537	0.00440155	0.00241277	0.00479694	0.00637074			2200	25.3275	12.3809	13.9285	7.7176	15.6672	25.043
2133	183	15.1589	8.98724	9.79448	6.36437	10.6731	15.0343		2201	0.00637663	0.00398539	0.00437959	0.00240074	0.00477302	0.00633896			2201	25.4909	12.4307	13.9901	7.73626	15.7427	25.2036
2134	184	15.2959	9.03784	9.85512	6.38591	10.7452	15.1694		2202	0.00634482	0.00396551	0.00435775	0.00238877	0.00474921	0.00630735			2202	25.6545	12.4804	14.0516	7.75488	15.8182	25.3644
2135	185	15.4335	9.08848	9.91583	6.40741	10.8174	15.305		2203	0.00631318	0.00394573	0.00433601	0.00237685	0.00472552	0.00627589			2203	25.8183	12.5301	14.1131	7.77345	15.8937	25.5254
2136	186	15.5716	9.13914	9.9766	6.42888	10.8896	15.4412		2204	0.00628169	0.00392605	0.00431439	0.002365	0.00470195	0.00624459			2204	25.9823	12.5797	14.1746	7.79197	15.9692	25.6866
2137	187	15.7103	9.18983	10.0374	6.45031	10.9621	15.5779		2205	0.00625036	0.00390647	0.00429287	0.0023532	0.0046785	0.00621344			2205	26.1466	12.6293	14.236	7.81044	16.0446	25.848
2138	188	15.8495	9.24055	10.0984	6.47171	11.0346	15.715		2206	0.00621919	0.00388699	0.00427146	0.00234146	0.00465517	0.00618245			2206	26.311	12.6789	14.2974	7.82886	16.12	26.0096
2139	189	15.9892	9.29129	10.1593	6.49307	11.1072	15.8527		2207	0.00618817	0.0038676	0.00425016	0.00232979	0.00463195	0.00615162			2207	26.4757	12.7283	14.3587	7.84724	16.1954	26.1714
2140	190	16.1294	9.34205	10.2203	6.51439	11.18	15.9909		2208	0.00615731	0.00384831	0.00422896	0.00231817	0.00460885	0.00612094			2208	26.6405	12.7778	14.42	7.86556	16.2708	26.3334
2141	191	16.2702	9.39284	10.2814	6.53568	11.2529	16.1297		2209	0.0061266	0.00382912	0.00420787	0.0023066	0.00458586	0.00609041			2209	26.8056	12.8271	14.4813	7.88384	16.3461	26.4956
2142	192	16.4114	9.44364	10.3426	6.55693	11.3258	16.2689		2210	0.00609604	0.00381002	0.00418688	0.0022951	0.00456299	0.00606003			2210	26.9708	12.8764	14.5424	7.90207	16.4214	26.6579
2143	193	16.5532	9.49446	10.4038	6.57814	11.3989	16.4086		2211	0.00606564	0.00379102	0.004166	0.00228365	0.00454023	0.00602981			2211	27.1362	12.9257	14.6036	7.92024	16.4967	26.8205
2144	194	16.6955	9.5453	10.465	6.59931	11.4721	16.5488		2212	0.00603538	0.00377211	0.00414522	0.00227226	0.00451759	0.00599973			2212	27.3019	12.9749	14.6647	7.93837	16.572	26.9832
2145	195	16.8382	9.59616	10.5263	6.62044	11.5454	16.6894		2213	0.00600528	0.0037533	0.00412454	0.00226093	0.00449506	0.00596981			2213	27.4676	13.024	14.7257	7.95645	16.6472	27.146
2146	196	16.9815	9.64703	10.5877	6.64154	11.6187	16.8306		2214	0.00597533	0.00373458	0.00410397	0.00224965	0.00447264	0.00594004			2214	27.6336	13.0731	14.7867	7.97448	16.7223	27.3091
2147	197	17.1253	9.69791	10.6491	6.6626	11.6922	16.9722		2215	0.00594553	0.00371595	0.0040835	0.00223843	0.00445033	0.00591041			2215	27.7997	13.1221	14.8476	7.99246	16.7975	27.4722
2148	198	17.2695	9.74881	10.7105	6.68362	11.7658	17.1144		2216	0.00591587	0.00369742	0.00406314	0.00222727	0.00442813	0.00588093			2216	27.966	13.171	14.9085	8.01039	16.8725	27.6356
2149	199	17.4143	9.79971	10.772	6.7046	11.8394	17.2569		2217	0.00588637	0.00367898	0.00404287	0.00221616	0.00440605	0.0058516			2217	28.1324	13.2199	14.9693	8.02827	16.9476	27.7991
2150	200	17.5595	9.85063	10.8336	6.72554	11.9132	17.4		2218	0.00585701	0.00366063	0.00402271	0.00220511	0.00438407	0.00582242			2218	28.299	13.2687	15.0301	8.0461	17.0226	27.9627
2151	201	17.7052	9.90155	10.8951	6.74644	11.987	17.5435		2219	0.0058278	0.00364237	0.00400265	0.00219411	0.00436221	0.00579338			2219	28.4657	13.3174	15.0908	8.06389	17.0976	28.1265
2152	202	17.8514	9.95248	10.9568	6.7673	12.0609	17.6875		2220	0.00579873	0.0036242	0.00398268	0.00218317	0.00434045	0.00576448			2220	28.6326	13.3661	15.1515	8.08162	17.1725	28.2903
2153	203	17.998	10.0034	11.0184	6.78812	12.1349	17.8319		2221	0.00576981	0.00360613	0.00396282	0.00217228	0.0043188	0.00573573			2221	28.7996	13.4147	15.2121	8.0993	17.2473	28.4544
2154	204	18.1451	10.0544	11.0801	6.8089	12.209	17.9767		2222	0.00574103	0.00358814	0.00394305	0.00216144	0.00429726	0.00570712			2222	28.9667	13.4633	15.2726	8.11693	17.3221	28.6185
2155	205	18.2926	10.1053	11.1418	6.82964	12.2832	18.1221		2223	0.0057124	0.00357025	0.00392339	0.00215066	0.00427583	0.00567866			2223	29.1339	13.5118	15.333	8.13451	17.3969	28.7828
2156	206	18.4406	10.1562	11.2036	6.85034	12.3574	18.2678		2224	0.00568391	0.00355244	0.00390382	0.00213994	0.0042545	0.00565034			2224	29.3013	13.5602	15.3934	8.15205	17.4716	28.9472
2157	207	18.5891	10.2072	11.2654	6.871	12.4317	18.414		2225	0.00565556	0.00353472	0.00388435	0.00212926	0.00423329	0.00562216			2225	29.4688	13.6085	15.4538	8.16953	17.5462	29.1117
2158	208	18.7379	10.2581	11.3272	6.89161	12.5061	18.5606		2226	0.00562735	0.00351709	0.00386498	0.00211864	0.00421217	0.00559412			2226	29.6364	13.6568	15.514	8.18696	17.6208	29.2763
2159	209	18.8873	10.3091	11.389	6.91219	12.5805	18.7076		2227	0.00559929	0.00349955	0.0038457	0.00210808	0.00419116	0.00556621			2227	29.8042	13.705	15.5742	8.20434	17.6954	29.441
2160	210	19.037	10.36	11.4509	6.93272	12.6551	18.8551		2228	0.00557136	0.0034821	0.00382652	0.00209756	0.00417026	0.00553845			2228	29.972	13.7531	15.6343	8.22168	17.7699	29.6057
2161	211	19.1872	10.4109	11.5128	6.95321	12.7296	19.0029		2229	0.00554357	0.00346473	0.00380743	0.0020871	0.00414946	0.00551083			2229	30.1399	13.8012	15.6944	8.23896	17.8443	29.7706
2162	212	19.3378	10.4619	11.5747	6.97366	12.8043	19.1512		2230	0.00551593	0.00344745	0.00378845	0.00207669	0.00412876	0.00548334			2230	30.3079	13.8492	15.7544	8.25619	17.9186	29.9356
2163	213	19.4889	10.5128	11.6366	6.99407	12.879	19.2999		2231	0.00548841	0.00343026	0.00376955	0.00206634	0.00410817	0.005456			2231	30.476	13.8971	15.8143	8.27337	17.9929	30.1006
2164	214	19.6403	10.5637	11.6986	7.01443	12.9538	19.449		2232	0.00546104	0.00341315	0.00375075	0.00205603	0.00408768	0.00542878			2232	30.6442	13.9449	15.8741	8.2905	18.0671	30.2658
2165	215	19.7922	10.6146	11.7606	7.03475	13.0286	19.5985		2233	0.0054338	0.00339612	0.00373204	0.00204577	0.0040673	0.00540171			2233	30.8125	13.9927	15.9339	8.30758	18.1413	30.431
2166	216	19.9444	10.6655	11.8226	7.05503	13.1035	19.7483		2234	0.0054067	0.00337919	0.00371343	0.00203557	0.00404701	0.00537477			2234	30.9808	14.0404	15.9936	8.32461	18.2154	30.5963
2167	217	20.0971	10.7164	11.8846	7.07526	13.1784	19.8986		2235	0.00537974	0.00336233	0.00369491	0.00202542	0.00402683	0.00534796			2235	31.1492	14.088	16.0532	8.34159	18.2894	30.7616
2168	218	20.2501	10.7672	11.9466	7.09546	13.2534	20.0492		2236	0.0053529	0.00334556	0.00367648	0.00201532	0.00400674	0.00532129			2236	31.3177	14.1355	16.1127	8.35852	18.3633	30.927
2169	219	20.4036	10.8181	12.0086	7.1156	13.3284	20.2002		2237	0.00532621	0.00332888	0.00365814	0.00200527	0.00398676	0.00529475			2237	31.4863	14.183	16.1722	8.3754	18.4372	31.0924
2170	220	20.5574	10.8689	12.0706	7.13571	13.4035	20.3516		2238	0.00529964	0.00331227	0.0036399	0.00199526	0.00396687	0.00526834			2238	31.6549	14.2303	16.2316	8.39223	18.511	31.2579
2171	221	20.7116	10.9197	12.1327	7.15577	13.4786	20.5034		2239	0.00527321	0.00329575	0.00362174	0.00198531	0.00394709	0.00524206			2239	31.8235	14.2776	16.2909	8.40901	18.5847	31.4235
2172	222	20.8662	10.9705	12.1947	7.17578	13.5538	20.6555		2240	0.00524691	0.00327932	0.00360368	0.00197541	0.0039274	0.00521592			2240	31.9922	14.3248	16.3501	8.42573	18.6584	31.5891
2173	223	21.0212	11.0213	12.2568	7.19575	13.629	20.808		2241	0.00522074	0.00326296	0.00358571	0.00196556	0.00390781	0.0051899			2241	32.161	14.372	16.4092	8.44241	18.7319	31.7547
2174	224	21.1765	11.0721	12.3188	7.21568	13.7042	20.9608		2242	0.0051947	0.00324669	0.00356782	0.00195576	0.00388832	0.00516402			2242	32.3297	14.419	16.4683	8.45904	18.8054	31.9204
2175	225	21.3322	11.1228	12.3809	7.23556	13.7795	21.114		2243	0.00516879	0.00323049	0.00355003	0.001946	0.00386893	0.00513826			2243	32.4986	14.466	16.5272	8.47561	18.8788	32.0861
2176	226	21.4882	11.1735	12.443	7.25539	13.8548	21.2676		2244	0.00514301	0.00321438	0.00353232	0.0019363	0.00384963	0.00511264			2244	32.6674	14.5129	16.5861	8.49214	18.9522	32.2518
2177	227	21.6446	11.2242	12.505	7.27519	13.9301	21.4214		2245	0.00511736	0.00319835	0.00351471	0.00192664	0.00383043	0.00508714			2245	32.8363	14.5597	16.6449	8.50862	19.0254	32.4175
2178	228	21.8014	11.2749	12.5671	7.29493	14.0055	21.5756		2246	0.00509184	0.0031824	0.00349718	0.00191703	0.00381133	0.00506177			2246	33.0052	14.6064	16.7036	8.52504	19.0986	32.5833
2179	229	21.9585	11.3255	12.6291	7.31463	14.0809	21.7302		2247	0.00506645	0.00316652	0.00347973	0.00190747	0.00379232	0.00503652			2247	33.1741	14.653	16.7622	8.54141	19.1716	32.7491
2180	230	22.1159	11.3761	12.6912	7.33429	14.1563	21.885		2248	0.00504118	0.00315073	0.00346238	0.00189795	0.00377341	0.0050114			2248	33.343	14.6995	16.8208	8.55774	19.2446	32.9148
2181	231	22.2736	11.4267	12.7532	7.3539	14.2318	22.0402		2249	0.00501603	0.00313502	0.00344511	0.00188849	0.00375459	0.00498641			2249	33.512	14.746	16.8792	8.57401	19.3175	33.0806
2182	232	22.4317	11.4772	12.8152	7.37346	14.3072	22.1957		2250	0.00499102	0.00311938	0.00342793	0.00187907	0.00373586	0.00496154			2250	33.6809	14.7924	16.9376	8.59023	19.3903	33.2464
2183	233	22.5901	11.5278	12.8773	7.39298	14.3827	22.3515		2251	0.00496612	0.00310382	0.00341083	0.0018697	0.00371723	0.00493679			2251	33.8499	14.8387	16.9958	8.60641	19.463	33.4122
2184	234	22.7489	11.5782	12.9393	7.41245	14.4582	22.5076		2252	0.00494135	0.00308834	0.00339382	0.00186037	0.00369869	0.00491217			2252	34.0188	14.8849	17.054	8.62253	19.5356	33.5779
2185	235	22.9079	11.6287	13.0013	7.43187	14.5338	22.664		2253	0.00491671	0.00307294	0.00337689	0.00185109	0.00368024	0.00488767			2253	34.1877	14.931	17.1121	8.6386	19.6082	33.7437
2186	236	23.0672	11.6791	13.0632	7.45125	14.6093	22.8207		2254	0.00489219	0.00305761	0.00336005	0.00184186	0.00366189	0.00486329			2254	34.3567	14.977	17.17	8.65462	19.6806	33.9094
2187	237	23.2269	11.7295	13.1252	7.47058	14.6849	22.9777		2255	0.00486779	0.00304236	0.00334329	0.00183267	0.00364362	0.00483903			2255	34.5256	15.0229	17.2279	8.67059	19.7529	34.0751
2188	238	23.3868	11.7799	13.1871	7.48987	14.7604	23.135		2256	0.00484351	0.00302719	0.00332662	0.00182353	0.00362545	0.0048149			2256	34.6945	15.0688	17.2857	8.68651	19.8252	34.2408
2189	239	23.547	11.8302	13.2491	7.50911	14.836	23.2926		2257	0.00481935	0.00301209	0.00331002	0.00181444	0.00360737	0.00479089			2257	34.8633	15.1145	17.3434	8.70238	19.8973	34.4065
2190	240	23.7076	11.8805	13.311	7.5283	14.9116	23.4504		2258	0.00479531	0.00299707	0.00329352	0.00180539	0.00358938	0.00476699			2258	35.0321	15.1602	17.401	8.7182	19.9693	34.5721
2191	241	23.8684	11.9307	13.3728	7.54744	14.9871	23.6086		2259	0.0047714	0.00298212	0.00327709	0.00179639	0.00357147	0.00474322			2259	35.2009	15.2058	17.4585	8.73396	20.0413	34.7377
2192	242	24.0295	11.9809	13.4347	7.56654	15.0627	23.7669		2260	0.0047476	0.00296725	0.00326074	0.00178743	0.00355366	0.00471956			2260	35.3697	15.2513	17.5159	8.74968	20.1131	34.9033
2193	243	24.1908	12.031	13.4965	7.58559	15.1383	23.9256		2261	0.00472392	0.00295245	0.00324448	0.00177851	0.00353594	0.00469602			2261	35.5384	15.2966	17.5732	8.76535	20.1848	35.0688
2194	244	24.3524	12.0812	13.5583	7.60459	15.2139	24.0845		2262	0.00470036	0.00293772	0.0032283	0.00176964	0.0035183	0.0046726			2262	35.7071	15.3419	17.6304	8.78097	20.2565	35.2342
2195	245	24.5143	12.1312	13.6201	7.62354	15.2895	24.2436		2263	0.00467692	0.00292307	0.0032122	0.00176081	0.00350075	0.00464929			2263	35.8757	15.3871	17.6875	8.79653	20.328	35.3997
2196	246	24.6765	12.1813	13.6819	7.64245	15.365	24.403		2264	0.00465359	0.00290849	0.00319618	0.00175203	0.00348329	0.00462611			2264	36.0443	15.4323	17.7445	8.81205	20.3994	35.565
2197	247	24.8389	12.2312	13.7436	7.66131	15.4406	24.5627		2265	0.00463038	0.00289399	0.00318024	0.00174329	0.00346592	0.00460303			2265	36.2128	15.4773	17.8014	8.82752	20.4707	35.7303
2198	248	25.0015	12.2812	13.8053	7.68012	15.5161	24.7226		2266	0.00460729	0.00287955	0.00316438	0.0017346	0.00344863	0.00458007			2266	36.3813	15.5222	17.8582	8.84293	20.5419	35.8955
2199	249	25.1644	12.3311	13.8669	7.69888	15.5917	24.8827		2267	0.00458431	0.00286519	0.00314859	0.00172595	0.00343143	0.00455723			2267	36.5497	15.567	17.9149	8.8583	20.613	36.0607
2200	250	25.3275	12.3809	13.9285	7.7176	15.6672	25.043		2268	0.00456144	0.0028509	0.00313289	0.00171734	0.00341432	0.0045345			2268	36.718	15.6117	17.9715	8.87361	20.684	36.2258
2201	251	25.4909	12.4307	13.9901	7.73626	15.7427	25.2036		2269	0.00453869	0.00283668	0.00311726	0.00170877	0.00339729	0.00451189			2269	36.8863	15.6564	18.028	8.88888	20.7548	36.3908
2202	252	25.6545	12.4804	14.0516	7.75488	15.8182	25.3644		2270	0.00451606	0.00282253	0.00310172	0.00170025	0.00338035	0.00448938			2270	37.0544	15.7009	18.0843	8.90409	20.8256	36.5557
2203	253	25.8183	12.5301	14.1131	7.77345	15.8937	25.5254		2271	0.00449353	0.00280846	0.00308625	0.00169177	0.00336349	0.00446699			2271	37.2225	15.7454	18.1406	8.91926	20.8962	36.7206
2204	254	25.9823	12.5797	14.1746	7.79197	15.9692	25.6866		2272	0.00447112	0.00279445	0.00307085	0.00168333	0.00334671	0.00444471			2272	37.3906	15.7897	18.1968	8.93437	20.9667	36.8853
2205	255	26.1466	12.6293	14.236	7.81044	16.0446	25.848		2273	0.00444882	0.00278051	0.00305554	0.00167494	0.00333002	0.00442254			2273	37.5585	15.834	18.2528	8.94944	21.0371	37.05
2206	256	26.311	12.6789	14.2974	7.82886	16.12	26.0096		2274	0.00442663	0.00276664	0.0030403	0.00166658	0.00331341	0.00440049			2274	37.7263	15.8781	18.3088	8.96445	21.1074	37.2146
2207	257	26.4757	12.7283	14.3587	7.84724	16.1954	26.1714		2275	0.00440456	0.00275284	0.00302513	0.00165827	0.00329689	0.00437854			2275	37.8941	15.9222	18.3646	8.97942	21.1776	37.3791
2208	258	26.6405	12.7778	14.42	7.86556	16.2708	26.3334		2276	0.00438259	0.00273911	0.00301005	0.00165	0.00328044	0.0043567			2276	38.0617	15.9661	18.4203	8.99433	21.2476	37.5435
2209	259	26.8056	12.8271	14.4813	7.88384	16.3461	26.4956		2277	0.00436073	0.00272545	0.00299503	0.00164177	0.00326408	0.00433497			2277	38.2293	16.01	18.4759	9.0092	21.3176	37.7078
2210	260	26.9708	12.8764	14.5424	7.90207	16.4214	26.6579		2278	0.00433898	0.00271186	0.0029801	0.00163358	0.0032478	0.00431335			2278	38.3967	16.0537	18.5314	9.02401	21.3874	37.8719
2211	261	27.1362	12.9257	14.6036	7.92024	16.4967	26.8205		2279	0.00431734	0.00269833	0.00296523	0.00162544	0.0032316	0.00429184			2279	38.564	16.0974	18.5868	9.03878	21.4571	38.036
2212	262	27.3019	12.9749	14.6647	7.93837	16.572	26.9832		2280	0.00429581	0.00268488	0.00295044	0.00161733	0.00321549	0.00427043			2280	38.7312	16.1409	18.6421	9.05349	21.5266	38.1999
2213	263	27.4676	13.024	14.7257	7.95645	16.6472	27.146		2281	0.00427438	0.00267149	0.00293573	0.00160926	0.00319945	0.00424913			2281	38.8983	16.1844	18.6973	9.06816	21.5961	38.3638
2214	264	27.6336	13.0731	14.7867	7.97448	16.7223	27.3091		2282	0.00425306	0.00265816	0.00292109	0.00160124	0.00318349	0.00422794			2282	39.0653	16.2277	18.7523	9.08278	21.6654	38.5275
2215	265	27.7997	13.1221	14.8476	7.99246	16.7975	27.4722		2283	0.00423185	0.0026449	0.00290652	0.00159325	0.00316761	0.00420685			2283	39.2322	16.271	18.8072	9.09734	21.7346	38.6911
2216	266	27.966	13.171	14.9085	8.01039	16.8725	27.6356		2284	0.00421074	0.00263171	0.00289202	0.0015853	0.00315181	0.00418587			2284	39.3989	16.3141	18.8621	9.11186	21.8037	38.8545
2217	267	28.1324	13.2199	14.9693	8.02827	16.9476	27.7991		2285	0.00418974	0.00261859	0.0028776	0.0015774	0.00313609	0.004165			2285	39.5655	16.3572	18.9168	9.12633	21.8726	39.0178
2218	268	28.299	13.2687	15.0301	8.0461	17.0226	27.9627		2286	0.00416885	0.00260553	0.00286325	0.00156953	0.00312045	0.00414422			2286	39.732	16.4001	18.9714	9.14075	21.9414	39.181
2219	269	28.4657	13.3174	15.0908	8.06389	17.0976	28.1265		2287	0.00414805	0.00259253	0.00284896	0.0015617	0.00310489	0.00412355			2287	39.8983	16.443	19.0258	9.15512	22.0101	39.3441
2220	270	28.6326	13.3661	15.1515	8.08162	17.1725	28.2903		2288	0.00412737	0.0025796	0.00283476	0.00155391	0.0030894	0.00410299			2288	40.0645	16.4857	19.0802	9.16944	22.0786	39.507
2221	271	28.7996	13.4147	15.2121	8.0993	17.2473	28.4544		2289	0.00410678	0.00256674	0.00282062	0.00154616	0.003074	0.00408252			2289	40.2305	16.5283	19.1344	9.18371	22.1471	39.6698
2222	272	28.9667	13.4633	15.2726	8.11693	17.3221	28.6185		2290	0.0040863	0.00255393	0.00280655	0.00153845	0.00305866	0.00406216			2290	40.3964	16.5709	19.1886	9.19793	22.2154	39.8324
2223	273	29.1339	13.5118	15.333	8.13451	17.3969	28.7828		2291	0.00406592	0.0025412	0.00279255	0.00153078	0.00304341	0.0040419			2291	40.5622	16.6133	19.2426	9.2121	22.2835	39.9948
2224	274	29.3013	13.5602	15.3934	8.15205	17.4716	28.9472		2292	0.00404564	0.00252852	0.00277862	0.00152314	0.00302823	0.00402174			2292	40.7278	16.6556	19.2965	9.22623	22.3515	40.1572
2225	275	29.4688	13.6085	15.4538	8.16953	17.5462	29.1117		2293	0.00402546	0.00251591	0.00276477	0.00151555	0.00301313	0.00400168			2293	40.8932	16.6978	19.3502	9.2403	22.4194	40.3193
2226	276	29.6364	13.6568	15.514	8.18696	17.6208	29.2763		2294	0.00400538	0.00250336	0.00275098	0.00150799	0.0029981	0.00398173			2294	41.0585	16.74	19.4039	9.25433	22.4872	40.4813
2227	277	29.8042	13.705	15.5742	8.20434	17.6954	29.441		2295	0.00398541	0.00249088	0.00273726	0.00150047	0.00298315	0.00396187			2295	41.2236	16.782	19.4574	9.2683	22.5548	40.6431
2228	278	29.972	13.7531	15.6343	8.22168	17.7699	29.6057		2296	0.00396553	0.00247845	0.0027236	0.00149298	0.00296827	0.00394211			2296	41.3886	16.8239	19.5108	9.28223	22.6223	40.8048
2229	279	30.1399	13.8012	15.6944	8.23896	17.8443	29.7706		2297	0.00394575	0.00246609	0.00271002	0.00148554	0.00295346	0.00392245			2297	41.5534	16.8657	19.5641	9.29611	22.6896	40.9663
2230	280	30.3079	13.8492	15.7544	8.25619	17.9186	29.9356		2298	0.00392607	0.00245379	0.0026965	0.00147813	0.00293873	0.00390288			2298	41.718	16.9074	19.6173	9.30994	22.7568	41.1276
2231	281	30.476	13.8971	15.8143	8.27337	17.9929	30.1006		2299	0.00390649	0.00244155	0.00268305	0.00147076	0.00292408	0.00388342			2299	41.8824	16.949	19.6703	9.32372	22.8239	41.2887
2232	282	30.6442	13.9449	15.8741	8.2905	18.0671	30.2658		2300	0.00388701	0.00242938	0.00266967	0.00146342	0.00290949	0.00386405			2300	42.0467	16.9905	19.7232	9.33745	22.8909	41.4497
2233	283	30.8125	13.9927	15.9339	8.30758	18.1413	30.431		2301	0.00386762	0.00241726	0.00265636	0.00145612	0.00289498	0.00384478			2301	42.2107	17.0318	19.776	9.35114	22.9577	41.6105
2234	284	30.9808	14.0404	15.9936	8.32461	18.2154	30.5963		2302	0.00384833	0.0024052	0.00264311	0.00144886	0.00288054	0.0038256			2302	42.3746	17.0731	19.8287	9.36477	23.0243	41.7711
2235	285	31.1492	14.088	16.0532	8.34159	18.2894	30.7616		2303	0.00382914	0.00239321	0.00262993	0.00144163	0.00286617	0.00380652			2303	42.5383	17.1143	19.8812	9.37836	23.0908	41.9315
2236	286	31.3177	14.1355	16.1127	8.35852	18.3633	30.927		2304	0.00381004	0.00238127	0.00261681	0.00143444	0.00285188	0.00378753			2304	42.7018	17.1553	19.9337	9.3919	23.1572	42.0917
2237	287	31.4863	14.183	16.1722	8.3754	18.4372	31.0924		2305	0.00379104	0.0023694	0.00260376	0.00142729	0.00283766	0.00376864			2305	42.8651	17.1963	19.986	9.40539	23.2234	42.2518
2238	288	31.6549	14.2303	16.2316	8.39223	18.511	31.2579		2306	0.00377213	0.00235758	0.00259077	0.00142017	0.0028235	0.00374985			2306	43.0283	17.2371	20.0381	9.41884	23.2895	42.4116
2239	289	31.8235	14.2776	16.2909	8.40901	18.5847	31.4235		2307	0.00375331	0.00234582	0.00257785	0.00141309	0.00280942	0.00373115			2307	43.1912	17.2778	20.0902	9.43223	23.3555	42.5712
2240	290	31.9922	14.3248	16.3501	8.42573	18.6584	31.5891		2308	0.0037346	0.00233412	0.00256499	0.00140604	0.00279541	0.00371254			2308	43.3539	17.3185	20.1421	9.44558	23.4213	42.7307
2241	291	32.161	14.372	16.4092	8.44241	18.7319	31.7547		2309	0.00371597	0.00232248	0.0025522	0.00139903	0.00278147	0.00369402			2309	43.5164	17.359	20.1939	9.45888	23.4869	42.8899
2242	292	32.3297	14.419	16.4683	8.45904	18.8054	31.9204		2310	0.00369744	0.00231089	0.00253947	0.00139205	0.00276759	0.0036756			2310	43.6787	17.3994	20.2456	9.47213	23.5524	43.0489
2243	293	32.4986	14.466	16.5272	8.47561	18.8788	32.0861		2311	0.00367899	0.00229937	0.0025268	0.00138511	0.00275379	0.00365726			2311	43.8408	17.4397	20.2971	9.48534	23.6178	43.2077
2244	294	32.6674	14.5129	16.5861	8.49214	18.9522	32.2518		2312	0.00366065	0.0022879	0.0025142	0.0013782	0.00274006	0.00363902			2312	44.0027	17.4799	20.3485	9.49849	23.683	43.3663
2245	295	32.8363	14.5597	16.6449	8.50862	19.0254	32.4175		2313	0.00364239	0.00227649	0.00250166	0.00137132	0.00272639	0.00362087			2313	44.1644	17.52	20.3998	9.5116	23.7481	43.5247
2246	296	33.0052	14.6064	16.7036	8.52504	19.0986	32.5833		2314	0.00362422	0.00226514	0.00248919	0.00136448	0.00271279	0.00360281			2314	44.3258	17.5599	20.451	9.52466	23.813	43.6829
2247	297	33.1741	14.653	16.7622	8.54141	19.1716	32.7491		2315	0.00360615	0.00225384	0.00247677	0.00135768	0.00269926	0.00358485			2315	44.4871	17.5998	20.502	9.53768	23.8778	43.8409
2248	298	33.343	14.6995	16.8208	8.55774	19.2446	32.9148		2316	0.00358816	0.0022426	0.00246442	0.00135091	0.0026858	0.00356697			2316	44.6481	17.6396	20.5529	9.55064	23.9424	43.9986
2249	299	33.512	14.746	16.8792	8.57401	19.3175	33.0806		2317	0.00357026	0.00223141	0.00245213	0.00134417	0.0026724	0.00354918			2317	44.8089	17.6792	20.6037	9.56356	24.0069	44.1561
2250	300	33.6809	14.7924	16.9376	8.59023	19.3903	33.2464		2318	0.00355246	0.00222028	0.0024399	0.00133747	0.00265907	0.00353147			2318	44.9694	17.7188	20.6543	9.57643	24.0712	44.3134
2251	301	33.8499	14.8387	16.9958	8.60641	19.463	33.4122		2319	0.00353474	0.00220921	0.00242773	0.0013308	0.00264581	0.00351386			2319	45.1297	17.7582	20.7049	9.58926	24.1354	44.4704
2252	302	34.0188	14.8849	17.054	8.62253	19.5356	33.5779		2320	0.00351711	0.00219819	0.00241562	0.00132416	0.00263262	0.00349634			2320	45.2898	17.7975	20.7552	9.60204	24.1994	44.6272
2253	303	34.1877	14.931	17.1121	8.6386	19.6082	33.7437		2321	0.00349957	0.00218723	0.00240357	0.00131755	0.00261949	0.0034789			2321	45.4497	17.8367	20.8055	9.61477	24.2633	44.7838
2254	304	34.3567	14.977	17.17	8.65462	19.6806	33.9094		2322	0.00348211	0.00217632	0.00239158	0.00131098	0.00260642	0.00346155			2322	45.6093	17.8758	20.8556	9.62745	24.327	44.9401
2255	305	34.5256	15.0229	17.2279	8.67059	19.7529	34.0751		2323	0.00346475	0.00216546	0.00237966	0.00130444	0.00259342	0.00344428			2323	45.7687	17.9148	20.9056	9.64009	24.3906	45.0962
2256	306	34.6945	15.0688	17.2857	8.68651	19.8252	34.2408		2324	0.00344747	0.00215466	0.00236779	0.00129794	0.00258049	0.0034271			2324	45.9278	17.9537	20.9555	9.65268	24.454	45.2521
2257	307	34.8633	15.1145	17.3434	8.70238	19.8973	34.4065		2325	0.00343027	0.00214392	0.00235598	0.00129146	0.00256762	0.00341001			2325	46.0867	17.9924	21.0052	9.66523	24.5173	45.4077
2258	308	35.0321	15.1602	17.401	8.7182	19.9693	34.5721		2326	0.00341316	0.00213322	0.00234423	0.00128502	0.00255481	0.003393			2326	46.2453	18.0311	21.0548	9.67773	24.5804	45.5631
2259	309	35.2009	15.2058	17.4585	8.73396	20.0413	34.7377		2327	0.00339614	0.00212259	0.00233253	0.00127861	0.00254207	0.00337608			2327	46.4037	18.0696	21.1043	9.69018	24.6433	45.7182
2260	310	35.3697	15.2513	17.5159	8.74968	20.1131	34.9033		2328	0.0033792	0.002112	0.0023209	0.00127224	0.00252939	0.00335924			2328	46.5618	18.1081	21.1537	9.70258	24.7061	45.8731
2261	311	35.5384	15.2966	17.5732	8.76535	20.1848	35.0688		2329	0.00336235	0.00210147	0.00230933	0.00126589	0.00251677	0.00334249			2329	46.7197	18.1464	21.2029	9.71494	24.7688	46.0277
2262	312	35.7071	15.3419	17.6304	8.78097	20.2565	35.2342		2330	0.00334558	0.00209098	0.00229781	0.00125958	0.00250422	0.00332582			2330	46.8773	18.1846	21.2519	9.72726	24.8313	46.1821
2263	313	35.8757	15.3871	17.6875	8.79653	20.328	35.3997		2331	0.00332889	0.00208056	0.00228635	0.0012533	0.00249173	0.00330923			2331	47.0347	18.2227	21.3009	9.73953	24.8936	46.3362
2264	314	36.0443	15.4323	17.7445	8.81205	20.3994	35.565		2332	0.00331229	0.00207018	0.00227494	0.00124704	0.00247931	0.00329272			2332	47.1918	18.2607	21.3497	9.75175	24.9558	46.49
2265	315	36.2128	15.4773	17.8014	8.82752	20.4707	35.7303		2333	0.00329577	0.00205985	0.0022636	0.00124083	0.00246694	0.0032763			2333	47.3486	18.2986	21.3984	9.76392	25.0178	46.6436
2266	316	36.3813	15.5222	17.8582	8.84293	20.5419	35.8955		2334	0.00327933	0.00204958	0.00225231	0.00123464	0.00245464	0.00325996			2334	47.5052	18.3364	21.4469	9.77605	25.0797	46.7969
2267	317	36.5497	15.567	17.9149	8.8583	20.613	36.0607		2335	0.00326298	0.00203936	0.00224107	0.00122848	0.00244239	0.0032437			2335	47.6615	18.374	21.4953	9.78814	25.1414	46.95
2268	318	36.718	15.6117	17.9715	8.87361	20.684	36.2258		2336	0.0032467	0.00202919	0.0022299	0.00122235	0.00243021	0.00322752			2336	47.8175	18.4116	21.5436	9.80018	25.203	47.1028
2269	319	36.8863	15.6564	18.028	8.88888	20.7548	36.3908		2337	0.00323051	0.00201907	0.00221878	0.00121626	0.00241809	0.00321143			2337	47.9732	18.449	21.5918	9.81217	25.2644	47.2553
2270	320	37.0544	15.7009	18.0843	8.90409	20.8256	36.5557		2338	0.0032144	0.002009	0.00220771	0.00121019	0.00240603	0.00319541			2338	48.1287	18.4863	21.6398	9.82412	25.3256	47.4075
2271	321	37.2225	15.7454	18.1406	8.91926	20.8962	36.7206		2339	0.00319836	0.00199898	0.0021967	0.00120415	0.00239403	0.00317947			2339	48.2839	18.5236	21.6877	9.83602	25.3867	47.5595
2272	322	37.3906	15.7897	18.1968	8.93437	20.9667	36.8853		2340	0.00318241	0.00198901	0.00218574	0.00119815	0.00238209	0.00316361			2340	48.4388	18.5607	21.7354	9.84788	25.4476	47.7112
2273	323	37.5585	15.834	18.2528	8.94944	21.0371	37.05		2341	0.00316654	0.00197909	0.00217484	0.00119217	0.00237021	0.00314784			2341	48.5935	18.5976	21.783	9.8597	25.5084	47.8626
2274	324	37.7263	15.8781	18.3088	8.96445	21.1074	37.2146		2342	0.00315075	0.00196921	0.00216399	0.00118623	0.00235839	0.00313214			2342	48.7479	18.6345	21.8305	9.87146	25.569	48.0138
2275	325	37.8941	15.9222	18.3646	8.97942	21.1776	37.3791		2343	0.00313503	0.00195939	0.0021532	0.00118031	0.00234663	0.00311651			2343	48.9019	18.6713	21.8778	9.88319	25.6294	48.1646
2276	326	38.0617	15.9661	18.4203	8.99433	21.2476	37.5435		2344	0.0031194	0.00194962	0.00214246	0.00117442	0.00233492	0.00310097			2344	49.0557	18.7079	21.9251	9.89487	25.6897	48.3152
2277	327	38.2293	16.01	18.4759	9.0092	21.3176	37.7078		2345	0.00310384	0.0019399	0.00213178	0.00116857	0.00232328	0.0030855			2345	49.2092	18.7445	21.9721	9.9065	25.7498	48.4655
2278	328	38.3967	16.0537	18.5314	9.02401	21.3874	37.8719		2346	0.00308836	0.00193022	0.00212114	0.00116274	0.00231169	0.00307012			2346	49.3624	18.7809	22.0191	9.91809	25.8098	48.6155
2279	329	38.564	16.0974	18.5868	9.03878	21.4571	38.036		2347	0.00307295	0.00192059	0.00211056	0.00115694	0.00230016	0.0030548			2347	49.5154	18.8172	22.0659	9.92964	25.8696	48.7652
2280	330	38.7312	16.1409	18.6421	9.05349	21.5266	38.1999		2348	0.00305763	0.00191102	0.00210004	0.00115117	0.00228869	0.00303957			2348	49.668	18.8535	22.1125	9.94114	25.9292	48.9146
2281	331	38.8983	16.1844	18.6973	9.06816	21.5961	38.3638		2349	0.00304238	0.00190148	0.00208956	0.00114543	0.00227727	0.00302441			2349	49.8203	18.8896	22.1591	9.9526	25.9887	49.0638
2282	332	39.0653	16.2277	18.7523	9.08278	21.6654	38.5275		2350	0.0030272	0.001892	0.00207914	0.00113971	0.00226591	0.00300932			2350	49.9724	18.9255	22.2055	9.96401	26.048	49.2126
2283	333	39.2322	16.271	18.8072	9.09734	21.7346	38.6911		2351	0.00301211	0.00188256	0.00206877	0.00113403	0.00225461	0.00299431			2351	50.1241	18.9614	22.2517	9.97538	26.1072	49.3611
2284	334	39.3989	16.3141	18.8621	9.11186	21.8037	38.8545		2352	0.00299708	0.00187317	0.00205845	0.00112837	0.00224337	0.00297938			2352	50.2755	18.9972	22.2979	9.9867	26.1662	49.5094
2285	335	39.5655	16.3572	18.9168	9.12633	21.8726	39.0178		2353	0.00298213	0.00186383	0.00204819	0.00112275	0.00223218	0.00296452			2353	50.4267	19.0328	22.3439	9.99798	26.225	49.6573
2286	336	39.732	16.4001	18.9714	9.14075	21.9414	39.181		2354	0.00296726	0.00185454	0.00203797	0.00111715	0.00222105	0.00294973			2354	50.5775	19.0684	22.3897	10.0092	26.2837	49.805
2287	337	39.8983	16.443	19.0258	9.15512	22.0101	39.3441		2355	0.00295246	0.00184529	0.00202781	0.00111157	0.00220997	0.00293502			2355	50.728	19.1038	22.4354	10.0204	26.3422	49.9523
2288	338	40.0645	16.4857	19.0802	9.16944	22.0786	39.507		2356	0.00293774	0.00183608	0.00201769	0.00110603	0.00219895	0.00292038			2356	50.8782	19.1391	22.481	10.0316	26.4006	50.0994
2289	339	40.2305	16.5283	19.1344	9.18371	22.1471	39.6698		2357	0.00292308	0.00182693	0.00200763	0.00110051	0.00218798	0.00290582			2357	51.0281	19.1743	22.5265	10.0427	26.4587	50.2461
2290	340	40.3964	16.5709	19.1886	9.19793	22.2154	39.8324		2358	0.00290851	0.00181781	0.00199762	0.00109502	0.00217707	0.00289133			2358	51.1777	19.2094	22.5718	10.0537	26.5167	50.3925
2291	341	40.5622	16.6133	19.2426	9.2121	22.2835	39.9948		2359	0.002894	0.00180875	0.00198766	0.00108956	0.00216621	0.00287691			2359	51.327	19.2444	22.617	10.0648	26.5746	50.5387
2292	342	40.7278	16.6556	19.2965	9.22623	22.3515	40.1572		2360	0.00287957	0.00179973	0.00197774	0.00108413	0.0021554	0.00286256			2360	51.476	19.2793	22.662	10.0757	26.6323	50.6845
2293	343	40.8932	16.6978	19.3502	9.2403	22.4194	40.3193		2361	0.0028652	0.00179075	0.00196788	0.00107872	0.00214465	0.00284828			2361	51.6246	19.314	22.7069	10.0867	26.6898	50.83
2294	344	41.0585	16.74	19.4039	9.25433	22.4872	40.4813		2362	0.00285091	0.00178182	0.00195806	0.00107334	0.00213396	0.00283407			2362	51.773	19.3487	22.7517	10.0976	26.7472	50.9752
2295	345	41.2236	16.782	19.4574	9.2683	22.5548	40.6431		2363	0.00283669	0.00177293	0.0019483	0.00106799	0.00212331	0.00281994			2363	51.921	19.3832	22.7963	10.1084	26.8044	51.12
2296	346	41.3886	16.8239	19.5108	9.28223	22.6223	40.8048		2364	0.00282255	0.00176409	0.00193858	0.00106266	0.00211272	0.00280587			2364	52.0687	19.4176	22.8408	10.1192	26.8614	51.2646
2297	347	41.5534	16.8657	19.5641	9.29611	22.6896	40.9663		2365	0.00280847	0.00175529	0.00192891	0.00105736	0.00210219	0.00279188			2365	52.2161	19.452	22.8852	10.13	26.9183	51.4089
2298	348	41.718	16.9074	19.6173	9.30994	22.7568	41.1276		2366	0.00279446	0.00174654	0.00191929	0.00105209	0.0020917	0.00277796			2366	52.3632	19.4862	22.9294	10.1407	26.975	51.5528
2299	349	41.8824	16.949	19.6703	9.32372	22.8239	41.2887		2367	0.00278052	0.00173783	0.00190972	0.00104684	0.00208127	0.0027641			2367	52.5099	19.5203	22.9735	10.1514	27.0315	51.6964
2300	350	42.0467	16.9905	19.7232	9.33745	22.8909	41.4497		2368	0.00276666	0.00172916	0.00190019	0.00104162	0.00207089	0.00275031			2368	52.6563	19.5542	23.0175	10.162	27.0879	51.8397
2301	351	42.2107	17.0318	19.776	9.35114	22.9577	41.6105		2369	0.00275286	0.00172053	0.00189072	0.00103642	0.00206056	0.0027366			2369	52.8024	19.5881	23.0613	10.1726	27.1441	51.9827
2302	352	42.3746	17.0731	19.8287	9.36477	23.0243	41.7711		2370	0.00273913	0.00171195	0.00188129	0.00103126	0.00205028	0.00272295			2370	52.9481	19.6219	23.105	10.1832	27.2002	52.1253
2303	353	42.5383	17.1143	19.8812	9.37836	23.0908	41.9315		2371	0.00272547	0.00170341	0.0018719	0.00102611	0.00204006	0.00270937			2371	53.0936	19.6555	23.1485	10.1937	27.2561	52.2676
2304	354	42.7018	17.1553	19.9337	9.3919	23.1572	42.0917		2372	0.00271187	0.00169492	0.00186257	0.00102099	0.00202988	0.00269585			2372	53.2387	19.6891	23.192	10.2042	27.3118	52.4096
2305	355	42.8651	17.1963	19.986	9.40539	23.2234	42.2518		2373	0.00269835	0.00168647	0.00185328	0.0010159	0.00201976	0.00268241			2373	53.3834	19.7225	23.2352	10.2146	27.3673	52.5513
2306	356	43.0283	17.2371	20.0381	9.41884	23.2895	42.4116		2374	0.00268489	0.00167805	0.00184403	0.00101083	0.00200969	0.00266903			2374	53.5279	19.7558	23.2784	10.225	27.4227	52.6926
2307	357	43.1912	17.2778	20.0902	9.43223	23.3555	42.5712		2375	0.0026715	0.00166968	0.00183484	0.00100579	0.00199966	0.00265572			2375	53.672	19.789	23.3214	10.2353	27.4779	52.8336
2308	358	43.3539	17.3185	20.1421	9.44558	23.4213	42.7307		2376	0.00265817	0.00166136	0.00182569	0.00100078	0.00198969	0.00264247			2376	53.8158	19.8221	23.3642	10.2456	27.533	52.9743
2309	359	43.5164	17.359	20.1939	9.45888	23.4869	42.8899		2377	0.00264492	0.00165307	0.00181658	0.000995786	0.00197977	0.00262929			2377	53.9592	19.8551	23.407	10.2559	27.5879	53.1147
2310	360	43.6787	17.3994	20.2456	9.47213	23.5524	43.0489		2378	0.00263172	0.00164483	0.00180752	0.000990819	0.00196989	0.00261618			2378	54.1023	19.888	23.4496	10.2661	27.6426	53.2547
2311	361	43.8408	17.4397	20.2971	9.48534	23.6178	43.2077		2379	0.0026186	0.00163662	0.0017985	0.000985877	0.00196007	0.00260313			2379	54.245	19.9207	23.492	10.2763	27.6972	53.3944
2312	362	44.0027	17.4799	20.3485	9.49849	23.683	43.3663		2380	0.00260554	0.00162846	0.00178953	0.00098096	0.00195029	0.00259015			2380	54.3875	19.9534	23.5344	10.2864	27.7516	53.5338
2313	363	44.1644	17.52	20.3998	9.5116	23.7481	43.5247		2381	0.00259254	0.00162034	0.00178061	0.000976068	0.00194056	0.00257723			2381	54.5295	19.9859	23.5766	10.2965	27.8058	53.6728
2314	364	44.3258	17.5599	20.451	9.52466	23.813	43.6829		2382	0.00257961	0.00161226	0.00177173	0.000971199	0.00193088	0.00256438			2382	54.6713	20.0184	23.6186	10.3066	27.8599	53.8115
2315	365	44.4871	17.5998	20.502	9.53768	23.8778	43.8409		2383	0.00256675	0.00160422	0.00176289	0.000966356	0.00192125	0.00255159			2383	54.8127	20.0507	23.6605	10.3166	27.9138	53.9498
2316	366	44.6481	17.6396	20.5529	9.55064	23.9424	43.9986		2384	0.00255395	0.00159621	0.0017541	0.000961536	0.00191167	0.00253886			2384	54.9537	20.0829	23.7023	10.3266	27.9675	54.0878
2317	367	44.8089	17.6792	20.6037	9.56356	24.0069	44.1561		2385	0.00254121	0.00158825	0.00174535	0.00095674	0.00190214	0.0025262			2385	55.0944	20.115	23.744	10.3365	28.0211	54.2255
2318	368	44.9694	17.7188	20.6543	9.57643	24.0712	44.3134		2386	0.00252853	0.00158033	0.00173665	0.000951968	0.00189265	0.0025136			2386	55.2348	20.147	23.7855	10.3464	28.0745	54.3628
2319	369	45.1297	17.7582	20.7049	9.58926	24.1354	44.4704		2387	0.00251592	0.00157245	0.00172798	0.00094722	0.00188321	0.00250106			2387	55.3748	20.1789	23.8269	10.3563	28.1277	54.4998
2320	370	45.2898	17.7975	20.7552	9.60204	24.1994	44.6272		2388	0.00250337	0.00156461	0.00171937	0.000942496	0.00187382	0.00248859			2388	55.5145	20.2107	23.8681	10.3661	28.1808	54.6365
2321	371	45.4497	17.8367	20.8055	9.61477	24.2633	44.7838		2389	0.00249089	0.0015568	0.00171079	0.000937795	0.00186447	0.00247618			2389	55.6538	20.2424	23.9092	10.3759	28.2337	54.7728
2322	372	45.6093	17.8758	20.8556	9.62745	24.327	44.9401		2390	0.00247846	0.00154904	0.00170226	0.000933118	0.00185517	0.00246383			2390	55.7928	20.2739	23.9502	10.3856	28.2864	54.9087
2323	373	45.7687	17.9148	20.9056	9.64009	24.3906	45.0962		2391	0.0024661	0.00154131	0.00169377	0.000928464	0.00184592	0.00245154			2391	55.9314	20.3054	23.991	10.3953	28.339	55.0444
2324	374	45.9278	17.9537	20.9555	9.65268	24.454	45.2521		2392	0.0024538	0.00153363	0.00168532	0.000923834	0.00183671	0.00243931			2392	56.0697	20.3367	24.0317	10.405	28.3914	55.1796
2325	375	46.0867	17.9924	21.0052	9.66523	24.5173	45.4077		2393	0.00244157	0.00152598	0.00167691	0.000919226	0.00182755	0.00242714			2393	56.2076	20.368	24.0723	10.4146	28.4436	55.3146
2326	376	46.2453	18.0311	21.0548	9.67773	24.5804	45.5631		2394	0.00242939	0.00151837	0.00166855	0.000914641	0.00181844	0.00241504			2394	56.3452	20.3991	24.1127	10.4242	28.4957	55.4491
2327	377	46.4037	18.0696	21.1043	9.69018	24.6433	45.7182		2395	0.00241727	0.00151079	0.00166023	0.000910079	0.00180937	0.00240299			2395	56.4824	20.4301	24.153	10.4337	28.5476	55.5834
2328	378	46.5618	18.1081	21.1537	9.70258	24.7061	45.8731		2396	0.00240522	0.00150326	0.00165195	0.00090554	0.00180034	0.00239101			2396	56.6193	20.461	24.1932	10.4432	28.5994	55.7173
2329	379	46.7197	18.1464	21.2029	9.71494	24.7688	46.0277		2397	0.00239322	0.00149576	0.00164371	0.000901024	0.00179137	0.00237908			2397	56.7558	20.4918	24.2332	10.4527	28.651	55.8508
2330	380	46.8773	18.1846	21.2519	9.72726	24.8313	46.1821		2398	0.00238128	0.0014883	0.00163551	0.00089653	0.00178243	0.00236722			2398	56.8919	20.5225	24.2731	10.4621	28.7024	55.984
2331	381	47.0347	18.2227	21.3009	9.73953	24.8936	46.3362		2399	0.00236941	0.00148088	0.00162735	0.000892059	0.00177354	0.00235541			2399	57.0277	20.5531	24.3129	10.4715	28.7536	56.1168
2332	382	47.1918	18.2607	21.3497	9.75175	24.9558	46.49		2400	0.00235759	0.00147349	0.00161924	0.000887609	0.0017647	0.00234366			2400	57.1632	20.5836	24.3525	10.4809	28.8047	56.2493
2333	383	47.3486	18.2986	21.3984	9.76392	25.0178	46.6436		2401	0.00234583	0.00146614	0.00161116	0.000883183	0.00175589	0.00233197			2401	57.2982	20.614	24.392	10.4902	28.8556	56.3815
2334	384	47.5052	18.3364	21.4469	9.77605	25.0797	46.7969		2402	0.00233413	0.00145883	0.00160313	0.000878778	0.00174714	0.00232034			2402	57.433	20.6442	24.4314	10.4995	28.9064	56.5132
2335	385	47.6615	18.374	21.4953	9.78814	25.1414	46.95		2403	0.00232249	0.00145155	0.00159513	0.000874395	0.00173842	0.00230877			2403	57.5673	20.6744	24.4706	10.5087	28.957	56.6447
2336	386	47.8175	18.4116	21.5436	9.80018	25.203	47.1028		2404	0.00231091	0.00144431	0.00158717	0.000870034	0.00172975	0.00229726			2404	57.7014	20.7045	24.5097	10.5179	29.0074	56.7758
2337	387	47.9732	18.449	21.5918	9.81217	25.2644	47.2553		2405	0.00229938	0.00143711	0.00157926	0.000865694	0.00172113	0.0022858			2405	57.835	20.7344	24.5487	10.527	29.0577	56.9065
2338	388	48.1287	18.4863	21.6398	9.82412	25.3256	47.4075		2406	0.00228791	0.00142994	0.00157138	0.000861377	0.00171254	0.0022744			2406	57.9683	20.7642	24.5875	10.5362	29.1078	57.0369
2339	389	48.2839	18.5236	21.6877	9.83602	25.3867	47.5595		2407	0.0022765	0.00142281	0.00156354	0.000857081	0.001704	0.00226305			2407	58.1012	20.794	24.6262	10.5453	29.1577	57.1669
2340	390	48.4388	18.5607	21.7354	9.84788	25.4476	47.7112		2408	0.00226515	0.00141572	0.00155575	0.000852806	0.0016955	0.00225177			2408	58.2338	20.8236	24.6648	10.5543	29.2075	57.2966
2341	391	48.5935	18.5976	21.783	9.8597	25.5084	47.8626		2409	0.00225385	0.00140865	0.00154799	0.000848552	0.00168704	0.00224054			2409	58.366	20.8531	24.7032	10.5633	29.2571	57.4259
2342	392	48.7479	18.6345	21.8305	9.87146	25.569	48.0138		2410	0.00224261	0.00140163	0.00154027	0.00084432	0.00167863	0.00222936			2410	58.4978	20.8825	24.7415	10.5723	29.3065	57.5548
2343	393	48.9019	18.6713	21.8778	9.88319	25.6294	48.1646		2411	0.00223142	0.00139464	0.00153258	0.000840109	0.00167026	0.00221824			2411	58.6293	20.9119	24.7797	10.5812	29.3558	57.6834
2344	394	49.0557	18.7079	21.9251	9.89487	25.6897	48.3152		2412	0.00222029	0.00138768	0.00152494	0.000835919	0.00166193	0.00220718			2412	58.7605	20.9411	24.8177	10.5901	29.4049	57.8117
2345	395	49.2092	18.7445	21.9721	9.9065	25.7498	48.4655		2413	0.00220922	0.00138076	0.00151734	0.00083175	0.00165364	0.00219617			2413	58.8912	20.9702	24.8556	10.599	29.4539	57.9395
2346	396	49.3624	18.7809	22.0191	9.91809	25.8098	48.6155		2414	0.0021982	0.00137387	0.00150977	0.000827602	0.00164539	0.00218522			2414	59.0216	20.9992	24.8934	10.6078	29.5026	58.0671
2347	397	49.5154	18.8172	22.0659	9.92964	25.8696	48.7652		2415	0.00218724	0.00136702	0.00150224	0.000823474	0.00163718	0.00217432			2415	59.1516	21.028	24.931	10.6166	29.5513	58.1942
2348	398	49.668	18.8535	22.1125	9.94114	25.9292	48.9146		2416	0.00217633	0.0013602	0.00149475	0.000819367	0.00162902	0.00216347			2416	59.2813	21.0568	24.9685	10.6253	29.5997	58.321
2349	399	49.8203	18.8896	22.1591	9.9526	25.9887	49.0638		2417	0.00216547	0.00135342	0.00148729	0.00081528	0.00162089	0.00215268			2417	59.4106	21.0855	25.0059	10.634	29.648	58.4475
2350	400	49.9724	18.9255	22.2055	9.96401	26.048	49.2126		2418	0.00215467	0.00134667	0.00147987	0.000811214	0.00161281	0.00214195			2418	59.5395	21.1141	25.0431	10.6427	29.6962	58.5736
2351	401	50.1241	18.9614	22.2517	9.97538	26.1072	49.3611		2419	0.00214393	0.00133995	0.00147249	0.000807168	0.00160477	0.00213126			2419	59.6681	21.1426	25.0803	10.6514	29.7441	58.6993
2352	402	50.2755	18.9972	22.2979	9.9867	26.1662	49.5094		2420	0.00213323	0.00133327	0.00146515	0.000803142	0.00159676	0.00212063			2420	59.7963	21.1709	25.1172	10.66	29.7919	58.8247
2353	403	50.4267	19.0328	22.3439	9.99798	26.225	49.6573		2421	0.00212259	0.00132662	0.00145784	0.000799137	0.0015888	0.00211006			2421	59.9241	21.1992	25.1541	10.6685	29.8396	58.9497
2354	404	50.5775	19.0684	22.3897	10.0092	26.2837	49.805		2422	0.00211201	0.00132	0.00145057	0.000795151	0.00158087	0.00209953			2422	60.0516	21.2273	25.1908	10.6771	29.8871	59.0743
2355	405	50.728	19.1038	22.4354	10.0204	26.3422	49.9523		2423	0.00210147	0.00131342	0.00144333	0.000791185	0.00157299	0.00208906			2423	60.1787	21.2554	25.2274	10.6856	29.9344	59.1986
2356	406	50.8782	19.1391	22.481	10.0316	26.4006	50.0994		2424	0.00209099	0.00130687	0.00143614	0.000787239	0.00156514	0.00207864			2424	60.3054	21.2834	25.2639	10.694	29.9816	59.3226
2357	407	51.0281	19.1743	22.5265	10.0427	26.4587	50.2461		2425	0.00208056	0.00130035	0.00142897	0.000783313	0.00155734	0.00206828			2425	60.4318	21.3112	25.3002	10.7024	30.0286	59.4461
2358	408	51.1777	19.2094	22.5718	10.0537	26.5167	50.3925		2426	0.00207019	0.00129387	0.00142185	0.000779406	0.00154957	0.00205796			2426	60.5578	21.339	25.3364	10.7108	30.0754	59.5693
2359	409	51.327	19.2444	22.617	10.0648	26.5746	50.5387		2427	0.00205986	0.00128741	0.00141475	0.000775519	0.00154184	0.0020477			2427	60.6834	21.3666	25.3725	10.7192	30.1221	59.6922
2360	410	51.476	19.2793	22.662	10.0757	26.6323	50.6845		2428	0.00204959	0.00128099	0.0014077	0.000771651	0.00153415	0.00203748			2428	60.8086	21.3941	25.4084	10.7275	30.1686	59.8147
2361	411	51.6246	19.314	22.7069	10.0867	26.6898	50.83		2429	0.00203937	0.0012746	0.00140068	0.000767802	0.0015265	0.00202732			2429	60.9335	21.4216	25.4443	10.7358	30.2149	59.9368
2362	412	51.773	19.3487	22.7517	10.0976	26.7472	50.9752		2430	0.0020292	0.00126825	0.00139369	0.000763973	0.00151889	0.00201721			2430	61.0581	21.4489	25.48	10.744	30.2611	60.0585
2363	413	51.921	19.3832	22.7963	10.1084	26.8044	51.12		2431	0.00201907	0.00126192	0.00138674	0.000760162	0.00151131	0.00200715			2431	61.1822	21.4762	25.5155	10.7523	30.3072	60.1799
2364	414	52.0687	19.4176	22.8408	10.1192	26.8614	51.2646		2432	0.002009	0.00125563	0.00137982	0.000756371	0.00150377	0.00199714			2432	61.306	21.5033	25.5509	10.7604	30.353	60.301
2365	415	52.2161	19.452	22.8852	10.13	26.9183	51.4089		2433	0.00199898	0.00124936	0.00137294	0.000752599	0.00149627	0.00198718			2433	61.4294	21.5303	25.5863	10.7686	30.3988	60.4216
2366	416	52.3632	19.4862	22.9294	10.1407	26.975	51.5528		2434	0.00198901	0.00124313	0.00136609	0.000748845	0.00148881	0.00197727			2434	61.5524	21.5573	25.6214	10.7767	30.4443	60.5419
2367	417	52.5099	19.5203	22.9735	10.1514	27.0315	51.6964		2435	0.00197909	0.00123693	0.00135928	0.00074511	0.00148139	0.0019674			2435	61.6751	21.5841	25.6565	10.7848	30.4897	60.6619
2368	418	52.6563	19.5542	23.0175	10.162	27.0879	51.8397		2436	0.00196922	0.00123076	0.0013525	0.000741394	0.001474	0.00195759			2436	61.7974	21.6108	25.6914	10.7928	30.5349	60.7815
2369	419	52.8024	19.5881	23.0613	10.1726	27.1441	51.9827		2437	0.0019594	0.00122463	0.00134576	0.000737696	0.00146665	0.00194783			2437	61.9193	21.6375	25.7262	10.8008	30.58	60.9007
2370	420	52.9481	19.6219	23.105	10.1832	27.2002	52.1253		2438	0.00194963	0.00121852	0.00133904	0.000734017	0.00145933	0.00193811			2438	62.0409	21.664	25.7609	10.8088	30.6249	61.0195
2371	421	53.0936	19.6555	23.1485	10.1937	27.2561	52.2676		2439	0.00193991	0.00121244	0.00133237	0.000730356	0.00145205	0.00192845			2439	62.1621	21.6904	25.7954	10.8167	30.6697	61.138
2372	422	53.2387	19.6891	23.192	10.2042	27.3118	52.4096		2440	0.00193023	0.00120639	0.00132572	0.000726713	0.00144481	0.00191883			2440	62.2829	21.7168	25.8298	10.8246	30.7143	61.2562
2373	423	53.3834	19.7225	23.2352	10.2146	27.3673	52.5513		2441	0.0019206	0.00120038	0.00131911	0.000723089	0.0014376	0.00190926			2441	62.4034	21.743	25.8641	10.8325	30.7587	61.3739
2374	424	53.5279	19.7558	23.2784	10.225	27.4227	52.6926		2442	0.00191102	0.00119439	0.00131253	0.000719482	0.00143043	0.00189974			2442	62.5235	21.7691	25.8983	10.8403	30.803	61.4913
2375	425	53.672	19.789	23.3214	10.2353	27.4779	52.8336		2443	0.00190149	0.00118843	0.00130598	0.000715894	0.0014233	0.00189026			2443	62.6432	21.7951	25.9323	10.8482	30.8471	61.6084
2376	426	53.8158	19.8221	23.3642	10.2456	27.533	52.9743		2444	0.00189201	0.0011825	0.00129947	0.000712323	0.0014162	0.00188083			2444	62.7625	21.8211	25.9662	10.8559	30.8911	61.7251
2377	427	53.9592	19.8551	23.407	10.2559	27.5879	53.1147		2445	0.00188257	0.00117661	0.00129299	0.000708771	0.00140914	0.00187145			2445	62.8815	21.8469	26	10.8637	30.9349	61.8414
2378	428	54.1023	19.888	23.4496	10.2661	27.6426	53.2547		2446	0.00187318	0.00117074	0.00128654	0.000705236	0.00140211	0.00186212			2446	63.0001	21.8726	26.0337	10.8714	30.9786	61.9573
2379	429	54.245	19.9207	23.492	10.2763	27.6972	53.3944		2447	0.00186384	0.0011649	0.00128012	0.000701718	0.00139512	0.00185283			2447	63.1183	21.8983	26.0672	10.879	31.0221	62.0729
2380	430	54.3875	19.9534	23.5344	10.2864	27.7516	53.5338		2448	0.00185455	0.00115909	0.00127374	0.000698218	0.00138816	0.00184359			2448	63.2362	21.9238	26.1006	10.8867	31.0654	62.1881
2381	431	54.5295	19.9859	23.5766	10.2965	27.8058	53.6728		2449	0.0018453	0.00115331	0.00126738	0.000694736	0.00138124	0.0018344			2449	63.3537	21.9493	26.1339	10.8943	31.1086	62.303
2382	432	54.6713	20.0184	23.6186	10.3066	27.8599	53.8115		2450	0.00183609	0.00114756	0.00126106	0.000691271	0.00137435	0.00182525			2450	63.4708	21.9746	26.1671	10.9019	31.1516	62.4175
2383	433	54.8127	20.0507	23.6605	10.3166	27.9138	53.9498		2451	0.00182693	0.00114183	0.00125477	0.000687823	0.00136749	0.00181614			2451	63.5876	21.9999	26.2001	10.9094	31.1945	62.5316
2384	434	54.9537	20.0829	23.7023	10.3266	27.9675	54.0878		2452	0.00181782	0.00113614	0.00124852	0.000684393	0.00136067	0.00180709			2452	63.7039	22.025	26.233	10.9169	31.2372	62.6454
2385	435	55.0944	20.115	23.744	10.3365	28.0211	54.2255		2453	0.00180876	0.00113047	0.00124229	0.000680979	0.00135389	0.00179807			2453	63.82	22.0501	26.2658	10.9244	31.2798	62.7588
2386	436	55.2348	20.147	23.7855	10.3464	28.0745	54.3628		2454	0.00179973	0.00112483	0.00123609	0.000677583	0.00134713	0.0017891			2454	63.9356	22.075	26.2985	10.9318	31.3222	62.8719
2387	437	55.3748	20.1789	23.8269	10.3563	28.1277	54.4998		2455	0.00179076	0.00111922	0.00122993	0.000674203	0.00134041	0.00178018			2455	64.0509	22.0999	26.331	10.9392	31.3644	62.9845
2388	438	55.5145	20.2107	23.8681	10.3661	28.1808	54.6365		2456	0.00178183	0.00111364	0.00122379	0.000670841	0.00133373	0.0017713			2456	64.1658	22.1246	26.3635	10.9466	31.4065	63.0969
2389	439	55.6538	20.2424	23.9092	10.3759	28.2337	54.7728		2457	0.00177294	0.00110809	0.00121769	0.000667495	0.00132708	0.00176247			2457	64.2803	22.1493	26.3958	10.954	31.4485	63.2088
2390	440	55.7928	20.2739	23.9502	10.3856	28.2864	54.9087		2458	0.0017641	0.00110256	0.00121162	0.000664166	0.00132046	0.00175368			2458	64.3945	22.1739	26.4279	10.9613	31.4902	63.3204
2391	441	55.9314	20.3054	23.991	10.3953	28.339	55.0444		2459	0.0017553	0.00109706	0.00120557	0.000660853	0.00131387	0.00174493			2459	64.5083	22.1983	26.46	10.9686	31.5319	63.4317
2392	442	56.0697	20.3367	24.0317	10.405	28.3914	55.1796		2460	0.00174654	0.00109159	0.00119956	0.000657557	0.00130732	0.00173623			2460	64.6217	22.2227	26.4919	10.9758	31.5734	63.5425
2393	443	56.2076	20.368	24.0723	10.4146	28.4436	55.3146		2461	0.00173783	0.00108615	0.00119358	0.000654278	0.0013008	0.00172757			2461	64.7348	22.247	26.5238	10.9831	31.6147	63.6531
2394	444	56.3452	20.3991	24.1127	10.4242	28.4957	55.4491		2462	0.00172917	0.00108073	0.00118763	0.000651014	0.00129431	0.00171895			2462	64.8475	22.2712	26.5555	10.9902	31.6559	63.7632
2395	445	56.4824	20.4301	24.153	10.4337	28.5476	55.5834		2463	0.00172054	0.00107534	0.0011817	0.000647768	0.00128786	0.00171038			2463	64.9598	22.2953	26.587	10.9974	31.6969	63.873
2396	446	56.6193	20.461	24.1932	10.4432	28.5994	55.7173		2464	0.00171196	0.00106997	0.00117581	0.000644537	0.00128143	0.00170185			2464	65.0717	22.3193	26.6185	11.0045	31.7378	63.9824
2397	447	56.7558	20.4918	24.2332	10.4527	28.651	55.8508		2465	0.00170342	0.00106464	0.00116994	0.000641322	0.00127504	0.00169336			2465	65.1833	22.3432	26.6498	11.0116	31.7785	64.0915
2398	448	56.8919	20.5225	24.2731	10.4621	28.7024	55.984		2466	0.00169493	0.00105933	0.00116411	0.000638124	0.00126868	0.00168492			2466	65.2946	22.367	26.681	11.0187	31.8191	64.2002
2399	449	57.0277	20.5531	24.3129	10.4715	28.7536	56.1168		2467	0.00168647	0.00105404	0.0011583	0.000634941	0.00126235	0.00167651			2467	65.4054	22.3907	26.7121	11.0257	31.8595	64.3086
2400	450	57.1632	20.5836	24.3525	10.4809	28.8047	56.2493		2468	0.00167806	0.00104879	0.00115253	0.000631774	0.00125606	0.00166815			2468	65.5159	22.4144	26.7431	11.0327	31.8998	64.4166
2401	451	57.2982	20.614	24.392	10.4902	28.8556	56.3815		2469	0.00166969	0.00104356	0.00114678	0.000628623	0.00124979	0.00165983			2469	65.626	22.4379	26.774	11.0397	31.9399	64.5242
2402	452	57.433	20.6442	24.4314	10.4995	28.9064	56.5132		2470	0.00166136	0.00103835	0.00114106	0.000625488	0.00124356	0.00165155			2470	65.7358	22.4613	26.8047	11.0467	31.9798	64.6315
2403	453	57.5673	20.6744	24.4706	10.5087	28.957	56.6447		2471	0.00165308	0.00103317	0.00113537	0.000622368	0.00123736	0.00164331			2471	65.8452	22.4847	26.8353	11.0536	32.0197	64.7384
2404	454	57.7014	20.7045	24.5097	10.5179	29.0074	56.7758		2472	0.00164483	0.00102802	0.0011297	0.000619264	0.00123119	0.00163512			2472	65.9542	22.5079	26.8658	11.0605	32.0593	64.845
2405	455	57.835	20.7344	24.5487	10.527	29.0577	56.9065		2473	0.00163663	0.00102289	0.00112407	0.000616176	0.00122505	0.00162696			2473	66.0629	22.5311	26.8962	11.0673	32.0988	64.9512
2406	456	57.9683	20.7642	24.5875	10.5362	29.1078	57.0369		2474	0.00162847	0.00101779	0.00111846	0.000613102	0.00121894	0.00161885			2474	66.1712	22.5542	26.9265	11.0741	32.1382	65.057
2407	457	58.1012	20.794	24.6262	10.5453	29.1577	57.1669		2475	0.00162035	0.00101271	0.00111288	0.000610044	0.00121286	0.00161077			2475	66.2791	22.5771	26.9566	11.0809	32.1774	65.1625
2408	458	58.2338	20.8236	24.6648	10.5543	29.2075	57.2966		2476	0.00161226	0.00100766	0.00110733	0.000607002	0.00120681	0.00160274			2476	66.3867	22.6	26.9867	11.0877	32.2165	65.2676
2409	459	58.366	20.8531	24.7032	10.5633	29.2571	57.4259		2477	0.00160422	0.00100264	0.00110181	0.000603974	0.00120079	0.00159475			2477	66.4939	22.6228	27.0166	11.0944	32.2554	65.3724
2410	460	58.4978	20.8825	24.7415	10.5723	29.3065	57.5548		2478	0.00159622	0.000997638	0.00109632	0.000600962	0.0011948	0.00158679			2478	66.6007	22.6455	27.0464	11.1011	32.2942	65.4768
2411	461	58.6293	20.9119	24.7797	10.5812	29.3558	57.6834		2479	0.00158826	0.000992662	0.00109085	0.000597965	0.00118884	0.00157888			2479	66.7072	22.6681	27.0761	11.1078	32.3328	65.5809
2412	462	58.7605	20.9411	24.8177	10.5901	29.4049	57.8117		2480	0.00158034	0.000987711	0.00108541	0.000594982	0.00118291	0.001571			2480	66.8133	22.6907	27.1056	11.1144	32.3713	65.6846
2413	463	58.8912	20.9702	24.8556	10.599	29.4539	57.9395		2481	0.00157246	0.000982785	0.00107999	0.000592015	0.00117701	0.00156317			2481	66.9191	22.7131	27.1351	11.1211	32.4097	65.788
2414	464	59.0216	20.9992	24.8934	10.6078	29.5026	58.0671		2482	0.00156461	0.000977883	0.00107461	0.000589062	0.00117114	0.00155537			2482	67.0245	22.7354	27.1644	11.1277	32.4479	65.891
2415	465	59.1516	21.028	24.931	10.6166	29.5513	58.1942		2483	0.00155681	0.000973006	0.00106925	0.000586124	0.0011653	0.00154762			2483	67.1295	22.7577	27.1936	11.1342	32.4859	65.9936
2416	466	59.2813	21.0568	24.9685	10.6253	29.5997	58.321		2484	0.00154905	0.000968153	0.00106392	0.000583201	0.00115949	0.0015399			2484	67.2342	22.7799	27.2227	11.1407	32.5238	66.0959
2417	467	59.4106	21.0855	25.0059	10.634	29.648	58.4475		2485	0.00154132	0.000963324	0.00105861	0.000580292	0.0011537	0.00153222			2485	67.3385	22.8019	27.2517	11.1472	32.5616	66.1978
2418	468	59.5395	21.1141	25.0431	10.6427	29.6962	58.5736		2486	0.00153363	0.00095852	0.00105333	0.000577398	0.00114795	0.00152457			2486	67.4424	22.8239	27.2806	11.1537	32.5992	66.2994
2419	469	59.6681	21.1426	25.0803	10.6514	29.7441	58.6993		2487	0.00152598	0.000953739	0.00104808	0.000574518	0.00114223	0.00151697			2487	67.546	22.8458	27.3094	11.1602	32.6366	66.4007
2420	470	59.7963	21.1709	25.1172	10.66	29.7919	58.8247		2488	0.00151837	0.000948982	0.00104285	0.000571653	0.00113653	0.0015094			2488	67.6493	22.8676	27.338	11.1666	32.674	66.5015
2421	471	59.9241	21.1992	25.1541	10.6685	29.8396	58.9497		2489	0.0015108	0.000944249	0.00103765	0.000568802	0.00113086	0.00150188			2489	67.7521	22.8894	27.3666	11.173	32.7111	66.6021
2422	472	60.0516	21.2273	25.1908	10.6771	29.8871	59.0743		2490	0.00150326	0.00093954	0.00103247	0.000565965	0.00112522	0.00149439			2490	67.8546	22.911	27.395	11.1793	32.7482	66.7022
2423	473	60.1787	21.2554	25.2274	10.6856	29.9344	59.1986
2424	474	60.3054	21.2834	25.2639	10.694	29.9816	59.3226
2425	475	60.4318	21.3112	25.3002	10.7024	30.0286	59.4461
2426	476	60.5578	21.339	25.3364	10.7108	30.0754	59.5693
2427	477	60.6834	21.3666	25.3725	10.7192	30.1221	59.6922
2428	478	60.8086	21.3941	25.4084	10.7275	30.1686	59.8147
2429	479	60.9335	21.4216	25.4443	10.7358	30.2149	59.9368
2430	480	61.0581	21.4489	25.48	10.744	30.2611	60.0585
2431	481	61.1822	21.4762	25.5155	10.7523	30.3072	60.1799
2432	482	61.306	21.5033	25.5509	10.7604	30.353	60.301
2433	483	61.4294	21.5303	25.5863	10.7686	30.3988	60.4216
2434	484	61.5524	21.5573	25.6214	10.7767	30.4443	60.5419
2435	485	61.6751	21.5841	25.6565	10.7848	30.4897	60.6619
2436	486	61.7974	21.6108	25.6914	10.7928	30.5349	60.7815
2437	487	61.9193	21.6375	25.7262	10.8008	30.58	60.9007
2438	488	62.0409	21.664	25.7609	10.8088	30.6249	61.0195
2439	489	62.1621	21.6904	25.7954	10.8167	30.6697	61.138
2440	490	62.2829	21.7168	25.8298	10.8246	30.7143	61.2562
2441	491	62.4034	21.743	25.8641	10.8325	30.7587	61.3739
2442	492	62.5235	21.7691	25.8983	10.8403	30.803	61.4913
2443	493	62.6432	21.7951	25.9323	10.8482	30.8471	61.6084
2444	494	62.7625	21.8211	25.9662	10.8559	30.8911	61.7251
2445	495	62.8815	21.8469	26	10.8637	30.9349	61.8414
2446	496	63.0001	21.8726	26.0337	10.8714	30.9786	61.9573
2447	497	63.1183	21.8983	26.0672	10.879	31.0221	62.0729
2448	498	63.2362	21.9238	26.1006	10.8867	31.0654	62.1881
2449	499	63.3537	21.9493	26.1339	10.8943	31.1086	62.303
2450	500	63.4708	21.9746	26.1671	10.9019	31.1516	62.4175
2451	501	63.5876	21.9999	26.2001	10.9094	31.1945	62.5316
2452	502	63.7039	22.025	26.233	10.9169	31.2372	62.6454
2453	503	63.82	22.0501	26.2658	10.9244	31.2798	62.7588
2454	504	63.9356	22.075	26.2985	10.9318	31.3222	62.8719
2455	505	64.0509	22.0999	26.331	10.9392	31.3644	62.9845
2456	506	64.1658	22.1246	26.3635	10.9466	31.4065	63.0969
2457	507	64.2803	22.1493	26.3958	10.954	31.4485	63.2088
2458	508	64.3945	22.1739	26.4279	10.9613	31.4902	63.3204
2459	509	64.5083	22.1983	26.46	10.9686	31.5319	63.4317
2460	510	64.6217	22.2227	26.4919	10.9758	31.5734	63.5425
2461	511	64.7348	22.247	26.5238	10.9831	31.6147	63.6531
2462	512	64.8475	22.2712	26.5555	10.9902	31.6559	63.7632
2463	513	64.9598	22.2953	26.587	10.9974	31.6969	63.873
2464	514	65.0717	22.3193	26.6185	11.0045	31.7378	63.9824
2465	515	65.1833	22.3432	26.6498	11.0116	31.7785	64.0915
2466	516	65.2946	22.367	26.681	11.0187	31.8191	64.2002
2467	517	65.4054	22.3907	26.7121	11.0257	31.8595	64.3086
2468	518	65.5159	22.4144	26.7431	11.0327	31.8998	64.4166
2469	519	65.626	22.4379	26.774	11.0397	31.9399	64.5242
2470	520	65.7358	22.4613	26.8047	11.0467	31.9798	64.6315
2471	521	65.8452	22.4847	26.8353	11.0536	32.0197	64.7384
2472	522	65.9542	22.5079	26.8658	11.0605	32.0593	64.845
2473	523	66.0629	22.5311	26.8962	11.0673	32.0988	64.9512
2474	524	66.1712	22.5542	26.9265	11.0741	32.1382	65.057
2475	525	66.2791	22.5771	26.9566	11.0809	32.1774	65.1625
2476	526	66.3867	22.6	26.9867	11.0877	32.2165	65.2676
2477	527	66.4939	22.6228	27.0166	11.0944	32.2554	65.3724
2478	528	66.6007	22.6455	27.0464	11.1011	32.2942	65.4768
2479	529	66.7072	22.6681	27.0761	11.1078	32.3328	65.5809
2480	530	66.8133	22.6907	27.1056	11.1144	32.3713	65.6846
2481	531	66.9191	22.7131	27.1351	11.1211	32.4097	65.788
2482	532	67.0245	22.7354	27.1644	11.1277	32.4479	65.891
2483	533	67.1295	22.7577	27.1936	11.1342	32.4859	65.9936
2484	534	67.2342	22.7799	27.2227	11.1407	32.5238	66.0959
2485	535	67.3385	22.8019	27.2517	11.1472	32.5616	66.1978
2486	536	67.4424	22.8239	27.2806	11.1537	32.5992	66.2994
2487	537	67.546	22.8458	27.3094	11.1602	32.6366	66.4007
2488	538	67.6493	22.8676	27.338	11.1666	32.674	66.5015
2489	539	67.7521	22.8894	27.3666	11.173	32.7111	66.6021
2490	540	67.8546	22.911	27.395	11.1793	32.7482	66.7022
2491
2492
2493
2494
2495
2496
2497
2498
2499
2500

## Sheet: TFP_Weitzman
		Weitzman							gA	DICE	SSP1	SSP2	SSP3	SSP4	SSP5				DICE	SSP1	SSP1	SSP3	SSP4	SSP5
1950	0	1.98163	1.98163	1.98163	1.98163	1.98163	1.98163			-0.005	-0.005	-0.005	-0.005	-0.005	-0.005
1951	1	2.0118	2.0118	2.0118	2.0118	2.0118	2.0118		2019	0.0158416	0.00990099	0.0108803	0.00596421	0.0118577	0.015748			2019	3.75343	3.75343	3.75343	3.75343	3.75343	3.75343
1952	2	2.00353	2.00353	2.00353	2.00353	2.00353	2.00353		2020	0.0157626	0.00985161	0.0108261	0.00593446	0.0117986	0.0156695			2020	3.81384	3.79096	3.79471	3.77595	3.79847	3.81348
1953	3	2.02181	2.02181	2.02181	2.02181	2.02181	2.02181		2021	0.015684	0.00980247	0.0107721	0.00590487	0.0117397	0.0155913			2021	3.87492	3.82868	3.83625	3.79849	3.84382	3.87419
1954	4	1.9989	1.9989	1.9989	1.9989	1.9989	1.9989		2022	0.0156057	0.00975358	0.0107183	0.00587541	0.0116812	0.0155136			2022	3.93667	3.86658	3.87802	3.82105	3.88948	3.93555
1955	5	2.03655	2.03655	2.03655	2.03655	2.03655	2.03655		2023	0.0155279	0.00970494	0.0106649	0.00584611	0.0116229	0.0154362			2023	3.99907	3.90467	3.92004	3.84364	3.93545	3.99757
1956	6	2.03891	2.03891	2.03891	2.03891	2.03891	2.03891		2024	0.0154505	0.00965653	0.0106117	0.00581695	0.0115649	0.0153592			2024	4.06215	3.94293	3.96229	3.86624	3.98173	4.06024
1957	7	2.03842	2.03842	2.03842	2.03842	2.03842	2.03842		2025	0.0153734	0.00960837	0.0105588	0.00578794	0.0115073	0.0152826			2025	4.1259	3.98138	4.00479	3.88886	4.02832	4.12357
1958	8	2.0177	2.0177	2.0177	2.0177	2.0177	2.0177		2026	0.0152967	0.00956045	0.0105061	0.00575907	0.0114499	0.0152064			2026	4.19032	4.02	4.04753	3.9115	4.07521	4.18757
1959	9	2.03582	2.03582	2.03582	2.03582	2.03582	2.03582		2027	0.0152204	0.00951277	0.0104537	0.00573035	0.0113928	0.0151305			2027	4.25541	4.05881	4.0905	3.93416	4.12241	4.25223
1960	10	2.06075	2.06075	2.06075	2.06075	2.06075	2.06075		2028	0.0151445	0.00946532	0.0104016	0.00570177	0.0113359	0.0150551			2028	4.32118	4.09779	4.13372	3.95683	4.16992	4.31756
1961	11	2.05606	2.05606	2.05606	2.05606	2.05606	2.05606		2029	0.015069	0.00941811	0.0103497	0.00567333	0.0112794	0.01498			2029	4.38763	4.13695	4.17717	3.97952	4.21773	4.38355
1962	12	2.08311	2.08311	2.08311	2.08311	2.08311	2.08311		2030	0.0149938	0.00937114	0.0102981	0.00564504	0.0112231	0.0149053			2030	4.45476	4.17628	4.22085	4.00223	4.26585	4.45022
1963	13	2.11661	2.11661	2.11661	2.11661	2.11661	2.11661		2031	0.0149191	0.0093244	0.0102467	0.00561688	0.0111672	0.0148309			2031	4.52257	4.21579	4.26477	4.02495	4.31427	4.51755
1964	14	2.1697	2.1697	2.1697	2.1697	2.1697	2.1697		2032	0.0148446	0.0092779	0.0101956	0.00558887	0.0111115	0.014757			2032	4.59106	4.25547	4.30892	4.04768	4.36299	4.58556
1965	15	2.19981	2.19981	2.19981	2.19981	2.19981	2.19981		2033	0.0147706	0.00923162	0.0101447	0.00556099	0.0110561	0.0146834			2033	4.66024	4.29532	4.35331	4.07043	4.41201	4.65424
1966	16	2.22397	2.22397	2.22397	2.22397	2.22397	2.22397		2034	0.0146969	0.00918558	0.0100941	0.00553326	0.0110009	0.0146101			2034	4.73011	4.33534	4.39792	4.09319	4.46134	4.7236
1967	17	2.22706	2.22706	2.22706	2.22706	2.22706	2.22706		2035	0.0146236	0.00913977	0.0100438	0.00550566	0.010946	0.0145373			2035	4.80067	4.37553	4.44277	4.11597	4.51096	4.79364
1968	18	2.26767	2.26767	2.26767	2.26767	2.26767	2.26767		2036	0.0145507	0.00909418	0.00999371	0.0054782	0.0108915	0.0144648			2036	4.87191	4.41589	4.48784	4.13875	4.56089	4.86435
1969	19	2.31706	2.31706	2.31706	2.31706	2.31706	2.31706		2037	0.0144781	0.00904882	0.00994386	0.00545088	0.0108371	0.0143926			2037	4.94385	4.45642	4.53314	4.16155	4.61111	4.93575
1970	20	2.32458	2.32458	2.32458	2.32458	2.32458	2.32458		2038	0.0144059	0.00900369	0.00989427	0.00542369	0.0107831	0.0143208			2038	5.01648	4.49711	4.57867	4.18436	4.66163	5.00782
1971	21	2.35158	2.35158	2.35158	2.35158	2.35158	2.35158		2039	0.0143341	0.00895879	0.00984492	0.00539664	0.0107293	0.0142494			2039	5.0898	4.53797	4.62443	4.20718	4.71244	5.08058
1972	22	2.39381	2.39381	2.39381	2.39381	2.39381	2.39381		2040	0.0142626	0.0089141	0.00979582	0.00536972	0.0106758	0.0141783			2040	5.16382	4.57899	4.67041	4.23001	4.76355	5.15402
1973	23	2.46068	2.46068	2.46068	2.46068	2.46068	2.46068		2041	0.0141914	0.00886964	0.00974696	0.00534294	0.0106225	0.0141076			2041	5.23853	4.62018	4.71661	4.25284	4.81496	5.22815
1974	24	2.44374	2.44374	2.44374	2.44374	2.44374	2.44374		2042	0.0141207	0.00882541	0.00969835	0.00531629	0.0105696	0.0140373			2042	5.31395	4.66152	4.76304	4.27569	4.86665	5.30296
1975	25	2.39867	2.39867	2.39867	2.39867	2.39867	2.39867		2043	0.0140502	0.00878139	0.00964998	0.00528978	0.0105168	0.0139672			2043	5.39006	4.70303	4.80968	4.29854	4.91864	5.37846
1976	26	2.44749	2.44749	2.44749	2.44749	2.44749	2.44749		2044	0.0139802	0.00873759	0.00960185	0.0052634	0.0104644	0.0138976			2044	5.46687	4.7447	4.85655	4.3214	4.97092	5.45465
1977	27	2.47222	2.47222	2.47222	2.47222	2.47222	2.47222		2045	0.0139104	0.00869401	0.00955396	0.00523715	0.0104122	0.0138283			2045	5.54438	4.78652	4.90363	4.34427	5.02349	5.53152
1978	28	2.49784	2.49784	2.49784	2.49784	2.49784	2.49784		2046	0.0138411	0.00865065	0.00950631	0.00521103	0.0103603	0.0137593			2046	5.62259	4.8285	4.95093	4.36714	5.07634	5.60909
1979	29	2.52401	2.52401	2.52401	2.52401	2.52401	2.52401		2047	0.013772	0.00860751	0.0094589	0.00518504	0.0103086	0.0136907			2047	5.70151	4.87063	4.99845	4.39001	5.12949	5.68734
1980	30	2.50749	2.50749	2.50749	2.50749	2.50749	2.50749		2048	0.0137033	0.00856458	0.00941172	0.00515917	0.0102572	0.0136224			2048	5.78112	4.91292	5.04618	4.41289	5.18291	5.76628
1981	31	2.48577	2.48577	2.48577	2.48577	2.48577	2.48577		2049	0.013635	0.00852186	0.00936478	0.00513344	0.010206	0.0135545			2049	5.86145	4.95536	5.09413	4.43578	5.23663	5.84592
1982	32	2.43881	2.43881	2.43881	2.43881	2.43881	2.43881		2050	0.013567	0.00847936	0.00931807	0.00510784	0.0101551	0.0134869			2050	5.94247	4.99795	5.14228	4.45867	5.29062	5.92625
1983	33	2.4465	2.4465	2.4465	2.4465	2.4465	2.4465		2051	0.0134993	0.00843707	0.0092716	0.00508236	0.0101045	0.0134196			2051	6.0242	5.04069	5.19065	4.48156	5.3449	6.00727
1984	34	2.49738	2.49738	2.49738	2.49738	2.49738	2.49738		2052	0.013432	0.00839499	0.00922535	0.00505702	0.0100541	0.0133527			2052	6.10664	5.08358	5.23923	4.50445	5.39946	6.08898
1985	35	2.52291	2.52291	2.52291	2.52291	2.52291	2.52291		2053	0.013365	0.00835312	0.00917934	0.00503179	0.0100039	0.0132861			2053	6.18978	5.12662	5.28801	4.52735	5.4543	6.17138
1986	36	2.54995	2.54995	2.54995	2.54995	2.54995	2.54995		2054	0.0132983	0.00831146	0.00913356	0.0050067	0.00995404	0.0132198			2054	6.27362	5.16981	5.337	4.55024	5.50941	6.25448
1987	37	2.58782	2.58782	2.58782	2.58782	2.58782	2.58782		2055	0.013232	0.00827	0.00908801	0.00498173	0.00990439	0.0131539			2055	6.35818	5.21313	5.3862	4.57314	5.56481	6.33827
1988	38	2.63616	2.63616	2.63616	2.63616	2.63616	2.63616		2056	0.013166	0.00822876	0.00904268	0.00495688	0.00985499	0.0130883			2056	6.44344	5.25661	5.43559	4.59604	5.62047	6.42275
1989	39	2.66105	2.66105	2.66105	2.66105	2.66105	2.66105		2057	0.0131004	0.00818771	0.00899758	0.00493216	0.00980584	0.013023			2057	6.5294	5.30022	5.48519	4.61893	5.67641	6.50793
1990	40	2.6777	2.6777	2.6777	2.6777	2.6777	2.6777		2058	0.013035	0.00814688	0.0089527	0.00490756	0.00975693	0.012958			2058	6.61608	5.34398	5.535	4.64183	5.73263	6.5938
1991	41	2.64128	2.64128	2.64128	2.64128	2.64128	2.64128		2059	0.01297	0.00810624	0.00890805	0.00488308	0.00970827	0.0128934			2059	6.70346	5.38787	5.585	4.66472	5.78911	6.68037
1992	42	2.62265	2.62265	2.62265	2.62265	2.62265	2.62265		2060	0.0129053	0.00806581	0.00886362	0.00485873	0.00965985	0.0128291			2060	6.79154	5.4319	5.6352	4.68761	5.84586	6.76762
1993	43	2.6137	2.6137	2.6137	2.6137	2.6137	2.6137		2061	0.012841	0.00802559	0.00881942	0.00483449	0.00961167	0.0127651			2061	6.88034	5.47607	5.68559	4.71049	5.90289	6.85557
1994	44	2.6344	2.6344	2.6344	2.6344	2.6344	2.6344		2062	0.0127769	0.00798556	0.00877543	0.00481038	0.00956373	0.0127014			2062	6.96984	5.52038	5.73618	4.73338	5.96017	6.94422
1995	45	2.66749	2.66749	2.66749	2.66749	2.66749	2.66749		2063	0.0127132	0.00794573	0.00873166	0.00478639	0.00951604	0.0126381			2063	7.06004	5.56481	5.78696	4.75626	6.01772	7.03355
1996	46	2.71596	2.71596	2.71596	2.71596	2.71596	2.71596		2064	0.0126498	0.0079061	0.00868811	0.00476252	0.00946857	0.0125751			2064	7.15095	5.60939	5.83794	4.77913	6.07554	7.12358
1997	47	2.76607	2.76607	2.76607	2.76607	2.76607	2.76607		2065	0.0125867	0.00786667	0.00864478	0.00473877	0.00942135	0.0125123			2065	7.24257	5.65409	5.8891	4.802	6.13362	7.2143
1998	48	2.77085	2.77085	2.77085	2.77085	2.77085	2.77085		2066	0.0125239	0.00782743	0.00860166	0.00471513	0.00937436	0.0124499			2066	7.33489	5.69892	5.94046	4.82487	6.19195	7.30572
1999	49	2.81406	2.81406	2.81406	2.81406	2.81406	2.81406		2067	0.0124614	0.00778839	0.00855876	0.00469161	0.00932761	0.0123878			2067	7.42792	5.74388	5.992	4.84772	6.25055	7.39782
2000	50	2.89118	2.89118	2.89118	2.89118	2.89118	2.89118		2068	0.0123993	0.00774955	0.00851608	0.00466821	0.00928108	0.0123261			2068	7.52165	5.78896	6.04373	4.87057	6.3094	7.49061
2001	51	2.9058	2.9058	2.9058	2.9058	2.9058	2.9058		2069	0.0123375	0.0077109	0.0084736	0.00464493	0.00923479	0.0122646			2069	7.61608	5.83418	6.09564	4.89342	6.36851	7.58409
2002	52	2.93896	2.93896	2.93896	2.93896	2.93896	2.93896		2070	0.0122759	0.00767244	0.00843134	0.00462176	0.00918874	0.0122034			2070	7.71122	5.87951	6.14773	4.91625	6.42787	7.67826
2003	53	2.99501	2.99501	2.99501	2.99501	2.99501	2.99501		2071	0.0122147	0.00763417	0.00838929	0.00459871	0.00914291	0.0121425			2071	7.80706	5.92497	6.2	4.93908	6.48748	7.77312
2004	54	3.09529	3.09529	3.09529	3.09529	3.09529	3.09529		2072	0.0121538	0.0075961	0.00834745	0.00457578	0.00909731	0.012082			2072	7.9036	5.97055	6.25246	4.9619	6.54734	7.86867
2005	55	3.17693	3.17693	3.17693	3.17693	3.17693	3.17693		2073	0.0120932	0.00755821	0.00830581	0.00455296	0.00905193	0.0120217			2073	8.00084	6.01625	6.30509	4.98471	6.60745	7.9649
2006	56	3.27623	3.27623	3.27623	3.27623	3.27623	3.27623		2074	0.0120328	0.00752052	0.00826439	0.00453025	0.00900679	0.0119618			2074	8.09878	6.06207	6.3579	5.00751	6.66781	8.06182
2007	57	3.36744	3.36744	3.36744	3.36744	3.36744	3.36744		2075	0.0119728	0.00748301	0.00822317	0.00450765	0.00896186	0.0119021			2075	8.19742	6.10801	6.41088	5.0303	6.72841	8.15942
2008	58	3.37752	3.37752	3.37752	3.37752	3.37752	3.37752		2076	0.0119131	0.00744569	0.00818216	0.00448517	0.00891717	0.0118427			2076	8.29675	6.15406	6.46403	5.05307	6.78925	8.2577
2009	59	3.2923	3.2923	3.2923	3.2923	3.2923	3.2923		2077	0.0118537	0.00740855	0.00814135	0.0044628	0.00887269	0.0117837			2077	8.39678	6.20022	6.51736	5.07584	6.85034	8.35667
2010	60	3.40553	3.40553	3.40553	3.40553	3.40553	3.40553		2078	0.0117946	0.0073716	0.00810074	0.00444054	0.00882844	0.0117249			2078	8.49751	6.2465	6.57086	5.09859	6.91166	8.45631
2011	61	3.46856	3.46856	3.46856	3.46856	3.46856	3.46856		2079	0.0117357	0.00733483	0.00806034	0.0044184	0.00878441	0.0116664			2079	8.59893	6.29289	6.62452	5.12133	6.97323	8.55664
2012	62	3.48655	3.48655	3.48655	3.48655	3.48655	3.48655		2080	0.0116772	0.00729825	0.00802014	0.00439636	0.0087406	0.0116082			2080	8.70104	6.33939	6.67835	5.14406	7.03502	8.65764
2013	63	3.53458	3.53458	3.53458	3.53458	3.53458	3.53458		2081	0.011619	0.00726185	0.00798014	0.00437443	0.008697	0.0115503			2081	8.80385	6.38599	6.73234	5.16678	7.09706	8.75932
2014	64	3.58858	3.58858	3.58858	3.58858	3.58858	3.58858		2082	0.011561	0.00722563	0.00794034	0.00435261	0.00865362	0.0114927			2082	8.90734	6.43271	6.7865	5.18948	7.15932	8.86168
2015	65	3.62487	3.62487	3.62487	3.62487	3.62487	3.62487		2083	0.0115034	0.00718959	0.00790073	0.00433091	0.00861046	0.0114354			2083	9.01152	6.47953	6.84082	5.21217	7.22182	8.96471
2016	66	3.65938	3.65938	3.65938	3.65938	3.65938	3.65938		2084	0.011446	0.00715374	0.00786133	0.0043093	0.00856752	0.0113784			2084	9.11639	6.52645	6.8953	5.23484	7.28454	9.06841
2017	67	3.70769	3.70769	3.70769	3.70769	3.70769	3.70769		2085	0.0113889	0.00711806	0.00782212	0.00428781	0.00852479	0.0113216			2085	9.22195	6.57347	6.94993	5.25749	7.34749	9.17278
2018	68	3.73389	3.73389	3.73389	3.73389	3.73389	3.73389		2086	0.0113321	0.00708256	0.00778311	0.00426643	0.00848227	0.0112652			2086	9.32819	6.6206	7.00472	5.28013	7.41066	9.27782
2019	69	3.75343	3.75343	3.75343	3.75343	3.75343	3.75343		2087	0.0112756	0.00704723	0.00774429	0.00424515	0.00843997	0.011209			2087	9.43511	6.66782	7.05967	5.30276	7.47406	9.38353
2020	70	3.81384	3.79096	3.79471	3.77595	3.79847	3.81348		2088	0.0112193	0.00701208	0.00770566	0.00422397	0.00839787	0.0111531			2088	9.54271	6.71515	7.11477	5.32536	7.53768	9.4899
2021	71	3.87492	3.82868	3.83625	3.79849	3.84382	3.87419		2089	0.0111634	0.00697711	0.00766723	0.00420291	0.00835599	0.0110974			2089	9.65098	6.76257	7.17002	5.34795	7.60151	9.59693
2022	72	3.93667	3.86658	3.87802	3.82105	3.88948	3.93555		2090	0.0111077	0.00694231	0.00762899	0.00418195	0.00831431	0.0110421			2090	9.75994	6.81008	7.22542	5.37053	7.66557	9.70463
2023	73	3.99907	3.90467	3.92004	3.84364	3.93545	3.99757		2091	0.0110523	0.00690769	0.00759094	0.00416109	0.00827284	0.010987			2091	9.86957	6.85769	7.28096	5.39308	7.72984	9.81299
2024	74	4.06215	3.94293	3.96229	3.86624	3.98173	4.06024		2092	0.0109972	0.00687323	0.00755308	0.00414033	0.00823158	0.0109322			2092	9.97987	6.90539	7.33666	5.41561	7.79432	9.922
2025	75	4.1259	3.98138	4.00479	3.88886	4.02832	4.12357		2093	0.0109423	0.00683895	0.00751541	0.00411968	0.00819053	0.0108777			2093	10.0908	6.95318	7.39249	5.43813	7.85901	10.0317
2026	76	4.19032	4.02	4.04753	3.9115	4.07521	4.18757		2094	0.0108878	0.00680484	0.00747793	0.00409914	0.00814968	0.0108235			2094	10.2025	7.00106	7.44847	5.46063	7.92391	10.142
2027	77	4.25541	4.05881	4.0905	3.93416	4.12241	4.25223		2095	0.0108335	0.0067709	0.00744063	0.00407869	0.00810903	0.0107695			2095	10.3148	7.04903	7.50459	5.4831	7.98902	10.253
2028	78	4.32118	4.09779	4.13372	3.95683	4.16992	4.31756		2096	0.0107794	0.00673713	0.00740352	0.00405835	0.00806859	0.0107158			2096	10.4277	7.09708	7.56085	5.50556	8.05433	10.3646
2029	79	4.38763	4.13695	4.17717	3.97952	4.21773	4.38355		2097	0.0107257	0.00670353	0.0073666	0.00403811	0.00802834	0.0106623			2097	10.5414	7.14522	7.61724	5.52799	8.11985	10.4769
2030	80	4.45476	4.17628	4.22085	4.00223	4.26585	4.45022		2098	0.0106722	0.0066701	0.00732985	0.00401797	0.0079883	0.0106091			2098	10.6557	7.19344	7.67377	5.5504	8.18556	10.5898
2031	81	4.52257	4.21579	4.26477	4.02495	4.31427	4.51755		2099	0.0106189	0.00663683	0.0072933	0.00399793	0.00794846	0.0105562			2099	10.7706	7.24174	7.73043	5.5728	8.25148	10.7033
2032	82	4.59106	4.25547	4.30892	4.04768	4.36299	4.58556		2100	0.010566	0.00660373	0.00725692	0.00397799	0.00790882	0.0105036			2100	10.8862	7.29013	7.78723	5.59517	8.31759	10.8175
2033	83	4.66024	4.29532	4.35331	4.07043	4.41201	4.65424		2101	0.0105133	0.00657079	0.00722073	0.00395815	0.00786937	0.0104512			2101	11.0025	7.33859	7.84415	5.61751	8.3839	10.9323
2034	84	4.73011	4.33534	4.39792	4.09319	4.46134	4.7236		2102	0.0104608	0.00653802	0.00718471	0.00393841	0.00783012	0.0103991			2102	11.1194	7.38713	7.90121	5.63984	8.4504	11.0478
2035	85	4.80067	4.37553	4.44277	4.11597	4.51096	4.79364		2103	0.0104087	0.00650541	0.00714888	0.00391877	0.00779107	0.0103472			2103	11.2369	7.43574	7.95838	5.66213	8.51709	11.1639
2036	86	4.87191	4.41589	4.48784	4.13875	4.56089	4.86435		2104	0.0103568	0.00647297	0.00711322	0.00389922	0.00775221	0.0102956			2104	11.3551	7.48443	8.01569	5.68441	8.58396	11.2806
2037	87	4.94385	4.45642	4.53314	4.16155	4.61111	4.93575		2105	0.0103051	0.00644068	0.00707775	0.00387977	0.00771355	0.0102442			2105	11.4739	7.5332	8.07311	5.70666	8.65103	11.398
2038	88	5.01648	4.49711	4.57867	4.18436	4.66163	5.00782		2106	0.0102537	0.00640856	0.00704245	0.00386042	0.00767508	0.0101931			2106	11.5934	7.58203	8.13066	5.72889	8.71828	11.5159
2039	89	5.0898	4.53797	4.62443	4.20718	4.71244	5.08058		2107	0.0102026	0.0063766	0.00700732	0.00384117	0.0076368	0.0101423			2107	11.7135	7.63093	8.18833	5.75109	8.78571	11.6345
2040	90	5.16382	4.57899	4.67041	4.23001	4.76355	5.15402		2108	0.0101517	0.00634479	0.00697237	0.00382201	0.00759871	0.0100917			2108	11.8343	7.6799	8.24611	5.77327	8.85332	11.7537
2041	91	5.23853	4.62018	4.71661	4.25284	4.81496	5.22815		2109	0.0101011	0.00631315	0.0069376	0.00380295	0.00756081	0.0100414			2109	11.9556	7.72894	8.30401	5.79542	8.92111	11.8736
2042	92	5.31395	4.66152	4.76304	4.27569	4.86665	5.30296		2110	0.0100507	0.00628166	0.006903	0.00378398	0.0075231	0.00999131			2110	12.0776	7.77805	8.36202	5.81754	8.98907	11.994
2043	93	5.39006	4.70303	4.80968	4.29854	4.91864	5.37846		2111	0.0100005	0.00625033	0.00686857	0.00376511	0.00748558	0.00994147			2111	12.2002	7.82721	8.42014	5.83964	9.05721	12.115
2044	94	5.46687	4.7447	4.85655	4.3214	4.97092	5.45465		2112	0.00995067	0.00621916	0.00683431	0.00374633	0.00744824	0.00989189			2112	12.3235	7.87645	8.47838	5.86171	9.12552	12.2367
2045	95	5.54438	4.78652	4.90363	4.34427	5.02349	5.53152		2113	0.00990104	0.00618814	0.00680022	0.00372764	0.0074111	0.00984255			2113	12.4473	7.92574	8.53672	5.88375	9.194	12.3589
2046	96	5.62259	4.8285	4.95093	4.36714	5.07634	5.60909		2114	0.00985165	0.00615728	0.00676631	0.00370905	0.00737413	0.00979346			2114	12.5718	7.97509	8.59517	5.90576	9.26265	12.4818
2047	97	5.70151	4.87063	4.99845	4.39001	5.12949	5.68734		2115	0.00980252	0.00612657	0.00673256	0.00369055	0.00733735	0.00974462			2115	12.6969	8.0245	8.65372	5.92775	9.33146	12.6053
2048	98	5.78112	4.91292	5.04618	4.41289	5.18291	5.76628		2116	0.00975363	0.00609601	0.00669898	0.00367215	0.00730076	0.00969602			2116	12.8226	8.07396	8.71238	5.94971	9.40043	12.7293
2049	99	5.86145	4.95536	5.09413	4.43578	5.23663	5.84592		2117	0.00970498	0.00606561	0.00666557	0.00365383	0.00726435	0.00964766			2117	12.9489	8.12348	8.77114	5.97164	9.46957	12.8539
2050	100	5.94247	4.99795	5.14228	4.45867	5.29062	5.92625		2118	0.00965658	0.00603536	0.00663233	0.00363561	0.00722812	0.00959954			2118	13.0758	8.17306	8.83	5.99354	9.53886	12.9791
2051	101	6.0242	5.04069	5.19065	4.48156	5.3449	6.00727		2119	0.00960842	0.00600525	0.00659925	0.00361748	0.00719206	0.00955166			2119	13.2033	8.22268	8.88895	6.01541	9.60831	13.1049
2052	102	6.10664	5.08358	5.23923	4.50445	5.39946	6.08898		2120	0.00956049	0.0059753	0.00656633	0.00359943	0.00715619	0.00950402			2120	13.3314	8.27236	8.948	6.03725	9.67792	13.2313
2053	103	6.18978	5.12662	5.28801	4.52735	5.4543	6.17138		2121	0.00951281	0.0059455	0.00653358	0.00358148	0.0071205	0.00945662			2121	13.4601	8.32209	9.00714	6.05906	9.74767	13.3583
2054	104	6.27362	5.16981	5.337	4.55024	5.50941	6.25448		2122	0.00946537	0.00591585	0.006501	0.00356362	0.00708499	0.00940946			2122	13.5893	8.37186	9.06638	6.08083	9.81758	13.4858
2055	105	6.35818	5.21313	5.3862	4.57314	5.56481	6.33827		2123	0.00941816	0.00588634	0.00646857	0.00354585	0.00704965	0.00936253			2123	13.7192	8.42169	9.12571	6.10258	9.88763	13.6139
2056	106	6.44344	5.25661	5.43559	4.59604	5.62047	6.42275		2124	0.00937118	0.00585698	0.00643631	0.00352816	0.00701449	0.00931583			2124	13.8496	8.47155	9.18512	6.1243	9.95783	13.7426
2057	107	6.5294	5.30022	5.48519	4.61893	5.67641	6.50793		2125	0.00932444	0.00582777	0.00640421	0.00351056	0.00697951	0.00926937			2125	13.9807	8.52146	9.24462	6.14598	10.0282	13.8718
2058	108	6.61608	5.34398	5.535	4.64183	5.73263	6.5938		2126	0.00927794	0.00579871	0.00637227	0.00349305	0.0069447	0.00922314			2126	14.1122	8.57141	9.30421	6.16763	10.0987	14.0016
2059	109	6.70346	5.38787	5.585	4.66472	5.78911	6.68037		2127	0.00923166	0.00576978	0.00634049	0.00347563	0.00691006	0.00917714			2127	14.2444	8.62141	9.36388	6.18925	10.1693	14.1319
2060	110	6.79154	5.4319	5.6352	4.68761	5.84586	6.76762		2128	0.00918562	0.00574101	0.00630886	0.0034583	0.0068756	0.00913137			2128	14.3771	8.67144	9.42363	6.21084	10.24	14.2628
2061	111	6.88034	5.47607	5.68559	4.71049	5.90289	6.85557		2129	0.00913981	0.00571237	0.0062774	0.00344105	0.0068413	0.00908582			2129	14.5104	8.72151	9.48346	6.23239	10.3109	14.3943
2062	112	6.96984	5.52038	5.73618	4.73338	5.96017	6.94422		2130	0.00909422	0.00568388	0.00624609	0.00342389	0.00680718	0.00904051			2130	14.6443	8.77162	9.54336	6.25391	10.382	14.5262
2063	113	7.06004	5.56481	5.78696	4.75626	6.01772	7.03355		2131	0.00904887	0.00565554	0.00621494	0.00340681	0.00677323	0.00899542			2131	14.7787	8.82176	9.60335	6.2754	10.4531	14.6588
2064	114	7.15095	5.60939	5.83794	4.77913	6.07554	7.12358		2132	0.00900373	0.00562733	0.00618394	0.00338982	0.00673945	0.00895055			2132	14.9136	8.87193	9.66341	6.29685	10.5244	14.7918
2065	115	7.24257	5.65409	5.8891	4.802	6.13362	7.2143		2133	0.00895883	0.00559926	0.0061531	0.00337291	0.00670584	0.00890591			2133	15.0491	8.92214	9.72354	6.31827	10.5958	14.9254
2066	116	7.33489	5.69892	5.94046	4.82487	6.19195	7.30572		2134	0.00891415	0.00557134	0.00612241	0.00335609	0.00667239	0.00886149			2134	15.1852	8.97238	9.78374	6.33965	10.6673	15.0595
2067	117	7.42792	5.74388	5.992	4.84772	6.25055	7.39782		2135	0.00886969	0.00554355	0.00609187	0.00333935	0.00663911	0.0088173			2135	15.3217	9.02265	9.844	6.361	10.739	15.1942
2068	118	7.52165	5.78896	6.04373	4.87057	6.3094	7.49061		2136	0.00882545	0.0055159	0.00606149	0.0033227	0.006606	0.00877332			2136	15.4589	9.07295	9.90434	6.38231	10.8108	15.3293
2069	119	7.61608	5.83418	6.09564	4.89342	6.36851	7.58409		2137	0.00878143	0.00548839	0.00603126	0.00330612	0.00657305	0.00872956			2137	15.5965	9.12327	9.96474	6.40359	10.8827	15.465
2070	120	7.71122	5.87951	6.14773	4.91625	6.42787	7.67826		2138	0.00873763	0.00546102	0.00600118	0.00328963	0.00654027	0.00868602			2138	15.7347	9.17362	10.0252	6.42483	10.9547	15.6012
2071	121	7.80706	5.92497	6.2	4.93908	6.48748	7.77312		2139	0.00869405	0.00543378	0.00597125	0.00327323	0.00650765	0.0086427			2139	15.8734	9.22399	10.0857	6.44604	11.0268	15.7379
2072	122	7.9036	5.97055	6.25246	4.9619	6.54734	7.86867		2140	0.00865069	0.00540668	0.00594146	0.0032569	0.00647519	0.0085996			2140	16.0126	9.27438	10.1463	6.4672	11.099	15.8751
2073	123	8.00084	6.01625	6.30509	4.98471	6.60745	7.9649		2141	0.00860755	0.00537971	0.00591183	0.00324066	0.0064429	0.00855671			2141	16.1523	9.3248	10.207	6.48834	11.1714	16.0128
2074	124	8.09878	6.06207	6.3579	5.00751	6.66781	8.06182		2142	0.00856462	0.00535288	0.00588235	0.0032245	0.00641076	0.00851403			2142	16.2925	9.37524	10.2677	6.50943	11.2438	16.151
2075	125	8.19742	6.10801	6.41088	5.0303	6.72841	8.15942		2143	0.0085219	0.00532618	0.00585301	0.00320841	0.00637879	0.00847157			2143	16.4333	9.42569	10.3284	6.53049	11.3163	16.2897
2076	126	8.29675	6.15406	6.46403	5.05307	6.78925	8.2577		2144	0.0084794	0.00529962	0.00582382	0.00319241	0.00634697	0.00842931			2144	16.5745	9.47616	10.3892	6.55151	11.389	16.4289
2077	127	8.39678	6.20022	6.51736	5.07584	6.85034	8.35667		2145	0.00843711	0.00527319	0.00579477	0.00317649	0.00631532	0.00838727			2145	16.7163	9.52665	10.4501	6.57249	11.4617	16.5686
2078	128	8.49751	6.2465	6.57086	5.09859	6.91166	8.45631		2146	0.00839503	0.00524689	0.00576587	0.00316065	0.00628382	0.00834544			2146	16.8585	9.57715	10.511	6.59343	11.5346	16.7087
2079	129	8.59893	6.29289	6.62452	5.12133	6.97323	8.55664		2147	0.00835316	0.00522072	0.00573711	0.00314488	0.00625248	0.00830382			2147	17.0012	9.62767	10.572	6.61434	11.6075	16.8493
2080	130	8.70104	6.33939	6.67835	5.14406	7.03502	8.65764		2148	0.00831149	0.00519468	0.0057085	0.0031292	0.0062213	0.0082624			2148	17.1445	9.67819	10.633	6.63521	11.6806	16.9904
2081	131	8.80385	6.38599	6.73234	5.16678	7.09706	8.75932		2149	0.00827004	0.00516877	0.00568003	0.00311359	0.00619027	0.00822119			2149	17.2881	9.72873	10.694	6.65604	11.7537	17.1319
2082	132	8.90734	6.43271	6.7865	5.18948	7.15932	8.86168		2150	0.00822879	0.00514299	0.0056517	0.00309806	0.00615939	0.00818019			2150	17.4323	9.77928	10.7551	6.67682	11.8269	17.274
2083	133	9.01152	6.47953	6.84082	5.21217	7.22182	8.96471		2151	0.00818775	0.00511734	0.00562351	0.00308261	0.00612867	0.00813939			2151	17.5769	9.82983	10.8162	6.69757	11.9002	17.4164
2084	134	9.11639	6.52645	6.8953	5.23484	7.28454	9.06841		2152	0.00814692	0.00509182	0.00559546	0.00306724	0.00609811	0.00809879			2152	17.7221	9.8804	10.8774	6.71828	11.9736	17.5593
2085	135	9.22195	6.57347	6.94993	5.25749	7.34749	9.17278		2153	0.00810628	0.00506642	0.00556755	0.00305194	0.00606769	0.0080584			2153	17.8676	9.93096	10.9386	6.73895	12.047	17.7027
2086	136	9.32819	6.6206	7.00472	5.28013	7.41066	9.27782		2154	0.00806585	0.00504115	0.00553978	0.00303672	0.00603743	0.00801821			2154	18.0136	9.98153	10.9998	6.75958	12.1206	17.8465
2087	137	9.43511	6.66782	7.05967	5.30276	7.47406	9.38353		2155	0.00802562	0.00501601	0.00551215	0.00302157	0.00600732	0.00797822			2155	18.1601	10.0321	11.0611	6.78017	12.1942	17.9908
2088	138	9.54271	6.71515	7.11477	5.32536	7.53768	9.4899		2156	0.0079856	0.00499099	0.00548466	0.0030065	0.00597736	0.00793843			2156	18.307	10.0827	11.1224	6.80072	12.2679	18.1355
2089	139	9.65098	6.76257	7.17002	5.34795	7.60151	9.59693		2157	0.00794577	0.0049661	0.00545731	0.00299151	0.00594754	0.00789883			2157	18.4544	10.1333	11.1838	6.82123	12.3417	18.2806
2090	140	9.75994	6.81008	7.22542	5.37053	7.66557	9.70463		2158	0.00790614	0.00494133	0.00543009	0.00297658	0.00591788	0.00785944			2158	18.6022	10.1838	11.2451	6.8417	12.4155	18.4261
2091	141	9.86957	6.85769	7.28096	5.39308	7.72984	9.81299		2159	0.00786671	0.00491669	0.00540301	0.00296174	0.00588836	0.00782024			2159	18.7505	10.2344	11.3065	6.86212	12.4894	18.5721
2092	142	9.97987	6.90539	7.33666	5.41561	7.79432	9.922		2160	0.00782747	0.00489216	0.00537606	0.00294697	0.005859	0.00778124			2160	18.8991	10.285	11.3679	6.88251	12.5634	18.7185
2093	143	10.0908	6.95318	7.39249	5.43813	7.85901	10.0317		2161	0.00778843	0.00486776	0.00534925	0.00293227	0.00582977	0.00774243			2161	19.0482	10.3355	11.4294	6.90285	12.6374	18.8653
2094	144	10.2025	7.00106	7.44847	5.46063	7.92391	10.142		2162	0.00774959	0.00484349	0.00532257	0.00291764	0.0058007	0.00770381			2162	19.1978	10.3861	11.4909	6.92315	12.7115	19.0125
2095	145	10.3148	7.04903	7.50459	5.4831	7.98902	10.253		2163	0.00771093	0.00481933	0.00529602	0.00290309	0.00577177	0.00766539			2163	19.3477	10.4366	11.5523	6.94341	12.7857	19.1601
2096	146	10.4277	7.09708	7.56085	5.50556	8.05433	10.3646		2164	0.00767248	0.00479529	0.00526961	0.00288861	0.00574298	0.00762716			2164	19.498	10.4872	11.6139	6.96362	12.8599	19.3081
2097	147	10.5414	7.14522	7.61724	5.52799	8.11985	10.4769		2165	0.00763421	0.00477138	0.00524332	0.00287421	0.00571434	0.00758912			2165	19.6488	10.5377	11.6754	6.9838	12.9342	19.4565
2098	148	10.6557	7.19344	7.67377	5.5504	8.18556	10.5898		2166	0.00759613	0.00474758	0.00521717	0.00285987	0.00568584	0.00755127			2166	19.8	10.5882	11.7369	7.00393	13.0085	19.6053
2099	149	10.7706	7.24174	7.73043	5.5728	8.25148	10.7033		2167	0.00755825	0.0047239	0.00519115	0.00284561	0.00565748	0.0075136			2167	19.9515	10.6387	11.7985	7.02402	13.0829	19.7545
2100	150	10.8862	7.29013	7.78723	5.59517	8.31759	10.8175		2168	0.00752055	0.00470034	0.00516526	0.00283142	0.00562926	0.00747613			2168	20.1035	10.6892	11.86	7.04406	13.1574	19.904
2101	151	11.0025	7.33859	7.84415	5.61751	8.3839	10.9323		2169	0.00748304	0.0046769	0.0051395	0.00281729	0.00560119	0.00743884			2169	20.2558	10.7397	11.9216	7.06406	13.2319	20.0539
2102	152	11.1194	7.38713	7.90121	5.63984	8.4504	11.0478		2170	0.00744572	0.00465357	0.00511387	0.00280324	0.00557325	0.00740174			2170	20.4085	10.7902	11.9832	7.08402	13.3064	20.2042
2103	153	11.2369	7.43574	7.95838	5.66213	8.51709	11.1639		2171	0.00740858	0.00463036	0.00508836	0.00278926	0.00554545	0.00736482			2171	20.5616	10.8406	12.0448	7.10393	13.381	20.3549
2104	154	11.3551	7.48443	8.01569	5.68441	8.58396	11.2806		2172	0.00737163	0.00460727	0.00506298	0.00277535	0.00551779	0.00732809			2172	20.7151	10.8911	12.1064	7.1238	13.4556	20.5059
2105	155	11.4739	7.5332	8.07311	5.70666	8.65103	11.398		2173	0.00733487	0.00458429	0.00503773	0.00276151	0.00549027	0.00729154			2173	20.8689	10.9415	12.168	7.14363	13.5302	20.6573
2106	156	11.5934	7.58203	8.13066	5.72889	8.71828	11.5159		2174	0.00729829	0.00456142	0.0050126	0.00274773	0.00546289	0.00725518			2174	21.0231	10.9919	12.2296	7.16341	13.6049	20.809
2107	157	11.7135	7.63093	8.18833	5.75109	8.78571	11.6345		2175	0.00726188	0.00453867	0.0049876	0.00273403	0.00543565	0.00721899			2175	21.1777	11.0422	12.2912	7.18315	13.6797	20.9611
2108	158	11.8343	7.6799	8.24611	5.77327	8.85332	11.7537		2176	0.00722567	0.00451604	0.00496273	0.00272039	0.00540854	0.00718299			2176	21.3326	11.0926	12.3528	7.20284	13.7544	21.1135
2109	159	11.9556	7.72894	8.30401	5.79542	8.92111	11.8736		2177	0.00718963	0.00449351	0.00493798	0.00270683	0.00538156	0.00714716			2177	21.4879	11.1429	12.4145	7.22249	13.8292	21.2663
2110	160	12.0776	7.77805	8.36202	5.81754	8.98907	11.994		2178	0.00715377	0.0044711	0.00491335	0.00269333	0.00535472	0.00711151			2178	21.6435	11.1932	12.4761	7.24209	13.9041	21.4194
2111	161	12.2002	7.82721	8.42014	5.83964	9.05721	12.115		2179	0.00711809	0.0044488	0.00488884	0.00267989	0.00532801	0.00707605			2179	21.7994	11.2435	12.5377	7.26165	13.9789	21.5728
2112	162	12.3235	7.87645	8.47838	5.86171	9.12552	12.2367		2180	0.00708259	0.00442661	0.00486446	0.00266653	0.00530144	0.00704075			2180	21.9557	11.2937	12.5993	7.28116	14.0538	21.7265
2113	163	12.4473	7.92574	8.53672	5.88375	9.194	12.3589		2181	0.00704726	0.00440454	0.0048402	0.00265323	0.005275	0.00700564			2181	22.1123	11.3439	12.6608	7.30063	14.1287	21.8806
2114	164	12.5718	7.97509	8.59517	5.90576	9.26265	12.4818		2182	0.00701212	0.00438257	0.00481606	0.00263999	0.00524869	0.0069707			2182	22.2692	11.3941	12.7224	7.32005	14.2036	22.0349
2115	165	12.6969	8.0245	8.65372	5.92775	9.33146	12.6053		2183	0.00697714	0.00436071	0.00479204	0.00262683	0.00522251	0.00693593			2183	22.4265	11.4443	12.784	7.33943	14.2786	22.1896
2116	166	12.8226	8.07396	8.71238	5.94971	9.40043	12.7293		2184	0.00694234	0.00433896	0.00476814	0.00261373	0.00519646	0.00690134			2184	22.5841	11.4944	12.8455	7.35876	14.3535	22.3446
2117	167	12.9489	8.12348	8.77114	5.97164	9.46957	12.8539		2185	0.00690772	0.00431732	0.00474436	0.00260069	0.00517055	0.00686692			2185	22.742	11.5445	12.9071	7.37804	14.4285	22.4999
2118	168	13.0758	8.17306	8.83	5.99354	9.53886	12.9791		2186	0.00687327	0.00429579	0.00472069	0.00258772	0.00514476	0.00683267			2186	22.9001	11.5945	12.9686	7.39728	14.5035	22.6554
2119	169	13.2033	8.22268	8.88895	6.01541	9.60831	13.1049		2187	0.00683899	0.00427436	0.00469715	0.00257481	0.0051191	0.00679859			2187	23.0586	11.6446	13.0301	7.41647	14.5785	22.8113
2120	170	13.3314	8.27236	8.948	6.03725	9.67792	13.2313		2188	0.00680488	0.00425304	0.00467372	0.00256197	0.00509357	0.00676468			2188	23.2174	11.6945	13.0916	7.43562	14.6535	22.9675
2121	171	13.4601	8.32209	9.00714	6.05906	9.74767	13.3583		2189	0.00677094	0.00423183	0.00465041	0.00254919	0.00506816	0.00673094			2189	23.3765	11.7445	13.1531	7.45472	14.7285	23.1239
2122	172	13.5893	8.37186	9.06638	6.08083	9.81758	13.4858		2190	0.00673717	0.00421072	0.00462722	0.00253648	0.00504288	0.00669737			2190	23.5358	11.7944	13.2146	7.47377	14.8035	23.2806
2123	173	13.7192	8.42169	9.12571	6.10258	9.88763	13.6139		2191	0.00670356	0.00418972	0.00460414	0.00252383	0.00501773	0.00666397			2191	23.6955	11.8443	13.276	7.49277	14.8786	23.4375
2124	174	13.8496	8.47155	9.18512	6.1243	9.95783	13.7426		2192	0.00667013	0.00416883	0.00458118	0.00251124	0.00499271	0.00663073			2192	23.8554	11.8941	13.3374	7.51173	14.9536	23.5948
2125	175	13.9807	8.52146	9.24462	6.14598	10.0282	13.8718		2193	0.00663686	0.00414804	0.00455833	0.00249872	0.00496781	0.00659766			2193	24.0156	11.9439	13.3988	7.53064	15.0286	23.7523
2126	176	14.1122	8.57141	9.30421	6.16763	10.0987	14.0016		2194	0.00660376	0.00412735	0.00453559	0.00248625	0.00494303	0.00656476			2194	24.176	11.9937	13.4601	7.54951	15.1037	23.91
2127	177	14.2444	8.62141	9.36388	6.18925	10.1693	14.1319		2195	0.00657082	0.00410676	0.00451297	0.00247385	0.00491838	0.00653201			2195	24.3368	12.0434	13.5215	7.56833	15.1787	24.068
2128	178	14.3771	8.67144	9.42363	6.21084	10.24	14.2628		2196	0.00653805	0.00408628	0.00449046	0.00246151	0.00489384	0.00649944			2196	24.4977	12.093	13.5828	7.58709	15.2537	24.2263
2129	179	14.5104	8.72151	9.48346	6.23239	10.3109	14.3943		2197	0.00650544	0.0040659	0.00446807	0.00244924	0.00486944	0.00646702			2197	24.659	12.1426	13.644	7.60582	15.3287	24.3848
2130	180	14.6443	8.77162	9.54336	6.25391	10.382	14.5262		2198	0.006473	0.00404562	0.00444578	0.00243702	0.00484515	0.00643476			2198	24.8204	12.1922	13.7053	7.62449	15.4038	24.5435
2131	181	14.7787	8.82176	9.60335	6.2754	10.4531	14.6588		2199	0.00644071	0.00402544	0.00442361	0.00242487	0.00482099	0.00640267			2199	24.9821	12.2417	13.7665	7.64312	15.4788	24.7024
2132	182	14.9136	8.87193	9.66341	6.29685	10.5244	14.7918		2200	0.00640859	0.00400537	0.00440155	0.00241277	0.00479694	0.00637074			2200	25.1441	12.2912	13.8276	7.6617	15.5537	24.8616
2133	183	15.0491	8.92214	9.72354	6.31827	10.5958	14.9254		2201	0.00637663	0.00398539	0.00437959	0.00240074	0.00477302	0.00633896			2201	25.3063	12.3406	13.8888	7.68023	15.6287	25.021
2134	184	15.1852	8.97238	9.78374	6.33965	10.6673	15.0595		2202	0.00634482	0.00396551	0.00435775	0.00238877	0.00474921	0.00630735			2202	25.4687	12.39	13.9499	7.69871	15.7037	25.1806
2135	185	15.3217	9.02265	9.844	6.361	10.739	15.1942		2203	0.00631318	0.00394573	0.00433601	0.00237685	0.00472552	0.00627589			2203	25.6313	12.4394	14.0109	7.71714	15.7786	25.3405
2136	186	15.4589	9.07295	9.90434	6.38231	10.8108	15.3293		2204	0.00628169	0.00392605	0.00431439	0.002365	0.00470195	0.00624459			2204	25.7941	12.4886	14.0719	7.73553	15.8535	25.5005
2137	187	15.5965	9.12327	9.96474	6.40359	10.8827	15.465		2205	0.00625036	0.00390647	0.00429287	0.0023532	0.0046785	0.00621344			2205	25.9572	12.5379	14.1329	7.75387	15.9284	25.6608
2138	188	15.7347	9.17362	10.0252	6.42483	10.9547	15.6012		2206	0.00621919	0.00388699	0.00427146	0.00234146	0.00465517	0.00618245			2206	26.1204	12.587	14.1938	7.77216	16.0033	25.8212
2139	189	15.8734	9.22399	10.0857	6.44604	11.0268	15.7379		2207	0.00618817	0.0038676	0.00425016	0.00232979	0.00463195	0.00615162			2207	26.2839	12.6361	14.2547	7.7904	16.0781	25.9818
2140	190	16.0126	9.27438	10.1463	6.4672	11.099	15.8751		2208	0.00615731	0.00384831	0.00422896	0.00231817	0.00460885	0.00612094			2208	26.4476	12.6852	14.3156	7.80859	16.1529	26.1426
2141	191	16.1523	9.3248	10.207	6.48834	11.1714	16.0128		2209	0.0061266	0.00382912	0.00420787	0.0023066	0.00458586	0.00609041			2209	26.6114	12.7342	14.3764	7.82673	16.2277	26.3036
2142	192	16.2925	9.37524	10.2677	6.50943	11.2438	16.151		2210	0.00609604	0.00381002	0.00418688	0.0022951	0.00456299	0.00606003			2210	26.7755	12.7832	14.4371	7.84483	16.3025	26.4648
2143	193	16.4333	9.42569	10.3284	6.53049	11.3163	16.2897		2211	0.00606564	0.00379102	0.004166	0.00228365	0.00454023	0.00602981			2211	26.9397	12.832	14.4978	7.86287	16.3772	26.6262
2144	194	16.5745	9.47616	10.3892	6.55151	11.389	16.4289		2212	0.00603538	0.00377211	0.00414522	0.00227226	0.00451759	0.00599973			2212	27.1041	12.8809	14.5585	7.88087	16.4519	26.7877
2145	195	16.7163	9.52665	10.4501	6.57249	11.4617	16.5686		2213	0.00600528	0.0037533	0.00412454	0.00226093	0.00449506	0.00596981			2213	27.2687	12.9296	14.6191	7.89882	16.5266	26.9494
2146	196	16.8585	9.57715	10.511	6.59343	11.5346	16.7087		2214	0.00597533	0.00373458	0.00410397	0.00224965	0.00447264	0.00594004			2214	27.4334	12.9784	14.6796	7.91672	16.6012	27.1112
2147	197	17.0012	9.62767	10.572	6.61434	11.6075	16.8493		2215	0.00594553	0.00371595	0.0040835	0.00223843	0.00445033	0.00591041			2215	27.5983	13.027	14.7401	7.93457	16.6758	27.2733
2148	198	17.1445	9.67819	10.633	6.63521	11.6806	16.9904		2216	0.00591587	0.00369742	0.00406314	0.00222727	0.00442813	0.00588093			2216	27.7634	13.0756	14.8005	7.95237	16.7503	27.4354
2149	199	17.2881	9.72873	10.694	6.65604	11.7537	17.1319		2217	0.00588637	0.00367898	0.00404287	0.00221616	0.00440605	0.0058516			2217	27.9286	13.1241	14.8609	7.97012	16.8248	27.5977
2150	200	17.4323	9.77928	10.7551	6.67682	11.8269	17.274		2218	0.00585701	0.00366063	0.00402271	0.00220511	0.00438407	0.00582242			2218	28.094	13.1726	14.9212	7.98782	16.8993	27.7601
2151	201	17.5769	9.82983	10.8162	6.69757	11.9002	17.4164		2219	0.0058278	0.00364237	0.00400265	0.00219411	0.00436221	0.00579338			2219	28.2595	13.221	14.9815	8.00548	16.9737	27.9227
2152	202	17.7221	9.8804	10.8774	6.71828	11.9736	17.5593		2220	0.00579873	0.0036242	0.00398268	0.00218317	0.00434045	0.00576448			2220	28.4252	13.2693	15.0417	8.02308	17.0481	28.0854
2153	203	17.8676	9.93096	10.9386	6.73895	12.047	17.7027		2221	0.00576981	0.00360613	0.00396282	0.00217228	0.0043188	0.00573573			2221	28.591	13.3176	15.1019	8.04063	17.1224	28.2483
2154	204	18.0136	9.98153	10.9998	6.75958	12.1206	17.8465		2222	0.00574103	0.00358814	0.00394305	0.00216144	0.00429726	0.00570712			2222	28.7569	13.3658	15.1619	8.05814	17.1967	28.4112
2155	205	18.1601	10.0321	11.0611	6.78017	12.1942	17.9908		2223	0.0057124	0.00357025	0.00392339	0.00215066	0.00427583	0.00567866			2223	28.9229	13.4139	15.222	8.07559	17.2709	28.5743
2156	206	18.307	10.0827	11.1224	6.80072	12.2679	18.1355		2224	0.00568391	0.00355244	0.00390382	0.00213994	0.0042545	0.00565034			2224	29.0891	13.462	15.2819	8.093	17.345	28.7375
2157	207	18.4544	10.1333	11.1838	6.82123	12.3417	18.2806		2225	0.00565556	0.00353472	0.00388435	0.00212926	0.00423329	0.00562216			2225	29.2554	13.51	15.3418	8.11035	17.4192	28.9008
2158	208	18.6022	10.1838	11.2451	6.8417	12.4155	18.4261		2226	0.00562735	0.00351709	0.00386498	0.00211864	0.00421217	0.00559412			2226	29.4218	13.5579	15.4016	8.12766	17.4932	29.0642
2159	209	18.7505	10.2344	11.3065	6.86212	12.4894	18.5721		2227	0.00559929	0.00349955	0.0038457	0.00210808	0.00419116	0.00556621			2227	29.5883	13.6057	15.4614	8.14492	17.5672	29.2277
2160	210	18.8991	10.285	11.3679	6.88251	12.5634	18.7185		2228	0.00557136	0.0034821	0.00382652	0.00209756	0.00417026	0.00553845			2228	29.7549	13.6535	15.5211	8.16212	17.6411	29.3913
2161	211	19.0482	10.3355	11.4294	6.90285	12.6374	18.8653		2229	0.00554357	0.00346473	0.00380743	0.0020871	0.00414946	0.00551083			2229	29.9216	13.7012	15.5807	8.17928	17.715	29.555
2162	212	19.1978	10.3861	11.4909	6.92315	12.7115	19.0125		2230	0.00551593	0.00344745	0.00378845	0.00207669	0.00412876	0.00548334			2230	30.0884	13.7489	15.6403	8.19639	17.7888	29.7188
2163	213	19.3477	10.4366	11.5523	6.94341	12.7857	19.1601		2231	0.00548841	0.00343026	0.00376955	0.00206634	0.00410817	0.005456			2231	30.2553	13.7964	15.6997	8.21344	17.8626	29.8826
2164	214	19.498	10.4872	11.6139	6.96362	12.8599	19.3081		2232	0.00546104	0.00341315	0.00375075	0.00205603	0.00408768	0.00542878			2232	30.4222	13.8439	15.7591	8.23045	17.9363	30.0466
2165	215	19.6488	10.5377	11.6754	6.9838	12.9342	19.4565		2233	0.0054338	0.00339612	0.00373204	0.00204577	0.0040673	0.00540171			2233	30.5893	13.8913	15.8185	8.24741	18.0099	30.2106
2166	216	19.8	10.5882	11.7369	7.00393	13.0085	19.6053		2234	0.0054067	0.00337919	0.00371343	0.00203557	0.00404701	0.00537477			2234	30.7564	13.9387	15.8777	8.26431	18.0834	30.3746
2167	217	19.9515	10.6387	11.7985	7.02402	13.0829	19.7545		2235	0.00537974	0.00336233	0.00369491	0.00202542	0.00402683	0.00534796			2235	30.9236	13.9859	15.9369	8.28117	18.1569	30.5388
2168	218	20.1035	10.6892	11.86	7.04406	13.1574	19.904		2236	0.0053529	0.00334556	0.00367648	0.00201532	0.00400674	0.00532129			2236	31.0909	14.0331	15.996	8.29798	18.2303	30.703
2169	219	20.2558	10.7397	11.9216	7.06406	13.2319	20.0539		2237	0.00532621	0.00332888	0.00365814	0.00200527	0.00398676	0.00529475			2237	31.2582	14.0802	16.055	8.31473	18.3037	30.8672
2170	220	20.4085	10.7902	11.9832	7.08402	13.3064	20.2042		2238	0.00529964	0.00331227	0.0036399	0.00199526	0.00396687	0.00526834			2238	31.4256	14.1272	16.114	8.33144	18.3769	31.0315
2171	221	20.5616	10.8406	12.0448	7.10393	13.381	20.3549		2239	0.00527321	0.00329575	0.00362174	0.00198531	0.00394709	0.00524206			2239	31.593	14.1742	16.1729	8.3481	18.4501	31.1959
2172	222	20.7151	10.8911	12.1064	7.1238	13.4556	20.5059		2240	0.00524691	0.00327932	0.00360368	0.00197541	0.0039274	0.00521592			2240	31.7605	14.2211	16.2316	8.3647	18.5232	31.3603
2173	223	20.8689	10.9415	12.168	7.14363	13.5302	20.6573		2241	0.00522074	0.00326296	0.00358571	0.00196556	0.00390781	0.0051899			2241	31.928	14.2679	16.2903	8.38126	18.5963	31.5247
2174	224	21.0231	10.9919	12.2296	7.16341	13.6049	20.809		2242	0.0051947	0.00324669	0.00356782	0.00195576	0.00388832	0.00516402			2242	32.0956	14.3146	16.349	8.39777	18.6692	31.6892
2175	225	21.1777	11.0422	12.2912	7.18315	13.6797	20.9611		2243	0.00516879	0.00323049	0.00355003	0.001946	0.00386893	0.00513826			2243	32.2632	14.3612	16.4075	8.41422	18.7421	31.8537
2176	226	21.3326	11.0926	12.3528	7.20284	13.7544	21.1135		2244	0.00514301	0.00321438	0.00353232	0.0019363	0.00384963	0.00511264			2244	32.4308	14.4077	16.466	8.43063	18.8149	32.0182
2177	227	21.4879	11.1429	12.4145	7.22249	13.8292	21.2663		2245	0.00511736	0.00319835	0.00351471	0.00192664	0.00383043	0.00508714			2245	32.5984	14.4542	16.5243	8.44699	18.8876	32.1827
2178	228	21.6435	11.1932	12.4761	7.24209	13.9041	21.4194		2246	0.00509184	0.0031824	0.00349718	0.00191703	0.00381133	0.00506177			2246	32.7661	14.5006	16.5826	8.46329	18.9602	32.3473
2179	229	21.7994	11.2435	12.5377	7.26165	13.9789	21.5728		2247	0.00506645	0.00316652	0.00347973	0.00190747	0.00379232	0.00503652			2247	32.9338	14.5469	16.6408	8.47955	19.0328	32.5118
2180	230	21.9557	11.2937	12.5993	7.28116	14.0538	21.7265		2248	0.00504118	0.00315073	0.00346238	0.00189795	0.00377341	0.0050114			2248	33.1015	14.5931	16.6989	8.49575	19.1052	32.6764
2181	231	22.1123	11.3439	12.6608	7.30063	14.1287	21.8806		2249	0.00501603	0.00313502	0.00344511	0.00188849	0.00375459	0.00498641			2249	33.2692	14.6392	16.7569	8.51191	19.1776	32.841
2182	232	22.2692	11.3941	12.7224	7.32005	14.2036	22.0349		2250	0.00499102	0.00311938	0.00342793	0.00187907	0.00373586	0.00496154			2250	33.437	14.6852	16.8149	8.52801	19.2499	33.0056
2183	233	22.4265	11.4443	12.784	7.33943	14.2786	22.1896		2251	0.00496612	0.00310382	0.00341083	0.0018697	0.00371723	0.00493679			2251	33.6047	14.7312	16.8727	8.54407	19.322	33.1701
2184	234	22.5841	11.4944	12.8455	7.35876	14.3535	22.3446		2252	0.00494135	0.00308834	0.00339382	0.00186037	0.00369869	0.00491217			2252	33.7724	14.7771	16.9305	8.56007	19.3941	33.3347
2185	235	22.742	11.5445	12.9071	7.37804	14.4285	22.4999		2253	0.00491671	0.00307294	0.00337689	0.00185109	0.00368024	0.00488767			2253	33.9401	14.8228	16.9881	8.57603	19.4661	33.4993
2186	236	22.9001	11.5945	12.9686	7.39728	14.5035	22.6554		2254	0.00489219	0.00305761	0.00336005	0.00184186	0.00366189	0.00486329			2254	34.1078	14.8685	17.0457	8.59193	19.538	33.6638
2187	237	23.0586	11.6446	13.0301	7.41647	14.5785	22.8113		2255	0.00486779	0.00304236	0.00334329	0.00183267	0.00364362	0.00483903			2255	34.2755	14.9141	17.1031	8.60779	19.6099	33.8283
2188	238	23.2174	11.6945	13.0916	7.43562	14.6535	22.9675		2256	0.00484351	0.00302719	0.00332662	0.00182353	0.00362545	0.0048149			2256	34.4432	14.9596	17.1605	8.62359	19.6816	33.9928
2189	239	23.3765	11.7445	13.1531	7.45472	14.7285	23.1239		2257	0.00481935	0.00301209	0.00331002	0.00181444	0.00360737	0.00479089			2257	34.6108	15.0051	17.2178	8.63934	19.7532	34.1573
2190	240	23.5358	11.7944	13.2146	7.47377	14.8035	23.2806		2258	0.00479531	0.00299707	0.00329352	0.00180539	0.00358938	0.00476699			2258	34.7784	15.0504	17.275	8.65505	19.8247	34.3217
2191	241	23.6955	11.8443	13.276	7.49277	14.8786	23.4375		2259	0.0047714	0.00298212	0.00327709	0.00179639	0.00357147	0.00474322			2259	34.946	15.0956	17.3321	8.6707	19.8961	34.4861
2192	242	23.8554	11.8941	13.3374	7.51173	14.9536	23.5948		2260	0.0047476	0.00296725	0.00326074	0.00178743	0.00355366	0.00471956			2260	35.1135	15.1408	17.389	8.68631	19.9674	34.6505
2193	243	24.0156	11.9439	13.3988	7.53064	15.0286	23.7523		2261	0.00472392	0.00295245	0.00324448	0.00177851	0.00353594	0.00469602			2261	35.281	15.1858	17.4459	8.70186	20.0386	34.8148
2194	244	24.176	11.9937	13.4601	7.54951	15.1037	23.91		2262	0.00470036	0.00293772	0.0032283	0.00176964	0.0035183	0.0046726			2262	35.4485	15.2308	17.5027	8.71736	20.1097	34.979
2195	245	24.3368	12.0434	13.5215	7.56833	15.1787	24.068		2263	0.00467692	0.00292307	0.0032122	0.00176081	0.00350075	0.00464929			2263	35.6159	15.2757	17.5594	8.73282	20.1807	35.1432
2196	246	24.4977	12.093	13.5828	7.58709	15.2537	24.2263		2264	0.00465359	0.00290849	0.00319618	0.00175203	0.00348329	0.00462611			2264	35.7832	15.3205	17.616	8.74822	20.2516	35.3074
2197	247	24.659	12.1426	13.644	7.60582	15.3287	24.3848		2265	0.00463038	0.00289399	0.00318024	0.00174329	0.00346592	0.00460303			2265	35.9505	15.3652	17.6725	8.76358	20.3224	35.4715
2198	248	24.8204	12.1922	13.7053	7.62449	15.4038	24.5435		2266	0.00460729	0.00287955	0.00316438	0.0017346	0.00344863	0.00458007			2266	36.1178	15.4098	17.7288	8.77888	20.3931	35.6355
2199	249	24.9821	12.2417	13.7665	7.64312	15.4788	24.7024		2267	0.00458431	0.00286519	0.00314859	0.00172595	0.00343143	0.00455723			2267	36.2849	15.4543	17.7851	8.79413	20.4637	35.7995
2200	250	25.1441	12.2912	13.8276	7.6617	15.5537	24.8616		2268	0.00456144	0.0028509	0.00313289	0.00171734	0.00341432	0.0045345			2268	36.4521	15.4987	17.8413	8.80934	20.5341	35.9634
2201	251	25.3063	12.3406	13.8888	7.68023	15.6287	25.021		2269	0.00453869	0.00283668	0.00311726	0.00170877	0.00339729	0.00451189			2269	36.6191	15.543	17.8974	8.82449	20.6045	36.1272
2202	252	25.4687	12.39	13.9499	7.69871	15.7037	25.1806		2270	0.00451606	0.00282253	0.00310172	0.00170025	0.00338035	0.00448938			2270	36.7861	15.5872	17.9533	8.8396	20.6747	36.2909
2203	253	25.6313	12.4394	14.0109	7.71714	15.7786	25.3405		2271	0.00449353	0.00280846	0.00308625	0.00169177	0.00336349	0.00446699			2271	36.9529	15.6313	18.0092	8.85465	20.7449	36.4546
2204	254	25.7941	12.4886	14.0719	7.73553	15.8535	25.5005		2272	0.00447112	0.00279445	0.00307085	0.00168333	0.00334671	0.00444471			2272	37.1197	15.6753	18.065	8.86966	20.8149	36.6182
2205	255	25.9572	12.5379	14.1329	7.75387	15.9284	25.6608		2273	0.00444882	0.00278051	0.00305554	0.00167494	0.00333002	0.00442254			2273	37.2864	15.7193	18.1206	8.88461	20.8848	36.7817
2206	256	26.1204	12.587	14.1938	7.77216	16.0033	25.8212		2274	0.00442663	0.00276664	0.0030403	0.00166658	0.00331341	0.00440049			2274	37.4531	15.7631	18.1761	8.89952	20.9545	36.945
2207	257	26.2839	12.6361	14.2547	7.7904	16.0781	25.9818		2275	0.00440456	0.00275284	0.00302513	0.00165827	0.00329689	0.00437854			2275	37.6196	15.8068	18.2316	8.91438	21.0242	37.1083
2208	258	26.4476	12.6852	14.3156	7.80859	16.1529	26.1426		2276	0.00438259	0.00273911	0.00301005	0.00165	0.00328044	0.0043567			2276	37.786	15.8505	18.2869	8.92918	21.0937	37.2715
2209	259	26.6114	12.7342	14.3764	7.82673	16.2277	26.3036		2277	0.00436073	0.00272545	0.00299503	0.00164177	0.00326408	0.00433497			2277	37.9524	15.894	18.3421	8.94394	21.1632	37.4346
2210	260	26.7755	12.7832	14.4371	7.84483	16.3025	26.4648		2278	0.00433898	0.00271186	0.0029801	0.00163358	0.0032478	0.00431335			2278	38.1186	15.9374	18.3972	8.95865	21.2325	37.5976
2211	261	26.9397	12.832	14.4978	7.86287	16.3772	26.6262		2279	0.00431734	0.00269833	0.00296523	0.00162544	0.0032316	0.00429184			2279	38.2847	15.9808	18.4522	8.97331	21.3017	37.7605
2212	262	27.1041	12.8809	14.5585	7.88087	16.4519	26.7877		2280	0.00429581	0.00268488	0.00295044	0.00161733	0.00321549	0.00427043			2280	38.4507	16.024	18.5071	8.98792	21.3707	37.9233
2213	263	27.2687	12.9296	14.6191	7.89882	16.5266	26.9494		2281	0.00427438	0.00267149	0.00293573	0.00160926	0.00319945	0.00424913			2281	38.6166	16.0671	18.5618	9.00248	21.4397	38.0859
2214	264	27.4334	12.9784	14.6796	7.91672	16.6012	27.1112		2282	0.00425306	0.00265816	0.00292109	0.00160124	0.00318349	0.00422794			2282	38.7824	16.1102	18.6165	9.01699	21.5085	38.2484
2215	265	27.5983	13.027	14.7401	7.93457	16.6758	27.2733		2283	0.00423185	0.0026449	0.00290652	0.00159325	0.00316761	0.00420685			2283	38.948	16.1531	18.671	9.03145	21.5772	38.4108
2216	266	27.7634	13.0756	14.8005	7.95237	16.7503	27.4354		2284	0.00421074	0.00263171	0.00289202	0.0015853	0.00315181	0.00418587			2284	39.1135	16.196	18.7254	9.04586	21.6457	38.5731
2217	267	27.9286	13.1241	14.8609	7.97012	16.8248	27.5977		2285	0.00418974	0.00261859	0.0028776	0.0015774	0.00313609	0.004165			2285	39.2789	16.2387	18.7798	9.06023	21.7142	38.7352
2218	268	28.094	13.1726	14.9212	7.98782	16.8993	27.7601		2286	0.00416885	0.00260553	0.00286325	0.00156953	0.00312045	0.00414422			2286	39.4442	16.2813	18.834	9.07454	21.7825	38.8972
2219	269	28.2595	13.221	14.9815	8.00548	16.9737	27.9227		2287	0.00414805	0.00259253	0.00284896	0.0015617	0.00310489	0.00412355			2287	39.6093	16.3239	18.888	9.08881	21.8507	39.0591
2220	270	28.4252	13.2693	15.0417	8.02308	17.0481	28.0854		2288	0.00412737	0.0025796	0.00283476	0.00155391	0.0030894	0.00410299			2288	39.7743	16.3663	18.942	9.10302	21.9187	39.2208
2221	271	28.591	13.3176	15.1019	8.04063	17.1224	28.2483		2289	0.00410678	0.00256674	0.00282062	0.00154616	0.003074	0.00408252			2289	39.9391	16.4086	18.9958	9.11719	21.9866	39.3824
2222	272	28.7569	13.3658	15.1619	8.05814	17.1967	28.4112		2290	0.0040863	0.00255393	0.00280655	0.00153845	0.00305866	0.00406216			2290	40.1038	16.4508	19.0496	9.13131	22.0544	39.5439
2223	273	28.9229	13.4139	15.222	8.07559	17.2709	28.5743		2291	0.00406592	0.0025412	0.00279255	0.00153078	0.00304341	0.0040419			2291	40.2684	16.493	19.1032	9.14538	22.1221	39.7051
2224	274	29.0891	13.462	15.2819	8.093	17.345	28.7375		2292	0.00404564	0.00252852	0.00277862	0.00152314	0.00302823	0.00402174			2292	40.4328	16.535	19.1567	9.1594	22.1896	39.8663
2225	275	29.2554	13.51	15.3418	8.11035	17.4192	28.9008		2293	0.00402546	0.00251591	0.00276477	0.00151555	0.00301313	0.00400168			2293	40.597	16.5769	19.2101	9.17337	22.257	40.0273
2226	276	29.4218	13.5579	15.4016	8.12766	17.4932	29.0642		2294	0.00400538	0.00250336	0.00275098	0.00150799	0.0029981	0.00398173			2294	40.7611	16.6187	19.2633	9.18729	22.3243	40.1881
2227	277	29.5883	13.6057	15.4614	8.14492	17.5672	29.2277		2295	0.00398541	0.00249088	0.00273726	0.00150047	0.00298315	0.00396187			2295	40.925	16.6604	19.3165	9.20117	22.3914	40.3487
2228	278	29.7549	13.6535	15.5211	8.16212	17.6411	29.3913		2296	0.00396553	0.00247845	0.0027236	0.00149298	0.00296827	0.00394211			2296	41.0888	16.702	19.3695	9.215	22.4584	40.5092
2229	279	29.9216	13.7012	15.5807	8.17928	17.715	29.555		2297	0.00394575	0.00246609	0.00271002	0.00148554	0.00295346	0.00392245			2297	41.2524	16.7435	19.4224	9.22877	22.5253	40.6696
2230	280	30.0884	13.7489	15.6403	8.19639	17.7888	29.7188		2298	0.00392607	0.00245379	0.0026965	0.00147813	0.00293873	0.00390288			2298	41.4158	16.7849	19.4752	9.2425	22.592	40.8297
2231	281	30.2553	13.7964	15.6997	8.21344	17.8626	29.8826		2299	0.00390649	0.00244155	0.00268305	0.00147076	0.00292408	0.00388342			2299	41.579	16.8262	19.5278	9.25619	22.6586	40.9897
2232	282	30.4222	13.8439	15.7591	8.23045	17.9363	30.0466		2300	0.00388701	0.00242938	0.00266967	0.00146342	0.00290949	0.00386405			2300	41.7421	16.8674	19.5804	9.26982	22.7251	41.1495
2233	283	30.5893	13.8913	15.8185	8.24741	18.0099	30.2106		2301	0.00386762	0.00241726	0.00265636	0.00145612	0.00289498	0.00384478			2301	41.905	16.9085	19.6328	9.28341	22.7914	41.3091
2234	284	30.7564	13.9387	15.8777	8.26431	18.0834	30.3746		2302	0.00384833	0.0024052	0.00264311	0.00144886	0.00288054	0.0038256			2302	42.0677	16.9494	19.6851	9.29694	22.8575	41.4685
2235	285	30.9236	13.9859	15.9369	8.28117	18.1569	30.5388		2303	0.00382914	0.00239321	0.00262993	0.00144163	0.00286617	0.00380652			2303	42.2302	16.9903	19.7372	9.31043	22.9236	41.6278
2236	286	31.0909	14.0331	15.996	8.29798	18.2303	30.703		2304	0.00381004	0.00238127	0.00261681	0.00143444	0.00285188	0.00378753			2304	42.3925	17.0311	19.7893	9.32387	22.9895	41.7869
2237	287	31.2582	14.0802	16.055	8.31473	18.3037	30.8672		2305	0.00379104	0.0023694	0.00260376	0.00142729	0.00283766	0.00376864			2305	42.5547	17.0717	19.8412	9.33727	23.0552	41.9457
2238	288	31.4256	14.1272	16.114	8.33144	18.3769	31.0315		2306	0.00377213	0.00235758	0.00259077	0.00142017	0.0028235	0.00374985			2306	42.7166	17.1123	19.893	9.35061	23.1208	42.1044
2239	289	31.593	14.1742	16.1729	8.3481	18.4501	31.1959		2307	0.00375331	0.00234582	0.00257785	0.00141309	0.00280942	0.00373115			2307	42.8783	17.1527	19.9447	9.36391	23.1863	42.2629
2240	290	31.7605	14.2211	16.2316	8.3647	18.5232	31.3603		2308	0.0037346	0.00233412	0.00256499	0.00140604	0.00279541	0.00371254			2308	43.0399	17.193	19.9962	9.37716	23.2516	42.4212
2241	291	31.928	14.2679	16.2903	8.38126	18.5963	31.5247		2309	0.00371597	0.00232248	0.0025522	0.00139903	0.00278147	0.00369402			2309	43.2012	17.2332	20.0476	9.39037	23.3168	42.5792
2242	292	32.0956	14.3146	16.349	8.39777	18.6692	31.6892		2310	0.00369744	0.00231089	0.00253947	0.00139205	0.00276759	0.0036756			2310	43.3624	17.2734	20.0989	9.40352	23.3818	42.7371
2243	293	32.2632	14.3612	16.4075	8.41422	18.7421	31.8537		2311	0.00367899	0.00229937	0.0025268	0.00138511	0.00275379	0.00365726			2311	43.5233	17.3134	20.1501	9.41663	23.4467	42.8948
2244	294	32.4308	14.4077	16.466	8.43063	18.8149	32.0182		2312	0.00366065	0.0022879	0.0025142	0.0013782	0.00274006	0.00363902			2312	43.684	17.3533	20.2011	9.42969	23.5115	43.0522
2245	295	32.5984	14.4542	16.5243	8.44699	18.8876	32.1827		2313	0.00364239	0.00227649	0.00250166	0.00137132	0.00272639	0.00362087			2313	43.8445	17.3931	20.2521	9.44271	23.5761	43.2095
2246	296	32.7661	14.5006	16.5826	8.46329	18.9602	32.3473		2314	0.00362422	0.00226514	0.00248919	0.00136448	0.00271279	0.00360281			2314	44.0048	17.4328	20.3028	9.45567	23.6405	43.3665
2247	297	32.9338	14.5469	16.6408	8.47955	19.0328	32.5118		2315	0.00360615	0.00225384	0.00247677	0.00135768	0.00269926	0.00358485			2315	44.1648	17.4723	20.3535	9.46859	23.7048	43.5233
2248	298	33.1015	14.5931	16.6989	8.49575	19.1052	32.6764		2316	0.00358816	0.0022426	0.00246442	0.00135091	0.0026858	0.00356697			2316	44.3247	17.5118	20.404	9.48146	23.769	43.6799
2249	299	33.2692	14.6392	16.7569	8.51191	19.1776	32.841		2317	0.00357026	0.00223141	0.00245213	0.00134417	0.0026724	0.00354918			2317	44.4843	17.5512	20.4545	9.49429	23.833	43.8362
2250	300	33.437	14.6852	16.8149	8.52801	19.2499	33.0056		2318	0.00355246	0.00222028	0.0024399	0.00133747	0.00265907	0.00353147			2318	44.6437	17.5904	20.5047	9.50707	23.8969	43.9924
2251	301	33.6047	14.7312	16.8727	8.54407	19.322	33.1701		2319	0.00353474	0.00220921	0.00242773	0.0013308	0.00264581	0.00351386			2319	44.8028	17.6296	20.5549	9.5198	23.9606	44.1483
2252	302	33.7724	14.7771	16.9305	8.56007	19.3941	33.3347		2320	0.00351711	0.00219819	0.00241562	0.00132416	0.00263262	0.00349634			2320	44.9618	17.6686	20.6049	9.53249	24.0241	44.304
2253	303	33.9401	14.8228	16.9881	8.57603	19.4661	33.4993		2321	0.00349957	0.00218723	0.00240357	0.00131755	0.00261949	0.0034789			2321	45.1205	17.7075	20.6548	9.54513	24.0875	44.4594
2254	304	34.1078	14.8685	17.0457	8.59193	19.538	33.6638		2322	0.00348211	0.00217632	0.00239158	0.00131098	0.00260642	0.00346155			2322	45.2789	17.7463	20.7046	9.55772	24.1508	44.6146
2255	305	34.2755	14.9141	17.1031	8.60779	19.6099	33.8283		2323	0.00346475	0.00216546	0.00237966	0.00130444	0.00259342	0.00344428			2323	45.4371	17.785	20.7542	9.57027	24.2139	44.7696
2256	306	34.4432	14.9596	17.1605	8.62359	19.6816	33.9928		2324	0.00344747	0.00215466	0.00236779	0.00129794	0.00258049	0.0034271			2324	45.5951	17.8236	20.8037	9.58277	24.2769	44.9243
2257	307	34.6108	15.0051	17.2178	8.63934	19.7532	34.1573		2325	0.00343027	0.00214392	0.00235598	0.00129146	0.00256762	0.00341001			2325	45.7528	17.8621	20.8531	9.59522	24.3397	45.0788
2258	308	34.7784	15.0504	17.275	8.65505	19.8247	34.3217		2326	0.00341316	0.00213322	0.00234423	0.00128502	0.00255481	0.003393			2326	45.9103	17.9005	20.9023	9.60763	24.4023	45.2331
2259	309	34.946	15.0956	17.3321	8.6707	19.8961	34.4861		2327	0.00339614	0.00212259	0.00233253	0.00127861	0.00254207	0.00337608			2327	46.0676	17.9388	20.9514	9.61999	24.4648	45.3871
2260	310	35.1135	15.1408	17.389	8.68631	19.9674	34.6505		2328	0.0033792	0.002112	0.0023209	0.00127224	0.00252939	0.00335924			2328	46.2246	17.9769	21.0004	9.63231	24.5272	45.5408
2261	311	35.281	15.1858	17.4459	8.70186	20.0386	34.8148		2329	0.00336235	0.00210147	0.00230933	0.00126589	0.00251677	0.00334249			2329	46.3813	18.015	21.0493	9.64458	24.5894	45.6943
2262	312	35.4485	15.2308	17.5027	8.71736	20.1097	34.979		2330	0.00334558	0.00209098	0.00229781	0.00125958	0.00250422	0.00332582			2330	46.5378	18.0529	21.098	9.6568	24.6514	45.8476
2263	313	35.6159	15.2757	17.5594	8.73282	20.1807	35.1432		2331	0.00332889	0.00208056	0.00228635	0.0012533	0.00249173	0.00330923			2331	46.694	18.0907	21.1466	9.66898	24.7133	46.0005
2264	314	35.7832	15.3205	17.616	8.74822	20.2516	35.3074		2332	0.00331229	0.00207018	0.00227494	0.00124704	0.00247931	0.00329272			2332	46.8499	18.1285	21.1951	9.68111	24.7751	46.1533
2265	315	35.9505	15.3652	17.6725	8.76358	20.3224	35.4715		2333	0.00329577	0.00205985	0.0022636	0.00124083	0.00246694	0.0032763			2333	47.0056	18.1661	21.2434	9.6932	24.8366	46.3057
2266	316	36.1178	15.4098	17.7288	8.77888	20.3931	35.6355		2334	0.00327933	0.00204958	0.00225231	0.00123464	0.00245464	0.00325996			2334	47.1611	18.2036	21.2916	9.70524	24.8981	46.458
2267	317	36.2849	15.4543	17.7851	8.79413	20.4637	35.7995		2335	0.00326298	0.00203936	0.00224107	0.00122848	0.00244239	0.0032437			2335	47.3162	18.2409	21.3396	9.71724	24.9593	46.6099
2268	318	36.4521	15.4987	17.8413	8.80934	20.5341	35.9634		2336	0.0032467	0.00202919	0.0022299	0.00122235	0.00243021	0.00322752			2336	47.4711	18.2782	21.3876	9.72919	25.0204	46.7616
2269	319	36.6191	15.543	17.8974	8.82449	20.6045	36.1272		2337	0.00323051	0.00201907	0.00221878	0.00121626	0.00241809	0.00321143			2337	47.6258	18.3154	21.4354	9.7411	25.0814	46.913
2270	320	36.7861	15.5872	17.9533	8.8396	20.6747	36.2909		2338	0.0032144	0.002009	0.00220771	0.00121019	0.00240603	0.00319541			2338	47.7801	18.3524	21.483	9.75296	25.1422	47.0641
2271	321	36.9529	15.6313	18.0092	8.85465	20.7449	36.4546		2339	0.00319836	0.00199898	0.0021967	0.00120415	0.00239403	0.00317947			2339	47.9342	18.3894	21.5306	9.76478	25.2028	47.215
2272	322	37.1197	15.6753	18.065	8.86966	20.8149	36.6182		2340	0.00318241	0.00198901	0.00218574	0.00119815	0.00238209	0.00316361			2340	48.088	18.4262	21.578	9.77655	25.2633	47.3656
2273	323	37.2864	15.7193	18.1206	8.88461	20.8848	36.7817		2341	0.00316654	0.00197909	0.00217484	0.00119217	0.00237021	0.00314784			2341	48.2415	18.4629	21.6252	9.78828	25.3236	47.5159
2274	324	37.4531	15.7631	18.1761	8.89952	20.9545	36.945		2342	0.00315075	0.00196921	0.00216399	0.00118623	0.00235839	0.00313214			2342	48.3948	18.4995	21.6724	9.79996	25.3838	47.666
2275	325	37.6196	15.8068	18.2316	8.91438	21.0242	37.1083		2343	0.00313503	0.00195939	0.0021532	0.00118031	0.00234663	0.00311651			2343	48.5477	18.5361	21.7194	9.8116	25.4438	47.8157
2276	326	37.786	15.8505	18.2869	8.92918	21.0937	37.2715		2344	0.0031194	0.00194962	0.00214246	0.00117442	0.00233492	0.00310097			2344	48.7004	18.5724	21.7662	9.8232	25.5036	47.9652
2277	327	37.9524	15.894	18.3421	8.94394	21.1632	37.4346		2345	0.00310384	0.0019399	0.00213178	0.00116857	0.00232328	0.0030855			2345	48.8528	18.6087	21.813	9.83475	25.5633	48.1144
2278	328	38.1186	15.9374	18.3972	8.95865	21.2325	37.5976		2346	0.00308836	0.00193022	0.00212114	0.00116274	0.00231169	0.00307012			2346	49.0049	18.6449	21.8596	9.84625	25.6229	48.2633
2279	329	38.2847	15.9808	18.4522	8.97331	21.3017	37.7605		2347	0.00307295	0.00192059	0.00211056	0.00115694	0.00230016	0.0030548			2347	49.1567	18.6809	21.906	9.85771	25.6822	48.412
2280	330	38.4507	16.024	18.5071	8.98792	21.3707	37.9233		2348	0.00305763	0.00191102	0.00210004	0.00115117	0.00228869	0.00303957			2348	49.3082	18.7169	21.9524	9.86913	25.7414	48.5603
2281	331	38.6166	16.0671	18.5618	9.00248	21.4397	38.0859		2349	0.00304238	0.00190148	0.00208956	0.00114543	0.00227727	0.00302441			2349	49.4595	18.7527	21.9986	9.88051	25.8005	48.7084
2282	332	38.7824	16.1102	18.6165	9.01699	21.5085	38.2484		2350	0.0030272	0.001892	0.00207914	0.00113971	0.00226591	0.00300932			2350	49.6104	18.7885	22.0446	9.89184	25.8594	48.8561
2283	333	38.948	16.1531	18.671	9.03145	21.5772	38.4108		2351	0.00301211	0.00188256	0.00206877	0.00113403	0.00225461	0.00299431			2351	49.761	18.8241	22.0906	9.90312	25.9181	49.0036
2284	334	39.1135	16.196	18.7254	9.04586	21.6457	38.5731		2352	0.00299708	0.00187317	0.00205845	0.00112837	0.00224337	0.00297938			2352	49.9114	18.8596	22.1364	9.91437	25.9767	49.1508
2285	335	39.2789	16.2387	18.7798	9.06023	21.7142	38.7352		2353	0.00298213	0.00186383	0.00204819	0.00112275	0.00223218	0.00296452			2353	50.0614	18.895	22.182	9.92557	26.0351	49.2976
2286	336	39.4442	16.2813	18.834	9.07454	21.7825	38.8972		2354	0.00296726	0.00185454	0.00203797	0.00111715	0.00222105	0.00294973			2354	50.2111	18.9303	22.2275	9.93672	26.0933	49.4442
2287	337	39.6093	16.3239	18.888	9.08881	21.8507	39.0591		2355	0.00295246	0.00184529	0.00202781	0.00111157	0.00220997	0.00293502			2355	50.3606	18.9654	22.2729	9.94784	26.1514	49.5905
2288	338	39.7743	16.3663	18.942	9.10302	21.9187	39.2208		2356	0.00293774	0.00183608	0.00201769	0.00110603	0.00219895	0.00292038			2356	50.5097	19.0005	22.3182	9.95891	26.2093	49.7365
2289	339	39.9391	16.4086	18.9958	9.11719	21.9866	39.3824		2357	0.00292308	0.00182693	0.00200763	0.00110051	0.00218798	0.00290582			2357	50.6585	19.0354	22.3633	9.96993	26.2671	49.8822
2290	340	40.1038	16.4508	19.0496	9.13131	22.0544	39.5439		2358	0.00290851	0.00181781	0.00199762	0.00109502	0.00217707	0.00289133			2358	50.807	19.0703	22.4083	9.98092	26.3247	50.0275
2291	341	40.2684	16.493	19.1032	9.14538	22.1221	39.7051		2359	0.002894	0.00180875	0.00198766	0.00108956	0.00216621	0.00287691			2359	50.9552	19.105	22.4532	9.99186	26.3821	50.1726
2292	342	40.4328	16.535	19.1567	9.1594	22.1896	39.8663		2360	0.00287957	0.00179973	0.00197774	0.00108413	0.0021554	0.00286256			2360	51.1031	19.1396	22.4979	10.0028	26.4394	50.3174
2293	343	40.597	16.5769	19.2101	9.17337	22.257	40.0273		2361	0.0028652	0.00179075	0.00196788	0.00107872	0.00214465	0.00284828			2361	51.2507	19.1741	22.5425	10.0136	26.4965	50.4618
2294	344	40.7611	16.6187	19.2633	9.18729	22.3243	40.1881		2362	0.00285091	0.00178182	0.00195806	0.00107334	0.00213396	0.00283407			2362	51.398	19.2085	22.5869	10.0244	26.5534	50.6059
2295	345	40.925	16.6604	19.3165	9.20117	22.3914	40.3487		2363	0.00283669	0.00177293	0.0019483	0.00106799	0.00212331	0.00281994			2363	51.5449	19.2428	22.6312	10.0352	26.6102	50.7498
2296	346	41.0888	16.702	19.3695	9.215	22.4584	40.5092		2364	0.00282255	0.00176409	0.00193858	0.00106266	0.00211272	0.00280587			2364	51.6916	19.277	22.6754	10.0459	26.6669	50.8933
2297	347	41.2524	16.7435	19.4224	9.22877	22.5253	40.6696		2365	0.00280847	0.00175529	0.00192891	0.00105736	0.00210219	0.00279188			2365	51.8379	19.3111	22.7194	10.0566	26.7233	51.0365
2298	348	41.4158	16.7849	19.4752	9.2425	22.592	40.8297		2366	0.00279446	0.00174654	0.00191929	0.00105209	0.0020917	0.00277796			2366	51.9839	19.345	22.7634	10.0673	26.7796	51.1794
2299	349	41.579	16.8262	19.5278	9.25619	22.6586	40.9897		2367	0.00278052	0.00173783	0.00190972	0.00104684	0.00208127	0.0027641			2367	52.1295	19.3789	22.8071	10.0779	26.8357	51.3219
2300	350	41.7421	16.8674	19.5804	9.26982	22.7251	41.1495		2368	0.00276666	0.00172916	0.00190019	0.00104162	0.00207089	0.00275031			2368	52.2749	19.4126	22.8508	10.0884	26.8917	51.4642
2301	351	41.905	16.9085	19.6328	9.28341	22.7914	41.3091		2369	0.00275286	0.00172053	0.00189072	0.00103642	0.00206056	0.0027366			2369	52.4199	19.4462	22.8943	10.0989	26.9475	51.6061
2302	352	42.0677	16.9494	19.6851	9.29694	22.8575	41.4685		2370	0.00273913	0.00171195	0.00188129	0.00103126	0.00205028	0.00272295			2370	52.5646	19.4797	22.9376	10.1094	27.0032	51.7477
2303	353	42.2302	16.9903	19.7372	9.31043	22.9236	41.6278		2371	0.00272547	0.00170341	0.0018719	0.00102611	0.00204006	0.00270937			2371	52.709	19.5131	22.9809	10.1199	27.0586	51.889
2304	354	42.3925	17.0311	19.7893	9.32387	22.9895	41.7869		2372	0.00271187	0.00169492	0.00186257	0.00102099	0.00202988	0.00269585			2372	52.8531	19.5464	23.024	10.1302	27.114	52.03
2305	355	42.5547	17.0717	19.8412	9.33727	23.0552	41.9457		2373	0.00269835	0.00168647	0.00185328	0.0010159	0.00201976	0.00268241			2373	52.9968	19.5796	23.0669	10.1406	27.1691	52.1706
2306	356	42.7166	17.1123	19.893	9.35061	23.1208	42.1044		2374	0.00268489	0.00167805	0.00184403	0.00101083	0.00200969	0.00266903			2374	53.1402	19.6127	23.1098	10.1509	27.2241	52.311
2307	357	42.8783	17.1527	19.9447	9.36391	23.1863	42.2629		2375	0.0026715	0.00166968	0.00183484	0.00100579	0.00199966	0.00265572			2375	53.2832	19.6457	23.1525	10.1612	27.2789	52.451
2308	358	43.0399	17.193	19.9962	9.37716	23.2516	42.4212		2376	0.00265817	0.00166136	0.00182569	0.00100078	0.00198969	0.00264247			2376	53.426	19.6785	23.195	10.1714	27.3336	52.5906
2309	359	43.2012	17.2332	20.0476	9.39037	23.3168	42.5792		2377	0.00264492	0.00165307	0.00181658	0.000995786	0.00197977	0.00262929			2377	53.5683	19.7113	23.2374	10.1816	27.3881	52.73
2310	360	43.3624	17.2734	20.0989	9.40352	23.3818	42.7371		2378	0.00263172	0.00164483	0.00180752	0.000990819	0.00196989	0.00261618			2378	53.7104	19.7439	23.2797	10.1918	27.4424	52.869
2311	361	43.5233	17.3134	20.1501	9.41663	23.4467	42.8948		2379	0.0026186	0.00163662	0.0017985	0.000985877	0.00196007	0.00260313			2379	53.8521	19.7764	23.3219	10.2019	27.4966	53.0076
2312	362	43.684	17.3533	20.2011	9.42969	23.5115	43.0522		2380	0.00260554	0.00162846	0.00178953	0.00098096	0.00195029	0.00259015			2380	53.9935	19.8089	23.3639	10.2119	27.5506	53.146
2313	363	43.8445	17.3931	20.2521	9.44271	23.5761	43.2095		2381	0.00259254	0.00162034	0.00178061	0.000976068	0.00194056	0.00257723			2381	54.1346	19.8412	23.4058	10.222	27.6044	53.284
2314	364	44.0048	17.4328	20.3028	9.45567	23.6405	43.3665		2382	0.00257961	0.00161226	0.00177173	0.000971199	0.00193088	0.00256438			2382	54.2753	19.8734	23.4475	10.2319	27.6581	53.4217
2315	365	44.1648	17.4723	20.3535	9.46859	23.7048	43.5233		2383	0.00256675	0.00160422	0.00176289	0.000966356	0.00192125	0.00255159			2383	54.4157	19.9055	23.4892	10.2419	27.7116	53.559
2316	366	44.3247	17.5118	20.404	9.48146	23.769	43.6799		2384	0.00255395	0.00159621	0.0017541	0.000961536	0.00191167	0.00253886			2384	54.5557	19.9375	23.5306	10.2518	27.7649	53.696
2317	367	44.4843	17.5512	20.4545	9.49429	23.833	43.8362		2385	0.00254121	0.00158825	0.00174535	0.00095674	0.00190214	0.0025262			2385	54.6954	19.9693	23.572	10.2617	27.8181	53.8327
2318	368	44.6437	17.5904	20.5047	9.50707	23.8969	43.9924		2386	0.00252853	0.00158033	0.00173665	0.000951968	0.00189265	0.0025136			2386	54.8347	20.0011	23.6132	10.2715	27.8711	53.9691
2319	369	44.8028	17.6296	20.5549	9.5198	23.9606	44.1483		2387	0.00251592	0.00157245	0.00172798	0.00094722	0.00188321	0.00250106			2387	54.9737	20.0328	23.6543	10.2813	27.924	54.1051
2320	370	44.9618	17.6686	20.6049	9.53249	24.0241	44.304		2388	0.00250337	0.00156461	0.00171937	0.000942496	0.00187382	0.00248859			2388	55.1124	20.0643	23.6952	10.291	27.9766	54.2407
2321	371	45.1205	17.7075	20.6548	9.54513	24.0875	44.4594		2389	0.00249089	0.0015568	0.00171079	0.000937795	0.00186447	0.00247618			2389	55.2507	20.0957	23.736	10.3007	28.0292	54.376
2322	372	45.2789	17.7463	20.7046	9.55772	24.1508	44.6146		2390	0.00247846	0.00154904	0.00170226	0.000933118	0.00185517	0.00246383			2390	55.3887	20.1271	23.7767	10.3104	28.0815	54.511
2323	373	45.4371	17.785	20.7542	9.57027	24.2139	44.7696		2391	0.0024661	0.00154131	0.00169377	0.000928464	0.00184592	0.00245154			2391	55.5263	20.1583	23.8173	10.32	28.1337	54.6456
2324	374	45.5951	17.8236	20.8037	9.58277	24.2769	44.9243		2392	0.0024538	0.00153363	0.00168532	0.000923834	0.00183671	0.00243931			2392	55.6635	20.1894	23.8577	10.3296	28.1857	54.7799
2325	375	45.7528	17.8621	20.8531	9.59522	24.3397	45.0788		2393	0.00244157	0.00152598	0.00167691	0.000919226	0.00182755	0.00242714			2393	55.8005	20.2204	23.8979	10.3392	28.2376	54.9139
2326	376	45.9103	17.9005	20.9023	9.60763	24.4023	45.2331		2394	0.00242939	0.00151837	0.00166855	0.000914641	0.00181844	0.00241504			2394	55.937	20.2513	23.9381	10.3487	28.2893	55.0475
2327	377	46.0676	17.9388	20.9514	9.61999	24.4648	45.3871		2395	0.00241727	0.00151079	0.00166023	0.000910079	0.00180937	0.00240299			2395	56.0733	20.2821	23.9781	10.3582	28.3408	55.1808
2328	378	46.2246	17.9769	21.0004	9.63231	24.5272	45.5408		2396	0.00240522	0.00150326	0.00165195	0.00090554	0.00180034	0.00239101			2396	56.2091	20.3128	24.018	10.3676	28.3922	55.3137
2329	379	46.3813	18.015	21.0493	9.64458	24.5894	45.6943		2397	0.00239322	0.00149576	0.00164371	0.000901024	0.00179137	0.00237908			2397	56.3447	20.3434	24.0577	10.377	28.4434	55.4463
2330	380	46.5378	18.0529	21.098	9.6568	24.6514	45.8476		2398	0.00238128	0.0014883	0.00163551	0.00089653	0.00178243	0.00236722			2398	56.4798	20.3739	24.0973	10.3864	28.4945	55.5785
2331	381	46.694	18.0907	21.1466	9.66898	24.7133	46.0005		2399	0.00236941	0.00148088	0.00162735	0.000892059	0.00177354	0.00235541			2399	56.6146	20.4042	24.1368	10.3957	28.5454	55.7104
2332	382	46.8499	18.1285	21.1951	9.68111	24.7751	46.1533		2400	0.00235759	0.00147349	0.00161924	0.000887609	0.0017647	0.00234366			2400	56.7491	20.4345	24.1761	10.405	28.5961	55.8419
2333	383	47.0056	18.1661	21.2434	9.6932	24.8366	46.3057		2401	0.00234583	0.00146614	0.00161116	0.000883183	0.00175589	0.00233197			2401	56.8832	20.4647	24.2153	10.4142	28.6466	55.9731
2334	384	47.1611	18.2036	21.2916	9.70524	24.8981	46.458		2402	0.00233413	0.00145883	0.00160313	0.000878778	0.00174714	0.00232034			2402	57.017	20.4947	24.2544	10.4234	28.697	56.1039
2335	385	47.3162	18.2409	21.3396	9.71724	24.9593	46.6099		2403	0.00232249	0.00145155	0.00159513	0.000874395	0.00173842	0.00230877			2403	57.1504	20.5246	24.2934	10.4326	28.7472	56.2344
2336	386	47.4711	18.2782	21.3876	9.72919	25.0204	46.7616		2404	0.00231091	0.00144431	0.00158717	0.000870034	0.00172975	0.00229726			2404	57.2834	20.5545	24.3322	10.4417	28.7973	56.3645
2337	387	47.6258	18.3154	21.4354	9.7411	25.0814	46.913		2405	0.00229938	0.00143711	0.00157926	0.000865694	0.00172113	0.0022858			2405	57.4161	20.5842	24.3709	10.4508	28.8472	56.4943
2338	388	47.7801	18.3524	21.483	9.75296	25.1422	47.0641		2406	0.00228791	0.00142994	0.00157138	0.000861377	0.00171254	0.0022744			2406	57.5484	20.6138	24.4094	10.4599	28.8969	56.6237
2339	389	47.9342	18.3894	21.5306	9.76478	25.2028	47.215		2407	0.0022765	0.00142281	0.00156354	0.000857081	0.001704	0.00226305			2407	57.6804	20.6434	24.4478	10.4689	28.9465	56.7528
2340	390	48.088	18.4262	21.578	9.77655	25.2633	47.3656		2408	0.00226515	0.00141572	0.00155575	0.000852806	0.0016955	0.00225177			2408	57.812	20.6728	24.4861	10.4779	28.9959	56.8815
2341	391	48.2415	18.4629	21.6252	9.78828	25.3236	47.5159		2409	0.00225385	0.00140865	0.00154799	0.000848552	0.00168704	0.00224054			2409	57.9432	20.7021	24.5243	10.4868	29.0452	57.0099
2342	392	48.3948	18.4995	21.6724	9.79996	25.3838	47.666		2410	0.00224261	0.00140163	0.00154027	0.00084432	0.00167863	0.00222936			2410	58.0741	20.7313	24.5623	10.4957	29.0942	57.1379
2343	393	48.5477	18.5361	21.7194	9.8116	25.4438	47.8157		2411	0.00223142	0.00139464	0.00153258	0.000840109	0.00167026	0.00221824			2411	58.2047	20.7604	24.6002	10.5046	29.1432	57.2656
2344	394	48.7004	18.5724	21.7662	9.8232	25.5036	47.9652		2412	0.00222029	0.00138768	0.00152494	0.000835919	0.00166193	0.00220718			2412	58.3348	20.7894	24.6379	10.5134	29.1919	57.3929
2345	395	48.8528	18.6087	21.813	9.83475	25.5633	48.1144		2413	0.00220922	0.00138076	0.00151734	0.00083175	0.00165364	0.00219617			2413	58.4646	20.8183	24.6756	10.5222	29.2405	57.5199
2346	396	49.0049	18.6449	21.8596	9.84625	25.6229	48.2633		2414	0.0021982	0.00137387	0.00150977	0.000827602	0.00164539	0.00218522			2414	58.5941	20.8471	24.7131	10.531	29.2889	57.6465
2347	397	49.1567	18.6809	21.906	9.85771	25.6822	48.412		2415	0.00218724	0.00136702	0.00150224	0.000823474	0.00163718	0.00217432			2415	58.7232	20.8757	24.7504	10.5397	29.3372	57.7727
2348	398	49.3082	18.7169	21.9524	9.86913	25.7414	48.5603		2416	0.00217633	0.0013602	0.00149475	0.000819367	0.00162902	0.00216347			2416	58.8519	20.9043	24.7877	10.5484	29.3853	57.8986
2349	399	49.4595	18.7527	21.9986	9.88051	25.8005	48.7084		2417	0.00216547	0.00135342	0.00148729	0.00081528	0.00162089	0.00215268			2417	58.9803	20.9328	24.8248	10.557	29.4333	58.0241
2350	400	49.6104	18.7885	22.0446	9.89184	25.8594	48.8561		2418	0.00215467	0.00134667	0.00147987	0.000811214	0.00161281	0.00214195			2418	59.1083	20.9611	24.8618	10.5656	29.4811	58.1493
2351	401	49.761	18.8241	22.0906	9.90312	25.9181	49.0036		2419	0.00214393	0.00133995	0.00147249	0.000807168	0.00160477	0.00213126			2419	59.2359	20.9894	24.8986	10.5742	29.5287	58.2741
2352	402	49.9114	18.8596	22.1364	9.91437	25.9767	49.1508		2420	0.00213323	0.00133327	0.00146515	0.000803142	0.00159676	0.00212063			2420	59.3632	21.0176	24.9353	10.5827	29.5761	58.3986
2353	403	50.0614	18.895	22.182	9.92557	26.0351	49.2976		2421	0.00212259	0.00132662	0.00145784	0.000799137	0.0015888	0.00211006			2421	59.4901	21.0456	24.9719	10.5913	29.6235	58.5227
2354	404	50.2111	18.9303	22.2275	9.93672	26.0933	49.4442		2422	0.00211201	0.00132	0.00145057	0.000795151	0.00158087	0.00209953			2422	59.6166	21.0736	25.0084	10.5997	29.6706	58.6465
2355	405	50.3606	18.9654	22.2729	9.94784	26.1514	49.5905		2423	0.00210147	0.00131342	0.00144333	0.000791185	0.00157299	0.00208906			2423	59.7428	21.1014	25.0447	10.6082	29.7176	58.7698
2356	406	50.5097	19.0005	22.3182	9.95891	26.2093	49.7365		2424	0.00209099	0.00130687	0.00143614	0.000787239	0.00156514	0.00207864			2424	59.8686	21.1292	25.0809	10.6166	29.7644	58.8929
2357	407	50.6585	19.0354	22.3633	9.96993	26.2671	49.8822		2425	0.00208056	0.00130035	0.00142897	0.000783313	0.00155734	0.00206828			2425	59.994	21.1568	25.117	10.6249	29.811	59.0155
2358	408	50.807	19.0703	22.4083	9.98092	26.3247	50.0275		2426	0.00207019	0.00129387	0.00142185	0.000779406	0.00154957	0.00205796			2426	60.1191	21.1844	25.1529	10.6333	29.8575	59.1379
2359	409	50.9552	19.105	22.4532	9.99186	26.3821	50.1726		2427	0.00205986	0.00128741	0.00141475	0.000775519	0.00154184	0.0020477			2427	60.2438	21.2118	25.1887	10.6415	29.9039	59.2598
2360	410	51.1031	19.1396	22.4979	10.0028	26.4394	50.3174		2428	0.00204959	0.00128099	0.0014077	0.000771651	0.00153415	0.00203748			2428	60.3682	21.2392	25.2244	10.6498	29.9501	59.3814
2361	411	51.2507	19.1741	22.5425	10.0136	26.4965	50.4618		2429	0.00203937	0.0012746	0.00140068	0.000767802	0.0015265	0.00202732			2429	60.4922	21.2664	25.26	10.658	29.9961	59.5026
2362	412	51.398	19.2085	22.5869	10.0244	26.5534	50.6059		2430	0.0020292	0.00126825	0.00139369	0.000763973	0.00151889	0.00201721			2430	60.6158	21.2936	25.2954	10.6662	30.0419	59.6235
2363	413	51.5449	19.2428	22.6312	10.0352	26.6102	50.7498		2431	0.00201907	0.00126192	0.00138674	0.000760162	0.00151131	0.00200715			2431	60.739	21.3206	25.3307	10.6744	30.0876	59.744
2364	414	51.6916	19.277	22.6754	10.0459	26.6669	50.8933		2432	0.002009	0.00125563	0.00137982	0.000756371	0.00150377	0.00199714			2432	60.8619	21.3475	25.3659	10.6825	30.1332	59.8642
2365	415	51.8379	19.3111	22.7194	10.0566	26.7233	51.0365		2433	0.00199898	0.00124936	0.00137294	0.000752599	0.00149627	0.00198718			2433	60.9844	21.3744	25.4009	10.6906	30.1786	59.984
2366	416	51.9839	19.345	22.7634	10.0673	26.7796	51.1794		2434	0.00198901	0.00124313	0.00136609	0.000748845	0.00148881	0.00197727			2434	61.1066	21.4011	25.4358	10.6986	30.2238	60.1034
2367	417	52.1295	19.3789	22.8071	10.0779	26.8357	51.3219		2435	0.00197909	0.00123693	0.00135928	0.00074511	0.00148139	0.0019674			2435	61.2284	21.4278	25.4706	10.7067	30.2689	60.2225
2368	418	52.2749	19.4126	22.8508	10.0884	26.8917	51.4642		2436	0.00196922	0.00123076	0.0013525	0.000741394	0.001474	0.00195759			2436	61.3498	21.4543	25.5053	10.7146	30.3138	60.3412
2369	419	52.4199	19.4462	22.8943	10.0989	26.9475	51.6061		2437	0.0019594	0.00122463	0.00134576	0.000737696	0.00146665	0.00194783			2437	61.4708	21.4807	25.5399	10.7226	30.3585	60.4596
2370	420	52.5646	19.4797	22.9376	10.1094	27.0032	51.7477		2438	0.00194963	0.00121852	0.00133904	0.000734017	0.00145933	0.00193811			2438	61.5915	21.5071	25.5743	10.7305	30.4031	60.5776
2371	421	52.709	19.5131	22.9809	10.1199	27.0586	51.889		2439	0.00193991	0.00121244	0.00133237	0.000730356	0.00145205	0.00192845			2439	61.7118	21.5333	25.6086	10.7384	30.4475	60.6952
2372	422	52.8531	19.5464	23.024	10.1302	27.114	52.03		2440	0.00193023	0.00120639	0.00132572	0.000726713	0.00144481	0.00191883			2440	61.8318	21.5595	25.6427	10.7462	30.4918	60.8125
2373	423	52.9968	19.5796	23.0669	10.1406	27.1691	52.1706		2441	0.0019206	0.00120038	0.00131911	0.000723089	0.0014376	0.00190926			2441	61.9514	21.5855	25.6768	10.754	30.5359	60.9294
2374	424	53.1402	19.6127	23.1098	10.1509	27.2241	52.311		2442	0.00191102	0.00119439	0.00131253	0.000719482	0.00143043	0.00189974			2442	62.0706	21.6114	25.7107	10.7618	30.5799	61.0459
2375	425	53.2832	19.6457	23.1525	10.1612	27.2789	52.451		2443	0.00190149	0.00118843	0.00130598	0.000715894	0.0014233	0.00189026			2443	62.1894	21.6373	25.7445	10.7696	30.6237	61.1621
2376	426	53.426	19.6785	23.195	10.1714	27.3336	52.5906		2444	0.00189201	0.0011825	0.00129947	0.000712323	0.0014162	0.00188083			2444	62.3079	21.663	25.7781	10.7773	30.6673	61.278
2377	427	53.5683	19.7113	23.2374	10.1816	27.3881	52.73		2445	0.00188257	0.00117661	0.00129299	0.000708771	0.00140914	0.00187145			2445	62.426	21.6887	25.8117	10.785	30.7108	61.3934
2378	428	53.7104	19.7439	23.2797	10.1918	27.4424	52.869		2446	0.00187318	0.00117074	0.00128654	0.000705236	0.00140211	0.00186212			2446	62.5438	21.7142	25.8451	10.7926	30.7542	61.5085
2379	429	53.8521	19.7764	23.3219	10.2019	27.4966	53.0076		2447	0.00186384	0.0011649	0.00128012	0.000701718	0.00139512	0.00185283			2447	62.6611	21.7397	25.8784	10.8002	30.7974	61.6233
2380	430	53.9935	19.8089	23.3639	10.2119	27.5506	53.146		2448	0.00185455	0.00115909	0.00127374	0.000698218	0.00138816	0.00184359			2448	62.7782	21.765	25.9116	10.8078	30.8404	61.7377
2381	431	54.1346	19.8412	23.4058	10.222	27.6044	53.284		2449	0.0018453	0.00115331	0.00126738	0.000694736	0.00138124	0.0018344			2449	62.8948	21.7903	25.9446	10.8154	30.8832	61.8517
2382	432	54.2753	19.8734	23.4475	10.2319	27.6581	53.4217		2450	0.00183609	0.00114756	0.00126106	0.000691271	0.00137435	0.00182525			2450	63.0111	21.8154	25.9775	10.8229	30.926	61.9654
2383	433	54.4157	19.9055	23.4892	10.2419	27.7116	53.559		2451	0.00182693	0.00114183	0.00125477	0.000687823	0.00136749	0.00181614			2451	63.127	21.8405	26.0103	10.8304	30.9685	62.0787
2384	434	54.5557	19.9375	23.5306	10.2518	27.7649	53.696		2452	0.00181782	0.00113614	0.00124852	0.000684393	0.00136067	0.00180709			2452	63.2425	21.8655	26.043	10.8378	31.0109	62.1916
2385	435	54.6954	19.9693	23.572	10.2617	27.8181	53.8327		2453	0.00180876	0.00113047	0.00124229	0.000680979	0.00135389	0.00179807			2453	63.3577	21.8903	26.0756	10.8453	31.0532	62.3042
2386	436	54.8347	20.0011	23.6132	10.2715	27.8711	53.9691		2454	0.00179973	0.00112483	0.00123609	0.000677583	0.00134713	0.0017891			2454	63.4725	21.9151	26.108	10.8527	31.0953	62.4165
2387	437	54.9737	20.0328	23.6543	10.2813	27.924	54.1051		2455	0.00179076	0.00111922	0.00122993	0.000674203	0.00134041	0.00178018			2455	63.5869	21.9398	26.1403	10.86	31.1372	62.5283
2388	438	55.1124	20.0643	23.6952	10.291	27.9766	54.2407		2456	0.00178183	0.00111364	0.00122379	0.000670841	0.00133373	0.0017713			2456	63.701	21.9644	26.1725	10.8673	31.179	62.6398
2389	439	55.2507	20.0957	23.736	10.3007	28.0292	54.376		2457	0.00177294	0.00110809	0.00121769	0.000667495	0.00132708	0.00176247			2457	63.8147	21.9889	26.2046	10.8746	31.2207	62.751
2390	440	55.3887	20.1271	23.7767	10.3104	28.0815	54.511		2458	0.0017641	0.00110256	0.00121162	0.000664166	0.00132046	0.00175368			2458	63.9281	22.0133	26.2365	10.8819	31.2622	62.8618
2391	441	55.5263	20.1583	23.8173	10.32	28.1337	54.6456		2459	0.0017553	0.00109706	0.00120557	0.000660853	0.00131387	0.00174493			2459	64.041	22.0376	26.2683	10.8891	31.3035	62.9722
2392	442	55.6635	20.1894	23.8577	10.3296	28.1857	54.7799		2460	0.00174654	0.00109159	0.00119956	0.000657557	0.00130732	0.00173623			2460	64.1536	22.0618	26.3	10.8963	31.3447	63.0823
2393	443	55.8005	20.2204	23.8979	10.3392	28.2376	54.9139		2461	0.00173783	0.00108615	0.00119358	0.000654278	0.0013008	0.00172757			2461	64.2659	22.0859	26.3316	10.9035	31.3857	63.192
2394	444	55.937	20.2513	23.9381	10.3487	28.2893	55.0475		2462	0.00172917	0.00108073	0.00118763	0.000651014	0.00129431	0.00171895			2462	64.3778	22.1099	26.3631	10.9106	31.4266	63.3014
2395	445	56.0733	20.2821	23.9781	10.3582	28.3408	55.1808		2463	0.00172054	0.00107534	0.0011817	0.000647768	0.00128786	0.00171038			2463	64.4893	22.1338	26.3944	10.9177	31.4673	63.4104
2396	446	56.2091	20.3128	24.018	10.3676	28.3922	55.3137		2464	0.00171196	0.00106997	0.00117581	0.000644537	0.00128143	0.00170185			2464	64.6004	22.1576	26.4257	10.9248	31.5079	63.519
2397	447	56.3447	20.3434	24.0577	10.377	28.4434	55.4463		2465	0.00170342	0.00106464	0.00116994	0.000641322	0.00127504	0.00169336			2465	64.7112	22.1814	26.4568	10.9319	31.5483	63.6273
2398	448	56.4798	20.3739	24.0973	10.3864	28.4945	55.5785		2466	0.00169493	0.00105933	0.00116411	0.000638124	0.00126868	0.00168492			2466	64.8216	22.205	26.4878	10.9389	31.5886	63.7352
2399	449	56.6146	20.4042	24.1368	10.3957	28.5454	55.7104		2467	0.00168647	0.00105404	0.0011583	0.000634941	0.00126235	0.00167651			2467	64.9317	22.2286	26.5186	10.9459	31.6287	63.8428
2400	450	56.7491	20.4345	24.1761	10.405	28.5961	55.8419		2468	0.00167806	0.00104879	0.00115253	0.000631774	0.00125606	0.00166815			2468	65.0414	22.252	26.5494	10.9528	31.6687	63.95
2401	451	56.8832	20.4647	24.2153	10.4142	28.6466	55.9731		2469	0.00166969	0.00104356	0.00114678	0.000628623	0.00124979	0.00165983			2469	65.1507	22.2754	26.58	10.9597	31.7085	64.0569
2402	452	57.017	20.4947	24.2544	10.4234	28.697	56.1039		2470	0.00166136	0.00103835	0.00114106	0.000625488	0.00124356	0.00165155			2470	65.2597	22.2986	26.6105	10.9666	31.7482	64.1634
2403	453	57.1504	20.5246	24.2934	10.4326	28.7472	56.2344		2471	0.00165308	0.00103317	0.00113537	0.000622368	0.00123736	0.00164331			2471	65.3683	22.3218	26.6409	10.9735	31.7877	64.2695
2404	454	57.2834	20.5545	24.3322	10.4417	28.7973	56.3645		2472	0.00164483	0.00102802	0.0011297	0.000619264	0.00123119	0.00163512			2472	65.4765	22.3449	26.6712	10.9803	31.8271	64.3753
2405	455	57.4161	20.5842	24.3709	10.4508	28.8472	56.4943		2473	0.00163663	0.00102289	0.00112407	0.000616176	0.00122505	0.00162696			2473	65.5844	22.3679	26.7014	10.9871	31.8663	64.4807
2406	456	57.5484	20.6138	24.4094	10.4599	28.8969	56.6237		2474	0.00162847	0.00101779	0.00111846	0.000613102	0.00121894	0.00161885			2474	65.6919	22.3908	26.7314	10.9939	31.9054	64.5858
2407	457	57.6804	20.6434	24.4478	10.4689	28.9465	56.7528		2475	0.00162035	0.00101271	0.00111288	0.000610044	0.00121286	0.00161077			2475	65.799	22.4136	26.7614	11.0007	31.9444	64.6905
2408	458	57.812	20.6728	24.4861	10.4779	28.9959	56.8815		2476	0.00161226	0.00100766	0.00110733	0.000607002	0.00120681	0.00160274			2476	65.9058	22.4363	26.7912	11.0074	31.9832	64.7949
2409	459	57.9432	20.7021	24.5243	10.4868	29.0452	57.0099		2477	0.00160422	0.00100264	0.00110181	0.000603974	0.00120079	0.00159475			2477	66.0123	22.459	26.8209	11.0141	32.0218	64.8989
2410	460	58.0741	20.7313	24.5623	10.4957	29.0942	57.1379		2478	0.00159622	0.000997638	0.00109632	0.000600962	0.0011948	0.00158679			2478	66.1183	22.4815	26.8505	11.0207	32.0603	65.0026
2411	461	58.2047	20.7604	24.6002	10.5046	29.1432	57.2656		2479	0.00158826	0.000992662	0.00109085	0.000597965	0.00118884	0.00157888			2479	66.224	22.504	26.8799	11.0273	32.0987	65.1059
2412	462	58.3348	20.7894	24.6379	10.5134	29.1919	57.3929		2480	0.00158034	0.000987711	0.00108541	0.000594982	0.00118291	0.001571			2480	66.3294	22.5263	26.9093	11.0339	32.1369	65.2088
2413	463	58.4646	20.8183	24.6756	10.5222	29.2405	57.5199		2481	0.00157246	0.000982785	0.00107999	0.000592015	0.00117701	0.00156317			2481	66.4344	22.5486	26.9385	11.0405	32.1749	65.3114
2414	464	58.5941	20.8471	24.7131	10.531	29.2889	57.6465		2482	0.00156461	0.000977883	0.00107461	0.000589062	0.00117114	0.00155537			2482	66.539	22.5708	26.9677	11.0471	32.2128	65.4137
2415	465	58.7232	20.8757	24.7504	10.5397	29.3372	57.7727		2483	0.00155681	0.000973006	0.00106925	0.000586124	0.0011653	0.00154762			2483	66.6433	22.5929	26.9967	11.0536	32.2506	65.5156
2416	466	58.8519	20.9043	24.7877	10.5484	29.3853	57.8986		2484	0.00154905	0.000968153	0.00106392	0.000583201	0.00115949	0.0015399			2484	66.7472	22.6149	27.0256	11.06	32.2882	65.6171
2417	467	58.9803	20.9328	24.8248	10.557	29.4333	58.0241		2485	0.00154132	0.000963324	0.00105861	0.000580292	0.0011537	0.00153222			2485	66.8507	22.6368	27.0543	11.0665	32.3257	65.7183
2418	468	59.1083	20.9611	24.8618	10.5656	29.4811	58.1493		2486	0.00153363	0.00095852	0.00105333	0.000577398	0.00114795	0.00152457			2486	66.9539	22.6586	27.083	11.0729	32.363	65.8192
2419	469	59.2359	20.9894	24.8986	10.5742	29.5287	58.2741		2487	0.00152598	0.000953739	0.00104808	0.000574518	0.00114223	0.00151697			2487	67.0568	22.6804	27.1116	11.0793	32.4002	65.9197
2420	470	59.3632	21.0176	24.9353	10.5827	29.5761	58.3986		2488	0.00151837	0.000948982	0.00104285	0.000571653	0.00113653	0.0015094			2488	67.1593	22.702	27.14	11.0857	32.4373	66.0198
2421	471	59.4901	21.0456	24.9719	10.5913	29.6235	58.5227		2489	0.0015108	0.000944249	0.00103765	0.000568802	0.00113086	0.00150188			2489	67.2614	22.7236	27.1684	11.092	32.4742	66.1196
2422	472	59.6166	21.0736	25.0084	10.5997	29.6706	58.6465		2490	0.00150326	0.00093954	0.00103247	0.000565965	0.00112522	0.00149439			2490	67.3632	22.745	27.1966	11.0983	32.511	66.2191
2423	473	59.7428	21.1014	25.0447	10.6082	29.7176	58.7698
2424	474	59.8686	21.1292	25.0809	10.6166	29.7644	58.8929
2425	475	59.994	21.1568	25.117	10.6249	29.811	59.0155
2426	476	60.1191	21.1844	25.1529	10.6333	29.8575	59.1379
2427	477	60.2438	21.2118	25.1887	10.6415	29.9039	59.2598
2428	478	60.3682	21.2392	25.2244	10.6498	29.9501	59.3814
2429	479	60.4922	21.2664	25.26	10.658	29.9961	59.5026
2430	480	60.6158	21.2936	25.2954	10.6662	30.0419	59.6235
2431	481	60.739	21.3206	25.3307	10.6744	30.0876	59.744
2432	482	60.8619	21.3475	25.3659	10.6825	30.1332	59.8642
2433	483	60.9844	21.3744	25.4009	10.6906	30.1786	59.984
2434	484	61.1066	21.4011	25.4358	10.6986	30.2238	60.1034
2435	485	61.2284	21.4278	25.4706	10.7067	30.2689	60.2225
2436	486	61.3498	21.4543	25.5053	10.7146	30.3138	60.3412
2437	487	61.4708	21.4807	25.5399	10.7226	30.3585	60.4596
2438	488	61.5915	21.5071	25.5743	10.7305	30.4031	60.5776
2439	489	61.7118	21.5333	25.6086	10.7384	30.4475	60.6952
2440	490	61.8318	21.5595	25.6427	10.7462	30.4918	60.8125
2441	491	61.9514	21.5855	25.6768	10.754	30.5359	60.9294
2442	492	62.0706	21.6114	25.7107	10.7618	30.5799	61.0459
2443	493	62.1894	21.6373	25.7445	10.7696	30.6237	61.1621
2444	494	62.3079	21.663	25.7781	10.7773	30.6673	61.278
2445	495	62.426	21.6887	25.8117	10.785	30.7108	61.3934
2446	496	62.5438	21.7142	25.8451	10.7926	30.7542	61.5085
2447	497	62.6611	21.7397	25.8784	10.8002	30.7974	61.6233
2448	498	62.7782	21.765	25.9116	10.8078	30.8404	61.7377
2449	499	62.8948	21.7903	25.9446	10.8154	30.8832	61.8517
2450	500	63.0111	21.8154	25.9775	10.8229	30.926	61.9654
2451	501	63.127	21.8405	26.0103	10.8304	30.9685	62.0787
2452	502	63.2425	21.8655	26.043	10.8378	31.0109	62.1916
2453	503	63.3577	21.8903	26.0756	10.8453	31.0532	62.3042
2454	504	63.4725	21.9151	26.108	10.8527	31.0953	62.4165
2455	505	63.5869	21.9398	26.1403	10.86	31.1372	62.5283
2456	506	63.701	21.9644	26.1725	10.8673	31.179	62.6398
2457	507	63.8147	21.9889	26.2046	10.8746	31.2207	62.751
2458	508	63.9281	22.0133	26.2365	10.8819	31.2622	62.8618
2459	509	64.041	22.0376	26.2683	10.8891	31.3035	62.9722
2460	510	64.1536	22.0618	26.3	10.8963	31.3447	63.0823
2461	511	64.2659	22.0859	26.3316	10.9035	31.3857	63.192
2462	512	64.3778	22.1099	26.3631	10.9106	31.4266	63.3014
2463	513	64.4893	22.1338	26.3944	10.9177	31.4673	63.4104
2464	514	64.6004	22.1576	26.4257	10.9248	31.5079	63.519
2465	515	64.7112	22.1814	26.4568	10.9319	31.5483	63.6273
2466	516	64.8216	22.205	26.4878	10.9389	31.5886	63.7352
2467	517	64.9317	22.2286	26.5186	10.9459	31.6287	63.8428
2468	518	65.0414	22.252	26.5494	10.9528	31.6687	63.95
2469	519	65.1507	22.2754	26.58	10.9597	31.7085	64.0569
2470	520	65.2597	22.2986	26.6105	10.9666	31.7482	64.1634
2471	521	65.3683	22.3218	26.6409	10.9735	31.7877	64.2695
2472	522	65.4765	22.3449	26.6712	10.9803	31.8271	64.3753
2473	523	65.5844	22.3679	26.7014	10.9871	31.8663	64.4807
2474	524	65.6919	22.3908	26.7314	10.9939	31.9054	64.5858
2475	525	65.799	22.4136	26.7614	11.0007	31.9444	64.6905
2476	526	65.9058	22.4363	26.7912	11.0074	31.9832	64.7949
2477	527	66.0123	22.459	26.8209	11.0141	32.0218	64.8989
2478	528	66.1183	22.4815	26.8505	11.0207	32.0603	65.0026
2479	529	66.224	22.504	26.8799	11.0273	32.0987	65.1059
2480	530	66.3294	22.5263	26.9093	11.0339	32.1369	65.2088
2481	531	66.4344	22.5486	26.9385	11.0405	32.1749	65.3114
2482	532	66.539	22.5708	26.9677	11.0471	32.2128	65.4137
2483	533	66.6433	22.5929	26.9967	11.0536	32.2506	65.5156
2484	534	66.7472	22.6149	27.0256	11.06	32.2882	65.6171
2485	535	66.8507	22.6368	27.0543	11.0665	32.3257	65.7183
2486	536	66.9539	22.6586	27.083	11.0729	32.363	65.8192
2487	537	67.0568	22.6804	27.1116	11.0793	32.4002	65.9197
2488	538	67.1593	22.702	27.14	11.0857	32.4373	66.0198
2489	539	67.2614	22.7236	27.1684	11.092	32.4742	66.1196
2490	540	67.3632	22.745	27.1966	11.0983	32.511	66.2191
2491
2492
2493
2494
2495
2496
2497
2498
2499
2500
