# Supplementary material for: The Social Cost of Fossil and Industrial CO2 Emissions from 1950 to 2018
Source: Research Square preprint supplement (doi:10.21203/rs.3.rs-2244259/v1), 2022-11-17
Supplement: Supplementary file 8 [file nation_1751_2014.xlsx]

## Sheet: nation.1751_2014
Nation	Year	Total CO2 emissions from fossil-fuels and cement production (thousand metric tons of C)	Emissions from solid fuel consumption	Emissions from liquid fuel consumption	Emissions from gas fuel consumption	Emissions from cement production	Emissions from gas flaring	Per capita CO2 emissions (metric tons of carbon)	Emissions from bunker fuels (not included in the totals)
AFGHANISTAN	1949	4	4	0	0	0	.	.	0
AFGHANISTAN	1950	23	6	18	0	0	0	0	0
AFGHANISTAN	1951	25	7	18	0	0	0	0	0
AFGHANISTAN	1952	25	9	17	0	0	0	0	0
AFGHANISTAN	1953	29	10	18	0	0	0	0	0
AFGHANISTAN	1954	29	12	18	0	0	0	0	0
AFGHANISTAN	1955	42	17	25	0	0	0	0	0
AFGHANISTAN	1956	50	17	33	0	0	0	0.01	0
AFGHANISTAN	1957	80	21	59	0	0	0	0.01	0
AFGHANISTAN	1958	90	25	65	0	0	0	0.01	0
AFGHANISTAN	1959	105	30	70	0	5	0	0.01	0
AFGHANISTAN	1960	113	35	74	0	5	0	0.01	0
AFGHANISTAN	1961	134	48	80	0	6	0	0.01	0
AFGHANISTAN	1962	188	81	99	0	8	0	0.02	0
AFGHANISTAN	1963	193	72	107	0	14	0	0.02	0
AFGHANISTAN	1964	229	82	130	0	17	0	0.02	0
AFGHANISTAN	1965	275	104	148	0	23	0	0.03	0
AFGHANISTAN	1966	298	117	157	0	24	0	0.03	0
AFGHANISTAN	1967	350	109	152	71	18	0	0.03	0
AFGHANISTAN	1968	334	91	136	95	13	0	0.03	0
AFGHANISTAN	1969	257	99	144	0	14	0	0.02	0
AFGHANISTAN	1970	456	119	183	59	13	81	0.04	3
AFGHANISTAN	1971	517	98	204	120	12	83	0.04	3
AFGHANISTAN	1972	418	52	171	82	13	100	0.03	2
AFGHANISTAN	1973	447	85	192	91	19	61	0.03	3
AFGHANISTAN	1974	523	83	210	109	20	100	0.04	3
AFGHANISTAN	1975	580	109	239	130	20	83	0.04	6
AFGHANISTAN	1976	542	116	241	82	23	80	0.04	4
AFGHANISTAN	1977	652	123	266	140	19	104	0.05	2
AFGHANISTAN	1978	589	157	255	82	17	77	0.04	6
AFGHANISTAN	1979	611	96	318	105	19	73	0.04	6
AFGHANISTAN	1980	480	86	252	51	7	83	0.03	13
AFGHANISTAN	1981	541	91	277	83	10	80	0.04	7
AFGHANISTAN	1982	573	105	271	108	12	77	0.04	9
AFGHANISTAN	1983	688	105	333	168	2	80	0.05	10
AFGHANISTAN	1984	772	107	309	254	15	86	0.06	13
AFGHANISTAN	1985	957	109	422	325	10	90	0.08	11
AFGHANISTAN	1986	857	116	311	328	12	90	0.07	9
AFGHANISTAN	1987	852	121	550	107	14	61	0.07	7
AFGHANISTAN	1988	782	100	497	120	14	51	0.06	7
AFGHANISTAN	1989	757	92	509	131	14	11	0.06	7
AFGHANISTAN	1990	713	76	505	110	15	7	0.05	5
AFGHANISTAN	1991	665	68	469	106	15	7	0.05	5
AFGHANISTAN	1992	380	6	253	99	16	6	0.02	5
AFGHANISTAN	1993	367	5	244	96	16	6	0.02	5
AFGHANISTAN	1994	353	4	234	92	16	6	0.02	4
AFGHANISTAN	1995	339	4	225	88	16	6	0.02	4
AFGHANISTAN	1996	321	2	213	84	16	6	0.02	4
AFGHANISTAN	1997	299	1	198	77	16	6	0.01	4
AFGHANISTAN	1998	284	1	188	72	16	6	0.01	4
AFGHANISTAN	1999	224	1	135	66	16	6	0.01	4
AFGHANISTAN	2000	211	1	136	61	7	6	0.01	4
AFGHANISTAN	2001	223	19	134	57	7	6	0.01	4
AFGHANISTAN	2002	292	15	120	149	8	0	0.01	4
AFGHANISTAN	2003	326	25	164	127	10	0	0.01	7
AFGHANISTAN	2004	259	25	162	62	10	0	0.01	0
AFGHANISTAN	2005	362	29	235	90	8	0	0.01	9
AFGHANISTAN	2006	450	44	310	90	7	0	0.02	9
AFGHANISTAN	2007	620	204	327	84	4	0	0.02	9
AFGHANISTAN	2008	1147	294	767	81	5	0	0.04	9
AFGHANISTAN	2009	1846	419	1349	74	4	0	0.07	9
AFGHANISTAN	2010	2308	627	1601	74	5	0	0.08	9
AFGHANISTAN	2011	3338	1174	2075	84	5	0	0.12	9
AFGHANISTAN	2012	2933	1000	1844	84	5	0	0.1	9
AFGHANISTAN	2013	2731	1075	1568	81	7	0	0.09	9
AFGHANISTAN	2014	2675	1194	1393	74	14	0	0.08	9
ALBANIA	1933	2	0	2	0	0	.	.	0
ALBANIA	1934	2	0	2	0	0	.	.	0
ALBANIA	1935	5	0	5	0	0	.	.	0
ALBANIA	1936	35	0	34	0	1	.	.	0
ALBANIA	1937	81	0	79	0	2	.	.	0
ALBANIA	1938	95	0	95	0	0	.	.	0
ALBANIA	1939	118	0	118	0	0	.	.	0
ALBANIA	1940	189	0	189	0	0	.	.	0
ALBANIA	1941	171	0	169	0	2	.	.	0
ALBANIA	1942	203	0	203	0	0	.	.	0
ALBANIA	1943	126	0	126	0	0	.	.	0
ALBANIA	1944	42	0	42	0	0	.	.	0
ALBANIA	1945	33	0	33	0	0	.	.	0
ALBANIA	1946	132	6	126	0	0	.	.	0
ALBANIA	1947	253	0	253	0	0	.	.	0
ALBANIA	1948	192	2	190	0	0	.	.	0
ALBANIA	1949	277	0	277	0	0	.	.	0
ALBANIA	1950	81	12	68	0	2	0	0.07	0
ALBANIA	1951	110	20	85	3	2	0	0.09	0
ALBANIA	1952	102	21	77	3	2	0	0.08	0
ALBANIA	1953	113	31	75	5	2	0	0.09	0
ALBANIA	1954	137	43	84	8	2	0	0.1	0
ALBANIA	1955	181	60	105	10	6	0	0.13	0
ALBANIA	1956	229	68	139	13	9	0	0.16	0
ALBANIA	1957	411	75	310	16	10	0	0.28	0
ALBANIA	1958	328	79	220	18	11	0	0.22	0
ALBANIA	1959	394	92	271	21	10	0	0.25	0
ALBANIA	1960	552	89	430	23	10	0	0.34	0
ALBANIA	1961	622	88	496	23	16	0	0.37	0
ALBANIA	1962	672	99	534	23	16	0	0.39	0
ALBANIA	1963	568	77	450	23	18	0	0.32	0
ALBANIA	1964	550	91	419	23	17	0	0.3	0
ALBANIA	1965	593	108	443	23	20	0	0.32	0
ALBANIA	1966	696	130	518	28	19	0	0.36	0
ALBANIA	1967	731	143	523	35	30	0	0.37	0
ALBANIA	1968	838	161	596	40	41	0	0.41	0
ALBANIA	1969	885	188	606	46	45	0	0.43	0
ALBANIA	1970	1021	243	677	51	49	0	0.48	0
ALBANIA	1971	1187	270	802	66	49	0	0.54	0
ALBANIA	1972	1539	295	1114	76	54	0	0.69	0
ALBANIA	1973	1443	319	954	100	70	0	0.63	0
ALBANIA	1974	1185	330	661	117	76	0	0.5	0
ALBANIA	1975	1253	344	670	151	88	0	0.52	0
ALBANIA	1976	1350	347	724	183	95	0	0.55	0
ALBANIA	1977	1560	464	804	191	102	0	0.62	0
ALBANIA	1978	1771	580	896	185	109	0	0.69	0
ALBANIA	1979	2069	732	1030	193	115	0	0.79	0
ALBANIA	1980	1410	634	429	211	136	0	0.53	0
ALBANIA	1981	2002	722	954	220	107	0	0.73	0
ALBANIA	1982	1993	786	858	236	113	0	0.72	0
ALBANIA	1983	2081	847	854	266	114	0	0.73	0
ALBANIA	1984	2134	928	804	285	117	0	0.74	0
ALBANIA	1985	2149	1016	752	265	116	0	0.73	0
ALBANIA	1986	2197	1012	783	287	115	0	0.72	0
ALBANIA	1987	2030	1019	770	123	117	0	0.65	0
ALBANIA	1988	1998	1096	703	97	101	0	0.63	0
ALBANIA	1989	2450	1107	1118	122	103	0	0.75	0
ALBANIA	1990	1504	682	593	127	102	0	0.46	0
ALBANIA	1991	1169	404	608	75	82	0	0.36	0
ALBANIA	1992	686	218	386	54	27	0	0.21	0
ALBANIA	1993	637	164	404	43	27	0	0.2	0
ALBANIA	1994	525	46	438	27	14	0	0.17	0
ALBANIA	1995	569	44	484	14	27	0	0.18	0
ALBANIA	1996	550	31	479	12	28	0	0.18	0
ALBANIA	1997	421	12	385	10	14	0	0.14	0
ALBANIA	1998	478	15	444	9	11	0	0.16	0
ALBANIA	1999	814	30	761	8	14	0	0.26	31
ALBANIA	2000	824	19	776	6	24	0	0.27	34
ALBANIA	2001	879	22	853	4	0	0	0.29	37
ALBANIA	2002	1023	23	993	7	0	0	0.33	37
ALBANIA	2003	1171	23	1062	7	79	0	0.38	40
ALBANIA	2004	1136	23	1026	9	78	0	0.36	41
ALBANIA	2005	1160	20	1068	6	67	0	0.37	49
ALBANIA	2006	1063	20	967	6	71	0	0.34	38
ALBANIA	2007	1071	20	922	9	121	0	0.34	17
ALBANIA	2008	1193	28	1036	4	125	0	0.38	7
ALBANIA	2009	1194	106	932	5	151	0	0.41	7
ALBANIA	2010	1254	117	953	7	177	0	0.43	7
ALBANIA	2011	1429	146	1030	8	245	0	0.5	7
ALBANIA	2012	1339	171	861	8	299	0	0.46	7
ALBANIA	2013	1381	150	909	9	313	0	0.48	24
ALBANIA	2014	1559	191	1053	16	299	0	0.54	23
ALGERIA	1900	0	0	0	0	0	.	.	0
ALGERIA	1901	0	0	0	0	0	.	.	0
ALGERIA	1902	0	0	0	0	0	.	.	0
ALGERIA	1903	0	0	0	0	0	.	.	0
ALGERIA	1904	0	0	0	0	0	.	.	0
ALGERIA	1905	0	0	0	0	0	.	.	0
ALGERIA	1916	1	0	1	0	0	.	.	0
ALGERIA	1917	2	1	1	0	0	.	.	0
ALGERIA	1918	5	4	1	0	0	.	.	0
ALGERIA	1919	5	5	1	0	0	.	.	0
ALGERIA	1920	6	5	1	0	0	.	.	0
ALGERIA	1921	7	7	0	0	0	.	.	0
ALGERIA	1922	7	7	1	0	0	.	.	0
ALGERIA	1923	4	3	1	0	0	.	.	0
ALGERIA	1924	8	7	2	0	0	.	.	0
ALGERIA	1925	9	7	2	0	0	.	.	0
ALGERIA	1926	11	10	1	0	0	.	.	0
ALGERIA	1927	16	15	1	0	0	.	.	0
ALGERIA	1928	20	12	1	0	7	.	.	0
ALGERIA	1929	22	12	3	0	8	.	.	0
ALGERIA	1930	23	12	2	0	9	.	.	0
ALGERIA	1931	27	15	1	0	10	.	.	0
ALGERIA	1932	31	18	1	0	12	.	.	0
ALGERIA	1933	33	22	1	0	10	.	.	0
ALGERIA	1934	38	25	0	0	13	.	.	0
ALGERIA	1935	36	28	0	0	9	.	.	0
ALGERIA	1936	14	5	0	0	9	.	.	0
ALGERIA	1937	19	10	0	0	9	.	.	0
ALGERIA	1938	9	9	0	0	0	.	.	0
ALGERIA	1939	44	14	0	30	0	.	.	0
ALGERIA	1940	65	40	0	25	0	.	.	0
ALGERIA	1941	85	58	0	27	0	.	.	0
ALGERIA	1942	136	107	0	29	0	.	.	0
ALGERIA	1943	128	85	0	32	11	.	.	0
ALGERIA	1944	136	87	1	36	13	.	.	0
ALGERIA	1945	168	117	0	37	14	.	.	0
ALGERIA	1946	208	156	0	37	16	.	.	0
ALGERIA	1947	203	149	0	37	17	.	.	0
ALGERIA	1948	219	164	0	38	18	.	.	0
ALGERIA	1949	248	192	0	38	17	.	.	0
ALGERIA	1950	1033	514	475	0	44	0	0.12	612
ALGERIA	1951	1128	557	510	0	61	0	0.13	616
ALGERIA	1952	1062	503	493	0	66	0	0.12	563
ALGERIA	1953	1092	422	599	0	70	0	0.12	620
ALGERIA	1954	1134	405	639	0	90	0	0.12	506
ALGERIA	1955	1258	435	731	0	92	0	0.13	606
ALGERIA	1956	1364	481	795	0	89	0	0.14	567
ALGERIA	1957	1512	539	876	0	97	0	0.15	590
ALGERIA	1958	1424	494	815	0	115	0	0.14	484
ALGERIA	1959	1545	399	1016	0	130	0	0.15	445
ALGERIA	1960	1680	343	1193	0	144	0	0.16	438
ALGERIA	1961	1654	209	1177	123	146	0	0.15	437
ALGERIA	1962	1546	111	1129	188	119	0	0.14	263
ALGERIA	1963	1480	69	1126	165	120	0	0.13	335
ALGERIA	1964	1541	77	1032	325	107	0	0.13	284
ALGERIA	1965	1799	72	1140	485	101	0	0.15	230
ALGERIA	1966	2299	74	1630	505	90	0	0.19	217
ALGERIA	1967	2302	52	1663	489	99	0	0.18	227
ALGERIA	1968	2471	55	1783	514	118	0	0.19	219
ALGERIA	1969	3075	123	2148	676	129	0	0.23	186
ALGERIA	1970	4111	265	1866	37	126	1817	0.3	163
ALGERIA	1971	5091	246	2079	184	131	2451	0.36	145
ALGERIA	1972	7731	177	1981	856	126	4591	0.53	128
ALGERIA	1973	10448	224	2559	859	137	6669	0.69	160
ALGERIA	1974	8701	191	2622	669	128	5091	0.56	165
ALGERIA	1975	8735	216	3082	1217	129	4092	0.55	157
ALGERIA	1976	10682	160	3012	1655	190	5666	0.65	290
ALGERIA	1977	11424	165	3785	984	242	6248	0.67	310
ALGERIA	1978	17052	156	3593	6511	367	6425	0.97	380
ALGERIA	1979	12441	244	4192	2229	513	5263	0.68	445
ALGERIA	1980	18140	439	5082	6954	565	5100	0.96	581
ALGERIA	1981	12664	521	4955	3047	607	3533	0.65	649
ALGERIA	1982	10709	539	5088	1957	598	2527	0.53	646
ALGERIA	1983	14351	859	6010	4533	654	2294	0.69	647
ALGERIA	1984	19390	1099	6214	8327	753	2997	0.9	581
ALGERIA	1985	19849	840	6142	7560	829	4478	0.9	403
ALGERIA	1986	20801	744	6212	9030	878	3937	0.91	390
ALGERIA	1987	22940	810	6848	10949	1026	3307	0.98	381
ALGERIA	1988	22893	812	7447	10637	979	3019	0.95	291
ALGERIA	1989	21829	815	6865	10009	927	3213	0.88	291
ALGERIA	1990	20990	803	6333	10619	862	2373	0.83	286
ALGERIA	1991	21557	734	7114	10488	859	2362	0.83	308
ALGERIA	1992	21854	649	7827	8715	870	3793	0.82	274
ALGERIA	1993	22419	525	7640	9852	870	3532	0.83	422
ALGERIA	1994	23566	624	8311	10204	824	3604	0.85	477
ALGERIA	1995	25987	528	7391	12888	928	4252	0.92	534
ALGERIA	1996	26479	384	7480	13801	884	3930	0.92	508
ALGERIA	1997	23818	377	8193	10646	965	3637	0.81	450
ALGERIA	1998	29179	576	9031	14913	1020	3639	0.98	435
ALGERIA	1999	25101	593	6056	13898	1020	3535	0.83	434
ALGERIA	2000	23960	537	8424	10838	1129	3032	0.78	416
ALGERIA	2001	22967	572	7767	11198	1129	2301	0.74	422
ALGERIA	2002	24518	712	8050	12187	1224	2345	0.78	586
ALGERIA	2003	24973	761	8718	12016	1224	2254	0.78	510
ALGERIA	2004	24137	525	8957	11247	1496	1912	0.75	466
ALGERIA	2005	29255	645	8475	16706	1741	1688	0.89	547
ALGERIA	2006	27562	737	9616	13457	1999	1753	0.83	604
ALGERIA	2007	29835	822	10459	13940	2160	2454	0.85	603
ALGERIA	2008	30054	821	10197	14069	2366	2600	0.84	617
ALGERIA	2009	33106	435	12252	14982	2548	2889	0.94	636
ALGERIA	2010	32500	332	12381	14565	2598	2623	0.9	663
ALGERIA	2011	33048	286	12806	15481	2584	1892	0.9	609
ALGERIA	2012	35448	283	13248	17499	2584	1835	0.95	658
ALGERIA	2013	36669	198	14170	17863	2516	1922	0.96	687
ALGERIA	2014	39651	149	14422	20151	2856	2073	1.02	581
ANDORRA	1990	111	0	111	0	0	0	2.09	0
ANDORRA	1991	111	0	111	0	0	0	2.01	0
ANDORRA	1992	111	0	111	0	0	0	1.91	0
ANDORRA	1993	112	0	112	0	0	0	1.85	0
ANDORRA	1994	111	0	111	0	0	0	1.75	0
ANDORRA	1995	116	0	116	0	0	0	1.79	0
ANDORRA	1996	124	0	124	0	0	0	1.9	0
ANDORRA	1997	127	0	127	0	0	0	1.96	0
ANDORRA	1998	134	0	134	0	0	0	2.09	0
ANDORRA	1999	140	0	140	0	0	0	2.19	0
ANDORRA	2000	143	0	143	0	0	0	2.22	0
ANDORRA	2001	143	0	143	0	0	0	2.16	0
ANDORRA	2002	145	0	145	0	0	0	2.1	0
ANDORRA	2003	146	0	146	0	0	0	2.02	0
ANDORRA	2004	153	0	153	0	0	0	2.03	0
ANDORRA	2005	157	0	157	0	0	0	2.02	0
ANDORRA	2006	149	0	149	0	0	0	1.87	0
ANDORRA	2007	147	0	147	0	0	0	1.8	0
ANDORRA	2008	147	0	147	0	0	0	1.83	0
ANDORRA	2009	141	0	141	0	0	0	1.65	0
ANDORRA	2010	141	0	141	0	0	0	1.68	0
ANDORRA	2011	134	0	134	0	0	0	1.63	0
ANDORRA	2012	133	0	133	0	0	0	1.68	0
ANDORRA	2013	130	0	130	0	0	0	1.71	0
ANDORRA	2014	126	0	126	0	0	0	1.74	0
ANGOLA	1950	51	16	34	0	0	0	0.01	0
ANGOLA	1951	68	26	42	0	0	0	0.02	0
ANGOLA	1952	85	33	52	0	0	0	0.02	0
ANGOLA	1953	75	19	52	0	4	0	0.02	3
ANGOLA	1954	95	21	69	0	6	0	0.02	2
ANGOLA	1955	113	23	80	0	10	0	0.02	2
ANGOLA	1956	137	11	114	0	12	0	0.03	1
ANGOLA	1957	169	22	129	0	18	0	0.04	0
ANGOLA	1958	162	12	127	0	23	0	0.03	14
ANGOLA	1959	169	15	133	0	21	0	0.03	9
ANGOLA	1960	150	34	95	0	22	0	0.03	41
ANGOLA	1961	124	17	85	0	21	0	0.02	64
ANGOLA	1962	322	25	275	0	23	0	0.06	65
ANGOLA	1963	314	6	282	0	26	0	0.06	86
ANGOLA	1964	334	21	284	0	29	0	0.06	138
ANGOLA	1965	324	15	276	0	33	0	0.06	144
ANGOLA	1966	424	24	364	0	36	0	0.08	133
ANGOLA	1967	271	15	218	0	38	0	0.05	233
ANGOLA	1968	456	28	387	0	42	0	0.08	239
ANGOLA	1969	760	25	682	0	52	0	0.13	189
ANGOLA	1970	977	13	476	23	61	405	0.16	227
ANGOLA	1971	930	8	449	23	72	379	0.15	265
ANGOLA	1972	1229	2	676	30	85	437	0.2	177
ANGOLA	1973	1331	6	685	34	105	501	0.21	185
ANGOLA	1974	1329	0	669	36	103	522	0.21	240
ANGOLA	1975	1204	0	595	34	89	486	0.18	193
ANGOLA	1976	896	0	528	30	41	297	0.13	147
ANGOLA	1977	964	0	293	37	41	593	0.14	154
ANGOLA	1978	1476	0	731	37	54	654	0.21	245
ANGOLA	1979	1501	0	756	37	54	654	0.2	274
ANGOLA	1980	1458	0	725	40	33	659	0.19	329
ANGOLA	1981	1440	0	754	47	34	605	0.18	349
ANGOLA	1982	1268	0	589	47	34	599	0.15	329
ANGOLA	1983	1395	0	692	54	30	619	0.16	380
ANGOLA	1984	1366	0	625	60	48	632	0.16	475
ANGOLA	1985	1282	0	535	60	48	639	0.14	650
ANGOLA	1986	1271	0	510	67	48	646	0.14	641
ANGOLA	1987	1586	0	798	81	48	659	0.17	701
ANGOLA	1988	1399	0	520	82	136	661	0.14	714
ANGOLA	1989	1366	0	476	87	136	666	0.14	718
ANGOLA	1990	1395	0	676	276	35	409	0.13	596
ANGOLA	1991	1388	0	623	296	35	435	0.13	599
ANGOLA	1992	1417	0	625	291	41	460	0.13	221
ANGOLA	1993	1575	0	810	286	34	445	0.14	251
ANGOLA	1994	1061	0	354	265	33	409	0.09	359
ANGOLA	1995	2993	0	2297	286	27	383	0.25	324
ANGOLA	1996	2852	0	1921	286	37	608	0.23	283
ANGOLA	1997	2013	0	909	291	41	772	0.16	285
ANGOLA	1998	1993	0	754	296	48	895	0.15	182
ANGOLA	1999	2497	0	1012	286	28	1171	0.18	320
ANGOLA	2000	2602	0	1001	296	27	1278	0.19	384
ANGOLA	2001	2654	0	1174	270	75	1135	0.18	416
ANGOLA	2002	3454	0	1370	316	81	1687	0.23	357
ANGOLA	2003	2472	0	1866	332	95	179	0.16	128
ANGOLA	2004	5125	0	1374	393	103	3255	0.32	351
ANGOLA	2005	5224	0	1292	341	179	3412	0.32	246
ANGOLA	2006	6072	0	2117	356	187	3412	0.36	80
ANGOLA	2007	6859	0	2402	435	190	3832	0.39	107
ANGOLA	2008	7011	0	2789	347	242	3633	0.38	357
ANGOLA	2009	7579	0	3356	352	245	3626	0.37	323
ANGOLA	2010	7924	0	3649	374	204	3697	0.37	321
ANGOLA	2011	8274	0	3915	384	204	3771	0.38	314
ANGOLA	2012	9108	0	4691	388	218	3811	0.4	470
ANGOLA	2013	8895	0	4738	209	272	3675	0.38	374
ANGOLA	2014	9480	0	5310	158	340	3672	0.39	509
ANGUILLA	1990	14	0	14	0	0	0	1.71	0
ANGUILLA	1991	14	0	14	0	0	0	1.64	0
ANGUILLA	1992	15	0	15	0	0	0	1.68	0
ANGUILLA	1993	18	0	18	0	0	0	1.9	0
ANGUILLA	1994	18	0	18	0	0	0	1.84	0
ANGUILLA	1995	18	0	18	0	0	0	1.88	0
ANGUILLA	1996	19	0	19	0	0	0	1.92	0
ANGUILLA	1997	19	0	19	0	0	0	1.88	0
ANGUILLA	1998	21	0	21	0	0	0	2	0
ANGUILLA	1999	22	0	22	0	0	0	2.03	0
ANGUILLA	2000	24	0	24	0	0	0	2.19	0
ANGUILLA	2001	26	0	26	0	0	0	2.26	0
ANGUILLA	2002	26	0	26	0	0	0	2.16	0
ANGUILLA	2003	28	0	28	0	0	0	2.27	0
ANGUILLA	2004	33	0	33	0	0	0	2.5	0
ANGUILLA	2005	35	0	35	0	0	0	2.59	0
ANGUILLA	2006	39	0	39	0	0	0	2.81	0
ANGUILLA	2007	41	0	41	0	0	0	3.12	0
ANGUILLA	2008	41	0	41	0	0	0	3.07	0
ANGUILLA	2009	40	0	40	0	0	0	2.96	0
ANGUILLA	2010	41	0	41	0	0	0	2.98	0
ANGUILLA	2011	39	0	39	0	0	0	2.76	0
ANGUILLA	2012	39	0	39	0	0	0	2.73	0
ANGUILLA	2013	37	0	37	0	0	0	2.58	0
ANGUILLA	2014	39	0	39	0	0	0	2.66	0
ANTARCTIC FISHERIES	1987	1	0	1	0	0	0	0.84	55
ANTARCTIC FISHERIES	1988	2	0	2	0	0	0	1.67	56
ANTARCTIC FISHERIES	1989	2	0	2	0	0	0	1.67	55
ANTARCTIC FISHERIES	1990	3	0	3	0	0	0	2.51	55
ANTARCTIC FISHERIES	1991	4	0	4	0	0	0	4.19	56
ANTARCTIC FISHERIES	1992	4	0	4	0	0	0	4.19	56
ANTARCTIC FISHERIES	1993	4	0	4	0	0	0	4.19	56
ANTARCTIC FISHERIES	1994	4	0	4	0	0	0	4.19	56
ANTARCTIC FISHERIES	1995	1	0	1	0	0	0	0.84	61
ANTARCTIC FISHERIES	1996	1	0	1	0	0	0	0.84	61
ANTARCTIC FISHERIES	1997	1	0	1	0	0	0	0.84	61
ANTARCTIC FISHERIES	1998	1	0	1	0	0	0	0.84	61
ANTARCTIC FISHERIES	1999	1	0	1	0	0	0	0.84	61
ANTARCTIC FISHERIES	2000	1	0	1	0	0	0	0.84	62
ANTARCTIC FISHERIES	2001	1	0	1	0	0	0	0.84	63
ANTARCTIC FISHERIES	2002	1	0	1	0	0	0	0.84	63
ANTARCTIC FISHERIES	2003	1	0	1	0	0	0	0.84	63
ANTARCTIC FISHERIES	2004	2	0	2	0	0	0	1.67	63
ANTARCTIC FISHERIES	2005	2	0	2	0	0	0	1.67	63
ANTARCTIC FISHERIES	2006	2	0	2	0	0	0	1.67	63
ANTARCTIC FISHERIES	2007	3	0	3	0	0	0	2.51	63
ANTIGUA & BARBUDA	1957	6	0	6	0	0	0	0.11	0
ANTIGUA & BARBUDA	1958	8	0	8	0	0	0	0.16	0
ANTIGUA & BARBUDA	1959	8	0	8	0	0	0	0.15	0
ANTIGUA & BARBUDA	1960	10	0	10	0	0	0	0.18	0
ANTIGUA & BARBUDA	1961	13	0	13	0	0	0	0.23	0
ANTIGUA & BARBUDA	1962	28	0	28	0	0	0	0.49	0
ANTIGUA & BARBUDA	1963	23	0	23	0	0	0	0.39	0
ANTIGUA & BARBUDA	1964	25	0	25	0	0	0	0.43	0
ANTIGUA & BARBUDA	1965	41	0	41	0	0	0	0.69	2
ANTIGUA & BARBUDA	1966	95	0	95	0	0	0	1.56	4
ANTIGUA & BARBUDA	1967	154	0	154	0	0	0	2.48	0
ANTIGUA & BARBUDA	1968	270	0	270	0	0	0	4.27	0
ANTIGUA & BARBUDA	1969	343	0	343	0	0	0	5.32	0
ANTIGUA & BARBUDA	1970	126	0	126	0	0	0	1.91	191
ANTIGUA & BARBUDA	1971	116	0	116	0	0	0	1.75	273
ANTIGUA & BARBUDA	1972	102	0	102	0	0	0	1.52	285
ANTIGUA & BARBUDA	1973	90	0	90	0	0	0	1.33	260
ANTIGUA & BARBUDA	1974	117	0	117	0	0	0	1.7	152
ANTIGUA & BARBUDA	1975	193	0	193	0	0	0	2.77	38
ANTIGUA & BARBUDA	1976	110	0	110	0	0	0	1.57	57
ANTIGUA & BARBUDA	1977	127	0	127	0	0	0	1.81	49
ANTIGUA & BARBUDA	1978	134	0	134	0	0	0	1.9	51
ANTIGUA & BARBUDA	1979	111	0	111	0	0	0	1.58	55
ANTIGUA & BARBUDA	1980	39	0	39	0	0	0	0.56	47
ANTIGUA & BARBUDA	1981	29	0	29	0	0	0	0.42	24
ANTIGUA & BARBUDA	1982	80	0	80	0	0	0	1.16	44
ANTIGUA & BARBUDA	1983	23	0	23	0	0	0	0.33	13
ANTIGUA & BARBUDA	1984	40	0	40	0	0	0	0.6	46
ANTIGUA & BARBUDA	1985	68	0	68	0	0	0	1.03	28
ANTIGUA & BARBUDA	1986	68	0	68	0	0	0	1.05	32
ANTIGUA & BARBUDA	1987	75	0	75	0	0	0	1.17	28
ANTIGUA & BARBUDA	1988	78	0	78	0	0	0	1.24	29
ANTIGUA & BARBUDA	1989	78	0	78	0	0	0	1.25	29
ANTIGUA & BARBUDA	1990	77	0	77	0	0	0	1.24	31
ANTIGUA & BARBUDA	1991	73	0	73	0	0	0	1.16	32
ANTIGUA & BARBUDA	1992	72	0	72	0	0	0	1.13	32
ANTIGUA & BARBUDA	1993	74	0	74	0	0	0	1.13	34
ANTIGUA & BARBUDA	1994	73	0	73	0	0	0	1.09	38
ANTIGUA & BARBUDA	1995	75	0	75	0	0	0	1.1	38
ANTIGUA & BARBUDA	1996	80	0	80	0	0	0	1.13	38
ANTIGUA & BARBUDA	1997	84	0	84	0	0	0	1.16	39
ANTIGUA & BARBUDA	1998	87	0	87	0	0	0	1.17	39
ANTIGUA & BARBUDA	1999	90	0	90	0	0	0	1.19	40
ANTIGUA & BARBUDA	2000	94	0	94	0	0	0	1.21	41
ANTIGUA & BARBUDA	2001	95	0	95	0	0	0	1.2	40
ANTIGUA & BARBUDA	2002	101	0	101	0	0	0	1.26	44
ANTIGUA & BARBUDA	2003	110	0	110	0	0	0	1.34	43
ANTIGUA & BARBUDA	2004	115	0	115	0	0	0	1.38	44
ANTIGUA & BARBUDA	2005	117	0	117	0	0	0	1.4	44
ANTIGUA & BARBUDA	2006	121	0	121	0	0	0	1.43	44
ANTIGUA & BARBUDA	2007	128	0	128	0	0	0	1.52	45
ANTIGUA & BARBUDA	2008	131	0	131	0	0	0	1.54	46
ANTIGUA & BARBUDA	2009	139	0	139	0	0	0	1.61	47
ANTIGUA & BARBUDA	2010	143	0	143	0	0	0	1.64	39
ANTIGUA & BARBUDA	2011	140	0	140	0	0	0	1.59	41
ANTIGUA & BARBUDA	2012	143	0	143	0	0	0	1.61	42
ANTIGUA & BARBUDA	2013	143	0	143	0	0	0	1.59	42
ANTIGUA & BARBUDA	2014	145	0	145	0	0	0	1.59	44
ARGENTINA	1887	296	296	0	0	0	.	.	0
ARGENTINA	1888	243	243	0	0	0	.	.	0
ARGENTINA	1889	479	479	0	0	0	.	.	0
ARGENTINA	1890	374	374	0	0	0	.	.	0
ARGENTINA	1891	256	256	0	0	0	.	.	0
ARGENTINA	1892	378	378	0	0	0	.	.	0
ARGENTINA	1893	424	424	0	0	0	.	.	0
ARGENTINA	1894	544	544	0	0	0	.	.	0
ARGENTINA	1895	618	618	0	0	0	.	.	0
ARGENTINA	1896	629	629	0	0	0	.	.	0
ARGENTINA	1897	568	568	0	0	0	.	.	0
ARGENTINA	1898	641	641	0	0	0	.	.	0
ARGENTINA	1899	797	797	0	0	0	.	.	0
ARGENTINA	1900	565	565	0	0	0	.	.	0
ARGENTINA	1901	680	680	0	0	0	.	.	0
ARGENTINA	1902	768	768	0	0	0	.	.	0
ARGENTINA	1903	781	781	0	0	0	.	.	0
ARGENTINA	1904	1036	1036	0	0	0	.	.	0
ARGENTINA	1905	1087	1087	0	0	0	.	.	0
ARGENTINA	1906	1707	1707	0	0	0	.	.	0
ARGENTINA	1907	1707	1707	0	0	0	.	.	0
ARGENTINA	1908	2079	2077	2	0	0	.	.	0
ARGENTINA	1909	1620	1618	3	0	0	.	.	0
ARGENTINA	1910	2431	2429	3	0	0	.	.	0
ARGENTINA	1911	2714	2712	2	0	0	.	.	0
ARGENTINA	1912	2587	2581	6	0	0	.	.	0
ARGENTINA	1913	2769	2752	16	0	0	.	.	0
ARGENTINA	1914	2367	2332	33	1	0	.	.	0
ARGENTINA	1915	1894	1828	62	3	0	.	.	0
ARGENTINA	1916	1361	1251	105	4	0	.	.	0
ARGENTINA	1917	609	454	148	7	0	.	.	0
ARGENTINA	1918	688	516	164	8	0	.	.	0
ARGENTINA	1919	1017	847	162	8	0	.	.	0
ARGENTINA	1920	1608	1398	200	10	0	.	.	0
ARGENTINA	1921	1512	1246	253	13	0	.	.	0
ARGENTINA	1922	1992	1608	368	17	0	.	.	0
ARGENTINA	1923	2305	1867	416	21	0	.	.	0
ARGENTINA	1924	2991	2389	567	35	0	.	.	0
ARGENTINA	1925	3067	2279	743	45	0	.	.	0
ARGENTINA	1926	3073	2033	959	80	0	.	.	0
ARGENTINA	1927	3650	2526	1052	71	0	.	.	0
ARGENTINA	1928	3477	2261	1103	81	32	.	.	0
ARGENTINA	1929	3584	2271	1140	125	48	.	.	0
ARGENTINA	1930	3485	2216	1093	124	52	.	.	0
ARGENTINA	1931	3506	1896	1383	154	73	.	.	0
ARGENTINA	1932	3576	1728	1570	210	68	.	.	0
ARGENTINA	1933	3612	1626	1633	282	70	.	.	0
ARGENTINA	1934	3887	1796	1673	341	77	.	.	0
ARGENTINA	1935	3821	1729	1705	288	98	.	.	0
ARGENTINA	1936	4121	1907	1852	249	113	.	.	0
ARGENTINA	1937	4562	2227	1959	236	141	.	.	0
ARGENTINA	1938	4463	2018	2046	229	169	.	.	0
ARGENTINA	1939	4744	2119	2230	242	153	.	.	0
ARGENTINA	1940	4331	1465	2468	250	147	.	.	0
ARGENTINA	1941	3806	733	2637	277	159	.	.	0
ARGENTINA	1942	3680	378	2840	315	146	.	.	0
ARGENTINA	1943	3843	423	2975	316	130	.	.	0
ARGENTINA	1944	3809	450	2903	309	147	.	.	0
ARGENTINA	1945	3731	558	2741	284	148	.	.	0
ARGENTINA	1946	3741	830	2492	264	155	.	.	0
ARGENTINA	1947	3963	888	2617	272	185	.	.	0
ARGENTINA	1948	4748	1587	2782	209	170	.	.	0
ARGENTINA	1949	4195	982	2706	310	197	.	.	0
ARGENTINA	1950	8168	972	6982	0	214	0	0.48	124
ARGENTINA	1951	9544	1493	7452	387	212	0	0.55	127
ARGENTINA	1952	9853	1230	7993	419	211	0	0.55	110
ARGENTINA	1953	9591	850	8190	326	225	0	0.53	169
ARGENTINA	1954	10032	1016	8455	330	232	0	0.54	186
ARGENTINA	1955	10799	876	9334	335	254	0	0.57	188
ARGENTINA	1956	12092	1041	10414	356	281	0	0.63	197
ARGENTINA	1957	12996	917	11359	398	322	0	0.66	214
ARGENTINA	1958	12064	1032	10292	404	336	0	0.6	231
ARGENTINA	1959	13362	1018	11620	402	322	0	0.66	222
ARGENTINA	1960	13312	1066	11242	645	359	0	0.65	211
ARGENTINA	1961	13957	966	11496	1100	395	0	0.67	241
ARGENTINA	1962	14643	548	12303	1394	398	0	0.69	211
ARGENTINA	1963	13658	629	11093	1591	345	0	0.63	315
ARGENTINA	1964	15197	698	12339	1765	396	0	0.69	268
ARGENTINA	1965	16053	710	12916	1978	449	0	0.72	333
ARGENTINA	1966	17218	706	13256	2142	474	640	0.76	370
ARGENTINA	1967	17874	802	13584	2240	483	763	0.78	363
ARGENTINA	1968	18839	646	14345	2495	568	785	0.81	368
ARGENTINA	1969	21088	707	16532	2485	591	773	0.89	338
ARGENTINA	1970	22562	897	17447	2806	645	767	0.94	390
ARGENTINA	1971	24254	799	18919	3008	752	776	1	512
ARGENTINA	1972	24586	780	18913	3403	741	749	0.99	207
ARGENTINA	1973	25652	786	19435	3872	705	854	1.02	128
ARGENTINA	1974	26062	919	19501	4073	733	836	1.02	119
ARGENTINA	1975	25888	981	18808	4291	743	1065	0.99	82
ARGENTINA	1976	27212	884	19614	4494	777	1442	1.03	161
ARGENTINA	1977	27486	738	19843	4614	816	1476	1.02	311
ARGENTINA	1978	27990	1046	19896	4483	859	1706	1.03	307
ARGENTINA	1979	30189	983	21581	4917	907	1801	1.09	359
ARGENTINA	1980	29653	782	20881	5340	970	1680	1.05	383
ARGENTINA	1981	27827	807	19121	5591	904	1404	0.97	404
ARGENTINA	1982	28204	726	18840	6345	765	1527	0.97	500
ARGENTINA	1983	28692	598	18743	7168	765	1418	0.97	613
ARGENTINA	1984	29049	586	18350	7451	710	1951	0.97	591
ARGENTINA	1985	27433	757	16495	7863	630	1689	0.9	569
ARGENTINA	1986	28419	926	16976	8451	755	1311	0.92	390
ARGENTINA	1987	31345	1031	18137	10016	857	1304	1	548
ARGENTINA	1988	33126	1098	18076	11526	823	1602	1.04	486
ARGENTINA	1989	31931	1131	16308	12175	608	1709	0.99	628
ARGENTINA	1990	30583	838	16154	11794	491	1306	0.94	628
ARGENTINA	1991	31933	734	16712	12905	462	1120	0.96	410
ARGENTINA	1992	33093	765	17367	13183	687	1091	0.99	415
ARGENTINA	1993	32159	628	18327	11137	768	1297	0.95	332
ARGENTINA	1994	33381	972	18342	11648	854	1566	0.97	334
ARGENTINA	1995	34896	1010	17149	14518	741	1477	1	410
ARGENTINA	1996	36815	846	17992	15705	696	1577	1.04	495
ARGENTINA	1997	37634	758	18250	16786	933	907	1.05	548
ARGENTINA	1998	38128	775	18989	16816	964	584	1.06	469
ARGENTINA	1999	40083	588	19654	18455	977	408	1.1	512
ARGENTINA	2000	38761	452	18237	18951	832	289	1.05	433
ARGENTINA	2001	36466	352	17375	17688	754	297	0.98	487
ARGENTINA	2002	34010	300	15692	17090	532	395	0.9	1019
ARGENTINA	2003	36832	543	16200	18851	710	528	0.97	1029
ARGENTINA	2004	42975	600	18508	22629	851	388	1.12	1062
ARGENTINA	2005	44208	892	19596	22371	1033	316	1.14	1058
ARGENTINA	2006	47842	1055	22356	22890	1214	327	1.23	860
ARGENTINA	2007	47771	999	21275	23793	1306	398	1.21	1245
ARGENTINA	2008	51570	1058	24197	24596	1320	399	1.3	1281
ARGENTINA	2009	49076	882	22484	24016	1276	418	1.2	1294
ARGENTINA	2010	51246	1089	24606	23725	1418	407	1.24	1542
ARGENTINA	2011	52259	1289	23723	25269	1577	401	1.25	1772
ARGENTINA	2012	52456	1180	23363	26032	1457	424	1.25	2068
ARGENTINA	2013	51773	649	24226	24771	1617	510	1.22	2253
ARGENTINA	2014	55638	1588	25685	26368	1551	446	1.29	2079
ARMENIA	1992	1589	102	484	949	54	0	0.46	128
ARMENIA	1993	697	2	256	411	27	0	0.21	56
ARMENIA	1994	738	26	257	441	14	0	0.22	41
ARMENIA	1995	930	2	183	714	31	0	0.29	29
ARMENIA	1996	699	4	100	557	38	0	0.22	16
ARMENIA	1997	882	4	107	731	40	0	0.28	17
ARMENIA	1998	917	4	111	762	41	0	0.29	18
ARMENIA	1999	822	2	160	621	39	0	0.27	18
ARMENIA	2000	945	0	215	700	30	0	0.31	52
ARMENIA	2001	966	0	212	713	41	0	0.31	50
ARMENIA	2002	830	13	223	547	48	0	0.27	44
ARMENIA	2003	935	20	255	608	52	0	0.31	22
ARMENIA	2004	994	0	251	675	68	0	0.32	32
ARMENIA	2005	1187	1	268	836	82	0	0.39	38
ARMENIA	2006	1195	1	251	857	85	0	0.39	33
ARMENIA	2007	1381	4	252	1026	98	0	0.46	50
ARMENIA	2008	1516	5	282	1125	105	0	0.51	48
ARMENIA	2009	1189	0	260	865	64	0	0.4	25
ARMENIA	2010	1150	3	275	806	66	0	0.39	37
ARMENIA	2011	1341	2	257	1025	57	0	0.45	38
ARMENIA	2012	1553	2	244	1246	60	0	0.52	40
ARMENIA	2013	1499	1	232	1207	59	0	0.5	39
ARMENIA	2014	1508	0	234	1216	58	0	0.5	34
ARUBA	1986	49	0	49	0	0	0	0.78	0
ARUBA	1987	122	0	122	0	0	0	1.98	0
ARUBA	1988	167	0	167	0	0	0	2.73	0
ARUBA	1989	177	0	177	0	0	0	2.89	0
ARUBA	1990	447	0	447	0	0	0	7.19	35
ARUBA	1991	459	0	459	0	0	0	7.1	48
ARUBA	1992	399	0	399	0	0	0	5.85	50
ARUBA	1993	435	0	435	0	0	0	6	52
ARUBA	1994	440	0	440	0	0	0	5.73	53
ARUBA	1995	455	0	455	0	0	0	5.66	54
ARUBA	1996	461	0	461	0	0	0	5.55	56
ARUBA	1997	476	0	476	0	0	0	5.58	57
ARUBA	1998	490	0	490	0	0	0	5.64	59
ARUBA	1999	493	0	493	0	0	0	5.58	61
ARUBA	2000	649	0	649	0	0	0	7.19	63
ARUBA	2001	657	0	657	0	0	0	7.12	65
ARUBA	2002	665	0	665	0	0	0	7.03	68
ARUBA	2003	699	0	699	0	0	0	7.22	69
ARUBA	2004	714	0	714	0	0	0	7.21	70
ARUBA	2005	742	0	742	0	0	0	7.34	72
ARUBA	2006	741	0	741	0	0	0	7.21	72
ARUBA	2007	770	0	770	0	0	0	7.61	74
ARUBA	2008	725	0	725	0	0	0	7.15	75
ARUBA	2009	717	0	717	0	0	0	7.07	77
ARUBA	2010	684	0	684	0	0	0	6.73	74
ARUBA	2011	682	0	682	0	0	0	6.69	75
ARUBA	2012	368	0	368	0	0	0	3.59	79
ARUBA	2013	235	0	235	0	0	0	2.29	80
ARUBA	2014	238	0	238	0	0	0	2.3	80
AUSTRALIA	1851	-17	-17	0	0	0	.	.	0
AUSTRALIA	1852	-15	-15	0	0	0	.	.	0
AUSTRALIA	1853	-30	-30	0	0	0	.	.	0
AUSTRALIA	1854	-35	-35	0	0	0	.	.	0
AUSTRALIA	1855	-36	-36	0	0	0	.	.	0
AUSTRALIA	1856	-50	-50	0	0	0	.	.	0
AUSTRALIA	1857	-57	-57	0	0	0	.	.	0
AUSTRALIA	1858	-67	-67	0	0	0	.	.	0
AUSTRALIA	1859	-103	-103	0	0	0	.	.	0
AUSTRALIA	1860	76	76	0	0	0	.	.	0
AUSTRALIA	1861	139	139	0	0	0	.	.	0
AUSTRALIA	1862	97	97	0	0	0	.	.	0
AUSTRALIA	1863	109	109	0	0	0	.	.	0
AUSTRALIA	1864	73	73	0	0	0	.	.	0
AUSTRALIA	1865	115	115	0	0	0	.	.	0
AUSTRALIA	1866	190	190	0	0	0	.	.	0
AUSTRALIA	1867	244	244	0	0	0	.	.	0
AUSTRALIA	1868	200	200	0	0	0	.	.	0
AUSTRALIA	1869	175	175	0	0	0	.	.	0
AUSTRALIA	1870	164	164	0	0	0	.	.	0
AUSTRALIA	1871	189	189	0	0	0	.	.	0
AUSTRALIA	1872	193	193	0	0	0	.	.	0
AUSTRALIA	1873	237	237	0	0	0	.	.	0
AUSTRALIA	1874	243	243	0	0	0	.	.	0
AUSTRALIA	1875	226	226	0	0	0	.	.	0
AUSTRALIA	1876	254	254	0	0	0	.	.	0
AUSTRALIA	1877	291	291	0	0	0	.	.	0
AUSTRALIA	1878	264	264	0	0	0	.	.	0
AUSTRALIA	1879	397	397	0	0	0	.	.	0
AUSTRALIA	1880	602	602	0	0	0	.	.	0
AUSTRALIA	1881	482	482	0	0	0	.	.	0
AUSTRALIA	1882	549	549	0	0	0	.	.	0
AUSTRALIA	1883	662	662	0	0	0	.	.	0
AUSTRALIA	1884	702	702	0	0	0	.	.	0
AUSTRALIA	1885	793	793	0	0	0	.	.	0
AUSTRALIA	1886	788	788	0	0	0	.	.	0
AUSTRALIA	1887	828	828	0	0	0	.	.	0
AUSTRALIA	1888	963	963	0	0	0	.	.	0
AUSTRALIA	1889	935	935	0	0	0	.	.	0
AUSTRALIA	1890	968	968	0	0	0	.	.	0
AUSTRALIA	1891	1094	1094	0	0	0	.	.	0
AUSTRALIA	1892	1133	1133	0	0	0	.	.	0
AUSTRALIA	1893	1082	1082	0	0	0	.	.	0
AUSTRALIA	1894	1190	1190	0	0	0	.	.	0
AUSTRALIA	1895	1253	1253	0	0	0	.	.	0
AUSTRALIA	1896	1229	1229	0	0	0	.	.	0
AUSTRALIA	1897	1358	1358	0	0	0	.	.	0
AUSTRALIA	1898	1532	1532	0	0	0	.	.	0
AUSTRALIA	1899	1579	1546	33	0	0	.	.	0
AUSTRALIA	1900	2775	2742	33	0	0	.	.	0
AUSTRALIA	1901	3122	3058	64	0	0	.	.	0
AUSTRALIA	1902	3110	3079	30	0	0	.	.	0
AUSTRALIA	1903	3062	3016	46	0	0	.	.	0
AUSTRALIA	1904	3151	3106	46	0	0	.	.	0
AUSTRALIA	1905	3288	3240	49	0	0	.	.	0
AUSTRALIA	1906	3919	3870	49	0	0	.	.	0
AUSTRALIA	1907	4224	4166	58	0	0	.	.	0
AUSTRALIA	1908	4573	4521	52	0	0	.	.	0
AUSTRALIA	1909	3972	3911	61	0	0	.	.	0
AUSTRALIA	1910	4759	4759	0	0	0	.	.	0
AUSTRALIA	1911	5251	5251	0	0	0	.	.	0
AUSTRALIA	1912	5673	5673	0	0	0	.	.	0
AUSTRALIA	1913	6111	6111	0	0	0	.	.	0
AUSTRALIA	1914	6681	6681	0	0	0	.	.	0
AUSTRALIA	1915	5948	5948	0	0	0	.	.	0
AUSTRALIA	1916	5260	5260	0	0	0	.	.	0
AUSTRALIA	1917	5666	5666	0	0	0	.	.	0
AUSTRALIA	1918	6261	6261	0	0	0	.	.	0
AUSTRALIA	1919	5933	5933	0	0	0	.	.	0
AUSTRALIA	1920	7023	7023	0	0	0	.	.	0
AUSTRALIA	1921	6319	6319	0	0	0	.	.	0
AUSTRALIA	1922	6644	6644	0	0	0	.	.	0
AUSTRALIA	1923	6782	6782	0	0	0	.	.	0
AUSTRALIA	1924	7388	7388	0	0	0	.	.	0
AUSTRALIA	1925	7706	7706	0	0	0	.	.	0
AUSTRALIA	1926	7602	7602	0	0	0	.	.	0
AUSTRALIA	1927	7886	7886	0	0	0	.	.	0
AUSTRALIA	1928	7175	7071	0	0	104	.	.	0
AUSTRALIA	1929	6456	6358	0	0	98	.	.	0
AUSTRALIA	1930	6013	5917	0	0	96	.	.	0
AUSTRALIA	1931	5335	5281	0	0	54	.	.	0
AUSTRALIA	1932	5552	5518	0	0	34	.	.	0
AUSTRALIA	1933	5890	5846	0	0	44	.	.	0
AUSTRALIA	1934	6195	6138	0	0	57	.	.	0
AUSTRALIA	1935	6886	6810	0	0	76	.	.	0
AUSTRALIA	1936	7383	7294	0	0	89	.	.	0
AUSTRALIA	1937	7876	7777	0	0	100	.	.	0
AUSTRALIA	1938	7652	7602	0	0	49	.	.	0
AUSTRALIA	1939	8773	8680	0	0	93	.	.	0
AUSTRALIA	1940	7926	7831	0	0	96	.	.	0
AUSTRALIA	1941	9429	9335	0	0	94	.	.	0
AUSTRALIA	1942	9963	9886	0	0	77	.	.	0
AUSTRALIA	1943	9550	9497	0	0	54	.	.	0
AUSTRALIA	1944	9337	9277	0	0	60	.	.	0
AUSTRALIA	1945	8924	8828	0	0	96	.	.	0
AUSTRALIA	1946	9668	9568	0	0	100	.	.	0
AUSTRALIA	1947	10376	10254	0	0	122	.	.	0
AUSTRALIA	1948	10487	10347	0	0	140	.	.	0
AUSTRALIA	1949	10276	10130	0	0	146	.	.	0
AUSTRALIA	1950	14941	12028	2739	0	174	0	1.83	758
AUSTRALIA	1951	16112	12581	3363	0	168	0	1.92	825
AUSTRALIA	1952	16432	12835	3412	0	185	0	1.91	753
AUSTRALIA	1953	16223	13163	2842	0	217	0	1.84	676
AUSTRALIA	1954	18517	13956	4301	0	260	0	2.06	719
AUSTRALIA	1955	19291	13987	5033	0	271	0	2.09	983
AUSTRALIA	1956	19934	13986	5657	0	291	0	2.12	1123
AUSTRALIA	1957	20340	14090	5934	0	316	0	2.11	1221
AUSTRALIA	1958	21184	14371	6479	0	334	0	2.15	1136
AUSTRALIA	1959	22849	15472	7021	0	356	0	2.27	1088
AUSTRALIA	1960	24053	16083	7590	0	380	0	2.34	1219
AUSTRALIA	1961	24704	16368	7946	0	389	0	2.35	1236
AUSTRALIA	1962	25883	16781	8702	1	399	0	2.42	1147
AUSTRALIA	1963	27551	17393	9732	2	424	0	2.53	1253
AUSTRALIA	1964	29719	18323	10902	2	493	0	2.67	1400
AUSTRALIA	1965	32988	19394	13075	2	517	0	2.9	1520
AUSTRALIA	1966	32815	19487	12826	2	500	0	2.82	1662
AUSTRALIA	1967	35251	20580	14149	2	520	0	2.96	1884
AUSTRALIA	1968	36712	20902	15273	3	534	0	3.02	2154
AUSTRALIA	1969	38794	21282	16793	133	586	0	3.11	2127
AUSTRALIA	1970	40256	20277	18615	752	613	0	3.16	2187
AUSTRALIA	1971	41662	20268	19638	1119	637	0	3.21	2369
AUSTRALIA	1972	42947	21216	19464	1595	671	0	3.24	2283
AUSTRALIA	1973	46630	21756	22390	1770	714	0	3.46	2637
AUSTRALIA	1974	47002	23254	20936	2104	708	0	3.43	2672
AUSTRALIA	1975	47964	23729	21269	2284	682	0	3.45	2444
AUSTRALIA	1976	47517	24255	20047	2527	688	0	3.38	1766
AUSTRALIA	1977	51210	26250	21260	3016	683	0	3.6	1895
AUSTRALIA	1978	55090	28406	22238	3767	679	0	3.83	1953
AUSTRALIA	1979	55923	29289	21749	4172	713	0	3.85	1741
AUSTRALIA	1980	60198	32202	22441	4823	733	0	4.09	1627
AUSTRALIA	1981	62820	33063	23383	5557	817	0	4.22	1572
AUSTRALIA	1982	63845	33699	23216	6149	781	0	4.23	1389
AUSTRALIA	1983	61359	33376	20985	6220	658	120	4	1382
AUSTRALIA	1984	64520	34920	22218	6564	743	75	4.14	1273
AUSTRALIA	1985	65784	37033	19626	8228	801	96	4.16	998
AUSTRALIA	1986	65439	36697	20182	7667	806	87	4.07	1172
AUSTRALIA	1987	69841	40227	20838	7907	798	70	4.28	1246
AUSTRALIA	1988	71215	41076	21072	8102	870	95	4.29	1407
AUSTRALIA	1989	75749	44157	22226	8282	938	146	4.49	1616
AUSTRALIA	1990	71913	38997	22580	9238	962	136	4.21	1730
AUSTRALIA	1991	71304	40241	21427	8650	831	155	4.12	1724
AUSTRALIA	1992	73080	41244	22021	8958	736	122	4.17	1823
AUSTRALIA	1993	75647	41576	23889	9321	748	114	4.27	1976
AUSTRALIA	1994	75844	41219	23914	9739	884	87	4.23	2079
AUSTRALIA	1995	76864	41775	23651	10457	884	97	4.24	2295
AUSTRALIA	1996	82401	45293	25593	10498	850	167	4.5	2430
AUSTRALIA	1997	83391	47414	24389	10572	877	139	4.5	2433
AUSTRALIA	1998	86415	50560	23778	11002	932	144	4.61	2535
AUSTRALIA	1999	88722	51721	24311	11467	1013	210	4.68	2621
AUSTRALIA	2000	89840	51807	24812	12039	1020	163	4.69	2722
AUSTRALIA	2001	88586	52780	21980	12686	1020	120	4.57	2836
AUSTRALIA	2002	93088	54011	24528	13399	1027	123	4.75	2338
AUSTRALIA	2003	91702	51661	26052	12813	1088	88	4.62	2339
AUSTRALIA	2004	93455	53496	25942	12839	1088	89	4.65	2661
AUSTRALIA	2005	95493	55286	27111	11850	1153	93	4.68	2915
AUSTRALIA	2006	99631	57103	26766	14440	1224	98	4.8	3074
AUSTRALIA	2007	101470	56556	27008	16552	1251	103	4.78	3174
AUSTRALIA	2008	105237	56795	29200	17859	1278	106	4.86	3250
AUSTRALIA	2009	107661	58677	29305	18318	1251	110	4.95	2989
AUSTRALIA	2010	106589	56257	31308	17763	1129	132	4.81	3307
AUSTRALIA	2011	106850	54287	32565	18687	1170	142	4.74	3177
AUSTRALIA	2012	105843	53298	33410	17843	1156	136	4.62	3433
AUSTRALIA	2013	101518	47663	33655	18902	1142	155	4.36	3445
AUSTRALIA	2014	98517	44558	32778	19800	1224	157	4.17	3754
AUSTRIA	1807	46	46	0	0	0	.	.	0
AUSTRIA	1819	69	69	0	0	0	.	.	0
AUSTRIA	1820	91	91	0	0	0	.	.	0
AUSTRIA	1821	98	98	0	0	0	.	.	0
AUSTRIA	1822	100	100	0	0	0	.	.	0
AUSTRIA	1823	95	95	0	0	0	.	.	0
AUSTRIA	1824	109	109	0	0	0	.	.	0
AUSTRIA	1825	110	110	0	0	0	.	.	0
AUSTRIA	1826	125	125	0	0	0	.	.	0
AUSTRIA	1827	130	130	0	0	0	.	.	0
AUSTRIA	1828	125	125	0	0	0	.	.	0
AUSTRIA	1829	130	130	0	0	0	.	.	0
AUSTRIA	1830	135	135	0	0	0	.	.	0
AUSTRIA	1831	131	131	0	0	0	.	.	0
AUSTRIA	1832	140	140	0	0	0	.	.	0
AUSTRIA	1833	117	117	0	0	0	.	.	0
AUSTRIA	1834	160	160	0	0	0	.	.	0
AUSTRIA	1835	173	173	0	0	0	.	.	0
AUSTRIA	1836	184	184	0	0	0	.	.	0
AUSTRIA	1837	193	193	0	0	0	.	.	0
AUSTRIA	1838	232	232	0	0	0	.	.	0
AUSTRIA	1839	289	289	0	0	0	.	.	0
AUSTRIA	1840	319	319	0	0	0	.	.	0
AUSTRIA	1841	360	360	0	0	0	.	.	0
AUSTRIA	1842	398	398	0	0	0	.	.	0
AUSTRIA	1843	346	346	0	0	0	.	.	0
AUSTRIA	1844	435	435	0	0	0	.	.	0
AUSTRIA	1845	491	491	0	0	0	.	.	0
AUSTRIA	1846	577	577	0	0	0	.	.	0
AUSTRIA	1847	568	568	0	0	0	.	.	0
AUSTRIA	1848	637	637	0	0	0	.	.	0
AUSTRIA	1849	617	617	0	0	0	.	.	0
AUSTRIA	1850	635	635	0	0	0	.	.	0
AUSTRIA	1851	637	637	0	0	0	.	.	0
AUSTRIA	1852	767	767	0	0	0	.	.	0
AUSTRIA	1853	880	880	0	0	0	.	.	0
AUSTRIA	1854	867	867	0	0	0	.	.	0
AUSTRIA	1855	1010	1010	0	0	0	.	.	0
AUSTRIA	1856	1155	1155	0	0	0	.	.	0
AUSTRIA	1857	1330	1330	0	0	0	.	.	0
AUSTRIA	1858	1977	1977	0	0	0	.	.	0
AUSTRIA	1859	1601	1601	0	0	0	.	.	0
AUSTRIA	1860	1678	1678	0	0	0	.	.	0
AUSTRIA	1861	1741	1741	0	0	0	.	.	0
AUSTRIA	1862	1734	1734	0	0	0	.	.	0
AUSTRIA	1863	1604	1604	0	0	0	.	.	0
AUSTRIA	1864	1385	1383	3	0	0	.	.	0
AUSTRIA	1865	1461	1459	2	0	0	.	.	0
AUSTRIA	1866	981	977	4	0	0	.	.	0
AUSTRIA	1867	1341	1336	5	0	0	.	.	0
AUSTRIA	1868	1657	1648	10	0	0	.	.	0
AUSTRIA	1869	1770	1754	16	0	0	.	.	0
AUSTRIA	1870	2010	1984	26	0	0	.	.	0
AUSTRIA	1871	2768	2734	33	0	0	.	.	0
AUSTRIA	1872	2731	2692	39	0	0	.	.	0
AUSTRIA	1873	2928	2874	54	0	0	.	.	0
AUSTRIA	1874	2498	2441	57	0	0	.	.	0
AUSTRIA	1875	2145	2077	67	0	0	.	.	0
AUSTRIA	1876	2208	2117	91	0	0	.	.	0
AUSTRIA	1877	1988	1901	87	0	0	.	.	0
AUSTRIA	1878	1976	1888	88	0	0	.	.	0
AUSTRIA	1879	2419	2342	78	0	0	.	.	0
AUSTRIA	1880	6454	6359	95	0	0	.	.	0
AUSTRIA	1881	2815	2692	123	0	0	.	.	0
AUSTRIA	1882	2893	2790	103	0	0	.	.	0
AUSTRIA	1883	3210	3120	90	0	0	.	.	0
AUSTRIA	1884	3128	3019	109	0	0	.	.	0
AUSTRIA	1885	3288	3173	115	0	0	.	.	0
AUSTRIA	1886	3103	2998	106	0	0	.	.	0
AUSTRIA	1887	3345	3251	93	0	0	.	.	0
AUSTRIA	1888	3262	3163	99	0	0	.	.	0
AUSTRIA	1889	3514	3399	114	0	0	.	.	0
AUSTRIA	1890	3558	3453	105	0	0	.	.	0
AUSTRIA	1891	4079	3964	115	0	0	.	.	0
AUSTRIA	1892	3948	3824	124	0	0	.	.	0
AUSTRIA	1893	4831	4697	134	0	0	.	.	0
AUSTRIA	1894	4948	4833	115	0	0	.	.	0
AUSTRIA	1895	5560	5457	103	0	0	.	.	0
AUSTRIA	1896	5813	5776	37	0	0	.	.	0
AUSTRIA	1897	6283	6237	46	0	0	.	.	0
AUSTRIA	1898	6674	6631	44	0	0	.	.	0
AUSTRIA	1899	6773	6718	55	0	0	.	.	0
AUSTRIA	1900	7553	7559	-6	0	0	.	.	0
AUSTRIA	1901	7741	7738	3	0	0	.	.	0
AUSTRIA	1902	7002	7013	-11	0	0	.	.	0
AUSTRIA	1903	6973	7014	-41	0	0	.	.	0
AUSTRIA	1904	7349	7426	-77	0	0	.	.	0
AUSTRIA	1905	7671	7808	-137	0	0	.	.	0
AUSTRIA	1906	9153	9328	-175	0	0	.	.	0
AUSTRIA	1907	11495	11653	-158	0	0	.	.	0
AUSTRIA	1908	16087	16384	-297	0	0	.	.	0
AUSTRIA	1909	11509	11911	-402	0	0	.	.	0
AUSTRIA	1910	15698	16044	-346	0	0	.	.	0
AUSTRIA	1911	13111	13412	-301	0	0	.	.	0
AUSTRIA	1912	13630	14107	-477	0	0	.	.	0
AUSTRIA	1913	16274	16644	-370	0	0	.	.	0
AUSTRIA	1914	13328	13552	-224	0	0	.	.	0
AUSTRIA	1915	9525	9646	-121	0	0	.	.	0
AUSTRIA	1916	2192	2480	-288	0	0	.	.	0
AUSTRIA	1917	942	942	0	0	0	.	.	0
AUSTRIA	1918	911	911	0	0	0	.	.	0
AUSTRIA	1919	823	823	0	0	0	.	.	0
AUSTRIA	1920	3965	3898	67	0	0	.	.	0
AUSTRIA	1921	5278	5198	80	0	0	.	.	0
AUSTRIA	1922	5073	4985	87	0	0	.	.	0
AUSTRIA	1923	4852	4765	87	0	0	.	.	0
AUSTRIA	1924	5484	5350	134	0	0	.	.	0
AUSTRIA	1925	5183	5064	119	0	0	.	.	0
AUSTRIA	1926	5082	4941	141	0	0	.	.	0
AUSTRIA	1927	5492	5339	153	0	0	.	.	0
AUSTRIA	1928	5784	5513	199	0	71	.	.	0
AUSTRIA	1929	6598	6302	218	0	79	.	.	0
AUSTRIA	1930	5149	4804	263	0	82	.	.	0
AUSTRIA	1931	4941	4639	261	0	41	.	.	0
AUSTRIA	1932	4141	3871	215	7	48	.	.	0
AUSTRIA	1933	3884	3572	275	0	38	.	.	0
AUSTRIA	1934	3754	3492	220	0	42	.	.	0
AUSTRIA	1935	3800	3506	244	0	50	.	.	0
AUSTRIA	1936	3710	3407	253	0	50	.	.	0
AUSTRIA	1937	4165	3865	241	0	58	.	.	0
AUSTRIA	1938	1580	1443	48	0	88	.	.	0
AUSTRIA	1939	1730	1509	121	0	101	.	.	0
AUSTRIA	1940	2005	1548	346	0	111	.	.	0
AUSTRIA	1941	2177	1517	546	0	115	.	.	0
AUSTRIA	1942	2333	1511	729	0	93	.	.	0
AUSTRIA	1943	2624	1595	924	0	105	.	.	0
AUSTRIA	1944	2563	1547	1016	0	0	.	.	0
AUSTRIA	1945	1245	851	373	22	0	.	.	0
AUSTRIA	1946	3483	2700	707	22	53	.	.	0
AUSTRIA	1947	4812	3974	774	26	38	.	.	0
AUSTRIA	1948	6684	5640	829	116	98	.	.	0
AUSTRIA	1949	7254	6070	1009	26	148	.	.	0
AUSTRIA	1950	5704	4744	532	253	175	0	0.82	0
AUSTRIA	1951	6351	5145	744	260	201	0	0.92	0
AUSTRIA	1952	6025	4747	826	263	189	0	0.87	0
AUSTRIA	1953	5928	4564	875	299	190	0	0.86	0
AUSTRIA	1954	6690	4992	1141	336	221	0	0.96	0
AUSTRIA	1955	7936	5240	2031	412	253	0	1.14	0
AUSTRIA	1956	7700	5453	1583	400	263	0	1.11	5
AUSTRIA	1957	7966	5603	1664	409	290	0	1.14	5
AUSTRIA	1958	7668	5075	1857	443	293	0	1.1	6
AUSTRIA	1959	7620	4718	1964	609	329	0	1.09	1
AUSTRIA	1960	8405	4926	2297	797	385	0	1.19	1
AUSTRIA	1961	8689	4820	2607	843	419	0	1.23	2
AUSTRIA	1962	9246	4936	3009	884	416	0	1.3	1
AUSTRIA	1963	10088	5349	3367	922	450	0	1.41	1
AUSTRIA	1964	10620	5168	3977	961	513	0	1.47	2
AUSTRIA	1965	10414	4903	4027	934	550	0	1.43	2
AUSTRIA	1966	10706	4597	4494	1002	612	0	1.46	3
AUSTRIA	1967	10899	4299	5022	960	618	0	1.48	3
AUSTRIA	1968	11549	4199	5708	1022	619	0	1.56	3
AUSTRIA	1969	12188	4183	6109	1275	620	0	1.64	3
AUSTRIA	1970	13824	4858	6763	1548	654	0	1.85	45
AUSTRIA	1971	14223	4107	7580	1790	747	0	1.9	46
AUSTRIA	1972	15324	4267	8261	1933	863	0	2.04	46
AUSTRIA	1973	16407	4327	9149	2080	851	0	2.17	47
AUSTRIA	1974	15672	4532	8007	2258	875	0	2.07	39
AUSTRIA	1975	14833	3975	7879	2213	766	0	1.96	36
AUSTRIA	1976	15930	3894	8707	2528	800	0	2.1	44
AUSTRIA	1977	15331	3423	8572	2570	766	0	2.02	45
AUSTRIA	1978	15676	3503	8697	2675	800	0	2.07	50
AUSTRIA	1979	16797	3940	9430	2664	763	0	2.22	51
AUSTRIA	1980	14264	3873	7116	2534	742	0	1.89	57
AUSTRIA	1981	15307	3996	8185	2407	719	0	2.03	64
AUSTRIA	1982	14690	3856	7820	2332	682	0	1.95	56
AUSTRIA	1983	14176	3929	7210	2370	667	0	1.88	65
AUSTRIA	1984	14876	4600	6958	2653	666	0	1.97	79
AUSTRIA	1985	14917	4546	6912	2839	620	0	1.97	86
AUSTRIA	1986	14748	4019	7584	2524	621	0	1.95	86
AUSTRIA	1987	15747	4039	8464	2629	615	0	2.08	91
AUSTRIA	1988	14546	3899	7480	2519	648	0	1.91	115
AUSTRIA	1989	14758	3779	7591	2743	646	0	1.93	146
AUSTRIA	1990	15731	4285	7543	3238	666	0	2.05	251
AUSTRIA	1991	16800	4483	8212	3423	682	0	2.18	280
AUSTRIA	1992	15451	3477	7929	3361	684	0	1.99	301
AUSTRIA	1993	15572	3120	8234	3545	672	0	1.99	318
AUSTRIA	1994	15559	3167	8088	3646	657	0	1.97	333
AUSTRIA	1995	16303	3604	8195	3981	523	0	2.05	373
AUSTRIA	1996	17229	3620	8845	4238	527	0	2.16	411
AUSTRIA	1997	17087	3847	8632	4084	524	0	2.14	427
AUSTRIA	1998	17361	3371	9273	4193	524	0	2.18	448
AUSTRIA	1999	16872	3355	8732	4266	519	0	2.11	432
AUSTRIA	2000	16985	3791	8568	4113	514	0	2.12	475
AUSTRIA	2001	17968	3909	9183	4359	517	0	2.24	463
AUSTRIA	2002	18291	3971	9436	4351	533	0	2.26	436
AUSTRIA	2003	19688	4265	10124	4772	528	0	2.42	410
AUSTRIA	2004	19741	4158	10132	4858	592	0	2.41	486
AUSTRIA	2005	20239	4230	10293	5096	620	0	2.46	548
AUSTRIA	2006	19679	4250	9984	4785	660	0	2.38	571
AUSTRIA	2007	19017	4032	9765	4512	708	0	2.29	606
AUSTRIA	2008	18824	3911	9422	4768	722	0	2.26	606
AUSTRIA	2009	17107	2974	8897	4603	632	0	2.05	530
AUSTRIA	2010	18408	3537	9218	5073	579	0	2.19	575
AUSTRIA	2011	17731	3599	8742	4788	602	0	2.1	605
AUSTRIA	2012	16982	3342	8458	4576	606	0	2.01	581
AUSTRIA	2013	17040	3402	8632	4410	596	0	2.01	555
AUSTRIA	2014	16011	3129	8259	4025	598	0	1.88	553
AZERBAIJAN	1992	15337	18	8522	6168	109	520	2.06	378
AZERBAIJAN	1993	13213	3	8411	4717	82	0	1.75	203
AZERBAIJAN	1994	11447	1	6832	4550	64	0	1.49	266
AZERBAIJAN	1995	9090	4	5427	3632	27	0	1.17	355
AZERBAIJAN	1996	8524	4	5286	3203	30	0	1.09	191
AZERBAIJAN	1997	8129	4	5063	3019	43	0	1.03	154
AZERBAIJAN	1998	8638	1	5718	2893	27	0	1.08	155
AZERBAIJAN	1999	7793	0	4579	3190	24	0	0.97	142
AZERBAIJAN	2000	8047	0	4903	3117	27	0	0.99	100
AZERBAIJAN	2001	7846	0	3078	4524	71	173	0.96	184
AZERBAIJAN	2002	8076	0	3080	4536	115	344	0.98	225
AZERBAIJAN	2003	8349	0	3465	4654	138	91	1	273
AZERBAIJAN	2004	8751	0	3475	5083	194	0	1.03	274
AZERBAIJAN	2005	9364	0	3995	5058	209	102	1.09	331
AZERBAIJAN	2006	10681	0	3542	5586	221	1333	1.23	348
AZERBAIJAN	2007	8320	6	3127	4798	230	160	0.95	373
AZERBAIJAN	2008	9682	4	2895	5660	217	906	1.09	417
AZERBAIJAN	2009	8700	4	2522	5128	175	871	0.97	319
AZERBAIJAN	2010	8366	6	2373	4904	174	909	0.92	398
AZERBAIJAN	2011	9121	5	2855	5192	194	874	0.99	430
AZERBAIJAN	2012	9696	4	3220	5413	267	792	1.04	391
AZERBAIJAN	2013	9720	3	3293	5436	312	675	1.02	393
AZERBAIJAN	2014	10223	2	3174	5782	390	876	1.06	360
BAHAMAS	1950	15	0	15	0	0	0	0.19	3
BAHAMAS	1951	18	0	18	0	0	0	0.22	3
BAHAMAS	1952	21	0	21	0	0	0	0.26	3
BAHAMAS	1953	22	0	22	0	0	0	0.26	3
BAHAMAS	1954	23	0	23	0	0	0	0.26	3
BAHAMAS	1955	35	0	35	0	0	0	0.4	2
BAHAMAS	1956	38	0	38	0	0	0	0.41	2
BAHAMAS	1957	48	0	48	0	0	0	0.5	2
BAHAMAS	1958	49	0	49	0	0	0	0.49	2
BAHAMAS	1959	71	0	71	0	0	0	0.68	18
BAHAMAS	1960	112	0	112	0	0	0	1.02	468
BAHAMAS	1961	149	0	149	0	0	0	1.29	1122
BAHAMAS	1962	198	0	198	0	0	0	1.63	1135
BAHAMAS	1963	193	0	193	0	0	0	1.52	1039
BAHAMAS	1964	296	0	296	0	0	0	2.22	1085
BAHAMAS	1965	359	0	359	0	0	0	2.56	950
BAHAMAS	1966	298	0	298	0	0	0	2.04	519
BAHAMAS	1967	465	0	372	0	93	0	3.05	235
BAHAMAS	1968	445	0	352	0	93	0	2.81	199
BAHAMAS	1969	476	0	365	0	111	0	2.9	227
BAHAMAS	1970	702	0	589	0	113	0	4.15	265
BAHAMAS	1971	1836	1	1722	0	113	0	10.56	472
BAHAMAS	1972	1770	0	1636	0	134	0	9.95	472
BAHAMAS	1973	2147	4	2013	0	130	0	11.83	586
BAHAMAS	1974	2015	3	1904	0	108	0	10.88	514
BAHAMAS	1975	2251	0	2199	0	52	0	11.92	456
BAHAMAS	1976	1763	0	1726	0	37	0	9.14	792
BAHAMAS	1977	2650	0	2640	0	10	0	13.44	711
BAHAMAS	1978	1802	0	1757	0	45	0	8.95	669
BAHAMAS	1979	1890	0	1829	0	61	0	9.17	562
BAHAMAS	1980	2179	0	2115	0	64	0	10.35	673
BAHAMAS	1981	764	18	742	0	4	0	3.55	661
BAHAMAS	1982	617	10	598	0	9	0	2.8	616
BAHAMAS	1983	550	0	547	0	3	0	2.44	582
BAHAMAS	1984	506	0	506	0	0	0	2.2	354
BAHAMAS	1985	412	0	412	0	0	0	1.76	470
BAHAMAS	1986	385	0	385	0	0	0	1.61	351
BAHAMAS	1987	388	0	388	0	0	0	1.6	287
BAHAMAS	1988	420	0	420	0	0	0	1.7	223
BAHAMAS	1989	531	1	530	0	0	0	2.11	193
BAHAMAS	1990	532	1	531	0	0	0	2.08	193
BAHAMAS	1991	486	1	485	0	0	0	1.86	193
BAHAMAS	1992	489	1	487	0	0	0	1.84	189
BAHAMAS	1993	464	1	462	0	0	0	1.71	191
BAHAMAS	1994	460	1	459	0	0	0	1.67	188
BAHAMAS	1995	459	1	457	0	0	0	1.64	190
BAHAMAS	1996	455	1	454	0	0	0	1.6	192
BAHAMAS	1997	372	1	371	0	0	0	1.3	193
BAHAMAS	1998	458	1	457	0	0	0	1.58	197
BAHAMAS	1999	457	1	455	0	0	0	1.55	202
BAHAMAS	2000	455	1	454	0	0	0	1.53	205
BAHAMAS	2001	428	1	427	0	0	0	1.42	209
BAHAMAS	2002	430	1	429	0	0	0	1.41	215
BAHAMAS	2003	414	2	412	0	0	0	1.33	237
BAHAMAS	2004	470	2	468	0	0	0	1.49	184
BAHAMAS	2005	475	2	473	0	0	0	1.49	177
BAHAMAS	2006	454	2	452	0	0	0	1.4	186
BAHAMAS	2007	461	1	460	0	0	0	1.35	199
BAHAMAS	2008	408	1	407	0	0	0	1.17	260
BAHAMAS	2009	448	1	446	0	0	0	1.26	133
BAHAMAS	2010	451	1	450	0	0	0	1.25	179
BAHAMAS	2011	509	1	507	0	0	0	1.39	161
BAHAMAS	2012	537	1	536	0	0	0	1.44	192
BAHAMAS	2013	764	1	763	0	0	0	2.02	167
BAHAMAS	2014	659	1	657	0	0	0	1.72	162
BAHRAIN	1933	3	0	3	0	0	.	.	0
BAHRAIN	1934	33	0	33	0	0	.	.	0
BAHRAIN	1935	145	0	145	0	0	.	.	0
BAHRAIN	1936	532	0	532	0	0	.	.	0
BAHRAIN	1937	888	0	888	0	0	.	.	0
BAHRAIN	1938	949	0	949	0	0	.	.	0
BAHRAIN	1939	869	0	869	0	0	.	.	0
BAHRAIN	1940	810	0	810	0	0	.	.	0
BAHRAIN	1941	778	0	778	0	0	.	.	0
BAHRAIN	1942	714	0	714	0	0	.	.	0
BAHRAIN	1943	753	0	753	0	0	.	.	0
BAHRAIN	1944	769	0	769	0	0	.	.	0
BAHRAIN	1945	836	0	836	0	0	.	.	0
BAHRAIN	1946	917	0	917	0	0	.	.	0
BAHRAIN	1947	1078	0	1078	0	0	.	.	0
BAHRAIN	1948	1249	0	1249	0	0	.	.	0
BAHRAIN	1949	1258	0	1258	0	0	.	.	0
BAHRAIN	1950	377	0	377	0	0	0	3.26	554
BAHRAIN	1951	321	0	321	0	0	0	2.74	551
BAHRAIN	1952	351	0	351	0	0	0	2.93	517
BAHRAIN	1953	272	0	272	0	0	0	2.21	597
BAHRAIN	1954	285	0	285	0	0	0	2.22	575
BAHRAIN	1955	383	0	383	0	0	0	2.88	587
BAHRAIN	1956	288	0	288	0	0	0	2.07	593
BAHRAIN	1957	206	0	206	0	0	0	1.42	669
BAHRAIN	1958	352	0	352	0	0	0	2.34	595
BAHRAIN	1959	358	0	358	0	0	0	2.29	595
BAHRAIN	1960	157	0	157	0	0	0	0.97	605
BAHRAIN	1961	483	0	483	0	0	0	2.89	616
BAHRAIN	1962	434	0	434	0	0	0	2.52	699
BAHRAIN	1963	326	0	300	26	0	0	1.84	751
BAHRAIN	1964	436	0	409	26	0	0	2.4	887
BAHRAIN	1965	335	0	309	26	0	0	1.8	882
BAHRAIN	1966	177	0	146	31	0	0	0.93	982
BAHRAIN	1967	274	0	243	31	0	0	1.41	1074
BAHRAIN	1968	301	0	160	141	0	0	1.51	1000
BAHRAIN	1969	347	0	185	162	0	0	1.69	826
BAHRAIN	1970	707	0	523	183	0	0	3.34	882
BAHRAIN	1971	829	10	552	267	0	0	3.77	906
BAHRAIN	1972	1004	0	412	592	0	0	4.4	826
BAHRAIN	1973	1506	10	657	839	0	0	6.32	869
BAHRAIN	1974	1474	0	440	1035	0	0	5.88	657
BAHRAIN	1975	1569	0	480	1089	0	0	5.92	538
BAHRAIN	1976	1793	0	652	1141	0	0	6.35	526
BAHRAIN	1977	2037	0	798	1239	0	0	6.75	393
BAHRAIN	1978	2118	0	758	1361	0	0	6.58	251
BAHRAIN	1979	2218	22	725	1472	0	0	6.51	126
BAHRAIN	1980	2151	0	624	1527	0	0	6.01	159
BAHRAIN	1981	2325	0	784	1541	0	0	6.25	308
BAHRAIN	1982	2683	0	988	1695	0	0	6.99	144
BAHRAIN	1983	2244	0	454	1790	0	0	5.69	0
BAHRAIN	1984	2511	0	653	1858	0	0	6.2	0
BAHRAIN	1985	2780	0	531	2249	0	0	6.67	0
BAHRAIN	1986	3003	0	444	2559	0	0	6.97	0
BAHRAIN	1987	3117	0	665	2453	0	0	6.99	0
BAHRAIN	1988	3317	0	676	2619	21	0	7.18	0
BAHRAIN	1989	3201	0	450	2730	21	0	6.7	0
BAHRAIN	1990	3389	0	516	2853	20	0	6.88	27
BAHRAIN	1991	3239	0	507	2712	20	0	6.39	68
BAHRAIN	1992	2973	0	230	2712	30	0	5.72	103
BAHRAIN	1993	3993	0	548	3414	31	0	7.5	258
BAHRAIN	1994	4033	0	658	3344	31	0	7.4	296
BAHRAIN	1995	4041	0	454	3560	27	0	7.23	312
BAHRAIN	1996	4260	0	563	3672	26	0	7.41	287
BAHRAIN	1997	4723	0	744	3955	23	0	7.96	205
BAHRAIN	1998	5019	0	819	4169	31	0	8.21	296
BAHRAIN	1999	4914	0	573	4320	21	0	7.84	283
BAHRAIN	2000	5084	0	666	4406	12	0	7.97	303
BAHRAIN	2001	3798	0	524	3261	12	0	5.91	292
BAHRAIN	2002	4281	0	838	3434	9	0	6.67	353
BAHRAIN	2003	4491	0	932	3541	18	0	6.94	395
BAHRAIN	2004	4775	0	1038	3683	54	0	7.11	432
BAHRAIN	2005	5238	0	1283	3901	54	0	7.23	467
BAHRAIN	2006	5135	0	838	4243	54	0	6.33	545
BAHRAIN	2007	7321	0	1572	5695	54	0	7.09	569
BAHRAIN	2008	8118	0	1789	6269	60	0	7.27	635
BAHRAIN	2009	7695	0	1002	6598	95	0	6.43	581
BAHRAIN	2010	7981	0	1123	6696	163	0	6.33	545
BAHRAIN	2011	7813	0	1008	6628	177	0	5.98	507
BAHRAIN	2012	7274	0	432	6658	184	0	5.45	481
BAHRAIN	2013	8539	0	1211	7145	184	0	6.33	344
BAHRAIN	2014	8546	0	604	7738	204	0	6.28	338
BANGLADESH	1972	957	97	662	195	3	0	0.01	23
BANGLADESH	1973	1242	126	800	312	4	0	0.02	31
BANGLADESH	1974	1271	112	769	377	12	0	0.02	19
BANGLADESH	1975	1328	129	913	263	23	0	0.02	21
BANGLADESH	1976	1519	122	990	385	21	0	0.02	19
BANGLADESH	1977	1585	137	975	431	42	0	0.02	25
BANGLADESH	1978	1641	115	1023	457	46	0	0.02	33
BANGLADESH	1979	1813	98	1148	523	44	0	0.02	26
BANGLADESH	1980	2083	122	1311	605	46	0	0.03	51
BANGLADESH	1981	2163	127	1323	666	47	0	0.03	66
BANGLADESH	1982	2345	155	1283	864	44	0	0.03	39
BANGLADESH	1983	2246	83	1160	961	42	0	0.03	21
BANGLADESH	1984	2488	32	1200	1219	37	0	0.03	33
BANGLADESH	1985	2791	51	1320	1388	33	0	0.03	22
BANGLADESH	1986	3126	77	1444	1565	40	0	0.03	15
BANGLADESH	1987	3235	121	1454	1618	42	0	0.03	13
BANGLADESH	1988	3694	104	1638	1910	42	0	0.04	13
BANGLADESH	1989	3669	28	1574	2024	43	0	0.04	13
BANGLADESH	1990	4236	292	1830	2068	46	0	0.04	9
BANGLADESH	1991	4347	93	1745	2472	37	0	0.04	4
BANGLADESH	1992	4840	88	2093	2622	37	0	0.04	0
BANGLADESH	1993	4747	33	1841	2836	37	0	0.04	0
BANGLADESH	1994	5173	27	1977	3131	38	0	0.04	0
BANGLADESH	1995	6222	333	2296	3556	38	0	0.05	41
BANGLADESH	1996	6553	185	2596	3684	88	0	0.05	43
BANGLADESH	1997	6835	335	2743	3620	138	0	0.06	38
BANGLADESH	1998	6558	96	2383	3909	169	0	0.05	150
BANGLADESH	1999	6882	48	2288	4262	284	0	0.05	154
BANGLADESH	2000	7600	342	2164	4607	487	0	0.06	133
BANGLADESH	2001	8851	363	2648	5159	681	0	0.07	198
BANGLADESH	2002	9192	363	2722	5428	680	0	0.07	204
BANGLADESH	2003	9728	373	2837	5838	680	0	0.07	242
BANGLADESH	2004	10282	396	2904	6302	680	0	0.07	243
BANGLADESH	2005	10766	438	2887	6748	694	0	0.08	268
BANGLADESH	2006	11874	494	2974	7712	694	0	0.08	258
BANGLADESH	2007	12103	603	2734	8073	694	0	0.08	251
BANGLADESH	2008	13502	674	2673	8795	1360	0	0.09	298
BANGLADESH	2009	14654	823	2526	9673	1632	0	0.1	281
BANGLADESH	2010	16345	839	2881	10753	1873	0	0.11	313
BANGLADESH	2011	17293	774	3706	10815	1998	0	0.11	359
BANGLADESH	2012	18409	934	4015	11385	2074	0	0.12	343
BANGLADESH	2013	19010	1023	3866	11839	2282	0	0.12	352
BANGLADESH	2014	19959	957	4154	12536	2312	0	0.13	362
BARBADOS	1928	1	0	1	0	0	.	.	0
BARBADOS	1929	1	0	1	0	0	.	.	0
BARBADOS	1930	2	0	2	0	0	.	.	0
BARBADOS	1931	1	0	1	0	0	.	.	0
BARBADOS	1932	1	0	1	0	0	.	.	0
BARBADOS	1933	1	0	1	0	0	.	.	0
BARBADOS	1934	1	0	1	0	0	.	.	0
BARBADOS	1935	0	0	0	0	0	.	.	0
BARBADOS	1936	0	0	0	0	0	.	.	0
BARBADOS	1937	0	0	0	0	0	.	.	0
BARBADOS	1938	0	0	0	0	0	.	.	0
BARBADOS	1939	1	0	1	0	0	.	.	0
BARBADOS	1940	0	0	0	0	0	.	.	0
BARBADOS	1941	0	0	0	0	0	.	.	0
BARBADOS	1942	0	0	0	0	0	.	.	0
BARBADOS	1943	0	0	0	0	0	.	.	0
BARBADOS	1944	0	0	0	0	0	.	.	0
BARBADOS	1945	0	0	0	0	0	.	.	0
BARBADOS	1946	0	0	0	0	0	.	.	0
BARBADOS	1947	1	0	0	1	0	.	.	0
BARBADOS	1948	1	0	0	1	0	.	.	0
BARBADOS	1949	1	0	0	1	0	.	.	0
BARBADOS	1950	20	1	18	1	0	0	0.1	0
BARBADOS	1951	30	1	27	2	0	0	0.14	0
BARBADOS	1952	24	1	21	2	0	0	0.11	0
BARBADOS	1953	30	1	27	2	0	0	0.13	0
BARBADOS	1954	31	1	28	2	0	0	0.14	1
BARBADOS	1955	35	1	32	2	0	0	0.15	1
BARBADOS	1956	35	1	32	2	0	0	0.15	1
BARBADOS	1957	37	1	35	2	0	0	0.16	2
BARBADOS	1958	41	1	39	2	0	0	0.18	2
BARBADOS	1959	41	1	39	2	0	0	0.18	3
BARBADOS	1960	47	1	45	1	0	0	0.2	3
BARBADOS	1961	53	1	51	2	0	0	0.23	6
BARBADOS	1962	71	1	69	2	0	0	0.31	168
BARBADOS	1963	52	0	50	2	0	0	0.22	236
BARBADOS	1964	49	0	48	2	0	0	0.21	206
BARBADOS	1965	56	0	54	2	0	0	0.24	250
BARBADOS	1966	73	1	70	2	0	0	0.31	269
BARBADOS	1967	92	1	90	2	0	0	0.39	223
BARBADOS	1968	120	0	119	2	0	0	0.51	253
BARBADOS	1969	131	0	130	2	0	0	0.55	145
BARBADOS	1970	117	0	116	2	0	0	0.49	127
BARBADOS	1971	132	0	131	2	0	0	0.55	171
BARBADOS	1972	137	0	136	1	0	0	0.57	151
BARBADOS	1973	131	0	129	2	0	0	0.54	116
BARBADOS	1974	134	0	133	1	0	0	0.55	229
BARBADOS	1975	155	0	154	1	0	0	0.63	113
BARBADOS	1976	145	0	142	2	0	0	0.59	95
BARBADOS	1977	161	0	158	2	0	0	0.65	96
BARBADOS	1978	172	0	167	5	0	0	0.69	162
BARBADOS	1979	164	0	157	6	0	0	0.66	148
BARBADOS	1980	184	0	177	7	0	0	0.74	169
BARBADOS	1981	187	0	183	4	0	0	0.75	138
BARBADOS	1982	176	0	172	5	0	0	0.7	122
BARBADOS	1983	187	0	182	6	0	0	0.74	131
BARBADOS	1984	204	0	173	10	20	0	0.8	131
BARBADOS	1985	231	0	188	13	30	0	0.91	114
BARBADOS	1986	250	0	209	14	27	0	0.98	86
BARBADOS	1987	257	0	218	12	28	0	1	105
BARBADOS	1988	258	0	219	14	25	0	1	102
BARBADOS	1989	270	0	226	15	29	0	1.04	102
BARBADOS	1990	293	0	251	15	27	0	1.13	92
BARBADOS	1991	329	0	290	12	27	0	1.26	92
BARBADOS	1992	267	0	232	11	24	0	1.02	76
BARBADOS	1993	304	0	282	14	8	0	1.16	69
BARBADOS	1994	204	0	182	12	11	0	0.78	95
BARBADOS	1995	226	0	202	14	10	0	0.86	102
BARBADOS	1996	232	0	202	15	15	0	0.88	113
BARBADOS	1997	246	0	209	12	24	0	0.93	148
BARBADOS	1998	311	0	257	19	35	0	1.17	136
BARBADOS	1999	330	0	271	25	34	0	1.24	140
BARBADOS	2000	324	0	268	20	36	0	1.21	172
BARBADOS	2001	333	0	282	17	34	0	1.24	167
BARBADOS	2002	335	0	279	15	41	0	1.25	162
BARBADOS	2003	346	0	290	13	44	0	1.29	156
BARBADOS	2004	353	0	296	13	44	0	1.31	151
BARBADOS	2005	369	0	309	14	46	0	1.36	146
BARBADOS	2006	374	0	314	14	46	0	1.38	140
BARBADOS	2007	372	0	322	10	40	1	1.35	125
BARBADOS	2008	442	0	392	9	41	1	1.59	134
BARBADOS	2009	441	0	397	9	35	1	1.58	115
BARBADOS	2010	403	0	363	8	31	1	1.44	108
BARBADOS	2011	417	0	378	9	30	1	1.49	121
BARBADOS	2012	401	0	367	10	24	1	1.43	97
BARBADOS	2013	395	0	360	12	22	1	1.4	109
BARBADOS	2014	347	0	317	7	22	0	1.22	27
BELARUS	1992	23839	2149	12122	9256	313	0	2.31	0
BELARUS	1993	20935	1865	10008	8804	258	0	2.03	0
BELARUS	1994	17741	1617	8320	7603	202	0	1.72	0
BELARUS	1995	16573	1448	7781	7177	168	0	1.61	0
BELARUS	1996	16407	1379	7264	7564	200	0	1.6	0
BELARUS	1997	16241	1139	6242	8606	255	0	1.59	0
BELARUS	1998	15844	1108	6018	8441	277	0	1.56	0
BELARUS	1999	15302	886	5404	8725	286	0	1.51	0
BELARUS	2000	14668	958	4554	8906	251	0	1.46	0
BELARUS	2001	14388	807	4308	9027	245	0	1.44	0
BELARUS	2002	14291	720	4086	9191	295	0	1.43	0
BELARUS	2003	14598	709	3987	9566	336	0	1.47	0
BELARUS	2004	15860	628	4486	10375	371	0	1.61	0
BELARUS	2005	16135	620	4508	10582	426	0	1.64	0
BELARUS	2006	16927	627	5050	10775	475	0	1.73	0
BELARUS	2007	16505	602	4545	10838	520	0	1.72	0
BELARUS	2008	17209	555	5029	11051	574	0	1.8	0
BELARUS	2009	16695	565	6361	9177	592	0	1.76	0
BELARUS	2010	17192	620	4620	11336	616	0	1.81	0
BELARUS	2011	17470	632	5479	10733	626	0	1.84	0
BELARUS	2012	17241	803	5193	10579	667	0	1.82	0
BELARUS	2013	17390	858	5170	10675	688	0	1.83	86
BELARUS	2014	17316	888	5072	10592	764	0	1.82	94
BELGIUM	1802	1746	1746	0	0	0	.	.	0
BELGIUM	1830	1691	1691	0	0	0	.	.	0
BELGIUM	1831	1218	1218	0	0	0	.	.	0
BELGIUM	1832	1287	1287	0	0	0	.	.	0
BELGIUM	1833	1246	1246	0	0	0	.	.	0
BELGIUM	1834	1203	1203	0	0	0	.	.	0
BELGIUM	1835	1299	1299	0	0	0	.	.	0
BELGIUM	1836	1528	1528	0	0	0	.	.	0
BELGIUM	1837	1637	1637	0	0	0	.	.	0
BELGIUM	1838	1671	1671	0	0	0	.	.	0
BELGIUM	1839	1831	1831	0	0	0	.	.	0
BELGIUM	1840	2109	2109	0	0	0	.	.	0
BELGIUM	1841	2017	2017	0	0	0	.	.	0
BELGIUM	1842	2096	2096	0	0	0	.	.	0
BELGIUM	1843	1941	1941	0	0	0	.	.	0
BELGIUM	1844	2129	2129	0	0	0	.	.	0
BELGIUM	1845	2243	2243	0	0	0	.	.	0
BELGIUM	1846	2447	2447	0	0	0	.	.	0
BELGIUM	1847	2543	2543	0	0	0	.	.	0
BELGIUM	1848	2261	2261	0	0	0	.	.	0
BELGIUM	1849	2384	2384	0	0	0	.	.	0
BELGIUM	1850	2547	2547	0	0	0	.	.	0
BELGIUM	1851	2775	2775	0	0	0	.	.	0
BELGIUM	1852	3114	3114	0	0	0	.	.	0
BELGIUM	1853	3217	3217	0	0	0	.	.	0
BELGIUM	1854	3564	3564	0	0	0	.	.	0
BELGIUM	1855	3651	3651	0	0	0	.	.	0
BELGIUM	1856	3606	3606	0	0	0	.	.	0
BELGIUM	1857	3754	3754	0	0	0	.	.	0
BELGIUM	1858	3944	3944	0	0	0	.	.	0
BELGIUM	1859	4066	4066	0	0	0	.	.	0
BELGIUM	1860	4152	4152	0	0	0	.	.	0
BELGIUM	1861	4492	4492	0	0	0	.	.	0
BELGIUM	1862	4461	4461	0	0	0	.	.	0
BELGIUM	1863	4702	4702	0	0	0	.	.	0
BELGIUM	1864	4935	4935	0	0	0	.	.	0
BELGIUM	1865	5202	5202	0	0	0	.	.	0
BELGIUM	1866	5603	5603	0	0	0	.	.	0
BELGIUM	1867	6068	6068	0	0	0	.	.	0
BELGIUM	1868	5486	5486	0	0	0	.	.	0
BELGIUM	1869	5909	5909	0	0	0	.	.	0
BELGIUM	1870	6754	6754	0	0	0	.	.	0
BELGIUM	1871	6473	6473	0	0	0	.	.	0
BELGIUM	1872	6984	6984	0	0	0	.	.	0
BELGIUM	1873	7671	7671	0	0	0	.	.	0
BELGIUM	1874	7073	7073	0	0	0	.	.	0
BELGIUM	1875	7350	7350	0	0	0	.	.	0
BELGIUM	1876	7183	7183	0	0	0	.	.	0
BELGIUM	1877	6837	6837	0	0	0	.	.	0
BELGIUM	1878	7434	7434	0	0	0	.	.	0
BELGIUM	1879	7569	7569	0	0	0	.	.	0
BELGIUM	1880	8304	8304	0	0	0	.	.	0
BELGIUM	1881	8360	8360	0	0	0	.	.	0
BELGIUM	1882	8853	8853	0	0	0	.	.	0
BELGIUM	1883	9384	9384	0	0	0	.	.	0
BELGIUM	1884	9244	9244	0	0	0	.	.	0
BELGIUM	1885	9029	9029	0	0	0	.	.	0
BELGIUM	1886	8762	8762	0	0	0	.	.	0
BELGIUM	1887	9271	9271	0	0	0	.	.	0
BELGIUM	1888	9840	9840	0	0	0	.	.	0
BELGIUM	1889	10053	10053	0	0	0	.	.	0
BELGIUM	1890	10869	10869	0	0	0	.	.	0
BELGIUM	1891	10311	10311	0	0	0	.	.	0
BELGIUM	1892	10297	10297	0	0	0	.	.	0
BELGIUM	1893	9846	9846	0	0	0	.	.	0
BELGIUM	1894	10871	10871	0	0	0	.	.	0
BELGIUM	1895	10953	10953	0	0	0	.	.	0
BELGIUM	1896	11539	11539	0	0	0	.	.	0
BELGIUM	1897	11939	11939	0	0	0	.	.	0
BELGIUM	1898	12305	12305	0	0	0	.	.	0
BELGIUM	1899	12862	12862	0	0	0	.	.	0
BELGIUM	1900	13555	13555	0	0	0	.	.	0
BELGIUM	1901	12748	12748	0	0	0	.	.	0
BELGIUM	1902	13334	13334	0	0	0	.	.	0
BELGIUM	1903	14364	14364	0	0	0	.	.	0
BELGIUM	1904	13742	13742	0	0	0	.	.	0
BELGIUM	1905	13719	13719	0	0	0	.	.	0
BELGIUM	1906	15692	15692	0	0	0	.	.	0
BELGIUM	1907	15918	15918	0	0	0	.	.	0
BELGIUM	1908	15788	15788	0	0	0	.	.	0
BELGIUM	1909	15765	15765	0	0	0	.	.	0
BELGIUM	1910	16727	16727	0	0	0	.	.	0
BELGIUM	1911	16836	16836	0	0	0	.	.	0
BELGIUM	1912	17679	17679	0	0	0	.	.	0
BELGIUM	1913	18563	18237	326	0	0	.	.	0
BELGIUM	1914	11074	11074	0	0	0	.	.	0
BELGIUM	1915	9394	9394	0	0	0	.	.	0
BELGIUM	1916	12498	12498	0	0	0	.	.	0
BELGIUM	1917	9893	9893	0	0	0	.	.	0
BELGIUM	1918	9204	9204	0	0	0	.	.	0
BELGIUM	1919	12246	12246	0	0	0	.	.	0
BELGIUM	1920	15053	15053	0	0	0	.	.	0
BELGIUM	1921	13792	13792	0	0	0	.	.	0
BELGIUM	1922	15259	15085	174	0	0	.	.	0
BELGIUM	1923	19619	19361	258	0	0	.	.	0
BELGIUM	1924	20812	20512	300	0	0	.	.	0
BELGIUM	1925	21299	20980	319	0	0	.	.	0
BELGIUM	1926	21202	20885	316	0	0	.	.	0
BELGIUM	1927	24693	24386	306	0	0	.	.	0
BELGIUM	1928	24088	23144	529	0	414	.	.	0
BELGIUM	1929	26465	25432	591	0	442	.	.	0
BELGIUM	1930	25569	24541	614	0	415	.	.	0
BELGIUM	1931	22962	21991	635	0	335	.	.	0
BELGIUM	1932	18483	17510	687	0	286	.	.	0
BELGIUM	1933	19832	18870	697	0	265	.	.	0
BELGIUM	1934	20460	19333	869	0	258	.	.	0
BELGIUM	1935	19555	18520	736	0	299	.	.	0
BELGIUM	1936	20473	19157	996	0	320	.	.	0
BELGIUM	1937	24648	23246	993	0	409	.	.	0
BELGIUM	1938	21597	20240	941	0	415	.	.	0
BELGIUM	1939	20120	19773	0	0	347	.	.	0
BELGIUM	1940	16950	16921	0	0	29	.	.	0
BELGIUM	1941	17791	17705	0	0	86	.	.	0
BELGIUM	1942	16670	16600	0	0	69	.	.	0
BELGIUM	1943	15790	15727	0	0	63	.	.	0
BELGIUM	1944	9045	8964	0	0	82	.	.	0
BELGIUM	1945	10578	10490	0	0	88	.	.	0
BELGIUM	1946	15398	15141	0	0	257	.	.	0
BELGIUM	1947	22391	20283	1753	0	355	.	.	0
BELGIUM	1948	23218	20903	1862	0	453	.	.	0
BELGIUM	1949	22048	19936	1715	0	398	.	.	0
BELGIUM	1950	20801	18612	1703	2	484	0	2.41	265
BELGIUM	1951	24418	21749	2063	8	598	0	2.82	435
BELGIUM	1952	22784	19929	2280	16	559	0	2.62	412
BELGIUM	1953	22487	19220	2619	19	629	0	2.57	364
BELGIUM	1954	23404	19904	2890	15	595	0	2.66	384
BELGIUM	1955	25119	20963	3498	21	638	0	2.83	493
BELGIUM	1956	26419	21873	3887	25	634	0	2.96	625
BELGIUM	1957	26339	21227	4442	29	640	0	2.93	494
BELGIUM	1958	23936	18219	5136	29	552	0	2.65	460
BELGIUM	1959	24107	18127	5351	25	604	0	2.65	585
BELGIUM	1960	24816	18533	5668	17	597	0	2.71	657
BELGIUM	1961	25305	18283	6356	19	647	0	2.75	901
BELGIUM	1962	26757	18707	7379	21	651	0	2.89	1139
BELGIUM	1963	28847	19455	8734	19	640	0	3.09	1313
BELGIUM	1964	28269	17746	9708	20	795	0	3.01	1559
BELGIUM	1965	28754	16877	11048	26	803	0	3.05	1758
BELGIUM	1966	28690	15882	11966	55	788	0	3.03	1816
BELGIUM	1967	29308	15522	12742	253	791	0	3.08	1773
BELGIUM	1968	32331	15957	14940	653	781	0	3.38	1916
BELGIUM	1969	33711	15253	16254	1352	853	0	3.52	2515
BELGIUM	1970	34257	13373	17830	2139	915	0	3.56	2628
BELGIUM	1971	33141	11028	18218	2952	943	0	3.43	2585
BELGIUM	1972	35679	11498	19505	3711	964	0	3.68	2862
BELGIUM	1973	37871	12347	20096	4471	958	0	3.89	3117
BELGIUM	1974	36875	13225	17406	5227	1016	0	3.78	2662
BELGIUM	1975	33297	10502	16768	5091	936	0	3.4	2704
BELGIUM	1976	35454	11262	17736	5435	1021	0	3.61	2615
BELGIUM	1977	34516	10598	17494	5369	1056	0	3.51	2670
BELGIUM	1978	37048	11913	18782	5323	1030	0	3.77	2704
BELGIUM	1979	38242	12856	18521	5817	1048	0	3.88	2457
BELGIUM	1980	36897	12870	17444	5565	1017	0	3.75	2444
BELGIUM	1981	33821	12612	15166	5133	910	0	3.43	2811
BELGIUM	1982	32057	12454	14505	4237	860	0	3.26	2547
BELGIUM	1983	27715	9998	12492	4447	778	0	2.82	2491
BELGIUM	1984	28749	11465	11919	4589	776	0	2.92	2503
BELGIUM	1985	28490	11111	12049	4577	753	0	2.9	2497
BELGIUM	1986	28054	9842	13750	3680	783	0	2.85	3004
BELGIUM	1987	28120	9949	13276	4120	774	0	2.85	3403
BELGIUM	1988	27367	9041	13383	4067	877	0	2.77	3815
BELGIUM	1989	29305	10935	12936	4519	914	0	2.95	4039
BELGIUM	1990	28920	10431	12445	5102	942	0	2.91	4382
BELGIUM	1991	30259	9867	13959	5455	977	0	3.03	4442
BELGIUM	1992	30534	9171	14613	5652	1098	0	3.05	4421
BELGIUM	1993	29357	8301	14146	5875	1035	0	2.93	4440
BELGIUM	1994	30634	8924	14525	6041	1144	0	3.05	4277
BELGIUM	1995	30632	8558	14329	6627	1118	0	3.04	4155
BELGIUM	1996	32195	8262	15484	7380	1069	0	3.19	4774
BELGIUM	1997	31454	7960	15363	7036	1095	0	3.11	5531
BELGIUM	1998	32281	8071	15467	7791	952	0	3.19	6041
BELGIUM	1999	31159	7046	14795	8329	990	0	3.07	5322
BELGIUM	2000	31393	7932	14139	8350	972	0	3.09	5964
BELGIUM	2001	31232	7268	14759	8232	973	0	3.06	5558
BELGIUM	2002	29264	6347	13613	8356	949	0	2.85	7081
BELGIUM	2003	30792	5974	14932	8995	891	0	2.99	7846
BELGIUM	2004	30298	5734	14551	9100	913	0	2.93	7999
BELGIUM	2005	29591	5088	14272	9199	1033	0	2.84	7866
BELGIUM	2006	29199	4901	13814	9370	1114	0	2.79	8337
BELGIUM	2007	28237	4376	13234	9324	1302	0	2.64	9332
BELGIUM	2008	28482	4440	13862	9268	913	0	2.64	9679
BELGIUM	2009	27233	3086	13894	9438	815	0	2.51	7305
BELGIUM	2010	30222	3787	14993	10613	829	0	2.77	7916
BELGIUM	2011	27255	3522	13799	8988	946	0	2.48	7243
BELGIUM	2012	25936	3205	12904	8973	854	0	2.34	6507
BELGIUM	2013	26444	3291	13330	8991	832	0	2.37	6542
BELGIUM	2014	25457	3215	13543	7869	830	0	2.27	5889
BELIZE	1950	5	0	5	0	0	0	0.07	0
BELIZE	1951	7	0	7	0	0	0	0.09	0
BELIZE	1952	7	0	7	0	0	0	0.09	0
BELIZE	1953	8	0	8	0	0	0	0.1	0
BELIZE	1954	8	0	8	0	0	0	0.1	2
BELIZE	1955	8	0	8	0	0	0	0.1	0
BELIZE	1956	8	0	8	0	0	0	0.1	2
BELIZE	1957	8	0	8	0	0	0	0.09	1
BELIZE	1958	11	0	11	0	0	0	0.12	1
BELIZE	1959	11	0	11	0	0	0	0.12	1
BELIZE	1960	12	0	12	0	0	0	0.13	1
BELIZE	1961	10	0	10	0	0	0	0.11	0
BELIZE	1962	19	0	19	0	0	0	0.2	1
BELIZE	1963	17	0	17	0	0	0	0.17	1
BELIZE	1964	23	0	23	0	0	0	0.22	1
BELIZE	1965	23	0	23	0	0	0	0.21	1
BELIZE	1966	22	0	22	0	0	0	0.2	1
BELIZE	1967	33	0	33	0	0	0	0.29	1
BELIZE	1968	28	0	28	0	0	0	0.24	1
BELIZE	1969	37	0	37	0	0	0	0.31	4
BELIZE	1970	33	0	33	0	0	0	0.27	2
BELIZE	1971	39	0	39	0	0	0	0.31	3
BELIZE	1972	43	0	43	0	0	0	0.34	5
BELIZE	1973	40	0	40	0	0	0	0.31	7
BELIZE	1974	42	0	42	0	0	0	0.32	7
BELIZE	1975	48	0	48	0	0	0	0.36	6
BELIZE	1976	48	0	48	0	0	0	0.35	6
BELIZE	1977	54	0	54	0	0	0	0.39	8
BELIZE	1978	59	0	59	0	0	0	0.43	10
BELIZE	1979	57	0	57	0	0	0	0.4	9
BELIZE	1980	52	0	52	0	0	0	0.36	9
BELIZE	1981	50	0	50	0	0	0	0.34	8
BELIZE	1982	47	0	47	0	0	0	0.31	8
BELIZE	1983	47	0	47	0	0	0	0.3	9
BELIZE	1984	47	0	47	0	0	0	0.29	9
BELIZE	1985	52	0	52	0	0	0	0.31	2
BELIZE	1986	56	0	56	0	0	0	0.33	2
BELIZE	1987	62	0	62	0	0	0	0.35	4
BELIZE	1988	68	0	68	0	0	0	0.38	12
BELIZE	1989	82	0	82	0	0	0	0.44	14
BELIZE	1990	85	0	85	0	0	0	0.45	10
BELIZE	1991	98	0	98	0	0	0	0.5	13
BELIZE	1992	97	0	97	0	0	0	0.48	13
BELIZE	1993	103	0	103	0	0	0	0.5	9
BELIZE	1994	102	0	102	0	0	0	0.48	11
BELIZE	1995	103	0	103	0	0	0	0.47	8
BELIZE	1996	84	0	84	0	0	0	0.37	9
BELIZE	1997	106	0	106	0	0	0	0.46	12
BELIZE	1998	101	0	101	0	0	0	0.42	19
BELIZE	1999	95	0	95	0	0	0	0.39	18
BELIZE	2000	108	0	108	0	0	0	0.43	24
BELIZE	2001	122	0	122	0	0	0	0.48	14
BELIZE	2002	118	0	118	0	0	0	0.45	15
BELIZE	2003	118	0	118	0	0	0	0.44	17
BELIZE	2004	107	0	107	0	0	0	0.39	18
BELIZE	2005	115	0	115	0	0	0	0.41	19
BELIZE	2006	121	0	121	0	0	0	0.42	19
BELIZE	2007	130	0	130	0	0	0	0.45	14
BELIZE	2008	119	0	119	0	0	0	0.41	13
BELIZE	2009	160	0	160	0	0	0	0.51	13
BELIZE	2010	147	0	143	3	0	0	0.46	11
BELIZE	2011	164	0	161	3	0	0	0.5	9
BELIZE	2012	130	0	128	2	0	0	0.39	9
BELIZE	2013	140	0	138	2	0	0	0.41	12
BELIZE	2014	135	0	134	1	0	0	0.38	10
BENIN	1958	34	0	34	0	0	0	0.01	0
BENIN	1959	28	0	28	0	0	0	0.01	0
BENIN	1960	44	0	44	0	0	0	0.02	0
BENIN	1961	35	0	35	0	0	0	0.01	0
BENIN	1962	37	0	37	0	0	0	0.01	0
BENIN	1963	33	0	33	0	0	0	0.01	0
BENIN	1964	39	0	39	0	0	0	0.02	0
BENIN	1965	41	0	41	0	0	0	0.02	0
BENIN	1966	31	0	31	0	0	0	0.01	0
BENIN	1967	39	0	39	0	0	0	0.01	0
BENIN	1968	42	0	42	0	0	0	0.02	0
BENIN	1969	55	0	55	0	0	0	0.02	0
BENIN	1970	77	0	77	0	0	0	0.03	6
BENIN	1971	80	0	80	0	0	0	0.03	4
BENIN	1972	106	0	106	0	0	0	0.04	5
BENIN	1973	104	0	104	0	0	0	0.03	3
BENIN	1974	111	0	111	0	0	0	0.04	3
BENIN	1975	121	0	121	0	0	0	0.04	3
BENIN	1976	71	0	71	0	0	0	0.02	4
BENIN	1977	81	0	81	0	0	0	0.02	8
BENIN	1978	99	0	99	0	0	0	0.03	9
BENIN	1979	100	0	100	0	0	0	0.03	9
BENIN	1980	141	0	102	0	39	0	0.04	9
BENIN	1981	117	0	77	0	40	0	0.03	15
BENIN	1982	134	0	91	0	43	0	0.04	14
BENIN	1983	124	0	83	0	41	0	0.03	16
BENIN	1984	137	0	96	0	41	0	0.03	15
BENIN	1985	203	0	162	0	41	0	0.05	15
BENIN	1986	187	0	146	0	41	0	0.04	15
BENIN	1987	147	0	106	0	41	0	0.03	13
BENIN	1988	151	0	124	0	27	0	0.03	15
BENIN	1989	172	0	138	0	34	0	0.04	15
BENIN	1990	193	0	152	0	41	0	0.04	15
BENIN	1991	224	0	180	0	44	0	0.05	16
BENIN	1992	245	0	195	0	50	0	0.05	16
BENIN	1993	309	0	240	0	69	0	0.06	16
BENIN	1994	345	0	282	0	63	0	0.06	17
BENIN	1995	362	0	283	0	79	0	0.06	17
BENIN	1996	345	0	296	0	49	0	0.06	19
BENIN	1997	332	0	305	0	27	0	0.06	15
BENIN	1998	331	0	304	0	27	0	0.05	26
BENIN	1999	426	0	399	0	27	0	0.07	26
BENIN	2000	436	0	402	0	34	0	0.07	18
BENIN	2001	495	0	461	0	34	0	0.07	17
BENIN	2002	567	0	533	0	34	0	0.08	20
BENIN	2003	642	0	608	0	34	0	0.09	30
BENIN	2004	684	0	650	0	34	0	0.09	21
BENIN	2005	653	0	619	0	34	0	0.09	9
BENIN	2006	1056	0	853	0	203	0	0.13	18
BENIN	2007	1226	0	1015	0	211	0	0.14	21
BENIN	2008	1203	0	1020	0	183	0	0.13	35
BENIN	2009	1271	0	1092	0	179	0	0.14	74
BENIN	2010	1388	0	1211	0	177	0	0.15	127
BENIN	2011	1444	0	1245	0	199	0	0.15	131
BENIN	2012	1492	0	1303	0	189	0	0.15	137
BENIN	2013	1585	0	1392	0	193	0	0.15	146
BENIN	2014	1723	51	1483	0	190	0	0.16	156
BERMUDA	1950	12	1	11	0	0	0	0.31	21
BERMUDA	1951	16	1	15	0	0	0	0.42	30
BERMUDA	1952	29	2	27	0	0	0	0.75	38
BERMUDA	1953	25	1	23	0	0	0	0.64	39
BERMUDA	1954	23	1	23	0	0	0	0.59	47
BERMUDA	1955	30	1	29	0	0	0	0.74	73
BERMUDA	1956	37	1	36	0	0	0	0.9	92
BERMUDA	1957	38	1	37	0	0	0	0.89	106
BERMUDA	1958	40	1	39	0	0	0	0.93	105
BERMUDA	1959	37	0	37	0	0	0	0.84	110
BERMUDA	1960	43	0	43	0	0	0	0.95	127
BERMUDA	1961	48	0	48	0	0	0	1.05	142
BERMUDA	1962	43	0	43	0	0	0	0.92	146
BERMUDA	1963	41	0	41	0	0	0	0.87	121
BERMUDA	1964	55	0	55	0	0	0	1.15	113
BERMUDA	1965	49	0	49	0	0	0	0.99	96
BERMUDA	1966	55	0	55	0	0	0	1.12	98
BERMUDA	1967	58	0	58	0	0	0	1.15	99
BERMUDA	1968	61	0	61	0	0	0	1.21	112
BERMUDA	1969	54	0	54	0	0	0	1.05	122
BERMUDA	1970	62	0	62	0	0	0	1.2	117
BERMUDA	1971	63	0	63	0	0	0	1.2	200
BERMUDA	1972	69	0	69	0	0	0	1.32	112
BERMUDA	1973	116	0	116	0	0	0	2.18	55
BERMUDA	1974	121	0	121	0	0	0	2.26	30
BERMUDA	1975	125	1	124	0	0	0	2.31	36
BERMUDA	1976	128	0	128	0	0	0	2.34	35
BERMUDA	1977	124	0	124	0	0	0	2.25	39
BERMUDA	1978	116	0	116	0	0	0	2.1	47
BERMUDA	1979	126	0	126	0	0	0	2.27	47
BERMUDA	1980	119	0	119	0	0	0	2.12	38
BERMUDA	1981	106	0	106	0	0	0	1.89	32
BERMUDA	1982	108	0	108	0	0	0	1.9	28
BERMUDA	1983	123	0	123	0	0	0	2.16	30
BERMUDA	1984	121	0	121	0	0	0	2.11	26
BERMUDA	1985	123	0	123	0	0	0	2.13	22
BERMUDA	1986	115	0	115	0	0	0	1.97	21
BERMUDA	1987	156	0	156	0	0	0	2.66	33
BERMUDA	1988	176	0	176	0	0	0	2.98	32
BERMUDA	1989	213	0	213	0	0	0	3.59	26
BERMUDA	1990	137	0	137	0	0	0	2.3	15
BERMUDA	1991	147	0	147	0	0	0	2.44	15
BERMUDA	1992	126	0	126	0	0	0	2.09	13
BERMUDA	1993	147	0	147	0	0	0	2.41	13
BERMUDA	1994	145	0	145	0	0	0	2.37	13
BERMUDA	1995	145	0	145	0	0	0	2.36	14
BERMUDA	1996	144	0	144	0	0	0	2.33	14
BERMUDA	1997	143	0	143	0	0	0	2.31	14
BERMUDA	1998	142	0	142	0	0	0	2.29	14
BERMUDA	1999	140	0	140	0	0	0	2.24	16
BERMUDA	2000	141	0	141	0	0	0	2.25	16
BERMUDA	2001	144	0	144	0	0	0	2.28	16
BERMUDA	2002	152	0	152	0	0	0	2.39	18
BERMUDA	2003	153	0	153	0	0	0	2.41	16
BERMUDA	2004	159	0	159	0	0	0	2.49	17
BERMUDA	2005	159	0	159	0	0	0	2.48	27
BERMUDA	2006	178	0	178	0	0	0	2.77	32
BERMUDA	2007	199	0	199	0	0	0	3.09	46
BERMUDA	2008	177	0	177	0	0	0	2.73	58
BERMUDA	2009	130	0	130	0	0	0	2.02	53
BERMUDA	2010	166	0	166	0	0	0	2.59	50
BERMUDA	2011	121	0	121	0	0	0	1.9	18
BERMUDA	2012	130	0	130	0	0	0	2.05	18
BERMUDA	2013	125	0	125	0	0	0	1.99	18
BERMUDA	2014	157	0	157	0	0	0	2.51	24
BHUTAN	1970	1	0	1	0	0	0	0	0
BHUTAN	1971	1	0	1	0	0	0	0	0
BHUTAN	1972	1	0	1	0	0	0	0	0
BHUTAN	1973	1	0	1	0	0	0	0	0
BHUTAN	1974	1	0	1	0	0	0	0	0
BHUTAN	1975	1	0	1	0	0	0	0	0
BHUTAN	1976	1	0	1	0	0	0	0	0
BHUTAN	1977	2	0	2	0	0	0	0	0
BHUTAN	1978	3	0	3	0	0	0	0.01	0
BHUTAN	1979	6	1	5	0	0	0	0.01	0
BHUTAN	1980	6	1	5	0	0	0	0.01	0
BHUTAN	1981	7	1	7	0	0	0	0.02	0
BHUTAN	1982	9	1	8	0	0	0	0.02	0
BHUTAN	1983	8	1	8	0	0	0	0.02	0
BHUTAN	1984	14	0	14	0	0	0	0.03	0
BHUTAN	1985	17	0	17	0	0	0	0.03	0
BHUTAN	1986	15	0	15	0	0	0	0.03	0
BHUTAN	1987	28	12	16	0	0	0	0.05	0
BHUTAN	1988	30	13	17	0	0	0	0.06	0
BHUTAN	1989	17	0	17	0	0	0	0.03	0
BHUTAN	1990	35	13	22	0	0	0	0.06	0
BHUTAN	1991	51	13	22	0	16	0	0.09	0
BHUTAN	1992	59	22	21	0	16	0	0.11	1
BHUTAN	1993	50	12	23	0	15	0	0.09	1
BHUTAN	1994	58	17	24	0	16	0	0.11	1
BHUTAN	1995	68	21	28	0	19	0	0.13	1
BHUTAN	1996	82	25	34	0	22	0	0.16	1
BHUTAN	1997	107	51	33	0	22	0	0.2	1
BHUTAN	1998	104	49	35	0	20	0	0.19	1
BHUTAN	1999	105	48	37	0	20	0	0.19	1
BHUTAN	2000	108	48	40	0	20	0	0.19	1
BHUTAN	2001	105	40	44	0	22	0	0.18	1
BHUTAN	2002	114	46	46	0	22	0	0.19	1
BHUTAN	2003	103	30	51	0	22	0	0.16	1
BHUTAN	2004	84	7	54	0	23	0	0.13	1
BHUTAN	2005	108	27	58	0	23	0	0.16	1
BHUTAN	2006	107	23	60	0	24	0	0.16	1
BHUTAN	2007	107	22	61	0	24	0	0.16	1
BHUTAN	2008	115	31	59	0	24	0	0.17	1
BHUTAN	2009	106	16	66	0	24	0	0.15	1
BHUTAN	2010	133	21	85	0	27	0	0.19	1
BHUTAN	2011	200	26	100	0	74	0	0.27	1
BHUTAN	2012	223	38	114	0	71	0	0.3	2
BHUTAN	2013	251	53	120	0	78	0	0.33	3
BHUTAN	2014	273	69	111	0	94	0	0.36	3
BONAIRE, SAINT EUSTATIUS, AND SABA	2012	85	0	85	0	0	0	3.72	185
BONAIRE, SAINT EUSTATIUS, AND SABA	2013	88	0	88	0	0	0	3.71	190
BONAIRE, SAINT EUSTATIUS, AND SABA	2014	88	0	88	0	0	0	3.62	190
BOSNIA & HERZEGOVINA	1992	4105	3435	435	215	20	0	1.04	14
BOSNIA & HERZEGOVINA	1993	3437	2977	367	73	20	0	0.93	26
BOSNIA & HERZEGOVINA	1994	881	321	440	88	33	0	0.25	31
BOSNIA & HERZEGOVINA	1995	935	376	452	77	31	0	0.28	32
BOSNIA & HERZEGOVINA	1996	1161	545	466	129	20	0	0.35	32
BOSNIA & HERZEGOVINA	1997	2289	1704	481	77	27	0	0.68	33
BOSNIA & HERZEGOVINA	1998	2889	2172	588	88	41	0	0.83	34
BOSNIA & HERZEGOVINA	1999	2830	2117	582	90	41	0	0.79	34
BOSNIA & HERZEGOVINA	2000	3760	2650	901	125	85	0	1.02	9
BOSNIA & HERZEGOVINA	2001	3644	2581	886	82	96	0	0.97	7
BOSNIA & HERZEGOVINA	2002	3900	2853	846	77	124	0	1.03	7
BOSNIA & HERZEGOVINA	2003	3951	2951	778	101	121	0	1.04	6
BOSNIA & HERZEGOVINA	2004	4257	3027	929	159	142	0	1.13	4
BOSNIA & HERZEGOVINA	2005	4419	3234	856	189	140	0	1.17	4
BOSNIA & HERZEGOVINA	2006	4790	3520	905	199	167	0	1.27	4
BOSNIA & HERZEGOVINA	2007	4814	3463	967	210	174	0	1.24	4
BOSNIA & HERZEGOVINA	2008	5496	3978	1119	208	191	0	1.42	4
BOSNIA & HERZEGOVINA	2009	5646	4181	1200	119	146	0	1.47	4
BOSNIA & HERZEGOVINA	2010	5802	4332	1217	125	129	0	1.51	4
BOSNIA & HERZEGOVINA	2011	6514	5045	1206	142	121	0	1.7	4
BOSNIA & HERZEGOVINA	2012	6070	4704	1121	131	115	0	1.59	4
BOSNIA & HERZEGOVINA	2013	5978	4663	1093	102	120	0	1.56	3
BOSNIA & HERZEGOVINA	2014	6063	4738	1117	95	114	0	1.59	3
BOTSWANA	1972	6	6	0	0	0	0	0.01	0
BOTSWANA	1973	14	14	0	0	0	0	0.02	0
BOTSWANA	1974	24	24	0	0	0	0	0.03	0
BOTSWANA	1975	51	51	0	0	0	0	0.06	0
BOTSWANA	1976	162	162	0	0	0	0	0.19	0
BOTSWANA	1977	213	213	0	0	0	0	0.24	0
BOTSWANA	1978	227	227	0	0	0	0	0.25	0
BOTSWANA	1979	257	257	0	0	0	0	0.27	0
BOTSWANA	1980	269	269	0	0	0	0	0.27	0
BOTSWANA	1981	275	275	0	0	0	0	0.27	0
BOTSWANA	1982	300	300	0	0	0	0	0.28	0
BOTSWANA	1983	281	281	0	0	0	0	0.25	0
BOTSWANA	1984	285	285	0	0	0	0	0.25	0
BOTSWANA	1985	316	316	0	0	0	0	0.27	0
BOTSWANA	1986	291	291	0	0	0	0	0.24	0
BOTSWANA	1987	338	338	0	0	0	0	0.27	0
BOTSWANA	1988	355	355	0	0	0	0	0.27	0
BOTSWANA	1989	390	390	0	0	0	0	0.29	0
BOTSWANA	1990	737	477	260	0	0	0	0.53	9
BOTSWANA	1991	719	469	250	0	0	0	0.51	8
BOTSWANA	1992	758	531	228	0	0	0	0.52	7
BOTSWANA	1993	872	525	347	0	0	0	0.58	3
BOTSWANA	1994	827	533	294	0	0	0	0.53	4
BOTSWANA	1995	831	539	292	0	0	0	0.52	5
BOTSWANA	1996	752	433	319	0	0	0	0.46	5
BOTSWANA	1997	764	464	300	0	0	0	0.46	4
BOTSWANA	1998	912	552	360	0	0	0	0.54	3
BOTSWANA	1999	862	435	427	0	0	0	0.5	5
BOTSWANA	2000	1031	560	471	0	0	0	0.59	6
BOTSWANA	2001	1050	547	503	0	0	0	0.59	9
BOTSWANA	2002	1085	570	515	0	0	0	0.6	6
BOTSWANA	2003	1044	492	552	0	0	0	0.57	6
BOTSWANA	2004	1063	541	522	0	0	0	0.57	7
BOTSWANA	2005	1117	584	533	0	0	0	0.6	9
BOTSWANA	2006	1128	571	558	0	0	0	0.59	9
BOTSWANA	2007	1154	528	626	0	0	0	0.6	7
BOTSWANA	2008	1229	533	696	0	0	0	0.64	14
BOTSWANA	2009	1026	430	595	0	0	0	0.51	13
BOTSWANA	2010	1278	576	667	0	35	0	0.62	14
BOTSWANA	2011	1139	390	707	0	41	0	0.54	15
BOTSWANA	2012	1154	355	749	0	50	0	0.54	10
BOTSWANA	2013	1426	589	787	0	50	0	0.66	11
BOTSWANA	2014	1918	1049	819	0	50	0	0.86	9
BRAZIL	1901	574	574	0	0	0	.	.	0
BRAZIL	1902	684	684	0	0	0	.	.	0
BRAZIL	1903	666	666	0	0	0	.	.	0
BRAZIL	1904	715	715	0	0	0	.	.	0
BRAZIL	1905	764	764	0	0	0	.	.	0
BRAZIL	1906	875	875	0	0	0	.	.	0
BRAZIL	1907	942	942	0	0	0	.	.	0
BRAZIL	1908	981	981	0	0	0	.	.	0
BRAZIL	1909	985	985	0	0	0	.	.	0
BRAZIL	1910	1146	1146	0	0	0	.	.	0
BRAZIL	1911	1257	1257	0	0	0	.	.	0
BRAZIL	1912	1526	1526	0	0	0	.	.	0
BRAZIL	1913	1647	1647	0	0	0	.	.	0
BRAZIL	1914	1121	1121	0	0	0	.	.	0
BRAZIL	1915	858	858	0	0	0	.	.	0
BRAZIL	1916	786	786	0	0	0	.	.	0
BRAZIL	1917	682	682	0	0	0	.	.	0
BRAZIL	1918	634	634	0	0	0	.	.	0
BRAZIL	1919	838	838	0	0	0	.	.	0
BRAZIL	1920	995	995	0	0	0	.	.	0
BRAZIL	1921	789	789	0	0	0	.	.	0
BRAZIL	1922	1032	1032	0	0	0	.	.	0
BRAZIL	1923	1260	1260	0	0	0	.	.	0
BRAZIL	1924	1393	1393	0	0	0	.	.	0
BRAZIL	1925	1467	1467	0	0	0	.	.	0
BRAZIL	1926	1495	1495	0	0	0	.	.	0
BRAZIL	1927	1658	1658	0	0	0	.	.	0
BRAZIL	1928	1618	1606	0	0	12	.	.	0
BRAZIL	1929	1732	1719	0	0	13	.	.	0
BRAZIL	1930	1505	1494	0	0	12	.	.	0
BRAZIL	1931	1138	1115	0	0	23	.	.	0
BRAZIL	1932	1138	1118	0	0	20	.	.	0
BRAZIL	1933	1289	1259	0	0	30	.	.	0
BRAZIL	1934	1262	1218	0	0	44	.	.	0
BRAZIL	1935	1504	1453	2	0	50	.	.	0
BRAZIL	1936	1405	1329	11	0	66	.	.	0
BRAZIL	1937	1662	1552	32	0	78	.	.	0
BRAZIL	1938	1664	1539	40	0	84	.	.	0
BRAZIL	1939	1624	1493	35	0	95	.	.	0
BRAZIL	1940	1771	1629	41	0	101	.	.	0
BRAZIL	1941	1715	1572	39	0	104	.	.	0
BRAZIL	1942	1602	1487	13	1	102	.	.	0
BRAZIL	1943	1768	1628	36	3	102	.	.	0
BRAZIL	1944	1610	1476	22	2	110	.	.	0
BRAZIL	1945	1863	1740	17	1	105	.	.	0
BRAZIL	1946	2037	1882	39	5	112	.	.	0
BRAZIL	1947	2443	2300	18	1	124	.	.	0
BRAZIL	1948	2143	1974	16	2	151	.	.	0
BRAZIL	1949	2012	1824	12	3	174	.	.	0
BRAZIL	1950	5367	1742	3433	1	189	2	0.1	290
BRAZIL	1951	5913	1713	3997	1	198	4	0.11	290
BRAZIL	1952	6807	1640	4943	1	220	4	0.12	121
BRAZIL	1953	6885	1534	5060	2	276	14	0.12	347
BRAZIL	1954	8102	1570	6155	4	340	34	0.13	275
BRAZIL	1955	9289	1600	7276	4	377	33	0.15	43
BRAZIL	1956	9995	1384	8116	5	445	45	0.15	47
BRAZIL	1957	9822	1372	7930	9	462	49	0.15	51
BRAZIL	1958	10663	1078	8967	18	515	85	0.16	60
BRAZIL	1959	10653	1121	8863	25	522	122	0.15	60
BRAZIL	1960	12792	1355	10649	31	608	149	0.18	64
BRAZIL	1961	13418	1277	11318	31	641	150	0.18	64
BRAZIL	1962	14643	1547	12235	30	690	142	0.19	64
BRAZIL	1963	15167	1479	12803	45	705	135	0.19	64
BRAZIL	1964	15472	1684	12828	44	765	152	0.19	180
BRAZIL	1965	15380	1895	12490	53	764	177	0.18	182
BRAZIL	1966	17536	2283	14153	67	822	211	0.2	215
BRAZIL	1967	18051	2217	14663	70	871	230	0.2	205
BRAZIL	1968	21113	2329	17462	63	990	270	0.23	218
BRAZIL	1969	22993	2570	18947	64	1064	348	0.25	248
BRAZIL	1970	25569	2430	21357	42	1224	515	0.27	710
BRAZIL	1971	27989	2452	23759	68	1333	377	0.28	744
BRAZIL	1972	31187	2558	26672	75	1548	334	0.31	1029
BRAZIL	1973	36123	2459	31486	103	1822	253	0.35	1077
BRAZIL	1974	39121	2604	34071	189	2028	229	0.37	1159
BRAZIL	1975	41223	3019	35400	213	2371	220	0.38	1272
BRAZIL	1976	42311	3144	36083	250	2604	230	0.38	1150
BRAZIL	1977	44440	4109	36925	309	2873	224	0.39	970
BRAZIL	1978	48248	4833	39703	405	3030	278	0.42	1075
BRAZIL	1979	51356	5039	42175	445	3383	315	0.43	1209
BRAZIL	1980	51020	5455	40997	514	3698	357	0.42	1012
BRAZIL	1981	46852	5383	36989	460	3543	477	0.38	1268
BRAZIL	1982	46953	5882	36352	650	3488	581	0.37	1345
BRAZIL	1983	45441	6530	34317	922	2838	833	0.35	1418
BRAZIL	1984	46034	7914	33314	1138	2685	983	0.35	1312
BRAZIL	1985	49427	9517	34802	1363	2803	941	0.36	1337
BRAZIL	1986	54236	9586	38858	1634	3440	718	0.39	1155
BRAZIL	1987	56594	10981	39722	1812	3464	615	0.4	1089
BRAZIL	1988	57094	10856	40298	1867	3445	628	0.4	821
BRAZIL	1989	58365	10898	41370	1994	3526	577	0.4	893
BRAZIL	1990	56964	9749	41067	2025	3509	614	0.38	860
BRAZIL	1991	59812	11191	42317	1981	3739	585	0.39	1076
BRAZIL	1992	60187	10756	43516	2128	3251	535	0.39	1099
BRAZIL	1993	62923	11029	45589	2324	3379	602	0.4	1304
BRAZIL	1994	66036	11485	48074	2411	3431	634	0.41	1539
BRAZIL	1995	70452	12109	51280	2587	3843	634	0.44	1569
BRAZIL	1996	77661	12788	56373	2899	4705	896	0.47	1801
BRAZIL	1997	81960	13002	59631	3218	5181	929	0.49	2181
BRAZIL	1998	85162	12710	62467	3377	5432	1175	0.5	2258
BRAZIL	1999	87312	13149	63550	3797	5477	1339	0.51	2929
BRAZIL	2000	89442	13976	63825	4915	5332	1394	0.51	3093
BRAZIL	2001	92019	13811	65127	6245	5294	1542	0.52	3348
BRAZIL	2002	90610	13315	63135	7731	5172	1257	0.51	3742
BRAZIL	2003	87707	14284	59884	7966	4625	947	0.48	3676
BRAZIL	2004	92126	14857	61763	9844	4680	982	0.5	3775
BRAZIL	2005	94712	14403	63294	10439	5264	1312	0.51	3915
BRAZIL	2006	94810	14254	62952	10928	5698	978	0.5	3968
BRAZIL	2007	99049	15093	65508	11066	6331	1051	0.52	4284
BRAZIL	2008	105708	15273	68994	13245	7056	1139	0.55	5238
BRAZIL	2009	100122	12134	68488	10678	7038	1784	0.51	4615
BRAZIL	2010	114468	15965	74689	14372	8040	1402	0.58	5101
BRAZIL	2011	119829	17498	78849	13778	8717	987	0.6	5516
BRAZIL	2012	128178	17165	84409	16328	9428	848	0.63	5168
BRAZIL	2013	137354	18773	88898	19399	9517	767	0.67	4895
BRAZIL	2014	144480	20089	92454	21297	9691	949	0.7	4895
BRITISH VIRGIN ISLANDS	1962	1	0	1	0	0	0	0.1	0
BRITISH VIRGIN ISLANDS	1963	1	0	1	0	0	0	0.1	0
BRITISH VIRGIN ISLANDS	1964	2	0	2	0	0	0	0.19	0
BRITISH VIRGIN ISLANDS	1965	2	0	2	0	0	0	0.19	0
BRITISH VIRGIN ISLANDS	1966	3	0	3	0	0	0	0.37	0
BRITISH VIRGIN ISLANDS	1967	1	0	1	0	0	0	0.09	0
BRITISH VIRGIN ISLANDS	1968	4	0	4	0	0	0	0.44	0
BRITISH VIRGIN ISLANDS	1969	5	0	5	0	0	0	0.52	0
BRITISH VIRGIN ISLANDS	1970	5	0	5	0	0	0	0.51	0
BRITISH VIRGIN ISLANDS	1971	6	0	6	0	0	0	0.59	0
BRITISH VIRGIN ISLANDS	1972	6	0	6	0	0	0	0.58	0
BRITISH VIRGIN ISLANDS	1973	7	0	7	0	0	0	0.65	0
BRITISH VIRGIN ISLANDS	1974	7	0	7	0	0	0	0.64	0
BRITISH VIRGIN ISLANDS	1975	7	0	7	0	0	0	0.64	0
BRITISH VIRGIN ISLANDS	1976	7	0	7	0	0	0	0.63	0
BRITISH VIRGIN ISLANDS	1977	8	0	8	0	0	0	0.71	0
BRITISH VIRGIN ISLANDS	1978	8	0	8	0	0	0	0.71	0
BRITISH VIRGIN ISLANDS	1979	8	0	8	0	0	0	0.7	0
BRITISH VIRGIN ISLANDS	1980	8	0	8	0	0	0	0.76	0
BRITISH VIRGIN ISLANDS	1981	12	0	12	0	0	0	1.03	0
BRITISH VIRGIN ISLANDS	1982	10	0	10	0	0	0	0.86	0
BRITISH VIRGIN ISLANDS	1983	11	0	11	0	0	0	0.89	0
BRITISH VIRGIN ISLANDS	1984	11	0	11	0	0	0	0.85	0
BRITISH VIRGIN ISLANDS	1985	13	0	13	0	0	0	1.01	0
BRITISH VIRGIN ISLANDS	1986	15	0	15	0	0	0	1.08	0
BRITISH VIRGIN ISLANDS	1987	17	0	17	0	0	0	1.15	0
BRITISH VIRGIN ISLANDS	1988	18	0	18	0	0	0	1.15	0
BRITISH VIRGIN ISLANDS	1989	18	0	18	0	0	0	1.1	0
BRITISH VIRGIN ISLANDS	1990	18	0	18	0	0	0	1.07	0
BRITISH VIRGIN ISLANDS	1991	18	0	18	0	0	0	1.04	0
BRITISH VIRGIN ISLANDS	1992	19	0	19	0	0	0	1.11	0
BRITISH VIRGIN ISLANDS	1993	20	0	20	0	0	0	1.13	0
BRITISH VIRGIN ISLANDS	1994	22	0	22	0	0	0	1.2	0
BRITISH VIRGIN ISLANDS	1995	23	0	23	0	0	0	1.27	0
BRITISH VIRGIN ISLANDS	1996	26	0	26	0	0	0	1.38	0
BRITISH VIRGIN ISLANDS	1997	27	0	27	0	0	0	1.39	0
BRITISH VIRGIN ISLANDS	1998	28	0	28	0	0	0	1.4	0
BRITISH VIRGIN ISLANDS	1999	28	0	28	0	0	0	1.37	0
BRITISH VIRGIN ISLANDS	2000	28	0	28	0	0	0	1.39	0
BRITISH VIRGIN ISLANDS	2001	29	0	29	0	0	0	1.41	0
BRITISH VIRGIN ISLANDS	2002	31	0	31	0	0	0	1.46	0
BRITISH VIRGIN ISLANDS	2003	33	0	33	0	0	0	1.52	0
BRITISH VIRGIN ISLANDS	2004	34	0	34	0	0	0	1.58	0
BRITISH VIRGIN ISLANDS	2005	36	0	36	0	0	0	1.64	0
BRITISH VIRGIN ISLANDS	2006	39	0	39	0	0	0	1.73	0
BRITISH VIRGIN ISLANDS	2007	41	0	41	0	0	0	1.65	0
BRITISH VIRGIN ISLANDS	2008	44	0	44	0	0	0	1.69	0
BRITISH VIRGIN ISLANDS	2009	45	0	45	0	0	0	1.71	0
BRITISH VIRGIN ISLANDS	2010	47	0	47	0	0	0	1.72	0
BRITISH VIRGIN ISLANDS	2011	48	0	48	0	0	0	1.71	0
BRITISH VIRGIN ISLANDS	2012	48	0	48	0	0	0	1.67	0
BRITISH VIRGIN ISLANDS	2013	48	0	48	0	0	0	1.64	0
BRITISH VIRGIN ISLANDS	2014	49	0	49	0	0	0	1.64	0
BRUNEI (DARUSSALAM)	1930	0	0	0	0	0	.	.	0
BRUNEI (DARUSSALAM)	1931	0	0	0	0	0	.	.	0
BRUNEI (DARUSSALAM)	1932	0	0	0	0	0	.	.	0
BRUNEI (DARUSSALAM)	1933	1	0	0	1	0	.	.	0
BRUNEI (DARUSSALAM)	1934	12	0	0	12	0	.	.	0
BRUNEI (DARUSSALAM)	1935	7	0	0	7	0	.	.	0
BRUNEI (DARUSSALAM)	1936	21	0	6	15	0	.	.	0
BRUNEI (DARUSSALAM)	1937	56	0	12	44	0	.	.	0
BRUNEI (DARUSSALAM)	1938	59	0	9	50	0	.	.	0
BRUNEI (DARUSSALAM)	1939	717	0	654	63	0	.	.	0
BRUNEI (DARUSSALAM)	1940	808	0	728	81	0	.	.	0
BRUNEI (DARUSSALAM)	1941	537	0	520	17	0	.	.	0
BRUNEI (DARUSSALAM)	1942	340	0	340	0	0	.	.	0
BRUNEI (DARUSSALAM)	1943	511	0	511	0	0	.	.	0
BRUNEI (DARUSSALAM)	1944	681	0	681	0	0	.	.	0
BRUNEI (DARUSSALAM)	1945	251	0	251	0	0	.	.	0
BRUNEI (DARUSSALAM)	1946	258	0	243	15	0	.	.	0
BRUNEI (DARUSSALAM)	1947	1461	0	1447	14	0	.	.	0
BRUNEI (DARUSSALAM)	1948	22	0	3	20	0	.	.	0
BRUNEI (DARUSSALAM)	1949	3130	0	2810	320	0	.	.	0
BRUNEI (DARUSSALAM)	1950	113	0	42	71	0	0	2.35	0
BRUNEI (DARUSSALAM)	1951	82	0	9	73	0	0	1.6	0
BRUNEI (DARUSSALAM)	1952	88	0	14	74	0	0	1.63	0
BRUNEI (DARUSSALAM)	1953	94	0	21	73	0	0	1.65	0
BRUNEI (DARUSSALAM)	1954	98	0	23	74	0	0	1.63	0
BRUNEI (DARUSSALAM)	1955	82	0	9	73	0	0	1.3	0
BRUNEI (DARUSSALAM)	1956	81	0	8	74	0	0	1.23	0
BRUNEI (DARUSSALAM)	1957	80	0	8	72	0	0	1.16	0
BRUNEI (DARUSSALAM)	1958	87	0	6	82	0	0	1.2	0
BRUNEI (DARUSSALAM)	1959	89	0	8	82	0	0	1.17	0
BRUNEI (DARUSSALAM)	1960	91	0	8	83	0	0	1.14	0
BRUNEI (DARUSSALAM)	1961	83	0	8	75	0	0	1	0
BRUNEI (DARUSSALAM)	1962	101	0	20	80	0	0	1.15	0
BRUNEI (DARUSSALAM)	1963	97	0	15	82	0	0	1.06	0
[truncated: 15,233 more rows]

## Sheet: Data_full
Summe von Total CO2 emissions from fossil-fuels and cement production (thousand metric tons of C)	Spaltenbeschriftungen
Zeilenbeschriftungen	AFGHANISTAN	ALBANIA	ALGERIA	ANDORRA	ANGOLA	ANGUILLA	ANTARCTIC FISHERIES	ANTIGUA & BARBUDA	ARGENTINA	ARMENIA	ARUBA	AUSTRALIA	AUSTRIA	AZERBAIJAN	BAHAMAS	BAHRAIN	BANGLADESH	BARBADOS	BELARUS	BELGIUM	BELIZE	BENIN	BERMUDA	BHUTAN	BONAIRE, SAINT EUSTATIUS, AND SABA	BOSNIA & HERZEGOVINA	BOTSWANA	BRAZIL	BRITISH VIRGIN ISLANDS	BRUNEI (DARUSSALAM)	BULGARIA	BURKINA FASO	BURUNDI	CAMBODIA	CANADA	CAPE VERDE	CAYMAN ISLANDS	CENTRAL AFRICAN REPUBLIC	CHAD	CHILE	CHINA (MAINLAND)	CHRISTMAS ISLAND	COLOMBIA	COMOROS	CONGO	COOK ISLANDS	COSTA RICA	COTE D IVOIRE	CROATIA
1751
1752
1753
1754
1755
1756
1757
1758
1759
1760
1761
1762
1763
1764
1765
1766
1767
1768
1769
1770
1771
1772
1773
1774
1775
1776
1777
1778
1779
1780
1781
1782
1783
1784
1785																																			1
1786																																			1
1787																																			1
1788																																			1
1789																																			1
1790																																			1
1791																																			1
1792																																			1
1793																																			1
1794																																			1
1795																																			1
1796																																			1
1797																																			1
1798																																			1
1799																																			1
1800																																			1
1801																																			1
1802																				1746															1
1803																																			1
1804																																			1
1805																																			1
1806																																			1
1807													46																						1
1808																																			1
1809																																			1
1810																																			1
1811																																			1
1812																																			1
1813																																			1
1814																																			1
1815																																			1
1816																																			1
1817																																			1
1818																																			1
1819													69																						1
1820													91																						1
1821													98																						1
1822													100																						1
1823													95																						1
1824													109																						1
1825													110																						1
1826													125																						1
1827													130																						1
1828													125																						1
1829													130																						1
1830													135							1691															1
1831													131							1218															1
1832													140							1287															1
1833													117							1246															1
1834													160							1203															1
1835													173							1299															1
1836													184							1528															1
1837													193							1637															1
1838													232							1671															1
1839													289							1831															1
1840													319							2109															1
1841													360							2017															1
1842													398							2096															1
1843													346							1941															1
1844													435							2129															1
1845													491							2243															1
1846													577							2447															7
1847													568							2543															9
1848													637							2261															11
1849													617							2384															13
1850													635							2547															16
1851												-17	637							2775															19
1852												-15	767							3114															23
1853												-30	880							3217															28
1854												-35	867							3564															34
1855												-36	1010							3651															41
1856												-50	1155							3606															49
1857												-57	1330							3754															59
1858												-67	1977							3944															72
1859												-103	1601							4066															86
1860												76	1678							4152															104
1861												139	1741							4492															125
1862												97	1734							4461															153
1863												109	1604							4702															192
1864												73	1385							4935															230
1865												115	1461							5202															278
1866												190	981							5603															339
1867												244	1341							6068															435
1868												200	1657							5486															258
1869												175	1770							5909															187
1870												164	2010							6754															334
1871												189	2768							6473															486
1872												193	2731							6984															504
1873												237	2928							7671															439
1874												243	2498							7073															443
1875												226	2145							7350															512
1876												254	2208							7183															507
1877												291	1988							6837															552
1878												264	1976							7434															528
1879												397	2419							7569											0				596
1880												602	6454							8304											0				1428
1881												482	2815							8360											1				1526
1882												549	2893							8853											1				1806
1883												662	3210							9384											2				2028
1884												702	3128							9244											3				2347
1885												793	3288							9029											2				2250
1886												788	3103							8762											2				2401
1887									296			828	3345							9271											3				2770
1888									243			963	3262							9840											5				3633
1889									479			935	3514							10053											7				3082
1890									374			968	3558							10869											9				3388
1891									256			1094	4079							10311											11				3805
1892									378			1133	3948							10297											13				3791
1893									424			1082	4831							9846											17				4054
1894									544			1190	4948							10871											22				3870
1895									618			1253	5560							10953											23				3693					143
1896									629			1229	5813							11539											29				3998					146
1897									568			1358	6283							11939											30				4039					174
1898									641			1532	6674							12305											40				4287					202
1899									797			1579	6773							12862											40				5232					173	26
1900			0						565			2775	7553							13555											59				5630					232
1901			0						680			3122	7741							12748								574			74				6508					428
1902			0						768			3110	7002							13334								684			65				7000					535	26
1903			0						781			3062	6973							14364								666			64				7631					590	536
1904			0						1036			3151	7349							13742								715			82				9033					537	570
1905			0						1087			3288	7671							13719								764			98				9658					567	627
1906									1707			3919	9153							15692								875			86				10204					666	4670
1907									1707			4224	11495							15918								942			124				12825					595	4596
1908									2079			4573	16087							15788								981			163				12939					671	6204
1909									1620			3972	11509							15765								985			165				12387					642	5687
1910									2431			4759	15698							16727								1146			173				14089					767	5117
1911									2714			5251	13111							16836								1257			245				16449					848	7600
1912									2587			5673	13630							17679								1526			245				18360					945	2671
1913									2769			6111	16274							18563								1647			215				21638					916	2936
1914									2367			6681	13328							11074								1121			323				18663					776	4123
1915									1894			5948	9525							9394								858			208				16680					837	4391
1916			1						1361			5260	2192							12498								786			252				20867					1012	4903
1917			2						609			5666	942							9893								682			311				23265					1099	5418
1918			5						688			6261	911							9204								634			388				24432					1083	5743
1919			5						1017			5933	823							12246								838			228				20767					1060	6620
1920			6						1608			7023	3965							15053								995			300				23029					759	7306
1921			7						1512			6319	5278							13792								789			373				21966					910	6902		8
1922			7						1992			6644	5073							15259								1032			412				18889					752	7269		39
1923			4						2305			6782	4852							19619								1260			438				25377					831	8775		51
1924			8						2991			7388	5484							20812								1393			503				21120					1099	9578		54
1925			9						3067			7706	5183							21299								1467			494				20537					1037	9067		121
1926			11						3073			7602	5082							21202								1495			486				23132					1065	8076		231
1927			16						3650			7886	5492							24693								1658			496				25109					1058	9150		225
1928			20						3477			7175	5784					1		24088								1618			584				25596					998	9311		368
1929			22						3584			6456	6598					1		26465								1732			678				27030					1096	9776		352
1930			23						3485			6013	5149					2		25569								1505		0	656				25752					1051	10350		178
1931			27						3506			5335	4941					1		22962								1138		0	621				20703					799	10988		90
1932			31						3576			5552	4141					1		18483								1138		0	720				19162					790	10535		22
1933		2	33						3612			5890	3884			3		1		19832								1289		1	641				18964					1117	11522		146
1934		2	38						3887			6195	3754			33		1		20460								1262		12	666				21811					1318	13448		201
1935		5	36						3821			6886	3800			145		0		19555								1504		7	675				21506					1395	15728		656
1936		35	14						4121			7383	3710			532		0		20473								1405		21	686				23517					1372	17751		760
1937		81	19						4562			7876	4165			888		0		24648								1662		56	761				25515					1441	16533		760
1938		95	9						4463			7652	1580			949		0		21597								1664		59	866				23348					1509	15094		820
1939		118	44						4744			8773	1730			869		1		20120								1624		717	951				25930					1367	18329		1266
1940		189	65						4331			7926	2005			810		0		16950								1771		808	1119				29647					1436	23499		1137
1941		171	85						3806			9429	2177			778		0		17791								1715		537	1207				32794					1520	29371		1019
1942		203	136						3680			9963	2333			714		0		16670								1602		340	1460				35776					1585	31078		1137
1943		126	128						3843			9550	2624			753		0		15790								1768		511	1586				37682					1668	26557		1019
1944		42	136						3809			9337	2563			769		0		9045								1610		681	1198				38322					1676	26710		1294
1945		33	168						3731			8924	1245			836		0		10578								1863		251	1422				35624					1540	13742		1223
1946		132	208						3741			9668	3483			917		0		15398								2037		258	1358				37781					1483	8536		1354
1947		253	203						3963			10376	4812			1078		1		22391								2443		1461	1613				39180					1558	9167		1382
1948		192	219						4748			10487	6684			1249		1		23218								2143		22	1698				43263					1695	6510		1224
1949	4	277	248						4195			10276	7254			1258		1		22048								2012		3130	2034				39583					1604	16187		1402
1950	23	81	1033		51				8168			14941	5704		15	377		20		20801	5		12					5367		113	2047				42070	28				2307	21465		2047				78
1951	25	110	1128		68				9544			16112	6351		18	321		30		24418	7		16					5913		82	2229				44402	21				2725	27763		2229				85
1952	25	102	1062		85				9853			16432	6025		21	351		24		22784	7		29					6807		88	2574				43510	10				2895	34995		2357				106
1953	29	113	1092		75				9591			16223	5928		22	272		30		22487	8		25					6885		94	2890				43838	5				2840	36600		2938				118
1954	29	137	1134		95				10032			18517	6690		23	285		31		23404	8		23					8102		98	3110				44482	6				3025	44011		2627				111
1955	42	181	1258		113				10799			19291	7936		35	383		35		25119	8		30					9289		82	3301			28	46258	6				3166	52099		3261				95
1956	50	229	1364		137				12092			19934	7700		38	288		35		26419	8		37					9995		81	3540			36	51807	8	1			3230	59047		3440				132
1957	80	411	1512		169			6	12996			20340	7966		48	206		37		26339	8		38					9822		80	3928			44	49900	5	1			3201	69964		3727				126
1958	90	328	1424		162			8	12064			21184	7668		49	352		41		23936	11	34	40					10663		87	4266	1		54	49721	4	2			3399	143390		3816				122	136
1959	105	394	1545		169			8	13362			22849	7620		71	358		41		24107	11	28	37					10653		89	5357	2		58	50356	5	2	27	17	3468	196823		4392	3	51		105	149
1960	113	552	1680		150			10	13312			24053	8405		112	157		47		24816	12	44	43					12792		91	6080	12		64	52603	6	3	24	15	3679	212906		4475	3	61		134	126
1961	134	622	1654		124			13	13957			24704	8689		149	483		53		25305	10	35	48					13418		83	7083	25		78	52954	6	3	24	14	3947	150550		4968	3	73		134	151
1962	188	672	1546		322			28	14643			25883	9246		198	434		71		26757	19	37	43					14643	1	101	8382	23	12	84	56500	5	3	20	23	4561	120087		5302	3	65		150	160
1963	193	568	1480		314			23	13658			27551	10088		193	326		52		28847	17	33	41					15167	1	97	9384	24	13	106	57570	4	3	20	25	4733	119088		5797	3	64		164	170
1964	229	550	1541		334			25	15197			29719	10620		296	436		49		28269	23	39	55					15472	2	93	11689	30	13	93	64849	8	3	20	27	4779	119150		5920	3	73		184	208
1965	275	593	1799		324			41	16053			32988	10414		359	335		56		28754	23	41	49					15380	2	91	12631	28	10	110	68763	7	3	24	29	4845	129799		6241	4	67		231	320
1966	298	696	2299		424			95	17218			32815	10706		298	177		73		28690	22	31	55					17536	3	134	13299	28	13	128	70717	6	5	23	23	5125	142566		6409	5	84		271	353
1967	350	731	2302		271			154	17874			35251	10899		465	274		92		29308	33	39	58					18051	1	120	15044	28	13	114	76874	5	4	25	32	5252	118144		6740	5	88		239	406
1968	334	838	2471		456			270	18839			36712	11549		445	301		120		32331	28	42	61					21113	4	117	16233	28	15	134	82776	8	6	50	34	5788	127878		7255	5	123		283	481
1969	257	885	3075		760			343	21088			38794	12188		476	347		131		33711	37	55	54					22993	5	133	18101	33	20	367	83829	10	12	51	44	6151	157414		7649	5	137	3	313	569
1970	456	1021	4111		977			126	22562			40256	13824		702	707		117		34257	33	77	62	1				25569	5	2239	16700	39	17	320	93124	10	10	57	34	6726	210422	19	7746	8	156	3	341	666
1971	517	1187	5091		930			116	24254			41662	14223		1836	829		132		33141	39	80	63	1				27989	6	2050	17535	41	20	68	96157	10	12	50	41	7389	239060	23	8270	8	187	3	417	738
1972	418	1539	7731		1229			102	24586			42947	15324		1770	1004	957	137		35679	43	106	69	1			6	31187	6	2580	18045	44	20	32	103937	14	15	46	33	7688	254043	23	8585	8	181	3	481	822
1973	447	1443	10448		1331			90	25652			46630	16407		2147	1506	1242	131		37871	40	104	116	1			14	36123	7	2722	18769	46	20	35	104069	17	16	44	44	7541	264124	19	9190	8	333	3	558	875
1974	523	1185	8701		1329			117	26062			47002	15672		2015	1474	1271	134		36875	42	111	121	1			24	39121	7	2232	19433	56	25	20	106346	18	15	31	41	7078	269434	34	9948	8	443	3	520	971
1975	580	1253	8735		1204			193	25888			47964	14833		2251	1569	1328	155		33297	48	121	125	1			51	41223	7	1931	19924	60	21	20	108302	21	15	28	50	6276	312410	37	9789	9	300	4	556	1088
1976	542	1350	10682		896			110	27212			47517	15930		1763	1793	1519	145		35454	48	71	128	1			162	42311	7	1643	19939	57	24	20	108895	20	18	35	50	6573	326205	34	10387	11	337	4	569	1081
1977	652	1560	11424		964			127	27486			51210	15331		2650	2037	1585	161		34516	54	81	124	2			213	44440	8	1744	20717	68	27	20	111304	22	19	35	54	6302	357325	25	10732	11	131	8	713	1106
1978	589	1771	17052		1476			134	27990			55090	15676		1802	2118	1641	172		37048	59	99	116	3			227	48248	8	2602	22201	95	28	14	113416	57	25	40	53	6258	398737	25	11367	8	88	8	797	1314
1979	611	2069	12441		1501			111	30189			55923	16797		1890	2218	1813	164		38242	57	100	126	6			257	51356	8	2029	21585	111	30	8	120553	68	25	28	55	6780	407652	27	12117	6	95	7	762	1479
1980	480	1410	18140		1458			39	29653			60198	14264		2179	2151	2083	184		36897	52	141	119	6			269	51020	8	1877	21131	118	40	78	120871	33	44	29	57	6890	400107	27	12096	13	111	8	672	1697
1981	541	2002	12664		1440			29	27827			62820	15307		764	2325	2163	187		33821	50	117	106	7			275	46852	12	401	21910	152	43	82	117263	9	42	37	57	6696	395828	28	12124	13	129	18	614	1218
1982	573	1993	10709		1268			80	28204			63845	14690		617	2683	2345	176		32057	47	134	108	9			300	46953	10	571	24579	157	43	92	113120	10	44	39	56	5622	430941	20	12521	13	367	14	569	1666
1983	688	2081	14351		1395			23	28692			61359	14176		550	2244	2246	187		27715	47	124	123	8			281	45441	11	738	24643	162	56	100	111450	10	46	40	56	5683	454603	22	13485	13	312	14	574	1320
1984	772	2134	19390		1366			40	29049			64520	14876		506	2511	2488	204		28749	47	137	121	14			285	46034	11	523	23825	127	60	112	116061	23	50	41	59	6054	494930		13357	13	311	6	546	1474
1985	957	2149	19849		1282			68	27433			65784	14917		412	2780	2791	231		28490	52	203	123	17			316	49427	13	708	24418	130	63	114	115102	23	52	44	49	5864	536284		13193	13	349	6	618	1998
1986	857	2197	20801		1271			68	28419		49	65439	14748		385	3003	3126	250		28054	56	187	115	15			291	54236	15	627	24960	131	64	118	110459	16	55	44	51	6067	564213		13390	12	291	6	711	1627
1987	852	2030	22940		1586		1	75	31345		122	69841	15747		388	3117	3235	257		28120	62	147	156	28			338	56594	17	905	24989	141	68	119	117630	22	59	71	54	6183	602593		13768	13	361	6	752	2095
1988	782	1998	22893		1399		2	78	33126		167	71215	14546		420	3317	3694	258		27367	68	151	176	30			355	57094	18	1559	23804	151	62	123	124367	20	61	63	18	7343	646169		14302	14	409	6	802	2498
1989	757	2450	21829		1366		2	78	31931		177	75749	14758		531	3201	3669	270		29305	82	172	213	17			390	58365	18	1731	23654	224	73	123	126336	22	70	68	28	8832	656815		14517	14	411	6	811	2324
1990	713	1504	20990	111	1395	14	3	77	30583		447	71913	15731		532	3389	4236	293		28920	85	193	137	35			737	56964	18	1689	20311	159	57	344	118675	26	68	54	39	9085	666057		15636	17	324	10	806	1373
1991	665	1169	21557	111	1388	14	4	73	31933		459	71304	16800		486	3239	4347	329		30259	98	224	147	51			719	59812	18	1448	15694	171	65	356	116384	27	74	56	18	8542	699644		15577	18	274	10	910	1244
1992	380	686	21854	111	1417	15	4	72	33093	1589	399	73080	15451	15337	489	2973	4840	267	23839	30534	97	245	126	59		4105	758	60187	19	1422	14782	172	59	368	120256	29	85	59	23	8856	733694		16921	18	349	10	1034	1118	4477
1993	367	637	22419	112	1575	18	4	74	32159	697	435	75647	15572	13213	464	3993	4747	304	20935	29357	103	309	147	50		3437	872	62923	20	1355	18506	171	62	378	121511	30	90	61	25	9443	785027		17459	19	360	11	1078	1458	4568
1994	353	525	23566	111	1061	18	4	73	33381	738	440	75844	15559	11447	460	4033	5173	204	17741	30634	102	345	145	58		881	827	66036	22	1280	14770	176	64	403	124584	31	99	64	28	10391	833990		18427	19	586	11	1437	1278	4497
1995	339	569	25987	116	2993	18	1	75	34896	930	455	76864	16303	9090	459	4041	6222	226	16573	30632	103	362	145	68		935	831	70452	23	1306	15818	171	65	423	127526	33	99	64	30	11384	905450		16257	20	427	11	1327	1805	4632
1996	321	550	26479	124	2852	19	1	80	36815	699	461	82401	17229	8524	455	4260	6553	232	16407	32195	84	345	144	82		1161	752	77661	26	1328	15424	193	66	441	130739	39	105	64	34	13226	944393		16506	21	468	13	1295	2138	4624
1997	299	421	23818	127	2013	19	1	84	37634	882	476	83391	17087	8129	372	4723	6835	246	16241	31454	106	332	143	107		2289	764	81960	27	1380	14076	220	68	420	135068	40	111	67	39	15379	946144		17701	22	639	13	1360	2064	5156
1998	284	478	29179	134	1993	21	1	87	38128	917	490	86415	17361	8638	458	5019	6558	311	15844	32281	101	331	142	104		2889	912	85162	28	1437	13362	235	68	532	138133	43	117	68	41	15719	906557		17992	24	212	13	1450	1885	5496
1999	224	814	25101	140	2497	22	1	90	40083	822	493	88722	16872	7793	457	4914	6882	330	15302	31159	95	426	140	105		2830	862	87312	28	1066	11994	254	69	517	140548	50	117	72	44	16772	904842		15411	25	224	13	1506	1709	5452
2000	211	824	23960	143	2602	24	1	94	38761	945	649	89840	16985	8047	455	5084	7600	324	14668	31393	108	436	141	108		3760	1031	89442	28	1285	11871	284	74	539	145727	59	127	73	48	16039	928601		15796	28	286	13	1493	1852	5274
2001	223	879	22967	143	2654	26	1	95	36466	966	657	88586	17968	7846	428	3798	8851	333	14388	31232	122	495	144	105		3644	1050	92019	29	1229	12668	272	56	614	143967	64	128	67	47	14546	951068		15346	28	209	9	1571	2107	5562
2002	292	1023	24518	145	3454	26	1	101	34010	830	665	93088	18291	8076	430	4281	9192	335	14291	29264	118	567	152	114		3900	1085	90610	31	1194	12172	274	58	602	141624	75	133	67	46	15043	1049978		15179	28	157	8	1725	1987	5856
2003	326	1171	24973	146	2472	28	1	110	36832	935	699	91702	19688	8349	414	4491	9728	346	14598	30792	118	642	153	103		3951	1044	87707	33	1252	12901	294	44	649	150832	84	135	64	104	15163	1238183		15659	36	250	9	1807	1489	6268
2004	259	1136	24137	153	5125	33	2	115	42975	994	714	93455	19741	8751	470	4775	10282	353	15860	30298	107	684	159	84		4257	1063	92126	34	1363	12763	301	54	667	150586	90	126	64	103	16301	1427199		15018	39	259	15	1890	2090	6102
2005	362	1160	29255	157	5224	35	2	117	44208	1187	742	95493	20239	9364	475	5238	10766	369	16135	29591	115	653	159	108		4419	1117	94712	36	1365	13067	307	42	757	152009	120	129	64	109	16858	1608115		16620	38	268	17	1873	2134	6161
2006	450	1063	27562	149	6072	39	2	121	47842	1195	741	99631	19679	10681	454	5135	11874	374	16927	29199	121	1056	178	107		4790	1128	94810	39	1326	13360	371	51	818	148301	129	132	68	111	17675	1780554		17164	44	305	18	1936	1908	6165
2007	620	1071	29835	147	6859	41	3	128	47771	1381	770	101470	19017	8320	461	7321	12103	372	16505	28237	130	1226	199	107		4814	1154	99049	41	2295	14250	449	51	945	151174	138	156	69	126	19536	1917316		17025	28	331	18	2215	1848	6498
2008	1147	1193	30054	147	7011	41		131	51570	1516	725	105237	18824	9682	408	8118	13502	442	17209	28482	119	1203	177	115		5496	1229	105708	44	2487	13837	523	52	1063	152994	128	159	69	139	19594	2059741		18568	29	357	19	2217	1848	6161
2009	1846	1194	33106	141	7579	40		139	49076	1189	717	107661	17107	8700	448	7695	14654	441	16695	27233	160	1271	130	106		5646	1026	100122	45	2144	11635	527	52	1269	146377	143	152	69	134	18218	2181895		19815	36	476	19	2155	1543	5772
2010	2308	1254	32500	141	7924	41		143	51246	1150	684	106589	18408	8366	451	7981	16345	403	17192	30222	147	1388	166	133		5802	1278	114468	47	2237	12030	535	58	1367	145806	152	152	72	141	19703	2393248		20773	44	540	19	2064	1900	5501
2011	3338	1429	33048	134	8274	39		140	52259	1341	682	106850	17731	9121	509	7813	17293	417	17470	27255	164	1444	121	200		6514	1139	119829	48	2644	13457	603	66	1420	146472	168	160	76	147	21610	2654360		20870	37	616	19	2111	1977	5402
2012	2933	1339	35448	133	9108	39		143	52456	1553	368	105843	16982	9696	537	7274	18409	401	17241	25936	130	1492	130	223	85	6070	1154	128178	48	2636	12192	717	77	1488	141112	138	146	80	167	22082	2734817		21803	39	810	19	2118	2535	4907
2013	2731	1381	36669	130	8895	37		143	51773	1499	235	101518	17040	9720	764	8539	19010	395	17390	26444	140	1585	125	251	88	5978	1426	137354	48	2128	10799	834	79	1528	141031	136	146	81	191	22696	2797384		24441	48	842	19	2072	2914	4786
2014	2675	1559	39651	126	9480	39		145	55638	1508	238	98517	16011	10223	659	8546	19959	347	17316	25457	135	1723	157	273	88	6063	1918	144480	49	2484	11567	777	120	1823	146494	134	148	82	199	22515	2806634		22932	42	844	19	2116	3012	4593
Gesamtergebnis	39133	70600	1003007	3332	142188	706	42	5478	2013085	25463	14356	4252724	1360997	217113	40904	198304	295157	13126	386767	3184611	4239	21898	6911	3025	261	93631	29930	3513002	1050	84018	957765	11362	2490	22847	8038299	2714	3838	2872	3356	662510	47649834	363	785909	1005	16601	494	57130	78502	123910
[truncated: 208 more columns]

## Sheet: Data_1950
MtC
Zeilenbeschriftungen	AFGHANISTAN	ALBANIA	ALGERIA	ANDORRA	ANGOLA	ANGUILLA	ANTARCTIC FISHERIES	ANTIGUA & BARBUDA	ARGENTINA	ARMENIA	ARUBA	AUSTRALIA	AUSTRIA	AZERBAIJAN	BAHAMAS	BAHRAIN	BANGLADESH	BARBADOS	BELARUS	BELGIUM	BELIZE	BENIN	BERMUDA	BHUTAN	BONAIRE, SAINT EUSTATIUS, AND SABA	BOSNIA & HERZEGOVINA	BOTSWANA	BRAZIL	BRITISH VIRGIN ISLANDS	BRUNEI (DARUSSALAM)	BULGARIA	BURKINA FASO	BURUNDI	CAMBODIA	CANADA	CAPE VERDE	CAYMAN ISLANDS	CENTRAL AFRICAN REPUBLIC	CHAD	CHILE	CHINA (MAINLAND)	CHRISTMAS ISLAND	COLOMBIA	COMOROS	CONGO	COOK ISLANDS	COSTA RICA	COTE D IVOIRE	CROATIA
1950	23	81	1033		51				8168			14941	5704		15	377		20		20801	5		12					5367		113	2047				42070	28				2307	21465		2047				78
1951	25	110	1128		68				9544			16112	6351		18	321		30		24418	7		16					5913		82	2229				44402	21				2725	27763		2229				85
1952	25	102	1062		85				9853			16432	6025		21	351		24		22784	7		29					6807		88	2574				43510	10				2895	34995		2357				106
1953	29	113	1092		75				9591			16223	5928		22	272		30		22487	8		25					6885		94	2890				43838	5				2840	36600		2938				118
1954	29	137	1134		95				10032			18517	6690		23	285		31		23404	8		23					8102		98	3110				44482	6				3025	44011		2627				111
1955	42	181	1258		113				10799			19291	7936		35	383		35		25119	8		30					9289		82	3301			28	46258	6				3166	52099		3261				95
1956	50	229	1364		137				12092			19934	7700		38	288		35		26419	8		37					9995		81	3540			36	51807	8	1			3230	59047		3440				132
1957	80	411	1512		169			6	12996			20340	7966		48	206		37		26339	8		38					9822		80	3928			44	49900	5	1			3201	69964		3727				126
1958	90	328	1424		162			8	12064			21184	7668		49	352		41		23936	11	34	40					10663		87	4266	1		54	49721	4	2			3399	143390		3816				122	136
1959	105	394	1545		169			8	13362			22849	7620		71	358		41		24107	11	28	37					10653		89	5357	2		58	50356	5	2	27	17	3468	196823		4392	3	51		105	149
1960	113	552	1680		150			10	13312			24053	8405		112	157		47		24816	12	44	43					12792		91	6080	12		64	52603	6	3	24	15	3679	212906		4475	3	61		134	126
1961	134	622	1654		124			13	13957			24704	8689		149	483		53		25305	10	35	48					13418		83	7083	25		78	52954	6	3	24	14	3947	150550		4968	3	73		134	151
1962	188	672	1546		322			28	14643			25883	9246		198	434		71		26757	19	37	43					14643	1	101	8382	23	12	84	56500	5	3	20	23	4561	120087		5302	3	65		150	160
1963	193	568	1480		314			23	13658			27551	10088		193	326		52		28847	17	33	41					15167	1	97	9384	24	13	106	57570	4	3	20	25	4733	119088		5797	3	64		164	170
1964	229	550	1541		334			25	15197			29719	10620		296	436		49		28269	23	39	55					15472	2	93	11689	30	13	93	64849	8	3	20	27	4779	119150		5920	3	73		184	208
1965	275	593	1799		324			41	16053			32988	10414		359	335		56		28754	23	41	49					15380	2	91	12631	28	10	110	68763	7	3	24	29	4845	129799		6241	4	67		231	320
1966	298	696	2299		424			95	17218			32815	10706		298	177		73		28690	22	31	55					17536	3	134	13299	28	13	128	70717	6	5	23	23	5125	142566		6409	5	84		271	353
1967	350	731	2302		271			154	17874			35251	10899		465	274		92		29308	33	39	58					18051	1	120	15044	28	13	114	76874	5	4	25	32	5252	118144		6740	5	88		239	406
1968	334	838	2471		456			270	18839			36712	11549		445	301		120		32331	28	42	61					21113	4	117	16233	28	15	134	82776	8	6	50	34	5788	127878		7255	5	123		283	481
1969	257	885	3075		760			343	21088			38794	12188		476	347		131		33711	37	55	54					22993	5	133	18101	33	20	367	83829	10	12	51	44	6151	157414		7649	5	137	3	313	569
1970	456	1021	4111		977			126	22562			40256	13824		702	707		117		34257	33	77	62	1				25569	5	2239	16700	39	17	320	93124	10	10	57	34	6726	210422	19	7746	8	156	3	341	666
1971	517	1187	5091		930			116	24254			41662	14223		1836	829		132		33141	39	80	63	1				27989	6	2050	17535	41	20	68	96157	10	12	50	41	7389	239060	23	8270	8	187	3	417	738
1972	418	1539	7731		1229			102	24586			42947	15324		1770	1004	957	137		35679	43	106	69	1			6	31187	6	2580	18045	44	20	32	103937	14	15	46	33	7688	254043	23	8585	8	181	3	481	822
1973	447	1443	10448		1331			90	25652			46630	16407		2147	1506	1242	131		37871	40	104	116	1			14	36123	7	2722	18769	46	20	35	104069	17	16	44	44	7541	264124	19	9190	8	333	3	558	875
1974	523	1185	8701		1329			117	26062			47002	15672		2015	1474	1271	134		36875	42	111	121	1			24	39121	7	2232	19433	56	25	20	106346	18	15	31	41	7078	269434	34	9948	8	443	3	520	971
1975	580	1253	8735		1204			193	25888			47964	14833		2251	1569	1328	155		33297	48	121	125	1			51	41223	7	1931	19924	60	21	20	108302	21	15	28	50	6276	312410	37	9789	9	300	4	556	1088
1976	542	1350	10682		896			110	27212			47517	15930		1763	1793	1519	145		35454	48	71	128	1			162	42311	7	1643	19939	57	24	20	108895	20	18	35	50	6573	326205	34	10387	11	337	4	569	1081
1977	652	1560	11424		964			127	27486			51210	15331		2650	2037	1585	161		34516	54	81	124	2			213	44440	8	1744	20717	68	27	20	111304	22	19	35	54	6302	357325	25	10732	11	131	8	713	1106
1978	589	1771	17052		1476			134	27990			55090	15676		1802	2118	1641	172		37048	59	99	116	3			227	48248	8	2602	22201	95	28	14	113416	57	25	40	53	6258	398737	25	11367	8	88	8	797	1314
1979	611	2069	12441		1501			111	30189			55923	16797		1890	2218	1813	164		38242	57	100	126	6			257	51356	8	2029	21585	111	30	8	120553	68	25	28	55	6780	407652	27	12117	6	95	7	762	1479
1980	480	1410	18140		1458			39	29653			60198	14264		2179	2151	2083	184		36897	52	141	119	6			269	51020	8	1877	21131	118	40	78	120871	33	44	29	57	6890	400107	27	12096	13	111	8	672	1697
1981	541	2002	12664		1440			29	27827			62820	15307		764	2325	2163	187		33821	50	117	106	7			275	46852	12	401	21910	152	43	82	117263	9	42	37	57	6696	395828	28	12124	13	129	18	614	1218
1982	573	1993	10709		1268			80	28204			63845	14690		617	2683	2345	176		32057	47	134	108	9			300	46953	10	571	24579	157	43	92	113120	10	44	39	56	5622	430941	20	12521	13	367	14	569	1666
1983	688	2081	14351		1395			23	28692			61359	14176		550	2244	2246	187		27715	47	124	123	8			281	45441	11	738	24643	162	56	100	111450	10	46	40	56	5683	454603	22	13485	13	312	14	574	1320
1984	772	2134	19390		1366			40	29049			64520	14876		506	2511	2488	204		28749	47	137	121	14			285	46034	11	523	23825	127	60	112	116061	23	50	41	59	6054	494930		13357	13	311	6	546	1474
1985	957	2149	19849		1282			68	27433			65784	14917		412	2780	2791	231		28490	52	203	123	17			316	49427	13	708	24418	130	63	114	115102	23	52	44	49	5864	536284		13193	13	349	6	618	1998
1986	857	2197	20801		1271			68	28419		49	65439	14748		385	3003	3126	250		28054	56	187	115	15			291	54236	15	627	24960	131	64	118	110459	16	55	44	51	6067	564213		13390	12	291	6	711	1627
1987	852	2030	22940		1586		1	75	31345		122	69841	15747		388	3117	3235	257		28120	62	147	156	28			338	56594	17	905	24989	141	68	119	117630	22	59	71	54	6183	602593		13768	13	361	6	752	2095
1988	782	1998	22893		1399		2	78	33126		167	71215	14546		420	3317	3694	258		27367	68	151	176	30			355	57094	18	1559	23804	151	62	123	124367	20	61	63	18	7343	646169		14302	14	409	6	802	2498
1989	757	2450	21829		1366		2	78	31931		177	75749	14758		531	3201	3669	270		29305	82	172	213	17			390	58365	18	1731	23654	224	73	123	126336	22	70	68	28	8832	656815		14517	14	411	6	811	2324
1990	713	1504	20990	111	1395	14	3	77	30583		447	71913	15731		532	3389	4236	293		28920	85	193	137	35			737	56964	18	1689	20311	159	57	344	118675	26	68	54	39	9085	666057		15636	17	324	10	806	1373
1991	665	1169	21557	111	1388	14	4	73	31933		459	71304	16800		486	3239	4347	329		30259	98	224	147	51			719	59812	18	1448	15694	171	65	356	116384	27	74	56	18	8542	699644		15577	18	274	10	910	1244
1992	380	686	21854	111	1417	15	4	72	33093	1589	399	73080	15451	15337	489	2973	4840	267	23839	30534	97	245	126	59		4105	758	60187	19	1422	14782	172	59	368	120256	29	85	59	23	8856	733694		16921	18	349	10	1034	1118	4477
1993	367	637	22419	112	1575	18	4	74	32159	697	435	75647	15572	13213	464	3993	4747	304	20935	29357	103	309	147	50		3437	872	62923	20	1355	18506	171	62	378	121511	30	90	61	25	9443	785027		17459	19	360	11	1078	1458	4568
1994	353	525	23566	111	1061	18	4	73	33381	738	440	75844	15559	11447	460	4033	5173	204	17741	30634	102	345	145	58		881	827	66036	22	1280	14770	176	64	403	124584	31	99	64	28	10391	833990		18427	19	586	11	1437	1278	4497
1995	339	569	25987	116	2993	18	1	75	34896	930	455	76864	16303	9090	459	4041	6222	226	16573	30632	103	362	145	68		935	831	70452	23	1306	15818	171	65	423	127526	33	99	64	30	11384	905450		16257	20	427	11	1327	1805	4632
1996	321	550	26479	124	2852	19	1	80	36815	699	461	82401	17229	8524	455	4260	6553	232	16407	32195	84	345	144	82		1161	752	77661	26	1328	15424	193	66	441	130739	39	105	64	34	13226	944393		16506	21	468	13	1295	2138	4624
1997	299	421	23818	127	2013	19	1	84	37634	882	476	83391	17087	8129	372	4723	6835	246	16241	31454	106	332	143	107		2289	764	81960	27	1380	14076	220	68	420	135068	40	111	67	39	15379	946144		17701	22	639	13	1360	2064	5156
1998	284	478	29179	134	1993	21	1	87	38128	917	490	86415	17361	8638	458	5019	6558	311	15844	32281	101	331	142	104		2889	912	85162	28	1437	13362	235	68	532	138133	43	117	68	41	15719	906557		17992	24	212	13	1450	1885	5496
1999	224	814	25101	140	2497	22	1	90	40083	822	493	88722	16872	7793	457	4914	6882	330	15302	31159	95	426	140	105		2830	862	87312	28	1066	11994	254	69	517	140548	50	117	72	44	16772	904842		15411	25	224	13	1506	1709	5452
2000	211	824	23960	143	2602	24	1	94	38761	945	649	89840	16985	8047	455	5084	7600	324	14668	31393	108	436	141	108		3760	1031	89442	28	1285	11871	284	74	539	145727	59	127	73	48	16039	928601		15796	28	286	13	1493	1852	5274
2001	223	879	22967	143	2654	26	1	95	36466	966	657	88586	17968	7846	428	3798	8851	333	14388	31232	122	495	144	105		3644	1050	92019	29	1229	12668	272	56	614	143967	64	128	67	47	14546	951068		15346	28	209	9	1571	2107	5562
2002	292	1023	24518	145	3454	26	1	101	34010	830	665	93088	18291	8076	430	4281	9192	335	14291	29264	118	567	152	114		3900	1085	90610	31	1194	12172	274	58	602	141624	75	133	67	46	15043	1049978		15179	28	157	8	1725	1987	5856
2003	326	1171	24973	146	2472	28	1	110	36832	935	699	91702	19688	8349	414	4491	9728	346	14598	30792	118	642	153	103		3951	1044	87707	33	1252	12901	294	44	649	150832	84	135	64	104	15163	1238183		15659	36	250	9	1807	1489	6268
2004	259	1136	24137	153	5125	33	2	115	42975	994	714	93455	19741	8751	470	4775	10282	353	15860	30298	107	684	159	84		4257	1063	92126	34	1363	12763	301	54	667	150586	90	126	64	103	16301	1427199		15018	39	259	15	1890	2090	6102
2005	362	1160	29255	157	5224	35	2	117	44208	1187	742	95493	20239	9364	475	5238	10766	369	16135	29591	115	653	159	108		4419	1117	94712	36	1365	13067	307	42	757	152009	120	129	64	109	16858	1608115		16620	38	268	17	1873	2134	6161
2006	450	1063	27562	149	6072	39	2	121	47842	1195	741	99631	19679	10681	454	5135	11874	374	16927	29199	121	1056	178	107		4790	1128	94810	39	1326	13360	371	51	818	148301	129	132	68	111	17675	1780554		17164	44	305	18	1936	1908	6165
2007	620	1071	29835	147	6859	41	3	128	47771	1381	770	101470	19017	8320	461	7321	12103	372	16505	28237	130	1226	199	107		4814	1154	99049	41	2295	14250	449	51	945	151174	138	156	69	126	19536	1917316		17025	28	331	18	2215	1848	6498
2008	1147	1193	30054	147	7011	41		131	51570	1516	725	105237	18824	9682	408	8118	13502	442	17209	28482	119	1203	177	115		5496	1229	105708	44	2487	13837	523	52	1063	152994	128	159	69	139	19594	2059741		18568	29	357	19	2217	1848	6161
2009	1846	1194	33106	141	7579	40		139	49076	1189	717	107661	17107	8700	448	7695	14654	441	16695	27233	160	1271	130	106		5646	1026	100122	45	2144	11635	527	52	1269	146377	143	152	69	134	18218	2181895		19815	36	476	19	2155	1543	5772
2010	2308	1254	32500	141	7924	41		143	51246	1150	684	106589	18408	8366	451	7981	16345	403	17192	30222	147	1388	166	133		5802	1278	114468	47	2237	12030	535	58	1367	145806	152	152	72	141	19703	2393248		20773	44	540	19	2064	1900	5501
2011	3338	1429	33048	134	8274	39		140	52259	1341	682	106850	17731	9121	509	7813	17293	417	17470	27255	164	1444	121	200		6514	1139	119829	48	2644	13457	603	66	1420	146472	168	160	76	147	21610	2654360		20870	37	616	19	2111	1977	5402
2012	2933	1339	35448	133	9108	39		143	52456	1553	368	105843	16982	9696	537	7274	18409	401	17241	25936	130	1492	130	223	85	6070	1154	128178	48	2636	12192	717	77	1488	141112	138	146	80	167	22082	2734817		21803	39	810	19	2118	2535	4907
2013	2731	1381	36669	130	8895	37		143	51773	1499	235	101518	17040	9720	764	8539	19010	395	17390	26444	140	1585	125	251	88	5978	1426	137354	48	2128	10799	834	79	1528	141031	136	146	81	191	22696	2797384		24441	48	842	19	2072	2914	4786
2014	2675	1559	39651	126	9480	39		145	55638	1508	238	98517	16011	10223	659	8546	19959	347	17316	25457	135	1723	157	273	88	6063	1918	144480	49	2484	11567	777	120	1823	146494	134	148	82	199	22515	2806634		22932	42	844	19	2116	3012	4593
Gesamtergebnis	39133	70600	1003007	3332	142188	706	42	5478	2013085	25463	14356	4252724	1360997	217113	40904	198304	295157	13126	386767	3184611	4239	21898	6911	3025	261	93631	29930	3513002	1050	84018	957765	11362	2490	22847	8038299	2714	3838	2872	3356	662510	47649834	363	785909	1005	16601	494	57130	78502	123910
[truncated: 208 more columns]

## Sheet: Tabelle1
	Zeilenbeschriftungen		1950	1951	1952	1953	1954	1955	1956	1957	1958	1959	1960	1961	1962	1963	1964	1965	1966	1967	1968	1969	1970	1971	1972	1973	1974	1975	1976	1977	1978	1979	1980	1981	1982	1983	1984	1985	1986	1987	1988	1989	1990	1991	1992	1993	1994	1995	1996
	AFGHANISTAN		23	25	25	29	29	42	50	80	90	105	113	134	188	193	229	275	298	350	334	257	456	517	418	447	523	580	542	652	589	611	480	541	573	688	772	957	857	852	782	757	713	665	380	367	353	339	321
	ALBANIA		81	110	102	113	137	181	229	411	328	394	552	622	672	568	550	593	696	731	838	885	1021	1187	1539	1443	1185	1253	1350	1560	1771	2069	1410	2002	1993	2081	2134	2149	2197	2030	1998	2450	1504	1169	686	637	525	569	550
	ALGERIA		1033	1128	1062	1092	1134	1258	1364	1512	1424	1545	1680	1654	1546	1480	1541	1799	2299	2302	2471	3075	4111	5091	7731	10448	8701	8735	10682	11424	17052	12441	18140	12664	10709	14351	19390	19849	20801	22940	22893	21829	20990	21557	21854	22419	23566	25987	26479
	ANDORRA																																										111	111	111	112	111	116	124
	ANGOLA		51	68	85	75	95	113	137	169	162	169	150	124	322	314	334	324	424	271	456	760	977	930	1229	1331	1329	1204	896	964	1476	1501	1458	1440	1268	1395	1366	1282	1271	1586	1399	1366	1395	1388	1417	1575	1061	2993	2852
	ANGUILLA																																										14	14	15	18	18	18	19
	ANTARCTIC FISHERIES																																							1	2	2	3	4	4	4	4	1	1
	ANTIGUA & BARBUDA									6	8	8	10	13	28	23	25	41	95	154	270	343	126	116	102	90	117	193	110	127	134	111	39	29	80	23	40	68	68	75	78	78	77	73	72	74	73	75	80
	ARGENTINA		8168	9544	9853	9591	10032	10799	12092	12996	12064	13362	13312	13957	14643	13658	15197	16053	17218	17874	18839	21088	22562	24254	24586	25652	26062	25888	27212	27486	27990	30189	29653	27827	28204	28692	29049	27433	28419	31345	33126	31931	30583	31933	33093	32159	33381	34896	36815
	ARMENIA																																												1589	697	738	930	699
	ARUBA																																						49	122	167	177	447	459	399	435	440	455	461
	AUSTRALIA		14941	16112	16432	16223	18517	19291	19934	20340	21184	22849	24053	24704	25883	27551	29719	32988	32815	35251	36712	38794	40256	41662	42947	46630	47002	47964	47517	51210	55090	55923	60198	62820	63845	61359	64520	65784	65439	69841	71215	75749	71913	71304	73080	75647	75844	76864	82401
	AUSTRIA		5704	6351	6025	5928	6690	7936	7700	7966	7668	7620	8405	8689	9246	10088	10620	10414	10706	10899	11549	12188	13824	14223	15324	16407	15672	14833	15930	15331	15676	16797	14264	15307	14690	14176	14876	14917	14748	15747	14546	14758	15731	16800	15451	15572	15559	16303	17229
	AZERBAIJAN																																												15337	13213	11447	9090	8524
	BAHAMAS		15	18	21	22	23	35	38	48	49	71	112	149	198	193	296	359	298	465	445	476	702	1836	1770	2147	2015	2251	1763	2650	1802	1890	2179	764	617	550	506	412	385	388	420	531	532	486	489	464	460	459	455
	BAHRAIN		377	321	351	272	285	383	288	206	352	358	157	483	434	326	436	335	177	274	301	347	707	829	1004	1506	1474	1569	1793	2037	2118	2218	2151	2325	2683	2244	2511	2780	3003	3117	3317	3201	3389	3239	2973	3993	4033	4041	4260
	BANGLADESH																								957	1242	1271	1328	1519	1585	1641	1813	2083	2163	2345	2246	2488	2791	3126	3235	3694	3669	4236	4347	4840	4747	5173	6222	6553
	BARBADOS		20	30	24	30	31	35	35	37	41	41	47	53	71	52	49	56	73	92	120	131	117	132	137	131	134	155	145	161	172	164	184	187	176	187	204	231	250	257	258	270	293	329	267	304	204	226	232
	BELARUS																																												23839	20935	17741	16573	16407
	BELGIUM		20801	24418	22784	22487	23404	25119	26419	26339	23936	24107	24816	25305	26757	28847	28269	28754	28690	29308	32331	33711	34257	33141	35679	37871	36875	33297	35454	34516	37048	38242	36897	33821	32057	27715	28749	28490	28054	28120	27367	29305	28920	30259	30534	29357	30634	30632	32195
	BELIZE		5	7	7	8	8	8	8	8	11	11	12	10	19	17	23	23	22	33	28	37	33	39	43	40	42	48	48	54	59	57	52	50	47	47	47	52	56	62	68	82	85	98	97	103	102	103	84
	BENIN										34	28	44	35	37	33	39	41	31	39	42	55	77	80	106	104	111	121	71	81	99	100	141	117	134	124	137	203	187	147	151	172	193	224	245	309	345	362	345
	BERMUDA		12	16	29	25	23	30	37	38	40	37	43	48	43	41	55	49	55	58	61	54	62	63	69	116	121	125	128	124	116	126	119	106	108	123	121	123	115	156	176	213	137	147	126	147	145	145	144
	BHUTAN																						1	1	1	1	1	1	1	2	3	6	6	7	9	8	14	17	15	28	30	17	35	51	59	50	58	68	82
	BONAIRE, SAINT EUSTATIUS, AND SABA
	BOSNIA & HERZEGOVINA																																												4105	3437	881	935	1161
	BOTSWANA																								6	14	24	51	162	213	227	257	269	275	300	281	285	316	291	338	355	390	737	719	758	872	827	831	752
	BRAZIL		5367	5913	6807	6885	8102	9289	9995	9822	10663	10653	12792	13418	14643	15167	15472	15380	17536	18051	21113	22993	25569	27989	31187	36123	39121	41223	42311	44440	48248	51356	51020	46852	46953	45441	46034	49427	54236	56594	57094	58365	56964	59812	60187	62923	66036	70452	77661
	BRITISH VIRGIN ISLANDS														1	1	2	2	3	1	4	5	5	6	6	7	7	7	7	8	8	8	8	12	10	11	11	13	15	17	18	18	18	18	19	20	22	23	26
	BRUNEI (DARUSSALAM)		113	82	88	94	98	82	81	80	87	89	91	83	101	97	93	91	134	120	117	133	2239	2050	2580	2722	2232	1931	1643	1744	2602	2029	1877	401	571	738	523	708	627	905	1559	1731	1689	1448	1422	1355	1280	1306	1328
	BULGARIA		2047	2229	2574	2890	3110	3301	3540	3928	4266	5357	6080	7083	8382	9384	11689	12631	13299	15044	16233	18101	16700	17535	18045	18769	19433	19924	19939	20717	22201	21585	21131	21910	24579	24643	23825	24418	24960	24989	23804	23654	20311	15694	14782	18506	14770	15818	15424
	BURKINA FASO										1	2	12	25	23	24	30	28	28	28	28	33	39	41	44	46	56	60	57	68	95	111	118	152	157	162	127	130	131	141	151	224	159	171	172	171	176	171	193
	BURUNDI														12	13	13	10	13	13	15	20	17	20	20	20	25	21	24	27	28	30	40	43	43	56	60	63	64	68	62	73	57	65	59	62	64	65	66
	CAMBODIA							28	36	44	54	58	64	78	84	106	93	110	128	114	134	367	320	68	32	35	20	20	20	20	14	8	78	82	92	100	112	114	118	119	123	123	344	356	368	378	403	423	441
	CANADA		42070	44402	43510	43838	44482	46258	51807	49900	49721	50356	52603	52954	56500	57570	64849	68763	70717	76874	82776	83829	93124	96157	103937	104069	106346	108302	108895	111304	113416	120553	120871	117263	113120	111450	116061	115102	110459	117630	124367	126336	118675	116384	120256	121511	124584	127526	130739
	CAPE VERDE		28	21	10	5	6	6	8	5	4	5	6	6	5	4	8	7	6	5	8	10	10	10	14	17	18	21	20	22	57	68	33	9	10	10	23	23	16	22	20	22	26	27	29	30	31	33	39
	CAYMAN ISLANDS								1	1	2	2	3	3	3	3	3	3	5	4	6	12	10	12	15	16	15	15	18	19	25	25	44	42	44	46	50	52	55	59	61	70	68	74	85	90	99	99	105
	CENTRAL AFRICAN REPUBLIC											27	24	24	20	20	20	24	23	25	50	51	57	50	46	44	31	28	35	35	40	28	29	37	39	40	41	44	44	71	63	68	54	56	59	61	64	64	64
	CHAD											17	15	14	23	25	27	29	23	32	34	44	34	41	33	44	41	50	50	54	53	55	57	57	56	56	59	49	51	54	18	28	39	18	23	25	28	30	34
	CHILE		2307	2725	2895	2840	3025	3166	3230	3201	3399	3468	3679	3947	4561	4733	4779	4845	5125	5252	5788	6151	6726	7389	7688	7541	7078	6276	6573	6302	6258	6780	6890	6696	5622	5683	6054	5864	6067	6183	7343	8832	9085	8542	8856	9443	10391	11384	13226
	CHINA (MAINLAND)		21465	27763	34995	36600	44011	52099	59047	69964	143390	196823	212906	150550	120087	119088	119150	129799	142566	118144	127878	157414	210422	239060	254043	264124	269434	312410	326205	357325	398737	407652	400107	395828	430941	454603	494930	536284	564213	602593	646169	656815	666057	699644	733694	785027	833990	905450	944393
	CHRISTMAS ISLAND																						19	23	23	19	34	37	34	25	25	27	27	28	20	22
	COLOMBIA		2047	2229	2357	2938	2627	3261	3440	3727	3816	4392	4475	4968	5302	5797	5920	6241	6409	6740	7255	7649	7746	8270	8585	9190	9948	9789	10387	10732	11367	12117	12096	12124	12521	13485	13357	13193	13390	13768	14302	14517	15636	15577	16921	17459	18427	16257	16506
	COMOROS											3	3	3	3	3	3	4	5	5	5	5	8	8	8	8	8	9	11	11	8	6	13	13	13	13	13	13	12	13	14	14	17	18	18	19	19	20	21
	CONGO											51	61	73	65	64	73	67	84	88	123	137	156	187	181	333	443	300	337	131	88	95	111	129	367	312	311	349	291	361	409	411	324	274	349	360	586	427	468
	COOK ISLANDS																					3	3	3	3	3	3	4	4	8	8	7	8	18	14	14	6	6	6	6	6	6	10	10	10	11	11	11	13
	COSTA RICA		78	85	106	118	111	95	132	126	122	105	134	134	150	164	184	231	271	239	283	313	341	417	481	558	520	556	569	713	797	762	672	614	569	574	546	618	711	752	802	811	806	910	1034	1078	1437	1327	1295
	COTE D IVOIRE										136	149	126	151	160	170	208	320	353	406	481	569	666	738	822	875	971	1088	1081	1106	1314	1479	1697	1218	1666	1320	1474	1998	1627	2095	2498	2324	1373	1244	1118	1458	1278	1805	2138
	CROATIA																																												4477	4568	4497	4632	4624
	CUBA		1530	1766	1715	1690	1624	1850	1595	3785	4912	4276	3736	3322	3864	3556	3898	3984	4141	4295	4373	4707	5092	5347	5672	6108	6248	7381	7424	8018	8369	8648	8563	8931	9423	8411	8891	8884	9154	9259	9718	9746	9093	8102	8534	8012	8794	7011	7362
	CURACAO
	CYPRUS		73	77	86	100	121	123	184	223	209	227	242	236	247	269	273	314	339	372	443	456	465	514	656	682	525	540	672	728	766	819	875	831	846	845	868	846	967	1124	1126	1184	1193	1279	1413	1486	1539	1468	1619
	CZECH REPUBLIC																																												37681	36169	34288	33769	34191
	CZECHOSLOVAKIA		20851	22219	23757	24623	26296	27296	29290	30592	33426	33457	35683	38729	41272	43415	45183	44026	43778	43687	45707	48523	55632	58367	58912	59162	59858	62640	65089	67048	67671	65920	66706	65994	65359	65463	67680	66768	67240	66714	65655	63501	59383	54764
	DEMOCRATIC PEOPLE S REPUBLIC OF KOREA		213	272	243	474	1307	2005	2447	3082	4268	5424	6495	7215	8378	8962	9724	12072	12994	14302	16179	17492	20058	29332	24434	26569	27739	29381	30049	31052	29575	30153	31208	31306	32000	34270	36875	39514	42952	48111	55061	58532	33803	32393	28527	26320	24098	22610	19978
	DEMOCRATIC REPUBLIC OF THE CONGO (FORMERLY ZAIRE)		404	477	569	625	769	925	867	909	799	737	633	643	593	626	539	674	656	625	919	996	740	808	824	871	919	883	931	951	965	1024	955	1030	838	1098	1081	993	921	1051	1096	1198	1110	808	768	707	447	579	632
	DEMOCRATIC REPUBLIC OF VIETNAM							644	490	432	919	1389	1621	1681	2059	1919	2105	2250	2395	2136	2289	2321
	DENMARK		6002	5984	6251	6320	6982	7388	7199	6797	7313	7107	8121	8654	10070	11101	11778	12091	13670	13383	14542	16199	16935	15561	16265	16162	15020	15211	16399	16866	16667	17180	16463	14123	14643	13683	13870	16382	16063	15910	15028	13304	13698	16436	14814	15562	16635	15591	19684
	DJIBOUTI		3	7	7	8	9	10	8	12	13	10	11	12	13	18	23	33	38	24	33	23	38	44	52	49	53	54	54	54	55	99	95	82	95	95	96	98	103	106	95	106	88	85	85	85	83	83	85
	DOMINICA			1	2	1	1	1	1	1	2	3	3	3	3	4	4	4	4	6	6	5	7	7	7	7	8	8	8	7	7	9	10	10	11	11	12	13	13	13	15	16	16	16	16	17	18	22	20
	DOMINICAN REPUBLIC		95	98	162	169	171	250	269	282	291	304	284	281	339	341	477	422	456	428	641	724	848	961	1275	1627	1750	1729	1727	1531	1486	1857	1761	1682	1729	2158	2030	1989	2231	2660	2682	2827	2517	2739	2979	3208	3402	4332	4725
	EAST & WEST PAKISTAN		1733	2140	2260	2300	2336	2407	2852	2947	3309	3211	3860	3997	4392	5049	5191	5447	5543	5883	6746	6543	6637	6293
	ECUADOR		202	192	244	224	263	327	354	309	361	353	481	449	427	490	585	621	660	707	850	980	1168	1152	1253	1435	1661	2008	2212	2041	2843	3318	3666	4552	5260	5333	5797	5299	4166	4122	4710	5527	4589	4499	6076	6601	3723	6229	6597
	EGYPT		2794	2883	2974	2943	3185	2906	2715	3254	3736	3470	4378	4660	5071	5878	6960	7538	7244	5366	6246	5371	5914	6285	6957	6489	7124	8481	9407	10326	10721	11712	12337	13902	15414	15569	17409	17436	20334	20401	20325	19684	20710	21466	22161	25404	23265	26104	27824
	EL SALVADOR		73	88	106	114	128	126	144	163	163	165	169	159	177	307	336	284	356	316	344	325	390	412	458	537	538	575	603	624	652	652	582	500	482	519	438	542	543	668	674	706	685	865	905	1035	1253	1371	1246
	EQUATORIAL GUINEA		3	3	3	3	8	10	10	9	13	13	6	6	6	7	7	8	7	7	8	12	10	18	24	8	14	17	17	17	19	17	16	19	20	17	22	18	22	27	29	32	18	39	43	27	9	35	31
	ERITREA																																														236	255	276
	ESTONIA																																												6512	5320	5193	4778	5004
	ETHIOPIA		24	17	27	50	74	62	66	88	87	92	96	93	108	115	111	176	225	293	471	455	451	505	384	478	474	330	321	286	374	504	497	509	404	503	454	495	604	704	729	771	823	814	809	826	611	699	780
	FAEROE ISLANDS		11	11	15	23	21	27	31	26	32	27	16	31	32	34	33	37	38	46	50	58	70	71	64	69	82	95	90	111	109	131	115	120	125	133	136	141	134	136	144	158	194	182	177	159	157	156	164
	FALKLAND ISLANDS (MALVINAS)		75	97	69	28	80	82	85	85	100	28	53	42	13	13	3	3	3	5			3	3	3	4	4	4	4	4	4	4	4	7	6	6	7	8	9	10	11	11	11	11	11	11	11	12	12
	FEDERAL REPUBLIC OF GERMANY		94786	108587	115080	112933	119855	132583	142587	143609	136469	135672	148359	150252	159755	174409	178232	177427	174573	172762	184911	199457	203756	205511	207402	218416	212052	195164	217385	204846	211348	220557	214599	200278	191092	190549	193819	192459	192504	188526	189664	186289	191890
	FEDERATED STATES OF MICRONESIA																																												27	27	28	29	29
	FEDERATION OF MALAYA-SINGAPORE		1421	2098	2555	2585	2800	3009	3041
	FIJI		33	36	43	46	43	47	53	45	48	54	53	46	63	66	116	94	88	97	108	118	142	150	158	172	183	170	132	209	194	229	217	295	229	195	159	158	165	130	151	172	222	183	204	205	204	208	224
	FINLAND		1787	2178	2363	2066	2499	2983	3322	3342	2896	3701	4119	4074	4584	5279	6232	6907	8050	7804	9085	10345	11016	11067	12043	13468	12730	12572	13984	13695	14157	14817	15884	14047	11749	11338	11523	13544	14543	15723	14231	14340	14111	14644	12946	13745	15605	14375	16712
	FORMER DEMOCRATIC YEMEN		9	4	8	11	1205	666	626	800	496	690	975	707	1041	774	964	1044	918	805	3141	1239	639	479	339	656	512	427	501	577	588	594	579	783	1088	1047	1152	1500	1395	1453	1690	1772	1590
	FORMER GERMAN DEMOCRATIC REPUBLIC		44606	48870	51689	57254	60224	64902	66551	68727	69992	70634	73822	77633	81322	83680	86254	84654	85140	82802	83909	87708	76323	77692	77028	78149	78267	78745	80724	82873	83690	85134	86252	86520	86780	86254	88909	93226	94166	94070	92068	91100	84557
	FORMER PANAMA CANAL ZONE		53	54	52	28	23	22	29	42	53	84	73	66	74	152	216	163	123	124	159	91	130	131	193	199	227	304	278	309	297	280
	FORMER YEMEN		7	7	8	8	11	12	10	7	18	20	16	20	19	22	27	28	27	28	35	37	46	59	69	89	101	165	199	236	259	285	326	371	534	679	804	861	860	915	929	954	1027
	FRANCE (INCLUDING MONACO)		55215	62435	61960	58566	61788	65236	73293	75750	72655	71492	73962	76687	81458	91088	94165	95951	94692	101448	104890	112697	119720	126107	131096	140878	136098	121876	137879	131131	137949	144302	137814	123998	119142	115245	110538	109321	105158	102943	101502	106531	102452	106542	99780	98150	92206	95217	102347
	FRENCH EQUATORIAL AFRICA		48	64	83	70	74	73	95	102	117
	FRENCH GUIANA		2	3	3	3	4	4	4	4	5	6	6	6	6	7	8	10	12	19	23	23	28	28	28	32	28	32	75	93	90	149	102	89	99	105	97	100	100	114	141	183	172	182	192	191	168	159	133
	FRENCH INDO-CHINA		404	351	509	478	729
	FRENCH POLYNESIA							12	12	14	14	8	10	16	13	18	18	23	33	38	42	44	53	62	59	57	59	58	72	75	85	77	80	90	92	115	125	160	165	166	156	148	119	118	113	116	120	117	118
	FRENCH WEST AFRICA		354	296	331	275	324	323	374	383
	GABON											6	36	45	24	20	52	59	104	276	535	391	568	776	747	1449	1487	1464	1557	1722	2062	1842	1809	1793	1788	1505	1635	1723	1355	1097	1182	1574	1227	1237	1345	1361	1197	1261	1302
	GAMBIA		4	4	3	3	4	4	5	6	7	5	5	6	7	8	8	8	9	9	10	13	13	15	18	17	17	27	27	31	38	40	43	43	44	44	47	47	44	49	50	49	48	49	49	51	51	54	54
	GEORGIA																																												4182	2714	1659	628	1109
	GERMANY		139392	157457	166769	170187	180079	197485	209138	212336	206461	206306	222181	227885	241077	258089	264486	262081	259713	255564	268820	287165	280079	283203	284430	296565	290319	273909	298109	287719	295038	305691	300851	286798	277872	276803	282728	285685	286670	282596	281732	277389	276447	253606	243244	239336	236040	235645	242600
	GHANA		174	239	237	278	274	324	294	353	372	361	399	367	391	470	450	465	393	408	481	461	716	626	661	675	801	749	664	819	810	725	698	831	830	997	704	907	831	896	941	912	1041	1073	1086	1240	1351	1439	1530
	GIBRALTAR		32	28	20	18	15	16	14	14	15	13	13	14	15	15	15	13	15	17	18	18	19	22	20	23	21	24	21	21	19	25	24	14	6	10	9	12	11	13	19	19	39	54	64	65	77	75	77
	GREECE		1127	1249	1310	1334	1388	1626	1717	1861	2034	2218	2565	2679	2772	3343	3606	4643	5086	5327	6087	6947	6590	7585	8610	10160	9877	10601	11702	12817	13112	13988	14025	13832	14221	15147	15559	16526	16125	17309	18541	20230	20256	20197	20589	20647	21246	21484	21882
	GREENLAND		27	27	29	33	28	57	39	44	62	64	61	80	72	90	86	94	106	114	148	111	104	128	151	152	152	138	60	197	107	156	154	144	141	99	155	139	89	64	149	129	151	149	131	136	137	137	141
	GRENADA		2	3	3	3	3	3	3	3	4	4	6	5	7	4	6	6	8	10	11	13	12	13	13	15	10	13	13	13	14	13	13	16	17	17	17	17	18	20	26	28	29	30	32	33	39	41	42
	GUADELOUPE		17	18	18	18	20	22	25	30	30	39	43	48	51	56	59	56	69	79	76	85	83	93	103	111	105	110	135	143	144	147	171	215	208	222	239	243	259	276	308	324	350	351	366	375	387	399	423
	GUATEMALA		169	174	176	186	203	250	267	269	308	338	367	384	377	415	483	539	475	541	584	622	627	666	739	801	837	961	903	1040	1126	1280	1230	1082	989	867	933	961	1009	1089	1125	1158	1387	1378	1641	1543	1865	1954	1814
	GUINEA										45	43	112	168	180	190	191	190	196	198	204	204	216	222	227	219	229	230	242	246	246	258	263	270	268	260	267	271	272	271	280	285	274	280	289	297	341	352	372
	GUINEA BISSAU		2	1	3	2	2	3	3	3	3	4	5	8	11	13	16	18	18	13	17	16	19	20	18	30	28	31	26	28	28	30	40	39	39	39	44	47	50	53	59	63	47	48	49	50	50	50	50
	GUYANA		71	78	92	123	129	141	150	146	125	151	180	201	185	168	177	294	322	361	363	373	431	409	426	492	424	498	478	518	561	415	488	491	383	340	383	387	285	357	383	323	309	304	285	285	378	399	414
	HAITI		31	36	40	43	59	73	72	69	75	69	78	81	83	68	82	83	83	71	72	86	105	110	107	115	129	132	184	193	206	206	205	209	225	244	249	257	230	249	279	283	271	272	248	181	82	246	282
	HONDURAS		82	95	98	91	103	119	124	157	160	160	168	201	191	194	197	205	220	239	334	321	379	363	419	412	425	455	485	546	559	527	561	497	481	546	542	520	504	593	683	744	707	736	839	777	910	1058	1080
	HONG KONG SPECIAL ADMINSTRATIVE REGION OF CHINA		360	425	419	472	491	513	579	645	648	738	806	920	1005	1159	1152	1311	1409	1652	1692	2116	2291	2498	2532	2535	2912	3005	3411	3881	4296	4332	4544	5097	5373	5731	6094	6276	7008	7710	8040	8276	7454	7810	9025	9535	8531	8582	7942
	HUNGARY		5020	6056	7427	8671	9283	9746	9052	10494	10712	11438	12373	13356	13788	15348	17017	16715	16835	16043	16677	17022	19090	18893	18934	19926	20208	20559	21820	22690	24049	23515	23687	23621	23690	24308	24776	23481	22781	23026	21343	20750	18993	18158	16470	16885	16058	16463	16925
	ICELAND		202	176	212	250	213	249	259	263	298	338	331	298	327	356	357	381	408	394	435	345	379	402	405	478	475	441	465	520	525	542	509	478	436	422	495	444	487	505	504	519	545	482	496	539	548	531	603
	INDIA		18178	19029	20058	20436	21490	23319	24142	27084	28309	29950	32883	35561	39124	42019	41082	45261	46841	46970	51087	52011	53216	56141	59408	61179	63265	68776	71935	76098	77201	80963	85633	92402	95347	103264	105841	116355	124781	133210	143868	157897	168845	179490	190643	197354	208544	221315	240612
	INDONESIA		2683	2563	3472	3570	4025	5689	5953	6117	6061	6513	5837	7097	6271	6213	6107	6733	6380	6698	7523	9106	9769	10632	11819	13399	13979	14716	16856	22480	25616	25933	25848	27314	28745	28622	30593	33064	33199	33644	36041	35715	40787	49013	55243	59613	60380	61342	69073
	IRAQ		450	663	535	690	832	1119	1746	1630	1820	1997	2254	2378	2463	2562	2475	5267	7555	5016	5377	6170	6520	7871	8059	8357	8438	9042	13308	11920	11540	14451	12424	8760	8351	10567	10964	12183	13022	14421	18524	19976	13006	12447	16120	17279	19453	20275	18953
	IRELAND		2655	2868	2626	2603	2482	3198	2982	2653	2445	3361	3049	3372	3578	3671	3881	3745	4121	4476	4860	5049	5294	6135	6014	6234	6355	6014	6080	6427	6428	7469	7160	7101	6967	7011	6962	7288	7779	8235	8138	8186	8513	8563	8463	8525	8910	8991	9519
	ISLAMIC REPUBLIC OF IRAN		-1473	1887	1117	1045	285	4316	6225	5950	6886	6979	10197	9965	10216	11274	12970	14662	17497	18528	22472	22666	25054	27740	28938	35341	39245	38001	42717	44715	44306	44731	32970	30788	37635	40847	41085	43842	40469	43516	48027	52142	57394	62013	62304	64689	72329	74432	75282
	ISRAEL		456	797	999	1103	1181	1315	1309	1412	1512	1530	1764	1928	2166	2239	2495	3530	3708	3693	3766	4041	4521	4431	4618	5266	5303	5358	5348	5425	5775	5732	5767	5785	6567	6528	6475	6782	7261	7468	8195	8660	9898	10023	11669	12292	13199	13935	14480
	ITALY (INCLUDING SAN MARINO)		11313	13331	13823	15291	17733	20008	22795	23779	23922	25694	29822	33965	39939	44936	47984	51750	58426	63929	68038	73632	80922	84971	89711	96624	98011	93349	100167	97130	101782	105663	106073	103087	100813	98545	100259	101482	99933	104628	106294	111510	113867	115597	114681	112331	111093	117394	116125
	JAMAICA		74	142	154	168	216	269	344	438	370	502	401	581	578	654	1109	816	960	1055	1059	1165	1362	1569	1715	2263	2073	2233	1986	2031	2487	2328	2305	2022	1696	1759	1403	1376	1241	1468	1235	1835	2054	2115	2104	2183	2235	2503	2646
	JAPAN		27991	33702	35599	39794	38913	38733	43856	51345	49460	52590	63480	77207	79962	88689	97987	105514	114465	133592	153413	178336	209660	217492	232717	249727	249761	237271	247860	255035	246492	260600	258405	253506	245487	241025	256376	249631	249614	246996	269725	279670	298931	299804	306476	302669	319966	322729	328522
	JAPAN (EXCLUDING THE RUYUKU ISLANDS)
	JORDAN		47	44	53	58	69	104	123	135	143	179	203	267	286	333	339	388	432	386	411	480	425	452	523	601	608	680	805	863	993	1035	1289	1599	1716	2008	2278	2329	2531	2635	2540	2518	2837	2672	3345	3300	3718	3697	3869
	KAZAKHSTAN																																												71460	59346	54536	46132	38597
	KENYA		248	380	434	413	464	542	606	623	570	603	662	655	716	779	771	673	732	737	769	854	841	1005	1056	1069	1350	1357	1257	1379	1452	1374	1690	1780	1280	1271	1178	1028	1135	1411	1306	1416	1588	1320	1511	1731	1788	2060	2544
	KIRIBATI													2	3	5	5	3	3	6	9	3	6	8	7	10	9	9	9	6	6	7	8	8	7	6	6	6	5	6	6	6	6	6	7	8	8	8	9
	KUWAIT		105	32	-119	-14	383	504	284	600	1007	1037	2128	2722	3897	4643	6909	9659	9586	6938	6120	7317	6829	7401	7536	6611	5271	4589	5038	4696	5727	4818	6729	6876	5773	5893	7736	7952	9632	8582	8976	9786	13908	2779	5750	9074	10610	14950	13677
	KUWAITI OIL FIRES																																											130438
	KYRGYZSTAN																																												3059	2351	1698	1235	1553
	LAO PEOPLE S DEMOCRATIC REPUBLIC							7	16	16	20	21	22	31	36	40	47	49	64	87	46	87	156	115	133	141	80	69	61	63	63	61	51	41	43	49	50	55	57	57	57	64	58	64	70	70	75	95	130
	LATVIA																																												3857	3277	2976	2575	2495
	LEBANON		413	398	321	341	357	443	515	564	541	669	704	732	779	826	891	905	990	974	1009	1187	1077	1456	1562	1956	1972	1754	1671	1520	1558	1679	1685	1732	1667	1996	1923	2197	2116	2173	2089	2196	2240	2312	2825	3186	3464	3703	3752
	LEEWARD ISLANDS		5	8	6	7	5	9	9
	LESOTHO																																										402	417	433	446	457	466	474
	LIBERIA		13	12	15	16	28	16	13	23	44	39	45	44	69	97	132	152	167	167	241	347	396	416	411	404	470	405	403	402	411	531	557	529	164	194	191	197	199	209	223	182	129	76	77	86	85	89	92
	LIBYAN ARAB JAMAHIRIYAH		39	46	45	68	82	117	90	85	96	118	189	326	286	399	181	277	717	5047	8219	9695	8817	5903	4154	3978	2549	3158	4886	5483	5792	7099	7337	7857	8389	8294	7806	8568	9288	8881	9926	10178	10030	11689	10161	10621	12035	12550	12042
	LIECHTENSTEIN
	LITHUANIA																																												6040	4771	4734	4419	4290
	LUXEMBOURG		2025	2459	2566	2362	2397	2698	2830	2958	2753	2844	3141	3161	3150	3122	3356	3328	3169	3098	3346	3598	3749	3600	3680	3864	3930	3230	3229	2980	3231	3306	3007	2571	2416	2261	2435	2500	2457	2364	2435	2634	2728	2895	2883	2942	2779	2268	2301
	MACAU SPECIAL ADMINSTRATIVE REGION OF CHINA						6	6	7	8	8	10	14	19	26	29	35	36	41	45	46	46	56	62	63	61	73	81	69	84	113	113	144	146	132	186	165	200	239	265	263	281	282	298	295	322	347	336	384
	MACEDONIA																																												2939	2820	2855	2956	3202
	MADAGASCAR		83	67	84	69	79	83	87	86	102	102	109	97	108	126	132	152	158	230	249	232	265	280	351	293	324	462	271	231	278	309	441	280	277	178	237	288	311	351	352	254	259	282	274	281	346	345	372
	MALAWI																90	95	117	100	106	104	124	137	149	156	150	158	159	174	183	174	194	165	162	157	152	152	151	149	148	154	204	217	217	243	250	251	249
	MALAYSIA																						3982	4548	4885	4776	5195	5303	6516	6166	6337	7439	7635	8406	8337	10355	9462	9882	10904	11116	11651	13603	15433	18705	20534	25013	25637	33033	34190
	MALDIVES																							1	1	1	1	2	3	4	6	8	12	13	13	14	16	18	22	22	26	34	47	42	63	54	54	68	79
	MALI											13	33	32	38	48	48	54	52	61	54	44	55	62	67	73	83	93	93	113	108	117	107	108	100	114	119	111	104	98	105	114	115	119	121	124	126	128	133
	MALTA		67	70	66	63	84	93	81	85	90	106	93	80	90	112	136	129	113	142	174	178	181	180	229	220	203	182	208	219	255	247	279	312	358	272	372	327	405	506	549	592	589	561	552	723	660	579	611
	MARSHALL ISLANDS																																												15	17	18	18	18
	MARTINIQUE		15	22	25	25	25	31	32	44	39	45	46	47	47	57	64	67	74	81	84	90	99	146	214	259	284	246	232	233	199	194	213	215	246	280	404	330	374	448	472	415	439	382	435	432	446	447	447
	MAURITANIA											9	10	13	17	24	32	44	49	54	64	75	117	109	122	128	132	139	141	152	159	165	172	181	241	256	238	179	102	896	881	777	247	251	264	268	312	293	304
	MAURITIUS		55	38	48	51	51	35	60	60	57	61	49	51	69	57	84	83	75	136	174	156	136	108	188	185	189	161	169	175	172	180	161	148	137	163	171	193	218	254	233	287	399	415	466	484	443	499	532
	MEXICO		8328	9524	10158	10020	9901	10827	11502	13452	14743	15911	17212	17809	17401	18097	20256	20520	22070	24571	25631	27894	31108	34453	36122	39349	42271	44852	50215	52590	60717	65687	73208	77592	83130	75932	75709	78675	80327	83817	83738	98685	86836	90526	91273	92574	96204	90760	94469
	MONGOLIA		78	80	82	83	133	161	188	208	310	367	353	380	538	437	558	534	533	587	677	732	777	828	895	949	1023	1109	1201	1356	1577	1718	1876	1812	1844	1908	1759	2462	2638	2887	3162	2882	2724	3316	3005	2532	2167	2160	2193
	MONTENEGRO
	MONTSERRAT														1	1	2	1	2	2	2	2	4	4	4	4	4	3	3	7	7	7	4	5	5	6	6	7	8	8	8	8	8	8	8	8	9	9	10
	MOROCCO		699	799	973	1139	979	971	961	834	892	920	993	1030	840	1080	1206	1162	1491	1477	1535	1589	1989	2237	2195	2629	3037	3030	3149	3464	3566	4352	4348	4324	4652	4853	4858	4872	5149	5486	5775	6250	6420	6811	7101	7695	8083	8283	8507
	MOZAMBIQUE		246	254	293	295	312	375	424	483	496	490	514	718	542	453	584	547	580	511	758	884	814	986	900	972	859	787	698	740	784	721	875	679	693	539	419	313	268	268	276	284	279	279	274	294	290	304	284
	MYANMAR (FORMERLY BURMA)		219	250	309	356	399	388	452	573	658	758	741	707	786	719	780	744	766	987	799	877	1259	1392	1336	1121	1275	1251	1336	1411	1406	1391	1507	1538	1527	1575	1792	1830	1852	1357	1123	1217	1166	1140	1333	1457	1703	1898	1979
	NAMIBIA																																											288	314	379	432	445	477
	NAURU																8	9	9	13	13	18	18	24	21	23	27	28	28	31	31	31	34	34	34	34	34	34	44	43	43	43	34	34	33	31	30	29	28
	NEPAL		7	8	8	10	11	12	13	15	16	18	22	22	24	27	41	49	52	58	69	109	62	54	73	115	116	96	77	92	90	140	148	124	121	135	192	185	192	238	271	249	173	262	363	400	463	555	678
	NETHERLAND ANTILLES																																						829	737	726	1382	1480	1181	973	1502	1440	1425	1333
	NETHERLAND ANTILLES AND ARUBA		2003	3159	1824	2111	4270	3532	4568	3120	2733	3518	3025	3157	3467	3321	3229	2897	2709	3337	3103	4061	4542	3953	3833	4252	3854	2791	5962	3114	2652	2782	2863	2727	3049	1567	3913	4580
	NETHERLANDS		13998	15003	14934	15084	15938	16646	17763	17580	18203	18320	20045	20695	22732	24878	26416	27406	28267	29120	30966	31609	38706	38417	43031	45172	43754	41729	46273	44799	46509	51217	48407	44984	36630	37703	39557	40346	39568	41606	40064	44478	43197	45038	44239	44942	45084	48714	50681
	NEW CALEDONIA		60	77	129	109	142	191	318	291	202	161	235	242	154	169	300	336	412	402	502	425	653	660	465	709	759	690	652	584	421	448	546	380	345	315	329	397	383	398	411	449	432	482	432	501	540	566	599
	NEW ZEALAND		2339	2230	2544	2334	2475	2564	2641	2813	2779	2817	3148	3209	3057	3335	3574	3736	3822	3720	3678	3892	3871	4107	4417	4964	5115	4980	5246	5536	4911	4493	4761	4507	4974	4899	5262	5946	6243	6575	6926	6928	6421	6568	6840	7278	7276	7399	7811
	NICARAGUA		52	55	75	78	86	107	103	114	164	131	145	153	180	230	259	213	262	295	336	351	383	411	438	499	532	526	607	774	718	467	553	584	577	546	505	543	617	665	613	403	695	547	653	628	693	758	784
	NIGER										7	6	8	15	18	24	26	25	37	36	44	52	59	63	69	90	79	91	91	100	114	131	156	187	204	263	271	272	246	273	270	284	200	197	191	213	211	221	246
	NIGERIA		616	460	595	665	702	736	822	869	1016	973	929	1122	1140	1459	1984	3208	3520	3501	1809	3303	5874	8803	11297	13520	16987	12925	15066	13790	13170	19168	18586	17987	17890	16343	18987	19060	20045	16183	19293	11574	10689	11528	12712	12309	9599	9774	10817
	NIUE																						1	1	1	1	1	1	1	1	1	1	1	1	1	1	1	1	1	1	1	1	2	2	2	2	2	2	2
	NORWAY		2302	2587	2644	2671	2698	3116	3263	3101	3054	3224	3573	3641	3839	4086	4415	4475	5335	5271	5765	6060	7639	7417	8025	8324	7553	8092	7995	8473	9488	9338	10377	10998	11195	10226	11033	11103	12838	11101	11585	13466	8593	8747	8729	9585	9246	9119	9099
	OCCUPIED PALESTINIAN TERRITORY																																										235	241	250	255	264	258	283
	OMAN																3	7	8	37	44	64	64	571	570	576	637	1979	2271	2320	2126	2106	1649	1641	1564	2054	2198	2362	2693	2581	2887	2745	3105	3210	3294	3670	4174	4335	4119
	PACIFIC ISLANDS (PALAU)							3	3	4	4	4	4	14	14	15	16	18	18	20	21	36	37	45	47	48	53	53	31	50	30	34	43	43	43	43	43	44	44	44	50	62	64	64
	PAKISTAN																								5162	5464	5841	6332	6228	6651	7128	7704	8745	9381	10195	10991	11687	12865	13486	14599	15875	16623	18698	18610	19850	21273	23136	23039	25756
	PALAU																																												64	64	64	64	64
	PANAMA		141	151	196	195	173	194	173	208	253	271	272	301	325	323	339	417	452	463	551	560	601	710	764	884	824	999	985	944	775	871	852	911	898	953	786	717	751	873	799	688	755	885	1158	1075	1183	814	1261
	PAPUA NEW GUINEA		15	17	23	26	26	35	35	40	40	44	49	55	54	70	73	83	93	119	137	152	189	225	346	367	433	418	429	431	457	490	499	527	531	548	558	580	563	637	600	555	584	563	560	544	595	562	597
	PARAGUAY		17	13	28	33	50	52	54	58	66	83	83	99	107	112	118	150	140	133	161	142	203	173	195	237	260	229	282	316	398	363	407	379	373	386	408	423	454	516	590	612	590	582	690	782	936	1081	1023
	PENINSULAR MALAYSIA									812	884	716	973	1091	1111	1355	1752	1769	2098	2312	2321	2598
	PERU		1240	1303	1416	1505	1702	1672	1723	1822	2013	1970	2229	2357	2719	2791	3345	3263	3615	3724	3955	4173	4850	5076	4956	5388	5825	5990	6120	6365	6125	6074	6578	6573	6455	5577	5643	5321	5958	7031	6847	5956	5746	5534	5570	6440	6351	6513	6651
	PHILIPPINES		984	970	1106	1101	1455	1806	1707	1837	2064	1973	2273	2379	2822	3132	3501	3813	4397	4972	6068	6234	6758	7523	7211	8602	8326	8870	9580	10023	10220	10400	10090	9453	9544	9658	8452	7649	7965	8913	10289	10674	11389	11980	13295	13494	14944	16556	16952
	PLURINATIONAL STATE OF BOLIVIA		135	126	140	147	215	254	302	274	250	259	274	284	300	331	404	412	461	516	594	695	678	835	974	943	959	1107	1249	1222	1371	1292	1273	1307	1186	1170	1102	1125	1030	1099	1175	1362	1570	1638	1815	2135	2355	2686	2680
	POLAND		30604	33336	34949	37993	40279	42090	45424	48772	48241	51769	54477	56568	59126	63054	66298	67418	68906	70707	75286	80080	83022	85423	89979	91663	94594	102416	108818	114269	117823	120668	126691	111825	115138	115173	118324	121598	123635	126903	121619	115568	100470	98621	96740	96333	91075	93868	97015
	PORTUGAL		1534	1473	1461	1619	1581	1764	1956	2125	2063	2179	2243	2479	2537	2734	3006	3163	3232	3384	3548	3985	4161	4474	5004	5455	5649	5824	6115	6198	6202	6826	7359	7425	7978	8230	7926	7474	8323	8600	8979	11238	11541	11997	13166	12797	12997	14145	13795
	PUERTO RICO
	QATAR		96	106	53	100	166	114	138	85	46	50	48	44	52	1674	1711	1716	1712	1824	1931	1956	2064	2496	2941	3400	2860	2988	2832	2707	2872	3916	3572	3507	3369	3073	3363	3383	3626	3136	3253	3907	3211	4828	7309	8378	8242	8669	8808
	REPUBLIC OF CAMEROON		38	50	77	55	63	64	65	70	76	76	74	77	79	82	92	85	94	125	138	156	174	221	235	245	266	317	298	427	546	499	1065	1457	1730	1797	1652	1766	544	503	600	2082	473	301	1033	1063	1041	1153	1217
	REPUBLIC OF KOREA		596	798	945	1281	1408	1759	2062	2242	2459	3063	3423	3944	4712	5755	6059	6819	8185	9586	10156	11596	14667	15985	16454	19933	20640	22315	25445	28828	30926	36327	36779	38108	38698	41152	44699	48632	49755	52539	60529	64316	67342	71307	77524	87797	93820	102201	110112
	REPUBLIC OF MOLDOVA																																												5719	4262	3297	3052	3142
	REPUBLIC OF SOUTH SUDAN
	REPUBLIC OF SOUTH VIETNAM							318	304	353	450	414	422	497	490	568	1113	1340	2841	4132	4153	5064
	REPUBLIC OF SUDAN
	REUNION		7	8	9	6	10	11	13	16	17	19	20	23	25	31	34	41	49	58	59	61	87	90	95	105	116	132	172	177	196	250	222	214	236	246	272	271	294	320	367	379	301	372	420	393	443	481	530
	RHODESIA-NYASALAND		1568	1729	1945	2120	2331	2749	2997	3085	2756	3074	2931	2496	2411	2318
	ROMANIA		5300	6143	7270	8361	9146	10041	11132	12538	13593	13825	14576	15210	17420	18961	19666	21468	22957	25124	27322	30447	32755	34314	36112	39531	41163	44248	47659	48650	52878	53470	53618	54037	53388	54694	51615	52998	55126	57858	58025	58397	47474	38257	35082	34169	32490	34374	34199
	RUSSIAN FEDERATION																																												566858	528619	463152	444907	439860
	RWANDA														23	23	10	13	12	11	15	16	16	17	18	19	20	48	73	73	79	81	135	164	166	190	173	168	163	168	190	188	148	133	133	135	129	126	131
	RWANDA-URUNDI		7	7	13	12	5	6	7	8	8	31	29	38
	RYUKYU ISLANDS				6	36	40	44	51	60	71	82	90	94	113	117	125	150	163	185	211	207	520	881	2458
	SABAH		12	10	14	16	13	15	19	21	19	36	35	37	54	54	58	76	91	85	132	119
	SAINT HELENA																				1													2	1	1	1	1	1	1	2	2	2	2	2	3	3	3	3
	SAINT LUCIA		1	3	2	3	2	3	3	3	3	3	4	5	5	6	6	7	8	9	10	17	18	19	21	22	20	21	23	19	27	41	31	26	31	28	31	35	36	40	45	45	44	46	55	61	71	85	89
	SAINT MARTIN (DUTCH PORTION)
	SAMOA		1	1	2	2	3	3	3	4	3	4	4	5	5	6	7	8	7	7	8	8	8	10	10	10	9	16	13	22	29	26	27	28	31	31	31	31	31	31	31	33	28	29	30	30	31	32	34
	SAO TOME & PRINCIPE			1	1	1	1	1	2	3	2	2	3	3	3	2	3	3	3	3	4	4	4	3	3	4	5	5	8	8	9	9	11	12	13	15	14	15	14	14	13	13	13	13	13	13	13	13	13
	SARAWAK		87	88	109	123	128	110	122	126	143	117	139	151	139	182	210	443	496	368	422	-222
	SAUDI ARABIA		1403	-95	-47	130	338	577	445	573	917	506	730	974	1706	1894	1922	1151	1749	6956	7937	9627	12351	16310	19183	25944	26940	22726	27693	32227	31397	37670	46197	47857	43112	43919	42464	47083	55871	52006	55237	55560	50669	73021	77866	85579	83982	64129	70562
	SENEGAL										97	106	226	222	222	235	252	462	469	191	-22	134	357	369	397	423	505	704	484	612	717	791	914	899	833	718	902	730	726	669	748	1008	868	934	949	980	1064	953	1020
	SERBIA
	SEYCHELLES															2	2	2	2	2	2	2	8	9	12	13	15	16	22	23	21	33	26	27	23	27	27	41	45	55	54	64	41	47	47	50	55	54	64
	SIERRA LEONE		43	26	49	46	34	50	49	106	57	64	195	79	89	101	83	77	82	69	105	302	238	219	185	147	142	143	123	140	194	185	166	189	151	188	168	181	184	136	125	102	133	149	122	122	140	109	129
	SINGAPORE									472	627	491	380	571	703	927	1010	690	184	834	1478	1965	4966	4525	6065	5787	5991	6693	8191	7720	9044	9851	8572	7322	8113	9544	9109	9113	9552	8890	9846	11423	12134	12345	13206	13959	16821	11501	13553
	SLOVAKIA																																												12049	11694	11023	11485	11266
	SLOVENIA																																												3403	3590	3638	3928	4078
	SOLOMON ISLANDS				1	1	1	3	3	3	3	3	3	4	4	4	5	7	7	9	10	10	11	13	15	18	18	16	17	22	17	30	28	37	33	39	39	41	42	44	43	44	40	40	39	39	38	39	39
	SOMALIA		13	13	13	13	13	18	19	20	23	24	23	24	29	28	37	36	38	62	42	44	59	51	64	72	90	137	131	218	152	133	222	75	196	255	195	234	252	271	275	261	200	193	186	175	172	161	155
	SOUTH AFRICA		16659	17781	19348	19379	20171	22638	23819	24471	26273	25787	26707	27874	28843	29950	32631	34977	35003	36511	37656	39073	40841	45969	46830	47323	48196	50505	52663	54527	55113	59697	62300	70185	76561	79692	86160	88414	90225	89726	93552	93021	85439	89013	82271	87551	92492	98789	99373
	SPAIN		9019	9041	10266	10629	10846	10996	11559	13710	15255	14220	13343	14638	16377	16041	17565	19394	21197	23594	26495	26420	31887	35092	39549	42369	47219	49535	54116	53358	54675	55562	58632	56528	57242	55868	54255	54877	51941	52053	54277	61814	59612	61531	63791	59791	63650	65888	63623
	SRI LANKA		444	422	529	564	487	454	387	633	532	561	616	637	699	691	620	725	726	804	884	1178	981	872	966	1006	800	790	765	796	941	1044	930	1100	1227	1332	1059	1079	1010	1111	952	950	1055	1139	1414	1375	1507	1610	1926
	ST. KITTS-NEVIS																																	15	18	14	14	14	16	15	18	18	29	29	30	31	33	35	36
	ST. KITTS-NEVIS-ANGUILLA									3	3	4	3	6	4	5	5	6	6	6	9	7	7	8	8	8	10	9	10	10	9	10	14
	ST. PIERRE & MIQUELON		4	6	9	8	9	10	9	11	11	9	10	13	9	10	13	11	12	14	11	9	10	13	19	11	12	9	13	10	9	10	10	11	11	9	10	9	13	14	18	28	25	28	26	20	19	19	19
	ST. VINCENT & THE GRENADINES		1	1	3	2	2	2	2	2	3	3	3	3	3	4	5	4	5	5	6	8	8	8	10	11	9	9	9	9	10	8	10	10	11	13	18	18	18	21	18	21	22	21	23	28	33	35	36
	SUDAN		150	197	207	227	223	253	245	315	352	373	371	378	405	458	507	662	721	869	847	1141	1324	1359	1467	1480	1550	1156	1024	1038	938	974	1022	993	1044	1066	956	1111	1159	914	1322	1025	1424	1334	1194	824	1131	1172	1209
	SURINAME		58	64	73	85	92	85	93	102	87	100	118	117	135	145	165	217	299	364	396	415	439	468	476	575	437	551	545	518	653	626	647	554	511	375	424	436	480	480	512	506	483	560	564	557	558	563	569
	SWAZILAND		1	1	1	1	1	1	1	1	1	1	9	1			3	22	55	62	76	83	100	109	104	101	85	92	91	93	120	122	127	119	119	74	91	120	125	119	119	119	116	89	72	36	132	124	93
	SWEDEN		7823	9128	9424	8886	9417	10673	11841	10604	11485	11572	13423	13322	13997	15100	16480	17079	19796	18817	21185	23580	25192	23068	23120	23825	21786	22041	24082	23399	21689	23160	19569	18934	16987	15898	15635	17015	16918	16285	15665	15144	14166	14051	13915	14114	14970	15041	15247
	SWITZERLAND		2794	3358	3065	2822	3439	3718	4658	4831	4446	4533	5324	5560	6587	7937	7681	8282	8598	8880	9825	10389	10989	11438	11719	12616	11312	10662	11040	11204	11513	10884	11055	10597	9989	10927	10683	10861	11534	10977	11102	10763	11620	11646	11670	11113	11269	10697	10877
	SYRIAN ARAB REPUBLIC		113	104	130	140	158	449	547	541	592	608	879	836	874	985	1191	1003	1341	1257	1626	1975	1816	2423	2118	2153	2636	3050	3752	3999	4151	6149	5673	7264	6678	7625	9024	8086	8550	9879	10075	9426	10188	11598	11704	12453	12721	11362	11673
	TAIWAN		1033	1340	1745	1767	1771	1965	2098	2234	2613	3001	3242	3421	3868	4126	4617	4873	5315	6000	6593	7180	7847	8596	9797	10991	10736	11868	15322	16697	19400	20694	22812	20503	20593	22711	23182	23147	25768	26821	30892	33632	33730	36784	39665	42862	44740	47545	49770
	TAJIKISTAN																																												1995	1412	643	668	771
	TANGANYIKA		129	115	142	138	140	144	171	199	211	179	217	183	198	210	274	308	366	471	442	484
	THAILAND		261	298	349	449	560	648	715	798	824	907	1013	1131	1373	1519	2040	2032	2585	3318	4663	3971	4193	5249	5955	6669	6612	6656	7848	8770	9563	10018	10945	10376	10338	11577	12537	13273	13554	15529	18272	21514	24763	27211	29937	34074	37949	43947	49156
	TIMOR-LESTE (FORMERLY EAST TIMOR)
	TOGO		7	7	12	8	9	11	11	13	13	15	18	25	24	29	36	36	49	54	53	66	75	86	109	110	103	85	88	126	97	377	196	171	200	149	166	150	193	209	216	228	211	230	228	236	227	260	289
	TONGA		2	2	2	2	2	2	2	2	2	2	3	3	3	3	3	3	3	4	4	3	7	5	6	7	6	9	8	8	10	11	11	13	12	13	13	13	13	15	19	19	21	26	19	23	25	26	21
	TRINIDAD AND TOBAGO		642	686	763	801	774	743	786	700	949	844	704	1255	1974	357	1035	1417	1106	1265	1102	1065	2454	2210	2248	2563	2741	2624	4343	4411	4180	4561	4619	4707	5025	4446	4782	5660	4741	4778	4327	4402	4643	4640	5223	4901	4756	4642	5615
	TUNISIA		333	376	394	376	384	436	426	430	395	434	471	482	490	531	752	672	787	842	981	1052	1021	1149	1292	1317	1472	1513	1595	1843	2043	2392	2589	2682	2598	3083	3149	3256	3290	3204	3399	3609	3618	4224	4097	4500	4347	4291	4570
	TURKEY		2590	2780	2859	3539	3667	3718	3920	4360	4378	4694	4587	4735	5899	6182	7182	7469	8603	9142	9903	10583	11628	13017	14687	16222	16672	17916	20104	22245	21068	20610	20661	21782	23722	24691	26124	29102	31874	35426	34445	37992	39776	40529	41753	43397	42773	46898	51324
	TURKMENISTAN																																												9007	7722	9145	9272	8364
	TURKS AND CAICOS ISLANDS																																										8	8	9	11	12	13	13
	TUVALU																																										2	2	2	2	2	2	2
	UGANDA		29	38	39	57	60	72	72	76	80	113	115	111	117	118	134	171	200	221	268	321	394	393	377	322	326	309	270	220	191	184	171	144	149	168	159	169	192	210	236	219	207	213	215	213	193	256	289
	UKRAINE																																												172056	147078	120471	121610	112445
	UNITED ARAB EMIRATES											3	3	3	5	6	5	6	7	250	339	5597	4158	5777	6396	8353	8543	8473	10813	10577	12221	9983	10064	10051	10055	9638	12652	13615	12881	13006	13190	14859	14183	15547	15854	17993	19943	19264	11197
	UNITED KINGDOM		136583	148700	144221	147404	150849	157381	156662	155676	151729	149154	159340	160605	161811	164664	165900	169790	168684	161581	165522	171491	178092	180219	176844	179993	168423	164615	163325	164916	165008	175864	157974	152937	149583	148825	144351	152674	155107	155950	155567	158637	151602	154576	151699	148817	149097	146746	150378
	UNITED KOREA
	UNITED REPUBLIC OF TANZANIA																						482	672	591	869	629	623	761	549	601	565	514	579	591	605	646	643	627	652	624	602	618	654	634	708	656	969	944
	UNITED STATES OF AMERICA		692124	712983	694618	711175	677689	742828	778631	772001	748069	770642	788300	785521	814619	850622	887918	924713	971333	1007829	1044820	1097559	1180503	1188102	1244874	1300844	1254019	1201617	1258004	1293235	1333750	1336732	1288031	1236924	1174461	1184041	1220396	1225131	1225924	1278531	1334204	1351263	1315354	1314657	1338842	1371332	1389243	1399760	1432264
	URUGUAY		670	716	861	957	1020	1070	1098	1210	1086	1198	1178	1124	1094	1178	1243	1506	1474	1332	1332	1526	1566	1584	1657	1575	1550	1628	1608	1541	1566	1712	1592	1466	1329	1041	941	899	867	971	1311	1331	1089	1242	1410	1218	1109	1252	1484
	USSR		185316	200844	215076	227542	248516	281797	308964	338105	360889	379431	395047	407399	427584	458556	487675	517331	546330	571269	587319	611655	643344	682832	718559	749046	777718	817647	849190	878142	908346	915905	952009	934023	951683	965326	974014	1050447	1053316	1097691	1127857	1104233	1035322	997905
	UZBEKISTAN																																												30490	31697	29633	28207	28953
	VANUATU														11	9	17	13	21	23	17	12	11	16	17	15	17	15	12	14	16	17	17	14	14	15	15	33	16	13	18	17	18	18	17	17	17	18	23
	VENEZUELA		10447	12932	13850	13062	13975	16309	17744	18993	14864	17783	15563	14161	14755	15327	15436	16577	15552	17948	17899	18816	20333	17061	17065	18135	20489	17403	15638	17380	18732	20881	24762	25080	25472	25389	25421	27619	29869	30265	31660	29685	33314	31481	28899	33922	35442	36365	33489
	VIET NAM																						7690	6689	6288	6844	5204	5945	3797	4166	4205	4440	4587	4834	5013	5268	4786	5772	6297	7082	6322	4775	5838	5850	5857	6274	7153	7933	9454
	WALLIS AND FUTUNA ISLANDS
	YEMEN																																											2511	2714	2374	2472	2854	2901
	YUGOSLAVIA (FORMER SOCIALIST FEDERAL REPUBLIC)		4833	4575	4594	4562	5442	6232	7125	7737	7625	8741	9548	10008	10270	11425	12944	13318	13197	13330	14257	14782	19317	20819	19513	23310	23412	24429	25214	24520	27401	29804	29307	31895	29302	31553	33275	33943	35449	35226	36457	36377	36348	25710
	YUGOSLAVIA (MONTENEGRO & SERBIA)																																												12367	10769	10476	11066	12953
	ZAMBIA																894	1068	955	1307	1247	1166	1028	1034	1109	1252	1146	1113	1098	1021	948	983	963	918	960	892	769	751	788	737	857	710	667	659	670	682	660	592	510
	ZANZIBAR		7	7	5	6	7	8	9	9	8	9	9	9	11	9	8	9	8	9	9	6
	ZIMBABWE																1220	1422	1649	1445	1741	1841	2226	2384	2243	2531	2470	2269	2964	2536	2535	2577	2628	2573	2403	2853	2706	2799	3580	4156	4391	4414	4266	4351	4639	4462	4853	4126	4089
[truncated: 18 more columns]
