# Supplementary material for: The Social Cost of Fossil and Industrial CO2 Emissions from 1950 to 2018
Source: Research Square preprint supplement (doi:10.21203/rs.3.rs-2244259/v1), 2022-11-17
Supplement: Supplementary file 9 [file 20THCENTURY_EMISSIONS.xls]

## Sheet: 20THCENTURY_EMISSIONS
PRE2005__EMISSIONS____________________________
CONTENT: GLOBAL ANNUAL EMISSIONS.
RUN: 20THCENTURY, FINAL RELEASE, 26 Nov. 2009
PRE2005 CONTACT: RCP Concentration Calculation & Data Group
DATE: 26/11/2009 11:29:06
MAGICC-VERSION: 6.3.09, 25 November 2009
FILE PRODUCED BY: RCP Concentration Calculation & Data Group, M. Meinshausen, S. Smith, K. Riahi, D. van Vuuren
CMIP5 INFO: http://cmip-pcmdi.llnl.gov/cmip5/
RCP DATABASE: http://www.iiasa.ac.at/web-apps/tnt/RcpDb
FURTHER INFO: For data sources, aknowledgements and further information, see http://www.pik-potsdam.de/~mmalte/rcps.
NOTE: THIS EMISSION DATASET ONLY TO BE USED FOR EMISSION-DRIVEN ESM CMIP5 RUNS, AS CONCENTRATIONS, NOT EMISSIONS, SHALL BE PRESCRIBED IN MAIN CMIP5 RUNS.
DOCUMENTATION: M. Meinshausen, S. Smith et al. (2011) "The RCP GHG concentrations and their extension from 1765 to 2300", DOI 10.1007/s10584-011-0156-z, Climatic Change.
COLUMN_DESCRIPTION________________________________________
1. FossilCO2 - Fossil & Industrial CO2 (Fossil, Cement, Gas Flaring & Bunker Fuels)
2. OtherCO2 - Landuse related CO2 Emissions
3. CH4 - Methane
4. N2O - Nitrous Oxide
5. - 11. - Tropospheric ozone precursors, aerosols and reactive gas emissions
12. - 23. - Flourinated gases controlled under the Kyoto Protocol, (HFCs, PFCs, SF6)
24. - 39. - Ozone Depleting Substances controlled under the Montreal Protocol (CFCs, HFCFC, Halons, CCl4, MCF, CH3Br, CH3Cl)
&THISFILE_SPECIFICATIONS
THISFILE_DATACOLUMNS	39
THISFILE_FIRSTYEAR	1765
THISFILE_LASTYEAR	2005
THISFILE_ANNUALSTEPS	1
THISFILE_FIRSTDATAROW	38
THISFILE_UNITS	SEE ROW 36
THISFILE_DATTYPE	RCPDAT
/
COLUMN:	1	2	3	4	5	6	7	8	9	10	11	12	13	14	15	16	17	18	19	20	21	22	23	24	25	26	27	28	29	30	31	32	33	34	35	36	37	38	39
UNITS:	GtC/yr	GtC/yr	MtCH4/yr	MtN2O-N/yr	MtS/yr	MtCO/yr	Mt/yr	MtN/yr	Mt/yr	Mt/yr	MtN/yr	kt/yr	kt/yr	kt/yr	kt/yr	kt/yr	kt/yr	kt/yr	kt/yr	kt/yr	kt/yr	kt/yr	kt/yr	kt/yr	kt/yr	kt/yr	kt/yr	kt/yr	kt/yr	kt/yr	kt/yr	kt/yr	kt/yr	kt/yr	kt/yr	kt/yr	kt/yr	kt/yr	kt/yr
v YEARS/GAS >	FossilCO2	OtherCO2	CH4	N2O	SOx	CO	NMVOC	NOx	BC	OC	NH3	CF4	C2F6	C6F14	HFC23	HFC32	HFC43_10	HFC125	HFC134a	HFC143a	HFC227ea	HFC245fa	SF6	CFC_11	CFC_12	CFC_113	CFC_114	CFC_115	CARB_TET	MCF	HCFC_22	HCFC_141B	HCFC_142B	HALON1211	HALON1202	HALON1301	HALON2402	CH3BR	CH3CL
1765	0.003	0	0	0	0	0	0	0	0	0	0.833837	0.0107627	0	0	0	0	0	0	0	0	0	0	0	0	0	0	0	0	0	0	0	0	0	0	0	0	0	157.267	3100.21
1766	0.003	0.0053383	1.96326	0.00519108	0.0988826	9.05022	1.59687	0.109502	0.106998	0.56592	0.854231	0.0107521	0	0	0	0	0	0	0	0	0	0	0	0	0	0	0	0	0	0	0	0	0	0	0	0	0	157.267	3100.21
1767	0.003	0.0106766	2.43645	0.0101168	0.116306	12.9608	2.29232	0.168038	0.133383	0.781468	0.874167	0.0107479	0	0	0	0	0	0	0	0	0	0	0	0	0	0	0	0	0	0	0	0	0	0	0	0	0	157.267	3100.21
1768	0.003	0.0160149	2.91111	0.0150428	0.133811	16.8765	2.98865	0.226625	0.159847	0.997361	0.893654	0.0107438	0	0	0	0	0	0	0	0	0	0	0	0	0	0	0	0	0	0	0	0	0	0	0	0	0	157.267	3100.21
1769	0.003	0.0213532	3.38728	0.0199691	0.151398	20.7975	3.6859	0.285264	0.186393	1.21361	0.912699	0.0107397	0	0	0	0	0	0	0	0	0	0	0	0	0	0	0	0	0	0	0	0	0	0	0	0	0	157.267	3100.21
1770	0.003	0.0266915	3.86501	0.0248956	0.16907	24.7238	4.38409	0.343956	0.213024	1.43023	0.931309	0.0107355	0	0	0	0	0	0	0	0	0	0	0	0	0	0	0	0	0	0	0	0	0	0	0	0	0	157.267	3100.21
1771	0.004	0.0320298	4.34436	0.0298224	0.186831	28.6557	5.08326	0.402704	0.239742	1.64723	0.952532	0.0107314	0	0	0	0	0	0	0	0	0	0	0	0	0	0	0	0	0	0	0	0	0	0	0	0	0	157.267	3100.21
1772	0.004	0.0373681	4.82537	0.0347495	0.204683	32.5933	5.78343	0.461508	0.26655	1.86461	0.970294	0.0107273	0	0	0	0	0	0	0	0	0	0	0	0	0	0	0	0	0	0	0	0	0	0	0	0	0	157.267	3100.21
1773	0.004	0.0427064	5.30809	0.039677	0.222628	36.5368	6.48465	0.520371	0.29345	2.0824	0.987642	0.0107231	0	0	0	0	0	0	0	0	0	0	0	0	0	0	0	0	0	0	0	0	0	0	0	0	0	157.267	3100.21
1774	0.004	0.0480447	5.79258	0.0446047	0.24067	40.4864	7.18692	0.579294	0.320446	2.30061	1.00458	0.0107189	0	0	0	0	0	0	0	0	0	0	0	0	0	0	0	0	0	0	0	0	0	0	0	0	0	157.267	3100.21
1775	0.004	0.053383	6.27889	0.0495328	0.258811	44.4423	7.8903	0.638279	0.347541	2.51924	1.02113	0.0107148	0	0	0	0	0	0	0	0	0	0	0	0	0	0	0	0	0	0	0	0	0	0	0	0	0	157.267	3100.21
1776	0.004	0.0587213	6.76707	0.0544612	0.277055	48.4046	8.59482	0.697329	0.374737	2.73832	1.03728	0.0107106	0	0	0	0	0	0	0	0	0	0	0	0	0	0	0	0	0	0	0	0	0	0	0	0	0	157.267	3100.21
1777	0.004	0.0640596	7.25719	0.0593899	0.295404	52.3736	9.3005	0.756445	0.402037	2.95785	1.05305	0.0107064	0	0	0	0	0	0	0	0	0	0	0	0	0	0	0	0	0	0	0	0	0	0	0	0	0	157.267	3100.21
1778	0.004	0.0693979	7.74931	0.064319	0.313863	56.3496	10.0074	0.815629	0.429446	3.17784	1.06844	0.0107022	0	0	0	0	0	0	0	0	0	0	0	0	0	0	0	0	0	0	0	0	0	0	0	0	0	157.267	3100.21
1779	0.004	0.0747361	8.24348	0.0692485	0.332434	60.3326	10.7155	0.874883	0.456966	3.39833	1.08346	0.010698	0	0	0	0	0	0	0	0	0	0	0	0	0	0	0	0	0	0	0	0	0	0	0	0	0	157.267	3100.21
1780	0.004	0.0800744	8.73977	0.0741783	0.35112	64.3229	11.425	0.93421	0.4846	3.61931	1.09813	0.0106938	0	0	0	0	0	0	0	0	0	0	0	0	0	0	0	0	0	0	0	0	0	0	0	0	0	157.267	3100.21
1781	0.005	0.0854127	9.23824	0.0791086	0.369927	68.3207	12.1357	0.993612	0.512353	3.8408	1.11547	0.0106896	0	0	0	0	0	0	0	0	0	0	0	0	0	0	0	0	0	0	0	0	0	0	0	0	0	157.267	3100.21
1782	0.005	0.090751	9.73897	0.0840392	0.388856	72.3263	12.8478	1.05309	0.540227	4.06282	1.12943	0.0106854	0	0	0	0	0	0	0	0	0	0	0	0	0	0	0	0	0	0	0	0	0	0	0	0	0	157.267	3100.21
1783	0.005	0.0960893	10.242	0.0889702	0.407913	76.34	13.5613	1.11265	0.568228	4.28539	1.14305	0.0106812	0	0	0	0	0	0	0	0	0	0	0	0	0	0	0	0	0	0	0	0	0	0	0	0	0	157.267	3100.21
1784	0.005	0.101428	10.7475	0.0939017	0.4271	80.3619	14.2763	1.17229	0.596358	4.50853	1.15634	0.0106769	0	0	0	0	0	0	0	0	0	0	0	0	0	0	0	0	0	0	0	0	0	0	0	0	0	157.267	3100.21
1785	0.005	0.106766	11.2554	0.0988336	0.446422	84.3923	14.9927	1.23201	0.624621	4.73224	1.1693	0.0106727	0	0	0	0	0	0	0	0	0	0	0	0	0	0	0	0	0	0	0	0	0	0	0	0	0	157.267	3100.21
1786	0.005	0.112104	11.7658	0.103766	0.465884	88.4315	15.7107	1.29182	0.653022	4.95655	1.18194	0.0106684	0	0	0	0	0	0	0	0	0	0	0	0	0	0	0	0	0	0	0	0	0	0	0	0	0	157.267	3100.21
1787	0.005	0.117443	12.2789	0.108699	0.485489	92.4797	16.4303	1.35173	0.681565	5.18148	1.19428	0.0106642	0	0	0	0	0	0	0	0	0	0	0	0	0	0	0	0	0	0	0	0	0	0	0	0	0	157.267	3100.21
1788	0.005	0.122781	12.7947	0.113632	0.505241	96.5372	17.1515	1.41172	0.710254	5.40705	1.20631	0.0106599	0	0	0	0	0	0	0	0	0	0	0	0	0	0	0	0	0	0	0	0	0	0	0	0	0	157.267	3100.21
1789	0.005	0.128119	13.3133	0.118566	0.525147	100.604	17.8744	1.47181	0.739094	5.63327	1.21804	0.0106556	0	0	0	0	0	0	0	0	0	0	0	0	0	0	0	0	0	0	0	0	0	0	0	0	0	157.267	3100.21
1790	0.005	0.133457	13.8347	0.1235	0.545209	104.682	18.599	1.532	0.76809	5.86016	1.22948	0.0106513	0	0	0	0	0	0	0	0	0	0	0	0	0	0	0	0	0	0	0	0	0	0	0	0	0	157.267	3100.21
1791	0.006	0.138796	14.3591	0.128435	0.565433	108.769	19.3255	1.59228	0.797246	6.08776	1.24369	0.010647	0	0	0	0	0	0	0	0	0	0	0	0	0	0	0	0	0	0	0	0	0	0	0	0	0	157.267	3100.21
1792	0.006	0.144134	14.8866	0.133371	0.585825	112.867	20.0537	1.65268	0.826567	6.31607	1.25458	0.0106427	0	0	0	0	0	0	0	0	0	0	0	0	0	0	0	0	0	0	0	0	0	0	0	0	0	157.267	3100.21
1793	0.006	0.149472	15.4172	0.138306	0.606388	116.975	20.7839	1.71318	0.856059	6.54512	1.2652	0.0106384	0	0	0	0	0	0	0	0	0	0	0	0	0	0	0	0	0	0	0	0	0	0	0	0	0	157.267	3100.21
1794	0.006	0.154811	15.9511	0.143243	0.627129	121.095	21.5161	1.77379	0.885726	6.77493	1.27556	0.010634	0	0	0	0	0	0	0	0	0	0	0	0	0	0	0	0	0	0	0	0	0	0	0	0	0	157.267	3100.21
1795	0.006	0.160149	16.4883	0.14818	0.648053	125.227	22.2503	1.83452	0.915575	7.00554	1.28567	0.0106297	0	0	0	0	0	0	0	0	0	0	0	0	0	0	0	0	0	0	0	0	0	0	0	0	0	157.267	3100.21
1796	0.006	0.165487	17.029	0.153118	0.669166	129.37	22.9865	1.89536	0.94561	7.23695	1.29554	0.0106253	0	0	0	0	0	0	0	0	0	0	0	0	0	0	0	0	0	0	0	0	0	0	0	0	0	157.267	3100.21
1797	0.007	0.170825	17.5732	0.158056	0.690473	133.526	23.7249	1.95633	0.975837	7.4692	1.30821	0.0106209	0	0	0	0	0	0	0	0	0	0	0	0	0	0	0	0	0	0	0	0	0	0	0	0	0	157.267	3100.21
1798	0.007	0.176164	18.1211	0.162995	0.711981	137.694	24.4656	2.01742	1.00626	7.70232	1.31761	0.0106165	0	0	0	0	0	0	0	0	0	0	0	0	0	0	0	0	0	0	0	0	0	0	0	0	0	157.267	3100.21
1799	0.007	0.181502	18.6728	0.167935	0.733695	141.875	25.2085	2.07864	1.03689	7.93632	1.32679	0.0106121	0	0	0	0	0	0	0	0	0	0	0	0	0	0	0	0	0	0	0	0	0	0	0	0	0	157.267	3100.21
1800	0.008	0.18684	19.2283	0.172875	0.755622	146.07	25.9538	2.13999	1.06774	8.17124	1.33879	0.0106077	0	0	0	0	0	0	0	0	0	0	0	0	0	0	0	0	0	0	0	0	0	0	0	0	0	157.267	3100.21
1801	0.008	0.192179	19.7879	0.177817	0.777769	150.279	26.7015	2.20149	1.09879	8.4071	1.34754	0.0106032	0	0	0	0	0	0	0	0	0	0	0	0	0	0	0	0	0	0	0	0	0	0	0	0	0	157.267	3100.21
1802	0.01	0.197517	20.3516	0.182758	0.800143	154.502	27.4517	2.26312	1.13008	8.64394	1.36217	0.0105988	0	0	0	0	0	0	0	0	0	0	0	0	0	0	0	0	0	0	0	0	0	0	0	0	0	157.267	3100.21
1803	0.009	0.202855	20.9196	0.187701	0.82275	158.739	28.2045	2.3249	1.16159	8.88178	1.36749	0.0105943	0	0	0	0	0	0	0	0	0	0	0	0	0	0	0	0	0	0	0	0	0	0	0	0	0	157.267	3100.21
1804	0.009	0.208194	21.492	0.192644	0.845598	162.992	28.96	2.38683	1.19334	9.12066	1.37566	0.0105898	0	0	0	0	0	0	0	0	0	0	0	0	0	0	0	0	0	0	0	0	0	0	0	0	0	157.267	3100.21
1805	0.009	0.213532	22.069	0.197589	0.868694	167.261	29.7182	2.44892	1.22534	9.3606	1.38365	0.0105853	0	0	0	0	0	0	0	0	0	0	0	0	0	0	0	0	0	0	0	0	0	0	0	0	0	157.267	3100.21
1806	0.01	0.21887	22.6506	0.202534	0.892046	171.545	30.4792	2.51116	1.25759	9.60165	1.39452	0.0105808	0	0	0	0	0	0	0	0	0	0	0	0	0	0	0	0	0	0	0	0	0	0	0	0	0	157.267	3100.21
1807	0.01	0.224208	23.2371	0.20748	0.915662	175.847	31.2432	2.57357	1.2901	9.84383	1.40217	0.0105762	0	0	0	0	0	0	0	0	0	0	0	0	0	0	0	0	0	0	0	0	0	0	0	0	0	157.267	3100.21
1808	0.01	0.229547	23.8285	0.212426	0.939549	180.165	32.0101	2.63615	1.32289	10.0872	1.40967	0.0105717	0	0	0	0	0	0	0	0	0	0	0	0	0	0	0	0	0	0	0	0	0	0	0	0	0	157.267	3100.21
1809	0.01	0.234885	24.425	0.217374	0.963717	184.501	32.7802	2.69891	1.35594	10.3317	1.41702	0.0105671	0	0	0	0	0	0	0	0	0	0	0	0	0	0	0	0	0	0	0	0	0	0	0	0	0	157.267	3100.21
1810	0.01	0.240223	25.0269	0.222323	0.988174	188.856	33.5535	2.76184	1.38929	10.5775	1.42423	0.0105625	0	0	0	0	0	0	0	0	0	0	0	0	0	0	0	0	0	0	0	0	0	0	0	0	0	157.267	3100.21
1811	0.011	0.245562	25.6341	0.227272	1.01293	193.229	34.33	2.82497	1.42293	10.8246	1.43434	0.0105578	0	0	0	0	0	0	0	0	0	0	0	0	0	0	0	0	0	0	0	0	0	0	0	0	0	157.267	3100.21
1812	0.011	0.2509	26.247	0.232223	1.03799	197.621	35.11	2.88828	1.45687	11.073	1.44129	0.0105532	0	0	0	0	0	0	0	0	0	0	0	0	0	0	0	0	0	0	0	0	0	0	0	0	0	157.267	3100.21
1813	0.011	0.256238	26.8657	0.237175	1.06337	202.034	35.8935	2.9518	1.49113	11.3228	1.44811	0.0105485	0	0	0	0	0	0	0	0	0	0	0	0	0	0	0	0	0	0	0	0	0	0	0	0	0	157.267	3100.21
1814	0.011	0.261577	27.4904	0.242127	1.08907	206.467	36.6806	3.01551	1.52571	11.5739	1.45482	0.0105438	0	0	0	0	0	0	0	0	0	0	0	0	0	0	0	0	0	0	0	0	0	0	0	0	0	157.267	3100.21
1815	0.012	0.266915	28.1212	0.247081	1.11511	210.921	37.4714	3.07944	1.56062	11.8266	1.46447	0.0105391	0	0	0	0	0	0	0	0	0	0	0	0	0	0	0	0	0	0	0	0	0	0	0	0	0	157.267	3100.21
1816	0.013	0.272253	28.7584	0.252036	1.1415	215.398	38.266	3.14359	1.59588	12.0807	1.47402	0.0105343	0	0	0	0	0	0	0	0	0	0	0	0	0	0	0	0	0	0	0	0	0	0	0	0	0	157.267	3100.21
1817	0.014	0.277591	29.4021	0.256992	1.16825	219.896	39.0646	3.20796	1.63149	12.3363	1.48348	0.0105296	0	0	0	0	0	0	0	0	0	0	0	0	0	0	0	0	0	0	0	0	0	0	0	0	0	157.267	3100.21
1818	0.014	0.28293	30.0526	0.261949	1.19536	224.418	39.8673	3.27256	1.66746	12.5935	1.48981	0.0105248	0	0	0	0	0	0	0	0	0	0	0	0	0	0	0	0	0	0	0	0	0	0	0	0	0	157.267	3100.21
1819	0.014	0.288268	30.71	0.266908	1.22286	228.964	40.6742	3.33739	1.70381	12.8524	1.49607	0.0105199	0	0	0	0	0	0	0	0	0	0	0	0	0	0	0	0	0	0	0	0	0	0	0	0	0	157.267	3100.21
1820	0.014	0.293606	31.3745	0.271868	1.25075	233.535	41.4854	3.40248	1.74055	13.1129	1.50225	0.0105151	0	0	0	0	0	0	0	0	0	0	0	0	0	0	0	0	0	0	0	0	0	0	0	0	0	157.267	3100.21
1821	0.014	0.298945	32.0465	0.276829	1.27904	238.131	42.3011	3.46781	1.77769	13.3752	1.50838	0.0105102	0	0	0	0	0	0	0	0	0	0	0	0	0	0	0	0	0	0	0	0	0	0	0	0	0	157.267	3100.21
1822	0.015	0.304283	32.7261	0.281791	1.30774	242.754	43.1214	3.53341	1.81524	13.6393	1.51749	0.0105053	0	0	0	0	0	0	0	0	0	0	0	0	0	0	0	0	0	0	0	0	0	0	0	0	0	157.267	3100.21
1823	0.016	0.309621	33.4135	0.286755	1.33688	247.404	43.9465	3.59927	1.85322	13.9052	1.52655	0.0105003	0	0	0	0	0	0	0	0	0	0	0	0	0	0	0	0	0	0	0	0	0	0	0	0	0	157.267	3100.21
1824	0.016	0.314959	34.1091	0.29172	1.36646	252.081	44.7764	3.66542	1.89163	14.1731	1.53254	0.0104954	0	0	0	0	0	0	0	0	0	0	0	0	0	0	0	0	0	0	0	0	0	0	0	0	0	157.267	3100.21
1825	0.017	0.320298	34.813	0.296687	1.39649	256.788	45.6114	3.73184	1.9305	14.4429	1.54153	0.0104904	0	0	0	0	0	0	0	0	0	0	0	0	0	0	0	0	0	0	0	0	0	0	0	0	0	157.267	3100.21
1826	0.017	0.325636	35.5254	0.301656	1.427	261.524	46.4516	3.79856	1.96983	14.7147	1.54746	0.0104853	0	0	0	0	0	0	0	0	0	0	0	0	0	0	0	0	0	0	0	0	0	0	0	0	0	157.267	3100.21
1827	0.018	0.330974	36.2468	0.306626	1.45799	266.29	47.2972	3.86559	2.00964	14.9886	1.55641	0.0104802	0	0	0	0	0	0	0	0	0	0	0	0	0	0	0	0	0	0	0	0	0	0	0	0	0	157.267	3100.21
1828	0.018	0.336313	36.9773	0.311597	1.48948	271.088	48.1483	3.93293	2.04994	15.2646	1.5623	0.0104751	0	0	0	0	0	0	0	0	0	0	0	0	0	0	0	0	0	0	0	0	0	0	0	0	0	157.267	3100.21
1829	0.018	0.341651	37.7173	0.31657	1.52149	275.919	49.0051	4.00059	2.09076	15.5429	1.5682	0.0104699	0	0	0	0	0	0	0	0	0	0	0	0	0	0	0	0	0	0	0	0	0	0	0	0	0	157.267	3100.21
1830	0.024	0.346989	38.4669	0.321545	1.55403	280.783	49.8678	4.06858	2.1321	15.8235	1.59235	0.0104648	0	0	0	0	0	0	0	0	0	0	0	0	0	0	0	0	0	0	0	0	0	0	0	0	0	157.267	3100.21
1831	0.023	0.352328	39.2266	0.326522	1.58711	285.682	50.7366	4.13692	2.17399	16.1064	1.59521	0.0104595	0	0	0	0	0	0	0	0	0	0	0	0	0	0	0	0	0	0	0	0	0	0	0	0	0	157.267	3100.21
1832	0.023	0.357666	39.9966	0.331501	1.62076	290.617	51.6116	4.2056	2.21643	16.3917	1.60114	0.0104542	0	0	0	0	0	0	0	0	0	0	0	0	0	0	0	0	0	0	0	0	0	0	0	0	0	157.267	3100.21
1833	0.024	0.363004	40.7773	0.336481	1.655	295.588	52.493	4.27466	2.25945	16.6796	1.61014	0.0104489	0	0	0	0	0	0	0	0	0	0	0	0	0	0	0	0	0	0	0	0	0	0	0	0	0	157.267	3100.21
1834	0.024	0.368342	41.5689	0.341464	1.68983	300.597	53.3811	4.34409	2.30306	16.97	1.61613	0.0104436	0	0	0	0	0	0	0	0	0	0	0	0	0	0	0	0	0	0	0	0	0	0	0	0	0	157.267	3100.21
1835	0.025	0.373681	42.3719	0.346448	1.72528	305.645	54.2761	4.4139	2.34729	17.2631	1.6252	0.0104381	0	0	0	0	0	0	0	0	0	0	0	0	0	0	0	0	0	0	0	0	0	0	0	0	0	157.267	3100.21
1836	0.029	0.379019	43.1865	0.351435	1.76137	310.733	55.1781	4.48412	2.39214	17.5589	1.64344	0.0104327	0	0	0	0	0	0	0	0	0	0	0	0	0	0	0	0	0	0	0	0	0	0	0	0	0	157.267	3100.21
1837	0.029	0.384357	44.0132	0.356423	1.79812	315.863	56.0874	4.55474	2.43765	17.8576	1.64957	0.0104272	0	0	0	0	0	0	0	0	0	0	0	0	0	0	0	0	0	0	0	0	0	0	0	0	0	157.267	3100.21
1838	0.03	0.389696	44.8522	0.361414	1.83554	321.036	57.0041	4.6258	2.48383	18.1592	1.65881	0.0104216	0	0	0	0	0	0	0	0	0	0	0	0	0	0	0	0	0	0	0	0	0	0	0	0	0	157.267	3100.21
1839	0.031	0.395034	45.7041	0.366407	1.87367	326.252	57.9287	4.69728	2.5307	18.4638	1.66811	0.010416	0	0	0	0	0	0	0	0	0	0	0	0	0	0	0	0	0	0	0	0	0	0	0	0	0	157.267	3100.21
1840	0.033	0.400372	46.5691	0.371403	1.91251	331.515	58.8612	4.76922	2.57828	18.7714	1.68054	0.0104104	0	0	0	0	0	0	0	0	0	0	0	0	0	0	0	0	0	0	0	0	0	0	0	0	0	157.267	3100.21
1841	0.034	0.405711	47.4478	0.376401	1.9521	336.824	59.8019	4.84163	2.6266	19.0823	1.69001	0.0104047	0	0	0	0	0	0	0	0	0	0	0	0	0	0	0	0	0	0	0	0	0	0	0	0	0	157.267	3100.21
1842	0.036	0.411049	48.3404	0.381401	1.99246	342.181	60.7511	4.91451	2.67568	19.3965	1.70261	0.0103989	0	0	0	0	0	0	0	0	0	0	0	0	0	0	0	0	0	0	0	0	0	0	0	0	0	157.267	3100.21
1843	0.037	0.416387	49.2475	0.386404	2.0336	347.588	61.709	4.98789	2.72554	19.7141	1.71227	0.0103931	0	0	0	0	0	0	0	0	0	0	0	0	0	0	0	0	0	0	0	0	0	0	0	0	0	157.267	3100.21
1844	0.039	0.421725	50.1694	0.39141	2.07556	353.047	62.6759	5.06177	2.7762	20.0351	1.72507	0.0103872	0	0	0	0	0	0	0	0	0	0	0	0	0	0	0	0	0	0	0	0	0	0	0	0	0	157.267	3100.21
1845	0.043	0.427064	51.1068	0.396418	2.11836	358.558	63.6522	5.13618	2.8277	20.3598	1.74408	0.0103812	0	0	0	0	0	0	0	0	0	0	0	0	0	0	0	0	0	0	0	0	0	0	0	0	0	157.267	3100.21
1846	0.043	0.432402	52.0599	0.401429	2.16202	364.125	64.638	5.21114	2.88005	20.6882	1.75104	0.0103752	0	0	0	0	0	0	0	0	0	0	0	0	0	0	0	0	0	0	0	0	0	0	0	0	0	157.267	3100.21
1847	0.046	0.43774	53.0294	0.406443	2.20657	369.747	65.6336	5.28665	2.93328	21.0205	1.76725	0.0103691	0	0	0	0	0	0	0	0	0	0	0	0	0	0	0	0	0	0	0	0	0	0	0	0	0	157.267	3100.21
1848	0.047	0.443079	54.0156	0.411461	2.25204	375.427	66.6395	5.36273	2.98742	21.3567	1.77751	0.010363	0	0	0	0	0	0	0	0	0	0	0	0	0	0	0	0	0	0	0	0	0	0	0	0	0	157.267	3100.21
1849	0.05	0.448417	55.0193	0.416481	2.29847	381.167	67.6558	5.43941	3.0425	21.6969	1.79401	0.0103568	0	0	0	0	0	0	0	0	0	0	0	0	0	0	0	0	0	0	0	0	0	0	0	0	0	157.267	3100.21
1850	0.054	0.453755	56.0408	0.421504	2.34586	386.969	68.6829	5.5167	3.09855	22.0414	1.81369	0.0103505	0	0	0	0	0	0	0	0	0	0	0	0	0	0	0	0	1.395	0	0	0	0	0	0	0	0	157.267	3100.21
1851	0.054	0.446786	56.4613	0.427401	2.40128	387.461	68.7278	5.54232	3.11874	22.1051	1.84692	0.0103509	0	0	0	0	0	0	0	0	0	0	0	0	0	0	0	0	1.447	0	0	0	0	0	0	0	0	157.267	3100.21
1852	0.057	0.498623	56.8819	0.464661	2.4567	387.952	68.7726	5.56795	3.13893	22.1687	1.99469	0.0103513	0	0	0	0	0	0	0	0	0	0	0	0	0	0	0	0	1.502	0	0	0	0	0	0	0	0	157.267	3100.21
1853	0.059	0.497354	57.3024	0.464774	2.51212	388.443	68.8174	5.59357	3.15912	22.2324	2.00081	0.0103518	0	0	0	0	0	0	0	0	0	0	0	0	0	0	0	0	1.554	0	0	0	0	0	0	0	0	157.267	3100.21
1854	0.069	0.495817	57.723	0.464436	2.56753	388.935	68.8622	5.61919	3.17931	22.296	2.0303	0.0103522	0	0	0	0	0	0	0	0	0	0	0	0	0	0	0	0	1.607	0	0	0	0	0	0	0	0	157.267	3100.21
1855	0.071	0.493679	58.1436	0.463279	2.62295	389.426	68.9071	5.64481	3.1995	22.3597	2.03251	0.0103526	0	0	0	0	0	0	0	0	0	0	0	0	0	0	0	0	1.657	0	0	0	0	0	0	0	0	157.267	3100.21
1856	0.076	0.498935	58.5641	0.467293	2.67837	389.918	68.9519	5.67043	3.21969	22.4233	2.06176	0.0103531	0	0	0	0	0	0	0	0	0	0	0	0	0	0	0	0	1.712	0	0	0	0	0	0	0	0	157.267	3100.21
1857	0.077	0.504232	58.9847	0.471264	2.73379	390.409	68.9967	5.69605	3.23988	22.487	2.07845	0.0103535	0	0	0	0	0	0	0	0	0	0	0	0	0	0	0	0	1.765	0	0	0	0	0	0	0	0	157.267	3100.21
1858	0.078	0.509233	59.4052	0.475031	2.78921	390.9	69.0416	5.72167	3.26007	22.5506	2.0943	0.0103539	0	0	0	0	0	0	0	0	0	0	0	0	0	0	0	0	1.815	0	0	0	0	0	0	0	0	157.267	3100.21
1859	0.083	0.514254	59.8258	0.478766	2.84462	391.392	69.0864	5.74729	3.28025	22.6143	2.12297	0.0103544	0	0	0	0	0	0	0	0	0	0	0	0	0	0	0	0	1.87	0	0	0	0	0	0	0	0	157.267	3100.21
1860	0.091	0.518967	60.2464	0.482577	2.90004	391.883	69.1312	5.77291	3.30044	22.6779	2.16198	0.0103548	0	0	0	0	0	0	0	0	0	0	0	0	0	0	0	0	1.923	0	0	0	0	0	0	0	0	157.267	3100.21
1861	0.095	0.528224	59.6145	0.504995	2.99268	392.896	69.269	5.81284	3.32441	22.7345	2.27359	0.010355	0	0	0	0	0	0	0	0	0	0	0	0	0	0	0	0	1.973	0	0	0	0	0	0	0	0	157.267	3100.21
1862	0.097	0.473717	58.9826	0.471113	3.08532	393.909	69.4069	5.85276	3.34838	22.7911	2.15582	0.0103551	0	0	0	0	0	0	0	0	0	0	0	0	0	0	0	0	2.028	0	0	0	0	0	0	0	0	157.267	3100.21
1863	0.104	0.473749	58.3507	0.474449	3.17795	394.922	69.5447	5.89268	3.37235	22.8478	2.19233	0.0103553	0	0	0	0	0	0	0	0	0	0	0	0	0	0	0	0	2.081	0	0	0	0	0	0	0	0	157.267	3100.21
1864	0.112	0.474138	57.7188	0.477858	3.27059	395.935	69.6826	5.9326	3.39632	22.9044	2.22994	0.0103555	0	0	0	0	0	0	0	0	0	0	0	0	0	0	0	0	2.134	0	0	0	0	0	0	0	0	157.267	3100.21
1865	0.119	0.474795	57.0869	0.48145	3.36323	396.948	69.8204	5.97253	3.42029	22.961	2.26553	0.0103556	0	0	0	0	0	0	0	0	0	0	0	0	0	0	0	0	2.184	0	0	0	0	0	0	0	0	157.267	3100.21
1866	0.122	0.474912	56.455	0.484205	3.45587	397.961	69.9582	6.01245	3.44426	23.0176	2.2872	0.0103558	0	0	0	0	0	0	0	0	0	0	0	0	0	0	0	0	2.239	0	0	0	0	0	0	0	0	157.267	3100.21
1867	0.130223	0.473384	55.8231	0.484723	3.5485	398.974	70.0961	6.05237	3.46823	23.0742	2.31876	0.010356	0	0	0	0	0	0	0	0	0	0	0	0	0	0	0	0	2.291	0	0	0	0	0	0	0	0	157.267	3100.21
1868	0.135252	0.471983	55.1912	0.485953	3.64114	399.987	70.2339	6.09229	3.4922	23.1308	2.33718	0.0103561	0	0	0	0	0	0	0	0	0	0	0	0	0	0	0	0	2.341	0	0	0	0	0	0	0	0	157.267	3100.21
1869	0.142281	0.470485	54.5593	0.486862	3.73378	401	70.3717	6.13222	3.51617	23.1875	2.36281	0.0103563	0	0	0	0	0	0	0	0	0	0	0	0	0	0	0	0	2.386	0	0	0	0	0	0	0	0	157.267	3100.21
1870	0.147311	0.469334	53.9274	0.487744	3.82642	402.013	70.5096	6.17214	3.54014	23.2441	2.38241	0.0103565	0	0	0	0	0	0	0	0	0	0	0	0	0	0	0	0	2.452	0	0	0	0	0	0	0	0	157.267	3100.21
1871	0.15634	0.487325	56.6839	0.585016	3.99317	403.032	70.6533	6.21717	3.56245	23.2838	2.86067	0.0103569	0	0	0	0	0	0	0	0	0	0	0	0	0	0	0	0	2.505	0	0	0	0	0	0	0	0	157.267	3100.21
1872	0.173369	0.566964	59.4403	0.66674	4.15992	404.051	70.7971	6.26219	3.58477	23.3236	3.24017	0.0103573	0	0	0	0	0	0	0	0	0	0	0	0	0	0	0	0	2.557	0	0	0	0	0	0	0	0	157.267	3100.21
1873	0.184398	0.576901	62.1968	0.696371	4.32667	405.071	70.9408	6.30722	3.60708	23.3634	3.40336	0.0103577	0	0	0	0	0	0	0	0	0	0	0	0	0	0	0	0	2.61	0	0	0	0	0	0	0	0	157.267	3100.21
1874	0.174428	0.583284	64.9533	0.70875	4.49342	406.09	71.0846	6.35225	3.62939	23.4031	3.42716	0.0103581	0	0	0	0	0	0	0	0	0	0	0	0	0	0	0	0	2.663	0	0	0	0	0	0	0	0	157.267	3100.21
1875	0.188457	0.58997	67.7097	0.720343	4.66018	407.109	71.2283	6.39727	3.6517	23.4429	3.51731	0.0103585	0	0	0	0	0	0	0	0	0	0	0	0	0	0	0	0	2.85	0	0	0	0	0	0	0	0	157.267	3100.21
1876	0.191486	0.596392	70.4662	0.745243	4.82693	408.128	71.3721	6.4423	3.67401	23.4827	3.63755	0.0103589	0	0	0	0	0	0	0	0	0	0	0	0	0	0	0	0	2.989	0	0	0	0	0	0	0	0	157.267	3100.21
1877	0.194515	0.602623	73.2226	0.756332	4.99368	409.147	71.5158	6.48732	3.69633	23.5224	3.69585	0.0103593	0	0	0	0	0	0	0	0	0	0	0	0	0	0	0	0	3.13	0	0	0	0	0	0	0	0	157.267	3100.21
1878	0.196	0.609051	75.9791	0.766046	5.16043	410.166	71.6596	6.53235	3.71864	23.5622	3.74565	0.0103597	0	0	0	0	0	0	0	0	0	0	0	0	0	0	0	0	3.275	0	0	0	0	0	0	0	0	157.267	3100.21
1879	0.21	0.615348	78.7356	0.774911	5.32718	411.185	71.8033	6.57738	3.74095	23.602	3.83041	0.0103602	0	0	0	0	0	0	0	0	0	0	0	0	0	0	0	0	3.396	0	0	0	0	0	0	0	0	157.267	3100.21
1880	0.236	0.621243	81.492	0.784121	5.49393	412.204	71.9471	6.6224	3.76326	23.6417	3.95202	0.0103606	0	0	0	0	0	0	0	0	0	0	0	0	0	0	0	0	3.573	0	0	0	0	0	0	0	0	157.267	3100.21
1881	0.243	0.648873	84.3595	0.811578	5.76232	413.256	72.0998	6.67595	3.79257	23.6754	4.07131	0.0103613	0	0	0	0	0	0	0	0	0	0	0	0	0	0	0	0	3.726	0	0	0	0	0	0	0	0	157.267	3100.21
1882	0.256	0.604664	87.2269	0.78526	6.03071	414.308	72.2526	6.72949	3.82188	23.7092	4.01987	0.010362	0	0	0	0	0	0	0	0	0	0	0	0	0	0	0	0	3.883	0	0	0	0	0	0	0	0	157.267	3100.21
1883	0.272	0.608518	90.0943	0.792556	6.2991	415.36	72.4053	6.78304	3.85119	23.7429	4.09853	0.0103627	0	0	0	0	0	0	0	0	0	0	0	0	0	0	0	0	4.043	0	0	0	0	0	0	0	0	157.267	3100.21
1884	0.275	0.612128	92.9618	0.798751	6.56748	416.412	72.5581	6.83658	3.8805	23.7766	4.13334	0.0103634	0	0	0	0	0	0	0	0	0	0	0	0	0	0	0	0	4.233	0	0	0	0	0	0	0	0	157.267	3100.21
1885	0.277	0.615236	95.8292	0.804534	6.83587	417.464	72.7108	6.89012	3.90981	23.8103	4.16461	0.0103642	0	0	0	0	0	0	0	0	0	0	0	0	0	0	0	0	4.427	0	0	0	0	0	0	0	0	157.267	3100.21
1886	0.281	0.617144	98.6966	0.826194	7.10426	418.517	72.8636	6.94367	3.93912	23.844	4.27589	0.0103649	0	0	0	0	0	0	0	0	0	0	0	0	0	0	0	0	4.625	0	0	0	0	0	0	0	0	157.267	3100.21
1887	0.295	0.616163	101.564	0.832196	7.37264	419.569	73.0163	6.99721	3.96843	23.8777	4.35318	0.0103656	0	0	0	0	0	0	0	0	0	0	0	0	0	0	0	0	4.827	0	0	0	0	0	0	0	0	157.267	3100.21
1888	0.327	0.614734	104.431	0.837058	7.64103	420.621	73.169	7.05076	3.99774	23.9115	4.47487	0.0103663	0	0	0	0	0	0	0	0	0	0	0	0	0	0	0	0	5.033	0	0	0	0	0	0	0	0	157.267	3100.21
1889	0.327	0.6132	107.299	0.84144	7.90942	421.673	73.3218	7.1043	4.02704	23.9452	4.49842	0.010367	0	0	0	0	0	0	0	0	0	0	0	0	0	0	0	0	5.27	0	0	0	0	0	0	0	0	157.267	3100.21
1890	0.356	0.611754	110.166	0.845525	8.1778	422.725	73.4745	7.15784	4.05635	23.9789	4.6037	0.0103678	0	0	0	0	0	0	0	0	0	0	0	0	0	0	0	0	5.485	0	0	0	0	0	0	0	0	157.267	3100.21
1891	0.372	0.610249	111.524	0.850982	8.56737	424.293	73.7003	7.23586	4.08828	24.0114	4.68307	0.0103687	0	0	0	0	0	0	0	0	0	0	0	0	0	0	0	0	5.731	0	0	0	0	0	0	0	0	157.267	3100.21
1892	0.374	0.623191	112.881	0.85742	8.95694	425.861	73.9261	7.31388	4.12022	24.0439	4.75516	0.0103697	0	0	0	0	0	0	0	0	0	0	0	0	0	0	0	0	6.01	0	0	0	0	0	0	0	0	157.267	3100.21
1893	0.37	0.624403	114.238	0.864758	9.34651	427.429	74.152	7.3919	4.15215	24.0763	4.82174	0.0103706	0	0	0	0	0	0	0	0	0	0	0	0	0	0	0	0	6.267	0	0	0	0	0	0	0	0	157.267	3100.21
1894	0.383	0.640367	115.595	0.872945	9.73608	428.997	74.3778	7.46992	4.18408	24.1088	4.88457	0.0103716	0	0	0	0	0	0	0	0	0	0	0	0	0	0	0	0	6.529	0	0	0	0	0	0	0	0	157.267	3100.21
1895	0.406	0.644419	116.953	0.881882	10.1256	430.565	74.6036	7.54794	4.21601	24.1413	4.94542	0.0103726	0	0	0	0	0	0	0	0	0	0	0	0	0	0	0	0	6.824	0	0	0	0	0	0	0	0	157.267	3100.21
1896	0.419	0.646278	118.31	0.891418	10.5152	432.133	74.8294	7.62596	4.24794	24.1738	5.00605	0.0103735	0	0	0	0	0	0	0	0	0	0	0	0	0	0	0	0	7.151	0	0	0	0	0	0	0	0	157.267	3100.21
1897	0.44	0.649564	119.667	0.901402	10.9048	433.701	75.0552	7.70398	4.27987	24.2063	5.06823	0.0103745	0	0	0	0	0	0	0	0	0	0	0	0	0	0	0	0	7.432	0	0	0	0	0	0	0	0	157.267	3100.21
1898	0.465	0.651001	121.025	0.911681	11.2943	435.269	75.281	7.782	4.3118	24.2387	5.13374	0.0103754	0	0	0	0	0	0	0	0	0	0	0	0	0	0	0	0	7.798	0	0	0	0	0	0	0	0	157.267	3100.21
1899	0.507	0.652204	122.382	0.922105	11.6839	436.837	75.5068	7.86002	4.34373	24.2712	5.20432	0.0103764	0.959119	0	0	0	0	0	0	0	0	0	0	0	0	0	0	0	8.119	0	0	0	0	0	0	0	0	157.267	3100.21
1900	0.534	0.653206	123.739	0.932522	12.0735	438.405	75.7326	7.93804	4.37566	24.3037	5.28176	0.0103773	0.0505758	0	0	0	0	0	0	0	0	0	0	0	0	0	0	0	8.473	0	0	0	0	0	0	0	0	157.267	3100.21
1901	0.552	0.702943	124.841	0.944667	12.6299	439.892	75.9205	8.04414	4.41738	24.3365	5.36856	0.0103797	0.0532377	0	0	0	0	0	0	0	0	0	0	0	0	0	0	0	8.592	0	0	0	0	0	0	0	0	157.267	3100.21
1902	0.566	0.702974	125.944	0.959931	13.1863	441.378	76.1084	8.15023	4.45911	24.3693	5.46467	0.0103821	0.0560397	0	0	0	0	0	0	0	0	0	0	0	0	0	0	0	8.762	0	0	0	0	0	0	0	0	157.267	3100.21
1903	0.617	0.726671	127.046	0.977647	13.7427	442.865	76.2962	8.25633	4.50083	24.4021	5.56792	0.0103845	0.0589892	0	0	0	0	0	0	0	0	0	0	0	0	0	0	0	8.906	0	0	0	0	0	0	0	0	157.267	3100.21
1904	0.624	0.748293	128.149	0.997229	14.2991	444.351	76.4841	8.36242	4.54255	24.4349	5.6762	0.0103868	0.0620939	0	0	0	0	0	0	0	0	0	0	0	0	0	0	0	9.102	0	0	0	0	0	0	0	0	157.267	3100.21
1905	0.663	0.769815	129.251	1.01813	14.8555	445.838	76.672	8.46851	4.58427	24.4677	5.78736	0.0103892	0.065362	0	0	0	0	0	0	0	0	0	0	0	0	0	0	0	9.623	0	0	0	0	0	0	0	0	157.267	3100.21
1906	0.707	0.796534	130.354	1.03974	15.4119	447.324	76.8598	8.57461	4.62599	24.5005	5.89926	0.0103916	0.0688021	0	0	0	0	0	0	0	0	0	0	0	0	0	0	0	12.093	0	0	0	0	0	0	0	0	157.267	3100.21
1907	0.784	0.803763	131.456	1.06146	15.9683	448.811	77.0477	8.6807	4.66771	24.5333	6.00977	0.010394	0.0724232	0	0	0	0	0	0	0	0	0	0	0	0	0	0	0	12.363	0	0	0	0	0	0	0	0	157.267	3100.21
1908	0.75	0.811413	132.559	1.08267	16.5247	450.297	77.2356	8.78679	4.70944	24.5661	6.11675	0.0103964	0.076235	0	0	0	0	0	0	0	0	0	0	0	0	0	0	0	12.633	0	0	0	0	0	0	0	0	157.267	3100.21
1909	0.785	0.817378	133.661	1.10278	17.081	451.784	77.4235	8.89289	4.75116	24.5989	6.21805	0.0103987	0.0802474	0	0	0	0	0	0	0	0	0	0	0	0	0	0	0	12.903	0	0	0	0	0	0	0	0	157.267	3100.21
1910	0.819	0.821982	134.764	1.12118	17.6374	453.27	77.6113	8.99898	4.79288	24.6317	6.31156	0.0104011	0.0844709	0	0	0	0	0	0	0	0	0	0	0	0	0	0	0	13.146	0	0	0	0	0	0	0	0	157.267	3100.21
1911	0.836	0.778894	135.969	1.13897	17.8214	451.76	77.2727	9.05696	4.79495	24.4275	6.39756	0.0104064	0.0889167	0	0	0	0	0	0	0	0	0	0	0	0	0	0	0	14.007	0	0	0	0	0	0	0	0	157.267	3100.21
1912	0.879	0.747848	137.175	1.15756	18.0054	450.249	76.9341	9.11494	4.79702	24.2232	6.47866	0.0104117	0.0935966	0	0	0	0	0	0	0	0	0	0	0	0	0	0	0	19.895	0	0	0	0	0	0	0	0	157.267	3100.21
1913	0.943	0.72298	138.381	1.17675	18.1894	448.739	76.5955	9.17292	4.7991	24.0189	6.55615	0.010417	0.0985227	0	0	0	0	0	0	0	0	0	0	0	0	0	0	0	19.025	0	0	0	0	0	0	0	0	157.267	3100.21
1914	0.85	0.714792	139.587	1.19626	18.3734	447.228	76.2569	9.23089	4.80117	23.8146	6.63132	0.0104222	0.103708	0	0	0	0	0	0	0	0	0	0	0	0	0	0	0	11.082	0	0	0	0	0	0	0	0	157.267	3100.21
1915	0.838	0.70575	140.793	1.21584	18.5574	445.718	75.9183	9.28887	4.80324	23.6104	6.70546	0.0104275	0.109166	0	0	0	0	0	0	0	0	0	0	0	0	0	0	0	11.216	0	0	0	0	0	0	0	0	157.267	3100.21
1916	0.901	0.708116	141.999	1.23532	18.7413	444.208	75.5796	9.34685	4.80532	23.4061	6.77987	0.0104328	0.114912	0	0	0	0	0	0	0	0	0	0	0	0	0	0	0	18.614	0	0	0	0	0	0	0	0	157.267	3100.21
1917	0.955	0.711196	143.204	1.25452	18.9253	442.697	75.241	9.40483	4.80739	23.2018	6.85582	0.0104381	0.12096	0	0	0	0	0	0	0	0	0	0	0	0	0	0	0	22.143	0	0	0	0	0	0	0	0	157.267	3100.21
1918	0.936	0.714304	144.41	1.27326	19.1093	441.187	74.9024	9.46281	4.80946	22.9976	6.93462	0.0104434	0.127326	0	0	0	0	0	0	0	0	0	0	0	0	0	0	0	22.696	0	0	0	0	0	0	0	0	157.267	3100.21
1919	0.806	0.719654	145.616	1.29138	19.2933	439.676	74.5638	9.52079	4.81153	22.7933	7.01756	0.0104487	0.134028	0	0	0	0	0	0	0	0	0	0	0	0	0	0	0	23.196	0	0	0	0	0	0	0	0	157.267	3100.21
1920	0.932	0.721283	146.822	1.30869	19.4773	438.166	74.2252	9.57877	4.81361	22.589	7.10592	0.010454	0.141082	0	0	0	0	0	0	0	0	0	0	0	0	0	0	0	23.802	0	0	0	0	0	0	0	0	157.267	3100.21
1921	0.803	0.757417	147.862	1.32579	19.8639	440.996	74.6803	9.6457	4.79871	22.6052	7.20195	0.0104523	0.148507	0	0	0	0	0	0	0	0	0	0	0	0	0	0	0	24.304	0	0	0	0	0	0	0	0	157.267	3100.21
1922	0.845	0.747941	148.901	1.34327	20.2505	443.825	75.1354	9.71264	4.78382	22.6215	7.30583	0.98418	0.156323	0	0	0	0	0	0	0	0	0	0	0	0	0	0	0	24.563	0	0	0	0	0	0	0	0	157.267	3100.21
1923	0.97	0.753288	149.941	1.36094	20.6371	446.655	75.5905	9.77958	4.76893	22.6377	7.41577	1.16488	0.164551	0	0	0	0	0	0	0	0	0	0	0	0	0	0	0	25.35	0	0	0	0	0	0	0	0	157.267	3100.21
1924	0.963	0.756861	150.981	1.37962	21.0237	449.484	76.0456	9.84651	4.75404	22.6539	7.52998	1.22567	0.173211	0	0	0	0	0	0	0	0	0	0	0	0	0	0	0	25.878	0	0	0	0	0	0	0	0	157.267	3100.21
1925	0.975	0.758089	152.02	1.3999	21.4104	452.314	76.5007	9.91345	4.73914	22.6701	7.64667	1.28964	0.182328	0	0	0	0	0	0	0	0	0	0	0	0	0	0	0	28.827	0	0	0	0	0	0	0	0	157.267	3100.21
1926	0.983	0.761483	153.06	1.42119	21.797	455.143	76.9558	9.98039	4.72425	22.6863	7.76406	1.35699	0.191924	0	0	0	0	0	0	0	0	0	0	0	0	0	0	0	29.446	0	0	0	0	0	0	0	0	157.267	3100.21
1927	1.062	0.797183	154.1	1.44292	22.1836	457.973	77.4109	10.0473	4.70936	22.7026	7.88034	1.42788	0.202025	0	0	0	0	0	0	0	0	0	0	0	0	0	0	0	30.065	0	0	0	0	0	0	0	0	157.267	3100.21
1928	1.065	0.799671	155.14	1.4645	22.5702	460.803	77.866	10.1143	4.69447	22.7188	7.99374	1.5025	0.212658	0	0	0	0	0	0	0	0	0	0	0	0	0	0	0	30.685	0	0	0	0	0	0	0	0	157.267	3100.21
1929	1.145	0.824226	156.179	1.48535	22.9569	463.632	78.3211	10.1812	4.67957	22.735	8.10245	1.58105	0.223851	0	0	0	0	0	0	0	0	0	0	0	0	0	0	0	31.573	0	0	0	0	0	0	0	0	157.267	3100.21
1930	1.053	0.89588	157.219	1.50489	23.3435	466.462	78.7762	10.2481	4.66468	22.7512	8.2047	1.66374	0.235632	0	0.74682	0	0	0	0	0	0	0	0	0	0	0	0	0	31.933	0	0	0	0	0	0	0	0	157.267	3100.21
1931	0.94	0.903341	158.345	1.52262	23.755	468.031	78.9094	10.3025	4.6671	22.7486	8.29855	1.75078	0.248034	0	0.0676905	0	0	0	0	0	0	0	0	0	0.097	0	0	0	32.553	0	0	0	0	0	0	0	0	157.267	3100.21
1932	0.847	0.812226	159.472	1.53852	24.1664	469.6	79.0427	10.3568	4.66951	22.7459	8.38498	1.8424	0.261089	0	0.0735767	0	0	0	0	0	0	0	0	0	0.097	0	0	0	33.979	0	0	0	0	0	0	0	0	157.267	3100.21
1933	0.893	0.808588	160.598	1.55267	24.5779	471.169	79.176	10.4111	4.67193	22.7433	8.46663	1.93884	0.27483	0	0.0799748	0	0	0	0	0	0	0	0	0	0.097	0	0	0	41.893	0	0	0	0	0	0	0	0	157.267	3100.21
1934	0.973	0.796863	161.725	1.56531	24.9894	472.738	79.3092	10.4655	4.67434	22.7407	8.54609	2.04035	0.289295	0	0.0869292	0	0	0	0	0	0	0	0	0	0.194	0	0.117	0	42.817	0	0	0	0	0	0	0	0	157.267	3100.21
1935	1.027	0.794716	162.851	1.57712	25.4009	474.307	79.4425	10.5198	4.67676	22.738	8.62599	2.14721	0.304521	0	0.0944883	0	0	0	0	0	0	0	0	0	0.291	0	0.117	0	43.74	0	0	0	0	0	0	0	0	157.267	3100.21
1936	1.13	0.8013	163.977	1.58892	25.8123	475.876	79.5758	10.5741	4.67917	22.7354	8.70894	2.2597	0.320548	0	0.102705	0	0	0	0	0	0	0	0	0	0.485	0	0.117	0	44.664	0	0	0	0	0	0	0	0	157.267	3100.21
1937	1.209	0.779699	165.104	1.60151	26.2238	477.445	79.709	10.6285	4.68159	22.7327	8.79755	2.3781	0.337419	0	0.111636	0	0	0	0	0	0	0	0	0	0.776	0	0.234	0	45.588	0	0	0	0	0	0	0	0	157.267	3100.21
1938	1.142	0.781882	166.23	1.61572	26.6353	479.014	79.8423	10.6828	4.684	22.7301	8.89443	2.50274	0.355178	0	0.121343	0	0	0	0	0	0	0	0	0.161	1.164	0	0.234	0	46.512	0	0.165	0	0	0	0	0	0	157.267	3100.21
1939	1.192	0.779444	167.357	1.63235	27.0468	480.583	79.9756	10.7371	4.68642	22.7274	9.00221	2.63393	0.373872	0	0.131895	0	0	0	0	0	0	0	0	0.161	1.649	0	0.351	0	47.436	0	0.33	0	0	0	0	0	0	157.267	3100.21
1940	1.299	0.766832	168.483	1.65224	27.4583	482.152	80.1088	10.7914	4.68883	22.7248	9.12349	2.77203	0.393549	0	0.143364	0	0	0	0	0	0	0	0	0.161	2.231	0	0.468	0	50.781	0	0.496	0	0	0	0	0	0	157.267	3100.21
1941	1.334	0.750365	170.03	1.7002	27.8404	488.558	81.2433	11.1234	4.69324	22.6876	9.26539	2.91741	0.414262	0	0.155833	0	0	0	0	0	0	0	0	0.161	2.91	0	0.585	0	52.603	0	0.661	0	0	0	0	0	0	157.267	3100.21
1942	1.342	0.76905	171.578	1.79386	28.2226	494.963	82.3778	11.4554	4.69766	22.6505	9.43212	3.07043	0.394683	0	0.169386	0	0	0	0	0	0	0	0	0.161	3.589	0	0.819	0	53.918	0	0.826	0	0	0	0	0	0	157.267	3100.21
1943	1.391	0.763766	173.126	1.92316	28.6048	501.369	83.5123	11.7873	4.70207	22.6133	9.62193	3.23151	0.378322	0	0.184119	0	0	0	0	0	0	0	0	0.322	4.365	0	1.17	0	54.705	0	0.991	0	0	0	0	0	0	157.267	3100.21
1944	1.383	0.768399	174.673	2.08668	28.987	507.774	84.6468	12.1193	4.70648	22.5762	9.83308	3.40106	0.364076	0	0.200132	0	0	0	0	0	0	0	0	0.322	5.917	0	1.521	0	55.75	0	1.157	0	0	0	0	0	0	157.267	3100.21
1945	1.16	0.769147	176.221	2.2804	29.3692	514.18	85.7813	12.4513	4.71089	22.539	10.0638	3.57954	0.351947	0	0.217538	0	0	0	0	0	0	0	0	0.483	7.76	1.868	3.861	0	56.796	0	1.322	0	0	0	0	0	0	157.267	3100.21
1946	1.238	0.842149	177.768	2.49036	29.7513	520.585	86.9158	12.7832	4.71531	22.5019	10.3124	3.76742	0.341933	0	0.236458	0	0	0	0	0	0	0	0	0.966	13.483	4.203	6.318	0	59.187	0	1.487	0	0	0	0	0	0	157.267	3100.21
1947	1.392	0.87018	179.316	2.7026	30.1335	526.991	88.0503	13.1152	4.71972	22.4647	10.577	3.96518	0.334036	0	0.257024	0	0	0	0	0	0	0	0	2.093	20.661	5.137	6.903	0	67.278	0	1.652	0	0	0	0	0	0	157.267	3100.21
1948	1.469	0.87513	180.863	2.90316	30.5157	533.396	89.1848	13.4472	4.72413	22.4276	10.8561	4.17335	0.328255	0	0.279378	0	0	0	0	0	0	0	0	3.703	24.056	6.071	7.254	0	68.369	0	1.817	0	0	0	0	0	0	157.267	3100.21
1949	1.419	0.882126	182.411	3.07807	30.8979	539.802	90.3193	13.7791	4.72855	22.3904	11.1477	4.39247	0.32459	0	0.303676	0	0	0	0	0	0	0	0	6.118	25.802	6.538	7.722	0	74.34	0	1.983	0	0	0	0	0	0	157.267	3100.21
1950	1.63	0.892335	183.959	3.21338	31.28	546.207	91.4538	14.1111	4.73296	22.3532	11.4501	4.62313	0.323043	0	0.330088	0	0	0	0	0	0	0	0.261908	8.855	28.615	7.939	8.073	0	65	0	2.148	0	0	0	0	0	0	157.267	3100.21
1951	1.768	1.08852	189.11	3.3186	32.8669	558.446	94.8484	14.5285	4.77333	22.5413	11.7846	4.86592	0.323612	0	0.358782	0	0	0	0	0	0	0	0.26199	8.158	33.854	1.889	7.102	0	65	0	2.313	0	0	0	0	0	0	157.267	3100.21
1952	1.796	1.10964	194.262	3.41111	34.4538	570.685	98.2429	14.9459	4.8137	22.7293	12.1691	5.12148	0.326299	0	0.389971	0	0	0	0	0	0	0	0.262072	11.742	35.2	2.139	7.288	0	70	0	2.478	0	0	0	0	0	0	157.927	3117.78
1953	1.841	1.10452	199.413	3.48872	36.0407	582.924	101.638	15.3633	4.85407	22.9174	12.5966	5.3905	0.331104	0	0.42387	0	0	0	0	0	0	0	0.262153	15.985	39.582	2.437	7.43	0	75	0	2.644	0	0	0	0	0	0	158.604	3137.15
1954	1.865	1.15214	204.565	3.55435	37.6277	595.163	105.032	15.7807	4.89444	23.1054	13.0603	5.67367	0.338026	0	0.460717	0	0	0	0	0	0	0	0.262235	19.855	44.802	2.785	7.431	0	80	1.214	2.809	0	0	0	0	0	0	159.3	3158.22
1955	2.043	1.19119	209.716	3.61411	39.2146	607.401	108.427	16.1981	4.93481	23.2935	13.5532	5.97175	0.347066	0	0.500767	0	0	0	0	0	0	0	0.262317	24.604	50.343	3.233	7.388	0	85	3.512	2.974	0	0	0	0	0	0	160.014	3180.75
1956	2.178	1.24469	214.868	3.67068	40.8015	619.64	111.821	16.6154	4.97518	23.4815	14.0685	6.28552	0.358224	0	0.544298	0	0	0	0	0	0	0	0.262399	30.685	58.664	3.73	7.302	0	90	6.224	3.48	0	0	0	0	0	0	160.748	3204.5
1957	2.27	1.27187	220.019	3.72673	42.3884	631.879	115.216	17.0328	5.01555	23.6696	14.5993	6.6158	0.3715	0	0.591613	0	0	0	0	0	0	0	0.262481	34.375	66.689	4.227	7.25	0	95	9.469	4.251	0	0	0	0	0	0	161.502	3229.07
1958	2.33	1.31958	225.171	3.78495	43.9753	644.118	118.61	17.4502	5.05592	23.8576	15.1387	6.96346	0.386895	0	0.643041	0	0	0	0	0	0	0	0.262563	32.235	69.93	4.824	7.221	0	100	10.772	6.008	0	0	0	0	0	0	162.277	3254.04
1959	2.462	1.2036	230.322	3.848	45.5622	656.357	122.005	17.8676	5.09629	24.0457	15.6798	7.32943	0.404409	0	0.69894	0	0	0	0	0	0	0	0.262644	33.015	78.149	5.57	7.176	0	105	14.717	7.06	0	0	0	0	0	0	163.073	3278.97
1960	2.577	1.19228	235.474	3.91858	47.1491	668.596	125.4	18.285	5.13665	24.2337	16.2157	7.71465	0.424041	0	0.759698	0	0	0	0	0	0	0	0.524634	43.342	93.09	6.366	6.6	0	110	18.348	7.659	0	0	0	0	0	0	163.892	3303.39
1961	2.594	1.24432	238.522	4.02401	48.7708	682.676	129.241	18.9591	5.1796	24.5022	16.7593	8.12016	0.445793	0	0.825763	0	0	0	0	0	0	0	0.524798	55.722	104.6	7.212	6.88	0	115	20.077	9.426	0	0	0	0	0	0	164.735	3326.86
1962	2.7	1.23557	241.571	4.18365	50.3925	696.756	133.083	19.6333	5.22254	24.7707	17.326	8.54701	0.469664	0	0.897574	0	0	0	0	0	0	0	0.786869	69.881	120.668	8.248	7.168	0	119	28.22	11.573	0	0	0	0	0	0	165.601	3349.07
1963	2.848	1.24429	244.619	4.38831	52.0142	710.836	136.925	20.3074	5.26549	25.0392	17.9133	14.985	0.495655	0	0.97563	0	0	0	0	0	0	0	0.525207	85.539	141.744	9.476	7.421	0	123	31.46	14.396	0	0	0.005	0.001	0.001	0.007	166.493	3369.71
1964	3.008	1.25159	247.668	4.63747	53.6359	724.916	140.766	20.9815	5.30843	25.3077	18.5183	13.4881	0.523766	0	1.06047	0	0	0	0	0	0	0	0.525371	101.538	164.921	10.853	7.692	0.225	127	36.197	16.782	0	0	0.014	0.002	0.003	0.014	167.41	3388.63
1965	3.145	1.26426	250.717	4.89682	55.2576	738.995	144.608	21.6557	5.35138	25.5762	19.1382	13.4884	0.553997	0	1.1527	0	0	0	0	0	0	0	0.525534	115.75	185.933	12.426	7.975	0.444	127	48.096	20.514	0	0	0.032	0.005	0.005	0.028	168.355	3405.7
1966	3.305	1.2937	253.765	5.19558	56.8793	753.075	148.45	22.3298	5.39432	25.8447	19.7704	13.4886	0.586348	0	1.25294	0	0	0	0	0	0	0	0.525698	129.623	208.571	14.246	8.305	0.633	127	69.567	24.512	0	0	0.058	0.008	0.008	0.048	169.328	3420.92
1967	3.411	1.29763	256.814	5.45748	58.501	767.155	152.292	23.0039	5.43727	26.1132	20.412	13.4889	0.620819	0	1.3619	0	0	0	0	0	0	0	1.04968	147.119	235.269	16.313	8.623	0.825	127	94.137	29.817	0	0	0.1	0.013	0.013	0.075	170.329	3434.34
1968	3.588	1.2352	259.863	5.61974	60.1227	781.235	156.133	23.6781	5.48021	26.3817	21.0604	13.4892	0.657411	0	1.48033	0	0	0	0	0	0	0	0.526189	167.586	263.953	18.678	8.974	1.043	127	114.767	36.216	0	0	0.158	0.019	0.016	0.109	171.36	3446.07
1969	3.8	1.23839	262.911	5.78483	61.7444	795.315	159.975	24.3522	5.52316	26.6502	21.7128	13.4894	0.696124	0	1.60907	0	0	0	0	0	0	0	0.788261	194.513	294.486	21.388	9.344	1.283	127	134.875	39.381	0	0	0.229	0.026	0.024	0.15	172.423	3456.22
1970	4.076	1.19711	265.96	5.93688	63.3661	809.395	163.817	25.0263	5.5661	26.9187	22.3665	11.9926	0.736958	0	1.74899	0	0	0.0554463	0	0.356404	0	0	0.788506	221.119	321.743	24.494	9.687	1.537	127	141.326	43.652	0	0	0.329	0.035	0.043	0.197	173.518	3464.95
1971	4.231	1.07089	270.025	5.60498	63.5459	825.183	167.161	25.8097	5.70387	27.2218	23.0425	13.49	0.779913	0	1.90113	0	0	0.0573185	0	0.363166	0	0	1.05066	243.137	346.609	28.094	10.052	1.803	127	170.133	47.746	0	0.613	0.461	0.044	0.1	0.252	174.646	3472.41
1972	4.399	1.04706	274.09	5.91813	63.7256	840.97	170.506	26.593	5.84164	27.5248	23.7556	13.4902	0.82499	0	2.06649	0	0	0.0591929	0	0.369936	0	0	0.789079	274.26	378.471	32.236	10.471	2.127	127	214.168	54.79	0	0.613	0.63	0.055	0.17	0.313	175.809	3478.74
1973	4.635	1.0331	278.155	6.0449	63.9053	856.758	173.851	27.3763	5.97941	27.8279	24.4941	13.4905	0.872189	0	2.24624	0	0	0.0610694	0	0.376713	0	0	1.05123	314.04	419.239	36.92	10.883	2.495	127	266.209	61.912	0	0.613	0.839	0.067	0.277	0.391	177.007	3484.11
1974	4.644	1.03874	282.22	5.9406	64.0851	872.546	177.195	28.1597	6.11718	28.1309	25.2459	11.9936	0.921509	0	2.44163	0	0	0.0629482	0	0.383499	0	0	1.05156	345.881	454.701	42.295	11.29	2.921	127	305.489	62.543	0	0.613	1.086	0.08	0.372	0.468	178.243	3488.63
1975	4.615	1.03159	286.285	6.14097	64.2648	888.333	180.54	28.943	6.25495	28.434	25.9992	13.491	0.972952	0	2.65401	0	0	0.0648291	0	0.390292	0	0	1.05189	335.741	442.834	48.505	11.734	3.391	127	308.992	70.487	0	0.613	1.365	0.095	0.524	0.544	179.517	3492.43
1976	4.883	1.09061	290.35	6.30426	64.4445	904.121	183.885	29.7263	6.39272	28.7371	26.742	13.4913	1.02652	0	2.88486	0	0	0.0667121	0	0.397093	0	0	1.57603	343.24	432.28	55.552	12.2	3.943	127	382.3	78.51	0	0.613	1.767	0.11	0.783	0.621	180.83	3495.62
1977	5.029	1.09399	294.415	6.5344	64.6243	919.908	187.229	30.5097	6.53049	29.0401	27.4625	11.9945	1.0822	0	3.56608	0	0	0.0685974	0	0.403902	0	0	1.83843	330.711	419.447	63.634	12.68	4.582	127	462.112	85.789	0	0.613	2.035	0.127	1.006	0.697	182.185	3498.28
1978	5.105	1.09037	298.48	6.61937	64.804	935.696	190.574	31.293	6.66826	29.3432	28.1487	13.4919	1.14001	0	3.7964	0	0	0.0704848	0	0.0542996	0	0	2.36282	359.009	424.498	72.896	13.168	5.337	127	587.319	92.012	0	0.613	2.454	0.145	1.253	0.774	183.581	3500.51
1979	5.387	1.06471	302.545	7.00777	64.9837	951.483	193.919	32.0763	6.80603	29.6462	28.7887	11.995	1.19995	0	4.02754	0	0	0.0723744	0	0.0543309	0	0	2.88737	274.357	357.266	83.489	13.661	6.228	127	489.712	99.321	0	0.613	2.928	0.161	1.548	0.85	185.022	3502.36
1980	5.332	1.02521	306.61	7.06139	65.1634	967.271	197.263	32.8597	6.9438	29.9493	29.3705	13.4924	1.262	0	4.2595	0	0	0.0188144	0	0.767209	0	0	3.15018	304.998	432.044	95.641	14.194	7.006	121.849	550.707	104.973	0	0.613	3.453	0.185	1.805	0.927	186.506	3503.91
1981	5.168	1.04486	310.013	6.84175	65.0439	980.445	199.799	33.3572	7.021	30.4563	29.9319	11.9955	1.32618	0	4.49216	0	0	0.0662884	0	0.780793	0	0	3.41307	289.529	386.347	104.421	14.121	7.743	110.093	505.097	106.406	0	1.25	3.946	0.206	2.139	1.003	188.038	3505.19
1982	5.127	1.19041	313.415	7.11899	64.9243	993.619	202.334	33.8548	7.09821	30.9634	30.5084	13.4929	1.39249	0	4.72561	0	0	0.0735941	0	0.0815283	0	0	3.67604	252.419	400.317	108.943	13.905	8.399	123.807	505.343	116.821	0	0.961	4.522	0.229	2.645	1.105	189.616	3506.26
1983	5.11	1.22552	316.817	7.2169	64.8048	1006.79	204.87	34.3524	7.17542	31.4705	31.0856	11.996	1.46092	0	4.95987	0	0	0.0734967	0	0.794366	0	0	3.93909	299.092	408.416	120.93	14.252	9.207	135.729	553.718	125.343	0	1.165	5.168	0.249	2.98	1.183	191.243	3507.15
1984	5.29	1.26008	320.22	7.04813	64.6852	1019.97	207.406	34.85	7.25262	31.9775	31.6489	11.9962	1.53147	0	5.19493	0	0	0.0182631	0	0.807943	0	0	3.94032	310.901	432.125	177.397	14.781	9.71	134.867	569.476	130.447	0	1.331	6.032	0.269	3.475	1.262	192.92	3507.88
1985	5.444	1.27534	323.623	7.01692	64.5656	1033.14	209.941	35.3475	7.32983	32.4846	32.1839	11.9965	1.60414	0	5.43079	0	0	-0.0806812	0	0.108674	0	0	4.72727	315.327	407.669	128.622	15.705	9.792	109.714	546.714	138.367	0	1.011	7.083	0.289	3.997	1.355	194.648	3508.5
1986	5.61	1.2872	327.025	7.07049	64.4461	1046.31	212.477	35.8451	7.40703	32.9917	32.6758	13.4939	1.67894	0	5.66746	0	0	0.075292	0	0.821507	0	0	4.99065	388.346	502.712	169.103	16.379	10.152	149.931	539.076	146.048	0	3.575	8.22	0.309	4.579	1.434	196.427	3509
1987	5.753	1.29401	330.427	7.46167	64.3265	1059.49	215.012	36.3427	7.48424	33.4988	33.1102	11.997	1.75587	0	5.90492	0	0	0.177805	0	1.54792	0	0	4.7303	387.277	453.238	250.222	16.667	10.807	115.608	647.608	162.883	0	3.773	9.656	0.329	5.109	1.504	198.259	3509.43
1988	5.964	1.31672	333.83	7.20251	64.207	1072.66	217.548	36.8403	7.56145	34.0058	33.4725	11.9972	1.83492	0	6.14318	0	0	0.181183	0	0.862227	0	0	4.99368	303.816	507.99	245.07	16.593	11.493	135.667	635.816	180.113	0	4.458	11.362	0.349	5.696	1.728	200.146	3509.77
1989	6.089	1.32364	337.232	7.33104	64.0874	1085.84	220.083	37.3378	7.63865	34.5129	33.7481	11.9975	1.91609	0	6.38225	0	0	0.188294	0.945058	0.875792	0	0	5.51905	301.477	385.52	204.109	15.725	12.26	118.146	564.767	186.15	0	6.174	11.605	0.369	5.482	1.73	202.087	3510.06
1990	6.144	1.31948	340.635	7.58568	63.9678	1099.01	222.619	37.8354	7.71586	35.02	33.9226	11.9977	2.07357	0	6.62182	0	0	0.185942	1.01015	0.88921	0	0	5.52077	291.464	405.617	203.131	14.022	12.363	143.171	694.142	195.69	0	11.322	11.702	0.389	5.119	1.73	204.082	3510.3
1991	6.235	1.38098	336.592	7.40236	62.9552	1095.91	221.419	37.8681	7.72475	35.0723	34.026	11.9979	2.37291	0	6.86218	0	0	0.190921	2.17764	0.902612	0.00471002	0	5.7844	190.405	309.884	198.928	13.243	12.135	70.607	573.576	204.801	0	16.556	11.426	0.409	4.094	1.735	206.133	3510.5
1992	6.118	1.30353	332.549	7.79893	61.9425	1092.81	220.22	37.9008	7.73365	35.1247	34.1135	11.9981	2.37315	0	7.10299	0	0	0.2889	4.20799	1.62865	0.00471003	0	5.7862	203.23	303.369	121.343	10.324	12.018	91.022	554.986	185.994	0	20.911	9.343	0.429	2.74	1.715	208.24	3510.66
1993	6.124	1.2981	328.507	7.3131	60.9298	1089.71	219.02	37.9335	7.74254	35.177	34.2079	11.9984	2.37338	0	7.34531	0	0	0.376816	8.41616	2.3686	0.18499	0	6.31181	144.94	228.999	67.857	8.322	11.681	85.436	372.232	188.092	23.101	22.5	10.23	0.509	3.344	1.7	210.402	3510.8
1994	6.242	1.2896	324.464	7.50728	59.9172	1086.61	217.821	37.9662	7.75143	35.2294	34.3318	11.9986	2.37362	0	7.58821	0	0	1.8251	21.3991	3.83476	0.18199	0	5.00424	127.137	232.722	61.065	6.105	11.011	77.289	244.236	179.101	33.844	25.599	9.105	0.589	4.75	1.68	212.619	3510.91
1995	6.372	1.27501	320.421	7.6191	58.9045	1083.51	216.621	37.9989	7.76033	35.2817	34.5081	10.5017	2.37386	0	10.2115	0	0	2.98022	29.7261	6.04096	0.0999948	0	6.05342	119.235	194.71	22.978	4.784	9.083	85.021	201.637	243.238	41.961	24.275	10.035	0.669	3.991	1.3	200.199	3511.01
1996	6.51	1.2511	316.378	7.65206	57.8919	1080.4	215.421	38.0316	7.76922	35.3341	34.9605	11.9991	2.37409	0	10.2482	0	0	3.41888	40.5849	6.14999	0.436978	0	6.05531	115.437	178.907	27.962	2.943	7.019	70.403	89.184	211.181	51.431	26.411	10.743	0.729	2.691	0.85	201.834	3511.08
1997	6.619	1.21814	312.335	7.90975	56.8792	1077.3	214.222	38.0642	7.77812	35.3864	35.8337	11.9993	2.37433	0	10.2844	0	0	5.35405	50.6436	6.25875	0.407978	0	4.48574	95.388	160.981	18.663	1.886	5.429	74.423	62.53	208.614	46.639	22.493	9.909	0.789	2.594	0.7	207.696	3511.08
1998	6.588	1.21484	308.293	7.89573	55.8665	1074.2	213.022	38.0969	7.78701	35.4388	37.0316	11.9996	2.37457	0	10.3207	0.0873054	0	7.20318	59.6521	6.36768	0.927952	0	4.74904	92.401	152.715	14.831	1.199	4.223	84.361	29.412	249.912	58.131	27.683	9.837	0.607	2.491	0.71	206.946	3511.08
1999	6.569	1.18279	304.25	7.52698	54.8539	1071.1	211.823	38.1296	7.79591	35.4911	38.4586	10.5027	2.3748	0	10.3577	0.785737	0	8.15317	67.044	6.47752	1.35393	0	6.32196	94.931	145.169	14.362	0.784	3.32	69.242	24.668	230.91	55.817	28.047	9.806	0.467	2.39	0.631	195.938	3511.08
2000	6.735	1.1488	300.207	7.4566	53.8412	1068	210.623	38.1623	7.8048	35.5435	40.0186	12.0001	2.3749	0.4624	10.3949	4	0	8.5381	75.0393	6.234	1.9509	17.9257	5.5382	99.227	140.712	17.777	0.567	2.609	74.132	18.584	229.638	55.602	26.296	8.834	0.328	2.295	0.562	186.206	3511.08
2001	6.8959	1.132	303.409	7.503	54.4191	1066.74	211.594	38.2888	7.8945	35.7143	40.3916	11.925	2.4345	0.4651	10.4328	5.3987	0.6471	9.0301	84.0409	7.4947	1.6449	19.7183	5.699	81.839	117.202	12.051	0.45	2.069	65.195	13.253	270.443	57.19	28.001	8.669	0.282	2.209	0.5	181.525	3511.08
2002	6.949	1.2317	306.579	7.5487	54.9961	1065.47	212.563	38.4153	7.9842	35.8845	40.7646	11.8481	2.4915	0.4058	10.4708	6.7975	1.294	9.8852	94.7161	8.7389	2.508	21.5109	5.8596	81.408	100.258	6.019	0.423	1.609	69.565	13.487	243.015	57.77	22.43	8.524	0.235	2.131	0.445	181.887	3511.08
2003	7.286	1.2257	309.716	7.5942	55.5716	1064.17	213.531	38.5418	8.0734	36.0543	41.1378	11.7693	2.5463	0.3939	10.5083	8.196	1.9411	12.0788	101.416	9.9776	3.341	23.3035	6.0201	90.865	107.745	2.604	0.37	1.288	69.381	8.444	252.962	48.801	23.232	7.77	0.189	2.057	0.396	177.539	3511.08
2004	7.6719	1.2429	312.824	7.6394	56.1461	1062.86	214.498	38.6684	8.1623	36.2232	41.5107	11.6885	2.599	0.4062	10.5454	9.5947	2.5882	12.5073	113.93	11.2136	4.269	25.096	6.1805	78.182	87.647	5.237	0.378	1.046	67.383	10.874	263.062	43.847	23.348	7.653	0.189	1.987	0.353	174.26	3511.08
2005	7.971	1.1955	315.903	7.6841	56.7195	1061.53	215.463	38.7948	8.2512	36.3917	41.8837	11.6059	2.6494	0.4358	10.8116	10.9935	3.2351	13.7591	120.933	12.4483	4.8901	26.8885	6.3407	49.49	51.552	0.854	0.227	0.785	65	10.874	283.408	46.641	26.458	7.518	0.189	1.92	0.314	168.841	3511.08
