# Supplementary material for: The Social Cost of Fossil and Industrial CO2 Emissions from 1950 to 2018
Source: Research Square preprint supplement (doi:10.21203/rs.3.rs-2244259/v1), 2022-11-17
Supplement: Supplementary file 11 [file 20THCENTURY_MIDYEAR_RADFORCING.xls]

## Sheet: 20THCENTURY_MIDYEAR_RADFORCING
PRE2005__RADIATIVE FORCINGS____________________________
CONTENT: ANNUAL AVERAGE, GLOBAL MEAN RADIATIVE FORCING.
RUN: 20THCENTURY/PRE2005 RUN, FINAL RELEASE, 26 Nov. 2009
PRE2005 CONTACT: RCP CONCENTRATION CALCULATION AND DATA GROUP.
DATE: 26/11/2009 11:29:06 (updated description, 30 May 2010).
MAGICC-VERSION: 6.3.09, 25 November 2009
FILE PRODUCED BY: RCP Concentration Calculation & Data Group, M. Meinshausen, S. Smith, K. Riahi, D. van Vuuren et al.
DOCUMENTATION: M. Meinshausen, S. Smith et al. (2011) "The RCP GHG concentrations and their extension from 1765 to 2300", DOI 10.1007/s10584-011-0156-z, Climatic Change.
CMIP5 INFO: http://cmip-pcmdi.llnl.gov/cmip5/
RCP DATABASE: http://www.iiasa.ac.at/web-apps/tnt/RcpDb
FURTHER INFO: For data sources, aknowledgements and further information, see http://www.pik-potsdam.de/~mmalte/rcps.
NOTE: THIS FORCING DATASET IS NOT CMIP5 RECOMMENDATION, AS CONCENTRATIONS, NOT FORCING, SHALL BE PRESCRIBED IN MAIN CMIP5 RUNS.
Radiative Forcing after strat. temp. adjustment.;
PRE2005 ends in year 2005
COLUMN_DESCRIPTION________________________________________
1 TOTAL_INCLVOLCANIC_RF Total anthropogenic and natural radiative forcing
2 VOLCANIC_ANNUAL_RF Annual mean volcanic stratospheric aerosol forcing
3 SOLAR_RF Solar irradience forcing
4 TOTAL_ANTHRO_RF Total anthropogenic forcing
5 GHG_RF Total greenhouse gas forcing (CO2, CH4, N2O, HFCs, PFCs, SF6, and Montreal Protocol gases).
6 KYOTOGHG_RF Total forcing from greenhouse gases controlled under the Kyoto Protocol (CO2, CH4, N2O, HFCs, PFCs, SF6).
7 CO2CH4N2O_RF Total forcing from CO2, methan and nitrous oxide.
8 CO2_RF CO2 Forcing
9 CH4_RF Methane Forcing
10 N2O_RF Nitrous Oxide Forcing
11 FGASSUM_RF Total forcing from all flourinated gases controlled under the Kyoto Protocol (HFCs, PFCs, SF6; i.e. columns 13-24)
12 MHALOSUM_RF Total forcing from all gases controlled under the Montreal Protocol (columns 25-40)
13-24 Flourinated gases controlled under the Kyoto Protocol
25-40 Ozone Depleting Substances controlled under the Montreal Protocol
41 TOTAER_DIR_RF Total direct aerosol forcing (aggregating columns 42 to 47)
42 OCI_RF Direct fossil fuel aerosol (organic carbon)
43 BCI_RF Direct fossil fuel aerosol (black carbon)
44 SOXI_RF Direct sulphate aerosol
45 NOXI_RF Direct nitrate aerosol
46 BIOMASSAER_RF Direct biomass burning related aerosol
47 MINERALDUST_RF Direct Forcing from mineral dust aerosol
48 CLOUD_TOT_RF Cloud albedo effect
49 STRATOZ_RF Stratospheric ozone forcing
50 TROPOZ_RF Tropospheric ozone forcing
51 CH4OXSTRATH2O_RF Stratospheric water-vapour from methane oxidisation
52 LANDUSE_RF Landuse albedo
53 BCSNOW_RF Black carbon on snow.
&THISFILE_SPECIFICATIONS
THISFILE_DATACOLUMNS	53
THISFILE_FIRSTYEAR	1765
THISFILE_LASTYEAR	2005
THISFILE_ANNUALSTEPS	1
THISFILE_FIRSTDATAROW	61
THISFILE_UNITS	SEE ROW 59
THISFILE_DATTYPE	RCPDAT
/
COLUMN:	1	2	3	4	5	6	7	8	9	10	11	12	13	14	15	16	17	18	19	20	21	22	23	24	25	26	27	28	29	30	31	32	33	34	35	36	37	38	39	40	41	42	43	44	45	46	47	48	49
UNITS:	W/m2	W/m2	W/m2	W/m2	W/m2	W/m2	W/m2	W/m2	W/m2	W/m2	W/m2	W/m2	W/m2	W/m2	W/m2	W/m2	W/m2	W/m2	W/m2	W/m2	W/m2	W/m2	W/m2	W/m2	W/m2	W/m2	W/m2	W/m2	W/m2	W/m2	W/m2	W/m2	W/m2	W/m2	W/m2	W/m2	W/m2	W/m2	W/m2	W/m2	W/m2	W/m2	W/m2	W/m2	W/m2	W/m2	W/m2	W/m2	W/m2
v YEARS/GAS >	TOTAL_INCLVOLCANIC_RF	VOLCANIC_ANNUAL_RF	SOLAR_RF	TOTAL_ANTHRO_RF	GHG_RF	KYOTOGHG_RF	CO2CH4N2O_RF	CO2_RF	CH4_RF	N2O_RF	FGASSUM_RF	MHALOSUM_RF	CF4	C2F6	C6F14	HFC23	HFC32	HFC43_10	HFC125	HFC134a	HFC143a	HFC227ea	HFC245fa	SF6	CFC_11	CFC_12	CFC_113	CFC_114	CFC_115	CARB_TET	MCF	HCFC_22	HCFC_141B	HCFC_142B	HALON1211	HALON1202	HALON1301	HALON2402	CH3BR	CH3CL	TOTAER_DIR_RF	OCI_RF	BCI_RF	SOXI_RF	NOXI_RF	BIOMASSAER_RF	MINERALDUST_RF	CLOUD_TOT_RF	STRATOZ_RF
1765	0	0	-0.0283587	0	0	0	0	0	0	0	0	0	0	0	0	0	0	0	0	0	0	0	0	0	0	0	0	0	0	0	0	0	0	0	0	0	0	0	0	0	0	0	0	0	0	0	0	0	0
1766	0.126027	0.116222	-0.0206938	0.0163188	0.0153635	0.0153635	0.0153635	0.0110491	0.00357577	0.000738661	0	0	0	0	0	0	0	0	0	0	0	0	0	0	0	0	0	0	0	0	0	0	0	0	0	0	0	0	0	0	1.77672e-05	0	0	-2.86731e-05	-1.2928e-05	0.000250103	-0.000190735	-0.000801451	0
1767	0.273031	0.232444	0.00703937	0.0335479	0.0321232	0.0321232	0.0321232	0.023246	0.00736074	0.00151637	0	0	0	0	0	0	0	0	0	0	0	0	0	0	0	0	0	0	0	0	0	0	0	0	0	0	0	0	0	0	-6.46768e-06	0	0	-7.97657e-05	-3.19082e-05	0.000672939	-0.000567733	-0.00238112	0
1768	0.278871	0.197444	0.0462569	0.0351696	0.0349722	0.0349722	0.0349722	0.0256052	0.00777313	0.00159381	0	0	0	0	0	0	0	0	0	0	0	0	0	0	0	0	0	0	0	0	0	0	0	0	0	0	0	0	0	0	-0.000120356	0	0	-0.000120421	-4.16465e-05	0.000977553	-0.000935841	-0.00391494	0
1769	0.242045	0.131819	0.073605	0.036621	0.0378995	0.0378995	0.0378995	0.028057	0.00817237	0.00167006	0	0	0	0	0	0	0	0	0	0	0	0	0	0	0	0	0	0	0	0	0	0	0	0	0	0	0	0	0	0	-0.00028157	0	0	-0.000153962	-4.79302e-05	0.00121549	-0.00129517	-0.0054041	0
1770	0.242824	0.127444	0.0772581	0.038122	0.0408559	0.0408559	0.0408559	0.0305529	0.00855779	0.00174523	0	0	0	0	0	0	0	0	0	0	0	0	0	0	0	0	0	0	0	0	0	0	0	0	0	0	0	0	0	0	-0.000470954	0	0	-0.000182439	-5.25379e-05	0.00140985	-0.00164582	-0.00684976	0
1771	0.284142	0.179944	0.0648944	0.0393037	0.043845	0.043845	0.043845	0.0330936	0.00893207	0.00181931	0	0	0	0	0	0	0	0	0	0	0	0	0	0	0	0	0	0	0	0	0	0	0	0	0	0	0	0	0	0	-0.000888303	-1.68577e-05	6.06652e-05	-0.000242598	-5.69856e-05	0.00135539	-0.00198792	-0.00844667	0
1772	0.299857	0.214944	0.0443363	0.0405766	0.0468967	0.0468967	0.0468967	0.0357058	0.00929859	0.00189228	0	0	0	0	0	0	0	0	0	0	0	0	0	0	0	0	0	0	0	0	0	0	0	0	0	0	0	0	0	0	-0.00132732	-3.37153e-05	0.00012133	-0.000298156	-6.07885e-05	0.00126556	-0.00232155	-0.0100013	0
1773	0.290756	0.228069	0.0203481	0.0423385	0.0500195	0.0500195	0.0500195	0.0383971	0.00965806	0.00196426	0	0	0	0	0	0	0	0	0	0	0	0	0	0	0	0	0	0	0	0	0	0	0	0	0	0	0	0	0	0	-0.00157118	-3.37153e-05	0.00012133	-0.000314621	-6.33834e-05	0.00136606	-0.00264685	-0.0113213	0
1774	0.2781	0.232444	0.00144375	0.0442116	0.0532061	0.0532061	0.0532061	0.0411609	0.0100098	0.00203544	0	0	0	0	0	0	0	0	0	0	0	0	0	0	0	0	0	0	0	0	0	0	0	0	0	0	0	0	0	0	-0.00181491	-3.37153e-05	0.00012133	-0.000329868	-6.57492e-05	0.001457	-0.00296391	-0.012602	0
1775	0.268839	0.232444	-0.00981313	0.046208	0.0564687	0.0564687	0.0564687	0.0440096	0.0103531	0.00210598	0	0	0	0	0	0	0	0	0	0	0	0	0	0	0	0	0	0	0	0	0	0	0	0	0	0	0	0	0	0	-0.00205687	-3.37153e-05	0.00012133	-0.000344145	-6.79547e-05	0.00154045	-0.00327284	-0.0138446	0
1776	0.276856	0.232444	-0.00395063	0.0483625	0.0598423	0.0598423	0.0598423	0.0469792	0.0106873	0.00217585	0	0	0	0	0	0	0	0	0	0	0	0	0	0	0	0	0	0	0	0	0	0	0	0	0	0	0	0	0	0	-0.00229589	-3.37153e-05	0.00012133	-0.00035764	-7.0046e-05	0.00161793	-0.00357375	-0.0150498	0
1777	0.305761	0.232444	0.022645	0.0506714	0.0633239	0.0633239	0.0633239	0.0500673	0.0110116	0.00224499	0	0	0	0	0	0	0	0	0	0	0	0	0	0	0	0	0	0	0	0	0	0	0	0	0	0	0	0	0	0	-0.00253112	-3.37153e-05	0.00012133	-0.000370499	-7.2055e-05	0.00169058	-0.00386676	-0.0162188	0
1778	0.337875	0.232444	0.0523687	0.0530622	0.0668415	0.0668415	0.0668415	0.0532026	0.0113254	0.0023135	0	0	0	0	0	0	0	0	0	0	0	0	0	0	0	0	0	0	0	0	0	0	0	0	0	0	0	0	0	0	-0.0027619	-3.37153e-05	0.00012133	-0.000382835	-7.40046e-05	0.00175929	-0.00415196	-0.0173523	0
1779	0.347581	0.232444	0.0597012	0.0554354	0.0702966	0.0702966	0.0702966	0.0562871	0.0116279	0.00238163	0	0	0	0	0	0	0	0	0	0	0	0	0	0	0	0	0	0	0	0	0	0	0	0	0	0	0	0	0	0	-0.00298778	-3.37153e-05	0.00012133	-0.000394738	-7.59118e-05	0.00182473	-0.00442948	-0.0184512	0
1780	0.341674	0.232444	0.0515287	0.057701	0.0736012	0.0736012	0.0736012	0.0592345	0.0119171	0.00244953	0	0	0	0	0	0	0	0	0	0	0	0	0	0	0	0	0	0	0	0	0	0	0	0	0	0	0	0	0	0	-0.0032084	-3.37153e-05	0.00012133	-0.00040628	-7.77893e-05	0.00188746	-0.00469941	-0.0195164	0
1781	0.333722	0.232444	0.041895	0.0593826	0.0767183	0.0767183	0.0767183	0.0620123	0.0121889	0.00251718	0	0	0	0	0	0	0	0	0	0	0	0	0	0	0	0	0	0	0	0	0	0	0	0	0	0	0	0	0	0	-0.0036953	-5.0573e-05	0.000181996	-0.000443034	-8.00993e-05	0.00165829	-0.00496187	-0.0207342	0
1782	0.29102	0.210569	0.019495	0.0609557	0.0796905	0.0796905	0.0796905	0.0646641	0.0124419	0.00258449	0	0	0	0	0	0	0	0	0	0	0	0	0	0	0	0	0	0	0	0	0	0	0	0	0	0	0	0	0	0	-0.00417917	-6.74306e-05	0.000242661	-0.000479101	-8.23858e-05	0.00142406	-0.00521697	-0.0219192	0
1783	0.175605	0.118694	-0.00603313	0.0629442	0.0826033	0.0826033	0.0826033	0.0672719	0.0126798	0.00265156	0	0	0	0	0	0	0	0	0	0	0	0	0	0	0	0	0	0	0	0	0	0	0	0	0	0	0	0	0	0	-0.0043878	-6.74306e-05	0.000242661	-0.000489063	-8.42044e-05	0.00147505	-0.00546481	-0.0228868	0
1784	0.0902692	0.0443192	-0.0190575	0.0650075	0.0855481	0.0855481	0.0855481	0.0699211	0.0129083	0.00271864	0	0	0	0	0	0	0	0	0	0	0	0	0	0	0	0	0	0	0	0	0	0	0	0	0	0	0	0	0	0	-0.00458993	-6.74306e-05	0.000242661	-0.000498942	-8.60251e-05	0.00152532	-0.00570551	-0.0238237	0
1785	0.162453	0.101194	-0.00597625	0.0672351	0.0886122	0.0886122	0.0886122	0.0726933	0.013133	0.00278589	0	0	0	0	0	0	0	0	0	0	0	0	0	0	0	0	0	0	0	0	0	0	0	0	0	0	0	0	0	0	-0.00478558	-6.74306e-05	0.000242661	-0.000508756	-8.78518e-05	0.00157496	-0.00593917	-0.0247309	0
1786	0.289562	0.188694	0.0311894	0.0696782	0.0918446	0.0918446	0.0918446	0.0756317	0.0133596	0.00285332	0	0	0	0	0	0	0	0	0	0	0	0	0	0	0	0	0	0	0	0	0	0	0	0	0	0	0	0	0	0	-0.00497481	-6.74306e-05	0.000242661	-0.00051852	-8.96878e-05	0.00162407	-0.00616591	-0.025609	0
1787	0.352999	0.223694	0.0569931	0.0723117	0.0952178	0.0952178	0.0952178	0.0787033	0.0135937	0.00292083	0	0	0	0	0	0	0	0	0	0	0	0	0	0	0	0	0	0	0	0	0	0	0	0	0	0	0	0	0	0	-0.00515766	-6.74306e-05	0.000242661	-0.000528246	-9.15357e-05	0.00167271	-0.00638582	-0.0264587	0
1788	0.361769	0.228069	0.0586425	0.0750571	0.0986512	0.0986512	0.0986512	0.0818218	0.0138409	0.0029885	0	0	0	0	0	0	0	0	0	0	0	0	0	0	0	0	0	0	0	0	0	0	0	0	0	0	0	0	0	0	-0.0053342	-6.74306e-05	0.000242661	-0.000537943	-9.3398e-05	0.00172093	-0.00659903	-0.0272807	0
1789	0.251054	0.123069	0.0501594	0.0778252	0.102053	0.102053	0.102053	0.0848899	0.0141068	0.00305652	0	0	0	0	0	0	0	0	0	0	0	0	0	0	0	0	0	0	0	0	0	0	0	0	0	0	0	0	0	0	-0.00550453	-6.74306e-05	0.000242661	-0.00054762	-9.52767e-05	0.00176877	-0.00680563	-0.0280756	0
1790	0.0888822	-0.0256808	0.0340112	0.0805518	0.105358	0.105358	0.105358	0.0878369	0.014396	0.00312507	0	0	0	0	0	0	0	0	0	0	0	0	0	0	0	0	0	0	0	0	0	0	0	0	0	0	0	0	0	0	-0.00566872	-6.74306e-05	0.000242661	-0.000557285	-9.71739e-05	0.00181626	-0.00700575	-0.0288442	0
1791	0.10802	0.00931922	0.0159119	0.0827889	0.108565	0.108565	0.108565	0.090661	0.0147095	0.00319415	0	0	0	0	0	0	0	0	0	0	0	0	0	0	0	0	0	0	0	0	0	0	0	0	0	0	0	0	0	0	-0.00611429	-8.42883e-05	0.000303326	-0.000589915	-9.94791e-05	0.00155555	-0.00719948	-0.0297669	0
1792	0.232799	0.140569	0.00721438	0.0850151	0.111707	0.111707	0.111707	0.0933979	0.0150454	0.00326368	0	0	0	0	0	0	0	0	0	0	0	0	0	0	0	0	0	0	0	0	0	0	0	0	0	0	0	0	0	0	-0.00655452	-0.000101146	0.000363991	-0.000622448	-0.000101804	0.00129383	-0.00738694	-0.030664	0
1793	0.294575	0.206194	0.000695625	0.0876853	0.114796	0.114796	0.114796	0.0960604	0.0154015	0.00333373	0	0	0	0	0	0	0	0	0	0	0	0	0	0	0	0	0	0	0	0	0	0	0	0	0	0	0	0	0	0	-0.00670198	-0.000101146	0.000363991	-0.000631935	-0.000103761	0.0013391	-0.00756823	-0.0313564	0
1794	0.291738	0.214944	-0.0135494	0.0903436	0.117822	0.117822	0.117822	0.0986421	0.0157759	0.00340449	0	0	0	0	0	0	0	0	0	0	0	0	0	0	0	0	0	0	0	0	0	0	0	0	0	0	0	0	0	0	-0.00684351	-0.000101146	0.000363991	-0.000641468	-0.000105745	0.00138433	-0.00774347	-0.0320248	0
1795	0.256846	0.193069	-0.0292075	0.0929845	0.120784	0.120784	0.120784	0.101141	0.016167	0.00347613	0	0	0	0	0	0	0	0	0	0	0	0	0	0	0	0	0	0	0	0	0	0	0	0	0	0	0	0	0	0	-0.00697922	-0.000101146	0.000363991	-0.000651046	-0.000107754	0.0014295	-0.00791277	-0.03267	0
1796	0.245053	0.188694	-0.0392525	0.0956109	0.123685	0.123685	0.123685	0.103563	0.0165732	0.00354868	0	0	0	0	0	0	0	0	0	0	0	0	0	0	0	0	0	0	0	0	0	0	0	0	0	0	0	0	0	0	-0.00710926	-0.000101146	0.000363991	-0.000660671	-0.000109792	0.00147458	-0.00807622	-0.0332925	0
1797	0.262057	0.210569	-0.0462919	0.0977792	0.12653	0.12653	0.12653	0.105915	0.0169925	0.00362206	0	0	0	0	0	0	0	0	0	0	0	0	0	0	0	0	0	0	0	0	0	0	0	0	0	0	0	0	0	0	-0.00752309	-0.000118004	0.000424656	-0.000693	-0.000112238	0.00120944	-0.00823395	-0.0340702	0
1798	0.277467	0.228069	-0.0505312	0.0999294	0.129313	0.129313	0.129313	0.108193	0.0174234	0.00369635	0	0	0	0	0	0	0	0	0	0	0	0	0	0	0	0	0	0	0	0	0	0	0	0	0	0	0	0	0	0	-0.00793151	-0.000134861	0.000485322	-0.000725378	-0.000114715	0.000944184	-0.00838606	-0.0348259	0
1799	0.285635	0.232444	-0.0493063	0.102497	0.132027	0.132027	0.132027	0.110391	0.0178642	0.00377173	0	0	0	0	0	0	0	0	0	0	0	0	0	0	0	0	0	0	0	0	0	0	0	0	0	0	0	0	0	0	-0.00804523	-0.000134861	0.000485322	-0.000735158	-0.000116843	0.000988968	-0.00853266	-0.035383	0
1800	0.30346	0.232444	-0.0335737	0.104589	0.134669	0.134669	0.134669	0.112505	0.0183161	0.00384836	0	0	0	0	0	0	0	0	0	0	0	0	0	0	0	0	0	0	0	0	0	0	0	0	0	0	0	0	0	0	-0.00844273	-0.000151719	0.000545987	-0.000767714	-0.000119385	0.000723959	-0.00867386	-0.0360958	0
1801	0.325814	0.232444	-0.0133	0.10667	0.137256	0.137256	0.137256	0.114543	0.0187862	0.00392631	0	0	0	0	0	0	0	0	0	0	0	0	0	0	0	0	0	0	0	0	0	0	0	0	0	0	0	0	0	0	-0.00883486	-0.000168577	0.000606652	-0.000800378	-0.000121961	0.000459176	-0.00880977	-0.0367883	0
1802	0.322938	0.232444	-0.0178194	0.108313	0.139798	0.139798	0.139798	0.116513	0.0192802	0.00400554	0	0	0	0	0	0	0	0	0	0	0	0	0	0	0	0	0	0	0	0	0	0	0	0	0	0	0	0	0	0	-0.00950964	-0.000202292	0.000727983	-0.000856043	-0.00012496	-0.000113837	-0.00894049	-0.0376356	0
1803	0.308295	0.232444	-0.034545	0.110395	0.142293	0.142293	0.142293	0.11841	0.0197968	0.0040861	0	0	0	0	0	0	0	0	0	0	0	0	0	0	0	0	0	0	0	0	0	0	0	0	0	0	0	0	0	0	-0.00989057	-0.00021915	0.000788648	-0.000889063	-0.000127612	-0.000377254	-0.00906614	-0.0382885	0
1804	0.306252	0.232444	-0.0395369	0.113344	0.144725	0.144725	0.144725	0.120225	0.0203315	0.00416812	0	0	0	0	0	0	0	0	0	0	0	0	0	0	0	0	0	0	0	0	0	0	0	0	0	0	0	0	0	0	-0.00968924	-0.000202292	0.000727983	-0.000876652	-0.000129537	-2.19124e-05	-0.00918683	-0.0385724	0
1805	0.305549	0.232444	-0.0427263	0.115831	0.147099	0.147099	0.147099	0.121968	0.0208796	0.00425172	0	0	0	0	0	0	0	0	0	0	0	0	0	0	0	0	0	0	0	0	0	0	0	0	0	0	0	0	0	0	-0.00977162	-0.000202292	0.000727983	-0.000887137	-0.000131884	2.43633e-05	-0.00930266	-0.0390136	0
1806	0.296562	0.232444	-0.0537644	0.117883	0.149444	0.149444	0.149444	0.12367	0.0214367	0.00433697	0	0	0	0	0	0	0	0	0	0	0	0	0	0	0	0	0	0	0	0	0	0	0	0	0	0	0	0	0	0	-0.010136	-0.00021915	0.000788648	-0.000920814	-0.000134662	-0.000236318	-0.00941374	-0.0396116	0
1807	0.287336	0.232444	-0.0650431	0.119935	0.151757	0.151757	0.151757	0.125335	0.0219981	0.00442389	0	0	0	0	0	0	0	0	0	0	0	0	0	0	0	0	0	0	0	0	0	0	0	0	0	0	0	0	0	0	-0.0104954	-0.000236007	0.000849313	-0.000954685	-0.000137484	-0.000496324	-0.00952019	-0.0401925	0
1808	-0.206609	-0.257556	-0.0714175	0.122364	0.153977	0.153977	0.153977	0.126905	0.0225594	0.00451253	0	0	0	0	0	0	0	0	0	0	0	0	0	0	0	0	0	0	0	0	0	0	0	0	0	0	0	0	0	0	-0.0105631	-0.000236007	0.000849313	-0.000965661	-0.00013996	-0.00044866	-0.0096221	-0.0405827	0
1809	-1.35012	-1.39943	-0.0753287	0.124641	0.156019	0.156019	0.156019	0.1283	0.023116	0.00460296	0	0	0	0	0	0	0	0	0	0	0	0	0	0	0	0	0	0	0	0	0	0	0	0	0	0	0	0	0	0	-0.0106265	-0.000236007	0.000849313	-0.000976744	-0.00014248	-0.000400998	-0.0097196	-0.040957	0
1810	-1.75196	-1.80193	-0.0767375	0.126704	0.157824	0.157824	0.157824	0.129463	0.0236656	0.00469527	0	0	0	0	0	0	0	0	0	0	0	0	0	0	0	0	0	0	0	0	0	0	0	0	0	0	0	0	0	0	-0.0106858	-0.000236007	0.000849313	-0.00098793	-0.000145046	-0.000353387	-0.00981279	-0.041316	0
1811	-0.956129	-1.01006	-0.0742044	0.128132	0.159405	0.159405	0.159405	0.130404	0.0242113	0.00478954	0	0	0	0	0	0	0	0	0	0	0	0	0	0	0	0	0	0	0	0	0	0	0	0	0	0	0	0	0	0	-0.0110244	-0.000252865	0.000909978	-0.00102288	-0.000148063	-0.000608758	-0.00990177	-0.0418329	0
1812	-0.279183	-0.340681	-0.0679394	0.129438	0.160837	0.160837	0.160837	0.131194	0.0247577	0.00488582	0	0	0	0	0	0	0	0	0	0	0	0	0	0	0	0	0	0	0	0	0	0	0	0	0	0	0	0	0	0	-0.0113582	-0.000269723	0.000970643	-0.00105807	-0.000151131	-0.000863292	-0.00998666	-0.0423352	0
1813	-0.0779071	-0.148181	-0.0608563	0.13113	0.162193	0.162193	0.162193	0.131903	0.0253063	0.00498417	0	0	0	0	0	0	0	0	0	0	0	0	0	0	0	0	0	0	0	0	0	0	0	0	0	0	0	0	0	0	-0.0114044	-0.000269723	0.000970643	-0.00106982	-0.000153847	-0.000814097	-0.0100676	-0.0426505	0
1814	-0.598962	-0.677556	-0.0542369	0.132831	0.163532	0.163532	0.163532	0.132591	0.0258564	0.00508465	0	0	0	0	0	0	0	0	0	0	0	0	0	0	0	0	0	0	0	0	0	0	0	0	0	0	0	0	0	0	-0.011447	-0.000269723	0.000970643	-0.00108169	-0.000156615	-0.000765034	-0.0101446	-0.0429521	0
1815	-2.06194	-2.15193	-0.0441744	0.134164	0.16491	0.16491	0.16491	0.133315	0.0264075	0.00518734	0	0	0	0	0	0	0	0	0	0	0	0	0	0	0	0	0	0	0	0	0	0	0	0	0	0	0	0	0	0	-0.0117657	-0.00028658	0.00103131	-0.00111791	-0.000159854	-0.00101481	-0.0102179	-0.0434128	0
1816	-2.56318	-2.66381	-0.0345275	0.135154	0.166351	0.166351	0.166351	0.134099	0.0269592	0.00529233	0	0	0	0	0	0	0	0	0	0	0	0	0	0	0	0	0	0	0	0	0	0	0	0	0	0	0	0	0	0	-0.0123587	-0.000320295	0.00115264	-0.00117881	-0.000163576	-0.00156113	-0.0102875	-0.0440324	0
1817	-1.39423	-1.49568	-0.0347594	0.13621	0.167829	0.167829	0.167829	0.134918	0.0275109	0.00539971	0	0	0	0	0	0	0	0	0	0	0	0	0	0	0	0	0	0	0	0	0	0	0	0	0	0	0	0	0	0	-0.0129443	-0.000354011	0.00127397	-0.00124048	-0.000167371	-0.00210289	-0.0103535	-0.0446389	0
1818	-0.265648	-0.362556	-0.0407925	0.137701	0.169288	0.169288	0.169288	0.135717	0.028062	0.00550955	0	0	0	0	0	0	0	0	0	0	0	0	0	0	0	0	0	0	0	0	0	0	0	0	0	0	0	0	0	0	-0.0132463	-0.000370868	0.00133463	-0.00127819	-0.000170809	-0.00234485	-0.0104162	-0.0450616	0
1819	0.185347	0.0924442	-0.0466594	0.139562	0.170669	0.170669	0.170669	0.136435	0.0286121	0.00562183	0	0	0	0	0	0	0	0	0	0	0	0	0	0	0	0	0	0	0	0	0	0	0	0	0	0	0	0	0	0	-0.0132666	-0.000370868	0.00133463	-0.00129161	-0.000173885	-0.00228941	-0.0104755	-0.0453015	0
1820	0.311867	0.223694	-0.0531475	0.14132	0.171926	0.171926	0.171926	0.137029	0.0291608	0.00573657	0	0	0	0	0	0	0	0	0	0	0	0	0	0	0	0	0	0	0	0	0	0	0	0	0	0	0	0	0	0	-0.0132841	-0.000370868	0.00133463	-0.00130516	-0.000177022	-0.0022341	-0.0105315	-0.0455305	0
1821	0.318984	0.232444	-0.0564375	0.142978	0.173064	0.173064	0.173064	0.137502	0.0297081	0.00585384	0	0	0	0	0	0	0	0	0	0	0	0	0	0	0	0	0	0	0	0	0	0	0	0	0	0	0	0	0	0	-0.0132988	-0.000370868	0.00133463	-0.00131884	-0.000180224	-0.00217896	-0.0105845	-0.0457491	0
1822	0.321522	0.232444	-0.0550769	0.144155	0.174125	0.174125	0.174125	0.137897	0.0302546	0.00597377	0	0	0	0	0	0	0	0	0	0	0	0	0	0	0	0	0	0	0	0	0	0	0	0	0	0	0	0	0	0	-0.0135826	-0.000387726	0.0013953	-0.00135815	-0.000183944	-0.00241361	-0.0106345	-0.0461284	0
1823	0.325542	0.232444	-0.0517956	0.144894	0.175148	0.175148	0.175148	0.138251	0.0308006	0.00609643	0	0	0	0	0	0	0	0	0	0	0	0	0	0	0	0	0	0	0	0	0	0	0	0	0	0	0	0	0	0	-0.0141332	-0.000421441	0.00151663	-0.0014235	-0.000188197	-0.00293517	-0.0106815	-0.0466684	0
1824	0.333737	0.232444	-0.0447738	0.146066	0.176162	0.176162	0.176162	0.138595	0.0313461	0.00622184	0	0	0	0	0	0	0	0	0	0	0	0	0	0	0	0	0	0	0	0	0	0	0	0	0	0	0	0	0	0	-0.0144072	-0.000438299	0.0015773	-0.00146387	-0.000192079	-0.00316445	-0.0107258	-0.0470284	0
1825	0.347678	0.232444	-0.0320425	0.147276	0.177192	0.177192	0.177192	0.138951	0.0318913	0.00635001	0	0	0	0	0	0	0	0	0	0	0	0	0	0	0	0	0	0	0	0	0	0	0	0	0	0	0	0	0	0	-0.0146751	-0.000455157	0.00163796	-0.001505	-0.000196051	-0.00338943	-0.0107674	-0.0473792	0
1826	0.366029	0.232444	-0.0149362	0.148521	0.17824	0.17824	0.17824	0.139322	0.0324366	0.00648103	0	0	0	0	0	0	0	0	0	0	0	0	0	0	0	0	0	0	0	0	0	0	0	0	0	0	0	0	0	0	-0.0149395	-0.000472014	0.00169863	-0.00154647	-0.000200106	-0.00361307	-0.0108065	-0.0477217	0
1827	0.385377	0.232444	0.00313687	0.149795	0.179296	0.179296	0.179296	0.139699	0.0329819	0.00661505	0	0	0	0	0	0	0	0	0	0	0	0	0	0	0	0	0	0	0	0	0	0	0	0	0	0	0	0	0	0	-0.0151978	-0.000488872	0.00175929	-0.00158874	-0.000204258	-0.00383219	-0.0108431	-0.0480558	0
1828	0.3956	0.228069	0.0164413	0.15109	0.180355	0.180355	0.180355	0.140075	0.0335275	0.00675215	0	0	0	0	0	0	0	0	0	0	0	0	0	0	0	0	0	0	0	0	0	0	0	0	0	0	0	0	0	0	-0.0154529	-0.00050573	0.00181996	-0.00163137	-0.000208498	-0.0040499	-0.0108773	-0.0483824	0
1829	0.369518	0.193069	0.0236294	0.152819	0.181418	0.181418	0.181418	0.140452	0.0340735	0.00689231	0	0	0	0	0	0	0	0	0	0	0	0	0	0	0	0	0	0	0	0	0	0	0	0	0	0	0	0	0	0	-0.0154395	-0.00050573	0.00181996	-0.00164779	-0.000212348	-0.00398423	-0.0109093	-0.0485322	0
1830	0.151585	-0.0213058	0.0207813	0.152109	0.182483	0.182483	0.182483	0.140828	0.034619	0.00703549	0	0	0	0	0	0	0	0	0	0	0	0	0	0	0	0	0	0	0	0	0	0	0	0	0	0	0	0	0	0	-0.01699	-0.000606876	0.00218395	-0.00182798	-0.00021929	-0.00558057	-0.0109392	-0.0496887	0
1831	-0.242712	-0.397556	0.003675	0.151168	0.182889	0.182889	0.182889	0.140546	0.035161	0.00718177	0	0	0	0	0	0	0	0	0	0	0	0	0	0	0	0	0	0	0	0	0	0	0	0	0	0	0	0	0	0	-0.0182706	-0.000691164	0.00248727	-0.00198224	-0.000225857	-0.00689156	-0.010967	-0.0506703	0
1832	-0.35069	-0.485056	-0.0166381	0.151004	0.181598	0.181598	0.181598	0.138569	0.0356978	0.0073313	0	0	0	0	0	0	0	0	0	0	0	0	0	0	0	0	0	0	0	0	0	0	0	0	0	0	0	0	0	0	-0.0179767	-0.000674306	0.00242661	-0.00197423	-0.000229549	-0.00653227	-0.010993	-0.0506325	0
1833	-0.0619758	-0.183181	-0.0278906	0.149096	0.179365	0.179365	0.179365	0.13565	0.0362309	0.00748419	0	0	0	0	0	0	0	0	0	0	0	0	0	0	0	0	0	0	0	0	0	0	0	0	0	0	0	0	0	0	-0.0181987	-0.000691164	0.00248727	-0.00202167	-0.000234363	-0.00672163	-0.0110171	-0.050926	0
1834	-0.2153	-0.345056	-0.0175394	0.147295	0.177227	0.177227	0.177227	0.132824	0.0367633	0.00764044	0	0	0	0	0	0	0	0	0	0	0	0	0	0	0	0	0	0	0	0	0	0	0	0	0	0	0	0	0	0	-0.0184177	-0.000708022	0.00254794	-0.00206953	-0.000239287	-0.00690921	-0.0110395	-0.0512145	0
1835	-0.819113	-0.988181	0.0235506	0.145517	0.175094	0.175094	0.175094	0.129996	0.0372979	0.00780001	0	0	0	0	0	0	0	0	0	0	0	0	0	0	0	0	0	0	0	0	0	0	0	0	0	0	0	0	0	0	-0.0186307	-0.000724879	0.0026086	-0.00211834	-0.000244341	-0.00709135	-0.0110604	-0.0514981	0
1836	-0.735064	-0.948806	0.071575	0.142167	0.172967	0.172967	0.172967	0.127166	0.0378376	0.00796301	0	0	0	0	0	0	0	0	0	0	0	0	0	0	0	0	0	0	0	0	0	0	0	0	0	0	0	0	0	0	-0.0198478	-0.000809168	0.00291193	-0.00228265	-0.000251692	-0.00833648	-0.0110798	-0.0524478	0
1837	-0.124807	-0.349431	0.0853737	0.13925	0.17085	0.17085	0.17085	0.124335	0.0383853	0.0081296	0	0	0	0	0	0	0	0	0	0	0	0	0	0	0	0	0	0	0	0	0	0	0	0	0	0	0	0	0	0	-0.0208025	-0.000876598	0.00315459	-0.00241995	-0.000258661	-0.00930414	-0.0110978	-0.0532255	0
1838	0.249179	0.0443192	0.0663469	0.138513	0.169691	0.169691	0.169691	0.122447	0.038944	0.0082999	0	0	0	0	0	0	0	0	0	0	0	0	0	0	0	0	0	0	0	0	0	0	0	0	0	0	0	0	0	0	-0.0209913	-0.000893456	0.00321526	-0.00247272	-0.000264165	-0.00946171	-0.0111145	-0.0534965	0
1839	0.363501	0.179944	0.0447212	0.138836	0.169966	0.169966	0.169966	0.121975	0.0395165	0.00847385	0	0	0	0	0	0	0	0	0	0	0	0	0	0	0	0	0	0	0	0	0	0	0	0	0	0	0	0	0	0	-0.0214243	-0.000927171	0.00333659	-0.00255554	-0.000270371	-0.00987763	-0.0111302	-0.0539314	0
1840	0.343505	0.179944	0.0242725	0.139288	0.170735	0.170735	0.170735	0.121975	0.0401075	0.00865206	0	0	0	0	0	0	0	0	0	0	0	0	0	0	0	0	0	0	0	0	0	0	0	0	0	0	0	0	0	0	-0.0220948	-0.000977744	0.00351858	-0.00266948	-0.00027732	-0.0105441	-0.0111447	-0.0545298	0
1841	0.31934	0.175569	0.00348687	0.140284	0.172016	0.172016	0.172016	0.122447	0.0407232	0.00884589	0	0	0	0	0	0	0	0	0	0	0	0	0	0	0	0	0	0	0	0	0	0	0	0	0	0	0	0	0	0	-0.022756	-0.00102832	0.00370058	-0.00278502	-0.000284448	-0.0112005	-0.0111584	-0.0551254	0
1842	0.319973	0.188694	-0.0110381	0.142317	0.174299	0.174299	0.174299	0.123863	0.0413656	0.00907048	0	0	0	0	0	0	0	0	0	0	0	0	0	0	0	0	0	0	0	0	0	0	0	0	0	0	0	0	0	0	-0.0234046	-0.00107889	0.00388257	-0.00290272	-0.000291779	-0.0118426	-0.0111712	-0.055718	0
1843	0.293452	0.166819	-0.0182569	0.14489	0.177093	0.177093	0.177093	0.125751	0.0420297	0.00931265	0	0	0	0	0	0	0	0	0	0	0	0	0	0	0	0	0	0	0	0	0	0	0	0	0	0	0	0	0	0	-0.0240439	-0.00112946	0.00406457	-0.00302205	-0.000299302	-0.0124744	-0.0111833	-0.0563087	0
1844	0.288578	0.153694	-0.0130681	0.147952	0.180349	0.180349	0.180349	0.12811	0.0427082	0.00953103	0	0	0	0	0	0	0	0	0	0	0	0	0	0	0	0	0	0	0	0	0	0	0	0	0	0	0	0	0	0	-0.0246704	-0.00118004	0.00424656	-0.0031436	-0.000307044	-0.0130916	-0.0111948	-0.0568972	0
1845	0.338834	0.184319	0.003745	0.15077	0.184482	0.184482	0.184482	0.13141	0.0433937	0.00967897	0	0	0	0	0	0	0	0	0	0	0	0	0	0	0	0	0	0	0	0	0	0	0	0	0	0	0	0	0	0	-0.025997	-0.00128118	0.00461056	-0.00336054	-0.000316863	-0.0144432	-0.0112058	-0.0579789	0
1846	0.391591	0.214944	0.022365	0.154282	0.188527	0.188527	0.188527	0.134708	0.0440787	0.00974026	0	0	0	0	0	0	0	0	0	0	0	0	0	0	0	0	0	0	0	0	0	0	0	0	0	0	0	0	0	0	-0.026836	-0.00134861	0.00485322	-0.00351756	-0.000325679	-0.0152809	-0.0112164	-0.0587295	0
1847	0.429859	0.228069	0.0441262	0.157663	0.19204	0.19204	0.19204	0.137534	0.044756	0.00975013	0	0	0	0	0	0	0	0	0	0	0	0	0	0	0	0	0	0	0	0	0	0	0	0	0	0	0	0	0	0	-0.0274202	-0.00139919	0.00503521	-0.00364652	-0.000334144	-0.0158488	-0.0112267	-0.0593136	0
1848	0.458917	0.232444	0.0653581	0.161115	0.195995	0.195995	0.195995	0.140828	0.0454182	0.00974841	0	0	0	0	0	0	0	0	0	0	0	0	0	0	0	0	0	0	0	0	0	0	0	0	0	0	0	0	0	0	-0.0282296	-0.00146662	0.00527787	-0.00380874	-0.000343474	-0.0166518	-0.0112369	-0.0600621	0
1849	0.444998	0.215994	0.0644481	0.164556	0.199925	0.199925	0.199925	0.144121	0.0460579	0.00974679	0	0	0	0	0	0	0	0	0	0	0	0	0	0	0	0	0	0	0	0	0	0	0	0	0	0	0	0	0	0	-0.0290206	-0.00153405	0.00552053	-0.0039742	-0.000353096	-0.0174328	-0.011247	-0.0608094	0
1850	0.405396	0.192005	0.0468169	0.166575	0.203438	0.203438	0.203438	0.146941	0.0466654	0.00983124	0	0	0	0	0	0	0	0	0	0	0	0	0	0	0	0	0	0	0	0	0	0	0	0	0	0	0	0	0	0	-0.0303756	-0.00165205	0.00594519	-0.0042566	-0.000366397	-0.0187885	-0.0112572	-0.0620457	0
1851	0.398625	0.193033	0.0350131	0.170579	0.207233	0.20723	0.20723	0.14976	0.0473827	0.010087	0	3.37155e-06	0	0	0	0	0	0	0	0	0	0	0	0	0	0	0	0	0	3.37155e-06	0	0	0	0	0	0	0	0	0	0	-0.0310854	-0.00171948	0.00618785	-0.00446059	-0.000380927	-0.0196019	-0.0111103	-0.0624378	0
1852	0.400521	0.208797	0.0234325	0.168291	0.210775	0.210765	0.210765	0.152108	0.0482287	0.0104282	0	1.0112e-05	0	0	0	0	0	0	0	0	0	0	0	0	0	0	0	0	0	1.0112e-05	0	0	0	0	0	0	0	0	0	0	-0.031923	-0.00177005	0.00636985	-0.00477111	-0.000426812	-0.01914	-0.0121848	-0.0667802	0
1853	0.393475	0.223534	0.00493063	0.165011	0.214315	0.214298	0.214298	0.154455	0.0490739	0.0107693	0	1.68545e-05	0	0	0	0	0	0	0	0	0	0	0	0	0	0	0	0	0	1.68545e-05	0	0	0	0	0	0	0	0	0	0	-0.0328911	-0.00185434	0.00667317	-0.00516171	-0.00047338	-0.0187067	-0.0133681	-0.0716228	0
1854	0.384141	0.231759	-0.0141137	0.166496	0.218323	0.218299	0.218299	0.15727	0.0499183	0.0111104	0	2.36015e-05	0	0	0	0	0	0	0	0	0	0	0	0	0	0	0	0	0	2.36015e-05	0	0	0	0	0	0	0	0	0	0	-0.0347687	-0.00205663	0.00740116	-0.00568177	-0.000494128	-0.0206647	-0.0132727	-0.0732375	0
1855	0.242826	0.101187	-0.0262806	0.16792	0.222187	0.222157	0.222157	0.160084	0.0506214	0.0114514	0	3.03485e-05	0	0	0	0	0	0	0	0	0	0	0	0	0	0	0	0	0	3.03485e-05	0	0	0	0	0	0	0	0	0	0	-0.0365941	-0.00225893	0.00812914	-0.00620497	-0.000514249	-0.0225881	-0.013157	-0.0747763	0
1856	-0.211073	-0.356671	-0.0247188	0.170318	0.226049	0.226012	0.226012	0.162896	0.0513238	0.0117924	0	3.7089e-05	0	0	0	0	0	0	0	0	0	0	0	0	0	0	0	0	0	3.7089e-05	0	0	0	0	0	0	0	0	0	0	-0.0373583	-0.00237693	0.00855379	-0.00657552	-0.000535075	-0.023216	-0.0132085	-0.0760571	0
1857	-0.44449	-0.610276	-0.00660625	0.172392	0.23005	0.230006	0.230006	0.165707	0.0521659	0.0121333	0	4.38295e-05	0	0	0	0	0	0	0	0	0	0	0	0	0	0	0	0	0	4.38295e-05	0	0	0	0	0	0	0	0	0	0	-0.0379593	-0.00247808	0.00891779	-0.00692952	-0.000560068	-0.0234691	-0.0134404	-0.0777602	0
1858	-0.0968363	-0.297726	0.0245875	0.176302	0.234516	0.234465	0.234465	0.168984	0.0530073	0.0124741	0	5.05765e-05	0	0	0	0	0	0	0	0	0	0	0	0	0	0	0	0	0	5.05765e-05	0	0	0	0	0	0	0	0	0	0	-0.0377434	-0.00251179	0.00903912	-0.00713598	-0.000582046	-0.0228811	-0.0136716	-0.0788276	0
1859	0.262109	0.0281901	0.0549981	0.178921	0.238979	0.238922	0.238922	0.172259	0.0538479	0.0128149	0	5.7317e-05	0	0	0	0	0	0	0	0	0	0	0	0	0	0	0	0	0	5.7317e-05	0	0	0	0	0	0	0	0	0	0	-0.0382962	-0.00261294	0.00940311	-0.00749556	-0.000607703	-0.0230821	-0.013901	-0.080499	0
1860	0.390709	0.150537	0.0655506	0.174622	0.242972	0.242908	0.242908	0.175065	0.0546876	0.0131556	0	6.40575e-05	0	0	0	0	0	0	0	0	0	0	0	0	0	0	0	0	0	6.40575e-05	0	0	0	0	0	0	0	0	0	0	-0.040746	-0.00374144	0.0115562	-0.00823371	-0.000642153	-0.0255547	-0.0141302	-0.0868929	0
1861	0.35779	0.13957	0.0522987	0.165921	0.246963	0.246892	0.246892	0.177869	0.0555265	0.0134962	0	7.08045e-05	0	0	0	0	0	0	0	0	0	0	0	0	0	0	0	0	0	7.08045e-05	0	0	0	0	0	0	0	0	0	0	-0.0438139	-0.00559474	0.0147615	-0.00907053	-0.000693842	-0.0286875	-0.0145288	-0.0968016	0
1862	0.258114	0.055264	0.030695	0.172155	0.250484	0.250406	0.250406	0.180205	0.0563646	0.0138368	0	7.7545e-05	0	0	0	0	0	0	0	0	0	0	0	0	0	0	0	0	0	7.7545e-05	0	0	0	0	0	0	0	0	0	0	-0.0442782	-0.0059419	0.0154946	-0.00939863	-0.000698698	-0.0302114	-0.0135223	-0.0957985	0
1863	0.263904	0.0676015	0.01407	0.182233	0.254003	0.253919	0.253919	0.18254	0.0572019	0.0141773	0	8.42855e-05	0	0	0	0	0	0	0	0	0	0	0	0	0	0	0	0	0	8.42855e-05	0	0	0	0	0	0	0	0	0	0	-0.0443449	-0.00574691	0.0155204	-0.00976109	-0.000690694	-0.0314319	-0.0122347	-0.0918583	0
1864	0.336234	0.15088	0.0009975	0.184357	0.257987	0.257896	0.257896	0.18534	0.0580385	0.0145178	0	9.10325e-05	0	0	0	0	0	0	0	0	0	0	0	0	0	0	0	0	0	9.10325e-05	0	0	0	0	0	0	0	0	0	0	-0.0458134	-0.00571758	0.0160069	-0.0105293	-0.000729976	-0.0325981	-0.0122454	-0.0931968	0
1865	0.370764	0.198516	-0.0124294	0.184677	0.261642	0.261544	0.261544	0.187673	0.0590133	0.0148582	0	9.77795e-05	0	0	0	0	0	0	0	0	0	0	0	0	0	0	0	0	0	9.77795e-05	0	0	0	0	0	0	0	0	0	0	-0.0474597	-0.00604244	0.0170249	-0.0113447	-0.000770023	-0.0340651	-0.0122624	-0.0959086	0
1866	0.375045	0.219079	-0.0242375	0.180204	0.264828	0.264723	0.264723	0.189538	0.0599872	0.0151985	0	0.00010452	0	0	0	0	0	0	0	0	0	0	0	0	0	0	0	0	0	0.00010452	0	0	0	0	0	0	0	0	0	0	-0.0491525	-0.00759759	0.0197121	-0.0120904	-0.000805345	-0.0360972	-0.0122741	-0.102845	0
1867	0.37954	0.229017	-0.0246006	0.175123	0.267873	0.267762	0.267762	0.191402	0.060821	0.0155388	0	0.00011126	0	0	0	0	0	0	0	0	0	0	0	0	0	0	0	0	0	0.00011126	0	0	0	0	0	0	0	0	0	0	-0.0509982	-0.00929334	0.0226456	-0.0128979	-0.000840293	-0.0383731	-0.0122391	-0.110111	0
1868	0.404765	0.231073	-0.0025725	0.176264	0.271383	0.271265	0.271265	0.193732	0.0616541	0.015879	0	0.000118008	0	0	0	0	0	0	0	0	0	0	0	0	0	0	0	0	0	0.000118008	0	0	0	0	0	0	0	0	0	0	-0.0521573	-0.00964501	0.0236331	-0.0136428	-0.000875393	-0.0394672	-0.01216	-0.112368	0
1869	0.440705	0.222848	0.0355338	0.182323	0.275357	0.275232	0.275232	0.196527	0.0624863	0.0162191	0	0.000124748	0	0	0	0	0	0	0	0	0	0	0	0	0	0	0	0	0	0.000124748	0	0	0	0	0	0	0	0	0	0	-0.0524795	-0.00903414	0.0231409	-0.0142438	-0.00090931	-0.0393557	-0.0120775	-0.110963	0
1870	0.469869	0.218736	0.0641287	0.187004	0.279382	0.27925	0.27925	0.19932	0.0634562	0.0164742	0	0.000131463	0	0	0	0	0	0	0	0	0	0	0	0	0	0	0	0	0	0.000131463	0	0	0	0	0	0	0	0	0	0	-0.0528636	-0.00881258	0.023233	-0.0149213	-0.000944553	-0.0394142	-0.012004	-0.110999	0
1871	0.468819	0.219421	0.06727	0.182128	0.283784	0.283646	0.283646	0.202576	0.0644252	0.0166442	0	0.00013819	0	0	0	0	0	0	0	0	0	0	0	0	0	0	0	0	0	0.00013819	0	0	0	0	0	0	0	0	0	0	-0.0563441	-0.00923964	0.0243689	-0.0159158	-0.0010687	-0.0419427	-0.0125462	-0.116906	0
1872	0.422773	0.207084	0.0517606	0.163928	0.288595	0.28845	0.28845	0.206296	0.0652549	0.0168992	0	0.00014495	0	0	0	0	0	0	0	0	0	0	0	0	0	0	0	0	0	0.00014495	0	0	0	0	0	0	0	0	0	0	-0.0623654	-0.0100273	0.0264705	-0.0177966	-0.0013119	-0.0446397	-0.0150604	-0.131321	0
1873	0.369789	0.193375	0.0265125	0.149901	0.293952	0.2938	0.2938	0.210477	0.0660837	0.0172392	0	0.00015171	0	0	0	0	0	0	0	0	0	0	0	0	0	0	0	0	0	0.00015171	0	0	0	0	0	0	0	0	0	0	-0.0665409	-0.0110844	0.029047	-0.0197738	-0.00150616	-0.0459737	-0.0172498	-0.144588	0
1874	0.353735	0.201258	-2.1875e-05	0.152499	0.300232	0.300074	0.300074	0.215583	0.0669118	0.017579	0	0.00015847	0	0	0	0	0	0	0	0	0	0	0	0	0	0	0	0	0	0.00015847	0	0	0	0	0	0	0	0	0	0	-0.0663417	-0.0117345	0.0300578	-0.0202242	-0.00158161	-0.0452238	-0.0176353	-0.14859	0
1875	0.332461	0.194061	-0.0208469	0.159247	0.307024	0.306858	0.306858	0.221148	0.0678768	0.0178339	0	0.00016523	0	0	0	0	0	0	0	0	0	0	0	0	0	0	0	0	0	0.00016523	0	0	0	0	0	0	0	0	0	0	-0.065587	-0.0116861	0.0301266	-0.0207088	-0.00164652	-0.0437521	-0.0179201	-0.149792	0
1876	0.288309	0.152936	-0.0317319	0.167105	0.314187	0.314014	0.314014	0.227169	0.0688409	0.0180038	0	0.000172315	0	0	0	0	0	0	0	0	0	0	0	0	0	0	0	0	0	0.000172315	0	0	0	0	0	0	0	0	0	0	-0.0665589	-0.0105746	0.0290978	-0.0216445	-0.00174032	-0.0434441	-0.0182533	-0.148668	0
1877	0.292982	0.148481	-0.0351575	0.179658	0.322214	0.322034	0.322034	0.234109	0.0696664	0.0182586	0	0.00017992	0	0	0	0	0	0	0	0	0	0	0	0	0	0	0	0	0	0.00017992	0	0	0	0	0	0	0	0	0	0	-0.065809	-0.00905825	0.0273256	-0.021951	-0.0018211	-0.0417316	-0.0185726	-0.145192	0
1878	0.334209	0.180353	-0.0366756	0.190532	0.330779	0.330592	0.330592	0.241502	0.0704911	0.0185984	0	0.000187915	0	0	0	0	0	0	0	0	0	0	0	0	0	0	0	0	0	0.000187915	0	0	0	0	0	0	0	0	0	0	-0.0644004	-0.0085663	0.0274192	-0.0222863	-0.00188831	-0.0402392	-0.0188395	-0.144794	0
1879	0.368246	0.201943	-0.0295531	0.195856	0.339795	0.339599	0.339599	0.249345	0.0713151	0.018938	0	0.0001963	0	0	0	0	0	0	0	0	0	0	0	0	0	0	0	0	0	0.0001963	0	0	0	0	0	0	0	0	0	0	-0.0655452	-0.00884175	0.0281805	-0.0232649	-0.00197026	-0.0405532	-0.0190956	-0.147846	0
1880	0.399955	0.215652	-0.00942375	0.193727	0.349856	0.349651	0.349651	0.258098	0.0722753	0.0192776	0	0.00020501	0	0	0	0	0	0	0	0	0	0	0	0	0	0	0	0	0	0.00020501	0	0	0	0	0	0	0	0	0	0	-0.0711233	-0.00985504	0.0292261	-0.0255507	-0.0020891	-0.0435052	-0.0193494	-0.155044	0
1881	0.429205	0.222848	0.01064	0.195717	0.360499	0.360285	0.360285	0.267296	0.0733715	0.0196171	0	0.00021411	0	0	0	0	0	0	0	0	0	0	0	0	0	0	0	0	0	0.00021411	0	0	0	0	0	0	0	0	0	0	-0.0740412	-0.0101177	0.0295307	-0.0274976	-0.00223281	-0.0434902	-0.0202335	-0.160541	0
1882	0.33982	0.111125	0.0210525	0.207642	0.370667	0.370443	0.370443	0.27602	0.0744664	0.0199566	0	0.000223665	0	0	0	0	0	0	0	0	0	0	0	0	0	0	0	0	0	0.000223665	0	0	0	0	0	0	0	0	0	0	-0.0741249	-0.009878	0.0294625	-0.0285753	-0.00230008	-0.0428917	-0.0199423	-0.160133	0
1883	-0.563533	-0.802535	0.0219013	0.2171	0.380361	0.380127	0.380127	0.284271	0.0755599	0.020296	0	0.00023361	0	0	0	0	0	0	0	0	0	0	0	0	0	0	0	0	0	0.00023361	0	0	0	0	0	0	0	0	0	0	-0.0762233	-0.0102509	0.0301271	-0.03011	-0.00234804	-0.0446772	-0.0189643	-0.160765	0
1884	-1.30178	-1.5373	0.0105831	0.224943	0.389905	0.389661	0.389661	0.29251	0.0765157	0.0206353	0	0.000243945	0	0	0	0	0	0	0	0	0	0	0	0	0	0	0	0	0	0.000243945	0	0	0	0	0	0	0	0	0	0	-0.076439	-0.0104628	0.0311033	-0.0312892	-0.00243688	-0.044279	-0.0190744	-0.163192	0
1885	-0.718939	-0.944073	-0.0105306	0.235665	0.398387	0.398132	0.398132	0.299823	0.0773341	0.0209746	0	0.000254735	0	0	0	0	0	0	0	0	0	0	0	0	0	0	0	0	0	0.000254735	0	0	0	0	0	0	0	0	0	0	-0.0744818	-0.0104264	0.0320677	-0.0317289	-0.0025029	-0.0427405	-0.0191509	-0.163813	0
1886	-0.235809	-0.448517	-0.0316925	0.244401	0.405626	0.40536	0.40536	0.305758	0.0782878	0.0213138	0	0.000266045	0	0	0	0	0	0	0	0	0	0	0	0	0	0	0	0	0	0.000266045	0	0	0	0	0	0	0	0	0	0	-0.0731332	-0.0103427	0.0329968	-0.0321938	-0.00258703	-0.0417672	-0.0192393	-0.164617	0
1887	-0.117215	-0.321372	-0.0442794	0.248437	0.411997	0.411719	0.411719	0.310774	0.0793767	0.0215682	0	0.000277875	0	0	0	0	0	0	0	0	0	0	0	0	0	0	0	0	0	0.000277875	0	0	0	0	0	0	0	0	0	0	-0.0737549	-0.0106555	0.0344594	-0.0333255	-0.00269147	-0.0422728	-0.0192691	-0.167532	0
1888	-0.0165989	-0.21102	-0.0505225	0.244944	0.417367	0.417077	0.417077	0.314875	0.0804642	0.0217377	0	0.000290225	0	0	0	0	0	0	0	0	0	0	0	0	0	0	0	0	0	0.000290225	0	0	0	0	0	0	0	0	0	0	-0.0782374	-0.0114674	0.0358514	-0.0359193	-0.00282376	-0.0446739	-0.0192044	-0.173259	0
1889	-0.0845096	-0.277506	-0.0530425	0.246039	0.422363	0.42206	0.42206	0.318517	0.0815504	0.021992	0	0.000303095	0	0	0	0	0	0	0	0	0	0	0	0	0	0	0	0	0	0.000303095	0	0	0	0	0	0	0	0	0	0	-0.080007	-0.0119144	0.0374632	-0.0377391	-0.00293162	-0.0457459	-0.0191391	-0.176851	0
1890	-0.123486	-0.331654	-0.0402588	0.248427	0.426985	0.426669	0.426669	0.321702	0.0826352	0.022331	0	0.00031655	0	0	0	0	0	0	0	0	0	0	0	0	0	0	0	0	0	0.00031655	0	0	0	0	0	0	0	0	0	0	-0.080852	-0.0122197	0.0390162	-0.0394044	-0.00304059	-0.0461154	-0.0190881	-0.179694	0
1891	-0.0281683	-0.261741	-0.0124338	0.246007	0.431286	0.430955	0.430955	0.324431	0.0838541	0.02267	0	0.00033059	0	0	0	0	0	0	0	0	0	0	0	0	0	0	0	0	0	0.00033059	0	0	0	0	0	0	0	0	0	0	-0.0848516	-0.0126245	0.0396731	-0.0422521	-0.00319693	-0.0474605	-0.0189906	-0.183801	0
1892	0.171455	-0.0876454	0.0133612	0.245739	0.435719	0.435373	0.435373	0.327158	0.0852065	0.0230089	0	0.000345215	0	0	0	0	0	0	0	0	0	0	0	0	0	0	0	0	0	0.000345215	0	0	0	0	0	0	0	0	0	0	-0.0869271	-0.0128256	0.0404906	-0.0446772	-0.00334476	-0.0473381	-0.019232	-0.187404	0
1893	0.340367	0.0600619	0.0341819	0.246123	0.439475	0.439115	0.439115	0.32943	0.086422	0.0232631	0	0.000360555	0	0	0	0	0	0	0	0	0	0	0	0	0	0	0	0	0	0.000360555	0	0	0	0	0	0	0	0	0	0	-0.0877202	-0.0129807	0.042014	-0.0468947	-0.00348751	-0.046792	-0.0195792	-0.190904	0
1894	0.458547	0.169386	0.0436013	0.24556	0.442556	0.44218	0.44218	0.331246	0.087501	0.0234325	0	0.00037661	0	0	0	0	0	0	0	0	0	0	0	0	0	0	0	0	0	0.00037661	0	0	0	0	0	0	0	0	0	0	-0.0879802	-0.0133624	0.0439162	-0.0489577	-0.0036267	-0.0459367	-0.0200129	-0.195117	0
1895	0.434966	0.161846	0.02968	0.24344	0.44577	0.445377	0.445377	0.333062	0.0887132	0.0236019	0	0.000393315	0	0	0	0	0	0	0	0	0	0	0	0	0	0	0	0	0	0.000393315	0	0	0	0	0	0	0	0	0	0	-0.0886382	-0.0141698	0.0456155	-0.0509215	-0.00376398	-0.0448917	-0.0205066	-0.200563	0
1896	0.262909	0.016538	0.0023975	0.243974	0.449118	0.448707	0.448707	0.334877	0.0900583	0.0237712	0	0.000410735	0	0	0	0	0	0	0	0	0	0	0	0	0	0	0	0	0	0.000410735	0	0	0	0	0	0	0	0	0	0	-0.0886154	-0.0148691	0.0481709	-0.0528425	-0.00390118	-0.0445245	-0.020649	-0.205048	0
1897	0.163166	-0.0646839	-0.0192413	0.247091	0.452867	0.452438	0.452438	0.337146	0.0912673	0.0240253	0	0.000429	0	0	0	0	0	0	0	0	0	0	0	0	0	0	0	0	0	0.000429	0	0	0	0	0	0	0	0	0	0	-0.087262	-0.0153758	0.0519425	-0.0547784	-0.00404027	-0.0442391	-0.020771	-0.209075	0
1898	0.258699	0.0377859	-0.0298594	0.250773	0.457974	0.457526	0.457526	0.340772	0.0924745	0.0242793	0	0.000448045	0	0	0	0	0	0	0	0	0	0	0	0	0	0	0	0	0	0.000448045	0	0	0	0	0	0	0	0	0	0	-0.0858324	-0.0162168	0.0563086	-0.0567877	-0.00418333	-0.0440767	-0.0208766	-0.214127	0
1899	0.36799	0.150537	-0.0367281	0.254182	0.464486	0.464018	0.464018	0.345756	0.0938141	0.0244486	0	0.000467935	0	0	0	0	0	0	0	0	0	0	0	0	0	0	0	0	0	0.000467935	0	0	0	0	0	0	0	0	0	0	-0.0857853	-0.017186	0.0597363	-0.0589296	-0.0043326	-0.0441358	-0.0209375	-0.219422	0
1900	0.414758	0.201943	-0.0451019	0.257917	0.471668	0.47118	0.471174	0.351187	0.0952852	0.0247025	5.26505e-06	0.000488735	0	5.26505e-06	0	0	0	0	0	0	0	0	0	0	0	0	0	0	0	0.000488735	0	0	0	0	0	0	0	0	0	0	-0.0866805	-0.0179615	0.0622837	-0.061285	-0.0045019	-0.0442715	-0.0209443	-0.22409	0
1901	0.39849	0.191662	-0.0529112	0.259739	0.47978	0.47927	0.479259	0.357064	0.0971539	0.025041	1.08072e-05	0.00051038	0	1.08072e-05	0	0	0	0	0	0	0	0	0	0	0	0	0	0	0	0.00051038	0	0	0	0	0	0	0	0	0	0	-0.0855945	-0.0186976	0.0650834	-0.0637067	-0.00470643	-0.0411879	-0.0223793	-0.231464	0
1902	-0.0416702	-0.256943	-0.0463881	0.261661	0.488595	0.488063	0.488051	0.363387	0.0992852	0.0253795	1.1376e-05	0.00053235	0	1.1376e-05	0	0	0	0	0	0	0	0	0	0	0	0	0	0	0	0.00053235	0	0	0	0	0	0	0	0	0	0	-0.0857321	-0.0190455	0.0663163	-0.0662422	-0.00493724	-0.0379648	-0.0238586	-0.237806	0
1903	-0.403369	-0.651058	-0.0158112	0.2635	0.49753	0.496976	0.496964	0.369701	0.101544	0.0257179	1.19747e-05	0.00055419	0	1.19747e-05	0	0	0	0	0	0	0	0	0	0	0	0	0	0	0	0.00055419	0	0	0	0	0	0	0	0	0	0	-0.0888614	-0.0194816	0.0662008	-0.0690836	-0.00518172	-0.036875	-0.0244402	-0.242613	0
1904	-0.0817013	-0.356329	0.00875	0.265877	0.507034	0.506458	0.506445	0.376459	0.10393	0.0260563	1.2605e-05	0.000575965	0	1.2605e-05	0	0	0	0	0	0	0	0	0	0	0	0	0	0	0	0.000575965	0	0	0	0	0	0	0	0	0	0	-0.0909065	-0.0198276	0.0670198	-0.072126	-0.00543742	-0.0350491	-0.0254863	-0.24822	0
1905	0.285079	0.00214422	0.0126306	0.270304	0.517422	0.516825	0.516811	0.384107	0.10631	0.0263946	1.32684e-05	0.00059774	0	1.32684e-05	0	0	0	0	0	0	0	0	0	0	0	0	0	0	0	0.00059774	0	0	0	0	0	0	0	0	0	0	-0.0926819	-0.01998	0.0682005	-0.0752667	-0.00570165	-0.0335032	-0.0264309	-0.253178	0
1906	0.389716	0.100159	0.016485	0.273072	0.528244	0.527624	0.52761	0.392194	0.108683	0.0267328	1.39667e-05	0.000620425	0	1.39667e-05	0	0	0	0	0	0	0	0	0	0	0	0	0	0	0	0.000620425	0	0	0	0	0	0	0	0	0	0	-0.0944081	-0.0208963	0.0701172	-0.0784052	-0.00597146	-0.0317893	-0.0274631	-0.260295	0
1907	0.3695	0.0761692	0.0177931	0.275537	0.538691	0.538041	0.538026	0.39982	0.111051	0.0271555	1.47018e-05	0.00064948	0	1.47018e-05	0	0	0	0	0	0	0	0	0	0	0	0	0	0	0	0.00064948	0	0	0	0	0	0	0	0	0	0	-0.0965804	-0.0221755	0.0721422	-0.0814429	-0.00624367	-0.0307328	-0.0281276	-0.267524	0
1908	0.386643	0.0878213	0.0135844	0.285237	0.548893	0.548209	0.548193	0.406988	0.113543	0.0276626	1.54756e-05	0.00068406	0	1.54756e-05	0	0	0	0	0	0	0	0	0	0	0	0	0	0	0	0.00068406	0	0	0	0	0	0	0	0	0	0	-0.0963313	-0.0222577	0.0755254	-0.0842829	-0.00651489	-0.0304833	-0.0283179	-0.270873	0
1909	0.45258	0.153964	0.000923125	0.297693	0.559209	0.558491	0.558475	0.414146	0.116159	0.0281696	1.62901e-05	0.00071864	0	1.62901e-05	0	0	0	0	0	0	0	0	0	0	0	0	0	0	0	0.00071864	0	0	0	0	0	0	0	0	0	0	-0.095366	-0.0217224	0.0785678	-0.0868298	-0.00678153	-0.0301259	-0.0284741	-0.27231	0
1910	0.474067	0.18892	-0.0192369	0.304384	0.569379	0.568626	0.568609	0.421294	0.118638	0.0286764	1.71475e-05	0.00075322	0	1.71475e-05	0	0	0	0	0	0	0	0	0	0	0	0	0	0	0	0.00075322	0	0	0	0	0	0	0	0	0	0	-0.0973185	-0.0222365	0.0792201	-0.0889837	-0.00704258	-0.0297163	-0.0285595	-0.275709	0
1911	0.475024	0.195089	-0.0344094	0.314345	0.578957	0.578169	0.578151	0.427988	0.12098	0.0291831	1.805e-05	0.000787735	0	1.805e-05	0	0	0	0	0	0	0	0	0	0	0	0	0	0	0	0.000787735	0	0	0	0	0	0	0	0	0	0	-0.0987111	-0.0227275	0.0807683	-0.0907383	-0.00729931	-0.0311982	-0.027516	-0.277429	0
1912	0.237872	-0.0485766	-0.0413963	0.327845	0.588289	0.587466	0.587447	0.434227	0.123446	0.029774	1.9e-05	0.000823615	0	1.9e-05	0	0	0	0	0	0	0	0	0	0	0	0	0	0	0	0.000823615	0	0	0	0	0	0	0	0	0	0	-0.09969	-0.0230286	0.0829117	-0.0922324	-0.00755132	-0.0341549	-0.0256345	-0.277167	0
1913	0.142892	-0.15653	-0.0390513	0.338473	0.597882	0.597007	0.596987	0.440459	0.126164	0.0303648	2e-05	0.00087458	0	2e-05	0	0	0	0	0	0	0	0	0	0	0	0	0	0	0	0.000874445	0	0	0	0	0	0	0	0	1.35e-07	0	-0.101757	-0.023801	0.0839213	-0.0935757	-0.00779867	-0.0363541	-0.0241485	-0.278121	0
1914	0.387926	0.0556067	-0.0191494	0.351469	0.60707	0.606134	0.606113	0.446239	0.129003	0.0308711	2.10526e-05	0.00093589	0	2.10526e-05	0	0	0	0	0	0	0	0	0	0	0	0	0	0	0	0.00093548	0	0	0	0	0	0	0	0	4.1e-07	0	-0.103025	-0.0230232	0.083467	-0.0948027	-0.00804319	-0.0374209	-0.0232021	-0.275846	0
1915	0.544847	0.159447	0.0196175	0.365782	0.61586	0.614886	0.614864	0.45157	0.131833	0.0314615	2.21607e-05	0.00097361	0	2.21607e-05	0	0	0	0	0	0	0	0	0	0	0	0	0	0	0	0.00097292	0	0	0	0	0	0	0	0	6.9e-07	0	-0.104047	-0.0212311	0.0818106	-0.0959469	-0.00828684	-0.0378242	-0.0225686	-0.271311	0
1916	0.619466	0.187549	0.0578375	0.374079	0.625143	0.624152	0.624129	0.457338	0.134655	0.0321361	2.3327e-05	0.000991055	0	2.3327e-05	0	0	0	0	0	0	0	0	0	0	0	0	0	0	0	0.00099008	0	0	0	0	0	0	0	0	9.75e-07	0	-0.106959	-0.0211044	0.0796577	-0.0970414	-0.00853174	-0.0377971	-0.0221423	-0.271094	0
1917	0.65508	0.196117	0.0783825	0.38058	0.634956	0.63393	0.633906	0.463543	0.137468	0.0328947	2.45547e-05	0.00102605	0	2.45547e-05	0	0	0	0	0	0	0	0	0	0	0	0	0	0	0	0.00102479	0	0	0	0	0	0	0	0	1.265e-06	0	-0.109292	-0.0218517	0.0786552	-0.098119	-0.00878013	-0.0371815	-0.0220147	-0.273662	0
1918	0.66255	0.201943	0.071505	0.389102	0.644548	0.643462	0.643436	0.469299	0.1404	0.0337372	2.58471e-05	0.00108614	0	2.58471e-05	0	0	0	0	0	0	0	0	0	0	0	0	0	0	0	0.00108459	0	0	0	0	0	0	0	0	1.555e-06	0	-0.11107	-0.0218246	0.0774364	-0.0992118	-0.00903437	-0.0365154	-0.02192	-0.274388	0
1919	0.640626	0.194746	0.0426475	0.403232	0.653733	0.652579	0.652552	0.474606	0.143451	0.0344951	2.72075e-05	0.00115384	0	2.72075e-05	0	0	0	0	0	0	0	0	0	0	0	0	0	0	0	0.001152	0	0	0	0	0	0	0	0	1.845e-06	0	-0.11051	-0.0200828	0.0767811	-0.100352	-0.00929696	-0.0355837	-0.0219764	-0.271262	0
1920	0.538608	0.110783	0.0138031	0.414022	0.663217	0.661996	0.661967	0.480349	0.146365	0.0352528	2.86395e-05	0.00122153	0	2.86395e-05	0	0	0	0	0	0	0	0	0	0	0	0	0	0	0	0.0012194	0	0	0	0	0	0	0	0	2.135e-06	0	-0.109767	-0.0199637	0.0781727	-0.10156	-0.00955195	-0.0348032	-0.0220605	-0.272523	0
1921	0.513908	0.0957036	-0.00765625	0.425861	0.673527	0.672237	0.672207	0.486969	0.149144	0.0360942	3.01468e-05	0.00128936	0	3.01468e-05	0	0	0	0	0	0	0	0	0	0	0	0	0	0	0	0.00128693	0	0	0	0	0	0	0	0	2.425e-06	0	-0.105712	-0.0197725	0.0820658	-0.102846	-0.00978369	-0.0321637	-0.023212	-0.275991	0
1922	0.599174	0.181038	-0.0211838	0.43932	0.683862	0.682504	0.682473	0.49358	0.152041	0.0368512	3.17335e-05	0.00135731	0	3.17335e-05	0	0	0	0	0	0	0	0	0	0	0	0	0	0	0	0.0013546	0	0	0	0	0	0	0	0	2.715e-06	0	-0.103054	-0.018506	0.0839562	-0.104206	-0.0100124	-0.0301092	-0.0241763	-0.276371	0
1923	0.618842	0.202286	-0.0221856	0.438741	0.693783	0.692359	0.692322	0.499744	0.155054	0.0375238	3.66556e-05	0.00142456	3.25193e-06	3.34036e-05	0	0	0	0	0	0	0	0	0	0	0	0	0	0	0	0.00142155	0	0	0	0	0	0	0	0	3.01e-06	0	-0.110078	-0.0198458	0.080011	-0.105624	-0.010255	-0.0302266	-0.0241372	-0.280736	0
1924	0.621606	0.189263	-0.00910437	0.441447	0.70457	0.703079	0.703033	0.506778	0.158059	0.0381962	4.5521e-05	0.00149181	1.03592e-05	3.51617e-05	0	0	0	0	0	0	0	0	0	0	0	0	0	0	0	0.0014885	0	0	0	0	0	0	0	0	3.31e-06	0	-0.114414	-0.0210079	0.0783979	-0.107078	-0.0105083	-0.0298239	-0.0243929	-0.285478	0
1925	0.656901	0.189263	0.01456	0.453078	0.716218	0.714659	0.714603	0.514682	0.161053	0.0388684	5.52852e-05	0.0015597	1.82729e-05	3.70124e-05	0	0	0	0	0	0	0	0	0	0	0	0	0	0	0	0.0015561	0	0	0	0	0	0	0	0	3.605e-06	0	-0.114389	-0.021049	0.0801858	-0.108546	-0.010769	-0.0296705	-0.0245403	-0.287664	0
1926	0.701245	0.197145	0.0403637	0.463736	0.727498	0.725864	0.725799	0.522136	0.164039	0.0396242	6.55634e-05	0.00163345	2.6603e-05	3.89604e-05	0	0	0	0	0	0	0	0	0	0	0	0	0	0	0	0.00162955	0	0	0	0	0	0	0	0	3.9e-06	0	-0.115335	-0.0208707	0.0811658	-0.11028	-0.0110317	-0.0296462	-0.024672	-0.289333	0
1927	0.721251	0.195089	0.0554925	0.47067	0.738763	0.73705	0.736974	0.529579	0.167015	0.0403798	7.63825e-05	0.00171305	3.53716e-05	4.10109e-05	0	0	0	0	0	0	0	0	0	0	0	0	0	0	0	0.00170885	0	0	0	0	0	0	0	0	4.2e-06	0	-0.116603	-0.0210432	0.0817083	-0.112257	-0.0112929	-0.0281011	-0.0256174	-0.29315	0
1928	0.674629	0.145739	0.0510169	0.477873	0.750716	0.748923	0.748835	0.537885	0.169983	0.0409673	8.77711e-05	0.00179265	4.46017e-05	4.31694e-05	0	0	0	0	0	0	0	0	0	0	0	0	0	0	0	0.00178815	0	0	0	0	0	0	0	0	4.505e-06	0	-0.118565	-0.0211149	0.081411	-0.114179	-0.0115513	-0.0266062	-0.0265239	-0.296512	0
1929	0.624013	0.0960463	0.0412825	0.486684	0.762524	0.760652	0.760552	0.546179	0.172818	0.0415546	9.9759e-05	0.00187226	5.43176e-05	4.54415e-05	0	0	0	0	0	0	0	0	0	0	0	0	0	0	0	0.00186745	0	0	0	0	0	0	0	0	4.81e-06	0	-0.121538	-0.0211039	0.0807338	-0.116025	-0.0118033	-0.0267785	-0.0265606	-0.2982	0
1930	0.652519	0.121749	0.0325894	0.49818	0.773754	0.771802	0.771689	0.554025	0.175523	0.0421417	0.000112378	0.00195251	6.45448e-05	4.78331e-05	0	0	0	0	0	0	0	0	0	0	0	0	0	0	0	0.0019474	0	0	0	0	0	0	0	0	5.115e-06	0	-0.123198	-0.0202739	0.0803249	-0.117778	-0.0120476	-0.0268103	-0.0266129	-0.297915	0
1931	0.678528	0.146424	0.0164544	0.51565	0.785323	0.78329	0.783158	0.562294	0.17822	0.0426447	0.000131699	0.00203277	7.53103e-05	5.03506e-05	0	6.03845e-06	0	0	0	0	0	0	0	0	0	0	0	0	0	0.00202735	0	0	0	0	0	0	0	0	5.42e-06	0	-0.121491	-0.0178248	0.0807677	-0.119418	-0.0122827	-0.0256014	-0.0271321	-0.294813	0
1932	0.64515	0.114895	-0.00354375	0.533799	0.796956	0.794843	0.794691	0.57055	0.180909	0.0432315	0.000152245	0.00211315	8.66424e-05	5.30007e-05	0	1.2602e-05	0	0	0	0	0	0	0	0	0	7.7616e-07	0	0	0	0.00210665	0	0	0	0	0	0	0	0	5.725e-06	0	-0.119225	-0.0155089	0.081711	-0.120927	-0.0125055	-0.0244386	-0.0275566	-0.291853	0
1933	0.656846	0.123806	-0.0139081	0.546949	0.807785	0.805588	0.80542	0.577927	0.183592	0.0439018	0.000168059	0.00219626	9.8571e-05	5.57902e-05	0	1.36978e-05	0	0	0	0	0	0	0	0	0	2.3208e-06	0	0	0	0.0021879	0	0	0	0	0	0	0	0	6.035e-06	0	-0.119079	-0.0147961	0.0826036	-0.122323	-0.012717	-0.0243865	-0.0274605	-0.291607	0
1934	0.717064	0.162189	6.5625e-05	0.554809	0.818061	0.815762	0.815577	0.58486	0.186146	0.0445719	0.000184743	0.00229885	0.000111127	5.87265e-05	0	1.48889e-05	0	0	0	0	0	0	0	0	0	3.85024e-06	0	0	0	0.00228865	0	0	0	0	0	0	0	0	6.345e-06	0	-0.12096	-0.0155197	0.083063	-0.123646	-0.0129221	-0.0248268	-0.0271077	-0.294285	0
1935	0.773297	0.169386	0.0409325	0.562979	0.82822	0.8258	0.825597	0.591784	0.188572	0.0452418	0.000202346	0.00242039	0.000124345	6.18174e-05	0	1.61836e-05	0	0	0	0	0	0	0	0	0	6.1408e-06	0	6.43715e-07	0	0.00240695	0	0	0	0	0	0	0	0	6.66e-06	0	-0.122688	-0.0161833	0.083596	-0.124937	-0.013126	-0.0252924	-0.0267455	-0.296735	0
1936	0.831551	0.180695	0.0815981	0.569258	0.837504	0.83496	0.834739	0.597836	0.190992	0.0459114	0.000220919	0.00254411	0.000138257	6.50709e-05	0	1.75909e-05	0	0	0	0	0	0	0	0	0	9.96e-06	0	1.92898e-06	0	0.00252525	0	0	0	0	0	0	0	0	6.975e-06	0	-0.123914	-0.0169668	0.0843626	-0.126237	-0.0133337	-0.0249097	-0.0268302	-0.300144	0
1937	0.84505	0.179324	0.0900637	0.575662	0.844968	0.842298	0.842058	0.602154	0.193406	0.0464972	0.000240519	0.00267012	0.000152903	6.84957e-05	0	1.91205e-05	0	0	0	0	0	0	0	0	0	1.60704e-05	0	3.21036e-06	0	0.00264355	0	0	0	0	0	0	0	0	7.29e-06	0	-0.124345	-0.017938	0.0866517	-0.127586	-0.0135503	-0.0254587	-0.026464	-0.303503	0
1938	0.833606	0.163217	0.0808325	0.589556	0.851051	0.84825	0.847989	0.605175	0.195814	0.0469991	0.000261202	0.00280165	0.000168319	7.21008e-05	0	2.07832e-05	0	0	0	0	0	0	0	0	0	2.59936e-05	0	5.1305e-06	0	0.00276185	0	1.069e-06	0	0	0	0	0	0	7.61e-06	0	-0.119579	-0.017775	0.0932865	-0.129026	-0.0137813	-0.026308	-0.0259756	-0.304568	0
1939	0.837512	0.163903	0.0738456	0.599764	0.856275	0.853333	0.85305	0.607332	0.198217	0.0475009	0.000283032	0.00294214	0.000184546	7.58955e-05	0	2.25904e-05	0	0	0	0	0	0	0	0	8.80625e-07	4.1264e-05	0	7.688e-06	0	0.00288015	0	4.231e-06	0	0	0	0	0	0	7.93e-06	0	-0.11641	-0.0173578	0.0978697	-0.130598	-0.014032	-0.026358	-0.0259336	-0.305603	0
1940	0.848384	0.18378	0.0641944	0.60041	0.86076	0.857667	0.857361	0.608625	0.200733	0.0480025	0.000306072	0.00309298	0.000201627	7.989e-05	0	2.45548e-05	0	0	0	0	0	0	0	0	2.62188e-06	6.3376e-05	0	1.0881e-05	0	0.00299845	0	9.399e-06	0	0	0	0	0	0	8.25e-06	0	-0.11984	-0.017966	0.0973886	-0.132344	-0.014345	-0.0270441	-0.0255301	-0.308068	0
1941	0.840653	0.193033	0.0500194	0.597601	0.864168	0.860907	0.860576	0.608625	0.203363	0.0485876	0.000330392	0.00326112	0.000219608	8.40948e-05	0	2.669e-05	0	0	0	0	0	0	0	0	4.325e-06	9.3792e-05	0	1.53496e-05	0	0.0031226	0	1.6487e-05	0	0	0	0	0	0	8.57e-06	0	-0.122763	-0.0186007	0.0967339	-0.134336	-0.0147654	-0.0263064	-0.0254879	-0.31246	0
1942	0.796379	0.171442	0.030625	0.594312	0.866261	0.862811	0.862455	0.607332	0.205867	0.049256	0.000356066	0.00344994	0.000238534	8.85208e-05	0	2.90109e-05	0	0	0	0	0	0	0	0	5.99125e-06	0.000134	0	2.10924e-05	0	0.00325455	0	2.542e-05	0	0	0	0	0	0	8.89e-06	0	-0.124111	-0.0185215	0.0964305	-0.136669	-0.0152651	-0.0237347	-0.0263512	-0.317009	0
1943	0.77291	0.166302	0.0136106	0.592998	0.867815	0.86416	0.863777	0.605607	0.208246	0.0499242	0.000382943	0.00365547	0.000258457	9.29526e-05	0	3.15336e-05	0	0	0	0	0	0	0	0	7.62125e-06	0.000184672	0	2.87416e-05	0	0.0033891	0	3.612e-05	0	0	0	0	0	0	9.215e-06	0	-0.125877	-0.0183919	0.0970053	-0.139371	-0.0158103	-0.022385	-0.0269234	-0.320373	0
1944	0.801498	0.189263	0.0210044	0.591231	0.870015	0.866137	0.865726	0.604313	0.210738	0.0506757	0.000410891	0.00387787	0.000279429	9.71867e-05	0	3.42756e-05	0	0	0	0	0	0	0	0	1.00963e-05	0.00024648	0	3.9587e-05	0	0.00352365	0	4.851e-05	0	0	0	0	0	0	9.545e-06	0	-0.129281	-0.0183034	0.0969316	-0.142423	-0.0163988	-0.021961	-0.0271265	-0.323498	0
1945	0.840125	0.199887	0.0499669	0.590271	0.873297	0.869173	0.868733	0.603881	0.213342	0.0515103	0.000440012	0.00412386	0.000301504	0.000101252	0	3.72561e-05	0	0	0	0	0	0	0	0	1.33963e-05	0.000326256	0	5.42655e-05	0	0.00365755	0	6.252e-05	0	0	0	0	0	0	9.87e-06	0	-0.135138	-0.0165944	0.0931975	-0.145805	-0.017028	-0.0214422	-0.0274659	-0.323067	0
1946	0.874348	0.207084	0.0807056	0.586558	0.877606	0.873184	0.872714	0.604313	0.216057	0.0523445	0.000470409	0.00442245	0.000324741	0.000105173	0	4.04957e-05	0	0	0	0	0	0	0	0	1.75037e-05	0.00043248	9.0345e-06	8.37e-05	0	0.00379145	0	7.809e-05	0	0	0	0	0	0	1.0195e-05	0	-0.13945	-0.0152848	0.0903358	-0.149498	-0.0176952	-0.0178593	-0.0294488	-0.326102	0
1947	0.88947	0.198859	0.111654	0.578957	0.883122	0.878287	0.877785	0.605607	0.219	0.0531784	0.000502189	0.00483527	0.000349201	0.000108971	0	4.40171e-05	0	0	0	0	0	0	0	0	2.504e-05	0.00059824	3.82845e-05	0.000139423	0	0.0039286	0	9.515e-05	0	0	0	0	0	0	1.053e-05	0	-0.143688	-0.0161481	0.0898363	-0.153481	-0.0183974	-0.0137008	-0.031797	-0.334831	0
1948	0.898865	0.196803	0.129456	0.572607	0.889774	0.884362	0.883826	0.607763	0.222052	0.0540119	0.000535464	0.00541175	0.000374948	0.000112671	0	4.78447e-05	0	0	0	0	0	0	0	0	4.1225e-05	0.00086544	8.301e-05	0.000211684	0	0.0040859	0	0.00011363	0	0	0	0	0	0	1.0865e-05	0	-0.151439	-0.0170579	0.0877219	-0.157734	-0.0191312	-0.0125818	-0.0326551	-0.34153	0
1949	0.878521	0.189263	0.116379	0.572878	0.897523	0.891407	0.890837	0.61078	0.225211	0.054845	0.000570351	0.00611578	0.000402051	0.000116295	0	5.20051e-05	0	0	0	0	0	0	0	0	7.2025e-05	0.00121456	0.000136245	0.000288827	0	0.00425945	0	0.00013348	0	0	0	0	0	0	1.1195e-05	0	-0.156901	-0.0169254	0.0875266	-0.162238	-0.0198935	-0.0121625	-0.0332081	-0.345925	0
1950	0.841639	0.186864	0.0807275	0.574047	0.906841	0.899883	0.899276	0.615088	0.228594	0.0555945	0.000606975	0.00695764	0.00043058	0.000119868	0	5.65273e-05	0	0	0	0	0	0	0	0	0.00012415	0.00160144	0.00019563	0.000370295	0	0.00449995	0	0.00015464	0	0	0	0	0	0	1.153e-05	0	-0.161256	-0.0178153	0.0895368	-0.167001	-0.0207256	-0.0115693	-0.0336817	-0.35283	0
1951	0.801351	0.190634	0.0490306	0.561687	0.918081	0.910219	0.909571	0.621112	0.232198	0.0562605	0.000648064	0.00786257	0.00046061	0.000123411	0	6.14427e-05	0	0	0	0	0	0	0	2.6e-06	0.0002033	0.00202048	0.000263145	0.000455855	0	0.00473005	0	0.00017787	0	0	0	0	0	0	1.187e-05	0	-0.159047	-0.0194497	0.0905994	-0.17159	-0.0216929	0.00300376	-0.0399182	-0.372243	0
1952	0.76631	0.184465	0.0318106	0.550034	0.930544	0.921829	0.921135	0.62799	0.236136	0.0570094	0.000693755	0.00871521	0.000492221	0.000126948	0	6.67855e-05	0	0	0	0	0	0	0	7.8e-06	0.000291875	0.00249968	0.00030735	0.000537695	0	0.0048789	0	0.0001875	0	0	0	0	0	0	1.221e-05	0	-0.155813	-0.0197917	0.0898049	-0.176295	-0.0227926	0.0206974	-0.0474357	-0.391158	0
1953	0.746104	0.175555	0.0204662	0.550083	0.943868	0.934275	0.933534	0.635287	0.240405	0.0578412	0.000741592	0.00959221	0.000525496	0.000130503	0	7.2593e-05	0	0	0	0	0	0	0	1.3e-05	0.00039425	0.00302768	0.00032325	0.000615195	0	0.0050349	0	0.0001844	0	0	0	0	0	0	1.2535e-05	0	-0.162431	-0.0195614	0.0869756	-0.181796	-0.023995	0.0251348	-0.0491888	-0.398612	0
1954	0.754805	0.180695	0.0221156	0.551994	0.958592	0.948012	0.947221	0.643859	0.244772	0.0585896	0.000791727	0.0105795	0.000560522	0.000134099	0	7.89054e-05	0	0	0	0	0	0	0	1.82e-05	0.00053725	0.0035968	0.0003417	0.00069409	0	0.0052104	0	0.0001864	0	0	0	0	0	0	1.2845e-05	0	-0.169982	-0.0193372	0.0848911	-0.18798	-0.0252888	0.0283572	-0.0506242	-0.405595	0
1955	0.815376	0.202971	0.0572644	0.555141	0.974832	0.963117	0.962273	0.653701	0.249234	0.0593376	0.000844317	0.0117156	0.000597392	0.000137759	0	8.57667e-05	0	0	0	0	0	0	0	2.34e-05	0.0007215	0.0042368	0.000363	0.00077345	0	0.0054041	1.5e-06	0.0001941	0	0	0	0	0	0	1.3155e-05	8e-06	-0.174956	-0.0198992	0.086395	-0.194737	-0.0266616	0.0329276	-0.0529809	-0.415361	0
1956	0.899099	0.215309	0.124871	0.558919	0.991948	0.978924	0.978025	0.663951	0.253905	0.0601684	0.000899532	0.0130236	0.000636202	0.000141506	0	9.32247e-05	0	0	0	0	0	0	0	2.86e-05	0.00094875	0.0049552	0.00038775	0.0008525	0	0.005616	7.08e-06	0.0002114	0	0	0	0	0	0	1.3465e-05	3.15e-05	-0.17987	-0.0208644	0.0890639	-0.20196	-0.0281002	0.0373827	-0.0553921	-0.425955	0
1957	0.9668	0.22559	0.177927	0.563283	1.0098	0.995263	0.994305	0.674607	0.258782	0.0609158	0.000957549	0.0145336	0.000677055	0.000145363	0	0.000101331	0	0	0	0	0	0	0	3.38e-05	0.00123025	0.0057776	0.00041685	0.000930465	0	0.0058448	1.785e-05	0.000238	0	0	0	0	0	0	1.3785e-05	6.4e-05	-0.186979	-0.0213623	0.0901206	-0.209548	-0.0295904	0.040692	-0.0572916	-0.434877	0
1958	0.982448	0.230731	0.179528	0.57219	1.02788	1.01163	1.01061	0.685201	0.26375	0.0616629	0.00101855	0.016249	0.000720058	0.000149354	0	0.000110143	0	0	0	0	0	0	0	3.9e-05	0.00155912	0.0067232	0.0004506	0.00100734	0	0.0060905	3.405e-05	0.0002711	0	0	0	0	0	0	1.412e-05	9.9e-05	-0.192885	-0.0215095	0.0930989	-0.217398	-0.0311175	0.0424956	-0.0584545	-0.442406	0
1959	0.968833	0.226961	0.151467	0.590405	1.04683	1.02875	1.02766	0.696281	0.268806	0.0625756	0.00108275	0.0180848	0.000765324	0.000153503	0	0.00011972	0	0	0	0	0	0	0	4.42e-05	0.00188925	0.0077488	0.00048915	0.00108361	0	0.00635245	5.298e-05	0.0003186	0	0	0	0	0	0	1.446e-05	0.0001355	-0.198203	-0.021802	0.0996986	-0.225412	-0.032666	0.0387934	-0.0568148	-0.447318	0
1960	0.880204	0.151908	0.115636	0.61266	1.06818	1.04815	1.047	0.709369	0.274062	0.0635708	0.00115033	0.0200263	0.000812972	0.000157831	0	0.000130131	0	0	0	0	0	0	0	4.94e-05	0.00220462	0.008856	0.0005337	0.00115924	0	0.0066287	7.497e-05	0.0003813	0	0	0	0	0	0	1.4805e-05	0.000173	-0.204271	-0.0223408	0.107055	-0.233483	-0.0341549	0.032864	-0.0542114	-0.45157	0
1961	0.751567	0.0607473	0.0722706	0.618549	1.09038	1.06815	1.06693	0.722933	0.279514	0.0644827	0.00122414	0.0222278	0.000863129	0.000162363	0	0.000141446	0	0	0	0	0	0	0	5.72e-05	0.00257388	0.0101392	0.00058515	0.00123116	0	0.0069199	0.00010233	0.00045	0	0	0	0	0	0	1.5165e-05	0.000211	-0.21075	-0.022317	0.10604	-0.240013	-0.0355224	0.037965	-0.0569018	-0.461607	0
1962	0.645151	-0.0139631	0.039375	0.619739	1.11162	1.08685	1.08555	0.735074	0.285159	0.0653112	0.00130439	0.0247749	0.000915925	0.000167122	0	0.000153746	0	0	0	0	0	0	0	6.76e-05	0.00305875	0.0116208	0.00064395	0.00130123	0	0.00722605	0.0001314	0.0005292	0	0	0	0	0	0	1.5535e-05	0.000248	-0.218924	-0.0221193	0.101353	-0.245452	-0.0368629	0.0445787	-0.0604224	-0.471841	0
1963	0.162053	-0.495468	0.02737	0.630152	1.13151	1.1038	1.1024	0.745213	0.290886	0.0663049	0.00139135	0.0277104	0.0009715	0.000172131	0	0.000167115	0	0	0	0	0	0	0	8.06e-05	0.00367875	0.0133072	0.00071115	0.00137423	0	0.00754325	0.00016743	0.0006285	0	0	0	0	0	0	1.5915e-05	0.000284	-0.226771	-0.0223355	0.10191	-0.25166	-0.0382559	0.0449589	-0.0613878	-0.478558	0
1964	-0.185672	-0.853256	0.0268012	0.640783	1.15094	1.11981	1.11831	0.754074	0.296692	0.0675464	0.00150266	0.0311298	0.00105	0.000177412	0	0.000181647	0	0	0	0	0	0	0	9.36e-05	0.00444875	0.0152752	0.00078855	0.00144987	0	0.00786825	0.00021102	0.0007534	0	0	0	0	0	0	1.6305e-05	0.0003185	-0.233538	-0.0228099	0.10438	-0.258387	-0.0396945	0.0455175	-0.062544	-0.48608	0
1965	0.162675	-0.532481	0.0380887	0.657067	1.17445	1.13937	1.13774	0.766182	0.302685	0.0688698	0.00162943	0.0350864	0.001145	0.000182991	0	0.000197443	0	0	0	0	0	0	0	0.000104	0.00537375	0.0175776	0.00087765	0.00152815	8.1e-07	0.00820105	0.00025659	0.0009034	0	0	1.5e-07	0	0	0	1.6705e-05	0.0003505	-0.239091	-0.0233691	0.10864	-0.265401	-0.0411719	0.0458755	-0.0636659	-0.493865	0
1966	0.593344	-0.150018	0.0643563	0.679006	1.20317	1.1636	1.16184	0.782898	0.308753	0.0701923	0.0017529	0.0395719	0.001235	0.000188889	0	0.000214611	0	0	0	0	0	0	0	0.0001144	0.00644375	0.0202096	0.00097995	0.00160936	3.15e-06	0.00853125	0.00031452	0.0010826	0	0	4.5e-07	0	0	1.65e-07	1.712e-05	0.00038	-0.244194	-0.0238464	0.113252	-0.272481	-0.0426813	0.0465875	-0.0650247	-0.501547	0
1967	0.768755	-0.0215027	0.0917788	0.698479	1.23173	1.18715	1.18527	0.79886	0.314896	0.0715138	0.0018782	0.0445849	0.001325	0.00019513	0	0.000233273	0	0	0	0	0	0	0	0.0001248	0.00764375	0.0231648	0.00109755	0.00169368	6.93e-06	0.0088491	0.00040332	0.0012997	0	0	9e-07	0	1.6e-07	4.95e-07	1.7545e-05	0.000407	-0.252397	-0.0241906	0.114983	-0.279423	-0.0442158	0.0464213	-0.0659727	-0.508198	0
1968	0.609199	-0.220273	0.108399	0.721073	1.26232	1.21212	1.21011	0.81597	0.321219	0.0729169	0.00201069	0.0502039	0.001415	0.000201737	0	0.000253558	0	0	0	0	0	0	0	0.0001404	0.00898875	0.0264864	0.00123255	0.00178111	1.215e-05	0.00915525	0.00053316	0.0015621	0	0	1.65e-06	0	3.2e-07	9.9e-07	1.7985e-05	0.0004315	-0.260835	-0.0246537	0.1168	-0.286028	-0.0457687	0.0452117	-0.0663959	-0.514337	0
1969	0.575317	-0.296355	0.117652	0.75402	1.29782	1.2413	1.23916	0.836955	0.327719	0.0744839	0.00214534	0.0565135	0.001505	0.000208734	0	0.000275606	0	0	0	0	0	0	0	0.000156	0.0105125	0.0302192	0.00138735	0.00187193	1.881e-05	0.0094497	0.0006954	0.0018822	0	0	2.85e-06	0	4.8e-07	1.65e-06	1.844e-05	0.000453	-0.264434	-0.0254765	0.123135	-0.292109	-0.0473331	0.0443333	-0.0669843	-0.521149	0
1970	0.847402	-0.0554308	0.108404	0.794429	1.33108	1.26752	1.26524	0.854819	0.334288	0.076132	0.00227972	0.0635577	0.001595	0.000216143	0	0.000299572	0	0	0	0	0	0	0	0.000169	0.0122625	0.034384	0.00156495	0.00196649	2.7e-05	0.0097331	0.0008787	0.002242	0	0	4.8e-06	0	8e-07	2.475e-06	1.8905e-05	0.000472	-0.261939	-0.0265622	0.135936	-0.29744	-0.0489504	0.0418569	-0.06678	-0.527605	0
1971	1.03702	0.11421	0.0874169	0.835393	1.36147	1.29014	1.28773	0.869128	0.340819	0.0777787	0.00241617	0.0713233	0.00168	0.000223988	0	0.000325622	0	0	3.358e-07	0	1.625e-06	0	0	0.0001846	0.0142662	0.038976	0.00176865	0.0020646	3.69e-05	0.0100061	0.0010617	0.002623	0	0	7.5e-06	0	1.12e-06	3.63e-06	1.938e-05	0.0004885	-0.262831	-0.0275096	0.149843	-0.304062	-0.0507025	0.0333	-0.0636999	-0.531736	0
1972	1.09744	0.153279	0.0721481	0.872013	1.39941	1.31966	1.3171	0.890181	0.347417	0.0795061	0.00255991	0.0797421	0.001765	0.000232292	0	0.000353937	0	0	1.0074e-06	0	4.875e-06	0	0	0.0002028	0.0164912	0.043936	0.0020022	0.00216628	4.869e-05	0.0102687	0.0012552	0.003029	0	3.6e-06	1.125e-05	0	1.92e-06	5.115e-06	1.987e-05	0.000503	-0.274952	-0.0281269	0.154949	-0.312309	-0.0525839	0.0233267	-0.0602077	-0.534763	0
1973	1.06245	0.106328	0.05096	0.905161	1.44241	1.35347	1.35076	0.915283	0.354081	0.0813963	0.0027116	0.0889365	0.001855	0.000241079	0	0.000384714	0	0	1.679e-06	0	8.125e-06	0	0	0.000221	0.0189587	0.049296	0.00227055	0.00227199	6.264e-05	0.0105209	0.0015039	0.003478	0	1.06e-05	1.65e-05	0	3.68e-06	7.095e-06	2.038e-05	0.0005155	-0.287701	-0.0289192	0.156593	-0.320339	-0.0545382	0.0194641	-0.0599616	-0.540351	0
1974	0.915371	-0.0406943	0.0251475	0.930917	1.47871	1.37955	1.37668	0.932607	0.360707	0.0833667	0.00286646	0.0991643	0.001945	0.000250372	0	0.000418167	0	0	2.3506e-06	0	1.1375e-05	0	0	0.0002392	0.02176	0.055184	0.0025785	0.00238204	7.893e-05	0.010764	0.0018264	0.003987	0	1.72e-05	2.34e-05	0	6.56e-06	9.405e-06	2.0905e-05	0.000526	-0.299043	-0.0292697	0.158025	-0.328138	-0.0565375	0.0175236	-0.0606474	-0.546424	0
1975	0.82177	-0.141108	0.0099925	0.952885	1.51231	1.40192	1.39889	0.946263	0.367296	0.0853351	0.00302237	0.110392	0.00203	0.000260193	0	0.00045453	0	0	3.0222e-06	0	1.4625e-05	0	0	0.00026	0.02489	0.061632	0.00293145	0.00249612	9.801e-05	0.010998	0.0022038	0.004508	0	2.35e-05	3.225e-05	0	1.072e-05	1.2045e-05	2.1445e-05	0.000535	-0.312462	-0.0288483	0.156694	-0.335695	-0.0585538	0.0148233	-0.0608822	-0.551084	0
1976	0.977694	-0.0173902	0.0194775	0.975607	1.5514	1.42954	1.42636	0.965046	0.373847	0.0874652	0.00318199	0.121857	0.002115	0.000270567	0	0.000494054	0	0	3.6938e-06	0	1.7875e-05	0	0	0.0002808	0.028075	0.068208	0.003336	0.00261438	0.00012033	0.0112229	0.0025659	0.005045	0	2.95e-05	4.335e-05	0	1.632e-05	1.5345e-05	2.2005e-05	0.0005425	-0.322936	-0.0291938	0.155858	-0.343	-0.0605584	0.0181688	-0.0642113	-0.559173	0
1977	1.19883	0.134087	0.0600775	1.00466	1.59633	1.4632	1.45984	0.989588	0.380463	0.0897893	0.00335582	0.133138	0.002205	0.000281516	0	0.000537015	0	0	4.3654e-06	0	2.1125e-05	0	0	0.0003068	0.031175	0.074528	0.003801	0.00273746	0.00014625	0.0114393	0.0029574	0.005646	0	3.51e-05	5.745e-05	0	2.448e-05	1.8975e-05	2.258e-05	0.000549	-0.33147	-0.0300851	0.1566	-0.35004	-0.0625224	0.0227389	-0.0681617	-0.568346	0
1978	1.27583	0.109069	0.122688	1.04408	1.64199	1.49766	1.49412	1.01483	0.387144	0.0921515	0.00354027	0.144325	0.00229	0.000293063	0	0.000587191	0	0	5.037e-06	0	2.4375e-05	0	0	0.0003406	0.034175	0.080608	0.0043335	0.00286533	0.00017631	0.0116474	0.0034674	0.006302	0	4.04e-05	7.425e-05	0	3.584e-05	2.2935e-05	2.317e-05	0.000554	-0.339285	-0.0303308	0.15998	-0.356804	-0.0644164	0.0213071	-0.0690211	-0.573911	0
1979	1.35619	0.0939901	0.174103	1.0881	1.68909	1.53339	1.52965	1.04157	0.393787	0.0942987	0.00373869	0.155695	0.002375	0.000305233	0	0.000644551	0	0	5.7086e-06	0	2.6e-05	0	0	0.0003822	0.0372	0.08656	0.0049425	0.00299785	0.00021132	0.0118482	0.0041391	0.006997	0	4.54e-05	9.375e-05	0	4.992e-05	2.739e-05	2.378e-05	0.0005585	-0.341683	-0.0310135	0.16757	-0.363282	-0.0662111	0.0212962	-0.0700427	-0.582178	0
1980	1.46606	0.148138	0.193082	1.12484	1.73799	1.57181	1.56786	1.07067	0.400791	0.0963945	0.00395006	0.166177	0.00246	0.000318047	0	0.000705428	0	0	6.3802e-06	0	2.6e-05	0	0	0.0004342	0.03985	0.091952	0.0056415	0.00313534	0.00025218	0.0120412	0.0047235	0.007728	0	5.01e-05	0.00011685	0	6.72e-05	3.2175e-05	2.441e-05	0.0005625	-0.352177	-0.0313835	0.166983	-0.369435	-0.0678056	0.0200112	-0.0705475	-0.589257	-0.000302352
1981	1.40776	0.0795963	0.179869	1.1483	1.78022	1.60393	1.59975	1.09228	0.40835	0.0991227	0.00417632	0.176289	0.002545	0.00033153	0	0.000769824	0	0	6.716e-06	0	2.925e-05	0	0	0.000494	0.0421375	0.09736	0.0064425	0.00327825	0.00029889	0.0122135	0.0051564	0.008488	0	5.46e-05	0.00014385	0	8.8e-05	3.729e-05	2.506e-05	0.0005655	-0.365704	-0.0309345	0.162083	-0.375649	-0.0691591	0.0207254	-0.0727701	-0.595711	-0.00131576
1982	0.714776	-0.591427	0.142323	1.16388	1.81808	1.63148	1.62706	1.10903	0.41606	0.101978	0.0044152	0.186603	0.00263	0.000345705	0	0.000837737	0	0	7.0035e-06	0	3.575e-05	0	0	0.000559	0.0444625	0.102944	0.007335	0.00342395	0.00035091	0.012337	0.0055299	0.009234	0	6.26e-05	0.0001746	0	0.00011232	4.2735e-05	2.573e-05	0.000568	-0.369038	-0.0310128	0.163277	-0.382236	-0.0704323	0.0317897	-0.0804231	-0.608207	-0.00322646
1983	0.408766	-0.876217	0.09982	1.18516	1.85996	1.66374	1.65908	1.13104	0.423758	0.104277	0.00466057	0.196223	0.002715	0.000360594	0	0.000909167	0	0	7.613e-06	0	3.9e-05	0	0	0.0006292	0.04645	0.108208	0.0082815	0.00356655	0.00040779	0.0124612	0.0057795	0.01	0	7.22e-05	0.00020925	0	0.0001416	4.8675e-05	2.642e-05	0.00057	-0.373851	-0.0313875	0.165322	-0.388993	-0.071723	0.0397582	-0.0868282	-0.618959	-0.00551124
1984	0.951877	-0.320002	0.0546175	1.21726	1.90382	1.69763	1.69271	1.15578	0.430734	0.1062	0.00491543	0.206195	0.0028	0.000376222	0	0.000984116	0	0	8.2455e-06	0	4.225e-05	0	0	0.0007046	0.0484375	0.1136	0.0092955	0.00370915	0.00046989	0.0126451	0.006045	0.010834	0	8.08e-05	0.0002484	0	0.00017584	5.4945e-05	2.713e-05	0.000572	-0.379048	-0.0323878	0.171632	-0.39573	-0.0729956	0.0399564	-0.0895234	-0.626897	-0.00804971
1985	1.25132	-0.0232162	0.02268	1.25186	1.94606	1.72898	1.7238	1.17908	0.436286	0.108436	0.00517506	0.217081	0.00288	0.000392611	0	0.00106258	0	0	8.5215e-06	0	4.875e-05	0	0	0.0007826	0.0507125	0.1192	0.010629	0.0038564	0.00053658	0.0128498	0.006342	0.011693	0	9.11e-05	0.00029325	0	0.00021488	6.138e-05	2.7865e-05	0.0005735	-0.381707	-0.0339184	0.181599	-0.402256	-0.0742145	0.0385309	-0.0914475	-0.634669	-0.0108835
1986	1.34237	0.0350442	0.0216256	1.2857	1.98758	1.75971	1.75427	1.20251	0.4411	0.110655	0.0054426	0.227867	0.00296	0.000409785	0	0.00114457	0	0	7.8545e-06	0	5.2e-05	0	0	0.0008684	0.053025	0.124736	0.011985	0.0040114	0.00060534	0.0129812	0.006576	0.01257	0	9.99e-05	0.0003456	0	0.00026	6.831e-05	2.8625e-05	0.0005745	-0.384827	-0.0354755	0.190877	-0.408376	-0.0753445	0.0366024	-0.093109	-0.641843	-0.0137224
1987	1.43528	0.065888	0.0475694	1.32183	2.03403	1.79455	1.78882	1.23094	0.445635	0.11224	0.00573024	0.23948	0.003045	0.000427766	0	0.00123007	0	0	7.5555e-06	0	5.525e-05	0	0	0.0009646	0.0557	0.130768	0.0132855	0.0041757	0.00067563	0.013143	0.006729	0.013483	0	0.0001215	0.00040635	0	0.00031168	7.557e-05	2.9405e-05	0.0005755	-0.390046	-0.0370307	0.19742	-0.413896	-0.0763509	0.0343842	-0.0945727	-0.648322	-0.0170523
1988	1.57609	0.105985	0.104563	1.36554	2.08662	1.83406	1.82803	1.26297	0.44981	0.115252	0.0060303	0.25256	0.00313	0.000446578	0	0.00131909	0	0	8.832e-06	0	6.5e-05	0	0	0.0010608	0.058725	0.137104	0.015159	0.0043431	0.00074943	0.0133185	0.006978	0.014488	0	0.0001582	0.0004773	0	0.00036976	8.283e-05	3.0205e-05	0.0005765	-0.39478	-0.0387166	0.204	-0.418617	-0.0771988	0.0311876	-0.0954342	-0.65393	-0.0211152
1989	1.70061	0.129289	0.162693	1.40863	2.13489	1.86923	1.8629	1.28962	0.453791	0.119486	0.00633033	0.265664	0.00321	0.000466245	0	0.00141162	0	0	1.07065e-05	0	7.475e-05	0	0	0.001157	0.061225	0.14344	0.017376	0.0045105	0.00082791	0.0134485	0.007302	0.015642	0	0.000198	0.0005607	0	0.00043408	9.0915e-05	3.103e-05	0.0005775	-0.39732	-0.0403412	0.211596	-0.422342	-0.0778539	0.0275134	-0.0958918	-0.658672	-0.0253641
1990	1.74564	0.126547	0.17444	1.44465	2.17459	1.89729	1.89065	1.31035	0.457668	0.122633	0.0066441	0.277301	0.00329	0.00048679	0	0.00150768	0	0	1.2581e-05	4.8e-06	8.125e-05	0	0	0.001261	0.0631875	0.149168	0.0193455	0.00467325	0.00091143	0.0135785	0.007467	0.016861	0	0.0002498	0.00064935	0	0.00049984	9.9495e-05	3.188e-05	0.000578	-0.398765	-0.0415859	0.217668	-0.424881	-0.0784437	0.0245183	-0.0960408	-0.662209	-0.030199
1991	0.806741	-0.814872	0.154604	1.46701	2.20888	1.92107	1.9141	1.32791	0.461544	0.124651	0.00697266	0.287807	0.00337	0.000508642	0	0.00160725	0	0	1.4421e-05	1.44e-05	8.775e-05	0	0	0.0013702	0.0650375	0.154016	0.02109	0.00482205	0.0009981	0.013728	0.007674	0.018088	0	0.0003392	0.00073455	0	0.00056096	0.00010758	3.2755e-05	0.0005785	-0.396841	-0.0424656	0.216613	-0.424334	-0.0791428	0.033451	-0.100962	-0.667004	-0.03631
1992	0.183167	-1.41975	0.125366	1.47755	2.23594	1.93909	1.93177	1.34097	0.464573	0.126224	0.00731543	0.296858	0.00345	0.000533	0	0.00171034	0	0	1.6215e-05	2.96e-05	9.425e-05	2.11225e-08	0	0.001482	0.0662375	0.158208	0.022788	0.0049569	0.00108423	0.0137475	0.007854	0.019343	0	0.0004848	0.00081375	0	0.000612	0.0001155	3.3655e-05	0.000579	-0.396023	-0.0424604	0.206985	-0.419207	-0.0798931	0.0425393	-0.103987	-0.671575	-0.0429799
1993	0.897138	-0.681902	0.0850237	1.49402	2.2597	1.95608	1.9484	1.35438	0.466274	0.127749	0.00768499	0.303616	0.00353	0.000559	0	0.00181695	0	0	1.85725e-05	6e-05	0.000104	6.27613e-08	0	0.0015964	0.0669375	0.161536	0.0240705	0.00507005	0.00116901	0.013637	0.00783	0.020428	0	0.0006789	0.00087555	0	0.00064688	0.000122925	3.458e-05	0.000579	-0.395358	-0.0422396	0.197842	-0.411007	-0.0806352	0.0427057	-0.102023	-0.672354	-0.0490306
1994	1.4368	-0.131512	0.0485363	1.51978	2.28862	1.98017	1.97207	1.37458	0.468059	0.129433	0.00810121	0.308449	0.00361	0.000585	0	0.00192708	0	0	2.19765e-05	0.00012	0.00012025	9.11702e-07	0	0.001716	0.067375	0.164192	0.0247035	0.0051553	0.00125226	0.0135655	0.00756	0.02132	7.973e-05	0.0008974	0.000927	0	0.00067648	0.00012969	3.553e-05	0.0005795	-0.392182	-0.0428387	0.191688	-0.402127	-0.0814255	0.0440421	-0.101521	-0.671509	-0.0551646
1995	1.64121	0.0586911	0.0260487	1.55647	2.32199	2.01042	2.0018	1.40007	0.470075	0.131651	0.00861607	0.311569	0.00369	0.000611	0	0.00204072	0	0	3.4569e-05	0.0002632	0.00014625	2.5313e-06	0	0.0018278	0.067375	0.166256	0.025038	0.0052173	0.00133191	0.0134615	0.006954	0.02209	0.00026803	0.0011316	0.0009741	0	0.00071856	0.000136125	3.65e-05	0.00058	-0.385604	-0.0439983	0.192353	-0.394949	-0.0823215	0.04384	-0.100528	-0.671594	-0.0603537
1996	1.73788	0.123806	0.0197181	1.59435	2.35324	2.03899	2.02971	1.4242	0.471455	0.134059	0.00927565	0.31425	0.003765	0.000637	0	0.00217712	0	0	6.25025e-05	0.0005048	0.0001885	3.72321e-06	0	0.001937	0.0672375	0.168016	0.025152	0.00525915	0.00140229	0.013364	0.0062454	0.02317	0.00050218	0.0013636	0.00101745	0	0.00076432	0.000140745	3.4995e-05	0.00058	-0.377983	-0.0453446	0.198817	-0.390468	-0.0836122	0.0418986	-0.0992733	-0.673231	-0.0635822
1997	1.81567	0.153279	0.0429187	1.61947	2.38518	2.06886	2.05879	1.44919	0.473265	0.136336	0.010067	0.316319	0.00384	0.000663	0	0.00233452	0	0	9.91415e-05	0.0008272	0.0002405	6.02431e-06	0	0.0020566	0.06705	0.169328	0.025104	0.00528395	0.00145845	0.0132535	0.0054729	0.02439	0.00077322	0.0015878	0.0010668	0	0.000796	0.0001419	3.28e-05	0.00058	-0.381987	-0.0465864	0.197514	-0.38756	-0.0857344	0.0385575	-0.0981783	-0.675861	-0.0652346
1998	1.92421	0.187549	0.0925838	1.64408	2.42451	2.10701	2.09607	1.48103	0.476231	0.138802	0.0109462	0.317498	0.00392	0.000689	0	0.00249192	0	0	0.000148914	0.0012336	0.0002925	9.64025e-06	0	0.0021606	0.0667375	0.170368	0.025035	0.00529325	0.00150165	0.013117	0.0046689	0.02527	0.00103278	0.0017892	0.00111255	0	0.00081808	0.000140745	3.355e-05	0.00058	-0.394515	-0.0470696	0.190006	-0.385373	-0.0887675	0.033855	-0.0971659	-0.678376	-0.0650724
1999	2.03322	0.216337	0.146252	1.67063	2.46087	2.14234	2.13043	1.51064	0.478682	0.141114	0.011905	0.318533	0.004	0.000715	0	0.00264931	4.96902e-07	0	0.000219914	0.0017088	0.0003445	1.53537e-05	0	0.0022516	0.0663	0.171184	0.0249045	0.00529325	0.00153495	0.0130201	0.0039363	0.02634	0.00128884	0.0019876	0.00115065	0	0.00083856	0.00013926	3.46e-05	0.00058	-0.404255	-0.046596	0.18688	-0.384069	-0.0925101	0.0282813	-0.0962409	-0.681142	-0.0634833
2000	2.09619	0.228674	0.181191	1.68633	2.48757	2.16801	2.15506	1.5327	0.479349	0.143001	0.0129504	0.319561	0.004075	0.000741	0	0.00280671	5.3733e-06	0	0.000305451	0.0022344	0.0003965	2.51441e-05	0	0.0023608	0.0658625	0.171856	0.0247545	0.00528705	0.00156069	0.0129181	0.0032898	0.02748	0.0015505	0.002208	0.0011859	0	0.00085728	0.00013761	3.2845e-05	0.00058	-0.412784	-0.0466785	0.186982	-0.383899	-0.0965845	0.023583	-0.0961873	-0.686086	-0.0611506
2001	2.12798	0.232444	0.190562	1.70497	2.51467	2.19434	2.18016	1.5559	0.479231	0.14503	0.0141809	0.320331	0.00415	0.000766999	1.95493e-06	0.00296411	3.16084e-05	0	0.000396152	0.0028016	0.000446886	3.92378e-05	0.000104522	0.0024778	0.065475	0.172432	0.024621	0.0052762	0.00158076	0.012792	0.0027471	0.02839	0.0017773	0.002407	0.00121365	0	0.00087456	0.0001353	2.889e-05	0.00058	-0.417581	-0.0478466	0.189391	-0.386164	-0.0988064	0.0228134	-0.0969686	-0.690713	-0.0592393
2002	2.14536	0.232444	0.174151	1.73876	2.54935	2.22832	2.21272	1.5855	0.479785	0.147437	0.0155953	0.321029	0.004225	0.000793324	5.87561e-06	0.00312151	7.92228e-05	2.96218e-06	0.000490601	0.0034184	0.000500933	5.42274e-05	0.000311056	0.0025922	0.065025	0.172784	0.0244785	0.0052638	0.00159642	0.0126601	0.0022884	0.02949	0.0019852	0.002595	0.0012336	0	0.0008904	0.00013266	2.549e-05	0.00058	-0.41749	-0.0490211	0.193791	-0.39016	-0.0991473	0.0248743	-0.0978269	-0.693303	-0.0574986
2003	2.1379	0.232444	0.130187	1.77527	2.58656	2.26528	2.24819	1.61755	0.480748	0.14989	0.017084	0.321281	0.00429915	0.000820285	9.55576e-06	0.0032789	0.00013392	1.16663e-05	0.000598771	0.0040704	0.000565359	7.12803e-05	0.000512873	0.0027118	0.0644875	0.172816	0.024279	0.0052514	0.00160848	0.0125223	0.0019068	0.03059	0.0021791	0.002751	0.00125085	0	0.00090496	0.000129855	2.394e-05	0.00058	-0.418209	-0.049655	0.196804	-0.3941	-0.0994884	0.0269294	-0.0986996	-0.695994	-0.0551123
2004	2.12582	0.232444	0.0860781	1.8073	2.61965	2.2984	2.27974	1.64679	0.480862	0.152086	0.0186534	0.321257	0.0043772	0.000847858	1.29337e-05	0.0034363	0.000194381	2.57604e-05	0.000717704	0.004764	0.000639868	9.54443e-05	0.000710546	0.0028314	0.0640125	0.172768	0.024036	0.005239	0.00161784	0.0124	0.0015885	0.03149	0.0023247	0.00287	0.0012621	0	0.0009184	0.00012672	2.2885e-05	0.00058	-0.419405	-0.0498851	0.198935	-0.398034	-0.0998295	0.0289768	-0.0995682	-0.698667	-0.0522666
2005	2.08375	0.184018	0.0592681	1.84047	2.65132	2.33017	2.30989	1.67512	0.480365	0.154397	0.0202831	0.321146	0.00445471	0.000876018	1.63124e-05	0.00359346	0.000259513	4.49136e-05	0.000834021	0.0054976	0.000724224	0.000126803	0.000904534	0.002951	0.063525	0.172608	0.023793	0.00522505	0.00162513	0.0122766	0.0013245	0.03245	0.0024073	0.002988	0.00126795	0	0.00093056	0.000123255	2.133e-05	0.00058	-0.418699	-0.0499248	0.200378	-0.400144	-0.0999537	0.0309461	-0.1	-0.699822	-0.0497123
[truncated: 4 more columns]
