# Supplementary material for: The Social Cost of Fossil and Industrial CO2 Emissions from 1950 to 2018
Source: Research Square preprint supplement (doi:10.21203/rs.3.rs-2244259/v1), 2022-11-17
Supplement: Supplementary file 12 [file RCP3PD_EMISSIONS.xls]

## Sheet: RCP3PD_EMISSIONS
RCP3PD__EMISSIONS____________________________
CONTENT: GLOBAL ANNUAL EMISSIONS.
RUN: RCP3PD (RCP3-Peak&Decline), FINAL RELEASE, 26 Nov. 2009
RCP3PD CONTACT: IMAGE group, Detlef van Vuuren (riahi@iiasa.ac.at)
DATE: 26/11/2009 11:29:06
MAGICC-VERSION: 6.3.09, 25 November 2009
FILE PRODUCED BY: RCP Concentration Calculation & Data Group, M. Meinshausen, S. Smith, K. Riahi, D. van Vuuren
DOCUMENTATION: M. Meinshausen, S. Smith et al. (2011) "The RCP GHG concentrations and their extension from 1765 to 2300", DOI 10.1007/s10584-011-0156-z, Climatic Change.
CMIP5 INFO: http://cmip-pcmdi.llnl.gov/cmip5/
RCP DATABASE: http://www.iiasa.ac.at/web-apps/tnt/RcpDb
FURTHER INFO: For data sources, aknowledgements and further information, see http://www.pik-potsdam.de/~mmalte/rcps.
NOTE: THIS EMISSION DATASET ONLY TO BE USED FOR EMISSION-DRIVEN ESM CMIP5 RUNS, AS CONCENTRATIONS, NOT EMISSIONS, SHALL BE PRESCRIBED IN MAIN CMIP5 RUNS.
RCP3PD starts 2005; 20th century data and earlier is provided for convenience.
COLUMN_DESCRIPTION________________________________________
1. FossilCO2 - Fossil & Industrial CO2 (Fossil, Cement, Gas Flaring & Bunker Fuels)
2. OtherCO2 - Landuse related CO2 Emissions
3. CH4 - Methane
4. N2O - Nitrous Oxide
5. - 11. - Tropospheric ozone precursors, aerosols and reactive gas emissions
12. - 23. - Flourinated gases controlled under the Kyoto Protocol, (HFCs, PFCs, SF6)
24. - 39. - Ozone Depleting Substances controlled under the Montreal Protocol (CFCs, HFCFC, Halons, CCl4, MCF, CH3Br, CH3Cl)
&THISFILE_SPECIFICATIONS
THISFILE_DATACOLUMNS	39
THISFILE_FIRSTYEAR	1765
THISFILE_LASTYEAR	2500
THISFILE_ANNUALSTEPS	1
THISFILE_FIRSTDATAROW	39
THISFILE_UNITS	SEE ROW 37
THISFILE_DATTYPE	RCPDAT
/
COLUMN:	1	2	3	4	5	6	7	8	9	10	11	12	13	14	15	16	17	18	19	20	21	22	23	24	25	26	27	28	29	30	31	32	33	34	35	36	37	38	39
UNITS:	GtC/yr	GtC/yr	MtCH4/yr	MtN2O-N/yr	MtS/yr	MtCO/yr	Mt/yr	MtN/yr	Mt/yr	Mt/yr	MtN/yr	kt/yr	kt/yr	kt/yr	kt/yr	kt/yr	kt/yr	kt/yr	kt/yr	kt/yr	kt/yr	kt/yr	kt/yr	kt/yr	kt/yr	kt/yr	kt/yr	kt/yr	kt/yr	kt/yr	kt/yr	kt/yr	kt/yr	kt/yr	kt/yr	kt/yr	kt/yr	kt/yr	kt/yr
v YEARS/GAS >	FossilCO2	OtherCO2	CH4	N2O	SOx	CO	NMVOC	NOx	BC	OC	NH3	CF4	C2F6	C6F14	HFC23	HFC32	HFC43_10	HFC125	HFC134a	HFC143a	HFC227ea	HFC245fa	SF6	CFC_11	CFC_12	CFC_113	CFC_114	CFC_115	CARB_TET	MCF	HCFC_22	HCFC_141B	HCFC_142B	HALON1211	HALON1202	HALON1301	HALON2402	CH3BR	CH3CL
1765	0.003	0	0	0	0	0	0	0	0	0	0.833837	0.0107627	0	0	0	0	0	0	0	0	0	0	0	0	0	0	0	0	0	0	0	0	0	0	0	0	0	157.267	3100.21
1766	0.003	0.0053383	1.96326	0.00519108	0.0988826	9.05022	1.59687	0.109502	0.106998	0.56592	0.854231	0.0107521	0	0	0	0	0	0	0	0	0	0	0	0	0	0	0	0	0	0	0	0	0	0	0	0	0	157.267	3100.21
1767	0.003	0.0106766	2.43645	0.0101168	0.116306	12.9608	2.29232	0.168038	0.133383	0.781468	0.874167	0.0107479	0	0	0	0	0	0	0	0	0	0	0	0	0	0	0	0	0	0	0	0	0	0	0	0	0	157.267	3100.21
1768	0.003	0.0160149	2.91111	0.0150428	0.133811	16.8765	2.98865	0.226625	0.159847	0.997361	0.893654	0.0107438	0	0	0	0	0	0	0	0	0	0	0	0	0	0	0	0	0	0	0	0	0	0	0	0	0	157.267	3100.21
1769	0.003	0.0213532	3.38728	0.0199691	0.151398	20.7975	3.6859	0.285264	0.186393	1.21361	0.912699	0.0107397	0	0	0	0	0	0	0	0	0	0	0	0	0	0	0	0	0	0	0	0	0	0	0	0	0	157.267	3100.21
1770	0.003	0.0266915	3.86501	0.0248956	0.16907	24.7238	4.38409	0.343956	0.213024	1.43023	0.931309	0.0107355	0	0	0	0	0	0	0	0	0	0	0	0	0	0	0	0	0	0	0	0	0	0	0	0	0	157.267	3100.21
1771	0.004	0.0320298	4.34436	0.0298224	0.186831	28.6557	5.08326	0.402704	0.239742	1.64723	0.952532	0.0107314	0	0	0	0	0	0	0	0	0	0	0	0	0	0	0	0	0	0	0	0	0	0	0	0	0	157.267	3100.21
1772	0.004	0.0373681	4.82537	0.0347495	0.204683	32.5933	5.78343	0.461508	0.26655	1.86461	0.970294	0.0107273	0	0	0	0	0	0	0	0	0	0	0	0	0	0	0	0	0	0	0	0	0	0	0	0	0	157.267	3100.21
1773	0.004	0.0427064	5.30809	0.039677	0.222628	36.5368	6.48465	0.520371	0.29345	2.0824	0.987642	0.0107231	0	0	0	0	0	0	0	0	0	0	0	0	0	0	0	0	0	0	0	0	0	0	0	0	0	157.267	3100.21
1774	0.004	0.0480447	5.79258	0.0446047	0.24067	40.4864	7.18692	0.579294	0.320446	2.30061	1.00458	0.0107189	0	0	0	0	0	0	0	0	0	0	0	0	0	0	0	0	0	0	0	0	0	0	0	0	0	157.267	3100.21
1775	0.004	0.053383	6.27889	0.0495328	0.258811	44.4423	7.8903	0.638279	0.347541	2.51924	1.02113	0.0107148	0	0	0	0	0	0	0	0	0	0	0	0	0	0	0	0	0	0	0	0	0	0	0	0	0	157.267	3100.21
1776	0.004	0.0587213	6.76707	0.0544612	0.277055	48.4046	8.59482	0.697329	0.374737	2.73832	1.03728	0.0107106	0	0	0	0	0	0	0	0	0	0	0	0	0	0	0	0	0	0	0	0	0	0	0	0	0	157.267	3100.21
1777	0.004	0.0640596	7.25719	0.0593899	0.295404	52.3736	9.3005	0.756445	0.402037	2.95785	1.05305	0.0107064	0	0	0	0	0	0	0	0	0	0	0	0	0	0	0	0	0	0	0	0	0	0	0	0	0	157.267	3100.21
1778	0.004	0.0693979	7.74931	0.064319	0.313863	56.3496	10.0074	0.815629	0.429446	3.17784	1.06844	0.0107022	0	0	0	0	0	0	0	0	0	0	0	0	0	0	0	0	0	0	0	0	0	0	0	0	0	157.267	3100.21
1779	0.004	0.0747361	8.24348	0.0692485	0.332434	60.3326	10.7155	0.874883	0.456966	3.39833	1.08346	0.010698	0	0	0	0	0	0	0	0	0	0	0	0	0	0	0	0	0	0	0	0	0	0	0	0	0	157.267	3100.21
1780	0.004	0.0800744	8.73977	0.0741783	0.35112	64.3229	11.425	0.93421	0.4846	3.61931	1.09813	0.0106938	0	0	0	0	0	0	0	0	0	0	0	0	0	0	0	0	0	0	0	0	0	0	0	0	0	157.267	3100.21
1781	0.005	0.0854127	9.23824	0.0791086	0.369927	68.3207	12.1357	0.993612	0.512353	3.8408	1.11547	0.0106896	0	0	0	0	0	0	0	0	0	0	0	0	0	0	0	0	0	0	0	0	0	0	0	0	0	157.267	3100.21
1782	0.005	0.090751	9.73897	0.0840392	0.388856	72.3263	12.8478	1.05309	0.540227	4.06282	1.12943	0.0106854	0	0	0	0	0	0	0	0	0	0	0	0	0	0	0	0	0	0	0	0	0	0	0	0	0	157.267	3100.21
1783	0.005	0.0960893	10.242	0.0889702	0.407913	76.34	13.5613	1.11265	0.568228	4.28539	1.14305	0.0106812	0	0	0	0	0	0	0	0	0	0	0	0	0	0	0	0	0	0	0	0	0	0	0	0	0	157.267	3100.21
1784	0.005	0.101428	10.7475	0.0939017	0.4271	80.3619	14.2763	1.17229	0.596358	4.50853	1.15634	0.0106769	0	0	0	0	0	0	0	0	0	0	0	0	0	0	0	0	0	0	0	0	0	0	0	0	0	157.267	3100.21
1785	0.005	0.106766	11.2554	0.0988336	0.446422	84.3923	14.9927	1.23201	0.624621	4.73224	1.1693	0.0106727	0	0	0	0	0	0	0	0	0	0	0	0	0	0	0	0	0	0	0	0	0	0	0	0	0	157.267	3100.21
1786	0.005	0.112104	11.7658	0.103766	0.465884	88.4315	15.7107	1.29182	0.653022	4.95655	1.18194	0.0106684	0	0	0	0	0	0	0	0	0	0	0	0	0	0	0	0	0	0	0	0	0	0	0	0	0	157.267	3100.21
1787	0.005	0.117443	12.2789	0.108699	0.485489	92.4797	16.4303	1.35173	0.681565	5.18148	1.19428	0.0106642	0	0	0	0	0	0	0	0	0	0	0	0	0	0	0	0	0	0	0	0	0	0	0	0	0	157.267	3100.21
1788	0.005	0.122781	12.7947	0.113632	0.505241	96.5372	17.1515	1.41172	0.710254	5.40705	1.20631	0.0106599	0	0	0	0	0	0	0	0	0	0	0	0	0	0	0	0	0	0	0	0	0	0	0	0	0	157.267	3100.21
1789	0.005	0.128119	13.3133	0.118566	0.525147	100.604	17.8744	1.47181	0.739094	5.63327	1.21804	0.0106556	0	0	0	0	0	0	0	0	0	0	0	0	0	0	0	0	0	0	0	0	0	0	0	0	0	157.267	3100.21
1790	0.005	0.133457	13.8347	0.1235	0.545209	104.682	18.599	1.532	0.76809	5.86016	1.22948	0.0106513	0	0	0	0	0	0	0	0	0	0	0	0	0	0	0	0	0	0	0	0	0	0	0	0	0	157.267	3100.21
1791	0.006	0.138796	14.3591	0.128435	0.565433	108.769	19.3255	1.59228	0.797246	6.08776	1.24369	0.010647	0	0	0	0	0	0	0	0	0	0	0	0	0	0	0	0	0	0	0	0	0	0	0	0	0	157.267	3100.21
1792	0.006	0.144134	14.8866	0.133371	0.585825	112.867	20.0537	1.65268	0.826567	6.31607	1.25458	0.0106427	0	0	0	0	0	0	0	0	0	0	0	0	0	0	0	0	0	0	0	0	0	0	0	0	0	157.267	3100.21
1793	0.006	0.149472	15.4172	0.138306	0.606388	116.975	20.7839	1.71318	0.856059	6.54512	1.2652	0.0106384	0	0	0	0	0	0	0	0	0	0	0	0	0	0	0	0	0	0	0	0	0	0	0	0	0	157.267	3100.21
1794	0.006	0.154811	15.9511	0.143243	0.627129	121.095	21.5161	1.77379	0.885726	6.77493	1.27556	0.010634	0	0	0	0	0	0	0	0	0	0	0	0	0	0	0	0	0	0	0	0	0	0	0	0	0	157.267	3100.21
1795	0.006	0.160149	16.4883	0.14818	0.648053	125.227	22.2503	1.83452	0.915575	7.00554	1.28567	0.0106297	0	0	0	0	0	0	0	0	0	0	0	0	0	0	0	0	0	0	0	0	0	0	0	0	0	157.267	3100.21
1796	0.006	0.165487	17.029	0.153118	0.669166	129.37	22.9865	1.89536	0.94561	7.23695	1.29554	0.0106253	0	0	0	0	0	0	0	0	0	0	0	0	0	0	0	0	0	0	0	0	0	0	0	0	0	157.267	3100.21
1797	0.007	0.170825	17.5732	0.158056	0.690473	133.526	23.7249	1.95633	0.975837	7.4692	1.30821	0.0106209	0	0	0	0	0	0	0	0	0	0	0	0	0	0	0	0	0	0	0	0	0	0	0	0	0	157.267	3100.21
1798	0.007	0.176164	18.1211	0.162995	0.711981	137.694	24.4656	2.01742	1.00626	7.70232	1.31761	0.0106165	0	0	0	0	0	0	0	0	0	0	0	0	0	0	0	0	0	0	0	0	0	0	0	0	0	157.267	3100.21
1799	0.007	0.181502	18.6728	0.167935	0.733695	141.875	25.2085	2.07864	1.03689	7.93632	1.32679	0.0106121	0	0	0	0	0	0	0	0	0	0	0	0	0	0	0	0	0	0	0	0	0	0	0	0	0	157.267	3100.21
1800	0.008	0.18684	19.2283	0.172875	0.755622	146.07	25.9538	2.13999	1.06774	8.17124	1.33879	0.0106077	0	0	0	0	0	0	0	0	0	0	0	0	0	0	0	0	0	0	0	0	0	0	0	0	0	157.267	3100.21
1801	0.008	0.192179	19.7879	0.177817	0.777769	150.279	26.7015	2.20149	1.09879	8.4071	1.34754	0.0106032	0	0	0	0	0	0	0	0	0	0	0	0	0	0	0	0	0	0	0	0	0	0	0	0	0	157.267	3100.21
1802	0.01	0.197517	20.3516	0.182758	0.800143	154.502	27.4517	2.26312	1.13008	8.64394	1.36217	0.0105988	0	0	0	0	0	0	0	0	0	0	0	0	0	0	0	0	0	0	0	0	0	0	0	0	0	157.267	3100.21
1803	0.009	0.202855	20.9196	0.187701	0.82275	158.739	28.2045	2.3249	1.16159	8.88178	1.36749	0.0105943	0	0	0	0	0	0	0	0	0	0	0	0	0	0	0	0	0	0	0	0	0	0	0	0	0	157.267	3100.21
1804	0.009	0.208194	21.492	0.192644	0.845598	162.992	28.96	2.38683	1.19334	9.12066	1.37566	0.0105898	0	0	0	0	0	0	0	0	0	0	0	0	0	0	0	0	0	0	0	0	0	0	0	0	0	157.267	3100.21
1805	0.009	0.213532	22.069	0.197589	0.868694	167.261	29.7182	2.44892	1.22534	9.3606	1.38365	0.0105853	0	0	0	0	0	0	0	0	0	0	0	0	0	0	0	0	0	0	0	0	0	0	0	0	0	157.267	3100.21
1806	0.01	0.21887	22.6506	0.202534	0.892046	171.545	30.4792	2.51116	1.25759	9.60165	1.39452	0.0105808	0	0	0	0	0	0	0	0	0	0	0	0	0	0	0	0	0	0	0	0	0	0	0	0	0	157.267	3100.21
1807	0.01	0.224208	23.2371	0.20748	0.915662	175.847	31.2432	2.57357	1.2901	9.84383	1.40217	0.0105762	0	0	0	0	0	0	0	0	0	0	0	0	0	0	0	0	0	0	0	0	0	0	0	0	0	157.267	3100.21
1808	0.01	0.229547	23.8285	0.212426	0.939549	180.165	32.0101	2.63615	1.32289	10.0872	1.40967	0.0105717	0	0	0	0	0	0	0	0	0	0	0	0	0	0	0	0	0	0	0	0	0	0	0	0	0	157.267	3100.21
1809	0.01	0.234885	24.425	0.217374	0.963717	184.501	32.7802	2.69891	1.35594	10.3317	1.41702	0.0105671	0	0	0	0	0	0	0	0	0	0	0	0	0	0	0	0	0	0	0	0	0	0	0	0	0	157.267	3100.21
1810	0.01	0.240223	25.0269	0.222323	0.988174	188.856	33.5535	2.76184	1.38929	10.5775	1.42423	0.0105625	0	0	0	0	0	0	0	0	0	0	0	0	0	0	0	0	0	0	0	0	0	0	0	0	0	157.267	3100.21
1811	0.011	0.245562	25.6341	0.227272	1.01293	193.229	34.33	2.82497	1.42293	10.8246	1.43434	0.0105578	0	0	0	0	0	0	0	0	0	0	0	0	0	0	0	0	0	0	0	0	0	0	0	0	0	157.267	3100.21
1812	0.011	0.2509	26.247	0.232223	1.03799	197.621	35.11	2.88828	1.45687	11.073	1.44129	0.0105532	0	0	0	0	0	0	0	0	0	0	0	0	0	0	0	0	0	0	0	0	0	0	0	0	0	157.267	3100.21
1813	0.011	0.256238	26.8657	0.237175	1.06337	202.034	35.8935	2.9518	1.49113	11.3228	1.44811	0.0105485	0	0	0	0	0	0	0	0	0	0	0	0	0	0	0	0	0	0	0	0	0	0	0	0	0	157.267	3100.21
1814	0.011	0.261577	27.4904	0.242127	1.08907	206.467	36.6806	3.01551	1.52571	11.5739	1.45482	0.0105438	0	0	0	0	0	0	0	0	0	0	0	0	0	0	0	0	0	0	0	0	0	0	0	0	0	157.267	3100.21
1815	0.012	0.266915	28.1212	0.247081	1.11511	210.921	37.4714	3.07944	1.56062	11.8266	1.46447	0.0105391	0	0	0	0	0	0	0	0	0	0	0	0	0	0	0	0	0	0	0	0	0	0	0	0	0	157.267	3100.21
1816	0.013	0.272253	28.7584	0.252036	1.1415	215.398	38.266	3.14359	1.59588	12.0807	1.47402	0.0105343	0	0	0	0	0	0	0	0	0	0	0	0	0	0	0	0	0	0	0	0	0	0	0	0	0	157.267	3100.21
1817	0.014	0.277591	29.4021	0.256992	1.16825	219.896	39.0646	3.20796	1.63149	12.3363	1.48348	0.0105296	0	0	0	0	0	0	0	0	0	0	0	0	0	0	0	0	0	0	0	0	0	0	0	0	0	157.267	3100.21
1818	0.014	0.28293	30.0526	0.261949	1.19536	224.418	39.8673	3.27256	1.66746	12.5935	1.48981	0.0105248	0	0	0	0	0	0	0	0	0	0	0	0	0	0	0	0	0	0	0	0	0	0	0	0	0	157.267	3100.21
1819	0.014	0.288268	30.71	0.266908	1.22286	228.964	40.6742	3.33739	1.70381	12.8524	1.49607	0.0105199	0	0	0	0	0	0	0	0	0	0	0	0	0	0	0	0	0	0	0	0	0	0	0	0	0	157.267	3100.21
1820	0.014	0.293606	31.3745	0.271868	1.25075	233.535	41.4854	3.40248	1.74055	13.1129	1.50225	0.0105151	0	0	0	0	0	0	0	0	0	0	0	0	0	0	0	0	0	0	0	0	0	0	0	0	0	157.267	3100.21
1821	0.014	0.298945	32.0465	0.276829	1.27904	238.131	42.3011	3.46781	1.77769	13.3752	1.50838	0.0105102	0	0	0	0	0	0	0	0	0	0	0	0	0	0	0	0	0	0	0	0	0	0	0	0	0	157.267	3100.21
1822	0.015	0.304283	32.7261	0.281791	1.30774	242.754	43.1214	3.53341	1.81524	13.6393	1.51749	0.0105053	0	0	0	0	0	0	0	0	0	0	0	0	0	0	0	0	0	0	0	0	0	0	0	0	0	157.267	3100.21
1823	0.016	0.309621	33.4135	0.286755	1.33688	247.404	43.9465	3.59927	1.85322	13.9052	1.52655	0.0105003	0	0	0	0	0	0	0	0	0	0	0	0	0	0	0	0	0	0	0	0	0	0	0	0	0	157.267	3100.21
1824	0.016	0.314959	34.1091	0.29172	1.36646	252.081	44.7764	3.66542	1.89163	14.1731	1.53254	0.0104954	0	0	0	0	0	0	0	0	0	0	0	0	0	0	0	0	0	0	0	0	0	0	0	0	0	157.267	3100.21
1825	0.017	0.320298	34.813	0.296687	1.39649	256.788	45.6114	3.73184	1.9305	14.4429	1.54153	0.0104904	0	0	0	0	0	0	0	0	0	0	0	0	0	0	0	0	0	0	0	0	0	0	0	0	0	157.267	3100.21
1826	0.017	0.325636	35.5254	0.301656	1.427	261.524	46.4516	3.79856	1.96983	14.7147	1.54746	0.0104853	0	0	0	0	0	0	0	0	0	0	0	0	0	0	0	0	0	0	0	0	0	0	0	0	0	157.267	3100.21
1827	0.018	0.330974	36.2468	0.306626	1.45799	266.29	47.2972	3.86559	2.00964	14.9886	1.55641	0.0104802	0	0	0	0	0	0	0	0	0	0	0	0	0	0	0	0	0	0	0	0	0	0	0	0	0	157.267	3100.21
1828	0.018	0.336313	36.9773	0.311597	1.48948	271.088	48.1483	3.93293	2.04994	15.2646	1.5623	0.0104751	0	0	0	0	0	0	0	0	0	0	0	0	0	0	0	0	0	0	0	0	0	0	0	0	0	157.267	3100.21
1829	0.018	0.341651	37.7173	0.31657	1.52149	275.919	49.0051	4.00059	2.09076	15.5429	1.5682	0.0104699	0	0	0	0	0	0	0	0	0	0	0	0	0	0	0	0	0	0	0	0	0	0	0	0	0	157.267	3100.21
1830	0.024	0.346989	38.4669	0.321545	1.55403	280.783	49.8678	4.06858	2.1321	15.8235	1.59235	0.0104648	0	0	0	0	0	0	0	0	0	0	0	0	0	0	0	0	0	0	0	0	0	0	0	0	0	157.267	3100.21
1831	0.023	0.352328	39.2266	0.326522	1.58711	285.682	50.7366	4.13692	2.17399	16.1064	1.59521	0.0104595	0	0	0	0	0	0	0	0	0	0	0	0	0	0	0	0	0	0	0	0	0	0	0	0	0	157.267	3100.21
1832	0.023	0.357666	39.9966	0.331501	1.62076	290.617	51.6116	4.2056	2.21643	16.3917	1.60114	0.0104542	0	0	0	0	0	0	0	0	0	0	0	0	0	0	0	0	0	0	0	0	0	0	0	0	0	157.267	3100.21
1833	0.024	0.363004	40.7773	0.336481	1.655	295.588	52.493	4.27466	2.25945	16.6796	1.61014	0.0104489	0	0	0	0	0	0	0	0	0	0	0	0	0	0	0	0	0	0	0	0	0	0	0	0	0	157.267	3100.21
1834	0.024	0.368342	41.5689	0.341464	1.68983	300.597	53.3811	4.34409	2.30306	16.97	1.61613	0.0104436	0	0	0	0	0	0	0	0	0	0	0	0	0	0	0	0	0	0	0	0	0	0	0	0	0	157.267	3100.21
1835	0.025	0.373681	42.3719	0.346448	1.72528	305.645	54.2761	4.4139	2.34729	17.2631	1.6252	0.0104381	0	0	0	0	0	0	0	0	0	0	0	0	0	0	0	0	0	0	0	0	0	0	0	0	0	157.267	3100.21
1836	0.029	0.379019	43.1865	0.351435	1.76137	310.733	55.1781	4.48412	2.39214	17.5589	1.64344	0.0104327	0	0	0	0	0	0	0	0	0	0	0	0	0	0	0	0	0	0	0	0	0	0	0	0	0	157.267	3100.21
1837	0.029	0.384357	44.0132	0.356423	1.79812	315.863	56.0874	4.55474	2.43765	17.8576	1.64957	0.0104272	0	0	0	0	0	0	0	0	0	0	0	0	0	0	0	0	0	0	0	0	0	0	0	0	0	157.267	3100.21
1838	0.03	0.389696	44.8522	0.361414	1.83554	321.036	57.0041	4.6258	2.48383	18.1592	1.65881	0.0104216	0	0	0	0	0	0	0	0	0	0	0	0	0	0	0	0	0	0	0	0	0	0	0	0	0	157.267	3100.21
1839	0.031	0.395034	45.7041	0.366407	1.87367	326.252	57.9287	4.69728	2.5307	18.4638	1.66811	0.010416	0	0	0	0	0	0	0	0	0	0	0	0	0	0	0	0	0	0	0	0	0	0	0	0	0	157.267	3100.21
1840	0.033	0.400372	46.5691	0.371403	1.91251	331.515	58.8612	4.76922	2.57828	18.7714	1.68054	0.0104104	0	0	0	0	0	0	0	0	0	0	0	0	0	0	0	0	0	0	0	0	0	0	0	0	0	157.267	3100.21
1841	0.034	0.405711	47.4478	0.376401	1.9521	336.824	59.8019	4.84163	2.6266	19.0823	1.69001	0.0104047	0	0	0	0	0	0	0	0	0	0	0	0	0	0	0	0	0	0	0	0	0	0	0	0	0	157.267	3100.21
1842	0.036	0.411049	48.3404	0.381401	1.99246	342.181	60.7511	4.91451	2.67568	19.3965	1.70261	0.0103989	0	0	0	0	0	0	0	0	0	0	0	0	0	0	0	0	0	0	0	0	0	0	0	0	0	157.267	3100.21
1843	0.037	0.416387	49.2475	0.386404	2.0336	347.588	61.709	4.98789	2.72554	19.7141	1.71227	0.0103931	0	0	0	0	0	0	0	0	0	0	0	0	0	0	0	0	0	0	0	0	0	0	0	0	0	157.267	3100.21
1844	0.039	0.421725	50.1694	0.39141	2.07556	353.047	62.6759	5.06177	2.7762	20.0351	1.72507	0.0103872	0	0	0	0	0	0	0	0	0	0	0	0	0	0	0	0	0	0	0	0	0	0	0	0	0	157.267	3100.21
1845	0.043	0.427064	51.1068	0.396418	2.11836	358.558	63.6522	5.13618	2.8277	20.3598	1.74408	0.0103812	0	0	0	0	0	0	0	0	0	0	0	0	0	0	0	0	0	0	0	0	0	0	0	0	0	157.267	3100.21
1846	0.043	0.432402	52.0599	0.401429	2.16202	364.125	64.638	5.21114	2.88005	20.6882	1.75104	0.0103752	0	0	0	0	0	0	0	0	0	0	0	0	0	0	0	0	0	0	0	0	0	0	0	0	0	157.267	3100.21
1847	0.046	0.43774	53.0294	0.406443	2.20657	369.747	65.6336	5.28665	2.93328	21.0205	1.76725	0.0103691	0	0	0	0	0	0	0	0	0	0	0	0	0	0	0	0	0	0	0	0	0	0	0	0	0	157.267	3100.21
1848	0.047	0.443079	54.0156	0.411461	2.25204	375.427	66.6395	5.36273	2.98742	21.3567	1.77751	0.010363	0	0	0	0	0	0	0	0	0	0	0	0	0	0	0	0	0	0	0	0	0	0	0	0	0	157.267	3100.21
1849	0.05	0.448417	55.0193	0.416481	2.29847	381.167	67.6558	5.43941	3.0425	21.6969	1.79401	0.0103568	0	0	0	0	0	0	0	0	0	0	0	0	0	0	0	0	0	0	0	0	0	0	0	0	0	157.267	3100.21
1850	0.054	0.453755	56.0408	0.421504	2.34586	386.969	68.6829	5.5167	3.09855	22.0414	1.81369	0.0103505	0	0	0	0	0	0	0	0	0	0	0	0	0	0	0	0	1.395	0	0	0	0	0	0	0	0	157.267	3100.21
1851	0.054	0.446786	56.4613	0.427401	2.40128	387.461	68.7278	5.54232	3.11874	22.1051	1.84692	0.0103509	0	0	0	0	0	0	0	0	0	0	0	0	0	0	0	0	1.447	0	0	0	0	0	0	0	0	157.267	3100.21
1852	0.057	0.498623	56.8819	0.464661	2.4567	387.952	68.7726	5.56795	3.13893	22.1687	1.99469	0.0103513	0	0	0	0	0	0	0	0	0	0	0	0	0	0	0	0	1.502	0	0	0	0	0	0	0	0	157.267	3100.21
1853	0.059	0.497354	57.3024	0.464774	2.51212	388.443	68.8174	5.59357	3.15912	22.2324	2.00081	0.0103518	0	0	0	0	0	0	0	0	0	0	0	0	0	0	0	0	1.554	0	0	0	0	0	0	0	0	157.267	3100.21
1854	0.069	0.495817	57.723	0.464436	2.56753	388.935	68.8622	5.61919	3.17931	22.296	2.0303	0.0103522	0	0	0	0	0	0	0	0	0	0	0	0	0	0	0	0	1.607	0	0	0	0	0	0	0	0	157.267	3100.21
1855	0.071	0.493679	58.1436	0.463279	2.62295	389.426	68.9071	5.64481	3.1995	22.3597	2.03251	0.0103526	0	0	0	0	0	0	0	0	0	0	0	0	0	0	0	0	1.657	0	0	0	0	0	0	0	0	157.267	3100.21
1856	0.076	0.498935	58.5641	0.467293	2.67837	389.918	68.9519	5.67043	3.21969	22.4233	2.06176	0.0103531	0	0	0	0	0	0	0	0	0	0	0	0	0	0	0	0	1.712	0	0	0	0	0	0	0	0	157.267	3100.21
1857	0.077	0.504232	58.9847	0.471264	2.73379	390.409	68.9967	5.69605	3.23988	22.487	2.07845	0.0103535	0	0	0	0	0	0	0	0	0	0	0	0	0	0	0	0	1.765	0	0	0	0	0	0	0	0	157.267	3100.21
1858	0.078	0.509233	59.4052	0.475031	2.78921	390.9	69.0416	5.72167	3.26007	22.5506	2.0943	0.0103539	0	0	0	0	0	0	0	0	0	0	0	0	0	0	0	0	1.815	0	0	0	0	0	0	0	0	157.267	3100.21
1859	0.083	0.514254	59.8258	0.478766	2.84462	391.392	69.0864	5.74729	3.28025	22.6143	2.12297	0.0103544	0	0	0	0	0	0	0	0	0	0	0	0	0	0	0	0	1.87	0	0	0	0	0	0	0	0	157.267	3100.21
1860	0.091	0.518967	60.2464	0.482577	2.90004	391.883	69.1312	5.77291	3.30044	22.6779	2.16198	0.0103548	0	0	0	0	0	0	0	0	0	0	0	0	0	0	0	0	1.923	0	0	0	0	0	0	0	0	157.267	3100.21
1861	0.095	0.528224	59.6145	0.504995	2.99268	392.896	69.269	5.81284	3.32441	22.7345	2.27359	0.010355	0	0	0	0	0	0	0	0	0	0	0	0	0	0	0	0	1.973	0	0	0	0	0	0	0	0	157.267	3100.21
1862	0.097	0.473717	58.9826	0.471113	3.08532	393.909	69.4069	5.85276	3.34838	22.7911	2.15582	0.0103551	0	0	0	0	0	0	0	0	0	0	0	0	0	0	0	0	2.028	0	0	0	0	0	0	0	0	157.267	3100.21
1863	0.104	0.473749	58.3507	0.474449	3.17795	394.922	69.5447	5.89268	3.37235	22.8478	2.19233	0.0103553	0	0	0	0	0	0	0	0	0	0	0	0	0	0	0	0	2.081	0	0	0	0	0	0	0	0	157.267	3100.21
1864	0.112	0.474138	57.7188	0.477858	3.27059	395.935	69.6826	5.9326	3.39632	22.9044	2.22994	0.0103555	0	0	0	0	0	0	0	0	0	0	0	0	0	0	0	0	2.134	0	0	0	0	0	0	0	0	157.267	3100.21
1865	0.119	0.474795	57.0869	0.48145	3.36323	396.948	69.8204	5.97253	3.42029	22.961	2.26553	0.0103556	0	0	0	0	0	0	0	0	0	0	0	0	0	0	0	0	2.184	0	0	0	0	0	0	0	0	157.267	3100.21
1866	0.122	0.474912	56.455	0.484205	3.45587	397.961	69.9582	6.01245	3.44426	23.0176	2.2872	0.0103558	0	0	0	0	0	0	0	0	0	0	0	0	0	0	0	0	2.239	0	0	0	0	0	0	0	0	157.267	3100.21
1867	0.130223	0.473384	55.8231	0.484723	3.5485	398.974	70.0961	6.05237	3.46823	23.0742	2.31876	0.010356	0	0	0	0	0	0	0	0	0	0	0	0	0	0	0	0	2.291	0	0	0	0	0	0	0	0	157.267	3100.21
1868	0.135252	0.471983	55.1912	0.485953	3.64114	399.987	70.2339	6.09229	3.4922	23.1308	2.33718	0.0103561	0	0	0	0	0	0	0	0	0	0	0	0	0	0	0	0	2.341	0	0	0	0	0	0	0	0	157.267	3100.21
1869	0.142281	0.470485	54.5593	0.486862	3.73378	401	70.3717	6.13222	3.51617	23.1875	2.36281	0.0103563	0	0	0	0	0	0	0	0	0	0	0	0	0	0	0	0	2.386	0	0	0	0	0	0	0	0	157.267	3100.21
1870	0.147311	0.469334	53.9274	0.487744	3.82642	402.013	70.5096	6.17214	3.54014	23.2441	2.38241	0.0103565	0	0	0	0	0	0	0	0	0	0	0	0	0	0	0	0	2.452	0	0	0	0	0	0	0	0	157.267	3100.21
1871	0.15634	0.487325	56.6839	0.585016	3.99317	403.032	70.6533	6.21717	3.56245	23.2838	2.86067	0.0103569	0	0	0	0	0	0	0	0	0	0	0	0	0	0	0	0	2.505	0	0	0	0	0	0	0	0	157.267	3100.21
1872	0.173369	0.566964	59.4403	0.66674	4.15992	404.051	70.7971	6.26219	3.58477	23.3236	3.24017	0.0103573	0	0	0	0	0	0	0	0	0	0	0	0	0	0	0	0	2.557	0	0	0	0	0	0	0	0	157.267	3100.21
1873	0.184398	0.576901	62.1968	0.696371	4.32667	405.071	70.9408	6.30722	3.60708	23.3634	3.40336	0.0103577	0	0	0	0	0	0	0	0	0	0	0	0	0	0	0	0	2.61	0	0	0	0	0	0	0	0	157.267	3100.21
1874	0.174428	0.583284	64.9533	0.70875	4.49342	406.09	71.0846	6.35225	3.62939	23.4031	3.42716	0.0103581	0	0	0	0	0	0	0	0	0	0	0	0	0	0	0	0	2.663	0	0	0	0	0	0	0	0	157.267	3100.21
1875	0.188457	0.58997	67.7097	0.720343	4.66018	407.109	71.2283	6.39727	3.6517	23.4429	3.51731	0.0103585	0	0	0	0	0	0	0	0	0	0	0	0	0	0	0	0	2.85	0	0	0	0	0	0	0	0	157.267	3100.21
1876	0.191486	0.596392	70.4662	0.745243	4.82693	408.128	71.3721	6.4423	3.67401	23.4827	3.63755	0.0103589	0	0	0	0	0	0	0	0	0	0	0	0	0	0	0	0	2.989	0	0	0	0	0	0	0	0	157.267	3100.21
1877	0.194515	0.602623	73.2226	0.756332	4.99368	409.147	71.5158	6.48732	3.69633	23.5224	3.69585	0.0103593	0	0	0	0	0	0	0	0	0	0	0	0	0	0	0	0	3.13	0	0	0	0	0	0	0	0	157.267	3100.21
1878	0.196	0.609051	75.9791	0.766046	5.16043	410.166	71.6596	6.53235	3.71864	23.5622	3.74565	0.0103597	0	0	0	0	0	0	0	0	0	0	0	0	0	0	0	0	3.275	0	0	0	0	0	0	0	0	157.267	3100.21
1879	0.21	0.615348	78.7356	0.774911	5.32718	411.185	71.8033	6.57738	3.74095	23.602	3.83041	0.0103602	0	0	0	0	0	0	0	0	0	0	0	0	0	0	0	0	3.396	0	0	0	0	0	0	0	0	157.267	3100.21
1880	0.236	0.621243	81.492	0.784121	5.49393	412.204	71.9471	6.6224	3.76326	23.6417	3.95202	0.0103606	0	0	0	0	0	0	0	0	0	0	0	0	0	0	0	0	3.573	0	0	0	0	0	0	0	0	157.267	3100.21
1881	0.243	0.648873	84.3595	0.811578	5.76232	413.256	72.0998	6.67595	3.79257	23.6754	4.07131	0.0103613	0	0	0	0	0	0	0	0	0	0	0	0	0	0	0	0	3.726	0	0	0	0	0	0	0	0	157.267	3100.21
1882	0.256	0.604664	87.2269	0.78526	6.03071	414.308	72.2526	6.72949	3.82188	23.7092	4.01987	0.010362	0	0	0	0	0	0	0	0	0	0	0	0	0	0	0	0	3.883	0	0	0	0	0	0	0	0	157.267	3100.21
1883	0.272	0.608518	90.0943	0.792556	6.2991	415.36	72.4053	6.78304	3.85119	23.7429	4.09853	0.0103627	0	0	0	0	0	0	0	0	0	0	0	0	0	0	0	0	4.043	0	0	0	0	0	0	0	0	157.267	3100.21
1884	0.275	0.612128	92.9618	0.798751	6.56748	416.412	72.5581	6.83658	3.8805	23.7766	4.13334	0.0103634	0	0	0	0	0	0	0	0	0	0	0	0	0	0	0	0	4.233	0	0	0	0	0	0	0	0	157.267	3100.21
1885	0.277	0.615236	95.8292	0.804534	6.83587	417.464	72.7108	6.89012	3.90981	23.8103	4.16461	0.0103642	0	0	0	0	0	0	0	0	0	0	0	0	0	0	0	0	4.427	0	0	0	0	0	0	0	0	157.267	3100.21
1886	0.281	0.617144	98.6966	0.826194	7.10426	418.517	72.8636	6.94367	3.93912	23.844	4.27589	0.0103649	0	0	0	0	0	0	0	0	0	0	0	0	0	0	0	0	4.625	0	0	0	0	0	0	0	0	157.267	3100.21
1887	0.295	0.616163	101.564	0.832196	7.37264	419.569	73.0163	6.99721	3.96843	23.8777	4.35318	0.0103656	0	0	0	0	0	0	0	0	0	0	0	0	0	0	0	0	4.827	0	0	0	0	0	0	0	0	157.267	3100.21
1888	0.327	0.614734	104.431	0.837058	7.64103	420.621	73.169	7.05076	3.99774	23.9115	4.47487	0.0103663	0	0	0	0	0	0	0	0	0	0	0	0	0	0	0	0	5.033	0	0	0	0	0	0	0	0	157.267	3100.21
1889	0.327	0.6132	107.299	0.84144	7.90942	421.673	73.3218	7.1043	4.02704	23.9452	4.49842	0.010367	0	0	0	0	0	0	0	0	0	0	0	0	0	0	0	0	5.27	0	0	0	0	0	0	0	0	157.267	3100.21
1890	0.356	0.611754	110.166	0.845525	8.1778	422.725	73.4745	7.15784	4.05635	23.9789	4.6037	0.0103678	0	0	0	0	0	0	0	0	0	0	0	0	0	0	0	0	5.485	0	0	0	0	0	0	0	0	157.267	3100.21
1891	0.372	0.610249	111.524	0.850982	8.56737	424.293	73.7003	7.23586	4.08828	24.0114	4.68307	0.0103687	0	0	0	0	0	0	0	0	0	0	0	0	0	0	0	0	5.731	0	0	0	0	0	0	0	0	157.267	3100.21
1892	0.374	0.623191	112.881	0.85742	8.95694	425.861	73.9261	7.31388	4.12022	24.0439	4.75516	0.0103697	0	0	0	0	0	0	0	0	0	0	0	0	0	0	0	0	6.01	0	0	0	0	0	0	0	0	157.267	3100.21
1893	0.37	0.624403	114.238	0.864758	9.34651	427.429	74.152	7.3919	4.15215	24.0763	4.82174	0.0103706	0	0	0	0	0	0	0	0	0	0	0	0	0	0	0	0	6.267	0	0	0	0	0	0	0	0	157.267	3100.21
1894	0.383	0.640367	115.595	0.872945	9.73608	428.997	74.3778	7.46992	4.18408	24.1088	4.88457	0.0103716	0	0	0	0	0	0	0	0	0	0	0	0	0	0	0	0	6.529	0	0	0	0	0	0	0	0	157.267	3100.21
1895	0.406	0.644419	116.953	0.881882	10.1256	430.565	74.6036	7.54794	4.21601	24.1413	4.94542	0.0103726	0	0	0	0	0	0	0	0	0	0	0	0	0	0	0	0	6.824	0	0	0	0	0	0	0	0	157.267	3100.21
1896	0.419	0.646278	118.31	0.891418	10.5152	432.133	74.8294	7.62596	4.24794	24.1738	5.00605	0.0103735	0	0	0	0	0	0	0	0	0	0	0	0	0	0	0	0	7.151	0	0	0	0	0	0	0	0	157.267	3100.21
1897	0.44	0.649564	119.667	0.901402	10.9048	433.701	75.0552	7.70398	4.27987	24.2063	5.06823	0.0103745	0	0	0	0	0	0	0	0	0	0	0	0	0	0	0	0	7.432	0	0	0	0	0	0	0	0	157.267	3100.21
1898	0.465	0.651001	121.025	0.911681	11.2943	435.269	75.281	7.782	4.3118	24.2387	5.13374	0.0103754	0	0	0	0	0	0	0	0	0	0	0	0	0	0	0	0	7.798	0	0	0	0	0	0	0	0	157.267	3100.21
1899	0.507	0.652204	122.382	0.922105	11.6839	436.837	75.5068	7.86002	4.34373	24.2712	5.20432	0.0103764	0.959119	0	0	0	0	0	0	0	0	0	0	0	0	0	0	0	8.119	0	0	0	0	0	0	0	0	157.267	3100.21
1900	0.534	0.653206	123.739	0.932522	12.0735	438.405	75.7326	7.93804	4.37566	24.3037	5.28176	0.0103773	0.0505758	0	0	0	0	0	0	0	0	0	0	0	0	0	0	0	8.473	0	0	0	0	0	0	0	0	157.267	3100.21
1901	0.552	0.702943	124.841	0.944667	12.6299	439.892	75.9205	8.04414	4.41738	24.3365	5.36856	0.0103797	0.0532377	0	0	0	0	0	0	0	0	0	0	0	0	0	0	0	8.592	0	0	0	0	0	0	0	0	157.267	3100.21
1902	0.566	0.702974	125.944	0.959931	13.1863	441.378	76.1084	8.15023	4.45911	24.3693	5.46467	0.0103821	0.0560397	0	0	0	0	0	0	0	0	0	0	0	0	0	0	0	8.762	0	0	0	0	0	0	0	0	157.267	3100.21
1903	0.617	0.726671	127.046	0.977647	13.7427	442.865	76.2962	8.25633	4.50083	24.4021	5.56792	0.0103845	0.0589892	0	0	0	0	0	0	0	0	0	0	0	0	0	0	0	8.906	0	0	0	0	0	0	0	0	157.267	3100.21
1904	0.624	0.748293	128.149	0.997229	14.2991	444.351	76.4841	8.36242	4.54255	24.4349	5.6762	0.0103868	0.0620939	0	0	0	0	0	0	0	0	0	0	0	0	0	0	0	9.102	0	0	0	0	0	0	0	0	157.267	3100.21
1905	0.663	0.769815	129.251	1.01813	14.8555	445.838	76.672	8.46851	4.58427	24.4677	5.78736	0.0103892	0.065362	0	0	0	0	0	0	0	0	0	0	0	0	0	0	0	9.623	0	0	0	0	0	0	0	0	157.267	3100.21
1906	0.707	0.796534	130.354	1.03974	15.4119	447.324	76.8598	8.57461	4.62599	24.5005	5.89926	0.0103916	0.0688021	0	0	0	0	0	0	0	0	0	0	0	0	0	0	0	12.093	0	0	0	0	0	0	0	0	157.267	3100.21
1907	0.784	0.803763	131.456	1.06146	15.9683	448.811	77.0477	8.6807	4.66771	24.5333	6.00977	0.010394	0.0724232	0	0	0	0	0	0	0	0	0	0	0	0	0	0	0	12.363	0	0	0	0	0	0	0	0	157.267	3100.21
1908	0.75	0.811413	132.559	1.08267	16.5247	450.297	77.2356	8.78679	4.70944	24.5661	6.11675	0.0103964	0.076235	0	0	0	0	0	0	0	0	0	0	0	0	0	0	0	12.633	0	0	0	0	0	0	0	0	157.267	3100.21
1909	0.785	0.817378	133.661	1.10278	17.081	451.784	77.4235	8.89289	4.75116	24.5989	6.21805	0.0103987	0.0802474	0	0	0	0	0	0	0	0	0	0	0	0	0	0	0	12.903	0	0	0	0	0	0	0	0	157.267	3100.21
1910	0.819	0.821982	134.764	1.12118	17.6374	453.27	77.6113	8.99898	4.79288	24.6317	6.31156	0.0104011	0.0844709	0	0	0	0	0	0	0	0	0	0	0	0	0	0	0	13.146	0	0	0	0	0	0	0	0	157.267	3100.21
1911	0.836	0.778894	135.969	1.13897	17.8214	451.76	77.2727	9.05696	4.79495	24.4275	6.39756	0.0104064	0.0889167	0	0	0	0	0	0	0	0	0	0	0	0	0	0	0	14.007	0	0	0	0	0	0	0	0	157.267	3100.21
1912	0.879	0.747848	137.175	1.15756	18.0054	450.249	76.9341	9.11494	4.79702	24.2232	6.47866	0.0104117	0.0935966	0	0	0	0	0	0	0	0	0	0	0	0	0	0	0	19.895	0	0	0	0	0	0	0	0	157.267	3100.21
1913	0.943	0.72298	138.381	1.17675	18.1894	448.739	76.5955	9.17292	4.7991	24.0189	6.55615	0.010417	0.0985227	0	0	0	0	0	0	0	0	0	0	0	0	0	0	0	19.025	0	0	0	0	0	0	0	0	157.267	3100.21
1914	0.85	0.714792	139.587	1.19626	18.3734	447.228	76.2569	9.23089	4.80117	23.8146	6.63132	0.0104222	0.103708	0	0	0	0	0	0	0	0	0	0	0	0	0	0	0	11.082	0	0	0	0	0	0	0	0	157.267	3100.21
1915	0.838	0.70575	140.793	1.21584	18.5574	445.718	75.9183	9.28887	4.80324	23.6104	6.70546	0.0104275	0.109166	0	0	0	0	0	0	0	0	0	0	0	0	0	0	0	11.216	0	0	0	0	0	0	0	0	157.267	3100.21
1916	0.901	0.708116	141.999	1.23532	18.7413	444.208	75.5796	9.34685	4.80532	23.4061	6.77987	0.0104328	0.114912	0	0	0	0	0	0	0	0	0	0	0	0	0	0	0	18.614	0	0	0	0	0	0	0	0	157.267	3100.21
1917	0.955	0.711196	143.204	1.25452	18.9253	442.697	75.241	9.40483	4.80739	23.2018	6.85582	0.0104381	0.12096	0	0	0	0	0	0	0	0	0	0	0	0	0	0	0	22.143	0	0	0	0	0	0	0	0	157.267	3100.21
1918	0.936	0.714304	144.41	1.27326	19.1093	441.187	74.9024	9.46281	4.80946	22.9976	6.93462	0.0104434	0.127326	0	0	0	0	0	0	0	0	0	0	0	0	0	0	0	22.696	0	0	0	0	0	0	0	0	157.267	3100.21
1919	0.806	0.719654	145.616	1.29138	19.2933	439.676	74.5638	9.52079	4.81153	22.7933	7.01756	0.0104487	0.134028	0	0	0	0	0	0	0	0	0	0	0	0	0	0	0	23.196	0	0	0	0	0	0	0	0	157.267	3100.21
1920	0.932	0.721283	146.822	1.30869	19.4773	438.166	74.2252	9.57877	4.81361	22.589	7.10592	0.010454	0.141082	0	0	0	0	0	0	0	0	0	0	0	0	0	0	0	23.802	0	0	0	0	0	0	0	0	157.267	3100.21
1921	0.803	0.757417	147.862	1.32579	19.8639	440.996	74.6803	9.6457	4.79871	22.6052	7.20195	0.0104523	0.148507	0	0	0	0	0	0	0	0	0	0	0	0	0	0	0	24.304	0	0	0	0	0	0	0	0	157.267	3100.21
1922	0.845	0.747941	148.901	1.34327	20.2505	443.825	75.1354	9.71264	4.78382	22.6215	7.30583	0.98418	0.156323	0	0	0	0	0	0	0	0	0	0	0	0	0	0	0	24.563	0	0	0	0	0	0	0	0	157.267	3100.21
1923	0.97	0.753288	149.941	1.36094	20.6371	446.655	75.5905	9.77958	4.76893	22.6377	7.41577	1.16488	0.164551	0	0	0	0	0	0	0	0	0	0	0	0	0	0	0	25.35	0	0	0	0	0	0	0	0	157.267	3100.21
1924	0.963	0.756861	150.981	1.37962	21.0237	449.484	76.0456	9.84651	4.75404	22.6539	7.52998	1.22567	0.173211	0	0	0	0	0	0	0	0	0	0	0	0	0	0	0	25.878	0	0	0	0	0	0	0	0	157.267	3100.21
1925	0.975	0.758089	152.02	1.3999	21.4104	452.314	76.5007	9.91345	4.73914	22.6701	7.64667	1.28964	0.182328	0	0	0	0	0	0	0	0	0	0	0	0	0	0	0	28.827	0	0	0	0	0	0	0	0	157.267	3100.21
1926	0.983	0.761483	153.06	1.42119	21.797	455.143	76.9558	9.98039	4.72425	22.6863	7.76406	1.35699	0.191924	0	0	0	0	0	0	0	0	0	0	0	0	0	0	0	29.446	0	0	0	0	0	0	0	0	157.267	3100.21
1927	1.062	0.797183	154.1	1.44292	22.1836	457.973	77.4109	10.0473	4.70936	22.7026	7.88034	1.42788	0.202025	0	0	0	0	0	0	0	0	0	0	0	0	0	0	0	30.065	0	0	0	0	0	0	0	0	157.267	3100.21
1928	1.065	0.799671	155.14	1.4645	22.5702	460.803	77.866	10.1143	4.69447	22.7188	7.99374	1.5025	0.212658	0	0	0	0	0	0	0	0	0	0	0	0	0	0	0	30.685	0	0	0	0	0	0	0	0	157.267	3100.21
1929	1.145	0.824226	156.179	1.48535	22.9569	463.632	78.3211	10.1812	4.67957	22.735	8.10245	1.58105	0.223851	0	0	0	0	0	0	0	0	0	0	0	0	0	0	0	31.573	0	0	0	0	0	0	0	0	157.267	3100.21
1930	1.053	0.89588	157.219	1.50489	23.3435	466.462	78.7762	10.2481	4.66468	22.7512	8.2047	1.66374	0.235632	0	0.74682	0	0	0	0	0	0	0	0	0	0	0	0	0	31.933	0	0	0	0	0	0	0	0	157.267	3100.21
1931	0.94	0.903341	158.345	1.52262	23.755	468.031	78.9094	10.3025	4.6671	22.7486	8.29855	1.75078	0.248034	0	0.0676905	0	0	0	0	0	0	0	0	0	0.097	0	0	0	32.553	0	0	0	0	0	0	0	0	157.267	3100.21
1932	0.847	0.812226	159.472	1.53852	24.1664	469.6	79.0427	10.3568	4.66951	22.7459	8.38498	1.8424	0.261089	0	0.0735767	0	0	0	0	0	0	0	0	0	0.097	0	0	0	33.979	0	0	0	0	0	0	0	0	157.267	3100.21
1933	0.893	0.808588	160.598	1.55267	24.5779	471.169	79.176	10.4111	4.67193	22.7433	8.46663	1.93884	0.27483	0	0.0799748	0	0	0	0	0	0	0	0	0	0.097	0	0	0	41.893	0	0	0	0	0	0	0	0	157.267	3100.21
1934	0.973	0.796863	161.725	1.56531	24.9894	472.738	79.3092	10.4655	4.67434	22.7407	8.54609	2.04035	0.289295	0	0.0869292	0	0	0	0	0	0	0	0	0	0.194	0	0.117	0	42.817	0	0	0	0	0	0	0	0	157.267	3100.21
1935	1.027	0.794716	162.851	1.57712	25.4009	474.307	79.4425	10.5198	4.67676	22.738	8.62599	2.14721	0.304521	0	0.0944883	0	0	0	0	0	0	0	0	0	0.291	0	0.117	0	43.74	0	0	0	0	0	0	0	0	157.267	3100.21
1936	1.13	0.8013	163.977	1.58892	25.8123	475.876	79.5758	10.5741	4.67917	22.7354	8.70894	2.2597	0.320548	0	0.102705	0	0	0	0	0	0	0	0	0	0.485	0	0.117	0	44.664	0	0	0	0	0	0	0	0	157.267	3100.21
1937	1.209	0.779699	165.104	1.60151	26.2238	477.445	79.709	10.6285	4.68159	22.7327	8.79755	2.3781	0.337419	0	0.111636	0	0	0	0	0	0	0	0	0	0.776	0	0.234	0	45.588	0	0	0	0	0	0	0	0	157.267	3100.21
1938	1.142	0.781882	166.23	1.61572	26.6353	479.014	79.8423	10.6828	4.684	22.7301	8.89443	2.50274	0.355178	0	0.121343	0	0	0	0	0	0	0	0	0.161	1.164	0	0.234	0	46.512	0	0.165	0	0	0	0	0	0	157.267	3100.21
1939	1.192	0.779444	167.357	1.63235	27.0468	480.583	79.9756	10.7371	4.68642	22.7274	9.00221	2.63393	0.373872	0	0.131895	0	0	0	0	0	0	0	0	0.161	1.649	0	0.351	0	47.436	0	0.33	0	0	0	0	0	0	157.267	3100.21
1940	1.299	0.766832	168.483	1.65224	27.4583	482.152	80.1088	10.7914	4.68883	22.7248	9.12349	2.77203	0.393549	0	0.143364	0	0	0	0	0	0	0	0	0.161	2.231	0	0.468	0	50.781	0	0.496	0	0	0	0	0	0	157.267	3100.21
1941	1.334	0.750365	170.03	1.7002	27.8404	488.558	81.2433	11.1234	4.69324	22.6876	9.26539	2.91741	0.414262	0	0.155833	0	0	0	0	0	0	0	0	0.161	2.91	0	0.585	0	52.603	0	0.661	0	0	0	0	0	0	157.267	3100.21
1942	1.342	0.76905	171.578	1.79386	28.2226	494.963	82.3778	11.4554	4.69766	22.6505	9.43212	3.07043	0.394683	0	0.169386	0	0	0	0	0	0	0	0	0.161	3.589	0	0.819	0	53.918	0	0.826	0	0	0	0	0	0	157.267	3100.21
1943	1.391	0.763766	173.126	1.92316	28.6048	501.369	83.5123	11.7873	4.70207	22.6133	9.62193	3.23151	0.378322	0	0.184119	0	0	0	0	0	0	0	0	0.322	4.365	0	1.17	0	54.705	0	0.991	0	0	0	0	0	0	157.267	3100.21
1944	1.383	0.768399	174.673	2.08668	28.987	507.774	84.6468	12.1193	4.70648	22.5762	9.83308	3.40106	0.364076	0	0.200132	0	0	0	0	0	0	0	0	0.322	5.917	0	1.521	0	55.75	0	1.157	0	0	0	0	0	0	157.267	3100.21
1945	1.16	0.769147	176.221	2.2804	29.3692	514.18	85.7813	12.4513	4.71089	22.539	10.0638	3.57954	0.351947	0	0.217538	0	0	0	0	0	0	0	0	0.483	7.76	1.868	3.861	0	56.796	0	1.322	0	0	0	0	0	0	157.267	3100.21
1946	1.238	0.842149	177.768	2.49036	29.7513	520.585	86.9158	12.7832	4.71531	22.5019	10.3124	3.76742	0.341933	0	0.236458	0	0	0	0	0	0	0	0	0.966	13.483	4.203	6.318	0	59.187	0	1.487	0	0	0	0	0	0	157.267	3100.21
1947	1.392	0.87018	179.316	2.7026	30.1335	526.991	88.0503	13.1152	4.71972	22.4647	10.577	3.96518	0.334036	0	0.257024	0	0	0	0	0	0	0	0	2.093	20.661	5.137	6.903	0	67.278	0	1.652	0	0	0	0	0	0	157.267	3100.21
1948	1.469	0.87513	180.863	2.90316	30.5157	533.396	89.1848	13.4472	4.72413	22.4276	10.8561	4.17335	0.328255	0	0.279378	0	0	0	0	0	0	0	0	3.703	24.056	6.071	7.254	0	68.369	0	1.817	0	0	0	0	0	0	157.267	3100.21
1949	1.419	0.882126	182.411	3.07807	30.8979	539.802	90.3193	13.7791	4.72855	22.3904	11.1477	4.39247	0.32459	0	0.303676	0	0	0	0	0	0	0	0	6.118	25.802	6.538	7.722	0	74.34	0	1.983	0	0	0	0	0	0	157.267	3100.21
1950	1.63	0.892335	183.959	3.21338	31.28	546.207	91.4538	14.1111	4.73296	22.3532	11.4501	4.62313	0.323043	0	0.330088	0	0	0	0	0	0	0	0.261908	8.855	28.615	7.939	8.073	0	65	0	2.148	0	0	0	0	0	0	157.267	3100.21
1951	1.768	1.08852	189.11	3.3186	32.8669	558.446	94.8484	14.5285	4.77333	22.5413	11.7846	4.86592	0.323612	0	0.358782	0	0	0	0	0	0	0	0.26199	8.158	33.854	1.889	7.102	0	65	0	2.313	0	0	0	0	0	0	157.267	3100.21
1952	1.796	1.10964	194.262	3.41111	34.4538	570.685	98.2429	14.9459	4.8137	22.7293	12.1691	5.12148	0.326299	0	0.389971	0	0	0	0	0	0	0	0.262072	11.742	35.2	2.139	7.288	0	70	0	2.478	0	0	0	0	0	0	157.927	3117.78
1953	1.841	1.10452	199.413	3.48872	36.0407	582.924	101.638	15.3633	4.85407	22.9174	12.5966	5.3905	0.331104	0	0.42387	0	0	0	0	0	0	0	0.262153	15.985	39.582	2.437	7.43	0	75	0	2.644	0	0	0	0	0	0	158.604	3137.15
1954	1.865	1.15214	204.565	3.55435	37.6277	595.163	105.032	15.7807	4.89444	23.1054	13.0603	5.67367	0.338026	0	0.460717	0	0	0	0	0	0	0	0.262235	19.855	44.802	2.785	7.431	0	80	1.214	2.809	0	0	0	0	0	0	159.3	3158.22
1955	2.043	1.19119	209.716	3.61411	39.2146	607.401	108.427	16.1981	4.93481	23.2935	13.5532	5.97175	0.347066	0	0.500767	0	0	0	0	0	0	0	0.262317	24.604	50.343	3.233	7.388	0	85	3.512	2.974	0	0	0	0	0	0	160.014	3180.75
1956	2.178	1.24469	214.868	3.67068	40.8015	619.64	111.821	16.6154	4.97518	23.4815	14.0685	6.28552	0.358224	0	0.544298	0	0	0	0	0	0	0	0.262399	30.685	58.664	3.73	7.302	0	90	6.224	3.48	0	0	0	0	0	0	160.748	3204.5
1957	2.27	1.27187	220.019	3.72673	42.3884	631.879	115.216	17.0328	5.01555	23.6696	14.5993	6.6158	0.3715	0	0.591613	0	0	0	0	0	0	0	0.262481	34.375	66.689	4.227	7.25	0	95	9.469	4.251	0	0	0	0	0	0	161.502	3229.07
1958	2.33	1.31958	225.171	3.78495	43.9753	644.118	118.61	17.4502	5.05592	23.8576	15.1387	6.96346	0.386895	0	0.643041	0	0	0	0	0	0	0	0.262563	32.235	69.93	4.824	7.221	0	100	10.772	6.008	0	0	0	0	0	0	162.277	3254.04
1959	2.462	1.2036	230.322	3.848	45.5622	656.357	122.005	17.8676	5.09629	24.0457	15.6798	7.32943	0.404409	0	0.69894	0	0	0	0	0	0	0	0.262644	33.015	78.149	5.57	7.176	0	105	14.717	7.06	0	0	0	0	0	0	163.073	3278.97
1960	2.577	1.19228	235.474	3.91858	47.1491	668.596	125.4	18.285	5.13665	24.2337	16.2157	7.71465	0.424041	0	0.759698	0	0	0	0	0	0	0	0.524634	43.342	93.09	6.366	6.6	0	110	18.348	7.659	0	0	0	0	0	0	163.892	3303.39
1961	2.594	1.24432	238.522	4.02401	48.7708	682.676	129.241	18.9591	5.1796	24.5022	16.7593	8.12016	0.445793	0	0.825763	0	0	0	0	0	0	0	0.524798	55.722	104.6	7.212	6.88	0	115	20.077	9.426	0	0	0	0	0	0	164.735	3326.86
1962	2.7	1.23557	241.571	4.18365	50.3925	696.756	133.083	19.6333	5.22254	24.7707	17.326	8.54701	0.469664	0	0.897574	0	0	0	0	0	0	0	0.786869	69.881	120.668	8.248	7.168	0	119	28.22	11.573	0	0	0	0	0	0	165.601	3349.07
1963	2.848	1.24429	244.619	4.38831	52.0142	710.836	136.925	20.3074	5.26549	25.0392	17.9133	14.985	0.495655	0	0.97563	0	0	0	0	0	0	0	0.525207	85.539	141.744	9.476	7.421	0	123	31.46	14.396	0	0	0.005	0.001	0.001	0.007	166.493	3369.71
1964	3.008	1.25159	247.668	4.63747	53.6359	724.916	140.766	20.9815	5.30843	25.3077	18.5183	13.4881	0.523766	0	1.06047	0	0	0	0	0	0	0	0.525371	101.538	164.921	10.853	7.692	0.225	127	36.197	16.782	0	0	0.014	0.002	0.003	0.014	167.41	3388.63
1965	3.145	1.26426	250.717	4.89682	55.2576	738.995	144.608	21.6557	5.35138	25.5762	19.1382	13.4884	0.553997	0	1.1527	0	0	0	0	0	0	0	0.525534	115.75	185.933	12.426	7.975	0.444	127	48.096	20.514	0	0	0.032	0.005	0.005	0.028	168.355	3405.7
1966	3.305	1.2937	253.765	5.19558	56.8793	753.075	148.45	22.3298	5.39432	25.8447	19.7704	13.4886	0.586348	0	1.25294	0	0	0	0	0	0	0	0.525698	129.623	208.571	14.246	8.305	0.633	127	69.567	24.512	0	0	0.058	0.008	0.008	0.048	169.328	3420.92
1967	3.411	1.29763	256.814	5.45748	58.501	767.155	152.292	23.0039	5.43727	26.1132	20.412	13.4889	0.620819	0	1.3619	0	0	0	0	0	0	0	1.04968	147.119	235.269	16.313	8.623	0.825	127	94.137	29.817	0	0	0.1	0.013	0.013	0.075	170.329	3434.34
1968	3.588	1.2352	259.863	5.61974	60.1227	781.235	156.133	23.6781	5.48021	26.3817	21.0604	13.4892	0.657411	0	1.48033	0	0	0	0	0	0	0	0.526189	167.586	263.953	18.678	8.974	1.043	127	114.767	36.216	0	0	0.158	0.019	0.016	0.109	171.36	3446.07
1969	3.8	1.23839	262.911	5.78483	61.7444	795.315	159.975	24.3522	5.52316	26.6502	21.7128	13.4894	0.696124	0	1.60907	0	0	0	0	0	0	0	0.788261	194.513	294.486	21.388	9.344	1.283	127	134.875	39.381	0	0	0.229	0.026	0.024	0.15	172.423	3456.22
1970	4.076	1.19711	265.96	5.93688	63.3661	809.395	163.817	25.0263	5.5661	26.9187	22.3665	11.9926	0.736958	0	1.74899	0	0	0.0554463	0	0.356404	0	0	0.788506	221.119	321.743	24.494	9.687	1.537	127	141.326	43.652	0	0	0.329	0.035	0.043	0.197	173.518	3464.95
1971	4.231	1.07089	270.025	5.60498	63.5459	825.183	167.161	25.8097	5.70387	27.2218	23.0425	13.49	0.779913	0	1.90113	0	0	0.0573185	0	0.363166	0	0	1.05066	243.137	346.609	28.094	10.052	1.803	127	170.133	47.746	0	0.613	0.461	0.044	0.1	0.252	174.646	3472.41
1972	4.399	1.04706	274.09	5.91813	63.7256	840.97	170.506	26.593	5.84164	27.5248	23.7556	13.4902	0.82499	0	2.06649	0	0	0.0591929	0	0.369936	0	0	0.789079	274.26	378.471	32.236	10.471	2.127	127	214.168	54.79	0	0.613	0.63	0.055	0.17	0.313	175.809	3478.74
1973	4.635	1.0331	278.155	6.0449	63.9053	856.758	173.851	27.3763	5.97941	27.8279	24.4941	13.4905	0.872189	0	2.24624	0	0	0.0610694	0	0.376713	0	0	1.05123	314.04	419.239	36.92	10.883	2.495	127	266.209	61.912	0	0.613	0.839	0.067	0.277	0.391	177.007	3484.11
1974	4.644	1.03874	282.22	5.9406	64.0851	872.546	177.195	28.1597	6.11718	28.1309	25.2459	11.9936	0.921509	0	2.44163	0	0	0.0629482	0	0.383499	0	0	1.05156	345.881	454.701	42.295	11.29	2.921	127	305.489	62.543	0	0.613	1.086	0.08	0.372	0.468	178.243	3488.63
1975	4.615	1.03159	286.285	6.14097	64.2648	888.333	180.54	28.943	6.25495	28.434	25.9992	13.491	0.972952	0	2.65401	0	0	0.0648291	0	0.390292	0	0	1.05189	335.741	442.834	48.505	11.734	3.391	127	308.992	70.487	0	0.613	1.365	0.095	0.524	0.544	179.517	3492.43
1976	4.883	1.09061	290.35	6.30426	64.4445	904.121	183.885	29.7263	6.39272	28.7371	26.742	13.4913	1.02652	0	2.88486	0	0	0.0667121	0	0.397093	0	0	1.57603	343.24	432.28	55.552	12.2	3.943	127	382.3	78.51	0	0.613	1.767	0.11	0.783	0.621	180.83	3495.62
1977	5.029	1.09399	294.415	6.5344	64.6243	919.908	187.229	30.5097	6.53049	29.0401	27.4625	11.9945	1.0822	0	3.56608	0	0	0.0685974	0	0.403902	0	0	1.83843	330.711	419.447	63.634	12.68	4.582	127	462.112	85.789	0	0.613	2.035	0.127	1.006	0.697	182.185	3498.28
1978	5.105	1.09037	298.48	6.61937	64.804	935.696	190.574	31.293	6.66826	29.3432	28.1487	13.4919	1.14001	0	3.7964	0	0	0.0704848	0	0.0542996	0	0	2.36282	359.009	424.498	72.896	13.168	5.337	127	587.319	92.012	0	0.613	2.454	0.145	1.253	0.774	183.581	3500.51
1979	5.387	1.06471	302.545	7.00777	64.9837	951.483	193.919	32.0763	6.80603	29.6462	28.7887	11.995	1.19995	0	4.02754	0	0	0.0723744	0	0.0543309	0	0	2.88737	274.357	357.266	83.489	13.661	6.228	127	489.712	99.321	0	0.613	2.928	0.161	1.548	0.85	185.022	3502.36
1980	5.332	1.02521	306.61	7.06139	65.1634	967.271	197.263	32.8597	6.9438	29.9493	29.3705	13.4924	1.262	0	4.2595	0	0	0.0188144	0	0.767209	0	0	3.15018	304.998	432.044	95.641	14.194	7.006	121.849	550.707	104.973	0	0.613	3.453	0.185	1.805	0.927	186.506	3503.91
1981	5.168	1.04486	310.013	6.84175	65.0439	980.445	199.799	33.3572	7.021	30.4563	29.9319	11.9955	1.32618	0	4.49216	0	0	0.0662884	0	0.780793	0	0	3.41307	289.529	386.347	104.421	14.121	7.743	110.093	505.097	106.406	0	1.25	3.946	0.206	2.139	1.003	188.038	3505.19
1982	5.127	1.19041	313.415	7.11899	64.9243	993.619	202.334	33.8548	7.09821	30.9634	30.5084	13.4929	1.39249	0	4.72561	0	0	0.0735941	0	0.0815283	0	0	3.67604	252.419	400.317	108.943	13.905	8.399	123.807	505.343	116.821	0	0.961	4.522	0.229	2.645	1.105	189.616	3506.26
1983	5.11	1.22552	316.817	7.2169	64.8048	1006.79	204.87	34.3524	7.17542	31.4705	31.0856	11.996	1.46092	0	4.95987	0	0	0.0734967	0	0.794366	0	0	3.93909	299.092	408.416	120.93	14.252	9.207	135.729	553.718	125.343	0	1.165	5.168	0.249	2.98	1.183	191.243	3507.15
1984	5.29	1.26008	320.22	7.04813	64.6852	1019.97	207.406	34.85	7.25262	31.9775	31.6489	11.9962	1.53147	0	5.19493	0	0	0.0182631	0	0.807943	0	0	3.94032	310.901	432.125	177.397	14.781	9.71	134.867	569.476	130.447	0	1.331	6.032	0.269	3.475	1.262	192.92	3507.88
1985	5.444	1.27534	323.623	7.01692	64.5656	1033.14	209.941	35.3475	7.32983	32.4846	32.1839	11.9965	1.60414	0	5.43079	0	0	-0.0806812	0	0.108674	0	0	4.72727	315.327	407.669	128.622	15.705	9.792	109.714	546.714	138.367	0	1.011	7.083	0.289	3.997	1.355	194.648	3508.5
1986	5.61	1.2872	327.025	7.07049	64.4461	1046.31	212.477	35.8451	7.40703	32.9917	32.6758	13.4939	1.67894	0	5.66746	0	0	0.075292	0	0.821507	0	0	4.99065	388.346	502.712	169.103	16.379	10.152	149.931	539.076	146.048	0	3.575	8.22	0.309	4.579	1.434	196.427	3509
1987	5.753	1.29401	330.427	7.46167	64.3265	1059.49	215.012	36.3427	7.48424	33.4988	33.1102	11.997	1.75587	0	5.90492	0	0	0.177805	0	1.54792	0	0	4.7303	387.277	453.238	250.222	16.667	10.807	115.608	647.608	162.883	0	3.773	9.656	0.329	5.109	1.504	198.259	3509.43
1988	5.964	1.31672	333.83	7.20251	64.207	1072.66	217.548	36.8403	7.56145	34.0058	33.4725	11.9972	1.83492	0	6.14318	0	0	0.181183	0	0.862227	0	0	4.99368	303.816	507.99	245.07	16.593	11.493	135.667	635.816	180.113	0	4.458	11.362	0.349	5.696	1.728	200.146	3509.77
1989	6.089	1.32364	337.232	7.33104	64.0874	1085.84	220.083	37.3378	7.63865	34.5129	33.7481	11.9975	1.91609	0	6.38225	0	0	0.188294	0.945058	0.875792	0	0	5.51905	301.477	385.52	204.109	15.725	12.26	118.146	564.767	186.15	0	6.174	11.605	0.369	5.482	1.73	202.087	3510.06
1990	6.144	1.31948	340.635	7.58568	63.9678	1099.01	222.619	37.8354	7.71586	35.02	33.9226	11.9977	2.07357	0	6.62182	0	0	0.185942	1.01015	0.88921	0	0	5.52077	291.464	405.617	203.131	14.022	12.363	143.171	694.142	195.69	0	11.322	11.702	0.389	5.119	1.73	204.082	3510.3
1991	6.235	1.38098	336.592	7.40236	62.9552	1095.91	221.419	37.8681	7.72475	35.0723	34.026	11.9979	2.37291	0	6.86218	0	0	0.190921	2.17764	0.902612	0.00471002	0	5.7844	190.405	309.884	198.928	13.243	12.135	70.607	573.576	204.801	0	16.556	11.426	0.409	4.094	1.735	206.133	3510.5
1992	6.118	1.30353	332.549	7.79893	61.9425	1092.81	220.22	37.9008	7.73365	35.1247	34.1135	11.9981	2.37315	0	7.10299	0	0	0.2889	4.20799	1.62865	0.00471003	0	5.7862	203.23	303.369	121.343	10.324	12.018	91.022	554.986	185.994	0	20.911	9.343	0.429	2.74	1.715	208.24	3510.66
1993	6.124	1.2981	328.507	7.3131	60.9298	1089.71	219.02	37.9335	7.74254	35.177	34.2079	11.9984	2.37338	0	7.34531	0	0	0.376816	8.41616	2.3686	0.18499	0	6.31181	144.94	228.999	67.857	8.322	11.681	85.436	372.232	188.092	23.101	22.5	10.23	0.509	3.344	1.7	210.402	3510.8
1994	6.242	1.2896	324.464	7.50728	59.9172	1086.61	217.821	37.9662	7.75143	35.2294	34.3318	11.9986	2.37362	0	7.58821	0	0	1.8251	21.3991	3.83476	0.18199	0	5.00424	127.137	232.722	61.065	6.105	11.011	77.289	244.236	179.101	33.844	25.599	9.105	0.589	4.75	1.68	212.619	3510.91
1995	6.372	1.27501	320.421	7.6191	58.9045	1083.51	216.621	37.9989	7.76033	35.2817	34.5081	10.5017	2.37386	0	10.2115	0	0	2.98022	29.7261	6.04096	0.0999948	0	6.05342	119.235	194.71	22.978	4.784	9.083	85.021	201.637	243.238	41.961	24.275	10.035	0.669	3.991	1.3	200.199	3511.01
1996	6.51	1.2511	316.378	7.65206	57.8919	1080.4	215.421	38.0316	7.76922	35.3341	34.9605	11.9991	2.37409	0	10.2482	0	0	3.41888	40.5849	6.14999	0.436978	0	6.05531	115.437	178.907	27.962	2.943	7.019	70.403	89.184	211.181	51.431	26.411	10.743	0.729	2.691	0.85	201.834	3511.08
1997	6.619	1.21814	312.335	7.90975	56.8792	1077.3	214.222	38.0642	7.77812	35.3864	35.8337	11.9993	2.37433	0	10.2844	0	0	5.35405	50.6436	6.25875	0.407978	0	4.48574	95.388	160.981	18.663	1.886	5.429	74.423	62.53	208.614	46.639	22.493	9.909	0.789	2.594	0.7	207.696	3511.08
1998	6.588	1.21484	308.293	7.89573	55.8665	1074.2	213.022	38.0969	7.78701	35.4388	37.0316	11.9996	2.37457	0	10.3207	0.0873054	0	7.20318	59.6521	6.36768	0.927952	0	4.74904	92.401	152.715	14.831	1.199	4.223	84.361	29.412	249.912	58.131	27.683	9.837	0.607	2.491	0.71	206.946	3511.08
1999	6.569	1.18279	304.25	7.52698	54.8539	1071.1	211.823	38.1296	7.79591	35.4911	38.4586	10.5027	2.3748	0	10.3577	0.785737	0	8.15317	67.044	6.47752	1.35393	0	6.32196	94.931	145.169	14.362	0.784	3.32	69.242	24.668	230.91	55.817	28.047	9.806	0.467	2.39	0.631	195.938	3511.08
2000	6.735	1.1488	300.207	7.4566	53.8412	1068	210.623	38.1623	7.8048	35.5435	40.0186	12.0001	2.3749	0.4624	10.3949	4	0	8.5381	75.0393	6.234	1.9509	17.9257	5.5382	99.227	140.712	17.777	0.567	2.609	74.132	18.584	229.638	55.602	26.296	8.834	0.328	2.295	0.562	186.206	3511.08
2001	6.8959	1.132	303.409	7.503	54.4191	1066.74	211.594	38.2888	7.8945	35.7143	40.3916	11.925	2.4345	0.4651	10.4328	5.3987	0.6471	9.0301	84.0409	7.4947	1.6449	19.7183	5.699	81.839	117.202	12.051	0.45	2.069	65.195	13.253	240.392	53.81	28.001	8.669	0.282	2.209	0.5	181.525	3511.08
2002	6.949	1.2317	306.579	7.5487	54.9961	1065.47	212.563	38.4153	7.9842	35.8845	40.7646	11.8481	2.4915	0.4058	10.4708	6.7975	1.294	9.8852	94.7161	8.7389	2.508	21.5109	5.8596	81.408	100.258	6.019	0.423	1.609	69.565	13.487	251.146	52.018	22.43	8.524	0.235	2.131	0.445	181.887	3511.08
2003	7.286	1.2257	309.716	7.5942	55.5716	1064.17	213.531	38.5418	8.0734	36.0543	41.1378	11.7693	2.5463	0.3939	10.5083	8.196	1.9411	12.0788	101.416	9.9776	3.341	23.3035	6.0201	90.865	107.745	2.604	0.37	1.288	69.381	8.444	261.9	50.225	23.232	7.77	0.189	2.057	0.396	177.539	3511.08
2004	7.6719	1.2429	312.824	7.6394	56.1461	1062.86	214.498	38.6684	8.1623	36.2232	41.5107	11.6885	2.599	0.4062	10.5454	9.5947	2.5882	12.5073	113.93	11.2136	4.269	25.096	6.1805	78.182	87.647	5.237	0.378	1.046	67.383	10.874	272.654	48.433	23.348	7.653	0.189	1.987	0.353	174.26	3511.08
2005	7.971	1.1955	315.903	7.6841	56.7195	1061.53	215.463	38.7948	8.2512	36.3917	41.8837	11.6059	2.6494	0.4358	10.8116	10.9935	3.2351	13.7591	120.933	12.4483	4.8901	26.8885	6.3407	49.49	51.552	0.854	0.227	0.785	65	10.874	283.408	46.641	26.458	7.518	0.189	1.92	0.314	168.841	3511.08
2006	8.1427	1.1676	320.061	7.715	56.545	1055.37	215.8	38.883	8.3258	36.4361	42.2406	12.2669	3.1051	0.4427	10.5529	12.3831	3.8803	16.2358	121.075	14.293	5.6938	31.7215	6.4709	48.471	49.808	1.119	0.136	0.588	58.5	10.874	296.002	48.231	34.767	6.992	0.049	1.834	0.279	167.857	3511.08
2007	8.3136	1.14	324.213	7.7459	56.3678	1049.21	216.138	38.97	8.4003	36.4792	42.5977	12.9284	3.5603	0.4492	10.2947	13.7731	4.5246	18.7259	129.622	16.1321	6.5045	36.5545	6.6013	47.083	46.366	0.911	0.082	0.441	52	10.874	308.596	49.821	39.869	6.502	0.049	1.752	0.249	167.857	3511.08
2008	8.48287	1.11217	328.349	7.77663	56.1845	1043.07	216.475	39.0544	8.47453	36.52	42.9544	13.5912	4.01497	0.455033	10.0372	15.1628	5.1677	21.2435	138.762	17.9599	7.32947	41.3875	6.60853	45.74	43.216	0.806	0.049	0.331	45.5	10.874	321.19	51.412	39.099	6.047	0.049	1.675	0.221	167.857	3511.08
2009	8.65213	1.08433	332.486	7.80737	56.0013	1036.92	216.812	39.1389	8.54877	36.5609	43.3111	14.254	4.46963	0.460867	9.77977	16.5524	5.8108	23.7611	147.903	19.7877	8.15443	46.2204	6.61577	44.442	40.334	0.754	0.029	0.248	39	10.874	333.784	53.002	38.069	5.624	0.049	1.601	0.197	167.857	3511.08
2010	8.8214	1.0565	336.623	7.8381	55.818	1030.77	217.149	39.2233	8.623	36.6017	43.6678	14.9168	4.9243	0.4667	9.5223	17.9421	6.4539	26.2787	157.043	21.6155	8.9794	51.0534	6.623	42.976	36.906	0.377	0.018	0.186	32.5	7.266	346.378	54.593	36.801	5.23	0	1.521	0.175	167.857	3511.08
2011	8.86803	1.04813	328.637	7.79063	54.6575	1025.96	216.764	38.9619	8.5989	36.6172	44.0735	14.6468	4.9717	0.43848	8.68531	22.2121	6.53107	32.5857	158.726	25.8914	8.24224	49.1802	6.18511	41.557	33.769	0.189	0.011	0.14	26	7.266	344.714	54.867	35.314	4.864	0	1.445	0.156	167.857	3511.08
2012	8.91466	1.03976	320.652	7.74316	53.497	1021.15	216.378	38.7005	8.5748	36.6327	44.4791	14.3768	5.0191	0.41026	7.84832	26.4821	6.60824	38.8928	160.41	30.1672	7.50508	47.307	5.74722	40.186	30.898	0.094	0.006	0.105	19.5	7.266	343.051	55.141	33.625	4.524	0	1.373	0.139	167.857	3511.08
2013	8.96129	1.03139	312.666	7.69569	52.3365	1016.33	215.992	38.4392	8.5507	36.6482	44.8848	14.1068	5.0665	0.38204	7.01133	30.752	6.68541	45.1998	162.094	34.4431	6.76792	45.4338	5.30933	38.86	28.272	0.047	0.004	0.079	13	7.266	341.387	55.414	31.75	4.207	0	1.304	0.124	167.857	3511.08
2014	9.00792	1.02302	304.681	7.64822	51.176	1011.52	215.606	38.1778	8.5266	36.6637	45.2904	13.8368	5.1139	0.35382	6.17434	35.022	6.76258	51.5068	163.777	38.7189	6.03076	43.5606	4.87144	37.578	25.869	0.024	0.002	0.059	6.5	7.266	339.724	55.688	29.705	3.913	0	1.239	0.11	167.857	3511.08
2015	9.05455	1.01465	296.695	7.60075	50.0155	1006.71	215.22	37.9164	8.5025	36.6791	45.6961	13.5668	5.1613	0.3256	5.33735	39.292	6.83975	57.8139	165.461	42.9948	5.2936	41.6874	4.43355	36.338	23.67	0.012	0.001	0.044	0	0	338.06	55.962	27.502	3.639	0	1.177	0.098	155.925	3511.08
2016	9.10118	1.00628	288.71	7.55328	48.8549	1001.9	214.834	37.655	8.4784	36.6946	46.1018	13.2968	5.2087	0.29738	4.50036	43.562	6.91692	64.1209	167.145	47.2707	4.55644	39.8143	3.99566	35.138	21.658	0.006	0.001	0.033	0	0	336.397	56.236	25.476	3.384	0	1.118	0.087	155.925	3511.08
2017	9.14781	0.99791	280.724	7.50581	47.6944	997.084	214.448	37.3936	8.4543	36.7101	46.5074	13.0268	5.2561	0.26916	3.66337	47.832	6.99409	70.4279	168.828	51.5465	3.81928	37.9411	3.55777	33.979	19.817	0.003	0	0.025	0	0	334.733	56.51	23.611	3.147	0	1.062	0.078	155.925	3511.08
2018	9.19444	0.98954	272.739	7.45834	46.5339	992.272	214.062	37.1323	8.4302	36.7256	46.9131	12.7568	5.3035	0.24094	2.82638	52.1019	7.07126	76.7349	170.512	55.8224	3.08212	36.0679	3.11988	32.858	18.133	0.001	0	0.019	0	0	333.07	56.784	21.896	2.927	0	1.009	0.069	155.925	3511.08
2019	9.24107	0.98117	264.753	7.41087	45.3734	987.459	213.676	36.8709	8.4061	36.7411	47.3187	12.4868	5.3509	0.21272	1.98939	56.3719	7.14843	83.042	172.195	60.0982	2.34496	34.1947	2.68199	31.773	16.591	0.001	0	0.014	0	0	331.406	57.058	20.318	2.722	0	0.959	0.061	155.925	3511.08
2020	9.2877	0.9728	256.768	7.3634	44.2129	982.647	213.291	36.6095	8.382	36.7566	47.7244	12.2168	5.3983	0.1845	1.1524	60.6419	7.2256	89.349	173.879	64.3741	1.6078	32.3215	2.2441	30.725	15.181	0	0	0.01	0	0	329.743	57.332	18.867	2.531	0	0.911	0.055	155.925	3511.08
2021	9.07462	0.95441	254.654	7.35756	42.7522	976.979	212.022	36.105	8.23806	36.6296	48.0643	11.6646	5.04704	0.17723	1.1063	61.7812	7.31559	91.304	175.91	65.4922	1.52656	29.4068	2.21491	29.711	13.891	0	0	0.008	0	0	313.814	56.425	17.531	2.354	0	0.865	0.049	155.925	3511.08
2022	8.86154	0.93602	252.541	7.35172	41.2915	971.311	210.753	35.6006	8.09412	36.5025	48.4042	11.1124	4.69578	0.16996	1.0602	62.9206	7.40558	93.259	177.94	66.6103	1.44532	26.4921	2.18572	28.73	12.71	0	0	0.006	0	0	297.886	55.519	16.302	2.189	0	0.822	0.043	155.925	3511.08
2023	8.64846	0.91763	250.427	7.34588	39.8308	965.643	209.484	35.0961	7.95018	36.3755	48.7441	10.5602	4.34452	0.16269	1.0141	64.06	7.49557	95.214	179.971	67.7285	1.36408	23.5773	2.15653	27.782	11.63	0	0	0.004	0	0	281.957	54.612	15.172	2.036	0	0.781	0.039	155.925	3511.08
2024	8.43538	0.89924	248.314	7.34004	38.3701	959.975	208.215	34.5917	7.80624	36.2484	49.084	10.008	3.99326	0.15542	0.968	65.1993	7.58556	97.169	182.002	68.8466	1.28284	20.6626	2.12734	26.865	10.641	0	0	0.003	0	0	266.029	53.705	14.132	1.894	0	0.742	0.034	155.925	3511.08
2025	8.2223	0.88085	246.2	7.3342	36.9094	954.308	206.946	34.0872	7.6623	36.1213	49.4239	9.45585	3.642	0.14815	0.9219	66.3387	7.67555	99.124	184.032	69.9647	1.2016	17.7479	2.09815	25.979	9.737	0	0	0.002	0	0	250.101	52.798	13.175	1.761	0	0.705	0.031	155.925	3511.08
2026	8.00922	0.86246	244.086	7.32836	35.4488	948.64	205.677	33.5827	7.51836	35.9943	49.7638	8.90366	3.29074	0.14088	0.8758	67.478	7.76554	101.079	186.063	71.0828	1.12036	14.8332	2.06896	25.122	8.909	0	0	0.002	0	0	234.172	51.892	12.295	1.638	0	0.669	0.027	155.925	3511.08
2027	7.79614	0.84407	241.973	7.32252	33.9881	942.972	204.408	33.0783	7.37442	35.8672	50.1037	8.35147	2.93948	0.13361	0.8297	68.6174	7.85553	103.034	188.094	72.2009	1.03912	11.9185	2.03977	24.293	8.152	0	0	0.001	0	0	218.244	50.985	11.485	1.523	0	0.636	0.024	155.925	3511.08
2028	7.58306	0.82568	239.859	7.31668	32.5274	937.304	203.14	32.5738	7.23048	35.7402	50.4436	7.79928	2.58822	0.12634	0.7836	69.7567	7.94552	104.989	190.124	73.3191	0.95788	9.00374	2.01058	23.491	7.459	0	0	0.001	0	0	202.315	50.078	10.74	1.417	0	0.604	0.022	155.925	3511.08
2029	7.36998	0.80729	237.746	7.31084	31.0667	931.636	201.871	32.0694	7.08654	35.6131	50.7835	7.24709	2.23696	0.11907	0.7375	70.8961	8.03551	106.944	192.155	74.4372	0.87664	6.08902	1.98139	22.716	6.825	0	0	0.001	0	0	186.387	49.172	10.055	1.317	0	0.574	0.019	155.925	3511.08
2030	7.1569	0.7889	235.632	7.305	29.606	925.968	200.602	31.5649	6.9426	35.4861	51.1234	6.6949	1.8857	0.1118	0.6914	72.0354	8.1255	108.899	194.186	75.5553	0.7954	3.1743	1.9522	21.966	6.245	0	0	0.001	0	0	170.458	48.265	9.424	1.225	0	0.545	0.017	155.925	3511.08
2031	6.8947	0.75891	234.572	7.29221	28.6345	921.166	199.767	31.409	6.81693	35.1389	51.3431	6.53063	1.80589	0.1119	0.66362	72.903	8.24943	110.505	196.05	76.3722	0.80448	2.85687	1.91374	21.241	5.714	0	0	0	0	0	158.161	46.405	8.826	1.139	0	0.518	0.015	155.925	3511.08
2032	6.6325	0.72892	233.511	7.27942	27.6629	916.363	198.932	31.2532	6.69126	34.7917	51.5628	6.36636	1.72608	0.112	0.63584	73.7707	8.37336	112.112	197.914	77.1891	0.81356	2.53944	1.87528	20.54	5.228	0	0	0	0	0	145.863	44.545	8.259	1.06	0	0.492	0.013	155.925	3511.08
2033	6.3703	0.69893	232.451	7.26663	26.6914	911.56	198.097	31.0973	6.56559	34.4445	51.7824	6.20209	1.64627	0.1121	0.60806	74.6383	8.49729	113.718	199.779	78.006	0.82264	2.22201	1.83682	19.862	4.784	0	0	0	0	0	133.566	42.685	7.72	0.985	0	0.467	0.012	155.925	3511.08
2034	6.1081	0.66894	231.391	7.25384	25.7198	906.757	197.262	30.9415	6.43992	34.0973	52.0021	6.03782	1.56646	0.1122	0.58028	75.5059	8.62122	115.324	201.643	78.8229	0.83172	1.90458	1.79836	19.207	4.377	0	0	0	0	0	121.269	40.825	7.207	0.916	0	0.444	0.011	155.925	3511.08
2035	5.8459	0.63895	230.33	7.24105	24.7483	901.954	196.427	30.7856	6.31425	33.7501	52.2218	5.87355	1.48665	0.1123	0.5525	76.3735	8.74515	116.93	203.507	79.6398	0.8408	1.58715	1.7599	18.573	4.005	0	0	0	0	0	108.971	38.965	6.717	0.852	0	0.422	0.01	155.925	3511.08
2036	5.5837	0.60896	229.27	7.22826	23.7768	897.152	195.592	30.6297	6.18858	33.4028	52.4415	5.70928	1.40684	0.1124	0.52472	77.2412	8.86908	118.536	205.372	80.4567	0.84988	1.26972	1.72144	17.96	3.665	0	0	0	0	0	96.674	37.105	6.249	0.793	0	0.401	0.008	155.925	3511.08
2037	5.3215	0.57897	228.21	7.21547	22.8052	892.349	194.757	30.4739	6.06291	33.0556	52.6612	5.54501	1.32703	0.1125	0.49694	78.1088	8.99301	120.143	207.236	81.2736	0.85896	0.95229	1.68298	17.368	3.353	0	0	0	0	0	84.377	35.244	5.801	0.737	0	0.381	0.008	155.925	3511.08
2038	5.0593	0.54898	227.149	7.20268	21.8337	887.546	193.922	30.318	5.93724	32.7084	52.8808	5.38074	1.24722	0.1126	0.46916	78.9764	9.11694	121.749	209.1	82.0905	0.86804	0.63486	1.64452	16.794	3.068	0	0	0	0	0	72.079	33.384	5.372	0.686	0	0.362	0.007	155.925	3511.08
2039	4.7971	0.51899	226.089	7.18989	20.8621	882.743	193.087	30.1622	5.81157	32.3612	53.1005	5.21647	1.16741	0.1127	0.44138	79.8441	9.24087	123.355	210.965	82.9074	0.87712	0.31743	1.60606	16.24	2.807	0	0	0	0	0	59.782	31.524	4.96	0.638	0	0.344	0.006	155.925	3511.08
2040	4.5349	0.489	225.029	7.1771	19.8906	877.94	192.252	30.0063	5.6859	32.014	53.3202	5.0522	1.0876	0.1128	0.4136	80.7117	9.3648	124.961	212.829	83.7243	0.8862	0	1.5676	15.704	2.569	0	0	0	0	0	47.485	29.664	4.563	0.593	0	0.326	0.005	155.925	3511.08
2041	4.39997	0.46022	221.455	7.08404	19.459	872.168	190.878	29.896	5.61136	31.8099	53.5418	4.81083	1.02596	0.11238	0.39687	80.1013	9.53783	124.379	211.381	83.0608	0.82716	0	1.47407	15.186	2.35	0	0	0	0	0	43.916	28.474	4.198	0.551	0	0.31	0.005	155.925	3511.08
2042	4.26504	0.43144	217.882	6.99098	19.0274	866.395	189.504	29.7857	5.53682	31.6058	53.7633	4.56946	0.96432	0.11196	0.38014	79.4908	9.71086	123.796	209.934	82.3973	0.76812	0	1.38054	14.685	2.151	0	0	0	0	0	40.347	27.284	3.862	0.513	0	0.295	0.004	155.925	3511.08
2043	4.13011	0.40266	214.309	6.89792	18.5958	860.622	188.13	29.6754	5.46228	31.4017	53.9849	4.32809	0.90268	0.11154	0.36341	78.8804	9.88389	123.214	208.486	81.7337	0.70908	0	1.28701	14.2	1.968	0	0	0	0	0	36.778	26.093	3.553	0.477	0	0.28	0.004	155.925	3511.08
2044	3.99518	0.37388	210.736	6.80486	18.1642	854.849	186.756	29.5651	5.38774	31.1976	54.2064	4.08672	0.84104	0.11112	0.34668	78.27	10.0569	122.632	207.038	81.0702	0.65004	0	1.19348	13.732	1.801	0	0	0	0	0	33.209	24.903	3.269	0.444	0	0.266	0.003	155.925	3511.08
2045	3.86025	0.3451	207.163	6.7118	17.7325	849.077	185.382	29.4548	5.3132	30.9934	54.428	3.84535	0.7794	0.1107	0.32995	77.6595	10.23	122.049	205.59	80.4067	0.591	0	1.09995	13.279	1.648	0	0	0	0	0	29.64	23.713	3.007	0.413	0	0.253	0.003	155.925	3511.08
2046	3.72532	0.31632	203.59	6.61874	17.3009	843.304	184.007	29.3444	5.23866	30.7893	54.6495	3.60398	0.71776	0.11028	0.31322	77.0491	10.403	121.467	204.142	79.7432	0.53196	0	1.00642	12.84	1.507	0	0	0	0	0	26.072	22.522	2.767	0.384	0	0.24	0.003	155.925	3511.08
2047	3.59039	0.28754	200.017	6.52568	16.8693	837.531	182.633	29.2341	5.16412	30.5852	54.871	3.36261	0.65612	0.10986	0.29649	76.4387	10.576	120.884	202.694	79.0797	0.47292	0	0.91289	12.417	1.379	0	0	0	0	0	22.503	21.332	2.545	0.357	0	0.228	0.002	155.925	3511.08
2048	3.45546	0.25876	196.444	6.43262	16.4377	831.758	181.259	29.1238	5.08958	30.3811	55.0926	3.12124	0.59448	0.10944	0.27976	75.8283	10.749	120.302	201.247	78.4161	0.41388	0	0.81936	12.007	1.262	0	0	0	0	0	18.934	20.142	2.342	0.332	0	0.217	0.002	155.925	3511.08
2049	3.32053	0.22998	192.871	6.33956	16.0061	825.985	179.885	29.0135	5.01504	30.177	55.3141	2.87987	0.53284	0.10902	0.26303	75.2178	10.9221	119.719	199.799	77.7526	0.35484	0	0.72583	11.611	1.155	0	0	0	0	0	15.365	18.951	2.154	0.309	0	0.206	0.002	155.925	3511.08
2050	3.1856	0.2012	189.298	6.2465	15.5745	820.213	178.511	28.9032	4.9405	29.9729	55.5357	2.6385	0.4712	0.1086	0.2463	74.6074	11.0951	119.137	198.351	77.0891	0.2958	0	0.6323	11.227	1.057	0	0	0	0	0	11.796	17.761	1.982	0.287	0	0.195	0.002	155.925	3511.08
2051	3.00896	0.2426	187.015	6.19366	15.387	816.11	177.301	28.7325	4.88943	29.9464	55.8339	2.59225	0.45634	0.10848	0.23542	75.5552	11.0969	121.103	201.152	78.0395	0.28044	0	0.61892	10.857	0.967	0	0	0	0	0	10.91	17.048	1.824	0.267	0	0.186	0.001	155.925	3511.08
2052	2.83232	0.284	184.732	6.14082	15.1996	812.008	176.09	28.5618	4.83836	29.9199	56.132	2.546	0.44148	0.10836	0.22454	76.503	11.0987	123.069	203.952	78.99	0.26508	0	0.60554	10.499	0.885	0	0	0	0	0	10.023	16.336	1.678	0.248	0	0.176	0.001	155.925	3511.08
2053	2.65568	0.3254	182.449	6.08798	15.0121	807.906	174.88	28.3911	4.78729	29.8934	56.4302	2.49975	0.42662	0.10824	0.21366	77.4509	11.1005	125.035	206.753	79.9404	0.24972	0	0.59216	10.152	0.809	0	0	0	0	0	9.137	15.623	1.543	0.231	0	0.168	0.001	155.925	3511.08
2054	2.47904	0.3668	180.166	6.03514	14.8246	803.803	173.67	28.2204	4.73622	29.8669	56.7284	2.4535	0.41176	0.10812	0.20278	78.3987	11.1023	127.001	209.553	80.8908	0.23436	0	0.57878	9.817	0.741	0	0	0	0	0	8.25	14.91	1.42	0.215	0	0.159	0.001	155.925	3511.08
2055	2.3024	0.4082	177.883	5.9823	14.6372	799.701	172.459	28.0497	4.68515	29.8404	57.0266	2.40725	0.3969	0.108	0.1919	79.3465	11.1041	128.967	212.354	81.8413	0.219	0	0.5654	9.493	0.678	0	0	0	0	0	7.363	14.198	1.306	0.2	0	0.151	0.001	155.925	3511.08
2056	2.12576	0.4496	175.6	5.92946	14.4497	795.598	171.249	27.8791	4.63408	29.8139	57.3247	2.361	0.38204	0.10788	0.18102	80.2943	11.1058	130.933	215.154	82.7917	0.20364	0	0.55202	9.18	0.62	0	0	0	0	0	6.477	13.485	1.202	0.186	0	0.144	0.001	155.925	3511.08
2057	1.94912	0.491	173.317	5.87662	14.2622	791.496	170.039	27.7084	4.58301	29.7874	57.6229	2.31475	0.36718	0.10776	0.17014	81.2421	11.1076	132.899	217.955	83.7421	0.18828	0	0.53864	8.877	0.567	0	0	0	0	0	5.59	12.772	1.106	0.173	0	0.136	0.001	155.925	3511.08
2058	1.77248	0.5324	171.034	5.82378	14.0747	787.394	168.828	27.5377	4.53194	29.7609	57.9211	2.2685	0.35232	0.10764	0.15926	82.19	11.1094	134.865	220.756	84.6925	0.17292	0	0.52526	8.584	0.519	0	0	0	0	0	4.704	12.06	1.017	0.161	0	0.13	0.001	155.925	3511.08
2059	1.59584	0.5738	168.751	5.77094	13.8873	783.291	167.618	27.367	4.48087	29.7344	58.2192	2.22225	0.33746	0.10752	0.14838	83.1378	11.1112	136.831	223.556	85.643	0.15756	0	0.51188	8.301	0.475	0	0	0	0	0	3.817	11.347	0.936	0.149	0	0.123	0.001	155.925	3511.08
2060	1.4192	0.6152	166.468	5.7181	13.6998	779.189	166.408	27.1963	4.4298	29.7079	58.5174	2.176	0.3226	0.1074	0.1375	84.0856	11.113	138.797	226.357	86.5934	0.1422	0	0.4985	8.027	0.435	0	0	0	0	0	2.93	10.634	0.861	0.139	0	0.117	0.001	155.925	3511.08
2061	1.28885	0.6075	165.952	5.7204	13.5164	772.519	164.797	26.8771	4.38112	29.5433	58.8098	2.17216	0.31644	0.10732	0.13105	85.0651	11.1064	140.836	229.306	87.4847	0.14112	0	0.49048	7.762	0.398	0	0	0	0	0	2.71	10.207	0.792	0.129	0	0.111	0	155.925	3511.08
2062	1.1585	0.5998	165.436	5.7227	13.3331	765.849	163.186	26.5579	4.33244	29.3786	59.1022	2.16832	0.31028	0.10724	0.1246	86.0445	11.0998	142.874	232.255	88.3761	0.14004	0	0.48246	7.506	0.364	0	0	0	0	0	2.49	9.781	0.729	0.12	0	0.106	0	155.925	3511.08
2063	1.02815	0.5921	164.92	5.725	13.1497	759.18	161.575	26.2387	4.28376	29.214	59.3946	2.16448	0.30412	0.10716	0.11815	87.024	11.0932	144.913	235.204	89.2674	0.13896	0	0.47444	7.258	0.333	0	0	0	0	0	2.27	9.354	0.67	0.112	0	0.1	0	155.925	3511.08
2064	0.8978	0.5844	164.404	5.7273	12.9664	752.51	159.965	25.9195	4.23508	29.0494	59.687	2.16064	0.29796	0.10708	0.1117	88.0034	11.0866	146.951	238.153	90.1587	0.13788	0	0.46642	7.019	0.305	0	0	0	0	0	2.049	8.927	0.617	0.104	0	0.095	0	155.925	3511.08
2065	0.76745	0.5767	163.888	5.7296	12.783	745.84	158.354	25.6003	4.1864	28.8848	59.9794	2.1568	0.2918	0.107	0.10525	88.9829	11.08	148.99	241.102	91.05	0.1368	0	0.4584	6.787	0.279	0	0	0	0	0	1.829	8.501	0.567	0.097	0	0.091	0	155.925	3511.08
2066	0.6371	0.569	163.372	5.7319	12.5996	739.17	156.743	25.2811	4.13772	28.7201	60.2719	2.15296	0.28564	0.10692	0.0988	89.9624	11.0735	151.028	244.051	91.9414	0.13572	0	0.45038	6.563	0.255	0	0	0	0	0	1.609	8.074	0.522	0.09	0	0.086	0	155.925	3511.08
2067	0.50675	0.5613	162.856	5.7342	12.4163	732.501	155.132	24.9619	4.08904	28.5555	60.5643	2.14912	0.27948	0.10684	0.09235	90.9418	11.0669	153.067	247	92.8327	0.13464	0	0.44236	6.346	0.233	0	0	0	0	0	1.389	7.647	0.48	0.084	0	0.082	0	155.925	3511.08
2068	0.3764	0.5536	162.34	5.7365	12.2329	725.831	153.522	24.6427	4.04036	28.3909	60.8567	2.14528	0.27332	0.10676	0.0859	91.9213	11.0603	155.105	249.949	93.724	0.13356	0	0.43434	6.137	0.214	0	0	0	0	0	1.168	7.221	0.442	0.078	0	0.078	0	155.925	3511.08
2069	0.24605	0.5459	161.824	5.7388	12.0496	719.161	151.911	24.3235	3.99168	28.2262	61.1491	2.14144	0.26716	0.10668	0.07945	92.9007	11.0537	157.144	252.898	94.6154	0.13248	0	0.42632	5.935	0.195	0	0	0	0	0	0.948	6.794	0.407	0.072	0	0.074	0	155.925	3511.08
2070	0.1157	0.5382	161.308	5.7411	11.8662	712.491	150.3	24.0043	3.943	28.0616	61.4415	2.1376	0.261	0.1066	0.073	93.8802	11.0471	159.182	255.846	95.5067	0.1314	0	0.4183	5.739	0.179	0	0	0	0	0	0.728	6.367	0.374	0.067	0	0.07	0	155.925	3511.08
2071	0.06083	0.53938	160.685	5.72833	11.6551	707.616	149.132	23.6664	3.91608	27.9425	61.6359	2.06823	0.25002	0.10626	0.06942	94.1193	11.0381	159.921	256.832	95.537	0.1303	0	0.40805	5.549	0.164	0	0	0	0	0	0.673	6.112	0.344	0.063	0	0.067	0	155.925	3511.08
2072	0.00596	0.54056	160.062	5.71556	11.4439	702.74	147.965	23.3286	3.88916	27.8234	61.8303	1.99886	0.23904	0.10592	0.06584	94.3584	11.0291	160.66	257.817	95.5673	0.1292	0	0.3978	5.366	0.15	0	0	0	0	0	0.619	5.856	0.317	0.058	0	0.063	0	155.925	3511.08
2073	-0.04891	0.54174	159.439	5.70279	11.2328	697.864	146.797	22.9907	3.86224	27.7043	62.0247	1.92949	0.22806	0.10558	0.06226	94.5975	11.0201	161.398	258.803	95.5976	0.1281	0	0.38755	5.189	0.137	0	0	0	0	0	0.564	5.601	0.291	0.054	0	0.06	0	155.925	3511.08
2074	-0.10378	0.54292	158.815	5.69002	11.0216	692.988	145.629	22.6528	3.83532	27.5852	62.2191	1.86012	0.21708	0.10524	0.05868	94.8366	11.0111	162.137	259.788	95.6279	0.127	0	0.3773	5.018	0.125	0	0	0	0	0	0.509	5.345	0.268	0.05	0	0.057	0	155.925	3511.08
2075	-0.15865	0.5441	158.192	5.67725	10.8105	688.112	144.461	22.3149	3.8084	27.4661	62.4134	1.79075	0.2061	0.1049	0.0551	95.0757	11.0021	162.875	260.773	95.6582	0.1259	0	0.36705	4.852	0.115	0	0	0	0	0	0.454	5.09	0.247	0.047	0	0.054	0	155.925	3511.08
2076	-0.21352	0.54528	157.569	5.66448	10.5994	683.237	143.293	21.9771	3.78148	27.3471	62.6078	1.72138	0.19512	0.10456	0.05152	95.3148	10.993	163.614	261.759	95.6886	0.1248	0	0.3568	4.692	0.105	0	0	0	0	0	0.4	4.834	0.227	0.043	0	0.052	0	155.925	3511.08
2077	-0.26839	0.54646	156.946	5.65171	10.3882	678.361	142.125	21.6392	3.75456	27.228	62.8022	1.65201	0.18414	0.10422	0.04794	95.5539	10.984	164.353	262.744	95.7189	0.1237	0	0.34655	4.537	0.096	0	0	0	0	0	0.345	4.579	0.209	0.04	0	0.049	0	155.925	3511.08
2078	-0.32326	0.54764	156.322	5.63894	10.1771	673.485	140.957	21.3013	3.72764	27.1089	62.9966	1.58264	0.17316	0.10388	0.04436	95.793	10.975	165.091	263.729	95.7492	0.1226	0	0.3363	4.388	0.088	0	0	0	0	0	0.29	4.323	0.192	0.038	0	0.046	0	155.925	3511.08
2079	-0.37813	0.54882	155.699	5.62617	9.96594	668.609	139.79	20.9635	3.70072	26.9898	63.191	1.51327	0.16218	0.10354	0.04078	96.0321	10.966	165.83	264.715	95.7795	0.1215	0	0.32605	4.243	0.08	0	0	0	0	0	0.236	4.068	0.177	0.035	0	0.044	0	155.925	3511.08
2080	-0.433	0.55	155.076	5.6134	9.7548	663.734	138.622	20.6256	3.6738	26.8707	63.3854	1.4439	0.1512	0.1032	0.0372	96.2712	10.957	166.569	265.7	95.8098	0.1204	0	0.3158	4.103	0.074	0	0	0	0	0	0.181	3.812	0.162	0.033	0	0.042	0	155.925	3511.08
2081	-0.47674	0.55524	154.412	5.59813	9.56188	661.045	137.884	20.4193	3.66094	26.8234	63.5787	1.41908	0.14528	0.1026	0.03348	95.7644	10.9366	166.067	264.815	95.1051	0.11903	0	0.30275	3.967	0.067	0	0	0	0	0	0.167	3.659	0.149	0.03	0	0.04	0	155.925	3511.08
2082	-0.52048	0.56048	153.749	5.58286	9.36896	658.357	137.146	20.2129	3.64808	26.7761	63.7721	1.39426	0.13936	0.102	0.02976	95.2577	10.9161	165.566	263.93	94.4004	0.11766	0	0.2897	3.836	0.062	0	0	0	0	0	0.154	3.506	0.138	0.028	0	0.038	0	155.925	3511.08
2083	-0.56422	0.56572	153.085	5.56759	9.17604	655.668	136.408	20.0066	3.63522	26.7289	63.9654	1.36944	0.13344	0.1014	0.02604	94.7509	10.8957	165.065	263.044	93.6957	0.11629	0	0.27665	3.71	0.056	0	0	0	0	0	0.14	3.353	0.127	0.026	0	0.036	0	155.925	3511.08
2084	-0.60796	0.57096	152.421	5.55232	8.98312	652.98	135.67	19.8003	3.62236	26.6816	64.1587	1.34462	0.12752	0.1008	0.02232	94.2442	10.8753	164.564	262.159	92.991	0.11492	0	0.2636	3.587	0.052	0	0	0	0	0	0.126	3.2	0.116	0.024	0	0.034	0	155.925	3511.08
2085	-0.6517	0.5762	151.757	5.53705	8.7902	650.291	134.932	19.5939	3.6095	26.6343	64.3521	1.3198	0.1216	0.1002	0.0186	93.7374	10.8549	164.063	261.274	92.2863	0.11355	0	0.25055	3.469	0.047	0	0	0	0	0	0.113	3.047	0.107	0.023	0	0.032	0	155.925	3511.08
2086	-0.69544	0.58144	151.094	5.52178	8.59728	647.603	134.194	19.3876	3.59664	26.587	64.5454	1.29498	0.11568	0.0996	0.01488	93.2306	10.8344	163.561	260.389	91.5816	0.11218	0	0.2375	3.355	0.043	0	0	0	0	0	0.099	2.894	0.099	0.021	0	0.031	0	155.925	3511.08
2087	-0.73918	0.58668	150.43	5.50651	8.40436	644.914	133.456	19.1813	3.58378	26.5397	64.7387	1.27016	0.10976	0.099	0.01116	92.7239	10.814	163.06	259.504	90.8769	0.11081	0	0.22445	3.244	0.039	0	0	0	0	0	0.086	2.741	0.091	0.02	0	0.029	0	155.925	3511.08
2088	-0.78292	0.59192	149.766	5.49124	8.21144	642.226	132.718	18.975	3.57092	26.4925	64.932	1.24534	0.10384	0.0984	0.00744	92.2171	10.7936	162.559	258.618	90.1722	0.10944	0	0.2114	3.137	0.036	0	0	0	0	0	0.072	2.588	0.083	0.018	0	0.028	0	155.925	3511.08
2089	-0.82666	0.59716	149.102	5.47597	8.01852	639.537	131.98	18.7686	3.55806	26.4452	65.1254	1.22052	0.09792	0.0978	0.00372	91.7104	10.7731	162.058	257.733	89.4675	0.10807	0	0.19835	3.033	0.033	0	0	0	0	0	0.059	2.435	0.077	0.017	0	0.026	0	155.925	3511.08
2090	-0.8704	0.6024	148.439	5.4607	7.8256	636.849	131.242	18.5623	3.5452	26.3979	65.3187	1.1957	0.092	0.0972	0	91.2036	10.7527	161.556	256.848	88.7628	0.1067	0	0.1853	2.933	0.03	0	0	0	0	0	0.045	2.283	0.071	0.016	0	0.025	0	155.925	3511.08
2091	-0.87644	0.59329	147.8	5.44286	7.68856	633.948	130.669	18.305	3.52646	26.2912	65.5106	1.18533	0.09137	0.09635	0	90.2059	10.718	160.222	254.702	87.6322	0.10515	0	0.17119	2.836	0.028	0	0	0	0	0	0.042	2.191	0.065	0.015	0	0.024	0	155.925	3511.08
2092	-0.88248	0.58418	147.161	5.42502	7.55152	631.048	130.096	18.0477	3.50772	26.1845	65.7026	1.17496	0.09074	0.0955	0	89.2083	10.6833	158.888	252.557	86.5017	0.1036	0	0.15708	2.743	0.025	0	0	0	0	0	0.038	2.099	0.06	0.014	0	0.023	0	155.925	3511.08
2093	-0.88852	0.57507	146.523	5.40718	7.41448	628.147	129.522	17.7905	3.48898	26.0779	65.8945	1.16459	0.09011	0.09465	0	88.2106	10.6485	157.554	250.411	85.3712	0.10205	0	0.14297	2.652	0.023	0	0	0	0	0	0.035	2.008	0.055	0.013	0	0.022	0	155.925	3511.08
2094	-0.89456	0.56596	145.884	5.38934	7.27744	625.247	128.949	17.5332	3.47024	25.9712	66.0865	1.15422	0.08948	0.0938	0	87.2129	10.6138	156.219	248.266	84.2406	0.1005	0	0.12886	2.565	0.021	0	0	0	0	0	0.031	1.916	0.051	0.012	0	0.02	0	155.925	3511.08
2095	-0.9006	0.55685	145.246	5.3715	7.1404	622.346	128.376	17.2759	3.4515	25.8645	66.2785	1.14385	0.08885	0.09295	0	86.2152	10.5791	154.885	246.12	83.1101	0.09895	0	0.11475	2.48	0.019	0	0	0	0	0	0.028	1.825	0.047	0.011	0	0.019	0	155.925	3511.08
2096	-0.90664	0.54774	144.607	5.35366	7.00336	619.446	127.803	17.0186	3.43276	25.7578	66.4704	1.13348	0.08822	0.0921	0	85.2176	10.5444	153.551	243.975	81.9795	0.0974	0	0.10064	2.398	0.018	0	0	0	0	0	0.025	1.733	0.043	0.01	0	0.018	0	155.925	3511.08
2097	-0.91268	0.53863	143.969	5.33582	6.86632	616.545	127.23	16.7613	3.41402	25.6511	66.6624	1.12311	0.08759	0.09125	0	84.2199	10.5097	152.217	241.829	80.849	0.09585	0	0.08653	2.319	0.016	0	0	0	0	0	0.021	1.641	0.039	0.009	0	0.018	0	155.925	3511.08
2098	-0.91872	0.52952	143.33	5.31798	6.72928	613.645	126.657	16.5041	3.39528	25.5445	66.8543	1.11274	0.08696	0.0904	0	83.2222	10.4749	150.882	239.684	79.7184	0.0943	0	0.07242	2.243	0.015	0	0	0	0	0	0.018	1.55	0.036	0.009	0	0.017	0	155.925	3511.08
2099	-0.92476	0.52041	142.691	5.30014	6.59224	610.744	126.084	16.2468	3.37654	25.4378	67.0463	1.10237	0.08633	0.08955	0	82.2246	10.4402	149.548	237.538	78.5879	0.09275	0	0.05831	2.169	0.014	0	0	0	0	0	0.015	1.458	0.033	0.008	0	0.016	0	155.925	3511.08
2100	-0.9308	0.5113	142.053	5.2823	6.4552	607.844	125.51	15.9895	3.3578	25.3311	67.2382	1.092	0.0857	0.0887	0	81.2269	10.4055	148.214	235.393	77.4573	0.0912	0	0.0442	2.097	0.012	0	0	0	0	0	0.011	1.367	0.031	0.008	0	0.015	0	155.925	3511.08
2101	-0.9308	0.490848	142.053	5.2823	6.4552	607.844	125.51	15.9895	3.3578	25.3311	67.2382	1.092	0.0857	0.0887	0	81.2269	10.4055	148.214	235.393	77.4573	0.0912	0	0.0442	2.028	0.011	0	0	0	0	0	0.01	1.298	0.028	0.007	0	0.014	0	155.925	3511.08
2102	-0.9308	0.470396	142.053	5.2823	6.4552	607.844	125.51	15.9895	3.3578	25.3311	67.2382	1.092	0.0857	0.0887	0	81.2269	10.4055	148.214	235.393	77.4573	0.0912	0	0.0442	1.961	0.01	0	0	0	0	0	0.008	1.233	0.026	0.007	0	0.014	0	155.925	3511.08
2103	-0.9308	0.449944	142.053	5.2823	6.4552	607.844	125.51	15.9895	3.3578	25.3311	67.2382	1.092	0.0857	0.0887	0	81.2269	10.4055	148.214	235.393	77.4573	0.0912	0	0.0442	1.896	0.01	0	0	0	0	0	0.007	1.172	0.024	0.006	0	0.013	0	155.925	3511.08
2104	-0.9308	0.429492	142.053	5.2823	6.4552	607.844	125.51	15.9895	3.3578	25.3311	67.2382	1.092	0.0857	0.0887	0	81.2269	10.4055	148.214	235.393	77.4573	0.0912	0	0.0442	1.834	0.009	0	0	0	0	0	0.006	1.113	0.022	0.006	0	0.012	0	155.925	3511.08
2105	-0.9308	0.40904	142.053	5.2823	6.4552	607.844	125.51	15.9895	3.3578	25.3311	67.2382	1.092	0.0857	0.0887	0	81.2269	10.4055	148.214	235.393	77.4573	0.0912	0	0.0442	1.773	0.008	0	0	0	0	0	0.006	1.057	0.02	0.005	0	0.012	0	155.925	3511.08
2106	-0.9308	0.388588	142.053	5.2823	6.4552	607.844	125.51	15.9895	3.3578	25.3311	67.2382	1.092	0.0857	0.0887	0	81.2269	10.4055	148.214	235.393	77.4573	0.0912	0	0.0442	1.715	0.007	0	0	0	0	0	0.005	1.005	0.019	0.005	0	0.011	0	155.925	3511.08
2107	-0.9308	0.368136	142.053	5.2823	6.4552	607.844	125.51	15.9895	3.3578	25.3311	67.2382	1.092	0.0857	0.0887	0	81.2269	10.4055	148.214	235.393	77.4573	0.0912	0	0.0442	1.658	0.007	0	0	0	0	0	0.004	0.954	0.017	0.005	0	0.011	0	155.925	3511.08
2108	-0.9308	0.347684	142.053	5.2823	6.4552	607.844	125.51	15.9895	3.3578	25.3311	67.2382	1.092	0.0857	0.0887	0	81.2269	10.4055	148.214	235.393	77.4573	0.0912	0	0.0442	1.603	0.006	0	0	0	0	0	0.004	0.907	0.016	0.004	0	0.01	0	155.925	3511.08
2109	-0.9308	0.327232	142.053	5.2823	6.4552	607.844	125.51	15.9895	3.3578	25.3311	67.2382	1.092	0.0857	0.0887	0	81.2269	10.4055	148.214	235.393	77.4573	0.0912	0	0.0442	1.55	0.006	0	0	0	0	0	0.003	0.861	0.014	0.004	0	0.009	0	155.925	3511.08
2110	-0.9308	0.30678	142.053	5.2823	6.4552	607.844	125.51	15.9895	3.3578	25.3311	67.2382	1.092	0.0857	0.0887	0	81.2269	10.4055	148.214	235.393	77.4573	0.0912	0	0.0442	1.499	0.005	0	0	0	0	0	0.003	0.818	0.013	0.004	0	0.009	0	155.925	3511.08
2111	-0.9308	0.286328	142.053	5.2823	6.4552	607.844	125.51	15.9895	3.3578	25.3311	67.2382	1.092	0.0857	0.0887	0	81.2269	10.4055	148.214	235.393	77.4573	0.0912	0	0.0442	1.45	0.005	0	0	0	0	0	0.002	0.777	0.012	0.003	0	0.009	0	155.925	3511.08
2112	-0.9308	0.265876	142.053	5.2823	6.4552	607.844	125.51	15.9895	3.3578	25.3311	67.2382	1.092	0.0857	0.0887	0	81.2269	10.4055	148.214	235.393	77.4573	0.0912	0	0.0442	1.402	0.004	0	0	0	0	0	0.002	0.738	0.011	0.003	0	0.008	0	155.925	3511.08
2113	-0.9308	0.245424	142.053	5.2823	6.4552	607.844	125.51	15.9895	3.3578	25.3311	67.2382	1.092	0.0857	0.0887	0	81.2269	10.4055	148.214	235.393	77.4573	0.0912	0	0.0442	1.356	0.004	0	0	0	0	0	0.002	0.702	0.01	0.003	0	0.008	0	155.925	3511.08
2114	-0.9308	0.224972	142.053	5.2823	6.4552	607.844	125.51	15.9895	3.3578	25.3311	67.2382	1.092	0.0857	0.0887	0	81.2269	10.4055	148.214	235.393	77.4573	0.0912	0	0.0442	1.311	0.004	0	0	0	0	0	0.002	0.666	0.01	0.003	0	0.007	0	155.925	3511.08
2115	-0.9308	0.20452	142.053	5.2823	6.4552	607.844	125.51	15.9895	3.3578	25.3311	67.2382	1.092	0.0857	0.0887	0	81.2269	10.4055	148.214	235.393	77.4573	0.0912	0	0.0442	1.268	0.003	0	0	0	0	0	0.001	0.633	0.009	0.003	0	0.007	0	155.925	3511.08
2116	-0.9308	0.184068	142.053	5.2823	6.4552	607.844	125.51	15.9895	3.3578	25.3311	67.2382	1.092	0.0857	0.0887	0	81.2269	10.4055	148.214	235.393	77.4573	0.0912	0	0.0442	1.226	0.003	0	0	0	0	0	0.001	0.601	0.008	0.002	0	0.007	0	155.925	3511.08
2117	-0.9308	0.163616	142.053	5.2823	6.4552	607.844	125.51	15.9895	3.3578	25.3311	67.2382	1.092	0.0857	0.0887	0	81.2269	10.4055	148.214	235.393	77.4573	0.0912	0	0.0442	1.185	0.003	0	0	0	0	0	0.001	0.571	0.007	0.002	0	0.006	0	155.925	3511.08
2118	-0.9308	0.143164	142.053	5.2823	6.4552	607.844	125.51	15.9895	3.3578	25.3311	67.2382	1.092	0.0857	0.0887	0	81.2269	10.4055	148.214	235.393	77.4573	0.0912	0	0.0442	1.146	0.003	0	0	0	0	0	0.001	0.543	0.007	0.002	0	0.006	0	155.925	3511.08
2119	-0.9308	0.122712	142.053	5.2823	6.4552	607.844	125.51	15.9895	3.3578	25.3311	67.2382	1.092	0.0857	0.0887	0	81.2269	10.4055	148.214	235.393	77.4573	0.0912	0	0.0442	1.108	0.002	0	0	0	0	0	0.001	0.516	0.006	0.002	0	0.006	0	155.925	3511.08
2120	-0.9308	0.10226	142.053	5.2823	6.4552	607.844	125.51	15.9895	3.3578	25.3311	67.2382	1.092	0.0857	0.0887	0	81.2269	10.4055	148.214	235.393	77.4573	0.0912	0	0.0442	1.072	0.002	0	0	0	0	0	0.001	0.49	0.006	0.002	0	0.005	0	155.925	3511.08
2121	-0.9308	0.081808	142.053	5.2823	6.4552	607.844	125.51	15.9895	3.3578	25.3311	67.2382	1.092	0.0857	0.0887	0	81.2269	10.4055	148.214	235.393	77.4573	0.0912	0	0.0442	1.036	0.002	0	0	0	0	0	0.001	0.465	0.005	0.002	0	0.005	0	155.925	3511.08
2122	-0.9308	0.061356	142.053	5.2823	6.4552	607.844	125.51	15.9895	3.3578	25.3311	67.2382	1.092	0.0857	0.0887	0	81.2269	10.4055	148.214	235.393	77.4573	0.0912	0	0.0442	1.002	0.002	0	0	0	0	0	0.001	0.442	0.005	0.002	0	0.005	0	155.925	3511.08
2123	-0.9308	0.040904	142.053	5.2823	6.4552	607.844	125.51	15.9895	3.3578	25.3311	67.2382	1.092	0.0857	0.0887	0	81.2269	10.4055	148.214	235.393	77.4573	0.0912	0	0.0442	0.969	0.002	0	0	0	0	0	0	0.42	0.005	0.001	0	0.005	0	155.925	3511.08
2124	-0.9308	0.020452	142.053	5.2823	6.4552	607.844	125.51	15.9895	3.3578	25.3311	67.2382	1.092	0.0857	0.0887	0	81.2269	10.4055	148.214	235.393	77.4573	0.0912	0	0.0442	0.937	0.001	0	0	0	0	0	0	0.399	0.004	0.001	0	0.004	0	155.925	3511.08
2125	-0.9308	0	142.053	5.2823	6.4552	607.844	125.51	15.9895	3.3578	25.3311	67.2382	1.092	0.0857	0.0887	0	81.2269	10.4055	148.214	235.393	77.4573	0.0912	0	0.0442	0.906	0.001	0	0	0	0	0	0	0.379	0.004	0.001	0	0.004	0	155.925	3511.08
2126	-0.9308	0	142.053	5.2823	6.4552	607.844	125.51	15.9895	3.3578	25.3311	67.2382	1.092	0.0857	0.0887	0	81.2269	10.4055	148.214	235.393	77.4573	0.0912	0	0.0442	0.876	0.001	0	0	0	0	0	0	0.36	0.004	0.001	0	0.004	0	155.925	3511.08
2127	-0.9308	0	142.053	5.2823	6.4552	607.844	125.51	15.9895	3.3578	25.3311	67.2382	1.092	0.0857	0.0887	0	81.2269	10.4055	148.214	235.393	77.4573	0.0912	0	0.0442	0.847	0.001	0	0	0	0	0	0	0.342	0.003	0.001	0	0.004	0	155.925	3511.08
2128	-0.9308	0	142.053	5.2823	6.4552	607.844	125.51	15.9895	3.3578	25.3311	67.2382	1.092	0.0857	0.0887	0	81.2269	10.4055	148.214	235.393	77.4573	0.0912	0	0.0442	0.819	0.001	0	0	0	0	0	0	0.325	0.003	0.001	0	0.004	0	155.925	3511.08
2129	-0.9308	0	142.053	5.2823	6.4552	607.844	125.51	15.9895	3.3578	25.3311	67.2382	1.092	0.0857	0.0887	0	81.2269	10.4055	148.214	235.393	77.4573	0.0912	0	0.0442	0.792	0.001	0	0	0	0	0	0	0.309	0.003	0.001	0	0.003	0	155.925	3511.08
2130	-0.9308	0	142.053	5.2823	6.4552	607.844	125.51	15.9895	3.3578	25.3311	67.2382	1.092	0.0857	0.0887	0	81.2269	10.4055	148.214	235.393	77.4573	0.0912	0	0.0442	0.766	0.001	0	0	0	0	0	0	0.293	0.003	0.001	0	0.003	0	155.925	3511.08
2131	-0.9308	0	142.053	5.2823	6.4552	607.844	125.51	15.9895	3.3578	25.3311	67.2382	1.092	0.0857	0.0887	0	81.2269	10.4055	148.214	235.393	77.4573	0.0912	0	0.0442	0.741	0.001	0	0	0	0	0	0	0.279	0.002	0.001	0	0.003	0	155.925	3511.08
2132	-0.9308	0	142.053	5.2823	6.4552	607.844	125.51	15.9895	3.3578	25.3311	67.2382	1.092	0.0857	0.0887	0	81.2269	10.4055	148.214	235.393	77.4573	0.0912	0	0.0442	0.717	0.001	0	0	0	0	0	0	0.265	0.002	0.001	0	0.003	0	155.925	3511.08
2133	-0.9308	0	142.053	5.2823	6.4552	607.844	125.51	15.9895	3.3578	25.3311	67.2382	1.092	0.0857	0.0887	0	81.2269	10.4055	148.214	235.393	77.4573	0.0912	0	0.0442	0.693	0.001	0	0	0	0	0	0	0.251	0.002	0.001	0	0.003	0	155.925	3511.08
2134	-0.9308	0	142.053	5.2823	6.4552	607.844	125.51	15.9895	3.3578	25.3311	67.2382	1.092	0.0857	0.0887	0	81.2269	10.4055	148.214	235.393	77.4573	0.0912	0	0.0442	0.67	0.001	0	0	0	0	0	0	0.239	0.002	0.001	0	0.003	0	155.925	3511.08
2135	-0.9308	0	142.053	5.2823	6.4552	607.844	125.51	15.9895	3.3578	25.3311	67.2382	1.092	0.0857	0.0887	0	81.2269	10.4055	148.214	235.393	77.4573	0.0912	0	0.0442	0.648	0.001	0	0	0	0	0	0	0.227	0.002	0.001	0	0.002	0	155.925	3511.08
2136	-0.9308	0	142.053	5.2823	6.4552	607.844	125.51	15.9895	3.3578	25.3311	67.2382	1.092	0.0857	0.0887	0	81.2269	10.4055	148.214	235.393	77.4573	0.0912	0	0.0442	0.627	0.001	0	0	0	0	0	0	0.216	0.002	0.001	0	0.002	0	155.925	3511.08
2137	-0.9308	0	142.053	5.2823	6.4552	607.844	125.51	15.9895	3.3578	25.3311	67.2382	1.092	0.0857	0.0887	0	81.2269	10.4055	148.214	235.393	77.4573	0.0912	0	0.0442	0.606	0	0	0	0	0	0	0	0.205	0.001	0.001	0	0.002	0	155.925	3511.08
2138	-0.9308	0	142.053	5.2823	6.4552	607.844	125.51	15.9895	3.3578	25.3311	67.2382	1.092	0.0857	0.0887	0	81.2269	10.4055	148.214	235.393	77.4573	0.0912	0	0.0442	0.586	0	0	0	0	0	0	0	0.195	0.001	0	0	0.002	0	155.925	3511.08
2139	-0.9308	0	142.053	5.2823	6.4552	607.844	125.51	15.9895	3.3578	25.3311	67.2382	1.092	0.0857	0.0887	0	81.2269	10.4055	148.214	235.393	77.4573	0.0912	0	0.0442	0.567	0	0	0	0	0	0	0	0.185	0.001	0	0	0.002	0	155.925	3511.08
2140	-0.9308	0	142.053	5.2823	6.4552	607.844	125.51	15.9895	3.3578	25.3311	67.2382	1.092	0.0857	0.0887	0	81.2269	10.4055	148.214	235.393	77.4573	0.0912	0	0.0442	0.548	0	0	0	0	0	0	0	0.176	0.001	0	0	0.002	0	155.925	3511.08
2141	-0.9308	0	142.053	5.2823	6.4552	607.844	125.51	15.9895	3.3578	25.3311	67.2382	1.092	0.0857	0.0887	0	81.2269	10.4055	148.214	235.393	77.4573	0.0912	0	0.0442	0.53	0	0	0	0	0	0	0	0.167	0.001	0	0	0.002	0	155.925	3511.08
2142	-0.9308	0	142.053	5.2823	6.4552	607.844	125.51	15.9895	3.3578	25.3311	67.2382	1.092	0.0857	0.0887	0	81.2269	10.4055	148.214	235.393	77.4573	0.0912	0	0.0442	0.512	0	0	0	0	0	0	0	0.159	0.001	0	0	0.002	0	155.925	3511.08
2143	-0.9308	0	142.053	5.2823	6.4552	607.844	125.51	15.9895	3.3578	25.3311	67.2382	1.092	0.0857	0.0887	0	81.2269	10.4055	148.214	235.393	77.4573	0.0912	0	0.0442	0.495	0	0	0	0	0	0	0	0.151	0.001	0	0	0.002	0	155.925	3511.08
2144	-0.9308	0	142.053	5.2823	6.4552	607.844	125.51	15.9895	3.3578	25.3311	67.2382	1.092	0.0857	0.0887	0	81.2269	10.4055	148.214	235.393	77.4573	0.0912	0	0.0442	0.479	0	0	0	0	0	0	0	0.143	0.001	0	0	0.002	0	155.925	3511.08
2145	-0.9308	0	142.053	5.2823	6.4552	607.844	125.51	15.9895	3.3578	25.3311	67.2382	1.092	0.0857	0.0887	0	81.2269	10.4055	148.214	235.393	77.4573	0.0912	0	0.0442	0.463	0	0	0	0	0	0	0	0.136	0.001	0	0	0.001	0	155.925	3511.08
2146	-0.9308	0	142.053	5.2823	6.4552	607.844	125.51	15.9895	3.3578	25.3311	67.2382	1.092	0.0857	0.0887	0	81.2269	10.4055	148.214	235.393	77.4573	0.0912	0	0.0442	0.448	0	0	0	0	0	0	0	0.129	0.001	0	0	0.001	0	155.925	3511.08
2147	-0.9308	0	142.053	5.2823	6.4552	607.844	125.51	15.9895	3.3578	25.3311	67.2382	1.092	0.0857	0.0887	0	81.2269	10.4055	148.214	235.393	77.4573	0.0912	0	0.0442	0.433	0	0	0	0	0	0	0	0.123	0.001	0	0	0.001	0	155.925	3511.08
2148	-0.9308	0	142.053	5.2823	6.4552	607.844	125.51	15.9895	3.3578	25.3311	67.2382	1.092	0.0857	0.0887	0	81.2269	10.4055	148.214	235.393	77.4573	0.0912	0	0.0442	0.419	0	0	0	0	0	0	0	0.117	0.001	0	0	0.001	0	155.925	3511.08
2149	-0.9308	0	142.053	5.2823	6.4552	607.844	125.51	15.9895	3.3578	25.3311	67.2382	1.092	0.0857	0.0887	0	81.2269	10.4055	148.214	235.393	77.4573	0.0912	0	0.0442	0.405	0	0	0	0	0	0	0	0.111	0.001	0	0	0.001	0	155.925	3511.08
2150	-0.9308	0	142.053	5.2823	6.4552	607.844	125.51	15.9895	3.3578	25.3311	67.2382	1.092	0.0857	0.0887	0	81.2269	10.4055	148.214	235.393	77.4573	0.0912	0	0.0442	0.392	0	0	0	0	0	0	0	0.105	0	0	0	0.001	0	155.925	3511.08
2151	-0.9308	0	142.053	5.2823	6.4552	607.844	125.51	15.9895	3.3578	25.3311	67.2382	1.092	0.0857	0.0887	0	81.2269	10.4055	148.214	235.393	77.4573	0.0912	0	0.0442	0.379	0	0	0	0	0	0	0	0.1	0	0	0	0.001	0	155.925	3511.08
2152	-0.9308	0	142.053	5.2823	6.4552	607.844	125.51	15.9895	3.3578	25.3311	67.2382	1.092	0.0857	0.0887	0	81.2269	10.4055	148.214	235.393	77.4573	0.0912	0	0.0442	0.366	0	0	0	0	0	0	0	0.095	0	0	0	0.001	0	155.925	3511.08
2153	-0.9308	0	142.053	5.2823	6.4552	607.844	125.51	15.9895	3.3578	25.3311	67.2382	1.092	0.0857	0.0887	0	81.2269	10.4055	148.214	235.393	77.4573	0.0912	0	0.0442	0.354	0	0	0	0	0	0	0	0.09	0	0	0	0.001	0	155.925	3511.08
2154	-0.9308	0	142.053	5.2823	6.4552	607.844	125.51	15.9895	3.3578	25.3311	67.2382	1.092	0.0857	0.0887	0	81.2269	10.4055	148.214	235.393	77.4573	0.0912	0	0.0442	0.342	0	0	0	0	0	0	0	0.086	0	0	0	0.001	0	155.925	3511.08
2155	-0.9308	0	142.053	5.2823	6.4552	607.844	125.51	15.9895	3.3578	25.3311	67.2382	1.092	0.0857	0.0887	0	81.2269	10.4055	148.214	235.393	77.4573	0.0912	0	0.0442	0.331	0	0	0	0	0	0	0	0.081	0	0	0	0.001	0	155.925	3511.08
2156	-0.9308	0	142.053	5.2823	6.4552	607.844	125.51	15.9895	3.3578	25.3311	67.2382	1.092	0.0857	0.0887	0	81.2269	10.4055	148.214	235.393	77.4573	0.0912	0	0.0442	0.32	0	0	0	0	0	0	0	0.077	0	0	0	0.001	0	155.925	3511.08
2157	-0.9308	0	142.053	5.2823	6.4552	607.844	125.51	15.9895	3.3578	25.3311	67.2382	1.092	0.0857	0.0887	0	81.2269	10.4055	148.214	235.393	77.4573	0.0912	0	0.0442	0.31	0	0	0	0	0	0	0	0.073	0	0	0	0.001	0	155.925	3511.08
2158	-0.9308	0	142.053	5.2823	6.4552	607.844	125.51	15.9895	3.3578	25.3311	67.2382	1.092	0.0857	0.0887	0	81.2269	10.4055	148.214	235.393	77.4573	0.0912	0	0.0442	0.299	0	0	0	0	0	0	0	0.07	0	0	0	0.001	0	155.925	3511.08
2159	-0.9308	0	142.053	5.2823	6.4552	607.844	125.51	15.9895	3.3578	25.3311	67.2382	1.092	0.0857	0.0887	0	81.2269	10.4055	148.214	235.393	77.4573	0.0912	0	0.0442	0.29	0	0	0	0	0	0	0	0.066	0	0	0	0.001	0	155.925	3511.08
2160	-0.9308	0	142.053	5.2823	6.4552	607.844	125.51	15.9895	3.3578	25.3311	67.2382	1.092	0.0857	0.0887	0	81.2269	10.4055	148.214	235.393	77.4573	0.0912	0	0.0442	0.28	0	0	0	0	0	0	0	0.063	0	0	0	0.001	0	155.925	3511.08
2161	-0.9308	0	142.053	5.2823	6.4552	607.844	125.51	15.9895	3.3578	25.3311	67.2382	1.092	0.0857	0.0887	0	81.2269	10.4055	148.214	235.393	77.4573	0.0912	0	0.0442	0.271	0	0	0	0	0	0	0	0.06	0	0	0	0.001	0	155.925	3511.08
2162	-0.9308	0	142.053	5.2823	6.4552	607.844	125.51	15.9895	3.3578	25.3311	67.2382	1.092	0.0857	0.0887	0	81.2269	10.4055	148.214	235.393	77.4573	0.0912	0	0.0442	0.262	0	0	0	0	0	0	0	0.057	0	0	0	0.001	0	155.925	3511.08
2163	-0.9308	0	142.053	5.2823	6.4552	607.844	125.51	15.9895	3.3578	25.3311	67.2382	1.092	0.0857	0.0887	0	81.2269	10.4055	148.214	235.393	77.4573	0.0912	0	0.0442	0.253	0	0	0	0	0	0	0	0.054	0	0	0	0.001	0	155.925	3511.08
2164	-0.9308	0	142.053	5.2823	6.4552	607.844	125.51	15.9895	3.3578	25.3311	67.2382	1.092	0.0857	0.0887	0	81.2269	10.4055	148.214	235.393	77.4573	0.0912	0	0.0442	0.245	0	0	0	0	0	0	0	0.051	0	0	0	0.001	0	155.925	3511.08
2165	-0.9308	0	142.053	5.2823	6.4552	607.844	125.51	15.9895	3.3578	25.3311	67.2382	1.092	0.0857	0.0887	0	81.2269	10.4055	148.214	235.393	77.4573	0.0912	0	0.0442	0.237	0	0	0	0	0	0	0	0.049	0	0	0	0.001	0	155.925	3511.08
2166	-0.9308	0	142.053	5.2823	6.4552	607.844	125.51	15.9895	3.3578	25.3311	67.2382	1.092	0.0857	0.0887	0	81.2269	10.4055	148.214	235.393	77.4573	0.0912	0	0.0442	0.229	0	0	0	0	0	0	0	0.046	0	0	0	0.001	0	155.925	3511.08
2167	-0.9308	0	142.053	5.2823	6.4552	607.844	125.51	15.9895	3.3578	25.3311	67.2382	1.092	0.0857	0.0887	0	81.2269	10.4055	148.214	235.393	77.4573	0.0912	0	0.0442	0.221	0	0	0	0	0	0	0	0.044	0	0	0	0	0	155.925	3511.08
2168	-0.9308	0	142.053	5.2823	6.4552	607.844	125.51	15.9895	3.3578	25.3311	67.2382	1.092	0.0857	0.0887	0	81.2269	10.4055	148.214	235.393	77.4573	0.0912	0	0.0442	0.214	0	0	0	0	0	0	0	0.042	0	0	0	0	0	155.925	3511.08
2169	-0.9308	0	142.053	5.2823	6.4552	607.844	125.51	15.9895	3.3578	25.3311	67.2382	1.092	0.0857	0.0887	0	81.2269	10.4055	148.214	235.393	77.4573	0.0912	0	0.0442	0.207	0	0	0	0	0	0	0	0.04	0	0	0	0	0	155.925	3511.08
2170	-0.9308	0	142.053	5.2823	6.4552	607.844	125.51	15.9895	3.3578	25.3311	67.2382	1.092	0.0857	0.0887	0	81.2269	10.4055	148.214	235.393	77.4573	0.0912	0	0.0442	0.2	0	0	0	0	0	0	0	0.038	0	0	0	0	0	155.925	3511.08
2171	-0.9308	0	142.053	5.2823	6.4552	607.844	125.51	15.9895	3.3578	25.3311	67.2382	1.092	0.0857	0.0887	0	81.2269	10.4055	148.214	235.393	77.4573	0.0912	0	0.0442	0.194	0	0	0	0	0	0	0	0.036	0	0	0	0	0	155.925	3511.08
2172	-0.9308	0	142.053	5.2823	6.4552	607.844	125.51	15.9895	3.3578	25.3311	67.2382	1.092	0.0857	0.0887	0	81.2269	10.4055	148.214	235.393	77.4573	0.0912	0	0.0442	0.187	0	0	0	0	0	0	0	0.034	0	0	0	0	0	155.925	3511.08
2173	-0.9308	0	142.053	5.2823	6.4552	607.844	125.51	15.9895	3.3578	25.3311	67.2382	1.092	0.0857	0.0887	0	81.2269	10.4055	148.214	235.393	77.4573	0.0912	0	0.0442	0.181	0	0	0	0	0	0	0	0.032	0	0	0	0	0	155.925	3511.08
2174	-0.9308	0	142.053	5.2823	6.4552	607.844	125.51	15.9895	3.3578	25.3311	67.2382	1.092	0.0857	0.0887	0	81.2269	10.4055	148.214	235.393	77.4573	0.0912	0	0.0442	0.175	0	0	0	0	0	0	0	0.031	0	0	0	0	0	155.925	3511.08
2175	-0.9308	0	142.053	5.2823	6.4552	607.844	125.51	15.9895	3.3578	25.3311	67.2382	1.092	0.0857	0.0887	0	81.2269	10.4055	148.214	235.393	77.4573	0.0912	0	0.0442	0.169	0	0	0	0	0	0	0	0.029	0	0	0	0	0	155.925	3511.08
2176	-0.9308	0	142.053	5.2823	6.4552	607.844	125.51	15.9895	3.3578	25.3311	67.2382	1.092	0.0857	0.0887	0	81.2269	10.4055	148.214	235.393	77.4573	0.0912	0	0.0442	0.164	0	0	0	0	0	0	0	0.028	0	0	0	0	0	155.925	3511.08
2177	-0.9308	0	142.053	5.2823	6.4552	607.844	125.51	15.9895	3.3578	25.3311	67.2382	1.092	0.0857	0.0887	0	81.2269	10.4055	148.214	235.393	77.4573	0.0912	0	0.0442	0.158	0	0	0	0	0	0	0	0.026	0	0	0	0	0	155.925	3511.08
2178	-0.9308	0	142.053	5.2823	6.4552	607.844	125.51	15.9895	3.3578	25.3311	67.2382	1.092	0.0857	0.0887	0	81.2269	10.4055	148.214	235.393	77.4573	0.0912	0	0.0442	0.153	0	0	0	0	0	0	0	0.025	0	0	0	0	0	155.925	3511.08
2179	-0.9308	0	142.053	5.2823	6.4552	607.844	125.51	15.9895	3.3578	25.3311	67.2382	1.092	0.0857	0.0887	0	81.2269	10.4055	148.214	235.393	77.4573	0.0912	0	0.0442	0.148	0	0	0	0	0	0	0	0.024	0	0	0	0	0	155.925	3511.08
2180	-0.9308	0	142.053	5.2823	6.4552	607.844	125.51	15.9895	3.3578	25.3311	67.2382	1.092	0.0857	0.0887	0	81.2269	10.4055	148.214	235.393	77.4573	0.0912	0	0.0442	0.143	0	0	0	0	0	0	0	0.023	0	0	0	0	0	155.925	3511.08
2181	-0.9308	0	142.053	5.2823	6.4552	607.844	125.51	15.9895	3.3578	25.3311	67.2382	1.092	0.0857	0.0887	0	81.2269	10.4055	148.214	235.393	77.4573	0.0912	0	0.0442	0.138	0	0	0	0	0	0	0	0.021	0	0	0	0	0	155.925	3511.08
2182	-0.9308	0	142.053	5.2823	6.4552	607.844	125.51	15.9895	3.3578	25.3311	67.2382	1.092	0.0857	0.0887	0	81.2269	10.4055	148.214	235.393	77.4573	0.0912	0	0.0442	0.134	0	0	0	0	0	0	0	0.02	0	0	0	0	0	155.925	3511.08
2183	-0.9308	0	142.053	5.2823	6.4552	607.844	125.51	15.9895	3.3578	25.3311	67.2382	1.092	0.0857	0.0887	0	81.2269	10.4055	148.214	235.393	77.4573	0.0912	0	0.0442	0.129	0	0	0	0	0	0	0	0.019	0	0	0	0	0	155.925	3511.08
2184	-0.9308	0	142.053	5.2823	6.4552	607.844	125.51	15.9895	3.3578	25.3311	67.2382	1.092	0.0857	0.0887	0	81.2269	10.4055	148.214	235.393	77.4573	0.0912	0	0.0442	0.125	0	0	0	0	0	0	0	0.018	0	0	0	0	0	155.925	3511.08
2185	-0.9308	0	142.053	5.2823	6.4552	607.844	125.51	15.9895	3.3578	25.3311	67.2382	1.092	0.0857	0.0887	0	81.2269	10.4055	148.214	235.393	77.4573	0.0912	0	0.0442	0.121	0	0	0	0	0	0	0	0.017	0	0	0	0	0	155.925	3511.08
2186	-0.9308	0	142.053	5.2823	6.4552	607.844	125.51	15.9895	3.3578	25.3311	67.2382	1.092	0.0857	0.0887	0	81.2269	10.4055	148.214	235.393	77.4573	0.0912	0	0.0442	0.117	0	0	0	0	0	0	0	0.017	0	0	0	0	0	155.925	3511.08
2187	-0.9308	0	142.053	5.2823	6.4552	607.844	125.51	15.9895	3.3578	25.3311	67.2382	1.092	0.0857	0.0887	0	81.2269	10.4055	148.214	235.393	77.4573	0.0912	0	0.0442	0.113	0	0	0	0	0	0	0	0.016	0	0	0	0	0	155.925	3511.08
2188	-0.9308	0	142.053	5.2823	6.4552	607.844	125.51	15.9895	3.3578	25.3311	67.2382	1.092	0.0857	0.0887	0	81.2269	10.4055	148.214	235.393	77.4573	0.0912	0	0.0442	0.109	0	0	0	0	0	0	0	0.015	0	0	0	0	0	155.925	3511.08
2189	-0.9308	0	142.053	5.2823	6.4552	607.844	125.51	15.9895	3.3578	25.3311	67.2382	1.092	0.0857	0.0887	0	81.2269	10.4055	148.214	235.393	77.4573	0.0912	0	0.0442	0.106	0	0	0	0	0	0	0	0.014	0	0	0	0	0	155.925	3511.08
2190	-0.9308	0	142.053	5.2823	6.4552	607.844	125.51	15.9895	3.3578	25.3311	67.2382	1.092	0.0857	0.0887	0	81.2269	10.4055	148.214	235.393	77.4573	0.0912	0	0.0442	0.102	0	0	0	0	0	0	0	0.014	0	0	0	0	0	155.925	3511.08
2191	-0.9308	0	142.053	5.2823	6.4552	607.844	125.51	15.9895	3.3578	25.3311	67.2382	1.092	0.0857	0.0887	0	81.2269	10.4055	148.214	235.393	77.4573	0.0912	0	0.0442	0.099	0	0	0	0	0	0	0	0.013	0	0	0	0	0	155.925	3511.08
2192	-0.9308	0	142.053	5.2823	6.4552	607.844	125.51	15.9895	3.3578	25.3311	67.2382	1.092	0.0857	0.0887	0	81.2269	10.4055	148.214	235.393	77.4573	0.0912	0	0.0442	0.096	0	0	0	0	0	0	0	0.012	0	0	0	0	0	155.925	3511.08
2193	-0.9308	0	142.053	5.2823	6.4552	607.844	125.51	15.9895	3.3578	25.3311	67.2382	1.092	0.0857	0.0887	0	81.2269	10.4055	148.214	235.393	77.4573	0.0912	0	0.0442	0.093	0	0	0	0	0	0	0	0.012	0	0	0	0	0	155.925	3511.08
2194	-0.9308	0	142.053	5.2823	6.4552	607.844	125.51	15.9895	3.3578	25.3311	67.2382	1.092	0.0857	0.0887	0	81.2269	10.4055	148.214	235.393	77.4573	0.0912	0	0.0442	0.089	0	0	0	0	0	0	0	0.011	0	0	0	0	0	155.925	3511.08
2195	-0.9308	0	142.053	5.2823	6.4552	607.844	125.51	15.9895	3.3578	25.3311	67.2382	1.092	0.0857	0.0887	0	81.2269	10.4055	148.214	235.393	77.4573	0.0912	0	0.0442	0.087	0	0	0	0	0	0	0	0.01	0	0	0	0	0	155.925	3511.08
2196	-0.9308	0	142.053	5.2823	6.4552	607.844	125.51	15.9895	3.3578	25.3311	67.2382	1.092	0.0857	0.0887	0	81.2269	10.4055	148.214	235.393	77.4573	0.0912	0	0.0442	0.084	0	0	0	0	0	0	0	0.01	0	0	0	0	0	155.925	3511.08
2197	-0.9308	0	142.053	5.2823	6.4552	607.844	125.51	15.9895	3.3578	25.3311	67.2382	1.092	0.0857	0.0887	0	81.2269	10.4055	148.214	235.393	77.4573	0.0912	0	0.0442	0.081	0	0	0	0	0	0	0	0.009	0	0	0	0	0	155.925	3511.08
2198	-0.9308	0	142.053	5.2823	6.4552	607.844	125.51	15.9895	3.3578	25.3311	67.2382	1.092	0.0857	0.0887	0	81.2269	10.4055	148.214	235.393	77.4573	0.0912	0	0.0442	0.078	0	0	0	0	0	0	0	0.009	0	0	0	0	0	155.925	3511.08
2199	-0.9308	0	142.053	5.2823	6.4552	607.844	125.51	15.9895	3.3578	25.3311	67.2382	1.092	0.0857	0.0887	0	81.2269	10.4055	148.214	235.393	77.4573	0.0912	0	0.0442	0.076	0	0	0	0	0	0	0	0.009	0	0	0	0	0	155.925	3511.08
2200	-0.9308	0	142.053	5.2823	6.4552	607.844	125.51	15.9895	3.3578	25.3311	67.2382	1.092	0.0857	0.0887	0	81.2269	10.4055	148.214	235.393	77.4573	0.0912	0	0.0442	0.073	0	0	0	0	0	0	0	0.008	0	0	0	0	0	155.925	3511.08
2201	-0.9308	0	142.053	5.2823	6.4552	607.844	125.51	15.9895	3.3578	25.3311	67.2382	1.092	0.0857	0.0887	0	81.2269	10.4055	148.214	235.393	77.4573	0.0912	0	0.0442	0.071	0	0	0	0	0	0	0	0.008	0	0	0	0	0	155.925	3511.08
2202	-0.9308	0	142.053	5.2823	6.4552	607.844	125.51	15.9895	3.3578	25.3311	67.2382	1.092	0.0857	0.0887	0	81.2269	10.4055	148.214	235.393	77.4573	0.0912	0	0.0442	0.068	0	0	0	0	0	0	0	0.007	0	0	0	0	0	155.925	3511.08
2203	-0.9308	0	142.053	5.2823	6.4552	607.844	125.51	15.9895	3.3578	25.3311	67.2382	1.092	0.0857	0.0887	0	81.2269	10.4055	148.214	235.393	77.4573	0.0912	0	0.0442	0.066	0	0	0	0	0	0	0	0.007	0	0	0	0	0	155.925	3511.08
2204	-0.9308	0	142.053	5.2823	6.4552	607.844	125.51	15.9895	3.3578	25.3311	67.2382	1.092	0.0857	0.0887	0	81.2269	10.4055	148.214	235.393	77.4573	0.0912	0	0.0442	0.064	0	0	0	0	0	0	0	0.007	0	0	0	0	0	155.925	3511.08
2205	-0.9308	0	142.053	5.2823	6.4552	607.844	125.51	15.9895	3.3578	25.3311	67.2382	1.092	0.0857	0.0887	0	81.2269	10.4055	148.214	235.393	77.4573	0.0912	0	0.0442	0.062	0	0	0	0	0	0	0	0.006	0	0	0	0	0	155.925	3511.08
2206	-0.9308	0	142.053	5.2823	6.4552	607.844	125.51	15.9895	3.3578	25.3311	67.2382	1.092	0.0857	0.0887	0	81.2269	10.4055	148.214	235.393	77.4573	0.0912	0	0.0442	0.06	0	0	0	0	0	0	0	0.006	0	0	0	0	0	155.925	3511.08
2207	-0.9308	0	142.053	5.2823	6.4552	607.844	125.51	15.9895	3.3578	25.3311	67.2382	1.092	0.0857	0.0887	0	81.2269	10.4055	148.214	235.393	77.4573	0.0912	0	0.0442	0.058	0	0	0	0	0	0	0	0.006	0	0	0	0	0	155.925	3511.08
2208	-0.9308	0	142.053	5.2823	6.4552	607.844	125.51	15.9895	3.3578	25.3311	67.2382	1.092	0.0857	0.0887	0	81.2269	10.4055	148.214	235.393	77.4573	0.0912	0	0.0442	0.056	0	0	0	0	0	0	0	0.005	0	0	0	0	0	155.925	3511.08
2209	-0.9308	0	142.053	5.2823	6.4552	607.844	125.51	15.9895	3.3578	25.3311	67.2382	1.092	0.0857	0.0887	0	81.2269	10.4055	148.214	235.393	77.4573	0.0912	0	0.0442	0.054	0	0	0	0	0	0	0	0.005	0	0	0	0	0	155.925	3511.08
2210	-0.9308	0	142.053	5.2823	6.4552	607.844	125.51	15.9895	3.3578	25.3311	67.2382	1.092	0.0857	0.0887	0	81.2269	10.4055	148.214	235.393	77.4573	0.0912	0	0.0442	0.052	0	0	0	0	0	0	0	0.005	0	0	0	0	0	155.925	3511.08
2211	-0.9308	0	142.053	5.2823	6.4552	607.844	125.51	15.9895	3.3578	25.3311	67.2382	1.092	0.0857	0.0887	0	81.2269	10.4055	148.214	235.393	77.4573	0.0912	0	0.0442	0.051	0	0	0	0	0	0	0	0.005	0	0	0	0	0	155.925	3511.08
2212	-0.9308	0	142.053	5.2823	6.4552	607.844	125.51	15.9895	3.3578	25.3311	67.2382	1.092	0.0857	0.0887	0	81.2269	10.4055	148.214	235.393	77.4573	0.0912	0	0.0442	0.049	0	0	0	0	0	0	0	0.004	0	0	0	0	0	155.925	3511.08
2213	-0.9308	0	142.053	5.2823	6.4552	607.844	125.51	15.9895	3.3578	25.3311	67.2382	1.092	0.0857	0.0887	0	81.2269	10.4055	148.214	235.393	77.4573	0.0912	0	0.0442	0.047	0	0	0	0	0	0	0	0.004	0	0	0	0	0	155.925	3511.08
2214	-0.9308	0	142.053	5.2823	6.4552	607.844	125.51	15.9895	3.3578	25.3311	67.2382	1.092	0.0857	0.0887	0	81.2269	10.4055	148.214	235.393	77.4573	0.0912	0	0.0442	0.046	0	0	0	0	0	0	0	0.004	0	0	0	0	0	155.925	3511.08
2215	-0.9308	0	142.053	5.2823	6.4552	607.844	125.51	15.9895	3.3578	25.3311	67.2382	1.092	0.0857	0.0887	0	81.2269	10.4055	148.214	235.393	77.4573	0.0912	0	0.0442	0.044	0	0	0	0	0	0	0	0.004	0	0	0	0	0	155.925	3511.08
2216	-0.9308	0	142.053	5.2823	6.4552	607.844	125.51	15.9895	3.3578	25.3311	67.2382	1.092	0.0857	0.0887	0	81.2269	10.4055	148.214	235.393	77.4573	0.0912	0	0.0442	0.043	0	0	0	0	0	0	0	0.004	0	0	0	0	0	155.925	3511.08
2217	-0.9308	0	142.053	5.2823	6.4552	607.844	125.51	15.9895	3.3578	25.3311	67.2382	1.092	0.0857	0.0887	0	81.2269	10.4055	148.214	235.393	77.4573	0.0912	0	0.0442	0.041	0	0	0	0	0	0	0	0.003	0	0	0	0	0	155.925	3511.08
2218	-0.9308	0	142.053	5.2823	6.4552	607.844	125.51	15.9895	3.3578	25.3311	67.2382	1.092	0.0857	0.0887	0	81.2269	10.4055	148.214	235.393	77.4573	0.0912	0	0.0442	0.04	0	0	0	0	0	0	0	0.003	0	0	0	0	0	155.925	3511.08
2219	-0.9308	0	142.053	5.2823	6.4552	607.844	125.51	15.9895	3.3578	25.3311	67.2382	1.092	0.0857	0.0887	0	81.2269	10.4055	148.214	235.393	77.4573	0.0912	0	0.0442	0.039	0	0	0	0	0	0	0	0.003	0	0	0	0	0	155.925	3511.08
2220	-0.9308	0	142.053	5.2823	6.4552	607.844	125.51	15.9895	3.3578	25.3311	67.2382	1.092	0.0857	0.0887	0	81.2269	10.4055	148.214	235.393	77.4573	0.0912	0	0.0442	0.037	0	0	0	0	0	0	0	0.003	0	0	0	0	0	155.925	3511.08
2221	-0.9308	0	142.053	5.2823	6.4552	607.844	125.51	15.9895	3.3578	25.3311	67.2382	1.092	0.0857	0.0887	0	81.2269	10.4055	148.214	235.393	77.4573	0.0912	0	0.0442	0.036	0	0	0	0	0	0	0	0.003	0	0	0	0	0	155.925	3511.08
2222	-0.9308	0	142.053	5.2823	6.4552	607.844	125.51	15.9895	3.3578	25.3311	67.2382	1.092	0.0857	0.0887	0	81.2269	10.4055	148.214	235.393	77.4573	0.0912	0	0.0442	0.035	0	0	0	0	0	0	0	0.003	0	0	0	0	0	155.925	3511.08
2223	-0.9308	0	142.053	5.2823	6.4552	607.844	125.51	15.9895	3.3578	25.3311	67.2382	1.092	0.0857	0.0887	0	81.2269	10.4055	148.214	235.393	77.4573	0.0912	0	0.0442	0.034	0	0	0	0	0	0	0	0.002	0	0	0	0	0	155.925	3511.08
2224	-0.9308	0	142.053	5.2823	6.4552	607.844	125.51	15.9895	3.3578	25.3311	67.2382	1.092	0.0857	0.0887	0	81.2269	10.4055	148.214	235.393	77.4573	0.0912	0	0.0442	0.033	0	0	0	0	0	0	0	0.002	0	0	0	0	0	155.925	3511.08
2225	-0.9308	0	142.053	5.2823	6.4552	607.844	125.51	15.9895	3.3578	25.3311	67.2382	1.092	0.0857	0.0887	0	81.2269	10.4055	148.214	235.393	77.4573	0.0912	0	0.0442	0.032	0	0	0	0	0	0	0	0.002	0	0	0	0	0	155.925	3511.08
2226	-0.9308	0	142.053	5.2823	6.4552	607.844	125.51	15.9895	3.3578	25.3311	67.2382	1.092	0.0857	0.0887	0	81.2269	10.4055	148.214	235.393	77.4573	0.0912	0	0.0442	0.031	0	0	0	0	0	0	0	0.002	0	0	0	0	0	155.925	3511.08
2227	-0.9308	0	142.053	5.2823	6.4552	607.844	125.51	15.9895	3.3578	25.3311	67.2382	1.092	0.0857	0.0887	0	81.2269	10.4055	148.214	235.393	77.4573	0.0912	0	0.0442	0.03	0	0	0	0	0	0	0	0.002	0	0	0	0	0	155.925	3511.08
2228	-0.9308	0	142.053	5.2823	6.4552	607.844	125.51	15.9895	3.3578	25.3311	67.2382	1.092	0.0857	0.0887	0	81.2269	10.4055	148.214	235.393	77.4573	0.0912	0	0.0442	0.029	0	0	0	0	0	0	0	0.002	0	0	0	0	0	155.925	3511.08
2229	-0.9308	0	142.053	5.2823	6.4552	607.844	125.51	15.9895	3.3578	25.3311	67.2382	1.092	0.0857	0.0887	0	81.2269	10.4055	148.214	235.393	77.4573	0.0912	0	0.0442	0.028	0	0	0	0	0	0	0	0.002	0	0	0	0	0	155.925	3511.08
2230	-0.9308	0	142.053	5.2823	6.4552	607.844	125.51	15.9895	3.3578	25.3311	67.2382	1.092	0.0857	0.0887	0	81.2269	10.4055	148.214	235.393	77.4573	0.0912	0	0.0442	0.027	0	0	0	0	0	0	0	0.002	0	0	0	0	0	155.925	3511.08
2231	-0.9308	0	142.053	5.2823	6.4552	607.844	125.51	15.9895	3.3578	25.3311	67.2382	1.092	0.0857	0.0887	0	81.2269	10.4055	148.214	235.393	77.4573	0.0912	0	0.0442	0.026	0	0	0	0	0	0	0	0.002	0	0	0	0	0	155.925	3511.08
2232	-0.9308	0	142.053	5.2823	6.4552	607.844	125.51	15.9895	3.3578	25.3311	67.2382	1.092	0.0857	0.0887	0	81.2269	10.4055	148.214	235.393	77.4573	0.0912	0	0.0442	0.025	0	0	0	0	0	0	0	0.002	0	0	0	0	0	155.925	3511.08
2233	-0.9308	0	142.053	5.2823	6.4552	607.844	125.51	15.9895	3.3578	25.3311	67.2382	1.092	0.0857	0.0887	0	81.2269	10.4055	148.214	235.393	77.4573	0.0912	0	0.0442	0.024	0	0	0	0	0	0	0	0.001	0	0	0	0	0	155.925	3511.08
2234	-0.9308	0	142.053	5.2823	6.4552	607.844	125.51	15.9895	3.3578	25.3311	67.2382	1.092	0.0857	0.0887	0	81.2269	10.4055	148.214	235.393	77.4573	0.0912	0	0.0442	0.023	0	0	0	0	0	0	0	0.001	0	0	0	0	0	155.925	3511.08
2235	-0.9308	0	142.053	5.2823	6.4552	607.844	125.51	15.9895	3.3578	25.3311	67.2382	1.092	0.0857	0.0887	0	81.2269	10.4055	148.214	235.393	77.4573	0.0912	0	0.0442	0.023	0	0	0	0	0	0	0	0.001	0	0	0	0	0	155.925	3511.08
2236	-0.9308	0	142.053	5.2823	6.4552	607.844	125.51	15.9895	3.3578	25.3311	67.2382	1.092	0.0857	0.0887	0	81.2269	10.4055	148.214	235.393	77.4573	0.0912	0	0.0442	0.022	0	0	0	0	0	0	0	0.001	0	0	0	0	0	155.925	3511.08
2237	-0.9308	0	142.053	5.2823	6.4552	607.844	125.51	15.9895	3.3578	25.3311	67.2382	1.092	0.0857	0.0887	0	81.2269	10.4055	148.214	235.393	77.4573	0.0912	0	0.0442	0.021	0	0	0	0	0	0	0	0.001	0	0	0	0	0	155.925	3511.08
2238	-0.9308	0	142.053	5.2823	6.4552	607.844	125.51	15.9895	3.3578	25.3311	67.2382	1.092	0.0857	0.0887	0	81.2269	10.4055	148.214	235.393	77.4573	0.0912	0	0.0442	0.02	0	0	0	0	0	0	0	0.001	0	0	0	0	0	155.925	3511.08
2239	-0.9308	0	142.053	5.2823	6.4552	607.844	125.51	15.9895	3.3578	25.3311	67.2382	1.092	0.0857	0.0887	0	81.2269	10.4055	148.214	235.393	77.4573	0.0912	0	0.0442	0.02	0	0	0	0	0	0	0	0.001	0	0	0	0	0	155.925	3511.08
2240	-0.9308	0	142.053	5.2823	6.4552	607.844	125.51	15.9895	3.3578	25.3311	67.2382	1.092	0.0857	0.0887	0	81.2269	10.4055	148.214	235.393	77.4573	0.0912	0	0.0442	0.019	0	0	0	0	0	0	0	0.001	0	0	0	0	0	155.925	3511.08
2241	-0.9308	0	142.053	5.2823	6.4552	607.844	125.51	15.9895	3.3578	25.3311	67.2382	1.092	0.0857	0.0887	0	81.2269	10.4055	148.214	235.393	77.4573	0.0912	0	0.0442	0.018	0	0	0	0	0	0	0	0.001	0	0	0	0	0	155.925	3511.08
2242	-0.9308	0	142.053	5.2823	6.4552	607.844	125.51	15.9895	3.3578	25.3311	67.2382	1.092	0.0857	0.0887	0	81.2269	10.4055	148.214	235.393	77.4573	0.0912	0	0.0442	0.018	0	0	0	0	0	0	0	0.001	0	0	0	0	0	155.925	3511.08
2243	-0.9308	0	142.053	5.2823	6.4552	607.844	125.51	15.9895	3.3578	25.3311	67.2382	1.092	0.0857	0.0887	0	81.2269	10.4055	148.214	235.393	77.4573	0.0912	0	0.0442	0.017	0	0	0	0	0	0	0	0.001	0	0	0	0	0	155.925	3511.08
2244	-0.9308	0	142.053	5.2823	6.4552	607.844	125.51	15.9895	3.3578	25.3311	67.2382	1.092	0.0857	0.0887	0	81.2269	10.4055	148.214	235.393	77.4573	0.0912	0	0.0442	0.017	0	0	0	0	0	0	0	0.001	0	0	0	0	0	155.925	3511.08
2245	-0.9308	0	142.053	5.2823	6.4552	607.844	125.51	15.9895	3.3578	25.3311	67.2382	1.092	0.0857	0.0887	0	81.2269	10.4055	148.214	235.393	77.4573	0.0912	0	0.0442	0.016	0	0	0	0	0	0	0	0.001	0	0	0	0	0	155.925	3511.08
2246	-0.9308	0	142.053	5.2823	6.4552	607.844	125.51	15.9895	3.3578	25.3311	67.2382	1.092	0.0857	0.0887	0	81.2269	10.4055	148.214	235.393	77.4573	0.0912	0	0.0442	0.016	0	0	0	0	0	0	0	0.001	0	0	0	0	0	155.925	3511.08
2247	-0.9308	0	142.053	5.2823	6.4552	607.844	125.51	15.9895	3.3578	25.3311	67.2382	1.092	0.0857	0.0887	0	81.2269	10.4055	148.214	235.393	77.4573	0.0912	0	0.0442	0.015	0	0	0	0	0	0	0	0.001	0	0	0	0	0	155.925	3511.08
2248	-0.9308	0	142.053	5.2823	6.4552	607.844	125.51	15.9895	3.3578	25.3311	67.2382	1.092	0.0857	0.0887	0	81.2269	10.4055	148.214	235.393	77.4573	0.0912	0	0.0442	0.015	0	0	0	0	0	0	0	0.001	0	0	0	0	0	155.925	3511.08
2249	-0.9308	0	142.053	5.2823	6.4552	607.844	125.51	15.9895	3.3578	25.3311	67.2382	1.092	0.0857	0.0887	0	81.2269	10.4055	148.214	235.393	77.4573	0.0912	0	0.0442	0.014	0	0	0	0	0	0	0	0.001	0	0	0	0	0	155.925	3511.08
2250	-0.9308	0	142.053	5.2823	6.4552	607.844	125.51	15.9895	3.3578	25.3311	67.2382	1.092	0.0857	0.0887	0	81.2269	10.4055	148.214	235.393	77.4573	0.0912	0	0.0442	0.014	0	0	0	0	0	0	0	0.001	0	0	0	0	0	155.925	3511.08
2251	-0.9308	0	142.053	5.2823	6.4552	607.844	125.51	15.9895	3.3578	25.3311	67.2382	1.092	0.0857	0.0887	0	81.2269	10.4055	148.214	235.393	77.4573	0.0912	0	0.0442	0.013	0	0	0	0	0	0	0	0.001	0	0	0	0	0	155.925	3511.08
2252	-0.9308	0	142.053	5.2823	6.4552	607.844	125.51	15.9895	3.3578	25.3311	67.2382	1.092	0.0857	0.0887	0	81.2269	10.4055	148.214	235.393	77.4573	0.0912	0	0.0442	0.013	0	0	0	0	0	0	0	0.001	0	0	0	0	0	155.925	3511.08
2253	-0.9308	0	142.053	5.2823	6.4552	607.844	125.51	15.9895	3.3578	25.3311	67.2382	1.092	0.0857	0.0887	0	81.2269	10.4055	148.214	235.393	77.4573	0.0912	0	0.0442	0.012	0	0	0	0	0	0	0	0.001	0	0	0	0	0	155.925	3511.08
2254	-0.9308	0	142.053	5.2823	6.4552	607.844	125.51	15.9895	3.3578	25.3311	67.2382	1.092	0.0857	0.0887	0	81.2269	10.4055	148.214	235.393	77.4573	0.0912	0	0.0442	0.012	0	0	0	0	0	0	0	0.001	0	0	0	0	0	155.925	3511.08
2255	-0.9308	0	142.053	5.2823	6.4552	607.844	125.51	15.9895	3.3578	25.3311	67.2382	1.092	0.0857	0.0887	0	81.2269	10.4055	148.214	235.393	77.4573	0.0912	0	0.0442	0.012	0	0	0	0	0	0	0	0	0	0	0	0	0	155.925	3511.08
2256	-0.9308	0	142.053	5.2823	6.4552	607.844	125.51	15.9895	3.3578	25.3311	67.2382	1.092	0.0857	0.0887	0	81.2269	10.4055	148.214	235.393	77.4573	0.0912	0	0.0442	0.011	0	0	0	0	0	0	0	0	0	0	0	0	0	155.925	3511.08
2257	-0.9308	0	142.053	5.2823	6.4552	607.844	125.51	15.9895	3.3578	25.3311	67.2382	1.092	0.0857	0.0887	0	81.2269	10.4055	148.214	235.393	77.4573	0.0912	0	0.0442	0.011	0	0	0	0	0	0	0	0	0	0	0	0	0	155.925	3511.08
2258	-0.9308	0	142.053	5.2823	6.4552	607.844	125.51	15.9895	3.3578	25.3311	67.2382	1.092	0.0857	0.0887	0	81.2269	10.4055	148.214	235.393	77.4573	0.0912	0	0.0442	0.01	0	0	0	0	0	0	0	0	0	0	0	0	0	155.925	3511.08
2259	-0.9308	0	142.053	5.2823	6.4552	607.844	125.51	15.9895	3.3578	25.3311	67.2382	1.092	0.0857	0.0887	0	81.2269	10.4055	148.214	235.393	77.4573	0.0912	0	0.0442	0.01	0	0	0	0	0	0	0	0	0	0	0	0	0	155.925	3511.08
2260	-0.9308	0	142.053	5.2823	6.4552	607.844	125.51	15.9895	3.3578	25.3311	67.2382	1.092	0.0857	0.0887	0	81.2269	10.4055	148.214	235.393	77.4573	0.0912	0	0.0442	0.01	0	0	0	0	0	0	0	0	0	0	0	0	0	155.925	3511.08
2261	-0.9308	0	142.053	5.2823	6.4552	607.844	125.51	15.9895	3.3578	25.3311	67.2382	1.092	0.0857	0.0887	0	81.2269	10.4055	148.214	235.393	77.4573	0.0912	0	0.0442	0.009	0	0	0	0	0	0	0	0	0	0	0	0	0	155.925	3511.08
2262	-0.9308	0	142.053	5.2823	6.4552	607.844	125.51	15.9895	3.3578	25.3311	67.2382	1.092	0.0857	0.0887	0	81.2269	10.4055	148.214	235.393	77.4573	0.0912	0	0.0442	0.009	0	0	0	0	0	0	0	0	0	0	0	0	0	155.925	3511.08
2263	-0.9308	0	142.053	5.2823	6.4552	607.844	125.51	15.9895	3.3578	25.3311	67.2382	1.092	0.0857	0.0887	0	81.2269	10.4055	148.214	235.393	77.4573	0.0912	0	0.0442	0.009	0	0	0	0	0	0	0	0	0	0	0	0	0	155.925	3511.08
2264	-0.9308	0	142.053	5.2823	6.4552	607.844	125.51	15.9895	3.3578	25.3311	67.2382	1.092	0.0857	0.0887	0	81.2269	10.4055	148.214	235.393	77.4573	0.0912	0	0.0442	0.009	0	0	0	0	0	0	0	0	0	0	0	0	0	155.925	3511.08
2265	-0.9308	0	142.053	5.2823	6.4552	607.844	125.51	15.9895	3.3578	25.3311	67.2382	1.092	0.0857	0.0887	0	81.2269	10.4055	148.214	235.393	77.4573	0.0912	0	0.0442	0.008	0	0	0	0	0	0	0	0	0	0	0	0	0	155.925	3511.08
2266	-0.9308	0	142.053	5.2823	6.4552	607.844	125.51	15.9895	3.3578	25.3311	67.2382	1.092	0.0857	0.0887	0	81.2269	10.4055	148.214	235.393	77.4573	0.0912	0	0.0442	0.008	0	0	0	0	0	0	0	0	0	0	0	0	0	155.925	3511.08
2267	-0.9308	0	142.053	5.2823	6.4552	607.844	125.51	15.9895	3.3578	25.3311	67.2382	1.092	0.0857	0.0887	0	81.2269	10.4055	148.214	235.393	77.4573	0.0912	0	0.0442	0.008	0	0	0	0	0	0	0	0	0	0	0	0	0	155.925	3511.08
2268	-0.9308	0	142.053	5.2823	6.4552	607.844	125.51	15.9895	3.3578	25.3311	67.2382	1.092	0.0857	0.0887	0	81.2269	10.4055	148.214	235.393	77.4573	0.0912	0	0.0442	0.007	0	0	0	0	0	0	0	0	0	0	0	0	0	155.925	3511.08
2269	-0.9308	0	142.053	5.2823	6.4552	607.844	125.51	15.9895	3.3578	25.3311	67.2382	1.092	0.0857	0.0887	0	81.2269	10.4055	148.214	235.393	77.4573	0.0912	0	0.0442	0.007	0	0	0	0	0	0	0	0	0	0	0	0	0	155.925	3511.08
2270	-0.9308	0	142.053	5.2823	6.4552	607.844	125.51	15.9895	3.3578	25.3311	67.2382	1.092	0.0857	0.0887	0	81.2269	10.4055	148.214	235.393	77.4573	0.0912	0	0.0442	0.007	0	0	0	0	0	0	0	0	0	0	0	0	0	155.925	3511.08
2271	-0.9308	0	142.053	5.2823	6.4552	607.844	125.51	15.9895	3.3578	25.3311	67.2382	1.092	0.0857	0.0887	0	81.2269	10.4055	148.214	235.393	77.4573	0.0912	0	0.0442	0.007	0	0	0	0	0	0	0	0	0	0	0	0	0	155.925	3511.08
2272	-0.9308	0	142.053	5.2823	6.4552	607.844	125.51	15.9895	3.3578	25.3311	67.2382	1.092	0.0857	0.0887	0	81.2269	10.4055	148.214	235.393	77.4573	0.0912	0	0.0442	0.007	0	0	0	0	0	0	0	0	0	0	0	0	0	155.925	3511.08
2273	-0.9308	0	142.053	5.2823	6.4552	607.844	125.51	15.9895	3.3578	25.3311	67.2382	1.092	0.0857	0.0887	0	81.2269	10.4055	148.214	235.393	77.4573	0.0912	0	0.0442	0.006	0	0	0	0	0	0	0	0	0	0	0	0	0	155.925	3511.08
2274	-0.9308	0	142.053	5.2823	6.4552	607.844	125.51	15.9895	3.3578	25.3311	67.2382	1.092	0.0857	0.0887	0	81.2269	10.4055	148.214	235.393	77.4573	0.0912	0	0.0442	0.006	0	0	0	0	0	0	0	0	0	0	0	0	0	155.925	3511.08
2275	-0.9308	0	142.053	5.2823	6.4552	607.844	125.51	15.9895	3.3578	25.3311	67.2382	1.092	0.0857	0.0887	0	81.2269	10.4055	148.214	235.393	77.4573	0.0912	0	0.0442	0.006	0	0	0	0	0	0	0	0	0	0	0	0	0	155.925	3511.08
2276	-0.9308	0	142.053	5.2823	6.4552	607.844	125.51	15.9895	3.3578	25.3311	67.2382	1.092	0.0857	0.0887	0	81.2269	10.4055	148.214	235.393	77.4573	0.0912	0	0.0442	0.006	0	0	0	0	0	0	0	0	0	0	0	0	0	155.925	3511.08
2277	-0.9308	0	142.053	5.2823	6.4552	607.844	125.51	15.9895	3.3578	25.3311	67.2382	1.092	0.0857	0.0887	0	81.2269	10.4055	148.214	235.393	77.4573	0.0912	0	0.0442	0.006	0	0	0	0	0	0	0	0	0	0	0	0	0	155.925	3511.08
2278	-0.9308	0	142.053	5.2823	6.4552	607.844	125.51	15.9895	3.3578	25.3311	67.2382	1.092	0.0857	0.0887	0	81.2269	10.4055	148.214	235.393	77.4573	0.0912	0	0.0442	0.005	0	0	0	0	0	0	0	0	0	0	0	0	0	155.925	3511.08
2279	-0.9308	0	142.053	5.2823	6.4552	607.844	125.51	15.9895	3.3578	25.3311	67.2382	1.092	0.0857	0.0887	0	81.2269	10.4055	148.214	235.393	77.4573	0.0912	0	0.0442	0.005	0	0	0	0	0	0	0	0	0	0	0	0	0	155.925	3511.08
2280	-0.9308	0	142.053	5.2823	6.4552	607.844	125.51	15.9895	3.3578	25.3311	67.2382	1.092	0.0857	0.0887	0	81.2269	10.4055	148.214	235.393	77.4573	0.0912	0	0.0442	0.005	0	0	0	0	0	0	0	0	0	0	0	0	0	155.925	3511.08
2281	-0.9308	0	142.053	5.2823	6.4552	607.844	125.51	15.9895	3.3578	25.3311	67.2382	1.092	0.0857	0.0887	0	81.2269	10.4055	148.214	235.393	77.4573	0.0912	0	0.0442	0.005	0	0	0	0	0	0	0	0	0	0	0	0	0	155.925	3511.08
2282	-0.9308	0	142.053	5.2823	6.4552	607.844	125.51	15.9895	3.3578	25.3311	67.2382	1.092	0.0857	0.0887	0	81.2269	10.4055	148.214	235.393	77.4573	0.0912	0	0.0442	0.005	0	0	0	0	0	0	0	0	0	0	0	0	0	155.925	3511.08
2283	-0.9308	0	142.053	5.2823	6.4552	607.844	125.51	15.9895	3.3578	25.3311	67.2382	1.092	0.0857	0.0887	0	81.2269	10.4055	148.214	235.393	77.4573	0.0912	0	0.0442	0.005	0	0	0	0	0	0	0	0	0	0	0	0	0	155.925	3511.08
2284	-0.9308	0	142.053	5.2823	6.4552	607.844	125.51	15.9895	3.3578	25.3311	67.2382	1.092	0.0857	0.0887	0	81.2269	10.4055	148.214	235.393	77.4573	0.0912	0	0.0442	0.004	0	0	0	0	0	0	0	0	0	0	0	0	0	155.925	3511.08
2285	-0.9308	0	142.053	5.2823	6.4552	607.844	125.51	15.9895	3.3578	25.3311	67.2382	1.092	0.0857	0.0887	0	81.2269	10.4055	148.214	235.393	77.4573	0.0912	0	0.0442	0.004	0	0	0	0	0	0	0	0	0	0	0	0	0	155.925	3511.08
2286	-0.9308	0	142.053	5.2823	6.4552	607.844	125.51	15.9895	3.3578	25.3311	67.2382	1.092	0.0857	0.0887	0	81.2269	10.4055	148.214	235.393	77.4573	0.0912	0	0.0442	0.004	0	0	0	0	0	0	0	0	0	0	0	0	0	155.925	3511.08
2287	-0.9308	0	142.053	5.2823	6.4552	607.844	125.51	15.9895	3.3578	25.3311	67.2382	1.092	0.0857	0.0887	0	81.2269	10.4055	148.214	235.393	77.4573	0.0912	0	0.0442	0.004	0	0	0	0	0	0	0	0	0	0	0	0	0	155.925	3511.08
2288	-0.9308	0	142.053	5.2823	6.4552	607.844	125.51	15.9895	3.3578	25.3311	67.2382	1.092	0.0857	0.0887	0	81.2269	10.4055	148.214	235.393	77.4573	0.0912	0	0.0442	0.004	0	0	0	0	0	0	0	0	0	0	0	0	0	155.925	3511.08
2289	-0.9308	0	142.053	5.2823	6.4552	607.844	125.51	15.9895	3.3578	25.3311	67.2382	1.092	0.0857	0.0887	0	81.2269	10.4055	148.214	235.393	77.4573	0.0912	0	0.0442	0.004	0	0	0	0	0	0	0	0	0	0	0	0	0	155.925	3511.08
2290	-0.9308	0	142.053	5.2823	6.4552	607.844	125.51	15.9895	3.3578	25.3311	67.2382	1.092	0.0857	0.0887	0	81.2269	10.4055	148.214	235.393	77.4573	0.0912	0	0.0442	0.004	0	0	0	0	0	0	0	0	0	0	0	0	0	155.925	3511.08
2291	-0.9308	0	142.053	5.2823	6.4552	607.844	125.51	15.9895	3.3578	25.3311	67.2382	1.092	0.0857	0.0887	0	81.2269	10.4055	148.214	235.393	77.4573	0.0912	0	0.0442	0.003	0	0	0	0	0	0	0	0	0	0	0	0	0	155.925	3511.08
2292	-0.9308	0	142.053	5.2823	6.4552	607.844	125.51	15.9895	3.3578	25.3311	67.2382	1.092	0.0857	0.0887	0	81.2269	10.4055	148.214	235.393	77.4573	0.0912	0	0.0442	0.003	0	0	0	0	0	0	0	0	0	0	0	0	0	155.925	3511.08
2293	-0.9308	0	142.053	5.2823	6.4552	607.844	125.51	15.9895	3.3578	25.3311	67.2382	1.092	0.0857	0.0887	0	81.2269	10.4055	148.214	235.393	77.4573	0.0912	0	0.0442	0.003	0	0	0	0	0	0	0	0	0	0	0	0	0	155.925	3511.08
2294	-0.9308	0	142.053	5.2823	6.4552	607.844	125.51	15.9895	3.3578	25.3311	67.2382	1.092	0.0857	0.0887	0	81.2269	10.4055	148.214	235.393	77.4573	0.0912	0	0.0442	0.003	0	0	0	0	0	0	0	0	0	0	0	0	0	155.925	3511.08
2295	-0.9308	0	142.053	5.2823	6.4552	607.844	125.51	15.9895	3.3578	25.3311	67.2382	1.092	0.0857	0.0887	0	81.2269	10.4055	148.214	235.393	77.4573	0.0912	0	0.0442	0.003	0	0	0	0	0	0	0	0	0	0	0	0	0	155.925	3511.08
2296	-0.9308	0	142.053	5.2823	6.4552	607.844	125.51	15.9895	3.3578	25.3311	67.2382	1.092	0.0857	0.0887	0	81.2269	10.4055	148.214	235.393	77.4573	0.0912	0	0.0442	0.003	0	0	0	0	0	0	0	0	0	0	0	0	0	155.925	3511.08
2297	-0.9308	0	142.053	5.2823	6.4552	607.844	125.51	15.9895	3.3578	25.3311	67.2382	1.092	0.0857	0.0887	0	81.2269	10.4055	148.214	235.393	77.4573	0.0912	0	0.0442	0.003	0	0	0	0	0	0	0	0	0	0	0	0	0	155.925	3511.08
2298	-0.9308	0	142.053	5.2823	6.4552	607.844	125.51	15.9895	3.3578	25.3311	67.2382	1.092	0.0857	0.0887	0	81.2269	10.4055	148.214	235.393	77.4573	0.0912	0	0.0442	0.003	0	0	0	0	0	0	0	0	0	0	0	0	0	155.925	3511.08
2299	-0.9308	0	142.053	5.2823	6.4552	607.844	125.51	15.9895	3.3578	25.3311	67.2382	1.092	0.0857	0.0887	0	81.2269	10.4055	148.214	235.393	77.4573	0.0912	0	0.0442	0.003	0	0	0	0	0	0	0	0	0	0	0	0	0	155.925	3511.08
2300	-0.9308	0	142.053	5.2823	6.4552	607.844	125.51	15.9895	3.3578	25.3311	67.2382	1.092	0.0857	0.0887	0	81.2269	10.4055	148.214	235.393	77.4573	0.0912	0	0.0442	0.003	0	0	0	0	0	0	0	0	0	0	0	0	0	155.925	3511.08
2301	-0.9308	0	142.053	5.2823	6.4552	607.844	125.51	15.9895	3.3578	25.3311	67.2382	1.092	0.0857	0.0887	0	81.2269	10.4055	148.214	235.393	77.4573	0.0912	0	0.0442	0.002	0	0	0	0	0	0	0	0	0	0	0	0	0	155.925	3511.08
2302	-0.9308	0	142.053	5.2823	6.4552	607.844	125.51	15.9895	3.3578	25.3311	67.2382	1.092	0.0857	0.0887	0	81.2269	10.4055	148.214	235.393	77.4573	0.0912	0	0.0442	0.002	0	0	0	0	0	0	0	0	0	0	0	0	0	155.925	3511.08
2303	-0.9308	0	142.053	5.2823	6.4552	607.844	125.51	15.9895	3.3578	25.3311	67.2382	1.092	0.0857	0.0887	0	81.2269	10.4055	148.214	235.393	77.4573	0.0912	0	0.0442	0.002	0	0	0	0	0	0	0	0	0	0	0	0	0	155.925	3511.08
2304	-0.9308	0	142.053	5.2823	6.4552	607.844	125.51	15.9895	3.3578	25.3311	67.2382	1.092	0.0857	0.0887	0	81.2269	10.4055	148.214	235.393	77.4573	0.0912	0	0.0442	0.002	0	0	0	0	0	0	0	0	0	0	0	0	0	155.925	3511.08
2305	-0.9308	0	142.053	5.2823	6.4552	607.844	125.51	15.9895	3.3578	25.3311	67.2382	1.092	0.0857	0.0887	0	81.2269	10.4055	148.214	235.393	77.4573	0.0912	0	0.0442	0.002	0	0	0	0	0	0	0	0	0	0	0	0	0	155.925	3511.08
2306	-0.9308	0	142.053	5.2823	6.4552	607.844	125.51	15.9895	3.3578	25.3311	67.2382	1.092	0.0857	0.0887	0	81.2269	10.4055	148.214	235.393	77.4573	0.0912	0	0.0442	0.002	0	0	0	0	0	0	0	0	0	0	0	0	0	155.925	3511.08
2307	-0.9308	0	142.053	5.2823	6.4552	607.844	125.51	15.9895	3.3578	25.3311	67.2382	1.092	0.0857	0.0887	0	81.2269	10.4055	148.214	235.393	77.4573	0.0912	0	0.0442	0.002	0	0	0	0	0	0	0	0	0	0	0	0	0	155.925	3511.08
2308	-0.9308	0	142.053	5.2823	6.4552	607.844	125.51	15.9895	3.3578	25.3311	67.2382	1.092	0.0857	0.0887	0	81.2269	10.4055	148.214	235.393	77.4573	0.0912	0	0.0442	0.002	0	0	0	0	0	0	0	0	0	0	0	0	0	155.925	3511.08
2309	-0.9308	0	142.053	5.2823	6.4552	607.844	125.51	15.9895	3.3578	25.3311	67.2382	1.092	0.0857	0.0887	0	81.2269	10.4055	148.214	235.393	77.4573	0.0912	0	0.0442	0.002	0	0	0	0	0	0	0	0	0	0	0	0	0	155.925	3511.08
2310	-0.9308	0	142.053	5.2823	6.4552	607.844	125.51	15.9895	3.3578	25.3311	67.2382	1.092	0.0857	0.0887	0	81.2269	10.4055	148.214	235.393	77.4573	0.0912	0	0.0442	0.002	0	0	0	0	0	0	0	0	0	0	0	0	0	155.925	3511.08
2311	-0.9308	0	142.053	5.2823	6.4552	607.844	125.51	15.9895	3.3578	25.3311	67.2382	1.092	0.0857	0.0887	0	81.2269	10.4055	148.214	235.393	77.4573	0.0912	0	0.0442	0.002	0	0	0	0	0	0	0	0	0	0	0	0	0	155.925	3511.08
2312	-0.9308	0	142.053	5.2823	6.4552	607.844	125.51	15.9895	3.3578	25.3311	67.2382	1.092	0.0857	0.0887	0	81.2269	10.4055	148.214	235.393	77.4573	0.0912	0	0.0442	0.002	0	0	0	0	0	0	0	0	0	0	0	0	0	155.925	3511.08
2313	-0.9308	0	142.053	5.2823	6.4552	607.844	125.51	15.9895	3.3578	25.3311	67.2382	1.092	0.0857	0.0887	0	81.2269	10.4055	148.214	235.393	77.4573	0.0912	0	0.0442	0.002	0	0	0	0	0	0	0	0	0	0	0	0	0	155.925	3511.08
2314	-0.9308	0	142.053	5.2823	6.4552	607.844	125.51	15.9895	3.3578	25.3311	67.2382	1.092	0.0857	0.0887	0	81.2269	10.4055	148.214	235.393	77.4573	0.0912	0	0.0442	0.002	0	0	0	0	0	0	0	0	0	0	0	0	0	155.925	3511.08
2315	-0.9308	0	142.053	5.2823	6.4552	607.844	125.51	15.9895	3.3578	25.3311	67.2382	1.092	0.0857	0.0887	0	81.2269	10.4055	148.214	235.393	77.4573	0.0912	0	0.0442	0.002	0	0	0	0	0	0	0	0	0	0	0	0	0	155.925	3511.08
2316	-0.9308	0	142.053	5.2823	6.4552	607.844	125.51	15.9895	3.3578	25.3311	67.2382	1.092	0.0857	0.0887	0	81.2269	10.4055	148.214	235.393	77.4573	0.0912	0	0.0442	0.001	0	0	0	0	0	0	0	0	0	0	0	0	0	155.925	3511.08
2317	-0.9308	0	142.053	5.2823	6.4552	607.844	125.51	15.9895	3.3578	25.3311	67.2382	1.092	0.0857	0.0887	0	81.2269	10.4055	148.214	235.393	77.4573	0.0912	0	0.0442	0.001	0	0	0	0	0	0	0	0	0	0	0	0	0	155.925	3511.08
2318	-0.9308	0	142.053	5.2823	6.4552	607.844	125.51	15.9895	3.3578	25.3311	67.2382	1.092	0.0857	0.0887	0	81.2269	10.4055	148.214	235.393	77.4573	0.0912	0	0.0442	0.001	0	0	0	0	0	0	0	0	0	0	0	0	0	155.925	3511.08
2319	-0.9308	0	142.053	5.2823	6.4552	607.844	125.51	15.9895	3.3578	25.3311	67.2382	1.092	0.0857	0.0887	0	81.2269	10.4055	148.214	235.393	77.4573	0.0912	0	0.0442	0.001	0	0	0	0	0	0	0	0	0	0	0	0	0	155.925	3511.08
2320	-0.9308	0	142.053	5.2823	6.4552	607.844	125.51	15.9895	3.3578	25.3311	67.2382	1.092	0.0857	0.0887	0	81.2269	10.4055	148.214	235.393	77.4573	0.0912	0	0.0442	0.001	0	0	0	0	0	0	0	0	0	0	0	0	0	155.925	3511.08
2321	-0.9308	0	142.053	5.2823	6.4552	607.844	125.51	15.9895	3.3578	25.3311	67.2382	1.092	0.0857	0.0887	0	81.2269	10.4055	148.214	235.393	77.4573	0.0912	0	0.0442	0.001	0	0	0	0	0	0	0	0	0	0	0	0	0	155.925	3511.08
2322	-0.9308	0	142.053	5.2823	6.4552	607.844	125.51	15.9895	3.3578	25.3311	67.2382	1.092	0.0857	0.0887	0	81.2269	10.4055	148.214	235.393	77.4573	0.0912	0	0.0442	0.001	0	0	0	0	0	0	0	0	0	0	0	0	0	155.925	3511.08
2323	-0.9308	0	142.053	5.2823	6.4552	607.844	125.51	15.9895	3.3578	25.3311	67.2382	1.092	0.0857	0.0887	0	81.2269	10.4055	148.214	235.393	77.4573	0.0912	0	0.0442	0.001	0	0	0	0	0	0	0	0	0	0	0	0	0	155.925	3511.08
2324	-0.9308	0	142.053	5.2823	6.4552	607.844	125.51	15.9895	3.3578	25.3311	67.2382	1.092	0.0857	0.0887	0	81.2269	10.4055	148.214	235.393	77.4573	0.0912	0	0.0442	0.001	0	0	0	0	0	0	0	0	0	0	0	0	0	155.925	3511.08
2325	-0.9308	0	142.053	5.2823	6.4552	607.844	125.51	15.9895	3.3578	25.3311	67.2382	1.092	0.0857	0.0887	0	81.2269	10.4055	148.214	235.393	77.4573	0.0912	0	0.0442	0.001	0	0	0	0	0	0	0	0	0	0	0	0	0	155.925	3511.08
2326	-0.9308	0	142.053	5.2823	6.4552	607.844	125.51	15.9895	3.3578	25.3311	67.2382	1.092	0.0857	0.0887	0	81.2269	10.4055	148.214	235.393	77.4573	0.0912	0	0.0442	0.001	0	0	0	0	0	0	0	0	0	0	0	0	0	155.925	3511.08
2327	-0.9308	0	142.053	5.2823	6.4552	607.844	125.51	15.9895	3.3578	25.3311	67.2382	1.092	0.0857	0.0887	0	81.2269	10.4055	148.214	235.393	77.4573	0.0912	0	0.0442	0.001	0	0	0	0	0	0	0	0	0	0	0	0	0	155.925	3511.08
2328	-0.9308	0	142.053	5.2823	6.4552	607.844	125.51	15.9895	3.3578	25.3311	67.2382	1.092	0.0857	0.0887	0	81.2269	10.4055	148.214	235.393	77.4573	0.0912	0	0.0442	0.001	0	0	0	0	0	0	0	0	0	0	0	0	0	155.925	3511.08
2329	-0.9308	0	142.053	5.2823	6.4552	607.844	125.51	15.9895	3.3578	25.3311	67.2382	1.092	0.0857	0.0887	0	81.2269	10.4055	148.214	235.393	77.4573	0.0912	0	0.0442	0.001	0	0	0	0	0	0	0	0	0	0	0	0	0	155.925	3511.08
2330	-0.9308	0	142.053	5.2823	6.4552	607.844	125.51	15.9895	3.3578	25.3311	67.2382	1.092	0.0857	0.0887	0	81.2269	10.4055	148.214	235.393	77.4573	0.0912	0	0.0442	0.001	0	0	0	0	0	0	0	0	0	0	0	0	0	155.925	3511.08
2331	-0.9308	0	142.053	5.2823	6.4552	607.844	125.51	15.9895	3.3578	25.3311	67.2382	1.092	0.0857	0.0887	0	81.2269	10.4055	148.214	235.393	77.4573	0.0912	0	0.0442	0.001	0	0	0	0	0	0	0	0	0	0	0	0	0	155.925	3511.08
2332	-0.9308	0	142.053	5.2823	6.4552	607.844	125.51	15.9895	3.3578	25.3311	67.2382	1.092	0.0857	0.0887	0	81.2269	10.4055	148.214	235.393	77.4573	0.0912	0	0.0442	0.001	0	0	0	0	0	0	0	0	0	0	0	0	0	155.925	3511.08
2333	-0.9308	0	142.053	5.2823	6.4552	607.844	125.51	15.9895	3.3578	25.3311	67.2382	1.092	0.0857	0.0887	0	81.2269	10.4055	148.214	235.393	77.4573	0.0912	0	0.0442	0.001	0	0	0	0	0	0	0	0	0	0	0	0	0	155.925	3511.08
2334	-0.9308	0	142.053	5.2823	6.4552	607.844	125.51	15.9895	3.3578	25.3311	67.2382	1.092	0.0857	0.0887	0	81.2269	10.4055	148.214	235.393	77.4573	0.0912	0	0.0442	0.001	0	0	0	0	0	0	0	0	0	0	0	0	0	155.925	3511.08
2335	-0.9308	0	142.053	5.2823	6.4552	607.844	125.51	15.9895	3.3578	25.3311	67.2382	1.092	0.0857	0.0887	0	81.2269	10.4055	148.214	235.393	77.4573	0.0912	0	0.0442	0.001	0	0	0	0	0	0	0	0	0	0	0	0	0	155.925	3511.08
2336	-0.9308	0	142.053	5.2823	6.4552	607.844	125.51	15.9895	3.3578	25.3311	67.2382	1.092	0.0857	0.0887	0	81.2269	10.4055	148.214	235.393	77.4573	0.0912	0	0.0442	0.001	0	0	0	0	0	0	0	0	0	0	0	0	0	155.925	3511.08
2337	-0.9308	0	142.053	5.2823	6.4552	607.844	125.51	15.9895	3.3578	25.3311	67.2382	1.092	0.0857	0.0887	0	81.2269	10.4055	148.214	235.393	77.4573	0.0912	0	0.0442	0.001	0	0	0	0	0	0	0	0	0	0	0	0	0	155.925	3511.08
2338	-0.9308	0	142.053	5.2823	6.4552	607.844	125.51	15.9895	3.3578	25.3311	67.2382	1.092	0.0857	0.0887	0	81.2269	10.4055	148.214	235.393	77.4573	0.0912	0	0.0442	0.001	0	0	0	0	0	0	0	0	0	0	0	0	0	155.925	3511.08
2339	-0.9308	0	142.053	5.2823	6.4552	607.844	125.51	15.9895	3.3578	25.3311	67.2382	1.092	0.0857	0.0887	0	81.2269	10.4055	148.214	235.393	77.4573	0.0912	0	0.0442	0.001	0	0	0	0	0	0	0	0	0	0	0	0	0	155.925	3511.08
2340	-0.9308	0	142.053	5.2823	6.4552	607.844	125.51	15.9895	3.3578	25.3311	67.2382	1.092	0.0857	0.0887	0	81.2269	10.4055	148.214	235.393	77.4573	0.0912	0	0.0442	0.001	0	0	0	0	0	0	0	0	0	0	0	0	0	155.925	3511.08
2341	-0.9308	0	142.053	5.2823	6.4552	607.844	125.51	15.9895	3.3578	25.3311	67.2382	1.092	0.0857	0.0887	0	81.2269	10.4055	148.214	235.393	77.4573	0.0912	0	0.0442	0.001	0	0	0	0	0	0	0	0	0	0	0	0	0	155.925	3511.08
2342	-0.9308	0	142.053	5.2823	6.4552	607.844	125.51	15.9895	3.3578	25.3311	67.2382	1.092	0.0857	0.0887	0	81.2269	10.4055	148.214	235.393	77.4573	0.0912	0	0.0442	0.001	0	0	0	0	0	0	0	0	0	0	0	0	0	155.925	3511.08
2343	-0.9308	0	142.053	5.2823	6.4552	607.844	125.51	15.9895	3.3578	25.3311	67.2382	1.092	0.0857	0.0887	0	81.2269	10.4055	148.214	235.393	77.4573	0.0912	0	0.0442	0.001	0	0	0	0	0	0	0	0	0	0	0	0	0	155.925	3511.08
2344	-0.9308	0	142.053	5.2823	6.4552	607.844	125.51	15.9895	3.3578	25.3311	67.2382	1.092	0.0857	0.0887	0	81.2269	10.4055	148.214	235.393	77.4573	0.0912	0	0.0442	0.001	0	0	0	0	0	0	0	0	0	0	0	0	0	155.925	3511.08
2345	-0.9308	0	142.053	5.2823	6.4552	607.844	125.51	15.9895	3.3578	25.3311	67.2382	1.092	0.0857	0.0887	0	81.2269	10.4055	148.214	235.393	77.4573	0.0912	0	0.0442	0.001	0	0	0	0	0	0	0	0	0	0	0	0	0	155.925	3511.08
2346	-0.9308	0	142.053	5.2823	6.4552	607.844	125.51	15.9895	3.3578	25.3311	67.2382	1.092	0.0857	0.0887	0	81.2269	10.4055	148.214	235.393	77.4573	0.0912	0	0.0442	0.001	0	0	0	0	0	0	0	0	0	0	0	0	0	155.925	3511.08
2347	-0.9308	0	142.053	5.2823	6.4552	607.844	125.51	15.9895	3.3578	25.3311	67.2382	1.092	0.0857	0.0887	0	81.2269	10.4055	148.214	235.393	77.4573	0.0912	0	0.0442	0.001	0	0	0	0	0	0	0	0	0	0	0	0	0	155.925	3511.08
2348	-0.9308	0	142.053	5.2823	6.4552	607.844	125.51	15.9895	3.3578	25.3311	67.2382	1.092	0.0857	0.0887	0	81.2269	10.4055	148.214	235.393	77.4573	0.0912	0	0.0442	0.001	0	0	0	0	0	0	0	0	0	0	0	0	0	155.925	3511.08
2349	-0.9308	0	142.053	5.2823	6.4552	607.844	125.51	15.9895	3.3578	25.3311	67.2382	1.092	0.0857	0.0887	0	81.2269	10.4055	148.214	235.393	77.4573	0.0912	0	0.0442	0	0	0	0	0	0	0	0	0	0	0	0	0	0	155.925	3511.08
2350	-0.9308	0	142.053	5.2823	6.4552	607.844	125.51	15.9895	3.3578	25.3311	67.2382	1.092	0.0857	0.0887	0	81.2269	10.4055	148.214	235.393	77.4573	0.0912	0	0.0442	0	0	0	0	0	0	0	0	0	0	0	0	0	0	155.925	3511.08
2351	-0.9308	0	142.053	5.2823	6.4552	607.844	125.51	15.9895	3.3578	25.3311	67.2382	1.092	0.0857	0.0887	0	81.2269	10.4055	148.214	235.393	77.4573	0.0912	0	0.0442	0	0	0	0	0	0	0	0	0	0	0	0	0	0	155.925	3511.08
2352	-0.9308	0	142.053	5.2823	6.4552	607.844	125.51	15.9895	3.3578	25.3311	67.2382	1.092	0.0857	0.0887	0	81.2269	10.4055	148.214	235.393	77.4573	0.0912	0	0.0442	0	0	0	0	0	0	0	0	0	0	0	0	0	0	155.925	3511.08
2353	-0.9308	0	142.053	5.2823	6.4552	607.844	125.51	15.9895	3.3578	25.3311	67.2382	1.092	0.0857	0.0887	0	81.2269	10.4055	148.214	235.393	77.4573	0.0912	0	0.0442	0	0	0	0	0	0	0	0	0	0	0	0	0	0	155.925	3511.08
2354	-0.9308	0	142.053	5.2823	6.4552	607.844	125.51	15.9895	3.3578	25.3311	67.2382	1.092	0.0857	0.0887	0	81.2269	10.4055	148.214	235.393	77.4573	0.0912	0	0.0442	0	0	0	0	0	0	0	0	0	0	0	0	0	0	155.925	3511.08
2355	-0.9308	0	142.053	5.2823	6.4552	607.844	125.51	15.9895	3.3578	25.3311	67.2382	1.092	0.0857	0.0887	0	81.2269	10.4055	148.214	235.393	77.4573	0.0912	0	0.0442	0	0	0	0	0	0	0	0	0	0	0	0	0	0	155.925	3511.08
2356	-0.9308	0	142.053	5.2823	6.4552	607.844	125.51	15.9895	3.3578	25.3311	67.2382	1.092	0.0857	0.0887	0	81.2269	10.4055	148.214	235.393	77.4573	0.0912	0	0.0442	0	0	0	0	0	0	0	0	0	0	0	0	0	0	155.925	3511.08
2357	-0.9308	0	142.053	5.2823	6.4552	607.844	125.51	15.9895	3.3578	25.3311	67.2382	1.092	0.0857	0.0887	0	81.2269	10.4055	148.214	235.393	77.4573	0.0912	0	0.0442	0	0	0	0	0	0	0	0	0	0	0	0	0	0	155.925	3511.08
2358	-0.9308	0	142.053	5.2823	6.4552	607.844	125.51	15.9895	3.3578	25.3311	67.2382	1.092	0.0857	0.0887	0	81.2269	10.4055	148.214	235.393	77.4573	0.0912	0	0.0442	0	0	0	0	0	0	0	0	0	0	0	0	0	0	155.925	3511.08
2359	-0.9308	0	142.053	5.2823	6.4552	607.844	125.51	15.9895	3.3578	25.3311	67.2382	1.092	0.0857	0.0887	0	81.2269	10.4055	148.214	235.393	77.4573	0.0912	0	0.0442	0	0	0	0	0	0	0	0	0	0	0	0	0	0	155.925	3511.08
2360	-0.9308	0	142.053	5.2823	6.4552	607.844	125.51	15.9895	3.3578	25.3311	67.2382	1.092	0.0857	0.0887	0	81.2269	10.4055	148.214	235.393	77.4573	0.0912	0	0.0442	0	0	0	0	0	0	0	0	0	0	0	0	0	0	155.925	3511.08
2361	-0.9308	0	142.053	5.2823	6.4552	607.844	125.51	15.9895	3.3578	25.3311	67.2382	1.092	0.0857	0.0887	0	81.2269	10.4055	148.214	235.393	77.4573	0.0912	0	0.0442	0	0	0	0	0	0	0	0	0	0	0	0	0	0	155.925	3511.08
2362	-0.9308	0	142.053	5.2823	6.4552	607.844	125.51	15.9895	3.3578	25.3311	67.2382	1.092	0.0857	0.0887	0	81.2269	10.4055	148.214	235.393	77.4573	0.0912	0	0.0442	0	0	0	0	0	0	0	0	0	0	0	0	0	0	155.925	3511.08
2363	-0.9308	0	142.053	5.2823	6.4552	607.844	125.51	15.9895	3.3578	25.3311	67.2382	1.092	0.0857	0.0887	0	81.2269	10.4055	148.214	235.393	77.4573	0.0912	0	0.0442	0	0	0	0	0	0	0	0	0	0	0	0	0	0	155.925	3511.08
2364	-0.9308	0	142.053	5.2823	6.4552	607.844	125.51	15.9895	3.3578	25.3311	67.2382	1.092	0.0857	0.0887	0	81.2269	10.4055	148.214	235.393	77.4573	0.0912	0	0.0442	0	0	0	0	0	0	0	0	0	0	0	0	0	0	155.925	3511.08
2365	-0.9308	0	142.053	5.2823	6.4552	607.844	125.51	15.9895	3.3578	25.3311	67.2382	1.092	0.0857	0.0887	0	81.2269	10.4055	148.214	235.393	77.4573	0.0912	0	0.0442	0	0	0	0	0	0	0	0	0	0	0	0	0	0	155.925	3511.08
2366	-0.9308	0	142.053	5.2823	6.4552	607.844	125.51	15.9895	3.3578	25.3311	67.2382	1.092	0.0857	0.0887	0	81.2269	10.4055	148.214	235.393	77.4573	0.0912	0	0.0442	0	0	0	0	0	0	0	0	0	0	0	0	0	0	155.925	3511.08
2367	-0.9308	0	142.053	5.2823	6.4552	607.844	125.51	15.9895	3.3578	25.3311	67.2382	1.092	0.0857	0.0887	0	81.2269	10.4055	148.214	235.393	77.4573	0.0912	0	0.0442	0	0	0	0	0	0	0	0	0	0	0	0	0	0	155.925	3511.08
2368	-0.9308	0	142.053	5.2823	6.4552	607.844	125.51	15.9895	3.3578	25.3311	67.2382	1.092	0.0857	0.0887	0	81.2269	10.4055	148.214	235.393	77.4573	0.0912	0	0.0442	0	0	0	0	0	0	0	0	0	0	0	0	0	0	155.925	3511.08
2369	-0.9308	0	142.053	5.2823	6.4552	607.844	125.51	15.9895	3.3578	25.3311	67.2382	1.092	0.0857	0.0887	0	81.2269	10.4055	148.214	235.393	77.4573	0.0912	0	0.0442	0	0	0	0	0	0	0	0	0	0	0	0	0	0	155.925	3511.08
2370	-0.9308	0	142.053	5.2823	6.4552	607.844	125.51	15.9895	3.3578	25.3311	67.2382	1.092	0.0857	0.0887	0	81.2269	10.4055	148.214	235.393	77.4573	0.0912	0	0.0442	0	0	0	0	0	0	0	0	0	0	0	0	0	0	155.925	3511.08
2371	-0.9308	0	142.053	5.2823	6.4552	607.844	125.51	15.9895	3.3578	25.3311	67.2382	1.092	0.0857	0.0887	0	81.2269	10.4055	148.214	235.393	77.4573	0.0912	0	0.0442	0	0	0	0	0	0	0	0	0	0	0	0	0	0	155.925	3511.08
2372	-0.9308	0	142.053	5.2823	6.4552	607.844	125.51	15.9895	3.3578	25.3311	67.2382	1.092	0.0857	0.0887	0	81.2269	10.4055	148.214	235.393	77.4573	0.0912	0	0.0442	0	0	0	0	0	0	0	0	0	0	0	0	0	0	155.925	3511.08
2373	-0.9308	0	142.053	5.2823	6.4552	607.844	125.51	15.9895	3.3578	25.3311	67.2382	1.092	0.0857	0.0887	0	81.2269	10.4055	148.214	235.393	77.4573	0.0912	0	0.0442	0	0	0	0	0	0	0	0	0	0	0	0	0	0	155.925	3511.08
2374	-0.9308	0	142.053	5.2823	6.4552	607.844	125.51	15.9895	3.3578	25.3311	67.2382	1.092	0.0857	0.0887	0	81.2269	10.4055	148.214	235.393	77.4573	0.0912	0	0.0442	0	0	0	0	0	0	0	0	0	0	0	0	0	0	155.925	3511.08
2375	-0.9308	0	142.053	5.2823	6.4552	607.844	125.51	15.9895	3.3578	25.3311	67.2382	1.092	0.0857	0.0887	0	81.2269	10.4055	148.214	235.393	77.4573	0.0912	0	0.0442	0	0	0	0	0	0	0	0	0	0	0	0	0	0	155.925	3511.08
2376	-0.9308	0	142.053	5.2823	6.4552	607.844	125.51	15.9895	3.3578	25.3311	67.2382	1.092	0.0857	0.0887	0	81.2269	10.4055	148.214	235.393	77.4573	0.0912	0	0.0442	0	0	0	0	0	0	0	0	0	0	0	0	0	0	155.925	3511.08
2377	-0.9308	0	142.053	5.2823	6.4552	607.844	125.51	15.9895	3.3578	25.3311	67.2382	1.092	0.0857	0.0887	0	81.2269	10.4055	148.214	235.393	77.4573	0.0912	0	0.0442	0	0	0	0	0	0	0	0	0	0	0	0	0	0	155.925	3511.08
2378	-0.9308	0	142.053	5.2823	6.4552	607.844	125.51	15.9895	3.3578	25.3311	67.2382	1.092	0.0857	0.0887	0	81.2269	10.4055	148.214	235.393	77.4573	0.0912	0	0.0442	0	0	0	0	0	0	0	0	0	0	0	0	0	0	155.925	3511.08
2379	-0.9308	0	142.053	5.2823	6.4552	607.844	125.51	15.9895	3.3578	25.3311	67.2382	1.092	0.0857	0.0887	0	81.2269	10.4055	148.214	235.393	77.4573	0.0912	0	0.0442	0	0	0	0	0	0	0	0	0	0	0	0	0	0	155.925	3511.08
2380	-0.9308	0	142.053	5.2823	6.4552	607.844	125.51	15.9895	3.3578	25.3311	67.2382	1.092	0.0857	0.0887	0	81.2269	10.4055	148.214	235.393	77.4573	0.0912	0	0.0442	0	0	0	0	0	0	0	0	0	0	0	0	0	0	155.925	3511.08
2381	-0.9308	0	142.053	5.2823	6.4552	607.844	125.51	15.9895	3.3578	25.3311	67.2382	1.092	0.0857	0.0887	0	81.2269	10.4055	148.214	235.393	77.4573	0.0912	0	0.0442	0	0	0	0	0	0	0	0	0	0	0	0	0	0	155.925	3511.08
2382	-0.9308	0	142.053	5.2823	6.4552	607.844	125.51	15.9895	3.3578	25.3311	67.2382	1.092	0.0857	0.0887	0	81.2269	10.4055	148.214	235.393	77.4573	0.0912	0	0.0442	0	0	0	0	0	0	0	0	0	0	0	0	0	0	155.925	3511.08
2383	-0.9308	0	142.053	5.2823	6.4552	607.844	125.51	15.9895	3.3578	25.3311	67.2382	1.092	0.0857	0.0887	0	81.2269	10.4055	148.214	235.393	77.4573	0.0912	0	0.0442	0	0	0	0	0	0	0	0	0	0	0	0	0	0	155.925	3511.08
2384	-0.9308	0	142.053	5.2823	6.4552	607.844	125.51	15.9895	3.3578	25.3311	67.2382	1.092	0.0857	0.0887	0	81.2269	10.4055	148.214	235.393	77.4573	0.0912	0	0.0442	0	0	0	0	0	0	0	0	0	0	0	0	0	0	155.925	3511.08
2385	-0.9308	0	142.053	5.2823	6.4552	607.844	125.51	15.9895	3.3578	25.3311	67.2382	1.092	0.0857	0.0887	0	81.2269	10.4055	148.214	235.393	77.4573	0.0912	0	0.0442	0	0	0	0	0	0	0	0	0	0	0	0	0	0	155.925	3511.08
2386	-0.9308	0	142.053	5.2823	6.4552	607.844	125.51	15.9895	3.3578	25.3311	67.2382	1.092	0.0857	0.0887	0	81.2269	10.4055	148.214	235.393	77.4573	0.0912	0	0.0442	0	0	0	0	0	0	0	0	0	0	0	0	0	0	155.925	3511.08
2387	-0.9308	0	142.053	5.2823	6.4552	607.844	125.51	15.9895	3.3578	25.3311	67.2382	1.092	0.0857	0.0887	0	81.2269	10.4055	148.214	235.393	77.4573	0.0912	0	0.0442	0	0	0	0	0	0	0	0	0	0	0	0	0	0	155.925	3511.08
2388	-0.9308	0	142.053	5.2823	6.4552	607.844	125.51	15.9895	3.3578	25.3311	67.2382	1.092	0.0857	0.0887	0	81.2269	10.4055	148.214	235.393	77.4573	0.0912	0	0.0442	0	0	0	0	0	0	0	0	0	0	0	0	0	0	155.925	3511.08
2389	-0.9308	0	142.053	5.2823	6.4552	607.844	125.51	15.9895	3.3578	25.3311	67.2382	1.092	0.0857	0.0887	0	81.2269	10.4055	148.214	235.393	77.4573	0.0912	0	0.0442	0	0	0	0	0	0	0	0	0	0	0	0	0	0	155.925	3511.08
2390	-0.9308	0	142.053	5.2823	6.4552	607.844	125.51	15.9895	3.3578	25.3311	67.2382	1.092	0.0857	0.0887	0	81.2269	10.4055	148.214	235.393	77.4573	0.0912	0	0.0442	0	0	0	0	0	0	0	0	0	0	0	0	0	0	155.925	3511.08
2391	-0.9308	0	142.053	5.2823	6.4552	607.844	125.51	15.9895	3.3578	25.3311	67.2382	1.092	0.0857	0.0887	0	81.2269	10.4055	148.214	235.393	77.4573	0.0912	0	0.0442	0	0	0	0	0	0	0	0	0	0	0	0	0	0	155.925	3511.08
2392	-0.9308	0	142.053	5.2823	6.4552	607.844	125.51	15.9895	3.3578	25.3311	67.2382	1.092	0.0857	0.0887	0	81.2269	10.4055	148.214	235.393	77.4573	0.0912	0	0.0442	0	0	0	0	0	0	0	0	0	0	0	0	0	0	155.925	3511.08
2393	-0.9308	0	142.053	5.2823	6.4552	607.844	125.51	15.9895	3.3578	25.3311	67.2382	1.092	0.0857	0.0887	0	81.2269	10.4055	148.214	235.393	77.4573	0.0912	0	0.0442	0	0	0	0	0	0	0	0	0	0	0	0	0	0	155.925	3511.08
2394	-0.9308	0	142.053	5.2823	6.4552	607.844	125.51	15.9895	3.3578	25.3311	67.2382	1.092	0.0857	0.0887	0	81.2269	10.4055	148.214	235.393	77.4573	0.0912	0	0.0442	0	0	0	0	0	0	0	0	0	0	0	0	0	0	155.925	3511.08
2395	-0.9308	0	142.053	5.2823	6.4552	607.844	125.51	15.9895	3.3578	25.3311	67.2382	1.092	0.0857	0.0887	0	81.2269	10.4055	148.214	235.393	77.4573	0.0912	0	0.0442	0	0	0	0	0	0	0	0	0	0	0	0	0	0	155.925	3511.08
2396	-0.9308	0	142.053	5.2823	6.4552	607.844	125.51	15.9895	3.3578	25.3311	67.2382	1.092	0.0857	0.0887	0	81.2269	10.4055	148.214	235.393	77.4573	0.0912	0	0.0442	0	0	0	0	0	0	0	0	0	0	0	0	0	0	155.925	3511.08
2397	-0.9308	0	142.053	5.2823	6.4552	607.844	125.51	15.9895	3.3578	25.3311	67.2382	1.092	0.0857	0.0887	0	81.2269	10.4055	148.214	235.393	77.4573	0.0912	0	0.0442	0	0	0	0	0	0	0	0	0	0	0	0	0	0	155.925	3511.08
2398	-0.9308	0	142.053	5.2823	6.4552	607.844	125.51	15.9895	3.3578	25.3311	67.2382	1.092	0.0857	0.0887	0	81.2269	10.4055	148.214	235.393	77.4573	0.0912	0	0.0442	0	0	0	0	0	0	0	0	0	0	0	0	0	0	155.925	3511.08
2399	-0.9308	0	142.053	5.2823	6.4552	607.844	125.51	15.9895	3.3578	25.3311	67.2382	1.092	0.0857	0.0887	0	81.2269	10.4055	148.214	235.393	77.4573	0.0912	0	0.0442	0	0	0	0	0	0	0	0	0	0	0	0	0	0	155.925	3511.08
2400	-0.9308	0	142.053	5.2823	6.4552	607.844	125.51	15.9895	3.3578	25.3311	67.2382	1.092	0.0857	0.0887	0	81.2269	10.4055	148.214	235.393	77.4573	0.0912	0	0.0442	0	0	0	0	0	0	0	0	0	0	0	0	0	0	155.925	3511.08
2401	-0.9308	0	142.053	5.2823	6.4552	607.844	125.51	15.9895	3.3578	25.3311	67.2382	1.092	0.0857	0.0887	0	81.2269	10.4055	148.214	235.393	77.4573	0.0912	0	0.0442	0	0	0	0	0	0	0	0	0	0	0	0	0	0	155.925	3511.08
2402	-0.9308	0	142.053	5.2823	6.4552	607.844	125.51	15.9895	3.3578	25.3311	67.2382	1.092	0.0857	0.0887	0	81.2269	10.4055	148.214	235.393	77.4573	0.0912	0	0.0442	0	0	0	0	0	0	0	0	0	0	0	0	0	0	155.925	3511.08
2403	-0.9308	0	142.053	5.2823	6.4552	607.844	125.51	15.9895	3.3578	25.3311	67.2382	1.092	0.0857	0.0887	0	81.2269	10.4055	148.214	235.393	77.4573	0.0912	0	0.0442	0	0	0	0	0	0	0	0	0	0	0	0	0	0	155.925	3511.08
2404	-0.9308	0	142.053	5.2823	6.4552	607.844	125.51	15.9895	3.3578	25.3311	67.2382	1.092	0.0857	0.0887	0	81.2269	10.4055	148.214	235.393	77.4573	0.0912	0	0.0442	0	0	0	0	0	0	0	0	0	0	0	0	0	0	155.925	3511.08
2405	-0.9308	0	142.053	5.2823	6.4552	607.844	125.51	15.9895	3.3578	25.3311	67.2382	1.092	0.0857	0.0887	0	81.2269	10.4055	148.214	235.393	77.4573	0.0912	0	0.0442	0	0	0	0	0	0	0	0	0	0	0	0	0	0	155.925	3511.08
2406	-0.9308	0	142.053	5.2823	6.4552	607.844	125.51	15.9895	3.3578	25.3311	67.2382	1.092	0.0857	0.0887	0	81.2269	10.4055	148.214	235.393	77.4573	0.0912	0	0.0442	0	0	0	0	0	0	0	0	0	0	0	0	0	0	155.925	3511.08
2407	-0.9308	0	142.053	5.2823	6.4552	607.844	125.51	15.9895	3.3578	25.3311	67.2382	1.092	0.0857	0.0887	0	81.2269	10.4055	148.214	235.393	77.4573	0.0912	0	0.0442	0	0	0	0	0	0	0	0	0	0	0	0	0	0	155.925	3511.08
2408	-0.9308	0	142.053	5.2823	6.4552	607.844	125.51	15.9895	3.3578	25.3311	67.2382	1.092	0.0857	0.0887	0	81.2269	10.4055	148.214	235.393	77.4573	0.0912	0	0.0442	0	0	0	0	0	0	0	0	0	0	0	0	0	0	155.925	3511.08
2409	-0.9308	0	142.053	5.2823	6.4552	607.844	125.51	15.9895	3.3578	25.3311	67.2382	1.092	0.0857	0.0887	0	81.2269	10.4055	148.214	235.393	77.4573	0.0912	0	0.0442	0	0	0	0	0	0	0	0	0	0	0	0	0	0	155.925	3511.08
2410	-0.9308	0	142.053	5.2823	6.4552	607.844	125.51	15.9895	3.3578	25.3311	67.2382	1.092	0.0857	0.0887	0	81.2269	10.4055	148.214	235.393	77.4573	0.0912	0	0.0442	0	0	0	0	0	0	0	0	0	0	0	0	0	0	155.925	3511.08
2411	-0.9308	0	142.053	5.2823	6.4552	607.844	125.51	15.9895	3.3578	25.3311	67.2382	1.092	0.0857	0.0887	0	81.2269	10.4055	148.214	235.393	77.4573	0.0912	0	0.0442	0	0	0	0	0	0	0	0	0	0	0	0	0	0	155.925	3511.08
2412	-0.9308	0	142.053	5.2823	6.4552	607.844	125.51	15.9895	3.3578	25.3311	67.2382	1.092	0.0857	0.0887	0	81.2269	10.4055	148.214	235.393	77.4573	0.0912	0	0.0442	0	0	0	0	0	0	0	0	0	0	0	0	0	0	155.925	3511.08
2413	-0.9308	0	142.053	5.2823	6.4552	607.844	125.51	15.9895	3.3578	25.3311	67.2382	1.092	0.0857	0.0887	0	81.2269	10.4055	148.214	235.393	77.4573	0.0912	0	0.0442	0	0	0	0	0	0	0	0	0	0	0	0	0	0	155.925	3511.08
2414	-0.9308	0	142.053	5.2823	6.4552	607.844	125.51	15.9895	3.3578	25.3311	67.2382	1.092	0.0857	0.0887	0	81.2269	10.4055	148.214	235.393	77.4573	0.0912	0	0.0442	0	0	0	0	0	0	0	0	0	0	0	0	0	0	155.925	3511.08
2415	-0.9308	0	142.053	5.2823	6.4552	607.844	125.51	15.9895	3.3578	25.3311	67.2382	1.092	0.0857	0.0887	0	81.2269	10.4055	148.214	235.393	77.4573	0.0912	0	0.0442	0	0	0	0	0	0	0	0	0	0	0	0	0	0	155.925	3511.08
2416	-0.9308	0	142.053	5.2823	6.4552	607.844	125.51	15.9895	3.3578	25.3311	67.2382	1.092	0.0857	0.0887	0	81.2269	10.4055	148.214	235.393	77.4573	0.0912	0	0.0442	0	0	0	0	0	0	0	0	0	0	0	0	0	0	155.925	3511.08
2417	-0.9308	0	142.053	5.2823	6.4552	607.844	125.51	15.9895	3.3578	25.3311	67.2382	1.092	0.0857	0.0887	0	81.2269	10.4055	148.214	235.393	77.4573	0.0912	0	0.0442	0	0	0	0	0	0	0	0	0	0	0	0	0	0	155.925	3511.08
2418	-0.9308	0	142.053	5.2823	6.4552	607.844	125.51	15.9895	3.3578	25.3311	67.2382	1.092	0.0857	0.0887	0	81.2269	10.4055	148.214	235.393	77.4573	0.0912	0	0.0442	0	0	0	0	0	0	0	0	0	0	0	0	0	0	155.925	3511.08
2419	-0.9308	0	142.053	5.2823	6.4552	607.844	125.51	15.9895	3.3578	25.3311	67.2382	1.092	0.0857	0.0887	0	81.2269	10.4055	148.214	235.393	77.4573	0.0912	0	0.0442	0	0	0	0	0	0	0	0	0	0	0	0	0	0	155.925	3511.08
2420	-0.9308	0	142.053	5.2823	6.4552	607.844	125.51	15.9895	3.3578	25.3311	67.2382	1.092	0.0857	0.0887	0	81.2269	10.4055	148.214	235.393	77.4573	0.0912	0	0.0442	0	0	0	0	0	0	0	0	0	0	0	0	0	0	155.925	3511.08
2421	-0.9308	0	142.053	5.2823	6.4552	607.844	125.51	15.9895	3.3578	25.3311	67.2382	1.092	0.0857	0.0887	0	81.2269	10.4055	148.214	235.393	77.4573	0.0912	0	0.0442	0	0	0	0	0	0	0	0	0	0	0	0	0	0	155.925	3511.08
2422	-0.9308	0	142.053	5.2823	6.4552	607.844	125.51	15.9895	3.3578	25.3311	67.2382	1.092	0.0857	0.0887	0	81.2269	10.4055	148.214	235.393	77.4573	0.0912	0	0.0442	0	0	0	0	0	0	0	0	0	0	0	0	0	0	155.925	3511.08
2423	-0.9308	0	142.053	5.2823	6.4552	607.844	125.51	15.9895	3.3578	25.3311	67.2382	1.092	0.0857	0.0887	0	81.2269	10.4055	148.214	235.393	77.4573	0.0912	0	0.0442	0	0	0	0	0	0	0	0	0	0	0	0	0	0	155.925	3511.08
2424	-0.9308	0	142.053	5.2823	6.4552	607.844	125.51	15.9895	3.3578	25.3311	67.2382	1.092	0.0857	0.0887	0	81.2269	10.4055	148.214	235.393	77.4573	0.0912	0	0.0442	0	0	0	0	0	0	0	0	0	0	0	0	0	0	155.925	3511.08
2425	-0.9308	0	142.053	5.2823	6.4552	607.844	125.51	15.9895	3.3578	25.3311	67.2382	1.092	0.0857	0.0887	0	81.2269	10.4055	148.214	235.393	77.4573	0.0912	0	0.0442	0	0	0	0	0	0	0	0	0	0	0	0	0	0	155.925	3511.08
2426	-0.9308	0	142.053	5.2823	6.4552	607.844	125.51	15.9895	3.3578	25.3311	67.2382	1.092	0.0857	0.0887	0	81.2269	10.4055	148.214	235.393	77.4573	0.0912	0	0.0442	0	0	0	0	0	0	0	0	0	0	0	0	0	0	155.925	3511.08
2427	-0.9308	0	142.053	5.2823	6.4552	607.844	125.51	15.9895	3.3578	25.3311	67.2382	1.092	0.0857	0.0887	0	81.2269	10.4055	148.214	235.393	77.4573	0.0912	0	0.0442	0	0	0	0	0	0	0	0	0	0	0	0	0	0	155.925	3511.08
2428	-0.9308	0	142.053	5.2823	6.4552	607.844	125.51	15.9895	3.3578	25.3311	67.2382	1.092	0.0857	0.0887	0	81.2269	10.4055	148.214	235.393	77.4573	0.0912	0	0.0442	0	0	0	0	0	0	0	0	0	0	0	0	0	0	155.925	3511.08
2429	-0.9308	0	142.053	5.2823	6.4552	607.844	125.51	15.9895	3.3578	25.3311	67.2382	1.092	0.0857	0.0887	0	81.2269	10.4055	148.214	235.393	77.4573	0.0912	0	0.0442	0	0	0	0	0	0	0	0	0	0	0	0	0	0	155.925	3511.08
2430	-0.9308	0	142.053	5.2823	6.4552	607.844	125.51	15.9895	3.3578	25.3311	67.2382	1.092	0.0857	0.0887	0	81.2269	10.4055	148.214	235.393	77.4573	0.0912	0	0.0442	0	0	0	0	0	0	0	0	0	0	0	0	0	0	155.925	3511.08
2431	-0.9308	0	142.053	5.2823	6.4552	607.844	125.51	15.9895	3.3578	25.3311	67.2382	1.092	0.0857	0.0887	0	81.2269	10.4055	148.214	235.393	77.4573	0.0912	0	0.0442	0	0	0	0	0	0	0	0	0	0	0	0	0	0	155.925	3511.08
2432	-0.9308	0	142.053	5.2823	6.4552	607.844	125.51	15.9895	3.3578	25.3311	67.2382	1.092	0.0857	0.0887	0	81.2269	10.4055	148.214	235.393	77.4573	0.0912	0	0.0442	0	0	0	0	0	0	0	0	0	0	0	0	0	0	155.925	3511.08
2433	-0.9308	0	142.053	5.2823	6.4552	607.844	125.51	15.9895	3.3578	25.3311	67.2382	1.092	0.0857	0.0887	0	81.2269	10.4055	148.214	235.393	77.4573	0.0912	0	0.0442	0	0	0	0	0	0	0	0	0	0	0	0	0	0	155.925	3511.08
2434	-0.9308	0	142.053	5.2823	6.4552	607.844	125.51	15.9895	3.3578	25.3311	67.2382	1.092	0.0857	0.0887	0	81.2269	10.4055	148.214	235.393	77.4573	0.0912	0	0.0442	0	0	0	0	0	0	0	0	0	0	0	0	0	0	155.925	3511.08
2435	-0.9308	0	142.053	5.2823	6.4552	607.844	125.51	15.9895	3.3578	25.3311	67.2382	1.092	0.0857	0.0887	0	81.2269	10.4055	148.214	235.393	77.4573	0.0912	0	0.0442	0	0	0	0	0	0	0	0	0	0	0	0	0	0	155.925	3511.08
2436	-0.9308	0	142.053	5.2823	6.4552	607.844	125.51	15.9895	3.3578	25.3311	67.2382	1.092	0.0857	0.0887	0	81.2269	10.4055	148.214	235.393	77.4573	0.0912	0	0.0442	0	0	0	0	0	0	0	0	0	0	0	0	0	0	155.925	3511.08
2437	-0.9308	0	142.053	5.2823	6.4552	607.844	125.51	15.9895	3.3578	25.3311	67.2382	1.092	0.0857	0.0887	0	81.2269	10.4055	148.214	235.393	77.4573	0.0912	0	0.0442	0	0	0	0	0	0	0	0	0	0	0	0	0	0	155.925	3511.08
2438	-0.9308	0	142.053	5.2823	6.4552	607.844	125.51	15.9895	3.3578	25.3311	67.2382	1.092	0.0857	0.0887	0	81.2269	10.4055	148.214	235.393	77.4573	0.0912	0	0.0442	0	0	0	0	0	0	0	0	0	0	0	0	0	0	155.925	3511.08
2439	-0.9308	0	142.053	5.2823	6.4552	607.844	125.51	15.9895	3.3578	25.3311	67.2382	1.092	0.0857	0.0887	0	81.2269	10.4055	148.214	235.393	77.4573	0.0912	0	0.0442	0	0	0	0	0	0	0	0	0	0	0	0	0	0	155.925	3511.08
2440	-0.9308	0	142.053	5.2823	6.4552	607.844	125.51	15.9895	3.3578	25.3311	67.2382	1.092	0.0857	0.0887	0	81.2269	10.4055	148.214	235.393	77.4573	0.0912	0	0.0442	0	0	0	0	0	0	0	0	0	0	0	0	0	0	155.925	3511.08
2441	-0.9308	0	142.053	5.2823	6.4552	607.844	125.51	15.9895	3.3578	25.3311	67.2382	1.092	0.0857	0.0887	0	81.2269	10.4055	148.214	235.393	77.4573	0.0912	0	0.0442	0	0	0	0	0	0	0	0	0	0	0	0	0	0	155.925	3511.08
2442	-0.9308	0	142.053	5.2823	6.4552	607.844	125.51	15.9895	3.3578	25.3311	67.2382	1.092	0.0857	0.0887	0	81.2269	10.4055	148.214	235.393	77.4573	0.0912	0	0.0442	0	0	0	0	0	0	0	0	0	0	0	0	0	0	155.925	3511.08
2443	-0.9308	0	142.053	5.2823	6.4552	607.844	125.51	15.9895	3.3578	25.3311	67.2382	1.092	0.0857	0.0887	0	81.2269	10.4055	148.214	235.393	77.4573	0.0912	0	0.0442	0	0	0	0	0	0	0	0	0	0	0	0	0	0	155.925	3511.08
2444	-0.9308	0	142.053	5.2823	6.4552	607.844	125.51	15.9895	3.3578	25.3311	67.2382	1.092	0.0857	0.0887	0	81.2269	10.4055	148.214	235.393	77.4573	0.0912	0	0.0442	0	0	0	0	0	0	0	0	0	0	0	0	0	0	155.925	3511.08
2445	-0.9308	0	142.053	5.2823	6.4552	607.844	125.51	15.9895	3.3578	25.3311	67.2382	1.092	0.0857	0.0887	0	81.2269	10.4055	148.214	235.393	77.4573	0.0912	0	0.0442	0	0	0	0	0	0	0	0	0	0	0	0	0	0	155.925	3511.08
2446	-0.9308	0	142.053	5.2823	6.4552	607.844	125.51	15.9895	3.3578	25.3311	67.2382	1.092	0.0857	0.0887	0	81.2269	10.4055	148.214	235.393	77.4573	0.0912	0	0.0442	0	0	0	0	0	0	0	0	0	0	0	0	0	0	155.925	3511.08
2447	-0.9308	0	142.053	5.2823	6.4552	607.844	125.51	15.9895	3.3578	25.3311	67.2382	1.092	0.0857	0.0887	0	81.2269	10.4055	148.214	235.393	77.4573	0.0912	0	0.0442	0	0	0	0	0	0	0	0	0	0	0	0	0	0	155.925	3511.08
2448	-0.9308	0	142.053	5.2823	6.4552	607.844	125.51	15.9895	3.3578	25.3311	67.2382	1.092	0.0857	0.0887	0	81.2269	10.4055	148.214	235.393	77.4573	0.0912	0	0.0442	0	0	0	0	0	0	0	0	0	0	0	0	0	0	155.925	3511.08
2449	-0.9308	0	142.053	5.2823	6.4552	607.844	125.51	15.9895	3.3578	25.3311	67.2382	1.092	0.0857	0.0887	0	81.2269	10.4055	148.214	235.393	77.4573	0.0912	0	0.0442	0	0	0	0	0	0	0	0	0	0	0	0	0	0	155.925	3511.08
2450	-0.9308	0	142.053	5.2823	6.4552	607.844	125.51	15.9895	3.3578	25.3311	67.2382	1.092	0.0857	0.0887	0	81.2269	10.4055	148.214	235.393	77.4573	0.0912	0	0.0442	0	0	0	0	0	0	0	0	0	0	0	0	0	0	155.925	3511.08
2451	-0.9308	0	142.053	5.2823	6.4552	607.844	125.51	15.9895	3.3578	25.3311	67.2382	1.092	0.0857	0.0887	0	81.2269	10.4055	148.214	235.393	77.4573	0.0912	0	0.0442	0	0	0	0	0	0	0	0	0	0	0	0	0	0	155.925	3511.08
2452	-0.9308	0	142.053	5.2823	6.4552	607.844	125.51	15.9895	3.3578	25.3311	67.2382	1.092	0.0857	0.0887	0	81.2269	10.4055	148.214	235.393	77.4573	0.0912	0	0.0442	0	0	0	0	0	0	0	0	0	0	0	0	0	0	155.925	3511.08
2453	-0.9308	0	142.053	5.2823	6.4552	607.844	125.51	15.9895	3.3578	25.3311	67.2382	1.092	0.0857	0.0887	0	81.2269	10.4055	148.214	235.393	77.4573	0.0912	0	0.0442	0	0	0	0	0	0	0	0	0	0	0	0	0	0	155.925	3511.08
2454	-0.9308	0	142.053	5.2823	6.4552	607.844	125.51	15.9895	3.3578	25.3311	67.2382	1.092	0.0857	0.0887	0	81.2269	10.4055	148.214	235.393	77.4573	0.0912	0	0.0442	0	0	0	0	0	0	0	0	0	0	0	0	0	0	155.925	3511.08
2455	-0.9308	0	142.053	5.2823	6.4552	607.844	125.51	15.9895	3.3578	25.3311	67.2382	1.092	0.0857	0.0887	0	81.2269	10.4055	148.214	235.393	77.4573	0.0912	0	0.0442	0	0	0	0	0	0	0	0	0	0	0	0	0	0	155.925	3511.08
2456	-0.9308	0	142.053	5.2823	6.4552	607.844	125.51	15.9895	3.3578	25.3311	67.2382	1.092	0.0857	0.0887	0	81.2269	10.4055	148.214	235.393	77.4573	0.0912	0	0.0442	0	0	0	0	0	0	0	0	0	0	0	0	0	0	155.925	3511.08
2457	-0.9308	0	142.053	5.2823	6.4552	607.844	125.51	15.9895	3.3578	25.3311	67.2382	1.092	0.0857	0.0887	0	81.2269	10.4055	148.214	235.393	77.4573	0.0912	0	0.0442	0	0	0	0	0	0	0	0	0	0	0	0	0	0	155.925	3511.08
2458	-0.9308	0	142.053	5.2823	6.4552	607.844	125.51	15.9895	3.3578	25.3311	67.2382	1.092	0.0857	0.0887	0	81.2269	10.4055	148.214	235.393	77.4573	0.0912	0	0.0442	0	0	0	0	0	0	0	0	0	0	0	0	0	0	155.925	3511.08
2459	-0.9308	0	142.053	5.2823	6.4552	607.844	125.51	15.9895	3.3578	25.3311	67.2382	1.092	0.0857	0.0887	0	81.2269	10.4055	148.214	235.393	77.4573	0.0912	0	0.0442	0	0	0	0	0	0	0	0	0	0	0	0	0	0	155.925	3511.08
2460	-0.9308	0	142.053	5.2823	6.4552	607.844	125.51	15.9895	3.3578	25.3311	67.2382	1.092	0.0857	0.0887	0	81.2269	10.4055	148.214	235.393	77.4573	0.0912	0	0.0442	0	0	0	0	0	0	0	0	0	0	0	0	0	0	155.925	3511.08
2461	-0.9308	0	142.053	5.2823	6.4552	607.844	125.51	15.9895	3.3578	25.3311	67.2382	1.092	0.0857	0.0887	0	81.2269	10.4055	148.214	235.393	77.4573	0.0912	0	0.0442	0	0	0	0	0	0	0	0	0	0	0	0	0	0	155.925	3511.08
2462	-0.9308	0	142.053	5.2823	6.4552	607.844	125.51	15.9895	3.3578	25.3311	67.2382	1.092	0.0857	0.0887	0	81.2269	10.4055	148.214	235.393	77.4573	0.0912	0	0.0442	0	0	0	0	0	0	0	0	0	0	0	0	0	0	155.925	3511.08
2463	-0.9308	0	142.053	5.2823	6.4552	607.844	125.51	15.9895	3.3578	25.3311	67.2382	1.092	0.0857	0.0887	0	81.2269	10.4055	148.214	235.393	77.4573	0.0912	0	0.0442	0	0	0	0	0	0	0	0	0	0	0	0	0	0	155.925	3511.08
2464	-0.9308	0	142.053	5.2823	6.4552	607.844	125.51	15.9895	3.3578	25.3311	67.2382	1.092	0.0857	0.0887	0	81.2269	10.4055	148.214	235.393	77.4573	0.0912	0	0.0442	0	0	0	0	0	0	0	0	0	0	0	0	0	0	155.925	3511.08
2465	-0.9308	0	142.053	5.2823	6.4552	607.844	125.51	15.9895	3.3578	25.3311	67.2382	1.092	0.0857	0.0887	0	81.2269	10.4055	148.214	235.393	77.4573	0.0912	0	0.0442	0	0	0	0	0	0	0	0	0	0	0	0	0	0	155.925	3511.08
2466	-0.9308	0	142.053	5.2823	6.4552	607.844	125.51	15.9895	3.3578	25.3311	67.2382	1.092	0.0857	0.0887	0	81.2269	10.4055	148.214	235.393	77.4573	0.0912	0	0.0442	0	0	0	0	0	0	0	0	0	0	0	0	0	0	155.925	3511.08
2467	-0.9308	0	142.053	5.2823	6.4552	607.844	125.51	15.9895	3.3578	25.3311	67.2382	1.092	0.0857	0.0887	0	81.2269	10.4055	148.214	235.393	77.4573	0.0912	0	0.0442	0	0	0	0	0	0	0	0	0	0	0	0	0	0	155.925	3511.08
2468	-0.9308	0	142.053	5.2823	6.4552	607.844	125.51	15.9895	3.3578	25.3311	67.2382	1.092	0.0857	0.0887	0	81.2269	10.4055	148.214	235.393	77.4573	0.0912	0	0.0442	0	0	0	0	0	0	0	0	0	0	0	0	0	0	155.925	3511.08
2469	-0.9308	0	142.053	5.2823	6.4552	607.844	125.51	15.9895	3.3578	25.3311	67.2382	1.092	0.0857	0.0887	0	81.2269	10.4055	148.214	235.393	77.4573	0.0912	0	0.0442	0	0	0	0	0	0	0	0	0	0	0	0	0	0	155.925	3511.08
2470	-0.9308	0	142.053	5.2823	6.4552	607.844	125.51	15.9895	3.3578	25.3311	67.2382	1.092	0.0857	0.0887	0	81.2269	10.4055	148.214	235.393	77.4573	0.0912	0	0.0442	0	0	0	0	0	0	0	0	0	0	0	0	0	0	155.925	3511.08
2471	-0.9308	0	142.053	5.2823	6.4552	607.844	125.51	15.9895	3.3578	25.3311	67.2382	1.092	0.0857	0.0887	0	81.2269	10.4055	148.214	235.393	77.4573	0.0912	0	0.0442	0	0	0	0	0	0	0	0	0	0	0	0	0	0	155.925	3511.08
2472	-0.9308	0	142.053	5.2823	6.4552	607.844	125.51	15.9895	3.3578	25.3311	67.2382	1.092	0.0857	0.0887	0	81.2269	10.4055	148.214	235.393	77.4573	0.0912	0	0.0442	0	0	0	0	0	0	0	0	0	0	0	0	0	0	155.925	3511.08
2473	-0.9308	0	142.053	5.2823	6.4552	607.844	125.51	15.9895	3.3578	25.3311	67.2382	1.092	0.0857	0.0887	0	81.2269	10.4055	148.214	235.393	77.4573	0.0912	0	0.0442	0	0	0	0	0	0	0	0	0	0	0	0	0	0	155.925	3511.08
2474	-0.9308	0	142.053	5.2823	6.4552	607.844	125.51	15.9895	3.3578	25.3311	67.2382	1.092	0.0857	0.0887	0	81.2269	10.4055	148.214	235.393	77.4573	0.0912	0	0.0442	0	0	0	0	0	0	0	0	0	0	0	0	0	0	155.925	3511.08
2475	-0.9308	0	142.053	5.2823	6.4552	607.844	125.51	15.9895	3.3578	25.3311	67.2382	1.092	0.0857	0.0887	0	81.2269	10.4055	148.214	235.393	77.4573	0.0912	0	0.0442	0	0	0	0	0	0	0	0	0	0	0	0	0	0	155.925	3511.08
2476	-0.9308	0	142.053	5.2823	6.4552	607.844	125.51	15.9895	3.3578	25.3311	67.2382	1.092	0.0857	0.0887	0	81.2269	10.4055	148.214	235.393	77.4573	0.0912	0	0.0442	0	0	0	0	0	0	0	0	0	0	0	0	0	0	155.925	3511.08
2477	-0.9308	0	142.053	5.2823	6.4552	607.844	125.51	15.9895	3.3578	25.3311	67.2382	1.092	0.0857	0.0887	0	81.2269	10.4055	148.214	235.393	77.4573	0.0912	0	0.0442	0	0	0	0	0	0	0	0	0	0	0	0	0	0	155.925	3511.08
2478	-0.9308	0	142.053	5.2823	6.4552	607.844	125.51	15.9895	3.3578	25.3311	67.2382	1.092	0.0857	0.0887	0	81.2269	10.4055	148.214	235.393	77.4573	0.0912	0	0.0442	0	0	0	0	0	0	0	0	0	0	0	0	0	0	155.925	3511.08
2479	-0.9308	0	142.053	5.2823	6.4552	607.844	125.51	15.9895	3.3578	25.3311	67.2382	1.092	0.0857	0.0887	0	81.2269	10.4055	148.214	235.393	77.4573	0.0912	0	0.0442	0	0	0	0	0	0	0	0	0	0	0	0	0	0	155.925	3511.08
2480	-0.9308	0	142.053	5.2823	6.4552	607.844	125.51	15.9895	3.3578	25.3311	67.2382	1.092	0.0857	0.0887	0	81.2269	10.4055	148.214	235.393	77.4573	0.0912	0	0.0442	0	0	0	0	0	0	0	0	0	0	0	0	0	0	155.925	3511.08
2481	-0.9308	0	142.053	5.2823	6.4552	607.844	125.51	15.9895	3.3578	25.3311	67.2382	1.092	0.0857	0.0887	0	81.2269	10.4055	148.214	235.393	77.4573	0.0912	0	0.0442	0	0	0	0	0	0	0	0	0	0	0	0	0	0	155.925	3511.08
2482	-0.9308	0	142.053	5.2823	6.4552	607.844	125.51	15.9895	3.3578	25.3311	67.2382	1.092	0.0857	0.0887	0	81.2269	10.4055	148.214	235.393	77.4573	0.0912	0	0.0442	0	0	0	0	0	0	0	0	0	0	0	0	0	0	155.925	3511.08
2483	-0.9308	0	142.053	5.2823	6.4552	607.844	125.51	15.9895	3.3578	25.3311	67.2382	1.092	0.0857	0.0887	0	81.2269	10.4055	148.214	235.393	77.4573	0.0912	0	0.0442	0	0	0	0	0	0	0	0	0	0	0	0	0	0	155.925	3511.08
2484	-0.9308	0	142.053	5.2823	6.4552	607.844	125.51	15.9895	3.3578	25.3311	67.2382	1.092	0.0857	0.0887	0	81.2269	10.4055	148.214	235.393	77.4573	0.0912	0	0.0442	0	0	0	0	0	0	0	0	0	0	0	0	0	0	155.925	3511.08
2485	-0.9308	0	142.053	5.2823	6.4552	607.844	125.51	15.9895	3.3578	25.3311	67.2382	1.092	0.0857	0.0887	0	81.2269	10.4055	148.214	235.393	77.4573	0.0912	0	0.0442	0	0	0	0	0	0	0	0	0	0	0	0	0	0	155.925	3511.08
2486	-0.9308	0	142.053	5.2823	6.4552	607.844	125.51	15.9895	3.3578	25.3311	67.2382	1.092	0.0857	0.0887	0	81.2269	10.4055	148.214	235.393	77.4573	0.0912	0	0.0442	0	0	0	0	0	0	0	0	0	0	0	0	0	0	155.925	3511.08
2487	-0.9308	0	142.053	5.2823	6.4552	607.844	125.51	15.9895	3.3578	25.3311	67.2382	1.092	0.0857	0.0887	0	81.2269	10.4055	148.214	235.393	77.4573	0.0912	0	0.0442	0	0	0	0	0	0	0	0	0	0	0	0	0	0	155.925	3511.08
2488	-0.9308	0	142.053	5.2823	6.4552	607.844	125.51	15.9895	3.3578	25.3311	67.2382	1.092	0.0857	0.0887	0	81.2269	10.4055	148.214	235.393	77.4573	0.0912	0	0.0442	0	0	0	0	0	0	0	0	0	0	0	0	0	0	155.925	3511.08
2489	-0.9308	0	142.053	5.2823	6.4552	607.844	125.51	15.9895	3.3578	25.3311	67.2382	1.092	0.0857	0.0887	0	81.2269	10.4055	148.214	235.393	77.4573	0.0912	0	0.0442	0	0	0	0	0	0	0	0	0	0	0	0	0	0	155.925	3511.08
2490	-0.9308	0	142.053	5.2823	6.4552	607.844	125.51	15.9895	3.3578	25.3311	67.2382	1.092	0.0857	0.0887	0	81.2269	10.4055	148.214	235.393	77.4573	0.0912	0	0.0442	0	0	0	0	0	0	0	0	0	0	0	0	0	0	155.925	3511.08
2491	-0.9308	0	142.053	5.2823	6.4552	607.844	125.51	15.9895	3.3578	25.3311	67.2382	1.092	0.0857	0.0887	0	81.2269	10.4055	148.214	235.393	77.4573	0.0912	0	0.0442	0	0	0	0	0	0	0	0	0	0	0	0	0	0	155.925	3511.08
2492	-0.9308	0	142.053	5.2823	6.4552	607.844	125.51	15.9895	3.3578	25.3311	67.2382	1.092	0.0857	0.0887	0	81.2269	10.4055	148.214	235.393	77.4573	0.0912	0	0.0442	0	0	0	0	0	0	0	0	0	0	0	0	0	0	155.925	3511.08
2493	-0.9308	0	142.053	5.2823	6.4552	607.844	125.51	15.9895	3.3578	25.3311	67.2382	1.092	0.0857	0.0887	0	81.2269	10.4055	148.214	235.393	77.4573	0.0912	0	0.0442	0	0	0	0	0	0	0	0	0	0	0	0	0	0	155.925	3511.08
2494	-0.9308	0	142.053	5.2823	6.4552	607.844	125.51	15.9895	3.3578	25.3311	67.2382	1.092	0.0857	0.0887	0	81.2269	10.4055	148.214	235.393	77.4573	0.0912	0	0.0442	0	0	0	0	0	0	0	0	0	0	0	0	0	0	155.925	3511.08
2495	-0.9308	0	142.053	5.2823	6.4552	607.844	125.51	15.9895	3.3578	25.3311	67.2382	1.092	0.0857	0.0887	0	81.2269	10.4055	148.214	235.393	77.4573	0.0912	0	0.0442	0	0	0	0	0	0	0	0	0	0	0	0	0	0	155.925	3511.08
2496	-0.9308	0	142.053	5.2823	6.4552	607.844	125.51	15.9895	3.3578	25.3311	67.2382	1.092	0.0857	0.0887	0	81.2269	10.4055	148.214	235.393	77.4573	0.0912	0	0.0442	0	0	0	0	0	0	0	0	0	0	0	0	0	0	155.925	3511.08
2497	-0.9308	0	142.053	5.2823	6.4552	607.844	125.51	15.9895	3.3578	25.3311	67.2382	1.092	0.0857	0.0887	0	81.2269	10.4055	148.214	235.393	77.4573	0.0912	0	0.0442	0	0	0	0	0	0	0	0	0	0	0	0	0	0	155.925	3511.08
2498	-0.9308	0	142.053	5.2823	6.4552	607.844	125.51	15.9895	3.3578	25.3311	67.2382	1.092	0.0857	0.0887	0	81.2269	10.4055	148.214	235.393	77.4573	0.0912	0	0.0442	0	0	0	0	0	0	0	0	0	0	0	0	0	0	155.925	3511.08
2499	-0.9308	0	142.053	5.2823	6.4552	607.844	125.51	15.9895	3.3578	25.3311	67.2382	1.092	0.0857	0.0887	0	81.2269	10.4055	148.214	235.393	77.4573	0.0912	0	0.0442	0	0	0	0	0	0	0	0	0	0	0	0	0	0	155.925	3511.08
2500	-0.9308	0	142.053	5.2823	6.4552	607.844	125.51	15.9895	3.3578	25.3311	67.2382	1.092	0.0857	0.0887	0	81.2269	10.4055	148.214	235.393	77.4573	0.0912	0	0.0442	0	0	0	0	0	0	0	0	0	0	0	0	0	0	155.925	3511.08
