# Supplementary material for: The Social Cost of Fossil and Industrial CO2 Emissions from 1950 to 2018
Source: Research Square preprint supplement (doi:10.21203/rs.3.rs-2244259/v1), 2022-11-17
Supplement: Supplementary file 13 [file RCP3PD_MIDYEAR_CONCENTRATIONS.xls]

## Sheet: RCP3PD_MIDYEAR_CONCENTRATIONS
RCP3PD__MIDYEAR__CONCENTRATIONS____________________________
CONTENT: CMIP5 RECOMMENDATIONS FOR ANNUAL AVERAGE, GLOBAL MEAN CONCENTRATIONS.
RUN: RCP3PD (RCP3-Peak&Decline), FINAL RELEASE, 26 Nov. 2009
RCP4.5 CONTACT: IMAGE group, Detlef van Vuuren (riahi@iiasa.ac.at)
DATE: 26/11/2009 11:29:06
MAGICC-VERSION: 6.3.09, 25 November 2009
FILE PRODUCED BY: RCP Concentration Calculation & Data Group, M. Meinshausen, S. Smith, K. Riahi, D. van Vuuren
DOCUMENTATION: M. Meinshausen, S. Smith et al. (2011) "The RCP GHG concentrations and their extension from 1765 to 2300", DOI 10.1007/s10584-011-0156-z, Climatic Change.
CMIP5 INFO: http://cmip-pcmdi.llnl.gov/cmip5/
RCP DATABASE: http://www.iiasa.ac.at/web-apps/tnt/RcpDb
FURTHER INFO: For data sources, aknowledgements and further information, see http://www.pik-potsdam.de/~mmalte/rcps.
NOTE: RCP3PD starts 2005; 20th century data and earlier is provided for convenience.
COLUMN_DESCRIPTION________________________________________
1. CO2EQ - (For Information only, not CMIP5 recommendation) CO2 equivalence concentrations using CO2 radiative forcing relationship Q = 3.71/ln(2)*ln(C/278), aggregating all (efficacy-adjusted) anthropogenic forcings, including greenhouse gases listed below (i.e. columns 3,4,5 and 8-35), and aerosols, trop. ozone etc. (not listed below).
2. KYOTO-CO2EQ - (For information only, not CMIP5 recommendation) As column 1, but only aggregating greenhouse gases controlled under the Kyoto Protocol (columns 3,4,5 and 8-19).
3. CO2 - Atmospheric CO2 concentrations
4. CH4 - Atmospheric CH4 concentrations
5. N2O - Atmospheric N2O concentrations
6. FGASSUMHFC134AEQ - All flourinated gases controlled under the Kyoto Protocol, i.e. HFCs, PFCs, and SF6 (columns 8-19) expressed as HFC134a equivalence concentrations.
7. MHALOSUMCFC12EQ - All flourinated gases controlled under the Montreal Protocol, i.e. CFCs, HCFCs, Halons, CCl4, CH3Br, CH3Cl (columns 20-35) expressed as CFC-12 equivalence concentrations.
8. - 19. - Flourinated Gases controlled under the Kyoto Protocol
20. - 35. - Ozone Depleting Substances controlled under the Montreal Protocol
&THISFILE_SPECIFICATIONS
THISFILE_DATACOLUMNS	35
THISFILE_FIRSTYEAR	1765
THISFILE_LASTYEAR	2500
THISFILE_ANNUALSTEPS	1
THISFILE_FIRSTDATAROW	40
THISFILE_UNITS	SEE ROW 38
THISFILE_DATTYPE	RCPDAT
/
COLUMN:	1	2	3	4	5	6	7	8	9	10	11	12	13	14	15	16	17	18	19	20	21	22	23	24	25	26	27	28	29	30	31	32	33	34	35
UNITS:	ppm	ppm	ppm	ppb	ppb	ppt	ppt	ppt	ppt	ppt	ppt	ppt	ppt	ppt	ppt	ppt	ppt	ppt	ppt	ppt	ppt	ppt	ppt	ppt	ppt	ppt	ppt	ppt	ppt	ppt	ppt	ppt	ppt	ppt	ppt
v YEARS/GAS >	CO2EQ	KYOTO-CO2EQ	CO2	CH4	N2O	FGASSUMHFC134AEQ	MHALOSUMCFC12EQ	CF4	C2F6	C6F14	HFC23	HFC32	HFC43_10	HFC125	HFC134a	HFC143a	HFC227ea	HFC245fa	SF6	CFC_11	CFC_12	CFC_113	CFC_114	CFC_115	CARB_TET	MCF	HCFC_22	HCFC_141B	HCFC_142B	HALON1211	HALON1202	HALON1301	HALON2402	CH3BR	CH3CL
1765	277.015	277.015	278.052	721.894	272.96	0	0	35	0	0	0	0	0	0	0	0	0	0	0	0	0	0	0	0	0	0	0	0	0	0	0	0	0	5.8	480
1766	277.839	277.815	278.106	722.256	272.971	0	0	35	0	0	0	0	0	0	0	0	0	0	0	0	0	0	0	0	0	0	0	0	0	0	0	0	0	5.8	480
1767	278.694	278.687	278.22	722.971	272.994	0	0	35	0	0	0	0	0	0	0	0	0	0	0	0	0	0	0	0	0	0	0	0	0	0	0	0	0	5.8	480
1768	278.748	278.836	278.343	723.668	273.017	0	0	35	0	0	0	0	0	0	0	0	0	0	0	0	0	0	0	0	0	0	0	0	0	0	0	0	0	5.8	480
1769	278.796	278.989	278.471	724.343	273.039	0	0	35	0	0	0	0	0	0	0	0	0	0	0	0	0	0	0	0	0	0	0	0	0	0	0	0	0	5.8	480
1770	278.849	279.143	278.6	724.995	273.061	0	0	35	0	0	0	0	0	0	0	0	0	0	0	0	0	0	0	0	0	0	0	0	0	0	0	0	0	5.8	480
1771	278.884	279.299	278.733	725.629	273.083	0	0	35	0	0	0	0	0	0	0	0	0	0	0	0	0	0	0	0	0	0	0	0	0	0	0	0	0	5.8	480
1772	278.925	279.459	278.869	726.25	273.104	0	0	35	0	0	0	0	0	0	0	0	0	0	0	0	0	0	0	0	0	0	0	0	0	0	0	0	0	5.8	480
1773	278.994	279.622	279.009	726.859	273.125	0	0	35	0	0	0	0	0	0	0	0	0	0	0	0	0	0	0	0	0	0	0	0	0	0	0	0	0	5.8	480
1774	279.069	279.789	279.153	727.455	273.146	0	0	35	0	0	0	0	0	0	0	0	0	0	0	0	0	0	0	0	0	0	0	0	0	0	0	0	0	5.8	480
1775	279.151	279.96	279.302	728.037	273.166	0	0	35	0	0	0	0	0	0	0	0	0	0	0	0	0	0	0	0	0	0	0	0	0	0	0	0	0	5.8	480
1776	279.242	280.137	279.457	728.604	273.187	0	0	35	0	0	0	0	0	0	0	0	0	0	0	0	0	0	0	0	0	0	0	0	0	0	0	0	0	5.8	480
1777	279.342	280.319	279.618	729.154	273.207	0	0	35	0	0	0	0	0	0	0	0	0	0	0	0	0	0	0	0	0	0	0	0	0	0	0	0	0	5.8	480
1778	279.447	280.504	279.782	729.687	273.227	0	0	35	0	0	0	0	0	0	0	0	0	0	0	0	0	0	0	0	0	0	0	0	0	0	0	0	0	5.8	480
1779	279.551	280.685	279.943	730.201	273.247	0	0	35	0	0	0	0	0	0	0	0	0	0	0	0	0	0	0	0	0	0	0	0	0	0	0	0	0	5.8	480
1780	279.65	280.859	280.097	730.692	273.266	0	0	35	0	0	0	0	0	0	0	0	0	0	0	0	0	0	0	0	0	0	0	0	0	0	0	0	0	5.8	480
1781	279.718	281.022	280.243	731.154	273.286	0	0	35	0	0	0	0	0	0	0	0	0	0	0	0	0	0	0	0	0	0	0	0	0	0	0	0	0	5.8	480
1782	279.782	281.179	280.382	731.584	273.306	0	0	35	0	0	0	0	0	0	0	0	0	0	0	0	0	0	0	0	0	0	0	0	0	0	0	0	0	5.8	480
1783	279.868	281.332	280.518	731.989	273.325	0	0	35	0	0	0	0	0	0	0	0	0	0	0	0	0	0	0	0	0	0	0	0	0	0	0	0	0	5.8	480
1784	279.959	281.487	280.657	732.378	273.345	0	0	35	0	0	0	0	0	0	0	0	0	0	0	0	0	0	0	0	0	0	0	0	0	0	0	0	0	5.8	480
1785	280.058	281.648	280.803	732.76	273.365	0	0	35	0	0	0	0	0	0	0	0	0	0	0	0	0	0	0	0	0	0	0	0	0	0	0	0	0	5.8	480
1786	280.17	281.819	280.957	733.146	273.384	0	0	35	0	0	0	0	0	0	0	0	0	0	0	0	0	0	0	0	0	0	0	0	0	0	0	0	0	5.8	480
1787	280.291	281.996	281.118	733.544	273.404	0	0	35	0	0	0	0	0	0	0	0	0	0	0	0	0	0	0	0	0	0	0	0	0	0	0	0	0	5.8	480
1788	280.419	282.177	281.282	733.965	273.424	0	0	35	0	0	0	0	0	0	0	0	0	0	0	0	0	0	0	0	0	0	0	0	0	0	0	0	0	5.8	480
1789	280.548	282.357	281.443	734.418	273.444	0	0	35	0	0	0	0	0	0	0	0	0	0	0	0	0	0	0	0	0	0	0	0	0	0	0	0	0	5.8	480
1790	280.676	282.532	281.598	734.911	273.464	0	0	35	0	0	0	0	0	0	0	0	0	0	0	0	0	0	0	0	0	0	0	0	0	0	0	0	0	5.8	480
1791	280.778	282.701	281.747	735.445	273.484	0	0	35	0	0	0	0	0	0	0	0	0	0	0	0	0	0	0	0	0	0	0	0	0	0	0	0	0	5.8	480
1792	280.879	282.867	281.891	736.018	273.504	0	0	35	0	0	0	0	0	0	0	0	0	0	0	0	0	0	0	0	0	0	0	0	0	0	0	0	0	5.8	480
1793	281.005	283.031	282.031	736.626	273.525	0	0	35	0	0	0	0	0	0	0	0	0	0	0	0	0	0	0	0	0	0	0	0	0	0	0	0	0	5.8	480
1794	281.13	283.191	282.167	737.265	273.545	0	0	35	0	0	0	0	0	0	0	0	0	0	0	0	0	0	0	0	0	0	0	0	0	0	0	0	0	5.8	480
1795	281.254	283.348	282.299	737.933	273.566	0	0	35	0	0	0	0	0	0	0	0	0	0	0	0	0	0	0	0	0	0	0	0	0	0	0	0	0	5.8	480
1796	281.378	283.502	282.427	738.627	273.587	0	0	35	0	0	0	0	0	0	0	0	0	0	0	0	0	0	0	0	0	0	0	0	0	0	0	0	0	5.8	480
1797	281.478	283.653	282.551	739.343	273.609	0	0	35	0	0	0	0	0	0	0	0	0	0	0	0	0	0	0	0	0	0	0	0	0	0	0	0	0	5.8	480
1798	281.577	283.801	282.671	740.08	273.63	0	0	35	0	0	0	0	0	0	0	0	0	0	0	0	0	0	0	0	0	0	0	0	0	0	0	0	0	5.8	480
1799	281.699	283.945	282.787	740.834	273.652	0	0	35	0	0	0	0	0	0	0	0	0	0	0	0	0	0	0	0	0	0	0	0	0	0	0	0	0	5.8	480
1800	281.795	284.086	282.899	741.608	273.675	0	0	35	0	0	0	0	0	0	0	0	0	0	0	0	0	0	0	0	0	0	0	0	0	0	0	0	0	5.8	480
1801	281.891	284.224	283.007	742.413	273.698	0	0	35	0	0	0	0	0	0	0	0	0	0	0	0	0	0	0	0	0	0	0	0	0	0	0	0	0	5.8	480
1802	281.964	284.359	283.111	743.26	273.721	0	0	35	0	0	0	0	0	0	0	0	0	0	0	0	0	0	0	0	0	0	0	0	0	0	0	0	0	5.8	480
1803	282.061	284.492	283.211	744.146	273.744	0	0	35	0	0	0	0	0	0	0	0	0	0	0	0	0	0	0	0	0	0	0	0	0	0	0	0	0	5.8	480
1804	282.204	284.622	283.307	745.063	273.768	0	0	35	0	0	0	0	0	0	0	0	0	0	0	0	0	0	0	0	0	0	0	0	0	0	0	0	0	5.8	480
1805	282.323	284.748	283.4	746.005	273.793	0	0	35	0	0	0	0	0	0	0	0	0	0	0	0	0	0	0	0	0	0	0	0	0	0	0	0	0	5.8	480
1806	282.418	284.873	283.49	746.962	273.818	0	0	35	0	0	0	0	0	0	0	0	0	0	0	0	0	0	0	0	0	0	0	0	0	0	0	0	0	5.8	480
1807	282.514	284.997	283.578	747.927	273.843	0	0	35	0	0	0	0	0	0	0	0	0	0	0	0	0	0	0	0	0	0	0	0	0	0	0	0	0	5.8	480
1808	282.631	285.115	283.661	748.893	273.869	0	0	35	0	0	0	0	0	0	0	0	0	0	0	0	0	0	0	0	0	0	0	0	0	0	0	0	0	5.8	480
1809	282.739	285.225	283.735	749.851	273.895	0	0	35	0	0	0	0	0	0	0	0	0	0	0	0	0	0	0	0	0	0	0	0	0	0	0	0	0	5.8	480
1810	282.836	285.321	283.797	750.798	273.922	0	0	35	0	0	0	0	0	0	0	0	0	0	0	0	0	0	0	0	0	0	0	0	0	0	0	0	0	5.8	480
1811	282.9	285.406	283.847	751.739	273.95	0	0	35	0	0	0	0	0	0	0	0	0	0	0	0	0	0	0	0	0	0	0	0	0	0	0	0	0	5.8	480
1812	282.957	285.483	283.889	752.682	273.978	0	0	35	0	0	0	0	0	0	0	0	0	0	0	0	0	0	0	0	0	0	0	0	0	0	0	0	0	5.8	480
1813	283.036	285.555	283.926	753.628	274.007	0	0	35	0	0	0	0	0	0	0	0	0	0	0	0	0	0	0	0	0	0	0	0	0	0	0	0	0	5.8	480
1814	283.115	285.627	283.963	754.579	274.036	0	0	35	0	0	0	0	0	0	0	0	0	0	0	0	0	0	0	0	0	0	0	0	0	0	0	0	0	5.8	480
1815	283.174	285.701	284.001	755.531	274.066	0	0	35	0	0	0	0	0	0	0	0	0	0	0	0	0	0	0	0	0	0	0	0	0	0	0	0	0	5.8	480
1816	283.215	285.778	284.043	756.486	274.097	0	0	35	0	0	0	0	0	0	0	0	0	0	0	0	0	0	0	0	0	0	0	0	0	0	0	0	0	5.8	480
1817	283.259	285.858	284.086	757.44	274.128	0	0	35	0	0	0	0	0	0	0	0	0	0	0	0	0	0	0	0	0	0	0	0	0	0	0	0	0	5.8	480
1818	283.327	285.936	284.129	758.395	274.16	0	0	35	0	0	0	0	0	0	0	0	0	0	0	0	0	0	0	0	0	0	0	0	0	0	0	0	0	5.8	480
1819	283.415	286.01	284.167	759.348	274.193	0	0	35	0	0	0	0	0	0	0	0	0	0	0	0	0	0	0	0	0	0	0	0	0	0	0	0	0	5.8	480
1820	283.498	286.078	284.198	760.3	274.227	0	0	35	0	0	0	0	0	0	0	0	0	0	0	0	0	0	0	0	0	0	0	0	0	0	0	0	0	5.8	480
1821	283.575	286.139	284.223	761.249	274.261	0	0	35	0	0	0	0	0	0	0	0	0	0	0	0	0	0	0	0	0	0	0	0	0	0	0	0	0	5.8	480
1822	283.627	286.196	284.244	762.198	274.296	0	0	35	0	0	0	0	0	0	0	0	0	0	0	0	0	0	0	0	0	0	0	0	0	0	0	0	0	5.8	480
1823	283.655	286.251	284.263	763.147	274.332	0	0	35	0	0	0	0	0	0	0	0	0	0	0	0	0	0	0	0	0	0	0	0	0	0	0	0	0	5.8	480
1824	283.706	286.306	284.281	764.095	274.368	0	0	35	0	0	0	0	0	0	0	0	0	0	0	0	0	0	0	0	0	0	0	0	0	0	0	0	0	5.8	480
1825	283.76	286.361	284.3	765.044	274.406	0	0	35	0	0	0	0	0	0	0	0	0	0	0	0	0	0	0	0	0	0	0	0	0	0	0	0	0	5.8	480
1826	283.816	286.418	284.32	765.993	274.444	0	0	35	0	0	0	0	0	0	0	0	0	0	0	0	0	0	0	0	0	0	0	0	0	0	0	0	0	5.8	480
1827	283.873	286.475	284.34	766.943	274.484	0	0	35	0	0	0	0	0	0	0	0	0	0	0	0	0	0	0	0	0	0	0	0	0	0	0	0	0	5.8	480
1828	283.931	286.532	284.36	767.894	274.524	0	0	35	0	0	0	0	0	0	0	0	0	0	0	0	0	0	0	0	0	0	0	0	0	0	0	0	0	5.8	480
1829	284.013	286.589	284.38	768.846	274.565	0	0	35	0	0	0	0	0	0	0	0	0	0	0	0	0	0	0	0	0	0	0	0	0	0	0	0	0	5.8	480
1830	283.962	286.647	284.4	769.798	274.606	0	0	35	0	0	0	0	0	0	0	0	0	0	0	0	0	0	0	0	0	0	0	0	0	0	0	0	0	5.8	480
1831	283.9	286.669	284.385	770.745	274.649	0	0	35	0	0	0	0	0	0	0	0	0	0	0	0	0	0	0	0	0	0	0	0	0	0	0	0	0	5.8	480
1832	283.882	286.6	284.28	771.683	274.693	0	0	35	0	0	0	0	0	0	0	0	0	0	0	0	0	0	0	0	0	0	0	0	0	0	0	0	0	5.8	480
1833	283.77	286.481	284.125	772.615	274.738	0	0	35	0	0	0	0	0	0	0	0	0	0	0	0	0	0	0	0	0	0	0	0	0	0	0	0	0	5.8	480
1834	283.664	286.367	283.975	773.547	274.784	0	0	35	0	0	0	0	0	0	0	0	0	0	0	0	0	0	0	0	0	0	0	0	0	0	0	0	0	5.8	480
1835	283.56	286.253	283.825	774.483	274.83	0	0	35	0	0	0	0	0	0	0	0	0	0	0	0	0	0	0	0	0	0	0	0	0	0	0	0	0	5.8	480
1836	283.369	286.14	283.675	775.428	274.878	0	0	35	0	0	0	0	0	0	0	0	0	0	0	0	0	0	0	0	0	0	0	0	0	0	0	0	0	5.8	480
1837	283.203	286.027	283.525	776.389	274.927	0	0	35	0	0	0	0	0	0	0	0	0	0	0	0	0	0	0	0	0	0	0	0	0	0	0	0	0	5.8	480
1838	283.153	285.966	283.425	777.369	274.977	0	0	35	0	0	0	0	0	0	0	0	0	0	0	0	0	0	0	0	0	0	0	0	0	0	0	0	0	5.8	480
1839	283.159	285.981	283.4	778.374	275.027	0	0	35	0	0	0	0	0	0	0	0	0	0	0	0	0	0	0	0	0	0	0	0	0	0	0	0	0	5.8	480
1840	283.17	286.022	283.4	779.412	275.08	0	0	35	0	0	0	0	0	0	0	0	0	0	0	0	0	0	0	0	0	0	0	0	0	0	0	0	0	5.8	480
1841	283.211	286.091	283.425	780.494	275.136	0	0	35	0	0	0	0	0	0	0	0	0	0	0	0	0	0	0	0	0	0	0	0	0	0	0	0	0	5.8	480
1842	283.306	286.214	283.5	781.624	275.202	0	0	35	0	0	0	0	0	0	0	0	0	0	0	0	0	0	0	0	0	0	0	0	0	0	0	0	0	5.8	480
1843	283.429	286.364	283.6	782.793	275.273	0	0	35	0	0	0	0	0	0	0	0	0	0	0	0	0	0	0	0	0	0	0	0	0	0	0	0	0	5.8	480
1844	283.579	286.538	283.725	783.989	275.337	0	0	35	0	0	0	0	0	0	0	0	0	0	0	0	0	0	0	0	0	0	0	0	0	0	0	0	0	5.8	480
1845	283.713	286.76	283.9	785.197	275.38	0	0	35	0	0	0	0	0	0	0	0	0	0	0	0	0	0	0	0	0	0	0	0	0	0	0	0	0	5.8	480
1846	283.885	286.977	284.075	786.406	275.398	0	0	35	0	0	0	0	0	0	0	0	0	0	0	0	0	0	0	0	0	0	0	0	0	0	0	0	0	5.8	480
1847	284.051	287.166	284.225	787.602	275.401	0	0	35	0	0	0	0	0	0	0	0	0	0	0	0	0	0	0	0	0	0	0	0	0	0	0	0	0	5.8	480
1848	284.22	287.379	284.4	788.773	275.401	0	0	35	0	0	0	0	0	0	0	0	0	0	0	0	0	0	0	0	0	0	0	0	0	0	0	0	0	5.8	480
1849	284.388	287.591	284.575	789.904	275.4	0	0	35	0	0	0	0	0	0	0	0	0	0	0	0	0	0	0	0	0	0	0	0	0	0	0	0	0	5.8	480
1850	284.478	287.78	284.725	790.979	275.425	0	0	35	0	0	0	0	0	0	0	0	0	0	0	0	0	0	0	0	0	0	0	0	0	0	0	0	0	5.8	480
1851	284.678	287.984	284.875	792.25	275.5	0	0.0105361	35	0	0	0	0	0	0	0	0	0	0	0	0	0	0	0	0	0.025935	0	0	0	0	0	0	0	0	5.8	480
1852	284.494	288.175	285	793.75	275.6	0	0.0316002	35	0	0	0	0	0	0	0	0	0	0	0	0	0	0	0	0	0.077785	0	0	0	0	0	0	0	0	5.8	480
1853	284.254	288.366	285.125	795.25	275.7	0	0.0526703	35	0	0	0	0	0	0	0	0	0	0	0	0	0	0	0	0	0.12965	0	0	0	0	0	0	0	0	5.8	480
1854	284.317	288.582	285.275	796.75	275.8	0	0.0737547	35	0	0	0	0	0	0	0	0	0	0	0	0	0	0	0	0	0.18155	0	0	0	0	0	0	0	0	5.8	480
1855	284.378	288.791	285.425	798	275.9	0	0.0948391	35	0	0	0	0	0	0	0	0	0	0	0	0	0	0	0	0	0.23345	0	0	0	0	0	0	0	0	5.8	480
1856	284.487	289	285.575	799.25	276	0	0.115903	35	0	0	0	0	0	0	0	0	0	0	0	0	0	0	0	0	0.2853	0	0	0	0	0	0	0	0	5.8	480
1857	284.571	289.216	285.725	800.75	276.1	0	0.136967	35	0	0	0	0	0	0	0	0	0	0	0	0	0	0	0	0	0.33715	0	0	0	0	0	0	0	0	5.8	480
1858	284.758	289.458	285.9	802.25	276.2	0	0.158052	35	0	0	0	0	0	0	0	0	0	0	0	0	0	0	0	0	0.38905	0	0	0	0	0	0	0	0	5.8	480
1859	284.872	289.7	286.075	803.75	276.3	0	0.179116	35	0	0	0	0	0	0	0	0	0	0	0	0	0	0	0	0	0.4409	0	0	0	0	0	0	0	0	5.8	480
1860	284.54	289.916	286.225	805.25	276.4	0	0.20018	35	0	0	0	0	0	0	0	0	0	0	0	0	0	0	0	0	0.49275	0	0	0	0	0	0	0	0	5.8	480
1861	283.91	290.132	286.375	806.75	276.5	0	0.221264	35	0	0	0	0	0	0	0	0	0	0	0	0	0	0	0	0	0.54465	0	0	0	0	0	0	0	0	5.8	480
1862	284.24	290.324	286.5	808.25	276.6	0	0.242328	35	0	0	0	0	0	0	0	0	0	0	0	0	0	0	0	0	0.5965	0	0	0	0	0	0	0	0	5.8	480
1863	284.827	290.515	286.625	809.75	276.7	0	0.263392	35	0	0	0	0	0	0	0	0	0	0	0	0	0	0	0	0	0.64835	0	0	0	0	0	0	0	0	5.8	480
1864	284.929	290.732	286.775	811.25	276.8	0	0.284477	35	0	0	0	0	0	0	0	0	0	0	0	0	0	0	0	0	0.70025	0	0	0	0	0	0	0	0	5.8	480
1865	284.907	290.93	286.9	813	276.9	0	0.305561	35	0	0	0	0	0	0	0	0	0	0	0	0	0	0	0	0	0.75215	0	0	0	0	0	0	0	0	5.8	480
1866	284.538	291.104	287	814.75	277	0	0.326625	35	0	0	0	0	0	0	0	0	0	0	0	0	0	0	0	0	0.804	0	0	0	0	0	0	0	0	5.8	480
1867	284.133	291.27	287.1	816.25	277.1	0	0.347689	35	0	0	0	0	0	0	0	0	0	0	0	0	0	0	0	0	0.85585	0	0	0	0	0	0	0	0	5.8	480
1868	284.156	291.461	287.225	817.75	277.2	0	0.368773	35	0	0	0	0	0	0	0	0	0	0	0	0	0	0	0	0	0.90775	0	0	0	0	0	0	0	0	5.8	480
1869	284.51	291.678	287.375	819.25	277.3	0	0.389838	35	0	0	0	0	0	0	0	0	0	0	0	0	0	0	0	0	0.9596	0	0	0	0	0	0	0	0	5.8	480
1870	284.76	291.898	287.525	821	277.375	0	0.41082	35	0	0	0	0	0	0	0	0	0	0	0	0	0	0	0	0	1.01125	0	0	0	0	0	0	0	0	5.8	480
1871	284.422	292.138	287.7	822.75	277.425	0	0.431844	35	0	0	0	0	0	0	0	0	0	0	0	0	0	0	0	0	1.063	0	0	0	0	0	0	0	0	5.8	480
1872	283.277	292.401	287.9	824.25	277.5	0	0.452969	35	0	0	0	0	0	0	0	0	0	0	0	0	0	0	0	0	1.115	0	0	0	0	0	0	0	0	5.8	480
1873	282.357	292.694	288.125	825.75	277.6	0	0.474094	35	0	0	0	0	0	0	0	0	0	0	0	0	0	0	0	0	1.167	0	0	0	0	0	0	0	0	5.8	480
1874	282.412	293.038	288.4	827.25	277.7	0	0.495219	35	0	0	0	0	0	0	0	0	0	0	0	0	0	0	0	0	1.219	0	0	0	0	0	0	0	0	5.8	480
1875	282.738	293.411	288.7	829	277.775	0	0.516344	35	0	0	0	0	0	0	0	0	0	0	0	0	0	0	0	0	1.271	0	0	0	0	0	0	0	0	5.8	480
1876	283.196	293.804	289.025	830.75	277.825	0	0.538484	35	0	0	0	0	0	0	0	0	0	0	0	0	0	0	0	0	1.3255	0	0	0	0	0	0	0	0	5.8	480
1877	283.933	294.245	289.4	832.25	277.9	0	0.56225	35	0	0	0	0	0	0	0	0	0	0	0	0	0	0	0	0	1.384	0	0	0	0	0	0	0	0	5.8	480
1878	284.511	294.717	289.8	833.75	278	0	0.587234	35	0	0	0	0	0	0	0	0	0	0	0	0	0	0	0	0	1.4455	0	0	0	0	0	0	0	0	5.8	480
1879	284.747	295.214	290.225	835.25	278.1	0	0.613437	35	0	0	0	0	0	0	0	0	0	0	0	0	0	0	0	0	1.51	0	0	0	0	0	0	0	0	5.8	480
1880	284.541	295.769	290.7	837	278.2	0	0.640656	35	0	0	0	0	0	0	0	0	0	0	0	0	0	0	0	0	1.577	0	0	0	0	0	0	0	0	5.8	480
1881	284.58	296.359	291.2	839	278.3	0	0.669094	35	0	0	0	0	0	0	0	0	0	0	0	0	0	0	0	0	1.647	0	0	0	0	0	0	0	0	5.8	480
1882	285.216	296.922	291.675	841	278.4	0	0.698953	35	0	0	0	0	0	0	0	0	0	0	0	0	0	0	0	0	1.7205	0	0	0	0	0	0	0	0	5.8	480
1883	285.702	297.461	292.125	843	278.5	0	0.730031	35	0	0	0	0	0	0	0	0	0	0	0	0	0	0	0	0	1.797	0	0	0	0	0	0	0	0	5.8	480
1884	286.076	297.992	292.575	844.75	278.6	0	0.762328	35	0	0	0	0	0	0	0	0	0	0	0	0	0	0	0	0	1.8765	0	0	0	0	0	0	0	0	5.8	480
1885	286.62	298.465	292.975	846.25	278.7	0	0.796047	35	0	0	0	0	0	0	0	0	0	0	0	0	0	0	0	0	1.9595	0	0	0	0	0	0	0	0	5.8	480
1886	287.061	298.869	293.3	848	278.8	0	0.831391	35	0	0	0	0	0	0	0	0	0	0	0	0	0	0	0	0	2.0465	0	0	0	0	0	0	0	0	5.8	480
1887	287.225	299.225	293.575	850	278.875	0	0.868359	35	0	0	0	0	0	0	0	0	0	0	0	0	0	0	0	0	2.1375	0	0	0	0	0	0	0	0	5.8	480
1888	286.962	299.525	293.8	852	278.925	0	0.906953	35	0	0	0	0	0	0	0	0	0	0	0	0	0	0	0	0	2.2325	0	0	0	0	0	0	0	0	5.8	480
1889	286.965	299.805	294	854	279	0	0.947172	35	0	0	0	0	0	0	0	0	0	0	0	0	0	0	0	0	2.3315	0	0	0	0	0	0	0	0	5.8	480
1890	287.046	300.064	294.175	856	279.1	0	0.989219	35	0	0	0	0	0	0	0	0	0	0	0	0	0	0	0	0	2.435	0	0	0	0	0	0	0	0	5.8	480
1891	286.867	300.305	294.325	858.25	279.2	0	1.03309	35	0	0	0	0	0	0	0	0	0	0	0	0	0	0	0	0	2.543	0	0	0	0	0	0	0	0	5.8	480
1892	286.801	300.554	294.475	860.75	279.3	0	1.0788	35	0	0	0	0	0	0	0	0	0	0	0	0	0	0	0	0	2.6555	0	0	0	0	0	0	0	0	5.8	480
1893	286.764	300.765	294.6	863	279.375	0	1.12673	35	0	0	0	0	0	0	0	0	0	0	0	0	0	0	0	0	2.7735	0	0	0	0	0	0	0	0	5.8	480
1894	286.661	300.939	294.7	865	279.425	0	1.17691	35	0	0	0	0	0	0	0	0	0	0	0	0	0	0	0	0	2.897	0	0	0	0	0	0	0	0	5.8	480
1895	286.452	301.119	294.8	867.25	279.475	0	1.22911	35	0	0	0	0	0	0	0	0	0	0	0	0	0	0	0	0	3.0255	0	0	0	0	0	0	0	0	5.8	480
1896	286.397	301.308	294.9	869.75	279.525	0	1.28355	35	0	0	0	0	0	0	0	0	0	0	0	0	0	0	0	0	3.1595	0	0	0	0	0	0	0	0	5.8	480
1897	286.487	301.519	295.025	872	279.6	0	1.34062	35	0	0	0	0	0	0	0	0	0	0	0	0	0	0	0	0	3.3	0	0	0	0	0	0	0	0	5.8	480
1898	286.588	301.806	295.225	874.25	279.675	0	1.40014	35	0	0	0	0	0	0	0	0	0	0	0	0	0	0	0	0	3.4465	0	0	0	0	0	0	0	0	5.8	480
1899	286.676	302.174	295.5	876.75	279.725	0	1.4623	35	0	0	0	0	0	0	0	0	0	0	0	0	0	0	0	0	3.5995	0	0	0	0	0	0	0	0	5.8	480
1900	286.799	302.579	295.8	879.5	279.8	0.0329065	1.5273	35	0.0202502	0	0	0	0	0	0	0	0	0	0	0	0	0	0	0	3.7595	0	0	0	0	0	0	0	0	5.8	480
1901	286.77	303.038	296.125	883	279.9	0.067545	1.59494	35	0.0415662	0	0	0	0	0	0	0	0	0	0	0	0	0	0	0	3.926	0	0	0	0	0	0	0	0	5.8	480
1902	286.768	303.538	296.475	887	280	0.0711	1.66359	35	0.0437538	0	0	0	0	0	0	0	0	0	0	0	0	0	0	0	4.095	0	0	0	0	0	0	0	0	5.8	480
1903	286.797	304.046	296.825	891.25	280.1	0.0748421	1.73184	35	0.0460567	0	0	0	0	0	0	0	0	0	0	0	0	0	0	0	4.263	0	0	0	0	0	0	0	0	5.8	480
1904	286.845	304.587	297.2	895.75	280.2	0.0787812	1.79989	35	0.0484807	0	0	0	0	0	0	0	0	0	0	0	0	0	0	0	4.4305	0	0	0	0	0	0	0	0	5.8	480
1905	287.014	305.179	297.625	900.25	280.3	0.0829275	1.86794	35	0.0510323	0	0	0	0	0	0	0	0	0	0	0	0	0	0	0	4.598	0	0	0	0	0	0	0	0	5.8	480
1906	287.053	305.797	298.075	904.75	280.4	0.0872921	1.93883	35	0.0537182	0	0	0	0	0	0	0	0	0	0	0	0	0	0	0	4.7725	0	0	0	0	0	0	0	0	5.8	480
1907	287.071	306.395	298.5	909.25	280.525	0.0918865	2.02962	35	0.0565455	0	0	0	0	0	0	0	0	0	0	0	0	0	0	0	4.996	0	0	0	0	0	0	0	0	5.8	480
1908	287.536	306.979	298.9	914	280.675	0.0967226	2.13769	35	0.0595216	0	0	0	0	0	0	0	0	0	0	0	0	0	0	0	5.262	0	0	0	0	0	0	0	0	5.8	480
1909	288.179	307.571	299.3	919	280.825	0.101813	2.24575	35	0.0626543	0	0	0	0	0	0	0	0	0	0	0	0	0	0	0	5.528	0	0	0	0	0	0	0	0	5.8	480
1910	288.48	308.156	299.7	923.75	280.975	0.107172	2.35381	35	0.0659519	0	0	0	0	0	0	0	0	0	0	0	0	0	0	0	5.794	0	0	0	0	0	0	0	0	5.8	480
1911	288.963	308.708	300.075	928.25	281.125	0.112812	2.46167	35	0.0694231	0	0	0	0	0	0	0	0	0	0	0	0	0	0	0	6.0595	0	0	0	0	0	0	0	0	5.8	480
1912	289.664	309.247	300.425	933	281.3	0.11875	2.5738	35	0.0730769	0	0	0	0	0	0	0	0	0	0	0	0	0	0	0	6.3355	0	0	0	0	0	0	0	0	5.8	480
1913	290.202	309.8	300.775	938.25	281.475	0.125	2.73306	35	0.0769231	0	0	0	0	0	0	0	0	0	0	0	0	0	0	0	6.7265	0	0	0	0	0	0	0	0	5.8135	480
1914	290.933	310.331	301.1	943.75	281.625	0.131579	2.92466	35	0.0809716	0	0	0	0	0	0	0	0	0	0	0	0	0	0	0	7.196	0	0	0	0	0	0	0	0	5.841	480
1915	291.784	310.841	301.4	949.25	281.8	0.138504	3.04253	35	0.0852333	0	0	0	0	0	0	0	0	0	0	0	0	0	0	0	7.484	0	0	0	0	0	0	0	0	5.869	480
1916	292.238	311.382	301.725	954.75	282	0.145794	3.09705	35	0.0897193	0	0	0	0	0	0	0	0	0	0	0	0	0	0	0	7.616	0	0	0	0	0	0	0	0	5.8975	480
1917	292.544	311.954	302.075	960.25	282.225	0.153467	3.20642	35	0.0944413	0	0	0	0	0	0	0	0	0	0	0	0	0	0	0	7.883	0	0	0	0	0	0	0	0	5.9265	480
1918	292.992	312.512	302.4	966	282.475	0.161544	3.3942	35	0.0994119	0	0	0	0	0	0	0	0	0	0	0	0	0	0	0	8.343	0	0	0	0	0	0	0	0	5.9555	480
1919	293.813	313.047	302.7	972	282.7	0.170047	3.60575	35	0.104644	0	0	0	0	0	0	0	0	0	0	0	0	0	0	0	8.8615	0	0	0	0	0	0	0	0	5.9845	480
1920	294.371	313.601	303.025	977.75	282.925	0.178997	3.8173	35	0.110152	0	0	0	0	0	0	0	0	0	0	0	0	0	0	0	9.38	0	0	0	0	0	0	0	0	6.0135	480
1921	294.952	314.204	303.4	983.25	283.175	0.188417	4.02925	35	0.115949	0	0	0	0	0	0	0	0	0	0	0	0	0	0	0	9.8995	0	0	0	0	0	0	0	0	6.0425	480
1922	295.684	314.809	303.775	989	283.4	0.198334	4.24161	35	0.122052	0	0	0	0	0	0	0	0	0	0	0	0	0	0	0	10.42	0	0	0	0	0	0	0	0	6.0715	480
1923	295.586	315.392	304.125	995	283.6	0.229097	4.45175	35.0325	0.128476	0	0	0	0	0	0	0	0	0	0	0	0	0	0	0	10.935	0	0	0	0	0	0	0	0	6.101	480
1924	295.655	316.027	304.525	1001	283.8	0.284506	4.66191	35.1036	0.135237	0	0	0	0	0	0	0	0	0	0	0	0	0	0	0	11.45	0	0	0	0	0	0	0	0	6.131	480
1925	296.251	316.714	304.975	1007	284	0.345533	4.87408	35.1827	0.142355	0	0	0	0	0	0	0	0	0	0	0	0	0	0	0	11.97	0	0	0	0	0	0	0	0	6.1605	480
1926	296.811	317.38	305.4	1013	284.225	0.409771	5.10453	35.266	0.149848	0	0	0	0	0	0	0	0	0	0	0	0	0	0	0	12.535	0	0	0	0	0	0	0	0	6.19	480
1927	297.141	318.046	305.825	1019	284.45	0.477391	5.35328	35.3537	0.157734	0	0	0	0	0	0	0	0	0	0	0	0	0	0	0	13.145	0	0	0	0	0	0	0	0	6.22	480
1928	297.497	318.755	306.3	1025	284.625	0.548569	5.60205	35.446	0.166036	0	0	0	0	0	0	0	0	0	0	0	0	0	0	0	13.755	0	0	0	0	0	0	0	0	6.2505	480
1929	297.965	319.456	306.775	1030.75	284.8	0.623494	5.85081	35.5432	0.174775	0	0	0	0	0	0	0	0	0	0	0	0	0	0	0	14.365	0	0	0	0	0	0	0	0	6.281	480
1930	298.618	320.124	307.225	1036.25	284.975	0.702362	6.10161	35.6454	0.183974	0	0	0	0	0	0	0	0	0	0	0	0	0	0	0	14.98	0	0	0	0	0	0	0	0	6.3115	480
1931	299.65	320.814	307.7	1041.75	285.125	0.823121	6.35241	35.7531	0.193656	0	0.0317813	0	0	0	0	0	0	0	0	0	0	0	0	0	15.595	0	0	0	0	0	0	0	0	6.342	480
1932	300.716	321.51	308.175	1047.25	285.3	0.951532	6.6036	35.8664	0.203849	0	0.0663262	0	0	0	0	0	0	0	0	0	0.0024255	0	0	0	16.205	0	0	0	0	0	0	0	0	6.3725	480
1933	301.45	322.158	308.6	1052.75	285.5	1.05037	6.8633	35.9857	0.214578	0	0.0720937	0	0	0	0	0	0	0	0	0	0.0072525	0	0	0	16.83	0	0	0	0	0	0	0	0	6.4035	480
1934	301.835	322.773	309	1058	285.7	1.15464	7.18389	36.1113	0.225871	0	0.0783628	0	0	0	0	0	0	0	0	0	0.012032	0	0	0	17.605	0	0	0	0	0	0	0	0	6.4345	480
1935	302.244	323.381	309.4	1063	285.9	1.26466	7.56373	36.2434	0.237759	0	0.0851769	0	0	0	0	0	0	0	0	0	0.01919	0	0.0020765	0	18.515	0	0	0	0	0	0	0	0	6.466	480
1936	302.533	323.937	309.75	1068	286.1	1.38075	7.95036	36.3826	0.250273	0	0.0925836	0	0	0	0	0	0	0	0	0	0.031125	0	0.0062225	0	19.425	0	0	0	0	0	0	0	0	6.4975	480
1937	302.823	324.383	310	1073	286.275	1.50324	8.34413	36.529	0.263445	0	0.100634	0	0	0	0	0	0	0	0	0	0.05022	0	0.010356	0	20.335	0	0	0	0	0	0	0	0	6.529	480
1938	303.562	324.746	310.175	1078	286.425	1.63252	8.75517	36.6832	0.277311	0	0.109385	0	0	0	0	0	0	0	0	0	0.08123	0	0.01655	0	21.245	0	0.005345	0	0	0	0	0	0	6.561	480
1939	304.106	325.056	310.3	1083	286.575	1.76895	9.1942	36.8455	0.291906	0	0.118897	0	0	0	0	0	0	0	0	0.0035225	0.12895	0	0.0248	0	22.155	0	0.021155	0	0	0	0	0	0	6.593	480
1940	304.101	325.322	310.375	1088.25	286.725	1.91295	9.66556	37.0163	0.307269	0	0.129236	0	0	0	0	0	0	0	0	0.0104875	0.19805	0	0.0351	0	23.065	0	0.046995	0	0	0	0	0	0	6.625	480
1941	303.847	325.521	310.375	1093.75	286.9	2.06495	10.191	37.1961	0.323441	0	0.140474	0	0	0	0	0	0	0	0	0.0173	0.2931	0	0.049515	0	24.02	0	0.082435	0	0	0	0	0	0	6.657	480
1942	303.564	325.639	310.3	1099	287.1	2.22541	10.7811	37.3853	0.340465	0	0.152689	0	0	0	0	0	0	0	0	0.023965	0.41875	0	0.06804	0	25.035	0	0.1271	0	0	0	0	0	0	6.689	480
1943	303.426	325.723	310.2	1104	287.3	2.3934	11.4233	37.5846	0.35751	0	0.165966	0	0	0	0	0	0	0	0	0.030485	0.5771	0	0.092715	0	26.07	0	0.1806	0	0	0	0	0	0	6.7215	480
1944	303.267	325.845	310.125	1109.25	287.525	2.56807	12.1183	37.7943	0.373795	0	0.180398	0	0	0	0	0	0	0	0	0.040385	0.77025	0	0.1277	0	27.105	0	0.24255	0	0	0	0	0	0	6.7545	480
1945	303.234	326.032	310.1	1114.75	287.775	2.75008	12.8871	38.015	0.389432	0	0.196085	0	0	0	0	0	0	0	0	0.053585	1.01955	0	0.17505	0	28.135	0	0.3126	0	0	0	0	0	0	6.787	480
1946	303.004	326.279	310.125	1120.5	288.025	2.94006	13.8202	38.2474	0.404511	0	0.213136	0	0	0	0	0	0	0	0	0.070015	1.3515	0.030115	0.27	0	29.165	0	0.39045	0	0	0	0	0	0	6.8195	480
1947	302.458	326.593	310.2	1126.75	288.275	3.13868	15.1102	38.492	0.419121	0	0.231669	0	0	0	0	0	0	0	0	0.10016	1.8695	0.127615	0.44975	0	30.22	0	0.47575	0	0	0	0	0	0	6.853	480
1948	302.011	326.966	310.325	1133.25	288.525	3.34665	16.9117	38.7495	0.433351	0	0.251814	0	0	0	0	0	0	0	0	0.1649	2.7045	0.2767	0.68285	0	31.43	0	0.56815	0	0	0	0	0	0	6.8865	480
1949	301.97	327.399	310.5	1140	288.775	3.5647	19.1118	39.0205	0.44729	0	0.273711	0	0	0	0	0	0	0	0	0.2881	3.7955	0.45415	0.9317	0	32.765	0	0.6674	0	0	0	0	0	0	6.9195	480
1950	301.92	327.921	310.75	1147.25	289	3.79359	21.7426	39.3058	0.461029	0	0.297512	0	0	0	0	0	0	0	0	0.4966	5.0045	0.6521	1.1945	0	34.615	0	0.7732	0	0	0	0	0	0	6.953	480
1951	300.877	328.558	311.1	1155	289.2	4.0504	24.5705	39.6061	0.474657	0	0.323383	0	0	0	0	0	0	0	0.005	0.8132	6.314	0.87715	1.4705	0	36.385	0	0.88935	0	0	0	0	0	0	6.987	480
1952	299.885	329.275	311.5	1163.5	289.425	4.33597	27.235	39.9222	0.488262	0	0.351503	0	0	0	0	0	0	0	0.015	1.1675	7.8115	1.0245	1.7345	0	37.53	0	0.9375	0	0	0	0	0	0	7.021	480
1953	299.764	330.045	311.925	1172.75	289.675	4.63495	29.9757	40.255	0.501935	0	0.382068	0	0	0	0	0	0	0	0.025	1.577	9.4615	1.0775	1.9845	0	38.73	0	0.922	0	0	0	0	0	0	7.0535	480
1954	299.77	330.896	312.425	1182.25	289.9	4.94829	33.0609	40.6052	0.515765	0	0.415292	0	0	0	0	0	0	0	0.035	2.149	11.24	1.139	2.239	0	40.08	0	0.932	0	0	0	0	0	0	7.0845	480
1955	299.81	331.835	313	1192	290.125	5.27698	36.6113	40.9739	0.529841	0	0.451404	0	0	0	0	0	0	0	0.045	2.886	13.24	1.21	2.495	0	41.57	0.025	0.9705	0	0	0	0	0	0	7.1155	480.8
1956	299.88	332.821	313.6	1202.25	290.375	5.62208	40.6989	41.362	0.544253	0	0.490656	0	0	0	0	0	0	0	0.055	3.795	15.485	1.2925	2.75	0	43.2	0.118	1.057	0	0	0	0	0	0	7.1465	483.15
1957	300.018	333.842	314.225	1213	290.6	5.98468	45.4175	41.7705	0.559089	0	0.533322	0	0	0	0	0	0	0	0.065	4.921	18.055	1.3895	3.0015	0	44.96	0.2975	1.19	0	0	0	0	0	0	7.1785	486.4
1958	300.426	334.869	314.848	1224	290.825	6.36597	50.7782	42.2006	0.57444	0	0.579698	0	0	0	0	0	0	0	0.075	6.2365	21.01	1.502	3.2495	0	46.85	0.5675	1.3555	0	0	0	0	0	0	7.212	489.9
1959	301.366	335.945	315.5	1235.25	291.1	6.76717	56.515	42.6532	0.590395	0	0.630107	0	0	0	0	0	0	0	0.085	7.557	24.215	1.6305	3.4955	0	48.865	0.883	1.593	0	0	0	0	0	0	7.246	493.55
1960	302.541	337.17	316.272	1247	291.4	7.18959	62.5823	43.1297	0.607043	0	0.684898	0	0	0	0	0	0	0	0.095	8.8185	27.675	1.779	3.7395	0	50.99	1.2495	1.9065	0	0	0	0	0	0	7.2805	497.3
1961	302.717	338.437	317.075	1259.25	291.675	7.65086	69.4618	43.6313	0.624474	0	0.744455	0	0	0	0	0	0	0	0.11	10.2955	31.685	1.9505	3.9715	0	53.23	1.7055	2.25	0	0	0	0	0	0	7.3165	501.1
1962	302.623	339.626	317.795	1272	291.925	8.15246	77.4216	44.1593	0.642776	0	0.80919	0	0	0	0	0	0	0	0.13	12.235	36.315	2.1465	4.1975	0	55.585	2.19	2.646	0	0	0	0	0	0	7.3535	504.8
1963	303.114	340.707	318.397	1285	292.225	8.69591	86.5951	44.715	0.66204	0	0.879554	0	0	0	0	0	0	0	0.155	14.715	41.585	2.3705	4.433	0	58.025	2.7905	3.1425	0	0	0	0	0	0	7.3915	508.4
1964	303.609	341.733	318.925	1298.25	292.6	9.39162	97.2808	45.5	0.682355	0	0.956037	0	0	0	0	0	0	0	0.18	17.795	47.735	2.6285	4.677	0	60.525	3.517	3.767	0	0	0	0	0	0	7.4305	511.85
1965	304.42	342.989	319.647	1312	293	10.184	109.645	46.45	0.70381	0	1.03917	0	0	0	0	0	0	0	0.2	21.495	54.93	2.9255	4.9295	0.0045	63.085	4.2765	4.517	0	0	0.0005	0	0	0	7.4705	515.05
1966	305.564	344.551	320.647	1326	293.4	10.9556	123.662	47.35	0.726495	0	1.12953	0	0	0	0	0	0	0	0.22	25.775	63.155	3.2665	5.1915	0.0175	65.625	5.242	5.413	0	0	0.0015	0	0	0.0005	7.512	518
1967	306.594	346.076	321.605	1340.25	293.8	11.7388	139.328	48.25	0.750499	0	1.22775	0	0	0	0	0	0	0	0.24	30.575	72.39	3.6585	5.4635	0.0385	68.07	6.722	6.4985	0	0	0.003	0	0.0005	0.0015	7.5545	520.7
1968	307.808	347.7	322.635	1355	294.225	12.5668	156.887	49.15	0.775911	0	1.33452	0	0	0	0	0	0	0	0.27	35.955	82.77	4.1085	5.7455	0.0675	70.425	8.886	7.8105	0	0	0.0055	0.0005	0.001	0.003	7.5985	523.15
1969	309.598	349.607	323.902	1370.25	294.7	13.4084	176.605	50.05	0.802821	0	1.45056	0	0	0	0	0	0	0	0.3	42.05	94.435	4.6245	6.0385	0.1045	72.69	11.59	9.411	0	0	0.0095	0.001	0.0015	0.005	7.644	525.3
1970	311.808	351.328	324.985	1385.75	295.2	14.2482	198.618	50.95	0.831319	0	1.5767	0	0	0	0	0	0	0	0.325	49.05	107.45	5.2165	6.3435	0.15	74.87	14.645	11.21	0	0	0.016	0.001	0.0025	0.0075	7.6905	527.2
1971	314.087	352.822	325.855	1401.25	295.7	15.1011	222.885	51.8	0.861493	0	1.7138	0	0	0.00146	0	0.0125	0	0	0.355	57.065	121.8	5.8955	6.66	0.205	76.97	17.695	13.115	0	0	0.025	0.0015	0.0035	0.011	7.738	528.85
1972	316.193	354.781	327.14	1417	296.225	15.9994	249.194	52.65	0.893433	0	1.86283	0	0	0.00438	0	0.0375	0	0	0.39	65.965	137.3	6.674	6.988	0.2705	78.99	20.92	15.145	0	0.018	0.0375	0.002	0.006	0.0155	7.787	530.3
1973	318.115	357.034	328.678	1433	296.8	16.9475	277.927	53.55	0.927228	0	2.02481	0	0	0.0073	0	0.0625	0	0	0.425	75.835	154.05	7.5685	7.329	0.348	80.93	25.065	17.39	0	0.053	0.055	0.0025	0.0115	0.0215	7.838	531.55
1974	319.6	358.783	329.743	1449	297.4	17.9154	309.889	54.45	0.962969	0	2.20088	0	0	0.01022	0	0.0875	0	0	0.46	87.04	172.45	8.595	7.684	0.4385	82.8	30.44	19.935	0	0.086	0.078	0.0035	0.0205	0.0285	7.8905	532.6
1975	320.882	360.292	330.585	1465	298	18.8898	344.976	55.3	1.00074	0	2.39226	0	0	0.01314	0	0.1125	0	0	0.5	99.56	192.6	9.7715	8.052	0.5445	84.6	36.73	22.54	0	0.1175	0.1075	0.0045	0.0335	0.0365	7.9445	533.5
1976	322.191	362.163	331.748	1481	298.65	19.8874	380.802	56.15	1.04064	0	2.60029	0	0	0.01606	0	0.1375	0	0	0.54	112.3	213.15	11.12	8.4335	0.6685	86.33	42.765	25.225	0	0.1475	0.1445	0.0055	0.051	0.0465	8.0005	534.25
1977	323.874	364.454	333.272	1497.25	299.36	20.9739	416.056	57.05	1.08275	0	2.8264	0	0	0.01898	0	0.1625	0	0	0.59	124.7	232.9	12.67	8.8305	0.8125	87.995	49.29	28.23	0	0.1755	0.1915	0.0065	0.0765	0.0575	8.058	534.9
1978	326.21	366.815	334.848	1513.75	300.082	22.1267	451.017	57.9	1.12717	0	3.09048	0	0	0.0219	0	0.1875	0	0	0.655	136.7	251.9	14.445	9.243	0.9795	89.595	57.79	31.51	0	0.202	0.2475	0.0075	0.112	0.0695	8.117	535.4
1979	328.74	369.278	336.525	1530.25	300.74	23.3668	486.546	58.75	1.17397	0	3.39237	0	0	0.02482	0	0.2	0	0	0.735	148.8	270.5	16.475	9.6705	1.174	91.14	68.985	34.985	0	0.227	0.3125	0.0085	0.156	0.083	8.178	535.85
1980	330.864	371.945	338.36	1547.75	301.382	24.6879	519.303	59.6	1.22326	0	3.71278	0	0	0.02774	0	0.2	0	0	0.835	159.4	287.35	18.805	10.114	1.401	92.625	78.725	38.64	0	0.2505	0.3895	0.0095	0.21	0.0975	8.241	536.25
1981	332.228	374.19	339.728	1566.75	302.22	26.102	550.904	60.45	1.27512	0	4.0517	0	0	0.0292	0	0.225	0	0	0.95	168.55	304.25	21.475	10.575	1.6605	93.95	85.94	42.44	0	0.273	0.4795	0.011	0.275	0.113	8.306	536.55
1982	333.034	376.129	340.793	1586.25	303.098	27.595	583.135	61.3	1.32963	0	4.40914	0	0	0.03045	0	0.275	0	0	1.075	177.85	321.7	24.45	11.045	1.9495	94.9	92.165	46.17	0	0.313	0.582	0.0125	0.351	0.1295	8.373	536.8
1983	334.244	378.41	342.197	1605.85	303.805	29.1286	613.196	62.15	1.3869	0	4.78509	0	0	0.0331	0	0.3	0	0	1.21	185.8	338.15	27.605	11.505	2.2655	95.855	96.325	50	0	0.361	0.6975	0.014	0.4425	0.1475	8.442	537
1984	336.145	380.82	343.783	1623.7	304.397	30.7215	644.36	63	1.44701	0	5.17956	0	0	0.03585	0	0.325	0	0	1.355	193.75	355	30.985	11.965	2.6105	97.27	100.75	54.17	0	0.404	0.828	0.016	0.5495	0.1665	8.513	537.2
1985	338.198	383.063	345.283	1637.99	305.087	32.3442	678.379	63.8	1.51004	0	5.59254	0	0	0.03705	0	0.375	0	0	1.505	202.85	372.5	35.43	12.44	2.981	98.845	105.7	58.465	0	0.4555	0.9775	0.018	0.6715	0.186	8.5865	537.35
1986	340.223	385.274	346.798	1650.43	305.772	34.0163	712.084	64.6	1.57609	0	6.02403	0	0	0.03415	0	0.4	0	0	1.67	212.1	389.8	39.95	12.94	3.363	99.855	109.6	62.85	0	0.4995	1.152	0.0195	0.8125	0.207	8.6625	537.45
1987	342.409	387.795	348.645	1662.2	306.262	35.814	748.374	65.45	1.64525	0	6.47404	0	0	0.03285	0	0.425	0	0	1.855	222.8	408.65	44.285	13.47	3.7535	101.1	112.15	67.415	0	0.6075	1.3545	0.021	0.974	0.229	8.7405	537.55
1988	345.085	390.673	350.738	1673.07	307.195	37.6894	789.249	66.3	1.71761	0	6.94256	0	0	0.0384	0	0.5	0	0	2.04	234.9	428.45	50.53	14.01	4.1635	102.45	116.3	72.44	0	0.791	1.591	0.023	1.1555	0.251	8.8205	537.65
1989	347.729	393.252	352.488	1683.47	308.507	39.5645	830.2	67.1	1.79325	0	7.4296	0	0	0.04655	0	0.575	0	0	2.225	244.9	448.25	57.92	14.55	4.5995	103.45	121.7	78.21	0	0.99	1.869	0.0245	1.3565	0.2755	8.903	537.75
1990	349.911	395.324	353.855	1693.63	309.485	41.5256	866.564	67.9	1.87227	0	7.93515	0	0	0.0547	0.03	0.625	0	0	2.425	252.75	466.15	64.485	15.075	5.0635	104.45	124.45	84.305	0	1.249	2.1645	0.026	1.562	0.3015	8.988	537.8
1991	351.189	397.088	355.017	1703.82	310.113	43.5792	899.397	68.7	1.95632	0	8.45922	0	0	0.0627	0.09	0.675	0	0	2.635	260.15	481.3	70.3	15.555	5.545	105.6	127.9	90.44	0	1.696	2.4485	0.028	1.753	0.326	9.0755	537.85
1992	351.548	398.429	355.885	1711.8	310.603	45.7214	927.681	69.5	2.05	0	9.0018	0	0	0.0705	0.185	0.725	8.12405e-05	0	2.85	264.95	494.4	75.96	15.99	6.0235	105.75	130.9	96.715	0	2.424	2.7125	0.0295	1.9125	0.35	9.1655	537.9
1993	352.275	399.699	356.777	1716.29	311.077	48.0312	948.8	70.3	2.15	0	9.5629	0	0	0.08075	0.375	0.8	0.00024139	0	3.07	267.75	504.8	80.235	16.355	6.4945	104.9	130.5	102.14	0	3.3945	2.9185	0.031	2.0215	0.3725	9.258	537.9
1994	353.737	401.505	358.127	1721.01	311.603	50.6326	963.903	71.1	2.25	0	10.1425	0	0	0.09555	0.75	0.925	0.00350655	0	3.3	269.5	513.1	82.345	16.63	6.957	104.35	126	106.6	0.5695	4.487	3.09	0.0335	2.114	0.393	9.353	537.95
1995	355.939	403.782	359.837	1726.35	312.295	53.8504	973.652	71.9	2.35	0	10.7406	0	0	0.1503	1.645	1.125	0.00973579	0	3.515	269.5	519.55	83.46	16.83	7.3995	103.55	115.9	110.45	1.9145	5.658	3.247	0.037	2.2455	0.4125	9.45	538
1996	358.263	405.945	361.462	1730.01	313.048	57.9728	982.03	72.65	2.45	0	11.4585	0	0	0.27175	3.155	1.45	0.01432	0	3.725	268.95	525.05	83.84	16.965	7.7905	102.8	104.09	115.85	3.587	6.818	3.3915	0.0415	2.3885	0.4265	9.2995	538
1997	359.83	408.22	363.155	1734.82	313.76	62.9186	988.498	73.4	2.55	0	12.2869	0	0	0.43105	5.17	1.85	0.0231704	0	3.955	268.2	529.15	83.68	17.045	8.1025	101.95	91.215	121.95	5.523	7.939	3.556	0.0465	2.4875	0.43	9.08	538
1998	361.471	411.144	365.322	1742.71	314.533	68.4136	992.182	74.2	2.65	0	13.1153	0	0	0.64745	7.71	2.25	0.0370779	0	4.155	266.95	532.4	83.45	17.075	8.3425	100.9	77.815	126.35	7.377	8.946	3.7085	0.0515	2.5565	0.4265	9.155	538
1999	363.283	413.868	367.348	1749.24	315.257	74.4061	995.415	75	2.75	0	13.9438	0.0045173	0	0.95615	10.68	2.65	0.0590527	0	4.33	265.2	534.95	83.015	17.075	8.5275	100.155	65.605	131.7	9.206	9.938	3.8355	0.0535	2.6205	0.422	9.26	538
2000	364.367	415.858	368.865	1751.02	315.85	80.9399	998.627	75.75	2.85	0	14.7722	0.0488482	0	1.32805	13.965	3.05	0.0967079	0	4.54	263.45	537.05	82.515	17.055	8.6705	99.37	54.83	137.4	11.075	11.04	3.953	0.051	2.679	0.417	9.0845	538
2001	365.653	417.91	370.467	1750.71	316.488	88.6304	1001.03	76.5	2.95	0.00398966	15.6006	0.287349	0	1.7224	17.51	3.43758	0.150915	0.373294	4.765	261.9	538.85	82.07	17.02	8.782	98.4	45.785	141.95	12.695	12.035	4.0455	0.046	2.733	0.41	8.689	538
2002	367.978	420.573	372.522	1752.19	317.245	97.4707	1003.21	77.25	3.05124	0.011991	16.429	0.720208	0.00740544	2.13305	21.365	3.85333	0.208567	1.11091	4.985	260.1	539.95	81.595	16.98	8.869	97.385	38.14	147.45	14.18	12.975	4.112	0.04	2.7825	0.402	8.349	538
2003	370.52	423.488	374.76	1754.76	318.017	106.775	1004	77.9915	3.15494	0.0195016	17.2574	1.21745	0.0291657	2.60335	25.44	4.34892	0.274155	1.83169	5.215	257.95	540.05	80.93	16.94	8.936	96.325	31.78	152.95	15.565	13.755	4.1695	0.0345	2.828	0.3935	8.194	538
2004	372.785	426.116	376.812	1755.07	318.71	116.584	1003.93	78.772	3.26099	0.0263954	18.0858	1.7671	0.0644009	3.12045	29.775	4.92206	0.367093	2.53767	5.445	256.05	539.9	80.12	16.9	8.988	95.385	26.475	157.45	16.605	14.35	4.207	0.0295	2.87	0.384	8.0885	538
2005	375.107	428.653	378.812	1753.73	319.44	126.769	1003.58	79.5471	3.3693	0.0332905	18.9129	2.35921	0.112284	3.62618	34.36	5.57096	0.487703	3.23048	5.675	254.1	539.4	79.31	16.855	9.0285	94.435	22.075	162.25	17.195	14.94	4.2265	0.0255	2.908	0.3735	7.933	538
2006	377.783	431.283	380.827	1754.51	320.2	136.988	1001.53	80.3168	3.47978	0.0405451	19.7485	2.98558	0.17203	4.14253	38.805	6.29394	0.631518	3.91148	5.91	251.3	537.5	78.48	16.81	9.059	93.435	18.52	167.7	17.67	15.365	4.241	0.023	2.9425	0.363	7.748	538
2007	380.584	433.903	382.777	1757.68	320.889	147.6	998.531	81.1056	3.60092	0.0481122	20.5812	3.63912	0.242881	4.73196	43.165	7.11091	0.79571	4.64524	6.175	247.95	534.7	77.595	16.76	9.081	92.3	15.61	173.9	18.22	15.625	4.2425	0.0195	2.9735	0.352	7.5945	538
2008	383.521	436.65	384.8	1761.98	321.578	158.725	995.689	81.9382	3.74129	0.0557926	21.3889	4.31529	0.324146	5.42238	47.4644	8.04146	0.982992	5.48933	6.45082	244.6	531.8	76.72	16.705	9.096	90.96	13.23	180.5	18.81	15.865	4.2255	0.015	3.0005	0.3405	7.5405	538
2009	386.702	439.641	387.001	1767.26	322.267	170.269	992.533	82.8147	3.90086	0.0635771	22.1717	5.00974	0.415157	6.2113	51.7244	9.0828	1.19305	6.42991	6.71256	241.029	528.537	75.8193	16.6514	9.1054	89.2801	11.271	187.098	19.3689	16.6686	4.1863	0.0116919	3.02112	0.32905	7.39344	538.008
2010	390.125	442.761	389.285	1773.13	322.957	182.496	989.06	83.735	4.07961	0.0714598	22.9297	5.71764	0.515263	7.09572	56.1986	10.2321	1.42543	7.45377	6.97452	237.285	524.944	74.8999	16.5937	9.11062	87.267	9.6541	193.641	19.8971	17.9778	4.12706	0.00945723	3.03563	0.317164	7.21699	538.019
2011	393.8	445.904	391.563	1779.54	323.646	195.361	985.495	84.6992	4.27753	0.0794406	23.6629	6.4363	0.623896	8.07232	60.8719	11.4873	1.67946	8.55037	7.23667	233.538	521.205	73.9799	16.5354	9.11307	85.0733	8.25768	200.471	20.4455	19.1479	4.05706	0.00728664	3.04663	0.30533	7.1611	538.024
2012	397.551	449.014	393.843	1784.55	324.327	208.532	981.524	85.6763	4.48604	0.0872258	24.3469	7.31363	0.734083	9.23052	65.5241	12.9325	1.92761	9.57192	7.49015	229.793	517.323	73.0583	16.4767	9.11345	82.7106	7.04312	207.109	20.9821	20.1745	3.97804	0.00516144	3.05418	0.29361	7.13752	538.027
2013	401.15	452.019	396.117	1786.37	324.993	221.696	976.897	86.6356	4.69653	0.0945216	24.9574	8.46972	0.839278	10.6566	69.9496	14.6498	2.14314	10.3888	7.72606	226.057	513.316	72.1402	16.4178	9.11229	80.1892	6.05088	213.108	21.4777	21.0538	3.89155	0.00365606	3.05854	0.28206	7.12444	538.028
2014	404.612	454.936	398.396	1785.29	325.642	234.86	971.665	87.577	4.909	0.101328	25.4947	9.85225	0.939773	12.3414	74.1623	16.634	2.32699	11.0261	7.94441	222.337	509.203	71.2288	16.3588	9.10995	77.5193	5.23987	218.515	21.9358	21.7823	3.79897	0.00258975	3.05994	0.270721	7.11486	538.028
2015	407.974	457.776	400.681	1781.58	326.276	248.034	965.883	88.5005	5.12346	0.107646	25.9589	11.4186	1.03584	14.2758	78.1759	18.88	2.48005	11.5058	8.14521	218.639	505.003	70.326	16.2998	9.10674	74.7108	4.57676	223.373	22.3594	22.3578	3.70156	0.00183443	3.0586	0.259625	7.10778	538.029
2016	411.242	460.54	402.968	1775.48	326.894	261.221	959.552	89.406	5.33989	0.113474	26.3503	13.1334	1.12772	16.4511	82.0015	21.3824	2.60319	11.847	8.32846	214.967	500.728	69.4325	16.2409	9.10286	71.7703	3.88755	227.718	22.7513	22.7786	3.60036	0.0012994	3.05473	0.248794	6.9058	538.029
2017	414.415	463.224	405.252	1767.15	327.496	274.426	952.762	90.2937	5.5583	0.118814	26.6691	14.9672	1.21564	18.8586	85.6488	24.1361	2.69723	12.0659	8.49416	211.32	496.385	68.5479	16.182	9.09847	68.823	3.17684	231.58	23.1133	23.0532	3.49626	0.000920422	3.04846	0.238246	6.65764	538.029
2018	417.5	465.828	407.529	1756.77	328.082	287.653	945.637	91.1635	5.77869	0.123665	26.9156	16.8957	1.29977	21.4898	89.1269	27.1359	2.76298	12.1771	8.64233	207.698	491.983	67.6723	16.1232	9.09372	65.9895	2.59532	234.99	23.4473	23.1985	3.39005	0.000651974	3.03993	0.227998	6.59265	538.029
2019	420.546	468.359	409.8	1744.51	328.653	300.903	938.204	92.0154	6.00106	0.128028	27.09	18.8987	1.38031	24.3366	92.4443	30.3765	2.80123	12.1933	8.77296	204.101	487.53	66.8054	16.0644	9.08869	63.2654	2.1195	237.976	23.7551	23.2302	3.28247	0.000461821	3.02929	0.218058	6.56831	538.029
2020	423.464	470.821	412.068	1730.52	329.208	314.179	930.491	92.8493	6.22541	0.131902	27.1924	20.9593	1.45743	27.3907	95.6087	33.853	2.81274	12.126	8.88606	200.531	483.034	65.9472	16.0056	9.08344	60.6466	1.73019	240.563	24.0385	23.1623	3.17416	0.000327127	3.01669	0.208422	6.55225	538.029
2021	426.135	473.208	414.326	1714.87	329.749	327.478	922.502	93.6654	6.45174	0.135288	27.2231	23.0619	1.53124	30.6437	98.6249	37.5598	2.79823	11.9845	8.98164	196.98	478.492	65.0962	15.9469	9.07799	58.1251	1.41162	242.769	24.2979	23.007	3.06556	0.000231718	3.00217	0.199102	6.53307	538.029
2022	428.593	475.49	416.517	1698.72	330.278	340.484	913.948	94.4542	6.67163	0.138367	27.2159	25.0336	1.60205	33.9818	101.51	41.3811	2.76976	11.7562	9.06787	193.447	473.906	64.2516	15.888	9.07241	55.6954	1.15101	244.148	24.5065	22.7758	2.95712	0.000164136	2.98578	0.190099	6.51073	538.029
2023	430.908	477.664	418.603	1683.31	330.801	352.937	904.607	95.2064	6.87666	0.141319	27.2046	26.7398	1.67027	37.2966	104.289	45.2045	2.73915	11.432	9.1529	189.937	469.29	63.4144	15.829	9.06672	53.3575	0.938105	244.317	24.6437	22.4807	2.84938	0.000116264	2.96774	0.181407	6.49235	538.029
2024	433.15	479.757	420.601	1668.83	331.318	364.925	894.59	95.9221	7.06685	0.144145	27.1893	28.2382	1.73622	40.5905	106.981	49.031	2.70658	11.0266	9.23675	186.459	464.654	62.5854	15.7701	9.06095	51.1106	0.764479	243.407	24.7212	22.1333	2.74277	8.2355e-05	2.94821	0.173035	6.48033	538.029
2025	435.333	481.778	422.516	1655.37	331.829	376.52	883.989	96.6012	7.24218	0.146845	27.1703	29.5735	1.80015	43.8659	109.601	52.8616	2.67221	10.552	9.3194	183.016	460.007	61.7654	15.7113	9.05511	48.9534	0.62304	241.53	24.748	21.7433	2.63769	5.83355e-05	2.92734	0.164984	6.47388	538.029
2026	437.458	483.731	424.349	1642.85	332.335	387.77	872.878	97.2437	7.40266	0.149418	27.1475	30.7783	1.86223	47.1237	112.155	56.6965	2.63611	10.0171	9.40085	179.614	455.361	60.9551	15.6526	9.04923	46.8846	0.507835	238.77	24.7302	21.3186	2.53444	4.13215e-05	2.9053	0.157252	6.47131	538.029
2027	439.52	485.607	426.097	1631.19	332.834	398.713	861.314	97.8496	7.54829	0.151865	27.1209	31.8779	1.92258	50.365	114.65	60.5358	2.59834	9.42957	9.48112	176.255	450.72	60.1546	15.5941	9.04332	44.9012	0.413991	235.2	24.6726	20.8655	2.43325	2.92698e-05	2.88216	0.149836	6.47018	538.029
2028	441.508	487.396	427.752	1620.25	333.327	409.378	849.338	98.4189	7.67908	0.154186	27.0906	32.8919	1.9813	53.5903	117.088	64.3795	2.55894	8.79579	9.5602	172.937	446.085	59.3635	15.5357	9.03739	42.999	0.337532	230.885	24.579	20.3897	2.33428	2.0733e-05	2.85801	0.142718	6.4683	538.029
2029	443.418	489.093	429.314	1609.95	333.815	419.791	836.993	98.9516	7.79502	0.156381	27.0566	33.8363	2.0385	56.8001	119.474	68.2275	2.51794	8.12146	9.63808	169.659	441.459	58.5814	15.4775	9.03144	41.1743	0.275225	225.883	24.4531	19.8964	2.23767	1.46861e-05	2.83292	0.135904	6.46563	538.029
2030	445.154	490.699	430.783	1600.22	334.297	429.975	824.319	99.4478	7.89612	0.158449	27.0188	34.7245	2.09428	59.9952	121.811	72.0798	2.4754	7.41156	9.71478	166.422	436.844	57.8082	15.4193	9.02548	39.424	0.224445	220.251	24.2983	19.39	2.14355	1.04028e-05	2.80698	0.12938	6.46264	538.029
2031	446.618	492.215	432.163	1590.98	334.774	439.95	811.352	99.9074	7.98237	0.160392	26.9774	35.5673	2.14872	63.1762	124.103	75.9365	2.43136	6.67047	9.79028	163.227	432.243	57.0439	15.3613	9.01951	37.7452	0.183056	214.039	24.1174	18.8746	2.05199	7.36873e-06	2.78025	0.12313	6.4596	538.029
2032	447.94	493.621	433.436	1582.2	335.244	449.795	798.165	100.343	8.05951	0.162272	26.9329	36.3527	2.20217	66.3331	126.341	79.7853	2.38734	5.9553	9.86442	160.066	427.65	56.2872	15.3032	9.01351	36.1325	0.149292	207.397	23.8879	18.352	1.96302	5.21959e-06	2.75274	0.117149	6.45131	538.029
2033	449.21	494.907	434.593	1573.88	335.707	459.58	784.828	100.768	8.13328	0.164153	26.8861	37.0717	2.25497	69.456	128.515	83.6147	2.34486	5.3162	9.93699	156.936	423.065	55.5372	15.2452	9.00747	34.5821	0.12173	200.466	23.5896	17.8238	1.87666	3.69726e-06	2.72447	0.11142	6.43804	538.029
2034	450.399	496.097	435.653	1566.01	336.163	469.309	771.379	101.182	8.20367	0.166035	26.8371	37.7382	2.30718	72.5467	130.633	87.4252	2.30387	4.74395	10.008	153.843	418.493	54.7949	15.1872	9.00141	33.0935	0.0992403	193.276	23.2305	17.2921	1.793	2.61892e-06	2.69555	0.105945	6.42664	538.029
2035	451.52	497.202	436.628	1558.56	336.613	478.983	757.848	101.586	8.27068	0.167919	26.7858	38.3637	2.35886	75.6066	132.699	91.2175	2.26436	4.23036	10.0775	150.792	413.942	54.0608	15.1293	8.99534	31.6658	0.0808953	185.852	22.8175	16.7591	1.71208	1.85509e-06	2.66609	0.100725	6.41809	538.029
2036	452.576	498.226	437.522	1551.54	337.055	488.605	744.262	101.978	8.33431	0.169803	26.7323	38.9573	2.41008	78.6373	134.721	94.9921	2.2263	3.76822	10.1454	147.784	409.418	53.3355	15.0715	8.98927	30.2978	0.0659356	178.218	22.3568	16.2265	1.63396	1.31404e-06	2.63621	0.0957499	6.41244	538.029
2037	453.569	499.17	438.334	1544.93	337.491	498.176	730.648	102.359	8.39457	0.171689	26.6766	39.5266	2.4609	81.6402	136.702	98.75	2.18967	3.35119	10.2117	144.826	404.926	52.6197	15.0139	8.9832	28.9885	0.0537401	170.394	21.8541	15.6958	1.55867	9.30792e-07	2.606	0.0909982	6.41008	538.029
2038	454.49	500.026	439.06	1538.68	337.92	507.697	717.02	102.73	8.45145	0.173576	26.6188	40.0767	2.51136	84.6166	138.646	102.491	2.15441	2.97362	10.2765	141.916	400.471	51.9135	14.9565	8.97713	27.7356	0.043799	162.398	21.3138	15.1681	1.48617	6.59319e-07	2.57553	0.0864699	6.409	538.029
2039	455.329	500.782	439.691	1532.76	338.342	517.162	703.384	103.09	8.50496	0.175464	26.5588	40.6103	2.56145	87.5669	140.555	106.216	2.1205	2.6305	10.3397	139.053	396.049	51.2164	14.8993	8.97107	26.5363	0.0356952	154.243	20.7397	14.6443	1.41642	4.67024e-07	2.54481	0.0821638	6.40717	538.029
2040	455.98	501.433	440.222	1527.1	338.758	526.569	689.748	103.438	8.55509	0.177353	26.4966	41.1303	2.61119	90.492	142.431	109.925	2.08788	2.31748	10.4014	136.236	391.661	50.5281	14.8423	8.965	25.388	0.0290891	145.941	20.1352	14.1253	1.34938	3.30813e-07	2.51387	0.078057	6.40455	538.029
2041	456.34	501.978	440.657	1521.68	339.168	535.916	676.121	103.776	8.60184	0.179243	26.4323	41.6391	2.66061	93.3926	144.276	113.618	2.05652	2.03078	10.4615	133.465	387.308	49.8486	14.7855	8.95893	24.2885	0.0237042	137.504	19.5037	13.6117	1.28496	2.34329e-07	2.48274	0.0741393	6.40178	538.029
2042	456.519	502.43	441.025	1516.03	339.562	544.943	662.698	104.101	8.64561	0.18113	26.3663	42.0612	2.71025	96.2156	145.997	117.243	2.0252	1.77365	10.519	130.739	382.991	49.1777	14.7288	8.95286	23.2359	0.0193146	129.232	18.8637	13.1044	1.22313	1.65985e-07	2.45148	0.0704121	6.39881	538.029
2043	456.613	502.786	441.347	1509.65	339.934	553.395	649.642	104.409	8.68676	0.183009	26.299	42.3322	2.76056	98.9084	147.504	120.748	1.99271	1.54886	10.5727	128.053	378.703	48.5143	14.6723	8.94679	22.2267	0.0157351	121.392	18.2314	12.6046	1.16378	1.17574e-07	2.42006	0.0668633	6.39133	538.029
2044	456.618	503.046	441.621	1502.6	340.282	561.302	636.92	104.701	8.72531	0.18488	26.2304	42.4786	2.81146	101.475	148.809	124.135	1.95907	1.35233	10.6226	125.404	374.44	47.8577	14.6157	8.94069	21.2581	0.0128159	113.949	17.6055	12.1132	1.10685	8.32828e-08	2.38847	0.0634823	6.3802	538.029
2045	456.556	503.234	441.864	1494.99	340.607	568.703	624.526	104.978	8.76126	0.186744	26.1606	42.5261	2.86294	103.919	149.93	127.407	1.92433	1.18057	10.6689	122.795	370.209	47.2086	14.5593	8.93459	20.3298	0.0104364	106.873	16.986	11.6315	1.0523	5.89928e-08	2.35678	0.0602625	6.37125	538.029
2046	456.441	503.364	442.085	1486.93	340.91	575.632	612.449	105.238	8.79459	0.188599	26.0896	42.4951	2.91499	106.247	150.881	130.565	1.88854	1.03051	10.7113	120.23	366.014	46.5674	14.503	8.92848	19.4409	0.0084974	100.138	16.3728	11.1606	1.0001	4.17871e-08	2.32508	0.0571972	6.36516	538.029
2047	456.277	503.44	442.283	1478.49	341.19	582.116	600.681	105.483	8.82532	0.190447	26.0173	42.4022	2.96762	108.463	151.676	133.614	1.85175	0.899449	10.75	117.71	361.858	45.9348	14.4469	8.92238	18.5905	0.0069179	93.7173	15.7656	10.7012	0.950177	2.95996e-08	2.29342	0.0542907	6.36192	538.029
2048	456.072	503.464	442.458	1469.75	341.447	588.186	589.214	105.711	8.85345	0.192287	25.9438	42.2611	3.02083	110.572	152.33	136.555	1.814	0.785017	10.785	115.238	357.747	45.3111	14.3911	8.91628	17.7779	0.00563161	87.5881	15.1642	10.2541	0.902485	2.09666e-08	2.26186	0.0515251	6.36187	538.029
2049	455.821	503.428	442.601	1460.77	341.683	593.86	578.034	105.924	8.87897	0.194119	25.8692	42.0812	3.07459	112.577	152.852	139.391	1.77531	0.685115	10.8162	112.815	353.682	44.6965	14.3355	8.9102	17.0014	0.00458423	81.7269	14.5683	9.81959	0.856951	1.48516e-08	2.23045	0.0488933	6.36306	538.029
2050	455.441	503.321	442.7	1451.54	341.896	599.156	567.121	106.12	8.90188	0.195943	25.7934	41.8692	3.12885	114.482	153.251	142.124	1.73572	0.597892	10.8437	110.438	349.659	44.0905	14.2801	8.90412	16.2592	0.00373136	76.1112	13.977	9.398	0.813496	1.052e-08	2.19919	0.0463987	6.36343	538.029
2051	454.853	503.136	442.752	1442.1	342.087	604.088	556.459	106.301	8.92219	0.19776	25.7164	41.6309	3.18355	116.29	153.535	144.754	1.69525	0.52174	10.8674	108.105	345.679	43.4928	14.225	8.89804	15.5496	0.00303691	70.7208	13.39	8.98947	0.772036	7.45175e-09	2.16806	0.0440338	6.36307	538.029
2052	454.145	502.9	442.761	1432.71	342.26	608.993	546.098	106.472	8.94088	0.199571	25.6386	41.4531	3.23675	118.067	153.834	147.343	1.65469	0.455269	10.889	105.817	341.742	42.9034	14.1701	8.89198	14.8711	0.00247157	65.6271	12.8185	8.59424	0.732495	5.27839e-09	2.13711	0.041781	6.36299	538.029
2053	453.416	502.634	442.734	1423.62	342.421	614.188	536.081	106.64	8.95894	0.201379	25.5601	41.4065	3.28662	119.878	154.268	149.947	1.6148	0.397264	10.91	103.572	337.846	42.3221	14.1155	8.88591	14.2224	0.00201145	60.8954	12.2727	8.21242	0.694801	3.73891e-09	2.10635	0.0396344	6.36334	538.029
2054	452.655	502.325	442.663	1414.74	342.569	619.63	526.374	106.805	8.97638	0.203185	25.4809	41.4628	3.3333	121.719	154.824	152.564	1.57555	0.346629	10.9305	101.366	333.987	41.7478	14.0609	8.87984	13.6011	0.00163687	56.494	11.7496	7.84376	0.658864	2.64843e-09	2.07572	0.0375979	6.35952	538.029
2055	451.861	501.97	442.548	1406.01	342.704	625.288	516.95	106.967	8.99318	0.204989	25.401	41.6007	3.37694	123.588	155.491	155.195	1.53691	0.302419	10.9505	99.1954	330.158	41.18	14.0065	8.87377	13.0054	0.00133187	52.3948	11.2464	7.48808	0.624611	1.876e-09	2.04522	0.0356651	6.35208	538.029
2056	451.052	501.591	442.406	1397.45	342.826	631.148	507.801	107.125	9.00935	0.206789	25.3205	41.8065	3.41776	125.486	156.262	157.839	1.49887	0.263831	10.9699	97.0628	326.366	40.619	13.9522	8.86768	12.4351	0.00108361	48.5742	10.7613	7.14539	0.591987	1.32885e-09	2.01488	0.0338315	6.34675	538.029
2057	450.238	501.199	442.248	1389.08	342.936	637.197	498.916	107.281	9.0249	0.208587	25.2394	42.0692	3.45601	127.412	157.133	160.497	1.46143	0.230159	10.9888	94.9703	322.612	40.0655	13.898	8.8616	11.8895	0.000881589	45.0105	10.2929	6.81561	0.560935	9.41279e-10	1.98476	0.032093	6.34419	538.029
2058	449.42	500.796	442.075	1380.89	343.033	643.423	490.289	107.434	9.03981	0.210383	25.1576	42.3793	3.49188	129.365	158.1	163.17	1.42457	0.200785	11.0072	92.9193	318.901	39.5197	13.8441	8.85553	11.368	0.000717228	41.6831	9.8395	6.49863	0.531402	6.66748e-10	1.95491	0.0304452	6.34436	538.029
2059	448.599	500.381	441.886	1372.91	343.118	649.816	481.909	107.583	9.0541	0.212175	25.0752	42.7298	3.52557	131.347	159.157	165.856	1.38829	0.175164	11.025	90.9115	315.236	38.982	13.7905	8.84946	10.8701	0.000583532	38.5734	9.39983	6.19422	0.503334	4.72286e-10	1.92536	0.0288841	6.34763	538.029
2060	447.834	499.944	441.673	1365.11	343.192	656.364	473.766	107.73	9.06776	0.213966	24.9923	43.1133	3.55724	133.357	160.3	168.558	1.35258	0.152818	11.0422	88.9465	311.616	38.4525	13.7372	8.84341	10.3947	0.000474781	35.6633	8.97245	5.90213	0.476657	3.3454e-10	1.89614	0.0274052	6.35204	538.029
2061	447.183	499.471	441.424	1357.45	343.253	663.052	465.842	107.873	9.08079	0.215753	24.9087	43.5228	3.58698	135.392	161.52	171.273	1.31741	0.133326	11.059	87.0223	308.04	37.9307	13.6841	8.83737	9.94058	0.000386308	32.9358	8.55592	5.62203	0.451309	2.36969e-10	1.86722	0.0260038	6.35549	538.029
2062	446.563	498.969	441.135	1350.23	343.308	669.878	458.141	108.015	9.09337	0.217538	24.8248	43.9548	3.61483	137.455	162.817	174	1.283	0.116322	11.0752	85.1375	304.506	37.4164	13.6313	8.83134	9.50659	0.000314329	30.3979	8.15597	5.35357	0.427237	1.67855e-10	1.8386	0.0246646	6.358	538.029
2063	445.921	498.448	440.803	1343.69	343.363	676.839	450.666	108.156	9.1057	0.219322	24.7407	44.4072	3.64081	139.545	164.189	176.736	1.2496	0.101489	11.0912	83.291	301.013	36.9094	13.5787	8.82532	9.0918	0.000255771	28.0557	7.77781	5.09646	0.404373	1.18899e-10	1.8103	0.0233844	6.36016	538.029
2064	445.277	497.907	440.43	1337.75	343.417	683.927	443.405	108.297	9.11776	0.221103	24.6563	44.876	3.66505	141.662	165.631	179.481	1.21716	0.0885501	11.1069	81.482	297.561	36.4094	13.5263	8.81931	8.69531	0.000208129	25.8932	7.4191	4.85035	0.382674	8.42212e-11	1.78229	0.0221709	6.36204	538.029
2065	444.619	497.333	440.01	1332.3	343.472	691.121	436.334	108.438	9.12956	0.222882	24.5717	45.3547	3.68756	143.803	167.134	182.234	1.18564	0.0772588	11.1222	79.7064	294.143	35.9157	13.4741	8.81329	8.31566	0.000169356	23.8945	7.07747	4.61478	0.36207	5.96574e-11	1.75453	0.0210197	6.35951	538.029
2066	443.944	496.725	439.545	1327.23	343.526	698.407	429.437	108.579	9.1411	0.22466	24.4869	45.8392	3.70839	145.966	168.69	184.994	1.15501	0.0674029	11.1372	77.9614	290.755	35.4275	13.4219	8.80726	7.95176	0.000137794	22.0457	6.75096	4.38938	0.3425	4.22579e-11	1.72702	0.0199273	6.35325	538.029
2067	443.269	496.103	439.052	1322.55	343.581	705.786	422.712	108.719	9.15237	0.226435	24.4017	46.3307	3.72771	148.151	170.299	187.76	1.12525	0.0588026	11.1518	76.249	287.401	34.9454	13.3699	8.80123	7.60337	0.00011211	20.3349	6.43819	4.17386	0.323926	2.99331e-11	1.69978	0.018891	6.34901	538.029
2068	442.604	495.477	438.543	1318.24	343.635	713.258	416.154	108.86	9.16339	0.228209	24.3164	46.8296	3.74566	150.359	171.959	190.535	1.09634	0.0512997	11.1662	74.5704	284.084	34.4697	13.3181	8.7952	7.27013	9.12132e-05	18.7511	6.13784	3.96796	0.306308	2.12029e-11	1.67285	0.0179085	6.34744	538.029
2069	441.952	494.852	438.019	1314.27	343.689	720.824	409.76	109	9.17415	0.229981	24.2309	47.3363	3.76238	152.59	173.668	193.319	1.06826	0.0447554	11.1802	72.9268	280.805	34.0007	13.2665	8.78918	6.95165	7.42141e-05	17.2842	5.84875	3.77139	0.289607	1.50189e-11	1.64625	0.0169773	6.34851	538.029
2070	441.343	494.224	437.481	1310.65	343.744	728.484	403.527	109.139	9.18464	0.23175	24.1452	47.8514	3.77799	154.844	175.428	196.111	1.04099	0.0390482	11.1939	71.3192	277.569	33.5387	13.2152	8.78317	6.64754	6.03877e-05	15.9247	5.56986	3.58385	0.273772	1.06385e-11	1.62	0.016095	6.3526	538.029
2071	440.802	493.583	436.919	1307.33	343.798	736.234	397.448	109.279	9.19487	0.233518	24.0593	48.3737	3.79259	157.122	177.233	198.913	1.01452	0.034071	11.2072	69.7472	274.374	33.0837	13.1641	8.77717	6.3572	4.91415e-05	14.6637	5.30006	3.40499	0.258765	7.53571e-12	1.59412	0.0152592	6.35771	538.029
2072	440.3	492.936	436.343	1304.28	343.851	743.918	391.518	109.416	9.20474	0.235282	23.9734	48.8646	3.80621	159.39	179.028	201.695	0.988814	0.0297304	11.2202	68.209	271.219	32.6354	13.1134	8.77118	6.07984	3.99936e-05	13.4985	5.04255	3.23447	0.244562	5.33786e-12	1.56859	0.0144672	6.36215	538.029
2073	439.809	492.292	435.764	1301.45	343.901	751.393	385.735	109.548	9.21415	0.237039	23.8875	49.2931	3.81894	161.618	180.758	204.426	0.963854	0.0259452	11.2328	66.7035	268.102	32.1935	13.0628	8.76521	5.81478	3.25527e-05	12.4267	4.80021	3.072	0.231111	3.78104e-12	1.54339	0.0137165	6.36604	538.029
2074	439.327	491.647	435.182	1298.83	343.947	758.674	380.089	109.676	9.22309	0.23879	23.8018	49.6709	3.83082	163.808	182.43	207.108	0.939619	0.022644	11.245	65.2298	265.022	31.7579	13.0125	8.75924	5.56143	2.64993e-05	11.4404	4.57138	2.91724	0.218363	2.67827e-12	1.51852	0.013005	6.3695	538.029
2075	438.85	491	434.595	1296.38	343.991	765.774	374.575	109.799	9.23156	0.240534	23.7161	50.0076	3.84189	165.961	184.046	209.743	0.916083	0.0197645	11.2568	63.7871	261.978	31.3284	12.9624	8.75328	5.31925	2.1574e-05	10.5324	4.3546	2.76984	0.206289	1.89713e-12	1.49399	0.0123306	6.37258	538.029
2076	438.367	490.339	433.995	1294.03	344.031	772.692	369.177	109.918	9.23958	0.242272	23.6305	50.3071	3.85212	168.076	185.606	212.328	0.893216	0.0172517	11.2681	62.3721	258.966	30.9042	12.9124	8.74731	5.08735	1.7565e-05	9.6959	4.14841	2.62947	0.194857	1.34382e-12	1.46975	0.0116908	6.37119	538.029
2077	437.876	489.665	433.385	1291.74	344.068	779.433	363.884	110.032	9.24712	0.244004	23.5449	50.574	3.86149	170.153	187.109	214.865	0.870989	0.0150584	11.279	60.9826	255.98	30.4847	12.8625	8.74134	4.86505	1.43009e-05	8.92471	3.95155	2.49579	0.184021	9.51884e-13	1.44577	0.0110836	6.36601	538.029
2078	437.397	488.997	432.78	1289.52	344.102	786.014	358.698	110.141	9.25421	0.245729	23.4593	50.8171	3.87012	172.195	188.565	217.355	0.849391	0.0131443	11.2895	59.62	253.026	30.0705	12.8127	8.73536	4.6522	1.16438e-05	8.21367	3.76316	2.36852	0.173748	6.7426e-13	1.42209	0.0105076	6.3628	538.029
2079	436.94	488.347	432.19	1287.41	344.133	792.452	353.618	110.246	9.26082	0.247448	23.3738	51.0429	3.87811	174.204	189.978	219.8	0.828407	0.0114741	11.2997	58.2852	250.103	29.6617	12.7631	8.72938	4.44859	9.48108e-06	7.55787	3.58241	2.24744	0.164042	4.77607e-13	1.39871	0.00996144	6.36221	538.029
2080	436.475	487.717	431.617	1285.4	344.161	798.762	348.643	110.346	9.26698	0.24916	23.2883	51.2564	3.88553	176.182	191.354	222.202	0.808024	0.010017	11.3093	56.979	247.216	29.2587	12.7138	8.72342	4.25398	7.72092e-06	6.95288	3.40856	2.13229	0.154868	3.38309e-13	1.37565	0.00944377	6.36422	538.029
2081	435.971	487.108	431.058	1283.53	344.186	804.957	343.775	110.442	9.27267	0.250866	23.203	51.4623	3.89249	178.132	192.7	224.563	0.788228	0.00874592	11.3186	55.7022	244.365	28.8617	12.6647	8.71746	4.06814	6.28848e-06	6.39457	3.24094	2.02282	0.146197	2.39639e-13	1.35296	0.00895331	6.36924	538.029
2082	435.472	486.508	430.51	1281.76	344.208	810.899	339.011	110.534	9.278	0.252563	23.1178	51.6232	3.89888	180.026	193.964	226.857	0.768994	0.00763698	11.3274	54.4544	241.552	28.4707	12.6158	8.71152	3.89069	5.12255e-06	5.88033	3.08131	1.91875	0.137995	1.69746e-13	1.33063	0.00848865	6.3752	538.029
2083	434.997	485.907	429.964	1280.04	344.227	816.454	334.347	110.625	9.28308	0.25425	23.0326	51.7073	3.90454	181.832	195.097	229.059	0.750298	0.0066692	11.3357	53.2342	238.774	28.0854	12.5672	8.70558	3.72117	4.17324e-06	5.40776	2.93122	1.81987	0.130232	1.20239e-13	1.30865	0.00804832	6.37999	538.029
2084	434.517	485.297	429.414	1278.36	344.242	821.646	329.777	110.715	9.28791	0.255925	22.9474	51.7282	3.90951	183.555	196.107	231.172	0.732119	0.00582447	11.3435	52.0408	236.03	27.7057	12.5188	8.69966	3.55917	3.40019e-06	4.97335	2.78964	1.72593	0.122895	8.517e-14	1.28699	0.00763097	6.38372	538.029
2085	434.031	484.676	428.859	1276.72	344.253	826.495	325.298	110.802	9.2925	0.25759	22.8624	51.6979	3.91382	185.197	197.003	233.195	0.714442	0.00508709	11.3507	50.8733	233.319	27.3313	12.4707	8.69374	3.40432	2.77059e-06	4.57389	2.65565	1.63664	0.115956	6.03296e-14	1.26566	0.00723539	6.38693	538.029
2086	433.538	484.045	428.299	1275.1	344.261	831.022	320.905	110.888	9.29683	0.259244	22.7773	51.6256	3.91752	186.76	197.792	235.132	0.69725	0.00444335	11.3575	49.7312	230.64	26.9622	12.4227	8.68784	3.25629	2.25776e-06	4.20649	2.52844	1.5518	0.109408	4.2734e-14	1.24463	0.00686041	6.38977	538.029
2087	433.028	483.394	427.727	1273.45	344.266	835.231	316.589	110.972	9.30091	0.260886	22.6923	51.5154	3.92053	188.244	198.476	236.983	0.680522	0.00388112	11.3637	48.6117	227.989	26.5977	12.3749	8.68193	3.11454	1.83989e-06	3.86838	2.40718	1.47122	0.103221	3.02703e-14	1.2239	0.00650468	6.38812	538.029
2088	432.501	482.722	427.143	1271.74	344.268	839.131	312.342	111.055	9.30474	0.262518	22.6073	51.3718	3.92284	189.651	199.06	238.746	0.664237	0.00338994	11.3693	47.5131	225.363	26.2373	12.3272	8.67601	2.97866	1.49931e-06	3.55706	2.29118	1.39464	0.0973709	2.14417e-14	1.20342	0.00616707	6.38269	538.029
2089	431.977	482.051	426.566	1270	344.266	842.747	308.166	111.136	9.30831	0.26414	22.5223	51.2038	3.92456	190.986	199.553	240.426	0.648388	0.00296094	11.3745	46.4365	222.763	25.8814	12.2795	8.67008	2.84856	1.22179e-06	3.27041	2.17995	1.32189	0.091838	1.51881e-14	1.18322	0.00584682	6.37925	538.029
2090	431.473	481.394	426.005	1268.28	344.261	846.101	304.063	111.215	9.31164	0.26575	22.4373	51.0178	3.92576	192.251	199.966	242.025	0.632965	0.00258633	11.3791	45.3826	220.193	25.5302	12.2321	8.66416	2.72411	9.95679e-07	3.00646	2.07305	1.2528	0.0866046	1.07584e-14	1.16331	0.00554315	6.37846	538.029
2091	430.999	480.753	425.461	1266.59	344.253	849.213	300.034	111.293	9.31472	0.267349	22.3523	50.8192	3.92654	193.451	200.306	243.546	0.61796	0.00225925	11.3832	44.3519	217.653	25.1839	12.1849	8.65825	2.60515	8.11481e-07	2.76338	1.97006	1.18725	0.0816703	7.62061e-15	1.14371	0.00525533	6.38029	538.029
2092	430.548	480.134	424.937	1264.97	344.241	852.013	296.081	111.37	9.31766	0.268936	22.2676	50.5881	3.92684	194.57	200.549	244.976	0.603363	0.00197375	11.3868	43.3449	215.147	24.8429	12.1379	8.65235	2.49155	6.61453e-07	2.53985	1.87213	1.12507	0.0770175	5.398e-15	1.12445	0.00498262	6.38534	538.029
2093	430.11	479.531	424.431	1263.45	344.225	854.427	292.203	111.446	9.32058	0.270507	22.1833	50.3068	3.92656	195.592	200.667	246.304	0.58916	0.00172455	11.3898	42.3614	212.673	24.507	12.0912	8.64646	2.38308	5.39255e-07	2.33458	1.78017	1.06608	0.0726284	3.82363e-15	1.10552	0.00472425	6.3917	538.029
2094	429.68	478.931	423.931	1261.99	344.206	856.475	288.395	111.521	9.32346	0.272063	22.0994	49.9835	3.92571	196.519	200.668	247.53	0.575337	0.00150699	11.3922	41.4002	210.23	24.176	12.0447	8.64058	2.27945	4.397e-07	2.14605	1.69355	1.01014	0.0684853	2.70844e-15	1.08691	0.0044794	6.39712	538.029
2095	429.251	478.327	423.431	1260.57	344.184	858.173	284.655	111.595	9.32632	0.273604	22.0159	49.6254	3.9243	197.354	200.559	248.658	0.561881	0.00131701	11.3941	40.4605	207.817	23.8498	11.9984	8.63472	2.18041	3.58574e-07	1.97283	1.61168	0.957089	0.0645719	1.91851e-15	1.06859	0.00424732	6.40156	538.029
2096	428.821	477.718	422.929	1259.2	344.157	859.539	280.979	111.669	9.32915	0.27513	21.9327	49.2387	3.92237	198.1	200.347	249.687	0.548781	0.0011511	11.3954	39.5417	205.434	23.5282	11.9523	8.62886	2.08574	2.92455e-07	1.81366	1.53405	0.906794	0.0608733	1.35896e-15	1.05054	0.00402734	6.40547	538.029
2097	428.391	477.104	422.428	1257.86	344.127	860.589	277.366	111.742	9.33196	0.276641	21.8499	48.8284	3.91995	198.761	200.04	250.621	0.536023	0.00100618	11.3961	38.6433	203.079	23.2111	11.9065	8.62301	1.99523	2.38559e-07	1.66738	1.46021	0.859094	0.0573756	9.62608e-16	1.03278	0.00381881	6.40899	538.029
2098	427.949	476.474	421.918	1256.49	344.094	861.325	273.807	111.815	9.33474	0.278136	21.7675	48.3951	3.91695	199.335	199.638	251.459	0.523593	0.000879552	11.3963	37.7632	200.749	22.8979	11.8607	8.61715	1.90855	1.94607e-07	1.53286	1.38966	0.813825	0.0540641	6.81856e-16	1.0153	0.00362098	6.408	538.029
2099	427.497	475.83	421.401	1255.07	344.057	861.753	270.298	111.886	9.33749	0.279617	21.6853	47.9406	3.91336	199.825	199.144	252.201	0.511475	0.000768863	11.3959	36.8999	198.44	22.5883	11.8151	8.61129	1.82546	1.58754e-07	1.40909	1.32205	0.770866	0.0509428	4.82988e-16	0.998058	0.00343321	6.40318	538.029
2100	426.963	475.193	420.895	1253.63	344.016	861.896	266.841	111.957	9.34022	0.281082	21.6035	47.4713	3.90927	200.235	198.568	252.851	0.499665	0.00067213	11.395	36.0544	196.155	22.2825	11.7695	8.60542	1.74589	1.29513e-07	1.29525	1.25709	0.730128	0.0480012	3.42121e-16	0.981067	0.00325509	6.40034	538.029
2101	426.265	474.574	420.41	1252.2	343.972	861.776	263.438	112.028	9.34291	0.282532	21.5221	46.9919	3.90477	200.57	197.92	253.412	0.488156	0.000587608	11.3934	35.2271	193.895	21.9808	11.7242	8.59956	1.66977	1.05668e-07	1.19052	1.19455	0.691525	0.0452289	2.42339e-16	0.964332	0.00308619	6.40027	538.029
2102	425.545	473.982	419.945	1250.89	343.927	861.577	260.091	112.098	9.3456	0.283974	21.441	46.5548	3.90026	200.863	197.263	253.925	0.476965	0.000513746	11.3916	34.4185	191.663	21.6833	11.679	8.5937	1.59702	8.62196e-08	1.0942	1.1347	0.654933	0.042616	1.71659e-16	0.947866	0.0029261	6.40253	538.029
2103	424.898	473.419	419.498	1249.77	343.882	861.473	256.801	112.168	9.34828	0.285416	21.3602	46.2031	3.89611	201.149	196.657	254.429	0.466108	0.000449191	11.3899	33.629	189.461	21.3904	11.6341	8.58786	1.52755	7.03555e-08	1.00566	1.07788	0.620236	0.0401532	1.21593e-16	0.931699	0.00277442	6.40722	538.029
2104	424.273	472.874	419.06	1248.83	343.837	861.45	253.569	112.238	9.35097	0.286858	21.2798	45.921	3.89233	201.428	196.099	254.926	0.455574	0.000392769	11.3881	32.8583	187.287	21.102	11.5894	8.58203	1.46122	5.74146e-08	0.924269	1.02397	0.587358	0.037831	8.61296e-17	0.915826	0.00263072	6.41276	538.029
2105	423.658	472.333	418.619	1248.03	343.792	861.493	250.39	112.308	9.35365	0.288299	21.1997	45.6943	3.88885	201.7	195.584	255.414	0.445354	0.000343448	11.3863	32.1055	185.142	20.8178	11.545	8.57621	1.39785	4.68565e-08	0.84946	0.972787	0.556193	0.0356399	6.10093e-17	0.900215	0.00249455	6.41727	538.029
2106	423.046	471.79	418.171	1247.35	343.748	861.589	247.263	112.378	9.35633	0.289739	21.1199	45.5121	3.88564	201.963	195.109	255.894	0.435437	0.00030033	11.3845	31.3699	183.023	20.5377	11.5007	8.57041	1.33729	3.82415e-08	0.780722	0.92417	0.526644	0.0335712	4.32155e-17	0.884875	0.00236547	6.42077	538.029
2107	422.435	471.243	417.715	1246.77	343.705	861.729	244.186	112.448	9.35902	0.29118	21.0404	45.3658	3.88267	202.219	194.67	256.366	0.425813	0.000262631	11.3827	30.6512	180.93	20.2616	11.4567	8.56461	1.2794	3.12116e-08	0.717558	0.878012	0.498648	0.0316171	3.06113e-17	0.869798	0.00224312	6.42377	538.029
2108	421.825	470.691	417.251	1246.28	343.661	861.907	241.158	112.518	9.3617	0.292619	20.9613	45.2483	3.87994	202.467	194.264	256.829	0.416473	0.000229671	11.3809	29.9488	178.862	19.9894	11.4129	8.55882	1.22407	2.54748e-08	0.659477	0.834175	0.472118	0.0297871	2.16833e-17	0.854978	0.00212714	6.42638	538.029
2109	421.205	470.124	416.772	1245.82	343.618	862.101	238.172	112.588	9.36438	0.294058	20.8824	45.151	3.87731	202.705	193.883	257.283	0.407404	0.000200841	11.3791	29.261	176.816	19.7207	11.3692	8.55303	1.17107	2.07917e-08	0.606077	0.792503	0.446963	0.0280553	1.53592e-17	0.840385	0.00201712	6.42448	538.029
2110	420.575	469.543	416.281	1245.35	343.576	862.3	235.224	112.658	9.36707	0.295497	20.8038	45.0677	3.87473	202.932	193.522	257.725	0.398596	0.000175618	11.3773	28.5868	174.79	19.455	11.3256	8.54723	1.12027	1.69679e-08	0.556966	0.752871	0.423101	0.0264149	1.08796e-17	0.825978	0.00191268	6.41875	538.029
2111	419.955	468.968	415.795	1244.9	343.534	862.51	232.318	112.728	9.36975	0.296935	20.7255	44.998	3.87226	203.149	193.183	258.157	0.390043	0.000153558	11.3755	27.9268	172.784	19.1926	11.2821	8.54143	1.07162	1.38468e-08	0.51181	0.71519	0.400466	0.0248778	7.70647e-18	0.811791	0.00181362	6.41502	538.029
2112	419.355	468.412	415.323	1244.5	343.492	862.736	229.453	112.798	9.37243	0.298373	20.6474	44.9412	3.86992	203.358	192.868	258.581	0.381741	0.000134268	11.3737	27.2814	170.802	18.9338	11.2388	8.53563	1.02508	1.12997e-08	0.470296	0.679393	0.379026	0.0234209	5.45882e-18	0.797852	0.00171968	6.41395	538.029
2113	418.778	467.876	414.867	1244.16	343.451	862.98	226.633	112.868	9.37511	0.299811	20.5697	44.8964	3.86778	203.561	192.577	258.997	0.373684	0.000117404	11.3719	26.6507	168.843	18.6786	11.1957	8.52985	0.980596	9.22138e-09	0.432136	0.645394	0.358718	0.0220397	3.86671e-18	0.784149	0.00163063	6.41551	538.029
2114	418.223	467.361	414.425	1243.92	343.41	863.248	223.859	112.938	9.37779	0.301248	20.4922	44.8632	3.86586	203.76	192.312	259.408	0.365868	0.000102663	11.3702	26.0352	166.911	18.4273	11.1528	8.52407	0.938109	7.52583e-09	0.397096	0.613142	0.339484	0.0207467	2.73896e-18	0.77069	0.00154625	6.42007	538.029
2115	417.682	466.856	413.989	1243.75	343.369	863.539	221.131	113.008	9.38047	0.302684	20.4152	44.8399	3.86416	203.955	192.071	259.812	0.358286	8.97786e-05	11.3684	25.4344	165.003	18.1798	11.1101	8.51831	0.897534	6.14251e-09	0.364921	0.582527	0.321292	0.0195363	1.94012e-18	0.757472	0.0014663	6.42566	538.029
2116	417.143	466.348	413.549	1243.64	343.329	863.844	218.445	113.078	9.38315	0.30412	20.3384	44.8235	3.86264	204.145	191.851	260.21	0.350929	7.85141e-05	11.3666	24.8478	163.12	17.9359	11.0677	8.51256	0.858766	5.01374e-09	0.335339	0.553442	0.304082	0.0184031	1.37427e-18	0.744484	0.00139054	6.43025	538.029
2117	416.6	465.833	413.099	1243.57	343.289	864.161	215.8	113.148	9.38583	0.305556	20.2619	44.8121	3.86127	204.331	191.649	260.602	0.34379	6.86652e-05	11.3648	24.2749	161.261	17.6956	11.0255	8.50682	0.821708	4.09257e-09	0.308137	0.525819	0.28777	0.0173248	9.73453e-19	0.731737	0.00131871	6.43383	538.029
2118	416.053	465.308	412.641	1243.53	343.249	864.485	213.195	113.218	9.38852	0.306991	20.1857	44.8047	3.86003	204.511	191.465	260.987	0.336863	6.00535e-05	11.363	23.7151	159.424	17.4587	10.9835	8.50109	0.786281	3.34077e-09	0.283151	0.499575	0.272305	0.016298	6.89538e-19	0.719205	0.00125063	6.43689	538.029
2119	415.501	464.775	412.173	1243.53	343.21	864.816	210.629	113.288	9.3912	0.308426	20.1099	44.8002	3.85892	204.687	191.296	261.365	0.33014	5.25231e-05	11.3612	23.1682	157.609	17.2251	10.9416	8.49537	0.752408	2.72717e-09	0.260201	0.474663	0.257668	0.0153364	4.88429e-19	0.706882	0.00118608	6.43956	538.029
2120	414.936	464.223	411.69	1243.49	343.171	865.138	208.097	113.358	9.39387	0.30986	20.0343	44.7946	3.85782	204.855	191.136	261.735	0.323612	4.59358e-05	11.3594	22.6329	155.814	16.9945	10.8999	8.48964	0.719964	2.22619e-09	0.239113	0.450996	0.243807	0.0144352	3.45975e-19	0.694762	0.00112484	6.43769	538.029
2121	414.357	463.654	411.194	1243.4	343.133	865.442	205.595	113.428	9.39655	0.311294	19.9589	44.786	3.85667	205.014	190.98	262.096	0.317271	4.01719e-05	11.3577	22.1083	154.035	16.7664	10.8583	8.48391	0.688856	1.81708e-09	0.219729	0.428482	0.230677	0.0135904	2.45069e-19	0.68281	0.0010667	6.43199	538.029
2122	413.784	463.089	410.702	1243.29	343.095	865.737	203.126	113.498	9.39923	0.312727	19.8838	44.7771	3.85554	205.165	190.832	262.448	0.311113	3.51302e-05	11.3559	21.5949	152.275	16.5412	10.8168	8.47818	0.659063	1.48309e-09	0.201919	0.407063	0.218242	0.0127987	1.73593e-19	0.671036	0.00101155	6.42829	538.029
2123	413.227	462.539	410.223	1243.19	343.057	866.03	200.692	113.568	9.40191	0.31416	19.809	44.7696	3.85447	205.311	190.695	262.793	0.305136	3.07211e-05	11.3541	21.093	150.535	16.319	10.7754	8.47244	0.630556	1.21048e-09	0.185557	0.386708	0.206464	0.0120571	1.22963e-19	0.659468	0.000959251	6.42725	538.029
2124	412.691	462.007	409.759	1243.12	343.02	866.328	198.293	113.638	9.40459	0.315593	19.7345	44.765	3.85351	205.454	190.569	263.133	0.299336	2.68659e-05	11.3523	20.6026	148.815	16.1	10.7342	8.46672	0.603301	9.88008e-10	0.170495	0.367385	0.19534	0.0113456	8.71e-20	0.64811	0.000909668	6.42884	538.029
2125	412.173	461.493	409.308	1243.11	342.983	866.637	195.932	113.708	9.40727	0.317025	19.6603	44.7645	3.8527	205.594	190.457	263.468	0.293709	2.34958e-05	11.3505	20.1242	147.119	15.8843	10.6933	8.46101	0.577266	8.06478e-10	0.156631	0.349044	0.184805	0.0106623	6.16966e-20	0.636951	0.000862682	6.43345	538.029
2126	411.664	460.987	408.863	1243.15	342.946	866.958	193.608	113.778	9.40995	0.318456	19.5864	44.7677	3.85205	205.733	190.359	263.798	0.28825	2.05496e-05	11.3487	19.6573	145.444	15.6718	10.6525	8.45532	0.5524	6.58352e-10	0.143899	0.331631	0.174829	0.0100227	4.37023e-20	0.625988	0.000818158	6.43909	538.029
2127	411.158	460.482	408.417	1243.23	342.91	867.284	191.319	113.848	9.41263	0.319887	19.5128	44.7729	3.85151	205.869	190.272	264.124	0.282955	1.79736e-05	11.347	19.2016	143.791	15.4624	10.612	8.44963	0.528636	5.37463e-10	0.132206	0.315093	0.165406	0.00942379	3.09562e-20	0.61523	0.000775957	6.44371	538.029
2128	410.653	459.977	407.97	1243.33	342.874	867.612	189.064	113.918	9.4153	0.321318	19.4395	44.7792	3.85106	206.002	190.194	264.445	0.277816	1.5721e-05	11.3452	18.7565	142.159	15.2561	10.5717	8.44396	0.505917	4.38791e-10	0.121466	0.299384	0.156477	0.00886289	2.19276e-20	0.604671	0.000735951	6.44734	538.029
2129	410.149	459.47	407.521	1243.44	342.838	867.941	186.841	113.988	9.41798	0.322748	19.3665	44.7861	3.85069	206.131	190.125	264.761	0.272829	1.37511e-05	11.3434	18.3218	140.546	15.0527	10.5316	8.4383	0.484194	3.58248e-10	0.1116	0.284464	0.148013	0.00833757	1.55323e-20	0.594305	0.000698022	6.45043	538.029
2130	409.644	458.962	407.071	1243.57	342.802	868.27	184.65	114.058	9.42066	0.324178	19.2938	44.7932	3.85038	206.258	190.063	265.071	0.26799	1.20284e-05	11.3416	17.8972	138.953	14.8522	10.4916	8.43264	0.46342	2.92499e-10	0.102537	0.270299	0.140019	0.00784554	1.10022e-20	0.584109	0.00066206	6.45312	538.029
2131	409.129	458.443	406.612	1243.65	342.767	868.584	182.487	114.128	9.42333	0.325607	19.2213	44.7971	3.85004	206.379	190.002	265.374	0.263291	1.05212e-05	11.3398	17.4817	137.377	14.6541	10.4518	8.42698	0.443519	2.38809e-10	0.0942082	0.256823	0.132464	0.00738442	7.7933e-21	0.574061	0.000627937	6.45125	538.029
2132	408.606	457.915	406.147	1243.66	342.733	868.875	180.349	114.198	9.42601	0.327036	19.1491	44.7962	3.84961	206.492	189.939	265.669	0.258725	9.20222e-06	11.3381	17.0747	135.815	14.4583	10.4121	8.42131	0.424433	1.94956e-10	0.0865525	0.244006	0.125293	0.00695208	5.52032e-21	0.564166	0.000595543	6.44554	538.029
2133	408.092	457.397	405.693	1243.64	342.698	869.153	178.238	114.268	9.42869	0.328465	19.0771	44.7936	3.84915	206.6	189.877	265.957	0.254292	8.04836e-06	11.3363	16.6764	134.269	14.2649	10.3724	8.41565	0.406151	1.5915e-10	0.0795174	0.231837	0.118488	0.00654692	3.91028e-21	0.554435	0.000564808	6.44182	538.029
2134	407.598	456.901	405.258	1243.62	342.664	869.426	176.155	114.338	9.43136	0.329893	19.0054	44.7912	3.84871	206.703	189.82	266.24	0.249988	7.03915e-06	11.3345	16.287	132.741	14.0741	10.3329	8.40998	0.388655	1.29919e-10	0.0730539	0.220253	0.112059	0.00616734	2.76982e-21	0.544873	0.000535657	6.44075	538.029
2135	407.128	456.429	404.844	1243.63	342.63	869.7	174.102	114.408	9.43404	0.33132	18.934	44.7907	3.84834	206.805	189.768	266.517	0.245811	6.15662e-06	11.3327	15.9067	131.231	13.886	10.2936	8.40433	0.371924	1.0606e-10	0.0671167	0.209246	0.105986	0.00581184	1.96198e-21	0.535484	0.000508019	6.4423	538.029
2136	406.68	455.981	404.449	1243.68	342.597	869.982	172.079	114.478	9.43671	0.332747	18.8629	44.7936	3.84809	206.905	189.725	266.792	0.24176	5.38502e-06	11.331	15.5357	129.741	13.7006	10.2545	8.39868	0.355938	8.65881e-11	0.061664	0.198809	0.10025	0.00547899	1.38975e-21	0.526255	0.000481826	6.44687	538.029
2137	406.246	455.547	404.065	1243.78	342.563	870.272	170.088	114.548	9.43939	0.334174	18.792	44.7994	3.84795	207.006	189.691	267.063	0.23783	4.71038e-06	11.3292	15.1738	128.271	13.5181	10.2156	8.39305	0.340668	7.06967e-11	0.0566564	0.188907	0.0948338	0.00516736	9.84421e-22	0.517184	0.000457003	6.45246	538.029
2138	405.815	455.115	403.682	1243.9	342.531	870.566	168.125	114.618	9.44206	0.3356	18.7215	44.8068	3.84789	207.104	189.664	267.331	0.234017	4.12044e-06	11.3274	14.8206	126.819	13.3383	10.1769	8.38743	0.326071	5.7725e-11	0.0520568	0.179506	0.0896889	0.00487554	6.97307e-22	0.508282	0.000433472	6.45703	538.029
2139	405.382	454.679	403.294	1244.04	342.498	870.86	166.191	114.688	9.44474	0.337026	18.6512	44.8147	3.84789	207.202	189.641	267.594	0.230318	3.6045e-06	11.3256	14.4756	125.385	13.161	10.1384	8.38182	0.312113	4.71354e-11	0.0478315	0.170575	0.0848001	0.00458516	4.93932e-22	0.499543	0.000411162	6.46057	538.029
2140	404.945	454.238	402.902	1244.19	342.466	871.153	164.284	114.758	9.44741	0.338451	18.5812	44.8229	3.84794	207.297	189.623	267.854	0.226728	3.15325e-06	11.3239	14.1388	123.968	12.9862	10.1001	8.37622	0.298764	3.84899e-11	0.04395	0.162091	0.0801818	0.00429611	3.49873e-22	0.490964	0.000390009	6.46359	538.029
2141	404.506	453.794	402.507	1244.35	342.434	871.444	162.403	114.828	9.45009	0.339876	18.5115	44.831	3.84803	207.39	189.609	268.109	0.223244	2.75856e-06	11.3221	13.8099	122.568	12.8139	10.0619	8.37063	0.285996	3.14311e-11	0.0403841	0.154028	0.075819	0.00402534	2.4783e-22	0.48254	0.000369951	6.46621	538.029
2142	404.054	453.335	402.101	1244.46	342.402	871.72	160.546	114.898	9.45276	0.341301	18.4421	44.8357	3.84806	207.479	189.592	268.359	0.21986	2.41321e-06	11.3203	13.488	121.183	12.6437	10.0239	8.36504	0.273762	2.5666e-11	0.0371068	0.146363	0.0716958	0.00377157	1.75549e-22	0.474253	0.000350916	6.46425	538.029
2143	403.592	452.865	401.687	1244.49	342.37	871.971	158.708	114.968	9.45544	0.342725	18.3728	44.8354	3.84798	207.561	189.57	268.601	0.216573	2.11095e-06	11.3185	13.1728	119.811	12.4754	9.98587	8.35943	0.262027	2.09565e-11	0.0340941	0.139073	0.0677981	0.00353363	1.24348e-22	0.466093	0.000332844	6.45844	538.029
2144	403.137	452.404	401.281	1244.5	342.339	872.208	156.893	115.038	9.45811	0.344148	18.3039	44.8332	3.84784	207.638	189.547	268.837	0.21338	1.84649e-06	11.3168	12.8643	118.452	12.3092	9.94799	8.35383	0.250784	1.71103e-11	0.0313253	0.132148	0.0641145	0.00331063	8.80813e-23	0.458066	0.000315695	6.45463	538.029
2145	402.7	451.962	400.894	1244.49	342.308	872.439	155.102	115.108	9.46078	0.345571	18.2351	44.8312	3.8477	207.713	189.524	269.068	0.21028	1.61515e-06	11.315	12.5628	117.109	12.1452	9.91026	8.34823	0.240022	1.397e-11	0.0287813	0.125555	0.0606341	0.00310169	6.23917e-23	0.450178	0.000299429	6.45347	538.029
2146	402.284	451.542	400.525	1244.51	342.278	872.671	153.336	115.178	9.46345	0.346994	18.1667	44.8309	3.84761	207.786	189.506	269.296	0.207272	1.41283e-06	11.3132	12.2684	115.783	11.9835	9.87269	8.34263	0.229728	1.14063e-11	0.0264443	0.119284	0.0573463	0.00290598	4.41947e-23	0.442413	0.000284006	6.45495	538.029
2147	401.889	451.144	400.174	1244.58	342.248	872.911	151.596	115.248	9.46613	0.348416	18.0985	44.8339	3.84762	207.859	189.494	269.521	0.204355	1.23591e-06	11.3115	11.9812	114.473	11.8241	9.83532	8.33705	0.219892	9.31372e-12	0.0242978	0.11333	0.054241	0.00272271	3.1305e-23	0.434777	0.000269387	6.45945	538.029
2148	401.506	450.758	399.832	1244.69	342.218	873.158	149.881	115.318	9.4688	0.349838	18.0306	44.8398	3.84772	207.933	189.488	269.745	0.201525	1.08121e-06	11.3097	11.7011	113.18	11.6672	9.79816	8.33149	0.210493	7.60561e-12	0.0223263	0.107683	0.0513082	0.00255111	2.21747e-23	0.427285	0.000255531	6.46498	538.029
2149	401.124	450.373	399.489	1244.82	342.188	873.409	148.191	115.388	9.47147	0.351259	17.963	44.8471	3.84789	208.006	189.486	269.965	0.198779	9.45907e-07	11.3079	11.4277	111.904	11.5126	9.76119	8.32593	0.201507	6.2111e-12	0.0205153	0.102334	0.0485379	0.00239038	1.57073e-23	0.419934	0.000242396	6.46948	538.029
2150	400.738	449.982	399.141	1244.97	342.158	873.66	146.525	115.458	9.47414	0.35268	17.8956	44.855	3.84811	208.079	189.488	270.182	0.196116	8.27565e-07	11.3062	11.1608	110.643	11.3602	9.7244	8.32038	0.192914	5.07249e-12	0.0188516	0.0972512	0.045921	0.00223983	1.11261e-23	0.412716	0.000229941	6.47296	538.029
2151	400.347	449.585	398.788	1245.12	342.129	873.91	144.881	115.528	9.47681	0.354101	17.8285	44.8631	3.84836	208.151	189.493	270.397	0.193531	7.24048e-07	11.3044	10.9003	109.398	11.2099	9.68777	8.31485	0.184694	4.14275e-12	0.0173231	0.0924067	0.0434199	0.0020988	7.8811e-24	0.405629	0.00021813	6.47591	538.029
2152	399.953	449.182	398.429	1245.28	342.1	874.158	143.26	115.598	9.47949	0.355521	17.7617	44.8712	3.84863	208.221	189.499	270.608	0.191023	6.33494e-07	11.3026	10.6458	108.167	11.0617	9.65132	8.30931	0.176829	3.38353e-12	0.0159188	0.0877993	0.0410282	0.00196669	5.58252e-24	0.39867	0.00020693	6.47846	538.029
2153	399.545	448.766	398.06	1245.39	342.071	874.39	141.658	115.668	9.48216	0.35694	17.6951	44.8757	3.84884	208.287	189.502	270.813	0.188587	5.5425e-07	11.3009	10.3969	106.95	10.9153	9.61496	8.30378	0.169293	2.76336e-12	0.014628	0.083425	0.0387678	0.00184285	3.95433e-24	0.391824	0.0001963	6.47643	538.029
2154	399.125	448.336	397.681	1245.43	342.043	874.599	140.072	115.738	9.48483	0.358359	17.6287	44.8753	3.84891	208.347	189.498	271.012	0.186219	4.84886e-07	11.2991	10.1531	105.743	10.7706	9.57866	8.29824	0.162062	2.25665e-12	0.0134414	0.0792575	0.0366309	0.00172672	2.80102e-24	0.385082	0.000186207	6.47054	538.029
2155	398.712	447.913	397.31	1245.44	342.015	874.794	138.506	115.808	9.4875	0.359778	17.5626	44.8729	3.84892	208.404	189.491	271.206	0.183919	4.24189e-07	11.2973	9.91456	104.548	10.6276	9.54246	8.2927	0.155133	1.84277e-12	0.0123507	0.0753022	0.0346113	0.00161788	1.98408e-24	0.37845	0.000176629	6.46666	538.029
2156	398.316	447.509	396.956	1245.44	341.987	874.983	136.96	115.878	9.49017	0.361196	17.4967	44.8707	3.84892	208.458	189.484	271.397	0.181686	3.71088e-07	11.2956	9.68147	103.367	10.4865	9.50639	8.28716	0.1485	1.50479e-12	0.0113485	0.0715387	0.0327029	0.00151589	1.40541e-24	0.371931	0.000167542	6.46543	538.029
2157	397.94	447.127	396.62	1245.46	341.959	875.173	135.435	115.948	9.49284	0.362614	17.4311	44.8702	3.84896	208.512	189.48	271.584	0.179519	3.2464e-07	11.2938	9.45389	102.201	10.3473	9.47048	8.28163	0.142154	1.22883e-12	0.0104278	0.0679486	0.0309001	0.00142036	9.95512e-25	0.36553	0.000158926	6.46685	538.029
2158	397.582	446.764	396.3	1245.52	341.932	875.371	133.931	116.018	9.49551	0.364031	17.3657	44.873	3.84909	208.567	189.481	271.769	0.177418	2.84021e-07	11.292	9.23193	101.049	10.2103	9.43477	8.27611	0.136089	1.00354e-12	0.00958203	0.0645396	0.0291973	0.00133089	7.05163e-25	0.35925	0.000150758	6.47129	538.029
2159	397.236	446.413	395.989	1245.63	341.905	875.577	132.45	116.088	9.49818	0.365448	17.3006	44.8788	3.8493	208.622	189.487	271.954	0.17538	2.48497e-07	11.2903	9.01544	99.9118	10.0753	9.39925	8.2706	0.130293	8.19621e-13	0.0088052	0.061317	0.0275889	0.0012471	4.99497e-25	0.353089	0.000143016	6.47677	538.029
2160	396.89	446.061	395.676	1245.76	341.878	875.788	130.989	116.158	9.50085	0.366865	17.2358	44.8859	3.84958	208.678	189.497	272.136	0.173404	2.17426e-07	11.2885	8.8042	98.7891	9.94221	9.36391	8.2651	0.12475	6.69442e-13	0.00809155	0.0582605	0.0260696	0.00116862	3.53815e-25	0.347042	0.000135676	6.48122	538.029
2161	396.539	445.702	395.356	1245.9	341.851	875.999	129.548	116.228	9.50351	0.368281	17.1712	44.8936	3.84989	208.734	189.509	272.316	0.171486	1.90245e-07	11.2867	8.59801	97.6801	9.81103	9.32874	8.25962	0.119449	5.46803e-13	0.00743589	0.0553524	0.0246343	0.00109511	2.50622e-25	0.341106	0.000128715	6.48465	538.029
2162	396.183	445.337	395.031	1246.06	341.825	876.209	128.127	116.298	9.50618	0.369696	17.1069	44.9015	3.85023	208.789	189.523	272.493	0.169625	1.66467e-07	11.285	8.3967	96.5845	9.6817	9.29373	8.25414	0.114377	4.46646e-13	0.00683347	0.0526012	0.0232782	0.00102623	1.77526e-25	0.335276	0.000122114	6.48756	538.029
2163	395.822	444.966	394.7	1246.21	341.799	876.419	126.724	116.367	9.50885	0.371111	17.0428	44.9094	3.85059	208.843	189.538	272.668	0.167819	1.45664e-07	11.2832	8.20015	95.502	9.55416	9.25888	8.24867	0.109523	3.64846e-13	0.00627994	0.0499903	0.0219971	0.000961705	1.25749e-25	0.329551	0.000115853	6.49005	538.029
2164	395.447	444.579	394.357	1246.32	341.773	876.613	125.338	116.437	9.51152	0.372526	16.979	44.9138	3.85087	208.894	189.549	272.838	0.166065	1.27457e-07	11.2815	8.00788	94.4305	9.42817	9.22413	8.24319	0.104872	2.98017e-13	0.00577115	0.0475032	0.0207861	0.000901216	8.90737e-26	0.323919	0.000109911	6.48797	538.029
2165	395.059	444.18	394.005	1246.36	341.747	876.784	123.966	116.507	9.51419	0.37394	16.9153	44.9132	3.85101	208.939	189.553	273.003	0.164359	1.11518e-07	11.2797	7.81959	93.3687	9.30358	9.18942	8.23771	0.100408	2.43406e-13	0.00530335	0.045126	0.0196413	0.000844492	6.30947e-26	0.318371	0.000104268	6.48201	538.029
2166	394.678	443.786	393.66	1246.36	341.721	876.942	122.61	116.577	9.51685	0.375354	16.8519	44.9107	3.85109	208.981	189.553	273.162	0.162703	9.75691e-08	11.2779	7.63544	92.3178	9.1805	9.15482	8.23223	0.0961296	1.98794e-13	0.00487336	0.0428727	0.0185592	0.000791321	4.46926e-26	0.312914	9.8913e-05	6.47806	538.029
2167	394.313	443.411	393.331	1246.36	341.696	877.094	121.271	116.647	9.51952	0.376767	16.7888	44.9083	3.85115	209.022	189.553	273.319	0.161094	8.53645e-08	11.2762	7.45549	91.2785	9.05904	9.12033	8.22675	0.092033	1.62357e-13	0.00447823	0.0407316	0.0175368	0.000741494	3.16577e-26	0.307549	9.38322e-05	6.47679	538.029
2168	393.966	443.056	393.02	1246.37	341.671	877.248	119.949	116.717	9.52219	0.37818	16.7258	44.9076	3.85125	209.062	189.554	273.473	0.159533	7.4688e-08	11.2744	7.2798	90.2516	8.93925	9.086	8.22128	0.0881134	1.32602e-13	0.00411518	0.0386919	0.0165708	0.000694814	2.24245e-26	0.302262	8.90137e-05	6.47815	538.029
2169	393.638	442.721	392.724	1246.43	341.646	877.411	118.647	116.787	9.52486	0.379593	16.6632	44.9103	3.85143	209.103	189.561	273.627	0.15802	6.535e-08	11.2727	7.10845	89.2379	8.82125	9.05186	8.21582	0.0843667	1.08307e-13	0.00378168	0.036768	0.0156583	0.000651096	1.58842e-26	0.297054	8.44459e-05	6.48256	538.029
2170	393.321	442.395	392.435	1246.54	341.622	877.583	117.363	116.857	9.52752	0.381005	16.6008	44.9158	3.85169	209.146	189.572	273.779	0.156553	5.71827e-08	11.2709	6.94135	88.2373	8.705	9.0179	8.21037	0.0807855	8.847e-14	0.00347533	0.0349479	0.0147965	0.000610151	1.12515e-26	0.291946	8.01157e-05	6.48799	538.029
2171	393.002	442.069	392.145	1246.67	341.597	877.759	116.096	116.927	9.53019	0.382416	16.5386	44.9228	3.85201	209.19	189.587	273.931	0.155129	5.00381e-08	11.2692	6.77832	87.2492	8.59043	8.98411	8.20493	0.0773606	7.227e-14	0.00319388	0.0332205	0.0139823	0.000571797	7.96989e-27	0.286931	7.60098e-05	6.49241	538.029
2172	392.679	441.735	391.847	1246.81	341.573	877.937	114.847	116.997	9.53285	0.383828	16.4767	44.9303	3.85236	209.234	189.604	274.08	0.153749	4.37875e-08	11.2674	6.6192	86.2731	8.47747	8.95048	8.1995	0.074084	5.90388e-14	0.00293528	0.0315756	0.013213	0.000535865	5.64541e-27	0.282007	7.2116e-05	6.4958	538.029
2173	392.349	441.394	391.544	1246.96	341.549	878.115	113.614	117.067	9.53552	0.385238	16.415	44.9381	3.85274	209.277	189.621	274.228	0.152409	3.83186e-08	11.2656	6.46387	85.3087	8.3661	8.91701	8.19408	0.0709487	4.82317e-14	0.00269766	0.0300047	0.0124863	0.0005022	3.99889e-27	0.277172	6.84229e-05	6.49867	538.029
2174	392.014	441.047	391.234	1247.11	341.526	878.292	112.397	117.137	9.53818	0.386649	16.3536	44.9458	3.85313	209.321	189.64	274.373	0.151109	3.35336e-08	11.2639	6.31221	84.3558	8.25626	8.88368	8.18867	0.0679483	3.9404e-14	0.00247931	0.0285	0.0117996	0.000470657	2.83258e-27	0.272423	6.49201e-05	6.50113	538.029
2175	391.665	440.684	390.912	1247.22	341.502	878.455	111.194	117.207	9.54085	0.388058	16.2924	44.9501	3.85344	209.361	189.655	274.515	0.149847	2.93453e-08	11.2621	6.16389	83.4125	8.14776	8.85044	8.18326	0.0650718	3.21908e-14	0.00227859	0.0270776	0.0111505	0.000441086	2.00644e-27	0.267751	6.15951e-05	6.499	538.029
2176	391.303	440.308	390.58	1247.25	341.479	878.595	110.003	117.277	9.54351	0.389468	16.2314	44.9493	3.85361	209.396	189.661	274.651	0.148618	2.56783e-08	11.2604	6.01864	82.4778	8.04044	8.81726	8.17783	0.0623112	2.62956e-14	0.00209403	0.0257282	0.0105368	0.000413353	1.42124e-27	0.263148	5.84375e-05	6.49299	538.029
2177	390.947	439.938	390.256	1247.25	341.456	878.722	108.825	117.347	9.54618	0.390877	16.1706	44.9466	3.85372	209.428	189.664	274.783	0.147425	2.24688e-08	11.2586	5.87659	81.5525	7.93443	8.78416	8.17241	0.0596649	2.14791e-14	0.00192438	0.0244452	0.00995682	0.000387355	1.00673e-27	0.25862	5.54403e-05	6.48899	538.029
2178	390.606	439.585	389.947	1247.24	341.433	878.845	107.662	117.417	9.54884	0.392285	16.11	44.9441	3.8538	209.459	189.667	274.913	0.146266	1.96603e-08	11.2569	5.73781	80.6375	7.8298	8.75119	8.16699	0.0571305	1.75447e-14	0.00176847	0.0232223	0.00940869	0.000362991	7.13108e-28	0.25417	5.25966e-05	6.48767	538.029
2179	390.284	439.252	389.654	1247.25	341.411	878.971	106.514	117.487	9.55151	0.393693	16.0497	44.9433	3.85392	209.489	189.671	275.041	0.145142	1.72032e-08	11.2551	5.60233	79.7333	7.72661	8.71836	8.16157	0.0547053	1.43312e-14	0.0016252	0.0220537	0.00889082	0.000340164	5.05125e-28	0.249798	4.98996e-05	6.489	538.029
2180	389.979	438.938	389.377	1247.31	341.388	879.105	105.382	117.557	9.55417	0.395101	15.9896	44.9458	3.85412	209.522	189.68	275.168	0.144052	1.50539e-08	11.2534	5.4702	78.8407	7.62494	8.6857	8.15617	0.0523867	1.17071e-14	0.00149359	0.0209584	0.00840162	0.000318783	3.57801e-28	0.245509	4.73425e-05	6.49337	538.029
2181	389.684	438.633	389.107	1247.41	341.366	879.249	104.266	117.626	9.55683	0.396508	15.9297	44.9512	3.8544	209.556	189.693	275.295	0.142996	1.31739e-08	11.2516	5.34137	77.9596	7.52479	8.65322	8.15078	0.0501702	9.56423e-15	0.00137269	0.0199288	0.00793953	0.000298757	2.53446e-28	0.2413	4.49184e-05	6.49878	538.029
2182	389.388	438.326	388.834	1247.54	341.344	879.398	103.166	117.696	9.5595	0.397915	15.8701	44.9581	3.85474	209.591	189.709	275.421	0.141971	1.15291e-08	11.2499	5.21567	77.0894	7.42608	8.62091	8.1454	0.0480501	7.81397e-15	0.0012616	0.0189337	0.00750297	0.000279997	1.79526e-28	0.237169	4.26196e-05	6.50317	538.029
2183	389.086	438.013	388.554	1247.68	341.322	879.549	102.079	117.766	9.56216	0.399321	15.8108	44.9655	3.85511	209.626	189.728	275.546	0.140978	1.00899e-08	11.2481	5.093	76.2298	7.32875	8.58875	8.14003	0.0460215	6.38426e-15	0.00115953	0.0179694	0.00709051	0.000262421	1.27166e-28	0.233113	4.04394e-05	6.50653	538.029
2184	388.778	437.692	388.268	1247.82	341.301	879.701	101.007	117.836	9.56482	0.400727	15.7516	44.9732	3.8555	209.662	189.747	275.669	0.140014	8.83065e-09	11.2464	4.97326	75.3805	7.23278	8.55673	8.13466	0.0440801	5.21632e-15	0.00106573	0.0170566	0.00670079	0.000245952	9.00772e-29	0.229129	3.83714e-05	6.50937	538.029
2185	388.464	437.364	387.975	1247.98	341.279	879.853	99.9483	117.906	9.56749	0.402133	15.6927	44.9808	3.8559	209.698	189.767	275.791	0.139079	7.72872e-09	11.2446	4.85636	74.5412	7.13813	8.52485	8.12931	0.0422219	4.26217e-15	0.000979534	0.01619	0.00633256	0.00023052	6.38055e-29	0.225216	3.64098e-05	6.5118	538.029
2186	388.136	437.02	387.67	1248.08	341.258	879.991	98.9014	117.976	9.57015	0.403538	15.6341	44.9849	3.85622	209.73	189.783	275.909	0.13817	6.76409e-09	11.2429	4.74205	73.7104	7.04463	8.49306	8.12395	0.0404402	3.48242e-15	0.000900291	0.0153642	0.00598448	0.000216051	4.51962e-29	0.221365	3.45476e-05	6.50963	538.029
2187	387.794	436.662	387.355	1248.11	341.237	880.106	97.8649	118.046	9.57281	0.404942	15.5756	44.984	3.8564	209.758	189.791	276.023	0.137286	5.91945e-09	11.2411	4.63012	72.887	6.95214	8.46132	8.11858	0.03873	2.84507e-15	0.000827423	0.0145987	0.00565537	0.000202481	3.20144e-29	0.217573	3.2779e-05	6.50358	538.029
2188	387.459	436.311	387.047	1248.1	341.216	880.21	96.8399	118.116	9.57547	0.406346	15.5173	44.9812	3.85651	209.783	189.795	276.132	0.136426	5.18011e-09	11.2394	4.52066	72.0719	6.86077	8.42966	8.11321	0.0370903	2.32425e-15	0.000760437	0.0138876	0.00534428	0.000189759	2.26771e-29	0.213841	3.11001e-05	6.49954	538.029
2189	387.138	435.976	386.754	1248.09	341.195	880.31	95.8273	118.186	9.57813	0.40775	15.4592	44.9786	3.85661	209.807	189.798	276.24	0.135591	4.53308e-09	11.2376	4.41372	71.2659	6.77059	8.39812	8.10785	0.0355198	1.89876e-15	0.000698871	0.0132017	0.00505029	0.000177836	1.60632e-29	0.210172	2.95071e-05	6.49818	538.029
2190	386.835	435.661	386.477	1248.1	341.175	880.412	94.8276	118.256	9.58079	0.409153	15.4013	44.9777	3.85673	209.832	189.803	276.346	0.134782	3.96694e-09	11.2359	4.30934	70.4693	6.68164	8.36671	8.10249	0.0340167	1.5512e-15	0.000642297	0.0125385	0.00477252	0.000166664	1.13782e-29	0.206569	2.79961e-05	6.49948	538.029
2191	386.55	435.364	386.215	1248.16	341.155	880.524	93.8418	118.326	9.58345	0.410556	15.3437	44.9801	3.85694	209.858	189.812	276.452	0.133997	3.47168e-09	11.2341	4.20755	69.6829	6.59401	8.33547	8.09714	0.0325795	1.26734e-15	0.000590322	0.0119202	0.00451011	0.000156199	8.05968e-30	0.203033	2.65635e-05	6.50383	538.029
2192	386.273	435.076	385.959	1248.26	341.135	880.647	92.8697	118.396	9.58611	0.411958	15.2863	44.9854	3.85722	209.886	189.826	276.558	0.133237	3.03842e-09	11.2324	4.10831	68.9067	6.50767	8.30441	8.09181	0.0312054	1.0355e-15	0.00054257	0.011342	0.00426223	0.000146397	5.70902e-30	0.199564	2.52052e-05	6.50922	538.029
2193	385.995	434.786	385.701	1248.38	341.115	880.775	91.9104	118.466	9.58877	0.41336	15.2292	44.9921	3.85756	209.915	189.843	276.664	0.1325	2.65933e-09	11.2306	4.0115	68.14	6.42257	8.27349	8.08648	0.0298908	8.46113e-16	0.000498694	0.0107755	0.00402804	0.000137214	4.04394e-30	0.196158	2.3917e-05	6.51358	538.029
2194	385.711	434.489	385.436	1248.51	341.095	880.905	90.9636	118.536	9.59143	0.414762	15.1722	44.9994	3.85793	209.944	189.862	276.769	0.131785	2.3276e-09	11.2289	3.91704	67.3826	6.33866	8.24272	8.08117	0.0286328	6.91393e-16	0.000458374	0.0102435	0.00380677	0.000128609	2.86449e-30	0.192814	2.26952e-05	6.51692	538.029
2195	385.421	434.184	385.163	1248.66	341.075	881.037	90.0289	118.605	9.59409	0.416163	15.1155	45.007	3.85832	209.975	189.882	276.873	0.131092	2.03731e-09	11.2272	3.82483	66.6342	6.25592	8.21209	8.07586	0.0274287	5.64983e-16	0.000421321	0.0097425	0.00359769	0.000120546	2.02904e-30	0.189529	2.15362e-05	6.51974	538.029
2196	385.125	433.871	384.884	1248.81	341.056	881.169	89.1059	118.675	9.59675	0.417563	15.0591	45.0145	3.85873	210.005	189.903	276.975	0.13042	1.78326e-09	11.2254	3.73481	65.8946	6.17431	8.1816	8.07056	0.026276	4.61699e-16	0.000387268	0.00924502	0.00340012	0.00011299	1.43726e-30	0.186302	2.04367e-05	6.52215	538.029
2197	384.814	433.543	384.593	1248.91	341.037	881.287	88.193	118.745	9.59941	0.418963	15.0028	45.0185	3.85905	210.032	189.919	277.075	0.129767	1.56084e-09	11.2237	3.6468	65.1625	6.09368	8.15119	8.06526	0.0251706	3.77283e-16	0.000355961	0.00877446	0.00321336	0.000105905	1.01807e-30	0.183127	1.93929e-05	6.51995	538.029
2198	384.49	433.202	384.292	1248.93	341.018	881.384	87.2888	118.815	9.60207	0.420363	14.9467	45.0175	3.85923	210.055	189.927	277.169	0.12913	1.36607e-09	11.2219	3.56063	64.4368	6.01393	8.12082	8.05995	0.0241094	3.08272e-16	0.000327171	0.00832784	0.00303677	9.92602e-05	7.21142e-31	0.179999	1.84015e-05	6.51386	538.029
2199	384.172	432.866	383.997	1248.93	340.999	881.469	86.3945	118.885	9.60473	0.421762	14.8908	45.0146	3.85935	210.075	189.931	277.261	0.128511	1.19557e-09	11.2202	3.47635	63.7185	5.93514	8.09053	8.05464	0.0230919	2.51873e-16	0.000300702	0.00790295	0.00286985	9.30298e-05	5.10816e-31	0.176922	1.74603e-05	6.50978	538.029
2200	383.868	432.547	383.718	1248.91	340.98	881.551	85.5109	118.955	9.60739	0.423161	14.8351	45.0119	3.85944	210.094	189.934	277.351	0.12791	1.04634e-09	11.2185	3.39403	63.0081	5.85736	8.06035	8.04932	0.0221171	2.0579e-16	0.000276374	0.00752186	0.00271209	8.71902e-05	3.61833e-31	0.173896	1.65671e-05	6.50839	538.029
2201	383.582	432.246	383.454	1248.92	340.962	881.636	84.6384	119.025	9.61005	0.42456	14.7796	45.0109	3.85956	210.114	189.939	277.439	0.127327	9.15749e-10	11.2167	3.31368	62.306	5.78066	8.0303	8.04402	0.0211841	1.68143e-16	0.000254017	0.00715607	0.00256303	8.17182e-05	2.56301e-31	0.170924	1.57199e-05	6.50966	538.029
2202	383.312	431.964	383.205	1248.97	340.944	881.731	83.7779	119.095	9.61271	0.425958	14.7244	45.0132	3.85977	210.136	189.949	277.528	0.126763	8.01498e-10	11.215	3.23533	61.6129	5.70507	8.00041	8.03873	0.0202917	1.37392e-16	0.000233476	0.00680414	0.00242221	7.65922e-05	1.81549e-31	0.168007	1.49165e-05	6.51399	538.029
2203	383.051	431.69	382.962	1249.07	340.925	881.837	82.9291	119.165	9.61536	0.427355	14.6693	45.0184	3.86005	210.159	189.963	277.618	0.126216	7.01539e-10	11.2132	3.15893	60.9286	5.63061	7.97068	8.03345	0.0194385	1.12272e-16	0.000214603	0.00646466	0.00228917	7.17905e-05	1.28599e-31	0.165145	1.41548e-05	6.51937	538.029
2204	382.789	431.414	382.716	1249.19	340.907	881.948	82.0914	119.235	9.61802	0.428752	14.6145	45.0251	3.86039	210.184	189.98	277.707	0.125686	6.14071e-10	11.2115	3.0844	60.2528	5.5572	7.94111	8.02818	0.0186221	9.17503e-17	0.000197261	0.00613623	0.00216348	6.72915e-05	9.10921e-32	0.162336	1.34324e-05	6.52371	538.029
2205	382.52	431.131	382.463	1249.32	340.89	882.063	81.2643	119.305	9.62068	0.430149	14.5599	45.0323	3.86076	210.21	189.999	277.795	0.125173	5.37523e-10	11.2098	3.01168	59.5852	5.48483	7.91166	8.02292	0.0178407	7.49824e-17	0.000181323	0.00584179	0.00204472	6.30758e-05	6.45244e-32	0.159576	1.27471e-05	6.52704	538.029
2206	382.245	430.839	382.202	1249.47	340.872	882.179	80.4477	119.374	9.62333	0.431545	14.5056	45.0398	3.86114	210.236	190.019	277.883	0.124675	4.7053e-10	11.208	2.94072	58.9254	5.41345	7.88235	8.01767	0.0170927	6.1281e-17	0.000166676	0.00555366	0.00193249	5.91252e-05	4.57054e-32	0.156866	1.2097e-05	6.52984	538.029
2207	381.964	430.54	381.935	1249.61	340.854	882.296	79.6413	119.444	9.62599	0.432941	14.4514	45.0472	3.86155	210.263	190.039	277.97	0.124192	4.11895e-10	11.2063	2.87145	58.2734	5.34305	7.85317	8.01242	0.0163766	5.00847e-17	0.000153214	0.00527117	0.00182645	5.54228e-05	3.23751e-32	0.154204	1.14802e-05	6.53223	538.029
2208	381.668	430.226	381.655	1249.71	340.837	882.399	78.8434	119.514	9.62865	0.434336	14.3974	45.0512	3.86187	210.286	190.055	278.054	0.123723	3.60556e-10	11.2045	2.80372	57.6279	5.27349	7.82407	8.00717	0.0156897	4.09324e-17	0.000140836	0.00501766	0.00172619	5.19512e-05	2.29326e-32	0.151584	1.08946e-05	6.53	538.029
2209	381.359	429.897	381.366	1249.74	340.82	882.482	78.053	119.584	9.6313	0.435731	14.3436	45.0501	3.86205	210.306	190.063	278.134	0.123265	3.15594e-10	11.2028	2.73741	56.9882	5.20468	7.79501	8.00192	0.0150303	3.34496e-17	0.000129453	0.00476588	0.0016314	4.86946e-05	1.62442e-32	0.149002	1.03383e-05	6.52388	538.029
2210	381.055	429.575	381.083	1249.73	340.803	882.553	77.2712	119.654	9.63396	0.437126	14.29	45.0471	3.86215	210.322	190.068	278.211	0.12282	2.7623e-10	11.2011	2.67256	56.3548	5.1367	7.76603	7.99666	0.0143978	2.73333e-17	0.000118988	0.00451579	0.00154179	4.56412e-05	1.15064e-32	0.146462	9.81025e-06	6.51977	538.029
2211	380.766	429.269	380.815	1249.71	340.786	882.621	76.4984	119.724	9.63661	0.43852	14.2366	45.0444	3.86225	210.338	190.071	278.286	0.122387	2.41774e-10	11.1993	2.60921	55.7284	5.06959	7.73714	7.9914	0.0137918	2.23353e-17	0.000109368	0.00429148	0.00145709	4.2779e-05	8.15049e-33	0.143965	9.30909e-06	6.51835	538.029
2212	380.494	428.981	380.563	1249.72	340.769	882.692	75.7354	119.794	9.63927	0.439914	14.1834	45.0433	3.86236	210.355	190.076	278.361	0.121968	2.1162e-10	11.1976	2.54739	55.1093	5.0034	7.70839	7.98615	0.0132117	1.82515e-17	0.000100526	0.00409035	0.00137706	4.00968e-05	5.77334e-33	0.141512	8.83365e-06	6.5196	538.029
2213	380.238	428.711	380.324	1249.77	340.753	882.774	74.9826	119.864	9.64192	0.441307	14.1304	45.0455	3.86256	210.373	190.085	278.436	0.121562	1.85235e-10	11.1959	2.48712	54.4981	4.93818	7.67978	7.98092	0.0126569	1.49154e-17	9.24028e-05	0.00388597	0.00130145	3.75841e-05	4.0895e-33	0.139105	8.3828e-06	6.52392	538.029
2214	379.99	428.45	380.092	1249.86	340.736	882.867	74.24	119.934	9.64458	0.442699	14.0777	45.0506	3.86285	210.394	190.099	278.511	0.121169	1.62149e-10	11.1941	2.42835	53.8947	4.87391	7.65134	7.97569	0.0121263	1.219e-17	8.49386e-05	0.00367869	0.00123002	3.52301e-05	2.89677e-33	0.136742	7.95528e-06	6.52928	538.029
2215	379.741	428.186	379.856	1249.98	340.72	882.966	73.507	120.004	9.64723	0.444092	14.0251	45.0572	3.86318	210.416	190.116	278.587	0.120789	1.41945e-10	11.1924	2.37103	53.2987	4.81057	7.62303	7.97048	0.0116185	9.96304e-18	7.80793e-05	0.00349286	0.00116253	3.30244e-05	2.0519e-33	0.134423	7.54978e-06	6.53362	538.029
2216	379.486	427.914	379.613	1250.11	340.704	883.069	72.7832	120.073	9.64989	0.445484	13.9728	45.0644	3.86354	210.439	190.135	278.662	0.120421	1.24263e-10	11.1907	2.31509	52.7099	4.7481	7.59485	7.96527	0.0111324	8.14326e-18	7.17751e-05	0.00332625	0.00109876	3.09575e-05	1.45345e-33	0.132145	7.1651e-06	6.53693	538.029
2217	379.223	427.635	379.363	1250.25	340.688	883.173	72.0683	120.143	9.65254	0.446875	13.9206	45.0718	3.86393	210.462	190.155	278.737	0.120064	1.08786e-10	11.1889	2.2605	52.128	4.6865	7.5668	7.96007	0.0106671	6.65608e-18	6.5981e-05	0.00317686	0.0010385	2.90204e-05	1.02954e-33	0.129907	6.80015e-06	6.53971	538.029
2218	378.955	427.348	379.106	1250.4	340.672	883.279	71.3623	120.213	9.65519	0.448266	13.8687	45.0791	3.86432	210.486	190.175	278.812	0.119718	9.52383e-11	11.1872	2.20722	51.5529	4.62573	7.53887	7.95488	0.0102215	5.44066e-18	6.06555e-05	0.00301877	0.000981546	2.72049e-05	7.29267e-34	0.127709	6.45388e-06	6.54209	538.029
2219	378.672	427.045	378.837	1250.49	340.656	883.371	70.6636	120.283	9.65785	0.449657	13.8169	45.083	3.86464	210.507	190.191	278.883	0.119381	8.33755e-11	11.1855	2.15511	50.9836	4.56569	7.51102	7.94968	0.00979404	4.44701e-18	5.57587e-05	0.00285274	0.000927707	2.55024e-05	5.16571e-34	0.125546	6.12511e-06	6.53984	538.029
2220	378.376	426.728	378.558	1250.52	340.641	883.442	69.9713	120.353	9.6605	0.451047	13.7653	45.0819	3.86481	210.524	190.199	278.951	0.119052	7.29853e-11	11.1837	2.10411	50.4193	4.5063	7.4832	7.94448	0.00938357	3.6345e-18	5.1255e-05	0.00270366	0.000876795	2.39054e-05	3.65909e-34	0.123414	5.81278e-06	6.53368	538.029
2221	378.085	426.417	378.285	1250.51	340.625	883.503	69.2863	120.423	9.66315	0.452437	13.7139	45.0789	3.86492	210.538	190.203	279.016	0.118732	6.38877e-11	11.182	2.05425	49.8606	4.44761	7.45546	7.93927	0.00898988	2.9703e-18	4.7114e-05	0.00256988	0.000828666	2.24078e-05	2.59189e-34	0.121317	5.51623e-06	6.52955	538.029
2222	377.808	426.123	378.027	1250.49	340.61	883.56	68.6093	120.493	9.66581	0.453826	13.6627	45.076	3.865	210.552	190.206	279.079	0.118421	5.59237e-11	11.1803	2.00552	49.308	4.38968	7.42782	7.93407	0.00861263	2.42746e-18	4.33075e-05	0.00244986	0.000783176	2.10039e-05	1.83595e-34	0.119254	5.23479e-06	6.5281	538.029
2223	377.548	425.847	377.784	1250.49	340.595	883.622	67.9407	120.563	9.66846	0.455215	13.6117	45.0749	3.86512	210.566	190.21	279.142	0.118119	4.89534e-11	11.1786	1.95798	48.7619	4.33254	7.40029	7.92887	0.00825143	1.98388e-18	3.98089e-05	0.00234224	0.000740189	1.96882e-05	1.30048e-34	0.117228	4.96778e-06	6.52934	538.029
2224	377.304	425.588	377.556	1250.54	340.58	883.694	67.2809	120.632	9.67111	0.456603	13.5609	45.077	3.86531	210.582	190.22	279.206	0.117828	4.28539e-11	11.1768	1.91163	48.2227	4.27622	7.37291	7.92369	0.00790591	1.62145e-18	3.65941e-05	0.00222167	0.000699576	1.84556e-05	9.21184e-35	0.11524	4.71456e-06	6.53364	538.029
2225	377.069	425.337	377.333	1250.63	340.565	883.777	66.63	120.702	9.67376	0.457991	13.5103	45.0821	3.86559	210.601	190.234	279.27	0.117546	3.75164e-11	11.1751	1.86646	47.6904	4.22074	7.34568	7.91852	0.00757543	1.32533e-18	3.364e-05	0.00208947	0.000661206	1.73008e-05	6.52514e-35	0.113288	4.47442e-06	6.53899	538.029
2226	376.831	425.084	377.106	1250.75	340.55	883.867	65.9873	120.772	9.67641	0.459379	13.4599	45.0886	3.86592	210.62	190.25	279.335	0.117274	3.28449e-11	11.1734	1.82239	47.1645	4.16605	7.31859	7.91336	0.00725914	1.08335e-18	3.09251e-05	0.00197094	0.000624951	1.62187e-05	4.62203e-35	0.111372	4.24664e-06	6.54332	538.029
2227	376.587	424.822	376.872	1250.88	340.536	883.96	65.3527	120.842	9.67907	0.460766	13.4096	45.0957	3.86628	210.641	190.269	279.4	0.11701	2.8756e-11	11.1717	1.7794	46.645	4.11211	7.29162	7.9082	0.00695634	8.85576e-19	2.84299e-05	0.00186465	0.000590691	1.52045e-05	3.27398e-35	0.109491	4.03054e-06	6.54662	538.029
2228	376.336	424.553	376.631	1251.02	340.521	884.055	64.7258	120.912	9.68172	0.462152	13.3596	45.103	3.86666	210.663	190.288	279.464	0.116754	2.51767e-11	11.1699	1.73745	46.1316	4.05891	7.26477	7.90305	0.0066664	7.23935e-19	2.61364e-05	0.00176934	0.000558315	1.4254e-05	2.3191e-35	0.107642	3.8255e-06	6.5494	538.029
2229	376.079	424.276	376.383	1251.16	340.507	884.152	64.1065	120.982	9.68437	0.463539	13.3098	45.1103	3.86705	210.685	190.308	279.529	0.116507	2.20434e-11	11.1682	1.6965	45.6242	4.00644	7.23803	7.89791	0.00638873	5.91814e-19	2.40282e-05	0.00168386	0.000527718	1.33631e-05	1.64272e-35	0.105826	3.63095e-06	6.55176	538.029
2230	375.807	423.984	376.123	1251.26	340.493	884.236	63.4935	121.052	9.68702	0.464924	13.2602	45.1142	3.86736	210.704	190.324	279.59	0.116266	1.92995e-11	11.1665	1.65646	45.1218	3.95459	7.21137	7.89277	0.00612234	4.83787e-19	2.20897e-05	0.00160713	0.000498791	1.25277e-05	1.16361e-35	0.104039	3.44622e-06	6.54949	538.029
2231	375.523	423.678	375.853	1251.28	340.479	884.299	62.886	121.122	9.68967	0.46631	13.2107	45.113	3.86753	210.719	190.332	279.648	0.11603	1.68959e-11	11.1648	1.61726	44.6239	3.9033	7.18474	7.88762	0.00586649	3.95443e-19	2.03066e-05	0.00153821	0.000471436	1.17439e-05	8.24232e-36	0.102277	3.27071e-06	6.5433	538.029
2232	375.243	423.377	375.589	1251.27	340.465	884.352	62.2849	121.191	9.69232	0.467695	13.1614	45.1099	3.86763	210.731	190.335	279.703	0.1158	1.47912e-11	11.163	1.57893	44.1309	3.85261	7.15819	7.88247	0.00562107	3.23216e-19	1.86671e-05	0.00147635	0.000445575	1.10088e-05	5.83838e-36	0.100544	3.10406e-06	6.53914	538.029
2233	374.977	423.093	375.34	1251.25	340.451	884.401	61.6906	121.261	9.69497	0.469079	13.1123	45.107	3.86771	210.743	190.338	279.757	0.115576	1.29486e-11	11.1613	1.54149	43.6432	3.80258	7.13172	7.87732	0.00538587	2.64178e-19	1.71599e-05	0.00142085	0.000421131	1.03198e-05	4.13557e-36	0.0988399	2.94589e-06	6.53768	538.029
2234	374.728	422.827	375.106	1251.25	340.437	884.455	61.1036	121.331	9.69762	0.470463	13.0633	45.1058	3.86782	210.756	190.343	279.81	0.11536	1.13357e-11	11.1596	1.50494	43.1612	3.75322	7.10537	7.87217	0.00516064	2.15929e-19	1.57745e-05	0.00134696	0.000398031	9.67394e-06	2.9294e-36	0.0971655	2.79581e-06	6.5389	538.029
2235	374.495	422.578	374.886	1251.3	340.424	884.52	60.5244	121.401	9.70027	0.471847	13.0146	45.1079	3.86801	210.77	190.352	279.865	0.115151	9.92418e-12	11.1579	1.4693	42.6853	3.70458	7.07916	7.86704	0.00494516	1.76503e-19	1.45015e-05	0.00125658	0.000376206	9.06884e-06	2.07502e-36	0.0955222	2.65348e-06	6.54319	538.029
2236	374.27	422.337	374.671	1251.39	340.41	884.596	59.9527	121.471	9.70291	0.47323	12.9661	45.1129	3.86828	210.787	190.366	279.92	0.11495	8.6889e-12	11.1561	1.43456	42.2155	3.65666	7.05309	7.86192	0.00473904	1.44286e-19	1.33316e-05	0.00117556	0.000355586	8.5019e-06	1.46983e-36	0.0939094	2.51849e-06	6.54854	538.029
2237	374.043	422.093	374.453	1251.51	340.397	884.678	59.3883	121.541	9.70556	0.474613	12.9177	45.1194	3.86861	210.806	190.382	279.976	0.114755	7.60766e-12	11.1544	1.40069	41.7514	3.60941	7.02715	7.85681	0.00454174	1.17956e-19	1.22564e-05	0.00110291	0.000336101	7.97062e-06	1.04114e-36	0.0923258	2.39044e-06	6.55286	538.029
2238	373.809	421.841	374.227	1251.64	340.384	884.765	58.8308	121.611	9.70821	0.475995	12.8696	45.1264	3.86896	210.825	190.4	280.032	0.114567	6.66116e-12	11.1527	1.36763	41.2928	3.56281	7.00133	7.85171	0.00435283	9.64341e-20	1.12681e-05	0.00103776	0.000317688	7.47267e-06	7.37483e-37	0.0907703	2.26895e-06	6.55615	538.029
2239	373.568	421.581	373.994	1251.77	340.371	884.853	58.28	121.681	9.71086	0.477377	12.8216	45.1337	3.86934	210.845	190.42	280.088	0.114385	5.83257e-12	11.151	1.33536	40.8396	3.51686	6.97562	7.84661	0.00417192	7.88417e-20	1.03597e-05	0.000979321	0.000300287	7.00596e-06	5.22391e-37	0.0892422	2.15367e-06	6.55891	538.029
2240	373.321	421.313	373.754	1251.91	340.358	884.944	57.7358	121.75	9.71351	0.478759	12.7739	45.141	3.86973	210.865	190.44	280.144	0.114208	5.10715e-12	11.1493	1.30387	40.3917	3.47152	6.95003	7.84153	0.00399865	6.44605e-20	9.52459e-06	0.000926909	0.000283841	6.56849e-06	3.70032e-37	0.0877409	2.04428e-06	6.56127	538.029
2241	373.059	421.03	373.502	1252.01	340.345	885.021	57.197	121.82	9.71615	0.48014	12.7262	45.1447	3.87003	210.883	190.455	280.197	0.114036	4.47182e-12	11.1475	1.27309	39.9483	3.42673	6.9245	7.83643	0.00383239	5.27005e-20	8.75666e-06	0.000879864	0.000268293	6.1582e-06	2.62109e-37	0.0862632	1.9404e-06	6.55898	538.029
2242	372.785	420.733	373.24	1252.03	340.332	885.078	56.663	121.89	9.7188	0.48152	12.6788	45.1435	3.8702	210.897	190.462	280.247	0.113867	3.91525e-12	11.1458	1.24294	39.5087	3.38241	6.89901	7.83134	0.0036727	4.30819e-20	8.05029e-06	0.00083761	0.000253588	5.77326e-06	1.85663e-37	0.0848072	1.8417e-06	6.55277	538.029
2243	372.515	420.442	372.985	1252.01	340.32	885.125	56.1346	121.96	9.72145	0.4829	12.6315	45.1404	3.87029	210.908	190.466	280.294	0.113702	3.42784e-12	11.1441	1.21347	39.0734	3.33861	6.87358	7.82623	0.00351949	3.52173e-20	7.40074e-06	0.000799682	0.000239687	5.41225e-06	1.31513e-37	0.0833741	1.74798e-06	6.54858	538.029
2244	372.259	420.167	372.744	1252	340.307	885.169	55.612	122.03	9.7241	0.48428	12.5844	45.1374	3.87037	210.919	190.469	280.34	0.113542	3.00108e-12	11.1424	1.18469	38.6429	3.29538	6.84824	7.82114	0.00337264	2.8788e-20	6.80357e-06	0.000765653	0.000226546	5.07379e-06	9.31562e-38	0.0819649	1.65902e-06	6.5471	538.029
2245	372.02	419.91	372.518	1252	340.295	885.216	55.0958	122.1	9.72674	0.48566	12.5374	45.1362	3.87047	210.93	190.473	280.386	0.113387	2.6275e-12	11.1407	1.1566	38.2174	3.25273	6.82301	7.81604	0.00323199	2.3533e-20	6.25466e-06	0.000735137	0.000214128	4.75656e-06	6.59865e-38	0.0805804	1.5746e-06	6.5483	538.029
2246	371.797	419.67	372.305	1252.04	340.283	885.276	54.5864	122.17	9.72939	0.487038	12.4907	45.1382	3.87066	210.944	190.482	280.433	0.113238	2.30053e-12	11.139	1.12922	37.7972	3.21069	6.79791	7.81096	0.00309743	1.92384e-20	5.75021e-06	0.000707787	0.000202394	4.45931e-06	4.67411e-38	0.0792215	1.49454e-06	6.55259	538.029
2247	371.581	419.438	372.098	1252.13	340.271	885.346	54.0836	122.239	9.73203	0.488417	12.4442	45.1432	3.87093	210.96	190.495	280.481	0.113094	2.01435e-12	11.1372	1.10254	37.3823	3.16928	6.77295	7.80589	0.00296868	1.57287e-20	5.28662e-06	0.000683279	0.000191308	4.18079e-06	3.31087e-38	0.0778877	1.4186e-06	6.55793	538.029
2248	371.363	419.202	371.887	1252.25	340.258	885.424	53.5871	122.309	9.73468	0.489795	12.3978	45.1496	3.87125	210.977	190.512	280.53	0.112956	1.76385e-12	11.1355	1.07651	36.9725	3.12844	6.74811	7.80083	0.00284544	1.286e-20	4.86052e-06	0.000661311	0.000180832	3.91977e-06	2.34523e-38	0.076578	1.34656e-06	6.56224	538.029
2249	371.138	418.959	371.669	1252.37	340.247	885.505	53.0965	122.379	9.73733	0.491172	12.3516	45.1566	3.8716	210.995	190.529	280.579	0.112822	1.54454e-12	11.1338	1.05111	36.5676	3.08817	6.72339	7.79578	0.00272742	1.05148e-20	4.46885e-06	0.000641615	0.000170932	3.67512e-06	1.66122e-38	0.0752915	1.27821e-06	6.56553	538.029
2250	370.906	418.707	371.443	1252.51	340.235	885.589	52.6118	122.449	9.73997	0.49255	12.3056	45.1638	3.87197	211.014	190.549	280.628	0.112692	1.35253e-12	11.1321	1.02633	36.1675	3.04845	6.69877	7.79074	0.00261438	8.59761e-21	4.1088e-06	0.000623955	0.000161575	3.44579e-06	1.17672e-38	0.0740277	1.21335e-06	6.56829	538.029
2251	370.668	418.448	371.21	1252.65	340.223	885.674	52.1328	122.519	9.74262	0.493926	12.2598	45.1711	3.87235	211.034	190.568	280.677	0.112567	1.18441e-12	11.1304	1.00214	35.7719	3.00927	6.67426	7.7857	0.0025061	7.03017e-21	3.77781e-06	0.00060812	0.000152732	3.23082e-06	8.33518e-39	0.0727858	1.15179e-06	6.57063	538.029
2252	370.415	418.173	370.965	1252.74	340.211	885.747	51.6586	122.589	9.74526	0.495303	12.2141	45.1748	3.87265	211.051	190.583	280.724	0.112445	1.03716e-12	11.1287	0.978484	35.3803	2.97055	6.64982	7.78066	0.0024022	5.74828e-21	3.47341e-06	0.000593896	0.000144371	3.0292e-06	5.90416e-39	0.0715635	1.09334e-06	6.56832	538.029
2253	370.15	417.885	370.711	1252.76	340.2	885.799	51.1884	122.658	9.7479	0.496679	12.1686	45.1735	3.87282	211.063	190.591	280.767	0.112325	9.08157e-13	11.127	0.955328	34.9921	2.93224	6.6254	7.77561	0.00230238	4.69969e-21	3.1934e-06	0.000581103	0.000136463	2.84002e-06	4.18217e-39	0.070359	1.03779e-06	6.56209	538.029
2254	369.889	417.603	370.463	1252.75	340.189	885.841	50.723	122.728	9.75055	0.498054	12.1233	45.1703	3.87291	211.074	190.594	280.808	0.112207	7.95169e-13	11.1253	0.932687	34.6077	2.89438	6.60106	7.77056	0.0022066	3.8422e-21	2.9359e-06	0.00056961	0.000128987	2.66259e-06	2.96241e-39	0.0691734	9.85042e-07	6.55789	538.029
2255	369.643	417.336	370.229	1252.73	340.177	885.881	50.2629	122.798	9.75319	0.499429	12.0781	45.1673	3.87298	211.083	190.597	280.847	0.112092	6.96233e-13	11.1235	0.910569	34.2274	2.857	6.57679	7.76551	0.00211479	3.14114e-21	2.69915e-06	0.000559296	0.00012192	2.49623e-06	2.0984e-39	0.0680076	9.3497e-07	6.55638	538.029
2256	369.412	417.087	370.01	1252.73	340.166	885.925	49.8082	122.868	9.75584	0.500804	12.0331	45.1661	3.87308	211.094	190.601	280.887	0.111982	6.09618e-13	11.1218	0.889	33.8516	2.82013	6.55263	7.76047	0.00202684	2.56805e-21	2.48152e-06	0.000525917	0.000115241	2.3403e-06	1.48639e-39	0.0668621	8.87456e-07	6.55757	538.029
2257	369.197	416.855	369.804	1252.77	340.155	885.98	49.3594	122.938	9.75848	0.502178	11.9882	45.168	3.87326	211.106	190.609	280.928	0.111875	5.33803e-13	11.1201	0.867967	33.4805	2.78379	6.52859	7.75544	0.00194269	2.09965e-21	2.28151e-06	0.000471853	0.00010893	2.19418e-06	1.05287e-39	0.0657376	8.42386e-07	6.56185	538.029
2258	368.99	416.63	369.604	1252.86	340.144	886.046	48.9164	123.008	9.76112	0.503552	11.9436	45.173	3.87353	211.121	190.623	280.97	0.111773	4.67442e-13	11.1184	0.847458	33.114	2.74798	6.50469	7.75042	0.00186217	1.7168e-21	2.09768e-06	0.000423365	0.000102968	2.05726e-06	7.45792e-40	0.064634	7.99637e-07	6.56719	538.029
2259	368.78	416.403	369.4	1252.98	340.133	886.12	48.4788	123.077	9.76376	0.504925	11.8991	45.1794	3.87384	211.138	190.639	281.013	0.111675	4.09346e-13	11.1167	0.827449	32.7521	2.71267	6.4809	7.74541	0.00178507	1.40384e-21	1.92872e-06	0.000379871	9.73326e-05	1.92893e-06	5.28276e-40	0.0635502	7.59078e-07	6.5715	538.029
2260	368.563	416.167	369.188	1253.1	340.122	886.197	48.0465	123.147	9.76641	0.506298	11.8548	45.1863	3.87419	211.155	190.656	281.056	0.111581	3.58481e-13	11.115	0.80792	32.3944	2.67785	6.45722	7.74041	0.00171124	1.14796e-21	1.77339e-06	0.000340854	9.20071e-05	1.80864e-06	3.74201e-40	0.0624856	7.20592e-07	6.57478	538.029
2261	368.339	415.923	368.969	1253.24	340.112	886.278	47.6192	123.217	9.76905	0.50767	11.8107	45.1935	3.87455	211.174	190.675	281.1	0.111489	3.13943e-13	11.1133	0.788877	32.0409	2.64351	6.43365	7.73542	0.00164052	9.3876e-22	1.6306e-06	0.00030585	8.69738e-05	1.69589e-06	2.65062e-40	0.0614397	6.84069e-07	6.57753	538.029
2262	368.109	415.671	368.743	1253.38	340.101	886.36	47.197	123.287	9.77169	0.509042	11.7667	45.2007	3.87494	211.192	190.695	281.143	0.111401	2.74945e-13	11.1116	0.770284	31.6915	2.60963	6.41018	7.73043	0.00157276	7.67702e-22	1.49933e-06	0.000274446	8.22167e-05	1.59018e-06	1.87755e-40	0.0604119	6.49408e-07	6.57987	538.029
2263	367.865	415.404	368.504	1253.47	340.091	886.429	46.7788	123.357	9.77433	0.510414	11.7229	45.2044	3.87523	211.209	190.71	281.185	0.111315	2.40784e-13	11.1099	0.752098	31.3455	2.57614	6.38677	7.72544	0.00150773	6.2779e-22	1.37859e-06	0.000246259	7.77187e-05	1.49103e-06	1.32995e-40	0.0594002	6.16488e-07	6.57754	538.029
2264	367.608	415.124	368.257	1253.49	340.08	886.478	46.3642	123.427	9.77697	0.511785	11.6793	45.203	3.87539	211.22	190.717	281.222	0.111229	2.10852e-13	11.1082	0.734309	31.0025	2.54301	6.36339	7.72044	0.00144525	5.13329e-22	1.26753e-06	0.000220956	7.34646e-05	1.39799e-06	9.42058e-41	0.0584032	5.85206e-07	6.57129	538.029
2265	367.356	414.85	368.016	1253.47	340.07	886.517	45.9537	123.496	9.77962	0.513156	11.6358	45.1998	3.87548	211.23	190.72	281.258	0.111146	1.84635e-13	11.1065	0.71693	30.6629	2.51027	6.34006	7.71544	0.0013853	4.19717e-22	1.16538e-06	0.000198246	6.94423e-05	1.31073e-06	6.673e-41	0.0574218	5.55497e-07	6.56706	538.029
2266	367.117	414.591	367.789	1253.45	340.06	886.553	45.5478	123.566	9.78226	0.514526	11.5924	45.1968	3.87555	211.239	190.723	281.292	0.111064	1.61677e-13	11.1048	0.699946	30.3269	2.47794	6.31682	7.71044	0.00132781	3.43173e-22	1.07147e-06	0.00017787	6.56401e-05	1.22891e-06	4.72677e-41	0.0564567	5.27293e-07	6.56554	538.029
2267	366.895	414.35	367.576	1253.45	340.05	886.594	45.1467	123.636	9.7849	0.515896	11.5493	45.1955	3.87564	211.249	190.727	281.327	0.110985	1.41575e-13	11.1031	0.683362	29.9948	2.44605	6.29368	7.70545	0.00127275	2.80594e-22	9.85129e-07	0.00015959	6.20466e-05	1.15221e-06	3.34817e-41	0.0555084	5.00528e-07	6.56672	538.029
2268	366.688	414.125	367.377	1253.49	340.039	886.646	44.7507	123.706	9.78754	0.517265	11.5063	45.1974	3.87582	211.261	190.735	281.363	0.11091	1.23979e-13	11.1014	0.667205	29.6669	2.41462	6.27066	7.70047	0.00122005	2.29441e-22	9.05776e-07	0.000143194	5.86509e-05	1.08034e-06	2.37165e-41	0.0545775	4.75139e-07	6.57099	538.029
2269	366.488	413.907	367.183	1253.58	340.03	886.71	44.3599	123.776	9.79018	0.518634	11.4634	45.2023	3.87608	211.275	190.748	281.4	0.110838	1.08576e-13	11.0996	0.651444	29.3431	2.38364	6.24777	7.6955	0.00116962	1.87627e-22	8.32842e-07	0.000128488	5.54424e-05	1.01298e-06	1.67994e-41	0.0536638	4.51055e-07	6.57633	538.029
2270	366.286	413.687	366.985	1253.69	340.02	886.781	43.9737	123.846	9.79282	0.520003	11.4208	45.2087	3.87639	211.291	190.764	281.439	0.110769	9.50895e-14	11.0979	0.636062	29.0232	2.3531	6.22498	7.69054	0.00112133	1.53441e-22	7.65799e-07	0.000115297	5.24101e-05	9.49849e-07	1.18997e-41	0.0527665	4.28205e-07	6.58063	538.029
2271	366.076	413.458	366.779	1253.82	340.01	886.856	43.5921	123.915	9.79546	0.521371	11.3783	45.2156	3.87674	211.308	190.782	281.477	0.110703	8.32808e-14	11.0962	0.621063	28.7072	2.32298	6.2023	7.68559	0.00107508	1.25488e-22	7.04165e-07	0.000103461	4.95443e-05	8.90669e-07	8.42909e-42	0.051885	4.0652e-07	6.58391	538.029
2272	365.86	413.221	366.566	1253.95	340	886.933	43.215	123.985	9.7981	0.522739	11.336	45.2227	3.8771	211.326	190.8	281.516	0.110639	7.29403e-14	11.0945	0.606437	28.3948	2.29327	6.17972	7.68064	0.00103077	1.02631e-22	6.47502e-07	9.28429e-05	4.68357e-05	8.3519e-07	5.97068e-42	0.0510189	3.8594e-07	6.58666	538.029
2273	365.637	412.976	366.346	1254.09	339.991	887.013	42.8422	124.055	9.80074	0.524106	11.2938	45.2299	3.87748	211.344	190.82	281.555	0.110578	6.38851e-14	11.0928	0.592172	28.086	2.26396	6.15724	7.6757	0.00098831	8.39393e-23	5.95406e-07	8.33157e-05	4.42756e-05	7.83178e-07	4.22929e-42	0.0501678	3.66408e-07	6.58899	538.029
2274	365.4	412.717	366.114	1254.18	339.981	887.08	42.4729	124.125	9.80337	0.525473	11.2518	45.2335	3.87777	211.36	190.835	281.592	0.110518	5.59523e-14	11.0911	0.578212	27.7802	2.23499	6.13481	7.67076	0.000947559	6.86493e-23	5.47491e-07	7.47642e-05	4.18548e-05	7.34389e-07	2.99578e-42	0.04933	3.47855e-07	6.58665	538.029
2275	365.151	412.444	365.873	1254.2	339.972	887.126	42.1067	124.195	9.80601	0.526839	11.2099	45.2321	3.87793	211.371	190.841	281.625	0.110457	4.90012e-14	11.0894	0.564536	27.4771	2.20633	6.11242	7.66581	0.0009084	5.61393e-23	5.03409e-07	6.70866e-05	3.95652e-05	6.88605e-07	2.12204e-42	0.0485043	3.30225e-07	6.58037	538.029
2276	364.906	412.176	365.638	1254.18	339.962	887.163	41.7441	124.265	9.80865	0.528205	11.1682	45.2289	3.87801	211.38	190.844	281.656	0.110398	4.29121e-14	11.0877	0.551174	27.1769	2.178	6.09008	7.66086	0.000870817	4.59068e-23	4.62867e-07	6.01958e-05	3.74004e-05	6.45661e-07	1.50313e-42	0.0476915	3.13481e-07	6.57613	538.029
2277	364.675	411.925	365.417	1254.16	339.953	887.197	41.3856	124.334	9.81129	0.529571	11.1266	45.2258	3.87808	211.389	190.847	281.687	0.11034	3.75793e-14	11.086	0.538131	26.88	2.15003	6.06782	7.65591	0.000834781	3.75389e-23	4.25588e-07	5.40124e-05	3.53538e-05	6.05391e-07	1.06473e-42	0.0468922	2.97583e-07	6.57459	538.029
2278	364.46	411.691	365.211	1254.16	339.944	887.236	41.0312	124.404	9.81393	0.530936	11.0852	45.2245	3.87817	211.398	190.85	281.717	0.110284	3.29099e-14	11.0843	0.52541	26.5864	2.12243	6.04565	7.65097	0.000800256	3.06971e-23	3.91315e-07	4.84648e-05	3.34195e-05	5.67641e-07	7.54195e-43	0.0461067	2.82496e-07	6.57576	538.029
2279	364.26	411.473	365.018	1254.2	339.935	887.286	40.6814	124.474	9.81656	0.532301	11.044	45.2264	3.87834	211.409	190.859	281.749	0.110231	2.8822e-14	11.0826	0.512995	26.2966	2.09524	6.0236	7.64604	0.000767211	2.51038e-23	3.59813e-07	4.34887e-05	3.15917e-05	5.32261e-07	5.34228e-43	0.0453356	2.68183e-07	6.58003	538.029
2280	364.067	411.262	364.829	1254.29	339.926	887.347	40.3359	124.544	9.8192	0.533665	11.0029	45.2313	3.8786	211.423	190.872	281.782	0.110181	2.52432e-14	11.0809	0.500879	26.0104	2.06843	6.00166	7.64112	0.000735584	2.0531e-23	3.30859e-07	3.90252e-05	2.98645e-05	4.99105e-07	3.78417e-43	0.0445787	2.54606e-07	6.58536	538.029
2281	363.872	411.048	364.637	1254.4	339.917	887.416	39.9946	124.614	9.82184	0.535029	10.962	45.2376	3.87891	211.439	190.887	281.817	0.110133	2.21096e-14	11.0792	0.489069	25.7276	2.04201	5.97984	7.6362	0.000705297	1.67921e-23	3.04241e-07	3.50209e-05	2.82322e-05	4.68027e-07	2.68049e-43	0.0438353	2.41722e-07	6.58966	538.029
2282	363.67	410.826	364.437	1254.52	339.908	887.489	39.6573	124.683	9.82448	0.536393	10.9212	45.2444	3.87925	211.455	190.905	281.852	0.110088	1.93656e-14	11.0775	0.477552	25.4482	2.01594	5.95811	7.6313	0.000676284	1.37346e-23	2.7977e-07	3.14282e-05	2.66894e-05	4.38892e-07	1.8987e-43	0.043105	2.29496e-07	6.59294	538.029
2283	363.46	410.595	364.23	1254.66	339.9	887.565	39.3239	124.753	9.82711	0.537756	10.8806	45.2516	3.87961	211.472	190.923	281.887	0.110044	1.69625e-14	11.0759	0.466321	25.172	1.99023	5.93648	7.6264	0.000648486	1.12341e-23	2.57271e-07	2.82046e-05	2.52312e-05	4.11578e-07	1.34493e-43	0.0423874	2.17891e-07	6.59568	538.029
2284	363.244	410.357	364.015	1254.79	339.891	887.643	38.9944	124.823	9.82975	0.539118	10.8402	45.2587	3.87998	211.49	190.943	281.922	0.110002	1.48579e-14	11.0742	0.455367	24.899	1.96486	5.91494	7.62151	0.000621848	9.18916e-24	2.36584e-07	2.53121e-05	2.38528e-05	3.85968e-07	9.52672e-44	0.0416823	2.06877e-07	6.59801	538.029
2285	363.014	410.104	363.789	1254.88	339.882	887.708	38.6678	124.893	9.83238	0.54048	10.7999	45.2623	3.88027	211.505	190.957	281.955	0.10996	1.30141e-14	11.0725	0.444641	24.6287	1.93978	5.89346	7.61662	0.000596276	7.51614e-24	2.17557e-07	2.27156e-05	2.25495e-05	3.61945e-07	6.74818e-44	0.0409881	1.96414e-07	6.59565	538.029
2286	362.771	409.838	363.554	1254.9	339.874	887.753	38.3439	124.963	9.83502	0.541842	10.7597	45.2609	3.88043	211.516	190.964	281.985	0.109918	1.13982e-14	11.0708	0.434128	24.3607	1.91497	5.872	7.61172	0.000571701	6.14715e-24	2.00051e-07	2.03843e-05	2.13167e-05	3.394e-07	4.78002e-44	0.0403039	1.86471e-07	6.58936	538.029
2287	362.534	409.577	363.325	1254.88	339.865	887.788	38.0232	125.032	9.83765	0.543204	10.7197	45.2576	3.88051	211.525	190.967	282.013	0.109876	9.98269e-15	11.0691	0.423855	24.0953	1.89045	5.8506	7.60682	0.000548112	5.02727e-24	1.83949e-07	1.82918e-05	2.01511e-05	3.18252e-07	3.38589e-44	0.0396304	1.77027e-07	6.58509	538.029
2288	362.31	409.332	363.109	1254.86	339.857	887.821	37.7059	125.102	9.84029	0.544564	10.6798	45.2545	3.88057	211.533	190.969	282.039	0.109836	8.74286e-15	11.0674	0.413827	23.8327	1.86624	5.82927	7.60192	0.000525491	4.11136e-24	1.69143e-07	1.6414e-05	1.90491e-05	2.9842e-07	2.39837e-44	0.0389679	1.6806e-07	6.58354	538.029
2289	362.102	409.105	362.909	1254.86	339.849	887.858	37.3924	125.172	9.84292	0.545925	10.6401	45.2531	3.88066	211.542	190.973	282.067	0.109797	7.65715e-15	11.0657	0.404046	23.5732	1.84235	5.80803	7.59702	0.000503816	3.3624e-24	1.5553e-07	1.47291e-05	1.80075e-05	2.79827e-07	1.69887e-44	0.0383169	1.59549e-07	6.5847	538.029
2290	361.908	408.893	362.721	1254.9	339.841	887.907	37.0828	125.242	9.84556	0.547285	10.6005	45.255	3.88083	211.553	190.981	282.095	0.10976	6.70658e-15	11.064	0.394515	23.3169	1.81881	5.78691	7.59214	0.000483067	2.75004e-24	1.43017e-07	1.32177e-05	1.70232e-05	2.62401e-07	1.20338e-44	0.0376779	1.51475e-07	6.58896	538.029
2291	361.722	408.689	362.538	1254.99	339.832	887.967	36.7772	125.312	9.84819	0.548645	10.5611	45.2598	3.88109	211.567	190.994	282.125	0.109725	5.87433e-15	11.0623	0.385229	23.0638	1.79561	5.76589	7.58727	0.000463207	2.24936e-24	1.31515e-07	1.18619e-05	1.60931e-05	2.4607e-07	8.52406e-45	0.0370505	1.43815e-07	6.59429	538.029
2292	361.532	408.481	362.351	1255.1	339.824	888.035	36.4751	125.381	9.85083	0.550004	10.5219	45.2661	3.88139	211.582	191.009	282.157	0.109693	5.14554e-15	11.0606	0.376156	22.8138	1.77273	5.74498	7.5824	0.000444186	1.83993e-24	1.20941e-07	1.06455e-05	1.5214e-05	2.3076e-07	6.03795e-45	0.0364344	1.36546e-07	6.5986	538.029
2293	361.336	408.264	362.156	1255.22	339.816	888.106	36.1765	125.451	9.85346	0.551363	10.4828	45.273	3.88173	211.598	191.026	282.188	0.109662	4.5073e-15	11.0589	0.367288	22.5667	1.75016	5.72417	7.57755	0.000425963	1.50508e-24	1.11219e-07	9.55406e-06	1.43831e-05	2.16408e-07	4.27694e-45	0.035829	1.29647e-07	6.60187	538.029
2294	361.133	408.04	361.954	1255.35	339.809	888.181	35.8813	125.521	9.8561	0.552721	10.4438	45.28	3.88208	211.615	191.045	282.22	0.109632	3.94832e-15	11.0572	0.358638	22.3224	1.7279	5.70344	7.5727	0.000408501	1.23121e-24	1.0228e-07	8.57468e-06	1.35977e-05	2.02951e-07	3.02954e-45	0.0352342	1.23099e-07	6.60461	538.029
2295	360.923	407.808	361.745	1255.49	339.801	888.258	35.5895	125.591	9.85873	0.554079	10.405	45.2871	3.88246	211.632	191.064	282.252	0.109604	3.45873e-15	11.0555	0.350201	22.081	1.70593	5.68281	7.56786	0.000391766	1.0072e-24	9.40612e-08	7.69582e-06	1.28554e-05	1.90334e-07	2.14595e-45	0.0346496	1.16884e-07	6.60693	538.029
2296	360.699	407.561	361.524	1255.58	339.793	888.322	35.3003	125.661	9.86136	0.555436	10.3664	45.2907	3.88274	211.647	191.079	282.283	0.109576	3.02975e-15	11.0539	0.341956	21.8419	1.68422	5.66222	7.56301	0.000375699	8.23917e-25	8.65007e-08	6.90687e-06	1.21534e-05	1.78497e-07	1.52007e-45	0.0340741	1.10979e-07	6.60456	538.029
2297	360.463	407.301	361.294	1255.59	339.785	888.366	35.0134	125.73	9.86399	0.556794	10.3279	45.2893	3.88289	211.658	191.085	282.31	0.109547	2.6538e-15	11.0522	0.333889	21.6049	1.66274	5.64166	7.55816	0.000360256	6.73923e-25	7.95445e-08	6.19844e-06	1.14894e-05	1.67388e-07	1.07673e-45	0.0335069	1.05368e-07	6.59824	538.029
2298	360.232	407.047	361.071	1255.58	339.778	888.4	34.7293	125.8	9.86663	0.55815	10.2895	45.286	3.88297	211.666	191.088	282.334	0.109518	2.32441e-15	11.0505	0.326007	21.3702	1.64151	5.62116	7.5533	0.000345431	5.51209e-25	7.3146e-08	5.56252e-06	1.08615e-05	1.56967e-07	7.62692e-46	0.0329484	1.00037e-07	6.59396	538.029
2299	360.015	406.808	360.861	1255.55	339.77	888.432	34.4483	125.87	9.86926	0.559506	10.2512	45.2828	3.88303	211.674	191.09	282.359	0.10949	2.0359e-15	11.0488	0.318311	21.1379	1.62054	5.60072	7.54845	0.000331213	4.50835e-25	6.72619e-08	4.99181e-06	1.02679e-05	1.47194e-07	5.40247e-46	0.0323992	9.49757e-08	6.5924	538.029
2300	359.813	406.587	360.666	1255.55	339.763	888.468	34.1705	125.94	9.87189	0.560862	10.2131	45.2814	3.88312	211.683	191.093	282.383	0.109463	1.78322e-15	11.0471	0.310805	20.9083	1.59985	5.58037	7.5436	0.000317587	3.68747e-25	6.18519e-08	4.47971e-06	9.70675e-06	1.38031e-07	3.8268e-46	0.0318594	9.01716e-08	6.59354	538.029
2301	359.625	406.381	360.483	1255.59	339.755	888.515	33.8962	126.009	9.87452	0.562218	10.1751	45.2833	3.88329	211.693	191.101	282.409	0.109437	1.56198e-15	11.0454	0.303491	20.6816	1.57946	5.56013	7.53877	0.000304543	3.01624e-25	5.68786e-08	4.02031e-06	9.1765e-06	1.29443e-07	2.71069e-46	0.0313294	8.56135e-08	6.59781	538.029
2302	359.445	406.182	360.305	1255.68	339.748	888.575	33.6253	126.079	9.87715	0.563573	10.1373	45.2881	3.88354	211.707	191.114	282.437	0.109414	1.36826e-15	11.0437	0.296343	20.4577	1.55937	5.53999	7.53394	0.000292056	2.46737e-25	5.2307e-08	3.60817e-06	8.67541e-06	1.21393e-07	1.92009e-46	0.0308092	8.12891e-08	6.60314	538.029
2303	359.261	405.98	360.123	1255.79	339.741	888.642	33.3576	126.149	9.87979	0.564927	10.0997	45.2943	3.88384	211.721	191.129	282.465	0.109393	1.19861e-15	11.042	0.289353	20.2366	1.53955	5.51995	7.52912	0.000280095	2.01848e-25	4.81039e-08	3.23838e-06	8.20181e-06	1.13847e-07	1.36008e-46	0.0302982	7.71852e-08	6.60744	538.029
2304	359.071	405.77	359.933	1255.91	339.733	888.713	33.0929	126.219	9.88242	0.566281	10.0622	45.3011	3.88417	211.737	191.147	282.494	0.109372	1.05002e-15	11.0404	0.282537	20.018	1.52	5.50001	7.52432	0.000268634	1.65131e-25	4.42394e-08	2.90655e-06	7.75415e-06	1.06772e-07	9.63405e-47	0.0297962	7.329e-08	6.61071	538.029
2305	358.873	405.551	359.736	1256.04	339.726	888.787	32.8312	126.289	9.88505	0.567635	10.0248	45.3082	3.88453	211.754	191.165	282.524	0.109353	9.19875e-16	11.0387	0.275889	19.8019	1.50072	5.48015	7.51951	0.000257651	1.35098e-25	4.06859e-08	2.60878e-06	7.331e-06	1.00139e-07	6.82421e-47	0.0293028	6.95926e-08	6.61344	538.029
2306	358.669	405.325	359.532	1256.18	339.719	888.863	32.5725	126.358	9.88768	0.568988	9.98762	45.3152	3.8849	211.771	191.184	282.553	0.109335	8.05877e-16	11.037	0.269403	19.5883	1.4817	5.46037	7.51472	0.000247124	1.1053e-25	3.74183e-08	2.34155e-06	6.93101e-06	9.39183e-08	4.83388e-47	0.028818	6.60827e-08	6.61576	538.029
2307	358.451	405.083	359.316	1256.26	339.712	888.926	32.316	126.428	9.89031	0.570341	9.95054	45.3188	3.88518	211.785	191.198	282.581	0.109317	7.05985e-16	11.0353	0.263064	19.3768	1.46289	5.44065	7.50992	0.000237016	9.04263e-26	3.44125e-08	2.10164e-06	6.55274e-06	8.80825e-08	3.42404e-47	0.0283406	6.27483e-08	6.61339	538.029
2308	358.221	404.829	359.091	1256.28	339.705	888.97	32.0615	126.498	9.89294	0.571694	9.91357	45.3173	3.88533	211.796	191.205	282.606	0.109297	6.18432e-16	11.0336	0.256863	19.1671	1.44428	5.42095	7.50512	0.000227299	7.39722e-26	3.16467e-08	1.88621e-06	6.19494e-06	8.26053e-08	2.42539e-47	0.0278701	5.95791e-08	6.60705	538.029
2309	357.996	404.581	358.872	1256.26	339.698	889.003	31.8095	126.568	9.89557	0.573046	9.87674	45.314	3.8854	211.804	191.207	282.628	0.109277	5.41717e-16	11.0319	0.250802	18.9594	1.42589	5.4013	7.50031	0.00021797	6.05093e-26	2.91026e-08	1.69281e-06	5.85659e-06	7.74668e-08	1.71801e-47	0.0274068	5.65684e-08	6.60275	538.029
2310	357.785	404.348	358.668	1256.24	339.691	889.034	31.5602	126.637	9.8982	0.574397	9.84004	45.3108	3.88546	211.812	191.209	282.65	0.109258	4.74516e-16	11.0303	0.244885	18.7539	1.40772	5.38171	7.4955	0.000209021	4.94961e-26	2.67629e-08	1.51923e-06	5.5367e-06	7.26476e-08	1.21694e-47	0.0269512	5.37096e-08	6.60117	538.029
2311	357.588	404.132	358.477	1256.23	339.685	889.07	31.3137	126.707	9.90082	0.575748	9.80348	45.3094	3.88555	211.82	191.213	282.672	0.109239	4.15657e-16	11.0286	0.239113	18.5507	1.3898	5.36221	7.4907	0.000200446	4.04882e-26	2.46116e-08	1.36347e-06	5.23433e-06	6.81291e-08	8.62009e-48	0.0265033	5.09959e-08	6.60231	538.029
2312	357.406	403.932	358.299	1256.27	339.678	889.117	31.0703	126.777	9.90345	0.577099	9.76707	45.3112	3.88571	211.83	191.22	282.696	0.109223	3.64117e-16	11.0269	0.233488	18.3501	1.37213	5.34281	7.48591	0.000192234	3.31217e-26	2.26338e-08	1.22372e-06	4.94856e-06	6.38936e-08	6.10598e-48	0.0260637	4.84211e-08	6.60657	538.029
2313	357.231	403.739	358.126	1256.36	339.671	889.177	30.83	126.847	9.90608	0.578449	9.7308	45.316	3.88596	211.843	191.233	282.721	0.109208	3.18984e-16	11.0252	0.228007	18.152	1.35472	5.32351	7.48113	0.000184373	2.70974e-26	2.08157e-08	1.09834e-06	4.6785e-06	5.99237e-08	4.32512e-48	0.025632	4.5978e-08	6.6119	538.029
2314	357.053	403.542	357.949	1256.47	339.665	889.243	30.5924	126.917	9.90871	0.579799	9.69469	45.3222	3.88626	211.858	191.248	282.748	0.109194	2.79456e-16	11.0235	0.222663	17.9563	1.33755	5.30431	7.47636	0.000176842	2.217e-26	1.91441e-08	9.85844e-07	4.42325e-06	5.62018e-08	3.06367e-48	0.025208	4.36594e-08	6.6162	538.029
2315	356.868	403.337	357.764	1256.59	339.658	889.313	30.3575	126.986	9.91134	0.581149	9.65871	45.329	3.88659	211.874	191.265	282.775	0.109181	2.44833e-16	11.0219	0.217451	17.7628	1.32062	5.28519	7.4716	0.000169625	1.81392e-26	1.7607e-08	8.84887e-07	4.18197e-06	5.27121e-08	2.17013e-48	0.0247914	4.14586e-08	6.61947	538.029
2316	356.676	403.123	357.571	1256.72	339.652	889.387	30.1252	127.056	9.91397	0.582498	9.62288	45.336	3.88694	211.89	191.284	282.802	0.10917	2.14504e-16	11.0202	0.212367	17.5716	1.30391	5.26616	7.46685	0.000162708	1.48417e-26	1.61935e-08	7.94284e-07	3.95389e-06	4.94399e-08	1.53719e-48	0.0243821	3.93695e-08	6.6222	538.029
2317	356.477	402.902	357.371	1256.86	339.645	889.463	29.8955	127.126	9.91659	0.583846	9.58718	45.343	3.88731	211.907	191.302	282.83	0.109159	1.87936e-16	11.0185	0.207386	17.3826	1.28742	5.24721	7.4621	0.000156078	1.2144e-26	1.48938e-08	7.12969e-07	3.73829e-06	4.63715e-08	1.08886e-48	0.0239797	3.73861e-08	6.62452	538.029
2318	356.265	402.666	357.16	1256.94	339.639	889.526	29.6677	127.196	9.91922	0.585195	9.55161	45.3466	3.88759	211.921	191.317	282.856	0.109147	1.64654e-16	11.0168	0.202497	17.1954	1.27113	5.2283	7.45735	0.00014971	9.93626e-27	1.3698e-08	6.39962e-07	3.53439e-06	4.34925e-08	7.71285e-49	0.0235835	3.55018e-08	6.62213	538.029
2319	356.041	402.418	356.94	1256.96	339.633	889.569	29.4417	127.265	9.92185	0.586542	9.51615	45.3451	3.88774	211.931	191.323	282.878	0.109135	1.44246e-16	11.0151	0.197714	17.0098	1.255	5.20942	7.45259	0.000143589	8.12912e-27	1.25978e-08	5.74399e-07	3.34151e-06	4.07903e-08	5.46334e-49	0.023193	3.37107e-08	6.61577	538.029
2320	355.821	402.175	356.727	1256.94	339.626	889.602	29.2178	127.335	9.92447	0.58789	9.48081	45.3417	3.88781	211.939	191.326	282.899	0.109121	1.26363e-16	11.0135	0.193039	16.826	1.23906	5.19059	7.44782	0.000137711	6.65033e-27	1.15856e-08	5.15538e-07	3.15912e-06	3.8255e-08	3.86991e-49	0.0228085	3.20092e-08	6.61145	538.029
2321	355.615	401.948	356.527	1256.91	339.62	889.633	28.9963	127.405	9.9271	0.589237	9.4456	45.3385	3.88786	211.947	191.327	282.919	0.109109	1.10696e-16	11.0118	0.188474	16.6441	1.22332	5.17182	7.44306	0.000132072	5.4405e-27	1.06547e-08	4.62705e-07	2.98667e-06	3.58772e-08	2.74123e-49	0.0224303	3.03933e-08	6.60986	538.029
2322	355.424	401.738	356.341	1256.91	339.614	889.669	28.7773	127.475	9.92973	0.590583	9.41053	45.3371	3.88795	211.955	191.33	282.939	0.109096	9.69735e-17	11.0101	0.184021	16.4643	1.20778	5.15313	7.43831	0.000126667	4.45085e-27	9.79873e-09	4.15293e-07	2.82365e-06	3.36475e-08	1.94173e-49	0.0220586	2.88594e-08	6.61099	538.029
2323	355.247	401.542	356.167	1256.95	339.608	889.716	28.5611	127.544	9.93235	0.591929	9.3756	45.3389	3.88811	211.965	191.338	282.961	0.109086	8.49559e-17	11.0084	0.179681	16.2867	1.19247	5.13453	7.43357	0.000121492	3.64145e-27	9.01178e-09	3.72753e-07	2.66959e-06	3.15575e-08	1.37541e-49	0.0216936	2.74039e-08	6.61525	538.029
2324	355.077	401.354	355.999	1257.03	339.602	889.775	28.3475	127.614	9.93498	0.593275	9.34081	45.3436	3.88836	211.978	191.351	282.985	0.109077	7.44314e-17	11.0068	0.175451	16.1113	1.17738	5.11604	7.42883	0.000116537	2.97945e-27	8.28831e-09	3.34585e-07	2.52399e-06	2.95983e-08	9.74259e-50	0.0213353	2.60228e-08	6.62058	538.029
2325	354.904	401.162	355.826	1257.14	339.596	889.841	28.1363	127.684	9.9376	0.59462	9.30617	45.3498	3.88865	211.992	191.366	283.009	0.109069	6.52132e-17	11.0051	0.171328	15.938	1.1625	5.09763	7.42411	0.000111789	2.43791e-27	7.62309e-09	3.00334e-07	2.38636e-06	2.77615e-08	6.90109e-50	0.0209833	2.4712e-08	6.62488	538.029
2326	354.724	400.962	355.645	1257.26	339.59	889.912	27.9275	127.754	9.94023	0.595965	9.27165	45.3566	3.88898	212.008	191.383	283.034	0.109061	5.71382e-17	11.0034	0.167305	15.7668	1.14782	5.07931	7.41939	0.000107239	1.99488e-27	7.01139e-09	2.69595e-07	2.25627e-06	2.60391e-08	4.88834e-50	0.0206375	2.34677e-08	6.62815	538.029
2327	354.537	400.754	355.456	1257.39	339.584	889.985	27.721	127.823	9.94285	0.59731	9.23727	45.3636	3.88933	212.024	191.401	283.06	0.109055	5.00643e-17	11.0017	0.163382	15.5975	1.13333	5.06107	7.41469	0.000102877	1.63241e-27	6.44886e-09	2.42007e-07	2.13329e-06	2.4424e-08	3.46262e-50	0.0202976	2.22865e-08	6.63088	538.029
2328	354.343	400.538	355.261	1257.53	339.579	890.061	27.5168	127.893	9.94548	0.598654	9.20303	45.3705	3.8897	212.04	191.42	283.086	0.109049	4.3867e-17	11.0001	0.159554	15.4302	1.11904	5.0429	7.40998	9.86958e-05	1.33584e-27	5.93155e-09	2.17246e-07	2.01703e-06	2.29095e-08	2.45272e-50	0.0199635	2.1165e-08	6.63319	538.029
2329	354.136	400.307	355.055	1257.61	339.573	890.124	27.3143	127.963	9.9481	0.599997	9.1689	45.3741	3.88998	212.055	191.434	283.11	0.109043	3.84357e-17	10.9984	0.155812	15.2644	1.10491	5.02478	7.40528	9.46799e-05	1.0931e-27	5.45562e-09	1.95013e-07	1.90708e-06	2.14883e-08	1.73736e-50	0.0196346	2.00994e-08	6.63079	538.029
2330	353.917	400.064	354.839	1257.63	339.567	890.167	27.1133	128.033	9.95073	0.60134	9.13488	45.3726	3.89012	212.065	191.44	283.131	0.109035	3.36745e-17	10.9967	0.152151	15.1001	1.09093	5.00668	7.40056	9.08185e-05	8.94393e-28	5.01765e-09	1.75046e-07	1.80307e-06	2.01543e-08	1.23065e-50	0.0193103	1.90865e-08	6.62442	538.029
2331	353.702	399.826	354.63	1257.61	339.562	890.2	26.9142	128.102	9.95335	0.602683	9.10098	45.3692	3.89019	212.072	191.442	283.15	0.109027	2.9502e-17	10.9951	0.148572	14.9373	1.07711	4.98863	7.39585	8.71104e-05	7.31769e-28	4.61475e-09	1.57118e-07	1.70471e-06	1.89027e-08	8.71721e-51	0.018991	1.81242e-08	6.62008	538.029
2332	353.501	399.604	354.434	1257.58	339.556	890.232	26.7171	128.172	9.95597	0.604025	9.0672	45.366	3.89024	212.08	191.444	283.169	0.109019	2.58464e-17	10.9934	0.145078	14.7763	1.06346	4.97064	7.39113	8.35529e-05	5.98709e-28	4.24417e-09	1.41026e-07	1.6117e-06	1.77287e-08	6.17477e-51	0.0186769	1.72103e-08	6.61848	538.029
2333	353.316	399.399	354.253	1257.58	339.55	890.267	26.5224	128.242	9.9586	0.605367	9.03356	45.3645	3.89032	212.087	191.447	283.188	0.109011	2.2644e-17	10.9917	0.141669	14.6171	1.04999	4.95272	7.38642	8.01426e-05	4.89853e-28	3.9034e-09	1.26584e-07	1.52379e-06	1.66278e-08	4.37385e-51	0.0183682	1.63427e-08	6.6196	538.029
2334	353.144	399.209	354.084	1257.62	339.545	890.314	26.33	128.312	9.96122	0.606709	9.00005	45.3662	3.89048	212.098	191.455	283.208	0.109005	1.98394e-17	10.9901	0.138346	14.4598	1.03672	4.9349	7.38173	7.68765e-05	4.00814e-28	3.59009e-09	1.13624e-07	1.44069e-06	1.55958e-08	3.09819e-51	0.0180651	1.55194e-08	6.62386	538.029
2335	352.978	399.025	353.919	1257.7	339.539	890.373	26.14	128.381	9.96384	0.60805	8.96667	45.371	3.89073	212.11	191.467	283.23	0.109	1.73831e-17	10.9884	0.135108	14.3046	1.02363	4.91717	7.37704	7.37489e-05	3.27982e-28	3.30204e-09	1.01996e-07	1.36216e-06	1.46284e-08	2.19458e-51	0.0177675	1.47381e-08	6.62919	538.029
2336	352.81	398.838	353.75	1257.81	339.534	890.44	25.9521	128.451	9.96647	0.609391	8.93343	45.3771	3.89102	212.124	191.482	283.253	0.108996	1.52314e-17	10.9867	0.13195	14.1511	1.01073	4.89953	7.37236	7.07522e-05	2.68398e-28	3.03717e-09	9.15612e-08	1.28793e-06	1.37213e-08	1.55451e-51	0.0174751	1.39965e-08	6.63349	538.029
2337	352.635	398.642	353.574	1257.93	339.529	890.51	25.7663	128.521	9.96909	0.610731	8.90032	45.3839	3.89135	212.14	191.499	283.277	0.108993	1.33464e-17	10.985	0.12887	13.9995	0.997996	4.88196	7.36769	6.78799e-05	2.19646e-28	2.7936e-09	8.21954e-08	1.21776e-06	1.28707e-08	1.10113e-51	0.0171879	1.32926e-08	6.63676	538.029
2338	352.452	398.438	353.389	1258.06	339.523	890.584	25.5825	128.591	9.97171	0.612071	8.86734	45.3908	3.89169	212.156	191.517	283.302	0.10899	1.1695e-17	10.9834	0.125866	13.8496	0.985436	4.86447	7.36303	6.51262e-05	1.79756e-28	2.5696e-09	7.37891e-08	1.15142e-06	1.20731e-08	7.79975e-52	0.0169055	1.26242e-08	6.63949	538.029
2339	352.263	398.227	353.198	1258.19	339.518	890.66	25.4007	128.66	9.97433	0.61341	8.83449	45.3978	3.89206	212.172	191.536	283.326	0.108988	1.02482e-17	10.9817	0.122934	13.7014	0.973042	4.84706	7.35837	6.2486e-05	1.47113e-28	2.36359e-09	6.62435e-08	1.08871e-06	1.1325e-08	5.52489e-52	0.016628	1.19897e-08	6.6418	538.029
2340	352.061	398.001	352.996	1258.28	339.513	890.723	25.2204	128.73	9.97695	0.614749	8.80174	45.4013	3.89234	212.186	191.55	283.349	0.108986	8.98001e-18	10.98	0.120068	13.5546	0.960789	4.82969	7.35371	5.99501e-05	1.20394e-28	2.17405e-09	5.94681e-08	1.0294e-06	1.06231e-08	3.91352e-52	0.0163547	1.13867e-08	6.63939	538.029
2341	351.846	397.763	352.785	1258.29	339.508	890.767	25.0414	128.8	9.97957	0.616088	8.76911	45.3998	3.89247	212.196	191.556	283.369	0.108981	7.86824e-18	10.9784	0.117264	13.409	0.948663	4.81234	7.34904	5.75114e-05	9.85185e-29	1.99962e-09	5.33826e-08	9.73288e-07	9.96413e-09	2.77211e-52	0.0160853	1.08135e-08	6.633	538.029
2342	351.637	397.531	352.58	1258.27	339.503	890.8	24.864	128.869	9.9822	0.617426	8.73658	45.3964	3.89254	212.204	191.558	283.386	0.108977	6.89387e-18	10.9767	0.114523	13.2649	0.936676	4.79503	7.34437	5.51693e-05	8.06138e-29	1.83915e-09	4.79184e-08	9.20223e-07	9.34584e-09	1.9636e-52	0.0158201	1.02689e-08	6.62865	538.029
2343	351.441	397.313	352.389	1258.25	339.498	890.831	24.6885	128.939	9.98482	0.618763	8.70418	45.3931	3.89259	212.211	191.559	283.404	0.108972	6.04011e-18	10.975	0.111846	13.1222	0.924838	4.77778	7.3397	5.2922e-05	6.59624e-29	1.69155e-09	4.30133e-08	8.70049e-07	8.76588e-09	1.3909e-52	0.0155591	9.75167e-09	6.62703	538.029
2344	351.259	397.113	352.211	1258.24	339.493	890.867	24.515	129.009	9.98744	0.620101	8.6719	45.3916	3.89267	212.218	191.563	283.421	0.108967	5.29217e-18	10.9734	0.109234	12.9812	0.913156	4.76061	7.33504	5.07674e-05	5.3975e-29	1.55581e-09	3.86108e-08	8.22616e-07	8.222e-09	9.85236e-53	0.0153026	9.26061e-09	6.62814	538.029
2345	351.092	396.927	352.046	1258.28	339.488	890.915	24.3437	129.079	9.99006	0.621438	8.63975	45.3934	3.89283	212.228	191.57	283.44	0.108964	4.63706e-18	10.9717	0.106688	12.8419	0.90164	4.74352	7.33038	4.87038e-05	4.41687e-29	1.431e-09	3.46603e-08	7.77785e-07	7.71212e-09	6.97884e-53	0.0150507	8.79459e-09	6.6324	538.029
2346	350.931	396.748	351.885	1258.36	339.483	890.974	24.1744	129.148	9.99268	0.622774	8.60773	45.3981	3.89307	212.241	191.582	283.461	0.108962	4.06326e-18	10.9701	0.104207	12.7044	0.890289	4.72652	7.32574	4.67275e-05	3.61466e-29	1.31625e-09	3.11152e-08	7.35413e-07	7.23411e-09	4.94341e-53	0.0148034	8.35234e-09	6.63773	538.029
2347	350.767	396.565	351.72	1258.47	339.478	891.041	24.007	129.218	9.9953	0.62411	8.57584	45.4042	3.89337	212.255	191.597	283.483	0.108961	3.5606e-18	10.9684	0.101788	12.5685	0.879094	4.70961	7.32111	4.48336e-05	2.9583e-29	1.21073e-09	2.79336e-08	6.9536e-07	6.78591e-09	3.50163e-53	0.0145605	7.93255e-09	6.64204	538.029
2348	350.596	396.374	351.548	1258.59	339.473	891.112	23.8414	129.288	9.99792	0.625446	8.54407	45.4109	3.89369	212.27	191.614	283.506	0.108961	3.1202e-18	10.9667	0.0994279	12.4341	0.86805	4.69277	7.31648	4.30182e-05	2.42121e-29	1.11369e-09	2.50779e-08	6.57496e-07	6.3656e-09	2.48035e-53	0.0143217	7.53401e-09	6.6453	538.029
2349	350.418	396.175	351.367	1258.72	339.468	891.186	23.6776	129.358	10.0005	0.626781	8.51243	45.4179	3.89404	212.286	191.632	283.529	0.108961	2.73434e-18	10.9651	0.0971254	12.3013	0.857154	4.676	7.31186	4.12776e-05	1.98169e-29	1.02444e-09	2.25146e-08	6.217e-07	5.97141e-09	1.75694e-53	0.0140871	7.15562e-09	6.64803	538.029
2350	350.234	395.968	351.18	1258.85	339.464	891.262	23.5155	129.427	10.0032	0.628116	8.48091	45.4248	3.8944	212.302	191.651	283.553	0.108962	2.39624e-18	10.9634	0.0948577	12.17	0.846401	4.65931	7.30725	3.96085e-05	1.622e-29	9.42353e-10	2.02136e-08	5.87858e-07	5.60172e-09	1.24451e-53	0.0138565	6.79634e-09	6.65034	538.029
2351	350.036	395.747	350.981	1258.94	339.459	891.326	23.3547	129.497	10.0058	0.62945	8.4495	45.4283	3.89467	212.316	191.664	283.574	0.108962	2.09989e-18	10.9618	0.0926199	12.04	0.835771	4.64265	7.30263	3.80051e-05	1.32754e-29	8.66828e-10	1.81473e-08	5.5585e-07	5.25479e-09	8.81542e-54	0.0136293	6.45493e-09	6.64792	538.029
2352	349.826	395.513	350.774	1258.95	339.454	891.369	23.1951	129.567	10.0084	0.630784	8.41818	45.4267	3.89481	212.326	191.67	283.593	0.10896	1.84005e-18	10.9601	0.0904299	11.9111	0.82525	4.62602	7.29801	3.64631e-05	1.08644e-29	7.97321e-10	1.62912e-08	5.25569e-07	4.9291e-09	6.24434e-54	0.0134054	6.13035e-09	6.64151	538.029
2353	349.621	395.286	350.574	1258.93	339.45	891.403	23.0369	129.636	10.011	0.632118	8.38698	45.4233	3.89487	212.333	191.673	283.609	0.108958	1.61232e-18	10.9584	0.0882891	11.7833	0.81485	4.60943	7.29338	3.49819e-05	8.89085e-30	7.33371e-10	1.46246e-08	4.96931e-07	4.6235e-09	4.42313e-54	0.0131849	5.82194e-09	6.63715	538.029
2354	349.429	395.073	350.386	1258.9	339.445	891.435	22.8804	129.706	10.0136	0.633451	8.35589	45.4201	3.89492	212.34	191.674	283.626	0.108955	1.41275e-18	10.9568	0.0861986	11.657	0.804578	4.59289	7.28876	3.35606e-05	7.27571e-30	6.74547e-10	1.31284e-08	4.69852e-07	4.33681e-09	3.13309e-54	0.012968	5.52902e-09	6.63552	538.029
2355	349.252	394.877	350.213	1258.9	339.441	891.471	22.7256	129.776	10.0162	0.634783	8.32492	45.4185	3.895	212.348	191.677	283.642	0.108953	1.23791e-18	10.9551	0.0841587	11.532	0.794441	4.57642	7.28414	3.21978e-05	5.95411e-30	6.20447e-10	1.17855e-08	4.44252e-07	4.06795e-09	2.2193e-54	0.0127547	5.2509e-09	6.63662	538.029
2356	349.09	394.696	350.052	1258.93	339.436	891.519	22.5727	129.846	10.0189	0.636116	8.29407	45.4202	3.89516	212.357	191.684	283.66	0.108952	1.08476e-18	10.9535	0.0821702	11.4086	0.784448	4.56003	7.27953	3.08923e-05	4.87287e-30	5.70704e-10	1.05803e-08	4.20055e-07	3.81588e-09	1.57203e-54	0.0125453	4.98694e-09	6.64088	538.029
2357	348.933	394.521	349.895	1259.02	339.432	891.579	22.4217	129.915	10.0215	0.637448	8.26335	45.4249	3.8954	212.37	191.697	283.68	0.108953	9.506e-19	10.9518	0.080232	11.2867	0.774598	4.54374	7.27493	2.96419e-05	3.98825e-30	5.24965e-10	9.49876e-09	3.97184e-07	3.57956e-09	1.11353e-54	0.0123397	4.73644e-09	6.64621	538.029
2358	348.773	394.342	349.733	1259.12	339.427	891.646	22.2723	129.985	10.0241	0.638779	8.23276	45.431	3.89569	212.384	191.711	283.701	0.108954	8.33066e-19	10.9501	0.0783419	11.1663	0.764883	4.52752	7.27034	2.84436e-05	3.26439e-30	4.82904e-10	8.52803e-09	3.75564e-07	3.35797e-09	7.88762e-55	0.0121377	4.49865e-09	6.65052	538.029
2359	348.606	394.155	349.564	1259.24	339.423	891.717	22.1245	130.055	10.0267	0.64011	8.20228	45.4377	3.89601	212.399	191.728	283.723	0.108956	7.30084e-19	10.9485	0.0764979	11.0472	0.755299	4.51137	7.26576	2.72948e-05	2.672e-30	4.4422e-10	7.65667e-09	3.55126e-07	3.15014e-09	5.58714e-55	0.0119392	4.27288e-09	6.65379	538.029
2360	348.432	393.96	349.387	1259.37	339.419	891.791	21.9783	130.124	10.0293	0.641441	8.17192	45.4447	3.89635	212.414	191.746	283.745	0.108958	6.39848e-19	10.9468	0.0746988	10.9296	0.745843	4.4953	7.26118	2.61932e-05	2.18718e-30	4.08641e-10	6.87448e-09	3.35803e-07	2.95523e-09	3.95761e-55	0.0117441	4.05851e-09	6.65651	538.029
2361	348.252	393.758	349.204	1259.5	339.414	891.868	21.8336	130.194	10.0319	0.642771	8.14168	45.4516	3.89671	212.43	191.764	283.768	0.108961	5.60776e-19	10.9452	0.0729431	10.8132	0.736511	4.47929	7.25661	2.51368e-05	1.79038e-30	3.75917e-10	6.1723e-09	3.17534e-07	2.77242e-09	2.80334e-55	0.0115523	3.85495e-09	6.65882	538.029
2362	348.058	393.541	349.009	1259.59	339.41	891.932	21.6901	130.264	10.0346	0.644101	8.11154	45.455	3.89699	212.444	191.778	283.788	0.108962	4.9146e-19	10.9435	0.0712268	10.698	0.727284	4.46332	7.25204	2.41218e-05	1.46551e-30	3.45806e-10	5.54169e-09	3.00255e-07	2.60085e-09	1.98573e-55	0.0113635	3.66151e-09	6.65639	538.029
2363	347.852	393.311	348.806	1259.6	339.406	891.976	21.5475	130.334	10.0372	0.64543	8.0815	45.4535	3.89712	212.454	191.784	283.806	0.108963	4.30682e-19	10.9419	0.0695469	10.5837	0.718153	4.44737	7.24746	2.31456e-05	1.19947e-30	3.18092e-10	4.97523e-09	2.83907e-07	2.43978e-09	1.40657e-55	0.0111772	3.4776e-09	6.64996	538.029
2364	347.651	393.088	348.609	1259.58	339.402	892.011	21.4063	130.403	10.0398	0.646759	8.05156	45.45	3.89719	212.461	191.786	283.822	0.108962	3.77407e-19	10.9402	0.0679047	10.4705	0.709125	4.43146	7.24288	2.22078e-05	9.81684e-31	2.92594e-10	4.46655e-09	2.68446e-07	2.28864e-09	9.96336e-56	0.0109939	3.30283e-09	6.64558	538.029
2365	347.464	392.88	348.426	1259.55	339.398	892.043	21.2665	130.473	10.0424	0.648088	8.02173	45.4467	3.89723	212.468	191.787	283.837	0.108961	3.30719e-19	10.9386	0.0663009	10.3585	0.700209	4.4156	7.2383	2.13077e-05	8.03431e-31	2.69138e-10	4.00984e-09	2.53826e-07	2.14684e-09	7.05747e-56	0.0108135	3.13684e-09	6.64394	538.029
2366	347.292	392.688	348.256	1259.55	339.393	892.079	21.1282	130.543	10.045	0.649416	7.99201	45.4452	3.89731	212.475	191.79	283.853	0.108961	2.89812e-19	10.9369	0.0647359	10.2477	0.69141	4.39981	7.23372	2.04446e-05	6.57559e-31	2.47565e-10	3.59989e-09	2.40004e-07	2.01386e-09	4.99911e-56	0.0106361	2.97922e-09	6.64504	538.029
2367	347.133	392.511	348.099	1259.58	339.389	892.128	20.9917	130.612	10.0476	0.650744	7.96242	45.4469	3.89746	212.485	191.798	283.87	0.108961	2.53976e-19	10.9353	0.0632102	10.1383	0.682735	4.38409	7.22916	1.96178e-05	5.38204e-31	2.27728e-10	3.23197e-09	2.26939e-07	1.88917e-09	3.54108e-56	0.0104619	2.82962e-09	6.6493	538.029
2368	346.98	392.341	347.945	1259.67	339.385	892.188	20.8568	130.682	10.0502	0.652071	7.93295	45.4515	3.8977	212.497	191.81	283.889	0.108963	2.22583e-19	10.9336	0.0617231	10.0303	0.674184	4.36847	7.2246	1.88258e-05	4.40544e-31	2.09487e-10	2.90177e-09	2.1459e-07	1.77226e-09	2.5083e-56	0.0102909	2.68764e-09	6.65464	538.029
2369	346.824	392.166	347.787	1259.77	339.381	892.256	20.7233	130.752	10.0529	0.653398	7.90359	45.4576	3.89799	212.511	191.825	283.909	0.108966	1.95077e-19	10.932	0.0602727	9.92356	0.66575	4.35291	7.22006	1.80667e-05	3.60622e-31	1.92712e-10	2.60539e-09	2.02916e-07	1.66264e-09	1.77673e-56	0.0101229	2.55285e-09	6.65894	538.029
2370	346.661	391.983	347.621	1259.89	339.377	892.328	20.5913	130.821	10.0555	0.654724	7.87435	45.4643	3.89831	212.526	191.841	283.93	0.108969	1.70975e-19	10.9303	0.0588577	9.81804	0.65743	4.33743	7.21552	1.73388e-05	2.95211e-31	1.77283e-10	2.33933e-09	1.91879e-07	1.55982e-09	1.25854e-56	0.00995776	2.42487e-09	6.66221	538.029
2371	346.491	391.792	347.448	1260.02	339.374	892.403	20.4606	130.891	10.0581	0.65605	7.84522	45.4712	3.89865	212.541	191.859	283.951	0.108973	1.49855e-19	10.9287	0.057477	9.71372	0.64922	4.32201	7.21099	1.66408e-05	2.41671e-31	1.63092e-10	2.10048e-09	1.81445e-07	1.46338e-09	8.91474e-57	0.00979546	2.30335e-09	6.66494	538.029
2372	346.314	391.593	347.268	1260.15	339.37	892.48	20.3313	130.961	10.0607	0.657376	7.8162	45.4781	3.89901	212.558	191.877	283.973	0.108977	1.31346e-19	10.927	0.0561295	9.61059	0.641118	4.30666	7.20646	1.59713e-05	1.97847e-31	1.50038e-10	1.88605e-09	1.71579e-07	1.37293e-09	6.31469e-57	0.0096359	2.18795e-09	6.66724	538.029
2373	346.124	391.38	347.077	1260.24	339.366	892.544	20.203	131.031	10.0633	0.658701	7.78729	45.4816	3.89928	212.571	191.891	283.993	0.10898	1.1512e-19	10.9254	0.0548122	9.50842	0.633107	4.29135	7.20193	1.53281e-05	1.61963e-31	1.38027e-10	1.69346e-09	1.62247e-07	1.28804e-09	4.47296e-57	0.00947876	2.07827e-09	6.6648	538.029
2374	345.923	391.155	346.877	1260.25	339.362	892.589	20.0755	131.1	10.0659	0.660026	7.75846	45.48	3.89941	212.581	191.897	284.01	0.108982	1.00891e-19	10.9237	0.0535227	9.40711	0.625178	4.27605	7.19739	1.47093e-05	1.32576e-31	1.26972e-10	1.52045e-09	1.53419e-07	1.20833e-09	3.16839e-57	0.00932383	1.974e-09	6.65836	538.029
2375	345.726	390.936	346.684	1260.23	339.358	892.624	19.9492	131.17	10.0685	0.66135	7.72974	45.4765	3.89948	212.588	191.899	284.025	0.108982	8.84173e-20	10.9221	0.0522621	9.30675	0.617339	4.26079	7.19285	1.41148e-05	1.08515e-31	1.16799e-10	1.36508e-09	1.45069e-07	1.13354e-09	2.24431e-57	0.00917124	1.8749e-09	6.65397	538.029
2376	345.543	390.732	346.505	1260.2	339.355	892.657	19.8242	131.24	10.0711	0.662674	7.70112	45.4732	3.89952	212.595	191.9	284.04	0.108983	7.74855e-20	10.9204	0.0510309	9.20745	0.609597	4.24558	7.18832	1.35442e-05	8.88199e-32	1.07441e-10	1.22558e-09	1.37172e-07	1.06336e-09	1.58974e-57	0.00902112	1.78077e-09	6.65231	538.029
2377	345.374	390.545	346.339	1260.19	339.351	892.694	19.7006	131.309	10.0738	0.663998	7.6726	45.4716	3.8996	212.602	191.903	284.054	0.108984	6.79063e-20	10.9188	0.0498294	9.10926	0.601956	4.23044	7.18378	1.2997e-05	7.2701e-32	9.88338e-11	1.10035e-09	1.29707e-07	9.97545e-10	1.12608e-57	0.00887354	1.69139e-09	6.65341	538.029
2378	345.219	390.372	346.184	1260.23	339.347	892.743	19.5785	131.379	10.0764	0.665321	7.64421	45.4733	3.89975	212.611	191.91	284.071	0.108985	5.95142e-20	10.9171	0.048658	9.01227	0.594423	4.21537	7.17926	1.24727e-05	5.9511e-32	9.09188e-11	9.87952e-10	1.2265e-07	9.35832e-10	7.97649e-58	0.0087286	1.60655e-09	6.65766	538.029
2379	345.07	390.205	346.034	1260.31	339.344	892.804	19.4578	131.449	10.079	0.666644	7.61593	45.4779	3.89999	212.624	191.922	284.089	0.108989	5.21618e-20	10.9155	0.0475161	8.91648	0.586997	4.20038	7.17475	1.19704e-05	4.87174e-32	8.36404e-11	8.87072e-10	1.1598e-07	8.77967e-10	5.65009e-58	0.00858628	1.52602e-09	6.663	538.029
2380	344.918	390.034	345.88	1260.41	339.34	892.872	19.3384	131.518	10.0816	0.667966	7.58776	45.484	3.90027	212.637	191.937	284.109	0.108992	4.57195e-20	10.9138	0.0464024	8.82182	0.579673	4.18547	7.17025	1.14889e-05	3.98833e-32	7.69464e-11	7.96518e-10	1.09674e-07	8.23702e-10	4.0022e-58	0.00844645	1.44957e-09	6.66731	538.029
2381	344.758	389.855	345.717	1260.53	339.336	892.944	19.2203	131.588	10.0842	0.669288	7.55971	45.4907	3.90059	212.652	191.953	284.129	0.108997	4.00739e-20	10.9122	0.0453158	8.72826	0.572447	4.17062	7.16575	1.10272e-05	3.26524e-32	7.07893e-11	7.15223e-10	1.03712e-07	7.72805e-10	2.83493e-58	0.00830902	1.37698e-09	6.67058	538.029
2382	344.592	389.667	345.547	1260.66	339.333	893.02	19.1034	131.658	10.0868	0.67061	7.53176	45.4976	3.90093	212.667	191.971	284.15	0.109001	3.51263e-20	10.9105	0.0442555	8.63576	0.565316	4.15583	7.16126	1.05844e-05	2.67252e-32	6.51259e-11	6.42237e-10	9.80752e-08	7.25064e-10	2.0081e-58	0.00817393	1.30805e-09	6.67331	538.029
2383	344.419	389.473	345.371	1260.79	339.329	893.098	18.9877	131.727	10.0894	0.671931	7.50392	45.5045	3.90129	212.683	191.989	284.171	0.109007	3.07901e-20	10.9089	0.0432206	8.5443	0.558279	4.14111	7.15678	1.01597e-05	2.18664e-32	5.99163e-11	5.76709e-10	9.27456e-08	6.80282e-10	1.42242e-58	0.00804113	1.24258e-09	6.67561	538.029
2384	344.232	389.264	345.183	1260.88	339.326	893.163	18.8728	131.797	10.092	0.673252	7.47617	45.5079	3.90156	212.697	192.003	284.19	0.109011	2.69883e-20	10.9072	0.0422088	8.4537	0.551321	4.12642	7.15229	9.7515e-06	1.78957e-32	5.51223e-11	5.17853e-10	8.77043e-08	6.38251e-10	1.00756e-58	0.00791033	1.18036e-09	6.67316	538.029
2385	344.035	389.043	344.987	1260.89	339.322	893.208	18.7586	131.867	10.0946	0.674572	7.44851	45.5063	3.90169	212.706	192.009	284.207	0.109013	2.36544e-20	10.9056	0.0412183	8.36386	0.544434	4.11175	7.1478	9.35882e-06	1.46501e-32	5.07097e-11	4.64977e-10	8.29346e-08	5.98788e-10	7.13698e-59	0.00778136	1.1212e-09	6.6667	538.029
2386	343.842	388.828	344.797	1260.87	339.319	893.244	18.6455	131.936	10.0973	0.675892	7.42095	45.5028	3.90175	212.713	192.01	284.221	0.109015	2.07315e-20	10.904	0.04025	8.27486	0.537625	4.09711	7.1433	8.98153e-06	1.19925e-32	4.66493e-11	4.17489e-10	7.84232e-08	5.61751e-10	5.05543e-59	0.00765434	1.06498e-09	6.66229	538.029
2387	343.663	388.628	344.621	1260.84	339.316	893.277	18.5336	132.006	10.0999	0.677211	7.39349	45.4995	3.90179	212.72	192.012	284.235	0.109016	1.81697e-20	10.9023	0.0393041	8.18679	0.530899	4.08253	7.13881	8.61934e-06	9.81691e-33	4.29138e-11	3.74847e-10	7.41569e-08	5.27002e-10	3.58098e-59	0.00752936	1.01157e-09	6.66063	538.029
2388	343.498	388.444	344.459	1260.83	339.312	893.315	18.4229	132.076	10.1025	0.67853	7.36613	45.4979	3.90187	212.727	192.014	284.249	0.109018	1.59246e-20	10.9007	0.0383811	8.0997	0.524262	4.068	7.13432	8.27196e-06	8.03616e-33	3.94778e-11	3.36566e-10	7.01232e-08	4.94409e-10	2.53656e-59	0.0074065	9.60848e-10	6.66172	538.029
2389	343.346	388.275	344.308	1260.87	339.309	893.364	18.3135	132.145	10.1051	0.679849	7.33889	45.4995	3.90202	212.737	192.021	284.265	0.10902	1.39577e-20	10.899	0.0374811	8.01368	0.517718	4.05355	7.12984	7.9391e-06	6.57884e-33	3.6318e-11	3.02205e-10	6.63103e-08	4.63846e-10	1.79675e-59	0.00728583	9.12703e-10	6.66597	538.029
2390	343.201	388.111	344.16	1260.95	339.306	893.426	18.2054	132.215	10.1077	0.681167	7.31175	45.5042	3.90225	212.749	192.033	284.283	0.109024	1.22343e-20	10.8974	0.0366037	7.92872	0.511266	4.03917	7.12537	7.62019e-06	5.38454e-33	3.34122e-11	2.71364e-10	6.2706e-08	4.35188e-10	1.27272e-59	0.00716733	8.67004e-10	6.67131	538.029
2391	343.052	387.944	344.009	1261.05	339.302	893.495	18.0985	132.285	10.1103	0.682485	7.28473	45.5102	3.90254	212.762	192.048	284.302	0.109029	1.07241e-20	10.8958	0.035748	7.84477	0.504903	4.02486	7.12091	7.31445e-06	4.40564e-33	3.07396e-11	2.43678e-10	5.92985e-08	4.08311e-10	9.01518e-60	0.0070509	8.23615e-10	6.67563	538.029
2392	342.896	387.769	343.85	1261.17	339.299	893.568	17.9926	132.354	10.1129	0.683802	7.25781	45.5168	3.90285	212.777	192.064	284.321	0.109034	9.40054e-21	10.8941	0.0349129	7.76178	0.498625	4.01062	7.11646	7.02124e-06	3.60483e-33	2.82812e-11	2.18821e-10	5.60769e-08	3.83101e-10	6.38584e-60	0.00693647	7.82414e-10	6.6789	538.029
2393	342.733	387.585	343.683	1261.3	339.296	893.644	17.8879	132.424	10.1155	0.685119	7.23099	45.5237	3.90319	212.792	192.082	284.342	0.109039	8.24055e-21	10.8925	0.0340981	7.67973	0.49243	3.99644	7.11201	6.74001e-06	2.94968e-33	2.60199e-11	1.96503e-10	5.30308e-08	3.59453e-10	4.52336e-60	0.00682398	7.43287e-10	6.68162	538.029
2394	342.563	387.394	343.51	1261.43	339.293	893.722	17.7842	132.494	10.1181	0.686436	7.20428	45.5306	3.90355	212.808	192.1	284.362	0.109045	7.22384e-21	10.8908	0.0333027	7.5986	0.486315	3.98232	7.10757	6.47022e-06	2.41366e-33	2.39396e-11	1.76465e-10	5.01506e-08	3.3727e-10	3.20409e-60	0.00671339	7.06126e-10	6.68393	538.029
2395	342.381	387.188	343.325	1261.51	339.29	893.789	17.6812	132.563	10.1207	0.687752	7.17765	45.534	3.90382	212.822	192.114	284.381	0.10905	6.33237e-21	10.8892	0.0325251	7.51823	0.48027	3.96823	7.10312	6.21093e-06	1.97497e-33	2.20252e-11	1.58465e-10	4.74261e-08	3.16448e-10	2.26959e-60	0.00660447	6.70807e-10	6.68147	538.029
2396	342.187	386.971	343.132	1261.52	339.287	893.834	17.5788	132.633	10.1233	0.689068	7.15112	45.5324	3.90395	212.831	192.119	284.397	0.109053	5.55052e-21	10.8876	0.0317638	7.43853	0.474286	3.95415	7.09867	5.96145e-06	1.61634e-33	2.0263e-11	1.42294e-10	4.48483e-08	2.96898e-10	1.60765e-60	0.00649706	6.3722e-10	6.675	538.029
2397	341.998	386.76	342.946	1261.5	339.283	893.871	17.4774	132.703	10.1259	0.690383	7.12467	45.5289	3.904	212.838	192.121	284.411	0.109055	4.86504e-21	10.8859	0.0310194	7.35958	0.468369	3.94012	7.09422	5.72171e-06	1.32327e-33	1.86414e-11	1.27769e-10	4.24101e-08	2.78548e-10	1.13877e-60	0.00639127	6.053e-10	6.67057	538.029
2398	341.822	386.564	342.773	1261.47	339.28	893.905	17.377	132.772	10.1285	0.691698	7.09832	45.5256	3.90405	212.844	192.122	284.424	0.109057	4.26418e-21	10.8843	0.0302923	7.28145	0.462524	3.92612	7.08977	5.49155e-06	1.08332e-33	1.71495e-11	1.14726e-10	4.01042e-08	2.61331e-10	8.06636e-61	0.00628718	5.74975e-10	6.6689	538.029
2399	341.661	386.384	342.614	1261.47	339.277	893.943	17.2777	132.842	10.1312	0.693012	7.07207	45.5239	3.90412	212.851	192.125	284.438	0.109059	3.73758e-21	10.8827	0.0295827	7.20419	0.456756	3.91219	7.08532	5.27078e-06	8.86898e-34	1.57771e-11	1.03016e-10	3.7924e-08	2.45181e-10	5.71374e-61	0.00618484	5.46177e-10	6.66998	538.029
2400	341.512	386.218	342.466	1261.5	339.274	893.993	17.1796	132.912	10.1338	0.694327	7.04593	45.5256	3.90427	212.861	192.132	284.453	0.109063	3.27617e-21	10.881	0.0288907	7.12787	0.451069	3.89832	7.08088	5.05921e-06	7.25916e-34	1.4515e-11	9.25046e-11	3.5863e-08	2.30037e-10	4.04729e-61	0.00608433	5.18839e-10	6.67423	538.029
2401	341.37	386.058	342.322	1261.58	339.271	894.055	17.0827	132.981	10.1364	0.69564	7.01989	45.5302	3.9045	212.873	192.144	284.47	0.109067	2.87187e-21	10.8794	0.0282161	7.05249	0.445462	3.88453	7.07645	4.85649e-06	5.93976e-34	1.33543e-11	8.30693e-11	3.39148e-08	2.15836e-10	2.86687e-61	0.00598562	4.92888e-10	6.67958	538.029
2402	341.225	385.895	342.174	1261.69	339.268	894.125	16.9868	133.051	10.139	0.696954	6.99396	45.5362	3.90478	212.886	192.158	284.489	0.109072	2.51756e-21	10.8778	0.0275581	6.978	0.439932	3.87081	7.07204	4.66212e-06	4.86041e-34	1.22867e-11	7.45985e-11	3.20729e-08	2.02516e-10	2.03072e-61	0.00588864	4.68248e-10	6.68389	538.029
2403	341.072	385.722	342.018	1261.81	339.266	894.199	16.8918	133.121	10.1416	0.698266	6.96813	45.5428	3.9051	212.901	192.175	284.508	0.109078	2.20701e-21	10.8761	0.026916	6.90437	0.434476	3.85715	7.06762	4.4757e-06	3.97734e-34	1.13046e-11	6.6993e-11	3.03313e-08	1.90022e-10	1.43845e-61	0.00579331	4.44848e-10	6.68717	538.029
2404	340.912	385.542	341.854	1261.93	339.263	894.276	16.7978	133.19	10.1442	0.699579	6.94239	45.5497	3.90544	212.916	192.192	284.528	0.109084	1.93482e-21	10.8745	0.0262894	6.83157	0.429091	3.84354	7.06322	4.29687e-06	3.25482e-34	1.04012e-11	6.01641e-11	2.86846e-08	1.78302e-10	1.01891e-61	0.0056996	4.22626e-10	6.68989	538.029
2405	340.746	385.354	341.683	1262.06	339.26	894.355	16.7047	133.26	10.1468	0.700891	6.91676	45.5566	3.90579	212.932	192.21	284.548	0.10909	1.69623e-21	10.8729	0.0256777	6.75958	0.423777	3.82999	7.05882	4.1253e-06	2.66361e-34	9.5701e-12	5.40321e-11	2.71276e-08	1.67306e-10	7.21739e-62	0.00560746	4.01519e-10	6.6922	538.029
2406	340.566	385.153	341.502	1262.15	339.257	894.421	16.6123	133.33	10.1494	0.702203	6.89122	45.5599	3.90606	212.945	192.224	284.566	0.109095	1.48702e-21	10.8712	0.0250796	6.68827	0.418522	3.81648	7.05442	3.9604e-06	2.17971e-34	8.80522e-12	4.85238e-11	2.56547e-08	1.56986e-10	5.11239e-62	0.00551671	3.81457e-10	6.68973	538.029
2407	340.376	384.939	341.313	1262.16	339.254	894.468	16.5204	133.399	10.152	0.703514	6.86575	45.5583	3.90618	212.954	192.229	284.581	0.109099	1.30352e-21	10.8696	0.024494	6.61754	0.41332	3.80298	7.05001	3.80171e-06	1.78355e-34	8.10112e-12	4.35746e-11	2.4261e-08	1.47294e-10	3.62132e-62	0.00542721	3.62378e-10	6.68324	538.029
2408	340.19	384.732	341.13	1262.13	339.251	894.505	16.4293	133.469	10.1546	0.704825	6.84037	45.5548	3.90624	212.961	192.231	284.595	0.109102	1.14262e-21	10.868	0.0239215	6.54748	0.408177	3.78951	7.04559	3.6492e-06	1.45932e-34	7.45315e-12	3.91291e-11	2.29427e-08	1.38198e-10	2.56514e-62	0.00533907	3.44244e-10	6.6788	538.029
2409	340.018	384.539	340.96	1262.1	339.249	894.539	16.3391	133.539	10.1572	0.706135	6.81509	45.5514	3.90628	212.967	192.232	284.608	0.109104	1.00157e-21	10.8663	0.0233621	6.47815	0.403096	3.77608	7.04118	3.50278e-06	1.19402e-34	6.85698e-12	3.51369e-11	2.1696e-08	1.29663e-10	1.81699e-62	0.00525233	3.27016e-10	6.67712	538.029
2410	339.86	384.363	340.804	1262.1	339.246	894.579	16.2499	133.608	10.1598	0.707445	6.7899	45.5498	3.90635	212.975	192.235	284.621	0.109107	8.77952e-22	10.8647	0.0228162	6.40958	0.398082	3.76272	7.03678	3.3623e-06	9.7697e-35	6.30856e-12	3.15524e-11	2.05172e-08	1.21656e-10	1.28705e-62	0.00516705	3.10654e-10	6.67819	538.029
2411	339.715	384.201	340.659	1262.13	339.243	894.629	16.1619	133.678	10.1624	0.708755	6.76482	45.5514	3.9065	212.984	192.242	284.636	0.10911	7.69625e-22	10.8631	0.0222839	6.34185	0.393138	3.74942	7.03238	3.22768e-06	7.99424e-35	5.80417e-12	2.83346e-11	1.94028e-08	1.14147e-10	9.11675e-63	0.00508329	2.95121e-10	6.68244	538.029
2412	339.576	384.044	340.518	1262.21	339.24	894.692	16.0748	133.748	10.165	0.710064	6.73983	45.556	3.90673	212.996	192.253	284.653	0.109115	6.74698e-22	10.8614	0.0217649	6.27496	0.388263	3.73619	7.028	3.09866e-06	6.5419e-35	5.34029e-12	2.54461e-11	1.83493e-08	1.07106e-10	6.45778e-63	0.00500103	2.80375e-10	6.6878	538.029
2413	339.434	383.884	340.372	1262.32	339.238	894.763	15.9886	133.817	10.1676	0.711373	6.71495	45.562	3.90701	213.009	192.268	284.671	0.109121	5.91502e-22	10.8598	0.0212586	6.20885	0.383455	3.72302	7.02362	2.97495e-06	5.35367e-35	4.91359e-12	2.28527e-11	1.73533e-08	1.00501e-10	4.57432e-63	0.0049202	2.66374e-10	6.69211	538.029
2414	339.284	383.715	340.219	1262.43	339.235	894.837	15.9033	133.887	10.1702	0.712681	6.69016	45.5686	3.90733	213.023	192.284	284.69	0.109127	5.18578e-22	10.8582	0.0207645	6.14349	0.378711	3.70991	7.01925	2.85629e-06	4.38142e-35	4.52106e-12	2.0524e-11	1.64116e-08	9.43059e-11	3.24019e-63	0.00484075	2.53077e-10	6.69539	538.029
2415	339.127	383.538	340.058	1262.56	339.233	894.915	15.8188	133.957	10.1728	0.713989	6.66547	45.5755	3.90766	213.039	192.302	284.709	0.109133	4.54655e-22	10.8566	0.0202822	6.07888	0.374029	3.69686	7.01488	2.74245e-06	3.58584e-35	4.15995e-12	1.8433e-11	1.55211e-08	8.84937e-11	2.29516e-63	0.00476264	2.40447e-10	6.69812	538.029
2416	338.964	383.353	339.891	1262.69	339.23	894.994	15.7352	134.026	10.1754	0.715296	6.64087	45.5823	3.90801	213.054	192.32	284.729	0.10914	3.9862e-22	10.8549	0.0198115	6.01498	0.369409	3.68386	7.01053	2.63322e-06	2.93481e-35	3.82773e-12	1.65553e-11	1.4679e-08	8.30409e-11	1.62576e-63	0.00468584	2.28451e-10	6.70042	538.029
2417	338.788	383.155	339.712	1262.77	339.227	895.062	15.6521	134.096	10.178	0.716604	6.61636	45.5857	3.90828	213.068	192.333	284.747	0.109145	3.4948e-22	10.8533	0.0193512	5.95169	0.364839	3.67089	7.00616	2.52821e-06	2.40188e-35	3.52197e-12	1.48685e-11	1.38824e-08	7.79222e-11	1.1516e-63	0.0046102	2.17048e-10	6.69795	538.029
2418	338.601	382.945	339.526	1262.78	339.225	895.109	15.5694	134.165	10.1806	0.71791	6.59193	45.584	3.90841	213.077	192.339	284.762	0.109149	3.06376e-22	10.8517	0.0189005	5.88891	0.360316	3.65794	7.0018	2.42716e-06	1.96553e-35	3.24049e-12	1.33528e-11	1.31287e-08	7.31155e-11	8.15724e-64	0.00453559	2.06204e-10	6.69144	538.029
2419	338.419	382.741	339.346	1262.76	339.222	895.146	15.4875	134.235	10.1832	0.719217	6.56757	45.5805	3.90846	213.084	192.34	284.775	0.109152	2.68579e-22	10.85	0.0184598	5.82672	0.355844	3.64502	6.99742	2.33004e-06	1.60838e-35	2.98144e-12	1.19913e-11	1.24157e-08	6.86037e-11	5.77812e-64	0.00446211	1.95896e-10	6.68699	538.029
2420	338.249	382.552	339.179	1262.73	339.22	895.182	15.4064	134.305	10.1858	0.720523	6.54331	45.5771	3.9085	213.09	192.341	284.787	0.109155	2.35443e-22	10.8484	0.0180292	5.76517	0.351425	3.63214	6.99305	2.23677e-06	1.31611e-35	2.74309e-12	1.07685e-11	1.17414e-08	6.43699e-11	4.09289e-64	0.0043898	1.86103e-10	6.68529	538.029
2421	338.095	382.379	339.026	1262.72	339.217	895.222	15.3262	134.374	10.1884	0.721828	6.51914	45.5755	3.90857	213.097	192.344	284.8	0.109158	2.06398e-22	10.8468	0.017609	5.7043	0.347065	3.61931	6.98869	2.14729e-06	1.07698e-35	2.52381e-12	9.67051e-12	1.11038e-08	6.03981e-11	2.89916e-64	0.0043187	1.76801e-10	6.68636	538.029
2422	337.953	382.22	338.884	1262.76	339.215	895.273	15.247	134.444	10.191	0.723133	6.49507	45.5771	3.90872	213.106	192.351	284.815	0.109162	1.80945e-22	10.8452	0.0171991	5.64417	0.342765	3.60655	6.98433	2.06152e-06	8.81344e-36	2.32214e-12	8.68482e-12	1.0501e-08	5.66732e-11	2.0536e-64	0.00424887	1.6797e-10	6.69061	538.029
2423	337.817	382.067	338.746	1262.84	339.212	895.337	15.1687	134.514	10.1936	0.724438	6.4711	45.5817	3.90895	213.118	192.362	284.831	0.109167	1.58639e-22	10.8436	0.0167996	5.58479	0.338526	3.59385	6.97999	1.97932e-06	7.21298e-36	2.13664e-12	7.79993e-12	9.9312e-09	5.31799e-11	1.45465e-64	0.00418028	1.59586e-10	6.69597	538.029
2424	337.677	381.909	338.603	1262.94	339.21	895.408	15.0911	134.583	10.1962	0.725742	6.44722	45.5877	3.90923	213.131	192.377	284.849	0.109173	1.39088e-22	10.8419	0.0164097	5.52609	0.334344	3.58122	6.97565	1.9005e-06	5.90345e-36	1.96601e-12	7.0054e-12	9.39243e-09	4.99031e-11	1.03039e-64	0.00411289	1.51625e-10	6.70029	538.029
2425	337.53	381.744	338.452	1263.06	339.208	895.483	15.0144	134.653	10.1988	0.727046	6.42343	45.5943	3.90954	213.145	192.393	284.867	0.109179	1.21949e-22	10.8403	0.0160293	5.46807	0.330218	3.56864	6.97132	1.82488e-06	4.83183e-36	1.80904e-12	6.29195e-12	8.88298e-09	4.68292e-11	7.29871e-65	0.00404664	1.44064e-10	6.70357	538.029
2426	337.377	381.57	338.294	1263.18	339.205	895.561	14.9383	134.722	10.2014	0.728349	6.39974	45.6011	3.90988	213.16	192.41	284.886	0.109186	1.06925e-22	10.8387	0.0156579	5.4107	0.326146	3.55612	6.967	1.75232e-06	3.95487e-36	1.66462e-12	5.65126e-12	8.40125e-09	4.39453e-11	5.16999e-65	0.0039815	1.36882e-10	6.7063	538.029
2427	337.216	381.388	338.13	1263.31	339.203	895.642	14.8631	134.792	10.204	0.729653	6.37614	45.6079	3.91023	213.176	192.428	284.906	0.109193	9.37535e-23	10.8371	0.0152955	5.35398	0.322127	3.54365	6.96268	1.6827e-06	3.23715e-36	1.53176e-12	5.07589e-12	7.94571e-09	4.12395e-11	3.66212e-65	0.00391746	1.3006e-10	6.7086	538.029
2428	337.043	381.193	337.954	1263.4	339.201	895.71	14.7882	134.862	10.2066	0.730955	6.35261	45.6113	3.91049	213.189	192.442	284.923	0.109198	8.2202e-23	10.8354	0.0149409	5.29777	0.318152	3.5312	6.95836	1.61577e-06	2.64958e-36	1.40946e-12	4.55899e-12	7.51476e-09	3.86994e-11	2.59404e-65	0.00385438	1.23575e-10	6.70612	538.029
2429	336.859	380.987	337.771	1263.41	339.198	895.758	14.7138	134.931	10.2092	0.732257	6.32917	45.6096	3.91061	213.198	192.447	284.938	0.109203	7.20688e-23	10.8338	0.0145938	5.24203	0.314218	3.51878	6.95403	1.55134e-06	2.16845e-36	1.29688e-12	4.09449e-12	7.10698e-09	3.63141e-11	1.83747e-65	0.00379216	1.17407e-10	6.6996	538.029
2430	336.68	380.786	337.594	1263.38	339.196	895.796	14.64	135.001	10.2118	0.733559	6.3058	45.6061	3.91067	213.205	192.449	284.951	0.109206	6.31825e-23	10.8322	0.0142544	5.18681	0.310327	3.50638	6.9497	1.48941e-06	1.77461e-36	1.19326e-12	3.67721e-12	6.72123e-09	3.40749e-11	1.30155e-65	0.00373088	1.11544e-10	6.69513	538.029
2431	336.514	380.601	337.43	1263.35	339.194	895.832	14.567	135.071	10.2144	0.734861	6.28252	45.6027	3.91071	213.211	192.45	284.963	0.109209	5.53914e-23	10.8306	0.0139227	5.13215	0.306483	3.49402	6.94537	1.42994e-06	1.45227e-36	1.09792e-12	3.30243e-12	6.35639e-09	3.19736e-11	9.21947e-66	0.00367056	1.05974e-10	6.69342	538.029
2432	336.363	380.431	337.28	1263.34	339.192	895.872	14.4947	135.14	10.217	0.736162	6.25932	45.601	3.91077	213.218	192.452	284.976	0.109212	4.85618e-23	10.829	0.013599	5.07811	0.30269	3.48171	6.94105	1.37288e-06	1.18851e-36	1.0102e-12	2.96589e-12	6.0114e-09	3.00023e-11	6.53054e-66	0.00361126	1.00682e-10	6.69449	538.029
2433	336.224	380.275	337.14	1263.38	339.189	895.925	14.4234	135.21	10.2196	0.737462	6.23622	45.6026	3.91092	213.227	192.459	284.99	0.109216	4.25762e-23	10.8273	0.0132833	5.02471	0.298949	3.46946	6.93674	1.31818e-06	9.72717e-37	9.29517e-13	2.66374e-12	5.68525e-09	2.81534e-11	4.62586e-66	0.00355301	9.56585e-11	6.69874	538.029
2434	336.091	380.125	337.005	1263.46	339.187	895.989	14.3528	135.279	10.2222	0.738763	6.21322	45.6071	3.91115	213.239	192.471	285.006	0.109221	3.73303e-23	10.8257	0.0129754	4.97197	0.295261	3.45728	6.93243	1.26575e-06	7.96157e-37	8.55307e-13	2.39248e-12	5.37691e-09	2.64193e-11	3.27669e-66	0.0034958	9.08889e-11	6.7041	538.029
2435	335.954	379.97	336.865	1263.56	339.185	896.061	14.283	135.349	10.2248	0.740062	6.1903	45.6131	3.91143	213.252	192.485	285.023	0.109227	3.2732e-23	10.8241	0.0126751	4.91985	0.291623	3.44516	6.92814	1.21546e-06	6.51677e-37	7.8704e-13	2.1489e-12	5.08536e-09	2.47927e-11	2.32102e-66	0.00343958	8.63594e-11	6.70843	538.029
2436	335.81	379.808	336.717	1263.68	339.183	896.136	14.2138	135.419	10.2274	0.741362	6.16748	45.6197	3.91174	213.266	192.501	285.041	0.109234	2.87008e-23	10.8225	0.0123819	4.86832	0.288033	3.43309	6.92385	1.16722e-06	5.33435e-37	7.24234e-13	1.93017e-12	4.80968e-09	2.32667e-11	1.64408e-66	0.00338431	8.20573e-11	6.7117	538.029
2437	335.659	379.637	336.561	1263.8	339.181	896.215	14.1453	135.488	10.23	0.742661	6.14474	45.6265	3.91207	213.281	192.518	285.06	0.109241	2.51667e-23	10.8209	0.0120958	4.81738	0.28449	3.42107	6.91956	1.12093e-06	4.3666e-37	6.66449e-13	1.73373e-12	4.54899e-09	2.1835e-11	1.16457e-66	0.00332998	7.79709e-11	6.71443	538.029
2438	335.502	379.459	336.399	1263.93	339.179	896.296	14.0774	135.558	10.2326	0.743959	6.12209	45.6334	3.91242	213.297	192.536	285.079	0.109248	2.20682e-23	10.8193	0.0118165	4.76699	0.280993	3.4091	6.91528	1.0765e-06	3.57452e-37	6.13282e-13	1.55731e-12	4.30247e-09	2.04916e-11	8.24914e-67	0.00327655	7.4089e-11	6.71674	538.029
2439	335.331	379.266	336.226	1264.02	339.176	896.365	14.0099	135.627	10.2352	0.745258	6.09952	45.6367	3.91268	213.31	192.55	285.097	0.109254	1.93506e-23	10.8176	0.0115433	4.71708	0.277534	3.39716	6.911	1.03378e-06	2.926e-37	5.64346e-13	1.3988e-12	4.06924e-09	1.92304e-11	5.84322e-67	0.00322391	7.03986e-11	6.71425	538.029
2440	335.15	379.063	336.046	1264.02	339.174	896.414	13.9428	135.697	10.2378	0.746555	6.07702	45.635	3.91281	213.319	192.555	285.111	0.109258	1.69665e-23	10.816	0.0112757	4.66757	0.27411	3.38523	6.90672	9.92663e-07	2.39492e-37	5.19291e-13	1.25636e-12	3.84855e-09	1.8046e-11	4.139e-67	0.003172	6.68885e-11	6.70771	538.029
2441	334.974	378.866	335.872	1264	339.172	896.453	13.8762	135.767	10.2404	0.747853	6.05459	45.6315	3.91286	213.326	192.557	285.123	0.109261	1.48755e-23	10.8144	0.0110141	4.61852	0.270725	3.37333	6.90243	9.53134e-07	1.96013e-37	4.77822e-13	1.12839e-12	3.63977e-09	1.69341e-11	2.93183e-67	0.00312087	6.35518e-11	6.70323	538.029
2442	334.812	378.684	335.711	1263.97	339.17	896.49	13.8103	135.836	10.243	0.74915	6.03225	45.6281	3.9129	213.332	192.557	285.135	0.109264	1.30422e-23	10.8128	0.0107585	4.56997	0.26738	3.36147	6.89814	9.15168e-07	1.60426e-37	4.39663e-13	1.01344e-12	3.4423e-09	1.58906e-11	2.07674e-67	0.00307054	6.03812e-11	6.70152	538.029
2443	334.663	378.517	335.563	1263.96	339.168	896.531	13.7452	135.906	10.2456	0.750446	6.00999	45.6264	3.91296	213.338	192.56	285.148	0.109268	1.14349e-23	10.8112	0.0105089	4.52196	0.264078	3.34966	6.89385	8.78736e-07	1.31302e-37	4.04555e-13	9.1022e-13	3.25558e-09	1.49116e-11	1.47104e-67	0.00302105	5.73694e-11	6.70258	538.029
2444	334.527	378.364	335.427	1263.99	339.166	896.584	13.6808	135.976	10.2482	0.751742	5.98783	45.6279	3.91311	213.348	192.566	285.162	0.109272	1.00262e-23	10.8096	0.0102655	4.47454	0.260823	3.33791	6.88958	8.43808e-07	1.07472e-37	3.72262e-13	8.17542e-13	3.07904e-09	1.39934e-11	1.042e-67	0.00297244	5.45098e-11	6.70683	538.029
2445	334.396	378.217	335.294	1264.07	339.164	896.649	13.6171	136.045	10.2508	0.753038	5.96575	45.6325	3.91334	213.359	192.578	285.178	0.109277	8.79153e-24	10.808	0.0100282	4.42769	0.257613	3.32622	6.88531	8.10327e-07	8.79735e-38	3.42557e-13	7.34331e-13	2.91213e-09	1.31322e-11	7.38094e-68	0.0029247	5.17947e-11	6.7122	538.029
2446	334.262	378.065	335.156	1264.18	339.162	896.721	13.5541	136.115	10.2533	0.754333	5.94376	45.6384	3.91361	213.372	192.592	285.195	0.109283	7.70915e-24	10.8064	0.00979666	4.38139	0.254447	3.31458	6.88106	7.78213e-07	7.20158e-38	3.1523e-13	6.59608e-13	2.75432e-09	1.23242e-11	5.22823e-68	0.00287778	4.92162e-11	6.71652	538.029
2447	334.121	377.905	335.011	1264.29	339.16	896.798	13.4917	136.184	10.2559	0.755628	5.92186	45.645	3.91392	213.386	192.608	285.213	0.10929	6.76022e-24	10.8047	0.00957065	4.33561	0.251322	3.303	6.87681	7.474e-07	5.89549e-38	2.90088e-13	5.92502e-13	2.60509e-09	1.15662e-11	3.70338e-68	0.00283165	4.67669e-11	6.7198	538.029
2448	333.972	377.737	334.858	1264.42	339.158	896.877	13.4298	136.254	10.2585	0.756923	5.90004	45.6518	3.91425	213.401	192.625	285.231	0.109297	5.92822e-24	10.8031	0.00935003	4.29035	0.248238	3.29147	6.87256	7.1783e-07	4.82641e-38	2.66955e-13	5.32233e-13	2.46396e-09	1.0855e-11	2.62326e-68	0.0027863	4.44403e-11	6.72253	538.029
2449	333.818	377.562	334.698	1264.55	339.156	896.959	13.3686	136.324	10.2611	0.758217	5.8783	45.6586	3.9146	213.417	192.643	285.25	0.109304	5.19872e-24	10.8015	0.00913463	4.24559	0.245194	3.27998	6.86833	6.89448e-07	3.95131e-38	2.4567e-13	4.78103e-13	2.3305e-09	1.01877e-11	1.85817e-68	0.00274171	4.22301e-11	6.72484	538.029
2450	333.65	377.373	334.528	1264.63	339.155	897.029	13.3076	136.393	10.2637	0.759511	5.85664	45.662	3.91486	213.43	192.657	285.267	0.10931	4.55885e-24	10.7999	0.00892395	4.20124	0.242184	3.26852	6.86408	6.62157e-07	3.23474e-38	2.26077e-13	4.29466e-13	2.20424e-09	9.56116e-12	1.31622e-68	0.00269777	4.01288e-11	6.72234	538.029
2451	333.472	377.173	334.35	1264.64	339.153	897.078	13.2469	136.463	10.2663	0.760804	5.83505	45.6603	3.91499	213.439	192.662	285.281	0.109315	3.99745e-24	10.7983	0.00871764	4.15726	0.239204	3.25707	6.85984	6.35883e-07	2.64788e-38	2.08038e-13	3.85755e-13	2.08476e-09	8.97272e-12	9.32334e-69	0.00265444	3.813e-11	6.71579	538.029
2452	333.299	376.979	334.179	1264.61	339.151	897.118	13.1868	136.532	10.2689	0.762097	5.81353	45.6567	3.91504	213.445	192.664	285.293	0.109318	3.50506e-24	10.7967	0.00851586	4.11368	0.236256	3.24565	6.85559	6.10623e-07	2.16738e-38	1.91433e-13	3.46483e-13	1.97172e-09	8.4203e-12	6.60412e-69	0.00261175	3.62298e-11	6.7113	538.029
2453	333.139	376.8	334.021	1264.58	339.149	897.155	13.1273	136.602	10.2715	0.76339	5.79209	45.6533	3.91507	213.451	192.664	285.305	0.109321	3.0733e-24	10.7951	0.0083187	4.07054	0.233345	3.23427	6.85134	5.8636e-07	1.77405e-38	1.76153e-13	3.11207e-13	1.86481e-09	7.90184e-12	4.67798e-69	0.00256974	3.44242e-11	6.70957	538.029
2454	332.993	376.636	333.876	1264.57	339.147	897.197	13.0684	136.671	10.2741	0.764682	5.77073	45.6516	3.91514	213.458	192.667	285.317	0.109325	2.69476e-24	10.7935	0.00812621	4.02789	0.230471	3.22293	6.84709	5.63073e-07	1.45214e-38	1.62095e-13	2.79526e-13	1.76371e-09	7.41538e-12	3.31361e-69	0.00252843	3.27089e-11	6.71063	538.029
2455	332.86	376.486	333.742	1264.61	339.145	897.251	13.0102	136.741	10.2767	0.765973	5.74945	45.6531	3.91528	213.467	192.673	285.331	0.109329	2.36296e-24	10.7919	0.00793847	3.98575	0.227636	3.21165	6.84286	5.40747e-07	1.18871e-38	1.49162e-13	2.5108e-13	1.66812e-09	6.9591e-12	2.34717e-69	0.00248784	3.10802e-11	6.71488	538.029
2456	332.732	376.341	333.611	1264.69	339.143	897.316	12.9527	136.811	10.2793	0.767265	5.72827	45.6576	3.91551	213.479	192.685	285.347	0.109335	2.07212e-24	10.7903	0.00775539	3.94412	0.224842	3.20043	6.83863	5.19343e-07	9.73131e-39	1.37266e-13	2.25537e-13	1.57775e-09	6.53112e-12	1.6626e-69	0.00244798	2.95337e-11	6.72025	538.029
2457	332.6	376.192	333.476	1264.79	339.142	897.389	12.8958	136.88	10.2819	0.768556	5.70716	45.6636	3.91579	213.492	192.699	285.363	0.109341	1.81714e-24	10.7887	0.00757675	3.90297	0.222085	3.18926	6.83441	4.98811e-07	7.9669e-39	1.26322e-13	2.026e-13	1.49229e-09	6.12962e-12	1.17769e-69	0.0024088	2.80649e-11	6.72458	538.029
2458	332.462	376.035	333.333	1264.91	339.14	897.466	12.8393	136.95	10.2844	0.769846	5.68614	45.6702	3.91609	213.506	192.715	285.381	0.109347	1.59358e-24	10.787	0.00740238	3.8623	0.219365	3.17815	6.8302	4.79108e-07	6.52263e-39	1.16252e-13	1.81999e-13	1.41148e-09	5.7529e-12	8.34208e-70	0.00237029	2.66696e-11	6.72786	538.029
2459	332.316	375.87	333.183	1265.03	339.138	897.547	12.7834	137.019	10.287	0.771136	5.6652	45.677	3.91642	213.521	192.732	285.399	0.109354	1.39755e-24	10.7854	0.00723216	3.82208	0.216679	3.16708	6.826	4.60199e-07	5.34035e-39	1.06986e-13	1.63496e-13	1.33506e-09	5.39942e-12	5.90905e-70	0.00233242	2.53442e-11	6.7306	538.029
2460	332.164	375.698	333.026	1265.16	339.136	897.629	12.728	137.089	10.2896	0.772426	5.64434	45.6838	3.91677	213.536	192.75	285.418	0.109362	1.22567e-24	10.7838	0.00706596	3.7823	0.214029	3.15605	6.8218	4.42047e-07	4.37249e-39	9.84605e-14	1.46876e-13	1.26278e-09	5.06773e-12	4.18563e-70	0.00229518	2.4085e-11	6.7329	538.029
2461	331.999	375.511	332.858	1265.24	339.135	897.699	12.6729	137.159	10.2922	0.773715	5.62356	45.6871	3.91703	213.549	192.763	285.435	0.109368	1.07489e-24	10.7822	0.00690339	3.74289	0.211408	3.14505	6.8176	4.24592e-07	3.57989e-39	9.06121e-14	1.31942e-13	1.1944e-09	4.75631e-12	2.96486e-70	0.00225849	2.28878e-11	6.7304	538.029
2462	331.824	375.314	332.683	1265.25	339.133	897.749	12.618	137.228	10.2948	0.775004	5.60283	45.6854	3.91715	213.558	192.769	285.448	0.109372	9.42587e-25	10.7806	0.00674418	3.7038	0.208813	3.13406	6.81339	4.07785e-07	2.93069e-39	8.33857e-14	1.1852e-13	1.1297e-09	4.4638e-12	2.10014e-70	0.0022223	2.17489e-11	6.72383	538.029
2463	331.654	375.123	332.514	1265.22	339.131	897.79	12.5636	137.298	10.2974	0.776293	5.58218	45.6818	3.9172	213.564	192.77	285.461	0.109376	8.26543e-25	10.779	0.00658846	3.66507	0.206246	3.1231	6.80918	3.91625e-07	2.3991e-39	7.67339e-14	1.0646e-13	1.06848e-09	4.18918e-12	1.48762e-70	0.00218665	2.06662e-11	6.71933	538.029
2464	331.496	374.947	332.359	1265.19	339.13	897.828	12.5097	137.367	10.3	0.777581	5.56161	45.6784	3.91724	213.57	192.771	285.472	0.109379	7.2478e-25	10.7774	0.00643629	3.62673	0.20371	3.11217	6.80497	3.76101e-07	1.96391e-39	7.06123e-14	9.56271e-14	1.01057e-09	3.93144e-12	1.05374e-70	0.00215156	1.96373e-11	6.71759	538.029
2465	331.353	374.786	332.216	1265.18	339.128	897.871	12.4564	137.437	10.3026	0.778868	5.54111	45.6766	3.9173	213.577	192.773	285.484	0.109382	6.35555e-25	10.7758	0.00628772	3.58882	0.201207	3.10129	6.80076	3.61201e-07	1.6077e-39	6.49798e-14	8.58973e-14	9.55812e-10	3.68959e-12	7.4641e-71	0.00211706	1.86598e-11	6.71864	538.029
2466	331.222	374.639	332.085	1265.22	339.126	897.925	12.4038	137.506	10.3052	0.780156	5.52069	45.6782	3.91744	213.586	192.78	285.498	0.109387	5.5734e-25	10.7742	0.00614281	3.55136	0.198739	3.09047	6.79657	3.46914e-07	1.31618e-39	5.97983e-14	7.71604e-14	9.04036e-10	3.46274e-12	5.28714e-71	0.00208316	1.77316e-11	6.7229	538.029
2467	331.096	374.497	331.957	1265.29	339.125	897.991	12.3517	137.576	10.3078	0.781443	5.50036	45.6827	3.91767	213.597	192.791	285.513	0.109393	4.88776e-25	10.7726	0.00600149	3.51436	0.196305	3.07969	6.79238	3.33215e-07	1.07759e-39	5.50317e-14	6.9315e-14	8.55084e-10	3.24994e-12	3.7451e-71	0.00204986	1.68502e-11	6.72827	538.029
2468	330.967	374.351	331.824	1265.4	339.123	898.065	12.3002	137.646	10.3103	0.782729	5.48011	45.6886	3.91794	213.61	192.805	285.53	0.109399	4.28661e-25	10.771	0.00586359	3.47779	0.193904	3.06898	6.7882	3.20074e-07	8.82293e-40	5.06462e-14	6.22691e-14	8.08795e-10	3.0503e-12	2.65282e-71	0.00201714	1.6013e-11	6.7326	538.029
2469	330.831	374.197	331.683	1265.51	339.122	898.143	12.2491	137.715	10.3129	0.784015	5.45993	45.6952	3.91825	213.624	192.821	285.547	0.109406	3.75951e-25	10.7694	0.00572897	3.44164	0.191535	3.0583	6.78403	3.07462e-07	7.22418e-40	4.6611e-14	5.59407e-14	7.6502e-10	2.86297e-12	1.8791e-71	0.00198496	1.52178e-11	6.73589	538.029
2470	330.688	374.034	331.535	1265.64	339.12	898.224	12.1984	137.785	10.3155	0.785301	5.43984	45.702	3.91858	213.639	192.838	285.565	0.109413	3.29729e-25	10.7678	0.00559755	3.40588	0.189196	3.04768	6.77986	2.95356e-07	5.91531e-40	4.28979e-14	5.02563e-14	7.23621e-10	2.6872e-12	1.33105e-71	0.00195333	1.44622e-11	6.73862	538.029
2471	330.538	373.864	331.38	1265.77	339.118	898.307	12.1483	137.854	10.3181	0.786586	5.41982	45.7087	3.91892	213.654	192.856	285.584	0.10942	2.89196e-25	10.7662	0.00546923	3.37053	0.186887	3.03709	6.7757	2.83734e-07	4.84371e-40	3.94811e-14	4.51503e-14	6.84468e-10	2.52224e-12	9.42838e-72	0.00192222	1.37444e-11	6.74093	538.029
2472	330.376	373.681	331.215	1265.85	339.117	898.378	12.0983	137.924	10.3207	0.787871	5.39987	45.712	3.91919	213.667	192.869	285.6	0.109426	2.53637e-25	10.7646	0.00534371	3.33549	0.184604	3.02653	6.77154	2.72557e-07	3.96607e-40	3.63357e-14	4.0562e-14	6.47425e-10	2.36736e-12	6.67852e-72	0.00189157	1.30619e-11	6.73842	538.029
2473	330.203	373.487	331.043	1265.86	339.115	898.428	12.0485	137.993	10.3233	0.789155	5.37998	45.7103	3.91931	213.676	192.874	285.614	0.109431	2.22435e-25	10.763	0.00522077	3.30074	0.182344	3.01599	6.76737	2.61795e-07	3.24715e-40	3.34394e-14	3.64379e-14	6.12368e-10	2.22188e-12	4.73068e-72	0.00186133	1.24126e-11	6.73184	538.029
2474	330.036	373.299	330.877	1265.83	339.114	898.469	11.9992	138.063	10.3259	0.790439	5.36016	45.7067	3.91936	213.683	192.876	285.626	0.109434	1.95065e-25	10.7614	0.00510051	3.26631	0.180108	3.00546	6.7632	2.51445e-07	2.65842e-40	3.07733e-14	3.27322e-14	5.79201e-10	2.08529e-12	3.35094e-72	0.00183154	1.17953e-11	6.72732	538.029
2475	329.881	373.125	330.724	1265.8	339.112	898.508	11.9504	138.133	10.3285	0.791723	5.34042	45.7033	3.91939	213.688	192.876	285.637	0.109437	1.71061e-25	10.7598	0.00498299	3.23223	0.177899	2.99497	6.75903	2.41502e-07	2.1764e-40	2.83196e-14	2.94031e-14	5.47828e-10	1.95709e-12	2.37361e-72	0.00180223	1.12086e-11	6.72557	538.029
2476	329.741	372.967	330.584	1265.79	339.111	898.551	11.9021	138.202	10.331	0.793006	5.32074	45.7015	3.91945	213.695	192.878	285.649	0.109441	1.50013e-25	10.7582	0.00486825	3.19852	0.175718	2.98453	6.75486	2.31957e-07	1.78182e-40	2.60618e-14	2.6413e-14	5.18159e-10	1.83678e-12	1.68133e-72	0.00177339	1.06513e-11	6.72662	538.029
2477	329.612	372.823	330.454	1265.82	339.109	898.606	11.8544	138.272	10.3336	0.794289	5.30115	45.7031	3.91959	213.704	192.885	285.662	0.109445	1.31561e-25	10.7566	0.00475632	3.16522	0.173568	2.97413	6.7507	2.22804e-07	1.45886e-40	2.39847e-14	2.37278e-14	4.90105e-10	1.72393e-12	1.19096e-72	0.00174507	1.0122e-11	6.73088	538.029
2478	329.489	372.683	330.328	1265.9	339.108	898.673	11.8072	138.341	10.3362	0.795572	5.28164	45.7076	3.91981	213.715	192.897	285.678	0.109451	1.15384e-25	10.755	0.00464716	3.13232	0.171448	2.96379	6.74655	2.14027e-07	1.19452e-40	2.20739e-14	2.13165e-14	4.63581e-10	1.61807e-12	8.43607e-73	0.00171724	9.61934e-12	6.73625	538.029
2479	329.362	372.54	330.198	1266	339.106	898.748	11.7604	138.411	10.3388	0.796854	5.2622	45.7135	3.92009	213.728	192.911	285.694	0.109457	1.01201e-25	10.7534	0.00454064	3.09981	0.169356	2.9535	6.74241	2.05607e-07	9.78129e-41	2.03157e-14	1.91508e-14	4.38499e-10	1.51875e-12	5.97562e-73	0.00168989	9.14191e-12	6.74059	538.029
2480	329.228	372.388	330.06	1266.12	339.105	898.826	11.7141	138.48	10.3414	0.798135	5.24284	45.72	3.9204	213.742	192.926	285.711	0.109464	8.87627e-26	10.7518	0.00443665	3.06766	0.167291	2.94326	6.73828	1.97524e-07	8.00964e-41	1.86979e-14	1.72055e-14	4.14778e-10	1.42555e-12	4.23279e-73	0.00166301	8.68835e-12	6.74388	538.029
2481	329.087	372.228	329.914	1266.24	339.103	898.908	11.6682	138.55	10.344	0.799417	5.22355	45.7268	3.92072	213.757	192.943	285.729	0.109471	7.78553e-26	10.7503	0.00433512	3.03587	0.165254	2.93305	6.73415	1.89766e-07	6.55909e-41	1.72092e-14	1.54581e-14	3.92344e-10	1.33809e-12	2.99826e-73	0.00163657	8.25743e-12	6.74662	538.029
2482	328.94	372.061	329.761	1266.37	339.102	898.992	11.6226	138.62	10.3465	0.800697	5.20434	45.7336	3.92107	213.772	192.961	285.747	0.109478	6.82895e-26	10.7487	0.00423599	3.00443	0.163242	2.92289	6.73003	1.82317e-07	5.37138e-41	1.58392e-14	1.38883e-14	3.71127e-10	1.25601e-12	2.1238e-73	0.00161056	7.848e-12	6.74892	538.029
2483	328.78	371.88	329.599	1266.45	339.101	899.063	11.5773	138.689	10.3491	0.801978	5.18519	45.7369	3.92133	213.785	192.974	285.764	0.109485	5.98971e-26	10.7471	0.004139	2.97328	0.161253	2.91276	6.72591	1.75152e-07	4.39856e-41	1.4578e-14	1.24777e-14	3.51052e-10	1.17894e-12	1.50438e-73	0.00158494	7.45868e-12	6.74641	538.029
2484	328.61	371.688	329.428	1266.46	339.099	899.115	11.5321	138.759	10.3517	0.803258	5.16611	45.7351	3.92145	213.794	192.98	285.777	0.109489	5.25324e-26	10.7455	0.004044	2.94238	0.159283	2.90263	6.72177	1.68253e-07	3.60158e-41	1.34166e-14	1.12097e-14	3.32053e-10	1.10655e-12	1.06561e-73	0.00155967	7.0883e-12	6.73981	538.029
2485	328.446	371.503	329.265	1266.43	339.098	899.156	11.4873	138.828	10.3543	0.804538	5.14709	45.7315	3.92149	213.8	192.981	285.789	0.109493	4.60716e-26	10.7439	0.00395108	2.91176	0.157334	2.89253	6.71764	1.61617e-07	2.94887e-41	1.23474e-14	1.00702e-14	3.14078e-10	1.03857e-12	7.54819e-74	0.00153477	6.73614e-12	6.73528	538.029
2486	328.293	371.333	329.114	1266.4	339.097	899.196	11.443	138.898	10.3569	0.805817	5.12814	45.7281	3.92153	213.806	192.981	285.8	0.109496	4.04051e-26	10.7423	0.00386026	2.88145	0.15541	2.88246	6.71351	1.55241e-07	2.41442e-41	1.13634e-14	9.04656e-15	2.97075e-10	9.74769e-13	5.34671e-74	0.00151026	6.40143e-12	6.73352	538.029
2487	328.155	371.177	328.977	1266.39	339.095	899.24	11.3991	138.967	10.3595	0.807096	5.10925	45.7263	3.92159	213.812	192.984	285.812	0.109499	3.5436e-26	10.7407	0.00377159	2.85147	0.153509	2.87243	6.70938	1.4912e-07	1.97687e-41	1.04579e-14	8.12704e-15	2.80994e-10	9.14894e-13	3.7873e-74	0.00148616	6.08343e-12	6.73456	538.029
2488	328.029	371.035	328.85	1266.43	339.094	899.295	11.3558	139.037	10.362	0.808374	5.09045	45.7278	3.92173	213.821	192.99	285.825	0.109504	3.10795e-26	10.7391	0.00368509	2.82186	0.151635	2.86245	6.70526	1.4325e-07	1.61872e-41	9.62487e-15	7.30126e-15	2.65789e-10	8.58725e-13	2.6827e-74	0.00146248	5.78142e-12	6.73882	538.029
2489	327.908	370.898	328.726	1266.5	339.092	899.363	11.313	139.106	10.3646	0.809652	5.07172	45.7323	3.92195	213.833	193.001	285.84	0.10951	2.726e-26	10.7375	0.00360072	2.7926	0.149787	2.85252	6.70115	1.37621e-07	1.32554e-41	8.85846e-15	6.55966e-15	2.51412e-10	8.06033e-13	1.90027e-74	0.00143922	5.49462e-12	6.7442	538.029
2490	327.784	370.757	328.598	1266.6	339.091	899.438	11.2705	139.176	10.3672	0.81093	5.05307	45.7382	3.92222	213.845	193.016	285.856	0.109516	2.39107e-26	10.7359	0.00351838	2.76368	0.147964	2.84264	6.69705	1.32219e-07	1.08551e-41	8.15327e-15	5.89356e-15	2.37817e-10	7.56593e-13	1.34604e-74	0.00141635	5.22219e-12	6.74855	538.029
2491	327.652	370.608	328.461	1266.72	339.09	899.517	11.2284	139.245	10.3698	0.812207	5.03449	45.7448	3.92253	213.859	193.031	285.873	0.109523	2.09735e-26	10.7343	0.003438	2.73509	0.146165	2.8328	6.69295	1.27034e-07	8.88984e-42	7.50434e-15	5.29521e-15	2.24959e-10	7.10198e-13	9.5346e-75	0.00139387	4.96336e-12	6.75184	538.029
2492	327.513	370.45	328.318	1266.84	339.089	899.599	11.1867	139.315	10.3724	0.813484	5.01598	45.7515	3.92286	213.874	193.048	285.891	0.10953	1.83975e-26	10.7327	0.00335951	2.70681	0.144389	2.82301	6.68886	1.22057e-07	7.28057e-42	6.90715e-15	4.75769e-15	2.12798e-10	6.66658e-13	6.75377e-75	0.00137176	4.71744e-12	6.75458	538.029
2493	327.368	370.286	328.168	1266.97	339.087	899.684	11.1453	139.385	10.375	0.81476	4.99754	45.7583	3.9232	213.889	193.066	285.909	0.109537	1.61382e-26	10.7312	0.00328287	2.67885	0.142636	2.81325	6.68478	1.17277e-07	5.96278e-42	6.35757e-15	4.27481e-15	2.01296e-10	6.25796e-13	4.78398e-75	0.00135002	4.48377e-12	6.75689	538.029
2494	327.211	370.107	328.007	1267.05	339.086	899.756	11.1041	139.454	10.3775	0.816037	4.97916	45.7616	3.92346	213.902	193.079	285.926	0.109543	1.41559e-26	10.7296	0.00320789	2.65114	0.140901	2.80352	6.68069	1.12679e-07	4.88331e-42	5.85159e-15	3.84084e-15	1.90413e-10	5.87425e-13	3.3887e-75	0.0013286	4.26156e-12	6.75436	538.029
2495	327.044	369.919	327.84	1267.06	339.085	899.808	11.063	139.524	10.3801	0.817312	4.96085	45.7598	3.92357	213.911	193.084	285.939	0.109548	1.24162e-26	10.728	0.00313444	2.62365	0.139184	2.7938	6.67659	1.08251e-07	3.99889e-42	5.38565e-15	3.45072e-15	1.80114e-10	5.5138e-13	2.40036e-75	0.00130746	4.05015e-12	6.74775	538.029
2496	326.881	369.736	327.678	1267.03	339.084	899.85	11.0222	139.593	10.3827	0.818587	4.94259	45.7562	3.92362	213.917	193.086	285.95	0.109551	1.089e-26	10.7264	0.00306259	2.59642	0.137486	2.7841	6.6725	1.03992e-07	3.27448e-42	4.9567e-15	3.10014e-15	1.70369e-10	5.17535e-13	1.70027e-75	0.00128664	3.84913e-12	6.74321	538.029
2497	326.731	369.568	327.53	1267	339.082	899.89	10.9819	139.663	10.3853	0.819862	4.9244	45.7527	3.92365	213.923	193.086	285.961	0.109555	9.55126e-27	10.7248	0.00299236	2.56946	0.135808	2.77443	6.6684	9.98992e-08	2.68127e-42	4.56189e-15	2.78516e-15	1.6115e-10	4.85764e-13	1.20438e-75	0.00126614	3.65807e-12	6.74144	538.029
2498	326.596	369.416	327.395	1266.99	339.081	899.935	10.942	139.732	10.3879	0.821137	4.90628	45.751	3.92371	213.929	193.088	285.973	0.109558	8.37723e-27	10.7232	0.00292379	2.54279	0.134151	2.76479	6.66431	9.59698e-08	2.19557e-42	4.19856e-15	2.50221e-15	1.52432e-10	4.55948e-13	8.53111e-76	0.00124599	3.47653e-12	6.74248	538.029
2499	326.472	369.276	327.27	1267.02	339.08	899.991	10.9026	139.802	10.3904	0.822411	4.88823	45.7525	3.92385	213.938	193.095	285.986	0.109563	7.34785e-27	10.7216	0.00285689	2.51645	0.132518	2.75521	6.66023	9.22009e-08	1.79796e-42	3.86429e-15	2.2481e-15	1.44188e-10	4.27976e-13	6.04295e-76	0.00122618	3.30412e-12	6.74674	538.029
2500	326.413	369.209	327.21	1267.05	339.079	900.023	10.883	139.837	10.3917	0.823048	4.87923	45.7542	3.92395	213.943	193.099	285.993	0.109565	6.86696e-27	10.7208	0.00282387	2.50336	0.131707	2.75043	6.65819	9.03561e-08	1.61899e-42	3.70412e-15	2.12786e-15	1.40181e-10	4.14437e-13	5.01126e-76	0.00121637	3.22014e-12	6.74965	538.029
