# Supplementary material for: The Social Cost of Fossil and Industrial CO2 Emissions from 1950 to 2018
Source: Research Square preprint supplement (doi:10.21203/rs.3.rs-2244259/v1), 2022-11-17
Supplement: Supplementary file 14 [file RCP3PD_MIDYEAR_RADFORCING.xls]

## Sheet: RCP3PD_MIDYEAR_RADFORCING
RCP3PD__RADIATIVE FORCINGS____________________________
CONTENT: ANNUAL AVERAGE, GLOBAL MEAN RADIATIVE FORCING.
RUN: RCP3PD, FINAL RELEASE, 26. Nov 2009
RCP3PD CONTACT: IMAGE group, Detlef van Vuuren (riahi@iiasa.ac.at)
DATE: 26/11/2009 11:29:06 (updated description)
MAGICC-VERSION: 6.3.09, 25 November 2009
FILE PRODUCED BY: RCP Concentration Calculation & Data Group, M. Meinshausen, S. Smith, K. Riahi, D. van Vuuren et al.
DOCUMENTATION: M. Meinshausen, S. Smith et al. (2011) "The RCP GHG concentrations and their extension from 1765 to 2300", DOI 10.1007/s10584-011-0156-z, Climatic Change.
CMIP5 INFO: http://cmip-pcmdi.llnl.gov/cmip5/
RCP DATABASE: http://www.iiasa.ac.at/web-apps/tnt/RcpDb
FURTHER INFO: For data sources, aknowledgements and further information, see http://www.pik-potsdam.de/~mmalte/rcps.
NOTE: THIS FORCING DATASET IS NOT CMIP5 RECOMMENDATION, AS CONCENTRATIONS, NOT FORCING, SHALL BE PRESCRIBED IN MAIN CMIP5 RUNS. SEE OZONE, LANDUSE AND AEROSOL DATA SOURCES DESCRIBED IN CMIP5 NOTES AND RCP DATABASE.
Radiative Forcing after strat. temp. adjustment.;
RCP3PD starts 2005; 20th century data and earlier is provided for convenience.
COLUMN_DESCRIPTION________________________________________
1 TOTAL_INCLVOLCANIC_RF Total anthropogenic and natural radiative forcing
2 VOLCANIC_ANNUAL_RF Annual mean volcanic stratospheric aerosol forcing
3 SOLAR_RF Solar irradience forcing
4 TOTAL_ANTHRO_RF Total anthropogenic forcing
5 GHG_RF Total greenhouse gas forcing (CO2, CH4, N2O, HFCs, PFCs, SF6, and Montreal Protocol gases).
6 KYOTOGHG_RF Total forcing from greenhouse gases controlled under the Kyoto Protocol (CO2, CH4, N2O, HFCs, PFCs, SF6).
7 CO2CH4N2O_RF Total forcing from CO2, methan and nitrous oxide.
8 CO2_RF CO2 Forcing
9 CH4_RF Methane Forcing
10 N2O_RF Nitrous Oxide Forcing
11 FGASSUM_RF Total forcing from all flourinated gases controlled under the Kyoto Protocol (HFCs, PFCs, SF6; i.e. columns 13-24)
12 MHALOSUM_RF Total forcing from all gases controlled under the Montreal Protocol (columns 25-40)
13-24 Flourinated gases controlled under the Kyoto Protocol
25-40 Ozone Depleting Substances controlled under the Montreal Protocol
41 TOTAER_DIR_RF Total direct aerosol forcing (aggregating columns 42 to 47)
42 OCI_RF Direct fossil fuel aerosol (organic carbon)
43 BCI_RF Direct fossil fuel aerosol (black carbon)
44 SOXI_RF Direct sulphate aerosol
45 NOXI_RF Direct nitrate aerosol
46 BIOMASSAER_RF Direct biomass burning related aerosol
47 MINERALDUST_RF Direct Forcing from mineral dust aerosol
48 CLOUD_TOT_RF Cloud albedo effect
49 STRATOZ_RF Stratospheric ozone forcing
50 TROPOZ_RF Tropospheric ozone forcing
51 CH4OXSTRATH2O_RF Stratospheric water-vapour from methane oxidisation
52 LANDUSE_RF Landuse albedo
53 BCSNOW_RF Black carbon on snow.
&THISFILE_SPECIFICATIONS
THISFILE_DATACOLUMNS	53
THISFILE_FIRSTYEAR	1765
THISFILE_LASTYEAR	2500
THISFILE_ANNUALSTEPS	1
THISFILE_FIRSTDATAROW	61
THISFILE_UNITS	SEE ROW 59
THISFILE_DATTYPE	RCPDAT
/
COLUMN:	1	2	3	4	5	6	7	8	9	10	11	12	13	14	15	16	17	18	19	20	21	22	23	24	25	26	27	28	29	30	31	32	33	34	35	36	37	38	39	40	41	42	43	44	45	46	47	48	49
UNITS:	W/m2	W/m2	W/m2	W/m2	W/m2	W/m2	W/m2	W/m2	W/m2	W/m2	W/m2	W/m2	W/m2	W/m2	W/m2	W/m2	W/m2	W/m2	W/m2	W/m2	W/m2	W/m2	W/m2	W/m2	W/m2	W/m2	W/m2	W/m2	W/m2	W/m2	W/m2	W/m2	W/m2	W/m2	W/m2	W/m2	W/m2	W/m2	W/m2	W/m2	W/m2	W/m2	W/m2	W/m2	W/m2	W/m2	W/m2	W/m2	W/m2
v YEARS/GAS >	TOTAL_INCLVOLCANIC_RF	VOLCANIC_ANNUAL_RF	SOLAR_RF	TOTAL_ANTHRO_RF	GHG_RF	KYOTOGHG_RF	CO2CH4N2O_RF	CO2_RF	CH4_RF	N2O_RF	FGASSUM_RF	MHALOSUM_RF	CF4	C2F6	C6F14	HFC23	HFC32	HFC43_10	HFC125	HFC134a	HFC143a	HFC227ea	HFC245fa	SF6	CFC_11	CFC_12	CFC_113	CFC_114	CFC_115	CARB_TET	MCF	HCFC_22	HCFC_141B	HCFC_142B	HALON1211	HALON1202	HALON1301	HALON2402	CH3BR	CH3CL	TOTAER_DIR_RF	OCI_RF	BCI_RF	SOXI_RF	NOXI_RF	BIOMASSAER_RF	MINERALDUST_RF	CLOUD_TOT_RF	STRATOZ_RF
1765	0	0	-0.0283587	0	0	0	0	0	0	0	0	0	0	0	0	0	0	0	0	0	0	0	0	0	0	0	0	0	0	0	0	0	0	0	0	0	0	0	0	0	0	0	0	0	0	0	0	0	0
1766	0.126027	0.116222	-0.0206938	0.0163188	0.0153635	0.0153635	0.0153635	0.0110491	0.00357577	0.000738661	0	0	0	0	0	0	0	0	0	0	0	0	0	0	0	0	0	0	0	0	0	0	0	0	0	0	0	0	0	0	1.77672e-05	0	0	-2.86731e-05	-1.2928e-05	0.000250103	-0.000190735	-0.000801451	0
1767	0.273031	0.232444	0.00703937	0.0335479	0.0321232	0.0321232	0.0321232	0.023246	0.00736074	0.00151637	0	0	0	0	0	0	0	0	0	0	0	0	0	0	0	0	0	0	0	0	0	0	0	0	0	0	0	0	0	0	-6.46768e-06	0	0	-7.97657e-05	-3.19082e-05	0.000672939	-0.000567733	-0.00238112	0
1768	0.278871	0.197444	0.0462569	0.0351696	0.0349722	0.0349722	0.0349722	0.0256052	0.00777313	0.00159381	0	0	0	0	0	0	0	0	0	0	0	0	0	0	0	0	0	0	0	0	0	0	0	0	0	0	0	0	0	0	-0.000120356	0	0	-0.000120421	-4.16465e-05	0.000977553	-0.000935841	-0.00391494	0
1769	0.242045	0.131819	0.073605	0.036621	0.0378995	0.0378995	0.0378995	0.028057	0.00817237	0.00167006	0	0	0	0	0	0	0	0	0	0	0	0	0	0	0	0	0	0	0	0	0	0	0	0	0	0	0	0	0	0	-0.00028157	0	0	-0.000153962	-4.79302e-05	0.00121549	-0.00129517	-0.0054041	0
1770	0.242824	0.127444	0.0772581	0.038122	0.0408559	0.0408559	0.0408559	0.0305529	0.00855779	0.00174523	0	0	0	0	0	0	0	0	0	0	0	0	0	0	0	0	0	0	0	0	0	0	0	0	0	0	0	0	0	0	-0.000470954	0	0	-0.000182439	-5.25379e-05	0.00140985	-0.00164582	-0.00684976	0
1771	0.284142	0.179944	0.0648944	0.0393037	0.043845	0.043845	0.043845	0.0330936	0.00893207	0.00181931	0	0	0	0	0	0	0	0	0	0	0	0	0	0	0	0	0	0	0	0	0	0	0	0	0	0	0	0	0	0	-0.000888303	-1.68577e-05	6.06652e-05	-0.000242598	-5.69856e-05	0.00135539	-0.00198792	-0.00844667	0
1772	0.299857	0.214944	0.0443363	0.0405766	0.0468967	0.0468967	0.0468967	0.0357058	0.00929859	0.00189228	0	0	0	0	0	0	0	0	0	0	0	0	0	0	0	0	0	0	0	0	0	0	0	0	0	0	0	0	0	0	-0.00132732	-3.37153e-05	0.00012133	-0.000298156	-6.07885e-05	0.00126556	-0.00232155	-0.0100013	0
1773	0.290756	0.228069	0.0203481	0.0423385	0.0500195	0.0500195	0.0500195	0.0383971	0.00965806	0.00196426	0	0	0	0	0	0	0	0	0	0	0	0	0	0	0	0	0	0	0	0	0	0	0	0	0	0	0	0	0	0	-0.00157118	-3.37153e-05	0.00012133	-0.000314621	-6.33834e-05	0.00136606	-0.00264685	-0.0113213	0
1774	0.2781	0.232444	0.00144375	0.0442116	0.0532061	0.0532061	0.0532061	0.0411609	0.0100098	0.00203544	0	0	0	0	0	0	0	0	0	0	0	0	0	0	0	0	0	0	0	0	0	0	0	0	0	0	0	0	0	0	-0.00181491	-3.37153e-05	0.00012133	-0.000329868	-6.57492e-05	0.001457	-0.00296391	-0.012602	0
1775	0.268839	0.232444	-0.00981313	0.046208	0.0564687	0.0564687	0.0564687	0.0440096	0.0103531	0.00210598	0	0	0	0	0	0	0	0	0	0	0	0	0	0	0	0	0	0	0	0	0	0	0	0	0	0	0	0	0	0	-0.00205687	-3.37153e-05	0.00012133	-0.000344145	-6.79547e-05	0.00154045	-0.00327284	-0.0138446	0
1776	0.276856	0.232444	-0.00395063	0.0483625	0.0598423	0.0598423	0.0598423	0.0469792	0.0106873	0.00217585	0	0	0	0	0	0	0	0	0	0	0	0	0	0	0	0	0	0	0	0	0	0	0	0	0	0	0	0	0	0	-0.00229589	-3.37153e-05	0.00012133	-0.00035764	-7.0046e-05	0.00161793	-0.00357375	-0.0150498	0
1777	0.305761	0.232444	0.022645	0.0506714	0.0633239	0.0633239	0.0633239	0.0500673	0.0110116	0.00224499	0	0	0	0	0	0	0	0	0	0	0	0	0	0	0	0	0	0	0	0	0	0	0	0	0	0	0	0	0	0	-0.00253112	-3.37153e-05	0.00012133	-0.000370499	-7.2055e-05	0.00169058	-0.00386676	-0.0162188	0
1778	0.337875	0.232444	0.0523687	0.0530622	0.0668415	0.0668415	0.0668415	0.0532026	0.0113254	0.0023135	0	0	0	0	0	0	0	0	0	0	0	0	0	0	0	0	0	0	0	0	0	0	0	0	0	0	0	0	0	0	-0.0027619	-3.37153e-05	0.00012133	-0.000382835	-7.40046e-05	0.00175929	-0.00415196	-0.0173523	0
1779	0.347581	0.232444	0.0597012	0.0554354	0.0702966	0.0702966	0.0702966	0.0562871	0.0116279	0.00238163	0	0	0	0	0	0	0	0	0	0	0	0	0	0	0	0	0	0	0	0	0	0	0	0	0	0	0	0	0	0	-0.00298778	-3.37153e-05	0.00012133	-0.000394738	-7.59118e-05	0.00182473	-0.00442948	-0.0184512	0
1780	0.341674	0.232444	0.0515287	0.057701	0.0736012	0.0736012	0.0736012	0.0592345	0.0119171	0.00244953	0	0	0	0	0	0	0	0	0	0	0	0	0	0	0	0	0	0	0	0	0	0	0	0	0	0	0	0	0	0	-0.0032084	-3.37153e-05	0.00012133	-0.00040628	-7.77893e-05	0.00188746	-0.00469941	-0.0195164	0
1781	0.333722	0.232444	0.041895	0.0593826	0.0767183	0.0767183	0.0767183	0.0620123	0.0121889	0.00251718	0	0	0	0	0	0	0	0	0	0	0	0	0	0	0	0	0	0	0	0	0	0	0	0	0	0	0	0	0	0	-0.0036953	-5.0573e-05	0.000181996	-0.000443034	-8.00993e-05	0.00165829	-0.00496187	-0.0207342	0
1782	0.29102	0.210569	0.019495	0.0609557	0.0796905	0.0796905	0.0796905	0.0646641	0.0124419	0.00258449	0	0	0	0	0	0	0	0	0	0	0	0	0	0	0	0	0	0	0	0	0	0	0	0	0	0	0	0	0	0	-0.00417917	-6.74306e-05	0.000242661	-0.000479101	-8.23858e-05	0.00142406	-0.00521697	-0.0219192	0
1783	0.175605	0.118694	-0.00603313	0.0629442	0.0826033	0.0826033	0.0826033	0.0672719	0.0126798	0.00265156	0	0	0	0	0	0	0	0	0	0	0	0	0	0	0	0	0	0	0	0	0	0	0	0	0	0	0	0	0	0	-0.0043878	-6.74306e-05	0.000242661	-0.000489063	-8.42044e-05	0.00147505	-0.00546481	-0.0228868	0
1784	0.0902692	0.0443192	-0.0190575	0.0650075	0.0855481	0.0855481	0.0855481	0.0699211	0.0129083	0.00271864	0	0	0	0	0	0	0	0	0	0	0	0	0	0	0	0	0	0	0	0	0	0	0	0	0	0	0	0	0	0	-0.00458993	-6.74306e-05	0.000242661	-0.000498942	-8.60251e-05	0.00152532	-0.00570551	-0.0238237	0
1785	0.162453	0.101194	-0.00597625	0.0672351	0.0886122	0.0886122	0.0886122	0.0726933	0.013133	0.00278589	0	0	0	0	0	0	0	0	0	0	0	0	0	0	0	0	0	0	0	0	0	0	0	0	0	0	0	0	0	0	-0.00478558	-6.74306e-05	0.000242661	-0.000508756	-8.78518e-05	0.00157496	-0.00593917	-0.0247309	0
1786	0.289562	0.188694	0.0311894	0.0696782	0.0918446	0.0918446	0.0918446	0.0756317	0.0133596	0.00285332	0	0	0	0	0	0	0	0	0	0	0	0	0	0	0	0	0	0	0	0	0	0	0	0	0	0	0	0	0	0	-0.00497481	-6.74306e-05	0.000242661	-0.00051852	-8.96878e-05	0.00162407	-0.00616591	-0.025609	0
1787	0.352999	0.223694	0.0569931	0.0723117	0.0952178	0.0952178	0.0952178	0.0787033	0.0135937	0.00292083	0	0	0	0	0	0	0	0	0	0	0	0	0	0	0	0	0	0	0	0	0	0	0	0	0	0	0	0	0	0	-0.00515766	-6.74306e-05	0.000242661	-0.000528246	-9.15357e-05	0.00167271	-0.00638582	-0.0264587	0
1788	0.361769	0.228069	0.0586425	0.0750571	0.0986512	0.0986512	0.0986512	0.0818218	0.0138409	0.0029885	0	0	0	0	0	0	0	0	0	0	0	0	0	0	0	0	0	0	0	0	0	0	0	0	0	0	0	0	0	0	-0.0053342	-6.74306e-05	0.000242661	-0.000537943	-9.3398e-05	0.00172093	-0.00659903	-0.0272807	0
1789	0.251054	0.123069	0.0501594	0.0778252	0.102053	0.102053	0.102053	0.0848899	0.0141068	0.00305652	0	0	0	0	0	0	0	0	0	0	0	0	0	0	0	0	0	0	0	0	0	0	0	0	0	0	0	0	0	0	-0.00550453	-6.74306e-05	0.000242661	-0.00054762	-9.52767e-05	0.00176877	-0.00680563	-0.0280756	0
1790	0.0888822	-0.0256808	0.0340112	0.0805518	0.105358	0.105358	0.105358	0.0878369	0.014396	0.00312507	0	0	0	0	0	0	0	0	0	0	0	0	0	0	0	0	0	0	0	0	0	0	0	0	0	0	0	0	0	0	-0.00566872	-6.74306e-05	0.000242661	-0.000557285	-9.71739e-05	0.00181626	-0.00700575	-0.0288442	0
1791	0.10802	0.00931922	0.0159119	0.0827889	0.108565	0.108565	0.108565	0.090661	0.0147095	0.00319415	0	0	0	0	0	0	0	0	0	0	0	0	0	0	0	0	0	0	0	0	0	0	0	0	0	0	0	0	0	0	-0.00611429	-8.42883e-05	0.000303326	-0.000589915	-9.94791e-05	0.00155555	-0.00719948	-0.0297669	0
1792	0.232799	0.140569	0.00721438	0.0850151	0.111707	0.111707	0.111707	0.0933979	0.0150454	0.00326368	0	0	0	0	0	0	0	0	0	0	0	0	0	0	0	0	0	0	0	0	0	0	0	0	0	0	0	0	0	0	-0.00655452	-0.000101146	0.000363991	-0.000622448	-0.000101804	0.00129383	-0.00738694	-0.030664	0
1793	0.294575	0.206194	0.000695625	0.0876853	0.114796	0.114796	0.114796	0.0960604	0.0154015	0.00333373	0	0	0	0	0	0	0	0	0	0	0	0	0	0	0	0	0	0	0	0	0	0	0	0	0	0	0	0	0	0	-0.00670198	-0.000101146	0.000363991	-0.000631935	-0.000103761	0.0013391	-0.00756823	-0.0313564	0
1794	0.291738	0.214944	-0.0135494	0.0903436	0.117822	0.117822	0.117822	0.0986421	0.0157759	0.00340449	0	0	0	0	0	0	0	0	0	0	0	0	0	0	0	0	0	0	0	0	0	0	0	0	0	0	0	0	0	0	-0.00684351	-0.000101146	0.000363991	-0.000641468	-0.000105745	0.00138433	-0.00774347	-0.0320248	0
1795	0.256846	0.193069	-0.0292075	0.0929845	0.120784	0.120784	0.120784	0.101141	0.016167	0.00347613	0	0	0	0	0	0	0	0	0	0	0	0	0	0	0	0	0	0	0	0	0	0	0	0	0	0	0	0	0	0	-0.00697922	-0.000101146	0.000363991	-0.000651046	-0.000107754	0.0014295	-0.00791277	-0.03267	0
1796	0.245053	0.188694	-0.0392525	0.0956109	0.123685	0.123685	0.123685	0.103563	0.0165732	0.00354868	0	0	0	0	0	0	0	0	0	0	0	0	0	0	0	0	0	0	0	0	0	0	0	0	0	0	0	0	0	0	-0.00710926	-0.000101146	0.000363991	-0.000660671	-0.000109792	0.00147458	-0.00807622	-0.0332925	0
1797	0.262057	0.210569	-0.0462919	0.0977792	0.12653	0.12653	0.12653	0.105915	0.0169925	0.00362206	0	0	0	0	0	0	0	0	0	0	0	0	0	0	0	0	0	0	0	0	0	0	0	0	0	0	0	0	0	0	-0.00752309	-0.000118004	0.000424656	-0.000693	-0.000112238	0.00120944	-0.00823395	-0.0340702	0
1798	0.277467	0.228069	-0.0505312	0.0999294	0.129313	0.129313	0.129313	0.108193	0.0174234	0.00369635	0	0	0	0	0	0	0	0	0	0	0	0	0	0	0	0	0	0	0	0	0	0	0	0	0	0	0	0	0	0	-0.00793151	-0.000134861	0.000485322	-0.000725378	-0.000114715	0.000944184	-0.00838606	-0.0348259	0
1799	0.285635	0.232444	-0.0493063	0.102497	0.132027	0.132027	0.132027	0.110391	0.0178642	0.00377173	0	0	0	0	0	0	0	0	0	0	0	0	0	0	0	0	0	0	0	0	0	0	0	0	0	0	0	0	0	0	-0.00804523	-0.000134861	0.000485322	-0.000735158	-0.000116843	0.000988968	-0.00853266	-0.035383	0
1800	0.30346	0.232444	-0.0335737	0.104589	0.134669	0.134669	0.134669	0.112505	0.0183161	0.00384836	0	0	0	0	0	0	0	0	0	0	0	0	0	0	0	0	0	0	0	0	0	0	0	0	0	0	0	0	0	0	-0.00844273	-0.000151719	0.000545987	-0.000767714	-0.000119385	0.000723959	-0.00867386	-0.0360958	0
1801	0.325814	0.232444	-0.0133	0.10667	0.137256	0.137256	0.137256	0.114543	0.0187862	0.00392631	0	0	0	0	0	0	0	0	0	0	0	0	0	0	0	0	0	0	0	0	0	0	0	0	0	0	0	0	0	0	-0.00883486	-0.000168577	0.000606652	-0.000800378	-0.000121961	0.000459176	-0.00880977	-0.0367883	0
1802	0.322938	0.232444	-0.0178194	0.108313	0.139798	0.139798	0.139798	0.116513	0.0192802	0.00400554	0	0	0	0	0	0	0	0	0	0	0	0	0	0	0	0	0	0	0	0	0	0	0	0	0	0	0	0	0	0	-0.00950964	-0.000202292	0.000727983	-0.000856043	-0.00012496	-0.000113837	-0.00894049	-0.0376356	0
1803	0.308295	0.232444	-0.034545	0.110395	0.142293	0.142293	0.142293	0.11841	0.0197968	0.0040861	0	0	0	0	0	0	0	0	0	0	0	0	0	0	0	0	0	0	0	0	0	0	0	0	0	0	0	0	0	0	-0.00989057	-0.00021915	0.000788648	-0.000889063	-0.000127612	-0.000377254	-0.00906614	-0.0382885	0
1804	0.306252	0.232444	-0.0395369	0.113344	0.144725	0.144725	0.144725	0.120225	0.0203315	0.00416812	0	0	0	0	0	0	0	0	0	0	0	0	0	0	0	0	0	0	0	0	0	0	0	0	0	0	0	0	0	0	-0.00968924	-0.000202292	0.000727983	-0.000876652	-0.000129537	-2.19124e-05	-0.00918683	-0.0385724	0
1805	0.305549	0.232444	-0.0427263	0.115831	0.147099	0.147099	0.147099	0.121968	0.0208796	0.00425172	0	0	0	0	0	0	0	0	0	0	0	0	0	0	0	0	0	0	0	0	0	0	0	0	0	0	0	0	0	0	-0.00977162	-0.000202292	0.000727983	-0.000887137	-0.000131884	2.43633e-05	-0.00930266	-0.0390136	0
1806	0.296562	0.232444	-0.0537644	0.117883	0.149444	0.149444	0.149444	0.12367	0.0214367	0.00433697	0	0	0	0	0	0	0	0	0	0	0	0	0	0	0	0	0	0	0	0	0	0	0	0	0	0	0	0	0	0	-0.010136	-0.00021915	0.000788648	-0.000920814	-0.000134662	-0.000236318	-0.00941374	-0.0396116	0
1807	0.287336	0.232444	-0.0650431	0.119935	0.151757	0.151757	0.151757	0.125335	0.0219981	0.00442389	0	0	0	0	0	0	0	0	0	0	0	0	0	0	0	0	0	0	0	0	0	0	0	0	0	0	0	0	0	0	-0.0104954	-0.000236007	0.000849313	-0.000954685	-0.000137484	-0.000496324	-0.00952019	-0.0401925	0
1808	-0.206609	-0.257556	-0.0714175	0.122364	0.153977	0.153977	0.153977	0.126905	0.0225594	0.00451253	0	0	0	0	0	0	0	0	0	0	0	0	0	0	0	0	0	0	0	0	0	0	0	0	0	0	0	0	0	0	-0.0105631	-0.000236007	0.000849313	-0.000965661	-0.00013996	-0.00044866	-0.0096221	-0.0405827	0
1809	-1.35012	-1.39943	-0.0753287	0.124641	0.156019	0.156019	0.156019	0.1283	0.023116	0.00460296	0	0	0	0	0	0	0	0	0	0	0	0	0	0	0	0	0	0	0	0	0	0	0	0	0	0	0	0	0	0	-0.0106265	-0.000236007	0.000849313	-0.000976744	-0.00014248	-0.000400998	-0.0097196	-0.040957	0
1810	-1.75196	-1.80193	-0.0767375	0.126704	0.157824	0.157824	0.157824	0.129463	0.0236656	0.00469527	0	0	0	0	0	0	0	0	0	0	0	0	0	0	0	0	0	0	0	0	0	0	0	0	0	0	0	0	0	0	-0.0106858	-0.000236007	0.000849313	-0.00098793	-0.000145046	-0.000353387	-0.00981279	-0.041316	0
1811	-0.956129	-1.01006	-0.0742044	0.128132	0.159405	0.159405	0.159405	0.130404	0.0242113	0.00478954	0	0	0	0	0	0	0	0	0	0	0	0	0	0	0	0	0	0	0	0	0	0	0	0	0	0	0	0	0	0	-0.0110244	-0.000252865	0.000909978	-0.00102288	-0.000148063	-0.000608758	-0.00990177	-0.0418329	0
1812	-0.279183	-0.340681	-0.0679394	0.129438	0.160837	0.160837	0.160837	0.131194	0.0247577	0.00488582	0	0	0	0	0	0	0	0	0	0	0	0	0	0	0	0	0	0	0	0	0	0	0	0	0	0	0	0	0	0	-0.0113582	-0.000269723	0.000970643	-0.00105807	-0.000151131	-0.000863292	-0.00998666	-0.0423352	0
1813	-0.0779071	-0.148181	-0.0608563	0.13113	0.162193	0.162193	0.162193	0.131903	0.0253063	0.00498417	0	0	0	0	0	0	0	0	0	0	0	0	0	0	0	0	0	0	0	0	0	0	0	0	0	0	0	0	0	0	-0.0114044	-0.000269723	0.000970643	-0.00106982	-0.000153847	-0.000814097	-0.0100676	-0.0426505	0
1814	-0.598962	-0.677556	-0.0542369	0.132831	0.163532	0.163532	0.163532	0.132591	0.0258564	0.00508465	0	0	0	0	0	0	0	0	0	0	0	0	0	0	0	0	0	0	0	0	0	0	0	0	0	0	0	0	0	0	-0.011447	-0.000269723	0.000970643	-0.00108169	-0.000156615	-0.000765034	-0.0101446	-0.0429521	0
1815	-2.06194	-2.15193	-0.0441744	0.134164	0.16491	0.16491	0.16491	0.133315	0.0264075	0.00518734	0	0	0	0	0	0	0	0	0	0	0	0	0	0	0	0	0	0	0	0	0	0	0	0	0	0	0	0	0	0	-0.0117657	-0.00028658	0.00103131	-0.00111791	-0.000159854	-0.00101481	-0.0102179	-0.0434128	0
1816	-2.56318	-2.66381	-0.0345275	0.135154	0.166351	0.166351	0.166351	0.134099	0.0269592	0.00529233	0	0	0	0	0	0	0	0	0	0	0	0	0	0	0	0	0	0	0	0	0	0	0	0	0	0	0	0	0	0	-0.0123587	-0.000320295	0.00115264	-0.00117881	-0.000163576	-0.00156113	-0.0102875	-0.0440324	0
1817	-1.39423	-1.49568	-0.0347594	0.13621	0.167829	0.167829	0.167829	0.134918	0.0275109	0.00539971	0	0	0	0	0	0	0	0	0	0	0	0	0	0	0	0	0	0	0	0	0	0	0	0	0	0	0	0	0	0	-0.0129443	-0.000354011	0.00127397	-0.00124048	-0.000167371	-0.00210289	-0.0103535	-0.0446389	0
1818	-0.265648	-0.362556	-0.0407925	0.137701	0.169288	0.169288	0.169288	0.135717	0.028062	0.00550955	0	0	0	0	0	0	0	0	0	0	0	0	0	0	0	0	0	0	0	0	0	0	0	0	0	0	0	0	0	0	-0.0132463	-0.000370868	0.00133463	-0.00127819	-0.000170809	-0.00234485	-0.0104162	-0.0450616	0
1819	0.185347	0.0924442	-0.0466594	0.139562	0.170669	0.170669	0.170669	0.136435	0.0286121	0.00562183	0	0	0	0	0	0	0	0	0	0	0	0	0	0	0	0	0	0	0	0	0	0	0	0	0	0	0	0	0	0	-0.0132666	-0.000370868	0.00133463	-0.00129161	-0.000173885	-0.00228941	-0.0104755	-0.0453015	0
1820	0.311867	0.223694	-0.0531475	0.14132	0.171926	0.171926	0.171926	0.137029	0.0291608	0.00573657	0	0	0	0	0	0	0	0	0	0	0	0	0	0	0	0	0	0	0	0	0	0	0	0	0	0	0	0	0	0	-0.0132841	-0.000370868	0.00133463	-0.00130516	-0.000177022	-0.0022341	-0.0105315	-0.0455305	0
1821	0.318984	0.232444	-0.0564375	0.142978	0.173064	0.173064	0.173064	0.137502	0.0297081	0.00585384	0	0	0	0	0	0	0	0	0	0	0	0	0	0	0	0	0	0	0	0	0	0	0	0	0	0	0	0	0	0	-0.0132988	-0.000370868	0.00133463	-0.00131884	-0.000180224	-0.00217896	-0.0105845	-0.0457491	0
1822	0.321522	0.232444	-0.0550769	0.144155	0.174125	0.174125	0.174125	0.137897	0.0302546	0.00597377	0	0	0	0	0	0	0	0	0	0	0	0	0	0	0	0	0	0	0	0	0	0	0	0	0	0	0	0	0	0	-0.0135826	-0.000387726	0.0013953	-0.00135815	-0.000183944	-0.00241361	-0.0106345	-0.0461284	0
1823	0.325542	0.232444	-0.0517956	0.144894	0.175148	0.175148	0.175148	0.138251	0.0308006	0.00609643	0	0	0	0	0	0	0	0	0	0	0	0	0	0	0	0	0	0	0	0	0	0	0	0	0	0	0	0	0	0	-0.0141332	-0.000421441	0.00151663	-0.0014235	-0.000188197	-0.00293517	-0.0106815	-0.0466684	0
1824	0.333737	0.232444	-0.0447738	0.146066	0.176162	0.176162	0.176162	0.138595	0.0313461	0.00622184	0	0	0	0	0	0	0	0	0	0	0	0	0	0	0	0	0	0	0	0	0	0	0	0	0	0	0	0	0	0	-0.0144072	-0.000438299	0.0015773	-0.00146387	-0.000192079	-0.00316445	-0.0107258	-0.0470284	0
1825	0.347678	0.232444	-0.0320425	0.147276	0.177192	0.177192	0.177192	0.138951	0.0318913	0.00635001	0	0	0	0	0	0	0	0	0	0	0	0	0	0	0	0	0	0	0	0	0	0	0	0	0	0	0	0	0	0	-0.0146751	-0.000455157	0.00163796	-0.001505	-0.000196051	-0.00338943	-0.0107674	-0.0473792	0
1826	0.366029	0.232444	-0.0149362	0.148521	0.17824	0.17824	0.17824	0.139322	0.0324366	0.00648103	0	0	0	0	0	0	0	0	0	0	0	0	0	0	0	0	0	0	0	0	0	0	0	0	0	0	0	0	0	0	-0.0149395	-0.000472014	0.00169863	-0.00154647	-0.000200106	-0.00361307	-0.0108065	-0.0477217	0
1827	0.385377	0.232444	0.00313687	0.149795	0.179296	0.179296	0.179296	0.139699	0.0329819	0.00661505	0	0	0	0	0	0	0	0	0	0	0	0	0	0	0	0	0	0	0	0	0	0	0	0	0	0	0	0	0	0	-0.0151978	-0.000488872	0.00175929	-0.00158874	-0.000204258	-0.00383219	-0.0108431	-0.0480558	0
1828	0.3956	0.228069	0.0164413	0.15109	0.180355	0.180355	0.180355	0.140075	0.0335275	0.00675215	0	0	0	0	0	0	0	0	0	0	0	0	0	0	0	0	0	0	0	0	0	0	0	0	0	0	0	0	0	0	-0.0154529	-0.00050573	0.00181996	-0.00163137	-0.000208498	-0.0040499	-0.0108773	-0.0483824	0
1829	0.369518	0.193069	0.0236294	0.152819	0.181418	0.181418	0.181418	0.140452	0.0340735	0.00689231	0	0	0	0	0	0	0	0	0	0	0	0	0	0	0	0	0	0	0	0	0	0	0	0	0	0	0	0	0	0	-0.0154395	-0.00050573	0.00181996	-0.00164779	-0.000212348	-0.00398423	-0.0109093	-0.0485322	0
1830	0.151585	-0.0213058	0.0207813	0.152109	0.182483	0.182483	0.182483	0.140828	0.034619	0.00703549	0	0	0	0	0	0	0	0	0	0	0	0	0	0	0	0	0	0	0	0	0	0	0	0	0	0	0	0	0	0	-0.01699	-0.000606876	0.00218395	-0.00182798	-0.00021929	-0.00558057	-0.0109392	-0.0496887	0
1831	-0.242712	-0.397556	0.003675	0.151168	0.182889	0.182889	0.182889	0.140546	0.035161	0.00718177	0	0	0	0	0	0	0	0	0	0	0	0	0	0	0	0	0	0	0	0	0	0	0	0	0	0	0	0	0	0	-0.0182706	-0.000691164	0.00248727	-0.00198224	-0.000225857	-0.00689156	-0.010967	-0.0506703	0
1832	-0.35069	-0.485056	-0.0166381	0.151004	0.181598	0.181598	0.181598	0.138569	0.0356978	0.0073313	0	0	0	0	0	0	0	0	0	0	0	0	0	0	0	0	0	0	0	0	0	0	0	0	0	0	0	0	0	0	-0.0179767	-0.000674306	0.00242661	-0.00197423	-0.000229549	-0.00653227	-0.010993	-0.0506325	0
1833	-0.0619758	-0.183181	-0.0278906	0.149096	0.179365	0.179365	0.179365	0.13565	0.0362309	0.00748419	0	0	0	0	0	0	0	0	0	0	0	0	0	0	0	0	0	0	0	0	0	0	0	0	0	0	0	0	0	0	-0.0181987	-0.000691164	0.00248727	-0.00202167	-0.000234363	-0.00672163	-0.0110171	-0.050926	0
1834	-0.2153	-0.345056	-0.0175394	0.147295	0.177227	0.177227	0.177227	0.132824	0.0367633	0.00764044	0	0	0	0	0	0	0	0	0	0	0	0	0	0	0	0	0	0	0	0	0	0	0	0	0	0	0	0	0	0	-0.0184177	-0.000708022	0.00254794	-0.00206953	-0.000239287	-0.00690921	-0.0110395	-0.0512145	0
1835	-0.819113	-0.988181	0.0235506	0.145517	0.175094	0.175094	0.175094	0.129996	0.0372979	0.00780001	0	0	0	0	0	0	0	0	0	0	0	0	0	0	0	0	0	0	0	0	0	0	0	0	0	0	0	0	0	0	-0.0186307	-0.000724879	0.0026086	-0.00211834	-0.000244341	-0.00709135	-0.0110604	-0.0514981	0
1836	-0.735064	-0.948806	0.071575	0.142167	0.172967	0.172967	0.172967	0.127166	0.0378376	0.00796301	0	0	0	0	0	0	0	0	0	0	0	0	0	0	0	0	0	0	0	0	0	0	0	0	0	0	0	0	0	0	-0.0198478	-0.000809168	0.00291193	-0.00228265	-0.000251692	-0.00833648	-0.0110798	-0.0524478	0
1837	-0.124807	-0.349431	0.0853737	0.13925	0.17085	0.17085	0.17085	0.124335	0.0383853	0.0081296	0	0	0	0	0	0	0	0	0	0	0	0	0	0	0	0	0	0	0	0	0	0	0	0	0	0	0	0	0	0	-0.0208025	-0.000876598	0.00315459	-0.00241995	-0.000258661	-0.00930414	-0.0110978	-0.0532255	0
1838	0.249179	0.0443192	0.0663469	0.138513	0.169691	0.169691	0.169691	0.122447	0.038944	0.0082999	0	0	0	0	0	0	0	0	0	0	0	0	0	0	0	0	0	0	0	0	0	0	0	0	0	0	0	0	0	0	-0.0209913	-0.000893456	0.00321526	-0.00247272	-0.000264165	-0.00946171	-0.0111145	-0.0534965	0
1839	0.363501	0.179944	0.0447212	0.138836	0.169966	0.169966	0.169966	0.121975	0.0395165	0.00847385	0	0	0	0	0	0	0	0	0	0	0	0	0	0	0	0	0	0	0	0	0	0	0	0	0	0	0	0	0	0	-0.0214243	-0.000927171	0.00333659	-0.00255554	-0.000270371	-0.00987763	-0.0111302	-0.0539314	0
1840	0.343505	0.179944	0.0242725	0.139288	0.170735	0.170735	0.170735	0.121975	0.0401075	0.00865206	0	0	0	0	0	0	0	0	0	0	0	0	0	0	0	0	0	0	0	0	0	0	0	0	0	0	0	0	0	0	-0.0220948	-0.000977744	0.00351858	-0.00266948	-0.00027732	-0.0105441	-0.0111447	-0.0545298	0
1841	0.31934	0.175569	0.00348687	0.140284	0.172016	0.172016	0.172016	0.122447	0.0407232	0.00884589	0	0	0	0	0	0	0	0	0	0	0	0	0	0	0	0	0	0	0	0	0	0	0	0	0	0	0	0	0	0	-0.022756	-0.00102832	0.00370058	-0.00278502	-0.000284448	-0.0112005	-0.0111584	-0.0551254	0
1842	0.319973	0.188694	-0.0110381	0.142317	0.174299	0.174299	0.174299	0.123863	0.0413656	0.00907048	0	0	0	0	0	0	0	0	0	0	0	0	0	0	0	0	0	0	0	0	0	0	0	0	0	0	0	0	0	0	-0.0234046	-0.00107889	0.00388257	-0.00290272	-0.000291779	-0.0118426	-0.0111712	-0.055718	0
1843	0.293452	0.166819	-0.0182569	0.14489	0.177093	0.177093	0.177093	0.125751	0.0420297	0.00931265	0	0	0	0	0	0	0	0	0	0	0	0	0	0	0	0	0	0	0	0	0	0	0	0	0	0	0	0	0	0	-0.0240439	-0.00112946	0.00406457	-0.00302205	-0.000299302	-0.0124744	-0.0111833	-0.0563087	0
1844	0.288578	0.153694	-0.0130681	0.147952	0.180349	0.180349	0.180349	0.12811	0.0427082	0.00953103	0	0	0	0	0	0	0	0	0	0	0	0	0	0	0	0	0	0	0	0	0	0	0	0	0	0	0	0	0	0	-0.0246704	-0.00118004	0.00424656	-0.0031436	-0.000307044	-0.0130916	-0.0111948	-0.0568972	0
1845	0.338834	0.184319	0.003745	0.15077	0.184482	0.184482	0.184482	0.13141	0.0433937	0.00967897	0	0	0	0	0	0	0	0	0	0	0	0	0	0	0	0	0	0	0	0	0	0	0	0	0	0	0	0	0	0	-0.025997	-0.00128118	0.00461056	-0.00336054	-0.000316863	-0.0144432	-0.0112058	-0.0579789	0
1846	0.391591	0.214944	0.022365	0.154282	0.188527	0.188527	0.188527	0.134708	0.0440787	0.00974026	0	0	0	0	0	0	0	0	0	0	0	0	0	0	0	0	0	0	0	0	0	0	0	0	0	0	0	0	0	0	-0.026836	-0.00134861	0.00485322	-0.00351756	-0.000325679	-0.0152809	-0.0112164	-0.0587295	0
1847	0.429859	0.228069	0.0441262	0.157663	0.19204	0.19204	0.19204	0.137534	0.044756	0.00975013	0	0	0	0	0	0	0	0	0	0	0	0	0	0	0	0	0	0	0	0	0	0	0	0	0	0	0	0	0	0	-0.0274202	-0.00139919	0.00503521	-0.00364652	-0.000334144	-0.0158488	-0.0112267	-0.0593136	0
1848	0.458917	0.232444	0.0653581	0.161115	0.195995	0.195995	0.195995	0.140828	0.0454182	0.00974841	0	0	0	0	0	0	0	0	0	0	0	0	0	0	0	0	0	0	0	0	0	0	0	0	0	0	0	0	0	0	-0.0282296	-0.00146662	0.00527787	-0.00380874	-0.000343474	-0.0166518	-0.0112369	-0.0600621	0
1849	0.444998	0.215994	0.0644481	0.164556	0.199925	0.199925	0.199925	0.144121	0.0460579	0.00974679	0	0	0	0	0	0	0	0	0	0	0	0	0	0	0	0	0	0	0	0	0	0	0	0	0	0	0	0	0	0	-0.0290206	-0.00153405	0.00552053	-0.0039742	-0.000353096	-0.0174328	-0.011247	-0.0608094	0
1850	0.405396	0.192005	0.0468169	0.166575	0.203438	0.203438	0.203438	0.146941	0.0466654	0.00983124	0	0	0	0	0	0	0	0	0	0	0	0	0	0	0	0	0	0	0	0	0	0	0	0	0	0	0	0	0	0	-0.0303756	-0.00165205	0.00594519	-0.0042566	-0.000366397	-0.0187885	-0.0112572	-0.0620457	0
1851	0.398625	0.193033	0.0350131	0.170579	0.207233	0.20723	0.20723	0.14976	0.0473827	0.010087	0	3.37155e-06	0	0	0	0	0	0	0	0	0	0	0	0	0	0	0	0	0	3.37155e-06	0	0	0	0	0	0	0	0	0	0	-0.0310854	-0.00171948	0.00618785	-0.00446059	-0.000380927	-0.0196019	-0.0111103	-0.0624378	0
1852	0.400521	0.208797	0.0234325	0.168291	0.210775	0.210765	0.210765	0.152108	0.0482287	0.0104282	0	1.0112e-05	0	0	0	0	0	0	0	0	0	0	0	0	0	0	0	0	0	1.0112e-05	0	0	0	0	0	0	0	0	0	0	-0.031923	-0.00177005	0.00636985	-0.00477111	-0.000426812	-0.01914	-0.0121848	-0.0667802	0
1853	0.393475	0.223534	0.00493063	0.165011	0.214315	0.214298	0.214298	0.154455	0.0490739	0.0107693	0	1.68545e-05	0	0	0	0	0	0	0	0	0	0	0	0	0	0	0	0	0	1.68545e-05	0	0	0	0	0	0	0	0	0	0	-0.0328911	-0.00185434	0.00667317	-0.00516171	-0.00047338	-0.0187067	-0.0133681	-0.0716228	0
1854	0.384141	0.231759	-0.0141137	0.166496	0.218323	0.218299	0.218299	0.15727	0.0499183	0.0111104	0	2.36015e-05	0	0	0	0	0	0	0	0	0	0	0	0	0	0	0	0	0	2.36015e-05	0	0	0	0	0	0	0	0	0	0	-0.0347687	-0.00205663	0.00740116	-0.00568177	-0.000494128	-0.0206647	-0.0132727	-0.0732375	0
1855	0.242826	0.101187	-0.0262806	0.16792	0.222187	0.222157	0.222157	0.160084	0.0506214	0.0114514	0	3.03485e-05	0	0	0	0	0	0	0	0	0	0	0	0	0	0	0	0	0	3.03485e-05	0	0	0	0	0	0	0	0	0	0	-0.0365941	-0.00225893	0.00812914	-0.00620497	-0.000514249	-0.0225881	-0.013157	-0.0747763	0
1856	-0.211073	-0.356671	-0.0247188	0.170318	0.226049	0.226012	0.226012	0.162896	0.0513238	0.0117924	0	3.7089e-05	0	0	0	0	0	0	0	0	0	0	0	0	0	0	0	0	0	3.7089e-05	0	0	0	0	0	0	0	0	0	0	-0.0373583	-0.00237693	0.00855379	-0.00657552	-0.000535075	-0.023216	-0.0132085	-0.0760571	0
1857	-0.44449	-0.610276	-0.00660625	0.172392	0.23005	0.230006	0.230006	0.165707	0.0521659	0.0121333	0	4.38295e-05	0	0	0	0	0	0	0	0	0	0	0	0	0	0	0	0	0	4.38295e-05	0	0	0	0	0	0	0	0	0	0	-0.0379593	-0.00247808	0.00891779	-0.00692952	-0.000560068	-0.0234691	-0.0134404	-0.0777602	0
1858	-0.0968363	-0.297726	0.0245875	0.176302	0.234516	0.234465	0.234465	0.168984	0.0530073	0.0124741	0	5.05765e-05	0	0	0	0	0	0	0	0	0	0	0	0	0	0	0	0	0	5.05765e-05	0	0	0	0	0	0	0	0	0	0	-0.0377434	-0.00251179	0.00903912	-0.00713598	-0.000582046	-0.0228811	-0.0136716	-0.0788276	0
1859	0.262109	0.0281901	0.0549981	0.178921	0.238979	0.238922	0.238922	0.172259	0.0538479	0.0128149	0	5.7317e-05	0	0	0	0	0	0	0	0	0	0	0	0	0	0	0	0	0	5.7317e-05	0	0	0	0	0	0	0	0	0	0	-0.0382962	-0.00261294	0.00940311	-0.00749556	-0.000607703	-0.0230821	-0.013901	-0.080499	0
1860	0.390709	0.150537	0.0655506	0.174622	0.242972	0.242908	0.242908	0.175065	0.0546876	0.0131556	0	6.40575e-05	0	0	0	0	0	0	0	0	0	0	0	0	0	0	0	0	0	6.40575e-05	0	0	0	0	0	0	0	0	0	0	-0.040746	-0.00374144	0.0115562	-0.00823371	-0.000642153	-0.0255547	-0.0141302	-0.0868929	0
1861	0.35779	0.13957	0.0522987	0.165921	0.246963	0.246892	0.246892	0.177869	0.0555265	0.0134962	0	7.08045e-05	0	0	0	0	0	0	0	0	0	0	0	0	0	0	0	0	0	7.08045e-05	0	0	0	0	0	0	0	0	0	0	-0.0438139	-0.00559474	0.0147615	-0.00907053	-0.000693842	-0.0286875	-0.0145288	-0.0968016	0
1862	0.258114	0.055264	0.030695	0.172155	0.250484	0.250406	0.250406	0.180205	0.0563646	0.0138368	0	7.7545e-05	0	0	0	0	0	0	0	0	0	0	0	0	0	0	0	0	0	7.7545e-05	0	0	0	0	0	0	0	0	0	0	-0.0442782	-0.0059419	0.0154946	-0.00939863	-0.000698698	-0.0302114	-0.0135223	-0.0957985	0
1863	0.263904	0.0676015	0.01407	0.182233	0.254003	0.253919	0.253919	0.18254	0.0572019	0.0141773	0	8.42855e-05	0	0	0	0	0	0	0	0	0	0	0	0	0	0	0	0	0	8.42855e-05	0	0	0	0	0	0	0	0	0	0	-0.0443449	-0.00574691	0.0155204	-0.00976109	-0.000690694	-0.0314319	-0.0122347	-0.0918583	0
1864	0.336234	0.15088	0.0009975	0.184357	0.257987	0.257896	0.257896	0.18534	0.0580385	0.0145178	0	9.10325e-05	0	0	0	0	0	0	0	0	0	0	0	0	0	0	0	0	0	9.10325e-05	0	0	0	0	0	0	0	0	0	0	-0.0458134	-0.00571758	0.0160069	-0.0105293	-0.000729976	-0.0325981	-0.0122454	-0.0931968	0
1865	0.370764	0.198516	-0.0124294	0.184677	0.261642	0.261544	0.261544	0.187673	0.0590133	0.0148582	0	9.77795e-05	0	0	0	0	0	0	0	0	0	0	0	0	0	0	0	0	0	9.77795e-05	0	0	0	0	0	0	0	0	0	0	-0.0474597	-0.00604244	0.0170249	-0.0113447	-0.000770023	-0.0340651	-0.0122624	-0.0959086	0
1866	0.375045	0.219079	-0.0242375	0.180204	0.264828	0.264723	0.264723	0.189538	0.0599872	0.0151985	0	0.00010452	0	0	0	0	0	0	0	0	0	0	0	0	0	0	0	0	0	0.00010452	0	0	0	0	0	0	0	0	0	0	-0.0491525	-0.00759759	0.0197121	-0.0120904	-0.000805345	-0.0360972	-0.0122741	-0.102845	0
1867	0.37954	0.229017	-0.0246006	0.175123	0.267873	0.267762	0.267762	0.191402	0.060821	0.0155388	0	0.00011126	0	0	0	0	0	0	0	0	0	0	0	0	0	0	0	0	0	0.00011126	0	0	0	0	0	0	0	0	0	0	-0.0509982	-0.00929334	0.0226456	-0.0128979	-0.000840293	-0.0383731	-0.0122391	-0.110111	0
1868	0.404765	0.231073	-0.0025725	0.176264	0.271383	0.271265	0.271265	0.193732	0.0616541	0.015879	0	0.000118008	0	0	0	0	0	0	0	0	0	0	0	0	0	0	0	0	0	0.000118008	0	0	0	0	0	0	0	0	0	0	-0.0521573	-0.00964501	0.0236331	-0.0136428	-0.000875393	-0.0394672	-0.01216	-0.112368	0
1869	0.440705	0.222848	0.0355338	0.182323	0.275357	0.275232	0.275232	0.196527	0.0624863	0.0162191	0	0.000124748	0	0	0	0	0	0	0	0	0	0	0	0	0	0	0	0	0	0.000124748	0	0	0	0	0	0	0	0	0	0	-0.0524795	-0.00903414	0.0231409	-0.0142438	-0.00090931	-0.0393557	-0.0120775	-0.110963	0
1870	0.469869	0.218736	0.0641287	0.187004	0.279382	0.27925	0.27925	0.19932	0.0634562	0.0164742	0	0.000131463	0	0	0	0	0	0	0	0	0	0	0	0	0	0	0	0	0	0.000131463	0	0	0	0	0	0	0	0	0	0	-0.0528636	-0.00881258	0.023233	-0.0149213	-0.000944553	-0.0394142	-0.012004	-0.110999	0
1871	0.468819	0.219421	0.06727	0.182128	0.283784	0.283646	0.283646	0.202576	0.0644252	0.0166442	0	0.00013819	0	0	0	0	0	0	0	0	0	0	0	0	0	0	0	0	0	0.00013819	0	0	0	0	0	0	0	0	0	0	-0.0563441	-0.00923964	0.0243689	-0.0159158	-0.0010687	-0.0419427	-0.0125462	-0.116906	0
1872	0.422773	0.207084	0.0517606	0.163928	0.288595	0.28845	0.28845	0.206296	0.0652549	0.0168992	0	0.00014495	0	0	0	0	0	0	0	0	0	0	0	0	0	0	0	0	0	0.00014495	0	0	0	0	0	0	0	0	0	0	-0.0623654	-0.0100273	0.0264705	-0.0177966	-0.0013119	-0.0446397	-0.0150604	-0.131321	0
1873	0.369789	0.193375	0.0265125	0.149901	0.293952	0.2938	0.2938	0.210477	0.0660837	0.0172392	0	0.00015171	0	0	0	0	0	0	0	0	0	0	0	0	0	0	0	0	0	0.00015171	0	0	0	0	0	0	0	0	0	0	-0.0665409	-0.0110844	0.029047	-0.0197738	-0.00150616	-0.0459737	-0.0172498	-0.144588	0
1874	0.353735	0.201258	-2.1875e-05	0.152499	0.300232	0.300074	0.300074	0.215583	0.0669118	0.017579	0	0.00015847	0	0	0	0	0	0	0	0	0	0	0	0	0	0	0	0	0	0.00015847	0	0	0	0	0	0	0	0	0	0	-0.0663417	-0.0117345	0.0300578	-0.0202242	-0.00158161	-0.0452238	-0.0176353	-0.14859	0
1875	0.332461	0.194061	-0.0208469	0.159247	0.307024	0.306858	0.306858	0.221148	0.0678768	0.0178339	0	0.00016523	0	0	0	0	0	0	0	0	0	0	0	0	0	0	0	0	0	0.00016523	0	0	0	0	0	0	0	0	0	0	-0.065587	-0.0116861	0.0301266	-0.0207088	-0.00164652	-0.0437521	-0.0179201	-0.149792	0
1876	0.288309	0.152936	-0.0317319	0.167105	0.314187	0.314014	0.314014	0.227169	0.0688409	0.0180038	0	0.000172315	0	0	0	0	0	0	0	0	0	0	0	0	0	0	0	0	0	0.000172315	0	0	0	0	0	0	0	0	0	0	-0.0665589	-0.0105746	0.0290978	-0.0216445	-0.00174032	-0.0434441	-0.0182533	-0.148668	0
1877	0.292982	0.148481	-0.0351575	0.179658	0.322214	0.322034	0.322034	0.234109	0.0696664	0.0182586	0	0.00017992	0	0	0	0	0	0	0	0	0	0	0	0	0	0	0	0	0	0.00017992	0	0	0	0	0	0	0	0	0	0	-0.065809	-0.00905825	0.0273256	-0.021951	-0.0018211	-0.0417316	-0.0185726	-0.145192	0
1878	0.334209	0.180353	-0.0366756	0.190532	0.330779	0.330592	0.330592	0.241502	0.0704911	0.0185984	0	0.000187915	0	0	0	0	0	0	0	0	0	0	0	0	0	0	0	0	0	0.000187915	0	0	0	0	0	0	0	0	0	0	-0.0644004	-0.0085663	0.0274192	-0.0222863	-0.00188831	-0.0402392	-0.0188395	-0.144794	0
1879	0.368246	0.201943	-0.0295531	0.195856	0.339795	0.339599	0.339599	0.249345	0.0713151	0.018938	0	0.0001963	0	0	0	0	0	0	0	0	0	0	0	0	0	0	0	0	0	0.0001963	0	0	0	0	0	0	0	0	0	0	-0.0655452	-0.00884175	0.0281805	-0.0232649	-0.00197026	-0.0405532	-0.0190956	-0.147846	0
1880	0.399955	0.215652	-0.00942375	0.193727	0.349856	0.349651	0.349651	0.258098	0.0722753	0.0192776	0	0.00020501	0	0	0	0	0	0	0	0	0	0	0	0	0	0	0	0	0	0.00020501	0	0	0	0	0	0	0	0	0	0	-0.0711233	-0.00985504	0.0292261	-0.0255507	-0.0020891	-0.0435052	-0.0193494	-0.155044	0
1881	0.429205	0.222848	0.01064	0.195717	0.360499	0.360285	0.360285	0.267296	0.0733715	0.0196171	0	0.00021411	0	0	0	0	0	0	0	0	0	0	0	0	0	0	0	0	0	0.00021411	0	0	0	0	0	0	0	0	0	0	-0.0740412	-0.0101177	0.0295307	-0.0274976	-0.00223281	-0.0434902	-0.0202335	-0.160541	0
1882	0.33982	0.111125	0.0210525	0.207642	0.370667	0.370443	0.370443	0.27602	0.0744664	0.0199566	0	0.000223665	0	0	0	0	0	0	0	0	0	0	0	0	0	0	0	0	0	0.000223665	0	0	0	0	0	0	0	0	0	0	-0.0741249	-0.009878	0.0294625	-0.0285753	-0.00230008	-0.0428917	-0.0199423	-0.160133	0
1883	-0.563533	-0.802535	0.0219013	0.2171	0.380361	0.380127	0.380127	0.284271	0.0755599	0.020296	0	0.00023361	0	0	0	0	0	0	0	0	0	0	0	0	0	0	0	0	0	0.00023361	0	0	0	0	0	0	0	0	0	0	-0.0762233	-0.0102509	0.0301271	-0.03011	-0.00234804	-0.0446772	-0.0189643	-0.160765	0
1884	-1.30178	-1.5373	0.0105831	0.224943	0.389905	0.389661	0.389661	0.29251	0.0765157	0.0206353	0	0.000243945	0	0	0	0	0	0	0	0	0	0	0	0	0	0	0	0	0	0.000243945	0	0	0	0	0	0	0	0	0	0	-0.076439	-0.0104628	0.0311033	-0.0312892	-0.00243688	-0.044279	-0.0190744	-0.163192	0
1885	-0.718939	-0.944073	-0.0105306	0.235665	0.398387	0.398132	0.398132	0.299823	0.0773341	0.0209746	0	0.000254735	0	0	0	0	0	0	0	0	0	0	0	0	0	0	0	0	0	0.000254735	0	0	0	0	0	0	0	0	0	0	-0.0744818	-0.0104264	0.0320677	-0.0317289	-0.0025029	-0.0427405	-0.0191509	-0.163813	0
1886	-0.235809	-0.448517	-0.0316925	0.244401	0.405626	0.40536	0.40536	0.305758	0.0782878	0.0213138	0	0.000266045	0	0	0	0	0	0	0	0	0	0	0	0	0	0	0	0	0	0.000266045	0	0	0	0	0	0	0	0	0	0	-0.0731332	-0.0103427	0.0329968	-0.0321938	-0.00258703	-0.0417672	-0.0192393	-0.164617	0
1887	-0.117215	-0.321372	-0.0442794	0.248437	0.411997	0.411719	0.411719	0.310774	0.0793767	0.0215682	0	0.000277875	0	0	0	0	0	0	0	0	0	0	0	0	0	0	0	0	0	0.000277875	0	0	0	0	0	0	0	0	0	0	-0.0737549	-0.0106555	0.0344594	-0.0333255	-0.00269147	-0.0422728	-0.0192691	-0.167532	0
1888	-0.0165989	-0.21102	-0.0505225	0.244944	0.417367	0.417077	0.417077	0.314875	0.0804642	0.0217377	0	0.000290225	0	0	0	0	0	0	0	0	0	0	0	0	0	0	0	0	0	0.000290225	0	0	0	0	0	0	0	0	0	0	-0.0782374	-0.0114674	0.0358514	-0.0359193	-0.00282376	-0.0446739	-0.0192044	-0.173259	0
1889	-0.0845096	-0.277506	-0.0530425	0.246039	0.422363	0.42206	0.42206	0.318517	0.0815504	0.021992	0	0.000303095	0	0	0	0	0	0	0	0	0	0	0	0	0	0	0	0	0	0.000303095	0	0	0	0	0	0	0	0	0	0	-0.080007	-0.0119144	0.0374632	-0.0377391	-0.00293162	-0.0457459	-0.0191391	-0.176851	0
1890	-0.123486	-0.331654	-0.0402588	0.248427	0.426985	0.426669	0.426669	0.321702	0.0826352	0.022331	0	0.00031655	0	0	0	0	0	0	0	0	0	0	0	0	0	0	0	0	0	0.00031655	0	0	0	0	0	0	0	0	0	0	-0.080852	-0.0122197	0.0390162	-0.0394044	-0.00304059	-0.0461154	-0.0190881	-0.179694	0
1891	-0.0281683	-0.261741	-0.0124338	0.246007	0.431286	0.430955	0.430955	0.324431	0.0838541	0.02267	0	0.00033059	0	0	0	0	0	0	0	0	0	0	0	0	0	0	0	0	0	0.00033059	0	0	0	0	0	0	0	0	0	0	-0.0848516	-0.0126245	0.0396731	-0.0422521	-0.00319693	-0.0474605	-0.0189906	-0.183801	0
1892	0.171455	-0.0876454	0.0133612	0.245739	0.435719	0.435373	0.435373	0.327158	0.0852065	0.0230089	0	0.000345215	0	0	0	0	0	0	0	0	0	0	0	0	0	0	0	0	0	0.000345215	0	0	0	0	0	0	0	0	0	0	-0.0869271	-0.0128256	0.0404906	-0.0446772	-0.00334476	-0.0473381	-0.019232	-0.187404	0
1893	0.340367	0.0600619	0.0341819	0.246123	0.439475	0.439115	0.439115	0.32943	0.086422	0.0232631	0	0.000360555	0	0	0	0	0	0	0	0	0	0	0	0	0	0	0	0	0	0.000360555	0	0	0	0	0	0	0	0	0	0	-0.0877202	-0.0129807	0.042014	-0.0468947	-0.00348751	-0.046792	-0.0195792	-0.190904	0
1894	0.458547	0.169386	0.0436013	0.24556	0.442556	0.44218	0.44218	0.331246	0.087501	0.0234325	0	0.00037661	0	0	0	0	0	0	0	0	0	0	0	0	0	0	0	0	0	0.00037661	0	0	0	0	0	0	0	0	0	0	-0.0879802	-0.0133624	0.0439162	-0.0489577	-0.0036267	-0.0459367	-0.0200129	-0.195117	0
1895	0.434966	0.161846	0.02968	0.24344	0.44577	0.445377	0.445377	0.333062	0.0887132	0.0236019	0	0.000393315	0	0	0	0	0	0	0	0	0	0	0	0	0	0	0	0	0	0.000393315	0	0	0	0	0	0	0	0	0	0	-0.0886382	-0.0141698	0.0456155	-0.0509215	-0.00376398	-0.0448917	-0.0205066	-0.200563	0
1896	0.262909	0.016538	0.0023975	0.243974	0.449118	0.448707	0.448707	0.334877	0.0900583	0.0237712	0	0.000410735	0	0	0	0	0	0	0	0	0	0	0	0	0	0	0	0	0	0.000410735	0	0	0	0	0	0	0	0	0	0	-0.0886154	-0.0148691	0.0481709	-0.0528425	-0.00390118	-0.0445245	-0.020649	-0.205048	0
1897	0.163166	-0.0646839	-0.0192413	0.247091	0.452867	0.452438	0.452438	0.337146	0.0912673	0.0240253	0	0.000429	0	0	0	0	0	0	0	0	0	0	0	0	0	0	0	0	0	0.000429	0	0	0	0	0	0	0	0	0	0	-0.087262	-0.0153758	0.0519425	-0.0547784	-0.00404027	-0.0442391	-0.020771	-0.209075	0
1898	0.258699	0.0377859	-0.0298594	0.250773	0.457974	0.457526	0.457526	0.340772	0.0924745	0.0242793	0	0.000448045	0	0	0	0	0	0	0	0	0	0	0	0	0	0	0	0	0	0.000448045	0	0	0	0	0	0	0	0	0	0	-0.0858324	-0.0162168	0.0563086	-0.0567877	-0.00418333	-0.0440767	-0.0208766	-0.214127	0
1899	0.36799	0.150537	-0.0367281	0.254182	0.464486	0.464018	0.464018	0.345756	0.0938141	0.0244486	0	0.000467935	0	0	0	0	0	0	0	0	0	0	0	0	0	0	0	0	0	0.000467935	0	0	0	0	0	0	0	0	0	0	-0.0857853	-0.017186	0.0597363	-0.0589296	-0.0043326	-0.0441358	-0.0209375	-0.219422	0
1900	0.414758	0.201943	-0.0451019	0.257917	0.471668	0.47118	0.471174	0.351187	0.0952852	0.0247025	5.26505e-06	0.000488735	0	5.26505e-06	0	0	0	0	0	0	0	0	0	0	0	0	0	0	0	0.000488735	0	0	0	0	0	0	0	0	0	0	-0.0866805	-0.0179615	0.0622837	-0.061285	-0.0045019	-0.0442715	-0.0209443	-0.22409	0
1901	0.39849	0.191662	-0.0529112	0.259739	0.47978	0.47927	0.479259	0.357064	0.0971539	0.025041	1.08072e-05	0.00051038	0	1.08072e-05	0	0	0	0	0	0	0	0	0	0	0	0	0	0	0	0.00051038	0	0	0	0	0	0	0	0	0	0	-0.0855945	-0.0186976	0.0650834	-0.0637067	-0.00470643	-0.0411879	-0.0223793	-0.231464	0
1902	-0.0416702	-0.256943	-0.0463881	0.261661	0.488595	0.488063	0.488051	0.363387	0.0992852	0.0253795	1.1376e-05	0.00053235	0	1.1376e-05	0	0	0	0	0	0	0	0	0	0	0	0	0	0	0	0.00053235	0	0	0	0	0	0	0	0	0	0	-0.0857321	-0.0190455	0.0663163	-0.0662422	-0.00493724	-0.0379648	-0.0238586	-0.237806	0
1903	-0.403369	-0.651058	-0.0158112	0.2635	0.49753	0.496976	0.496964	0.369701	0.101544	0.0257179	1.19747e-05	0.00055419	0	1.19747e-05	0	0	0	0	0	0	0	0	0	0	0	0	0	0	0	0.00055419	0	0	0	0	0	0	0	0	0	0	-0.0888614	-0.0194816	0.0662008	-0.0690836	-0.00518172	-0.036875	-0.0244402	-0.242613	0
1904	-0.0817013	-0.356329	0.00875	0.265877	0.507034	0.506458	0.506445	0.376459	0.10393	0.0260563	1.2605e-05	0.000575965	0	1.2605e-05	0	0	0	0	0	0	0	0	0	0	0	0	0	0	0	0.000575965	0	0	0	0	0	0	0	0	0	0	-0.0909065	-0.0198276	0.0670198	-0.072126	-0.00543742	-0.0350491	-0.0254863	-0.24822	0
1905	0.285079	0.00214422	0.0126306	0.270304	0.517422	0.516825	0.516811	0.384107	0.10631	0.0263946	1.32684e-05	0.00059774	0	1.32684e-05	0	0	0	0	0	0	0	0	0	0	0	0	0	0	0	0.00059774	0	0	0	0	0	0	0	0	0	0	-0.0926819	-0.01998	0.0682005	-0.0752667	-0.00570165	-0.0335032	-0.0264309	-0.253178	0
1906	0.389716	0.100159	0.016485	0.273072	0.528244	0.527624	0.52761	0.392194	0.108683	0.0267328	1.39667e-05	0.000620425	0	1.39667e-05	0	0	0	0	0	0	0	0	0	0	0	0	0	0	0	0.000620425	0	0	0	0	0	0	0	0	0	0	-0.0944081	-0.0208963	0.0701172	-0.0784052	-0.00597146	-0.0317893	-0.0274631	-0.260295	0
1907	0.3695	0.0761692	0.0177931	0.275537	0.538691	0.538041	0.538026	0.39982	0.111051	0.0271555	1.47018e-05	0.00064948	0	1.47018e-05	0	0	0	0	0	0	0	0	0	0	0	0	0	0	0	0.00064948	0	0	0	0	0	0	0	0	0	0	-0.0965804	-0.0221755	0.0721422	-0.0814429	-0.00624367	-0.0307328	-0.0281276	-0.267524	0
1908	0.386643	0.0878213	0.0135844	0.285237	0.548893	0.548209	0.548193	0.406988	0.113543	0.0276626	1.54756e-05	0.00068406	0	1.54756e-05	0	0	0	0	0	0	0	0	0	0	0	0	0	0	0	0.00068406	0	0	0	0	0	0	0	0	0	0	-0.0963313	-0.0222577	0.0755254	-0.0842829	-0.00651489	-0.0304833	-0.0283179	-0.270873	0
1909	0.45258	0.153964	0.000923125	0.297693	0.559209	0.558491	0.558475	0.414146	0.116159	0.0281696	1.62901e-05	0.00071864	0	1.62901e-05	0	0	0	0	0	0	0	0	0	0	0	0	0	0	0	0.00071864	0	0	0	0	0	0	0	0	0	0	-0.095366	-0.0217224	0.0785678	-0.0868298	-0.00678153	-0.0301259	-0.0284741	-0.27231	0
1910	0.474067	0.18892	-0.0192369	0.304384	0.569379	0.568626	0.568609	0.421294	0.118638	0.0286764	1.71475e-05	0.00075322	0	1.71475e-05	0	0	0	0	0	0	0	0	0	0	0	0	0	0	0	0.00075322	0	0	0	0	0	0	0	0	0	0	-0.0973185	-0.0222365	0.0792201	-0.0889837	-0.00704258	-0.0297163	-0.0285595	-0.275709	0
1911	0.475024	0.195089	-0.0344094	0.314345	0.578957	0.578169	0.578151	0.427988	0.12098	0.0291831	1.805e-05	0.000787735	0	1.805e-05	0	0	0	0	0	0	0	0	0	0	0	0	0	0	0	0.000787735	0	0	0	0	0	0	0	0	0	0	-0.0987111	-0.0227275	0.0807683	-0.0907383	-0.00729931	-0.0311982	-0.027516	-0.277429	0
1912	0.237872	-0.0485766	-0.0413963	0.327845	0.588289	0.587466	0.587447	0.434227	0.123446	0.029774	1.9e-05	0.000823615	0	1.9e-05	0	0	0	0	0	0	0	0	0	0	0	0	0	0	0	0.000823615	0	0	0	0	0	0	0	0	0	0	-0.09969	-0.0230286	0.0829117	-0.0922324	-0.00755132	-0.0341549	-0.0256345	-0.277167	0
1913	0.142892	-0.15653	-0.0390513	0.338473	0.597882	0.597007	0.596987	0.440459	0.126164	0.0303648	2e-05	0.00087458	0	2e-05	0	0	0	0	0	0	0	0	0	0	0	0	0	0	0	0.000874445	0	0	0	0	0	0	0	0	1.35e-07	0	-0.101757	-0.023801	0.0839213	-0.0935757	-0.00779867	-0.0363541	-0.0241485	-0.278121	0
1914	0.387926	0.0556067	-0.0191494	0.351469	0.60707	0.606134	0.606113	0.446239	0.129003	0.0308711	2.10526e-05	0.00093589	0	2.10526e-05	0	0	0	0	0	0	0	0	0	0	0	0	0	0	0	0.00093548	0	0	0	0	0	0	0	0	4.1e-07	0	-0.103025	-0.0230232	0.083467	-0.0948027	-0.00804319	-0.0374209	-0.0232021	-0.275846	0
1915	0.544847	0.159447	0.0196175	0.365782	0.61586	0.614886	0.614864	0.45157	0.131833	0.0314615	2.21607e-05	0.00097361	0	2.21607e-05	0	0	0	0	0	0	0	0	0	0	0	0	0	0	0	0.00097292	0	0	0	0	0	0	0	0	6.9e-07	0	-0.104047	-0.0212311	0.0818106	-0.0959469	-0.00828684	-0.0378242	-0.0225686	-0.271311	0
1916	0.619466	0.187549	0.0578375	0.374079	0.625143	0.624152	0.624129	0.457338	0.134655	0.0321361	2.3327e-05	0.000991055	0	2.3327e-05	0	0	0	0	0	0	0	0	0	0	0	0	0	0	0	0.00099008	0	0	0	0	0	0	0	0	9.75e-07	0	-0.106959	-0.0211044	0.0796577	-0.0970414	-0.00853174	-0.0377971	-0.0221423	-0.271094	0
1917	0.65508	0.196117	0.0783825	0.38058	0.634956	0.63393	0.633906	0.463543	0.137468	0.0328947	2.45547e-05	0.00102605	0	2.45547e-05	0	0	0	0	0	0	0	0	0	0	0	0	0	0	0	0.00102479	0	0	0	0	0	0	0	0	1.265e-06	0	-0.109292	-0.0218517	0.0786552	-0.098119	-0.00878013	-0.0371815	-0.0220147	-0.273662	0
1918	0.66255	0.201943	0.071505	0.389102	0.644548	0.643462	0.643436	0.469299	0.1404	0.0337372	2.58471e-05	0.00108614	0	2.58471e-05	0	0	0	0	0	0	0	0	0	0	0	0	0	0	0	0.00108459	0	0	0	0	0	0	0	0	1.555e-06	0	-0.11107	-0.0218246	0.0774364	-0.0992118	-0.00903437	-0.0365154	-0.02192	-0.274388	0
1919	0.640626	0.194746	0.0426475	0.403232	0.653733	0.652579	0.652552	0.474606	0.143451	0.0344951	2.72075e-05	0.00115384	0	2.72075e-05	0	0	0	0	0	0	0	0	0	0	0	0	0	0	0	0.001152	0	0	0	0	0	0	0	0	1.845e-06	0	-0.11051	-0.0200828	0.0767811	-0.100352	-0.00929696	-0.0355837	-0.0219764	-0.271262	0
1920	0.538608	0.110783	0.0138031	0.414022	0.663217	0.661996	0.661967	0.480349	0.146365	0.0352528	2.86395e-05	0.00122153	0	2.86395e-05	0	0	0	0	0	0	0	0	0	0	0	0	0	0	0	0.0012194	0	0	0	0	0	0	0	0	2.135e-06	0	-0.109767	-0.0199637	0.0781727	-0.10156	-0.00955195	-0.0348032	-0.0220605	-0.272523	0
1921	0.513908	0.0957036	-0.00765625	0.425861	0.673527	0.672237	0.672207	0.486969	0.149144	0.0360942	3.01468e-05	0.00128936	0	3.01468e-05	0	0	0	0	0	0	0	0	0	0	0	0	0	0	0	0.00128693	0	0	0	0	0	0	0	0	2.425e-06	0	-0.105712	-0.0197725	0.0820658	-0.102846	-0.00978369	-0.0321637	-0.023212	-0.275991	0
1922	0.599174	0.181038	-0.0211838	0.43932	0.683862	0.682504	0.682473	0.49358	0.152041	0.0368512	3.17335e-05	0.00135731	0	3.17335e-05	0	0	0	0	0	0	0	0	0	0	0	0	0	0	0	0.0013546	0	0	0	0	0	0	0	0	2.715e-06	0	-0.103054	-0.018506	0.0839562	-0.104206	-0.0100124	-0.0301092	-0.0241763	-0.276371	0
1923	0.618842	0.202286	-0.0221856	0.438741	0.693783	0.692359	0.692322	0.499744	0.155054	0.0375238	3.66556e-05	0.00142456	3.25193e-06	3.34036e-05	0	0	0	0	0	0	0	0	0	0	0	0	0	0	0	0.00142155	0	0	0	0	0	0	0	0	3.01e-06	0	-0.110078	-0.0198458	0.080011	-0.105624	-0.010255	-0.0302266	-0.0241372	-0.280736	0
1924	0.621606	0.189263	-0.00910437	0.441447	0.70457	0.703079	0.703033	0.506778	0.158059	0.0381962	4.5521e-05	0.00149181	1.03592e-05	3.51617e-05	0	0	0	0	0	0	0	0	0	0	0	0	0	0	0	0.0014885	0	0	0	0	0	0	0	0	3.31e-06	0	-0.114414	-0.0210079	0.0783979	-0.107078	-0.0105083	-0.0298239	-0.0243929	-0.285478	0
1925	0.656901	0.189263	0.01456	0.453078	0.716218	0.714659	0.714603	0.514682	0.161053	0.0388684	5.52852e-05	0.0015597	1.82729e-05	3.70124e-05	0	0	0	0	0	0	0	0	0	0	0	0	0	0	0	0.0015561	0	0	0	0	0	0	0	0	3.605e-06	0	-0.114389	-0.021049	0.0801858	-0.108546	-0.010769	-0.0296705	-0.0245403	-0.287664	0
1926	0.701245	0.197145	0.0403637	0.463736	0.727498	0.725864	0.725799	0.522136	0.164039	0.0396242	6.55634e-05	0.00163345	2.6603e-05	3.89604e-05	0	0	0	0	0	0	0	0	0	0	0	0	0	0	0	0.00162955	0	0	0	0	0	0	0	0	3.9e-06	0	-0.115335	-0.0208707	0.0811658	-0.11028	-0.0110317	-0.0296462	-0.024672	-0.289333	0
1927	0.721251	0.195089	0.0554925	0.47067	0.738763	0.73705	0.736974	0.529579	0.167015	0.0403798	7.63825e-05	0.00171305	3.53716e-05	4.10109e-05	0	0	0	0	0	0	0	0	0	0	0	0	0	0	0	0.00170885	0	0	0	0	0	0	0	0	4.2e-06	0	-0.116603	-0.0210432	0.0817083	-0.112257	-0.0112929	-0.0281011	-0.0256174	-0.29315	0
1928	0.674629	0.145739	0.0510169	0.477873	0.750716	0.748923	0.748835	0.537885	0.169983	0.0409673	8.77711e-05	0.00179265	4.46017e-05	4.31694e-05	0	0	0	0	0	0	0	0	0	0	0	0	0	0	0	0.00178815	0	0	0	0	0	0	0	0	4.505e-06	0	-0.118565	-0.0211149	0.081411	-0.114179	-0.0115513	-0.0266062	-0.0265239	-0.296512	0
1929	0.624013	0.0960463	0.0412825	0.486684	0.762524	0.760652	0.760552	0.546179	0.172818	0.0415546	9.9759e-05	0.00187226	5.43176e-05	4.54415e-05	0	0	0	0	0	0	0	0	0	0	0	0	0	0	0	0.00186745	0	0	0	0	0	0	0	0	4.81e-06	0	-0.121538	-0.0211039	0.0807338	-0.116025	-0.0118033	-0.0267785	-0.0265606	-0.2982	0
1930	0.652519	0.121749	0.0325894	0.49818	0.773754	0.771802	0.771689	0.554025	0.175523	0.0421417	0.000112378	0.00195251	6.45448e-05	4.78331e-05	0	0	0	0	0	0	0	0	0	0	0	0	0	0	0	0.0019474	0	0	0	0	0	0	0	0	5.115e-06	0	-0.123198	-0.0202739	0.0803249	-0.117778	-0.0120476	-0.0268103	-0.0266129	-0.297915	0
1931	0.678528	0.146424	0.0164544	0.51565	0.785323	0.78329	0.783158	0.562294	0.17822	0.0426447	0.000131699	0.00203277	7.53103e-05	5.03506e-05	0	6.03845e-06	0	0	0	0	0	0	0	0	0	0	0	0	0	0.00202735	0	0	0	0	0	0	0	0	5.42e-06	0	-0.121491	-0.0178248	0.0807677	-0.119418	-0.0122827	-0.0256014	-0.0271321	-0.294813	0
1932	0.64515	0.114895	-0.00354375	0.533799	0.796956	0.794843	0.794691	0.57055	0.180909	0.0432315	0.000152245	0.00211315	8.66424e-05	5.30007e-05	0	1.2602e-05	0	0	0	0	0	0	0	0	0	7.7616e-07	0	0	0	0.00210665	0	0	0	0	0	0	0	0	5.725e-06	0	-0.119225	-0.0155089	0.081711	-0.120927	-0.0125055	-0.0244386	-0.0275566	-0.291853	0
1933	0.656846	0.123806	-0.0139081	0.546949	0.807785	0.805588	0.80542	0.577927	0.183592	0.0439018	0.000168059	0.00219626	9.8571e-05	5.57902e-05	0	1.36978e-05	0	0	0	0	0	0	0	0	0	2.3208e-06	0	0	0	0.0021879	0	0	0	0	0	0	0	0	6.035e-06	0	-0.119079	-0.0147961	0.0826036	-0.122323	-0.012717	-0.0243865	-0.0274605	-0.291607	0
1934	0.717064	0.162189	6.5625e-05	0.554809	0.818061	0.815762	0.815577	0.58486	0.186146	0.0445719	0.000184743	0.00229885	0.000111127	5.87265e-05	0	1.48889e-05	0	0	0	0	0	0	0	0	0	3.85024e-06	0	0	0	0.00228865	0	0	0	0	0	0	0	0	6.345e-06	0	-0.12096	-0.0155197	0.083063	-0.123646	-0.0129221	-0.0248268	-0.0271077	-0.294285	0
1935	0.773297	0.169386	0.0409325	0.562979	0.82822	0.8258	0.825597	0.591784	0.188572	0.0452418	0.000202346	0.00242039	0.000124345	6.18174e-05	0	1.61836e-05	0	0	0	0	0	0	0	0	0	6.1408e-06	0	6.43715e-07	0	0.00240695	0	0	0	0	0	0	0	0	6.66e-06	0	-0.122688	-0.0161833	0.083596	-0.124937	-0.013126	-0.0252924	-0.0267455	-0.296735	0
1936	0.831551	0.180695	0.0815981	0.569258	0.837504	0.83496	0.834739	0.597836	0.190992	0.0459114	0.000220919	0.00254411	0.000138257	6.50709e-05	0	1.75909e-05	0	0	0	0	0	0	0	0	0	9.96e-06	0	1.92898e-06	0	0.00252525	0	0	0	0	0	0	0	0	6.975e-06	0	-0.123914	-0.0169668	0.0843626	-0.126237	-0.0133337	-0.0249097	-0.0268302	-0.300144	0
1937	0.84505	0.179324	0.0900637	0.575662	0.844968	0.842298	0.842058	0.602154	0.193406	0.0464972	0.000240519	0.00267012	0.000152903	6.84957e-05	0	1.91205e-05	0	0	0	0	0	0	0	0	0	1.60704e-05	0	3.21036e-06	0	0.00264355	0	0	0	0	0	0	0	0	7.29e-06	0	-0.124345	-0.017938	0.0866517	-0.127586	-0.0135503	-0.0254587	-0.026464	-0.303503	0
1938	0.833606	0.163217	0.0808325	0.589556	0.851051	0.84825	0.847989	0.605175	0.195814	0.0469991	0.000261202	0.00280165	0.000168319	7.21008e-05	0	2.07832e-05	0	0	0	0	0	0	0	0	0	2.59936e-05	0	5.1305e-06	0	0.00276185	0	1.069e-06	0	0	0	0	0	0	7.61e-06	0	-0.119579	-0.017775	0.0932865	-0.129026	-0.0137813	-0.026308	-0.0259756	-0.304568	0
1939	0.837512	0.163903	0.0738456	0.599764	0.856275	0.853333	0.85305	0.607332	0.198217	0.0475009	0.000283032	0.00294214	0.000184546	7.58955e-05	0	2.25904e-05	0	0	0	0	0	0	0	0	8.80625e-07	4.1264e-05	0	7.688e-06	0	0.00288015	0	4.231e-06	0	0	0	0	0	0	7.93e-06	0	-0.11641	-0.0173578	0.0978697	-0.130598	-0.014032	-0.026358	-0.0259336	-0.305603	0
1940	0.848384	0.18378	0.0641944	0.60041	0.86076	0.857667	0.857361	0.608625	0.200733	0.0480025	0.000306072	0.00309298	0.000201627	7.989e-05	0	2.45548e-05	0	0	0	0	0	0	0	0	2.62188e-06	6.3376e-05	0	1.0881e-05	0	0.00299845	0	9.399e-06	0	0	0	0	0	0	8.25e-06	0	-0.11984	-0.017966	0.0973886	-0.132344	-0.014345	-0.0270441	-0.0255301	-0.308068	0
1941	0.840653	0.193033	0.0500194	0.597601	0.864168	0.860907	0.860576	0.608625	0.203363	0.0485876	0.000330392	0.00326112	0.000219608	8.40948e-05	0	2.669e-05	0	0	0	0	0	0	0	0	4.325e-06	9.3792e-05	0	1.53496e-05	0	0.0031226	0	1.6487e-05	0	0	0	0	0	0	8.57e-06	0	-0.122763	-0.0186007	0.0967339	-0.134336	-0.0147654	-0.0263064	-0.0254879	-0.31246	0
1942	0.796379	0.171442	0.030625	0.594312	0.866261	0.862811	0.862455	0.607332	0.205867	0.049256	0.000356066	0.00344994	0.000238534	8.85208e-05	0	2.90109e-05	0	0	0	0	0	0	0	0	5.99125e-06	0.000134	0	2.10924e-05	0	0.00325455	0	2.542e-05	0	0	0	0	0	0	8.89e-06	0	-0.124111	-0.0185215	0.0964305	-0.136669	-0.0152651	-0.0237347	-0.0263512	-0.317009	0
1943	0.77291	0.166302	0.0136106	0.592998	0.867815	0.86416	0.863777	0.605607	0.208246	0.0499242	0.000382943	0.00365547	0.000258457	9.29526e-05	0	3.15336e-05	0	0	0	0	0	0	0	0	7.62125e-06	0.000184672	0	2.87416e-05	0	0.0033891	0	3.612e-05	0	0	0	0	0	0	9.215e-06	0	-0.125877	-0.0183919	0.0970053	-0.139371	-0.0158103	-0.022385	-0.0269234	-0.320373	0
1944	0.801498	0.189263	0.0210044	0.591231	0.870015	0.866137	0.865726	0.604313	0.210738	0.0506757	0.000410891	0.00387787	0.000279429	9.71867e-05	0	3.42756e-05	0	0	0	0	0	0	0	0	1.00963e-05	0.00024648	0	3.9587e-05	0	0.00352365	0	4.851e-05	0	0	0	0	0	0	9.545e-06	0	-0.129281	-0.0183034	0.0969316	-0.142423	-0.0163988	-0.021961	-0.0271265	-0.323498	0
1945	0.840125	0.199887	0.0499669	0.590271	0.873297	0.869173	0.868733	0.603881	0.213342	0.0515103	0.000440012	0.00412386	0.000301504	0.000101252	0	3.72561e-05	0	0	0	0	0	0	0	0	1.33963e-05	0.000326256	0	5.42655e-05	0	0.00365755	0	6.252e-05	0	0	0	0	0	0	9.87e-06	0	-0.135138	-0.0165944	0.0931975	-0.145805	-0.017028	-0.0214422	-0.0274659	-0.323067	0
1946	0.874348	0.207084	0.0807056	0.586558	0.877606	0.873184	0.872714	0.604313	0.216057	0.0523445	0.000470409	0.00442245	0.000324741	0.000105173	0	4.04957e-05	0	0	0	0	0	0	0	0	1.75037e-05	0.00043248	9.0345e-06	8.37e-05	0	0.00379145	0	7.809e-05	0	0	0	0	0	0	1.0195e-05	0	-0.13945	-0.0152848	0.0903358	-0.149498	-0.0176952	-0.0178593	-0.0294488	-0.326102	0
1947	0.88947	0.198859	0.111654	0.578957	0.883122	0.878287	0.877785	0.605607	0.219	0.0531784	0.000502189	0.00483527	0.000349201	0.000108971	0	4.40171e-05	0	0	0	0	0	0	0	0	2.504e-05	0.00059824	3.82845e-05	0.000139423	0	0.0039286	0	9.515e-05	0	0	0	0	0	0	1.053e-05	0	-0.143688	-0.0161481	0.0898363	-0.153481	-0.0183974	-0.0137008	-0.031797	-0.334831	0
1948	0.898865	0.196803	0.129456	0.572607	0.889774	0.884362	0.883826	0.607763	0.222052	0.0540119	0.000535464	0.00541175	0.000374948	0.000112671	0	4.78447e-05	0	0	0	0	0	0	0	0	4.1225e-05	0.00086544	8.301e-05	0.000211684	0	0.0040859	0	0.00011363	0	0	0	0	0	0	1.0865e-05	0	-0.151439	-0.0170579	0.0877219	-0.157734	-0.0191312	-0.0125818	-0.0326551	-0.34153	0
1949	0.878521	0.189263	0.116379	0.572878	0.897523	0.891407	0.890837	0.61078	0.225211	0.054845	0.000570351	0.00611578	0.000402051	0.000116295	0	5.20051e-05	0	0	0	0	0	0	0	0	7.2025e-05	0.00121456	0.000136245	0.000288827	0	0.00425945	0	0.00013348	0	0	0	0	0	0	1.1195e-05	0	-0.156901	-0.0169254	0.0875266	-0.162238	-0.0198935	-0.0121625	-0.0332081	-0.345925	0
1950	0.841639	0.186864	0.0807275	0.574047	0.906841	0.899883	0.899276	0.615088	0.228594	0.0555945	0.000606975	0.00695764	0.00043058	0.000119868	0	5.65273e-05	0	0	0	0	0	0	0	0	0.00012415	0.00160144	0.00019563	0.000370295	0	0.00449995	0	0.00015464	0	0	0	0	0	0	1.153e-05	0	-0.161256	-0.0178153	0.0895368	-0.167001	-0.0207256	-0.0115693	-0.0336817	-0.35283	0
1951	0.801351	0.190634	0.0490306	0.561687	0.918081	0.910219	0.909571	0.621112	0.232198	0.0562605	0.000648064	0.00786257	0.00046061	0.000123411	0	6.14427e-05	0	0	0	0	0	0	0	2.6e-06	0.0002033	0.00202048	0.000263145	0.000455855	0	0.00473005	0	0.00017787	0	0	0	0	0	0	1.187e-05	0	-0.159047	-0.0194497	0.0905994	-0.17159	-0.0216929	0.00300376	-0.0399182	-0.372243	0
1952	0.76631	0.184465	0.0318106	0.550034	0.930544	0.921829	0.921135	0.62799	0.236136	0.0570094	0.000693755	0.00871521	0.000492221	0.000126948	0	6.67855e-05	0	0	0	0	0	0	0	7.8e-06	0.000291875	0.00249968	0.00030735	0.000537695	0	0.0048789	0	0.0001875	0	0	0	0	0	0	1.221e-05	0	-0.155813	-0.0197917	0.0898049	-0.176295	-0.0227926	0.0206974	-0.0474357	-0.391158	0
1953	0.746104	0.175555	0.0204662	0.550083	0.943868	0.934275	0.933534	0.635287	0.240405	0.0578412	0.000741592	0.00959221	0.000525496	0.000130503	0	7.2593e-05	0	0	0	0	0	0	0	1.3e-05	0.00039425	0.00302768	0.00032325	0.000615195	0	0.0050349	0	0.0001844	0	0	0	0	0	0	1.2535e-05	0	-0.162431	-0.0195614	0.0869756	-0.181796	-0.023995	0.0251348	-0.0491888	-0.398612	0
1954	0.754805	0.180695	0.0221156	0.551994	0.958592	0.948012	0.947221	0.643859	0.244772	0.0585896	0.000791727	0.0105795	0.000560522	0.000134099	0	7.89054e-05	0	0	0	0	0	0	0	1.82e-05	0.00053725	0.0035968	0.0003417	0.00069409	0	0.0052104	0	0.0001864	0	0	0	0	0	0	1.2845e-05	0	-0.169982	-0.0193372	0.0848911	-0.18798	-0.0252888	0.0283572	-0.0506242	-0.405595	0
1955	0.815376	0.202971	0.0572644	0.555141	0.974832	0.963117	0.962273	0.653701	0.249234	0.0593376	0.000844317	0.0117156	0.000597392	0.000137759	0	8.57667e-05	0	0	0	0	0	0	0	2.34e-05	0.0007215	0.0042368	0.000363	0.00077345	0	0.0054041	1.5e-06	0.0001941	0	0	0	0	0	0	1.3155e-05	8e-06	-0.174956	-0.0198992	0.086395	-0.194737	-0.0266616	0.0329276	-0.0529809	-0.415361	0
1956	0.899099	0.215309	0.124871	0.558919	0.991948	0.978924	0.978025	0.663951	0.253905	0.0601684	0.000899532	0.0130236	0.000636202	0.000141506	0	9.32247e-05	0	0	0	0	0	0	0	2.86e-05	0.00094875	0.0049552	0.00038775	0.0008525	0	0.005616	7.08e-06	0.0002114	0	0	0	0	0	0	1.3465e-05	3.15e-05	-0.17987	-0.0208644	0.0890639	-0.20196	-0.0281002	0.0373827	-0.0553921	-0.425955	0
1957	0.9668	0.22559	0.177927	0.563283	1.0098	0.995263	0.994305	0.674607	0.258782	0.0609158	0.000957549	0.0145336	0.000677055	0.000145363	0	0.000101331	0	0	0	0	0	0	0	3.38e-05	0.00123025	0.0057776	0.00041685	0.000930465	0	0.0058448	1.785e-05	0.000238	0	0	0	0	0	0	1.3785e-05	6.4e-05	-0.186979	-0.0213623	0.0901206	-0.209548	-0.0295904	0.040692	-0.0572916	-0.434877	0
1958	0.982448	0.230731	0.179528	0.57219	1.02788	1.01163	1.01061	0.685201	0.26375	0.0616629	0.00101855	0.016249	0.000720058	0.000149354	0	0.000110143	0	0	0	0	0	0	0	3.9e-05	0.00155912	0.0067232	0.0004506	0.00100734	0	0.0060905	3.405e-05	0.0002711	0	0	0	0	0	0	1.412e-05	9.9e-05	-0.192885	-0.0215095	0.0930989	-0.217398	-0.0311175	0.0424956	-0.0584545	-0.442406	0
1959	0.968833	0.226961	0.151467	0.590405	1.04683	1.02875	1.02766	0.696281	0.268806	0.0625756	0.00108275	0.0180848	0.000765324	0.000153503	0	0.00011972	0	0	0	0	0	0	0	4.42e-05	0.00188925	0.0077488	0.00048915	0.00108361	0	0.00635245	5.298e-05	0.0003186	0	0	0	0	0	0	1.446e-05	0.0001355	-0.198203	-0.021802	0.0996986	-0.225412	-0.032666	0.0387934	-0.0568148	-0.447318	0
1960	0.880204	0.151908	0.115636	0.61266	1.06818	1.04815	1.047	0.709369	0.274062	0.0635708	0.00115033	0.0200263	0.000812972	0.000157831	0	0.000130131	0	0	0	0	0	0	0	4.94e-05	0.00220462	0.008856	0.0005337	0.00115924	0	0.0066287	7.497e-05	0.0003813	0	0	0	0	0	0	1.4805e-05	0.000173	-0.204271	-0.0223408	0.107055	-0.233483	-0.0341549	0.032864	-0.0542114	-0.45157	0
1961	0.751567	0.0607473	0.0722706	0.618549	1.09038	1.06815	1.06693	0.722933	0.279514	0.0644827	0.00122414	0.0222278	0.000863129	0.000162363	0	0.000141446	0	0	0	0	0	0	0	5.72e-05	0.00257388	0.0101392	0.00058515	0.00123116	0	0.0069199	0.00010233	0.00045	0	0	0	0	0	0	1.5165e-05	0.000211	-0.21075	-0.022317	0.10604	-0.240013	-0.0355224	0.037965	-0.0569018	-0.461607	0
1962	0.645151	-0.0139631	0.039375	0.619739	1.11162	1.08685	1.08555	0.735074	0.285159	0.0653112	0.00130439	0.0247749	0.000915925	0.000167122	0	0.000153746	0	0	0	0	0	0	0	6.76e-05	0.00305875	0.0116208	0.00064395	0.00130123	0	0.00722605	0.0001314	0.0005292	0	0	0	0	0	0	1.5535e-05	0.000248	-0.218924	-0.0221193	0.101353	-0.245452	-0.0368629	0.0445787	-0.0604224	-0.471841	0
1963	0.162053	-0.495468	0.02737	0.630152	1.13151	1.1038	1.1024	0.745213	0.290886	0.0663049	0.00139135	0.0277104	0.0009715	0.000172131	0	0.000167115	0	0	0	0	0	0	0	8.06e-05	0.00367875	0.0133072	0.00071115	0.00137423	0	0.00754325	0.00016743	0.0006285	0	0	0	0	0	0	1.5915e-05	0.000284	-0.226771	-0.0223355	0.10191	-0.25166	-0.0382559	0.0449589	-0.0613878	-0.478558	0
1964	-0.185672	-0.853256	0.0268012	0.640783	1.15094	1.11981	1.11831	0.754074	0.296692	0.0675464	0.00150266	0.0311298	0.00105	0.000177412	0	0.000181647	0	0	0	0	0	0	0	9.36e-05	0.00444875	0.0152752	0.00078855	0.00144987	0	0.00786825	0.00021102	0.0007534	0	0	0	0	0	0	1.6305e-05	0.0003185	-0.233538	-0.0228099	0.10438	-0.258387	-0.0396945	0.0455175	-0.062544	-0.48608	0
1965	0.162675	-0.532481	0.0380887	0.657067	1.17445	1.13937	1.13774	0.766182	0.302685	0.0688698	0.00162943	0.0350864	0.001145	0.000182991	0	0.000197443	0	0	0	0	0	0	0	0.000104	0.00537375	0.0175776	0.00087765	0.00152815	8.1e-07	0.00820105	0.00025659	0.0009034	0	0	1.5e-07	0	0	0	1.6705e-05	0.0003505	-0.239091	-0.0233691	0.10864	-0.265401	-0.0411719	0.0458755	-0.0636659	-0.493865	0
1966	0.593344	-0.150018	0.0643563	0.679006	1.20317	1.1636	1.16184	0.782898	0.308753	0.0701923	0.0017529	0.0395719	0.001235	0.000188889	0	0.000214611	0	0	0	0	0	0	0	0.0001144	0.00644375	0.0202096	0.00097995	0.00160936	3.15e-06	0.00853125	0.00031452	0.0010826	0	0	4.5e-07	0	0	1.65e-07	1.712e-05	0.00038	-0.244194	-0.0238464	0.113252	-0.272481	-0.0426813	0.0465875	-0.0650247	-0.501547	0
1967	0.768755	-0.0215027	0.0917788	0.698479	1.23173	1.18715	1.18527	0.79886	0.314896	0.0715138	0.0018782	0.0445849	0.001325	0.00019513	0	0.000233273	0	0	0	0	0	0	0	0.0001248	0.00764375	0.0231648	0.00109755	0.00169368	6.93e-06	0.0088491	0.00040332	0.0012997	0	0	9e-07	0	1.6e-07	4.95e-07	1.7545e-05	0.000407	-0.252397	-0.0241906	0.114983	-0.279423	-0.0442158	0.0464213	-0.0659727	-0.508198	0
1968	0.609199	-0.220273	0.108399	0.721073	1.26232	1.21212	1.21011	0.81597	0.321219	0.0729169	0.00201069	0.0502039	0.001415	0.000201737	0	0.000253558	0	0	0	0	0	0	0	0.0001404	0.00898875	0.0264864	0.00123255	0.00178111	1.215e-05	0.00915525	0.00053316	0.0015621	0	0	1.65e-06	0	3.2e-07	9.9e-07	1.7985e-05	0.0004315	-0.260835	-0.0246537	0.1168	-0.286028	-0.0457687	0.0452117	-0.0663959	-0.514337	0
1969	0.575317	-0.296355	0.117652	0.75402	1.29782	1.2413	1.23916	0.836955	0.327719	0.0744839	0.00214534	0.0565135	0.001505	0.000208734	0	0.000275606	0	0	0	0	0	0	0	0.000156	0.0105125	0.0302192	0.00138735	0.00187193	1.881e-05	0.0094497	0.0006954	0.0018822	0	0	2.85e-06	0	4.8e-07	1.65e-06	1.844e-05	0.000453	-0.264434	-0.0254765	0.123135	-0.292109	-0.0473331	0.0443333	-0.0669843	-0.521149	0
1970	0.847402	-0.0554308	0.108404	0.794429	1.33108	1.26752	1.26524	0.854819	0.334288	0.076132	0.00227972	0.0635577	0.001595	0.000216143	0	0.000299572	0	0	0	0	0	0	0	0.000169	0.0122625	0.034384	0.00156495	0.00196649	2.7e-05	0.0097331	0.0008787	0.002242	0	0	4.8e-06	0	8e-07	2.475e-06	1.8905e-05	0.000472	-0.261939	-0.0265622	0.135936	-0.29744	-0.0489504	0.0418569	-0.06678	-0.527605	0
1971	1.03702	0.11421	0.0874169	0.835393	1.36147	1.29014	1.28773	0.869128	0.340819	0.0777787	0.00241617	0.0713233	0.00168	0.000223988	0	0.000325622	0	0	3.358e-07	0	1.625e-06	0	0	0.0001846	0.0142662	0.038976	0.00176865	0.0020646	3.69e-05	0.0100061	0.0010617	0.002623	0	0	7.5e-06	0	1.12e-06	3.63e-06	1.938e-05	0.0004885	-0.262831	-0.0275096	0.149843	-0.304062	-0.0507025	0.0333	-0.0636999	-0.531736	0
1972	1.09744	0.153279	0.0721481	0.872013	1.39941	1.31966	1.3171	0.890181	0.347417	0.0795061	0.00255991	0.0797421	0.001765	0.000232292	0	0.000353937	0	0	1.0074e-06	0	4.875e-06	0	0	0.0002028	0.0164912	0.043936	0.0020022	0.00216628	4.869e-05	0.0102687	0.0012552	0.003029	0	3.6e-06	1.125e-05	0	1.92e-06	5.115e-06	1.987e-05	0.000503	-0.274952	-0.0281269	0.154949	-0.312309	-0.0525839	0.0233267	-0.0602077	-0.534763	0
1973	1.06245	0.106328	0.05096	0.905161	1.44241	1.35347	1.35076	0.915283	0.354081	0.0813963	0.0027116	0.0889365	0.001855	0.000241079	0	0.000384714	0	0	1.679e-06	0	8.125e-06	0	0	0.000221	0.0189587	0.049296	0.00227055	0.00227199	6.264e-05	0.0105209	0.0015039	0.003478	0	1.06e-05	1.65e-05	0	3.68e-06	7.095e-06	2.038e-05	0.0005155	-0.287701	-0.0289192	0.156593	-0.320339	-0.0545382	0.0194641	-0.0599616	-0.540351	0
1974	0.915371	-0.0406943	0.0251475	0.930917	1.47871	1.37955	1.37668	0.932607	0.360707	0.0833667	0.00286646	0.0991643	0.001945	0.000250372	0	0.000418167	0	0	2.3506e-06	0	1.1375e-05	0	0	0.0002392	0.02176	0.055184	0.0025785	0.00238204	7.893e-05	0.010764	0.0018264	0.003987	0	1.72e-05	2.34e-05	0	6.56e-06	9.405e-06	2.0905e-05	0.000526	-0.299043	-0.0292697	0.158025	-0.328138	-0.0565375	0.0175236	-0.0606474	-0.546424	0
1975	0.82177	-0.141108	0.0099925	0.952885	1.51231	1.40192	1.39889	0.946263	0.367296	0.0853351	0.00302237	0.110392	0.00203	0.000260193	0	0.00045453	0	0	3.0222e-06	0	1.4625e-05	0	0	0.00026	0.02489	0.061632	0.00293145	0.00249612	9.801e-05	0.010998	0.0022038	0.004508	0	2.35e-05	3.225e-05	0	1.072e-05	1.2045e-05	2.1445e-05	0.000535	-0.312462	-0.0288483	0.156694	-0.335695	-0.0585538	0.0148233	-0.0608822	-0.551084	0
1976	0.977694	-0.0173902	0.0194775	0.975607	1.5514	1.42954	1.42636	0.965046	0.373847	0.0874652	0.00318199	0.121857	0.002115	0.000270567	0	0.000494054	0	0	3.6938e-06	0	1.7875e-05	0	0	0.0002808	0.028075	0.068208	0.003336	0.00261438	0.00012033	0.0112229	0.0025659	0.005045	0	2.95e-05	4.335e-05	0	1.632e-05	1.5345e-05	2.2005e-05	0.0005425	-0.322936	-0.0291938	0.155858	-0.343	-0.0605584	0.0181688	-0.0642113	-0.559173	0
1977	1.19883	0.134087	0.0600775	1.00466	1.59633	1.4632	1.45984	0.989588	0.380463	0.0897893	0.00335582	0.133138	0.002205	0.000281516	0	0.000537015	0	0	4.3654e-06	0	2.1125e-05	0	0	0.0003068	0.031175	0.074528	0.003801	0.00273746	0.00014625	0.0114393	0.0029574	0.005646	0	3.51e-05	5.745e-05	0	2.448e-05	1.8975e-05	2.258e-05	0.000549	-0.33147	-0.0300851	0.1566	-0.35004	-0.0625224	0.0227389	-0.0681617	-0.568346	0
1978	1.27583	0.109069	0.122688	1.04408	1.64199	1.49766	1.49412	1.01483	0.387144	0.0921515	0.00354027	0.144325	0.00229	0.000293063	0	0.000587191	0	0	5.037e-06	0	2.4375e-05	0	0	0.0003406	0.034175	0.080608	0.0043335	0.00286533	0.00017631	0.0116474	0.0034674	0.006302	0	4.04e-05	7.425e-05	0	3.584e-05	2.2935e-05	2.317e-05	0.000554	-0.339285	-0.0303308	0.15998	-0.356804	-0.0644164	0.0213071	-0.0690211	-0.573911	0
1979	1.35619	0.0939901	0.174103	1.0881	1.68909	1.53339	1.52965	1.04157	0.393787	0.0942987	0.00373869	0.155695	0.002375	0.000305233	0	0.000644551	0	0	5.7086e-06	0	2.6e-05	0	0	0.0003822	0.0372	0.08656	0.0049425	0.00299785	0.00021132	0.0118482	0.0041391	0.006997	0	4.54e-05	9.375e-05	0	4.992e-05	2.739e-05	2.378e-05	0.0005585	-0.341683	-0.0310135	0.16757	-0.363282	-0.0662111	0.0212962	-0.0700427	-0.582178	0
1980	1.46606	0.148138	0.193082	1.12484	1.73799	1.57181	1.56786	1.07067	0.400791	0.0963945	0.00395006	0.166177	0.00246	0.000318047	0	0.000705428	0	0	6.3802e-06	0	2.6e-05	0	0	0.0004342	0.03985	0.091952	0.0056415	0.00313534	0.00025218	0.0120412	0.0047235	0.007728	0	5.01e-05	0.00011685	0	6.72e-05	3.2175e-05	2.441e-05	0.0005625	-0.352177	-0.0313835	0.166983	-0.369435	-0.0678056	0.0200112	-0.0705475	-0.589257	-0.000302352
1981	1.40776	0.0795963	0.179869	1.1483	1.78022	1.60393	1.59975	1.09228	0.40835	0.0991227	0.00417632	0.176289	0.002545	0.00033153	0	0.000769824	0	0	6.716e-06	0	2.925e-05	0	0	0.000494	0.0421375	0.09736	0.0064425	0.00327825	0.00029889	0.0122135	0.0051564	0.008488	0	5.46e-05	0.00014385	0	8.8e-05	3.729e-05	2.506e-05	0.0005655	-0.365704	-0.0309345	0.162083	-0.375649	-0.0691591	0.0207254	-0.0727701	-0.595711	-0.00131576
1982	0.714776	-0.591427	0.142323	1.16388	1.81808	1.63148	1.62706	1.10903	0.41606	0.101978	0.0044152	0.186603	0.00263	0.000345705	0	0.000837737	0	0	7.0035e-06	0	3.575e-05	0	0	0.000559	0.0444625	0.102944	0.007335	0.00342395	0.00035091	0.012337	0.0055299	0.009234	0	6.26e-05	0.0001746	0	0.00011232	4.2735e-05	2.573e-05	0.000568	-0.369038	-0.0310128	0.163277	-0.382236	-0.0704323	0.0317897	-0.0804231	-0.608207	-0.00322646
1983	0.408766	-0.876217	0.09982	1.18516	1.85996	1.66374	1.65908	1.13104	0.423758	0.104277	0.00466057	0.196223	0.002715	0.000360594	0	0.000909167	0	0	7.613e-06	0	3.9e-05	0	0	0.0006292	0.04645	0.108208	0.0082815	0.00356655	0.00040779	0.0124612	0.0057795	0.01	0	7.22e-05	0.00020925	0	0.0001416	4.8675e-05	2.642e-05	0.00057	-0.373851	-0.0313875	0.165322	-0.388993	-0.071723	0.0397582	-0.0868282	-0.618959	-0.00551124
1984	0.951877	-0.320002	0.0546175	1.21726	1.90382	1.69763	1.69271	1.15578	0.430734	0.1062	0.00491543	0.206195	0.0028	0.000376222	0	0.000984116	0	0	8.2455e-06	0	4.225e-05	0	0	0.0007046	0.0484375	0.1136	0.0092955	0.00370915	0.00046989	0.0126451	0.006045	0.010834	0	8.08e-05	0.0002484	0	0.00017584	5.4945e-05	2.713e-05	0.000572	-0.379048	-0.0323878	0.171632	-0.39573	-0.0729956	0.0399564	-0.0895234	-0.626897	-0.00804971
1985	1.25132	-0.0232162	0.02268	1.25186	1.94606	1.72898	1.7238	1.17908	0.436286	0.108436	0.00517506	0.217081	0.00288	0.000392611	0	0.00106258	0	0	8.5215e-06	0	4.875e-05	0	0	0.0007826	0.0507125	0.1192	0.010629	0.0038564	0.00053658	0.0128498	0.006342	0.011693	0	9.11e-05	0.00029325	0	0.00021488	6.138e-05	2.7865e-05	0.0005735	-0.381707	-0.0339184	0.181599	-0.402256	-0.0742145	0.0385309	-0.0914475	-0.634669	-0.0108835
1986	1.34237	0.0350442	0.0216256	1.2857	1.98758	1.75971	1.75427	1.20251	0.4411	0.110655	0.0054426	0.227867	0.00296	0.000409785	0	0.00114457	0	0	7.8545e-06	0	5.2e-05	0	0	0.0008684	0.053025	0.124736	0.011985	0.0040114	0.00060534	0.0129812	0.006576	0.01257	0	9.99e-05	0.0003456	0	0.00026	6.831e-05	2.8625e-05	0.0005745	-0.384827	-0.0354755	0.190877	-0.408376	-0.0753445	0.0366024	-0.093109	-0.641843	-0.0137224
1987	1.43528	0.065888	0.0475694	1.32183	2.03403	1.79455	1.78882	1.23094	0.445635	0.11224	0.00573024	0.23948	0.003045	0.000427766	0	0.00123007	0	0	7.5555e-06	0	5.525e-05	0	0	0.0009646	0.0557	0.130768	0.0132855	0.0041757	0.00067563	0.013143	0.006729	0.013483	0	0.0001215	0.00040635	0	0.00031168	7.557e-05	2.9405e-05	0.0005755	-0.390046	-0.0370307	0.19742	-0.413896	-0.0763509	0.0343842	-0.0945727	-0.648322	-0.0170523
1988	1.57609	0.105985	0.104563	1.36554	2.08662	1.83406	1.82803	1.26297	0.44981	0.115252	0.0060303	0.25256	0.00313	0.000446578	0	0.00131909	0	0	8.832e-06	0	6.5e-05	0	0	0.0010608	0.058725	0.137104	0.015159	0.0043431	0.00074943	0.0133185	0.006978	0.014488	0	0.0001582	0.0004773	0	0.00036976	8.283e-05	3.0205e-05	0.0005765	-0.39478	-0.0387166	0.204	-0.418617	-0.0771988	0.0311876	-0.0954342	-0.65393	-0.0211152
1989	1.70061	0.129289	0.162693	1.40863	2.13489	1.86923	1.8629	1.28962	0.453791	0.119486	0.00633033	0.265664	0.00321	0.000466245	0	0.00141162	0	0	1.07065e-05	0	7.475e-05	0	0	0.001157	0.061225	0.14344	0.017376	0.0045105	0.00082791	0.0134485	0.007302	0.015642	0	0.000198	0.0005607	0	0.00043408	9.0915e-05	3.103e-05	0.0005775	-0.39732	-0.0403412	0.211596	-0.422342	-0.0778539	0.0275134	-0.0958918	-0.658672	-0.0253641
1990	1.74564	0.126547	0.17444	1.44465	2.17459	1.89729	1.89065	1.31035	0.457668	0.122633	0.0066441	0.277301	0.00329	0.00048679	0	0.00150768	0	0	1.2581e-05	4.8e-06	8.125e-05	0	0	0.001261	0.0631875	0.149168	0.0193455	0.00467325	0.00091143	0.0135785	0.007467	0.016861	0	0.0002498	0.00064935	0	0.00049984	9.9495e-05	3.188e-05	0.000578	-0.398765	-0.0415859	0.217668	-0.424881	-0.0784437	0.0245183	-0.0960408	-0.662209	-0.030199
1991	0.806741	-0.814872	0.154604	1.46701	2.20888	1.92107	1.9141	1.32791	0.461544	0.124651	0.00697266	0.287807	0.00337	0.000508642	0	0.00160725	0	0	1.4421e-05	1.44e-05	8.775e-05	0	0	0.0013702	0.0650375	0.154016	0.02109	0.00482205	0.0009981	0.013728	0.007674	0.018088	0	0.0003392	0.00073455	0	0.00056096	0.00010758	3.2755e-05	0.0005785	-0.396841	-0.0424656	0.216613	-0.424334	-0.0791428	0.033451	-0.100962	-0.667004	-0.03631
1992	0.183167	-1.41975	0.125366	1.47755	2.23594	1.93909	1.93177	1.34097	0.464573	0.126224	0.00731543	0.296858	0.00345	0.000533	0	0.00171034	0	0	1.6215e-05	2.96e-05	9.425e-05	2.11225e-08	0	0.001482	0.0662375	0.158208	0.022788	0.0049569	0.00108423	0.0137475	0.007854	0.019343	0	0.0004848	0.00081375	0	0.000612	0.0001155	3.3655e-05	0.000579	-0.396023	-0.0424604	0.206985	-0.419207	-0.0798931	0.0425393	-0.103987	-0.671575	-0.0429799
1993	0.897138	-0.681902	0.0850237	1.49402	2.2597	1.95608	1.9484	1.35438	0.466274	0.127749	0.00768499	0.303616	0.00353	0.000559	0	0.00181695	0	0	1.85725e-05	6e-05	0.000104	6.27613e-08	0	0.0015964	0.0669375	0.161536	0.0240705	0.00507005	0.00116901	0.013637	0.00783	0.020428	0	0.0006789	0.00087555	0	0.00064688	0.000122925	3.458e-05	0.000579	-0.395358	-0.0422396	0.197842	-0.411007	-0.0806352	0.0427057	-0.102023	-0.672354	-0.0490306
1994	1.4368	-0.131512	0.0485363	1.51978	2.28862	1.98017	1.97207	1.37458	0.468059	0.129433	0.00810121	0.308449	0.00361	0.000585	0	0.00192708	0	0	2.19765e-05	0.00012	0.00012025	9.11702e-07	0	0.001716	0.067375	0.164192	0.0247035	0.0051553	0.00125226	0.0135655	0.00756	0.02132	7.973e-05	0.0008974	0.000927	0	0.00067648	0.00012969	3.553e-05	0.0005795	-0.392182	-0.0428387	0.191688	-0.402127	-0.0814255	0.0440421	-0.101521	-0.671509	-0.0551646
1995	1.64121	0.0586911	0.0260487	1.55647	2.32199	2.01042	2.0018	1.40007	0.470075	0.131651	0.00861607	0.311569	0.00369	0.000611	0	0.00204072	0	0	3.4569e-05	0.0002632	0.00014625	2.5313e-06	0	0.0018278	0.067375	0.166256	0.025038	0.0052173	0.00133191	0.0134615	0.006954	0.02209	0.00026803	0.0011316	0.0009741	0	0.00071856	0.000136125	3.65e-05	0.00058	-0.385604	-0.0439983	0.192353	-0.394949	-0.0823215	0.04384	-0.100528	-0.671594	-0.0603537
1996	1.73788	0.123806	0.0197181	1.59435	2.35324	2.03899	2.02971	1.4242	0.471455	0.134059	0.00927565	0.31425	0.003765	0.000637	0	0.00217712	0	0	6.25025e-05	0.0005048	0.0001885	3.72321e-06	0	0.001937	0.0672375	0.168016	0.025152	0.00525915	0.00140229	0.013364	0.0062454	0.02317	0.00050218	0.0013636	0.00101745	0	0.00076432	0.000140745	3.4995e-05	0.00058	-0.377983	-0.0453446	0.198817	-0.390468	-0.0836122	0.0418986	-0.0992733	-0.673231	-0.0635822
1997	1.81567	0.153279	0.0429187	1.61947	2.38518	2.06886	2.05879	1.44919	0.473265	0.136336	0.010067	0.316319	0.00384	0.000663	0	0.00233452	0	0	9.91415e-05	0.0008272	0.0002405	6.02431e-06	0	0.0020566	0.06705	0.169328	0.025104	0.00528395	0.00145845	0.0132535	0.0054729	0.02439	0.00077322	0.0015878	0.0010668	0	0.000796	0.0001419	3.28e-05	0.00058	-0.381987	-0.0465864	0.197514	-0.38756	-0.0857344	0.0385575	-0.0981783	-0.675861	-0.0652346
1998	1.92421	0.187549	0.0925838	1.64408	2.42451	2.10701	2.09607	1.48103	0.476231	0.138802	0.0109462	0.317498	0.00392	0.000689	0	0.00249192	0	0	0.000148914	0.0012336	0.0002925	9.64025e-06	0	0.0021606	0.0667375	0.170368	0.025035	0.00529325	0.00150165	0.013117	0.0046689	0.02527	0.00103278	0.0017892	0.00111255	0	0.00081808	0.000140745	3.355e-05	0.00058	-0.394515	-0.0470696	0.190006	-0.385373	-0.0887675	0.033855	-0.0971659	-0.678376	-0.0650724
1999	2.03322	0.216337	0.146252	1.67063	2.46087	2.14234	2.13043	1.51064	0.478682	0.141114	0.011905	0.318533	0.004	0.000715	0	0.00264931	4.96902e-07	0	0.000219914	0.0017088	0.0003445	1.53537e-05	0	0.0022516	0.0663	0.171184	0.0249045	0.00529325	0.00153495	0.0130201	0.0039363	0.02634	0.00128884	0.0019876	0.00115065	0	0.00083856	0.00013926	3.46e-05	0.00058	-0.404255	-0.046596	0.18688	-0.384069	-0.0925101	0.0282813	-0.0962409	-0.681142	-0.0634833
2000	2.09619	0.228674	0.181191	1.68633	2.48757	2.16801	2.15506	1.5327	0.479349	0.143001	0.0129504	0.319561	0.004075	0.000741	0	0.00280671	5.3733e-06	0	0.000305451	0.0022344	0.0003965	2.51441e-05	0	0.0023608	0.0658625	0.171856	0.0247545	0.00528705	0.00156069	0.0129181	0.0032898	0.02748	0.0015505	0.002208	0.0011859	0	0.00085728	0.00013761	3.2845e-05	0.00058	-0.412784	-0.0466785	0.186982	-0.383899	-0.0965845	0.023583	-0.0961873	-0.686086	-0.0611506
2001	2.12798	0.232444	0.190562	1.70497	2.51467	2.19434	2.18016	1.5559	0.479231	0.14503	0.0141809	0.320331	0.00415	0.000766999	1.95493e-06	0.00296411	3.16084e-05	0	0.000396152	0.0028016	0.000446886	3.92378e-05	0.000104522	0.0024778	0.065475	0.172432	0.024621	0.0052762	0.00158076	0.012792	0.0027471	0.02839	0.0017773	0.002407	0.00121365	0	0.00087456	0.0001353	2.889e-05	0.00058	-0.417581	-0.0478466	0.189391	-0.386164	-0.0988064	0.0228134	-0.0969686	-0.690713	-0.0592393
2002	2.14536	0.232444	0.174151	1.73876	2.54935	2.22832	2.21272	1.5855	0.479785	0.147437	0.0155953	0.321029	0.004225	0.000793324	5.87561e-06	0.00312151	7.92228e-05	2.96218e-06	0.000490601	0.0034184	0.000500933	5.42274e-05	0.000311056	0.0025922	0.065025	0.172784	0.0244785	0.0052638	0.00159642	0.0126601	0.0022884	0.02949	0.0019852	0.002595	0.0012336	0	0.0008904	0.00013266	2.549e-05	0.00058	-0.41749	-0.0490211	0.193791	-0.39016	-0.0991473	0.0248743	-0.0978269	-0.693303	-0.0574986
2003	2.1379	0.232444	0.130187	1.77527	2.58656	2.26528	2.24819	1.61755	0.480748	0.14989	0.017084	0.321281	0.00429915	0.000820285	9.55576e-06	0.0032789	0.00013392	1.16663e-05	0.000598771	0.0040704	0.000565359	7.12803e-05	0.000512873	0.0027118	0.0644875	0.172816	0.024279	0.0052514	0.00160848	0.0125223	0.0019068	0.03059	0.0021791	0.002751	0.00125085	0	0.00090496	0.000129855	2.394e-05	0.00058	-0.418209	-0.049655	0.196804	-0.3941	-0.0994884	0.0269294	-0.0986996	-0.695994	-0.0551123
2004	2.12582	0.232444	0.0860781	1.8073	2.61965	2.2984	2.27974	1.64679	0.480862	0.152086	0.0186534	0.321257	0.0043772	0.000847858	1.29337e-05	0.0034363	0.000194381	2.57604e-05	0.000717704	0.004764	0.000639868	9.54443e-05	0.000710546	0.0028314	0.0640125	0.172768	0.024036	0.005239	0.00161784	0.0124	0.0015885	0.03149	0.0023247	0.00287	0.0012621	0	0.0009184	0.00012672	2.2885e-05	0.00058	-0.419405	-0.0498851	0.198935	-0.398034	-0.0998295	0.0289768	-0.0995682	-0.698667	-0.0522666
2005	2.08345	0.184018	0.0592681	1.84016	2.65132	2.33017	2.30989	1.67512	0.480365	0.154397	0.0202831	0.321146	0.00445471	0.000876018	1.63124e-05	0.00359346	0.000259513	4.49136e-05	0.000834021	0.0054976	0.000724224	0.000126803	0.000904534	0.002951	0.063525	0.172608	0.023793	0.00522505	0.00162513	0.0122766	0.0013245	0.03245	0.0024073	0.002988	0.00126795	0	0.00093056	0.000123255	2.133e-05	0.00058	-0.418405	-0.0500736	0.200993	-0.400532	-0.100145	0.0313529	-0.1	-0.700713	-0.0497123
2006	1.98931	0.0677962	0.0431769	1.87834	2.68339	2.3629	2.34098	1.70352	0.480656	0.156801	0.0219181	0.320488	0.00453168	0.000904742	1.98671e-05	0.00375221	0.000328414	6.88119e-05	0.000952782	0.0062088	0.000818212	0.000164195	0.00109521	0.0030732	0.062825	0.172	0.023544	0.0052111	0.00163062	0.0121466	0.0011112	0.03354	0.0024738	0.003073	0.0012723	0	0.0009416	0.00011979	1.948e-05	0.00058	-0.413451	-0.0501794	0.202907	-0.40016	-0.100408	0.0343897	-0.1	-0.701522	-0.0477661
2007	1.95046	0	0.0322656	1.9182	2.71483	2.3953	2.37168	1.73086	0.481842	0.158978	0.023616	0.31953	0.00461056	0.00093624	2.3575e-05	0.00391042	0.000400304	9.71525e-05	0.00108835	0.0069064	0.000924419	0.000206885	0.00130067	0.003211	0.0619875	0.171104	0.0232785	0.0051956	0.00163458	0.011999	0.0009366	0.03478	0.0025508	0.003125	0.00127275	0	0.00095152	0.00011616	1.7945e-05	0.00058	-0.406711	-0.0502424	0.204746	-0.398336	-0.100642	0.0377634	-0.1	-0.701701	-0.0461083
2008	1.98526	0	0.025655	1.95961	2.74768	2.42906	2.40366	1.75906	0.483446	0.161154	0.025396	0.31862	0.00469382	0.000972736	2.73384e-05	0.00406388	0.000474682	0.000129659	0.00124715	0.00759431	0.00104539	0.000255578	0.00153701	0.00335443	0.06115	0.170176	0.023016	0.00517855	0.00163728	0.0118248	0.0007938	0.0361	0.0026334	0.003173	0.00126765	0	0.00096016	0.000112365	1.7405e-05	0.00058	-0.399932	-0.0503034	0.206582	-0.396485	-0.100873	0.0411468	-0.1	-0.701861	-0.0443753
2009	2.07657	0	0.0725288	2.00404	2.78318	2.46557	2.43832	1.78958	0.485415	0.163327	0.027243	0.317611	0.00478147	0.00101422	3.11528e-05	0.00421262	0.000551072	0.000166063	0.0014286	0.00827591	0.00118076	0.000310194	0.00180037	0.00349053	0.0602571	0.169132	0.0227458	0.00516193	0.00163897	0.0116064	0.00067626	0.0374195	0.00271164	0.00333372	0.00125589	0	0.000966758	0.000108587	1.59344e-05	0.000580078	-0.393139	-0.0503638	0.208416	-0.394623	-0.101102	0.044534	-0.1	-0.702011	-0.0424774
2010	2.19765	0	0.146252	2.0514	2.81988	2.50339	2.47419	1.82109	0.487601	0.165498	0.0291993	0.316499	0.0048735	0.0010607	3.50153e-05	0.00435664	0.00062894	0.000206105	0.00163201	0.00899178	0.00133018	0.000370611	0.00208706	0.00362675	0.0593212	0.167982	0.02247	0.00514406	0.00163991	0.0113447	0.000579246	0.0387282	0.0027856	0.00359556	0.00123812	0	0.000971401	0.000104664	1.41699e-05	0.000580191	-0.385346	-0.0504197	0.209656	-0.390993	-0.101106	0.0475164	-0.1	-0.701255	-0.0405882
2011	2.28298	0	0.181191	2.10179	2.85657	2.54122	2.50996	1.85231	0.489985	0.167666	0.0312578	0.315358	0.00496992	0.00111216	3.89259e-05	0.00449595	0.000707993	0.000249558	0.00185663	0.0097395	0.00149335	0.000436658	0.0023941	0.00376307	0.0583846	0.166786	0.022194	0.00512598	0.00164035	0.0110595	0.000495461	0.0400942	0.00286237	0.00382959	0.00121712	0	0.000974921	0.000100759	1.3611e-05	0.000580244	-0.375555	-0.0504668	0.209707	-0.383825	-0.10066	0.0496891	-0.1	-0.698677	-0.0389831
2012	2.34299	0	0.190562	2.15242	2.89249	2.5784	2.54504	1.88339	0.491845	0.169808	0.0333651	0.314088	0.00506763	0.00116637	4.27407e-05	0.00462592	0.000804499	0.000293633	0.00212302	0.0104839	0.00168122	0.000501177	0.00268014	0.00389488	0.0574484	0.165543	0.0219175	0.00510779	0.00164042	0.0107524	0.000422587	0.0414217	0.0029375	0.0040349	0.00119341	0	0.000977338	9.68913e-05	1.33752e-05	0.000580268	-0.364765	-0.0505096	0.209165	-0.374887	-0.0999896	0.0514568	-0.1	-0.695171	-0.0370457
2013	2.37445	0	0.174151	2.2003	2.9267	2.6141	2.57863	1.91421	0.492519	0.171897	0.0354713	0.312607	0.00516356	0.0012211	4.63156e-05	0.00474191	0.000931669	0.000335711	0.00245102	0.0111919	0.00190447	0.000557216	0.00290887	0.00401755	0.0565143	0.164261	0.0216421	0.00508952	0.00164021	0.0104246	0.000363053	0.0426216	0.00300688	0.00421075	0.00116747	0	0.000978733	9.30796e-05	1.32444e-05	0.000580279	-0.353975	-0.0505523	0.208622	-0.36595	-0.0993192	0.0532246	-0.1	-0.691641	-0.0349468
2014	2.37619	0	0.130187	2.24601	2.95947	2.64854	2.61096	1.94491	0.492118	0.173934	0.0375777	0.310933	0.0052577	0.00127634	4.96508e-05	0.00484399	0.00108375	0.000375909	0.00283851	0.011866	0.00216243	0.000605016	0.00308731	0.0041311	0.0555842	0.162945	0.0213686	0.00507123	0.00163979	0.0100775	0.000314392	0.0437031	0.00307101	0.00435646	0.00113969	0	0.000979179	8.93381e-05	1.31486e-05	0.000580285	-0.343185	-0.050595	0.20808	-0.357013	-0.0986488	0.0549924	-0.1	-0.688086	-0.0331554
2015	2.37606	0	0.0860781	2.28998	2.99095	2.68187	2.64218	1.97552	0.490743	0.175919	0.0396854	0.309082	0.00535005	0.0013321	5.27464e-05	0.00493219	0.00125604	0.000414337	0.00328343	0.0125081	0.0024544	0.000644812	0.00322164	0.00423551	0.0546598	0.161601	0.0210978	0.00505294	0.00163921	0.0097124	0.000274606	0.0446746	0.00313032	0.00447156	0.00111047	0	0.000978753	8.56764e-05	1.30778e-05	0.000580287	-0.332395	-0.0506378	0.207537	-0.348076	-0.0979785	0.0567602	-0.1	-0.684506	-0.0314312
2016	2.3916	0	0.0592681	2.33233	3.02117	2.71411	2.67232	2.00599	0.488475	0.177853	0.0417954	0.307057	0.0054406	0.00138837	5.56023e-05	0.00500656	0.00144467	0.00045109	0.00378374	0.0131202	0.00277972	0.000676829	0.00331715	0.0043308	0.0537418	0.160233	0.0208297	0.00503467	0.00163851	0.00933014	0.000233253	0.0455435	0.00318518	0.00455573	0.00108011	0	0.000977515	8.21021e-05	1.1058e-05	0.000580288	-0.321605	-0.0506805	0.206995	-0.339139	-0.0973081	0.058528	-0.1	-0.6809	-0.0297291
2017	2.41628	0	0.0431769	2.3731	3.05014	2.74525	2.70135	2.03624	0.485374	0.179736	0.0439082	0.304884	0.00552937	0.00144516	5.82188e-05	0.00506714	0.00164639	0.000486254	0.00433747	0.0137038	0.00313769	0.00070128	0.00337844	0.00441696	0.05283	0.158843	0.0205644	0.00501642	0.00163773	0.00894699	0.00019061	0.046316	0.00323586	0.00461063	0.00104888	0	0.000975508	7.8621e-05	8.57641e-06	0.000580289	-0.310816	-0.0507233	0.206452	-0.330202	-0.0966377	0.0602957	-0.1	-0.677269	-0.0280369
2018	2.44465	0	0.0322656	2.41238	3.07792	2.77532	2.72929	2.06623	0.4815	0.181567	0.0460244	0.302604	0.00561635	0.00150246	6.05958e-05	0.00511397	0.00185853	0.000519908	0.00494267	0.0142603	0.00352766	0.000718375	0.00340958	0.00449401	0.0519244	0.157435	0.0203017	0.00499819	0.00163687	0.00857863	0.000155719	0.046998	0.00328262	0.0046397	0.00101701	0	0.000972779	7.52392e-05	7.92654e-06	0.000580289	-0.300026	-0.050766	0.205909	-0.321265	-0.0959673	0.0620635	-0.1	-0.673611	-0.0263578
2019	2.47636	0	0.025655	2.45071	3.1046	2.80438	2.75623	2.09598	0.476906	0.183349	0.0481445	0.300225	0.00570154	0.00156028	6.27335e-05	0.00514709	0.00207885	0.000552124	0.00559742	0.0147911	0.00394895	0.000728319	0.00341414	0.00456194	0.0510252	0.15601	0.0200416	0.00497996	0.00163596	0.0082245	0.00012717	0.0475951	0.00332572	0.00464604	0.000984742	0	0.000969373	7.19591e-05	7.68315e-06	0.000580289	-0.289236	-0.0508088	0.205367	-0.312328	-0.0952969	0.0638313	-0.1	-0.669927	-0.024254
2020	2.55939	0	0.0725288	2.48686	3.13026	2.8325	2.78224	2.12551	0.471644	0.185082	0.0502687	0.297757	0.00578493	0.00161861	6.46319e-05	0.00516655	0.00230553	0.000582971	0.00629985	0.0152974	0.00440088	0.000731311	0.00339528	0.00462075	0.0501327	0.154571	0.0197842	0.00496175	0.00163502	0.00788406	0.000103811	0.0481126	0.00336539	0.00463246	0.000952248	0	0.00096534	6.87793e-05	7.52248e-06	0.000580289	-0.279542	-0.0507953	0.204037	-0.302986	-0.0944708	0.064672	-0.1	-0.665684	-0.0220891
2021	2.66555	0	0.146252	2.5193	3.15485	2.85965	2.80726	2.15476	0.465733	0.186765	0.0523964	0.295201	0.00586654	0.00167745	6.62911e-05	0.00517239	0.00253681	0.000612496	0.00704804	0.01578	0.00488277	0.000727539	0.00335565	0.00467045	0.0492451	0.153117	0.0195289	0.00494352	0.00163404	0.00755627	8.4697e-05	0.0485538	0.0034017	0.00460139	0.000919668	0	0.000960693	6.57036e-05	7.33068e-06	0.000580289	-0.272042	-0.0506694	0.201134	-0.292832	-0.0933331	0.0636586	-0.1	-0.660333	-0.020402
2022	2.72972	0	0.181191	2.54853	3.17795	2.88549	2.83101	2.18299	0.459606	0.188414	0.0544775	0.292463	0.00594542	0.00173462	6.77997e-05	0.00517102	0.00275369	0.000640822	0.00781582	0.0162416	0.00537955	0.000720138	0.00329172	0.00471529	0.0483617	0.15165	0.0192755	0.00492527	0.00163303	0.0072404	6.90605e-05	0.0488296	0.00343092	0.00455516	0.000887137	0	0.000955451	6.27328e-05	7.10733e-06	0.000580289	-0.265638	-0.0504872	0.197444	-0.282273	-0.0920396	0.0617182	-0.1	-0.654385	-0.0188705
2023	2.76626	0	0.190562	2.5757	3.19945	2.90998	2.85351	2.20974	0.453727	0.190042	0.0564699	0.289474	0.00602064	0.00178793	6.92463e-05	0.00516887	0.00294138	0.000668109	0.00857821	0.0166863	0.00587658	0.000712178	0.00320095	0.00475951	0.0474844	0.150173	0.0190243	0.004907	0.00163201	0.00693647	5.62863e-05	0.0488633	0.00345012	0.00449613	0.000854814	0	0.000949677	5.98642e-05	6.92354e-06	0.000580289	-0.259234	-0.0503051	0.193753	-0.271714	-0.0907461	0.0597777	-0.1	-0.648366	-0.0174231
2024	2.77597	0	0.174151	2.60182	3.21971	2.93344	2.87506	2.23523	0.44818	0.191649	0.058388	0.286269	0.00609221	0.00183738	7.06311e-05	0.00516598	0.0031062	0.000694487	0.00933582	0.017117	0.00637403	0.00070371	0.00308745	0.00480311	0.0466147	0.148689	0.0187756	0.00488874	0.00163097	0.00664438	4.58687e-05	0.0486813	0.00346096	0.00442665	0.000822832	0	0.000943427	5.71016e-05	6.80333e-06	0.000580289	-0.25283	-0.0501229	0.190063	-0.261155	-0.0894526	0.0578373	-0.1	-0.642271	-0.0160333
2025	2.75724	0	0.130187	2.62706	3.23889	2.95602	2.89577	2.25954	0.443003	0.193237	0.0602432	0.282877	0.00616012	0.00188297	7.19539e-05	0.00516235	0.00325309	0.000720059	0.0100891	0.0175361	0.006872	0.000694775	0.00295456	0.00484609	0.0457539	0.147202	0.0185296	0.0048705	0.00162992	0.00636394	3.73824e-05	0.048306	0.00346472	0.00434867	0.000791306	0	0.00093675	5.44447e-05	6.73876e-06	0.000580289	-0.246427	-0.0499408	0.186372	-0.250596	-0.0881591	0.0558968	-0.1	-0.6361	-0.0146919
2026	2.73754	0	0.0860781	2.65146	3.25705	2.97773	2.91568	2.28271	0.43817	0.194804	0.0620432	0.279321	0.00622437	0.00192469	7.32149e-05	0.00515802	0.00338562	0.00074489	0.0108385	0.0179448	0.00737054	0.00068539	0.00280479	0.00488844	0.0449035	0.145716	0.0182865	0.00485231	0.00162886	0.006095	3.04701e-05	0.047754	0.00346223	0.00426371	0.000760331	0	0.000929695	5.18932e-05	6.71314e-06	0.000580289	-0.240023	-0.0497586	0.182682	-0.240037	-0.0868656	0.0539564	-0.1	-0.629851	-0.0134073
2027	2.73423	0	0.0592681	2.67496	3.27412	2.9985	2.93471	2.30471	0.433646	0.196353	0.0637941	0.27562	0.00628496	0.00196256	7.44139e-05	0.00515297	0.00350657	0.00076903	0.011584	0.0183439	0.00786966	0.000675569	0.00264028	0.00493018	0.0440637	0.14423	0.0180464	0.00483417	0.0016278	0.00583716	2.48395e-05	0.0470401	0.00345416	0.00417309	0.000729974	0	0.000922291	4.94459e-05	6.70183e-06	0.000580289	-0.233619	-0.0495765	0.178992	-0.229478	-0.0855721	0.0520159	-0.1	-0.62352	-0.0121867
2028	2.74063	0	0.0431769	2.69745	3.29003	3.01824	2.95274	2.32547	0.42939	0.197882	0.0655004	0.271788	0.00634189	0.00199656	7.55512e-05	0.00514721	0.00361811	0.00079252	0.0123258	0.018734	0.00836934	0.000665324	0.00246282	0.0049713	0.0432342	0.142747	0.017809	0.00481607	0.00162673	0.00558988	2.02519e-05	0.046177	0.00344106	0.00407795	0.000700283	0	0.000914562	4.70969e-05	6.68302e-06	0.000580289	-0.227215	-0.0493944	0.175301	-0.218919	-0.0842786	0.0500755	-0.1	-0.617106	-0.0110306
2029	2.75116	0	0.0322656	2.71889	3.30474	3.0369	2.96973	2.34497	0.425369	0.199393	0.0671665	0.267838	0.00639516	0.00202671	7.66266e-05	0.00514075	0.003722	0.000815401	0.013064	0.0191158	0.00886958	0.000654665	0.00227401	0.0050118	0.0424148	0.141267	0.0175744	0.00479801	0.00162566	0.00535266	1.65135e-05	0.0451766	0.00342344	0.00397928	0.000671302	0	0.000906535	4.48484e-05	6.6563e-06	0.000580289	-0.220811	-0.0492122	0.171611	-0.20836	-0.0829851	0.0481351	-0.1	-0.610606	-0.00993717
2030	2.76372	0	0.025655	2.73806	3.31828	3.0545	2.9857	2.36326	0.421556	0.200884	0.068796	0.263782	0.00644478	0.00205299	7.76402e-05	0.00513357	0.0038197	0.000837711	0.0137989	0.0194898	0.00937038	0.000643605	0.00207524	0.00505168	0.0416056	0.13979	0.0173425	0.00477998	0.00162459	0.00512512	1.34667e-05	0.0440502	0.00340176	0.00387801	0.000643065	0	0.000898233	4.26954e-05	6.6264e-06	0.000580289	-0.215361	-0.0489537	0.168034	-0.198704	-0.0819159	0.0461793	-0.1	-0.604365	-0.00890292
2031	2.82629	0	0.0725288	2.75376	3.33069	3.07106	3.00067	2.38038	0.417926	0.202358	0.070392	0.259633	0.00649074	0.00207542	7.8592e-05	0.0051257	0.0039124	0.000859489	0.0145305	0.0198566	0.00987174	0.000632153	0.00186773	0.00509095	0.0408067	0.138318	0.0171132	0.00476199	0.00162351	0.00490687	1.09833e-05	0.0428077	0.00337644	0.00377492	0.000615597	0	0.000889681	4.06331e-05	6.59599e-06	0.000580289	-0.211817	-0.0485424	0.164685	-0.190857	-0.0812953	0.0441931	-0.1	-0.59874	-0.0079242
2032	2.91404	0	0.146252	2.76779	3.34178	3.08637	3.0144	2.39613	0.414468	0.20381	0.0719672	0.255413	0.00653433	0.00209547	7.95132e-05	0.00511725	0.0039988	0.00088087	0.0152566	0.0202146	0.0103721	0.000620709	0.00166748	0.0051295	0.0400164	0.136848	0.0168862	0.00474401	0.00162243	0.00469723	8.95755e-06	0.0414794	0.0033443	0.00367041	0.000588906	0	0.000880878	3.86592e-05	6.51311e-06	0.000580289	-0.209226	-0.0480548	0.161449	-0.183913	-0.0808989	0.0421916	-0.1	-0.593402	-0.00700103
2033	2.9625	0	0.181191	2.78131	3.35149	3.10034	3.02681	2.41039	0.411179	0.20524	0.0735328	0.251145	0.00657683	0.00211465	8.0435e-05	0.00510836	0.00407788	0.000901988	0.0159749	0.0205625	0.0108699	0.000609662	0.00148854	0.00516723	0.039234	0.135381	0.0166612	0.00472601	0.00162134	0.00449568	7.30382e-06	0.0400932	0.00330254	0.00356475	0.000562998	0	0.00087183	3.67686e-05	6.38045e-06	0.000580289	-0.206636	-0.0475672	0.158213	-0.176969	-0.0805025	0.04019	-0.1	-0.58801	-0.00613411
2034	2.98439	0	0.190562	2.79383	3.36007	3.11323	3.03814	2.42343	0.40806	0.206648	0.0750894	0.246841	0.00661824	0.00213295	8.13573e-05	0.00509904	0.00415121	0.000922871	0.0166857	0.0209013	0.0113653	0.000599006	0.00132831	0.00520416	0.0384608	0.133918	0.0164385	0.00470803	0.00162025	0.00430216	5.95442e-06	0.0386552	0.00325226	0.00345842	0.000537899	0	0.000862575	3.49618e-05	6.26642e-06	0.000580289	-0.204045	-0.0470796	0.154977	-0.170025	-0.0801061	0.0381885	-0.1	-0.58256	-0.00532378
2035	2.97966	0	0.174151	2.8055	3.36768	3.12517	3.04854	2.4354	0.405104	0.208034	0.0766373	0.242511	0.00665856	0.00215038	8.22802e-05	0.0050893	0.00422001	0.000943545	0.0173895	0.0212319	0.0118583	0.000588734	0.0011845	0.00524028	0.0376979	0.132461	0.0162182	0.00469007	0.00161916	0.00411655	4.85372e-06	0.0371704	0.00319445	0.00335183	0.000513624	0	0.000853148	3.32393e-05	6.18093e-06	0.000580289	-0.201454	-0.0465919	0.151742	-0.163081	-0.0797097	0.036187	-0.1	-0.577053	-0.00456342
2036	2.94657	0	0.130187	2.81639	3.37439	3.13622	3.05805	2.44634	0.402308	0.209397	0.0781767	0.238164	0.00669779	0.00216692	8.32036e-05	0.00507913	0.0042853	0.000964033	0.0180866	0.0215553	0.012349	0.000578839	0.0010551	0.00527559	0.0369461	0.131014	0.0160007	0.00467216	0.00161807	0.00393872	3.95614e-06	0.0356436	0.00312996	0.0032453	0.000490187	0	0.000843587	3.15975e-05	6.12443e-06	0.000580289	-0.198864	-0.0461043	0.148506	-0.156137	-0.0793133	0.0341854	-0.1	-0.571486	-0.00385354
2037	2.91257	0	0.0860781	2.82649	3.3802	3.14639	3.06668	2.45628	0.399668	0.210739	0.0797082	0.233807	0.00673593	0.00218259	8.41276e-05	0.00506856	0.00434792	0.000984362	0.0187773	0.0218722	0.0128375	0.000569313	0.000938333	0.00531008	0.0362064	0.129576	0.0157859	0.00465431	0.00161698	0.0037685	3.22441e-06	0.0340789	0.00305957	0.00313915	0.0004676	0	0.000833921	3.00294e-05	6.10077e-06	0.000580289	-0.196273	-0.0456167	0.14527	-0.149194	-0.0789169	0.0321839	-0.1	-0.565857	-0.00320284
2038	2.89501	0	0.0592681	2.83574	3.38504	3.15559	3.07436	2.46513	0.397172	0.21206	0.0812315	0.229446	0.00677298	0.00219738	8.50521e-05	0.00505757	0.00440843	0.00100454	0.0194618	0.0221833	0.0133239	0.000560148	0.000832613	0.00534377	0.0354789	0.128151	0.0155741	0.00463652	0.00161588	0.00360563	2.62794e-06	0.0324796	0.00298393	0.00303361	0.000445852	0	0.000824169	2.85351e-05	6.09004e-06	0.000580289	-0.193683	-0.045129	0.142034	-0.14225	-0.0785205	0.0301824	-0.1	-0.560166	-0.00261248
2039	2.88717	0	0.0431769	2.844	3.3888	3.16371	3.08097	2.47281	0.394796	0.213359	0.0827459	0.225083	0.00680895	0.00221129	8.59772e-05	0.00504617	0.00446714	0.00102458	0.0201404	0.0224888	0.0138081	0.00055133	0.000736539	0.00537665	0.0347632	0.126736	0.0153649	0.00461879	0.00161479	0.00344972	2.14171e-06	0.0308485	0.00290356	0.00292887	0.000424927	0	0.000814338	2.71141e-05	6.07167e-06	0.000580289	-0.191092	-0.0446414	0.138798	-0.135306	-0.0781241	0.0281809	-0.1	-0.554411	-0.00208223
2040	2.88238	0	0.0322656	2.85012	3.39141	3.17069	3.08644	2.47928	0.392524	0.214637	0.084251	0.220719	0.00684383	0.00222432	8.69029e-05	0.00503436	0.00452433	0.00104448	0.0208132	0.0227889	0.0142903	0.000542849	0.000648894	0.00540872	0.034059	0.125331	0.0151584	0.00460112	0.0016137	0.00330043	1.74534e-06	0.0291881	0.00281893	0.00282506	0.000404813	0	0.000804438	2.57588e-05	6.04554e-06	0.000580289	-0.18909	-0.0442061	0.135908	-0.129342	-0.0777567	0.0263068	-0.1	-0.549278	-0.00161205
2041	2.87865	0	0.025655	2.85299	3.3929	3.17655	3.0908	2.48456	0.390345	0.215894	0.0857466	0.216359	0.00687762	0.00223648	8.78291e-05	0.00502214	0.0045803	0.00106424	0.0214803	0.0230841	0.0147704	0.000534696	0.000568617	0.00543998	0.0333662	0.123939	0.0149546	0.00458351	0.00161261	0.0031575	1.42225e-06	0.0275009	0.00273052	0.00272234	0.000385489	0	0.000794478	2.4466e-05	6.01784e-06	0.000580289	-0.188264	-0.0438755	0.13371	-0.125339	-0.0774472	0.0246878	-0.1	-0.545473	-0.00120001
2042	2.92638	0	0.0725288	2.85385	3.39345	3.18139	3.0942	2.48903	0.388066	0.217105	0.0871908	0.212063	0.00691006	0.00224786	8.87537e-05	0.0050096	0.00462673	0.0010841	0.0221296	0.0233595	0.0152416	0.000526552	0.000496621	0.00546986	0.0326848	0.122557	0.0147533	0.00456594	0.00161152	0.00302067	1.15888e-06	0.0258463	0.00264092	0.00262089	0.000366938	0	0.000784473	2.3236e-05	5.98808e-06	0.000580289	-0.188027	-0.0435972	0.131857	-0.122316	-0.0771667	0.0231963	-0.1	-0.542332	-0.00084464
2043	2.99996	0	0.146252	2.85371	3.3931	3.18521	3.09667	2.49293	0.385491	0.218245	0.0885431	0.207885	0.0069409	0.00225856	8.96744e-05	0.00499681	0.00465654	0.00110423	0.0227489	0.0236006	0.0156973	0.000518104	0.000433682	0.00549779	0.0320133	0.121185	0.0145543	0.00454841	0.00161042	0.00288947	9.44106e-07	0.0242784	0.00255239	0.00252092	0.000349134	0	0.000774418	2.20649e-05	5.91333e-06	0.000580289	-0.187789	-0.0433189	0.130004	-0.119292	-0.0768862	0.0217047	-0.1	-0.539173	-0.000546823
2044	3.03373	0	0.181191	2.85254	3.39183	3.18802	3.09821	2.49626	0.382637	0.219313	0.0898084	0.203814	0.00697015	0.00226858	9.05913e-05	0.00498379	0.00467265	0.00112458	0.0233392	0.0238095	0.0161376	0.000509358	0.000378652	0.00552377	0.031351	0.119821	0.0143573	0.00453088	0.00160932	0.00276356	7.68956e-07	0.0227898	0.00246477	0.00242264	0.000332055	0	0.000764309	2.09491e-05	5.80204e-06	0.000580289	-0.187551	-0.0430406	0.128151	-0.116269	-0.0766057	0.0202132	-0.1	-0.535996	-0.00030866
2045	3.04117	0	0.190562	2.8506	3.38991	3.19006	3.09907	2.49921	0.37955	0.220311	0.0909926	0.199848	0.0069978	0.00227793	9.15044e-05	0.00497052	0.00467787	0.00114517	0.0239014	0.0239888	0.0165629	0.000500326	0.000330559	0.0055478	0.0306989	0.118467	0.0141626	0.00451338	0.00160823	0.00264287	6.26183e-07	0.0213746	0.00237804	0.0023263	0.000315691	0	0.000754169	1.98866e-05	5.7125e-06	0.000580289	-0.187314	-0.0427623	0.126298	-0.113246	-0.0763252	0.0187217	-0.1	-0.5328	-0.000134225
2046	3.0222	0	0.174151	2.84805	3.38747	3.19148	3.09938	2.50188	0.376268	0.221238	0.0921011	0.195984	0.00702384	0.00228659	9.24136e-05	0.00495702	0.00467447	0.001166	0.0244368	0.0241409	0.0169735	0.000491022	0.000288543	0.00556988	0.0300575	0.117124	0.0139702	0.00449593	0.00160713	0.00252731	5.09844e-07	0.0200276	0.00229219	0.00223212	0.000300029	0	0.000744024	1.88751e-05	5.65165e-06	0.000580289	-0.187076	-0.042484	0.124445	-0.110223	-0.0760447	0.0172301	-0.1	-0.529586	-3.18398e-05
2047	2.97513	0	0.130187	2.84494	3.38456	3.19234	3.0992	2.50428	0.372824	0.222095	0.0931386	0.192218	0.00704829	0.00229458	9.3319e-05	0.00494328	0.00466424	0.00118705	0.0249465	0.0242682	0.0173698	0.000481456	0.000251846	0.00559001	0.0294275	0.115795	0.0137804	0.00447854	0.00160603	0.00241676	4.15074e-07	0.0187435	0.00220718	0.00214024	0.000285053	0	0.000733893	1.79159e-05	5.61917e-06	0.000580289	-0.186839	-0.0422057	0.122592	-0.107199	-0.0757642	0.0157386	-0.1	-0.526352	-3.34531e-08
2048	2.92742	0	0.0860781	2.84134	3.38119	3.19264	3.09853	2.5064	0.369249	0.222883	0.0941097	0.188549	0.00707114	0.0023019	9.42205e-05	0.00492933	0.00464872	0.00120833	0.0254315	0.0243728	0.0177522	0.000471639	0.000219805	0.00560819	0.0288096	0.114479	0.0135933	0.00446123	0.00160493	0.00231112	3.37897e-07	0.0175176	0.00212299	0.00205081	0.000270745	0	0.000723795	1.70033e-05	5.61874e-06	0.000580289	-0.186601	-0.0419274	0.120739	-0.104176	-0.0754836	0.0142471	-0.1	-0.5231	0
2049	2.89647	0	0.0592681	2.8372	3.37727	3.1923	3.09728	2.50812	0.365559	0.223602	0.0950177	0.184971	0.00709239	0.00230853	9.51182e-05	0.00491515	0.00462893	0.00122984	0.0258927	0.0244563	0.0181208	0.000461582	0.000191832	0.00562442	0.0282037	0.113178	0.0134089	0.004444	0.00160384	0.00221018	2.75054e-07	0.0163454	0.00203956	0.00196392	0.000257085	0	0.000713744	1.61348e-05	5.63057e-06	0.000580289	-0.186364	-0.0416491	0.118886	-0.101153	-0.0752031	0.0127556	-0.1	-0.519828	0
2050	2.87479	0	0.0431769	2.83162	3.37268	3.1912	3.09534	2.50933	0.361759	0.224254	0.095865	0.181479	0.00711204	0.00231449	9.60121e-05	0.00490075	0.00460562	0.00125154	0.0263309	0.0245202	0.0184761	0.000451288	0.00016741	0.00563871	0.0276094	0.111891	0.0132271	0.00442684	0.00160274	0.0021137	2.23882e-07	0.0152222	0.00195679	0.0018796	0.000244049	0	0.000703741	1.53116e-05	5.63428e-06	0.000580289	-0.186493	-0.0414291	0.117169	-0.098574	-0.0748886	0.0112298	-0.1	-0.51699	0
2051	2.85599	0	0.0322656	2.82372	3.36736	3.1893	3.09264	2.50995	0.357856	0.224838	0.096654	0.178067	0.0071301	0.00231977	9.69022e-05	0.00488613	0.00457939	0.00127342	0.0267467	0.0245656	0.0188181	0.000440765	0.000146087	0.00565105	0.0270262	0.110617	0.0130478	0.00440976	0.00160165	0.00202145	1.82214e-07	0.0141442	0.00187459	0.00179789	0.000231611	0	0.000693781	1.45311e-05	5.63069e-06	0.000580289	-0.187357	-0.0413257	0.115722	-0.0968832	-0.0745062	0.00963566	-0.1	-0.515044	0
2052	2.84014	0	0.025655	2.81448	3.36158	3.18683	3.08939	2.51006	0.353964	0.225369	0.097439	0.174751	0.0071472	0.00232463	9.77897e-05	0.00487133	0.00455984	0.0012947	0.0271555	0.0246134	0.0191546	0.000430219	0.000127475	0.00566228	0.0264542	0.109357	0.012871	0.00439274	0.00160056	0.00193324	1.48294e-07	0.0131254	0.00179458	0.00171885	0.000219748	0	0.000683876	1.37877e-05	5.62989e-06	0.000580289	-0.188588	-0.0412806	0.114412	-0.0956365	-0.0740898	0.00800729	-0.1	-0.513544	0
2053	2.87747	0	0.0725288	2.80495	3.35559	3.18405	3.08578	2.50973	0.350183	0.22586	0.09827	0.171546	0.00716399	0.00232933	9.86759e-05	0.00485641	0.00455471	0.00131465	0.027572	0.0246829	0.0194931	0.000419848	0.000111234	0.00567322	0.025893	0.108111	0.0126966	0.0043758	0.00159946	0.00184891	1.20687e-07	0.0121791	0.00171818	0.00164248	0.00020844	0	0.000674031	1.30793e-05	5.63339e-06	0.000580289	-0.189819	-0.0412355	0.113101	-0.0943899	-0.0736734	0.00637892	-0.1	-0.512036	0
2054	2.94127	0	0.146252	2.79502	3.34924	3.1808	3.08166	2.50887	0.346477	0.226311	0.0991408	0.16844	0.00718047	0.00233386	9.95608e-05	0.00484137	0.00456091	0.00133332	0.0279954	0.0247719	0.0198334	0.000409644	9.70562e-05	0.00568388	0.0253415	0.106876	0.0125244	0.00435889	0.00159837	0.00176814	9.82119e-08	0.0112988	0.00164494	0.00156875	0.000197659	0	0.000664231	1.24073e-05	5.59516e-06	0.000580289	-0.19105	-0.0411903	0.11179	-0.0931433	-0.0732569	0.00475055	-0.1	-0.510523	0
2055	2.96587	0	0.181191	2.78468	3.34249	3.17707	3.07702	2.50748	0.342821	0.226723	0.100046	0.165424	0.00719665	0.00233823	0.000100444	0.0048262	0.00457607	0.00135077	0.0284253	0.0248785	0.0201754	0.000399597	8.46772e-05	0.00569426	0.0247988	0.105651	0.012354	0.00434201	0.00159728	0.0016907	7.99119e-08	0.010479	0.00157449	0.00149762	0.000187383	0	0.00065447	1.17695e-05	5.5208e-06	0.000580289	-0.192281	-0.0411452	0.110479	-0.0918967	-0.0728405	0.00312218	-0.1	-0.509002	0
2056	2.9647	0	0.190562	2.77414	3.33557	3.17308	3.07209	2.50577	0.339226	0.227096	0.100984	0.162496	0.00721253	0.00234243	0.000101327	0.0048109	0.00459872	0.00136711	0.0288617	0.0250019	0.0205191	0.000389706	7.38726e-05	0.00570437	0.0242657	0.104437	0.0121857	0.00432517	0.00159618	0.00161656	6.50165e-08	0.00971484	0.00150659	0.00142908	0.000177596	0	0.00064476	1.11644e-05	5.46752e-06	0.000580289	-0.193512	-0.0411001	0.109168	-0.09065	-0.0724241	0.00149381	-0.1	-0.507475	0
2057	2.93766	0	0.174151	2.76351	3.32859	3.16894	3.06699	2.50386	0.335697	0.227432	0.101952	0.159653	0.00722809	0.00234647	0.000102208	0.00479548	0.00462761	0.0013824	0.0293047	0.0251413	0.0208647	0.000379971	6.44447e-05	0.00571418	0.0237426	0.103236	0.0120196	0.00430839	0.00159509	0.00154564	5.28953e-08	0.0090021	0.00144101	0.00136312	0.000168281	0	0.000635125	1.05907e-05	5.4419e-06	0.000580289	-0.194743	-0.041055	0.107857	-0.0894034	-0.0720077	-0.000134559	-0.1	-0.50594	0
2058	2.88301	0	0.130187	2.75282	3.32157	3.16468	3.06173	2.50176	0.332237	0.22773	0.102948	0.156892	0.00724335	0.00235035	0.000103088	0.00477994	0.00466172	0.00139675	0.0297541	0.025296	0.0212121	0.000370388	5.62197e-05	0.00572372	0.0232298	0.102048	0.0118559	0.00429168	0.00159399	0.00147784	4.30337e-08	0.00833662	0.00137753	0.00129973	0.000159421	0	0.000625571	1.00469e-05	5.44361e-06	0.000580289	-0.195974	-0.0410099	0.106547	-0.0881568	-0.0715912	-0.00176293	-0.1	-0.504399	0
2059	2.82814	0	0.0860781	2.74207	3.3145	3.16029	3.05632	2.49947	0.328851	0.22799	0.103971	0.154211	0.00725831	0.00235407	0.000103966	0.00476429	0.00470027	0.00141023	0.0302099	0.0254652	0.0215613	0.000360956	4.90459e-05	0.00573298	0.0227279	0.100875	0.0116946	0.00427505	0.0015929	0.00141311	3.50119e-08	0.00771467	0.00131598	0.00123884	0.000151	0	0.000616116	9.53175e-06	5.47632e-06	0.000580289	-0.197205	-0.0409647	0.105236	-0.0869101	-0.0711748	-0.0033913	-0.1	-0.502851	0
2060	2.79115	0	0.0592681	2.73188	3.30726	3.15565	3.05063	2.49689	0.325534	0.228213	0.105018	0.151605	0.00727295	0.00235762	0.000104843	0.00474853	0.00474247	0.0014229	0.0306721	0.025648	0.0219125	0.00035167	4.2789e-05	0.00574196	0.0222366	0.0997171	0.0115358	0.00425852	0.00159181	0.00135131	2.84868e-08	0.00713265	0.00125614	0.00118043	0.000142997	0	0.000606765	9.04371e-06	5.52043e-06	0.000580289	-0.198062	-0.040875	0.103962	-0.0857088	-0.0706616	-0.00477916	-0.1	-0.500954	0
2061	2.76606	0	0.0431769	2.72288	3.2997	3.15063	3.04454	2.49387	0.32227	0.2284	0.106088	0.149069	0.00728729	0.00236101	0.000105719	0.00473266	0.0047875	0.00143479	0.0311402	0.0258432	0.0222655	0.000342526	3.73311e-05	0.00575066	0.0217556	0.0985728	0.0113792	0.00424207	0.00159073	0.00129227	2.31785e-08	0.00658716	0.00119783	0.00112441	0.000135393	0	0.00059751	8.58124e-06	5.5549e-06	0.000580289	-0.198171	-0.0406959	0.102764	-0.0845982	-0.069955	-0.00568602	-0.1	-0.498363	0
2062	2.74637	0	0.0322656	2.7141	3.29189	3.14529	3.03811	2.49036	0.31918	0.228568	0.10718	0.146605	0.00730147	0.00236428	0.000106594	0.00471671	0.00483503	0.00144593	0.0316145	0.0260506	0.0226199	0.000333581	3.25701e-05	0.00575913	0.0212844	0.0974419	0.0112249	0.00422569	0.00158964	0.00123586	1.88598e-08	0.00607957	0.00114184	0.00107071	0.000128171	0	0.000588352	8.13932e-06	5.57999e-06	0.000580289	-0.197906	-0.0404721	0.101603	-0.0835329	-0.0691516	-0.00635237	-0.1	-0.495416	0
2063	2.73062	0	0.025655	2.70496	3.28395	3.13974	3.03145	2.48633	0.316376	0.228736	0.108294	0.144213	0.00731561	0.00236748	0.000107468	0.00470073	0.00488479	0.00145632	0.0320953	0.0262702	0.0229756	0.000324896	2.84169e-05	0.00576743	0.0208228	0.0963242	0.0110728	0.00420939	0.00158856	0.00118193	1.53463e-08	0.00561115	0.00108889	0.00101929	0.000121312	0	0.000579295	7.71685e-06	5.60158e-06	0.000580289	-0.19764	-0.0402483	0.100443	-0.0824677	-0.0683482	-0.00701872	-0.1	-0.492451	0
2064	2.76833	0	0.0725288	2.69581	3.27586	3.13397	3.02454	2.48181	0.313825	0.228902	0.109428	0.14189	0.00732974	0.00237062	0.00010834	0.0046847	0.00493636	0.00146602	0.0325822	0.026501	0.0233325	0.000316461	2.4794e-05	0.00577556	0.0203705	0.0952195	0.0109228	0.00419315	0.00158748	0.00113039	1.24878e-08	0.00517864	0.00103867	0.00097007	0.000114802	0	0.000570334	7.31639e-06	5.62037e-06	0.000580289	-0.197375	-0.0400246	0.099282	-0.0814024	-0.0675448	-0.00768507	-0.1	-0.489471	0
2065	2.83272	0	0.146252	2.68646	3.26745	3.12782	3.01724	2.4767	0.311475	0.229068	0.110579	0.139627	0.00734383	0.00237368	0.000109212	0.00466863	0.00498902	0.00147502	0.0330747	0.0267415	0.0236904	0.000308267	2.16325e-05	0.00578353	0.0199266	0.0941257	0.0107747	0.00417696	0.00158639	0.00108104	1.01614e-08	0.0047789	0.000990846	0.000922957	0.000108621	0	0.000561451	6.93651e-06	5.5951e-06	0.000580289	-0.197109	-0.0398008	0.0981213	-0.0803371	-0.0667414	-0.00835142	-0.1	-0.486473	0
2066	2.85809	0	0.181191	2.6769	3.25872	3.1213	3.00956	2.47104	0.30929	0.229234	0.111745	0.13742	0.0073579	0.00237669	0.000110083	0.0046525	0.00504232	0.00148336	0.0335721	0.0269904	0.0240492	0.000300303	1.88728e-05	0.00579132	0.0194903	0.0930416	0.0106283	0.0041608	0.00158531	0.00103373	8.26766e-09	0.00440913	0.000945135	0.000877875	0.00010275	0	0.000552647	6.576e-06	5.53254e-06	0.000580289	-0.196844	-0.039577	0.0969606	-0.0792718	-0.065938	-0.00901777	-0.1	-0.483458	0
2067	2.8579	0	0.190562	2.66734	3.24989	3.11463	3.0017	2.46504	0.307265	0.2294	0.112926	0.135268	0.00737195	0.00237962	0.000110953	0.00463633	0.00509638	0.00149108	0.0340748	0.0272478	0.0244089	0.000292565	1.64647e-05	0.00579895	0.0190622	0.0919683	0.0104836	0.00414468	0.00158422	0.000988438	6.7266e-09	0.00406697	0.000901347	0.000834772	9.71777e-05	0	0.000543931	6.23403e-06	5.49009e-06	0.000580289	-0.196579	-0.0393533	0.0957999	-0.0782066	-0.0651346	-0.00968412	-0.1	-0.480426	0
2068	2.83204	0	0.174151	2.65789	3.24108	3.10791	2.99378	2.45882	0.305396	0.229566	0.114121	0.133169	0.00738597	0.00238248	0.000111822	0.00462012	0.00515126	0.00149826	0.0345826	0.0275134	0.0247696	0.000285048	1.43639e-05	0.00580641	0.0186426	0.0909068	0.0103409	0.00412861	0.00158314	0.000945117	5.47279e-09	0.00375023	0.000859298	0.000793592	9.18923e-05	0	0.000535311	5.9098e-06	5.47436e-06	0.000580289	-0.196313	-0.0391295	0.0946392	-0.0771413	-0.0643312	-0.0103505	-0.1	-0.477376	0
2069	2.77876	0	0.130187	2.64857	3.23229	3.10117	2.98584	2.45243	0.303676	0.229732	0.115332	0.131123	0.00739996	0.00238528	0.000112691	0.00460387	0.00520699	0.00150495	0.0350957	0.0277869	0.0251314	0.000277748	1.25315e-05	0.00581369	0.0182317	0.0898578	0.0102002	0.00411262	0.00158205	0.000903714	4.45285e-09	0.00345684	0.000818825	0.000754277	8.68822e-05	0	0.000526799	5.6025e-06	5.48507e-06	0.000580289	-0.196048	-0.0389057	0.0934785	-0.076076	-0.0635278	-0.0110168	-0.1	-0.474308	0
2070	2.72593	0	0.0860781	2.63985	3.22353	3.0944	2.97784	2.44584	0.302102	0.229898	0.116557	0.129128	0.00741393	0.00238801	0.000113558	0.00458759	0.00526365	0.0015112	0.0356142	0.0280684	0.0254945	0.000270659	1.09335e-05	0.00582081	0.0178298	0.0888221	0.0100616	0.00409671	0.00158097	0.000864181	3.62326e-09	0.00318494	0.00077978	0.00071677	8.21317e-05	0	0.000518402	5.31136e-06	5.52598e-06	0.000580289	-0.19532	-0.0386984	0.0924554	-0.0749524	-0.0627075	-0.0114173	-0.1	-0.471268	0
2071	2.69135	0	0.0592681	2.63208	3.21467	3.08748	2.96969	2.43896	0.300658	0.230064	0.117797	0.127183	0.00742787	0.00239067	0.000114424	0.00457127	0.00532111	0.00151703	0.036138	0.0283573	0.0258587	0.000263775	9.53987e-06	0.00582776	0.0174368	0.0877997	0.00992512	0.00408088	0.00157989	0.000826436	2.94849e-09	0.00293274	0.000742008	0.000680998	7.76294e-05	0	0.000510118	5.03555e-06	5.57707e-06	0.000580289	-0.193668	-0.038524	0.0917079	-0.0737122	-0.0618534	-0.0112862	-0.1	-0.468304	0
2072	2.66802	0	0.0431769	2.62485	3.20576	3.08048	2.96145	2.4319	0.299327	0.230225	0.119027	0.125286	0.00744157	0.00239323	0.000115288	0.00455494	0.00537511	0.00152249	0.0366596	0.0286444	0.0262203	0.000257092	8.32451e-06	0.00583452	0.0170523	0.08679	0.00979063	0.00406514	0.00157881	0.000790379	2.39962e-09	0.00269969	0.000705957	0.000646894	7.33686e-05	0	0.000501948	4.77418e-06	5.62154e-06	0.000580289	-0.191553	-0.0383661	0.091098	-0.0724136	-0.0609824	-0.0108892	-0.1	-0.465371	0
2073	2.65003	0	0.0322656	2.61776	3.19693	3.0735	2.95327	2.4248	0.298095	0.230376	0.120223	0.123435	0.00745481	0.00239568	0.000116149	0.00453863	0.00542224	0.00152758	0.0371721	0.0289213	0.0265754	0.000250602	7.26466e-06	0.00584107	0.0166759	0.0857925	0.00965806	0.00404947	0.00157774	0.000755921	1.95316e-09	0.00248533	0.000672029	0.000614401	6.93332e-05	0	0.000493885	4.52646e-06	5.66037e-06	0.000580289	-0.189439	-0.0382081	0.0904881	-0.071115	-0.0601114	-0.0104922	-0.1	-0.462423	0
2074	2.63641	0	0.025655	2.61076	3.18813	3.0665	2.94511	2.41764	0.29695	0.230518	0.121388	0.121629	0.00746759	0.002398	0.000117007	0.00452234	0.0054638	0.00153233	0.0376758	0.0291888	0.0269241	0.000244301	6.34031e-06	0.0058474	0.0163075	0.084807	0.00952737	0.00403387	0.00157666	0.000722986	1.58996e-09	0.00228808	0.000639993	0.000583448	6.55088e-05	0	0.000485928	4.29166e-06	5.69497e-06	0.000580289	-0.187324	-0.0380502	0.0898782	-0.0698164	-0.0592403	-0.0100952	-0.1	-0.45946	0
2075	2.67634	0	0.0725288	2.60381	3.17934	3.05947	2.93695	2.41042	0.295879	0.230651	0.122524	0.119864	0.00747992	0.00240021	0.000117862	0.00450606	0.00550083	0.00153676	0.0381711	0.0294474	0.0272666	0.000238182	5.53405e-06	0.00585351	0.0159468	0.0838331	0.00939852	0.00401833	0.00157559	0.000691502	1.29444e-09	0.00210648	0.000609644	0.000553968	6.18867e-05	0	0.000478078	4.0691e-06	5.72584e-06	0.000580289	-0.185209	-0.0378922	0.0892683	-0.0685179	-0.0583693	-0.00969821	-0.1	-0.45648	0
2076	2.74303	0	0.146252	2.59678	3.17042	3.05228	2.92865	2.40303	0.29485	0.230773	0.123631	0.118137	0.00749178	0.00240229	0.000118713	0.00448979	0.00553378	0.00154085	0.0386575	0.0296969	0.0276027	0.000232236	4.83049e-06	0.00585941	0.015593	0.082869	0.00927125	0.00400284	0.00157452	0.000661355	1.0539e-09	0.00193918	0.000580777	0.000525895	5.8457e-05	0	0.000470319	3.85796e-06	5.71192e-06	0.000580289	-0.183095	-0.0377343	0.0886585	-0.0672193	-0.0574983	-0.00930122	-0.1	-0.453485	0
2077	2.77084	0	0.181191	2.58965	3.16138	3.04493	2.92022	2.39549	0.293845	0.230887	0.124709	0.116443	0.00750318	0.00240425	0.000119562	0.00447352	0.00556314	0.0015446	0.0391352	0.0299375	0.0279325	0.000226457	4.21635e-06	0.00586509	0.0152457	0.0819137	0.00914542	0.00398737	0.00157344	0.000632456	8.58054e-10	0.00178494	0.000553217	0.000499157	5.52062e-05	0	0.000462647	3.65758e-06	5.66013e-06	0.000580289	-0.18098	-0.0375763	0.0880486	-0.0659207	-0.0566273	-0.00890423	-0.1	-0.450474	0
2078	2.7732	0	0.190562	2.58264	3.15243	3.03764	2.91188	2.38802	0.292875	0.230991	0.125762	0.114783	0.00751412	0.00240609	0.000120407	0.00445727	0.00558988	0.00154805	0.0396048	0.0301704	0.0282562	0.000220842	3.68039e-06	0.00587056	0.014905	0.0809682	0.00902115	0.00397195	0.00157236	0.000604786	6.98627e-10	0.00164273	0.000526842	0.000473705	5.21245e-05	0	0.00045507	3.4675e-06	5.62799e-06	0.000580289	-0.178865	-0.0374183	0.0874387	-0.0646222	-0.0557563	-0.00850724	-0.1	-0.447446	0
2079	2.75004	0	0.174151	2.57588	3.1437	3.03054	2.90375	2.38072	0.291947	0.231086	0.126792	0.113158	0.00752461	0.00240781	0.000121249	0.00444102	0.00561471	0.00155124	0.0400668	0.0303964	0.028574	0.000215386	3.21275e-06	0.00587582	0.0145713	0.0800331	0.00889852	0.00395657	0.00157129	0.000578317	5.68865e-10	0.00151157	0.000501537	0.000449488	4.92126e-05	0	0.000447587	3.28727e-06	5.62209e-06	0.000580289	-0.176751	-0.0372604	0.0868288	-0.0633236	-0.0548853	-0.00811025	-0.1	-0.444402	0
2080	2.69932	0	0.130187	2.56913	3.13522	3.02365	2.89585	2.37361	0.291068	0.231171	0.127802	0.111566	0.00753463	0.00240941	0.000122088	0.00442479	0.0056382	0.00155421	0.0405218	0.0306167	0.0288863	0.000210086	2.80476e-06	0.00588086	0.0142448	0.0791091	0.00877761	0.00394127	0.00157021	0.000553018	4.63255e-10	0.00139058	0.000477198	0.000426458	4.64605e-05	0	0.000440209	3.11645e-06	5.64217e-06	0.000580289	-0.174661	-0.0371247	0.0862887	-0.0620319	-0.0540984	-0.00769472	-0.1	-0.441632	0
2081	2.64816	0	0.0860781	2.56208	3.12698	3.01697	2.88818	2.36669	0.290244	0.231247	0.128793	0.110008	0.00754419	0.00241089	0.000122924	0.00440857	0.00566086	0.001557	0.0409705	0.030832	0.0291931	0.000204939	2.44886e-06	0.00588569	0.0139256	0.078197	0.00865851	0.00392604	0.00156914	0.000528858	3.77309e-10	0.00127891	0.000453731	0.000404563	4.3859e-05	0	0.000432948	2.95459e-06	5.69242e-06	0.000580289	-0.172621	-0.0370336	0.0858882	-0.0607541	-0.0534798	-0.00724214	-0.1	-0.439432	0
2082	2.61452	0	0.0592681	2.55525	3.11888	3.0104	2.88065	2.35988	0.289464	0.231314	0.129744	0.108483	0.00755345	0.00241228	0.000123756	0.00439237	0.00567856	0.00155955	0.0414059	0.0310342	0.0294914	0.000199939	2.13836e-06	0.00589027	0.0136136	0.0772967	0.00854121	0.0039109	0.00156807	0.00050579	3.07353e-10	0.00117607	0.000431383	0.00038375	4.13985e-05	0	0.000425803	2.80125e-06	5.75201e-06	0.000580289	-0.170607	-0.0369647	0.0855574	-0.0594831	-0.0529453	-0.00677102	-0.1	-0.437514	0
2083	2.59194	0	0.0431769	2.54877	3.11078	3.00379	2.87316	2.35308	0.288709	0.23137	0.130633	0.106991	0.00756253	0.0024136	0.000124582	0.00437619	0.0056878	0.00156182	0.0418215	0.0312155	0.0297777	0.000195077	1.86738e-06	0.00589458	0.0133086	0.0764077	0.00842563	0.00389583	0.00156701	0.000483752	2.50395e-10	0.00108155	0.000410371	0.000363973	3.90695e-05	0	0.000418768	2.65594e-06	5.79988e-06	0.000580289	-0.168592	-0.0368958	0.0852267	-0.0582121	-0.0524108	-0.0062999	-0.1	-0.435588	0
2084	2.57448	0	0.0322656	2.54221	3.10261	2.99708	2.86562	2.34623	0.28797	0.231416	0.131463	0.105529	0.00757146	0.00241486	0.000125403	0.00436001	0.00569011	0.0015638	0.0422177	0.0313771	0.0300523	0.000190351	1.63085e-06	0.00589862	0.0130102	0.0755295	0.00831171	0.00388083	0.00156594	0.000462692	2.04011e-10	0.00099467	0.00039055	0.000345185	3.68684e-05	0	0.000411838	2.51822e-06	5.83719e-06	0.000580289	-0.166577	-0.0368269	0.0848959	-0.0569412	-0.0518763	-0.00582879	-0.1	-0.433655	0
2085	2.56122	0	0.025655	2.53557	3.09434	2.99024	2.858	2.33931	0.287245	0.231451	0.132239	0.104095	0.00758022	0.00241605	0.000126219	0.00434385	0.00568676	0.00156553	0.0425952	0.0315204	0.0303154	0.000185755	1.42438e-06	0.00590239	0.0127183	0.074662	0.0081994	0.0038659	0.00156487	0.000442561	1.66235e-10	0.000914777	0.000371791	0.000327328	3.47869e-05	0	0.000405011	2.38768e-06	5.86935e-06	0.000580289	-0.164563	-0.036758	0.0845652	-0.0556702	-0.0513418	-0.00535767	-0.1	-0.431714	0
2086	2.60137	0	0.0725288	2.52884	3.08597	2.98328	2.85032	2.33231	0.286531	0.231476	0.132964	0.10269	0.00758881	0.00241717	0.000127029	0.00432769	0.00567881	0.00156701	0.0429547	0.0316467	0.0305672	0.000181285	1.24414e-06	0.00590588	0.0124328	0.0738049	0.00808867	0.00385104	0.00156381	0.000423318	1.35466e-10	0.000841299	0.000353982	0.000310361	3.28225e-05	0	0.000398283	2.26393e-06	5.8977e-06	0.000580289	-0.162548	-0.0366891	0.0842344	-0.0543993	-0.0508074	-0.00488655	-0.1	-0.429765	0
2087	2.66813	0	0.146252	2.52188	3.07739	2.97608	2.84245	2.32515	0.285802	0.23149	0.133637	0.101309	0.00759724	0.00241824	0.000127834	0.00431154	0.00566669	0.00156821	0.0432962	0.0317562	0.0308077	0.000176936	1.08671e-06	0.0059091	0.0121529	0.0729566	0.00797932	0.00383622	0.00156275	0.000404891	1.10394e-10	0.000773677	0.000337005	0.000294243	3.09664e-05	0	0.000391647	2.14655e-06	5.88123e-06	0.000580289	-0.160533	-0.0366203	0.0839037	-0.0531283	-0.0502729	-0.00441544	-0.1	-0.427809	0
2088	2.69589	0	0.181191	2.5147	3.0686	2.96865	2.83439	2.31785	0.285047	0.231495	0.134261	0.0999494	0.00760551	0.00241923	0.000128634	0.00429538	0.0056509	0.00156914	0.0436198	0.0318496	0.031037	0.000172702	9.49182e-07	0.00591205	0.0118783	0.0721161	0.0078712	0.00382142	0.00156168	0.000387226	8.99587e-11	0.000711413	0.000320765	0.000278929	2.92113e-05	0	0.000385094	2.03513e-06	5.82694e-06	0.000580289	-0.158518	-0.0365514	0.0835729	-0.0518573	-0.0497384	-0.00394432	-0.1	-0.425845	0
2089	2.69811	0	0.190562	2.50755	3.05984	2.96122	2.82638	2.31061	0.284282	0.23149	0.13484	0.0986132	0.00761361	0.00242016	0.000129428	0.00427923	0.00563241	0.00156982	0.0439268	0.0319286	0.0312554	0.000168581	8.29063e-07	0.00591473	0.0116091	0.0712842	0.00776442	0.00380666	0.00156061	0.000370313	7.33072e-11	0.000654083	0.000305193	0.000264377	2.75514e-05	0	0.00037863	1.92945e-06	5.79253e-06	0.000580289	-0.156504	-0.0364825	0.0832422	-0.0505864	-0.0492039	-0.0034732	-0.1	-0.423872	0
2090	2.67473	0	0.174151	2.50058	3.05123	2.95393	2.81856	2.30356	0.28352	0.231474	0.135376	0.0973003	0.00762154	0.00242103	0.000130217	0.00426308	0.00561196	0.00157031	0.0442178	0.0319946	0.0314633	0.000164571	7.24172e-07	0.00591714	0.0113457	0.0704617	0.00765906	0.00379195	0.00155955	0.000354134	5.97407e-11	0.000601293	0.000290226	0.00025056	2.59814e-05	0	0.000372261	1.82924e-06	5.78461e-06	0.000580289	-0.15457	-0.0363946	0.0828853	-0.0494265	-0.048635	-0.00299901	-0.1	-0.421784	0
2091	2.62405	0	0.130187	2.49387	3.04283	2.94682	2.81094	2.29672	0.282771	0.231449	0.135874	0.0960109	0.00762932	0.00242183	0.000131001	0.00424694	0.00559011	0.00157062	0.0444938	0.032049	0.0316609	0.00016067	6.32591e-07	0.00591927	0.011088	0.0696491	0.00755518	0.00377731	0.00155848	0.00033867	4.86889e-11	0.000552677	0.000275809	0.000237451	2.45011e-05	0	0.000365989	1.73426e-06	5.8029e-06	0.000580289	-0.152797	-0.0362686	0.082476	-0.0484886	-0.0479974	-0.00251865	-0.1	-0.41947	0
2092	2.57343	0	0.0860781	2.48736	3.03467	2.93993	2.80361	2.29014	0.282055	0.231413	0.136322	0.0947459	0.00763697	0.00242259	0.000131779	0.00423085	0.00556469	0.00157074	0.0447512	0.0320878	0.0318469	0.000156874	5.5265e-07	0.00592112	0.0108362	0.0688469	0.00745286	0.00376274	0.00155742	0.000323902	3.96872e-11	0.000507969	0.000262098	0.000225013	2.31053e-05	0	0.000359825	1.64426e-06	5.85344e-06	0.000580289	-0.151105	-0.0361235	0.0820405	-0.0476618	-0.0473254	-0.00203522	-0.1	-0.417037	0
2093	2.54025	0	0.0592681	2.48098	3.02672	2.93321	2.7965	2.28376	0.281379	0.231366	0.136708	0.0935048	0.00764456	0.00242335	0.000132549	0.00421483	0.00553375	0.00157062	0.0449862	0.0321067	0.0320195	0.000153182	4.82874e-07	0.00592268	0.0105903	0.0680553	0.00735209	0.00374826	0.00155636	0.000309801	3.23553e-11	0.000466917	0.000249223	0.000213216	2.17885e-05	0	0.000353767	1.559e-06	5.91704e-06	0.000580289	-0.149414	-0.0359785	0.081605	-0.046835	-0.0466534	-0.00155179	-0.1	-0.414594	0
2094	2.51787	0	0.0431769	2.4747	3.01881	2.92652	2.78948	2.27744	0.280732	0.231308	0.137036	0.0922864	0.00765208	0.0024241	0.000133311	0.00419889	0.00549819	0.00157028	0.0451994	0.0321068	0.032179	0.000149588	4.21957e-07	0.00592395	0.01035	0.0672736	0.0072528	0.00373385	0.00155531	0.000296329	2.6382e-11	0.00042921	0.000237096	0.000202028	2.05456e-05	0	0.000347812	1.4782e-06	5.97124e-06	0.000580289	-0.147722	-0.0358335	0.0811696	-0.0460082	-0.0459814	-0.00106835	-0.1	-0.412141	0
2095	2.50068	0	0.0322656	2.46841	3.01086	2.91978	2.78247	2.27112	0.280105	0.231239	0.137308	0.0910894	0.00765953	0.00242484	0.000134066	0.00418301	0.0054588	0.00156972	0.0453914	0.0320894	0.0323255	0.000146089	3.68763e-07	0.00592492	0.0101151	0.0665015	0.00715493	0.0037195	0.00155425	0.000283453	2.15144e-11	0.000394566	0.000225635	0.000191418	1.93716e-05	0	0.000341948	1.40162e-06	6.01556e-06	0.000580289	-0.14603	-0.0356884	0.0807341	-0.0451813	-0.0453094	-0.000584922	-0.1	-0.409677	0
2096	2.48777	0	0.025655	2.46212	3.00288	2.91297	2.77544	2.26479	0.279495	0.231158	0.137526	0.0899133	0.00766691	0.00242558	0.000134814	0.00416721	0.00541626	0.00156895	0.0455631	0.0320555	0.0324593	0.000142683	3.22307e-07	0.0059256	0.00988543	0.0657389	0.00705845	0.00370522	0.00155319	0.000271146	1.75473e-11	0.000362731	0.000214768	0.000181359	1.8262e-05	0	0.000336172	1.32902e-06	6.05474e-06	0.000580289	-0.144338	-0.0355434	0.0802986	-0.0443545	-0.0446374	-0.000101488	-0.1	-0.407202	0
2097	2.52834	0	0.0725288	2.45581	2.99485	2.90609	2.7684	2.25843	0.278898	0.231067	0.137694	0.0887571	0.00767422	0.00242631	0.000135554	0.00415148	0.00537112	0.00156798	0.0457149	0.0320064	0.0325807	0.000139366	2.81731e-07	0.00592598	0.00966083	0.0649853	0.00696332	0.003691	0.00155214	0.000259379	1.43135e-11	0.000333477	0.00020443	0.000171819	1.72127e-05	0	0.00033049	1.26021e-06	6.08995e-06	0.000580289	-0.142646	-0.0353984	0.0798631	-0.0435277	-0.0439654	0.000381945	-0.1	-0.404716	0
2098	2.5956	0	0.146252	2.44935	2.98665	2.89903	2.76122	2.25196	0.278291	0.230965	0.137812	0.0876184	0.00768147	0.00242703	0.000136287	0.00413582	0.00532346	0.00156678	0.0458471	0.0319421	0.0326896	0.000136134	2.46275e-07	0.00592607	0.00944079	0.0642396	0.00686938	0.00367683	0.00155109	0.000248112	1.16764e-11	0.000306572	0.000194553	0.000162765	1.62192e-05	0	0.000324895	1.19492e-06	6.07997e-06	0.000580289	-0.140955	-0.0352533	0.0794277	-0.0427009	-0.0432934	0.000865378	-0.1	-0.402219	0
2099	2.62394	0	0.181191	2.44275	2.9783	2.8918	2.75392	2.24541	0.277658	0.230852	0.13788	0.0864954	0.00768864	0.00242775	0.000137012	0.00412022	0.00527347	0.00156534	0.0459598	0.031863	0.0327861	0.000132984	2.15282e-07	0.00592587	0.00922499	0.0635007	0.00677649	0.00366267	0.00155003	0.000237309	9.52524e-12	0.000281818	0.000185087	0.000154173	1.52829e-05	0	0.000319379	1.13296e-06	6.03183e-06	0.000580289	-0.139263	-0.0351083	0.0789922	-0.0418741	-0.0426214	0.00134881	-0.1	-0.399711	0
2100	2.62581	0	0.190562	2.43525	2.97002	2.88463	2.74673	2.23898	0.277019	0.230729	0.137903	0.0853891	0.00769575	0.00242846	0.00013773	0.00410467	0.00522185	0.00156371	0.0460541	0.031771	0.0328707	0.000129913	1.88196e-07	0.00592538	0.00901361	0.0627695	0.00668475	0.00364855	0.00154898	0.000226966	7.77078e-12	0.00025905	0.000175993	0.000146026	1.44004e-05	0	0.000313941	1.07418e-06	6.00345e-06	0.000580289	-0.137994	-0.0349995	0.0786656	-0.041254	-0.0421174	0.00171139	-0.1	-0.397823	0
2101	2.60015	0	0.174151	2.426	2.96197	2.87767	2.73978	2.23281	0.276384	0.230595	0.137884	0.0843001	0.00770278	0.00242916	0.000138441	0.0040892	0.0051691	0.00156191	0.0461311	0.0316672	0.0329436	0.000126921	1.6453e-07	0.00592459	0.00880678	0.0620465	0.00659423	0.00363449	0.00154792	0.00021707	6.34006e-12	0.000238103	0.000167237	0.000138305	1.35687e-05	0	0.000308586	1.01844e-06	6.00275e-06	0.000580289	-0.137571	-0.0349632	0.0785567	-0.0410473	-0.0419494	0.00183224	-0.1	-0.397193	0
2102	2.54692	0	0.130187	2.41673	2.95422	2.87099	2.73314	2.22689	0.275798	0.230456	0.137852	0.083229	0.00770979	0.00242986	0.000139147	0.00407379	0.00512103	0.0015601	0.0461986	0.031562	0.0330102	0.000124011	1.43849e-07	0.00592366	0.00860462	0.0613323	0.006505	0.00362048	0.00154687	0.000207613	5.17318e-12	0.00021884	0.000158858	0.000130986	1.27848e-05	0	0.000303317	9.65613e-07	6.02528e-06	0.000580289	-0.137571	-0.0349632	0.0785567	-0.0410473	-0.0419494	0.00183224	-0.1	-0.397193	0
2103	2.49458	0	0.0860781	2.4085	2.94681	2.86464	2.7268	2.22119	0.275299	0.230318	0.137836	0.0821764	0.00771679	0.00243055	0.000139854	0.00405844	0.00508234	0.00155845	0.0462644	0.0314651	0.0330758	0.000121188	1.25773e-07	0.00592272	0.00840725	0.0606275	0.00641713	0.00360656	0.00154581	0.000198582	4.22133e-12	0.000201132	0.000150903	0.000124047	1.2046e-05	0	0.000298144	9.1556e-07	6.0722e-06	0.000580289	-0.137571	-0.0349632	0.0785567	-0.0410473	-0.0419494	0.00183224	-0.1	-0.397193	0
2104	2.45981	0	0.0592681	2.40054	2.93962	2.85848	2.72065	2.21559	0.274879	0.230181	0.137832	0.081142	0.00772379	0.00243125	0.00014056	0.00404316	0.00505131	0.00155693	0.0463285	0.0313758	0.0331403	0.000118449	1.09975e-07	0.00592179	0.00821456	0.059932	0.00633059	0.00359271	0.00154477	0.000189959	3.44488e-12	0.000184854	0.000143355	0.000117472	1.13493e-05	0	0.000293064	8.68139e-07	6.12763e-06	0.000580289	-0.137571	-0.0349632	0.0785567	-0.0410473	-0.0419494	0.00183224	-0.1	-0.397193	0
2105	2.43587	0	0.0431769	2.3927	2.93249	2.85236	2.71452	2.20996	0.274523	0.230046	0.137839	0.0801248	0.0077308	0.00243195	0.000141266	0.00402794	0.00502637	0.00155554	0.0463909	0.0312935	0.0332038	0.000115792	9.61655e-08	0.00592086	0.00802637	0.0592454	0.00624533	0.00357894	0.00154372	0.000181721	2.81139e-12	0.000169892	0.00013619	0.000111239	1.0692e-05	0	0.000288069	8.232e-07	6.17266e-06	0.000580289	-0.137571	-0.0349632	0.0785567	-0.0410473	-0.0419494	0.00183224	-0.1	-0.397193	0
2106	2.41715	0	0.0322656	2.38489	2.92533	2.84621	2.70835	2.20422	0.27422	0.229911	0.137854	0.0791242	0.0077378	0.00243265	0.000141972	0.00401278	0.00500633	0.00155426	0.0464515	0.0312175	0.0332662	0.000113214	8.40923e-08	0.00591993	0.00784249	0.0585673	0.0061613	0.00356523	0.00154267	0.000173848	2.29449e-12	0.000156144	0.000129384	0.000105329	1.00714e-05	0	0.00028316	7.80606e-07	6.20772e-06	0.000580289	-0.137571	-0.0349632	0.0785567	-0.0410473	-0.0419494	0.00183224	-0.1	-0.397193	0
2107	2.40274	0	0.025655	2.37708	2.91814	2.84	2.70212	2.19838	0.273963	0.229778	0.137877	0.0781396	0.0077448	0.00243334	0.000142678	0.00399768	0.00499023	0.00155307	0.0465104	0.0311472	0.0333276	0.000110711	7.35368e-08	0.005919	0.0076628	0.0578975	0.00607848	0.00355158	0.00154163	0.000166323	1.8727e-12	0.000143512	0.000122922	9.97296e-05	9.48513e-06	0	0.000278335	7.40231e-07	6.23772e-06	0.000580289	-0.137571	-0.0349632	0.0785567	-0.0410473	-0.0419494	0.00183224	-0.1	-0.397193	0
2108	2.44181	0	0.0725288	2.36928	2.9109	2.83373	2.69582	2.19243	0.273745	0.229646	0.137905	0.0771706	0.0077518	0.00243404	0.000143383	0.00398265	0.00497732	0.00155197	0.0465675	0.0310822	0.0333878	0.000108283	6.43078e-08	0.00591806	0.0074872	0.0572359	0.00599683	0.003538	0.00154059	0.000159129	1.52849e-12	0.000131895	0.000116784	9.44236e-05	8.93614e-06	0	0.000273593	7.01957e-07	6.26385e-06	0.000580289	-0.137571	-0.0349632	0.0785567	-0.0410473	-0.0419494	0.00183224	-0.1	-0.397193	0
2109	2.5076	0	0.146252	2.36135	2.90349	2.82728	2.68934	2.18629	0.273538	0.229515	0.137936	0.0762151	0.00775881	0.00243474	0.000144089	0.00396766	0.00496661	0.00155093	0.0466222	0.0310213	0.0334468	0.000105925	5.62355e-08	0.00591713	0.00731526	0.0565813	0.00591621	0.00352446	0.00153955	0.000152239	1.2475e-12	0.000121215	0.00011095	8.93926e-05	8.4166e-06	0	0.000268923	6.65648e-07	6.24476e-06	0.000580289	-0.137571	-0.0349632	0.0785567	-0.0410473	-0.0419494	0.00183224	-0.1	-0.397193	0
2110	2.53447	0	0.181191	2.35328	2.89593	2.82066	2.68269	2.17998	0.273327	0.229386	0.137968	0.0752718	0.00776581	0.00243544	0.000144794	0.00395272	0.00495744	0.00154989	0.0466743	0.0309635	0.0335042	0.000103635	4.91731e-08	0.0059162	0.00714671	0.0559327	0.0058365	0.00351094	0.0015385	0.000145635	1.01808e-12	0.000111393	0.000105402	8.46201e-05	7.92446e-06	0	0.000264313	6.31186e-07	6.18753e-06	0.000580289	-0.137571	-0.0349632	0.0785567	-0.0410473	-0.0419494	0.00183224	-0.1	-0.397193	0
2111	2.53589	0	0.190562	2.34533	2.88846	2.81411	2.67611	2.17373	0.273127	0.229257	0.138002	0.0743416	0.00777281	0.00243613	0.000145498	0.00393784	0.00494978	0.0015489	0.0467242	0.0309093	0.0335604	0.000101411	4.29962e-08	0.00591527	0.00698171	0.055291	0.00575779	0.00349746	0.00153746	0.000139311	8.30808e-13	0.000102362	0.000100127	8.00933e-05	7.46333e-06	0	0.000259773	5.98493e-07	6.15023e-06	0.000580289	-0.137571	-0.0349632	0.0785567	-0.0410473	-0.0419494	0.00183224	-0.1	-0.397193	0
2112	2.51178	0	0.174151	2.33763	2.88119	2.80776	2.66973	2.16765	0.272948	0.22913	0.138038	0.0734251	0.00777981	0.00243683	0.000146203	0.00392301	0.00494353	0.00154797	0.0467723	0.0308589	0.0336155	9.92526e-05	3.75951e-08	0.00591434	0.00682035	0.0546566	0.00568013	0.00348403	0.00153641	0.000133261	6.77982e-13	9.40592e-05	9.5115e-05	7.58053e-05	7.02628e-06	0	0.000255313	5.67493e-07	6.1395e-06	0.000580289	-0.137571	-0.0349632	0.0785567	-0.0410473	-0.0419494	0.00183224	-0.1	-0.397193	0
2113	2.4604	0	0.130187	2.33021	2.87417	2.80165	2.66357	2.16177	0.272799	0.229004	0.138077	0.0725227	0.00778681	0.00243753	0.000146907	0.00390824	0.0049386	0.00154711	0.046819	0.0308123	0.0336697	9.71579e-05	3.28732e-08	0.00591341	0.00666268	0.0540299	0.00560358	0.00347066	0.00153537	0.000127478	5.53283e-13	8.64272e-05	9.03552e-05	7.17436e-05	6.61191e-06	0	0.000250928	5.38107e-07	6.15506e-06	0.000580289	-0.137571	-0.0349632	0.0785567	-0.0410473	-0.0419494	0.00183224	-0.1	-0.397193	0
2114	2.40916	0	0.0860781	2.32308	2.86738	2.79575	2.65763	2.15606	0.272688	0.228878	0.13812	0.071635	0.00779381	0.00243823	0.000147611	0.00389353	0.00493496	0.00154634	0.0468647	0.0307699	0.033723	9.51257e-05	2.87457e-08	0.00591248	0.00650879	0.0534114	0.00552818	0.00345736	0.00153433	0.000121954	4.5155e-13	7.94192e-05	8.58399e-05	6.78967e-05	6.22401e-06	0	0.000246621	5.10263e-07	6.20071e-06	0.000580289	-0.137571	-0.0349632	0.0785567	-0.0410473	-0.0419494	0.00183224	-0.1	-0.397193	0
2115	2.37538	0	0.0592681	2.31611	2.86072	2.78996	2.65179	2.15043	0.272613	0.228755	0.138166	0.0707618	0.00780082	0.00243892	0.000148315	0.00387888	0.00493239	0.00154566	0.0469096	0.0307313	0.0337756	9.31543e-05	2.5138e-08	0.00591155	0.0063586	0.052801	0.00545393	0.00344414	0.0015333	0.000116679	3.68551e-13	7.29841e-05	8.15537e-05	6.42583e-05	5.8609e-06	0	0.000242391	4.8388e-07	6.25664e-06	0.000580289	-0.137571	-0.0349632	0.0785567	-0.0410473	-0.0419494	0.00183224	-0.1	-0.397193	0
2116	2.35235	0	0.0431769	2.30917	2.85404	2.78414	2.64593	2.14473	0.272564	0.228632	0.138215	0.0699023	0.00780782	0.00243962	0.000149019	0.00386429	0.00493058	0.00154505	0.0469534	0.0306961	0.0338273	9.12415e-05	2.1984e-08	0.00591062	0.00621196	0.0521985	0.00538077	0.00343099	0.00153226	0.00011164	3.00824e-13	6.70678e-05	7.74818e-05	6.08164e-05	5.52093e-06	0	0.000238235	4.58877e-07	6.30247e-06	0.000580289	-0.137571	-0.0349632	0.0785567	-0.0410473	-0.0419494	0.00183224	-0.1	-0.397193	0
2117	2.33444	0	0.0322656	2.30217	2.84728	2.77822	2.63996	2.13891	0.272533	0.22851	0.138266	0.0690559	0.00781482	0.00244032	0.000149722	0.00384976	0.00492933	0.00154451	0.046996	0.0306639	0.0338782	8.93854e-05	1.92263e-08	0.00590969	0.00606871	0.0516034	0.00530867	0.0034179	0.00153123	0.000106822	2.45554e-13	6.16274e-05	7.36146e-05	5.7554e-05	5.19745e-06	0	0.000234156	4.35175e-07	6.33826e-06	0.000580289	-0.137571	-0.0349632	0.0785567	-0.0410473	-0.0419494	0.00183224	-0.1	-0.397193	0
2118	2.32077	0	0.025655	2.29511	2.84041	2.77219	2.63387	2.13297	0.272518	0.22839	0.138318	0.0682224	0.00782182	0.00244101	0.000150426	0.00383529	0.00492852	0.00154401	0.0470376	0.0306344	0.0339283	8.75843e-05	1.6815e-08	0.00590876	0.00592878	0.0510156	0.0052376	0.00340487	0.0015302	0.000102217	2.00446e-13	5.66303e-05	6.99406e-05	5.44609e-05	4.88941e-06	0	0.000230146	4.12707e-07	6.36889e-06	0.000580289	-0.137571	-0.0349632	0.0785567	-0.0410473	-0.0419494	0.00183224	-0.1	-0.397193	0
2119	2.36052	0	0.0725288	2.28799	2.83346	2.76606	2.62769	2.1269	0.272514	0.22827	0.138371	0.0674014	0.00782882	0.00244171	0.000151129	0.00382087	0.00492802	0.00154357	0.047078	0.0306073	0.0339775	8.58364e-05	1.47065e-08	0.00590784	0.00579206	0.050435	0.00516753	0.00339191	0.00152917	9.7813e-05	1.6363e-13	5.20403e-05	6.64529e-05	5.15335e-05	4.60091e-06	0	0.000226202	3.91406e-07	6.39557e-06	0.000580289	-0.137571	-0.0349632	0.0785567	-0.0410473	-0.0419494	0.00183224	-0.1	-0.397193	0
2120	2.42693	0	0.146252	2.28068	2.82629	2.7597	2.62128	2.12063	0.272498	0.228152	0.138422	0.0665911	0.00783582	0.00244241	0.000151831	0.00380651	0.00492741	0.00154313	0.0471166	0.0305817	0.0340256	8.41391e-05	1.2862e-08	0.00590691	0.00565823	0.0498604	0.00509834	0.00337898	0.00152814	9.35953e-05	1.33571e-13	4.78226e-05	6.31395e-05	4.87614e-05	4.33056e-06	0	0.000222324	3.71196e-07	6.37688e-06	0.000580289	-0.137571	-0.0349632	0.0785567	-0.0410473	-0.0419494	0.00183224	-0.1	-0.397193	0
2121	2.45438	0	0.181191	2.27319	2.81893	2.75313	2.61466	2.11417	0.272457	0.228034	0.138471	0.0657905	0.00784282	0.0024431	0.000152534	0.00379219	0.00492646	0.00154267	0.0471531	0.0305568	0.0340725	8.24904e-05	1.12481e-08	0.00590598	0.00552709	0.0492912	0.00502993	0.00336607	0.0015271	8.95512e-05	1.09025e-13	4.39459e-05	5.99875e-05	4.61355e-05	4.07712e-06	0	0.000218499	3.52012e-07	6.31992e-06	0.000580289	-0.137571	-0.0349632	0.0785567	-0.0410473	-0.0419494	0.00183224	-0.1	-0.397193	0
2122	2.45633	0	0.190562	2.26577	2.81161	2.74661	2.60809	2.10776	0.272409	0.227918	0.138518	0.0650005	0.00784982	0.0024438	0.000153236	0.00377792	0.00492548	0.00154221	0.047188	0.0305332	0.0341183	8.08895e-05	9.83645e-09	0.00590505	0.00539874	0.0487279	0.00496237	0.0033532	0.00152607	8.56782e-05	8.89853e-14	4.03837e-05	5.69889e-05	4.36483e-05	3.83962e-06	0	0.000214732	3.33812e-07	6.28292e-06	0.000580289	-0.137571	-0.0349632	0.0785567	-0.0410473	-0.0419494	0.00183224	-0.1	-0.397193	0
2123	2.43271	0	0.174151	2.25856	2.80447	2.74025	2.60169	2.10152	0.272364	0.227803	0.138565	0.0642215	0.00785682	0.0024445	0.000153938	0.00376371	0.00492466	0.00154179	0.0472216	0.0305112	0.0341632	7.93354e-05	8.6019e-09	0.00590413	0.00527324	0.048171	0.00489571	0.00334037	0.00152504	8.19723e-05	7.26288e-14	3.71113e-05	5.41391e-05	4.12928e-05	3.61714e-06	0	0.00021103	3.16553e-07	6.27251e-06	0.000580289	-0.137571	-0.0349632	0.0785567	-0.0410473	-0.0419494	0.00183224	-0.1	-0.397193	0
2124	2.38178	0	0.130187	2.25159	2.79755	2.73409	2.59548	2.09546	0.272334	0.227689	0.138613	0.0634539	0.00786383	0.00244519	0.00015464	0.00374955	0.00492415	0.0015414	0.0472544	0.030491	0.0342073	7.78273e-05	7.52246e-09	0.0059032	0.00515066	0.0476209	0.00483	0.00332761	0.00152401	7.84291e-05	5.92805e-14	3.4099e-05	5.14339e-05	3.90679e-05	3.40367e-06	0	0.000207395	3.0019e-07	6.28842e-06	0.000580289	-0.137571	-0.0349632	0.0785567	-0.0410473	-0.0419494	0.00183224	-0.1	-0.397193	0
2125	2.33095	0	0.0860781	2.24487	2.79083	2.72813	2.58947	2.08957	0.272328	0.227575	0.138662	0.0626983	0.00787083	0.00244589	0.000155342	0.00373545	0.0049241	0.00154108	0.0472867	0.0304732	0.0342508	7.63643e-05	6.57881e-09	0.00590227	0.00503104	0.047078	0.00476528	0.00331491	0.00152298	7.50446e-05	4.83887e-14	3.13262e-05	4.88662e-05	3.69611e-05	3.1987e-06	0	0.000203824	2.84685e-07	6.33449e-06	0.000580289	-0.137571	-0.0349632	0.0785567	-0.0410473	-0.0419494	0.00183224	-0.1	-0.397193	0
2126	2.29753	0	0.0592681	2.23826	2.78421	2.72226	2.58355	2.08374	0.272348	0.227463	0.138713	0.0619546	0.00787783	0.00244659	0.000156044	0.00372141	0.00492445	0.00154082	0.0473185	0.0304575	0.0342938	7.49451e-05	5.75388e-09	0.00590135	0.00491433	0.0465422	0.00470154	0.00330229	0.00152196	7.1812e-05	3.95011e-14	2.87799e-05	4.64284e-05	3.49657e-05	3.00682e-06	0	0.000200316	2.69992e-07	6.39086e-06	0.000580289	-0.137571	-0.0349632	0.0785567	-0.0410473	-0.0419494	0.00183224	-0.1	-0.397193	0
2127	2.27485	0	0.0431769	2.23167	2.77761	2.71639	2.57763	2.07789	0.272382	0.227352	0.138765	0.0612221	0.00788483	0.00244728	0.000156745	0.00370743	0.00492502	0.0015406	0.0473498	0.0304435	0.0343362	7.35682e-05	5.0326e-09	0.00590042	0.00480039	0.0460132	0.00463873	0.00328973	0.00152093	6.87227e-05	3.22478e-14	2.64412e-05	4.4113e-05	3.30811e-05	2.82714e-06	0	0.000196874	2.56066e-07	6.43714e-06	0.000580289	-0.137571	-0.0349632	0.0785567	-0.0410473	-0.0419494	0.00183224	-0.1	-0.397193	0
2128	2.25736	0	0.0322656	2.2251	2.77102	2.71052	2.5717	2.07203	0.272426	0.227242	0.138818	0.0605003	0.00789183	0.00244798	0.000157446	0.0036935	0.00492571	0.00154042	0.0473803	0.0304311	0.0343779	7.22321e-05	4.40187e-09	0.00589949	0.00468913	0.0454908	0.00457683	0.00327723	0.00151991	6.57693e-05	2.63275e-14	2.42931e-05	4.19137e-05	3.12953e-05	2.65887e-06	0	0.000193495	2.42864e-07	6.47336e-06	0.000580289	-0.137571	-0.0349632	0.0785567	-0.0410473	-0.0419494	0.00183224	-0.1	-0.397193	0
2129	2.24417	0	0.025655	2.21851	2.76441	2.70462	2.56575	2.06614	0.272476	0.227133	0.138871	0.0597891	0.00789883	0.00244867	0.000158147	0.00367963	0.00492647	0.00154027	0.0474102	0.03042	0.0344189	7.09356e-05	3.85031e-09	0.00589857	0.00458046	0.0449748	0.00451581	0.00326479	0.00151889	6.29453e-05	2.14949e-14	2.232e-05	3.98249e-05	2.96027e-05	2.50127e-06	0	0.000190178	2.30347e-07	6.50432e-06	0.000580289	-0.137571	-0.0349632	0.0785567	-0.0410473	-0.0419494	0.00183224	-0.1	-0.397193	0
2130	2.28445	0	0.0725288	2.21192	2.75779	2.6987	2.55978	2.06022	0.272532	0.227025	0.138923	0.0590881	0.00790583	0.00244937	0.000158847	0.00366582	0.00492725	0.00154015	0.0474394	0.03041	0.0344592	6.96774e-05	3.36794e-09	0.00589764	0.00447431	0.044465	0.00445565	0.00325241	0.00151788	6.02446e-05	1.75499e-14	2.05074e-05	3.78418e-05	2.80037e-05	2.35366e-06	0	0.000186915	2.1848e-07	6.53122e-06	0.000580289	-0.137571	-0.0349632	0.0785567	-0.0410473	-0.0419494	0.00183224	-0.1	-0.397193	0
2131	2.35144	0	0.146252	2.20519	2.75104	2.69265	2.55368	2.05419	0.272568	0.226918	0.138973	0.058396	0.00791283	0.00245007	0.000159548	0.00365205	0.00492768	0.00154002	0.0474671	0.0304003	0.0344987	6.84555e-05	2.94593e-09	0.00589672	0.00437043	0.0439605	0.00439623	0.00324006	0.00151686	5.76575e-05	1.43285e-14	1.88416e-05	3.59552e-05	2.64927e-05	2.21533e-06	0	0.000183699	2.07219e-07	6.51253e-06	0.000580289	-0.137571	-0.0349632	0.0785567	-0.0410473	-0.0419494	0.00183224	-0.1	-0.397193	0
2132	2.37952	0	0.181191	2.19833	2.74418	2.68647	2.54745	2.04807	0.272573	0.226812	0.13902	0.0577117	0.00791983	0.00245076	0.000160248	0.00363832	0.00492758	0.00153984	0.0474932	0.0303902	0.034537	6.72685e-05	2.57662e-09	0.00589579	0.00426866	0.0434607	0.00433749	0.00322774	0.00151584	5.51763e-05	1.16974e-14	1.73105e-05	3.41609e-05	2.50586e-05	2.08563e-06	0	0.000180533	1.96529e-07	6.4554e-06	0.000580289	-0.137571	-0.0349632	0.0785567	-0.0410473	-0.0419494	0.00183224	-0.1	-0.397193	0
2133	2.38216	0	0.190562	2.1916	2.73745	2.68041	2.54135	2.04208	0.272565	0.226706	0.139065	0.0570361	0.00792682	0.00245146	0.000160948	0.00362465	0.00492729	0.00153966	0.0475179	0.0303803	0.0345745	6.61158e-05	2.25354e-09	0.00589487	0.00416909	0.0429661	0.00427947	0.00321545	0.00151482	5.27997e-05	9.54899e-15	1.59035e-05	3.24572e-05	2.36977e-05	1.96408e-06	0	0.000177419	1.86387e-07	6.41817e-06	0.000580289	-0.137571	-0.0349632	0.0785567	-0.0410473	-0.0419494	0.00183224	-0.1	-0.397193	0
2134	2.35927	0	0.174151	2.18512	2.73098	2.67461	2.5355	2.03634	0.272557	0.226602	0.139108	0.0563695	0.00793382	0.00245215	0.000161647	0.00361103	0.00492704	0.00153948	0.0475418	0.0303711	0.0346112	6.49968e-05	1.97096e-09	0.00589395	0.00407175	0.0424771	0.00422223	0.0032032	0.0015138	5.05251e-05	7.79514e-15	1.46108e-05	3.08354e-05	2.24118e-05	1.8502e-06	0	0.000174359	1.76767e-07	6.40746e-06	0.000580289	-0.137571	-0.0349632	0.0785567	-0.0410473	-0.0419494	0.00183224	-0.1	-0.397193	0
2135	2.30912	0	0.130187	2.17893	2.72479	2.66908	2.52993	2.03087	0.272559	0.226499	0.139152	0.0557125	0.00794082	0.00245285	0.000162347	0.00359746	0.00492698	0.00153934	0.0475651	0.0303629	0.0346473	6.39109e-05	1.72385e-09	0.00589302	0.00397668	0.041994	0.00416579	0.00319101	0.00151278	4.83501e-05	6.36359e-15	1.34233e-05	2.92944e-05	2.11972e-05	1.74355e-06	0	0.000171355	1.67646e-07	6.42303e-06	0.000580289	-0.137571	-0.0349632	0.0785567	-0.0410473	-0.0419494	0.00183224	-0.1	-0.397193	0
2136	2.25912	0	0.0860781	2.17304	2.71889	2.66382	2.52462	2.02565	0.272582	0.226396	0.139197	0.0550654	0.00794782	0.00245355	0.000163046	0.00358394	0.00492729	0.00153923	0.0475882	0.0303561	0.0346829	6.28575e-05	1.5078e-09	0.0058921	0.00388393	0.0415172	0.00411019	0.00317889	0.00151176	4.6272e-05	5.19529e-15	1.23328e-05	2.78333e-05	2.00501e-05	1.6437e-06	0	0.000168402	1.59003e-07	6.46871e-06	0.000580289	-0.137571	-0.0349632	0.0785567	-0.0410473	-0.0419494	0.00183224	-0.1	-0.397193	0
2137	2.2266	0	0.0592681	2.16733	2.71315	2.65872	2.51948	2.02056	0.272626	0.226295	0.139244	0.0544281	0.00795482	0.00245424	0.000163745	0.00357048	0.00492794	0.00153918	0.0476113	0.0303506	0.0347182	6.18358e-05	1.31891e-09	0.00589117	0.00379345	0.0410466	0.00405544	0.00316683	0.00151075	4.42868e-05	4.2418e-15	1.13313e-05	2.6447e-05	1.89668e-05	1.55021e-06	0	0.000165499	1.50811e-07	6.5246e-06	0.000580289	-0.137571	-0.0349632	0.0785567	-0.0410473	-0.0419494	0.00183224	-0.1	-0.397193	0
2138	2.20482	0	0.0431769	2.16165	2.70744	2.65364	2.51435	2.01548	0.272682	0.226194	0.139291	0.0538001	0.00796182	0.00245494	0.000164444	0.00355708	0.00492874	0.00153916	0.047634	0.0303462	0.034753	6.08445e-05	1.15372e-09	0.00589025	0.00370514	0.040582	0.00400148	0.00315484	0.00150974	4.23892e-05	3.4635e-15	1.04114e-05	2.51308e-05	1.79378e-05	1.46266e-06	0	0.00016265	1.43046e-07	6.57026e-06	0.000580289	-0.137571	-0.0349632	0.0785567	-0.0410473	-0.0419494	0.00183224	-0.1	-0.397193	0
2139	2.18819	0	0.0322656	2.15593	2.7017	2.64851	2.50918	2.01034	0.272745	0.226095	0.139338	0.0531811	0.00796882	0.00245563	0.000165143	0.00354373	0.00492962	0.00153916	0.0476564	0.0303426	0.0347873	5.98826e-05	1.00926e-09	0.00588933	0.00361891	0.040123	0.0039483	0.0031429	0.00150873	4.05747e-05	2.82812e-15	9.56631e-06	2.38806e-05	1.696e-05	1.37555e-06	0	0.000159854	1.35684e-07	6.60574e-06	0.000580289	-0.137571	-0.0349632	0.0785567	-0.0410473	-0.0419494	0.00183224	-0.1	-0.397193	0
2140	2.17582	0	0.025655	2.15016	2.6959	2.64333	2.50394	2.00513	0.272812	0.225996	0.139384	0.0525708	0.00797582	0.00245633	0.000165841	0.00353044	0.00493052	0.00153918	0.0476783	0.0303397	0.034821	5.89492e-05	8.8291e-10	0.00588841	0.00353471	0.0396697	0.00389587	0.00313102	0.00150772	3.88394e-05	2.30939e-15	8.79e-06	2.26927e-05	1.60364e-05	1.28883e-06	0	0.000157108	1.28703e-07	6.63594e-06	0.000580289	-0.137571	-0.0349632	0.0785567	-0.0410473	-0.0419494	0.00183224	-0.1	-0.397193	0
2141	2.21688	0	0.0725288	2.14435	2.69006	2.63809	2.49865	1.99988	0.272881	0.225898	0.139431	0.0519691	0.00798281	0.00245702	0.000166539	0.00351719	0.00493141	0.00153921	0.0476998	0.0303374	0.0348542	5.80434e-05	7.72397e-10	0.00588749	0.00345247	0.0392218	0.00384418	0.00311919	0.00150671	3.71795e-05	1.88587e-15	8.07682e-06	2.1564e-05	1.51638e-05	1.2076e-06	0	0.000154413	1.22084e-07	6.66207e-06	0.000580289	-0.137571	-0.0349632	0.0785567	-0.0410473	-0.0419494	0.00183224	-0.1	-0.397193	0
2142	2.28463	0	0.146252	2.13837	2.68405	2.63268	2.4932	1.99447	0.27293	0.225801	0.139475	0.0513746	0.00798981	0.00245772	0.000167237	0.00350399	0.00493193	0.00153923	0.0477201	0.0303347	0.0348866	5.71637e-05	6.75698e-10	0.00588656	0.00337201	0.0387786	0.00379312	0.0031074	0.00150571	3.55891e-05	1.53996e-15	7.42137e-06	2.04908e-05	1.43392e-05	1.13147e-06	0	0.000151761	1.15802e-07	6.64251e-06	0.000580289	-0.137571	-0.0349632	0.0785567	-0.0410473	-0.0419494	0.00183224	-0.1	-0.397193	0
2143	2.31343	0	0.181191	2.13224	2.67791	2.62713	2.48761	1.98896	0.272946	0.225705	0.139515	0.0507867	0.00799681	0.00245841	0.000167935	0.00349084	0.0049319	0.00153919	0.047739	0.0303312	0.0349181	5.63089e-05	5.91065e-10	0.00588564	0.00329319	0.0383394	0.00374263	0.00309562	0.0015047	3.40635e-05	1.25739e-15	6.81882e-06	1.94702e-05	1.35596e-05	1.06009e-06	0	0.00014915	1.09839e-07	6.58442e-06	0.000580289	-0.137571	-0.0349632	0.0785567	-0.0410473	-0.0419494	0.00183224	-0.1	-0.397193	0
2144	2.31676	0	0.190562	2.1262	2.67187	2.62167	2.48211	1.98356	0.272947	0.22561	0.139553	0.0502059	0.00800381	0.00245911	0.000168633	0.00347773	0.00493166	0.00153913	0.0477568	0.0303275	0.0349488	5.54788e-05	5.17016e-10	0.00588472	0.00321607	0.0379048	0.00369276	0.00308388	0.00150369	3.26019e-05	1.02662e-15	6.26506e-06	1.85008e-05	1.28229e-05	9.93188e-07	0	0.000146581	1.04179e-07	6.54629e-06	0.000580289	-0.137571	-0.0349632	0.0785567	-0.0410473	-0.0419494	0.00183224	-0.1	-0.397193	0
2145	2.29455	0	0.174151	2.1204	2.66607	2.61644	2.47685	1.97839	0.272947	0.225516	0.13959	0.0496327	0.00801081	0.0024598	0.00016933	0.00346467	0.00493143	0.00153908	0.0477739	0.0303239	0.0349789	5.46728e-05	4.52242e-10	0.0058838	0.0031407	0.037475	0.00364356	0.00307218	0.00150268	3.12028e-05	8.38199e-16	5.75627e-06	1.75777e-05	1.21268e-05	9.30506e-07	0	0.000144057	9.88117e-08	6.53473e-06	0.000580289	-0.137571	-0.0349632	0.0785567	-0.0410473	-0.0419494	0.00183224	-0.1	-0.397193	0
2146	2.24505	0	0.130187	2.11487	2.66053	2.61147	2.47184	1.97346	0.272955	0.225422	0.139627	0.0490675	0.0080178	0.0024605	0.000170027	0.00345166	0.0049314	0.00153904	0.0477908	0.0303209	0.0350085	5.38908e-05	3.95591e-10	0.00588288	0.0030671	0.0370504	0.00359504	0.00306053	0.00150167	2.98646e-05	6.84379e-16	5.28886e-06	1.66998e-05	1.14693e-05	8.71794e-07	0	0.000141572	9.37219e-08	6.54952e-06	0.000580289	-0.137571	-0.0349632	0.0785567	-0.0410473	-0.0419494	0.00183224	-0.1	-0.397193	0
2147	2.19568	0	0.0860781	2.1096	2.65526	2.60675	2.46708	1.96877	0.272984	0.22533	0.139666	0.0485106	0.0080248	0.00246119	0.000170724	0.00343871	0.00493172	0.00153905	0.0478076	0.030319	0.0350378	5.31322e-05	3.46054e-10	0.00588196	0.0029953	0.0366313	0.00354725	0.00304895	0.00150067	2.85859e-05	5.58823e-16	4.85956e-06	1.58662e-05	1.08482e-05	8.16814e-07	0	0.000139128	8.88977e-08	6.59452e-06	0.000580289	-0.137571	-0.0349632	0.0785567	-0.0410473	-0.0419494	0.00183224	-0.1	-0.397193	0
2148	2.16376	0	0.0592681	2.1045	2.65013	2.60217	2.46246	1.96419	0.273032	0.225238	0.139705	0.047962	0.0080318	0.00246189	0.000171421	0.00342581	0.00493237	0.00153909	0.0478246	0.0303181	0.0350668	5.23964e-05	3.02738e-10	0.00588104	0.00292527	0.0362177	0.00350017	0.00303743	0.00149967	2.73641e-05	4.56336e-16	4.46526e-06	1.50756e-05	1.02616e-05	7.65332e-07	0	0.000136731	8.43254e-08	6.64975e-06	0.000580289	-0.137571	-0.0349632	0.0785567	-0.0410473	-0.0419494	0.00183224	-0.1	-0.397193	0
2149	2.14258	0	0.0431769	2.0994	2.64501	2.59759	2.45784	1.9596	0.273092	0.225147	0.139745	0.0474211	0.0080388	0.00246258	0.000172117	0.00341296	0.00493318	0.00153916	0.0478415	0.0303178	0.0350955	5.16827e-05	2.64854e-10	0.00588012	0.00285693	0.0358093	0.00345378	0.00302597	0.00149867	2.6196e-05	3.72666e-16	4.10307e-06	1.43267e-05	9.70759e-06	7.17115e-07	0	0.000134379	7.99907e-08	6.69475e-06	0.000580289	-0.137571	-0.0349632	0.0785567	-0.0410473	-0.0419494	0.00183224	-0.1	-0.397193	0
2150	2.12652	0	0.0322656	2.09425	2.63982	2.59294	2.45315	1.95494	0.273158	0.225057	0.139786	0.0468879	0.00804579	0.00246328	0.000172813	0.00340016	0.00493405	0.00153924	0.0478582	0.0303181	0.0351237	5.09901e-05	2.31718e-10	0.0058792	0.00279021	0.0354059	0.00340805	0.00301456	0.00149767	2.50788e-05	3.04349e-16	3.77032e-06	1.36152e-05	9.18419e-06	6.7195e-07	0	0.000132069	7.58805e-08	6.72958e-06	0.000580289	-0.137571	-0.0349632	0.0785567	-0.0410473	-0.0419494	0.00183224	-0.1	-0.397193	0
2151	2.11469	0	0.025655	2.08903	2.63457	2.58821	2.44839	1.95019	0.273227	0.224967	0.139826	0.0463619	0.00805279	0.00246397	0.000173509	0.00338742	0.00493494	0.00153934	0.0478746	0.0303188	0.0351516	5.03181e-05	2.02733e-10	0.00587828	0.00272507	0.0350073	0.00336296	0.00300321	0.00149667	2.40102e-05	2.48565e-16	3.46462e-06	1.29369e-05	8.68398e-06	6.29641e-07	0	0.000129801	7.1983e-08	6.75913e-06	0.000580289	-0.137571	-0.0349632	0.0785567	-0.0410473	-0.0419494	0.00183224	-0.1	-0.397193	0
2152	2.15629	0	0.0725288	2.08376	2.62927	2.58342	2.44356	1.94538	0.273298	0.224879	0.139865	0.0458431	0.00805979	0.00246467	0.000174205	0.00337472	0.00493583	0.00153945	0.0478908	0.0303198	0.035179	4.96659e-05	1.77378e-10	0.00587736	0.00266146	0.0346136	0.00331851	0.00299191	0.00149568	2.29878e-05	2.03012e-16	3.18376e-06	1.22919e-05	8.20564e-06	5.90006e-07	0	0.000127575	6.82869e-08	6.78462e-06	0.000580289	-0.137571	-0.0349632	0.0785567	-0.0410473	-0.0419494	0.00183224	-0.1	-0.397193	0
2153	2.22455	0	0.146252	2.0783	2.62378	2.57845	2.43855	1.94041	0.273348	0.224791	0.139902	0.0453304	0.00806679	0.00246536	0.000174901	0.00336207	0.00493633	0.00153953	0.047906	0.0303203	0.0352057	4.90325e-05	1.5519e-10	0.00587644	0.00259922	0.0342239	0.00327459	0.00298064	0.00149468	2.20081e-05	1.65801e-16	2.9256e-06	1.16795e-05	7.75356e-06	5.52854e-07	0	0.000125384	6.47791e-08	6.76432e-06	0.000580289	-0.137571	-0.0349632	0.0785567	-0.0410473	-0.0419494	0.00183224	-0.1	-0.397193	0
2154	2.25386	0	0.181191	2.07267	2.61815	2.57332	2.43339	1.93532	0.273365	0.224704	0.139936	0.0448232	0.00807378	0.00246606	0.000175596	0.00334946	0.00493628	0.00153956	0.0479199	0.0303196	0.0352316	4.84169e-05	1.35768e-10	0.00587553	0.00253827	0.0338377	0.00323117	0.00296938	0.00149368	2.10681e-05	1.35399e-16	2.68827e-06	1.10961e-05	7.32617e-06	5.18017e-07	0	0.000123226	6.14483e-08	6.70543e-06	0.000580289	-0.137571	-0.0349632	0.0785567	-0.0410473	-0.0419494	0.00183224	-0.1	-0.397193	0
2155	2.25769	0	0.190562	2.06713	2.6126	2.56828	2.42831	1.93033	0.273367	0.224618	0.139967	0.044322	0.00808078	0.00246675	0.000176291	0.00333689	0.00493602	0.00153957	0.0479329	0.0303185	0.0352568	4.78189e-05	1.18773e-10	0.00587461	0.00247864	0.0334555	0.00318827	0.00295816	0.00149269	2.01673e-05	1.10566e-16	2.47014e-06	1.05423e-05	6.92225e-06	4.85364e-07	0	0.000121104	5.82874e-08	6.66655e-06	0.000580289	-0.137571	-0.0349632	0.0785567	-0.0410473	-0.0419494	0.00183224	-0.1	-0.397193	0
2156	2.23596	0	0.174151	2.0618	2.60728	2.56345	2.42345	1.92555	0.273367	0.224533	0.139997	0.0438272	0.00808778	0.00246744	0.000176986	0.00332437	0.00493578	0.00153957	0.0479454	0.0303174	0.0352815	4.72384e-05	1.03905e-10	0.00587369	0.00242037	0.0330776	0.00314594	0.00294698	0.00149169	1.9305e-05	9.02876e-17	2.2697e-06	1.00154e-05	6.54059e-06	4.54768e-07	0	0.000119018	5.52889e-08	6.65431e-06	0.000580289	-0.137571	-0.0349632	0.0785567	-0.0410473	-0.0419494	0.00183224	-0.1	-0.397193	0
2157	2.18693	0	0.130187	2.05674	2.60221	2.55887	2.41884	1.92102	0.273375	0.224448	0.140028	0.0433391	0.00809477	0.00246814	0.000177681	0.0033119	0.00493573	0.00153958	0.0479578	0.0303167	0.0353059	4.66751e-05	9.08992e-11	0.00587277	0.00236347	0.0327042	0.0031042	0.00293585	0.00149069	1.848e-05	7.37299e-17	2.08555e-06	9.51281e-06	6.18002e-06	4.26107e-07	0	0.00011697	5.24455e-08	6.66848e-06	0.000580289	-0.137571	-0.0349632	0.0785567	-0.0410473	-0.0419494	0.00183224	-0.1	-0.397193	0
2158	2.13801	0	0.0860781	2.05193	2.59739	2.55453	2.41447	1.9167	0.273404	0.224365	0.140059	0.042858	0.00810177	0.00246883	0.000178375	0.00329948	0.00493603	0.00153963	0.0479703	0.0303169	0.03533	4.61287e-05	7.95258e-11	0.00587186	0.00230798	0.0323356	0.00306308	0.00292478	0.0014897	1.76915e-05	6.02127e-17	1.91641e-06	9.03555e-06	5.83945e-06	3.99266e-07	0	0.00011496	4.97502e-08	6.71293e-06	0.000580289	-0.137571	-0.0349632	0.0785567	-0.0410473	-0.0419494	0.00183224	-0.1	-0.397193	0
2159	2.10654	0	0.0592681	2.04727	2.5927	2.55032	2.41023	1.91249	0.273452	0.224281	0.140092	0.042384	0.00810876	0.00246953	0.00017907	0.00328712	0.00493666	0.00153972	0.0479831	0.0303179	0.035354	4.55989e-05	6.95792e-11	0.00587094	0.00225386	0.0319718	0.00302258	0.00291377	0.00148871	1.6938e-05	4.91773e-17	1.76104e-06	8.58438e-06	5.51778e-06	3.74131e-07	0	0.000112989	4.71953e-08	6.76767e-06	0.000580289	-0.137571	-0.0349632	0.0785567	-0.0410473	-0.0419494	0.00183224	-0.1	-0.397193	0
2160	2.08578	0	0.0431769	2.04261	2.58801	2.54609	2.40597	1.90826	0.273511	0.224199	0.140126	0.0419165	0.00811576	0.00247022	0.000179764	0.0032748	0.00493745	0.00153983	0.0479959	0.0303195	0.0353776	4.50849e-05	6.08792e-11	0.00587002	0.00220105	0.0316125	0.00298266	0.00290281	0.00148772	1.62175e-05	4.01665e-17	1.61831e-06	8.15647e-06	5.21392e-06	3.50587e-07	0	0.000111054	4.4773e-08	6.81217e-06	0.000580289	-0.137571	-0.0349632	0.0785567	-0.0410473	-0.0419494	0.00183224	-0.1	-0.397193	0
2161	2.07014	0	0.0322656	2.03787	2.58325	2.54179	2.40163	1.90394	0.273576	0.224118	0.14016	0.0414554	0.00812276	0.00247091	0.000180458	0.00326253	0.0049383	0.00153996	0.0480087	0.0303214	0.035401	4.45863e-05	5.32686e-11	0.00586911	0.0021495	0.0312576	0.00294331	0.00289191	0.00148673	1.55283e-05	3.28082e-17	1.48718e-06	7.74934e-06	4.92685e-06	3.28532e-07	0	0.000109154	4.2476e-08	6.8465e-06	0.000580289	-0.137571	-0.0349632	0.0785567	-0.0410473	-0.0419494	0.00183224	-0.1	-0.397193	0
2162	2.05872	0	0.025655	2.03306	2.57841	2.53741	2.39721	1.89953	0.273644	0.224037	0.140194	0.0410006	0.00812975	0.00247161	0.000181151	0.00325031	0.00493917	0.00154009	0.0480214	0.0303237	0.0354241	4.41024e-05	4.66107e-11	0.00586819	0.00209918	0.030907	0.00290451	0.00288106	0.00148574	1.4869e-05	2.67988e-17	1.36669e-06	7.36416e-06	4.65565e-06	3.0787e-07	0	0.000107288	4.02976e-08	6.87556e-06	0.000580289	-0.137571	-0.0349632	0.0785567	-0.0410473	-0.0419494	0.00183224	-0.1	-0.397193	0
2163	2.10071	0	0.0725288	2.02818	2.57349	2.53294	2.39272	1.89504	0.273715	0.223957	0.140227	0.0405518	0.00813675	0.0024723	0.000181845	0.00323814	0.00494004	0.00154023	0.0480339	0.0303261	0.0354468	4.36329e-05	4.07858e-11	0.00586727	0.00205004	0.0305606	0.00286625	0.00287025	0.00148476	1.4238e-05	2.18908e-17	1.25599e-06	6.99864e-06	4.39941e-06	2.88512e-07	0	0.000105456	3.82316e-08	6.90055e-06	0.000580289	-0.137571	-0.0349632	0.0785567	-0.0410473	-0.0419494	0.00183224	-0.1	-0.397193	0
2164	2.16936	0	0.146252	2.02311	2.5684	2.52829	2.38803	1.89039	0.273763	0.223877	0.140258	0.0401082	0.00814374	0.00247299	0.000182538	0.00322601	0.00494052	0.00154035	0.0480456	0.0303279	0.035469	4.31768e-05	3.56879e-11	0.00586636	0.00200197	0.0302178	0.00282845	0.00285948	0.00148378	1.36333e-05	1.7881e-17	1.15423e-06	6.65045e-06	4.15722e-06	2.70365e-07	0	0.000103654	3.62707e-08	6.87966e-06	0.000580289	-0.137571	-0.0349632	0.0785567	-0.0410473	-0.0419494	0.00183224	-0.1	-0.397193	0
2165	2.19905	0	0.181191	2.01786	2.56314	2.52347	2.38319	1.88561	0.273779	0.223799	0.140285	0.0396691	0.00815074	0.00247369	0.000183231	0.00321392	0.00494045	0.0015404	0.048056	0.0303285	0.0354903	4.27334e-05	3.1225e-11	0.00586544	0.0019549	0.029878	0.00279107	0.00284872	0.00148279	1.3053e-05	1.46044e-17	1.06067e-06	6.31763e-06	3.92826e-06	2.53348e-07	0	0.000101879	3.44086e-08	6.82013e-06	0.000580289	-0.137571	-0.0349632	0.0785567	-0.0410473	-0.0419494	0.00183224	-0.1	-0.397193	0
2166	2.20325	0	0.190562	2.01269	2.55797	2.51874	2.37843	1.88093	0.27378	0.223721	0.140311	0.0392352	0.00815773	0.00247438	0.000183924	0.00320187	0.00494017	0.00154043	0.0480657	0.0303285	0.0355111	4.23027e-05	2.73193e-11	0.00586453	0.00190886	0.0295417	0.00275415	0.00283799	0.0014818	1.24968e-05	1.19276e-17	9.74672e-07	6.00218e-06	3.71185e-06	2.37396e-07	0	0.000100132	3.26413e-08	6.78065e-06	0.000580289	-0.137571	-0.0349632	0.0785567	-0.0410473	-0.0419494	0.00183224	-0.1	-0.397193	0
2167	2.18189	0	0.174151	2.00774	2.55302	2.51421	2.37387	1.87645	0.273778	0.223644	0.140335	0.0388066	0.00816473	0.00247508	0.000184616	0.00318986	0.00493991	0.00154046	0.048075	0.0303284	0.0355315	4.18845e-05	2.39021e-11	0.00586361	0.00186387	0.0292091	0.00271771	0.0028273	0.00148081	1.19643e-05	9.74142e-18	8.95645e-07	5.70242e-06	3.50736e-06	2.22448e-07	0	9.84158e-05	3.09646e-08	6.76785e-06	0.000580289	-0.137571	-0.0349632	0.0785567	-0.0410473	-0.0419494	0.00183224	-0.1	-0.397193	0
2168	2.13322	0	0.130187	2.00303	2.54831	2.50992	2.36956	1.87221	0.273785	0.223567	0.14036	0.0383838	0.00817172	0.00247577	0.000185308	0.00317791	0.00493984	0.0015405	0.0480842	0.0303287	0.0355515	4.14787e-05	2.09126e-11	0.0058627	0.00181995	0.0288805	0.00268178	0.00281666	0.00147983	1.14547e-05	7.95612e-18	8.23036e-07	5.41686e-06	3.31416e-06	2.08444e-07	0	9.67237e-05	2.93745e-08	6.78153e-06	0.000580289	-0.137571	-0.0349632	0.0785567	-0.0410473	-0.0419494	0.00183224	-0.1	-0.397193	0
2169	2.08465	0	0.0860781	1.99857	2.54384	2.50587	2.36548	1.86818	0.273812	0.223491	0.140386	0.0379669	0.00817872	0.00247646	0.000186001	0.003166	0.00494013	0.00154057	0.0480938	0.0303298	0.0355715	4.10852e-05	1.8298e-11	0.00586179	0.00177711	0.0285561	0.00264637	0.00280608	0.00147885	1.09677e-05	6.49843e-18	7.56336e-07	5.14752e-06	3.13166e-06	1.95329e-07	0	9.50574e-05	2.78671e-08	6.82558e-06	0.000580289	-0.137571	-0.0349632	0.0785567	-0.0410473	-0.0419494	0.00183224	-0.1	-0.397193	0
2170	2.05352	0	0.0592681	1.99425	2.53949	2.50193	2.36152	1.86425	0.273859	0.223416	0.140413	0.0375561	0.00818571	0.00247716	0.000186692	0.00315414	0.00494074	0.00154068	0.0481037	0.0303316	0.0355913	4.07037e-05	1.60111e-11	0.00586087	0.00173534	0.0282359	0.0026115	0.00279555	0.00147787	1.05021e-05	5.3082e-18	6.95066e-07	4.89271e-06	2.95929e-06	1.83045e-07	0	9.34226e-05	2.64382e-08	6.87995e-06	0.000580289	-0.137571	-0.0349632	0.0785567	-0.0410473	-0.0419494	0.00183224	-0.1	-0.397193	0
2171	2.03309	0	0.0431769	1.98992	2.53513	2.49798	2.35754	1.86028	0.273916	0.223342	0.140441	0.0371508	0.00819271	0.00247785	0.000187384	0.00314233	0.00494151	0.0015408	0.0481137	0.0303339	0.035611	4.03336e-05	1.40107e-11	0.00585996	0.00169458	0.0279198	0.00257713	0.00278507	0.00147689	1.00569e-05	4.3362e-18	6.38776e-07	4.65086e-06	2.79645e-06	1.71539e-07	0	9.18179e-05	2.50832e-08	6.92408e-06	0.000580289	-0.137571	-0.0349632	0.0785567	-0.0410473	-0.0419494	0.00183224	-0.1	-0.397193	0
2172	2.01777	0	0.0322656	1.98551	2.53069	2.49394	2.35347	1.85622	0.27398	0.223268	0.14047	0.036751	0.0081997	0.00247854	0.000188076	0.00313057	0.00494234	0.00154094	0.0481237	0.0303366	0.0356304	3.99746e-05	1.22605e-11	0.00585905	0.0016548	0.0276074	0.00254324	0.00277465	0.00147591	9.63092e-06	3.54233e-18	5.87055e-07	4.42059e-06	2.64261e-06	1.6076e-07	0	9.02423e-05	2.37983e-08	6.95803e-06	0.000580289	-0.137571	-0.0349632	0.0785567	-0.0410473	-0.0419494	0.00183224	-0.1	-0.397193	0
2173	2.00667	0	0.025655	1.98101	2.52617	2.48981	2.34931	1.85207	0.274047	0.223195	0.140498	0.0363564	0.0082067	0.00247923	0.000188767	0.00311885	0.00494319	0.00154109	0.0481338	0.0303394	0.0356496	3.96264e-05	1.07292e-11	0.00585813	0.00161597	0.0272988	0.00250983	0.00276427	0.00147493	9.22334e-06	2.8939e-18	5.39531e-07	4.20066e-06	2.49725e-06	1.5066e-07	0	8.8695e-05	2.25796e-08	6.98671e-06	0.000580289	-0.137571	-0.0349632	0.0785567	-0.0410473	-0.0419494	0.00183224	-0.1	-0.397193	0
2174	2.04897	0	0.0725288	1.97644	2.52156	2.4856	2.34507	1.84783	0.274115	0.223122	0.140527	0.035967	0.00821369	0.00247993	0.000189458	0.00310718	0.00494404	0.00154125	0.0481437	0.0303425	0.0356685	3.92884e-05	9.38941e-12	0.00585722	0.00157805	0.0269939	0.00247688	0.00275394	0.00147396	8.83327e-06	2.36424e-18	4.95862e-07	3.99e-06	2.35992e-06	1.41197e-07	0	8.71754e-05	2.14236e-08	7.01132e-06	0.000580289	-0.137571	-0.0349632	0.0785567	-0.0410473	-0.0419494	0.00183224	-0.1	-0.397193	0
2175	2.11793	0	0.146252	1.97168	2.51677	2.48119	2.34064	1.84343	0.274163	0.223051	0.140553	0.035582	0.00822069	0.00248062	0.000190149	0.00309555	0.00494451	0.00154138	0.0481529	0.0303448	0.0356869	3.89601e-05	8.21668e-12	0.00585631	0.00154097	0.026692	0.00244433	0.00274364	0.00147299	8.45933e-06	1.93145e-18	4.55718e-07	3.79086e-06	2.2301e-06	1.32326e-07	0	8.56802e-05	2.03264e-08	6.98997e-06	0.000580289	-0.137571	-0.0349632	0.0785567	-0.0410473	-0.0419494	0.00183224	-0.1	-0.397193	0
2176	2.14792	0	0.181191	1.96673	2.51182	2.47662	2.33604	1.83889	0.274177	0.222979	0.140575	0.0352008	0.00822768	0.00248131	0.000190839	0.00308396	0.00494442	0.00154145	0.048161	0.0303458	0.0357046	3.86408e-05	7.18992e-12	0.0058554	0.00150466	0.0263929	0.00241213	0.00273335	0.00147201	8.10045e-06	1.57774e-18	4.18806e-07	3.60195e-06	2.10737e-06	1.24006e-07	0	8.42075e-05	1.92844e-08	6.9299e-06	0.000580289	-0.137571	-0.0349632	0.0785567	-0.0410473	-0.0419494	0.00183224	-0.1	-0.397193	0
2177	2.15241	0	0.190562	1.96185	2.50694	2.47212	2.33152	1.83444	0.274176	0.222909	0.140596	0.034824	0.00823467	0.00248201	0.00019153	0.00307241	0.00494413	0.00154149	0.0481684	0.0303463	0.0357218	3.83305e-05	6.29126e-12	0.00585448	0.00146915	0.0260968	0.00238033	0.00272309	0.00147103	7.75643e-06	1.28875e-18	3.84876e-07	3.42233e-06	1.99136e-06	1.16207e-07	0	8.27585e-05	1.82953e-08	6.88993e-06	0.000580289	-0.137571	-0.0349632	0.0785567	-0.0410473	-0.0419494	0.00183224	-0.1	-0.397193	0
2178	2.13133	0	0.174151	1.95718	2.50228	2.46782	2.32721	1.8302	0.274173	0.222839	0.140615	0.0344519	0.00824167	0.0024827	0.00019222	0.0030609	0.00494385	0.00154152	0.0481755	0.0303467	0.0357387	3.80292e-05	5.50488e-12	0.00585357	0.00143445	0.025804	0.00234894	0.00271287	0.00147006	7.42697e-06	1.05268e-18	3.53693e-07	3.25113e-06	1.88174e-06	1.08897e-07	0	8.13343e-05	1.73569e-08	6.87669e-06	0.000580289	-0.137571	-0.0349632	0.0785567	-0.0410473	-0.0419494	0.00183224	-0.1	-0.397193	0
2179	2.08295	0	0.130187	1.95276	2.49785	2.46377	2.32313	1.82618	0.274179	0.22277	0.140635	0.0340845	0.00824866	0.00248339	0.00019291	0.00304944	0.00494377	0.00154157	0.0481825	0.0303473	0.0357553	3.77369e-05	4.81689e-12	0.00585266	0.00140058	0.0255147	0.00231798	0.00270269	0.00146908	7.11169e-06	8.59875e-19	3.25041e-07	3.08752e-06	1.77816e-06	1.02049e-07	0	7.99354e-05	1.64669e-08	6.88998e-06	0.000580289	-0.137571	-0.0349632	0.0785567	-0.0410473	-0.0419494	0.00183224	-0.1	-0.397193	0
2180	2.03466	0	0.0860781	1.94858	2.49366	2.45994	2.31928	1.82237	0.274204	0.222701	0.140657	0.0337223	0.00825566	0.00248408	0.000193599	0.00303802	0.00494404	0.00154165	0.04819	0.0303487	0.0357718	3.74535e-05	4.21509e-12	0.00585175	0.00136755	0.025229	0.00228748	0.00269257	0.00146811	6.81027e-06	7.02429e-19	2.98719e-07	2.93418e-06	1.68032e-06	9.56349e-08	0	7.85628e-05	1.5623e-08	6.93372e-06	0.000580289	-0.137571	-0.0349632	0.0785567	-0.0410473	-0.0419494	0.00183224	-0.1	-0.397193	0
2181	2.0038	0	0.0592681	1.94453	2.48958	2.45622	2.31554	1.81866	0.274249	0.222633	0.14068	0.0333653	0.00826265	0.00248478	0.000194289	0.00302665	0.00494464	0.00154176	0.0481979	0.0303509	0.0357883	3.71789e-05	3.68868e-12	0.00585084	0.00133534	0.0249471	0.00225744	0.0026825	0.00146714	6.52213e-06	5.73854e-19	2.74538e-07	2.79004e-06	1.58791e-06	8.96272e-08	0	7.72161e-05	1.48231e-08	6.98781e-06	0.000580289	-0.137571	-0.0349632	0.0785567	-0.0410473	-0.0419494	0.00183224	-0.1	-0.397193	0
2182	1.98364	0	0.0431769	1.94046	2.48549	2.45248	2.31177	1.8149	0.274305	0.222566	0.140704	0.033013	0.00826964	0.00248547	0.000194978	0.00301533	0.00494539	0.0015419	0.0482059	0.0303535	0.0358047	3.69125e-05	3.22814e-12	0.00584993	0.00130392	0.0246686	0.00222782	0.00267248	0.00146617	6.24651e-06	4.68838e-19	2.52321e-07	2.65072e-06	1.50059e-06	8.39992e-08	0	7.58941e-05	1.40645e-08	7.03167e-06	0.000580289	-0.137571	-0.0349632	0.0785567	-0.0410473	-0.0419494	0.00183224	-0.1	-0.397193	0
2183	1.96858	0	0.0322656	1.93631	2.48131	2.44865	2.30792	1.81105	0.274367	0.222499	0.140728	0.0326653	0.00827664	0.00248616	0.000195667	0.00300405	0.00494621	0.00154204	0.0482141	0.0303564	0.0358209	3.66542e-05	2.82518e-12	0.00584902	0.00127325	0.0243935	0.00219863	0.00266251	0.0014652	5.98279e-06	3.83056e-19	2.31906e-07	2.51571e-06	1.4181e-06	7.87262e-08	0	7.4596e-05	1.3345e-08	7.06533e-06	0.000580289	-0.137571	-0.0349632	0.0785567	-0.0410473	-0.0419494	0.00183224	-0.1	-0.397193	0
2184	1.95772	0	0.025655	1.93207	2.47704	2.44472	2.30397	1.8071	0.274433	0.222433	0.140752	0.0323222	0.00828363	0.00248685	0.000196356	0.00299281	0.00494705	0.0015422	0.0482223	0.0303595	0.035837	3.64036e-05	2.47258e-12	0.00584811	0.00124332	0.0241217	0.00216983	0.00265259	0.00146424	5.73041e-06	3.12979e-19	2.13146e-07	2.38793e-06	1.34016e-06	7.37855e-08	0	7.33212e-05	1.26626e-08	7.09372e-06	0.000580289	-0.137571	-0.0349632	0.0785567	-0.0410473	-0.0419494	0.00183224	-0.1	-0.397193	0
2185	2.00028	0	0.0725288	1.92775	2.47269	2.4407	2.29993	1.80306	0.2745	0.222368	0.140777	0.0319835	0.00829062	0.00248755	0.000197045	0.00298162	0.00494788	0.00154236	0.0482305	0.0303628	0.0358528	3.61605e-05	2.16404e-12	0.0058472	0.00121409	0.0238532	0.00214144	0.0026427	0.00146328	5.48884e-06	2.5573e-19	1.95907e-07	2.2666e-06	1.26651e-06	6.91559e-08	0	7.2069e-05	1.20152e-08	7.11804e-06	0.000580289	-0.137571	-0.0349632	0.0785567	-0.0410473	-0.0419494	0.00183224	-0.1	-0.397193	0
2186	2.06948	0	0.146252	1.92323	2.46814	2.4365	2.2957	1.79885	0.274546	0.222303	0.140799	0.0316485	0.00829761	0.00248824	0.000197733	0.00297047	0.00494834	0.00154249	0.048238	0.0303653	0.0358682	3.59242e-05	1.89395e-12	0.00584629	0.00118551	0.0235873	0.00211339	0.00263285	0.00146231	5.25722e-06	2.08945e-19	1.80058e-07	2.15099e-06	1.1969e-06	6.48154e-08	0	7.08369e-05	1.14007e-08	7.09631e-06	0.000580289	-0.137571	-0.0349632	0.0785567	-0.0410473	-0.0419494	0.00183224	-0.1	-0.397193	0
2187	2.09971	0	0.181191	1.91852	2.46343	2.43211	2.2913	1.7945	0.274559	0.222238	0.140817	0.0313168	0.00830461	0.00248893	0.000198422	0.00295935	0.00494824	0.00154256	0.0482444	0.0303665	0.0358829	3.56943e-05	1.65745e-12	0.00584538	0.00115753	0.0233238	0.00208564	0.00262301	0.00146134	5.03489e-06	1.70704e-19	1.65485e-07	2.04381e-06	1.13107e-06	6.07444e-08	0	6.96232e-05	1.08171e-08	7.03579e-06	0.000580289	-0.137571	-0.0349632	0.0785567	-0.0410473	-0.0419494	0.00183224	-0.1	-0.397193	0
2188	2.10444	0	0.190562	1.91388	2.45879	2.4278	2.28697	1.79024	0.274557	0.222175	0.140834	0.0309888	0.0083116	0.00248962	0.00019911	0.00294828	0.00494793	0.00154261	0.0482502	0.0303672	0.0358972	3.54708e-05	1.45043e-12	0.00584447	0.00113017	0.023063	0.00205823	0.0026132	0.00146038	4.82174e-06	1.39455e-19	1.52087e-07	1.94427e-06	1.06886e-06	5.69278e-08	0	6.8429e-05	1.0263e-08	6.9954e-06	0.000580289	-0.137571	-0.0349632	0.0785567	-0.0410473	-0.0419494	0.00183224	-0.1	-0.397193	0
2189	2.0836	0	0.174151	1.90945	2.45437	2.4237	2.28285	1.78619	0.274552	0.222111	0.14085	0.0306647	0.00831859	0.00249031	0.000199797	0.00293724	0.00494765	0.00154264	0.0482557	0.0303677	0.0359112	3.52538e-05	1.26926e-12	0.00584357	0.00110343	0.0228051	0.00203118	0.00260342	0.00145941	4.61758e-06	1.13926e-19	1.39774e-07	1.84824e-06	1.01006e-06	5.33508e-08	0	6.72551e-05	9.73735e-09	6.98179e-06	0.000580289	-0.137571	-0.0349632	0.0785567	-0.0410473	-0.0419494	0.00183224	-0.1	-0.397193	0
2190	2.03545	0	0.130187	1.90526	2.45017	2.41983	2.27896	1.78236	0.274557	0.222049	0.140866	0.0303448	0.00832558	0.00249101	0.000200485	0.00292625	0.00494755	0.00154269	0.0482612	0.0303685	0.035925	3.50433e-05	1.11074e-12	0.00584266	0.00107733	0.0225502	0.00200449	0.00259368	0.00145845	4.42218e-06	9.30719e-20	1.28459e-07	1.7554e-06	9.54503e-07	4.99992e-08	0	6.61021e-05	9.23873e-09	6.99478e-06	0.000580289	-0.137571	-0.0349632	0.0785567	-0.0410473	-0.0419494	0.00183224	-0.1	-0.397193	0
2191	1.98739	0	0.0860781	1.90131	2.44621	2.41618	2.27529	1.77873	0.274581	0.221987	0.140884	0.0300294	0.00833258	0.0024917	0.000201172	0.0029153	0.00494781	0.00154277	0.0482672	0.03037	0.0359388	3.48393e-05	9.72071e-13	0.00584175	0.00105189	0.0222985	0.0019782	0.002584	0.00145749	4.23534e-06	7.60403e-20	1.18064e-07	1.66882e-06	9.02022e-07	4.68598e-08	0	6.49706e-05	8.76595e-09	7.03828e-06	0.000580289	-0.137571	-0.0349632	0.0785567	-0.0410473	-0.0419494	0.00183224	-0.1	-0.397193	0
2192	1.95675	0	0.0592681	1.89748	2.44236	2.41264	2.27174	1.77519	0.274625	0.221925	0.140903	0.0297183	0.00833957	0.00249239	0.00020186	0.0029044	0.00494839	0.00154289	0.0482737	0.0303722	0.0359526	3.46416e-05	8.50757e-13	0.00584084	0.00102708	0.0220501	0.0019523	0.00257437	0.00145653	4.0567e-06	6.21299e-20	1.08514e-07	1.58788e-06	8.52447e-07	4.39191e-08	0	6.38605e-05	8.31771e-09	7.09216e-06	0.000580289	-0.137571	-0.0349632	0.0785567	-0.0410473	-0.0419494	0.00183224	-0.1	-0.397193	0
2193	1.93681	0	0.0431769	1.89363	2.43848	2.40907	2.26815	1.7716	0.27468	0.221864	0.140924	0.0294113	0.00834656	0.00249308	0.000202546	0.00289354	0.00494913	0.00154303	0.0482804	0.0303749	0.0359663	3.445e-05	7.44611e-13	0.00583994	0.00100288	0.0218048	0.00192677	0.00256478	0.00145557	3.88581e-06	5.07668e-20	9.97388e-08	1.50857e-06	8.05609e-07	4.11641e-08	0	6.27706e-05	7.89262e-09	7.1358e-06	0.000580289	-0.137571	-0.0349632	0.0785567	-0.0410473	-0.0419494	0.00183224	-0.1	-0.397193	0
2194	1.92196	0	0.0322656	1.88969	2.43452	2.40541	2.26446	1.76792	0.27474	0.221804	0.140945	0.0291083	0.00835355	0.00249377	0.000203233	0.00288273	0.00494994	0.00154317	0.0482872	0.0303779	0.0359799	3.42642e-05	6.51729e-13	0.00583903	0.00097926	0.0215624	0.0019016	0.00255524	0.00145461	3.72226e-06	4.14836e-20	9.16748e-08	1.4341e-06	7.61354e-07	3.85826e-08	0	6.17004e-05	7.48942e-09	7.16925e-06	0.000580289	-0.137571	-0.0349632	0.0785567	-0.0410473	-0.0419494	0.00183224	-0.1	-0.397193	0
2195	1.91132	0	0.025655	1.88566	2.43046	2.40165	2.26068	1.76413	0.274805	0.221744	0.140966	0.0288092	0.00836054	0.00249446	0.00020392	0.00287195	0.00495077	0.00154333	0.0482941	0.0303811	0.0359934	3.4084e-05	5.70446e-13	0.00583812	0.000956207	0.0213229	0.00187678	0.00254575	0.00145366	3.56573e-06	3.3899e-20	8.42642e-08	1.36395e-06	7.19538e-07	3.61637e-08	0	6.06492e-05	7.10695e-09	7.19741e-06	0.000580289	-0.137571	-0.0349632	0.0785567	-0.0410473	-0.0419494	0.00183224	-0.1	-0.397193	0
2196	1.95408	0	0.0725288	1.88155	2.42631	2.3978	2.25681	1.76025	0.274871	0.221685	0.140987	0.0285139	0.00836754	0.00249516	0.000204606	0.00286122	0.00495159	0.00154349	0.0483011	0.0303844	0.0360068	3.39092e-05	4.99313e-13	0.00583722	0.000933703	0.0210863	0.00185229	0.0025363	0.0014527	3.41588e-06	2.7702e-20	7.74537e-08	1.2943e-06	6.80025e-07	3.3897e-08	0	5.96167e-05	6.74412e-09	7.2215e-06	0.000580289	-0.137571	-0.0349632	0.0785567	-0.0410473	-0.0419494	0.00183224	-0.1	-0.397193	0
2197	2.02348	0	0.146252	1.87723	2.42197	2.39375	2.25274	1.7562	0.274916	0.221626	0.141006	0.0282217	0.00837453	0.00249585	0.000205292	0.00285053	0.00495204	0.00154362	0.0483074	0.030387	0.0360197	3.37393e-05	4.37036e-13	0.00583631	0.000911701	0.020852	0.00182811	0.00252687	0.00145175	3.27218e-06	2.2637e-20	7.11922e-08	1.22842e-06	6.42673e-07	3.17716e-08	0	5.86007e-05	6.39966e-09	7.19946e-06	0.000580289	-0.137571	-0.0349632	0.0785567	-0.0410473	-0.0419494	0.00183224	-0.1	-0.397193	0
2198	2.05391	0	0.181191	1.87272	2.41746	2.38953	2.24851	1.75201	0.274927	0.221568	0.141021	0.0279324	0.00838152	0.00249654	0.000205978	0.00283987	0.00495193	0.00154369	0.0483126	0.0303883	0.036032	3.35738e-05	3.82501e-13	0.0058354	0.000890157	0.0206198	0.00180418	0.00251745	0.00145079	3.13423e-06	1.84963e-20	6.54341e-08	1.1659e-06	6.07355e-07	2.9778e-08	0	5.75998e-05	6.07248e-09	7.13855e-06	0.000580289	-0.137571	-0.0349632	0.0785567	-0.0410473	-0.0419494	0.00183224	-0.1	-0.397193	0
2199	2.05885	0	0.190562	1.86828	2.41302	2.38538	2.24434	1.74791	0.274924	0.22151	0.141035	0.0276462	0.00838851	0.00249723	0.000206664	0.00282925	0.00495161	0.00154374	0.0483173	0.0303889	0.0360439	3.34129e-05	3.34759e-13	0.0058345	0.000869088	0.0203899	0.00178054	0.00250806	0.00144983	3.00195e-06	1.51124e-20	6.01404e-08	1.10641e-06	5.7397e-07	2.7909e-08	0	5.66149e-05	5.76188e-09	7.09781e-06	0.000580289	-0.137571	-0.0349632	0.0785567	-0.0410473	-0.0419494	0.00183224	-0.1	-0.397193	0
2200	2.0382	0	0.174151	1.86405	2.40879	2.38143	2.24038	1.74401	0.274919	0.221453	0.141048	0.0273635	0.0083955	0.00249792	0.000207349	0.00281867	0.00495131	0.00154378	0.0483217	0.0303895	0.0360556	3.32567e-05	2.92974e-13	0.00583359	0.000848508	0.0201626	0.00175721	0.00249871	0.00144888	2.87523e-06	1.23474e-20	5.52748e-08	1.05306e-06	5.42418e-07	2.61571e-08	0	5.56467e-05	5.46715e-09	7.08389e-06	0.000580289	-0.137571	-0.0349632	0.0785567	-0.0410473	-0.0419494	0.00183224	-0.1	-0.397193	0
2201	1.99024	0	0.130187	1.86006	2.4048	2.37771	2.23665	1.74033	0.274922	0.221396	0.141062	0.0270843	0.00840249	0.00249861	0.000208034	0.00280813	0.0049512	0.00154383	0.0483262	0.0303903	0.0360671	3.31051e-05	2.5641e-13	0.00583269	0.00082842	0.0199379	0.0017342	0.00248939	0.00144792	2.75393e-06	1.00886e-20	5.08034e-08	1.00185e-06	5.12605e-07	2.45155e-08	0	5.46956e-05	5.18756e-09	7.09662e-06	0.000580289	-0.137571	-0.0349632	0.0785567	-0.0410473	-0.0419494	0.00183224	-0.1	-0.397193	0
2202	1.94237	0	0.0860781	1.85629	2.40102	2.37421	2.23314	1.73685	0.274945	0.22134	0.141077	0.0268089	0.00840948	0.0024993	0.000208719	0.00279763	0.00495145	0.00154391	0.0483312	0.0303918	0.0360787	3.29583e-05	2.24419e-13	0.00583178	0.000808832	0.0197161	0.00171152	0.00248013	0.00144697	2.63793e-06	8.24349e-21	4.66952e-08	9.5258e-07	4.84441e-07	2.29777e-08	0	5.37623e-05	4.92245e-09	7.13993e-06	0.000580289	-0.137571	-0.0349632	0.0785567	-0.0410473	-0.0419494	0.00183224	-0.1	-0.397193	0
2203	1.91192	0	0.0592681	1.85265	2.39736	2.37082	2.22973	1.73346	0.274988	0.221285	0.141094	0.0265373	0.00841647	0.00249999	0.000209404	0.00278717	0.00495203	0.00154402	0.0483367	0.0303941	0.0360903	3.28162e-05	1.96431e-13	0.00583088	0.000789734	0.0194972	0.00168918	0.00247091	0.00144602	2.527e-06	6.73634e-21	4.29207e-08	9.05053e-07	4.57835e-07	2.15371e-08	0	5.28465e-05	4.67108e-09	7.19366e-06	0.000580289	-0.137571	-0.0349632	0.0785567	-0.0410473	-0.0419494	0.00183224	-0.1	-0.397193	0
2204	1.89216	0	0.0431769	1.84898	2.39367	2.3674	2.22629	1.73002	0.275042	0.221229	0.141112	0.0262692	0.00842346	0.00250069	0.000210089	0.00277676	0.00495276	0.00154416	0.0483424	0.0303968	0.0361019	3.26785e-05	1.7194e-13	0.00582998	0.000771101	0.0192809	0.00166716	0.00246174	0.00144507	2.42087e-06	5.50502e-21	3.94522e-08	8.59072e-07	4.32697e-07	2.01875e-08	0	5.19474e-05	4.43268e-09	7.23714e-06	0.000580289	-0.137571	-0.0349632	0.0785567	-0.0410473	-0.0419494	0.00183224	-0.1	-0.397193	0
2205	1.87749	0	0.0322656	1.84523	2.38988	2.36388	2.22275	1.72647	0.275102	0.221175	0.14113	0.0260046	0.00843045	0.00250138	0.000210773	0.00276639	0.00495356	0.0015443	0.0483483	0.0303998	0.0361134	3.2545e-05	1.50507e-13	0.00582907	0.000752921	0.0190672	0.00164545	0.00245262	0.00144413	2.3193e-06	4.49895e-21	3.62646e-08	8.1785e-07	4.08944e-07	1.89227e-08	0	5.10644e-05	4.20653e-09	7.27042e-06	0.000580289	-0.137571	-0.0349632	0.0785567	-0.0410473	-0.0419494	0.00183224	-0.1	-0.397193	0
2206	1.86703	0	0.025655	1.84137	2.386	2.36026	2.21911	1.72282	0.275165	0.221121	0.141149	0.0257433	0.00843744	0.00250207	0.000211457	0.00275606	0.00495438	0.00154446	0.0483543	0.030403	0.0361248	3.24155e-05	1.31748e-13	0.00582817	0.000735179	0.0188561	0.00162403	0.00244353	0.00144318	2.22206e-06	3.67686e-21	3.33352e-08	7.77512e-07	3.86499e-07	1.77376e-08	0	5.01971e-05	3.99199e-09	7.2984e-06	0.000580289	-0.137571	-0.0349632	0.0785567	-0.0410473	-0.0419494	0.00183224	-0.1	-0.397193	0
2207	1.90996	0	0.0725288	1.83743	2.38203	2.35654	2.21538	1.71908	0.27523	0.221067	0.141167	0.0254852	0.00844443	0.00250276	0.000212141	0.00274577	0.00495519	0.00154462	0.0483604	0.0304063	0.0361361	3.229e-05	1.15331e-13	0.00582727	0.000717863	0.0186475	0.00160291	0.00243448	0.00144224	2.12896e-06	3.00508e-21	3.06428e-08	7.37964e-07	3.65289e-07	1.66268e-08	0	4.93452e-05	3.78846e-09	7.32231e-06	0.000580289	-0.137571	-0.0349632	0.0785567	-0.0410473	-0.0419494	0.00183224	-0.1	-0.397193	0
2208	1.97954	0	0.146252	1.83329	2.37786	2.35263	2.21145	1.71516	0.275274	0.221014	0.141184	0.0252299	0.00845142	0.00250345	0.000212825	0.00273551	0.00495563	0.00154475	0.0483659	0.0304088	0.0361471	3.21679e-05	1.00956e-13	0.00582636	0.00070093	0.0184409	0.00158205	0.00242546	0.00144129	2.03967e-06	2.45595e-21	2.81673e-08	7.02472e-07	3.45239e-07	1.55853e-08	0	4.85068e-05	3.59522e-09	7.3e-06	0.000580289	-0.137571	-0.0349632	0.0785567	-0.0410473	-0.0419494	0.00183224	-0.1	-0.397193	0
2209	2.01014	0	0.181191	1.82895	2.37352	2.34854	2.20735	1.7111	0.275285	0.220961	0.141197	0.024977	0.00845841	0.00250414	0.000213508	0.00272529	0.00495551	0.00154482	0.0483703	0.0304101	0.0361574	3.20489e-05	8.83665e-14	0.00582546	0.000684351	0.0182362	0.0015614	0.00241645	0.00144035	1.95393e-06	2.00697e-21	2.58906e-08	6.67223e-07	3.2628e-07	1.46084e-08	0	4.76808e-05	3.41166e-09	7.23875e-06	0.000580289	-0.137571	-0.0349632	0.0785567	-0.0410473	-0.0419494	0.00183224	-0.1	-0.397193	0
2210	2.01525	0	0.190562	1.82468	2.36926	2.34453	2.20332	1.70713	0.275281	0.220909	0.141208	0.0247268	0.0084654	0.00250483	0.000214192	0.00271511	0.00495519	0.00154486	0.0483742	0.0304108	0.0361674	3.19331e-05	7.73444e-14	0.00582456	0.00066814	0.0180335	0.00154101	0.00240747	0.0014394	1.87171e-06	1.64e-21	2.37975e-08	6.32211e-07	3.08357e-07	1.36924e-08	0	4.6868e-05	3.23738e-09	7.1977e-06	0.000580289	-0.137571	-0.0349632	0.0785567	-0.0410473	-0.0419494	0.00183224	-0.1	-0.397193	0
2211	1.99477	0	0.174151	1.82062	2.36519	2.34071	2.1995	1.70336	0.275274	0.220857	0.141219	0.0244795	0.00847239	0.00250552	0.000214875	0.00270496	0.00495488	0.0015449	0.0483778	0.0304113	0.0361772	3.18207e-05	6.76967e-14	0.00582366	0.000652303	0.0178331	0.00152088	0.00239851	0.00143845	1.79294e-06	1.34012e-21	2.18735e-08	6.00807e-07	2.91418e-07	1.28337e-08	0	4.60689e-05	3.072e-09	7.18351e-06	0.000580289	-0.137571	-0.0349632	0.0785567	-0.0410473	-0.0419494	0.00183224	-0.1	-0.397193	0
2212	1.94698	0	0.130187	1.81679	2.36137	2.33713	2.1959	1.69982	0.275277	0.220806	0.141231	0.0242353	0.00847938	0.00250621	0.000215558	0.00269485	0.00495476	0.00154495	0.0483816	0.0304121	0.0361869	3.17116e-05	5.92535e-14	0.00582275	0.000636848	0.017635	0.00150102	0.0023896	0.00143751	1.71753e-06	1.09509e-21	2.01053e-08	5.72649e-07	2.75412e-07	1.2029e-08	0	4.52839e-05	2.9151e-09	7.19602e-06	0.000580289	-0.137571	-0.0349632	0.0785567	-0.0410473	-0.0419494	0.00183224	-0.1	-0.397193	0
2213	1.89927	0	0.0860781	1.81319	2.35776	2.33376	2.19252	1.69646	0.275299	0.220755	0.141244	0.0239944	0.00848637	0.0025069	0.00021624	0.00268478	0.004955	0.00154503	0.0483858	0.0304136	0.0361966	3.16061e-05	5.18658e-14	0.00582185	0.000621781	0.0174394	0.00148145	0.00238073	0.00143656	1.6454e-06	8.94925e-22	1.84806e-08	5.44036e-07	2.60291e-07	1.12752e-08	0	4.45135e-05	2.76632e-09	7.23919e-06	0.000580289	-0.137571	-0.0349632	0.0785567	-0.0410473	-0.0419494	0.00183224	-0.1	-0.397193	0
2214	1.86898	0	0.0592681	1.80971	2.35425	2.3305	2.18924	1.69319	0.275341	0.220705	0.141259	0.0237568	0.00849336	0.00250759	0.000216923	0.00267476	0.00495557	0.00154514	0.0483906	0.0304159	0.0362065	3.1504e-05	4.54016e-14	0.00582095	0.000607088	0.0172463	0.00146217	0.00237191	0.00143562	1.57641e-06	7.31398e-22	1.69877e-08	5.15016e-07	2.46005e-07	1.0569e-08	0	4.37575e-05	2.62524e-09	7.2928e-06	0.000580289	-0.137571	-0.0349632	0.0785567	-0.0410473	-0.0419494	0.00183224	-0.1	-0.397193	0
2215	1.84938	0	0.0431769	1.8062	2.35072	2.3272	2.18592	1.68987	0.275394	0.220655	0.141275	0.0235222	0.00850035	0.00250828	0.000217605	0.00266477	0.0049563	0.00154527	0.0483957	0.0304186	0.0362163	3.14052e-05	3.97447e-14	0.00582005	0.000592757	0.0170556	0.00144317	0.00236314	0.00143469	1.5104e-06	5.97783e-22	1.56159e-08	4.89001e-07	2.32507e-07	9.90733e-09	0	4.30153e-05	2.49143e-09	7.33615e-06	0.000580289	-0.137571	-0.0349632	0.0785567	-0.0410473	-0.0419494	0.00183224	-0.1	-0.397193	0
2216	1.83487	0	0.0322656	1.8026	2.34709	2.3238	2.18251	1.68645	0.275453	0.220606	0.141291	0.0232906	0.00850734	0.00250897	0.000218287	0.00265483	0.00495708	0.00154542	0.0484009	0.0304216	0.0362261	3.13094e-05	3.47936e-14	0.00581915	0.000578773	0.0168672	0.00142443	0.0023544	0.00143375	1.44722e-06	4.88595e-22	1.4355e-08	4.65675e-07	2.19752e-07	9.28725e-09	0	4.22863e-05	2.36448e-09	7.3693e-06	0.000580289	-0.137571	-0.0349632	0.0785567	-0.0410473	-0.0419494	0.00183224	-0.1	-0.397193	0
2217	1.82456	0	0.025655	1.7989	2.34336	2.3203	2.17899	1.68292	0.275515	0.220557	0.141308	0.0230619	0.00851433	0.00250966	0.000218969	0.00264492	0.00495789	0.00154557	0.0484063	0.0304247	0.0362359	3.12165e-05	3.046e-14	0.00581825	0.000565125	0.016681	0.00140595	0.00234571	0.00143281	1.38672e-06	3.99365e-22	1.31962e-08	4.4476e-07	2.07699e-07	8.70612e-09	0	4.15703e-05	2.24405e-09	7.39714e-06	0.000580289	-0.137571	-0.0349632	0.0785567	-0.0410473	-0.0419494	0.00183224	-0.1	-0.397193	0
2218	1.86764	0	0.0725288	1.79511	2.33954	2.3167	2.17538	1.67929	0.27558	0.220508	0.141325	0.0228359	0.00852132	0.00251035	0.00021965	0.00263505	0.0049587	0.00154573	0.0484118	0.030428	0.0362455	3.11265e-05	2.66667e-14	0.00581735	0.000551804	0.0164969	0.00138772	0.00233705	0.00143188	1.32879e-06	3.2644e-22	1.21311e-08	4.22627e-07	1.96309e-07	8.16147e-09	0	4.08669e-05	2.12978e-09	7.4209e-06	0.000580289	-0.137571	-0.0349632	0.0785567	-0.0410473	-0.0419494	0.00183224	-0.1	-0.397193	0
2219	1.93736	0	0.146252	1.79111	2.33552	2.31291	2.17157	1.67549	0.275623	0.22046	0.141339	0.0226123	0.00852831	0.00251104	0.000220332	0.00262522	0.00495913	0.00154586	0.0484166	0.0304305	0.0362548	3.1039e-05	2.33451e-14	0.00581645	0.000538778	0.0163148	0.00136971	0.00232842	0.00143094	1.27323e-06	2.66821e-22	1.11517e-08	3.99384e-07	1.85541e-07	7.65073e-09	0	4.01746e-05	2.02129e-09	7.39836e-06	0.000580289	-0.137571	-0.0349632	0.0785567	-0.0410473	-0.0419494	0.00183224	-0.1	-0.397193	0
2220	1.96812	0	0.181191	1.78693	2.33133	2.30894	2.16759	1.67154	0.275633	0.220413	0.141351	0.0223908	0.00853529	0.00251173	0.000221013	0.00261541	0.00495901	0.00154593	0.0484205	0.0304318	0.0362636	3.09534e-05	2.04359e-14	0.00581555	0.000526029	0.0161342	0.00135189	0.00231979	0.00143001	1.21986e-06	2.1807e-22	1.0251e-08	3.78513e-07	1.75359e-07	7.17161e-09	0	3.94925e-05	1.91822e-09	7.33681e-06	0.000580289	-0.137571	-0.0349632	0.0785567	-0.0410473	-0.0419494	0.00183224	-0.1	-0.397193	0
2221	1.97337	0	0.190562	1.78281	2.32721	2.30504	2.16368	1.66769	0.275628	0.220365	0.14136	0.0221716	0.00854228	0.00251242	0.000221694	0.00260564	0.00495867	0.00154597	0.0484238	0.0304324	0.0362721	3.08702e-05	1.78886e-14	0.00581465	0.000513561	0.0159554	0.00133428	0.00231119	0.00142907	1.16868e-06	1.78218e-22	9.42281e-09	3.59783e-07	1.65733e-07	6.72233e-09	0	3.88213e-05	1.82036e-09	7.29548e-06	0.000580289	-0.137571	-0.0349632	0.0785567	-0.0410473	-0.0419494	0.00183224	-0.1	-0.397193	0
2222	1.95304	0	0.174151	1.77889	2.3233	2.30134	2.15997	1.66403	0.275621	0.220319	0.14137	0.021955	0.00854927	0.00251311	0.000222375	0.00259591	0.00495836	0.001546	0.0484269	0.0304329	0.0362803	3.07893e-05	1.56586e-14	0.00581375	0.000501381	0.0157786	0.0013169	0.00230262	0.00142813	1.11964e-06	1.45648e-22	8.66149e-09	3.4298e-07	1.56635e-07	6.30117e-09	0	3.81614e-05	1.72748e-09	7.28104e-06	0.000580289	-0.137571	-0.0349632	0.0785567	-0.0410473	-0.0419494	0.00183224	-0.1	-0.397193	0
2223	1.90539	0	0.130187	1.77521	2.31961	2.29787	2.15649	1.6606	0.275623	0.220272	0.141379	0.021741	0.00855626	0.0025138	0.000223055	0.00258622	0.00495824	0.00154605	0.0484301	0.0304337	0.0362885	3.0711e-05	1.3707e-14	0.00581285	0.000489495	0.0156038	0.00129976	0.00229409	0.0014272	1.07269e-06	1.19033e-22	7.96178e-09	3.27914e-07	1.48038e-07	5.90647e-09	0	3.7513e-05	1.63937e-09	7.29338e-06	0.000580289	-0.137571	-0.0349632	0.0785567	-0.0410473	-0.0419494	0.00183224	-0.1	-0.397193	0
2224	1.85783	0	0.0860781	1.77175	2.31615	2.29462	2.15323	1.65736	0.275644	0.220226	0.141391	0.0215299	0.00856325	0.00251449	0.000223735	0.00257656	0.00495847	0.00154613	0.0484339	0.0304352	0.0362968	3.06352e-05	1.19991e-14	0.00581195	0.000477908	0.0154313	0.00128287	0.0022856	0.00142626	1.02777e-06	9.72871e-23	7.31881e-09	3.11034e-07	1.39915e-07	5.53668e-09	0	3.68767e-05	1.5558e-09	7.33642e-06	0.000580289	-0.137571	-0.0349632	0.0785567	-0.0410473	-0.0419494	0.00183224	-0.1	-0.397193	0
2225	1.82768	0	0.0592681	1.76841	2.31279	2.29147	2.15006	1.65419	0.275685	0.220181	0.141404	0.0213216	0.00857024	0.00251518	0.000224416	0.00256695	0.00495903	0.00154624	0.0484381	0.0304374	0.0363051	3.0562e-05	1.05046e-14	0.00581106	0.000466614	0.0152609	0.00126622	0.00227716	0.00142533	9.84806e-07	7.95198e-23	6.728e-09	2.92526e-07	1.32241e-07	5.19024e-09	0	3.62523e-05	1.47656e-09	7.38994e-06	0.000580289	-0.137571	-0.0349632	0.0785567	-0.0410473	-0.0419494	0.00183224	-0.1	-0.397193	0
2226	1.80821	0	0.0431769	1.76504	2.30939	2.28827	2.14686	1.65098	0.275738	0.220136	0.141419	0.021116	0.00857722	0.00251587	0.000225095	0.00255737	0.00495975	0.00154637	0.0484427	0.0304401	0.0363136	3.04911e-05	9.19658e-15	0.00581016	0.000455598	0.0150927	0.00124981	0.00226876	0.0014244	9.43689e-07	6.50007e-23	6.18503e-09	2.75931e-07	1.2499e-07	4.8656e-09	0	3.56392e-05	1.40139e-09	7.4332e-06	0.000580289	-0.137571	-0.0349632	0.0785567	-0.0410473	-0.0419494	0.00183224	-0.1	-0.397193	0
2227	1.79383	0	0.0322656	1.76157	2.3059	2.28498	2.14355	1.64766	0.275796	0.220091	0.141434	0.0209129	0.00858421	0.00251656	0.000225775	0.00254783	0.00496053	0.00154651	0.0484475	0.030443	0.036322	3.04226e-05	8.05167e-15	0.00580926	0.00044485	0.0149264	0.00123363	0.0022604	0.00142348	9.04324e-07	5.31346e-23	5.68598e-09	2.61051e-07	1.18138e-07	4.56135e-09	0	3.5037e-05	1.33008e-09	7.46624e-06	0.000580289	-0.137571	-0.0349632	0.0785567	-0.0410473	-0.0419494	0.00183224	-0.1	-0.397193	0
2228	1.78366	0	0.025655	1.758	2.3023	2.28159	2.14014	1.64423	0.275858	0.220047	0.141449	0.0207122	0.0085912	0.00251725	0.000226455	0.00253833	0.00496134	0.00154666	0.0484524	0.0304461	0.0363304	3.03561e-05	7.04947e-15	0.00580836	0.000434362	0.0147621	0.00121767	0.00225208	0.00142255	8.66632e-07	4.34361e-23	5.22727e-09	2.47707e-07	1.11663e-07	4.2762e-09	0	3.44454e-05	1.26242e-09	7.49397e-06	0.000580289	-0.137571	-0.0349632	0.0785567	-0.0410473	-0.0419494	0.00183224	-0.1	-0.397193	0
2229	1.82687	0	0.0725288	1.75434	2.29861	2.2781	2.13663	1.64071	0.275921	0.220003	0.141464	0.0205141	0.00859819	0.00251794	0.000227134	0.00252887	0.00496214	0.00154682	0.0484574	0.0304494	0.0363387	3.02918e-05	6.17215e-15	0.00580747	0.000424125	0.0145997	0.00120193	0.00224379	0.00142162	8.30534e-07	3.55088e-23	4.80564e-09	2.3574e-07	1.05544e-07	4.00894e-09	0	3.38643e-05	1.19821e-09	7.51761e-06	0.000580289	-0.137571	-0.0349632	0.0785567	-0.0410473	-0.0419494	0.00183224	-0.1	-0.397193	0
2230	1.89673	0	0.146252	1.75047	2.29472	2.2744	2.13293	1.637	0.275964	0.219959	0.141478	0.0203179	0.00860517	0.00251862	0.000227813	0.00251944	0.00496256	0.00154694	0.0484619	0.0304518	0.0363467	3.02291e-05	5.40385e-15	0.00580657	0.000414115	0.014439	0.00118638	0.00223552	0.0014207	7.95904e-07	2.90272e-23	4.41793e-09	2.24998e-07	9.97582e-08	3.7583e-09	0	3.32923e-05	1.13725e-09	7.49486e-06	0.000580289	-0.137571	-0.0349632	0.0785567	-0.0410473	-0.0419494	0.00183224	-0.1	-0.397193	0
2231	1.92761	0	0.181191	1.74642	2.29066	2.27054	2.12905	1.63316	0.275973	0.219916	0.141488	0.0201235	0.00861216	0.00251931	0.000228492	0.00251004	0.00496243	0.00154701	0.0484653	0.0304531	0.0363542	3.01677e-05	4.73086e-15	0.00580567	0.000404315	0.0142796	0.00117099	0.00222727	0.00141977	7.62644e-07	2.37266e-23	4.06132e-09	2.1535e-07	9.42872e-08	3.52316e-09	0	3.27288e-05	1.07933e-09	7.43303e-06	0.000580289	-0.137571	-0.0349632	0.0785567	-0.0410473	-0.0419494	0.00183224	-0.1	-0.397193	0
2232	1.93299	0	0.190562	1.74243	2.28668	2.26674	2.12525	1.62941	0.275967	0.219874	0.141496	0.0199312	0.00861915	0.00252	0.00022917	0.00250067	0.00496209	0.00154705	0.0484682	0.0304537	0.0363614	3.0108e-05	4.14153e-15	0.00580478	0.000394733	0.0141219	0.00115578	0.00221904	0.00141884	7.30739e-07	1.93929e-23	3.73342e-09	2.06689e-07	8.91149e-08	3.30265e-09	0	3.21741e-05	1.02434e-09	7.39144e-06	0.000580289	-0.137571	-0.0349632	0.0785567	-0.0410473	-0.0419494	0.00183224	-0.1	-0.397193	0
2233	1.91279	0	0.174151	1.73864	2.28289	2.26315	2.12165	1.62586	0.27596	0.219831	0.141504	0.019741	0.00862613	0.00252069	0.000229849	0.00249133	0.00496177	0.00154708	0.0484709	0.0304541	0.0363684	3.00499e-05	3.6256e-15	0.00580388	0.000385372	0.0139658	0.00114077	0.00221083	0.00141792	7.00163e-07	1.58507e-23	3.43198e-09	1.98919e-07	8.42262e-08	3.09593e-09	0	3.16288e-05	9.72143e-10	7.3768e-06	0.000580289	-0.137571	-0.0349632	0.0785567	-0.0410473	-0.0419494	0.00183224	-0.1	-0.397193	0
2234	1.86527	0	0.130187	1.73509	2.27934	2.25978	2.11827	1.62252	0.275961	0.219789	0.141513	0.0195532	0.00863312	0.00252138	0.000230527	0.00248204	0.00496164	0.00154713	0.0484738	0.0304549	0.0363753	2.99936e-05	3.17399e-15	0.00580299	0.000376235	0.0138116	0.00112597	0.00220267	0.00141699	6.70883e-07	1.29557e-23	3.15491e-09	1.88574e-07	7.96063e-08	2.90218e-09	0	3.1093e-05	9.22618e-10	7.38897e-06	0.000580289	-0.137571	-0.0349632	0.0785567	-0.0410473	-0.0419494	0.00183224	-0.1	-0.397193	0
2235	1.81783	0	0.0860781	1.73176	2.276	2.25663	2.11511	1.61938	0.275982	0.219748	0.141523	0.0193678	0.00864011	0.00252207	0.000231205	0.00247278	0.00496187	0.0015472	0.0484772	0.0304563	0.0363824	2.99393e-05	2.77877e-15	0.00580209	0.000367324	0.0136593	0.00111137	0.00219454	0.00141607	6.42871e-07	1.05902e-23	2.90029e-09	1.75922e-07	7.52413e-08	2.72065e-09	0	3.05671e-05	8.75648e-10	7.43191e-06	0.000580289	-0.137571	-0.0349632	0.0785567	-0.0410473	-0.0419494	0.00183224	-0.1	-0.397193	0
2236	1.78781	0	0.0592681	1.72854	2.27276	2.25357	2.11204	1.61631	0.276022	0.219707	0.141535	0.0191849	0.00864709	0.00252276	0.000231883	0.00246355	0.00496242	0.00154731	0.0484811	0.0304585	0.0363896	2.98869e-05	2.43289e-15	0.0058012	0.00035864	0.013509	0.001097	0.00218646	0.00141515	6.16075e-07	8.65718e-24	2.66632e-09	1.64579e-07	7.11172e-08	2.55057e-09	0	3.0051e-05	8.31103e-10	7.48537e-06	0.000580289	-0.137571	-0.0349632	0.0785567	-0.0410473	-0.0419494	0.00183224	-0.1	-0.397193	0
2237	1.76847	0	0.0431769	1.72529	2.26948	2.25048	2.10893	1.61319	0.276074	0.219666	0.141549	0.0190043	0.00865408	0.00252345	0.00023256	0.00245437	0.00496313	0.00154744	0.0484853	0.0304611	0.0363969	2.98363e-05	2.13015e-15	0.0058003	0.000350173	0.0133604	0.00108282	0.00217842	0.00141423	5.90426e-07	7.07736e-24	2.45128e-09	1.54408e-07	6.72203e-08	2.39118e-09	0	2.95442e-05	7.88846e-10	7.52855e-06	0.000580289	-0.137571	-0.0349632	0.0785567	-0.0410473	-0.0419494	0.00183224	-0.1	-0.397193	0
2238	1.75421	0	0.0322656	1.72194	2.26611	2.24728	2.10572	1.60996	0.276131	0.219626	0.141562	0.0188258	0.00866107	0.00252413	0.000233238	0.00244522	0.00496391	0.00154758	0.0484898	0.030464	0.0364042	2.97874e-05	1.86513e-15	0.00579941	0.000341908	0.0132137	0.00106884	0.00217041	0.00141331	5.65868e-07	5.78605e-24	2.25362e-09	1.45286e-07	6.35377e-08	2.2418e-09	0	2.90465e-05	7.48753e-10	7.56151e-06	0.000580289	-0.137571	-0.0349632	0.0785567	-0.0410473	-0.0419494	0.00183224	-0.1	-0.397193	0
2239	1.74415	0	0.025655	1.71849	2.26263	2.24398	2.1024	1.60663	0.276193	0.219585	0.141577	0.0186496	0.00866805	0.00252482	0.000233915	0.00243611	0.00496471	0.00154773	0.0484944	0.0304671	0.0364115	2.974e-05	1.63312e-15	0.00579851	0.00033384	0.0130687	0.00105506	0.00216244	0.00141239	5.4235e-07	4.7305e-24	2.07193e-09	1.37105e-07	6.00574e-08	2.10179e-09	0	2.85575e-05	7.10711e-10	7.58914e-06	0.000580289	-0.137571	-0.0349632	0.0785567	-0.0410473	-0.0419494	0.00183224	-0.1	-0.397193	0
2240	1.78748	0	0.0725288	1.71495	2.25906	2.24058	2.09899	1.60319	0.276255	0.219546	0.141591	0.0184755	0.00867504	0.00252551	0.000234592	0.00242703	0.00496551	0.00154789	0.0484991	0.0304703	0.0364187	2.96941e-05	1.43e-15	0.00579762	0.000325967	0.0129254	0.00104146	0.00215451	0.00141147	5.19824e-07	3.86763e-24	1.90492e-09	1.29767e-07	5.67683e-08	1.97055e-09	0	2.80771e-05	6.74613e-10	7.61269e-06	0.000580289	-0.137571	-0.0349632	0.0785567	-0.0410473	-0.0419494	0.00183224	-0.1	-0.397193	0
2241	1.85745	0	0.146252	1.7112	2.25529	2.23698	2.09538	1.59958	0.276297	0.219506	0.141603	0.018303	0.00868202	0.0025262	0.000235268	0.00241799	0.00496592	0.00154801	0.0485032	0.0304728	0.0364257	2.96494e-05	1.25211e-15	0.00579672	0.000318272	0.0127834	0.00102802	0.00214659	0.00141056	4.98211e-07	3.16203e-24	1.75133e-09	1.23181e-07	5.36585e-08	1.84746e-09	0	2.76042e-05	6.40332e-10	7.58975e-06	0.000580289	-0.137571	-0.0349632	0.0785567	-0.0410473	-0.0419494	0.00183224	-0.1	-0.397193	0
2242	1.88845	0	0.181191	1.70726	2.25134	2.23321	2.0916	1.59583	0.276306	0.219467	0.141613	0.0181322	0.00868901	0.00252689	0.000235945	0.00240897	0.00496578	0.00154808	0.0485063	0.030474	0.0364321	2.96055e-05	1.09627e-15	0.00579583	0.000310735	0.0126428	0.00101472	0.00213869	0.00140964	4.77451e-07	2.58492e-24	1.61006e-09	1.17265e-07	5.07177e-08	1.73198e-09	0	2.71383e-05	6.07761e-10	7.52766e-06	0.000580289	-0.137571	-0.0349632	0.0785567	-0.0410473	-0.0419494	0.00183224	-0.1	-0.397193	0
2243	1.89395	0	0.190562	1.70338	2.24747	2.22951	2.08789	1.59216	0.2763	0.219429	0.14162	0.0179631	0.008696	0.00252758	0.000236621	0.00239998	0.00496544	0.00154812	0.0485089	0.0304745	0.0364382	2.95626e-05	9.59794e-16	0.00579494	0.000303367	0.0125035	0.00100158	0.00213081	0.00140872	4.57533e-07	2.11304e-24	1.48015e-09	1.11956e-07	4.79373e-08	1.62368e-09	0	2.66797e-05	5.76833e-10	7.48584e-06	0.000580289	-0.137571	-0.0349632	0.0785567	-0.0410473	-0.0419494	0.00183224	-0.1	-0.397193	0
2244	1.87386	0	0.174151	1.69971	2.2438	2.22601	2.08438	1.5887	0.276292	0.219391	0.141627	0.0177959	0.00870298	0.00252826	0.000237297	0.00239103	0.00496512	0.00154815	0.0485114	0.030475	0.0364442	2.9521e-05	8.40302e-16	0.00579405	0.000296172	0.0123657	0.000988613	0.00212295	0.0014078	4.38443e-07	1.72728e-24	1.36071e-09	1.07191e-07	4.53093e-08	1.52214e-09	0	2.62288e-05	5.47476e-10	7.471e-06	0.000580289	-0.137571	-0.0349632	0.0785567	-0.0410473	-0.0419494	0.00183224	-0.1	-0.397193	0
2245	1.82646	0	0.130187	1.69627	2.24036	2.22273	2.0811	1.58545	0.276292	0.219353	0.141635	0.0176307	0.00870997	0.00252895	0.000237973	0.00238212	0.00496498	0.00154819	0.048514	0.0304757	0.0364502	2.94807e-05	7.35699e-16	0.00579315	0.000289151	0.0122296	0.000975818	0.00211513	0.00140689	4.20159e-07	1.41198e-24	1.25093e-09	1.02919e-07	4.28256e-08	1.42697e-09	0	2.57857e-05	5.19619e-10	7.48302e-06	0.000580289	-0.137571	-0.0349632	0.0785567	-0.0410473	-0.0419494	0.00183224	-0.1	-0.397193	0
2246	1.77913	0	0.0860781	1.69305	2.23714	2.21967	2.07803	1.5824	0.276313	0.219315	0.141644	0.0174676	0.00871695	0.00252964	0.000238649	0.00237323	0.0049652	0.00154826	0.048517	0.0304771	0.0364563	2.94419e-05	6.44148e-16	0.00579226	0.000282306	0.0120951	0.000963208	0.00210735	0.00140597	4.02666e-07	1.15431e-24	1.15004e-09	9.90902e-08	4.04789e-08	1.33779e-09	0	2.53509e-05	4.93198e-10	7.52589e-06	0.000580289	-0.137571	-0.0349632	0.0785567	-0.0410473	-0.0419494	0.00183224	-0.1	-0.397193	0
2247	1.74921	0	0.0592681	1.68995	2.23401	2.2167	2.07505	1.57942	0.276353	0.219278	0.141655	0.0173068	0.00872394	0.00253033	0.000239324	0.00236439	0.00496575	0.00154837	0.0485207	0.0304792	0.0364626	2.94045e-05	5.64019e-16	0.00579137	0.000275634	0.0119623	0.000950783	0.00209961	0.00140506	3.85929e-07	9.43724e-25	1.05732e-09	9.56591e-08	3.82616e-08	1.25424e-09	0	2.49241e-05	4.6814e-10	7.57929e-06	0.000580289	-0.137571	-0.0349632	0.0785567	-0.0410473	-0.0419494	0.00183224	-0.1	-0.397193	0
2248	1.72998	0	0.0431769	1.6868	2.23085	2.2137	2.07203	1.57638	0.276404	0.219241	0.141668	0.0171479	0.00873092	0.00253102	0.000239999	0.00235558	0.00496646	0.0015485	0.0485247	0.0304818	0.0364689	2.93685e-05	4.93877e-16	0.00579048	0.000269127	0.0118312	0.000938533	0.00209191	0.00140415	3.69907e-07	7.71597e-25	9.72104e-10	9.25835e-08	3.61664e-08	1.17593e-09	0	2.4505e-05	4.44366e-10	7.62242e-06	0.000580289	-0.137571	-0.0349632	0.0785567	-0.0410473	-0.0419494	0.00183224	-0.1	-0.397193	0
2249	1.71583	0	0.0322656	1.68356	2.22758	2.21059	2.06891	1.57324	0.276461	0.219204	0.141681	0.0169909	0.00873791	0.0025317	0.000240675	0.00234681	0.00496723	0.00154864	0.0485289	0.0304847	0.0364753	2.93337e-05	4.3247e-16	0.00578959	0.000262778	0.0117016	0.000926452	0.00208425	0.00140324	3.54565e-07	6.30889e-25	8.93769e-10	8.98261e-08	3.41863e-08	1.10254e-09	0	2.40933e-05	4.21809e-10	7.65531e-06	0.000580289	-0.137571	-0.0349632	0.0785567	-0.0410473	-0.0419494	0.00183224	-0.1	-0.397193	0
2250	1.70587	0	0.025655	1.68022	2.2242	2.20737	2.06567	1.56999	0.276521	0.219168	0.141694	0.0168358	0.00874489	0.00253239	0.000241349	0.00233807	0.00496802	0.00154879	0.0485333	0.0304878	0.0364817	2.93e-05	3.78708e-16	0.00578869	0.000256582	0.0115736	0.000914535	0.00207662	0.00140233	3.3987e-07	5.15857e-25	8.21759e-10	8.73537e-08	3.2315e-08	1.03374e-09	0	2.36889e-05	4.00404e-10	7.68287e-06	0.000580289	-0.137571	-0.0349632	0.0785567	-0.0410473	-0.0419494	0.00183224	-0.1	-0.397193	0
2251	1.74931	0	0.0725288	1.67678	2.22074	2.20405	2.06235	1.56663	0.276584	0.219132	0.141708	0.0166825	0.00875188	0.00253308	0.000242024	0.00232936	0.00496882	0.00154894	0.0485377	0.0304909	0.036488	2.92675e-05	3.31636e-16	0.0057878	0.000250534	0.011447	0.000902781	0.00206902	0.00140143	3.25794e-07	4.2181e-25	7.55561e-10	8.51368e-08	3.05464e-08	9.69247e-10	0	2.32915e-05	3.80092e-10	7.70633e-06	0.000580289	-0.137571	-0.0349632	0.0785567	-0.0410473	-0.0419494	0.00183224	-0.1	-0.397193	0
2252	1.81939	0	0.146252	1.67313	2.21707	2.20054	2.05882	1.5631	0.276625	0.219097	0.14172	0.0165307	0.00875886	0.00253377	0.000242698	0.00232069	0.00496923	0.00154906	0.0485416	0.0304934	0.0364941	2.92357e-05	2.90406e-16	0.00578691	0.000244621	0.0113217	0.000891164	0.00206144	0.00140052	3.12286e-07	3.44897e-25	6.94682e-10	8.31455e-08	2.88741e-08	9.08759e-10	0	2.29003e-05	3.60801e-10	7.68323e-06	0.000580289	-0.137571	-0.0349632	0.0785567	-0.0410473	-0.0419494	0.00183224	-0.1	-0.397193	0
2253	1.85049	0	0.181191	1.6693	2.21323	2.19685	2.05512	1.55943	0.276633	0.219061	0.141728	0.0163803	0.00876585	0.00253446	0.000243373	0.00231204	0.00496908	0.00154913	0.0485445	0.0304945	0.0364997	2.92044e-05	2.54284e-16	0.00578602	0.000238832	0.0111975	0.000879671	0.00205388	0.00139961	2.99309e-07	2.81981e-25	6.3868e-10	8.13544e-08	2.72926e-08	8.52005e-10	0	2.25149e-05	3.42471e-10	7.62089e-06	0.000580289	-0.137571	-0.0349632	0.0785567	-0.0410473	-0.0419494	0.00183224	-0.1	-0.397193	0
2254	1.85609	0	0.190562	1.66553	2.20946	2.19323	2.0515	1.55585	0.276627	0.219027	0.141735	0.0162314	0.00877283	0.00253514	0.000244046	0.00230342	0.00496874	0.00154916	0.0485469	0.0304951	0.036505	2.91738e-05	2.22647e-16	0.00578513	0.000233172	0.0110745	0.000868313	0.00204633	0.0013987	2.86858e-07	2.30532e-25	5.8718e-10	7.97454e-08	2.57974e-08	7.98776e-10	0	2.21355e-05	3.25064e-10	7.57885e-06	0.000580289	-0.137571	-0.0349632	0.0785567	-0.0410473	-0.0419494	0.00183224	-0.1	-0.397193	0
2255	1.83611	0	0.174151	1.66196	2.2059	2.18982	2.04808	1.55247	0.276618	0.218992	0.141741	0.0160841	0.00877981	0.00253583	0.00024472	0.00229483	0.00496841	0.00154919	0.0485492	0.0304955	0.0365102	2.9144e-05	1.94945e-16	0.00578424	0.000227642	0.0109528	0.0008571	0.0020388	0.00139779	2.74922e-07	1.88468e-25	5.3983e-10	7.83015e-08	2.4384e-08	7.48869e-10	0	2.17624e-05	3.0854e-10	7.56383e-06	0.000580289	-0.137571	-0.0349632	0.0785567	-0.0410473	-0.0419494	0.00183224	-0.1	-0.397193	0
2256	1.78881	0	0.130187	1.65862	2.20256	2.18663	2.04488	1.5493	0.276618	0.218958	0.141748	0.0159386	0.0087868	0.00253652	0.000245394	0.00228628	0.00496827	0.00154923	0.0485516	0.0304961	0.0365153	2.91152e-05	1.70693e-16	0.00578335	0.00022225	0.0108325	0.000846038	0.00203132	0.00139688	2.6349e-07	1.54083e-25	4.96304e-10	7.36283e-08	2.30482e-08	7.02089e-10	0	2.13959e-05	2.9286e-10	7.57572e-06	0.000580289	-0.137571	-0.0349632	0.0785567	-0.0410473	-0.0419494	0.00183224	-0.1	-0.397193	0
2257	1.74159	0	0.0860781	1.65551	2.19944	2.18364	2.04189	1.54633	0.276638	0.218924	0.141757	0.015795	0.00879378	0.0025372	0.000246067	0.00227776	0.00496849	0.0015493	0.0485545	0.0304975	0.0365206	2.90876e-05	1.49465e-16	0.00578246	0.000216992	0.0107137	0.000835136	0.00202386	0.00139598	2.5255e-07	1.25979e-25	4.56301e-10	6.60594e-08	2.17861e-08	6.58254e-10	0	2.1036e-05	2.77987e-10	7.61852e-06	0.000580289	-0.137571	-0.0349632	0.0785567	-0.0410473	-0.0419494	0.00183224	-0.1	-0.397193	0
2258	1.71177	0	0.0592681	1.6525	2.19641	2.18076	2.03899	1.54342	0.276677	0.21889	0.141767	0.0156532	0.00880076	0.00253789	0.00024674	0.00226928	0.00496903	0.00154941	0.0485579	0.0304996	0.0365261	2.90611e-05	1.30884e-16	0.00578158	0.000211865	0.0105965	0.000824394	0.00201645	0.00139508	2.42082e-07	1.03008e-25	4.19537e-10	5.92711e-08	2.05935e-08	6.17177e-10	0	2.06829e-05	2.6388e-10	7.67189e-06	0.000580289	-0.137571	-0.0349632	0.0785567	-0.0410473	-0.0419494	0.00183224	-0.1	-0.397193	0
2259	1.69263	0	0.0431769	1.64946	2.19334	2.17783	2.03605	1.54047	0.276728	0.218857	0.141779	0.0155132	0.00880775	0.00253858	0.000247413	0.00226083	0.00496973	0.00154954	0.0485617	0.0305022	0.0365317	2.90356e-05	1.14617e-16	0.00578069	0.000206862	0.0104807	0.000813802	0.00200908	0.00139417	2.3206e-07	8.42301e-26	3.85743e-10	5.3182e-08	1.94665e-08	5.78679e-10	0	2.03361e-05	2.50496e-10	7.71498e-06	0.000580289	-0.137571	-0.0349632	0.0785567	-0.0410473	-0.0419494	0.00183224	-0.1	-0.397193	0
2260	1.67858	0	0.0322656	1.64631	2.19017	2.1748	2.03301	1.5374	0.276784	0.218823	0.141792	0.0153749	0.00881473	0.00253927	0.000248086	0.00225241	0.00497049	0.00154967	0.0485657	0.030505	0.0365373	2.9011e-05	1.00375e-16	0.0057798	0.00020198	0.0103662	0.000803356	0.00200174	0.00139327	2.22461e-07	6.88779e-26	3.54678e-10	4.77195e-08	1.84014e-08	5.42593e-10	0	1.99954e-05	2.37795e-10	7.7478e-06	0.000580289	-0.137571	-0.0349632	0.0785567	-0.0410473	-0.0419494	0.00183224	-0.1	-0.397193	0
2261	1.66872	0	0.025655	1.64306	2.1869	2.17166	2.02985	1.53422	0.276844	0.218791	0.141804	0.0152382	0.00882172	0.00253995	0.000248758	0.00224403	0.00497129	0.00154982	0.0485699	0.0305081	0.036543	2.89872e-05	8.79041e-17	0.00577891	0.000197219	0.0102531	0.000793052	0.00199443	0.00139237	2.13267e-07	5.63256e-26	3.2612e-10	4.2819e-08	1.73948e-08	5.08766e-10	0	1.96607e-05	2.25743e-10	7.7753e-06	0.000580289	-0.137571	-0.0349632	0.0785567	-0.0410473	-0.0419494	0.00183224	-0.1	-0.397193	0
2262	1.71225	0	0.0725288	1.63972	2.18352	2.16842	2.0266	1.53094	0.276906	0.218758	0.141818	0.015103	0.0088287	0.00254064	0.000249431	0.00223568	0.00497207	0.00154997	0.0485742	0.0305112	0.0365486	2.89643e-05	7.69846e-17	0.00577802	0.000192571	0.0101413	0.000782888	0.00198716	0.00139148	2.04459e-07	4.60621e-26	2.99866e-10	3.84224e-08	1.64433e-08	4.77054e-10	0	1.93318e-05	2.14305e-10	7.79869e-06	0.000580289	-0.137571	-0.0349632	0.0785567	-0.0410473	-0.0419494	0.00183224	-0.1	-0.397193	0
2263	1.78242	0	0.146252	1.63617	2.17995	2.16498	2.02315	1.52748	0.276947	0.218726	0.141829	0.0149692	0.00883568	0.00254133	0.000250103	0.00222736	0.00497248	0.00155009	0.048578	0.0305136	0.036554	2.89419e-05	6.74195e-17	0.00577714	0.000188024	0.0100306	0.000772842	0.0019799	0.00139058	1.96005e-07	3.76674e-26	2.75719e-10	3.44763e-08	1.55437e-08	4.47309e-10	0	1.90081e-05	2.03441e-10	7.77543e-06	0.000580289	-0.137571	-0.0349632	0.0785567	-0.0410473	-0.0419494	0.00183224	-0.1	-0.397193	0
2264	1.81362	0	0.181191	1.63243	2.17621	2.16137	2.01953	1.52388	0.276955	0.218694	0.141836	0.0148365	0.00884267	0.00254201	0.000250775	0.00221906	0.00497233	0.00155016	0.0485807	0.0305147	0.0365589	2.89197e-05	5.90387e-17	0.00577625	0.000183577	0.0099208	0.000762903	0.00197265	0.00138968	1.87883e-07	3.07997e-26	2.53506e-10	3.09338e-08	1.46929e-08	4.19398e-10	0	1.8689e-05	1.93118e-10	7.71287e-06	0.000580289	-0.137571	-0.0349632	0.0785567	-0.0410473	-0.0419494	0.00183224	-0.1	-0.397193	0
2265	1.81931	0	0.190562	1.62875	2.17253	2.15783	2.01599	1.52038	0.276948	0.218663	0.141843	0.0147052	0.00884965	0.0025427	0.000251446	0.0022108	0.00497198	0.00155019	0.0485829	0.0305152	0.0365635	2.88979e-05	5.16979e-17	0.00577536	0.000179232	0.00981212	0.00075308	0.00196542	0.00138878	1.80088e-07	2.5183e-26	2.33077e-10	2.77545e-08	1.38885e-08	3.9322e-10	0	1.8375e-05	1.83314e-10	7.67062e-06	0.000580289	-0.137571	-0.0349632	0.0785567	-0.0410473	-0.0419494	0.00183224	-0.1	-0.397193	0
2266	1.79943	0	0.174151	1.62528	2.16907	2.15449	2.01264	1.51707	0.276939	0.218631	0.141849	0.0145753	0.00885663	0.00254339	0.000252118	0.00220256	0.00497165	0.00155022	0.048585	0.0305156	0.036568	2.88767e-05	4.52695e-17	0.00577447	0.000174986	0.00970461	0.000743382	0.00195822	0.00138788	1.72616e-07	2.05904e-26	2.14293e-10	2.49017e-08	1.3128e-08	3.68674e-10	0	1.80662e-05	1.74007e-10	7.65543e-06	0.000580289	-0.137571	-0.0349632	0.0785567	-0.0410473	-0.0419494	0.00183224	-0.1	-0.397193	0
2267	1.75222	0	0.130187	1.62203	2.16582	2.15138	2.00952	1.51398	0.276938	0.2186	0.141855	0.0144469	0.00886361	0.00254407	0.000252789	0.00219436	0.0049715	0.00155026	0.0485873	0.0305162	0.0365725	2.88562e-05	3.96411e-17	0.00577359	0.00017084	0.00959834	0.000733815	0.00195104	0.00138698	1.65457e-07	1.68357e-26	1.97026e-10	2.23426e-08	1.24093e-08	3.45664e-10	0	1.77627e-05	1.65174e-10	7.66721e-06	0.000580289	-0.137571	-0.0349632	0.0785567	-0.0410473	-0.0419494	0.00183224	-0.1	-0.397193	0
2268	1.70509	0	0.0860781	1.61901	2.16279	2.14847	2.00661	1.51108	0.276958	0.218569	0.141863	0.0143202	0.0088706	0.00254476	0.00025346	0.00218619	0.00497172	0.00155033	0.04859	0.0305176	0.0365772	2.88366e-05	3.47142e-17	0.0057727	0.000166801	0.00949341	0.000724385	0.00194391	0.00138608	1.58606e-07	1.37665e-26	1.81155e-10	2.00472e-08	1.17302e-08	3.24101e-10	0	1.74648e-05	1.56796e-10	7.70995e-06	0.000580289	-0.137571	-0.0349632	0.0785567	-0.0410473	-0.0419494	0.00183224	-0.1	-0.397193	0
2269	1.67536	0	0.0592681	1.61609	2.15985	2.14566	2.00379	1.50825	0.276997	0.218539	0.141874	0.0141952	0.00887758	0.00254545	0.000254131	0.00217805	0.00497226	0.00155043	0.0485933	0.0305197	0.036582	2.88179e-05	3.04012e-17	0.00577182	0.000162861	0.00938979	0.000715093	0.00193681	0.00138519	1.5205e-07	1.12576e-26	1.66568e-10	1.79884e-08	1.10885e-08	3.03894e-10	0	1.71724e-05	1.48848e-10	7.76329e-06	0.000580289	-0.137571	-0.0349632	0.0785567	-0.0410473	-0.0419494	0.00183224	-0.1	-0.397193	0
2270	1.65632	0	0.0431769	1.61314	2.15688	2.14281	2.00092	1.50536	0.277047	0.218509	0.141885	0.0140716	0.00888456	0.00254613	0.000254801	0.00216995	0.00497295	0.00155056	0.048597	0.0305222	0.036587	2.88e-05	2.66251e-17	0.00577093	0.000159015	0.00928744	0.000705931	0.00192974	0.0013843	1.45773e-07	9.20645e-27	1.5316e-10	1.61415e-08	1.0482e-08	2.84955e-10	0	1.68853e-05	1.41308e-10	7.80635e-06	0.000580289	-0.137571	-0.0349632	0.0785567	-0.0410473	-0.0419494	0.00183224	-0.1	-0.397193	0
2271	1.64235	0	0.0322656	1.61008	2.15379	2.13984	1.99795	1.50237	0.277103	0.218479	0.141897	0.0139495	0.00889154	0.00254682	0.000255472	0.00216188	0.00497371	0.00155069	0.0486009	0.0305251	0.036592	2.87828e-05	2.33186e-17	0.00577005	0.000155266	0.00918629	0.000696895	0.00192271	0.00138341	1.3976e-07	7.52928e-27	1.40833e-10	1.44846e-08	9.90887e-09	2.67201e-10	0	1.66032e-05	1.34152e-10	7.83913e-06	0.000580289	-0.137571	-0.0349632	0.0785567	-0.0410473	-0.0419494	0.00183224	-0.1	-0.397193	0
2272	1.63258	0	0.025655	1.60692	2.1506	2.13677	1.99486	1.49925	0.277163	0.218449	0.141909	0.0138288	0.00889852	0.00254751	0.000256142	0.00215384	0.0049745	0.00155084	0.0486049	0.030528	0.0365971	2.87662e-05	2.04233e-17	0.00576916	0.000151609	0.00908633	0.000687982	0.00191571	0.00138252	1.34e-07	6.15785e-27	1.295e-10	1.2998e-08	9.36715e-09	2.50557e-10	0	1.6326e-05	1.2736e-10	7.86658e-06	0.000580289	-0.137571	-0.0349632	0.0785567	-0.0410473	-0.0419494	0.00183224	-0.1	-0.397193	0
2273	1.67619	0	0.0725288	1.60366	2.14732	2.13361	1.99168	1.49604	0.277224	0.21842	0.141922	0.0137095	0.00890551	0.00254819	0.000256812	0.00214583	0.00497528	0.00155099	0.0486091	0.0305312	0.0366021	2.87503e-05	1.78878e-17	0.00576828	0.000148043	0.00898752	0.000679188	0.00190874	0.00138163	1.2848e-07	5.03636e-27	1.19081e-10	1.16642e-08	8.85512e-09	2.34953e-10	0	1.60537e-05	1.20915e-10	7.88991e-06	0.000580289	-0.137571	-0.0349632	0.0785567	-0.0410473	-0.0419494	0.00183224	-0.1	-0.397193	0
2274	1.74645	0	0.146252	1.60019	2.14383	2.13024	1.9883	1.49265	0.277265	0.218391	0.141933	0.0135913	0.00891249	0.00254888	0.000257482	0.00213784	0.00497569	0.00155111	0.0486127	0.0305335	0.0366069	2.87346e-05	1.56666e-17	0.00576739	0.000144553	0.00888967	0.000670498	0.00190179	0.00138074	1.23183e-07	4.11896e-27	1.09498e-10	1.0467e-08	8.37096e-09	2.20317e-10	0	1.57856e-05	1.14792e-10	7.86651e-06	0.000580289	-0.137571	-0.0349632	0.0785567	-0.0410473	-0.0419494	0.00183224	-0.1	-0.397193	0
2275	1.77773	0	0.181191	1.59654	2.14017	2.1267	1.98476	1.48912	0.277272	0.218362	0.14194	0.0134741	0.00891947	0.00254956	0.000258151	0.00212989	0.00497554	0.00155117	0.0486153	0.0305346	0.0366112	2.87189e-05	1.37203e-17	0.00576651	0.000141134	0.00879267	0.000661898	0.00189485	0.00137985	1.18092e-07	3.36836e-27	1.00682e-10	9.39213e-09	7.91305e-09	2.06582e-10	0	1.55214e-05	1.08974e-10	7.80372e-06	0.000580289	-0.137571	-0.0349632	0.0785567	-0.0410473	-0.0419494	0.00183224	-0.1	-0.397193	0
2276	1.78351	0	0.190562	1.59295	2.13659	2.12323	1.98128	1.48568	0.277264	0.218333	0.141946	0.0133581	0.00892645	0.00255025	0.000258821	0.00212196	0.00497518	0.0015512	0.0486174	0.0305351	0.0366153	2.87034e-05	1.20154e-17	0.00576562	0.000137793	0.00869661	0.0006534	0.00188792	0.00137895	1.13206e-07	2.75441e-27	9.25733e-11	8.42741e-09	7.48007e-09	1.93698e-10	0	1.52613e-05	1.03449e-10	7.76128e-06	0.000580289	-0.137571	-0.0349632	0.0785567	-0.0410473	-0.0419494	0.00183224	-0.1	-0.397193	0
2277	1.76372	0	0.174151	1.58956	2.1332	2.11996	1.97801	1.48245	0.277255	0.218305	0.141952	0.0132434	0.00893343	0.00255094	0.00025949	0.00211406	0.00497484	0.00155123	0.0486194	0.0305355	0.0366193	2.86884e-05	1.05222e-17	0.00576474	0.000134533	0.00860159	0.000645009	0.00188102	0.00137806	1.08522e-07	2.25234e-27	8.51175e-11	7.56173e-09	7.07076e-09	1.81617e-10	0	1.50055e-05	9.82025e-11	7.74593e-06	0.000580289	-0.137571	-0.0349632	0.0785567	-0.0410473	-0.0419494	0.00183224	-0.1	-0.397193	0
2278	1.71659	0	0.130187	1.58641	2.13005	2.11692	1.97496	1.47943	0.277254	0.218277	0.141958	0.01313	0.00894041	0.00255162	0.000260159	0.00210619	0.00497469	0.00155127	0.0486215	0.0305361	0.0366232	2.86739e-05	9.21477e-18	0.00576386	0.000131353	0.00850766	0.00063673	0.00187415	0.00137717	1.04033e-07	1.84182e-27	7.8263e-11	6.78507e-09	6.68391e-09	1.70292e-10	0	1.47541e-05	9.32237e-11	7.75759e-06	0.000580289	-0.137571	-0.0349632	0.0785567	-0.0410473	-0.0419494	0.00183224	-0.1	-0.397193	0
2279	1.66955	0	0.0860781	1.58347	2.1271	2.11408	1.97212	1.47659	0.277273	0.218249	0.141966	0.013018	0.00894739	0.00255231	0.000260827	0.00209835	0.0049749	0.00155134	0.0486242	0.0305374	0.0366274	2.86602e-05	8.07016e-18	0.00576297	0.000128249	0.0084149	0.000628571	0.00186732	0.00137629	9.97374e-08	1.50623e-27	7.19627e-11	6.08842e-09	6.31834e-09	1.59678e-10	0	1.45074e-05	8.85005e-11	7.80029e-06	0.000580289	-0.137571	-0.0349632	0.0785567	-0.0410473	-0.0419494	0.00183224	-0.1	-0.397193	0
2280	1.6399	0	0.0592681	1.58063	2.12425	2.11134	1.96936	1.47383	0.277312	0.218222	0.141976	0.0129075	0.00895438	0.00255299	0.000261496	0.00209055	0.00497544	0.00155144	0.0486274	0.0305395	0.0366317	2.86471e-05	7.0681e-18	0.00576209	0.00012522	0.00832332	0.00062053	0.00186052	0.0013754	9.56259e-08	1.23186e-27	6.61717e-11	5.46353e-09	5.9729e-09	1.49732e-10	0	1.42652e-05	8.40199e-11	7.85361e-06	0.000580289	-0.137571	-0.0349632	0.0785567	-0.0410473	-0.0419494	0.00183224	-0.1	-0.397193	0
2281	1.62094	0	0.0431769	1.57776	2.12135	2.10855	1.96657	1.47101	0.277362	0.218194	0.141987	0.0127983	0.00896136	0.00255368	0.000262164	0.00208277	0.00497613	0.00155156	0.0486309	0.030542	0.0366362	2.86347e-05	6.1907e-18	0.00576121	0.000122267	0.00823284	0.000612602	0.00185375	0.00137452	9.16887e-08	1.00753e-27	6.08482e-11	4.90293e-09	5.64644e-09	1.40408e-10	0	1.40273e-05	7.97684e-11	7.89665e-06	0.000580289	-0.137571	-0.0349632	0.0785567	-0.0410473	-0.0419494	0.00183224	-0.1	-0.397193	0
2282	1.60705	0	0.0322656	1.57478	2.11835	2.10566	1.96366	1.46807	0.277417	0.218167	0.141998	0.0126903	0.00896834	0.00255436	0.000262832	0.00207503	0.00497689	0.0015517	0.0486347	0.0305448	0.0366407	2.86228e-05	5.42236e-18	0.00576033	0.000119388	0.00814342	0.000604782	0.00184701	0.00137363	8.79169e-08	8.24075e-28	5.5954e-11	4.39995e-09	5.33788e-09	1.31668e-10	0	1.37936e-05	7.57335e-11	7.9294e-06	0.000580289	-0.137571	-0.0349632	0.0785567	-0.0410473	-0.0419494	0.00183224	-0.1	-0.397193	0
2283	1.59736	0	0.025655	1.5717	2.11524	2.10265	1.96064	1.46503	0.277476	0.21814	0.14201	0.0125837	0.00897532	0.00255505	0.0002635	0.00206732	0.00497767	0.00155184	0.0486387	0.0305477	0.0366453	2.86114e-05	4.7495e-18	0.00575944	0.00011658	0.00805505	0.000597068	0.00184031	0.00137275	8.43031e-08	6.74048e-28	5.14542e-11	3.94865e-09	5.04624e-09	1.23473e-10	0	1.3564e-05	7.19041e-11	7.9568e-06	0.000580289	-0.137571	-0.0349632	0.0785567	-0.0410473	-0.0419494	0.00183224	-0.1	-0.397193	0
2284	1.64105	0	0.0725288	1.56852	2.11203	2.09955	1.95753	1.46188	0.277537	0.218114	0.142023	0.0124782	0.0089823	0.00255573	0.000264168	0.00205964	0.00497845	0.00155199	0.0486427	0.0305508	0.0366498	2.86005e-05	4.16022e-18	0.00575856	0.000113842	0.00796769	0.000589457	0.00183363	0.00137187	8.08402e-08	5.51349e-28	4.73168e-11	3.54369e-09	4.77057e-09	1.15791e-10	0	1.33383e-05	6.82693e-11	7.98008e-06	0.000580289	-0.137571	-0.0349632	0.0785567	-0.0410473	-0.0419494	0.00183224	-0.1	-0.397193	0
2285	1.71138	0	0.146252	1.56513	2.10862	2.09625	1.95421	1.45855	0.277577	0.218088	0.142033	0.0123737	0.00898928	0.00255642	0.000264835	0.00205198	0.00497885	0.00155211	0.0486462	0.0305532	0.0366541	2.85896e-05	3.64394e-18	0.00575768	0.00011116	0.00788119	0.000581935	0.00182697	0.00137099	7.75159e-08	4.50969e-28	4.35113e-11	3.18019e-09	4.5099e-09	1.08583e-10	0	1.31162e-05	6.48167e-11	7.95654e-06	0.000580289	-0.137571	-0.0349632	0.0785567	-0.0410473	-0.0419494	0.00183224	-0.1	-0.397193	0
2286	1.74275	0	0.181191	1.56156	2.10504	2.09277	1.95073	1.45508	0.277584	0.218061	0.14204	0.01227	0.00899626	0.00255711	0.000265503	0.00204435	0.0049787	0.00155217	0.0486488	0.0305543	0.036658	2.85787e-05	3.19151e-18	0.0057568	0.000108532	0.00779542	0.000574492	0.00182032	0.00137011	7.43211e-08	3.68829e-28	4.00101e-11	2.85381e-09	4.26334e-09	1.0182e-10	0	1.28972e-05	6.15354e-11	7.89355e-06	0.000580289	-0.137571	-0.0349632	0.0785567	-0.0410473	-0.0419494	0.00183224	-0.1	-0.397193	0
2287	1.74861	0	0.190562	1.55805	2.10154	2.08937	1.94732	1.45171	0.277577	0.218036	0.142046	0.0121674	0.00900324	0.00255779	0.00026617	0.00203674	0.00497834	0.0015522	0.0486508	0.0305547	0.0366616	2.85678e-05	2.79515e-18	0.00575592	0.000105964	0.0077105	0.000567136	0.00181369	0.00136923	7.12545e-08	3.01636e-28	3.67898e-11	2.56085e-09	4.03021e-09	9.54755e-11	0	1.26817e-05	5.84188e-11	7.85092e-06	0.000580289	-0.137571	-0.0349632	0.0785567	-0.0410473	-0.0419494	0.00183224	-0.1	-0.397193	0
2288	1.72889	0	0.174151	1.55474	2.09823	2.08617	1.94412	1.44854	0.277567	0.21801	0.142051	0.0120659	0.00901022	0.00255848	0.000266837	0.00202916	0.004978	0.00155223	0.0486527	0.030555	0.0366651	2.85572e-05	2.448e-18	0.00575504	0.000103457	0.00762648	0.000559873	0.00180707	0.00136834	6.83138e-08	2.46682e-28	3.38286e-11	2.29795e-09	3.80981e-09	8.95259e-11	0	1.24697e-05	5.54597e-11	7.83541e-06	0.000580289	-0.137571	-0.0349632	0.0785567	-0.0410473	-0.0419494	0.00183224	-0.1	-0.397193	0
2289	1.68185	0	0.130187	1.55166	2.09516	2.08319	1.94113	1.44558	0.277566	0.217985	0.142057	0.0119656	0.0090172	0.00255916	0.000267503	0.00202162	0.00497784	0.00155226	0.0486547	0.0305556	0.0366687	2.85471e-05	2.144e-18	0.00575416	0.000101011	0.00754342	0.000552706	0.00180049	0.00136746	6.54961e-08	2.01744e-28	3.1106e-11	2.06208e-09	3.6015e-09	8.3948e-11	0	1.22614e-05	5.26512e-11	7.84698e-06	0.000580289	-0.137571	-0.0349632	0.0785567	-0.0410473	-0.0419494	0.00183224	-0.1	-0.397193	0
2290	1.63488	0	0.0860781	1.5488	2.09229	2.08042	1.93835	1.44281	0.277584	0.21796	0.142065	0.0118665	0.00902418	0.00255985	0.00026817	0.0020141	0.00497805	0.00155233	0.0486572	0.0305569	0.0366724	2.85375e-05	1.87784e-18	0.00575328	9.86287e-05	0.0074614	0.000545643	0.00179394	0.00136658	6.27987e-08	1.65002e-28	2.86034e-11	1.85048e-09	3.40464e-09	7.87203e-11	0	1.20569e-05	4.99867e-11	7.88963e-06	0.000580289	-0.137571	-0.0349632	0.0785567	-0.0410473	-0.0419494	0.00183224	-0.1	-0.397193	0
2291	1.60531	0	0.0592681	1.54604	2.08951	2.07774	1.93567	1.44011	0.277622	0.217935	0.142075	0.0117687	0.00903116	0.00256053	0.000268836	0.00200661	0.00497858	0.00155243	0.0486604	0.030559	0.0366763	2.85286e-05	1.64481e-18	0.0057524	9.63073e-05	0.00738042	0.000538682	0.00178743	0.00136571	6.02169e-08	1.34962e-28	2.6303e-11	1.66067e-09	3.21861e-09	7.38209e-11	0	1.18562e-05	4.74589e-11	7.94295e-06	0.000580289	-0.137571	-0.0349632	0.0785567	-0.0410473	-0.0419494	0.00183224	-0.1	-0.397193	0
2292	1.58642	0	0.0431769	1.54325	2.08669	2.07502	1.93293	1.43735	0.277672	0.21791	0.142086	0.011672	0.00903814	0.00256122	0.000269502	0.00199915	0.00497927	0.00155256	0.0486638	0.0305615	0.0366804	2.85201e-05	1.44075e-18	0.00575152	9.40391e-05	0.0073004	0.000531818	0.00178094	0.00136483	5.77442e-08	1.10396e-28	2.41882e-11	1.49037e-09	3.0428e-09	6.92281e-11	0	1.1659e-05	4.50602e-11	7.98597e-06	0.000580289	-0.137571	-0.0349632	0.0785567	-0.0410473	-0.0419494	0.00183224	-0.1	-0.397193	0
2293	1.57261	0	0.0322656	1.54034	2.08376	2.07218	1.93009	1.43447	0.277727	0.217885	0.142097	0.0115765	0.00904512	0.0025619	0.000270168	0.00199173	0.00498002	0.00155269	0.0486675	0.0305642	0.0366845	2.8512e-05	1.26204e-18	0.00575064	9.1822e-05	0.00722133	0.000525048	0.00177449	0.00136396	5.53752e-08	9.03049e-29	2.22439e-11	1.33757e-09	2.87662e-09	6.49223e-11	0	1.14653e-05	4.27836e-11	8.01869e-06	0.000580289	-0.137571	-0.0349632	0.0785567	-0.0410473	-0.0419494	0.00183224	-0.1	-0.397193	0
2294	1.56299	0	0.025655	1.53733	2.08072	2.06924	1.92713	1.43148	0.277786	0.217861	0.142109	0.011482	0.0090521	0.00256258	0.000270833	0.00198433	0.0049808	0.00155283	0.0486714	0.0305672	0.0366886	2.85044e-05	1.10553e-18	0.00574976	8.96596e-05	0.00714318	0.000518369	0.00176807	0.00136309	5.31051e-08	7.38726e-29	2.04561e-11	1.20045e-09	2.71955e-09	6.08853e-11	0	1.12749e-05	4.06227e-11	8.04606e-06	0.000580289	-0.137571	-0.0349632	0.0785567	-0.0410473	-0.0419494	0.00183224	-0.1	-0.397193	0
2295	1.60675	0	0.0725288	1.53422	2.07758	2.0662	1.92407	1.42839	0.277847	0.217837	0.142121	0.0113886	0.00905908	0.00256327	0.000271499	0.00197696	0.00498158	0.00155298	0.0486754	0.0305703	0.0366928	2.8497e-05	9.68444e-19	0.00574888	8.75503e-05	0.00706592	0.00051178	0.00176167	0.00136221	5.09296e-08	6.04321e-29	1.88122e-11	1.07742e-09	2.57107e-09	5.71002e-11	0	1.10879e-05	3.85716e-11	8.06929e-06	0.000580289	-0.137571	-0.0349632	0.0785567	-0.0410473	-0.0419494	0.00183224	-0.1	-0.397193	0
2296	1.67716	0	0.146252	1.53091	2.07425	2.06295	1.92082	1.42512	0.277886	0.217813	0.142131	0.0112961	0.00906605	0.00256395	0.000272164	0.00196961	0.00498198	0.0015531	0.0486788	0.0305726	0.0366967	2.84897e-05	8.48331e-19	0.005748	8.5489e-05	0.00698942	0.000505267	0.00175529	0.00136134	4.88409e-08	4.9435e-29	1.73001e-11	9.66961e-10	2.43067e-09	5.35491e-11	0	1.09037e-05	3.66231e-11	8.04563e-06	0.000580289	-0.137571	-0.0349632	0.0785567	-0.0410473	-0.0419494	0.00183224	-0.1	-0.397193	0
2297	1.70859	0	0.181191	1.5274	2.07074	2.05954	1.9174	1.42172	0.277893	0.21779	0.142139	0.0112043	0.00907303	0.00256464	0.000272829	0.00196229	0.00498182	0.00155316	0.0486813	0.0305736	0.0367002	2.84822e-05	7.43064e-19	0.00574712	8.34723e-05	0.00691356	0.000498822	0.00174892	0.00136047	4.68333e-08	4.04354e-29	1.59089e-11	8.67782e-10	2.29787e-09	5.02165e-11	0	1.07222e-05	3.47713e-11	7.98244e-06	0.000580289	-0.137571	-0.0349632	0.0785567	-0.0410473	-0.0419494	0.00183224	-0.1	-0.397193	0
2298	1.71453	0	0.190562	1.52397	2.06731	2.0562	1.91405	1.4184	0.277885	0.217766	0.142144	0.0111134	0.00908001	0.00256532	0.000273494	0.001955	0.00498146	0.00155319	0.0486832	0.0305741	0.0367035	2.84746e-05	6.50836e-19	0.00574625	8.15017e-05	0.00683845	0.000492452	0.00174256	0.00135959	4.4906e-08	3.30725e-29	1.46292e-11	7.78753e-10	2.17229e-09	4.70901e-11	0	1.05435e-05	3.30122e-11	7.93962e-06	0.000580289	-0.137571	-0.0349632	0.0785567	-0.0410473	-0.0419494	0.00183224	-0.1	-0.397193	0
2299	1.69489	0	0.174151	1.52073	2.06408	2.05306	1.91091	1.41529	0.277875	0.217743	0.142149	0.0110234	0.00908699	0.00256601	0.000274158	0.00194773	0.00498111	0.00155321	0.048685	0.0305744	0.0367066	2.84673e-05	5.70051e-19	0.00574537	7.95779e-05	0.00676413	0.000486162	0.00173622	0.00135872	4.30576e-08	2.70501e-29	1.34524e-11	6.98853e-10	2.05357e-09	4.41582e-11	0	1.03677e-05	3.1342e-11	7.92397e-06	0.000580289	-0.137571	-0.0349632	0.0785567	-0.0410473	-0.0419494	0.00183224	-0.1	-0.397193	0
2300	1.64792	0	0.130187	1.51773	2.06108	2.05014	1.90799	1.41239	0.277873	0.21772	0.142155	0.0109346	0.00909397	0.00256669	0.000274822	0.00194049	0.00498095	0.00155325	0.048687	0.0305749	0.0367098	2.84602e-05	4.99302e-19	0.00574449	7.77013e-05	0.00669067	0.000479956	0.00172991	0.00135785	4.12863e-08	2.21248e-29	1.23704e-11	6.2716e-10	1.94135e-09	4.14093e-11	0	1.0195e-05	2.97566e-11	7.93544e-06	0.000580289	-0.137571	-0.0349632	0.0785567	-0.0410473	-0.0419494	0.00183224	-0.1	-0.397193	0
2301	1.60102	0	0.0860781	1.51494	2.05828	2.04743	1.90527	1.40968	0.277891	0.217697	0.142162	0.0108468	0.00910095	0.00256738	0.000275487	0.00193327	0.00498116	0.00155331	0.0486895	0.0305762	0.0367132	2.84537e-05	4.37354e-19	0.00574361	7.58727e-05	0.00661812	0.000473839	0.00172364	0.00135698	3.95906e-08	1.80975e-29	1.13757e-11	5.62843e-10	1.8353e-09	3.88328e-11	0	1.00254e-05	2.82525e-11	7.97807e-06	0.000580289	-0.137571	-0.0349632	0.0785567	-0.0410473	-0.0419494	0.00183224	-0.1	-0.397193	0
2302	1.57152	0	0.0592681	1.51225	2.05557	2.04481	1.90264	1.40704	0.277929	0.217675	0.142172	0.0107601	0.00910792	0.00256806	0.000276151	0.00192609	0.00498169	0.00155342	0.0486925	0.0305782	0.0367167	2.84477e-05	3.83112e-19	0.00574274	7.40857e-05	0.00654647	0.00046781	0.0017174	0.00135611	3.79672e-08	1.48042e-29	1.04614e-11	5.05144e-10	1.73508e-09	3.6418e-11	0	9.85894e-06	2.68254e-11	8.03138e-06	0.000580289	-0.137571	-0.0349632	0.0785567	-0.0410473	-0.0419494	0.00183224	-0.1	-0.397193	0
2303	1.5527	0	0.0431769	1.50952	2.05282	2.04215	1.89996	1.40433	0.277978	0.217653	0.142183	0.0106744	0.0091149	0.00256874	0.000276814	0.00191894	0.00498237	0.00155354	0.0486959	0.0305807	0.0367205	2.84421e-05	3.3561e-19	0.00574186	7.23384e-05	0.0064757	0.000461865	0.00171119	0.00135524	3.64123e-08	1.21109e-29	9.62079e-12	4.53373e-10	1.64036e-09	3.41541e-11	0	9.69543e-06	2.54711e-11	8.07439e-06	0.000580289	-0.137571	-0.0349632	0.0785567	-0.0410473	-0.0419494	0.00183224	-0.1	-0.397193	0
2304	1.53895	0	0.0322656	1.50669	2.04996	2.03937	1.89718	1.40151	0.278033	0.21763	0.142194	0.0105897	0.00912188	0.00256943	0.000277478	0.00191181	0.00498312	0.00155367	0.0486996	0.0305835	0.0367242	2.84368e-05	2.94006e-19	0.00574099	7.06343e-05	0.00640575	0.000456001	0.001705	0.00135438	3.49224e-08	9.90788e-30	8.84788e-12	4.06918e-10	1.55083e-09	3.20316e-11	0	9.53478e-06	2.41857e-11	8.1071e-06	0.000580289	-0.137571	-0.0349632	0.0785567	-0.0410473	-0.0419494	0.00183224	-0.1	-0.397193	0
2305	1.5294	0	0.025655	1.50375	2.04699	2.03648	1.89428	1.39858	0.278092	0.217609	0.142206	0.010506	0.00912886	0.00257011	0.000278141	0.00190472	0.0049839	0.00155381	0.0487034	0.0305864	0.0367281	2.84318e-05	2.57565e-19	0.00574011	6.89721e-05	0.00633661	0.000450217	0.00169885	0.00135351	3.34946e-08	8.10588e-30	8.13718e-12	3.65229e-10	1.4662e-09	3.00416e-11	0	9.37691e-06	2.29656e-11	8.13444e-06	0.000580289	-0.137571	-0.0349632	0.0785567	-0.0410473	-0.0419494	0.00183224	-0.1	-0.397193	0
2306	1.57323	0	0.0725288	1.5007	2.04392	2.0335	1.89128	1.39554	0.278152	0.217587	0.142218	0.0104232	0.00913584	0.0025708	0.000278804	0.00189765	0.00498467	0.00155396	0.0487073	0.0305894	0.0367319	2.84271e-05	2.25646e-19	0.00573923	6.73507e-05	0.00626826	0.000444509	0.00169272	0.00135265	3.21261e-08	6.6318e-30	7.48367e-12	3.27817e-10	1.3862e-09	2.81755e-11	0	9.22176e-06	2.18073e-11	8.15763e-06	0.000580289	-0.137571	-0.0349632	0.0785567	-0.0410473	-0.0419494	0.00183224	-0.1	-0.397193	0
2307	1.6437	0	0.146252	1.49745	2.04065	2.03031	1.88808	1.39232	0.278191	0.217565	0.142228	0.0103411	0.00914281	0.00257148	0.000279467	0.0018906	0.00498507	0.00155407	0.0487107	0.0305917	0.0367355	2.84223e-05	1.97676e-19	0.00573836	6.57661e-05	0.00620057	0.000438867	0.0016866	0.00135179	3.0812e-08	5.42558e-30	6.8825e-12	2.9423e-10	1.31055e-09	2.64247e-11	0	9.069e-06	2.07069e-11	8.13385e-06	0.000580289	-0.137571	-0.0349632	0.0785567	-0.0410473	-0.0419494	0.00183224	-0.1	-0.397193	0
2308	1.67521	0	0.181191	1.49402	2.03721	2.02695	1.88472	1.38898	0.278198	0.217544	0.142235	0.0102597	0.00914979	0.00257216	0.00028013	0.00188358	0.00498491	0.00155413	0.0487131	0.0305928	0.0367387	2.84172e-05	1.73161e-19	0.00573748	6.42156e-05	0.00613346	0.000433284	0.00168049	0.00135092	2.95488e-08	4.43833e-30	6.32935e-12	2.64069e-10	1.23899e-09	2.47816e-11	0	8.91843e-06	1.96611e-11	8.07046e-06	0.000580289	-0.137571	-0.0349632	0.0785567	-0.0410473	-0.0419494	0.00183224	-0.1	-0.397193	0
2309	1.68121	0	0.190562	1.49065	2.03385	2.02367	1.88143	1.38572	0.278189	0.217523	0.14224	0.010179	0.00915677	0.00257285	0.000280792	0.00187658	0.00498454	0.00155416	0.0487149	0.0305932	0.0367417	2.84121e-05	1.51681e-19	0.00573661	6.27005e-05	0.006067	0.000427766	0.0016744	0.00135006	2.83361e-08	3.63056e-30	5.82052e-12	2.36993e-10	1.17132e-09	2.32401e-11	0	8.77018e-06	1.86676e-11	8.02747e-06	0.000580289	-0.137571	-0.0349632	0.0785567	-0.0410473	-0.0419494	0.00183224	-0.1	-0.397193	0
2310	1.66164	0	0.174151	1.48748	2.03069	2.02059	1.87834	1.38266	0.278179	0.217502	0.142246	0.0100993	0.00916375	0.00257353	0.000281455	0.00186961	0.00498419	0.00155418	0.0487167	0.0305935	0.0367445	2.8407e-05	1.32864e-19	0.00573573	6.12212e-05	0.00600124	0.000422317	0.00166833	0.00134919	2.71728e-08	2.96976e-30	5.35258e-12	2.12692e-10	1.10734e-09	2.17943e-11	0	8.62437e-06	1.77242e-11	8.01168e-06	0.000580289	-0.137571	-0.0349632	0.0785567	-0.0410473	-0.0419494	0.00183224	-0.1	-0.397193	0
2311	1.61473	0	0.130187	1.48455	2.02775	2.01773	1.87548	1.37982	0.278177	0.217481	0.142251	0.0100204	0.00917072	0.00257421	0.000282117	0.00186266	0.00498403	0.00155422	0.0487186	0.030594	0.0367474	2.84023e-05	1.16384e-19	0.00573486	5.97782e-05	0.00593624	0.00041694	0.00166229	0.00134833	2.60579e-08	2.42929e-30	4.92231e-12	1.90885e-10	1.04687e-09	2.04387e-11	0	8.48107e-06	1.68287e-11	8.02306e-06	0.000580289	-0.137571	-0.0349632	0.0785567	-0.0410473	-0.0419494	0.00183224	-0.1	-0.397193	0
2312	1.5679	0	0.0860781	1.48182	2.02502	2.01508	1.87282	1.37716	0.278195	0.217461	0.142259	0.00994251	0.0091777	0.0025749	0.000282779	0.00185574	0.00498423	0.00155428	0.048721	0.0305953	0.0367505	2.83979e-05	1.01953e-19	0.00573399	5.8372e-05	0.00587204	0.00041164	0.00165627	0.00134746	2.49904e-08	1.9873e-30	4.52676e-12	1.71321e-10	9.89712e-10	1.91681e-11	0	8.34037e-06	1.59789e-11	8.06566e-06	0.000580289	-0.137571	-0.0349632	0.0785567	-0.0410473	-0.0419494	0.00183224	-0.1	-0.397193	0
2313	1.53847	0	0.0592681	1.4792	2.02238	2.01252	1.87025	1.37457	0.278232	0.21744	0.142268	0.00986559	0.00918468	0.00257558	0.00028344	0.00184885	0.00498476	0.00155438	0.048724	0.0305973	0.0367538	2.8394e-05	8.93155e-20	0.00573311	5.70017e-05	0.00580864	0.000406417	0.00165029	0.0013466	2.39684e-08	1.62585e-30	4.16314e-12	1.53768e-10	9.357e-10	1.79771e-11	0	8.20224e-06	1.51727e-11	8.11898e-06	0.000580289	-0.137571	-0.0349632	0.0785567	-0.0410473	-0.0419494	0.00183224	-0.1	-0.397193	0
2314	1.51971	0	0.0431769	1.47654	2.01969	2.0099	1.86762	1.37192	0.278281	0.21742	0.142279	0.00978957	0.00919165	0.00257626	0.000284102	0.00184199	0.00498544	0.0015545	0.0487273	0.0305997	0.0367572	2.83904e-05	7.82476e-20	0.00573224	5.56657e-05	0.00574601	0.000401266	0.00164434	0.00134575	2.29894e-08	1.3302e-30	3.82881e-12	1.38018e-10	8.8465e-10	1.68605e-11	0	8.06657e-06	1.44076e-11	8.16199e-06	0.000580289	-0.137571	-0.0349632	0.0785567	-0.0410473	-0.0419494	0.00183224	-0.1	-0.397193	0
2315	1.50603	0	0.0322656	1.47377	2.01689	2.00718	1.86489	1.36916	0.278335	0.2174	0.14229	0.00971439	0.00919863	0.00257695	0.000284763	0.00183516	0.00498619	0.00155464	0.0487309	0.0306025	0.0367607	2.83871e-05	6.85531e-20	0.00573137	5.43627e-05	0.00568411	0.000396185	0.00163841	0.00134489	2.20512e-08	1.08835e-30	3.52139e-12	1.23884e-10	8.36394e-10	1.58136e-11	0	7.93326e-06	1.36813e-11	8.19468e-06	0.000580289	-0.137571	-0.0349632	0.0785567	-0.0410473	-0.0419494	0.00183224	-0.1	-0.397193	0
2316	1.49654	0	0.025655	1.47088	2.01399	2.00435	1.86204	1.36627	0.278394	0.21738	0.142302	0.00964006	0.00920561	0.00257763	0.000285424	0.00182835	0.00498696	0.00155478	0.0487347	0.0306054	0.0367643	2.83841e-05	6.00611e-20	0.00573049	5.30918e-05	0.00562292	0.000391173	0.00163251	0.00134403	2.1152e-08	8.90502e-31	3.23871e-12	1.112e-10	7.90779e-10	1.4832e-11	0	7.80226e-06	1.29919e-11	8.22199e-06	0.000580289	-0.137571	-0.0349632	0.0785567	-0.0410473	-0.0419494	0.00183224	-0.1	-0.397193	0
2317	1.54043	0	0.0725288	1.46791	2.01098	2.00141	1.8591	1.36328	0.278454	0.21736	0.142314	0.00956655	0.00921258	0.00257831	0.000286085	0.00182156	0.00498773	0.00155492	0.0487386	0.0306084	0.0367679	2.83813e-05	5.26222e-20	0.00572962	5.18466e-05	0.00556243	0.000386227	0.00162663	0.00134318	2.02901e-08	7.2864e-31	2.97875e-12	9.98157e-11	7.47657e-10	1.39114e-11	0	7.67351e-06	1.23374e-11	8.24516e-06	0.000580289	-0.137571	-0.0349632	0.0785567	-0.0410473	-0.0419494	0.00183224	-0.1	-0.397193	0
2318	1.61097	0	0.146252	1.46472	2.00777	1.99828	1.85595	1.36012	0.278493	0.217341	0.142324	0.00949366	0.00921956	0.002579	0.000286745	0.00181481	0.00498812	0.00155504	0.0487419	0.0306107	0.0367712	2.83783e-05	4.61032e-20	0.00572875	5.06244e-05	0.00550253	0.000381338	0.00162077	0.00134232	1.94623e-08	5.96175e-31	2.73961e-12	8.95947e-11	7.06878e-10	1.30477e-11	0	7.54673e-06	1.17156e-11	8.22126e-06	0.000580289	-0.137571	-0.0349632	0.0785567	-0.0410473	-0.0419494	0.00183224	-0.1	-0.397193	0
2319	1.64253	0	0.181191	1.46134	2.0044	1.99497	1.85264	1.35682	0.278499	0.217322	0.142331	0.00942133	0.00922654	0.00257968	0.000287406	0.00180807	0.00498796	0.00155509	0.0487442	0.0306117	0.0367742	2.8375e-05	4.03889e-20	0.00572788	4.94284e-05	0.00544313	0.0003765	0.00161492	0.00134147	1.86665e-08	4.87747e-31	2.51955e-12	8.04158e-11	6.68303e-10	1.22371e-11	0	7.42177e-06	1.11245e-11	8.15769e-06	0.000580289	-0.137571	-0.0349632	0.0785567	-0.0410473	-0.0419494	0.00183224	-0.1	-0.397193	0
2320	1.6486	0	0.190562	1.45804	2.0011	1.99175	1.84941	1.35362	0.27849	0.217303	0.142336	0.00934969	0.00923351	0.00258036	0.000288066	0.00180135	0.00498759	0.00155512	0.0487461	0.0306121	0.0367768	2.83716e-05	3.53817e-20	0.005727	4.82596e-05	0.00538431	0.000371717	0.00160908	0.00134061	1.79024e-08	3.9902e-31	2.31712e-12	7.21753e-11	6.31824e-10	1.14765e-11	0	7.29873e-06	1.0563e-11	8.11453e-06	0.000580289	-0.137571	-0.0349632	0.0785567	-0.0410473	-0.0419494	0.00183224	-0.1	-0.397193	0
2321	1.62909	0	0.174151	1.45494	1.998	1.98872	1.84638	1.35062	0.278479	0.217284	0.142341	0.00927881	0.00924049	0.00258105	0.000288726	0.00179466	0.00498724	0.00155515	0.0487477	0.0306123	0.0367794	2.83682e-05	3.0995e-20	0.00572613	4.71185e-05	0.0053261	0.000366995	0.00160326	0.00133975	1.71694e-08	3.2643e-31	2.13094e-12	6.47787e-11	5.97334e-10	1.07631e-11	0	7.1777e-06	1.00298e-11	8.0986e-06	0.000580289	-0.137571	-0.0349632	0.0785567	-0.0410473	-0.0419494	0.00183224	-0.1	-0.397193	0
2322	1.58225	0	0.130187	1.45206	1.99513	1.98592	1.84357	1.34783	0.278477	0.217265	0.142347	0.00920874	0.00924746	0.00258173	0.000289386	0.001788	0.00498708	0.00155518	0.0487496	0.0306129	0.0367821	2.83651e-05	2.71526e-20	0.00572526	4.60052e-05	0.00526856	0.000362335	0.00159747	0.0013389	1.64668e-08	2.67051e-31	1.95975e-12	5.8141e-11	5.64731e-10	1.00943e-11	0	7.05875e-06	9.52361e-12	8.1099e-06	0.000580289	-0.137571	-0.0349632	0.0785567	-0.0410473	-0.0419494	0.00183224	-0.1	-0.397193	0
2323	1.53548	0	0.0860781	1.4494	1.99246	1.98332	1.84096	1.34522	0.278495	0.217246	0.142355	0.00913955	0.00925444	0.00258241	0.000290045	0.00178136	0.00498727	0.00155524	0.048752	0.0306141	0.0367849	2.83623e-05	2.37876e-20	0.00572439	4.49202e-05	0.00521174	0.000357741	0.00159171	0.00133804	1.5794e-08	2.18487e-31	1.80236e-12	5.21854e-11	5.33918e-10	9.46724e-12	0	6.94196e-06	9.04329e-12	8.15248e-06	0.000580289	-0.137571	-0.0349632	0.0785567	-0.0410473	-0.0419494	0.00183224	-0.1	-0.397193	0
2324	1.50611	0	0.0592681	1.44684	1.98988	1.98081	1.83844	1.34268	0.278532	0.217228	0.142364	0.0090712	0.00926141	0.00258309	0.000290705	0.00177475	0.0049878	0.00155534	0.0487549	0.0306161	0.036788	2.83599e-05	2.08408e-20	0.00572352	4.38628e-05	0.00515562	0.000353214	0.00158597	0.00133719	1.51497e-08	1.78767e-31	1.65766e-12	4.68418e-11	5.04797e-10	8.87949e-12	0	6.82729e-06	8.58753e-12	8.2058e-06	0.000580289	-0.137571	-0.0349632	0.0785567	-0.0410473	-0.0419494	0.00183224	-0.1	-0.397193	0
2325	1.48741	0	0.0431769	1.44423	1.98725	1.97825	1.83587	1.34008	0.27858	0.217209	0.142375	0.00900363	0.00926839	0.00258378	0.000291364	0.00176817	0.00498848	0.00155546	0.0487582	0.0306185	0.0367912	2.83578e-05	1.82597e-20	0.00572265	4.28319e-05	0.00510017	0.000348749	0.00158027	0.00133634	1.45326e-08	1.46275e-31	1.52462e-12	4.20467e-11	4.77273e-10	8.32844e-12	0	6.71466e-06	8.15496e-12	8.24881e-06	0.000580289	-0.137571	-0.0349632	0.0785567	-0.0410473	-0.0419494	0.00183224	-0.1	-0.397193	0
2326	1.47379	0	0.0322656	1.44152	1.98451	1.97557	1.83319	1.33736	0.278635	0.217191	0.142386	0.00893681	0.00927536	0.00258446	0.000292023	0.00176161	0.00498922	0.00155559	0.0487617	0.0306212	0.0367945	2.8356e-05	1.59987e-20	0.00572178	4.18264e-05	0.00504538	0.000344345	0.00157459	0.00133549	1.3941e-08	1.19693e-31	1.40228e-12	3.77433e-11	4.51254e-10	7.81174e-12	0	6.60399e-06	7.74434e-12	8.2815e-06	0.000580289	-0.137571	-0.0349632	0.0785567	-0.0410473	-0.0419494	0.00183224	-0.1	-0.397193	0
2327	1.46435	0	0.025655	1.4387	1.98166	1.97279	1.83039	1.33453	0.278693	0.217173	0.142398	0.00887073	0.00928234	0.00258514	0.000292682	0.00175508	0.00498999	0.00155573	0.0487655	0.0306241	0.0367978	2.83543e-05	1.4018e-20	0.00572091	4.08455e-05	0.00499121	0.00034	0.00156893	0.00133464	1.3374e-08	9.79447e-32	1.28977e-12	3.3881e-11	4.26658e-10	7.32721e-12	0	6.49523e-06	7.35453e-12	8.30879e-06	0.000580289	-0.137571	-0.0349632	0.0785567	-0.0410473	-0.0419494	0.00183224	-0.1	-0.397193	0
2328	1.50831	0	0.0725288	1.43578	1.97871	1.9699	1.82749	1.33159	0.278752	0.217156	0.14241	0.00880538	0.00928931	0.00258582	0.00029334	0.00174858	0.00499076	0.00155588	0.0487693	0.0306271	0.0368012	2.83529e-05	1.22828e-20	0.00572004	3.98884e-05	0.00493766	0.000335712	0.0015633	0.0013338	1.28305e-08	8.01503e-32	1.18631e-12	3.04144e-11	4.03406e-10	6.87284e-12	0	6.38832e-06	6.98444e-12	8.33193e-06	0.000580289	-0.137571	-0.0349632	0.0785567	-0.0410473	-0.0419494	0.00183224	-0.1	-0.397193	0
2329	1.5789	0	0.146252	1.43264	1.97556	1.96682	1.8244	1.32847	0.278791	0.217138	0.14242	0.00874057	0.00929629	0.00258651	0.000293999	0.00174209	0.00499115	0.00155599	0.0487726	0.0306294	0.0368044	2.83512e-05	1.0762e-20	0.00571917	3.8953e-05	0.00488462	0.000331474	0.00155768	0.00133295	1.23084e-08	6.55862e-32	1.09112e-12	2.73018e-11	3.81415e-10	6.44649e-12	0	6.28306e-06	6.63281e-12	8.30793e-06	0.000580289	-0.137571	-0.0349632	0.0785567	-0.0410473	-0.0419494	0.00183224	-0.1	-0.397193	0
2330	1.61052	0	0.181191	1.42933	1.97224	1.96357	1.82114	1.32522	0.278797	0.217121	0.142427	0.00867625	0.00930326	0.00258719	0.000294657	0.00173563	0.00499098	0.00155605	0.0487749	0.0306304	0.0368071	2.83492e-05	9.42885e-21	0.0057183	3.80377e-05	0.00483203	0.000327279	0.00155207	0.0013321	1.18064e-08	5.36636e-32	1.00353e-12	2.45064e-11	3.60613e-10	6.04629e-12	0	6.17929e-06	6.29855e-12	8.24417e-06	0.000580289	-0.137571	-0.0349632	0.0785567	-0.0410473	-0.0419494	0.00183224	-0.1	-0.397193	0
2331	1.61665	0	0.190562	1.42609	1.969	1.96039	1.81796	1.32207	0.278788	0.217103	0.142432	0.00861253	0.00931024	0.00258787	0.000295315	0.00172919	0.00499061	0.00155607	0.0487767	0.0306308	0.0368096	2.8347e-05	8.26057e-21	0.00571743	3.7143e-05	0.00477995	0.000323133	0.00154648	0.00133125	1.13244e-08	4.39062e-32	9.2295e-13	2.19965e-11	3.40941e-10	5.67081e-12	0	6.07712e-06	5.98099e-12	8.20084e-06	0.000580289	-0.137571	-0.0349632	0.0785567	-0.0410473	-0.0419494	0.00183224	-0.1	-0.397193	0
2332	1.59719	0	0.174151	1.42304	1.96596	1.95741	1.81498	1.31912	0.278777	0.217086	0.142437	0.00854949	0.00931721	0.00258855	0.000295972	0.00172277	0.00499026	0.0015561	0.0487783	0.030631	0.036812	2.83448e-05	7.23698e-21	0.00571656	3.62694e-05	0.00472842	0.000319039	0.0015409	0.0013304	1.08619e-08	3.59225e-32	8.48835e-13	1.97436e-11	3.22341e-10	5.31861e-12	0	5.97662e-06	5.6794e-12	8.18479e-06	0.000580289	-0.137571	-0.0349632	0.0785567	-0.0410473	-0.0419494	0.00183224	-0.1	-0.397193	0
2333	1.55041	0	0.130187	1.42023	1.96315	1.95466	1.81222	1.31638	0.278774	0.217069	0.142443	0.00848716	0.00932419	0.00258924	0.00029663	0.00171638	0.00499009	0.00155613	0.0487801	0.0306315	0.0368144	2.83429e-05	6.34033e-21	0.00571569	3.54171e-05	0.00467747	0.000314998	0.00153534	0.00132956	1.04185e-08	2.93912e-32	7.8068e-13	1.77217e-11	3.04757e-10	4.98835e-12	0	5.87783e-06	5.39309e-12	8.19601e-06	0.000580289	-0.137571	-0.0349632	0.0785567	-0.0410473	-0.0419494	0.00183224	-0.1	-0.397193	0
2334	1.5037	0	0.0860781	1.41762	1.96054	1.95211	1.80966	1.31382	0.278792	0.217052	0.14245	0.0084256	0.00933116	0.00258992	0.000297287	0.00171001	0.00499029	0.00155619	0.0487824	0.0306328	0.0368171	2.83412e-05	5.55504e-21	0.00571483	3.45865e-05	0.00462715	0.000311015	0.00152982	0.00132871	9.99395e-09	2.40489e-32	7.18019e-13	1.59074e-11	2.88139e-10	4.67875e-12	0	5.78083e-06	5.12139e-12	8.23857e-06	0.000580289	-0.137571	-0.0349632	0.0785567	-0.0410473	-0.0419494	0.00183224	-0.1	-0.397193	0
2335	1.47439	0	0.0592681	1.41512	1.95802	1.94965	1.80719	1.31133	0.278829	0.217036	0.14246	0.00836479	0.00933813	0.0025906	0.000297944	0.00170367	0.00499081	0.00155629	0.0487854	0.0306347	0.0368199	2.83399e-05	4.86726e-21	0.00571396	3.37769e-05	0.00457746	0.000307089	0.00152432	0.00132787	9.58736e-09	1.96789e-32	6.60408e-13	1.42795e-11	2.72433e-10	4.38852e-12	0	5.68559e-06	4.86357e-12	8.29191e-06	0.000580289	-0.137571	-0.0349632	0.0785567	-0.0410473	-0.0419494	0.00183224	-0.1	-0.397193	0
2336	1.45575	0	0.0431769	1.41257	1.95544	1.94714	1.80467	1.30877	0.278877	0.217019	0.14247	0.00830467	0.00934511	0.00259128	0.000298601	0.00169735	0.00499148	0.00155641	0.0487886	0.0306371	0.0368229	2.83389e-05	4.2648e-21	0.00571309	3.29875e-05	0.00452836	0.000303218	0.00151885	0.00132702	9.19779e-09	1.61039e-32	6.07435e-13	1.28186e-11	2.57586e-10	4.1164e-12	0	5.59204e-06	4.61886e-12	8.33492e-06	0.000580289	-0.137571	-0.0349632	0.0785567	-0.0410473	-0.0419494	0.00183224	-0.1	-0.397193	0
2337	1.44218	0	0.0322656	1.40991	1.95276	1.94451	1.80203	1.3061	0.278931	0.217003	0.142482	0.00824521	0.00935208	0.00259196	0.000299258	0.00169106	0.00499222	0.00155654	0.0487921	0.0306398	0.036826	2.83381e-05	3.73701e-21	0.00571222	3.22176e-05	0.00447983	0.000299399	0.00151341	0.00132618	8.82438e-09	1.31788e-32	5.5872e-13	1.15074e-11	2.43552e-10	3.86122e-12	0	5.50012e-06	4.38655e-12	8.3676e-06	0.000580289	-0.137571	-0.0349632	0.0785567	-0.0410473	-0.0419494	0.00183224	-0.1	-0.397193	0
2338	1.4328	0	0.025655	1.40714	1.94996	1.94178	1.79928	1.30331	0.278988	0.216987	0.142493	0.00818639	0.00935906	0.00259264	0.000299915	0.00168479	0.00499299	0.00155668	0.0487958	0.0306427	0.0368292	2.83375e-05	3.27461e-21	0.00571136	3.14664e-05	0.00443186	0.000295631	0.00150799	0.00132534	8.46641e-09	1.07853e-32	5.1392e-13	1.03305e-11	2.30285e-10	3.62193e-12	0	5.40977e-06	4.16599e-12	8.39489e-06	0.000580289	-0.137571	-0.0349632	0.0785567	-0.0410473	-0.0419494	0.00183224	-0.1	-0.397193	0
2339	1.4768	0	0.0725288	1.40427	1.94707	1.93894	1.79643	1.30042	0.279048	0.21697	0.142506	0.00812822	0.00936603	0.00259333	0.000300571	0.00167855	0.00499376	0.00155682	0.0487996	0.0306457	0.0368324	2.8337e-05	2.86949e-21	0.00571049	3.07335e-05	0.00438444	0.000291913	0.00150259	0.00132451	8.12319e-09	8.8268e-33	4.72718e-13	9.27409e-12	2.17742e-10	3.39751e-12	0	5.32097e-06	3.95659e-12	8.418e-06	0.000580289	-0.137571	-0.0349632	0.0785567	-0.0410473	-0.0419494	0.00183224	-0.1	-0.397193	0
2340	1.54745	0	0.146252	1.4012	1.94397	1.9359	1.79339	1.29734	0.279086	0.216955	0.142516	0.00807052	0.009373	0.00259401	0.000301227	0.00167233	0.00499414	0.00155693	0.0488028	0.0306479	0.0368354	2.83363e-05	2.5144e-21	0.00570962	3.00171e-05	0.00433747	0.000288237	0.0014972	0.00132367	7.79351e-09	7.22365e-33	4.3481e-13	8.32553e-12	2.0588e-10	3.18692e-12	0	5.23352e-06	3.75761e-12	8.39389e-06	0.000580289	-0.137571	-0.0349632	0.0785567	-0.0410473	-0.0419494	0.00183224	-0.1	-0.397193	0
2341	1.57913	0	0.181191	1.39793	1.94071	1.9327	1.79017	1.29414	0.279092	0.216939	0.142523	0.00801323	0.00937998	0.00259469	0.000301883	0.00166613	0.00499398	0.00155699	0.0488051	0.0306489	0.0368379	2.83352e-05	2.20311e-21	0.00570876	2.93159e-05	0.00429089	0.000284599	0.00149183	0.00132283	7.47648e-09	5.91111e-33	3.99924e-13	7.47356e-12	1.94658e-10	2.98924e-12	0	5.14731e-06	3.56846e-12	8.32995e-06	0.000580289	-0.137571	-0.0349632	0.0785567	-0.0410473	-0.0419494	0.00183224	-0.1	-0.397193	0
2342	1.58531	0	0.190562	1.39475	1.93752	1.92957	1.78704	1.29103	0.279083	0.216923	0.142528	0.00795649	0.00938695	0.00259537	0.000302539	0.00165995	0.0049936	0.00155702	0.0488068	0.0306493	0.0368402	2.83339e-05	1.93028e-21	0.00570789	2.86306e-05	0.00424476	0.000281003	0.00148646	0.00132199	7.17201e-09	4.83683e-33	3.6783e-13	6.70858e-12	1.84045e-10	2.80375e-12	0	5.06242e-06	3.38874e-12	8.28647e-06	0.000580289	-0.137571	-0.0349632	0.0785567	-0.0410473	-0.0419494	0.00183224	-0.1	-0.397193	0
2343	1.56591	0	0.174151	1.39176	1.93454	1.92664	1.78411	1.28813	0.279071	0.216908	0.142533	0.00790033	0.00939392	0.00259605	0.000303194	0.00165379	0.00499324	0.00155704	0.0488084	0.0306495	0.0368425	2.83326e-05	1.69123e-21	0.00570703	2.79614e-05	0.00419912	0.000277451	0.00148111	0.00132115	6.87986e-09	3.95774e-33	3.38309e-13	6.02186e-12	1.7401e-10	2.62976e-12	0	4.97892e-06	3.21805e-12	8.27029e-06	0.000580289	-0.137571	-0.0349632	0.0785567	-0.0410473	-0.0419494	0.00183224	-0.1	-0.397193	0
2344	1.51919	0	0.130187	1.389	1.93178	1.92394	1.7814	1.28544	0.279068	0.216892	0.142539	0.00784481	0.00940089	0.00259673	0.000303849	0.00164766	0.00499308	0.00155707	0.0488102	0.03065	0.0368447	2.83315e-05	1.48181e-21	0.00570616	2.73085e-05	0.00415399	0.000273947	0.00147579	0.00132031	6.59977e-09	3.2385e-33	3.11161e-13	5.40552e-12	1.64523e-10	2.4666e-12	0	4.89683e-06	3.056e-12	8.28144e-06	0.000580289	-0.137571	-0.0349632	0.0785567	-0.0410473	-0.0419494	0.00183224	-0.1	-0.397193	0
2345	1.47253	0	0.0860781	1.38645	1.92923	1.92144	1.77889	1.28293	0.279086	0.216877	0.142546	0.00778998	0.00940787	0.00259741	0.000304504	0.00164155	0.00499327	0.00155713	0.0488125	0.0306512	0.0368472	2.83306e-05	1.29838e-21	0.0057053	2.66721e-05	0.00410942	0.000270492	0.00147049	0.00131947	6.3315e-09	2.65012e-33	2.862e-13	4.85244e-12	1.55557e-10	2.31364e-12	0	4.81623e-06	2.90221e-12	8.32398e-06	0.000580289	-0.137571	-0.0349632	0.0785567	-0.0410473	-0.0419494	0.00183224	-0.1	-0.397193	0
2346	1.44327	0	0.0592681	1.384	1.92676	1.91902	1.77647	1.28048	0.279122	0.216862	0.142556	0.00773581	0.00941484	0.0025981	0.000305159	0.00163547	0.00499379	0.00155723	0.0488154	0.0306532	0.03685	2.83302e-05	1.13771e-21	0.00570443	2.60518e-05	0.0040654	0.000267087	0.00146522	0.00131863	6.07457e-09	2.1688e-33	2.6325e-13	4.35613e-12	1.47083e-10	2.17023e-12	0	4.7371e-06	2.75627e-12	8.37734e-06	0.000580289	-0.137571	-0.0349632	0.0785567	-0.0410473	-0.0419494	0.00183224	-0.1	-0.397193	0
2347	1.42468	0	0.0431769	1.3815	1.92424	1.91655	1.77399	1.27797	0.27917	0.216847	0.142567	0.00768224	0.00942181	0.00259878	0.000305814	0.00162941	0.00499446	0.00155735	0.0488186	0.0306556	0.0368528	2.83299e-05	9.96967e-22	0.00570357	2.5447e-05	0.00402191	0.000263728	0.00145998	0.0013178	5.82837e-09	1.77498e-33	2.42146e-13	3.91071e-12	1.39072e-10	2.03577e-12	0	4.65935e-06	2.61774e-12	8.42037e-06	0.000580289	-0.137571	-0.0349632	0.0785567	-0.0410473	-0.0419494	0.00183224	-0.1	-0.397193	0
2348	1.41116	0	0.0322656	1.37889	1.9216	1.91397	1.7714	1.27534	0.279224	0.216832	0.142578	0.00762925	0.00942879	0.00259946	0.000306468	0.00162337	0.0049952	0.00155748	0.0488221	0.0306582	0.0368558	2.83298e-05	8.73656e-22	0.0057027	2.4857e-05	0.00397892	0.000260415	0.00145476	0.00131697	5.59236e-09	1.45272e-33	2.22737e-13	3.51091e-12	1.31499e-10	1.90968e-12	0	4.58296e-06	2.48622e-12	8.45304e-06	0.000580289	-0.137571	-0.0349632	0.0785567	-0.0410473	-0.0419494	0.00183224	-0.1	-0.397193	0
2349	1.40183	0	0.025655	1.37617	1.91886	1.91128	1.76869	1.27259	0.279281	0.216817	0.14259	0.00757683	0.00943576	0.00260014	0.000307123	0.00161736	0.00499597	0.00155761	0.0488257	0.0306611	0.0368588	2.83299e-05	7.65615e-22	0.00570184	2.42813e-05	0.00393643	0.000257146	0.00144956	0.00131613	5.36608e-09	1.18901e-33	2.04888e-13	3.15204e-12	1.2434e-10	1.79142e-12	0	4.50787e-06	2.36135e-12	8.48032e-06	0.000580289	-0.137571	-0.0349632	0.0785567	-0.0410473	-0.0419494	0.00183224	-0.1	-0.397193	0
2350	1.44589	0	0.0725288	1.37336	1.91601	1.90849	1.76589	1.26974	0.27934	0.216803	0.142602	0.00752497	0.00944273	0.00260082	0.000307777	0.00161137	0.00499673	0.00155776	0.0488295	0.0306641	0.0368618	2.83301e-05	6.70948e-22	0.00570097	2.37144e-05	0.00389442	0.00025392	0.00144439	0.0013153	5.1491e-09	9.732e-34	1.88471e-13	2.8299e-12	1.17572e-10	1.68051e-12	0	4.43407e-06	2.24279e-12	8.50341e-06	0.000580289	-0.137571	-0.0349632	0.0785567	-0.0410473	-0.0419494	0.00183224	-0.1	-0.397193	0
2351	1.51658	0	0.146252	1.37033	1.91297	1.90549	1.76288	1.26671	0.279379	0.216789	0.142612	0.00747352	0.0094497	0.0026015	0.000308431	0.0016054	0.00499711	0.00155787	0.0488327	0.0306663	0.0368647	2.83301e-05	5.87968e-22	0.00570011	2.3155e-05	0.0038528	0.000250731	0.00143922	0.00131447	4.94066e-09	7.96527e-34	1.73366e-13	2.54062e-12	1.1117e-10	1.57644e-12	0	4.36138e-06	2.13013e-12	8.47921e-06	0.000580289	-0.137571	-0.0349632	0.0785567	-0.0410473	-0.0419494	0.00183224	-0.1	-0.397193	0
2352	1.54831	0	0.181191	1.36712	1.90975	1.90233	1.75971	1.26356	0.279384	0.216774	0.142619	0.00742243	0.00945667	0.00260218	0.000309084	0.00159945	0.00499694	0.00155792	0.0488349	0.0306673	0.0368671	2.83297e-05	5.15215e-22	0.00569925	2.26075e-05	0.00381154	0.000247575	0.00143407	0.00131364	4.7402e-09	6.51865e-34	1.59464e-13	2.28077e-12	1.05114e-10	1.47873e-12	0	4.28973e-06	2.02302e-12	8.4151e-06	0.000580289	-0.137571	-0.0349632	0.0785567	-0.0410473	-0.0419494	0.00183224	-0.1	-0.397193	0
2353	1.55454	0	0.190562	1.36398	1.90662	1.89925	1.75663	1.26049	0.279374	0.21676	0.142624	0.00737181	0.00946365	0.00260286	0.000309738	0.00159353	0.00499656	0.00155795	0.0488366	0.0306676	0.0368692	2.8329e-05	4.51448e-22	0.00569838	2.20723e-05	0.00377067	0.000244455	0.00142892	0.00131281	4.54765e-09	5.33451e-34	1.46674e-13	2.04745e-12	9.93863e-11	1.38705e-12	0	4.21917e-06	1.92124e-12	8.37145e-06	0.000580289	-0.137571	-0.0349632	0.0785567	-0.0410473	-0.0419494	0.00183224	-0.1	-0.397193	0
2354	1.5352	0	0.174151	1.36105	1.90369	1.89637	1.75374	1.25763	0.279363	0.216746	0.14263	0.00732172	0.00947062	0.00260354	0.000310391	0.00158762	0.00499621	0.00155797	0.0488382	0.0306678	0.0368713	2.83284e-05	3.95571e-22	0.00569752	2.15496e-05	0.00373023	0.000241373	0.00142379	0.00131198	4.36288e-09	4.36543e-34	1.34909e-13	1.83798e-12	9.39704e-11	1.30104e-12	0	4.14975e-06	1.82458e-12	8.35516e-06	0.000580289	-0.137571	-0.0349632	0.0785567	-0.0410473	-0.0419494	0.00183224	-0.1	-0.397193	0
2355	1.48853	0	0.130187	1.35834	1.90099	1.89371	1.75108	1.25499	0.27936	0.216732	0.142635	0.00727219	0.00947759	0.00260422	0.000311044	0.00158173	0.00499604	0.001558	0.0488399	0.0306683	0.0368735	2.83278e-05	3.46615e-22	0.00569666	2.10397e-05	0.00369024	0.000238332	0.00141869	0.00131114	4.18571e-09	3.57247e-34	1.24089e-13	1.64997e-12	8.88504e-11	1.22039e-12	0	4.08151e-06	1.7328e-12	8.36623e-06	0.000580289	-0.137571	-0.0349632	0.0785567	-0.0410473	-0.0419494	0.00183224	-0.1	-0.397193	0
2356	1.44192	0	0.0860781	1.35584	1.89848	1.89126	1.74861	1.25252	0.279377	0.216718	0.142643	0.00722327	0.00948456	0.0026049	0.000311697	0.00157587	0.00499623	0.00155806	0.0488422	0.0306695	0.0368758	2.83276e-05	3.03732e-22	0.0056958	2.05425e-05	0.00365075	0.000235334	0.00141361	0.00131032	4.016e-09	2.92372e-34	1.14141e-13	1.48124e-12	8.40109e-11	1.14477e-12	0	4.01451e-06	1.64569e-12	8.40876e-06	0.000580289	-0.137571	-0.0349632	0.0785567	-0.0410473	-0.0419494	0.00183224	-0.1	-0.397193	0
2357	1.41271	0	0.0592681	1.35344	1.89606	1.88889	1.74623	1.25012	0.279413	0.216705	0.142653	0.00717493	0.00949153	0.00260558	0.000312349	0.00157004	0.00499674	0.00155816	0.048845	0.0306714	0.0368784	2.83277e-05	2.66168e-22	0.00569494	2.0058e-05	0.00361175	0.000232379	0.00140856	0.00130949	3.85345e-09	2.39295e-34	1.04993e-13	1.32983e-12	7.94368e-11	1.07387e-12	0	3.94871e-06	1.56303e-12	8.46214e-06	0.000580289	-0.137571	-0.0349632	0.0785567	-0.0410473	-0.0419494	0.00183224	-0.1	-0.397193	0
2358	1.39417	0	0.0431769	1.35099	1.89359	1.88646	1.7438	1.24765	0.279461	0.216691	0.142663	0.00712713	0.0094985	0.00260626	0.000313002	0.00156422	0.00499741	0.00155828	0.0488482	0.0306738	0.0368811	2.8328e-05	2.33259e-22	0.00569407	1.95855e-05	0.00357321	0.000229465	0.00140353	0.00130866	3.69767e-09	1.95863e-34	9.65808e-14	1.19392e-12	7.51129e-11	1.00739e-12	0	3.88408e-06	1.48455e-12	8.50518e-06	0.000580289	-0.137571	-0.0349632	0.0785567	-0.0410473	-0.0419494	0.00183224	-0.1	-0.397193	0
2359	1.3807	0	0.0322656	1.34843	1.89101	1.88393	1.74125	1.24506	0.279514	0.216678	0.142675	0.00707984	0.00950547	0.00260694	0.000313654	0.00155843	0.00499815	0.0015584	0.0488517	0.0306765	0.036884	2.83285e-05	2.04424e-22	0.00569321	1.91245e-05	0.00353512	0.00022659	0.00139853	0.00130784	3.54832e-09	1.6032e-34	8.8844e-14	1.07193e-12	7.10252e-11	9.45043e-13	0	3.82056e-06	1.41005e-12	8.53787e-06	0.000580289	-0.137571	-0.0349632	0.0785567	-0.0410473	-0.0419494	0.00183224	-0.1	-0.397193	0
2360	1.37141	0	0.025655	1.34576	1.88831	1.88127	1.73859	1.24235	0.279571	0.216665	0.142687	0.00703306	0.00951244	0.00260763	0.000314306	0.00155266	0.00499891	0.00155854	0.0488553	0.0306793	0.0368868	2.83291e-05	1.79157e-22	0.00569235	1.86747e-05	0.00349746	0.000223753	0.00139354	0.00130701	3.40512e-09	1.31231e-34	8.17282e-14	9.62427e-13	6.71606e-11	8.86569e-13	0	3.75812e-06	1.33931e-12	8.56513e-06	0.000580289	-0.137571	-0.0349632	0.0785567	-0.0410473	-0.0419494	0.00183224	-0.1	-0.397193	0
2361	1.41552	0	0.0725288	1.34299	1.88551	1.87852	1.73582	1.23954	0.27963	0.216651	0.142699	0.00698676	0.00951942	0.00260831	0.000314958	0.00154692	0.00499967	0.00155869	0.048859	0.0306823	0.0368898	2.83298e-05	1.57017e-22	0.00569149	1.82358e-05	0.00346023	0.000220953	0.00138858	0.00130619	3.26778e-09	1.07423e-34	7.51833e-14	8.64122e-13	6.35068e-11	8.31725e-13	0	3.69675e-06	1.27213e-12	8.58821e-06	0.000580289	-0.137571	-0.0349632	0.0785567	-0.0410473	-0.0419494	0.00183224	-0.1	-0.397193	0
2362	1.48626	0	0.146252	1.34001	1.88251	1.87557	1.73286	1.23655	0.279668	0.216638	0.142709	0.00694083	0.00952639	0.00260899	0.000315609	0.00154119	0.00500005	0.0015588	0.0488622	0.0306845	0.0368925	2.83302e-05	1.37609e-22	0.00569063	1.78067e-05	0.00342335	0.000218185	0.00138363	0.00130537	3.13583e-09	8.79304e-35	6.91611e-14	7.75837e-13	6.00509e-11	7.80255e-13	0	3.63631e-06	1.2083e-12	8.56391e-06	0.000580289	-0.137571	-0.0349632	0.0785567	-0.0410473	-0.0419494	0.00183224	-0.1	-0.397193	0
2363	1.51804	0	0.181191	1.33685	1.87935	1.87245	1.72973	1.23344	0.279673	0.216625	0.142716	0.00689521	0.00953336	0.00260967	0.000316261	0.00153548	0.00499988	0.00155885	0.0488644	0.0306855	0.0368948	2.83303e-05	1.20591e-22	0.00568977	1.73867e-05	0.00338678	0.000215446	0.00137868	0.00130454	3.00892e-09	7.19683e-35	6.36185e-14	6.96532e-13	5.67814e-11	7.31935e-13	0	3.57672e-06	1.14761e-12	8.49963e-06	0.000580289	-0.137571	-0.0349632	0.0785567	-0.0410473	-0.0419494	0.00183224	-0.1	-0.397193	0
2364	1.52432	0	0.190562	1.33376	1.87626	1.86941	1.72669	1.23041	0.279664	0.216613	0.142722	0.00685001	0.00954033	0.00261035	0.000316912	0.0015298	0.0049995	0.00155887	0.0488661	0.0306858	0.0368968	2.83301e-05	1.05674e-22	0.00568891	1.69762e-05	0.00335056	0.000212738	0.00137375	0.00130372	2.88701e-09	5.8901e-35	5.85188e-14	6.25316e-13	5.36892e-11	6.86591e-13	0	3.51804e-06	1.08994e-12	8.45584e-06	0.000580289	-0.137571	-0.0349632	0.0785567	-0.0410473	-0.0419494	0.00183224	-0.1	-0.397193	0
2365	1.50502	0	0.174151	1.33087	1.87338	1.86658	1.72385	1.2276	0.279652	0.2166	0.142727	0.00680527	0.0095473	0.00261102	0.000317563	0.00152413	0.00499914	0.00155889	0.0488676	0.030686	0.0368988	2.83299e-05	9.26013e-23	0.00568805	1.65752e-05	0.00331471	0.000210063	0.00136884	0.00130289	2.77e-09	4.82059e-35	5.38276e-14	5.61378e-13	5.07652e-11	6.44053e-13	0	3.4603e-06	1.03516e-12	8.43942e-06	0.000580289	-0.137571	-0.0349632	0.0785567	-0.0410473	-0.0419494	0.00183224	-0.1	-0.397193	0
2366	1.4584	0	0.130187	1.32821	1.87072	1.86396	1.72123	1.225	0.279649	0.216587	0.142733	0.00676104	0.00955427	0.0026117	0.000318214	0.00151848	0.00499897	0.00155892	0.0488693	0.0306865	0.0369008	2.83298e-05	8.11472e-23	0.00568719	1.6184e-05	0.00327928	0.000207423	0.00136394	0.00130207	2.6578e-09	3.94535e-35	4.9513e-14	5.03984e-13	4.80008e-11	6.04157e-13	0	3.40355e-06	9.83142e-13	8.45042e-06	0.000580289	-0.137571	-0.0349632	0.0785567	-0.0410473	-0.0419494	0.00183224	-0.1	-0.397193	0
2367	1.41184	0	0.0860781	1.32576	1.86827	1.86155	1.71881	1.22257	0.279665	0.216575	0.14274	0.00671734	0.00956124	0.00261238	0.000318864	0.00151286	0.00499916	0.00155899	0.0488716	0.0306876	0.0369031	2.833e-05	7.11132e-23	0.00568633	1.58026e-05	0.00324427	0.000204821	0.00135907	0.00130125	2.55032e-09	3.22922e-35	4.55456e-14	4.52475e-13	4.53878e-11	5.66751e-13	0	3.34782e-06	9.33775e-13	8.49295e-06	0.000580289	-0.137571	-0.0349632	0.0785567	-0.0410473	-0.0419494	0.00183224	-0.1	-0.397193	0
2368	1.38268	0	0.0592681	1.32341	1.8659	1.85922	1.71647	1.22021	0.279702	0.216563	0.14275	0.00667417	0.00956821	0.00261306	0.000319515	0.00150726	0.00499967	0.00155908	0.0488744	0.0306896	0.0369056	2.83305e-05	6.23232e-23	0.00568547	1.54308e-05	0.0032097	0.000202255	0.00135422	0.00130043	2.44735e-09	2.64326e-35	4.18974e-14	4.06248e-13	4.2918e-11	5.31679e-13	0	3.29309e-06	8.86921e-13	8.54635e-06	0.000580289	-0.137571	-0.0349632	0.0785567	-0.0410473	-0.0419494	0.00183224	-0.1	-0.397193	0
2369	1.36418	0	0.0431769	1.32101	1.86347	1.85684	1.71408	1.21778	0.279749	0.21655	0.142761	0.00663147	0.00957518	0.00261374	0.000320165	0.00150168	0.00500034	0.0015592	0.0488776	0.0306919	0.0369082	2.83312e-05	5.46217e-23	0.00568461	1.50682e-05	0.00317554	0.000199725	0.0013494	0.00129961	2.34867e-09	2.16373e-35	3.85424e-14	3.64754e-13	4.05832e-11	4.98791e-13	0	3.23932e-06	8.42441e-13	8.58942e-06	0.000580289	-0.137571	-0.0349632	0.0785567	-0.0410473	-0.0419494	0.00183224	-0.1	-0.397193	0
2370	1.35076	0	0.0322656	1.31849	1.86093	1.85434	1.71157	1.21523	0.279802	0.216538	0.142772	0.00658921	0.00958215	0.00261442	0.000320815	0.00149613	0.00500107	0.00155932	0.048881	0.0306946	0.0369109	2.8332e-05	4.78731e-23	0.00568376	1.47144e-05	0.00314177	0.000197229	0.0013446	0.00129879	2.25404e-09	1.77126e-35	3.54566e-14	3.27506e-13	3.83759e-11	4.67946e-13	0	3.18648e-06	8.00207e-13	8.6221e-06	0.000580289	-0.137571	-0.0349632	0.0785567	-0.0410473	-0.0419494	0.00183224	-0.1	-0.397193	0
2371	1.34152	0	0.025655	1.31586	1.85828	1.85173	1.70894	1.21256	0.279859	0.216526	0.142784	0.0065474	0.00958912	0.0026151	0.000321465	0.00149059	0.00500184	0.00155946	0.0488845	0.0306974	0.0369137	2.8333e-05	4.19594e-23	0.0056829	1.43692e-05	0.00310839	0.000194766	0.00133982	0.00129798	2.1633e-09	1.45003e-35	3.26184e-14	2.94067e-13	3.62889e-11	4.39015e-13	0	3.13455e-06	7.60104e-13	8.64937e-06	0.000580289	-0.137571	-0.0349632	0.0785567	-0.0410473	-0.0419494	0.00183224	-0.1	-0.397193	0
2372	1.38567	0	0.0725288	1.31314	1.85552	1.84902	1.70622	1.20979	0.279918	0.216514	0.142797	0.00650603	0.00959609	0.00261578	0.000322114	0.00148508	0.00500259	0.0015596	0.0488882	0.0307004	0.0369165	2.83341e-05	3.67769e-23	0.00568204	1.40324e-05	0.00307539	0.000192335	0.00133507	0.00129716	2.07627e-09	1.18708e-35	3.00077e-14	2.64046e-13	3.43158e-11	4.11879e-13	0	3.08349e-06	7.22022e-13	8.67244e-06	0.000580289	-0.137571	-0.0349632	0.0785567	-0.0410473	-0.0419494	0.00183224	-0.1	-0.397193	0
2373	1.45645	0	0.146252	1.3102	1.85257	1.8461	1.7033	1.20684	0.279955	0.216503	0.142807	0.00646497	0.00960305	0.00261646	0.000322764	0.00147958	0.00500297	0.00155971	0.0488914	0.0307025	0.0369191	2.83349e-05	3.22335e-23	0.00568118	1.3703e-05	0.00304269	0.000189932	0.00133032	0.00129635	1.99265e-09	9.7178e-36	2.76054e-14	2.37085e-13	3.24495e-11	3.86411e-13	0	3.0332e-06	6.8583e-13	8.64804e-06	0.000580289	-0.137571	-0.0349632	0.0785567	-0.0410473	-0.0419494	0.00183224	-0.1	-0.397193	0
2374	1.48828	0	0.181191	1.30709	1.84945	1.84303	1.70021	1.20376	0.27996	0.216491	0.142814	0.00642417	0.00961002	0.00261714	0.000323413	0.00147411	0.0050028	0.00155977	0.0488936	0.0307035	0.0369213	2.83353e-05	2.82494e-23	0.00568033	1.33807e-05	0.00301027	0.000187553	0.00132558	0.00129553	1.91221e-09	7.95453e-36	2.53943e-14	2.12864e-13	3.06838e-11	3.625e-13	0	2.98362e-06	6.51419e-13	8.5836e-06	0.000580289	-0.137571	-0.0349632	0.0785567	-0.0410473	-0.0419494	0.00183224	-0.1	-0.397193	0
2375	1.49461	0	0.190562	1.30404	1.84641	1.84003	1.69721	1.20078	0.27995	0.216479	0.14282	0.00638375	0.00961699	0.00261782	0.000324062	0.00146865	0.00500242	0.00155979	0.0488952	0.0307038	0.0369233	2.83354e-05	2.47569e-23	0.00567947	1.30655e-05	0.00297816	0.000185202	0.00132085	0.00129471	1.83492e-09	6.51089e-36	2.33598e-14	1.91112e-13	2.90137e-11	3.40061e-13	0	2.9348e-06	6.18718e-13	8.53965e-06	0.000580289	-0.137571	-0.0349632	0.0785567	-0.0410473	-0.0419494	0.00183224	-0.1	-0.397193	0
2376	1.47536	0	0.174151	1.3012	1.84358	1.83724	1.69441	1.198	0.279938	0.216468	0.142825	0.00634375	0.00962396	0.0026185	0.00032471	0.00146321	0.00500205	0.00155981	0.0488967	0.030704	0.0369251	2.83355e-05	2.16959e-23	0.00567861	1.27577e-05	0.00294638	0.000182879	0.00131613	0.0012939	1.76075e-09	5.3292e-36	2.14882e-14	1.71581e-13	2.74345e-11	3.19009e-13	0	2.88676e-06	5.87655e-13	8.52312e-06	0.000580289	-0.137571	-0.0349632	0.0785567	-0.0410473	-0.0419494	0.00183224	-0.1	-0.397193	0
2377	1.42878	0	0.130187	1.29859	1.84097	1.83466	1.69183	1.19544	0.279935	0.216457	0.142831	0.00630419	0.00963093	0.00261918	0.000325359	0.00145779	0.00500188	0.00155984	0.0488984	0.0307044	0.0369271	2.83357e-05	1.90138e-23	0.00567776	1.24573e-05	0.00291496	0.000180587	0.00131144	0.00129308	1.68961e-09	4.36206e-36	1.97668e-14	1.54049e-13	2.59414e-11	2.99264e-13	0	2.83953e-06	5.58158e-13	8.53406e-06	0.000580289	-0.137571	-0.0349632	0.0785567	-0.0410473	-0.0419494	0.00183224	-0.1	-0.397193	0
2378	1.38227	0	0.0860781	1.29619	1.83856	1.83229	1.68945	1.19306	0.279951	0.216445	0.142839	0.00626511	0.0096379	0.00261986	0.000326007	0.0014524	0.00500206	0.0015599	0.0489006	0.0307056	0.0369292	2.83362e-05	1.6664e-23	0.0056769	1.21645e-05	0.00288393	0.000178327	0.00130676	0.00129227	1.62145e-09	3.57066e-36	1.81838e-14	1.38313e-13	2.453e-11	2.80749e-13	0	2.79315e-06	5.30161e-13	8.57658e-06	0.000580289	-0.137571	-0.0349632	0.0785567	-0.0410473	-0.0419494	0.00183224	-0.1	-0.397193	0
2379	1.35315	0	0.0592681	1.29388	1.83623	1.83	1.68715	1.19073	0.279987	0.216434	0.142849	0.00622649	0.00964487	0.00262054	0.000326656	0.00144703	0.00500257	0.00155999	0.0489034	0.0307075	0.0369316	2.8337e-05	1.46053e-23	0.00567604	1.1879e-05	0.00285327	0.000176099	0.00130212	0.00129146	1.55615e-09	2.92304e-36	1.67281e-14	1.2419e-13	2.31959e-11	2.6339e-13	0	2.74761e-06	5.03588e-13	8.63001e-06	0.000580289	-0.137571	-0.0349632	0.0785567	-0.0410473	-0.0419494	0.00183224	-0.1	-0.397193	0
2380	1.33469	0	0.0431769	1.29152	1.83385	1.82766	1.6848	1.18834	0.280034	0.216423	0.14286	0.00618829	0.00965184	0.00262121	0.000327303	0.00144167	0.00500324	0.00156011	0.0489066	0.0307099	0.0369342	2.8338e-05	1.28015e-23	0.00567519	1.16006e-05	0.00282298	0.000173902	0.00129749	0.00129064	1.49356e-09	2.393e-36	1.53893e-14	1.11512e-13	2.19348e-11	2.47111e-13	0	2.70286e-06	4.78359e-13	8.6731e-06	0.000580289	-0.137571	-0.0349632	0.0785567	-0.0410473	-0.0419494	0.00183224	-0.1	-0.397193	0
2381	1.32131	0	0.0322656	1.28904	1.83135	1.8252	1.68233	1.18583	0.280087	0.216412	0.142871	0.00615049	0.0096588	0.00262189	0.000327951	0.00143634	0.00500397	0.00156024	0.0489099	0.0307125	0.0369368	2.83391e-05	1.12207e-23	0.00567433	1.1329e-05	0.00279304	0.000171734	0.00129289	0.00128984	1.43354e-09	1.95914e-36	1.41579e-14	1.00131e-13	2.07424e-11	2.31841e-13	0	2.65889e-06	4.54404e-13	8.70579e-06	0.000580289	-0.137571	-0.0349632	0.0785567	-0.0410473	-0.0419494	0.00183224	-0.1	-0.397193	0
2382	1.31211	0	0.025655	1.28646	1.82874	1.82262	1.67974	1.1832	0.280144	0.216401	0.142883	0.00611308	0.00966577	0.00262257	0.000328599	0.00143103	0.00500473	0.00156037	0.0489135	0.0307153	0.0369395	2.83404e-05	9.83535e-24	0.00567348	1.10639e-05	0.00276344	0.000169595	0.00128831	0.00128903	1.37597e-09	1.60351e-36	1.30252e-14	8.99132e-14	1.9615e-11	2.17519e-13	0	2.61566e-06	4.31656e-13	8.73306e-06	0.000580289	-0.137571	-0.0349632	0.0785567	-0.0410473	-0.0419494	0.00183224	-0.1	-0.397193	0
2383	1.3563	0	0.0725288	1.28377	1.82603	1.81995	1.67705	1.18046	0.280203	0.216391	0.142896	0.00607605	0.00967274	0.00262325	0.000329246	0.00142574	0.00500549	0.00156051	0.0489172	0.0307183	0.0369422	2.83417e-05	8.62122e-24	0.00567262	1.08052e-05	0.00273418	0.000167484	0.00128374	0.00128822	1.32076e-09	1.31199e-36	1.19833e-14	8.07393e-14	1.85491e-11	2.04085e-13	0	2.57316e-06	4.10052e-13	8.75612e-06	0.000580289	-0.137571	-0.0349632	0.0785567	-0.0410473	-0.0419494	0.00183224	-0.1	-0.397193	0
2384	1.42713	0	0.146252	1.28088	1.82311	1.81707	1.67417	1.17755	0.28024	0.21638	0.142906	0.00603929	0.00967971	0.00262393	0.000329893	0.00142047	0.00500587	0.00156062	0.0489203	0.0307204	0.0369447	2.83428e-05	7.55674e-24	0.00567177	1.05522e-05	0.00270518	0.000165396	0.00127919	0.00128741	1.26769e-09	1.07374e-36	1.10245e-14	7.24995e-14	1.75409e-11	1.91475e-13	0	2.53131e-06	3.8952e-13	8.73164e-06	0.000580289	-0.137571	-0.0349632	0.0785567	-0.0410473	-0.0419494	0.00183224	-0.1	-0.397193	0
2385	1.459	0	0.181191	1.27781	1.82004	1.81404	1.67112	1.17451	0.280245	0.216369	0.142913	0.00600276	0.00968668	0.00262461	0.00033054	0.00141522	0.00500569	0.00156068	0.0489224	0.0307214	0.0369468	2.83434e-05	6.62322e-24	0.00567091	1.03046e-05	0.00267643	0.00016333	0.00127464	0.0012866	1.21665e-09	8.79005e-37	1.01419e-14	6.50968e-14	1.65869e-11	1.79636e-13	0	2.49003e-06	3.69997e-13	8.66703e-06	0.000580289	-0.137571	-0.0349632	0.0785567	-0.0410473	-0.0419494	0.00183224	-0.1	-0.397193	0
2386	1.46537	0	0.190562	1.27481	1.81704	1.81108	1.66816	1.17157	0.280235	0.216359	0.142919	0.00596657	0.00969364	0.00262529	0.000331187	0.00140998	0.00500531	0.0015607	0.0489241	0.0307217	0.0369487	2.83438e-05	5.80482e-24	0.00567006	1.00625e-05	0.00264795	0.000161288	0.00127011	0.00128579	1.1676e-09	7.1955e-37	9.32986e-15	5.84484e-14	1.56846e-11	1.68525e-13	0	2.44939e-06	3.51443e-13	8.62293e-06	0.000580289	-0.137571	-0.0349632	0.0785567	-0.0410473	-0.0419494	0.00183224	-0.1	-0.397193	0
2387	1.44617	0	0.174151	1.27201	1.81426	1.80832	1.6654	1.16883	0.280222	0.216348	0.142924	0.00593074	0.00970061	0.00262597	0.000331833	0.00140476	0.00500494	0.00156072	0.0489256	0.0307218	0.0369505	2.83441e-05	5.0875e-24	0.00566921	9.82604e-06	0.00261977	0.00015927	0.00126558	0.00128499	1.12051e-09	5.89015e-37	8.58275e-15	5.24786e-14	1.48314e-11	1.58101e-13	0	2.4094e-06	3.33817e-13	8.60629e-06	0.000580289	-0.137571	-0.0349632	0.0785567	-0.0410473	-0.0419494	0.00183224	-0.1	-0.397193	0
2388	1.39963	0	0.130187	1.26945	1.81169	1.80579	1.66286	1.16631	0.280219	0.216338	0.14293	0.00589531	0.00970758	0.00262664	0.00033248	0.00139957	0.00500477	0.00156075	0.0489272	0.0307223	0.0369524	2.83446e-05	4.4589e-24	0.00566835	9.59527e-06	0.0025919	0.000157279	0.00126108	0.00128418	1.07536e-09	4.8217e-37	7.89556e-15	4.71192e-14	1.40246e-11	1.48323e-13	0	2.37008e-06	3.1708e-13	8.61717e-06	0.000580289	-0.137571	-0.0349632	0.0785567	-0.0410473	-0.0419494	0.00183224	-0.1	-0.397193	0
2389	1.35316	0	0.0860781	1.26708	1.80932	1.80346	1.66052	1.16396	0.280235	0.216328	0.142938	0.00586032	0.00971455	0.00262732	0.000333126	0.00139439	0.00500495	0.00156081	0.0489294	0.0307234	0.0369545	2.83453e-05	3.90815e-24	0.0056675	9.37027e-06	0.00256438	0.000155315	0.0012566	0.00128337	1.03208e-09	3.9473e-37	7.26359e-15	4.23087e-14	1.32621e-11	1.39154e-13	0	2.33146e-06	3.01192e-13	8.65969e-06	0.000580289	-0.137571	-0.0349632	0.0785567	-0.0410473	-0.0419494	0.00183224	-0.1	-0.397193	0
2390	1.32408	0	0.0592681	1.26482	1.80703	1.80121	1.65826	1.16167	0.280271	0.216318	0.142948	0.00582573	0.00972151	0.002628	0.000333772	0.00138923	0.00500546	0.0015609	0.0489322	0.0307253	0.0369568	2.83463e-05	3.4256e-24	0.00566665	9.15093e-06	0.00253719	0.00015338	0.00125214	0.00128257	9.90624e-10	3.23072e-37	6.68243e-15	3.7991e-14	1.25412e-11	1.30556e-13	0	2.29355e-06	2.86111e-13	8.71315e-06	0.000580289	-0.137571	-0.0349632	0.0785567	-0.0410473	-0.0419494	0.00183224	-0.1	-0.397193	0
2391	1.30567	0	0.0431769	1.2625	1.80469	1.7989	1.65594	1.15932	0.280318	0.216308	0.142959	0.00579151	0.00972848	0.00262868	0.000334418	0.0013841	0.00500612	0.00156102	0.0489353	0.0307277	0.0369592	2.83475e-05	3.00274e-24	0.00566579	8.93699e-06	0.00251033	0.000151471	0.00124771	0.00128176	9.50879e-10	2.64338e-37	6.14791e-15	3.41149e-14	1.18597e-11	1.22493e-13	0	2.25629e-06	2.71793e-13	8.75626e-06	0.000580289	-0.137571	-0.0349632	0.0785567	-0.0410473	-0.0419494	0.00183224	-0.1	-0.397193	0
2392	1.29233	0	0.0322656	1.26006	1.80224	1.79648	1.65351	1.15684	0.28037	0.216298	0.142971	0.00575764	0.00973545	0.00262936	0.000335063	0.00137898	0.00500685	0.00156114	0.0489387	0.0307303	0.0369618	2.83488e-05	2.63215e-24	0.00566494	8.72824e-06	0.00248377	0.000149587	0.00124329	0.00128096	9.12762e-10	2.1629e-37	5.65624e-15	3.06349e-14	1.12154e-11	1.1493e-13	0	2.21967e-06	2.58197e-13	8.78897e-06	0.000580289	-0.137571	-0.0349632	0.0785567	-0.0410473	-0.0419494	0.00183224	-0.1	-0.397193	0
2393	1.28317	0	0.025655	1.25752	1.79966	1.79394	1.65096	1.15424	0.280427	0.216288	0.142983	0.00572411	0.00974241	0.00263003	0.000335708	0.00137389	0.00500761	0.00156128	0.0489422	0.0307331	0.0369644	2.83502e-05	2.30735e-24	0.00566409	8.52452e-06	0.00245751	0.000147729	0.0012389	0.00128016	8.76201e-10	1.76981e-37	5.20397e-15	2.75104e-14	1.06062e-11	1.07836e-13	0	2.18367e-06	2.45285e-13	8.81623e-06	0.000580289	-0.137571	-0.0349632	0.0785567	-0.0410473	-0.0419494	0.00183224	-0.1	-0.397193	0
2394	1.3274	0	0.0725288	1.25487	1.79699	1.7913	1.6483	1.15154	0.280485	0.216278	0.142996	0.00569093	0.00974938	0.00263071	0.000336354	0.00136881	0.00500837	0.00156142	0.0489459	0.030736	0.0369671	2.83517e-05	2.02267e-24	0.00566324	8.32569e-06	0.00243155	0.000145895	0.00123452	0.00127936	8.41128e-10	1.44819e-37	4.78792e-15	2.4705e-14	1.00301e-11	1.01181e-13	0	2.14829e-06	2.33022e-13	8.83929e-06	0.000580289	-0.137571	-0.0349632	0.0785567	-0.0410473	-0.0419494	0.00183224	-0.1	-0.397193	0
2395	1.39827	0	0.146252	1.25202	1.79412	1.78846	1.64545	1.14866	0.280522	0.216269	0.143006	0.00565798	0.00975635	0.00263139	0.000336998	0.00136375	0.00500874	0.00156153	0.048949	0.0307382	0.0369695	2.8353e-05	1.77306e-24	0.00566239	8.13127e-06	0.00240583	0.000144081	0.00123015	0.00127856	8.07421e-10	1.18498e-37	4.40504e-15	2.21851e-14	9.48522e-12	9.49345e-14	0	2.11343e-06	2.21366e-13	8.81472e-06	0.000580289	-0.137571	-0.0349632	0.0785567	-0.0410473	-0.0419494	0.00183224	-0.1	-0.397193	0
2396	1.43018	0	0.181191	1.24899	1.79108	1.78546	1.64245	1.14566	0.280527	0.216259	0.143013	0.00562522	0.00976331	0.00263207	0.000337643	0.00135871	0.00500856	0.00156158	0.0489511	0.0307391	0.0369716	2.83538e-05	1.55415e-24	0.00566153	7.94094e-06	0.00238033	0.000142286	0.00122579	0.00127776	7.74988e-10	9.69807e-38	4.05261e-15	1.99211e-14	8.96967e-12	8.90693e-14	0	2.07906e-06	2.10283e-13	8.74995e-06	0.000580289	-0.137571	-0.0349632	0.0785567	-0.0410473	-0.0419494	0.00183224	-0.1	-0.397193	0
2397	1.43659	0	0.190562	1.24603	1.78813	1.78254	1.63952	1.14275	0.280517	0.21625	0.143019	0.00559277	0.00977028	0.00263275	0.000338288	0.00135369	0.00500818	0.0015616	0.0489527	0.0307394	0.0369734	2.83543e-05	1.36221e-24	0.00566068	7.75485e-06	0.00235507	0.000140511	0.00122144	0.00127696	7.43822e-10	7.9396e-38	3.72828e-15	1.78877e-14	8.48201e-12	8.35644e-14	0	2.04521e-06	1.99749e-13	8.70571e-06	0.000580289	-0.137571	-0.0349632	0.0785567	-0.0410473	-0.0419494	0.00183224	-0.1	-0.397193	0
2398	1.41743	0	0.174151	1.24328	1.78538	1.77982	1.6368	1.14005	0.280504	0.21624	0.143025	0.00556064	0.00977724	0.00263342	0.000338932	0.00134868	0.00500781	0.00156162	0.0489542	0.0307396	0.0369751	2.83548e-05	1.19397e-24	0.00565983	7.57308e-06	0.00233006	0.000138757	0.0012171	0.00127616	7.13902e-10	6.49991e-38	3.4299e-15	1.60617e-14	8.02084e-12	7.83993e-14	0	2.0119e-06	1.89742e-13	8.68896e-06	0.000580289	-0.137571	-0.0349632	0.0785567	-0.0410473	-0.0419494	0.00183224	-0.1	-0.397193	0
2399	1.37094	0	0.130187	1.24075	1.78286	1.77733	1.6343	1.13757	0.2805	0.216231	0.143031	0.00552887	0.00978421	0.0026341	0.000339576	0.00134369	0.00500763	0.00156165	0.0489558	0.03074	0.0369769	2.83554e-05	1.04652e-24	0.00565898	7.39566e-06	0.00230534	0.000137027	0.00121278	0.00127536	6.85202e-10	5.32138e-38	3.15543e-15	1.44222e-14	7.5848e-12	7.35544e-14	0	1.97915e-06	1.80238e-13	8.69978e-06	0.000580289	-0.137571	-0.0349632	0.0785567	-0.0410473	-0.0419494	0.00183224	-0.1	-0.397193	0
2400	1.32451	0	0.0860781	1.23843	1.78053	1.77503	1.63199	1.13526	0.280516	0.216222	0.143039	0.00549748	0.00979118	0.00263478	0.00034022	0.00133873	0.00500781	0.00156171	0.048958	0.0307411	0.0369789	2.83563e-05	9.17328e-25	0.00565813	7.22268e-06	0.00228092	0.000135321	0.00120848	0.00127456	6.57698e-10	4.35549e-38	2.903e-15	1.29506e-14	7.1726e-12	6.9011e-14	0	1.94699e-06	1.71217e-13	8.7423e-06	0.000580289	-0.137571	-0.0349632	0.0785567	-0.0410473	-0.0419494	0.00183224	-0.1	-0.397193	0
2401	1.29547	0	0.0592681	1.2362	1.77829	1.77282	1.62977	1.133	0.280552	0.216213	0.143049	0.00546646	0.00979814	0.00263546	0.000340864	0.00133378	0.00500832	0.0015618	0.0489607	0.030743	0.0369812	2.83574e-05	8.04124e-25	0.00565728	7.05404e-06	0.0022568	0.000133639	0.00120421	0.00127376	6.31344e-10	3.56386e-38	2.67086e-15	1.16297e-14	6.78295e-12	6.47507e-14	0	1.9154e-06	1.62653e-13	8.79579e-06	0.000580289	-0.137571	-0.0349632	0.0785567	-0.0410473	-0.0419494	0.00183224	-0.1	-0.397193	0
2402	1.2771	0	0.0431769	1.23392	1.77598	1.77055	1.62749	1.13068	0.280599	0.216204	0.14306	0.00543576	0.00980511	0.00263613	0.000341507	0.00132885	0.00500898	0.00156191	0.0489638	0.0307453	0.0369835	2.83588e-05	7.04915e-25	0.00565643	6.88953e-06	0.00223296	0.00013198	0.00119995	0.00127297	6.06076e-10	2.91625e-38	2.45734e-15	1.04438e-14	6.41457e-12	6.07548e-14	0	1.88436e-06	1.54522e-13	8.83893e-06	0.000580289	-0.137571	-0.0349632	0.0785567	-0.0410473	-0.0419494	0.00183224	-0.1	-0.397193	0
2403	1.26379	0	0.0322656	1.23152	1.77356	1.76816	1.62509	1.12824	0.280651	0.216195	0.143072	0.00540537	0.00981207	0.00263681	0.000342151	0.00132394	0.00500971	0.00156204	0.0489671	0.0307479	0.036986	2.83602e-05	6.17963e-25	0.00565558	6.72901e-06	0.0022094	0.000130343	0.00119572	0.00127217	5.81841e-10	2.38641e-38	2.26092e-15	9.37902e-15	6.06626e-12	5.70066e-14	0	1.85386e-06	1.468e-13	8.87165e-06	0.000580289	-0.137571	-0.0349632	0.0785567	-0.0410473	-0.0419494	0.00183224	-0.1	-0.397193	0
2404	1.25467	0	0.025655	1.22902	1.77103	1.76565	1.62257	1.12568	0.280707	0.216186	0.143084	0.00537529	0.00981904	0.00263749	0.000342794	0.00131905	0.00501047	0.00156217	0.0489707	0.0307507	0.0369886	2.83618e-05	5.41749e-25	0.00565473	6.57234e-06	0.0021861	0.000128727	0.0011915	0.00127138	5.58594e-10	1.95289e-38	2.08024e-15	8.42297e-15	5.73693e-12	5.34905e-14	0	1.82387e-06	1.39466e-13	8.89892e-06	0.000580289	-0.137571	-0.0349632	0.0785567	-0.0410473	-0.0419494	0.00183224	-0.1	-0.397193	0
2405	1.29894	0	0.0725288	1.22641	1.76839	1.76305	1.61995	1.12301	0.280765	0.216177	0.143097	0.00534551	0.009826	0.00263816	0.000343437	0.00131418	0.00501122	0.00156232	0.0489743	0.0307536	0.0369912	2.83634e-05	4.74945e-25	0.00565388	6.41943e-06	0.00216307	0.000127133	0.0011873	0.00127059	5.3629e-10	1.59817e-38	1.91402e-15	7.56449e-15	5.42551e-12	5.01919e-14	0	1.79439e-06	1.32501e-13	8.92198e-06	0.000580289	-0.137571	-0.0349632	0.0785567	-0.0410473	-0.0419494	0.00183224	-0.1	-0.397193	0
2406	1.36984	0	0.146252	1.22359	1.76556	1.76024	1.61714	1.12017	0.280803	0.216168	0.143107	0.00531593	0.00983297	0.00263884	0.000344079	0.00130933	0.00501159	0.00156242	0.0489774	0.0307558	0.0369936	2.83648e-05	4.16365e-25	0.00565303	6.2699e-06	0.00214025	0.000125557	0.00118311	0.00126979	5.14851e-10	1.30783e-38	1.76104e-15	6.79334e-15	5.13093e-12	4.70957e-14	0	1.76535e-06	1.25881e-13	8.89733e-06	0.000580289	-0.137571	-0.0349632	0.0785567	-0.0410473	-0.0419494	0.00183224	-0.1	-0.397193	0
2407	1.40179	0	0.181191	1.2206	1.76256	1.75728	1.61416	1.1172	0.280807	0.21616	0.143115	0.00528652	0.00983993	0.00263952	0.000344722	0.00130449	0.00501141	0.00156247	0.0489795	0.0307567	0.0369956	2.83657e-05	3.64984e-25	0.00565219	6.12351e-06	0.00211761	0.000123996	0.00117892	0.001269	4.94222e-10	1.07013e-38	1.62022e-15	6.10045e-15	4.8522e-12	4.41883e-14	0	1.73671e-06	1.19585e-13	8.8324e-06	0.000580289	-0.137571	-0.0349632	0.0785567	-0.0410473	-0.0419494	0.00183224	-0.1	-0.397193	0
2408	1.40824	0	0.190562	1.21768	1.75965	1.75439	1.61127	1.11433	0.280796	0.216151	0.143121	0.00525737	0.0098469	0.0026402	0.000345364	0.00129967	0.00501103	0.0015625	0.0489811	0.030757	0.0369973	2.83664e-05	3.19933e-25	0.00565134	5.98037e-06	0.00209519	0.000122453	0.00117475	0.00126821	4.74396e-10	8.75593e-39	1.49063e-15	5.47807e-15	4.58855e-12	4.14594e-14	0	1.7085e-06	1.13601e-13	8.78802e-06	0.000580289	-0.137571	-0.0349632	0.0785567	-0.0410473	-0.0419494	0.00183224	-0.1	-0.397193	0
2409	1.38912	0	0.174151	1.21497	1.75694	1.75172	1.60859	1.11166	0.280784	0.216143	0.143126	0.00522852	0.00985386	0.00264087	0.000346006	0.00129487	0.00501066	0.00156251	0.0489825	0.0307571	0.036999	2.8367e-05	2.8044e-25	0.00565049	5.84054e-06	0.00207301	0.000120929	0.00117059	0.00126741	4.55361e-10	7.16412e-39	1.3714e-15	4.91916e-15	4.3392e-12	3.88988e-14	0	1.68075e-06	1.07915e-13	8.77116e-06	0.000580289	-0.137571	-0.0349632	0.0785567	-0.0410473	-0.0419494	0.00183224	-0.1	-0.397193	0
2410	1.34267	0	0.130187	1.21248	1.75446	1.74926	1.60612	1.10921	0.28078	0.216134	0.143133	0.00519998	0.00986083	0.00264155	0.000346648	0.00129008	0.00501048	0.00156254	0.0489841	0.0307575	0.0370007	2.83677e-05	2.45827e-25	0.00564964	5.70405e-06	0.00205107	0.000119425	0.00116644	0.00126662	4.371e-10	5.86182e-39	1.26171e-15	4.41733e-15	4.10344e-12	3.64968e-14	0	1.65346e-06	1.02516e-13	8.78192e-06	0.000580289	-0.137571	-0.0349632	0.0785567	-0.0410473	-0.0419494	0.00183224	-0.1	-0.397193	0
2411	1.29628	0	0.0860781	1.2102	1.75217	1.747	1.60386	1.10693	0.280796	0.216126	0.143141	0.00517179	0.00986779	0.00264223	0.00034729	0.00128532	0.00501066	0.0015626	0.0489863	0.0307587	0.0370027	2.83687e-05	2.15495e-25	0.0056488	5.57097e-06	0.00202939	0.000117941	0.00116232	0.00126583	4.19598e-10	4.79655e-39	1.16083e-15	3.96684e-15	3.88056e-12	3.42442e-14	0	1.62665e-06	9.73899e-14	8.82445e-06	0.000580289	-0.137571	-0.0349632	0.0785567	-0.0410473	-0.0419494	0.00183224	-0.1	-0.397193	0
2412	1.26727	0	0.0592681	1.20801	1.74996	1.74482	1.60167	1.10472	0.280831	0.216118	0.143151	0.00514393	0.00987476	0.0026429	0.000347931	0.00128057	0.00501116	0.00156269	0.048989	0.0307606	0.0370049	2.83699e-05	1.88916e-25	0.00564795	5.44122e-06	0.00200799	0.000116479	0.00115822	0.00126504	4.02826e-10	3.92514e-39	1.06806e-15	3.56245e-15	3.66987e-12	3.21318e-14	0	1.60033e-06	9.25239e-14	8.87797e-06	0.000580289	-0.137571	-0.0349632	0.0785567	-0.0410473	-0.0419494	0.00183224	-0.1	-0.397193	0
2413	1.24894	0	0.0431769	1.20576	1.74769	1.74258	1.59942	1.10243	0.280878	0.21611	0.143162	0.00511635	0.00988172	0.00264358	0.000348573	0.00127584	0.00501182	0.00156281	0.0489921	0.0307629	0.0370072	2.83714e-05	1.6562e-25	0.0056471	5.31464e-06	0.00198683	0.000115037	0.00115414	0.00126425	3.86744e-10	3.2122e-39	9.82717e-16	3.19937e-15	3.47066e-12	3.01504e-14	0	1.57446e-06	8.79034e-14	8.92114e-06	0.000580289	-0.137571	-0.0349632	0.0785567	-0.0410473	-0.0419494	0.00183224	-0.1	-0.397193	0
2414	1.23567	0	0.0322656	1.2034	1.74531	1.74022	1.59705	1.10002	0.28093	0.216101	0.143174	0.00508905	0.00988869	0.00264426	0.000349214	0.00127113	0.00501255	0.00156293	0.0489954	0.0307655	0.0370097	2.83729e-05	1.45202e-25	0.00564625	5.19112e-06	0.00196592	0.000113613	0.00115007	0.00126346	3.71318e-10	2.62885e-39	9.04212e-16	2.87336e-15	3.28231e-12	2.82918e-14	0	1.54904e-06	8.35153e-14	8.95388e-06	0.000580289	-0.137571	-0.0349632	0.0785567	-0.0410473	-0.0419494	0.00183224	-0.1	-0.397193	0
2415	1.22659	0	0.025655	1.20093	1.74281	1.73775	1.59456	1.09749	0.280986	0.216093	0.143186	0.00506202	0.00989565	0.00264493	0.000349855	0.00126644	0.0050133	0.00156307	0.0489989	0.0307682	0.0370122	2.83746e-05	1.27303e-25	0.00564541	5.07056e-06	0.00194524	0.000112209	0.00114603	0.00126268	3.56518e-10	2.15151e-39	8.3199e-16	2.58062e-15	3.10421e-12	2.65481e-14	0	1.52404e-06	7.93476e-14	8.98116e-06	0.000580289	-0.137571	-0.0349632	0.0785567	-0.0410473	-0.0419494	0.00183224	-0.1	-0.397193	0
2416	1.27089	0	0.0725288	1.19836	1.74021	1.73518	1.59198	1.09485	0.281044	0.216085	0.143199	0.00503525	0.00990261	0.00264561	0.000350495	0.00126177	0.00501406	0.00156321	0.0490025	0.0307712	0.0370147	2.83763e-05	1.11614e-25	0.00564456	4.95288e-06	0.0019248	0.000110823	0.001142	0.00126189	3.42318e-10	1.76088e-39	7.65546e-16	2.31775e-15	2.9358e-12	2.49123e-14	0	1.49947e-06	7.53889e-14	9.00421e-06	0.000580289	-0.137571	-0.0349632	0.0785567	-0.0410473	-0.0419494	0.00183224	-0.1	-0.397193	0
2417	1.34183	0	0.146252	1.19558	1.73741	1.73241	1.5892	1.09204	0.281081	0.216078	0.14321	0.00500866	0.00990958	0.00264628	0.000351136	0.00125711	0.00501443	0.00156331	0.0490055	0.0307733	0.0370171	2.83778e-05	9.78544e-26	0.00564372	4.8378e-06	0.00190454	0.000109452	0.00113798	0.00126111	3.28668e-10	1.44113e-39	7.04394e-16	2.08159e-15	2.77649e-12	2.33767e-14	0	1.47526e-06	7.1626e-14	8.97948e-06	0.000580289	-0.137571	-0.0349632	0.0785567	-0.0410473	-0.0419494	0.00183224	-0.1	-0.397193	0
2418	1.37381	0	0.181191	1.19262	1.73446	1.72947	1.58626	1.0891	0.281085	0.21607	0.143217	0.00498221	0.00991654	0.00264696	0.000351776	0.00125247	0.00501425	0.00156336	0.0490076	0.0307742	0.037019	2.83788e-05	8.57853e-26	0.00564287	4.72513e-06	0.00188445	0.000108095	0.00113396	0.00126032	3.15531e-10	1.17932e-39	6.48098e-16	1.86939e-15	2.62574e-12	2.19347e-14	0	1.45139e-06	6.80473e-14	8.9144e-06	0.000580289	-0.137571	-0.0349632	0.0785567	-0.0410473	-0.0419494	0.00183224	-0.1	-0.397193	0
2419	1.3803	0	0.190562	1.18974	1.73158	1.72662	1.5834	1.08627	0.281074	0.216062	0.143223	0.004956	0.0099235	0.00264764	0.000352416	0.00124784	0.00501386	0.00156339	0.0490092	0.0307745	0.0370207	2.83796e-05	7.52021e-26	0.00564203	4.61495e-06	0.00186455	0.000106753	0.00112996	0.00125954	3.02905e-10	9.6503e-40	5.96288e-16	1.67878e-15	2.48315e-12	2.05811e-14	0	1.42788e-06	6.46458e-14	8.86988e-06	0.000580289	-0.137571	-0.0349632	0.0785567	-0.0410473	-0.0419494	0.00183224	-0.1	-0.397193	0
2420	1.36122	0	0.174151	1.18707	1.72891	1.72398	1.58075	1.08364	0.281061	0.216054	0.143229	0.00493005	0.00993047	0.00264831	0.000353056	0.00124323	0.00501349	0.0015634	0.0490106	0.0307746	0.0370223	2.83803e-05	6.5924e-26	0.00564118	4.50731e-06	0.00184485	0.000105428	0.00112596	0.00125875	2.9078e-10	7.89668e-40	5.48617e-16	1.50759e-15	2.34828e-12	1.9311e-14	0	1.40474e-06	6.14139e-14	8.85291e-06	0.000580289	-0.137571	-0.0349632	0.0785567	-0.0410473	-0.0419494	0.00183224	-0.1	-0.397193	0
2421	1.3148	0	0.130187	1.18461	1.72646	1.72156	1.57832	1.08122	0.281057	0.216047	0.143235	0.00490438	0.00993743	0.00264899	0.000353696	0.00123864	0.0050133	0.00156343	0.0490122	0.030775	0.037024	2.8381e-05	5.77915e-26	0.00564034	4.40224e-06	0.00182538	0.000104119	0.00112199	0.00125796	2.79148e-10	6.46186e-40	5.04762e-16	1.35387e-15	2.22076e-12	1.81194e-14	0	1.38199e-06	5.83443e-14	8.86362e-06	0.000580289	-0.137571	-0.0349632	0.0785567	-0.0410473	-0.0419494	0.00183224	-0.1	-0.397193	0
2422	1.26845	0	0.0860781	1.18237	1.72421	1.71933	1.57609	1.07898	0.281073	0.216039	0.143244	0.00487903	0.00994439	0.00264967	0.000354335	0.00123406	0.00501348	0.00156349	0.0490144	0.0307761	0.0370259	2.83821e-05	5.06646e-26	0.00563949	4.29979e-06	0.00180614	0.000102829	0.00111803	0.00125718	2.67998e-10	5.28806e-40	4.64427e-16	1.21587e-15	2.10021e-12	1.70019e-14	0	1.35964e-06	5.543e-14	8.90615e-06	0.000580289	-0.137571	-0.0349632	0.0785567	-0.0410473	-0.0419494	0.00183224	-0.1	-0.397193	0
2423	1.23948	0	0.0592681	1.18021	1.72204	1.71718	1.57393	1.07679	0.281108	0.216032	0.143254	0.00485397	0.00995136	0.00265034	0.000354975	0.00122951	0.00501398	0.00156358	0.0490171	0.030778	0.0370281	2.83834e-05	4.44189e-26	0.00563865	4.19989e-06	0.00178713	0.000101558	0.00111409	0.0012564	2.57312e-10	4.32779e-40	4.27329e-16	1.09199e-15	1.98624e-12	1.5954e-14	0	1.33769e-06	5.26634e-14	8.95971e-06	0.000580289	-0.137571	-0.0349632	0.0785567	-0.0410473	-0.0419494	0.00183224	-0.1	-0.397193	0
2424	1.22118	0	0.0431769	1.17801	1.71981	1.71498	1.57171	1.07453	0.281154	0.216024	0.143265	0.00482916	0.00995832	0.00265102	0.000355614	0.00122497	0.00501464	0.00156369	0.0490201	0.0307803	0.0370304	2.83849e-05	3.89445e-26	0.0056378	4.10243e-06	0.00176835	0.000100303	0.00111018	0.00125562	2.47065e-10	3.54207e-40	3.93203e-16	9.80756e-16	1.87849e-12	1.49709e-14	0	1.31612e-06	5.00362e-14	9.00291e-06	0.000580289	-0.137571	-0.0349632	0.0785567	-0.0410473	-0.0419494	0.00183224	-0.1	-0.397193	0
2425	1.20795	0	0.0322656	1.17568	1.71746	1.71265	1.56938	1.07215	0.281206	0.216017	0.143277	0.00480459	0.00996528	0.00265169	0.000356253	0.00122045	0.00501537	0.00156382	0.0490234	0.0307829	0.0370328	2.83865e-05	3.41457e-26	0.00563696	4.00732e-06	0.00174978	9.90654e-05	0.00110628	0.00125484	2.37234e-10	2.8991e-40	3.61808e-16	8.80873e-16	1.7766e-12	1.40488e-14	0	1.29492e-06	4.7541e-14	9.03567e-06	0.000580289	-0.137571	-0.0349632	0.0785567	-0.0410473	-0.0419494	0.00183224	-0.1	-0.397193	0
2426	1.1989	0	0.025655	1.17324	1.71499	1.71021	1.56692	1.06965	0.281262	0.21601	0.14329	0.00478027	0.00997225	0.00265237	0.000356891	0.00121595	0.00501612	0.00156395	0.0490269	0.0307856	0.0370352	2.83883e-05	2.9939e-26	0.00563612	3.91449e-06	0.00173143	9.78437e-05	0.0011024	0.00125406	2.27802e-10	2.37292e-40	3.32925e-16	7.91177e-16	1.68025e-12	1.31836e-14	0	1.27408e-06	4.5171e-14	9.06296e-06	0.000580289	-0.137571	-0.0349632	0.0785567	-0.0410473	-0.0419494	0.00183224	-0.1	-0.397193	0
2427	1.24323	0	0.0725288	1.1707	1.71243	1.70767	1.56437	1.06705	0.28132	0.216003	0.143303	0.00475618	0.00997921	0.00265304	0.00035753	0.00121147	0.00501687	0.00156409	0.0490305	0.0307885	0.0370378	2.83901e-05	2.6251e-26	0.00563527	3.82386e-06	0.00171327	9.6638e-05	0.00109853	0.00125328	2.18751e-10	1.94229e-40	3.06351e-16	7.10625e-16	1.58914e-12	1.23719e-14	0	1.25359e-06	4.29198e-14	9.08601e-06	0.000580289	-0.137571	-0.0349632	0.0785567	-0.0410473	-0.0419494	0.00183224	-0.1	-0.397193	0
2428	1.31421	0	0.146252	1.16796	1.70966	1.70493	1.56162	1.06427	0.281357	0.215995	0.143314	0.00473223	0.00998617	0.00265372	0.000358168	0.001207	0.00501724	0.0015642	0.0490335	0.0307907	0.03704	2.83916e-05	2.30166e-26	0.00563443	3.73524e-06	0.00169529	9.54457e-05	0.00109467	0.00125251	2.1005e-10	1.58975e-40	2.81893e-16	6.38258e-16	1.50295e-12	1.16098e-14	0	1.2334e-06	4.07797e-14	9.0612e-06	0.000580289	-0.137571	-0.0349632	0.0785567	-0.0410473	-0.0419494	0.00183224	-0.1	-0.397193	0
2429	1.34623	0	0.181191	1.16504	1.70674	1.70203	1.55871	1.06136	0.281361	0.215988	0.143321	0.00470841	0.00999313	0.0026544	0.000358806	0.00120254	0.00501706	0.00156425	0.0490356	0.0307915	0.0370419	2.83927e-05	2.01793e-26	0.00563359	3.64846e-06	0.00167745	9.42653e-05	0.00109082	0.00125173	2.01674e-10	1.30107e-40	2.59376e-16	5.73228e-16	1.4214e-12	1.08942e-14	0	1.21349e-06	3.87444e-14	8.99597e-06	0.000580289	-0.137571	-0.0349632	0.0785567	-0.0410473	-0.0419494	0.00183224	-0.1	-0.397193	0
2430	1.35275	0	0.190562	1.16219	1.7039	1.69922	1.55589	1.05856	0.28135	0.215981	0.143327	0.0046848	0.0100001	0.00265507	0.000359444	0.0011981	0.00501667	0.00156427	0.0490372	0.0307918	0.0370436	2.83935e-05	1.76911e-26	0.00563274	3.56359e-06	0.00165978	9.30981e-05	0.00108698	0.00125095	1.93624e-10	1.06476e-40	2.38652e-16	5.14809e-16	1.34425e-12	1.02225e-14	0	1.19388e-06	3.68096e-14	8.95131e-06	0.000580289	-0.137571	-0.0349632	0.0785567	-0.0410473	-0.0419494	0.00183224	-0.1	-0.397193	0
2431	1.3337	0	0.174151	1.15955	1.70127	1.69661	1.55327	1.05596	0.281337	0.215974	0.143333	0.00466143	0.0100071	0.00265575	0.000360082	0.00119368	0.00501629	0.00156428	0.0490386	0.0307919	0.0370452	2.83942e-05	1.55096e-26	0.0056319	3.48068e-06	0.00164229	9.1945e-05	0.00108315	0.00125017	1.85893e-10	8.71365e-41	2.19583e-16	4.6234e-16	1.27128e-12	9.59209e-15	0	1.17458e-06	3.49713e-14	8.93424e-06	0.000580289	-0.137571	-0.0349632	0.0785567	-0.0410473	-0.0419494	0.00183224	-0.1	-0.397193	0
2432	1.28732	0	0.130187	1.15714	1.69885	1.69422	1.55088	1.05358	0.281333	0.215968	0.14334	0.00463831	0.010014	0.00265642	0.000360719	0.00118927	0.00501611	0.00156431	0.0490401	0.0307923	0.0370468	2.83951e-05	1.35973e-26	0.00563106	3.39974e-06	0.00162499	9.08069e-05	0.00107933	0.00124939	1.78474e-10	7.13109e-41	2.0204e-16	4.15225e-16	1.20228e-12	9.00068e-15	0	1.1556e-06	3.32251e-14	8.94489e-06	0.000580289	-0.137571	-0.0349632	0.0785567	-0.0410473	-0.0419494	0.00183224	-0.1	-0.397193	0
2433	1.24101	0	0.0860781	1.15493	1.69664	1.69202	1.54867	1.05137	0.281348	0.215961	0.143348	0.00461547	0.010021	0.0026571	0.000361357	0.00118488	0.00501629	0.00156437	0.0490423	0.0307934	0.0370487	2.83962e-05	1.19213e-26	0.00563022	3.32081e-06	0.00160791	8.96847e-05	0.00107553	0.00124861	1.71363e-10	5.8363e-41	1.85903e-16	3.72924e-16	1.13705e-12	8.44601e-15	0	1.13696e-06	3.15673e-14	8.98743e-06	0.000580289	-0.137571	-0.0349632	0.0785567	-0.0410473	-0.0419494	0.00183224	-0.1	-0.397193	0
2434	1.21207	0	0.0592681	1.15281	1.6945	1.68991	1.54655	1.04921	0.281383	0.215954	0.143358	0.0045929	0.0100279	0.00265777	0.000361994	0.00118051	0.00501679	0.00156446	0.0490449	0.0307953	0.0370508	2.83975e-05	1.04525e-26	0.00562938	3.24385e-06	0.00159103	8.85783e-05	0.00107176	0.00124784	1.64547e-10	4.77694e-41	1.71061e-16	3.34947e-16	1.07538e-12	7.9258e-15	0	1.11866e-06	2.99933e-14	9.04103e-06	0.000580289	-0.137571	-0.0349632	0.0785567	-0.0410473	-0.0419494	0.00183224	-0.1	-0.397193	0
2435	1.19381	0	0.0431769	1.15063	1.6923	1.68773	1.54436	1.04699	0.281429	0.215947	0.14337	0.00457055	0.0100349	0.00265845	0.000362631	0.00117616	0.00501744	0.00156457	0.049048	0.0307976	0.037053	2.83991e-05	9.16496e-27	0.00562854	3.16876e-06	0.00157435	8.74868e-05	0.001068	0.00124706	1.5801e-10	3.91006e-41	1.57408e-16	3.00847e-16	1.01707e-12	7.43782e-15	0	1.10067e-06	2.84986e-14	9.08426e-06	0.000580289	-0.137571	-0.0349632	0.0785567	-0.0410473	-0.0419494	0.00183224	-0.1	-0.397193	0
2436	1.1806	0	0.0322656	1.14834	1.68999	1.68544	1.54206	1.04463	0.281481	0.215941	0.143382	0.00454841	0.0100419	0.00265912	0.000363267	0.00117182	0.00501817	0.0015647	0.0490512	0.0308002	0.0370554	2.84008e-05	8.03624e-27	0.0056277	3.09548e-06	0.00155786	8.64098e-05	0.00106426	0.00124629	1.51738e-10	3.20061e-41	1.44847e-16	2.70223e-16	9.61937e-13	6.98001e-15	0	1.08298e-06	2.70789e-14	9.11704e-06	0.000580289	-0.137571	-0.0349632	0.0785567	-0.0410473	-0.0419494	0.00183224	-0.1	-0.397193	0
2437	1.17159	0	0.025655	1.14593	1.68755	1.68303	1.53963	1.04216	0.281537	0.215934	0.143394	0.00452648	0.0100488	0.0026598	0.000363904	0.0011675	0.00501892	0.00156483	0.0490547	0.0308029	0.0370578	2.84025e-05	7.04668e-27	0.00562686	3.02395e-06	0.00154156	8.53469e-05	0.00106053	0.00124552	1.4572e-10	2.61996e-41	1.3329e-16	2.42722e-16	9.09798e-13	6.55049e-15	0	1.06559e-06	2.57304e-14	9.14434e-06	0.000580289	-0.137571	-0.0349632	0.0785567	-0.0410473	-0.0419494	0.00183224	-0.1	-0.397193	0
2438	1.21595	0	0.0725288	1.14343	1.68502	1.68052	1.53711	1.03959	0.281595	0.215928	0.143407	0.00450477	0.0100558	0.00266047	0.00036454	0.0011632	0.00501967	0.00156497	0.0490583	0.0308058	0.0370603	2.84044e-05	6.1791e-27	0.00562602	2.95412e-06	0.00152544	8.42978e-05	0.00105682	0.00124475	1.39945e-10	2.14471e-41	1.22656e-16	2.18023e-16	8.60493e-13	6.14747e-15	0	1.0485e-06	2.44494e-14	9.1674e-06	0.000580289	-0.137571	-0.0349632	0.0785567	-0.0410473	-0.0419494	0.00183224	-0.1	-0.397193	0
2439	1.28696	0	0.146252	1.14071	1.68229	1.67781	1.53439	1.03684	0.281631	0.215921	0.143418	0.00448318	0.0100627	0.00266115	0.000365176	0.00115891	0.00502004	0.00156507	0.0490613	0.0308079	0.0370626	2.8406e-05	5.41817e-27	0.00562518	2.88581e-06	0.00150946	8.32603e-05	0.00105312	0.00124398	1.34392e-10	1.7556e-41	1.12869e-16	1.95832e-16	8.13848e-13	5.76912e-15	0	1.03165e-06	2.32315e-14	9.14252e-06	0.000580289	-0.137571	-0.0349632	0.0785567	-0.0410473	-0.0419494	0.00183224	-0.1	-0.397193	0
2440	1.31901	0	0.181191	1.13782	1.6794	1.67494	1.53151	1.03396	0.281635	0.215915	0.143426	0.00446169	0.0100697	0.00266182	0.000365812	0.00115463	0.00501985	0.00156512	0.0490633	0.0308088	0.0370644	2.84071e-05	4.75061e-27	0.00562434	2.81893e-06	0.00149362	8.22331e-05	0.00104942	0.00124321	1.29046e-10	1.43695e-41	1.03858e-16	1.7589e-16	7.6971e-13	5.41379e-15	0	1.01504e-06	2.20732e-14	9.07713e-06	0.000580289	-0.137571	-0.0349632	0.0785567	-0.0410473	-0.0419494	0.00183224	-0.1	-0.397193	0
2441	1.32557	0	0.190562	1.13501	1.67659	1.67215	1.52872	1.03119	0.281624	0.215908	0.143432	0.00444039	0.0100767	0.0026625	0.000366448	0.00115037	0.00501946	0.00156514	0.0490649	0.0308091	0.037066	2.84079e-05	4.16515e-27	0.0056235	2.75353e-06	0.00147793	8.12174e-05	0.00104573	0.00124244	1.23907e-10	1.17608e-41	9.55645e-17	1.57974e-16	7.27954e-13	5.08023e-15	0	9.98677e-07	2.09721e-14	9.03234e-06	0.000580289	-0.137571	-0.0349632	0.0785567	-0.0410473	-0.0419494	0.00183224	-0.1	-0.397193	0
2442	1.30656	0	0.174151	1.13241	1.67399	1.66958	1.52614	1.02862	0.281611	0.215902	0.143438	0.0044193	0.0100836	0.00266317	0.000367083	0.00114613	0.00501909	0.00156516	0.0490663	0.0308092	0.0370676	2.84087e-05	3.65181e-27	0.00562266	2.68962e-06	0.00146239	8.0214e-05	0.00104206	0.00124166	1.18972e-10	9.62555e-42	8.79326e-17	1.41882e-16	6.88461e-13	4.76719e-15	0	9.82573e-07	1.99258e-14	9.01517e-06	0.000580289	-0.137571	-0.0349632	0.0785567	-0.0410473	-0.0419494	0.00183224	-0.1	-0.397193	0
2443	1.26021	0	0.130187	1.13003	1.67162	1.66722	1.52377	1.02627	0.281606	0.215896	0.143445	0.00439845	0.0100906	0.00266385	0.000367719	0.0011419	0.0050189	0.00156519	0.0490678	0.0308095	0.0370692	2.84096e-05	3.20178e-27	0.00562182	2.62723e-06	0.00144703	7.92235e-05	0.00103839	0.00124089	1.14236e-10	7.87814e-42	8.09111e-17	1.27431e-16	6.51115e-13	4.47349e-15	0	9.66737e-07	1.89319e-14	9.02577e-06	0.000580289	-0.137571	-0.0349632	0.0785567	-0.0410473	-0.0419494	0.00183224	-0.1	-0.397193	0
2444	1.21393	0	0.0860781	1.12785	1.66943	1.66506	1.5216	1.02409	0.281622	0.21589	0.143453	0.00437785	0.0100976	0.00266452	0.000368354	0.00113769	0.00501907	0.00156524	0.0490699	0.0308106	0.037071	2.84107e-05	2.80735e-27	0.00562098	2.56639e-06	0.00143185	7.82469e-05	0.00103475	0.00124012	1.09695e-10	6.44835e-42	7.44524e-17	1.14456e-16	6.15807e-13	4.19802e-15	0	9.51182e-07	1.79882e-14	9.06831e-06	0.000580289	-0.137571	-0.0349632	0.0785567	-0.0410473	-0.0419494	0.00183224	-0.1	-0.397193	0
2445	1.18503	0	0.0592681	1.12576	1.66733	1.66297	1.51951	1.02197	0.281657	0.215884	0.143464	0.00435748	0.0101045	0.0026652	0.000368989	0.00113349	0.00501957	0.00156533	0.0490726	0.0308125	0.0370731	2.84121e-05	2.46163e-27	0.00562014	2.50705e-06	0.00141686	7.7284e-05	0.00103113	0.00123936	1.05343e-10	5.27841e-42	6.85115e-17	1.02806e-16	5.82427e-13	3.93965e-15	0	9.35904e-07	1.70923e-14	9.12195e-06	0.000580289	-0.137571	-0.0349632	0.0785567	-0.0410473	-0.0419494	0.00183224	-0.1	-0.397193	0
2446	1.16679	0	0.0431769	1.12362	1.66516	1.66082	1.51735	1.01977	0.281702	0.215878	0.143475	0.00433731	0.0101115	0.00266587	0.000369623	0.00112931	0.00502023	0.00156545	0.0490756	0.0308148	0.0370753	2.84137e-05	2.15856e-27	0.0056193	2.44916e-06	0.00140204	7.6334e-05	0.00102752	0.00123859	1.01168e-10	4.32095e-42	6.30461e-17	9.23452e-17	5.50864e-13	3.69727e-15	0	9.20889e-07	1.62413e-14	9.16522e-06	0.000580289	-0.137571	-0.0349632	0.0785567	-0.0410473	-0.0419494	0.00183224	-0.1	-0.397193	0
2447	1.15362	0	0.0322656	1.12136	1.66288	1.65856	1.51507	1.01745	0.281754	0.215872	0.143488	0.00431733	0.0101184	0.00266654	0.000370258	0.00112515	0.00502095	0.00156557	0.0490789	0.0308173	0.0370776	2.84154e-05	1.89286e-27	0.00561846	2.39266e-06	0.0013874	7.53967e-05	0.00102393	0.00123783	9.7162e-11	3.53729e-42	5.80176e-17	8.29503e-17	5.21017e-13	3.46987e-15	0	9.06129e-07	1.54331e-14	9.19802e-06	0.000580289	-0.137571	-0.0349632	0.0785567	-0.0410473	-0.0419494	0.00183224	-0.1	-0.397193	0
2448	1.14464	0	0.025655	1.11898	1.66048	1.65618	1.51268	1.015	0.28181	0.215866	0.1435	0.00429754	0.0101254	0.00266722	0.000370892	0.00112101	0.0050217	0.0015657	0.0490823	0.0308201	0.03708	2.84172e-05	1.6599e-27	0.00561763	2.33751e-06	0.00137291	7.44715e-05	0.00102035	0.00123706	9.33179e-11	2.89585e-42	5.3391e-17	7.45127e-17	4.92792e-13	3.25651e-15	0	8.91616e-07	1.46653e-14	9.22534e-06	0.000580289	-0.137571	-0.0349632	0.0785567	-0.0410473	-0.0419494	0.00183224	-0.1	-0.397193	0
2449	1.18904	0	0.0725288	1.11651	1.65797	1.6537	1.51018	1.01246	0.281867	0.21586	0.143513	0.00427794	0.0101324	0.00266789	0.000371526	0.00111688	0.00502245	0.00156584	0.0490859	0.030823	0.0370825	2.84191e-05	1.45564e-27	0.00561679	2.28366e-06	0.00135859	7.35583e-05	0.00101679	0.0012363	8.96282e-11	2.37079e-42	4.9134e-17	6.69344e-17	4.66101e-13	3.05631e-15	0	8.77346e-07	1.39359e-14	9.2484e-06	0.000580289	-0.137571	-0.0349632	0.0785567	-0.0410473	-0.0419494	0.00183224	-0.1	-0.397193	0
2450	1.26007	0	0.146252	1.11382	1.65527	1.65101	1.50749	1.00973	0.281904	0.215854	0.143525	0.00425844	0.0101393	0.00266857	0.00037216	0.00111276	0.00502282	0.00156595	0.0490889	0.0308251	0.0370847	2.84207e-05	1.27648e-27	0.00561595	2.23099e-06	0.0013444	7.26552e-05	0.00101324	0.00123554	8.60804e-11	1.94085e-42	4.52154e-17	6.01252e-17	4.40848e-13	2.86835e-15	0	8.63287e-07	1.32425e-14	9.22345e-06	0.000580289	-0.137571	-0.0349632	0.0785567	-0.0410473	-0.0419494	0.00183224	-0.1	-0.397193	0
2451	1.29216	0	0.181191	1.11097	1.65241	1.64818	1.50464	1.00689	0.281907	0.215848	0.143532	0.00423902	0.0101463	0.00266924	0.000372794	0.00110866	0.00502263	0.00156599	0.0490909	0.0308259	0.0370865	2.84218e-05	1.11929e-27	0.00561512	2.17941e-06	0.00133032	7.17611e-05	0.00100969	0.00123477	8.26649e-11	1.58873e-42	4.16075e-17	5.40057e-17	4.16952e-13	2.69182e-15	0	8.49421e-07	1.25829e-14	9.15791e-06	0.000580289	-0.137571	-0.0349632	0.0785567	-0.0410473	-0.0419494	0.00183224	-0.1	-0.397193	0
2452	1.29875	0	0.190562	1.10819	1.64964	1.64542	1.50188	1.00414	0.281896	0.215842	0.143539	0.00421978	0.0101532	0.00266991	0.000373428	0.00110457	0.00502224	0.00156602	0.0490924	0.0308262	0.0370881	2.84227e-05	9.81418e-28	0.00561428	2.12896e-06	0.00131638	7.08769e-05	0.00100615	0.00123401	7.9381e-11	1.30043e-42	3.82867e-17	4.85076e-17	3.94345e-13	2.52609e-15	0	8.3576e-07	1.19558e-14	9.11298e-06	0.000580289	-0.137571	-0.0349632	0.0785567	-0.0410473	-0.0419494	0.00183224	-0.1	-0.397193	0
2453	1.27977	0	0.174151	1.10562	1.64708	1.64288	1.49933	1.00161	0.281883	0.215837	0.143545	0.00420073	0.0101602	0.00267059	0.000374061	0.0011005	0.00502186	0.00156603	0.0490938	0.0308263	0.0370896	2.84235e-05	8.60524e-28	0.00561344	2.07967e-06	0.00130257	7.00034e-05	0.00100262	0.00123324	7.62267e-11	1.06443e-42	3.52307e-17	4.3569e-17	3.72962e-13	2.37055e-15	0	8.22316e-07	1.136e-14	9.09572e-06	0.000580289	-0.137571	-0.0349632	0.0785567	-0.0410473	-0.0419494	0.00183224	-0.1	-0.397193	0
2454	1.23346	0	0.130187	1.10327	1.64473	1.64055	1.497	0.999289	0.281878	0.215831	0.143552	0.00418189	0.0101671	0.00267126	0.000374694	0.00109644	0.00502167	0.00156606	0.0490954	0.0308266	0.0370912	2.84244e-05	7.54534e-28	0.00561261	2.03155e-06	0.00128892	6.91412e-05	0.000999109	0.00123248	7.31995e-11	8.71281e-43	3.2419e-17	3.91336e-17	3.52742e-13	2.22461e-15	0	8.09096e-07	1.07939e-14	9.10626e-06	0.000580289	-0.137571	-0.0349632	0.0785567	-0.0410473	-0.0419494	0.00183224	-0.1	-0.397193	0
2455	1.1872	0	0.0860781	1.10113	1.64258	1.63842	1.49486	0.997138	0.281893	0.215826	0.14356	0.00416327	0.0101741	0.00267194	0.000375327	0.0010924	0.00502184	0.00156611	0.0490974	0.0308277	0.037093	2.84256e-05	6.61629e-28	0.00561177	1.98462e-06	0.00127544	6.82909e-05	0.000995612	0.00123171	7.02971e-11	7.13223e-43	2.98325e-17	3.51511e-17	3.33624e-13	2.08773e-15	0	7.96109e-07	1.02565e-14	9.14882e-06	0.000580289	-0.137571	-0.0349632	0.0785567	-0.0410473	-0.0419494	0.00183224	-0.1	-0.397193	0
2456	1.15834	0	0.0592681	1.09907	1.64051	1.63636	1.49279	0.995043	0.281928	0.21582	0.143571	0.00414487	0.0101811	0.00267261	0.00037596	0.00108837	0.00502234	0.0015662	0.0491001	0.0308296	0.0370951	2.8427e-05	5.80193e-28	0.00561094	1.93885e-06	0.00126212	6.74526e-05	0.000992134	0.00123095	6.75146e-11	5.83878e-43	2.74533e-17	3.15752e-17	3.15549e-13	1.95934e-15	0	7.83353e-07	9.74611e-15	9.2025e-06	0.000580289	-0.137571	-0.0349632	0.0785567	-0.0410473	-0.0419494	0.00183224	-0.1	-0.397193	0
2457	1.14013	0	0.0431769	1.09695	1.63837	1.63424	1.49066	0.992874	0.281974	0.215815	0.143582	0.00412664	0.010188	0.00267328	0.000376592	0.00108436	0.005023	0.00156631	0.0491031	0.0308318	0.0370972	2.84286e-05	5.08799e-28	0.0056101	1.89419e-06	0.00124895	6.66255e-05	0.000988672	0.00123019	6.48454e-11	4.78014e-43	2.52644e-17	2.8364e-17	2.98458e-13	1.83889e-15	0	7.70817e-07	9.26141e-15	9.2458e-06	0.000580289	-0.137571	-0.0349632	0.0785567	-0.0410473	-0.0419494	0.00183224	-0.1	-0.397193	0
2458	1.12699	0	0.0322656	1.09472	1.63612	1.63201	1.48841	0.990579	0.282025	0.215809	0.143595	0.00410858	0.010195	0.00267396	0.000377225	0.00108037	0.00502372	0.00156644	0.0491063	0.0308344	0.0370995	2.84303e-05	4.46202e-28	0.00560926	1.8506e-06	0.00123594	6.58094e-05	0.000985226	0.00122944	6.22841e-11	3.91358e-43	2.32504e-17	2.54798e-17	2.82296e-13	1.72587e-15	0	7.58492e-07	8.80098e-15	9.27863e-06	0.000580289	-0.137571	-0.0349632	0.0785567	-0.0410473	-0.0419494	0.00183224	-0.1	-0.397193	0
2459	1.11803	0	0.025655	1.09238	1.63374	1.62965	1.48605	0.988162	0.282081	0.215804	0.143607	0.00409069	0.0102019	0.00267463	0.000377857	0.00107639	0.00502447	0.00156657	0.0491097	0.0308371	0.0371019	2.84322e-05	3.91315e-28	0.00560843	1.80804e-06	0.00122306	6.50038e-05	0.000981794	0.00122868	5.98258e-11	3.20421e-43	2.13973e-17	2.28894e-17	2.67011e-13	1.61983e-15	0	7.46374e-07	8.36359e-15	9.30596e-06	0.000580289	-0.137571	-0.0349632	0.0785567	-0.0410473	-0.0419494	0.00183224	-0.1	-0.397193	0
2460	1.16246	0	0.0725288	1.08993	1.63127	1.6272	1.48358	0.985641	0.282138	0.215798	0.143621	0.00407296	0.0102089	0.0026753	0.000378489	0.00107243	0.00502521	0.00156671	0.0491133	0.03084	0.0371043	2.8434e-05	3.43187e-28	0.0056076	1.76649e-06	0.00121034	6.42087e-05	0.000978376	0.00122792	5.74662e-11	2.62349e-43	1.96921e-17	2.05626e-17	2.52557e-13	1.52032e-15	0	7.34458e-07	7.94806e-15	9.32903e-06	0.000580289	-0.137571	-0.0349632	0.0785567	-0.0410473	-0.0419494	0.00183224	-0.1	-0.397193	0
2461	1.23353	0	0.146252	1.08728	1.6286	1.62454	1.48091	0.982945	0.282174	0.215793	0.143632	0.00405532	0.0102159	0.00267598	0.00037912	0.00106848	0.00502558	0.00156681	0.0491163	0.0308421	0.0371065	2.84357e-05	3.00968e-28	0.00560676	1.72585e-06	0.00119773	6.34223e-05	0.000974966	0.00122717	5.51969e-11	2.14793e-43	1.81224e-17	1.84719e-17	2.38881e-13	1.42689e-15	0	7.22717e-07	7.55297e-15	9.304e-06	0.000580289	-0.137571	-0.0349632	0.0785567	-0.0410473	-0.0419494	0.00183224	-0.1	-0.397193	0
2462	1.26564	0	0.181191	1.08445	1.62577	1.62173	1.47809	0.980128	0.282178	0.215788	0.14364	0.00403775	0.0102228	0.00267665	0.000379752	0.00106454	0.00502539	0.00156686	0.0491183	0.030843	0.0371083	2.84368e-05	2.63924e-28	0.00560593	1.68605e-06	0.00118522	6.26438e-05	0.00097156	0.00122641	5.30121e-11	1.75841e-43	1.66771e-17	1.65928e-17	2.25939e-13	1.33914e-15	0	7.11137e-07	7.17715e-15	9.23832e-06	0.000580289	-0.137571	-0.0349632	0.0785567	-0.0410473	-0.0419494	0.00183224	-0.1	-0.397193	0
2463	1.27227	0	0.190562	1.08171	1.62303	1.61901	1.47536	0.977415	0.282166	0.215783	0.143646	0.00402034	0.0102298	0.00267732	0.000380383	0.00106061	0.005025	0.00156688	0.0491198	0.0308432	0.0371099	2.84377e-05	2.31432e-28	0.00560509	1.64712e-06	0.00117282	6.18738e-05	0.000968162	0.00122565	5.09113e-11	1.43946e-43	1.53468e-17	1.49045e-17	2.13695e-13	1.25676e-15	0	6.99729e-07	6.81985e-15	9.19326e-06	0.000580289	-0.137571	-0.0349632	0.0785567	-0.0410473	-0.0419494	0.00183224	-0.1	-0.397193	0
2464	1.25332	0	0.174151	1.07916	1.6205	1.61649	1.47284	0.974911	0.282153	0.215778	0.143652	0.0040031	0.0102367	0.002678	0.000381015	0.00105671	0.00502462	0.0015669	0.0491212	0.0308433	0.0371114	2.84385e-05	2.02938e-28	0.00560426	1.60907e-06	0.00116055	6.11131e-05	0.000964774	0.00122489	4.88932e-11	1.17835e-43	1.41225e-17	1.33878e-17	2.02114e-13	1.17943e-15	0	6.885e-07	6.4803e-15	9.1759e-06	0.000580289	-0.137571	-0.0349632	0.0785567	-0.0410473	-0.0419494	0.00183224	-0.1	-0.397193	0
2465	1.20704	0	0.130187	1.07685	1.61818	1.6142	1.47054	0.972618	0.282148	0.215773	0.143659	0.00398605	0.0102437	0.00267867	0.000381646	0.00105281	0.00502443	0.00156692	0.0491227	0.0308437	0.0371129	2.84394e-05	1.77955e-28	0.00560343	1.57193e-06	0.00114842	6.03622e-05	0.000961401	0.00122414	4.69561e-11	9.6462e-44	1.2996e-17	1.20256e-17	1.91162e-13	1.10688e-15	0	6.77459e-07	6.15773e-15	9.18639e-06	0.000580289	-0.137571	-0.0349632	0.0785567	-0.0410473	-0.0419494	0.00183224	-0.1	-0.397193	0
2466	1.16081	0	0.0860781	1.07474	1.61606	1.61209	1.46843	0.970496	0.282163	0.215768	0.143668	0.0039692	0.0102506	0.00267934	0.000382276	0.00104893	0.0050246	0.00156698	0.0491247	0.0308447	0.0371147	2.84406e-05	1.56055e-28	0.00560259	1.5357e-06	0.00113644	5.96217e-05	0.000958044	0.00122338	4.50988e-11	7.89706e-44	1.19597e-17	1.08025e-17	1.80807e-13	1.03882e-15	0	6.66611e-07	5.85142e-15	9.22896e-06	0.000580289	-0.137571	-0.0349632	0.0785567	-0.0410473	-0.0419494	0.00183224	-0.1	-0.397193	0
2467	1.13198	0	0.0592681	1.07271	1.61402	1.61007	1.46639	0.968429	0.282198	0.215763	0.143679	0.00395255	0.0102576	0.00268002	0.000382907	0.00104507	0.00502509	0.00156707	0.0491274	0.0308466	0.0371167	2.84421e-05	1.36857e-28	0.00560176	1.50037e-06	0.0011246	5.88916e-05	0.000954705	0.00122263	4.3318e-11	6.46553e-44	1.10063e-17	9.7041e-18	1.71017e-13	9.74983e-16	0	6.55956e-07	5.56056e-15	9.28269e-06	0.000580289	-0.137571	-0.0349632	0.0785567	-0.0410473	-0.0419494	0.00183224	-0.1	-0.397193	0
2468	1.1138	0	0.0431769	1.07062	1.61191	1.60798	1.46429	0.966287	0.282243	0.215758	0.14369	0.00393605	0.0102646	0.00268069	0.000383537	0.00104122	0.00502575	0.00156718	0.0491304	0.0308488	0.0371189	2.84437e-05	1.20025e-28	0.00560093	1.4659e-06	0.00111289	5.81713e-05	0.000951382	0.00122188	4.16096e-11	5.29376e-44	1.01292e-17	8.71768e-18	1.61759e-13	9.1509e-16	0	6.45484e-07	5.2843e-15	9.32603e-06	0.000580289	-0.137571	-0.0349632	0.0785567	-0.0410473	-0.0419494	0.00183224	-0.1	-0.397193	0
2469	1.10069	0	0.0322656	1.06842	1.60969	1.60577	1.46207	0.964018	0.282295	0.215753	0.143703	0.0039197	0.0102715	0.00268136	0.000384167	0.00103739	0.00502647	0.0015673	0.0491336	0.0308514	0.0371211	2.84454e-05	1.05266e-28	0.0056001	1.43224e-06	0.00110132	5.74604e-05	0.000948074	0.00122113	3.997e-11	4.33451e-44	9.3222e-18	7.8317e-18	1.53004e-13	8.58892e-16	0	6.35189e-07	5.02186e-15	9.35889e-06	0.000580289	-0.137571	-0.0349632	0.0785567	-0.0410473	-0.0419494	0.00183224	-0.1	-0.397193	0
2470	1.09176	0	0.025655	1.0661	1.60734	1.60344	1.45973	0.961628	0.28235	0.215748	0.143716	0.0039035	0.0102785	0.00268203	0.000384797	0.00103357	0.00502722	0.00156743	0.049137	0.0308541	0.0371235	2.84473e-05	9.23241e-29	0.00559926	1.39939e-06	0.00108988	5.67588e-05	0.00094478	0.00122038	3.83963e-11	3.54919e-44	8.57959e-18	7.03589e-18	1.44724e-13	8.06159e-16	0	6.25065e-07	4.77254e-15	9.38623e-06	0.000580289	-0.137571	-0.0349632	0.0785567	-0.0410473	-0.0419494	0.00183224	-0.1	-0.397193	0
2471	1.13621	0	0.0725288	1.06369	1.6049	1.60101	1.45728	0.959132	0.282407	0.215743	0.143729	0.00388744	0.0102854	0.00268271	0.000385427	0.00102977	0.00502796	0.00156757	0.0491405	0.030857	0.0371259	2.84492e-05	8.09748e-29	0.00559843	1.36731e-06	0.00107857	5.60662e-05	0.000941499	0.00121963	3.68855e-11	2.90622e-44	7.89622e-18	6.32105e-18	1.36894e-13	7.56673e-16	0	6.1511e-07	4.53566e-15	9.40931e-06	0.000580289	-0.137571	-0.0349632	0.0785567	-0.0410473	-0.0419494	0.00183224	-0.1	-0.397193	0
2472	1.20731	0	0.146252	1.06106	1.60226	1.59838	1.45464	0.956463	0.282443	0.215738	0.14374	0.00387146	0.0102924	0.00268338	0.000386057	0.00102598	0.00502832	0.00156767	0.0491435	0.0308591	0.037128	2.84508e-05	7.10184e-29	0.0055976	1.33593e-06	0.00106736	5.53813e-05	0.000938226	0.00121888	3.54324e-11	2.37964e-44	7.26714e-18	5.67868e-18	1.29485e-13	7.10208e-16	0	6.05302e-07	4.31043e-15	9.38421e-06	0.000580289	-0.137571	-0.0349632	0.0785567	-0.0410473	-0.0419494	0.00183224	-0.1	-0.397193	0
2473	1.23945	0	0.181191	1.05826	1.59946	1.5956	1.45185	0.953673	0.282447	0.215733	0.143749	0.00385553	0.0102993	0.00268405	0.000386686	0.0010222	0.00502814	0.00156772	0.0491455	0.0308599	0.0371298	2.8452e-05	6.22819e-29	0.00559677	1.30519e-06	0.00105624	5.47031e-05	0.000934956	0.00121813	3.40333e-11	1.94829e-44	6.68788e-18	5.10131e-18	1.22474e-13	6.66564e-16	0	5.95626e-07	4.09617e-15	9.31838e-06	0.000580289	-0.137571	-0.0349632	0.0785567	-0.0410473	-0.0419494	0.00183224	-0.1	-0.397193	0
2474	1.24611	0	0.190562	1.05555	1.59675	1.59291	1.44915	0.950988	0.282435	0.215729	0.143755	0.00383974	0.0103063	0.00268472	0.000387315	0.00101843	0.00502774	0.00156774	0.049147	0.0308601	0.0371313	2.84529e-05	5.46182e-29	0.00559594	1.27513e-06	0.00104522	5.40324e-05	0.000931693	0.00121738	3.26879e-11	1.59505e-44	6.15466e-18	4.5825e-18	1.1584e-13	6.25587e-16	0	5.86094e-07	3.89245e-15	9.27319e-06	0.000580289	-0.137571	-0.0349632	0.0785567	-0.0410473	-0.0419494	0.00183224	-0.1	-0.397193	0
2475	1.22719	0	0.174151	1.05304	1.59424	1.59042	1.44666	0.948513	0.282422	0.215724	0.143761	0.00382412	0.0103133	0.0026854	0.000387944	0.00101468	0.00502736	0.00156776	0.0491483	0.0308602	0.0371328	2.84537e-05	4.7897e-29	0.00559511	1.24575e-06	0.00103431	5.33697e-05	0.000928442	0.00121662	3.13952e-11	1.30584e-44	5.66392e-18	4.11643e-18	1.09566e-13	5.87126e-16	0	5.76712e-07	3.69885e-15	9.25573e-06	0.000580289	-0.137571	-0.0349632	0.0785567	-0.0410473	-0.0419494	0.00183224	-0.1	-0.397193	0
2476	1.18094	0	0.130187	1.05075	1.59196	1.58815	1.44438	0.946248	0.282417	0.21572	0.143768	0.00380866	0.0103202	0.00268607	0.000388573	0.00101094	0.00502717	0.00156778	0.0491499	0.0308606	0.0371343	2.84546e-05	4.20036e-29	0.00559428	1.21706e-06	0.00102353	5.27155e-05	0.000925203	0.00121587	3.01544e-11	1.06909e-44	5.21236e-18	3.69781e-18	1.03632e-13	5.51035e-16	0	5.67486e-07	3.51492e-15	9.26618e-06	0.000580289	-0.137571	-0.0349632	0.0785567	-0.0410473	-0.0419494	0.00183224	-0.1	-0.397193	0
2477	1.13475	0	0.0860781	1.04867	1.58987	1.58608	1.4423	0.944154	0.282432	0.215715	0.143777	0.00379339	0.0103272	0.00268674	0.000389202	0.00100722	0.00502734	0.00156784	0.0491519	0.0308616	0.0371361	2.84558e-05	3.68371e-29	0.00559345	1.18908e-06	0.00101287	5.20704e-05	0.000921981	0.00121513	2.89645e-11	8.75316e-45	4.79694e-18	3.32189e-18	9.80211e-14	5.1718e-16	0	5.58421e-07	3.34025e-15	9.30876e-06	0.000580289	-0.137571	-0.0349632	0.0785567	-0.0410473	-0.0419494	0.00183224	-0.1	-0.397193	0
2478	1.10594	0	0.0592681	1.04667	1.58786	1.58408	1.44029	0.942113	0.282466	0.21571	0.143788	0.0037783	0.0103341	0.00268741	0.00038983	0.00100351	0.00502783	0.00156793	0.0491545	0.0308634	0.0371381	2.84573e-05	3.23076e-29	0.00559262	1.16179e-06	0.00100234	5.14343e-05	0.000918776	0.00121438	2.78235e-11	7.16714e-45	4.41477e-18	2.98431e-18	9.27162e-14	4.85422e-16	0	5.49517e-07	3.17438e-15	9.36253e-06	0.000580289	-0.137571	-0.0349632	0.0785567	-0.0410473	-0.0419494	0.00183224	-0.1	-0.397193	0
2479	1.08779	0	0.0431769	1.04461	1.58578	1.58201	1.43821	0.939997	0.282511	0.215706	0.1438	0.00376334	0.0103411	0.00268809	0.000390458	0.000999818	0.00502849	0.00156804	0.0491575	0.0308657	0.0371402	2.84589e-05	2.83362e-29	0.00559179	1.13516e-06	0.000991938	5.08067e-05	0.000915586	0.00121363	2.67288e-11	5.86877e-45	4.06314e-18	2.68111e-18	8.76997e-14	4.55625e-16	0	5.40766e-07	3.01683e-15	9.40591e-06	0.000580289	-0.137571	-0.0349632	0.0785567	-0.0410473	-0.0419494	0.00183224	-0.1	-0.397193	0
2480	1.0747	0	0.0322656	1.04244	1.58358	1.57983	1.43602	0.937754	0.282563	0.215702	0.143812	0.00374851	0.010348	0.00268876	0.000391086	0.00099614	0.0050292	0.00156816	0.0491607	0.0308682	0.0371425	2.84606e-05	2.48536e-29	0.00559096	1.10916e-06	0.000981651	5.01874e-05	0.000912409	0.00121289	2.56782e-11	4.80579e-45	3.73958e-18	2.40877e-18	8.29556e-14	4.27665e-16	0	5.32162e-07	2.86716e-15	9.4388e-06	0.000580289	-0.137571	-0.0349632	0.0785567	-0.0410473	-0.0419494	0.00183224	-0.1	-0.397193	0
2481	1.0658	0	0.025655	1.04015	1.58126	1.57753	1.4337	0.935388	0.282618	0.215697	0.143825	0.00373381	0.010355	0.00268943	0.000391714	0.000992475	0.00502995	0.00156829	0.0491641	0.030871	0.0371448	2.84625e-05	2.17995e-29	0.00559013	1.08378e-06	0.000971478	4.95761e-05	0.000909247	0.00121215	2.46696e-11	3.93545e-45	3.44184e-18	2.16413e-18	7.84689e-14	4.01427e-16	0	5.23701e-07	2.72495e-15	9.46617e-06	0.000580289	-0.137571	-0.0349632	0.0785567	-0.0410473	-0.0419494	0.00183224	-0.1	-0.397193	0
2482	1.11028	0	0.0725288	1.03776	1.57884	1.57512	1.43129	0.932918	0.282675	0.215693	0.143839	0.00371925	0.010362	0.0026901	0.000392342	0.000988825	0.00503069	0.00156843	0.0491676	0.0308738	0.0371472	2.84644e-05	1.91211e-29	0.0055893	1.059e-06	0.000961418	4.89726e-05	0.000906097	0.00121141	2.37012e-11	3.22283e-45	3.16784e-18	1.94437e-18	7.42254e-14	3.76804e-16	0	5.15381e-07	2.58984e-15	9.48925e-06	0.000580289	-0.137571	-0.0349632	0.0785567	-0.0410473	-0.0419494	0.00183224	-0.1	-0.397193	0
2483	1.18141	0	0.146252	1.03516	1.57623	1.57252	1.42867	0.930274	0.282711	0.215689	0.14385	0.00370474	0.0103689	0.00269077	0.000392969	0.000985187	0.00503106	0.00156853	0.0491706	0.0308759	0.0371493	2.8466e-05	1.67712e-29	0.00558847	1.03475e-06	0.000951449	4.83758e-05	0.000902955	0.00121066	2.27698e-11	2.63913e-45	2.91559e-18	1.74688e-18	7.02104e-14	3.53683e-16	0	5.07182e-07	2.46136e-15	9.46408e-06	0.000580289	-0.137571	-0.0349632	0.0785567	-0.0410473	-0.0419494	0.00183224	-0.1	-0.397193	0
2484	1.21358	0	0.181191	1.03239	1.57346	1.56977	1.42591	0.927511	0.282714	0.215684	0.143858	0.00369028	0.0103759	0.00269145	0.000393596	0.000981561	0.00503087	0.00156858	0.0491725	0.0308767	0.037151	2.84672e-05	1.47091e-29	0.00558764	1.011e-06	0.00094156	4.77848e-05	0.000899815	0.00120992	2.18729e-11	2.16095e-45	2.68331e-18	1.56936e-18	6.64107e-14	3.31964e-16	0	4.99095e-07	2.33914e-15	9.39811e-06	0.000580289	-0.137571	-0.0349632	0.0785567	-0.0410473	-0.0419494	0.00183224	-0.1	-0.397193	0
2485	1.22026	0	0.190562	1.0297	1.57078	1.5671	1.42324	0.924853	0.282702	0.21568	0.143865	0.00367594	0.0103828	0.00269212	0.000394223	0.000977947	0.00503047	0.0015686	0.049174	0.0308769	0.0371526	2.84681e-05	1.29001e-29	0.00558682	9.8777e-07	0.000931762	4.72003e-05	0.000896683	0.00120918	2.10102e-11	1.76932e-45	2.46948e-18	1.40983e-18	6.28156e-14	3.11572e-16	0	4.91127e-07	2.22292e-15	9.35279e-06	0.000580289	-0.137571	-0.0349632	0.0785567	-0.0410473	-0.0419494	0.00183224	-0.1	-0.397193	0
2486	1.20137	0	0.174151	1.02722	1.5683	1.56464	1.42077	0.922405	0.282689	0.215676	0.143871	0.00366175	0.0103898	0.00269279	0.00039485	0.000974346	0.00503009	0.00156861	0.0491754	0.030877	0.037154	2.84689e-05	1.13134e-29	0.00558599	9.65066e-07	0.000922063	4.66229e-05	0.000893561	0.00120843	2.01814e-11	1.44865e-45	2.27268e-18	1.26652e-18	5.9415e-14	2.92431e-16	0	4.83284e-07	2.11247e-15	9.33524e-06	0.000580289	-0.137571	-0.0349632	0.0785567	-0.0410473	-0.0419494	0.00183224	-0.1	-0.397193	0
2487	1.15515	0	0.130187	1.02497	1.56605	1.5624	1.41852	0.920168	0.282684	0.215672	0.143878	0.00364772	0.0103967	0.00269346	0.000395477	0.000970758	0.00502989	0.00156863	0.0491769	0.0308774	0.0371555	2.84699e-05	9.92209e-30	0.00558516	9.42897e-07	0.000912471	4.60528e-05	0.000890452	0.00120769	1.93856e-11	1.18612e-45	2.09158e-18	1.13779e-18	5.61989e-14	2.74468e-16	0	4.75571e-07	2.00753e-15	9.34564e-06	0.000580289	-0.137571	-0.0349632	0.0785567	-0.0410473	-0.0419494	0.00183224	-0.1	-0.397193	0
2488	1.10899	0	0.0860781	1.02291	1.56399	1.56035	1.41647	0.918101	0.282698	0.215668	0.143887	0.00363386	0.0104037	0.00269413	0.000396103	0.000967186	0.00503006	0.00156869	0.0491789	0.0308784	0.0371572	2.8471e-05	8.70226e-30	0.00558433	9.21271e-07	0.000902994	4.54906e-05	0.000887358	0.00120695	1.86225e-11	9.71229e-46	1.92497e-18	1.02218e-18	5.31578e-14	2.57618e-16	0	4.67993e-07	1.90787e-15	9.38824e-06	0.000580289	-0.137571	-0.0349632	0.0785567	-0.0410473	-0.0419494	0.00183224	-0.1	-0.397193	0
2489	1.08021	0	0.0592681	1.02094	1.562	1.55838	1.41448	0.916086	0.282733	0.215663	0.143898	0.00362015	0.0104106	0.0026948	0.00039673	0.000963627	0.00503055	0.00156878	0.0491815	0.0308802	0.0371592	2.84725e-05	7.63279e-30	0.00558351	9.00179e-07	0.000893632	4.49362e-05	0.000884281	0.00120621	1.78907e-11	7.95323e-46	1.77169e-18	9.18352e-19	5.02824e-14	2.4181e-16	0	4.60549e-07	1.81323e-15	9.44205e-06	0.000580289	-0.137571	-0.0349632	0.0785567	-0.0410473	-0.0419494	0.00183224	-0.1	-0.397193	0
2490	1.06209	0	0.0431769	1.01891	1.55995	1.55634	1.41243	0.913995	0.282778	0.215659	0.14391	0.00360656	0.0104176	0.00269548	0.000397356	0.000960083	0.00503121	0.00156889	0.0491844	0.0308825	0.0371613	2.84741e-05	6.69499e-30	0.00558268	8.79594e-07	0.000884378	4.43893e-05	0.000881218	0.00120547	1.71885e-11	6.51308e-46	1.63065e-18	8.25098e-19	4.75633e-14	2.26978e-16	0	4.53232e-07	1.72332e-15	9.48547e-06	0.000580289	-0.137571	-0.0349632	0.0785567	-0.0410473	-0.0419494	0.00183224	-0.1	-0.397193	0
2491	1.04903	0	0.0322656	1.01676	1.55778	1.55418	1.41026	0.911776	0.282829	0.215655	0.143923	0.00359309	0.0104245	0.00269615	0.000397982	0.000956553	0.00503192	0.00156901	0.0491876	0.030885	0.0371636	2.84759e-05	5.87257e-30	0.00558185	8.59499e-07	0.000875228	4.38495e-05	0.000878169	0.00120473	1.65145e-11	5.3339e-46	1.50087e-18	7.41329e-19	4.49917e-14	2.13059e-16	0	4.46039e-07	1.63791e-15	9.51839e-06	0.000580289	-0.137571	-0.0349632	0.0785567	-0.0410473	-0.0419494	0.00183224	-0.1	-0.397193	0
2492	1.04015	0	0.025655	1.0145	1.55549	1.55191	1.40797	0.909435	0.282884	0.215651	0.143936	0.00357974	0.0104315	0.00269682	0.000398607	0.000953036	0.00503267	0.00156914	0.049191	0.0308877	0.0371659	2.84777e-05	5.1513e-30	0.00558103	8.39878e-07	0.000866181	4.33167e-05	0.000875132	0.001204	1.58673e-11	4.36834e-46	1.38143e-18	6.66077e-19	4.25596e-14	1.99997e-16	0	4.38964e-07	1.55675e-15	9.54577e-06	0.000580289	-0.137571	-0.0349632	0.0785567	-0.0410473	-0.0419494	0.00183224	-0.1	-0.397193	0
2493	1.08466	0	0.0725288	1.01213	1.55309	1.54953	1.40558	0.906989	0.282941	0.215647	0.143949	0.0035665	0.0104385	0.00269749	0.000399233	0.000949533	0.00503341	0.00156928	0.0491945	0.0308906	0.0371682	2.84797e-05	4.5187e-30	0.0055802	8.20718e-07	0.000857232	4.27907e-05	0.000872108	0.00120326	1.5246e-11	3.57767e-46	1.27151e-18	5.98473e-19	4.02592e-14	1.87739e-16	0	4.32007e-07	1.47964e-15	9.56887e-06	0.000580289	-0.137571	-0.0349632	0.0785567	-0.0410473	-0.0419494	0.00183224	-0.1	-0.397193	0
2494	1.15581	0	0.146252	1.00956	1.5505	1.54695	1.40299	0.904369	0.282976	0.215644	0.143961	0.00355331	0.0104454	0.00269816	0.000399858	0.000946041	0.00503377	0.00156938	0.0491975	0.0308926	0.0371703	2.84813e-05	3.96366e-30	0.00557938	8.01972e-07	0.000848366	4.22704e-05	0.000869091	0.00120252	1.46483e-11	2.92999e-46	1.17032e-18	5.37717e-19	3.80827e-14	1.76228e-16	0	4.25152e-07	1.40631e-15	9.54364e-06	0.000580289	-0.137571	-0.0349632	0.0785567	-0.0410473	-0.0419494	0.00183224	-0.1	-0.397193	0
2495	1.18801	0	0.181191	1.00682	1.54776	1.54422	1.40025	0.901632	0.28298	0.21564	0.143969	0.00354016	0.0104524	0.00269883	0.000400483	0.000942561	0.00503358	0.00156943	0.0491994	0.0308935	0.0371721	2.84825e-05	3.47655e-30	0.00557855	7.8361e-07	0.000839569	4.17553e-05	0.000866077	0.00120179	1.40726e-11	2.39933e-46	1.07713e-18	4.83101e-19	3.60228e-14	1.65414e-16	0	4.18389e-07	1.33655e-15	9.47752e-06	0.000580289	-0.137571	-0.0349632	0.0785567	-0.0410473	-0.0419494	0.00183224	-0.1	-0.397193	0
2496	1.19472	0	0.190562	1.00416	1.54511	1.54158	1.3976	0.899	0.282968	0.215636	0.143976	0.00352712	0.0104593	0.0026995	0.000401108	0.000939092	0.00503318	0.00156945	0.0492009	0.0308937	0.0371736	2.84834e-05	3.0492e-30	0.00557773	7.65647e-07	0.000830854	4.12458e-05	0.00086307	0.00120105	1.3519e-11	1.96469e-46	9.9134e-19	4.3402e-19	3.40737e-14	1.5526e-16	0	4.11725e-07	1.27021e-15	9.43207e-06	0.000580289	-0.137571	-0.0349632	0.0785567	-0.0410473	-0.0419494	0.00183224	-0.1	-0.397193	0
2497	1.17586	0	0.174151	1.00171	1.54266	1.53915	1.39517	0.896579	0.282954	0.215632	0.143982	0.00351421	0.0104663	0.00270017	0.000401733	0.000935636	0.0050328	0.00156946	0.0492022	0.0308938	0.037175	2.84842e-05	2.67435e-30	0.0055769	7.48091e-07	0.000822226	4.07424e-05	0.000860072	0.00120031	1.29869e-11	1.60876e-46	9.12377e-19	3.89923e-19	3.22301e-14	1.45729e-16	0	4.05166e-07	1.20716e-15	9.41442e-06	0.000580289	-0.137571	-0.0349632	0.0785567	-0.0410473	-0.0419494	0.00183224	-0.1	-0.397193	0
2498	1.12967	0	0.130187	0.999479	1.54044	1.53694	1.39295	0.894369	0.282949	0.215628	0.14399	0.00350144	0.0104732	0.00270084	0.000402357	0.000932193	0.00503261	0.00156948	0.0492037	0.0308941	0.0371765	2.84851e-05	2.34562e-30	0.00557608	7.30947e-07	0.000813693	4.02454e-05	0.000857086	0.00119958	1.24761e-11	1.31734e-46	8.39713e-19	3.5031e-19	3.04864e-14	1.36784e-16	0	3.98716e-07	1.14726e-15	9.42478e-06	0.000580289	-0.137571	-0.0349632	0.0785567	-0.0410473	-0.0419494	0.00183224	-0.1	-0.397193	0
2499	1.08353	0	0.0860781	0.997452	1.5384	1.53491	1.39092	0.892327	0.282963	0.215625	0.143999	0.00348884	0.0104802	0.00270152	0.000402981	0.000928764	0.00503277	0.00156954	0.0492057	0.0308951	0.0371782	2.84863e-05	2.0574e-30	0.00557525	7.14223e-07	0.000805263	3.97553e-05	0.000854116	0.00119884	1.19861e-11	1.07878e-46	7.72858e-19	3.14734e-19	2.88375e-14	1.28393e-16	0	3.92378e-07	1.09036e-15	9.46739e-06	0.000580289	-0.137571	-0.0349632	0.0785567	-0.0410473	-0.0419494	0.00183224	-0.1	-0.397193	0
2500	1.06613	0	0.0844167	0.996482	1.53743	1.53394	1.38994	0.891341	0.282977	0.215623	0.144004	0.00348258	0.0104837	0.00270185	0.000403293	0.000927053	0.00503296	0.00156958	0.0492069	0.0308959	0.0371791	2.8487e-05	1.92275e-30	0.00557484	7.05967e-07	0.000801074	3.9512e-05	0.000852635	0.00119847	1.17463e-11	9.71395e-47	7.40824e-19	2.97901e-19	2.80362e-14	1.24331e-16	0	3.89237e-07	1.06265e-15	9.4965e-06	0.000580289	-0.137571	-0.0349632	0.0785567	-0.0410473	-0.0419494	0.00183224	-0.1	-0.397193	0
[truncated: 4 more columns]
