# Supplementary material for: The Social Cost of Fossil and Industrial CO2 Emissions from 1950 to 2018
Source: Research Square preprint supplement (doi:10.21203/rs.3.rs-2244259/v1), 2022-11-17
Supplement: Supplementary file 15 [file RCP45SCP45TO3PD_EMISSIONS.xls]

## Sheet: RCP45SCP45to3PD_EMISSIONS
RCP4.5-WITH SUPPLEMENTARY EXTENSION SCP4.5to3PD__EMISSIONS____________________________
CONTENT: GLOBAL ANNUAL EMISSIONS;
RUN: RCP4.5-SCP4.5to3PD, FINAL RELEASE, 30 May. 2010
RCP4.5 CONTACT: MiniCAM group, Allison Thomson (Allison.Thomson@pnl.gov)
DATE: 30/5/2010 01:02:33
MAGICC-VERSION: 6.3.09, 25 November 2009
FILE PRODUCED BY: RCP Concentration Calculation & Data Group, M. Meinshausen, S. Smith, K. Riahi, D. van Vuuren et al.
DOCUMENTATION: M. Meinshausen, S. Smith et al. (2011) "The RCP GHG concentrations and their extension from 1765 to 2300", DOI 10.1007/s10584-011-0156-z, Climatic Change.
CMIP5 INFO: http://cmip-pcmdi.llnl.gov/cmip5/
RCP DATABASE: http://www.iiasa.ac.at/web-apps/tnt/RcpDb
FURTHER INFO: For data sources, aknowledgements and further information, see http://www.pik-potsdam.de/~mmalte/rcps.
NOTE: THIS EMISSION DATASET ONLY TO BE USED FOR EMISSION-DRIVEN ESM CMIP5 RUNS, AS CONCENTRATIONS, NOT EMISSIONS, SHALL BE PRESCRIBED IN MAIN CMIP5 RUNS.
RCP4.5 starts 2005; 20th century data and earlier is provided for convenience; SCP4.5 supplementary extension reaching RCP3PD concentration levels by 2250.
COLUMN_DESCRIPTION________________________________________
1. FossilCO2 - Fossil & Industrial CO2 (Fossil, Cement, Gas Flaring & Bunker Fuels)
2. OtherCO2 - Landuse related CO2 Emissions
3. CH4 - Methane
4. N2O - Nitrous Oxide
5. - 11. - Tropospheric ozone precursors, aerosols and reactive gas emissions
12. - 23. - Flourinated gases controlled under the Kyoto Protocol, (HFCs, PFCs, SF6)
24. - 39. - Ozone Depleting Substances controlled under the Montreal Protocol (CFCs, HFCFC, Halons, CCl4, MCF, CH3Br, CH3Cl)
&THISFILE_SPECIFICATIONS
THISFILE_DATACOLUMNS	39
THISFILE_FIRSTYEAR	1765
THISFILE_LASTYEAR	2500
THISFILE_ANNUALSTEPS	1
THISFILE_FIRSTDATAROW	39
THISFILE_UNITS	SEE ROW 37
THISFILE_DATTYPE	RCPDAT
/
COLUMN:	1	2	3	4	5	6	7	8	9	10	11	12	13	14	15	16	17	18	19	20	21	22	23	24	25	26	27	28	29	30	31	32	33	34	35	36	37	38	39
UNITS:	GtC/yr	GtC/yr	MtCH4/yr	MtN2O-N/yr	MtS/yr	MtCO/yr	Mt/yr	MtN/yr	Mt/yr	Mt/yr	MtN/yr	kt/yr	kt/yr	kt/yr	kt/yr	kt/yr	kt/yr	kt/yr	kt/yr	kt/yr	kt/yr	kt/yr	kt/yr	kt/yr	kt/yr	kt/yr	kt/yr	kt/yr	kt/yr	kt/yr	kt/yr	kt/yr	kt/yr	kt/yr	kt/yr	kt/yr	kt/yr	kt/yr	kt/yr
v YEARS/GAS >	FossilCO2	OtherCO2	CH4	N2O	SOx	CO	NMVOC	NOx	BC	OC	NH3	CF4	C2F6	C6F14	HFC23	HFC32	HFC43_10	HFC125	HFC134a	HFC143a	HFC227ea	HFC245fa	SF6	CFC_11	CFC_12	CFC_113	CFC_114	CFC_115	CARB_TET	MCF	HCFC_22	HCFC_141B	HCFC_142B	HALON1211	HALON1202	HALON1301	HALON2402	CH3BR	CH3CL
1765	0.003	0	0	0	0	0	0	0	0	0	0.833837	0.0107627	0	0	0	0	0	0	0	0	0	0	0	0	0	0	0	0	0	0	0	0	0	0	0	0	0	157.267	3100.21
1766	0.003	0.0053383	1.96326	0.00519108	0.0988826	9.05022	1.59687	0.109502	0.106998	0.56592	0.854231	0.0107521	0	0	0	0	0	0	0	0	0	0	0	0	0	0	0	0	0	0	0	0	0	0	0	0	0	157.267	3100.21
1767	0.003	0.0106766	2.43645	0.0101168	0.116306	12.9608	2.29232	0.168038	0.133383	0.781468	0.874167	0.0107479	0	0	0	0	0	0	0	0	0	0	0	0	0	0	0	0	0	0	0	0	0	0	0	0	0	157.267	3100.21
1768	0.003	0.0160149	2.91111	0.0150428	0.133811	16.8765	2.98865	0.226625	0.159847	0.997361	0.893654	0.0107438	0	0	0	0	0	0	0	0	0	0	0	0	0	0	0	0	0	0	0	0	0	0	0	0	0	157.267	3100.21
1769	0.003	0.0213532	3.38728	0.0199691	0.151398	20.7975	3.6859	0.285264	0.186393	1.21361	0.912699	0.0107397	0	0	0	0	0	0	0	0	0	0	0	0	0	0	0	0	0	0	0	0	0	0	0	0	0	157.267	3100.21
1770	0.003	0.0266915	3.86501	0.0248956	0.16907	24.7238	4.38409	0.343956	0.213024	1.43023	0.931309	0.0107355	0	0	0	0	0	0	0	0	0	0	0	0	0	0	0	0	0	0	0	0	0	0	0	0	0	157.267	3100.21
1771	0.004	0.0320298	4.34436	0.0298224	0.186831	28.6557	5.08326	0.402704	0.239742	1.64723	0.952532	0.0107314	0	0	0	0	0	0	0	0	0	0	0	0	0	0	0	0	0	0	0	0	0	0	0	0	0	157.267	3100.21
1772	0.004	0.0373681	4.82537	0.0347495	0.204683	32.5933	5.78343	0.461508	0.26655	1.86461	0.970294	0.0107273	0	0	0	0	0	0	0	0	0	0	0	0	0	0	0	0	0	0	0	0	0	0	0	0	0	157.267	3100.21
1773	0.004	0.0427064	5.30809	0.039677	0.222628	36.5368	6.48465	0.520371	0.29345	2.0824	0.987642	0.0107231	0	0	0	0	0	0	0	0	0	0	0	0	0	0	0	0	0	0	0	0	0	0	0	0	0	157.267	3100.21
1774	0.004	0.0480447	5.79258	0.0446047	0.24067	40.4864	7.18692	0.579294	0.320446	2.30061	1.00458	0.0107189	0	0	0	0	0	0	0	0	0	0	0	0	0	0	0	0	0	0	0	0	0	0	0	0	0	157.267	3100.21
1775	0.004	0.053383	6.27889	0.0495328	0.258811	44.4423	7.8903	0.638279	0.347541	2.51924	1.02113	0.0107148	0	0	0	0	0	0	0	0	0	0	0	0	0	0	0	0	0	0	0	0	0	0	0	0	0	157.267	3100.21
1776	0.004	0.0587213	6.76707	0.0544612	0.277055	48.4046	8.59482	0.697329	0.374737	2.73832	1.03728	0.0107106	0	0	0	0	0	0	0	0	0	0	0	0	0	0	0	0	0	0	0	0	0	0	0	0	0	157.267	3100.21
1777	0.004	0.0640596	7.25719	0.0593899	0.295404	52.3736	9.3005	0.756445	0.402037	2.95785	1.05305	0.0107064	0	0	0	0	0	0	0	0	0	0	0	0	0	0	0	0	0	0	0	0	0	0	0	0	0	157.267	3100.21
1778	0.004	0.0693979	7.74931	0.064319	0.313863	56.3496	10.0074	0.815629	0.429446	3.17784	1.06844	0.0107022	0	0	0	0	0	0	0	0	0	0	0	0	0	0	0	0	0	0	0	0	0	0	0	0	0	157.267	3100.21
1779	0.004	0.0747361	8.24348	0.0692485	0.332434	60.3326	10.7155	0.874883	0.456966	3.39833	1.08346	0.010698	0	0	0	0	0	0	0	0	0	0	0	0	0	0	0	0	0	0	0	0	0	0	0	0	0	157.267	3100.21
1780	0.004	0.0800744	8.73977	0.0741783	0.35112	64.3229	11.425	0.93421	0.4846	3.61931	1.09813	0.0106938	0	0	0	0	0	0	0	0	0	0	0	0	0	0	0	0	0	0	0	0	0	0	0	0	0	157.267	3100.21
1781	0.005	0.0854127	9.23824	0.0791086	0.369927	68.3207	12.1357	0.993612	0.512353	3.8408	1.11547	0.0106896	0	0	0	0	0	0	0	0	0	0	0	0	0	0	0	0	0	0	0	0	0	0	0	0	0	157.267	3100.21
1782	0.005	0.090751	9.73897	0.0840392	0.388856	72.3263	12.8478	1.05309	0.540227	4.06282	1.12943	0.0106854	0	0	0	0	0	0	0	0	0	0	0	0	0	0	0	0	0	0	0	0	0	0	0	0	0	157.267	3100.21
1783	0.005	0.0960893	10.242	0.0889702	0.407913	76.34	13.5613	1.11265	0.568228	4.28539	1.14305	0.0106812	0	0	0	0	0	0	0	0	0	0	0	0	0	0	0	0	0	0	0	0	0	0	0	0	0	157.267	3100.21
1784	0.005	0.101428	10.7475	0.0939017	0.4271	80.3619	14.2763	1.17229	0.596358	4.50853	1.15634	0.0106769	0	0	0	0	0	0	0	0	0	0	0	0	0	0	0	0	0	0	0	0	0	0	0	0	0	157.267	3100.21
1785	0.005	0.106766	11.2554	0.0988336	0.446422	84.3923	14.9927	1.23201	0.624621	4.73224	1.1693	0.0106727	0	0	0	0	0	0	0	0	0	0	0	0	0	0	0	0	0	0	0	0	0	0	0	0	0	157.267	3100.21
1786	0.005	0.112104	11.7658	0.103766	0.465884	88.4315	15.7107	1.29182	0.653022	4.95655	1.18194	0.0106684	0	0	0	0	0	0	0	0	0	0	0	0	0	0	0	0	0	0	0	0	0	0	0	0	0	157.267	3100.21
1787	0.005	0.117443	12.2789	0.108699	0.485489	92.4797	16.4303	1.35173	0.681565	5.18148	1.19428	0.0106642	0	0	0	0	0	0	0	0	0	0	0	0	0	0	0	0	0	0	0	0	0	0	0	0	0	157.267	3100.21
1788	0.005	0.122781	12.7947	0.113632	0.505241	96.5372	17.1515	1.41172	0.710254	5.40705	1.20631	0.0106599	0	0	0	0	0	0	0	0	0	0	0	0	0	0	0	0	0	0	0	0	0	0	0	0	0	157.267	3100.21
1789	0.005	0.128119	13.3133	0.118566	0.525147	100.604	17.8744	1.47181	0.739094	5.63327	1.21804	0.0106556	0	0	0	0	0	0	0	0	0	0	0	0	0	0	0	0	0	0	0	0	0	0	0	0	0	157.267	3100.21
1790	0.005	0.133457	13.8347	0.1235	0.545209	104.682	18.599	1.532	0.76809	5.86016	1.22948	0.0106513	0	0	0	0	0	0	0	0	0	0	0	0	0	0	0	0	0	0	0	0	0	0	0	0	0	157.267	3100.21
1791	0.006	0.138796	14.3591	0.128435	0.565433	108.769	19.3255	1.59228	0.797246	6.08776	1.24369	0.010647	0	0	0	0	0	0	0	0	0	0	0	0	0	0	0	0	0	0	0	0	0	0	0	0	0	157.267	3100.21
1792	0.006	0.144134	14.8866	0.133371	0.585825	112.867	20.0537	1.65268	0.826567	6.31607	1.25458	0.0106427	0	0	0	0	0	0	0	0	0	0	0	0	0	0	0	0	0	0	0	0	0	0	0	0	0	157.267	3100.21
1793	0.006	0.149472	15.4172	0.138306	0.606388	116.975	20.7839	1.71318	0.856059	6.54512	1.2652	0.0106384	0	0	0	0	0	0	0	0	0	0	0	0	0	0	0	0	0	0	0	0	0	0	0	0	0	157.267	3100.21
1794	0.006	0.154811	15.9511	0.143243	0.627129	121.095	21.5161	1.77379	0.885726	6.77493	1.27556	0.010634	0	0	0	0	0	0	0	0	0	0	0	0	0	0	0	0	0	0	0	0	0	0	0	0	0	157.267	3100.21
1795	0.006	0.160149	16.4883	0.14818	0.648053	125.227	22.2503	1.83452	0.915575	7.00554	1.28567	0.0106297	0	0	0	0	0	0	0	0	0	0	0	0	0	0	0	0	0	0	0	0	0	0	0	0	0	157.267	3100.21
1796	0.006	0.165487	17.029	0.153118	0.669166	129.37	22.9865	1.89536	0.94561	7.23695	1.29554	0.0106253	0	0	0	0	0	0	0	0	0	0	0	0	0	0	0	0	0	0	0	0	0	0	0	0	0	157.267	3100.21
1797	0.007	0.170825	17.5732	0.158056	0.690473	133.526	23.7249	1.95633	0.975837	7.4692	1.30821	0.0106209	0	0	0	0	0	0	0	0	0	0	0	0	0	0	0	0	0	0	0	0	0	0	0	0	0	157.267	3100.21
1798	0.007	0.176164	18.1211	0.162995	0.711981	137.694	24.4656	2.01742	1.00626	7.70232	1.31761	0.0106165	0	0	0	0	0	0	0	0	0	0	0	0	0	0	0	0	0	0	0	0	0	0	0	0	0	157.267	3100.21
1799	0.007	0.181502	18.6728	0.167935	0.733695	141.875	25.2085	2.07864	1.03689	7.93632	1.32679	0.0106121	0	0	0	0	0	0	0	0	0	0	0	0	0	0	0	0	0	0	0	0	0	0	0	0	0	157.267	3100.21
1800	0.008	0.18684	19.2283	0.172875	0.755622	146.07	25.9538	2.13999	1.06774	8.17124	1.33879	0.0106077	0	0	0	0	0	0	0	0	0	0	0	0	0	0	0	0	0	0	0	0	0	0	0	0	0	157.267	3100.21
1801	0.008	0.192179	19.7879	0.177817	0.777769	150.279	26.7015	2.20149	1.09879	8.4071	1.34754	0.0106032	0	0	0	0	0	0	0	0	0	0	0	0	0	0	0	0	0	0	0	0	0	0	0	0	0	157.267	3100.21
1802	0.01	0.197517	20.3516	0.182758	0.800143	154.502	27.4517	2.26312	1.13008	8.64394	1.36217	0.0105988	0	0	0	0	0	0	0	0	0	0	0	0	0	0	0	0	0	0	0	0	0	0	0	0	0	157.267	3100.21
1803	0.009	0.202855	20.9196	0.187701	0.82275	158.739	28.2045	2.3249	1.16159	8.88178	1.36749	0.0105943	0	0	0	0	0	0	0	0	0	0	0	0	0	0	0	0	0	0	0	0	0	0	0	0	0	157.267	3100.21
1804	0.009	0.208194	21.492	0.192644	0.845598	162.992	28.96	2.38683	1.19334	9.12066	1.37566	0.0105898	0	0	0	0	0	0	0	0	0	0	0	0	0	0	0	0	0	0	0	0	0	0	0	0	0	157.267	3100.21
1805	0.009	0.213532	22.069	0.197589	0.868694	167.261	29.7182	2.44892	1.22534	9.3606	1.38365	0.0105853	0	0	0	0	0	0	0	0	0	0	0	0	0	0	0	0	0	0	0	0	0	0	0	0	0	157.267	3100.21
1806	0.01	0.21887	22.6506	0.202534	0.892046	171.545	30.4792	2.51116	1.25759	9.60165	1.39452	0.0105808	0	0	0	0	0	0	0	0	0	0	0	0	0	0	0	0	0	0	0	0	0	0	0	0	0	157.267	3100.21
1807	0.01	0.224208	23.2371	0.20748	0.915662	175.847	31.2432	2.57357	1.2901	9.84383	1.40217	0.0105762	0	0	0	0	0	0	0	0	0	0	0	0	0	0	0	0	0	0	0	0	0	0	0	0	0	157.267	3100.21
1808	0.01	0.229547	23.8285	0.212426	0.939549	180.165	32.0101	2.63615	1.32289	10.0872	1.40967	0.0105717	0	0	0	0	0	0	0	0	0	0	0	0	0	0	0	0	0	0	0	0	0	0	0	0	0	157.267	3100.21
1809	0.01	0.234885	24.425	0.217374	0.963717	184.501	32.7802	2.69891	1.35594	10.3317	1.41702	0.0105671	0	0	0	0	0	0	0	0	0	0	0	0	0	0	0	0	0	0	0	0	0	0	0	0	0	157.267	3100.21
1810	0.01	0.240223	25.0269	0.222323	0.988174	188.856	33.5535	2.76184	1.38929	10.5775	1.42423	0.0105625	0	0	0	0	0	0	0	0	0	0	0	0	0	0	0	0	0	0	0	0	0	0	0	0	0	157.267	3100.21
1811	0.011	0.245562	25.6341	0.227272	1.01293	193.229	34.33	2.82497	1.42293	10.8246	1.43434	0.0105578	0	0	0	0	0	0	0	0	0	0	0	0	0	0	0	0	0	0	0	0	0	0	0	0	0	157.267	3100.21
1812	0.011	0.2509	26.247	0.232223	1.03799	197.621	35.11	2.88828	1.45687	11.073	1.44129	0.0105532	0	0	0	0	0	0	0	0	0	0	0	0	0	0	0	0	0	0	0	0	0	0	0	0	0	157.267	3100.21
1813	0.011	0.256238	26.8657	0.237175	1.06337	202.034	35.8935	2.9518	1.49113	11.3228	1.44811	0.0105485	0	0	0	0	0	0	0	0	0	0	0	0	0	0	0	0	0	0	0	0	0	0	0	0	0	157.267	3100.21
1814	0.011	0.261577	27.4904	0.242127	1.08907	206.467	36.6806	3.01551	1.52571	11.5739	1.45482	0.0105438	0	0	0	0	0	0	0	0	0	0	0	0	0	0	0	0	0	0	0	0	0	0	0	0	0	157.267	3100.21
1815	0.012	0.266915	28.1212	0.247081	1.11511	210.921	37.4714	3.07944	1.56062	11.8266	1.46447	0.0105391	0	0	0	0	0	0	0	0	0	0	0	0	0	0	0	0	0	0	0	0	0	0	0	0	0	157.267	3100.21
1816	0.013	0.272253	28.7584	0.252036	1.1415	215.398	38.266	3.14359	1.59588	12.0807	1.47402	0.0105343	0	0	0	0	0	0	0	0	0	0	0	0	0	0	0	0	0	0	0	0	0	0	0	0	0	157.267	3100.21
1817	0.014	0.277591	29.4021	0.256992	1.16825	219.896	39.0646	3.20796	1.63149	12.3363	1.48348	0.0105296	0	0	0	0	0	0	0	0	0	0	0	0	0	0	0	0	0	0	0	0	0	0	0	0	0	157.267	3100.21
1818	0.014	0.28293	30.0526	0.261949	1.19536	224.418	39.8673	3.27256	1.66746	12.5935	1.48981	0.0105248	0	0	0	0	0	0	0	0	0	0	0	0	0	0	0	0	0	0	0	0	0	0	0	0	0	157.267	3100.21
1819	0.014	0.288268	30.71	0.266908	1.22286	228.964	40.6742	3.33739	1.70381	12.8524	1.49607	0.0105199	0	0	0	0	0	0	0	0	0	0	0	0	0	0	0	0	0	0	0	0	0	0	0	0	0	157.267	3100.21
1820	0.014	0.293606	31.3745	0.271868	1.25075	233.535	41.4854	3.40248	1.74055	13.1129	1.50225	0.0105151	0	0	0	0	0	0	0	0	0	0	0	0	0	0	0	0	0	0	0	0	0	0	0	0	0	157.267	3100.21
1821	0.014	0.298945	32.0465	0.276829	1.27904	238.131	42.3011	3.46781	1.77769	13.3752	1.50838	0.0105102	0	0	0	0	0	0	0	0	0	0	0	0	0	0	0	0	0	0	0	0	0	0	0	0	0	157.267	3100.21
1822	0.015	0.304283	32.7261	0.281791	1.30774	242.754	43.1214	3.53341	1.81524	13.6393	1.51749	0.0105053	0	0	0	0	0	0	0	0	0	0	0	0	0	0	0	0	0	0	0	0	0	0	0	0	0	157.267	3100.21
1823	0.016	0.309621	33.4135	0.286755	1.33688	247.404	43.9465	3.59927	1.85322	13.9052	1.52655	0.0105003	0	0	0	0	0	0	0	0	0	0	0	0	0	0	0	0	0	0	0	0	0	0	0	0	0	157.267	3100.21
1824	0.016	0.314959	34.1091	0.29172	1.36646	252.081	44.7764	3.66542	1.89163	14.1731	1.53254	0.0104954	0	0	0	0	0	0	0	0	0	0	0	0	0	0	0	0	0	0	0	0	0	0	0	0	0	157.267	3100.21
1825	0.017	0.320298	34.813	0.296687	1.39649	256.788	45.6114	3.73184	1.9305	14.4429	1.54153	0.0104904	0	0	0	0	0	0	0	0	0	0	0	0	0	0	0	0	0	0	0	0	0	0	0	0	0	157.267	3100.21
1826	0.017	0.325636	35.5254	0.301656	1.427	261.524	46.4516	3.79856	1.96983	14.7147	1.54746	0.0104853	0	0	0	0	0	0	0	0	0	0	0	0	0	0	0	0	0	0	0	0	0	0	0	0	0	157.267	3100.21
1827	0.018	0.330974	36.2468	0.306626	1.45799	266.29	47.2972	3.86559	2.00964	14.9886	1.55641	0.0104802	0	0	0	0	0	0	0	0	0	0	0	0	0	0	0	0	0	0	0	0	0	0	0	0	0	157.267	3100.21
1828	0.018	0.336313	36.9773	0.311597	1.48948	271.088	48.1483	3.93293	2.04994	15.2646	1.5623	0.0104751	0	0	0	0	0	0	0	0	0	0	0	0	0	0	0	0	0	0	0	0	0	0	0	0	0	157.267	3100.21
1829	0.018	0.341651	37.7173	0.31657	1.52149	275.919	49.0051	4.00059	2.09076	15.5429	1.5682	0.0104699	0	0	0	0	0	0	0	0	0	0	0	0	0	0	0	0	0	0	0	0	0	0	0	0	0	157.267	3100.21
1830	0.024	0.346989	38.4669	0.321545	1.55403	280.783	49.8678	4.06858	2.1321	15.8235	1.59235	0.0104648	0	0	0	0	0	0	0	0	0	0	0	0	0	0	0	0	0	0	0	0	0	0	0	0	0	157.267	3100.21
1831	0.023	0.352328	39.2266	0.326522	1.58711	285.682	50.7366	4.13692	2.17399	16.1064	1.59521	0.0104595	0	0	0	0	0	0	0	0	0	0	0	0	0	0	0	0	0	0	0	0	0	0	0	0	0	157.267	3100.21
1832	0.023	0.357666	39.9966	0.331501	1.62076	290.617	51.6116	4.2056	2.21643	16.3917	1.60114	0.0104542	0	0	0	0	0	0	0	0	0	0	0	0	0	0	0	0	0	0	0	0	0	0	0	0	0	157.267	3100.21
1833	0.024	0.363004	40.7773	0.336481	1.655	295.588	52.493	4.27466	2.25945	16.6796	1.61014	0.0104489	0	0	0	0	0	0	0	0	0	0	0	0	0	0	0	0	0	0	0	0	0	0	0	0	0	157.267	3100.21
1834	0.024	0.368342	41.5689	0.341464	1.68983	300.597	53.3811	4.34409	2.30306	16.97	1.61613	0.0104436	0	0	0	0	0	0	0	0	0	0	0	0	0	0	0	0	0	0	0	0	0	0	0	0	0	157.267	3100.21
1835	0.025	0.373681	42.3719	0.346448	1.72528	305.645	54.2761	4.4139	2.34729	17.2631	1.6252	0.0104381	0	0	0	0	0	0	0	0	0	0	0	0	0	0	0	0	0	0	0	0	0	0	0	0	0	157.267	3100.21
1836	0.029	0.379019	43.1865	0.351435	1.76137	310.733	55.1781	4.48412	2.39214	17.5589	1.64344	0.0104327	0	0	0	0	0	0	0	0	0	0	0	0	0	0	0	0	0	0	0	0	0	0	0	0	0	157.267	3100.21
1837	0.029	0.384357	44.0132	0.356423	1.79812	315.863	56.0874	4.55474	2.43765	17.8576	1.64957	0.0104272	0	0	0	0	0	0	0	0	0	0	0	0	0	0	0	0	0	0	0	0	0	0	0	0	0	157.267	3100.21
1838	0.03	0.389696	44.8522	0.361414	1.83554	321.036	57.0041	4.6258	2.48383	18.1592	1.65881	0.0104216	0	0	0	0	0	0	0	0	0	0	0	0	0	0	0	0	0	0	0	0	0	0	0	0	0	157.267	3100.21
1839	0.031	0.395034	45.7041	0.366407	1.87367	326.252	57.9287	4.69728	2.5307	18.4638	1.66811	0.010416	0	0	0	0	0	0	0	0	0	0	0	0	0	0	0	0	0	0	0	0	0	0	0	0	0	157.267	3100.21
1840	0.033	0.400372	46.5691	0.371403	1.91251	331.515	58.8612	4.76922	2.57828	18.7714	1.68054	0.0104104	0	0	0	0	0	0	0	0	0	0	0	0	0	0	0	0	0	0	0	0	0	0	0	0	0	157.267	3100.21
1841	0.034	0.405711	47.4478	0.376401	1.9521	336.824	59.8019	4.84163	2.6266	19.0823	1.69001	0.0104047	0	0	0	0	0	0	0	0	0	0	0	0	0	0	0	0	0	0	0	0	0	0	0	0	0	157.267	3100.21
1842	0.036	0.411049	48.3404	0.381401	1.99246	342.181	60.7511	4.91451	2.67568	19.3965	1.70261	0.0103989	0	0	0	0	0	0	0	0	0	0	0	0	0	0	0	0	0	0	0	0	0	0	0	0	0	157.267	3100.21
1843	0.037	0.416387	49.2475	0.386404	2.0336	347.588	61.709	4.98789	2.72554	19.7141	1.71227	0.0103931	0	0	0	0	0	0	0	0	0	0	0	0	0	0	0	0	0	0	0	0	0	0	0	0	0	157.267	3100.21
1844	0.039	0.421725	50.1694	0.39141	2.07556	353.047	62.6759	5.06177	2.7762	20.0351	1.72507	0.0103872	0	0	0	0	0	0	0	0	0	0	0	0	0	0	0	0	0	0	0	0	0	0	0	0	0	157.267	3100.21
1845	0.043	0.427064	51.1068	0.396418	2.11836	358.558	63.6522	5.13618	2.8277	20.3598	1.74408	0.0103812	0	0	0	0	0	0	0	0	0	0	0	0	0	0	0	0	0	0	0	0	0	0	0	0	0	157.267	3100.21
1846	0.043	0.432402	52.0599	0.401429	2.16202	364.125	64.638	5.21114	2.88005	20.6882	1.75104	0.0103752	0	0	0	0	0	0	0	0	0	0	0	0	0	0	0	0	0	0	0	0	0	0	0	0	0	157.267	3100.21
1847	0.046	0.43774	53.0294	0.406443	2.20657	369.747	65.6336	5.28665	2.93328	21.0205	1.76725	0.0103691	0	0	0	0	0	0	0	0	0	0	0	0	0	0	0	0	0	0	0	0	0	0	0	0	0	157.267	3100.21
1848	0.047	0.443079	54.0156	0.411461	2.25204	375.427	66.6395	5.36273	2.98742	21.3567	1.77751	0.010363	0	0	0	0	0	0	0	0	0	0	0	0	0	0	0	0	0	0	0	0	0	0	0	0	0	157.267	3100.21
1849	0.05	0.448417	55.0193	0.416481	2.29847	381.167	67.6558	5.43941	3.0425	21.6969	1.79401	0.0103568	0	0	0	0	0	0	0	0	0	0	0	0	0	0	0	0	0	0	0	0	0	0	0	0	0	157.267	3100.21
1850	0.054	0.453755	56.0408	0.421504	2.34586	386.969	68.6829	5.5167	3.09855	22.0414	1.81369	0.0103505	0	0	0	0	0	0	0	0	0	0	0	0	0	0	0	0	1.395	0	0	0	0	0	0	0	0	157.267	3100.21
1851	0.054	0.446786	56.4613	0.427401	2.40128	387.461	68.7278	5.54232	3.11874	22.1051	1.84692	0.0103509	0	0	0	0	0	0	0	0	0	0	0	0	0	0	0	0	1.447	0	0	0	0	0	0	0	0	157.267	3100.21
1852	0.057	0.498623	56.8819	0.464661	2.4567	387.952	68.7726	5.56795	3.13893	22.1687	1.99469	0.0103513	0	0	0	0	0	0	0	0	0	0	0	0	0	0	0	0	1.502	0	0	0	0	0	0	0	0	157.267	3100.21
1853	0.059	0.497354	57.3024	0.464774	2.51212	388.443	68.8174	5.59357	3.15912	22.2324	2.00081	0.0103518	0	0	0	0	0	0	0	0	0	0	0	0	0	0	0	0	1.554	0	0	0	0	0	0	0	0	157.267	3100.21
1854	0.069	0.495817	57.723	0.464436	2.56753	388.935	68.8622	5.61919	3.17931	22.296	2.0303	0.0103522	0	0	0	0	0	0	0	0	0	0	0	0	0	0	0	0	1.607	0	0	0	0	0	0	0	0	157.267	3100.21
1855	0.071	0.493679	58.1436	0.463279	2.62295	389.426	68.9071	5.64481	3.1995	22.3597	2.03251	0.0103526	0	0	0	0	0	0	0	0	0	0	0	0	0	0	0	0	1.657	0	0	0	0	0	0	0	0	157.267	3100.21
1856	0.076	0.498935	58.5641	0.467293	2.67837	389.918	68.9519	5.67043	3.21969	22.4233	2.06176	0.0103531	0	0	0	0	0	0	0	0	0	0	0	0	0	0	0	0	1.712	0	0	0	0	0	0	0	0	157.267	3100.21
1857	0.077	0.504232	58.9847	0.471264	2.73379	390.409	68.9967	5.69605	3.23988	22.487	2.07845	0.0103535	0	0	0	0	0	0	0	0	0	0	0	0	0	0	0	0	1.765	0	0	0	0	0	0	0	0	157.267	3100.21
1858	0.078	0.509233	59.4052	0.475031	2.78921	390.9	69.0416	5.72167	3.26007	22.5506	2.0943	0.0103539	0	0	0	0	0	0	0	0	0	0	0	0	0	0	0	0	1.815	0	0	0	0	0	0	0	0	157.267	3100.21
1859	0.083	0.514254	59.8258	0.478766	2.84462	391.392	69.0864	5.74729	3.28025	22.6143	2.12297	0.0103544	0	0	0	0	0	0	0	0	0	0	0	0	0	0	0	0	1.87	0	0	0	0	0	0	0	0	157.267	3100.21
1860	0.091	0.518967	60.2464	0.482577	2.90004	391.883	69.1312	5.77291	3.30044	22.6779	2.16198	0.0103548	0	0	0	0	0	0	0	0	0	0	0	0	0	0	0	0	1.923	0	0	0	0	0	0	0	0	157.267	3100.21
1861	0.095	0.528224	59.6145	0.504995	2.99268	392.896	69.269	5.81284	3.32441	22.7345	2.27359	0.010355	0	0	0	0	0	0	0	0	0	0	0	0	0	0	0	0	1.973	0	0	0	0	0	0	0	0	157.267	3100.21
1862	0.097	0.473717	58.9826	0.471113	3.08532	393.909	69.4069	5.85276	3.34838	22.7911	2.15582	0.0103551	0	0	0	0	0	0	0	0	0	0	0	0	0	0	0	0	2.028	0	0	0	0	0	0	0	0	157.267	3100.21
1863	0.104	0.473749	58.3507	0.474449	3.17795	394.922	69.5447	5.89268	3.37235	22.8478	2.19233	0.0103553	0	0	0	0	0	0	0	0	0	0	0	0	0	0	0	0	2.081	0	0	0	0	0	0	0	0	157.267	3100.21
1864	0.112	0.474138	57.7188	0.477858	3.27059	395.935	69.6826	5.9326	3.39632	22.9044	2.22994	0.0103555	0	0	0	0	0	0	0	0	0	0	0	0	0	0	0	0	2.134	0	0	0	0	0	0	0	0	157.267	3100.21
1865	0.119	0.474795	57.0869	0.48145	3.36323	396.948	69.8204	5.97253	3.42029	22.961	2.26553	0.0103556	0	0	0	0	0	0	0	0	0	0	0	0	0	0	0	0	2.184	0	0	0	0	0	0	0	0	157.267	3100.21
1866	0.122	0.474912	56.455	0.484205	3.45587	397.961	69.9582	6.01245	3.44426	23.0176	2.2872	0.0103558	0	0	0	0	0	0	0	0	0	0	0	0	0	0	0	0	2.239	0	0	0	0	0	0	0	0	157.267	3100.21
1867	0.130223	0.473384	55.8231	0.484723	3.5485	398.974	70.0961	6.05237	3.46823	23.0742	2.31876	0.010356	0	0	0	0	0	0	0	0	0	0	0	0	0	0	0	0	2.291	0	0	0	0	0	0	0	0	157.267	3100.21
1868	0.135252	0.471983	55.1912	0.485953	3.64114	399.987	70.2339	6.09229	3.4922	23.1308	2.33718	0.0103561	0	0	0	0	0	0	0	0	0	0	0	0	0	0	0	0	2.341	0	0	0	0	0	0	0	0	157.267	3100.21
1869	0.142281	0.470485	54.5593	0.486862	3.73378	401	70.3717	6.13222	3.51617	23.1875	2.36281	0.0103563	0	0	0	0	0	0	0	0	0	0	0	0	0	0	0	0	2.386	0	0	0	0	0	0	0	0	157.267	3100.21
1870	0.147311	0.469334	53.9274	0.487744	3.82642	402.013	70.5096	6.17214	3.54014	23.2441	2.38241	0.0103565	0	0	0	0	0	0	0	0	0	0	0	0	0	0	0	0	2.452	0	0	0	0	0	0	0	0	157.267	3100.21
1871	0.15634	0.487325	56.6839	0.585016	3.99317	403.032	70.6533	6.21717	3.56245	23.2838	2.86067	0.0103569	0	0	0	0	0	0	0	0	0	0	0	0	0	0	0	0	2.505	0	0	0	0	0	0	0	0	157.267	3100.21
1872	0.173369	0.566964	59.4403	0.66674	4.15992	404.051	70.7971	6.26219	3.58477	23.3236	3.24017	0.0103573	0	0	0	0	0	0	0	0	0	0	0	0	0	0	0	0	2.557	0	0	0	0	0	0	0	0	157.267	3100.21
1873	0.184398	0.576901	62.1968	0.696371	4.32667	405.071	70.9408	6.30722	3.60708	23.3634	3.40336	0.0103577	0	0	0	0	0	0	0	0	0	0	0	0	0	0	0	0	2.61	0	0	0	0	0	0	0	0	157.267	3100.21
1874	0.174428	0.583284	64.9533	0.70875	4.49342	406.09	71.0846	6.35225	3.62939	23.4031	3.42716	0.0103581	0	0	0	0	0	0	0	0	0	0	0	0	0	0	0	0	2.663	0	0	0	0	0	0	0	0	157.267	3100.21
1875	0.188457	0.58997	67.7097	0.720343	4.66018	407.109	71.2283	6.39727	3.6517	23.4429	3.51731	0.0103585	0	0	0	0	0	0	0	0	0	0	0	0	0	0	0	0	2.85	0	0	0	0	0	0	0	0	157.267	3100.21
1876	0.191486	0.596392	70.4662	0.745243	4.82693	408.128	71.3721	6.4423	3.67401	23.4827	3.63755	0.0103589	0	0	0	0	0	0	0	0	0	0	0	0	0	0	0	0	2.989	0	0	0	0	0	0	0	0	157.267	3100.21
1877	0.194515	0.602623	73.2226	0.756332	4.99368	409.147	71.5158	6.48732	3.69633	23.5224	3.69585	0.0103593	0	0	0	0	0	0	0	0	0	0	0	0	0	0	0	0	3.13	0	0	0	0	0	0	0	0	157.267	3100.21
1878	0.196	0.609051	75.9791	0.766046	5.16043	410.166	71.6596	6.53235	3.71864	23.5622	3.74565	0.0103597	0	0	0	0	0	0	0	0	0	0	0	0	0	0	0	0	3.275	0	0	0	0	0	0	0	0	157.267	3100.21
1879	0.21	0.615348	78.7356	0.774911	5.32718	411.185	71.8033	6.57738	3.74095	23.602	3.83041	0.0103602	0	0	0	0	0	0	0	0	0	0	0	0	0	0	0	0	3.396	0	0	0	0	0	0	0	0	157.267	3100.21
1880	0.236	0.621243	81.492	0.784121	5.49393	412.204	71.9471	6.6224	3.76326	23.6417	3.95202	0.0103606	0	0	0	0	0	0	0	0	0	0	0	0	0	0	0	0	3.573	0	0	0	0	0	0	0	0	157.267	3100.21
1881	0.243	0.648873	84.3595	0.811578	5.76232	413.256	72.0998	6.67595	3.79257	23.6754	4.07131	0.0103613	0	0	0	0	0	0	0	0	0	0	0	0	0	0	0	0	3.726	0	0	0	0	0	0	0	0	157.267	3100.21
1882	0.256	0.604664	87.2269	0.78526	6.03071	414.308	72.2526	6.72949	3.82188	23.7092	4.01987	0.010362	0	0	0	0	0	0	0	0	0	0	0	0	0	0	0	0	3.883	0	0	0	0	0	0	0	0	157.267	3100.21
1883	0.272	0.608518	90.0943	0.792556	6.2991	415.36	72.4053	6.78304	3.85119	23.7429	4.09853	0.0103627	0	0	0	0	0	0	0	0	0	0	0	0	0	0	0	0	4.043	0	0	0	0	0	0	0	0	157.267	3100.21
1884	0.275	0.612128	92.9618	0.798751	6.56748	416.412	72.5581	6.83658	3.8805	23.7766	4.13334	0.0103634	0	0	0	0	0	0	0	0	0	0	0	0	0	0	0	0	4.233	0	0	0	0	0	0	0	0	157.267	3100.21
1885	0.277	0.615236	95.8292	0.804534	6.83587	417.464	72.7108	6.89012	3.90981	23.8103	4.16461	0.0103642	0	0	0	0	0	0	0	0	0	0	0	0	0	0	0	0	4.427	0	0	0	0	0	0	0	0	157.267	3100.21
1886	0.281	0.617144	98.6966	0.826194	7.10426	418.517	72.8636	6.94367	3.93912	23.844	4.27589	0.0103649	0	0	0	0	0	0	0	0	0	0	0	0	0	0	0	0	4.625	0	0	0	0	0	0	0	0	157.267	3100.21
1887	0.295	0.616163	101.564	0.832196	7.37264	419.569	73.0163	6.99721	3.96843	23.8777	4.35318	0.0103656	0	0	0	0	0	0	0	0	0	0	0	0	0	0	0	0	4.827	0	0	0	0	0	0	0	0	157.267	3100.21
1888	0.327	0.614734	104.431	0.837058	7.64103	420.621	73.169	7.05076	3.99774	23.9115	4.47487	0.0103663	0	0	0	0	0	0	0	0	0	0	0	0	0	0	0	0	5.033	0	0	0	0	0	0	0	0	157.267	3100.21
1889	0.327	0.6132	107.299	0.84144	7.90942	421.673	73.3218	7.1043	4.02704	23.9452	4.49842	0.010367	0	0	0	0	0	0	0	0	0	0	0	0	0	0	0	0	5.27	0	0	0	0	0	0	0	0	157.267	3100.21
1890	0.356	0.611754	110.166	0.845525	8.1778	422.725	73.4745	7.15784	4.05635	23.9789	4.6037	0.0103678	0	0	0	0	0	0	0	0	0	0	0	0	0	0	0	0	5.485	0	0	0	0	0	0	0	0	157.267	3100.21
1891	0.372	0.610249	111.524	0.850982	8.56737	424.293	73.7003	7.23586	4.08828	24.0114	4.68307	0.0103687	0	0	0	0	0	0	0	0	0	0	0	0	0	0	0	0	5.731	0	0	0	0	0	0	0	0	157.267	3100.21
1892	0.374	0.623191	112.881	0.85742	8.95694	425.861	73.9261	7.31388	4.12022	24.0439	4.75516	0.0103697	0	0	0	0	0	0	0	0	0	0	0	0	0	0	0	0	6.01	0	0	0	0	0	0	0	0	157.267	3100.21
1893	0.37	0.624403	114.238	0.864758	9.34651	427.429	74.152	7.3919	4.15215	24.0763	4.82174	0.0103706	0	0	0	0	0	0	0	0	0	0	0	0	0	0	0	0	6.267	0	0	0	0	0	0	0	0	157.267	3100.21
1894	0.383	0.640367	115.595	0.872945	9.73608	428.997	74.3778	7.46992	4.18408	24.1088	4.88457	0.0103716	0	0	0	0	0	0	0	0	0	0	0	0	0	0	0	0	6.529	0	0	0	0	0	0	0	0	157.267	3100.21
1895	0.406	0.644419	116.953	0.881882	10.1256	430.565	74.6036	7.54794	4.21601	24.1413	4.94542	0.0103726	0	0	0	0	0	0	0	0	0	0	0	0	0	0	0	0	6.824	0	0	0	0	0	0	0	0	157.267	3100.21
1896	0.419	0.646278	118.31	0.891418	10.5152	432.133	74.8294	7.62596	4.24794	24.1738	5.00605	0.0103735	0	0	0	0	0	0	0	0	0	0	0	0	0	0	0	0	7.151	0	0	0	0	0	0	0	0	157.267	3100.21
1897	0.44	0.649564	119.667	0.901402	10.9048	433.701	75.0552	7.70398	4.27987	24.2063	5.06823	0.0103745	0	0	0	0	0	0	0	0	0	0	0	0	0	0	0	0	7.432	0	0	0	0	0	0	0	0	157.267	3100.21
1898	0.465	0.651001	121.025	0.911681	11.2943	435.269	75.281	7.782	4.3118	24.2387	5.13374	0.0103754	0	0	0	0	0	0	0	0	0	0	0	0	0	0	0	0	7.798	0	0	0	0	0	0	0	0	157.267	3100.21
1899	0.507	0.652204	122.382	0.922105	11.6839	436.837	75.5068	7.86002	4.34373	24.2712	5.20432	0.0103764	0.959119	0	0	0	0	0	0	0	0	0	0	0	0	0	0	0	8.119	0	0	0	0	0	0	0	0	157.267	3100.21
1900	0.534	0.653206	123.739	0.932522	12.0735	438.405	75.7326	7.93804	4.37566	24.3037	5.28176	0.0103773	0.0505758	0	0	0	0	0	0	0	0	0	0	0	0	0	0	0	8.473	0	0	0	0	0	0	0	0	157.267	3100.21
1901	0.552	0.702943	124.841	0.944667	12.6299	439.892	75.9205	8.04414	4.41738	24.3365	5.36856	0.0103797	0.0532377	0	0	0	0	0	0	0	0	0	0	0	0	0	0	0	8.592	0	0	0	0	0	0	0	0	157.267	3100.21
1902	0.566	0.702974	125.944	0.959931	13.1863	441.378	76.1084	8.15023	4.45911	24.3693	5.46467	0.0103821	0.0560397	0	0	0	0	0	0	0	0	0	0	0	0	0	0	0	8.762	0	0	0	0	0	0	0	0	157.267	3100.21
1903	0.617	0.726671	127.046	0.977647	13.7427	442.865	76.2962	8.25633	4.50083	24.4021	5.56792	0.0103845	0.0589892	0	0	0	0	0	0	0	0	0	0	0	0	0	0	0	8.906	0	0	0	0	0	0	0	0	157.267	3100.21
1904	0.624	0.748293	128.149	0.997229	14.2991	444.351	76.4841	8.36242	4.54255	24.4349	5.6762	0.0103868	0.0620939	0	0	0	0	0	0	0	0	0	0	0	0	0	0	0	9.102	0	0	0	0	0	0	0	0	157.267	3100.21
1905	0.663	0.769815	129.251	1.01813	14.8555	445.838	76.672	8.46851	4.58427	24.4677	5.78736	0.0103892	0.065362	0	0	0	0	0	0	0	0	0	0	0	0	0	0	0	9.623	0	0	0	0	0	0	0	0	157.267	3100.21
1906	0.707	0.796534	130.354	1.03974	15.4119	447.324	76.8598	8.57461	4.62599	24.5005	5.89926	0.0103916	0.0688021	0	0	0	0	0	0	0	0	0	0	0	0	0	0	0	12.093	0	0	0	0	0	0	0	0	157.267	3100.21
1907	0.784	0.803763	131.456	1.06146	15.9683	448.811	77.0477	8.6807	4.66771	24.5333	6.00977	0.010394	0.0724232	0	0	0	0	0	0	0	0	0	0	0	0	0	0	0	12.363	0	0	0	0	0	0	0	0	157.267	3100.21
1908	0.75	0.811413	132.559	1.08267	16.5247	450.297	77.2356	8.78679	4.70944	24.5661	6.11675	0.0103964	0.076235	0	0	0	0	0	0	0	0	0	0	0	0	0	0	0	12.633	0	0	0	0	0	0	0	0	157.267	3100.21
1909	0.785	0.817378	133.661	1.10278	17.081	451.784	77.4235	8.89289	4.75116	24.5989	6.21805	0.0103987	0.0802474	0	0	0	0	0	0	0	0	0	0	0	0	0	0	0	12.903	0	0	0	0	0	0	0	0	157.267	3100.21
1910	0.819	0.821982	134.764	1.12118	17.6374	453.27	77.6113	8.99898	4.79288	24.6317	6.31156	0.0104011	0.0844709	0	0	0	0	0	0	0	0	0	0	0	0	0	0	0	13.146	0	0	0	0	0	0	0	0	157.267	3100.21
1911	0.836	0.778894	135.969	1.13897	17.8214	451.76	77.2727	9.05696	4.79495	24.4275	6.39756	0.0104064	0.0889167	0	0	0	0	0	0	0	0	0	0	0	0	0	0	0	14.007	0	0	0	0	0	0	0	0	157.267	3100.21
1912	0.879	0.747848	137.175	1.15756	18.0054	450.249	76.9341	9.11494	4.79702	24.2232	6.47866	0.0104117	0.0935966	0	0	0	0	0	0	0	0	0	0	0	0	0	0	0	19.895	0	0	0	0	0	0	0	0	157.267	3100.21
1913	0.943	0.72298	138.381	1.17675	18.1894	448.739	76.5955	9.17292	4.7991	24.0189	6.55615	0.010417	0.0985227	0	0	0	0	0	0	0	0	0	0	0	0	0	0	0	19.025	0	0	0	0	0	0	0	0	157.267	3100.21
1914	0.85	0.714792	139.587	1.19626	18.3734	447.228	76.2569	9.23089	4.80117	23.8146	6.63132	0.0104222	0.103708	0	0	0	0	0	0	0	0	0	0	0	0	0	0	0	11.082	0	0	0	0	0	0	0	0	157.267	3100.21
1915	0.838	0.70575	140.793	1.21584	18.5574	445.718	75.9183	9.28887	4.80324	23.6104	6.70546	0.0104275	0.109166	0	0	0	0	0	0	0	0	0	0	0	0	0	0	0	11.216	0	0	0	0	0	0	0	0	157.267	3100.21
1916	0.901	0.708116	141.999	1.23532	18.7413	444.208	75.5796	9.34685	4.80532	23.4061	6.77987	0.0104328	0.114912	0	0	0	0	0	0	0	0	0	0	0	0	0	0	0	18.614	0	0	0	0	0	0	0	0	157.267	3100.21
1917	0.955	0.711196	143.204	1.25452	18.9253	442.697	75.241	9.40483	4.80739	23.2018	6.85582	0.0104381	0.12096	0	0	0	0	0	0	0	0	0	0	0	0	0	0	0	22.143	0	0	0	0	0	0	0	0	157.267	3100.21
1918	0.936	0.714304	144.41	1.27326	19.1093	441.187	74.9024	9.46281	4.80946	22.9976	6.93462	0.0104434	0.127326	0	0	0	0	0	0	0	0	0	0	0	0	0	0	0	22.696	0	0	0	0	0	0	0	0	157.267	3100.21
1919	0.806	0.719654	145.616	1.29138	19.2933	439.676	74.5638	9.52079	4.81153	22.7933	7.01756	0.0104487	0.134028	0	0	0	0	0	0	0	0	0	0	0	0	0	0	0	23.196	0	0	0	0	0	0	0	0	157.267	3100.21
1920	0.932	0.721283	146.822	1.30869	19.4773	438.166	74.2252	9.57877	4.81361	22.589	7.10592	0.010454	0.141082	0	0	0	0	0	0	0	0	0	0	0	0	0	0	0	23.802	0	0	0	0	0	0	0	0	157.267	3100.21
1921	0.803	0.757417	147.862	1.32579	19.8639	440.996	74.6803	9.6457	4.79871	22.6052	7.20195	0.0104523	0.148507	0	0	0	0	0	0	0	0	0	0	0	0	0	0	0	24.304	0	0	0	0	0	0	0	0	157.267	3100.21
1922	0.845	0.747941	148.901	1.34327	20.2505	443.825	75.1354	9.71264	4.78382	22.6215	7.30583	0.98418	0.156323	0	0	0	0	0	0	0	0	0	0	0	0	0	0	0	24.563	0	0	0	0	0	0	0	0	157.267	3100.21
1923	0.97	0.753288	149.941	1.36094	20.6371	446.655	75.5905	9.77958	4.76893	22.6377	7.41577	1.16488	0.164551	0	0	0	0	0	0	0	0	0	0	0	0	0	0	0	25.35	0	0	0	0	0	0	0	0	157.267	3100.21
1924	0.963	0.756861	150.981	1.37962	21.0237	449.484	76.0456	9.84651	4.75404	22.6539	7.52998	1.22567	0.173211	0	0	0	0	0	0	0	0	0	0	0	0	0	0	0	25.878	0	0	0	0	0	0	0	0	157.267	3100.21
1925	0.975	0.758089	152.02	1.3999	21.4104	452.314	76.5007	9.91345	4.73914	22.6701	7.64667	1.28964	0.182328	0	0	0	0	0	0	0	0	0	0	0	0	0	0	0	28.827	0	0	0	0	0	0	0	0	157.267	3100.21
1926	0.983	0.761483	153.06	1.42119	21.797	455.143	76.9558	9.98039	4.72425	22.6863	7.76406	1.35699	0.191924	0	0	0	0	0	0	0	0	0	0	0	0	0	0	0	29.446	0	0	0	0	0	0	0	0	157.267	3100.21
1927	1.062	0.797183	154.1	1.44292	22.1836	457.973	77.4109	10.0473	4.70936	22.7026	7.88034	1.42788	0.202025	0	0	0	0	0	0	0	0	0	0	0	0	0	0	0	30.065	0	0	0	0	0	0	0	0	157.267	3100.21
1928	1.065	0.799671	155.14	1.4645	22.5702	460.803	77.866	10.1143	4.69447	22.7188	7.99374	1.5025	0.212658	0	0	0	0	0	0	0	0	0	0	0	0	0	0	0	30.685	0	0	0	0	0	0	0	0	157.267	3100.21
1929	1.145	0.824226	156.179	1.48535	22.9569	463.632	78.3211	10.1812	4.67957	22.735	8.10245	1.58105	0.223851	0	0	0	0	0	0	0	0	0	0	0	0	0	0	0	31.573	0	0	0	0	0	0	0	0	157.267	3100.21
1930	1.053	0.89588	157.219	1.50489	23.3435	466.462	78.7762	10.2481	4.66468	22.7512	8.2047	1.66374	0.235632	0	0.74682	0	0	0	0	0	0	0	0	0	0	0	0	0	31.933	0	0	0	0	0	0	0	0	157.267	3100.21
1931	0.94	0.903341	158.345	1.52262	23.755	468.031	78.9094	10.3025	4.6671	22.7486	8.29855	1.75078	0.248034	0	0.0676905	0	0	0	0	0	0	0	0	0	0.097	0	0	0	32.553	0	0	0	0	0	0	0	0	157.267	3100.21
1932	0.847	0.812226	159.472	1.53852	24.1664	469.6	79.0427	10.3568	4.66951	22.7459	8.38498	1.8424	0.261089	0	0.0735767	0	0	0	0	0	0	0	0	0	0.097	0	0	0	33.979	0	0	0	0	0	0	0	0	157.267	3100.21
1933	0.893	0.808588	160.598	1.55267	24.5779	471.169	79.176	10.4111	4.67193	22.7433	8.46663	1.93884	0.27483	0	0.0799748	0	0	0	0	0	0	0	0	0	0.097	0	0	0	41.893	0	0	0	0	0	0	0	0	157.267	3100.21
1934	0.973	0.796863	161.725	1.56531	24.9894	472.738	79.3092	10.4655	4.67434	22.7407	8.54609	2.04035	0.289295	0	0.0869292	0	0	0	0	0	0	0	0	0	0.194	0	0.117	0	42.817	0	0	0	0	0	0	0	0	157.267	3100.21
1935	1.027	0.794716	162.851	1.57712	25.4009	474.307	79.4425	10.5198	4.67676	22.738	8.62599	2.14721	0.304521	0	0.0944883	0	0	0	0	0	0	0	0	0	0.291	0	0.117	0	43.74	0	0	0	0	0	0	0	0	157.267	3100.21
1936	1.13	0.8013	163.977	1.58892	25.8123	475.876	79.5758	10.5741	4.67917	22.7354	8.70894	2.2597	0.320548	0	0.102705	0	0	0	0	0	0	0	0	0	0.485	0	0.117	0	44.664	0	0	0	0	0	0	0	0	157.267	3100.21
1937	1.209	0.779699	165.104	1.60151	26.2238	477.445	79.709	10.6285	4.68159	22.7327	8.79755	2.3781	0.337419	0	0.111636	0	0	0	0	0	0	0	0	0	0.776	0	0.234	0	45.588	0	0	0	0	0	0	0	0	157.267	3100.21
1938	1.142	0.781882	166.23	1.61572	26.6353	479.014	79.8423	10.6828	4.684	22.7301	8.89443	2.50274	0.355178	0	0.121343	0	0	0	0	0	0	0	0	0.161	1.164	0	0.234	0	46.512	0	0.165	0	0	0	0	0	0	157.267	3100.21
1939	1.192	0.779444	167.357	1.63235	27.0468	480.583	79.9756	10.7371	4.68642	22.7274	9.00221	2.63393	0.373872	0	0.131895	0	0	0	0	0	0	0	0	0.161	1.649	0	0.351	0	47.436	0	0.33	0	0	0	0	0	0	157.267	3100.21
1940	1.299	0.766832	168.483	1.65224	27.4583	482.152	80.1088	10.7914	4.68883	22.7248	9.12349	2.77203	0.393549	0	0.143364	0	0	0	0	0	0	0	0	0.161	2.231	0	0.468	0	50.781	0	0.496	0	0	0	0	0	0	157.267	3100.21
1941	1.334	0.750365	170.03	1.7002	27.8404	488.558	81.2433	11.1234	4.69324	22.6876	9.26539	2.91741	0.414262	0	0.155833	0	0	0	0	0	0	0	0	0.161	2.91	0	0.585	0	52.603	0	0.661	0	0	0	0	0	0	157.267	3100.21
1942	1.342	0.76905	171.578	1.79386	28.2226	494.963	82.3778	11.4554	4.69766	22.6505	9.43212	3.07043	0.394683	0	0.169386	0	0	0	0	0	0	0	0	0.161	3.589	0	0.819	0	53.918	0	0.826	0	0	0	0	0	0	157.267	3100.21
1943	1.391	0.763766	173.126	1.92316	28.6048	501.369	83.5123	11.7873	4.70207	22.6133	9.62193	3.23151	0.378322	0	0.184119	0	0	0	0	0	0	0	0	0.322	4.365	0	1.17	0	54.705	0	0.991	0	0	0	0	0	0	157.267	3100.21
1944	1.383	0.768399	174.673	2.08668	28.987	507.774	84.6468	12.1193	4.70648	22.5762	9.83308	3.40106	0.364076	0	0.200132	0	0	0	0	0	0	0	0	0.322	5.917	0	1.521	0	55.75	0	1.157	0	0	0	0	0	0	157.267	3100.21
1945	1.16	0.769147	176.221	2.2804	29.3692	514.18	85.7813	12.4513	4.71089	22.539	10.0638	3.57954	0.351947	0	0.217538	0	0	0	0	0	0	0	0	0.483	7.76	1.868	3.861	0	56.796	0	1.322	0	0	0	0	0	0	157.267	3100.21
1946	1.238	0.842149	177.768	2.49036	29.7513	520.585	86.9158	12.7832	4.71531	22.5019	10.3124	3.76742	0.341933	0	0.236458	0	0	0	0	0	0	0	0	0.966	13.483	4.203	6.318	0	59.187	0	1.487	0	0	0	0	0	0	157.267	3100.21
1947	1.392	0.87018	179.316	2.7026	30.1335	526.991	88.0503	13.1152	4.71972	22.4647	10.577	3.96518	0.334036	0	0.257024	0	0	0	0	0	0	0	0	2.093	20.661	5.137	6.903	0	67.278	0	1.652	0	0	0	0	0	0	157.267	3100.21
1948	1.469	0.87513	180.863	2.90316	30.5157	533.396	89.1848	13.4472	4.72413	22.4276	10.8561	4.17335	0.328255	0	0.279378	0	0	0	0	0	0	0	0	3.703	24.056	6.071	7.254	0	68.369	0	1.817	0	0	0	0	0	0	157.267	3100.21
1949	1.419	0.882126	182.411	3.07807	30.8979	539.802	90.3193	13.7791	4.72855	22.3904	11.1477	4.39247	0.32459	0	0.303676	0	0	0	0	0	0	0	0	6.118	25.802	6.538	7.722	0	74.34	0	1.983	0	0	0	0	0	0	157.267	3100.21
1950	1.63	0.892335	183.959	3.21338	31.28	546.207	91.4538	14.1111	4.73296	22.3532	11.4501	4.62313	0.323043	0	0.330088	0	0	0	0	0	0	0	0.261908	8.855	28.615	7.939	8.073	0	65	0	2.148	0	0	0	0	0	0	157.267	3100.21
1951	1.768	1.08852	189.11	3.3186	32.8669	558.446	94.8484	14.5285	4.77333	22.5413	11.7846	4.86592	0.323612	0	0.358782	0	0	0	0	0	0	0	0.26199	8.158	33.854	1.889	7.102	0	65	0	2.313	0	0	0	0	0	0	157.267	3100.21
1952	1.796	1.10964	194.262	3.41111	34.4538	570.685	98.2429	14.9459	4.8137	22.7293	12.1691	5.12148	0.326299	0	0.389971	0	0	0	0	0	0	0	0.262072	11.742	35.2	2.139	7.288	0	70	0	2.478	0	0	0	0	0	0	157.927	3117.78
1953	1.841	1.10452	199.413	3.48872	36.0407	582.924	101.638	15.3633	4.85407	22.9174	12.5966	5.3905	0.331104	0	0.42387	0	0	0	0	0	0	0	0.262153	15.985	39.582	2.437	7.43	0	75	0	2.644	0	0	0	0	0	0	158.604	3137.15
1954	1.865	1.15214	204.565	3.55435	37.6277	595.163	105.032	15.7807	4.89444	23.1054	13.0603	5.67367	0.338026	0	0.460717	0	0	0	0	0	0	0	0.262235	19.855	44.802	2.785	7.431	0	80	1.214	2.809	0	0	0	0	0	0	159.3	3158.22
1955	2.043	1.19119	209.716	3.61411	39.2146	607.401	108.427	16.1981	4.93481	23.2935	13.5532	5.97175	0.347066	0	0.500767	0	0	0	0	0	0	0	0.262317	24.604	50.343	3.233	7.388	0	85	3.512	2.974	0	0	0	0	0	0	160.014	3180.75
1956	2.178	1.24469	214.868	3.67068	40.8015	619.64	111.821	16.6154	4.97518	23.4815	14.0685	6.28552	0.358224	0	0.544298	0	0	0	0	0	0	0	0.262399	30.685	58.664	3.73	7.302	0	90	6.224	3.48	0	0	0	0	0	0	160.748	3204.5
1957	2.27	1.27187	220.019	3.72673	42.3884	631.879	115.216	17.0328	5.01555	23.6696	14.5993	6.6158	0.3715	0	0.591613	0	0	0	0	0	0	0	0.262481	34.375	66.689	4.227	7.25	0	95	9.469	4.251	0	0	0	0	0	0	161.502	3229.07
1958	2.33	1.31958	225.171	3.78495	43.9753	644.118	118.61	17.4502	5.05592	23.8576	15.1387	6.96346	0.386895	0	0.643041	0	0	0	0	0	0	0	0.262563	32.235	69.93	4.824	7.221	0	100	10.772	6.008	0	0	0	0	0	0	162.277	3254.04
1959	2.462	1.2036	230.322	3.848	45.5622	656.357	122.005	17.8676	5.09629	24.0457	15.6798	7.32943	0.404409	0	0.69894	0	0	0	0	0	0	0	0.262644	33.015	78.149	5.57	7.176	0	105	14.717	7.06	0	0	0	0	0	0	163.073	3278.97
1960	2.577	1.19228	235.474	3.91858	47.1491	668.596	125.4	18.285	5.13665	24.2337	16.2157	7.71465	0.424041	0	0.759698	0	0	0	0	0	0	0	0.524634	43.342	93.09	6.366	6.6	0	110	18.348	7.659	0	0	0	0	0	0	163.892	3303.39
1961	2.594	1.24432	238.522	4.02401	48.7708	682.676	129.241	18.9591	5.1796	24.5022	16.7593	8.12016	0.445793	0	0.825763	0	0	0	0	0	0	0	0.524798	55.722	104.6	7.212	6.88	0	115	20.077	9.426	0	0	0	0	0	0	164.735	3326.86
1962	2.7	1.23557	241.571	4.18365	50.3925	696.756	133.083	19.6333	5.22254	24.7707	17.326	8.54701	0.469664	0	0.897574	0	0	0	0	0	0	0	0.786869	69.881	120.668	8.248	7.168	0	119	28.22	11.573	0	0	0	0	0	0	165.601	3349.07
1963	2.848	1.24429	244.619	4.38831	52.0142	710.836	136.925	20.3074	5.26549	25.0392	17.9133	14.985	0.495655	0	0.97563	0	0	0	0	0	0	0	0.525207	85.539	141.744	9.476	7.421	0	123	31.46	14.396	0	0	0.005	0.001	0.001	0.007	166.493	3369.71
1964	3.008	1.25159	247.668	4.63747	53.6359	724.916	140.766	20.9815	5.30843	25.3077	18.5183	13.4881	0.523766	0	1.06047	0	0	0	0	0	0	0	0.525371	101.538	164.921	10.853	7.692	0.225	127	36.197	16.782	0	0	0.014	0.002	0.003	0.014	167.41	3388.63
1965	3.145	1.26426	250.717	4.89682	55.2576	738.995	144.608	21.6557	5.35138	25.5762	19.1382	13.4884	0.553997	0	1.1527	0	0	0	0	0	0	0	0.525534	115.75	185.933	12.426	7.975	0.444	127	48.096	20.514	0	0	0.032	0.005	0.005	0.028	168.355	3405.7
1966	3.305	1.2937	253.765	5.19558	56.8793	753.075	148.45	22.3298	5.39432	25.8447	19.7704	13.4886	0.586348	0	1.25294	0	0	0	0	0	0	0	0.525698	129.623	208.571	14.246	8.305	0.633	127	69.567	24.512	0	0	0.058	0.008	0.008	0.048	169.328	3420.92
1967	3.411	1.29763	256.814	5.45748	58.501	767.155	152.292	23.0039	5.43727	26.1132	20.412	13.4889	0.620819	0	1.3619	0	0	0	0	0	0	0	1.04968	147.119	235.269	16.313	8.623	0.825	127	94.137	29.817	0	0	0.1	0.013	0.013	0.075	170.329	3434.34
1968	3.588	1.2352	259.863	5.61974	60.1227	781.235	156.133	23.6781	5.48021	26.3817	21.0604	13.4892	0.657411	0	1.48033	0	0	0	0	0	0	0	0.526189	167.586	263.953	18.678	8.974	1.043	127	114.767	36.216	0	0	0.158	0.019	0.016	0.109	171.36	3446.07
1969	3.8	1.23839	262.911	5.78483	61.7444	795.315	159.975	24.3522	5.52316	26.6502	21.7128	13.4894	0.696124	0	1.60907	0	0	0	0	0	0	0	0.788261	194.513	294.486	21.388	9.344	1.283	127	134.875	39.381	0	0	0.229	0.026	0.024	0.15	172.423	3456.22
1970	4.076	1.19711	265.96	5.93688	63.3661	809.395	163.817	25.0263	5.5661	26.9187	22.3665	11.9926	0.736958	0	1.74899	0	0	0.0554463	0	0.356404	0	0	0.788506	221.119	321.743	24.494	9.687	1.537	127	141.326	43.652	0	0	0.329	0.035	0.043	0.197	173.518	3464.95
1971	4.231	1.07089	270.025	5.60498	63.5459	825.183	167.161	25.8097	5.70387	27.2218	23.0425	13.49	0.779913	0	1.90113	0	0	0.0573185	0	0.363166	0	0	1.05066	243.137	346.609	28.094	10.052	1.803	127	170.133	47.746	0	0.613	0.461	0.044	0.1	0.252	174.646	3472.41
1972	4.399	1.04706	274.09	5.91813	63.7256	840.97	170.506	26.593	5.84164	27.5248	23.7556	13.4902	0.82499	0	2.06649	0	0	0.0591929	0	0.369936	0	0	0.789079	274.26	378.471	32.236	10.471	2.127	127	214.168	54.79	0	0.613	0.63	0.055	0.17	0.313	175.809	3478.74
1973	4.635	1.0331	278.155	6.0449	63.9053	856.758	173.851	27.3763	5.97941	27.8279	24.4941	13.4905	0.872189	0	2.24624	0	0	0.0610694	0	0.376713	0	0	1.05123	314.04	419.239	36.92	10.883	2.495	127	266.209	61.912	0	0.613	0.839	0.067	0.277	0.391	177.007	3484.11
1974	4.644	1.03874	282.22	5.9406	64.0851	872.546	177.195	28.1597	6.11718	28.1309	25.2459	11.9936	0.921509	0	2.44163	0	0	0.0629482	0	0.383499	0	0	1.05156	345.881	454.701	42.295	11.29	2.921	127	305.489	62.543	0	0.613	1.086	0.08	0.372	0.468	178.243	3488.63
1975	4.615	1.03159	286.285	6.14097	64.2648	888.333	180.54	28.943	6.25495	28.434	25.9992	13.491	0.972952	0	2.65401	0	0	0.0648291	0	0.390292	0	0	1.05189	335.741	442.834	48.505	11.734	3.391	127	308.992	70.487	0	0.613	1.365	0.095	0.524	0.544	179.517	3492.43
1976	4.883	1.09061	290.35	6.30426	64.4445	904.121	183.885	29.7263	6.39272	28.7371	26.742	13.4913	1.02652	0	2.88486	0	0	0.0667121	0	0.397093	0	0	1.57603	343.24	432.28	55.552	12.2	3.943	127	382.3	78.51	0	0.613	1.767	0.11	0.783	0.621	180.83	3495.62
1977	5.029	1.09399	294.415	6.5344	64.6243	919.908	187.229	30.5097	6.53049	29.0401	27.4625	11.9945	1.0822	0	3.56608	0	0	0.0685974	0	0.403902	0	0	1.83843	330.711	419.447	63.634	12.68	4.582	127	462.112	85.789	0	0.613	2.035	0.127	1.006	0.697	182.185	3498.28
1978	5.105	1.09037	298.48	6.61937	64.804	935.696	190.574	31.293	6.66826	29.3432	28.1487	13.4919	1.14001	0	3.7964	0	0	0.0704848	0	0.0542996	0	0	2.36282	359.009	424.498	72.896	13.168	5.337	127	587.319	92.012	0	0.613	2.454	0.145	1.253	0.774	183.581	3500.51
1979	5.387	1.06471	302.545	7.00777	64.9837	951.483	193.919	32.0763	6.80603	29.6462	28.7887	11.995	1.19995	0	4.02754	0	0	0.0723744	0	0.0543309	0	0	2.88737	274.357	357.266	83.489	13.661	6.228	127	489.712	99.321	0	0.613	2.928	0.161	1.548	0.85	185.022	3502.36
1980	5.332	1.02521	306.61	7.06139	65.1634	967.271	197.263	32.8597	6.9438	29.9493	29.3705	13.4924	1.262	0	4.2595	0	0	0.0188144	0	0.767209	0	0	3.15018	304.998	432.044	95.641	14.194	7.006	121.849	550.707	104.973	0	0.613	3.453	0.185	1.805	0.927	186.506	3503.91
1981	5.168	1.04486	310.013	6.84175	65.0439	980.445	199.799	33.3572	7.021	30.4563	29.9319	11.9955	1.32618	0	4.49216	0	0	0.0662884	0	0.780793	0	0	3.41307	289.529	386.347	104.421	14.121	7.743	110.093	505.097	106.406	0	1.25	3.946	0.206	2.139	1.003	188.038	3505.19
1982	5.127	1.19041	313.415	7.11899	64.9243	993.619	202.334	33.8548	7.09821	30.9634	30.5084	13.4929	1.39249	0	4.72561	0	0	0.0735941	0	0.0815283	0	0	3.67604	252.419	400.317	108.943	13.905	8.399	123.807	505.343	116.821	0	0.961	4.522	0.229	2.645	1.105	189.616	3506.26
1983	5.11	1.22552	316.817	7.2169	64.8048	1006.79	204.87	34.3524	7.17542	31.4705	31.0856	11.996	1.46092	0	4.95987	0	0	0.0734967	0	0.794366	0	0	3.93909	299.092	408.416	120.93	14.252	9.207	135.729	553.718	125.343	0	1.165	5.168	0.249	2.98	1.183	191.243	3507.15
1984	5.29	1.26008	320.22	7.04813	64.6852	1019.97	207.406	34.85	7.25262	31.9775	31.6489	11.9962	1.53147	0	5.19493	0	0	0.0182631	0	0.807943	0	0	3.94032	310.901	432.125	177.397	14.781	9.71	134.867	569.476	130.447	0	1.331	6.032	0.269	3.475	1.262	192.92	3507.88
1985	5.444	1.27534	323.623	7.01692	64.5656	1033.14	209.941	35.3475	7.32983	32.4846	32.1839	11.9965	1.60414	0	5.43079	0	0	-0.0806812	0	0.108674	0	0	4.72727	315.327	407.669	128.622	15.705	9.792	109.714	546.714	138.367	0	1.011	7.083	0.289	3.997	1.355	194.648	3508.5
1986	5.61	1.2872	327.025	7.07049	64.4461	1046.31	212.477	35.8451	7.40703	32.9917	32.6758	13.4939	1.67894	0	5.66746	0	0	0.075292	0	0.821507	0	0	4.99065	388.346	502.712	169.103	16.379	10.152	149.931	539.076	146.048	0	3.575	8.22	0.309	4.579	1.434	196.427	3509
1987	5.753	1.29401	330.427	7.46167	64.3265	1059.49	215.012	36.3427	7.48424	33.4988	33.1102	11.997	1.75587	0	5.90492	0	0	0.177805	0	1.54792	0	0	4.7303	387.277	453.238	250.222	16.667	10.807	115.608	647.608	162.883	0	3.773	9.656	0.329	5.109	1.504	198.259	3509.43
1988	5.964	1.31672	333.83	7.20251	64.207	1072.66	217.548	36.8403	7.56145	34.0058	33.4725	11.9972	1.83492	0	6.14318	0	0	0.181183	0	0.862227	0	0	4.99368	303.816	507.99	245.07	16.593	11.493	135.667	635.816	180.113	0	4.458	11.362	0.349	5.696	1.728	200.146	3509.77
1989	6.089	1.32364	337.232	7.33104	64.0874	1085.84	220.083	37.3378	7.63865	34.5129	33.7481	11.9975	1.91609	0	6.38225	0	0	0.188294	0.945058	0.875792	0	0	5.51905	301.477	385.52	204.109	15.725	12.26	118.146	564.767	186.15	0	6.174	11.605	0.369	5.482	1.73	202.087	3510.06
1990	6.144	1.31948	340.635	7.58568	63.9678	1099.01	222.619	37.8354	7.71586	35.02	33.9226	11.9977	2.07357	0	6.62182	0	0	0.185942	1.01015	0.88921	0	0	5.52077	291.464	405.617	203.131	14.022	12.363	143.171	694.142	195.69	0	11.322	11.702	0.389	5.119	1.73	204.082	3510.3
1991	6.235	1.38098	336.592	7.40236	62.9552	1095.91	221.419	37.8681	7.72475	35.0723	34.026	11.9979	2.37291	0	6.86218	0	0	0.190921	2.17764	0.902612	0.00471002	0	5.7844	190.405	309.884	198.928	13.243	12.135	70.607	573.576	204.801	0	16.556	11.426	0.409	4.094	1.735	206.133	3510.5
1992	6.118	1.30353	332.549	7.79893	61.9425	1092.81	220.22	37.9008	7.73365	35.1247	34.1135	11.9981	2.37315	0	7.10299	0	0	0.2889	4.20799	1.62865	0.00471003	0	5.7862	203.23	303.369	121.343	10.324	12.018	91.022	554.986	185.994	0	20.911	9.343	0.429	2.74	1.715	208.24	3510.66
1993	6.124	1.2981	328.507	7.3131	60.9298	1089.71	219.02	37.9335	7.74254	35.177	34.2079	11.9984	2.37338	0	7.34531	0	0	0.376816	8.41616	2.3686	0.18499	0	6.31181	144.94	228.999	67.857	8.322	11.681	85.436	372.232	188.092	23.101	22.5	10.23	0.509	3.344	1.7	210.402	3510.8
1994	6.242	1.2896	324.464	7.50728	59.9172	1086.61	217.821	37.9662	7.75143	35.2294	34.3318	11.9986	2.37362	0	7.58821	0	0	1.8251	21.3991	3.83476	0.18199	0	5.00424	127.137	232.722	61.065	6.105	11.011	77.289	244.236	179.101	33.844	25.599	9.105	0.589	4.75	1.68	212.619	3510.91
1995	6.372	1.27501	320.421	7.6191	58.9045	1083.51	216.621	37.9989	7.76033	35.2817	34.5081	10.5017	2.37386	0	10.2115	0	0	2.98022	29.7261	6.04096	0.0999948	0	6.05342	119.235	194.71	22.978	4.784	9.083	85.021	201.637	243.238	41.961	24.275	10.035	0.669	3.991	1.3	200.199	3511.01
1996	6.51	1.2511	316.378	7.65206	57.8919	1080.4	215.421	38.0316	7.76922	35.3341	34.9605	11.9991	2.37409	0	10.2482	0	0	3.41888	40.5849	6.14999	0.436978	0	6.05531	115.437	178.907	27.962	2.943	7.019	70.403	89.184	211.181	51.431	26.411	10.743	0.729	2.691	0.85	201.834	3511.08
1997	6.619	1.21814	312.335	7.90975	56.8792	1077.3	214.222	38.0642	7.77812	35.3864	35.8337	11.9993	2.37433	0	10.2844	0	0	5.35405	50.6436	6.25875	0.407978	0	4.48574	95.388	160.981	18.663	1.886	5.429	74.423	62.53	208.614	46.639	22.493	9.909	0.789	2.594	0.7	207.696	3511.08
1998	6.588	1.21484	308.293	7.89573	55.8665	1074.2	213.022	38.0969	7.78701	35.4388	37.0316	11.9996	2.37457	0	10.3207	0.0873054	0	7.20318	59.6521	6.36768	0.927952	0	4.74904	92.401	152.715	14.831	1.199	4.223	84.361	29.412	249.912	58.131	27.683	9.837	0.607	2.491	0.71	206.946	3511.08
1999	6.569	1.18279	304.25	7.52698	54.8539	1071.1	211.823	38.1296	7.79591	35.4911	38.4586	10.5027	2.3748	0	10.3577	0.785737	0	8.15317	67.044	6.47752	1.35393	0	6.32196	94.931	145.169	14.362	0.784	3.32	69.242	24.668	230.91	55.817	28.047	9.806	0.467	2.39	0.631	195.938	3511.08
2000	6.735	1.1488	300.207	7.4566	53.8412	1068	210.623	38.1623	7.8048	35.5435	40.0186	12.0001	2.3749	0.4624	10.3949	4	0	8.5381	75.0393	6.234	1.9509	17.9257	5.5382	99.227	140.712	17.777	0.567	2.609	74.132	18.584	229.638	55.602	26.296	8.834	0.328	2.295	0.562	186.206	3511.08
2001	6.8959	1.132	303.409	7.503	54.4191	1066.74	211.594	38.2888	7.8945	35.7143	40.3916	11.925	2.4345	0.4651	10.4328	5.3987	0.6471	9.0301	84.0409	7.4947	1.6449	19.7183	5.699	81.839	117.202	12.051	0.45	2.069	65.195	13.253	270.443	57.19	28.001	8.669	0.282	2.209	0.5	181.525	3511.08
2002	6.949	1.2317	306.579	7.5487	54.9961	1065.47	212.563	38.4153	7.9842	35.8845	40.7646	11.8481	2.4915	0.4058	10.4708	6.7975	1.294	9.8852	94.7161	8.7389	2.508	21.5109	5.8596	81.408	100.258	6.019	0.423	1.609	69.565	13.487	243.015	57.77	22.43	8.524	0.235	2.131	0.445	181.887	3511.08
2003	7.286	1.2257	309.716	7.5942	55.5716	1064.17	213.531	38.5418	8.0734	36.0543	41.1378	11.7693	2.5463	0.3939	10.5083	8.196	1.9411	12.0788	101.416	9.9776	3.341	23.3035	6.0201	90.865	107.745	2.604	0.37	1.288	69.381	8.444	252.962	48.801	23.232	7.77	0.189	2.057	0.396	177.539	3511.08
2004	7.6719	1.2429	312.824	7.6394	56.1461	1062.86	214.498	38.6684	8.1623	36.2232	41.5107	11.6885	2.599	0.4062	10.5454	9.5947	2.5882	12.5073	113.93	11.2136	4.269	25.096	6.1805	78.182	87.647	5.237	0.378	1.046	67.383	10.874	263.062	43.847	23.348	7.653	0.189	1.987	0.353	174.26	3511.08
2005	7.971	1.1955	315.903	7.6841	56.7195	1061.53	215.463	38.7948	8.2512	36.3917	41.8837	11.6059	2.6494	0.4358	10.8116	10.9935	3.2351	13.7591	120.933	12.4483	4.8901	26.8885	6.3407	49.49	51.552	0.854	0.227	0.785	65	10.874	283.408	46.641	26.458	7.518	0.189	1.92	0.314	168.841	3511.08
2006	8.0985	1.1385	317.24	7.721	56.3034	1057.01	214.052	38.5859	8.2245	35.9952	41.9902	11.411	2.5813	0.4427	10.5529	12.3831	3.8803	14.4509	121.075	12.7893	5.1614	31.23	6.4709	48.471	49.808	1.119	0.136	0.588	58.5	10.874	297.615	48.747	34.767	6.992	0.049	1.834	0.279	167.857	3511.08
2007	8.226	1.0815	318.572	7.7579	55.8873	1052.47	212.638	38.3772	8.1977	35.598	42.0965	11.2139	2.5131	0.4492	10.2947	13.7731	4.5246	15.1335	129.622	13.1314	5.4292	35.5714	6.6013	47.083	46.366	0.911	0.082	0.441	52	10.874	311.265	50.583	39.869	6.502	0.049	1.752	0.249	167.857	3511.08
2008	8.35313	1.02453	319.896	7.79467	55.4711	1047.85	211.218	38.1687	8.17087	35.1995	42.2027	11.0121	2.44527	0.455033	10.0372	15.1628	5.1677	15.798	133.992	13.4753	5.69017	39.9129	6.286	45.74	43.216	0.806	0.049	0.331	45.5	10.874	324.431	52.161	39.099	6.047	0.049	1.675	0.221	167.857	3511.08
2009	8.48027	0.967567	321.221	7.83143	55.0549	1043.24	209.798	37.9601	8.14403	34.8009	42.309	10.8104	2.37743	0.460867	9.77977	16.5524	5.8108	16.4625	138.362	13.8192	5.95113	44.2545	5.9707	44.442	40.334	0.754	0.029	0.248	39	10.874	337.175	53.496	38.069	5.624	0.049	1.601	0.197	167.857	3511.08
2010	8.6074	0.9106	322.545	7.8682	54.6387	1038.62	208.379	37.7516	8.1172	34.4024	42.4152	10.6086	2.3096	0.4667	9.5223	17.9421	6.4539	17.127	142.731	14.1631	6.2121	48.596	5.6554	42.976	36.906	0.377	0.018	0.186	32.5	7.266	349.552	54.598	36.801	5.23	0	1.521	0.175	167.857	3511.08
2011	8.73381	0.85362	323.841	7.90492	54.2221	1033.77	206.94	37.5439	8.09002	33.9992	42.5208	10.3919	2.24289	0.43848	8.68531	22.2121	6.53107	18.5425	147.402	14.5134	5.65092	52.9375	5.34014	41.557	33.769	0.189	0.011	0.14	26	7.266	361.61	55.479	35.314	4.864	0	1.445	0.156	167.857	3511.08
2012	8.86022	0.79664	325.137	7.94164	53.8056	1028.93	205.501	37.3361	8.06284	33.596	42.6264	10.1752	2.17618	0.41026	7.84832	26.4821	6.60824	19.9579	152.072	14.8638	5.08974	57.279	5.02488	40.186	30.898	0.094	0.006	0.105	19.5	7.266	373.391	56.152	33.625	4.524	0	1.373	0.139	167.857	3511.08
2013	8.98663	0.73966	326.434	7.97836	53.389	1024.08	204.063	37.1284	8.03566	33.1928	42.732	9.9585	2.10947	0.38204	7.01133	30.752	6.68541	21.3734	156.743	15.2141	4.52856	61.6205	4.70962	38.86	28.272	0.047	0.004	0.079	13	7.266	384.93	56.625	31.75	4.207	0	1.304	0.124	167.857	3511.08
2014	9.11304	0.68268	327.73	8.01508	52.9725	1019.23	202.624	36.9206	8.00848	32.7896	42.8376	9.7418	2.04276	0.35382	6.17434	35.022	6.76258	22.7888	161.413	15.5644	3.96738	65.962	4.39436	37.578	25.869	0.024	0.002	0.059	6.5	7.266	396.259	56.909	29.705	3.913	0	1.239	0.11	167.857	3511.08
2015	9.23945	0.6257	329.026	8.0518	52.5559	1014.39	201.185	36.7129	7.9813	32.3864	42.9432	9.5251	1.97605	0.3256	5.33735	39.292	6.83975	24.2043	166.083	15.9147	3.4062	70.3034	4.0791	36.338	23.67	0.012	0.001	0.044	0	0	407.405	57.013	27.502	3.639	0	1.177	0.098	155.925	3511.08
2016	9.36586	0.56872	330.323	8.08852	52.1393	1009.54	199.746	36.5052	7.95412	31.9831	43.0488	9.3084	1.90934	0.29738	4.50036	43.562	6.91692	25.6198	170.754	16.2651	2.84502	74.6449	3.76384	35.138	21.658	0.006	0.001	0.033	0	0	417.103	57.113	25.476	3.384	0	1.118	0.087	155.925	3511.08
2017	9.49227	0.51174	331.619	8.12524	51.7228	1004.69	198.308	36.2974	7.92694	31.5799	43.1544	9.0917	1.84263	0.26916	3.66337	47.832	6.99409	27.0352	175.424	16.6154	2.28384	78.9864	3.44858	33.979	19.817	0.003	0	0.025	0	0	425.539	57.207	23.611	3.147	0	1.062	0.078	155.925	3511.08
2018	9.61868	0.45476	332.915	8.16196	51.3062	999.847	196.869	36.0897	7.89976	31.1767	43.26	8.875	1.77592	0.24094	2.82638	52.1019	7.07126	28.4507	180.095	16.9657	1.72266	83.3279	3.13332	32.858	18.133	0.001	0	0.019	0	0	432.879	57.297	21.896	2.927	0	1.009	0.069	155.925	3511.08
2019	9.74509	0.39778	334.212	8.19868	50.8897	995	195.43	35.8819	7.87258	30.7735	43.3656	8.6583	1.70921	0.21272	1.98939	56.3719	7.14843	29.8661	184.765	17.3161	1.16148	87.6694	2.81806	31.773	16.591	0.001	0	0.014	0	0	439.265	57.382	20.318	2.722	0	0.959	0.061	155.925	3511.08
2020	9.8715	0.3408	335.508	8.2354	50.4731	990.154	193.991	35.6742	7.8454	30.3703	43.4712	8.4416	1.6425	0.1845	1.1524	60.6419	7.2256	31.2816	189.436	17.6664	0.6003	92.0109	2.5028	30.725	15.181	0	0	0.01	0	0	444.821	57.463	18.867	2.531	0	0.911	0.055	155.925	3511.08
2021	9.97968	0.32835	335.857	8.26904	49.7123	990.114	194.873	35.583	7.79487	30.2411	43.6626	8.442	1.65926	0.17723	1.1063	61.7812	7.31559	31.3297	191.32	17.9457	0.56612	92.3863	2.54361	29.711	13.891	0	0	0.008	0	0	449.654	57.54	17.531	2.354	0	0.865	0.049	155.925	3511.08
2022	10.0879	0.3159	336.206	8.30268	48.9514	990.074	195.754	35.4919	7.74434	30.1119	43.8541	8.4424	1.67602	0.16996	1.0602	62.9206	7.40558	31.3777	193.204	18.225	0.53194	92.7617	2.58442	28.73	12.71	0	0	0.006	0	0	453.859	57.613	16.302	2.189	0	0.822	0.043	155.925	3511.08
2023	10.196	0.30345	336.555	8.33632	48.1906	990.034	196.636	35.4007	7.69381	29.9827	44.0455	8.4428	1.69278	0.16269	1.0141	64.06	7.49557	31.4258	195.088	18.5043	0.49776	93.1371	2.62523	27.782	11.63	0	0	0.004	0	0	457.517	57.682	15.172	2.036	0	0.781	0.039	155.925	3511.08
2024	10.3042	0.291	336.904	8.36996	47.4298	989.994	197.517	35.3096	7.64328	29.8535	44.237	8.4432	1.70954	0.15542	0.968	65.1993	7.58556	31.4739	196.972	18.7836	0.46358	93.5125	2.66604	26.865	10.641	0	0	0.003	0	0	460.7	57.748	14.132	1.894	0	0.742	0.034	155.925	3511.08
2025	10.4124	0.27855	337.253	8.4036	46.669	989.954	198.399	35.2184	7.59275	29.7243	44.4284	8.4436	1.7263	0.14815	0.9219	66.3387	7.67555	31.522	198.856	19.0629	0.4294	93.888	2.70685	25.979	9.737	0	0	0.002	0	0	463.469	57.811	13.175	1.761	0	0.705	0.031	155.925	3511.08
2026	10.5206	0.2661	337.602	8.43724	45.9081	989.914	199.28	35.1272	7.54222	29.5951	44.6198	8.444	1.74306	0.14088	0.8758	67.478	7.76554	31.57	200.74	19.3421	0.39522	94.2634	2.74766	25.122	8.909	0	0	0.002	0	0	465.878	57.87	12.295	1.638	0	0.669	0.027	155.925	3511.08
2027	10.6288	0.25365	337.951	8.47088	45.1473	989.874	200.162	35.0361	7.49169	29.4659	44.8113	8.4444	1.75982	0.13361	0.8297	68.6174	7.85553	31.6181	202.624	19.6214	0.36104	94.6388	2.78847	24.293	8.152	0	0	0.001	0	0	467.974	57.927	11.485	1.523	0	0.636	0.024	155.925	3511.08
2028	10.7369	0.2412	338.3	8.50452	44.3865	989.834	201.043	34.9449	7.44116	29.3367	45.0027	8.4448	1.77658	0.12634	0.7836	69.7567	7.94552	31.6662	204.508	19.9007	0.32686	95.0142	2.82928	23.491	7.459	0	0	0.001	0	0	469.797	57.98	10.74	1.417	0	0.604	0.022	155.925	3511.08
2029	10.8451	0.22875	338.649	8.53816	43.6256	989.794	201.924	34.8538	7.39063	29.2075	45.1942	8.4452	1.79334	0.11907	0.7375	70.8961	8.03551	31.7142	206.392	20.18	0.29268	95.3896	2.87009	22.716	6.825	0	0	0.001	0	0	471.384	58.031	10.055	1.317	0	0.574	0.019	155.925	3511.08
2030	10.9533	0.2163	338.998	8.5718	42.8648	989.754	202.806	34.7626	7.3401	29.0783	45.3856	8.4456	1.8101	0.1118	0.6914	72.0354	8.1255	31.7623	208.276	20.4593	0.2585	95.765	2.9109	21.966	6.245	0	0	0.001	0	0	472.764	58.08	9.424	1.225	0	0.545	0.017	155.925	3511.08
2031	10.9918	0.21454	338.856	8.58349	42.0387	985.803	202.691	34.543	7.2846	28.9595	45.4871	8.46737	1.8237	0.1119	0.66362	72.903	8.24943	31.7241	210.391	20.7426	0.25838	95.8801	2.95352	21.241	5.714	0	0	0	0	0	467.698	57.831	8.826	1.139	0	0.518	0.015	155.925	3511.08
2032	11.0302	0.21278	338.713	8.59518	41.2126	981.852	202.576	34.3233	7.2291	28.8408	45.5887	8.48914	1.8373	0.112	0.63584	73.7707	8.37336	31.6859	212.506	21.0258	0.25826	95.9953	2.99614	20.54	5.228	0	0	0	0	0	457.026	57.299	8.259	1.06	0	0.492	0.013	155.925	3511.08
2033	11.0687	0.21102	338.571	8.60687	40.3866	977.902	202.46	34.1037	7.1736	28.722	45.6902	8.51091	1.8509	0.1121	0.60806	74.6383	8.49729	31.6477	214.622	21.3091	0.25814	96.1104	3.03876	19.862	4.784	0	0	0	0	0	441.474	56.499	7.72	0.985	0	0.467	0.012	155.925	3511.08
2034	11.1072	0.20926	338.429	8.61856	39.5605	973.951	202.345	33.8841	7.1181	28.6033	45.7918	8.53268	1.8645	0.1122	0.58028	75.5059	8.62122	31.6095	216.737	21.5923	0.25802	96.2256	3.08138	19.207	4.377	0	0	0	0	0	421.679	55.444	7.207	0.916	0	0.444	0.011	155.925	3511.08
2035	11.1456	0.2075	338.286	8.63025	38.7344	970	202.23	33.6645	7.0626	28.4845	45.8933	8.55445	1.8781	0.1123	0.5525	76.3735	8.74515	31.5712	218.852	21.8756	0.2579	96.3407	3.124	18.573	4.005	0	0	0	0	0	398.19	54.147	6.717	0.852	0	0.422	0.01	155.925	3511.08
2036	11.1841	0.20574	338.144	8.64194	37.9083	966.05	202.115	33.4448	7.0071	28.3657	45.9949	8.57622	1.8917	0.1124	0.52472	77.2412	8.86908	31.533	220.968	22.1589	0.25778	96.4558	3.16662	17.96	3.665	0	0	0	0	0	371.49	52.62	6.249	0.793	0	0.401	0.008	155.925	3511.08
2037	11.2226	0.20398	338.002	8.65363	37.0822	962.099	202	33.2252	6.9516	28.247	46.0964	8.59799	1.9053	0.1125	0.49694	78.1088	8.99301	31.4948	223.083	22.4421	0.25766	96.571	3.20924	17.368	3.353	0	0	0	0	0	341.994	50.874	5.801	0.737	0	0.381	0.008	155.925	3511.08
2038	11.2611	0.20222	337.859	8.66532	36.2562	958.148	201.885	33.0056	6.8961	28.1282	46.198	8.61976	1.9189	0.1126	0.46916	78.9764	9.11694	31.4566	225.198	22.7254	0.25754	96.6861	3.25186	16.794	3.068	0	0	0	0	0	310.067	48.92	5.372	0.686	0	0.362	0.007	155.925	3511.08
2039	11.2995	0.20046	337.717	8.67701	35.4301	954.197	201.77	32.7859	6.8406	28.0095	46.2996	8.64153	1.9325	0.1127	0.44138	79.8441	9.24087	31.4184	227.314	23.0086	0.25742	96.8013	3.29448	16.24	2.807	0	0	0	0	0	276.024	46.769	4.96	0.638	0	0.344	0.006	155.925	3511.08
2040	11.338	0.1987	337.574	8.6887	34.604	950.247	201.655	32.5663	6.7851	27.8907	46.4011	8.6633	1.9461	0.1128	0.4136	80.7117	9.3648	31.3802	229.429	23.2919	0.2573	96.9164	3.3371	15.704	2.569	0	0	0	0	0	240.141	44.431	4.563	0.593	0	0.326	0.005	155.925	3511.08
2041	11.3073	0.20369	336.951	8.67866	33.7115	942.499	200.553	32.218	6.72454	27.7823	46.4125	8.71054	1.95661	0.11238	0.39687	80.1013	9.53783	31.3132	231.783	23.5745	0.24048	96.7712	3.38154	15.186	2.35	0	0	0	0	0	208.923	42.209	4.198	0.551	0	0.31	0.005	155.925	3511.08
2042	11.2767	0.20868	336.327	8.66862	32.819	934.752	199.452	31.8696	6.66398	27.674	46.424	8.75778	1.96712	0.11196	0.38014	79.4908	9.71086	31.2461	234.137	23.8572	0.22366	96.6261	3.42598	14.685	2.151	0	0	0	0	0	181.763	40.099	3.862	0.513	0	0.295	0.004	155.925	3511.08
2043	11.246	0.21367	335.703	8.65858	31.9264	927.005	198.351	31.5213	6.60342	27.5656	46.4354	8.80502	1.97763	0.11154	0.36341	78.8804	9.88389	31.1791	236.492	24.1398	0.20684	96.481	3.47042	14.2	1.968	0	0	0	0	0	158.134	38.094	3.553	0.477	0	0.28	0.004	155.925	3511.08
2044	11.2153	0.21866	335.079	8.64854	31.0339	919.257	197.25	31.173	6.54286	27.4572	46.4468	8.85226	1.98814	0.11112	0.34668	78.27	10.0569	31.1121	238.846	24.4224	0.19002	96.3358	3.51486	13.732	1.801	0	0	0	0	0	137.576	36.189	3.269	0.444	0	0.266	0.003	155.925	3511.08
2045	11.1846	0.22365	334.456	8.6385	30.1414	911.51	196.149	30.8246	6.4823	27.3488	46.4582	8.8995	1.99865	0.1107	0.32995	77.6595	10.23	31.045	241.2	24.705	0.1732	96.1907	3.5593	13.279	1.648	0	0	0	0	0	119.691	34.38	3.007	0.413	0	0.253	0.003	155.925	3511.08
2046	11.154	0.22864	333.832	8.62846	29.2489	903.762	195.048	30.4763	6.42174	27.2405	46.4697	8.94674	2.00916	0.11028	0.31322	77.0491	10.403	30.978	243.554	24.9877	0.15638	96.0455	3.60374	12.84	1.507	0	0	0	0	0	104.131	32.661	2.767	0.384	0	0.24	0.003	155.925	3511.08
2047	11.1233	0.23363	333.208	8.61842	28.3564	896.015	193.947	30.128	6.36118	27.1321	46.4811	8.99398	2.01967	0.10986	0.29649	76.4387	10.576	30.911	245.908	25.2703	0.13956	95.9004	3.64818	12.417	1.379	0	0	0	0	0	90.594	31.028	2.545	0.357	0	0.228	0.002	155.925	3511.08
2048	11.0926	0.23862	332.584	8.60838	27.4638	888.268	192.845	29.7797	6.30062	27.0237	46.4925	9.04122	2.03018	0.10944	0.27976	75.8283	10.749	30.844	248.262	25.5529	0.12274	95.7552	3.69262	12.007	1.262	0	0	0	0	0	78.817	29.476	2.342	0.332	0	0.217	0.002	155.925	3511.08
2049	11.062	0.24361	331.961	8.59834	26.5713	880.52	191.744	29.4313	6.24006	26.9154	46.504	9.08846	2.04069	0.10902	0.26303	75.2178	10.9221	30.7769	250.617	25.8356	0.10592	95.6101	3.73706	11.611	1.155	0	0	0	0	0	68.571	28.002	2.154	0.309	0	0.206	0.002	155.925	3511.08
2050	11.0313	0.2486	331.337	8.5883	25.6788	872.773	190.643	29.083	6.1795	26.807	46.5154	9.1357	2.0512	0.1086	0.2463	74.6074	11.0951	30.7099	252.971	26.1182	0.0891	95.4649	3.7815	11.227	1.057	0	0	0	0	0	59.657	26.602	1.982	0.287	0	0.195	0.002	155.925	3511.08
2051	10.8683	0.24215	329.964	8.58011	25.1821	863.351	189.568	28.73	6.11469	26.6151	46.4627	9.11255	2.04957	0.10848	0.23542	75.5552	11.0969	30.2611	252.018	26.0603	0.08327	94.546	3.83266	10.857	0.967	0	0	0	0	0	51.901	25.272	1.824	0.267	0	0.186	0.001	155.925	3511.08
2052	10.7053	0.2357	328.592	8.57192	24.6853	853.93	188.492	28.377	6.04988	26.4233	46.41	9.0894	2.04794	0.10836	0.22454	76.503	11.0987	29.8122	251.065	26.0024	0.07744	93.627	3.88382	10.499	0.885	0	0	0	0	0	45.154	24.008	1.678	0.248	0	0.176	0.001	155.925	3511.08
2053	10.5423	0.22925	327.219	8.56373	24.1886	844.508	187.417	28.024	5.98507	26.2314	46.3572	9.06625	2.04631	0.10824	0.21366	77.4509	11.1005	29.3634	250.112	25.9445	0.07161	92.7081	3.93498	10.152	0.809	0	0	0	0	0	39.284	22.808	1.543	0.231	0	0.168	0.001	155.925	3511.08
2054	10.3793	0.2228	325.846	8.55554	23.6919	835.086	186.341	27.671	5.92026	26.0396	46.3045	9.0431	2.04468	0.10812	0.20278	78.3987	11.1023	28.9146	249.16	25.8866	0.06578	91.7892	3.98614	9.817	0.741	0	0	0	0	0	34.177	21.668	1.42	0.215	0	0.159	0.001	155.925	3511.08
2055	10.2163	0.21635	324.473	8.54735	23.1952	825.665	185.266	27.3179	5.85545	25.8478	46.2518	9.01995	2.04305	0.108	0.1919	79.3465	11.1041	28.4657	248.207	25.8287	0.05995	90.8702	4.0373	9.493	0.678	0	0	0	0	0	29.734	20.584	1.306	0.2	0	0.151	0.001	155.925	3511.08
2056	10.0532	0.2099	323.101	8.53916	22.6984	816.243	184.191	26.9649	5.79064	25.6559	46.1991	8.9968	2.04142	0.10788	0.18102	80.2943	11.1058	28.0169	247.254	25.7709	0.05412	89.9513	4.08846	9.18	0.62	0	0	0	0	0	25.869	19.555	1.202	0.186	0	0.144	0.001	155.925	3511.08
2057	9.89023	0.20345	321.728	8.53097	22.2017	806.822	183.115	26.6119	5.72583	25.4641	46.1464	8.97365	2.03979	0.10776	0.17014	81.2421	11.1076	27.5681	246.301	25.713	0.04829	89.0324	4.13962	8.877	0.567	0	0	0	0	0	22.506	18.577	1.106	0.173	0	0.136	0.001	155.925	3511.08
2058	9.72722	0.197	320.355	8.52278	21.705	797.4	182.04	26.2589	5.66102	25.2722	46.0936	8.9505	2.03816	0.10764	0.15926	82.19	11.1094	27.1193	245.349	25.6551	0.04246	88.1135	4.19078	8.584	0.519	0	0	0	0	0	19.58	17.648	1.017	0.161	0	0.13	0.001	155.925	3511.08
2059	9.56421	0.19055	318.982	8.51459	21.2082	787.978	180.964	25.9059	5.59621	25.0803	46.0409	8.92735	2.03653	0.10752	0.14838	83.1378	11.1112	26.6704	244.396	25.5972	0.03663	87.1945	4.24194	8.301	0.475	0	0	0	0	0	17.035	16.766	0.936	0.149	0	0.123	0.001	155.925	3511.08
2060	9.4012	0.1841	317.61	8.5064	20.7115	778.557	179.889	25.5529	5.5314	24.8885	45.9882	8.9042	2.0349	0.1074	0.1375	84.0856	11.113	26.2216	243.443	25.5393	0.0308	86.2756	4.2931	8.027	0.435	0	0	0	0	0	14.82	15.928	0.861	0.139	0	0.117	0.001	155.925	3511.08
2061	9.1729	0.17607	315.925	8.49168	20.2802	768.065	178.545	25.2186	5.46337	24.6749	45.9095	8.91416	2.0301	0.10732	0.13105	85.0651	11.1064	25.9984	244.904	25.7899	0.02989	85.7358	4.35328	7.762	0.398	0	0	0	0	0	12.893	15.131	0.792	0.129	0	0.111	0	155.925	3511.08
2062	8.9446	0.16804	314.241	8.47696	19.849	757.574	177.201	24.8843	5.39534	24.4613	45.8308	8.92412	2.0253	0.10724	0.1246	86.0445	11.0998	25.7752	246.365	26.0405	0.02898	85.1961	4.41346	7.506	0.364	0	0	0	0	0	11.217	14.375	0.729	0.12	0	0.106	0	155.925	3511.08
2063	8.7163	0.16001	312.556	8.46224	19.4177	747.082	175.858	24.55	5.32731	24.2478	45.7522	8.93408	2.0205	0.10716	0.11815	87.024	11.0932	25.5519	247.826	26.2912	0.02807	84.6563	4.47364	7.258	0.333	0	0	0	0	0	9.759	13.656	0.67	0.112	0	0.1	0	155.925	3511.08
2064	8.488	0.15198	310.872	8.44752	18.9864	736.591	174.514	24.2157	5.25928	24.0342	45.6735	8.94404	2.0157	0.10708	0.1117	88.0034	11.0866	25.3287	249.287	26.5418	0.02716	84.1165	4.53382	7.019	0.305	0	0	0	0	0	8.49	12.973	0.617	0.104	0	0.095	0	155.925	3511.08
2065	8.2597	0.14395	309.187	8.4328	18.5552	726.099	173.17	23.8814	5.19125	23.8206	45.5948	8.954	2.0109	0.107	0.10525	88.9829	11.08	25.1055	250.748	26.7924	0.02625	83.5768	4.594	6.787	0.279	0	0	0	0	0	7.387	12.325	0.567	0.097	0	0.091	0	155.925	3511.08
2066	8.0314	0.13592	307.503	8.41808	18.1239	715.608	171.826	23.5471	5.12322	23.607	45.5161	8.96396	2.0061	0.10692	0.0988	89.9624	11.0735	24.8823	252.209	27.043	0.02534	83.037	4.65418	6.563	0.255	0	0	0	0	0	6.426	11.708	0.522	0.09	0	0.086	0	155.925	3511.08
2067	7.8031	0.12789	305.818	8.40336	17.6926	705.116	170.483	23.2128	5.05519	23.3934	45.4374	8.97392	2.0013	0.10684	0.09235	90.9418	11.0669	24.6591	253.67	27.2936	0.02443	82.4972	4.71436	6.346	0.233	0	0	0	0	0	5.591	11.123	0.48	0.084	0	0.082	0	155.925	3511.08
2068	7.5748	0.11986	304.134	8.38864	17.2613	694.625	169.139	22.8785	4.98716	23.1799	45.3588	8.98388	1.9965	0.10676	0.0859	91.9213	11.0603	24.4358	255.131	27.5443	0.02352	81.9574	4.77454	6.137	0.214	0	0	0	0	0	4.864	10.567	0.442	0.078	0	0.078	0	155.925	3511.08
2069	7.3465	0.11183	302.449	8.37392	16.8301	684.133	167.795	22.5442	4.91913	22.9663	45.2801	8.99384	1.9917	0.10668	0.07945	92.9007	11.0537	24.2126	256.592	27.7949	0.02261	81.4177	4.83472	5.935	0.195	0	0	0	0	0	4.232	10.038	0.407	0.072	0	0.074	0	155.925	3511.08
2070	7.1182	0.1038	300.765	8.3592	16.3988	673.642	166.452	22.2099	4.8511	22.7527	45.2014	9.0038	1.9869	0.1066	0.073	93.8802	11.0471	23.9894	258.053	28.0455	0.0217	80.8779	4.8949	5.739	0.179	0	0	0	0	0	3.682	9.537	0.374	0.067	0	0.07	0	155.925	3511.08
2071	6.82459	0.0942	298.769	8.33796	16.033	662.079	164.84	21.8943	4.77984	22.5174	45.0967	9.04993	1.97901	0.10626	0.06942	94.1193	11.0381	23.9441	262.309	28.6199	0.02131	80.7173	4.96411	5.549	0.164	0	0	0	0	0	3.203	9.06	0.344	0.063	0	0.067	0	155.925	3511.08
2072	6.53098	0.0846	296.773	8.31672	15.6672	650.517	163.228	21.5787	4.70858	22.2821	44.992	9.09606	1.97112	0.10592	0.06584	94.3584	11.0291	23.8987	266.565	29.1944	0.02092	80.5568	5.03332	5.366	0.15	0	0	0	0	0	2.787	8.607	0.317	0.058	0	0.063	0	155.925	3511.08
2073	6.23737	0.075	294.776	8.29548	15.3015	638.955	161.616	21.2632	4.63732	22.0468	44.8873	9.14219	1.96323	0.10558	0.06226	94.5975	11.0201	23.8534	270.822	29.7688	0.02053	80.3962	5.10253	5.189	0.137	0	0	0	0	0	2.424	8.176	0.291	0.054	0	0.06	0	155.925	3511.08
2074	5.94376	0.0654	292.78	8.27424	14.9357	627.392	160.004	20.9476	4.56606	21.8115	44.7826	9.18832	1.95534	0.10524	0.05868	94.8366	11.0111	23.808	275.078	30.3433	0.02014	80.2357	5.17174	5.018	0.125	0	0	0	0	0	2.109	7.768	0.268	0.05	0	0.057	0	155.925	3511.08
2075	5.65015	0.0558	290.784	8.253	14.5699	615.83	158.392	20.632	4.4948	21.5762	44.678	9.23445	1.94745	0.1049	0.0551	95.0757	11.0021	23.7627	279.334	30.9177	0.01975	80.0751	5.24095	4.852	0.115	0	0	0	0	0	1.835	7.379	0.247	0.047	0	0.054	0	155.925	3511.08
2076	5.35654	0.0462	288.788	8.23176	14.2041	604.268	156.779	20.3164	4.42354	21.3409	44.5733	9.28058	1.93956	0.10456	0.05152	95.3148	10.993	23.7174	283.591	31.4921	0.01936	79.9146	5.31016	4.692	0.105	0	0	0	0	0	1.596	7.01	0.227	0.043	0	0.052	0	155.925	3511.08
2077	5.06293	0.0366	286.792	8.21052	13.8383	592.706	155.167	20.0008	4.35228	21.1056	44.4686	9.32671	1.93167	0.10422	0.04794	95.5539	10.984	23.672	287.847	32.0666	0.01897	79.7541	5.37937	4.537	0.096	0	0	0	0	0	1.389	6.66	0.209	0.04	0	0.049	0	155.925	3511.08
2078	4.76932	0.027	284.796	8.18928	13.4726	581.143	153.555	19.6853	4.28102	20.8703	44.3639	9.37284	1.92378	0.10388	0.04436	95.793	10.975	23.6267	292.104	32.641	0.01858	79.5935	5.44858	4.388	0.088	0	0	0	0	0	1.208	6.327	0.192	0.038	0	0.046	0	155.925	3511.08
2079	4.47571	0.0174	282.8	8.16804	13.1068	569.581	151.943	19.3697	4.20976	20.635	44.2592	9.41897	1.91589	0.10354	0.04078	96.0321	10.966	23.5813	296.36	33.2155	0.01819	79.433	5.51779	4.243	0.08	0	0	0	0	0	1.051	6.01	0.177	0.035	0	0.044	0	155.925	3511.08
2080	4.1821	0.0078	280.803	8.1468	12.741	558.019	150.331	19.0541	4.1385	20.3997	44.1545	9.4651	1.908	0.1032	0.0372	96.2712	10.957	23.536	300.616	33.7899	0.0178	79.2724	5.587	4.103	0.074	0	0	0	0	0	0.915	5.71	0.162	0.033	0	0.042	0	155.925	3511.08
2081	4.18314	0.00973	280.067	8.14506	12.6666	553.983	149.817	19.0042	4.12467	20.3498	44.1252	9.57675	1.91453	0.1026	0.03348	95.7644	10.9366	23.5344	305.855	34.4037	0.01759	79.4532	5.62936	3.967	0.067	0	0	0	0	0	0.796	5.424	0.149	0.03	0	0.04	0	155.925	3511.08
2082	4.18418	0.01166	279.33	8.14332	12.5923	549.947	149.302	18.9543	4.11084	20.2998	44.096	9.6884	1.92106	0.102	0.02976	95.2577	10.9161	23.5329	311.094	35.0175	0.01738	79.634	5.67172	3.836	0.062	0	0	0	0	0	0.692	5.153	0.138	0.028	0	0.038	0	155.925	3511.08
2083	4.18522	0.01359	278.593	8.14158	12.5179	545.911	148.787	18.9044	4.09701	20.2498	44.0667	9.80005	1.92759	0.1014	0.02604	94.7509	10.8957	23.5313	316.333	35.6313	0.01717	79.8148	5.71408	3.71	0.056	0	0	0	0	0	0.602	4.895	0.127	0.026	0	0.036	0	155.925	3511.08
2084	4.18626	0.01552	277.856	8.13984	12.4436	541.875	148.272	18.8545	4.08318	20.1999	44.0375	9.9117	1.93412	0.1008	0.02232	94.2442	10.8753	23.5298	321.571	36.2451	0.01696	79.9956	5.75644	3.587	0.052	0	0	0	0	0	0.524	4.651	0.116	0.024	0	0.034	0	155.925	3511.08
2085	4.1873	0.01745	277.119	8.1381	12.3692	537.839	147.757	18.8046	4.06935	20.15	44.0082	10.0234	1.94065	0.1002	0.0186	93.7374	10.8549	23.5282	326.81	36.8589	0.01675	80.1764	5.7988	3.469	0.047	0	0	0	0	0	0.456	4.418	0.107	0.023	0	0.032	0	155.925	3511.08
2086	4.18834	0.01938	276.382	8.13636	12.2948	533.803	147.242	18.7547	4.05552	20.1	43.9789	10.135	1.94718	0.0996	0.01488	93.2306	10.8344	23.5266	332.049	37.4727	0.01654	80.3572	5.84116	3.355	0.043	0	0	0	0	0	0.397	4.197	0.099	0.021	0	0.031	0	155.925	3511.08
2087	4.18938	0.02131	275.645	8.13462	12.2205	529.767	146.727	18.7048	4.04169	20.05	43.9497	10.2467	1.95371	0.099	0.01116	92.7239	10.814	23.5251	337.288	38.0865	0.01633	80.538	5.88352	3.244	0.039	0	0	0	0	0	0.345	3.987	0.091	0.02	0	0.029	0	155.925	3511.08
2088	4.19042	0.02324	274.908	8.13288	12.1461	525.731	146.212	18.6549	4.02786	20.0001	43.9204	10.3583	1.96024	0.0984	0.00744	92.2171	10.7936	23.5235	342.526	38.7003	0.01612	80.7188	5.92588	3.137	0.036	0	0	0	0	0	0.3	3.788	0.083	0.018	0	0.028	0	155.925	3511.08
2089	4.19146	0.02517	274.171	8.13114	12.0718	521.695	145.697	18.605	4.01403	19.9502	43.8912	10.47	1.96677	0.0978	0.00372	91.7104	10.7731	23.522	347.765	39.3141	0.01591	80.8996	5.96824	3.033	0.033	0	0	0	0	0	0.261	3.599	0.077	0.017	0	0.026	0	155.925	3511.08
2090	4.1925	0.0271	273.434	8.1294	11.9974	517.659	145.183	18.5551	4.0002	19.9002	43.8619	10.5816	1.9733	0.0972	0	91.2036	10.7527	23.5204	353.004	39.9279	0.0157	81.0804	6.0106	2.933	0.03	0	0	0	0	0	0.227	3.419	0.071	0.016	0	0.025	0	155.925	3511.08
2091	4.19355	0.02902	272.697	8.12762	11.923	513.623	144.668	18.5052	3.98639	19.8502	43.8326	10.6631	1.98218	0.09635	0	90.2059	10.718	23.469	358.611	40.5622	0.01555	81.2612	6.05297	2.836	0.028	0	0	0	0	0	0.198	3.248	0.065	0.015	0	0.024	0	155.925	3511.08
2092	4.1946	0.03094	271.959	8.12584	11.8487	509.587	144.153	18.4553	3.97258	19.8003	43.8033	10.7445	1.99106	0.0955	0	89.2082	10.6833	23.4176	364.218	41.1964	0.0154	81.442	6.09534	2.743	0.025	0	0	0	0	0	0.172	3.085	0.06	0.014	0	0.023	0	155.925	3511.08
2093	4.19565	0.03286	271.222	8.12406	11.7744	505.551	143.638	18.4053	3.95877	19.7503	43.7739	10.826	1.99994	0.09465	0	88.2106	10.6485	23.3662	369.825	41.8306	0.01525	81.6228	6.13771	2.652	0.023	0	0	0	0	0	0.15	2.931	0.055	0.013	0	0.022	0	155.925	3511.08
2094	4.1967	0.03478	270.484	8.12228	11.7	501.515	143.123	18.3554	3.94496	19.7003	43.7446	10.9075	2.00882	0.0938	0	87.2129	10.6138	23.3148	375.432	42.4649	0.0151	81.8036	6.18008	2.565	0.021	0	0	0	0	0	0.13	2.785	0.051	0.012	0	0.02	0	155.925	3511.08
2095	4.19775	0.0367	269.747	8.1205	11.6257	497.479	142.608	18.3055	3.93115	19.6503	43.7153	10.989	2.0177	0.09295	0	86.2152	10.5791	23.2634	381.04	43.0992	0.01495	81.9844	6.22245	2.48	0.019	0	0	0	0	0	0.113	2.645	0.047	0.011	0	0.019	0	155.925	3511.08
2096	4.1988	0.03862	269.009	8.11872	11.5513	493.443	142.093	18.2556	3.91734	19.6004	43.686	11.0704	2.02658	0.0921	0	85.2175	10.5444	23.212	386.647	43.7334	0.0148	82.1652	6.26482	2.398	0.018	0	0	0	0	0	0.099	2.513	0.043	0.01	0	0.018	0	155.925	3511.08
2097	4.19985	0.04054	268.271	8.11694	11.477	489.407	141.578	18.2057	3.90353	19.5504	43.6567	11.1519	2.03546	0.09125	0	84.2198	10.5097	23.1606	392.254	44.3676	0.01465	82.346	6.30719	2.319	0.016	0	0	0	0	0	0.086	2.387	0.039	0.009	0	0.018	0	155.925	3511.08
2098	4.2009	0.04246	267.534	8.11516	11.4026	485.371	141.064	18.1557	3.88972	19.5004	43.6273	11.2334	2.04434	0.0904	0	83.2222	10.4749	23.1092	397.861	45.0019	0.0145	82.5268	6.34956	2.243	0.015	0	0	0	0	0	0.075	2.268	0.036	0.009	0	0.017	0	155.925	3511.08
2099	4.20195	0.04438	266.796	8.11338	11.3283	481.336	140.549	18.1058	3.87591	19.4505	43.598	11.3148	2.05322	0.08955	0	82.2245	10.4402	23.0578	403.468	45.6362	0.01435	82.7076	6.39193	2.169	0.014	0	0	0	0	0	0.065	2.155	0.033	0.008	0	0.016	0	155.925	3511.08
2100	4.203	0.0463	266.059	8.1116	11.2539	477.3	140.034	18.0559	3.8621	19.4005	43.5687	11.3963	2.0621	0.0887	0	81.2268	10.4055	23.0064	409.075	46.2704	0.0142	82.8884	6.4343	2.097	0.012	0	0	0	0	0	0.056	2.047	0.031	0.008	0	0.015	0	155.925	3511.08
2101	4.0168	0.044448	265.232	8.04484	11.2219	478.17	139.937	18.0421	3.85874	19.44	43.7265	11.1694	2.0215	0.08704	0.016572	81.2265	10.4059	23.0123	410.305	46.0509	0.015108	82.8883	6.3101	2.028	0.011	0	0	0	0	0	0.049	1.945	0.028	0.007	0	0.014	0	155.925	3511.08
2102	3.83059	0.042596	264.405	7.97808	11.1899	479.04	139.84	18.0283	3.85538	19.4796	43.8843	10.9425	1.98089	0.08538	0.033144	81.2262	10.4063	23.0181	411.535	45.8313	0.016016	82.8882	6.18591	1.961	0.01	0	0	0	0	0	0.042	1.847	0.026	0.007	0	0.014	0	155.925	3511.08
2103	3.64439	0.040744	263.578	7.91132	11.1579	479.91	139.743	18.0146	3.85202	19.5191	44.0421	10.7156	1.94029	0.08372	0.049716	81.2259	10.4067	23.024	412.764	45.6118	0.016924	82.8881	6.06171	1.896	0.01	0	0	0	0	0	0.037	1.755	0.024	0.006	0	0.013	0	155.925	3511.08
2104	3.45818	0.038892	262.752	7.84456	11.1259	480.781	139.647	18.0008	3.84866	19.5586	44.1999	10.4887	1.89968	0.08206	0.066288	81.2256	10.4071	23.0298	413.994	45.3922	0.017832	82.888	5.93752	1.834	0.009	0	0	0	0	0	0.032	1.667	0.022	0.006	0	0.012	0	155.925	3511.08
2105	3.27198	0.03704	261.925	7.7778	11.0939	481.651	139.55	17.987	3.8453	19.5982	44.3577	10.2618	1.85908	0.0804	0.08286	81.2253	10.4075	23.0357	415.224	45.1727	0.01874	82.888	5.81332	1.773	0.008	0	0	0	0	0	0.028	1.584	0.02	0.005	0	0.012	0	155.925	3511.08
2106	3.08578	0.035188	261.098	7.71104	11.0619	482.521	139.453	17.9732	3.84194	19.6377	44.5155	10.0349	1.81848	0.07874	0.099432	81.225	10.4079	23.0415	416.454	44.9531	0.019648	82.8879	5.68912	1.715	0.007	0	0	0	0	0	0.024	1.505	0.019	0.005	0	0.011	0	155.925	3511.08
2107	2.89957	0.033336	260.272	7.64428	11.0299	483.392	139.356	17.9595	3.83858	19.6773	44.6733	9.80797	1.77787	0.07708	0.116004	81.2247	10.4083	23.0474	417.684	44.7336	0.020556	82.8878	5.56493	1.658	0.007	0	0	0	0	0	0.021	1.429	0.017	0.005	0	0.011	0	155.925	3511.08
2108	2.71337	0.031484	259.445	7.57752	10.9979	484.262	139.259	17.9457	3.83522	19.7168	44.8311	9.58107	1.73727	0.07542	0.132576	81.2244	10.4087	23.0532	418.913	44.514	0.021464	82.8877	5.44073	1.603	0.006	0	0	0	0	0	0.018	1.358	0.016	0.004	0	0.01	0	155.925	3511.08
2109	2.52716	0.029632	258.618	7.51076	10.9659	485.132	139.162	17.9319	3.83186	19.7563	44.9889	9.35416	1.69666	0.07376	0.149148	81.2241	10.4091	23.0591	420.143	44.2945	0.022372	82.8876	5.31654	1.55	0.006	0	0	0	0	0	0.016	1.29	0.014	0.004	0	0.009	0	155.925	3511.08
2110	2.34096	0.02778	257.792	7.444	10.9339	486.003	139.066	17.9181	3.8285	19.7959	45.1467	9.12726	1.65606	0.0721	0.16572	81.2238	10.4095	23.0649	421.373	44.075	0.02328	82.8875	5.19234	1.499	0.005	0	0	0	0	0	0.014	1.226	0.013	0.004	0	0.009	0	155.925	3511.08
2111	2.15476	0.025928	256.965	7.37724	10.9019	486.873	138.969	17.9044	3.82514	19.8354	45.3045	8.90036	1.61546	0.07044	0.182292	81.2235	10.4099	23.0708	422.603	43.8554	0.024188	82.8874	5.06814	1.45	0.005	0	0	0	0	0	0.012	1.164	0.012	0.003	0	0.009	0	155.925	3511.08
2112	1.96855	0.024076	256.138	7.31048	10.8699	487.743	138.872	17.8906	3.82178	19.8749	45.4623	8.67345	1.57485	0.06878	0.198864	81.2232	10.4103	23.0766	423.832	43.6359	0.025096	82.8873	4.94395	1.402	0.004	0	0	0	0	0	0.01	1.106	0.011	0.003	0	0.008	0	155.925	3511.08
2113	1.78235	0.022224	255.311	7.24372	10.838	488.613	138.775	17.8768	3.81842	19.9145	45.62	8.44655	1.53425	0.06712	0.215436	81.2228	10.4107	23.0825	425.062	43.4163	0.026004	82.8873	4.81975	1.356	0.004	0	0	0	0	0	0.009	1.051	0.01	0.003	0	0.008	0	155.925	3511.08
2114	1.59614	0.020372	254.485	7.17696	10.806	489.484	138.678	17.863	3.81506	19.954	45.7778	8.21964	1.49364	0.06546	0.232008	81.2225	10.4111	23.0883	426.292	43.1968	0.026912	82.8872	4.69556	1.311	0.004	0	0	0	0	0	0.008	0.998	0.01	0.003	0	0.007	0	155.925	3511.08
2115	1.40994	0.01852	253.658	7.1102	10.774	490.354	138.581	17.8493	3.8117	19.9935	45.9356	7.99274	1.45304	0.0638	0.24858	81.2222	10.4115	23.0942	427.522	42.9772	0.02782	82.8871	4.57136	1.268	0.003	0	0	0	0	0	0.007	0.948	0.009	0.003	0	0.007	0	155.925	3511.08
2116	1.22374	0.016668	252.831	7.04344	10.742	491.224	138.485	17.8355	3.80834	20.0331	46.0934	7.76584	1.41244	0.06214	0.265152	81.2219	10.4119	23.1	428.752	42.7577	0.028728	82.887	4.44716	1.226	0.003	0	0	0	0	0	0.006	0.901	0.008	0.002	0	0.007	0	155.925	3511.08
2117	1.03753	0.014816	252.005	6.97668	10.71	492.095	138.388	17.8217	3.80498	20.0726	46.2512	7.53893	1.37183	0.06048	0.281724	81.2216	10.4123	23.1059	429.981	42.5382	0.029636	82.8869	4.32297	1.185	0.003	0	0	0	0	0	0.005	0.856	0.007	0.002	0	0.006	0	155.925	3511.08
2118	0.851328	0.012964	251.178	6.90992	10.678	492.965	138.291	17.8079	3.80162	20.1121	46.409	7.31203	1.33123	0.05882	0.298296	81.2213	10.4127	23.1117	431.211	42.3186	0.030544	82.8868	4.19877	1.146	0.003	0	0	0	0	0	0.005	0.813	0.007	0.002	0	0.006	0	155.925	3511.08
2119	0.665124	0.011112	250.351	6.84316	10.646	493.835	138.194	17.7942	3.79826	20.1517	46.5668	7.08512	1.29062	0.05716	0.314868	81.221	10.4131	23.1176	432.441	42.0991	0.031452	82.8867	4.07458	1.108	0.002	0	0	0	0	0	0.004	0.772	0.006	0.002	0	0.006	0	155.925	3511.08
2120	0.47892	0.00926	249.524	6.7764	10.614	494.706	138.097	17.7804	3.7949	20.1912	46.7246	6.85822	1.25002	0.0555	0.33144	81.2207	10.4135	23.1234	433.671	41.8795	0.03236	82.8866	3.95038	1.072	0.002	0	0	0	0	0	0.003	0.734	0.006	0.002	0	0.005	0	155.925	3511.08
2121	0.292716	0.007408	248.698	6.70964	10.582	495.576	138	17.7666	3.79154	20.2308	46.8824	6.63132	1.20942	0.05384	0.348012	81.2204	10.4139	23.1293	434.9	41.66	0.033268	82.8866	3.82618	1.036	0.002	0	0	0	0	0	0.003	0.697	0.005	0.002	0	0.005	0	155.925	3511.08
2122	0.106512	0.005556	247.871	6.64288	10.55	496.446	137.904	17.7528	3.78818	20.2703	47.0402	6.40441	1.16881	0.05218	0.364584	81.2201	10.4143	23.1351	436.13	41.4404	0.034176	82.8865	3.70199	1.002	0.002	0	0	0	0	0	0.003	0.662	0.005	0.002	0	0.005	0	155.925	3511.08
2123	-0.079692	0.003704	247.044	6.57612	10.518	497.316	137.807	17.7391	3.78482	20.3098	47.198	6.17751	1.12821	0.05052	0.381156	81.2198	10.4147	23.141	437.36	41.2209	0.035084	82.8864	3.57779	0.969	0.002	0	0	0	0	0	0.002	0.629	0.005	0.001	0	0.005	0	155.925	3511.08
2124	-0.265896	0.001852	246.218	6.50936	10.486	498.187	137.71	17.7253	3.78146	20.3494	47.3558	5.9506	1.0876	0.04886	0.397728	81.2195	10.4151	23.1468	438.59	41.0013	0.035992	82.8863	3.4536	0.937	0.001	0	0	0	0	0	0.002	0.598	0.004	0.001	0	0.004	0	155.925	3511.08
2125	-0.4521	0	245.391	6.4426	10.454	499.057	137.613	17.7115	3.7781	20.3889	47.5136	5.7237	1.047	0.0472	0.4143	81.2192	10.4155	23.1527	439.82	40.7818	0.0369	82.8862	3.3294	0.906	0.001	0	0	0	0	0	0.002	0.568	0.004	0.001	0	0.004	0	155.925	3511.08
2126	-0.638296	0	244.564	6.37585	10.422	499.927	137.516	17.6977	3.77473	20.4284	47.6714	5.4968	1.0064	0.045544	0.430872	81.2189	10.4159	23.1586	441.049	40.5623	0.037824	82.8861	3.20521	0.876	0.001	0	0	0	0	0	0.001	0.539	0.004	0.001	0	0.004	0	155.925	3511.08
2127	-0.824492	0	243.738	6.3091	10.39	500.798	137.42	17.6839	3.77136	20.468	47.8292	5.26989	0.965792	0.043888	0.447444	81.2186	10.4163	23.1644	442.279	40.3427	0.038748	82.886	3.08102	0.847	0.001	0	0	0	0	0	0.001	0.512	0.003	0.001	0	0.004	0	155.925	3511.08
2128	-1.01069	0	242.911	6.24234	10.358	501.668	137.323	17.6702	3.768	20.5075	47.987	5.04299	0.925188	0.042232	0.464016	81.2183	10.4167	23.1703	443.509	40.1232	0.039672	82.886	2.95682	0.819	0.001	0	0	0	0	0	0.001	0.487	0.003	0.001	0	0.004	0	155.925	3511.08
2129	-1.19688	0	242.084	6.17559	10.326	502.538	137.226	17.6564	3.76463	20.547	48.1448	4.81608	0.884584	0.040576	0.480588	81.218	10.4171	23.1761	444.739	39.9036	0.040596	82.8859	2.83263	0.792	0.001	0	0	0	0	0	0.001	0.462	0.003	0.001	0	0.003	0	155.925	3511.08
2130	-1.38308	0	241.257	6.10884	10.2941	503.408	137.129	17.6426	3.76126	20.5866	48.3026	4.58918	0.84398	0.03892	0.49716	81.2177	10.4175	23.182	445.969	39.6841	0.04152	82.8858	2.70844	0.766	0.001	0	0	0	0	0	0.001	0.439	0.003	0.001	0	0.003	0	155.925	3511.08
2131	-1.56928	0	240.431	6.04209	10.2621	504.279	137.032	17.6288	3.75789	20.6261	48.4604	4.36228	0.803376	0.037264	0.513732	81.2174	10.4179	23.1878	447.198	39.4646	0.042444	82.8857	2.58425	0.741	0.001	0	0	0	0	0	0.001	0.417	0.002	0.001	0	0.003	0	155.925	3511.08
2132	-1.75547	0	239.604	5.97534	10.2301	505.149	136.935	17.6151	3.75452	20.6657	48.6182	4.13537	0.762772	0.035608	0.530304	81.217	10.4183	23.1937	448.428	39.245	0.043368	82.8856	2.46006	0.717	0.001	0	0	0	0	0	0.001	0.397	0.002	0.001	0	0.003	0	155.925	3511.08
2133	-1.94167	0	238.777	5.90858	10.1981	506.019	136.839	17.6013	3.75116	20.7052	48.776	3.90847	0.722168	0.033952	0.546876	81.2167	10.4187	23.1995	449.658	39.0255	0.044292	82.8856	2.33586	0.693	0.001	0	0	0	0	0	0.001	0.377	0.002	0.001	0	0.003	0	155.925	3511.08
2134	-2.12786	0	237.951	5.84183	10.1661	506.89	136.742	17.5875	3.74779	20.7447	48.9338	3.68156	0.681564	0.032296	0.563448	81.2164	10.4191	23.2054	450.888	38.8059	0.045216	82.8855	2.21167	0.67	0.001	0	0	0	0	0	0	0.358	0.002	0.001	0	0.003	0	155.925	3511.08
2135	-2.31406	0	237.124	5.77508	10.1341	507.76	136.645	17.5737	3.74442	20.7843	49.0916	3.45466	0.64096	0.03064	0.58002	81.2161	10.4195	23.2113	452.117	38.5864	0.04614	82.8854	2.08748	0.648	0.001	0	0	0	0	0	0	0.34	0.002	0.001	0	0.002	0	155.925	3511.08
2136	-2.50026	0	236.297	5.70833	10.1021	508.63	136.548	17.56	3.74105	20.8238	49.2494	3.22776	0.600356	0.028984	0.596592	81.2158	10.4199	23.2171	453.347	38.3669	0.047064	82.8853	1.96329	0.627	0.001	0	0	0	0	0	0	0.323	0.002	0.001	0	0.002	0	155.925	3511.08
2137	-2.68645	0	235.47	5.64158	10.0701	509.501	136.451	17.5462	3.73768	20.8633	49.4072	3.00085	0.559752	0.027328	0.613164	81.2155	10.4203	23.223	454.577	38.1473	0.047988	82.8852	1.8391	0.606	0	0	0	0	0	0	0	0.307	0.001	0.001	0	0.002	0	155.925	3511.08
2138	-2.87265	0	234.644	5.57482	10.0382	510.371	136.354	17.5324	3.73432	20.9029	49.565	2.77395	0.519148	0.025672	0.629736	81.2152	10.4207	23.2288	455.807	37.9278	0.048912	82.8852	1.7149	0.586	0	0	0	0	0	0	0	0.291	0.001	0	0	0.002	0	155.925	3511.08
2139	-3.05884	0	233.817	5.50807	10.0062	511.241	136.258	17.5186	3.73095	20.9424	49.7228	2.54704	0.478544	0.024016	0.646308	81.2149	10.4211	23.2347	457.037	37.7082	0.049836	82.8851	1.59071	0.567	0	0	0	0	0	0	0	0.277	0.001	0	0	0.002	0	155.925	3511.08
2140	-3.24504	0	232.99	5.44132	9.97418	512.111	136.161	17.5049	3.72758	20.9819	49.8806	2.32014	0.43794	0.02236	0.66288	81.2146	10.4215	23.2405	458.266	37.4887	0.05076	82.885	1.46652	0.548	0	0	0	0	0	0	0	0.263	0.001	0	0	0.002	0	155.925	3511.08
2141	-3.43124	0	232.164	5.37457	9.94219	512.982	136.064	17.4911	3.72421	21.0215	50.0384	2.09324	0.397336	0.020704	0.679452	81.2143	10.4219	23.2464	459.496	37.2692	0.051684	82.8849	1.34233	0.53	0	0	0	0	0	0	0	0.25	0.001	0	0	0.002	0	155.925	3511.08
2142	-3.61743	0	231.337	5.30782	9.9102	513.852	135.967	17.4773	3.72084	21.061	50.1962	1.86633	0.356732	0.019048	0.696024	81.214	10.4223	23.2523	460.726	37.0496	0.052608	82.8848	1.21814	0.512	0	0	0	0	0	0	0	0.237	0.001	0	0	0.002	0	155.925	3511.08
2143	-3.80363	0	230.51	5.24106	9.87822	514.722	135.87	17.4635	3.71748	21.1005	50.354	1.63943	0.316128	0.017392	0.712596	81.2137	10.4227	23.2581	461.956	36.8301	0.053532	82.8848	1.09394	0.495	0	0	0	0	0	0	0	0.226	0.001	0	0	0.002	0	155.925	3511.08
2144	-3.98982	0	229.684	5.17431	9.84623	515.593	135.774	17.4498	3.71411	21.1401	50.5118	1.41252	0.275524	0.015736	0.729168	81.2133	10.4231	23.264	463.185	36.6105	0.054456	82.8847	0.969752	0.479	0	0	0	0	0	0	0	0.214	0.001	0	0	0.002	0	155.925	3511.08
2145	-4.17602	0	228.857	5.10756	9.81424	516.463	135.677	17.436	3.71074	21.1796	50.6696	1.18562	0.23492	0.01408	0.74574	81.213	10.4235	23.2698	464.415	36.391	0.05538	82.8846	0.84556	0.463	0	0	0	0	0	0	0	0.204	0.001	0	0	0.001	0	155.925	3511.08
2146	-4.36222	0	228.03	5.04081	9.78225	517.333	135.58	17.4222	3.70737	21.2192	50.8274	0.958716	0.194316	0.012424	0.762312	81.2127	10.4239	23.2757	465.645	36.1715	0.056304	82.8845	0.721368	0.448	0	0	0	0	0	0	0	0.193	0.001	0	0	0.001	0	155.925	3511.08
2147	-4.54841	0	227.203	4.97406	9.75026	518.204	135.483	17.4084	3.704	21.2587	50.9852	0.731812	0.153712	0.010768	0.778884	81.2124	10.4243	23.2815	466.875	35.9519	0.057228	82.8844	0.597176	0.433	0	0	0	0	0	0	0	0.184	0.001	0	0	0.001	0	155.925	3511.08
2148	-4.73461	0	226.377	4.9073	9.71828	519.074	135.386	17.3947	3.70064	21.2982	51.143	0.504908	0.113108	0.009112	0.795456	81.2121	10.4247	23.2874	468.105	35.7324	0.058152	82.8844	0.472984	0.419	0	0	0	0	0	0	0	0.175	0.001	0	0	0.001	0	155.925	3511.08
2149	-4.9208	0	225.55	4.84055	9.68629	519.944	135.289	17.3809	3.69727	21.3378	51.3008	0.278004	0.072504	0.007456	0.812028	81.2118	10.4251	23.2932	469.334	35.5128	0.059076	82.8843	0.348792	0.405	0	0	0	0	0	0	0	0.166	0.001	0	0	0.001	0	155.925	3511.08
2150	-5.107	0	224.723	4.7738	9.6543	520.814	135.193	17.3671	3.6939	21.3773	51.4586	0.0511	0.0319	0.0058	0.8286	81.2115	10.4255	23.2991	470.564	35.2933	0.06	82.8842	0.2246	0.392	0	0	0	0	0	0	0	0.157	0	0	0	0.001	0	155.925	3511.08
2151	-5.107	0	223.897	4.70706	9.62232	521.685	135.096	17.3533	3.69054	21.4168	51.6164	0.0511	0.0319	0.0058	0.82862	81.2134	10.4257	23.2996	471.794	35.2941	0.06	82.8861	0.2246	0.379	0	0	0	0	0	0	0	0.15	0	0	0	0.001	0	155.925	3511.08
2152	-5.107	0	223.07	4.64032	9.59034	522.555	134.999	17.3395	3.68718	21.4563	51.7741	0.0511	0.0319	0.0058	0.82864	81.2153	10.426	23.3001	473.024	35.2949	0.06	82.888	0.2246	0.366	0	0	0	0	0	0	0	0.142	0	0	0	0.001	0	155.925	3511.08
2153	-5.107	0	222.243	4.57358	9.55836	523.425	134.902	17.3258	3.68382	21.4959	51.9319	0.0511	0.0319	0.0058	0.82866	81.2172	10.4262	23.3007	474.253	35.2958	0.06	82.8899	0.2246	0.354	0	0	0	0	0	0	0	0.135	0	0	0	0.001	0	155.925	3511.08
2154	-5.107	0	221.417	4.50684	9.52638	524.296	134.805	17.312	3.68046	21.5354	52.0896	0.0511	0.0319	0.0058	0.82868	81.2191	10.4265	23.3012	475.483	35.2966	0.06	82.8918	0.2246	0.342	0	0	0	0	0	0	0	0.128	0	0	0	0.001	0	155.925	3511.08
2155	-5.107	0	220.59	4.4401	9.4944	525.166	134.709	17.2982	3.6771	21.5749	52.2474	0.0511	0.0319	0.0058	0.8287	81.221	10.4267	23.3017	476.713	35.2974	0.06	82.8937	0.2246	0.331	0	0	0	0	0	0	0	0.122	0	0	0	0.001	0	155.925	3511.08
2156	-5.107	0	219.763	4.37332	9.4624	526.036	134.612	17.2844	3.67378	21.6145	52.4052	0.0511	0.0319	0.0058	0.82874	81.2239	10.4271	23.3026	477.943	35.2986	0.06	82.8967	0.2246	0.32	0	0	0	0	0	0	0	0.116	0	0	0	0.001	0	155.925	3511.08
2157	-5.107	0	218.936	4.30654	9.4304	526.906	134.515	17.2707	3.67046	21.654	52.563	0.0511	0.0319	0.0058	0.82878	81.2268	10.4275	23.3034	479.172	35.2999	0.06	82.8997	0.2246	0.31	0	0	0	0	0	0	0	0.11	0	0	0	0.001	0	155.925	3511.08
2158	-5.107	0	218.11	4.23976	9.3984	527.777	134.418	17.2569	3.66714	21.6936	52.7208	0.0511	0.0319	0.0058	0.82882	81.2298	10.4278	23.3043	480.402	35.3011	0.06	82.9027	0.2246	0.299	0	0	0	0	0	0	0	0.104	0	0	0	0.001	0	155.925	3511.08
2159	-5.107	0	217.283	4.17298	9.3664	528.647	134.321	17.2432	3.66382	21.7331	52.8786	0.0511	0.0319	0.0058	0.82886	81.2327	10.4282	23.3051	481.632	35.3024	0.06	82.9057	0.2246	0.29	0	0	0	0	0	0	0	0.099	0	0	0	0.001	0	155.925	3511.08
2160	-5.107	0	216.456	4.1062	9.3344	529.517	134.224	17.2294	3.6605	21.7727	53.0364	0.0511	0.0319	0.0058	0.8289	81.2356	10.4286	23.306	482.862	35.3036	0.06	82.9087	0.2246	0.28	0	0	0	0	0	0	0	0.094	0	0	0	0.001	0	155.925	3511.08
2161	-5.107	0	215.629	4.1062	9.32134	529.872	134.185	17.2238	3.6591	21.7888	53.1007	0.0511	0.0319	0.0058	0.82892	81.239	10.429	23.307	484.092	35.3051	0.06	82.9121	0.2246	0.271	0	0	0	0	0	0	0	0.09	0	0	0	0.001	0	155.925	3511.08
2162	-5.107	0	214.803	4.1062	9.30828	530.226	134.146	17.2182	3.6577	21.8049	53.165	0.0511	0.0319	0.0058	0.82894	81.2423	10.4295	23.3079	485.321	35.3066	0.06	82.9156	0.2246	0.262	0	0	0	0	0	0	0	0.085	0	0	0	0.001	0	155.925	3511.08
2163	-5.107	0	213.976	4.1062	9.29522	530.581	134.106	17.2126	3.6563	21.821	53.2292	0.0511	0.0319	0.0058	0.82896	81.2457	10.4299	23.3089	486.551	35.3081	0.06	82.919	0.2246	0.253	0	0	0	0	0	0	0	0.081	0	0	0	0.001	0	155.925	3511.08
2164	-5.107	0	213.149	4.1062	9.28216	530.935	134.067	17.207	3.6549	21.8371	53.2935	0.0511	0.0319	0.0058	0.82898	81.249	10.4304	23.3098	487.781	35.3096	0.06	82.9225	0.2246	0.245	0	0	0	0	0	0	0	0.077	0	0	0	0.001	0	155.925	3511.08
2165	-5.107	0	212.323	4.1062	9.2691	531.29	134.027	17.2014	3.6535	21.8532	53.3578	0.0511	0.0319	0.0058	0.829	81.2524	10.4308	23.3108	489.011	35.3111	0.06	82.9259	0.2246	0.237	0	0	0	0	0	0	0	0.073	0	0	0	0.001	0	155.925	3511.08
2166	-5.107	0	211.496	4.1062	9.21816	532.676	133.873	17.1794	3.64816	21.9162	53.6091	0.05112	0.0319	0.0058	0.82902	81.2558	10.4312	23.3118	490.241	35.3125	0.06	82.9293	0.2246	0.229	0	0	0	0	0	0	0	0.069	0	0	0	0.001	0	155.925	3511.08
2167	-5.107	0	210.669	4.1062	9.16722	534.062	133.719	17.1575	3.64282	21.9792	53.8604	0.05114	0.0319	0.0058	0.82904	81.2592	10.4316	23.3128	491.47	35.314	0.06	82.9327	0.2246	0.221	0	0	0	0	0	0	0	0.066	0	0	0	0	0	155.925	3511.08
2168	-5.107	0	209.843	4.1062	9.11628	535.448	133.565	17.1355	3.63748	22.0421	54.1118	0.05116	0.0319	0.0058	0.82906	81.2625	10.4321	23.3137	492.7	35.3154	0.06	82.9362	0.2246	0.214	0	0	0	0	0	0	0	0.063	0	0	0	0	0	155.925	3511.08
2169	-5.107	0	209.016	4.1062	9.06534	536.834	133.41	17.1136	3.63214	22.1051	54.3631	0.05118	0.0319	0.0058	0.82908	81.2659	10.4325	23.3147	493.93	35.3169	0.06	82.9396	0.2246	0.207	0	0	0	0	0	0	0	0.059	0	0	0	0	0	155.925	3511.08
2170	-5.107	0	208.189	4.1062	9.0144	538.22	133.256	17.0916	3.6268	22.1681	54.6144	0.0512	0.0319	0.0058	0.8291	81.2693	10.4329	23.3157	495.16	35.3183	0.06	82.943	0.2246	0.2	0	0	0	0	0	0	0	0.056	0	0	0	0	0	155.925	3511.08
2171	-5.107	0	207.362	4.1062	8.9824	539.09	133.159	17.0778	3.62344	22.2076	54.7722	0.0512	0.0319	0.0058	0.82916	81.2727	10.4334	23.3167	496.389	35.3198	0.06	82.9465	0.2246	0.194	0	0	0	0	0	0	0	0.054	0	0	0	0	0	155.925	3511.08
2172	-5.107	0	206.536	4.1062	8.9504	539.961	133.063	17.0641	3.62008	22.2472	54.93	0.0512	0.0319	0.0058	0.82922	81.2761	10.4338	23.3176	497.619	35.3213	0.06	82.95	0.2246	0.187	0	0	0	0	0	0	0	0.051	0	0	0	0	0	155.925	3511.08
2173	-5.107	0	205.709	4.1062	8.9184	540.831	132.966	17.0503	3.61672	22.2867	55.0878	0.0512	0.0319	0.0058	0.82928	81.2796	10.4343	23.3186	498.849	35.3228	0.06	82.9535	0.2246	0.181	0	0	0	0	0	0	0	0.048	0	0	0	0	0	155.925	3511.08
2174	-5.107	0	204.882	4.1062	8.8864	541.701	132.869	17.0366	3.61336	22.3263	55.2456	0.0512	0.0319	0.0058	0.82934	81.283	10.4347	23.3195	500.079	35.3243	0.06	82.957	0.2246	0.175	0	0	0	0	0	0	0	0.046	0	0	0	0	0	155.925	3511.08
2175	-5.107	0	204.055	4.1062	8.8544	542.572	132.772	17.0228	3.61	22.3658	55.4034	0.0512	0.0319	0.0058	0.8294	81.2864	10.4352	23.3205	501.308	35.3258	0.06	82.9605	0.2246	0.169	0	0	0	0	0	0	0	0.044	0	0	0	0	0	155.925	3511.08
2176	-5.107	0	203.229	4.1062	8.82242	543.442	132.675	17.009	3.60664	22.4053	55.5612	0.0512	0.0319	0.0058	0.82942	81.2898	10.4356	23.3215	502.538	35.3273	0.06	82.964	0.2246	0.164	0	0	0	0	0	0	0	0.042	0	0	0	0	0	155.925	3511.08
2177	-5.107	0	202.402	4.1062	8.79044	544.312	132.578	16.9952	3.60328	22.4449	55.719	0.0512	0.0319	0.0058	0.82944	81.2932	10.436	23.3224	503.768	35.3288	0.06	82.9675	0.2246	0.158	0	0	0	0	0	0	0	0.039	0	0	0	0	0	155.925	3511.08
2178	-5.107	0	201.575	4.1062	8.75846	545.183	132.482	16.9815	3.59992	22.4844	55.8767	0.0512	0.0319	0.0058	0.82946	81.2967	10.4365	23.3234	504.998	35.3302	0.06	82.971	0.2246	0.153	0	0	0	0	0	0	0	0.037	0	0	0	0	0	155.925	3511.08
2179	-5.107	0	200.749	4.1062	8.72648	546.053	132.385	16.9677	3.59656	22.524	56.0345	0.0512	0.0319	0.0058	0.82948	81.3001	10.4369	23.3243	506.228	35.3317	0.06	82.9745	0.2246	0.148	0	0	0	0	0	0	0	0.036	0	0	0	0	0	155.925	3511.08
2180	-5.107	0	199.922	4.1062	8.6945	546.923	132.288	16.9539	3.5932	22.5635	56.1923	0.0512	0.0319	0.0058	0.8295	81.3035	10.4373	23.3253	507.457	35.3332	0.06	82.978	0.2246	0.143	0	0	0	0	0	0	0	0.034	0	0	0	0	0	155.925	3511.08
2181	-5.107	0	199.095	4.1062	8.6625	547.793	132.191	16.9401	3.58984	22.603	56.3501	0.0512	0.0319	0.0058	0.82952	81.3068	10.4377	23.3263	508.687	35.3346	0.06	82.9813	0.2246	0.138	0	0	0	0	0	0	0	0.032	0	0	0	0	0	155.925	3511.08
2182	-5.107	0	198.269	4.1062	8.6305	548.664	132.094	16.9263	3.58648	22.6426	56.5079	0.0512	0.0319	0.0058	0.82954	81.3101	10.4382	23.3272	509.917	35.3361	0.06	82.9847	0.2246	0.134	0	0	0	0	0	0	0	0.031	0	0	0	0	0	155.925	3511.08
2183	-5.107	0	197.442	4.1062	8.5985	549.534	131.998	16.9125	3.58312	22.6821	56.6658	0.0512	0.0319	0.0058	0.82956	81.3134	10.4386	23.3282	511.147	35.3375	0.06	82.988	0.2246	0.129	0	0	0	0	0	0	0	0.029	0	0	0	0	0	155.925	3511.08
2184	-5.107	0	196.615	4.1062	8.5665	550.404	131.901	16.8987	3.57976	22.7217	56.8236	0.0512	0.0319	0.0058	0.82958	81.3167	10.4391	23.3291	512.377	35.339	0.06	82.9914	0.2246	0.125	0	0	0	0	0	0	0	0.028	0	0	0	0	0	155.925	3511.08
2185	-5.107	0	195.789	4.1062	8.5345	551.275	131.804	16.8849	3.5764	22.7612	56.9814	0.0512	0.0319	0.0058	0.8296	81.32	10.4395	23.3301	513.606	35.3404	0.06	82.9947	0.2246	0.121	0	0	0	0	0	0	0	0.026	0	0	0	0	0	155.925	3511.08
2186	-5.107	0	194.962	4.1062	8.50252	552.145	131.707	16.8712	3.57302	22.8007	57.1392	0.0512	0.0319	0.0058	0.82966	81.3233	10.4399	23.331	514.836	35.3418	0.06	82.9981	0.2246	0.117	0	0	0	0	0	0	0	0.025	0	0	0	0	0	155.925	3511.08
2187	-5.107	0	194.135	4.1062	8.47054	553.015	131.61	16.8574	3.56964	22.8403	57.297	0.0512	0.0319	0.0058	0.82972	81.3266	10.4403	23.332	516.066	35.3433	0.06	83.0015	0.2246	0.113	0	0	0	0	0	0	0	0.024	0	0	0	0	0	155.925	3511.08
2188	-5.107	0	193.309	4.1062	8.43856	553.885	131.513	16.8437	3.56626	22.8798	57.4549	0.0512	0.0319	0.0058	0.82978	81.3299	10.4407	23.3329	517.296	35.3447	0.06	83.0049	0.2246	0.109	0	0	0	0	0	0	0	0.022	0	0	0	0	0	155.925	3511.08
2189	-5.107	0	192.482	4.1062	8.40658	554.756	131.417	16.8299	3.56288	22.9194	57.6127	0.0512	0.0319	0.0058	0.82984	81.3332	10.4411	23.3339	518.525	35.3462	0.06	83.0083	0.2246	0.106	0	0	0	0	0	0	0	0.021	0	0	0	0	0	155.925	3511.08
2190	-5.107	0	191.655	4.1062	8.3746	555.626	131.32	16.8162	3.5595	22.9589	57.7705	0.0512	0.0319	0.0058	0.8299	81.3365	10.4415	23.3348	519.755	35.3476	0.06	83.0117	0.2246	0.102	0	0	0	0	0	0	0	0.02	0	0	0	0	0	155.925	3511.08
2191	-5.107	0	190.828	4.1062	8.34262	556.496	131.223	16.8024	3.55618	22.9984	57.9283	0.0512	0.0319	0.0058	0.82992	81.3396	10.4419	23.3357	520.985	35.349	0.06	83.0149	0.2246	0.099	0	0	0	0	0	0	0	0.019	0	0	0	0	0	155.925	3511.08
2192	-5.107	0	190.002	4.1062	8.31064	557.367	131.126	16.7886	3.55286	23.038	58.086	0.0512	0.0319	0.0058	0.82994	81.3428	10.4423	23.3366	522.215	35.3503	0.06	83.0181	0.2246	0.096	0	0	0	0	0	0	0	0.018	0	0	0	0	0	155.925	3511.08
2193	-5.107	0	189.175	4.1062	8.27866	558.237	131.029	16.7747	3.54954	23.0775	58.2438	0.0512	0.0319	0.0058	0.82996	81.3459	10.4428	23.3375	523.445	35.3517	0.06	83.0214	0.2246	0.093	0	0	0	0	0	0	0	0.017	0	0	0	0	0	155.925	3511.08
2194	-5.107	0	188.348	4.1062	8.24668	559.107	130.932	16.7609	3.54622	23.1171	58.4015	0.0512	0.0319	0.0058	0.82998	81.3491	10.4432	23.3384	524.674	35.353	0.06	83.0246	0.2246	0.089	0	0	0	0	0	0	0	0.016	0	0	0	0	0	155.925	3511.08
2195	-5.107	0	187.522	4.1062	8.2147	559.978	130.835	16.7471	3.5429	23.1566	58.5593	0.0512	0.0319	0.0058	0.83	81.3522	10.4436	23.3393	525.904	35.3544	0.06	83.0278	0.2246	0.087	0	0	0	0	0	0	0	0.016	0	0	0	0	0	155.925	3511.08
2196	-5.107	0	186.695	4.1062	8.18272	560.848	130.739	16.7334	3.53952	23.1961	58.7171	0.0512	0.0319	0.0058	0.83002	81.3554	10.444	23.3402	527.134	35.3558	0.06	83.031	0.2246	0.084	0	0	0	0	0	0	0	0.015	0	0	0	0	0	155.925	3511.08
2197	-5.107	0	185.868	4.1062	8.15074	561.718	130.642	16.7196	3.53614	23.2357	58.8749	0.0512	0.0319	0.0058	0.83004	81.3586	10.4444	23.3412	528.364	35.3572	0.06	83.0342	0.2246	0.081	0	0	0	0	0	0	0	0.014	0	0	0	0	0	155.925	3511.08
2198	-5.107	0	185.041	4.1062	8.11876	562.588	130.545	16.7059	3.53276	23.2752	59.0327	0.0512	0.0319	0.0058	0.83006	81.3617	10.4449	23.3421	529.593	35.3585	0.06	83.0373	0.2246	0.078	0	0	0	0	0	0	0	0.013	0	0	0	0	0	155.925	3511.08
2199	-5.107	0	184.215	4.1062	8.08678	563.459	130.448	16.6921	3.52938	23.3148	59.1905	0.0512	0.0319	0.0058	0.83008	81.3649	10.4453	23.3431	530.823	35.3599	0.06	83.0405	0.2246	0.076	0	0	0	0	0	0	0	0.013	0	0	0	0	0	155.925	3511.08
2200	-5.107	0	183.388	4.1062	8.0548	564.329	130.351	16.6784	3.526	23.3543	59.3483	0.0512	0.0319	0.0058	0.8301	81.3681	10.4457	23.344	532.053	35.3613	0.06	83.0437	0.2246	0.073	0	0	0	0	0	0	0	0.012	0	0	0	0	0	155.925	3511.08
2201	-5.107	0	182.561	4.12972	8.02279	565.199	130.255	16.6646	3.52265	23.3938	59.5061	0.05121	0.0319	0.0058	0.83013	81.3711	10.4461	23.3449	532.053	35.3626	0.06	83.0468	0.2246	0.071	0	0	0	0	0	0	0	0.012	0	0	0	0	0	155.925	3511.08
2202	-5.107	0	181.734	4.15324	7.99078	566.07	130.158	16.6508	3.5193	23.4334	59.6639	0.05122	0.0319	0.0058	0.83016	81.3741	10.4464	23.3457	532.053	35.3639	0.06	83.0498	0.2246	0.068	0	0	0	0	0	0	0	0.011	0	0	0	0	0	155.925	3511.08
2203	-5.107	0	180.908	4.17676	7.95877	566.94	130.061	16.6371	3.51595	23.4729	59.8217	0.05123	0.0319	0.0058	0.83019	81.3771	10.4468	23.3466	532.053	35.3652	0.06	83.0529	0.2246	0.066	0	0	0	0	0	0	0	0.01	0	0	0	0	0	155.925	3511.08
2204	-5.107	0	180.081	4.20028	7.92676	567.81	129.964	16.6233	3.5126	23.5124	59.9795	0.05124	0.0319	0.0058	0.83022	81.3801	10.4471	23.3474	532.053	35.3665	0.06	83.056	0.2246	0.064	0	0	0	0	0	0	0	0.01	0	0	0	0	0	155.925	3511.08
2205	-5.107	0	179.254	4.2238	7.89475	568.681	129.867	16.6095	3.50925	23.552	60.1373	0.05125	0.0319	0.0058	0.83025	81.3831	10.4475	23.3483	532.053	35.3678	0.06	83.059	0.2246	0.062	0	0	0	0	0	0	0	0.009	0	0	0	0	0	155.925	3511.08
2206	-5.107	0	178.428	4.24732	7.86274	569.551	129.771	16.5957	3.5059	23.5915	60.2951	0.05126	0.0319	0.0058	0.83028	81.3861	10.4479	23.3491	532.053	35.3691	0.06	83.0621	0.2246	0.06	0	0	0	0	0	0	0	0.009	0	0	0	0	0	155.925	3511.08
2207	-5.107	0	177.601	4.27084	7.83073	570.421	129.674	16.5819	3.50255	23.631	60.4529	0.05127	0.0319	0.0058	0.83031	81.3891	10.4482	23.3499	532.053	35.3704	0.06	83.0652	0.2246	0.058	0	0	0	0	0	0	0	0.008	0	0	0	0	0	155.925	3511.08
2208	-5.107	0	176.774	4.29436	7.79872	571.292	129.577	16.5682	3.4992	23.6705	60.6107	0.05128	0.0319	0.0058	0.83034	81.3921	10.4486	23.3508	532.053	35.3717	0.06	83.0683	0.2246	0.056	0	0	0	0	0	0	0	0.008	0	0	0	0	0	155.925	3511.08
2209	-5.107	0	175.948	4.31788	7.76671	572.162	129.48	16.5544	3.49585	23.7101	60.7685	0.05129	0.0319	0.0058	0.83037	81.3951	10.4489	23.3516	532.053	35.373	0.06	83.0713	0.2246	0.054	0	0	0	0	0	0	0	0.008	0	0	0	0	0	155.925	3511.08
2210	-5.107	0	175.121	4.3414	7.7347	573.032	129.383	16.5406	3.4925	23.7496	60.9263	0.0513	0.0319	0.0058	0.8304	81.3981	10.4493	23.3525	532.053	35.3743	0.06	83.0744	0.2246	0.052	0	0	0	0	0	0	0	0.007	0	0	0	0	0	155.925	3511.08
2211	-5.107	0	174.294	4.36492	7.70271	573.902	129.286	16.5268	3.48911	23.7891	61.0841	0.0513	0.0319	0.0058	0.83044	81.4009	10.4497	23.3533	532.053	35.3755	0.06	83.0773	0.2246	0.051	0	0	0	0	0	0	0	0.007	0	0	0	0	0	155.925	3511.08
2212	-5.107	0	173.468	4.38844	7.67072	574.773	129.19	16.513	3.48572	23.8287	61.2419	0.0513	0.0319	0.0058	0.83048	81.4038	10.45	23.3541	532.053	35.3768	0.06	83.0802	0.2246	0.049	0	0	0	0	0	0	0	0.007	0	0	0	0	0	155.925	3511.08
2213	-5.107	0	172.641	4.41196	7.63873	575.643	129.093	16.4992	3.48233	23.8682	61.3997	0.0513	0.0319	0.0058	0.83052	81.4066	10.4504	23.355	532.053	35.378	0.06	83.0832	0.2246	0.047	0	0	0	0	0	0	0	0.006	0	0	0	0	0	155.925	3511.08
2214	-5.107	0	171.814	4.43548	7.60674	576.513	128.996	16.4854	3.47894	23.9078	61.5575	0.0513	0.0319	0.0058	0.83056	81.4095	10.4508	23.3558	532.053	35.3792	0.06	83.0861	0.2246	0.046	0	0	0	0	0	0	0	0.006	0	0	0	0	0	155.925	3511.08
2215	-5.107	0	170.987	4.459	7.57475	577.384	128.899	16.4717	3.47555	23.9473	61.7153	0.0513	0.0319	0.0058	0.8306	81.4124	10.4512	23.3566	532.053	35.3805	0.06	83.089	0.2246	0.044	0	0	0	0	0	0	0	0.006	0	0	0	0	0	155.925	3511.08
2216	-5.107	0	170.161	4.48252	7.54276	578.254	128.802	16.4579	3.47216	23.9868	61.8731	0.0513	0.0319	0.0058	0.83064	81.4152	10.4515	23.3574	532.053	35.3817	0.06	83.0919	0.2246	0.043	0	0	0	0	0	0	0	0.005	0	0	0	0	0	155.925	3511.08
2217	-5.107	0	169.334	4.50604	7.51077	579.124	128.705	16.4441	3.46877	24.0264	62.0309	0.0513	0.0319	0.0058	0.83068	81.418	10.4519	23.3582	532.053	35.3829	0.06	83.0948	0.2246	0.041	0	0	0	0	0	0	0	0.005	0	0	0	0	0	155.925	3511.08
2218	-5.107	0	168.507	4.52956	7.47878	579.994	128.609	16.4303	3.46538	24.0659	62.1887	0.0513	0.0319	0.0058	0.83072	81.4209	10.4523	23.3591	532.053	35.3841	0.06	83.0978	0.2246	0.04	0	0	0	0	0	0	0	0.005	0	0	0	0	0	155.925	3511.08
2219	-5.107	0	167.681	4.55308	7.44679	580.865	128.512	16.4165	3.46199	24.1055	62.3465	0.0513	0.0319	0.0058	0.83076	81.4237	10.4526	23.3599	532.053	35.3854	0.06	83.1007	0.2246	0.039	0	0	0	0	0	0	0	0.005	0	0	0	0	0	155.925	3511.08
2220	-5.107	0	166.854	4.5766	7.4148	581.735	128.415	16.4027	3.4586	24.145	62.5043	0.0513	0.0319	0.0058	0.8308	81.4266	10.453	23.3607	532.053	35.3866	0.06	83.1036	0.2246	0.037	0	0	0	0	0	0	0	0.004	0	0	0	0	0	155.925	3511.08
2221	-5.00344	0	166.027	4.60011	7.38281	582.605	128.318	16.3889	3.45524	24.1845	62.6621	0.0513	0.0319	0.0058	0.83082	81.4293	10.4534	23.3615	532.053	35.3878	0.06	83.1064	0.2246	0.036	0	0	0	0	0	0	0	0.004	0	0	0	0	0	155.925	3511.08
2222	-4.89988	0	165.201	4.62362	7.35082	583.476	128.221	16.3752	3.45188	24.2241	62.8199	0.0513	0.0319	0.0058	0.83084	81.432	10.4537	23.3623	532.053	35.389	0.06	83.1091	0.2246	0.035	0	0	0	0	0	0	0	0.004	0	0	0	0	0	155.925	3511.08
2223	-4.79632	0	164.374	4.64713	7.31883	584.346	128.125	16.3614	3.44852	24.2636	62.9777	0.0513	0.0319	0.0058	0.83086	81.4348	10.4541	23.363	532.053	35.3902	0.06	83.1119	0.2246	0.034	0	0	0	0	0	0	0	0.004	0	0	0	0	0	155.925	3511.08
2224	-4.69276	0	163.547	4.67064	7.28684	585.216	128.028	16.3476	3.44516	24.3032	63.1355	0.0513	0.0319	0.0058	0.83088	81.4375	10.4545	23.3638	532.053	35.3914	0.06	83.1147	0.2246	0.033	0	0	0	0	0	0	0	0.004	0	0	0	0	0	155.925	3511.08
2225	-4.5892	0	162.72	4.69415	7.25485	586.086	127.931	16.3339	3.4418	24.3427	63.2933	0.0513	0.0319	0.0058	0.8309	81.4402	10.4549	23.3646	532.053	35.3925	0.06	83.1175	0.2246	0.032	0	0	0	0	0	0	0	0.003	0	0	0	0	0	155.925	3511.08
2226	-4.48564	0	161.894	4.71766	7.22286	586.957	127.834	16.3201	3.43844	24.3822	63.451	0.0513	0.0319	0.0058	0.83092	81.4429	10.4552	23.3654	532.053	35.3937	0.06	83.1202	0.2246	0.031	0	0	0	0	0	0	0	0.003	0	0	0	0	0	155.925	3511.08
2227	-4.38208	0	161.067	4.74117	7.19087	587.827	127.737	16.3063	3.43508	24.4218	63.6088	0.0513	0.0319	0.0058	0.83094	81.4456	10.4556	23.3662	532.053	35.3949	0.06	83.123	0.2246	0.03	0	0	0	0	0	0	0	0.003	0	0	0	0	0	155.925	3511.08
2228	-4.27852	0	160.24	4.76468	7.15888	588.697	127.64	16.2925	3.43172	24.4613	63.7666	0.0513	0.0319	0.0058	0.83096	81.4484	10.456	23.3669	532.053	35.3961	0.06	83.1258	0.2246	0.029	0	0	0	0	0	0	0	0.003	0	0	0	0	0	155.925	3511.08
2229	-4.17496	0	159.414	4.78819	7.12689	589.568	127.544	16.2788	3.42836	24.5009	63.9244	0.0513	0.0319	0.0058	0.83098	81.4511	10.4563	23.3677	532.053	35.3973	0.06	83.1285	0.2246	0.028	0	0	0	0	0	0	0	0.003	0	0	0	0	0	155.925	3511.08
2230	-4.0714	0	158.587	4.8117	7.0949	590.438	127.447	16.265	3.425	24.5404	64.0822	0.0513	0.0319	0.0058	0.831	81.4538	10.4567	23.3685	532.053	35.3985	0.06	83.1313	0.2246	0.027	0	0	0	0	0	0	0	0.003	0	0	0	0	0	155.925	3511.08
2231	-3.96784	0	157.76	4.83524	7.06291	591.308	127.35	16.2512	3.42165	24.5799	64.24	0.0513	0.0319	0.0058	0.83103	81.4564	10.457	23.3693	532.053	35.3996	0.06	83.1339	0.2246	0.026	0	0	0	0	0	0	0	0.002	0	0	0	0	0	155.925	3511.08
2232	-3.86428	0	156.933	4.85878	7.03092	592.178	127.253	16.2375	3.4183	24.6195	64.3978	0.0513	0.0319	0.0058	0.83106	81.459	10.4573	23.37	532.053	35.4008	0.06	83.1366	0.2246	0.025	0	0	0	0	0	0	0	0.002	0	0	0	0	0	155.925	3511.08
2233	-3.76072	0	156.107	4.88232	6.99893	593.049	127.156	16.2237	3.41495	24.659	64.5556	0.0513	0.0319	0.0058	0.83109	81.4616	10.4576	23.3708	532.053	35.4019	0.06	83.1393	0.2246	0.024	0	0	0	0	0	0	0	0.002	0	0	0	0	0	155.925	3511.08
2234	-3.65716	0	155.28	4.90586	6.96694	593.919	127.06	16.2099	3.4116	24.6986	64.7134	0.0513	0.0319	0.0058	0.83112	81.4642	10.4579	23.3715	532.053	35.403	0.06	83.1419	0.2246	0.023	0	0	0	0	0	0	0	0.002	0	0	0	0	0	155.925	3511.08
2235	-3.5536	0	154.453	4.9294	6.93495	594.789	126.963	16.1961	3.40825	24.7381	64.8712	0.0513	0.0319	0.0058	0.83115	81.4668	10.4582	23.3723	532.053	35.4042	0.06	83.1445	0.2246	0.023	0	0	0	0	0	0	0	0.002	0	0	0	0	0	155.925	3511.08
2236	-3.45004	0	153.627	4.95294	6.90296	595.66	126.866	16.1824	3.4049	24.7776	65.0289	0.0513	0.0319	0.0058	0.83118	81.4693	10.4586	23.373	532.053	35.4053	0.06	83.1472	0.2246	0.022	0	0	0	0	0	0	0	0.002	0	0	0	0	0	155.925	3511.08
2237	-3.34648	0	152.8	4.97648	6.87097	596.53	126.769	16.1686	3.40155	24.8172	65.1867	0.0513	0.0319	0.0058	0.83121	81.4719	10.4589	23.3738	532.053	35.4064	0.06	83.1499	0.2246	0.021	0	0	0	0	0	0	0	0.002	0	0	0	0	0	155.925	3511.08
2238	-3.24292	0	151.973	5.00002	6.83898	597.4	126.672	16.1548	3.3982	24.8567	65.3445	0.0513	0.0319	0.0058	0.83124	81.4745	10.4592	23.3745	532.053	35.4075	0.06	83.1525	0.2246	0.02	0	0	0	0	0	0	0	0.002	0	0	0	0	0	155.925	3511.08
2239	-3.13936	0	151.146	5.02356	6.80699	598.271	126.575	16.1411	3.39485	24.8963	65.5023	0.0513	0.0319	0.0058	0.83127	81.4771	10.4595	23.3753	532.053	35.4087	0.06	83.1552	0.2246	0.02	0	0	0	0	0	0	0	0.002	0	0	0	0	0	155.925	3511.08
2240	-3.0358	0	150.32	5.0471	6.775	599.141	126.479	16.1273	3.3915	24.9358	65.6601	0.0513	0.0319	0.0058	0.8313	81.4797	10.4598	23.376	532.053	35.4098	0.06	83.1578	0.2246	0.019	0	0	0	0	0	0	0	0.002	0	0	0	0	0	155.925	3511.08
2241	-2.93221	0	149.493	5.07063	6.74301	600.011	126.382	16.1135	3.38813	24.9753	65.8179	0.0513	0.0319	0.0058	0.831329	81.4822	10.4601	23.3767	532.053	35.4109	0.06	83.1603	0.2246	0.018	0	0	0	0	0	0	0	0.001	0	0	0	0	0	155.925	3511.08
2242	-2.82863	0	148.666	5.09416	6.71103	600.881	126.285	16.0997	3.38476	25.0148	65.9757	0.0513	0.0319	0.0058	0.831357	81.4846	10.4604	23.3774	532.053	35.4119	0.06	83.1629	0.2246	0.018	0	0	0	0	0	0	0	0.001	0	0	0	0	0	155.925	3511.08
2243	-2.72504	0	147.84	5.11769	6.67904	601.752	126.188	16.0859	3.38139	25.0543	66.1335	0.0513	0.0319	0.0058	0.831386	81.4871	10.4607	23.3781	532.053	35.413	0.06	83.1654	0.2246	0.017	0	0	0	0	0	0	0	0.001	0	0	0	0	0	155.925	3511.08
2244	-2.62146	0	147.013	5.14121	6.64706	602.622	126.091	16.0722	3.37801	25.0939	66.2914	0.0513	0.0319	0.0058	0.831414	81.4896	10.4611	23.3789	532.053	35.4141	0.06	83.1679	0.2246	0.017	0	0	0	0	0	0	0	0.001	0	0	0	0	0	155.925	3511.08
2245	-2.51787	0	146.186	5.16474	6.61507	603.492	125.995	16.0584	3.37464	25.1334	66.4492	0.0513	0.0319	0.0058	0.831443	81.4921	10.4614	23.3796	532.053	35.4152	0.06	83.1704	0.2246	0.016	0	0	0	0	0	0	0	0.001	0	0	0	0	0	155.925	3511.08
2246	-2.41429	0	145.359	5.18827	6.58309	604.363	125.898	16.0446	3.37127	25.1729	66.607	0.0513	0.0319	0.0058	0.831471	81.4945	10.4617	23.3803	532.053	35.4162	0.06	83.173	0.2246	0.016	0	0	0	0	0	0	0	0.001	0	0	0	0	0	155.925	3511.08
2247	-2.3107	0	144.533	5.2118	6.5511	605.233	125.801	16.0308	3.3679	25.2124	66.7648	0.0513	0.0319	0.0058	0.8315	81.497	10.462	23.381	532.053	35.4173	0.06	83.1755	0.2246	0.015	0	0	0	0	0	0	0	0.001	0	0	0	0	0	155.925	3511.08
2248	-2.3068	0	143.706	5.2557	6.5192	606.103	125.704	16.0171	3.3647	25.2519	66.9225	0.0513	0.0319	0.0058	0.8315	81.4995	10.4626	23.3816	532.053	35.4184	0.06	83.1779	0.2246	0.015	0	0	0	0	0	0	0	0.001	0	0	0	0	0	155.925	3511.08
2249	-2.2569	0	142.879	5.254	6.4871	606.973	125.607	16.0033	3.3612	25.2916	67.0804	0.0513	0.0319	0.0058	0.8316	81.502	10.4628	23.3824	532.053	35.4194	0.06	83.1805	0.2246	0.014	0	0	0	0	0	0	0	0.001	0	0	0	0	0	155.925	3511.08
2250	-2.1708	0	142.053	5.2838	6.4551	607.844	125.51	15.9896	3.3579	25.3311	67.2381	0.0513	0.0319	0.0058	0.8316	81.5043	10.4631	23.3831	532.053	35.4205	0.06	83.183	0.2246	0.014	0	0	0	0	0	0	0	0.001	0	0	0	0	0	155.925	3511.08
2251	-2.1289	0	142.053	5.2831	6.4551	607.844	125.51	15.9896	3.3579	25.3311	67.2381	0.0513	0.0319	0.0058	0.8316	81.5069	10.4635	23.3837	532.053	35.4216	0.06	83.1854	0.2246	0.013	0	0	0	0	0	0	0	0.001	0	0	0	0	0	155.925	3511.08
2252	-2.0919	0	142.053	5.2827	6.4551	607.844	125.51	15.9896	3.3579	25.3311	67.2381	0.0513	0.0319	0.0058	0.8316	81.5091	10.4636	23.3844	532.053	35.4225	0.06	83.1879	0.2246	0.013	0	0	0	0	0	0	0	0.001	0	0	0	0	0	155.925	3511.08
2253	-2.0577	0	142.053	5.2824	6.4551	607.844	125.51	15.9896	3.3579	25.3311	67.2381	0.0513	0.0319	0.0058	0.8316	81.5115	10.4639	23.3852	532.053	35.4236	0.06	83.1902	0.2246	0.012	0	0	0	0	0	0	0	0.001	0	0	0	0	0	155.925	3511.08
2254	-2.0267	0	142.053	5.2823	6.4551	607.844	125.51	15.9896	3.3579	25.3311	67.2381	0.0513	0.0319	0.0058	0.8317	81.5139	10.4643	23.3857	532.053	35.4246	0.06	83.1928	0.2246	0.012	0	0	0	0	0	0	0	0.001	0	0	0	0	0	155.925	3511.08
2255	-1.9981	0	142.053	5.2823	6.4551	607.844	125.51	15.9896	3.3579	25.3311	67.2381	0.0513	0.0319	0.0058	0.8317	81.5163	10.4647	23.3864	532.053	35.4256	0.06	83.1951	0.2246	0.012	0	0	0	0	0	0	0	0.001	0	0	0	0	0	155.925	3511.08
2256	-1.97316	0	142.053	5.2823	6.4551	607.844	125.51	15.9896	3.3579	25.3311	67.2381	0.0513	0.0319	0.0058	0.83172	81.5187	10.465	23.3871	532.053	35.4266	0.06	83.1975	0.2246	0.011	0	0	0	0	0	0	0	0.001	0	0	0	0	0	155.925	3511.08
2257	-1.94822	0	142.053	5.2823	6.4551	607.844	125.51	15.9896	3.3579	25.3311	67.2381	0.0513	0.0319	0.0058	0.83174	81.521	10.4652	23.3878	532.053	35.4277	0.06	83.2	0.2246	0.011	0	0	0	0	0	0	0	0.001	0	0	0	0	0	155.925	3511.08
2258	-1.92328	0	142.053	5.2823	6.4551	607.844	125.51	15.9896	3.3579	25.3311	67.2381	0.0513	0.0319	0.0058	0.83176	81.5234	10.4655	23.3885	532.053	35.4287	0.06	83.2024	0.2246	0.01	0	0	0	0	0	0	0	0.001	0	0	0	0	0	155.925	3511.08
2259	-1.89834	0	142.053	5.2823	6.4551	607.844	125.51	15.9896	3.3579	25.3311	67.2381	0.0513	0.0319	0.0058	0.83178	81.5257	10.4657	23.3892	532.053	35.4298	0.06	83.2049	0.2246	0.01	0	0	0	0	0	0	0	0.001	0	0	0	0	0	155.925	3511.08
2260	-1.8734	0	142.053	5.2823	6.4551	607.844	125.51	15.9896	3.3579	25.3311	67.2381	0.0513	0.0319	0.0058	0.8318	81.5281	10.466	23.3899	532.053	35.4308	0.06	83.2073	0.2246	0.01	0	0	0	0	0	0	0	0.001	0	0	0	0	0	155.925	3511.08
2261	-1.8511	0	142.053	5.2823	6.4551	607.844	125.51	15.9896	3.3579	25.3311	67.2381	0.0513	0.0319	0.0058	0.83184	81.5304	10.4663	23.3906	532.053	35.4318	0.06	83.2096	0.2246	0.009	0	0	0	0	0	0	0	0.001	0	0	0	0	0	155.925	3511.08
2262	-1.8288	0	142.053	5.2823	6.4551	607.844	125.51	15.9896	3.3579	25.3311	67.2381	0.0513	0.0319	0.0058	0.83188	81.5327	10.4666	23.3912	532.053	35.4328	0.06	83.2119	0.2246	0.009	0	0	0	0	0	0	0	0.001	0	0	0	0	0	155.925	3511.08
2263	-1.8065	0	142.053	5.2823	6.4551	607.844	125.51	15.9896	3.3579	25.3311	67.2381	0.0513	0.0319	0.0058	0.83192	81.535	10.4669	23.3919	532.053	35.4338	0.06	83.2142	0.2246	0.009	0	0	0	0	0	0	0	0	0	0	0	0	0	155.925	3511.08
2264	-1.7842	0	142.053	5.2823	6.4551	607.844	125.51	15.9896	3.3579	25.3311	67.2381	0.0513	0.0319	0.0058	0.83196	81.5373	10.4672	23.3925	532.053	35.4348	0.06	83.2165	0.2246	0.009	0	0	0	0	0	0	0	0	0	0	0	0	0	155.925	3511.08
2265	-1.7619	0	142.053	5.2823	6.4551	607.844	125.51	15.9896	3.3579	25.3311	67.2381	0.0513	0.0319	0.0058	0.832	81.5396	10.4675	23.3932	532.053	35.4358	0.06	83.2188	0.2246	0.008	0	0	0	0	0	0	0	0	0	0	0	0	0	155.925	3511.08
2266	-1.74512	0	142.053	5.2823	6.4551	607.844	125.51	15.9896	3.3579	25.3311	67.2381	0.0513	0.0319	0.0058	0.832	81.5418	10.4678	23.3938	532.053	35.4368	0.06002	83.2211	0.2246	0.008	0	0	0	0	0	0	0	0	0	0	0	0	0	155.925	3511.08
2267	-1.72834	0	142.053	5.2823	6.4551	607.844	125.51	15.9896	3.3579	25.3311	67.2381	0.0513	0.0319	0.0058	0.832	81.5441	10.4681	23.3944	532.053	35.4377	0.06004	83.2234	0.2246	0.008	0	0	0	0	0	0	0	0	0	0	0	0	0	155.925	3511.08
2268	-1.71156	0	142.053	5.2823	6.4551	607.844	125.51	15.9896	3.3579	25.3311	67.2381	0.0513	0.0319	0.0058	0.832	81.5463	10.4685	23.3951	532.053	35.4387	0.06006	83.2258	0.2246	0.007	0	0	0	0	0	0	0	0	0	0	0	0	0	155.925	3511.08
2269	-1.69478	0	142.053	5.2823	6.4551	607.844	125.51	15.9896	3.3579	25.3311	67.2381	0.0513	0.0319	0.0058	0.832	81.5486	10.4688	23.3957	532.053	35.4396	0.06008	83.2281	0.2246	0.007	0	0	0	0	0	0	0	0	0	0	0	0	0	155.925	3511.08
2270	-1.678	0	142.053	5.2823	6.4551	607.844	125.51	15.9896	3.3579	25.3311	67.2381	0.0513	0.0319	0.0058	0.832	81.5508	10.4691	23.3963	532.053	35.4406	0.0601	83.2304	0.2246	0.007	0	0	0	0	0	0	0	0	0	0	0	0	0	155.925	3511.08
2271	-1.66166	0	142.053	5.2823	6.4551	607.844	125.51	15.9896	3.3579	25.3311	67.2381	0.0513	0.0319	0.0058	0.83202	81.553	10.4693	23.3969	532.053	35.4416	0.0601	83.2326	0.2246	0.007	0	0	0	0	0	0	0	0	0	0	0	0	0	155.925	3511.08
2272	-1.64532	0	142.053	5.2823	6.4551	607.844	125.51	15.9896	3.3579	25.3311	67.2381	0.0513	0.0319	0.0058	0.83204	81.5552	10.4696	23.3976	532.053	35.4425	0.0601	83.2348	0.2246	0.007	0	0	0	0	0	0	0	0	0	0	0	0	0	155.925	3511.08
2273	-1.62898	0	142.053	5.2823	6.4551	607.844	125.51	15.9896	3.3579	25.3311	67.2381	0.0513	0.0319	0.0058	0.83206	81.5574	10.4698	23.3982	532.053	35.4435	0.0601	83.2371	0.2246	0.006	0	0	0	0	0	0	0	0	0	0	0	0	0	155.925	3511.08
2274	-1.61264	0	142.053	5.2823	6.4551	607.844	125.51	15.9896	3.3579	25.3311	67.2381	0.0513	0.0319	0.0058	0.83208	81.5596	10.4701	23.3989	532.053	35.4444	0.0601	83.2393	0.2246	0.006	0	0	0	0	0	0	0	0	0	0	0	0	0	155.925	3511.08
2275	-1.5963	0	142.053	5.2823	6.4551	607.844	125.51	15.9896	3.3579	25.3311	67.2381	0.0513	0.0319	0.0058	0.8321	81.5618	10.4703	23.3995	532.053	35.4454	0.0601	83.2415	0.2246	0.006	0	0	0	0	0	0	0	0	0	0	0	0	0	155.925	3511.08
2276	-1.58398	0	142.053	5.2823	6.4551	607.844	125.51	15.9896	3.3579	25.3311	67.2381	0.0513	0.0319	0.0058	0.83212	81.564	10.4706	23.4001	532.053	35.4464	0.0601	83.2437	0.2246	0.006	0	0	0	0	0	0	0	0	0	0	0	0	0	155.925	3511.08
2277	-1.57166	0	142.053	5.2823	6.4551	607.844	125.51	15.9896	3.3579	25.3311	67.2381	0.0513	0.0319	0.0058	0.83214	81.5661	10.4709	23.4008	532.053	35.4473	0.0601	83.2459	0.2246	0.006	0	0	0	0	0	0	0	0	0	0	0	0	0	155.925	3511.08
2278	-1.55934	0	142.053	5.2823	6.4551	607.844	125.51	15.9896	3.3579	25.3311	67.2381	0.0513	0.0319	0.0058	0.83216	81.5683	10.4712	23.4014	532.053	35.4483	0.0601	83.2482	0.2246	0.005	0	0	0	0	0	0	0	0	0	0	0	0	0	155.925	3511.08
2279	-1.54702	0	142.053	5.2823	6.4551	607.844	125.51	15.9896	3.3579	25.3311	67.2381	0.0513	0.0319	0.0058	0.83218	81.5704	10.4715	23.4021	532.053	35.4492	0.0601	83.2504	0.2246	0.005	0	0	0	0	0	0	0	0	0	0	0	0	0	155.925	3511.08
2280	-1.5347	0	142.053	5.2823	6.4551	607.844	125.51	15.9896	3.3579	25.3311	67.2381	0.0513	0.0319	0.0058	0.8322	81.5726	10.4718	23.4027	532.053	35.4502	0.0601	83.2526	0.2246	0.005	0	0	0	0	0	0	0	0	0	0	0	0	0	155.925	3511.08
2281	-1.52238	0	142.053	5.2823	6.4551	607.844	125.51	15.9896	3.3579	25.3311	67.2381	0.0513	0.0319	0.0058	0.83224	81.5747	10.4721	23.4033	532.053	35.4511	0.0601	83.2548	0.2246	0.005	0	0	0	0	0	0	0	0	0	0	0	0	0	155.925	3511.08
2282	-1.51006	0	142.053	5.2823	6.4551	607.844	125.51	15.9896	3.3579	25.3311	67.2381	0.0513	0.0319	0.0058	0.83228	81.5768	10.4724	23.4039	532.053	35.452	0.0601	83.2569	0.2246	0.005	0	0	0	0	0	0	0	0	0	0	0	0	0	155.925	3511.08
2283	-1.49774	0	142.053	5.2823	6.4551	607.844	125.51	15.9896	3.3579	25.3311	67.2381	0.0513	0.0319	0.0058	0.83232	81.5789	10.4727	23.4045	532.053	35.4529	0.0601	83.2591	0.2246	0.005	0	0	0	0	0	0	0	0	0	0	0	0	0	155.925	3511.08
2284	-1.48542	0	142.053	5.2823	6.4551	607.844	125.51	15.9896	3.3579	25.3311	67.2381	0.0513	0.0319	0.0058	0.83236	81.581	10.473	23.4051	532.053	35.4538	0.0601	83.2612	0.2246	0.004	0	0	0	0	0	0	0	0	0	0	0	0	0	155.925	3511.08
2285	-1.4731	0	142.053	5.2823	6.4551	607.844	125.51	15.9896	3.3579	25.3311	67.2381	0.0513	0.0319	0.0058	0.8324	81.5831	10.4733	23.4057	532.053	35.4547	0.0601	83.2634	0.2246	0.004	0	0	0	0	0	0	0	0	0	0	0	0	0	155.925	3511.08
2286	-1.46344	0	142.053	5.2823	6.4551	607.844	125.51	15.9896	3.3579	25.3311	67.2381	0.0513	0.0319	0.0058	0.83242	81.5852	10.4735	23.4063	532.053	35.4556	0.0601	83.2655	0.2246	0.004	0	0	0	0	0	0	0	0	0	0	0	0	0	155.925	3511.08
2287	-1.45378	0	142.053	5.2823	6.4551	607.844	125.51	15.9896	3.3579	25.3311	67.2381	0.0513	0.0319	0.0058	0.83244	81.5873	10.4738	23.4069	532.053	35.4565	0.0601	83.2676	0.2246	0.004	0	0	0	0	0	0	0	0	0	0	0	0	0	155.925	3511.08
2288	-1.44412	0	142.053	5.2823	6.4551	607.844	125.51	15.9896	3.3579	25.3311	67.2381	0.0513	0.0319	0.0058	0.83246	81.5894	10.474	23.4075	532.053	35.4575	0.0601	83.2698	0.2246	0.004	0	0	0	0	0	0	0	0	0	0	0	0	0	155.925	3511.08
2289	-1.43446	0	142.053	5.2823	6.4551	607.844	125.51	15.9896	3.3579	25.3311	67.2381	0.0513	0.0319	0.0058	0.83248	81.5915	10.4743	23.4081	532.053	35.4584	0.0601	83.2719	0.2246	0.004	0	0	0	0	0	0	0	0	0	0	0	0	0	155.925	3511.08
2290	-1.4248	0	142.053	5.2823	6.4551	607.844	125.51	15.9896	3.3579	25.3311	67.2381	0.0513	0.0319	0.0058	0.8325	81.5936	10.4745	23.4087	532.053	35.4593	0.0601	83.274	0.2246	0.004	0	0	0	0	0	0	0	0	0	0	0	0	0	155.925	3511.08
2291	-1.41568	0	142.053	5.2823	6.4551	607.844	125.51	15.9896	3.3579	25.3311	67.2381	0.0513	0.0319	0.0058	0.83252	81.5956	10.4748	23.4093	532.053	35.4602	0.06012	83.2761	0.2246	0.003	0	0	0	0	0	0	0	0	0	0	0	0	0	155.925	3511.08
2292	-1.40656	0	142.053	5.2823	6.4551	607.844	125.51	15.9896	3.3579	25.3311	67.2381	0.0513	0.0319	0.0058	0.83254	81.5977	10.4751	23.4099	532.053	35.4611	0.06014	83.2781	0.2246	0.003	0	0	0	0	0	0	0	0	0	0	0	0	0	155.925	3511.08
2293	-1.39744	0	142.053	5.2823	6.4551	607.844	125.51	15.9896	3.3579	25.3311	67.2381	0.0513	0.0319	0.0058	0.83256	81.5997	10.4753	23.4104	532.053	35.462	0.06016	83.2802	0.2246	0.003	0	0	0	0	0	0	0	0	0	0	0	0	0	155.925	3511.08
2294	-1.38832	0	142.053	5.2823	6.4551	607.844	125.51	15.9896	3.3579	25.3311	67.2381	0.0513	0.0319	0.0058	0.83258	81.6018	10.4756	23.411	532.053	35.4629	0.06018	83.2822	0.2246	0.003	0	0	0	0	0	0	0	0	0	0	0	0	0	155.925	3511.08
2295	-1.3792	0	142.053	5.2823	6.4551	607.844	125.51	15.9896	3.3579	25.3311	67.2381	0.0513	0.0319	0.0058	0.8326	81.6038	10.4759	23.4116	532.053	35.4638	0.0602	83.2843	0.2246	0.003	0	0	0	0	0	0	0	0	0	0	0	0	0	155.925	3511.08
2296	-1.37094	0	142.053	5.2823	6.4551	607.844	125.51	15.9896	3.3579	25.3311	67.2381	0.0513	0.0319	0.0058	0.8326	81.6058	10.4761	23.4122	532.053	35.4646	0.0602	83.2864	0.2246	0.003	0	0	0	0	0	0	0	0	0	0	0	0	0	155.925	3511.08
2297	-1.36268	0	142.053	5.2823	6.4551	607.844	125.51	15.9896	3.3579	25.3311	67.2381	0.0513	0.0319	0.0058	0.8326	81.6078	10.4763	23.4128	532.053	35.4655	0.0602	83.2885	0.2246	0.003	0	0	0	0	0	0	0	0	0	0	0	0	0	155.925	3511.08
2298	-1.35442	0	142.053	5.2823	6.4551	607.844	125.51	15.9896	3.3579	25.3311	67.2381	0.0513	0.0319	0.0058	0.8326	81.6098	10.4766	23.4133	532.053	35.4663	0.0602	83.2905	0.2246	0.003	0	0	0	0	0	0	0	0	0	0	0	0	0	155.925	3511.08
2299	-1.34616	0	142.053	5.2823	6.4551	607.844	125.51	15.9896	3.3579	25.3311	67.2381	0.0513	0.0319	0.0058	0.8326	81.6118	10.4768	23.4139	532.053	35.4672	0.0602	83.2926	0.2246	0.003	0	0	0	0	0	0	0	0	0	0	0	0	0	155.925	3511.08
2300	-1.3379	0	142.053	5.2823	6.4551	607.844	125.51	15.9896	3.3579	25.3311	67.2381	0.0513	0.0319	0.0058	0.8326	81.6138	10.477	23.4145	532.053	35.468	0.0602	83.2947	0.2246	0.003	0	0	0	0	0	0	0	0	0	0	0	0	0	155.925	3511.08
2301	-1.33099	0	142.053	5.2823	6.4551	607.844	125.51	15.9896	3.3579	25.3311	67.2381	0.0513	0.0319	0.0058	0.83261	81.6142	10.4771	23.4146	532.053	35.4682	0.0602	83.2951	0.2246	0.002	0	0	0	0	0	0	0	0	0	0	0	0	0	155.925	3511.08
2302	-1.32408	0	142.053	5.2823	6.4551	607.844	125.51	15.9896	3.3579	25.3311	67.2381	0.0513	0.0319	0.0058	0.83262	81.6145	10.4771	23.4147	532.053	35.4683	0.0602	83.2955	0.2246	0.002	0	0	0	0	0	0	0	0	0	0	0	0	0	155.925	3511.08
2303	-1.31717	0	142.053	5.2823	6.4551	607.844	125.51	15.9896	3.3579	25.3311	67.2381	0.0513	0.0319	0.0058	0.83263	81.6149	10.4772	23.4148	532.053	35.4685	0.0602	83.2958	0.2246	0.002	0	0	0	0	0	0	0	0	0	0	0	0	0	155.925	3511.08
2304	-1.31026	0	142.053	5.2823	6.4551	607.844	125.51	15.9896	3.3579	25.3311	67.2381	0.0513	0.0319	0.0058	0.83264	81.6153	10.4772	23.4149	532.053	35.4687	0.0602	83.2962	0.2246	0.002	0	0	0	0	0	0	0	0	0	0	0	0	0	155.925	3511.08
2305	-1.30335	0	142.053	5.2823	6.4551	607.844	125.51	15.9896	3.3579	25.3311	67.2381	0.0513	0.0319	0.0058	0.83265	81.6157	10.4773	23.415	532.053	35.4689	0.0602	83.2966	0.2246	0.002	0	0	0	0	0	0	0	0	0	0	0	0	0	155.925	3511.08
2306	-1.29644	0	142.053	5.2823	6.4551	607.844	125.51	15.9896	3.3579	25.3311	67.2381	0.0513	0.0319	0.0058	0.83266	81.616	10.4774	23.4151	532.053	35.469	0.0602	83.297	0.2246	0.002	0	0	0	0	0	0	0	0	0	0	0	0	0	155.925	3511.08
2307	-1.28953	0	142.053	5.2823	6.4551	607.844	125.51	15.9896	3.3579	25.3311	67.2381	0.0513	0.0319	0.0058	0.83267	81.6164	10.4774	23.4152	532.053	35.4692	0.0602	83.2974	0.2246	0.002	0	0	0	0	0	0	0	0	0	0	0	0	0	155.925	3511.08
2308	-1.28262	0	142.053	5.2823	6.4551	607.844	125.51	15.9896	3.3579	25.3311	67.2381	0.0513	0.0319	0.0058	0.83268	81.6168	10.4775	23.4153	532.053	35.4694	0.0602	83.2977	0.2246	0.002	0	0	0	0	0	0	0	0	0	0	0	0	0	155.925	3511.08
2309	-1.27571	0	142.053	5.2823	6.4551	607.844	125.51	15.9896	3.3579	25.3311	67.2381	0.0513	0.0319	0.0058	0.83269	81.6171	10.4775	23.4154	532.053	35.4695	0.0602	83.2981	0.2246	0.002	0	0	0	0	0	0	0	0	0	0	0	0	0	155.925	3511.08
2310	-1.2688	0	142.053	5.2823	6.4551	607.844	125.51	15.9896	3.3579	25.3311	67.2381	0.0513	0.0319	0.0058	0.8327	81.6175	10.4776	23.4155	532.053	35.4697	0.0602	83.2985	0.2246	0.002	0	0	0	0	0	0	0	0	0	0	0	0	0	155.925	3511.08
2311	-1.26332	0	142.053	5.2823	6.4551	607.844	125.51	15.9896	3.3579	25.3311	67.2381	0.0513	0.0319	0.0058	0.8327	81.6179	10.4777	23.4156	532.053	35.4699	0.0602	83.2989	0.2246	0.002	0	0	0	0	0	0	0	0	0	0	0	0	0	155.925	3511.08
2312	-1.25784	0	142.053	5.2823	6.4551	607.844	125.51	15.9896	3.3579	25.3311	67.2381	0.0513	0.0319	0.0058	0.8327	81.6183	10.4777	23.4157	532.053	35.47	0.0602	83.2992	0.2246	0.002	0	0	0	0	0	0	0	0	0	0	0	0	0	155.925	3511.08
2313	-1.25236	0	142.053	5.2823	6.4551	607.844	125.51	15.9896	3.3579	25.3311	67.2381	0.0513	0.0319	0.0058	0.8327	81.6186	10.4778	23.4158	532.053	35.4701	0.0602	83.2996	0.2246	0.002	0	0	0	0	0	0	0	0	0	0	0	0	0	155.925	3511.08
2314	-1.24688	0	142.053	5.2823	6.4551	607.844	125.51	15.9896	3.3579	25.3311	67.2381	0.0513	0.0319	0.0058	0.8327	81.619	10.4778	23.4159	532.053	35.4703	0.0602	83.2999	0.2246	0.002	0	0	0	0	0	0	0	0	0	0	0	0	0	155.925	3511.08
2315	-1.2414	0	142.053	5.2823	6.4551	607.844	125.51	15.9896	3.3579	25.3311	67.2381	0.0513	0.0319	0.0058	0.8327	81.6194	10.4779	23.416	532.053	35.4704	0.0602	83.3003	0.2246	0.002	0	0	0	0	0	0	0	0	0	0	0	0	0	155.925	3511.08
2316	-1.23592	0	142.053	5.2823	6.4551	607.844	125.51	15.9896	3.3579	25.3311	67.2381	0.0513	0.0319	0.0058	0.8327	81.6198	10.4779	23.4161	532.053	35.4706	0.0602	83.3007	0.2246	0.001	0	0	0	0	0	0	0	0	0	0	0	0	0	155.925	3511.08
2317	-1.23044	0	142.053	5.2823	6.4551	607.844	125.51	15.9896	3.3579	25.3311	67.2381	0.0513	0.0319	0.0058	0.8327	81.6202	10.4779	23.4162	532.053	35.4708	0.0602	83.301	0.2246	0.001	0	0	0	0	0	0	0	0	0	0	0	0	0	155.925	3511.08
2318	-1.22496	0	142.053	5.2823	6.4551	607.844	125.51	15.9896	3.3579	25.3311	67.2381	0.0513	0.0319	0.0058	0.8327	81.6205	10.478	23.4163	532.053	35.4709	0.0602	83.3014	0.2246	0.001	0	0	0	0	0	0	0	0	0	0	0	0	0	155.925	3511.08
2319	-1.21948	0	142.053	5.2823	6.4551	607.844	125.51	15.9896	3.3579	25.3311	67.2381	0.0513	0.0319	0.0058	0.8327	81.6209	10.478	23.4164	532.053	35.471	0.0602	83.3017	0.2246	0.001	0	0	0	0	0	0	0	0	0	0	0	0	0	155.925	3511.08
2320	-1.214	0	142.053	5.2823	6.4551	607.844	125.51	15.9896	3.3579	25.3311	67.2381	0.0513	0.0319	0.0058	0.8327	81.6213	10.4781	23.4165	532.053	35.4712	0.0602	83.3021	0.2246	0.001	0	0	0	0	0	0	0	0	0	0	0	0	0	155.925	3511.08
2321	-1.20966	0	142.053	5.2823	6.4551	607.844	125.51	15.9896	3.3579	25.3311	67.2381	0.0513	0.0319	0.0058	0.8327	81.6217	10.4781	23.4166	532.053	35.4714	0.0602	83.3025	0.2246	0.001	0	0	0	0	0	0	0	0	0	0	0	0	0	155.925	3511.08
2322	-1.20532	0	142.053	5.2823	6.4551	607.844	125.51	15.9896	3.3579	25.3311	67.2381	0.0513	0.0319	0.0058	0.8327	81.622	10.4782	23.4167	532.053	35.4715	0.0602	83.3029	0.2246	0.001	0	0	0	0	0	0	0	0	0	0	0	0	0	155.925	3511.08
2323	-1.20098	0	142.053	5.2823	6.4551	607.844	125.51	15.9896	3.3579	25.3311	67.2381	0.0513	0.0319	0.0058	0.8327	81.6224	10.4782	23.4168	532.053	35.4717	0.0602	83.3032	0.2246	0.001	0	0	0	0	0	0	0	0	0	0	0	0	0	155.925	3511.08
2324	-1.19664	0	142.053	5.2823	6.4551	607.844	125.51	15.9896	3.3579	25.3311	67.2381	0.0513	0.0319	0.0058	0.8327	81.6227	10.4783	23.4169	532.053	35.4719	0.0602	83.3036	0.2246	0.001	0	0	0	0	0	0	0	0	0	0	0	0	0	155.925	3511.08
2325	-1.1923	0	142.053	5.2823	6.4551	607.844	125.51	15.9896	3.3579	25.3311	67.2381	0.0513	0.0319	0.0058	0.8327	81.6231	10.4783	23.417	532.053	35.4721	0.0602	83.304	0.2246	0.001	0	0	0	0	0	0	0	0	0	0	0	0	0	155.925	3511.08
2326	-1.18796	0	142.053	5.2823	6.4551	607.844	125.51	15.9896	3.3579	25.3311	67.2381	0.0513	0.0319	0.0058	0.8327	81.6235	10.4783	23.4172	532.053	35.4722	0.0602	83.3044	0.2246	0.001	0	0	0	0	0	0	0	0	0	0	0	0	0	155.925	3511.08
2327	-1.18362	0	142.053	5.2823	6.4551	607.844	125.51	15.9896	3.3579	25.3311	67.2381	0.0513	0.0319	0.0058	0.8327	81.6238	10.4784	23.4173	532.053	35.4724	0.0602	83.3048	0.2246	0.001	0	0	0	0	0	0	0	0	0	0	0	0	0	155.925	3511.08
2328	-1.17928	0	142.053	5.2823	6.4551	607.844	125.51	15.9896	3.3579	25.3311	67.2381	0.0513	0.0319	0.0058	0.8327	81.6242	10.4784	23.4174	532.053	35.4726	0.0602	83.3051	0.2246	0.001	0	0	0	0	0	0	0	0	0	0	0	0	0	155.925	3511.08
2329	-1.17494	0	142.053	5.2823	6.4551	607.844	125.51	15.9896	3.3579	25.3311	67.2381	0.0513	0.0319	0.0058	0.8327	81.6245	10.4785	23.4175	532.053	35.4727	0.0602	83.3055	0.2246	0.001	0	0	0	0	0	0	0	0	0	0	0	0	0	155.925	3511.08
2330	-1.1706	0	142.053	5.2823	6.4551	607.844	125.51	15.9896	3.3579	25.3311	67.2381	0.0513	0.0319	0.0058	0.8327	81.6249	10.4785	23.4176	532.053	35.4729	0.0602	83.3059	0.2246	0.001	0	0	0	0	0	0	0	0	0	0	0	0	0	155.925	3511.08
2331	-1.16716	0	142.053	5.2823	6.4551	607.844	125.51	15.9896	3.3579	25.3311	67.2381	0.0513	0.0319	0.0058	0.83271	81.6253	10.4785	23.4177	532.053	35.4731	0.0602	83.3063	0.2246	0.001	0	0	0	0	0	0	0	0	0	0	0	0	0	155.925	3511.08
2332	-1.16372	0	142.053	5.2823	6.4551	607.844	125.51	15.9896	3.3579	25.3311	67.2381	0.0513	0.0319	0.0058	0.83272	81.6256	10.4786	23.4178	532.053	35.4732	0.0602	83.3067	0.2246	0.001	0	0	0	0	0	0	0	0	0	0	0	0	0	155.925	3511.08
2333	-1.16028	0	142.053	5.2823	6.4551	607.844	125.51	15.9896	3.3579	25.3311	67.2381	0.0513	0.0319	0.0058	0.83273	81.626	10.4786	23.4179	532.053	35.4734	0.0602	83.307	0.2246	0.001	0	0	0	0	0	0	0	0	0	0	0	0	0	155.925	3511.08
2334	-1.15684	0	142.053	5.2823	6.4551	607.844	125.51	15.9896	3.3579	25.3311	67.2381	0.0513	0.0319	0.0058	0.83274	81.6263	10.4787	23.418	532.053	35.4735	0.0602	83.3074	0.2246	0.001	0	0	0	0	0	0	0	0	0	0	0	0	0	155.925	3511.08
2335	-1.1534	0	142.053	5.2823	6.4551	607.844	125.51	15.9896	3.3579	25.3311	67.2381	0.0513	0.0319	0.0058	0.83275	81.6267	10.4787	23.4181	532.053	35.4737	0.0602	83.3078	0.2246	0.001	0	0	0	0	0	0	0	0	0	0	0	0	0	155.925	3511.08
2336	-1.14996	0	142.053	5.2823	6.4551	607.844	125.51	15.9896	3.3579	25.3311	67.2381	0.0513	0.0319	0.0058	0.83276	81.6271	10.4787	23.4182	532.053	35.4739	0.0602	83.3082	0.2246	0.001	0	0	0	0	0	0	0	0	0	0	0	0	0	155.925	3511.08
2337	-1.14652	0	142.053	5.2823	6.4551	607.844	125.51	15.9896	3.3579	25.3311	67.2381	0.0513	0.0319	0.0058	0.83277	81.6274	10.4788	23.4183	532.053	35.474	0.0602	83.3086	0.2246	0.001	0	0	0	0	0	0	0	0	0	0	0	0	0	155.925	3511.08
2338	-1.14308	0	142.053	5.2823	6.4551	607.844	125.51	15.9896	3.3579	25.3311	67.2381	0.0513	0.0319	0.0058	0.83278	81.6278	10.4788	23.4184	532.053	35.4742	0.0602	83.3089	0.2246	0.001	0	0	0	0	0	0	0	0	0	0	0	0	0	155.925	3511.08
2339	-1.13964	0	142.053	5.2823	6.4551	607.844	125.51	15.9896	3.3579	25.3311	67.2381	0.0513	0.0319	0.0058	0.83279	81.6281	10.4789	23.4185	532.053	35.4743	0.0602	83.3093	0.2246	0.001	0	0	0	0	0	0	0	0	0	0	0	0	0	155.925	3511.08
2340	-1.1362	0	142.053	5.2823	6.4551	607.844	125.51	15.9896	3.3579	25.3311	67.2381	0.0513	0.0319	0.0058	0.8328	81.6285	10.4789	23.4186	532.053	35.4745	0.0602	83.3097	0.2246	0.001	0	0	0	0	0	0	0	0	0	0	0	0	0	155.925	3511.08
2341	-1.13352	0	142.053	5.2823	6.4551	607.844	125.51	15.9896	3.3579	25.3311	67.2381	0.0513	0.0319	0.0058	0.8328	81.6289	10.479	23.4187	532.053	35.4747	0.0602	83.3101	0.2246	0.001	0	0	0	0	0	0	0	0	0	0	0	0	0	155.925	3511.08
2342	-1.13084	0	142.053	5.2823	6.4551	607.844	125.51	15.9896	3.3579	25.3311	67.2381	0.0513	0.0319	0.0058	0.8328	81.6293	10.479	23.4188	532.053	35.4748	0.0602	83.3105	0.2246	0.001	0	0	0	0	0	0	0	0	0	0	0	0	0	155.925	3511.08
2343	-1.12816	0	142.053	5.2823	6.4551	607.844	125.51	15.9896	3.3579	25.3311	67.2381	0.0513	0.0319	0.0058	0.8328	81.6296	10.4791	23.4189	532.053	35.475	0.0602	83.3108	0.2246	0.001	0	0	0	0	0	0	0	0	0	0	0	0	0	155.925	3511.08
2344	-1.12548	0	142.053	5.2823	6.4551	607.844	125.51	15.9896	3.3579	25.3311	67.2381	0.0513	0.0319	0.0058	0.8328	81.63	10.4791	23.419	532.053	35.4751	0.0602	83.3112	0.2246	0.001	0	0	0	0	0	0	0	0	0	0	0	0	0	155.925	3511.08
2345	-1.1228	0	142.053	5.2823	6.4551	607.844	125.51	15.9896	3.3579	25.3311	67.2381	0.0513	0.0319	0.0058	0.8328	81.6304	10.4792	23.4191	532.053	35.4753	0.0602	83.3116	0.2246	0.001	0	0	0	0	0	0	0	0	0	0	0	0	0	155.925	3511.08
2346	-1.12012	0	142.053	5.2823	6.4551	607.844	125.51	15.9896	3.3579	25.3311	67.2381	0.0513	0.0319	0.0058	0.8328	81.6308	10.4793	23.4192	532.053	35.4755	0.0602	83.312	0.2246	0.001	0	0	0	0	0	0	0	0	0	0	0	0	0	155.925	3511.08
2347	-1.11744	0	142.053	5.2823	6.4551	607.844	125.51	15.9896	3.3579	25.3311	67.2381	0.0513	0.0319	0.0058	0.8328	81.6312	10.4793	23.4193	532.053	35.4756	0.0602	83.3124	0.2246	0.001	0	0	0	0	0	0	0	0	0	0	0	0	0	155.925	3511.08
2348	-1.11476	0	142.053	5.2823	6.4551	607.844	125.51	15.9896	3.3579	25.3311	67.2381	0.0513	0.0319	0.0058	0.8328	81.6315	10.4794	23.4194	532.053	35.4758	0.0602	83.3127	0.2246	0.001	0	0	0	0	0	0	0	0	0	0	0	0	0	155.925	3511.08
2349	-1.11208	0	142.053	5.2823	6.4551	607.844	125.51	15.9896	3.3579	25.3311	67.2381	0.0513	0.0319	0.0058	0.8328	81.6319	10.4794	23.4195	532.053	35.4759	0.0602	83.3131	0.2246	0	0	0	0	0	0	0	0	0	0	0	0	0	0	155.925	3511.08
2350	-1.1094	0	142.053	5.2823	6.4551	607.844	125.51	15.9896	3.3579	25.3311	67.2381	0.0513	0.0319	0.0058	0.8328	81.6323	10.4795	23.4196	532.053	35.4761	0.0602	83.3135	0.2246	0	0	0	0	0	0	0	0	0	0	0	0	0	0	155.925	3511.08
2351	-1.10721	0	142.053	5.2823	6.4551	607.844	125.51	15.9896	3.3579	25.3311	67.2381	0.0513	0.0319	0.0058	0.832808	81.6327	10.4795	23.4197	532.053	35.4763	0.0602	83.3139	0.2246	0	0	0	0	0	0	0	0	0	0	0	0	0	0	155.925	3511.08
2352	-1.10502	0	142.053	5.2823	6.4551	607.844	125.51	15.9896	3.3579	25.3311	67.2381	0.0513	0.0319	0.0058	0.832816	81.633	10.4796	23.4198	532.053	35.4764	0.0602	83.3143	0.2246	0	0	0	0	0	0	0	0	0	0	0	0	0	0	155.925	3511.08
2353	-1.10284	0	142.053	5.2823	6.4551	607.844	125.51	15.9896	3.3579	25.3311	67.2381	0.0513	0.0319	0.0058	0.832824	81.6334	10.4796	23.4199	532.053	35.4766	0.0602	83.3146	0.2246	0	0	0	0	0	0	0	0	0	0	0	0	0	0	155.925	3511.08
2354	-1.10065	0	142.053	5.2823	6.4551	607.844	125.51	15.9896	3.3579	25.3311	67.2381	0.0513	0.0319	0.0058	0.832832	81.6338	10.4797	23.42	532.053	35.4767	0.0602	83.315	0.2246	0	0	0	0	0	0	0	0	0	0	0	0	0	0	155.925	3511.08
2355	-1.09846	0	142.053	5.2823	6.4551	607.844	125.51	15.9896	3.3579	25.3311	67.2381	0.0513	0.0319	0.0058	0.83284	81.6341	10.4797	23.4202	532.053	35.4769	0.0602	83.3154	0.2246	0	0	0	0	0	0	0	0	0	0	0	0	0	0	155.925	3511.08
2356	-1.09627	0	142.053	5.2823	6.4551	607.844	125.51	15.9896	3.3579	25.3311	67.2381	0.0513	0.0319	0.0058	0.832848	81.6345	10.4798	23.4203	532.053	35.4771	0.0602	83.3158	0.2246	0	0	0	0	0	0	0	0	0	0	0	0	0	0	155.925	3511.08
2357	-1.09408	0	142.053	5.2823	6.4551	607.844	125.51	15.9896	3.3579	25.3311	67.2381	0.0513	0.0319	0.0058	0.832856	81.6349	10.4798	23.4204	532.053	35.4772	0.0602	83.3162	0.2246	0	0	0	0	0	0	0	0	0	0	0	0	0	0	155.925	3511.08
2358	-1.0919	0	142.053	5.2823	6.4551	607.844	125.51	15.9896	3.3579	25.3311	67.2381	0.0513	0.0319	0.0058	0.832864	81.6352	10.4799	23.4205	532.053	35.4774	0.0602	83.3165	0.2246	0	0	0	0	0	0	0	0	0	0	0	0	0	0	155.925	3511.08
2359	-1.08971	0	142.053	5.2823	6.4551	607.844	125.51	15.9896	3.3579	25.3311	67.2381	0.0513	0.0319	0.0058	0.832872	81.6356	10.4799	23.4206	532.053	35.4775	0.0602	83.3169	0.2246	0	0	0	0	0	0	0	0	0	0	0	0	0	0	155.925	3511.08
2360	-1.08752	0	142.053	5.2823	6.4551	607.844	125.51	15.9896	3.3579	25.3311	67.2381	0.0513	0.0319	0.0058	0.83288	81.636	10.4799	23.4207	532.053	35.4777	0.0602	83.3173	0.2246	0	0	0	0	0	0	0	0	0	0	0	0	0	0	155.925	3511.08
2361	-1.08533	0	142.053	5.2823	6.4551	607.844	125.51	15.9896	3.3579	25.3311	67.2381	0.0513	0.0319	0.0058	0.832888	81.6363	10.48	23.4208	532.053	35.4779	0.0602	83.3177	0.2246	0	0	0	0	0	0	0	0	0	0	0	0	0	0	155.925	3511.08
2362	-1.08314	0	142.053	5.2823	6.4551	607.844	125.51	15.9896	3.3579	25.3311	67.2381	0.0513	0.0319	0.0058	0.832896	81.6367	10.48	23.4209	532.053	35.478	0.0602	83.3181	0.2246	0	0	0	0	0	0	0	0	0	0	0	0	0	0	155.925	3511.08
2363	-1.08096	0	142.053	5.2823	6.4551	607.844	125.51	15.9896	3.3579	25.3311	67.2381	0.0513	0.0319	0.0058	0.832904	81.6371	10.4801	23.4211	532.053	35.4782	0.0602	83.3184	0.2246	0	0	0	0	0	0	0	0	0	0	0	0	0	0	155.925	3511.08
2364	-1.07877	0	142.053	5.2823	6.4551	607.844	125.51	15.9896	3.3579	25.3311	67.2381	0.0513	0.0319	0.0058	0.832912	81.6375	10.4801	23.4212	532.053	35.4783	0.0602	83.3188	0.2246	0	0	0	0	0	0	0	0	0	0	0	0	0	0	155.925	3511.08
2365	-1.07658	0	142.053	5.2823	6.4551	607.844	125.51	15.9896	3.3579	25.3311	67.2381	0.0513	0.0319	0.0058	0.83292	81.6378	10.4802	23.4213	532.053	35.4785	0.0602	83.3192	0.2246	0	0	0	0	0	0	0	0	0	0	0	0	0	0	155.925	3511.08
2366	-1.07439	0	142.053	5.2823	6.4551	607.844	125.51	15.9896	3.3579	25.3311	67.2381	0.0513	0.0319	0.0058	0.832928	81.6382	10.4802	23.4214	532.053	35.4787	0.0602	83.3196	0.2246	0	0	0	0	0	0	0	0	0	0	0	0	0	0	155.925	3511.08
2367	-1.0722	0	142.053	5.2823	6.4551	607.844	125.51	15.9896	3.3579	25.3311	67.2381	0.0513	0.0319	0.0058	0.832936	81.6386	10.4802	23.4215	532.053	35.4788	0.0602	83.32	0.2246	0	0	0	0	0	0	0	0	0	0	0	0	0	0	155.925	3511.08
2368	-1.07002	0	142.053	5.2823	6.4551	607.844	125.51	15.9896	3.3579	25.3311	67.2381	0.0513	0.0319	0.0058	0.832944	81.6389	10.4803	23.4216	532.053	35.479	0.0602	83.3203	0.2246	0	0	0	0	0	0	0	0	0	0	0	0	0	0	155.925	3511.08
2369	-1.06783	0	142.053	5.2823	6.4551	607.844	125.51	15.9896	3.3579	25.3311	67.2381	0.0513	0.0319	0.0058	0.832952	81.6393	10.4803	23.4217	532.053	35.4791	0.0602	83.3207	0.2246	0	0	0	0	0	0	0	0	0	0	0	0	0	0	155.925	3511.08
2370	-1.06564	0	142.053	5.2823	6.4551	607.844	125.51	15.9896	3.3579	25.3311	67.2381	0.0513	0.0319	0.0058	0.83296	81.6397	10.4804	23.4218	532.053	35.4793	0.0602	83.3211	0.2246	0	0	0	0	0	0	0	0	0	0	0	0	0	0	155.925	3511.08
2371	-1.06345	0	142.053	5.2823	6.4551	607.844	125.51	15.9896	3.3579	25.3311	67.2381	0.0513	0.0319	0.0058	0.832968	81.64	10.4804	23.422	532.053	35.4795	0.0602	83.3215	0.2246	0	0	0	0	0	0	0	0	0	0	0	0	0	0	155.925	3511.08
2372	-1.06126	0	142.053	5.2823	6.4551	607.844	125.51	15.9896	3.3579	25.3311	67.2381	0.0513	0.0319	0.0058	0.832976	81.6404	10.4805	23.4221	532.053	35.4796	0.0602	83.3219	0.2246	0	0	0	0	0	0	0	0	0	0	0	0	0	0	155.925	3511.08
2373	-1.05908	0	142.053	5.2823	6.4551	607.844	125.51	15.9896	3.3579	25.3311	67.2381	0.0513	0.0319	0.0058	0.832984	81.6408	10.4805	23.4222	532.053	35.4798	0.0602	83.3222	0.2246	0	0	0	0	0	0	0	0	0	0	0	0	0	0	155.925	3511.08
2374	-1.05689	0	142.053	5.2823	6.4551	607.844	125.51	15.9896	3.3579	25.3311	67.2381	0.0513	0.0319	0.0058	0.832992	81.6411	10.4806	23.4223	532.053	35.4799	0.0602	83.3226	0.2246	0	0	0	0	0	0	0	0	0	0	0	0	0	0	155.925	3511.08
2375	-1.0547	0	142.053	5.2823	6.4551	607.844	125.51	15.9896	3.3579	25.3311	67.2381	0.0513	0.0319	0.0058	0.833	81.6415	10.4806	23.4224	532.053	35.4801	0.0602	83.323	0.2246	0	0	0	0	0	0	0	0	0	0	0	0	0	0	155.925	3511.08
2376	-1.05352	0	142.053	5.2823	6.4551	607.844	125.51	15.9896	3.3579	25.3311	67.2381	0.0513	0.0319	0.0058	0.833	81.6419	10.4807	23.4225	532.053	35.4803	0.0602	83.3234	0.2246	0	0	0	0	0	0	0	0	0	0	0	0	0	0	155.925	3511.08
2377	-1.05233	0	142.053	5.2823	6.4551	607.844	125.51	15.9896	3.3579	25.3311	67.2381	0.0513	0.0319	0.0058	0.833	81.6422	10.4807	23.4226	532.053	35.4804	0.0602	83.3237	0.2246	0	0	0	0	0	0	0	0	0	0	0	0	0	0	155.925	3511.08
2378	-1.05115	0	142.053	5.2823	6.4551	607.844	125.51	15.9896	3.3579	25.3311	67.2381	0.0513	0.0319	0.0058	0.833	81.6426	10.4808	23.4227	532.053	35.4806	0.0602	83.3241	0.2246	0	0	0	0	0	0	0	0	0	0	0	0	0	0	155.925	3511.08
2379	-1.04996	0	142.053	5.2823	6.4551	607.844	125.51	15.9896	3.3579	25.3311	67.2381	0.0513	0.0319	0.0058	0.833	81.643	10.4808	23.4228	532.053	35.4807	0.0602	83.3245	0.2246	0	0	0	0	0	0	0	0	0	0	0	0	0	0	155.925	3511.08
2380	-1.04878	0	142.053	5.2823	6.4551	607.844	125.51	15.9896	3.3579	25.3311	67.2381	0.0513	0.0319	0.0058	0.833	81.6434	10.4809	23.4229	532.053	35.4809	0.0602	83.3249	0.2246	0	0	0	0	0	0	0	0	0	0	0	0	0	0	155.925	3511.08
2381	-1.0476	0	142.053	5.2823	6.4551	607.844	125.51	15.9896	3.3579	25.3311	67.2381	0.0513	0.0319	0.0058	0.833	81.6437	10.4809	23.423	532.053	35.4811	0.0602	83.3252	0.2246	0	0	0	0	0	0	0	0	0	0	0	0	0	0	155.925	3511.08
2382	-1.04641	0	142.053	5.2823	6.4551	607.844	125.51	15.9896	3.3579	25.3311	67.2381	0.0513	0.0319	0.0058	0.833	81.6441	10.481	23.4231	532.053	35.4812	0.0602	83.3256	0.2246	0	0	0	0	0	0	0	0	0	0	0	0	0	0	155.925	3511.08
2383	-1.04523	0	142.053	5.2823	6.4551	607.844	125.51	15.9896	3.3579	25.3311	67.2381	0.0513	0.0319	0.0058	0.833	81.6445	10.481	23.4232	532.053	35.4814	0.0602	83.326	0.2246	0	0	0	0	0	0	0	0	0	0	0	0	0	0	155.925	3511.08
2384	-1.04404	0	142.053	5.2823	6.4551	607.844	125.51	15.9896	3.3579	25.3311	67.2381	0.0513	0.0319	0.0058	0.833	81.6448	10.4811	23.4233	532.053	35.4815	0.0602	83.3263	0.2246	0	0	0	0	0	0	0	0	0	0	0	0	0	0	155.925	3511.08
2385	-1.04286	0	142.053	5.2823	6.4551	607.844	125.51	15.9896	3.3579	25.3311	67.2381	0.0513	0.0319	0.0058	0.833	81.6452	10.4811	23.4234	532.053	35.4817	0.0602	83.3267	0.2246	0	0	0	0	0	0	0	0	0	0	0	0	0	0	155.925	3511.08
2386	-1.04168	0	142.053	5.2823	6.4551	607.844	125.51	15.9896	3.3579	25.3311	67.2381	0.0513	0.0319	0.0058	0.833	81.6456	10.4812	23.4235	532.053	35.4819	0.0602	83.3271	0.2246	0	0	0	0	0	0	0	0	0	0	0	0	0	0	155.925	3511.08
2387	-1.04049	0	142.053	5.2823	6.4551	607.844	125.51	15.9896	3.3579	25.3311	67.2381	0.0513	0.0319	0.0058	0.833	81.646	10.4812	23.4236	532.053	35.482	0.0602	83.3275	0.2246	0	0	0	0	0	0	0	0	0	0	0	0	0	0	155.925	3511.08
2388	-1.03931	0	142.053	5.2823	6.4551	607.844	125.51	15.9896	3.3579	25.3311	67.2381	0.0513	0.0319	0.0058	0.833	81.6463	10.4813	23.4238	532.053	35.4822	0.0602	83.3278	0.2246	0	0	0	0	0	0	0	0	0	0	0	0	0	0	155.925	3511.08
2389	-1.03812	0	142.053	5.2823	6.4551	607.844	125.51	15.9896	3.3579	25.3311	67.2381	0.0513	0.0319	0.0058	0.833	81.6467	10.4813	23.4239	532.053	35.4823	0.0602	83.3282	0.2246	0	0	0	0	0	0	0	0	0	0	0	0	0	0	155.925	3511.08
2390	-1.03694	0	142.053	5.2823	6.4551	607.844	125.51	15.9896	3.3579	25.3311	67.2381	0.0513	0.0319	0.0058	0.833	81.6471	10.4814	23.424	532.053	35.4825	0.0602	83.3286	0.2246	0	0	0	0	0	0	0	0	0	0	0	0	0	0	155.925	3511.08
2391	-1.03576	0	142.053	5.2823	6.4551	607.844	125.51	15.9896	3.3579	25.3311	67.2381	0.0513	0.0319	0.0058	0.833	81.6475	10.4814	23.4241	532.053	35.4827	0.0602	83.329	0.2246	0	0	0	0	0	0	0	0	0	0	0	0	0	0	155.925	3511.08
2392	-1.03457	0	142.053	5.2823	6.4551	607.844	125.51	15.9896	3.3579	25.3311	67.2381	0.0513	0.0319	0.0058	0.833	81.6478	10.4815	23.4242	532.053	35.4828	0.0602	83.3293	0.2246	0	0	0	0	0	0	0	0	0	0	0	0	0	0	155.925	3511.08
2393	-1.03339	0	142.053	5.2823	6.4551	607.844	125.51	15.9896	3.3579	25.3311	67.2381	0.0513	0.0319	0.0058	0.833	81.6482	10.4815	23.4243	532.053	35.483	0.0602	83.3297	0.2246	0	0	0	0	0	0	0	0	0	0	0	0	0	0	155.925	3511.08
2394	-1.0322	0	142.053	5.2823	6.4551	607.844	125.51	15.9896	3.3579	25.3311	67.2381	0.0513	0.0319	0.0058	0.833	81.6486	10.4816	23.4244	532.053	35.4831	0.0602	83.3301	0.2246	0	0	0	0	0	0	0	0	0	0	0	0	0	0	155.925	3511.08
2395	-1.03102	0	142.053	5.2823	6.4551	607.844	125.51	15.9896	3.3579	25.3311	67.2381	0.0513	0.0319	0.0058	0.833	81.6489	10.4816	23.4245	532.053	35.4833	0.0602	83.3304	0.2246	0	0	0	0	0	0	0	0	0	0	0	0	0	0	155.925	3511.08
2396	-1.02984	0	142.053	5.2823	6.4551	607.844	125.51	15.9896	3.3579	25.3311	67.2381	0.0513	0.0319	0.0058	0.833	81.6493	10.4817	23.4246	532.053	35.4835	0.0602	83.3308	0.2246	0	0	0	0	0	0	0	0	0	0	0	0	0	0	155.925	3511.08
2397	-1.02865	0	142.053	5.2823	6.4551	607.844	125.51	15.9896	3.3579	25.3311	67.2381	0.0513	0.0319	0.0058	0.833	81.6497	10.4817	23.4247	532.053	35.4836	0.0602	83.3312	0.2246	0	0	0	0	0	0	0	0	0	0	0	0	0	0	155.925	3511.08
2398	-1.02747	0	142.053	5.2823	6.4551	607.844	125.51	15.9896	3.3579	25.3311	67.2381	0.0513	0.0319	0.0058	0.833	81.6501	10.4818	23.4248	532.053	35.4838	0.0602	83.3316	0.2246	0	0	0	0	0	0	0	0	0	0	0	0	0	0	155.925	3511.08
2399	-1.02628	0	142.053	5.2823	6.4551	607.844	125.51	15.9896	3.3579	25.3311	67.2381	0.0513	0.0319	0.0058	0.833	81.6504	10.4818	23.4249	532.053	35.4839	0.0602	83.3319	0.2246	0	0	0	0	0	0	0	0	0	0	0	0	0	0	155.925	3511.08
2400	-1.0251	0	142.053	5.2823	6.4551	607.844	125.51	15.9896	3.3579	25.3311	67.2381	0.0513	0.0319	0.0058	0.833	81.6508	10.4819	23.425	532.053	35.4841	0.0602	83.3323	0.2246	0	0	0	0	0	0	0	0	0	0	0	0	0	0	155.925	3511.08
2401	-1.02436	0	142.053	5.2823	6.4551	607.844	125.51	15.9896	3.3579	25.3311	67.2381	0.0513	0.0319	0.0058	0.833004	81.6512	10.4819	23.4251	532.053	35.4843	0.0602	83.3327	0.2246	0	0	0	0	0	0	0	0	0	0	0	0	0	0	155.925	3511.08
2402	-1.02362	0	142.053	5.2823	6.4551	607.844	125.51	15.9896	3.3579	25.3311	67.2381	0.0513	0.0319	0.0058	0.833008	81.6515	10.482	23.4252	532.053	35.4844	0.0602	83.3331	0.2246	0	0	0	0	0	0	0	0	0	0	0	0	0	0	155.925	3511.08
2403	-1.02287	0	142.053	5.2823	6.4551	607.844	125.51	15.9896	3.3579	25.3311	67.2381	0.0513	0.0319	0.0058	0.833012	81.6519	10.482	23.4253	532.053	35.4846	0.0602	83.3334	0.2246	0	0	0	0	0	0	0	0	0	0	0	0	0	0	155.925	3511.08
2404	-1.02213	0	142.053	5.2823	6.4551	607.844	125.51	15.9896	3.3579	25.3311	67.2381	0.0513	0.0319	0.0058	0.833016	81.6523	10.4821	23.4254	532.053	35.4847	0.0602	83.3338	0.2246	0	0	0	0	0	0	0	0	0	0	0	0	0	0	155.925	3511.08
2405	-1.02139	0	142.053	5.2823	6.4551	607.844	125.51	15.9896	3.3579	25.3311	67.2381	0.0513	0.0319	0.0058	0.83302	81.6526	10.4821	23.4255	532.053	35.4849	0.0602	83.3342	0.2246	0	0	0	0	0	0	0	0	0	0	0	0	0	0	155.925	3511.08
2406	-1.02065	0	142.053	5.2823	6.4551	607.844	125.51	15.9896	3.3579	25.3311	67.2381	0.0513	0.0319	0.0058	0.833024	81.653	10.4822	23.4256	532.053	35.4851	0.0602	83.3346	0.2246	0	0	0	0	0	0	0	0	0	0	0	0	0	0	155.925	3511.08
2407	-1.01991	0	142.053	5.2823	6.4551	607.844	125.51	15.9896	3.3579	25.3311	67.2381	0.0513	0.0319	0.0058	0.833028	81.6534	10.4822	23.4257	532.053	35.4852	0.0602	83.3349	0.2246	0	0	0	0	0	0	0	0	0	0	0	0	0	0	155.925	3511.08
2408	-1.01916	0	142.053	5.2823	6.4551	607.844	125.51	15.9896	3.3579	25.3311	67.2381	0.0513	0.0319	0.0058	0.833032	81.6537	10.4823	23.4258	532.053	35.4854	0.0602	83.3353	0.2246	0	0	0	0	0	0	0	0	0	0	0	0	0	0	155.925	3511.08
2409	-1.01842	0	142.053	5.2823	6.4551	607.844	125.51	15.9896	3.3579	25.3311	67.2381	0.0513	0.0319	0.0058	0.833036	81.6541	10.4823	23.426	532.053	35.4856	0.0602	83.3357	0.2246	0	0	0	0	0	0	0	0	0	0	0	0	0	0	155.925	3511.08
2410	-1.01768	0	142.053	5.2823	6.4551	607.844	125.51	15.9896	3.3579	25.3311	67.2381	0.0513	0.0319	0.0058	0.83304	81.6545	10.4824	23.4261	532.053	35.4857	0.0602	83.3361	0.2246	0	0	0	0	0	0	0	0	0	0	0	0	0	0	155.925	3511.08
2411	-1.01694	0	142.053	5.2823	6.4551	607.844	125.51	15.9896	3.3579	25.3311	67.2381	0.0513	0.0319	0.0058	0.833044	81.6548	10.4824	23.4262	532.053	35.4859	0.0602	83.3365	0.2246	0	0	0	0	0	0	0	0	0	0	0	0	0	0	155.925	3511.08
2412	-1.0162	0	142.053	5.2823	6.4551	607.844	125.51	15.9896	3.3579	25.3311	67.2381	0.0513	0.0319	0.0058	0.833048	81.6552	10.4825	23.4263	532.053	35.486	0.0602	83.3368	0.2246	0	0	0	0	0	0	0	0	0	0	0	0	0	0	155.925	3511.08
2413	-1.01545	0	142.053	5.2823	6.4551	607.844	125.51	15.9896	3.3579	25.3311	67.2381	0.0513	0.0319	0.0058	0.833052	81.6556	10.4825	23.4264	532.053	35.4862	0.0602	83.3372	0.2246	0	0	0	0	0	0	0	0	0	0	0	0	0	0	155.925	3511.08
2414	-1.01471	0	142.053	5.2823	6.4551	607.844	125.51	15.9896	3.3579	25.3311	67.2381	0.0513	0.0319	0.0058	0.833056	81.656	10.4825	23.4265	532.053	35.4864	0.0602	83.3376	0.2246	0	0	0	0	0	0	0	0	0	0	0	0	0	0	155.925	3511.08
2415	-1.01397	0	142.053	5.2823	6.4551	607.844	125.51	15.9896	3.3579	25.3311	67.2381	0.0513	0.0319	0.0058	0.83306	81.6563	10.4826	23.4266	532.053	35.4865	0.0602	83.338	0.2246	0	0	0	0	0	0	0	0	0	0	0	0	0	0	155.925	3511.08
2416	-1.01323	0	142.053	5.2823	6.4551	607.844	125.51	15.9896	3.3579	25.3311	67.2381	0.0513	0.0319	0.0058	0.833064	81.6567	10.4826	23.4267	532.053	35.4867	0.0602	83.3383	0.2246	0	0	0	0	0	0	0	0	0	0	0	0	0	0	155.925	3511.08
2417	-1.01249	0	142.053	5.2823	6.4551	607.844	125.51	15.9896	3.3579	25.3311	67.2381	0.0513	0.0319	0.0058	0.833068	81.6571	10.4827	23.4268	532.053	35.4869	0.0602	83.3387	0.2246	0	0	0	0	0	0	0	0	0	0	0	0	0	0	155.925	3511.08
2418	-1.01174	0	142.053	5.2823	6.4551	607.844	125.51	15.9896	3.3579	25.3311	67.2381	0.0513	0.0319	0.0058	0.833072	81.6574	10.4827	23.4269	532.053	35.487	0.0602	83.3391	0.2246	0	0	0	0	0	0	0	0	0	0	0	0	0	0	155.925	3511.08
2419	-1.011	0	142.053	5.2823	6.4551	607.844	125.51	15.9896	3.3579	25.3311	67.2381	0.0513	0.0319	0.0058	0.833076	81.6578	10.4828	23.427	532.053	35.4872	0.0602	83.3395	0.2246	0	0	0	0	0	0	0	0	0	0	0	0	0	0	155.925	3511.08
2420	-1.01026	0	142.053	5.2823	6.4551	607.844	125.51	15.9896	3.3579	25.3311	67.2381	0.0513	0.0319	0.0058	0.83308	81.6582	10.4828	23.4271	532.053	35.4873	0.0602	83.3399	0.2246	0	0	0	0	0	0	0	0	0	0	0	0	0	0	155.925	3511.08
2421	-1.00952	0	142.053	5.2823	6.4551	607.844	125.51	15.9896	3.3579	25.3311	67.2381	0.0513	0.0319	0.0058	0.833084	81.6585	10.4829	23.4272	532.053	35.4875	0.0602	83.3402	0.2246	0	0	0	0	0	0	0	0	0	0	0	0	0	0	155.925	3511.08
2422	-1.00878	0	142.053	5.2823	6.4551	607.844	125.51	15.9896	3.3579	25.3311	67.2381	0.0513	0.0319	0.0058	0.833088	81.6589	10.4829	23.4273	532.053	35.4877	0.0602	83.3406	0.2246	0	0	0	0	0	0	0	0	0	0	0	0	0	0	155.925	3511.08
2423	-1.00803	0	142.053	5.2823	6.4551	607.844	125.51	15.9896	3.3579	25.3311	67.2381	0.0513	0.0319	0.0058	0.833092	81.6593	10.483	23.4274	532.053	35.4878	0.0602	83.341	0.2246	0	0	0	0	0	0	0	0	0	0	0	0	0	0	155.925	3511.08
2424	-1.00729	0	142.053	5.2823	6.4551	607.844	125.51	15.9896	3.3579	25.3311	67.2381	0.0513	0.0319	0.0058	0.833096	81.6596	10.483	23.4275	532.053	35.488	0.0602	83.3414	0.2246	0	0	0	0	0	0	0	0	0	0	0	0	0	0	155.925	3511.08
2425	-1.00655	0	142.053	5.2823	6.4551	607.844	125.51	15.9896	3.3579	25.3311	67.2381	0.0513	0.0319	0.0058	0.8331	81.66	10.4831	23.4276	532.053	35.4881	0.0602	83.3418	0.2246	0	0	0	0	0	0	0	0	0	0	0	0	0	0	155.925	3511.08
2426	-1.00581	0	142.053	5.2823	6.4551	607.844	125.51	15.9896	3.3579	25.3311	67.2381	0.0513	0.0319	0.0058	0.833104	81.6604	10.4831	23.4278	532.053	35.4883	0.0602	83.3421	0.2246	0	0	0	0	0	0	0	0	0	0	0	0	0	0	155.925	3511.08
2427	-1.00507	0	142.053	5.2823	6.4551	607.844	125.51	15.9896	3.3579	25.3311	67.2381	0.0513	0.0319	0.0058	0.833108	81.6607	10.4831	23.4279	532.053	35.4885	0.0602	83.3425	0.2246	0	0	0	0	0	0	0	0	0	0	0	0	0	0	155.925	3511.08
2428	-1.00432	0	142.053	5.2823	6.4551	607.844	125.51	15.9896	3.3579	25.3311	67.2381	0.0513	0.0319	0.0058	0.833112	81.6611	10.4832	23.428	532.053	35.4886	0.0602	83.3429	0.2246	0	0	0	0	0	0	0	0	0	0	0	0	0	0	155.925	3511.08
2429	-1.00358	0	142.053	5.2823	6.4551	607.844	125.51	15.9896	3.3579	25.3311	67.2381	0.0513	0.0319	0.0058	0.833116	81.6615	10.4832	23.4281	532.053	35.4888	0.0602	83.3433	0.2246	0	0	0	0	0	0	0	0	0	0	0	0	0	0	155.925	3511.08
2430	-1.00284	0	142.053	5.2823	6.4551	607.844	125.51	15.9896	3.3579	25.3311	67.2381	0.0513	0.0319	0.0058	0.83312	81.6618	10.4833	23.4282	532.053	35.489	0.0602	83.3436	0.2246	0	0	0	0	0	0	0	0	0	0	0	0	0	0	155.925	3511.08
2431	-1.0021	0	142.053	5.2823	6.4551	607.844	125.51	15.9896	3.3579	25.3311	67.2381	0.0513	0.0319	0.0058	0.833124	81.6622	10.4833	23.4283	532.053	35.4891	0.0602	83.344	0.2246	0	0	0	0	0	0	0	0	0	0	0	0	0	0	155.925	3511.08
2432	-1.00136	0	142.053	5.2823	6.4551	607.844	125.51	15.9896	3.3579	25.3311	67.2381	0.0513	0.0319	0.0058	0.833128	81.6626	10.4834	23.4284	532.053	35.4893	0.0602	83.3444	0.2246	0	0	0	0	0	0	0	0	0	0	0	0	0	0	155.925	3511.08
2433	-1.00061	0	142.053	5.2823	6.4551	607.844	125.51	15.9896	3.3579	25.3311	67.2381	0.0513	0.0319	0.0058	0.833132	81.6629	10.4834	23.4285	532.053	35.4894	0.0602	83.3448	0.2246	0	0	0	0	0	0	0	0	0	0	0	0	0	0	155.925	3511.08
2434	-0.999872	0	142.053	5.2823	6.4551	607.844	125.51	15.9896	3.3579	25.3311	67.2381	0.0513	0.0319	0.0058	0.833136	81.6633	10.4835	23.4286	532.053	35.4896	0.0602	83.3452	0.2246	0	0	0	0	0	0	0	0	0	0	0	0	0	0	155.925	3511.08
2435	-0.99913	0	142.053	5.2823	6.4551	607.844	125.51	15.9896	3.3579	25.3311	67.2381	0.0513	0.0319	0.0058	0.83314	81.6637	10.4835	23.4287	532.053	35.4898	0.0602	83.3455	0.2246	0	0	0	0	0	0	0	0	0	0	0	0	0	0	155.925	3511.08
2436	-0.998388	0	142.053	5.2823	6.4551	607.844	125.51	15.9896	3.3579	25.3311	67.2381	0.0513	0.0319	0.0058	0.833144	81.664	10.4836	23.4288	532.053	35.4899	0.0602	83.3459	0.2246	0	0	0	0	0	0	0	0	0	0	0	0	0	0	155.925	3511.08
2437	-0.997646	0	142.053	5.2823	6.4551	607.844	125.51	15.9896	3.3579	25.3311	67.2381	0.0513	0.0319	0.0058	0.833148	81.6644	10.4836	23.4289	532.053	35.4901	0.0602	83.3463	0.2246	0	0	0	0	0	0	0	0	0	0	0	0	0	0	155.925	3511.08
2438	-0.996904	0	142.053	5.2823	6.4551	607.844	125.51	15.9896	3.3579	25.3311	67.2381	0.0513	0.0319	0.0058	0.833152	81.6648	10.4836	23.429	532.053	35.4903	0.0602	83.3467	0.2246	0	0	0	0	0	0	0	0	0	0	0	0	0	0	155.925	3511.08
2439	-0.996162	0	142.053	5.2823	6.4551	607.844	125.51	15.9896	3.3579	25.3311	67.2381	0.0513	0.0319	0.0058	0.833156	81.6652	10.4837	23.4291	532.053	35.4904	0.0602	83.347	0.2246	0	0	0	0	0	0	0	0	0	0	0	0	0	0	155.925	3511.08
2440	-0.99542	0	142.053	5.2823	6.4551	607.844	125.51	15.9896	3.3579	25.3311	67.2381	0.0513	0.0319	0.0058	0.83316	81.6655	10.4837	23.4292	532.053	35.4906	0.0602	83.3474	0.2246	0	0	0	0	0	0	0	0	0	0	0	0	0	0	155.925	3511.08
2441	-0.994678	0	142.053	5.2823	6.4551	607.844	125.51	15.9896	3.3579	25.3311	67.2381	0.0513	0.0319	0.0058	0.833164	81.6659	10.4838	23.4293	532.053	35.4907	0.0602	83.3478	0.2246	0	0	0	0	0	0	0	0	0	0	0	0	0	0	155.925	3511.08
2442	-0.993936	0	142.053	5.2823	6.4551	607.844	125.51	15.9896	3.3579	25.3311	67.2381	0.0513	0.0319	0.0058	0.833168	81.6663	10.4838	23.4295	532.053	35.4909	0.0602	83.3482	0.2246	0	0	0	0	0	0	0	0	0	0	0	0	0	0	155.925	3511.08
2443	-0.993194	0	142.053	5.2823	6.4551	607.844	125.51	15.9896	3.3579	25.3311	67.2381	0.0513	0.0319	0.0058	0.833172	81.6666	10.4839	23.4296	532.053	35.4911	0.0602	83.3486	0.2246	0	0	0	0	0	0	0	0	0	0	0	0	0	0	155.925	3511.08
2444	-0.992452	0	142.053	5.2823	6.4551	607.844	125.51	15.9896	3.3579	25.3311	67.2381	0.0513	0.0319	0.0058	0.833176	81.667	10.4839	23.4297	532.053	35.4912	0.0602	83.3489	0.2246	0	0	0	0	0	0	0	0	0	0	0	0	0	0	155.925	3511.08
2445	-0.99171	0	142.053	5.2823	6.4551	607.844	125.51	15.9896	3.3579	25.3311	67.2381	0.0513	0.0319	0.0058	0.83318	81.6674	10.484	23.4298	532.053	35.4914	0.0602	83.3493	0.2246	0	0	0	0	0	0	0	0	0	0	0	0	0	0	155.925	3511.08
2446	-0.990968	0	142.053	5.2823	6.4551	607.844	125.51	15.9896	3.3579	25.3311	67.2381	0.0513	0.0319	0.0058	0.833184	81.6677	10.484	23.4299	532.053	35.4916	0.0602	83.3497	0.2246	0	0	0	0	0	0	0	0	0	0	0	0	0	0	155.925	3511.08
2447	-0.990226	0	142.053	5.2823	6.4551	607.844	125.51	15.9896	3.3579	25.3311	67.2381	0.0513	0.0319	0.0058	0.833188	81.6681	10.4841	23.43	532.053	35.4917	0.0602	83.3501	0.2246	0	0	0	0	0	0	0	0	0	0	0	0	0	0	155.925	3511.08
2448	-0.989484	0	142.053	5.2823	6.4551	607.844	125.51	15.9896	3.3579	25.3311	67.2381	0.0513	0.0319	0.0058	0.833192	81.6685	10.4841	23.4301	532.053	35.4919	0.0602	83.3504	0.2246	0	0	0	0	0	0	0	0	0	0	0	0	0	0	155.925	3511.08
2449	-0.988742	0	142.053	5.2823	6.4551	607.844	125.51	15.9896	3.3579	25.3311	67.2381	0.0513	0.0319	0.0058	0.833196	81.6688	10.4842	23.4302	532.053	35.492	0.0602	83.3508	0.2246	0	0	0	0	0	0	0	0	0	0	0	0	0	0	155.925	3511.08
2450	-0.988	0	142.053	5.2823	6.4551	607.844	125.51	15.9896	3.3579	25.3311	67.2381	0.0513	0.0319	0.0058	0.8332	81.6692	10.4842	23.4303	532.053	35.4922	0.0602	83.3512	0.2246	0	0	0	0	0	0	0	0	0	0	0	0	0	0	155.925	3511.08
2451	-0.986854	0	142.053	5.28229	6.4551	607.844	125.51	15.9896	3.3579	25.3311	67.2381	0.0513	0.0319	0.0058	0.833204	81.6696	10.4842	23.4304	532.053	35.4924	0.0602	83.3516	0.2246	0	0	0	0	0	0	0	0	0	0	0	0	0	0	155.925	3511.08
2452	-0.985708	0	142.053	5.28228	6.4551	607.844	125.51	15.9896	3.3579	25.3311	67.2381	0.0513	0.0319	0.0058	0.833208	81.6699	10.4843	23.4305	532.053	35.4925	0.0602	83.3519	0.2246	0	0	0	0	0	0	0	0	0	0	0	0	0	0	155.925	3511.08
2453	-0.984562	0	142.053	5.28228	6.4551	607.844	125.51	15.9896	3.3579	25.3311	67.2381	0.0513	0.0319	0.0058	0.833212	81.6703	10.4843	23.4306	532.053	35.4927	0.0602	83.3523	0.2246	0	0	0	0	0	0	0	0	0	0	0	0	0	0	155.925	3511.08
2454	-0.983416	0	142.053	5.28227	6.4551	607.844	125.51	15.9896	3.3579	25.3311	67.2381	0.0513	0.0319	0.0058	0.833216	81.6707	10.4844	23.4307	532.053	35.4928	0.0602	83.3527	0.2246	0	0	0	0	0	0	0	0	0	0	0	0	0	0	155.925	3511.08
2455	-0.98227	0	142.053	5.28226	6.4551	607.844	125.51	15.9896	3.3579	25.3311	67.2381	0.0513	0.0319	0.0058	0.83322	81.671	10.4844	23.4308	532.053	35.493	0.0602	83.3531	0.2246	0	0	0	0	0	0	0	0	0	0	0	0	0	0	155.925	3511.08
2456	-0.981124	0	142.053	5.28225	6.4551	607.844	125.51	15.9896	3.3579	25.3311	67.2381	0.0513	0.0319	0.0058	0.833224	81.6714	10.4845	23.4309	532.053	35.4931	0.0602	83.3534	0.2246	0	0	0	0	0	0	0	0	0	0	0	0	0	0	155.925	3511.08
2457	-0.979978	0	142.053	5.28224	6.4551	607.844	125.51	15.9896	3.3579	25.3311	67.2381	0.0513	0.0319	0.0058	0.833228	81.6718	10.4845	23.431	532.053	35.4933	0.0602	83.3538	0.2246	0	0	0	0	0	0	0	0	0	0	0	0	0	0	155.925	3511.08
2458	-0.978832	0	142.053	5.28224	6.4551	607.844	125.51	15.9896	3.3579	25.3311	67.2381	0.0513	0.0319	0.0058	0.833232	81.6721	10.4846	23.4311	532.053	35.4935	0.0602	83.3542	0.2246	0	0	0	0	0	0	0	0	0	0	0	0	0	0	155.925	3511.08
2459	-0.977686	0	142.053	5.28223	6.4551	607.844	125.51	15.9896	3.3579	25.3311	67.2381	0.0513	0.0319	0.0058	0.833236	81.6725	10.4846	23.4313	532.053	35.4936	0.0602	83.3546	0.2246	0	0	0	0	0	0	0	0	0	0	0	0	0	0	155.925	3511.08
2460	-0.97654	0	142.053	5.28222	6.4551	607.844	125.51	15.9896	3.3579	25.3311	67.2381	0.0513	0.0319	0.0058	0.83324	81.6729	10.4847	23.4314	532.053	35.4938	0.0602	83.3549	0.2246	0	0	0	0	0	0	0	0	0	0	0	0	0	0	155.925	3511.08
2461	-0.975394	0	142.053	5.28221	6.4551	607.844	125.51	15.9896	3.3579	25.3311	67.2381	0.0513	0.0319	0.0058	0.833244	81.6732	10.4847	23.4315	532.053	35.4939	0.0602	83.3553	0.2246	0	0	0	0	0	0	0	0	0	0	0	0	0	0	155.925	3511.08
2462	-0.974248	0	142.053	5.2822	6.4551	607.844	125.51	15.9896	3.3579	25.3311	67.2381	0.0513	0.0319	0.0058	0.833248	81.6736	10.4848	23.4316	532.053	35.4941	0.0602	83.3557	0.2246	0	0	0	0	0	0	0	0	0	0	0	0	0	0	155.925	3511.08
2463	-0.973102	0	142.053	5.2822	6.4551	607.844	125.51	15.9896	3.3579	25.3311	67.2381	0.0513	0.0319	0.0058	0.833252	81.674	10.4848	23.4317	532.053	35.4943	0.0602	83.3561	0.2246	0	0	0	0	0	0	0	0	0	0	0	0	0	0	155.925	3511.08
2464	-0.971956	0	142.053	5.28219	6.4551	607.844	125.51	15.9896	3.3579	25.3311	67.2381	0.0513	0.0319	0.0058	0.833256	81.6744	10.4849	23.4318	532.053	35.4944	0.0602	83.3564	0.2246	0	0	0	0	0	0	0	0	0	0	0	0	0	0	155.925	3511.08
2465	-0.97081	0	142.053	5.28218	6.4551	607.844	125.51	15.9896	3.3579	25.3311	67.2381	0.0513	0.0319	0.0058	0.83326	81.6747	10.4849	23.4319	532.053	35.4946	0.0602	83.3568	0.2246	0	0	0	0	0	0	0	0	0	0	0	0	0	0	155.925	3511.08
2466	-0.969664	0	142.053	5.28217	6.4551	607.844	125.51	15.9896	3.3579	25.3311	67.2381	0.0513	0.0319	0.0058	0.833264	81.6751	10.485	23.432	532.053	35.4947	0.0602	83.3572	0.2246	0	0	0	0	0	0	0	0	0	0	0	0	0	0	155.925	3511.08
2467	-0.968518	0	142.053	5.28216	6.4551	607.844	125.51	15.9896	3.3579	25.3311	67.2381	0.0513	0.0319	0.0058	0.833268	81.6755	10.485	23.4321	532.053	35.4949	0.0602	83.3576	0.2246	0	0	0	0	0	0	0	0	0	0	0	0	0	0	155.925	3511.08
2468	-0.967372	0	142.053	5.28216	6.4551	607.844	125.51	15.9896	3.3579	25.3311	67.2381	0.0513	0.0319	0.0058	0.833272	81.6758	10.4851	23.4322	532.053	35.495	0.0602	83.3579	0.2246	0	0	0	0	0	0	0	0	0	0	0	0	0	0	155.925	3511.08
2469	-0.966226	0	142.053	5.28215	6.4551	607.844	125.51	15.9896	3.3579	25.3311	67.2381	0.0513	0.0319	0.0058	0.833276	81.6762	10.4851	23.4323	532.053	35.4952	0.0602	83.3583	0.2246	0	0	0	0	0	0	0	0	0	0	0	0	0	0	155.925	3511.08
2470	-0.96508	0	142.053	5.28214	6.4551	607.844	125.51	15.9896	3.3579	25.3311	67.2381	0.0513	0.0319	0.0058	0.83328	81.6766	10.4852	23.4324	532.053	35.4954	0.0602	83.3587	0.2246	0	0	0	0	0	0	0	0	0	0	0	0	0	0	155.925	3511.08
2471	-0.963934	0	142.053	5.28213	6.4551	607.844	125.51	15.9896	3.3579	25.3311	67.2381	0.0513	0.0319	0.0058	0.833284	81.6769	10.4852	23.4325	532.053	35.4955	0.0602	83.3591	0.2246	0	0	0	0	0	0	0	0	0	0	0	0	0	0	155.925	3511.08
2472	-0.962788	0	142.053	5.28212	6.4551	607.844	125.51	15.9896	3.3579	25.3311	67.2381	0.0513	0.0319	0.0058	0.833288	81.6773	10.4853	23.4326	532.053	35.4957	0.0602	83.3594	0.2246	0	0	0	0	0	0	0	0	0	0	0	0	0	0	155.925	3511.08
2473	-0.961642	0	142.053	5.28212	6.4551	607.844	125.51	15.9896	3.3579	25.3311	67.2381	0.0513	0.0319	0.0058	0.833292	81.6777	10.4853	23.4327	532.053	35.4958	0.0602	83.3598	0.2246	0	0	0	0	0	0	0	0	0	0	0	0	0	0	155.925	3511.08
2474	-0.960496	0	142.053	5.28211	6.4551	607.844	125.51	15.9896	3.3579	25.3311	67.2381	0.0513	0.0319	0.0058	0.833296	81.678	10.4854	23.4328	532.053	35.496	0.0602	83.3602	0.2246	0	0	0	0	0	0	0	0	0	0	0	0	0	0	155.925	3511.08
2475	-0.95935	0	142.053	5.2821	6.4551	607.844	125.51	15.9896	3.3579	25.3311	67.2381	0.0513	0.0319	0.0058	0.8333	81.6784	10.4854	23.433	532.053	35.4962	0.0602	83.3606	0.2246	0	0	0	0	0	0	0	0	0	0	0	0	0	0	155.925	3511.08
2476	-0.958204	0	142.053	5.28209	6.4551	607.844	125.51	15.9896	3.3579	25.3311	67.2381	0.0513	0.0319	0.0058	0.833304	81.6788	10.4854	23.4331	532.053	35.4963	0.0602	83.3609	0.2246	0	0	0	0	0	0	0	0	0	0	0	0	0	0	155.925	3511.08
2477	-0.957058	0	142.053	5.28208	6.4551	607.844	125.51	15.9896	3.3579	25.3311	67.2381	0.0513	0.0319	0.0058	0.833308	81.6791	10.4855	23.4332	532.053	35.4965	0.0602	83.3613	0.2246	0	0	0	0	0	0	0	0	0	0	0	0	0	0	155.925	3511.08
2478	-0.955912	0	142.053	5.28208	6.4551	607.844	125.51	15.9896	3.3579	25.3311	67.2381	0.0513	0.0319	0.0058	0.833312	81.6795	10.4855	23.4333	532.053	35.4966	0.0602	83.3617	0.2246	0	0	0	0	0	0	0	0	0	0	0	0	0	0	155.925	3511.08
2479	-0.954766	0	142.053	5.28207	6.4551	607.844	125.51	15.9896	3.3579	25.3311	67.2381	0.0513	0.0319	0.0058	0.833316	81.6799	10.4856	23.4334	532.053	35.4968	0.0602	83.362	0.2246	0	0	0	0	0	0	0	0	0	0	0	0	0	0	155.925	3511.08
2480	-0.95362	0	142.053	5.28206	6.4551	607.844	125.51	15.9896	3.3579	25.3311	67.2381	0.0513	0.0319	0.0058	0.83332	81.6802	10.4856	23.4335	532.053	35.4969	0.0602	83.3624	0.2246	0	0	0	0	0	0	0	0	0	0	0	0	0	0	155.925	3511.08
2481	-0.952474	0	142.053	5.28205	6.4551	607.844	125.51	15.9896	3.3579	25.3311	67.2381	0.0513	0.0319	0.0058	0.833324	81.6806	10.4857	23.4336	532.053	35.4971	0.0602	83.3628	0.2246	0	0	0	0	0	0	0	0	0	0	0	0	0	0	155.925	3511.08
2482	-0.951328	0	142.053	5.28204	6.4551	607.844	125.51	15.9896	3.3579	25.3311	67.2381	0.0513	0.0319	0.0058	0.833328	81.681	10.4857	23.4337	532.053	35.4973	0.0602	83.3632	0.2246	0	0	0	0	0	0	0	0	0	0	0	0	0	0	155.925	3511.08
2483	-0.950182	0	142.053	5.28204	6.4551	607.844	125.51	15.9896	3.3579	25.3311	67.2381	0.0513	0.0319	0.0058	0.833332	81.6813	10.4858	23.4338	532.053	35.4974	0.0602	83.3635	0.2246	0	0	0	0	0	0	0	0	0	0	0	0	0	0	155.925	3511.08
2484	-0.949036	0	142.053	5.28203	6.4551	607.844	125.51	15.9896	3.3579	25.3311	67.2381	0.0513	0.0319	0.0058	0.833336	81.6817	10.4858	23.4339	532.053	35.4976	0.0602	83.3639	0.2246	0	0	0	0	0	0	0	0	0	0	0	0	0	0	155.925	3511.08
2485	-0.94789	0	142.053	5.28202	6.4551	607.844	125.51	15.9896	3.3579	25.3311	67.2381	0.0513	0.0319	0.0058	0.83334	81.6821	10.4859	23.434	532.053	35.4977	0.0602	83.3643	0.2246	0	0	0	0	0	0	0	0	0	0	0	0	0	0	155.925	3511.08
2486	-0.946744	0	142.053	5.28201	6.4551	607.844	125.51	15.9896	3.3579	25.3311	67.2381	0.0513	0.0319	0.0058	0.833344	81.6824	10.4859	23.4341	532.053	35.4979	0.0602	83.3647	0.2246	0	0	0	0	0	0	0	0	0	0	0	0	0	0	155.925	3511.08
2487	-0.945598	0	142.053	5.282	6.4551	607.844	125.51	15.9896	3.3579	25.3311	67.2381	0.0513	0.0319	0.0058	0.833348	81.6828	10.486	23.4342	532.053	35.498	0.0602	83.365	0.2246	0	0	0	0	0	0	0	0	0	0	0	0	0	0	155.925	3511.08
2488	-0.944452	0	142.053	5.282	6.4551	607.844	125.51	15.9896	3.3579	25.3311	67.2381	0.0513	0.0319	0.0058	0.833352	81.6832	10.486	23.4343	532.053	35.4982	0.0602	83.3654	0.2246	0	0	0	0	0	0	0	0	0	0	0	0	0	0	155.925	3511.08
2489	-0.943306	0	142.053	5.28199	6.4551	607.844	125.51	15.9896	3.3579	25.3311	67.2381	0.0513	0.0319	0.0058	0.833356	81.6836	10.4861	23.4344	532.053	35.4984	0.0602	83.3658	0.2246	0	0	0	0	0	0	0	0	0	0	0	0	0	0	155.925	3511.08
2490	-0.94216	0	142.053	5.28198	6.4551	607.844	125.51	15.9896	3.3579	25.3311	67.2381	0.0513	0.0319	0.0058	0.83336	81.6839	10.4861	23.4345	532.053	35.4985	0.0602	83.3662	0.2246	0	0	0	0	0	0	0	0	0	0	0	0	0	0	155.925	3511.08
2491	-0.941014	0	142.053	5.28197	6.4551	607.844	125.51	15.9896	3.3579	25.3311	67.2381	0.0513	0.0319	0.0058	0.833364	81.6843	10.4862	23.4346	532.053	35.4987	0.0602	83.3665	0.2246	0	0	0	0	0	0	0	0	0	0	0	0	0	0	155.925	3511.08
2492	-0.939868	0	142.053	5.28196	6.4551	607.844	125.51	15.9896	3.3579	25.3311	67.2381	0.0513	0.0319	0.0058	0.833368	81.6847	10.4862	23.4348	532.053	35.4988	0.0602	83.3669	0.2246	0	0	0	0	0	0	0	0	0	0	0	0	0	0	155.925	3511.08
2493	-0.938722	0	142.053	5.28196	6.4551	607.844	125.51	15.9896	3.3579	25.3311	67.2381	0.0513	0.0319	0.0058	0.833372	81.685	10.4863	23.4349	532.053	35.499	0.0602	83.3673	0.2246	0	0	0	0	0	0	0	0	0	0	0	0	0	0	155.925	3511.08
2494	-0.937576	0	142.053	5.28195	6.4551	607.844	125.51	15.9896	3.3579	25.3311	67.2381	0.0513	0.0319	0.0058	0.833376	81.6854	10.4863	23.435	532.053	35.4992	0.0602	83.3677	0.2246	0	0	0	0	0	0	0	0	0	0	0	0	0	0	155.925	3511.08
2495	-0.93643	0	142.053	5.28194	6.4551	607.844	125.51	15.9896	3.3579	25.3311	67.2381	0.0513	0.0319	0.0058	0.83338	81.6858	10.4864	23.4351	532.053	35.4993	0.0602	83.368	0.2246	0	0	0	0	0	0	0	0	0	0	0	0	0	0	155.925	3511.08
2496	-0.935284	0	142.053	5.28193	6.4551	607.844	125.51	15.9896	3.3579	25.3311	67.2381	0.0513	0.0319	0.0058	0.833384	81.6861	10.4864	23.4352	532.053	35.4995	0.0602	83.3684	0.2246	0	0	0	0	0	0	0	0	0	0	0	0	0	0	155.925	3511.08
2497	-0.934138	0	142.053	5.28192	6.4551	607.844	125.51	15.9896	3.3579	25.3311	67.2381	0.0513	0.0319	0.0058	0.833388	81.6865	10.4865	23.4353	532.053	35.4996	0.0602	83.3688	0.2246	0	0	0	0	0	0	0	0	0	0	0	0	0	0	155.925	3511.08
2498	-0.932992	0	142.053	5.28192	6.4551	607.844	125.51	15.9896	3.3579	25.3311	67.2381	0.0513	0.0319	0.0058	0.833392	81.6869	10.4865	23.4354	532.053	35.4998	0.0602	83.3692	0.2246	0	0	0	0	0	0	0	0	0	0	0	0	0	0	155.925	3511.08
2499	-0.931846	0	142.053	5.28191	6.4551	607.844	125.51	15.9896	3.3579	25.3311	67.2381	0.0513	0.0319	0.0058	0.833396	81.6872	10.4866	23.4355	532.053	35.4999	0.0602	83.3695	0.2246	0	0	0	0	0	0	0	0	0	0	0	0	0	0	155.925	3511.08
2500	-0.9307	0	142.053	5.2819	6.4551	607.844	125.51	15.9896	3.3579	25.3311	67.2381	0.0513	0.0319	0.0058	0.8334	81.6876	10.4866	23.4356	532.053	35.5001	0.0602	83.3699	0.2246	0	0	0	0	0	0	0	0	0	0	0	0	0	0	155.925	3511.08
