# Supplementary material for: The Social Cost of Fossil and Industrial CO2 Emissions from 1950 to 2018
Source: Research Square preprint supplement (doi:10.21203/rs.3.rs-2244259/v1), 2022-11-17
Supplement: Supplementary file 16 [file RCP45SCP45TO3PD_MIDYEAR_CONCENTRATIONS.xls]

## Sheet: RCP45SCP45to3PD_MIDYEAR_CONCEN
RCP4.5_WITH SUPPLEMENTARY EXTENSION SCP45to3PD__MIDYEAR__CONCENTRATIONS____________________________
CONTENT: CMIP5 RECOMMENDATIONS FOR ANNUAL AVERAGE, GLOBAL MEAN CONCENTRATIONS.
RUN: RCP45SCP45to3PD, FINAL RELEASE, 30 May 2010
RCP4.5 CONTACT: MiniCAM group, Allison Thomson (Allison.Thomson@pnl.gov)
DATE: 30/5/2010 01:02:33
MAGICC-VERSION: 6.3.09, 25 November 2009
FILE PRODUCED BY: RCP Concentration Calculation & Data Group, M. Meinshausen, S. Smith, K. Riahi, D. van Vuuren et al.
DOCUMENTATION: M. Meinshausen, S. Smith et al. (2011) "The RCP GHG concentrations and their extension from 1765 to 2300", DOI 10.1007/s10584-011-0156-z, Climatic Change.
CMIP5 INFO: http://cmip-pcmdi.llnl.gov/cmip5/
RCP DATABASE: http://www.iiasa.ac.at/web-apps/tnt/RcpDb
FURTHER INFO: For data sources, aknowledgements and further information, see http://www.pik-potsdam.de/~mmalte/rcps
NOTE: RCP4.5 starts 2005; 20th century data and earlier is provided for convenience; supplementary extension so that RCP3PD levels reached by 2250.
COLUMN_DESCRIPTION________________________________________
1. CO2EQ - (For Information only, not CMIP5 recommendation) CO2 equivalence concentrations using CO2 radiative forcing relationship Q = 3.71/ln(2)*ln(C/278), aggregating all (efficacy-adjusted) anthropogenic forcings, including greenhouse gases listed below (i.e. columns 3,4,5 and 8-35), and aerosols, trop. ozone etc. (not listed below).
2. KYOTO-CO2EQ - (For information only, not CMIP5 recommendation) As column 1, but only aggregating greenhouse gases controlled under the Kyoto Protocol (columns 3,4,5 and 8-19).
3. CO2 - Atmospheric CO2 concentrations
4. CH4 - Atmospheric CH4 concentrations
5. N2O - Atmospheric N2O concentrations
6. FGASSUMHFC134AEQ - All flourinated gases controlled under the Kyoto Protocol, i.e. HFCs, PFCs, and SF6 (columns 8-19) expressed as HFC134a equivalence concentrations.
7. MHALOSUMCFC12EQ - All flourinated gases controlled under the Montreal Protocol, i.e. CFCs, HCFCs, Halons, CCl4, CH3Br, CH3Cl (columns 20-35) expressed as CFC-12 equivalence concentrations.
8. - 19. - Flourinated Gases controlled under the Kyoto Protocol
20. - 35. - Ozone Depleting Substances controlled under the Montreal Protocol
&THISFILE_SPECIFICATIONS
THISFILE_DATACOLUMNS	35
THISFILE_FIRSTYEAR	1765
THISFILE_LASTYEAR	2500
THISFILE_ANNUALSTEPS	1
THISFILE_FIRSTDATAROW	40
THISFILE_UNITS	SEE ROW 38
THISFILE_DATTYPE	RCPDAT
/
COLUMN:	1	2	3	4	5	6	7	8	9	10	11	12	13	14	15	16	17	18	19	20	21	22	23	24	25	26	27	28	29	30	31	32	33	34	35
UNITS:	ppm	ppm	ppm	ppb	ppb	ppt	ppt	ppt	ppt	ppt	ppt	ppt	ppt	ppt	ppt	ppt	ppt	ppt	ppt	ppt	ppt	ppt	ppt	ppt	ppt	ppt	ppt	ppt	ppt	ppt	ppt	ppt	ppt	ppt	ppt
v YEARS/GAS >	CO2EQ	KYOTO-CO2EQ	CO2	CH4	N2O	FGASSUMHFC134AEQ	MHALOSUMCFC12EQ	CF4	C2F6	C6F14	HFC23	HFC32	HFC43_10	HFC125	HFC134a	HFC143a	HFC227ea	HFC245fa	SF6	CFC_11	CFC_12	CFC_113	CFC_114	CFC_115	CARB_TET	MCF	HCFC_22	HCFC_141B	HCFC_142B	HALON1211	HALON1202	HALON1301	HALON2402	CH3BR	CH3CL
1765	277.015	277.015	278.052	721.894	272.96	0	0	35	0	0	0	0	0	0	0	0	0	0	0	0	0	0	0	0	0	0	0	0	0	0	0	0	0	5.8	480
1766	277.839	277.815	278.106	722.256	272.971	0	0	35	0	0	0	0	0	0	0	0	0	0	0	0	0	0	0	0	0	0	0	0	0	0	0	0	0	5.8	480
1767	278.694	278.687	278.22	722.971	272.994	0	0	35	0	0	0	0	0	0	0	0	0	0	0	0	0	0	0	0	0	0	0	0	0	0	0	0	0	5.8	480
1768	278.748	278.836	278.343	723.668	273.017	0	0	35	0	0	0	0	0	0	0	0	0	0	0	0	0	0	0	0	0	0	0	0	0	0	0	0	0	5.8	480
1769	278.796	278.989	278.471	724.343	273.039	0	0	35	0	0	0	0	0	0	0	0	0	0	0	0	0	0	0	0	0	0	0	0	0	0	0	0	0	5.8	480
1770	278.849	279.143	278.6	724.995	273.061	0	0	35	0	0	0	0	0	0	0	0	0	0	0	0	0	0	0	0	0	0	0	0	0	0	0	0	0	5.8	480
1771	278.884	279.299	278.733	725.629	273.083	0	0	35	0	0	0	0	0	0	0	0	0	0	0	0	0	0	0	0	0	0	0	0	0	0	0	0	0	5.8	480
1772	278.925	279.459	278.869	726.25	273.104	0	0	35	0	0	0	0	0	0	0	0	0	0	0	0	0	0	0	0	0	0	0	0	0	0	0	0	0	5.8	480
1773	278.994	279.622	279.009	726.859	273.125	0	0	35	0	0	0	0	0	0	0	0	0	0	0	0	0	0	0	0	0	0	0	0	0	0	0	0	0	5.8	480
1774	279.069	279.789	279.153	727.455	273.146	0	0	35	0	0	0	0	0	0	0	0	0	0	0	0	0	0	0	0	0	0	0	0	0	0	0	0	0	5.8	480
1775	279.151	279.96	279.302	728.037	273.166	0	0	35	0	0	0	0	0	0	0	0	0	0	0	0	0	0	0	0	0	0	0	0	0	0	0	0	0	5.8	480
1776	279.242	280.137	279.457	728.604	273.187	0	0	35	0	0	0	0	0	0	0	0	0	0	0	0	0	0	0	0	0	0	0	0	0	0	0	0	0	5.8	480
1777	279.342	280.319	279.618	729.154	273.207	0	0	35	0	0	0	0	0	0	0	0	0	0	0	0	0	0	0	0	0	0	0	0	0	0	0	0	0	5.8	480
1778	279.447	280.504	279.782	729.687	273.227	0	0	35	0	0	0	0	0	0	0	0	0	0	0	0	0	0	0	0	0	0	0	0	0	0	0	0	0	5.8	480
1779	279.551	280.685	279.943	730.201	273.247	0	0	35	0	0	0	0	0	0	0	0	0	0	0	0	0	0	0	0	0	0	0	0	0	0	0	0	0	5.8	480
1780	279.65	280.859	280.097	730.692	273.266	0	0	35	0	0	0	0	0	0	0	0	0	0	0	0	0	0	0	0	0	0	0	0	0	0	0	0	0	5.8	480
1781	279.718	281.022	280.243	731.154	273.286	0	0	35	0	0	0	0	0	0	0	0	0	0	0	0	0	0	0	0	0	0	0	0	0	0	0	0	0	5.8	480
1782	279.782	281.179	280.382	731.584	273.306	0	0	35	0	0	0	0	0	0	0	0	0	0	0	0	0	0	0	0	0	0	0	0	0	0	0	0	0	5.8	480
1783	279.868	281.332	280.518	731.989	273.325	0	0	35	0	0	0	0	0	0	0	0	0	0	0	0	0	0	0	0	0	0	0	0	0	0	0	0	0	5.8	480
1784	279.959	281.487	280.657	732.378	273.345	0	0	35	0	0	0	0	0	0	0	0	0	0	0	0	0	0	0	0	0	0	0	0	0	0	0	0	0	5.8	480
1785	280.058	281.648	280.803	732.76	273.365	0	0	35	0	0	0	0	0	0	0	0	0	0	0	0	0	0	0	0	0	0	0	0	0	0	0	0	0	5.8	480
1786	280.17	281.819	280.957	733.146	273.384	0	0	35	0	0	0	0	0	0	0	0	0	0	0	0	0	0	0	0	0	0	0	0	0	0	0	0	0	5.8	480
1787	280.291	281.996	281.118	733.544	273.404	0	0	35	0	0	0	0	0	0	0	0	0	0	0	0	0	0	0	0	0	0	0	0	0	0	0	0	0	5.8	480
1788	280.419	282.177	281.282	733.965	273.424	0	0	35	0	0	0	0	0	0	0	0	0	0	0	0	0	0	0	0	0	0	0	0	0	0	0	0	0	5.8	480
1789	280.548	282.357	281.443	734.418	273.444	0	0	35	0	0	0	0	0	0	0	0	0	0	0	0	0	0	0	0	0	0	0	0	0	0	0	0	0	5.8	480
1790	280.676	282.532	281.598	734.911	273.464	0	0	35	0	0	0	0	0	0	0	0	0	0	0	0	0	0	0	0	0	0	0	0	0	0	0	0	0	5.8	480
1791	280.778	282.701	281.747	735.445	273.484	0	0	35	0	0	0	0	0	0	0	0	0	0	0	0	0	0	0	0	0	0	0	0	0	0	0	0	0	5.8	480
1792	280.879	282.867	281.891	736.018	273.504	0	0	35	0	0	0	0	0	0	0	0	0	0	0	0	0	0	0	0	0	0	0	0	0	0	0	0	0	5.8	480
1793	281.005	283.031	282.031	736.626	273.525	0	0	35	0	0	0	0	0	0	0	0	0	0	0	0	0	0	0	0	0	0	0	0	0	0	0	0	0	5.8	480
1794	281.13	283.191	282.167	737.265	273.545	0	0	35	0	0	0	0	0	0	0	0	0	0	0	0	0	0	0	0	0	0	0	0	0	0	0	0	0	5.8	480
1795	281.254	283.348	282.299	737.933	273.566	0	0	35	0	0	0	0	0	0	0	0	0	0	0	0	0	0	0	0	0	0	0	0	0	0	0	0	0	5.8	480
1796	281.378	283.502	282.427	738.627	273.587	0	0	35	0	0	0	0	0	0	0	0	0	0	0	0	0	0	0	0	0	0	0	0	0	0	0	0	0	5.8	480
1797	281.478	283.653	282.551	739.343	273.609	0	0	35	0	0	0	0	0	0	0	0	0	0	0	0	0	0	0	0	0	0	0	0	0	0	0	0	0	5.8	480
1798	281.577	283.801	282.671	740.08	273.63	0	0	35	0	0	0	0	0	0	0	0	0	0	0	0	0	0	0	0	0	0	0	0	0	0	0	0	0	5.8	480
1799	281.699	283.945	282.787	740.834	273.652	0	0	35	0	0	0	0	0	0	0	0	0	0	0	0	0	0	0	0	0	0	0	0	0	0	0	0	0	5.8	480
1800	281.795	284.086	282.899	741.608	273.675	0	0	35	0	0	0	0	0	0	0	0	0	0	0	0	0	0	0	0	0	0	0	0	0	0	0	0	0	5.8	480
1801	281.891	284.224	283.007	742.413	273.698	0	0	35	0	0	0	0	0	0	0	0	0	0	0	0	0	0	0	0	0	0	0	0	0	0	0	0	0	5.8	480
1802	281.964	284.359	283.111	743.26	273.721	0	0	35	0	0	0	0	0	0	0	0	0	0	0	0	0	0	0	0	0	0	0	0	0	0	0	0	0	5.8	480
1803	282.061	284.492	283.211	744.146	273.744	0	0	35	0	0	0	0	0	0	0	0	0	0	0	0	0	0	0	0	0	0	0	0	0	0	0	0	0	5.8	480
1804	282.204	284.622	283.307	745.063	273.768	0	0	35	0	0	0	0	0	0	0	0	0	0	0	0	0	0	0	0	0	0	0	0	0	0	0	0	0	5.8	480
1805	282.323	284.748	283.4	746.005	273.793	0	0	35	0	0	0	0	0	0	0	0	0	0	0	0	0	0	0	0	0	0	0	0	0	0	0	0	0	5.8	480
1806	282.418	284.873	283.49	746.962	273.818	0	0	35	0	0	0	0	0	0	0	0	0	0	0	0	0	0	0	0	0	0	0	0	0	0	0	0	0	5.8	480
1807	282.514	284.997	283.578	747.927	273.843	0	0	35	0	0	0	0	0	0	0	0	0	0	0	0	0	0	0	0	0	0	0	0	0	0	0	0	0	5.8	480
1808	282.631	285.115	283.661	748.893	273.869	0	0	35	0	0	0	0	0	0	0	0	0	0	0	0	0	0	0	0	0	0	0	0	0	0	0	0	0	5.8	480
1809	282.739	285.225	283.735	749.851	273.895	0	0	35	0	0	0	0	0	0	0	0	0	0	0	0	0	0	0	0	0	0	0	0	0	0	0	0	0	5.8	480
1810	282.836	285.321	283.797	750.798	273.922	0	0	35	0	0	0	0	0	0	0	0	0	0	0	0	0	0	0	0	0	0	0	0	0	0	0	0	0	5.8	480
1811	282.9	285.406	283.847	751.739	273.95	0	0	35	0	0	0	0	0	0	0	0	0	0	0	0	0	0	0	0	0	0	0	0	0	0	0	0	0	5.8	480
1812	282.957	285.483	283.889	752.682	273.978	0	0	35	0	0	0	0	0	0	0	0	0	0	0	0	0	0	0	0	0	0	0	0	0	0	0	0	0	5.8	480
1813	283.036	285.555	283.926	753.628	274.007	0	0	35	0	0	0	0	0	0	0	0	0	0	0	0	0	0	0	0	0	0	0	0	0	0	0	0	0	5.8	480
1814	283.115	285.627	283.963	754.579	274.036	0	0	35	0	0	0	0	0	0	0	0	0	0	0	0	0	0	0	0	0	0	0	0	0	0	0	0	0	5.8	480
1815	283.174	285.701	284.001	755.531	274.066	0	0	35	0	0	0	0	0	0	0	0	0	0	0	0	0	0	0	0	0	0	0	0	0	0	0	0	0	5.8	480
1816	283.215	285.778	284.043	756.486	274.097	0	0	35	0	0	0	0	0	0	0	0	0	0	0	0	0	0	0	0	0	0	0	0	0	0	0	0	0	5.8	480
1817	283.259	285.858	284.086	757.44	274.128	0	0	35	0	0	0	0	0	0	0	0	0	0	0	0	0	0	0	0	0	0	0	0	0	0	0	0	0	5.8	480
1818	283.327	285.936	284.129	758.395	274.16	0	0	35	0	0	0	0	0	0	0	0	0	0	0	0	0	0	0	0	0	0	0	0	0	0	0	0	0	5.8	480
1819	283.415	286.01	284.167	759.348	274.193	0	0	35	0	0	0	0	0	0	0	0	0	0	0	0	0	0	0	0	0	0	0	0	0	0	0	0	0	5.8	480
1820	283.498	286.078	284.198	760.3	274.227	0	0	35	0	0	0	0	0	0	0	0	0	0	0	0	0	0	0	0	0	0	0	0	0	0	0	0	0	5.8	480
1821	283.575	286.139	284.223	761.249	274.261	0	0	35	0	0	0	0	0	0	0	0	0	0	0	0	0	0	0	0	0	0	0	0	0	0	0	0	0	5.8	480
1822	283.627	286.196	284.244	762.198	274.296	0	0	35	0	0	0	0	0	0	0	0	0	0	0	0	0	0	0	0	0	0	0	0	0	0	0	0	0	5.8	480
1823	283.655	286.251	284.263	763.147	274.332	0	0	35	0	0	0	0	0	0	0	0	0	0	0	0	0	0	0	0	0	0	0	0	0	0	0	0	0	5.8	480
1824	283.706	286.306	284.281	764.095	274.368	0	0	35	0	0	0	0	0	0	0	0	0	0	0	0	0	0	0	0	0	0	0	0	0	0	0	0	0	5.8	480
1825	283.76	286.361	284.3	765.044	274.406	0	0	35	0	0	0	0	0	0	0	0	0	0	0	0	0	0	0	0	0	0	0	0	0	0	0	0	0	5.8	480
1826	283.816	286.418	284.32	765.993	274.444	0	0	35	0	0	0	0	0	0	0	0	0	0	0	0	0	0	0	0	0	0	0	0	0	0	0	0	0	5.8	480
1827	283.873	286.475	284.34	766.943	274.484	0	0	35	0	0	0	0	0	0	0	0	0	0	0	0	0	0	0	0	0	0	0	0	0	0	0	0	0	5.8	480
1828	283.931	286.532	284.36	767.894	274.524	0	0	35	0	0	0	0	0	0	0	0	0	0	0	0	0	0	0	0	0	0	0	0	0	0	0	0	0	5.8	480
1829	284.013	286.589	284.38	768.846	274.565	0	0	35	0	0	0	0	0	0	0	0	0	0	0	0	0	0	0	0	0	0	0	0	0	0	0	0	0	5.8	480
1830	283.962	286.647	284.4	769.798	274.606	0	0	35	0	0	0	0	0	0	0	0	0	0	0	0	0	0	0	0	0	0	0	0	0	0	0	0	0	5.8	480
1831	283.9	286.669	284.385	770.745	274.649	0	0	35	0	0	0	0	0	0	0	0	0	0	0	0	0	0	0	0	0	0	0	0	0	0	0	0	0	5.8	480
1832	283.882	286.6	284.28	771.683	274.693	0	0	35	0	0	0	0	0	0	0	0	0	0	0	0	0	0	0	0	0	0	0	0	0	0	0	0	0	5.8	480
1833	283.77	286.481	284.125	772.615	274.738	0	0	35	0	0	0	0	0	0	0	0	0	0	0	0	0	0	0	0	0	0	0	0	0	0	0	0	0	5.8	480
1834	283.664	286.367	283.975	773.547	274.784	0	0	35	0	0	0	0	0	0	0	0	0	0	0	0	0	0	0	0	0	0	0	0	0	0	0	0	0	5.8	480
1835	283.56	286.253	283.825	774.483	274.83	0	0	35	0	0	0	0	0	0	0	0	0	0	0	0	0	0	0	0	0	0	0	0	0	0	0	0	0	5.8	480
1836	283.369	286.14	283.675	775.428	274.878	0	0	35	0	0	0	0	0	0	0	0	0	0	0	0	0	0	0	0	0	0	0	0	0	0	0	0	0	5.8	480
1837	283.203	286.027	283.525	776.389	274.927	0	0	35	0	0	0	0	0	0	0	0	0	0	0	0	0	0	0	0	0	0	0	0	0	0	0	0	0	5.8	480
1838	283.153	285.966	283.425	777.369	274.977	0	0	35	0	0	0	0	0	0	0	0	0	0	0	0	0	0	0	0	0	0	0	0	0	0	0	0	0	5.8	480
1839	283.159	285.981	283.4	778.374	275.027	0	0	35	0	0	0	0	0	0	0	0	0	0	0	0	0	0	0	0	0	0	0	0	0	0	0	0	0	5.8	480
1840	283.17	286.022	283.4	779.412	275.08	0	0	35	0	0	0	0	0	0	0	0	0	0	0	0	0	0	0	0	0	0	0	0	0	0	0	0	0	5.8	480
1841	283.211	286.091	283.425	780.494	275.136	0	0	35	0	0	0	0	0	0	0	0	0	0	0	0	0	0	0	0	0	0	0	0	0	0	0	0	0	5.8	480
1842	283.306	286.214	283.5	781.624	275.202	0	0	35	0	0	0	0	0	0	0	0	0	0	0	0	0	0	0	0	0	0	0	0	0	0	0	0	0	5.8	480
1843	283.429	286.364	283.6	782.793	275.273	0	0	35	0	0	0	0	0	0	0	0	0	0	0	0	0	0	0	0	0	0	0	0	0	0	0	0	0	5.8	480
1844	283.579	286.538	283.725	783.989	275.337	0	0	35	0	0	0	0	0	0	0	0	0	0	0	0	0	0	0	0	0	0	0	0	0	0	0	0	0	5.8	480
1845	283.713	286.76	283.9	785.197	275.38	0	0	35	0	0	0	0	0	0	0	0	0	0	0	0	0	0	0	0	0	0	0	0	0	0	0	0	0	5.8	480
1846	283.885	286.977	284.075	786.406	275.398	0	0	35	0	0	0	0	0	0	0	0	0	0	0	0	0	0	0	0	0	0	0	0	0	0	0	0	0	5.8	480
1847	284.051	287.166	284.225	787.602	275.401	0	0	35	0	0	0	0	0	0	0	0	0	0	0	0	0	0	0	0	0	0	0	0	0	0	0	0	0	5.8	480
1848	284.22	287.379	284.4	788.773	275.401	0	0	35	0	0	0	0	0	0	0	0	0	0	0	0	0	0	0	0	0	0	0	0	0	0	0	0	0	5.8	480
1849	284.388	287.591	284.575	789.904	275.4	0	0	35	0	0	0	0	0	0	0	0	0	0	0	0	0	0	0	0	0	0	0	0	0	0	0	0	0	5.8	480
1850	284.478	287.78	284.725	790.979	275.425	0	0	35	0	0	0	0	0	0	0	0	0	0	0	0	0	0	0	0	0	0	0	0	0	0	0	0	0	5.8	480
1851	284.678	287.984	284.875	792.25	275.5	0	0.0105361	35	0	0	0	0	0	0	0	0	0	0	0	0	0	0	0	0	0.025935	0	0	0	0	0	0	0	0	5.8	480
1852	284.494	288.175	285	793.75	275.6	0	0.0316002	35	0	0	0	0	0	0	0	0	0	0	0	0	0	0	0	0	0.077785	0	0	0	0	0	0	0	0	5.8	480
1853	284.254	288.366	285.125	795.25	275.7	0	0.0526703	35	0	0	0	0	0	0	0	0	0	0	0	0	0	0	0	0	0.12965	0	0	0	0	0	0	0	0	5.8	480
1854	284.317	288.582	285.275	796.75	275.8	0	0.0737547	35	0	0	0	0	0	0	0	0	0	0	0	0	0	0	0	0	0.18155	0	0	0	0	0	0	0	0	5.8	480
1855	284.378	288.791	285.425	798	275.9	0	0.0948391	35	0	0	0	0	0	0	0	0	0	0	0	0	0	0	0	0	0.23345	0	0	0	0	0	0	0	0	5.8	480
1856	284.487	289	285.575	799.25	276	0	0.115903	35	0	0	0	0	0	0	0	0	0	0	0	0	0	0	0	0	0.2853	0	0	0	0	0	0	0	0	5.8	480
1857	284.571	289.216	285.725	800.75	276.1	0	0.136967	35	0	0	0	0	0	0	0	0	0	0	0	0	0	0	0	0	0.33715	0	0	0	0	0	0	0	0	5.8	480
1858	284.758	289.458	285.9	802.25	276.2	0	0.158052	35	0	0	0	0	0	0	0	0	0	0	0	0	0	0	0	0	0.38905	0	0	0	0	0	0	0	0	5.8	480
1859	284.872	289.7	286.075	803.75	276.3	0	0.179116	35	0	0	0	0	0	0	0	0	0	0	0	0	0	0	0	0	0.4409	0	0	0	0	0	0	0	0	5.8	480
1860	284.54	289.916	286.225	805.25	276.4	0	0.20018	35	0	0	0	0	0	0	0	0	0	0	0	0	0	0	0	0	0.49275	0	0	0	0	0	0	0	0	5.8	480
1861	283.91	290.132	286.375	806.75	276.5	0	0.221264	35	0	0	0	0	0	0	0	0	0	0	0	0	0	0	0	0	0.54465	0	0	0	0	0	0	0	0	5.8	480
1862	284.24	290.324	286.5	808.25	276.6	0	0.242328	35	0	0	0	0	0	0	0	0	0	0	0	0	0	0	0	0	0.5965	0	0	0	0	0	0	0	0	5.8	480
1863	284.827	290.515	286.625	809.75	276.7	0	0.263392	35	0	0	0	0	0	0	0	0	0	0	0	0	0	0	0	0	0.64835	0	0	0	0	0	0	0	0	5.8	480
1864	284.929	290.732	286.775	811.25	276.8	0	0.284477	35	0	0	0	0	0	0	0	0	0	0	0	0	0	0	0	0	0.70025	0	0	0	0	0	0	0	0	5.8	480
1865	284.907	290.93	286.9	813	276.9	0	0.305561	35	0	0	0	0	0	0	0	0	0	0	0	0	0	0	0	0	0.75215	0	0	0	0	0	0	0	0	5.8	480
1866	284.538	291.104	287	814.75	277	0	0.326625	35	0	0	0	0	0	0	0	0	0	0	0	0	0	0	0	0	0.804	0	0	0	0	0	0	0	0	5.8	480
1867	284.133	291.27	287.1	816.25	277.1	0	0.347689	35	0	0	0	0	0	0	0	0	0	0	0	0	0	0	0	0	0.85585	0	0	0	0	0	0	0	0	5.8	480
1868	284.156	291.461	287.225	817.75	277.2	0	0.368773	35	0	0	0	0	0	0	0	0	0	0	0	0	0	0	0	0	0.90775	0	0	0	0	0	0	0	0	5.8	480
1869	284.51	291.678	287.375	819.25	277.3	0	0.389838	35	0	0	0	0	0	0	0	0	0	0	0	0	0	0	0	0	0.9596	0	0	0	0	0	0	0	0	5.8	480
1870	284.76	291.898	287.525	821	277.375	0	0.41082	35	0	0	0	0	0	0	0	0	0	0	0	0	0	0	0	0	1.01125	0	0	0	0	0	0	0	0	5.8	480
1871	284.422	292.138	287.7	822.75	277.425	0	0.431844	35	0	0	0	0	0	0	0	0	0	0	0	0	0	0	0	0	1.063	0	0	0	0	0	0	0	0	5.8	480
1872	283.277	292.401	287.9	824.25	277.5	0	0.452969	35	0	0	0	0	0	0	0	0	0	0	0	0	0	0	0	0	1.115	0	0	0	0	0	0	0	0	5.8	480
1873	282.357	292.694	288.125	825.75	277.6	0	0.474094	35	0	0	0	0	0	0	0	0	0	0	0	0	0	0	0	0	1.167	0	0	0	0	0	0	0	0	5.8	480
1874	282.412	293.038	288.4	827.25	277.7	0	0.495219	35	0	0	0	0	0	0	0	0	0	0	0	0	0	0	0	0	1.219	0	0	0	0	0	0	0	0	5.8	480
1875	282.738	293.411	288.7	829	277.775	0	0.516344	35	0	0	0	0	0	0	0	0	0	0	0	0	0	0	0	0	1.271	0	0	0	0	0	0	0	0	5.8	480
1876	283.196	293.804	289.025	830.75	277.825	0	0.538484	35	0	0	0	0	0	0	0	0	0	0	0	0	0	0	0	0	1.3255	0	0	0	0	0	0	0	0	5.8	480
1877	283.933	294.245	289.4	832.25	277.9	0	0.56225	35	0	0	0	0	0	0	0	0	0	0	0	0	0	0	0	0	1.384	0	0	0	0	0	0	0	0	5.8	480
1878	284.511	294.717	289.8	833.75	278	0	0.587234	35	0	0	0	0	0	0	0	0	0	0	0	0	0	0	0	0	1.4455	0	0	0	0	0	0	0	0	5.8	480
1879	284.747	295.214	290.225	835.25	278.1	0	0.613437	35	0	0	0	0	0	0	0	0	0	0	0	0	0	0	0	0	1.51	0	0	0	0	0	0	0	0	5.8	480
1880	284.541	295.769	290.7	837	278.2	0	0.640656	35	0	0	0	0	0	0	0	0	0	0	0	0	0	0	0	0	1.577	0	0	0	0	0	0	0	0	5.8	480
1881	284.58	296.359	291.2	839	278.3	0	0.669094	35	0	0	0	0	0	0	0	0	0	0	0	0	0	0	0	0	1.647	0	0	0	0	0	0	0	0	5.8	480
1882	285.216	296.922	291.675	841	278.4	0	0.698953	35	0	0	0	0	0	0	0	0	0	0	0	0	0	0	0	0	1.7205	0	0	0	0	0	0	0	0	5.8	480
1883	285.702	297.461	292.125	843	278.5	0	0.730031	35	0	0	0	0	0	0	0	0	0	0	0	0	0	0	0	0	1.797	0	0	0	0	0	0	0	0	5.8	480
1884	286.076	297.992	292.575	844.75	278.6	0	0.762328	35	0	0	0	0	0	0	0	0	0	0	0	0	0	0	0	0	1.8765	0	0	0	0	0	0	0	0	5.8	480
1885	286.62	298.465	292.975	846.25	278.7	0	0.796047	35	0	0	0	0	0	0	0	0	0	0	0	0	0	0	0	0	1.9595	0	0	0	0	0	0	0	0	5.8	480
1886	287.061	298.869	293.3	848	278.8	0	0.831391	35	0	0	0	0	0	0	0	0	0	0	0	0	0	0	0	0	2.0465	0	0	0	0	0	0	0	0	5.8	480
1887	287.225	299.225	293.575	850	278.875	0	0.868359	35	0	0	0	0	0	0	0	0	0	0	0	0	0	0	0	0	2.1375	0	0	0	0	0	0	0	0	5.8	480
1888	286.962	299.525	293.8	852	278.925	0	0.906953	35	0	0	0	0	0	0	0	0	0	0	0	0	0	0	0	0	2.2325	0	0	0	0	0	0	0	0	5.8	480
1889	286.965	299.805	294	854	279	0	0.947172	35	0	0	0	0	0	0	0	0	0	0	0	0	0	0	0	0	2.3315	0	0	0	0	0	0	0	0	5.8	480
1890	287.046	300.064	294.175	856	279.1	0	0.989219	35	0	0	0	0	0	0	0	0	0	0	0	0	0	0	0	0	2.435	0	0	0	0	0	0	0	0	5.8	480
1891	286.867	300.305	294.325	858.25	279.2	0	1.03309	35	0	0	0	0	0	0	0	0	0	0	0	0	0	0	0	0	2.543	0	0	0	0	0	0	0	0	5.8	480
1892	286.801	300.554	294.475	860.75	279.3	0	1.0788	35	0	0	0	0	0	0	0	0	0	0	0	0	0	0	0	0	2.6555	0	0	0	0	0	0	0	0	5.8	480
1893	286.764	300.765	294.6	863	279.375	0	1.12673	35	0	0	0	0	0	0	0	0	0	0	0	0	0	0	0	0	2.7735	0	0	0	0	0	0	0	0	5.8	480
1894	286.661	300.939	294.7	865	279.425	0	1.17691	35	0	0	0	0	0	0	0	0	0	0	0	0	0	0	0	0	2.897	0	0	0	0	0	0	0	0	5.8	480
1895	286.452	301.119	294.8	867.25	279.475	0	1.22911	35	0	0	0	0	0	0	0	0	0	0	0	0	0	0	0	0	3.0255	0	0	0	0	0	0	0	0	5.8	480
1896	286.397	301.308	294.9	869.75	279.525	0	1.28355	35	0	0	0	0	0	0	0	0	0	0	0	0	0	0	0	0	3.1595	0	0	0	0	0	0	0	0	5.8	480
1897	286.487	301.519	295.025	872	279.6	0	1.34062	35	0	0	0	0	0	0	0	0	0	0	0	0	0	0	0	0	3.3	0	0	0	0	0	0	0	0	5.8	480
1898	286.588	301.806	295.225	874.25	279.675	0	1.40014	35	0	0	0	0	0	0	0	0	0	0	0	0	0	0	0	0	3.4465	0	0	0	0	0	0	0	0	5.8	480
1899	286.676	302.174	295.5	876.75	279.725	0	1.4623	35	0	0	0	0	0	0	0	0	0	0	0	0	0	0	0	0	3.5995	0	0	0	0	0	0	0	0	5.8	480
1900	286.799	302.579	295.8	879.5	279.8	0.0329065	1.5273	35	0.0202502	0	0	0	0	0	0	0	0	0	0	0	0	0	0	0	3.7595	0	0	0	0	0	0	0	0	5.8	480
1901	286.77	303.038	296.125	883	279.9	0.067545	1.59494	35	0.0415662	0	0	0	0	0	0	0	0	0	0	0	0	0	0	0	3.926	0	0	0	0	0	0	0	0	5.8	480
1902	286.768	303.538	296.475	887	280	0.0711	1.66359	35	0.0437538	0	0	0	0	0	0	0	0	0	0	0	0	0	0	0	4.095	0	0	0	0	0	0	0	0	5.8	480
1903	286.797	304.046	296.825	891.25	280.1	0.0748421	1.73184	35	0.0460567	0	0	0	0	0	0	0	0	0	0	0	0	0	0	0	4.263	0	0	0	0	0	0	0	0	5.8	480
1904	286.845	304.587	297.2	895.75	280.2	0.0787812	1.79989	35	0.0484807	0	0	0	0	0	0	0	0	0	0	0	0	0	0	0	4.4305	0	0	0	0	0	0	0	0	5.8	480
1905	287.014	305.179	297.625	900.25	280.3	0.0829275	1.86794	35	0.0510323	0	0	0	0	0	0	0	0	0	0	0	0	0	0	0	4.598	0	0	0	0	0	0	0	0	5.8	480
1906	287.053	305.797	298.075	904.75	280.4	0.0872921	1.93883	35	0.0537182	0	0	0	0	0	0	0	0	0	0	0	0	0	0	0	4.7725	0	0	0	0	0	0	0	0	5.8	480
1907	287.071	306.395	298.5	909.25	280.525	0.0918865	2.02962	35	0.0565455	0	0	0	0	0	0	0	0	0	0	0	0	0	0	0	4.996	0	0	0	0	0	0	0	0	5.8	480
1908	287.536	306.979	298.9	914	280.675	0.0967226	2.13769	35	0.0595216	0	0	0	0	0	0	0	0	0	0	0	0	0	0	0	5.262	0	0	0	0	0	0	0	0	5.8	480
1909	288.179	307.571	299.3	919	280.825	0.101813	2.24575	35	0.0626543	0	0	0	0	0	0	0	0	0	0	0	0	0	0	0	5.528	0	0	0	0	0	0	0	0	5.8	480
1910	288.48	308.156	299.7	923.75	280.975	0.107172	2.35381	35	0.0659519	0	0	0	0	0	0	0	0	0	0	0	0	0	0	0	5.794	0	0	0	0	0	0	0	0	5.8	480
1911	288.963	308.708	300.075	928.25	281.125	0.112812	2.46167	35	0.0694231	0	0	0	0	0	0	0	0	0	0	0	0	0	0	0	6.0595	0	0	0	0	0	0	0	0	5.8	480
1912	289.664	309.247	300.425	933	281.3	0.11875	2.5738	35	0.0730769	0	0	0	0	0	0	0	0	0	0	0	0	0	0	0	6.3355	0	0	0	0	0	0	0	0	5.8	480
1913	290.202	309.8	300.775	938.25	281.475	0.125	2.73306	35	0.0769231	0	0	0	0	0	0	0	0	0	0	0	0	0	0	0	6.7265	0	0	0	0	0	0	0	0	5.8135	480
1914	290.933	310.331	301.1	943.75	281.625	0.131579	2.92466	35	0.0809716	0	0	0	0	0	0	0	0	0	0	0	0	0	0	0	7.196	0	0	0	0	0	0	0	0	5.841	480
1915	291.784	310.841	301.4	949.25	281.8	0.138504	3.04253	35	0.0852333	0	0	0	0	0	0	0	0	0	0	0	0	0	0	0	7.484	0	0	0	0	0	0	0	0	5.869	480
1916	292.238	311.382	301.725	954.75	282	0.145794	3.09705	35	0.0897193	0	0	0	0	0	0	0	0	0	0	0	0	0	0	0	7.616	0	0	0	0	0	0	0	0	5.8975	480
1917	292.544	311.954	302.075	960.25	282.225	0.153467	3.20642	35	0.0944413	0	0	0	0	0	0	0	0	0	0	0	0	0	0	0	7.883	0	0	0	0	0	0	0	0	5.9265	480
1918	292.992	312.512	302.4	966	282.475	0.161544	3.3942	35	0.0994119	0	0	0	0	0	0	0	0	0	0	0	0	0	0	0	8.343	0	0	0	0	0	0	0	0	5.9555	480
1919	293.813	313.047	302.7	972	282.7	0.170047	3.60575	35	0.104644	0	0	0	0	0	0	0	0	0	0	0	0	0	0	0	8.8615	0	0	0	0	0	0	0	0	5.9845	480
1920	294.371	313.601	303.025	977.75	282.925	0.178997	3.8173	35	0.110152	0	0	0	0	0	0	0	0	0	0	0	0	0	0	0	9.38	0	0	0	0	0	0	0	0	6.0135	480
1921	294.952	314.204	303.4	983.25	283.175	0.188417	4.02925	35	0.115949	0	0	0	0	0	0	0	0	0	0	0	0	0	0	0	9.8995	0	0	0	0	0	0	0	0	6.0425	480
1922	295.684	314.809	303.775	989	283.4	0.198334	4.24161	35	0.122052	0	0	0	0	0	0	0	0	0	0	0	0	0	0	0	10.42	0	0	0	0	0	0	0	0	6.0715	480
1923	295.586	315.392	304.125	995	283.6	0.229097	4.45175	35.0325	0.128476	0	0	0	0	0	0	0	0	0	0	0	0	0	0	0	10.935	0	0	0	0	0	0	0	0	6.101	480
1924	295.655	316.027	304.525	1001	283.8	0.284506	4.66191	35.1036	0.135237	0	0	0	0	0	0	0	0	0	0	0	0	0	0	0	11.45	0	0	0	0	0	0	0	0	6.131	480
1925	296.251	316.714	304.975	1007	284	0.345533	4.87408	35.1827	0.142355	0	0	0	0	0	0	0	0	0	0	0	0	0	0	0	11.97	0	0	0	0	0	0	0	0	6.1605	480
1926	296.811	317.38	305.4	1013	284.225	0.409771	5.10453	35.266	0.149848	0	0	0	0	0	0	0	0	0	0	0	0	0	0	0	12.535	0	0	0	0	0	0	0	0	6.19	480
1927	297.141	318.046	305.825	1019	284.45	0.477391	5.35328	35.3537	0.157734	0	0	0	0	0	0	0	0	0	0	0	0	0	0	0	13.145	0	0	0	0	0	0	0	0	6.22	480
1928	297.497	318.755	306.3	1025	284.625	0.548569	5.60205	35.446	0.166036	0	0	0	0	0	0	0	0	0	0	0	0	0	0	0	13.755	0	0	0	0	0	0	0	0	6.2505	480
1929	297.965	319.456	306.775	1030.75	284.8	0.623494	5.85081	35.5432	0.174775	0	0	0	0	0	0	0	0	0	0	0	0	0	0	0	14.365	0	0	0	0	0	0	0	0	6.281	480
1930	298.618	320.124	307.225	1036.25	284.975	0.702362	6.10161	35.6454	0.183974	0	0	0	0	0	0	0	0	0	0	0	0	0	0	0	14.98	0	0	0	0	0	0	0	0	6.3115	480
1931	299.65	320.814	307.7	1041.75	285.125	0.823121	6.35241	35.7531	0.193656	0	0.0317813	0	0	0	0	0	0	0	0	0	0	0	0	0	15.595	0	0	0	0	0	0	0	0	6.342	480
1932	300.716	321.51	308.175	1047.25	285.3	0.951532	6.6036	35.8664	0.203849	0	0.0663262	0	0	0	0	0	0	0	0	0	0.0024255	0	0	0	16.205	0	0	0	0	0	0	0	0	6.3725	480
1933	301.45	322.158	308.6	1052.75	285.5	1.05037	6.8633	35.9857	0.214578	0	0.0720937	0	0	0	0	0	0	0	0	0	0.0072525	0	0	0	16.83	0	0	0	0	0	0	0	0	6.4035	480
1934	301.835	322.773	309	1058	285.7	1.15464	7.18389	36.1113	0.225871	0	0.0783628	0	0	0	0	0	0	0	0	0	0.012032	0	0	0	17.605	0	0	0	0	0	0	0	0	6.4345	480
1935	302.244	323.381	309.4	1063	285.9	1.26466	7.56373	36.2434	0.237759	0	0.0851769	0	0	0	0	0	0	0	0	0	0.01919	0	0.0020765	0	18.515	0	0	0	0	0	0	0	0	6.466	480
1936	302.533	323.937	309.75	1068	286.1	1.38075	7.95036	36.3826	0.250273	0	0.0925836	0	0	0	0	0	0	0	0	0	0.031125	0	0.0062225	0	19.425	0	0	0	0	0	0	0	0	6.4975	480
1937	302.823	324.383	310	1073	286.275	1.50324	8.34413	36.529	0.263445	0	0.100634	0	0	0	0	0	0	0	0	0	0.05022	0	0.010356	0	20.335	0	0	0	0	0	0	0	0	6.529	480
1938	303.562	324.746	310.175	1078	286.425	1.63252	8.75517	36.6832	0.277311	0	0.109385	0	0	0	0	0	0	0	0	0	0.08123	0	0.01655	0	21.245	0	0.005345	0	0	0	0	0	0	6.561	480
1939	304.106	325.056	310.3	1083	286.575	1.76895	9.1942	36.8455	0.291906	0	0.118897	0	0	0	0	0	0	0	0	0.0035225	0.12895	0	0.0248	0	22.155	0	0.021155	0	0	0	0	0	0	6.593	480
1940	304.101	325.322	310.375	1088.25	286.725	1.91295	9.66556	37.0163	0.307269	0	0.129236	0	0	0	0	0	0	0	0	0.0104875	0.19805	0	0.0351	0	23.065	0	0.046995	0	0	0	0	0	0	6.625	480
1941	303.847	325.521	310.375	1093.75	286.9	2.06495	10.191	37.1961	0.323441	0	0.140474	0	0	0	0	0	0	0	0	0.0173	0.2931	0	0.049515	0	24.02	0	0.082435	0	0	0	0	0	0	6.657	480
1942	303.564	325.639	310.3	1099	287.1	2.22541	10.7811	37.3853	0.340465	0	0.152689	0	0	0	0	0	0	0	0	0.023965	0.41875	0	0.06804	0	25.035	0	0.1271	0	0	0	0	0	0	6.689	480
1943	303.426	325.723	310.2	1104	287.3	2.3934	11.4233	37.5846	0.35751	0	0.165966	0	0	0	0	0	0	0	0	0.030485	0.5771	0	0.092715	0	26.07	0	0.1806	0	0	0	0	0	0	6.7215	480
1944	303.267	325.845	310.125	1109.25	287.525	2.56807	12.1183	37.7943	0.373795	0	0.180398	0	0	0	0	0	0	0	0	0.040385	0.77025	0	0.1277	0	27.105	0	0.24255	0	0	0	0	0	0	6.7545	480
1945	303.234	326.032	310.1	1114.75	287.775	2.75008	12.8871	38.015	0.389432	0	0.196085	0	0	0	0	0	0	0	0	0.053585	1.01955	0	0.17505	0	28.135	0	0.3126	0	0	0	0	0	0	6.787	480
1946	303.004	326.279	310.125	1120.5	288.025	2.94006	13.8202	38.2474	0.404511	0	0.213136	0	0	0	0	0	0	0	0	0.070015	1.3515	0.030115	0.27	0	29.165	0	0.39045	0	0	0	0	0	0	6.8195	480
1947	302.458	326.593	310.2	1126.75	288.275	3.13868	15.1102	38.492	0.419121	0	0.231669	0	0	0	0	0	0	0	0	0.10016	1.8695	0.127615	0.44975	0	30.22	0	0.47575	0	0	0	0	0	0	6.853	480
1948	302.011	326.966	310.325	1133.25	288.525	3.34665	16.9117	38.7495	0.433351	0	0.251814	0	0	0	0	0	0	0	0	0.1649	2.7045	0.2767	0.68285	0	31.43	0	0.56815	0	0	0	0	0	0	6.8865	480
1949	301.97	327.399	310.5	1140	288.775	3.5647	19.1118	39.0205	0.44729	0	0.273711	0	0	0	0	0	0	0	0	0.2881	3.7955	0.45415	0.9317	0	32.765	0	0.6674	0	0	0	0	0	0	6.9195	480
1950	301.92	327.921	310.75	1147.25	289	3.79359	21.7426	39.3058	0.461029	0	0.297512	0	0	0	0	0	0	0	0	0.4966	5.0045	0.6521	1.1945	0	34.615	0	0.7732	0	0	0	0	0	0	6.953	480
1951	300.877	328.558	311.1	1155	289.2	4.0504	24.5705	39.6061	0.474657	0	0.323383	0	0	0	0	0	0	0	0.005	0.8132	6.314	0.87715	1.4705	0	36.385	0	0.88935	0	0	0	0	0	0	6.987	480
1952	299.885	329.275	311.5	1163.5	289.425	4.33597	27.235	39.9222	0.488262	0	0.351503	0	0	0	0	0	0	0	0.015	1.1675	7.8115	1.0245	1.7345	0	37.53	0	0.9375	0	0	0	0	0	0	7.021	480
1953	299.764	330.045	311.925	1172.75	289.675	4.63495	29.9757	40.255	0.501935	0	0.382068	0	0	0	0	0	0	0	0.025	1.577	9.4615	1.0775	1.9845	0	38.73	0	0.922	0	0	0	0	0	0	7.0535	480
1954	299.77	330.896	312.425	1182.25	289.9	4.94829	33.0609	40.6052	0.515765	0	0.415292	0	0	0	0	0	0	0	0.035	2.149	11.24	1.139	2.239	0	40.08	0	0.932	0	0	0	0	0	0	7.0845	480
1955	299.81	331.835	313	1192	290.125	5.27698	36.6113	40.9739	0.529841	0	0.451404	0	0	0	0	0	0	0	0.045	2.886	13.24	1.21	2.495	0	41.57	0.025	0.9705	0	0	0	0	0	0	7.1155	480.8
1956	299.88	332.821	313.6	1202.25	290.375	5.62208	40.6989	41.362	0.544253	0	0.490656	0	0	0	0	0	0	0	0.055	3.795	15.485	1.2925	2.75	0	43.2	0.118	1.057	0	0	0	0	0	0	7.1465	483.15
1957	300.018	333.842	314.225	1213	290.6	5.98468	45.4175	41.7705	0.559089	0	0.533322	0	0	0	0	0	0	0	0.065	4.921	18.055	1.3895	3.0015	0	44.96	0.2975	1.19	0	0	0	0	0	0	7.1785	486.4
1958	300.426	334.869	314.848	1224	290.825	6.36597	50.7782	42.2006	0.57444	0	0.579698	0	0	0	0	0	0	0	0.075	6.2365	21.01	1.502	3.2495	0	46.85	0.5675	1.3555	0	0	0	0	0	0	7.212	489.9
1959	301.366	335.945	315.5	1235.25	291.1	6.76717	56.515	42.6532	0.590395	0	0.630107	0	0	0	0	0	0	0	0.085	7.557	24.215	1.6305	3.4955	0	48.865	0.883	1.593	0	0	0	0	0	0	7.246	493.55
1960	302.541	337.17	316.272	1247	291.4	7.18959	62.5823	43.1297	0.607043	0	0.684898	0	0	0	0	0	0	0	0.095	8.8185	27.675	1.779	3.7395	0	50.99	1.2495	1.9065	0	0	0	0	0	0	7.2805	497.3
1961	302.717	338.437	317.075	1259.25	291.675	7.65086	69.4618	43.6313	0.624474	0	0.744455	0	0	0	0	0	0	0	0.11	10.2955	31.685	1.9505	3.9715	0	53.23	1.7055	2.25	0	0	0	0	0	0	7.3165	501.1
1962	302.623	339.626	317.795	1272	291.925	8.15246	77.4216	44.1593	0.642776	0	0.80919	0	0	0	0	0	0	0	0.13	12.235	36.315	2.1465	4.1975	0	55.585	2.19	2.646	0	0	0	0	0	0	7.3535	504.8
1963	303.114	340.707	318.397	1285	292.225	8.69591	86.5951	44.715	0.66204	0	0.879554	0	0	0	0	0	0	0	0.155	14.715	41.585	2.3705	4.433	0	58.025	2.7905	3.1425	0	0	0	0	0	0	7.3915	508.4
1964	303.609	341.733	318.925	1298.25	292.6	9.39162	97.2808	45.5	0.682355	0	0.956037	0	0	0	0	0	0	0	0.18	17.795	47.735	2.6285	4.677	0	60.525	3.517	3.767	0	0	0	0	0	0	7.4305	511.85
1965	304.42	342.989	319.647	1312	293	10.184	109.645	46.45	0.70381	0	1.03917	0	0	0	0	0	0	0	0.2	21.495	54.93	2.9255	4.9295	0.0045	63.085	4.2765	4.517	0	0	0.0005	0	0	0	7.4705	515.05
1966	305.564	344.551	320.647	1326	293.4	10.9556	123.662	47.35	0.726495	0	1.12953	0	0	0	0	0	0	0	0.22	25.775	63.155	3.2665	5.1915	0.0175	65.625	5.242	5.413	0	0	0.0015	0	0	0.0005	7.512	518
1967	306.594	346.076	321.605	1340.25	293.8	11.7388	139.328	48.25	0.750499	0	1.22775	0	0	0	0	0	0	0	0.24	30.575	72.39	3.6585	5.4635	0.0385	68.07	6.722	6.4985	0	0	0.003	0	0.0005	0.0015	7.5545	520.7
1968	307.808	347.7	322.635	1355	294.225	12.5668	156.887	49.15	0.775911	0	1.33452	0	0	0	0	0	0	0	0.27	35.955	82.77	4.1085	5.7455	0.0675	70.425	8.886	7.8105	0	0	0.0055	0.0005	0.001	0.003	7.5985	523.15
1969	309.598	349.607	323.902	1370.25	294.7	13.4084	176.605	50.05	0.802821	0	1.45056	0	0	0	0	0	0	0	0.3	42.05	94.435	4.6245	6.0385	0.1045	72.69	11.59	9.411	0	0	0.0095	0.001	0.0015	0.005	7.644	525.3
1970	311.808	351.328	324.985	1385.75	295.2	14.2482	198.618	50.95	0.831319	0	1.5767	0	0	0	0	0	0	0	0.325	49.05	107.45	5.2165	6.3435	0.15	74.87	14.645	11.21	0	0	0.016	0.001	0.0025	0.0075	7.6905	527.2
1971	314.087	352.822	325.855	1401.25	295.7	15.1011	222.885	51.8	0.861493	0	1.7138	0	0	0.00146	0	0.0125	0	0	0.355	57.065	121.8	5.8955	6.66	0.205	76.97	17.695	13.115	0	0	0.025	0.0015	0.0035	0.011	7.738	528.85
1972	316.193	354.781	327.14	1417	296.225	15.9994	249.194	52.65	0.893433	0	1.86283	0	0	0.00438	0	0.0375	0	0	0.39	65.965	137.3	6.674	6.988	0.2705	78.99	20.92	15.145	0	0.018	0.0375	0.002	0.006	0.0155	7.787	530.3
1973	318.115	357.034	328.678	1433	296.8	16.9475	277.927	53.55	0.927228	0	2.02481	0	0	0.0073	0	0.0625	0	0	0.425	75.835	154.05	7.5685	7.329	0.348	80.93	25.065	17.39	0	0.053	0.055	0.0025	0.0115	0.0215	7.838	531.55
1974	319.6	358.783	329.743	1449	297.4	17.9154	309.889	54.45	0.962969	0	2.20088	0	0	0.01022	0	0.0875	0	0	0.46	87.04	172.45	8.595	7.684	0.4385	82.8	30.44	19.935	0	0.086	0.078	0.0035	0.0205	0.0285	7.8905	532.6
1975	320.882	360.292	330.585	1465	298	18.8898	344.976	55.3	1.00074	0	2.39226	0	0	0.01314	0	0.1125	0	0	0.5	99.56	192.6	9.7715	8.052	0.5445	84.6	36.73	22.54	0	0.1175	0.1075	0.0045	0.0335	0.0365	7.9445	533.5
1976	322.191	362.163	331.748	1481	298.65	19.8874	380.802	56.15	1.04064	0	2.60029	0	0	0.01606	0	0.1375	0	0	0.54	112.3	213.15	11.12	8.4335	0.6685	86.33	42.765	25.225	0	0.1475	0.1445	0.0055	0.051	0.0465	8.0005	534.25
1977	323.874	364.454	333.272	1497.25	299.36	20.9739	416.056	57.05	1.08275	0	2.8264	0	0	0.01898	0	0.1625	0	0	0.59	124.7	232.9	12.67	8.8305	0.8125	87.995	49.29	28.23	0	0.1755	0.1915	0.0065	0.0765	0.0575	8.058	534.9
1978	326.21	366.815	334.848	1513.75	300.082	22.1267	451.017	57.9	1.12717	0	3.09048	0	0	0.0219	0	0.1875	0	0	0.655	136.7	251.9	14.445	9.243	0.9795	89.595	57.79	31.51	0	0.202	0.2475	0.0075	0.112	0.0695	8.117	535.4
1979	328.74	369.278	336.525	1530.25	300.74	23.3668	486.546	58.75	1.17397	0	3.39237	0	0	0.02482	0	0.2	0	0	0.735	148.8	270.5	16.475	9.6705	1.174	91.14	68.985	34.985	0	0.227	0.3125	0.0085	0.156	0.083	8.178	535.85
1980	330.864	371.945	338.36	1547.75	301.382	24.6879	519.303	59.6	1.22326	0	3.71278	0	0	0.02774	0	0.2	0	0	0.835	159.4	287.35	18.805	10.114	1.401	92.625	78.725	38.64	0	0.2505	0.3895	0.0095	0.21	0.0975	8.241	536.25
1981	332.228	374.19	339.728	1566.75	302.22	26.102	550.904	60.45	1.27512	0	4.0517	0	0	0.0292	0	0.225	0	0	0.95	168.55	304.25	21.475	10.575	1.6605	93.95	85.94	42.44	0	0.273	0.4795	0.011	0.275	0.113	8.306	536.55
1982	333.034	376.129	340.793	1586.25	303.098	27.595	583.135	61.3	1.32963	0	4.40914	0	0	0.03045	0	0.275	0	0	1.075	177.85	321.7	24.45	11.045	1.9495	94.9	92.165	46.17	0	0.313	0.582	0.0125	0.351	0.1295	8.373	536.8
1983	334.244	378.41	342.197	1605.85	303.805	29.1286	613.196	62.15	1.3869	0	4.78509	0	0	0.0331	0	0.3	0	0	1.21	185.8	338.15	27.605	11.505	2.2655	95.855	96.325	50	0	0.361	0.6975	0.014	0.4425	0.1475	8.442	537
1984	336.145	380.82	343.783	1623.7	304.397	30.7215	644.36	63	1.44701	0	5.17956	0	0	0.03585	0	0.325	0	0	1.355	193.75	355	30.985	11.965	2.6105	97.27	100.75	54.17	0	0.404	0.828	0.016	0.5495	0.1665	8.513	537.2
1985	338.198	383.063	345.283	1637.99	305.087	32.3442	678.379	63.8	1.51004	0	5.59254	0	0	0.03705	0	0.375	0	0	1.505	202.85	372.5	35.43	12.44	2.981	98.845	105.7	58.465	0	0.4555	0.9775	0.018	0.6715	0.186	8.5865	537.35
1986	340.223	385.274	346.798	1650.43	305.772	34.0163	712.084	64.6	1.57609	0	6.02403	0	0	0.03415	0	0.4	0	0	1.67	212.1	389.8	39.95	12.94	3.363	99.855	109.6	62.85	0	0.4995	1.152	0.0195	0.8125	0.207	8.6625	537.45
1987	342.409	387.795	348.645	1662.2	306.262	35.814	748.374	65.45	1.64525	0	6.47404	0	0	0.03285	0	0.425	0	0	1.855	222.8	408.65	44.285	13.47	3.7535	101.1	112.15	67.415	0	0.6075	1.3545	0.021	0.974	0.229	8.7405	537.55
1988	345.085	390.673	350.738	1673.07	307.195	37.6894	789.249	66.3	1.71761	0	6.94256	0	0	0.0384	0	0.5	0	0	2.04	234.9	428.45	50.53	14.01	4.1635	102.45	116.3	72.44	0	0.791	1.591	0.023	1.1555	0.251	8.8205	537.65
1989	347.729	393.252	352.488	1683.47	308.507	39.5645	830.2	67.1	1.79325	0	7.4296	0	0	0.04655	0	0.575	0	0	2.225	244.9	448.25	57.92	14.55	4.5995	103.45	121.7	78.21	0	0.99	1.869	0.0245	1.3565	0.2755	8.903	537.75
1990	349.911	395.324	353.855	1693.63	309.485	41.5256	866.564	67.9	1.87227	0	7.93515	0	0	0.0547	0.03	0.625	0	0	2.425	252.75	466.15	64.485	15.075	5.0635	104.45	124.45	84.305	0	1.249	2.1645	0.026	1.562	0.3015	8.988	537.8
1991	351.189	397.088	355.017	1703.82	310.113	43.5792	899.397	68.7	1.95632	0	8.45922	0	0	0.0627	0.09	0.675	0	0	2.635	260.15	481.3	70.3	15.555	5.545	105.6	127.9	90.44	0	1.696	2.4485	0.028	1.753	0.326	9.0755	537.85
1992	351.548	398.429	355.885	1711.8	310.603	45.7214	927.681	69.5	2.05	0	9.0018	0	0	0.0705	0.185	0.725	8.12405e-05	0	2.85	264.95	494.4	75.96	15.99	6.0235	105.75	130.9	96.715	0	2.424	2.7125	0.0295	1.9125	0.35	9.1655	537.9
1993	352.275	399.699	356.777	1716.29	311.077	48.0312	948.8	70.3	2.15	0	9.5629	0	0	0.08075	0.375	0.8	0.00024139	0	3.07	267.75	504.8	80.235	16.355	6.4945	104.9	130.5	102.14	0	3.3945	2.9185	0.031	2.0215	0.3725	9.258	537.9
1994	353.737	401.505	358.127	1721.01	311.603	50.6326	963.903	71.1	2.25	0	10.1425	0	0	0.09555	0.75	0.925	0.00350655	0	3.3	269.5	513.1	82.345	16.63	6.957	104.35	126	106.6	0.5695	4.487	3.09	0.0335	2.114	0.393	9.353	537.95
1995	355.939	403.782	359.837	1726.35	312.295	53.8504	973.652	71.9	2.35	0	10.7406	0	0	0.1503	1.645	1.125	0.00973579	0	3.515	269.5	519.55	83.46	16.83	7.3995	103.55	115.9	110.45	1.9145	5.658	3.247	0.037	2.2455	0.4125	9.45	538
1996	358.263	405.945	361.462	1730.01	313.048	57.9728	982.03	72.65	2.45	0	11.4585	0	0	0.27175	3.155	1.45	0.01432	0	3.725	268.95	525.05	83.84	16.965	7.7905	102.8	104.09	115.85	3.587	6.818	3.3915	0.0415	2.3885	0.4265	9.2995	538
1997	359.83	408.22	363.155	1734.82	313.76	62.9186	988.498	73.4	2.55	0	12.2869	0	0	0.43105	5.17	1.85	0.0231704	0	3.955	268.2	529.15	83.68	17.045	8.1025	101.95	91.215	121.95	5.523	7.939	3.556	0.0465	2.4875	0.43	9.08	538
1998	361.471	411.144	365.322	1742.71	314.533	68.4136	992.182	74.2	2.65	0	13.1153	0	0	0.64745	7.71	2.25	0.0370779	0	4.155	266.95	532.4	83.45	17.075	8.3425	100.9	77.815	126.35	7.377	8.946	3.7085	0.0515	2.5565	0.4265	9.155	538
1999	363.283	413.868	367.348	1749.24	315.257	74.4061	995.415	75	2.75	0	13.9438	0.0045173	0	0.95615	10.68	2.65	0.0590527	0	4.33	265.2	534.95	83.015	17.075	8.5275	100.155	65.605	131.7	9.206	9.938	3.8355	0.0535	2.6205	0.422	9.26	538
2000	364.367	415.858	368.865	1751.02	315.85	80.9399	998.627	75.75	2.85	0	14.7722	0.0488482	0	1.32805	13.965	3.05	0.0967079	0	4.54	263.45	537.05	82.515	17.055	8.6705	99.37	54.83	137.4	11.075	11.04	3.953	0.051	2.679	0.417	9.0845	538
2001	365.653	417.91	370.467	1750.71	316.488	88.6304	1001.03	76.5	2.95	0.00398966	15.6006	0.287349	0	1.7224	17.51	3.43758	0.150915	0.373294	4.765	261.9	538.85	82.07	17.02	8.782	98.4	45.785	141.95	12.695	12.035	4.0455	0.046	2.733	0.41	8.689	538
2002	367.978	420.573	372.522	1752.19	317.245	97.4707	1003.21	77.25	3.05124	0.011991	16.429	0.720208	0.00740544	2.13305	21.365	3.85333	0.208567	1.11091	4.985	260.1	539.95	81.595	16.98	8.869	97.385	38.14	147.45	14.18	12.975	4.112	0.04	2.7825	0.402	8.349	538
2003	370.52	423.488	374.76	1754.76	318.017	106.775	1004	77.9915	3.15494	0.0195016	17.2574	1.21745	0.0291657	2.60335	25.44	4.34892	0.274155	1.83169	5.215	257.95	540.05	80.93	16.94	8.936	96.325	31.78	152.95	15.565	13.755	4.1695	0.0345	2.828	0.3935	8.194	538
2004	372.785	426.116	376.812	1755.07	318.71	116.584	1003.93	78.772	3.26099	0.0263954	18.0858	1.7671	0.0644009	3.12045	29.775	4.92206	0.367093	2.53767	5.445	256.05	539.9	80.12	16.9	8.988	95.385	26.475	157.45	16.605	14.35	4.207	0.0295	2.87	0.384	8.0885	538
2005	375.148	428.653	378.812	1753.73	319.44	126.769	1003.58	79.5471	3.3693	0.0332905	18.9129	2.35921	0.112284	3.62618	34.36	5.57096	0.487703	3.23048	5.675	254.1	539.4	79.31	16.855	9.0285	94.435	22.075	162.25	17.195	14.94	4.2265	0.0255	2.908	0.3735	7.933	538
2006	377.946	431.283	380.827	1754.51	320.2	136.988	1001.53	80.3168	3.47978	0.0405451	19.7485	2.98558	0.17203	4.14253	38.805	6.29394	0.631518	3.91148	5.91	251.3	537.5	78.48	16.81	9.059	93.435	18.52	167.7	17.67	15.365	4.241	0.023	2.9425	0.363	7.748	538
2007	380.857	433.888	382.777	1757.28	320.889	147.427	998.531	81.0773	3.58986	0.0481122	20.5812	3.63941	0.242887	4.68853	43.165	7.05824	0.786538	4.63525	6.175	247.95	534.7	77.595	16.76	9.081	92.3	15.61	173.9	18.22	15.625	4.2425	0.0195	2.9735	0.352	7.5945	538
2008	383.834	436.593	384.8	1760.39	321.581	158.04	995.689	81.8248	3.69707	0.0557926	21.389	4.31644	0.324174	5.2496	47.467	7.83201	0.94639	5.45065	6.45082	244.6	531.8	76.72	16.705	9.096	90.96	13.23	180.5	18.81	15.865	4.2255	0.015	3.0005	0.3405	7.5405	538
2009	386.98	439.457	386.952	1763.78	322.273	168.587	992.619	82.5591	3.80138	0.0635771	22.172	5.01228	0.415225	5.82453	51.5988	8.61515	1.11075	6.34622	6.70612	241.028	528.537	75.8193	16.6514	9.1054	89.28	11.2729	187.221	19.3891	16.6696	4.18629	0.0116919	3.02112	0.32905	7.39575	538.008
2010	390.164	442.353	389.128	1767.1	322.967	179.193	989.315	83.28	3.90283	0.0714598	22.9301	5.72204	0.515394	6.41211	55.6876	9.40729	1.27933	7.31086	6.94876	237.284	524.944	74.8998	16.5937	9.11062	87.2667	9.65949	194.009	19.9499	17.9809	4.12705	0.00945723	3.03562	0.317164	7.22266	538.019
2011	393.307	445.218	391.274	1770.37	323.661	189.841	985.903	83.9875	4.00139	0.0794406	23.6636	6.44301	0.624115	7.01187	59.7359	10.2082	1.45199	8.33585	7.17872	233.538	521.206	73.9799	16.5354	9.11307	85.0734	8.26596	201.069	20.5106	19.1537	4.05707	0.00728664	3.04663	0.305331	7.16875	538.024
2012	396.503	448.092	393.421	1773.63	324.358	200.586	982.354	84.6812	4.09711	0.0872258	24.3478	7.32211	0.734387	7.64174	63.7558	11.0181	1.61445	9.41378	7.39603	229.796	517.326	73.0587	16.4768	9.11346	82.7123	7.05286	208.361	21.0605	20.1825	3.97808	0.00516144	3.05421	0.293613	7.14563	538.027
2013	399.75	450.989	395.583	1776.92	325.056	211.467	978.682	85.3604	4.19	0.0945216	24.9585	8.47899	0.83964	8.31902	67.7581	11.8369	1.75282	10.5382	7.60067	226.065	513.323	72.1415	16.4179	9.1123	80.1938	6.06055	215.847	21.5908	21.0631	3.89166	0.00365606	3.05861	0.282068	7.13181	538.028
2014	403.008	453.917	397.764	1780.24	325.755	222.438	974.888	86.0254	4.28007	0.101328	25.4959	9.86219	0.940189	9.04211	71.7447	12.6646	1.86782	11.7033	7.79267	222.35	509.217	71.2311	16.359	9.10997	77.5275	5.24903	223.497	22.0939	21.7928	3.79916	0.00258975	3.06006	0.270737	7.12222	538.028
2015	406.304	456.877	399.966	1783.65	326.456	233.467	970.975	86.6759	4.36731	0.107646	25.9602	11.43	1.03633	9.80953	75.7179	13.5009	1.96012	12.9046	7.97201	218.66	505.025	70.3296	16.3001	9.10676	74.723	4.58555	231.289	22.5638	22.3697	3.70184	0.00183443	3.0588	0.259648	7.11624	538.029
2016	409.634	459.864	402.184	1787.14	327.159	244.521	966.908	87.3121	4.45172	0.113474	26.3519	13.1483	1.12835	10.6198	79.6787	14.3458	2.03039	14.1375	8.13871	214.996	500.758	69.4374	16.2412	9.10289	71.7868	3.89635	239.197	22.9951	22.7929	3.60074	0.0012994	3.05501	0.248824	6.91629	538.029
2017	412.992	462.868	404.411	1790.68	327.863	255.576	962.712	87.934	4.53331	0.118814	26.6711	14.9889	1.21648	11.4713	83.6275	15.1991	2.07927	15.3979	8.29277	211.356	496.424	68.5542	16.1824	9.09852	68.8435	3.18601	247.156	23.3871	23.0712	3.49673	0.000920422	3.04882	0.238283	6.67091	538.029
2018	416.376	465.884	406.643	1794.24	328.568	266.608	958.434	88.5415	4.61207	0.123665	26.918	16.9288	1.30096	12.3628	87.5647	16.0606	2.10737	16.6824	8.43418	207.741	492.03	67.6799	16.1237	9.09377	66.0138	2.60514	255.072	23.7433	23.2221	3.39061	0.000651974	3.04036	0.228042	6.6096	538.029
2019	419.83	468.914	408.882	1797.83	329.275	277.6	954.037	89.1346	4.68801	0.128028	27.0931	18.9495	1.38202	13.2928	91.4907	16.9301	2.1153	17.9877	8.56297	204.151	487.586	66.8144	16.065	9.08875	63.2929	2.13015	262.87	24.0671	23.2615	3.28311	0.000461821	3.0298	0.218107	6.5898	538.029
2020	423.269	471.958	411.129	1801.43	329.983	288.538	949.495	89.7133	4.76113	0.131902	27.1965	21.0357	1.45985	14.2599	95.4062	17.8074	2.10363	19.3113	8.67912	200.587	483.096	65.9573	16.0063	9.08351	60.6768	1.74172	270.489	24.3616	23.2037	3.17485	0.000327127	3.01726	0.208476	6.57903	538.029
2021	426.573	475.008	413.378	1804.97	330.693	299.401	944.767	90.2777	4.83142	0.135288	27.2284	23.1733	1.53461	15.2627	99.3089	18.6923	2.0729	20.6496	8.78265	197.041	478.56	65.1072	15.9476	9.07807	58.1571	1.42399	277.877	24.6284	23.0612	3.06629	0.000231718	3.00279	0.199159	6.56569	538.029
2022	429.852	478.065	415.639	1808.3	331.404	309.885	939.837	90.8349	4.90064	0.138367	27.2227	25.1911	1.60665	16.2667	103.122	19.5821	2.03278	21.9185	8.88067	193.511	473.978	64.2632	15.8888	9.07249	55.7282	1.16411	285.002	24.8704	22.8456	2.95786	0.000164136	2.98644	0.190157	6.54971	538.029
2023	433.181	481.15	417.936	1811.4	332.116	319.737	934.723	91.3921	4.97057	0.141319	27.2131	26.952	1.67633	17.2388	106.776	20.4744	1.99265	23.0455	8.98029	190.002	469.364	63.4262	15.8299	9.06681	53.39	0.951688	291.854	25.0915	22.5682	2.8501	0.000116264	2.96841	0.181464	6.53671	538.029
2024	436.545	484.275	420.274	1814.32	332.828	329.038	929.44	91.9494	5.0412	0.144145	27.1997	28.5047	1.74382	18.1801	110.285	21.3693	1.95252	24.0487	9.0815	186.521	464.726	62.597	15.7709	9.06103	51.1415	0.778065	298.42	25.294	22.2384	2.74344	8.2355e-05	2.94886	0.173089	6.52652	538.029
2025	439.949	487.444	422.656	1817.12	333.541	337.855	924.002	92.5066	5.11253	0.146845	27.1824	29.8889	1.80927	19.092	113.66	22.2668	1.91241	24.9442	9.18432	183.073	460.075	61.7763	15.7121	9.05519	48.9814	0.636167	304.693	25.4802	21.8647	2.63827	5.83355e-05	2.92795	0.165032	6.51898	538.029
2026	443.393	490.658	425.08	1819.83	334.255	346.251	918.428	93.0639	5.18456	0.149418	27.1614	31.1374	1.87284	19.9754	116.911	23.167	1.87231	25.746	9.28873	179.663	455.42	60.9646	15.6533	9.0493	46.9084	0.520206	310.674	25.652	21.4547	2.5349	4.13215e-05	2.90582	0.157292	6.5145	538.029
2027	446.871	493.908	427.538	1822.48	334.97	354.274	912.727	93.6212	5.25729	0.151865	27.1366	32.2757	1.93464	20.8316	120.049	24.0697	1.83224	26.466	9.39473	176.293	450.767	60.1622	15.5947	9.04338	44.9197	0.425434	316.361	25.8109	21.0151	2.43357	2.92698e-05	2.88256	0.149866	6.51104	538.029
2028	450.372	497.184	430.021	1825.04	335.685	361.963	906.898	94.1785	5.33073	0.154186	27.108	33.3238	1.99477	21.6612	123.079	24.9751	1.79218	27.114	9.50234	172.961	446.116	59.3685	15.5361	9.03743	43.0109	0.347962	321.753	25.9578	20.5514	2.33443	2.0733e-05	2.85824	0.142736	6.50651	538.029
2029	453.892	500.481	432.523	1827.52	336.401	369.353	900.946	94.7358	5.40486	0.156381	27.0757	34.2981	2.05333	22.4653	126.009	25.8829	1.75213	27.6988	9.61154	169.665	441.469	58.5832	15.4776	9.03145	41.1785	0.28462	326.853	26.0935	20.0688	2.23762	1.46861e-05	2.83296	0.135909	6.50089	538.029
2030	457.458	503.799	435.046	1829.91	337.118	376.475	894.879	95.2932	5.47969	0.158449	27.0397	35.2121	2.11042	23.2446	128.846	26.793	1.71207	28.228	9.72233	166.407	436.829	57.8061	15.4191	9.02546	39.4193	0.232826	331.665	26.2188	19.5718	2.14327	1.04028e-05	2.80677	0.129369	6.49466	538.029
2031	461.099	507.139	437.589	1832.21	337.836	383.356	888.704	95.8505	5.55522	0.160392	26.9999	36.0769	2.16611	24	131.595	27.7056	1.67202	28.7085	9.83472	163.187	432.198	57.0372	15.3607	9.01946	37.7306	0.190469	336.199	26.3347	19.0644	2.05146	7.36873e-06	2.77975	0.123103	6.48792	538.029
2032	464.727	510.469	440.131	1834.26	338.551	389.997	882.272	96.4086	5.63139	0.162272	26.9571	36.8838	2.22082	24.7298	134.265	28.6203	1.63252	29.1389	9.94875	159.996	427.57	56.2749	15.3023	9.01341	36.1067	0.155814	340.241	26.4333	18.5491	1.96221	5.21959e-06	2.75189	0.117102	6.47623	538.029
2033	468.292	513.774	442.664	1835.92	339.263	396.401	875.339	96.9681	5.70812	0.164153	26.912	37.6267	2.27493	25.4323	136.863	29.5371	1.59414	29.5186	10.0644	156.833	422.942	55.5184	15.2437	9.00732	34.5439	0.127451	343.423	26.5014	18.0279	1.87554	3.69726e-06	2.7232	0.111352	6.46029	538.029
2034	471.84	517.08	445.207	1837.27	339.971	402.598	867.745	97.5291	5.78542	0.166035	26.8647	38.3189	2.3285	26.1087	139.397	30.4559	1.55685	29.8546	10.1818	153.702	418.322	54.7686	15.1851	9.0012	33.0418	0.104243	345.471	26.5293	17.5028	1.79154	2.61892e-06	2.69381	0.105855	6.44622	538.029
2035	475.383	520.4	447.77	1838.38	340.676	408.612	859.371	98.0914	5.86329	0.167919	26.8152	38.9707	2.38159	26.76	141.872	31.3769	1.52062	30.1528	10.3008	150.609	413.716	54.0262	15.1265	8.99505	31.5997	0.0852581	346.182	26.5089	16.976	1.71028	1.85509e-06	2.66382	0.100611	6.43478	538.029
2036	478.924	523.74	450.355	1839.31	341.376	414.468	850.129	98.6552	5.94172	0.169803	26.7635	39.5907	2.43425	27.3871	144.293	32.3	1.48543	30.4185	10.4215	147.555	409.131	53.2917	15.068	8.9889	30.2166	0.0697295	345.403	26.4337	16.449	1.63179	1.31404e-06	2.63336	0.0956116	6.42598	538.029
2037	482.462	527.103	452.963	1840.1	342.072	420.185	839.963	99.2205	6.02072	0.171689	26.7097	40.1865	2.48654	27.9912	146.667	33.2254	1.45127	30.6565	10.5438	144.547	404.573	52.5658	15.0095	8.98274	28.8914	0.0570306	343.034	26.2983	15.9233	1.55613	9.30792e-07	2.60251	0.0908345	6.42023	538.029
2038	485.989	530.479	455.586	1840.79	342.765	425.777	828.831	99.7871	6.10028	0.173576	26.6537	40.7626	2.53849	28.5729	148.997	34.1531	1.4181	30.8704	10.6678	141.583	400.044	51.8485	14.9512	8.97657	27.6222	0.0466457	339.004	26.0983	15.4001	1.48326	6.59319e-07	2.57133	0.0862805	6.41557	538.029
2039	489.493	533.858	458.215	1841.36	343.454	431.253	816.7	100.355	6.18042	0.175464	26.5956	41.3217	2.59009	29.1329	151.285	35.0829	1.38589	31.0627	10.7935	138.663	395.542	51.1394	14.893	8.97039	26.4061	0.0381521	333.27	25.8296	14.8803	1.41312	4.67024e-07	2.53985	0.0819482	6.40993	538.029
2040	492.998	537.235	460.845	1841.8	344.139	436.622	803.558	100.925	6.26111	0.177353	26.5353	41.8663	2.64135	29.672	153.533	36.0146	1.3546	31.2356	10.9209	135.786	391.069	50.4383	14.8348	8.9642	25.2407	0.0312047	325.817	25.4892	14.3646	1.34569	3.30813e-07	2.5081	0.0778151	6.4033	538.029
2041	496.533	540.609	463.475	1842.13	344.82	441.893	789.407	101.496	6.34238	0.179243	26.4729	42.3987	2.69229	30.1907	155.743	36.9484	1.32422	31.3914	11.0499	132.95	386.624	49.745	14.7768	8.958	24.1239	0.0255219	316.651	25.0751	13.8537	1.28089	2.34329e-07	2.47611	0.073871	6.39613	538.029
2042	500.025	543.959	466.093	1842.24	345.495	447.016	774.392	102.069	6.42414	0.18113	26.4089	42.8436	2.74346	30.6888	157.922	37.8839	1.29441	31.5263	11.1806	130.157	382.207	49.0593	14.7188	8.95179	23.0537	0.0208732	306	24.5928	13.3486	1.21867	1.65985e-07	2.44391	0.0701174	6.38835	538.029
2043	503.417	547.255	468.678	1841.99	346.163	451.941	758.752	102.645	6.50634	0.183009	26.3435	43.1366	2.79531	31.1659	160.075	38.8207	1.26486	31.6353	11.313	127.4	377.813	48.3802	14.6608	8.94555	22.0265	0.017069	294.26	24.0535	12.8504	1.15894	1.17574e-07	2.41149	0.0665421	6.37585	538.029
2044	506.748	550.499	471.234	1841.35	346.822	456.688	742.691	103.225	6.58898	0.18488	26.2769	43.3032	2.84776	31.6223	162.198	39.7585	1.23554	31.7204	11.4472	124.676	373.437	47.7068	14.6027	8.93928	21.0398	0.0139554	281.762	23.4675	12.3601	1.10163	8.32828e-08	2.37884	0.0631347	6.35948	538.029
2045	510.048	553.719	473.78	1840.41	347.473	461.286	726.404	103.807	6.67205	0.186744	26.209	43.3684	2.90078	32.0588	164.296	40.6975	1.20647	31.7853	11.5831	121.989	369.086	47.0399	14.5445	8.93299	20.0933	0.0114079	268.793	22.8453	11.879	1.0467	5.89928e-08	2.34604	0.0598888	6.34504	538.029
2046	513.337	556.929	476.328	1839.23	348.115	465.759	710.047	104.393	6.75556	0.188599	26.1399	43.3525	2.95437	32.4764	166.372	41.6377	1.17763	31.8332	11.7207	119.342	364.763	46.3801	14.4864	8.92668	19.1864	0.00932418	255.585	22.1958	11.4081	0.994132	4.17871e-08	2.31316	0.0567981	6.33327	538.029
2047	516.623	560.136	478.881	1837.87	348.75	470.127	693.75	104.982	6.8395	0.190447	26.0695	43.2719	3.00852	32.8757	168.429	42.5791	1.14904	31.8669	11.86	116.738	360.474	45.7278	14.4284	8.92037	18.3181	0.00762032	242.328	21.5268	10.9482	0.943857	2.95996e-08	2.28027	0.0538667	6.32413	538.029
2048	519.911	563.342	481.438	1836.38	349.377	474.41	677.619	105.574	6.92388	0.192287	25.998	43.1404	3.06323	33.2577	170.472	43.522	1.12068	31.8889	12.0011	114.18	356.222	45.0837	14.3705	8.91404	17.4878	0.00622742	229.175	20.845	10.5	0.895822	2.09666e-08	2.24743	0.0510769	6.31802	538.029
2049	523.196	566.539	483.993	1834.8	349.996	478.619	661.729	106.169	7.00869	0.194119	25.9253	42.9677	3.11846	33.623	172.501	44.4663	1.09256	31.9008	12.144	111.668	352.01	44.4477	14.3128	8.90771	16.694	0.00508884	216.242	20.156	10.064	0.84996	1.48516e-08	2.21469	0.0484218	6.31299	538.029
2050	526.376	569.715	486.535	1833.09	350.608	482.76	646.136	106.767	7.09394	0.195943	25.8514	42.7605	3.17416	33.972	174.515	45.4118	1.06466	31.9034	12.2885	109.199	347.834	43.8195	14.2552	8.90137	15.9348	0.00415809	203.621	19.464	9.64046	0.806193	1.052e-08	2.18204	0.0459047	6.30699	538.029
2051	529.353	572.865	489.06	1831.28	351.211	486.837	630.881	107.368	7.17962	0.19776	25.7763	42.5245	3.23028	34.3051	176.516	46.3584	1.03698	31.8975	12.4348	106.774	343.695	43.1988	14.1977	8.89503	15.2086	0.00339726	191.378	18.773	9.22955	0.764439	7.45175e-09	2.14949	0.0435185	6.30014	538.029
2052	532.178	575.944	491.536	1829.21	351.807	490.762	615.997	107.97	7.26549	0.199571	25.7002	42.3451	3.28482	34.6135	178.408	47.2942	1.0097	31.8677	12.5829	104.392	339.592	42.5856	14.1403	8.88867	14.5141	0.00277533	179.567	18.0863	8.83141	0.724621	5.27839e-09	2.11706	0.0412454	6.29295	538.029
2053	534.908	578.91	493.932	1826.78	352.396	494.443	601.507	108.571	7.35127	0.201379	25.6235	42.2912	3.33587	34.8885	180.105	48.2071	0.982994	31.8004	12.7331	102.051	335.526	41.9799	14.083	8.8823	13.8499	0.00226696	168.223	17.4065	8.44607	0.68667	3.73891e-09	2.08479	0.0390797	6.28542	538.029
2054	537.538	581.755	496.244	1823.93	352.978	497.874	587.411	109.17	7.43698	0.203185	25.5459	42.3356	3.38356	35.1307	181.614	49.0972	0.95683	31.6984	12.8852	99.7486	331.49	41.3805	14.0258	8.87592	13.2137	0.00185132	157.365	16.7353	8.0733	0.650496	2.64843e-09	2.05261	0.0370254	6.27349	538.029
2055	540.072	584.483	498.474	1820.66	353.553	501.057	573.711	109.767	7.52261	0.204989	25.4676	42.4574	3.42802	35.3409	182.945	49.9646	0.931187	31.5648	13.0394	97.4806	327.481	40.7868	13.9685	8.86951	12.6039	0.00151147	147.006	16.0745	7.71297	0.616027	1.876e-09	2.02053	0.035076	6.25783	538.029
2056	542.536	587.12	500.645	1817.05	354.12	504.009	560.422	110.363	7.60816	0.206789	25.3886	42.6435	3.46948	35.5203	184.111	50.8098	0.906057	31.4044	13.1955	95.2502	323.502	40.1995	13.9112	8.86308	12.0201	0.00123371	137.158	15.4263	7.36514	0.583208	1.32885e-09	1.98858	0.0332272	6.24414	538.029
2057	544.949	589.685	502.768	1813.18	354.681	506.745	547.553	110.957	7.69364	0.208587	25.3088	42.8833	3.50815	35.6702	185.127	51.6334	0.881432	31.2213	13.3536	93.0596	319.558	39.6191	13.854	8.85664	11.4619	0.00100678	127.824	14.7926	7.0298	0.551985	9.41279e-10	1.95683	0.0314748	6.23313	538.029
2058	547.318	592.185	504.847	1809.09	355.235	509.282	535.108	111.55	7.77904	0.210383	25.2283	43.1678	3.54424	35.7919	186.005	52.4359	0.857303	31.019	13.5137	90.9106	315.653	39.0459	13.7969	8.85019	10.9285	0.00082144	119.002	14.1747	6.70687	0.5223	6.66748e-10	1.92532	0.0298144	6.22477	538.029
2059	549.649	594.623	506.884	1804.86	355.782	511.635	523.088	112.141	7.86436	0.212175	25.1471	43.4903	3.57796	35.8865	186.757	53.218	0.833662	30.8008	13.6758	88.805	311.789	38.4804	13.74	8.84373	10.4195	0.000670125	110.684	13.5739	6.39621	0.494103	4.72286e-10	1.89409	0.0282421	6.21943	538.029
2060	551.912	596.993	508.871	1800.51	356.322	513.815	511.485	112.731	7.9496	0.213966	25.0652	43.8436	3.60944	35.9549	187.392	53.98	0.810497	30.5688	13.8399	86.7427	307.968	37.9227	13.6833	8.83728	9.93378	0.000546608	102.856	12.9908	6.09761	0.467318	3.3454e-10	1.86318	0.0267533	6.21518	538.029
2061	554.07	599.283	510.799	1796.03	356.856	515.827	500.285	113.319	8.03477	0.215753	24.9826	44.221	3.63881	35.9981	187.918	54.7222	0.78779	30.3244	14.006	84.7221	304.187	37.3724	13.6267	8.83082	9.47018	0.000445786	95.5039	12.4258	5.81079	0.441884	2.36969e-10	1.83255	0.0253434	6.21007	538.029
2062	556.123	601.466	512.647	1791.34	357.382	517.774	489.474	113.907	8.11979	0.217538	24.8995	44.6174	3.66604	36.0219	188.405	55.4555	0.765611	30.0762	14.1743	82.742	300.446	36.8294	13.5703	8.82436	9.0276	0.00036349	88.6072	11.8788	5.5354	0.417747	1.67855e-10	1.80223	0.0239971	6.20389	538.029
2063	558.077	603.526	514.402	1786.38	357.901	519.755	479.036	114.495	8.2046	0.219322	24.816	45.0294	3.69112	36.0325	188.924	56.1907	0.744026	29.832	14.3449	80.8016	296.743	36.2934	13.5141	8.8179	8.60509	0.000296317	82.1465	11.3498	5.27113	0.39484	1.18899e-10	1.77221	0.0227111	6.19703	538.029
2064	559.934	605.466	516.065	1781.18	358.411	521.763	468.958	115.084	8.2892	0.221103	24.7322	45.4531	3.71418	36.0301	189.47	56.9276	0.723017	29.5912	14.5179	78.9004	293.08	35.7644	13.458	8.81143	8.20175	0.0002415	76.1028	10.839	5.01767	0.373118	8.42212e-11	1.74251	0.0214932	6.18982	538.029
2065	561.682	607.273	517.629	1775.67	358.914	523.781	459.216	115.673	8.37359	0.222882	24.6479	45.8822	3.73522	36.0146	190.035	57.6657	0.70256	29.3516	14.6932	77.0343	289.449	35.2416	13.4019	8.80494	7.81616	0.000196761	70.4539	10.3457	4.77461	0.352511	5.96574e-11	1.71305	0.020339	6.17834	538.029
2066	563.322	608.95	519.096	1769.85	359.409	525.8	449.79	116.264	8.45777	0.22466	24.5633	46.3128	3.75429	35.9862	190.614	58.4045	0.682634	29.112	14.8709	75.201	285.848	34.7242	13.3459	8.79843	7.44721	0.000160248	65.1789	9.86984	4.54161	0.332956	4.22579e-11	1.68384	0.0192447	6.16326	538.029
2067	564.881	610.526	520.488	1763.79	359.897	527.824	440.673	116.855	8.54174	0.226435	24.4782	46.746	3.77157	35.9455	191.208	59.1442	0.66323	28.8735	15.0509	73.4024	282.279	34.213	13.2899	8.79191	7.09462	0.000130466	60.2602	9.41146	4.31844	0.314415	2.99331e-11	1.65492	0.0182078	6.15017	538.029
2068	566.376	612.017	521.818	1757.54	360.377	529.857	431.86	117.446	8.62549	0.228209	24.3928	47.1827	3.78721	35.8932	191.819	59.8849	0.644338	28.6365	15.2332	71.6399	278.746	33.7081	13.2341	8.78538	6.75803	0.000106186	55.6795	8.97064	4.10486	0.296847	2.12029e-11	1.62632	0.0172259	6.13975	538.029
2069	567.815	613.43	523.089	1751.18	360.849	531.905	423.343	118.038	8.70904	0.229981	24.307	47.6234	3.80134	35.8299	192.447	60.6268	0.625948	28.4018	15.4179	69.9147	275.252	33.2101	13.1784	8.77884	6.43698	8.64004e-05	51.4189	8.54732	3.90063	0.280213	1.50189e-11	1.59807	0.0162963	6.13196	538.029
2070	569.176	614.77	524.302	1744.74	361.314	533.971	415.114	118.631	8.79237	0.23175	24.2208	48.0693	3.81412	35.7564	193.095	61.37	0.608051	28.1697	15.605	68.2281	271.8	32.7192	13.1229	8.77231	6.13107	7.02844e-05	47.4605	8.14134	3.70549	0.264459	1.06385e-11	1.5702	0.0154167	6.12714	538.029
2071	570.428	616.028	525.451	1738.25	361.771	536.055	407.161	119.225	8.87549	0.233518	24.1344	48.5193	3.82563	35.6729	193.761	62.1146	0.590634	27.9404	15.7944	66.5796	268.39	32.2356	13.0676	8.76578	5.83966	5.71613e-05	43.7861	7.75233	3.51913	0.249546	7.53571e-12	1.5427	0.0145846	6.12345	538.029
2072	571.562	617.172	526.509	1731.61	362.22	538.23	399.469	119.82	8.95834	0.235282	24.0476	48.9321	3.83586	35.5839	194.52	62.8716	0.573689	27.7204	15.9863	64.9677	265.02	31.7588	13.0126	8.75925	5.56195	4.64758e-05	40.3772	7.37968	3.34116	0.23545	5.33786e-12	1.51559	0.0137972	6.11873	538.029
2073	572.579	618.176	527.457	1724.77	362.661	540.569	392.024	120.418	9.04084	0.237039	23.9608	49.2744	3.84482	35.4937	195.438	63.6516	0.557209	27.5157	16.1809	63.3915	261.69	31.2887	12.9577	8.75272	5.29725	3.77758e-05	37.2162	7.02274	3.17128	0.222119	3.78104e-12	1.48884	0.013052	6.1129	538.029
2074	573.48	619.042	528.296	1717.72	363.093	543.063	384.814	121.02	9.12301	0.23879	23.8738	49.5587	3.85257	35.4022	196.506	64.4542	0.54118	27.3243	16.3783	61.85	258.398	30.8252	12.903	8.74619	5.04494	3.06944e-05	34.2872	6.68106	3.00916	0.209502	2.67827e-12	1.46244	0.0123468	6.10663	538.029
2075	574.267	619.773	529.027	1710.49	363.517	545.705	377.826	121.624	9.20483	0.240534	23.7867	49.7956	3.85917	35.3094	197.709	65.2787	0.525589	27.1444	16.5783	60.3427	255.144	30.3681	12.8485	8.73966	4.80445	2.4932e-05	31.5747	6.35418	2.85451	0.197569	1.89713e-12	1.43642	0.0116794	6.10009	538.029
2076	574.927	620.356	529.643	1703.03	363.932	548.475	371.043	122.231	9.28631	0.242272	23.6994	49.9898	3.86458	35.2149	199.033	66.1241	0.51042	26.973	16.781	58.8663	251.923	29.9168	12.7941	8.73312	4.57489	2.02432e-05	29.0636	6.04139	2.70701	0.186287	1.34382e-12	1.41072	0.0110475	6.08943	538.029
2077	575.461	620.793	530.144	1695.31	364.339	551.358	364.449	122.842	9.36745	0.244004	23.6119	50.1463	3.86881	35.1183	200.464	66.9895	0.495655	26.8081	16.9864	57.4186	248.731	29.4707	12.7398	8.72656	4.35557	1.64283e-05	26.7395	5.74208	2.56633	0.17561	9.51884e-13	1.38532	0.0104488	6.07528	538.029
2078	575.897	621.111	530.553	1687.43	364.738	554.359	358.041	123.455	9.44824	0.245729	23.5243	50.2755	3.872	35.0201	201.997	67.8749	0.48129	26.6501	17.1946	56.0012	245.572	29.0301	12.6855	8.71999	4.14628	1.33267e-05	24.5908	5.4561	2.43226	0.165504	6.7426e-13	1.36026	0.00988187	6.06334	538.029
2079	576.26	621.337	530.883	1679.55	365.129	557.501	351.817	124.072	9.5287	0.247448	23.4365	50.3912	3.87444	34.9215	203.639	68.7809	0.467327	26.5013	17.4054	54.6149	242.449	28.5956	12.6314	8.71342	3.94676	1.08079e-05	22.6071	5.18353	2.30465	0.155971	4.77607e-13	1.33554	0.00934539	6.05541	538.029
2080	576.427	621.48	531.138	1671.83	365.511	560.798	345.772	124.692	9.60882	0.24916	23.3487	50.5038	3.87639	34.8235	205.393	69.7083	0.453768	26.3632	17.6189	53.2605	239.362	28.1673	12.5776	8.70685	3.75673	8.76426e-06	20.7782	4.92426	2.18335	0.146975	3.38309e-13	1.31118	0.00883788	6.05149	538.029
2081	576.262	621.544	531.319	1664.28	365.885	564.25	339.903	125.314	9.68859	0.250866	23.261	50.6163	3.87794	34.7265	207.255	70.6569	0.440602	26.2353	17.8351	51.9387	236.316	27.7455	12.5239	8.70028	3.57591	7.10663e-06	19.0931	4.6778	2.0681	0.138486	2.39639e-13	1.28724	0.00835801	6.05094	538.029
2082	576.044	621.614	531.49	1657.12	366.254	567.862	334.204	125.942	9.76833	0.252563	23.1732	50.691	3.87899	34.6315	209.245	71.6277	0.427824	26.1238	18.0535	50.6492	233.311	27.3304	12.4705	8.69373	3.40391	5.76229e-06	17.5412	4.44358	1.95861	0.130471	1.69746e-13	1.2637	0.00790434	6.05184	538.029
2083	575.973	621.757	531.702	1650.49	366.618	571.641	328.663	126.577	9.84833	0.25425	23.0855	50.6959	3.87942	34.5395	211.379	72.6216	0.415422	26.0331	18.2735	49.3908	230.344	26.9216	12.4174	8.68718	3.24023	4.67197e-06	16.1122	4.22094	1.85467	0.122898	1.20239e-13	1.24055	0.00747535	6.05202	538.029
2084	575.965	621.954	531.942	1644.32	366.979	575.576	323.271	127.22	9.92861	0.255925	22.9978	50.6437	3.87927	34.4501	213.647	73.638	0.403385	25.9603	18.4952	48.1622	227.415	26.5189	12.3645	8.68064	3.08441	3.78768e-06	14.7967	4.00931	1.75601	0.115754	8.517e-14	1.21777	0.00706964	6.05125	538.029
2085	576.01	622.197	532.205	1638.56	367.336	579.661	318.022	127.87	10.0091	0.25759	22.91	50.5453	3.87854	34.3634	216.038	74.6764	0.391701	25.903	18.7184	46.9628	224.522	26.1221	12.3118	8.6741	2.93607	3.07051e-06	13.586	3.80815	1.66233	0.10901	6.03296e-14	1.19536	0.00668593	6.05001	538.029
2086	576.102	622.479	532.487	1633.14	367.69	583.887	312.909	128.527	10.09	0.259244	22.8222	50.4095	3.87729	34.2791	218.542	75.7362	0.380361	25.8592	18.9433	45.7917	221.666	25.7312	12.2593	8.66756	2.79483	2.48894e-06	12.4722	3.61695	1.5734	0.102657	4.2734e-14	1.1733	0.006323	6.04842	538.029
2087	576.219	622.781	532.776	1627.97	368.04	588.235	307.917	129.192	10.171	0.260886	22.7344	50.2396	3.87544	34.1967	221.145	76.8164	0.369349	25.8257	19.1698	44.6463	218.84	25.3455	12.2069	8.66102	2.66015	2.01721e-06	11.4472	3.43507	1.48901	0.096665	3.02703e-14	1.15157	0.00597949	6.04266	538.029
2088	576.356	623.097	533.07	1622.96	368.386	592.692	303.036	129.864	10.2524	0.262518	22.6465	50.0397	3.87296	34.1159	223.835	77.9161	0.358652	25.8004	19.3979	43.5248	216.042	24.9644	12.1547	8.65446	2.5316	1.63455e-06	10.5041	3.26198	1.40891	0.0910093	2.14417e-14	1.13014	0.00565421	6.03339	538.029
2089	576.535	623.451	533.388	1618.15	368.729	597.259	298.267	130.544	10.334	0.26414	22.5586	49.8183	3.86996	34.0368	226.609	79.0354	0.348266	25.783	19.6276	42.4282	213.275	24.5884	12.1025	8.64789	2.40903	1.32426e-06	9.63683	3.09741	1.33288	0.0856703	1.51881e-14	1.10904	0.00534635	6.02601	538.029
2090	576.766	623.855	533.741	1613.55	369.068	601.939	293.609	131.23	10.4159	0.26575	22.4706	49.5815	3.86653	33.9597	229.465	80.1741	0.338182	25.7732	19.859	41.3568	210.54	24.2176	12.0505	8.64133	2.29227	1.07275e-06	8.83962	2.94102	1.26078	0.0806292	1.07584e-14	1.08827	0.00505511	6.02114	538.029
2091	577.053	624.313	534.131	1609.17	369.404	606.731	289.059	131.925	10.498	0.267349	22.3826	49.3344	3.86274	33.8847	232.398	81.332	0.328394	25.7707	20.092	40.3111	207.839	23.8523	11.9987	8.63476	2.18114	8.68931e-07	8.10715	2.79249	1.19245	0.0758852	7.62061e-15	1.06784	0.0047797	6.01869	538.029
2092	577.397	624.825	534.558	1605.01	369.736	611.627	284.617	132.625	10.5805	0.268936	22.2948	49.0558	3.85851	33.8109	235.419	82.51	0.318897	25.7752	20.3266	39.2916	205.174	23.4928	11.9472	8.62821	2.07546	7.03805e-07	7.43447	2.65148	1.12769	0.0714203	5.398e-15	1.04779	0.00451936	6.01898	538.029
2093	577.786	625.379	535.011	1601.07	370.065	616.617	280.279	133.331	10.6633	0.270507	22.2073	48.727	3.85371	33.737	238.53	83.7083	0.309683	25.786	20.5628	38.2977	202.545	23.1389	11.896	8.62166	1.97496	5.70038e-07	6.81685	2.51759	1.06633	0.0672163	3.82363e-15	1.0281	0.00427328	6.02018	538.029
2094	578.203	625.957	535.48	1597.28	370.39	621.693	276.038	134.043	10.7465	0.272063	22.1202	48.3567	3.84835	33.6628	241.725	84.9263	0.300743	25.8018	20.8006	37.3283	199.951	22.7904	11.8449	8.61512	1.87936	4.6167e-07	6.2498	2.39045	1.00821	0.0632552	2.70844e-15	1.00878	0.00404062	6.02039	538.029
2095	578.639	626.55	535.955	1593.63	370.712	626.852	271.891	134.76	10.8301	0.273604	22.0333	47.9525	3.84245	33.5884	244.993	86.1635	0.292068	25.8218	21.0401	36.3825	197.389	22.4472	11.7941	8.60859	1.78838	3.73877e-07	5.72923	2.26973	0.953146	0.0595205	1.91851e-15	0.989768	0.00382064	6.01964	538.029
2096	579.09	627.154	536.435	1590.09	371.031	632.09	267.832	135.482	10.914	0.27513	21.9467	47.5206	3.83603	33.5136	248.331	87.4194	0.283649	25.8453	21.2811	35.4597	194.86	22.109	11.7435	8.60206	1.70179	3.02756e-07	5.25137	2.15508	0.901008	0.0559971	1.35896e-15	0.971072	0.00361261	6.01839	538.029
2097	579.554	627.768	536.92	1586.65	371.347	637.405	263.859	136.209	10.9983	0.276641	21.8605	47.0663	3.82913	33.4386	251.732	88.6936	0.275479	25.8718	21.5238	34.5593	192.362	21.7759	11.6931	8.59553	1.61937	2.45145e-07	4.81284	2.04617	0.851624	0.0526711	9.62608e-16	0.9527	0.00341588	6.01677	538.029
2098	580.015	628.376	537.399	1583.23	371.659	642.778	259.961	136.942	11.083	0.278136	21.7745	46.5905	3.82168	33.3627	255.184	89.9849	0.267547	25.8995	21.7681	33.6791	189.892	21.4472	11.6428	8.589	1.54081	1.98467e-07	4.4103	1.94265	0.804819	0.0495276	6.81856e-16	0.934636	0.00322971	6.011	538.029
2099	580.47	628.975	537.871	1579.78	371.968	648.2	256.133	137.68	11.168	0.279617	21.6888	46.095	3.81364	33.2857	258.677	91.2926	0.259843	25.9274	22.014	32.8179	187.447	21.1225	11.5926	8.58245	1.46584	1.60643e-07	4.04075	1.84421	0.760465	0.0465706	4.82988e-16	0.916854	0.00305345	6.00172	538.029
2100	580.902	629.592	538.358	1576.35	372.274	653.679	252.375	138.424	11.2534	0.281082	21.6033	45.5862	3.80513	33.208	262.213	92.6166	0.252365	25.9562	22.2616	31.9762	185.028	20.8022	11.5425	8.57589	1.39438	1.30007e-07	3.70163	1.75069	0.718466	0.0437894	3.42121e-16	0.899351	0.00288666	5.99432	538.029
2101	581.287	630.241	538.872	1572.97	372.576	659.219	248.689	139.173	11.3391	0.282532	21.5181	45.0686	3.79621	33.1298	265.792	93.957	0.245105	25.9866	22.5107	31.1545	182.638	20.4863	11.4926	8.56933	1.32634	1.05201e-07	3.39055	1.66187	0.678726	0.0411734	2.42339e-16	0.882136	0.0027289	5.98943	538.029
2102	581.636	630.875	539.371	1569.69	372.869	664.699	245.075	139.917	11.4242	0.28396	21.4339	44.5992	3.78744	33.0531	269.297	95.2843	0.238081	26.016	22.7581	30.3529	180.278	20.1752	11.4428	8.56278	1.2616	8.51243e-08	3.10535	1.5776	0.641134	0.0387127	1.71659e-16	0.865218	0.00257975	5.98745	538.029
2103	581.948	631.444	539.818	1566.56	373.145	670.002	241.534	140.646	11.5076	0.285359	21.3515	44.2237	3.7793	32.9798	272.619	96.5698	0.231305	26.0425	23.0005	29.5719	177.95	19.8689	11.3934	8.55623	1.20005	6.8882e-08	2.84404	1.4977	0.605583	0.0363978	1.21593e-16	0.848626	0.00243878	5.98879	538.029
2104	582.2	631.944	540.207	1563.56	373.405	675.13	238.063	141.361	11.5892	0.286729	21.2709	43.9243	3.77177	32.9097	275.771	97.8143	0.22477	26.0664	23.2379	28.811	175.654	19.5676	11.3441	8.5497	1.14155	5.57421e-08	2.60464	1.42194	0.571984	0.0342191	8.61296e-17	0.832356	0.00230556	5.99121	538.029
2105	582.378	632.359	540.527	1560.68	373.648	680.085	234.659	142.06	11.6691	0.28807	21.192	43.685	3.76479	32.8427	278.766	99.0186	0.218469	26.0879	23.4702	28.0694	173.388	19.2709	11.2951	8.54317	1.08592	4.51103e-08	2.38533	1.3501	0.540221	0.0321674	6.10093e-17	0.816375	0.00217964	5.99277	538.029
2106	582.477	632.684	540.775	1557.87	373.874	684.866	231.32	142.744	11.7473	0.289381	21.1148	43.4936	3.7583	32.7785	281.612	100.183	0.212394	26.107	23.6975	27.3463	171.151	18.9787	11.2463	8.53664	1.03301	3.65073e-08	2.1844	1.28195	0.510184	0.030234	4.32155e-17	0.800692	0.0020606	5.9935	538.029
2107	582.497	632.919	540.951	1555.14	374.084	689.481	228.042	143.413	11.8238	0.290664	21.0393	43.3405	3.75226	32.7171	284.321	101.309	0.206536	26.124	23.9198	26.6414	168.943	18.691	11.1978	8.53013	0.982675	2.95455e-08	2.00032	1.21731	0.481801	0.0284111	3.06113e-17	0.7853	0.00194807	5.99386	538.029
2108	582.437	633.065	541.055	1552.46	374.278	693.933	224.824	144.067	11.8986	0.291918	20.9655	43.2181	3.74665	32.6582	286.902	102.397	0.200891	26.139	24.137	25.954	166.764	18.4076	11.1494	8.52361	0.93479	2.39118e-08	1.83168	1.15595	0.454975	0.0267083	2.16833e-17	0.770193	0.00184168	5.99398	538.029
2109	582.285	633.107	541.08	1549.78	374.456	698.214	221.66	144.706	11.9716	0.293142	20.8935	43.117	3.74134	32.6015	289.357	103.447	0.195448	26.1511	24.3492	25.2827	164.609	18.128	11.1012	8.51709	0.889168	1.93513e-08	1.67714	1.09768	0.429608	0.0250997	1.53592e-17	0.75534	0.00174102	5.99007	538.029
2110	582.038	633.047	541.026	1547.04	374.618	702.323	218.544	145.329	12.0429	0.294338	20.823	43.0311	3.73625	32.5464	291.689	104.459	0.190201	26.1597	24.5564	24.6265	162.477	17.852	11.053	8.51056	0.845663	1.5659e-08	1.53551	1.04231	0.405607	0.0235787	1.08796e-17	0.740705	0.00164575	5.98282	538.029
2111	581.725	632.911	540.915	1544.29	374.764	706.277	215.478	145.938	12.1125	0.295504	20.7542	42.9594	3.73143	32.4932	293.913	105.434	0.185144	26.1661	24.7586	23.9856	160.369	17.5798	11.005	8.50403	0.804221	1.26704e-08	1.40576	0.989743	0.382903	0.0221573	7.70647e-18	0.726318	0.00155563	5.97756	538.029
2112	581.361	632.718	540.76	1541.58	374.895	710.091	212.465	146.532	12.1803	0.296642	20.6871	42.9012	3.72691	32.4422	296.041	106.374	0.180273	26.1714	24.9557	23.3606	158.286	17.3115	10.9572	8.49749	0.764783	1.02521e-08	1.28692	0.939839	0.361454	0.0208123	5.45882e-18	0.712207	0.00147041	5.97489	538.029
2113	580.955	632.475	540.568	1538.93	375.009	713.779	209.505	147.111	12.2465	0.29775	20.6217	42.8553	3.72273	32.3934	298.084	107.28	0.175584	26.1765	25.1478	22.7514	156.231	17.0474	10.9095	8.49096	0.727281	8.2955e-09	1.17808	0.892475	0.341192	0.0195392	3.86671e-18	0.698358	0.00138987	5.97473	538.029
2114	580.509	632.184	540.337	1536.37	375.109	717.354	206.599	147.675	12.3109	0.29883	20.558	42.8213	3.71891	32.3471	300.054	108.153	0.171072	26.1821	25.3349	22.1584	154.205	16.7875	10.8621	8.48444	0.691651	6.71275e-09	1.07844	0.847565	0.322052	0.0183507	2.73896e-18	0.684778	0.00131377	5.97739	538.029
2115	580.016	631.838	540.062	1533.9	375.193	720.822	203.746	148.223	12.3736	0.299881	20.4959	42.7973	3.71544	32.3033	301.958	108.993	0.166732	26.1883	25.517	21.5811	152.207	16.5319	10.815	8.47793	0.657805	5.4324e-09	0.987253	0.804965	0.303998	0.0172412	1.94012e-18	0.671465	0.00124187	5.98107	538.029
2116	579.46	631.421	539.73	1531.49	375.263	724.183	200.944	148.757	12.4346	0.300902	20.4355	42.7805	3.71228	32.2616	303.797	109.802	0.162558	26.1948	25.694	21.0189	150.236	16.2803	10.7681	8.47144	0.625638	4.3965e-09	0.90378	0.76453	0.286964	0.0162052	1.37427e-18	0.658407	0.00117394	5.98389	538.029
2117	578.835	630.925	539.334	1529.12	375.317	727.439	198.19	149.276	12.4938	0.301895	20.3768	42.7688	3.70939	32.222	305.576	110.579	0.158545	26.2011	25.8661	20.4713	148.292	16.0327	10.7215	8.46495	0.595059	3.55829e-09	0.827357	0.726163	0.270862	0.0152208	9.73453e-19	0.645615	0.00110973	5.98588	538.029
2118	578.139	630.348	538.875	1526.79	375.357	730.593	195.483	149.779	12.5514	0.302858	20.3198	42.7612	3.70675	32.1843	307.299	111.326	0.154687	26.2074	26.0331	19.9378	146.374	15.789	10.6751	8.45847	0.565986	2.88001e-09	0.757382	0.689757	0.255637	0.0142845	6.89538e-19	0.633062	0.00104905	5.98751	538.029
2119	577.373	629.691	538.351	1524.48	375.381	733.649	192.822	150.268	12.6072	0.303793	20.2644	42.7567	3.70434	32.1486	308.968	112.043	0.15098	26.2135	26.1951	19.4181	144.481	15.5491	10.6288	8.45199	0.538342	2.3311e-09	0.693334	0.655193	0.241265	0.01341	4.88429e-19	0.620742	0.00099169	5.9889	538.029
2120	576.521	628.94	537.755	1522.13	375.392	736.595	190.202	150.741	12.6613	0.304699	20.2106	42.7514	3.70204	32.1142	310.58	112.729	0.147417	26.2182	26.3521	18.9109	142.61	15.3125	10.5828	8.44552	0.512019	1.88676e-09	0.634688	0.622339	0.227693	0.012593	3.45975e-19	0.608653	0.000937441	5.9863	538.029
2121	575.582	628.093	537.086	1519.71	375.388	739.427	187.619	151.2	12.7136	0.305576	20.1583	42.7434	3.6998	32.0807	312.133	113.385	0.143992	26.2207	26.5041	18.4155	140.76	15.079	10.5368	8.43903	0.486929	1.52699e-09	0.580938	0.591115	0.214871	0.0118292	2.45069e-19	0.596758	0.000886108	5.98035	538.029
2122	574.582	627.179	536.366	1517.27	375.369	742.16	185.076	151.643	12.7643	0.306424	20.1077	42.7354	3.69767	32.0486	313.637	114.012	0.140703	26.2223	26.6511	17.9321	138.931	14.8488	10.491	8.43254	0.463041	1.23577e-09	0.531718	0.561459	0.20276	0.0111155	1.73593e-19	0.585066	0.000837558	5.97641	538.029
2123	573.54	626.214	535.608	1514.84	375.337	744.807	182.573	152.071	12.8132	0.307243	20.0587	42.7291	3.69569	32.018	315.1	114.611	0.137547	26.2237	26.7931	17.4609	137.126	14.622	10.4453	8.42606	0.440318	1.00009e-09	0.486685	0.533287	0.191321	0.0104489	1.22963e-19	0.573604	0.000791662	5.97505	538.029
2124	572.46	625.207	534.816	1512.46	375.29	747.378	180.112	152.485	12.8605	0.308033	20.0113	42.726	3.6939	31.989	316.53	115.183	0.134519	26.2257	26.9301	17.0021	135.345	14.3988	10.3999	8.41958	0.41872	8.09399e-10	0.44546	0.506547	0.180545	0.00980947	8.71e-20	0.562375	0.00074829	5.9762	538.029
2125	571.347	624.159	533.991	1510.15	375.23	749.886	177.694	152.883	12.9059	0.308794	19.9655	42.7273	3.69235	31.9618	317.935	115.728	0.131618	26.2291	27.0621	16.5557	133.589	14.1794	10.3547	8.41312	0.398208	6.5512e-10	0.407724	0.481189	0.170369	0.00919556	6.16966e-20	0.551366	0.00070732	5.98018	538.029
2126	570.192	623.061	533.126	1507.91	375.156	752.333	175.318	153.266	12.9497	0.309526	19.9214	42.7326	3.69103	31.9365	319.318	116.249	0.128839	26.2337	27.1891	16.1215	131.859	13.9636	10.3098	8.40667	0.378731	5.30298e-10	0.373212	0.457137	0.160757	0.00862254	4.37023e-20	0.540573	0.000668622	5.98516	538.029
2127	568.98	621.899	532.209	1505.72	375.068	754.716	172.982	153.635	12.9918	0.31023	19.8789	42.7402	3.6899	31.9129	320.679	116.745	0.126178	26.2392	27.311	15.699	130.153	13.7513	10.2652	8.40023	0.360228	4.29292e-10	0.341613	0.434289	0.151703	0.00808758	3.09562e-20	0.530007	0.00063206	5.98928	538.029
2128	567.705	620.665	531.233	1503.56	374.967	757.035	170.685	153.988	13.0321	0.310905	19.8379	42.749	3.68894	31.8908	322.016	117.216	0.123632	26.245	27.428	15.2876	128.471	13.5424	10.2208	8.3938	0.342644	3.47547e-10	0.312674	0.412583	0.143147	0.00758809	2.19276e-20	0.519659	0.000597512	5.99259	538.029
2129	566.365	619.357	530.198	1501.43	374.852	759.289	168.426	154.326	13.0707	0.31155	19.7986	42.7588	3.68812	31.8702	323.333	117.663	0.121197	26.2512	27.54	14.8871	126.812	13.3369	10.1766	8.38739	0.325931	2.81384e-10	0.2862	0.391988	0.135059	0.00712169	1.55323e-20	0.509525	0.000564864	5.99553	538.029
2130	564.96	617.976	529.105	1499.32	374.724	761.482	166.204	154.649	13.1077	0.312168	19.7608	42.7692	3.68743	31.8509	324.629	118.086	0.118869	26.2577	27.647	14.4972	125.176	13.1346	10.1326	8.38098	0.310045	2.2783e-10	0.26198	0.37243	0.127439	0.00668619	1.10022e-20	0.49958	0.000534012	5.99825	538.029
2131	563.476	616.507	527.942	1497.16	374.583	763.597	164.015	154.957	13.1428	0.312756	19.7246	42.7768	3.68678	31.8325	325.898	118.485	0.116645	26.263	27.749	14.117	123.559	12.9353	10.0888	8.37458	0.294923	1.84467e-10	0.239814	0.35383	0.120259	0.00627928	7.7933e-21	0.489804	0.000504834	5.99695	538.029
2132	561.911	614.949	526.711	1494.92	374.429	765.629	161.855	155.25	13.1763	0.313316	19.6899	42.78	3.6861	31.8147	327.135	118.859	0.114519	26.2664	27.846	13.7458	121.961	12.7386	10.0451	8.36816	0.280512	1.49347e-10	0.219522	0.336146	0.113462	0.00589895	5.52032e-21	0.480205	0.000477227	5.99233	538.029
2133	560.292	613.33	525.433	1492.66	374.262	767.591	159.727	155.529	13.2081	0.313846	19.6568	42.782	3.68546	31.7977	328.348	119.211	0.11249	26.2691	27.938	13.3839	120.382	12.5448	10.0016	8.36175	0.266796	1.20911e-10	0.200951	0.319362	0.107028	0.00554361	3.91028e-21	0.470789	0.000451121	5.9897	538.029
2134	558.634	611.668	524.122	1490.4	374.082	769.496	157.633	155.792	13.2381	0.314349	19.6252	42.7846	3.6849	31.7817	329.545	119.54	0.110555	26.2719	28.0251	13.0314	118.823	12.354	9.95823	8.35534	0.253752	9.78925e-11	0.18396	0.303435	0.100966	0.00521174	2.76982e-21	0.461561	0.000426444	5.98968	538.029
2135	556.946	609.968	522.781	1488.19	373.89	771.351	155.572	156.04	13.2664	0.314822	19.5951	42.7896	3.68446	31.767	330.732	119.848	0.108712	26.2755	28.1071	12.6882	117.286	12.1662	9.9151	8.34895	0.241356	7.92606e-11	0.168382	0.288304	0.0952554	0.00490189	1.96198e-21	0.452524	0.000403126	5.99216	538.029
2136	555.228	608.234	521.412	1486.04	373.685	773.166	153.547	156.273	13.293	0.315267	19.5666	42.7983	3.6842	31.7538	331.914	120.136	0.10696	26.2806	28.1842	12.3546	115.772	11.9816	9.87225	8.34257	0.229586	6.41816e-11	0.154101	0.273937	0.0898777	0.00461269	1.38975e-21	0.443663	0.000381102	5.99747	538.029
2137	553.474	606.456	520.005	1483.96	373.468	774.945	151.556	156.49	13.3179	0.315683	19.5397	42.8104	3.68411	31.7421	333.095	120.404	0.105295	26.2872	28.2562	12.0302	114.28	11.8001	9.82966	8.33621	0.218411	5.19773e-11	0.141039	0.260298	0.0848132	0.00434277	9.84421e-22	0.434975	0.0003603	6.0038	538.029
2138	551.669	604.619	518.55	1481.93	373.238	776.681	149.598	156.693	13.341	0.31607	19.5144	42.8243	3.68416	31.7316	334.27	120.653	0.103714	26.2946	28.3233	11.7147	112.81	11.6217	9.78732	8.32986	0.207797	4.20978e-11	0.12909	0.247352	0.0800142	0.0040908	6.97307e-22	0.426472	0.000340648	6.00927	538.029
2139	549.805	602.715	517.04	1479.92	372.996	778.372	147.672	156.881	13.3625	0.316428	19.4905	42.8393	3.68431	31.7223	335.44	120.882	0.102215	26.3026	28.3854	11.4077	111.36	11.4462	9.74522	8.32352	0.197712	3.40989e-11	0.118158	0.235046	0.0754649	0.00383851	4.93932e-22	0.418148	0.000322079	6.01391	538.029
2140	547.88	600.743	515.474	1477.94	372.742	780.019	145.777	157.054	13.3822	0.316758	19.4682	42.8548	3.68457	31.7141	336.604	121.092	0.100795	26.311	28.4426	11.109	109.931	11.2736	9.70335	8.3172	0.188127	2.7622e-11	0.108156	0.223356	0.0711793	0.0035859	3.49873e-22	0.409997	0.000304532	6.01821	538.029
2141	545.896	598.703	513.852	1475.97	372.476	781.621	143.913	157.212	13.4002	0.317059	19.4475	42.8707	3.68492	31.7069	337.762	121.284	0.0994519	26.3197	28.4947	10.8183	108.522	11.1038	9.66171	8.31089	0.179018	2.23772e-11	0.0990044	0.212264	0.067142	0.00335001	2.4783e-22	0.402017	0.00028795	6.02228	538.029
2142	543.838	596.58	512.165	1473.96	372.198	783.163	142.076	157.355	13.4165	0.317332	19.4282	42.8837	3.68526	31.7003	338.905	121.456	0.0981813	26.3273	28.5419	10.535	107.13	10.9364	9.62023	8.30458	0.170347	1.81284e-11	0.0906273	0.201718	0.0633371	0.00312961	1.75549e-22	0.39419	0.000272268	6.02233	538.029
2143	541.705	594.375	510.413	1471.87	371.908	784.637	140.263	157.483	13.4311	0.317576	19.4104	42.8922	3.68553	31.694	340.028	121.609	0.0969807	26.3332	28.5841	10.2585	105.754	10.7714	9.57887	8.29827	0.162084	1.46856e-11	0.0829573	0.19168	0.0597502	0.00292361	1.24348e-22	0.386507	0.000257431	6.01904	538.029
2144	539.522	592.115	508.618	1469.75	371.607	786.055	138.476	157.595	13.444	0.317791	19.394	42.8992	3.68581	31.6882	341.139	121.744	0.0958486	26.3384	28.6214	9.98897	104.396	10.6088	9.53768	8.29197	0.15422	1.18968e-11	0.0759365	0.182147	0.0563698	0.00273115	8.80813e-23	0.378973	0.0002434	6.01777	538.029
2145	537.307	589.816	506.793	1467.64	371.294	787.429	136.717	157.693	13.4551	0.317977	19.3792	42.907	3.68613	31.6832	342.245	121.861	0.0947837	26.3437	28.6536	9.72657	103.056	10.4488	9.49669	8.28566	0.146741	9.63793e-12	0.0695115	0.173093	0.0531847	0.00255139	6.23917e-23	0.37159	0.000230138	6.01911	538.029
2146	535.065	587.485	504.942	1465.56	370.97	788.768	134.986	157.776	13.4645	0.318135	19.3658	42.9169	3.68655	31.6792	343.35	121.962	0.0937844	26.3499	28.6809	9.47128	101.734	10.2913	9.45593	8.27938	0.139634	7.80862e-12	0.0636326	0.164495	0.0501841	0.00238354	4.41947e-23	0.364344	0.000217605	6.02297	538.029
2147	532.799	585.125	503.065	1463.55	370.634	790.08	133.285	157.843	13.4723	0.318265	19.354	42.9306	3.68711	31.6764	344.46	122.046	0.0928494	26.3577	28.7032	9.22315	100.433	10.1366	9.41543	8.27311	0.132886	6.3273e-12	0.0582543	0.15633	0.047358	0.00222685	3.1305e-23	0.357236	0.000205767	6.02969	538.029
2148	530.5	582.725	501.154	1461.61	370.288	791.366	131.612	157.896	13.4783	0.318365	19.3436	42.9475	3.68781	31.6747	345.577	122.116	0.0919768	26.3669	28.7206	8.98201	99.1508	9.98456	9.3752	8.26686	0.126479	5.12768e-12	0.0533341	0.148574	0.0446962	0.00208059	2.21747e-23	0.350284	0.000194586	6.03743	538.029
2149	528.155	580.272	499.198	1459.71	369.93	792.621	129.967	157.934	13.4825	0.318437	19.3348	42.9664	3.68863	31.6742	346.697	122.17	0.0911644	26.377	28.733	8.74755	97.8879	9.83511	9.33523	8.26063	0.120393	4.15599e-12	0.0488321	0.141231	0.0421887	0.00194402	1.57073e-23	0.343482	0.000184022	6.04431	538.029
2150	525.757	577.757	497.19	1457.84	369.56	793.842	128.348	157.956	13.4851	0.318481	19.3274	42.9861	3.68954	31.6745	347.819	122.209	0.0904101	26.3877	28.7404	8.51951	96.6432	9.68815	9.29549	8.25441	0.11461	3.36878e-12	0.0447123	0.134252	0.0398265	0.0018165	1.11261e-23	0.336825	0.000174039	6.05038	538.029
2151	523.303	575.18	495.13	1455.99	369.181	795.029	126.755	157.964	13.486	0.318496	19.3216	43.0065	3.69052	31.6758	348.942	122.233	0.089712	26.3988	28.7429	8.2977	95.4164	9.54362	9.25599	8.24821	0.109113	2.73095e-12	0.040942	0.127598	0.0375721	0.00169742	7.8811e-24	0.330308	0.000164606	6.05611	538.029
2152	520.84	572.59	493.06	1454.15	368.79	796.199	125.188	157.964	13.486	0.318496	19.3164	43.0274	3.69157	31.6777	350.066	122.25	0.0890526	26.4104	28.7429	8.08192	94.2071	9.40148	9.21672	8.24203	0.103889	2.2141e-12	0.0374914	0.121281	0.0354194	0.0015862	5.58252e-24	0.323928	0.00015569	6.06162	538.029
2153	518.394	570.019	491.01	1452.27	368.388	797.357	123.643	157.964	13.486	0.318497	19.3113	43.0455	3.69259	31.6798	351.181	122.268	0.0884135	26.4209	28.7429	7.87164	93.0132	9.26146	9.17762	8.23585	0.0989147	1.79513e-12	0.0343321	0.115283	0.0333903	0.00148227	3.95433e-24	0.317672	0.000147258	6.06304	538.029
2154	515.961	567.46	488.976	1450.31	367.976	798.493	122.118	157.964	13.486	0.318497	19.3063	43.0592	3.69352	31.6816	352.28	122.284	0.0877935	26.4298	28.7429	7.66651	91.8332	9.1234	9.13865	8.22966	0.0941741	1.45539e-12	0.0314386	0.109567	0.0314771	0.00138512	2.80102e-24	0.311532	0.000139278	6.06102	538.029
2155	513.562	564.938	486.976	1448.32	367.553	799.619	120.615	157.964	13.486	0.318498	19.3012	43.0715	3.69443	31.6836	353.372	122.301	0.0871927	26.4379	28.7428	7.46661	90.6683	8.98739	9.09984	8.22348	0.0896609	1.17998e-12	0.0287892	0.104129	0.0296738	0.00129434	1.98408e-24	0.305512	0.000131731	6.06093	538.029
2156	511.209	562.465	485.019	1446.33	367.12	800.746	119.135	157.964	13.486	0.318498	19.2962	43.0844	3.69536	31.6859	354.462	122.318	0.0866111	26.4463	28.7428	7.272	89.5191	8.85353	9.06123	8.21732	0.0853675	9.56746e-13	0.0263639	0.098966	0.0279744	0.00120953	1.40541e-24	0.299614	0.000124596	6.06337	538.029
2157	508.906	560.044	483.108	1444.37	366.677	801.88	117.679	157.964	13.486	0.318499	19.2913	43.0994	3.69636	31.6887	355.555	122.336	0.0860485	26.4555	28.7428	7.0827	88.3864	8.72188	9.02285	8.21116	0.0812862	7.75816e-13	0.024144	0.094074	0.0263731	0.00113032	9.95512e-25	0.29384	0.000117852	6.06823	538.029
2158	506.654	557.676	481.241	1442.48	366.223	803.032	116.246	157.964	13.486	0.3185	19.2864	43.118	3.69748	31.6923	356.658	122.356	0.0855049	26.4661	28.7428	6.89873	87.2707	8.5925	8.98473	8.20503	0.0774094	6.29187e-13	0.0221125	0.0894253	0.0248645	0.00105637	7.05163e-25	0.288192	0.000111481	6.07587	538.029
2159	504.44	555.348	479.408	1440.64	365.759	804.2	114.838	157.964	13.486	0.3185	19.2816	43.1398	3.69873	31.6967	357.77	122.378	0.0849798	26.4782	28.7428	6.71994	86.172	8.46538	8.94687	8.19892	0.0737272	5.10345e-13	0.0202533	0.0849937	0.0234433	0.000987314	4.99497e-25	0.282668	0.000105461	6.08442	538.029
2160	502.254	553.044	477.595	1438.84	365.285	805.379	113.452	157.964	13.486	0.318501	19.2769	43.1633	3.70006	31.7018	358.887	122.4	0.0844724	26.4911	28.7428	6.5461	85.0896	8.34041	8.90925	8.19282	0.0702276	4.14001e-13	0.0185515	0.0807781	0.0221042	0.000922823	3.53815e-25	0.277262	9.97722e-05	6.092	538.029
2161	500.091	550.755	475.797	1437.05	364.801	806.565	112.088	157.964	13.486	0.318501	19.2723	43.1875	3.70146	31.7073	360.009	122.424	0.0839819	26.5045	28.7428	6.37702	84.0227	8.21752	8.87186	8.18675	0.0669003	3.35883e-13	0.0169936	0.0767782	0.0208423	0.000862585	2.50622e-25	0.271971	9.43949e-05	6.09864	538.029
2162	497.946	548.481	474.009	1435.28	364.314	807.755	110.746	157.964	13.486	0.318502	19.2677	43.2118	3.7029	31.7134	361.132	122.449	0.0835075	26.5181	28.7428	6.21253	82.9711	8.09666	8.83469	8.18068	0.0637363	2.72531e-13	0.0155673	0.0729941	0.0196531	0.000806313	1.77526e-25	0.26679	8.93115e-05	6.10474	538.029
2163	495.817	546.222	472.233	1433.5	363.831	808.946	109.424	157.964	13.4859	0.318502	19.2632	43.2356	3.70437	31.7198	362.255	122.475	0.0830488	26.5318	28.7428	6.0525	81.9345	7.97778	8.79774	8.17464	0.0607269	2.21148e-13	0.0142612	0.0694018	0.0185323	0.000753743	1.25749e-25	0.261718	8.45057e-05	6.11042	538.029
2164	493.69	543.965	470.458	1431.66	363.352	810.121	108.121	157.964	13.4859	0.318503	19.2587	43.2559	3.70578	31.7261	363.368	122.5	0.0826041	26.5441	28.7427	5.89651	80.9108	7.86065	8.76095	8.16859	0.0578599	1.79457e-13	0.0130649	0.0659775	0.0174754	0.000704603	8.90737e-26	0.256743	7.99587e-05	6.11187	538.029
2165	491.556	541.707	468.685	1429.72	362.878	811.272	106.834	157.964	13.4859	0.318504	19.2542	43.271	3.70706	31.732	364.465	122.524	0.0821724	26.5542	28.7427	5.74431	79.899	7.74513	8.72428	8.16255	0.0551256	1.45619e-13	0.0119687	0.0627255	0.0164787	0.000658651	6.30947e-26	0.251859	7.56544e-05	6.1098	538.029
2166	489.43	539.475	466.932	1427.75	362.408	812.411	105.565	157.965	13.4859	0.318504	19.2497	43.2841	3.70829	31.7378	365.554	122.548	0.0817539	26.5635	28.7427	5.59598	78.8999	7.63132	8.68776	8.15651	0.0525208	1.18164e-13	0.0109645	0.0596291	0.0155388	0.000615697	4.46926e-26	0.247069	7.1582e-05	6.10968	538.029
2167	487.333	537.282	465.211	1425.77	361.942	813.551	104.315	157.965	13.4859	0.318505	19.2453	43.2979	3.70953	31.7438	366.642	122.573	0.0813489	26.5729	28.7427	5.45155	77.9142	7.51928	8.65143	8.15048	0.0500412	9.58903e-14	0.0100449	0.0566733	0.0146529	0.000575556	3.16577e-26	0.242375	6.77304e-05	6.1122	538.029
2168	485.277	535.133	463.525	1423.83	361.48	814.702	103.084	157.965	13.4859	0.318505	19.2409	43.3144	3.71084	31.7504	367.736	122.599	0.0809577	26.5832	28.7427	5.31101	76.9424	7.40906	8.61531	8.14446	0.0476825	7.78238e-14	0.0092029	0.0538684	0.0138179	0.000538054	2.24245e-26	0.237759	6.40887e-05	6.11733	538.029
2169	483.263	533.029	461.873	1421.96	361.023	815.874	101.873	157.965	13.4859	0.318506	19.2367	43.3349	3.71227	31.7577	368.842	122.626	0.0805803	26.5952	28.7427	5.17438	75.9852	7.30074	8.57944	8.13847	0.0454405	6.31705e-14	0.00843207	0.0512234	0.0130312	0.000503025	1.58842e-26	0.233223	6.06469e-05	6.12527	538.029
2170	481.287	530.96	460.246	1420.15	360.57	817.065	100.682	157.965	13.4859	0.318506	19.2325	43.3589	3.71382	31.7657	369.96	122.655	0.0802163	26.6087	28.7427	5.04159	75.0424	7.19429	8.54381	8.13249	0.0433096	5.12844e-14	0.00772639	0.0486967	0.0122898	0.000470308	1.12515e-26	0.228786	5.73939e-05	6.13413	538.029
2171	479.337	528.909	458.631	1418.38	360.121	818.27	99.5091	157.965	13.4859	0.318507	19.2283	43.3847	3.71545	31.7744	371.086	122.685	0.0798651	26.6231	28.7427	4.91245	74.1134	7.08962	8.5084	8.12654	0.0412831	4.16404e-14	0.00708022	0.0462748	0.0115912	0.000439742	7.96989e-27	0.224443	5.43185e-05	6.14199	538.029
2172	477.402	526.869	457.022	1416.63	359.676	819.483	98.3546	157.965	13.4859	0.318508	19.2243	43.4112	3.71714	31.7835	372.217	122.717	0.079526	26.6379	28.7426	4.78681	73.1976	6.98667	8.47321	8.12059	0.039355	3.38139e-14	0.00648845	0.0439937	0.0109326	0.000411181	5.64541e-27	0.220191	5.14104e-05	6.14884	538.029
2173	475.477	524.838	455.419	1414.88	359.235	820.7	97.2177	157.965	13.4859	0.318508	19.2203	43.4377	3.71887	31.7929	373.351	122.749	0.0791985	26.653	28.7426	4.66457	72.2948	6.8854	8.43823	8.11467	0.0375202	2.74613e-14	0.00594643	0.0418378	0.0103118	0.000384492	3.99889e-27	0.216026	4.86603e-05	6.15512	538.029
2174	473.56	522.815	453.821	1413.14	358.798	821.92	96.098	157.965	13.4859	0.318509	19.2163	43.464	3.72063	31.8027	374.487	122.782	0.0788822	26.6681	28.7426	4.54559	71.4046	6.78577	8.40346	8.10876	0.035774	2.23044e-14	0.00544995	0.0397693	0.00972662	0.00035955	2.83258e-27	0.211948	4.60593e-05	6.16103	538.029
2175	471.64	520.787	452.219	1411.34	358.365	823.127	94.9932	157.965	13.4859	0.318509	19.2124	43.4867	3.72232	31.8123	375.614	122.815	0.0785757	26.6819	28.7426	4.4296	70.5255	6.68759	8.36883	8.10285	0.0341092	1.81165e-14	0.00499499	0.0378012	0.00917469	0.000336226	2.00644e-27	0.207947	4.35975e-05	6.16268	538.029
2176	469.715	518.755	450.614	1409.45	357.936	824.309	93.902	157.965	13.4859	0.31851	19.2085	43.5045	3.72388	31.8215	376.726	122.847	0.0782782	26.6936	28.7426	4.3164	69.6564	6.59073	8.33431	8.09694	0.0325203	1.47146e-14	0.00457796	0.0359457	0.00865401	0.000314409	1.42124e-27	0.204017	4.12663e-05	6.16077	538.029
2177	467.808	516.742	449.025	1407.52	357.511	825.482	92.8256	157.965	13.4859	0.31851	19.2047	43.5203	3.72539	31.8306	377.831	122.878	0.0779899	26.7045	28.7426	4.20605	68.798	6.49529	8.29993	8.09104	0.0310056	1.19517e-14	0.0041958	0.0341918	0.00816295	0.000294008	1.00673e-27	0.200162	3.90597e-05	6.16081	538.029
2178	465.931	514.761	447.463	1405.58	357.09	826.653	91.7645	157.966	13.4859	0.318511	19.2008	43.5363	3.72689	31.8398	378.934	122.911	0.0777111	26.7153	28.7426	4.09857	67.951	6.40131	8.26573	8.08515	0.0295626	9.70823e-15	0.00384566	0.0325054	0.00769991	0.000274936	7.13108e-28	0.196383	3.6972e-05	6.16337	538.029
2179	464.09	512.819	445.931	1403.67	356.672	827.832	90.7193	157.966	13.4859	0.318512	19.1971	43.5541	3.72843	31.8493	380.042	122.943	0.077442	26.7267	28.7426	3.99397	67.1158	6.30885	8.23173	8.07927	0.0281891	7.88662e-15	0.00352489	0.0308797	0.00726335	0.000257111	5.05125e-28	0.192682	3.49974e-05	6.1684	538.029
2180	462.285	510.914	444.428	1401.8	356.259	829.028	89.6908	157.966	13.4859	0.318512	19.1934	43.575	3.73006	31.8594	381.16	122.977	0.0771827	26.7393	28.7426	3.89226	66.293	6.21795	8.19795	8.07341	0.0268827	6.40767e-15	0.00323109	0.029357	0.00685184	0.000240457	3.57801e-28	0.18906	3.31304e-05	6.17623	538.029
2181	460.507	509.036	442.945	1399.99	355.849	830.24	88.6786	157.966	13.4859	0.318513	19.1898	43.5988	3.73178	31.87	382.288	123.013	0.0769329	26.7531	28.7425	3.79338	65.4824	6.1286	8.1644	8.06757	0.0256401	5.20682e-15	0.00296198	0.0279262	0.00646395	0.000224895	2.53446e-28	0.185515	3.13651e-05	6.18498	538.029
2182	458.742	507.172	441.47	1398.2	355.443	831.463	87.6819	157.966	13.4859	0.318513	19.1862	43.6239	3.73356	31.8811	383.422	123.049	0.0766923	26.7676	28.7425	3.69718	64.6836	6.04074	8.13107	8.06174	0.0244575	4.23154e-15	0.00271544	0.0265529	0.00609825	0.000210352	1.79526e-28	0.182045	2.96956e-05	6.19274	538.029
2183	456.984	505.314	439.999	1396.42	355.041	832.692	86.7002	157.966	13.4859	0.318514	19.1827	43.6496	3.73538	31.8924	384.561	123.087	0.0764602	26.7824	28.7425	3.60357	63.896	5.9543	8.09793	8.05593	0.0233316	3.43931e-15	0.00248955	0.0252547	0.00575344	0.000196758	1.27166e-28	0.178646	2.81164e-05	6.19953	538.029
2184	455.231	503.461	438.529	1394.65	354.642	833.926	85.7331	157.966	13.4859	0.318514	19.1793	43.6754	3.73723	31.9041	385.703	123.125	0.0762364	26.7974	28.7425	3.51246	63.1194	5.86925	8.06499	8.05014	0.0222595	2.79569e-15	0.00228257	0.0240234	0.0054283	0.000184051	9.00772e-29	0.175316	2.66223e-05	6.20585	538.029
2185	453.483	501.612	437.062	1392.88	354.247	835.163	84.7802	157.966	13.4859	0.318515	19.1759	43.7011	3.7391	31.916	386.847	123.163	0.0760205	26.8125	28.7425	3.42377	62.3536	5.78556	8.03224	8.04436	0.0212383	2.27275e-15	0.00209289	0.0228516	0.0051217	0.000172171	6.38055e-29	0.172054	2.52088e-05	6.2118	538.029
2186	451.728	499.756	435.588	1391.05	353.856	836.385	83.8396	157.966	13.4859	0.318516	19.1725	43.7234	3.74089	31.9277	387.982	123.202	0.0758114	26.8262	28.7425	3.33729	61.5971	5.70307	7.99962	8.03859	0.0202641	1.84768e-15	0.001919	0.0217321	0.00483246	0.000161058	4.51962e-29	0.168853	2.38703e-05	6.21344	538.029
2187	449.966	497.892	434.109	1389.14	353.468	837.584	82.9102	157.966	13.4859	0.318516	19.1692	43.7408	3.74255	31.9389	389.102	123.239	0.0756083	26.8379	28.7425	3.25287	60.849	5.62168	7.96711	8.03281	0.0193337	1.50207e-15	0.00175954	0.0206586	0.00455952	0.00015066	3.20144e-29	0.165709	2.26024e-05	6.2115	538.029
2188	448.219	496.044	432.644	1387.19	353.084	838.771	81.993	157.967	13.4859	0.318517	19.1658	43.7564	3.74415	31.9499	390.214	123.276	0.0754116	26.8488	28.7425	3.17055	60.1101	5.54145	7.93473	8.02704	0.0184461	1.22114e-15	0.00161335	0.0196509	0.00430203	0.000140932	2.26771e-29	0.162623	2.14018e-05	6.21151	538.029
2189	446.499	494.226	431.203	1385.24	352.703	839.958	81.0886	157.967	13.4859	0.318517	19.1625	43.7721	3.74573	31.9609	391.325	123.314	0.0752216	26.8595	28.7425	3.09035	59.3809	5.46244	7.90251	8.02128	0.0175999	9.9281e-16	0.00147935	0.0186784	0.00405917	0.000131836	1.60632e-29	0.159598	2.02655e-05	6.21408	538.029
2190	444.811	492.441	429.788	1383.3	352.325	841.153	80.1975	157.967	13.4859	0.318518	19.1593	43.7896	3.74735	31.9722	392.441	123.352	0.0750384	26.8709	28.7424	3.01228	58.6616	5.38469	7.87048	8.01553	0.0167939	8.07249e-16	0.00135654	0.0177375	0.00383012	0.000123331	1.13782e-29	0.156633	1.91903e-05	6.21913	538.029
2191	443.155	490.69	428.4	1381.42	351.952	842.364	79.3202	157.967	13.4859	0.318518	19.1562	43.8104	3.74906	31.984	393.567	123.391	0.0748624	26.8834	28.7424	2.93635	57.9529	5.30823	7.83865	8.00981	0.0160267	6.56459e-16	0.001244	0.0168495	0.00361416	0.000115382	8.05968e-30	0.153732	1.81734e-05	6.22701	538.029
2192	441.522	488.962	427.028	1379.58	351.581	843.592	78.4565	157.967	13.4859	0.318519	19.1531	43.834	3.75085	31.9963	394.704	123.431	0.0746934	26.8972	28.7424	2.86252	57.2547	5.23307	7.80705	8.0041	0.0152966	5.33912e-16	0.00114088	0.0160085	0.00341053	0.000107952	5.70902e-30	0.150891	1.72115e-05	6.23583	538.029
2193	439.899	487.245	425.663	1377.77	351.214	844.831	77.6058	157.967	13.4859	0.318519	19.1501	43.859	3.75269	32.0089	395.847	123.472	0.0745309	26.9117	28.7424	2.79069	56.5664	5.15914	7.77564	7.9984	0.0146012	4.34295e-16	0.00104636	0.0152093	0.0032185	0.000101006	4.04394e-30	0.14811	1.63014e-05	6.24366	538.029
2194	438.281	485.53	424.298	1375.97	350.85	846.075	76.7676	157.967	13.4859	0.31852	19.1471	43.8845	3.75457	32.0218	396.995	123.514	0.0743746	26.9265	28.7424	2.72078	55.8877	5.0864	7.74441	7.99273	0.0139387	3.53303e-16	0.00095973	0.0144472	0.00303739	9.45113e-05	2.86449e-30	0.145385	1.54402e-05	6.25051	538.029
2195	436.664	483.818	422.933	1374.17	350.49	847.325	75.9415	157.967	13.4859	0.318521	19.1442	43.9103	3.75647	32.035	398.146	123.557	0.0742243	26.9415	28.7424	2.6527	55.2184	5.01481	7.71338	7.98706	0.0133074	2.87445e-16	0.000880312	0.0137183	0.00286656	8.84377e-05	2.02904e-30	0.142715	1.46252e-05	6.25688	538.029
2196	435.051	482.108	421.568	1372.38	350.133	848.578	75.1274	157.967	13.4859	0.318521	19.1413	43.9359	3.75839	32.0483	399.299	123.6	0.0740796	26.9565	28.7424	2.58642	54.5583	4.94435	7.68251	7.98142	0.0127058	2.33886e-16	0.000807503	0.0130429	0.00270542	8.27577e-05	1.43726e-30	0.140098	1.38537e-05	6.26288	538.029
2197	433.429	480.388	420.196	1370.54	349.779	849.816	74.3234	157.968	13.4859	0.318522	19.1385	43.9582	3.76023	32.0614	400.443	123.643	0.0739395	26.9703	28.7424	2.52179	53.9061	4.87488	7.65178	7.97577	0.0121313	1.90313e-16	0.000740726	0.0124148	0.00255337	7.74427e-05	1.01807e-30	0.13753	1.31231e-05	6.26453	538.029
2198	431.798	478.66	418.818	1368.61	349.428	851.029	73.5287	157.968	13.4859	0.318522	19.1357	43.9755	3.76194	32.0739	401.572	123.685	0.0738033	26.982	28.7423	2.45867	53.261	4.80633	7.62113	7.97013	0.0115824	1.54854e-16	0.000679464	0.0118046	0.00240984	7.24674e-05	7.21142e-31	0.135006	1.24306e-05	6.26255	538.029
2199	430.18	476.946	417.451	1366.64	349.081	852.231	72.7441	157.968	13.4859	0.318523	19.1329	43.991	3.76358	32.0861	402.692	123.726	0.0736715	26.9928	28.7423	2.3971	52.6237	4.73874	7.59061	7.96448	0.0110582	1.26004e-16	0.000623275	0.0112107	0.00227439	6.78118e-05	5.10816e-31	0.132529	1.17747e-05	6.26255	538.029
2200	428.588	475.259	416.107	1364.66	348.736	853.433	71.9702	157.968	13.4859	0.318523	19.1301	44.0067	3.7652	32.0984	403.812	123.768	0.0735444	27.0035	28.7423	2.3371	51.9946	4.67216	7.56025	7.95885	0.0105583	1.02535e-16	0.00057175	0.0106557	0.00214661	6.34566e-05	3.61833e-31	0.130099	1.11536e-05	6.26512	538.029
2201	427.024	473.602	414.787	1362.71	348.395	854.642	71.2074	157.968	13.4859	0.318524	19.1274	44.0241	3.76686	32.1109	404.937	123.81	0.0734222	27.0148	28.7423	2.27869	51.3741	4.60663	7.53005	7.95323	0.0100817	8.34454e-17	0.000524508	0.0101356	0.00202606	5.93834e-05	2.56301e-31	0.127718	1.05658e-05	6.2702	538.029
2202	425.489	471.976	413.491	1360.8	348.06	855.833	70.4563	157.968	13.4859	0.318525	19.1247	44.0448	3.7686	32.1238	406.037	123.853	0.0733053	27.0274	28.7423	2.22186	50.7625	4.54218	7.50005	7.94763	0.00962781	6.79187e-17	0.0004812	0.00964707	0.00191236	5.55749e-05	1.81549e-31	0.125386	1.00096e-05	6.27815	538.029
2203	423.975	470.371	412.21	1358.94	347.732	856.975	69.7166	157.968	13.4859	0.318525	19.1221	44.0684	3.77043	32.1372	407.082	123.897	0.0731936	27.0411	28.7423	2.16657	50.1599	4.47881	7.47026	7.94205	0.00919551	5.5289e-17	0.000441498	0.0091866	0.00180513	5.2014e-05	1.28599e-31	0.123104	9.48327e-06	6.28705	538.029
2204	422.469	468.774	410.933	1357.11	347.412	858.065	68.9877	157.968	13.4859	0.318526	19.1196	44.0934	3.7723	32.1509	408.071	123.942	0.0730866	27.0556	28.7423	2.11276	49.5658	4.41646	7.44064	7.93649	0.00878353	4.50133e-17	0.000405094	0.00872699	0.00170397	4.86837e-05	9.10921e-32	0.120867	8.98514e-06	6.29494	538.029
2205	420.965	467.179	409.655	1355.29	347.1	859.103	68.2693	157.969	13.4859	0.318526	19.1172	44.119	3.77421	32.1648	409.008	123.988	0.0729841	27.0703	28.7423	2.06038	48.9798	4.35511	7.41121	7.93094	0.00839077	3.66513e-17	0.000371712	0.00829213	0.00160854	4.55687e-05	6.45244e-32	0.118676	8.51359e-06	6.30186	538.029
2206	419.463	465.585	408.376	1353.47	346.797	860.093	67.561	157.969	13.4859	0.318527	19.1147	44.1447	3.77614	32.179	409.894	124.034	0.0728858	27.0853	28.7423	2.00938	48.4019	4.29471	7.38194	7.9254	0.00801625	2.98458e-17	0.000341097	0.00787934	0.00151851	4.26548e-05	4.57054e-32	0.116529	8.06716e-06	6.30829	538.029
2207	417.963	463.992	407.095	1351.66	346.5	861.037	66.8628	157.969	13.4859	0.318527	19.1124	44.1703	3.77808	32.1932	410.733	124.081	0.0727917	27.1003	28.7422	1.95971	47.8317	4.23526	7.35285	7.91988	0.00765907	2.43063e-17	0.000313018	0.00748622	0.00143355	3.99288e-05	3.23751e-32	0.114424	7.64446e-06	6.31435	538.029
2208	416.454	462.389	405.806	1349.79	346.212	861.919	66.173	157.969	13.4859	0.318528	19.11	44.1925	3.77994	32.2072	411.517	124.127	0.0727006	27.1141	28.7422	1.91125	47.2684	4.17663	7.32386	7.91436	0.00731782	1.97955e-17	0.000287254	0.00711037	0.00135336	3.73772e-05	2.29326e-32	0.112357	7.24393e-06	6.31601	538.029
2209	414.937	460.778	404.511	1347.84	345.931	862.733	65.4909	157.969	13.4859	0.318529	19.1077	44.2098	3.78166	32.2206	412.241	124.173	0.072612	27.1257	28.7422	1.86392	46.7111	4.11876	7.29497	7.90884	0.00699146	1.61215e-17	0.000263608	0.00674977	0.00127765	3.49877e-05	1.62442e-32	0.110325	6.86421e-06	6.314	538.029
2210	413.432	459.18	403.227	1345.85	345.658	863.496	64.8173	157.969	13.4859	0.318529	19.1054	44.2253	3.78332	32.2337	412.918	124.217	0.0725263	27.1365	28.7422	1.81774	46.1604	4.06169	7.26619	7.90333	0.00667966	1.31297e-17	0.000241911	0.00642711	0.00120618	3.27511e-05	1.15064e-32	0.10833	6.50441e-06	6.31399	538.029
2211	411.95	457.607	401.963	1343.86	345.393	864.221	64.1527	157.969	13.4859	0.31853	19.1031	44.241	3.78496	32.2468	413.556	124.262	0.0724439	27.1473	28.7422	1.77272	45.6166	4.00546	7.23754	7.89782	0.00638204	1.06937e-17	0.000222006	0.00611442	0.00113873	3.0658e-05	8.15049e-33	0.106374	6.1636e-06	6.31656	538.029
2212	410.495	456.064	400.723	1341.89	345.134	864.919	63.4974	157.97	13.4859	0.31853	19.1009	44.2584	3.78663	32.2601	414.165	124.307	0.072365	27.1586	28.7422	1.72889	45.0802	3.95011	7.20906	7.89233	0.00609814	8.7105e-18	0.000203748	0.00581076	0.00107509	2.86999e-05	5.77334e-33	0.104455	5.84089e-06	6.32166	538.029
2213	409.068	454.549	399.504	1339.96	344.884	865.601	62.8519	157.97	13.4859	0.318531	19.0987	44.2791	3.78838	32.2737	414.753	124.354	0.0722901	27.1711	28.7422	1.68624	44.5515	3.89566	7.18077	7.88685	0.00582757	7.09602e-18	0.000187004	0.00553939	0.00101505	2.68683e-05	4.0895e-33	0.102577	5.53542e-06	6.32968	538.029
2214	407.659	453.054	398.298	1338.08	344.64	866.271	62.2161	157.97	13.4859	0.318531	19.0966	44.3026	3.79022	32.2878	415.322	124.401	0.072219	27.1849	28.7422	1.64473	44.0304	3.84211	7.15266	7.8814	0.00556971	5.78161e-18	0.000171647	0.00527278	0.000958398	2.51553e-05	2.89677e-33	0.100737	5.24629e-06	6.33865	538.029
2215	406.258	451.566	397.095	1336.23	344.404	866.924	61.5894	157.97	13.4859	0.318532	19.0946	44.3276	3.7921	32.3022	415.87	124.449	0.0721515	27.1993	28.7422	1.60433	43.5166	3.78942	7.12473	7.87596	0.0053238	4.71123e-18	0.00015756	0.00501034	0.000904947	2.35526e-05	2.0519e-33	0.0989337	4.97253e-06	6.34662	538.029
2216	404.858	450.078	395.891	1334.38	344.175	867.557	60.9715	157.97	13.4859	0.318532	19.0926	44.3531	3.79402	32.3168	416.396	124.498	0.0720872	27.214	28.7421	1.56499	43.0098	3.73755	7.09697	7.87053	0.00508921	3.83943e-18	0.000144637	0.00477567	0.000854505	2.2053e-05	1.45345e-33	0.0971665	4.71329e-06	6.35361	538.029
2217	403.458	448.59	394.684	1332.55	343.953	868.17	60.3621	157.97	13.4859	0.318533	19.0907	44.3788	3.79596	32.3316	416.902	124.547	0.0720261	27.229	28.7421	1.52666	42.5098	3.68649	7.06936	7.86512	0.00486537	3.12927e-18	0.00013278	0.0045417	0.000806902	2.06498e-05	1.02954e-33	0.0954342	4.46776e-06	6.3601	538.029
2218	402.059	447.103	393.476	1330.71	343.739	868.765	59.7611	157.97	13.4859	0.318534	19.0888	44.4044	3.79791	32.3465	417.389	124.597	0.0719679	27.244	28.7421	1.48933	42.0165	3.63621	7.04191	7.85972	0.00465174	2.55072e-18	0.000121901	0.00430832	0.000761973	1.93366e-05	7.29267e-34	0.0937357	4.2352e-06	6.36621	538.029
2219	400.651	445.605	392.258	1328.82	343.531	869.323	59.1673	157.971	13.4859	0.318534	19.0869	44.4266	3.79979	32.3611	417.844	124.646	0.0719116	27.2577	28.7421	1.45289	41.529	3.58662	7.01456	7.85433	0.00444751	2.07919e-18	0.000111914	0.00409939	0.000719553	1.8107e-05	5.16571e-34	0.0920675	4.01476e-06	6.36788	538.029
2220	399.234	444.099	391.034	1326.85	343.33	869.836	58.5798	157.971	13.4859	0.318535	19.085	44.4439	3.80152	32.3751	418.264	124.694	0.0718568	27.2694	28.7421	1.41731	41.0466	3.53766	6.9873	7.84893	0.00425204	1.69479e-18	0.000102745	0.00391223	0.000679489	1.69551e-05	3.65909e-34	0.0904274	3.80569e-06	6.36583	538.029
2221	397.829	442.605	389.82	1324.85	343.136	870.32	57.9995	157.971	13.4859	0.318535	19.0832	44.4593	3.80319	32.3887	418.658	124.741	0.0718039	27.2802	28.7421	1.38258	40.5698	3.48936	6.96014	7.84354	0.00406517	1.38149e-18	9.43276e-05	0.00372057	0.00064166	1.58766e-05	2.59189e-34	0.0888165	3.60752e-06	6.36579	538.029
2222	396.471	441.162	388.65	1322.84	342.949	870.786	57.4267	157.971	13.4859	0.318536	19.0814	44.475	3.80484	32.4024	419.035	124.789	0.0717533	27.2909	28.7421	1.3487	40.099	3.44178	6.93311	7.83815	0.00388668	1.12617e-18	8.66025e-05	0.00352494	0.000605949	1.4867e-05	1.83595e-34	0.0872358	3.41974e-06	6.36836	538.029
2223	395.182	439.797	387.545	1320.84	342.768	871.243	56.8619	157.971	13.4859	0.318536	19.0796	44.4923	3.80652	32.4161	419.4	124.836	0.0717053	27.3022	28.7421	1.31571	39.6345	3.39491	6.90624	7.83278	0.0037163	9.1812e-19	7.95136e-05	0.00334993	0.000572243	1.3922e-05	1.30048e-34	0.0856858	3.24187e-06	6.37346	538.029
2224	393.961	438.504	386.501	1318.9	342.594	871.703	56.3053	157.971	13.4859	0.318537	19.0779	44.5129	3.80828	32.4303	419.761	124.885	0.0716602	27.3147	28.7421	1.28361	39.1765	3.34881	6.87953	7.82743	0.00355381	7.48605e-19	7.30094e-05	0.00319343	0.000540434	1.30379e-05	9.21184e-35	0.0841673	3.07344e-06	6.38143	538.029
2225	392.795	437.273	385.507	1316.99	342.427	872.165	55.7568	157.972	13.4859	0.318537	19.0763	44.5362	3.81011	32.4449	420.119	124.935	0.0716181	27.3283	28.742	1.25237	38.725	3.30345	6.853	7.8221	0.00339884	6.10472e-19	6.70417e-05	0.00305351	0.000510416	1.22107e-05	6.52514e-35	0.0826797	2.91395e-06	6.3903	538.029
2226	391.673	436.089	384.553	1315.11	342.267	872.624	55.2161	157.972	13.4859	0.318538	19.0747	44.5608	3.812	32.4597	420.471	124.985	0.0715785	27.3426	28.742	1.22195	38.2798	3.25881	6.82664	7.81678	0.00325094	4.97885e-19	6.15652e-05	0.00290425	0.000482083	1.14365e-05	4.62203e-35	0.0812216	2.76288e-06	6.39808	538.029
2227	390.587	434.945	383.632	1313.24	342.113	873.076	54.6826	157.972	13.4859	0.318539	19.0732	44.5858	3.81391	32.4747	420.815	125.036	0.0715414	27.3571	28.742	1.19232	37.8404	3.21486	6.80042	7.81147	0.00310974	4.06103e-19	5.65388e-05	0.00274659	0.000455337	1.07119e-05	3.27398e-35	0.0797919	2.61976e-06	6.40479	538.029
2228	389.536	433.838	382.742	1311.37	341.965	873.521	54.1564	157.972	13.4859	0.318539	19.0717	44.6108	3.81583	32.4897	421.151	125.087	0.0715064	27.3717	28.742	1.16346	37.4069	3.17157	6.77435	7.80618	0.00297491	3.31272e-19	5.19251e-05	0.00260549	0.000430088	1.00335e-05	2.3191e-35	0.0783898	2.48416e-06	6.41091	538.029
2229	388.518	432.769	381.884	1309.49	341.824	873.957	53.6371	157.972	13.4858	0.31854	19.0703	44.6355	3.81776	32.5049	421.477	125.139	0.0714735	27.3864	28.742	1.13532	36.979	3.12893	6.74842	7.8009	0.00284612	2.70254e-19	4.76899e-05	0.00247921	0.000406251	9.39848e-06	1.64272e-35	0.0770146	2.35567e-06	6.41656	538.029
2230	387.523	431.725	381.048	1307.57	341.689	874.366	53.1237	157.972	13.4858	0.31854	19.0688	44.6566	3.8196	32.5197	421.783	125.19	0.0714417	27.3995	28.742	1.10785	36.556	3.08686	6.72259	7.79562	0.0027229	2.20481e-19	4.38005e-05	0.00236609	0.000383737	8.80359e-06	1.16361e-35	0.0756633	2.23382e-06	6.41764	538.029
2231	386.551	430.708	380.237	1305.55	341.56	874.739	52.6156	157.973	13.4858	0.318541	19.0674	44.6726	3.82129	32.5338	422.063	125.239	0.0714106	27.4106	28.742	1.081	36.1372	3.0453	6.69682	7.79034	0.00260486	1.79868e-19	4.02277e-05	0.00226468	0.000362466	8.24613e-06	8.24232e-36	0.074334	2.1182e-06	6.41487	538.029
2232	385.62	429.737	379.467	1303.5	341.438	875.09	52.1134	157.973	13.4858	0.318541	19.066	44.6864	3.82291	32.5475	422.325	125.288	0.0713804	27.4206	28.742	1.05478	35.7232	3.0043	6.67115	7.78506	0.00249192	1.46737e-19	3.69466e-05	0.00214973	0.000342377	7.72393e-06	5.83838e-36	0.0730278	2.00856e-06	6.41402	538.029
2233	384.74	428.822	378.745	1301.44	341.321	875.429	51.6174	157.973	13.4858	0.318542	19.0646	44.7002	3.82449	32.5611	422.576	125.337	0.0713518	27.4304	28.7419	1.0292	35.3142	2.96387	6.64559	7.77979	0.00238394	1.19715e-19	3.39338e-05	0.00202266	0.000323406	7.2349e-06	4.13557e-36	0.0717453	1.90463e-06	6.41572	538.029
2234	383.914	427.966	378.073	1299.39	341.211	875.767	51.128	157.973	13.4858	0.318543	19.0632	44.7154	3.82609	32.5748	422.823	125.386	0.0713249	27.4406	28.7419	1.00425	34.9104	2.92404	6.62017	7.77453	0.00228078	9.76766e-20	3.11679e-05	0.00190891	0.000305493	6.77704e-06	2.9294e-36	0.0704872	1.80613e-06	6.41991	538.029
2235	383.139	427.167	377.449	1297.37	341.107	876.112	50.6455	157.973	13.4858	0.318543	19.0619	44.7337	3.82776	32.5888	423.073	125.435	0.0713002	27.452	28.7419	0.979958	34.5122	2.88484	6.5949	7.76928	0.00218231	7.97046e-20	2.86291e-05	0.0018071	0.000288584	6.34848e-06	2.07502e-36	0.069254	1.71282e-06	6.42699	538.029
2236	382.408	426.416	376.864	1295.4	341.009	876.465	50.1698	157.973	13.4858	0.318544	19.0607	44.7546	3.82949	32.6031	423.326	125.486	0.0712777	27.4644	28.7419	0.956312	34.1195	2.84626	6.56979	7.76405	0.00208832	6.50475e-20	2.62986e-05	0.001716	0.000272622	5.94734e-06	1.46983e-36	0.0680452	1.62443e-06	6.43497	538.029
2237	381.708	425.699	376.307	1293.45	340.917	876.82	49.7005	157.974	13.4858	0.318544	19.0595	44.7766	3.83126	32.6176	423.578	125.536	0.0712571	27.4774	28.7419	0.933285	33.7319	2.80826	6.54482	7.75884	0.00199854	5.30912e-20	2.4159e-05	0.00163445	0.00025755	5.57178e-06	1.04114e-36	0.0668599	1.54067e-06	6.44185	538.029
2238	381.034	425.01	375.774	1291.5	340.83	877.173	49.2373	157.974	13.4858	0.318545	19.0583	44.7989	3.83304	32.6322	423.827	125.588	0.071238	27.4905	28.7419	0.910829	33.3494	2.77084	6.51999	7.75363	0.00191276	4.33364e-20	2.21944e-05	0.00156145	0.000243319	5.22012e-06	7.37483e-37	0.065697	1.46128e-06	6.44763	538.029
2239	380.385	424.349	375.263	1289.55	340.75	877.522	48.7801	157.974	13.4858	0.318545	19.0572	44.8211	3.83483	32.6469	424.072	125.639	0.0712205	27.5037	28.7419	0.888926	32.9718	2.73396	6.49529	7.74844	0.00183078	3.53768e-20	2.03904e-05	0.00149609	0.00022988	4.8908e-06	5.22391e-37	0.0645561	1.38603e-06	6.45281	538.029
2240	379.761	423.716	374.776	1287.59	340.675	877.867	48.3287	157.974	13.4858	0.318546	19.0561	44.8431	3.83662	32.6615	424.312	125.691	0.0712044	27.5168	28.7419	0.867579	32.599	2.69763	6.47071	7.74326	0.00175241	2.88814e-20	1.87337e-05	0.00143757	0.000217189	4.5824e-06	3.70032e-37	0.0634363	1.31469e-06	6.45752	538.029
2241	379.153	423.1	374.305	1285.58	340.606	878.188	47.8822	157.974	13.4858	0.318546	19.0551	44.8612	3.8383	32.6757	424.536	125.741	0.0711888	27.5284	28.7419	0.846734	32.2301	2.66176	6.44621	7.73808	0.00167737	2.35788e-20	1.72116e-05	0.00138511	0.000205199	4.2934e-06	2.62109e-37	0.0623356	1.24702e-06	6.4576	538.029
2242	378.56	422.503	373.852	1283.49	340.543	878.476	47.4399	157.975	13.4858	0.318547	19.054	44.8742	3.83983	32.6892	424.737	125.79	0.0711731	27.5378	28.7418	0.826333	31.8649	2.62631	6.42177	7.73289	0.00160542	1.92488e-20	1.58128e-05	0.00131393	0.000193867	4.02248e-06	1.85663e-37	0.0612521	1.18278e-06	6.4538	538.029
2243	378.001	421.944	373.434	1281.35	340.485	878.746	47.0026	157.975	13.4858	0.318548	19.0529	44.8849	3.84127	32.7022	424.924	125.838	0.0711579	27.5461	28.7418	0.806412	31.5037	2.59131	6.39741	7.72771	0.00153653	1.5714e-20	1.45278e-05	0.00122601	0.000183162	3.76862e-06	1.31513e-37	0.060187	1.12184e-06	6.45193	538.029
2244	377.487	421.434	373.058	1279.2	340.433	879.006	46.5705	157.975	13.4858	0.318548	19.0519	44.8956	3.84268	32.7151	425.104	125.886	0.0711435	27.5542	28.7418	0.786975	31.1466	2.55679	6.37315	7.72253	0.00147061	1.28287e-20	1.33473e-05	0.00114722	0.000173049	3.53081e-06	9.31562e-38	0.0591408	1.06404e-06	6.45261	538.029
2245	377.018	420.976	372.725	1277.07	340.386	879.268	46.1439	157.975	13.4858	0.318549	19.0508	44.9077	3.8441	32.728	425.282	125.934	0.0711304	27.5627	28.7418	0.768024	30.794	2.52277	6.34901	7.71736	0.00140759	1.04739e-20	1.22632e-05	0.00107663	0.000163499	3.30808e-06	6.59865e-38	0.0581139	1.00925e-06	6.45583	538.029
2246	376.595	420.567	372.434	1274.97	340.345	879.539	45.7231	157.975	13.4858	0.318549	19.0499	44.9228	3.84557	32.7411	425.465	125.983	0.0711188	27.5722	28.7418	0.749565	30.4461	2.48928	6.32501	7.7122	0.0013474	8.5522e-21	1.12677e-05	0.00101343	0.00015448	3.09954e-06	4.67411e-38	0.0571068	9.57331e-07	6.46195	538.029
2247	376.209	420.198	372.177	1272.9	340.309	879.821	45.3081	157.976	13.4858	0.31855	19.0489	44.9406	3.84711	32.7545	425.655	126.032	0.0711089	27.5828	28.7418	0.731584	30.1028	2.45629	6.30115	7.70706	0.00128989	6.98387e-21	1.03536e-05	0.000956826	0.000145964	2.90428e-06	3.31087e-38	0.0561193	9.08125e-07	6.46898	538.029
2248	375.848	419.858	371.942	1270.86	340.279	880.107	44.8984	157.976	13.4858	0.31855	19.0481	44.9594	3.84868	32.768	425.845	126.081	0.0711004	27.594	28.7418	0.71406	29.764	2.4238	6.27742	7.70193	0.00123493	5.70366e-21	9.51399e-06	0.00090613	0.000137922	2.72141e-06	2.34523e-38	0.0551505	8.61481e-07	6.4749	538.029
2249	375.486	419.516	371.705	1268.82	340.256	880.393	44.4939	157.976	13.4858	0.318551	19.0472	44.9786	3.85027	32.7816	426.035	126.131	0.0710929	27.6052	28.7418	0.696973	29.4294	2.39178	6.25381	7.69681	0.00118238	4.65848e-21	8.74281e-06	0.000860715	0.000130326	2.55013e-06	1.66122e-38	0.0541996	8.17258e-07	6.47973	538.029
2250	375.116	419.16	371.453	1266.78	340.238	880.677	44.0943	157.976	13.4858	0.318551	19.0464	44.9976	3.85186	32.7952	426.224	126.181	0.0710865	27.6165	28.7418	0.680308	29.099	2.36021	6.23032	7.6917	0.00113212	3.80509e-21	8.0344e-06	0.000820029	0.000123151	2.3897e-06	1.17672e-38	0.0532661	7.75326e-07	6.48398	538.029
2251	374.764	418.814	371.21	1264.73	340.223	880.958	43.6997	157.976	13.4858	0.318552	19.0456	45.0165	3.85344	32.8088	426.409	126.23	0.071081	27.6278	28.7417	0.664053	28.7726	2.3291	6.20694	7.6866	0.00108405	3.10823e-21	7.38362e-06	0.000783577	0.000116373	2.2394e-06	8.33518e-39	0.0523497	7.35563e-07	6.4878	538.029
2252	374.42	418.469	370.965	1262.76	340.211	881.215	43.3091	157.977	13.4858	0.318553	19.0449	45.0309	3.8549	32.8218	426.579	126.279	0.0710754	27.6373	28.7417	0.648168	28.4496	2.29837	6.18363	7.6815	0.00103798	2.53896e-21	6.78549e-06	0.000750882	0.000109968	2.09853e-06	5.90416e-39	0.0514485	6.97828e-07	6.48684	538.029
2253	374.075	418.118	370.71	1260.96	340.2	881.433	42.9221	157.977	13.4858	0.318553	19.044	45.0391	3.85617	32.8338	426.722	126.326	0.071069	27.6441	28.7417	0.632625	28.1297	2.26799	6.16036	7.67639	0.000993796	2.07377e-21	6.23557e-06	0.000721528	0.000103912	1.96644e-06	4.18217e-39	0.050561	6.62e-07	6.48181	538.029
2254	373.744	417.781	370.462	1259.33	340.189	881.629	42.5391	157.977	13.4858	0.318554	19.0432	45.0442	3.85731	32.8453	426.849	126.371	0.0710624	27.6495	28.7417	0.617435	27.8131	2.23799	6.13716	7.67128	0.000951457	1.69375e-21	5.73012e-06	0.000695194	9.81889e-05	1.84263e-06	2.96241e-39	0.0496882	6.28e-07	6.47871	538.029
2255	373.435	417.467	370.229	1257.89	340.177	881.813	42.1606	157.977	13.4858	0.318554	19.0424	45.0486	3.8584	32.8564	426.968	126.415	0.0710559	27.6543	28.7417	0.602603	27.5001	2.20839	6.11405	7.66617	0.000910925	1.38337e-21	5.26563e-06	0.000671582	9.27808e-05	1.72662e-06	2.0984e-39	0.0488306	5.95747e-07	6.47822	538.029
2256	373.15	417.175	370.01	1256.64	340.166	881.994	41.7868	157.977	13.4858	0.318555	19.0416	45.0541	3.85947	32.8673	427.084	126.459	0.0710501	27.6593	28.7417	0.588152	27.1909	2.17921	6.09105	7.66108	0.000872153	1.1299e-21	4.83887e-06	0.000650423	8.76716e-05	1.61794e-06	1.48639e-39	0.0479885	5.65162e-07	6.48032	538.029
2257	372.887	416.906	369.804	1255.57	340.155	882.184	41.418	157.977	13.4858	0.318555	19.0408	45.0621	3.86057	32.8784	427.204	126.503	0.0710453	27.6651	28.7417	0.574065	26.8858	2.15047	6.06818	7.65599	0.000835097	9.22939e-22	4.44685e-06	0.000631479	8.28456e-05	1.51617e-06	1.05287e-39	0.0471624	5.3617e-07	6.4854	538.029
2258	372.637	416.648	369.603	1254.69	340.144	882.382	41.0541	157.978	13.4858	0.318556	19.0401	45.0726	3.86172	32.8896	427.328	126.548	0.0710415	27.6718	28.7417	0.560334	26.5846	2.12216	6.04544	7.65092	0.000799685	7.53945e-22	4.08674e-06	0.00061452	7.82872e-05	1.42085e-06	7.45792e-40	0.0463521	5.08689e-07	6.49145	538.029
2259	372.389	416.391	369.398	1253.94	340.133	882.582	40.6947	157.978	13.4858	0.318556	19.0394	45.0842	3.86289	32.9008	427.454	126.593	0.0710385	27.6789	28.7417	0.546941	26.2873	2.09426	6.02282	7.64586	0.000765822	6.15931e-22	3.7559e-06	0.000599332	7.39809e-05	1.33157e-06	5.28276e-40	0.0455569	4.82632e-07	6.49645	538.029
2260	372.139	416.129	369.186	1253.31	340.122	882.781	40.3397	157.978	13.4858	0.318557	19.0387	45.0959	3.86404	32.912	427.578	126.637	0.0710361	27.6861	28.7416	0.533873	25.9936	2.06676	6.0003	7.64081	0.000733429	5.03204e-22	3.45191e-06	0.000585729	6.99126e-05	1.24793e-06	3.74201e-40	0.0447762	4.57922e-07	6.5004	538.029
2261	371.887	415.863	368.966	1252.78	340.112	882.978	39.989	157.978	13.4858	0.318557	19.0381	45.1075	3.86519	32.923	427.7	126.681	0.0710342	27.6933	28.7416	0.521141	25.7035	2.03965	5.9779	7.63577	0.000702437	4.11124e-22	3.17259e-06	0.000573542	6.60688e-05	1.16957e-06	2.65062e-40	0.0440097	4.34488e-07	6.50381	538.029
2262	371.631	415.593	368.74	1252.34	340.101	883.171	39.6425	157.978	13.4858	0.318558	19.0374	45.1189	3.86631	32.934	427.82	126.725	0.0710328	27.7003	28.7416	0.508712	25.4168	2.01292	5.95559	7.63073	0.000672781	3.35906e-22	2.91592e-06	0.000562625	6.2437e-05	1.09615e-06	1.87755e-40	0.0432569	4.12261e-07	6.50679	538.029
2263	371.364	415.308	368.501	1251.91	340.091	883.343	39.2993	157.979	13.4858	0.318559	19.0368	45.1266	3.86733	32.9443	427.925	126.768	0.071031	27.7058	28.7416	0.496558	25.1332	1.98651	5.93335	7.6257	0.000644352	2.7444e-22	2.67996e-06	0.000552822	5.90042e-05	1.02732e-06	1.32995e-40	0.0425164	3.91164e-07	6.50517	538.029
2264	371.086	415.012	368.253	1251.48	340.08	883.482	38.9592	157.979	13.4858	0.318559	19.0361	45.1291	3.86817	32.9538	428.008	126.808	0.0710282	27.7091	28.7416	0.484678	24.8521	1.9604	5.91115	7.62065	0.000617071	2.24203e-22	2.46301e-06	0.000519875	5.57586e-05	9.62774e-07	9.42058e-41	0.0417871	3.71129e-07	6.49968	538.029
2265	370.815	414.724	368.01	1251.07	340.07	883.603	38.6227	157.979	13.4858	0.31856	19.0354	45.1296	3.86892	32.9628	428.08	126.848	0.0710251	27.7114	28.7416	0.473081	24.5739	1.93461	5.88901	7.61561	0.000590921	1.83155e-22	2.26357e-06	0.00046619	5.26909e-05	9.02262e-07	6.673e-41	0.0410696	3.52112e-07	6.4962	538.029
2266	370.562	414.453	367.783	1250.71	340.06	883.718	38.2899	157.979	13.4858	0.31856	19.0348	45.1302	3.86963	32.9715	428.146	126.886	0.0710221	27.7134	28.7416	0.461749	24.2988	1.90916	5.86696	7.61057	0.000565879	1.49621e-22	2.08028e-06	0.000418047	4.9792e-05	8.45554e-07	4.72677e-41	0.0403645	3.3407e-07	6.49537	538.029
2267	370.326	414.203	367.57	1250.4	340.05	883.836	37.9612	157.979	13.4858	0.318561	19.0341	45.1324	3.87034	32.9801	428.212	126.925	0.0710199	27.7159	28.7416	0.450685	24.027	1.88406	5.845	7.60553	0.000541917	1.22231e-22	1.91186e-06	0.000374883	4.7053e-05	7.92423e-07	3.34817e-41	0.039672	3.16958e-07	6.49715	538.029
2268	370.108	413.969	367.371	1250.19	340.04	883.965	37.6368	157.98	13.4858	0.318561	19.0335	45.1377	3.87111	32.9889	428.286	126.964	0.0710193	27.7195	28.7416	0.439913	23.7588	1.85934	5.82317	7.60051	0.000519008	9.98614e-23	1.75714e-06	0.00033619	4.44657e-05	7.42657e-07	2.37165e-41	0.0389925	3.00734e-07	6.50195	538.029
2269	369.898	413.745	367.176	1250.05	340.03	884.107	37.3166	157.98	13.4858	0.318562	19.0329	45.1459	3.87194	32.9979	428.368	127.003	0.0710202	27.7243	28.7415	0.429406	23.494	1.83498	5.80145	7.5955	0.000497107	8.15922e-23	1.61499e-06	0.000301505	4.20216e-05	6.96046e-07	1.67994e-41	0.038326	2.85353e-07	6.50775	538.029
2270	369.688	413.518	366.979	1249.96	340.02	884.254	37.0003	157.98	13.4858	0.318562	19.0323	45.1554	3.87281	33.007	428.453	127.042	0.0710225	27.7297	28.7415	0.419151	23.2325	1.81098	5.77985	7.5905	0.00047616	6.6669e-23	1.48438e-06	0.000270408	3.97126e-05	6.52378e-07	1.18997e-41	0.0376717	2.70768e-07	6.5125	538.029
2271	369.471	413.285	366.773	1249.91	340.01	884.404	36.6878	157.98	13.4858	0.318563	19.0317	45.1655	3.87368	33.016	428.54	127.081	0.0710258	27.7353	28.7415	0.409158	22.9742	1.78731	5.75835	7.58551	0.000456115	5.44776e-23	1.36437e-06	0.000242525	3.7531e-05	6.11465e-07	8.42909e-42	0.0370293	2.56934e-07	6.51622	538.029
2272	369.249	413.044	366.56	1249.9	340	884.554	36.3791	157.98	13.4858	0.318564	19.0312	45.1756	3.87456	33.0251	428.626	127.12	0.0710299	27.741	28.7415	0.39942	22.719	1.76398	5.73695	7.58053	0.000436933	4.45173e-23	1.25408e-06	0.000217522	3.54697e-05	5.73128e-07	5.97068e-42	0.0363984	2.43813e-07	6.51941	538.029
2273	369.021	412.796	366.34	1249.91	339.991	884.704	36.074	157.981	13.4858	0.318564	19.0307	45.1857	3.87544	33.034	428.713	127.159	0.0710343	27.7468	28.7415	0.389929	22.4669	1.74097	5.71565	7.57556	0.000418571	3.63793e-23	1.15272e-06	0.0001951	3.35219e-05	5.37205e-07	4.22929e-42	0.0357787	2.31365e-07	6.52218	538.029
2274	368.78	412.534	366.109	1249.89	339.981	884.833	35.7717	157.981	13.4858	0.318565	19.0301	45.1923	3.87621	33.0425	428.787	127.196	0.071038	27.7512	28.7415	0.38064	22.2173	1.71824	5.6944	7.57058	0.000400965	2.9728e-23	1.05954e-06	0.000174986	3.16807e-05	5.03523e-07	2.99578e-42	0.0351691	2.19549e-07	6.52034	538.029
2275	368.526	412.258	365.867	1249.82	339.972	884.934	35.4721	157.981	13.4858	0.318565	19.0296	45.1938	3.87683	33.0501	428.841	127.232	0.0710407	27.7534	28.7415	0.371538	21.9699	1.69576	5.67319	7.5656	0.000384065	2.42906e-23	9.73847e-07	0.000156937	2.99399e-05	4.71932e-07	2.12204e-42	0.0345685	2.08326e-07	6.51463	538.029
2276	368.277	411.989	365.632	1249.72	339.963	885.018	35.1755	157.981	13.4858	0.318566	19.029	45.1934	3.87736	33.0573	428.885	127.266	0.0710428	27.7547	28.7415	0.362652	21.7251	1.67355	5.65204	7.56061	0.000367862	1.98469e-23	8.9507e-07	0.000140747	2.82943e-05	4.42313e-07	1.50313e-42	0.0339777	1.97672e-07	6.51095	538.029
2277	368.043	411.735	365.411	1249.64	339.953	885.099	34.8822	157.981	13.4858	0.318566	19.0284	45.1931	3.87786	33.0642	428.925	127.3	0.0710448	27.7559	28.7415	0.353983	21.483	1.65163	5.63097	7.55563	0.000352341	1.62161e-23	8.22664e-07	0.000126226	2.67391e-05	4.14553e-07	1.06473e-42	0.0333969	1.87563e-07	6.50992	538.029
2278	367.825	411.499	365.204	1249.58	339.944	885.183	34.5925	157.982	13.4858	0.318567	19.0279	45.1945	3.87837	33.0711	428.967	127.334	0.0710471	27.7576	28.7414	0.345534	21.2438	1.63001	5.60999	7.55065	0.000337485	1.32499e-23	7.56125e-07	0.000113205	2.52697e-05	3.88541e-07	7.54195e-43	0.0328264	1.77973e-07	6.51154	538.029
2279	367.623	411.28	365.01	1249.58	339.935	885.281	34.3064	157.982	13.4858	0.318567	19.0274	45.1991	3.87896	33.0783	429.018	127.368	0.0710501	27.7605	28.7414	0.337285	21.0076	1.60871	5.58912	7.54569	0.000323279	1.08269e-23	6.9499e-07	0.000101532	2.38815e-05	3.64174e-07	5.34228e-43	0.0322667	1.68881e-07	6.51618	538.029
2280	367.428	411.068	364.822	1249.63	339.926	885.393	34.0241	157.982	13.4858	0.318568	19.0269	45.2067	3.87961	33.0857	429.078	127.403	0.0710539	27.7646	28.7414	0.329233	20.7745	1.58773	5.56837	7.54074	0.000309696	8.84774e-24	6.38822e-07	9.10668e-05	2.25701e-05	3.41349e-07	3.78417e-43	0.0317174	1.6026e-07	6.52184	538.029
2281	367.232	410.854	364.63	1249.71	339.917	885.513	33.7452	157.982	13.4858	0.318569	19.0264	45.2156	3.88031	33.0932	429.143	127.437	0.0710583	27.7693	28.7414	0.321389	20.5443	1.56705	5.54773	7.5358	0.0002967	7.23075e-24	5.87208e-07	8.16829e-05	2.13311e-05	3.19963e-07	2.68049e-43	0.0311783	1.52083e-07	6.52646	538.029
2282	367.029	410.632	364.43	1249.81	339.908	885.636	33.4695	157.983	13.4858	0.318569	19.026	45.2251	3.88102	33.1007	429.21	127.472	0.071063	27.7744	28.7414	0.313745	20.3168	1.54666	5.52718	7.53086	0.000284262	5.90952e-24	5.39775e-07	7.32679e-05	2.01604e-05	2.99924e-07	1.8987e-43	0.0306488	1.44327e-07	6.53006	538.029
2283	366.819	410.402	364.223	1249.93	339.9	885.761	33.1971	157.983	13.4858	0.31857	19.0255	45.2347	3.88175	33.1083	429.279	127.506	0.0710679	27.7796	28.7414	0.306294	20.0921	1.52655	5.50672	7.52594	0.000272356	4.82989e-24	4.96182e-07	6.57212e-05	1.90542e-05	2.81145e-07	1.34493e-43	0.0301288	1.3697e-07	6.53312	538.029
2284	366.603	410.166	364.009	1250.06	339.891	885.887	32.9278	157.983	13.4858	0.31857	19.0251	45.2443	3.88248	33.1159	429.349	127.541	0.0710732	27.7849	28.7414	0.299031	19.87	1.50672	5.48636	7.52102	0.000260958	3.94763e-24	4.56116e-07	5.8953e-05	1.80088e-05	2.63546e-07	9.52672e-44	0.029618	1.2999e-07	6.53578	538.029
2285	366.373	409.913	363.784	1250.14	339.882	885.994	32.6611	157.983	13.4858	0.318571	19.0247	45.2504	3.88312	33.1229	429.407	127.574	0.0710777	27.7888	28.7414	0.291917	19.6502	1.48713	5.46605	7.5161	0.000250025	3.22642e-24	4.19278e-07	5.28806e-05	1.70206e-05	2.47044e-07	6.74818e-44	0.0291154	1.23362e-07	6.53381	538.029
2286	366.13	409.648	363.548	1250.15	339.874	886.072	32.3965	157.983	13.4858	0.318571	19.0242	45.2514	3.88361	33.1292	429.446	127.605	0.0710812	27.7906	28.7414	0.284941	19.4323	1.46775	5.44578	7.51117	0.000239529	2.63673e-24	3.854e-07	4.74312e-05	1.60861e-05	2.31564e-07	4.78002e-44	0.0286202	1.17067e-07	6.52797	538.029
2287	365.891	409.387	363.319	1250.14	339.865	886.136	32.1346	157.984	13.4858	0.318572	19.0238	45.2505	3.88402	33.135	429.475	127.636	0.071084	27.7915	28.7413	0.278129	19.2167	1.44861	5.42555	7.50624	0.000229464	2.15473e-24	3.54251e-07	4.25422e-05	1.52028e-05	2.1705e-07	3.38589e-44	0.028133	1.11091e-07	6.52415	538.029
2288	365.666	409.142	363.103	1250.12	339.857	886.196	31.8755	157.984	13.4858	0.318572	19.0233	45.2498	3.8844	33.1407	429.502	127.665	0.0710868	27.7923	28.7413	0.271482	19.0034	1.42971	5.40541	7.50131	0.00021982	1.76083e-24	3.2562e-07	3.8157e-05	1.4368e-05	2.03445e-07	2.39837e-44	0.027654	1.05419e-07	6.52301	538.029
2289	365.456	408.914	362.901	1250.12	339.849	886.262	31.6196	157.984	13.4858	0.318573	19.0229	45.2508	3.88481	33.1463	429.531	127.695	0.0710897	27.7936	28.7413	0.265003	18.7926	1.41107	5.38535	7.49639	0.000210588	1.43897e-24	2.99306e-07	3.42244e-05	1.35791e-05	1.90695e-07	1.69887e-44	0.0271835	1.00039e-07	6.52452	538.029
2290	365.262	408.702	362.713	1250.17	339.841	886.342	31.3669	157.984	13.4858	0.318573	19.0225	45.2551	3.88528	33.1522	429.571	127.725	0.0710934	27.7962	28.7413	0.258693	18.5845	1.3927	5.36539	7.49149	0.000201758	1.17603e-24	2.75128e-07	3.06984e-05	1.28338e-05	1.78751e-07	1.20338e-44	0.0267218	9.49365e-08	6.52907	538.029
2291	365.076	408.498	362.53	1250.27	339.832	886.437	31.1175	157.984	13.4858	0.318574	19.0221	45.2622	3.88583	33.1585	429.619	127.756	0.0710979	27.8	28.7413	0.252549	18.379	1.37461	5.34555	7.48659	0.000193313	9.61201e-25	2.52912e-07	2.75369e-05	1.21297e-05	1.67562e-07	8.52406e-45	0.0262687	9.00982e-08	6.53465	538.029
2292	364.888	408.292	362.343	1250.39	339.824	886.54	30.871	157.985	13.4858	0.318575	19.0217	45.2708	3.88643	33.1648	429.673	127.786	0.0711031	27.8044	28.7413	0.246542	18.1762	1.35678	5.32581	7.4817	0.000185232	7.8566e-25	2.32495e-07	2.47018e-05	1.14644e-05	1.57077e-07	6.03795e-45	0.0258239	8.5509e-08	6.53919	538.029
2293	364.692	408.077	362.149	1250.53	339.816	886.648	30.6274	157.985	13.4858	0.318575	19.0214	45.2799	3.88705	33.1713	429.731	127.817	0.0711094	27.8092	28.7413	0.240666	17.9757	1.33919	5.30616	7.47682	0.000177497	6.42203e-25	2.13731e-07	2.21592e-05	1.08357e-05	1.47251e-07	4.27694e-45	0.0253871	8.11555e-08	6.54271	538.029
2294	364.489	407.854	361.947	1250.67	339.809	886.758	30.3865	157.985	13.4858	0.318576	19.0211	45.2892	3.88768	33.1778	429.79	127.848	0.0711166	27.8141	28.7413	0.234938	17.7776	1.32185	5.2866	7.47195	0.00017009	5.24959e-25	1.96484e-07	1.98787e-05	1.02417e-05	1.38043e-07	3.02954e-45	0.024958	7.70251e-08	6.5457	538.029
2295	364.28	407.624	361.738	1250.83	339.801	886.869	30.1484	157.985	13.4858	0.318576	19.0208	45.2985	3.88833	33.1843	429.85	127.879	0.0711246	27.8191	28.7413	0.229354	17.5819	1.30474	5.26712	7.46709	0.000162998	4.29134e-25	1.80632e-07	1.78332e-05	9.68027e-06	1.29412e-07	2.14595e-45	0.0245365	7.31062e-08	6.54828	538.029
2296	364.057	407.378	361.518	1250.93	339.793	886.962	29.9125	157.985	13.4858	0.318577	19.0204	45.3042	3.88888	33.1903	429.899	127.908	0.0711326	27.8228	28.7412	0.223899	17.3881	1.28784	5.2477	7.46222	0.000156195	3.50788e-25	1.66056e-07	1.59979e-05	9.14953e-06	1.21319e-07	1.52007e-45	0.0241216	6.93851e-08	6.54622	538.029
2297	363.82	407.118	361.287	1250.96	339.785	887.027	29.6785	157.986	13.4857	0.318577	19.0201	45.305	3.88929	33.1956	429.93	127.936	0.0711397	27.8243	28.7412	0.218566	17.196	1.27112	5.22831	7.45735	0.000149662	2.86719e-25	1.52649e-07	1.43506e-05	8.64764e-06	1.13726e-07	1.07673e-45	0.0237129	6.58502e-08	6.54029	538.029
2298	363.588	406.864	361.062	1250.96	339.778	887.078	29.4468	157.986	13.4857	0.318578	19.0197	45.3038	3.88962	33.2004	429.952	127.963	0.0711461	27.825	28.7412	0.213357	17.0059	1.2546	5.20897	7.45247	0.000143396	2.34342e-25	1.40323e-07	1.28727e-05	8.17318e-06	1.06606e-07	7.62692e-46	0.0233108	6.24938e-08	6.53638	538.029
2299	363.369	406.625	360.851	1250.96	339.77	887.127	29.2176	157.986	13.4857	0.318578	19.0194	45.3028	3.88993	33.2051	429.971	127.989	0.0711523	27.8256	28.7412	0.208275	16.8178	1.23829	5.18969	7.4476	0.000137392	1.91532e-25	1.28991e-07	1.15469e-05	7.72473e-06	9.99319e-08	5.40247e-46	0.0229153	5.93083e-08	6.53516	538.029
2300	363.166	406.403	360.655	1250.97	339.763	887.18	28.9911	157.986	13.4857	0.318579	19.019	45.3035	3.89027	33.2099	429.994	128.015	0.0711586	27.8267	28.7412	0.20332	16.632	1.22221	5.17051	7.44273	0.000131642	1.56547e-25	1.18575e-07	1.03578e-05	7.30095e-06	9.36767e-08	3.8268e-46	0.0225269	5.6286e-08	6.5366	538.029
2301	362.979	406.198	360.472	1251.03	339.755	887.249	28.7675	157.986	13.4857	0.318579	19.0187	45.3074	3.89067	33.2149	430.026	128.042	0.0711655	27.829	28.7412	0.198494	16.4485	1.20636	5.15142	7.43788	0.000126142	1.2796e-25	1.09005e-07	9.29151e-06	6.90057e-06	8.78162e-08	2.71069e-46	0.0221457	5.34198e-08	6.54109	538.029
2302	362.8	406.001	360.295	1251.14	339.748	887.333	28.5467	157.987	13.4857	0.31858	19.0184	45.3142	3.89116	33.2202	430.069	128.069	0.071173	27.8326	28.7412	0.193774	16.2673	1.19075	5.13244	7.43303	0.000120882	1.04601e-25	1.0021e-07	8.33539e-06	6.52229e-06	8.23254e-08	1.92009e-46	0.0217715	5.07016e-08	6.54662	538.029
2303	362.617	405.801	360.114	1251.27	339.741	887.425	28.3285	157.987	13.4857	0.318581	19.0181	45.3223	3.89168	33.2257	430.117	128.097	0.071181	27.8367	28.7412	0.189153	16.0884	1.17535	5.11355	7.4282	0.000115846	8.55109e-26	9.21268e-08	7.4779e-06	6.16485e-06	7.718e-08	1.36008e-46	0.0214042	4.81231e-08	6.55111	538.029
2304	362.428	405.592	359.925	1251.41	339.733	887.522	28.1128	157.987	13.4857	0.318581	19.0178	45.3308	3.89223	33.2313	430.169	128.124	0.0711891	27.8411	28.7412	0.184649	15.9116	1.16017	5.09475	7.42337	0.000111026	6.99075e-26	8.46974e-08	6.70878e-06	5.82708e-06	7.23577e-08	9.63405e-47	0.0210434	4.56768e-08	6.55457	538.029
2305	362.232	405.375	359.728	1251.56	339.726	887.621	27.8995	157.987	13.4857	0.318582	19.0176	45.3394	3.8928	33.2369	430.222	128.152	0.0711975	27.8457	28.7411	0.180257	15.7369	1.1452	5.07604	7.41855	0.000106409	5.71533e-26	7.78684e-08	6.0189e-06	5.50787e-06	6.78379e-08	6.82421e-47	0.020689	4.33557e-08	6.55751	538.029
2306	362.028	405.151	359.524	1251.71	339.719	887.722	27.6887	157.987	13.4857	0.318582	19.0174	45.3478	3.89337	33.2425	430.278	128.179	0.0712059	27.8503	28.7411	0.175976	15.5643	1.13043	5.05741	7.41374	0.000101988	4.67275e-26	7.15911e-08	5.40007e-06	5.2062e-06	6.36014e-08	4.83388e-47	0.0203409	4.11532e-08	6.56003	538.029
2307	361.811	404.911	359.309	1251.82	339.712	887.805	27.4797	157.988	13.4857	0.318583	19.0171	45.3527	3.89385	33.2477	430.322	128.205	0.0712136	27.8535	28.7411	0.171793	15.3933	1.11584	5.03883	7.40892	9.77466e-05	3.82022e-26	6.58186e-08	4.84474e-06	4.92099e-06	5.96283e-08	3.42404e-47	0.0199982	3.90617e-08	6.55792	538.029
2308	361.58	404.657	359.084	1251.86	339.705	887.86	27.2723	157.988	13.4857	0.318583	19.0169	45.3525	3.89418	33.2521	430.348	128.23	0.0712201	27.8546	28.7411	0.167703	15.2239	1.10141	5.02027	7.4041	9.36725e-05	3.12294e-26	6.05089e-08	4.34628e-06	4.65127e-06	5.59007e-08	2.42539e-47	0.0196606	3.70746e-08	6.55191	538.029
2309	361.354	404.409	358.864	1251.86	339.698	887.901	27.067	157.988	13.4857	0.318584	19.0166	45.3504	3.89443	33.2561	430.365	128.253	0.0712258	27.8548	28.7411	0.163708	15.0562	1.08714	5.00176	7.39928	8.97642e-05	2.55282e-26	5.56265e-08	3.899e-06	4.39627e-06	5.2405e-08	1.71801e-47	0.0193283	3.51878e-08	6.54794	538.029
2310	361.142	404.176	358.659	1251.85	339.691	887.939	26.8638	157.988	13.4857	0.318584	19.0163	45.3485	3.89467	33.2599	430.38	128.276	0.0712314	27.8548	28.7411	0.15981	14.8902	1.07306	4.98332	7.39446	8.60183e-05	2.08677e-26	5.11378e-08	3.49774e-06	4.15525e-06	4.91277e-08	1.21694e-47	0.0190016	3.33969e-08	6.54665	538.029
2311	360.945	403.961	358.469	1251.87	339.685	887.983	26.6631	157.989	13.4857	0.318585	19.016	45.3482	3.89492	33.2638	430.399	128.299	0.071237	27.8553	28.7411	0.156009	14.7263	1.05917	4.96496	7.38964	8.24311e-05	1.70584e-26	4.7012e-08	3.13782e-06	3.92747e-06	4.6056e-08	8.62009e-48	0.0186806	3.16975e-08	6.54804	538.029
2312	360.764	403.762	358.291	1251.93	339.678	888.042	26.4649	157.989	13.4857	0.318585	19.0157	45.3511	3.89525	33.268	430.427	128.322	0.0712433	27.8572	28.7411	0.152306	14.5644	1.04549	4.9467	7.38484	7.89989e-05	1.39454e-26	4.32203e-08	2.81506e-06	3.71226e-06	4.31778e-08	6.10598e-48	0.0183655	3.00858e-08	6.55248	538.029
2313	360.59	403.57	358.118	1252.03	339.671	888.117	26.2692	157.989	13.4857	0.318586	19.0155	45.357	3.89566	33.2725	430.466	128.346	0.0712503	27.8602	28.7411	0.1487	14.4045	1.032	4.92854	7.38005	7.57155e-05	1.14013e-26	3.97359e-08	2.5256e-06	3.50892e-06	4.04811e-08	4.32512e-48	0.0180563	2.85572e-08	6.55797	538.029
2314	360.413	403.376	357.942	1252.16	339.665	888.2	26.0757	157.989	13.4857	0.318587	19.0153	45.3643	3.89612	33.2772	430.51	128.37	0.0712576	27.8638	28.741	0.145186	14.2466	1.0187	4.91046	7.37526	7.25724e-05	9.32185e-27	3.65332e-08	2.26598e-06	3.31677e-06	3.79537e-08	3.06367e-48	0.0177527	2.7107e-08	6.56242	538.029
2315	360.23	403.173	357.758	1252.3	339.658	888.288	25.8844	157.989	13.4857	0.318587	19.0151	45.3721	3.8966	33.2819	430.558	128.395	0.0712652	27.8678	28.741	0.14176	14.0906	1.00559	4.89247	7.37049	6.95626e-05	7.62195e-27	3.35893e-08	2.0331e-06	3.13518e-06	3.55849e-08	2.17013e-48	0.0174545	2.57311e-08	6.56585	538.029
2316	360.039	402.961	357.566	1252.45	339.652	888.38	25.6953	157.99	13.4857	0.318588	19.015	45.3801	3.8971	33.2868	430.609	128.419	0.071273	27.872	28.741	0.13842	13.9364	0.992661	4.87456	7.36572	6.66801e-05	6.23224e-27	3.08832e-08	1.82419e-06	2.96357e-06	3.33645e-08	1.53719e-48	0.0171616	2.44254e-08	6.56874	538.029
2317	359.841	402.742	357.368	1252.6	339.645	888.472	25.5082	157.99	13.4857	0.318588	19.0148	45.3881	3.89761	33.2916	430.661	128.443	0.0712809	27.8762	28.741	0.135142	13.784	0.979904	4.85673	7.36096	6.39189e-05	5.09608e-27	2.83954e-08	1.63677e-06	2.80138e-06	3.12832e-08	1.08886e-48	0.0168737	2.31864e-08	6.57123	538.029
2318	359.629	402.508	357.158	1252.71	339.639	888.548	25.3227	157.99	13.4857	0.318589	19.0146	45.3926	3.89803	33.2961	430.702	128.467	0.071288	27.8791	28.741	0.131919	13.6332	0.967298	4.83895	7.35619	6.12694e-05	4.16689e-27	2.61076e-08	1.46858e-06	2.64803e-06	2.9331e-08	7.71285e-49	0.0165904	2.20098e-08	6.56906	538.029
2319	359.404	402.261	356.938	1252.74	339.633	888.595	25.1387	157.99	13.4857	0.318589	19.0144	45.3921	3.89831	33.2998	430.725	128.488	0.0712939	27.8799	28.741	0.128766	13.4836	0.954827	4.82119	7.35142	5.87242e-05	3.40681e-27	2.4003e-08	1.31759e-06	2.503e-06	2.74994e-08	5.46334e-49	0.0163113	2.08917e-08	6.56299	538.029
2320	359.184	402.018	356.724	1252.73	339.626	888.63	24.9564	157.99	13.4857	0.31859	19.0142	45.3896	3.89851	33.3031	430.74	128.509	0.0712992	27.8798	28.741	0.125687	13.3356	0.942503	4.80348	7.34665	5.62821e-05	2.78526e-27	2.20677e-08	1.1821e-06	2.36588e-06	2.57816e-08	3.86991e-49	0.0160365	1.983e-08	6.55897	538.029
2321	358.977	401.792	356.524	1252.73	339.62	888.661	24.7761	157.991	13.4857	0.31859	19.014	45.3874	3.89869	33.3062	430.752	128.529	0.0713042	27.8796	28.741	0.122682	13.1891	0.930337	4.78583	7.34188	5.39412e-05	2.27708e-27	2.02883e-08	1.06053e-06	2.23627e-06	2.4171e-08	2.74123e-49	0.0157664	1.88222e-08	6.55763	538.029
2322	358.786	401.582	356.338	1252.74	339.614	888.698	24.5978	157.991	13.4857	0.318591	19.0138	45.3868	3.8989	33.3095	430.768	128.549	0.0713093	27.8799	28.741	0.119751	13.0443	0.918335	4.76825	7.33711	5.1699e-05	1.86167e-27	1.86526e-08	9.51485e-07	2.11378e-06	2.26613e-08	1.94173e-49	0.0155009	1.78658e-08	6.55897	538.029
2323	358.61	401.388	356.165	1252.8	339.608	888.751	24.4218	157.991	13.4857	0.318591	19.0136	45.3895	3.89918	33.313	430.794	128.569	0.0713151	27.8815	28.7409	0.116896	12.9014	0.906507	4.75077	7.33236	4.95535e-05	1.52214e-27	1.71494e-08	8.53684e-07	1.99804e-06	2.12466e-08	1.37541e-49	0.0152403	1.69587e-08	6.56338	538.029
2324	358.441	401.201	355.997	1252.9	339.602	888.82	24.248	157.991	13.4857	0.318592	19.0134	45.3952	3.89955	33.3169	430.83	128.591	0.0713216	27.8843	28.7409	0.114116	12.7603	0.894852	4.73339	7.32762	4.75006e-05	1.24462e-27	1.57678e-08	7.65968e-07	1.88868e-06	1.9921e-08	9.74259e-50	0.0149846	1.60983e-08	6.56884	538.029
2325	358.269	401.011	355.825	1253.02	339.596	888.898	24.0762	157.992	13.4857	0.318593	19.0133	45.4022	3.89996	33.321	430.872	128.612	0.0713284	27.8878	28.7409	0.111405	12.6209	0.883362	4.71609	7.32288	4.55352e-05	1.01775e-27	1.44979e-08	6.87288e-07	1.78533e-06	1.86786e-08	6.90109e-50	0.0147335	1.52819e-08	6.57327	538.029
2326	358.09	400.813	355.645	1253.16	339.59	888.98	23.9063	157.992	13.4857	0.318593	19.0132	45.4099	3.9004	33.3252	430.918	128.634	0.0713355	27.8916	28.7409	0.108763	12.4831	0.87203	4.69886	7.31816	4.36529e-05	8.32272e-28	1.33305e-08	6.16704e-07	1.68766e-06	1.7514e-08	4.88834e-50	0.0144868	1.45073e-08	6.57666	538.029
2327	357.904	400.606	355.458	1253.31	339.584	889.066	23.7382	157.992	13.4857	0.318594	19.013	45.4177	3.90086	33.3295	430.966	128.655	0.0713429	27.8956	28.7409	0.106187	12.347	0.860852	4.68172	7.31344	4.18498e-05	6.80616e-28	1.22573e-08	5.5338e-07	1.59535e-06	1.64224e-08	3.46262e-50	0.0142445	1.37722e-08	6.57953	538.029
2328	357.711	400.393	355.264	1253.46	339.579	889.153	23.572	157.992	13.4857	0.318594	19.013	45.4255	3.90133	33.3338	431.016	128.677	0.0713503	27.8997	28.7409	0.103674	12.2124	0.849826	4.66465	7.30873	4.01225e-05	5.56612e-28	1.12706e-08	4.96567e-07	1.5081e-06	1.5399e-08	2.45272e-50	0.0140063	1.30746e-08	6.58198	538.029
2329	357.504	400.163	355.058	1253.56	339.573	889.223	23.4072	157.992	13.4857	0.318595	19.0128	45.4299	3.90171	33.3377	431.055	128.698	0.071357	27.9025	28.7409	0.101219	12.0792	0.838929	4.64763	7.30401	3.84647e-05	4.55183e-28	1.03632e-08	4.45577e-07	1.42561e-06	1.4439e-08	1.73736e-50	0.013772	1.2412e-08	6.57978	538.029
2330	357.284	399.921	354.842	1253.59	339.567	889.266	23.2436	157.993	13.4857	0.318595	19.0127	45.4292	3.90195	33.3409	431.076	128.717	0.0713624	27.9031	28.7409	0.0988178	11.9471	0.828148	4.63063	7.29929	3.68719e-05	3.72203e-28	9.52842e-09	3.998e-07	1.34759e-06	1.35383e-08	1.23065e-50	0.013541	1.17824e-08	6.57366	538.029
2331	357.069	399.684	354.633	1253.58	339.562	889.295	23.0816	157.993	13.4857	0.318596	19.0125	45.4266	3.90212	33.3437	431.089	128.735	0.0713672	27.9029	28.7409	0.0964721	11.8163	0.817494	4.61367	7.29456	3.53434e-05	3.04337e-28	8.7607e-09	3.58716e-07	1.27382e-06	1.26934e-08	8.71721e-51	0.0133136	1.11844e-08	6.56958	538.029
2332	356.867	399.462	354.437	1253.57	339.556	889.322	22.9213	157.993	13.4857	0.318596	19.0124	45.4242	3.90227	33.3464	431.099	128.753	0.0713718	27.9026	28.7408	0.0941826	11.687	0.806975	4.59677	7.28984	3.38781e-05	2.48843e-28	8.05481e-09	3.21852e-07	1.20409e-06	1.19013e-08	6.17477e-51	0.01309	1.06168e-08	6.56821	538.029
2333	356.68	399.256	354.256	1253.58	339.55	889.355	22.7628	157.993	13.4857	0.318597	19.0122	45.4235	3.90245	33.3492	431.113	128.771	0.0713766	27.9028	28.7408	0.0919499	11.5591	0.796598	4.57995	7.28513	3.24743e-05	2.03473e-28	7.40589e-09	2.88781e-07	1.13818e-06	1.11587e-08	4.37385e-51	0.0128703	1.00781e-08	6.56951	538.029
2334	356.508	399.067	354.086	1253.64	339.545	889.403	22.6063	157.993	13.4857	0.318597	19.0121	45.4261	3.9027	33.3523	431.137	128.789	0.0713819	27.9043	28.7408	0.0897746	11.4328	0.786371	4.56321	7.28042	3.11309e-05	1.66385e-28	6.80945e-09	2.59119e-07	1.0759e-06	1.04628e-08	3.09819e-51	0.0126547	9.56706e-09	6.5739	538.029
2335	356.343	398.884	353.922	1253.73	339.539	889.467	22.4517	157.994	13.4857	0.318598	19.012	45.4316	3.90304	33.3557	431.172	128.808	0.071388	27.907	28.7408	0.0876556	11.3082	0.776293	4.54656	7.27573	2.98452e-05	1.36068e-28	6.26126e-09	2.32513e-07	1.01706e-06	9.81067e-09	2.19458e-51	0.012443	9.08232e-09	6.57934	538.029
2336	356.176	398.699	353.754	1253.86	339.534	889.54	22.2989	157.994	13.4857	0.318599	19.0119	45.4385	3.90342	33.3594	431.212	128.827	0.0713945	27.9104	28.7408	0.0855902	11.185	0.766356	4.53	7.27104	2.86142e-05	1.1128e-28	5.75734e-09	2.08646e-07	9.61443e-07	9.19943e-09	1.55451e-51	0.0122352	8.62239e-09	6.58374	538.029
2337	356.001	398.505	353.578	1253.99	339.529	889.619	22.1477	157.994	13.4857	0.318599	19.0118	45.446	3.90384	33.3632	431.256	128.847	0.0714012	27.9141	28.7408	0.0835764	11.0633	0.756557	4.51351	7.26637	2.74351e-05	9.10115e-29	5.29407e-09	1.87233e-07	9.08883e-07	8.62644e-09	1.10113e-51	0.012031	8.18593e-09	6.58712	538.029
2338	355.819	398.303	353.395	1254.14	339.523	889.7	21.9982	157.994	13.4857	0.3186	19.0118	45.4538	3.90427	33.367	431.303	128.866	0.0714081	27.9181	28.7408	0.0816126	10.9431	0.74689	4.49709	7.2617	2.63055e-05	7.44372e-29	4.86816e-09	1.68021e-07	8.59205e-07	8.08928e-09	7.79975e-52	0.0118303	7.7717e-09	6.58996	538.029
2339	355.63	398.093	353.205	1254.28	339.518	889.784	21.8503	157.995	13.4857	0.3186	19.0118	45.4615	3.90472	33.371	431.352	128.886	0.0714152	27.9221	28.7408	0.0796974	10.8242	0.737354	4.48075	7.25703	2.52231e-05	6.0883e-29	4.47657e-09	1.50784e-07	8.1225e-07	7.58568e-09	5.52489e-52	0.0116332	7.37855e-09	6.59239	538.029
2340	355.428	397.868	353.002	1254.38	339.513	889.85	21.7036	157.995	13.4857	0.318601	19.0117	45.4657	3.90508	33.3745	431.389	128.904	0.0714215	27.9248	28.7408	0.0778259	10.7065	0.727929	4.46445	7.25236	2.41842e-05	4.9795e-29	4.11641e-09	1.35311e-07	7.67851e-07	7.11327e-09	3.91352e-52	0.0114391	7.00513e-09	6.59016	538.029
2341	355.212	397.63	352.791	1254.41	339.508	889.889	21.558	157.995	13.4857	0.318601	19.0116	45.4649	3.9053	33.3773	431.409	128.922	0.0714266	27.9254	28.7407	0.0759953	10.5898	0.718603	4.44817	7.24769	2.31858e-05	4.07226e-29	3.78505e-09	1.21419e-07	7.25858e-07	6.66997e-09	2.77211e-52	0.0112479	6.65026e-09	6.584	538.029
2342	355.001	397.398	352.586	1254.4	339.503	889.915	21.4137	157.995	13.4857	0.318602	19.0115	45.4622	3.90544	33.3798	431.42	128.938	0.071431	27.9251	28.7407	0.0742067	10.4742	0.709387	4.43193	7.24302	2.22277e-05	3.33017e-29	3.4803e-09	1.08951e-07	6.86151e-07	6.25416e-09	1.9636e-52	0.0110596	6.31321e-09	6.57988	538.029
2343	354.803	397.18	352.394	1254.39	339.498	889.938	21.271	157.995	13.4857	0.318602	19.0114	45.4597	3.90557	33.3821	431.429	128.953	0.0714353	27.9247	28.7407	0.0724609	10.3599	0.700288	4.41575	7.23834	2.13089e-05	2.72328e-29	3.20007e-09	9.77619e-08	6.48616e-07	5.86424e-09	1.3909e-52	0.0108745	5.99322e-09	6.57847	538.029
2344	354.621	396.978	352.216	1254.4	339.493	889.967	21.1299	157.996	13.4857	0.318603	19.0113	45.4589	3.90573	33.3845	431.442	128.969	0.0714397	27.9248	28.7407	0.0707582	10.2469	0.691311	4.39964	7.23367	2.04287e-05	2.22704e-29	2.94244e-09	8.77236e-08	6.13138e-07	5.4987e-09	9.85236e-53	0.0106925	5.68953e-09	6.57974	538.029
2345	354.453	396.793	352.05	1254.45	339.488	890.012	20.9905	157.996	13.4857	0.318603	19.0113	45.4614	3.90597	33.3873	431.465	128.986	0.0714447	27.9263	28.7407	0.0690992	10.1353	0.682463	4.38361	7.22902	1.95862e-05	1.82135e-29	2.70563e-09	7.87191e-08	5.79613e-07	5.15612e-09	6.97884e-53	0.0105139	5.40142e-09	6.58412	538.029
2346	354.291	396.614	351.889	1254.54	339.483	890.073	20.8528	157.996	13.4857	0.318604	19.0112	45.4668	3.90629	33.3904	431.498	129.003	0.0714504	27.9289	28.7407	0.067483	10.0252	0.673744	4.36767	7.22437	1.87798e-05	1.48966e-29	2.48797e-09	7.0642e-08	5.47933e-07	4.83506e-09	4.94341e-53	0.0103386	5.1281e-09	6.58954	538.029
2347	354.127	396.432	351.724	1254.66	339.478	890.143	20.7167	157.996	13.4857	0.318604	19.0112	45.4737	3.90666	33.3938	431.537	129.02	0.0714565	27.9322	28.7407	0.0659076	9.91634	0.665147	4.35181	7.21973	1.80075e-05	1.21844e-29	2.28787e-09	6.33956e-08	5.17993e-07	4.53411e-09	3.50163e-53	0.0101664	4.86876e-09	6.59393	538.029
2348	353.956	396.242	351.551	1254.8	339.473	890.218	20.582	157.997	13.4857	0.318605	19.0112	45.4811	3.90706	33.3972	431.58	129.038	0.0714629	27.9359	28.7407	0.0643714	9.80878	0.656668	4.33602	7.2151	1.72678e-05	9.9664e-30	2.1039e-09	5.68938e-08	4.89695e-07	4.25198e-09	2.48035e-53	0.0099973	4.62263e-09	6.59729	538.029
2349	353.778	396.043	351.371	1254.94	339.468	890.296	20.4488	157.997	13.4857	0.318606	19.0112	45.4888	3.90748	33.4008	431.626	129.056	0.0714696	27.9398	28.7407	0.0628732	9.70248	0.648304	4.3203	7.21048	1.65589e-05	8.15241e-30	1.93476e-09	5.106e-08	4.62948e-07	3.98747e-09	1.75694e-53	0.0098311	4.38902e-09	6.60011	538.029
2350	353.593	395.838	351.185	1255.08	339.464	890.377	20.317	157.997	13.4857	0.318606	19.0112	45.4964	3.90791	33.4045	431.673	129.073	0.0714763	27.9438	28.7406	0.061391	9.59741	0.640051	4.30464	7.20586	1.58797e-05	6.66878e-30	1.77923e-09	4.58251e-08	4.37665e-07	3.73947e-09	1.24451e-53	0.00966778	4.16728e-09	6.60253	538.029
2351	353.394	395.616	350.986	1255.18	339.459	890.44	20.1862	157.997	13.4857	0.318607	19.0112	45.5006	3.90826	33.4077	431.71	129.09	0.0714823	27.9464	28.7406	0.0599217	9.49336	0.631895	4.28903	7.20124	1.52276e-05	5.45495e-30	1.63618e-09	4.11259e-08	4.13758e-07	3.50682e-09	8.81542e-54	0.00950699	3.95665e-09	6.60026	538.029
2352	353.182	395.382	350.778	1255.2	339.454	890.476	20.0563	157.997	13.4857	0.318607	19.0112	45.4997	3.90847	33.4103	431.728	129.106	0.0714871	27.9469	28.7406	0.0584843	9.3902	0.623825	4.27344	7.19662	1.46009e-05	4.46165e-30	1.50456e-09	3.69065e-08	3.91146e-07	3.28849e-09	6.24434e-54	0.00934853	3.75648e-09	6.59407	538.029
2353	352.975	395.153	350.576	1255.19	339.45	890.499	19.9276	157.998	13.4857	0.318608	19.0112	45.497	3.90861	33.4124	431.739	129.12	0.0714913	27.9466	28.7406	0.0570799	9.28805	0.615849	4.25789	7.19199	1.39993e-05	3.64905e-30	1.38351e-09	3.31191e-08	3.69764e-07	3.08367e-09	4.42313e-54	0.00919253	3.56634e-09	6.58992	538.029
2354	352.781	394.939	350.387	1255.18	339.445	890.519	19.8003	157.998	13.4857	0.318608	19.0111	45.4944	3.90872	33.4145	431.747	129.134	0.0714952	27.9461	28.7406	0.0557089	9.18699	0.607974	4.24239	7.18736	1.34224e-05	2.98442e-30	1.27218e-09	2.97202e-08	3.4955e-07	2.89161e-09	3.13309e-54	0.00903911	3.38581e-09	6.58847	538.029
2355	352.602	394.742	350.212	1255.19	339.441	890.545	19.6744	157.998	13.4857	0.318609	19.0111	45.4935	3.90887	33.4167	431.758	129.149	0.0714993	27.9462	28.7406	0.0543717	9.0871	0.600204	4.22696	7.18274	1.28696e-05	2.4409e-30	1.16983e-09	2.66705e-08	3.30443e-07	2.71154e-09	2.2193e-54	0.00888834	3.21446e-09	6.58973	538.029
2356	352.437	394.56	350.05	1255.24	339.436	890.588	19.5501	157.998	13.4857	0.318609	19.011	45.4959	3.9091	33.4192	431.78	129.163	0.0715041	27.9476	28.7406	0.0530686	8.98845	0.592545	4.2116	7.17813	1.23404e-05	1.99649e-30	1.07575e-09	2.39347e-08	3.12388e-07	2.54276e-09	1.57203e-54	0.00874032	3.0519e-09	6.59409	538.029
2357	352.279	394.385	349.892	1255.33	339.432	890.646	19.4272	157.998	13.4857	0.31861	19.0111	45.5013	3.90941	33.4221	431.812	129.179	0.0715095	27.9502	28.7406	0.051799	8.89104	0.584998	4.19633	7.17353	1.18339e-05	1.63311e-30	9.89263e-10	2.14805e-08	2.95325e-07	2.38458e-09	1.11353e-54	0.00859503	2.89767e-09	6.5995	538.029
2358	352.119	394.206	349.73	1255.45	339.427	890.713	19.3058	157.999	13.4857	0.31861	19.0111	45.5081	3.90976	33.4252	431.851	129.195	0.0715154	27.9535	28.7406	0.0505613	8.79481	0.577556	4.18114	7.16894	1.13487e-05	1.33594e-30	9.09753e-10	1.92785e-08	2.79199e-07	2.2363e-09	7.88762e-55	0.00845232	2.75132e-09	6.60388	538.029
2359	351.951	394.019	349.561	1255.58	339.423	890.786	19.1856	157.999	13.4857	0.318611	19.0112	45.5154	3.91015	33.4285	431.893	129.211	0.0715215	27.9571	28.7406	0.0493543	8.69971	0.570216	4.16602	7.16436	1.08839e-05	1.09288e-30	8.36648e-10	1.73026e-08	2.63957e-07	2.09728e-09	5.58714e-55	0.00831212	2.61241e-09	6.60722	538.029
2360	351.776	393.825	349.384	1255.72	339.419	890.862	19.0667	157.999	13.4857	0.318611	19.0112	45.523	3.91056	33.4318	431.938	129.227	0.0715279	27.9609	28.7405	0.0481771	8.60571	0.562974	4.15096	7.15978	1.04384e-05	8.94078e-31	7.6943e-10	1.55296e-08	2.49549e-07	1.96694e-09	3.95761e-55	0.00817435	2.48056e-09	6.61004	538.029
2361	351.595	393.622	349.201	1255.86	339.414	890.94	18.949	157.999	13.4857	0.318612	19.0113	45.5306	3.91098	33.4353	431.984	129.244	0.0715344	27.9649	28.7405	0.0470287	8.5128	0.55583	4.13596	7.15521	1.00115e-05	7.31457e-31	7.07622e-10	1.39385e-08	2.3593e-07	1.84472e-09	2.80334e-55	0.00803896	2.3554e-09	6.61244	538.029
2362	351.4	393.405	349.005	1255.96	339.41	891.001	18.8322	158	13.4857	0.318612	19.0114	45.5347	3.91132	33.4383	432.02	129.259	0.0715402	27.9674	28.7405	0.0459065	8.42078	0.548769	4.12101	7.15064	9.6016e-06	5.98392e-31	6.50766e-10	1.25101e-08	2.23051e-07	1.73006e-09	1.98573e-55	0.00790567	2.2365e-09	6.61015	538.029
2363	351.192	393.175	348.801	1255.98	339.406	891.034	18.7162	158	13.4857	0.318613	19.0114	45.5337	3.91152	33.4407	432.038	129.273	0.0715447	27.9679	28.7405	0.0448086	8.32955	0.541781	4.10607	7.14606	9.2076e-06	4.89489e-31	5.98452e-10	1.12274e-08	2.10869e-07	1.62245e-09	1.40657e-55	0.00777428	2.12349e-09	6.60392	538.029
2364	350.989	392.95	348.603	1255.97	339.402	891.055	18.6013	158	13.4857	0.318614	19.0114	45.5309	3.91165	33.4427	432.047	129.286	0.0715486	27.9675	28.7405	0.0437358	8.23921	0.534875	4.09117	7.14147	8.82936e-06	4.00387e-31	5.50332e-10	1.0076e-08	1.9935e-07	1.5215e-09	9.96336e-56	0.00764495	2.01615e-09	6.59974	538.029
2365	350.799	392.741	348.418	1255.95	339.398	891.073	18.4876	158	13.4856	0.318614	19.0114	45.5282	3.91175	33.4446	432.054	129.299	0.0715523	27.9671	28.7405	0.0426884	8.14984	0.528055	4.07633	7.13689	8.46658e-06	3.27502e-31	5.0608e-10	9.04262e-09	1.88459e-07	1.42682e-09	7.05747e-56	0.00751773	1.91422e-09	6.59827	538.029
2366	350.624	392.548	348.247	1255.96	339.393	891.097	18.3751	158	13.4856	0.318615	19.0114	45.5273	3.91189	33.4466	432.065	129.312	0.0715562	27.9671	28.7405	0.0416667	8.06148	0.521327	4.06154	7.13232	8.11891e-06	2.6789e-31	4.6539e-10	8.11534e-09	1.78165e-07	1.33805e-09	4.99911e-56	0.00739271	1.81747e-09	6.5995	538.029
2367	350.464	392.37	348.089	1256	339.389	891.137	18.2641	158.001	13.4856	0.318615	19.0114	45.5296	3.91211	33.4489	432.086	129.325	0.0715608	27.9685	28.7405	0.0406711	7.97423	0.514695	4.04684	7.12776	7.78605e-06	2.19142e-31	4.27986e-10	7.28342e-09	1.68436e-07	1.25484e-09	3.54108e-56	0.00726997	1.72567e-09	6.60385	538.029
2368	350.311	392.2	347.935	1256.1	339.385	891.193	18.1543	158.001	13.4856	0.318616	19.0115	45.5349	3.91241	33.4516	432.118	129.34	0.071566	27.971	28.7405	0.039701	7.88807	0.508158	4.03221	7.1232	7.46738e-06	1.79278e-31	3.936e-10	6.53707e-09	1.59242e-07	1.17685e-09	2.5083e-56	0.00714947	1.63857e-09	6.60925	538.029
2369	350.155	392.026	347.777	1256.21	339.381	891.258	18.0458	158.001	13.4856	0.318616	19.0116	45.5417	3.91275	33.4546	432.156	129.354	0.0715716	27.9743	28.7404	0.0387552	7.80295	0.501713	4.01765	7.11866	7.16214e-06	1.46673e-31	3.61986e-10	5.86738e-09	1.50553e-07	1.10374e-09	1.77673e-56	0.00703112	1.55592e-09	6.61362	538.029
2370	349.992	391.844	347.612	1256.34	339.377	891.329	17.9384	158.001	13.4856	0.318617	19.0117	45.549	3.91313	33.4577	432.197	129.369	0.0715775	27.9778	28.7404	0.0378327	7.71882	0.495355	4.00316	7.11412	6.86963e-06	1.20002e-31	3.32917e-10	5.26642e-09	1.42339e-07	1.03519e-09	1.25854e-56	0.00691483	1.47746e-09	6.61695	538.029
2371	349.822	391.654	347.44	1256.48	339.374	891.403	17.8321	158.002	13.4856	0.318617	19.0118	45.5565	3.91353	33.4609	432.241	129.384	0.0715837	27.9816	28.7404	0.036933	7.63567	0.489083	3.98873	7.10959	6.5893e-06	9.81844e-32	3.06188e-10	4.72711e-09	1.34575e-07	9.70916e-10	8.91474e-57	0.00680056	1.40298e-09	6.61975	538.029
2372	349.645	391.457	347.261	1256.62	339.37	891.479	17.7269	158.002	13.4856	0.318618	19.012	45.564	3.91395	33.4641	432.287	129.4	0.07159	27.9855	28.7404	0.0360552	7.55347	0.482895	3.97437	7.10506	6.32059e-06	8.03355e-32	2.81608e-10	4.24309e-09	1.27235e-07	9.10644e-10	6.31469e-57	0.00668826	1.33228e-09	6.62214	538.029
2373	349.455	391.246	347.071	1256.72	339.366	891.538	17.6225	158.002	13.4856	0.318618	19.0121	45.568	3.91428	33.467	432.322	129.414	0.0715955	27.988	28.7404	0.0351974	7.47207	0.476778	3.96004	7.10054	6.06256e-06	6.57289e-32	2.58996e-10	3.80854e-09	1.20294e-07	8.54094e-10	4.47296e-57	0.00657769	1.26512e-09	6.61982	538.029
2374	349.253	391.021	346.871	1256.74	339.362	891.569	17.5187	158.002	13.4856	0.318619	19.0121	45.567	3.91447	33.4692	432.339	129.427	0.0715999	27.9885	28.7404	0.034358	7.39135	0.470725	3.94573	7.096	5.8145e-06	5.37731e-32	2.38189e-10	3.41831e-09	1.13729e-07	8.01017e-10	3.16839e-57	0.0064687	1.20127e-09	6.61356	538.029
2375	349.055	390.802	346.678	1256.72	339.358	891.588	17.4159	158.002	13.4856	0.318619	19.0122	45.5641	3.91458	33.4711	432.347	129.439	0.0716036	27.9881	28.7404	0.0335378	7.31143	0.464742	3.93146	7.09146	5.57633e-06	4.399e-32	2.19049e-10	3.06797e-09	1.0752e-07	7.51222e-10	2.24431e-57	0.00636139	1.14062e-09	6.60935	538.029
2376	348.871	390.599	346.498	1256.71	339.355	891.604	17.3142	158.003	13.4856	0.31862	19.0123	45.5614	3.91468	33.4728	432.354	129.45	0.0716071	27.9875	28.7404	0.032737	7.23234	0.458834	3.91723	7.08693	5.34787e-06	3.59864e-32	2.01447e-10	2.75352e-09	1.0165e-07	7.04518e-10	1.58974e-57	0.00625584	1.08303e-09	6.60785	538.029
2377	348.701	390.411	346.333	1256.71	339.351	891.626	17.2136	158.003	13.4856	0.318621	19.0123	45.5604	3.91481	33.4747	432.364	129.462	0.0716108	27.9876	28.7404	0.0319558	7.15417	0.453005	3.90307	7.0824	5.1289e-06	2.94397e-32	1.85261e-10	2.47134e-09	9.61012e-08	6.60727e-10	1.12608e-57	0.00615211	1.02836e-09	6.60906	538.029
2378	348.546	390.239	346.179	1256.75	339.347	891.665	17.1143	158.003	13.4856	0.318621	19.0124	45.5626	3.91502	33.4769	432.385	129.474	0.0716151	27.9889	28.7403	0.0311944	7.07696	0.447258	3.88897	7.07788	4.91923e-06	2.40854e-32	1.7038e-10	2.21816e-09	9.0857e-08	6.19678e-10	7.97649e-58	0.00605026	9.76478e-10	6.61339	538.029
2379	348.397	390.073	346.029	1256.84	339.344	891.719	17.0161	158.003	13.4856	0.318622	19.0125	45.5679	3.91531	33.4795	432.415	129.488	0.0716201	27.9914	28.7403	0.0304525	7.00071	0.441595	3.87496	7.07337	4.71847e-06	1.97063e-32	1.567e-10	1.991e-09	8.5901e-08	5.812e-10	5.65009e-58	0.00595027	9.27255e-10	6.61878	538.029
2380	348.245	389.904	345.876	1256.96	339.34	891.782	16.9189	158.004	13.4856	0.318622	19.0127	45.5745	3.91566	33.4823	432.452	129.501	0.0716256	27.9946	28.7403	0.0297291	6.92539	0.43601	3.86101	7.06887	4.52614e-06	1.61243e-32	1.44122e-10	1.78716e-09	8.12165e-08	5.45126e-10	4.0022e-58	0.00585206	8.80537e-10	6.62314	538.029
2381	348.085	389.726	345.714	1257.09	339.336	891.851	16.8228	158.004	13.4856	0.318623	19.0128	45.5817	3.91603	33.4853	432.493	129.515	0.0716313	27.9981	28.7403	0.0290235	6.85094	0.430501	3.84713	7.06438	4.34182e-06	1.31938e-32	1.32556e-10	1.60423e-09	7.67885e-08	5.113e-10	2.83493e-58	0.00575555	8.36191e-10	6.62646	538.029
2382	347.919	389.54	345.545	1257.22	339.333	891.923	16.7277	158.004	13.4856	0.318623	19.013	45.5892	3.91642	33.4883	432.537	129.529	0.0716373	28.0019	28.7403	0.0283353	6.77735	0.425066	3.8333	7.05989	4.16515e-06	1.07963e-32	1.2192e-10	1.44005e-09	7.26026e-08	4.79582e-10	2.0081e-58	0.00566071	7.94092e-10	6.62925	538.029
2383	347.746	389.346	345.369	1257.36	339.329	891.997	16.6335	158.004	13.4856	0.318624	19.0132	45.5967	3.91683	33.4915	432.582	129.543	0.0716434	28.0057	28.7403	0.0276638	6.7046	0.419703	3.81954	7.05541	3.99578e-06	8.83464e-33	1.12139e-10	1.29269e-09	6.86454e-08	4.49837e-10	1.42242e-58	0.0055675	7.54124e-10	6.63162	538.029
2384	347.558	389.137	345.182	1257.46	339.326	892.055	16.54	158.005	13.4856	0.318624	19.0133	45.6006	3.91716	33.4943	432.616	129.557	0.0716488	28.0082	28.7403	0.0270075	6.63255	0.414402	3.80581	7.05093	3.83312e-06	7.22917e-33	1.0314e-10	1.16039e-09	6.49031e-08	4.21928e-10	1.00756e-58	0.00547572	7.16151e-10	6.62929	538.029
2385	347.359	388.916	344.985	1257.47	339.322	892.085	16.447	158.005	13.4856	0.318625	19.0134	45.5995	3.91734	33.4963	432.632	129.569	0.0716529	28.0086	28.7403	0.0263653	6.56112	0.409156	3.79209	7.04644	3.67673e-06	5.9149e-33	9.48593e-11	1.04156e-09	6.1363e-08	3.95732e-10	7.13698e-59	0.00538525	6.80054e-10	6.623	538.029
2386	347.164	388.7	344.794	1257.46	339.319	892.102	16.3549	158.005	13.4856	0.318625	19.0135	45.5966	3.91745	33.4981	432.64	129.579	0.0716565	28.0081	28.7403	0.0257377	6.49037	0.403971	3.77841	7.04195	3.52655e-06	4.83935e-33	8.72417e-11	9.34881e-10	5.80152e-08	3.71153e-10	5.05543e-59	0.00529617	6.45761e-10	6.61876	538.029
2387	346.982	388.499	344.617	1257.44	339.316	892.116	16.2638	158.005	13.4856	0.318626	19.0136	45.5938	3.91755	33.4997	432.646	129.59	0.0716598	28.0076	28.7402	0.0251248	6.42037	0.39885	3.76478	7.03746	3.38247e-06	3.95933e-33	8.02354e-11	8.39121e-10	5.48499e-08	3.48099e-10	3.58098e-59	0.00520855	6.13193e-10	6.61724	538.029
2388	346.815	388.314	344.453	1257.44	339.312	892.137	16.1736	158.005	13.4856	0.318626	19.0137	45.5927	3.91767	33.5014	432.656	129.601	0.0716633	28.0075	28.7402	0.024527	6.35117	0.393797	3.75121	7.03297	3.24437e-06	3.23941e-33	7.37926e-11	7.53181e-10	5.18576e-08	3.26482e-10	2.53656e-59	0.00512243	5.82277e-10	6.61844	538.029
2389	346.662	388.144	344.302	1257.49	339.309	892.173	16.0846	158.006	13.4856	0.318627	19.0139	45.595	3.91787	33.5035	432.676	129.612	0.0716675	28.0088	28.7402	0.0239443	6.28282	0.388816	3.7377	7.0285	3.11211e-06	2.65056e-33	6.78692e-11	6.76068e-10	4.90296e-08	3.06216e-10	1.79675e-59	0.00503787	5.52938e-10	6.62276	538.029
2390	346.516	387.981	344.154	1257.58	339.306	892.226	15.9966	158.006	13.4856	0.318627	19.014	45.6001	3.91816	33.506	432.706	129.625	0.0716724	28.0113	28.7402	0.0233764	6.21533	0.383907	3.72427	7.02404	2.98546e-06	2.1689e-33	6.24234e-11	6.06877e-10	4.63569e-08	2.8722e-10	1.27272e-59	0.00495485	5.25099e-10	6.62815	538.029
2391	346.366	387.814	344.003	1257.69	339.302	892.288	15.9096	158.006	13.4856	0.318628	19.0142	45.6068	3.9185	33.5087	432.742	129.637	0.0716777	28.0144	28.7402	0.0228226	6.14864	0.379065	3.7109	7.01958	2.86411e-06	1.77485e-33	5.74159e-11	5.44783e-10	4.38305e-08	2.69408e-10	9.01518e-60	0.0048733	4.98675e-10	6.6325	538.029
2392	346.21	387.639	343.844	1257.82	339.299	892.355	15.8234	158.006	13.4856	0.318628	19.0144	45.6139	3.91886	33.5116	432.783	129.65	0.0716833	28.018	28.7402	0.0222825	6.08273	0.37429	3.69759	7.01513	2.7478e-06	1.45245e-33	5.2811e-11	4.89054e-10	4.14423e-08	2.52706e-10	6.38584e-60	0.00479316	4.7359e-10	6.63582	538.029
2393	346.046	387.456	343.678	1257.95	339.296	892.426	15.7381	158.007	13.4856	0.318629	19.0146	45.6214	3.91925	33.5146	432.825	129.664	0.071689	28.0217	28.7402	0.0217556	6.01758	0.369578	3.68435	7.01069	2.6363e-06	1.18865e-33	4.85761e-11	4.39034e-10	3.91846e-08	2.37043e-10	4.52336e-60	0.00471441	4.49776e-10	6.6386	538.029
2394	345.876	387.265	343.505	1258.09	339.293	892.499	15.6537	158.007	13.4856	0.31863	19.0148	45.6288	3.91966	33.5176	432.87	129.677	0.071695	28.0255	28.7402	0.0212415	5.95317	0.364928	3.67115	7.00625	2.5294e-06	9.72795e-34	4.46814e-11	3.94137e-10	3.70502e-08	2.22355e-10	3.20409e-60	0.004637	4.27165e-10	6.64097	538.029
2395	345.692	387.06	343.32	1258.18	339.29	892.555	15.5698	158.007	13.4856	0.31863	19.015	45.6327	3.91998	33.5203	432.904	129.69	0.0717002	28.028	28.7402	0.020739	5.88938	0.360332	3.65799	7.00181	2.42672e-06	7.96104e-34	4.10982e-11	3.53822e-10	3.50317e-08	2.08571e-10	2.26959e-60	0.00456077	4.05681e-10	6.63862	538.029
2396	345.496	386.842	343.127	1258.2	339.287	892.583	15.4864	158.007	13.4856	0.318631	19.0152	45.6316	3.92016	33.5223	432.92	129.701	0.0717043	28.0283	28.7401	0.0202472	5.82613	0.355783	3.64485	6.99737	2.32799e-06	6.51447e-34	3.78007e-11	3.17613e-10	3.31221e-08	1.95633e-10	1.60765e-60	0.00448563	3.85258e-10	6.6323	538.029
2397	345.304	386.63	342.939	1258.18	339.283	892.599	15.4037	158.007	13.4856	0.318631	19.0153	45.6286	3.92027	33.5239	432.927	129.711	0.0717077	28.0278	28.7401	0.0197666	5.76348	0.351287	3.63174	6.99292	2.23317e-06	5.33049e-34	3.4767e-11	2.85101e-10	3.13162e-08	1.83493e-10	1.13877e-60	0.00441164	3.65854e-10	6.62803	538.029
2398	345.126	386.433	342.765	1258.16	339.28	892.612	15.3219	158.008	13.4856	0.318632	19.0155	45.6257	3.92036	33.5255	432.932	129.721	0.0717109	28.0272	28.7401	0.0192973	5.7015	0.346847	3.61867	6.98847	2.14219e-06	4.36166e-34	3.19766e-11	2.55916e-10	2.96086e-08	1.72106e-10	8.06636e-61	0.00433886	3.47425e-10	6.62649	538.029
2399	344.963	386.252	342.605	1258.16	339.277	892.632	15.241	158.008	13.4856	0.318632	19.0156	45.6246	3.92047	33.5271	432.942	129.731	0.0717142	28.0272	28.7401	0.0188394	5.64022	0.342465	3.60566	6.98403	2.05496e-06	3.56899e-34	2.94106e-11	2.29722e-10	2.79944e-08	1.61427e-10	5.71374e-61	0.00426732	3.29929e-10	6.62768	538.029
2400	344.813	386.085	342.457	1258.21	339.274	892.667	15.1611	158.008	13.4856	0.318633	19.0158	45.6268	3.92067	33.5291	432.961	129.741	0.0717183	28.0284	28.7401	0.018393	5.57969	0.338145	3.59272	6.9796	1.97142e-06	2.92056e-34	2.70512e-11	2.06217e-10	2.64687e-08	1.51416e-10	4.04729e-61	0.00419707	3.13325e-10	6.63199	538.029
2401	344.67	385.926	342.313	1258.29	339.271	892.718	15.0822	158.008	13.4856	0.318633	19.016	45.6319	3.92096	33.5315	432.991	129.753	0.071723	28.0309	28.7401	0.017958	5.51992	0.333888	3.57984	6.97518	1.89142e-06	2.3901e-34	2.48819e-11	1.85125e-10	2.50267e-08	1.42031e-10	2.86687e-61	0.0041281	2.97568e-10	6.63737	538.029
2402	344.524	385.763	342.165	1258.41	339.268	892.779	15.004	158.009	13.4856	0.318634	19.0162	45.6385	3.92129	33.5342	433.027	129.765	0.0717282	28.034	28.7401	0.0175339	5.46086	0.329689	3.56703	6.97077	1.81475e-06	1.95609e-34	2.28872e-11	1.66195e-10	2.36636e-08	1.33231e-10	2.03072e-61	0.00406035	2.82612e-10	6.64172	538.029
2403	344.371	385.591	342.009	1258.53	339.266	892.845	14.9267	158.009	13.4856	0.318634	19.0164	45.6456	3.92165	33.537	433.066	129.777	0.0717336	28.0375	28.7401	0.0171201	5.40249	0.325547	3.55428	6.96636	1.74126e-06	1.60095e-34	2.10527e-11	1.49204e-10	2.23751e-08	1.24978e-10	1.43845e-61	0.00399377	2.68412e-10	6.64504	538.029
2404	344.211	385.412	341.846	1258.67	339.263	892.915	14.8501	158.009	13.4856	0.318635	19.0167	45.653	3.92204	33.5399	433.109	129.79	0.0717393	28.0412	28.7401	0.0167164	5.34479	0.32146	3.54158	6.96196	1.6708e-06	1.31033e-34	1.93655e-11	1.33953e-10	2.11569e-08	1.17239e-10	1.01891e-61	0.00392833	2.54931e-10	6.64781	538.029
2405	344.044	385.224	341.675	1258.8	339.26	892.986	14.7742	158.009	13.4856	0.318635	19.0169	45.6604	3.92244	33.5428	433.153	129.802	0.0717451	28.045	28.7401	0.0163224	5.28774	0.317428	3.52893	6.95757	1.60324e-06	1.07249e-34	1.78138e-11	1.20263e-10	2.00052e-08	1.09981e-10	7.21739e-62	0.00386401	2.42131e-10	6.65017	538.029
2406	343.863	385.022	341.494	1258.89	339.257	893.041	14.6988	158.01	13.4856	0.318636	19.0172	45.6643	3.92275	33.5454	433.186	129.814	0.0717502	28.0474	28.74	0.0159374	5.23124	0.313441	3.51632	6.95318	1.53834e-06	8.77792e-35	1.63861e-11	1.07969e-10	1.89159e-08	1.03169e-10	5.11239e-62	0.00380067	2.29967e-10	6.6478	538.029
2407	343.67	384.808	341.303	1258.91	339.254	893.068	14.6239	158.01	13.4856	0.318636	19.0174	45.6631	3.92293	33.5474	433.202	129.825	0.0717541	28.0478	28.74	0.0155605	5.17521	0.309495	3.50372	6.94877	1.47592e-06	7.18372e-35	1.50722e-11	9.69263e-11	1.78855e-08	9.67748e-11	3.62132e-62	0.00373823	2.18404e-10	6.64146	538.029
2408	343.482	384.599	341.119	1258.89	339.251	893.083	14.5496	158.01	13.4856	0.318637	19.0175	45.6601	3.92303	33.5489	433.209	129.834	0.0717574	28.0472	28.74	0.0151922	5.11972	0.305595	3.49115	6.94437	1.41597e-06	5.87877e-35	1.38633e-11	8.70107e-11	1.69109e-08	9.07747e-11	2.56514e-62	0.00367674	2.07416e-10	6.63717	538.029
2409	343.306	384.405	340.948	1258.87	339.249	893.095	14.4761	158.01	13.4856	0.318637	19.0177	45.6572	3.92312	33.5504	433.213	129.843	0.0717605	28.0466	28.74	0.0148324	5.06481	0.301742	3.47863	6.93997	1.35844e-06	4.81082e-35	1.27513e-11	7.8109e-11	1.59894e-08	8.51462e-11	1.81699e-62	0.00361625	1.96981e-10	6.63561	538.029
2410	343.146	384.227	340.79	1258.87	339.246	893.113	14.4034	158.01	13.4856	0.318638	19.0179	45.656	3.92323	33.552	433.222	129.853	0.0717637	28.0465	28.74	0.0144814	5.01052	0.297941	3.46615	6.93557	1.30328e-06	3.93696e-35	1.17287e-11	7.0119e-11	1.51182e-08	7.98677e-11	1.28705e-62	0.00355679	1.87072e-10	6.63679	538.029
2411	342.999	384.063	340.644	1258.91	339.243	893.148	14.3315	158.011	13.4856	0.318639	19.0181	45.6582	3.92343	33.5539	433.241	129.863	0.0717676	28.0477	28.74	0.0141393	4.95691	0.294194	3.45374	6.93118	1.25044e-06	3.22203e-35	1.07883e-11	6.29487e-11	1.42948e-08	7.49189e-11	9.11675e-63	0.0034984	1.77669e-10	6.64109	538.029
2412	342.858	383.906	340.502	1259	339.24	893.198	14.2606	158.011	13.4856	0.318639	19.0183	45.6633	3.9237	33.5563	433.27	129.874	0.0717722	28.0502	28.74	0.0138058	4.90395	0.2905	3.4414	6.9268	1.19983e-06	2.63711e-35	9.92375e-12	5.65141e-11	1.35165e-08	7.02792e-11	6.45778e-63	0.00344107	1.68745e-10	6.64648	538.029
2413	342.714	383.745	340.356	1259.11	339.238	893.258	14.1903	158.011	13.4856	0.31864	19.0186	45.6698	3.92403	33.5588	433.306	129.885	0.0717773	28.0533	28.74	0.0134806	4.85163	0.286857	3.42912	6.92243	1.15133e-06	2.15849e-35	9.12865e-12	5.07387e-11	1.27808e-08	6.59286e-11	4.57432e-63	0.00338475	1.60273e-10	6.65082	538.029
2414	342.564	383.577	340.203	1259.24	339.235	893.323	14.1207	158.011	13.4856	0.31864	19.0189	45.6769	3.92439	33.5616	433.345	129.897	0.0717826	28.0567	28.74	0.0131634	4.79992	0.283263	3.41689	6.91807	1.10483e-06	1.7668e-35	8.3974e-12	4.55546e-11	1.20852e-08	6.18485e-11	3.24019e-63	0.0033294	1.5223e-10	6.65413	538.029
2415	342.406	383.399	340.042	1259.37	339.233	893.391	14.0518	158.012	13.4856	0.318641	19.0191	45.6842	3.92477	33.5644	433.387	129.909	0.0717882	28.0604	28.7399	0.0128538	4.74879	0.279717	3.40472	6.91371	1.06025e-06	1.44623e-35	7.72484e-12	4.09009e-11	1.14277e-08	5.80218e-11	2.29516e-63	0.003275	1.44593e-10	6.6569	538.029
2416	342.241	383.215	339.874	1259.51	339.23	893.462	13.9836	158.012	13.4856	0.318641	19.0194	45.6916	3.92517	33.5673	433.431	129.921	0.0717939	28.0642	28.7399	0.0125517	4.69825	0.276217	3.3926	6.90936	1.01749e-06	1.18386e-35	7.10624e-12	3.67233e-11	1.0806e-08	5.44326e-11	1.62576e-63	0.00322153	1.37341e-10	6.65926	538.029
2417	342.063	383.016	339.695	1259.6	339.227	893.516	13.9157	158.012	13.4856	0.318642	19.0197	45.6954	3.92548	33.5699	433.464	129.932	0.0717989	28.0666	28.7399	0.0122564	4.64818	0.272758	3.3805	6.90501	9.76415e-07	9.69047e-36	6.53705e-12	3.29715e-11	1.0218e-08	5.10643e-11	1.1516e-63	0.00316886	1.3045e-10	6.65688	538.029
2418	341.873	382.805	339.508	1259.61	339.225	893.542	13.8483	158.012	13.4856	0.318642	19.02	45.6942	3.92565	33.5717	433.479	129.942	0.0718027	28.0669	28.7399	0.0119674	4.59854	0.269334	3.36842	6.90065	9.36905e-07	7.93141e-36	6.01319e-12	2.96013e-11	9.66168e-09	4.79022e-11	8.15724e-64	0.00311694	1.23898e-10	6.65051	538.029
2419	341.688	382.599	339.326	1259.59	339.222	893.556	13.7814	158.013	13.4856	0.318643	19.0202	45.6911	3.92575	33.5733	433.485	129.951	0.0718059	28.0664	28.7399	0.0116849	4.54936	0.265949	3.35637	6.89629	8.98951e-07	6.49135e-36	5.53118e-12	2.65749e-11	9.13554e-09	4.49348e-11	5.77812e-64	0.00306581	1.17672e-10	6.6462	538.029
2420	341.516	382.408	339.158	1259.57	339.22	893.567	13.7152	158.013	13.4856	0.318643	19.0204	45.6882	3.92583	33.5747	433.49	129.959	0.0718089	28.0657	28.7399	0.011409	4.50071	0.262605	3.34437	6.89193	8.62526e-07	5.3127e-36	5.08779e-12	2.38578e-11	8.63802e-09	4.2151e-11	4.09289e-64	0.00301551	1.11759e-10	6.64463	538.029
2421	341.359	382.233	339.003	1259.57	339.217	893.584	13.6497	158.013	13.4856	0.318644	19.0206	45.687	3.92594	33.5762	433.498	129.968	0.071812	28.0656	28.7399	0.0111397	4.4526	0.259306	3.33241	6.88757	8.27598e-07	4.34816e-36	4.68e-12	2.14187e-11	8.16766e-09	3.95401e-11	2.89916e-64	0.00296607	1.06144e-10	6.64579	538.029
2422	341.215	382.073	338.86	1259.61	339.215	893.617	13.5851	158.013	13.4856	0.318644	19.0209	45.6891	3.92613	33.5781	433.517	129.978	0.0718158	28.0668	28.7399	0.0108773	4.40508	0.256054	3.32051	6.88323	7.94136e-07	3.55895e-36	4.30501e-12	1.92298e-11	7.72307e-09	3.70922e-11	2.0536e-64	0.00291751	1.00814e-10	6.65009	538.029
2423	341.077	381.919	338.721	1259.7	339.212	893.667	13.5212	158.013	13.4856	0.318645	19.0211	45.6942	3.9264	33.5804	433.546	129.988	0.0718203	28.0692	28.7399	0.0106214	4.35815	0.252848	3.30868	6.87889	7.62083e-07	2.91319e-36	3.96021e-12	1.72653e-11	7.30284e-09	3.47971e-11	1.45465e-64	0.00286983	9.57563e-11	6.65547	538.029
2424	340.936	381.762	338.578	1259.81	339.21	893.726	13.4579	158.014	13.4856	0.318645	19.0214	45.7007	3.92673	33.5829	433.581	129.999	0.0718253	28.0723	28.7399	0.0103719	4.31178	0.249685	3.2969	6.87456	7.31361e-07	2.38472e-36	3.6431e-12	1.55019e-11	6.90558e-09	3.26448e-11	1.03039e-64	0.00282298	9.09545e-11	6.65982	538.029
2425	340.788	381.596	338.427	1259.93	339.208	893.79	13.3952	158.014	13.4856	0.318646	19.0217	45.7077	3.92708	33.5856	433.62	130.01	0.0718305	28.0757	28.7398	0.0101285	4.26595	0.246566	3.28518	6.87024	7.01904e-07	1.95219e-36	3.35145e-12	1.3919e-11	6.53e-09	3.06262e-11	7.29871e-65	0.00277695	8.63953e-11	6.66313	538.029
2426	340.634	381.422	338.269	1260.06	339.205	893.857	13.3331	158.014	13.4856	0.318646	19.022	45.715	3.92746	33.5884	433.661	130.022	0.071836	28.0794	28.7398	0.00989095	4.22064	0.243487	3.2735	6.86593	6.73656e-07	1.59816e-36	3.08319e-12	1.24979e-11	6.17492e-09	2.8733e-11	5.16999e-65	0.0027317	8.20661e-11	6.66589	538.029
2427	340.472	381.241	338.105	1260.2	339.203	893.927	13.2716	158.014	13.4856	0.318647	19.0224	45.7223	3.92785	33.5912	433.705	130.033	0.0718416	28.0831	28.7398	0.00965915	4.17584	0.24045	3.26188	6.86162	6.46563e-07	1.30836e-36	2.83643e-12	1.12221e-11	5.83919e-09	2.69571e-11	3.66212e-65	0.00268722	7.7955e-11	6.66824	538.029
2428	340.297	381.046	337.929	1260.29	339.201	893.98	13.2105	158.015	13.4856	0.318647	19.0227	45.7261	3.92816	33.5937	433.737	130.044	0.0718465	28.0855	28.7398	0.00943252	4.13146	0.237446	3.25028	6.85731	6.20531e-07	1.07108e-36	2.60938e-12	1.00763e-11	5.52164e-09	2.52904e-11	2.59404e-65	0.00264341	7.4048e-11	6.66585	538.029
2429	340.111	380.838	337.744	1260.3	339.198	894.006	13.1496	158.015	13.4856	0.318648	19.023	45.7249	3.92832	33.5955	433.752	130.053	0.0718503	28.0859	28.7398	0.00921069	4.08745	0.234474	3.2387	6.85299	5.95489e-07	8.76747e-37	2.40039e-12	9.04696e-12	5.22121e-09	2.37256e-11	1.83747e-65	0.00260022	7.03332e-11	6.65946	538.029
2430	339.929	380.636	337.566	1260.28	339.196	894.019	13.0893	158.015	13.4856	0.318649	19.0232	45.7218	3.92842	33.597	433.758	130.062	0.0718533	28.0853	28.7398	0.00899383	4.04386	0.231535	3.22715	6.84867	5.7143e-07	7.17639e-37	2.2081e-12	8.12254e-12	4.93705e-09	2.22571e-11	1.30155e-65	0.00255768	6.6803e-11	6.65513	538.029
2431	339.76	380.449	337.401	1260.26	339.194	894.029	13.0296	158.015	13.4856	0.318649	19.0235	45.7189	3.9285	33.5984	433.762	130.07	0.0718562	28.0846	28.7398	0.00878203	4.00073	0.228632	3.21563	6.84435	5.48338e-07	5.874e-37	2.0312e-12	7.29254e-12	4.66834e-09	2.08794e-11	9.21947e-66	0.00251583	6.34497e-11	6.65354	538.029
2432	339.606	380.278	337.249	1260.26	339.192	894.045	12.9706	158.016	13.4856	0.31865	19.0237	45.7176	3.9286	33.5999	433.77	130.078	0.0718593	28.0845	28.7398	0.00857534	3.95808	0.225767	3.20417	6.84004	5.26192e-07	4.80807e-37	1.86849e-12	6.54744e-12	4.41429e-09	1.95872e-11	6.53054e-66	0.00247469	6.02654e-11	6.65468	538.029
2433	339.466	380.121	337.11	1260.3	339.189	894.078	12.9123	158.016	13.4855	0.31865	19.024	45.7197	3.92879	33.6017	433.789	130.088	0.071863	28.0857	28.7398	0.00837384	3.91596	0.222943	3.19276	6.83574	5.04974e-07	3.93581e-37	1.71886e-12	5.8787e-12	4.17415e-09	1.83756e-11	4.62586e-66	0.00243428	5.7243e-11	6.65898	538.029
2434	339.331	379.971	336.974	1260.38	339.187	894.127	12.8546	158.016	13.4855	0.318651	19.0243	45.7247	3.92906	33.6039	433.817	130.097	0.0718674	28.088	28.7397	0.00817741	3.87435	0.220159	3.18141	6.83144	4.84646e-07	3.22202e-37	1.58127e-12	5.27848e-12	3.94716e-09	1.72396e-11	3.27669e-66	0.00239461	5.43743e-11	6.66436	538.029
2435	339.194	379.817	336.834	1260.49	339.185	894.185	12.7975	158.016	13.4855	0.318651	19.0246	45.7312	3.92938	33.6064	433.852	130.108	0.0718723	28.0911	28.7397	0.00798583	3.83324	0.217413	3.17012	6.82716	4.65161e-07	2.63781e-37	1.45473e-12	4.73969e-12	3.73257e-09	1.61742e-11	2.32102e-66	0.00235563	5.16508e-11	6.6687	538.029
2436	339.049	379.654	336.686	1260.62	339.183	894.248	12.741	158.017	13.4855	0.318652	19.025	45.7382	3.92973	33.6091	433.89	130.119	0.0718775	28.0945	28.7397	0.0077989	3.7926	0.214704	3.15888	6.82288	4.46476e-07	2.1596e-37	1.33834e-12	4.25599e-12	3.52969e-09	1.51749e-11	1.64408e-66	0.00231732	4.90647e-11	6.67201	538.029
2437	338.898	379.484	336.531	1260.75	339.181	894.315	12.685	158.017	13.4855	0.318652	19.0253	45.7455	3.93011	33.6118	433.932	130.13	0.0718828	28.0982	28.7397	0.00761649	3.75243	0.212031	3.14768	6.81861	4.28555e-07	1.76761e-37	1.23128e-12	3.82172e-12	3.33787e-09	1.42376e-11	1.16457e-66	0.00227966	4.66089e-11	6.67477	538.029
2438	338.74	379.307	336.37	1260.88	339.179	894.384	12.6295	158.017	13.4855	0.318653	19.0257	45.7527	3.9305	33.6146	433.975	130.141	0.0718884	28.1019	28.7397	0.00743847	3.71271	0.209393	3.13654	6.81434	4.11366e-07	1.44628e-37	1.13279e-12	3.43183e-12	3.1565e-09	1.33583e-11	8.24914e-67	0.00224264	4.42767e-11	6.67711	538.029
2439	338.568	379.115	336.197	1260.97	339.176	894.436	12.5743	158.017	13.4855	0.318653	19.026	45.7565	3.9308	33.6171	434.007	130.151	0.0718932	28.1043	28.7397	0.00726442	3.67336	0.206785	3.12542	6.81007	3.94847e-07	1.18367e-37	1.04217e-12	3.08163e-12	2.98494e-09	1.25331e-11	5.84322e-67	0.00220618	4.20601e-11	6.6747	538.029
2440	338.385	378.911	336.016	1260.98	339.174	894.461	12.5193	158.017	13.4855	0.318654	19.0264	45.7552	3.93096	33.6189	434.021	130.16	0.0718968	28.1046	28.7397	0.00709403	3.63434	0.204203	3.11431	6.80579	3.78955e-07	9.69016e-38	9.58749e-13	2.76701e-12	2.82263e-09	1.17583e-11	4.139e-67	0.00217022	3.99524e-11	6.66829	538.029
2441	338.207	378.713	335.841	1260.96	339.172	894.473	12.4648	158.018	13.4855	0.318654	19.0266	45.7521	3.93105	33.6203	434.027	130.168	0.0718998	28.104	28.7397	0.00692746	3.59568	0.20165	3.10323	6.80151	3.63685e-07	7.93249e-38	8.81988e-13	2.48444e-12	2.6691e-09	1.10311e-11	2.93183e-67	0.00213482	3.79494e-11	6.66394	538.029
2442	338.042	378.53	335.68	1260.94	339.17	894.482	12.4109	158.018	13.4855	0.318655	19.0269	45.7491	3.93113	33.6216	434.031	130.176	0.0719026	28.1033	28.7397	0.00676475	3.55743	0.199129	3.09219	6.79724	3.49027e-07	6.49357e-38	8.1137e-13	2.23071e-12	2.52392e-09	1.03489e-11	2.07674e-67	0.00209998	3.60466e-11	6.66233	538.029
2443	337.892	378.362	335.532	1260.94	339.168	894.498	12.3575	158.018	13.4855	0.318655	19.0272	45.7478	3.93123	33.6231	434.039	130.184	0.0719056	28.1031	28.7396	0.00660597	3.51961	0.19664	3.08119	6.79296	3.34968e-07	5.31578e-38	7.46413e-13	2.00293e-12	2.38665e-09	9.70896e-12	1.47104e-67	0.00206573	3.42396e-11	6.66346	538.029
2444	337.754	378.209	335.395	1260.98	339.166	894.53	12.3048	158.018	13.4855	0.318656	19.0275	45.7499	3.93142	33.6249	434.056	130.193	0.0719093	28.1043	28.7396	0.00645115	3.48226	0.194187	3.07025	6.7887	3.21496e-07	4.35188e-38	6.86677e-13	1.79847e-12	2.25689e-09	9.10888e-12	1.042e-67	0.00203209	3.25244e-11	6.66775	538.029
2445	337.623	378.063	335.263	1261.06	339.164	894.578	12.2528	158.019	13.4855	0.318656	19.0279	45.7548	3.93168	33.6271	434.085	130.202	0.0719136	28.1066	28.7396	0.00630023	3.44536	0.191769	3.05937	6.78445	3.08589e-07	3.56193e-38	6.31743e-13	1.61495e-12	2.13423e-09	8.54621e-12	7.38094e-68	0.00199906	3.08963e-11	6.67313	538.029
2446	337.489	377.912	335.126	1261.17	339.162	894.635	12.2012	158.019	13.4855	0.318657	19.0282	45.7613	3.932	33.6295	434.119	130.212	0.0719184	28.1097	28.7396	0.00615301	3.4089	0.189383	3.04854	6.7802	2.96214e-07	2.91444e-38	5.81216e-13	1.4502e-12	2.01827e-09	8.01849e-12	5.22823e-68	0.0019666	2.93505e-11	6.67747	538.029
2447	337.348	377.754	334.981	1261.29	339.16	894.698	12.1501	158.019	13.4855	0.318657	19.0286	45.7683	3.93235	33.6321	434.157	130.223	0.0719235	28.1131	28.7396	0.00600937	3.37285	0.18703	3.03776	6.77597	2.84347e-07	2.38474e-38	5.3474e-13	1.30229e-12	1.90863e-09	7.5235e-12	3.70338e-68	0.00193471	2.78826e-11	6.68077	538.029
2448	337.2	377.587	334.83	1261.42	339.158	894.764	12.0994	158.019	13.4855	0.318658	19.029	45.7755	3.93272	33.6348	434.198	130.233	0.0719288	28.1167	28.7396	0.00586919	3.33722	0.184707	3.02702	6.77173	2.72964e-07	1.95138e-38	4.91988e-13	1.16948e-12	1.80497e-09	7.05918e-12	2.62326e-68	0.00190335	2.64885e-11	6.68353	538.029
2449	337.045	377.413	334.672	1261.56	339.156	894.832	12.0492	158.02	13.4855	0.318658	19.0294	45.7827	3.9331	33.6376	434.241	130.244	0.0719343	28.1204	28.7396	0.00573238	3.30199	0.182415	3.01633	6.76751	2.62044e-07	1.59681e-38	4.52659e-13	1.05024e-12	1.70695e-09	6.6236e-12	1.85817e-68	0.00187252	2.51646e-11	6.68586	538.029
2450	336.877	377.225	334.502	1261.64	339.155	894.884	11.9993	158.02	13.4855	0.318659	19.0298	45.7865	3.9334	33.64	434.273	130.254	0.071939	28.1227	28.7396	0.0055986	3.26709	0.180149	3.00567	6.76328	2.51549e-07	1.30661e-38	4.16466e-13	9.4313e-13	1.61423e-09	6.21476e-12	1.31622e-68	0.00184216	2.39062e-11	6.68344	538.029
2451	336.698	377.026	334.325	1261.66	339.153	894.908	11.9495	158.02	13.4855	0.31866	19.0301	45.7852	3.93356	33.6418	434.287	130.263	0.0719426	28.123	28.7396	0.00546763	3.23247	0.177906	2.99501	6.75904	2.41451e-07	1.06938e-38	3.8315e-13	8.46896e-13	1.5265e-09	5.83088e-12	9.32334e-69	0.00181222	2.27096e-11	6.67701	538.029
2452	336.523	376.832	334.154	1261.63	339.151	894.919	11.9002	158.02	13.4855	0.31866	19.0304	45.782	3.93365	33.6432	434.292	130.27	0.0719455	28.1224	28.7396	0.00533958	3.19819	0.175688	2.98439	6.7548	2.31748e-07	8.755e-39	3.52491e-13	7.6046e-13	1.44352e-09	5.47058e-12	6.60412e-69	0.00178273	2.15723e-11	6.67263	538.029
2453	336.362	376.653	333.996	1261.61	339.149	894.928	11.8514	158.021	13.4855	0.318661	19.0307	45.779	3.93372	33.6445	434.296	130.278	0.0719482	28.1217	28.7395	0.0052145	3.16425	0.173497	2.97379	6.75057	2.22431e-07	7.16764e-39	3.24284e-13	6.82841e-13	1.36505e-09	5.13251e-12	4.67798e-69	0.00175371	2.04918e-11	6.67101	538.029
2454	336.216	376.49	333.852	1261.6	339.147	894.943	11.8031	158.021	13.4855	0.318661	19.0311	45.7776	3.93382	33.6459	434.303	130.286	0.0719511	28.1215	28.7395	0.00509243	3.1307	0.171335	2.96325	6.74634	2.13495e-07	5.8682e-39	2.98338e-13	6.13153e-13	1.29085e-09	4.8154e-12	3.31361e-69	0.00172519	1.94657e-11	6.67213	538.029
2455	336.083	376.341	333.719	1261.64	339.145	894.974	11.7555	158.021	13.4855	0.318662	19.0314	45.7796	3.934	33.6476	434.321	130.294	0.0719547	28.1226	28.7395	0.00497339	3.09756	0.169203	2.95275	6.74211	2.04931e-07	4.80318e-39	2.74475e-13	5.50598e-13	1.22071e-09	4.51802e-12	2.34717e-69	0.00169717	1.84917e-11	6.67641	538.029
2456	335.956	376.199	333.59	1261.73	339.143	895.021	11.7083	158.021	13.4855	0.318662	19.0318	45.7846	3.93427	33.6498	434.348	130.303	0.071959	28.125	28.7395	0.00485735	3.06482	0.167101	2.94231	6.7379	1.96725e-07	3.93028e-39	2.5253e-13	4.94446e-13	1.15441e-09	4.23916e-12	1.6626e-69	0.00166965	1.7567e-11	6.68179	538.029
2457	335.826	376.053	333.458	1261.83	339.142	895.078	11.6616	158.022	13.4855	0.318663	19.0322	45.7909	3.93458	33.6522	434.382	130.313	0.0719637	28.128	28.7395	0.00474415	3.03248	0.165028	2.93193	6.7337	1.88857e-07	3.21617e-39	2.32344e-13	4.44034e-13	1.09172e-09	3.97761e-12	1.17769e-69	0.00164262	1.66891e-11	6.68612	538.029
2458	335.689	375.899	333.318	1261.96	339.14	895.14	11.6154	158.022	13.4855	0.318663	19.0326	45.7979	3.93493	33.6548	434.42	130.323	0.0719687	28.1313	28.7395	0.00463369	3.0005	0.162983	2.92158	6.7295	1.8131e-07	2.63191e-39	2.13776e-13	3.9877e-13	1.03245e-09	3.73227e-12	8.34208e-70	0.00161605	1.58553e-11	6.68942	538.029
2459	335.545	375.737	333.17	1262.09	339.138	895.205	11.5695	158.022	13.4855	0.318664	19.033	45.8051	3.9353	33.6574	434.461	130.333	0.0719739	28.1349	28.7395	0.00452588	2.96888	0.160964	2.91129	6.72531	1.74071e-07	2.15386e-39	1.96694e-13	3.58127e-13	9.76405e-10	3.50211e-12	5.90905e-70	0.00158992	1.50635e-11	6.69216	538.029
2460	335.395	375.569	333.017	1262.22	339.136	895.273	11.524	158.022	13.4855	0.318664	19.0334	45.8123	3.93568	33.6602	434.503	130.344	0.0719793	28.1386	28.7395	0.00442065	2.93762	0.158972	2.90103	6.72112	1.67125e-07	1.76268e-39	1.8098e-13	3.21632e-13	9.23412e-10	3.2862e-12	4.18563e-70	0.00156424	1.43114e-11	6.69449	538.029
2461	335.232	375.386	332.852	1262.3	339.135	895.324	11.4788	158.022	13.4855	0.318665	19.0338	45.816	3.93598	33.6626	434.535	130.354	0.071984	28.1409	28.7395	0.00431776	2.90665	0.157002	2.8908	6.71693	1.60449e-07	1.44249e-39	1.66517e-13	2.88849e-13	8.73283e-10	3.08352e-12	2.96486e-70	0.00153894	1.35966e-11	6.69205	538.029
2462	335.058	375.192	332.68	1262.32	339.133	895.347	11.4337	158.023	13.4855	0.318665	19.0342	45.8146	3.93613	33.6643	434.548	130.362	0.0719875	28.1412	28.7394	0.00421701	2.87594	0.155052	2.88058	6.71274	1.54025e-07	1.18035e-39	1.53204e-13	2.59392e-13	8.25851e-10	2.89321e-12	2.10014e-70	0.00151399	1.29167e-11	6.68559	538.029
2463	334.888	375.004	332.514	1262.3	339.131	895.358	11.389	158.023	13.4855	0.318666	19.0346	45.8114	3.93622	33.6657	434.554	130.369	0.0719903	28.1405	28.7394	0.00411851	2.84551	0.153124	2.87039	6.70854	1.47851e-07	9.65808e-40	1.40952e-13	2.32932e-13	7.80983e-10	2.71458e-12	1.48762e-70	0.00148942	1.22706e-11	6.68119	538.029
2464	334.732	374.83	332.361	1262.27	339.13	895.366	11.3447	158.023	13.4855	0.318666	19.0349	45.8084	3.93629	33.6669	434.557	130.376	0.071993	28.1398	28.7394	0.00402228	2.8154	0.15122	2.86023	6.70434	1.41922e-07	7.9025e-40	1.29679e-13	2.09171e-13	7.38551e-10	2.54696e-12	1.05374e-70	0.00146524	1.16567e-11	6.67954	538.029
2465	334.59	374.672	332.221	1262.26	339.128	895.38	11.3009	158.023	13.4855	0.318667	19.0353	45.807	3.93638	33.6683	434.563	130.384	0.0719958	28.1396	28.7394	0.00392836	2.78562	0.14934	2.85011	6.70015	1.36235e-07	6.46617e-40	1.19309e-13	1.87836e-13	6.9843e-10	2.38972e-12	7.4641e-71	0.00144147	1.10736e-11	6.68064	538.029
2466	334.462	374.529	332.093	1262.3	339.126	895.41	11.2577	158.024	13.4855	0.318667	19.0356	45.8089	3.93656	33.67	434.58	130.392	0.0719993	28.1407	28.7394	0.00383678	2.75621	0.147486	2.84004	6.69597	1.30784e-07	5.29122e-40	1.09772e-13	1.68683e-13	6.605e-10	2.24226e-12	5.28714e-71	0.00141812	1.05201e-11	6.68492	538.029
2467	334.34	374.392	331.969	1262.38	339.125	895.457	11.215	158.024	13.4855	0.318668	19.036	45.8138	3.93682	33.6722	434.608	130.401	0.0720035	28.143	28.7394	0.00374748	2.72716	0.145659	2.83003	6.69179	1.2556e-07	4.33007e-40	1.01e-13	1.51489e-13	6.24645e-10	2.10397e-12	3.7451e-71	0.00139519	9.99463e-12	6.69029	538.029
2468	334.214	374.251	331.841	1262.49	339.123	895.513	11.1726	158.024	13.4855	0.318668	19.0365	45.8202	3.93713	33.6745	434.642	130.41	0.0720082	28.146	28.7394	0.00366037	2.69845	0.143857	2.82006	6.68763	1.20551e-07	3.54369e-40	9.2931e-14	1.36053e-13	5.90745e-10	1.97427e-12	2.65282e-71	0.00137266	9.49567e-12	6.69462	538.029
2469	334.082	374.102	331.706	1262.61	339.121	895.574	11.1307	158.024	13.4855	0.318669	19.0369	45.8271	3.93747	33.677	434.679	130.42	0.0720131	28.1493	28.7394	0.00357536	2.67007	0.142078	2.81014	6.68347	1.15747e-07	2.90023e-40	8.55083e-14	1.22191e-13	5.5869e-10	1.85259e-12	1.8791e-71	0.00135051	9.0218e-12	6.6979	538.029
2470	333.943	373.945	331.563	1262.74	339.12	895.638	11.089	158.025	13.4855	0.318669	19.0373	45.8342	3.93784	33.6797	434.719	130.43	0.0720183	28.1529	28.7394	0.00349239	2.64201	0.140323	2.80026	6.67932	1.11137e-07	2.37368e-40	7.86796e-14	1.09745e-13	5.28381e-10	1.73844e-12	1.33105e-71	0.00132873	8.57172e-12	6.70064	538.029
2471	333.797	373.782	331.414	1262.87	339.118	895.705	11.0478	158.025	13.4855	0.31867	19.0378	45.8414	3.93822	33.6824	434.761	130.44	0.0720236	28.1565	28.7394	0.0034114	2.61426	0.138591	2.79043	6.67517	1.06714e-07	1.94278e-40	7.23972e-14	9.85671e-14	4.9972e-10	1.63135e-12	9.42838e-72	0.00130733	8.14422e-12	6.70296	538.029
2472	333.639	373.604	331.253	1262.95	339.116	895.755	11.0067	158.025	13.4855	0.31867	19.0382	45.845	3.93851	33.6848	434.792	130.45	0.0720282	28.1588	28.7393	0.0033322	2.58677	0.136878	2.78061	6.67102	1.02462e-07	1.59004e-40	6.66151e-14	8.85258e-14	4.72607e-10	1.53081e-12	6.67852e-72	0.00128624	7.73784e-12	6.7005	538.029
2473	333.469	373.415	331.086	1262.97	339.115	895.778	10.9657	158.025	13.4855	0.318671	19.0386	45.8436	3.93866	33.6864	434.805	130.458	0.0720316	28.1591	28.7393	0.00325465	2.55951	0.135183	2.77081	6.66687	9.83694e-08	1.30122e-40	6.1292e-14	7.95029e-14	4.46952e-10	1.43641e-12	4.73068e-72	0.00126544	7.35136e-12	6.69401	538.029
2474	333.305	373.232	330.924	1262.94	339.113	895.788	10.9251	158.026	13.4855	0.318671	19.039	45.8403	3.93874	33.6878	434.81	130.465	0.0720344	28.1584	28.7393	0.00317882	2.5325	0.133506	2.76103	6.66271	9.44361e-08	1.06482e-40	5.63931e-14	7.13976e-14	4.22683e-10	1.34779e-12	3.35094e-72	0.00124495	6.984e-12	6.68958	538.029
2475	333.153	373.064	330.776	1262.92	339.112	895.795	10.8849	158.026	13.4855	0.318672	19.0394	45.8372	3.93881	33.689	434.813	130.472	0.072037	28.1576	28.7393	0.00310474	2.50577	0.13185	2.75128	6.65855	9.06591e-08	8.7135e-41	5.18855e-14	6.41182e-14	3.99731e-10	1.26463e-12	2.37361e-72	0.00122479	6.63496e-12	6.68791	538.029
2476	333.016	372.911	330.641	1262.91	339.11	895.809	10.8452	158.026	13.4855	0.318673	19.0398	45.8358	3.9389	33.6903	434.819	130.479	0.0720397	28.1574	28.7393	0.00303242	2.47933	0.130215	2.74157	6.6544	8.70352e-08	7.13049e-41	4.77386e-14	5.75818e-14	3.78028e-10	1.18662e-12	1.68133e-72	0.00120497	6.30345e-12	6.689	538.029
2477	332.892	372.773	330.517	1262.95	339.109	895.838	10.8059	158.026	13.4855	0.318673	19.0402	45.8377	3.93907	33.692	434.836	130.487	0.0720432	28.1584	28.7393	0.00296191	2.45322	0.128603	2.73191	6.65025	8.35616e-08	5.83542e-41	4.39245e-14	5.17137e-14	3.5751e-10	1.11346e-12	1.19096e-72	0.0011855	5.9887e-12	6.69326	538.029
2478	332.774	372.64	330.397	1263.03	339.107	895.884	10.7671	158.027	13.4855	0.318674	19.0406	45.8425	3.93933	33.6941	434.863	130.495	0.0720473	28.1607	28.7393	0.00289315	2.42743	0.127014	2.7223	6.64612	8.02324e-08	4.77591e-41	4.04164e-14	4.64455e-14	3.38113e-10	1.04484e-12	8.43607e-73	0.00116638	5.68989e-12	6.69862	538.029
2479	332.653	372.504	330.273	1263.13	339.106	895.939	10.7286	158.027	13.4855	0.318674	19.0411	45.8488	3.93964	33.6965	434.896	130.505	0.0720519	28.1637	28.7393	0.00282607	2.40194	0.125446	2.71274	6.642	7.70398e-08	3.90895e-41	3.71894e-14	4.17152e-14	3.19773e-10	9.80479e-13	5.97562e-73	0.00114759	5.40614e-12	6.70295	538.029
2480	332.525	372.36	330.142	1263.25	339.104	895.999	10.6905	158.027	13.4855	0.318675	19.0415	45.8557	3.93998	33.6989	434.933	130.514	0.0720567	28.167	28.7393	0.0027606	2.37674	0.123899	2.70322	6.63788	7.39769e-08	3.19949e-41	3.42206e-14	3.74675e-14	3.02432e-10	9.20098e-13	4.23279e-73	0.00112912	5.13664e-12	6.70622	538.029
2481	332.39	372.208	330.003	1263.38	339.103	896.063	10.6526	158.027	13.4855	0.318675	19.042	45.8628	3.94034	33.7015	434.973	130.524	0.0720618	28.1705	28.7392	0.0026967	2.35182	0.122373	2.69374	6.63376	7.1038e-08	2.61887e-41	3.14892e-14	3.3653e-14	2.86034e-10	8.63449e-13	2.99826e-73	0.00111096	4.88066e-12	6.70895	538.029
2482	332.248	372.049	329.858	1263.51	339.101	896.129	10.6151	158.028	13.4855	0.318676	19.0425	45.8699	3.94071	33.7042	435.014	130.534	0.072067	28.1741	28.7392	0.00263432	2.32719	0.120866	2.6843	6.62965	6.82178e-08	2.14368e-41	2.89762e-14	3.02273e-14	2.70527e-10	8.10299e-13	2.1238e-73	0.00109311	4.6375e-12	6.71126	538.029
2483	332.094	371.876	329.703	1263.59	339.1	896.179	10.5777	158.028	13.4855	0.318676	19.0429	45.8735	3.941	33.7066	435.045	130.543	0.0720716	28.1764	28.7392	0.00257331	2.30278	0.119376	2.67488	6.62554	6.55064e-08	1.75464e-41	2.66633e-14	2.71496e-14	2.55857e-10	7.60403e-13	1.50438e-73	0.00107552	4.40634e-12	6.70878	538.029
2484	331.929	371.692	329.539	1263.6	339.098	896.2	10.5405	158.028	13.4855	0.318677	19.0434	45.872	3.94115	33.7082	435.058	130.551	0.0720749	28.1766	28.7392	0.00251357	2.27857	0.117901	2.66548	6.62143	6.28966e-08	1.43607e-41	2.45338e-14	2.43839e-14	2.41976e-10	7.13545e-13	1.06561e-73	0.00105817	4.18649e-12	6.70227	538.029
2485	331.769	371.514	329.382	1263.58	339.097	896.209	10.5035	158.028	13.4855	0.318677	19.0438	45.8687	3.94123	33.7095	435.062	130.558	0.0720776	28.1759	28.7392	0.00245516	2.25458	0.116442	2.65609	6.61731	6.03879e-08	1.17528e-41	2.2574e-14	2.18993e-14	2.28844e-10	6.69558e-13	7.54819e-74	0.00104109	3.9775e-12	6.69782	538.029
2486	331.622	371.35	329.238	1263.55	339.096	896.216	10.4669	158.028	13.4855	0.318678	19.0442	45.8656	3.94129	33.7107	435.064	130.564	0.0720801	28.1751	28.7392	0.00239808	2.23085	0.115001	2.64674	6.61319	5.79786e-08	9.61838e-42	2.07705e-14	1.96678e-14	2.16424e-10	6.28279e-13	5.34671e-74	0.00102427	3.77893e-12	6.69612	538.029
2487	331.489	371.202	329.107	1263.54	339.094	896.229	10.4307	158.029	13.4855	0.318678	19.0446	45.8641	3.94138	33.712	435.07	130.571	0.0720828	28.1748	28.7392	0.00234236	2.20737	0.113579	2.63742	6.60907	5.56668e-08	7.87176e-42	1.91114e-14	1.76638e-14	2.0468e-10	5.89552e-13	3.7873e-74	0.00100774	3.59031e-12	6.69719	538.029
2488	331.369	371.069	328.988	1263.58	339.093	896.257	10.395	158.029	13.4855	0.318679	19.045	45.8659	3.94155	33.7136	435.086	130.579	0.0720861	28.1759	28.7392	0.00228803	2.18418	0.112176	2.62815	6.60497	5.34506e-08	6.4427e-42	1.75853e-14	1.58647e-14	1.93577e-10	5.5323e-13	2.6827e-74	0.000991495	3.41122e-12	6.70145	538.029
2489	331.256	370.941	328.872	1263.66	339.091	896.302	10.3597	158.029	13.4855	0.318679	19.0455	45.8707	3.9418	33.7157	435.113	130.587	0.0720902	28.1781	28.7392	0.00223504	2.16128	0.110793	2.61893	6.60087	5.13263e-08	5.27345e-42	1.61816e-14	1.42494e-14	1.8308e-10	5.19164e-13	1.90027e-74	0.000975543	3.2412e-12	6.7068	538.029
2490	331.138	370.809	328.752	1263.76	339.09	896.357	10.3247	158.029	13.4855	0.31868	19.0459	45.877	3.9421	33.718	435.145	130.596	0.0720947	28.181	28.7392	0.00218335	2.13864	0.109429	2.60976	6.59679	4.92889e-08	4.3166e-42	1.48903e-14	1.27989e-14	1.73155e-10	4.87208e-13	1.34604e-74	0.000959867	3.07973e-12	6.71112	538.029
2491	331.014	370.669	328.625	1263.88	339.089	896.416	10.2899	158.03	13.4855	0.31868	19.0464	45.8838	3.94244	33.7204	435.182	130.606	0.0720995	28.1843	28.7391	0.0021329	2.11626	0.108083	2.60062	6.59271	4.73341e-08	3.5335e-42	1.37022e-14	1.14963e-14	1.6377e-10	4.57227e-13	9.5346e-75	0.000944456	2.92636e-12	6.71439	538.029
2492	330.883	370.522	328.49	1264	339.087	896.479	10.2555	158.03	13.4855	0.318681	19.0469	45.8908	3.94279	33.723	435.221	130.615	0.0721045	28.1878	28.7391	0.00208365	2.09413	0.106755	2.59153	6.58863	4.54583e-08	2.89256e-42	1.26091e-14	1.03265e-14	1.54895e-10	4.29098e-13	6.75377e-75	0.000929305	2.78068e-12	6.71711	538.029
2493	330.746	370.367	328.349	1264.13	339.086	896.545	10.2213	158.03	13.4855	0.318681	19.0474	45.8979	3.94316	33.7257	435.262	130.625	0.0721096	28.1914	28.7391	0.00203557	2.07225	0.105444	2.58247	6.58456	4.3658e-08	2.36793e-42	1.16034e-14	9.27589e-15	1.46502e-10	4.02705e-13	4.78398e-75	0.000914406	2.64228e-12	6.7194	538.029
2494	330.596	370.199	328.198	1264.22	339.085	896.593	10.1872	158.03	13.4855	0.318682	19.0479	45.9014	3.94345	33.728	435.292	130.634	0.0721141	28.1936	28.7391	0.00198854	2.05056	0.104147	2.57343	6.58049	4.1927e-08	1.93839e-42	1.06777e-14	8.33193e-15	1.38562e-10	3.77926e-13	3.3887e-75	0.000899729	2.51072e-12	6.71691	538.029
2495	330.436	370.02	328.038	1264.22	339.083	896.614	10.1532	158.031	13.4855	0.318682	19.0483	45.8999	3.94359	33.7296	435.305	130.641	0.0721174	28.1938	28.7391	0.0019425	2.02906	0.102863	2.5644	6.57641	4.02607e-08	1.58661e-42	9.82537e-15	7.48361e-15	1.31049e-10	3.54655e-13	2.40036e-75	0.000885254	2.38557e-12	6.71037	538.029
2496	330.28	369.846	327.886	1264.2	339.082	896.623	10.1195	158.031	13.4855	0.318683	19.0488	45.8966	3.94367	33.7308	435.308	130.648	0.07212	28.1931	28.7391	0.00189746	2.00775	0.101594	2.55539	6.57233	3.86588e-08	1.29861e-42	9.0409e-15	6.72147e-15	1.23941e-10	3.32808e-13	1.70027e-75	0.000870994	2.26661e-12	6.70589	538.029
2497	330.137	369.688	327.746	1264.17	339.081	896.628	10.0862	158.031	13.4855	0.318683	19.0492	45.8934	3.94372	33.732	435.31	130.654	0.0721224	28.1922	28.7391	0.00185346	1.98667	0.10034	2.54642	6.56825	3.71201e-08	1.06287e-42	8.31901e-15	6.0369e-15	1.17218e-10	3.12306e-13	1.20438e-75	0.00085696	2.15357e-12	6.70418	538.029
2498	330.008	369.544	327.619	1264.16	339.079	896.64	10.0532	158.031	13.4855	0.318684	19.0496	45.8918	3.94381	33.7332	435.316	130.661	0.072125	28.1919	28.7391	0.0018105	1.96581	0.0991016	2.53748	6.56417	3.56436e-08	8.69949e-43	7.65484e-15	5.42213e-15	1.1086e-10	2.9307e-13	8.53111e-76	0.00084316	2.04618e-12	6.70523	538.029
2499	329.893	369.415	327.504	1264.2	339.078	896.668	10.0206	158.032	13.4855	0.318684	19.0501	45.8936	3.94397	33.7349	435.331	130.668	0.0721283	28.1929	28.7391	0.0017686	1.94521	0.0978808	2.52858	6.5601	3.4228e-08	7.12086e-43	7.0439e-15	4.87015e-15	1.0485e-10	2.75028e-13	6.04295e-76	0.000829604	1.94423e-12	6.70948	538.029
2500	329.838	369.353	327.448	1264.23	339.077	896.688	10.0045	158.032	13.4855	0.318685	19.0503	45.8955	3.94408	33.7358	435.342	130.672	0.0721302	28.1938	28.7391	0.00174792	1.93498	0.0972749	2.52415	6.55807	3.35352e-08	6.41046e-43	6.7512e-15	4.60902e-15	1.01929e-10	2.66296e-13	5.01126e-76	0.000822888	1.89457e-12	6.71237	538.029
