# Supplementary material for: The Social Cost of Fossil and Industrial CO2 Emissions from 1950 to 2018
Source: Research Square preprint supplement (doi:10.21203/rs.3.rs-2244259/v1), 2022-11-17
Supplement: Supplementary file 17 [file RCP45SCP45TO3PD_MIDYEAR_RADFORCING.xls]

## Sheet: RCP45SCP45to3PD_MIDYEAR_RADFOR
RCP4.5 WITH SUPPLEMENTARY EXTENSION SCP45TO3PD__RADIATIVE FORCINGS____________________________
CONTENT: ANNUAL AVERAGE, GLOBAL MEAN RADIATIVE FORCING.
RUN: RCP45SCP45TO3PD, FINAL RELEASE, 30 MAY 2009
RCP4.5 CONTACT: MiniCAM group, Allison Thomson (Allison.Thomson@pnl.gov)
DATE: 30/5/2010 01:02:33
MAGICC-VERSION: 6.3.09, 25 November 2009
FILE PRODUCED BY: RCP Concentration Calculation & Data Group, M. Meinshausen, S. Smith, K. Riahi, D. van Vuuren et al.
DOCUMENTATION: M. Meinshausen, S. Smith et al. (2011) "The RCP GHG concentrations and their extension from 1765 to 2300", DOI 10.1007/s10584-011-0156-z, Climatic Change.
CMIP5 INFO: http://cmip-pcmdi.llnl.gov/cmip5/
RCP DATABASE: http://www.iiasa.ac.at/web-apps/tnt/RcpDb
FURTHER INFO: For data sources, aknowledgements and further information, see http://www.pik-potsdam.de/~mmalte/rcps.
NOTE: THIS FORCING DATASET IS NOT CMIP5 RECOMMENDATION, AS CONCENTRATIONS, NOT FORCING, SHALL BE PRESCRIBED IN MAIN CMIP5 RUNS. SEE OZONE, LANDUSE AND AEROSOL DATA SOURCES DESCRIBED IN CMIP5 NOTES AND RCP DATABASE.
Radiative Forcing after strat. temp. adjustment.;
RCP4.5 starts 2005; 20th century data and earlier is provided for convenience. After 2100, the supplementary extension starts, and merges with RCP3PD concentration levels by 2250.
COLUMN_DESCRIPTION________________________________________
1 TOTAL_INCLVOLCANIC_RF Total anthropogenic and natural radiative forcing
2 VOLCANIC_ANNUAL_RF Annual mean volcanic stratospheric aerosol forcing
3 SOLAR_RF Solar irradience forcing
4 TOTAL_ANTHRO_RF Total anthropogenic forcing
5 GHG_RF Total greenhouse gas forcing (CO2, CH4, N2O, HFCs, PFCs, SF6, and Montreal Protocol gases).
6 KYOTOGHG_RF Total forcing from greenhouse gases controlled under the Kyoto Protocol (CO2, CH4, N2O, HFCs, PFCs, SF6).
7 CO2CH4N2O_RF Total forcing from CO2, methan and nitrous oxide.
8 CO2_RF CO2 Forcing
9 CH4_RF Methane Forcing
10 N2O_RF Nitrous Oxide Forcing
11 FGASSUM_RF Total forcing from all flourinated gases controlled under the Kyoto Protocol (HFCs, PFCs, SF6; i.e. columns 13-24)
12 MHALOSUM_RF Total forcing from all gases controlled under the Montreal Protocol (columns 25-40)
13-24 Flourinated gases controlled under the Kyoto Protocol
25-40 Ozone Depleting Substances controlled under the Montreal Protocol
41 TOTAER_DIR_RF Total direct aerosol forcing (aggregating columns 42 to 47)
42 OCI_RF Direct fossil fuel aerosol (organic carbon)
43 BCI_RF Direct fossil fuel aerosol (black carbon)
44 SOXI_RF Direct sulphate aerosol
45 NOXI_RF Direct nitrate aerosol
46 BIOMASSAER_RF Direct biomass burning related aerosol
47 MINERALDUST_RF Direct Forcing from mineral dust aerosol
48 CLOUD_TOT_RF Cloud albedo effect
49 STRATOZ_RF Stratospheric ozone forcing
50 TROPOZ_RF Tropospheric ozone forcing
51 CH4OXSTRATH2O_RF Stratospheric water-vapour from methane oxidisation
52 LANDUSE_RF Landuse albedo
53 BCSNOW_RF Black carbon on snow.
&THISFILE_SPECIFICATIONS
THISFILE_DATACOLUMNS	53
THISFILE_FIRSTYEAR	1765
THISFILE_LASTYEAR	2500
THISFILE_ANNUALSTEPS	1
THISFILE_FIRSTDATAROW	61
THISFILE_UNITS	SEE ROW 59
THISFILE_DATTYPE	RCPDAT
/
COLUMN:	1	2	3	4	5	6	7	8	9	10	11	12	13	14	15	16	17	18	19	20	21	22	23	24	25	26	27	28	29	30	31	32	33	34	35	36	37	38	39	40	41	42	43	44	45	46	47	48	49
UNITS:	W/m2	W/m2	W/m2	W/m2	W/m2	W/m2	W/m2	W/m2	W/m2	W/m2	W/m2	W/m2	W/m2	W/m2	W/m2	W/m2	W/m2	W/m2	W/m2	W/m2	W/m2	W/m2	W/m2	W/m2	W/m2	W/m2	W/m2	W/m2	W/m2	W/m2	W/m2	W/m2	W/m2	W/m2	W/m2	W/m2	W/m2	W/m2	W/m2	W/m2	W/m2	W/m2	W/m2	W/m2	W/m2	W/m2	W/m2	W/m2	W/m2
v YEARS/GAS >	TOTAL_INCLVOLCANIC_RF	VOLCANIC_ANNUAL_RF	SOLAR_RF	TOTAL_ANTHRO_RF	GHG_RF	KYOTOGHG_RF	CO2CH4N2O_RF	CO2_RF	CH4_RF	N2O_RF	FGASSUM_RF	MHALOSUM_RF	CF4	C2F6	C6F14	HFC23	HFC32	HFC43_10	HFC125	HFC134a	HFC143a	HFC227ea	HFC245fa	SF6	CFC_11	CFC_12	CFC_113	CFC_114	CFC_115	CARB_TET	MCF	HCFC_22	HCFC_141B	HCFC_142B	HALON1211	HALON1202	HALON1301	HALON2402	CH3BR	CH3CL	TOTAER_DIR_RF	OCI_RF	BCI_RF	SOXI_RF	NOXI_RF	BIOMASSAER_RF	MINERALDUST_RF	CLOUD_TOT_RF	STRATOZ_RF
1765	0	0	-0.0283587	0	0	0	0	0	0	0	0	0	0	0	0	0	0	0	0	0	0	0	0	0	0	0	0	0	0	0	0	0	0	0	0	0	0	0	0	0	0	0	0	0	0	0	0	0	0
1766	0.126027	0.116222	-0.0206938	0.0163188	0.0153635	0.0153635	0.0153635	0.0110491	0.00357577	0.000738661	0	0	0	0	0	0	0	0	0	0	0	0	0	0	0	0	0	0	0	0	0	0	0	0	0	0	0	0	0	0	1.77672e-05	0	0	-2.86731e-05	-1.2928e-05	0.000250103	-0.000190735	-0.000801451	0
1767	0.273031	0.232444	0.00703937	0.0335479	0.0321232	0.0321232	0.0321232	0.023246	0.00736074	0.00151637	0	0	0	0	0	0	0	0	0	0	0	0	0	0	0	0	0	0	0	0	0	0	0	0	0	0	0	0	0	0	-6.46768e-06	0	0	-7.97657e-05	-3.19082e-05	0.000672939	-0.000567733	-0.00238112	0
1768	0.278871	0.197444	0.0462569	0.0351696	0.0349722	0.0349722	0.0349722	0.0256052	0.00777313	0.00159381	0	0	0	0	0	0	0	0	0	0	0	0	0	0	0	0	0	0	0	0	0	0	0	0	0	0	0	0	0	0	-0.000120356	0	0	-0.000120421	-4.16465e-05	0.000977553	-0.000935841	-0.00391494	0
1769	0.242045	0.131819	0.073605	0.036621	0.0378995	0.0378995	0.0378995	0.028057	0.00817237	0.00167006	0	0	0	0	0	0	0	0	0	0	0	0	0	0	0	0	0	0	0	0	0	0	0	0	0	0	0	0	0	0	-0.00028157	0	0	-0.000153962	-4.79302e-05	0.00121549	-0.00129517	-0.0054041	0
1770	0.242824	0.127444	0.0772581	0.038122	0.0408559	0.0408559	0.0408559	0.0305529	0.00855779	0.00174523	0	0	0	0	0	0	0	0	0	0	0	0	0	0	0	0	0	0	0	0	0	0	0	0	0	0	0	0	0	0	-0.000470954	0	0	-0.000182439	-5.25379e-05	0.00140985	-0.00164582	-0.00684976	0
1771	0.284142	0.179944	0.0648944	0.0393037	0.043845	0.043845	0.043845	0.0330936	0.00893207	0.00181931	0	0	0	0	0	0	0	0	0	0	0	0	0	0	0	0	0	0	0	0	0	0	0	0	0	0	0	0	0	0	-0.000888303	-1.68577e-05	6.06652e-05	-0.000242598	-5.69856e-05	0.00135539	-0.00198792	-0.00844667	0
1772	0.299857	0.214944	0.0443363	0.0405766	0.0468967	0.0468967	0.0468967	0.0357058	0.00929859	0.00189228	0	0	0	0	0	0	0	0	0	0	0	0	0	0	0	0	0	0	0	0	0	0	0	0	0	0	0	0	0	0	-0.00132732	-3.37153e-05	0.00012133	-0.000298156	-6.07885e-05	0.00126556	-0.00232155	-0.0100013	0
1773	0.290756	0.228069	0.0203481	0.0423385	0.0500195	0.0500195	0.0500195	0.0383971	0.00965806	0.00196426	0	0	0	0	0	0	0	0	0	0	0	0	0	0	0	0	0	0	0	0	0	0	0	0	0	0	0	0	0	0	-0.00157118	-3.37153e-05	0.00012133	-0.000314621	-6.33834e-05	0.00136606	-0.00264685	-0.0113213	0
1774	0.2781	0.232444	0.00144375	0.0442116	0.0532061	0.0532061	0.0532061	0.0411609	0.0100098	0.00203544	0	0	0	0	0	0	0	0	0	0	0	0	0	0	0	0	0	0	0	0	0	0	0	0	0	0	0	0	0	0	-0.00181491	-3.37153e-05	0.00012133	-0.000329868	-6.57492e-05	0.001457	-0.00296391	-0.012602	0
1775	0.268839	0.232444	-0.00981313	0.046208	0.0564687	0.0564687	0.0564687	0.0440096	0.0103531	0.00210598	0	0	0	0	0	0	0	0	0	0	0	0	0	0	0	0	0	0	0	0	0	0	0	0	0	0	0	0	0	0	-0.00205687	-3.37153e-05	0.00012133	-0.000344145	-6.79547e-05	0.00154045	-0.00327284	-0.0138446	0
1776	0.276856	0.232444	-0.00395063	0.0483625	0.0598423	0.0598423	0.0598423	0.0469792	0.0106873	0.00217585	0	0	0	0	0	0	0	0	0	0	0	0	0	0	0	0	0	0	0	0	0	0	0	0	0	0	0	0	0	0	-0.00229589	-3.37153e-05	0.00012133	-0.00035764	-7.0046e-05	0.00161793	-0.00357375	-0.0150498	0
1777	0.305761	0.232444	0.022645	0.0506714	0.0633239	0.0633239	0.0633239	0.0500673	0.0110116	0.00224499	0	0	0	0	0	0	0	0	0	0	0	0	0	0	0	0	0	0	0	0	0	0	0	0	0	0	0	0	0	0	-0.00253112	-3.37153e-05	0.00012133	-0.000370499	-7.2055e-05	0.00169058	-0.00386676	-0.0162188	0
1778	0.337875	0.232444	0.0523687	0.0530622	0.0668415	0.0668415	0.0668415	0.0532026	0.0113254	0.0023135	0	0	0	0	0	0	0	0	0	0	0	0	0	0	0	0	0	0	0	0	0	0	0	0	0	0	0	0	0	0	-0.0027619	-3.37153e-05	0.00012133	-0.000382835	-7.40046e-05	0.00175929	-0.00415196	-0.0173523	0
1779	0.347581	0.232444	0.0597012	0.0554354	0.0702966	0.0702966	0.0702966	0.0562871	0.0116279	0.00238163	0	0	0	0	0	0	0	0	0	0	0	0	0	0	0	0	0	0	0	0	0	0	0	0	0	0	0	0	0	0	-0.00298778	-3.37153e-05	0.00012133	-0.000394738	-7.59118e-05	0.00182473	-0.00442948	-0.0184512	0
1780	0.341674	0.232444	0.0515287	0.057701	0.0736012	0.0736012	0.0736012	0.0592345	0.0119171	0.00244953	0	0	0	0	0	0	0	0	0	0	0	0	0	0	0	0	0	0	0	0	0	0	0	0	0	0	0	0	0	0	-0.0032084	-3.37153e-05	0.00012133	-0.00040628	-7.77893e-05	0.00188746	-0.00469941	-0.0195164	0
1781	0.333722	0.232444	0.041895	0.0593826	0.0767183	0.0767183	0.0767183	0.0620123	0.0121889	0.00251718	0	0	0	0	0	0	0	0	0	0	0	0	0	0	0	0	0	0	0	0	0	0	0	0	0	0	0	0	0	0	-0.0036953	-5.0573e-05	0.000181996	-0.000443034	-8.00993e-05	0.00165829	-0.00496187	-0.0207342	0
1782	0.29102	0.210569	0.019495	0.0609557	0.0796905	0.0796905	0.0796905	0.0646641	0.0124419	0.00258449	0	0	0	0	0	0	0	0	0	0	0	0	0	0	0	0	0	0	0	0	0	0	0	0	0	0	0	0	0	0	-0.00417917	-6.74306e-05	0.000242661	-0.000479101	-8.23858e-05	0.00142406	-0.00521697	-0.0219192	0
1783	0.175605	0.118694	-0.00603313	0.0629442	0.0826033	0.0826033	0.0826033	0.0672719	0.0126798	0.00265156	0	0	0	0	0	0	0	0	0	0	0	0	0	0	0	0	0	0	0	0	0	0	0	0	0	0	0	0	0	0	-0.0043878	-6.74306e-05	0.000242661	-0.000489063	-8.42044e-05	0.00147505	-0.00546481	-0.0228868	0
1784	0.0902692	0.0443192	-0.0190575	0.0650075	0.0855481	0.0855481	0.0855481	0.0699211	0.0129083	0.00271864	0	0	0	0	0	0	0	0	0	0	0	0	0	0	0	0	0	0	0	0	0	0	0	0	0	0	0	0	0	0	-0.00458993	-6.74306e-05	0.000242661	-0.000498942	-8.60251e-05	0.00152532	-0.00570551	-0.0238237	0
1785	0.162453	0.101194	-0.00597625	0.0672351	0.0886122	0.0886122	0.0886122	0.0726933	0.013133	0.00278589	0	0	0	0	0	0	0	0	0	0	0	0	0	0	0	0	0	0	0	0	0	0	0	0	0	0	0	0	0	0	-0.00478558	-6.74306e-05	0.000242661	-0.000508756	-8.78518e-05	0.00157496	-0.00593917	-0.0247309	0
1786	0.289562	0.188694	0.0311894	0.0696782	0.0918446	0.0918446	0.0918446	0.0756317	0.0133596	0.00285332	0	0	0	0	0	0	0	0	0	0	0	0	0	0	0	0	0	0	0	0	0	0	0	0	0	0	0	0	0	0	-0.00497481	-6.74306e-05	0.000242661	-0.00051852	-8.96878e-05	0.00162407	-0.00616591	-0.025609	0
1787	0.352999	0.223694	0.0569931	0.0723117	0.0952178	0.0952178	0.0952178	0.0787033	0.0135937	0.00292083	0	0	0	0	0	0	0	0	0	0	0	0	0	0	0	0	0	0	0	0	0	0	0	0	0	0	0	0	0	0	-0.00515766	-6.74306e-05	0.000242661	-0.000528246	-9.15357e-05	0.00167271	-0.00638582	-0.0264587	0
1788	0.361769	0.228069	0.0586425	0.0750571	0.0986512	0.0986512	0.0986512	0.0818218	0.0138409	0.0029885	0	0	0	0	0	0	0	0	0	0	0	0	0	0	0	0	0	0	0	0	0	0	0	0	0	0	0	0	0	0	-0.0053342	-6.74306e-05	0.000242661	-0.000537943	-9.3398e-05	0.00172093	-0.00659903	-0.0272807	0
1789	0.251054	0.123069	0.0501594	0.0778252	0.102053	0.102053	0.102053	0.0848899	0.0141068	0.00305652	0	0	0	0	0	0	0	0	0	0	0	0	0	0	0	0	0	0	0	0	0	0	0	0	0	0	0	0	0	0	-0.00550453	-6.74306e-05	0.000242661	-0.00054762	-9.52767e-05	0.00176877	-0.00680563	-0.0280756	0
1790	0.0888822	-0.0256808	0.0340112	0.0805518	0.105358	0.105358	0.105358	0.0878369	0.014396	0.00312507	0	0	0	0	0	0	0	0	0	0	0	0	0	0	0	0	0	0	0	0	0	0	0	0	0	0	0	0	0	0	-0.00566872	-6.74306e-05	0.000242661	-0.000557285	-9.71739e-05	0.00181626	-0.00700575	-0.0288442	0
1791	0.10802	0.00931922	0.0159119	0.0827889	0.108565	0.108565	0.108565	0.090661	0.0147095	0.00319415	0	0	0	0	0	0	0	0	0	0	0	0	0	0	0	0	0	0	0	0	0	0	0	0	0	0	0	0	0	0	-0.00611429	-8.42883e-05	0.000303326	-0.000589915	-9.94791e-05	0.00155555	-0.00719948	-0.0297669	0
1792	0.232799	0.140569	0.00721438	0.0850151	0.111707	0.111707	0.111707	0.0933979	0.0150454	0.00326368	0	0	0	0	0	0	0	0	0	0	0	0	0	0	0	0	0	0	0	0	0	0	0	0	0	0	0	0	0	0	-0.00655452	-0.000101146	0.000363991	-0.000622448	-0.000101804	0.00129383	-0.00738694	-0.030664	0
1793	0.294575	0.206194	0.000695625	0.0876853	0.114796	0.114796	0.114796	0.0960604	0.0154015	0.00333373	0	0	0	0	0	0	0	0	0	0	0	0	0	0	0	0	0	0	0	0	0	0	0	0	0	0	0	0	0	0	-0.00670198	-0.000101146	0.000363991	-0.000631935	-0.000103761	0.0013391	-0.00756823	-0.0313564	0
1794	0.291738	0.214944	-0.0135494	0.0903436	0.117822	0.117822	0.117822	0.0986421	0.0157759	0.00340449	0	0	0	0	0	0	0	0	0	0	0	0	0	0	0	0	0	0	0	0	0	0	0	0	0	0	0	0	0	0	-0.00684351	-0.000101146	0.000363991	-0.000641468	-0.000105745	0.00138433	-0.00774347	-0.0320248	0
1795	0.256846	0.193069	-0.0292075	0.0929845	0.120784	0.120784	0.120784	0.101141	0.016167	0.00347613	0	0	0	0	0	0	0	0	0	0	0	0	0	0	0	0	0	0	0	0	0	0	0	0	0	0	0	0	0	0	-0.00697922	-0.000101146	0.000363991	-0.000651046	-0.000107754	0.0014295	-0.00791277	-0.03267	0
1796	0.245053	0.188694	-0.0392525	0.0956109	0.123685	0.123685	0.123685	0.103563	0.0165732	0.00354868	0	0	0	0	0	0	0	0	0	0	0	0	0	0	0	0	0	0	0	0	0	0	0	0	0	0	0	0	0	0	-0.00710926	-0.000101146	0.000363991	-0.000660671	-0.000109792	0.00147458	-0.00807622	-0.0332925	0
1797	0.262057	0.210569	-0.0462919	0.0977792	0.12653	0.12653	0.12653	0.105915	0.0169925	0.00362206	0	0	0	0	0	0	0	0	0	0	0	0	0	0	0	0	0	0	0	0	0	0	0	0	0	0	0	0	0	0	-0.00752309	-0.000118004	0.000424656	-0.000693	-0.000112238	0.00120944	-0.00823395	-0.0340702	0
1798	0.277467	0.228069	-0.0505312	0.0999294	0.129313	0.129313	0.129313	0.108193	0.0174234	0.00369635	0	0	0	0	0	0	0	0	0	0	0	0	0	0	0	0	0	0	0	0	0	0	0	0	0	0	0	0	0	0	-0.00793151	-0.000134861	0.000485322	-0.000725378	-0.000114715	0.000944184	-0.00838606	-0.0348259	0
1799	0.285635	0.232444	-0.0493063	0.102497	0.132027	0.132027	0.132027	0.110391	0.0178642	0.00377173	0	0	0	0	0	0	0	0	0	0	0	0	0	0	0	0	0	0	0	0	0	0	0	0	0	0	0	0	0	0	-0.00804523	-0.000134861	0.000485322	-0.000735158	-0.000116843	0.000988968	-0.00853266	-0.035383	0
1800	0.30346	0.232444	-0.0335737	0.104589	0.134669	0.134669	0.134669	0.112505	0.0183161	0.00384836	0	0	0	0	0	0	0	0	0	0	0	0	0	0	0	0	0	0	0	0	0	0	0	0	0	0	0	0	0	0	-0.00844273	-0.000151719	0.000545987	-0.000767714	-0.000119385	0.000723959	-0.00867386	-0.0360958	0
1801	0.325814	0.232444	-0.0133	0.10667	0.137256	0.137256	0.137256	0.114543	0.0187862	0.00392631	0	0	0	0	0	0	0	0	0	0	0	0	0	0	0	0	0	0	0	0	0	0	0	0	0	0	0	0	0	0	-0.00883486	-0.000168577	0.000606652	-0.000800378	-0.000121961	0.000459176	-0.00880977	-0.0367883	0
1802	0.322938	0.232444	-0.0178194	0.108313	0.139798	0.139798	0.139798	0.116513	0.0192802	0.00400554	0	0	0	0	0	0	0	0	0	0	0	0	0	0	0	0	0	0	0	0	0	0	0	0	0	0	0	0	0	0	-0.00950964	-0.000202292	0.000727983	-0.000856043	-0.00012496	-0.000113837	-0.00894049	-0.0376356	0
1803	0.308295	0.232444	-0.034545	0.110395	0.142293	0.142293	0.142293	0.11841	0.0197968	0.0040861	0	0	0	0	0	0	0	0	0	0	0	0	0	0	0	0	0	0	0	0	0	0	0	0	0	0	0	0	0	0	-0.00989057	-0.00021915	0.000788648	-0.000889063	-0.000127612	-0.000377254	-0.00906614	-0.0382885	0
1804	0.306252	0.232444	-0.0395369	0.113344	0.144725	0.144725	0.144725	0.120225	0.0203315	0.00416812	0	0	0	0	0	0	0	0	0	0	0	0	0	0	0	0	0	0	0	0	0	0	0	0	0	0	0	0	0	0	-0.00968924	-0.000202292	0.000727983	-0.000876652	-0.000129537	-2.19124e-05	-0.00918683	-0.0385724	0
1805	0.305549	0.232444	-0.0427263	0.115831	0.147099	0.147099	0.147099	0.121968	0.0208796	0.00425172	0	0	0	0	0	0	0	0	0	0	0	0	0	0	0	0	0	0	0	0	0	0	0	0	0	0	0	0	0	0	-0.00977162	-0.000202292	0.000727983	-0.000887137	-0.000131884	2.43633e-05	-0.00930266	-0.0390136	0
1806	0.296562	0.232444	-0.0537644	0.117883	0.149444	0.149444	0.149444	0.12367	0.0214367	0.00433697	0	0	0	0	0	0	0	0	0	0	0	0	0	0	0	0	0	0	0	0	0	0	0	0	0	0	0	0	0	0	-0.010136	-0.00021915	0.000788648	-0.000920814	-0.000134662	-0.000236318	-0.00941374	-0.0396116	0
1807	0.287336	0.232444	-0.0650431	0.119935	0.151757	0.151757	0.151757	0.125335	0.0219981	0.00442389	0	0	0	0	0	0	0	0	0	0	0	0	0	0	0	0	0	0	0	0	0	0	0	0	0	0	0	0	0	0	-0.0104954	-0.000236007	0.000849313	-0.000954685	-0.000137484	-0.000496324	-0.00952019	-0.0401925	0
1808	-0.206609	-0.257556	-0.0714175	0.122364	0.153977	0.153977	0.153977	0.126905	0.0225594	0.00451253	0	0	0	0	0	0	0	0	0	0	0	0	0	0	0	0	0	0	0	0	0	0	0	0	0	0	0	0	0	0	-0.0105631	-0.000236007	0.000849313	-0.000965661	-0.00013996	-0.00044866	-0.0096221	-0.0405827	0
1809	-1.35012	-1.39943	-0.0753287	0.124641	0.156019	0.156019	0.156019	0.1283	0.023116	0.00460296	0	0	0	0	0	0	0	0	0	0	0	0	0	0	0	0	0	0	0	0	0	0	0	0	0	0	0	0	0	0	-0.0106265	-0.000236007	0.000849313	-0.000976744	-0.00014248	-0.000400998	-0.0097196	-0.040957	0
1810	-1.75196	-1.80193	-0.0767375	0.126704	0.157824	0.157824	0.157824	0.129463	0.0236656	0.00469527	0	0	0	0	0	0	0	0	0	0	0	0	0	0	0	0	0	0	0	0	0	0	0	0	0	0	0	0	0	0	-0.0106858	-0.000236007	0.000849313	-0.00098793	-0.000145046	-0.000353387	-0.00981279	-0.041316	0
1811	-0.956129	-1.01006	-0.0742044	0.128132	0.159405	0.159405	0.159405	0.130404	0.0242113	0.00478954	0	0	0	0	0	0	0	0	0	0	0	0	0	0	0	0	0	0	0	0	0	0	0	0	0	0	0	0	0	0	-0.0110244	-0.000252865	0.000909978	-0.00102288	-0.000148063	-0.000608758	-0.00990177	-0.0418329	0
1812	-0.279183	-0.340681	-0.0679394	0.129438	0.160837	0.160837	0.160837	0.131194	0.0247577	0.00488582	0	0	0	0	0	0	0	0	0	0	0	0	0	0	0	0	0	0	0	0	0	0	0	0	0	0	0	0	0	0	-0.0113582	-0.000269723	0.000970643	-0.00105807	-0.000151131	-0.000863292	-0.00998666	-0.0423352	0
1813	-0.0779071	-0.148181	-0.0608563	0.13113	0.162193	0.162193	0.162193	0.131903	0.0253063	0.00498417	0	0	0	0	0	0	0	0	0	0	0	0	0	0	0	0	0	0	0	0	0	0	0	0	0	0	0	0	0	0	-0.0114044	-0.000269723	0.000970643	-0.00106982	-0.000153847	-0.000814097	-0.0100676	-0.0426505	0
1814	-0.598962	-0.677556	-0.0542369	0.132831	0.163532	0.163532	0.163532	0.132591	0.0258564	0.00508465	0	0	0	0	0	0	0	0	0	0	0	0	0	0	0	0	0	0	0	0	0	0	0	0	0	0	0	0	0	0	-0.011447	-0.000269723	0.000970643	-0.00108169	-0.000156615	-0.000765034	-0.0101446	-0.0429521	0
1815	-2.06194	-2.15193	-0.0441744	0.134164	0.16491	0.16491	0.16491	0.133315	0.0264075	0.00518734	0	0	0	0	0	0	0	0	0	0	0	0	0	0	0	0	0	0	0	0	0	0	0	0	0	0	0	0	0	0	-0.0117657	-0.00028658	0.00103131	-0.00111791	-0.000159854	-0.00101481	-0.0102179	-0.0434128	0
1816	-2.56318	-2.66381	-0.0345275	0.135154	0.166351	0.166351	0.166351	0.134099	0.0269592	0.00529233	0	0	0	0	0	0	0	0	0	0	0	0	0	0	0	0	0	0	0	0	0	0	0	0	0	0	0	0	0	0	-0.0123587	-0.000320295	0.00115264	-0.00117881	-0.000163576	-0.00156113	-0.0102875	-0.0440324	0
1817	-1.39423	-1.49568	-0.0347594	0.13621	0.167829	0.167829	0.167829	0.134918	0.0275109	0.00539971	0	0	0	0	0	0	0	0	0	0	0	0	0	0	0	0	0	0	0	0	0	0	0	0	0	0	0	0	0	0	-0.0129443	-0.000354011	0.00127397	-0.00124048	-0.000167371	-0.00210289	-0.0103535	-0.0446389	0
1818	-0.265648	-0.362556	-0.0407925	0.137701	0.169288	0.169288	0.169288	0.135717	0.028062	0.00550955	0	0	0	0	0	0	0	0	0	0	0	0	0	0	0	0	0	0	0	0	0	0	0	0	0	0	0	0	0	0	-0.0132463	-0.000370868	0.00133463	-0.00127819	-0.000170809	-0.00234485	-0.0104162	-0.0450616	0
1819	0.185347	0.0924442	-0.0466594	0.139562	0.170669	0.170669	0.170669	0.136435	0.0286121	0.00562183	0	0	0	0	0	0	0	0	0	0	0	0	0	0	0	0	0	0	0	0	0	0	0	0	0	0	0	0	0	0	-0.0132666	-0.000370868	0.00133463	-0.00129161	-0.000173885	-0.00228941	-0.0104755	-0.0453015	0
1820	0.311867	0.223694	-0.0531475	0.14132	0.171926	0.171926	0.171926	0.137029	0.0291608	0.00573657	0	0	0	0	0	0	0	0	0	0	0	0	0	0	0	0	0	0	0	0	0	0	0	0	0	0	0	0	0	0	-0.0132841	-0.000370868	0.00133463	-0.00130516	-0.000177022	-0.0022341	-0.0105315	-0.0455305	0
1821	0.318984	0.232444	-0.0564375	0.142978	0.173064	0.173064	0.173064	0.137502	0.0297081	0.00585384	0	0	0	0	0	0	0	0	0	0	0	0	0	0	0	0	0	0	0	0	0	0	0	0	0	0	0	0	0	0	-0.0132988	-0.000370868	0.00133463	-0.00131884	-0.000180224	-0.00217896	-0.0105845	-0.0457491	0
1822	0.321522	0.232444	-0.0550769	0.144155	0.174125	0.174125	0.174125	0.137897	0.0302546	0.00597377	0	0	0	0	0	0	0	0	0	0	0	0	0	0	0	0	0	0	0	0	0	0	0	0	0	0	0	0	0	0	-0.0135826	-0.000387726	0.0013953	-0.00135815	-0.000183944	-0.00241361	-0.0106345	-0.0461284	0
1823	0.325542	0.232444	-0.0517956	0.144894	0.175148	0.175148	0.175148	0.138251	0.0308006	0.00609643	0	0	0	0	0	0	0	0	0	0	0	0	0	0	0	0	0	0	0	0	0	0	0	0	0	0	0	0	0	0	-0.0141332	-0.000421441	0.00151663	-0.0014235	-0.000188197	-0.00293517	-0.0106815	-0.0466684	0
1824	0.333737	0.232444	-0.0447738	0.146066	0.176162	0.176162	0.176162	0.138595	0.0313461	0.00622184	0	0	0	0	0	0	0	0	0	0	0	0	0	0	0	0	0	0	0	0	0	0	0	0	0	0	0	0	0	0	-0.0144072	-0.000438299	0.0015773	-0.00146387	-0.000192079	-0.00316445	-0.0107258	-0.0470284	0
1825	0.347678	0.232444	-0.0320425	0.147276	0.177192	0.177192	0.177192	0.138951	0.0318913	0.00635001	0	0	0	0	0	0	0	0	0	0	0	0	0	0	0	0	0	0	0	0	0	0	0	0	0	0	0	0	0	0	-0.0146751	-0.000455157	0.00163796	-0.001505	-0.000196051	-0.00338943	-0.0107674	-0.0473792	0
1826	0.366029	0.232444	-0.0149362	0.148521	0.17824	0.17824	0.17824	0.139322	0.0324366	0.00648103	0	0	0	0	0	0	0	0	0	0	0	0	0	0	0	0	0	0	0	0	0	0	0	0	0	0	0	0	0	0	-0.0149395	-0.000472014	0.00169863	-0.00154647	-0.000200106	-0.00361307	-0.0108065	-0.0477217	0
1827	0.385377	0.232444	0.00313687	0.149795	0.179296	0.179296	0.179296	0.139699	0.0329819	0.00661505	0	0	0	0	0	0	0	0	0	0	0	0	0	0	0	0	0	0	0	0	0	0	0	0	0	0	0	0	0	0	-0.0151978	-0.000488872	0.00175929	-0.00158874	-0.000204258	-0.00383219	-0.0108431	-0.0480558	0
1828	0.3956	0.228069	0.0164413	0.15109	0.180355	0.180355	0.180355	0.140075	0.0335275	0.00675215	0	0	0	0	0	0	0	0	0	0	0	0	0	0	0	0	0	0	0	0	0	0	0	0	0	0	0	0	0	0	-0.0154529	-0.00050573	0.00181996	-0.00163137	-0.000208498	-0.0040499	-0.0108773	-0.0483824	0
1829	0.369518	0.193069	0.0236294	0.152819	0.181418	0.181418	0.181418	0.140452	0.0340735	0.00689231	0	0	0	0	0	0	0	0	0	0	0	0	0	0	0	0	0	0	0	0	0	0	0	0	0	0	0	0	0	0	-0.0154395	-0.00050573	0.00181996	-0.00164779	-0.000212348	-0.00398423	-0.0109093	-0.0485322	0
1830	0.151585	-0.0213058	0.0207813	0.152109	0.182483	0.182483	0.182483	0.140828	0.034619	0.00703549	0	0	0	0	0	0	0	0	0	0	0	0	0	0	0	0	0	0	0	0	0	0	0	0	0	0	0	0	0	0	-0.01699	-0.000606876	0.00218395	-0.00182798	-0.00021929	-0.00558057	-0.0109392	-0.0496887	0
1831	-0.242712	-0.397556	0.003675	0.151168	0.182889	0.182889	0.182889	0.140546	0.035161	0.00718177	0	0	0	0	0	0	0	0	0	0	0	0	0	0	0	0	0	0	0	0	0	0	0	0	0	0	0	0	0	0	-0.0182706	-0.000691164	0.00248727	-0.00198224	-0.000225857	-0.00689156	-0.010967	-0.0506703	0
1832	-0.35069	-0.485056	-0.0166381	0.151004	0.181598	0.181598	0.181598	0.138569	0.0356978	0.0073313	0	0	0	0	0	0	0	0	0	0	0	0	0	0	0	0	0	0	0	0	0	0	0	0	0	0	0	0	0	0	-0.0179767	-0.000674306	0.00242661	-0.00197423	-0.000229549	-0.00653227	-0.010993	-0.0506325	0
1833	-0.0619758	-0.183181	-0.0278906	0.149096	0.179365	0.179365	0.179365	0.13565	0.0362309	0.00748419	0	0	0	0	0	0	0	0	0	0	0	0	0	0	0	0	0	0	0	0	0	0	0	0	0	0	0	0	0	0	-0.0181987	-0.000691164	0.00248727	-0.00202167	-0.000234363	-0.00672163	-0.0110171	-0.050926	0
1834	-0.2153	-0.345056	-0.0175394	0.147295	0.177227	0.177227	0.177227	0.132824	0.0367633	0.00764044	0	0	0	0	0	0	0	0	0	0	0	0	0	0	0	0	0	0	0	0	0	0	0	0	0	0	0	0	0	0	-0.0184177	-0.000708022	0.00254794	-0.00206953	-0.000239287	-0.00690921	-0.0110395	-0.0512145	0
1835	-0.819113	-0.988181	0.0235506	0.145517	0.175094	0.175094	0.175094	0.129996	0.0372979	0.00780001	0	0	0	0	0	0	0	0	0	0	0	0	0	0	0	0	0	0	0	0	0	0	0	0	0	0	0	0	0	0	-0.0186307	-0.000724879	0.0026086	-0.00211834	-0.000244341	-0.00709135	-0.0110604	-0.0514981	0
1836	-0.735064	-0.948806	0.071575	0.142167	0.172967	0.172967	0.172967	0.127166	0.0378376	0.00796301	0	0	0	0	0	0	0	0	0	0	0	0	0	0	0	0	0	0	0	0	0	0	0	0	0	0	0	0	0	0	-0.0198478	-0.000809168	0.00291193	-0.00228265	-0.000251692	-0.00833648	-0.0110798	-0.0524478	0
1837	-0.124807	-0.349431	0.0853737	0.13925	0.17085	0.17085	0.17085	0.124335	0.0383853	0.0081296	0	0	0	0	0	0	0	0	0	0	0	0	0	0	0	0	0	0	0	0	0	0	0	0	0	0	0	0	0	0	-0.0208025	-0.000876598	0.00315459	-0.00241995	-0.000258661	-0.00930414	-0.0110978	-0.0532255	0
1838	0.249179	0.0443192	0.0663469	0.138513	0.169691	0.169691	0.169691	0.122447	0.038944	0.0082999	0	0	0	0	0	0	0	0	0	0	0	0	0	0	0	0	0	0	0	0	0	0	0	0	0	0	0	0	0	0	-0.0209913	-0.000893456	0.00321526	-0.00247272	-0.000264165	-0.00946171	-0.0111145	-0.0534965	0
1839	0.363501	0.179944	0.0447212	0.138836	0.169966	0.169966	0.169966	0.121975	0.0395165	0.00847385	0	0	0	0	0	0	0	0	0	0	0	0	0	0	0	0	0	0	0	0	0	0	0	0	0	0	0	0	0	0	-0.0214243	-0.000927171	0.00333659	-0.00255554	-0.000270371	-0.00987763	-0.0111302	-0.0539314	0
1840	0.343505	0.179944	0.0242725	0.139288	0.170735	0.170735	0.170735	0.121975	0.0401075	0.00865206	0	0	0	0	0	0	0	0	0	0	0	0	0	0	0	0	0	0	0	0	0	0	0	0	0	0	0	0	0	0	-0.0220948	-0.000977744	0.00351858	-0.00266948	-0.00027732	-0.0105441	-0.0111447	-0.0545298	0
1841	0.31934	0.175569	0.00348687	0.140284	0.172016	0.172016	0.172016	0.122447	0.0407232	0.00884589	0	0	0	0	0	0	0	0	0	0	0	0	0	0	0	0	0	0	0	0	0	0	0	0	0	0	0	0	0	0	-0.022756	-0.00102832	0.00370058	-0.00278502	-0.000284448	-0.0112005	-0.0111584	-0.0551254	0
1842	0.319973	0.188694	-0.0110381	0.142317	0.174299	0.174299	0.174299	0.123863	0.0413656	0.00907048	0	0	0	0	0	0	0	0	0	0	0	0	0	0	0	0	0	0	0	0	0	0	0	0	0	0	0	0	0	0	-0.0234046	-0.00107889	0.00388257	-0.00290272	-0.000291779	-0.0118426	-0.0111712	-0.055718	0
1843	0.293452	0.166819	-0.0182569	0.14489	0.177093	0.177093	0.177093	0.125751	0.0420297	0.00931265	0	0	0	0	0	0	0	0	0	0	0	0	0	0	0	0	0	0	0	0	0	0	0	0	0	0	0	0	0	0	-0.0240439	-0.00112946	0.00406457	-0.00302205	-0.000299302	-0.0124744	-0.0111833	-0.0563087	0
1844	0.288578	0.153694	-0.0130681	0.147952	0.180349	0.180349	0.180349	0.12811	0.0427082	0.00953103	0	0	0	0	0	0	0	0	0	0	0	0	0	0	0	0	0	0	0	0	0	0	0	0	0	0	0	0	0	0	-0.0246704	-0.00118004	0.00424656	-0.0031436	-0.000307044	-0.0130916	-0.0111948	-0.0568972	0
1845	0.338834	0.184319	0.003745	0.15077	0.184482	0.184482	0.184482	0.13141	0.0433937	0.00967897	0	0	0	0	0	0	0	0	0	0	0	0	0	0	0	0	0	0	0	0	0	0	0	0	0	0	0	0	0	0	-0.025997	-0.00128118	0.00461056	-0.00336054	-0.000316863	-0.0144432	-0.0112058	-0.0579789	0
1846	0.391591	0.214944	0.022365	0.154282	0.188527	0.188527	0.188527	0.134708	0.0440787	0.00974026	0	0	0	0	0	0	0	0	0	0	0	0	0	0	0	0	0	0	0	0	0	0	0	0	0	0	0	0	0	0	-0.026836	-0.00134861	0.00485322	-0.00351756	-0.000325679	-0.0152809	-0.0112164	-0.0587295	0
1847	0.429859	0.228069	0.0441262	0.157663	0.19204	0.19204	0.19204	0.137534	0.044756	0.00975013	0	0	0	0	0	0	0	0	0	0	0	0	0	0	0	0	0	0	0	0	0	0	0	0	0	0	0	0	0	0	-0.0274202	-0.00139919	0.00503521	-0.00364652	-0.000334144	-0.0158488	-0.0112267	-0.0593136	0
1848	0.458917	0.232444	0.0653581	0.161115	0.195995	0.195995	0.195995	0.140828	0.0454182	0.00974841	0	0	0	0	0	0	0	0	0	0	0	0	0	0	0	0	0	0	0	0	0	0	0	0	0	0	0	0	0	0	-0.0282296	-0.00146662	0.00527787	-0.00380874	-0.000343474	-0.0166518	-0.0112369	-0.0600621	0
1849	0.444998	0.215994	0.0644481	0.164556	0.199925	0.199925	0.199925	0.144121	0.0460579	0.00974679	0	0	0	0	0	0	0	0	0	0	0	0	0	0	0	0	0	0	0	0	0	0	0	0	0	0	0	0	0	0	-0.0290206	-0.00153405	0.00552053	-0.0039742	-0.000353096	-0.0174328	-0.011247	-0.0608094	0
1850	0.405396	0.192005	0.0468169	0.166575	0.203438	0.203438	0.203438	0.146941	0.0466654	0.00983124	0	0	0	0	0	0	0	0	0	0	0	0	0	0	0	0	0	0	0	0	0	0	0	0	0	0	0	0	0	0	-0.0303756	-0.00165205	0.00594519	-0.0042566	-0.000366397	-0.0187885	-0.0112572	-0.0620457	0
1851	0.398625	0.193033	0.0350131	0.170579	0.207233	0.20723	0.20723	0.14976	0.0473827	0.010087	0	3.37155e-06	0	0	0	0	0	0	0	0	0	0	0	0	0	0	0	0	0	3.37155e-06	0	0	0	0	0	0	0	0	0	0	-0.0310854	-0.00171948	0.00618785	-0.00446059	-0.000380927	-0.0196019	-0.0111103	-0.0624378	0
1852	0.400521	0.208797	0.0234325	0.168291	0.210775	0.210765	0.210765	0.152108	0.0482287	0.0104282	0	1.0112e-05	0	0	0	0	0	0	0	0	0	0	0	0	0	0	0	0	0	1.0112e-05	0	0	0	0	0	0	0	0	0	0	-0.031923	-0.00177005	0.00636985	-0.00477111	-0.000426812	-0.01914	-0.0121848	-0.0667802	0
1853	0.393475	0.223534	0.00493063	0.165011	0.214315	0.214298	0.214298	0.154455	0.0490739	0.0107693	0	1.68545e-05	0	0	0	0	0	0	0	0	0	0	0	0	0	0	0	0	0	1.68545e-05	0	0	0	0	0	0	0	0	0	0	-0.0328911	-0.00185434	0.00667317	-0.00516171	-0.00047338	-0.0187067	-0.0133681	-0.0716228	0
1854	0.384141	0.231759	-0.0141137	0.166496	0.218323	0.218299	0.218299	0.15727	0.0499183	0.0111104	0	2.36015e-05	0	0	0	0	0	0	0	0	0	0	0	0	0	0	0	0	0	2.36015e-05	0	0	0	0	0	0	0	0	0	0	-0.0347687	-0.00205663	0.00740116	-0.00568177	-0.000494128	-0.0206647	-0.0132727	-0.0732375	0
1855	0.242826	0.101187	-0.0262806	0.16792	0.222187	0.222157	0.222157	0.160084	0.0506214	0.0114514	0	3.03485e-05	0	0	0	0	0	0	0	0	0	0	0	0	0	0	0	0	0	3.03485e-05	0	0	0	0	0	0	0	0	0	0	-0.0365941	-0.00225893	0.00812914	-0.00620497	-0.000514249	-0.0225881	-0.013157	-0.0747763	0
1856	-0.211073	-0.356671	-0.0247188	0.170318	0.226049	0.226012	0.226012	0.162896	0.0513238	0.0117924	0	3.7089e-05	0	0	0	0	0	0	0	0	0	0	0	0	0	0	0	0	0	3.7089e-05	0	0	0	0	0	0	0	0	0	0	-0.0373583	-0.00237693	0.00855379	-0.00657552	-0.000535075	-0.023216	-0.0132085	-0.0760571	0
1857	-0.44449	-0.610276	-0.00660625	0.172392	0.23005	0.230006	0.230006	0.165707	0.0521659	0.0121333	0	4.38295e-05	0	0	0	0	0	0	0	0	0	0	0	0	0	0	0	0	0	4.38295e-05	0	0	0	0	0	0	0	0	0	0	-0.0379593	-0.00247808	0.00891779	-0.00692952	-0.000560068	-0.0234691	-0.0134404	-0.0777602	0
1858	-0.0968363	-0.297726	0.0245875	0.176302	0.234516	0.234465	0.234465	0.168984	0.0530073	0.0124741	0	5.05765e-05	0	0	0	0	0	0	0	0	0	0	0	0	0	0	0	0	0	5.05765e-05	0	0	0	0	0	0	0	0	0	0	-0.0377434	-0.00251179	0.00903912	-0.00713598	-0.000582046	-0.0228811	-0.0136716	-0.0788276	0
1859	0.262109	0.0281901	0.0549981	0.178921	0.238979	0.238922	0.238922	0.172259	0.0538479	0.0128149	0	5.7317e-05	0	0	0	0	0	0	0	0	0	0	0	0	0	0	0	0	0	5.7317e-05	0	0	0	0	0	0	0	0	0	0	-0.0382962	-0.00261294	0.00940311	-0.00749556	-0.000607703	-0.0230821	-0.013901	-0.080499	0
1860	0.390709	0.150537	0.0655506	0.174622	0.242972	0.242908	0.242908	0.175065	0.0546876	0.0131556	0	6.40575e-05	0	0	0	0	0	0	0	0	0	0	0	0	0	0	0	0	0	6.40575e-05	0	0	0	0	0	0	0	0	0	0	-0.040746	-0.00374144	0.0115562	-0.00823371	-0.000642153	-0.0255547	-0.0141302	-0.0868929	0
1861	0.35779	0.13957	0.0522987	0.165921	0.246963	0.246892	0.246892	0.177869	0.0555265	0.0134962	0	7.08045e-05	0	0	0	0	0	0	0	0	0	0	0	0	0	0	0	0	0	7.08045e-05	0	0	0	0	0	0	0	0	0	0	-0.0438139	-0.00559474	0.0147615	-0.00907053	-0.000693842	-0.0286875	-0.0145288	-0.0968016	0
1862	0.258114	0.055264	0.030695	0.172155	0.250484	0.250406	0.250406	0.180205	0.0563646	0.0138368	0	7.7545e-05	0	0	0	0	0	0	0	0	0	0	0	0	0	0	0	0	0	7.7545e-05	0	0	0	0	0	0	0	0	0	0	-0.0442782	-0.0059419	0.0154946	-0.00939863	-0.000698698	-0.0302114	-0.0135223	-0.0957985	0
1863	0.263904	0.0676015	0.01407	0.182233	0.254003	0.253919	0.253919	0.18254	0.0572019	0.0141773	0	8.42855e-05	0	0	0	0	0	0	0	0	0	0	0	0	0	0	0	0	0	8.42855e-05	0	0	0	0	0	0	0	0	0	0	-0.0443449	-0.00574691	0.0155204	-0.00976109	-0.000690694	-0.0314319	-0.0122347	-0.0918583	0
1864	0.336234	0.15088	0.0009975	0.184357	0.257987	0.257896	0.257896	0.18534	0.0580385	0.0145178	0	9.10325e-05	0	0	0	0	0	0	0	0	0	0	0	0	0	0	0	0	0	9.10325e-05	0	0	0	0	0	0	0	0	0	0	-0.0458134	-0.00571758	0.0160069	-0.0105293	-0.000729976	-0.0325981	-0.0122454	-0.0931968	0
1865	0.370764	0.198516	-0.0124294	0.184677	0.261642	0.261544	0.261544	0.187673	0.0590133	0.0148582	0	9.77795e-05	0	0	0	0	0	0	0	0	0	0	0	0	0	0	0	0	0	9.77795e-05	0	0	0	0	0	0	0	0	0	0	-0.0474597	-0.00604244	0.0170249	-0.0113447	-0.000770023	-0.0340651	-0.0122624	-0.0959086	0
1866	0.375045	0.219079	-0.0242375	0.180204	0.264828	0.264723	0.264723	0.189538	0.0599872	0.0151985	0	0.00010452	0	0	0	0	0	0	0	0	0	0	0	0	0	0	0	0	0	0.00010452	0	0	0	0	0	0	0	0	0	0	-0.0491525	-0.00759759	0.0197121	-0.0120904	-0.000805345	-0.0360972	-0.0122741	-0.102845	0
1867	0.37954	0.229017	-0.0246006	0.175123	0.267873	0.267762	0.267762	0.191402	0.060821	0.0155388	0	0.00011126	0	0	0	0	0	0	0	0	0	0	0	0	0	0	0	0	0	0.00011126	0	0	0	0	0	0	0	0	0	0	-0.0509982	-0.00929334	0.0226456	-0.0128979	-0.000840293	-0.0383731	-0.0122391	-0.110111	0
1868	0.404765	0.231073	-0.0025725	0.176264	0.271383	0.271265	0.271265	0.193732	0.0616541	0.015879	0	0.000118008	0	0	0	0	0	0	0	0	0	0	0	0	0	0	0	0	0	0.000118008	0	0	0	0	0	0	0	0	0	0	-0.0521573	-0.00964501	0.0236331	-0.0136428	-0.000875393	-0.0394672	-0.01216	-0.112368	0
1869	0.440705	0.222848	0.0355338	0.182323	0.275357	0.275232	0.275232	0.196527	0.0624863	0.0162191	0	0.000124748	0	0	0	0	0	0	0	0	0	0	0	0	0	0	0	0	0	0.000124748	0	0	0	0	0	0	0	0	0	0	-0.0524795	-0.00903414	0.0231409	-0.0142438	-0.00090931	-0.0393557	-0.0120775	-0.110963	0
1870	0.469869	0.218736	0.0641287	0.187004	0.279382	0.27925	0.27925	0.19932	0.0634562	0.0164742	0	0.000131463	0	0	0	0	0	0	0	0	0	0	0	0	0	0	0	0	0	0.000131463	0	0	0	0	0	0	0	0	0	0	-0.0528636	-0.00881258	0.023233	-0.0149213	-0.000944553	-0.0394142	-0.012004	-0.110999	0
1871	0.468819	0.219421	0.06727	0.182128	0.283784	0.283646	0.283646	0.202576	0.0644252	0.0166442	0	0.00013819	0	0	0	0	0	0	0	0	0	0	0	0	0	0	0	0	0	0.00013819	0	0	0	0	0	0	0	0	0	0	-0.0563441	-0.00923964	0.0243689	-0.0159158	-0.0010687	-0.0419427	-0.0125462	-0.116906	0
1872	0.422773	0.207084	0.0517606	0.163928	0.288595	0.28845	0.28845	0.206296	0.0652549	0.0168992	0	0.00014495	0	0	0	0	0	0	0	0	0	0	0	0	0	0	0	0	0	0.00014495	0	0	0	0	0	0	0	0	0	0	-0.0623654	-0.0100273	0.0264705	-0.0177966	-0.0013119	-0.0446397	-0.0150604	-0.131321	0
1873	0.369789	0.193375	0.0265125	0.149901	0.293952	0.2938	0.2938	0.210477	0.0660837	0.0172392	0	0.00015171	0	0	0	0	0	0	0	0	0	0	0	0	0	0	0	0	0	0.00015171	0	0	0	0	0	0	0	0	0	0	-0.0665409	-0.0110844	0.029047	-0.0197738	-0.00150616	-0.0459737	-0.0172498	-0.144588	0
1874	0.353735	0.201258	-2.1875e-05	0.152499	0.300232	0.300074	0.300074	0.215583	0.0669118	0.017579	0	0.00015847	0	0	0	0	0	0	0	0	0	0	0	0	0	0	0	0	0	0.00015847	0	0	0	0	0	0	0	0	0	0	-0.0663417	-0.0117345	0.0300578	-0.0202242	-0.00158161	-0.0452238	-0.0176353	-0.14859	0
1875	0.332461	0.194061	-0.0208469	0.159247	0.307024	0.306858	0.306858	0.221148	0.0678768	0.0178339	0	0.00016523	0	0	0	0	0	0	0	0	0	0	0	0	0	0	0	0	0	0.00016523	0	0	0	0	0	0	0	0	0	0	-0.065587	-0.0116861	0.0301266	-0.0207088	-0.00164652	-0.0437521	-0.0179201	-0.149792	0
1876	0.288309	0.152936	-0.0317319	0.167105	0.314187	0.314014	0.314014	0.227169	0.0688409	0.0180038	0	0.000172315	0	0	0	0	0	0	0	0	0	0	0	0	0	0	0	0	0	0.000172315	0	0	0	0	0	0	0	0	0	0	-0.0665589	-0.0105746	0.0290978	-0.0216445	-0.00174032	-0.0434441	-0.0182533	-0.148668	0
1877	0.292982	0.148481	-0.0351575	0.179658	0.322214	0.322034	0.322034	0.234109	0.0696664	0.0182586	0	0.00017992	0	0	0	0	0	0	0	0	0	0	0	0	0	0	0	0	0	0.00017992	0	0	0	0	0	0	0	0	0	0	-0.065809	-0.00905825	0.0273256	-0.021951	-0.0018211	-0.0417316	-0.0185726	-0.145192	0
1878	0.334209	0.180353	-0.0366756	0.190532	0.330779	0.330592	0.330592	0.241502	0.0704911	0.0185984	0	0.000187915	0	0	0	0	0	0	0	0	0	0	0	0	0	0	0	0	0	0.000187915	0	0	0	0	0	0	0	0	0	0	-0.0644004	-0.0085663	0.0274192	-0.0222863	-0.00188831	-0.0402392	-0.0188395	-0.144794	0
1879	0.368246	0.201943	-0.0295531	0.195856	0.339795	0.339599	0.339599	0.249345	0.0713151	0.018938	0	0.0001963	0	0	0	0	0	0	0	0	0	0	0	0	0	0	0	0	0	0.0001963	0	0	0	0	0	0	0	0	0	0	-0.0655452	-0.00884175	0.0281805	-0.0232649	-0.00197026	-0.0405532	-0.0190956	-0.147846	0
1880	0.399955	0.215652	-0.00942375	0.193727	0.349856	0.349651	0.349651	0.258098	0.0722753	0.0192776	0	0.00020501	0	0	0	0	0	0	0	0	0	0	0	0	0	0	0	0	0	0.00020501	0	0	0	0	0	0	0	0	0	0	-0.0711233	-0.00985504	0.0292261	-0.0255507	-0.0020891	-0.0435052	-0.0193494	-0.155044	0
1881	0.429205	0.222848	0.01064	0.195717	0.360499	0.360285	0.360285	0.267296	0.0733715	0.0196171	0	0.00021411	0	0	0	0	0	0	0	0	0	0	0	0	0	0	0	0	0	0.00021411	0	0	0	0	0	0	0	0	0	0	-0.0740412	-0.0101177	0.0295307	-0.0274976	-0.00223281	-0.0434902	-0.0202335	-0.160541	0
1882	0.33982	0.111125	0.0210525	0.207642	0.370667	0.370443	0.370443	0.27602	0.0744664	0.0199566	0	0.000223665	0	0	0	0	0	0	0	0	0	0	0	0	0	0	0	0	0	0.000223665	0	0	0	0	0	0	0	0	0	0	-0.0741249	-0.009878	0.0294625	-0.0285753	-0.00230008	-0.0428917	-0.0199423	-0.160133	0
1883	-0.563533	-0.802535	0.0219013	0.2171	0.380361	0.380127	0.380127	0.284271	0.0755599	0.020296	0	0.00023361	0	0	0	0	0	0	0	0	0	0	0	0	0	0	0	0	0	0.00023361	0	0	0	0	0	0	0	0	0	0	-0.0762233	-0.0102509	0.0301271	-0.03011	-0.00234804	-0.0446772	-0.0189643	-0.160765	0
1884	-1.30178	-1.5373	0.0105831	0.224943	0.389905	0.389661	0.389661	0.29251	0.0765157	0.0206353	0	0.000243945	0	0	0	0	0	0	0	0	0	0	0	0	0	0	0	0	0	0.000243945	0	0	0	0	0	0	0	0	0	0	-0.076439	-0.0104628	0.0311033	-0.0312892	-0.00243688	-0.044279	-0.0190744	-0.163192	0
1885	-0.718939	-0.944073	-0.0105306	0.235665	0.398387	0.398132	0.398132	0.299823	0.0773341	0.0209746	0	0.000254735	0	0	0	0	0	0	0	0	0	0	0	0	0	0	0	0	0	0.000254735	0	0	0	0	0	0	0	0	0	0	-0.0744818	-0.0104264	0.0320677	-0.0317289	-0.0025029	-0.0427405	-0.0191509	-0.163813	0
1886	-0.235809	-0.448517	-0.0316925	0.244401	0.405626	0.40536	0.40536	0.305758	0.0782878	0.0213138	0	0.000266045	0	0	0	0	0	0	0	0	0	0	0	0	0	0	0	0	0	0.000266045	0	0	0	0	0	0	0	0	0	0	-0.0731332	-0.0103427	0.0329968	-0.0321938	-0.00258703	-0.0417672	-0.0192393	-0.164617	0
1887	-0.117215	-0.321372	-0.0442794	0.248437	0.411997	0.411719	0.411719	0.310774	0.0793767	0.0215682	0	0.000277875	0	0	0	0	0	0	0	0	0	0	0	0	0	0	0	0	0	0.000277875	0	0	0	0	0	0	0	0	0	0	-0.0737549	-0.0106555	0.0344594	-0.0333255	-0.00269147	-0.0422728	-0.0192691	-0.167532	0
1888	-0.0165989	-0.21102	-0.0505225	0.244944	0.417367	0.417077	0.417077	0.314875	0.0804642	0.0217377	0	0.000290225	0	0	0	0	0	0	0	0	0	0	0	0	0	0	0	0	0	0.000290225	0	0	0	0	0	0	0	0	0	0	-0.0782374	-0.0114674	0.0358514	-0.0359193	-0.00282376	-0.0446739	-0.0192044	-0.173259	0
1889	-0.0845096	-0.277506	-0.0530425	0.246039	0.422363	0.42206	0.42206	0.318517	0.0815504	0.021992	0	0.000303095	0	0	0	0	0	0	0	0	0	0	0	0	0	0	0	0	0	0.000303095	0	0	0	0	0	0	0	0	0	0	-0.080007	-0.0119144	0.0374632	-0.0377391	-0.00293162	-0.0457459	-0.0191391	-0.176851	0
1890	-0.123486	-0.331654	-0.0402588	0.248427	0.426985	0.426669	0.426669	0.321702	0.0826352	0.022331	0	0.00031655	0	0	0	0	0	0	0	0	0	0	0	0	0	0	0	0	0	0.00031655	0	0	0	0	0	0	0	0	0	0	-0.080852	-0.0122197	0.0390162	-0.0394044	-0.00304059	-0.0461154	-0.0190881	-0.179694	0
1891	-0.0281683	-0.261741	-0.0124338	0.246007	0.431286	0.430955	0.430955	0.324431	0.0838541	0.02267	0	0.00033059	0	0	0	0	0	0	0	0	0	0	0	0	0	0	0	0	0	0.00033059	0	0	0	0	0	0	0	0	0	0	-0.0848516	-0.0126245	0.0396731	-0.0422521	-0.00319693	-0.0474605	-0.0189906	-0.183801	0
1892	0.171455	-0.0876454	0.0133612	0.245739	0.435719	0.435373	0.435373	0.327158	0.0852065	0.0230089	0	0.000345215	0	0	0	0	0	0	0	0	0	0	0	0	0	0	0	0	0	0.000345215	0	0	0	0	0	0	0	0	0	0	-0.0869271	-0.0128256	0.0404906	-0.0446772	-0.00334476	-0.0473381	-0.019232	-0.187404	0
1893	0.340367	0.0600619	0.0341819	0.246123	0.439475	0.439115	0.439115	0.32943	0.086422	0.0232631	0	0.000360555	0	0	0	0	0	0	0	0	0	0	0	0	0	0	0	0	0	0.000360555	0	0	0	0	0	0	0	0	0	0	-0.0877202	-0.0129807	0.042014	-0.0468947	-0.00348751	-0.046792	-0.0195792	-0.190904	0
1894	0.458547	0.169386	0.0436013	0.24556	0.442556	0.44218	0.44218	0.331246	0.087501	0.0234325	0	0.00037661	0	0	0	0	0	0	0	0	0	0	0	0	0	0	0	0	0	0.00037661	0	0	0	0	0	0	0	0	0	0	-0.0879802	-0.0133624	0.0439162	-0.0489577	-0.0036267	-0.0459367	-0.0200129	-0.195117	0
1895	0.434966	0.161846	0.02968	0.24344	0.44577	0.445377	0.445377	0.333062	0.0887132	0.0236019	0	0.000393315	0	0	0	0	0	0	0	0	0	0	0	0	0	0	0	0	0	0.000393315	0	0	0	0	0	0	0	0	0	0	-0.0886382	-0.0141698	0.0456155	-0.0509215	-0.00376398	-0.0448917	-0.0205066	-0.200563	0
1896	0.262909	0.016538	0.0023975	0.243974	0.449118	0.448707	0.448707	0.334877	0.0900583	0.0237712	0	0.000410735	0	0	0	0	0	0	0	0	0	0	0	0	0	0	0	0	0	0.000410735	0	0	0	0	0	0	0	0	0	0	-0.0886154	-0.0148691	0.0481709	-0.0528425	-0.00390118	-0.0445245	-0.020649	-0.205048	0
1897	0.163166	-0.0646839	-0.0192413	0.247091	0.452867	0.452438	0.452438	0.337146	0.0912673	0.0240253	0	0.000429	0	0	0	0	0	0	0	0	0	0	0	0	0	0	0	0	0	0.000429	0	0	0	0	0	0	0	0	0	0	-0.087262	-0.0153758	0.0519425	-0.0547784	-0.00404027	-0.0442391	-0.020771	-0.209075	0
1898	0.258699	0.0377859	-0.0298594	0.250773	0.457974	0.457526	0.457526	0.340772	0.0924745	0.0242793	0	0.000448045	0	0	0	0	0	0	0	0	0	0	0	0	0	0	0	0	0	0.000448045	0	0	0	0	0	0	0	0	0	0	-0.0858324	-0.0162168	0.0563086	-0.0567877	-0.00418333	-0.0440767	-0.0208766	-0.214127	0
1899	0.36799	0.150537	-0.0367281	0.254182	0.464486	0.464018	0.464018	0.345756	0.0938141	0.0244486	0	0.000467935	0	0	0	0	0	0	0	0	0	0	0	0	0	0	0	0	0	0.000467935	0	0	0	0	0	0	0	0	0	0	-0.0857853	-0.017186	0.0597363	-0.0589296	-0.0043326	-0.0441358	-0.0209375	-0.219422	0
1900	0.414758	0.201943	-0.0451019	0.257917	0.471668	0.47118	0.471174	0.351187	0.0952852	0.0247025	5.26505e-06	0.000488735	0	5.26505e-06	0	0	0	0	0	0	0	0	0	0	0	0	0	0	0	0.000488735	0	0	0	0	0	0	0	0	0	0	-0.0866805	-0.0179615	0.0622837	-0.061285	-0.0045019	-0.0442715	-0.0209443	-0.22409	0
1901	0.39849	0.191662	-0.0529112	0.259739	0.47978	0.47927	0.479259	0.357064	0.0971539	0.025041	1.08072e-05	0.00051038	0	1.08072e-05	0	0	0	0	0	0	0	0	0	0	0	0	0	0	0	0.00051038	0	0	0	0	0	0	0	0	0	0	-0.0855945	-0.0186976	0.0650834	-0.0637067	-0.00470643	-0.0411879	-0.0223793	-0.231464	0
1902	-0.0416702	-0.256943	-0.0463881	0.261661	0.488595	0.488063	0.488051	0.363387	0.0992852	0.0253795	1.1376e-05	0.00053235	0	1.1376e-05	0	0	0	0	0	0	0	0	0	0	0	0	0	0	0	0.00053235	0	0	0	0	0	0	0	0	0	0	-0.0857321	-0.0190455	0.0663163	-0.0662422	-0.00493724	-0.0379648	-0.0238586	-0.237806	0
1903	-0.403369	-0.651058	-0.0158112	0.2635	0.49753	0.496976	0.496964	0.369701	0.101544	0.0257179	1.19747e-05	0.00055419	0	1.19747e-05	0	0	0	0	0	0	0	0	0	0	0	0	0	0	0	0.00055419	0	0	0	0	0	0	0	0	0	0	-0.0888614	-0.0194816	0.0662008	-0.0690836	-0.00518172	-0.036875	-0.0244402	-0.242613	0
1904	-0.0817013	-0.356329	0.00875	0.265877	0.507034	0.506458	0.506445	0.376459	0.10393	0.0260563	1.2605e-05	0.000575965	0	1.2605e-05	0	0	0	0	0	0	0	0	0	0	0	0	0	0	0	0.000575965	0	0	0	0	0	0	0	0	0	0	-0.0909065	-0.0198276	0.0670198	-0.072126	-0.00543742	-0.0350491	-0.0254863	-0.24822	0
1905	0.285079	0.00214422	0.0126306	0.270304	0.517422	0.516825	0.516811	0.384107	0.10631	0.0263946	1.32684e-05	0.00059774	0	1.32684e-05	0	0	0	0	0	0	0	0	0	0	0	0	0	0	0	0.00059774	0	0	0	0	0	0	0	0	0	0	-0.0926819	-0.01998	0.0682005	-0.0752667	-0.00570165	-0.0335032	-0.0264309	-0.253178	0
1906	0.389716	0.100159	0.016485	0.273072	0.528244	0.527624	0.52761	0.392194	0.108683	0.0267328	1.39667e-05	0.000620425	0	1.39667e-05	0	0	0	0	0	0	0	0	0	0	0	0	0	0	0	0.000620425	0	0	0	0	0	0	0	0	0	0	-0.0944081	-0.0208963	0.0701172	-0.0784052	-0.00597146	-0.0317893	-0.0274631	-0.260295	0
1907	0.3695	0.0761692	0.0177931	0.275537	0.538691	0.538041	0.538026	0.39982	0.111051	0.0271555	1.47018e-05	0.00064948	0	1.47018e-05	0	0	0	0	0	0	0	0	0	0	0	0	0	0	0	0.00064948	0	0	0	0	0	0	0	0	0	0	-0.0965804	-0.0221755	0.0721422	-0.0814429	-0.00624367	-0.0307328	-0.0281276	-0.267524	0
1908	0.386643	0.0878213	0.0135844	0.285237	0.548893	0.548209	0.548193	0.406988	0.113543	0.0276626	1.54756e-05	0.00068406	0	1.54756e-05	0	0	0	0	0	0	0	0	0	0	0	0	0	0	0	0.00068406	0	0	0	0	0	0	0	0	0	0	-0.0963313	-0.0222577	0.0755254	-0.0842829	-0.00651489	-0.0304833	-0.0283179	-0.270873	0
1909	0.45258	0.153964	0.000923125	0.297693	0.559209	0.558491	0.558475	0.414146	0.116159	0.0281696	1.62901e-05	0.00071864	0	1.62901e-05	0	0	0	0	0	0	0	0	0	0	0	0	0	0	0	0.00071864	0	0	0	0	0	0	0	0	0	0	-0.095366	-0.0217224	0.0785678	-0.0868298	-0.00678153	-0.0301259	-0.0284741	-0.27231	0
1910	0.474067	0.18892	-0.0192369	0.304384	0.569379	0.568626	0.568609	0.421294	0.118638	0.0286764	1.71475e-05	0.00075322	0	1.71475e-05	0	0	0	0	0	0	0	0	0	0	0	0	0	0	0	0.00075322	0	0	0	0	0	0	0	0	0	0	-0.0973185	-0.0222365	0.0792201	-0.0889837	-0.00704258	-0.0297163	-0.0285595	-0.275709	0
1911	0.475024	0.195089	-0.0344094	0.314345	0.578957	0.578169	0.578151	0.427988	0.12098	0.0291831	1.805e-05	0.000787735	0	1.805e-05	0	0	0	0	0	0	0	0	0	0	0	0	0	0	0	0.000787735	0	0	0	0	0	0	0	0	0	0	-0.0987111	-0.0227275	0.0807683	-0.0907383	-0.00729931	-0.0311982	-0.027516	-0.277429	0
1912	0.237872	-0.0485766	-0.0413963	0.327845	0.588289	0.587466	0.587447	0.434227	0.123446	0.029774	1.9e-05	0.000823615	0	1.9e-05	0	0	0	0	0	0	0	0	0	0	0	0	0	0	0	0.000823615	0	0	0	0	0	0	0	0	0	0	-0.09969	-0.0230286	0.0829117	-0.0922324	-0.00755132	-0.0341549	-0.0256345	-0.277167	0
1913	0.142892	-0.15653	-0.0390513	0.338473	0.597882	0.597007	0.596987	0.440459	0.126164	0.0303648	2e-05	0.00087458	0	2e-05	0	0	0	0	0	0	0	0	0	0	0	0	0	0	0	0.000874445	0	0	0	0	0	0	0	0	1.35e-07	0	-0.101757	-0.023801	0.0839213	-0.0935757	-0.00779867	-0.0363541	-0.0241485	-0.278121	0
1914	0.387926	0.0556067	-0.0191494	0.351469	0.60707	0.606134	0.606113	0.446239	0.129003	0.0308711	2.10526e-05	0.00093589	0	2.10526e-05	0	0	0	0	0	0	0	0	0	0	0	0	0	0	0	0.00093548	0	0	0	0	0	0	0	0	4.1e-07	0	-0.103025	-0.0230232	0.083467	-0.0948027	-0.00804319	-0.0374209	-0.0232021	-0.275846	0
1915	0.544847	0.159447	0.0196175	0.365782	0.61586	0.614886	0.614864	0.45157	0.131833	0.0314615	2.21607e-05	0.00097361	0	2.21607e-05	0	0	0	0	0	0	0	0	0	0	0	0	0	0	0	0.00097292	0	0	0	0	0	0	0	0	6.9e-07	0	-0.104047	-0.0212311	0.0818106	-0.0959469	-0.00828684	-0.0378242	-0.0225686	-0.271311	0
1916	0.619466	0.187549	0.0578375	0.374079	0.625143	0.624152	0.624129	0.457338	0.134655	0.0321361	2.3327e-05	0.000991055	0	2.3327e-05	0	0	0	0	0	0	0	0	0	0	0	0	0	0	0	0.00099008	0	0	0	0	0	0	0	0	9.75e-07	0	-0.106959	-0.0211044	0.0796577	-0.0970414	-0.00853174	-0.0377971	-0.0221423	-0.271094	0
1917	0.65508	0.196117	0.0783825	0.38058	0.634956	0.63393	0.633906	0.463543	0.137468	0.0328947	2.45547e-05	0.00102605	0	2.45547e-05	0	0	0	0	0	0	0	0	0	0	0	0	0	0	0	0.00102479	0	0	0	0	0	0	0	0	1.265e-06	0	-0.109292	-0.0218517	0.0786552	-0.098119	-0.00878013	-0.0371815	-0.0220147	-0.273662	0
1918	0.66255	0.201943	0.071505	0.389102	0.644548	0.643462	0.643436	0.469299	0.1404	0.0337372	2.58471e-05	0.00108614	0	2.58471e-05	0	0	0	0	0	0	0	0	0	0	0	0	0	0	0	0.00108459	0	0	0	0	0	0	0	0	1.555e-06	0	-0.11107	-0.0218246	0.0774364	-0.0992118	-0.00903437	-0.0365154	-0.02192	-0.274388	0
1919	0.640626	0.194746	0.0426475	0.403232	0.653733	0.652579	0.652552	0.474606	0.143451	0.0344951	2.72075e-05	0.00115384	0	2.72075e-05	0	0	0	0	0	0	0	0	0	0	0	0	0	0	0	0.001152	0	0	0	0	0	0	0	0	1.845e-06	0	-0.11051	-0.0200828	0.0767811	-0.100352	-0.00929696	-0.0355837	-0.0219764	-0.271262	0
1920	0.538608	0.110783	0.0138031	0.414022	0.663217	0.661996	0.661967	0.480349	0.146365	0.0352528	2.86395e-05	0.00122153	0	2.86395e-05	0	0	0	0	0	0	0	0	0	0	0	0	0	0	0	0.0012194	0	0	0	0	0	0	0	0	2.135e-06	0	-0.109767	-0.0199637	0.0781727	-0.10156	-0.00955195	-0.0348032	-0.0220605	-0.272523	0
1921	0.513908	0.0957036	-0.00765625	0.425861	0.673527	0.672237	0.672207	0.486969	0.149144	0.0360942	3.01468e-05	0.00128936	0	3.01468e-05	0	0	0	0	0	0	0	0	0	0	0	0	0	0	0	0.00128693	0	0	0	0	0	0	0	0	2.425e-06	0	-0.105712	-0.0197725	0.0820658	-0.102846	-0.00978369	-0.0321637	-0.023212	-0.275991	0
1922	0.599174	0.181038	-0.0211838	0.43932	0.683862	0.682504	0.682473	0.49358	0.152041	0.0368512	3.17335e-05	0.00135731	0	3.17335e-05	0	0	0	0	0	0	0	0	0	0	0	0	0	0	0	0.0013546	0	0	0	0	0	0	0	0	2.715e-06	0	-0.103054	-0.018506	0.0839562	-0.104206	-0.0100124	-0.0301092	-0.0241763	-0.276371	0
1923	0.618842	0.202286	-0.0221856	0.438741	0.693783	0.692359	0.692322	0.499744	0.155054	0.0375238	3.66556e-05	0.00142456	3.25193e-06	3.34036e-05	0	0	0	0	0	0	0	0	0	0	0	0	0	0	0	0.00142155	0	0	0	0	0	0	0	0	3.01e-06	0	-0.110078	-0.0198458	0.080011	-0.105624	-0.010255	-0.0302266	-0.0241372	-0.280736	0
1924	0.621606	0.189263	-0.00910437	0.441447	0.70457	0.703079	0.703033	0.506778	0.158059	0.0381962	4.5521e-05	0.00149181	1.03592e-05	3.51617e-05	0	0	0	0	0	0	0	0	0	0	0	0	0	0	0	0.0014885	0	0	0	0	0	0	0	0	3.31e-06	0	-0.114414	-0.0210079	0.0783979	-0.107078	-0.0105083	-0.0298239	-0.0243929	-0.285478	0
1925	0.656901	0.189263	0.01456	0.453078	0.716218	0.714659	0.714603	0.514682	0.161053	0.0388684	5.52852e-05	0.0015597	1.82729e-05	3.70124e-05	0	0	0	0	0	0	0	0	0	0	0	0	0	0	0	0.0015561	0	0	0	0	0	0	0	0	3.605e-06	0	-0.114389	-0.021049	0.0801858	-0.108546	-0.010769	-0.0296705	-0.0245403	-0.287664	0
1926	0.701245	0.197145	0.0403637	0.463736	0.727498	0.725864	0.725799	0.522136	0.164039	0.0396242	6.55634e-05	0.00163345	2.6603e-05	3.89604e-05	0	0	0	0	0	0	0	0	0	0	0	0	0	0	0	0.00162955	0	0	0	0	0	0	0	0	3.9e-06	0	-0.115335	-0.0208707	0.0811658	-0.11028	-0.0110317	-0.0296462	-0.024672	-0.289333	0
1927	0.721251	0.195089	0.0554925	0.47067	0.738763	0.73705	0.736974	0.529579	0.167015	0.0403798	7.63825e-05	0.00171305	3.53716e-05	4.10109e-05	0	0	0	0	0	0	0	0	0	0	0	0	0	0	0	0.00170885	0	0	0	0	0	0	0	0	4.2e-06	0	-0.116603	-0.0210432	0.0817083	-0.112257	-0.0112929	-0.0281011	-0.0256174	-0.29315	0
1928	0.674629	0.145739	0.0510169	0.477873	0.750716	0.748923	0.748835	0.537885	0.169983	0.0409673	8.77711e-05	0.00179265	4.46017e-05	4.31694e-05	0	0	0	0	0	0	0	0	0	0	0	0	0	0	0	0.00178815	0	0	0	0	0	0	0	0	4.505e-06	0	-0.118565	-0.0211149	0.081411	-0.114179	-0.0115513	-0.0266062	-0.0265239	-0.296512	0
1929	0.624013	0.0960463	0.0412825	0.486684	0.762524	0.760652	0.760552	0.546179	0.172818	0.0415546	9.9759e-05	0.00187226	5.43176e-05	4.54415e-05	0	0	0	0	0	0	0	0	0	0	0	0	0	0	0	0.00186745	0	0	0	0	0	0	0	0	4.81e-06	0	-0.121538	-0.0211039	0.0807338	-0.116025	-0.0118033	-0.0267785	-0.0265606	-0.2982	0
1930	0.652519	0.121749	0.0325894	0.49818	0.773754	0.771802	0.771689	0.554025	0.175523	0.0421417	0.000112378	0.00195251	6.45448e-05	4.78331e-05	0	0	0	0	0	0	0	0	0	0	0	0	0	0	0	0.0019474	0	0	0	0	0	0	0	0	5.115e-06	0	-0.123198	-0.0202739	0.0803249	-0.117778	-0.0120476	-0.0268103	-0.0266129	-0.297915	0
1931	0.678528	0.146424	0.0164544	0.51565	0.785323	0.78329	0.783158	0.562294	0.17822	0.0426447	0.000131699	0.00203277	7.53103e-05	5.03506e-05	0	6.03845e-06	0	0	0	0	0	0	0	0	0	0	0	0	0	0.00202735	0	0	0	0	0	0	0	0	5.42e-06	0	-0.121491	-0.0178248	0.0807677	-0.119418	-0.0122827	-0.0256014	-0.0271321	-0.294813	0
1932	0.64515	0.114895	-0.00354375	0.533799	0.796956	0.794843	0.794691	0.57055	0.180909	0.0432315	0.000152245	0.00211315	8.66424e-05	5.30007e-05	0	1.2602e-05	0	0	0	0	0	0	0	0	0	7.7616e-07	0	0	0	0.00210665	0	0	0	0	0	0	0	0	5.725e-06	0	-0.119225	-0.0155089	0.081711	-0.120927	-0.0125055	-0.0244386	-0.0275566	-0.291853	0
1933	0.656846	0.123806	-0.0139081	0.546949	0.807785	0.805588	0.80542	0.577927	0.183592	0.0439018	0.000168059	0.00219626	9.8571e-05	5.57902e-05	0	1.36978e-05	0	0	0	0	0	0	0	0	0	2.3208e-06	0	0	0	0.0021879	0	0	0	0	0	0	0	0	6.035e-06	0	-0.119079	-0.0147961	0.0826036	-0.122323	-0.012717	-0.0243865	-0.0274605	-0.291607	0
1934	0.717064	0.162189	6.5625e-05	0.554809	0.818061	0.815762	0.815577	0.58486	0.186146	0.0445719	0.000184743	0.00229885	0.000111127	5.87265e-05	0	1.48889e-05	0	0	0	0	0	0	0	0	0	3.85024e-06	0	0	0	0.00228865	0	0	0	0	0	0	0	0	6.345e-06	0	-0.12096	-0.0155197	0.083063	-0.123646	-0.0129221	-0.0248268	-0.0271077	-0.294285	0
1935	0.773297	0.169386	0.0409325	0.562979	0.82822	0.8258	0.825597	0.591784	0.188572	0.0452418	0.000202346	0.00242039	0.000124345	6.18174e-05	0	1.61836e-05	0	0	0	0	0	0	0	0	0	6.1408e-06	0	6.43715e-07	0	0.00240695	0	0	0	0	0	0	0	0	6.66e-06	0	-0.122688	-0.0161833	0.083596	-0.124937	-0.013126	-0.0252924	-0.0267455	-0.296735	0
1936	0.831551	0.180695	0.0815981	0.569258	0.837504	0.83496	0.834739	0.597836	0.190992	0.0459114	0.000220919	0.00254411	0.000138257	6.50709e-05	0	1.75909e-05	0	0	0	0	0	0	0	0	0	9.96e-06	0	1.92898e-06	0	0.00252525	0	0	0	0	0	0	0	0	6.975e-06	0	-0.123914	-0.0169668	0.0843626	-0.126237	-0.0133337	-0.0249097	-0.0268302	-0.300144	0
1937	0.84505	0.179324	0.0900637	0.575662	0.844968	0.842298	0.842058	0.602154	0.193406	0.0464972	0.000240519	0.00267012	0.000152903	6.84957e-05	0	1.91205e-05	0	0	0	0	0	0	0	0	0	1.60704e-05	0	3.21036e-06	0	0.00264355	0	0	0	0	0	0	0	0	7.29e-06	0	-0.124345	-0.017938	0.0866517	-0.127586	-0.0135503	-0.0254587	-0.026464	-0.303503	0
1938	0.833606	0.163217	0.0808325	0.589556	0.851051	0.84825	0.847989	0.605175	0.195814	0.0469991	0.000261202	0.00280165	0.000168319	7.21008e-05	0	2.07832e-05	0	0	0	0	0	0	0	0	0	2.59936e-05	0	5.1305e-06	0	0.00276185	0	1.069e-06	0	0	0	0	0	0	7.61e-06	0	-0.119579	-0.017775	0.0932865	-0.129026	-0.0137813	-0.026308	-0.0259756	-0.304568	0
1939	0.837512	0.163903	0.0738456	0.599764	0.856275	0.853333	0.85305	0.607332	0.198217	0.0475009	0.000283032	0.00294214	0.000184546	7.58955e-05	0	2.25904e-05	0	0	0	0	0	0	0	0	8.80625e-07	4.1264e-05	0	7.688e-06	0	0.00288015	0	4.231e-06	0	0	0	0	0	0	7.93e-06	0	-0.11641	-0.0173578	0.0978697	-0.130598	-0.014032	-0.026358	-0.0259336	-0.305603	0
1940	0.848384	0.18378	0.0641944	0.60041	0.86076	0.857667	0.857361	0.608625	0.200733	0.0480025	0.000306072	0.00309298	0.000201627	7.989e-05	0	2.45548e-05	0	0	0	0	0	0	0	0	2.62188e-06	6.3376e-05	0	1.0881e-05	0	0.00299845	0	9.399e-06	0	0	0	0	0	0	8.25e-06	0	-0.11984	-0.017966	0.0973886	-0.132344	-0.014345	-0.0270441	-0.0255301	-0.308068	0
1941	0.840653	0.193033	0.0500194	0.597601	0.864168	0.860907	0.860576	0.608625	0.203363	0.0485876	0.000330392	0.00326112	0.000219608	8.40948e-05	0	2.669e-05	0	0	0	0	0	0	0	0	4.325e-06	9.3792e-05	0	1.53496e-05	0	0.0031226	0	1.6487e-05	0	0	0	0	0	0	8.57e-06	0	-0.122763	-0.0186007	0.0967339	-0.134336	-0.0147654	-0.0263064	-0.0254879	-0.31246	0
1942	0.796379	0.171442	0.030625	0.594312	0.866261	0.862811	0.862455	0.607332	0.205867	0.049256	0.000356066	0.00344994	0.000238534	8.85208e-05	0	2.90109e-05	0	0	0	0	0	0	0	0	5.99125e-06	0.000134	0	2.10924e-05	0	0.00325455	0	2.542e-05	0	0	0	0	0	0	8.89e-06	0	-0.124111	-0.0185215	0.0964305	-0.136669	-0.0152651	-0.0237347	-0.0263512	-0.317009	0
1943	0.77291	0.166302	0.0136106	0.592998	0.867815	0.86416	0.863777	0.605607	0.208246	0.0499242	0.000382943	0.00365547	0.000258457	9.29526e-05	0	3.15336e-05	0	0	0	0	0	0	0	0	7.62125e-06	0.000184672	0	2.87416e-05	0	0.0033891	0	3.612e-05	0	0	0	0	0	0	9.215e-06	0	-0.125877	-0.0183919	0.0970053	-0.139371	-0.0158103	-0.022385	-0.0269234	-0.320373	0
1944	0.801498	0.189263	0.0210044	0.591231	0.870015	0.866137	0.865726	0.604313	0.210738	0.0506757	0.000410891	0.00387787	0.000279429	9.71867e-05	0	3.42756e-05	0	0	0	0	0	0	0	0	1.00963e-05	0.00024648	0	3.9587e-05	0	0.00352365	0	4.851e-05	0	0	0	0	0	0	9.545e-06	0	-0.129281	-0.0183034	0.0969316	-0.142423	-0.0163988	-0.021961	-0.0271265	-0.323498	0
1945	0.840125	0.199887	0.0499669	0.590271	0.873297	0.869173	0.868733	0.603881	0.213342	0.0515103	0.000440012	0.00412386	0.000301504	0.000101252	0	3.72561e-05	0	0	0	0	0	0	0	0	1.33963e-05	0.000326256	0	5.42655e-05	0	0.00365755	0	6.252e-05	0	0	0	0	0	0	9.87e-06	0	-0.135138	-0.0165944	0.0931975	-0.145805	-0.017028	-0.0214422	-0.0274659	-0.323067	0
1946	0.874348	0.207084	0.0807056	0.586558	0.877606	0.873184	0.872714	0.604313	0.216057	0.0523445	0.000470409	0.00442245	0.000324741	0.000105173	0	4.04957e-05	0	0	0	0	0	0	0	0	1.75037e-05	0.00043248	9.0345e-06	8.37e-05	0	0.00379145	0	7.809e-05	0	0	0	0	0	0	1.0195e-05	0	-0.13945	-0.0152848	0.0903358	-0.149498	-0.0176952	-0.0178593	-0.0294488	-0.326102	0
1947	0.88947	0.198859	0.111654	0.578957	0.883122	0.878287	0.877785	0.605607	0.219	0.0531784	0.000502189	0.00483527	0.000349201	0.000108971	0	4.40171e-05	0	0	0	0	0	0	0	0	2.504e-05	0.00059824	3.82845e-05	0.000139423	0	0.0039286	0	9.515e-05	0	0	0	0	0	0	1.053e-05	0	-0.143688	-0.0161481	0.0898363	-0.153481	-0.0183974	-0.0137008	-0.031797	-0.334831	0
1948	0.898865	0.196803	0.129456	0.572607	0.889774	0.884362	0.883826	0.607763	0.222052	0.0540119	0.000535464	0.00541175	0.000374948	0.000112671	0	4.78447e-05	0	0	0	0	0	0	0	0	4.1225e-05	0.00086544	8.301e-05	0.000211684	0	0.0040859	0	0.00011363	0	0	0	0	0	0	1.0865e-05	0	-0.151439	-0.0170579	0.0877219	-0.157734	-0.0191312	-0.0125818	-0.0326551	-0.34153	0
1949	0.878521	0.189263	0.116379	0.572878	0.897523	0.891407	0.890837	0.61078	0.225211	0.054845	0.000570351	0.00611578	0.000402051	0.000116295	0	5.20051e-05	0	0	0	0	0	0	0	0	7.2025e-05	0.00121456	0.000136245	0.000288827	0	0.00425945	0	0.00013348	0	0	0	0	0	0	1.1195e-05	0	-0.156901	-0.0169254	0.0875266	-0.162238	-0.0198935	-0.0121625	-0.0332081	-0.345925	0
1950	0.841639	0.186864	0.0807275	0.574047	0.906841	0.899883	0.899276	0.615088	0.228594	0.0555945	0.000606975	0.00695764	0.00043058	0.000119868	0	5.65273e-05	0	0	0	0	0	0	0	0	0.00012415	0.00160144	0.00019563	0.000370295	0	0.00449995	0	0.00015464	0	0	0	0	0	0	1.153e-05	0	-0.161256	-0.0178153	0.0895368	-0.167001	-0.0207256	-0.0115693	-0.0336817	-0.35283	0
1951	0.801351	0.190634	0.0490306	0.561687	0.918081	0.910219	0.909571	0.621112	0.232198	0.0562605	0.000648064	0.00786257	0.00046061	0.000123411	0	6.14427e-05	0	0	0	0	0	0	0	2.6e-06	0.0002033	0.00202048	0.000263145	0.000455855	0	0.00473005	0	0.00017787	0	0	0	0	0	0	1.187e-05	0	-0.159047	-0.0194497	0.0905994	-0.17159	-0.0216929	0.00300376	-0.0399182	-0.372243	0
1952	0.76631	0.184465	0.0318106	0.550034	0.930544	0.921829	0.921135	0.62799	0.236136	0.0570094	0.000693755	0.00871521	0.000492221	0.000126948	0	6.67855e-05	0	0	0	0	0	0	0	7.8e-06	0.000291875	0.00249968	0.00030735	0.000537695	0	0.0048789	0	0.0001875	0	0	0	0	0	0	1.221e-05	0	-0.155813	-0.0197917	0.0898049	-0.176295	-0.0227926	0.0206974	-0.0474357	-0.391158	0
1953	0.746104	0.175555	0.0204662	0.550083	0.943868	0.934275	0.933534	0.635287	0.240405	0.0578412	0.000741592	0.00959221	0.000525496	0.000130503	0	7.2593e-05	0	0	0	0	0	0	0	1.3e-05	0.00039425	0.00302768	0.00032325	0.000615195	0	0.0050349	0	0.0001844	0	0	0	0	0	0	1.2535e-05	0	-0.162431	-0.0195614	0.0869756	-0.181796	-0.023995	0.0251348	-0.0491888	-0.398612	0
1954	0.754805	0.180695	0.0221156	0.551994	0.958592	0.948012	0.947221	0.643859	0.244772	0.0585896	0.000791727	0.0105795	0.000560522	0.000134099	0	7.89054e-05	0	0	0	0	0	0	0	1.82e-05	0.00053725	0.0035968	0.0003417	0.00069409	0	0.0052104	0	0.0001864	0	0	0	0	0	0	1.2845e-05	0	-0.169982	-0.0193372	0.0848911	-0.18798	-0.0252888	0.0283572	-0.0506242	-0.405595	0
1955	0.815376	0.202971	0.0572644	0.555141	0.974832	0.963117	0.962273	0.653701	0.249234	0.0593376	0.000844317	0.0117156	0.000597392	0.000137759	0	8.57667e-05	0	0	0	0	0	0	0	2.34e-05	0.0007215	0.0042368	0.000363	0.00077345	0	0.0054041	1.5e-06	0.0001941	0	0	0	0	0	0	1.3155e-05	8e-06	-0.174956	-0.0198992	0.086395	-0.194737	-0.0266616	0.0329276	-0.0529809	-0.415361	0
1956	0.899099	0.215309	0.124871	0.558919	0.991948	0.978924	0.978025	0.663951	0.253905	0.0601684	0.000899532	0.0130236	0.000636202	0.000141506	0	9.32247e-05	0	0	0	0	0	0	0	2.86e-05	0.00094875	0.0049552	0.00038775	0.0008525	0	0.005616	7.08e-06	0.0002114	0	0	0	0	0	0	1.3465e-05	3.15e-05	-0.17987	-0.0208644	0.0890639	-0.20196	-0.0281002	0.0373827	-0.0553921	-0.425955	0
1957	0.9668	0.22559	0.177927	0.563283	1.0098	0.995263	0.994305	0.674607	0.258782	0.0609158	0.000957549	0.0145336	0.000677055	0.000145363	0	0.000101331	0	0	0	0	0	0	0	3.38e-05	0.00123025	0.0057776	0.00041685	0.000930465	0	0.0058448	1.785e-05	0.000238	0	0	0	0	0	0	1.3785e-05	6.4e-05	-0.186979	-0.0213623	0.0901206	-0.209548	-0.0295904	0.040692	-0.0572916	-0.434877	0
1958	0.982448	0.230731	0.179528	0.57219	1.02788	1.01163	1.01061	0.685201	0.26375	0.0616629	0.00101855	0.016249	0.000720058	0.000149354	0	0.000110143	0	0	0	0	0	0	0	3.9e-05	0.00155912	0.0067232	0.0004506	0.00100734	0	0.0060905	3.405e-05	0.0002711	0	0	0	0	0	0	1.412e-05	9.9e-05	-0.192885	-0.0215095	0.0930989	-0.217398	-0.0311175	0.0424956	-0.0584545	-0.442406	0
1959	0.968833	0.226961	0.151467	0.590405	1.04683	1.02875	1.02766	0.696281	0.268806	0.0625756	0.00108275	0.0180848	0.000765324	0.000153503	0	0.00011972	0	0	0	0	0	0	0	4.42e-05	0.00188925	0.0077488	0.00048915	0.00108361	0	0.00635245	5.298e-05	0.0003186	0	0	0	0	0	0	1.446e-05	0.0001355	-0.198203	-0.021802	0.0996986	-0.225412	-0.032666	0.0387934	-0.0568148	-0.447318	0
1960	0.880204	0.151908	0.115636	0.61266	1.06818	1.04815	1.047	0.709369	0.274062	0.0635708	0.00115033	0.0200263	0.000812972	0.000157831	0	0.000130131	0	0	0	0	0	0	0	4.94e-05	0.00220462	0.008856	0.0005337	0.00115924	0	0.0066287	7.497e-05	0.0003813	0	0	0	0	0	0	1.4805e-05	0.000173	-0.204271	-0.0223408	0.107055	-0.233483	-0.0341549	0.032864	-0.0542114	-0.45157	0
1961	0.751567	0.0607473	0.0722706	0.618549	1.09038	1.06815	1.06693	0.722933	0.279514	0.0644827	0.00122414	0.0222278	0.000863129	0.000162363	0	0.000141446	0	0	0	0	0	0	0	5.72e-05	0.00257388	0.0101392	0.00058515	0.00123116	0	0.0069199	0.00010233	0.00045	0	0	0	0	0	0	1.5165e-05	0.000211	-0.21075	-0.022317	0.10604	-0.240013	-0.0355224	0.037965	-0.0569018	-0.461607	0
1962	0.645151	-0.0139631	0.039375	0.619739	1.11162	1.08685	1.08555	0.735074	0.285159	0.0653112	0.00130439	0.0247749	0.000915925	0.000167122	0	0.000153746	0	0	0	0	0	0	0	6.76e-05	0.00305875	0.0116208	0.00064395	0.00130123	0	0.00722605	0.0001314	0.0005292	0	0	0	0	0	0	1.5535e-05	0.000248	-0.218924	-0.0221193	0.101353	-0.245452	-0.0368629	0.0445787	-0.0604224	-0.471841	0
1963	0.162053	-0.495468	0.02737	0.630152	1.13151	1.1038	1.1024	0.745213	0.290886	0.0663049	0.00139135	0.0277104	0.0009715	0.000172131	0	0.000167115	0	0	0	0	0	0	0	8.06e-05	0.00367875	0.0133072	0.00071115	0.00137423	0	0.00754325	0.00016743	0.0006285	0	0	0	0	0	0	1.5915e-05	0.000284	-0.226771	-0.0223355	0.10191	-0.25166	-0.0382559	0.0449589	-0.0613878	-0.478558	0
1964	-0.185672	-0.853256	0.0268012	0.640783	1.15094	1.11981	1.11831	0.754074	0.296692	0.0675464	0.00150266	0.0311298	0.00105	0.000177412	0	0.000181647	0	0	0	0	0	0	0	9.36e-05	0.00444875	0.0152752	0.00078855	0.00144987	0	0.00786825	0.00021102	0.0007534	0	0	0	0	0	0	1.6305e-05	0.0003185	-0.233538	-0.0228099	0.10438	-0.258387	-0.0396945	0.0455175	-0.062544	-0.48608	0
1965	0.162675	-0.532481	0.0380887	0.657067	1.17445	1.13937	1.13774	0.766182	0.302685	0.0688698	0.00162943	0.0350864	0.001145	0.000182991	0	0.000197443	0	0	0	0	0	0	0	0.000104	0.00537375	0.0175776	0.00087765	0.00152815	8.1e-07	0.00820105	0.00025659	0.0009034	0	0	1.5e-07	0	0	0	1.6705e-05	0.0003505	-0.239091	-0.0233691	0.10864	-0.265401	-0.0411719	0.0458755	-0.0636659	-0.493865	0
1966	0.593344	-0.150018	0.0643563	0.679006	1.20317	1.1636	1.16184	0.782898	0.308753	0.0701923	0.0017529	0.0395719	0.001235	0.000188889	0	0.000214611	0	0	0	0	0	0	0	0.0001144	0.00644375	0.0202096	0.00097995	0.00160936	3.15e-06	0.00853125	0.00031452	0.0010826	0	0	4.5e-07	0	0	1.65e-07	1.712e-05	0.00038	-0.244194	-0.0238464	0.113252	-0.272481	-0.0426813	0.0465875	-0.0650247	-0.501547	0
1967	0.768755	-0.0215027	0.0917788	0.698479	1.23173	1.18715	1.18527	0.79886	0.314896	0.0715138	0.0018782	0.0445849	0.001325	0.00019513	0	0.000233273	0	0	0	0	0	0	0	0.0001248	0.00764375	0.0231648	0.00109755	0.00169368	6.93e-06	0.0088491	0.00040332	0.0012997	0	0	9e-07	0	1.6e-07	4.95e-07	1.7545e-05	0.000407	-0.252397	-0.0241906	0.114983	-0.279423	-0.0442158	0.0464213	-0.0659727	-0.508198	0
1968	0.609199	-0.220273	0.108399	0.721073	1.26232	1.21212	1.21011	0.81597	0.321219	0.0729169	0.00201069	0.0502039	0.001415	0.000201737	0	0.000253558	0	0	0	0	0	0	0	0.0001404	0.00898875	0.0264864	0.00123255	0.00178111	1.215e-05	0.00915525	0.00053316	0.0015621	0	0	1.65e-06	0	3.2e-07	9.9e-07	1.7985e-05	0.0004315	-0.260835	-0.0246537	0.1168	-0.286028	-0.0457687	0.0452117	-0.0663959	-0.514337	0
1969	0.575317	-0.296355	0.117652	0.75402	1.29782	1.2413	1.23916	0.836955	0.327719	0.0744839	0.00214534	0.0565135	0.001505	0.000208734	0	0.000275606	0	0	0	0	0	0	0	0.000156	0.0105125	0.0302192	0.00138735	0.00187193	1.881e-05	0.0094497	0.0006954	0.0018822	0	0	2.85e-06	0	4.8e-07	1.65e-06	1.844e-05	0.000453	-0.264434	-0.0254765	0.123135	-0.292109	-0.0473331	0.0443333	-0.0669843	-0.521149	0
1970	0.847402	-0.0554308	0.108404	0.794429	1.33108	1.26752	1.26524	0.854819	0.334288	0.076132	0.00227972	0.0635577	0.001595	0.000216143	0	0.000299572	0	0	0	0	0	0	0	0.000169	0.0122625	0.034384	0.00156495	0.00196649	2.7e-05	0.0097331	0.0008787	0.002242	0	0	4.8e-06	0	8e-07	2.475e-06	1.8905e-05	0.000472	-0.261939	-0.0265622	0.135936	-0.29744	-0.0489504	0.0418569	-0.06678	-0.527605	0
1971	1.03702	0.11421	0.0874169	0.835393	1.36147	1.29014	1.28773	0.869128	0.340819	0.0777787	0.00241617	0.0713233	0.00168	0.000223988	0	0.000325622	0	0	3.358e-07	0	1.625e-06	0	0	0.0001846	0.0142662	0.038976	0.00176865	0.0020646	3.69e-05	0.0100061	0.0010617	0.002623	0	0	7.5e-06	0	1.12e-06	3.63e-06	1.938e-05	0.0004885	-0.262831	-0.0275096	0.149843	-0.304062	-0.0507025	0.0333	-0.0636999	-0.531736	0
1972	1.09744	0.153279	0.0721481	0.872013	1.39941	1.31966	1.3171	0.890181	0.347417	0.0795061	0.00255991	0.0797421	0.001765	0.000232292	0	0.000353937	0	0	1.0074e-06	0	4.875e-06	0	0	0.0002028	0.0164912	0.043936	0.0020022	0.00216628	4.869e-05	0.0102687	0.0012552	0.003029	0	3.6e-06	1.125e-05	0	1.92e-06	5.115e-06	1.987e-05	0.000503	-0.274952	-0.0281269	0.154949	-0.312309	-0.0525839	0.0233267	-0.0602077	-0.534763	0
1973	1.06245	0.106328	0.05096	0.905161	1.44241	1.35347	1.35076	0.915283	0.354081	0.0813963	0.0027116	0.0889365	0.001855	0.000241079	0	0.000384714	0	0	1.679e-06	0	8.125e-06	0	0	0.000221	0.0189587	0.049296	0.00227055	0.00227199	6.264e-05	0.0105209	0.0015039	0.003478	0	1.06e-05	1.65e-05	0	3.68e-06	7.095e-06	2.038e-05	0.0005155	-0.287701	-0.0289192	0.156593	-0.320339	-0.0545382	0.0194641	-0.0599616	-0.540351	0
1974	0.915371	-0.0406943	0.0251475	0.930917	1.47871	1.37955	1.37668	0.932607	0.360707	0.0833667	0.00286646	0.0991643	0.001945	0.000250372	0	0.000418167	0	0	2.3506e-06	0	1.1375e-05	0	0	0.0002392	0.02176	0.055184	0.0025785	0.00238204	7.893e-05	0.010764	0.0018264	0.003987	0	1.72e-05	2.34e-05	0	6.56e-06	9.405e-06	2.0905e-05	0.000526	-0.299043	-0.0292697	0.158025	-0.328138	-0.0565375	0.0175236	-0.0606474	-0.546424	0
1975	0.82177	-0.141108	0.0099925	0.952885	1.51231	1.40192	1.39889	0.946263	0.367296	0.0853351	0.00302237	0.110392	0.00203	0.000260193	0	0.00045453	0	0	3.0222e-06	0	1.4625e-05	0	0	0.00026	0.02489	0.061632	0.00293145	0.00249612	9.801e-05	0.010998	0.0022038	0.004508	0	2.35e-05	3.225e-05	0	1.072e-05	1.2045e-05	2.1445e-05	0.000535	-0.312462	-0.0288483	0.156694	-0.335695	-0.0585538	0.0148233	-0.0608822	-0.551084	0
1976	0.977694	-0.0173902	0.0194775	0.975607	1.5514	1.42954	1.42636	0.965046	0.373847	0.0874652	0.00318199	0.121857	0.002115	0.000270567	0	0.000494054	0	0	3.6938e-06	0	1.7875e-05	0	0	0.0002808	0.028075	0.068208	0.003336	0.00261438	0.00012033	0.0112229	0.0025659	0.005045	0	2.95e-05	4.335e-05	0	1.632e-05	1.5345e-05	2.2005e-05	0.0005425	-0.322936	-0.0291938	0.155858	-0.343	-0.0605584	0.0181688	-0.0642113	-0.559173	0
1977	1.19883	0.134087	0.0600775	1.00466	1.59633	1.4632	1.45984	0.989588	0.380463	0.0897893	0.00335582	0.133138	0.002205	0.000281516	0	0.000537015	0	0	4.3654e-06	0	2.1125e-05	0	0	0.0003068	0.031175	0.074528	0.003801	0.00273746	0.00014625	0.0114393	0.0029574	0.005646	0	3.51e-05	5.745e-05	0	2.448e-05	1.8975e-05	2.258e-05	0.000549	-0.33147	-0.0300851	0.1566	-0.35004	-0.0625224	0.0227389	-0.0681617	-0.568346	0
1978	1.27583	0.109069	0.122688	1.04408	1.64199	1.49766	1.49412	1.01483	0.387144	0.0921515	0.00354027	0.144325	0.00229	0.000293063	0	0.000587191	0	0	5.037e-06	0	2.4375e-05	0	0	0.0003406	0.034175	0.080608	0.0043335	0.00286533	0.00017631	0.0116474	0.0034674	0.006302	0	4.04e-05	7.425e-05	0	3.584e-05	2.2935e-05	2.317e-05	0.000554	-0.339285	-0.0303308	0.15998	-0.356804	-0.0644164	0.0213071	-0.0690211	-0.573911	0
1979	1.35619	0.0939901	0.174103	1.0881	1.68909	1.53339	1.52965	1.04157	0.393787	0.0942987	0.00373869	0.155695	0.002375	0.000305233	0	0.000644551	0	0	5.7086e-06	0	2.6e-05	0	0	0.0003822	0.0372	0.08656	0.0049425	0.00299785	0.00021132	0.0118482	0.0041391	0.006997	0	4.54e-05	9.375e-05	0	4.992e-05	2.739e-05	2.378e-05	0.0005585	-0.341683	-0.0310135	0.16757	-0.363282	-0.0662111	0.0212962	-0.0700427	-0.582178	0
1980	1.46606	0.148138	0.193082	1.12484	1.73799	1.57181	1.56786	1.07067	0.400791	0.0963945	0.00395006	0.166177	0.00246	0.000318047	0	0.000705428	0	0	6.3802e-06	0	2.6e-05	0	0	0.0004342	0.03985	0.091952	0.0056415	0.00313534	0.00025218	0.0120412	0.0047235	0.007728	0	5.01e-05	0.00011685	0	6.72e-05	3.2175e-05	2.441e-05	0.0005625	-0.352177	-0.0313835	0.166983	-0.369435	-0.0678056	0.0200112	-0.0705475	-0.589257	-0.000302352
1981	1.40776	0.0795963	0.179869	1.1483	1.78022	1.60393	1.59975	1.09228	0.40835	0.0991227	0.00417632	0.176289	0.002545	0.00033153	0	0.000769824	0	0	6.716e-06	0	2.925e-05	0	0	0.000494	0.0421375	0.09736	0.0064425	0.00327825	0.00029889	0.0122135	0.0051564	0.008488	0	5.46e-05	0.00014385	0	8.8e-05	3.729e-05	2.506e-05	0.0005655	-0.365704	-0.0309345	0.162083	-0.375649	-0.0691591	0.0207254	-0.0727701	-0.595711	-0.00131576
1982	0.714776	-0.591427	0.142323	1.16388	1.81808	1.63148	1.62706	1.10903	0.41606	0.101978	0.0044152	0.186603	0.00263	0.000345705	0	0.000837737	0	0	7.0035e-06	0	3.575e-05	0	0	0.000559	0.0444625	0.102944	0.007335	0.00342395	0.00035091	0.012337	0.0055299	0.009234	0	6.26e-05	0.0001746	0	0.00011232	4.2735e-05	2.573e-05	0.000568	-0.369038	-0.0310128	0.163277	-0.382236	-0.0704323	0.0317897	-0.0804231	-0.608207	-0.00322646
1983	0.408766	-0.876217	0.09982	1.18516	1.85996	1.66374	1.65908	1.13104	0.423758	0.104277	0.00466057	0.196223	0.002715	0.000360594	0	0.000909167	0	0	7.613e-06	0	3.9e-05	0	0	0.0006292	0.04645	0.108208	0.0082815	0.00356655	0.00040779	0.0124612	0.0057795	0.01	0	7.22e-05	0.00020925	0	0.0001416	4.8675e-05	2.642e-05	0.00057	-0.373851	-0.0313875	0.165322	-0.388993	-0.071723	0.0397582	-0.0868282	-0.618959	-0.00551124
1984	0.951877	-0.320002	0.0546175	1.21726	1.90382	1.69763	1.69271	1.15578	0.430734	0.1062	0.00491543	0.206195	0.0028	0.000376222	0	0.000984116	0	0	8.2455e-06	0	4.225e-05	0	0	0.0007046	0.0484375	0.1136	0.0092955	0.00370915	0.00046989	0.0126451	0.006045	0.010834	0	8.08e-05	0.0002484	0	0.00017584	5.4945e-05	2.713e-05	0.000572	-0.379048	-0.0323878	0.171632	-0.39573	-0.0729956	0.0399564	-0.0895234	-0.626897	-0.00804971
1985	1.25132	-0.0232162	0.02268	1.25186	1.94606	1.72898	1.7238	1.17908	0.436286	0.108436	0.00517506	0.217081	0.00288	0.000392611	0	0.00106258	0	0	8.5215e-06	0	4.875e-05	0	0	0.0007826	0.0507125	0.1192	0.010629	0.0038564	0.00053658	0.0128498	0.006342	0.011693	0	9.11e-05	0.00029325	0	0.00021488	6.138e-05	2.7865e-05	0.0005735	-0.381707	-0.0339184	0.181599	-0.402256	-0.0742145	0.0385309	-0.0914475	-0.634669	-0.0108835
1986	1.34237	0.0350442	0.0216256	1.2857	1.98758	1.75971	1.75427	1.20251	0.4411	0.110655	0.0054426	0.227867	0.00296	0.000409785	0	0.00114457	0	0	7.8545e-06	0	5.2e-05	0	0	0.0008684	0.053025	0.124736	0.011985	0.0040114	0.00060534	0.0129812	0.006576	0.01257	0	9.99e-05	0.0003456	0	0.00026	6.831e-05	2.8625e-05	0.0005745	-0.384827	-0.0354755	0.190877	-0.408376	-0.0753445	0.0366024	-0.093109	-0.641843	-0.0137224
1987	1.43528	0.065888	0.0475694	1.32183	2.03403	1.79455	1.78882	1.23094	0.445635	0.11224	0.00573024	0.23948	0.003045	0.000427766	0	0.00123007	0	0	7.5555e-06	0	5.525e-05	0	0	0.0009646	0.0557	0.130768	0.0132855	0.0041757	0.00067563	0.013143	0.006729	0.013483	0	0.0001215	0.00040635	0	0.00031168	7.557e-05	2.9405e-05	0.0005755	-0.390046	-0.0370307	0.19742	-0.413896	-0.0763509	0.0343842	-0.0945727	-0.648322	-0.0170523
1988	1.57609	0.105985	0.104563	1.36554	2.08662	1.83406	1.82803	1.26297	0.44981	0.115252	0.0060303	0.25256	0.00313	0.000446578	0	0.00131909	0	0	8.832e-06	0	6.5e-05	0	0	0.0010608	0.058725	0.137104	0.015159	0.0043431	0.00074943	0.0133185	0.006978	0.014488	0	0.0001582	0.0004773	0	0.00036976	8.283e-05	3.0205e-05	0.0005765	-0.39478	-0.0387166	0.204	-0.418617	-0.0771988	0.0311876	-0.0954342	-0.65393	-0.0211152
1989	1.70061	0.129289	0.162693	1.40863	2.13489	1.86923	1.8629	1.28962	0.453791	0.119486	0.00633033	0.265664	0.00321	0.000466245	0	0.00141162	0	0	1.07065e-05	0	7.475e-05	0	0	0.001157	0.061225	0.14344	0.017376	0.0045105	0.00082791	0.0134485	0.007302	0.015642	0	0.000198	0.0005607	0	0.00043408	9.0915e-05	3.103e-05	0.0005775	-0.39732	-0.0403412	0.211596	-0.422342	-0.0778539	0.0275134	-0.0958918	-0.658672	-0.0253641
1990	1.74564	0.126547	0.17444	1.44465	2.17459	1.89729	1.89065	1.31035	0.457668	0.122633	0.0066441	0.277301	0.00329	0.00048679	0	0.00150768	0	0	1.2581e-05	4.8e-06	8.125e-05	0	0	0.001261	0.0631875	0.149168	0.0193455	0.00467325	0.00091143	0.0135785	0.007467	0.016861	0	0.0002498	0.00064935	0	0.00049984	9.9495e-05	3.188e-05	0.000578	-0.398765	-0.0415859	0.217668	-0.424881	-0.0784437	0.0245183	-0.0960408	-0.662209	-0.030199
1991	0.806741	-0.814872	0.154604	1.46701	2.20888	1.92107	1.9141	1.32791	0.461544	0.124651	0.00697266	0.287807	0.00337	0.000508642	0	0.00160725	0	0	1.4421e-05	1.44e-05	8.775e-05	0	0	0.0013702	0.0650375	0.154016	0.02109	0.00482205	0.0009981	0.013728	0.007674	0.018088	0	0.0003392	0.00073455	0	0.00056096	0.00010758	3.2755e-05	0.0005785	-0.396841	-0.0424656	0.216613	-0.424334	-0.0791428	0.033451	-0.100962	-0.667004	-0.03631
1992	0.183167	-1.41975	0.125366	1.47755	2.23594	1.93909	1.93177	1.34097	0.464573	0.126224	0.00731543	0.296858	0.00345	0.000533	0	0.00171034	0	0	1.6215e-05	2.96e-05	9.425e-05	2.11225e-08	0	0.001482	0.0662375	0.158208	0.022788	0.0049569	0.00108423	0.0137475	0.007854	0.019343	0	0.0004848	0.00081375	0	0.000612	0.0001155	3.3655e-05	0.000579	-0.396023	-0.0424604	0.206985	-0.419207	-0.0798931	0.0425393	-0.103987	-0.671575	-0.0429799
1993	0.897138	-0.681902	0.0850237	1.49402	2.2597	1.95608	1.9484	1.35438	0.466274	0.127749	0.00768499	0.303616	0.00353	0.000559	0	0.00181695	0	0	1.85725e-05	6e-05	0.000104	6.27613e-08	0	0.0015964	0.0669375	0.161536	0.0240705	0.00507005	0.00116901	0.013637	0.00783	0.020428	0	0.0006789	0.00087555	0	0.00064688	0.000122925	3.458e-05	0.000579	-0.395358	-0.0422396	0.197842	-0.411007	-0.0806352	0.0427057	-0.102023	-0.672354	-0.0490306
1994	1.4368	-0.131512	0.0485363	1.51978	2.28862	1.98017	1.97207	1.37458	0.468059	0.129433	0.00810121	0.308449	0.00361	0.000585	0	0.00192708	0	0	2.19765e-05	0.00012	0.00012025	9.11702e-07	0	0.001716	0.067375	0.164192	0.0247035	0.0051553	0.00125226	0.0135655	0.00756	0.02132	7.973e-05	0.0008974	0.000927	0	0.00067648	0.00012969	3.553e-05	0.0005795	-0.392182	-0.0428387	0.191688	-0.402127	-0.0814255	0.0440421	-0.101521	-0.671509	-0.0551646
1995	1.64121	0.0586911	0.0260487	1.55647	2.32199	2.01042	2.0018	1.40007	0.470075	0.131651	0.00861607	0.311569	0.00369	0.000611	0	0.00204072	0	0	3.4569e-05	0.0002632	0.00014625	2.5313e-06	0	0.0018278	0.067375	0.166256	0.025038	0.0052173	0.00133191	0.0134615	0.006954	0.02209	0.00026803	0.0011316	0.0009741	0	0.00071856	0.000136125	3.65e-05	0.00058	-0.385604	-0.0439983	0.192353	-0.394949	-0.0823215	0.04384	-0.100528	-0.671594	-0.0603537
1996	1.73788	0.123806	0.0197181	1.59435	2.35324	2.03899	2.02971	1.4242	0.471455	0.134059	0.00927565	0.31425	0.003765	0.000637	0	0.00217712	0	0	6.25025e-05	0.0005048	0.0001885	3.72321e-06	0	0.001937	0.0672375	0.168016	0.025152	0.00525915	0.00140229	0.013364	0.0062454	0.02317	0.00050218	0.0013636	0.00101745	0	0.00076432	0.000140745	3.4995e-05	0.00058	-0.377983	-0.0453446	0.198817	-0.390468	-0.0836122	0.0418986	-0.0992733	-0.673231	-0.0635822
1997	1.81567	0.153279	0.0429187	1.61947	2.38518	2.06886	2.05879	1.44919	0.473265	0.136336	0.010067	0.316319	0.00384	0.000663	0	0.00233452	0	0	9.91415e-05	0.0008272	0.0002405	6.02431e-06	0	0.0020566	0.06705	0.169328	0.025104	0.00528395	0.00145845	0.0132535	0.0054729	0.02439	0.00077322	0.0015878	0.0010668	0	0.000796	0.0001419	3.28e-05	0.00058	-0.381987	-0.0465864	0.197514	-0.38756	-0.0857344	0.0385575	-0.0981783	-0.675861	-0.0652346
1998	1.92421	0.187549	0.0925838	1.64408	2.42451	2.10701	2.09607	1.48103	0.476231	0.138802	0.0109462	0.317498	0.00392	0.000689	0	0.00249192	0	0	0.000148914	0.0012336	0.0002925	9.64025e-06	0	0.0021606	0.0667375	0.170368	0.025035	0.00529325	0.00150165	0.013117	0.0046689	0.02527	0.00103278	0.0017892	0.00111255	0	0.00081808	0.000140745	3.355e-05	0.00058	-0.394515	-0.0470696	0.190006	-0.385373	-0.0887675	0.033855	-0.0971659	-0.678376	-0.0650724
1999	2.03322	0.216337	0.146252	1.67063	2.46087	2.14234	2.13043	1.51064	0.478682	0.141114	0.011905	0.318533	0.004	0.000715	0	0.00264931	4.96902e-07	0	0.000219914	0.0017088	0.0003445	1.53537e-05	0	0.0022516	0.0663	0.171184	0.0249045	0.00529325	0.00153495	0.0130201	0.0039363	0.02634	0.00128884	0.0019876	0.00115065	0	0.00083856	0.00013926	3.46e-05	0.00058	-0.404255	-0.046596	0.18688	-0.384069	-0.0925101	0.0282813	-0.0962409	-0.681142	-0.0634833
2000	2.09619	0.228674	0.181191	1.68633	2.48757	2.16801	2.15506	1.5327	0.479349	0.143001	0.0129504	0.319561	0.004075	0.000741	0	0.00280671	5.3733e-06	0	0.000305451	0.0022344	0.0003965	2.51441e-05	0	0.0023608	0.0658625	0.171856	0.0247545	0.00528705	0.00156069	0.0129181	0.0032898	0.02748	0.0015505	0.002208	0.0011859	0	0.00085728	0.00013761	3.2845e-05	0.00058	-0.412784	-0.0466785	0.186982	-0.383899	-0.0965845	0.023583	-0.0961873	-0.686086	-0.0611506
2001	2.12798	0.232444	0.190562	1.70497	2.51467	2.19434	2.18016	1.5559	0.479231	0.14503	0.0141809	0.320331	0.00415	0.000766999	1.95493e-06	0.00296411	3.16084e-05	0	0.000396152	0.0028016	0.000446886	3.92378e-05	0.000104522	0.0024778	0.065475	0.172432	0.024621	0.0052762	0.00158076	0.012792	0.0027471	0.02839	0.0017773	0.002407	0.00121365	0	0.00087456	0.0001353	2.889e-05	0.00058	-0.417581	-0.0478466	0.189391	-0.386164	-0.0988064	0.0228134	-0.0969686	-0.690713	-0.0592393
2002	2.14536	0.232444	0.174151	1.73876	2.54935	2.22832	2.21272	1.5855	0.479785	0.147437	0.0155953	0.321029	0.004225	0.000793324	5.87561e-06	0.00312151	7.92228e-05	2.96218e-06	0.000490601	0.0034184	0.000500933	5.42274e-05	0.000311056	0.0025922	0.065025	0.172784	0.0244785	0.0052638	0.00159642	0.0126601	0.0022884	0.02949	0.0019852	0.002595	0.0012336	0	0.0008904	0.00013266	2.549e-05	0.00058	-0.41749	-0.0490211	0.193791	-0.39016	-0.0991473	0.0248743	-0.0978269	-0.693303	-0.0574986
2003	2.1379	0.232444	0.130187	1.77527	2.58656	2.26528	2.24819	1.61755	0.480748	0.14989	0.017084	0.321281	0.00429915	0.000820285	9.55576e-06	0.0032789	0.00013392	1.16663e-05	0.000598771	0.0040704	0.000565359	7.12803e-05	0.000512873	0.0027118	0.0644875	0.172816	0.024279	0.0052514	0.00160848	0.0125223	0.0019068	0.03059	0.0021791	0.002751	0.00125085	0	0.00090496	0.000129855	2.394e-05	0.00058	-0.418209	-0.049655	0.196804	-0.3941	-0.0994884	0.0269294	-0.0986996	-0.695994	-0.0551123
2004	2.12582	0.232444	0.0860781	1.8073	2.61965	2.2984	2.27974	1.64679	0.480862	0.152086	0.0186534	0.321257	0.0043772	0.000847858	1.29337e-05	0.0034363	0.000194381	2.57604e-05	0.000717704	0.004764	0.000639868	9.54443e-05	0.000710546	0.0028314	0.0640125	0.172768	0.024036	0.005239	0.00161784	0.0124	0.0015885	0.03149	0.0023247	0.00287	0.0012621	0	0.0009184	0.00012672	2.2885e-05	0.00058	-0.419405	-0.0498851	0.198935	-0.398034	-0.0998295	0.0289768	-0.0995682	-0.698667	-0.0522666
2005	2.08375	0.184018	0.0592681	1.84047	2.65132	2.33017	2.30989	1.67512	0.480365	0.154397	0.0202831	0.321146	0.00445471	0.000876018	1.63124e-05	0.00359346	0.000259513	4.49136e-05	0.000834021	0.0054976	0.000724224	0.000126803	0.000904534	0.002951	0.063525	0.172608	0.023793	0.00522505	0.00162513	0.0122766	0.0013245	0.03245	0.0024073	0.002988	0.00126795	0	0.00093056	0.000123255	2.133e-05	0.00058	-0.418699	-0.0499248	0.200378	-0.400144	-0.0999537	0.0309461	-0.1	-0.699822	-0.0497123
2006	1.99052	0.0677962	0.0431769	1.87955	2.68339	2.3629	2.34098	1.70352	0.480656	0.156801	0.0219181	0.320488	0.00453168	0.000904742	1.98671e-05	0.00375221	0.000328414	6.88119e-05	0.000952782	0.0062088	0.000818212	0.000164195	0.00109521	0.0030732	0.062825	0.172	0.023544	0.0052111	0.00163062	0.0121466	0.0011112	0.03354	0.0024738	0.003073	0.0012723	0	0.0009416	0.00011979	1.948e-05	0.00058	-0.414636	-0.0495843	0.200445	-0.398612	-0.0996446	0.03276	-0.1	-0.697954	-0.0477661
2007	1.95195	0	0.0322656	1.91968	2.71465	2.39512	2.37153	1.73086	0.48169	0.15898	0.0235883	0.31953	0.00460773	0.000933365	2.3575e-05	0.00391043	0.000400335	9.7155e-05	0.00107836	0.0069064	0.000917571	0.0002045	0.00129787	0.003211	0.0619875	0.171104	0.0232785	0.0051956	0.00163458	0.011999	0.0009366	0.03478	0.0025508	0.003125	0.00127275	0	0.00095152	0.00011616	1.7945e-05	0.00058	-0.409113	-0.049053	0.199824	-0.395261	-0.0991191	0.034496	-0.1	-0.694561	-0.0461083
2008	1.98589	0	0.025655	1.96024	2.74699	2.42836	2.40308	1.75906	0.482853	0.161162	0.0252864	0.31862	0.00468248	0.000961237	2.73384e-05	0.00406391	0.000474808	0.00012967	0.00120741	0.00759471	0.00101816	0.000246061	0.00152618	0.00335443	0.06115	0.170176	0.023016	0.00517855	0.00163728	0.0118248	0.0007938	0.0361	0.0026334	0.003173	0.00126765	0	0.00096016	0.000112365	1.7405e-05	0.00058	-0.40359	-0.0485205	0.199203	-0.391911	-0.0985938	0.0362327	-0.1	-0.691146	-0.0443753
2009	2.07529	0	0.0725288	2.00276	2.78098	2.46334	2.43637	1.78891	0.484117	0.163345	0.0269739	0.317638	0.00475591	0.00098836	3.11528e-05	0.00421267	0.000551351	0.00016609	0.00133964	0.00825581	0.00111997	0.000288795	0.00177694	0.00348718	0.0602571	0.169132	0.0227458	0.00516193	0.00163897	0.0116064	0.000676373	0.0374441	0.00271447	0.00333391	0.00125589	0	0.000966757	0.000108587	1.59575e-05	0.000580078	-0.398066	-0.0479876	0.198581	-0.388561	-0.0980687	0.0379697	-0.1	-0.68771	-0.0424774
2010	2.1917	0	0.146252	2.04545	2.81506	2.49848	2.46981	1.81893	0.485355	0.165529	0.0286708	0.316581	0.004828	0.00101473	3.50153e-05	0.00435673	0.000629425	0.000206158	0.00147478	0.00891001	0.00122295	0.000332626	0.00204704	0.00361335	0.059321	0.167982	0.0224699	0.00514406	0.00163991	0.0113447	0.000579569	0.0388018	0.00279299	0.00359618	0.00123812	0	0.0009714	0.000104664	1.42266e-05	0.000580191	-0.392545	-0.047453	0.197957	-0.385212	-0.097544	0.0397072	-0.1	-0.684249	-0.0405882
2011	2.26852	0	0.181191	2.08733	2.84851	2.53302	2.50265	1.84836	0.486574	0.167715	0.0303745	0.315489	0.00489875	0.00104036	3.89259e-05	0.00449608	0.000708731	0.000249646	0.00161273	0.00955775	0.00132707	0.000377518	0.00233404	0.00373294	0.0583846	0.166786	0.022194	0.00512598	0.00164035	0.0110595	0.000495958	0.0402139	0.00287148	0.00383073	0.00121712	0	0.000974921	0.000100759	1.36875e-05	0.000580244	-0.387026	-0.0469153	0.19733	-0.381866	-0.0970202	0.0414454	-0.1	-0.680758	-0.0389831
2012	2.32002	0	0.190562	2.12946	2.8818	2.56744	2.53535	1.87766	0.48779	0.169904	0.0320938	0.314353	0.00496812	0.00106525	4.27407e-05	0.00462609	0.000805433	0.000293755	0.0017576	0.0102009	0.00143235	0.000419758	0.00263586	0.00384593	0.0574491	0.165544	0.0219176	0.0051078	0.00164042	0.0107526	0.000423172	0.0416721	0.00294847	0.00403649	0.00119342	0	0.000977347	9.68924e-05	1.34563e-05	0.000580268	-0.381509	-0.0463759	0.1967	-0.378521	-0.0964969	0.043184	-0.1	-0.677242	-0.0370555
2013	2.34602	0	0.174151	2.17187	2.9151	2.60192	2.56809	1.90698	0.48901	0.172095	0.0338347	0.313178	0.00503604	0.0010894	4.63156e-05	0.00474212	0.000932689	0.000335856	0.00191337	0.0108413	0.0015388	0.000455734	0.00295068	0.00395235	0.0565162	0.164264	0.0216425	0.00508955	0.00164021	0.0104252	0.000363633	0.0431693	0.00302271	0.00421262	0.0011675	0	0.000978755	9.30825e-05	1.33181e-05	0.000580279	-0.375992	-0.0458365	0.19607	-0.375175	-0.0959735	0.0449225	-0.1	-0.673705	-0.0349723
2014	2.34437	0	0.130187	2.21418	2.94851	2.63654	2.60095	1.93642	0.490247	0.174288	0.0355901	0.311964	0.00510254	0.00111282	4.96508e-05	0.00484422	0.00108484	0.000376076	0.00207969	0.0114792	0.00164639	0.000485632	0.00327694	0.00405219	0.0555876	0.162949	0.0213693	0.00507128	0.00163979	0.0100786	0.000314942	0.0446995	0.00309315	0.00435856	0.00113975	0	0.000979221	8.93431e-05	1.32222e-05	0.000580285	-0.370476	-0.0452971	0.195441	-0.37183	-0.0954502	0.0466611	-0.1	-0.670147	-0.0331911
2015	2.34274	0	0.0860781	2.25666	2.98203	2.67132	2.63396	1.96597	0.491512	0.176484	0.0373547	0.310712	0.00516759	0.0011355	5.27464e-05	0.00493245	0.0012573	0.000414534	0.00225619	0.0121149	0.00175512	0.000509631	0.00361329	0.00414545	0.054665	0.161608	0.0210989	0.00505302	0.00163922	0.00971399	0.000275133	0.0462577	0.00315894	0.00447395	0.00111055	0	0.000978816	8.56839e-05	1.31624e-05	0.000580287	-0.364959	-0.0447577	0.194811	-0.368485	-0.0949269	0.0483997	-0.1	-0.666568	-0.0314808
2016	2.35852	0	0.0592681	2.29925	3.01559	2.70618	2.66705	1.99557	0.492805	0.178682	0.0391234	0.309411	0.00523121	0.00115745	5.56023e-05	0.00500686	0.00144632	0.00045134	0.00244255	0.0127486	0.00186496	0.000527903	0.0039585	0.00423213	0.0537489	0.160242	0.0208312	0.00503478	0.00163852	0.00933228	0.000233781	0.0478393	0.00321932	0.00455858	0.00108022	0	0.000977603	8.21121e-05	1.11629e-05	0.000580288	-0.359442	-0.0442183	0.194181	-0.36514	-0.0944035	0.0501382	-0.1	-0.662967	-0.0298054
2017	2.38503	0	0.0431769	2.34186	3.04907	2.74101	2.70011	2.02512	0.494115	0.180882	0.0408921	0.308068	0.0052934	0.00117866	5.82188e-05	0.0050675	0.00164878	0.000486593	0.00263841	0.0133804	0.00197589	0.000540611	0.00431143	0.00431224	0.052839	0.158856	0.0205663	0.00501655	0.00163773	0.00894966	0.00019116	0.0494313	0.00327419	0.00461423	0.00104902	0	0.000975621	7.86334e-05	8.70911e-06	0.000580289	-0.353925	-0.0436789	0.193552	-0.361794	-0.0938802	0.0518768	-0.1	-0.659345	-0.0281537
2018	2.41671	0	0.0322656	2.38444	3.08245	2.77576	2.7331	2.05458	0.495435	0.183085	0.0426573	0.306699	0.00535415	0.00119914	6.05958e-05	0.00511443	0.00186217	0.000520386	0.00284345	0.0140103	0.00208788	0.000547917	0.00467107	0.00438578	0.0519353	0.15745	0.020304	0.00499835	0.00163688	0.00858179	0.000156309	0.0510145	0.00332406	0.00464441	0.00101718	0	0.000972917	7.52537e-05	8.09595e-06	0.000580289	-0.348408	-0.0431395	0.192922	-0.358449	-0.0933568	0.0536154	-0.1	-0.655701	-0.0265273
2019	2.4531	0	0.025655	2.42744	3.11572	2.81043	2.76602	2.08397	0.496761	0.18529	0.0444161	0.305292	0.00541346	0.00121888	6.27335e-05	0.00514769	0.00208445	0.000552807	0.00305734	0.0146385	0.00220091	0.000549977	0.00503656	0.00445274	0.0510378	0.156027	0.0200443	0.00498015	0.00163598	0.00822808	0.000127809	0.0525739	0.0033694	0.00465229	0.000984932	0	0.000969535	7.19755e-05	7.89802e-06	0.000580289	-0.342891	-0.0426001	0.192293	-0.355104	-0.0928335	0.0553539	-0.1	-0.652035	-0.0244828
2020	2.54248	0	0.0725288	2.46996	3.14889	2.84505	2.79889	2.1133	0.498091	0.187497	0.046166	0.303838	0.00547133	0.00123789	6.46319e-05	0.00516733	0.00231393	0.000583939	0.00327978	0.015265	0.00231496	0.000546943	0.00540715	0.00451314	0.0501468	0.154591	0.0197872	0.00496197	0.00163503	0.00788798	0.000104503	0.0540979	0.00341062	0.00464074	0.000952456	0	0.000965523	6.87971e-05	7.79028e-06	0.000580289	-0.337596	-0.04215	0.191489	-0.351194	-0.0923836	0.0566421	-0.1	-0.648557	-0.0223816
2021	2.657	0	0.146252	2.51075	3.18183	2.87951	2.8316	2.1425	0.499395	0.189705	0.0479042	0.302326	0.00552777	0.00125617	6.62911e-05	0.00517339	0.00254906	0.000613844	0.00351043	0.0158894	0.00242999	0.000538955	0.00578189	0.00456698	0.0492603	0.153139	0.0195322	0.00494376	0.00163405	0.00756043	8.54392e-05	0.0555754	0.00344797	0.00461224	0.000919886	0	0.000960893	6.57223e-05	7.65692e-06	0.000580289	-0.332745	-0.0418785	0.19034	-0.346155	-0.0920807	0.0570296	-0.1	-0.645482	-0.0207624
2022	2.73231	0	0.181191	2.55112	3.21457	2.91382	2.86424	2.1717	0.500624	0.191915	0.0495816	0.300748	0.00558349	0.00127417	6.77997e-05	0.00517231	0.00277102	0.00064266	0.00374134	0.0164995	0.00254567	0.000528522	0.00613718	0.00461795	0.0483776	0.151673	0.019279	0.00492552	0.00163305	0.00724467	6.98469e-05	0.0570004	0.00348186	0.00456913	0.000887358	0	0.000955662	6.27519e-05	7.49709e-06	0.000580289	-0.328115	-0.0416963	0.189016	-0.340551	-0.0918513	0.0569668	-0.1	-0.642601	-0.0193
2023	2.78247	0	0.190562	2.59191	3.24735	2.94824	2.89708	2.20119	0.501765	0.194125	0.0511579	0.299111	0.00563921	0.00129235	6.92463e-05	0.00517049	0.00296472	0.000670533	0.00396491	0.0170842	0.00266167	0.000518088	0.00645273	0.00466975	0.0475005	0.150196	0.0190279	0.00490726	0.00163203	0.0069407	5.71013e-05	0.0583708	0.00351281	0.00451364	0.000855029	0	0.000949892	5.9883e-05	7.36712e-06	0.000580289	-0.323486	-0.0415141	0.187693	-0.334946	-0.0916219	0.0569039	-0.1	-0.639703	-0.0179208
2024	2.80697	0	0.174151	2.63282	3.28029	2.98287	2.93023	2.23105	0.50284	0.196335	0.052646	0.297421	0.00569494	0.00131071	7.06311e-05	0.00516793	0.00313551	0.000697529	0.00418143	0.0176456	0.00277801	0.000507656	0.00673364	0.00472238	0.0466302	0.148712	0.0187791	0.00488899	0.00163099	0.00664839	4.66839e-05	0.0596839	0.00354116	0.00444768	0.000823032	0	0.000943637	5.71193e-05	7.26516e-06	0.000580289	-0.318856	-0.041332	0.18637	-0.329342	-0.0913925	0.056841	-0.1	-0.636787	-0.0165962
2025	2.80409	0	0.130187	2.6739	3.31345	3.01777	2.96371	2.2613	0.503866	0.198545	0.0540569	0.295681	0.00575066	0.00132926	7.19539e-05	0.00516466	0.00328778	0.000723709	0.00439115	0.0181856	0.00289468	0.000497226	0.00698437	0.00477584	0.0457682	0.147224	0.0185329	0.00487074	0.00162993	0.00636758	3.817e-05	0.0609386	0.00356722	0.00437294	0.000791481	0	0.000936944	5.44605e-05	7.18982e-06	0.000580289	-0.314227	-0.0411498	0.185046	-0.323738	-0.0911631	0.0567781	-0.1	-0.633854	-0.0153231
2026	2.80125	0	0.0860781	2.71517	3.34682	3.05293	2.99753	2.29191	0.504862	0.200754	0.0554002	0.293897	0.00580639	0.00134799	7.32149e-05	0.00516066	0.00342511	0.000749135	0.00459435	0.0187058	0.0030117	0.000486802	0.00720888	0.00483014	0.0449158	0.145735	0.0182894	0.00485253	0.00162887	0.0060981	3.12124e-05	0.0621348	0.00359128	0.00429094	0.000760471	0	0.000929862	5.19065e-05	7.14496e-06	0.000580289	-0.309597	-0.0409676	0.183723	-0.318134	-0.0909337	0.0567153	-0.1	-0.630903	-0.0141126
2027	2.81579	0	0.0592681	2.75652	3.38033	3.08825	3.03157	2.32277	0.505834	0.202964	0.0566838	0.292073	0.00586212	0.0013669	7.44139e-05	0.00515595	0.00355033	0.000773855	0.00479126	0.0192078	0.00312907	0.000476383	0.00741047	0.00488526	0.0440732	0.144245	0.0180487	0.00483434	0.00162781	0.00583956	2.55261e-05	0.0632722	0.00361353	0.00420301	0.000730071	0	0.000922419	4.94559e-05	7.11038e-06	0.000580289	-0.304968	-0.0407854	0.1824	-0.31253	-0.0907043	0.0566524	-0.1	-0.627934	-0.0129639
2028	2.84103	0	0.0431769	2.79785	3.41383	3.12362	3.06571	2.35376	0.506775	0.205173	0.057914	0.290207	0.00591785	0.00138599	7.55512e-05	0.00515053	0.00366562	0.000797909	0.00498208	0.0196926	0.00324676	0.000465967	0.00759192	0.00494122	0.0432401	0.142757	0.0178105	0.00481619	0.00162674	0.00559142	2.08777e-05	0.0643506	0.00363409	0.00411028	0.000700328	0	0.000914638	4.7103e-05	7.0651e-06	0.000580289	-0.300338	-0.0406033	0.181076	-0.306926	-0.0904749	0.0565895	-0.1	-0.624947	-0.011876
2029	2.87135	0	0.0322656	2.83909	3.44729	3.15899	3.09989	2.38482	0.507683	0.207382	0.0590964	0.288303	0.00597358	0.00140526	7.66266e-05	0.00514439	0.00377279	0.000821334	0.00516702	0.0201614	0.00336477	0.000455553	0.00775565	0.004998	0.0424163	0.14127	0.017575	0.00479805	0.00162566	0.0053532	1.70772e-05	0.0653705	0.00365309	0.00401376	0.000671286	0	0.000906547	4.485e-05	7.00888e-06	0.000580289	-0.295709	-0.0404211	0.179753	-0.301322	-0.0902455	0.0565267	-0.1	-0.621941	-0.0108491
2030	2.90619	0	0.025655	2.88054	3.4807	3.19433	3.1341	2.41595	0.508558	0.209591	0.060236	0.286361	0.00602932	0.00142472	7.76402e-05	0.00513754	0.00387333	0.000844168	0.00534626	0.0206153	0.0034831	0.000445139	0.00790384	0.00505561	0.0416018	0.139785	0.0173418	0.00477993	0.00162458	0.00512452	1.39696e-05	0.0663331	0.00367063	0.00391436	0.000642981	0	0.000898167	4.26919e-05	6.9466e-06	0.000580289	-0.290894	-0.0402428	0.178403	-0.295621	-0.0899328	0.0564996	-0.1	-0.61879	-0.00987837
2031	2.99505	0	0.0725288	2.92252	3.51407	3.22968	3.16834	2.44714	0.509401	0.2118	0.061337	0.284385	0.00608505	0.00144436	7.8592e-05	0.00512997	0.00396845	0.000866445	0.00552001	0.0210552	0.00360173	0.000434725	0.00803837	0.00511406	0.0407966	0.138303	0.0171111	0.00476183	0.0016235	0.00490497	1.14281e-05	0.0672398	0.00368685	0.00381288	0.000615438	0	0.00088952	4.06239e-05	6.87917e-06	0.000580289	-0.285707	-0.0400722	0.177001	-0.289726	-0.0894538	0.0565441	-0.1	-0.615362	-0.00895855
2032	3.11018	0	0.146252	2.96393	3.54703	3.2647	3.2023	2.47815	0.510149	0.214001	0.0623995	0.282327	0.00614086	0.00146416	7.95132e-05	0.00512184	0.00405722	0.000888327	0.00568785	0.0214824	0.00372064	0.000424456	0.0081589	0.00517335	0.0399991	0.136822	0.0168825	0.00474371	0.00162241	0.00469387	9.34884e-06	0.0680483	0.00370066	0.00370983	0.000588662	0	0.000880604	3.86437e-05	6.76232e-06	0.000580289	-0.280335	-0.0399055	0.175573	-0.283735	-0.0888914	0.0566243	-0.1	-0.611783	-0.00808831
2033	3.18541	0	0.181191	3.00422	3.57934	3.29923	3.23581	2.50887	0.510756	0.216188	0.0634241	0.280108	0.00619681	0.00148411	8.0435e-05	0.00511328	0.00413894	0.00090997	0.00584944	0.0218981	0.00383982	0.000414477	0.00826521	0.00523351	0.0392083	0.135341	0.0166555	0.00472556	0.00162132	0.0044907	7.64705e-06	0.0686845	0.00371019	0.00360557	0.000562661	0	0.000871425	3.67462e-05	6.60291e-06	0.000580289	-0.274963	-0.0397388	0.174144	-0.277744	-0.0883291	0.0567046	-0.1	-0.608178	-0.0072672
2034	3.23457	0	0.190562	3.04401	3.61123	3.33355	3.26914	2.53952	0.51125	0.218361	0.0644156	0.277678	0.00625291	0.00150421	8.13573e-05	0.00510429	0.00421508	0.000931399	0.00600501	0.0223035	0.00395927	0.00040478	0.00835928	0.00529453	0.0384256	0.133863	0.0164306	0.00470739	0.00162022	0.00429543	6.25459e-06	0.0690943	0.0037141	0.00350057	0.000537463	0	0.000862019	3.49321e-05	6.46218e-06	0.000580289	-0.269591	-0.039572	0.172716	-0.271753	-0.0877668	0.0567848	-0.1	-0.604547	-0.00649424
2035	3.25759	0	0.174151	3.08344	3.6428	3.3678	3.30242	2.57025	0.511656	0.220519	0.065378	0.274999	0.00630914	0.00152445	8.22802e-05	0.00509489	0.00428678	0.000952636	0.0061548	0.0226995	0.00407899	0.000395361	0.00844277	0.00535642	0.0376521	0.132389	0.0162079	0.00468922	0.00161911	0.00410796	5.11548e-06	0.0692363	0.00371125	0.0033952	0.000513083	0	0.000852424	3.32018e-05	6.34775e-06	0.000580289	-0.264218	-0.0394053	0.171288	-0.265761	-0.0872045	0.0568651	-0.1	-0.600889	-0.00575986
2036	3.25273	0	0.130187	3.12254	3.67408	3.40204	3.33572	2.60106	0.511994	0.222663	0.0663149	0.272041	0.00636552	0.00154485	8.32036e-05	0.00508507	0.00435498	0.000973701	0.00629904	0.0230869	0.004199	0.000386213	0.00851717	0.00541917	0.0368888	0.130922	0.0159875	0.00467107	0.001618	0.00392815	4.18377e-06	0.0690807	0.00370071	0.00328979	0.000489538	0	0.000842675	3.15518e-05	6.25977e-06	0.000580289	-0.258846	-0.0392386	0.169859	-0.25977	-0.0866422	0.0569453	-0.1	-0.597203	-0.00506063
2037	3.2474	0	0.0860781	3.16132	3.70507	3.43628	3.36905	2.63197	0.512285	0.224794	0.0672295	0.268788	0.00642205	0.00156539	8.41276e-05	0.00507484	0.00442051	0.000994617	0.00643797	0.0234668	0.00431931	0.000377331	0.00858382	0.0054828	0.0361366	0.129463	0.0157697	0.00465295	0.00161689	0.00375588	3.42184e-06	0.0686068	0.00368177	0.00318466	0.000466839	0	0.000832803	2.99754e-05	6.20235e-06	0.000580289	-0.253474	-0.0390719	0.168431	-0.253779	-0.0860799	0.0570256	-0.1	-0.593491	-0.00440265
2038	3.25896	0	0.0592681	3.19969	3.73567	3.47045	3.40232	2.66288	0.512536	0.22691	0.0681243	0.265226	0.00647871	0.00158607	8.50521e-05	0.00506421	0.00448388	0.00101539	0.00657177	0.0238396	0.0044399	0.000368706	0.00864371	0.00554728	0.0353958	0.128014	0.0155545	0.00463487	0.00161578	0.00359089	2.79874e-06	0.0678007	0.00365377	0.00308002	0.000444977	0	0.000822827	2.84726e-05	6.15573e-06	0.000580289	-0.248102	-0.0389052	0.167003	-0.247787	-0.0855175	0.0571059	-0.1	-0.58975	-0.00378579
2039	3.2807	0	0.0431769	3.23752	3.76577	3.50443	3.43543	2.69367	0.512744	0.229013	0.0690005	0.261344	0.00653552	0.00160691	8.59772e-05	0.00505317	0.00454539	0.00103603	0.00670058	0.0242057	0.00456077	0.000360331	0.00869754	0.00561263	0.0346658	0.126574	0.0153418	0.00461682	0.00161467	0.0034328	2.28913e-06	0.0666539	0.00361615	0.00297606	0.000423937	0	0.000812753	2.70429e-05	6.09934e-06	0.000580289	-0.24273	-0.0387385	0.165574	-0.241796	-0.0849552	0.0571861	-0.1	-0.58598	-0.0032097
2040	3.30733	0	0.0322656	3.27507	3.79531	3.53817	3.46831	2.7243	0.512905	0.231102	0.0698596	0.257138	0.00659247	0.00162789	8.69029e-05	0.00504172	0.00460529	0.00105654	0.00682456	0.0245653	0.0046819	0.000352197	0.00874596	0.00567885	0.0339464	0.125142	0.0151315	0.0045988	0.00161356	0.00328129	1.87228e-06	0.0651633	0.00356849	0.00287292	0.000403707	0	0.000802593	2.5679e-05	6.03303e-06	0.000580289	-0.237171	-0.0385756	0.164119	-0.235707	-0.0843095	0.0573021	-0.1	-0.582045	-0.00267507
2041	3.3383	0	0.025655	3.31265	3.82428	3.57167	3.50097	2.75477	0.513024	0.233178	0.0707029	0.25261	0.00664957	0.00164902	8.78291e-05	0.00502986	0.00466386	0.00107691	0.00694385	0.0249189	0.00480329	0.000344297	0.00878959	0.00574593	0.0332376	0.12372	0.0149235	0.0045808	0.00161244	0.00313611	1.53132e-06	0.0633301	0.00351051	0.00277075	0.000384268	0	0.000792355	2.43774e-05	5.96134e-06	0.000580289	-0.231238	-0.0384205	0.16261	-0.22942	-0.083497	0.0574894	-0.1	-0.577802	-0.00218073
2042	3.42191	0	0.0725288	3.34938	3.85254	3.60474	3.53321	2.78492	0.513065	0.235233	0.0715225	0.247806	0.00670689	0.00167028	8.87537e-05	0.00501768	0.0047128	0.00109738	0.00705844	0.0252676	0.0049249	0.000336547	0.00882736	0.00581389	0.0325392	0.122306	0.0147178	0.00456283	0.00161132	0.00299697	1.25239e-06	0.0612	0.00344299	0.00266973	0.000365601	0	0.00078205	2.31387e-05	5.88352e-06	0.000580289	-0.225119	-0.0382691	0.161074	-0.223035	-0.0826011	0.0577123	-0.1	-0.573385	-0.00172618
2043	3.53097	0	0.146252	3.38472	3.87986	3.63706	3.56475	2.81452	0.512973	0.237261	0.0723106	0.242801	0.00676453	0.00169165	8.96744e-05	0.00500527	0.00474503	0.00111813	0.00716817	0.025612	0.00504669	0.000328863	0.00885789	0.00588276	0.0318499	0.1209	0.0145141	0.00454484	0.0016102	0.00286344	1.02414e-06	0.058852	0.00336748	0.00257008	0.000347681	0	0.000771677	2.19589e-05	5.75849e-06	0.000580289	-0.219	-0.0381178	0.159538	-0.21665	-0.0817052	0.0579353	-0.1	-0.568929	-0.00131371
2044	3.60036	0	0.181191	3.41916	3.90636	3.6687	3.59563	2.84362	0.51274	0.239263	0.0730701	0.237661	0.00682247	0.00171313	9.05913e-05	0.00499261	0.00476335	0.0011391	0.00727313	0.0259517	0.00516861	0.000321241	0.00888172	0.00595252	0.0311689	0.1195	0.014312	0.00452683	0.00160907	0.00273518	8.37321e-07	0.0563525	0.00328545	0.00247202	0.000330488	0	0.000761229	2.08344e-05	5.59477e-06	0.000580289	-0.212881	-0.0379665	0.158002	-0.210266	-0.0808093	0.0581583	-0.1	-0.564433	-0.000946724
2045	3.64361	0	0.190562	3.45305	3.93236	3.69991	3.6261	2.87247	0.512396	0.241239	0.0738058	0.232449	0.00688073	0.00173473	9.15044e-05	0.00497971	0.00477052	0.00116031	0.00737353	0.0262873	0.00529067	0.000313682	0.00889989	0.00602319	0.0304972	0.118107	0.014112	0.00450881	0.00160794	0.00261213	6.84471e-07	0.0537586	0.00319834	0.0023758	0.000314011	0	0.000750731	1.97633e-05	5.45042e-06	0.000580289	-0.206762	-0.0378152	0.156466	-0.203881	-0.0799135	0.0583813	-0.1	-0.559896	-0.000629907
2046	3.66073	0	0.174151	3.48658	3.95807	3.73085	3.65633	2.90118	0.511965	0.243188	0.0745214	0.227215	0.0069393	0.00175644	9.24136e-05	0.00496657	0.00476878	0.00118175	0.00746956	0.0266195	0.0054129	0.000306184	0.0089133	0.00609476	0.0298355	0.116724	0.013914	0.0044908	0.0016068	0.00249423	5.59451e-07	0.0511171	0.00310741	0.00228161	0.00029824	0	0.000740211	1.87434e-05	5.33266e-06	0.000580289	-0.200643	-0.0376639	0.154931	-0.197496	-0.0790176	0.0586043	-0.1	-0.555318	-0.000367529
2047	3.65005	0	0.130187	3.51986	3.98358	3.76158	3.68636	2.92978	0.511468	0.24511	0.0752204	0.222	0.00699818	0.00177827	9.3319e-05	0.00495321	0.00475991	0.00120341	0.00756141	0.0269487	0.00553529	0.000298749	0.00892273	0.00616722	0.0291846	0.115352	0.0137183	0.00447281	0.00160567	0.00238136	4.57219e-07	0.0484657	0.00301375	0.00218963	0.000283157	0	0.000729686	1.7776e-05	5.24133e-06	0.000580289	-0.194524	-0.0375126	0.153395	-0.191111	-0.0781217	0.0588272	-0.1	-0.550696	-0.000167466
2048	3.63903	0	0.0860781	3.55296	4.00897	3.79213	3.71623	2.95829	0.510926	0.247008	0.0759057	0.216838	0.00705737	0.00180021	9.42205e-05	0.00493962	0.00474545	0.00122529	0.00764927	0.0272755	0.00565786	0.000291377	0.0089289	0.00624059	0.028545	0.113991	0.0135251	0.00445487	0.00160453	0.00227342	3.73645e-07	0.0458349	0.0029183	0.0021	0.000268747	0	0.000719177	1.68554e-05	5.18023e-06	0.000580289	-0.188405	-0.0373613	0.151859	-0.184727	-0.0772258	0.0590502	-0.1	-0.546032	-4.34669e-05
2049	3.64508	0	0.0592681	3.58581	4.03418	3.82243	3.74585	2.98662	0.510346	0.248879	0.0765791	0.211753	0.00711687	0.00182226	9.51182e-05	0.0049258	0.00472645	0.00124738	0.00773329	0.0276002	0.00578061	0.000284065	0.00893224	0.00631486	0.0279169	0.112643	0.0133343	0.00443697	0.00160339	0.00217022	3.0533e-07	0.0432485	0.00282184	0.0020128	0.000254988	0	0.000708699	1.59792e-05	5.12985e-06	0.000580289	-0.182285	-0.03721	0.150323	-0.178342	-0.0763299	0.0592732	-0.1	-0.541323	-1.1648e-06
2050	3.66048	0	0.0431769	3.61731	4.05912	3.85235	3.77511	3.01466	0.509724	0.250726	0.0772416	0.206764	0.00717669	0.00184442	9.60121e-05	0.00491176	0.00470365	0.00126966	0.00781355	0.0279225	0.00590353	0.000276813	0.00893296	0.00639003	0.0272999	0.111307	0.0131458	0.00441911	0.00160225	0.00207153	2.49485e-07	0.0407241	0.00272496	0.00192809	0.000241858	0	0.000698253	1.51486e-05	5.06989e-06	0.000580289	-0.177042	-0.0370293	0.148767	-0.172691	-0.0754301	0.0593407	-0.1	-0.53676	0
2051	3.67864	0	0.0322656	3.64637	4.08375	3.88187	3.80397	3.04237	0.509058	0.252547	0.077894	0.201882	0.00723681	0.0018667	9.69022e-05	0.00489749	0.0046777	0.00129211	0.00789017	0.0282425	0.0060266	0.000269616	0.00893131	0.0064661	0.0266936	0.109982	0.0129596	0.00440129	0.0016011	0.00197712	2.03835e-07	0.0382757	0.00262822	0.00184591	0.000229332	0	0.000687836	1.43611e-05	5.00144e-06	0.000580289	-0.173549	-0.0367898	0.147173	-0.168506	-0.0745226	0.0590972	-0.1	-0.532538	0
2052	3.69928	0	0.025655	3.67362	4.10768	3.91056	3.83204	3.06939	0.508302	0.254345	0.0785219	0.197119	0.00729702	0.00188903	9.77897e-05	0.00488304	0.00465796	0.00131393	0.0079611	0.0285452	0.00614824	0.000262523	0.00892296	0.00654313	0.0260979	0.108669	0.0127757	0.0043835	0.00159996	0.00188683	1.6652e-07	0.0359134	0.00253208	0.00176628	0.000217386	0	0.00067746	1.3611e-05	4.92953e-06	0.000580289	-0.170931	-0.036521	0.145559	-0.165056	-0.0736113	0.0586982	-0.1	-0.528475	0
2053	3.77228	0	0.0725288	3.69975	4.13054	3.93806	3.85895	3.09542	0.507411	0.256119	0.0791109	0.192482	0.00735707	0.00191133	9.86759e-05	0.00486846	0.00465203	0.00133435	0.00802435	0.0288168	0.00626692	0.000255579	0.00890411	0.00662121	0.0255128	0.107368	0.012594	0.00436574	0.00159881	0.00180048	1.36018e-07	0.0336445	0.00243691	0.00168921	0.000206001	0	0.000667132	1.28963e-05	4.85419e-06	0.000580289	-0.168313	-0.0362522	0.143945	-0.161606	-0.0726999	0.0582993	-0.1	-0.52438	0
2054	3.87099	0	0.146252	3.72474	4.15229	3.96431	3.88465	3.12042	0.506368	0.25787	0.0796599	0.187972	0.00741696	0.00193362	9.95608e-05	0.00485373	0.00465692	0.00135343	0.00808007	0.0290583	0.00638264	0.000248776	0.00887556	0.00670032	0.0249372	0.106077	0.0124141	0.00434799	0.00159767	0.00171778	1.11079e-07	0.031473	0.00234295	0.00161466	0.000195149	0	0.000656837	1.22184e-05	4.73492e-06	0.000580289	-0.165696	-0.0359834	0.142331	-0.158155	-0.0717886	0.0579003	-0.1	-0.520253	0
2055	3.9298	0	0.181191	3.74861	4.17295	3.98936	3.90919	3.14442	0.505168	0.259599	0.0801691	0.183587	0.0074767	0.00195588	0.000100444	0.00483885	0.00467031	0.00137121	0.00812841	0.0292712	0.00649539	0.000242109	0.00883815	0.00678047	0.0243701	0.104794	0.012236	0.00433022	0.00159651	0.00163851	9.06883e-08	0.0294013	0.00225043	0.00154259	0.000184808	0	0.000646569	1.15751e-05	4.57832e-06	0.000580289	-0.163078	-0.0357146	0.140717	-0.154705	-0.0708772	0.0575013	-0.1	-0.516094	0
2056	3.96224	0	0.190562	3.77168	4.1928	4.01347	3.93283	3.16768	0.503843	0.261305	0.0806414	0.179335	0.00753629	0.00197812	0.000101327	0.00482383	0.00469079	0.00138779	0.00816967	0.0294578	0.00660527	0.000235575	0.00879323	0.00686166	0.0238125	0.103521	0.0120599	0.00431246	0.00159535	0.00156262	7.40225e-08	0.0274317	0.00215969	0.00147303	0.000174963	0	0.000636344	1.0965e-05	4.44142e-06	0.000580289	-0.16046	-0.0354458	0.139103	-0.151254	-0.0699658	0.0571024	-0.1	-0.511902	0
2057	3.96826	0	0.174151	3.79411	4.21203	4.03681	3.95574	3.19033	0.502417	0.262989	0.0810792	0.175217	0.00759572	0.00200035	0.000102208	0.00480867	0.00471716	0.00140326	0.00820416	0.0296204	0.00671234	0.000229172	0.00874195	0.00694388	0.0232649	0.102259	0.0118857	0.00429473	0.00159419	0.00149004	6.04067e-08	0.0255649	0.00207096	0.00140596	0.000165595	0	0.000626185	1.03867e-05	4.33132e-06	0.000580289	-0.157843	-0.0351769	0.137489	-0.147804	-0.0690545	0.0567034	-0.1	-0.507676	0
2058	3.94618	0	0.130187	3.816	4.23071	4.05947	3.97799	3.21242	0.500914	0.264651	0.0814851	0.171235	0.00765499	0.00202255	0.000103088	0.00479338	0.00474846	0.0014177	0.00823213	0.0297608	0.00681667	0.000222899	0.00868531	0.00702714	0.0227276	0.101009	0.0117138	0.00427703	0.00159303	0.00142071	4.92864e-08	0.0238004	0.00198445	0.00134137	0.00015669	0	0.000616101	9.83877e-06	4.24771e-06	0.000580289	-0.155225	-0.0349081	0.135875	-0.144353	-0.0681431	0.0563044	-0.1	-0.503416	0
2059	3.92347	0	0.0860781	3.83739	4.24887	4.08148	3.99962	3.23397	0.499356	0.266291	0.0818616	0.167388	0.00771411	0.00204473	0.000103966	0.00477795	0.00478393	0.00143118	0.00825388	0.0298811	0.00691834	0.000216752	0.00862421	0.00711144	0.0222013	0.0997725	0.0115441	0.00425939	0.00159187	0.00135453	4.02075e-08	0.0221367	0.00190034	0.00127924	0.000148231	0	0.00060611	9.3199e-06	4.19426e-06	0.000580289	-0.152607	-0.0346393	0.134261	-0.140903	-0.0672318	0.0559055	-0.1	-0.499121	0
2060	3.91726	0	0.0592681	3.85799	4.26646	4.10279	4.02058	3.25492	0.49775	0.26791	0.0822104	0.163675	0.00777308	0.0020669	0.000104843	0.00476239	0.0048228	0.00144378	0.00826963	0.0299828	0.0070174	0.000210729	0.00855927	0.00719677	0.0216857	0.0985497	0.0113768	0.00424181	0.00159071	0.00129139	3.27965e-08	0.0205713	0.00181871	0.00121952	0.000140196	0	0.000596217	8.8286e-06	4.1518e-06	0.000580289	-0.150197	-0.0343633	0.132632	-0.13758	-0.0663318	0.0554462	-0.1	-0.494827	0
2061	3.92062	0	0.0431769	3.87745	4.28338	4.12329	4.04076	3.27515	0.496095	0.269508	0.0825322	0.160091	0.00783189	0.00208904	0.000105719	0.00474669	0.00486431	0.00145552	0.00827955	0.0300668	0.00711389	0.000204826	0.00849084	0.00728314	0.0211805	0.0973398	0.0112117	0.00422428	0.00158955	0.00123112	2.67472e-08	0.0191008	0.00173961	0.00116216	0.000132565	0	0.000586417	8.36332e-06	4.10075e-06	0.000580289	-0.1482	-0.0340728	0.130972	-0.134512	-0.0654546	0.0548664	-0.1	-0.490571	0
2062	3.92803	0	0.0322656	3.89577	4.2994	4.14277	4.05993	3.29449	0.49436	0.271082	0.0828438	0.156632	0.00789066	0.00211115	0.000106594	0.0047309	0.00490792	0.00146642	0.00828504	0.0301449	0.00720922	0.000199059	0.00842135	0.00737064	0.0206855	0.0961426	0.0110488	0.0042068	0.00158839	0.00117359	2.18094e-08	0.0177214	0.00166303	0.00110708	0.000125324	0	0.000576713	7.91904e-06	4.03894e-06	0.000580289	-0.146411	-0.0337751	0.129298	-0.131571	-0.0645888	0.0542264	-0.1	-0.486318	0
2063	3.9387	0	0.025655	3.91305	4.31438	4.16109	4.07793	3.31277	0.492524	0.272632	0.0831607	0.153291	0.00794949	0.0021332	0.000107468	0.00471504	0.00495323	0.00147645	0.00828747	0.0302278	0.00730479	0.000193447	0.00835297	0.00745936	0.0202004	0.0949579	0.010888	0.00418936	0.00158722	0.00111866	1.7779e-08	0.0164293	0.00158898	0.00105423	0.000118452	0	0.000567109	7.49467e-06	3.97034e-06	0.000580289	-0.144621	-0.0334774	0.127623	-0.128631	-0.063723	0.0535864	-0.1	-0.48203	0
2064	4.00185	0	0.0725288	3.92932	4.32835	4.17828	4.0948	3.33005	0.490593	0.274157	0.083482	0.150067	0.00800838	0.00215519	0.00010834	0.00469911	0.00499984	0.00148567	0.00828692	0.0303152	0.00740059	0.000187985	0.00828552	0.0075493	0.0197251	0.0937856	0.0107293	0.00417197	0.00158606	0.00106623	1.449e-08	0.0152206	0.00151746	0.00100353	0.000111935	0	0.000557602	7.09275e-06	3.89816e-06	0.000580289	-0.142832	-0.0331797	0.125949	-0.12569	-0.0628572	0.0529463	-0.1	-0.477709	0
2065	4.09074	0	0.146252	3.94449	4.34121	4.19426	4.11045	3.34625	0.488548	0.275658	0.083805	0.146949	0.00806734	0.00217713	0.000109212	0.00468311	0.00504705	0.00149409	0.00828337	0.0304056	0.00749654	0.000182666	0.00821844	0.00764046	0.0192586	0.0926237	0.0105725	0.0041546	0.00158489	0.0010161	1.18056e-08	0.0140908	0.0014484	0.000954923	0.000105753	0	0.000548175	6.71186e-06	3.78337e-06	0.000580289	-0.141042	-0.032882	0.124275	-0.12275	-0.0619913	0.0523063	-0.1	-0.473352	0
2066	4.13975	0	0.181191	3.95856	4.35298	4.20904	4.12492	3.3614	0.486381	0.277135	0.0841279	0.143933	0.00812637	0.00219902	0.000110083	0.00466702	0.00509441	0.00150172	0.00827683	0.0304982	0.00759258	0.000177485	0.00815137	0.00773285	0.0188002	0.0914712	0.0104173	0.00413722	0.00158372	0.000968137	9.61489e-09	0.0130358	0.00138178	0.000908322	9.9887e-05	0	0.000538829	6.35074e-06	3.63258e-06	0.000580289	-0.139252	-0.0325843	0.1226	-0.119809	-0.0611255	0.0516663	-0.1	-0.468959	0
2067	4.16236	0	0.190562	3.9718	4.36391	4.2229	4.13844	3.37574	0.484121	0.278587	0.0844518	0.141015	0.00818546	0.00222085	0.000110953	0.00465086	0.00514206	0.00150863	0.00826747	0.0305933	0.00768874	0.00017244	0.00808457	0.00782646	0.0183506	0.0903292	0.0102639	0.00411987	0.00158254	0.000922301	7.82797e-09	0.012052	0.0013176	0.000863688	9.43246e-05	0	0.000529576	6.00858e-06	3.50168e-06	0.000580289	-0.137463	-0.0322866	0.120926	-0.116868	-0.0602597	0.0510262	-0.1	-0.46453	0
2068	4.15853	0	0.174151	3.98437	4.37417	4.23597	4.1512	3.38939	0.481789	0.280016	0.0847772	0.138195	0.00824461	0.00224263	0.000111822	0.00463463	0.00519009	0.00151488	0.00825544	0.030691	0.00778504	0.000167528	0.00801823	0.00792128	0.01791	0.0891988	0.0101124	0.00410256	0.00158137	0.000878543	6.37117e-09	0.0111359	0.00125589	0.000820973	8.90542e-05	0	0.000520422	5.68453e-06	3.3975e-06	0.000580289	-0.135673	-0.0319889	0.119251	-0.113928	-0.0593939	0.0503862	-0.1	-0.460064	0
2069	4.12656	0	0.130187	3.99637	4.38382	4.24835	4.16324	3.40241	0.479406	0.281422	0.0851048	0.13547	0.00830383	0.00226435	0.000112691	0.00461833	0.00523858	0.00152054	0.00824088	0.0307916	0.00788148	0.000162746	0.00795249	0.00801733	0.0174787	0.0880807	0.00996303	0.00408529	0.00158019	0.000836807	5.18402e-09	0.0102838	0.00119662	0.000780126	8.40639e-05	0	0.000511382	5.37777e-06	3.31957e-06	0.000580289	-0.133884	-0.0316912	0.117577	-0.110987	-0.0585281	0.0497461	-0.1	-0.45556	0
2070	4.09365	0	0.0860781	4.00757	4.39288	4.26005	4.17461	3.41481	0.476993	0.282805	0.0854354	0.132836	0.00836311	0.00228602	0.000113558	0.00460196	0.00528762	0.00152565	0.00822396	0.0308952	0.00797811	0.000158093	0.00788753	0.00811459	0.017057	0.0869761	0.00981577	0.00406809	0.00157902	0.000797039	4.21707e-09	0.0094921	0.00113979	0.000741099	7.93376e-05	0	0.000502463	5.08752e-06	3.2714e-06	0.000580289	-0.132301	-0.0313863	0.115887	-0.108174	-0.0576737	0.0490457	-0.1	-0.451059	0
2071	4.07692	0	0.0592681	4.01765	4.40131	4.27102	4.18525	3.42653	0.474555	0.284164	0.0857688	0.130292	0.00842245	0.00230763	0.000114424	0.00458553	0.00533713	0.00153025	0.00820476	0.0310018	0.0080749	0.000153565	0.0078233	0.00821308	0.0166449	0.0858848	0.00967067	0.00405096	0.00157784	0.000759155	3.42968e-09	0.00875722	0.00108533	0.000703826	7.48637e-05	0	0.000493665	4.81291e-06	3.23448e-06	0.000580289	-0.131134	-0.0310669	0.114167	-0.105616	-0.0568421	0.0482244	-0.1	-0.446601	0
2072	4.06975	0	0.0431769	4.02658	4.4088	4.28097	4.19486	3.4373	0.472059	0.285499	0.0861168	0.12783	0.00848198	0.00232917	0.000115288	0.00456905	0.00538254	0.00153435	0.0081843	0.0311231	0.0081733	0.000149159	0.0077617	0.00831288	0.0162419	0.0848065	0.00952763	0.0040339	0.00157666	0.000723053	2.78855e-09	0.00807543	0.00103315	0.000668232	7.06351e-05	0	0.000484988	4.55306e-06	3.18728e-06	0.000580289	-0.130173	-0.0307404	0.112432	-0.103186	-0.0560218	0.0473426	-0.1	-0.442149	0
2073	4.06664	0	0.0322656	4.03437	4.41515	4.2897	4.20321	3.44693	0.469477	0.286808	0.086491	0.125448	0.00854182	0.00235062	0.000116149	0.00455255	0.00542018	0.00153793	0.00816355	0.0312702	0.00827471	0.000144874	0.0077044	0.00841408	0.0158479	0.0837407	0.00938661	0.00401689	0.00157549	0.000688642	2.26655e-09	0.00744324	0.000983184	0.000634255	6.66358e-05	0	0.000476427	4.30715e-06	3.12901e-06	0.000580289	-0.129213	-0.0304138	0.110697	-0.100755	-0.0552016	0.0464609	-0.1	-0.43766	0
2074	4.06671	0	0.025655	4.04105	4.42037	4.29723	4.21034	3.45543	0.466815	0.288091	0.0868901	0.12314	0.00860195	0.00237198	0.000117007	0.00453603	0.00545146	0.00154103	0.0081425	0.0314409	0.00837905	0.000140707	0.00765081	0.00851669	0.0154625	0.0826873	0.00924755	0.00399994	0.00157431	0.000655842	1.84166e-09	0.00685743	0.000935348	0.000601832	6.28506e-05	0	0.000467982	4.07444e-06	3.06632e-06	0.000580289	-0.128253	-0.0300872	0.108962	-0.0983248	-0.0543814	0.0455791	-0.1	-0.433133	0
2075	4.11917	0	0.0725288	4.04664	4.42448	4.30357	4.21626	3.46284	0.464078	0.289347	0.0873129	0.120904	0.00866239	0.00239325	0.000117862	0.00451947	0.00547752	0.00154367	0.00812117	0.0316335	0.00848624	0.000136653	0.00760043	0.00862071	0.0150857	0.0816461	0.00911044	0.00398304	0.00157314	0.000624579	1.49592e-09	0.00631495	0.000889585	0.000570902	5.92708e-05	0	0.000459654	3.85421e-06	3.00094e-06	0.000580289	-0.127292	-0.0297607	0.107227	-0.0958943	-0.0535611	0.0446974	-0.1	-0.428569	0
2076	4.19728	0	0.146252	4.05103	4.42737	4.30864	4.22088	3.46906	0.461246	0.290578	0.0877561	0.118734	0.00872314	0.00241444	0.000118713	0.00450289	0.00549887	0.00154583	0.00809942	0.0318453	0.00859614	0.000132709	0.00755245	0.00872612	0.0147166	0.0806153	0.00897504	0.00396618	0.00157196	0.000594736	1.21459e-09	0.00581271	0.000845795	0.000541402	5.58862e-05	0	0.00045143	3.64566e-06	2.89427e-06	0.000580289	-0.126332	-0.0294341	0.105491	-0.0934638	-0.0527409	0.0438156	-0.1	-0.423965	0
2077	4.2354	0	0.181191	4.05421	4.42906	4.31244	4.22422	3.47413	0.45831	0.291783	0.0882173	0.116624	0.00878419	0.00243554	0.000119562	0.00448626	0.00551609	0.00154752	0.0080772	0.0320742	0.00870864	0.00012887	0.00750628	0.00883295	0.0143547	0.079594	0.0088412	0.00394933	0.00157078	0.000566224	9.85696e-10	0.0053479	0.000803891	0.000513266	5.26831e-05	0	0.000443304	3.44809e-06	2.75284e-06	0.000580289	-0.125371	-0.0291075	0.103756	-0.0910333	-0.0519207	0.0429339	-0.1	-0.419322	0
2078	4.24702	0	0.190562	4.05646	4.42979	4.31522	4.22652	3.47826	0.455303	0.292964	0.0886975	0.114573	0.00884554	0.00245654	0.000120407	0.00446961	0.0055303	0.0015488	0.00805462	0.0323196	0.00882373	0.000125135	0.00746204	0.00894118	0.0140003	0.0785831	0.00870904	0.00393252	0.0015696	0.000539016	7.99604e-10	0.00491816	0.000763854	0.000486451	4.96513e-05	0	0.000435285	3.26102e-06	2.63338e-06	0.000580289	-0.124411	-0.028781	0.102021	-0.0886028	-0.0511004	0.0420522	-0.1	-0.414638	0
2079	4.23216	0	0.174151	4.05801	4.42978	4.31719	4.22799	3.48158	0.452293	0.294119	0.0892001	0.112581	0.0089072	0.00247746	0.000121249	0.00445294	0.00554303	0.00154978	0.00803194	0.0325823	0.00894152	0.000121505	0.00742036	0.00905081	0.0136537	0.0775836	0.00857868	0.00391575	0.00156842	0.000513079	6.48475e-10	0.00452142	0.000725695	0.00046093	4.67912e-05	0	0.000427373	3.08398e-06	2.5541e-06	0.000580289	-0.123451	-0.0284544	0.100286	-0.0861724	-0.0502802	0.0411704	-0.1	-0.409913	0
2080	4.18818	0	0.130187	4.058	4.42911	4.31846	4.22874	3.48415	0.449335	0.29525	0.0897277	0.110647	0.00896916	0.00249829	0.000122088	0.00443626	0.00555541	0.00155056	0.00800941	0.0328629	0.00906207	0.00011798	0.00738169	0.00916184	0.0133151	0.076596	0.00845019	0.00389904	0.00156723	0.000488375	5.25856e-10	0.00415564	0.000689396	0.000436671	4.40925e-05	0	0.000419579	2.9165e-06	2.51492e-06	0.000580289	-0.122686	-0.0281927	0.0989048	-0.0842319	-0.0496318	0.0404652	-0.1	-0.406114	0
2081	4.14152	0	0.0860781	4.05544	4.42782	4.31905	4.22877	3.48598	0.446437	0.296356	0.0902799	0.108769	0.00903142	0.00251903	0.000122924	0.00441959	0.00556779	0.00155117	0.0079871	0.0331608	0.00918539	0.000114557	0.0073459	0.00927428	0.0129847	0.0756212	0.00832366	0.00388241	0.00156605	0.000464868	4.26398e-10	0.00381863	0.000654891	0.00041362	4.15459e-05	0	0.000411916	2.75814e-06	2.50941e-06	0.000580289	-0.122315	-0.0280606	0.0982313	-0.0832715	-0.049327	0.0401129	-0.1	-0.404224	0
2082	4.11208	0	0.0592681	4.05281	4.42663	4.31968	4.22882	3.4877	0.443681	0.297445	0.090858	0.106945	0.0090942	0.00253977	0.000123756	0.00440292	0.00557601	0.0015516	0.00796525	0.0334791	0.0093116	0.000111234	0.00731465	0.00938784	0.0126623	0.0746595	0.00819912	0.00386586	0.00156487	0.000442508	3.45737e-10	0.00350824	0.000622101	0.000391723	3.91414e-05	0	0.000404383	2.60843e-06	2.51837e-06	0.000580289	-0.12214	-0.0279934	0.0979117	-0.0828012	-0.049194	0.0399371	-0.1	-0.403295	0
2083	4.09489	0	0.0431769	4.05171	4.42611	4.32094	4.22948	3.48983	0.441125	0.298521	0.0914625	0.105172	0.00915773	0.00256057	0.000124582	0.00438625	0.00557655	0.00155177	0.00794408	0.0338207	0.00944081	0.00010801	0.00728926	0.00950224	0.0123477	0.0737101	0.00807647	0.00384939	0.00156369	0.00042123	2.80318e-10	0.00322244	0.000590932	0.000370934	3.68695e-05	0	0.000396975	2.46687e-06	2.52021e-06	0.000580289	-0.121965	-0.0279262	0.097592	-0.0823309	-0.0490611	0.0397613	-0.1	-0.402364	0
2084	4.08345	0	0.0322656	4.05119	4.42611	4.32267	4.23057	3.49225	0.43874	0.299586	0.0920922	0.103447	0.00922199	0.00258144	0.000125403	0.00436957	0.00557081	0.00155171	0.00792353	0.0341835	0.00957294	0.00010488	0.00726888	0.00961749	0.0120406	0.0727728	0.00795566	0.00383299	0.00156251	0.000400974	2.27261e-10	0.00295934	0.000561303	0.000351202	3.47262e-05	0	0.000389686	2.33298e-06	2.51251e-06	0.000580289	-0.12179	-0.0278589	0.0972724	-0.0818605	-0.0489281	0.0395855	-0.1	-0.401432	0
2085	4.07682	0	0.025655	4.05117	4.42655	4.32478	4.23204	3.49489	0.436507	0.300639	0.0927457	0.101767	0.00928699	0.00260238	0.000126219	0.0043529	0.00555999	0.00155142	0.00790358	0.0345661	0.00970793	0.000101842	0.00725285	0.00973358	0.0117407	0.0718471	0.00783664	0.00381665	0.00156134	0.000381689	1.84231e-10	0.00271721	0.000533141	0.000332465	3.2703e-05	0	0.000382514	2.20636e-06	2.50007e-06	0.000580289	-0.121615	-0.0277917	0.0969528	-0.0813902	-0.0487951	0.0394097	-0.1	-0.400498	0
2086	4.12411	0	0.0725288	4.05158	4.42736	4.32723	4.23381	3.49773	0.434406	0.301681	0.0934219	0.100131	0.00935272	0.00262339	0.000127029	0.00433622	0.00554504	0.00155092	0.00788419	0.0349667	0.0098457	9.88938e-05	0.00724058	0.00985051	0.0114479	0.070933	0.00771937	0.00380038	0.00156016	0.000363328	1.49336e-10	0.00249443	0.000506373	0.00031468	3.0797e-05	0	0.000375455	2.08659e-06	2.48419e-06	0.000580289	-0.121439	-0.0277245	0.0966332	-0.0809198	-0.0486622	0.0392339	-0.1	-0.399563	0
2087	4.19849	0	0.146252	4.05224	4.42839	4.32985	4.23574	3.50063	0.432395	0.302712	0.0941177	0.0985333	0.0094192	0.00264447	0.000127834	0.00431954	0.00552635	0.00155017	0.00786525	0.0353832	0.00998613	9.60306e-05	0.00723121	0.00996829	0.0111616	0.0700288	0.00760364	0.00378415	0.00155898	0.00034582	1.21033e-10	0.00228944	0.00048091	0.000297801	2.89995e-05	0	0.000368502	1.97323e-06	2.42664e-06	0.000580289	-0.121264	-0.0276572	0.0963136	-0.0804495	-0.0485292	0.0390581	-0.1	-0.398627	0
2088	4.23427	0	0.181191	4.05308	4.42957	4.33259	4.23776	3.50358	0.430449	0.303732	0.0948307	0.0969716	0.00948641	0.00266562	0.000128634	0.00430284	0.00550437	0.00154918	0.00784665	0.0358136	0.0101291	9.32496e-05	0.00722411	0.0100869	0.0108812	0.0691335	0.00748932	0.00376795	0.0015578	0.000329107	9.8073e-11	0.00210083	0.000456678	0.000281782	2.73028e-05	0	0.000361646	1.86589e-06	2.33393e-06	0.000580289	-0.121089	-0.02759	0.0959939	-0.0799792	-0.0483963	0.0388823	-0.1	-0.397689	0
2089	4.24487	0	0.190562	4.0543	4.4311	4.33565	4.24009	3.50678	0.428574	0.304741	0.0955614	0.0954455	0.00955436	0.00268684	0.000129428	0.00428613	0.00548001	0.00154798	0.00782846	0.0362575	0.0102746	9.0549e-05	0.00721924	0.0102064	0.010607	0.0682479	0.00737651	0.00375178	0.00155662	0.000313174	7.94559e-11	0.00192737	0.000433637	0.000266577	2.57011e-05	0	0.000354892	1.7643e-06	2.26014e-06	0.000580289	-0.120914	-0.0275228	0.0956743	-0.0795088	-0.0482633	0.0387065	-0.1	-0.396749	0
2090	4.23017	0	0.174151	4.05602	4.4331	4.33914	4.24283	3.51032	0.426779	0.305739	0.0963102	0.0939547	0.00962305	0.00270812	0.000130217	0.00426941	0.00545397	0.00154661	0.00781073	0.0367143	0.0104226	8.79273e-05	0.0072165	0.0103267	0.0103392	0.0673727	0.00726529	0.00373566	0.00155544	0.000297995	6.43651e-11	0.00176792	0.000411743	0.000252156	2.41888e-05	0	0.000348245	1.66819e-06	2.21139e-06	0.000580289	-0.120741	-0.0274551	0.0953523	-0.0790336	-0.0481312	0.0385265	-0.1	-0.395808	0
2091	4.18845	0	0.130187	4.05826	4.43559	4.34309	4.24602	3.51423	0.425065	0.306726	0.0970769	0.0924988	0.00969247	0.00272948	0.000131001	0.0042527	0.00542678	0.0015451	0.00779349	0.0371838	0.0105732	8.53825e-05	0.00721578	0.0104478	0.0100778	0.0665084	0.0071557	0.00371961	0.00155426	0.000283548	5.21359e-11	0.00162143	0.000390949	0.00023849	2.27656e-05	0	0.000341709	1.5773e-06	2.18688e-06	0.000580289	-0.120573	-0.0273866	0.0950255	-0.0785487	-0.0480008	0.0383379	-0.1	-0.394867	0
2092	4.1471	0	0.0860781	4.06102	4.43858	4.3475	4.24964	3.5185	0.423438	0.307703	0.0978604	0.0910773	0.00976254	0.00275092	0.000131779	0.00423601	0.00539613	0.0015434	0.0077765	0.037667	0.0107263	8.29133e-05	0.00721705	0.0105698	0.0098229	0.0656557	0.00704783	0.00370364	0.00155308	0.000269809	4.22283e-11	0.00148689	0.000371207	0.000225538	2.14261e-05	0	0.000335292	1.49139e-06	2.1898e-06	0.000580289	-0.120406	-0.0273176	0.0946964	-0.0780588	-0.0478714	0.038145	-0.1	-0.393925	0
2093	4.12347	0	0.0592681	4.06421	4.44195	4.35226	4.2536	3.52304	0.42189	0.30867	0.0986587	0.0896891	0.00983314	0.00277246	0.000132549	0.00421939	0.00535997	0.00154148	0.0077595	0.0381649	0.0108821	8.05177e-05	0.00722007	0.0106926	0.00957442	0.0648145	0.00694167	0.00368775	0.0015519	0.000256745	3.42023e-11	0.00136337	0.000352463	0.000213267	2.01649e-05	0	0.000328994	1.41018e-06	2.20176e-06	0.000580289	-0.12024	-0.0272487	0.0943672	-0.077569	-0.0477419	0.0379521	-0.1	-0.392981	0
2094	4.11083	0	0.0431769	4.06765	4.44556	4.35723	4.25776	3.52772	0.420405	0.309626	0.0994709	0.0883323	0.00990428	0.00279409	0.000133311	0.00420283	0.00531924	0.00153934	0.00774245	0.0386759	0.0110404	7.81932e-05	0.00722451	0.0108163	0.00933207	0.0639842	0.00683712	0.00367192	0.00155072	0.000244316	2.77002e-11	0.00124996	0.000334664	0.000201641	1.89766e-05	0	0.000322808	1.33341e-06	2.20389e-06	0.000580289	-0.120074	-0.0271798	0.0940381	-0.0770792	-0.0476124	0.0377593	-0.1	-0.392035	0
2095	4.10353	0	0.0322656	4.07126	4.44932	4.36231	4.26202	3.53247	0.418971	0.310572	0.100296	0.0870051	0.00997595	0.00281582	0.000134066	0.00418633	0.00527477	0.00153698	0.00772533	0.039199	0.0112012	7.59376e-05	0.00723011	0.0109408	0.00909563	0.0631645	0.00673415	0.00365617	0.00154955	0.000232489	2.24326e-11	0.00114584	0.000317763	0.000190629	1.78561e-05	0	0.000316726	1.26081e-06	2.19638e-06	0.000580289	-0.119908	-0.0271108	0.0937089	-0.0765893	-0.0474829	0.0375664	-0.1	-0.391088	0
2096	4.10067	0	0.025655	4.07501	4.45319	4.36749	4.26635	3.53727	0.417579	0.311507	0.101134	0.0857063	0.0100482	0.00283764	0.000134814	0.00416988	0.00522727	0.00153441	0.00770814	0.039733	0.0113645	7.37487e-05	0.0072367	0.0110662	0.00886493	0.0623552	0.00663271	0.00364048	0.00154837	0.000221233	1.81654e-11	0.00105027	0.000301711	0.000180202	1.67991e-05	0	0.000310743	1.19216e-06	2.18393e-06	0.000580289	-0.119741	-0.0270419	0.0933798	-0.0760995	-0.0473534	0.0373736	-0.1	-0.390138	0
2097	4.15142	0	0.0725288	4.07889	4.45718	4.37274	4.27076	3.5421	0.416224	0.312433	0.101985	0.0844348	0.0101209	0.00285956	0.000135554	0.00415349	0.0051773	0.00153165	0.00769087	0.0402771	0.0115302	7.16245e-05	0.00724411	0.0111924	0.00863982	0.061556	0.00653278	0.00362486	0.0015472	0.000210518	1.47087e-11	0.000962567	0.000286464	0.000170325	1.58013e-05	0	0.000304864	1.12724e-06	2.16775e-06	0.000580289	-0.119575	-0.0269729	0.0930506	-0.0756097	-0.0472239	0.0371807	-0.1	-0.389188	0
2098	4.22898	0	0.146252	4.08272	4.46113	4.37794	4.27509	3.54687	0.414874	0.313348	0.102845	0.0831875	0.0101942	0.00288157	0.000136287	0.00413716	0.00512495	0.00152867	0.00767342	0.0408294	0.011698	6.95621e-05	0.00725187	0.0113194	0.00841978	0.0607655	0.00643417	0.00360927	0.00154602	0.000200305	1.1908e-11	0.000882059	0.000271971	0.000160964	1.48583e-05	0	0.000299083	1.06581e-06	2.10997e-06	0.000580289	-0.119409	-0.026904	0.0927214	-0.0751199	-0.0470944	0.0369879	-0.1	-0.388235	0
2099	4.26769	0	0.181191	4.0865	4.46502	4.38306	4.27934	3.55158	0.413512	0.314254	0.103712	0.0819624	0.010268	0.00290368	0.000137012	0.00412087	0.00507045	0.00152546	0.00765571	0.0413883	0.011868	6.75593e-05	0.00725967	0.0114473	0.00820447	0.059983	0.00633676	0.0035937	0.00154484	0.000190559	9.63861e-12	0.000808149	0.00025819	0.000152093	1.39712e-05	0	0.000293393	1.00764e-06	2.01721e-06	0.000580289	-0.119243	-0.0268351	0.0923923	-0.07463	-0.0469649	0.036795	-0.1	-0.387281	0
2100	4.28071	0	0.190562	4.09014	4.46908	4.38832	4.28373	3.55642	0.412156	0.31515	0.104589	0.08076	0.0103424	0.00292588	0.00013773	0.00410463	0.00501448	0.00152205	0.00763784	0.0419541	0.0120402	6.56148e-05	0.00726774	0.011576	0.00799406	0.059209	0.00624065	0.00357817	0.00154366	0.00018127	7.80044e-12	0.000740327	0.000245097	0.000143693	1.31368e-05	0	0.000287792	9.52599e-07	1.94317e-06	0.000580289	-0.119148	-0.026797	0.0921254	-0.07421	-0.0468589	0.0365924	-0.1	-0.386584	0
2101	4.26765	0	0.174151	4.0935	4.47343	4.39385	4.28838	3.56152	0.410819	0.316036	0.105475	0.0795805	0.0104173	0.00294818	0.000138441	0.00408844	0.00495755	0.00151849	0.00761986	0.0425268	0.0122144	6.37274e-05	0.00727625	0.0117056	0.00778862	0.0584442	0.00614589	0.0035627	0.00154248	0.000172424	6.31207e-12	0.00067811	0.000232662	0.000135745	1.2352e-05	0	0.000282283	9.00538e-07	1.89428e-06	0.000580289	-0.119196	-0.0268207	0.091983	-0.0739294	-0.0467997	0.0363705	-0.1	-0.386405	0
2102	4.22683	0	0.130187	4.09664	4.47767	4.39925	4.2929	3.56648	0.40952	0.316893	0.106352	0.078424	0.0104917	0.0029703	0.00013914	0.00407245	0.00490591	0.00151497	0.00760222	0.0430875	0.012387	6.1901e-05	0.00728449	0.0118342	0.00758824	0.057689	0.00605255	0.00354728	0.0015413	0.000164008	5.10746e-12	0.000621071	0.000220864	0.000128227	1.16138e-05	0	0.00027687	8.51316e-07	1.8745e-06	0.000580289	-0.119316	-0.0268752	0.0919029	-0.0737186	-0.046764	0.0361389	-0.1	-0.386484	0
2103	4.18555	0	0.0860781	4.09948	4.48139	4.40409	4.29689	3.57091	0.408279	0.317701	0.1072	0.0772907	0.0105646	0.00299197	0.000139826	0.00405679	0.00486461	0.00151172	0.00758534	0.043619	0.0125541	6.01392e-05	0.00729189	0.0119603	0.00739298	0.056944	0.00596068	0.00353194	0.00154012	0.000156007	4.13292e-12	0.000568808	0.000209678	0.000121117	1.09193e-05	0	0.00027156	8.04797e-07	1.88789e-06	0.000580289	-0.119436	-0.0269298	0.0918229	-0.0735078	-0.0467282	0.0359073	-0.1	-0.386564	0
2104	4.16103	0	0.0592681	4.10176	4.48452	4.40834	4.30032	3.57477	0.407092	0.31846	0.108021	0.0761801	0.0106361	0.0030132	0.000140497	0.00404147	0.00483167	0.00150871	0.00756923	0.0441234	0.0127159	5.84403e-05	0.0072986	0.0120837	0.00720275	0.0562091	0.00587027	0.00351668	0.00153895	0.000148402	3.34452e-12	0.000520929	0.000199072	0.000114397	1.02657e-05	0	0.000266354	7.60835e-07	1.91206e-06	0.000580289	-0.119555	-0.0269843	0.0917428	-0.0732971	-0.0466925	0.0356757	-0.1	-0.386643	0
2105	4.14655	0	0.0431769	4.10337	4.48696	4.41187	4.30306	3.57794	0.405945	0.319171	0.108814	0.075091	0.010706	0.00303398	0.000141154	0.00402647	0.00480535	0.00150591	0.00755382	0.0446025	0.0128724	5.6802e-05	0.00730462	0.0122045	0.00701734	0.055484	0.00578126	0.00350149	0.00153777	0.00014117	2.70662e-12	0.000477066	0.000189014	0.000108044	9.65023e-06	0	0.00026124	7.19282e-07	1.92773e-06	0.000580289	-0.119675	-0.0270388	0.0916627	-0.0730863	-0.0466568	0.0354441	-0.1	-0.386723	0
2106	4.13652	0	0.0322656	4.10425	4.48866	4.41464	4.30506	3.5804	0.40483	0.319833	0.109579	0.0740223	0.0107744	0.00305431	0.000141797	0.00401181	0.0047843	0.00150332	0.00753906	0.0450579	0.0130238	5.52223e-05	0.00730997	0.0123227	0.00683658	0.0547683	0.00569361	0.00348637	0.0015366	0.000134291	2.19044e-12	0.00043688	0.000179473	0.000102037	9.07021e-06	0	0.000256221	6.8e-07	1.93502e-06	0.000580289	-0.119795	-0.0270934	0.0915826	-0.0728755	-0.046621	0.0352125	-0.1	-0.386802	0
2107	4.13006	0	0.025655	4.1044	4.48961	4.41664	4.30632	3.58213	0.403742	0.320447	0.110317	0.0729735	0.0108413	0.00307419	0.000142425	0.00399747	0.00476746	0.00150091	0.00752493	0.0454914	0.0131702	5.36995e-05	0.00731472	0.0124383	0.00666034	0.0540618	0.00560729	0.00347131	0.00153542	0.000127748	1.77273e-12	0.000400063	0.000170423	9.63602e-05	8.52332e-06	0	0.000251296	6.42863e-07	1.93862e-06	0.000580289	-0.119915	-0.0271479	0.0915025	-0.0726647	-0.0465853	0.0349809	-0.1	-0.386882	0
2108	4.17636	0	0.0725288	4.10383	4.48983	4.41789	4.30686	3.58317	0.402676	0.321013	0.111029	0.0719438	0.0109067	0.00309362	0.00014304	0.00398345	0.00475399	0.00149866	0.0075114	0.0459044	0.0133116	5.22316e-05	0.00731893	0.0125512	0.00648851	0.0533644	0.00552227	0.00345632	0.00153425	0.000121523	1.43471e-12	0.000366335	0.000161834	9.09951e-05	8.01248e-06	0	0.000246462	6.07753e-07	1.93975e-06	0.000580289	-0.120034	-0.0272025	0.0914224	-0.0724539	-0.0465496	0.0347493	-0.1	-0.386961	0
2109	4.24866	0	0.146252	4.1024	4.48919	4.41826	4.30655	3.58341	0.401604	0.321532	0.111714	0.0709311	0.0109706	0.00311261	0.00014364	0.00396976	0.00474288	0.00149654	0.00749834	0.0462971	0.0134481	5.08165e-05	0.0073223	0.0126616	0.00632068	0.0526749	0.00543841	0.00344136	0.00153308	0.000115592	1.16108e-12	0.000335428	0.000153675	8.59215e-05	7.52991e-06	0	0.000241709	5.74537e-07	1.90075e-06	0.000580289	-0.120154	-0.027257	0.0913423	-0.0722431	-0.0465138	0.0345177	-0.1	-0.38704	0
2110	4.2813	0	0.181191	4.10011	4.4877	4.41776	4.30539	3.58288	0.400511	0.322005	0.112372	0.0699339	0.0110329	0.00313115	0.000144226	0.00395637	0.00473342	0.0014945	0.00748567	0.0466703	0.0135796	4.94521e-05	0.0073247	0.0127693	0.00615661	0.0519925	0.00535561	0.00342644	0.0015319	0.000109936	9.39539e-13	0.000307102	0.000145924	8.11215e-05	7.07361e-06	0	0.000237026	5.43098e-07	1.82822e-06	0.000580289	-0.120274	-0.0273116	0.0912622	-0.0720324	-0.0464781	0.0342861	-0.1	-0.38712	0
2111	4.28776	0	0.190562	4.0972	4.48558	4.41663	4.30363	3.58178	0.399416	0.322432	0.113004	0.0689531	0.0110938	0.00314924	0.000144797	0.00394331	0.00472554	0.00149257	0.00747344	0.047026	0.0137064	4.81374e-05	0.00732651	0.0128744	0.00599641	0.0513179	0.00527394	0.00341155	0.00153072	0.000104549	7.60226e-13	0.000281153	0.000138564	7.65807e-05	6.64718e-06	0	0.000232422	5.13358e-07	1.77561e-06	0.000580289	-0.120393	-0.0273661	0.0911821	-0.0718216	-0.0464424	0.0340545	-0.1	-0.387199	0
2112	4.26798	0	0.174151	4.09383	4.483	4.41501	4.3014	3.58025	0.398332	0.322812	0.113615	0.0679888	0.0111532	0.00316689	0.000145355	0.00393055	0.00471913	0.00149077	0.00746171	0.0473665	0.0138286	4.6871e-05	0.007328	0.012977	0.00584015	0.0506516	0.00519346	0.00339672	0.00152955	9.94218e-05	6.15126e-13	0.000257385	0.000131577	7.22908e-05	6.24369e-06	0	0.000227906	4.85236e-07	1.74891e-06	0.000580289	-0.120513	-0.0274207	0.091102	-0.0716108	-0.0464066	0.0338229	-0.1	-0.387278	0
2113	4.22025	0	0.130187	4.09006	4.48001	4.41297	4.29876	3.57834	0.397272	0.323148	0.114205	0.0670415	0.0112111	0.00318408	0.000145898	0.00391812	0.00471408	0.00148909	0.00745049	0.0476934	0.0139464	4.56518e-05	0.00732941	0.0130769	0.00568786	0.049994	0.00511421	0.00338195	0.00152837	9.45465e-05	4.9773e-13	0.000235616	0.000124947	6.82384e-05	5.86177e-06	0	0.000223474	4.58656e-07	1.74728e-06	0.000580289	-0.120633	-0.0274752	0.0910219	-0.0714	-0.0463709	0.0335913	-0.1	-0.387358	0
2114	4.17201	0	0.0860781	4.08593	4.47664	4.41052	4.29575	3.57606	0.396247	0.323438	0.114777	0.0661116	0.0112675	0.00320083	0.000146427	0.00390601	0.00471034	0.00148756	0.00743984	0.0480087	0.0140598	4.44788e-05	0.00733098	0.0131741	0.0055396	0.0493455	0.00503625	0.00336726	0.0015272	8.99146e-05	4.02765e-13	0.000215689	0.000118659	6.44103e-05	5.50521e-06	0	0.000219129	4.33543e-07	1.77394e-06	0.000580289	-0.120753	-0.0275298	0.0909419	-0.0711892	-0.0463352	0.0333597	-0.1	-0.387437	0
2115	4.14063	0	0.0592681	4.08136	4.4728	4.40761	4.29227	3.57333	0.395257	0.323684	0.115331	0.0651987	0.0113223	0.00321713	0.000146941	0.00389422	0.0047077	0.00148618	0.00742975	0.0483132	0.0141691	4.33504e-05	0.00733273	0.0132688	0.00539528	0.0487061	0.00495956	0.00335266	0.00152603	8.55146e-05	3.25944e-13	0.000197451	0.000112695	6.07995e-05	5.17236e-06	0	0.000214869	4.09818e-07	1.81067e-06	0.000580289	-0.120872	-0.0275843	0.0908618	-0.0709784	-0.0462994	0.0331281	-0.1	-0.387516	0
2116	4.11939	0	0.0431769	4.07622	4.46839	4.40408	4.28821	3.57004	0.394289	0.323886	0.115869	0.0643019	0.0113757	0.00323299	0.000147442	0.00388275	0.00470585	0.00148491	0.00742017	0.0486076	0.0142742	4.22652e-05	0.00733453	0.0133609	0.00525474	0.0480755	0.0048841	0.00333812	0.00152486	8.1333e-05	2.6379e-13	0.000180756	0.000107034	5.73928e-05	4.86157e-06	0	0.00021069	3.87399e-07	1.83886e-06	0.000580289	-0.120992	-0.0276389	0.0907817	-0.0707676	-0.0462637	0.0328965	-0.1	-0.387595	0
2117	4.10269	0	0.0322656	4.07042	4.46331	4.39989	4.2835	3.56612	0.393338	0.324045	0.11639	0.0634207	0.0114276	0.00324839	0.000147928	0.0038716	0.00470457	0.00148376	0.00741106	0.0488922	0.0143753	4.12217e-05	0.00733632	0.0134504	0.00511783	0.0474534	0.00480982	0.00332366	0.00152369	7.73577e-05	2.13498e-13	0.000165471	0.000101663	5.41724e-05	4.56625e-06	0	0.000206597	3.66211e-07	1.85877e-06	0.000580289	-0.121112	-0.0276934	0.0907016	-0.0705569	-0.046228	0.0326649	-0.1	-0.387674	0
2118	4.08962	0	0.025655	4.06396	4.45756	4.39501	4.27811	3.56155	0.3924	0.32416	0.116895	0.0625546	0.0114779	0.00326335	0.000148401	0.00386076	0.00470373	0.0014827	0.0074024	0.0491678	0.0144724	4.02187e-05	0.00733808	0.0135372	0.00498446	0.0468395	0.0047367	0.00330927	0.00152252	7.35781e-05	1.728e-13	0.000151476	9.6566e-05	5.11273e-05	4.28534e-06	0	0.00020258	3.46185e-07	1.87509e-06	0.000580289	-0.121231	-0.0277479	0.0906215	-0.0703461	-0.0461922	0.0324333	-0.1	-0.387754	0
2119	4.12937	0	0.0725288	4.05684	4.45115	4.38944	4.27206	3.55635	0.391472	0.324233	0.117384	0.0617032	0.0115268	0.00327787	0.000148859	0.00385023	0.00470323	0.00148174	0.00739417	0.0494349	0.0145656	3.92548e-05	0.00733979	0.0136215	0.00485452	0.0462338	0.00466472	0.00329494	0.00152136	6.99845e-05	1.39866e-13	0.000138667	9.1727e-05	4.82531e-05	4.02301e-06	0	0.000198638	3.27258e-07	1.88904e-06	0.000580289	-0.121351	-0.0278025	0.0905414	-0.0701353	-0.0461565	0.0322017	-0.1	-0.387833	0
2120	4.19517	0	0.146252	4.04892	4.44393	4.38307	4.26521	3.55042	0.390528	0.324263	0.117855	0.0608647	0.0115741	0.00329193	0.000149302	0.00384001	0.00470265	0.00148082	0.00738626	0.0496928	0.0146548	3.83284e-05	0.0073411	0.0137031	0.00472772	0.0456353	0.00459374	0.00328066	0.00152019	6.65625e-05	1.13206e-13	0.000126938	8.71275e-05	4.55387e-05	3.77789e-06	0	0.000194769	3.09356e-07	1.86297e-06	0.000580289	-0.121471	-0.027857	0.0904613	-0.0699245	-0.0461208	0.0319701	-0.1	-0.387912	0
2121	4.22137	0	0.181191	4.04018	4.43591	4.37587	4.25756	3.54376	0.389553	0.324251	0.118308	0.0600382	0.01162	0.00330555	0.000149732	0.00383008	0.00470177	0.00147992	0.00737857	0.0499413	0.0147401	3.7438e-05	0.0073418	0.0137821	0.00460386	0.0450431	0.00452369	0.00326641	0.00151903	6.33008e-05	9.16192e-14	0.000116188	8.27561e-05	4.29743e-05	3.54875e-06	0	0.000190962	2.92416e-07	1.80353e-06	0.000580289	-0.121591	-0.0279116	0.0903812	-0.0697137	-0.046085	0.0317385	-0.1	-0.387991	0
2122	4.22143	0	0.190562	4.03086	4.42731	4.36809	4.24934	3.53658	0.388569	0.324197	0.118746	0.0592243	0.0116643	0.00331872	0.000150148	0.00382047	0.00470089	0.00147907	0.00737118	0.0501818	0.0148215	3.65828e-05	0.00734223	0.0138586	0.00448302	0.044458	0.00445463	0.0032522	0.00151786	6.01953e-05	7.41461e-14	0.000106344	7.86042e-05	4.0552e-05	3.33465e-06	0	0.000187221	2.76394e-07	1.76408e-06	0.000580289	-0.12171	-0.0279661	0.0903011	-0.0695029	-0.0460493	0.0315069	-0.1	-0.38807	0
2123	4.19527	0	0.174151	4.02112	4.41829	4.35986	4.24069	3.529	0.387589	0.324103	0.119169	0.0584234	0.0117071	0.00333144	0.000150549	0.00381115	0.00470021	0.00147827	0.00736413	0.050416	0.0148994	3.57621e-05	0.00734264	0.0139324	0.00436523	0.0438803	0.00438661	0.00323805	0.00151669	5.72413e-05	6.00057e-14	9.73371e-05	7.46602e-05	3.82641e-05	3.13467e-06	0	0.000183553	2.61248e-07	1.75051e-06	0.000580289	-0.12183	-0.0280207	0.090221	-0.0692922	-0.0460136	0.0312753	-0.1	-0.388149	0
2124	4.14121	0	0.130187	4.01102	4.40889	4.35126	4.23168	3.52108	0.386626	0.323967	0.119581	0.0576358	0.0117485	0.00334372	0.000150936	0.00380215	0.00469986	0.00147756	0.00735746	0.0506448	0.0149737	3.4975e-05	0.00734321	0.0140036	0.00425053	0.0433104	0.00431965	0.00322397	0.00151552	5.44336e-05	4.85639e-14	8.90919e-05	7.09165e-05	3.6109e-05	2.94284e-06	0	0.00017996	2.46936e-07	1.76201e-06	0.000580289	-0.12195	-0.0280752	0.0901409	-0.0690814	-0.0459778	0.0310437	-0.1	-0.388228	0
2125	4.08667	0	0.0860781	4.00059	4.39916	4.34229	4.22231	3.51283	0.385693	0.323791	0.119982	0.0568619	0.0117883	0.00335555	0.000151309	0.00379345	0.00470001	0.00147694	0.00735122	0.0508696	0.0150447	3.42206e-05	0.00734415	0.0140723	0.00413893	0.0427486	0.00425381	0.00320997	0.00151436	5.17671e-05	3.93072e-14	8.15447e-05	6.73665e-05	3.40737e-05	2.75867e-06	0	0.000176437	2.33416e-07	1.80176e-06	0.000580289	-0.12207	-0.0281298	0.0900608	-0.0688706	-0.0459421	0.030812	-0.1	-0.388307	0
2126	4.04901	0	0.0592681	3.98975	4.38899	4.33289	4.21251	3.50415	0.384788	0.323575	0.120373	0.0561016	0.0118266	0.00336693	0.000151668	0.00378506	0.00470059	0.00147641	0.00734541	0.0510909	0.0151124	3.3498e-05	0.00734545	0.0141383	0.00403038	0.042195	0.00418907	0.00319605	0.0015132	4.92351e-05	3.18179e-14	7.46425e-05	6.39992e-05	3.21513e-05	2.58676e-06	0	0.000172983	2.20645e-07	1.85157e-06	0.000580289	-0.12219	-0.0281843	0.0899806	-0.0686599	-0.0459064	0.0305801	-0.1	-0.388386	0
2127	4.02153	0	0.0431769	3.97835	4.37826	4.32291	4.20215	3.49493	0.383902	0.323318	0.120755	0.0553542	0.0118635	0.00337786	0.000152013	0.00377698	0.00470142	0.00147596	0.00733997	0.0513086	0.0151768	3.28063e-05	0.00734697	0.0142017	0.00392474	0.0416491	0.00412539	0.00318221	0.00151204	4.68296e-05	2.57575e-14	6.83226e-05	6.08005e-05	3.03407e-05	2.42627e-06	0	0.000169602	2.0858e-07	1.89284e-06	0.000580289	-0.12231	-0.0282389	0.0899003	-0.0684491	-0.0458706	0.0303481	-0.1	-0.388465	0
2128	3.99859	0	0.0322656	3.96633	4.36691	4.31229	4.19116	3.48511	0.383028	0.323023	0.121126	0.0546192	0.0118988	0.00338835	0.000152343	0.00376921	0.00470239	0.00147557	0.00733489	0.0515226	0.015238	3.21443e-05	0.00734861	0.0142626	0.0038219	0.0411108	0.00406273	0.00316844	0.00151088	4.45437e-05	2.08528e-14	6.25347e-05	5.77616e-05	2.86294e-05	2.27643e-06	0	0.000166291	1.97179e-07	1.92586e-06	0.000580289	-0.122431	-0.0282934	0.08982	-0.0682384	-0.0458349	0.0301162	-0.1	-0.388544	0
2129	3.97932	0	0.025655	3.95367	4.35491	4.30101	4.17952	3.47467	0.382164	0.322688	0.121486	0.0538963	0.0119326	0.00339839	0.00015266	0.00376173	0.00470347	0.00147525	0.00733014	0.0517333	0.0152961	3.15112e-05	0.00735035	0.0143208	0.00372178	0.0405799	0.00400107	0.00315474	0.00150973	4.2371e-05	1.6883e-14	5.724e-05	5.48783e-05	2.70117e-05	2.13651e-06	0	0.000163048	1.86405e-07	1.95533e-06	0.000580289	-0.122551	-0.028348	0.0897397	-0.0680277	-0.0457992	0.0298842	-0.1	-0.388623	0
2130	4.01289	0	0.0725288	3.94036	4.34226	4.28908	4.16724	3.46362	0.381307	0.322315	0.121837	0.0531853	0.0119649	0.00340799	0.000152962	0.00375456	0.00470461	0.00147497	0.00732571	0.0519407	0.0153511	3.0906e-05	0.00735215	0.0143764	0.00362431	0.0400562	0.00394039	0.00314111	0.00150858	4.03059e-05	1.36698e-14	5.2396e-05	5.21403e-05	2.54878e-05	2.00586e-06	0	0.000159866	1.76224e-07	1.98245e-06	0.000580289	-0.122671	-0.0284025	0.0896594	-0.0678169	-0.0457634	0.0296522	-0.1	-0.388702	0
2131	4.07252	0	0.146252	3.92627	4.32884	4.27635	4.15418	3.45184	0.380431	0.321903	0.122176	0.0524847	0.0119957	0.00341714	0.00015325	0.00374768	0.00470545	0.00147471	0.00732148	0.0521437	0.015403	3.03276e-05	0.00735363	0.0144295	0.00352925	0.0395389	0.00388059	0.00312753	0.00150742	3.83399e-05	1.1068e-14	4.79628e-05	4.95362e-05	2.40518e-05	1.88378e-06	0	0.000156737	1.66595e-07	1.96954e-06	0.000580289	-0.122792	-0.028457	0.0895791	-0.0676062	-0.0457277	0.0294203	-0.1	-0.388781	0
2132	4.09256	0	0.181191	3.91137	4.31462	4.26283	4.14033	3.43935	0.379523	0.321453	0.122501	0.0517936	0.012025	0.00342584	0.000153525	0.00374109	0.0047058	0.00147444	0.00731738	0.0523415	0.0154517	2.97749e-05	0.00735459	0.0144799	0.00343646	0.0390274	0.00382159	0.00311399	0.00150627	3.64666e-05	8.96082e-15	4.39044e-05	4.70604e-05	2.26923e-05	1.76968e-06	0	0.000153666	1.57485e-07	1.92326e-06	0.000580289	-0.122912	-0.0285116	0.0894988	-0.0673954	-0.045692	0.0291883	-0.1	-0.38886	0
2133	4.08647	0	0.190562	3.89591	4.29985	4.24873	4.12592	3.42635	0.378603	0.320966	0.122815	0.0511128	0.0120529	0.00343409	0.000153785	0.00373479	0.00470602	0.00147418	0.00731347	0.0525357	0.0154974	2.92473e-05	0.00735534	0.0145278	0.00334598	0.0385221	0.00376345	0.00310049	0.00150512	3.46835e-05	7.25469e-15	4.01903e-05	4.47106e-05	2.14055e-05	1.66308e-06	0	0.000150652	1.4887e-07	1.89705e-06	0.000580289	-0.123032	-0.0285661	0.0894185	-0.0671847	-0.0456562	0.0289563	-0.1	-0.388938	0
2134	4.05419	0	0.174151	3.88004	4.28466	4.23422	4.1111	3.41297	0.377685	0.32044	0.123119	0.0504425	0.0120792	0.0034419	0.000154031	0.00372878	0.00470631	0.00147396	0.0073098	0.0527272	0.0155402	2.87442e-05	0.00735614	0.014573	0.00325784	0.0380234	0.00370619	0.00308705	0.00150396	3.29877e-05	5.87355e-15	3.67919e-05	4.24809e-05	2.01931e-05	1.56352e-06	0	0.0001477	1.40727e-07	1.89678e-06	0.000580289	-0.123153	-0.0286207	0.0893382	-0.066974	-0.0456205	0.0287244	-0.1	-0.389017	0
2135	3.99401	0	0.130187	3.86383	4.26912	4.21934	4.09592	3.39926	0.376783	0.319878	0.123416	0.0497831	0.012104	0.00344926	0.000154263	0.00372307	0.00470686	0.00147378	0.00730642	0.0529171	0.0155803	2.82652e-05	0.00735715	0.0146157	0.00317206	0.0375316	0.00364986	0.00307368	0.00150281	3.13762e-05	4.75564e-15	3.36764e-05	4.03626e-05	1.90511e-05	1.47057e-06	0	0.000144808	1.33032e-07	1.9216e-06	0.000580289	-0.123273	-0.0286752	0.0892579	-0.0667632	-0.0455848	0.0284924	-0.1	-0.389096	0
2136	3.93337	0	0.0860781	3.84729	4.25325	4.20412	4.08041	3.38522	0.375908	0.319279	0.123707	0.0491349	0.0121273	0.00345618	0.000154481	0.00371766	0.00470781	0.00147368	0.00730338	0.0531063	0.0156177	2.78096e-05	0.00735857	0.0146558	0.00308864	0.037047	0.00359448	0.0030604	0.00150166	2.98461e-05	3.8509e-15	3.08202e-05	3.83511e-05	1.79755e-05	1.38381e-06	0	0.000141972	1.25764e-07	1.97475e-06	0.000580289	-0.123393	-0.0287298	0.0891776	-0.0665525	-0.045549	0.0282604	-0.1	-0.389175	0
2137	3.88961	0	0.0592681	3.83034	4.23696	4.18846	4.06447	3.37077	0.375061	0.318644	0.123991	0.0484979	0.012149	0.00346265	0.000154684	0.00371255	0.00470914	0.00147364	0.00730067	0.0532952	0.0156526	2.73767e-05	0.0073604	0.0146932	0.00300755	0.0365696	0.00354004	0.00304719	0.00150052	2.83935e-05	3.11864e-15	2.82078e-05	3.64417e-05	1.69626e-05	1.30283e-06	0	0.000139192	1.18899e-07	2.03797e-06	0.000580289	-0.123514	-0.0287843	0.0890973	-0.0663418	-0.0455133	0.0280285	-0.1	-0.389254	0
2138	3.85602	0	0.0431769	3.81284	4.22011	4.17224	4.04797	3.35577	0.374231	0.317972	0.124269	0.0478714	0.0121693	0.00346867	0.000154874	0.00370773	0.00471068	0.00147366	0.00729826	0.0534832	0.0156849	2.69657e-05	0.00736248	0.0147281	0.00292867	0.0360991	0.00348652	0.00303407	0.00149937	2.70136e-05	2.52586e-15	2.58181e-05	3.46293e-05	1.60028e-05	1.22724e-06	0	0.000136471	1.12414e-07	2.09265e-06	0.000580289	-0.123634	-0.0288389	0.089017	-0.066131	-0.0454776	0.0277965	-0.1	-0.389332	0
2139	3.82698	0	0.0322656	3.79472	4.20263	4.15537	4.03083	3.34016	0.373412	0.317264	0.12454	0.0472551	0.0121881	0.00347424	0.00015505	0.0037032	0.00471232	0.00147373	0.00729612	0.0536704	0.0157147	2.6576e-05	0.00736472	0.0147604	0.00285193	0.0356352	0.00343387	0.00302102	0.00149823	2.57025e-05	2.04593e-15	2.36317e-05	3.29064e-05	1.5093e-05	1.15155e-06	0	0.000133807	1.06286e-07	2.13912e-06	0.000580289	-0.123754	-0.0288934	0.0889367	-0.0659203	-0.0454418	0.0275645	-0.1	-0.389411	0
2140	3.8016	0	0.025655	3.77594	4.18449	4.13784	4.01304	3.32392	0.372601	0.316521	0.124803	0.0466488	0.0122054	0.00347937	0.000155211	0.00369896	0.00471403	0.00147383	0.00729424	0.0538566	0.015742	2.62068e-05	0.00736707	0.0147901	0.00277725	0.0351779	0.00338208	0.00300804	0.0014971	2.44565e-05	1.65732e-15	2.16312e-05	3.12699e-05	1.42359e-05	1.07577e-06	0	0.000131199	1.00495e-07	2.1821e-06	0.000580289	-0.123875	-0.028948	0.0888564	-0.0657096	-0.0454061	0.0273325	-0.1	-0.38949	0
2141	3.82904	0	0.0725288	3.75651	4.1657	4.11965	3.99459	3.30705	0.371796	0.315742	0.125059	0.0460522	0.0122212	0.00348406	0.000155359	0.00369502	0.00471578	0.00147397	0.00729259	0.0540419	0.0157669	2.58575e-05	0.00736951	0.0148173	0.00270458	0.0347269	0.00333113	0.00299513	0.00149596	2.32723e-05	1.34263e-15	1.98009e-05	2.97169e-05	1.34284e-05	1.005e-06	0	0.000128645	9.50234e-08	2.22278e-06	0.000580289	-0.123995	-0.0290025	0.0887761	-0.0654988	-0.0453704	0.0271006	-0.1	-0.389568	0
2142	3.88254	0	0.146252	3.73629	4.14612	4.10065	3.97535	3.28945	0.370973	0.314928	0.125306	0.0454642	0.0122355	0.00348829	0.000155493	0.00369135	0.0047172	0.0014741	0.00729107	0.0542248	0.0157893	2.55271e-05	0.00737165	0.0148418	0.00263374	0.0342816	0.00328093	0.00298227	0.00149483	2.21451e-05	1.0877e-15	1.81255e-05	2.82406e-05	1.26674e-05	9.38882e-07	0	0.000126141	8.98485e-08	2.22329e-06	0.000580289	-0.124115	-0.0290571	0.0886958	-0.0652881	-0.0453346	0.0268686	-0.1	-0.389647	0
2143	3.89643	0	0.181191	3.71524	4.12573	4.08085	3.95531	3.27111	0.370117	0.31408	0.125542	0.0448841	0.0122483	0.00349208	0.000155612	0.00368797	0.00471814	0.00147421	0.00728962	0.0544045	0.0158092	2.5215e-05	0.00737329	0.0148637	0.00256462	0.0338414	0.00323142	0.00296945	0.00149369	2.1071e-05	8.81139e-16	1.65915e-05	2.68352e-05	1.195e-05	8.77083e-07	0	0.000123682	8.49523e-08	2.19037e-06	0.000580289	-0.124236	-0.0291116	0.0886155	-0.0650774	-0.0452989	0.0266366	-0.1	-0.389726	0
2144	3.88419	0	0.190562	3.69363	4.10478	4.06047	3.9347	3.25226	0.369248	0.313196	0.125769	0.0443124	0.0122595	0.00349543	0.000155718	0.00368486	0.00471892	0.00147432	0.00728829	0.0545823	0.0158267	2.49206e-05	0.00737474	0.0148831	0.00249724	0.0334067	0.00318264	0.00295668	0.00149255	2.00486e-05	7.13805e-16	1.51873e-05	2.55006e-05	1.1274e-05	8.19344e-07	0	0.000121271	8.03222e-08	2.1777e-06	0.000580289	-0.124356	-0.0291661	0.0885352	-0.0648666	-0.0452632	0.0264047	-0.1	-0.389804	0
2145	3.84574	0	0.174151	3.67159	4.08341	4.03966	3.91368	3.23301	0.368382	0.312279	0.125989	0.0437495	0.0122693	0.00349833	0.000155809	0.00368204	0.00471977	0.00147445	0.00728714	0.0547592	0.0158419	2.46438e-05	0.00737625	0.0148999	0.00243164	0.0329778	0.00313463	0.00294397	0.00149142	1.90764e-05	5.78276e-16	1.39023e-05	2.42331e-05	1.06369e-05	7.65416e-07	0	0.000118909	7.59455e-08	2.19109e-06	0.000580289	-0.124476	-0.0292207	0.0884549	-0.0646559	-0.0452274	0.0261727	-0.1	-0.389883	0
2146	3.77939	0	0.130187	3.6492	4.06168	4.01849	3.89228	3.21343	0.36753	0.311328	0.126203	0.0431956	0.0122776	0.00350078	0.000155886	0.00367951	0.00472086	0.00147462	0.00728621	0.054936	0.015855	2.4384e-05	0.00737798	0.0149141	0.00236782	0.0325549	0.0030874	0.00293134	0.00149029	1.81525e-05	4.68517e-16	1.27265e-05	2.30293e-05	1.00368e-05	7.15061e-07	0	0.00011659	7.18098e-08	2.22974e-06	0.000580289	-0.124597	-0.0292752	0.0883746	-0.0644452	-0.0451917	0.0259407	-0.1	-0.389961	0
2147	3.71256	0	0.0860781	3.62648	4.03961	3.99695	3.87054	3.19349	0.366706	0.310343	0.126413	0.0426511	0.0122843	0.00350279	0.00015595	0.00367726	0.00472236	0.00147484	0.00728556	0.0551136	0.015866	2.41409e-05	0.00738015	0.0149257	0.00230579	0.0321384	0.00304098	0.00291878	0.00148916	1.72752e-05	3.79638e-16	1.16509e-05	2.18861e-05	9.4716e-06	6.68055e-07	0	0.000114316	6.79033e-08	2.29691e-06	0.000580289	-0.124717	-0.0293298	0.0882943	-0.0642344	-0.045156	0.0257088	-0.1	-0.39004	0
2148	3.6626	0	0.0592681	3.60333	4.01709	3.97498	3.84836	3.17313	0.365908	0.309324	0.126618	0.0421158	0.0122896	0.00350435	0.000155999	0.00367529	0.00472423	0.00147513	0.00728519	0.0552923	0.015875	2.3914e-05	0.00738272	0.0149347	0.0022455	0.0317283	0.00299537	0.00290631	0.00148803	1.64423e-05	3.07661e-16	1.06668e-05	2.08004e-05	8.93923e-06	6.24176e-07	0	0.000112091	6.42134e-08	2.37426e-06	0.000580289	-0.124837	-0.0293843	0.088214	-0.0640237	-0.0451202	0.0254768	-0.1	-0.390119	0
2149	3.62279	0	0.0431769	3.57961	3.994	3.95241	3.82559	3.15219	0.365126	0.308273	0.126819	0.0415893	0.0122934	0.00350546	0.000156034	0.00367361	0.0047263	0.00147545	0.00728506	0.0554716	0.0158821	2.37027e-05	0.00738555	0.0149412	0.00218689	0.0313241	0.00295053	0.00289392	0.00148691	1.56511e-05	2.49359e-16	9.76642e-06	1.97723e-05	8.43774e-06	5.83207e-07	0	0.000109914	6.07273e-08	2.44311e-06	0.000580289	-0.124958	-0.0294389	0.0881337	-0.0638129	-0.0450845	0.0252448	-0.1	-0.390197	0
2150	3.58751	0	0.0322656	3.55524	3.97025	3.92918	3.80216	3.13062	0.364356	0.307188	0.127015	0.0410713	0.0122956	0.00350613	0.000156056	0.00367221	0.00472847	0.00147581	0.00728514	0.0556511	0.0158871	2.35066e-05	0.00738855	0.014945	0.00212988	0.0309258	0.00290644	0.0028816	0.00148579	1.48993e-05	2.02127e-16	8.94246e-06	1.87953e-05	7.96529e-06	5.44951e-07	0	0.000107784	5.7433e-08	2.5038e-06	0.000580289	-0.125078	-0.0294934	0.0880534	-0.0636022	-0.0450488	0.025013	-0.1	-0.390275	0
2151	3.55585	0	0.025655	3.5302	3.94583	3.90526	3.77806	3.1084	0.363593	0.306071	0.127205	0.0405616	0.0122964	0.00350635	0.000156063	0.0036711	0.00473072	0.00147621	0.00728543	0.0558308	0.0158903	2.33251e-05	0.00739168	0.0149463	0.00207442	0.0305332	0.00286309	0.00286936	0.00148468	1.41847e-05	1.63857e-16	8.18841e-06	1.78637e-05	7.51443e-06	5.09225e-07	0	0.000105698	5.43199e-08	2.56109e-06	0.000580289	-0.125198	-0.0295479	0.0879733	-0.0633915	-0.045013	0.0247815	-0.1	-0.390354	0
2152	3.57747	0	0.0725288	3.50494	3.92118	3.88112	3.75373	3.08597	0.362837	0.304921	0.127392	0.0400601	0.0122964	0.00350635	0.000156063	0.00367012	0.00473301	0.00147663	0.00728587	0.0560106	0.0158925	2.31537e-05	0.00739491	0.0149463	0.00202048	0.0301463	0.00282044	0.00285718	0.00148356	1.35055e-05	1.32846e-16	7.49828e-06	1.69793e-05	7.08388e-06	4.7586e-07	0	0.000103657	5.13777e-08	2.61616e-06	0.000580289	-0.125317	-0.0296025	0.0878931	-0.0631808	-0.0449773	0.0245501	-0.1	-0.390432	0
2153	3.626	0	0.146252	3.47975	3.89662	3.85705	3.72947	3.06367	0.362061	0.303739	0.127577	0.0395657	0.0122964	0.00350635	0.000156063	0.00366916	0.004735	0.00147704	0.00728634	0.0561889	0.0158948	2.29875e-05	0.00739786	0.0149463	0.00196791	0.0297642	0.00277844	0.00284506	0.00148245	1.28589e-05	1.07708e-16	6.86641e-06	1.61396e-05	6.67805e-06	4.44682e-07	0	0.000101655	4.8595e-08	2.63041e-06	0.000580289	-0.125437	-0.029657	0.087813	-0.0629701	-0.0449415	0.0243187	-0.1	-0.390511	0
2154	3.63575	0	0.181191	3.45456	3.87207	3.83299	3.70523	3.04145	0.361253	0.302525	0.127759	0.0390778	0.0122964	0.00350635	0.000156064	0.00366819	0.00473651	0.00147741	0.00728677	0.0563648	0.0158969	2.28263e-05	0.00740033	0.0149463	0.00191663	0.0293866	0.00273702	0.00283298	0.00148134	1.22426e-05	8.73237e-17	6.28771e-06	1.53393e-05	6.29542e-06	4.15536e-07	0	9.96904e-05	4.59618e-08	2.61016e-06	0.000580289	-0.125557	-0.0297115	0.0877328	-0.0627594	-0.0449058	0.0240873	-0.1	-0.390589	0
2155	3.62017	0	0.190562	3.42961	3.84776	3.80916	3.68122	3.01951	0.360431	0.301279	0.127939	0.0385969	0.0122964	0.00350635	0.000156064	0.00366723	0.00473786	0.00147777	0.00728722	0.0565395	0.0158991	2.26701e-05	0.00740263	0.0149463	0.00186665	0.0290139	0.00269622	0.00282095	0.00148023	1.16559e-05	7.07989e-17	5.75785e-06	1.45781e-05	5.93476e-06	3.88301e-07	0	9.77639e-05	4.34713e-08	2.60932e-06	0.000580289	-0.125676	-0.0297661	0.0876529	-0.0625487	-0.04487	0.0238563	-0.1	-0.390667	0
2156	3.57918	0	0.174151	3.40503	3.82382	3.7857	3.65758	2.99797	0.359609	0.300002	0.128119	0.0381233	0.0122964	0.00350635	0.000156064	0.00366628	0.00473928	0.00147814	0.00728775	0.0567139	0.0159014	2.25189e-05	0.00740496	0.0149463	0.001818	0.0286461	0.00265606	0.00280898	0.00147912	1.10978e-05	5.74047e-17	5.27279e-06	1.38552e-05	5.59487e-06	3.62859e-07	0	9.58765e-05	4.11166e-08	2.63365e-06	0.000580289	-0.125793	-0.0298206	0.0875735	-0.0623379	-0.0448343	0.0236262	-0.1	-0.390746	0
2157	3.51104	0	0.130187	3.38086	3.80029	3.76263	3.63433	2.97683	0.358801	0.298693	0.128301	0.0376572	0.0122964	0.00350635	0.000156065	0.00366534	0.00474093	0.00147854	0.0072884	0.0568889	0.0159037	2.23726e-05	0.00740753	0.0149463	0.00177067	0.0282836	0.00261656	0.00279708	0.00147801	1.05672e-05	4.65489e-17	4.82881e-06	1.31704e-05	5.27461e-06	3.39097e-07	0	9.40287e-05	3.88912e-08	2.68234e-06	0.000580289	-0.12591	-0.0298752	0.0874943	-0.0621271	-0.0447986	0.0233965	-0.1	-0.390825	0
2158	3.44318	0	0.0860781	3.35711	3.77716	3.73996	3.61148	2.95611	0.358016	0.297353	0.128485	0.0371988	0.0122964	0.00350635	0.000156065	0.00366442	0.00474298	0.00147899	0.00728923	0.0570653	0.0159063	2.22313e-05	0.00741051	0.0149463	0.00172468	0.0279266	0.00257775	0.00278527	0.00147691	1.00632e-05	3.77512e-17	4.4225e-06	1.25195e-05	4.9729e-06	3.1691e-07	0	9.22213e-05	3.67886e-08	2.7587e-06	0.000580289	-0.126027	-0.0299298	0.0874151	-0.0619163	-0.044763	0.0231668	-0.1	-0.390904	0
2159	3.39294	0	0.0592681	3.33367	3.75434	3.71759	3.58892	2.93568	0.357255	0.295983	0.128672	0.0367481	0.0122964	0.00350635	0.000156065	0.00366351	0.00474538	0.00147949	0.00729024	0.0572432	0.0159091	2.20948e-05	0.00741389	0.0149463	0.00167998	0.0275751	0.00253961	0.00277353	0.00147581	9.58453e-06	3.06207e-17	4.05066e-06	1.18991e-05	4.68866e-06	2.96194e-07	0	9.04536e-05	3.48021e-08	2.84419e-06	0.000580289	-0.126144	-0.0299844	0.0873359	-0.0617056	-0.0447273	0.0229371	-0.1	-0.390982	0
2160	3.35359	0	0.0431769	3.31042	3.73166	3.69536	3.5665	2.91541	0.356508	0.294581	0.128861	0.0363047	0.0122964	0.00350635	0.000156065	0.00366262	0.00474796	0.00148002	0.0072914	0.057422	0.0159121	2.19628e-05	0.00741751	0.0149462	0.00163653	0.0272287	0.00250212	0.00276187	0.00147471	9.12959e-06	2.48401e-17	3.71031e-06	1.13089e-05	4.42084e-06	2.76847e-07	0	8.87238e-05	3.29248e-08	2.91998e-06	0.000580289	-0.126245	-0.0300309	0.0872682	-0.061526	-0.0446969	0.022741	-0.1	-0.391049	0
2161	3.31956	0	0.0322656	3.2873	3.70905	3.67318	3.54413	2.89521	0.355768	0.29315	0.12905	0.0358683	0.0122964	0.00350635	0.000156066	0.00366174	0.00475062	0.00148058	0.00729269	0.0576014	0.0159152	2.18353e-05	0.00742126	0.0149462	0.00159426	0.0268873	0.00246526	0.00275028	0.00147361	8.69704e-06	2.0153e-17	3.39873e-06	1.0749e-05	4.16847e-06	2.58775e-07	0	8.70306e-05	3.11503e-08	2.98637e-06	0.000580289	-0.126312	-0.0300612	0.0872233	-0.0614087	-0.044677	0.0226118	-0.1	-0.391093	0
2162	3.28993	0	0.025655	3.26428	3.68649	3.65105	3.52181	2.87507	0.355031	0.291708	0.129241	0.0354387	0.0122964	0.00350635	0.000156066	0.00366087	0.00475329	0.00148116	0.00729407	0.0577811	0.0159184	2.1712e-05	0.00742508	0.0149462	0.00155313	0.0265508	0.002429	0.00273875	0.00147252	8.28572e-06	1.63519e-17	3.11346e-06	1.02192e-05	3.93062e-06	2.41894e-07	0	8.53729e-05	2.94728e-08	3.04743e-06	0.000580289	-0.126363	-0.0300834	0.0871898	-0.0613226	-0.0446625	0.0225162	-0.1	-0.391124	0
2163	3.31386	0	0.0725288	3.24133	3.66399	3.62897	3.49954	2.85497	0.354292	0.290278	0.129431	0.0350158	0.0122964	0.00350635	0.000156066	0.00366001	0.00475592	0.00148175	0.00729555	0.0579608	0.0159217	2.15927e-05	0.0074289	0.0149462	0.00151312	0.026219	0.00239333	0.0027273	0.00147143	7.89449e-06	1.32689e-17	2.85225e-06	9.71625e-06	3.70645e-06	2.26123e-07	0	8.37497e-05	2.78869e-08	3.1042e-06	0.000580289	-0.126413	-0.0301056	0.0871564	-0.0612365	-0.044648	0.0224205	-0.1	-0.391156	0
2164	3.36456	0	0.146252	3.2183	3.64142	3.60682	3.4772	2.83482	0.353528	0.288859	0.129619	0.0345987	0.0122964	0.00350635	0.000156066	0.00365915	0.00475815	0.00148231	0.00729699	0.058139	0.015925	2.14771e-05	0.00743234	0.0149462	0.00147413	0.0258915	0.00235819	0.00271589	0.00147035	7.52178e-06	1.07674e-17	2.61298e-06	9.23685e-06	3.49509e-06	2.11381e-07	0	8.21578e-05	2.63864e-08	3.11871e-06	0.000580289	-0.126464	-0.0301278	0.0871229	-0.0611504	-0.0446335	0.0223249	-0.1	-0.391188	0
2165	3.3763	0	0.181191	3.1951	3.61877	3.58458	3.45478	2.8146	0.352724	0.287452	0.129804	0.0341869	0.0122964	0.00350635	0.000156067	0.0036583	0.00475981	0.00148282	0.00729835	0.0583144	0.0159282	2.13648e-05	0.00743519	0.0149462	0.00143608	0.0255677	0.00232354	0.00270453	0.00146926	7.16633e-06	8.73717e-18	2.39374e-06	8.78157e-06	3.29574e-06	1.97595e-07	0	8.05949e-05	2.4966e-08	3.09802e-06	0.000580289	-0.126549	-0.0301662	0.087066	-0.0610019	-0.0446083	0.022161	-0.1	-0.391242	0
2166	3.36248	0	0.190562	3.17191	3.59628	3.56249	3.43251	2.79455	0.351902	0.286056	0.129986	0.0337809	0.0122965	0.00350635	0.000156067	0.00365745	0.00476125	0.00148331	0.00729969	0.0584886	0.0159313	2.1256e-05	0.00743778	0.0149462	0.001399	0.025248	0.00228939	0.00269321	0.00146817	6.8277e-06	7.08982e-18	2.19291e-06	8.34807e-06	3.10777e-06	1.84709e-07	0	7.9062e-05	2.36221e-08	3.09675e-06	0.000580289	-0.126705	-0.0302369	0.0869623	-0.0607287	-0.044562	0.0218607	-0.1	-0.391344	0
2167	3.32309	0	0.174151	3.14894	3.57409	3.54071	3.41054	2.77479	0.351079	0.284673	0.130168	0.0333808	0.0122965	0.00350635	0.000156067	0.00365661	0.00476277	0.00148381	0.00730108	0.0586627	0.0159345	2.11507e-05	0.0074404	0.0149462	0.00136289	0.0249325	0.00225578	0.00268194	0.00146709	6.50535e-06	5.75342e-18	2.00898e-06	7.93426e-06	2.93058e-06	1.72667e-07	0	7.75599e-05	2.2351e-08	3.12202e-06	0.000580289	-0.126895	-0.0303238	0.0868351	-0.0603932	-0.044505	0.0214922	-0.1	-0.391469	0
2168	3.25651	0	0.130187	3.12632	3.55227	3.51928	3.38893	2.75536	0.350272	0.283301	0.130352	0.0329869	0.0122965	0.00350634	0.000156068	0.00365578	0.00476459	0.00148433	0.00730259	0.0588378	0.0159379	2.1049e-05	0.0074433	0.0149462	0.00132775	0.0246216	0.00222272	0.00267075	0.001466	6.19872e-06	4.66943e-18	1.84058e-06	7.54158e-06	2.76359e-06	1.61416e-07	0	7.60829e-05	2.11493e-08	3.17329e-06	0.000580289	-0.127085	-0.0304107	0.0867079	-0.0600576	-0.0444481	0.0211236	-0.1	-0.391593	0
2169	3.19015	0	0.0860781	3.10408	3.53081	3.49822	3.36768	2.73624	0.349492	0.28194	0.13054	0.0325993	0.0122965	0.00350634	0.000156068	0.00365497	0.00476684	0.00148491	0.00730427	0.0590147	0.0159414	2.09509e-05	0.00744665	0.0149462	0.0012936	0.0243153	0.00219022	0.00265963	0.00146492	5.90727e-06	3.79023e-18	1.68641e-06	7.17128e-06	2.60624e-06	1.50908e-07	0	7.46315e-05	2.00135e-08	3.25269e-06	0.000580289	-0.127275	-0.0304976	0.0865807	-0.0597221	-0.0443911	0.0207551	-0.1	-0.391718	0
2170	3.14141	0	0.0592681	3.08215	3.50963	3.47741	3.34668	2.71735	0.348737	0.280592	0.13073	0.0322181	0.0122965	0.00350634	0.000156068	0.00365417	0.00476948	0.00148553	0.00730612	0.0591936	0.0159452	2.08562e-05	0.00745043	0.0149462	0.0012604	0.0240136	0.00215829	0.00264858	0.00146385	5.63025e-06	3.07706e-18	1.54528e-06	6.81754e-06	2.45797e-06	1.41092e-07	0	7.32116e-05	1.894e-08	3.34125e-06	0.000580289	-0.127447	-0.0305764	0.0864652	-0.0594177	-0.0443394	0.0204208	-0.1	-0.391831	0
2171	3.10358	0	0.0431769	3.06041	3.48856	3.45671	3.32579	2.69854	0.347998	0.279254	0.130923	0.0318429	0.0122965	0.00350634	0.000156068	0.00365338	0.00477232	0.00148618	0.00730811	0.0593738	0.0159491	2.07649e-05	0.00745446	0.0149462	0.00122811	0.0237163	0.00212689	0.0026376	0.00146278	5.3668e-06	2.49842e-18	1.41604e-06	6.47847e-06	2.31824e-06	1.31923e-07	0	7.18219e-05	1.79251e-08	3.41992e-06	0.000580289	-0.127585	-0.030639	0.0863733	-0.0591757	-0.0442984	0.020155	-0.1	-0.39192	0
2172	3.07102	0	0.0322656	3.03875	3.46752	3.43605	3.30493	2.67973	0.347266	0.277928	0.131117	0.0314735	0.0122965	0.00350634	0.000156069	0.00365261	0.00477523	0.00148686	0.0073102	0.0595547	0.0159532	2.06768e-05	0.00745862	0.0149462	0.0011967	0.0234232	0.002096	0.0026267	0.00146171	5.11615e-06	2.02883e-18	1.29769e-06	6.15912e-06	2.18653e-06	1.23354e-07	0	7.04611e-05	1.69654e-08	3.48835e-06	0.000580289	-0.127705	-0.0306936	0.0862932	-0.0589649	-0.0442628	0.0199234	-0.1	-0.391999	0
2173	3.04278	0	0.025655	3.01712	3.4465	3.41539	3.28407	2.66092	0.346536	0.276614	0.131312	0.0311097	0.0122965	0.00350634	0.000156069	0.00365185	0.00477815	0.00148755	0.00731237	0.0597362	0.0159574	2.05916e-05	0.00746283	0.0149462	0.00116614	0.0231343	0.00206562	0.00261585	0.00146064	4.87763e-06	1.64768e-18	1.18929e-06	5.85729e-06	2.06237e-06	1.15348e-07	0	6.91285e-05	1.60579e-08	3.5512e-06	0.000580289	-0.127825	-0.0307481	0.086213	-0.0587541	-0.0442271	0.0196918	-0.1	-0.392077	0
2174	3.06803	0	0.0725288	2.99551	3.42548	3.39473	3.26323	2.64211	0.345807	0.27531	0.131507	0.0307514	0.0122965	0.00350634	0.000156069	0.0036511	0.00478104	0.00148825	0.00731462	0.0599179	0.0159617	2.05094e-05	0.00746707	0.0149462	0.0011364	0.0228495	0.00203573	0.00260507	0.00145958	4.65062e-06	1.33826e-18	1.08999e-06	5.5677e-06	1.94532e-06	1.07865e-07	0	6.78233e-05	1.51996e-08	3.61028e-06	0.000580289	-0.127944	-0.0308027	0.0861329	-0.0585433	-0.0441914	0.0194601	-0.1	-0.392155	0
2175	3.12001	0	0.146252	2.97375	3.40435	3.37395	3.24225	2.62318	0.345053	0.274018	0.1317	0.0303978	0.0122965	0.00350634	0.00015607	0.00365036	0.00478354	0.00148893	0.00731683	0.0600982	0.0159659	2.04297e-05	0.00747093	0.0149462	0.0011074	0.0225682	0.00200628	0.00259434	0.00145851	4.43419e-06	1.08699e-18	9.98999e-07	5.29217e-06	1.83494e-06	1.00868e-07	0	6.65429e-05	1.43872e-08	3.62675e-06	0.000580289	-0.128064	-0.0308572	0.0860528	-0.0583326	-0.0441557	0.0192284	-0.1	-0.392233	0
2176	3.13305	0	0.181191	2.95186	3.38309	3.35304	3.22115	2.60415	0.344262	0.272737	0.131889	0.0300486	0.0122965	0.00350634	0.00015607	0.00364962	0.00478549	0.00148955	0.00731895	0.0602761	0.0159701	2.03523e-05	0.00747422	0.0149462	0.0010791	0.02229	0.00197722	0.00258364	0.00145745	4.22764e-06	8.82873e-19	9.15593e-07	5.0324e-06	1.7308e-06	9.43227e-08	0	6.52855e-05	1.36179e-08	3.60767e-06	0.000580289	-0.128184	-0.0309118	0.0859728	-0.0581218	-0.0441199	0.0189965	-0.1	-0.392311	0
2177	3.12064	0	0.190562	2.93007	3.36195	3.33224	3.20016	2.58524	0.343453	0.271466	0.132077	0.0297042	0.0122965	0.00350634	0.00015607	0.00364889	0.00478724	0.00149016	0.00732104	0.0604529	0.0159742	2.02774e-05	0.00747726	0.0149461	0.00105151	0.0220154	0.00194859	0.00257298	0.00145639	4.03072e-06	7.17103e-19	8.39161e-07	4.78686e-06	1.63259e-06	8.82023e-08	0	6.40519e-05	1.28897e-08	3.60806e-06	0.000580289	-0.128304	-0.0309663	0.0858929	-0.0579111	-0.0440842	0.0187645	-0.1	-0.392389	0
2178	3.08271	0	0.174151	2.90856	3.34107	3.31171	3.17944	2.56659	0.342642	0.270207	0.132265	0.0293646	0.0122966	0.00350634	0.00015607	0.00364816	0.004789	0.00149076	0.00732315	0.0606295	0.0159784	2.02049e-05	0.00748028	0.0149461	0.00102464	0.0217443	0.00192039	0.00256238	0.00145533	3.84314e-06	5.82494e-19	7.69131e-07	4.55075e-06	1.53998e-06	8.24808e-08	0	6.28427e-05	1.22008e-08	3.63373e-06	0.000580289	-0.128424	-0.0310209	0.085813	-0.0577004	-0.0440484	0.0185325	-0.1	-0.392467	0
2179	3.01755	0	0.130187	2.88736	3.32051	3.29148	3.15903	2.54823	0.341838	0.268958	0.132453	0.0290302	0.0122966	0.00350634	0.000156071	0.00364744	0.00479095	0.00149137	0.00732534	0.0608067	0.0159826	2.01349e-05	0.00748346	0.0149461	0.000998491	0.0214771	0.00189265	0.00255184	0.00145427	3.66458e-06	4.73197e-19	7.04978e-07	4.32316e-06	1.45267e-06	7.71334e-08	0	6.16583e-05	1.15491e-08	3.68399e-06	0.000580289	-0.128544	-0.0310754	0.0857331	-0.0574897	-0.0440127	0.0183005	-0.1	-0.392545	0
2180	2.95257	0	0.0860781	2.8665	3.30028	3.27158	3.13894	2.53016	0.341055	0.26772	0.132644	0.028701	0.0122966	0.00350634	0.000156071	0.00364674	0.00479325	0.00149202	0.00732765	0.0609856	0.0159871	2.00675e-05	0.007487	0.0149461	0.000973065	0.0212138	0.00186539	0.00254136	0.00145321	3.49475e-06	3.8446e-19	6.46218e-07	4.10998e-06	1.37037e-06	7.21371e-08	0	6.04991e-05	1.0933e-08	3.76231e-06	0.000580289	-0.128664	-0.03113	0.0856531	-0.057279	-0.0439769	0.0180687	-0.1	-0.392623	0
2181	2.90513	0	0.0592681	2.84586	3.28027	3.25189	3.11905	2.51227	0.340292	0.266492	0.132838	0.0283771	0.0122966	0.00350634	0.000156071	0.00364605	0.00479587	0.00149271	0.0073301	0.0611661	0.0159917	2.00026e-05	0.00749087	0.0149461	0.000948344	0.0209544	0.00183858	0.00253096	0.00145216	3.33321e-06	3.12409e-19	5.92396e-07	3.90967e-06	1.29279e-06	6.74686e-08	0	5.93648e-05	1.03505e-08	3.84982e-06	0.000580289	-0.128784	-0.0311845	0.085573	-0.0570682	-0.0439411	0.0178372	-0.1	-0.3927	0
2182	2.86849	0	0.0431769	2.82531	3.26033	3.23227	3.09924	2.49442	0.339539	0.265275	0.133034	0.0280582	0.0122966	0.00350634	0.000156072	0.00364538	0.00479863	0.00149343	0.00733264	0.0613476	0.0159964	1.994e-05	0.00749493	0.0149461	0.000924294	0.0206987	0.00181222	0.00252063	0.00145111	3.17947e-06	2.53892e-19	5.43089e-07	3.71741e-06	1.21965e-06	6.31057e-08	0	5.82543e-05	9.79956e-09	3.92738e-06	0.000580289	-0.128903	-0.0312391	0.0854928	-0.0568575	-0.0439054	0.0176058	-0.1	-0.392778	0
2183	2.83702	0	0.0322656	2.80475	3.24039	3.21265	3.07942	2.47656	0.338792	0.264069	0.133231	0.0277441	0.0122966	0.00350634	0.000156072	0.00364471	0.00480145	0.00149415	0.00733526	0.0615298	0.0160013	1.98797e-05	0.00749907	0.0149461	0.000900892	0.0204467	0.00178629	0.00251036	0.00145007	3.03311e-06	2.06359e-19	4.97911e-07	3.53566e-06	1.15069e-06	5.90275e-08	0	5.71666e-05	9.2784e-09	3.99533e-06	0.000580289	-0.129023	-0.0312936	0.0854126	-0.0566467	-0.0438696	0.0173745	-0.1	-0.392856	0
2184	2.80983	0	0.025655	2.78418	3.22043	3.19299	3.05957	2.45865	0.338046	0.262872	0.133428	0.0274346	0.0122966	0.00350634	0.000156072	0.00364406	0.00480429	0.00149489	0.00733794	0.0617125	0.0160062	1.98215e-05	0.00750327	0.0149461	0.000878115	0.0201982	0.00176077	0.00250015	0.00144903	2.89373e-06	1.67742e-19	4.56514e-07	3.36327e-06	1.08566e-06	5.52153e-08	0	5.61011e-05	8.78537e-09	4.05847e-06	0.000580289	-0.129142	-0.0313482	0.0853324	-0.0564359	-0.0438338	0.0171431	-0.1	-0.392934	0
2185	2.83611	0	0.0725288	2.76358	3.20045	3.17332	3.03969	2.44071	0.337301	0.261686	0.133626	0.0271297	0.0122966	0.00350634	0.000156072	0.00364342	0.00480712	0.00149564	0.00734068	0.0618955	0.0160112	1.97653e-05	0.00750749	0.0149461	0.000855942	0.0199531	0.00173567	0.00248999	0.00144799	2.76098e-06	1.36365e-19	4.18578e-07	3.19923e-06	1.02434e-06	5.16513e-08	0	5.50573e-05	8.31889e-09	4.11796e-06	0.000580289	-0.129262	-0.0314027	0.0852522	-0.0562251	-0.043798	0.0169113	-0.1	-0.393011	0
2186	2.88908	0	0.146252	2.74283	3.18032	3.15349	3.01967	2.42263	0.336532	0.26051	0.133822	0.0268287	0.0122966	0.00350634	0.000156073	0.00364278	0.00480958	0.00149636	0.00734337	0.0620771	0.0160162	1.9711e-05	0.00751134	0.0149461	0.000834323	0.0197111	0.00171092	0.00247988	0.00144695	2.63434e-06	1.10861e-19	3.838e-07	3.04249e-06	9.66493e-07	4.83175e-08	0	5.40331e-05	7.87721e-09	4.13442e-06	0.000580289	-0.129383	-0.0314573	0.0851718	-0.0560144	-0.0437623	0.0166788	-0.1	-0.393089	0
2187	2.90309	0	0.181191	2.7219	3.16004	3.13351	2.9995	2.40442	0.335726	0.259344	0.134013	0.0265313	0.0122966	0.00350634	0.000156073	0.00364214	0.00481149	0.00149702	0.00734595	0.0622563	0.0160211	1.96582e-05	0.00751462	0.0149461	0.000813218	0.0194717	0.0016865	0.0024698	0.00144591	2.51338e-06	9.01243e-20	3.51908e-07	2.8922e-06	9.11905e-07	4.51979e-08	0	5.30268e-05	7.45879e-09	4.11497e-06	0.000580289	-0.129505	-0.0315118	0.0850913	-0.0558037	-0.0437267	0.0164459	-0.1	-0.393167	0
2188	2.89163	0	0.190562	2.70107	3.13986	3.11362	2.97942	2.38633	0.334903	0.258189	0.134203	0.0262378	0.0122967	0.00350634	0.000156073	0.00364151	0.0048132	0.00149766	0.00734847	0.0624342	0.0160259	1.9607e-05	0.00751766	0.0149461	0.000792638	0.0192352	0.00166243	0.00245977	0.00144487	2.39799e-06	7.32683e-20	3.2267e-07	2.75113e-06	8.60407e-07	4.22797e-08	0	5.20394e-05	7.06261e-09	4.11515e-06	0.000580289	-0.129627	-0.0315664	0.0850109	-0.055593	-0.0436911	0.0162129	-0.1	-0.393245	0
2189	2.85464	0	0.174151	2.68049	3.11993	3.09398	2.95959	2.36847	0.334077	0.257043	0.134393	0.0259484	0.0122967	0.00350634	0.000156073	0.00364088	0.00481493	0.00149829	0.00735101	0.0626121	0.0160308	1.95576e-05	0.00752067	0.0149461	0.000772587	0.0190019	0.00163873	0.00244978	0.00144383	2.28799e-06	5.95686e-20	2.95869e-07	2.61497e-06	8.11833e-07	3.95508e-08	0	5.10713e-05	6.68762e-09	4.14079e-06	0.000580289	-0.129748	-0.0316209	0.0849304	-0.0553822	-0.0436554	0.01598	-0.1	-0.393323	0
2190	2.79039	0	0.130187	2.66021	3.1003	3.07463	2.94005	2.35088	0.333258	0.255906	0.134584	0.0256632	0.0122967	0.00350634	0.000156074	0.00364027	0.00481686	0.00149894	0.00735361	0.0627906	0.0160357	1.951e-05	0.00752384	0.0149461	0.00075307	0.0187717	0.00161541	0.00243985	0.0014428	2.18321e-06	4.8435e-20	2.71307e-07	2.48326e-06	7.66025e-07	3.69994e-08	0	5.01227e-05	6.33281e-09	4.19128e-06	0.000580289	-0.129869	-0.0316755	0.0848503	-0.0551715	-0.0436197	0.0157479	-0.1	-0.393401	0
2191	2.72631	0	0.0860781	2.64024	3.08096	3.05558	2.9208	2.33356	0.33246	0.25478	0.134778	0.0253825	0.0122967	0.00350634	0.000156074	0.00363967	0.00481914	0.00149962	0.00735632	0.0629708	0.0160408	1.94642e-05	0.00752737	0.0149461	0.000734089	0.0185449	0.00159247	0.00242998	0.00144177	2.08348e-06	3.93876e-20	2.488e-07	2.35892e-06	7.22833e-07	3.46147e-08	0	4.91941e-05	5.99721e-09	4.27015e-06	0.000580289	-0.129986	-0.03173	0.0847707	-0.0549609	-0.0435839	0.0155176	-0.1	-0.393478	0
2192	2.67974	0	0.0592681	2.62047	3.06183	3.03672	2.90175	2.3164	0.331682	0.253663	0.134975	0.0251061	0.0122967	0.00350634	0.000156074	0.00363908	0.00482174	0.00150034	0.00735914	0.0631526	0.016046	1.94203e-05	0.00753123	0.0149461	0.00071563	0.0183215	0.00156992	0.00242018	0.00144074	1.98856e-06	3.20347e-20	2.28175e-07	2.24119e-06	6.82107e-07	3.23857e-08	0	4.82852e-05	5.67978e-09	4.35835e-06	0.000580289	-0.130103	-0.0317846	0.0846916	-0.0547502	-0.0435481	0.0152881	-0.1	-0.393556	0
2193	2.64394	0	0.0431769	2.60076	3.04274	3.0179	2.88273	2.29926	0.330914	0.252556	0.135173	0.0248339	0.0122967	0.00350634	0.000156075	0.00363851	0.00482449	0.00150108	0.00736205	0.0633356	0.0160514	1.9378e-05	0.00753528	0.0149461	0.000697672	0.0181013	0.00154774	0.00241045	0.00143971	1.89816e-06	2.60577e-20	2.09273e-07	2.1293e-06	6.43701e-07	3.03019e-08	0	4.73951e-05	5.37946e-09	4.43655e-06	0.000580289	-0.13022	-0.0318391	0.0846124	-0.0545395	-0.0435122	0.0150587	-0.1	-0.393634	0
2194	2.61329	0	0.0322656	2.58102	3.02362	2.99905	2.86368	2.28207	0.330151	0.251459	0.135372	0.0245656	0.0122967	0.00350633	0.000156075	0.00363795	0.0048273	0.00150183	0.00736502	0.0635192	0.0160569	1.93374e-05	0.00753942	0.014946	0.000680195	0.0178841	0.00152592	0.00240077	0.00143869	1.81203e-06	2.11982e-20	1.91946e-07	2.02261e-06	6.07478e-07	2.83534e-08	0	4.65231e-05	5.09526e-09	4.50509e-06	0.000580289	-0.130337	-0.0318937	0.0845332	-0.0543289	-0.0434764	0.0148292	-0.1	-0.393712	0
2195	2.5869	0	0.025655	2.56124	3.00446	2.98016	2.84459	2.26483	0.32939	0.25037	0.135572	0.0243013	0.0122967	0.00350633	0.000156075	0.0036374	0.00483013	0.00150259	0.00736804	0.0637033	0.0160624	1.92983e-05	0.00754361	0.014946	0.000663176	0.0176699	0.00150444	0.00239115	0.00143767	1.72997e-06	1.72467e-20	1.76062e-07	1.92056e-06	5.73312e-07	2.65313e-08	0	4.56686e-05	4.8263e-09	4.56877e-06	0.000580289	-0.130454	-0.0319482	0.0844536	-0.0541182	-0.0434406	0.014599	-0.1	-0.393789	0
2196	2.61395	0	0.0725288	2.54142	2.98526	2.96122	2.82545	2.24753	0.32863	0.249292	0.135772	0.0240408	0.0122967	0.00350633	0.000156075	0.00363685	0.00483295	0.00150336	0.00737111	0.0638879	0.016068	1.92607e-05	0.00754783	0.014946	0.000646606	0.0174586	0.0014833	0.00238158	0.00143665	1.65175e-06	1.40332e-20	1.61501e-07	1.826e-06	5.41084e-07	2.48273e-08	0	4.48314e-05	4.57174e-09	4.62878e-06	0.000580289	-0.130575	-0.0320028	0.0843733	-0.0539075	-0.0434049	0.0143673	-0.1	-0.393867	0
2197	2.66767	0	0.146252	2.52142	2.9659	2.94211	2.80614	2.23007	0.327845	0.248222	0.135971	0.0237835	0.0122968	0.00350633	0.000156076	0.00363631	0.0048354	0.00150409	0.00737411	0.0640709	0.0160736	1.92243e-05	0.00755167	0.014946	0.000630448	0.0172499	0.00146247	0.00237205	0.00143564	1.57707e-06	1.14188e-20	1.48145e-07	1.73807e-06	5.10673e-07	2.32328e-08	0	4.40095e-05	4.33061e-09	4.64529e-06	0.000580289	-0.130696	-0.0320573	0.0842926	-0.0536968	-0.0433693	0.0141349	-0.1	-0.393945	0
2198	2.68243	0	0.181191	2.50124	2.94637	2.92284	2.78667	2.21249	0.327025	0.247162	0.136165	0.0235292	0.0122968	0.00350633	0.000156076	0.00363578	0.0048373	0.00150477	0.00737699	0.0642514	0.016079	1.91889e-05	0.00755495	0.014946	0.000614668	0.0170435	0.0014419	0.00236255	0.00143462	1.50571e-06	9.29121e-21	1.35893e-07	1.65264e-06	4.81967e-07	2.17402e-08	0	4.32019e-05	4.1021e-09	4.62551e-06	0.000580289	-0.130817	-0.0321119	0.0842119	-0.0534861	-0.0433336	0.0139025	-0.1	-0.394022	0
2199	2.6717	0	0.190562	2.48114	2.92693	2.90365	2.76729	2.195	0.326187	0.246111	0.136357	0.0232781	0.0122968	0.00350633	0.000156076	0.00363524	0.00483901	0.00150543	0.00737981	0.0644308	0.0160844	1.91546e-05	0.00755797	0.014946	0.000599275	0.0168396	0.00142162	0.00235309	0.00143361	1.43757e-06	7.56023e-21	1.24655e-07	1.56949e-06	4.54879e-07	2.03435e-08	0	4.24092e-05	3.88565e-09	4.62551e-06	0.000580289	-0.130939	-0.0321664	0.0841312	-0.0532754	-0.043298	0.01367	-0.1	-0.3941	0
2200	2.63543	0	0.174151	2.46128	2.90773	2.8847	2.74815	2.17773	0.325346	0.245068	0.136549	0.0230305	0.0122968	0.00350633	0.000156076	0.00363472	0.00484074	0.00150608	0.00738264	0.06461	0.0160898	1.91215e-05	0.00756098	0.014946	0.000584276	0.0166383	0.00140165	0.00234368	0.00143259	1.37258e-06	6.15211e-21	1.1435e-07	1.49179e-06	4.29321e-07	1.9037e-08	0	4.16317e-05	3.6807e-09	4.65118e-06	0.000580289	-0.131059	-0.032221	0.0840507	-0.0530646	-0.0432623	0.0134379	-0.1	-0.394177	0
2201	2.57189	0	0.130187	2.44171	2.88881	2.86602	2.72928	2.16073	0.324514	0.244035	0.136743	0.0227864	0.0122968	0.00350633	0.000156077	0.0036342	0.00484266	0.00150675	0.0073855	0.0647899	0.0160953	1.90898e-05	0.00756414	0.014946	0.000569672	0.0164397	0.00138199	0.00233432	0.00143158	1.31062e-06	5.00672e-21	1.04902e-07	1.41899e-06	4.05212e-07	1.7815e-08	0	4.08697e-05	3.48671e-09	4.70197e-06	0.000580289	-0.131179	-0.0322755	0.0839707	-0.0528538	-0.0432266	0.0132064	-0.1	-0.394255	0
2202	2.5085	0	0.0860781	2.42243	2.87018	2.84763	2.7107	2.14398	0.323701	0.243018	0.136933	0.022546	0.0122968	0.00350633	0.000156077	0.0036337	0.00484493	0.00150744	0.00738848	0.0649659	0.0161009	1.90594e-05	0.00756766	0.014946	0.000555464	0.016244	0.00136265	0.00232502	0.00143057	1.25162e-06	4.07512e-21	9.624e-08	1.35059e-06	3.82473e-07	1.66725e-08	0	4.01236e-05	3.30316e-09	4.78147e-06	0.000580289	-0.131298	-0.0323301	0.0838909	-0.052643	-0.0431909	0.0129751	-0.1	-0.394332	0
2203	2.46261	0	0.0592681	2.40334	2.85172	2.82941	2.6923	2.12737	0.322907	0.242025	0.137116	0.0223093	0.0122968	0.00350633	0.000156077	0.00363321	0.00484753	0.00150817	0.00739156	0.0651331	0.0161066	1.90303e-05	0.00757152	0.014946	0.000541644	0.0160512	0.00134364	0.00231578	0.00142957	1.19542e-06	3.31734e-21	8.82995e-08	1.28612e-06	3.61026e-07	1.56042e-08	0	3.93932e-05	3.12948e-09	4.87046e-06	0.000580289	-0.131417	-0.0323846	0.0838112	-0.0524321	-0.0431551	0.0127438	-0.1	-0.39441	0
2204	2.42746	0	0.0431769	2.38429	2.83331	2.81123	2.67394	2.11076	0.322124	0.241056	0.13729	0.0220761	0.0122968	0.00350633	0.000156078	0.00363273	0.00485028	0.00150892	0.00739471	0.0652914	0.0161125	1.90025e-05	0.00757556	0.014946	0.000528191	0.015861	0.00132494	0.0023066	0.00142857	1.14186e-06	2.7008e-21	8.10189e-08	1.22178e-06	3.40795e-07	1.46051e-08	0	3.86776e-05	2.9651e-09	4.9494e-06	0.000580289	-0.131536	-0.0324391	0.0837314	-0.0522212	-0.0431194	0.0125126	-0.1	-0.394487	0
2205	2.39746	0	0.0322656	2.3652	2.81485	2.793	2.65555	2.09409	0.321346	0.24011	0.137457	0.0218462	0.0122969	0.00350633	0.000156078	0.00363226	0.00485308	0.00150968	0.00739791	0.0654412	0.0161184	1.89759e-05	0.00757969	0.014946	0.000515095	0.0156735	0.00130653	0.00229747	0.00142757	1.0908e-06	2.19908e-21	7.43423e-08	1.1609e-06	3.21709e-07	1.36706e-08	0	3.79764e-05	2.80949e-09	5.01861e-06	0.000580289	-0.131655	-0.0324937	0.0836516	-0.0520104	-0.0430836	0.0122813	-0.1	-0.394564	0
2206	2.37172	0	0.025655	2.34606	2.79634	2.77472	2.63711	2.07735	0.320569	0.239187	0.137615	0.0216195	0.0122969	0.00350633	0.000156078	0.0036318	0.00485591	0.00151045	0.00740116	0.0655831	0.0161245	1.89503e-05	0.00758388	0.014946	0.000502344	0.0154886	0.00128841	0.0022884	0.00142657	1.04211e-06	1.79075e-21	6.82193e-08	1.10311e-06	3.03701e-07	1.27964e-08	0	3.72892e-05	2.66216e-09	5.08292e-06	0.000580289	-0.131774	-0.0325482	0.0835718	-0.0517995	-0.0430479	0.01205	-0.1	-0.394642	0
2207	2.39941	0	0.0725288	2.32688	2.77779	2.75639	2.61862	2.06054	0.319794	0.238288	0.137766	0.0213961	0.0122969	0.00350633	0.000156078	0.00363135	0.00485874	0.00151123	0.00740445	0.0657173	0.0161305	1.89258e-05	0.00758809	0.014946	0.000489928	0.0153062	0.00127058	0.00227938	0.00142558	9.95679e-07	1.45838e-21	6.26035e-08	1.04807e-06	2.8671e-07	1.19787e-08	0	3.66156e-05	2.52267e-09	5.1435e-06	0.000580289	-0.131893	-0.0326028	0.0834921	-0.0515886	-0.0430121	0.0118188	-0.1	-0.394719	0
2208	2.45376	0	0.146252	2.30751	2.75906	2.73788	2.59998	2.04357	0.318994	0.237412	0.137907	0.0211754	0.0122969	0.00350633	0.000156079	0.00363091	0.00486118	0.00151198	0.00740766	0.0658427	0.0161366	1.89022e-05	0.00759194	0.014946	0.000477814	0.0151259	0.00125299	0.0022704	0.00142459	9.51317e-07	1.18773e-21	5.74507e-08	9.95452e-07	2.70673e-07	1.12131e-08	0	3.59542e-05	2.3905e-09	5.16012e-06	0.000580289	-0.132012	-0.0326573	0.0834123	-0.0513778	-0.0429764	0.0115875	-0.1	-0.394796	0
2209	2.46915	0	0.181191	2.28796	2.74017	2.71921	2.58117	2.02646	0.318159	0.236559	0.138037	0.0209571	0.0122969	0.00350633	0.000156079	0.00363046	0.00486308	0.00151267	0.00741074	0.0659585	0.0161424	1.88791e-05	0.00759521	0.014946	0.000465981	0.0149475	0.00123563	0.00226144	0.00142359	9.08889e-07	9.67291e-22	5.27215e-08	9.44968e-07	2.5553e-07	1.04963e-08	0	3.53041e-05	2.26519e-09	5.14004e-06	0.000580289	-0.132131	-0.0327118	0.0833325	-0.0511669	-0.0429406	0.0113562	-0.1	-0.394873	0
2210	2.45906	0	0.190562	2.2685	2.72137	2.70063	2.56247	2.00944	0.317307	0.235728	0.138159	0.0207415	0.0122969	0.00350633	0.000156079	0.00363002	0.00486478	0.00151333	0.00741376	0.0660668	0.0161483	1.88568e-05	0.00759823	0.0149459	0.000454436	0.0147713	0.00121851	0.00225252	0.0014226	8.68356e-07	7.87781e-22	4.83821e-08	8.99795e-07	2.41236e-07	9.82532e-09	0	3.46658e-05	2.14645e-09	5.13986e-06	0.000580289	-0.13225	-0.0327664	0.0832525	-0.0509561	-0.0429049	0.0111246	-0.1	-0.39495	0
2211	2.42342	0	0.174151	2.24927	2.70281	2.68229	2.54401	1.99264	0.316452	0.23492	0.138275	0.0205289	0.0122969	0.00350633	0.00015608	0.00362959	0.00486651	0.00151398	0.00741676	0.066169	0.0161541	1.88354e-05	0.00760123	0.0149459	0.00044318	0.0145973	0.00120164	0.00224364	0.00142161	8.29665e-07	6.41623e-22	4.44012e-08	8.56019e-07	2.27747e-07	9.19741e-09	0	3.40396e-05	2.03399e-09	5.16555e-06	0.000580289	-0.132371	-0.0328209	0.0831719	-0.0507453	-0.0428691	0.0108922	-0.1	-0.395028	0
2212	2.36052	0	0.130187	2.23033	2.68454	2.66422	2.52583	1.97609	0.315604	0.234135	0.138387	0.0203192	0.012297	0.00350633	0.00015608	0.00362917	0.00486842	0.00151465	0.00741981	0.0662665	0.01616	1.88149e-05	0.0076044	0.0149459	0.000432221	0.0144257	0.00118503	0.00223481	0.00142062	7.92759e-07	5.2263e-22	4.07496e-08	8.13507e-07	2.15018e-07	8.60996e-09	0	3.34257e-05	1.92749e-09	5.21664e-06	0.000580289	-0.132493	-0.0328755	0.083091	-0.0505345	-0.0428334	0.0106593	-0.1	-0.395105	0
2213	2.29775	0	0.0860781	2.21168	2.66654	2.64643	2.50793	1.95979	0.314776	0.233371	0.138496	0.0201126	0.012297	0.00350633	0.00015608	0.00362875	0.0048707	0.00151535	0.00742296	0.0663605	0.016166	1.87954e-05	0.00760791	0.0149459	0.00042156	0.0142565	0.0011687	0.00222604	0.00141963	7.57585e-07	4.25761e-22	3.74007e-08	7.75514e-07	2.03009e-07	8.0605e-09	0	3.28245e-05	1.82669e-09	5.29677e-06	0.000580289	-0.132615	-0.03293	0.0830101	-0.0503238	-0.0427976	0.0104265	-0.1	-0.395182	0
2214	2.25247	0	0.0592681	2.19321	2.64872	2.62881	2.49021	1.94361	0.313968	0.23263	0.138603	0.0199091	0.012297	0.00350633	0.00015608	0.00362836	0.00487329	0.00151609	0.0074262	0.0664515	0.0161721	1.87769e-05	0.00761176	0.0149459	0.000411183	0.0140897	0.00115263	0.00221733	0.00141865	7.24062e-07	3.46897e-22	3.43294e-08	7.3819e-07	1.9168e-07	7.54658e-09	0	3.22357e-05	1.73128e-09	5.38653e-06	0.000580289	-0.132737	-0.0329846	0.0829292	-0.050113	-0.0427618	0.0101937	-0.1	-0.395259	0
2215	2.21794	0	0.0431769	2.17476	2.63092	2.61121	2.47251	1.92743	0.313169	0.231911	0.138708	0.0197086	0.012297	0.00350633	0.000156081	0.00362797	0.00487604	0.00151684	0.00742952	0.0665392	0.0161784	1.87594e-05	0.0076158	0.0149459	0.000401083	0.0139253	0.00113683	0.00220867	0.00141767	6.92095e-07	2.82674e-22	3.1512e-08	7.01448e-07	1.80989e-07	7.06578e-09	0	3.16588e-05	1.64094e-09	5.4662e-06	0.000580289	-0.132858	-0.0330391	0.0828484	-0.0499023	-0.042726	0.00996083	-0.1	-0.395336	0
2216	2.18854	0	0.0322656	2.15627	2.61307	2.59356	2.45475	1.91117	0.312375	0.231213	0.138809	0.0195109	0.012297	0.00350633	0.000156081	0.00362759	0.00487884	0.00151761	0.00743288	0.0666234	0.0161847	1.87427e-05	0.00761993	0.0149459	0.000391247	0.0137631	0.00112127	0.00220006	0.0014167	6.61598e-07	2.30366e-22	2.89274e-08	6.68593e-07	1.70901e-07	6.61591e-09	0	3.10933e-05	1.55539e-09	5.53606e-06	0.000580289	-0.13298	-0.0330937	0.0827675	-0.0496915	-0.0426903	0.009728	-0.1	-0.395413	0
2217	2.16338	0	0.025655	2.13772	2.59517	2.57585	2.43695	1.89483	0.311583	0.230537	0.138907	0.0193159	0.012297	0.00350633	0.000156081	0.00362722	0.00488167	0.00151838	0.00743627	0.0667044	0.0161911	1.87268e-05	0.00762412	0.0149459	0.000381666	0.0136031	0.00110595	0.0021915	0.00141572	6.32498e-07	1.87756e-22	2.6556e-08	6.35838e-07	1.6138e-07	6.19494e-09	0	3.05389e-05	1.47436e-09	5.60097e-06	0.000580289	-0.133102	-0.0331482	0.0826866	-0.0494808	-0.0426545	0.00949517	-0.1	-0.39549	0
2218	2.19165	0	0.0725288	2.11912	2.57721	2.55809	2.41908	1.87841	0.310792	0.229882	0.139002	0.0191236	0.012297	0.00350633	0.000156081	0.00362687	0.00488449	0.00151917	0.0074397	0.0667822	0.0161976	1.87116e-05	0.00762833	0.0149459	0.000372333	0.0134453	0.00109086	0.00218299	0.00141475	6.04726e-07	1.53043e-22	2.43801e-08	6.03165e-07	1.52395e-07	5.80099e-09	0	2.99954e-05	1.39762e-09	5.66209e-06	0.000580289	-0.133224	-0.0332028	0.0826057	-0.04927	-0.0426187	0.00926233	-0.1	-0.395567	0
2219	2.24659	0	0.146252	2.10034	2.55907	2.54014	2.40105	1.86182	0.309977	0.229248	0.139092	0.0189335	0.0122971	0.00350632	0.000156082	0.00362651	0.00488693	0.00151991	0.00744305	0.0668551	0.016204	1.8697e-05	0.00763217	0.0149459	0.000363223	0.0132893	0.00107599	0.00217452	0.00141378	5.78176e-07	1.24751e-22	2.23829e-08	5.73915e-07	1.43911e-07	5.4321e-09	0	2.94616e-05	1.32487e-09	5.67878e-06	0.000580289	-0.133345	-0.0332573	0.0825248	-0.0490593	-0.042583	0.0090295	-0.1	-0.395644	0
2220	2.26256	0	0.181191	2.08137	2.54078	2.52203	2.38286	1.84509	0.309127	0.228635	0.139174	0.0187455	0.0122971	0.00350632	0.000156082	0.00362616	0.00488883	0.00152061	0.00744627	0.0669223	0.0162102	1.86828e-05	0.00763544	0.0149459	0.000354327	0.0131349	0.0010613	0.00216606	0.00141281	5.52765e-07	1.01687e-22	2.0549e-08	5.47713e-07	1.35898e-07	5.08655e-09	0	2.89368e-05	1.25588e-09	5.65833e-06	0.000580289	-0.133467	-0.0333119	0.0824441	-0.0488485	-0.0425472	0.00879698	-0.1	-0.395721	0
2221	2.25305	0	0.190562	2.06249	2.52257	2.50401	2.36476	1.82846	0.30826	0.228043	0.139251	0.0185598	0.0122971	0.00350632	0.000156082	0.00362581	0.00489053	0.00152127	0.00744941	0.0669853	0.0162164	1.8669e-05	0.00763846	0.0149459	0.000345644	0.0129823	0.00104681	0.00215764	0.00141184	5.28472e-07	8.28892e-23	1.88655e-08	5.2088e-07	1.28332e-07	4.76298e-09	0	2.84213e-05	1.19048e-09	5.65791e-06	0.000580289	-0.133587	-0.0333664	0.0823638	-0.0486378	-0.0425115	0.00856508	-0.1	-0.395798	0
2222	2.21832	0	0.174151	2.04417	2.50492	2.48655	2.34722	1.81236	0.307389	0.227472	0.139326	0.0183766	0.0122971	0.00350632	0.000156083	0.00362547	0.00489225	0.00152193	0.00745254	0.0670455	0.0162225	1.86559e-05	0.00764145	0.0149459	0.000337175	0.0128317	0.00103253	0.00214927	0.00141087	5.05268e-07	6.75701e-23	1.73205e-08	4.93492e-07	1.2119e-07	4.46009e-09	0	2.79155e-05	1.12851e-09	5.68358e-06	0.000580289	-0.133707	-0.033421	0.0822837	-0.048427	-0.0424757	0.00833348	-0.1	-0.395875	0
2223	2.15692	0	0.130187	2.02673	2.48816	2.46997	2.33057	1.79712	0.306526	0.226921	0.139399	0.0181958	0.0122971	0.00350632	0.000156083	0.00362513	0.00489416	0.00152261	0.00745571	0.067104	0.0162287	1.86434e-05	0.00764461	0.0149459	0.000328927	0.012683	0.00101847	0.00214093	0.0014099	4.83119e-07	5.50872e-23	1.59027e-08	4.6899e-07	1.14449e-07	4.17661e-09	0	2.74195e-05	1.06982e-09	5.73459e-06	0.000580289	-0.133826	-0.0334756	0.0822036	-0.0482163	-0.04244	0.00810189	-0.1	-0.395952	0
2224	2.09623	0	0.0860781	2.01015	2.47224	2.45423	2.31475	1.78268	0.305683	0.22639	0.139472	0.0180177	0.0122971	0.00350632	0.000156083	0.00362481	0.00489641	0.00152331	0.00745897	0.0671618	0.0162351	1.86316e-05	0.00764811	0.0149459	0.000320902	0.0125365	0.00100464	0.00213266	0.00140894	4.61995e-07	4.49163e-23	1.46019e-08	4.4708e-07	1.08087e-07	3.91138e-09	0	2.69335e-05	1.01423e-09	5.81432e-06	0.000580289	-0.133946	-0.0335301	0.0821235	-0.0480055	-0.0424043	0.00787029	-0.1	-0.396029	0
2225	2.05355	0	0.0592681	1.99428	2.45703	2.43919	2.29965	1.76891	0.304857	0.225879	0.139546	0.0178422	0.0122972	0.00350632	0.000156083	0.0036245	0.00489898	0.00152405	0.00746232	0.0672191	0.0162415	1.86207e-05	0.00765193	0.0149459	0.000313092	0.012392	0.000991036	0.00212443	0.00140798	4.41849e-07	3.66283e-23	1.34084e-08	4.27491e-07	1.02083e-07	3.66321e-09	0	2.64575e-05	9.61602e-10	5.90305e-06	0.000580289	-0.134066	-0.0335847	0.0820434	-0.0477948	-0.0423686	0.0076387	-0.1	-0.396106	0
2226	2.02213	0	0.0431769	1.97896	2.44236	2.42469	2.28507	1.75565	0.30404	0.225388	0.13962	0.0176691	0.0122972	0.00350632	0.000156084	0.0036242	0.00490169	0.0015248	0.00746573	0.0672754	0.0162481	1.86104e-05	0.00765592	0.0149459	0.000305488	0.0122495	0.000977644	0.00211626	0.00140702	4.22622e-07	2.98731e-23	1.2313e-08	4.06595e-07	9.64165e-08	3.43096e-09	0	2.59909e-05	9.1175e-10	5.98084e-06	0.000580289	-0.134186	-0.0336392	0.0819633	-0.047584	-0.0423329	0.00740711	-0.1	-0.396183	0
2227	1.99635	0	0.0322656	1.96409	2.42814	2.41065	2.27095	1.74281	0.303226	0.224917	0.139692	0.0174984	0.0122972	0.00350632	0.000156084	0.00362391	0.00490443	0.00152556	0.00746917	0.0673304	0.0162547	1.86008e-05	0.00765999	0.0149458	0.000298081	0.0121089	0.000964457	0.00210813	0.00140606	4.04267e-07	2.43662e-23	1.13078e-08	3.84523e-07	9.10674e-08	3.21357e-09	0	2.55334e-05	8.64522e-10	6.04791e-06	0.000580289	-0.134306	-0.0336938	0.0818832	-0.0473733	-0.0422972	0.00717551	-0.1	-0.39626	0
2228	1.9753	0	0.025655	1.94965	2.41435	2.39702	2.25726	1.73038	0.302413	0.224466	0.139763	0.01733	0.0122972	0.00350632	0.000156084	0.00362362	0.00490718	0.00152633	0.00747264	0.0673841	0.0162614	1.85917e-05	0.00766408	0.0149458	0.000290864	0.0119702	0.00095147	0.00210005	0.00140511	3.86738e-07	1.98763e-23	1.0385e-08	3.64769e-07	8.60176e-08	3.01006e-09	0	2.50848e-05	8.19773e-10	6.10912e-06	0.000580289	-0.134425	-0.0337483	0.0818031	-0.0471625	-0.0422614	0.00694392	-0.1	-0.396337	0
2229	2.00816	0	0.0725288	1.93563	2.40099	2.38382	2.24399	1.71836	0.301599	0.224034	0.139833	0.0171639	0.0122972	0.00350632	0.000156084	0.00362335	0.00490991	0.00152711	0.00747613	0.0674363	0.0162681	1.85831e-05	0.00766818	0.0149458	0.000283831	0.0118333	0.000938679	0.00209201	0.00140416	3.69996e-07	1.62153e-23	9.53798e-09	3.4709e-07	8.12501e-08	2.81954e-09	0	2.46447e-05	7.77371e-10	6.16564e-06	0.000580289	-0.134545	-0.0338029	0.081723	-0.0469518	-0.0422257	0.00671232	-0.1	-0.396414	0
2230	2.06814	0	0.146252	1.92189	2.38791	2.37091	2.23102	1.70663	0.300759	0.223621	0.139899	0.0169996	0.0122972	0.00350632	0.000156085	0.00362308	0.00491223	0.00152784	0.00747953	0.0674853	0.0162747	1.85749e-05	0.00767187	0.0149458	0.000276964	0.0116979	0.000926058	0.002084	0.00140321	3.53977e-07	1.32288e-23	8.76011e-09	3.31252e-07	7.67473e-08	2.64108e-09	0	2.42122e-05	7.3716e-10	6.17637e-06	0.000580289	-0.134665	-0.0338574	0.081643	-0.046741	-0.04219	0.00648079	-0.1	-0.396491	0
2231	2.08963	0	0.181191	1.90843	2.37514	2.3583	2.21834	1.69523	0.299883	0.223228	0.139958	0.016837	0.0122973	0.00350632	0.000156085	0.0036228	0.00491398	0.00152852	0.00748277	0.06753	0.0162811	1.85667e-05	0.00767496	0.0149458	0.00027025	0.0115639	0.000913591	0.00207602	0.00140226	3.38632e-07	1.07921e-23	8.04554e-09	3.17056e-07	7.24933e-08	2.47384e-09	0	2.37869e-05	6.99007e-10	6.14866e-06	0.000580289	-0.134784	-0.033912	0.0815631	-0.0465303	-0.0421543	0.00624937	-0.1	-0.396568	0
2232	2.08608	0	0.190562	1.89552	2.36291	2.34623	2.20622	1.68438	0.298988	0.222853	0.140014	0.0166763	0.0122973	0.00350632	0.000156085	0.00362253	0.0049155	0.00152916	0.00748593	0.0675719	0.0162875	1.85589e-05	0.00767777	0.0149458	0.000263695	0.0114314	0.000901289	0.00206806	0.00140131	3.23949e-07	8.80423e-24	7.38932e-09	3.00962e-07	6.84754e-08	2.31718e-09	0	2.33689e-05	6.62826e-10	6.14022e-06	0.000580289	-0.134903	-0.0339665	0.0814833	-0.0463196	-0.0421186	0.006018	-0.1	-0.396645	0
2233	2.05743	0	0.174151	1.88328	2.35136	2.33485	2.19478	1.67419	0.298087	0.222497	0.140069	0.0165176	0.0122973	0.00350632	0.000156086	0.00362227	0.00491702	0.0015298	0.00748906	0.0676122	0.0162938	1.85515e-05	0.00768051	0.0149458	0.000257299	0.0113005	0.000889161	0.00206013	0.00140036	3.09912e-07	7.1829e-24	6.78677e-09	2.83173e-07	6.46811e-08	2.17047e-09	0	2.29585e-05	6.28528e-10	6.15716e-06	0.000580289	-0.135023	-0.0340211	0.0814036	-0.0461088	-0.0420828	0.00578664	-0.1	-0.396722	0
2234	2.00194	0	0.130187	1.87175	2.34053	2.32416	2.18404	1.66469	0.297192	0.22216	0.140123	0.0163609	0.0122973	0.00350632	0.000156086	0.00362201	0.0049187	0.00153044	0.00749221	0.0676517	0.0163001	1.85445e-05	0.00768338	0.0149458	0.000251064	0.0111713	0.000877212	0.00205225	0.00139941	2.96501e-07	5.86059e-24	6.23359e-09	2.67247e-07	6.10987e-08	2.03311e-09	0	2.25559e-05	5.96023e-10	6.19914e-06	0.000580289	-0.135142	-0.0340756	0.0813238	-0.0458981	-0.0420471	0.00555528	-0.1	-0.396799	0
2235	1.94701	0	0.0860781	1.86093	2.33038	2.31418	2.174	1.65584	0.296313	0.221841	0.140178	0.0162066	0.0122973	0.00350632	0.000156086	0.00362176	0.00492071	0.0015311	0.00749542	0.0676917	0.0163066	1.85381e-05	0.00768656	0.0149458	0.00024499	0.0110439	0.000865452	0.00204442	0.00139847	2.837e-07	4.78228e-24	5.72582e-09	2.52994e-07	5.77168e-08	1.90454e-09	0	2.21613e-05	5.65231e-10	6.26992e-06	0.000580289	-0.135261	-0.0341302	0.081244	-0.0456873	-0.0420114	0.00532392	-0.1	-0.396876	0
2236	1.90995	0	0.0592681	1.85069	2.32082	2.30476	2.16453	1.64754	0.29545	0.22154	0.140234	0.0160543	0.0122973	0.00350632	0.000156086	0.00362153	0.004923	0.0015318	0.00749872	0.0677321	0.0163131	1.85322e-05	0.00769004	0.0149458	0.000239078	0.0109182	0.000853877	0.00203663	0.00139753	2.71481e-07	3.90285e-24	5.25972e-09	2.4024e-07	5.45243e-08	1.7842e-09	0	2.17745e-05	5.36061e-10	6.34974e-06	0.000580289	-0.13538	-0.0341847	0.0811643	-0.0454766	-0.0419757	0.00509256	-0.1	-0.396953	0
2237	1.88405	0	0.0431769	1.84087	2.31167	2.29577	2.15548	1.63962	0.294595	0.221258	0.140291	0.0159042	0.0122974	0.00350632	0.000156087	0.0036213	0.00492543	0.0015325	0.00750206	0.0677724	0.0163197	1.85268e-05	0.00769366	0.0149458	0.000233321	0.0107942	0.000842479	0.00202889	0.00139659	2.59811e-07	3.18547e-24	4.83181e-09	2.28823e-07	5.15101e-08	1.67153e-09	0	2.13952e-05	5.0842e-10	6.41845e-06	0.000580289	-0.135499	-0.0342393	0.0810845	-0.0452659	-0.04194	0.00486119	-0.1	-0.397029	0
2238	1.86367	0	0.0322656	1.8314	2.30287	2.28712	2.14677	1.63203	0.293741	0.220994	0.140348	0.0157559	0.0122974	0.00350632	0.000156087	0.00362108	0.00492788	0.00153322	0.00750541	0.0678122	0.0163264	1.85219e-05	0.00769734	0.0149458	0.000227707	0.0106718	0.000831251	0.0020212	0.00139565	2.48659e-07	2.60019e-24	4.43889e-09	2.18603e-07	4.86638e-08	1.56603e-09	0	2.10231e-05	4.82221e-10	6.47628e-06	0.000580289	-0.135619	-0.0342938	0.0810047	-0.0450551	-0.0419043	0.00462983	-0.1	-0.397106	0
2239	1.84792	0	0.025655	1.82226	2.29441	2.2788	2.13839	1.62476	0.292886	0.220747	0.140404	0.0156096	0.0122974	0.00350632	0.000156087	0.00362087	0.00493033	0.00153393	0.00750878	0.0678515	0.0163331	1.85173e-05	0.00770103	0.0149458	0.000222232	0.010551	0.000820189	0.00201354	0.00139472	2.38002e-07	2.12261e-24	4.07808e-09	2.09452e-07	4.59761e-08	1.46724e-09	0	2.06579e-05	4.57389e-10	6.52812e-06	0.000580289	-0.135738	-0.0343484	0.080925	-0.0448444	-0.0418685	0.00439847	-0.1	-0.397183	0
2240	1.88599	0	0.0725288	1.81346	2.28628	2.27081	2.13035	1.61781	0.292029	0.220518	0.140459	0.0154652	0.0122974	0.00350632	0.000156087	0.00362067	0.00493274	0.00153465	0.00751215	0.0678899	0.0163398	1.85131e-05	0.0077047	0.0149458	0.000216895	0.0104317	0.000809288	0.00200592	0.00139379	2.27814e-07	1.73288e-24	3.74673e-09	2.01259e-07	4.34378e-08	1.37472e-09	0	2.02996e-05	4.33848e-10	6.57515e-06	0.000580289	-0.135857	-0.0344029	0.080845	-0.0446336	-0.0418328	0.00416699	-0.1	-0.39726	0
2241	1.95111	0	0.146252	1.80486	2.27836	2.26304	2.12253	1.61108	0.291146	0.220307	0.14051	0.0153223	0.0122974	0.00350632	0.000156088	0.00362046	0.00493474	0.00153532	0.00751542	0.0679258	0.0163463	1.85091e-05	0.00770795	0.0149458	0.000211683	0.0103136	0.000798527	0.00199833	0.00139285	2.18058e-07	1.41473e-24	3.44232e-09	1.93916e-07	4.10397e-08	1.28802e-09	0	1.99474e-05	4.11515e-10	6.57596e-06	0.000580289	-0.135977	-0.0344575	0.0807647	-0.0444229	-0.0417971	0.00393528	-0.1	-0.397336	0
2242	1.97766	0	0.181191	1.79647	2.27067	2.25549	2.11494	1.6046	0.290226	0.220113	0.140556	0.0151808	0.0122975	0.00350632	0.000156088	0.00362026	0.00493616	0.00153593	0.00751852	0.0679579	0.0163527	1.8505e-05	0.00771058	0.0149458	0.000206583	0.0101968	0.000787892	0.00199075	0.00139192	2.08705e-07	1.15493e-24	3.16257e-09	1.83951e-07	3.87734e-08	1.20675e-09	0	1.96007e-05	3.90317e-10	6.53795e-06	0.000580289	-0.136098	-0.034512	0.0806843	-0.0442121	-0.0417613	0.00370346	-0.1	-0.397413	0
2243	1.97911	0	0.190562	1.78855	2.26347	2.24842	2.10783	1.5986	0.289286	0.219936	0.140599	0.0150408	0.0122975	0.00350632	0.000156088	0.00362005	0.00493734	0.00153651	0.00752152	0.0679878	0.016359	1.85011e-05	0.00771291	0.0149458	0.000201603	0.0100812	0.000777393	0.0019832	0.00139099	1.99749e-07	9.42838e-25	2.90555e-09	1.71641e-07	3.66323e-08	1.13059e-09	0	1.92598e-05	3.70206e-10	6.51927e-06	0.000580289	-0.136218	-0.0345665	0.0806038	-0.0440014	-0.0417255	0.00347164	-0.1	-0.397489	0
2244	1.95539	0	0.174151	1.78124	2.25687	2.24197	2.10133	1.59321	0.28834	0.219776	0.140641	0.0149026	0.0122975	0.00350632	0.000156089	0.00361985	0.00493852	0.00153707	0.00752447	0.0680166	0.0163652	1.84973e-05	0.00771517	0.0149457	0.000196744	0.00996691	0.000767038	0.00197568	0.00139006	1.9118e-07	7.69721e-25	2.66947e-09	1.6061e-07	3.46099e-08	1.05924e-09	0	1.8925e-05	3.51134e-10	6.52615e-06	0.000580289	-0.136338	-0.034621	0.0805234	-0.0437906	-0.0416898	0.00323981	-0.1	-0.397566	0
2245	1.90476	0	0.130187	1.77457	2.25092	2.23615	2.09547	1.58844	0.287398	0.219633	0.140683	0.014766	0.0122975	0.00350631	0.000156089	0.00361966	0.00493985	0.00153764	0.00752743	0.0680451	0.0163714	1.84939e-05	0.00771754	0.0149457	0.000192006	0.00985408	0.000756832	0.00196819	0.00138912	1.82987e-07	6.28432e-25	2.45264e-09	1.50729e-07	3.26997e-08	9.92423e-10	0	1.85964e-05	3.33054e-10	6.55827e-06	0.000580289	-0.136459	-0.0346755	0.0804429	-0.0435799	-0.041654	0.00300799	-0.1	-0.397642	0
2246	1.85462	0	0.0860781	1.76854	2.24559	2.23096	2.09024	1.58426	0.286473	0.219507	0.140726	0.0146314	0.0122975	0.00350631	0.000156089	0.00361948	0.00494151	0.00153823	0.00753045	0.0680745	0.0163778	1.84909e-05	0.00772022	0.0149457	0.000187391	0.00974274	0.000746783	0.00196075	0.0013882	1.75161e-07	5.13132e-25	2.25354e-09	1.4188e-07	3.0896e-08	9.29861e-10	0	1.82742e-05	3.15919e-10	6.61947e-06	0.000580289	-0.136579	-0.03473	0.0803624	-0.0433691	-0.0416183	0.00277616	-0.1	-0.397718	0
2247	1.8223	0	0.0592681	1.76303	2.24078	2.22628	2.08551	1.58055	0.285562	0.219397	0.140771	0.0144986	0.0122976	0.00350631	0.000156089	0.0036193	0.00494346	0.00153885	0.00753353	0.0681047	0.0163841	1.84883e-05	0.00772319	0.0149457	0.000182896	0.00963291	0.000736888	0.00195336	0.00138727	1.67686e-07	4.19032e-25	2.07071e-09	1.33956e-07	2.91929e-08	8.71283e-10	0	1.79582e-05	2.99681e-10	6.68982e-06	0.000580289	-0.136696	-0.0347845	0.0802831	-0.0431585	-0.0415826	0.00254606	-0.1	-0.397795	0
2248	1.80106	0	0.0431769	1.75788	2.23633	2.22196	2.08115	1.57718	0.284659	0.219304	0.140817	0.0143675	0.0122976	0.00350631	0.00015609	0.00361913	0.00494554	0.00153947	0.00753665	0.0681353	0.0163906	1.84861e-05	0.00772631	0.0149457	0.000178515	0.00952448	0.00072714	0.001946	0.00138635	1.60541e-07	3.4222e-25	1.9028e-09	1.26858e-07	2.75844e-08	8.16424e-10	0	1.76481e-05	2.84289e-10	6.74903e-06	0.000580289	-0.136814	-0.0348391	0.0802041	-0.0429479	-0.0415469	0.00231612	-0.1	-0.397872	0
2249	1.78497	0	0.0322656	1.75271	2.23185	2.21761	2.07675	1.57376	0.283756	0.219234	0.140863	0.014238	0.0122976	0.00350631	0.00015609	0.00361897	0.00494764	0.00154011	0.00753977	0.0681656	0.016397	1.84842e-05	0.00772946	0.0149457	0.000174243	0.00941742	0.000717533	0.00193868	0.00138543	1.53709e-07	2.79509e-25	1.74856e-09	1.205e-07	2.60652e-08	7.6504e-10	0	1.73439e-05	2.69695e-10	6.79729e-06	0.000580289	-0.136935	-0.0348938	0.0801235	-0.0427369	-0.0415112	0.00208371	-0.1	-0.397949	0
2250	1.77306	0	0.025655	1.74741	2.22719	2.21308	2.07217	1.57014	0.282853	0.219178	0.140908	0.0141102	0.0122976	0.00350631	0.00015609	0.00361882	0.00494974	0.00154074	0.0075429	0.0681958	0.0164035	1.84825e-05	0.00773263	0.0149457	0.000170077	0.00931168	0.000708064	0.0019314	0.00138451	1.47176e-07	2.28305e-25	1.60688e-09	1.14804e-07	2.46302e-08	7.16909e-10	0	1.70452e-05	2.55858e-10	6.83984e-06	0.000580289	-0.137025	-0.0349347	0.0800632	-0.0425786	-0.0414845	0.00190989	-0.1	-0.398007	0
2251	1.81487	0	0.0725288	1.74235	2.22265	2.20866	2.06771	1.56663	0.281948	0.219132	0.140953	0.0139839	0.0122976	0.00350631	0.00015609	0.00361867	0.00495181	0.00154138	0.00754602	0.0682255	0.01641	1.84811e-05	0.00773578	0.0149457	0.000166013	0.00920723	0.00069873	0.00192415	0.00138359	1.40926e-07	1.86494e-25	1.47672e-09	1.09701e-07	2.32746e-08	6.71821e-10	0	1.67519e-05	2.42736e-10	6.87803e-06	0.000580289	-0.137054	-0.0349483	0.0800435	-0.0425259	-0.0414756	0.00185274	-0.1	-0.398026	0
2252	1.88364	0	0.146252	1.73739	2.21812	2.20426	2.06327	1.5631	0.281075	0.219097	0.140994	0.0138589	0.0122977	0.00350631	0.000156091	0.00361852	0.0049534	0.00154196	0.00754901	0.0682526	0.0164163	1.84796e-05	0.00773845	0.0149457	0.000162042	0.00910388	0.000689512	0.00191692	0.00138267	1.34938e-07	1.52337e-25	1.3571e-09	1.05123e-07	2.19935e-08	6.29559e-10	0	1.64635e-05	2.30283e-10	6.86842e-06	0.000580289	-0.137054	-0.0349483	0.0800435	-0.0425259	-0.0414756	0.00185274	-0.1	-0.398026	0
2253	1.91361	0	0.181191	1.73242	2.21352	2.19979	2.05876	1.55942	0.280275	0.219062	0.141029	0.0137351	0.0122977	0.00350631	0.000156091	0.00361837	0.0049543	0.00154247	0.00755178	0.0682755	0.0164223	1.84779e-05	0.00774036	0.0149457	0.000158156	0.0090015	0.000680398	0.00190971	0.00138175	1.29194e-07	1.24426e-25	1.24711e-09	1.01014e-07	2.07824e-08	5.89931e-10	0	1.61795e-05	2.1846e-10	6.81809e-06	0.000580289	-0.137054	-0.0349483	0.0800435	-0.0425259	-0.0414756	0.00185274	-0.1	-0.398026	0
2254	1.91821	0	0.190562	1.72765	2.2091	2.19548	2.05442	1.55584	0.279553	0.219027	0.141061	0.0136125	0.0122977	0.00350631	0.000156091	0.00361821	0.00495486	0.00154293	0.00755441	0.0682959	0.0164282	1.84762e-05	0.00774186	0.0149457	0.000154359	0.0089002	0.000671398	0.00190252	0.00138083	1.23689e-07	1.01625e-25	1.14602e-09	9.73272e-08	1.96378e-08	5.52789e-10	0	1.59002e-05	2.0724e-10	6.78713e-06	0.000580289	-0.137054	-0.0349483	0.0800435	-0.0425259	-0.0414756	0.00185274	-0.1	-0.398026	0
2255	1.89735	0	0.174151	1.7232	2.20495	2.19146	2.05037	1.55246	0.278913	0.218992	0.14109	0.0134914	0.0122977	0.00350631	0.000156092	0.00361806	0.00495535	0.00154336	0.00755696	0.0683149	0.016434	1.84745e-05	0.00774321	0.0149457	0.000150651	0.00880004	0.000662518	0.00189536	0.00137991	1.1842e-07	8.30022e-26	1.05313e-09	9.40215e-08	1.85562e-08	5.17986e-10	0	1.56258e-05	1.96596e-10	6.78222e-06	0.000580289	-0.137054	-0.0349483	0.0800435	-0.0425259	-0.0414756	0.00185274	-0.1	-0.398026	0
2256	1.84928	0	0.130187	1.71909	2.2011	2.18773	2.04661	1.5493	0.278356	0.218958	0.141119	0.0133718	0.0122977	0.00350631	0.000156092	0.00361791	0.00495595	0.00154379	0.00755948	0.0683334	0.0164397	1.8473e-05	0.00774459	0.0149457	0.000147038	0.0087011	0.000653764	0.00188823	0.00137899	1.1338e-07	6.7794e-26	9.67774e-10	9.10593e-08	1.75343e-08	4.85383e-10	0	1.53563e-05	1.86503e-10	6.8032e-06	0.000580289	-0.137054	-0.0349483	0.0800435	-0.0425259	-0.0414756	0.00185274	-0.1	-0.398026	0
2257	1.80137	0	0.0860781	1.7153	2.19753	2.18428	2.04313	1.54632	0.277884	0.218924	0.141149	0.0132538	0.0122977	0.00350631	0.000156092	0.00361776	0.00495684	0.00154423	0.00756203	0.0683526	0.0164454	1.84718e-05	0.00774623	0.0149457	0.000143516	0.00860345	0.00064514	0.00188114	0.00137808	1.08563e-07	5.53763e-26	8.8937e-10	8.8407e-08	1.65691e-08	4.5485e-10	0	1.5092e-05	1.76936e-10	6.85396e-06	0.000580289	-0.137054	-0.0349483	0.0800435	-0.0425259	-0.0414756	0.00185274	-0.1	-0.398026	0
2258	1.77096	0	0.0592681	1.71169	2.19411	2.18097	2.03979	1.54341	0.27749	0.21889	0.141181	0.0131373	0.0122978	0.00350631	0.000156092	0.00361762	0.00495799	0.00154469	0.0075646	0.0683725	0.0164512	1.84708e-05	0.00774811	0.0149457	0.000140084	0.00850708	0.000636647	0.00187409	0.00137717	1.03959e-07	4.52367e-26	8.17348e-10	8.60328e-08	1.56574e-08	4.26256e-10	0	1.48327e-05	1.67867e-10	6.91451e-06	0.000580289	-0.137054	-0.0349483	0.0800435	-0.0425259	-0.0414756	0.00185274	-0.1	-0.398026	0
2259	1.75129	0	0.0431769	1.70812	2.19069	2.17767	2.03646	1.54044	0.277159	0.218857	0.141213	0.0130223	0.0122978	0.00350631	0.000156093	0.00361749	0.00495926	0.00154515	0.00756719	0.0683926	0.016457	1.847e-05	0.0077501	0.0149457	0.000136735	0.00841193	0.000628278	0.00186707	0.00137626	9.95568e-08	3.69559e-26	7.5118e-10	8.39065e-08	1.47962e-08	3.99472e-10	0	1.45782e-05	1.59269e-10	6.96448e-06	0.000580289	-0.137054	-0.0349483	0.0800435	-0.0425259	-0.0414756	0.00185274	-0.1	-0.398026	0
2260	1.73678	0	0.0322656	1.70451	2.18722	2.17431	2.03307	1.53737	0.276878	0.218824	0.141245	0.0129087	0.0122978	0.00350631	0.000156093	0.00361736	0.00496055	0.00154562	0.00756975	0.0684125	0.0164628	1.84694e-05	0.00775211	0.0149457	0.000133468	0.00831795	0.000620028	0.00186009	0.00137535	9.53458e-08	3.01922e-26	6.90382e-10	8.2002e-08	1.39825e-08	3.7438e-10	0	1.43284e-05	1.51114e-10	7.00404e-06	0.000580289	-0.137054	-0.0349483	0.0800435	-0.0425259	-0.0414756	0.00185274	-0.1	-0.398026	0
2261	1.72652	0	0.025655	1.70087	2.18369	2.17089	2.02962	1.53418	0.276642	0.218791	0.141277	0.0127965	0.0122978	0.00350631	0.000156093	0.00361724	0.00496183	0.00154607	0.0075723	0.0684321	0.0164685	1.84689e-05	0.00775412	0.0149456	0.000130285	0.00822511	0.000611895	0.00185315	0.00137444	9.13169e-08	2.46674e-26	6.34518e-10	8.02959e-08	1.32138e-08	3.50872e-10	0	1.40831e-05	1.43381e-10	7.03812e-06	0.000580289	-0.137054	-0.0349483	0.0800435	-0.0425259	-0.0414756	0.00185274	-0.1	-0.398026	0
2262	1.76971	0	0.0725288	1.69718	2.1801	2.16741	2.02611	1.5309	0.276444	0.218758	0.141307	0.0126856	0.0122978	0.00350631	0.000156093	0.00361712	0.00496308	0.00154653	0.00757481	0.0684512	0.0164743	1.84685e-05	0.00775609	0.0149456	0.000127178	0.00813339	0.000603875	0.00184623	0.00137353	8.74615e-08	2.01543e-26	5.83183e-10	7.87675e-08	1.24874e-08	3.28846e-10	0	1.38422e-05	1.36046e-10	7.06794e-06	0.000580289	-0.137054	-0.0349483	0.0800435	-0.0425259	-0.0414756	0.00185274	-0.1	-0.398026	0
2263	1.83958	0	0.146252	1.69332	2.17633	2.16375	2.02242	1.52743	0.276256	0.218726	0.141335	0.0125758	0.0122979	0.00350631	0.000156094	0.00361699	0.00496393	0.00154693	0.00757719	0.068468	0.0164798	1.84681e-05	0.00775764	0.0149456	0.000124139	0.00804261	0.000595954	0.00183934	0.00137263	8.37658e-08	1.64664e-26	5.35993e-10	7.73951e-08	1.18008e-08	3.08197e-10	0	1.36052e-05	1.29084e-10	7.05168e-06	0.000580289	-0.137054	-0.0349483	0.0800435	-0.0425259	-0.0414756	0.00185274	-0.1	-0.398026	0
2264	1.8705	0	0.181191	1.68931	2.1724	2.15993	2.01858	1.52382	0.276063	0.218694	0.141357	0.012467	0.0122979	0.00350631	0.000156094	0.00361686	0.0049642	0.00154727	0.00757938	0.0684813	0.0164851	1.84673e-05	0.00775856	0.0149456	0.000121169	0.00795267	0.00058812	0.00183246	0.00137172	8.02192e-08	1.34522e-26	4.92601e-10	7.27825e-08	1.11517e-08	2.88832e-10	0	1.33719e-05	1.22472e-10	6.99681e-06	0.000580289	-0.137054	-0.0349483	0.0800435	-0.0425259	-0.0414756	0.00185274	-0.1	-0.398026	0
2265	1.87596	0	0.190562	1.68539	2.16857	2.15621	2.01484	1.52029	0.27588	0.218663	0.141377	0.0123593	0.0122979	0.00350631	0.000156094	0.00361673	0.00496426	0.00154757	0.00758144	0.0684927	0.0164902	1.84665e-05	0.00775919	0.0149456	0.00011827	0.00786365	0.000580383	0.00182559	0.00137081	7.68198e-08	1.09893e-26	4.52714e-10	6.52665e-08	1.05382e-08	2.70679e-10	0	1.31423e-05	1.16197e-10	6.96203e-06	0.000580289	-0.137054	-0.0349483	0.0800435	-0.0425259	-0.0414756	0.00185274	-0.1	-0.398026	0
2266	1.85588	0	0.174151	1.68173	2.16498	2.15273	2.01133	1.51699	0.275717	0.218631	0.141395	0.0122528	0.0122979	0.00350631	0.000156095	0.0036166	0.00496432	0.00154785	0.00758344	0.0685033	0.0164952	1.84658e-05	0.00775976	0.0149456	0.000115437	0.00777563	0.000572748	0.00181876	0.0013699	7.35643e-08	8.97726e-27	4.16057e-10	5.85266e-08	9.9584e-09	2.53666e-10	0	1.29166e-05	1.10243e-10	6.95368e-06	0.000580289	-0.137054	-0.0349483	0.0800435	-0.0425259	-0.0414756	0.00185274	-0.1	-0.398026	0
2267	1.80851	0	0.130187	1.67832	2.16164	2.14949	2.00808	1.5139	0.275583	0.2186	0.141414	0.0121476	0.0122979	0.00350631	0.000156095	0.00361648	0.00496456	0.00154814	0.00758542	0.068514	0.0165002	1.84652e-05	0.00776045	0.0149456	0.000112671	0.00768866	0.000565218	0.00181195	0.001369	7.04492e-08	7.33384e-27	3.82373e-10	5.24836e-08	9.4106e-09	2.37727e-10	0	1.2695e-05	1.04596e-10	6.97155e-06	0.000580289	-0.137054	-0.0349483	0.0800435	-0.0425259	-0.0414756	0.00185274	-0.1	-0.398026	0
2268	1.76123	0	0.0860781	1.67516	2.15852	2.14648	2.00504	1.51099	0.275486	0.21857	0.141434	0.0120438	0.012298	0.00350631	0.000156095	0.00361636	0.00496515	0.00154844	0.00758744	0.0685258	0.0165053	1.8465e-05	0.00776147	0.0149456	0.000109978	0.00760281	0.000557801	0.00180518	0.00136809	6.7471e-08	5.99168e-27	3.51427e-10	4.70667e-08	8.89313e-09	2.22797e-10	0	1.24776e-05	9.92422e-11	7.0195e-06	0.000580289	-0.137054	-0.0349483	0.0800435	-0.0425259	-0.0414756	0.00185274	-0.1	-0.398026	0
2269	1.73139	0	0.0592681	1.67212	2.15552	2.14358	2.00212	1.50816	0.275423	0.218539	0.141457	0.0119413	0.012298	0.00350631	0.000156095	0.00361624	0.00496605	0.00154878	0.00758951	0.0685389	0.0165104	1.84653e-05	0.00776281	0.0149456	0.000107351	0.00751807	0.000550494	0.00179845	0.00136719	6.4624e-08	4.89553e-27	3.22998e-10	4.22108e-08	8.40432e-09	2.08814e-10	0	1.22643e-05	9.41666e-11	7.07747e-06	0.000580289	-0.137054	-0.0349483	0.0800435	-0.0425259	-0.0414756	0.00185274	-0.1	-0.398026	0
2270	1.71225	0	0.0431769	1.66907	2.15248	2.14064	1.99916	1.50527	0.275385	0.218509	0.141481	0.0118401	0.012298	0.00350631	0.000156096	0.00361614	0.0049671	0.00154912	0.0075916	0.0685525	0.0165155	1.84658e-05	0.00776431	0.0149456	0.000104788	0.0074344	0.000543293	0.00179175	0.00136629	6.19008e-08	4.00014e-27	2.96877e-10	3.78572e-08	7.94252e-09	1.95714e-10	0	1.20549e-05	8.93534e-11	7.125e-06	0.000580289	-0.137054	-0.0349483	0.0800435	-0.0425259	-0.0414756	0.00185274	-0.1	-0.398026	0
2271	1.6982	0	0.0322656	1.66594	2.14936	2.13762	1.99612	1.50227	0.275365	0.218479	0.141505	0.0117401	0.012298	0.0035063	0.000156096	0.00361603	0.0049682	0.00154947	0.00759369	0.0685663	0.0165205	1.84667e-05	0.00776588	0.0149456	0.00010229	0.00735175	0.000536194	0.00178509	0.00136539	5.9295e-08	3.26866e-27	2.72874e-10	3.39535e-08	7.5062e-09	1.83439e-10	0	1.18494e-05	8.47883e-11	7.16224e-06	0.000580289	-0.137054	-0.0349483	0.0800435	-0.0425259	-0.0414756	0.00185274	-0.1	-0.398026	0
2272	1.68837	0	0.025655	1.66272	2.14614	2.1345	1.99297	1.49916	0.275358	0.218449	0.141529	0.0116413	0.012298	0.0035063	0.000156096	0.00361593	0.00496932	0.00154983	0.00759577	0.0685802	0.0165256	1.84678e-05	0.00776749	0.0149456	9.9855e-05	0.00727008	0.000529194	0.00177845	0.0013645	5.68012e-08	2.67104e-27	2.50816e-10	3.0453e-08	7.09394e-09	1.71938e-10	0	1.16475e-05	8.04581e-11	7.1941e-06	0.000580289	-0.137054	-0.0349483	0.0800435	-0.0425259	-0.0414756	0.00185274	-0.1	-0.398026	0
2273	1.73194	0	0.0725288	1.65941	2.14284	2.13129	1.98974	1.49596	0.275363	0.21842	0.141553	0.0115437	0.0122981	0.0035063	0.000156096	0.00361583	0.00497043	0.00155018	0.00759783	0.0685941	0.0165306	1.84689e-05	0.00776911	0.0149456	9.74821e-05	0.0071894	0.000522291	0.00177185	0.0013636	5.44142e-08	2.18276e-27	2.30544e-10	2.7314e-08	6.70438e-09	1.61161e-10	0	1.14492e-05	7.63506e-11	7.22181e-06	0.000580289	-0.137054	-0.0349483	0.0800435	-0.0425259	-0.0414756	0.00185274	-0.1	-0.398026	0
2274	1.80216	0	0.146252	1.65591	2.13933	2.12789	1.98631	1.49257	0.275355	0.218391	0.141573	0.011447	0.0122981	0.0035063	0.000156097	0.00361573	0.00497115	0.00155048	0.00759977	0.0686058	0.0165355	1.84699e-05	0.00777033	0.0149456	9.51599e-05	0.00710953	0.000515472	0.00176527	0.0013627	5.21255e-08	1.78368e-27	2.11908e-10	2.44981e-08	6.33615e-09	1.51057e-10	0	1.12541e-05	7.24512e-11	7.20341e-06	0.000580289	-0.137054	-0.0349483	0.0800435	-0.0425259	-0.0414756	0.00185274	-0.1	-0.398026	0
2275	1.83341	0	0.181191	1.65222	2.13566	2.12431	1.98272	1.48904	0.275321	0.218362	0.141589	0.0113511	0.0122981	0.0035063	0.000156097	0.00361562	0.00497132	0.00155073	0.00760153	0.0686145	0.0165402	1.84706e-05	0.00777096	0.0149456	9.28845e-05	0.00703038	0.000508727	0.00175869	0.00136181	4.99284e-08	1.45744e-27	1.9477e-10	2.19712e-08	5.98797e-09	1.41579e-10	0	1.10619e-05	6.87476e-11	7.14635e-06	0.000580289	-0.137054	-0.0349483	0.0800435	-0.0425259	-0.0414756	0.00185274	-0.1	-0.398026	0
2276	1.83917	0	0.190562	1.64861	2.13207	2.12081	1.97921	1.4856	0.275279	0.218333	0.141603	0.0112562	0.0122981	0.0035063	0.000156097	0.00361551	0.00497127	0.00155094	0.00760318	0.0686215	0.0165446	1.84711e-05	0.00777132	0.0149456	9.06629e-05	0.00695204	0.000502064	0.00175213	0.00136091	4.7822e-08	1.19082e-27	1.79014e-10	1.97045e-08	5.65886e-09	1.32694e-10	0	1.08729e-05	6.52318e-11	7.10949e-06	0.000580289	-0.137054	-0.0349483	0.0800435	-0.0425259	-0.0414756	0.00185274	-0.1	-0.398026	0
2277	1.81935	0	0.174151	1.6452	2.12868	2.11752	1.9759	1.48236	0.27524	0.218305	0.141616	0.0111623	0.0122981	0.0035063	0.000156097	0.0036154	0.00497124	0.00155114	0.00760477	0.0686279	0.016549	1.84716e-05	0.00777165	0.0149456	8.84957e-05	0.00687457	0.000495489	0.0017456	0.00136001	4.58043e-08	9.72966e-28	1.64533e-10	1.76716e-08	5.34782e-09	1.24366e-10	0	1.0687e-05	6.18957e-11	7.09924e-06	0.000580289	-0.137054	-0.0349483	0.0800435	-0.0425259	-0.0414756	0.00185274	-0.1	-0.398026	0
2278	1.77221	0	0.130187	1.64203	2.12552	2.11445	1.97282	1.47933	0.275215	0.218277	0.141629	0.0110696	0.0122982	0.0035063	0.000156098	0.0036153	0.00497139	0.00155135	0.00760636	0.0686347	0.0165534	1.84722e-05	0.00777212	0.0149456	8.63834e-05	0.00679801	0.000489003	0.0017391	0.00135912	4.3873e-08	7.94992e-28	1.51225e-10	1.58488e-08	5.05393e-09	1.16562e-10	0	1.05045e-05	5.87312e-11	7.11538e-06	0.000580289	-0.137054	-0.0349483	0.0800435	-0.0425259	-0.0414756	0.00185274	-0.1	-0.398026	0
2279	1.72516	0	0.0860781	1.63908	2.12257	2.1116	1.96995	1.47649	0.275215	0.218249	0.141645	0.0109781	0.0122982	0.0035063	0.000156098	0.0036152	0.00497191	0.00155158	0.007608	0.0686429	0.0165578	1.8473e-05	0.00777294	0.0149455	8.43213e-05	0.00672244	0.000482614	0.00173263	0.00135822	4.20263e-08	6.49616e-28	1.38998e-10	1.42145e-08	4.7763e-09	1.09252e-10	0	1.03253e-05	5.57307e-11	7.16183e-06	0.000580289	-0.137054	-0.0349483	0.0800435	-0.0425259	-0.0414756	0.00185274	-0.1	-0.398026	0
2280	1.69552	0	0.0592681	1.63625	2.11973	2.10884	1.96718	1.47372	0.275237	0.218222	0.141663	0.0108877	0.0122982	0.0035063	0.000156098	0.0036151	0.00497274	0.00155184	0.0076097	0.0686525	0.0165623	1.8474e-05	0.00777409	0.0149455	8.23083e-05	0.00664784	0.00047632	0.0017262	0.00135733	4.02604e-08	5.30865e-28	1.27764e-10	1.27494e-08	4.51402e-09	1.02405e-10	0	1.01496e-05	5.28857e-11	7.21843e-06	0.000580289	-0.137054	-0.0349483	0.0800435	-0.0425259	-0.0414756	0.00185274	-0.1	-0.398026	0
2281	1.67656	0	0.0431769	1.63339	2.11685	2.10605	1.96437	1.4709	0.275274	0.218194	0.141682	0.0107985	0.0122982	0.0035063	0.000156099	0.00361502	0.00497372	0.00155212	0.00761143	0.0686629	0.0165668	1.84751e-05	0.00777541	0.0149455	8.03473e-05	0.00657417	0.000470115	0.0017198	0.00135644	3.8571e-08	4.33845e-28	1.17442e-10	1.14356e-08	4.26622e-09	9.59889e-11	0	9.97705e-06	5.01875e-11	7.26464e-06	0.000580289	-0.137054	-0.0349483	0.0800435	-0.0425259	-0.0414756	0.00185274	-0.1	-0.398026	0
2282	1.66269	0	0.0322656	1.63043	2.11387	2.10316	1.96146	1.46797	0.27532	0.218167	0.141702	0.0107102	0.0122983	0.0035063	0.000156099	0.00361493	0.00497476	0.00155241	0.00761317	0.0686737	0.0165713	1.84764e-05	0.00777683	0.0149455	7.84363e-05	0.00650138	0.000463998	0.00171342	0.00135556	3.69541e-08	3.54571e-28	1.07955e-10	1.02575e-08	4.03208e-09	8.99771e-11	0	9.80762e-06	4.7628e-11	7.30061e-06	0.000580289	-0.137054	-0.0349483	0.0800435	-0.0425259	-0.0414756	0.00185274	-0.1	-0.398026	0
2283	1.65302	0	0.025655	1.62737	2.11079	2.10016	1.95844	1.46493	0.275372	0.218141	0.141722	0.0106231	0.0122983	0.0035063	0.000156099	0.00361485	0.00497582	0.0015527	0.00761491	0.0686847	0.0165758	1.84777e-05	0.00777829	0.0149455	7.65736e-05	0.00642947	0.000457966	0.00170708	0.00135467	3.54063e-08	2.89793e-28	9.92363e-11	9.20097e-09	3.81083e-09	8.43434e-11	0	9.64122e-06	4.52e-11	7.33124e-06	0.000580289	-0.137054	-0.0349483	0.0800435	-0.0425259	-0.0414756	0.00185274	-0.1	-0.398026	0
2284	1.69675	0	0.0725288	1.62422	2.10761	2.09707	1.95533	1.46179	0.275428	0.218114	0.141742	0.0105369	0.0122983	0.0035063	0.000156099	0.00361477	0.00497687	0.00155299	0.00761665	0.0686958	0.0165803	1.8479e-05	0.00777977	0.0149455	7.47578e-05	0.00635841	0.000452017	0.00170077	0.00135378	3.39245e-08	2.36858e-28	9.12232e-11	8.25342e-09	3.60176e-09	7.90638e-11	0	9.47777e-06	4.28966e-11	7.35776e-06	0.000580289	-0.137054	-0.0349483	0.0800435	-0.0425259	-0.0414756	0.00185274	-0.1	-0.398026	0
2285	1.76711	0	0.146252	1.62086	2.10423	2.09378	1.95202	1.45847	0.275465	0.218088	0.141759	0.0104515	0.0122983	0.0035063	0.0001561	0.00361469	0.00497754	0.00155325	0.00761827	0.068705	0.0165846	1.84802e-05	0.00778086	0.0149455	7.29793e-05	0.00628806	0.000446139	0.00169448	0.0013529	3.25033e-08	1.93585e-28	8.38557e-11	7.40329e-09	3.40412e-09	7.41131e-11	0	9.31692e-06	4.07096e-11	7.33808e-06	0.000580289	-0.137054	-0.0349483	0.0800435	-0.0425259	-0.0414756	0.00185274	-0.1	-0.398026	0
2286	1.7985	0	0.181191	1.61731	2.10068	2.09031	1.94854	1.45501	0.275471	0.218062	0.141771	0.0103669	0.0122983	0.0035063	0.0001561	0.00361461	0.00497765	0.00155344	0.00761971	0.0687113	0.0165887	1.84811e-05	0.00778137	0.0149455	7.12353e-05	0.00621834	0.000440325	0.00168819	0.00135201	3.11388e-08	1.58204e-28	7.70799e-11	6.64036e-09	3.21723e-09	6.94693e-11	0	9.15847e-06	3.86322e-11	7.27966e-06	0.000580289	-0.137054	-0.0349483	0.0800435	-0.0425259	-0.0414756	0.00185274	-0.1	-0.398026	0
2287	1.80438	0	0.190562	1.61381	2.09719	2.08691	1.94513	1.45163	0.275463	0.218036	0.141782	0.0102831	0.0122984	0.0035063	0.0001561	0.00361452	0.00497756	0.00155361	0.00762106	0.068716	0.0165926	1.84818e-05	0.00778162	0.0149455	6.95321e-05	0.00614933	0.000434582	0.00168192	0.00135112	2.98303e-08	1.29284e-28	7.08503e-11	5.95591e-09	3.04056e-09	6.5115e-11	0	9.00256e-06	3.666e-11	7.24151e-06	0.000580289	-0.137054	-0.0349483	0.0800435	-0.0425259	-0.0414756	0.00185274	-0.1	-0.398026	0
2288	1.78467	0	0.174151	1.61052	2.0939	2.0837	1.94191	1.44844	0.275455	0.21801	0.141791	0.0102002	0.0122984	0.0035063	0.0001561	0.00361443	0.00497748	0.00155376	0.00762235	0.0687203	0.0165965	1.84826e-05	0.00778184	0.0149455	6.78705e-05	0.00608107	0.000428912	0.00167568	0.00135024	2.85766e-08	1.0565e-28	6.5124e-11	5.34198e-09	2.87359e-09	6.10335e-11	0	8.84929e-06	3.47884e-11	7.23008e-06	0.000580289	-0.137054	-0.0349483	0.0800435	-0.0425259	-0.0414756	0.00185274	-0.1	-0.398026	0
2289	1.73764	0	0.130187	1.60745	2.09083	2.08071	1.93891	1.44547	0.275457	0.217985	0.141802	0.0101183	0.0122984	0.0035063	0.000156101	0.00361435	0.00497759	0.00155392	0.00762365	0.068725	0.0166004	1.84833e-05	0.00778222	0.0149455	6.62508e-05	0.00601362	0.000423321	0.00166946	0.00134935	2.73764e-08	8.63384e-29	5.98612e-11	4.79142e-09	2.71581e-09	5.72086e-11	0	8.69873e-06	3.30128e-11	7.24519e-06	0.000580289	-0.137054	-0.0349483	0.0800435	-0.0425259	-0.0414756	0.00185274	-0.1	-0.398026	0
2290	1.69069	0	0.0860781	1.60461	2.08798	2.07794	1.93613	1.44269	0.275479	0.21796	0.141815	0.0100374	0.0122984	0.0035063	0.000156101	0.00361427	0.00497806	0.00155411	0.00762502	0.0687313	0.0166043	1.84843e-05	0.00778294	0.0149455	6.46733e-05	0.00594703	0.000417811	0.00166327	0.00134847	2.62285e-08	7.05616e-29	5.50256e-11	4.29778e-09	2.56675e-09	5.36254e-11	0	8.55098e-06	3.1329e-11	7.29073e-06	0.000580289	-0.137054	-0.0349483	0.0800435	-0.0425259	-0.0414756	0.00185274	-0.1	-0.398026	0
2291	1.66115	0	0.0592681	1.60188	2.08523	2.07527	1.93344	1.43999	0.275522	0.217935	0.14183	0.0099576	0.0122984	0.0035063	0.000156101	0.0036142	0.00497885	0.00155433	0.00762645	0.0687391	0.0166082	1.84854e-05	0.00778399	0.0149455	6.31373e-05	0.0058813	0.000412383	0.00165712	0.00134759	2.51307e-08	5.76721e-29	5.05823e-11	3.85517e-09	2.42593e-09	5.02685e-11	0	8.406e-06	2.97324e-11	7.34652e-06	0.000580289	-0.137054	-0.0349483	0.0800435	-0.0425259	-0.0414756	0.00185274	-0.1	-0.398026	0
2292	1.6423	0	0.0431769	1.59912	2.08244	2.07256	1.93072	1.43723	0.275577	0.21791	0.141846	0.00987872	0.0122985	0.0035063	0.000156102	0.00361413	0.00497979	0.00155457	0.00762791	0.0687478	0.0166122	1.84868e-05	0.00778523	0.0149455	6.16354e-05	0.00581637	0.000407033	0.001651	0.00134671	2.40802e-08	4.71396e-29	4.6499e-11	3.45826e-09	2.29288e-09	4.7123e-11	0	8.26366e-06	2.8218e-11	7.39194e-06	0.000580289	-0.137054	-0.0349483	0.0800435	-0.0425259	-0.0414756	0.00185274	-0.1	-0.398026	0
2293	1.62852	0	0.0322656	1.59626	2.07955	2.06975	1.92788	1.43436	0.275638	0.217886	0.141864	0.00980075	0.0122985	0.0035063	0.000156102	0.00361406	0.00498079	0.00155482	0.0076294	0.0687569	0.0166162	1.84884e-05	0.00778657	0.0149455	6.01665e-05	0.00575223	0.000401757	0.00164491	0.00134583	2.30745e-08	3.85322e-29	4.27462e-11	3.10229e-09	2.16715e-09	4.41754e-11	0	8.12386e-06	2.67813e-11	7.42712e-06	0.000580289	-0.137054	-0.0349483	0.0800435	-0.0425259	-0.0414756	0.00185274	-0.1	-0.398026	0
2294	1.61894	0	0.025655	1.59328	2.07655	2.06682	1.92494	1.43138	0.275703	0.217861	0.141881	0.00972369	0.0122985	0.0035063	0.000156102	0.003614	0.00498181	0.00155507	0.00763089	0.0687664	0.0166202	1.84903e-05	0.00778795	0.0149455	5.87345e-05	0.00568884	0.000396554	0.00163885	0.00134495	2.21117e-08	3.14976e-29	3.92969e-11	2.78302e-09	2.04833e-09	4.14128e-11	0	7.98655e-06	2.54183e-11	7.45699e-06	0.000580289	-0.137054	-0.0349483	0.0800435	-0.0425259	-0.0414756	0.00185274	-0.1	-0.398026	0
2295	1.66274	0	0.0725288	1.59022	2.07345	2.0638	1.9219	1.42829	0.275771	0.217837	0.141899	0.0096475	0.0122985	0.0035063	0.000156102	0.00361395	0.00498283	0.00155533	0.00763238	0.0687761	0.0166242	1.84924e-05	0.00778935	0.0149455	5.73384e-05	0.00562621	0.000391422	0.00163281	0.00134408	2.11898e-08	2.5748e-29	3.61264e-11	2.49665e-09	1.93605e-09	3.88236e-11	0	7.85167e-06	2.41251e-11	7.48276e-06	0.000580289	-0.137054	-0.0349483	0.0800435	-0.0425259	-0.0414756	0.00185274	-0.1	-0.398026	0
2296	1.73318	0	0.146252	1.58693	2.07014	2.06057	1.91866	1.42502	0.275818	0.217813	0.141914	0.009572	0.0122985	0.0035063	0.000156103	0.00361388	0.00498347	0.00155555	0.00763377	0.0687839	0.0166281	1.84945e-05	0.00779038	0.0149454	5.59749e-05	0.00556419	0.000386351	0.00162679	0.0013432	2.03054e-08	2.10473e-29	3.32112e-11	2.2397e-09	1.82991e-09	3.63956e-11	0	7.71892e-06	2.28971e-11	7.46224e-06	0.000580289	-0.137054	-0.0349483	0.0800435	-0.0425259	-0.0414756	0.00185274	-0.1	-0.398026	0
2297	1.76464	0	0.181191	1.58345	2.06665	2.05716	1.91523	1.42161	0.275832	0.21779	0.141924	0.00949711	0.0122986	0.00350629	0.000156103	0.00361382	0.00498354	0.00155572	0.00763498	0.0687889	0.0166317	1.84963e-05	0.00779082	0.0149454	5.46415e-05	0.00550273	0.000381336	0.00162078	0.00134232	1.94561e-08	1.72032e-29	3.05299e-11	2.00909e-09	1.72953e-09	3.41178e-11	0	7.58814e-06	2.17305e-11	7.40288e-06	0.000580289	-0.137054	-0.0349483	0.0800435	-0.0425259	-0.0414756	0.00185274	-0.1	-0.398026	0
2298	1.77059	0	0.190562	1.58003	2.06323	2.05381	1.91188	1.41828	0.275832	0.217766	0.141933	0.00942297	0.0122986	0.00350629	0.000156103	0.00361375	0.00498342	0.00155585	0.0076361	0.0687923	0.0166352	1.8498e-05	0.007791	0.0149454	5.33394e-05	0.00544189	0.00037638	0.00161478	0.00134144	1.86415e-08	1.40605e-29	2.80645e-11	1.80217e-09	1.63464e-09	3.19819e-11	0	7.45944e-06	2.06229e-11	7.36385e-06	0.000580289	-0.137054	-0.0349483	0.0800435	-0.0425259	-0.0414756	0.00185274	-0.1	-0.398026	0
2299	1.75096	0	0.174151	1.57681	2.06001	2.05066	1.90872	1.41515	0.27583	0.217743	0.14194	0.00934963	0.0122986	0.00350629	0.000156103	0.00361368	0.0049833	0.00155597	0.00763718	0.0687954	0.0166386	1.84996e-05	0.00779116	0.0149454	5.20688e-05	0.00538171	0.000371488	0.00160881	0.00134057	1.78609e-08	1.14919e-29	2.57981e-11	1.61656e-09	1.54495e-09	2.99796e-11	0	7.33291e-06	1.95717e-11	7.35162e-06	0.000580289	-0.137054	-0.0349483	0.0800435	-0.0425259	-0.0414756	0.00185274	-0.1	-0.398026	0
2300	1.70401	0	0.130187	1.57382	2.05702	2.04775	1.9058	1.41224	0.275836	0.21772	0.141949	0.00927716	0.0122986	0.00350629	0.000156104	0.00361361	0.00498338	0.00155611	0.00763827	0.0687991	0.016642	1.85012e-05	0.00779147	0.0149454	5.08301e-05	0.00532224	0.000366663	0.00160286	0.00133969	1.71135e-08	9.3928e-30	2.37151e-11	1.45009e-09	1.46019e-09	2.8103e-11	0	7.20861e-06	1.85744e-11	7.36601e-06	0.000580289	-0.137054	-0.0349483	0.0800435	-0.0425259	-0.0414756	0.00185274	-0.1	-0.398026	0
2301	1.65714	0	0.0860781	1.57107	2.05425	2.04505	1.90309	1.40953	0.275863	0.217698	0.14196	0.00920561	0.0122986	0.00350629	0.000156104	0.00361355	0.00498382	0.00155627	0.00763943	0.0688042	0.0166455	1.8503e-05	0.00779213	0.0149454	4.96236e-05	0.00526352	0.000361908	0.00159694	0.00133882	1.63985e-08	7.6776e-30	2.18009e-11	1.30081e-09	1.38011e-09	2.63448e-11	0	7.08661e-06	1.76285e-11	7.41095e-06	0.000580289	-0.137054	-0.0349483	0.0800435	-0.0425259	-0.0414756	0.00185274	-0.1	-0.398026	0
2302	1.62769	0	0.0592681	1.56842	2.05158	2.04245	1.90048	1.40689	0.27591	0.217675	0.141973	0.00913496	0.0122987	0.00350629	0.000156104	0.00361349	0.00498456	0.00155646	0.00764066	0.068811	0.016649	1.8505e-05	0.00779312	0.0149454	4.84434e-05	0.00520555	0.000357224	0.00159106	0.00133795	1.57146e-08	6.27607e-30	2.00419e-11	1.16695e-09	1.30446e-09	2.46976e-11	0	6.9669e-06	1.67315e-11	7.46619e-06	0.000580289	-0.137054	-0.0349483	0.0800435	-0.0425259	-0.0414756	0.00185274	-0.1	-0.398026	0
2303	1.60891	0	0.0431769	1.56573	2.04887	2.0398	1.89782	1.4042	0.275967	0.217653	0.141988	0.00906513	0.0122987	0.00350629	0.000156104	0.00361344	0.00498545	0.00155667	0.00764192	0.0688187	0.0166526	1.85071e-05	0.00779428	0.0149454	4.72882e-05	0.00514829	0.000352605	0.0015852	0.00133708	1.506e-08	5.13065e-30	1.84254e-11	1.04691e-09	1.23297e-09	2.3154e-11	0	6.84935e-06	1.58806e-11	7.51109e-06	0.000580289	-0.137054	-0.0349483	0.0800435	-0.0425259	-0.0414756	0.00185274	-0.1	-0.398026	0
2304	1.5952	0	0.0322656	1.56294	2.04605	2.03705	1.89505	1.40139	0.276031	0.217631	0.142004	0.0089961	0.0122987	0.00350629	0.000156105	0.00361339	0.00498638	0.00155689	0.0076432	0.068827	0.0166561	1.85092e-05	0.00779552	0.0149454	4.61621e-05	0.00509172	0.000348051	0.00157937	0.00133621	1.44333e-08	4.19445e-30	1.69395e-11	9.3923e-10	1.16542e-09	2.17073e-11	0	6.7339e-06	1.50733e-11	7.54574e-06	0.000580289	-0.137054	-0.0349483	0.0800435	-0.0425259	-0.0414756	0.00185274	-0.1	-0.398026	0
2305	1.58569	0	0.025655	1.56004	2.04311	2.03419	1.89217	1.39846	0.276098	0.217609	0.142019	0.00892785	0.0122987	0.00350629	0.000156105	0.00361334	0.00498733	0.00155712	0.00764449	0.0688356	0.0166597	1.85113e-05	0.0077968	0.0149454	4.50643e-05	0.00503581	0.00034356	0.00157357	0.00133534	1.38332e-08	3.4292e-30	1.55737e-11	8.42647e-10	1.10157e-09	2.03514e-11	0	6.62049e-06	1.43074e-11	7.57508e-06	0.000580289	-0.137054	-0.0349483	0.0800435	-0.0425259	-0.0414756	0.00185274	-0.1	-0.398026	0
2306	1.62957	0	0.0725288	1.55704	2.04008	2.03122	1.88919	1.39543	0.276167	0.217587	0.142036	0.00886037	0.0122987	0.00350629	0.000156105	0.0036133	0.00498826	0.00155735	0.00764578	0.0688444	0.0166633	1.85135e-05	0.00779808	0.0149454	4.39939e-05	0.00498057	0.00033913	0.0015678	0.00133447	1.32585e-08	2.80365e-30	1.43182e-11	7.56009e-10	1.04124e-09	1.90804e-11	0	6.50908e-06	1.35806e-11	7.60032e-06	0.000580289	-0.137054	-0.0349483	0.0800435	-0.0425259	-0.0414756	0.00185274	-0.1	-0.398026	0
2307	1.70007	0	0.146252	1.55382	2.03684	2.02805	1.886	1.39222	0.276215	0.217565	0.142049	0.00879349	0.0122988	0.00350629	0.000156106	0.00361326	0.0049888	0.00155754	0.00764697	0.0688515	0.0166667	1.85155e-05	0.00779898	0.0149454	4.29483e-05	0.00492587	0.000334752	0.00156204	0.00133361	1.27071e-08	2.29213e-30	1.31637e-11	6.78263e-10	9.84197e-10	1.78885e-11	0	6.39942e-06	1.28904e-11	7.57917e-06	0.000580289	-0.137054	-0.0349483	0.0800435	-0.0425259	-0.0414756	0.00185274	-0.1	-0.398026	0
2308	1.7316	0	0.181191	1.55041	2.03342	2.0247	1.88264	1.38886	0.27623	0.217544	0.142058	0.00872713	0.0122988	0.00350629	0.000156106	0.0036132	0.00498878	0.00155767	0.00764799	0.0688557	0.0166699	1.85172e-05	0.00779929	0.0149454	4.19258e-05	0.00487165	0.000330422	0.00155628	0.00133274	1.21774e-08	1.87377e-30	1.21018e-11	6.08479e-10	9.30254e-10	1.67702e-11	0	6.29138e-06	1.22346e-11	7.51909e-06	0.000580289	-0.137054	-0.0349483	0.0800435	-0.0425259	-0.0414756	0.00185274	-0.1	-0.398026	0
2309	1.73762	0	0.190562	1.54706	2.03007	2.02141	1.87935	1.3856	0.27623	0.217523	0.142064	0.00866143	0.0122988	0.00350629	0.000156106	0.00361315	0.00498855	0.00155777	0.00764891	0.0688584	0.0166729	1.85187e-05	0.00779933	0.0149454	4.09271e-05	0.00481797	0.000326143	0.00155055	0.00133187	1.16693e-08	1.53169e-30	1.11253e-11	5.45861e-10	8.79255e-10	1.57215e-11	0	6.18505e-06	1.1612e-11	7.47937e-06	0.000580289	-0.137054	-0.0349483	0.0800435	-0.0425259	-0.0414756	0.00185274	-0.1	-0.398026	0
2310	1.71806	0	0.174151	1.54391	2.02693	2.01833	1.87626	1.38253	0.276228	0.217502	0.14207	0.00859643	0.0122988	0.00350629	0.000156106	0.00361309	0.00498833	0.00155787	0.00764979	0.0688608	0.0166759	1.85202e-05	0.00779934	0.0149454	3.99525e-05	0.00476488	0.000321919	0.00154483	0.001331	1.11824e-08	1.25206e-30	1.02276e-11	4.89684e-10	8.3105e-10	1.47383e-11	0	6.0805e-06	1.1021e-11	7.46651e-06	0.000580289	-0.137054	-0.0349483	0.0800435	-0.0425259	-0.0414756	0.00185274	-0.1	-0.398026	0
2311	1.67119	0	0.130187	1.541	2.02402	2.01548	1.87341	1.37969	0.276235	0.217481	0.142077	0.00853219	0.0122989	0.00350629	0.000156107	0.00361304	0.0049883	0.00155797	0.00765068	0.0688638	0.0166789	1.85216e-05	0.0077995	0.0149454	3.90022e-05	0.0047124	0.000317752	0.00153914	0.00133014	1.0716e-08	1.02351e-30	9.40239e-12	4.39295e-10	7.85494e-10	1.38168e-11	0	5.97778e-06	1.04602e-11	7.48036e-06	0.000580289	-0.137054	-0.0349483	0.0800435	-0.0425259	-0.0414756	0.00185274	-0.1	-0.398026	0
2312	1.62439	0	0.0860781	1.53832	2.02132	2.01285	1.87076	1.37704	0.276261	0.217461	0.142087	0.00846877	0.0122989	0.00350629	0.000156107	0.00361299	0.00498863	0.0015581	0.00765164	0.0688683	0.0166819	1.85233e-05	0.0078	0.0149454	3.80766e-05	0.00466059	0.000313646	0.00153348	0.00132927	1.02699e-08	8.36724e-31	8.64407e-12	3.94108e-10	7.42452e-10	1.29533e-11	0	5.87697e-06	9.92832e-12	7.52485e-06	0.000580289	-0.137054	-0.0349483	0.0800435	-0.0425259	-0.0414756	0.00185274	-0.1	-0.398026	0
2313	1.595	0	0.0592681	1.53573	2.01871	2.01031	1.86821	1.37446	0.276307	0.21744	0.142099	0.00840613	0.0122989	0.00350629	0.000156107	0.00361295	0.00498927	0.00155827	0.00765267	0.0688745	0.016685	1.85251e-05	0.00780085	0.0149453	3.71751e-05	0.00460944	0.0003096	0.00152785	0.00132841	9.84301e-09	6.84079e-31	7.94717e-12	3.53584e-10	7.01784e-10	1.21443e-11	0	5.77803e-06	9.42388e-12	7.5797e-06	0.000580289	-0.137054	-0.0349483	0.0800435	-0.0425259	-0.0414756	0.00185274	-0.1	-0.398026	0
2314	1.57629	0	0.0431769	1.53311	2.01606	2.00772	1.86561	1.37182	0.276364	0.21742	0.142112	0.00834422	0.0122989	0.00350629	0.000156107	0.00361291	0.00499007	0.00155845	0.00765375	0.0688816	0.0166882	1.8527e-05	0.00780187	0.0149453	3.62965e-05	0.00455892	0.000305611	0.00152224	0.00132755	9.43441e-09	5.59311e-31	7.30664e-12	3.17237e-10	6.63354e-10	1.13861e-11	0	5.68088e-06	8.94532e-12	7.62421e-06	0.000580289	-0.137054	-0.0349483	0.0800435	-0.0425259	-0.0414756	0.00185274	-0.1	-0.398026	0
2315	1.56265	0	0.0322656	1.53039	2.01331	2.00502	1.8629	1.36907	0.276427	0.2174	0.142126	0.00828301	0.0122989	0.00350629	0.000156108	0.00361288	0.00499093	0.00155864	0.00765485	0.0688893	0.0166913	1.8529e-05	0.00780298	0.0149453	3.54401e-05	0.00450899	0.000301678	0.00151667	0.00132669	9.04314e-09	4.57317e-31	6.71786e-12	2.84634e-10	6.27037e-10	1.06755e-11	0	5.58545e-06	8.49126e-12	7.65848e-06	0.000580289	-0.137054	-0.0349483	0.0800435	-0.0425259	-0.0414756	0.00185274	-0.1	-0.398026	0
2316	1.55321	0	0.025655	1.52755	2.01044	2.00222	1.86008	1.3662	0.276493	0.21738	0.142141	0.00822248	0.012299	0.00350629	0.000156108	0.00361284	0.00499182	0.00155884	0.00765596	0.0688974	0.0166945	1.8531e-05	0.00780415	0.0149453	3.4605e-05	0.00445966	0.000297798	0.00151111	0.00132583	8.66841e-09	3.73935e-31	6.17663e-12	2.55386e-10	5.92714e-10	1.00094e-11	0	5.4917e-06	8.0604e-12	7.68743e-06	0.000580289	-0.137054	-0.0349483	0.0800435	-0.0425259	-0.0414756	0.00185274	-0.1	-0.398026	0
2317	1.59714	0	0.0725288	1.52462	2.00747	1.99931	1.85716	1.36323	0.276561	0.21736	0.142156	0.00816262	0.012299	0.00350629	0.000156108	0.00361281	0.00499269	0.00155904	0.00765708	0.0689057	0.0166976	1.8533e-05	0.00780534	0.0149453	3.37855e-05	0.0044109	0.000293971	0.00150559	0.00132497	8.30946e-09	3.05765e-31	5.67908e-12	2.29148e-10	5.60276e-10	9.38496e-12	0	5.3996e-06	7.65152e-12	7.71227e-06	0.000580289	-0.137054	-0.0349483	0.0800435	-0.0425259	-0.0414756	0.00185274	-0.1	-0.398026	0
2318	1.66772	0	0.146252	1.52146	2.0043	1.9962	1.85403	1.36008	0.276608	0.217341	0.142168	0.00810327	0.012299	0.00350629	0.000156108	0.00361278	0.00499319	0.00155921	0.00765809	0.0689123	0.0167007	1.85349e-05	0.00780614	0.0149453	3.29797e-05	0.00436262	0.00029019	0.00150007	0.00132411	7.96503e-09	2.50013e-31	5.22151e-12	2.05601e-10	5.29606e-10	8.79931e-12	0	5.30894e-06	7.26322e-12	7.69063e-06	0.000580289	-0.137054	-0.0349483	0.0800435	-0.0425259	-0.0414756	0.00185274	-0.1	-0.398026	0
2319	1.69931	0	0.181191	1.51812	2.00095	1.9929	1.85073	1.35678	0.276622	0.217322	0.142175	0.00804437	0.012299	0.00350629	0.000156109	0.00361274	0.00499313	0.00155932	0.00765895	0.068916	0.0167035	1.85364e-05	0.00780637	0.0149453	3.21916e-05	0.00431476	0.000286448	0.00149457	0.00132326	7.63414e-09	2.04409e-31	4.80061e-12	1.84463e-10	5.006e-10	8.24983e-12	0	5.21961e-06	6.89427e-12	7.62995e-06	0.000580289	-0.137054	-0.0349483	0.0800435	-0.0425259	-0.0414756	0.00185274	-0.1	-0.398026	0
2320	1.7054	0	0.190562	1.51483	1.99767	1.98968	1.8475	1.35357	0.276621	0.217303	0.142181	0.00798604	0.012299	0.00350629	0.000156109	0.0036127	0.00499286	0.0015594	0.00765971	0.0689183	0.0167061	1.85378e-05	0.00780634	0.0149453	3.14217e-05	0.00426738	0.000282751	0.00148908	0.0013224	7.31667e-09	1.67115e-31	4.41354e-12	1.65494e-10	4.73177e-10	7.73448e-12	0	5.13169e-06	6.54391e-12	7.58966e-06	0.000580289	-0.137054	-0.0349483	0.0800435	-0.0425259	-0.0414756	0.00185274	-0.1	-0.398026	0
2321	1.68591	0	0.174151	1.51176	1.99459	1.98666	1.84447	1.35057	0.276618	0.217284	0.142186	0.00792834	0.0122991	0.00350629	0.000156109	0.00361266	0.00499261	0.00155948	0.00766044	0.0689203	0.0167087	1.85391e-05	0.00780627	0.0149453	3.06704e-05	0.00422051	0.000279101	0.00148361	0.00132154	7.01235e-09	1.36625e-31	4.05766e-12	1.48475e-10	4.47255e-10	7.2513e-12	0	5.04523e-06	6.21132e-12	7.57628e-06	0.000580289	-0.137054	-0.0349483	0.0800435	-0.0425259	-0.0414756	0.00185274	-0.1	-0.398026	0
2322	1.63909	0	0.130187	1.50891	1.99173	1.98386	1.84167	1.34778	0.276623	0.217265	0.142192	0.00787131	0.0122991	0.00350629	0.00015611	0.00361261	0.00499255	0.00155956	0.00766118	0.0689228	0.0167113	1.85404e-05	0.00780637	0.0149453	2.99378e-05	0.00417419	0.000275501	0.00147816	0.00132068	6.72087e-09	1.117e-31	3.73053e-12	1.33208e-10	4.22756e-10	6.79839e-12	0	4.96029e-06	5.89572e-12	7.58969e-06	0.000580289	-0.137054	-0.0349483	0.0800435	-0.0425259	-0.0414756	0.00185274	-0.1	-0.398026	0
2323	1.59235	0	0.0860781	1.50627	1.98909	1.98128	1.83908	1.34518	0.276649	0.217246	0.1422	0.00781499	0.0122991	0.00350628	0.00015611	0.00361258	0.00499285	0.00155967	0.00766199	0.068927	0.016714	1.85419e-05	0.00780682	0.0149453	2.92241e-05	0.00412844	0.000271952	0.00147274	0.00131982	6.44195e-09	9.13283e-32	3.42987e-12	1.19516e-10	3.99608e-10	6.37399e-12	0	4.87691e-06	5.59637e-12	7.63385e-06	0.000580289	-0.137054	-0.0349483	0.0800435	-0.0425259	-0.0414756	0.00185274	-0.1	-0.398026	0
2324	1.56302	0	0.0592681	1.50375	1.98655	1.97879	1.83657	1.34265	0.276693	0.217228	0.142211	0.00775937	0.0122991	0.00350628	0.00015611	0.00361255	0.00499347	0.00155982	0.00766289	0.0689327	0.0167168	1.85436e-05	0.0078076	0.0149453	2.85289e-05	0.00408328	0.000268456	0.00146735	0.00131897	6.17508e-09	7.46773e-32	3.15356e-12	1.07236e-10	3.77735e-10	5.9763e-12	0	4.79508e-06	5.31243e-12	7.68842e-06	0.000580289	-0.137054	-0.0349483	0.0800435	-0.0425259	-0.0414756	0.00185274	-0.1	-0.398026	0
2325	1.54436	0	0.0431769	1.50118	1.98395	1.97625	1.83403	1.34007	0.276749	0.21721	0.142224	0.00770438	0.0122992	0.00350628	0.00015611	0.00361252	0.00499425	0.00155998	0.00766383	0.0689395	0.0167196	1.85454e-05	0.00780858	0.0149453	2.78513e-05	0.00403867	0.000265009	0.00146199	0.00131812	5.91957e-09	6.10652e-32	2.89957e-12	9.62203e-11	3.57066e-10	5.60358e-12	0	4.71472e-06	5.04304e-12	7.73266e-06	0.000580289	-0.137054	-0.0349483	0.0800435	-0.0425259	-0.0414756	0.00185274	-0.1	-0.398026	0
2326	1.53078	0	0.0322656	1.49851	1.98125	1.9736	1.83137	1.33736	0.276811	0.217191	0.142237	0.00765001	0.0122992	0.00350628	0.000156111	0.0036125	0.00499509	0.00156016	0.0076648	0.0689468	0.0167224	1.85472e-05	0.00780964	0.0149453	2.71908e-05	0.00399459	0.000261609	0.00145665	0.00131727	5.67487e-09	4.99363e-32	2.66609e-12	8.63385e-11	3.37532e-10	5.25421e-12	0	4.63578e-06	4.78741e-12	7.76663e-06	0.000580289	-0.137054	-0.0349483	0.0800435	-0.0425259	-0.0414756	0.00185274	-0.1	-0.398026	0
2327	1.52139	0	0.025655	1.49573	1.97844	1.97084	1.82859	1.33454	0.276875	0.217173	0.142251	0.00759623	0.0122992	0.00350628	0.000156111	0.00361248	0.00499595	0.00156034	0.00766578	0.0689546	0.0167252	1.85491e-05	0.00781077	0.0149453	2.65466e-05	0.00395103	0.000258256	0.00145133	0.00131642	5.44048e-09	4.0837e-32	2.45145e-12	7.74732e-11	3.1907e-10	4.92671e-12	0	4.55823e-06	4.54483e-12	7.79529e-06	0.000580289	-0.137054	-0.0349483	0.0800435	-0.0425259	-0.0414756	0.00185274	-0.1	-0.398026	0
2328	1.56538	0	0.0725288	1.49285	1.97553	1.96799	1.82572	1.33162	0.276942	0.217156	0.142264	0.00754305	0.0122992	0.00350628	0.000156111	0.00361246	0.00499681	0.00156053	0.00766677	0.0689625	0.016728	1.85511e-05	0.00781192	0.0149453	2.59185e-05	0.00390797	0.000254948	0.00144604	0.00131557	5.21592e-09	3.33967e-32	2.25412e-12	6.95194e-11	3.0162e-10	4.61969e-12	0	4.48203e-06	4.31461e-12	7.81983e-06	0.000580289	-0.137054	-0.0349483	0.0800435	-0.0425259	-0.0414756	0.00185274	-0.1	-0.398026	0
2329	1.63601	0	0.146252	1.48975	1.97241	1.96492	1.82264	1.32852	0.276988	0.217138	0.142276	0.0074903	0.0122992	0.00350628	0.000156111	0.00361244	0.00499728	0.00156068	0.00766767	0.0689688	0.0167307	1.85528e-05	0.00781269	0.0149453	2.53047e-05	0.00386534	0.000251679	0.00144076	0.00131472	5.00041e-09	2.7311e-32	2.07264e-12	6.23807e-11	2.85122e-10	4.3317e-12	0	4.40702e-06	4.09596e-12	7.79778e-06	0.000580289	-0.137054	-0.0349483	0.0800435	-0.0425259	-0.0414756	0.00185274	-0.1	-0.398026	0
2330	1.66765	0	0.181191	1.48646	1.96911	1.96168	1.81939	1.32527	0.277	0.217121	0.142283	0.00743795	0.0122993	0.00350628	0.000156112	0.00361241	0.00499721	0.00156078	0.00766841	0.0689722	0.0167332	1.85542e-05	0.00781288	0.0149453	2.47045e-05	0.00382307	0.000248444	0.00143549	0.00131387	4.79334e-09	2.23322e-32	1.90568e-12	5.59719e-11	2.69517e-10	4.06148e-12	0	4.33311e-06	3.88818e-12	7.73661e-06	0.000580289	-0.137054	-0.0349483	0.0800435	-0.0425259	-0.0414756	0.00185274	-0.1	-0.398026	0
2331	1.6738	0	0.190562	1.48324	1.96589	1.9585	1.81621	1.32211	0.276998	0.217103	0.142287	0.0073861	0.0122993	0.00350628	0.000156112	0.00361238	0.00499692	0.00156085	0.00766906	0.0689742	0.0167356	1.85555e-05	0.00781281	0.0149452	2.4118e-05	0.00378123	0.000245248	0.00143024	0.00131302	4.59465e-09	1.82602e-32	1.75214e-12	5.02202e-11	2.54764e-10	3.80803e-12	0	4.26036e-06	3.69086e-12	7.69585e-06	0.000580289	-0.137054	-0.0349483	0.0800435	-0.0425259	-0.0414756	0.00185274	-0.1	-0.398026	0
2332	1.65436	0	0.174151	1.48021	1.96286	1.95553	1.81324	1.31916	0.276994	0.217086	0.142292	0.0073348	0.0122993	0.00350628	0.000156112	0.00361235	0.00499666	0.00156091	0.00766967	0.0689758	0.0167379	1.85567e-05	0.00781272	0.0149452	2.35456e-05	0.00373983	0.000242092	0.001425	0.00131217	4.40415e-09	1.49306e-32	1.61096e-12	4.50593e-11	2.40817e-10	3.57038e-12	0	4.18881e-06	3.50353e-12	7.68205e-06	0.000580289	-0.137054	-0.0349483	0.0800435	-0.0425259	-0.0414756	0.00185274	-0.1	-0.398026	0
2333	1.6076	0	0.130187	1.47741	1.96006	1.95278	1.81048	1.31641	0.276998	0.217069	0.142297	0.00728409	0.0122993	0.00350628	0.000156112	0.00361232	0.00499658	0.00156098	0.00767031	0.0689781	0.0167402	1.85579e-05	0.00781279	0.0149452	2.29875e-05	0.00369891	0.000238979	0.00141978	0.00131132	4.22166e-09	1.22084e-32	1.48118e-12	4.04294e-11	2.27636e-10	3.34761e-12	0	4.11851e-06	3.32576e-12	7.69512e-06	0.000580289	-0.137054	-0.0349483	0.0800435	-0.0425259	-0.0414756	0.00185274	-0.1	-0.398026	0
2334	1.56091	0	0.0860781	1.47483	1.95747	1.95023	1.80793	1.31386	0.277022	0.217052	0.142304	0.00723402	0.0122993	0.00350628	0.000156113	0.00361229	0.00499687	0.00156108	0.00767102	0.0689819	0.0167426	1.85593e-05	0.00781321	0.0149452	2.24437e-05	0.00365851	0.000235911	0.00141459	0.00131048	4.04701e-09	9.98313e-33	1.36189e-12	3.62766e-11	2.1518e-10	3.13884e-12	0	4.0495e-06	3.15713e-12	7.73902e-06	0.000580289	-0.137054	-0.0349483	0.0800435	-0.0425259	-0.0414756	0.00185274	-0.1	-0.398026	0
2335	1.53162	0	0.0592681	1.47235	1.95497	1.94779	1.80547	1.31137	0.277066	0.217036	0.142315	0.00718455	0.0122994	0.00350628	0.000156113	0.00361228	0.00499747	0.00156121	0.00767181	0.0689875	0.016745	1.85609e-05	0.00781397	0.0149452	2.19139e-05	0.00361862	0.000232888	0.00140943	0.00130963	3.87988e-09	8.16407e-33	1.25225e-12	3.25519e-11	2.03411e-10	2.9432e-12	0	3.98177e-06	2.99717e-12	7.79339e-06	0.000580289	-0.137054	-0.0349483	0.0800435	-0.0425259	-0.0414756	0.00185274	-0.1	-0.398026	0
2336	1.51301	0	0.0431769	1.46983	1.95243	1.94529	1.80297	1.30883	0.27712	0.217019	0.142326	0.00713565	0.0122994	0.00350628	0.000156113	0.00361226	0.00499824	0.00156137	0.00767266	0.0689939	0.0167475	1.85626e-05	0.00781491	0.0149452	2.13976e-05	0.00357921	0.000229907	0.0014043	0.00130879	3.71985e-09	6.67681e-33	1.15147e-12	2.92105e-11	1.92289e-10	2.75983e-12	0	3.91526e-06	2.84539e-12	7.83742e-06	0.000580289	-0.137054	-0.0349483	0.0800435	-0.0425259	-0.0414756	0.00185274	-0.1	-0.398026	0
2337	1.49947	0	0.0322656	1.46721	1.94978	1.94269	1.80035	1.30617	0.27718	0.217003	0.142339	0.00708728	0.0122994	0.00350628	0.000156114	0.00361225	0.00499906	0.00156153	0.00767353	0.069001	0.0167501	1.85643e-05	0.00781596	0.0149452	2.08941e-05	0.00354027	0.000226967	0.00139919	0.00130795	3.56656e-09	5.46069e-33	1.05881e-12	2.62127e-11	1.81777e-10	2.58793e-12	0	3.84991e-06	2.70136e-12	7.87119e-06	0.000580289	-0.137054	-0.0349483	0.0800435	-0.0425259	-0.0414756	0.00185274	-0.1	-0.398026	0
2338	1.49013	0	0.025655	1.46447	1.94701	1.93997	1.79762	1.30339	0.277244	0.216987	0.142352	0.00703944	0.0122994	0.00350628	0.000156114	0.00361224	0.00499992	0.00156171	0.00767442	0.0690085	0.0167526	1.85661e-05	0.00781706	0.0149452	2.04032e-05	0.00350178	0.000224067	0.0013941	0.00130711	3.41971e-09	4.46623e-33	9.73632e-13	2.3523e-11	1.71841e-10	2.42678e-12	0	3.78571e-06	2.56466e-12	7.89962e-06	0.000580289	-0.137054	-0.0349483	0.0800435	-0.0425259	-0.0414756	0.00185274	-0.1	-0.398026	0
2339	1.53417	0	0.0725288	1.46164	1.94415	1.93715	1.79479	1.30051	0.27731	0.21697	0.142365	0.00699211	0.0122995	0.00350628	0.000156114	0.00361223	0.00500076	0.00156189	0.00767532	0.0690163	0.0167552	1.85679e-05	0.00781819	0.0149452	1.99243e-05	0.00346374	0.000221206	0.00138903	0.00130627	3.279e-09	3.65298e-33	8.95315e-13	2.11097e-11	1.6245e-10	2.2757e-12	0	3.72263e-06	2.43492e-12	7.92393e-06	0.000580289	-0.137054	-0.0349483	0.0800435	-0.0425259	-0.0414756	0.00185274	-0.1	-0.398026	0
2340	1.60484	0	0.146252	1.45859	1.94108	1.93413	1.79175	1.29745	0.277354	0.216955	0.142376	0.00694517	0.0122995	0.00350628	0.000156114	0.00361223	0.00500123	0.00156203	0.00767613	0.0690223	0.0167576	1.85696e-05	0.00781894	0.0149452	1.94565e-05	0.00342607	0.000218379	0.00138398	0.00130543	3.14394e-09	2.9877e-33	8.23281e-13	1.89435e-11	1.5357e-10	2.13398e-12	0	3.66052e-06	2.31169e-12	7.90156e-06	0.000580289	-0.137054	-0.0349483	0.0800435	-0.0425259	-0.0414756	0.00185274	-0.1	-0.398026	0
2341	1.63654	0	0.181191	1.45535	1.93783	1.93093	1.78855	1.29424	0.277366	0.216939	0.142382	0.00689856	0.0122995	0.00350628	0.000156115	0.00361221	0.00500114	0.00156212	0.00767678	0.0690254	0.0167598	1.85709e-05	0.0078191	0.0149452	1.89988e-05	0.00338873	0.000215581	0.00137893	0.00130458	3.01416e-09	2.44336e-33	7.57011e-13	1.69987e-11	1.45172e-10	2.00099e-12	0	3.59932e-06	2.19459e-12	7.83996e-06	0.000580289	-0.137054	-0.0349483	0.0800435	-0.0425259	-0.0414756	0.00185274	-0.1	-0.398026	0
2342	1.64273	0	0.190562	1.45217	1.93465	1.92779	1.78541	1.29112	0.277362	0.216923	0.142386	0.00685239	0.0122995	0.00350628	0.000156115	0.00361219	0.00500084	0.00156218	0.00767735	0.0690272	0.0167619	1.85721e-05	0.00781902	0.0149452	1.85517e-05	0.00335175	0.000212816	0.0013739	0.00130374	2.8896e-09	1.9981e-33	6.9606e-13	1.52531e-11	1.3723e-10	1.87625e-12	0	3.53908e-06	2.08336e-12	7.79879e-06	0.000580289	-0.137054	-0.0349483	0.0800435	-0.0425259	-0.0414756	0.00185274	-0.1	-0.398026	0
2343	1.62333	0	0.174151	1.44918	1.93167	1.92486	1.78247	1.28821	0.277357	0.216908	0.14239	0.00680672	0.0122995	0.00350628	0.000156115	0.00361217	0.00500057	0.00156223	0.00767788	0.0690287	0.0167639	1.85732e-05	0.00781891	0.0149452	1.81152e-05	0.00331517	0.000210086	0.00136888	0.0013029	2.77016e-09	1.63397e-33	6.40014e-13	1.36867e-11	1.29723e-10	1.75927e-12	0	3.47983e-06	1.97776e-12	7.78466e-06	0.000580289	-0.137054	-0.0349483	0.0800435	-0.0425259	-0.0414756	0.00185274	-0.1	-0.398026	0
2344	1.57661	0	0.130187	1.44643	1.92891	1.92215	1.77975	1.2855	0.27736	0.216892	0.142395	0.00676156	0.0122996	0.00350628	0.000156115	0.00361215	0.00500048	0.00156229	0.00767844	0.0690307	0.016766	1.85743e-05	0.00781895	0.0149452	1.76895e-05	0.00327902	0.000207393	0.00136389	0.00130206	2.65573e-09	1.33623e-33	5.88488e-13	1.22813e-11	1.22628e-10	1.64961e-12	0	3.42161e-06	1.87754e-12	7.79745e-06	0.000580289	-0.137054	-0.0349483	0.0800435	-0.0425259	-0.0414756	0.00185274	-0.1	-0.398026	0
2345	1.52997	0	0.0860781	1.44389	1.92636	1.91964	1.77724	1.28298	0.277383	0.216877	0.142402	0.00671696	0.0122996	0.00350628	0.000156116	0.00361214	0.00500075	0.00156239	0.00767908	0.0690343	0.0167681	1.85756e-05	0.00781935	0.0149452	1.72748e-05	0.00324331	0.000204739	0.00135892	0.00130122	2.5462e-09	1.09281e-33	5.41127e-13	1.10207e-11	1.15923e-10	1.54684e-12	0	3.36446e-06	1.78247e-12	7.84116e-06	0.000580289	-0.137054	-0.0349483	0.0800435	-0.0425259	-0.0414756	0.00185274	-0.1	-0.398026	0
2346	1.50072	0	0.0592681	1.44145	1.9239	1.91723	1.77482	1.28053	0.277426	0.216862	0.142412	0.00667291	0.0122996	0.00350628	0.000156116	0.00361213	0.00500135	0.00156252	0.00767979	0.0690397	0.0167703	1.85771e-05	0.0078201	0.0149452	1.68707e-05	0.00320806	0.000202123	0.00135398	0.00130039	2.44137e-09	8.93797e-34	4.97594e-13	9.88987e-12	1.09587e-10	1.45052e-12	0	3.30836e-06	1.69227e-12	7.89538e-06	0.000580289	-0.137054	-0.0349483	0.0800435	-0.0425259	-0.0414756	0.00185274	-0.1	-0.398026	0
2347	1.48215	0	0.0431769	1.43898	1.9214	1.91477	1.77235	1.27802	0.277479	0.216847	0.142423	0.00662935	0.0122996	0.00350628	0.000156116	0.00361213	0.00500211	0.00156266	0.00768056	0.069046	0.0167726	1.85787e-05	0.00782103	0.0149452	1.64769e-05	0.00317323	0.000199544	0.00134906	0.00129955	2.34098e-09	7.31065e-34	4.57574e-13	8.87538e-12	1.03599e-10	1.36023e-12	0	3.25326e-06	1.60669e-12	7.93926e-06	0.000580289	-0.137054	-0.0349483	0.0800435	-0.0425259	-0.0414756	0.00185274	-0.1	-0.398026	0
2348	1.46866	0	0.0322656	1.43639	1.91879	1.9122	1.76977	1.2754	0.277538	0.216832	0.142435	0.00658625	0.0122997	0.00350628	0.000156116	0.00361213	0.00500293	0.00156282	0.00768136	0.0690528	0.0167749	1.85804e-05	0.00782206	0.0149451	1.60928e-05	0.00313881	0.000197	0.00134416	0.00129872	2.24481e-09	5.97984e-34	4.2078e-13	7.96514e-12	9.7939e-11	1.27559e-12	0	3.19914e-06	1.52547e-12	7.97287e-06	0.000580289	-0.137054	-0.0349483	0.0800435	-0.0425259	-0.0414756	0.00185274	-0.1	-0.398026	0
2349	1.45935	0	0.025655	1.4337	1.91607	1.90952	1.76708	1.27266	0.277601	0.216818	0.142447	0.00654362	0.0122997	0.00350627	0.000156117	0.00361213	0.00500377	0.00156299	0.00768219	0.0690602	0.0167772	1.85821e-05	0.00782314	0.0149451	1.57183e-05	0.00310479	0.000194491	0.00133929	0.00129789	2.15266e-09	4.89145e-34	3.86951e-13	7.14839e-12	9.25896e-11	1.19624e-12	0	3.14595e-06	1.44838e-12	8.00113e-06	0.000580289	-0.137054	-0.0349483	0.0800435	-0.0425259	-0.0414756	0.00185274	-0.1	-0.398026	0
2350	1.50343	0	0.0725288	1.4309	1.91324	1.90674	1.76428	1.26981	0.277666	0.216803	0.14246	0.00650144	0.0122997	0.00350627	0.000156117	0.00361213	0.00500461	0.00156316	0.00768303	0.0690677	0.0167796	1.85838e-05	0.00782425	0.0149451	1.53478e-05	0.00307117	0.000192015	0.00133444	0.00129706	2.06436e-09	4.00127e-34	3.55847e-13	6.41551e-12	8.75331e-11	1.12184e-12	0	3.09369e-06	1.3752e-12	8.02526e-06	0.000580289	-0.137054	-0.0349483	0.0800435	-0.0425259	-0.0414756	0.00185274	-0.1	-0.398026	0
2351	1.57414	0	0.146252	1.42789	1.91021	1.90375	1.76128	1.26678	0.277709	0.216789	0.14247	0.00645958	0.0122997	0.00350627	0.000156117	0.00361213	0.00500506	0.0015633	0.00768377	0.0690736	0.0167818	1.85854e-05	0.00782499	0.0149451	1.49804e-05	0.00303787	0.000189569	0.0013296	0.00129622	1.97958e-09	3.27297e-34	3.27236e-13	5.75762e-12	8.27516e-11	1.05205e-12	0	3.04224e-06	1.3057e-12	8.00262e-06	0.000580289	-0.137054	-0.0349483	0.0800435	-0.0425259	-0.0414756	0.00185274	-0.1	-0.398026	0
2352	1.60588	0	0.181191	1.42469	1.907	1.90058	1.7581	1.26361	0.27772	0.216774	0.142476	0.00641801	0.0122997	0.00350627	0.000156117	0.00361213	0.00500497	0.00156339	0.00768436	0.0690766	0.0167838	1.85867e-05	0.00782514	0.0149451	1.46211e-05	0.00300486	0.000187148	0.00132477	0.00129539	1.89811e-09	2.67699e-34	3.00913e-13	5.16691e-12	7.82291e-11	9.86546e-13	0	2.99153e-06	1.23964e-12	7.94066e-06	0.000580289	-0.137054	-0.0349483	0.0800435	-0.0425259	-0.0414756	0.00185274	-0.1	-0.398026	0
2353	1.6121	0	0.190562	1.42154	1.90386	1.89748	1.755	1.26052	0.277715	0.21676	0.14248	0.00637684	0.0122998	0.00350627	0.000156118	0.00361212	0.00500466	0.00156344	0.00768486	0.0690782	0.0167856	1.85877e-05	0.00782504	0.0149451	1.427e-05	0.00297218	0.000184755	0.00131994	0.00129456	1.81991e-09	2.18943e-34	2.76701e-13	4.63667e-12	7.39527e-11	9.25102e-13	0	2.94161e-06	1.17689e-12	7.89916e-06	0.000580289	-0.137054	-0.0349483	0.0800435	-0.0425259	-0.0414756	0.00185274	-0.1	-0.398026	0
2354	1.59275	0	0.174151	1.4186	1.90092	1.89458	1.7521	1.25764	0.277709	0.216746	0.142483	0.00633609	0.0122998	0.00350627	0.000156118	0.00361211	0.00500438	0.00156349	0.00768534	0.0690795	0.0167875	1.85888e-05	0.00782491	0.0149451	1.39272e-05	0.00293984	0.000182392	0.00131514	0.00129373	1.74491e-09	1.79065e-34	2.54437e-13	4.16083e-12	6.99099e-11	8.67482e-13	0	2.89251e-06	1.11732e-12	7.88473e-06	0.000580289	-0.137054	-0.0349483	0.0800435	-0.0425259	-0.0414756	0.00185274	-0.1	-0.398026	0
2355	1.54607	0	0.130187	1.41588	1.8982	1.8919	1.74941	1.25497	0.277711	0.216732	0.142487	0.00629581	0.0122998	0.00350627	0.000156118	0.0036121	0.00500428	0.00156355	0.00768584	0.0690813	0.0167893	1.85898e-05	0.00782494	0.0149451	1.35929e-05	0.00290787	0.000180061	0.00131036	0.00129289	1.67305e-09	1.46454e-34	2.33966e-13	3.73387e-12	6.60887e-11	8.13461e-13	0	2.84427e-06	1.06077e-12	7.89729e-06	0.000580289	-0.137054	-0.0349483	0.0800435	-0.0425259	-0.0414756	0.00185274	-0.1	-0.398026	0
2356	1.49946	0	0.0860781	1.41338	1.89569	1.88943	1.74694	1.25249	0.277734	0.216718	0.142494	0.00625602	0.0122998	0.00350627	0.000156119	0.0036121	0.00500455	0.00156364	0.00768642	0.0690848	0.0167912	1.85911e-05	0.00782533	0.0149451	1.32672e-05	0.0028763	0.000177764	0.0013056	0.00129206	1.60425e-09	1.1979e-34	2.15149e-13	3.35086e-12	6.24775e-11	7.62829e-13	0	2.7969e-06	1.00713e-12	7.94085e-06	0.000580289	-0.137054	-0.0349483	0.0800435	-0.0425259	-0.0414756	0.00185274	-0.1	-0.398026	0
2357	1.47026	0	0.0592681	1.41099	1.89327	1.88706	1.74455	1.25007	0.277775	0.216705	0.142503	0.00621672	0.0122998	0.00350627	0.000156119	0.0036121	0.00500514	0.00156376	0.00768708	0.06909	0.0167933	1.85925e-05	0.00782606	0.0149451	1.29498e-05	0.00284513	0.000175499	0.00130086	0.00129124	1.5384e-09	9.79868e-35	1.97853e-13	3.00727e-12	5.9065e-11	7.15375e-13	0	2.75041e-06	9.56232e-13	7.99498e-06	0.000580289	-0.137054	-0.0349483	0.0800435	-0.0425259	-0.0414756	0.00185274	-0.1	-0.398026	0
2358	1.45173	0	0.0431769	1.40855	1.89081	1.88463	1.74212	1.2476	0.277828	0.216691	0.142514	0.00617784	0.0122999	0.00350627	0.000156119	0.00361211	0.00500589	0.00156391	0.0076878	0.0690961	0.0167953	1.8594e-05	0.00782698	0.0149451	1.26403e-05	0.00281434	0.000173267	0.00129615	0.00129041	1.47533e-09	8.01564e-35	1.81951e-13	2.69899e-12	5.58398e-11	6.70891e-13	0	2.70474e-06	9.07934e-13	8.03875e-06	0.000580289	-0.137054	-0.0349483	0.0800435	-0.0425259	-0.0414756	0.00185274	-0.1	-0.398026	0
2359	1.43827	0	0.0322656	1.406	1.88824	1.8821	1.73957	1.24501	0.277886	0.216678	0.142526	0.00613938	0.0122999	0.00350627	0.000156119	0.00361212	0.0050067	0.00156406	0.00768855	0.0691029	0.0167974	1.85956e-05	0.00782799	0.0149451	1.23386e-05	0.00278391	0.000171065	0.00129146	0.00128958	1.4149e-09	6.5573e-35	1.6733e-13	2.42237e-12	5.27913e-11	6.29185e-13	0	2.65988e-06	8.62094e-13	8.07223e-06	0.000580289	-0.137054	-0.0349483	0.0800435	-0.0425259	-0.0414756	0.00185274	-0.1	-0.398026	0
2360	1.429	0	0.025655	1.40335	1.88555	1.87945	1.73691	1.2423	0.277948	0.216665	0.142538	0.00610133	0.0122999	0.00350627	0.00015612	0.00361213	0.00500753	0.00156422	0.00768932	0.0691101	0.0167996	1.85973e-05	0.00782906	0.0149451	1.20443e-05	0.00275383	0.000168892	0.0012868	0.00128876	1.35699e-09	5.36447e-35	1.53886e-13	2.17414e-12	4.99098e-11	5.90082e-13	0	2.61579e-06	8.18584e-13	8.10037e-06	0.000580289	-0.137054	-0.0349483	0.0800435	-0.0425259	-0.0414756	0.00185274	-0.1	-0.398026	0
2361	1.47312	0	0.0725288	1.40059	1.88276	1.8767	1.73415	1.23949	0.278012	0.216651	0.14255	0.00606368	0.0122999	0.00350627	0.00015612	0.00361215	0.00500836	0.00156439	0.00769011	0.0691175	0.0168017	1.85989e-05	0.00783016	0.0149451	1.17572e-05	0.0027241	0.000166749	0.00128215	0.00128794	1.3015e-09	4.38874e-35	1.41524e-13	1.95139e-12	4.7186e-11	5.53417e-13	0	2.57247e-06	7.77281e-13	8.12436e-06	0.000580289	-0.137054	-0.0349483	0.0800435	-0.0425259	-0.0414756	0.00185274	-0.1	-0.398026	0
2362	1.54387	0	0.146252	1.39762	1.87977	1.87374	1.73118	1.23649	0.278054	0.216638	0.14256	0.00602631	0.0123	0.00350627	0.00015612	0.00361216	0.00500881	0.00156453	0.00769081	0.0691232	0.0168037	1.86004e-05	0.00783088	0.0149451	1.14766e-05	0.00269465	0.000164631	0.00127751	0.00128711	1.24821e-09	3.59035e-35	1.30153e-13	1.75141e-12	4.46102e-11	5.19018e-13	0	2.52981e-06	7.38045e-13	8.10148e-06	0.000580289	-0.137054	-0.0349483	0.0800435	-0.0425259	-0.0414756	0.00185274	-0.1	-0.398026	0
2363	1.57564	0	0.181191	1.39445	1.8766	1.87061	1.72805	1.23336	0.278064	0.216626	0.142565	0.00598918	0.0123	0.00350627	0.00015612	0.00361216	0.00500871	0.00156461	0.00769136	0.0691261	0.0168055	1.86016e-05	0.00783103	0.0149451	1.12021e-05	0.00266546	0.000162534	0.00127288	0.00128629	1.19699e-09	2.93694e-35	1.1969e-13	1.57184e-12	4.21738e-11	4.86735e-13	0	2.48777e-06	7.00753e-13	8.0392e-06	0.000580289	-0.137054	-0.0349483	0.0800435	-0.0425259	-0.0414756	0.00185274	-0.1	-0.398026	0
2364	1.58192	0	0.190562	1.39135	1.87351	1.86755	1.72498	1.23031	0.278059	0.216613	0.142569	0.00595241	0.0123	0.00350627	0.000156121	0.00361216	0.0050084	0.00156466	0.00769182	0.0691275	0.0168072	1.86026e-05	0.00783091	0.0149451	1.09339e-05	0.00263655	0.000160462	0.00126826	0.00128547	1.14782e-09	2.40232e-35	1.10067e-13	1.41064e-12	3.987e-11	4.56449e-13	0	2.44638e-06	6.65329e-13	7.99738e-06	0.000580289	-0.137054	-0.0349483	0.0800435	-0.0425259	-0.0414756	0.00185274	-0.1	-0.398026	0
2365	1.56261	0	0.174151	1.38846	1.87061	1.8647	1.72213	1.22747	0.278052	0.2166	0.142572	0.00591602	0.0123	0.00350627	0.000156121	0.00361216	0.00500811	0.0015647	0.00769225	0.0691287	0.0168089	1.86036e-05	0.00783077	0.0149451	1.06721e-05	0.00260795	0.000158417	0.00126366	0.00128464	1.10066e-09	1.96501e-35	1.01216e-13	1.26597e-12	3.76918e-11	4.28045e-13	0	2.40567e-06	6.31692e-13	7.98269e-06	0.000580289	-0.137054	-0.0349483	0.0800435	-0.0425259	-0.0414756	0.00185274	-0.1	-0.398026	0
2366	1.51598	0	0.130187	1.38579	1.86795	1.86207	1.71949	1.22485	0.278054	0.216587	0.142576	0.00588004	0.0123	0.00350627	0.000156121	0.00361217	0.005008	0.00156476	0.00769271	0.0691305	0.0168105	1.86046e-05	0.00783079	0.014945	1.04167e-05	0.00257968	0.000156398	0.00125908	0.00128382	1.05546e-09	1.60734e-35	9.30781e-14	1.13615e-12	3.5633e-11	4.01414e-13	0	2.36567e-06	5.99765e-13	7.99504e-06	0.000580289	-0.137054	-0.0349483	0.0800435	-0.0425259	-0.0414756	0.00185274	-0.1	-0.398026	0
2367	1.46942	0	0.0860781	1.38335	1.86549	1.85965	1.71706	1.22241	0.278075	0.216575	0.142582	0.0058445	0.0123001	0.00350627	0.000156121	0.00361217	0.00500826	0.00156484	0.00769325	0.0691338	0.0168123	1.86058e-05	0.00783117	0.014945	1.01678e-05	0.00255175	0.000154408	0.00125452	0.001283	1.01219e-09	1.31485e-35	8.55971e-14	1.01968e-12	3.36872e-11	3.76453e-13	0	2.32639e-06	5.69471e-13	8.03847e-06	0.000580289	-0.137054	-0.0349483	0.0800435	-0.0425259	-0.0414756	0.00185274	-0.1	-0.398026	0
2368	1.44027	0	0.0592681	1.38101	1.86313	1.85732	1.71473	1.22005	0.278116	0.216563	0.142591	0.00580939	0.0123001	0.00350627	0.000156122	0.00361219	0.00500884	0.00156496	0.00769387	0.0691389	0.0168142	1.86072e-05	0.00783189	0.014945	9.92525e-06	0.00252418	0.000152447	0.00124998	0.00128218	9.7076e-10	1.07567e-35	7.87201e-14	9.1519e-13	3.18485e-11	3.53056e-13	0	2.28783e-06	5.40729e-13	8.09249e-06	0.000580289	-0.137054	-0.0349483	0.0800435	-0.0425259	-0.0414756	0.00185274	-0.1	-0.398026	0
2369	1.4218	0	0.0431769	1.37862	1.86072	1.85495	1.71235	1.21763	0.278168	0.21655	0.142601	0.00577465	0.0123001	0.00350627	0.000156122	0.0036122	0.00500958	0.0015651	0.00769455	0.0691449	0.0168161	1.86086e-05	0.00783279	0.014945	9.68879e-06	0.00249694	0.000150514	0.00124547	0.00128136	9.31078e-10	8.80038e-36	7.23973e-14	8.21434e-13	3.01106e-11	3.31123e-13	0	2.24996e-06	5.13452e-13	8.13616e-06	0.000580289	-0.137054	-0.0349483	0.0800435	-0.0425259	-0.0414756	0.00185274	-0.1	-0.398026	0
2370	1.4084	0	0.0322656	1.37613	1.85821	1.85247	1.70985	1.21509	0.278225	0.216538	0.142613	0.00574028	0.0123001	0.00350627	0.000156122	0.00361222	0.00501039	0.00156525	0.00769526	0.0691515	0.016818	1.86102e-05	0.00783379	0.014945	9.45819e-06	0.00247002	0.000148607	0.00124098	0.00128054	8.93052e-10	7.20013e-36	6.65835e-14	7.37299e-13	2.84678e-11	3.10558e-13	0	2.21275e-06	4.87562e-13	8.16952e-06	0.000580289	-0.137054	-0.0349483	0.0800435	-0.0425259	-0.0414756	0.00185274	-0.1	-0.398026	0
2371	1.39919	0	0.025655	1.37353	1.85558	1.84987	1.70725	1.21243	0.278287	0.216526	0.142624	0.00570627	0.0123002	0.00350627	0.000156122	0.00361225	0.00501121	0.00156541	0.007696	0.0691586	0.01682	1.86118e-05	0.00783486	0.014945	9.23325e-06	0.00244341	0.000146725	0.00123651	0.00127973	8.56609e-10	5.89106e-36	6.12375e-14	6.61795e-13	2.6915e-11	2.91275e-13	0	2.17618e-06	4.62985e-13	8.19752e-06	0.000580289	-0.137054	-0.0349483	0.0800435	-0.0425259	-0.0414756	0.00185274	-0.1	-0.398026	0
2372	1.44336	0	0.0725288	1.37084	1.85285	1.84718	1.70454	1.20968	0.27835	0.216514	0.142637	0.00567261	0.0123002	0.00350627	0.000156123	0.00361227	0.00501204	0.00156558	0.00769675	0.0691659	0.0168219	1.86134e-05	0.00783594	0.014945	9.01381e-06	0.00241711	0.000144869	0.00123205	0.00127891	8.21677e-10	4.82013e-36	5.63215e-14	5.94033e-13	2.54471e-11	2.73193e-13	0	2.14024e-06	4.39654e-13	8.22137e-06	0.000580289	-0.137054	-0.0349483	0.0800435	-0.0425259	-0.0414756	0.00185274	-0.1	-0.398026	0
2373	1.51418	0	0.146252	1.36792	1.84992	1.84428	1.70163	1.20674	0.278391	0.216503	0.142646	0.0056392	0.0123002	0.00350627	0.000156123	0.00361229	0.00501248	0.00156571	0.00769742	0.0691715	0.0168238	1.86148e-05	0.00783665	0.014945	8.79935e-06	0.00239106	0.000143033	0.00122761	0.0012781	7.88133e-10	3.94374e-36	5.17991e-14	5.33196e-13	2.40589e-11	2.56228e-13	0	2.10486e-06	4.17488e-13	8.19824e-06	0.000580289	-0.137054	-0.0349483	0.0800435	-0.0425259	-0.0414756	0.00185274	-0.1	-0.398026	0
2374	1.54601	0	0.181191	1.36482	1.84681	1.84121	1.69856	1.20367	0.2784	0.216491	0.142651	0.00560599	0.0123002	0.00350627	0.000156123	0.00361231	0.00501237	0.00156579	0.00769792	0.0691742	0.0168255	1.8616e-05	0.00783678	0.014945	8.58951e-06	0.00236523	0.000141218	0.00122318	0.00127728	7.55885e-10	3.22639e-36	4.76378e-14	4.78563e-13	2.27458e-11	2.40305e-13	0	2.06998e-06	3.9642e-13	8.13562e-06	0.000580289	-0.137054	-0.0349483	0.0800435	-0.0425259	-0.0414756	0.00185274	-0.1	-0.398026	0
2375	1.55235	0	0.190562	1.36179	1.84379	1.83821	1.69556	1.20068	0.278395	0.216479	0.142654	0.0055731	0.0123003	0.00350627	0.000156124	0.00361232	0.00501205	0.00156583	0.00769835	0.0691756	0.016827	1.86169e-05	0.00783666	0.014945	8.38446e-06	0.00233966	0.000139423	0.00121875	0.00127646	7.24923e-10	2.6394e-36	4.38098e-14	4.29516e-13	2.1504e-11	2.25366e-13	0	2.03564e-06	3.76405e-13	8.09348e-06	0.000580289	-0.137054	-0.0349483	0.0800435	-0.0425259	-0.0414756	0.00185274	-0.1	-0.398026	0
2376	1.53312	0	0.174151	1.35896	1.84096	1.83542	1.69276	1.19791	0.278387	0.216468	0.142657	0.00554054	0.0123003	0.00350626	0.000156124	0.00361233	0.00501175	0.00156587	0.00769875	0.0691766	0.0168285	1.86178e-05	0.00783651	0.014945	8.18425e-06	0.00231435	0.00013765	0.00121434	0.00127565	6.95223e-10	2.15919e-36	4.02893e-14	3.85493e-13	2.033e-11	2.11355e-13	0	2.00187e-06	3.57399e-13	8.07849e-06	0.000580289	-0.137054	-0.0349483	0.0800435	-0.0425259	-0.0414756	0.00185274	-0.1	-0.398026	0
2377	1.48655	0	0.130187	1.35637	1.83836	1.83285	1.69019	1.19535	0.278388	0.216457	0.14266	0.00550835	0.0123003	0.00350626	0.000156124	0.00361234	0.00501164	0.00156593	0.00769918	0.0691783	0.0168301	1.86188e-05	0.00783652	0.014945	7.98895e-06	0.00228933	0.000135901	0.00120995	0.00127483	6.66757e-10	1.76638e-36	3.70521e-14	3.45987e-13	1.92202e-11	1.98218e-13	0	1.96868e-06	3.39357e-13	8.09062e-06	0.000580289	-0.137054	-0.0349483	0.0800435	-0.0425259	-0.0414756	0.00185274	-0.1	-0.398026	0
2378	1.44006	0	0.0860781	1.35398	1.83597	1.83049	1.68782	1.19297	0.278408	0.216445	0.142666	0.00547656	0.0123003	0.00350626	0.000156124	0.00361236	0.00501189	0.00156601	0.00769968	0.0691815	0.0168317	1.86199e-05	0.00783688	0.014945	7.7986e-06	0.00226463	0.000134178	0.00120558	0.00127402	6.39499e-10	1.44512e-36	3.4076e-14	3.10542e-13	1.81714e-11	1.85903e-13	0	1.93608e-06	3.22238e-13	8.1339e-06	0.000580289	-0.137054	-0.0349483	0.0800435	-0.0425259	-0.0414756	0.00185274	-0.1	-0.398026	0
2379	1.41096	0	0.0592681	1.35169	1.83366	1.82821	1.68554	1.19066	0.278448	0.216434	0.142675	0.00544515	0.0123003	0.00350626	0.000156125	0.00361238	0.00501246	0.00156613	0.00770028	0.0691865	0.0168334	1.86212e-05	0.00783758	0.014945	7.61312e-06	0.00224023	0.000132479	0.00120124	0.00127321	6.13401e-10	1.18238e-36	3.134e-14	2.7874e-13	1.71802e-11	1.7436e-13	0	1.90409e-06	3.05994e-13	8.18781e-06	0.000580289	-0.137054	-0.0349483	0.0800435	-0.0425259	-0.0414756	0.00185274	-0.1	-0.398026	0
2380	1.39253	0	0.0431769	1.34936	1.8313	1.82589	1.6832	1.18828	0.2785	0.216423	0.142685	0.00541406	0.0123004	0.00350626	0.000156125	0.00361241	0.0050132	0.00156626	0.00770093	0.0691924	0.0168352	1.86227e-05	0.00783848	0.014945	7.43227e-06	0.00221612	0.000130803	0.00119691	0.0012724	5.88398e-10	9.67455e-37	2.88244e-14	2.50203e-13	1.62433e-11	1.63538e-13	0	1.87266e-06	2.90577e-13	8.23138e-06	0.000580289	-0.137054	-0.0349483	0.0800435	-0.0425259	-0.0414756	0.00185274	-0.1	-0.398026	0
2381	1.37918	0	0.0322656	1.34691	1.82883	1.82345	1.68075	1.18578	0.278556	0.216412	0.142696	0.0053833	0.0123004	0.00350626	0.000156125	0.00361244	0.00501399	0.00156641	0.00770161	0.0691989	0.016837	1.86241e-05	0.00783947	0.014945	7.25588e-06	0.0021923	0.00012915	0.00119261	0.00127159	5.64437e-10	7.91627e-37	2.65112e-14	2.24592e-13	1.53577e-11	1.5339e-13	0	1.84178e-06	2.75943e-13	8.26462e-06	0.000580289	-0.137054	-0.0349483	0.0800435	-0.0425259	-0.0414756	0.00185274	-0.1	-0.398026	0
2382	1.37001	0	0.025655	1.34435	1.82624	1.82089	1.67818	1.18316	0.278617	0.216401	0.142708	0.00535285	0.0123004	0.00350626	0.000156125	0.00361247	0.00501481	0.00156657	0.00770232	0.0692058	0.0168388	1.86257e-05	0.00784052	0.014945	7.08381e-06	0.00216875	0.00012752	0.00118832	0.00127078	5.41469e-10	6.47775e-37	2.43839e-14	2.01607e-13	1.45205e-11	1.43875e-13	0	1.81143e-06	2.6205e-13	8.2925e-06	0.000580289	-0.137054	-0.0349483	0.0800435	-0.0425259	-0.0414756	0.00185274	-0.1	-0.398026	0
2383	1.41422	0	0.0725288	1.34169	1.82355	1.81823	1.67551	1.18044	0.278679	0.216391	0.14272	0.00532272	0.0123004	0.00350626	0.000156126	0.0036125	0.00501563	0.00156673	0.00770304	0.0692131	0.0168406	1.86273e-05	0.00784159	0.014945	6.91594e-06	0.00214547	0.000125911	0.00118406	0.00126997	5.19451e-10	5.30079e-37	2.24277e-14	1.80977e-13	1.37291e-11	1.34951e-13	0	1.7816e-06	2.48861e-13	8.31623e-06	0.000580289	-0.137054	-0.0349483	0.0800435	-0.0425259	-0.0414756	0.00185274	-0.1	-0.398026	0
2384	1.48506	0	0.146252	1.33881	1.82065	1.81536	1.67263	1.17753	0.27872	0.21638	0.142729	0.00529279	0.0123005	0.00350626	0.000156126	0.00361253	0.00501607	0.00156686	0.00770368	0.0692185	0.0168424	1.86287e-05	0.00784229	0.0149449	6.75187e-06	0.00212242	0.000124321	0.0011798	0.00126917	4.98305e-10	4.3375e-37	2.0628e-14	1.62454e-13	1.29806e-11	1.26578e-13	0	1.75223e-06	2.3633e-13	8.2929e-06	0.000580289	-0.137054	-0.0349483	0.0800435	-0.0425259	-0.0414756	0.00185274	-0.1	-0.398026	0
2385	1.51693	0	0.181191	1.33574	1.81757	1.81231	1.66958	1.17448	0.278729	0.216369	0.142734	0.00526305	0.0123005	0.00350626	0.000156126	0.00361255	0.00501595	0.00156694	0.00770416	0.0692212	0.0168439	1.86298e-05	0.00784241	0.0149449	6.59132e-06	0.00209956	0.000122747	0.00117555	0.00126836	4.77974e-10	3.54894e-37	1.89719e-14	1.45819e-13	1.22726e-11	1.1872e-13	0	1.72328e-06	2.24418e-13	8.22999e-06	0.000580289	-0.137054	-0.0349483	0.0800435	-0.0425259	-0.0414756	0.00185274	-0.1	-0.398026	0
2386	1.52329	0	0.190562	1.33273	1.81457	1.80934	1.6666	1.17152	0.278722	0.216359	0.142736	0.00523357	0.0123005	0.00350626	0.000156126	0.00361257	0.00501562	0.00156698	0.00770456	0.0692225	0.0168453	1.86307e-05	0.00784228	0.0149449	6.43441e-06	0.00207692	0.000121191	0.00117131	0.00126755	4.58451e-10	2.90361e-37	1.74483e-14	1.30883e-13	1.1603e-11	1.11346e-13	0	1.69478e-06	2.13101e-13	8.18759e-06	0.000580289	-0.137054	-0.0349483	0.0800435	-0.0425259	-0.0414756	0.00185274	-0.1	-0.398026	0
2387	1.50408	0	0.174151	1.32993	1.81177	1.80657	1.66383	1.16876	0.278714	0.216348	0.142739	0.00520441	0.0123005	0.00350626	0.000156127	0.00361259	0.00501532	0.00156702	0.00770493	0.0692234	0.0168467	1.86316e-05	0.00784212	0.0149449	6.28121e-06	0.00205452	0.000119655	0.00116708	0.00126674	4.39721e-10	2.3756e-37	1.60471e-14	1.17477e-13	1.097e-11	1.0443e-13	0	1.66674e-06	2.02354e-13	8.17239e-06	0.000580289	-0.137054	-0.0349483	0.0800435	-0.0425259	-0.0414756	0.00185274	-0.1	-0.398026	0
2388	1.45754	0	0.130187	1.32735	1.80919	1.80402	1.66128	1.16622	0.278714	0.216338	0.142742	0.00517557	0.0123005	0.00350626	0.000156127	0.00361261	0.0050152	0.00156707	0.00770533	0.0692249	0.0168481	1.86325e-05	0.00784211	0.0149449	6.13174e-06	0.00203237	0.000118139	0.00116287	0.00126594	4.21768e-10	1.94365e-37	1.47585e-14	1.05445e-13	1.03715e-11	9.79445e-14	0	1.63918e-06	1.92151e-13	8.18437e-06	0.000580289	-0.137054	-0.0349483	0.0800435	-0.0425259	-0.0414756	0.00185274	-0.1	-0.398026	0
2389	1.41107	0	0.0860781	1.32499	1.80682	1.80168	1.65893	1.16387	0.278734	0.216328	0.142748	0.00514708	0.0123006	0.00350626	0.000156127	0.00361264	0.00501545	0.00156715	0.00770581	0.0692281	0.0168496	1.86336e-05	0.00784246	0.0149449	5.98606e-06	0.0020105	0.000116645	0.00115869	0.00126513	4.04574e-10	1.59033e-37	1.35738e-14	9.46496e-14	9.80593e-12	9.18649e-14	0	1.61212e-06	1.8247e-13	8.22758e-06	0.000580289	-0.137054	-0.0349483	0.0800435	-0.0425259	-0.0414756	0.00185274	-0.1	-0.398026	0
2390	1.382	0	0.0592681	1.32273	1.80454	1.79942	1.65667	1.16158	0.278774	0.216318	0.142756	0.00511893	0.0123006	0.00350626	0.000156127	0.00361267	0.00501602	0.00156726	0.00770638	0.0692329	0.0168512	1.86348e-05	0.00784316	0.0149449	5.84409e-06	0.0019889	0.000115172	0.00115452	0.00126433	3.88109e-10	1.30134e-37	1.24847e-14	8.49627e-14	9.27137e-12	8.61659e-14	0	1.58555e-06	1.73283e-13	8.28146e-06	0.000580289	-0.137054	-0.0349483	0.0800435	-0.0425259	-0.0414756	0.00185274	-0.1	-0.398026	0
2391	1.3636	0	0.0431769	1.32042	1.80221	1.79712	1.65436	1.15922	0.278824	0.216308	0.142766	0.00509107	0.0123006	0.00350626	0.000156128	0.0036127	0.00501674	0.0015674	0.00770701	0.0692388	0.0168529	1.86362e-05	0.00784405	0.0149449	5.70566e-06	0.00196757	0.00011372	0.00115038	0.00126352	3.72334e-10	1.06491e-37	1.14832e-14	7.62696e-14	8.7661e-12	8.08224e-14	0	1.55945e-06	1.64563e-13	8.32499e-06	0.000580289	-0.137054	-0.0349483	0.0800435	-0.0425259	-0.0414756	0.00185274	-0.1	-0.398026	0
2392	1.35027	0	0.0322656	1.318	1.79977	1.79471	1.65193	1.15675	0.27888	0.216298	0.142777	0.00506349	0.0123006	0.00350626	0.000156128	0.00361274	0.00501753	0.00156755	0.00770767	0.0692452	0.0168546	1.86376e-05	0.00784503	0.0149449	5.57063e-06	0.00194647	0.000112287	0.00114625	0.00126272	3.57214e-10	8.71472e-38	1.05622e-14	6.84675e-14	8.28846e-12	7.58118e-14	0	1.53381e-06	1.56285e-13	8.35819e-06	0.000580289	-0.137054	-0.0349483	0.0800435	-0.0425259	-0.0414756	0.00185274	-0.1	-0.398026	0
2393	1.34113	0	0.025655	1.31547	1.79721	1.79218	1.64939	1.15416	0.27894	0.216288	0.142788	0.00503619	0.0123007	0.00350626	0.000156128	0.00361278	0.00501835	0.0015677	0.00770835	0.0692521	0.0168563	1.86392e-05	0.00784607	0.0149449	5.43891e-06	0.00192563	0.000110873	0.00114215	0.00126192	3.4272e-10	7.13193e-38	9.71522e-15	6.14647e-14	7.83692e-12	7.1113e-14	0	1.50861e-06	1.48426e-13	8.386e-06	0.000580289	-0.137054	-0.0349483	0.0800435	-0.0425259	-0.0414756	0.00185274	-0.1	-0.398026	0
2394	1.38537	0	0.0725288	1.31284	1.79455	1.78954	1.64674	1.15146	0.279002	0.216278	0.1428	0.00500917	0.0123007	0.00350626	0.000156128	0.00361282	0.00501916	0.00156786	0.00770906	0.0692592	0.016858	1.86407e-05	0.00784714	0.0149449	5.31038e-06	0.00190502	0.000109478	0.00113806	0.00126113	3.28822e-10	5.83677e-38	8.93629e-15	5.51791e-14	7.41005e-12	6.67064e-14	0	1.48384e-06	1.40964e-13	8.40965e-06	0.000580289	-0.137054	-0.0349483	0.0800435	-0.0425259	-0.0414756	0.00185274	-0.1	-0.398026	0
2395	1.45625	0	0.146252	1.31	1.79169	1.7867	1.6439	1.14858	0.279043	0.216269	0.142809	0.00498233	0.0123007	0.00350626	0.000156129	0.00361285	0.00501959	0.00156799	0.00770967	0.0692646	0.0168596	1.86421e-05	0.00784783	0.0149449	5.18475e-06	0.0018846	0.0001081	0.00113398	0.00126033	3.15474e-10	4.77663e-38	8.21964e-15	4.9535e-14	7.00633e-12	6.25715e-14	0	1.45945e-06	1.33875e-13	8.38616e-06	0.000580289	-0.137054	-0.0349483	0.0800435	-0.0425259	-0.0414756	0.00185274	-0.1	-0.398026	0
2396	1.48815	0	0.181191	1.30696	1.78865	1.78369	1.64088	1.14557	0.27905	0.216259	0.142813	0.00495564	0.0123007	0.00350626	0.000156129	0.00361289	0.00501947	0.00156806	0.00771013	0.0692671	0.0168611	1.86431e-05	0.00784794	0.0149449	5.06181e-06	0.00186436	0.000106735	0.0011299	0.00125953	3.02639e-10	3.90868e-38	7.56014e-15	4.44658e-14	6.62442e-12	5.869e-14	0	1.4354e-06	1.27135e-13	8.32299e-06	0.000580289	-0.137054	-0.0349483	0.0800435	-0.0425259	-0.0414756	0.00185274	-0.1	-0.398026	0
2397	1.49456	0	0.190562	1.304	1.78569	1.78076	1.63794	1.14265	0.279043	0.21625	0.142816	0.00492919	0.0123007	0.00350626	0.000156129	0.00361291	0.00501914	0.00156811	0.00771051	0.0692683	0.0168624	1.8644e-05	0.00784779	0.0149449	4.94165e-06	0.00184431	0.000105386	0.00112584	0.00125873	2.90312e-10	3.19829e-38	6.9534e-15	3.99142e-14	6.26323e-12	5.5048e-14	0	1.41173e-06	1.20732e-13	8.28034e-06	0.000580289	-0.137054	-0.0349483	0.0800435	-0.0425259	-0.0414756	0.00185274	-0.1	-0.398026	0
2398	1.47538	0	0.174151	1.30123	1.78293	1.77802	1.6352	1.13993	0.279035	0.21624	0.142818	0.00490301	0.0123008	0.00350626	0.00015613	0.00361294	0.00501883	0.00156814	0.00771086	0.0692692	0.0168637	1.86448e-05	0.00784762	0.0149449	4.82432e-06	0.00182448	0.000104054	0.00112179	0.00125793	2.78484e-10	2.61699e-38	6.39533e-15	3.58283e-14	5.92172e-12	5.16318e-14	0	1.38844e-06	1.1465e-13	8.26494e-06	0.000580289	-0.137054	-0.0349483	0.0800435	-0.0425259	-0.0414756	0.00185274	-0.1	-0.398026	0
2399	1.42889	0	0.130187	1.2987	1.78039	1.77551	1.63269	1.13743	0.279034	0.216231	0.142821	0.00487713	0.0123008	0.00350626	0.00015613	0.00361297	0.00501871	0.00156819	0.00771124	0.0692707	0.016865	1.86457e-05	0.00784761	0.0149449	4.70984e-06	0.00180487	0.000102739	0.00111776	0.00125713	2.67145e-10	2.14139e-38	5.88211e-15	3.21611e-14	5.59888e-12	4.84282e-14	0	1.36554e-06	1.08876e-13	8.27678e-06	0.000580289	-0.137054	-0.0349483	0.0800435	-0.0425259	-0.0414756	0.00185274	-0.1	-0.398026	0
2400	1.38246	0	0.0860781	1.29638	1.77806	1.77321	1.63039	1.13511	0.279054	0.216222	0.142827	0.00485157	0.0123008	0.00350626	0.00015613	0.003613	0.00501895	0.00156827	0.0077117	0.0692737	0.0168664	1.86467e-05	0.00784796	0.0149449	4.59826e-06	0.0017855	0.000101444	0.00111374	0.00125633	2.56285e-10	1.75233e-38	5.41024e-15	2.88703e-14	5.29374e-12	4.54248e-14	0	1.34306e-06	1.03397e-13	8.31991e-06	0.000580289	-0.137054	-0.0349483	0.0800435	-0.0425259	-0.0414756	0.00185274	-0.1	-0.398026	0
2401	1.35343	0	0.0592681	1.29416	1.77583	1.771	1.62817	1.13286	0.279093	0.216213	0.142835	0.0048263	0.0123008	0.00350626	0.00015613	0.00361304	0.00501951	0.00156838	0.00771225	0.0692785	0.0168679	1.8648e-05	0.00784864	0.0149449	4.48951e-06	0.00176637	0.000100166	0.00110975	0.00125553	2.45884e-10	1.43406e-38	4.97639e-15	2.59174e-14	5.00534e-12	4.26093e-14	0	1.32099e-06	9.81975e-14	8.37375e-06	0.000580289	-0.137054	-0.0349483	0.0800435	-0.0425259	-0.0414756	0.00185274	-0.1	-0.398026	0
2402	1.33507	0	0.0431769	1.2919	1.77354	1.76874	1.62589	1.13054	0.279143	0.216204	0.142845	0.00480129	0.0123009	0.00350625	0.000156131	0.00361308	0.00502024	0.00156852	0.00771286	0.0692843	0.0168694	1.86493e-05	0.00784952	0.0149448	4.38346e-06	0.00174748	9.89067e-05	0.00110578	0.00125474	2.35918e-10	1.17365e-38	4.57743e-15	2.32673e-14	4.73273e-12	3.99692e-14	0	1.29931e-06	9.32618e-14	8.41723e-06	0.000580289	-0.137054	-0.0349483	0.0800435	-0.0425259	-0.0414756	0.00185274	-0.1	-0.398026	0
2403	1.32178	0	0.0322656	1.28952	1.77113	1.76636	1.6235	1.12811	0.279198	0.216195	0.142855	0.00477653	0.0123009	0.00350625	0.000156131	0.00361312	0.00502102	0.00156866	0.0077135	0.0692906	0.016871	1.86507e-05	0.0078505	0.0149448	4.28002e-06	0.0017288	9.76641e-05	0.00110183	0.00125395	2.26364e-10	9.60569e-39	4.21054e-15	2.08885e-14	4.47501e-12	3.74935e-14	0	1.27801e-06	8.85761e-14	8.45037e-06	0.000580289	-0.137054	-0.0349483	0.0800435	-0.0425259	-0.0414756	0.00185274	-0.1	-0.398026	0
2404	1.31268	0	0.025655	1.28702	1.76861	1.76386	1.62099	1.12555	0.279258	0.216186	0.142866	0.00475202	0.0123009	0.00350625	0.000156131	0.00361317	0.00502183	0.00156882	0.00771417	0.0692974	0.0168727	1.86522e-05	0.00785153	0.0149448	4.17909e-06	0.00171033	9.64381e-05	0.00109789	0.00125315	2.17204e-10	7.86196e-39	3.87311e-15	1.87534e-14	4.23138e-12	3.51717e-14	0	1.25707e-06	8.41273e-14	8.47811e-06	0.000580289	-0.137054	-0.0349483	0.0800435	-0.0425259	-0.0414756	0.00185274	-0.1	-0.398026	0
2405	1.35696	0	0.0725288	1.28443	1.76599	1.76126	1.61838	1.12288	0.279319	0.216177	0.142878	0.00472775	0.0123009	0.00350625	0.000156131	0.00361321	0.00502264	0.00156898	0.00771485	0.0693044	0.0168743	1.86537e-05	0.00785259	0.0149448	4.08061e-06	0.00169208	9.52283e-05	0.00109397	0.00125236	2.08421e-10	6.43495e-39	3.56276e-15	1.68368e-14	4.00104e-12	3.29942e-14	0	1.23648e-06	7.99032e-14	8.50169e-06	0.000580289	-0.137054	-0.0349483	0.0800435	-0.0425259	-0.0414756	0.00185274	-0.1	-0.398026	0
2406	1.42787	0	0.146252	1.28162	1.76315	1.75845	1.61556	1.12004	0.279359	0.216168	0.142887	0.00470363	0.012301	0.00350625	0.000156132	0.00361326	0.00502307	0.0015691	0.00771545	0.0693098	0.0168759	1.86551e-05	0.00785327	0.0149448	3.98434e-06	0.001674	9.40322e-05	0.00109006	0.00125157	1.99984e-10	5.26675e-39	3.27722e-15	1.51156e-14	3.78319e-12	3.09507e-14	0	1.21622e-06	7.58893e-14	8.47803e-06	0.000580289	-0.137054	-0.0349483	0.0800435	-0.0425259	-0.0414756	0.00185274	-0.1	-0.398026	0
2407	1.4598	0	0.181191	1.27861	1.76015	1.75547	1.61258	1.11705	0.279366	0.21616	0.142891	0.00467964	0.012301	0.00350625	0.000156132	0.0036133	0.00502294	0.00156917	0.00771589	0.0693123	0.0168772	1.86561e-05	0.00785338	0.0149448	3.89013e-06	0.00165607	9.28485e-05	0.00108615	0.00125078	1.91869e-10	4.31023e-39	3.01444e-15	1.35697e-14	3.5771e-12	2.90324e-14	0	1.19623e-06	7.20733e-14	8.41461e-06	0.000580289	-0.137054	-0.0349483	0.0800435	-0.0425259	-0.0414756	0.00185274	-0.1	-0.398026	0
2408	1.46624	0	0.190562	1.27568	1.75722	1.75256	1.60967	1.11416	0.279359	0.216151	0.142893	0.00465587	0.012301	0.00350625	0.000156132	0.00361333	0.00502261	0.00156921	0.00771626	0.0693134	0.0168784	1.86569e-05	0.00785323	0.0149448	3.79804e-06	0.00163831	9.16784e-05	0.00108226	0.00124999	1.84076e-10	3.52726e-39	2.77266e-15	1.21815e-14	3.38218e-12	2.72324e-14	0	1.17656e-06	6.84474e-14	8.37173e-06	0.000580289	-0.137054	-0.0349483	0.0800435	-0.0425259	-0.0414756	0.00185274	-0.1	-0.398026	0
2409	1.4471	0	0.174151	1.27295	1.75449	1.74986	1.60696	1.11147	0.27935	0.216143	0.142895	0.00463234	0.012301	0.00350625	0.000156132	0.00361336	0.00502229	0.00156925	0.0077166	0.0693142	0.0168796	1.86577e-05	0.00785305	0.0149448	3.70811e-06	0.00162074	9.05227e-05	0.00107837	0.00124919	1.76597e-10	2.88649e-39	2.55026e-15	1.09353e-14	3.19788e-12	2.55439e-14	0	1.1572e-06	6.50036e-14	8.35615e-06	0.000580289	-0.137054	-0.0349483	0.0800435	-0.0425259	-0.0414756	0.00185274	-0.1	-0.398026	0
2410	1.40063	0	0.130187	1.27044	1.75199	1.74738	1.60448	1.109	0.279349	0.216134	0.142898	0.00460908	0.012301	0.00350625	0.000156133	0.0036134	0.00502216	0.00156929	0.00771696	0.0693155	0.0168808	1.86586e-05	0.00785303	0.0149448	3.62036e-06	0.00160337	8.93823e-05	0.00107451	0.0012484	1.69426e-10	2.36218e-39	2.34573e-15	9.81666e-15	3.02364e-12	2.39603e-14	0	1.13817e-06	6.17339e-14	8.36786e-06	0.000580289	-0.137054	-0.0349483	0.0800435	-0.0425259	-0.0414756	0.00185274	-0.1	-0.398026	0
2411	1.35423	0	0.0860781	1.26815	1.74969	1.7451	1.6022	1.1067	0.279368	0.216126	0.142904	0.0045861	0.0123011	0.00350625	0.000156133	0.00361344	0.0050224	0.00156937	0.00771741	0.0693186	0.0168822	1.86596e-05	0.00785337	0.0149448	3.53483e-06	0.00158621	8.82581e-05	0.00107066	0.00124761	1.62557e-10	1.93322e-39	2.15767e-15	8.81282e-15	2.85895e-12	2.24757e-14	0	1.11949e-06	5.86307e-14	8.41093e-06	0.000580289	-0.137054	-0.0349483	0.0800435	-0.0425259	-0.0414756	0.00185274	-0.1	-0.398026	0
2412	1.32523	0	0.0592681	1.26596	1.74747	1.74291	1.6	1.10448	0.279406	0.216118	0.142912	0.00456338	0.0123011	0.00350625	0.000156133	0.00361348	0.00502296	0.00156948	0.00771794	0.0693232	0.0168836	1.86608e-05	0.00785405	0.0149448	3.45146e-06	0.00156927	8.71499e-05	0.00106683	0.00124682	1.55978e-10	1.58227e-39	1.98475e-15	7.91197e-15	2.7033e-12	2.10838e-14	0	1.10114e-06	5.56857e-14	8.46476e-06	0.000580289	-0.137054	-0.0349483	0.0800435	-0.0425259	-0.0414756	0.00185274	-0.1	-0.398026	0
2413	1.30689	0	0.0431769	1.26372	1.74521	1.74067	1.59775	1.10218	0.279456	0.21611	0.142921	0.00454089	0.0123011	0.00350625	0.000156133	0.00361353	0.00502368	0.00156961	0.00771853	0.0693289	0.0168851	1.86621e-05	0.00785492	0.0149448	3.37016e-06	0.00155252	8.6057e-05	0.00106303	0.00124604	1.49673e-10	1.29509e-39	1.82573e-15	7.10342e-15	2.55615e-12	1.97786e-14	0	1.08312e-06	5.28901e-14	8.50823e-06	0.000580289	-0.137054	-0.0349483	0.0800435	-0.0425259	-0.0414756	0.00185274	-0.1	-0.398026	0
2414	1.29363	0	0.0322656	1.26136	1.74283	1.73831	1.59538	1.09977	0.279511	0.216101	0.142932	0.00451863	0.0123011	0.00350625	0.000156134	0.00361358	0.00502446	0.00156976	0.00771916	0.0693352	0.0168866	1.86635e-05	0.00785589	0.0149448	3.29084e-06	0.00153597	8.49788e-05	0.00105924	0.00124525	1.43628e-10	1.06008e-39	1.67948e-15	6.37764e-15	2.41705e-12	1.85545e-14	0	1.06541e-06	5.02359e-14	8.54134e-06	0.000580289	-0.137054	-0.0349483	0.0800435	-0.0425259	-0.0414756	0.00185274	-0.1	-0.398026	0
2415	1.28455	0	0.025655	1.2589	1.74034	1.73584	1.5929	1.09723	0.27957	0.216093	0.142943	0.00449658	0.0123012	0.00350625	0.000156134	0.00361364	0.00502527	0.00156991	0.00771981	0.0693419	0.0168881	1.86649e-05	0.00785691	0.0149448	3.21345e-06	0.00151961	8.3915e-05	0.00105546	0.00124447	1.37832e-10	8.67737e-40	1.54497e-15	5.72613e-15	2.28553e-12	1.74065e-14	0	1.048e-06	4.77157e-14	8.56905e-06	0.000580289	-0.137054	-0.0349483	0.0800435	-0.0425259	-0.0414756	0.00185274	-0.1	-0.398026	0
2416	1.32886	0	0.0725288	1.25633	1.73774	1.73326	1.59031	1.09459	0.279631	0.216085	0.142954	0.00447474	0.0123012	0.00350625	0.000156134	0.00361369	0.00502607	0.00157007	0.00772049	0.0693489	0.0168897	1.86664e-05	0.00785797	0.0149448	3.13794e-06	0.00150344	8.28652e-05	0.0010517	0.00124369	1.32274e-10	7.10314e-40	1.42125e-15	5.14126e-15	2.1612e-12	1.63298e-14	0	1.03089e-06	4.53226e-14	8.59258e-06	0.000580289	-0.137054	-0.0349483	0.0800435	-0.0425259	-0.0414756	0.00185274	-0.1	-0.398026	0
2417	1.3998	0	0.146252	1.25354	1.73494	1.73048	1.58752	1.09177	0.279671	0.216078	0.142963	0.00445304	0.0123012	0.00350625	0.000156134	0.00361375	0.00502649	0.00157019	0.00772107	0.0693542	0.0168912	1.86677e-05	0.00785864	0.0149448	3.06411e-06	0.00148742	8.18273e-05	0.00104796	0.0012429	1.26934e-10	5.81428e-40	1.30741e-15	4.61601e-15	2.04359e-12	1.53193e-14	0	1.01404e-06	4.30485e-14	8.56878e-06	0.000580289	-0.137054	-0.0349483	0.0800435	-0.0425259	-0.0414756	0.00185274	-0.1	-0.398026	0
2418	1.43176	0	0.181191	1.25057	1.73196	1.72753	1.58456	1.08882	0.279678	0.21607	0.142967	0.00443144	0.0123012	0.00350625	0.000156135	0.00361379	0.00502636	0.00157026	0.0077215	0.0693566	0.0168924	1.86687e-05	0.00785874	0.0149448	2.99186e-06	0.00147153	8.08001e-05	0.00104421	0.00124212	1.21798e-10	4.75884e-40	1.20264e-15	4.14419e-15	1.93234e-12	1.43707e-14	0	9.97421e-07	4.08864e-14	8.50514e-06	0.000580289	-0.137054	-0.0349483	0.0800435	-0.0425259	-0.0414756	0.00185274	-0.1	-0.398026	0
2419	1.43823	0	0.190562	1.24767	1.72907	1.72466	1.58169	1.08595	0.27967	0.216062	0.142969	0.00441004	0.0123013	0.00350625	0.000156135	0.00361383	0.00502602	0.0015703	0.00772185	0.0693577	0.0168936	1.86695e-05	0.00785859	0.0149447	2.92123e-06	0.0014558	7.97846e-05	0.00104048	0.00124133	1.16864e-10	3.89481e-40	1.10624e-15	3.72049e-15	1.82711e-12	1.34804e-14	0	9.8106e-07	3.88318e-14	8.46205e-06	0.000580289	-0.137054	-0.0349483	0.0800435	-0.0425259	-0.0414756	0.00185274	-0.1	-0.398026	0
2420	1.41913	0	0.174151	1.24497	1.72637	1.72198	1.57901	1.0833	0.27966	0.216054	0.142971	0.00438886	0.0123013	0.00350625	0.000156135	0.00361387	0.0050257	0.00157033	0.00772218	0.0693584	0.0168947	1.86703e-05	0.0078584	0.0149447	2.85225e-06	0.00144023	7.87816e-05	0.00103675	0.00124055	1.12128e-10	3.18762e-40	1.01756e-15	3.34009e-15	1.7276e-12	1.26453e-14	0	9.64964e-07	3.68803e-14	8.44629e-06	0.000580289	-0.137054	-0.0349483	0.0800435	-0.0425259	-0.0414756	0.00185274	-0.1	-0.398026	0
2421	1.37269	0	0.130187	1.2425	1.7239	1.71954	1.57656	1.08086	0.279659	0.216047	0.142973	0.00436791	0.0123013	0.00350625	0.000156135	0.00361391	0.00502557	0.00157038	0.00772253	0.0693597	0.0168959	1.86711e-05	0.00785838	0.0149447	2.78494e-06	0.00142483	7.77919e-05	0.00103305	0.00123976	1.07588e-10	2.6089e-40	9.35999e-16	2.99862e-15	1.63353e-12	1.1862e-14	0	9.49141e-07	3.50274e-14	8.45788e-06	0.000580289	-0.137054	-0.0349483	0.0800435	-0.0425259	-0.0414756	0.00185274	-0.1	-0.398026	0
2422	1.32633	0	0.0860781	1.24025	1.72164	1.71729	1.57431	1.0786	0.279677	0.216039	0.142979	0.00434722	0.0123013	0.00350625	0.000156136	0.00361396	0.0050258	0.00157045	0.00772296	0.0693627	0.0168971	1.86721e-05	0.00785871	0.0149447	2.71932e-06	0.00140963	7.68161e-05	0.00102936	0.00123898	1.03238e-10	2.13537e-40	8.61003e-16	2.69217e-15	1.54461e-12	1.11277e-14	0	9.33602e-07	3.32687e-14	8.50091e-06	0.000580289	-0.137054	-0.0349483	0.0800435	-0.0425259	-0.0414756	0.00185274	-0.1	-0.398026	0
2423	1.29736	0	0.0592681	1.23809	1.71946	1.71514	1.57215	1.0764	0.279715	0.216032	0.142987	0.00432677	0.0123013	0.00350625	0.000156136	0.00361401	0.00502636	0.00157056	0.00772348	0.0693673	0.0168985	1.86733e-05	0.00785938	0.0149447	2.65536e-06	0.00139461	7.58543e-05	0.00102569	0.0012382	9.90708e-11	1.74791e-40	7.92041e-16	2.41714e-15	1.46057e-12	1.04391e-14	0	9.18345e-07	3.15996e-14	8.55473e-06	0.000580289	-0.137054	-0.0349483	0.0800435	-0.0425259	-0.0414756	0.00185274	-0.1	-0.398026	0
2424	1.27906	0	0.0431769	1.23588	1.71723	1.71293	1.56993	1.07414	0.279765	0.216024	0.142996	0.00430652	0.0123014	0.00350625	0.000156136	0.00361407	0.00502707	0.00157069	0.00772406	0.0693729	0.0168999	1.86746e-05	0.00786025	0.0149447	2.59298e-06	0.00137977	7.49056e-05	0.00102204	0.00123742	9.50769e-11	1.43083e-40	7.2862e-16	2.17027e-15	1.38112e-12	9.79344e-15	0	9.03355e-07	3.0015e-14	8.59818e-06	0.000580289	-0.137054	-0.0349483	0.0800435	-0.0425259	-0.0414756	0.00185274	-0.1	-0.398026	0
2425	1.26583	0	0.0322656	1.23357	1.71489	1.7106	1.5676	1.07176	0.279819	0.216017	0.143006	0.00428646	0.0123014	0.00350625	0.000156137	0.00361413	0.00502785	0.00157083	0.00772468	0.0693792	0.0169013	1.86759e-05	0.00786121	0.0149447	2.53212e-06	0.0013651	7.39697e-05	0.0010184	0.00123664	9.12476e-11	1.17131e-40	6.70289e-16	1.94865e-15	1.306e-12	9.18787e-15	0	8.88624e-07	2.85105e-14	8.63126e-06	0.000580289	-0.137054	-0.0349483	0.0800435	-0.0425259	-0.0414756	0.00185274	-0.1	-0.398026	0
2426	1.25679	0	0.025655	1.23113	1.71243	1.70816	1.56514	1.06926	0.279878	0.21601	0.143017	0.0042666	0.0123014	0.00350625	0.000156137	0.00361419	0.00502865	0.00157098	0.00772532	0.0693858	0.0169028	1.86774e-05	0.00786223	0.0149447	2.47274e-06	0.0013506	7.30462e-05	0.00101479	0.00123587	8.75753e-11	9.58893e-41	6.16637e-16	1.74971e-15	1.23498e-12	8.61989e-15	0	8.74144e-07	2.70818e-14	8.65892e-06	0.000580289	-0.137054	-0.0349483	0.0800435	-0.0425259	-0.0414756	0.00185274	-0.1	-0.398026	0
2427	1.30113	0	0.0725288	1.2286	1.70987	1.70562	1.56259	1.06665	0.279938	0.216003	0.143028	0.00424692	0.0123014	0.00350625	0.000156137	0.00361425	0.00502946	0.00157114	0.00772598	0.0693927	0.0169043	1.86788e-05	0.00786328	0.0149447	2.41479e-06	0.00133627	7.21349e-05	0.00101118	0.00123509	8.40532e-11	7.85019e-41	5.67287e-16	1.5711e-15	1.16784e-12	8.08713e-15	0	8.5991e-07	2.57252e-14	8.6824e-06	0.000580289	-0.137054	-0.0349483	0.0800435	-0.0425259	-0.0414756	0.00185274	-0.1	-0.398026	0
2428	1.37211	0	0.146252	1.22585	1.7071	1.70287	1.55984	1.06386	0.279978	0.215995	0.143037	0.00422736	0.0123015	0.00350624	0.000156137	0.00361431	0.00502987	0.00157126	0.00772656	0.0693979	0.0169057	1.86801e-05	0.00786395	0.0149447	2.35813e-06	0.00132207	7.12339e-05	0.00100759	0.00123432	8.0669e-11	6.42648e-41	5.21876e-16	1.41068e-15	1.10433e-12	7.58712e-15	0	8.45891e-07	2.44358e-14	8.65846e-06	0.000580289	-0.137054	-0.0349483	0.0800435	-0.0425259	-0.0414756	0.00185274	-0.1	-0.398026	0
2429	1.40411	0	0.181191	1.22292	1.70417	1.69996	1.55692	1.06094	0.279984	0.215988	0.143041	0.00420788	0.0123015	0.00350624	0.000156138	0.00361436	0.00502974	0.00157133	0.00772697	0.0694003	0.0169069	1.86811e-05	0.00786404	0.0149447	2.30267e-06	0.00130798	7.03421e-05	0.001004	0.00123354	7.74135e-11	5.26048e-41	4.80078e-16	1.26657e-15	1.04424e-12	7.11769e-15	0	8.32069e-07	2.32099e-14	8.59459e-06	0.000580289	-0.137054	-0.0349483	0.0800435	-0.0425259	-0.0414756	0.00185274	-0.1	-0.398026	0
2430	1.41062	0	0.190562	1.22006	1.70131	1.69712	1.55408	1.05812	0.279976	0.215981	0.143043	0.00418858	0.0123015	0.00350624	0.000156138	0.00361441	0.0050294	0.00157137	0.00772731	0.0694013	0.016908	1.86819e-05	0.00786388	0.0149447	2.24846e-06	0.00129404	6.94604e-05	0.00100042	0.00123276	7.42859e-11	4.30584e-41	4.41619e-16	1.13716e-15	9.8741e-13	6.67714e-15	0	8.18457e-07	2.2045e-14	8.55128e-06	0.000580289	-0.137054	-0.0349483	0.0800435	-0.0425259	-0.0414756	0.00185274	-0.1	-0.398026	0
2431	1.39155	0	0.174151	1.2174	1.69866	1.69449	1.55144	1.0555	0.279966	0.215974	0.143045	0.00416948	0.0123015	0.00350624	0.000156138	0.00361446	0.00502907	0.0015714	0.00772763	0.069402	0.0169091	1.86826e-05	0.00786369	0.0149447	2.19551e-06	0.00128023	6.85896e-05	0.000996847	0.00123198	7.12839e-11	3.5244e-41	4.06239e-16	1.02096e-15	9.33669e-13	6.26383e-15	0	8.05065e-07	2.09384e-14	8.53535e-06	0.000580289	-0.137054	-0.0349483	0.0800435	-0.0425259	-0.0414756	0.00185274	-0.1	-0.398026	0
2432	1.34516	0	0.130187	1.21497	1.69623	1.69208	1.54903	1.0531	0.279964	0.215968	0.143047	0.00415059	0.0123016	0.00350624	0.000156138	0.00361451	0.00502894	0.00157144	0.00772797	0.0694033	0.0169102	1.86834e-05	0.00786366	0.0149447	2.14384e-06	0.00126659	6.77302e-05	0.000993292	0.00123121	6.8405e-11	2.88484e-41	3.73698e-16	9.16642e-16	8.82859e-13	5.87617e-15	0	7.919e-07	1.98876e-14	8.54682e-06	0.000580289	-0.137054	-0.0349483	0.0800435	-0.0425259	-0.0414756	0.00185274	-0.1	-0.398026	0
2433	1.29884	0	0.0860781	1.21276	1.694	1.68987	1.54682	1.05088	0.279983	0.215961	0.143052	0.00413193	0.0123016	0.00350624	0.000156139	0.00361456	0.00502917	0.00157152	0.00772839	0.0694062	0.0169114	1.86844e-05	0.00786399	0.0149447	2.09346e-06	0.00125311	6.6883e-05	0.000989756	0.00123043	6.56466e-11	2.36149e-41	3.43773e-16	8.23017e-16	8.34831e-13	5.51269e-15	0	7.7897e-07	1.88902e-14	8.5898e-06	0.000580289	-0.137054	-0.0349483	0.0800435	-0.0425259	-0.0414756	0.00185274	-0.1	-0.398026	0
2434	1.26991	0	0.0592681	1.21064	1.69187	1.68775	1.54469	1.04872	0.28002	0.215954	0.14306	0.00411348	0.0123016	0.00350624	0.000156139	0.00361462	0.00502972	0.00157162	0.00772891	0.0694107	0.0169127	1.86855e-05	0.00786465	0.0149447	2.04435e-06	0.00123979	6.60478e-05	0.000986238	0.00122966	6.3004e-11	1.93321e-41	3.16255e-16	7.38987e-16	7.89433e-13	5.17187e-15	0	7.66274e-07	1.79435e-14	8.6436e-06	0.000580289	-0.137054	-0.0349483	0.0800435	-0.0425259	-0.0414756	0.00185274	-0.1	-0.398026	0
2435	1.25165	0	0.0431769	1.20847	1.68968	1.68558	1.54251	1.0465	0.280069	0.215947	0.14307	0.00409521	0.0123016	0.00350624	0.000156139	0.00361468	0.00503043	0.00157175	0.00772948	0.0694163	0.016914	1.86868e-05	0.00786551	0.0149447	1.99646e-06	0.00122664	6.5224e-05	0.000982737	0.00122889	6.04709e-11	1.58268e-41	2.90946e-16	6.63556e-16	7.46515e-13	4.85225e-15	0	7.53801e-07	1.70448e-14	8.68702e-06	0.000580289	-0.137054	-0.0349483	0.0800435	-0.0425259	-0.0414756	0.00185274	-0.1	-0.398026	0
2436	1.23846	0	0.0322656	1.20619	1.68737	1.68329	1.54021	1.04415	0.280123	0.215941	0.14308	0.00407712	0.0123017	0.00350624	0.000156139	0.00361475	0.0050312	0.00157189	0.00773008	0.0694225	0.0169154	1.86881e-05	0.00786647	0.0149447	1.94973e-06	0.00121363	6.44113e-05	0.000979252	0.00122812	5.80419e-11	1.29576e-41	2.67668e-16	5.95838e-16	7.05938e-13	4.55247e-15	0	7.41541e-07	1.61914e-14	8.72007e-06	0.000580289	-0.137054	-0.0349483	0.0800435	-0.0425259	-0.0414756	0.00185274	-0.1	-0.398026	0
2437	1.22945	0	0.025655	1.2038	1.68495	1.68089	1.5378	1.04169	0.280181	0.215934	0.14309	0.00405919	0.0123017	0.00350624	0.00015614	0.00361481	0.005032	0.00157204	0.00773071	0.0694291	0.0169169	1.86895e-05	0.00786748	0.0149447	1.90412e-06	0.00120078	6.36093e-05	0.000975782	0.00122735	5.57122e-11	1.06057e-41	2.46255e-16	5.35041e-16	6.67574e-13	4.27127e-15	0	7.29491e-07	1.53809e-14	8.74768e-06	0.000580289	-0.137054	-0.0349483	0.0800435	-0.0425259	-0.0414756	0.00185274	-0.1	-0.398026	0
2438	1.27383	0	0.0725288	1.20131	1.68243	1.67839	1.53529	1.03912	0.280241	0.215928	0.143101	0.00404143	0.0123017	0.00350624	0.00015614	0.00361488	0.0050328	0.0015722	0.00773137	0.0694359	0.0169183	1.8691e-05	0.00786853	0.0149446	1.85962e-06	0.00118807	6.28179e-05	0.000972327	0.00122658	5.34776e-11	8.67768e-42	2.26559e-16	4.80456e-16	6.313e-13	4.0075e-15	0	7.17644e-07	1.46113e-14	8.7711e-06	0.000580289	-0.137054	-0.0349483	0.0800435	-0.0425259	-0.0414756	0.00185274	-0.1	-0.398026	0
2439	1.34485	0	0.146252	1.1986	1.6797	1.67568	1.53257	1.03637	0.28028	0.215921	0.14311	0.00402376	0.0123017	0.00350624	0.00015614	0.00361495	0.00503321	0.00157232	0.00773193	0.0694411	0.0169197	1.86922e-05	0.00786919	0.0149446	1.8161e-06	0.00117547	6.20354e-05	0.00096888	0.00122581	5.13301e-11	7.10204e-42	2.08433e-16	4.31428e-16	5.96989e-13	3.75994e-15	0	7.05976e-07	1.38798e-14	8.74702e-06	0.000580289	-0.137054	-0.0349483	0.0800435	-0.0425259	-0.0414756	0.00185274	-0.1	-0.398026	0
2440	1.3769	0	0.181191	1.19571	1.67681	1.6728	1.52969	1.03349	0.280287	0.215915	0.143114	0.00400617	0.0123017	0.00350624	0.00015614	0.00361501	0.00503307	0.00157238	0.00773234	0.0694434	0.0169208	1.86932e-05	0.00786928	0.0149446	1.77351e-06	0.00116299	6.12608e-05	0.000965437	0.00122504	4.92641e-11	5.8141e-42	1.9175e-16	3.87381e-16	5.64526e-13	3.5275e-15	0	6.94471e-07	1.31843e-14	8.68291e-06	0.000580289	-0.137054	-0.0349483	0.0800435	-0.0425259	-0.0414756	0.00185274	-0.1	-0.398026	0
2441	1.38345	0	0.190562	1.19289	1.674	1.67001	1.52689	1.0307	0.280278	0.215908	0.143116	0.00398873	0.0123018	0.00350624	0.000156141	0.00361506	0.00503273	0.00157242	0.00773267	0.0694444	0.0169219	1.8694e-05	0.00786911	0.0149446	1.73186e-06	0.00115062	6.0495e-05	0.000962002	0.00122427	4.72791e-11	4.7595e-42	1.76398e-16	3.47822e-16	5.3382e-13	3.30934e-15	0	6.83141e-07	1.25233e-14	8.63939e-06	0.000580289	-0.137054	-0.0349483	0.0800435	-0.0425259	-0.0414756	0.00185274	-0.1	-0.398026	0
2442	1.36443	0	0.174151	1.19027	1.67139	1.66741	1.5243	1.02813	0.280268	0.215902	0.143117	0.00397147	0.0123018	0.00350624	0.000156141	0.00361512	0.0050324	0.00157245	0.00773298	0.069445	0.0169229	1.86947e-05	0.00786891	0.0149446	1.69119e-06	0.00113838	5.97386e-05	0.000958579	0.0012235	4.53735e-11	3.89614e-42	1.62274e-16	3.123e-16	5.04784e-13	3.10467e-15	0	6.71993e-07	1.18954e-14	8.62328e-06	0.000580289	-0.137054	-0.0349483	0.0800435	-0.0425259	-0.0414756	0.00185274	-0.1	-0.398026	0
2443	1.31808	0	0.130187	1.18789	1.669	1.66505	1.52193	1.02577	0.280265	0.215896	0.14312	0.00395441	0.0123018	0.00350624	0.000156141	0.00361517	0.00503226	0.00157249	0.00773331	0.0694462	0.0169239	1.86955e-05	0.00786888	0.0149446	1.65149e-06	0.00112628	5.89921e-05	0.00095517	0.00122273	4.35458e-11	3.18947e-42	1.49283e-16	2.8041e-16	4.7733e-13	2.91269e-15	0	6.61033e-07	1.12991e-14	8.63463e-06	0.000580289	-0.137054	-0.0349483	0.0800435	-0.0425259	-0.0414756	0.00185274	-0.1	-0.398026	0
2444	1.2718	0	0.0860781	1.18572	1.66682	1.66288	1.51976	1.02359	0.280283	0.21589	0.143125	0.00393755	0.0123018	0.00350624	0.000156141	0.00361523	0.00503248	0.00157257	0.00773372	0.069449	0.0169251	1.86964e-05	0.00786919	0.0149446	1.61279e-06	0.00111432	5.82562e-05	0.000951778	0.00122197	4.17945e-11	2.61113e-42	1.37335e-16	2.51786e-16	4.51378e-13	2.73266e-15	0	6.50269e-07	1.0733e-14	8.67754e-06	0.000580289	-0.137054	-0.0349483	0.0800435	-0.0425259	-0.0414756	0.00185274	-0.1	-0.398026	0
2445	1.24291	0	0.0592681	1.18364	1.66473	1.66081	1.51767	1.02147	0.280321	0.215884	0.143132	0.00392089	0.0123019	0.00350624	0.000156142	0.0036153	0.00503303	0.00157267	0.00773423	0.0694535	0.0169263	1.86975e-05	0.00786986	0.0149446	1.57506e-06	0.00110251	5.75306e-05	0.000948405	0.0012212	4.01165e-11	2.13716e-42	1.26349e-16	2.26093e-16	4.26846e-13	2.56386e-15	0	6.39699e-07	1.01958e-14	8.73132e-06	0.000580289	-0.137054	-0.0349483	0.0800435	-0.0425259	-0.0414756	0.00185274	-0.1	-0.398026	0
2446	1.22469	0	0.0431769	1.18152	1.66258	1.65867	1.51553	1.01929	0.280369	0.215878	0.143142	0.00390438	0.0123019	0.00350624	0.000156142	0.00361537	0.00503374	0.0015728	0.00773479	0.0694591	0.0169276	1.86988e-05	0.00787071	0.0149446	1.53825e-06	0.00109085	5.6815e-05	0.000945047	0.00122044	3.85079e-11	1.74867e-42	1.16243e-16	2.03028e-16	4.03654e-13	2.40555e-15	0	6.29314e-07	9.68565e-15	8.77472e-06	0.000580289	-0.137054	-0.0349483	0.0800435	-0.0425259	-0.0414756	0.00185274	-0.1	-0.398026	0
2447	1.21154	0	0.0322656	1.17928	1.66032	1.65643	1.51328	1.01698	0.280423	0.215872	0.143152	0.00388802	0.0123019	0.00350624	0.000156142	0.00361544	0.00503451	0.00157294	0.00773538	0.0694652	0.016929	1.87001e-05	0.00787166	0.0149446	1.50234e-06	0.00107931	5.6109e-05	0.000941705	0.00121967	3.69651e-11	1.43085e-42	1.06948e-16	1.8232e-16	3.81727e-13	2.25705e-15	0	6.19106e-07	9.20124e-15	8.80773e-06	0.000580289	-0.137054	-0.0349483	0.0800435	-0.0425259	-0.0414756	0.00185274	-0.1	-0.398026	0
2448	1.20258	0	0.025655	1.17693	1.65794	1.65407	1.5109	1.01456	0.280481	0.215866	0.143162	0.00387181	0.0123019	0.00350624	0.000156142	0.00361551	0.0050353	0.00157309	0.00773601	0.0694717	0.0169303	1.87015e-05	0.00787267	0.0149446	1.4673e-06	0.00106791	5.54123e-05	0.000938377	0.00121891	3.54854e-11	1.17083e-42	9.83976e-17	1.63728e-16	3.60994e-13	2.11775e-15	0	6.09072e-07	8.74121e-15	8.83529e-06	0.000580289	-0.137054	-0.0349483	0.0800435	-0.0425259	-0.0414756	0.00185274	-0.1	-0.398026	0
2449	1.247	0	0.0725288	1.17447	1.65546	1.6516	1.50843	1.01203	0.28054	0.21586	0.143173	0.00385575	0.012302	0.00350624	0.000156143	0.00361559	0.0050361	0.00157324	0.00773665	0.0694785	0.0169317	1.87029e-05	0.0078737	0.0149446	1.43309e-06	0.00105664	5.47246e-05	0.000935063	0.00121815	3.40658e-11	9.58085e-43	9.05319e-17	1.47034e-16	3.4139e-13	1.98708e-15	0	5.99207e-07	8.30431e-15	8.85865e-06	0.000580289	-0.137054	-0.0349483	0.0800435	-0.0425259	-0.0414756	0.00185274	-0.1	-0.398026	0
2450	1.31806	0	0.146252	1.17181	1.65277	1.64893	1.50575	1.00932	0.280579	0.215854	0.143181	0.00383977	0.012302	0.00350624	0.000156143	0.00361566	0.00503651	0.00157336	0.00773721	0.0694836	0.016933	1.87041e-05	0.00787436	0.0149446	1.39965e-06	0.00104547	5.40448e-05	0.000931756	0.00121739	3.27014e-11	7.83968e-43	8.32932e-17	1.32038e-16	3.22846e-13	1.86443e-15	0	5.89491e-07	7.88904e-15	8.83442e-06	0.000580289	-0.137054	-0.0349483	0.0800435	-0.0425259	-0.0414756	0.00185274	-0.1	-0.398026	0
2451	1.35015	0	0.181191	1.16896	1.64992	1.6461	1.50291	1.00648	0.280585	0.215848	0.143185	0.00382385	0.012302	0.00350624	0.000156143	0.00361572	0.00503637	0.00157343	0.00773761	0.0694859	0.0169342	1.87051e-05	0.00787444	0.0149446	1.36691e-06	0.00103439	5.33717e-05	0.000928454	0.00121663	3.13887e-11	6.41628e-43	7.663e-17	1.18565e-16	3.05301e-13	1.74926e-15	0	5.7991e-07	7.49415e-15	8.77008e-06	0.000580289	-0.137054	-0.0349483	0.0800435	-0.0425259	-0.0414756	0.00185274	-0.1	-0.398026	0
2452	1.35675	0	0.190562	1.16619	1.64715	1.64335	1.50016	1.00374	0.280576	0.215842	0.143187	0.00380807	0.012302	0.00350624	0.000156143	0.00361578	0.00503602	0.00157346	0.00773793	0.0694868	0.0169352	1.87058e-05	0.00787427	0.0149446	1.3349e-06	0.00102342	5.27064e-05	0.00092516	0.00121586	3.01272e-11	5.253e-43	7.04983e-17	1.06464e-16	2.88705e-13	1.64117e-15	0	5.70473e-07	7.11885e-15	8.72634e-06	0.000580289	-0.137054	-0.0349483	0.0800435	-0.0425259	-0.0414756	0.00185274	-0.1	-0.398026	0
2453	1.33777	0	0.174151	1.16362	1.64459	1.6408	1.49761	1.00121	0.280565	0.215837	0.143188	0.00379245	0.0123021	0.00350624	0.000156144	0.00361584	0.00503568	0.00157349	0.00773823	0.0694873	0.0169361	1.87065e-05	0.00787407	0.0149446	1.30363e-06	0.00101256	5.20491e-05	0.000921876	0.0012151	2.89161e-11	4.30058e-43	6.48569e-17	9.55978e-17	2.7301e-13	1.53975e-15	0	5.61188e-07	6.7623e-15	8.71005e-06	0.000580289	-0.137054	-0.0349483	0.0800435	-0.0425259	-0.0414756	0.00185274	-0.1	-0.398026	0
2454	1.29148	0	0.130187	1.16129	1.64226	1.63848	1.49529	0.9989	0.280562	0.215831	0.143191	0.00377701	0.0123021	0.00350623	0.000156144	0.0036159	0.00503554	0.00157353	0.00773855	0.0694885	0.0169371	1.87073e-05	0.00787402	0.0149446	1.27311e-06	0.00100182	5.14004e-05	0.000918607	0.00121434	2.77543e-11	3.52092e-43	5.96676e-17	8.58414e-17	2.5817e-13	1.44462e-15	0	5.5206e-07	6.42369e-15	8.72127e-06	0.000580289	-0.137054	-0.0349483	0.0800435	-0.0425259	-0.0414756	0.00185274	-0.1	-0.398026	0
2455	1.24525	0	0.0860781	1.15917	1.64013	1.63637	1.49318	0.996771	0.28058	0.215826	0.143196	0.00376175	0.0123021	0.00350623	0.000156144	0.00361597	0.00503576	0.0015736	0.00773896	0.0694913	0.0169382	1.87082e-05	0.00787433	0.0149446	1.24335e-06	0.000991219	5.07608e-05	0.000915353	0.00121358	2.6641e-11	2.88191e-43	5.48951e-17	7.70837e-17	2.44142e-13	1.35541e-15	0	5.43094e-07	6.10225e-15	8.76412e-06	0.000580289	-0.137054	-0.0349483	0.0800435	-0.0425259	-0.0414756	0.00185274	-0.1	-0.398026	0
2456	1.21642	0	0.0592681	1.15715	1.6381	1.63435	1.49115	0.994709	0.280617	0.21582	0.143203	0.00374667	0.0123021	0.00350623	0.000156144	0.00361604	0.0050363	0.00157371	0.00773946	0.0694957	0.0169394	1.87093e-05	0.00787499	0.0149445	1.21434e-06	0.000980744	5.01303e-05	0.000912118	0.00121282	2.55742e-11	2.35817e-43	5.0506e-17	6.92224e-17	2.30881e-13	1.27175e-15	0	5.34289e-07	5.79712e-15	8.81786e-06	0.000580289	-0.137054	-0.0349483	0.0800435	-0.0425259	-0.0414756	0.00185274	-0.1	-0.398026	0
2457	1.19826	0	0.0431769	1.15508	1.636	1.63227	1.48906	0.992581	0.280664	0.215814	0.143212	0.00373173	0.0123021	0.00350623	0.000156145	0.00361612	0.005037	0.00157383	0.00774001	0.0695012	0.0169407	1.87106e-05	0.00787583	0.0149445	1.18604e-06	0.000970392	4.95084e-05	0.000908897	0.00121207	2.45514e-11	1.9297e-43	4.64688e-17	6.21647e-17	2.18344e-13	1.19328e-15	0	5.25638e-07	5.5074e-15	8.86122e-06	0.000580289	-0.137054	-0.0349483	0.0800435	-0.0425259	-0.0414756	0.00185274	-0.1	-0.398026	0
2458	1.18516	0	0.0322656	1.1529	1.6338	1.63008	1.48686	0.990332	0.280718	0.215809	0.143222	0.00371691	0.0123022	0.00350623	0.000156145	0.00361619	0.00503777	0.00157397	0.0077406	0.0695073	0.016942	1.87119e-05	0.00787678	0.0149445	1.15842e-06	0.000960159	4.88948e-05	0.000905691	0.00121131	2.35703e-11	1.57915e-43	4.27552e-17	5.58278e-17	2.0649e-13	1.11968e-15	0	5.17135e-07	5.23226e-15	8.89416e-06	0.000580289	-0.137054	-0.0349483	0.0800435	-0.0425259	-0.0414756	0.00185274	-0.1	-0.398026	0
2459	1.17626	0	0.025655	1.15061	1.63148	1.62778	1.48454	0.987966	0.280775	0.215804	0.143233	0.00370224	0.0123022	0.00350623	0.000156145	0.00361627	0.00503856	0.00157412	0.00774121	0.0695137	0.0169433	1.87132e-05	0.00787778	0.0149445	1.13147e-06	0.000950042	4.82892e-05	0.000902499	0.00121056	2.26292e-11	1.29231e-43	3.93388e-17	5.01378e-17	1.95281e-13	1.05063e-15	0	5.08775e-07	4.97096e-15	8.92165e-06	0.000580289	-0.137054	-0.0349483	0.0800435	-0.0425259	-0.0414756	0.00185274	-0.1	-0.398026	0
2460	1.22075	0	0.0725288	1.14822	1.62906	1.62537	1.48213	0.985497	0.280834	0.215798	0.143244	0.00368769	0.0123022	0.00350623	0.000156145	0.00361635	0.00503935	0.00157427	0.00774185	0.0695205	0.0169447	1.87146e-05	0.00787881	0.0149445	1.10516e-06	0.000940039	4.76916e-05	0.00089932	0.0012098	2.17263e-11	1.05761e-43	3.61959e-17	4.50285e-17	1.84682e-13	9.8586e-16	0	5.00557e-07	4.72277e-15	8.94492e-06	0.000580289	-0.137054	-0.0349483	0.0800435	-0.0425259	-0.0414756	0.00185274	-0.1	-0.398026	0
2461	1.29187	0	0.146252	1.14562	1.62644	1.62277	1.47952	0.982852	0.280873	0.215793	0.143252	0.00367321	0.0123022	0.00350623	0.000156146	0.00361643	0.00503976	0.00157439	0.0077424	0.0695255	0.016946	1.87158e-05	0.00787946	0.0149445	1.07944e-06	0.000930128	4.71006e-05	0.000896149	0.00120905	2.08584e-11	8.65496e-44	3.33035e-17	4.04388e-17	1.74657e-13	9.25057e-16	0	4.92461e-07	4.48686e-15	8.9205e-06	0.000580289	-0.137054	-0.0349483	0.0800435	-0.0425259	-0.0414756	0.00185274	-0.1	-0.398026	0
2462	1.32402	0	0.181191	1.14283	1.62366	1.62	1.47674	0.980078	0.280878	0.215788	0.143256	0.00365877	0.0123023	0.00350623	0.000156146	0.0036165	0.00503961	0.00157445	0.00774279	0.0695277	0.016947	1.87167e-05	0.00787953	0.0149445	1.05425e-06	0.0009203	4.65156e-05	0.000892981	0.00120829	2.00232e-11	7.08213e-44	3.06408e-17	3.63149e-17	1.6517e-13	8.67963e-16	0	4.84478e-07	4.26252e-15	8.8559e-06	0.000580289	-0.137054	-0.0349483	0.0800435	-0.0425259	-0.0414756	0.00185274	-0.1	-0.398026	0
2463	1.33069	0	0.190562	1.14013	1.62096	1.61731	1.47406	0.977405	0.280869	0.215782	0.143257	0.00364447	0.0123023	0.00350623	0.000156146	0.00361657	0.00503926	0.00157449	0.0077431	0.0695286	0.016948	1.87175e-05	0.00787935	0.0149445	1.02963e-06	0.000910564	4.59372e-05	0.000889821	0.00120754	1.92206e-11	5.79485e-44	2.81904e-17	3.26105e-17	1.56197e-13	8.14373e-16	0	4.76615e-07	4.04928e-15	8.81191e-06	0.000580289	-0.137054	-0.0349483	0.0800435	-0.0425259	-0.0414756	0.00185274	-0.1	-0.398026	0
2464	1.31178	0	0.174151	1.13763	1.61847	1.61484	1.47158	0.974943	0.280857	0.215777	0.143259	0.0036303	0.0123023	0.00350623	0.000156146	0.00361663	0.00503892	0.00157451	0.00774339	0.0695291	0.0169489	1.87182e-05	0.00787914	0.0149445	1.00557e-06	0.000900928	4.53659e-05	0.000886671	0.00120678	1.84499e-11	4.7415e-44	2.59358e-17	2.92839e-17	1.4771e-13	7.64088e-16	0	4.68878e-07	3.8467e-15	8.7954e-06	0.000580289	-0.137054	-0.0349483	0.0800435	-0.0425259	-0.0414756	0.00185274	-0.1	-0.398026	0
2465	1.26555	0	0.130187	1.13537	1.6162	1.61258	1.46932	0.972698	0.280854	0.215772	0.143261	0.0036163	0.0123023	0.00350623	0.000156147	0.0036167	0.00503877	0.00157455	0.00774371	0.0695302	0.0169499	1.87189e-05	0.00787909	0.0149445	9.8209e-07	0.0008914	4.48019e-05	0.000883534	0.00120603	1.77105e-11	3.8797e-44	2.38618e-17	2.6297e-17	1.39686e-13	7.16916e-16	0	4.61271e-07	3.65429e-15	8.80644e-06	0.000580289	-0.137054	-0.0349483	0.0800435	-0.0425259	-0.0414756	0.00185274	-0.1	-0.398026	0
2466	1.21939	0	0.0860781	1.13331	1.61414	1.61054	1.46727	0.970634	0.280871	0.215767	0.143266	0.00360247	0.0123024	0.00350623	0.000156147	0.00361677	0.00503898	0.00157462	0.00774411	0.0695329	0.0169509	1.87198e-05	0.00787939	0.0149445	9.59194e-07	0.000881988	4.42459e-05	0.000880413	0.00120527	1.70019e-11	3.17473e-44	2.19543e-17	2.36156e-17	1.321e-13	6.72678e-16	0	4.53799e-07	3.47163e-15	8.84919e-06	0.000580289	-0.137054	-0.0349483	0.0800435	-0.0425259	-0.0414756	0.00185274	-0.1	-0.398026	0
2467	1.19062	0	0.0592681	1.13136	1.61217	1.60858	1.4653	0.968634	0.280907	0.215762	0.143273	0.0035888	0.0123024	0.00350623	0.000156147	0.00361685	0.00503952	0.00157473	0.0077446	0.0695373	0.0169521	1.87209e-05	0.00788004	0.0149445	9.3687e-07	0.000872691	4.36978e-05	0.000877309	0.00120452	1.63229e-11	2.59804e-44	2.02e-17	2.12085e-17	1.24929e-13	6.31192e-16	0	4.46461e-07	3.29823e-15	8.90287e-06	0.000580289	-0.137054	-0.0349483	0.0800435	-0.0425259	-0.0414756	0.00185274	-0.1	-0.398026	0
2468	1.17253	0	0.0431769	1.12935	1.61014	1.60656	1.46328	0.966568	0.280955	0.215757	0.143282	0.00357524	0.0123024	0.00350623	0.000156147	0.00361693	0.00504022	0.00157485	0.00774514	0.0695427	0.0169533	1.87221e-05	0.00788088	0.0149445	9.15093e-07	0.000863504	4.31571e-05	0.00087422	0.00120377	1.56717e-11	2.12622e-44	1.85862e-17	1.90474e-17	1.18149e-13	5.9228e-16	0	4.3925e-07	3.13357e-15	8.94615e-06	0.000580289	-0.137054	-0.0349483	0.0800435	-0.0425259	-0.0414756	0.00185274	-0.1	-0.398026	0
2469	1.1595	0	0.0322656	1.12723	1.60799	1.60443	1.46114	0.964381	0.281008	0.215752	0.143292	0.00356181	0.0123024	0.00350623	0.000156148	0.00361701	0.00504098	0.00157499	0.00774572	0.0695486	0.0169546	1.87234e-05	0.00788181	0.0149445	8.93841e-07	0.000854422	4.26235e-05	0.000871144	0.00120302	1.50471e-11	1.74014e-44	1.71017e-17	1.71068e-17	1.11738e-13	5.55777e-16	0	4.32163e-07	2.97719e-15	8.97901e-06	0.000580289	-0.137054	-0.0349483	0.0800435	-0.0425259	-0.0414756	0.00185274	-0.1	-0.398026	0
2470	1.15066	0	0.025655	1.125	1.60574	1.60219	1.45889	0.962075	0.281065	0.215747	0.143302	0.00354849	0.0123025	0.00350623	0.000156148	0.0036171	0.00504177	0.00157513	0.00774633	0.0695551	0.0169559	1.87248e-05	0.00788281	0.0149445	8.73099e-07	0.000845442	4.2097e-05	0.000868081	0.00120228	1.44478e-11	1.42421e-44	1.57359e-17	1.53642e-17	1.05676e-13	5.21532e-16	0	4.25195e-07	2.82867e-15	9.0064e-06	0.000580289	-0.137054	-0.0349483	0.0800435	-0.0425259	-0.0414756	0.00185274	-0.1	-0.398026	0
2471	1.1952	0	0.0725288	1.12267	1.60338	1.59984	1.45653	0.959666	0.281123	0.215742	0.143313	0.00353529	0.0123025	0.00350623	0.000156148	0.00361718	0.00504255	0.00157529	0.00774696	0.0695618	0.0169572	1.87261e-05	0.00788383	0.0149445	8.52851e-07	0.000836563	4.15773e-05	0.000865032	0.00120153	1.38728e-11	1.16567e-44	1.44794e-17	1.37994e-17	9.99439e-14	4.89404e-16	0	4.18344e-07	2.68759e-15	9.02956e-06	0.000580289	-0.137054	-0.0349483	0.0800435	-0.0425259	-0.0414756	0.00185274	-0.1	-0.398026	0
2472	1.26638	0	0.146252	1.12013	1.60082	1.5973	1.45398	0.957081	0.281161	0.215737	0.143321	0.00352214	0.0123025	0.00350623	0.000156149	0.00361727	0.00504295	0.0015754	0.0077475	0.0695667	0.0169585	1.87273e-05	0.00788447	0.0149445	8.3305e-07	0.000827766	4.10635e-05	0.000861989	0.00120078	1.332e-11	9.54026e-45	1.3323e-17	1.23936e-17	9.45213e-14	4.59244e-16	0	4.11596e-07	2.55349e-15	9.00496e-06	0.000580289	-0.137054	-0.0349483	0.0800435	-0.0425259	-0.0414756	0.00185274	-0.1	-0.398026	0
2473	1.2986	0	0.181191	1.11741	1.5981	1.59459	1.45127	0.954368	0.281166	0.215732	0.143324	0.00350903	0.0123025	0.00350623	0.000156149	0.00361734	0.0050428	0.00157546	0.00774788	0.0695689	0.0169595	1.87282e-05	0.00788454	0.0149445	8.13663e-07	0.000819042	4.05548e-05	0.00085895	0.00120004	1.2788e-11	7.80735e-45	1.22584e-17	1.11304e-17	8.93903e-14	4.30922e-16	0	4.0494e-07	2.42595e-15	8.94009e-06	0.000580289	-0.137054	-0.0349483	0.0800435	-0.0425259	-0.0414756	0.00185274	-0.1	-0.398026	0
2474	1.30533	0	0.190562	1.11477	1.59546	1.59197	1.44864	0.951757	0.281156	0.215728	0.143326	0.00349603	0.0123026	0.00350623	0.000156149	0.00361741	0.00504244	0.0015755	0.00774819	0.0695696	0.0169604	1.87289e-05	0.00788435	0.0149444	7.94706e-07	0.000810399	4.00518e-05	0.000855918	0.00119929	1.22767e-11	6.3889e-45	1.12786e-17	9.99566e-18	8.45366e-14	4.04337e-16	0	3.98385e-07	2.30472e-15	8.89584e-06	0.000580289	-0.137054	-0.0349483	0.0800435	-0.0425259	-0.0414756	0.00185274	-0.1	-0.398026	0
2475	1.28649	0	0.174151	1.11233	1.59303	1.58955	1.44622	0.949356	0.281144	0.215723	0.143327	0.00348317	0.0123026	0.00350623	0.000156149	0.00361748	0.00504209	0.00157552	0.00774847	0.06957	0.0169613	1.87296e-05	0.00788413	0.0149444	7.76185e-07	0.000801845	3.95549e-05	0.000852896	0.00119854	1.17857e-11	5.2281e-45	1.03771e-17	8.97655e-18	7.99462e-14	3.7939e-16	0	3.91934e-07	2.18954e-15	8.87911e-06	0.000580289	-0.137054	-0.0349483	0.0800435	-0.0425259	-0.0414756	0.00185274	-0.1	-0.398026	0
2476	1.24032	0	0.130187	1.11013	1.59083	1.58736	1.44403	0.947172	0.28114	0.215718	0.143329	0.00347045	0.0123026	0.00350623	0.00015615	0.00361756	0.00504194	0.00157556	0.00774878	0.0695711	0.0169623	1.87303e-05	0.00788407	0.0149444	7.58106e-07	0.000793387	3.90644e-05	0.000849886	0.00119779	1.13146e-11	4.27829e-45	9.54773e-18	8.06145e-18	7.56055e-14	3.55986e-16	0	3.85592e-07	2.08014e-15	8.88999e-06	0.000580289	-0.137054	-0.0349483	0.0800435	-0.0425259	-0.0414756	0.00185274	-0.1	-0.398026	0
2477	1.19422	0	0.0860781	1.10814	1.58883	1.58537	1.44204	0.945169	0.281157	0.215713	0.143334	0.00345789	0.0123026	0.00350623	0.00015615	0.00361763	0.00504215	0.00157563	0.00774917	0.0695737	0.0169633	1.87312e-05	0.00788436	0.0149444	7.40476e-07	0.000785031	3.85809e-05	0.000846892	0.00119705	1.0863e-11	3.50125e-45	8.7849e-18	7.23991e-18	7.1502e-14	3.34037e-16	0	3.79361e-07	1.97627e-15	8.93264e-06	0.000580289	-0.137054	-0.0349483	0.0800435	-0.0425259	-0.0414756	0.00185274	-0.1	-0.398026	0
2478	1.16551	0	0.0592681	1.10624	1.58692	1.58347	1.44013	0.943229	0.281193	0.215709	0.143341	0.00344547	0.0123027	0.00350623	0.00015615	0.00361771	0.00504268	0.00157573	0.00774965	0.069578	0.0169644	1.87323e-05	0.007885	0.0149444	7.23287e-07	0.000776777	3.81041e-05	0.000843914	0.0011963	1.04302e-11	2.86554e-45	8.08329e-18	6.50237e-18	6.76226e-14	3.13453e-16	0	3.73243e-07	1.87766e-15	8.98625e-06	0.000580289	-0.137054	-0.0349483	0.0800435	-0.0425259	-0.0414756	0.00185274	-0.1	-0.398026	0
2479	1.14747	0	0.0431769	1.10429	1.58495	1.58152	1.43816	0.941221	0.281239	0.215704	0.14335	0.00343316	0.0123027	0.00350623	0.00015615	0.0036178	0.00504337	0.00157586	0.00775018	0.0695834	0.0169656	1.87335e-05	0.00788583	0.0149444	7.06516e-07	0.000768621	3.76338e-05	0.00084095	0.00119556	1.00152e-11	2.34537e-45	7.43788e-18	5.84013e-18	6.39547e-14	2.94144e-16	0	3.6723e-07	1.78403e-15	9.02946e-06	0.000580289	-0.137054	-0.0349483	0.0800435	-0.0425259	-0.0414756	0.00185274	-0.1	-0.398026	0
2480	1.1345	0	0.0322656	1.10223	1.58286	1.57944	1.43608	0.939092	0.281292	0.2157	0.14336	0.00342095	0.0123027	0.00350623	0.000156151	0.00361789	0.00504413	0.00157599	0.00775076	0.0695893	0.0169668	1.87347e-05	0.00788676	0.0149444	6.9015e-07	0.000760557	3.71697e-05	0.000837998	0.00119482	9.61699e-12	1.91969e-45	6.84412e-18	5.24545e-18	6.04864e-14	2.76029e-16	0	3.61319e-07	1.69509e-15	9.06223e-06	0.000580289	-0.137054	-0.0349483	0.0800435	-0.0425259	-0.0414756	0.00185274	-0.1	-0.398026	0
2481	1.12572	0	0.025655	1.10006	1.58067	1.57726	1.43389	0.936843	0.281348	0.215695	0.14337	0.00340884	0.0123027	0.00350622	0.000156151	0.00361798	0.00504491	0.00157613	0.00775136	0.0695956	0.0169681	1.87361e-05	0.00788774	0.0149444	6.74175e-07	0.000752584	3.67118e-05	0.00083506	0.00119408	9.23494e-12	1.57132e-45	6.29785e-18	4.71142e-18	5.72067e-14	2.59035e-16	0	3.55509e-07	1.61062e-15	9.08953e-06	0.000580289	-0.137054	-0.0349483	0.0800435	-0.0425259	-0.0414756	0.00185274	-0.1	-0.398026	0
2482	1.17032	0	0.0725288	1.09779	1.57837	1.57497	1.43159	0.934492	0.281406	0.215691	0.143381	0.00339684	0.0123028	0.00350622	0.000156151	0.00361807	0.00504569	0.00157628	0.00775198	0.0696022	0.0169694	1.87374e-05	0.00788876	0.0149444	6.5858e-07	0.0007447	3.62597e-05	0.000832134	0.00119334	8.86831e-12	1.28621e-45	5.79525e-18	4.23182e-18	5.41054e-14	2.4309e-16	0	3.49795e-07	1.53037e-15	9.11259e-06	0.000580289	-0.137054	-0.0349483	0.0800435	-0.0425259	-0.0414756	0.00185274	-0.1	-0.398026	0
2483	1.24156	0	0.146252	1.09531	1.57587	1.57248	1.42909	0.931964	0.281443	0.215686	0.143389	0.00338488	0.0123028	0.00350622	0.000156151	0.00361816	0.00504608	0.0015764	0.00775251	0.0696071	0.0169706	1.87386e-05	0.00788939	0.0149444	6.43328e-07	0.000736889	3.58127e-05	0.000829214	0.0011926	8.51583e-12	1.05278e-45	5.33265e-18	3.80095e-18	5.11714e-14	2.28121e-16	0	3.44167e-07	1.45409e-15	9.08781e-06	0.000580289	-0.137054	-0.0349483	0.0800435	-0.0425259	-0.0414756	0.00185274	-0.1	-0.398026	0
2484	1.27384	0	0.181191	1.09265	1.5732	1.56983	1.42644	0.929309	0.281448	0.215682	0.143392	0.00337295	0.0123028	0.00350622	0.000156152	0.00361824	0.00504593	0.00157646	0.00775288	0.0696092	0.0169716	1.87395e-05	0.00788945	0.0149444	6.28394e-07	0.000729142	3.53702e-05	0.000826298	0.00119186	8.17656e-12	8.6164e-46	4.90676e-18	3.41375e-18	4.83951e-14	2.14063e-16	0	3.38616e-07	1.38154e-15	9.02267e-06	0.000580289	-0.137054	-0.0349483	0.0800435	-0.0425259	-0.0414756	0.00185274	-0.1	-0.398026	0
2485	1.28063	0	0.190562	1.09007	1.57063	1.56726	1.42387	0.926757	0.281437	0.215677	0.143394	0.00336112	0.0123028	0.00350622	0.000156152	0.00361831	0.00504556	0.00157649	0.00775318	0.0696099	0.0169725	1.87402e-05	0.00788925	0.0149444	6.13789e-07	0.000721467	3.49326e-05	0.000823389	0.00119112	7.85043e-12	7.05167e-46	4.51479e-18	3.0659e-18	4.57688e-14	2.00867e-16	0	3.33148e-07	1.31258e-15	8.97816e-06	0.000580289	-0.137054	-0.0349483	0.0800435	-0.0425259	-0.0414756	0.00185274	-0.1	-0.398026	0
2486	1.26184	0	0.174151	1.08769	1.56826	1.56491	1.42151	0.924416	0.281425	0.215673	0.143395	0.00334941	0.0123028	0.00350622	0.000156152	0.00361839	0.00504521	0.00157652	0.00775346	0.0696102	0.0169734	1.87408e-05	0.00788902	0.0149444	5.9952e-07	0.000713871	3.45003e-05	0.000820489	0.00119037	7.53722e-12	5.77103e-46	4.15411e-18	2.75349e-18	4.32849e-14	1.88484e-16	0	3.27767e-07	1.24705e-15	8.96122e-06	0.000580289	-0.137054	-0.0349483	0.0800435	-0.0425259	-0.0414756	0.00185274	-0.1	-0.398026	0
2487	1.21573	0	0.130187	1.08555	1.56611	1.56278	1.41938	0.922291	0.281421	0.215669	0.143397	0.00333784	0.0123029	0.00350622	0.000156152	0.00361847	0.00504505	0.00157655	0.00775375	0.0696112	0.0169743	1.87415e-05	0.00788895	0.0149444	5.85591e-07	0.000706359	3.40736e-05	0.000817601	0.00118963	7.23668e-12	4.72305e-46	3.82228e-18	2.47294e-18	4.0936e-14	1.76866e-16	0	3.22476e-07	1.1848e-15	8.97194e-06	0.000580289	-0.137054	-0.0349483	0.0800435	-0.0425259	-0.0414756	0.00185274	-0.1	-0.398026	0
2488	1.16969	0	0.0860781	1.08361	1.56417	1.56085	1.41745	0.920346	0.281437	0.215664	0.143401	0.00332641	0.0123029	0.00350622	0.000156153	0.00361855	0.00504525	0.00157662	0.00775414	0.0696138	0.0169752	1.87424e-05	0.00788924	0.0149444	5.72007e-07	0.000698939	3.36528e-05	0.000814728	0.00118889	6.94858e-12	3.86562e-46	3.51706e-18	2.22105e-18	3.87154e-14	1.65969e-16	0	3.17278e-07	1.1257e-15	9.01449e-06	0.000580289	-0.137054	-0.0349483	0.0800435	-0.0425259	-0.0414756	0.00185274	-0.1	-0.398026	0
2489	1.14104	0	0.0592681	1.08177	1.56232	1.559	1.4156	0.918463	0.281472	0.21566	0.143408	0.0033151	0.0123029	0.00350622	0.000156153	0.00361864	0.00504578	0.00157672	0.00775461	0.069618	0.0169763	1.87435e-05	0.00788987	0.0149444	5.58761e-07	0.000691609	3.3238e-05	0.00081187	0.00118816	6.67242e-12	3.16407e-46	3.23632e-18	1.99491e-18	3.6616e-14	1.55749e-16	0	3.12174e-07	1.0696e-15	9.06803e-06	0.000580289	-0.137054	-0.0349483	0.0800435	-0.0425259	-0.0414756	0.00185274	-0.1	-0.398026	0
2490	1.12306	0	0.0431769	1.07988	1.56041	1.5571	1.41369	0.916512	0.281518	0.215656	0.143417	0.00330389	0.0123029	0.00350622	0.000156153	0.00361873	0.00504646	0.00157684	0.00775514	0.0696233	0.0169775	1.87446e-05	0.00789069	0.0149444	5.45838e-07	0.000684364	3.28288e-05	0.000809025	0.00118742	6.40756e-12	2.58996e-46	2.97805e-18	1.79185e-18	3.4631e-14	1.46162e-16	0	3.07157e-07	1.01631e-15	9.11118e-06	0.000580289	-0.137054	-0.0349483	0.0800435	-0.0425259	-0.0414756	0.00185274	-0.1	-0.398026	0
2491	1.11015	0	0.0322656	1.07788	1.55838	1.55509	1.41166	0.914438	0.28157	0.215652	0.143427	0.00329278	0.012303	0.00350622	0.000156153	0.00361882	0.00504721	0.00157697	0.0077557	0.0696291	0.0169787	1.87459e-05	0.00789161	0.0149444	5.33224e-07	0.000677202	3.2425e-05	0.000806193	0.00118669	6.15343e-12	2.1201e-46	2.74044e-18	1.60949e-18	3.2754e-14	1.37168e-16	0	3.02226e-07	9.65699e-16	9.14387e-06	0.000580289	-0.137054	-0.0349483	0.0800435	-0.0425259	-0.0414756	0.00185274	-0.1	-0.398026	0
2492	1.10142	0	0.025655	1.07576	1.55624	1.55296	1.40952	0.912245	0.281626	0.215647	0.143437	0.00328175	0.012303	0.00350622	0.000156154	0.00361891	0.00504799	0.00157712	0.00775629	0.0696354	0.01698	1.87472e-05	0.00789259	0.0149443	5.20912e-07	0.000670121	3.20265e-05	0.000803373	0.00118595	5.90958e-12	1.73553e-46	2.52183e-18	1.44571e-18	3.0979e-14	1.28729e-16	0	2.97378e-07	9.17623e-16	9.17108e-06	0.000580289	-0.137054	-0.0349483	0.0800435	-0.0425259	-0.0414756	0.00185274	-0.1	-0.398026	0
2493	1.14608	0	0.0725288	1.07355	1.55399	1.55072	1.40728	0.909949	0.281683	0.215643	0.143447	0.00327082	0.012303	0.00350622	0.000156154	0.00361901	0.00504877	0.00157727	0.00775691	0.0696419	0.0169812	1.87485e-05	0.00789359	0.0149443	5.08892e-07	0.000663118	3.16331e-05	0.000800565	0.00118522	5.67554e-12	1.42076e-46	2.32068e-18	1.29862e-18	2.93004e-14	1.20811e-16	0	2.9261e-07	8.71954e-16	9.19403e-06	0.000580289	-0.137054	-0.0349483	0.0800435	-0.0425259	-0.0414756	0.00185274	-0.1	-0.398026	0
2494	1.21737	0	0.146252	1.07112	1.55155	1.54829	1.40484	0.907476	0.28172	0.215639	0.143455	0.00325992	0.012303	0.00350622	0.000156154	0.0036191	0.00504916	0.00157738	0.00775743	0.0696468	0.0169824	1.87497e-05	0.00789422	0.0149443	4.97136e-07	0.000656181	3.12441e-05	0.000797763	0.00118449	5.45051e-12	1.16303e-46	2.13554e-18	1.16647e-18	2.77124e-14	1.13378e-16	0	2.87913e-07	8.28536e-16	9.16907e-06	0.000580289	-0.137054	-0.0349483	0.0800435	-0.0425259	-0.0414756	0.00185274	-0.1	-0.398026	0
2495	1.24971	0	0.181191	1.06852	1.54894	1.5457	1.40224	0.904878	0.281724	0.215635	0.143458	0.00324904	0.0123031	0.00350622	0.000156154	0.00361919	0.00504899	0.00157744	0.0077578	0.0696487	0.0169834	1.87505e-05	0.00789427	0.0149443	4.85624e-07	0.000649299	3.08589e-05	0.000794964	0.00118375	5.23389e-12	9.51965e-47	1.96507e-18	1.04771e-18	2.62097e-14	1.06396e-16	0	2.83281e-07	7.87239e-16	9.10367e-06	0.000580289	-0.137054	-0.0349483	0.0800435	-0.0425259	-0.0414756	0.00185274	-0.1	-0.398026	0
2496	1.25656	0	0.190562	1.06599	1.54643	1.54319	1.39973	0.902383	0.281713	0.215631	0.14346	0.00323825	0.0123031	0.00350622	0.000156155	0.00361927	0.00504862	0.00157747	0.00775809	0.0696494	0.0169842	1.87512e-05	0.00789406	0.0149443	4.74365e-07	0.000642481	3.04781e-05	0.000792172	0.00118302	5.02564e-12	7.79165e-47	1.80818e-18	9.41006e-19	2.47881e-14	9.98425e-17	0	2.78718e-07	7.47981e-16	9.05892e-06	0.000580289	-0.137054	-0.0349483	0.0800435	-0.0425259	-0.0414756	0.00185274	-0.1	-0.398026	0
2497	1.23783	0	0.174151	1.06368	1.54411	1.54089	1.39743	0.9001	0.2817	0.215627	0.143461	0.00322758	0.0123031	0.00350622	0.000156155	0.00361935	0.00504827	0.00157749	0.00775835	0.0696496	0.0169851	1.87518e-05	0.00789382	0.0149443	4.63364e-07	0.000635733	3.01019e-05	0.000789389	0.00118228	4.82562e-12	6.37724e-47	1.6638e-18	8.45167e-19	2.34436e-14	9.36918e-17	0	2.74227e-07	7.10677e-16	9.04176e-06	0.000580289	-0.137054	-0.0349483	0.0800435	-0.0425259	-0.0414756	0.00185274	-0.1	-0.398026	0
2498	1.19178	0	0.130187	1.06159	1.54203	1.53881	1.39535	0.898032	0.281695	0.215623	0.143462	0.00321702	0.0123031	0.00350622	0.000156155	0.00361943	0.0050481	0.00157752	0.00775864	0.0696505	0.0169859	1.87525e-05	0.00789375	0.0149443	4.52625e-07	0.00062906	2.97305e-05	0.000786618	0.00118155	4.63366e-12	5.21969e-47	1.53097e-18	7.59098e-19	2.21721e-14	8.79211e-17	0	2.69811e-07	6.75241e-16	9.05232e-06	0.000580289	-0.137054	-0.0349483	0.0800435	-0.0425259	-0.0414756	0.00185274	-0.1	-0.398026	0
2499	1.14579	0	0.0860781	1.05971	1.54015	1.53694	1.39347	0.896144	0.281711	0.215619	0.143467	0.0032066	0.0123032	0.00350622	0.000156155	0.00361952	0.0050483	0.00157759	0.00775902	0.069653	0.0169869	1.87534e-05	0.00789402	0.0149443	4.42151e-07	0.000622468	2.93643e-05	0.00078386	0.00118082	4.44963e-12	4.27252e-47	1.40878e-18	6.8182e-19	2.097e-14	8.25084e-17	0	2.65473e-07	6.41594e-16	9.09478e-06	0.000580289	-0.137054	-0.0349483	0.0800435	-0.0425259	-0.0414756	0.00185274	-0.1	-0.398026	0
2500	1.12847	0	0.0844167	1.05882	1.53925	1.53605	1.39258	0.895236	0.281724	0.215617	0.14347	0.00320143	0.0123032	0.00350622	0.000156155	0.00361956	0.00504851	0.00157763	0.00775923	0.0696548	0.0169874	1.87538e-05	0.00789427	0.0149443	4.3698e-07	0.000619192	2.91825e-05	0.000782485	0.00118045	4.35958e-12	3.84628e-47	1.35024e-18	6.45262e-19	2.03858e-14	7.98888e-17	0	2.63324e-07	6.25208e-16	9.12371e-06	0.000580289	-0.137054	-0.0349483	0.0800435	-0.0425259	-0.0414756	0.00185274	-0.1	-0.398026	0
[truncated: 4 more columns]
