# Supplementary material for: The Social Cost of Fossil and Industrial CO2 Emissions from 1950 to 2018
Source: Research Square preprint supplement (doi:10.21203/rs.3.rs-2244259/v1), 2022-11-17
Supplement: Supplementary file 18 [file RCP45_EMISSIONS.xls]

## Sheet: RCP45_EMISSIONS
RCP45__EMISSIONS____________________________
CONTENT: GLOBAL ANNUAL EMISSIONS.
RUN: RCP4.5, FINAL RELEASE, 26 Nov. 2009
RCP4.5 CONTACT: MiniCAM group, Allison Thomson (Allison.Thomson@pnl.gov)
DATE: 26/11/2009 11:29:06
MAGICC-VERSION: 6.3.09, 25 November 2009
FILE PRODUCED BY: RCP Concentration Calculation & Data Group, M. Meinshausen, S. Smith, K. Riahi, D. van Vuuren
DOCUMENTATION: M. Meinshausen, S. Smith et al. (2011) "The RCP GHG concentrations and their extension from 1765 to 2300", DOI 10.1007/s10584-011-0156-z, Climatic Change.
CMIP5 INFO: http://cmip-pcmdi.llnl.gov/cmip5/
RCP DATABASE: http://www.iiasa.ac.at/web-apps/tnt/RcpDb
FURTHER INFO: For data sources, aknowledgements and further information, see http://www.pik-potsdam.de/~mmalte/rcps.
NOTE: THIS EMISSION DATASET ONLY TO BE USED FOR EMISSION-DRIVEN ESM CMIP5 RUNS, AS CONCENTRATIONS, NOT EMISSIONS, SHALL BE PRESCRIBED IN MAIN CMIP5 RUNS.
RCP4.5 starts 2005; 20th century data and earlier is provided for convenience.
COLUMN_DESCRIPTION________________________________________
1. FossilCO2 - Fossil & Industrial CO2 (Fossil, Cement, Gas Flaring & Bunker Fuels)
2. OtherCO2 - Landuse related CO2 Emissions
3. CH4 - Methane
4. N2O - Nitrous Oxide
5. - 11. - Tropospheric ozone precursors, aerosols and reactive gas emissions
12. - 23. - Flourinated gases controlled under the Kyoto Protocol, (HFCs, PFCs, SF6)
24. - 39. - Ozone Depleting Substances controlled under the Montreal Protocol (CFCs, HFCFC, Halons, CCl4, MCF, CH3Br, CH3Cl)
&THISFILE_SPECIFICATIONS
THISFILE_DATACOLUMNS	39
THISFILE_FIRSTYEAR	1765
THISFILE_LASTYEAR	2500
THISFILE_ANNUALSTEPS	1
THISFILE_FIRSTDATAROW	39
THISFILE_UNITS	SEE ROW 37
THISFILE_DATTYPE	RCPDAT
/
COLUMN:	1	2	3	4	5	6	7	8	9	10	11	12	13	14	15	16	17	18	19	20	21	22	23	24	25	26	27	28	29	30	31	32	33	34	35	36	37	38	39
UNITS:	GtC/yr	GtC/yr	MtCH4/yr	MtN2O-N/yr	MtS/yr	MtCO/yr	Mt/yr	MtN/yr	Mt/yr	Mt/yr	MtN/yr	kt/yr	kt/yr	kt/yr	kt/yr	kt/yr	kt/yr	kt/yr	kt/yr	kt/yr	kt/yr	kt/yr	kt/yr	kt/yr	kt/yr	kt/yr	kt/yr	kt/yr	kt/yr	kt/yr	kt/yr	kt/yr	kt/yr	kt/yr	kt/yr	kt/yr	kt/yr	kt/yr	kt/yr
v YEARS/GAS >	FossilCO2	OtherCO2	CH4	N2O	SOx	CO	NMVOC	NOx	BC	OC	NH3	CF4	C2F6	C6F14	HFC23	HFC32	HFC43_10	HFC125	HFC134a	HFC143a	HFC227ea	HFC245fa	SF6	CFC_11	CFC_12	CFC_113	CFC_114	CFC_115	CARB_TET	MCF	HCFC_22	HCFC_141B	HCFC_142B	HALON1211	HALON1202	HALON1301	HALON2402	CH3BR	CH3CL
1765	0.003	0	0	0	0	0	0	0	0	0	0.833837	0.0107627	0	0	0	0	0	0	0	0	0	0	0	0	0	0	0	0	0	0	0	0	0	0	0	0	0	157.267	3100.21
1766	0.003	0.0053383	1.96326	0.00519108	0.0988826	9.05022	1.59687	0.109502	0.106998	0.56592	0.854231	0.0107521	0	0	0	0	0	0	0	0	0	0	0	0	0	0	0	0	0	0	0	0	0	0	0	0	0	157.267	3100.21
1767	0.003	0.0106766	2.43645	0.0101168	0.116306	12.9608	2.29232	0.168038	0.133383	0.781468	0.874167	0.0107479	0	0	0	0	0	0	0	0	0	0	0	0	0	0	0	0	0	0	0	0	0	0	0	0	0	157.267	3100.21
1768	0.003	0.0160149	2.91111	0.0150428	0.133811	16.8765	2.98865	0.226625	0.159847	0.997361	0.893654	0.0107438	0	0	0	0	0	0	0	0	0	0	0	0	0	0	0	0	0	0	0	0	0	0	0	0	0	157.267	3100.21
1769	0.003	0.0213532	3.38728	0.0199691	0.151398	20.7975	3.6859	0.285264	0.186393	1.21361	0.912699	0.0107397	0	0	0	0	0	0	0	0	0	0	0	0	0	0	0	0	0	0	0	0	0	0	0	0	0	157.267	3100.21
1770	0.003	0.0266915	3.86501	0.0248956	0.16907	24.7238	4.38409	0.343956	0.213024	1.43023	0.931309	0.0107355	0	0	0	0	0	0	0	0	0	0	0	0	0	0	0	0	0	0	0	0	0	0	0	0	0	157.267	3100.21
1771	0.004	0.0320298	4.34436	0.0298224	0.186831	28.6557	5.08326	0.402704	0.239742	1.64723	0.952532	0.0107314	0	0	0	0	0	0	0	0	0	0	0	0	0	0	0	0	0	0	0	0	0	0	0	0	0	157.267	3100.21
1772	0.004	0.0373681	4.82537	0.0347495	0.204683	32.5933	5.78343	0.461508	0.26655	1.86461	0.970294	0.0107273	0	0	0	0	0	0	0	0	0	0	0	0	0	0	0	0	0	0	0	0	0	0	0	0	0	157.267	3100.21
1773	0.004	0.0427064	5.30809	0.039677	0.222628	36.5368	6.48465	0.520371	0.29345	2.0824	0.987642	0.0107231	0	0	0	0	0	0	0	0	0	0	0	0	0	0	0	0	0	0	0	0	0	0	0	0	0	157.267	3100.21
1774	0.004	0.0480447	5.79258	0.0446047	0.24067	40.4864	7.18692	0.579294	0.320446	2.30061	1.00458	0.0107189	0	0	0	0	0	0	0	0	0	0	0	0	0	0	0	0	0	0	0	0	0	0	0	0	0	157.267	3100.21
1775	0.004	0.053383	6.27889	0.0495328	0.258811	44.4423	7.8903	0.638279	0.347541	2.51924	1.02113	0.0107148	0	0	0	0	0	0	0	0	0	0	0	0	0	0	0	0	0	0	0	0	0	0	0	0	0	157.267	3100.21
1776	0.004	0.0587213	6.76707	0.0544612	0.277055	48.4046	8.59482	0.697329	0.374737	2.73832	1.03728	0.0107106	0	0	0	0	0	0	0	0	0	0	0	0	0	0	0	0	0	0	0	0	0	0	0	0	0	157.267	3100.21
1777	0.004	0.0640596	7.25719	0.0593899	0.295404	52.3736	9.3005	0.756445	0.402037	2.95785	1.05305	0.0107064	0	0	0	0	0	0	0	0	0	0	0	0	0	0	0	0	0	0	0	0	0	0	0	0	0	157.267	3100.21
1778	0.004	0.0693979	7.74931	0.064319	0.313863	56.3496	10.0074	0.815629	0.429446	3.17784	1.06844	0.0107022	0	0	0	0	0	0	0	0	0	0	0	0	0	0	0	0	0	0	0	0	0	0	0	0	0	157.267	3100.21
1779	0.004	0.0747361	8.24348	0.0692485	0.332434	60.3326	10.7155	0.874883	0.456966	3.39833	1.08346	0.010698	0	0	0	0	0	0	0	0	0	0	0	0	0	0	0	0	0	0	0	0	0	0	0	0	0	157.267	3100.21
1780	0.004	0.0800744	8.73977	0.0741783	0.35112	64.3229	11.425	0.93421	0.4846	3.61931	1.09813	0.0106938	0	0	0	0	0	0	0	0	0	0	0	0	0	0	0	0	0	0	0	0	0	0	0	0	0	157.267	3100.21
1781	0.005	0.0854127	9.23824	0.0791086	0.369927	68.3207	12.1357	0.993612	0.512353	3.8408	1.11547	0.0106896	0	0	0	0	0	0	0	0	0	0	0	0	0	0	0	0	0	0	0	0	0	0	0	0	0	157.267	3100.21
1782	0.005	0.090751	9.73897	0.0840392	0.388856	72.3263	12.8478	1.05309	0.540227	4.06282	1.12943	0.0106854	0	0	0	0	0	0	0	0	0	0	0	0	0	0	0	0	0	0	0	0	0	0	0	0	0	157.267	3100.21
1783	0.005	0.0960893	10.242	0.0889702	0.407913	76.34	13.5613	1.11265	0.568228	4.28539	1.14305	0.0106812	0	0	0	0	0	0	0	0	0	0	0	0	0	0	0	0	0	0	0	0	0	0	0	0	0	157.267	3100.21
1784	0.005	0.101428	10.7475	0.0939017	0.4271	80.3619	14.2763	1.17229	0.596358	4.50853	1.15634	0.0106769	0	0	0	0	0	0	0	0	0	0	0	0	0	0	0	0	0	0	0	0	0	0	0	0	0	157.267	3100.21
1785	0.005	0.106766	11.2554	0.0988336	0.446422	84.3923	14.9927	1.23201	0.624621	4.73224	1.1693	0.0106727	0	0	0	0	0	0	0	0	0	0	0	0	0	0	0	0	0	0	0	0	0	0	0	0	0	157.267	3100.21
1786	0.005	0.112104	11.7658	0.103766	0.465884	88.4315	15.7107	1.29182	0.653022	4.95655	1.18194	0.0106684	0	0	0	0	0	0	0	0	0	0	0	0	0	0	0	0	0	0	0	0	0	0	0	0	0	157.267	3100.21
1787	0.005	0.117443	12.2789	0.108699	0.485489	92.4797	16.4303	1.35173	0.681565	5.18148	1.19428	0.0106642	0	0	0	0	0	0	0	0	0	0	0	0	0	0	0	0	0	0	0	0	0	0	0	0	0	157.267	3100.21
1788	0.005	0.122781	12.7947	0.113632	0.505241	96.5372	17.1515	1.41172	0.710254	5.40705	1.20631	0.0106599	0	0	0	0	0	0	0	0	0	0	0	0	0	0	0	0	0	0	0	0	0	0	0	0	0	157.267	3100.21
1789	0.005	0.128119	13.3133	0.118566	0.525147	100.604	17.8744	1.47181	0.739094	5.63327	1.21804	0.0106556	0	0	0	0	0	0	0	0	0	0	0	0	0	0	0	0	0	0	0	0	0	0	0	0	0	157.267	3100.21
1790	0.005	0.133457	13.8347	0.1235	0.545209	104.682	18.599	1.532	0.76809	5.86016	1.22948	0.0106513	0	0	0	0	0	0	0	0	0	0	0	0	0	0	0	0	0	0	0	0	0	0	0	0	0	157.267	3100.21
1791	0.006	0.138796	14.3591	0.128435	0.565433	108.769	19.3255	1.59228	0.797246	6.08776	1.24369	0.010647	0	0	0	0	0	0	0	0	0	0	0	0	0	0	0	0	0	0	0	0	0	0	0	0	0	157.267	3100.21
1792	0.006	0.144134	14.8866	0.133371	0.585825	112.867	20.0537	1.65268	0.826567	6.31607	1.25458	0.0106427	0	0	0	0	0	0	0	0	0	0	0	0	0	0	0	0	0	0	0	0	0	0	0	0	0	157.267	3100.21
1793	0.006	0.149472	15.4172	0.138306	0.606388	116.975	20.7839	1.71318	0.856059	6.54512	1.2652	0.0106384	0	0	0	0	0	0	0	0	0	0	0	0	0	0	0	0	0	0	0	0	0	0	0	0	0	157.267	3100.21
1794	0.006	0.154811	15.9511	0.143243	0.627129	121.095	21.5161	1.77379	0.885726	6.77493	1.27556	0.010634	0	0	0	0	0	0	0	0	0	0	0	0	0	0	0	0	0	0	0	0	0	0	0	0	0	157.267	3100.21
1795	0.006	0.160149	16.4883	0.14818	0.648053	125.227	22.2503	1.83452	0.915575	7.00554	1.28567	0.0106297	0	0	0	0	0	0	0	0	0	0	0	0	0	0	0	0	0	0	0	0	0	0	0	0	0	157.267	3100.21
1796	0.006	0.165487	17.029	0.153118	0.669166	129.37	22.9865	1.89536	0.94561	7.23695	1.29554	0.0106253	0	0	0	0	0	0	0	0	0	0	0	0	0	0	0	0	0	0	0	0	0	0	0	0	0	157.267	3100.21
1797	0.007	0.170825	17.5732	0.158056	0.690473	133.526	23.7249	1.95633	0.975837	7.4692	1.30821	0.0106209	0	0	0	0	0	0	0	0	0	0	0	0	0	0	0	0	0	0	0	0	0	0	0	0	0	157.267	3100.21
1798	0.007	0.176164	18.1211	0.162995	0.711981	137.694	24.4656	2.01742	1.00626	7.70232	1.31761	0.0106165	0	0	0	0	0	0	0	0	0	0	0	0	0	0	0	0	0	0	0	0	0	0	0	0	0	157.267	3100.21
1799	0.007	0.181502	18.6728	0.167935	0.733695	141.875	25.2085	2.07864	1.03689	7.93632	1.32679	0.0106121	0	0	0	0	0	0	0	0	0	0	0	0	0	0	0	0	0	0	0	0	0	0	0	0	0	157.267	3100.21
1800	0.008	0.18684	19.2283	0.172875	0.755622	146.07	25.9538	2.13999	1.06774	8.17124	1.33879	0.0106077	0	0	0	0	0	0	0	0	0	0	0	0	0	0	0	0	0	0	0	0	0	0	0	0	0	157.267	3100.21
1801	0.008	0.192179	19.7879	0.177817	0.777769	150.279	26.7015	2.20149	1.09879	8.4071	1.34754	0.0106032	0	0	0	0	0	0	0	0	0	0	0	0	0	0	0	0	0	0	0	0	0	0	0	0	0	157.267	3100.21
1802	0.01	0.197517	20.3516	0.182758	0.800143	154.502	27.4517	2.26312	1.13008	8.64394	1.36217	0.0105988	0	0	0	0	0	0	0	0	0	0	0	0	0	0	0	0	0	0	0	0	0	0	0	0	0	157.267	3100.21
1803	0.009	0.202855	20.9196	0.187701	0.82275	158.739	28.2045	2.3249	1.16159	8.88178	1.36749	0.0105943	0	0	0	0	0	0	0	0	0	0	0	0	0	0	0	0	0	0	0	0	0	0	0	0	0	157.267	3100.21
1804	0.009	0.208194	21.492	0.192644	0.845598	162.992	28.96	2.38683	1.19334	9.12066	1.37566	0.0105898	0	0	0	0	0	0	0	0	0	0	0	0	0	0	0	0	0	0	0	0	0	0	0	0	0	157.267	3100.21
1805	0.009	0.213532	22.069	0.197589	0.868694	167.261	29.7182	2.44892	1.22534	9.3606	1.38365	0.0105853	0	0	0	0	0	0	0	0	0	0	0	0	0	0	0	0	0	0	0	0	0	0	0	0	0	157.267	3100.21
1806	0.01	0.21887	22.6506	0.202534	0.892046	171.545	30.4792	2.51116	1.25759	9.60165	1.39452	0.0105808	0	0	0	0	0	0	0	0	0	0	0	0	0	0	0	0	0	0	0	0	0	0	0	0	0	157.267	3100.21
1807	0.01	0.224208	23.2371	0.20748	0.915662	175.847	31.2432	2.57357	1.2901	9.84383	1.40217	0.0105762	0	0	0	0	0	0	0	0	0	0	0	0	0	0	0	0	0	0	0	0	0	0	0	0	0	157.267	3100.21
1808	0.01	0.229547	23.8285	0.212426	0.939549	180.165	32.0101	2.63615	1.32289	10.0872	1.40967	0.0105717	0	0	0	0	0	0	0	0	0	0	0	0	0	0	0	0	0	0	0	0	0	0	0	0	0	157.267	3100.21
1809	0.01	0.234885	24.425	0.217374	0.963717	184.501	32.7802	2.69891	1.35594	10.3317	1.41702	0.0105671	0	0	0	0	0	0	0	0	0	0	0	0	0	0	0	0	0	0	0	0	0	0	0	0	0	157.267	3100.21
1810	0.01	0.240223	25.0269	0.222323	0.988174	188.856	33.5535	2.76184	1.38929	10.5775	1.42423	0.0105625	0	0	0	0	0	0	0	0	0	0	0	0	0	0	0	0	0	0	0	0	0	0	0	0	0	157.267	3100.21
1811	0.011	0.245562	25.6341	0.227272	1.01293	193.229	34.33	2.82497	1.42293	10.8246	1.43434	0.0105578	0	0	0	0	0	0	0	0	0	0	0	0	0	0	0	0	0	0	0	0	0	0	0	0	0	157.267	3100.21
1812	0.011	0.2509	26.247	0.232223	1.03799	197.621	35.11	2.88828	1.45687	11.073	1.44129	0.0105532	0	0	0	0	0	0	0	0	0	0	0	0	0	0	0	0	0	0	0	0	0	0	0	0	0	157.267	3100.21
1813	0.011	0.256238	26.8657	0.237175	1.06337	202.034	35.8935	2.9518	1.49113	11.3228	1.44811	0.0105485	0	0	0	0	0	0	0	0	0	0	0	0	0	0	0	0	0	0	0	0	0	0	0	0	0	157.267	3100.21
1814	0.011	0.261577	27.4904	0.242127	1.08907	206.467	36.6806	3.01551	1.52571	11.5739	1.45482	0.0105438	0	0	0	0	0	0	0	0	0	0	0	0	0	0	0	0	0	0	0	0	0	0	0	0	0	157.267	3100.21
1815	0.012	0.266915	28.1212	0.247081	1.11511	210.921	37.4714	3.07944	1.56062	11.8266	1.46447	0.0105391	0	0	0	0	0	0	0	0	0	0	0	0	0	0	0	0	0	0	0	0	0	0	0	0	0	157.267	3100.21
1816	0.013	0.272253	28.7584	0.252036	1.1415	215.398	38.266	3.14359	1.59588	12.0807	1.47402	0.0105343	0	0	0	0	0	0	0	0	0	0	0	0	0	0	0	0	0	0	0	0	0	0	0	0	0	157.267	3100.21
1817	0.014	0.277591	29.4021	0.256992	1.16825	219.896	39.0646	3.20796	1.63149	12.3363	1.48348	0.0105296	0	0	0	0	0	0	0	0	0	0	0	0	0	0	0	0	0	0	0	0	0	0	0	0	0	157.267	3100.21
1818	0.014	0.28293	30.0526	0.261949	1.19536	224.418	39.8673	3.27256	1.66746	12.5935	1.48981	0.0105248	0	0	0	0	0	0	0	0	0	0	0	0	0	0	0	0	0	0	0	0	0	0	0	0	0	157.267	3100.21
1819	0.014	0.288268	30.71	0.266908	1.22286	228.964	40.6742	3.33739	1.70381	12.8524	1.49607	0.0105199	0	0	0	0	0	0	0	0	0	0	0	0	0	0	0	0	0	0	0	0	0	0	0	0	0	157.267	3100.21
1820	0.014	0.293606	31.3745	0.271868	1.25075	233.535	41.4854	3.40248	1.74055	13.1129	1.50225	0.0105151	0	0	0	0	0	0	0	0	0	0	0	0	0	0	0	0	0	0	0	0	0	0	0	0	0	157.267	3100.21
1821	0.014	0.298945	32.0465	0.276829	1.27904	238.131	42.3011	3.46781	1.77769	13.3752	1.50838	0.0105102	0	0	0	0	0	0	0	0	0	0	0	0	0	0	0	0	0	0	0	0	0	0	0	0	0	157.267	3100.21
1822	0.015	0.304283	32.7261	0.281791	1.30774	242.754	43.1214	3.53341	1.81524	13.6393	1.51749	0.0105053	0	0	0	0	0	0	0	0	0	0	0	0	0	0	0	0	0	0	0	0	0	0	0	0	0	157.267	3100.21
1823	0.016	0.309621	33.4135	0.286755	1.33688	247.404	43.9465	3.59927	1.85322	13.9052	1.52655	0.0105003	0	0	0	0	0	0	0	0	0	0	0	0	0	0	0	0	0	0	0	0	0	0	0	0	0	157.267	3100.21
1824	0.016	0.314959	34.1091	0.29172	1.36646	252.081	44.7764	3.66542	1.89163	14.1731	1.53254	0.0104954	0	0	0	0	0	0	0	0	0	0	0	0	0	0	0	0	0	0	0	0	0	0	0	0	0	157.267	3100.21
1825	0.017	0.320298	34.813	0.296687	1.39649	256.788	45.6114	3.73184	1.9305	14.4429	1.54153	0.0104904	0	0	0	0	0	0	0	0	0	0	0	0	0	0	0	0	0	0	0	0	0	0	0	0	0	157.267	3100.21
1826	0.017	0.325636	35.5254	0.301656	1.427	261.524	46.4516	3.79856	1.96983	14.7147	1.54746	0.0104853	0	0	0	0	0	0	0	0	0	0	0	0	0	0	0	0	0	0	0	0	0	0	0	0	0	157.267	3100.21
1827	0.018	0.330974	36.2468	0.306626	1.45799	266.29	47.2972	3.86559	2.00964	14.9886	1.55641	0.0104802	0	0	0	0	0	0	0	0	0	0	0	0	0	0	0	0	0	0	0	0	0	0	0	0	0	157.267	3100.21
1828	0.018	0.336313	36.9773	0.311597	1.48948	271.088	48.1483	3.93293	2.04994	15.2646	1.5623	0.0104751	0	0	0	0	0	0	0	0	0	0	0	0	0	0	0	0	0	0	0	0	0	0	0	0	0	157.267	3100.21
1829	0.018	0.341651	37.7173	0.31657	1.52149	275.919	49.0051	4.00059	2.09076	15.5429	1.5682	0.0104699	0	0	0	0	0	0	0	0	0	0	0	0	0	0	0	0	0	0	0	0	0	0	0	0	0	157.267	3100.21
1830	0.024	0.346989	38.4669	0.321545	1.55403	280.783	49.8678	4.06858	2.1321	15.8235	1.59235	0.0104648	0	0	0	0	0	0	0	0	0	0	0	0	0	0	0	0	0	0	0	0	0	0	0	0	0	157.267	3100.21
1831	0.023	0.352328	39.2266	0.326522	1.58711	285.682	50.7366	4.13692	2.17399	16.1064	1.59521	0.0104595	0	0	0	0	0	0	0	0	0	0	0	0	0	0	0	0	0	0	0	0	0	0	0	0	0	157.267	3100.21
1832	0.023	0.357666	39.9966	0.331501	1.62076	290.617	51.6116	4.2056	2.21643	16.3917	1.60114	0.0104542	0	0	0	0	0	0	0	0	0	0	0	0	0	0	0	0	0	0	0	0	0	0	0	0	0	157.267	3100.21
1833	0.024	0.363004	40.7773	0.336481	1.655	295.588	52.493	4.27466	2.25945	16.6796	1.61014	0.0104489	0	0	0	0	0	0	0	0	0	0	0	0	0	0	0	0	0	0	0	0	0	0	0	0	0	157.267	3100.21
1834	0.024	0.368342	41.5689	0.341464	1.68983	300.597	53.3811	4.34409	2.30306	16.97	1.61613	0.0104436	0	0	0	0	0	0	0	0	0	0	0	0	0	0	0	0	0	0	0	0	0	0	0	0	0	157.267	3100.21
1835	0.025	0.373681	42.3719	0.346448	1.72528	305.645	54.2761	4.4139	2.34729	17.2631	1.6252	0.0104381	0	0	0	0	0	0	0	0	0	0	0	0	0	0	0	0	0	0	0	0	0	0	0	0	0	157.267	3100.21
1836	0.029	0.379019	43.1865	0.351435	1.76137	310.733	55.1781	4.48412	2.39214	17.5589	1.64344	0.0104327	0	0	0	0	0	0	0	0	0	0	0	0	0	0	0	0	0	0	0	0	0	0	0	0	0	157.267	3100.21
1837	0.029	0.384357	44.0132	0.356423	1.79812	315.863	56.0874	4.55474	2.43765	17.8576	1.64957	0.0104272	0	0	0	0	0	0	0	0	0	0	0	0	0	0	0	0	0	0	0	0	0	0	0	0	0	157.267	3100.21
1838	0.03	0.389696	44.8522	0.361414	1.83554	321.036	57.0041	4.6258	2.48383	18.1592	1.65881	0.0104216	0	0	0	0	0	0	0	0	0	0	0	0	0	0	0	0	0	0	0	0	0	0	0	0	0	157.267	3100.21
1839	0.031	0.395034	45.7041	0.366407	1.87367	326.252	57.9287	4.69728	2.5307	18.4638	1.66811	0.010416	0	0	0	0	0	0	0	0	0	0	0	0	0	0	0	0	0	0	0	0	0	0	0	0	0	157.267	3100.21
1840	0.033	0.400372	46.5691	0.371403	1.91251	331.515	58.8612	4.76922	2.57828	18.7714	1.68054	0.0104104	0	0	0	0	0	0	0	0	0	0	0	0	0	0	0	0	0	0	0	0	0	0	0	0	0	157.267	3100.21
1841	0.034	0.405711	47.4478	0.376401	1.9521	336.824	59.8019	4.84163	2.6266	19.0823	1.69001	0.0104047	0	0	0	0	0	0	0	0	0	0	0	0	0	0	0	0	0	0	0	0	0	0	0	0	0	157.267	3100.21
1842	0.036	0.411049	48.3404	0.381401	1.99246	342.181	60.7511	4.91451	2.67568	19.3965	1.70261	0.0103989	0	0	0	0	0	0	0	0	0	0	0	0	0	0	0	0	0	0	0	0	0	0	0	0	0	157.267	3100.21
1843	0.037	0.416387	49.2475	0.386404	2.0336	347.588	61.709	4.98789	2.72554	19.7141	1.71227	0.0103931	0	0	0	0	0	0	0	0	0	0	0	0	0	0	0	0	0	0	0	0	0	0	0	0	0	157.267	3100.21
1844	0.039	0.421725	50.1694	0.39141	2.07556	353.047	62.6759	5.06177	2.7762	20.0351	1.72507	0.0103872	0	0	0	0	0	0	0	0	0	0	0	0	0	0	0	0	0	0	0	0	0	0	0	0	0	157.267	3100.21
1845	0.043	0.427064	51.1068	0.396418	2.11836	358.558	63.6522	5.13618	2.8277	20.3598	1.74408	0.0103812	0	0	0	0	0	0	0	0	0	0	0	0	0	0	0	0	0	0	0	0	0	0	0	0	0	157.267	3100.21
1846	0.043	0.432402	52.0599	0.401429	2.16202	364.125	64.638	5.21114	2.88005	20.6882	1.75104	0.0103752	0	0	0	0	0	0	0	0	0	0	0	0	0	0	0	0	0	0	0	0	0	0	0	0	0	157.267	3100.21
1847	0.046	0.43774	53.0294	0.406443	2.20657	369.747	65.6336	5.28665	2.93328	21.0205	1.76725	0.0103691	0	0	0	0	0	0	0	0	0	0	0	0	0	0	0	0	0	0	0	0	0	0	0	0	0	157.267	3100.21
1848	0.047	0.443079	54.0156	0.411461	2.25204	375.427	66.6395	5.36273	2.98742	21.3567	1.77751	0.010363	0	0	0	0	0	0	0	0	0	0	0	0	0	0	0	0	0	0	0	0	0	0	0	0	0	157.267	3100.21
1849	0.05	0.448417	55.0193	0.416481	2.29847	381.167	67.6558	5.43941	3.0425	21.6969	1.79401	0.0103568	0	0	0	0	0	0	0	0	0	0	0	0	0	0	0	0	0	0	0	0	0	0	0	0	0	157.267	3100.21
1850	0.054	0.453755	56.0408	0.421504	2.34586	386.969	68.6829	5.5167	3.09855	22.0414	1.81369	0.0103505	0	0	0	0	0	0	0	0	0	0	0	0	0	0	0	0	1.395	0	0	0	0	0	0	0	0	157.267	3100.21
1851	0.054	0.446786	56.4613	0.427401	2.40128	387.461	68.7278	5.54232	3.11874	22.1051	1.84692	0.0103509	0	0	0	0	0	0	0	0	0	0	0	0	0	0	0	0	1.447	0	0	0	0	0	0	0	0	157.267	3100.21
1852	0.057	0.498623	56.8819	0.464661	2.4567	387.952	68.7726	5.56795	3.13893	22.1687	1.99469	0.0103513	0	0	0	0	0	0	0	0	0	0	0	0	0	0	0	0	1.502	0	0	0	0	0	0	0	0	157.267	3100.21
1853	0.059	0.497354	57.3024	0.464774	2.51212	388.443	68.8174	5.59357	3.15912	22.2324	2.00081	0.0103518	0	0	0	0	0	0	0	0	0	0	0	0	0	0	0	0	1.554	0	0	0	0	0	0	0	0	157.267	3100.21
1854	0.069	0.495817	57.723	0.464436	2.56753	388.935	68.8622	5.61919	3.17931	22.296	2.0303	0.0103522	0	0	0	0	0	0	0	0	0	0	0	0	0	0	0	0	1.607	0	0	0	0	0	0	0	0	157.267	3100.21
1855	0.071	0.493679	58.1436	0.463279	2.62295	389.426	68.9071	5.64481	3.1995	22.3597	2.03251	0.0103526	0	0	0	0	0	0	0	0	0	0	0	0	0	0	0	0	1.657	0	0	0	0	0	0	0	0	157.267	3100.21
1856	0.076	0.498935	58.5641	0.467293	2.67837	389.918	68.9519	5.67043	3.21969	22.4233	2.06176	0.0103531	0	0	0	0	0	0	0	0	0	0	0	0	0	0	0	0	1.712	0	0	0	0	0	0	0	0	157.267	3100.21
1857	0.077	0.504232	58.9847	0.471264	2.73379	390.409	68.9967	5.69605	3.23988	22.487	2.07845	0.0103535	0	0	0	0	0	0	0	0	0	0	0	0	0	0	0	0	1.765	0	0	0	0	0	0	0	0	157.267	3100.21
1858	0.078	0.509233	59.4052	0.475031	2.78921	390.9	69.0416	5.72167	3.26007	22.5506	2.0943	0.0103539	0	0	0	0	0	0	0	0	0	0	0	0	0	0	0	0	1.815	0	0	0	0	0	0	0	0	157.267	3100.21
1859	0.083	0.514254	59.8258	0.478766	2.84462	391.392	69.0864	5.74729	3.28025	22.6143	2.12297	0.0103544	0	0	0	0	0	0	0	0	0	0	0	0	0	0	0	0	1.87	0	0	0	0	0	0	0	0	157.267	3100.21
1860	0.091	0.518967	60.2464	0.482577	2.90004	391.883	69.1312	5.77291	3.30044	22.6779	2.16198	0.0103548	0	0	0	0	0	0	0	0	0	0	0	0	0	0	0	0	1.923	0	0	0	0	0	0	0	0	157.267	3100.21
1861	0.095	0.528224	59.6145	0.504995	2.99268	392.896	69.269	5.81284	3.32441	22.7345	2.27359	0.010355	0	0	0	0	0	0	0	0	0	0	0	0	0	0	0	0	1.973	0	0	0	0	0	0	0	0	157.267	3100.21
1862	0.097	0.473717	58.9826	0.471113	3.08532	393.909	69.4069	5.85276	3.34838	22.7911	2.15582	0.0103551	0	0	0	0	0	0	0	0	0	0	0	0	0	0	0	0	2.028	0	0	0	0	0	0	0	0	157.267	3100.21
1863	0.104	0.473749	58.3507	0.474449	3.17795	394.922	69.5447	5.89268	3.37235	22.8478	2.19233	0.0103553	0	0	0	0	0	0	0	0	0	0	0	0	0	0	0	0	2.081	0	0	0	0	0	0	0	0	157.267	3100.21
1864	0.112	0.474138	57.7188	0.477858	3.27059	395.935	69.6826	5.9326	3.39632	22.9044	2.22994	0.0103555	0	0	0	0	0	0	0	0	0	0	0	0	0	0	0	0	2.134	0	0	0	0	0	0	0	0	157.267	3100.21
1865	0.119	0.474795	57.0869	0.48145	3.36323	396.948	69.8204	5.97253	3.42029	22.961	2.26553	0.0103556	0	0	0	0	0	0	0	0	0	0	0	0	0	0	0	0	2.184	0	0	0	0	0	0	0	0	157.267	3100.21
1866	0.122	0.474912	56.455	0.484205	3.45587	397.961	69.9582	6.01245	3.44426	23.0176	2.2872	0.0103558	0	0	0	0	0	0	0	0	0	0	0	0	0	0	0	0	2.239	0	0	0	0	0	0	0	0	157.267	3100.21
1867	0.130223	0.473384	55.8231	0.484723	3.5485	398.974	70.0961	6.05237	3.46823	23.0742	2.31876	0.010356	0	0	0	0	0	0	0	0	0	0	0	0	0	0	0	0	2.291	0	0	0	0	0	0	0	0	157.267	3100.21
1868	0.135252	0.471983	55.1912	0.485953	3.64114	399.987	70.2339	6.09229	3.4922	23.1308	2.33718	0.0103561	0	0	0	0	0	0	0	0	0	0	0	0	0	0	0	0	2.341	0	0	0	0	0	0	0	0	157.267	3100.21
1869	0.142281	0.470485	54.5593	0.486862	3.73378	401	70.3717	6.13222	3.51617	23.1875	2.36281	0.0103563	0	0	0	0	0	0	0	0	0	0	0	0	0	0	0	0	2.386	0	0	0	0	0	0	0	0	157.267	3100.21
1870	0.147311	0.469334	53.9274	0.487744	3.82642	402.013	70.5096	6.17214	3.54014	23.2441	2.38241	0.0103565	0	0	0	0	0	0	0	0	0	0	0	0	0	0	0	0	2.452	0	0	0	0	0	0	0	0	157.267	3100.21
1871	0.15634	0.487325	56.6839	0.585016	3.99317	403.032	70.6533	6.21717	3.56245	23.2838	2.86067	0.0103569	0	0	0	0	0	0	0	0	0	0	0	0	0	0	0	0	2.505	0	0	0	0	0	0	0	0	157.267	3100.21
1872	0.173369	0.566964	59.4403	0.66674	4.15992	404.051	70.7971	6.26219	3.58477	23.3236	3.24017	0.0103573	0	0	0	0	0	0	0	0	0	0	0	0	0	0	0	0	2.557	0	0	0	0	0	0	0	0	157.267	3100.21
1873	0.184398	0.576901	62.1968	0.696371	4.32667	405.071	70.9408	6.30722	3.60708	23.3634	3.40336	0.0103577	0	0	0	0	0	0	0	0	0	0	0	0	0	0	0	0	2.61	0	0	0	0	0	0	0	0	157.267	3100.21
1874	0.174428	0.583284	64.9533	0.70875	4.49342	406.09	71.0846	6.35225	3.62939	23.4031	3.42716	0.0103581	0	0	0	0	0	0	0	0	0	0	0	0	0	0	0	0	2.663	0	0	0	0	0	0	0	0	157.267	3100.21
1875	0.188457	0.58997	67.7097	0.720343	4.66018	407.109	71.2283	6.39727	3.6517	23.4429	3.51731	0.0103585	0	0	0	0	0	0	0	0	0	0	0	0	0	0	0	0	2.85	0	0	0	0	0	0	0	0	157.267	3100.21
1876	0.191486	0.596392	70.4662	0.745243	4.82693	408.128	71.3721	6.4423	3.67401	23.4827	3.63755	0.0103589	0	0	0	0	0	0	0	0	0	0	0	0	0	0	0	0	2.989	0	0	0	0	0	0	0	0	157.267	3100.21
1877	0.194515	0.602623	73.2226	0.756332	4.99368	409.147	71.5158	6.48732	3.69633	23.5224	3.69585	0.0103593	0	0	0	0	0	0	0	0	0	0	0	0	0	0	0	0	3.13	0	0	0	0	0	0	0	0	157.267	3100.21
1878	0.196	0.609051	75.9791	0.766046	5.16043	410.166	71.6596	6.53235	3.71864	23.5622	3.74565	0.0103597	0	0	0	0	0	0	0	0	0	0	0	0	0	0	0	0	3.275	0	0	0	0	0	0	0	0	157.267	3100.21
1879	0.21	0.615348	78.7356	0.774911	5.32718	411.185	71.8033	6.57738	3.74095	23.602	3.83041	0.0103602	0	0	0	0	0	0	0	0	0	0	0	0	0	0	0	0	3.396	0	0	0	0	0	0	0	0	157.267	3100.21
1880	0.236	0.621243	81.492	0.784121	5.49393	412.204	71.9471	6.6224	3.76326	23.6417	3.95202	0.0103606	0	0	0	0	0	0	0	0	0	0	0	0	0	0	0	0	3.573	0	0	0	0	0	0	0	0	157.267	3100.21
1881	0.243	0.648873	84.3595	0.811578	5.76232	413.256	72.0998	6.67595	3.79257	23.6754	4.07131	0.0103613	0	0	0	0	0	0	0	0	0	0	0	0	0	0	0	0	3.726	0	0	0	0	0	0	0	0	157.267	3100.21
1882	0.256	0.604664	87.2269	0.78526	6.03071	414.308	72.2526	6.72949	3.82188	23.7092	4.01987	0.010362	0	0	0	0	0	0	0	0	0	0	0	0	0	0	0	0	3.883	0	0	0	0	0	0	0	0	157.267	3100.21
1883	0.272	0.608518	90.0943	0.792556	6.2991	415.36	72.4053	6.78304	3.85119	23.7429	4.09853	0.0103627	0	0	0	0	0	0	0	0	0	0	0	0	0	0	0	0	4.043	0	0	0	0	0	0	0	0	157.267	3100.21
1884	0.275	0.612128	92.9618	0.798751	6.56748	416.412	72.5581	6.83658	3.8805	23.7766	4.13334	0.0103634	0	0	0	0	0	0	0	0	0	0	0	0	0	0	0	0	4.233	0	0	0	0	0	0	0	0	157.267	3100.21
1885	0.277	0.615236	95.8292	0.804534	6.83587	417.464	72.7108	6.89012	3.90981	23.8103	4.16461	0.0103642	0	0	0	0	0	0	0	0	0	0	0	0	0	0	0	0	4.427	0	0	0	0	0	0	0	0	157.267	3100.21
1886	0.281	0.617144	98.6966	0.826194	7.10426	418.517	72.8636	6.94367	3.93912	23.844	4.27589	0.0103649	0	0	0	0	0	0	0	0	0	0	0	0	0	0	0	0	4.625	0	0	0	0	0	0	0	0	157.267	3100.21
1887	0.295	0.616163	101.564	0.832196	7.37264	419.569	73.0163	6.99721	3.96843	23.8777	4.35318	0.0103656	0	0	0	0	0	0	0	0	0	0	0	0	0	0	0	0	4.827	0	0	0	0	0	0	0	0	157.267	3100.21
1888	0.327	0.614734	104.431	0.837058	7.64103	420.621	73.169	7.05076	3.99774	23.9115	4.47487	0.0103663	0	0	0	0	0	0	0	0	0	0	0	0	0	0	0	0	5.033	0	0	0	0	0	0	0	0	157.267	3100.21
1889	0.327	0.6132	107.299	0.84144	7.90942	421.673	73.3218	7.1043	4.02704	23.9452	4.49842	0.010367	0	0	0	0	0	0	0	0	0	0	0	0	0	0	0	0	5.27	0	0	0	0	0	0	0	0	157.267	3100.21
1890	0.356	0.611754	110.166	0.845525	8.1778	422.725	73.4745	7.15784	4.05635	23.9789	4.6037	0.0103678	0	0	0	0	0	0	0	0	0	0	0	0	0	0	0	0	5.485	0	0	0	0	0	0	0	0	157.267	3100.21
1891	0.372	0.610249	111.524	0.850982	8.56737	424.293	73.7003	7.23586	4.08828	24.0114	4.68307	0.0103687	0	0	0	0	0	0	0	0	0	0	0	0	0	0	0	0	5.731	0	0	0	0	0	0	0	0	157.267	3100.21
1892	0.374	0.623191	112.881	0.85742	8.95694	425.861	73.9261	7.31388	4.12022	24.0439	4.75516	0.0103697	0	0	0	0	0	0	0	0	0	0	0	0	0	0	0	0	6.01	0	0	0	0	0	0	0	0	157.267	3100.21
1893	0.37	0.624403	114.238	0.864758	9.34651	427.429	74.152	7.3919	4.15215	24.0763	4.82174	0.0103706	0	0	0	0	0	0	0	0	0	0	0	0	0	0	0	0	6.267	0	0	0	0	0	0	0	0	157.267	3100.21
1894	0.383	0.640367	115.595	0.872945	9.73608	428.997	74.3778	7.46992	4.18408	24.1088	4.88457	0.0103716	0	0	0	0	0	0	0	0	0	0	0	0	0	0	0	0	6.529	0	0	0	0	0	0	0	0	157.267	3100.21
1895	0.406	0.644419	116.953	0.881882	10.1256	430.565	74.6036	7.54794	4.21601	24.1413	4.94542	0.0103726	0	0	0	0	0	0	0	0	0	0	0	0	0	0	0	0	6.824	0	0	0	0	0	0	0	0	157.267	3100.21
1896	0.419	0.646278	118.31	0.891418	10.5152	432.133	74.8294	7.62596	4.24794	24.1738	5.00605	0.0103735	0	0	0	0	0	0	0	0	0	0	0	0	0	0	0	0	7.151	0	0	0	0	0	0	0	0	157.267	3100.21
1897	0.44	0.649564	119.667	0.901402	10.9048	433.701	75.0552	7.70398	4.27987	24.2063	5.06823	0.0103745	0	0	0	0	0	0	0	0	0	0	0	0	0	0	0	0	7.432	0	0	0	0	0	0	0	0	157.267	3100.21
1898	0.465	0.651001	121.025	0.911681	11.2943	435.269	75.281	7.782	4.3118	24.2387	5.13374	0.0103754	0	0	0	0	0	0	0	0	0	0	0	0	0	0	0	0	7.798	0	0	0	0	0	0	0	0	157.267	3100.21
1899	0.507	0.652204	122.382	0.922105	11.6839	436.837	75.5068	7.86002	4.34373	24.2712	5.20432	0.0103764	0.959119	0	0	0	0	0	0	0	0	0	0	0	0	0	0	0	8.119	0	0	0	0	0	0	0	0	157.267	3100.21
1900	0.534	0.653206	123.739	0.932522	12.0735	438.405	75.7326	7.93804	4.37566	24.3037	5.28176	0.0103773	0.0505758	0	0	0	0	0	0	0	0	0	0	0	0	0	0	0	8.473	0	0	0	0	0	0	0	0	157.267	3100.21
1901	0.552	0.702943	124.841	0.944667	12.6299	439.892	75.9205	8.04414	4.41738	24.3365	5.36856	0.0103797	0.0532377	0	0	0	0	0	0	0	0	0	0	0	0	0	0	0	8.592	0	0	0	0	0	0	0	0	157.267	3100.21
1902	0.566	0.702974	125.944	0.959931	13.1863	441.378	76.1084	8.15023	4.45911	24.3693	5.46467	0.0103821	0.0560397	0	0	0	0	0	0	0	0	0	0	0	0	0	0	0	8.762	0	0	0	0	0	0	0	0	157.267	3100.21
1903	0.617	0.726671	127.046	0.977647	13.7427	442.865	76.2962	8.25633	4.50083	24.4021	5.56792	0.0103845	0.0589892	0	0	0	0	0	0	0	0	0	0	0	0	0	0	0	8.906	0	0	0	0	0	0	0	0	157.267	3100.21
1904	0.624	0.748293	128.149	0.997229	14.2991	444.351	76.4841	8.36242	4.54255	24.4349	5.6762	0.0103868	0.0620939	0	0	0	0	0	0	0	0	0	0	0	0	0	0	0	9.102	0	0	0	0	0	0	0	0	157.267	3100.21
1905	0.663	0.769815	129.251	1.01813	14.8555	445.838	76.672	8.46851	4.58427	24.4677	5.78736	0.0103892	0.065362	0	0	0	0	0	0	0	0	0	0	0	0	0	0	0	9.623	0	0	0	0	0	0	0	0	157.267	3100.21
1906	0.707	0.796534	130.354	1.03974	15.4119	447.324	76.8598	8.57461	4.62599	24.5005	5.89926	0.0103916	0.0688021	0	0	0	0	0	0	0	0	0	0	0	0	0	0	0	12.093	0	0	0	0	0	0	0	0	157.267	3100.21
1907	0.784	0.803763	131.456	1.06146	15.9683	448.811	77.0477	8.6807	4.66771	24.5333	6.00977	0.010394	0.0724232	0	0	0	0	0	0	0	0	0	0	0	0	0	0	0	12.363	0	0	0	0	0	0	0	0	157.267	3100.21
1908	0.75	0.811413	132.559	1.08267	16.5247	450.297	77.2356	8.78679	4.70944	24.5661	6.11675	0.0103964	0.076235	0	0	0	0	0	0	0	0	0	0	0	0	0	0	0	12.633	0	0	0	0	0	0	0	0	157.267	3100.21
1909	0.785	0.817378	133.661	1.10278	17.081	451.784	77.4235	8.89289	4.75116	24.5989	6.21805	0.0103987	0.0802474	0	0	0	0	0	0	0	0	0	0	0	0	0	0	0	12.903	0	0	0	0	0	0	0	0	157.267	3100.21
1910	0.819	0.821982	134.764	1.12118	17.6374	453.27	77.6113	8.99898	4.79288	24.6317	6.31156	0.0104011	0.0844709	0	0	0	0	0	0	0	0	0	0	0	0	0	0	0	13.146	0	0	0	0	0	0	0	0	157.267	3100.21
1911	0.836	0.778894	135.969	1.13897	17.8214	451.76	77.2727	9.05696	4.79495	24.4275	6.39756	0.0104064	0.0889167	0	0	0	0	0	0	0	0	0	0	0	0	0	0	0	14.007	0	0	0	0	0	0	0	0	157.267	3100.21
1912	0.879	0.747848	137.175	1.15756	18.0054	450.249	76.9341	9.11494	4.79702	24.2232	6.47866	0.0104117	0.0935966	0	0	0	0	0	0	0	0	0	0	0	0	0	0	0	19.895	0	0	0	0	0	0	0	0	157.267	3100.21
1913	0.943	0.72298	138.381	1.17675	18.1894	448.739	76.5955	9.17292	4.7991	24.0189	6.55615	0.010417	0.0985227	0	0	0	0	0	0	0	0	0	0	0	0	0	0	0	19.025	0	0	0	0	0	0	0	0	157.267	3100.21
1914	0.85	0.714792	139.587	1.19626	18.3734	447.228	76.2569	9.23089	4.80117	23.8146	6.63132	0.0104222	0.103708	0	0	0	0	0	0	0	0	0	0	0	0	0	0	0	11.082	0	0	0	0	0	0	0	0	157.267	3100.21
1915	0.838	0.70575	140.793	1.21584	18.5574	445.718	75.9183	9.28887	4.80324	23.6104	6.70546	0.0104275	0.109166	0	0	0	0	0	0	0	0	0	0	0	0	0	0	0	11.216	0	0	0	0	0	0	0	0	157.267	3100.21
1916	0.901	0.708116	141.999	1.23532	18.7413	444.208	75.5796	9.34685	4.80532	23.4061	6.77987	0.0104328	0.114912	0	0	0	0	0	0	0	0	0	0	0	0	0	0	0	18.614	0	0	0	0	0	0	0	0	157.267	3100.21
1917	0.955	0.711196	143.204	1.25452	18.9253	442.697	75.241	9.40483	4.80739	23.2018	6.85582	0.0104381	0.12096	0	0	0	0	0	0	0	0	0	0	0	0	0	0	0	22.143	0	0	0	0	0	0	0	0	157.267	3100.21
1918	0.936	0.714304	144.41	1.27326	19.1093	441.187	74.9024	9.46281	4.80946	22.9976	6.93462	0.0104434	0.127326	0	0	0	0	0	0	0	0	0	0	0	0	0	0	0	22.696	0	0	0	0	0	0	0	0	157.267	3100.21
1919	0.806	0.719654	145.616	1.29138	19.2933	439.676	74.5638	9.52079	4.81153	22.7933	7.01756	0.0104487	0.134028	0	0	0	0	0	0	0	0	0	0	0	0	0	0	0	23.196	0	0	0	0	0	0	0	0	157.267	3100.21
1920	0.932	0.721283	146.822	1.30869	19.4773	438.166	74.2252	9.57877	4.81361	22.589	7.10592	0.010454	0.141082	0	0	0	0	0	0	0	0	0	0	0	0	0	0	0	23.802	0	0	0	0	0	0	0	0	157.267	3100.21
1921	0.803	0.757417	147.862	1.32579	19.8639	440.996	74.6803	9.6457	4.79871	22.6052	7.20195	0.0104523	0.148507	0	0	0	0	0	0	0	0	0	0	0	0	0	0	0	24.304	0	0	0	0	0	0	0	0	157.267	3100.21
1922	0.845	0.747941	148.901	1.34327	20.2505	443.825	75.1354	9.71264	4.78382	22.6215	7.30583	0.98418	0.156323	0	0	0	0	0	0	0	0	0	0	0	0	0	0	0	24.563	0	0	0	0	0	0	0	0	157.267	3100.21
1923	0.97	0.753288	149.941	1.36094	20.6371	446.655	75.5905	9.77958	4.76893	22.6377	7.41577	1.16488	0.164551	0	0	0	0	0	0	0	0	0	0	0	0	0	0	0	25.35	0	0	0	0	0	0	0	0	157.267	3100.21
1924	0.963	0.756861	150.981	1.37962	21.0237	449.484	76.0456	9.84651	4.75404	22.6539	7.52998	1.22567	0.173211	0	0	0	0	0	0	0	0	0	0	0	0	0	0	0	25.878	0	0	0	0	0	0	0	0	157.267	3100.21
1925	0.975	0.758089	152.02	1.3999	21.4104	452.314	76.5007	9.91345	4.73914	22.6701	7.64667	1.28964	0.182328	0	0	0	0	0	0	0	0	0	0	0	0	0	0	0	28.827	0	0	0	0	0	0	0	0	157.267	3100.21
1926	0.983	0.761483	153.06	1.42119	21.797	455.143	76.9558	9.98039	4.72425	22.6863	7.76406	1.35699	0.191924	0	0	0	0	0	0	0	0	0	0	0	0	0	0	0	29.446	0	0	0	0	0	0	0	0	157.267	3100.21
1927	1.062	0.797183	154.1	1.44292	22.1836	457.973	77.4109	10.0473	4.70936	22.7026	7.88034	1.42788	0.202025	0	0	0	0	0	0	0	0	0	0	0	0	0	0	0	30.065	0	0	0	0	0	0	0	0	157.267	3100.21
1928	1.065	0.799671	155.14	1.4645	22.5702	460.803	77.866	10.1143	4.69447	22.7188	7.99374	1.5025	0.212658	0	0	0	0	0	0	0	0	0	0	0	0	0	0	0	30.685	0	0	0	0	0	0	0	0	157.267	3100.21
1929	1.145	0.824226	156.179	1.48535	22.9569	463.632	78.3211	10.1812	4.67957	22.735	8.10245	1.58105	0.223851	0	0	0	0	0	0	0	0	0	0	0	0	0	0	0	31.573	0	0	0	0	0	0	0	0	157.267	3100.21
1930	1.053	0.89588	157.219	1.50489	23.3435	466.462	78.7762	10.2481	4.66468	22.7512	8.2047	1.66374	0.235632	0	0.74682	0	0	0	0	0	0	0	0	0	0	0	0	0	31.933	0	0	0	0	0	0	0	0	157.267	3100.21
1931	0.94	0.903341	158.345	1.52262	23.755	468.031	78.9094	10.3025	4.6671	22.7486	8.29855	1.75078	0.248034	0	0.0676905	0	0	0	0	0	0	0	0	0	0.097	0	0	0	32.553	0	0	0	0	0	0	0	0	157.267	3100.21
1932	0.847	0.812226	159.472	1.53852	24.1664	469.6	79.0427	10.3568	4.66951	22.7459	8.38498	1.8424	0.261089	0	0.0735767	0	0	0	0	0	0	0	0	0	0.097	0	0	0	33.979	0	0	0	0	0	0	0	0	157.267	3100.21
1933	0.893	0.808588	160.598	1.55267	24.5779	471.169	79.176	10.4111	4.67193	22.7433	8.46663	1.93884	0.27483	0	0.0799748	0	0	0	0	0	0	0	0	0	0.097	0	0	0	41.893	0	0	0	0	0	0	0	0	157.267	3100.21
1934	0.973	0.796863	161.725	1.56531	24.9894	472.738	79.3092	10.4655	4.67434	22.7407	8.54609	2.04035	0.289295	0	0.0869292	0	0	0	0	0	0	0	0	0	0.194	0	0.117	0	42.817	0	0	0	0	0	0	0	0	157.267	3100.21
1935	1.027	0.794716	162.851	1.57712	25.4009	474.307	79.4425	10.5198	4.67676	22.738	8.62599	2.14721	0.304521	0	0.0944883	0	0	0	0	0	0	0	0	0	0.291	0	0.117	0	43.74	0	0	0	0	0	0	0	0	157.267	3100.21
1936	1.13	0.8013	163.977	1.58892	25.8123	475.876	79.5758	10.5741	4.67917	22.7354	8.70894	2.2597	0.320548	0	0.102705	0	0	0	0	0	0	0	0	0	0.485	0	0.117	0	44.664	0	0	0	0	0	0	0	0	157.267	3100.21
1937	1.209	0.779699	165.104	1.60151	26.2238	477.445	79.709	10.6285	4.68159	22.7327	8.79755	2.3781	0.337419	0	0.111636	0	0	0	0	0	0	0	0	0	0.776	0	0.234	0	45.588	0	0	0	0	0	0	0	0	157.267	3100.21
1938	1.142	0.781882	166.23	1.61572	26.6353	479.014	79.8423	10.6828	4.684	22.7301	8.89443	2.50274	0.355178	0	0.121343	0	0	0	0	0	0	0	0	0.161	1.164	0	0.234	0	46.512	0	0.165	0	0	0	0	0	0	157.267	3100.21
1939	1.192	0.779444	167.357	1.63235	27.0468	480.583	79.9756	10.7371	4.68642	22.7274	9.00221	2.63393	0.373872	0	0.131895	0	0	0	0	0	0	0	0	0.161	1.649	0	0.351	0	47.436	0	0.33	0	0	0	0	0	0	157.267	3100.21
1940	1.299	0.766832	168.483	1.65224	27.4583	482.152	80.1088	10.7914	4.68883	22.7248	9.12349	2.77203	0.393549	0	0.143364	0	0	0	0	0	0	0	0	0.161	2.231	0	0.468	0	50.781	0	0.496	0	0	0	0	0	0	157.267	3100.21
1941	1.334	0.750365	170.03	1.7002	27.8404	488.558	81.2433	11.1234	4.69324	22.6876	9.26539	2.91741	0.414262	0	0.155833	0	0	0	0	0	0	0	0	0.161	2.91	0	0.585	0	52.603	0	0.661	0	0	0	0	0	0	157.267	3100.21
1942	1.342	0.76905	171.578	1.79386	28.2226	494.963	82.3778	11.4554	4.69766	22.6505	9.43212	3.07043	0.394683	0	0.169386	0	0	0	0	0	0	0	0	0.161	3.589	0	0.819	0	53.918	0	0.826	0	0	0	0	0	0	157.267	3100.21
1943	1.391	0.763766	173.126	1.92316	28.6048	501.369	83.5123	11.7873	4.70207	22.6133	9.62193	3.23151	0.378322	0	0.184119	0	0	0	0	0	0	0	0	0.322	4.365	0	1.17	0	54.705	0	0.991	0	0	0	0	0	0	157.267	3100.21
1944	1.383	0.768399	174.673	2.08668	28.987	507.774	84.6468	12.1193	4.70648	22.5762	9.83308	3.40106	0.364076	0	0.200132	0	0	0	0	0	0	0	0	0.322	5.917	0	1.521	0	55.75	0	1.157	0	0	0	0	0	0	157.267	3100.21
1945	1.16	0.769147	176.221	2.2804	29.3692	514.18	85.7813	12.4513	4.71089	22.539	10.0638	3.57954	0.351947	0	0.217538	0	0	0	0	0	0	0	0	0.483	7.76	1.868	3.861	0	56.796	0	1.322	0	0	0	0	0	0	157.267	3100.21
1946	1.238	0.842149	177.768	2.49036	29.7513	520.585	86.9158	12.7832	4.71531	22.5019	10.3124	3.76742	0.341933	0	0.236458	0	0	0	0	0	0	0	0	0.966	13.483	4.203	6.318	0	59.187	0	1.487	0	0	0	0	0	0	157.267	3100.21
1947	1.392	0.87018	179.316	2.7026	30.1335	526.991	88.0503	13.1152	4.71972	22.4647	10.577	3.96518	0.334036	0	0.257024	0	0	0	0	0	0	0	0	2.093	20.661	5.137	6.903	0	67.278	0	1.652	0	0	0	0	0	0	157.267	3100.21
1948	1.469	0.87513	180.863	2.90316	30.5157	533.396	89.1848	13.4472	4.72413	22.4276	10.8561	4.17335	0.328255	0	0.279378	0	0	0	0	0	0	0	0	3.703	24.056	6.071	7.254	0	68.369	0	1.817	0	0	0	0	0	0	157.267	3100.21
1949	1.419	0.882126	182.411	3.07807	30.8979	539.802	90.3193	13.7791	4.72855	22.3904	11.1477	4.39247	0.32459	0	0.303676	0	0	0	0	0	0	0	0	6.118	25.802	6.538	7.722	0	74.34	0	1.983	0	0	0	0	0	0	157.267	3100.21
1950	1.63	0.892335	183.959	3.21338	31.28	546.207	91.4538	14.1111	4.73296	22.3532	11.4501	4.62313	0.323043	0	0.330088	0	0	0	0	0	0	0	0.261908	8.855	28.615	7.939	8.073	0	65	0	2.148	0	0	0	0	0	0	157.267	3100.21
1951	1.768	1.08852	189.11	3.3186	32.8669	558.446	94.8484	14.5285	4.77333	22.5413	11.7846	4.86592	0.323612	0	0.358782	0	0	0	0	0	0	0	0.26199	8.158	33.854	1.889	7.102	0	65	0	2.313	0	0	0	0	0	0	157.267	3100.21
1952	1.796	1.10964	194.262	3.41111	34.4538	570.685	98.2429	14.9459	4.8137	22.7293	12.1691	5.12148	0.326299	0	0.389971	0	0	0	0	0	0	0	0.262072	11.742	35.2	2.139	7.288	0	70	0	2.478	0	0	0	0	0	0	157.927	3117.78
1953	1.841	1.10452	199.413	3.48872	36.0407	582.924	101.638	15.3633	4.85407	22.9174	12.5966	5.3905	0.331104	0	0.42387	0	0	0	0	0	0	0	0.262153	15.985	39.582	2.437	7.43	0	75	0	2.644	0	0	0	0	0	0	158.604	3137.15
1954	1.865	1.15214	204.565	3.55435	37.6277	595.163	105.032	15.7807	4.89444	23.1054	13.0603	5.67367	0.338026	0	0.460717	0	0	0	0	0	0	0	0.262235	19.855	44.802	2.785	7.431	0	80	1.214	2.809	0	0	0	0	0	0	159.3	3158.22
1955	2.043	1.19119	209.716	3.61411	39.2146	607.401	108.427	16.1981	4.93481	23.2935	13.5532	5.97175	0.347066	0	0.500767	0	0	0	0	0	0	0	0.262317	24.604	50.343	3.233	7.388	0	85	3.512	2.974	0	0	0	0	0	0	160.014	3180.75
1956	2.178	1.24469	214.868	3.67068	40.8015	619.64	111.821	16.6154	4.97518	23.4815	14.0685	6.28552	0.358224	0	0.544298	0	0	0	0	0	0	0	0.262399	30.685	58.664	3.73	7.302	0	90	6.224	3.48	0	0	0	0	0	0	160.748	3204.5
1957	2.27	1.27187	220.019	3.72673	42.3884	631.879	115.216	17.0328	5.01555	23.6696	14.5993	6.6158	0.3715	0	0.591613	0	0	0	0	0	0	0	0.262481	34.375	66.689	4.227	7.25	0	95	9.469	4.251	0	0	0	0	0	0	161.502	3229.07
1958	2.33	1.31958	225.171	3.78495	43.9753	644.118	118.61	17.4502	5.05592	23.8576	15.1387	6.96346	0.386895	0	0.643041	0	0	0	0	0	0	0	0.262563	32.235	69.93	4.824	7.221	0	100	10.772	6.008	0	0	0	0	0	0	162.277	3254.04
1959	2.462	1.2036	230.322	3.848	45.5622	656.357	122.005	17.8676	5.09629	24.0457	15.6798	7.32943	0.404409	0	0.69894	0	0	0	0	0	0	0	0.262644	33.015	78.149	5.57	7.176	0	105	14.717	7.06	0	0	0	0	0	0	163.073	3278.97
1960	2.577	1.19228	235.474	3.91858	47.1491	668.596	125.4	18.285	5.13665	24.2337	16.2157	7.71465	0.424041	0	0.759698	0	0	0	0	0	0	0	0.524634	43.342	93.09	6.366	6.6	0	110	18.348	7.659	0	0	0	0	0	0	163.892	3303.39
1961	2.594	1.24432	238.522	4.02401	48.7708	682.676	129.241	18.9591	5.1796	24.5022	16.7593	8.12016	0.445793	0	0.825763	0	0	0	0	0	0	0	0.524798	55.722	104.6	7.212	6.88	0	115	20.077	9.426	0	0	0	0	0	0	164.735	3326.86
1962	2.7	1.23557	241.571	4.18365	50.3925	696.756	133.083	19.6333	5.22254	24.7707	17.326	8.54701	0.469664	0	0.897574	0	0	0	0	0	0	0	0.786869	69.881	120.668	8.248	7.168	0	119	28.22	11.573	0	0	0	0	0	0	165.601	3349.07
1963	2.848	1.24429	244.619	4.38831	52.0142	710.836	136.925	20.3074	5.26549	25.0392	17.9133	14.985	0.495655	0	0.97563	0	0	0	0	0	0	0	0.525207	85.539	141.744	9.476	7.421	0	123	31.46	14.396	0	0	0.005	0.001	0.001	0.007	166.493	3369.71
1964	3.008	1.25159	247.668	4.63747	53.6359	724.916	140.766	20.9815	5.30843	25.3077	18.5183	13.4881	0.523766	0	1.06047	0	0	0	0	0	0	0	0.525371	101.538	164.921	10.853	7.692	0.225	127	36.197	16.782	0	0	0.014	0.002	0.003	0.014	167.41	3388.63
1965	3.145	1.26426	250.717	4.89682	55.2576	738.995	144.608	21.6557	5.35138	25.5762	19.1382	13.4884	0.553997	0	1.1527	0	0	0	0	0	0	0	0.525534	115.75	185.933	12.426	7.975	0.444	127	48.096	20.514	0	0	0.032	0.005	0.005	0.028	168.355	3405.7
1966	3.305	1.2937	253.765	5.19558	56.8793	753.075	148.45	22.3298	5.39432	25.8447	19.7704	13.4886	0.586348	0	1.25294	0	0	0	0	0	0	0	0.525698	129.623	208.571	14.246	8.305	0.633	127	69.567	24.512	0	0	0.058	0.008	0.008	0.048	169.328	3420.92
1967	3.411	1.29763	256.814	5.45748	58.501	767.155	152.292	23.0039	5.43727	26.1132	20.412	13.4889	0.620819	0	1.3619	0	0	0	0	0	0	0	1.04968	147.119	235.269	16.313	8.623	0.825	127	94.137	29.817	0	0	0.1	0.013	0.013	0.075	170.329	3434.34
1968	3.588	1.2352	259.863	5.61974	60.1227	781.235	156.133	23.6781	5.48021	26.3817	21.0604	13.4892	0.657411	0	1.48033	0	0	0	0	0	0	0	0.526189	167.586	263.953	18.678	8.974	1.043	127	114.767	36.216	0	0	0.158	0.019	0.016	0.109	171.36	3446.07
1969	3.8	1.23839	262.911	5.78483	61.7444	795.315	159.975	24.3522	5.52316	26.6502	21.7128	13.4894	0.696124	0	1.60907	0	0	0	0	0	0	0	0.788261	194.513	294.486	21.388	9.344	1.283	127	134.875	39.381	0	0	0.229	0.026	0.024	0.15	172.423	3456.22
1970	4.076	1.19711	265.96	5.93688	63.3661	809.395	163.817	25.0263	5.5661	26.9187	22.3665	11.9926	0.736958	0	1.74899	0	0	0.0554463	0	0.356404	0	0	0.788506	221.119	321.743	24.494	9.687	1.537	127	141.326	43.652	0	0	0.329	0.035	0.043	0.197	173.518	3464.95
1971	4.231	1.07089	270.025	5.60498	63.5459	825.183	167.161	25.8097	5.70387	27.2218	23.0425	13.49	0.779913	0	1.90113	0	0	0.0573185	0	0.363166	0	0	1.05066	243.137	346.609	28.094	10.052	1.803	127	170.133	47.746	0	0.613	0.461	0.044	0.1	0.252	174.646	3472.41
1972	4.399	1.04706	274.09	5.91813	63.7256	840.97	170.506	26.593	5.84164	27.5248	23.7556	13.4902	0.82499	0	2.06649	0	0	0.0591929	0	0.369936	0	0	0.789079	274.26	378.471	32.236	10.471	2.127	127	214.168	54.79	0	0.613	0.63	0.055	0.17	0.313	175.809	3478.74
1973	4.635	1.0331	278.155	6.0449	63.9053	856.758	173.851	27.3763	5.97941	27.8279	24.4941	13.4905	0.872189	0	2.24624	0	0	0.0610694	0	0.376713	0	0	1.05123	314.04	419.239	36.92	10.883	2.495	127	266.209	61.912	0	0.613	0.839	0.067	0.277	0.391	177.007	3484.11
1974	4.644	1.03874	282.22	5.9406	64.0851	872.546	177.195	28.1597	6.11718	28.1309	25.2459	11.9936	0.921509	0	2.44163	0	0	0.0629482	0	0.383499	0	0	1.05156	345.881	454.701	42.295	11.29	2.921	127	305.489	62.543	0	0.613	1.086	0.08	0.372	0.468	178.243	3488.63
1975	4.615	1.03159	286.285	6.14097	64.2648	888.333	180.54	28.943	6.25495	28.434	25.9992	13.491	0.972952	0	2.65401	0	0	0.0648291	0	0.390292	0	0	1.05189	335.741	442.834	48.505	11.734	3.391	127	308.992	70.487	0	0.613	1.365	0.095	0.524	0.544	179.517	3492.43
1976	4.883	1.09061	290.35	6.30426	64.4445	904.121	183.885	29.7263	6.39272	28.7371	26.742	13.4913	1.02652	0	2.88486	0	0	0.0667121	0	0.397093	0	0	1.57603	343.24	432.28	55.552	12.2	3.943	127	382.3	78.51	0	0.613	1.767	0.11	0.783	0.621	180.83	3495.62
1977	5.029	1.09399	294.415	6.5344	64.6243	919.908	187.229	30.5097	6.53049	29.0401	27.4625	11.9945	1.0822	0	3.56608	0	0	0.0685974	0	0.403902	0	0	1.83843	330.711	419.447	63.634	12.68	4.582	127	462.112	85.789	0	0.613	2.035	0.127	1.006	0.697	182.185	3498.28
1978	5.105	1.09037	298.48	6.61937	64.804	935.696	190.574	31.293	6.66826	29.3432	28.1487	13.4919	1.14001	0	3.7964	0	0	0.0704848	0	0.0542996	0	0	2.36282	359.009	424.498	72.896	13.168	5.337	127	587.319	92.012	0	0.613	2.454	0.145	1.253	0.774	183.581	3500.51
1979	5.387	1.06471	302.545	7.00777	64.9837	951.483	193.919	32.0763	6.80603	29.6462	28.7887	11.995	1.19995	0	4.02754	0	0	0.0723744	0	0.0543309	0	0	2.88737	274.357	357.266	83.489	13.661	6.228	127	489.712	99.321	0	0.613	2.928	0.161	1.548	0.85	185.022	3502.36
1980	5.332	1.02521	306.61	7.06139	65.1634	967.271	197.263	32.8597	6.9438	29.9493	29.3705	13.4924	1.262	0	4.2595	0	0	0.0188144	0	0.767209	0	0	3.15018	304.998	432.044	95.641	14.194	7.006	121.849	550.707	104.973	0	0.613	3.453	0.185	1.805	0.927	186.506	3503.91
1981	5.168	1.04486	310.013	6.84175	65.0439	980.445	199.799	33.3572	7.021	30.4563	29.9319	11.9955	1.32618	0	4.49216	0	0	0.0662884	0	0.780793	0	0	3.41307	289.529	386.347	104.421	14.121	7.743	110.093	505.097	106.406	0	1.25	3.946	0.206	2.139	1.003	188.038	3505.19
1982	5.127	1.19041	313.415	7.11899	64.9243	993.619	202.334	33.8548	7.09821	30.9634	30.5084	13.4929	1.39249	0	4.72561	0	0	0.0735941	0	0.0815283	0	0	3.67604	252.419	400.317	108.943	13.905	8.399	123.807	505.343	116.821	0	0.961	4.522	0.229	2.645	1.105	189.616	3506.26
1983	5.11	1.22552	316.817	7.2169	64.8048	1006.79	204.87	34.3524	7.17542	31.4705	31.0856	11.996	1.46092	0	4.95987	0	0	0.0734967	0	0.794366	0	0	3.93909	299.092	408.416	120.93	14.252	9.207	135.729	553.718	125.343	0	1.165	5.168	0.249	2.98	1.183	191.243	3507.15
1984	5.29	1.26008	320.22	7.04813	64.6852	1019.97	207.406	34.85	7.25262	31.9775	31.6489	11.9962	1.53147	0	5.19493	0	0	0.0182631	0	0.807943	0	0	3.94032	310.901	432.125	177.397	14.781	9.71	134.867	569.476	130.447	0	1.331	6.032	0.269	3.475	1.262	192.92	3507.88
1985	5.444	1.27534	323.623	7.01692	64.5656	1033.14	209.941	35.3475	7.32983	32.4846	32.1839	11.9965	1.60414	0	5.43079	0	0	-0.0806812	0	0.108674	0	0	4.72727	315.327	407.669	128.622	15.705	9.792	109.714	546.714	138.367	0	1.011	7.083	0.289	3.997	1.355	194.648	3508.5
1986	5.61	1.2872	327.025	7.07049	64.4461	1046.31	212.477	35.8451	7.40703	32.9917	32.6758	13.4939	1.67894	0	5.66746	0	0	0.075292	0	0.821507	0	0	4.99065	388.346	502.712	169.103	16.379	10.152	149.931	539.076	146.048	0	3.575	8.22	0.309	4.579	1.434	196.427	3509
1987	5.753	1.29401	330.427	7.46167	64.3265	1059.49	215.012	36.3427	7.48424	33.4988	33.1102	11.997	1.75587	0	5.90492	0	0	0.177805	0	1.54792	0	0	4.7303	387.277	453.238	250.222	16.667	10.807	115.608	647.608	162.883	0	3.773	9.656	0.329	5.109	1.504	198.259	3509.43
1988	5.964	1.31672	333.83	7.20251	64.207	1072.66	217.548	36.8403	7.56145	34.0058	33.4725	11.9972	1.83492	0	6.14318	0	0	0.181183	0	0.862227	0	0	4.99368	303.816	507.99	245.07	16.593	11.493	135.667	635.816	180.113	0	4.458	11.362	0.349	5.696	1.728	200.146	3509.77
1989	6.089	1.32364	337.232	7.33104	64.0874	1085.84	220.083	37.3378	7.63865	34.5129	33.7481	11.9975	1.91609	0	6.38225	0	0	0.188294	0.945058	0.875792	0	0	5.51905	301.477	385.52	204.109	15.725	12.26	118.146	564.767	186.15	0	6.174	11.605	0.369	5.482	1.73	202.087	3510.06
1990	6.144	1.31948	340.635	7.58568	63.9678	1099.01	222.619	37.8354	7.71586	35.02	33.9226	11.9977	2.07357	0	6.62182	0	0	0.185942	1.01015	0.88921	0	0	5.52077	291.464	405.617	203.131	14.022	12.363	143.171	694.142	195.69	0	11.322	11.702	0.389	5.119	1.73	204.082	3510.3
1991	6.235	1.38098	336.592	7.40236	62.9552	1095.91	221.419	37.8681	7.72475	35.0723	34.026	11.9979	2.37291	0	6.86218	0	0	0.190921	2.17764	0.902612	0.00471002	0	5.7844	190.405	309.884	198.928	13.243	12.135	70.607	573.576	204.801	0	16.556	11.426	0.409	4.094	1.735	206.133	3510.5
1992	6.118	1.30353	332.549	7.79893	61.9425	1092.81	220.22	37.9008	7.73365	35.1247	34.1135	11.9981	2.37315	0	7.10299	0	0	0.2889	4.20799	1.62865	0.00471003	0	5.7862	203.23	303.369	121.343	10.324	12.018	91.022	554.986	185.994	0	20.911	9.343	0.429	2.74	1.715	208.24	3510.66
1993	6.124	1.2981	328.507	7.3131	60.9298	1089.71	219.02	37.9335	7.74254	35.177	34.2079	11.9984	2.37338	0	7.34531	0	0	0.376816	8.41616	2.3686	0.18499	0	6.31181	144.94	228.999	67.857	8.322	11.681	85.436	372.232	188.092	23.101	22.5	10.23	0.509	3.344	1.7	210.402	3510.8
1994	6.242	1.2896	324.464	7.50728	59.9172	1086.61	217.821	37.9662	7.75143	35.2294	34.3318	11.9986	2.37362	0	7.58821	0	0	1.8251	21.3991	3.83476	0.18199	0	5.00424	127.137	232.722	61.065	6.105	11.011	77.289	244.236	179.101	33.844	25.599	9.105	0.589	4.75	1.68	212.619	3510.91
1995	6.372	1.27501	320.421	7.6191	58.9045	1083.51	216.621	37.9989	7.76033	35.2817	34.5081	10.5017	2.37386	0	10.2115	0	0	2.98022	29.7261	6.04096	0.0999948	0	6.05342	119.235	194.71	22.978	4.784	9.083	85.021	201.637	243.238	41.961	24.275	10.035	0.669	3.991	1.3	200.199	3511.01
1996	6.51	1.2511	316.378	7.65206	57.8919	1080.4	215.421	38.0316	7.76922	35.3341	34.9605	11.9991	2.37409	0	10.2482	0	0	3.41888	40.5849	6.14999	0.436978	0	6.05531	115.437	178.907	27.962	2.943	7.019	70.403	89.184	211.181	51.431	26.411	10.743	0.729	2.691	0.85	201.834	3511.08
1997	6.619	1.21814	312.335	7.90975	56.8792	1077.3	214.222	38.0642	7.77812	35.3864	35.8337	11.9993	2.37433	0	10.2844	0	0	5.35405	50.6436	6.25875	0.407978	0	4.48574	95.388	160.981	18.663	1.886	5.429	74.423	62.53	208.614	46.639	22.493	9.909	0.789	2.594	0.7	207.696	3511.08
1998	6.588	1.21484	308.293	7.89573	55.8665	1074.2	213.022	38.0969	7.78701	35.4388	37.0316	11.9996	2.37457	0	10.3207	0.0873054	0	7.20318	59.6521	6.36768	0.927952	0	4.74904	92.401	152.715	14.831	1.199	4.223	84.361	29.412	249.912	58.131	27.683	9.837	0.607	2.491	0.71	206.946	3511.08
1999	6.569	1.18279	304.25	7.52698	54.8539	1071.1	211.823	38.1296	7.79591	35.4911	38.4586	10.5027	2.3748	0	10.3577	0.785737	0	8.15317	67.044	6.47752	1.35393	0	6.32196	94.931	145.169	14.362	0.784	3.32	69.242	24.668	230.91	55.817	28.047	9.806	0.467	2.39	0.631	195.938	3511.08
2000	6.735	1.1488	300.207	7.4566	53.8412	1068	210.623	38.1623	7.8048	35.5435	40.0186	12.0001	2.3749	0.4624	10.3949	4	0	8.5381	75.0393	6.234	1.9509	17.9257	5.5382	99.227	140.712	17.777	0.567	2.609	74.132	18.584	229.638	55.602	26.296	8.834	0.328	2.295	0.562	186.206	3511.08
2001	6.8959	1.132	303.409	7.503	54.4191	1066.74	211.594	38.2888	7.8945	35.7143	40.3916	11.925	2.4345	0.4651	10.4328	5.3987	0.6471	9.0301	84.0409	7.4947	1.6449	19.7183	5.699	81.839	117.202	12.051	0.45	2.069	65.195	13.253	270.443	57.19	28.001	8.669	0.282	2.209	0.5	181.525	3511.08
2002	6.949	1.2317	306.579	7.5487	54.9961	1065.47	212.563	38.4153	7.9842	35.8845	40.7646	11.8481	2.4915	0.4058	10.4708	6.7975	1.294	9.8852	94.7161	8.7389	2.508	21.5109	5.8596	81.408	100.258	6.019	0.423	1.609	69.565	13.487	243.015	57.77	22.43	8.524	0.235	2.131	0.445	181.887	3511.08
2003	7.286	1.2257	309.716	7.5942	55.5716	1064.17	213.531	38.5418	8.0734	36.0543	41.1378	11.7693	2.5463	0.3939	10.5083	8.196	1.9411	12.0788	101.416	9.9776	3.341	23.3035	6.0201	90.865	107.745	2.604	0.37	1.288	69.381	8.444	252.962	48.801	23.232	7.77	0.189	2.057	0.396	177.539	3511.08
2004	7.6719	1.2429	312.824	7.6394	56.1461	1062.86	214.498	38.6684	8.1623	36.2232	41.5107	11.6885	2.599	0.4062	10.5454	9.5947	2.5882	12.5073	113.93	11.2136	4.269	25.096	6.1805	78.182	87.647	5.237	0.378	1.046	67.383	10.874	263.062	43.847	23.348	7.653	0.189	1.987	0.353	174.26	3511.08
2005	7.971	1.1955	315.903	7.6841	56.7195	1061.53	215.463	38.7948	8.2512	36.3917	41.8837	11.6059	2.6494	0.4358	10.8116	10.9935	3.2351	13.7591	120.933	12.4483	4.8901	26.8885	6.3407	49.49	51.552	0.854	0.227	0.785	65	10.874	283.408	46.641	26.458	7.518	0.189	1.92	0.314	168.841	3511.08
2006	8.0985	1.1385	317.24	7.721	56.3034	1057.01	214.052	38.5859	8.2245	35.9952	41.9902	11.411	2.5813	0.4427	10.5529	12.3831	3.8803	14.4509	121.075	12.7893	5.1614	31.23	6.4709	48.471	49.808	1.119	0.136	0.588	58.5	10.874	297.615	48.747	34.767	6.992	0.049	1.834	0.279	167.857	3511.08
2007	8.226	1.0815	318.572	7.7579	55.8873	1052.47	212.638	38.3772	8.1977	35.598	42.0965	11.2139	2.5131	0.4492	10.2947	13.7731	4.5246	15.1335	129.622	13.1314	5.4292	35.5714	6.6013	47.083	46.366	0.911	0.082	0.441	52	10.874	311.265	50.583	39.869	6.502	0.049	1.752	0.249	167.857	3511.08
2008	8.35313	1.02453	319.896	7.79467	55.4711	1047.85	211.218	38.1687	8.17087	35.1995	42.2027	11.0121	2.44527	0.455033	10.0372	15.1628	5.1677	15.798	133.992	13.4753	5.69017	39.9129	6.286	45.74	43.216	0.806	0.049	0.331	45.5	10.874	324.431	52.161	39.099	6.047	0.049	1.675	0.221	167.857	3511.08
2009	8.48027	0.967567	321.221	7.83143	55.0549	1043.24	209.798	37.9601	8.14403	34.8009	42.309	10.8104	2.37743	0.460867	9.77977	16.5524	5.8108	16.4625	138.362	13.8192	5.95113	44.2545	5.9707	44.442	40.334	0.754	0.029	0.248	39	10.874	337.175	53.496	38.069	5.624	0.049	1.601	0.197	167.857	3511.08
2010	8.6074	0.9106	322.545	7.8682	54.6387	1038.62	208.379	37.7516	8.1172	34.4024	42.4152	10.6086	2.3096	0.4667	9.5223	17.9421	6.4539	17.127	142.731	14.1631	6.2121	48.596	5.6554	42.976	36.906	0.377	0.018	0.186	32.5	7.266	349.552	54.598	36.801	5.23	0	1.521	0.175	167.857	3511.08
2011	8.73381	0.85362	323.841	7.90492	54.2221	1033.77	206.94	37.5439	8.09002	33.9992	42.5208	10.3919	2.24289	0.43848	8.68531	22.2121	6.53107	18.5425	147.402	14.5134	5.65092	52.9375	5.34014	41.557	33.769	0.189	0.011	0.14	26	7.266	361.61	55.479	35.314	4.864	0	1.445	0.156	167.857	3511.08
2012	8.86022	0.79664	325.137	7.94164	53.8056	1028.93	205.501	37.3361	8.06284	33.596	42.6264	10.1752	2.17618	0.41026	7.84832	26.4821	6.60824	19.9579	152.072	14.8638	5.08974	57.279	5.02488	40.186	30.898	0.094	0.006	0.105	19.5	7.266	373.391	56.152	33.625	4.524	0	1.373	0.139	167.857	3511.08
2013	8.98663	0.73966	326.434	7.97836	53.389	1024.08	204.063	37.1284	8.03566	33.1928	42.732	9.9585	2.10947	0.38204	7.01133	30.752	6.68541	21.3734	156.743	15.2141	4.52856	61.6205	4.70962	38.86	28.272	0.047	0.004	0.079	13	7.266	384.93	56.625	31.75	4.207	0	1.304	0.124	167.857	3511.08
2014	9.11304	0.68268	327.73	8.01508	52.9725	1019.23	202.624	36.9206	8.00848	32.7896	42.8376	9.7418	2.04276	0.35382	6.17434	35.022	6.76258	22.7888	161.413	15.5644	3.96738	65.962	4.39436	37.578	25.869	0.024	0.002	0.059	6.5	7.266	396.259	56.909	29.705	3.913	0	1.239	0.11	167.857	3511.08
2015	9.23945	0.6257	329.026	8.0518	52.5559	1014.39	201.185	36.7129	7.9813	32.3864	42.9432	9.5251	1.97605	0.3256	5.33735	39.292	6.83975	24.2043	166.083	15.9147	3.4062	70.3034	4.0791	36.338	23.67	0.012	0.001	0.044	0	0	407.405	57.013	27.502	3.639	0	1.177	0.098	155.925	3511.08
2016	9.36586	0.56872	330.323	8.08852	52.1393	1009.54	199.746	36.5052	7.95412	31.9831	43.0488	9.3084	1.90934	0.29738	4.50036	43.562	6.91692	25.6198	170.754	16.2651	2.84502	74.6449	3.76384	35.138	21.658	0.006	0.001	0.033	0	0	417.103	57.113	25.476	3.384	0	1.118	0.087	155.925	3511.08
2017	9.49227	0.51174	331.619	8.12524	51.7228	1004.69	198.308	36.2974	7.92694	31.5799	43.1544	9.0917	1.84263	0.26916	3.66337	47.832	6.99409	27.0352	175.424	16.6154	2.28384	78.9864	3.44858	33.979	19.817	0.003	0	0.025	0	0	425.539	57.207	23.611	3.147	0	1.062	0.078	155.925	3511.08
2018	9.61868	0.45476	332.915	8.16196	51.3062	999.847	196.869	36.0897	7.89976	31.1767	43.26	8.875	1.77592	0.24094	2.82638	52.1019	7.07126	28.4507	180.095	16.9657	1.72266	83.3279	3.13332	32.858	18.133	0.001	0	0.019	0	0	432.879	57.297	21.896	2.927	0	1.009	0.069	155.925	3511.08
2019	9.74509	0.39778	334.212	8.19868	50.8897	995	195.43	35.8819	7.87258	30.7735	43.3656	8.6583	1.70921	0.21272	1.98939	56.3719	7.14843	29.8661	184.765	17.3161	1.16148	87.6694	2.81806	31.773	16.591	0.001	0	0.014	0	0	439.265	57.382	20.318	2.722	0	0.959	0.061	155.925	3511.08
2020	9.8715	0.3408	335.508	8.2354	50.4731	990.154	193.991	35.6742	7.8454	30.3703	43.4712	8.4416	1.6425	0.1845	1.1524	60.6419	7.2256	31.2816	189.436	17.6664	0.6003	92.0109	2.5028	30.725	15.181	0	0	0.01	0	0	444.821	57.463	18.867	2.531	0	0.911	0.055	155.925	3511.08
2021	9.97968	0.32835	335.857	8.26904	49.7123	990.114	194.873	35.583	7.79487	30.2411	43.6626	8.442	1.65926	0.17723	1.1063	61.7812	7.31559	31.3297	191.32	17.9457	0.56612	92.3863	2.54361	29.711	13.891	0	0	0.008	0	0	449.654	57.54	17.531	2.354	0	0.865	0.049	155.925	3511.08
2022	10.0879	0.3159	336.206	8.30268	48.9514	990.074	195.754	35.4919	7.74434	30.1119	43.8541	8.4424	1.67602	0.16996	1.0602	62.9206	7.40558	31.3777	193.204	18.225	0.53194	92.7617	2.58442	28.73	12.71	0	0	0.006	0	0	453.859	57.613	16.302	2.189	0	0.822	0.043	155.925	3511.08
2023	10.196	0.30345	336.555	8.33632	48.1906	990.034	196.636	35.4007	7.69381	29.9827	44.0455	8.4428	1.69278	0.16269	1.0141	64.06	7.49557	31.4258	195.088	18.5043	0.49776	93.1371	2.62523	27.782	11.63	0	0	0.004	0	0	457.517	57.682	15.172	2.036	0	0.781	0.039	155.925	3511.08
2024	10.3042	0.291	336.904	8.36996	47.4298	989.994	197.517	35.3096	7.64328	29.8535	44.237	8.4432	1.70954	0.15542	0.968	65.1993	7.58556	31.4739	196.972	18.7836	0.46358	93.5125	2.66604	26.865	10.641	0	0	0.003	0	0	460.7	57.748	14.132	1.894	0	0.742	0.034	155.925	3511.08
2025	10.4124	0.27855	337.253	8.4036	46.669	989.954	198.399	35.2184	7.59275	29.7243	44.4284	8.4436	1.7263	0.14815	0.9219	66.3387	7.67555	31.522	198.856	19.0629	0.4294	93.888	2.70685	25.979	9.737	0	0	0.002	0	0	463.469	57.811	13.175	1.761	0	0.705	0.031	155.925	3511.08
2026	10.5206	0.2661	337.602	8.43724	45.9081	989.914	199.28	35.1272	7.54222	29.5951	44.6198	8.444	1.74306	0.14088	0.8758	67.478	7.76554	31.57	200.74	19.3421	0.39522	94.2634	2.74766	25.122	8.909	0	0	0.002	0	0	465.878	57.87	12.295	1.638	0	0.669	0.027	155.925	3511.08
2027	10.6288	0.25365	337.951	8.47088	45.1473	989.874	200.162	35.0361	7.49169	29.4659	44.8113	8.4444	1.75982	0.13361	0.8297	68.6174	7.85553	31.6181	202.624	19.6214	0.36104	94.6388	2.78847	24.293	8.152	0	0	0.001	0	0	467.974	57.927	11.485	1.523	0	0.636	0.024	155.925	3511.08
2028	10.7369	0.2412	338.3	8.50452	44.3865	989.834	201.043	34.9449	7.44116	29.3367	45.0027	8.4448	1.77658	0.12634	0.7836	69.7567	7.94552	31.6662	204.508	19.9007	0.32686	95.0142	2.82928	23.491	7.459	0	0	0.001	0	0	469.797	57.98	10.74	1.417	0	0.604	0.022	155.925	3511.08
2029	10.8451	0.22875	338.649	8.53816	43.6256	989.794	201.924	34.8538	7.39063	29.2075	45.1942	8.4452	1.79334	0.11907	0.7375	70.8961	8.03551	31.7142	206.392	20.18	0.29268	95.3896	2.87009	22.716	6.825	0	0	0.001	0	0	471.384	58.031	10.055	1.317	0	0.574	0.019	155.925	3511.08
2030	10.9533	0.2163	338.998	8.5718	42.8648	989.754	202.806	34.7626	7.3401	29.0783	45.3856	8.4456	1.8101	0.1118	0.6914	72.0354	8.1255	31.7623	208.276	20.4593	0.2585	95.765	2.9109	21.966	6.245	0	0	0.001	0	0	472.764	58.08	9.424	1.225	0	0.545	0.017	155.925	3511.08
2031	10.9918	0.21454	338.856	8.58349	42.0387	985.803	202.691	34.543	7.2846	28.9595	45.4871	8.46737	1.8237	0.1119	0.66362	72.903	8.24943	31.7241	210.391	20.7426	0.25838	95.8801	2.95352	21.241	5.714	0	0	0	0	0	467.698	57.831	8.826	1.139	0	0.518	0.015	155.925	3511.08
2032	11.0302	0.21278	338.713	8.59518	41.2126	981.852	202.576	34.3233	7.2291	28.8408	45.5887	8.48914	1.8373	0.112	0.63584	73.7707	8.37336	31.6859	212.506	21.0258	0.25826	95.9953	2.99614	20.54	5.228	0	0	0	0	0	457.026	57.299	8.259	1.06	0	0.492	0.013	155.925	3511.08
2033	11.0687	0.21102	338.571	8.60687	40.3866	977.902	202.46	34.1037	7.1736	28.722	45.6902	8.51091	1.8509	0.1121	0.60806	74.6383	8.49729	31.6477	214.622	21.3091	0.25814	96.1104	3.03876	19.862	4.784	0	0	0	0	0	441.474	56.499	7.72	0.985	0	0.467	0.012	155.925	3511.08
2034	11.1072	0.20926	338.429	8.61856	39.5605	973.951	202.345	33.8841	7.1181	28.6033	45.7918	8.53268	1.8645	0.1122	0.58028	75.5059	8.62122	31.6095	216.737	21.5923	0.25802	96.2256	3.08138	19.207	4.377	0	0	0	0	0	421.679	55.444	7.207	0.916	0	0.444	0.011	155.925	3511.08
2035	11.1456	0.2075	338.286	8.63025	38.7344	970	202.23	33.6645	7.0626	28.4845	45.8933	8.55445	1.8781	0.1123	0.5525	76.3735	8.74515	31.5712	218.852	21.8756	0.2579	96.3407	3.124	18.573	4.005	0	0	0	0	0	398.19	54.147	6.717	0.852	0	0.422	0.01	155.925	3511.08
2036	11.1841	0.20574	338.144	8.64194	37.9083	966.05	202.115	33.4448	7.0071	28.3657	45.9949	8.57622	1.8917	0.1124	0.52472	77.2412	8.86908	31.533	220.968	22.1589	0.25778	96.4558	3.16662	17.96	3.665	0	0	0	0	0	371.49	52.62	6.249	0.793	0	0.401	0.008	155.925	3511.08
2037	11.2226	0.20398	338.002	8.65363	37.0822	962.099	202	33.2252	6.9516	28.247	46.0964	8.59799	1.9053	0.1125	0.49694	78.1088	8.99301	31.4948	223.083	22.4421	0.25766	96.571	3.20924	17.368	3.353	0	0	0	0	0	341.994	50.874	5.801	0.737	0	0.381	0.008	155.925	3511.08
2038	11.2611	0.20222	337.859	8.66532	36.2562	958.148	201.885	33.0056	6.8961	28.1282	46.198	8.61976	1.9189	0.1126	0.46916	78.9764	9.11694	31.4566	225.198	22.7254	0.25754	96.6861	3.25186	16.794	3.068	0	0	0	0	0	310.067	48.92	5.372	0.686	0	0.362	0.007	155.925	3511.08
2039	11.2995	0.20046	337.717	8.67701	35.4301	954.197	201.77	32.7859	6.8406	28.0095	46.2996	8.64153	1.9325	0.1127	0.44138	79.8441	9.24087	31.4184	227.314	23.0086	0.25742	96.8013	3.29448	16.24	2.807	0	0	0	0	0	276.024	46.769	4.96	0.638	0	0.344	0.006	155.925	3511.08
2040	11.338	0.1987	337.574	8.6887	34.604	950.247	201.655	32.5663	6.7851	27.8907	46.4011	8.6633	1.9461	0.1128	0.4136	80.7117	9.3648	31.3802	229.429	23.2919	0.2573	96.9164	3.3371	15.704	2.569	0	0	0	0	0	240.141	44.431	4.563	0.593	0	0.326	0.005	155.925	3511.08
2041	11.3073	0.20369	336.951	8.67866	33.7115	942.499	200.553	32.218	6.72454	27.7823	46.4125	8.71054	1.95661	0.11238	0.39687	80.1013	9.53783	31.3132	231.783	23.5745	0.24048	96.7712	3.38154	15.186	2.35	0	0	0	0	0	208.923	42.209	4.198	0.551	0	0.31	0.005	155.925	3511.08
2042	11.2767	0.20868	336.327	8.66862	32.819	934.752	199.452	31.8696	6.66398	27.674	46.424	8.75778	1.96712	0.11196	0.38014	79.4908	9.71086	31.2461	234.137	23.8572	0.22366	96.6261	3.42598	14.685	2.151	0	0	0	0	0	181.763	40.099	3.862	0.513	0	0.295	0.004	155.925	3511.08
2043	11.246	0.21367	335.703	8.65858	31.9264	927.005	198.351	31.5213	6.60342	27.5656	46.4354	8.80502	1.97763	0.11154	0.36341	78.8804	9.88389	31.1791	236.492	24.1398	0.20684	96.481	3.47042	14.2	1.968	0	0	0	0	0	158.134	38.094	3.553	0.477	0	0.28	0.004	155.925	3511.08
2044	11.2153	0.21866	335.079	8.64854	31.0339	919.257	197.25	31.173	6.54286	27.4572	46.4468	8.85226	1.98814	0.11112	0.34668	78.27	10.0569	31.1121	238.846	24.4224	0.19002	96.3358	3.51486	13.732	1.801	0	0	0	0	0	137.576	36.189	3.269	0.444	0	0.266	0.003	155.925	3511.08
2045	11.1846	0.22365	334.456	8.6385	30.1414	911.51	196.149	30.8246	6.4823	27.3488	46.4582	8.8995	1.99865	0.1107	0.32995	77.6595	10.23	31.045	241.2	24.705	0.1732	96.1907	3.5593	13.279	1.648	0	0	0	0	0	119.691	34.38	3.007	0.413	0	0.253	0.003	155.925	3511.08
2046	11.154	0.22864	333.832	8.62846	29.2489	903.762	195.048	30.4763	6.42174	27.2405	46.4697	8.94674	2.00916	0.11028	0.31322	77.0491	10.403	30.978	243.554	24.9877	0.15638	96.0455	3.60374	12.84	1.507	0	0	0	0	0	104.131	32.661	2.767	0.384	0	0.24	0.003	155.925	3511.08
2047	11.1233	0.23363	333.208	8.61842	28.3564	896.015	193.947	30.128	6.36118	27.1321	46.4811	8.99398	2.01967	0.10986	0.29649	76.4387	10.576	30.911	245.908	25.2703	0.13956	95.9004	3.64818	12.417	1.379	0	0	0	0	0	90.594	31.028	2.545	0.357	0	0.228	0.002	155.925	3511.08
2048	11.0926	0.23862	332.584	8.60838	27.4638	888.268	192.845	29.7797	6.30062	27.0237	46.4925	9.04122	2.03018	0.10944	0.27976	75.8283	10.749	30.844	248.262	25.5529	0.12274	95.7552	3.69262	12.007	1.262	0	0	0	0	0	78.817	29.476	2.342	0.332	0	0.217	0.002	155.925	3511.08
2049	11.062	0.24361	331.961	8.59834	26.5713	880.52	191.744	29.4313	6.24006	26.9154	46.504	9.08846	2.04069	0.10902	0.26303	75.2178	10.9221	30.7769	250.617	25.8356	0.10592	95.6101	3.73706	11.611	1.155	0	0	0	0	0	68.571	28.002	2.154	0.309	0	0.206	0.002	155.925	3511.08
2050	11.0313	0.2486	331.337	8.5883	25.6788	872.773	190.643	29.083	6.1795	26.807	46.5154	9.1357	2.0512	0.1086	0.2463	74.6074	11.0951	30.7099	252.971	26.1182	0.0891	95.4649	3.7815	11.227	1.057	0	0	0	0	0	59.657	26.602	1.982	0.287	0	0.195	0.002	155.925	3511.08
2051	10.8683	0.24215	329.964	8.58011	25.1821	863.351	189.568	28.73	6.11469	26.6151	46.4627	9.11255	2.04957	0.10848	0.23542	75.5552	11.0969	30.2611	252.018	26.0603	0.08327	94.546	3.83266	10.857	0.967	0	0	0	0	0	51.901	25.272	1.824	0.267	0	0.186	0.001	155.925	3511.08
2052	10.7053	0.2357	328.592	8.57192	24.6853	853.93	188.492	28.377	6.04988	26.4233	46.41	9.0894	2.04794	0.10836	0.22454	76.503	11.0987	29.8122	251.065	26.0024	0.07744	93.627	3.88382	10.499	0.885	0	0	0	0	0	45.154	24.008	1.678	0.248	0	0.176	0.001	155.925	3511.08
2053	10.5423	0.22925	327.219	8.56373	24.1886	844.508	187.417	28.024	5.98507	26.2314	46.3572	9.06625	2.04631	0.10824	0.21366	77.4509	11.1005	29.3634	250.112	25.9445	0.07161	92.7081	3.93498	10.152	0.809	0	0	0	0	0	39.284	22.808	1.543	0.231	0	0.168	0.001	155.925	3511.08
2054	10.3793	0.2228	325.846	8.55554	23.6919	835.086	186.341	27.671	5.92026	26.0396	46.3045	9.0431	2.04468	0.10812	0.20278	78.3987	11.1023	28.9146	249.16	25.8866	0.06578	91.7892	3.98614	9.817	0.741	0	0	0	0	0	34.177	21.668	1.42	0.215	0	0.159	0.001	155.925	3511.08
2055	10.2163	0.21635	324.473	8.54735	23.1952	825.665	185.266	27.3179	5.85545	25.8478	46.2518	9.01995	2.04305	0.108	0.1919	79.3465	11.1041	28.4657	248.207	25.8287	0.05995	90.8702	4.0373	9.493	0.678	0	0	0	0	0	29.734	20.584	1.306	0.2	0	0.151	0.001	155.925	3511.08
2056	10.0532	0.2099	323.101	8.53916	22.6984	816.243	184.191	26.9649	5.79064	25.6559	46.1991	8.9968	2.04142	0.10788	0.18102	80.2943	11.1058	28.0169	247.254	25.7709	0.05412	89.9513	4.08846	9.18	0.62	0	0	0	0	0	25.869	19.555	1.202	0.186	0	0.144	0.001	155.925	3511.08
2057	9.89023	0.20345	321.728	8.53097	22.2017	806.822	183.115	26.6119	5.72583	25.4641	46.1464	8.97365	2.03979	0.10776	0.17014	81.2421	11.1076	27.5681	246.301	25.713	0.04829	89.0324	4.13962	8.877	0.567	0	0	0	0	0	22.506	18.577	1.106	0.173	0	0.136	0.001	155.925	3511.08
2058	9.72722	0.197	320.355	8.52278	21.705	797.4	182.04	26.2589	5.66102	25.2722	46.0936	8.9505	2.03816	0.10764	0.15926	82.19	11.1094	27.1193	245.349	25.6551	0.04246	88.1135	4.19078	8.584	0.519	0	0	0	0	0	19.58	17.648	1.017	0.161	0	0.13	0.001	155.925	3511.08
2059	9.56421	0.19055	318.982	8.51459	21.2082	787.978	180.964	25.9059	5.59621	25.0803	46.0409	8.92735	2.03653	0.10752	0.14838	83.1378	11.1112	26.6704	244.396	25.5972	0.03663	87.1945	4.24194	8.301	0.475	0	0	0	0	0	17.035	16.766	0.936	0.149	0	0.123	0.001	155.925	3511.08
2060	9.4012	0.1841	317.61	8.5064	20.7115	778.557	179.889	25.5529	5.5314	24.8885	45.9882	8.9042	2.0349	0.1074	0.1375	84.0856	11.113	26.2216	243.443	25.5393	0.0308	86.2756	4.2931	8.027	0.435	0	0	0	0	0	14.82	15.928	0.861	0.139	0	0.117	0.001	155.925	3511.08
2061	9.1729	0.17607	315.925	8.49168	20.2802	768.065	178.545	25.2186	5.46337	24.6749	45.9095	8.91416	2.0301	0.10732	0.13105	85.0651	11.1064	25.9984	244.904	25.7899	0.02989	85.7358	4.35328	7.762	0.398	0	0	0	0	0	12.893	15.131	0.792	0.129	0	0.111	0	155.925	3511.08
2062	8.9446	0.16804	314.241	8.47696	19.849	757.574	177.201	24.8843	5.39534	24.4613	45.8308	8.92412	2.0253	0.10724	0.1246	86.0445	11.0998	25.7752	246.365	26.0405	0.02898	85.1961	4.41346	7.506	0.364	0	0	0	0	0	11.217	14.375	0.729	0.12	0	0.106	0	155.925	3511.08
2063	8.7163	0.16001	312.556	8.46224	19.4177	747.082	175.858	24.55	5.32731	24.2478	45.7522	8.93408	2.0205	0.10716	0.11815	87.024	11.0932	25.5519	247.826	26.2912	0.02807	84.6563	4.47364	7.258	0.333	0	0	0	0	0	9.759	13.656	0.67	0.112	0	0.1	0	155.925	3511.08
2064	8.488	0.15198	310.872	8.44752	18.9864	736.591	174.514	24.2157	5.25928	24.0342	45.6735	8.94404	2.0157	0.10708	0.1117	88.0034	11.0866	25.3287	249.287	26.5418	0.02716	84.1165	4.53382	7.019	0.305	0	0	0	0	0	8.49	12.973	0.617	0.104	0	0.095	0	155.925	3511.08
2065	8.2597	0.14395	309.187	8.4328	18.5552	726.099	173.17	23.8814	5.19125	23.8206	45.5948	8.954	2.0109	0.107	0.10525	88.9829	11.08	25.1055	250.748	26.7924	0.02625	83.5768	4.594	6.787	0.279	0	0	0	0	0	7.387	12.325	0.567	0.097	0	0.091	0	155.925	3511.08
2066	8.0314	0.13592	307.503	8.41808	18.1239	715.608	171.826	23.5471	5.12322	23.607	45.5161	8.96396	2.0061	0.10692	0.0988	89.9624	11.0735	24.8823	252.209	27.043	0.02534	83.037	4.65418	6.563	0.255	0	0	0	0	0	6.426	11.708	0.522	0.09	0	0.086	0	155.925	3511.08
2067	7.8031	0.12789	305.818	8.40336	17.6926	705.116	170.483	23.2128	5.05519	23.3934	45.4374	8.97392	2.0013	0.10684	0.09235	90.9418	11.0669	24.6591	253.67	27.2936	0.02443	82.4972	4.71436	6.346	0.233	0	0	0	0	0	5.591	11.123	0.48	0.084	0	0.082	0	155.925	3511.08
2068	7.5748	0.11986	304.134	8.38864	17.2613	694.625	169.139	22.8785	4.98716	23.1799	45.3588	8.98388	1.9965	0.10676	0.0859	91.9213	11.0603	24.4358	255.131	27.5443	0.02352	81.9574	4.77454	6.137	0.214	0	0	0	0	0	4.864	10.567	0.442	0.078	0	0.078	0	155.925	3511.08
2069	7.3465	0.11183	302.449	8.37392	16.8301	684.133	167.795	22.5442	4.91913	22.9663	45.2801	8.99384	1.9917	0.10668	0.07945	92.9007	11.0537	24.2126	256.592	27.7949	0.02261	81.4177	4.83472	5.935	0.195	0	0	0	0	0	4.232	10.038	0.407	0.072	0	0.074	0	155.925	3511.08
2070	7.1182	0.1038	300.765	8.3592	16.3988	673.642	166.452	22.2099	4.8511	22.7527	45.2014	9.0038	1.9869	0.1066	0.073	93.8802	11.0471	23.9894	258.053	28.0455	0.0217	80.8779	4.8949	5.739	0.179	0	0	0	0	0	3.682	9.537	0.374	0.067	0	0.07	0	155.925	3511.08
2071	6.82459	0.0942	298.769	8.33796	16.033	662.079	164.84	21.8943	4.77984	22.5174	45.0967	9.04993	1.97901	0.10626	0.06942	94.1193	11.0381	23.9441	262.309	28.6199	0.02131	80.7173	4.96411	5.549	0.164	0	0	0	0	0	3.203	9.06	0.344	0.063	0	0.067	0	155.925	3511.08
2072	6.53098	0.0846	296.773	8.31672	15.6672	650.517	163.228	21.5787	4.70858	22.2821	44.992	9.09606	1.97112	0.10592	0.06584	94.3584	11.0291	23.8987	266.565	29.1944	0.02092	80.5568	5.03332	5.366	0.15	0	0	0	0	0	2.787	8.607	0.317	0.058	0	0.063	0	155.925	3511.08
2073	6.23737	0.075	294.776	8.29548	15.3015	638.955	161.616	21.2632	4.63732	22.0468	44.8873	9.14219	1.96323	0.10558	0.06226	94.5975	11.0201	23.8534	270.822	29.7688	0.02053	80.3962	5.10253	5.189	0.137	0	0	0	0	0	2.424	8.176	0.291	0.054	0	0.06	0	155.925	3511.08
2074	5.94376	0.0654	292.78	8.27424	14.9357	627.392	160.004	20.9476	4.56606	21.8115	44.7826	9.18832	1.95534	0.10524	0.05868	94.8366	11.0111	23.808	275.078	30.3433	0.02014	80.2357	5.17174	5.018	0.125	0	0	0	0	0	2.109	7.768	0.268	0.05	0	0.057	0	155.925	3511.08
2075	5.65015	0.0558	290.784	8.253	14.5699	615.83	158.392	20.632	4.4948	21.5762	44.678	9.23445	1.94745	0.1049	0.0551	95.0757	11.0021	23.7627	279.334	30.9177	0.01975	80.0751	5.24095	4.852	0.115	0	0	0	0	0	1.835	7.379	0.247	0.047	0	0.054	0	155.925	3511.08
2076	5.35654	0.0462	288.788	8.23176	14.2041	604.268	156.779	20.3164	4.42354	21.3409	44.5733	9.28058	1.93956	0.10456	0.05152	95.3148	10.993	23.7174	283.591	31.4921	0.01936	79.9146	5.31016	4.692	0.105	0	0	0	0	0	1.596	7.01	0.227	0.043	0	0.052	0	155.925	3511.08
2077	5.06293	0.0366	286.792	8.21052	13.8383	592.706	155.167	20.0008	4.35228	21.1056	44.4686	9.32671	1.93167	0.10422	0.04794	95.5539	10.984	23.672	287.847	32.0666	0.01897	79.7541	5.37937	4.537	0.096	0	0	0	0	0	1.389	6.66	0.209	0.04	0	0.049	0	155.925	3511.08
2078	4.76932	0.027	284.796	8.18928	13.4726	581.143	153.555	19.6853	4.28102	20.8703	44.3639	9.37284	1.92378	0.10388	0.04436	95.793	10.975	23.6267	292.104	32.641	0.01858	79.5935	5.44858	4.388	0.088	0	0	0	0	0	1.208	6.327	0.192	0.038	0	0.046	0	155.925	3511.08
2079	4.47571	0.0174	282.8	8.16804	13.1068	569.581	151.943	19.3697	4.20976	20.635	44.2592	9.41897	1.91589	0.10354	0.04078	96.0321	10.966	23.5813	296.36	33.2155	0.01819	79.433	5.51779	4.243	0.08	0	0	0	0	0	1.051	6.01	0.177	0.035	0	0.044	0	155.925	3511.08
2080	4.1821	0.0078	280.803	8.1468	12.741	558.019	150.331	19.0541	4.1385	20.3997	44.1545	9.4651	1.908	0.1032	0.0372	96.2712	10.957	23.536	300.616	33.7899	0.0178	79.2724	5.587	4.103	0.074	0	0	0	0	0	0.915	5.71	0.162	0.033	0	0.042	0	155.925	3511.08
2081	4.18314	0.00973	280.067	8.14506	12.6666	553.983	149.817	19.0042	4.12467	20.3498	44.1252	9.57675	1.91453	0.1026	0.03348	95.7644	10.9366	23.5344	305.855	34.4037	0.01759	79.4532	5.62936	3.967	0.067	0	0	0	0	0	0.796	5.424	0.149	0.03	0	0.04	0	155.925	3511.08
2082	4.18418	0.01166	279.33	8.14332	12.5923	549.947	149.302	18.9543	4.11084	20.2998	44.096	9.6884	1.92106	0.102	0.02976	95.2577	10.9161	23.5329	311.094	35.0175	0.01738	79.634	5.67172	3.836	0.062	0	0	0	0	0	0.692	5.153	0.138	0.028	0	0.038	0	155.925	3511.08
2083	4.18522	0.01359	278.593	8.14158	12.5179	545.911	148.787	18.9044	4.09701	20.2498	44.0667	9.80005	1.92759	0.1014	0.02604	94.7509	10.8957	23.5313	316.333	35.6313	0.01717	79.8148	5.71408	3.71	0.056	0	0	0	0	0	0.602	4.895	0.127	0.026	0	0.036	0	155.925	3511.08
2084	4.18626	0.01552	277.856	8.13984	12.4436	541.875	148.272	18.8545	4.08318	20.1999	44.0375	9.9117	1.93412	0.1008	0.02232	94.2442	10.8753	23.5298	321.571	36.2451	0.01696	79.9956	5.75644	3.587	0.052	0	0	0	0	0	0.524	4.651	0.116	0.024	0	0.034	0	155.925	3511.08
2085	4.1873	0.01745	277.119	8.1381	12.3692	537.839	147.757	18.8046	4.06935	20.15	44.0082	10.0234	1.94065	0.1002	0.0186	93.7374	10.8549	23.5282	326.81	36.8589	0.01675	80.1764	5.7988	3.469	0.047	0	0	0	0	0	0.456	4.418	0.107	0.023	0	0.032	0	155.925	3511.08
2086	4.18834	0.01938	276.382	8.13636	12.2948	533.803	147.242	18.7547	4.05552	20.1	43.9789	10.135	1.94718	0.0996	0.01488	93.2306	10.8344	23.5266	332.049	37.4727	0.01654	80.3572	5.84116	3.355	0.043	0	0	0	0	0	0.397	4.197	0.099	0.021	0	0.031	0	155.925	3511.08
2087	4.18938	0.02131	275.645	8.13462	12.2205	529.767	146.727	18.7048	4.04169	20.05	43.9497	10.2467	1.95371	0.099	0.01116	92.7239	10.814	23.5251	337.288	38.0865	0.01633	80.538	5.88352	3.244	0.039	0	0	0	0	0	0.345	3.987	0.091	0.02	0	0.029	0	155.925	3511.08
2088	4.19042	0.02324	274.908	8.13288	12.1461	525.731	146.212	18.6549	4.02786	20.0001	43.9204	10.3583	1.96024	0.0984	0.00744	92.2171	10.7936	23.5235	342.526	38.7003	0.01612	80.7188	5.92588	3.137	0.036	0	0	0	0	0	0.3	3.788	0.083	0.018	0	0.028	0	155.925	3511.08
2089	4.19146	0.02517	274.171	8.13114	12.0718	521.695	145.697	18.605	4.01403	19.9502	43.8912	10.47	1.96677	0.0978	0.00372	91.7104	10.7731	23.522	347.765	39.3141	0.01591	80.8996	5.96824	3.033	0.033	0	0	0	0	0	0.261	3.599	0.077	0.017	0	0.026	0	155.925	3511.08
2090	4.1925	0.0271	273.434	8.1294	11.9974	517.659	145.183	18.5551	4.0002	19.9002	43.8619	10.5816	1.9733	0.0972	0	91.2036	10.7527	23.5204	353.004	39.9279	0.0157	81.0804	6.0106	2.933	0.03	0	0	0	0	0	0.227	3.419	0.071	0.016	0	0.025	0	155.925	3511.08
2091	4.19355	0.02902	272.697	8.12762	11.923	513.623	144.668	18.5052	3.98639	19.8502	43.8326	10.6631	1.98218	0.09635	0	90.2059	10.718	23.469	358.611	40.5622	0.01555	81.2612	6.05297	2.836	0.028	0	0	0	0	0	0.198	3.248	0.065	0.015	0	0.024	0	155.925	3511.08
2092	4.1946	0.03094	271.959	8.12584	11.8487	509.587	144.153	18.4553	3.97258	19.8003	43.8033	10.7445	1.99106	0.0955	0	89.2082	10.6833	23.4176	364.218	41.1964	0.0154	81.442	6.09534	2.743	0.025	0	0	0	0	0	0.172	3.085	0.06	0.014	0	0.023	0	155.925	3511.08
2093	4.19565	0.03286	271.222	8.12406	11.7744	505.551	143.638	18.4053	3.95877	19.7503	43.7739	10.826	1.99994	0.09465	0	88.2106	10.6485	23.3662	369.825	41.8306	0.01525	81.6228	6.13771	2.652	0.023	0	0	0	0	0	0.15	2.931	0.055	0.013	0	0.022	0	155.925	3511.08
2094	4.1967	0.03478	270.484	8.12228	11.7	501.515	143.123	18.3554	3.94496	19.7003	43.7446	10.9075	2.00882	0.0938	0	87.2129	10.6138	23.3148	375.432	42.4649	0.0151	81.8036	6.18008	2.565	0.021	0	0	0	0	0	0.13	2.785	0.051	0.012	0	0.02	0	155.925	3511.08
2095	4.19775	0.0367	269.747	8.1205	11.6257	497.479	142.608	18.3055	3.93115	19.6503	43.7153	10.989	2.0177	0.09295	0	86.2152	10.5791	23.2634	381.04	43.0992	0.01495	81.9844	6.22245	2.48	0.019	0	0	0	0	0	0.113	2.645	0.047	0.011	0	0.019	0	155.925	3511.08
2096	4.1988	0.03862	269.009	8.11872	11.5513	493.443	142.093	18.2556	3.91734	19.6004	43.686	11.0704	2.02658	0.0921	0	85.2175	10.5444	23.212	386.647	43.7334	0.0148	82.1652	6.26482	2.398	0.018	0	0	0	0	0	0.099	2.513	0.043	0.01	0	0.018	0	155.925	3511.08
2097	4.19985	0.04054	268.271	8.11694	11.477	489.407	141.578	18.2057	3.90353	19.5504	43.6567	11.1519	2.03546	0.09125	0	84.2198	10.5097	23.1606	392.254	44.3676	0.01465	82.346	6.30719	2.319	0.016	0	0	0	0	0	0.086	2.387	0.039	0.009	0	0.018	0	155.925	3511.08
2098	4.2009	0.04246	267.534	8.11516	11.4026	485.371	141.064	18.1557	3.88972	19.5004	43.6273	11.2334	2.04434	0.0904	0	83.2222	10.4749	23.1092	397.861	45.0019	0.0145	82.5268	6.34956	2.243	0.015	0	0	0	0	0	0.075	2.268	0.036	0.009	0	0.017	0	155.925	3511.08
2099	4.20195	0.04438	266.796	8.11338	11.3283	481.336	140.549	18.1058	3.87591	19.4505	43.598	11.3148	2.05322	0.08955	0	82.2245	10.4402	23.0578	403.468	45.6362	0.01435	82.7076	6.39193	2.169	0.014	0	0	0	0	0	0.065	2.155	0.033	0.008	0	0.016	0	155.925	3511.08
2100	4.203	0.0463	266.059	8.1116	11.2539	477.3	140.034	18.0559	3.8621	19.4005	43.5687	11.3963	2.0621	0.0887	0	81.2268	10.4055	23.0064	409.075	46.2704	0.0142	82.8884	6.4343	2.097	0.012	0	0	0	0	0	0.056	2.047	0.031	0.008	0	0.015	0	155.925	3511.08
2101	4.09086	0.04445	266.059	8.08938	11.2539	477.3	140.034	18.0559	3.8621	19.4005	43.5687	11.1694	2.02147	0.08703	0	81.2268	10.4055	23.0064	408.894	46.045	0.01423	82.8884	6.30908	2.028	0.011	0	0	0	0	0	0.049	1.945	0.028	0.007	0	0.014	0	155.925	3511.08
2102	3.97872	0.0426	266.059	8.06716	11.2539	477.3	140.034	18.0559	3.8621	19.4005	43.5687	10.9425	1.98084	0.08536	0	81.2268	10.4055	23.0064	408.712	45.8196	0.01426	82.8884	6.18386	1.961	0.01	0	0	0	0	0	0.042	1.847	0.026	0.007	0	0.014	0	155.925	3511.08
2103	3.86658	0.04075	266.059	8.04494	11.2539	477.3	140.034	18.0559	3.8621	19.4005	43.5687	10.7155	1.94021	0.08369	0	81.2268	10.4055	23.0064	408.531	45.5942	0.01429	82.8884	6.05864	1.896	0.01	0	0	0	0	0	0.037	1.755	0.024	0.006	0	0.013	0	155.925	3511.08
2104	3.75444	0.0389	266.059	8.02272	11.2539	477.3	140.034	18.0559	3.8621	19.4005	43.5687	10.4886	1.89958	0.08202	0	81.2268	10.4055	23.0064	408.349	45.3688	0.01432	82.8884	5.93342	1.834	0.009	0	0	0	0	0	0.032	1.667	0.022	0.006	0	0.012	0	155.925	3511.08
2105	3.6423	0.03705	266.06	8.0005	11.2539	477.3	140.034	18.0559	3.8621	19.4005	43.5687	10.2617	1.85895	0.08035	0	81.2268	10.4055	23.0064	408.168	45.1434	0.01435	82.8884	5.8082	1.773	0.008	0	0	0	0	0	0.028	1.584	0.02	0.005	0	0.012	0	155.925	3511.08
2106	3.53016	0.0352	266.06	7.97828	11.2539	477.3	140.034	18.0559	3.8621	19.4005	43.5687	10.0348	1.81832	0.07868	0	81.2268	10.4055	23.0064	407.986	44.918	0.01438	82.8884	5.68298	1.715	0.007	0	0	0	0	0	0.024	1.505	0.019	0.005	0	0.011	0	155.925	3511.08
2107	3.41802	0.03335	266.06	7.95606	11.2539	477.3	140.034	18.0559	3.8621	19.4005	43.5687	9.80786	1.77769	0.07701	0	81.2268	10.4055	23.0064	407.805	44.6926	0.01441	82.8884	5.55776	1.658	0.007	0	0	0	0	0	0.021	1.429	0.017	0.005	0	0.011	0	155.925	3511.08
2108	3.30588	0.0315	266.06	7.93384	11.2539	477.3	140.034	18.0559	3.8621	19.4005	43.5687	9.58094	1.73706	0.07534	0	81.2268	10.4055	23.0064	407.623	44.4672	0.01444	82.8884	5.43254	1.603	0.006	0	0	0	0	0	0.018	1.358	0.016	0.004	0	0.01	0	155.925	3511.08
2109	3.19374	0.02965	266.06	7.91162	11.2539	477.3	140.034	18.0559	3.8621	19.4005	43.5687	9.35402	1.69643	0.07367	0	81.2268	10.4055	23.0064	407.442	44.2418	0.01447	82.8884	5.30732	1.55	0.006	0	0	0	0	0	0.016	1.29	0.014	0.004	0	0.009	0	155.925	3511.08
2110	3.0816	0.0278	266.061	7.8894	11.2539	477.3	140.034	18.0559	3.8621	19.4005	43.5687	9.1271	1.6558	0.072	0	81.2268	10.4055	23.0064	407.26	44.0164	0.0145	82.8884	5.1821	1.499	0.005	0	0	0	0	0	0.014	1.226	0.013	0.004	0	0.009	0	155.925	3511.08
2111	3.00189	0.02594	266.061	7.86716	11.2539	477.3	140.034	18.0559	3.8621	19.4005	43.5687	8.90017	1.61514	0.07032	0	81.2268	10.4055	23.0064	407.079	43.791	0.01452	82.8884	5.05688	1.45	0.005	0	0	0	0	0	0.012	1.164	0.012	0.003	0	0.009	0	155.925	3511.08
2112	2.92218	0.02408	266.061	7.84492	11.2539	477.3	140.034	18.0559	3.8621	19.4005	43.5687	8.67324	1.57448	0.06864	0	81.2268	10.4055	23.0064	406.897	43.5656	0.01454	82.8884	4.93166	1.402	0.004	0	0	0	0	0	0.01	1.106	0.011	0.003	0	0.008	0	155.925	3511.08
2113	2.84247	0.02222	266.061	7.82268	11.2539	477.3	140.034	18.0559	3.8621	19.4005	43.5687	8.44631	1.53382	0.06696	0	81.2268	10.4055	23.0064	406.716	43.3401	0.01456	82.8884	4.80644	1.356	0.004	0	0	0	0	0	0.009	1.051	0.01	0.003	0	0.008	0	155.925	3511.08
2114	2.76276	0.02036	266.061	7.80044	11.2539	477.3	140.034	18.0559	3.8621	19.4005	43.5687	8.21938	1.49316	0.06528	0	81.2268	10.4055	23.0064	406.534	43.1147	0.01458	82.8884	4.68122	1.311	0.004	0	0	0	0	0	0.008	0.998	0.01	0.003	0	0.007	0	155.925	3511.08
2115	2.68305	0.0185	266.061	7.7782	11.2539	477.3	140.034	18.0559	3.8621	19.4005	43.5687	7.99245	1.4525	0.0636	0	81.2268	10.4055	23.0064	406.353	42.8893	0.0146	82.8884	4.556	1.268	0.003	0	0	0	0	0	0.007	0.948	0.009	0.003	0	0.007	0	155.925	3511.08
2116	2.60334	0.01664	266.062	7.75596	11.2539	477.3	140.034	18.0559	3.8621	19.4005	43.5687	7.76552	1.41184	0.06192	0	81.2268	10.4055	23.0064	406.171	42.6639	0.01462	82.8884	4.43078	1.226	0.003	0	0	0	0	0	0.006	0.901	0.008	0.002	0	0.007	0	155.925	3511.08
2117	2.52363	0.01478	266.062	7.73372	11.2539	477.3	140.034	18.0559	3.8621	19.4005	43.5687	7.53859	1.37118	0.06024	0	81.2268	10.4055	23.0064	405.99	42.4385	0.01464	82.8884	4.30556	1.185	0.003	0	0	0	0	0	0.005	0.856	0.007	0.002	0	0.006	0	155.925	3511.08
2118	2.44392	0.01292	266.062	7.71148	11.2539	477.3	140.034	18.0559	3.8621	19.4005	43.5687	7.31166	1.33052	0.05856	0	81.2268	10.4055	23.0064	405.808	42.213	0.01466	82.8884	4.18034	1.146	0.003	0	0	0	0	0	0.005	0.813	0.007	0.002	0	0.006	0	155.925	3511.08
2119	2.36421	0.01106	266.062	7.68924	11.2539	477.3	140.034	18.0559	3.8621	19.4005	43.5687	7.08473	1.28986	0.05688	0	81.2268	10.4055	23.0064	405.627	41.9876	0.01468	82.8884	4.05512	1.108	0.002	0	0	0	0	0	0.004	0.772	0.006	0.002	0	0.006	0	155.925	3511.08
2120	2.2845	0.0092	266.062	7.667	11.2539	477.3	140.034	18.0559	3.8621	19.4005	43.5687	6.8578	1.2492	0.0552	0	81.2268	10.4055	23.0064	405.445	41.7622	0.0147	82.8884	3.9299	1.072	0.002	0	0	0	0	0	0.003	0.734	0.006	0.002	0	0.005	0	155.925	3511.08
2121	2.25245	0.00828	266.062	7.64476	11.2539	477.3	140.034	18.0559	3.8621	19.4005	43.5687	6.63088	1.20857	0.05353	0	81.2268	10.4055	23.0064	405.264	41.5368	0.01474	82.8884	3.80466	1.036	0.002	0	0	0	0	0	0.003	0.697	0.005	0.002	0	0.005	0	155.925	3511.08
2122	2.2204	0.00736	266.062	7.62252	11.2539	477.3	140.034	18.0559	3.8621	19.4005	43.5687	6.40396	1.16794	0.05186	0	81.2268	10.4055	23.0064	405.082	41.3114	0.01478	82.8884	3.67942	1.002	0.002	0	0	0	0	0	0.003	0.662	0.005	0.002	0	0.005	0	155.925	3511.08
2123	2.18835	0.00644	266.063	7.60028	11.2539	477.3	140.034	18.0559	3.8621	19.4005	43.5687	6.17704	1.12731	0.05019	0	81.2268	10.4055	23.0064	404.901	41.086	0.01482	82.8884	3.55418	0.969	0.002	0	0	0	0	0	0.002	0.629	0.005	0.001	0	0.005	0	155.925	3511.08
2124	2.1563	0.00552	266.063	7.57804	11.2539	477.3	140.034	18.0559	3.8621	19.4005	43.5687	5.95012	1.08668	0.04852	0	81.2268	10.4055	23.0064	404.719	40.8606	0.01486	82.8884	3.42894	0.937	0.001	0	0	0	0	0	0.002	0.598	0.004	0.001	0	0.004	0	155.925	3511.08
2125	2.12425	0.0046	266.063	7.5558	11.2539	477.3	140.034	18.0559	3.8621	19.4005	43.5687	5.7232	1.04605	0.04685	0	81.2268	10.4055	23.0064	404.538	40.6352	0.0149	82.8884	3.3037	0.906	0.001	0	0	0	0	0	0.002	0.568	0.004	0.001	0	0.004	0	155.925	3511.08
2126	2.0922	0.00368	266.063	7.53356	11.2539	477.3	140.034	18.0559	3.8621	19.4005	43.5687	5.49628	1.00542	0.04518	0	81.2268	10.4055	23.0064	404.356	40.4097	0.01494	82.8884	3.17846	0.876	0.001	0	0	0	0	0	0.001	0.539	0.004	0.001	0	0.004	0	155.925	3511.08
2127	2.06015	0.00276	266.063	7.51132	11.2539	477.3	140.034	18.0559	3.8621	19.4005	43.5687	5.26936	0.96479	0.04351	0	81.2268	10.4055	23.0064	404.175	40.1843	0.01498	82.8884	3.05322	0.847	0.001	0	0	0	0	0	0.001	0.512	0.003	0.001	0	0.004	0	155.925	3511.08
2128	2.0281	0.00184	266.063	7.48908	11.2539	477.3	140.034	18.0559	3.8621	19.4005	43.5687	5.04244	0.92416	0.04184	0	81.2268	10.4055	23.0064	403.993	39.9589	0.01502	82.8884	2.92798	0.819	0.001	0	0	0	0	0	0.001	0.487	0.003	0.001	0	0.004	0	155.925	3511.08
2129	1.99605	0.00092	266.063	7.46684	11.2539	477.3	140.034	18.0559	3.8621	19.4005	43.5687	4.81552	0.88353	0.04017	0	81.2268	10.4055	23.0064	403.812	39.7335	0.01506	82.8884	2.80274	0.792	0.001	0	0	0	0	0	0.001	0.462	0.003	0.001	0	0.003	0	155.925	3511.08
2130	1.964	0	266.063	7.4446	11.2539	477.3	140.034	18.0559	3.8621	19.4005	43.5687	4.5886	0.8429	0.0385	0	81.2268	10.4055	23.0064	403.63	39.5081	0.0151	82.8884	2.6775	0.766	0.001	0	0	0	0	0	0.001	0.439	0.003	0.001	0	0.003	0	155.925	3511.08
2131	1.93853	0	266.064	7.42237	11.2539	477.3	140.034	18.0559	3.8621	19.4005	43.5687	4.36166	0.80226	0.03683	0	81.2268	10.4055	23.0064	403.449	39.2827	0.01512	82.8884	2.55229	0.741	0.001	0	0	0	0	0	0.001	0.417	0.002	0.001	0	0.003	0	155.925	3511.08
2132	1.91306	0	266.064	7.40014	11.2539	477.3	140.034	18.0559	3.8621	19.4005	43.5687	4.13472	0.76162	0.03516	0	81.2268	10.4055	23.0064	403.267	39.0573	0.01514	82.8884	2.42708	0.717	0.001	0	0	0	0	0	0.001	0.397	0.002	0.001	0	0.003	0	155.925	3511.08
2133	1.88759	0	266.064	7.37791	11.2539	477.3	140.034	18.0559	3.8621	19.4005	43.5687	3.90778	0.72098	0.03349	0	81.2268	10.4055	23.0064	403.086	38.8319	0.01516	82.8884	2.30187	0.693	0.001	0	0	0	0	0	0.001	0.377	0.002	0.001	0	0.003	0	155.925	3511.08
2134	1.86212	0	266.064	7.35568	11.2539	477.3	140.034	18.0559	3.8621	19.4005	43.5687	3.68084	0.68034	0.03182	0	81.2268	10.4055	23.0064	402.904	38.6065	0.01518	82.8884	2.17666	0.67	0.001	0	0	0	0	0	0	0.358	0.002	0.001	0	0.003	0	155.925	3511.08
2135	1.83665	0	266.064	7.33345	11.2539	477.3	140.034	18.0559	3.8621	19.4005	43.5687	3.4539	0.6397	0.03015	0	81.2268	10.4055	23.0064	402.723	38.3811	0.0152	82.8884	2.05145	0.648	0.001	0	0	0	0	0	0	0.34	0.002	0.001	0	0.002	0	155.925	3511.08
2136	1.81118	0	266.064	7.31122	11.2539	477.3	140.034	18.0559	3.8621	19.4005	43.5687	3.22696	0.59906	0.02848	0	81.2268	10.4055	23.0064	402.541	38.1556	0.01522	82.8884	1.92624	0.627	0.001	0	0	0	0	0	0	0.323	0.002	0.001	0	0.002	0	155.925	3511.08
2137	1.78571	0	266.064	7.28899	11.2539	477.3	140.034	18.0559	3.8621	19.4005	43.5687	3.00002	0.55842	0.02681	0	81.2268	10.4055	23.0064	402.36	37.9302	0.01524	82.8884	1.80103	0.606	0	0	0	0	0	0	0	0.307	0.001	0.001	0	0.002	0	155.925	3511.08
2138	1.76024	0	266.064	7.26676	11.2539	477.3	140.034	18.0559	3.8621	19.4005	43.5687	2.77308	0.51778	0.02514	0	81.2268	10.4055	23.0064	402.178	37.7048	0.01526	82.8884	1.67582	0.586	0	0	0	0	0	0	0	0.291	0.001	0	0	0.002	0	155.925	3511.08
2139	1.73477	0	266.065	7.24453	11.2539	477.3	140.034	18.0559	3.8621	19.4005	43.5687	2.54614	0.47714	0.02347	0	81.2268	10.4055	23.0064	401.997	37.4794	0.01528	82.8884	1.55061	0.567	0	0	0	0	0	0	0	0.277	0.001	0	0	0.002	0	155.925	3511.08
2140	1.7093	0	266.065	7.2223	11.2539	477.3	140.034	18.0559	3.8621	19.4005	43.5687	2.3192	0.4365	0.0218	0	81.2268	10.4055	23.0064	401.815	37.254	0.0153	82.8884	1.4254	0.548	0	0	0	0	0	0	0	0.263	0.001	0	0	0.002	0	155.925	3511.08
2141	1.68314	0	266.065	7.20008	11.2539	477.3	140.034	18.0559	3.8621	19.4005	43.5687	2.09227	0.39585	0.020125	0	81.2268	10.4055	23.0064	401.634	37.0286	0.01535	82.8884	1.30019	0.53	0	0	0	0	0	0	0	0.25	0.001	0	0	0.002	0	155.925	3511.08
2142	1.65698	0	266.065	7.17785	11.2539	477.3	140.034	18.0559	3.8621	19.4005	43.5687	1.86535	0.3552	0.01845	0	81.2268	10.4055	23.0064	401.452	36.8032	0.0154	82.8884	1.17498	0.512	0	0	0	0	0	0	0	0.237	0.001	0	0	0.002	0	155.925	3511.08
2143	1.63081	0	266.065	7.15562	11.2539	477.3	140.034	18.0559	3.8621	19.4005	43.5687	1.63843	0.31455	0.016775	0	81.2268	10.4055	23.0064	401.271	36.5778	0.01545	82.8884	1.04976	0.495	0	0	0	0	0	0	0	0.226	0.001	0	0	0.002	0	155.925	3511.08
2144	1.60465	0	266.065	7.1334	11.2539	477.3	140.034	18.0559	3.8621	19.4005	43.5687	1.4115	0.2739	0.0151	0	81.2268	10.4055	23.0064	401.089	36.3524	0.0155	82.8884	0.92455	0.479	0	0	0	0	0	0	0	0.214	0.001	0	0	0.002	0	155.925	3511.08
2145	1.57849	0	266.065	7.11118	11.2539	477.3	140.034	18.0559	3.8621	19.4005	43.5687	1.18457	0.23325	0.013425	0	81.2268	10.4055	23.0064	400.908	36.127	0.01555	82.8884	0.799338	0.463	0	0	0	0	0	0	0	0.204	0.001	0	0	0.001	0	155.925	3511.08
2146	1.55232	0	266.065	7.08895	11.2539	477.3	140.034	18.0559	3.8621	19.4005	43.5687	0.95765	0.1926	0.01175	0	81.2268	10.4055	23.0064	400.726	35.9016	0.0156	82.8884	0.674125	0.448	0	0	0	0	0	0	0	0.193	0.001	0	0	0.001	0	155.925	3511.08
2147	1.52616	0	266.065	7.06672	11.2539	477.3	140.034	18.0559	3.8621	19.4005	43.5687	0.730725	0.15195	0.010075	0	81.2268	10.4055	23.0064	400.545	35.6762	0.01565	82.8884	0.548913	0.433	0	0	0	0	0	0	0	0.184	0.001	0	0	0.001	0	155.925	3511.08
2148	1.5	0	266.066	7.0445	11.2539	477.3	140.034	18.0559	3.8621	19.4005	43.5687	0.5038	0.1113	0.0084	0	81.2268	10.4055	23.0064	400.363	35.4508	0.0157	82.8884	0.4237	0.419	0	0	0	0	0	0	0	0.175	0.001	0	0	0.001	0	155.925	3511.08
2149	1.5354	0	266.083	7.0065	11.2539	477.3	140.034	18.0559	3.8621	19.4005	43.5687	0.0511	0.0319	0.0058	0.8286	81.2101	10.4253	23.2987	401.214	35.2926	0.06	82.8825	0.2246	5.888	26.472	4.838	1.2	0.17	0.154	0	0.058	0.306	0.04	0.004	0	0.175	0	155.922	3511.08
2150	1.5468	0	266.092	7.0074	11.2539	477.3	140.034	18.0559	3.8621	19.4005	43.5687	0.0511	0.0319	0.0058	0.8286	81.2115	10.4255	23.2991	401.221	35.2933	0.06	82.8842	0.2246	5.888	26.473	4.838	1.2	0.17	0.154	0	0.058	0.306	0.041	0.004	0	0.175	0	155.949	3511.08
2151	1.5531	0	266.101	7.008	11.2539	477.3	140.034	18.0559	3.8621	19.4005	43.5687	0.0511	0.0319	0.0058	0.8286	81.2131	10.4256	23.2994	401.228	35.2939	0.06	82.8858	0.2246	5.889	26.476	4.839	1.2	0.17	0.154	0	0.058	0.306	0.041	0.004	0	0.175	0	155.957	3511.08
2152	1.5547	0	266.11	7.0085	11.2539	477.3	140.034	18.0559	3.8621	19.4005	43.5687	0.0511	0.0319	0.0058	0.8286	81.2145	10.4258	23.2998	401.236	35.2945	0.06	82.8872	0.2246	5.889	26.478	4.839	1.2	0.17	0.154	0	0.058	0.306	0.041	0.004	0	0.175	0	155.964	3511.08
2153	1.5527	0	266.12	7.0085	11.2539	477.3	140.034	18.0559	3.8621	19.4005	43.5687	0.0511	0.0319	0.0058	0.8286	81.2164	10.426	23.3004	401.244	35.2953	0.06	82.889	0.2246	5.89	26.481	4.84	1.2	0.17	0.154	0	0.058	0.306	0.041	0.004	0	0.175	0	155.973	3511.08
2154	1.5482	0	266.133	7.0085	11.2539	477.3	140.034	18.0559	3.8621	19.4005	43.5687	0.0511	0.0319	0.0058	0.8287	81.2186	10.4263	23.3011	401.255	35.2963	0.06	82.8912	0.2246	5.891	26.484	4.84	1.2	0.17	0.154	0	0.058	0.306	0.041	0.004	0	0.175	0	155.983	3511.08
2155	1.5419	0	266.147	7.0085	11.2539	477.3	140.034	18.0559	3.8621	19.4005	43.5687	0.0511	0.0319	0.0058	0.8287	81.221	10.4267	23.3017	401.267	35.2974	0.06	82.8937	0.2246	5.891	26.488	4.841	1.2	0.17	0.154	0	0.058	0.306	0.041	0.004	0	0.175	0	155.994	3511.08
2156	1.5324	0	266.164	7.0085	11.2539	477.3	140.034	18.0559	3.8621	19.4005	43.5687	0.0511	0.0319	0.0058	0.82874	81.2239	10.4271	23.3026	401.281	35.2986	0.06	82.8967	0.2246	5.892	26.491	4.842	1.201	0.17	0.154	0	0.058	0.306	0.041	0.004	0	0.175	0	156.005	3511.08
2157	1.5229	0	266.181	7.0085	11.2539	477.3	140.034	18.0559	3.8621	19.4005	43.5687	0.0511	0.0319	0.0058	0.82878	81.2268	10.4275	23.3034	401.296	35.2999	0.06	82.8997	0.2246	5.893	26.495	4.842	1.201	0.17	0.154	0	0.058	0.306	0.041	0.004	0	0.175	0	156.018	3511.08
2158	1.5134	0	266.199	7.0085	11.2539	477.3	140.034	18.0559	3.8621	19.4005	43.5687	0.0511	0.0319	0.0058	0.82882	81.2298	10.4278	23.3043	401.31	35.3011	0.06	82.9027	0.2246	5.894	26.499	4.843	1.201	0.17	0.154	0	0.058	0.306	0.041	0.004	0	0.175	0	156.03	3511.08
2159	1.5039	0	266.216	7.0085	11.2539	477.3	140.034	18.0559	3.8621	19.4005	43.5687	0.0511	0.0319	0.0058	0.82886	81.2327	10.4282	23.3051	401.325	35.3024	0.06	82.9057	0.2246	5.895	26.504	4.844	1.201	0.17	0.154	0	0.058	0.306	0.041	0.004	0	0.175	0	156.044	3511.08
2160	1.4944	0	266.233	7.0085	11.2539	477.3	140.034	18.0559	3.8621	19.4005	43.5687	0.0511	0.0319	0.0058	0.8289	81.2356	10.4286	23.306	401.339	35.3036	0.06	82.9087	0.2246	5.896	26.508	4.845	1.201	0.17	0.154	0	0.058	0.306	0.041	0.004	0	0.175	0	156.057	3511.08
2161	1.48311	0	266.253	7.0085	11.2539	477.3	140.034	18.0559	3.8621	19.4005	43.5687	0.05111	0.0319	0.0058	0.82892	81.239	10.429	23.307	401.356	35.3051	0.06	82.9121	0.2246	5.897	26.512	4.845	1.201	0.17	0.154	0	0.058	0.306	0.041	0.004	0	0.175	0	156.071	3511.08
2162	1.47182	0	266.273	7.0085	11.2539	477.3	140.034	18.0559	3.8621	19.4005	43.5687	0.05112	0.0319	0.0058	0.82894	81.2423	10.4295	23.3079	401.373	35.3065	0.06	82.9156	0.2246	5.898	26.517	4.846	1.202	0.17	0.154	0	0.058	0.306	0.041	0.004	0	0.175	0	156.084	3511.08
2163	1.46053	0	266.293	7.0085	11.2539	477.3	140.034	18.0559	3.8621	19.4005	43.5687	0.05113	0.0319	0.0058	0.82896	81.2457	10.4299	23.3089	401.389	35.308	0.06	82.919	0.2246	5.899	26.521	4.847	1.202	0.17	0.154	0	0.058	0.306	0.041	0.004	0	0.175	0	156.098	3511.08
2164	1.44924	0	266.312	7.0085	11.2539	477.3	140.034	18.0559	3.8621	19.4005	43.5687	0.05114	0.0319	0.0058	0.82898	81.2491	10.4303	23.3099	401.406	35.3095	0.06	82.9224	0.2246	5.9	26.525	4.848	1.202	0.17	0.154	0	0.058	0.306	0.041	0.004	0	0.175	0	156.112	3511.08
2165	1.43795	0	266.332	7.0085	11.2539	477.3	140.034	18.0559	3.8621	19.4005	43.5687	0.05115	0.0319	0.0058	0.829	81.2524	10.4307	23.3108	401.423	35.3109	0.06	82.9258	0.2246	5.901	26.53	4.849	1.202	0.17	0.154	0	0.058	0.306	0.041	0.004	0	0.175	0	156.127	3511.08
2166	1.42666	0	266.352	7.0085	11.2539	477.3	140.034	18.0559	3.8621	19.4005	43.5687	0.05116	0.0319	0.0058	0.82902	81.2558	10.4312	23.3118	401.439	35.3124	0.06	82.9293	0.2246	5.902	26.534	4.849	1.202	0.17	0.154	0	0.058	0.306	0.041	0.004	0	0.175	0	156.141	3511.08
2167	1.41537	0	266.372	7.0085	11.2539	477.3	140.034	18.0559	3.8621	19.4005	43.5687	0.05117	0.0319	0.0058	0.82904	81.2592	10.4316	23.3128	401.456	35.3139	0.06	82.9327	0.2246	5.903	26.539	4.85	1.203	0.17	0.154	0	0.058	0.306	0.041	0.004	0	0.175	0	156.155	3511.08
2168	1.40408	0	266.392	7.0085	11.2539	477.3	140.034	18.0559	3.8621	19.4005	43.5687	0.05118	0.0319	0.0058	0.82906	81.2626	10.432	23.3138	401.473	35.3154	0.06	82.9361	0.2246	5.904	26.544	4.851	1.203	0.17	0.154	0	0.058	0.306	0.041	0.004	0	0.175	0	156.169	3511.08
2169	1.39279	0	266.412	7.0085	11.2539	477.3	140.034	18.0559	3.8621	19.4005	43.5687	0.05119	0.0319	0.0058	0.82908	81.2659	10.4325	23.3147	401.489	35.3168	0.06	82.9396	0.2246	5.905	26.548	4.852	1.203	0.17	0.154	0	0.058	0.306	0.041	0.004	0	0.175	0	156.183	3511.08
2170	1.3815	0	266.432	7.0085	11.2539	477.3	140.034	18.0559	3.8621	19.4005	43.5687	0.0512	0.0319	0.0058	0.8291	81.2693	10.4329	23.3157	401.506	35.3183	0.06	82.943	0.2246	5.906	26.553	4.853	1.203	0.17	0.154	0	0.058	0.306	0.041	0.004	0	0.175	0	156.198	3511.08
2171	1.3712	0	266.452	7.0085	11.2539	477.3	140.034	18.0559	3.8621	19.4005	43.5687	0.0512	0.0319	0.0058	0.82914	81.2727	10.4333	23.3167	401.523	35.3198	0.06	82.9465	0.2246	5.907	26.557	4.854	1.204	0.17	0.154	0	0.058	0.306	0.041	0.004	0	0.175	0	156.212	3511.08
2172	1.3609	0	266.472	7.0085	11.2539	477.3	140.034	18.0559	3.8621	19.4005	43.5687	0.0512	0.0319	0.0058	0.82918	81.2761	10.4338	23.3176	401.54	35.3213	0.06	82.95	0.2246	5.908	26.562	4.854	1.204	0.17	0.154	0	0.058	0.306	0.041	0.004	0	0.175	0	156.226	3511.08
2173	1.3506	0	266.492	7.0085	11.2539	477.3	140.034	18.0559	3.8621	19.4005	43.5687	0.0512	0.0319	0.0058	0.82922	81.2796	10.4342	23.3186	401.556	35.3228	0.06	82.9535	0.2246	5.909	26.566	4.855	1.204	0.17	0.154	0	0.058	0.306	0.041	0.004	0	0.175	0	156.24	3511.08
2174	1.3403	0	266.512	7.0085	11.2539	477.3	140.034	18.0559	3.8621	19.4005	43.5687	0.0512	0.0319	0.0058	0.82926	81.283	10.4347	23.3195	401.573	35.3243	0.06	82.957	0.2246	5.91	26.571	4.856	1.204	0.171	0.154	0	0.058	0.306	0.041	0.004	0	0.175	0	156.254	3511.08
2175	1.33	0	266.532	7.0085	11.2539	477.3	140.034	18.0559	3.8621	19.4005	43.5687	0.0512	0.0319	0.0058	0.8293	81.2864	10.4351	23.3205	401.59	35.3257	0.06	82.9605	0.2246	5.911	26.575	4.857	1.204	0.171	0.154	0	0.058	0.306	0.041	0.004	0	0.175	0	156.268	3511.08
2176	1.3197	0	266.552	7.0085	11.2539	477.3	140.034	18.0559	3.8621	19.4005	43.5687	0.0512	0.0319	0.0058	0.82934	81.2898	10.4355	23.3215	401.607	35.3272	0.06	82.964	0.2246	5.912	26.58	4.858	1.205	0.171	0.154	0	0.058	0.306	0.041	0.004	0	0.176	0	156.282	3511.08
2177	1.3094	0	266.572	7.0085	11.2539	477.3	140.034	18.0559	3.8621	19.4005	43.5687	0.0512	0.0319	0.0058	0.82938	81.2932	10.436	23.3224	401.624	35.3287	0.06	82.9675	0.2246	5.913	26.584	4.859	1.205	0.171	0.154	0	0.058	0.306	0.041	0.004	0	0.176	0	156.296	3511.08
2178	1.2991	0	266.592	7.0085	11.2539	477.3	140.034	18.0559	3.8621	19.4005	43.5687	0.0512	0.0319	0.0058	0.82942	81.2967	10.4364	23.3234	401.641	35.3302	0.06	82.971	0.2246	5.914	26.588	4.859	1.205	0.171	0.154	0	0.058	0.306	0.041	0.004	0	0.176	0	156.31	3511.08
2179	1.2888	0	266.613	7.0085	11.2539	477.3	140.034	18.0559	3.8621	19.4005	43.5687	0.0512	0.0319	0.0058	0.82946	81.3001	10.4369	23.3243	401.658	35.3317	0.06	82.9745	0.2246	5.915	26.593	4.86	1.205	0.171	0.154	0	0.058	0.306	0.041	0.004	0	0.176	0	156.324	3511.08
2180	1.2785	0	266.633	7.0085	11.2539	477.3	140.034	18.0559	3.8621	19.4005	43.5687	0.0512	0.0319	0.0058	0.8295	81.3035	10.4373	23.3253	401.675	35.3332	0.06	82.978	0.2246	5.916	26.597	4.861	1.205	0.171	0.154	0	0.058	0.306	0.041	0.004	0	0.176	0	156.338	3511.08
2181	1.26966	0	266.652	7.0085	11.2539	477.3	140.034	18.0559	3.8621	19.4005	43.5687	0.0512	0.0319	0.0058	0.82954	81.3068	10.4377	23.3263	401.691	35.3346	0.06	82.9814	0.2246	5.917	26.602	4.862	1.206	0.171	0.154	0	0.058	0.306	0.041	0.004	0	0.176	0	156.351	3511.08
2182	1.26082	0	266.672	7.0085	11.2539	477.3	140.034	18.0559	3.8621	19.4005	43.5687	0.0512	0.0319	0.0058	0.82958	81.3101	10.4381	23.3272	401.707	35.3361	0.06	82.9847	0.2246	5.918	26.606	4.863	1.206	0.171	0.154	0	0.058	0.306	0.041	0.004	0	0.176	0	156.365	3511.08
2183	1.25198	0	266.691	7.0085	11.2539	477.3	140.034	18.0559	3.8621	19.4005	43.5687	0.0512	0.0319	0.0058	0.82962	81.3134	10.4386	23.3282	401.724	35.3375	0.06	82.9881	0.2246	5.919	26.61	4.863	1.206	0.171	0.154	0	0.058	0.306	0.041	0.004	0	0.176	0	156.379	3511.08
2184	1.24314	0	266.71	7.0085	11.2539	477.3	140.034	18.0559	3.8621	19.4005	43.5687	0.0512	0.0319	0.0058	0.82966	81.3167	10.439	23.3291	401.74	35.339	0.06	82.9915	0.2246	5.92	26.615	4.864	1.206	0.171	0.154	0	0.058	0.306	0.041	0.004	0	0.176	0	156.392	3511.08
2185	1.2343	0	266.73	7.0085	11.2539	477.3	140.034	18.0559	3.8621	19.4005	43.5687	0.0512	0.0319	0.0058	0.8297	81.32	10.4394	23.33	401.756	35.3404	0.06	82.9948	0.2246	5.921	26.619	4.865	1.206	0.171	0.154	0	0.058	0.306	0.041	0.004	0	0.176	0	156.406	3511.08
2186	1.22546	0	266.749	7.0085	11.2539	477.3	140.034	18.0559	3.8621	19.4005	43.5687	0.0512	0.0319	0.0058	0.82974	81.3233	10.4398	23.331	401.773	35.3418	0.06	82.9982	0.2246	5.922	26.623	4.866	1.207	0.171	0.154	0	0.058	0.306	0.041	0.004	0	0.176	0	156.419	3511.08
2187	1.21662	0	266.769	7.0085	11.2539	477.3	140.034	18.0559	3.8621	19.4005	43.5687	0.0512	0.0319	0.0058	0.82978	81.3266	10.4402	23.3319	401.789	35.3433	0.06	83.0016	0.2246	5.923	26.627	4.866	1.207	0.171	0.155	0	0.058	0.306	0.041	0.004	0	0.176	0	156.432	3511.08
2188	1.20778	0	266.788	7.0085	11.2539	477.3	140.034	18.0559	3.8621	19.4005	43.5687	0.0512	0.0319	0.0058	0.82982	81.3299	10.4407	23.3329	401.805	35.3447	0.06	83.005	0.2246	5.924	26.632	4.867	1.207	0.171	0.155	0	0.058	0.306	0.041	0.004	0	0.176	0	156.446	3511.08
2189	1.19894	0	266.808	7.0085	11.2539	477.3	140.034	18.0559	3.8621	19.4005	43.5687	0.0512	0.0319	0.0058	0.82986	81.3332	10.4411	23.3339	401.821	35.3462	0.06	83.0083	0.2246	5.924	26.636	4.868	1.207	0.171	0.155	0	0.058	0.306	0.041	0.004	0	0.176	0	156.459	3511.08
2190	1.1901	0	266.827	7.0085	11.2539	477.3	140.034	18.0559	3.8621	19.4005	43.5687	0.0512	0.0319	0.0058	0.8299	81.3365	10.4415	23.3348	401.838	35.3476	0.06	83.0117	0.2246	5.925	26.64	4.869	1.207	0.171	0.155	0	0.058	0.306	0.041	0.004	0	0.176	0	156.472	3511.08
2191	1.18257	0	266.846	7.0085	11.2539	477.3	140.034	18.0559	3.8621	19.4005	43.5687	0.0512	0.0319	0.0058	0.82992	81.3397	10.4419	23.3357	401.853	35.349	0.06	83.0149	0.2246	5.926	26.644	4.87	1.207	0.171	0.155	0	0.058	0.306	0.041	0.004	0	0.176	0	156.485	3511.08
2192	1.17504	0	266.864	7.0085	11.2539	477.3	140.034	18.0559	3.8621	19.4005	43.5687	0.0512	0.0319	0.0058	0.82994	81.3428	10.4423	23.3366	401.869	35.3503	0.06	83.0181	0.2246	5.927	26.648	4.87	1.208	0.171	0.155	0	0.058	0.306	0.041	0.004	0	0.176	0	156.498	3511.08
2193	1.16751	0	266.883	7.0085	11.2539	477.3	140.034	18.0559	3.8621	19.4005	43.5687	0.0512	0.0319	0.0058	0.82996	81.346	10.4428	23.3376	401.884	35.3517	0.06	83.0213	0.2246	5.928	26.653	4.871	1.208	0.171	0.155	0	0.058	0.306	0.041	0.004	0	0.176	0	156.511	3511.08
2194	1.15998	0	266.901	7.0085	11.2539	477.3	140.034	18.0559	3.8621	19.4005	43.5687	0.0512	0.0319	0.0058	0.82998	81.3491	10.4432	23.3385	401.9	35.3531	0.06	83.0245	0.2246	5.929	26.657	4.872	1.208	0.171	0.155	0	0.058	0.306	0.041	0.004	0	0.176	0	156.524	3511.08
2195	1.15245	0	266.92	7.0085	11.2539	477.3	140.034	18.0559	3.8621	19.4005	43.5687	0.0512	0.0319	0.0058	0.83	81.3523	10.4436	23.3394	401.916	35.3544	0.06	83.0277	0.2246	5.93	26.661	4.873	1.208	0.171	0.155	0	0.058	0.306	0.041	0.004	0	0.176	0	156.537	3511.08
2196	1.14492	0	266.938	7.0085	11.2539	477.3	140.034	18.0559	3.8621	19.4005	43.5687	0.0512	0.0319	0.0058	0.83002	81.3555	10.444	23.3403	401.931	35.3558	0.06	83.0309	0.2246	5.931	26.665	4.873	1.208	0.171	0.155	0	0.058	0.306	0.041	0.004	0	0.176	0	156.549	3511.08
2197	1.13739	0	266.957	7.0085	11.2539	477.3	140.034	18.0559	3.8621	19.4005	43.5687	0.0512	0.0319	0.0058	0.83004	81.3586	10.4444	23.3412	401.947	35.3572	0.06	83.0341	0.2246	5.932	26.669	4.874	1.209	0.171	0.155	0	0.058	0.306	0.041	0.004	0	0.176	0	156.562	3511.08
2198	1.12986	0	266.975	7.0085	11.2539	477.3	140.034	18.0559	3.8621	19.4005	43.5687	0.0512	0.0319	0.0058	0.83006	81.3618	10.4449	23.3422	401.962	35.3586	0.06	83.0373	0.2246	5.933	26.673	4.875	1.209	0.171	0.155	0	0.058	0.306	0.041	0.004	0	0.176	0	156.575	3511.08
2199	1.12233	0	266.994	7.0085	11.2539	477.3	140.034	18.0559	3.8621	19.4005	43.5687	0.0512	0.0319	0.0058	0.83008	81.3649	10.4453	23.3431	401.978	35.3599	0.06	83.0405	0.2246	5.934	26.677	4.875	1.209	0.171	0.155	0	0.058	0.307	0.041	0.004	0	0.176	0	156.587	3511.08
2200	1.1148	0	267.012	7.0085	11.2539	477.3	140.034	18.0559	3.8621	19.4005	43.5687	0.0512	0.0319	0.0058	0.8301	81.3681	10.4457	23.344	401.993	35.3613	0.06	83.0437	0.2246	5.934	26.681	4.876	1.209	0.171	0.155	0	0.058	0.307	0.041	0.004	0	0.176	0	156.6	3511.08
2201	1.10836	0	267.03	7.0085	11.2539	477.3	140.034	18.0559	3.8621	19.4005	43.5687	0.05121	0.0319	0.0058	0.83013	81.3711	10.4461	23.3449	402.008	35.3626	0.06	83.0468	0.2246	5.935	26.685	4.877	1.209	0.171	0.155	0	0.058	0.307	0.041	0.004	0	0.176	0	156.612	3511.08
2202	1.10192	0	267.048	7.0085	11.2539	477.3	140.034	18.0559	3.8621	19.4005	43.5687	0.05122	0.0319	0.0058	0.83016	81.3741	10.4464	23.3457	402.023	35.3639	0.06	83.0498	0.2246	5.936	26.689	4.878	1.209	0.171	0.155	0	0.058	0.307	0.041	0.004	0	0.176	0	156.624	3511.08
2203	1.09548	0	267.065	7.0085	11.2539	477.3	140.034	18.0559	3.8621	19.4005	43.5687	0.05123	0.0319	0.0058	0.83019	81.3771	10.4468	23.3466	402.038	35.3652	0.06	83.0529	0.2246	5.937	26.693	4.878	1.21	0.171	0.155	0	0.058	0.307	0.041	0.004	0	0.176	0	156.637	3511.08
2204	1.08904	0	267.083	7.0085	11.2539	477.3	140.034	18.0559	3.8621	19.4005	43.5687	0.05124	0.0319	0.0058	0.83022	81.3801	10.4471	23.3474	402.053	35.3665	0.06	83.056	0.2246	5.938	26.696	4.879	1.21	0.171	0.155	0	0.058	0.307	0.041	0.004	0	0.176	0	156.649	3511.08
2205	1.0826	0	267.101	7.0085	11.2539	477.3	140.034	18.0559	3.8621	19.4005	43.5687	0.05125	0.0319	0.0058	0.83025	81.3831	10.4475	23.3483	402.067	35.3678	0.06	83.059	0.2246	5.939	26.7	4.88	1.21	0.171	0.155	0	0.058	0.307	0.041	0.004	0	0.176	0	156.661	3511.08
2206	1.07616	0	267.118	7.0085	11.2539	477.3	140.034	18.0559	3.8621	19.4005	43.5687	0.05126	0.0319	0.0058	0.83028	81.3861	10.4479	23.3491	402.082	35.3691	0.06	83.0621	0.2246	5.94	26.704	4.88	1.21	0.171	0.155	0	0.058	0.307	0.041	0.004	0	0.176	0	156.673	3511.08
2207	1.06972	0	267.136	7.0085	11.2539	477.3	140.034	18.0559	3.8621	19.4005	43.5687	0.05127	0.0319	0.0058	0.83031	81.3891	10.4482	23.3499	402.097	35.3704	0.06	83.0652	0.2246	5.94	26.708	4.881	1.21	0.171	0.155	0	0.058	0.307	0.041	0.004	0	0.176	0	156.685	3511.08
2208	1.06328	0	267.154	7.0085	11.2539	477.3	140.034	18.0559	3.8621	19.4005	43.5687	0.05128	0.0319	0.0058	0.83034	81.3921	10.4486	23.3508	402.112	35.3717	0.06	83.0683	0.2246	5.941	26.712	4.882	1.211	0.171	0.155	0	0.058	0.307	0.041	0.004	0	0.176	0	156.697	3511.08
2209	1.05684	0	267.171	7.0085	11.2539	477.3	140.034	18.0559	3.8621	19.4005	43.5687	0.05129	0.0319	0.0058	0.83037	81.3951	10.4489	23.3516	402.127	35.373	0.06	83.0713	0.2246	5.942	26.716	4.883	1.211	0.171	0.155	0	0.058	0.307	0.041	0.004	0	0.176	0	156.709	3511.08
2210	1.0504	0	267.189	7.0085	11.2539	477.3	140.034	18.0559	3.8621	19.4005	43.5687	0.0513	0.0319	0.0058	0.8304	81.3981	10.4493	23.3525	402.142	35.3743	0.06	83.0744	0.2246	5.943	26.719	4.883	1.211	0.171	0.155	0	0.058	0.307	0.041	0.004	0	0.176	0	156.721	3511.08
2211	1.04486	0	267.206	7.0085	11.2539	477.3	140.034	18.0559	3.8621	19.4005	43.5687	0.0513	0.0319	0.0058	0.83044	81.4009	10.4497	23.3533	402.156	35.3755	0.06	83.0773	0.2246	5.944	26.723	4.884	1.211	0.172	0.155	0	0.058	0.307	0.041	0.004	0	0.176	0	156.733	3511.08
2212	1.03932	0	267.223	7.0085	11.2539	477.3	140.034	18.0559	3.8621	19.4005	43.5687	0.0513	0.0319	0.0058	0.83048	81.4038	10.45	23.3541	402.17	35.3768	0.06	83.0802	0.2246	5.945	26.727	4.885	1.211	0.172	0.155	0	0.058	0.307	0.041	0.004	0	0.176	0	156.744	3511.08
2213	1.03378	0	267.239	7.0085	11.2539	477.3	140.034	18.0559	3.8621	19.4005	43.5687	0.0513	0.0319	0.0058	0.83052	81.4066	10.4504	23.355	402.184	35.378	0.06	83.0832	0.2246	5.946	26.731	4.885	1.211	0.172	0.155	0	0.058	0.307	0.041	0.004	0	0.177	0	156.756	3511.08
2214	1.02824	0	267.256	7.0085	11.2539	477.3	140.034	18.0559	3.8621	19.4005	43.5687	0.0513	0.0319	0.0058	0.83056	81.4095	10.4508	23.3558	402.198	35.3792	0.06	83.0861	0.2246	5.946	26.734	4.886	1.212	0.172	0.155	0	0.058	0.307	0.041	0.004	0	0.177	0	156.768	3511.08
2215	1.0227	0	267.273	7.0085	11.2539	477.3	140.034	18.0559	3.8621	19.4005	43.5687	0.0513	0.0319	0.0058	0.8306	81.4124	10.4512	23.3566	402.212	35.3805	0.06	83.089	0.2246	5.947	26.738	4.887	1.212	0.172	0.155	0	0.058	0.307	0.041	0.004	0	0.177	0	156.779	3511.08
2216	1.01716	0	267.29	7.0085	11.2539	477.3	140.034	18.0559	3.8621	19.4005	43.5687	0.0513	0.0319	0.0058	0.83064	81.4152	10.4515	23.3574	402.226	35.3817	0.06	83.0919	0.2246	5.948	26.742	4.887	1.212	0.172	0.155	0	0.058	0.307	0.041	0.004	0	0.177	0	156.791	3511.08
2217	1.01162	0	267.307	7.0085	11.2539	477.3	140.034	18.0559	3.8621	19.4005	43.5687	0.0513	0.0319	0.0058	0.83068	81.418	10.4519	23.3582	402.24	35.3829	0.06	83.0948	0.2246	5.949	26.745	4.888	1.212	0.172	0.155	0	0.058	0.307	0.041	0.004	0	0.177	0	156.802	3511.08
2218	1.00608	0	267.323	7.0085	11.2539	477.3	140.034	18.0559	3.8621	19.4005	43.5687	0.0513	0.0319	0.0058	0.83072	81.4209	10.4523	23.3591	402.254	35.3841	0.06	83.0978	0.2246	5.95	26.749	4.889	1.212	0.172	0.155	0	0.058	0.307	0.041	0.004	0	0.177	0	156.813	3511.08
2219	1.00054	0	267.34	7.0085	11.2539	477.3	140.034	18.0559	3.8621	19.4005	43.5687	0.0513	0.0319	0.0058	0.83076	81.4237	10.4526	23.3599	402.268	35.3854	0.06	83.1007	0.2246	5.95	26.752	4.889	1.212	0.172	0.155	0	0.058	0.307	0.041	0.004	0	0.177	0	156.825	3511.08
2220	0.995	0	267.357	7.0085	11.2539	477.3	140.034	18.0559	3.8621	19.4005	43.5687	0.0513	0.0319	0.0058	0.8308	81.4266	10.453	23.3607	402.283	35.3866	0.06	83.1036	0.2246	5.951	26.756	4.89	1.213	0.172	0.155	0	0.058	0.307	0.041	0.004	0	0.177	0	156.836	3511.08
2221	0.99023	0	267.373	7.0085	11.2539	477.3	140.034	18.0559	3.8621	19.4005	43.5687	0.0513	0.0319	0.0058	0.83082	81.4293	10.4534	23.3615	402.296	35.3878	0.06	83.1064	0.2246	5.952	26.76	4.891	1.213	0.172	0.155	0	0.058	0.307	0.041	0.004	0	0.177	0	156.847	3511.08
2222	0.98546	0	267.389	7.0085	11.2539	477.3	140.034	18.0559	3.8621	19.4005	43.5687	0.0513	0.0319	0.0058	0.83084	81.432	10.4537	23.3623	402.309	35.389	0.06	83.1091	0.2246	5.953	26.763	4.891	1.213	0.172	0.155	0	0.058	0.307	0.041	0.004	0	0.177	0	156.858	3511.08
2223	0.98069	0	267.405	7.0085	11.2539	477.3	140.034	18.0559	3.8621	19.4005	43.5687	0.0513	0.0319	0.0058	0.83086	81.4348	10.4541	23.363	402.323	35.3902	0.06	83.1119	0.2246	5.954	26.767	4.892	1.213	0.172	0.155	0	0.058	0.307	0.041	0.004	0	0.177	0	156.869	3511.08
2224	0.97592	0	267.421	7.0085	11.2539	477.3	140.034	18.0559	3.8621	19.4005	43.5687	0.0513	0.0319	0.0058	0.83088	81.4375	10.4545	23.3638	402.336	35.3914	0.06	83.1147	0.2246	5.954	26.77	4.893	1.213	0.172	0.155	0	0.058	0.307	0.041	0.004	0	0.177	0	156.88	3511.08
2225	0.97115	0	267.437	7.0085	11.2539	477.3	140.034	18.0559	3.8621	19.4005	43.5687	0.0513	0.0319	0.0058	0.8309	81.4402	10.4549	23.3646	402.35	35.3925	0.06	83.1175	0.2246	5.955	26.774	4.893	1.213	0.172	0.155	0	0.058	0.307	0.041	0.004	0	0.177	0	156.891	3511.08
2226	0.96638	0	267.453	7.0085	11.2539	477.3	140.034	18.0559	3.8621	19.4005	43.5687	0.0513	0.0319	0.0058	0.83092	81.4429	10.4552	23.3654	402.363	35.3937	0.06	83.1202	0.2246	5.956	26.777	4.894	1.213	0.172	0.155	0	0.058	0.307	0.041	0.004	0	0.177	0	156.902	3511.08
2227	0.96161	0	267.469	7.0085	11.2539	477.3	140.034	18.0559	3.8621	19.4005	43.5687	0.0513	0.0319	0.0058	0.83094	81.4456	10.4556	23.3662	402.377	35.3949	0.06	83.123	0.2246	5.957	26.781	4.894	1.214	0.172	0.155	0	0.058	0.307	0.041	0.004	0	0.177	0	156.913	3511.08
2228	0.95684	0	267.485	7.0085	11.2539	477.3	140.034	18.0559	3.8621	19.4005	43.5687	0.0513	0.0319	0.0058	0.83096	81.4484	10.456	23.3669	402.39	35.3961	0.06	83.1258	0.2246	5.957	26.784	4.895	1.214	0.172	0.155	0	0.058	0.307	0.041	0.004	0	0.177	0	156.924	3511.08
2229	0.95207	0	267.501	7.0085	11.2539	477.3	140.034	18.0559	3.8621	19.4005	43.5687	0.0513	0.0319	0.0058	0.83098	81.4511	10.4563	23.3677	402.403	35.3973	0.06	83.1285	0.2246	5.958	26.788	4.896	1.214	0.172	0.155	0	0.058	0.307	0.041	0.004	0	0.177	0	156.935	3511.08
2230	0.9473	0	267.517	7.0085	11.2539	477.3	140.034	18.0559	3.8621	19.4005	43.5687	0.0513	0.0319	0.0058	0.831	81.4538	10.4567	23.3685	402.417	35.3985	0.06	83.1313	0.2246	5.959	26.791	4.896	1.214	0.172	0.155	0	0.058	0.307	0.041	0.004	0	0.177	0	156.945	3511.08
2231	0.94314	0	267.532	7.0085	11.2539	477.3	140.034	18.0559	3.8621	19.4005	43.5687	0.0513	0.0319	0.0058	0.83103	81.4564	10.457	23.3693	402.43	35.3996	0.06	83.1339	0.2246	5.96	26.794	4.897	1.214	0.172	0.155	0	0.058	0.307	0.041	0.004	0	0.177	0	156.956	3511.08
2232	0.93898	0	267.548	7.0085	11.2539	477.3	140.034	18.0559	3.8621	19.4005	43.5687	0.0513	0.0319	0.0058	0.83106	81.459	10.4573	23.37	402.442	35.4008	0.06	83.1366	0.2246	5.96	26.798	4.898	1.214	0.172	0.155	0	0.058	0.307	0.041	0.004	0	0.177	0	156.967	3511.08
2233	0.93482	0	267.563	7.0085	11.2539	477.3	140.034	18.0559	3.8621	19.4005	43.5687	0.0513	0.0319	0.0058	0.83109	81.4616	10.4576	23.3708	402.455	35.4019	0.06	83.1393	0.2246	5.961	26.801	4.898	1.215	0.172	0.156	0	0.058	0.307	0.041	0.004	0	0.177	0	156.977	3511.08
2234	0.93066	0	267.578	7.0085	11.2539	477.3	140.034	18.0559	3.8621	19.4005	43.5687	0.0513	0.0319	0.0058	0.83112	81.4642	10.4579	23.3715	402.468	35.403	0.06	83.1419	0.2246	5.962	26.804	4.899	1.215	0.172	0.156	0	0.058	0.307	0.041	0.004	0	0.177	0	156.988	3511.08
2235	0.9265	0	267.593	7.0085	11.2539	477.3	140.034	18.0559	3.8621	19.4005	43.5687	0.0513	0.0319	0.0058	0.83115	81.4668	10.4582	23.3723	402.481	35.4042	0.06	83.1445	0.2246	5.963	26.808	4.899	1.215	0.172	0.156	0	0.058	0.307	0.041	0.004	0	0.177	0	156.998	3511.08
2236	0.92234	0	267.609	7.0085	11.2539	477.3	140.034	18.0559	3.8621	19.4005	43.5687	0.0513	0.0319	0.0058	0.83118	81.4693	10.4586	23.373	402.494	35.4053	0.06	83.1472	0.2246	5.963	26.811	4.9	1.215	0.172	0.156	0	0.058	0.307	0.041	0.004	0	0.177	0	157.008	3511.08
2237	0.91818	0	267.624	7.0085	11.2539	477.3	140.034	18.0559	3.8621	19.4005	43.5687	0.0513	0.0319	0.0058	0.83121	81.4719	10.4589	23.3738	402.506	35.4064	0.06	83.1499	0.2246	5.964	26.814	4.901	1.215	0.172	0.156	0	0.058	0.307	0.041	0.004	0	0.177	0	157.019	3511.08
2238	0.91402	0	267.639	7.0085	11.2539	477.3	140.034	18.0559	3.8621	19.4005	43.5687	0.0513	0.0319	0.0058	0.83124	81.4745	10.4592	23.3745	402.519	35.4075	0.06	83.1525	0.2246	5.965	26.818	4.901	1.215	0.172	0.156	0	0.058	0.307	0.041	0.004	0	0.177	0	157.029	3511.08
2239	0.90986	0	267.654	7.0085	11.2539	477.3	140.034	18.0559	3.8621	19.4005	43.5687	0.0513	0.0319	0.0058	0.83127	81.4771	10.4595	23.3753	402.532	35.4087	0.06	83.1552	0.2246	5.966	26.821	4.902	1.215	0.172	0.156	0	0.058	0.307	0.041	0.004	0	0.177	0	157.039	3511.08
2240	0.9057	0	267.67	7.0085	11.2539	477.3	140.034	18.0559	3.8621	19.4005	43.5687	0.0513	0.0319	0.0058	0.8313	81.4797	10.4598	23.376	402.545	35.4098	0.06	83.1578	0.2246	5.966	26.824	4.902	1.216	0.172	0.156	0	0.058	0.307	0.041	0.004	0	0.177	0	157.05	3511.08
2241	0.90206	0	267.684	7.0085	11.2539	477.3	140.034	18.0559	3.8621	19.4005	43.5687	0.0513	0.0319	0.0058	0.83133	81.4822	10.4601	23.3767	402.557	35.4109	0.06	83.1603	0.2246	5.967	26.827	4.903	1.216	0.172	0.156	0	0.058	0.307	0.041	0.004	0	0.177	0	157.06	3511.08
2242	0.89842	0	267.699	7.0085	11.2539	477.3	140.034	18.0559	3.8621	19.4005	43.5687	0.0513	0.0319	0.0058	0.83136	81.4846	10.4605	23.3774	402.569	35.4119	0.06	83.1628	0.2246	5.968	26.831	4.904	1.216	0.172	0.156	0	0.058	0.307	0.041	0.004	0	0.177	0	157.07	3511.08
2243	0.89478	0	267.713	7.0085	11.2539	477.3	140.034	18.0559	3.8621	19.4005	43.5687	0.0513	0.0319	0.0058	0.83139	81.4871	10.4608	23.3781	402.582	35.413	0.06	83.1654	0.2246	5.968	26.834	4.904	1.216	0.172	0.156	0	0.058	0.307	0.041	0.004	0	0.177	0	157.08	3511.08
2244	0.89114	0	267.728	7.0085	11.2539	477.3	140.034	18.0559	3.8621	19.4005	43.5687	0.0513	0.0319	0.0058	0.83142	81.4895	10.4611	23.3788	402.594	35.4141	0.06	83.1679	0.2246	5.969	26.837	4.905	1.216	0.172	0.156	0	0.058	0.307	0.041	0.004	0	0.177	0	157.09	3511.08
2245	0.8875	0	267.743	7.0085	11.2539	477.3	140.034	18.0559	3.8621	19.4005	43.5687	0.0513	0.0319	0.0058	0.83145	81.492	10.4614	23.3795	402.606	35.4151	0.06	83.1704	0.2246	5.97	26.84	4.905	1.216	0.172	0.156	0	0.058	0.307	0.041	0.004	0	0.177	0	157.1	3511.08
2246	0.88386	0	267.757	7.0085	11.2539	477.3	140.034	18.0559	3.8621	19.4005	43.5687	0.0513	0.0319	0.0058	0.83148	81.4945	10.4618	23.3803	402.618	35.4162	0.06	83.1729	0.2246	5.971	26.843	4.906	1.216	0.172	0.156	0	0.058	0.307	0.041	0.004	0	0.177	0	157.11	3511.08
2247	0.88022	0	267.772	7.0085	11.2539	477.3	140.034	18.0559	3.8621	19.4005	43.5687	0.0513	0.0319	0.0058	0.83151	81.4969	10.4621	23.381	402.631	35.4173	0.06	83.1754	0.2246	5.971	26.847	4.906	1.217	0.172	0.156	0	0.058	0.307	0.041	0.004	0	0.177	0	157.12	3511.08
2248	0.87658	0	267.786	7.0085	11.2539	477.3	140.034	18.0559	3.8621	19.4005	43.5687	0.0513	0.0319	0.0058	0.83154	81.4994	10.4624	23.3817	402.643	35.4184	0.06	83.178	0.2246	5.972	26.85	4.907	1.217	0.172	0.156	0	0.058	0.307	0.041	0.004	0	0.177	0	157.13	3511.08
2249	0.87294	0	267.801	7.0085	11.2539	477.3	140.034	18.0559	3.8621	19.4005	43.5687	0.0513	0.0319	0.0058	0.83157	81.5018	10.4628	23.3824	402.655	35.4194	0.06	83.1805	0.2246	5.973	26.853	4.908	1.217	0.172	0.156	0	0.058	0.307	0.041	0.004	0	0.177	0	157.139	3511.08
2250	0.8693	0	267.815	7.0085	11.2539	477.3	140.034	18.0559	3.8621	19.4005	43.5687	0.0513	0.0319	0.0058	0.8316	81.5043	10.4631	23.3831	402.667	35.4205	0.06	83.183	0.2246	5.973	26.856	4.908	1.217	0.172	0.156	0	0.058	0.307	0.041	0.004	0	0.177	0	157.149	3511.08
2251	0.8661	0	267.829	7.0085	11.2539	477.3	140.034	18.0559	3.8621	19.4005	43.5687	0.0513	0.0319	0.0058	0.83162	81.5067	10.4634	23.3838	402.679	35.4215	0.06	83.1854	0.2246	5.974	26.859	4.909	1.217	0.172	0.156	0	0.058	0.307	0.041	0.004	0	0.177	0	157.159	3511.08
2252	0.8629	0	267.843	7.0085	11.2539	477.3	140.034	18.0559	3.8621	19.4005	43.5687	0.0513	0.0319	0.0058	0.83164	81.5091	10.4637	23.3845	402.691	35.4226	0.06	83.1879	0.2246	5.975	26.862	4.909	1.217	0.172	0.156	0	0.058	0.307	0.041	0.004	0	0.177	0	157.168	3511.08
2253	0.8597	0	267.857	7.0085	11.2539	477.3	140.034	18.0559	3.8621	19.4005	43.5687	0.0513	0.0319	0.0058	0.83166	81.5114	10.464	23.3851	402.703	35.4236	0.06	83.1903	0.2246	5.975	26.865	4.91	1.217	0.172	0.156	0	0.058	0.307	0.041	0.004	0	0.177	0	157.178	3511.08
2254	0.8565	0	267.871	7.0085	11.2539	477.3	140.034	18.0559	3.8621	19.4005	43.5687	0.0513	0.0319	0.0058	0.83168	81.5138	10.4643	23.3858	402.714	35.4246	0.06	83.1927	0.2246	5.976	26.868	4.91	1.218	0.172	0.156	0	0.058	0.307	0.041	0.004	0	0.177	0	157.188	3511.08
2255	0.8533	0	267.885	7.0085	11.2539	477.3	140.034	18.0559	3.8621	19.4005	43.5687	0.0513	0.0319	0.0058	0.8317	81.5162	10.4645	23.3865	402.726	35.4256	0.06	83.1951	0.2246	5.977	26.871	4.911	1.218	0.172	0.156	0	0.058	0.307	0.041	0.004	0	0.177	0	157.197	3511.08
2256	0.8501	0	267.899	7.0085	11.2539	477.3	140.034	18.0559	3.8621	19.4005	43.5687	0.0513	0.0319	0.0058	0.83172	81.5186	10.4648	23.3872	402.738	35.4267	0.06	83.1976	0.2246	5.977	26.874	4.912	1.218	0.172	0.156	0	0.058	0.307	0.041	0.004	0	0.177	0	157.207	3511.08
2257	0.8469	0	267.913	7.0085	11.2539	477.3	140.034	18.0559	3.8621	19.4005	43.5687	0.0513	0.0319	0.0058	0.83174	81.521	10.4651	23.3879	402.75	35.4277	0.06	83.2	0.2246	5.978	26.877	4.912	1.218	0.172	0.156	0	0.058	0.307	0.041	0.004	0	0.177	0	157.216	3511.08
2258	0.8437	0	267.927	7.0085	11.2539	477.3	140.034	18.0559	3.8621	19.4005	43.5687	0.0513	0.0319	0.0058	0.83176	81.5233	10.4654	23.3885	402.761	35.4287	0.06	83.2024	0.2246	5.979	26.88	4.913	1.218	0.173	0.156	0	0.058	0.307	0.041	0.004	0	0.178	0	157.226	3511.08
2259	0.8405	0	267.941	7.0085	11.2539	477.3	140.034	18.0559	3.8621	19.4005	43.5687	0.0513	0.0319	0.0058	0.83178	81.5257	10.4657	23.3892	402.773	35.4298	0.06	83.2049	0.2246	5.979	26.883	4.913	1.218	0.173	0.156	0	0.058	0.307	0.041	0.004	0	0.178	0	157.235	3511.08
2260	0.8373	0	267.955	7.0085	11.2539	477.3	140.034	18.0559	3.8621	19.4005	43.5687	0.0513	0.0319	0.0058	0.8318	81.5281	10.466	23.3899	402.785	35.4308	0.06	83.2073	0.2246	5.98	26.886	4.914	1.218	0.173	0.156	0	0.058	0.307	0.041	0.004	0	0.178	0	157.244	3511.08
2261	0.83445	0	267.968	7.0085	11.2539	477.3	140.034	18.0559	3.8621	19.4005	43.5687	0.0513	0.0319	0.0058	0.83182	81.5304	10.4663	23.3905	402.796	35.4318	0.06001	83.2096	0.2246	5.981	26.889	4.914	1.219	0.173	0.156	0	0.058	0.307	0.041	0.004	0	0.178	0	157.253	3511.08
2262	0.8316	0	267.982	7.0085	11.2539	477.3	140.034	18.0559	3.8621	19.4005	43.5687	0.0513	0.0319	0.0058	0.83184	81.5326	10.4666	23.3912	402.807	35.4328	0.06002	83.2119	0.2246	5.981	26.892	4.915	1.219	0.173	0.156	0	0.058	0.307	0.041	0.004	0	0.178	0	157.263	3511.08
2263	0.82875	0	267.995	7.0085	11.2539	477.3	140.034	18.0559	3.8621	19.4005	43.5687	0.0513	0.0319	0.0058	0.83186	81.5349	10.4669	23.3918	402.818	35.4337	0.06003	83.2142	0.2246	5.982	26.895	4.915	1.219	0.173	0.156	0	0.058	0.307	0.041	0.004	0	0.178	0	157.272	3511.08
2264	0.8259	0	268.009	7.0085	11.2539	477.3	140.034	18.0559	3.8621	19.4005	43.5687	0.0513	0.0319	0.0058	0.83188	81.5372	10.4672	23.3925	402.829	35.4347	0.06004	83.2165	0.2246	5.983	26.898	4.916	1.219	0.173	0.156	0	0.058	0.307	0.041	0.004	0	0.178	0	157.281	3511.08
2265	0.82305	0	268.022	7.0085	11.2539	477.3	140.034	18.0559	3.8621	19.4005	43.5687	0.0513	0.0319	0.0058	0.8319	81.5395	10.4675	23.3931	402.841	35.4357	0.06005	83.2189	0.2246	5.983	26.901	4.916	1.219	0.173	0.156	0	0.058	0.307	0.041	0.004	0	0.178	0	157.29	3511.08
2266	0.8202	0	268.035	7.0085	11.2539	477.3	140.034	18.0559	3.8621	19.4005	43.5687	0.0513	0.0319	0.0058	0.83192	81.5417	10.4679	23.3937	402.852	35.4367	0.06006	83.2212	0.2246	5.984	26.904	4.917	1.219	0.173	0.156	0	0.058	0.307	0.041	0.004	0	0.178	0	157.299	3511.08
2267	0.81735	0	268.049	7.0085	11.2539	477.3	140.034	18.0559	3.8621	19.4005	43.5687	0.0513	0.0319	0.0058	0.83194	81.544	10.4682	23.3944	402.863	35.4377	0.06007	83.2235	0.2246	5.985	26.907	4.917	1.219	0.173	0.156	0	0.058	0.307	0.041	0.004	0	0.178	0	157.308	3511.08
2268	0.8145	0	268.062	7.0085	11.2539	477.3	140.034	18.0559	3.8621	19.4005	43.5687	0.0513	0.0319	0.0058	0.83196	81.5463	10.4685	23.395	402.874	35.4386	0.06008	83.2258	0.2246	5.985	26.91	4.918	1.219	0.173	0.156	0	0.058	0.307	0.041	0.004	0	0.178	0	157.317	3511.08
2269	0.81165	0	268.076	7.0085	11.2539	477.3	140.034	18.0559	3.8621	19.4005	43.5687	0.0513	0.0319	0.0058	0.83198	81.5485	10.4688	23.3957	402.885	35.4396	0.06009	83.2281	0.2246	5.986	26.912	4.919	1.22	0.173	0.156	0	0.058	0.307	0.041	0.004	0	0.178	0	157.326	3511.08
2270	0.8088	0	268.089	7.0085	11.2539	477.3	140.034	18.0559	3.8621	19.4005	43.5687	0.0513	0.0319	0.0058	0.832	81.5508	10.4691	23.3963	402.897	35.4406	0.0601	83.2304	0.2246	5.987	26.915	4.919	1.22	0.173	0.156	0	0.058	0.307	0.041	0.004	0	0.178	0	157.335	3511.08
2271	0.80629	0	268.102	7.0085	11.2539	477.3	140.034	18.0559	3.8621	19.4005	43.5687	0.0513	0.0319	0.0058	0.83202	81.553	10.4694	23.3969	402.907	35.4416	0.0601	83.2326	0.2246	5.987	26.918	4.92	1.22	0.173	0.156	0	0.058	0.307	0.041	0.004	0	0.178	0	157.344	3511.08
2272	0.80378	0	268.115	7.0085	11.2539	477.3	140.034	18.0559	3.8621	19.4005	43.5687	0.0513	0.0319	0.0058	0.83204	81.5552	10.4696	23.3976	402.918	35.4425	0.0601	83.2348	0.2246	5.988	26.921	4.92	1.22	0.173	0.156	0	0.058	0.307	0.041	0.004	0	0.178	0	157.353	3511.08
2273	0.80127	0	268.127	7.0085	11.2539	477.3	140.034	18.0559	3.8621	19.4005	43.5687	0.0513	0.0319	0.0058	0.83206	81.5573	10.4699	23.3982	402.929	35.4435	0.0601	83.2371	0.2246	5.988	26.924	4.921	1.22	0.173	0.156	0	0.058	0.307	0.041	0.004	0	0.178	0	157.362	3511.08
2274	0.79876	0	268.14	7.0085	11.2539	477.3	140.034	18.0559	3.8621	19.4005	43.5687	0.0513	0.0319	0.0058	0.83208	81.5595	10.4702	23.3989	402.94	35.4444	0.0601	83.2393	0.2246	5.989	26.927	4.921	1.22	0.173	0.156	0	0.058	0.307	0.041	0.004	0	0.178	0	157.371	3511.08
2275	0.79625	0	268.153	7.0085	11.2539	477.3	140.034	18.0559	3.8621	19.4005	43.5687	0.0513	0.0319	0.0058	0.8321	81.5617	10.4704	23.3995	402.951	35.4454	0.0601	83.2415	0.2246	5.99	26.929	4.922	1.22	0.173	0.156	0	0.058	0.307	0.041	0.004	0	0.178	0	157.379	3511.08
2276	0.79374	0	268.166	7.0085	11.2539	477.3	140.034	18.0559	3.8621	19.4005	43.5687	0.0513	0.0319	0.0058	0.83212	81.5639	10.4707	23.4001	402.961	35.4464	0.0601	83.2437	0.2246	5.99	26.932	4.922	1.221	0.173	0.156	0	0.058	0.307	0.041	0.004	0	0.178	0	157.388	3511.08
2277	0.79123	0	268.179	7.0085	11.2539	477.3	140.034	18.0559	3.8621	19.4005	43.5687	0.0513	0.0319	0.0058	0.83214	81.5661	10.471	23.4008	402.972	35.4473	0.0601	83.2459	0.2246	5.991	26.935	4.923	1.221	0.173	0.156	0	0.058	0.307	0.041	0.004	0	0.178	0	157.397	3511.08
2278	0.78872	0	268.192	7.0085	11.2539	477.3	140.034	18.0559	3.8621	19.4005	43.5687	0.0513	0.0319	0.0058	0.83216	81.5682	10.4713	23.4014	402.983	35.4483	0.0601	83.2482	0.2246	5.992	26.938	4.923	1.221	0.173	0.156	0	0.058	0.307	0.041	0.004	0	0.178	0	157.406	3511.08
2279	0.78621	0	268.204	7.0085	11.2539	477.3	140.034	18.0559	3.8621	19.4005	43.5687	0.0513	0.0319	0.0058	0.83218	81.5704	10.4715	23.4021	402.994	35.4492	0.0601	83.2504	0.2246	5.992	26.94	4.924	1.221	0.173	0.156	0	0.058	0.307	0.041	0.004	0	0.178	0	157.414	3511.08
2280	0.7837	0	268.217	7.0085	11.2539	477.3	140.034	18.0559	3.8621	19.4005	43.5687	0.0513	0.0319	0.0058	0.8322	81.5726	10.4718	23.4027	403.005	35.4502	0.0601	83.2526	0.2246	5.993	26.943	4.924	1.221	0.173	0.156	0	0.058	0.307	0.041	0.004	0	0.178	0	157.423	3511.08
2281	0.78142	0	268.23	7.0085	11.2539	477.3	140.034	18.0559	3.8621	19.4005	43.5687	0.0513	0.0319	0.0058	0.83223	81.5747	10.4721	23.4033	403.015	35.4511	0.0601	83.2547	0.2246	5.993	26.946	4.925	1.221	0.173	0.156	0	0.058	0.307	0.041	0.004	0	0.178	0	157.431	3511.08
2282	0.77914	0	268.242	7.0085	11.2539	477.3	140.034	18.0559	3.8621	19.4005	43.5687	0.0513	0.0319	0.0058	0.83226	81.5768	10.4723	23.4039	403.025	35.452	0.0601	83.2569	0.2246	5.994	26.949	4.925	1.221	0.173	0.156	0	0.058	0.307	0.041	0.004	0	0.178	0	157.44	3511.08
2283	0.77686	0	268.254	7.0085	11.2539	477.3	140.034	18.0559	3.8621	19.4005	43.5687	0.0513	0.0319	0.0058	0.83229	81.5789	10.4726	23.4045	403.036	35.4529	0.0601	83.259	0.2246	5.995	26.951	4.926	1.221	0.173	0.156	0	0.058	0.307	0.041	0.004	0	0.178	0	157.448	3511.08
2284	0.77458	0	268.267	7.0085	11.2539	477.3	140.034	18.0559	3.8621	19.4005	43.5687	0.0513	0.0319	0.0058	0.83232	81.581	10.4729	23.4051	403.046	35.4538	0.0601	83.2612	0.2246	5.995	26.954	4.926	1.221	0.173	0.156	0	0.058	0.307	0.041	0.004	0	0.178	0	157.457	3511.08
2285	0.7723	0	268.279	7.0085	11.2539	477.3	140.034	18.0559	3.8621	19.4005	43.5687	0.0513	0.0319	0.0058	0.83235	81.5831	10.4732	23.4057	403.056	35.4547	0.0601	83.2633	0.2246	5.996	26.957	4.927	1.222	0.173	0.156	0	0.058	0.307	0.041	0.004	0	0.178	0	157.465	3511.08
2286	0.77002	0	268.291	7.0085	11.2539	477.3	140.034	18.0559	3.8621	19.4005	43.5687	0.0513	0.0319	0.0058	0.83238	81.5852	10.4734	23.4063	403.067	35.4557	0.0601	83.2654	0.2246	5.996	26.959	4.927	1.222	0.173	0.156	0	0.058	0.307	0.041	0.004	0	0.178	0	157.473	3511.08
2287	0.76774	0	268.304	7.0085	11.2539	477.3	140.034	18.0559	3.8621	19.4005	43.5687	0.0513	0.0319	0.0058	0.83241	81.5873	10.4737	23.4069	403.077	35.4566	0.0601	83.2676	0.2246	5.997	26.962	4.928	1.222	0.173	0.156	0	0.058	0.307	0.041	0.004	0	0.178	0	157.482	3511.08
2288	0.76546	0	268.316	7.0085	11.2539	477.3	140.034	18.0559	3.8621	19.4005	43.5687	0.0513	0.0319	0.0058	0.83244	81.5894	10.474	23.4075	403.087	35.4575	0.0601	83.2697	0.2246	5.998	26.965	4.928	1.222	0.173	0.156	0	0.058	0.307	0.041	0.004	0	0.178	0	157.49	3511.08
2289	0.76318	0	268.328	7.0085	11.2539	477.3	140.034	18.0559	3.8621	19.4005	43.5687	0.0513	0.0319	0.0058	0.83247	81.5915	10.4742	23.4081	403.098	35.4584	0.0601	83.2719	0.2246	5.998	26.967	4.929	1.222	0.173	0.156	0	0.058	0.307	0.041	0.004	0	0.178	0	157.498	3511.08
2290	0.7609	0	268.341	7.0085	11.2539	477.3	140.034	18.0559	3.8621	19.4005	43.5687	0.0513	0.0319	0.0058	0.8325	81.5936	10.4745	23.4087	403.108	35.4593	0.0601	83.274	0.2246	5.999	26.97	4.929	1.222	0.173	0.156	0	0.058	0.307	0.041	0.004	0	0.178	0	157.507	3511.08
2291	0.75884	0	268.352	7.0085	11.2539	477.3	140.034	18.0559	3.8621	19.4005	43.5687	0.0513	0.0319	0.0058	0.83251	81.5956	10.4748	23.4093	403.118	35.4602	0.06011	83.2761	0.2246	5.999	26.972	4.93	1.222	0.173	0.157	0	0.058	0.307	0.041	0.004	0	0.178	0	157.515	3511.08
2292	0.75678	0	268.364	7.0085	11.2539	477.3	140.034	18.0559	3.8621	19.4005	43.5687	0.0513	0.0319	0.0058	0.83252	81.5976	10.475	23.4099	403.128	35.461	0.06012	83.2781	0.2246	6	26.975	4.93	1.222	0.173	0.157	0	0.058	0.307	0.041	0.004	0	0.178	0	157.523	3511.08
2293	0.75472	0	268.376	7.0085	11.2539	477.3	140.034	18.0559	3.8621	19.4005	43.5687	0.0513	0.0319	0.0058	0.83253	81.5997	10.4753	23.4104	403.138	35.4619	0.06013	83.2802	0.2246	6	26.978	4.93	1.223	0.173	0.157	0	0.058	0.307	0.041	0.004	0	0.178	0	157.531	3511.08
2294	0.75266	0	268.388	7.0085	11.2539	477.3	140.034	18.0559	3.8621	19.4005	43.5687	0.0513	0.0319	0.0058	0.83254	81.6017	10.4755	23.411	403.148	35.4628	0.06014	83.2823	0.2246	6.001	26.98	4.931	1.223	0.173	0.157	0	0.058	0.307	0.041	0.004	0	0.178	0	157.539	3511.08
2295	0.7506	0	268.4	7.0085	11.2539	477.3	140.034	18.0559	3.8621	19.4005	43.5687	0.0513	0.0319	0.0058	0.83255	81.6037	10.4757	23.4116	403.158	35.4637	0.06015	83.2844	0.2246	6.002	26.983	4.931	1.223	0.173	0.157	0	0.058	0.307	0.041	0.004	0	0.178	0	157.547	3511.08
2296	0.74854	0	268.412	7.0085	11.2539	477.3	140.034	18.0559	3.8621	19.4005	43.5687	0.0513	0.0319	0.0058	0.83256	81.6057	10.476	23.4122	403.168	35.4645	0.06016	83.2864	0.2246	6.002	26.985	4.932	1.223	0.173	0.157	0	0.058	0.307	0.041	0.004	0	0.178	0	157.555	3511.08
2297	0.74648	0	268.424	7.0085	11.2539	477.3	140.034	18.0559	3.8621	19.4005	43.5687	0.0513	0.0319	0.0058	0.83257	81.6077	10.4763	23.4128	403.178	35.4654	0.06017	83.2885	0.2246	6.003	26.988	4.932	1.223	0.173	0.157	0	0.058	0.307	0.041	0.004	0	0.178	0	157.564	3511.08
2298	0.74442	0	268.436	7.0085	11.2539	477.3	140.034	18.0559	3.8621	19.4005	43.5687	0.0513	0.0319	0.0058	0.83258	81.6098	10.4765	23.4133	403.188	35.4663	0.06018	83.2906	0.2246	6.003	26.991	4.933	1.223	0.173	0.157	0	0.058	0.307	0.041	0.004	0	0.178	0	157.572	3511.08
2299	0.74236	0	268.447	7.0085	11.2539	477.3	140.034	18.0559	3.8621	19.4005	43.5687	0.0513	0.0319	0.0058	0.83259	81.6118	10.4767	23.4139	403.198	35.4671	0.06019	83.2926	0.2246	6.004	26.993	4.933	1.223	0.173	0.157	0	0.058	0.307	0.041	0.004	0	0.178	0	157.579	3511.08
2300	0.7403	0	268.459	7.0085	11.2539	477.3	140.034	18.0559	3.8621	19.4005	43.5687	0.0513	0.0319	0.0058	0.8326	81.6138	10.477	23.4145	403.208	35.468	0.0602	83.2947	0.2246	6.004	26.996	4.934	1.223	0.173	0.157	0	0.058	0.307	0.041	0.004	0	0.178	0	157.587	3511.08
2301	0.738714	0	268.47	7.0085	11.2539	477.3	140.034	18.0559	3.8621	19.4005	43.5687	0.0513	0.0319	0.0058	0.83262	81.6156	10.4772	23.415	403.217	35.4688	0.0602	83.2966	0.2246	6.005	26.998	4.934	1.223	0.173	0.157	0	0.058	0.307	0.041	0.004	0	0.178	0	157.595	3511.08
2302	0.737128	0	268.481	7.0085	11.2539	477.3	140.034	18.0559	3.8621	19.4005	43.5687	0.0513	0.0319	0.0058	0.83264	81.6174	10.4775	23.4155	403.226	35.4696	0.0602	83.2984	0.2246	6.006	27.001	4.935	1.224	0.173	0.157	0	0.058	0.307	0.041	0.004	0	0.178	0	157.603	3511.08
2303	0.735542	0	268.491	7.0085	11.2539	477.3	140.034	18.0559	3.8621	19.4005	43.5687	0.0513	0.0319	0.0058	0.83266	81.6192	10.4777	23.4161	403.235	35.4704	0.0602	83.3003	0.2246	6.006	27.003	4.935	1.224	0.173	0.157	0	0.058	0.307	0.041	0.004	0	0.178	0	157.611	3511.08
2304	0.733956	0	268.502	7.0085	11.2539	477.3	140.034	18.0559	3.8621	19.4005	43.5687	0.0513	0.0319	0.0058	0.83268	81.6211	10.478	23.4166	403.244	35.4712	0.0602	83.3021	0.2246	6.007	27.006	4.936	1.224	0.173	0.157	0	0.058	0.307	0.041	0.004	0	0.178	0	157.619	3511.08
2305	0.73237	0	268.513	7.0085	11.2539	477.3	140.034	18.0559	3.8621	19.4005	43.5687	0.0513	0.0319	0.0058	0.8327	81.6229	10.4782	23.4171	403.253	35.4719	0.0602	83.304	0.2246	6.007	27.008	4.936	1.224	0.173	0.157	0	0.058	0.307	0.041	0.004	0	0.178	0	157.627	3511.08
2306	0.730784	0	268.523	7.0085	11.2539	477.3	140.034	18.0559	3.8621	19.4005	43.5687	0.0513	0.0319	0.0058	0.83272	81.6247	10.4784	23.4176	403.262	35.4727	0.0602	83.3058	0.2246	6.008	27.011	4.936	1.224	0.173	0.157	0	0.058	0.307	0.041	0.004	0	0.178	0	157.634	3511.08
2307	0.729198	0	268.534	7.0085	11.2539	477.3	140.034	18.0559	3.8621	19.4005	43.5687	0.0513	0.0319	0.0058	0.83274	81.6265	10.4787	23.4181	403.27	35.4735	0.0602	83.3077	0.2246	6.008	27.013	4.937	1.224	0.173	0.157	0	0.058	0.307	0.041	0.004	0	0.178	0	157.642	3511.08
2308	0.727612	0	268.545	7.0085	11.2539	477.3	140.034	18.0559	3.8621	19.4005	43.5687	0.0513	0.0319	0.0058	0.83276	81.6283	10.4789	23.4187	403.279	35.4743	0.0602	83.3095	0.2246	6.009	27.016	4.937	1.224	0.173	0.157	0	0.058	0.307	0.041	0.004	0	0.178	0	157.65	3511.08
2309	0.726026	0	268.555	7.0085	11.2539	477.3	140.034	18.0559	3.8621	19.4005	43.5687	0.0513	0.0319	0.0058	0.83278	81.6301	10.4791	23.4192	403.288	35.4751	0.0602	83.3114	0.2246	6.009	27.018	4.938	1.224	0.173	0.157	0	0.058	0.307	0.041	0.004	0	0.178	0	157.658	3511.08
2310	0.72444	0	268.566	7.0085	11.2539	477.3	140.034	18.0559	3.8621	19.4005	43.5687	0.0513	0.0319	0.0058	0.8328	81.632	10.4794	23.4197	403.297	35.4759	0.0602	83.3132	0.2246	6.01	27.02	4.938	1.225	0.173	0.157	0	0.058	0.308	0.041	0.004	0	0.178	0	157.665	3511.08
2311	0.722854	0	268.577	7.0085	11.2539	477.3	140.034	18.0559	3.8621	19.4005	43.5687	0.0513	0.0319	0.0058	0.83282	81.6338	10.4796	23.4202	403.306	35.4767	0.0602	83.3151	0.2246	6.011	27.023	4.939	1.225	0.173	0.157	0	0.058	0.308	0.041	0.004	0	0.178	0	157.673	3511.08
2312	0.721268	0	268.588	7.0085	11.2539	477.3	140.034	18.0559	3.8621	19.4005	43.5687	0.0513	0.0319	0.0058	0.83284	81.6356	10.4799	23.4207	403.315	35.4775	0.0602	83.3169	0.2246	6.011	27.025	4.939	1.225	0.173	0.157	0	0.058	0.308	0.041	0.004	0	0.178	0	157.68	3511.08
2313	0.719682	0	268.598	7.0085	11.2539	477.3	140.034	18.0559	3.8621	19.4005	43.5687	0.0513	0.0319	0.0058	0.83286	81.6374	10.4801	23.4213	403.324	35.4783	0.0602	83.3188	0.2246	6.012	27.028	4.94	1.225	0.173	0.157	0	0.058	0.308	0.041	0.004	0	0.178	0	157.688	3511.08
2314	0.718096	0	268.609	7.0085	11.2539	477.3	140.034	18.0559	3.8621	19.4005	43.5687	0.0513	0.0319	0.0058	0.83288	81.6392	10.4803	23.4218	403.333	35.4791	0.0602	83.3206	0.2246	6.012	27.03	4.94	1.225	0.173	0.157	0	0.058	0.308	0.041	0.004	0	0.178	0	157.696	3511.08
2315	0.71651	0	268.62	7.0085	11.2539	477.3	140.034	18.0559	3.8621	19.4005	43.5687	0.0513	0.0319	0.0058	0.8329	81.641	10.4806	23.4223	403.342	35.4798	0.0602	83.3225	0.2246	6.013	27.032	4.94	1.225	0.173	0.157	0	0.058	0.308	0.041	0.004	0	0.179	0	157.703	3511.08
2316	0.714924	0	268.63	7.0085	11.2539	477.3	140.034	18.0559	3.8621	19.4005	43.5687	0.0513	0.0319	0.0058	0.83292	81.6429	10.4808	23.4228	403.351	35.4806	0.0602	83.3243	0.2246	6.013	27.035	4.941	1.225	0.174	0.157	0	0.058	0.308	0.041	0.004	0	0.179	0	157.711	3511.08
2317	0.713338	0	268.641	7.0085	11.2539	477.3	140.034	18.0559	3.8621	19.4005	43.5687	0.0513	0.0319	0.0058	0.83294	81.6447	10.481	23.4233	403.36	35.4814	0.0602	83.3262	0.2246	6.014	27.037	4.941	1.225	0.174	0.157	0	0.058	0.308	0.041	0.004	0	0.179	0	157.718	3511.08
2318	0.711752	0	268.652	7.0085	11.2539	477.3	140.034	18.0559	3.8621	19.4005	43.5687	0.0513	0.0319	0.0058	0.83296	81.6465	10.4813	23.4239	403.369	35.4822	0.0602	83.328	0.2246	6.014	27.04	4.942	1.225	0.174	0.157	0	0.058	0.308	0.041	0.004	0	0.179	0	157.725	3511.08
2319	0.710166	0	268.662	7.0085	11.2539	477.3	140.034	18.0559	3.8621	19.4005	43.5687	0.0513	0.0319	0.0058	0.83298	81.6483	10.4815	23.4244	403.378	35.483	0.0602	83.3299	0.2246	6.015	27.042	4.942	1.225	0.174	0.157	0	0.058	0.308	0.041	0.004	0	0.179	0	157.733	3511.08
2320	0.70858	0	268.673	7.0085	11.2539	477.3	140.034	18.0559	3.8621	19.4005	43.5687	0.0513	0.0319	0.0058	0.833	81.6501	10.4818	23.4249	403.387	35.4838	0.0602	83.3317	0.2246	6.015	27.044	4.943	1.226	0.174	0.157	0	0.058	0.308	0.041	0.004	0	0.179	0	157.74	3511.08
2321	0.706994	0	268.684	7.0085	11.2539	477.3	140.034	18.0559	3.8621	19.4005	43.5687	0.0513	0.0319	0.0058	0.83302	81.6519	10.482	23.4254	403.396	35.4846	0.0602	83.3336	0.2246	6.016	27.047	4.943	1.226	0.174	0.157	0	0.058	0.308	0.041	0.004	0	0.179	0	157.748	3511.08
2322	0.705408	0	268.694	7.0085	11.2539	477.3	140.034	18.0559	3.8621	19.4005	43.5687	0.0513	0.0319	0.0058	0.83304	81.6538	10.4822	23.4259	403.405	35.4854	0.0602	83.3354	0.2246	6.016	27.049	4.943	1.226	0.174	0.157	0	0.058	0.308	0.041	0.004	0	0.179	0	157.755	3511.08
2323	0.703822	0	268.705	7.0085	11.2539	477.3	140.034	18.0559	3.8621	19.4005	43.5687	0.0513	0.0319	0.0058	0.83306	81.6556	10.4825	23.4265	403.414	35.4862	0.0602	83.3373	0.2246	6.017	27.051	4.944	1.226	0.174	0.157	0	0.058	0.308	0.041	0.004	0	0.179	0	157.762	3511.08
2324	0.702236	0	268.716	7.0085	11.2539	477.3	140.034	18.0559	3.8621	19.4005	43.5687	0.0513	0.0319	0.0058	0.83308	81.6574	10.4827	23.427	403.423	35.487	0.0602	83.3391	0.2246	6.017	27.054	4.944	1.226	0.174	0.157	0	0.058	0.308	0.041	0.004	0	0.179	0	157.77	3511.08
2325	0.70065	0	268.726	7.0085	11.2539	477.3	140.034	18.0559	3.8621	19.4005	43.5687	0.0513	0.0319	0.0058	0.8331	81.6592	10.483	23.4275	403.432	35.4877	0.0602	83.341	0.2246	6.018	27.056	4.945	1.226	0.174	0.157	0	0.058	0.308	0.041	0.004	0	0.179	0	157.777	3511.08
2326	0.699064	0	268.737	7.0085	11.2539	477.3	140.034	18.0559	3.8621	19.4005	43.5687	0.0513	0.0319	0.0058	0.83312	81.661	10.4832	23.428	403.441	35.4885	0.0602	83.3429	0.2246	6.018	27.058	4.945	1.226	0.174	0.157	0	0.058	0.308	0.041	0.004	0	0.179	0	157.784	3511.08
2327	0.697478	0	268.748	7.0085	11.2539	477.3	140.034	18.0559	3.8621	19.4005	43.5687	0.0513	0.0319	0.0058	0.83314	81.6628	10.4834	23.4285	403.45	35.4893	0.0602	83.3447	0.2246	6.019	27.061	4.946	1.226	0.174	0.157	0	0.058	0.308	0.041	0.004	0	0.179	0	157.791	3511.08
2328	0.695892	0	268.759	7.0085	11.2539	477.3	140.034	18.0559	3.8621	19.4005	43.5687	0.0513	0.0319	0.0058	0.83316	81.6646	10.4837	23.4291	403.459	35.4901	0.0602	83.3466	0.2246	6.019	27.063	4.946	1.226	0.174	0.157	0	0.058	0.308	0.041	0.004	0	0.179	0	157.798	3511.08
2329	0.694306	0	268.769	7.0085	11.2539	477.3	140.034	18.0559	3.8621	19.4005	43.5687	0.0513	0.0319	0.0058	0.83318	81.6665	10.4839	23.4296	403.468	35.4909	0.0602	83.3484	0.2246	6.02	27.065	4.946	1.227	0.174	0.157	0	0.058	0.308	0.041	0.004	0	0.179	0	157.806	3511.08
2330	0.69272	0	268.78	7.0085	11.2539	477.3	140.034	18.0559	3.8621	19.4005	43.5687	0.0513	0.0319	0.0058	0.8332	81.6683	10.4841	23.4301	403.477	35.4917	0.0602	83.3503	0.2246	6.02	27.067	4.947	1.227	0.174	0.157	0	0.058	0.308	0.041	0.004	0	0.179	0	157.813	3511.08
2331	0.691134	0	268.791	7.0085	11.2539	477.3	140.034	18.0559	3.8621	19.4005	43.5687	0.0513	0.0319	0.0058	0.83322	81.6701	10.4844	23.4306	403.486	35.4925	0.0602	83.3521	0.2246	6.021	27.07	4.947	1.227	0.174	0.157	0	0.058	0.308	0.041	0.004	0	0.179	0	157.82	3511.08
2332	0.689548	0	268.801	7.0085	11.2539	477.3	140.034	18.0559	3.8621	19.4005	43.5687	0.0513	0.0319	0.0058	0.83324	81.6719	10.4846	23.4311	403.495	35.4933	0.0602	83.354	0.2246	6.021	27.072	4.948	1.227	0.174	0.157	0	0.058	0.308	0.041	0.004	0	0.179	0	157.827	3511.08
2333	0.687962	0	268.812	7.0085	11.2539	477.3	140.034	18.0559	3.8621	19.4005	43.5687	0.0513	0.0319	0.0058	0.83326	81.6737	10.4849	23.4317	403.504	35.4941	0.0602	83.3558	0.2246	6.022	27.074	4.948	1.227	0.174	0.157	0	0.058	0.308	0.041	0.004	0	0.179	0	157.834	3511.08
2334	0.686376	0	268.823	7.0085	11.2539	477.3	140.034	18.0559	3.8621	19.4005	43.5687	0.0513	0.0319	0.0058	0.83328	81.6755	10.4851	23.4322	403.513	35.4949	0.0602	83.3577	0.2246	6.022	27.076	4.948	1.227	0.174	0.157	0	0.058	0.308	0.041	0.004	0	0.179	0	157.841	3511.08
2335	0.68479	0	268.833	7.0085	11.2539	477.3	140.034	18.0559	3.8621	19.4005	43.5687	0.0513	0.0319	0.0058	0.8333	81.6774	10.4853	23.4327	403.522	35.4956	0.0602	83.3595	0.2246	6.023	27.079	4.949	1.227	0.174	0.157	0	0.058	0.308	0.041	0.004	0	0.179	0	157.848	3511.08
2336	0.683204	0	268.844	7.0085	11.2539	477.3	140.034	18.0559	3.8621	19.4005	43.5687	0.0513	0.0319	0.0058	0.83332	81.6792	10.4856	23.4332	403.531	35.4964	0.0602	83.3614	0.2246	6.023	27.081	4.949	1.227	0.174	0.157	0	0.058	0.308	0.041	0.004	0	0.179	0	157.855	3511.08
2337	0.681618	0	268.855	7.0085	11.2539	477.3	140.034	18.0559	3.8621	19.4005	43.5687	0.0513	0.0319	0.0058	0.83334	81.681	10.4858	23.4337	403.54	35.4972	0.0602	83.3632	0.2246	6.024	27.083	4.95	1.227	0.174	0.157	0	0.058	0.308	0.041	0.004	0	0.179	0	157.862	3511.08
2338	0.680032	0	268.865	7.0085	11.2539	477.3	140.034	18.0559	3.8621	19.4005	43.5687	0.0513	0.0319	0.0058	0.83336	81.6828	10.486	23.4343	403.549	35.498	0.0602	83.3651	0.2246	6.024	27.085	4.95	1.227	0.174	0.157	0	0.058	0.308	0.041	0.004	0	0.179	0	157.869	3511.08
2339	0.678446	0	268.876	7.0085	11.2539	477.3	140.034	18.0559	3.8621	19.4005	43.5687	0.0513	0.0319	0.0058	0.83338	81.6846	10.4863	23.4348	403.558	35.4988	0.0602	83.3669	0.2246	6.025	27.088	4.951	1.228	0.174	0.157	0	0.058	0.308	0.041	0.004	0	0.179	0	157.876	3511.08
2340	0.67686	0	268.887	7.0085	11.2539	477.3	140.034	18.0559	3.8621	19.4005	43.5687	0.0513	0.0319	0.0058	0.8334	81.6864	10.4865	23.4353	403.567	35.4996	0.0602	83.3688	0.2246	6.025	27.09	4.951	1.228	0.174	0.157	0	0.058	0.308	0.041	0.004	0	0.179	0	157.883	3511.08
2341	0.675274	0	268.898	7.0085	11.2539	477.3	140.034	18.0559	3.8621	19.4005	43.5687	0.0513	0.0319	0.0058	0.83342	81.6883	10.4868	23.4358	403.575	35.5004	0.0602	83.3706	0.2246	6.026	27.092	4.951	1.228	0.174	0.157	0	0.058	0.308	0.041	0.004	0	0.179	0	157.89	3511.08
2342	0.673688	0	268.908	7.0085	11.2539	477.3	140.034	18.0559	3.8621	19.4005	43.5687	0.0513	0.0319	0.0058	0.83344	81.6901	10.487	23.4363	403.584	35.5012	0.0602	83.3725	0.2246	6.026	27.094	4.952	1.228	0.174	0.157	0	0.058	0.308	0.041	0.004	0	0.179	0	157.896	3511.08
2343	0.672102	0	268.919	7.0085	11.2539	477.3	140.034	18.0559	3.8621	19.4005	43.5687	0.0513	0.0319	0.0058	0.83346	81.6919	10.4872	23.4369	403.593	35.502	0.0602	83.3743	0.2246	6.027	27.096	4.952	1.228	0.174	0.157	0	0.058	0.308	0.041	0.004	0	0.179	0	157.903	3511.08
2344	0.670516	0	268.93	7.0085	11.2539	477.3	140.034	18.0559	3.8621	19.4005	43.5687	0.0513	0.0319	0.0058	0.83348	81.6937	10.4875	23.4374	403.602	35.5028	0.0602	83.3762	0.2246	6.027	27.098	4.953	1.228	0.174	0.157	0	0.058	0.308	0.041	0.004	0	0.179	0	157.91	3511.08
2345	0.66893	0	268.94	7.0085	11.2539	477.3	140.034	18.0559	3.8621	19.4005	43.5687	0.0513	0.0319	0.0058	0.8335	81.6955	10.4877	23.4379	403.611	35.5035	0.0602	83.378	0.2246	6.028	27.101	4.953	1.228	0.174	0.157	0	0.058	0.308	0.041	0.004	0	0.179	0	157.917	3511.08
2346	0.667344	0	268.951	7.0085	11.2539	477.3	140.034	18.0559	3.8621	19.4005	43.5687	0.0513	0.0319	0.0058	0.83352	81.6973	10.4879	23.4384	403.62	35.5043	0.0602	83.3799	0.2246	6.028	27.103	4.953	1.228	0.174	0.157	0	0.058	0.308	0.041	0.004	0	0.179	0	157.924	3511.08
2347	0.665758	0	268.962	7.0085	11.2539	477.3	140.034	18.0559	3.8621	19.4005	43.5687	0.0513	0.0319	0.0058	0.83354	81.6992	10.4882	23.4389	403.629	35.5051	0.0602	83.3817	0.2246	6.029	27.105	4.954	1.228	0.174	0.157	0	0.058	0.308	0.041	0.004	0	0.179	0	157.93	3511.08
2348	0.664172	0	268.972	7.0085	11.2539	477.3	140.034	18.0559	3.8621	19.4005	43.5687	0.0513	0.0319	0.0058	0.83356	81.701	10.4884	23.4395	403.638	35.5059	0.0602	83.3836	0.2246	6.029	27.107	4.954	1.228	0.174	0.157	0	0.058	0.308	0.041	0.004	0	0.179	0	157.937	3511.08
2349	0.662586	0	268.983	7.0085	11.2539	477.3	140.034	18.0559	3.8621	19.4005	43.5687	0.0513	0.0319	0.0058	0.83358	81.7028	10.4887	23.44	403.647	35.5067	0.0602	83.3854	0.2246	6.03	27.109	4.954	1.229	0.174	0.157	0	0.058	0.308	0.041	0.004	0	0.179	0	157.944	3511.08
2350	0.661	0	268.994	7.0085	11.2539	477.3	140.034	18.0559	3.8621	19.4005	43.5687	0.0513	0.0319	0.0058	0.8336	81.7046	10.4889	23.4405	403.656	35.5075	0.0602	83.3873	0.2246	6.03	27.111	4.955	1.229	0.174	0.157	0	0.058	0.308	0.041	0.004	0	0.179	0	157.951	3511.08
2351	0.659886	0	269.003	7.0085	11.2539	477.3	140.034	18.0559	3.8621	19.4005	43.5687	0.051304	0.0319	0.0058	0.833618	81.7061	10.4891	23.4409	403.664	35.5082	0.0602	83.3889	0.2246	6.031	27.113	4.955	1.229	0.174	0.157	0	0.058	0.308	0.041	0.004	0	0.179	0	157.957	3511.08
2352	0.658772	0	269.012	7.0085	11.2539	477.3	140.034	18.0559	3.8621	19.4005	43.5687	0.051308	0.0319	0.0058	0.833636	81.7077	10.4893	23.4414	403.671	35.5088	0.0602	83.3905	0.2246	6.031	27.116	4.956	1.229	0.174	0.157	0	0.058	0.308	0.041	0.004	0	0.179	0	157.964	3511.08
2353	0.657658	0	269.021	7.0085	11.2539	477.3	140.034	18.0559	3.8621	19.4005	43.5687	0.051312	0.0319	0.0058	0.833654	81.7092	10.4895	23.4418	403.679	35.5095	0.0602	83.392	0.2246	6.032	27.118	4.956	1.229	0.174	0.157	0	0.058	0.308	0.041	0.004	0	0.179	0	157.97	3511.08
2354	0.656544	0	269.03	7.0085	11.2539	477.3	140.034	18.0559	3.8621	19.4005	43.5687	0.051316	0.0319	0.0058	0.833672	81.7108	10.4897	23.4423	403.687	35.5102	0.0602	83.3936	0.2246	6.032	27.12	4.956	1.229	0.174	0.157	0	0.058	0.308	0.041	0.004	0	0.179	0	157.977	3511.08
2355	0.65543	0	269.039	7.0085	11.2539	477.3	140.034	18.0559	3.8621	19.4005	43.5687	0.05132	0.0319	0.0058	0.83369	81.7123	10.4899	23.4427	403.694	35.5109	0.0602	83.3952	0.2246	6.033	27.122	4.957	1.229	0.174	0.157	0	0.058	0.308	0.041	0.004	0	0.179	0	157.984	3511.08
2356	0.654316	0	269.048	7.0085	11.2539	477.3	140.034	18.0559	3.8621	19.4005	43.5687	0.051324	0.0319	0.0058	0.833708	81.7139	10.4901	23.4432	403.702	35.5115	0.0602	83.3968	0.2246	6.033	27.124	4.957	1.229	0.174	0.157	0	0.058	0.308	0.041	0.004	0	0.179	0	157.99	3511.08
2357	0.653202	0	269.057	7.0085	11.2539	477.3	140.034	18.0559	3.8621	19.4005	43.5687	0.051328	0.0319	0.0058	0.833726	81.7154	10.4903	23.4436	403.71	35.5122	0.0602	83.3983	0.2246	6.033	27.126	4.958	1.229	0.174	0.157	0	0.058	0.308	0.041	0.004	0	0.179	0	157.997	3511.08
2358	0.652088	0	269.067	7.0085	11.2539	477.3	140.034	18.0559	3.8621	19.4005	43.5687	0.051332	0.0319	0.0058	0.833744	81.717	10.4905	23.4441	403.717	35.5129	0.0602	83.3999	0.2246	6.034	27.128	4.958	1.229	0.174	0.157	0	0.058	0.308	0.041	0.004	0	0.179	0	158.003	3511.08
2359	0.650974	0	269.076	7.0085	11.2539	477.3	140.034	18.0559	3.8621	19.4005	43.5687	0.051336	0.0319	0.0058	0.833762	81.7185	10.4907	23.4445	403.725	35.5135	0.0602	83.4015	0.2246	6.034	27.13	4.958	1.229	0.174	0.157	0	0.058	0.308	0.041	0.004	0	0.179	0	158.01	3511.08
2360	0.64986	0	269.085	7.0085	11.2539	477.3	140.034	18.0559	3.8621	19.4005	43.5687	0.05134	0.0319	0.0058	0.83378	81.72	10.4909	23.4449	403.733	35.5142	0.0602	83.4031	0.2246	6.035	27.132	4.959	1.23	0.174	0.157	0	0.058	0.308	0.041	0.004	0	0.179	0	158.016	3511.08
2361	0.648746	0	269.094	7.0085	11.2539	477.3	140.034	18.0559	3.8621	19.4005	43.5687	0.051344	0.0319	0.0058	0.833798	81.7216	10.4911	23.4454	403.74	35.5149	0.0602	83.4047	0.2246	6.035	27.134	4.959	1.23	0.174	0.157	0	0.058	0.308	0.041	0.004	0	0.179	0	158.023	3511.08
2362	0.647632	0	269.103	7.0085	11.2539	477.3	140.034	18.0559	3.8621	19.4005	43.5687	0.051348	0.0319	0.0058	0.833816	81.7231	10.4913	23.4458	403.748	35.5156	0.0602	83.4062	0.2246	6.036	27.136	4.959	1.23	0.174	0.157	0	0.058	0.308	0.041	0.004	0	0.179	0	158.029	3511.08
2363	0.646518	0	269.112	7.0085	11.2539	477.3	140.034	18.0559	3.8621	19.4005	43.5687	0.051352	0.0319	0.0058	0.833834	81.7247	10.4915	23.4463	403.756	35.5162	0.0602	83.4078	0.2246	6.036	27.138	4.96	1.23	0.174	0.157	0	0.058	0.308	0.041	0.004	0	0.179	0	158.035	3511.08
2364	0.645404	0	269.121	7.0085	11.2539	477.3	140.034	18.0559	3.8621	19.4005	43.5687	0.051356	0.0319	0.0058	0.833852	81.7262	10.4917	23.4467	403.763	35.5169	0.0602	83.4094	0.2246	6.037	27.14	4.96	1.23	0.174	0.157	0	0.058	0.308	0.041	0.004	0	0.179	0	158.042	3511.08
2365	0.64429	0	269.13	7.0085	11.2539	477.3	140.034	18.0559	3.8621	19.4005	43.5687	0.05136	0.0319	0.0058	0.83387	81.7278	10.4919	23.4472	403.771	35.5176	0.0602	83.411	0.2246	6.037	27.142	4.961	1.23	0.174	0.157	0	0.058	0.308	0.041	0.004	0	0.179	0	158.048	3511.08
2366	0.643176	0	269.139	7.0085	11.2539	477.3	140.034	18.0559	3.8621	19.4005	43.5687	0.051364	0.0319	0.0058	0.833888	81.7293	10.4921	23.4476	403.779	35.5183	0.0602	83.4125	0.2246	6.038	27.144	4.961	1.23	0.174	0.158	0	0.058	0.308	0.041	0.004	0	0.179	0	158.055	3511.08
2367	0.642062	0	269.149	7.0085	11.2539	477.3	140.034	18.0559	3.8621	19.4005	43.5687	0.051368	0.0319	0.0058	0.833906	81.7308	10.4923	23.448	403.786	35.5189	0.0602	83.4141	0.2246	6.038	27.147	4.961	1.23	0.174	0.158	0	0.058	0.308	0.041	0.004	0	0.179	0	158.061	3511.08
2368	0.640948	0	269.158	7.0085	11.2539	477.3	140.034	18.0559	3.8621	19.4005	43.5687	0.051372	0.0319	0.0058	0.833924	81.7324	10.4925	23.4485	403.794	35.5196	0.0602	83.4157	0.2246	6.038	27.149	4.962	1.23	0.174	0.158	0	0.058	0.308	0.041	0.004	0	0.179	0	158.067	3511.08
2369	0.639834	0	269.167	7.0085	11.2539	477.3	140.034	18.0559	3.8621	19.4005	43.5687	0.051376	0.0319	0.0058	0.833942	81.7339	10.4927	23.4489	403.801	35.5203	0.0602	83.4173	0.2246	6.039	27.151	4.962	1.23	0.174	0.158	0	0.058	0.308	0.041	0.004	0	0.179	0	158.073	3511.08
2370	0.63872	0	269.176	7.0085	11.2539	477.3	140.034	18.0559	3.8621	19.4005	43.5687	0.05138	0.0319	0.0058	0.83396	81.7355	10.4929	23.4494	403.809	35.5209	0.0602	83.4189	0.2246	6.039	27.153	4.962	1.23	0.174	0.158	0	0.058	0.308	0.041	0.004	0	0.179	0	158.08	3511.08
2371	0.637606	0	269.185	7.0085	11.2539	477.3	140.034	18.0559	3.8621	19.4005	43.5687	0.051384	0.0319	0.0058	0.833978	81.737	10.4931	23.4498	403.817	35.5216	0.0602	83.4204	0.2246	6.04	27.155	4.963	1.231	0.174	0.158	0	0.058	0.308	0.041	0.004	0	0.179	0	158.086	3511.08
2372	0.636492	0	269.194	7.0085	11.2539	477.3	140.034	18.0559	3.8621	19.4005	43.5687	0.051388	0.0319	0.0058	0.833996	81.7386	10.4933	23.4503	403.824	35.5223	0.0602	83.422	0.2246	6.04	27.157	4.963	1.231	0.174	0.158	0	0.058	0.308	0.041	0.004	0	0.179	0	158.092	3511.08
2373	0.635378	0	269.203	7.0085	11.2539	477.3	140.034	18.0559	3.8621	19.4005	43.5687	0.051392	0.0319	0.0058	0.834014	81.7401	10.4935	23.4507	403.832	35.523	0.0602	83.4236	0.2246	6.041	27.158	4.963	1.231	0.174	0.158	0	0.058	0.308	0.041	0.004	0	0.179	0	158.098	3511.08
2374	0.634264	0	269.212	7.0085	11.2539	477.3	140.034	18.0559	3.8621	19.4005	43.5687	0.051396	0.0319	0.0058	0.834032	81.7417	10.4937	23.4512	403.84	35.5236	0.0602	83.4252	0.2246	6.041	27.16	4.964	1.231	0.174	0.158	0	0.058	0.308	0.041	0.004	0	0.179	0	158.105	3511.08
2375	0.63315	0	269.221	7.0085	11.2539	477.3	140.034	18.0559	3.8621	19.4005	43.5687	0.0514	0.0319	0.0058	0.83405	81.7432	10.4939	23.4516	403.847	35.5243	0.0602	83.4267	0.2246	6.042	27.162	4.964	1.231	0.174	0.158	0	0.058	0.308	0.041	0.004	0	0.179	0	158.111	3511.08
2376	0.632036	0	269.231	7.0085	11.2539	477.3	140.034	18.0559	3.8621	19.4005	43.5687	0.051404	0.0319	0.0058	0.834068	81.7447	10.494	23.452	403.855	35.525	0.0602	83.4283	0.2246	6.042	27.164	4.965	1.231	0.174	0.158	0	0.058	0.308	0.041	0.004	0	0.179	0	158.117	3511.08
2377	0.630922	0	269.24	7.0085	11.2539	477.3	140.034	18.0559	3.8621	19.4005	43.5687	0.051408	0.0319	0.0058	0.834086	81.7463	10.4942	23.4525	403.863	35.5256	0.0602	83.4299	0.2246	6.042	27.166	4.965	1.231	0.174	0.158	0	0.058	0.308	0.041	0.004	0	0.179	0	158.123	3511.08
2378	0.629808	0	269.249	7.0085	11.2539	477.3	140.034	18.0559	3.8621	19.4005	43.5687	0.051412	0.0319	0.0058	0.834104	81.7478	10.4944	23.4529	403.87	35.5263	0.0602	83.4315	0.2246	6.043	27.168	4.965	1.231	0.174	0.158	0	0.058	0.308	0.041	0.004	0	0.179	0	158.129	3511.08
2379	0.628694	0	269.258	7.0085	11.2539	477.3	140.034	18.0559	3.8621	19.4005	43.5687	0.051416	0.0319	0.0058	0.834122	81.7494	10.4946	23.4534	403.878	35.527	0.0602	83.4331	0.2246	6.043	27.17	4.966	1.231	0.174	0.158	0	0.058	0.308	0.041	0.004	0	0.179	0	158.135	3511.08
2380	0.62758	0	269.267	7.0085	11.2539	477.3	140.034	18.0559	3.8621	19.4005	43.5687	0.05142	0.0319	0.0058	0.83414	81.7509	10.4948	23.4538	403.886	35.5277	0.0602	83.4346	0.2246	6.044	27.172	4.966	1.231	0.174	0.158	0	0.058	0.308	0.041	0.004	0	0.179	0	158.141	3511.08
2381	0.626466	0	269.276	7.0085	11.2539	477.3	140.034	18.0559	3.8621	19.4005	43.5687	0.051424	0.0319	0.0058	0.834158	81.7525	10.495	23.4543	403.893	35.5283	0.0602	83.4362	0.2246	6.044	27.174	4.966	1.231	0.174	0.158	0	0.058	0.308	0.041	0.004	0	0.179	0	158.148	3511.08
2382	0.625352	0	269.285	7.0085	11.2539	477.3	140.034	18.0559	3.8621	19.4005	43.5687	0.051428	0.0319	0.0058	0.834176	81.754	10.4952	23.4547	403.901	35.529	0.0602	83.4378	0.2246	6.045	27.176	4.967	1.232	0.174	0.158	0	0.058	0.308	0.041	0.004	0	0.179	0	158.154	3511.08
2383	0.624238	0	269.294	7.0085	11.2539	477.3	140.034	18.0559	3.8621	19.4005	43.5687	0.051432	0.0319	0.0058	0.834194	81.7556	10.4954	23.4552	403.908	35.5297	0.0602	83.4394	0.2246	6.045	27.178	4.967	1.232	0.174	0.158	0	0.058	0.308	0.041	0.004	0	0.179	0	158.16	3511.08
2384	0.623124	0	269.303	7.0085	11.2539	477.3	140.034	18.0559	3.8621	19.4005	43.5687	0.051436	0.0319	0.0058	0.834212	81.7571	10.4956	23.4556	403.916	35.5303	0.0602	83.441	0.2246	6.045	27.18	4.967	1.232	0.174	0.158	0	0.058	0.308	0.041	0.004	0	0.179	0	158.166	3511.08
2385	0.62201	0	269.312	7.0085	11.2539	477.3	140.034	18.0559	3.8621	19.4005	43.5687	0.05144	0.0319	0.0058	0.83423	81.7586	10.4958	23.456	403.924	35.531	0.0602	83.4425	0.2246	6.046	27.182	4.968	1.232	0.174	0.158	0	0.058	0.308	0.041	0.004	0	0.179	0	158.172	3511.08
2386	0.620896	0	269.322	7.0085	11.2539	477.3	140.034	18.0559	3.8621	19.4005	43.5687	0.051444	0.0319	0.0058	0.834248	81.7602	10.496	23.4565	403.931	35.5317	0.0602	83.4441	0.2246	6.046	27.184	4.968	1.232	0.174	0.158	0	0.058	0.308	0.041	0.004	0	0.18	0	158.178	3511.08
2387	0.619782	0	269.331	7.0085	11.2539	477.3	140.034	18.0559	3.8621	19.4005	43.5687	0.051448	0.0319	0.0058	0.834266	81.7617	10.4962	23.4569	403.939	35.5324	0.0602	83.4457	0.2246	6.047	27.186	4.968	1.232	0.174	0.158	0	0.058	0.308	0.041	0.004	0	0.18	0	158.184	3511.08
2388	0.618668	0	269.34	7.0085	11.2539	477.3	140.034	18.0559	3.8621	19.4005	43.5687	0.051452	0.0319	0.0058	0.834284	81.7633	10.4964	23.4574	403.947	35.533	0.0602	83.4473	0.2246	6.047	27.188	4.969	1.232	0.174	0.158	0	0.058	0.308	0.041	0.004	0	0.18	0	158.19	3511.08
2389	0.617554	0	269.349	7.0085	11.2539	477.3	140.034	18.0559	3.8621	19.4005	43.5687	0.051456	0.0319	0.0058	0.834302	81.7648	10.4966	23.4578	403.954	35.5337	0.0602	83.4488	0.2246	6.048	27.189	4.969	1.232	0.174	0.158	0	0.058	0.308	0.041	0.004	0	0.18	0	158.195	3511.08
2390	0.61644	0	269.358	7.0085	11.2539	477.3	140.034	18.0559	3.8621	19.4005	43.5687	0.05146	0.0319	0.0058	0.83432	81.7664	10.4968	23.4583	403.962	35.5344	0.0602	83.4504	0.2246	6.048	27.191	4.969	1.232	0.175	0.158	0	0.058	0.308	0.041	0.004	0	0.18	0	158.201	3511.08
2391	0.615326	0	269.367	7.0085	11.2539	477.3	140.034	18.0559	3.8621	19.4005	43.5687	0.051464	0.0319	0.0058	0.834338	81.7679	10.497	23.4587	403.97	35.5351	0.0602	83.452	0.2246	6.048	27.193	4.97	1.232	0.175	0.158	0	0.058	0.308	0.041	0.004	0	0.18	0	158.207	3511.08
2392	0.614212	0	269.376	7.0085	11.2539	477.3	140.034	18.0559	3.8621	19.4005	43.5687	0.051468	0.0319	0.0058	0.834356	81.7694	10.4972	23.4591	403.977	35.5357	0.0602	83.4536	0.2246	6.049	27.195	4.97	1.232	0.175	0.158	0	0.058	0.308	0.041	0.004	0	0.18	0	158.213	3511.08
2393	0.613098	0	269.385	7.0085	11.2539	477.3	140.034	18.0559	3.8621	19.4005	43.5687	0.051472	0.0319	0.0058	0.834374	81.771	10.4974	23.4596	403.985	35.5364	0.0602	83.4552	0.2246	6.049	27.197	4.971	1.233	0.175	0.158	0	0.058	0.308	0.041	0.004	0	0.18	0	158.219	3511.08
2394	0.611984	0	269.394	7.0085	11.2539	477.3	140.034	18.0559	3.8621	19.4005	43.5687	0.051476	0.0319	0.0058	0.834392	81.7725	10.4976	23.46	403.993	35.5371	0.0602	83.4567	0.2246	6.05	27.199	4.971	1.233	0.175	0.158	0	0.058	0.308	0.041	0.004	0	0.18	0	158.225	3511.08
2395	0.61087	0	269.404	7.0085	11.2539	477.3	140.034	18.0559	3.8621	19.4005	43.5687	0.05148	0.0319	0.0058	0.83441	81.7741	10.4978	23.4605	404	35.5377	0.0602	83.4583	0.2246	6.05	27.201	4.971	1.233	0.175	0.158	0	0.058	0.308	0.041	0.004	0	0.18	0	158.231	3511.08
2396	0.609756	0	269.413	7.0085	11.2539	477.3	140.034	18.0559	3.8621	19.4005	43.5687	0.051484	0.0319	0.0058	0.834428	81.7756	10.498	23.4609	404.008	35.5384	0.0602	83.4599	0.2246	6.05	27.203	4.972	1.233	0.175	0.158	0	0.058	0.308	0.041	0.004	0	0.18	0	158.237	3511.08
2397	0.608642	0	269.422	7.0085	11.2539	477.3	140.034	18.0559	3.8621	19.4005	43.5687	0.051488	0.0319	0.0058	0.834446	81.7772	10.4982	23.4614	404.015	35.5391	0.0602	83.4615	0.2246	6.051	27.204	4.972	1.233	0.175	0.158	0	0.058	0.308	0.041	0.004	0	0.18	0	158.242	3511.08
2398	0.607528	0	269.431	7.0085	11.2539	477.3	140.034	18.0559	3.8621	19.4005	43.5687	0.051492	0.0319	0.0058	0.834464	81.7787	10.4984	23.4618	404.023	35.5398	0.0602	83.463	0.2246	6.051	27.206	4.972	1.233	0.175	0.158	0	0.058	0.308	0.041	0.004	0	0.18	0	158.248	3511.08
2399	0.606414	0	269.44	7.0085	11.2539	477.3	140.034	18.0559	3.8621	19.4005	43.5687	0.051496	0.0319	0.0058	0.834482	81.7803	10.4986	23.4623	404.031	35.5404	0.0602	83.4646	0.2246	6.052	27.208	4.973	1.233	0.175	0.158	0	0.058	0.308	0.041	0.004	0	0.18	0	158.254	3511.08
2400	0.6053	0	269.449	7.0085	11.2539	477.3	140.034	18.0559	3.8621	19.4005	43.5687	0.0515	0.0319	0.0058	0.8345	81.7818	10.4988	23.4627	404.038	35.5411	0.0602	83.4662	0.2246	6.052	27.21	4.973	1.233	0.175	0.158	0	0.058	0.308	0.041	0.004	0	0.18	0	158.26	3511.08
2401	0.604434	0	269.457	7.0085	11.2539	477.3	140.034	18.0559	3.8621	19.4005	43.5687	0.0515	0.0319	0.0058	0.834514	81.7831	10.499	23.4631	404.045	35.5417	0.060202	83.4676	0.2246	6.053	27.212	4.973	1.233	0.175	0.158	0	0.058	0.308	0.041	0.004	0	0.18	0	158.265	3511.08
2402	0.603568	0	269.465	7.0085	11.2539	477.3	140.034	18.0559	3.8621	19.4005	43.5687	0.0515	0.0319	0.0058	0.834528	81.7845	10.4991	23.4635	404.052	35.5423	0.060204	83.469	0.2246	6.053	27.214	4.974	1.233	0.175	0.158	0	0.058	0.308	0.041	0.004	0	0.18	0	158.271	3511.08
2403	0.602702	0	269.473	7.0085	11.2539	477.3	140.034	18.0559	3.8621	19.4005	43.5687	0.0515	0.0319	0.0058	0.834542	81.7858	10.4993	23.4639	404.058	35.5429	0.060206	83.4703	0.2246	6.053	27.215	4.974	1.233	0.175	0.158	0	0.058	0.308	0.041	0.004	0	0.18	0	158.277	3511.08
2404	0.601836	0	269.481	7.0085	11.2539	477.3	140.034	18.0559	3.8621	19.4005	43.5687	0.0515	0.0319	0.0058	0.834556	81.7872	10.4995	23.4642	404.065	35.5434	0.060208	83.4717	0.2246	6.054	27.217	4.974	1.233	0.175	0.158	0	0.058	0.308	0.041	0.004	0	0.18	0	158.282	3511.08
2405	0.60097	0	269.489	7.0085	11.2539	477.3	140.034	18.0559	3.8621	19.4005	43.5687	0.0515	0.0319	0.0058	0.83457	81.7885	10.4997	23.4646	404.072	35.544	0.06021	83.4731	0.2246	6.054	27.219	4.975	1.234	0.175	0.158	0	0.058	0.308	0.041	0.004	0	0.18	0	158.288	3511.08
2406	0.600104	0	269.497	7.0085	11.2539	477.3	140.034	18.0559	3.8621	19.4005	43.5687	0.0515	0.0319	0.0058	0.834584	81.7899	10.4998	23.465	404.078	35.5446	0.060212	83.4745	0.2246	6.055	27.221	4.975	1.234	0.175	0.158	0	0.058	0.308	0.041	0.004	0	0.18	0	158.294	3511.08
2407	0.599238	0	269.505	7.0085	11.2539	477.3	140.034	18.0559	3.8621	19.4005	43.5687	0.0515	0.0319	0.0058	0.834598	81.7912	10.5	23.4654	404.085	35.5452	0.060214	83.4758	0.2246	6.055	27.223	4.975	1.234	0.175	0.158	0	0.058	0.308	0.041	0.004	0	0.18	0	158.299	3511.08
2408	0.598372	0	269.512	7.0085	11.2539	477.3	140.034	18.0559	3.8621	19.4005	43.5687	0.0515	0.0319	0.0058	0.834612	81.7926	10.5002	23.4658	404.092	35.5458	0.060216	83.4772	0.2246	6.055	27.224	4.976	1.234	0.175	0.158	0	0.058	0.308	0.041	0.004	0	0.18	0	158.305	3511.08
2409	0.597506	0	269.52	7.0085	11.2539	477.3	140.034	18.0559	3.8621	19.4005	43.5687	0.0515	0.0319	0.0058	0.834626	81.7939	10.5003	23.4662	404.098	35.5464	0.060218	83.4786	0.2246	6.056	27.226	4.976	1.234	0.175	0.158	0	0.058	0.308	0.041	0.004	0	0.18	0	158.311	3511.08
2410	0.59664	0	269.528	7.0085	11.2539	477.3	140.034	18.0559	3.8621	19.4005	43.5687	0.0515	0.0319	0.0058	0.83464	81.7953	10.5005	23.4666	404.105	35.547	0.06022	83.48	0.2246	6.056	27.228	4.976	1.234	0.175	0.158	0	0.058	0.308	0.041	0.004	0	0.18	0	158.316	3511.08
2411	0.595774	0	269.536	7.0085	11.2539	477.3	140.034	18.0559	3.8621	19.4005	43.5687	0.0515	0.0319	0.0058	0.834654	81.7966	10.5007	23.4669	404.112	35.5475	0.060222	83.4813	0.2246	6.057	27.23	4.977	1.234	0.175	0.158	0	0.058	0.308	0.041	0.004	0	0.18	0	158.322	3511.08
2412	0.594908	0	269.544	7.0085	11.2539	477.3	140.034	18.0559	3.8621	19.4005	43.5687	0.0515	0.0319	0.0058	0.834668	81.798	10.5009	23.4673	404.118	35.5481	0.060224	83.4827	0.2246	6.057	27.231	4.977	1.234	0.175	0.158	0	0.058	0.308	0.041	0.004	0	0.18	0	158.327	3511.08
2413	0.594042	0	269.552	7.0085	11.2539	477.3	140.034	18.0559	3.8621	19.4005	43.5687	0.0515	0.0319	0.0058	0.834682	81.7993	10.501	23.4677	404.125	35.5487	0.060226	83.4841	0.2246	6.057	27.233	4.977	1.234	0.175	0.158	0	0.058	0.308	0.041	0.004	0	0.18	0	158.333	3511.08
2414	0.593176	0	269.56	7.0085	11.2539	477.3	140.034	18.0559	3.8621	19.4005	43.5687	0.0515	0.0319	0.0058	0.834696	81.8007	10.5012	23.4681	404.132	35.5493	0.060228	83.4855	0.2246	6.058	27.235	4.977	1.234	0.175	0.158	0	0.058	0.308	0.041	0.004	0	0.18	0	158.338	3511.08
2415	0.59231	0	269.568	7.0085	11.2539	477.3	140.034	18.0559	3.8621	19.4005	43.5687	0.0515	0.0319	0.0058	0.83471	81.802	10.5014	23.4685	404.138	35.5499	0.06023	83.4868	0.2246	6.058	27.237	4.978	1.234	0.175	0.158	0	0.058	0.308	0.041	0.004	0	0.18	0	158.344	3511.08
2416	0.591444	0	269.576	7.0085	11.2539	477.3	140.034	18.0559	3.8621	19.4005	43.5687	0.0515	0.0319	0.0058	0.834724	81.8034	10.5016	23.4689	404.145	35.5505	0.060232	83.4882	0.2246	6.058	27.239	4.978	1.234	0.175	0.158	0	0.058	0.308	0.041	0.004	0	0.18	0	158.349	3511.08
2417	0.590578	0	269.584	7.0085	11.2539	477.3	140.034	18.0559	3.8621	19.4005	43.5687	0.0515	0.0319	0.0058	0.834738	81.8047	10.5017	23.4693	404.151	35.5511	0.060234	83.4896	0.2246	6.059	27.24	4.978	1.234	0.175	0.158	0	0.058	0.308	0.041	0.004	0	0.18	0	158.355	3511.08
2418	0.589712	0	269.592	7.0085	11.2539	477.3	140.034	18.0559	3.8621	19.4005	43.5687	0.0515	0.0319	0.0058	0.834752	81.8061	10.5019	23.4696	404.158	35.5516	0.060236	83.491	0.2246	6.059	27.242	4.979	1.235	0.175	0.158	0	0.058	0.308	0.041	0.004	0	0.18	0	158.36	3511.08
2419	0.588846	0	269.6	7.0085	11.2539	477.3	140.034	18.0559	3.8621	19.4005	43.5687	0.0515	0.0319	0.0058	0.834766	81.8074	10.5021	23.47	404.165	35.5522	0.060238	83.4923	0.2246	6.06	27.244	4.979	1.235	0.175	0.158	0	0.058	0.308	0.041	0.004	0	0.18	0	158.366	3511.08
2420	0.58798	0	269.608	7.0085	11.2539	477.3	140.034	18.0559	3.8621	19.4005	43.5687	0.0515	0.0319	0.0058	0.83478	81.8088	10.5022	23.4704	404.171	35.5528	0.06024	83.4937	0.2246	6.06	27.245	4.979	1.235	0.175	0.158	0	0.058	0.308	0.041	0.004	0	0.18	0	158.371	3511.08
2421	0.587114	0	269.615	7.0085	11.2539	477.3	140.034	18.0559	3.8621	19.4005	43.5687	0.0515	0.0319	0.0058	0.834794	81.8101	10.5024	23.4708	404.178	35.5534	0.060242	83.4951	0.2246	6.06	27.247	4.98	1.235	0.175	0.158	0	0.058	0.308	0.041	0.004	0	0.18	0	158.377	3511.08
2422	0.586248	0	269.623	7.0085	11.2539	477.3	140.034	18.0559	3.8621	19.4005	43.5687	0.0515	0.0319	0.0058	0.834808	81.8115	10.5026	23.4712	404.185	35.554	0.060244	83.4965	0.2246	6.061	27.249	4.98	1.235	0.175	0.158	0	0.058	0.308	0.041	0.004	0	0.18	0	158.382	3511.08
2423	0.585382	0	269.631	7.0085	11.2539	477.3	140.034	18.0559	3.8621	19.4005	43.5687	0.0515	0.0319	0.0058	0.834822	81.8128	10.5028	23.4716	404.191	35.5546	0.060246	83.4978	0.2246	6.061	27.251	4.98	1.235	0.175	0.158	0	0.058	0.308	0.041	0.004	0	0.18	0	158.388	3511.08
2424	0.584516	0	269.639	7.0085	11.2539	477.3	140.034	18.0559	3.8621	19.4005	43.5687	0.0515	0.0319	0.0058	0.834836	81.8142	10.5029	23.472	404.198	35.5552	0.060248	83.4992	0.2246	6.062	27.252	4.981	1.235	0.175	0.158	0	0.058	0.308	0.041	0.004	0	0.18	0	158.393	3511.08
2425	0.58365	0	269.647	7.0085	11.2539	477.3	140.034	18.0559	3.8621	19.4005	43.5687	0.0515	0.0319	0.0058	0.83485	81.8155	10.5031	23.4723	404.205	35.5558	0.06025	83.5006	0.2246	6.062	27.254	4.981	1.235	0.175	0.158	0	0.058	0.308	0.041	0.004	0	0.18	0	158.398	3511.08
2426	0.582784	0	269.655	7.0085	11.2539	477.3	140.034	18.0559	3.8621	19.4005	43.5687	0.0515	0.0319	0.0058	0.834864	81.8168	10.5033	23.4727	404.211	35.5563	0.060252	83.502	0.2246	6.062	27.256	4.981	1.235	0.175	0.158	0	0.058	0.308	0.041	0.004	0	0.18	0	158.404	3511.08
2427	0.581918	0	269.663	7.0085	11.2539	477.3	140.034	18.0559	3.8621	19.4005	43.5687	0.0515	0.0319	0.0058	0.834878	81.8182	10.5034	23.4731	404.218	35.5569	0.060254	83.5034	0.2246	6.063	27.257	4.982	1.235	0.175	0.158	0	0.058	0.308	0.041	0.004	0	0.18	0	158.409	3511.08
2428	0.581052	0	269.671	7.0085	11.2539	477.3	140.034	18.0559	3.8621	19.4005	43.5687	0.0515	0.0319	0.0058	0.834892	81.8195	10.5036	23.4735	404.225	35.5575	0.060256	83.5047	0.2246	6.063	27.259	4.982	1.235	0.175	0.158	0	0.058	0.308	0.041	0.004	0	0.18	0	158.414	3511.08
2429	0.580186	0	269.679	7.0085	11.2539	477.3	140.034	18.0559	3.8621	19.4005	43.5687	0.0515	0.0319	0.0058	0.834906	81.8209	10.5038	23.4739	404.231	35.5581	0.060258	83.5061	0.2246	6.063	27.261	4.982	1.235	0.175	0.158	0	0.058	0.308	0.041	0.004	0	0.18	0	158.42	3511.08
2430	0.57932	0	269.687	7.0085	11.2539	477.3	140.034	18.0559	3.8621	19.4005	43.5687	0.0515	0.0319	0.0058	0.83492	81.8222	10.504	23.4743	404.238	35.5587	0.06026	83.5075	0.2246	6.064	27.263	4.983	1.235	0.175	0.158	0	0.058	0.308	0.041	0.004	0	0.18	0	158.425	3511.08
2431	0.578454	0	269.695	7.0085	11.2539	477.3	140.034	18.0559	3.8621	19.4005	43.5687	0.0515	0.0319	0.0058	0.834934	81.8236	10.5041	23.4747	404.245	35.5593	0.060262	83.5089	0.2246	6.064	27.264	4.983	1.236	0.175	0.158	0	0.058	0.308	0.041	0.004	0	0.18	0	158.43	3511.08
2432	0.577588	0	269.703	7.0085	11.2539	477.3	140.034	18.0559	3.8621	19.4005	43.5687	0.0515	0.0319	0.0058	0.834948	81.8249	10.5043	23.4751	404.251	35.5599	0.060264	83.5102	0.2246	6.065	27.266	4.983	1.236	0.175	0.158	0	0.058	0.308	0.041	0.004	0	0.18	0	158.436	3511.08
2433	0.576722	0	269.711	7.0085	11.2539	477.3	140.034	18.0559	3.8621	19.4005	43.5687	0.0515	0.0319	0.0058	0.834962	81.8263	10.5045	23.4754	404.258	35.5604	0.060266	83.5116	0.2246	6.065	27.268	4.983	1.236	0.175	0.158	0	0.058	0.308	0.041	0.004	0	0.18	0	158.441	3511.08
2434	0.575856	0	269.719	7.0085	11.2539	477.3	140.034	18.0559	3.8621	19.4005	43.5687	0.0515	0.0319	0.0058	0.834976	81.8276	10.5046	23.4758	404.264	35.561	0.060268	83.513	0.2246	6.065	27.269	4.984	1.236	0.175	0.158	0	0.058	0.308	0.041	0.004	0	0.18	0	158.446	3511.08
2435	0.57499	0	269.726	7.0085	11.2539	477.3	140.034	18.0559	3.8621	19.4005	43.5687	0.0515	0.0319	0.0058	0.83499	81.829	10.5048	23.4762	404.271	35.5616	0.06027	83.5144	0.2246	6.066	27.271	4.984	1.236	0.175	0.158	0	0.058	0.308	0.041	0.004	0	0.18	0	158.451	3511.08
2436	0.574124	0	269.734	7.0085	11.2539	477.3	140.034	18.0559	3.8621	19.4005	43.5687	0.0515	0.0319	0.0058	0.835004	81.8303	10.505	23.4766	404.278	35.5622	0.060272	83.5157	0.2246	6.066	27.273	4.984	1.236	0.175	0.158	0	0.058	0.308	0.041	0.004	0	0.18	0	158.457	3511.08
2437	0.573258	0	269.742	7.0085	11.2539	477.3	140.034	18.0559	3.8621	19.4005	43.5687	0.0515	0.0319	0.0058	0.835018	81.8317	10.5052	23.477	404.284	35.5628	0.060274	83.5171	0.2246	6.066	27.274	4.985	1.236	0.175	0.158	0	0.058	0.308	0.041	0.004	0	0.18	0	158.462	3511.08
2438	0.572392	0	269.75	7.0085	11.2539	477.3	140.034	18.0559	3.8621	19.4005	43.5687	0.0515	0.0319	0.0058	0.835032	81.833	10.5053	23.4774	404.291	35.5634	0.060276	83.5185	0.2246	6.067	27.276	4.985	1.236	0.175	0.158	0	0.058	0.308	0.041	0.004	0	0.18	0	158.467	3511.08
2439	0.571526	0	269.758	7.0085	11.2539	477.3	140.034	18.0559	3.8621	19.4005	43.5687	0.0515	0.0319	0.0058	0.835046	81.8344	10.5055	23.4778	404.298	35.564	0.060278	83.5199	0.2246	6.067	27.278	4.985	1.236	0.175	0.158	0	0.058	0.308	0.041	0.004	0	0.18	0	158.472	3511.08
2440	0.57066	0	269.766	7.0085	11.2539	477.3	140.034	18.0559	3.8621	19.4005	43.5687	0.0515	0.0319	0.0058	0.83506	81.8357	10.5057	23.4781	404.304	35.5645	0.06028	83.5212	0.2246	6.068	27.279	4.986	1.236	0.175	0.158	0	0.058	0.308	0.041	0.004	0	0.18	0	158.477	3511.08
2441	0.569794	0	269.774	7.0085	11.2539	477.3	140.034	18.0559	3.8621	19.4005	43.5687	0.0515	0.0319	0.0058	0.835074	81.8371	10.5059	23.4785	404.311	35.5651	0.060282	83.5226	0.2246	6.068	27.281	4.986	1.236	0.175	0.158	0	0.058	0.308	0.041	0.004	0	0.18	0	158.482	3511.08
2442	0.568928	0	269.782	7.0085	11.2539	477.3	140.034	18.0559	3.8621	19.4005	43.5687	0.0515	0.0319	0.0058	0.835088	81.8384	10.506	23.4789	404.318	35.5657	0.060284	83.524	0.2246	6.068	27.283	4.986	1.236	0.175	0.158	0	0.058	0.308	0.041	0.004	0	0.18	0	158.488	3511.08
2443	0.568062	0	269.79	7.0085	11.2539	477.3	140.034	18.0559	3.8621	19.4005	43.5687	0.0515	0.0319	0.0058	0.835102	81.8398	10.5062	23.4793	404.324	35.5663	0.060286	83.5254	0.2246	6.069	27.284	4.986	1.236	0.175	0.158	0	0.058	0.308	0.041	0.004	0	0.18	0	158.493	3511.08
2444	0.567196	0	269.798	7.0085	11.2539	477.3	140.034	18.0559	3.8621	19.4005	43.5687	0.0515	0.0319	0.0058	0.835116	81.8411	10.5064	23.4797	404.331	35.5669	0.060288	83.5267	0.2246	6.069	27.286	4.987	1.237	0.175	0.158	0	0.058	0.308	0.041	0.004	0	0.18	0	158.498	3511.08
2445	0.56633	0	269.806	7.0085	11.2539	477.3	140.034	18.0559	3.8621	19.4005	43.5687	0.0515	0.0319	0.0058	0.83513	81.8425	10.5065	23.4801	404.338	35.5675	0.06029	83.5281	0.2246	6.069	27.287	4.987	1.237	0.175	0.158	0	0.058	0.308	0.041	0.004	0	0.18	0	158.503	3511.08
2446	0.565464	0	269.814	7.0085	11.2539	477.3	140.034	18.0559	3.8621	19.4005	43.5687	0.0515	0.0319	0.0058	0.835144	81.8438	10.5067	23.4805	404.344	35.5681	0.060292	83.5295	0.2246	6.07	27.289	4.987	1.237	0.175	0.158	0	0.058	0.308	0.041	0.004	0	0.18	0	158.508	3511.08
2447	0.564598	0	269.822	7.0085	11.2539	477.3	140.034	18.0559	3.8621	19.4005	43.5687	0.0515	0.0319	0.0058	0.835158	81.8452	10.5069	23.4808	404.351	35.5686	0.060294	83.5309	0.2246	6.07	27.291	4.988	1.237	0.175	0.158	0	0.058	0.308	0.041	0.004	0	0.18	0	158.513	3511.08
2448	0.563732	0	269.829	7.0085	11.2539	477.3	140.034	18.0559	3.8621	19.4005	43.5687	0.0515	0.0319	0.0058	0.835172	81.8465	10.5071	23.4812	404.358	35.5692	0.060296	83.5322	0.2246	6.07	27.292	4.988	1.237	0.175	0.158	0	0.058	0.308	0.041	0.004	0	0.18	0	158.518	3511.08
2449	0.562866	0	269.837	7.0085	11.2539	477.3	140.034	18.0559	3.8621	19.4005	43.5687	0.0515	0.0319	0.0058	0.835186	81.8479	10.5072	23.4816	404.364	35.5698	0.060298	83.5336	0.2246	6.071	27.294	4.988	1.237	0.175	0.158	0	0.058	0.308	0.041	0.004	0	0.18	0	158.523	3511.08
2450	0.562	0	269.845	7.0085	11.2539	477.3	140.034	18.0559	3.8621	19.4005	43.5687	0.0515	0.0319	0.0058	0.8352	81.8492	10.5074	23.482	404.371	35.5704	0.0603	83.535	0.2246	6.071	27.295	4.989	1.237	0.175	0.158	0	0.058	0.308	0.041	0.004	0	0.18	0	158.528	3511.08
2451	0.56425	0	269.826	7.0085	11.2539	477.3	140.034	18.0559	3.8621	19.4005	43.5687	0.051496	0.0319	0.0058	0.835164	81.846	10.507	23.4811	404.355	35.569	0.060298	83.5317	0.2246	6.072	27.297	4.989	1.237	0.175	0.158	0	0.058	0.308	0.041	0.004	0	0.18	0	158.533	3511.08
2452	0.5665	0	269.807	7.0085	11.2539	477.3	140.034	18.0559	3.8621	19.4005	43.5687	0.051492	0.0319	0.0058	0.835128	81.8427	10.5066	23.4801	404.339	35.5676	0.060296	83.5284	0.2246	6.072	27.299	4.989	1.237	0.175	0.158	0	0.058	0.308	0.041	0.004	0	0.18	0	158.538	3511.08
2453	0.56875	0	269.788	7.0085	11.2539	477.3	140.034	18.0559	3.8621	19.4005	43.5687	0.051488	0.0319	0.0058	0.835092	81.8395	10.5062	23.4792	404.323	35.5662	0.060294	83.5251	0.2246	6.072	27.3	4.989	1.237	0.175	0.158	0	0.058	0.308	0.041	0.004	0	0.18	0	158.543	3511.08
2454	0.571	0	269.769	7.0085	11.2539	477.3	140.034	18.0559	3.8621	19.4005	43.5687	0.051484	0.0319	0.0058	0.835056	81.8363	10.5057	23.4783	404.307	35.5648	0.060292	83.5218	0.2246	6.073	27.302	4.99	1.237	0.175	0.158	0	0.058	0.308	0.041	0.004	0	0.18	0	158.548	3511.08
2455	0.57325	0	269.75	7.0085	11.2539	477.3	140.034	18.0559	3.8621	19.4005	43.5687	0.05148	0.0319	0.0058	0.83502	81.833	10.5053	23.4774	404.291	35.5634	0.06029	83.5185	0.2246	6.073	27.303	4.99	1.237	0.175	0.158	0	0.058	0.308	0.041	0.004	0	0.18	0	158.553	3511.08
2456	0.5755	0	269.731	7.0085	11.2539	477.3	140.034	18.0559	3.8621	19.4005	43.5687	0.051476	0.0319	0.0058	0.834984	81.8298	10.5049	23.4764	404.275	35.562	0.060288	83.5152	0.2246	6.073	27.305	4.99	1.237	0.175	0.158	0	0.058	0.308	0.041	0.004	0	0.18	0	158.558	3511.08
2457	0.57775	0	269.712	7.0085	11.2539	477.3	140.034	18.0559	3.8621	19.4005	43.5687	0.051472	0.0319	0.0058	0.834948	81.8266	10.5045	23.4755	404.259	35.5606	0.060286	83.5119	0.2246	6.074	27.307	4.991	1.237	0.175	0.158	0	0.058	0.308	0.041	0.004	0	0.18	0	158.563	3511.08
2458	0.58	0	269.693	7.0085	11.2539	477.3	140.034	18.0559	3.8621	19.4005	43.5687	0.051468	0.0319	0.0058	0.834912	81.8233	10.5041	23.4746	404.243	35.5592	0.060284	83.5086	0.2246	6.074	27.308	4.991	1.238	0.175	0.158	0	0.058	0.308	0.041	0.004	0	0.18	0	158.568	3511.08
2459	0.58225	0	269.674	7.0085	11.2539	477.3	140.034	18.0559	3.8621	19.4005	43.5687	0.051464	0.0319	0.0058	0.834876	81.8201	10.5037	23.4736	404.227	35.5577	0.060282	83.5053	0.2246	6.074	27.31	4.991	1.238	0.175	0.158	0	0.058	0.308	0.041	0.004	0	0.18	0	158.573	3511.08
2460	0.5845	0	269.655	7.0085	11.2539	477.3	140.034	18.0559	3.8621	19.4005	43.5687	0.05146	0.0319	0.0058	0.83484	81.8169	10.5032	23.4727	404.211	35.5563	0.06028	83.502	0.2246	6.075	27.311	4.991	1.238	0.175	0.158	0	0.058	0.308	0.041	0.004	0	0.18	0	158.578	3511.08
2461	0.58675	0	269.636	7.0085	11.2539	477.3	140.034	18.0559	3.8621	19.4005	43.5687	0.051456	0.0319	0.0058	0.834804	81.8136	10.5028	23.4718	404.195	35.5549	0.060278	83.4987	0.2246	6.075	27.313	4.992	1.238	0.175	0.158	0	0.058	0.308	0.041	0.004	0	0.18	0	158.583	3511.08
2462	0.589	0	269.617	7.0085	11.2539	477.3	140.034	18.0559	3.8621	19.4005	43.5687	0.051452	0.0319	0.0058	0.834768	81.8104	10.5024	23.4709	404.179	35.5535	0.060276	83.4954	0.2246	6.075	27.314	4.992	1.238	0.175	0.158	0	0.058	0.308	0.041	0.004	0	0.18	0	158.588	3511.08
2463	0.59125	0	269.598	7.0085	11.2539	477.3	140.034	18.0559	3.8621	19.4005	43.5687	0.051448	0.0319	0.0058	0.834732	81.8072	10.502	23.4699	404.163	35.5521	0.060274	83.4921	0.2246	6.076	27.316	4.992	1.238	0.175	0.158	0	0.058	0.308	0.041	0.004	0	0.18	0	158.593	3511.08
2464	0.5935	0	269.579	7.0085	11.2539	477.3	140.034	18.0559	3.8621	19.4005	43.5687	0.051444	0.0319	0.0058	0.834696	81.804	10.5016	23.469	404.147	35.5507	0.060272	83.4888	0.2246	6.076	27.318	4.993	1.238	0.175	0.159	0	0.058	0.308	0.041	0.004	0	0.18	0	158.597	3511.08
2465	0.59575	0	269.56	7.0085	11.2539	477.3	140.034	18.0559	3.8621	19.4005	43.5687	0.05144	0.0319	0.0058	0.83466	81.8007	10.5012	23.4681	404.131	35.5493	0.06027	83.4855	0.2246	6.076	27.319	4.993	1.238	0.175	0.159	0	0.058	0.308	0.041	0.004	0	0.18	0	158.602	3511.08
2466	0.598	0	269.541	7.0085	11.2539	477.3	140.034	18.0559	3.8621	19.4005	43.5687	0.051436	0.0319	0.0058	0.834624	81.7975	10.5007	23.4672	404.115	35.5479	0.060268	83.4822	0.2246	6.077	27.321	4.993	1.238	0.175	0.159	0	0.058	0.308	0.041	0.004	0	0.18	0	158.607	3511.08
2467	0.60025	0	269.522	7.0085	11.2539	477.3	140.034	18.0559	3.8621	19.4005	43.5687	0.051432	0.0319	0.0058	0.834588	81.7943	10.5003	23.4662	404.099	35.5465	0.060266	83.4789	0.2246	6.077	27.322	4.993	1.238	0.175	0.159	0	0.058	0.308	0.041	0.004	0	0.18	0	158.612	3511.08
2468	0.6025	0	269.503	7.0085	11.2539	477.3	140.034	18.0559	3.8621	19.4005	43.5687	0.051428	0.0319	0.0058	0.834552	81.791	10.4999	23.4653	404.083	35.5451	0.060264	83.4756	0.2246	6.077	27.324	4.994	1.238	0.175	0.159	0	0.058	0.308	0.041	0.004	0	0.18	0	158.617	3511.08
2469	0.60475	0	269.484	7.0085	11.2539	477.3	140.034	18.0559	3.8621	19.4005	43.5687	0.051424	0.0319	0.0058	0.834516	81.7878	10.4995	23.4644	404.067	35.5437	0.060262	83.4723	0.2246	6.078	27.325	4.994	1.238	0.175	0.159	0	0.058	0.308	0.041	0.004	0	0.18	0	158.622	3511.08
2470	0.607	0	269.465	7.0085	11.2539	477.3	140.034	18.0559	3.8621	19.4005	43.5687	0.05142	0.0319	0.0058	0.83448	81.7846	10.4991	23.4634	404.051	35.5423	0.06026	83.469	0.2246	6.078	27.327	4.994	1.238	0.175	0.159	0	0.058	0.308	0.041	0.004	0	0.18	0	158.626	3511.08
2471	0.60925	0	269.446	7.0085	11.2539	477.3	140.034	18.0559	3.8621	19.4005	43.5687	0.051416	0.0319	0.0058	0.834444	81.7813	10.4987	23.4625	404.036	35.5409	0.060258	83.4657	0.2246	6.078	27.328	4.995	1.238	0.175	0.159	0	0.058	0.308	0.041	0.004	0	0.18	0	158.631	3511.08
2472	0.6115	0	269.427	7.0085	11.2539	477.3	140.034	18.0559	3.8621	19.4005	43.5687	0.051412	0.0319	0.0058	0.834408	81.7781	10.4982	23.4616	404.02	35.5395	0.060256	83.4624	0.2246	6.079	27.33	4.995	1.239	0.175	0.159	0	0.058	0.308	0.041	0.004	0	0.18	0	158.636	3511.08
2473	0.61375	0	269.408	7.0085	11.2539	477.3	140.034	18.0559	3.8621	19.4005	43.5687	0.051408	0.0319	0.0058	0.834372	81.7749	10.4978	23.4607	404.004	35.5381	0.060254	83.4591	0.2246	6.079	27.331	4.995	1.239	0.175	0.159	0	0.058	0.308	0.041	0.004	0	0.18	0	158.641	3511.08
2474	0.616	0	269.389	7.0085	11.2539	477.3	140.034	18.0559	3.8621	19.4005	43.5687	0.051404	0.0319	0.0058	0.834336	81.7716	10.4974	23.4597	403.988	35.5367	0.060252	83.4558	0.2246	6.079	27.333	4.995	1.239	0.175	0.159	0	0.058	0.308	0.041	0.004	0	0.18	0	158.645	3511.08
2475	0.61825	0	269.37	7.0085	11.2539	477.3	140.034	18.0559	3.8621	19.4005	43.5687	0.0514	0.0319	0.0058	0.8343	81.7684	10.497	23.4588	403.972	35.5352	0.06025	83.4524	0.2246	6.08	27.334	4.996	1.239	0.175	0.159	0	0.058	0.308	0.041	0.004	0	0.18	0	158.65	3511.08
2476	0.6205	0	269.35	7.0085	11.2539	477.3	140.034	18.0559	3.8621	19.4005	43.5687	0.051396	0.0319	0.0058	0.834264	81.7652	10.4966	23.4579	403.956	35.5338	0.060248	83.4491	0.2246	6.08	27.336	4.996	1.239	0.175	0.159	0	0.058	0.308	0.041	0.004	0	0.181	0	158.655	3511.08
2477	0.62275	0	269.331	7.0085	11.2539	477.3	140.034	18.0559	3.8621	19.4005	43.5687	0.051392	0.0319	0.0058	0.834228	81.7619	10.4962	23.4569	403.94	35.5324	0.060246	83.4458	0.2246	6.08	27.337	4.996	1.239	0.175	0.159	0	0.058	0.308	0.041	0.004	0	0.181	0	158.66	3511.08
2478	0.625	0	269.312	7.0085	11.2539	477.3	140.034	18.0559	3.8621	19.4005	43.5687	0.051388	0.0319	0.0058	0.834192	81.7587	10.4958	23.456	403.924	35.531	0.060244	83.4425	0.2246	6.081	27.339	4.996	1.239	0.175	0.159	0	0.058	0.308	0.041	0.004	0	0.181	0	158.664	3511.08
2479	0.62725	0	269.293	7.0085	11.2539	477.3	140.034	18.0559	3.8621	19.4005	43.5687	0.051384	0.0319	0.0058	0.834156	81.7555	10.4953	23.4551	403.908	35.5296	0.060242	83.4392	0.2246	6.081	27.34	4.997	1.239	0.175	0.159	0	0.058	0.308	0.041	0.004	0	0.181	0	158.669	3511.08
2480	0.6295	0	269.274	7.0085	11.2539	477.3	140.034	18.0559	3.8621	19.4005	43.5687	0.05138	0.0319	0.0058	0.83412	81.7522	10.4949	23.4542	403.892	35.5282	0.06024	83.4359	0.2246	6.081	27.342	4.997	1.239	0.175	0.159	0	0.058	0.308	0.041	0.004	0	0.181	0	158.674	3511.08
2481	0.63175	0	269.255	7.0085	11.2539	477.3	140.034	18.0559	3.8621	19.4005	43.5687	0.051376	0.0319	0.0058	0.834084	81.749	10.4945	23.4532	403.876	35.5268	0.060238	83.4326	0.2246	6.082	27.343	4.997	1.239	0.175	0.159	0	0.058	0.308	0.041	0.004	0	0.181	0	158.678	3511.08
2482	0.634	0	269.236	7.0085	11.2539	477.3	140.034	18.0559	3.8621	19.4005	43.5687	0.051372	0.0319	0.0058	0.834048	81.7458	10.4941	23.4523	403.86	35.5254	0.060236	83.4293	0.2246	6.082	27.345	4.998	1.239	0.175	0.159	0	0.058	0.308	0.041	0.004	0	0.181	0	158.683	3511.08
2483	0.63625	0	269.217	7.0085	11.2539	477.3	140.034	18.0559	3.8621	19.4005	43.5687	0.051368	0.0319	0.0058	0.834012	81.7425	10.4937	23.4514	403.844	35.524	0.060234	83.426	0.2246	6.082	27.346	4.998	1.239	0.176	0.159	0	0.058	0.308	0.041	0.004	0	0.181	0	158.688	3511.08
2484	0.6385	0	269.198	7.0085	11.2539	477.3	140.034	18.0559	3.8621	19.4005	43.5687	0.051364	0.0319	0.0058	0.833976	81.7393	10.4933	23.4504	403.828	35.5226	0.060232	83.4227	0.2246	6.083	27.348	4.998	1.239	0.176	0.159	0	0.058	0.308	0.041	0.004	0	0.181	0	158.692	3511.08
2485	0.64075	0	269.179	7.0085	11.2539	477.3	140.034	18.0559	3.8621	19.4005	43.5687	0.05136	0.0319	0.0058	0.83394	81.7361	10.4928	23.4495	403.812	35.5212	0.06023	83.4194	0.2246	6.083	27.349	4.998	1.239	0.176	0.159	0	0.058	0.308	0.041	0.004	0	0.181	0	158.697	3511.08
2486	0.643	0	269.16	7.0085	11.2539	477.3	140.034	18.0559	3.8621	19.4005	43.5687	0.051356	0.0319	0.0058	0.833904	81.7328	10.4924	23.4486	403.796	35.5198	0.060228	83.4161	0.2246	6.083	27.351	4.999	1.239	0.176	0.159	0	0.058	0.308	0.041	0.004	0	0.181	0	158.702	3511.08
2487	0.64525	0	269.141	7.0085	11.2539	477.3	140.034	18.0559	3.8621	19.4005	43.5687	0.051352	0.0319	0.0058	0.833868	81.7296	10.492	23.4477	403.78	35.5184	0.060226	83.4128	0.2246	6.084	27.352	4.999	1.24	0.176	0.159	0	0.058	0.308	0.041	0.004	0	0.181	0	158.706	3511.08
2488	0.6475	0	269.122	7.0085	11.2539	477.3	140.034	18.0559	3.8621	19.4005	43.5687	0.051348	0.0319	0.0058	0.833832	81.7264	10.4916	23.4467	403.764	35.517	0.060224	83.4095	0.2246	6.084	27.354	4.999	1.24	0.176	0.159	0	0.058	0.308	0.041	0.004	0	0.181	0	158.711	3511.08
2489	0.64975	0	269.103	7.0085	11.2539	477.3	140.034	18.0559	3.8621	19.4005	43.5687	0.051344	0.0319	0.0058	0.833796	81.7232	10.4912	23.4458	403.748	35.5156	0.060222	83.4062	0.2246	6.084	27.355	4.999	1.24	0.176	0.159	0	0.058	0.308	0.041	0.004	0	0.181	0	158.715	3511.08
2490	0.652	0	269.084	7.0085	11.2539	477.3	140.034	18.0559	3.8621	19.4005	43.5687	0.05134	0.0319	0.0058	0.83376	81.7199	10.4908	23.4449	403.732	35.5142	0.06022	83.4029	0.2246	6.085	27.357	5	1.24	0.176	0.159	0	0.058	0.308	0.041	0.004	0	0.181	0	158.72	3511.08
2491	0.65425	0	269.065	7.0085	11.2539	477.3	140.034	18.0559	3.8621	19.4005	43.5687	0.051336	0.0319	0.0058	0.833724	81.7167	10.4903	23.444	403.716	35.5128	0.060218	83.3996	0.2246	6.085	27.358	5	1.24	0.176	0.159	0	0.058	0.308	0.041	0.004	0	0.181	0	158.725	3511.08
2492	0.6565	0	269.046	7.0085	11.2539	477.3	140.034	18.0559	3.8621	19.4005	43.5687	0.051332	0.0319	0.0058	0.833688	81.7135	10.4899	23.443	403.7	35.5113	0.060216	83.3963	0.2246	6.085	27.359	5	1.24	0.176	0.159	0	0.058	0.308	0.041	0.004	0	0.181	0	158.729	3511.08
2493	0.65875	0	269.027	7.0085	11.2539	477.3	140.034	18.0559	3.8621	19.4005	43.5687	0.051328	0.0319	0.0058	0.833652	81.7102	10.4895	23.4421	403.684	35.5099	0.060214	83.393	0.2246	6.086	27.361	5	1.24	0.176	0.159	0	0.058	0.308	0.041	0.004	0	0.181	0	158.734	3511.08
2494	0.661	0	269.008	7.0085	11.2539	477.3	140.034	18.0559	3.8621	19.4005	43.5687	0.051324	0.0319	0.0058	0.833616	81.707	10.4891	23.4412	403.668	35.5085	0.060212	83.3897	0.2246	6.086	27.362	5.001	1.24	0.176	0.159	0	0.059	0.308	0.041	0.004	0	0.181	0	158.738	3511.08
2495	0.66325	0	268.989	7.0085	11.2539	477.3	140.034	18.0559	3.8621	19.4005	43.5687	0.05132	0.0319	0.0058	0.83358	81.7038	10.4887	23.4402	403.652	35.5071	0.06021	83.3864	0.2246	6.086	27.364	5.001	1.24	0.176	0.159	0	0.059	0.309	0.041	0.004	0	0.181	0	158.743	3511.08
2496	0.6655	0	268.97	7.0085	11.2539	477.3	140.034	18.0559	3.8621	19.4005	43.5687	0.051316	0.0319	0.0058	0.833544	81.7005	10.4883	23.4393	403.636	35.5057	0.060208	83.3831	0.2246	6.087	27.365	5.001	1.24	0.176	0.159	0	0.059	0.309	0.041	0.004	0	0.181	0	158.747	3511.08
2497	0.66775	0	268.951	7.0085	11.2539	477.3	140.034	18.0559	3.8621	19.4005	43.5687	0.051312	0.0319	0.0058	0.833508	81.6973	10.4878	23.4384	403.62	35.5043	0.060206	83.3798	0.2246	6.087	27.367	5.002	1.24	0.176	0.159	0	0.059	0.309	0.041	0.004	0	0.181	0	158.752	3511.08
2498	0.67	0	268.932	7.0085	11.2539	477.3	140.034	18.0559	3.8621	19.4005	43.5687	0.051308	0.0319	0.0058	0.833472	81.6941	10.4874	23.4375	403.604	35.5029	0.060204	83.3765	0.2246	6.087	27.368	5.002	1.24	0.176	0.159	0	0.059	0.309	0.041	0.004	0	0.181	0	158.756	3511.08
2499	0.67225	0	268.913	7.0085	11.2539	477.3	140.034	18.0559	3.8621	19.4005	43.5687	0.051304	0.0319	0.0058	0.833436	81.6908	10.487	23.4365	403.588	35.5015	0.060202	83.3732	0.2246	6.088	27.37	5.002	1.24	0.176	0.159	0	0.059	0.309	0.041	0.004	0	0.181	0	158.761	3511.08
2500	0.6745	0	268.894	7.0085	11.2539	477.3	140.034	18.0559	3.8621	19.4005	43.5687	0.0513	0.0319	0.0058	0.8334	81.6876	10.4866	23.4356	403.572	35.5001	0.0602	83.3699	0.2246	6.088	27.37	5.002	1.24	0.176	0.159	0	0.059	0.309	0.041	0.004	0	0.181	0	158.761	3511.08
