# Supplementary material for: The Social Cost of Fossil and Industrial CO2 Emissions from 1950 to 2018
Source: Research Square preprint supplement (doi:10.21203/rs.3.rs-2244259/v1), 2022-11-17
Supplement: Supplementary file 19 [file RCP45_MIDYEAR_CONCENTRATIONS.xls]

## Sheet: RCP45_MIDYEAR_CONCENTRATIONS
RCP45__MIDYEAR__CONCENTRATIONS____________________________
CONTENT: CMIP5 RECOMMENDATIONS FOR ANNUAL AVERAGE, GLOBAL MEAN CONCENTRATIONS.
RUN: RCP4.5, FINAL RELEASE, 26 Nov. 2009
RCP4.5 CONTACT: MiniCAM group, Allison Thomson (Allison.Thomson@pnl.gov)
DATE: 26/11/2009 09:00:37 (updated description, 30 May 2010)
MAGICC-VERSION: 6.3.09, 25 November 2009
FILE PRODUCED BY: RCP Concentration Calculation & Data Group, M. Meinshausen, S. Smith, K. Riahi, D. van Vuuren
DOCUMENTATION: M. Meinshausen, S. Smith et al. (2011) "The RCP GHG concentrations and their extension from 1765 to 2300", DOI 10.1007/s10584-011-0156-z, Climatic Change.
CMIP5 INFO: http://cmip-pcmdi.llnl.gov/cmip5/
RCP DATABASE: http://www.iiasa.ac.at/web-apps/tnt/RcpDb
FURTHER INFO: For data sources, aknowledgements and further information, see http://www.pik-potsdam.de/~mmalte/rcps
NOTE: RCP4.5 starts 2005; 20th century data and earlier is provided for convenience.
COLUMN_DESCRIPTION________________________________________
1. CO2EQ - (For Information only, not CMIP5 recommendation) CO2 equivalence concentrations using CO2 radiative forcing relationship Q = 3.71/ln(2)*ln(C/278), aggregating all (efficacy-adjusted) anthropogenic forcings, including greenhouse gases listed below (i.e. columns 3,4,5 and 8-35), and aerosols, trop. ozone etc. (not listed below).
2. KYOTO-CO2EQ - (For information only, not CMIP5 recommendation) As column 1, but only aggregating greenhouse gases controlled under the Kyoto Protocol (columns 3,4,5 and 8-19).
3. CO2 - Atmospheric CO2 concentrations
4. CH4 - Atmospheric CH4 concentrations
5. N2O - Atmospheric N2O concentrations
6. FGASSUMHFC134AEQ - All flourinated gases controlled under the Kyoto Protocol, i.e. HFCs, PFCs, and SF6 (columns 8-19) expressed as HFC134a equivalence concentrations.
7. MHALOSUMCFC12EQ - All flourinated gases controlled under the Montreal Protocol, i.e. CFCs, HCFCs, Halons, CCl4, CH3Br, CH3Cl (columns 20-35) expressed as CFC-12 equivalence concentrations.
8. - 19. - Flourinated Gases controlled under the Kyoto Protocol
20. - 35. - Ozone Depleting Substances controlled under the Montreal Protocol
&THISFILE_SPECIFICATIONS
THISFILE_DATACOLUMNS	35
THISFILE_FIRSTYEAR	1765
THISFILE_LASTYEAR	2500
THISFILE_ANNUALSTEPS	1
THISFILE_FIRSTDATAROW	40
THISFILE_UNITS	SEE ROW 38
THISFILE_DATTYPE	RCPDAT
/
COLUMN:	1	2	3	4	5	6	7	8	9	10	11	12	13	14	15	16	17	18	19	20	21	22	23	24	25	26	27	28	29	30	31	32	33	34	35
UNITS:	ppm	ppm	ppm	ppb	ppb	ppt	ppt	ppt	ppt	ppt	ppt	ppt	ppt	ppt	ppt	ppt	ppt	ppt	ppt	ppt	ppt	ppt	ppt	ppt	ppt	ppt	ppt	ppt	ppt	ppt	ppt	ppt	ppt	ppt	ppt
v YEARS/GAS >	CO2EQ	KYOTO-CO2EQ	CO2	CH4	N2O	FGASSUMHFC134AEQ	MHALOSUMCFC12EQ	CF4	C2F6	C6F14	HFC23	HFC32	HFC43_10	HFC125	HFC134a	HFC143a	HFC227ea	HFC245fa	SF6	CFC_11	CFC_12	CFC_113	CFC_114	CFC_115	CARB_TET	MCF	HCFC_22	HCFC_141B	HCFC_142B	HALON1211	HALON1202	HALON1301	HALON2402	CH3BR	CH3CL
1765	277.015	277.015	278.052	721.894	272.96	0	0	35	0	0	0	0	0	0	0	0	0	0	0	0	0	0	0	0	0	0	0	0	0	0	0	0	0	5.8	480
1766	277.839	277.815	278.106	722.256	272.971	0	0	35	0	0	0	0	0	0	0	0	0	0	0	0	0	0	0	0	0	0	0	0	0	0	0	0	0	5.8	480
1767	278.694	278.687	278.22	722.971	272.994	0	0	35	0	0	0	0	0	0	0	0	0	0	0	0	0	0	0	0	0	0	0	0	0	0	0	0	0	5.8	480
1768	278.748	278.836	278.343	723.668	273.017	0	0	35	0	0	0	0	0	0	0	0	0	0	0	0	0	0	0	0	0	0	0	0	0	0	0	0	0	5.8	480
1769	278.796	278.989	278.471	724.343	273.039	0	0	35	0	0	0	0	0	0	0	0	0	0	0	0	0	0	0	0	0	0	0	0	0	0	0	0	0	5.8	480
1770	278.849	279.143	278.6	724.995	273.061	0	0	35	0	0	0	0	0	0	0	0	0	0	0	0	0	0	0	0	0	0	0	0	0	0	0	0	0	5.8	480
1771	278.884	279.299	278.733	725.629	273.083	0	0	35	0	0	0	0	0	0	0	0	0	0	0	0	0	0	0	0	0	0	0	0	0	0	0	0	0	5.8	480
1772	278.925	279.459	278.869	726.25	273.104	0	0	35	0	0	0	0	0	0	0	0	0	0	0	0	0	0	0	0	0	0	0	0	0	0	0	0	0	5.8	480
1773	278.994	279.622	279.009	726.859	273.125	0	0	35	0	0	0	0	0	0	0	0	0	0	0	0	0	0	0	0	0	0	0	0	0	0	0	0	0	5.8	480
1774	279.069	279.789	279.153	727.455	273.146	0	0	35	0	0	0	0	0	0	0	0	0	0	0	0	0	0	0	0	0	0	0	0	0	0	0	0	0	5.8	480
1775	279.151	279.96	279.302	728.037	273.166	0	0	35	0	0	0	0	0	0	0	0	0	0	0	0	0	0	0	0	0	0	0	0	0	0	0	0	0	5.8	480
1776	279.242	280.137	279.457	728.604	273.187	0	0	35	0	0	0	0	0	0	0	0	0	0	0	0	0	0	0	0	0	0	0	0	0	0	0	0	0	5.8	480
1777	279.342	280.319	279.618	729.154	273.207	0	0	35	0	0	0	0	0	0	0	0	0	0	0	0	0	0	0	0	0	0	0	0	0	0	0	0	0	5.8	480
1778	279.447	280.504	279.782	729.687	273.227	0	0	35	0	0	0	0	0	0	0	0	0	0	0	0	0	0	0	0	0	0	0	0	0	0	0	0	0	5.8	480
1779	279.551	280.685	279.943	730.201	273.247	0	0	35	0	0	0	0	0	0	0	0	0	0	0	0	0	0	0	0	0	0	0	0	0	0	0	0	0	5.8	480
1780	279.65	280.859	280.097	730.692	273.266	0	0	35	0	0	0	0	0	0	0	0	0	0	0	0	0	0	0	0	0	0	0	0	0	0	0	0	0	5.8	480
1781	279.718	281.022	280.243	731.154	273.286	0	0	35	0	0	0	0	0	0	0	0	0	0	0	0	0	0	0	0	0	0	0	0	0	0	0	0	0	5.8	480
1782	279.782	281.179	280.382	731.584	273.306	0	0	35	0	0	0	0	0	0	0	0	0	0	0	0	0	0	0	0	0	0	0	0	0	0	0	0	0	5.8	480
1783	279.868	281.332	280.518	731.989	273.325	0	0	35	0	0	0	0	0	0	0	0	0	0	0	0	0	0	0	0	0	0	0	0	0	0	0	0	0	5.8	480
1784	279.959	281.487	280.657	732.378	273.345	0	0	35	0	0	0	0	0	0	0	0	0	0	0	0	0	0	0	0	0	0	0	0	0	0	0	0	0	5.8	480
1785	280.058	281.648	280.803	732.76	273.365	0	0	35	0	0	0	0	0	0	0	0	0	0	0	0	0	0	0	0	0	0	0	0	0	0	0	0	0	5.8	480
1786	280.17	281.819	280.957	733.146	273.384	0	0	35	0	0	0	0	0	0	0	0	0	0	0	0	0	0	0	0	0	0	0	0	0	0	0	0	0	5.8	480
1787	280.291	281.996	281.118	733.544	273.404	0	0	35	0	0	0	0	0	0	0	0	0	0	0	0	0	0	0	0	0	0	0	0	0	0	0	0	0	5.8	480
1788	280.419	282.177	281.282	733.965	273.424	0	0	35	0	0	0	0	0	0	0	0	0	0	0	0	0	0	0	0	0	0	0	0	0	0	0	0	0	5.8	480
1789	280.548	282.357	281.443	734.418	273.444	0	0	35	0	0	0	0	0	0	0	0	0	0	0	0	0	0	0	0	0	0	0	0	0	0	0	0	0	5.8	480
1790	280.676	282.532	281.598	734.911	273.464	0	0	35	0	0	0	0	0	0	0	0	0	0	0	0	0	0	0	0	0	0	0	0	0	0	0	0	0	5.8	480
1791	280.778	282.701	281.747	735.445	273.484	0	0	35	0	0	0	0	0	0	0	0	0	0	0	0	0	0	0	0	0	0	0	0	0	0	0	0	0	5.8	480
1792	280.879	282.867	281.891	736.018	273.504	0	0	35	0	0	0	0	0	0	0	0	0	0	0	0	0	0	0	0	0	0	0	0	0	0	0	0	0	5.8	480
1793	281.005	283.031	282.031	736.626	273.525	0	0	35	0	0	0	0	0	0	0	0	0	0	0	0	0	0	0	0	0	0	0	0	0	0	0	0	0	5.8	480
1794	281.13	283.191	282.167	737.265	273.545	0	0	35	0	0	0	0	0	0	0	0	0	0	0	0	0	0	0	0	0	0	0	0	0	0	0	0	0	5.8	480
1795	281.254	283.348	282.299	737.933	273.566	0	0	35	0	0	0	0	0	0	0	0	0	0	0	0	0	0	0	0	0	0	0	0	0	0	0	0	0	5.8	480
1796	281.378	283.502	282.427	738.627	273.587	0	0	35	0	0	0	0	0	0	0	0	0	0	0	0	0	0	0	0	0	0	0	0	0	0	0	0	0	5.8	480
1797	281.478	283.653	282.551	739.343	273.609	0	0	35	0	0	0	0	0	0	0	0	0	0	0	0	0	0	0	0	0	0	0	0	0	0	0	0	0	5.8	480
1798	281.577	283.801	282.671	740.08	273.63	0	0	35	0	0	0	0	0	0	0	0	0	0	0	0	0	0	0	0	0	0	0	0	0	0	0	0	0	5.8	480
1799	281.699	283.945	282.787	740.834	273.652	0	0	35	0	0	0	0	0	0	0	0	0	0	0	0	0	0	0	0	0	0	0	0	0	0	0	0	0	5.8	480
1800	281.795	284.086	282.899	741.608	273.675	0	0	35	0	0	0	0	0	0	0	0	0	0	0	0	0	0	0	0	0	0	0	0	0	0	0	0	0	5.8	480
1801	281.891	284.224	283.007	742.413	273.698	0	0	35	0	0	0	0	0	0	0	0	0	0	0	0	0	0	0	0	0	0	0	0	0	0	0	0	0	5.8	480
1802	281.964	284.359	283.111	743.26	273.721	0	0	35	0	0	0	0	0	0	0	0	0	0	0	0	0	0	0	0	0	0	0	0	0	0	0	0	0	5.8	480
1803	282.061	284.492	283.211	744.146	273.744	0	0	35	0	0	0	0	0	0	0	0	0	0	0	0	0	0	0	0	0	0	0	0	0	0	0	0	0	5.8	480
1804	282.204	284.622	283.307	745.063	273.768	0	0	35	0	0	0	0	0	0	0	0	0	0	0	0	0	0	0	0	0	0	0	0	0	0	0	0	0	5.8	480
1805	282.323	284.748	283.4	746.005	273.793	0	0	35	0	0	0	0	0	0	0	0	0	0	0	0	0	0	0	0	0	0	0	0	0	0	0	0	0	5.8	480
1806	282.418	284.873	283.49	746.962	273.818	0	0	35	0	0	0	0	0	0	0	0	0	0	0	0	0	0	0	0	0	0	0	0	0	0	0	0	0	5.8	480
1807	282.514	284.997	283.578	747.927	273.843	0	0	35	0	0	0	0	0	0	0	0	0	0	0	0	0	0	0	0	0	0	0	0	0	0	0	0	0	5.8	480
1808	282.631	285.115	283.661	748.893	273.869	0	0	35	0	0	0	0	0	0	0	0	0	0	0	0	0	0	0	0	0	0	0	0	0	0	0	0	0	5.8	480
1809	282.739	285.225	283.735	749.851	273.895	0	0	35	0	0	0	0	0	0	0	0	0	0	0	0	0	0	0	0	0	0	0	0	0	0	0	0	0	5.8	480
1810	282.836	285.321	283.797	750.798	273.922	0	0	35	0	0	0	0	0	0	0	0	0	0	0	0	0	0	0	0	0	0	0	0	0	0	0	0	0	5.8	480
1811	282.9	285.406	283.847	751.739	273.95	0	0	35	0	0	0	0	0	0	0	0	0	0	0	0	0	0	0	0	0	0	0	0	0	0	0	0	0	5.8	480
1812	282.957	285.483	283.889	752.682	273.978	0	0	35	0	0	0	0	0	0	0	0	0	0	0	0	0	0	0	0	0	0	0	0	0	0	0	0	0	5.8	480
1813	283.036	285.555	283.926	753.628	274.007	0	0	35	0	0	0	0	0	0	0	0	0	0	0	0	0	0	0	0	0	0	0	0	0	0	0	0	0	5.8	480
1814	283.115	285.627	283.963	754.579	274.036	0	0	35	0	0	0	0	0	0	0	0	0	0	0	0	0	0	0	0	0	0	0	0	0	0	0	0	0	5.8	480
1815	283.174	285.701	284.001	755.531	274.066	0	0	35	0	0	0	0	0	0	0	0	0	0	0	0	0	0	0	0	0	0	0	0	0	0	0	0	0	5.8	480
1816	283.215	285.778	284.043	756.486	274.097	0	0	35	0	0	0	0	0	0	0	0	0	0	0	0	0	0	0	0	0	0	0	0	0	0	0	0	0	5.8	480
1817	283.259	285.858	284.086	757.44	274.128	0	0	35	0	0	0	0	0	0	0	0	0	0	0	0	0	0	0	0	0	0	0	0	0	0	0	0	0	5.8	480
1818	283.327	285.936	284.129	758.395	274.16	0	0	35	0	0	0	0	0	0	0	0	0	0	0	0	0	0	0	0	0	0	0	0	0	0	0	0	0	5.8	480
1819	283.415	286.01	284.167	759.348	274.193	0	0	35	0	0	0	0	0	0	0	0	0	0	0	0	0	0	0	0	0	0	0	0	0	0	0	0	0	5.8	480
1820	283.498	286.078	284.198	760.3	274.227	0	0	35	0	0	0	0	0	0	0	0	0	0	0	0	0	0	0	0	0	0	0	0	0	0	0	0	0	5.8	480
1821	283.575	286.139	284.223	761.249	274.261	0	0	35	0	0	0	0	0	0	0	0	0	0	0	0	0	0	0	0	0	0	0	0	0	0	0	0	0	5.8	480
1822	283.627	286.196	284.244	762.198	274.296	0	0	35	0	0	0	0	0	0	0	0	0	0	0	0	0	0	0	0	0	0	0	0	0	0	0	0	0	5.8	480
1823	283.655	286.251	284.263	763.147	274.332	0	0	35	0	0	0	0	0	0	0	0	0	0	0	0	0	0	0	0	0	0	0	0	0	0	0	0	0	5.8	480
1824	283.706	286.306	284.281	764.095	274.368	0	0	35	0	0	0	0	0	0	0	0	0	0	0	0	0	0	0	0	0	0	0	0	0	0	0	0	0	5.8	480
1825	283.76	286.361	284.3	765.044	274.406	0	0	35	0	0	0	0	0	0	0	0	0	0	0	0	0	0	0	0	0	0	0	0	0	0	0	0	0	5.8	480
1826	283.816	286.418	284.32	765.993	274.444	0	0	35	0	0	0	0	0	0	0	0	0	0	0	0	0	0	0	0	0	0	0	0	0	0	0	0	0	5.8	480
1827	283.873	286.475	284.34	766.943	274.484	0	0	35	0	0	0	0	0	0	0	0	0	0	0	0	0	0	0	0	0	0	0	0	0	0	0	0	0	5.8	480
1828	283.931	286.532	284.36	767.894	274.524	0	0	35	0	0	0	0	0	0	0	0	0	0	0	0	0	0	0	0	0	0	0	0	0	0	0	0	0	5.8	480
1829	284.013	286.589	284.38	768.846	274.565	0	0	35	0	0	0	0	0	0	0	0	0	0	0	0	0	0	0	0	0	0	0	0	0	0	0	0	0	5.8	480
1830	283.962	286.647	284.4	769.798	274.606	0	0	35	0	0	0	0	0	0	0	0	0	0	0	0	0	0	0	0	0	0	0	0	0	0	0	0	0	5.8	480
1831	283.9	286.669	284.385	770.745	274.649	0	0	35	0	0	0	0	0	0	0	0	0	0	0	0	0	0	0	0	0	0	0	0	0	0	0	0	0	5.8	480
1832	283.882	286.6	284.28	771.683	274.693	0	0	35	0	0	0	0	0	0	0	0	0	0	0	0	0	0	0	0	0	0	0	0	0	0	0	0	0	5.8	480
1833	283.77	286.481	284.125	772.615	274.738	0	0	35	0	0	0	0	0	0	0	0	0	0	0	0	0	0	0	0	0	0	0	0	0	0	0	0	0	5.8	480
1834	283.664	286.367	283.975	773.547	274.784	0	0	35	0	0	0	0	0	0	0	0	0	0	0	0	0	0	0	0	0	0	0	0	0	0	0	0	0	5.8	480
1835	283.56	286.253	283.825	774.483	274.83	0	0	35	0	0	0	0	0	0	0	0	0	0	0	0	0	0	0	0	0	0	0	0	0	0	0	0	0	5.8	480
1836	283.369	286.14	283.675	775.428	274.878	0	0	35	0	0	0	0	0	0	0	0	0	0	0	0	0	0	0	0	0	0	0	0	0	0	0	0	0	5.8	480
1837	283.203	286.027	283.525	776.389	274.927	0	0	35	0	0	0	0	0	0	0	0	0	0	0	0	0	0	0	0	0	0	0	0	0	0	0	0	0	5.8	480
1838	283.153	285.966	283.425	777.369	274.977	0	0	35	0	0	0	0	0	0	0	0	0	0	0	0	0	0	0	0	0	0	0	0	0	0	0	0	0	5.8	480
1839	283.159	285.981	283.4	778.374	275.027	0	0	35	0	0	0	0	0	0	0	0	0	0	0	0	0	0	0	0	0	0	0	0	0	0	0	0	0	5.8	480
1840	283.17	286.022	283.4	779.412	275.08	0	0	35	0	0	0	0	0	0	0	0	0	0	0	0	0	0	0	0	0	0	0	0	0	0	0	0	0	5.8	480
1841	283.211	286.091	283.425	780.494	275.136	0	0	35	0	0	0	0	0	0	0	0	0	0	0	0	0	0	0	0	0	0	0	0	0	0	0	0	0	5.8	480
1842	283.306	286.214	283.5	781.624	275.202	0	0	35	0	0	0	0	0	0	0	0	0	0	0	0	0	0	0	0	0	0	0	0	0	0	0	0	0	5.8	480
1843	283.429	286.364	283.6	782.793	275.273	0	0	35	0	0	0	0	0	0	0	0	0	0	0	0	0	0	0	0	0	0	0	0	0	0	0	0	0	5.8	480
1844	283.579	286.538	283.725	783.989	275.337	0	0	35	0	0	0	0	0	0	0	0	0	0	0	0	0	0	0	0	0	0	0	0	0	0	0	0	0	5.8	480
1845	283.713	286.76	283.9	785.197	275.38	0	0	35	0	0	0	0	0	0	0	0	0	0	0	0	0	0	0	0	0	0	0	0	0	0	0	0	0	5.8	480
1846	283.885	286.977	284.075	786.406	275.398	0	0	35	0	0	0	0	0	0	0	0	0	0	0	0	0	0	0	0	0	0	0	0	0	0	0	0	0	5.8	480
1847	284.051	287.166	284.225	787.602	275.401	0	0	35	0	0	0	0	0	0	0	0	0	0	0	0	0	0	0	0	0	0	0	0	0	0	0	0	0	5.8	480
1848	284.22	287.379	284.4	788.773	275.401	0	0	35	0	0	0	0	0	0	0	0	0	0	0	0	0	0	0	0	0	0	0	0	0	0	0	0	0	5.8	480
1849	284.388	287.591	284.575	789.904	275.4	0	0	35	0	0	0	0	0	0	0	0	0	0	0	0	0	0	0	0	0	0	0	0	0	0	0	0	0	5.8	480
1850	284.478	287.78	284.725	790.979	275.425	0	0	35	0	0	0	0	0	0	0	0	0	0	0	0	0	0	0	0	0	0	0	0	0	0	0	0	0	5.8	480
1851	284.678	287.984	284.875	792.25	275.5	0	0.0105361	35	0	0	0	0	0	0	0	0	0	0	0	0	0	0	0	0	0.025935	0	0	0	0	0	0	0	0	5.8	480
1852	284.494	288.175	285	793.75	275.6	0	0.0316002	35	0	0	0	0	0	0	0	0	0	0	0	0	0	0	0	0	0.077785	0	0	0	0	0	0	0	0	5.8	480
1853	284.254	288.366	285.125	795.25	275.7	0	0.0526703	35	0	0	0	0	0	0	0	0	0	0	0	0	0	0	0	0	0.12965	0	0	0	0	0	0	0	0	5.8	480
1854	284.317	288.582	285.275	796.75	275.8	0	0.0737547	35	0	0	0	0	0	0	0	0	0	0	0	0	0	0	0	0	0.18155	0	0	0	0	0	0	0	0	5.8	480
1855	284.378	288.791	285.425	798	275.9	0	0.0948391	35	0	0	0	0	0	0	0	0	0	0	0	0	0	0	0	0	0.23345	0	0	0	0	0	0	0	0	5.8	480
1856	284.487	289	285.575	799.25	276	0	0.115903	35	0	0	0	0	0	0	0	0	0	0	0	0	0	0	0	0	0.2853	0	0	0	0	0	0	0	0	5.8	480
1857	284.571	289.216	285.725	800.75	276.1	0	0.136967	35	0	0	0	0	0	0	0	0	0	0	0	0	0	0	0	0	0.33715	0	0	0	0	0	0	0	0	5.8	480
1858	284.758	289.458	285.9	802.25	276.2	0	0.158052	35	0	0	0	0	0	0	0	0	0	0	0	0	0	0	0	0	0.38905	0	0	0	0	0	0	0	0	5.8	480
1859	284.872	289.7	286.075	803.75	276.3	0	0.179116	35	0	0	0	0	0	0	0	0	0	0	0	0	0	0	0	0	0.4409	0	0	0	0	0	0	0	0	5.8	480
1860	284.54	289.916	286.225	805.25	276.4	0	0.20018	35	0	0	0	0	0	0	0	0	0	0	0	0	0	0	0	0	0.49275	0	0	0	0	0	0	0	0	5.8	480
1861	283.91	290.132	286.375	806.75	276.5	0	0.221264	35	0	0	0	0	0	0	0	0	0	0	0	0	0	0	0	0	0.54465	0	0	0	0	0	0	0	0	5.8	480
1862	284.24	290.324	286.5	808.25	276.6	0	0.242328	35	0	0	0	0	0	0	0	0	0	0	0	0	0	0	0	0	0.5965	0	0	0	0	0	0	0	0	5.8	480
1863	284.827	290.515	286.625	809.75	276.7	0	0.263392	35	0	0	0	0	0	0	0	0	0	0	0	0	0	0	0	0	0.64835	0	0	0	0	0	0	0	0	5.8	480
1864	284.929	290.732	286.775	811.25	276.8	0	0.284477	35	0	0	0	0	0	0	0	0	0	0	0	0	0	0	0	0	0.70025	0	0	0	0	0	0	0	0	5.8	480
1865	284.907	290.93	286.9	813	276.9	0	0.305561	35	0	0	0	0	0	0	0	0	0	0	0	0	0	0	0	0	0.75215	0	0	0	0	0	0	0	0	5.8	480
1866	284.538	291.104	287	814.75	277	0	0.326625	35	0	0	0	0	0	0	0	0	0	0	0	0	0	0	0	0	0.804	0	0	0	0	0	0	0	0	5.8	480
1867	284.133	291.27	287.1	816.25	277.1	0	0.347689	35	0	0	0	0	0	0	0	0	0	0	0	0	0	0	0	0	0.85585	0	0	0	0	0	0	0	0	5.8	480
1868	284.156	291.461	287.225	817.75	277.2	0	0.368773	35	0	0	0	0	0	0	0	0	0	0	0	0	0	0	0	0	0.90775	0	0	0	0	0	0	0	0	5.8	480
1869	284.51	291.678	287.375	819.25	277.3	0	0.389838	35	0	0	0	0	0	0	0	0	0	0	0	0	0	0	0	0	0.9596	0	0	0	0	0	0	0	0	5.8	480
1870	284.76	291.898	287.525	821	277.375	0	0.41082	35	0	0	0	0	0	0	0	0	0	0	0	0	0	0	0	0	1.01125	0	0	0	0	0	0	0	0	5.8	480
1871	284.422	292.138	287.7	822.75	277.425	0	0.431844	35	0	0	0	0	0	0	0	0	0	0	0	0	0	0	0	0	1.063	0	0	0	0	0	0	0	0	5.8	480
1872	283.277	292.401	287.9	824.25	277.5	0	0.452969	35	0	0	0	0	0	0	0	0	0	0	0	0	0	0	0	0	1.115	0	0	0	0	0	0	0	0	5.8	480
1873	282.357	292.694	288.125	825.75	277.6	0	0.474094	35	0	0	0	0	0	0	0	0	0	0	0	0	0	0	0	0	1.167	0	0	0	0	0	0	0	0	5.8	480
1874	282.412	293.038	288.4	827.25	277.7	0	0.495219	35	0	0	0	0	0	0	0	0	0	0	0	0	0	0	0	0	1.219	0	0	0	0	0	0	0	0	5.8	480
1875	282.738	293.411	288.7	829	277.775	0	0.516344	35	0	0	0	0	0	0	0	0	0	0	0	0	0	0	0	0	1.271	0	0	0	0	0	0	0	0	5.8	480
1876	283.196	293.804	289.025	830.75	277.825	0	0.538484	35	0	0	0	0	0	0	0	0	0	0	0	0	0	0	0	0	1.3255	0	0	0	0	0	0	0	0	5.8	480
1877	283.933	294.245	289.4	832.25	277.9	0	0.56225	35	0	0	0	0	0	0	0	0	0	0	0	0	0	0	0	0	1.384	0	0	0	0	0	0	0	0	5.8	480
1878	284.511	294.717	289.8	833.75	278	0	0.587234	35	0	0	0	0	0	0	0	0	0	0	0	0	0	0	0	0	1.4455	0	0	0	0	0	0	0	0	5.8	480
1879	284.747	295.214	290.225	835.25	278.1	0	0.613437	35	0	0	0	0	0	0	0	0	0	0	0	0	0	0	0	0	1.51	0	0	0	0	0	0	0	0	5.8	480
1880	284.541	295.769	290.7	837	278.2	0	0.640656	35	0	0	0	0	0	0	0	0	0	0	0	0	0	0	0	0	1.577	0	0	0	0	0	0	0	0	5.8	480
1881	284.58	296.359	291.2	839	278.3	0	0.669094	35	0	0	0	0	0	0	0	0	0	0	0	0	0	0	0	0	1.647	0	0	0	0	0	0	0	0	5.8	480
1882	285.216	296.922	291.675	841	278.4	0	0.698953	35	0	0	0	0	0	0	0	0	0	0	0	0	0	0	0	0	1.7205	0	0	0	0	0	0	0	0	5.8	480
1883	285.702	297.461	292.125	843	278.5	0	0.730031	35	0	0	0	0	0	0	0	0	0	0	0	0	0	0	0	0	1.797	0	0	0	0	0	0	0	0	5.8	480
1884	286.076	297.992	292.575	844.75	278.6	0	0.762328	35	0	0	0	0	0	0	0	0	0	0	0	0	0	0	0	0	1.8765	0	0	0	0	0	0	0	0	5.8	480
1885	286.62	298.465	292.975	846.25	278.7	0	0.796047	35	0	0	0	0	0	0	0	0	0	0	0	0	0	0	0	0	1.9595	0	0	0	0	0	0	0	0	5.8	480
1886	287.061	298.869	293.3	848	278.8	0	0.831391	35	0	0	0	0	0	0	0	0	0	0	0	0	0	0	0	0	2.0465	0	0	0	0	0	0	0	0	5.8	480
1887	287.225	299.225	293.575	850	278.875	0	0.868359	35	0	0	0	0	0	0	0	0	0	0	0	0	0	0	0	0	2.1375	0	0	0	0	0	0	0	0	5.8	480
1888	286.962	299.525	293.8	852	278.925	0	0.906953	35	0	0	0	0	0	0	0	0	0	0	0	0	0	0	0	0	2.2325	0	0	0	0	0	0	0	0	5.8	480
1889	286.965	299.805	294	854	279	0	0.947172	35	0	0	0	0	0	0	0	0	0	0	0	0	0	0	0	0	2.3315	0	0	0	0	0	0	0	0	5.8	480
1890	287.046	300.064	294.175	856	279.1	0	0.989219	35	0	0	0	0	0	0	0	0	0	0	0	0	0	0	0	0	2.435	0	0	0	0	0	0	0	0	5.8	480
1891	286.867	300.305	294.325	858.25	279.2	0	1.03309	35	0	0	0	0	0	0	0	0	0	0	0	0	0	0	0	0	2.543	0	0	0	0	0	0	0	0	5.8	480
1892	286.801	300.554	294.475	860.75	279.3	0	1.0788	35	0	0	0	0	0	0	0	0	0	0	0	0	0	0	0	0	2.6555	0	0	0	0	0	0	0	0	5.8	480
1893	286.764	300.765	294.6	863	279.375	0	1.12673	35	0	0	0	0	0	0	0	0	0	0	0	0	0	0	0	0	2.7735	0	0	0	0	0	0	0	0	5.8	480
1894	286.661	300.939	294.7	865	279.425	0	1.17691	35	0	0	0	0	0	0	0	0	0	0	0	0	0	0	0	0	2.897	0	0	0	0	0	0	0	0	5.8	480
1895	286.452	301.119	294.8	867.25	279.475	0	1.22911	35	0	0	0	0	0	0	0	0	0	0	0	0	0	0	0	0	3.0255	0	0	0	0	0	0	0	0	5.8	480
1896	286.397	301.308	294.9	869.75	279.525	0	1.28355	35	0	0	0	0	0	0	0	0	0	0	0	0	0	0	0	0	3.1595	0	0	0	0	0	0	0	0	5.8	480
1897	286.487	301.519	295.025	872	279.6	0	1.34062	35	0	0	0	0	0	0	0	0	0	0	0	0	0	0	0	0	3.3	0	0	0	0	0	0	0	0	5.8	480
1898	286.588	301.806	295.225	874.25	279.675	0	1.40014	35	0	0	0	0	0	0	0	0	0	0	0	0	0	0	0	0	3.4465	0	0	0	0	0	0	0	0	5.8	480
1899	286.676	302.174	295.5	876.75	279.725	0	1.4623	35	0	0	0	0	0	0	0	0	0	0	0	0	0	0	0	0	3.5995	0	0	0	0	0	0	0	0	5.8	480
1900	286.799	302.579	295.8	879.5	279.8	0.0329065	1.5273	35	0.0202502	0	0	0	0	0	0	0	0	0	0	0	0	0	0	0	3.7595	0	0	0	0	0	0	0	0	5.8	480
1901	286.77	303.038	296.125	883	279.9	0.067545	1.59494	35	0.0415662	0	0	0	0	0	0	0	0	0	0	0	0	0	0	0	3.926	0	0	0	0	0	0	0	0	5.8	480
1902	286.768	303.538	296.475	887	280	0.0711	1.66359	35	0.0437538	0	0	0	0	0	0	0	0	0	0	0	0	0	0	0	4.095	0	0	0	0	0	0	0	0	5.8	480
1903	286.797	304.046	296.825	891.25	280.1	0.0748421	1.73184	35	0.0460567	0	0	0	0	0	0	0	0	0	0	0	0	0	0	0	4.263	0	0	0	0	0	0	0	0	5.8	480
1904	286.845	304.587	297.2	895.75	280.2	0.0787812	1.79989	35	0.0484807	0	0	0	0	0	0	0	0	0	0	0	0	0	0	0	4.4305	0	0	0	0	0	0	0	0	5.8	480
1905	287.014	305.179	297.625	900.25	280.3	0.0829275	1.86794	35	0.0510323	0	0	0	0	0	0	0	0	0	0	0	0	0	0	0	4.598	0	0	0	0	0	0	0	0	5.8	480
1906	287.053	305.797	298.075	904.75	280.4	0.0872921	1.93883	35	0.0537182	0	0	0	0	0	0	0	0	0	0	0	0	0	0	0	4.7725	0	0	0	0	0	0	0	0	5.8	480
1907	287.071	306.395	298.5	909.25	280.525	0.0918865	2.02962	35	0.0565455	0	0	0	0	0	0	0	0	0	0	0	0	0	0	0	4.996	0	0	0	0	0	0	0	0	5.8	480
1908	287.536	306.979	298.9	914	280.675	0.0967226	2.13769	35	0.0595216	0	0	0	0	0	0	0	0	0	0	0	0	0	0	0	5.262	0	0	0	0	0	0	0	0	5.8	480
1909	288.179	307.571	299.3	919	280.825	0.101813	2.24575	35	0.0626543	0	0	0	0	0	0	0	0	0	0	0	0	0	0	0	5.528	0	0	0	0	0	0	0	0	5.8	480
1910	288.48	308.156	299.7	923.75	280.975	0.107172	2.35381	35	0.0659519	0	0	0	0	0	0	0	0	0	0	0	0	0	0	0	5.794	0	0	0	0	0	0	0	0	5.8	480
1911	288.963	308.708	300.075	928.25	281.125	0.112812	2.46167	35	0.0694231	0	0	0	0	0	0	0	0	0	0	0	0	0	0	0	6.0595	0	0	0	0	0	0	0	0	5.8	480
1912	289.664	309.247	300.425	933	281.3	0.11875	2.5738	35	0.0730769	0	0	0	0	0	0	0	0	0	0	0	0	0	0	0	6.3355	0	0	0	0	0	0	0	0	5.8	480
1913	290.202	309.8	300.775	938.25	281.475	0.125	2.73306	35	0.0769231	0	0	0	0	0	0	0	0	0	0	0	0	0	0	0	6.7265	0	0	0	0	0	0	0	0	5.8135	480
1914	290.933	310.331	301.1	943.75	281.625	0.131579	2.92466	35	0.0809716	0	0	0	0	0	0	0	0	0	0	0	0	0	0	0	7.196	0	0	0	0	0	0	0	0	5.841	480
1915	291.784	310.841	301.4	949.25	281.8	0.138504	3.04253	35	0.0852333	0	0	0	0	0	0	0	0	0	0	0	0	0	0	0	7.484	0	0	0	0	0	0	0	0	5.869	480
1916	292.238	311.382	301.725	954.75	282	0.145794	3.09705	35	0.0897193	0	0	0	0	0	0	0	0	0	0	0	0	0	0	0	7.616	0	0	0	0	0	0	0	0	5.8975	480
1917	292.544	311.954	302.075	960.25	282.225	0.153467	3.20642	35	0.0944413	0	0	0	0	0	0	0	0	0	0	0	0	0	0	0	7.883	0	0	0	0	0	0	0	0	5.9265	480
1918	292.992	312.512	302.4	966	282.475	0.161544	3.3942	35	0.0994119	0	0	0	0	0	0	0	0	0	0	0	0	0	0	0	8.343	0	0	0	0	0	0	0	0	5.9555	480
1919	293.813	313.047	302.7	972	282.7	0.170047	3.60575	35	0.104644	0	0	0	0	0	0	0	0	0	0	0	0	0	0	0	8.8615	0	0	0	0	0	0	0	0	5.9845	480
1920	294.371	313.601	303.025	977.75	282.925	0.178997	3.8173	35	0.110152	0	0	0	0	0	0	0	0	0	0	0	0	0	0	0	9.38	0	0	0	0	0	0	0	0	6.0135	480
1921	294.952	314.204	303.4	983.25	283.175	0.188417	4.02925	35	0.115949	0	0	0	0	0	0	0	0	0	0	0	0	0	0	0	9.8995	0	0	0	0	0	0	0	0	6.0425	480
1922	295.684	314.809	303.775	989	283.4	0.198334	4.24161	35	0.122052	0	0	0	0	0	0	0	0	0	0	0	0	0	0	0	10.42	0	0	0	0	0	0	0	0	6.0715	480
1923	295.586	315.392	304.125	995	283.6	0.229097	4.45175	35.0325	0.128476	0	0	0	0	0	0	0	0	0	0	0	0	0	0	0	10.935	0	0	0	0	0	0	0	0	6.101	480
1924	295.655	316.027	304.525	1001	283.8	0.284506	4.66191	35.1036	0.135237	0	0	0	0	0	0	0	0	0	0	0	0	0	0	0	11.45	0	0	0	0	0	0	0	0	6.131	480
1925	296.251	316.714	304.975	1007	284	0.345533	4.87408	35.1827	0.142355	0	0	0	0	0	0	0	0	0	0	0	0	0	0	0	11.97	0	0	0	0	0	0	0	0	6.1605	480
1926	296.811	317.38	305.4	1013	284.225	0.409771	5.10453	35.266	0.149848	0	0	0	0	0	0	0	0	0	0	0	0	0	0	0	12.535	0	0	0	0	0	0	0	0	6.19	480
1927	297.141	318.046	305.825	1019	284.45	0.477391	5.35328	35.3537	0.157734	0	0	0	0	0	0	0	0	0	0	0	0	0	0	0	13.145	0	0	0	0	0	0	0	0	6.22	480
1928	297.497	318.755	306.3	1025	284.625	0.548569	5.60205	35.446	0.166036	0	0	0	0	0	0	0	0	0	0	0	0	0	0	0	13.755	0	0	0	0	0	0	0	0	6.2505	480
1929	297.965	319.456	306.775	1030.75	284.8	0.623494	5.85081	35.5432	0.174775	0	0	0	0	0	0	0	0	0	0	0	0	0	0	0	14.365	0	0	0	0	0	0	0	0	6.281	480
1930	298.618	320.124	307.225	1036.25	284.975	0.702362	6.10161	35.6454	0.183974	0	0	0	0	0	0	0	0	0	0	0	0	0	0	0	14.98	0	0	0	0	0	0	0	0	6.3115	480
1931	299.65	320.814	307.7	1041.75	285.125	0.823121	6.35241	35.7531	0.193656	0	0.0317813	0	0	0	0	0	0	0	0	0	0	0	0	0	15.595	0	0	0	0	0	0	0	0	6.342	480
1932	300.716	321.51	308.175	1047.25	285.3	0.951532	6.6036	35.8664	0.203849	0	0.0663262	0	0	0	0	0	0	0	0	0	0.0024255	0	0	0	16.205	0	0	0	0	0	0	0	0	6.3725	480
1933	301.45	322.158	308.6	1052.75	285.5	1.05037	6.8633	35.9857	0.214578	0	0.0720937	0	0	0	0	0	0	0	0	0	0.0072525	0	0	0	16.83	0	0	0	0	0	0	0	0	6.4035	480
1934	301.835	322.773	309	1058	285.7	1.15464	7.18389	36.1113	0.225871	0	0.0783628	0	0	0	0	0	0	0	0	0	0.012032	0	0	0	17.605	0	0	0	0	0	0	0	0	6.4345	480
1935	302.244	323.381	309.4	1063	285.9	1.26466	7.56373	36.2434	0.237759	0	0.0851769	0	0	0	0	0	0	0	0	0	0.01919	0	0.0020765	0	18.515	0	0	0	0	0	0	0	0	6.466	480
1936	302.533	323.937	309.75	1068	286.1	1.38075	7.95036	36.3826	0.250273	0	0.0925836	0	0	0	0	0	0	0	0	0	0.031125	0	0.0062225	0	19.425	0	0	0	0	0	0	0	0	6.4975	480
1937	302.823	324.383	310	1073	286.275	1.50324	8.34413	36.529	0.263445	0	0.100634	0	0	0	0	0	0	0	0	0	0.05022	0	0.010356	0	20.335	0	0	0	0	0	0	0	0	6.529	480
1938	303.562	324.746	310.175	1078	286.425	1.63252	8.75517	36.6832	0.277311	0	0.109385	0	0	0	0	0	0	0	0	0	0.08123	0	0.01655	0	21.245	0	0.005345	0	0	0	0	0	0	6.561	480
1939	304.106	325.056	310.3	1083	286.575	1.76895	9.1942	36.8455	0.291906	0	0.118897	0	0	0	0	0	0	0	0	0.0035225	0.12895	0	0.0248	0	22.155	0	0.021155	0	0	0	0	0	0	6.593	480
1940	304.101	325.322	310.375	1088.25	286.725	1.91295	9.66556	37.0163	0.307269	0	0.129236	0	0	0	0	0	0	0	0	0.0104875	0.19805	0	0.0351	0	23.065	0	0.046995	0	0	0	0	0	0	6.625	480
1941	303.847	325.521	310.375	1093.75	286.9	2.06495	10.191	37.1961	0.323441	0	0.140474	0	0	0	0	0	0	0	0	0.0173	0.2931	0	0.049515	0	24.02	0	0.082435	0	0	0	0	0	0	6.657	480
1942	303.564	325.639	310.3	1099	287.1	2.22541	10.7811	37.3853	0.340465	0	0.152689	0	0	0	0	0	0	0	0	0.023965	0.41875	0	0.06804	0	25.035	0	0.1271	0	0	0	0	0	0	6.689	480
1943	303.426	325.723	310.2	1104	287.3	2.3934	11.4233	37.5846	0.35751	0	0.165966	0	0	0	0	0	0	0	0	0.030485	0.5771	0	0.092715	0	26.07	0	0.1806	0	0	0	0	0	0	6.7215	480
1944	303.267	325.845	310.125	1109.25	287.525	2.56807	12.1183	37.7943	0.373795	0	0.180398	0	0	0	0	0	0	0	0	0.040385	0.77025	0	0.1277	0	27.105	0	0.24255	0	0	0	0	0	0	6.7545	480
1945	303.234	326.032	310.1	1114.75	287.775	2.75008	12.8871	38.015	0.389432	0	0.196085	0	0	0	0	0	0	0	0	0.053585	1.01955	0	0.17505	0	28.135	0	0.3126	0	0	0	0	0	0	6.787	480
1946	303.004	326.279	310.125	1120.5	288.025	2.94006	13.8202	38.2474	0.404511	0	0.213136	0	0	0	0	0	0	0	0	0.070015	1.3515	0.030115	0.27	0	29.165	0	0.39045	0	0	0	0	0	0	6.8195	480
1947	302.458	326.593	310.2	1126.75	288.275	3.13868	15.1102	38.492	0.419121	0	0.231669	0	0	0	0	0	0	0	0	0.10016	1.8695	0.127615	0.44975	0	30.22	0	0.47575	0	0	0	0	0	0	6.853	480
1948	302.011	326.966	310.325	1133.25	288.525	3.34665	16.9117	38.7495	0.433351	0	0.251814	0	0	0	0	0	0	0	0	0.1649	2.7045	0.2767	0.68285	0	31.43	0	0.56815	0	0	0	0	0	0	6.8865	480
1949	301.97	327.399	310.5	1140	288.775	3.5647	19.1118	39.0205	0.44729	0	0.273711	0	0	0	0	0	0	0	0	0.2881	3.7955	0.45415	0.9317	0	32.765	0	0.6674	0	0	0	0	0	0	6.9195	480
1950	301.92	327.921	310.75	1147.25	289	3.79359	21.7426	39.3058	0.461029	0	0.297512	0	0	0	0	0	0	0	0	0.4966	5.0045	0.6521	1.1945	0	34.615	0	0.7732	0	0	0	0	0	0	6.953	480
1951	300.877	328.558	311.1	1155	289.2	4.0504	24.5705	39.6061	0.474657	0	0.323383	0	0	0	0	0	0	0	0.005	0.8132	6.314	0.87715	1.4705	0	36.385	0	0.88935	0	0	0	0	0	0	6.987	480
1952	299.885	329.275	311.5	1163.5	289.425	4.33597	27.235	39.9222	0.488262	0	0.351503	0	0	0	0	0	0	0	0.015	1.1675	7.8115	1.0245	1.7345	0	37.53	0	0.9375	0	0	0	0	0	0	7.021	480
1953	299.764	330.045	311.925	1172.75	289.675	4.63495	29.9757	40.255	0.501935	0	0.382068	0	0	0	0	0	0	0	0.025	1.577	9.4615	1.0775	1.9845	0	38.73	0	0.922	0	0	0	0	0	0	7.0535	480
1954	299.77	330.896	312.425	1182.25	289.9	4.94829	33.0609	40.6052	0.515765	0	0.415292	0	0	0	0	0	0	0	0.035	2.149	11.24	1.139	2.239	0	40.08	0	0.932	0	0	0	0	0	0	7.0845	480
1955	299.81	331.835	313	1192	290.125	5.27698	36.6113	40.9739	0.529841	0	0.451404	0	0	0	0	0	0	0	0.045	2.886	13.24	1.21	2.495	0	41.57	0.025	0.9705	0	0	0	0	0	0	7.1155	480.8
1956	299.88	332.821	313.6	1202.25	290.375	5.62208	40.6989	41.362	0.544253	0	0.490656	0	0	0	0	0	0	0	0.055	3.795	15.485	1.2925	2.75	0	43.2	0.118	1.057	0	0	0	0	0	0	7.1465	483.15
1957	300.018	333.842	314.225	1213	290.6	5.98468	45.4175	41.7705	0.559089	0	0.533322	0	0	0	0	0	0	0	0.065	4.921	18.055	1.3895	3.0015	0	44.96	0.2975	1.19	0	0	0	0	0	0	7.1785	486.4
1958	300.426	334.869	314.848	1224	290.825	6.36597	50.7782	42.2006	0.57444	0	0.579698	0	0	0	0	0	0	0	0.075	6.2365	21.01	1.502	3.2495	0	46.85	0.5675	1.3555	0	0	0	0	0	0	7.212	489.9
1959	301.366	335.945	315.5	1235.25	291.1	6.76717	56.515	42.6532	0.590395	0	0.630107	0	0	0	0	0	0	0	0.085	7.557	24.215	1.6305	3.4955	0	48.865	0.883	1.593	0	0	0	0	0	0	7.246	493.55
1960	302.541	337.17	316.272	1247	291.4	7.18959	62.5823	43.1297	0.607043	0	0.684898	0	0	0	0	0	0	0	0.095	8.8185	27.675	1.779	3.7395	0	50.99	1.2495	1.9065	0	0	0	0	0	0	7.2805	497.3
1961	302.717	338.437	317.075	1259.25	291.675	7.65086	69.4618	43.6313	0.624474	0	0.744455	0	0	0	0	0	0	0	0.11	10.2955	31.685	1.9505	3.9715	0	53.23	1.7055	2.25	0	0	0	0	0	0	7.3165	501.1
1962	302.623	339.626	317.795	1272	291.925	8.15246	77.4216	44.1593	0.642776	0	0.80919	0	0	0	0	0	0	0	0.13	12.235	36.315	2.1465	4.1975	0	55.585	2.19	2.646	0	0	0	0	0	0	7.3535	504.8
1963	303.114	340.707	318.397	1285	292.225	8.69591	86.5951	44.715	0.66204	0	0.879554	0	0	0	0	0	0	0	0.155	14.715	41.585	2.3705	4.433	0	58.025	2.7905	3.1425	0	0	0	0	0	0	7.3915	508.4
1964	303.609	341.733	318.925	1298.25	292.6	9.39162	97.2808	45.5	0.682355	0	0.956037	0	0	0	0	0	0	0	0.18	17.795	47.735	2.6285	4.677	0	60.525	3.517	3.767	0	0	0	0	0	0	7.4305	511.85
1965	304.42	342.989	319.647	1312	293	10.184	109.645	46.45	0.70381	0	1.03917	0	0	0	0	0	0	0	0.2	21.495	54.93	2.9255	4.9295	0.0045	63.085	4.2765	4.517	0	0	0.0005	0	0	0	7.4705	515.05
1966	305.564	344.551	320.647	1326	293.4	10.9556	123.662	47.35	0.726495	0	1.12953	0	0	0	0	0	0	0	0.22	25.775	63.155	3.2665	5.1915	0.0175	65.625	5.242	5.413	0	0	0.0015	0	0	0.0005	7.512	518
1967	306.594	346.076	321.605	1340.25	293.8	11.7388	139.328	48.25	0.750499	0	1.22775	0	0	0	0	0	0	0	0.24	30.575	72.39	3.6585	5.4635	0.0385	68.07	6.722	6.4985	0	0	0.003	0	0.0005	0.0015	7.5545	520.7
1968	307.808	347.7	322.635	1355	294.225	12.5668	156.887	49.15	0.775911	0	1.33452	0	0	0	0	0	0	0	0.27	35.955	82.77	4.1085	5.7455	0.0675	70.425	8.886	7.8105	0	0	0.0055	0.0005	0.001	0.003	7.5985	523.15
1969	309.598	349.607	323.902	1370.25	294.7	13.4084	176.605	50.05	0.802821	0	1.45056	0	0	0	0	0	0	0	0.3	42.05	94.435	4.6245	6.0385	0.1045	72.69	11.59	9.411	0	0	0.0095	0.001	0.0015	0.005	7.644	525.3
1970	311.808	351.328	324.985	1385.75	295.2	14.2482	198.618	50.95	0.831319	0	1.5767	0	0	0	0	0	0	0	0.325	49.05	107.45	5.2165	6.3435	0.15	74.87	14.645	11.21	0	0	0.016	0.001	0.0025	0.0075	7.6905	527.2
1971	314.087	352.822	325.855	1401.25	295.7	15.1011	222.885	51.8	0.861493	0	1.7138	0	0	0.00146	0	0.0125	0	0	0.355	57.065	121.8	5.8955	6.66	0.205	76.97	17.695	13.115	0	0	0.025	0.0015	0.0035	0.011	7.738	528.85
1972	316.193	354.781	327.14	1417	296.225	15.9994	249.194	52.65	0.893433	0	1.86283	0	0	0.00438	0	0.0375	0	0	0.39	65.965	137.3	6.674	6.988	0.2705	78.99	20.92	15.145	0	0.018	0.0375	0.002	0.006	0.0155	7.787	530.3
1973	318.115	357.034	328.678	1433	296.8	16.9475	277.927	53.55	0.927228	0	2.02481	0	0	0.0073	0	0.0625	0	0	0.425	75.835	154.05	7.5685	7.329	0.348	80.93	25.065	17.39	0	0.053	0.055	0.0025	0.0115	0.0215	7.838	531.55
1974	319.6	358.783	329.743	1449	297.4	17.9154	309.889	54.45	0.962969	0	2.20088	0	0	0.01022	0	0.0875	0	0	0.46	87.04	172.45	8.595	7.684	0.4385	82.8	30.44	19.935	0	0.086	0.078	0.0035	0.0205	0.0285	7.8905	532.6
1975	320.882	360.292	330.585	1465	298	18.8898	344.976	55.3	1.00074	0	2.39226	0	0	0.01314	0	0.1125	0	0	0.5	99.56	192.6	9.7715	8.052	0.5445	84.6	36.73	22.54	0	0.1175	0.1075	0.0045	0.0335	0.0365	7.9445	533.5
1976	322.191	362.163	331.748	1481	298.65	19.8874	380.802	56.15	1.04064	0	2.60029	0	0	0.01606	0	0.1375	0	0	0.54	112.3	213.15	11.12	8.4335	0.6685	86.33	42.765	25.225	0	0.1475	0.1445	0.0055	0.051	0.0465	8.0005	534.25
1977	323.874	364.454	333.272	1497.25	299.36	20.9739	416.056	57.05	1.08275	0	2.8264	0	0	0.01898	0	0.1625	0	0	0.59	124.7	232.9	12.67	8.8305	0.8125	87.995	49.29	28.23	0	0.1755	0.1915	0.0065	0.0765	0.0575	8.058	534.9
1978	326.21	366.815	334.848	1513.75	300.082	22.1267	451.017	57.9	1.12717	0	3.09048	0	0	0.0219	0	0.1875	0	0	0.655	136.7	251.9	14.445	9.243	0.9795	89.595	57.79	31.51	0	0.202	0.2475	0.0075	0.112	0.0695	8.117	535.4
1979	328.74	369.278	336.525	1530.25	300.74	23.3668	486.546	58.75	1.17397	0	3.39237	0	0	0.02482	0	0.2	0	0	0.735	148.8	270.5	16.475	9.6705	1.174	91.14	68.985	34.985	0	0.227	0.3125	0.0085	0.156	0.083	8.178	535.85
1980	330.864	371.945	338.36	1547.75	301.382	24.6879	519.303	59.6	1.22326	0	3.71278	0	0	0.02774	0	0.2	0	0	0.835	159.4	287.35	18.805	10.114	1.401	92.625	78.725	38.64	0	0.2505	0.3895	0.0095	0.21	0.0975	8.241	536.25
1981	332.228	374.19	339.728	1566.75	302.22	26.102	550.904	60.45	1.27512	0	4.0517	0	0	0.0292	0	0.225	0	0	0.95	168.55	304.25	21.475	10.575	1.6605	93.95	85.94	42.44	0	0.273	0.4795	0.011	0.275	0.113	8.306	536.55
1982	333.034	376.129	340.793	1586.25	303.098	27.595	583.135	61.3	1.32963	0	4.40914	0	0	0.03045	0	0.275	0	0	1.075	177.85	321.7	24.45	11.045	1.9495	94.9	92.165	46.17	0	0.313	0.582	0.0125	0.351	0.1295	8.373	536.8
1983	334.244	378.41	342.197	1605.85	303.805	29.1286	613.196	62.15	1.3869	0	4.78509	0	0	0.0331	0	0.3	0	0	1.21	185.8	338.15	27.605	11.505	2.2655	95.855	96.325	50	0	0.361	0.6975	0.014	0.4425	0.1475	8.442	537
1984	336.145	380.82	343.783	1623.7	304.397	30.7215	644.36	63	1.44701	0	5.17956	0	0	0.03585	0	0.325	0	0	1.355	193.75	355	30.985	11.965	2.6105	97.27	100.75	54.17	0	0.404	0.828	0.016	0.5495	0.1665	8.513	537.2
1985	338.198	383.063	345.283	1637.99	305.087	32.3442	678.379	63.8	1.51004	0	5.59254	0	0	0.03705	0	0.375	0	0	1.505	202.85	372.5	35.43	12.44	2.981	98.845	105.7	58.465	0	0.4555	0.9775	0.018	0.6715	0.186	8.5865	537.35
1986	340.223	385.274	346.798	1650.43	305.772	34.0163	712.084	64.6	1.57609	0	6.02403	0	0	0.03415	0	0.4	0	0	1.67	212.1	389.8	39.95	12.94	3.363	99.855	109.6	62.85	0	0.4995	1.152	0.0195	0.8125	0.207	8.6625	537.45
1987	342.409	387.795	348.645	1662.2	306.262	35.814	748.374	65.45	1.64525	0	6.47404	0	0	0.03285	0	0.425	0	0	1.855	222.8	408.65	44.285	13.47	3.7535	101.1	112.15	67.415	0	0.6075	1.3545	0.021	0.974	0.229	8.7405	537.55
1988	345.085	390.673	350.738	1673.07	307.195	37.6894	789.249	66.3	1.71761	0	6.94256	0	0	0.0384	0	0.5	0	0	2.04	234.9	428.45	50.53	14.01	4.1635	102.45	116.3	72.44	0	0.791	1.591	0.023	1.1555	0.251	8.8205	537.65
1989	347.729	393.252	352.488	1683.47	308.507	39.5645	830.2	67.1	1.79325	0	7.4296	0	0	0.04655	0	0.575	0	0	2.225	244.9	448.25	57.92	14.55	4.5995	103.45	121.7	78.21	0	0.99	1.869	0.0245	1.3565	0.2755	8.903	537.75
1990	349.911	395.324	353.855	1693.63	309.485	41.5256	866.564	67.9	1.87227	0	7.93515	0	0	0.0547	0.03	0.625	0	0	2.425	252.75	466.15	64.485	15.075	5.0635	104.45	124.45	84.305	0	1.249	2.1645	0.026	1.562	0.3015	8.988	537.8
1991	351.189	397.088	355.017	1703.82	310.113	43.5792	899.397	68.7	1.95632	0	8.45922	0	0	0.0627	0.09	0.675	0	0	2.635	260.15	481.3	70.3	15.555	5.545	105.6	127.9	90.44	0	1.696	2.4485	0.028	1.753	0.326	9.0755	537.85
1992	351.548	398.429	355.885	1711.8	310.603	45.7214	927.681	69.5	2.05	0	9.0018	0	0	0.0705	0.185	0.725	8.12405e-05	0	2.85	264.95	494.4	75.96	15.99	6.0235	105.75	130.9	96.715	0	2.424	2.7125	0.0295	1.9125	0.35	9.1655	537.9
1993	352.275	399.699	356.777	1716.29	311.077	48.0312	948.8	70.3	2.15	0	9.5629	0	0	0.08075	0.375	0.8	0.00024139	0	3.07	267.75	504.8	80.235	16.355	6.4945	104.9	130.5	102.14	0	3.3945	2.9185	0.031	2.0215	0.3725	9.258	537.9
1994	353.737	401.505	358.127	1721.01	311.603	50.6326	963.903	71.1	2.25	0	10.1425	0	0	0.09555	0.75	0.925	0.00350655	0	3.3	269.5	513.1	82.345	16.63	6.957	104.35	126	106.6	0.5695	4.487	3.09	0.0335	2.114	0.393	9.353	537.95
1995	355.939	403.782	359.837	1726.35	312.295	53.8504	973.652	71.9	2.35	0	10.7406	0	0	0.1503	1.645	1.125	0.00973579	0	3.515	269.5	519.55	83.46	16.83	7.3995	103.55	115.9	110.45	1.9145	5.658	3.247	0.037	2.2455	0.4125	9.45	538
1996	358.263	405.945	361.462	1730.01	313.048	57.9728	982.03	72.65	2.45	0	11.4585	0	0	0.27175	3.155	1.45	0.01432	0	3.725	268.95	525.05	83.84	16.965	7.7905	102.8	104.09	115.85	3.587	6.818	3.3915	0.0415	2.3885	0.4265	9.2995	538
1997	359.83	408.22	363.155	1734.82	313.76	62.9186	988.498	73.4	2.55	0	12.2869	0	0	0.43105	5.17	1.85	0.0231704	0	3.955	268.2	529.15	83.68	17.045	8.1025	101.95	91.215	121.95	5.523	7.939	3.556	0.0465	2.4875	0.43	9.08	538
1998	361.471	411.144	365.322	1742.71	314.533	68.4136	992.182	74.2	2.65	0	13.1153	0	0	0.64745	7.71	2.25	0.0370779	0	4.155	266.95	532.4	83.45	17.075	8.3425	100.9	77.815	126.35	7.377	8.946	3.7085	0.0515	2.5565	0.4265	9.155	538
1999	363.283	413.868	367.348	1749.24	315.257	74.4061	995.415	75	2.75	0	13.9438	0.0045173	0	0.95615	10.68	2.65	0.0590527	0	4.33	265.2	534.95	83.015	17.075	8.5275	100.155	65.605	131.7	9.206	9.938	3.8355	0.0535	2.6205	0.422	9.26	538
2000	364.367	415.858	368.865	1751.02	315.85	80.9399	998.627	75.75	2.85	0	14.7722	0.0488482	0	1.32805	13.965	3.05	0.0967079	0	4.54	263.45	537.05	82.515	17.055	8.6705	99.37	54.83	137.4	11.075	11.04	3.953	0.051	2.679	0.417	9.0845	538
2001	365.653	417.91	370.467	1750.71	316.488	88.6304	1001.03	76.5	2.95	0.00398966	15.6006	0.287349	0	1.7224	17.51	3.43758	0.150915	0.373294	4.765	261.9	538.85	82.07	17.02	8.782	98.4	45.785	141.95	12.695	12.035	4.0455	0.046	2.733	0.41	8.689	538
2002	367.978	420.573	372.522	1752.19	317.245	97.4707	1003.21	77.25	3.05124	0.011991	16.429	0.720208	0.00740544	2.13305	21.365	3.85333	0.208567	1.11091	4.985	260.1	539.95	81.595	16.98	8.869	97.385	38.14	147.45	14.18	12.975	4.112	0.04	2.7825	0.402	8.349	538
2003	370.52	423.488	374.76	1754.76	318.017	106.775	1004	77.9915	3.15494	0.0195016	17.2574	1.21745	0.0291657	2.60335	25.44	4.34892	0.274155	1.83169	5.215	257.95	540.05	80.93	16.94	8.936	96.325	31.78	152.95	15.565	13.755	4.1695	0.0345	2.828	0.3935	8.194	538
2004	372.785	426.116	376.812	1755.07	318.71	116.584	1003.93	78.772	3.26099	0.0263954	18.0858	1.7671	0.0644009	3.12045	29.775	4.92206	0.367093	2.53767	5.445	256.05	539.9	80.12	16.9	8.988	95.385	26.475	157.45	16.605	14.35	4.207	0.0295	2.87	0.384	8.0885	538
2005	375.148	428.653	378.812	1753.73	319.44	126.769	1003.58	79.5471	3.3693	0.0332905	18.9129	2.35921	0.112284	3.62618	34.36	5.57096	0.487703	3.23048	5.675	254.1	539.4	79.31	16.855	9.0285	94.435	22.075	162.25	17.195	14.94	4.2265	0.0255	2.908	0.3735	7.933	538
2006	377.946	431.283	380.827	1754.51	320.2	136.988	1001.53	80.3168	3.47978	0.0405451	19.7485	2.98558	0.17203	4.14253	38.805	6.29394	0.631518	3.91148	5.91	251.3	537.5	78.48	16.81	9.059	93.435	18.52	167.7	17.67	15.365	4.241	0.023	2.9425	0.363	7.748	538
2007	380.857	433.888	382.777	1757.28	320.889	147.427	998.531	81.0773	3.58986	0.0481122	20.5812	3.63941	0.242887	4.68853	43.165	7.05824	0.786538	4.63525	6.175	247.95	534.7	77.595	16.76	9.081	92.3	15.61	173.9	18.22	15.625	4.2425	0.0195	2.9735	0.352	7.5945	538
2008	383.834	436.593	384.8	1760.39	321.581	158.04	995.689	81.8248	3.69707	0.0557926	21.389	4.31644	0.324174	5.2496	47.467	7.83201	0.94639	5.45065	6.45082	244.6	531.8	76.72	16.705	9.096	90.96	13.23	180.5	18.81	15.865	4.2255	0.015	3.0005	0.3405	7.5405	538
2009	386.98	439.457	386.952	1763.78	322.273	168.587	992.619	82.5591	3.80138	0.0635771	22.172	5.01228	0.415225	5.82453	51.5988	8.61515	1.11075	6.34622	6.70612	241.028	528.537	75.8193	16.6514	9.1054	89.28	11.2729	187.221	19.3891	16.6696	4.18629	0.0116919	3.02112	0.32905	7.39575	538.008
2010	390.164	442.353	389.128	1767.1	322.967	179.193	989.315	83.28	3.90283	0.0714598	22.9301	5.72204	0.515394	6.41211	55.6876	9.40729	1.27933	7.31086	6.94876	237.284	524.944	74.8998	16.5937	9.11062	87.2667	9.65949	194.009	19.9499	17.9809	4.12705	0.00945723	3.03562	0.317164	7.22266	538.019
2011	393.307	445.218	391.274	1770.37	323.661	189.841	985.903	83.9875	4.00139	0.0794406	23.6636	6.44301	0.624115	7.01187	59.7359	10.2082	1.45199	8.33585	7.17872	233.538	521.206	73.9799	16.5354	9.11307	85.0734	8.26596	201.069	20.5106	19.1537	4.05707	0.00728664	3.04663	0.305331	7.16875	538.024
2012	396.503	448.092	393.421	1773.63	324.358	200.586	982.354	84.6812	4.09711	0.0872258	24.3478	7.32211	0.734387	7.64174	63.7558	11.0181	1.61445	9.41378	7.39603	229.796	517.326	73.0587	16.4768	9.11346	82.7123	7.05286	208.361	21.0605	20.1825	3.97808	0.00516144	3.05421	0.293613	7.14563	538.027
2013	399.75	450.989	395.583	1776.92	325.056	211.467	978.682	85.3604	4.19	0.0945216	24.9585	8.47899	0.83964	8.31902	67.7581	11.8369	1.75282	10.5382	7.60067	226.065	513.323	72.1415	16.4179	9.1123	80.1938	6.06055	215.847	21.5908	21.0631	3.89166	0.00365606	3.05861	0.282068	7.13181	538.028
2014	403.008	453.917	397.764	1780.24	325.755	222.438	974.888	86.0254	4.28007	0.101328	25.4959	9.86219	0.940189	9.04211	71.7447	12.6646	1.86782	11.7033	7.79267	222.35	509.217	71.2311	16.359	9.10997	77.5275	5.24903	223.497	22.0939	21.7928	3.79916	0.00258975	3.06006	0.270737	7.12222	538.028
2015	406.304	456.877	399.966	1783.65	326.456	233.467	970.975	86.6759	4.36731	0.107646	25.9602	11.43	1.03633	9.80953	75.7179	13.5009	1.96012	12.9046	7.97201	218.66	505.025	70.3296	16.3001	9.10676	74.723	4.58555	231.289	22.5638	22.3697	3.70184	0.00183443	3.0588	0.259648	7.11624	538.029
2016	409.634	459.864	402.184	1787.14	327.159	244.521	966.908	87.3121	4.45172	0.113474	26.3519	13.1483	1.12835	10.6198	79.6787	14.3458	2.03039	14.1375	8.13871	214.996	500.758	69.4374	16.2412	9.10289	71.7868	3.89635	239.197	22.9951	22.7929	3.60074	0.0012994	3.05501	0.248824	6.91629	538.029
2017	412.992	462.868	404.411	1790.68	327.863	255.576	962.712	87.934	4.53331	0.118814	26.6711	14.9889	1.21648	11.4713	83.6275	15.1991	2.07927	15.3979	8.29277	211.356	496.424	68.5542	16.1824	9.09852	68.8435	3.18601	247.156	23.3871	23.0712	3.49673	0.000920422	3.04882	0.238283	6.67091	538.029
2018	416.376	465.884	406.643	1794.24	328.568	266.608	958.434	88.5415	4.61207	0.123665	26.918	16.9288	1.30096	12.3628	87.5647	16.0606	2.10737	16.6824	8.43418	207.741	492.03	67.6799	16.1237	9.09377	66.0138	2.60514	255.072	23.7433	23.2221	3.39061	0.000651974	3.04036	0.228042	6.6096	538.029
2019	419.83	468.914	408.882	1797.83	329.275	277.6	954.037	89.1346	4.68801	0.128028	27.0931	18.9495	1.38202	13.2928	91.4907	16.9301	2.1153	17.9877	8.56297	204.151	487.586	66.8144	16.065	9.08875	63.2929	2.13015	262.87	24.0671	23.2615	3.28311	0.000461821	3.0298	0.218107	6.5898	538.029
2020	423.269	471.958	411.129	1801.43	329.983	288.538	949.495	89.7133	4.76113	0.131902	27.1965	21.0357	1.45985	14.2599	95.4062	17.8074	2.10363	19.3113	8.67912	200.587	483.096	65.9573	16.0063	9.08351	60.6768	1.74172	270.489	24.3616	23.2037	3.17485	0.000327127	3.01726	0.208476	6.57903	538.029
2021	426.573	475.008	413.378	1804.97	330.693	299.401	944.767	90.2777	4.83142	0.135288	27.2284	23.1733	1.53461	15.2627	99.3089	18.6923	2.0729	20.6496	8.78265	197.041	478.56	65.1072	15.9476	9.07807	58.1571	1.42399	277.877	24.6284	23.0612	3.06629	0.000231718	3.00279	0.199159	6.56569	538.029
2022	429.852	478.065	415.639	1808.3	331.404	309.885	939.837	90.8349	4.90064	0.138367	27.2227	25.1911	1.60665	16.2667	103.122	19.5821	2.03278	21.9185	8.88067	193.511	473.978	64.2632	15.8888	9.07249	55.7282	1.16411	285.002	24.8704	22.8456	2.95786	0.000164136	2.98644	0.190157	6.54971	538.029
2023	433.181	481.15	417.936	1811.4	332.116	319.737	934.723	91.3921	4.97057	0.141319	27.2131	26.952	1.67633	17.2388	106.776	20.4744	1.99265	23.0455	8.98029	190.002	469.364	63.4262	15.8299	9.06681	53.39	0.951688	291.854	25.0915	22.5682	2.8501	0.000116264	2.96841	0.181464	6.53671	538.029
2024	436.545	484.275	420.274	1814.32	332.828	329.038	929.44	91.9494	5.0412	0.144145	27.1997	28.5047	1.74382	18.1801	110.285	21.3693	1.95252	24.0487	9.0815	186.521	464.726	62.597	15.7709	9.06103	51.1415	0.778065	298.42	25.294	22.2384	2.74344	8.2355e-05	2.94886	0.173089	6.52652	538.029
2025	439.949	487.444	422.656	1817.12	333.541	337.855	924.002	92.5066	5.11253	0.146845	27.1824	29.8889	1.80927	19.092	113.66	22.2668	1.91241	24.9442	9.18432	183.073	460.075	61.7763	15.7121	9.05519	48.9814	0.636167	304.693	25.4802	21.8647	2.63827	5.83355e-05	2.92795	0.165032	6.51898	538.029
2026	443.393	490.658	425.08	1819.83	334.255	346.251	918.428	93.0639	5.18456	0.149418	27.1614	31.1374	1.87284	19.9754	116.911	23.167	1.87231	25.746	9.28873	179.663	455.42	60.9646	15.6533	9.0493	46.9084	0.520206	310.674	25.652	21.4547	2.5349	4.13215e-05	2.90582	0.157292	6.5145	538.029
2027	446.871	493.908	427.538	1822.48	334.97	354.274	912.727	93.6212	5.25729	0.151865	27.1366	32.2757	1.93464	20.8316	120.049	24.0697	1.83224	26.466	9.39473	176.293	450.767	60.1622	15.5947	9.04338	44.9197	0.425434	316.361	25.8109	21.0151	2.43357	2.92698e-05	2.88256	0.149866	6.51104	538.029
2028	450.372	497.184	430.021	1825.04	335.685	361.963	906.898	94.1785	5.33073	0.154186	27.108	33.3238	1.99477	21.6612	123.079	24.9751	1.79218	27.114	9.50234	172.961	446.116	59.3685	15.5361	9.03743	43.0109	0.347962	321.753	25.9578	20.5514	2.33443	2.0733e-05	2.85824	0.142736	6.50651	538.029
2029	453.892	500.481	432.523	1827.52	336.401	369.353	900.946	94.7358	5.40486	0.156381	27.0757	34.2981	2.05333	22.4653	126.009	25.8829	1.75213	27.6988	9.61154	169.665	441.469	58.5832	15.4776	9.03145	41.1785	0.28462	326.853	26.0935	20.0688	2.23762	1.46861e-05	2.83296	0.135909	6.50089	538.029
2030	457.458	503.799	435.046	1829.91	337.118	376.475	894.879	95.2932	5.47969	0.158449	27.0397	35.2121	2.11042	23.2446	128.846	26.793	1.71207	28.228	9.72233	166.407	436.829	57.8061	15.4191	9.02546	39.4193	0.232826	331.665	26.2188	19.5718	2.14327	1.04028e-05	2.80677	0.129369	6.49466	538.029
2031	461.099	507.139	437.589	1832.21	337.836	383.356	888.704	95.8505	5.55522	0.160392	26.9999	36.0769	2.16611	24	131.595	27.7056	1.67202	28.7085	9.83472	163.187	432.198	57.0372	15.3607	9.01946	37.7306	0.190469	336.199	26.3347	19.0644	2.05146	7.36873e-06	2.77975	0.123103	6.48792	538.029
2032	464.727	510.469	440.131	1834.26	338.551	389.997	882.272	96.4086	5.63139	0.162272	26.9571	36.8838	2.22082	24.7298	134.265	28.6203	1.63252	29.1389	9.94875	159.996	427.57	56.2749	15.3023	9.01341	36.1067	0.155814	340.241	26.4333	18.5491	1.96221	5.21959e-06	2.75189	0.117102	6.47623	538.029
2033	468.292	513.774	442.664	1835.92	339.263	396.401	875.339	96.9681	5.70812	0.164153	26.912	37.6267	2.27493	25.4323	136.863	29.5371	1.59414	29.5186	10.0644	156.833	422.942	55.5184	15.2437	9.00732	34.5439	0.127451	343.423	26.5014	18.0279	1.87554	3.69726e-06	2.7232	0.111352	6.46029	538.029
2034	471.84	517.08	445.207	1837.27	339.971	402.598	867.745	97.5291	5.78542	0.166035	26.8647	38.3189	2.3285	26.1087	139.397	30.4559	1.55685	29.8546	10.1818	153.702	418.322	54.7686	15.1851	9.0012	33.0418	0.104243	345.471	26.5293	17.5028	1.79154	2.61892e-06	2.69381	0.105855	6.44622	538.029
2035	475.383	520.4	447.77	1838.38	340.676	408.612	859.371	98.0914	5.86329	0.167919	26.8152	38.9707	2.38159	26.76	141.872	31.3769	1.52062	30.1528	10.3008	150.609	413.716	54.0262	15.1265	8.99505	31.5997	0.0852581	346.182	26.5089	16.976	1.71028	1.85509e-06	2.66382	0.100611	6.43478	538.029
2036	478.924	523.74	450.355	1839.31	341.376	414.468	850.129	98.6552	5.94172	0.169803	26.7635	39.5907	2.43425	27.3871	144.293	32.3	1.48543	30.4185	10.4215	147.555	409.131	53.2917	15.068	8.9889	30.2166	0.0697295	345.403	26.4337	16.449	1.63179	1.31404e-06	2.63336	0.0956116	6.42598	538.029
2037	482.462	527.103	452.963	1840.1	342.072	420.185	839.963	99.2205	6.02072	0.171689	26.7097	40.1865	2.48654	27.9912	146.667	33.2254	1.45127	30.6565	10.5438	144.547	404.573	52.5658	15.0095	8.98274	28.8914	0.0570306	343.034	26.2983	15.9233	1.55613	9.30792e-07	2.60251	0.0908345	6.42023	538.029
2038	485.989	530.479	455.586	1840.79	342.765	425.777	828.831	99.7871	6.10028	0.173576	26.6537	40.7626	2.53849	28.5729	148.997	34.1531	1.4181	30.8704	10.6678	141.583	400.044	51.8485	14.9512	8.97657	27.6222	0.0466457	339.004	26.0983	15.4001	1.48326	6.59319e-07	2.57133	0.0862805	6.41557	538.029
2039	489.493	533.858	458.215	1841.36	343.454	431.253	816.7	100.355	6.18042	0.175464	26.5956	41.3217	2.59009	29.1329	151.285	35.0829	1.38589	31.0627	10.7935	138.663	395.542	51.1394	14.893	8.97039	26.4061	0.0381521	333.27	25.8296	14.8803	1.41312	4.67024e-07	2.53985	0.0819482	6.40993	538.029
2040	492.998	537.235	460.845	1841.8	344.139	436.622	803.558	100.925	6.26111	0.177353	26.5353	41.8663	2.64135	29.672	153.533	36.0146	1.3546	31.2356	10.9209	135.786	391.069	50.4383	14.8348	8.9642	25.2407	0.0312047	325.817	25.4892	14.3646	1.34569	3.30813e-07	2.5081	0.0778151	6.4033	538.029
2041	496.533	540.609	463.475	1842.13	344.82	441.893	789.407	101.496	6.34238	0.179243	26.4729	42.3987	2.69229	30.1907	155.743	36.9484	1.32422	31.3914	11.0499	132.95	386.624	49.745	14.7768	8.958	24.1239	0.0255219	316.651	25.0751	13.8537	1.28089	2.34329e-07	2.47611	0.073871	6.39613	538.029
2042	500.025	543.959	466.093	1842.24	345.495	447.016	774.392	102.069	6.42414	0.18113	26.4089	42.8436	2.74346	30.6888	157.922	37.8839	1.29441	31.5263	11.1806	130.157	382.207	49.0593	14.7188	8.95179	23.0537	0.0208732	306	24.5928	13.3486	1.21867	1.65985e-07	2.44391	0.0701174	6.38835	538.029
2043	503.417	547.255	468.678	1841.99	346.163	451.941	758.752	102.645	6.50634	0.183009	26.3435	43.1366	2.79531	31.1659	160.075	38.8207	1.26486	31.6353	11.313	127.4	377.813	48.3802	14.6608	8.94555	22.0265	0.017069	294.26	24.0535	12.8504	1.15894	1.17574e-07	2.41149	0.0665421	6.37585	538.029
2044	506.748	550.499	471.234	1841.35	346.822	456.688	742.691	103.225	6.58898	0.18488	26.2769	43.3032	2.84776	31.6223	162.198	39.7585	1.23554	31.7204	11.4472	124.676	373.437	47.7068	14.6027	8.93928	21.0398	0.0139554	281.762	23.4675	12.3601	1.10163	8.32828e-08	2.37884	0.0631347	6.35948	538.029
2045	510.048	553.719	473.78	1840.41	347.473	461.286	726.404	103.807	6.67205	0.186744	26.209	43.3684	2.90078	32.0588	164.296	40.6975	1.20647	31.7853	11.5831	121.989	369.086	47.0399	14.5445	8.93299	20.0933	0.0114079	268.793	22.8453	11.879	1.0467	5.89928e-08	2.34604	0.0598888	6.34504	538.029
2046	513.337	556.929	476.328	1839.23	348.115	465.759	710.047	104.393	6.75556	0.188599	26.1399	43.3525	2.95437	32.4764	166.372	41.6377	1.17763	31.8332	11.7207	119.342	364.763	46.3801	14.4864	8.92668	19.1864	0.00932418	255.585	22.1958	11.4081	0.994132	4.17871e-08	2.31316	0.0567981	6.33327	538.029
2047	516.623	560.136	478.881	1837.87	348.75	470.127	693.75	104.982	6.8395	0.190447	26.0695	43.2719	3.00852	32.8757	168.429	42.5791	1.14904	31.8669	11.86	116.738	360.474	45.7278	14.4284	8.92037	18.3181	0.00762032	242.328	21.5268	10.9482	0.943857	2.95996e-08	2.28027	0.0538667	6.32413	538.029
2048	519.911	563.342	481.438	1836.38	349.377	474.41	677.619	105.574	6.92388	0.192287	25.998	43.1404	3.06323	33.2577	170.472	43.522	1.12068	31.8889	12.0011	114.18	356.222	45.0837	14.3705	8.91404	17.4878	0.00622742	229.175	20.845	10.5	0.895822	2.09666e-08	2.24743	0.0510769	6.31802	538.029
2049	523.196	566.539	483.993	1834.8	349.996	478.619	661.729	106.169	7.00869	0.194119	25.9253	42.9677	3.11846	33.623	172.501	44.4663	1.09256	31.9008	12.144	111.668	352.01	44.4477	14.3128	8.90771	16.694	0.00508884	216.242	20.156	10.064	0.84996	1.48516e-08	2.21469	0.0484218	6.31299	538.029
2050	526.376	569.715	486.535	1833.09	350.608	482.76	646.136	106.767	7.09394	0.195943	25.8514	42.7605	3.17416	33.972	174.515	45.4118	1.06466	31.9034	12.2885	109.199	347.834	43.8195	14.2552	8.90137	15.9348	0.00415809	203.621	19.464	9.64046	0.806193	1.052e-08	2.18204	0.0459047	6.30699	538.029
2051	529.353	572.865	489.06	1831.28	351.211	486.837	630.881	107.368	7.17962	0.19776	25.7763	42.5245	3.23028	34.3051	176.516	46.3584	1.03698	31.8975	12.4348	106.774	343.695	43.1988	14.1977	8.89503	15.2086	0.00339726	191.378	18.773	9.22955	0.764439	7.45175e-09	2.14949	0.0435185	6.30014	538.029
2052	532.178	575.944	491.536	1829.21	351.807	490.762	615.997	107.97	7.26549	0.199571	25.7002	42.3451	3.28482	34.6135	178.408	47.2942	1.0097	31.8677	12.5829	104.392	339.592	42.5856	14.1403	8.88867	14.5141	0.00277533	179.567	18.0863	8.83141	0.724621	5.27839e-09	2.11706	0.0412454	6.29295	538.029
2053	534.908	578.91	493.932	1826.78	352.396	494.443	601.507	108.571	7.35127	0.201379	25.6235	42.2912	3.33587	34.8885	180.105	48.2071	0.982994	31.8004	12.7331	102.051	335.526	41.9799	14.083	8.8823	13.8499	0.00226696	168.223	17.4065	8.44607	0.68667	3.73891e-09	2.08479	0.0390797	6.28542	538.029
2054	537.538	581.755	496.244	1823.93	352.978	497.874	587.411	109.17	7.43698	0.203185	25.5459	42.3356	3.38356	35.1307	181.614	49.0972	0.95683	31.6984	12.8852	99.7486	331.49	41.3805	14.0258	8.87592	13.2137	0.00185132	157.365	16.7353	8.0733	0.650496	2.64843e-09	2.05261	0.0370254	6.27349	538.029
2055	540.072	584.483	498.474	1820.66	353.553	501.057	573.711	109.767	7.52261	0.204989	25.4676	42.4574	3.42802	35.3409	182.945	49.9646	0.931187	31.5648	13.0394	97.4806	327.481	40.7868	13.9685	8.86951	12.6039	0.00151147	147.006	16.0745	7.71297	0.616027	1.876e-09	2.02053	0.035076	6.25783	538.029
2056	542.536	587.12	500.645	1817.05	354.12	504.009	560.422	110.363	7.60816	0.206789	25.3886	42.6435	3.46948	35.5203	184.111	50.8098	0.906057	31.4044	13.1955	95.2502	323.502	40.1995	13.9112	8.86308	12.0201	0.00123371	137.158	15.4263	7.36514	0.583208	1.32885e-09	1.98858	0.0332272	6.24414	538.029
2057	544.949	589.685	502.768	1813.18	354.681	506.745	547.553	110.957	7.69364	0.208587	25.3088	42.8833	3.50815	35.6702	185.127	51.6334	0.881432	31.2213	13.3536	93.0596	319.558	39.6191	13.854	8.85664	11.4619	0.00100678	127.824	14.7926	7.0298	0.551985	9.41279e-10	1.95683	0.0314748	6.23313	538.029
2058	547.318	592.185	504.847	1809.09	355.235	509.282	535.108	111.55	7.77904	0.210383	25.2283	43.1678	3.54424	35.7919	186.005	52.4359	0.857303	31.019	13.5137	90.9106	315.653	39.0459	13.7969	8.85019	10.9285	0.00082144	119.002	14.1747	6.70687	0.5223	6.66748e-10	1.92532	0.0298144	6.22477	538.029
2059	549.649	594.623	506.884	1804.86	355.782	511.635	523.088	112.141	7.86436	0.212175	25.1471	43.4903	3.57796	35.8865	186.757	53.218	0.833662	30.8008	13.6758	88.805	311.789	38.4804	13.74	8.84373	10.4195	0.000670125	110.684	13.5739	6.39621	0.494103	4.72286e-10	1.89409	0.0282421	6.21943	538.029
2060	551.912	596.993	508.871	1800.51	356.322	513.815	511.485	112.731	7.9496	0.213966	25.0652	43.8436	3.60944	35.9549	187.392	53.98	0.810497	30.5688	13.8399	86.7427	307.968	37.9227	13.6833	8.83728	9.93378	0.000546608	102.856	12.9908	6.09761	0.467318	3.3454e-10	1.86318	0.0267533	6.21518	538.029
2061	554.07	599.283	510.799	1796.03	356.856	515.827	500.285	113.319	8.03477	0.215753	24.9826	44.221	3.63881	35.9981	187.918	54.7222	0.78779	30.3244	14.006	84.7221	304.187	37.3724	13.6267	8.83082	9.47018	0.000445786	95.5039	12.4258	5.81079	0.441884	2.36969e-10	1.83255	0.0253434	6.21007	538.029
2062	556.123	601.466	512.647	1791.34	357.382	517.774	489.474	113.907	8.11979	0.217538	24.8995	44.6174	3.66604	36.0219	188.405	55.4555	0.765611	30.0762	14.1743	82.742	300.446	36.8294	13.5703	8.82436	9.0276	0.00036349	88.6072	11.8788	5.5354	0.417747	1.67855e-10	1.80223	0.0239971	6.20389	538.029
2063	558.077	603.526	514.402	1786.38	357.901	519.755	479.036	114.495	8.2046	0.219322	24.816	45.0294	3.69112	36.0325	188.924	56.1907	0.744026	29.832	14.3449	80.8016	296.743	36.2934	13.5141	8.8179	8.60509	0.000296317	82.1465	11.3498	5.27113	0.39484	1.18899e-10	1.77221	0.0227111	6.19703	538.029
2064	559.934	605.466	516.065	1781.18	358.411	521.763	468.958	115.084	8.2892	0.221103	24.7322	45.4531	3.71418	36.0301	189.47	56.9276	0.723017	29.5912	14.5179	78.9004	293.08	35.7644	13.458	8.81143	8.20175	0.0002415	76.1028	10.839	5.01767	0.373118	8.42212e-11	1.74251	0.0214932	6.18982	538.029
2065	561.682	607.273	517.629	1775.67	358.914	523.781	459.216	115.673	8.37359	0.222882	24.6479	45.8822	3.73522	36.0146	190.035	57.6657	0.70256	29.3516	14.6932	77.0343	289.449	35.2416	13.4019	8.80494	7.81616	0.000196761	70.4539	10.3457	4.77461	0.352511	5.96574e-11	1.71305	0.020339	6.17834	538.029
2066	563.322	608.95	519.096	1769.85	359.409	525.8	449.79	116.264	8.45777	0.22466	24.5633	46.3128	3.75429	35.9862	190.614	58.4045	0.682634	29.112	14.8709	75.201	285.848	34.7242	13.3459	8.79843	7.44721	0.000160248	65.1789	9.86984	4.54161	0.332956	4.22579e-11	1.68384	0.0192447	6.16326	538.029
2067	564.881	610.526	520.488	1763.79	359.897	527.824	440.673	116.855	8.54174	0.226435	24.4782	46.746	3.77157	35.9455	191.208	59.1442	0.66323	28.8735	15.0509	73.4024	282.279	34.213	13.2899	8.79191	7.09462	0.000130466	60.2602	9.41146	4.31844	0.314415	2.99331e-11	1.65492	0.0182078	6.15017	538.029
2068	566.376	612.017	521.818	1757.54	360.377	529.857	431.86	117.446	8.62549	0.228209	24.3928	47.1827	3.78721	35.8932	191.819	59.8849	0.644338	28.6365	15.2332	71.6399	278.746	33.7081	13.2341	8.78538	6.75803	0.000106186	55.6795	8.97064	4.10486	0.296847	2.12029e-11	1.62632	0.0172259	6.13975	538.029
2069	567.815	613.43	523.089	1751.18	360.849	531.905	423.343	118.038	8.70904	0.229981	24.307	47.6234	3.80134	35.8299	192.447	60.6268	0.625948	28.4018	15.4179	69.9147	275.252	33.2101	13.1784	8.77884	6.43698	8.64004e-05	51.4189	8.54732	3.90063	0.280213	1.50189e-11	1.59807	0.0162963	6.13196	538.029
2070	569.176	614.77	524.302	1744.74	361.314	533.971	415.114	118.631	8.79237	0.23175	24.2208	48.0693	3.81412	35.7564	193.095	61.37	0.608051	28.1697	15.605	68.2281	271.8	32.7192	13.1229	8.77231	6.13107	7.02844e-05	47.4605	8.14134	3.70549	0.264459	1.06385e-11	1.5702	0.0154167	6.12714	538.029
2071	570.428	616.028	525.451	1738.25	361.771	536.055	407.161	119.225	8.87549	0.233518	24.1344	48.5193	3.82563	35.6729	193.761	62.1146	0.590634	27.9404	15.7944	66.5796	268.39	32.2356	13.0676	8.76578	5.83966	5.71613e-05	43.7861	7.75233	3.51913	0.249546	7.53571e-12	1.5427	0.0145846	6.12345	538.029
2072	571.562	617.172	526.509	1731.61	362.22	538.23	399.469	119.82	8.95834	0.235282	24.0476	48.9321	3.83586	35.5839	194.52	62.8716	0.573689	27.7204	15.9863	64.9677	265.02	31.7588	13.0126	8.75925	5.56195	4.64758e-05	40.3772	7.37968	3.34116	0.23545	5.33786e-12	1.51559	0.0137972	6.11873	538.029
2073	572.579	618.176	527.457	1724.77	362.661	540.569	392.024	120.418	9.04084	0.237039	23.9608	49.2744	3.84482	35.4937	195.438	63.6516	0.557209	27.5157	16.1809	63.3915	261.69	31.2887	12.9577	8.75272	5.29725	3.77758e-05	37.2162	7.02274	3.17128	0.222119	3.78104e-12	1.48884	0.013052	6.1129	538.029
2074	573.48	619.042	528.296	1717.72	363.093	543.063	384.814	121.02	9.12301	0.23879	23.8738	49.5587	3.85257	35.4022	196.506	64.4542	0.54118	27.3243	16.3783	61.85	258.398	30.8252	12.903	8.74619	5.04494	3.06944e-05	34.2872	6.68106	3.00916	0.209502	2.67827e-12	1.46244	0.0123468	6.10663	538.029
2075	574.267	619.773	529.027	1710.49	363.517	545.705	377.826	121.624	9.20483	0.240534	23.7867	49.7956	3.85917	35.3094	197.709	65.2787	0.525589	27.1444	16.5783	60.3427	255.144	30.3681	12.8485	8.73966	4.80445	2.4932e-05	31.5747	6.35418	2.85451	0.197569	1.89713e-12	1.43642	0.0116794	6.10009	538.029
2076	574.927	620.356	529.643	1703.03	363.932	548.475	371.043	122.231	9.28631	0.242272	23.6994	49.9898	3.86458	35.2149	199.033	66.1241	0.51042	26.973	16.781	58.8663	251.923	29.9168	12.7941	8.73312	4.57489	2.02432e-05	29.0636	6.04139	2.70701	0.186287	1.34382e-12	1.41072	0.0110475	6.08943	538.029
2077	575.461	620.793	530.144	1695.31	364.339	551.358	364.449	122.842	9.36745	0.244004	23.6119	50.1463	3.86881	35.1183	200.464	66.9895	0.495655	26.8081	16.9864	57.4186	248.731	29.4707	12.7398	8.72656	4.35557	1.64283e-05	26.7395	5.74208	2.56633	0.17561	9.51884e-13	1.38532	0.0104488	6.07528	538.029
2078	575.897	621.111	530.553	1687.43	364.738	554.359	358.041	123.455	9.44824	0.245729	23.5243	50.2755	3.872	35.0201	201.997	67.8749	0.48129	26.6501	17.1946	56.0012	245.572	29.0301	12.6855	8.71999	4.14628	1.33267e-05	24.5908	5.4561	2.43226	0.165504	6.7426e-13	1.36026	0.00988187	6.06334	538.029
2079	576.26	621.337	530.883	1679.55	365.129	557.501	351.817	124.072	9.5287	0.247448	23.4365	50.3912	3.87444	34.9215	203.639	68.7809	0.467327	26.5013	17.4054	54.6149	242.449	28.5956	12.6314	8.71342	3.94676	1.08079e-05	22.6071	5.18353	2.30465	0.155971	4.77607e-13	1.33554	0.00934539	6.05541	538.029
2080	576.427	621.48	531.138	1671.83	365.511	560.798	345.772	124.692	9.60882	0.24916	23.3487	50.5038	3.87639	34.8235	205.393	69.7083	0.453768	26.3632	17.6189	53.2605	239.362	28.1673	12.5776	8.70685	3.75673	8.76426e-06	20.7782	4.92426	2.18335	0.146975	3.38309e-13	1.31118	0.00883788	6.05149	538.029
2081	576.262	621.544	531.319	1664.28	365.885	564.25	339.903	125.314	9.68859	0.250866	23.261	50.6163	3.87794	34.7265	207.255	70.6569	0.440602	26.2353	17.8351	51.9387	236.316	27.7455	12.5239	8.70028	3.57591	7.10663e-06	19.0931	4.6778	2.0681	0.138486	2.39639e-13	1.28724	0.00835801	6.05094	538.029
2082	576.044	621.614	531.49	1657.12	366.254	567.862	334.204	125.942	9.76833	0.252563	23.1732	50.691	3.87899	34.6315	209.245	71.6277	0.427824	26.1238	18.0535	50.6492	233.311	27.3304	12.4705	8.69373	3.40391	5.76229e-06	17.5412	4.44358	1.95861	0.130471	1.69746e-13	1.2637	0.00790434	6.05184	538.029
2083	575.973	621.757	531.702	1650.49	366.618	571.641	328.663	126.577	9.84833	0.25425	23.0855	50.6959	3.87942	34.5395	211.379	72.6216	0.415422	26.0331	18.2735	49.3908	230.344	26.9216	12.4174	8.68718	3.24023	4.67197e-06	16.1122	4.22094	1.85467	0.122898	1.20239e-13	1.24055	0.00747535	6.05202	538.029
2084	575.965	621.954	531.942	1644.32	366.979	575.576	323.271	127.22	9.92861	0.255925	22.9978	50.6437	3.87927	34.4501	213.647	73.638	0.403385	25.9603	18.4952	48.1622	227.415	26.5189	12.3645	8.68064	3.08441	3.78768e-06	14.7967	4.00931	1.75601	0.115754	8.517e-14	1.21777	0.00706964	6.05125	538.029
2085	576.01	622.197	532.205	1638.56	367.336	579.661	318.022	127.87	10.0091	0.25759	22.91	50.5453	3.87854	34.3634	216.038	74.6764	0.391701	25.903	18.7184	46.9628	224.522	26.1221	12.3118	8.6741	2.93607	3.07051e-06	13.586	3.80815	1.66233	0.10901	6.03296e-14	1.19536	0.00668593	6.05001	538.029
2086	576.102	622.479	532.487	1633.14	367.69	583.887	312.909	128.527	10.09	0.259244	22.8222	50.4095	3.87729	34.2791	218.542	75.7362	0.380361	25.8592	18.9433	45.7917	221.666	25.7312	12.2593	8.66756	2.79483	2.48894e-06	12.4722	3.61695	1.5734	0.102657	4.2734e-14	1.1733	0.006323	6.04842	538.029
2087	576.219	622.781	532.776	1627.97	368.04	588.235	307.917	129.192	10.171	0.260886	22.7344	50.2396	3.87544	34.1967	221.145	76.8164	0.369349	25.8257	19.1698	44.6463	218.84	25.3455	12.2069	8.66102	2.66015	2.01721e-06	11.4472	3.43507	1.48901	0.096665	3.02703e-14	1.15157	0.00597949	6.04266	538.029
2088	576.356	623.097	533.07	1622.96	368.386	592.692	303.036	129.864	10.2524	0.262518	22.6465	50.0397	3.87296	34.1159	223.835	77.9161	0.358652	25.8004	19.3979	43.5248	216.042	24.9644	12.1547	8.65446	2.5316	1.63455e-06	10.5041	3.26198	1.40891	0.0910093	2.14417e-14	1.13014	0.00565421	6.03339	538.029
2089	576.535	623.451	533.388	1618.15	368.729	597.259	298.267	130.544	10.334	0.26414	22.5586	49.8183	3.86996	34.0368	226.609	79.0354	0.348266	25.783	19.6276	42.4282	213.275	24.5884	12.1025	8.64789	2.40903	1.32426e-06	9.63683	3.09741	1.33288	0.0856703	1.51881e-14	1.10904	0.00534635	6.02601	538.029
2090	576.766	623.855	533.741	1613.55	369.068	601.939	293.609	131.23	10.4159	0.26575	22.4706	49.5815	3.86653	33.9597	229.465	80.1741	0.338182	25.7732	19.859	41.3568	210.54	24.2176	12.0505	8.64133	2.29227	1.07275e-06	8.83962	2.94102	1.26078	0.0806292	1.07584e-14	1.08827	0.00505511	6.02114	538.029
2091	577.053	624.313	534.131	1609.17	369.404	606.731	289.059	131.925	10.498	0.267349	22.3826	49.3344	3.86274	33.8847	232.398	81.332	0.328394	25.7707	20.092	40.3111	207.839	23.8523	11.9987	8.63476	2.18114	8.68931e-07	8.10715	2.79249	1.19245	0.0758852	7.62061e-15	1.06784	0.0047797	6.01869	538.029
2092	577.397	624.825	534.558	1605.01	369.736	611.627	284.617	132.625	10.5805	0.268936	22.2948	49.0558	3.85851	33.8109	235.419	82.51	0.318897	25.7752	20.3266	39.2916	205.174	23.4928	11.9472	8.62821	2.07546	7.03805e-07	7.43447	2.65148	1.12769	0.0714203	5.398e-15	1.04779	0.00451936	6.01898	538.029
2093	577.786	625.379	535.011	1601.07	370.065	616.617	280.279	133.331	10.6633	0.270507	22.2073	48.727	3.85371	33.737	238.53	83.7083	0.309683	25.786	20.5628	38.2977	202.545	23.1389	11.896	8.62166	1.97496	5.70038e-07	6.81685	2.51759	1.06633	0.0672163	3.82363e-15	1.0281	0.00427328	6.02018	538.029
2094	578.203	625.957	535.48	1597.28	370.39	621.693	276.038	134.043	10.7465	0.272063	22.1202	48.3567	3.84835	33.6628	241.725	84.9263	0.300743	25.8018	20.8006	37.3283	199.951	22.7904	11.8449	8.61512	1.87936	4.6167e-07	6.2498	2.39045	1.00821	0.0632552	2.70844e-15	1.00878	0.00404062	6.02039	538.029
2095	578.639	626.55	535.955	1593.63	370.712	626.852	271.891	134.76	10.8301	0.273604	22.0333	47.9525	3.84245	33.5884	244.993	86.1635	0.292068	25.8218	21.0401	36.3825	197.389	22.4472	11.7941	8.60859	1.78838	3.73877e-07	5.72923	2.26973	0.953146	0.0595205	1.91851e-15	0.989768	0.00382064	6.01964	538.029
2096	579.09	627.154	536.435	1590.09	371.031	632.09	267.832	135.482	10.914	0.27513	21.9467	47.5206	3.83603	33.5136	248.331	87.4194	0.283649	25.8453	21.2811	35.4597	194.86	22.109	11.7435	8.60206	1.70179	3.02756e-07	5.25137	2.15508	0.901008	0.0559971	1.35896e-15	0.971072	0.00361261	6.01839	538.029
2097	579.554	627.768	536.92	1586.65	371.347	637.405	263.859	136.209	10.9983	0.276641	21.8605	47.0663	3.82913	33.4386	251.732	88.6936	0.275479	25.8718	21.5238	34.5593	192.362	21.7759	11.6931	8.59553	1.61937	2.45145e-07	4.81284	2.04617	0.851624	0.0526711	9.62608e-16	0.9527	0.00341588	6.01677	538.029
2098	580.015	628.376	537.399	1583.23	371.659	642.778	259.961	136.942	11.083	0.278136	21.7745	46.5905	3.82168	33.3627	255.184	89.9849	0.267547	25.8995	21.7681	33.6791	189.892	21.4472	11.6428	8.589	1.54081	1.98467e-07	4.4103	1.94265	0.804819	0.0495276	6.81856e-16	0.934636	0.00322971	6.011	538.029
2099	580.47	628.975	537.871	1579.78	371.968	648.2	256.133	137.68	11.168	0.279617	21.6888	46.095	3.81364	33.2857	258.677	91.2926	0.259843	25.9274	22.014	32.8179	187.447	21.1225	11.5926	8.58245	1.46584	1.60643e-07	4.04075	1.84421	0.760465	0.0465706	4.82988e-16	0.916854	0.00305345	6.00172	538.029
2100	580.909	629.592	538.358	1576.35	372.274	653.679	252.375	138.424	11.2534	0.281082	21.6033	45.5862	3.80513	33.208	262.213	92.6166	0.252365	25.9562	22.2616	31.9762	185.028	20.8022	11.5425	8.57589	1.39438	1.30007e-07	3.70163	1.75069	0.718466	0.0437894	3.42121e-16	0.899351	0.00288666	5.99432	538.029
2101	581.315	630.241	538.871	1572.97	372.576	659.219	248.689	139.173	11.3391	0.282532	21.5181	45.0686	3.79621	33.1298	265.792	93.957	0.245105	25.9866	22.5107	31.1545	182.638	20.4863	11.4926	8.56933	1.32634	1.05201e-07	3.39055	1.66187	0.678726	0.0411734	2.42339e-16	0.882136	0.0027289	5.98942	538.029
2102	581.722	630.901	539.388	1569.81	372.874	664.655	245.075	139.917	11.4242	0.28396	21.4332	44.5985	3.78741	33.0529	269.256	95.284	0.238065	26.0158	22.7581	30.3529	180.278	20.1752	11.4428	8.56278	1.2616	8.51233e-08	3.10534	1.57759	0.641131	0.0387127	1.71659e-16	0.865218	0.00257974	5.98729	538.029
2103	582.144	631.548	539.884	1567.05	373.164	669.831	241.533	140.646	11.5076	0.285359	21.3487	44.2215	3.77921	32.9789	272.457	96.5684	0.231243	26.0415	23.0004	29.5719	177.95	19.8689	11.3934	8.55623	1.20005	6.88786e-08	2.84397	1.49765	0.605573	0.0363977	1.21593e-16	0.848625	0.00243877	5.9883	538.029
2104	582.553	632.172	540.352	1564.64	373.447	674.754	238.062	141.361	11.5892	0.286728	21.2645	43.9195	3.77158	32.9077	275.417	97.8113	0.224632	26.0644	23.2377	28.8109	175.653	19.5675	11.3441	8.5497	1.14155	5.57356e-08	2.6045	1.42185	0.571963	0.0342191	8.61296e-17	0.832354	0.00230555	5.99031	538.029
2105	582.934	632.758	540.782	1562.53	373.722	679.431	234.658	142.06	11.6691	0.288068	21.1807	43.677	3.76445	32.8392	278.149	99.0132	0.218226	26.0845	23.4699	28.0692	173.387	19.2708	11.2951	8.54317	1.08591	4.5101e-08	2.38509	1.34994	0.540185	0.0321673	6.10093e-17	0.816371	0.00217963	5.99141	538.029
2106	583.278	633.298	541.168	1560.66	373.99	683.869	231.318	142.744	11.7473	0.289379	21.0971	43.4818	3.75779	32.7731	280.671	100.175	0.212017	26.1018	23.697	27.346	171.15	18.9786	11.2463	8.53664	1.03299	3.64954e-08	2.18406	1.28172	0.51013	0.0302337	4.32155e-17	0.800685	0.00206058	5.99162	538.029
2107	583.584	633.789	541.51	1559.01	374.251	688.076	228.039	143.413	11.8238	0.290661	21.0139	43.3244	3.75154	32.7093	282.996	101.297	0.206	26.1168	23.919	26.6408	168.942	18.6908	11.1977	8.53012	0.982639	2.95315e-08	1.99986	1.21699	0.481727	0.0284106	3.06113e-17	0.785289	0.00194803	5.9914	538.029
2108	583.85	634.231	541.808	1557.54	374.505	692.063	224.82	144.067	11.8985	0.291914	20.9311	43.1973	3.74569	32.6478	285.139	102.38	0.200169	26.1295	24.136	25.9532	166.761	18.4073	11.1493	8.52361	0.934737	2.38962e-08	1.83111	1.15555	0.454881	0.0267075	2.16833e-17	0.770175	0.00184162	5.99088	538.029
2109	584.06	634.609	542.053	1556.17	374.751	695.824	221.654	144.706	11.9715	0.293137	20.8485	43.0912	3.7401	32.588	287.106	103.425	0.194514	26.1391	24.3479	25.2815	164.606	18.1276	11.1011	8.51708	0.889095	1.93348e-08	1.67645	1.09718	0.42949	0.0250987	1.53592e-17	0.755315	0.00174094	5.9863	538.029
2110	584.213	634.922	542.246	1554.84	374.991	699.363	218.536	145.329	12.0428	0.294331	20.7662	42.9999	3.73471	32.5295	288.902	104.431	0.189031	26.1449	24.5547	24.6248	162.472	17.8514	11.0529	8.51055	0.845564	1.56419e-08	1.53471	1.04172	0.405466	0.0235774	1.08796e-17	0.74067	0.00164565	5.97832	538.029
2111	584.335	635.196	542.408	1553.6	375.224	702.7	215.468	145.938	12.1124	0.295496	20.6841	42.9226	3.72955	32.4725	290.547	105.4	0.183714	26.1484	24.7565	23.9835	160.362	17.5789	11.0048	8.50401	0.804093	1.26532e-08	1.40485	0.98906	0.382737	0.0221555	7.70647e-18	0.726271	0.0015555	5.97227	538.029
2112	584.448	635.458	542.559	1552.47	375.449	705.853	212.452	146.532	12.1803	0.296631	20.6024	42.8585	3.72468	32.4174	292.055	106.333	0.178561	26.1506	24.9532	23.3578	158.278	17.3104	10.957	8.49746	0.764622	1.02351e-08	1.28591	0.939064	0.361264	0.0208102	5.45882e-18	0.712146	0.00147025	5.96876	538.029
2113	584.567	635.721	542.712	1551.46	375.668	708.839	209.488	147.111	12.2464	0.297738	20.521	42.8065	3.7201	32.3642	293.441	107.231	0.173566	26.1524	25.1449	22.7479	156.22	17.046	10.9093	8.49092	0.727083	8.27905e-09	1.17697	0.891609	0.340976	0.0195366	3.86671e-18	0.698282	0.00138966	5.96769	538.029
2114	584.693	635.988	542.866	1550.61	375.881	711.674	206.578	147.674	12.3108	0.298815	20.4399	42.7662	3.71587	32.3131	294.719	108.096	0.168727	26.1545	25.3314	22.154	154.191	16.7857	10.8618	8.4844	0.691412	6.69701e-09	1.07724	0.846609	0.321811	0.0183476	2.73896e-18	0.684684	0.00131352	5.96937	538.029
2115	584.817	636.247	543.013	1549.89	376.086	714.365	203.72	148.223	12.3735	0.299862	20.3592	42.7356	3.71197	32.2641	295.897	108.927	0.164039	26.1571	25.513	21.5758	152.19	16.5297	10.8146	8.47788	0.657521	5.41752e-09	0.985963	0.803922	0.303733	0.0172376	1.94012e-18	0.67135	0.00124159	5.97198	538.029
2116	584.924	636.483	543.139	1549.27	376.285	716.916	200.913	148.757	12.4344	0.300881	20.2788	42.7119	3.70834	32.217	296.981	109.726	0.159496	26.1597	25.6894	21.0126	150.215	16.2777	10.7676	8.47137	0.625306	4.38256e-09	0.902414	0.763404	0.286675	0.0162011	1.37427e-18	0.658268	0.0011736	5.97367	538.029
2117	585.004	636.687	543.239	1548.73	376.477	719.331	198.153	149.275	12.4937	0.30187	20.1987	42.6932	3.70496	32.1717	297.976	110.493	0.155093	26.1622	25.8608	20.4638	148.267	16.0296	10.7209	8.46486	0.594675	3.54536e-09	0.825923	0.724957	0.270549	0.0152161	9.73453e-19	0.645448	0.00110935	5.97446	538.029
2118	585.055	636.857	543.311	1548.26	376.663	721.613	195.44	149.779	12.5512	0.302829	20.119	42.6783	3.70181	32.128	298.888	111.229	0.150827	26.1643	26.0272	19.929	146.344	15.7853	10.6743	8.45837	0.565547	2.86809e-09	0.755888	0.688475	0.255301	0.0142791	6.89538e-19	0.632865	0.00104861	5.97482	538.029
2119	585.077	636.991	543.355	1547.84	376.842	723.77	192.772	150.267	12.607	0.30376	20.0395	42.6662	3.69886	32.0859	299.722	111.934	0.146693	26.1662	26.1885	19.4078	144.446	15.5447	10.628	8.45187	0.537845	2.3202e-09	0.691788	0.653838	0.240907	0.0134041	4.88429e-19	0.620513	0.0009912	5.97487	538.029
2120	585.054	637.075	543.36	1547.41	377.015	725.79	190.144	150.741	12.661	0.304661	19.9603	42.6532	3.696	32.0449	300.476	112.607	0.142685	26.1664	26.3448	18.8991	142.57	15.3074	10.5818	8.44538	0.511462	1.87685e-09	0.633098	0.620915	0.227314	0.0125863	3.45975e-19	0.608388	0.000936895	5.97086	538.029
2121	584.983	637.106	543.327	1546.92	377.181	727.672	187.553	151.199	12.7134	0.305533	19.8814	42.6372	3.69317	32.0046	301.15	113.25	0.138797	26.1644	26.496	18.4021	140.713	15.0731	10.5356	8.43887	0.486309	1.51802e-09	0.579312	0.589627	0.214471	0.0118219	2.45069e-19	0.596454	0.000885503	5.96345	538.029
2122	584.903	637.126	543.288	1546.42	377.342	729.433	185	151.643	12.764	0.306375	19.8028	42.6209	3.69043	31.9652	301.755	113.863	0.135029	26.1612	26.6421	17.9169	138.878	14.842	10.4896	8.43235	0.462356	1.2277e-09	0.530062	0.559911	0.20234	0.0111076	1.73593e-19	0.58472	0.000836894	5.95796	538.029
2123	584.84	637.162	543.266	1545.95	377.496	731.086	182.487	152.071	12.8129	0.307189	19.7245	42.6063	3.68782	31.9271	302.302	114.447	0.131378	26.1577	26.7832	17.4439	137.065	14.6144	10.4438	8.42584	0.439566	9.92862e-10	0.485008	0.531683	0.190882	0.0104404	1.22963e-19	0.573212	0.000790938	5.95497	538.029
2124	584.799	637.221	543.264	1545.54	377.643	732.642	180.014	152.484	12.8601	0.307973	19.6464	42.5944	3.68537	31.8904	302.797	115.004	0.12784	26.1547	26.9193	16.9831	135.276	14.3902	10.3981	8.41933	0.417899	8.02943e-10	0.443766	0.504891	0.180089	0.00980026	8.71e-20	0.561935	0.000747504	5.95439	538.029
2125	584.784	637.303	543.282	1545.21	377.785	734.115	177.584	152.883	12.9055	0.308729	19.5687	42.5867	3.68314	31.8552	303.251	115.534	0.124414	26.1529	27.0503	16.5346	133.512	14.1696	10.3527	8.41283	0.397317	6.49379e-10	0.40602	0.479486	0.169896	0.0091857	6.16966e-20	0.550873	0.000706473	5.95652	538.029
2126	584.784	637.398	543.31	1544.96	377.921	735.508	175.196	153.266	12.9493	0.309455	19.4914	42.5826	3.68112	31.8216	303.667	116.038	0.121096	26.1521	27.1763	16.0982	131.772	13.9527	10.3076	8.40634	0.377769	5.25209e-10	0.371505	0.45539	0.160268	0.00861203	4.37023e-20	0.540024	0.000667712	5.95954	538.029
2127	584.783	637.49	543.337	1544.77	378.05	736.819	172.846	153.634	12.9913	0.310153	19.4143	42.5806	3.67926	31.7894	304.045	116.516	0.117881	26.152	27.2972	15.6733	130.056	13.7392	10.2626	8.39986	0.359193	4.24795e-10	0.339906	0.432502	0.1512	0.00807644	3.09562e-20	0.529398	0.000631088	5.96162	538.029
2128	584.773	637.569	543.355	1544.6	378.174	738.048	170.535	153.987	13.0316	0.310821	19.3376	42.5795	3.67754	31.7584	304.387	116.969	0.114767	26.1521	27.4131	15.2595	128.363	13.529	10.2179	8.39339	0.341536	3.43583e-10	0.310973	0.410759	0.14263	0.00757633	2.19276e-20	0.518988	0.000596477	5.96277	538.029
2129	584.75	637.633	543.361	1544.47	378.292	739.197	168.261	154.325	13.0702	0.31146	19.2611	42.5791	3.67595	31.7286	304.694	117.397	0.111751	26.1524	27.524	14.8564	126.692	13.3221	10.1734	8.38692	0.32475	2.779e-10	0.284509	0.390131	0.134529	0.00710934	1.55323e-20	0.508787	0.000563768	5.96346	538.029
2130	584.714	637.681	543.356	1544.36	378.404	740.268	166.022	154.648	13.107	0.312071	19.185	42.5789	3.67446	31.6999	304.97	117.8	0.108829	26.1527	27.6298	14.4639	125.044	13.1183	10.1291	8.38046	0.30879	2.24774e-10	0.260304	0.370544	0.126898	0.00667324	1.10022e-20	0.498771	0.000532853	5.96382	538.029
2131	584.649	637.697	543.33	1544.19	378.51	741.248	163.815	154.957	13.1422	0.312652	19.1091	42.5756	3.67298	31.6718	305.206	118.179	0.105997	26.1517	27.7306	14.0808	123.414	12.9174	10.0849	8.374	0.293593	1.81793e-10	0.238155	0.351918	0.119707	0.00626576	7.7933e-21	0.488922	0.000503614	5.96011	538.029
2132	584.556	637.682	543.283	1543.95	378.61	742.131	161.638	155.25	13.1756	0.313204	19.0335	42.5676	3.67144	31.644	305.4	118.532	0.103251	26.1486	27.8264	13.7067	121.802	12.7191	10.0407	8.36752	0.279109	1.47013e-10	0.217885	0.334211	0.1129	0.00588488	5.52032e-21	0.479245	0.000475948	5.95299	538.029
2133	584.46	637.665	543.238	1543.67	378.705	742.932	159.491	155.528	13.2073	0.313727	18.9582	42.558	3.66991	31.6168	305.562	118.862	0.10059	26.1446	27.9171	13.3418	120.208	12.5235	9.99676	8.36104	0.265319	1.18878e-10	0.199338	0.317407	0.106457	0.00552901	3.91028e-21	0.469747	0.000449783	5.94776	538.029
2134	584.378	637.661	543.208	1543.39	378.794	743.661	157.376	155.791	13.2373	0.314222	18.8831	42.5488	3.66844	31.5904	305.697	119.168	0.0980103	26.1405	28.0028	12.9862	118.634	12.3308	9.95294	8.35456	0.252202	9.61242e-11	0.182373	0.301464	0.100388	0.00519663	2.76982e-21	0.460434	0.000425048	5.94501	538.029
2135	584.317	637.678	543.197	1543.15	378.878	744.328	155.294	156.038	13.2655	0.314687	18.8084	42.5416	3.66707	31.5649	305.812	119.453	0.0955111	26.137	28.0835	12.6398	117.081	12.1411	9.90931	8.34809	0.239734	7.77255e-11	0.166824	0.28632	0.0946706	0.00488629	1.96198e-21	0.451308	0.000401674	5.94463	538.029
2136	584.279	637.717	543.205	1542.98	378.956	744.943	153.246	156.271	13.2921	0.315123	18.7339	42.5377	3.66584	31.5406	305.914	119.717	0.0930904	26.1348	28.1591	12.3029	115.549	11.9545	9.86591	8.34162	0.227893	6.28511e-11	0.152574	0.271941	0.089287	0.00459662	1.38975e-21	0.442354	0.000379595	5.94695	538.029
2137	584.255	637.77	543.223	1542.87	379.028	745.508	151.231	156.489	13.3169	0.315531	18.6598	42.5368	3.66476	31.5175	306.005	119.96	0.0907457	26.1338	28.2297	11.9751	114.039	11.7709	9.82275	8.33517	0.216648	5.08259e-11	0.139545	0.258294	0.0842175	0.00432627	9.84421e-22	0.43357	0.00035874	5.95016	538.029
2138	584.23	637.818	543.239	1542.8	379.095	746.019	149.249	156.692	13.34	0.315909	18.586	42.5375	3.66379	31.4955	306.082	120.182	0.0884744	26.1335	28.2953	11.6561	112.55	11.5903	9.77981	8.32873	0.205965	4.11027e-11	0.12763	0.245342	0.0794143	0.00407388	6.97307e-22	0.424968	0.000339037	5.95241	538.029
2139	584.194	637.854	543.246	1542.76	379.157	746.475	147.298	156.88	13.3614	0.316259	18.5125	42.5388	3.6629	31.4743	306.145	120.385	0.086274	26.1335	28.3559	11.3456	111.081	11.4125	9.73707	8.3223	0.195813	3.32401e-11	0.116734	0.233033	0.0748617	0.0038212	4.93932e-22	0.41654	0.000320419	5.95374	538.029
2140	584.145	637.875	543.242	1542.72	379.213	746.874	145.377	157.053	13.3811	0.316579	18.4392	42.5403	3.66208	31.454	306.195	120.568	0.0841423	26.1337	28.4115	11.0432	109.631	11.2375	9.69452	8.31587	0.186163	2.68819e-11	0.106768	0.221342	0.0705736	0.00356823	3.49873e-22	0.408283	0.000302825	5.9546	538.029
2141	584.084	637.88	543.227	1542.7	379.264	747.218	143.485	157.21	13.399	0.316871	18.3663	42.5418	3.66133	31.4344	306.231	120.731	0.082077	26.1341	28.462	10.7488	108.201	11.0651	9.65217	8.30944	0.17699	2.17401e-11	0.0976535	0.210251	0.0665345	0.00333202	2.4783e-22	0.400193	0.000286199	5.95513	538.029
2142	583.994	637.854	543.19	1542.62	379.31	747.492	141.619	157.353	13.4152	0.317134	18.2936	42.54	3.66054	31.4152	306.247	120.874	0.0800757	26.1331	28.5076	10.4617	106.787	10.8952	9.60994	8.30302	0.168257	1.75807e-11	0.0893143	0.199709	0.0627286	0.00311135	1.75549e-22	0.392253	0.000270475	5.95159	538.029
2143	583.874	637.795	543.131	1542.46	379.351	747.69	139.776	157.481	13.4298	0.317368	18.2212	42.5333	3.65965	31.3959	306.237	120.998	0.0781362	26.1301	28.5481	10.1814	105.388	10.7275	9.56779	8.29658	0.159935	1.42154e-11	0.0816826	0.189676	0.0591415	0.0029051	1.24348e-22	0.384454	0.000255598	5.94465	538.029
2144	583.747	637.73	543.072	1542.25	379.386	747.823	137.959	157.593	13.4426	0.317572	18.149	42.5249	3.65873	31.3769	306.21	121.101	0.0762574	26.1263	28.5836	9.908	104.005	10.5621	9.52577	8.29014	0.152014	1.14934e-11	0.0747005	0.18015	0.0557615	0.00271244	8.80813e-23	0.376799	0.00024153	5.9396	538.029
2145	583.632	637.677	543.025	1542.04	379.417	747.902	136.168	157.691	13.4536	0.317748	18.0771	42.5168	3.65783	31.3584	306.17	121.187	0.0744379	26.1224	28.6141	9.64165	102.64	10.3992	9.48391	8.2837	0.14448	9.29239e-12	0.0683143	0.171106	0.0525775	0.0025325	6.23917e-23	0.369295	0.000228232	5.93701	538.029
2146	583.535	637.641	542.993	1541.85	379.442	747.936	134.404	157.774	13.463	0.317895	18.0055	42.5105	3.657	31.3406	306.124	121.255	0.0726763	26.1191	28.6395	9.38237	101.293	10.2388	9.44224	8.27726	0.13732	7.51288e-12	0.0624741	0.162519	0.0495786	0.00236451	4.41947e-23	0.361922	0.000215667	5.93681	538.029
2147	583.459	637.625	542.979	1541.74	379.463	747.933	132.668	157.841	13.4706	0.318013	17.9342	42.5075	3.65628	31.3238	306.077	121.307	0.0709713	26.1171	28.66	9.13021	99.9649	10.0811	9.40079	8.27084	0.130522	6.07442e-12	0.0571344	0.154366	0.0467548	0.00220772	3.1305e-23	0.354686	0.000203799	5.93929	538.029
2148	583.394	637.62	542.973	1541.68	379.478	747.894	130.961	157.894	13.4766	0.318102	17.8632	42.5075	3.65568	31.3079	306.03	121.342	0.0693213	26.1163	28.6755	8.885	98.6556	9.92592	9.35957	8.26443	0.124067	4.91164e-12	0.0522525	0.146625	0.0440958	0.00206138	2.21747e-23	0.347603	0.00019259	5.94264	538.029
2149	583.325	637.609	542.963	1541.65	379.489	747.815	129.28	157.931	13.4808	0.318162	17.7925	42.5089	3.65516	31.2927	305.979	121.361	0.0677242	26.1162	28.6859	8.64643	97.3643	9.77326	9.31855	8.25802	0.117936	3.97158e-12	0.0477885	0.139296	0.0415917	0.00192478	1.57073e-23	0.340667	0.000182001	5.94504	538.029
2150	583.288	637.6	542.955	1541.65	379.493	747.765	128.446	157.946	13.4825	0.318185	17.7572	42.5099	3.65491	31.2853	305.953	121.367	0.0669387	26.1163	28.6899	8.52878	96.7231	9.69754	9.2981	8.25482	0.114948	3.55131e-12	0.0456562	0.135729	0.0403773	0.00185882	1.30256e-23	0.337235	0.000176857	5.94597	538.029
2151	583.288	637.6	542.955	1541.65	379.493	747.765	128.446	157.946	13.4825	0.318185	17.7572	42.5099	3.65491	31.2853	305.953	121.367	0.0669387	26.1163	28.6899	8.52878	96.7231	9.69754	9.2981	8.25482	0.114948	3.55131e-12	0.0456562	0.135729	0.0403773	0.00185882	1.30256e-23	0.337235	0.000176857	5.94597	538.029
2152	583.288	637.6	542.955	1541.65	379.493	747.765	128.446	157.946	13.4825	0.318185	17.7572	42.5099	3.65491	31.2853	305.953	121.367	0.0669387	26.1163	28.6899	8.52878	96.7231	9.69754	9.2981	8.25482	0.114948	3.55131e-12	0.0456562	0.135729	0.0403773	0.00185882	1.30256e-23	0.337235	0.000176857	5.94597	538.029
2153	583.288	637.6	542.955	1541.65	379.493	747.765	128.446	157.946	13.4825	0.318185	17.7572	42.5099	3.65491	31.2853	305.953	121.367	0.0669387	26.1163	28.6899	8.52878	96.7231	9.69754	9.2981	8.25482	0.114948	3.55131e-12	0.0456562	0.135729	0.0403773	0.00185882	1.30256e-23	0.337235	0.000176857	5.94597	538.029
2154	583.288	637.6	542.955	1541.65	379.493	747.765	128.446	157.946	13.4825	0.318185	17.7572	42.5099	3.65491	31.2853	305.953	121.367	0.0669387	26.1163	28.6899	8.52878	96.7231	9.69754	9.2981	8.25482	0.114948	3.55131e-12	0.0456562	0.135729	0.0403773	0.00185882	1.30256e-23	0.337235	0.000176857	5.94597	538.029
2155	583.288	637.6	542.955	1541.65	379.493	747.765	128.446	157.946	13.4825	0.318185	17.7572	42.5099	3.65491	31.2853	305.953	121.367	0.0669387	26.1163	28.6899	8.52878	96.7231	9.69754	9.2981	8.25482	0.114948	3.55131e-12	0.0456562	0.135729	0.0403773	0.00185882	1.30256e-23	0.337235	0.000176857	5.94597	538.029
2156	583.288	637.6	542.955	1541.65	379.493	747.765	128.446	157.946	13.4825	0.318185	17.7572	42.5099	3.65491	31.2853	305.953	121.367	0.0669387	26.1163	28.6899	8.52878	96.7231	9.69754	9.2981	8.25482	0.114948	3.55131e-12	0.0456562	0.135729	0.0403773	0.00185882	1.30256e-23	0.337235	0.000176857	5.94597	538.029
2157	583.288	637.6	542.955	1541.65	379.493	747.765	128.446	157.946	13.4825	0.318185	17.7572	42.5099	3.65491	31.2853	305.953	121.367	0.0669387	26.1163	28.6899	8.52878	96.7231	9.69754	9.2981	8.25482	0.114948	3.55131e-12	0.0456562	0.135729	0.0403773	0.00185882	1.30256e-23	0.337235	0.000176857	5.94597	538.029
2158	583.288	637.6	542.955	1541.65	379.493	747.765	128.446	157.946	13.4825	0.318185	17.7572	42.5099	3.65491	31.2853	305.953	121.367	0.0669387	26.1163	28.6899	8.52878	96.7231	9.69754	9.2981	8.25482	0.114948	3.55131e-12	0.0456562	0.135729	0.0403773	0.00185882	1.30256e-23	0.337235	0.000176857	5.94597	538.029
2159	583.288	637.6	542.955	1541.65	379.493	747.765	128.446	157.946	13.4825	0.318185	17.7572	42.5099	3.65491	31.2853	305.953	121.367	0.0669387	26.1163	28.6899	8.52878	96.7231	9.69754	9.2981	8.25482	0.114948	3.55131e-12	0.0456562	0.135729	0.0403773	0.00185882	1.30256e-23	0.337235	0.000176857	5.94597	538.029
2160	583.288	637.6	542.955	1541.65	379.493	747.765	128.446	157.946	13.4825	0.318185	17.7572	42.5099	3.65491	31.2853	305.953	121.367	0.0669387	26.1163	28.6899	8.52878	96.7231	9.69754	9.2981	8.25482	0.114948	3.55131e-12	0.0456562	0.135729	0.0403773	0.00185882	1.30256e-23	0.337235	0.000176857	5.94597	538.029
2161	583.288	637.6	542.955	1541.65	379.493	747.765	128.446	157.946	13.4825	0.318185	17.7572	42.5099	3.65491	31.2853	305.953	121.367	0.0669387	26.1163	28.6899	8.52878	96.7231	9.69754	9.2981	8.25482	0.114948	3.55131e-12	0.0456562	0.135729	0.0403773	0.00185882	1.30256e-23	0.337235	0.000176857	5.94597	538.029
2162	583.288	637.6	542.955	1541.65	379.493	747.765	128.446	157.946	13.4825	0.318185	17.7572	42.5099	3.65491	31.2853	305.953	121.367	0.0669387	26.1163	28.6899	8.52878	96.7231	9.69754	9.2981	8.25482	0.114948	3.55131e-12	0.0456562	0.135729	0.0403773	0.00185882	1.30256e-23	0.337235	0.000176857	5.94597	538.029
2163	583.288	637.6	542.955	1541.65	379.493	747.765	128.446	157.946	13.4825	0.318185	17.7572	42.5099	3.65491	31.2853	305.953	121.367	0.0669387	26.1163	28.6899	8.52878	96.7231	9.69754	9.2981	8.25482	0.114948	3.55131e-12	0.0456562	0.135729	0.0403773	0.00185882	1.30256e-23	0.337235	0.000176857	5.94597	538.029
2164	583.288	637.6	542.955	1541.65	379.493	747.765	128.446	157.946	13.4825	0.318185	17.7572	42.5099	3.65491	31.2853	305.953	121.367	0.0669387	26.1163	28.6899	8.52878	96.7231	9.69754	9.2981	8.25482	0.114948	3.55131e-12	0.0456562	0.135729	0.0403773	0.00185882	1.30256e-23	0.337235	0.000176857	5.94597	538.029
2165	583.288	637.6	542.955	1541.65	379.493	747.765	128.446	157.946	13.4825	0.318185	17.7572	42.5099	3.65491	31.2853	305.953	121.367	0.0669387	26.1163	28.6899	8.52878	96.7231	9.69754	9.2981	8.25482	0.114948	3.55131e-12	0.0456562	0.135729	0.0403773	0.00185882	1.30256e-23	0.337235	0.000176857	5.94597	538.029
2166	583.288	637.6	542.955	1541.65	379.493	747.765	128.446	157.946	13.4825	0.318185	17.7572	42.5099	3.65491	31.2853	305.953	121.367	0.0669387	26.1163	28.6899	8.52878	96.7231	9.69754	9.2981	8.25482	0.114948	3.55131e-12	0.0456562	0.135729	0.0403773	0.00185882	1.30256e-23	0.337235	0.000176857	5.94597	538.029
2167	583.288	637.6	542.955	1541.65	379.493	747.765	128.446	157.946	13.4825	0.318185	17.7572	42.5099	3.65491	31.2853	305.953	121.367	0.0669387	26.1163	28.6899	8.52878	96.7231	9.69754	9.2981	8.25482	0.114948	3.55131e-12	0.0456562	0.135729	0.0403773	0.00185882	1.30256e-23	0.337235	0.000176857	5.94597	538.029
2168	583.288	637.6	542.955	1541.65	379.493	747.765	128.446	157.946	13.4825	0.318185	17.7572	42.5099	3.65491	31.2853	305.953	121.367	0.0669387	26.1163	28.6899	8.52878	96.7231	9.69754	9.2981	8.25482	0.114948	3.55131e-12	0.0456562	0.135729	0.0403773	0.00185882	1.30256e-23	0.337235	0.000176857	5.94597	538.029
2169	583.288	637.6	542.955	1541.65	379.493	747.765	128.446	157.946	13.4825	0.318185	17.7572	42.5099	3.65491	31.2853	305.953	121.367	0.0669387	26.1163	28.6899	8.52878	96.7231	9.69754	9.2981	8.25482	0.114948	3.55131e-12	0.0456562	0.135729	0.0403773	0.00185882	1.30256e-23	0.337235	0.000176857	5.94597	538.029
2170	583.288	637.6	542.955	1541.65	379.493	747.765	128.446	157.946	13.4825	0.318185	17.7572	42.5099	3.65491	31.2853	305.953	121.367	0.0669387	26.1163	28.6899	8.52878	96.7231	9.69754	9.2981	8.25482	0.114948	3.55131e-12	0.0456562	0.135729	0.0403773	0.00185882	1.30256e-23	0.337235	0.000176857	5.94597	538.029
2171	583.288	637.6	542.955	1541.65	379.493	747.765	128.446	157.946	13.4825	0.318185	17.7572	42.5099	3.65491	31.2853	305.953	121.367	0.0669387	26.1163	28.6899	8.52878	96.7231	9.69754	9.2981	8.25482	0.114948	3.55131e-12	0.0456562	0.135729	0.0403773	0.00185882	1.30256e-23	0.337235	0.000176857	5.94597	538.029
2172	583.288	637.6	542.955	1541.65	379.493	747.765	128.446	157.946	13.4825	0.318185	17.7572	42.5099	3.65491	31.2853	305.953	121.367	0.0669387	26.1163	28.6899	8.52878	96.7231	9.69754	9.2981	8.25482	0.114948	3.55131e-12	0.0456562	0.135729	0.0403773	0.00185882	1.30256e-23	0.337235	0.000176857	5.94597	538.029
2173	583.288	637.6	542.955	1541.65	379.493	747.765	128.446	157.946	13.4825	0.318185	17.7572	42.5099	3.65491	31.2853	305.953	121.367	0.0669387	26.1163	28.6899	8.52878	96.7231	9.69754	9.2981	8.25482	0.114948	3.55131e-12	0.0456562	0.135729	0.0403773	0.00185882	1.30256e-23	0.337235	0.000176857	5.94597	538.029
2174	583.288	637.6	542.955	1541.65	379.493	747.765	128.446	157.946	13.4825	0.318185	17.7572	42.5099	3.65491	31.2853	305.953	121.367	0.0669387	26.1163	28.6899	8.52878	96.7231	9.69754	9.2981	8.25482	0.114948	3.55131e-12	0.0456562	0.135729	0.0403773	0.00185882	1.30256e-23	0.337235	0.000176857	5.94597	538.029
2175	583.288	637.6	542.955	1541.65	379.493	747.765	128.446	157.946	13.4825	0.318185	17.7572	42.5099	3.65491	31.2853	305.953	121.367	0.0669387	26.1163	28.6899	8.52878	96.7231	9.69754	9.2981	8.25482	0.114948	3.55131e-12	0.0456562	0.135729	0.0403773	0.00185882	1.30256e-23	0.337235	0.000176857	5.94597	538.029
2176	583.288	637.6	542.955	1541.65	379.493	747.765	128.446	157.946	13.4825	0.318185	17.7572	42.5099	3.65491	31.2853	305.953	121.367	0.0669387	26.1163	28.6899	8.52878	96.7231	9.69754	9.2981	8.25482	0.114948	3.55131e-12	0.0456562	0.135729	0.0403773	0.00185882	1.30256e-23	0.337235	0.000176857	5.94597	538.029
2177	583.288	637.6	542.955	1541.65	379.493	747.765	128.446	157.946	13.4825	0.318185	17.7572	42.5099	3.65491	31.2853	305.953	121.367	0.0669387	26.1163	28.6899	8.52878	96.7231	9.69754	9.2981	8.25482	0.114948	3.55131e-12	0.0456562	0.135729	0.0403773	0.00185882	1.30256e-23	0.337235	0.000176857	5.94597	538.029
2178	583.288	637.6	542.955	1541.65	379.493	747.765	128.446	157.946	13.4825	0.318185	17.7572	42.5099	3.65491	31.2853	305.953	121.367	0.0669387	26.1163	28.6899	8.52878	96.7231	9.69754	9.2981	8.25482	0.114948	3.55131e-12	0.0456562	0.135729	0.0403773	0.00185882	1.30256e-23	0.337235	0.000176857	5.94597	538.029
2179	583.288	637.6	542.955	1541.65	379.493	747.765	128.446	157.946	13.4825	0.318185	17.7572	42.5099	3.65491	31.2853	305.953	121.367	0.0669387	26.1163	28.6899	8.52878	96.7231	9.69754	9.2981	8.25482	0.114948	3.55131e-12	0.0456562	0.135729	0.0403773	0.00185882	1.30256e-23	0.337235	0.000176857	5.94597	538.029
2180	583.288	637.6	542.955	1541.65	379.493	747.765	128.446	157.946	13.4825	0.318185	17.7572	42.5099	3.65491	31.2853	305.953	121.367	0.0669387	26.1163	28.6899	8.52878	96.7231	9.69754	9.2981	8.25482	0.114948	3.55131e-12	0.0456562	0.135729	0.0403773	0.00185882	1.30256e-23	0.337235	0.000176857	5.94597	538.029
2181	583.288	637.6	542.955	1541.65	379.493	747.765	128.446	157.946	13.4825	0.318185	17.7572	42.5099	3.65491	31.2853	305.953	121.367	0.0669387	26.1163	28.6899	8.52878	96.7231	9.69754	9.2981	8.25482	0.114948	3.55131e-12	0.0456562	0.135729	0.0403773	0.00185882	1.30256e-23	0.337235	0.000176857	5.94597	538.029
2182	583.288	637.6	542.955	1541.65	379.493	747.765	128.446	157.946	13.4825	0.318185	17.7572	42.5099	3.65491	31.2853	305.953	121.367	0.0669387	26.1163	28.6899	8.52878	96.7231	9.69754	9.2981	8.25482	0.114948	3.55131e-12	0.0456562	0.135729	0.0403773	0.00185882	1.30256e-23	0.337235	0.000176857	5.94597	538.029
2183	583.288	637.6	542.955	1541.65	379.493	747.765	128.446	157.946	13.4825	0.318185	17.7572	42.5099	3.65491	31.2853	305.953	121.367	0.0669387	26.1163	28.6899	8.52878	96.7231	9.69754	9.2981	8.25482	0.114948	3.55131e-12	0.0456562	0.135729	0.0403773	0.00185882	1.30256e-23	0.337235	0.000176857	5.94597	538.029
2184	583.288	637.6	542.955	1541.65	379.493	747.765	128.446	157.946	13.4825	0.318185	17.7572	42.5099	3.65491	31.2853	305.953	121.367	0.0669387	26.1163	28.6899	8.52878	96.7231	9.69754	9.2981	8.25482	0.114948	3.55131e-12	0.0456562	0.135729	0.0403773	0.00185882	1.30256e-23	0.337235	0.000176857	5.94597	538.029
2185	583.288	637.6	542.955	1541.65	379.493	747.765	128.446	157.946	13.4825	0.318185	17.7572	42.5099	3.65491	31.2853	305.953	121.367	0.0669387	26.1163	28.6899	8.52878	96.7231	9.69754	9.2981	8.25482	0.114948	3.55131e-12	0.0456562	0.135729	0.0403773	0.00185882	1.30256e-23	0.337235	0.000176857	5.94597	538.029
2186	583.288	637.6	542.955	1541.65	379.493	747.765	128.446	157.946	13.4825	0.318185	17.7572	42.5099	3.65491	31.2853	305.953	121.367	0.0669387	26.1163	28.6899	8.52878	96.7231	9.69754	9.2981	8.25482	0.114948	3.55131e-12	0.0456562	0.135729	0.0403773	0.00185882	1.30256e-23	0.337235	0.000176857	5.94597	538.029
2187	583.288	637.6	542.955	1541.65	379.493	747.765	128.446	157.946	13.4825	0.318185	17.7572	42.5099	3.65491	31.2853	305.953	121.367	0.0669387	26.1163	28.6899	8.52878	96.7231	9.69754	9.2981	8.25482	0.114948	3.55131e-12	0.0456562	0.135729	0.0403773	0.00185882	1.30256e-23	0.337235	0.000176857	5.94597	538.029
2188	583.288	637.6	542.955	1541.65	379.493	747.765	128.446	157.946	13.4825	0.318185	17.7572	42.5099	3.65491	31.2853	305.953	121.367	0.0669387	26.1163	28.6899	8.52878	96.7231	9.69754	9.2981	8.25482	0.114948	3.55131e-12	0.0456562	0.135729	0.0403773	0.00185882	1.30256e-23	0.337235	0.000176857	5.94597	538.029
2189	583.288	637.6	542.955	1541.65	379.493	747.765	128.446	157.946	13.4825	0.318185	17.7572	42.5099	3.65491	31.2853	305.953	121.367	0.0669387	26.1163	28.6899	8.52878	96.7231	9.69754	9.2981	8.25482	0.114948	3.55131e-12	0.0456562	0.135729	0.0403773	0.00185882	1.30256e-23	0.337235	0.000176857	5.94597	538.029
2190	583.288	637.6	542.955	1541.65	379.493	747.765	128.446	157.946	13.4825	0.318185	17.7572	42.5099	3.65491	31.2853	305.953	121.367	0.0669387	26.1163	28.6899	8.52878	96.7231	9.69754	9.2981	8.25482	0.114948	3.55131e-12	0.0456562	0.135729	0.0403773	0.00185882	1.30256e-23	0.337235	0.000176857	5.94597	538.029
2191	583.288	637.6	542.955	1541.65	379.493	747.765	128.446	157.946	13.4825	0.318185	17.7572	42.5099	3.65491	31.2853	305.953	121.367	0.0669387	26.1163	28.6899	8.52878	96.7231	9.69754	9.2981	8.25482	0.114948	3.55131e-12	0.0456562	0.135729	0.0403773	0.00185882	1.30256e-23	0.337235	0.000176857	5.94597	538.029
2192	583.288	637.6	542.955	1541.65	379.493	747.765	128.446	157.946	13.4825	0.318185	17.7572	42.5099	3.65491	31.2853	305.953	121.367	0.0669387	26.1163	28.6899	8.52878	96.7231	9.69754	9.2981	8.25482	0.114948	3.55131e-12	0.0456562	0.135729	0.0403773	0.00185882	1.30256e-23	0.337235	0.000176857	5.94597	538.029
2193	583.288	637.6	542.955	1541.65	379.493	747.765	128.446	157.946	13.4825	0.318185	17.7572	42.5099	3.65491	31.2853	305.953	121.367	0.0669387	26.1163	28.6899	8.52878	96.7231	9.69754	9.2981	8.25482	0.114948	3.55131e-12	0.0456562	0.135729	0.0403773	0.00185882	1.30256e-23	0.337235	0.000176857	5.94597	538.029
2194	583.288	637.6	542.955	1541.65	379.493	747.765	128.446	157.946	13.4825	0.318185	17.7572	42.5099	3.65491	31.2853	305.953	121.367	0.0669387	26.1163	28.6899	8.52878	96.7231	9.69754	9.2981	8.25482	0.114948	3.55131e-12	0.0456562	0.135729	0.0403773	0.00185882	1.30256e-23	0.337235	0.000176857	5.94597	538.029
2195	583.288	637.6	542.955	1541.65	379.493	747.765	128.446	157.946	13.4825	0.318185	17.7572	42.5099	3.65491	31.2853	305.953	121.367	0.0669387	26.1163	28.6899	8.52878	96.7231	9.69754	9.2981	8.25482	0.114948	3.55131e-12	0.0456562	0.135729	0.0403773	0.00185882	1.30256e-23	0.337235	0.000176857	5.94597	538.029
2196	583.288	637.6	542.955	1541.65	379.493	747.765	128.446	157.946	13.4825	0.318185	17.7572	42.5099	3.65491	31.2853	305.953	121.367	0.0669387	26.1163	28.6899	8.52878	96.7231	9.69754	9.2981	8.25482	0.114948	3.55131e-12	0.0456562	0.135729	0.0403773	0.00185882	1.30256e-23	0.337235	0.000176857	5.94597	538.029
2197	583.288	637.6	542.955	1541.65	379.493	747.765	128.446	157.946	13.4825	0.318185	17.7572	42.5099	3.65491	31.2853	305.953	121.367	0.0669387	26.1163	28.6899	8.52878	96.7231	9.69754	9.2981	8.25482	0.114948	3.55131e-12	0.0456562	0.135729	0.0403773	0.00185882	1.30256e-23	0.337235	0.000176857	5.94597	538.029
2198	583.288	637.6	542.955	1541.65	379.493	747.765	128.446	157.946	13.4825	0.318185	17.7572	42.5099	3.65491	31.2853	305.953	121.367	0.0669387	26.1163	28.6899	8.52878	96.7231	9.69754	9.2981	8.25482	0.114948	3.55131e-12	0.0456562	0.135729	0.0403773	0.00185882	1.30256e-23	0.337235	0.000176857	5.94597	538.029
2199	583.288	637.6	542.955	1541.65	379.493	747.765	128.446	157.946	13.4825	0.318185	17.7572	42.5099	3.65491	31.2853	305.953	121.367	0.0669387	26.1163	28.6899	8.52878	96.7231	9.69754	9.2981	8.25482	0.114948	3.55131e-12	0.0456562	0.135729	0.0403773	0.00185882	1.30256e-23	0.337235	0.000176857	5.94597	538.029
2200	583.288	637.6	542.955	1541.65	379.493	747.765	128.446	157.946	13.4825	0.318185	17.7572	42.5099	3.65491	31.2853	305.953	121.367	0.0669387	26.1163	28.6899	8.52878	96.7231	9.69754	9.2981	8.25482	0.114948	3.55131e-12	0.0456562	0.135729	0.0403773	0.00185882	1.30256e-23	0.337235	0.000176857	5.94597	538.029
2201	583.288	637.6	542.955	1541.65	379.493	747.765	128.446	157.946	13.4825	0.318185	17.7572	42.5099	3.65491	31.2853	305.953	121.367	0.0669387	26.1163	28.6899	8.52878	96.7231	9.69754	9.2981	8.25482	0.114948	3.55131e-12	0.0456562	0.135729	0.0403773	0.00185882	1.30256e-23	0.337235	0.000176857	5.94597	538.029
2202	583.288	637.6	542.955	1541.65	379.493	747.765	128.446	157.946	13.4825	0.318185	17.7572	42.5099	3.65491	31.2853	305.953	121.367	0.0669387	26.1163	28.6899	8.52878	96.7231	9.69754	9.2981	8.25482	0.114948	3.55131e-12	0.0456562	0.135729	0.0403773	0.00185882	1.30256e-23	0.337235	0.000176857	5.94597	538.029
2203	583.288	637.6	542.955	1541.65	379.493	747.765	128.446	157.946	13.4825	0.318185	17.7572	42.5099	3.65491	31.2853	305.953	121.367	0.0669387	26.1163	28.6899	8.52878	96.7231	9.69754	9.2981	8.25482	0.114948	3.55131e-12	0.0456562	0.135729	0.0403773	0.00185882	1.30256e-23	0.337235	0.000176857	5.94597	538.029
2204	583.288	637.6	542.955	1541.65	379.493	747.765	128.446	157.946	13.4825	0.318185	17.7572	42.5099	3.65491	31.2853	305.953	121.367	0.0669387	26.1163	28.6899	8.52878	96.7231	9.69754	9.2981	8.25482	0.114948	3.55131e-12	0.0456562	0.135729	0.0403773	0.00185882	1.30256e-23	0.337235	0.000176857	5.94597	538.029
2205	583.288	637.6	542.955	1541.65	379.493	747.765	128.446	157.946	13.4825	0.318185	17.7572	42.5099	3.65491	31.2853	305.953	121.367	0.0669387	26.1163	28.6899	8.52878	96.7231	9.69754	9.2981	8.25482	0.114948	3.55131e-12	0.0456562	0.135729	0.0403773	0.00185882	1.30256e-23	0.337235	0.000176857	5.94597	538.029
2206	583.288	637.6	542.955	1541.65	379.493	747.765	128.446	157.946	13.4825	0.318185	17.7572	42.5099	3.65491	31.2853	305.953	121.367	0.0669387	26.1163	28.6899	8.52878	96.7231	9.69754	9.2981	8.25482	0.114948	3.55131e-12	0.0456562	0.135729	0.0403773	0.00185882	1.30256e-23	0.337235	0.000176857	5.94597	538.029
2207	583.288	637.6	542.955	1541.65	379.493	747.765	128.446	157.946	13.4825	0.318185	17.7572	42.5099	3.65491	31.2853	305.953	121.367	0.0669387	26.1163	28.6899	8.52878	96.7231	9.69754	9.2981	8.25482	0.114948	3.55131e-12	0.0456562	0.135729	0.0403773	0.00185882	1.30256e-23	0.337235	0.000176857	5.94597	538.029
2208	583.288	637.6	542.955	1541.65	379.493	747.765	128.446	157.946	13.4825	0.318185	17.7572	42.5099	3.65491	31.2853	305.953	121.367	0.0669387	26.1163	28.6899	8.52878	96.7231	9.69754	9.2981	8.25482	0.114948	3.55131e-12	0.0456562	0.135729	0.0403773	0.00185882	1.30256e-23	0.337235	0.000176857	5.94597	538.029
2209	583.288	637.6	542.955	1541.65	379.493	747.765	128.446	157.946	13.4825	0.318185	17.7572	42.5099	3.65491	31.2853	305.953	121.367	0.0669387	26.1163	28.6899	8.52878	96.7231	9.69754	9.2981	8.25482	0.114948	3.55131e-12	0.0456562	0.135729	0.0403773	0.00185882	1.30256e-23	0.337235	0.000176857	5.94597	538.029
2210	583.288	637.6	542.955	1541.65	379.493	747.765	128.446	157.946	13.4825	0.318185	17.7572	42.5099	3.65491	31.2853	305.953	121.367	0.0669387	26.1163	28.6899	8.52878	96.7231	9.69754	9.2981	8.25482	0.114948	3.55131e-12	0.0456562	0.135729	0.0403773	0.00185882	1.30256e-23	0.337235	0.000176857	5.94597	538.029
2211	583.288	637.6	542.955	1541.65	379.493	747.765	128.446	157.946	13.4825	0.318185	17.7572	42.5099	3.65491	31.2853	305.953	121.367	0.0669387	26.1163	28.6899	8.52878	96.7231	9.69754	9.2981	8.25482	0.114948	3.55131e-12	0.0456562	0.135729	0.0403773	0.00185882	1.30256e-23	0.337235	0.000176857	5.94597	538.029
2212	583.288	637.6	542.955	1541.65	379.493	747.765	128.446	157.946	13.4825	0.318185	17.7572	42.5099	3.65491	31.2853	305.953	121.367	0.0669387	26.1163	28.6899	8.52878	96.7231	9.69754	9.2981	8.25482	0.114948	3.55131e-12	0.0456562	0.135729	0.0403773	0.00185882	1.30256e-23	0.337235	0.000176857	5.94597	538.029
2213	583.288	637.6	542.955	1541.65	379.493	747.765	128.446	157.946	13.4825	0.318185	17.7572	42.5099	3.65491	31.2853	305.953	121.367	0.0669387	26.1163	28.6899	8.52878	96.7231	9.69754	9.2981	8.25482	0.114948	3.55131e-12	0.0456562	0.135729	0.0403773	0.00185882	1.30256e-23	0.337235	0.000176857	5.94597	538.029
2214	583.288	637.6	542.955	1541.65	379.493	747.765	128.446	157.946	13.4825	0.318185	17.7572	42.5099	3.65491	31.2853	305.953	121.367	0.0669387	26.1163	28.6899	8.52878	96.7231	9.69754	9.2981	8.25482	0.114948	3.55131e-12	0.0456562	0.135729	0.0403773	0.00185882	1.30256e-23	0.337235	0.000176857	5.94597	538.029
2215	583.288	637.6	542.955	1541.65	379.493	747.765	128.446	157.946	13.4825	0.318185	17.7572	42.5099	3.65491	31.2853	305.953	121.367	0.0669387	26.1163	28.6899	8.52878	96.7231	9.69754	9.2981	8.25482	0.114948	3.55131e-12	0.0456562	0.135729	0.0403773	0.00185882	1.30256e-23	0.337235	0.000176857	5.94597	538.029
2216	583.288	637.6	542.955	1541.65	379.493	747.765	128.446	157.946	13.4825	0.318185	17.7572	42.5099	3.65491	31.2853	305.953	121.367	0.0669387	26.1163	28.6899	8.52878	96.7231	9.69754	9.2981	8.25482	0.114948	3.55131e-12	0.0456562	0.135729	0.0403773	0.00185882	1.30256e-23	0.337235	0.000176857	5.94597	538.029
2217	583.288	637.6	542.955	1541.65	379.493	747.765	128.446	157.946	13.4825	0.318185	17.7572	42.5099	3.65491	31.2853	305.953	121.367	0.0669387	26.1163	28.6899	8.52878	96.7231	9.69754	9.2981	8.25482	0.114948	3.55131e-12	0.0456562	0.135729	0.0403773	0.00185882	1.30256e-23	0.337235	0.000176857	5.94597	538.029
2218	583.288	637.6	542.955	1541.65	379.493	747.765	128.446	157.946	13.4825	0.318185	17.7572	42.5099	3.65491	31.2853	305.953	121.367	0.0669387	26.1163	28.6899	8.52878	96.7231	9.69754	9.2981	8.25482	0.114948	3.55131e-12	0.0456562	0.135729	0.0403773	0.00185882	1.30256e-23	0.337235	0.000176857	5.94597	538.029
2219	583.288	637.6	542.955	1541.65	379.493	747.765	128.446	157.946	13.4825	0.318185	17.7572	42.5099	3.65491	31.2853	305.953	121.367	0.0669387	26.1163	28.6899	8.52878	96.7231	9.69754	9.2981	8.25482	0.114948	3.55131e-12	0.0456562	0.135729	0.0403773	0.00185882	1.30256e-23	0.337235	0.000176857	5.94597	538.029
2220	583.288	637.6	542.955	1541.65	379.493	747.765	128.446	157.946	13.4825	0.318185	17.7572	42.5099	3.65491	31.2853	305.953	121.367	0.0669387	26.1163	28.6899	8.52878	96.7231	9.69754	9.2981	8.25482	0.114948	3.55131e-12	0.0456562	0.135729	0.0403773	0.00185882	1.30256e-23	0.337235	0.000176857	5.94597	538.029
2221	583.288	637.6	542.955	1541.65	379.493	747.765	128.446	157.946	13.4825	0.318185	17.7572	42.5099	3.65491	31.2853	305.953	121.367	0.0669387	26.1163	28.6899	8.52878	96.7231	9.69754	9.2981	8.25482	0.114948	3.55131e-12	0.0456562	0.135729	0.0403773	0.00185882	1.30256e-23	0.337235	0.000176857	5.94597	538.029
2222	583.288	637.6	542.955	1541.65	379.493	747.765	128.446	157.946	13.4825	0.318185	17.7572	42.5099	3.65491	31.2853	305.953	121.367	0.0669387	26.1163	28.6899	8.52878	96.7231	9.69754	9.2981	8.25482	0.114948	3.55131e-12	0.0456562	0.135729	0.0403773	0.00185882	1.30256e-23	0.337235	0.000176857	5.94597	538.029
2223	583.288	637.6	542.955	1541.65	379.493	747.765	128.446	157.946	13.4825	0.318185	17.7572	42.5099	3.65491	31.2853	305.953	121.367	0.0669387	26.1163	28.6899	8.52878	96.7231	9.69754	9.2981	8.25482	0.114948	3.55131e-12	0.0456562	0.135729	0.0403773	0.00185882	1.30256e-23	0.337235	0.000176857	5.94597	538.029
2224	583.288	637.6	542.955	1541.65	379.493	747.765	128.446	157.946	13.4825	0.318185	17.7572	42.5099	3.65491	31.2853	305.953	121.367	0.0669387	26.1163	28.6899	8.52878	96.7231	9.69754	9.2981	8.25482	0.114948	3.55131e-12	0.0456562	0.135729	0.0403773	0.00185882	1.30256e-23	0.337235	0.000176857	5.94597	538.029
2225	583.288	637.6	542.955	1541.65	379.493	747.765	128.446	157.946	13.4825	0.318185	17.7572	42.5099	3.65491	31.2853	305.953	121.367	0.0669387	26.1163	28.6899	8.52878	96.7231	9.69754	9.2981	8.25482	0.114948	3.55131e-12	0.0456562	0.135729	0.0403773	0.00185882	1.30256e-23	0.337235	0.000176857	5.94597	538.029
2226	583.288	637.6	542.955	1541.65	379.493	747.765	128.446	157.946	13.4825	0.318185	17.7572	42.5099	3.65491	31.2853	305.953	121.367	0.0669387	26.1163	28.6899	8.52878	96.7231	9.69754	9.2981	8.25482	0.114948	3.55131e-12	0.0456562	0.135729	0.0403773	0.00185882	1.30256e-23	0.337235	0.000176857	5.94597	538.029
2227	583.288	637.6	542.955	1541.65	379.493	747.765	128.446	157.946	13.4825	0.318185	17.7572	42.5099	3.65491	31.2853	305.953	121.367	0.0669387	26.1163	28.6899	8.52878	96.7231	9.69754	9.2981	8.25482	0.114948	3.55131e-12	0.0456562	0.135729	0.0403773	0.00185882	1.30256e-23	0.337235	0.000176857	5.94597	538.029
2228	583.288	637.6	542.955	1541.65	379.493	747.765	128.446	157.946	13.4825	0.318185	17.7572	42.5099	3.65491	31.2853	305.953	121.367	0.0669387	26.1163	28.6899	8.52878	96.7231	9.69754	9.2981	8.25482	0.114948	3.55131e-12	0.0456562	0.135729	0.0403773	0.00185882	1.30256e-23	0.337235	0.000176857	5.94597	538.029
2229	583.288	637.6	542.955	1541.65	379.493	747.765	128.446	157.946	13.4825	0.318185	17.7572	42.5099	3.65491	31.2853	305.953	121.367	0.0669387	26.1163	28.6899	8.52878	96.7231	9.69754	9.2981	8.25482	0.114948	3.55131e-12	0.0456562	0.135729	0.0403773	0.00185882	1.30256e-23	0.337235	0.000176857	5.94597	538.029
2230	583.288	637.6	542.955	1541.65	379.493	747.765	128.446	157.946	13.4825	0.318185	17.7572	42.5099	3.65491	31.2853	305.953	121.367	0.0669387	26.1163	28.6899	8.52878	96.7231	9.69754	9.2981	8.25482	0.114948	3.55131e-12	0.0456562	0.135729	0.0403773	0.00185882	1.30256e-23	0.337235	0.000176857	5.94597	538.029
2231	583.288	637.6	542.955	1541.65	379.493	747.765	128.446	157.946	13.4825	0.318185	17.7572	42.5099	3.65491	31.2853	305.953	121.367	0.0669387	26.1163	28.6899	8.52878	96.7231	9.69754	9.2981	8.25482	0.114948	3.55131e-12	0.0456562	0.135729	0.0403773	0.00185882	1.30256e-23	0.337235	0.000176857	5.94597	538.029
2232	583.288	637.6	542.955	1541.65	379.493	747.765	128.446	157.946	13.4825	0.318185	17.7572	42.5099	3.65491	31.2853	305.953	121.367	0.0669387	26.1163	28.6899	8.52878	96.7231	9.69754	9.2981	8.25482	0.114948	3.55131e-12	0.0456562	0.135729	0.0403773	0.00185882	1.30256e-23	0.337235	0.000176857	5.94597	538.029
2233	583.288	637.6	542.955	1541.65	379.493	747.765	128.446	157.946	13.4825	0.318185	17.7572	42.5099	3.65491	31.2853	305.953	121.367	0.0669387	26.1163	28.6899	8.52878	96.7231	9.69754	9.2981	8.25482	0.114948	3.55131e-12	0.0456562	0.135729	0.0403773	0.00185882	1.30256e-23	0.337235	0.000176857	5.94597	538.029
2234	583.288	637.6	542.955	1541.65	379.493	747.765	128.446	157.946	13.4825	0.318185	17.7572	42.5099	3.65491	31.2853	305.953	121.367	0.0669387	26.1163	28.6899	8.52878	96.7231	9.69754	9.2981	8.25482	0.114948	3.55131e-12	0.0456562	0.135729	0.0403773	0.00185882	1.30256e-23	0.337235	0.000176857	5.94597	538.029
2235	583.288	637.6	542.955	1541.65	379.493	747.765	128.446	157.946	13.4825	0.318185	17.7572	42.5099	3.65491	31.2853	305.953	121.367	0.0669387	26.1163	28.6899	8.52878	96.7231	9.69754	9.2981	8.25482	0.114948	3.55131e-12	0.0456562	0.135729	0.0403773	0.00185882	1.30256e-23	0.337235	0.000176857	5.94597	538.029
2236	583.288	637.6	542.955	1541.65	379.493	747.765	128.446	157.946	13.4825	0.318185	17.7572	42.5099	3.65491	31.2853	305.953	121.367	0.0669387	26.1163	28.6899	8.52878	96.7231	9.69754	9.2981	8.25482	0.114948	3.55131e-12	0.0456562	0.135729	0.0403773	0.00185882	1.30256e-23	0.337235	0.000176857	5.94597	538.029
2237	583.288	637.6	542.955	1541.65	379.493	747.765	128.446	157.946	13.4825	0.318185	17.7572	42.5099	3.65491	31.2853	305.953	121.367	0.0669387	26.1163	28.6899	8.52878	96.7231	9.69754	9.2981	8.25482	0.114948	3.55131e-12	0.0456562	0.135729	0.0403773	0.00185882	1.30256e-23	0.337235	0.000176857	5.94597	538.029
2238	583.288	637.6	542.955	1541.65	379.493	747.765	128.446	157.946	13.4825	0.318185	17.7572	42.5099	3.65491	31.2853	305.953	121.367	0.0669387	26.1163	28.6899	8.52878	96.7231	9.69754	9.2981	8.25482	0.114948	3.55131e-12	0.0456562	0.135729	0.0403773	0.00185882	1.30256e-23	0.337235	0.000176857	5.94597	538.029
2239	583.288	637.6	542.955	1541.65	379.493	747.765	128.446	157.946	13.4825	0.318185	17.7572	42.5099	3.65491	31.2853	305.953	121.367	0.0669387	26.1163	28.6899	8.52878	96.7231	9.69754	9.2981	8.25482	0.114948	3.55131e-12	0.0456562	0.135729	0.0403773	0.00185882	1.30256e-23	0.337235	0.000176857	5.94597	538.029
2240	583.288	637.6	542.955	1541.65	379.493	747.765	128.446	157.946	13.4825	0.318185	17.7572	42.5099	3.65491	31.2853	305.953	121.367	0.0669387	26.1163	28.6899	8.52878	96.7231	9.69754	9.2981	8.25482	0.114948	3.55131e-12	0.0456562	0.135729	0.0403773	0.00185882	1.30256e-23	0.337235	0.000176857	5.94597	538.029
2241	583.288	637.6	542.955	1541.65	379.493	747.765	128.446	157.946	13.4825	0.318185	17.7572	42.5099	3.65491	31.2853	305.953	121.367	0.0669387	26.1163	28.6899	8.52878	96.7231	9.69754	9.2981	8.25482	0.114948	3.55131e-12	0.0456562	0.135729	0.0403773	0.00185882	1.30256e-23	0.337235	0.000176857	5.94597	538.029
2242	583.288	637.6	542.955	1541.65	379.493	747.765	128.446	157.946	13.4825	0.318185	17.7572	42.5099	3.65491	31.2853	305.953	121.367	0.0669387	26.1163	28.6899	8.52878	96.7231	9.69754	9.2981	8.25482	0.114948	3.55131e-12	0.0456562	0.135729	0.0403773	0.00185882	1.30256e-23	0.337235	0.000176857	5.94597	538.029
2243	583.288	637.6	542.955	1541.65	379.493	747.765	128.446	157.946	13.4825	0.318185	17.7572	42.5099	3.65491	31.2853	305.953	121.367	0.0669387	26.1163	28.6899	8.52878	96.7231	9.69754	9.2981	8.25482	0.114948	3.55131e-12	0.0456562	0.135729	0.0403773	0.00185882	1.30256e-23	0.337235	0.000176857	5.94597	538.029
2244	583.288	637.6	542.955	1541.65	379.493	747.765	128.446	157.946	13.4825	0.318185	17.7572	42.5099	3.65491	31.2853	305.953	121.367	0.0669387	26.1163	28.6899	8.52878	96.7231	9.69754	9.2981	8.25482	0.114948	3.55131e-12	0.0456562	0.135729	0.0403773	0.00185882	1.30256e-23	0.337235	0.000176857	5.94597	538.029
2245	583.288	637.6	542.955	1541.65	379.493	747.765	128.446	157.946	13.4825	0.318185	17.7572	42.5099	3.65491	31.2853	305.953	121.367	0.0669387	26.1163	28.6899	8.52878	96.7231	9.69754	9.2981	8.25482	0.114948	3.55131e-12	0.0456562	0.135729	0.0403773	0.00185882	1.30256e-23	0.337235	0.000176857	5.94597	538.029
2246	583.288	637.6	542.955	1541.65	379.493	747.765	128.446	157.946	13.4825	0.318185	17.7572	42.5099	3.65491	31.2853	305.953	121.367	0.0669387	26.1163	28.6899	8.52878	96.7231	9.69754	9.2981	8.25482	0.114948	3.55131e-12	0.0456562	0.135729	0.0403773	0.00185882	1.30256e-23	0.337235	0.000176857	5.94597	538.029
2247	583.288	637.6	542.955	1541.65	379.493	747.765	128.446	157.946	13.4825	0.318185	17.7572	42.5099	3.65491	31.2853	305.953	121.367	0.0669387	26.1163	28.6899	8.52878	96.7231	9.69754	9.2981	8.25482	0.114948	3.55131e-12	0.0456562	0.135729	0.0403773	0.00185882	1.30256e-23	0.337235	0.000176857	5.94597	538.029
2248	583.288	637.6	542.955	1541.65	379.493	747.765	128.446	157.946	13.4825	0.318185	17.7572	42.5099	3.65491	31.2853	305.953	121.367	0.0669387	26.1163	28.6899	8.52878	96.7231	9.69754	9.2981	8.25482	0.114948	3.55131e-12	0.0456562	0.135729	0.0403773	0.00185882	1.30256e-23	0.337235	0.000176857	5.94597	538.029
2249	583.288	637.6	542.955	1541.65	379.493	747.765	128.446	157.946	13.4825	0.318185	17.7572	42.5099	3.65491	31.2853	305.953	121.367	0.0669387	26.1163	28.6899	8.52878	96.7231	9.69754	9.2981	8.25482	0.114948	3.55131e-12	0.0456562	0.135729	0.0403773	0.00185882	1.30256e-23	0.337235	0.000176857	5.94597	538.029
2250	583.288	637.6	542.955	1541.65	379.493	747.765	128.446	157.946	13.4825	0.318185	17.7572	42.5099	3.65491	31.2853	305.953	121.367	0.0669387	26.1163	28.6899	8.52878	96.7231	9.69754	9.2981	8.25482	0.114948	3.55131e-12	0.0456562	0.135729	0.0403773	0.00185882	1.30256e-23	0.337235	0.000176857	5.94597	538.029
2251	583.288	637.6	542.955	1541.65	379.493	747.765	128.446	157.946	13.4825	0.318185	17.7572	42.5099	3.65491	31.2853	305.953	121.367	0.0669387	26.1163	28.6899	8.52878	96.7231	9.69754	9.2981	8.25482	0.114948	3.55131e-12	0.0456562	0.135729	0.0403773	0.00185882	1.30256e-23	0.337235	0.000176857	5.94597	538.029
2252	583.288	637.6	542.955	1541.65	379.493	747.765	128.446	157.946	13.4825	0.318185	17.7572	42.5099	3.65491	31.2853	305.953	121.367	0.0669387	26.1163	28.6899	8.52878	96.7231	9.69754	9.2981	8.25482	0.114948	3.55131e-12	0.0456562	0.135729	0.0403773	0.00185882	1.30256e-23	0.337235	0.000176857	5.94597	538.029
2253	583.288	637.6	542.955	1541.65	379.493	747.765	128.446	157.946	13.4825	0.318185	17.7572	42.5099	3.65491	31.2853	305.953	121.367	0.0669387	26.1163	28.6899	8.52878	96.7231	9.69754	9.2981	8.25482	0.114948	3.55131e-12	0.0456562	0.135729	0.0403773	0.00185882	1.30256e-23	0.337235	0.000176857	5.94597	538.029
2254	583.288	637.6	542.955	1541.65	379.493	747.765	128.446	157.946	13.4825	0.318185	17.7572	42.5099	3.65491	31.2853	305.953	121.367	0.0669387	26.1163	28.6899	8.52878	96.7231	9.69754	9.2981	8.25482	0.114948	3.55131e-12	0.0456562	0.135729	0.0403773	0.00185882	1.30256e-23	0.337235	0.000176857	5.94597	538.029
2255	583.288	637.6	542.955	1541.65	379.493	747.765	128.446	157.946	13.4825	0.318185	17.7572	42.5099	3.65491	31.2853	305.953	121.367	0.0669387	26.1163	28.6899	8.52878	96.7231	9.69754	9.2981	8.25482	0.114948	3.55131e-12	0.0456562	0.135729	0.0403773	0.00185882	1.30256e-23	0.337235	0.000176857	5.94597	538.029
2256	583.288	637.6	542.955	1541.65	379.493	747.765	128.446	157.946	13.4825	0.318185	17.7572	42.5099	3.65491	31.2853	305.953	121.367	0.0669387	26.1163	28.6899	8.52878	96.7231	9.69754	9.2981	8.25482	0.114948	3.55131e-12	0.0456562	0.135729	0.0403773	0.00185882	1.30256e-23	0.337235	0.000176857	5.94597	538.029
2257	583.288	637.6	542.955	1541.65	379.493	747.765	128.446	157.946	13.4825	0.318185	17.7572	42.5099	3.65491	31.2853	305.953	121.367	0.0669387	26.1163	28.6899	8.52878	96.7231	9.69754	9.2981	8.25482	0.114948	3.55131e-12	0.0456562	0.135729	0.0403773	0.00185882	1.30256e-23	0.337235	0.000176857	5.94597	538.029
2258	583.288	637.6	542.955	1541.65	379.493	747.765	128.446	157.946	13.4825	0.318185	17.7572	42.5099	3.65491	31.2853	305.953	121.367	0.0669387	26.1163	28.6899	8.52878	96.7231	9.69754	9.2981	8.25482	0.114948	3.55131e-12	0.0456562	0.135729	0.0403773	0.00185882	1.30256e-23	0.337235	0.000176857	5.94597	538.029
2259	583.288	637.6	542.955	1541.65	379.493	747.765	128.446	157.946	13.4825	0.318185	17.7572	42.5099	3.65491	31.2853	305.953	121.367	0.0669387	26.1163	28.6899	8.52878	96.7231	9.69754	9.2981	8.25482	0.114948	3.55131e-12	0.0456562	0.135729	0.0403773	0.00185882	1.30256e-23	0.337235	0.000176857	5.94597	538.029
2260	583.288	637.6	542.955	1541.65	379.493	747.765	128.446	157.946	13.4825	0.318185	17.7572	42.5099	3.65491	31.2853	305.953	121.367	0.0669387	26.1163	28.6899	8.52878	96.7231	9.69754	9.2981	8.25482	0.114948	3.55131e-12	0.0456562	0.135729	0.0403773	0.00185882	1.30256e-23	0.337235	0.000176857	5.94597	538.029
2261	583.288	637.6	542.955	1541.65	379.493	747.765	128.446	157.946	13.4825	0.318185	17.7572	42.5099	3.65491	31.2853	305.953	121.367	0.0669387	26.1163	28.6899	8.52878	96.7231	9.69754	9.2981	8.25482	0.114948	3.55131e-12	0.0456562	0.135729	0.0403773	0.00185882	1.30256e-23	0.337235	0.000176857	5.94597	538.029
2262	583.288	637.6	542.955	1541.65	379.493	747.765	128.446	157.946	13.4825	0.318185	17.7572	42.5099	3.65491	31.2853	305.953	121.367	0.0669387	26.1163	28.6899	8.52878	96.7231	9.69754	9.2981	8.25482	0.114948	3.55131e-12	0.0456562	0.135729	0.0403773	0.00185882	1.30256e-23	0.337235	0.000176857	5.94597	538.029
2263	583.288	637.6	542.955	1541.65	379.493	747.765	128.446	157.946	13.4825	0.318185	17.7572	42.5099	3.65491	31.2853	305.953	121.367	0.0669387	26.1163	28.6899	8.52878	96.7231	9.69754	9.2981	8.25482	0.114948	3.55131e-12	0.0456562	0.135729	0.0403773	0.00185882	1.30256e-23	0.337235	0.000176857	5.94597	538.029
2264	583.288	637.6	542.955	1541.65	379.493	747.765	128.446	157.946	13.4825	0.318185	17.7572	42.5099	3.65491	31.2853	305.953	121.367	0.0669387	26.1163	28.6899	8.52878	96.7231	9.69754	9.2981	8.25482	0.114948	3.55131e-12	0.0456562	0.135729	0.0403773	0.00185882	1.30256e-23	0.337235	0.000176857	5.94597	538.029
2265	583.288	637.6	542.955	1541.65	379.493	747.765	128.446	157.946	13.4825	0.318185	17.7572	42.5099	3.65491	31.2853	305.953	121.367	0.0669387	26.1163	28.6899	8.52878	96.7231	9.69754	9.2981	8.25482	0.114948	3.55131e-12	0.0456562	0.135729	0.0403773	0.00185882	1.30256e-23	0.337235	0.000176857	5.94597	538.029
2266	583.288	637.6	542.955	1541.65	379.493	747.765	128.446	157.946	13.4825	0.318185	17.7572	42.5099	3.65491	31.2853	305.953	121.367	0.0669387	26.1163	28.6899	8.52878	96.7231	9.69754	9.2981	8.25482	0.114948	3.55131e-12	0.0456562	0.135729	0.0403773	0.00185882	1.30256e-23	0.337235	0.000176857	5.94597	538.029
2267	583.288	637.6	542.955	1541.65	379.493	747.765	128.446	157.946	13.4825	0.318185	17.7572	42.5099	3.65491	31.2853	305.953	121.367	0.0669387	26.1163	28.6899	8.52878	96.7231	9.69754	9.2981	8.25482	0.114948	3.55131e-12	0.0456562	0.135729	0.0403773	0.00185882	1.30256e-23	0.337235	0.000176857	5.94597	538.029
2268	583.288	637.6	542.955	1541.65	379.493	747.765	128.446	157.946	13.4825	0.318185	17.7572	42.5099	3.65491	31.2853	305.953	121.367	0.0669387	26.1163	28.6899	8.52878	96.7231	9.69754	9.2981	8.25482	0.114948	3.55131e-12	0.0456562	0.135729	0.0403773	0.00185882	1.30256e-23	0.337235	0.000176857	5.94597	538.029
2269	583.288	637.6	542.955	1541.65	379.493	747.765	128.446	157.946	13.4825	0.318185	17.7572	42.5099	3.65491	31.2853	305.953	121.367	0.0669387	26.1163	28.6899	8.52878	96.7231	9.69754	9.2981	8.25482	0.114948	3.55131e-12	0.0456562	0.135729	0.0403773	0.00185882	1.30256e-23	0.337235	0.000176857	5.94597	538.029
2270	583.288	637.6	542.955	1541.65	379.493	747.765	128.446	157.946	13.4825	0.318185	17.7572	42.5099	3.65491	31.2853	305.953	121.367	0.0669387	26.1163	28.6899	8.52878	96.7231	9.69754	9.2981	8.25482	0.114948	3.55131e-12	0.0456562	0.135729	0.0403773	0.00185882	1.30256e-23	0.337235	0.000176857	5.94597	538.029
2271	583.288	637.6	542.955	1541.65	379.493	747.765	128.446	157.946	13.4825	0.318185	17.7572	42.5099	3.65491	31.2853	305.953	121.367	0.0669387	26.1163	28.6899	8.52878	96.7231	9.69754	9.2981	8.25482	0.114948	3.55131e-12	0.0456562	0.135729	0.0403773	0.00185882	1.30256e-23	0.337235	0.000176857	5.94597	538.029
2272	583.288	637.6	542.955	1541.65	379.493	747.765	128.446	157.946	13.4825	0.318185	17.7572	42.5099	3.65491	31.2853	305.953	121.367	0.0669387	26.1163	28.6899	8.52878	96.7231	9.69754	9.2981	8.25482	0.114948	3.55131e-12	0.0456562	0.135729	0.0403773	0.00185882	1.30256e-23	0.337235	0.000176857	5.94597	538.029
2273	583.288	637.6	542.955	1541.65	379.493	747.765	128.446	157.946	13.4825	0.318185	17.7572	42.5099	3.65491	31.2853	305.953	121.367	0.0669387	26.1163	28.6899	8.52878	96.7231	9.69754	9.2981	8.25482	0.114948	3.55131e-12	0.0456562	0.135729	0.0403773	0.00185882	1.30256e-23	0.337235	0.000176857	5.94597	538.029
2274	583.288	637.6	542.955	1541.65	379.493	747.765	128.446	157.946	13.4825	0.318185	17.7572	42.5099	3.65491	31.2853	305.953	121.367	0.0669387	26.1163	28.6899	8.52878	96.7231	9.69754	9.2981	8.25482	0.114948	3.55131e-12	0.0456562	0.135729	0.0403773	0.00185882	1.30256e-23	0.337235	0.000176857	5.94597	538.029
2275	583.288	637.6	542.955	1541.65	379.493	747.765	128.446	157.946	13.4825	0.318185	17.7572	42.5099	3.65491	31.2853	305.953	121.367	0.0669387	26.1163	28.6899	8.52878	96.7231	9.69754	9.2981	8.25482	0.114948	3.55131e-12	0.0456562	0.135729	0.0403773	0.00185882	1.30256e-23	0.337235	0.000176857	5.94597	538.029
2276	583.288	637.6	542.955	1541.65	379.493	747.765	128.446	157.946	13.4825	0.318185	17.7572	42.5099	3.65491	31.2853	305.953	121.367	0.0669387	26.1163	28.6899	8.52878	96.7231	9.69754	9.2981	8.25482	0.114948	3.55131e-12	0.0456562	0.135729	0.0403773	0.00185882	1.30256e-23	0.337235	0.000176857	5.94597	538.029
2277	583.288	637.6	542.955	1541.65	379.493	747.765	128.446	157.946	13.4825	0.318185	17.7572	42.5099	3.65491	31.2853	305.953	121.367	0.0669387	26.1163	28.6899	8.52878	96.7231	9.69754	9.2981	8.25482	0.114948	3.55131e-12	0.0456562	0.135729	0.0403773	0.00185882	1.30256e-23	0.337235	0.000176857	5.94597	538.029
2278	583.288	637.6	542.955	1541.65	379.493	747.765	128.446	157.946	13.4825	0.318185	17.7572	42.5099	3.65491	31.2853	305.953	121.367	0.0669387	26.1163	28.6899	8.52878	96.7231	9.69754	9.2981	8.25482	0.114948	3.55131e-12	0.0456562	0.135729	0.0403773	0.00185882	1.30256e-23	0.337235	0.000176857	5.94597	538.029
2279	583.288	637.6	542.955	1541.65	379.493	747.765	128.446	157.946	13.4825	0.318185	17.7572	42.5099	3.65491	31.2853	305.953	121.367	0.0669387	26.1163	28.6899	8.52878	96.7231	9.69754	9.2981	8.25482	0.114948	3.55131e-12	0.0456562	0.135729	0.0403773	0.00185882	1.30256e-23	0.337235	0.000176857	5.94597	538.029
2280	583.288	637.6	542.955	1541.65	379.493	747.765	128.446	157.946	13.4825	0.318185	17.7572	42.5099	3.65491	31.2853	305.953	121.367	0.0669387	26.1163	28.6899	8.52878	96.7231	9.69754	9.2981	8.25482	0.114948	3.55131e-12	0.0456562	0.135729	0.0403773	0.00185882	1.30256e-23	0.337235	0.000176857	5.94597	538.029
2281	583.288	637.6	542.955	1541.65	379.493	747.765	128.446	157.946	13.4825	0.318185	17.7572	42.5099	3.65491	31.2853	305.953	121.367	0.0669387	26.1163	28.6899	8.52878	96.7231	9.69754	9.2981	8.25482	0.114948	3.55131e-12	0.0456562	0.135729	0.0403773	0.00185882	1.30256e-23	0.337235	0.000176857	5.94597	538.029
2282	583.288	637.6	542.955	1541.65	379.493	747.765	128.446	157.946	13.4825	0.318185	17.7572	42.5099	3.65491	31.2853	305.953	121.367	0.0669387	26.1163	28.6899	8.52878	96.7231	9.69754	9.2981	8.25482	0.114948	3.55131e-12	0.0456562	0.135729	0.0403773	0.00185882	1.30256e-23	0.337235	0.000176857	5.94597	538.029
2283	583.288	637.6	542.955	1541.65	379.493	747.765	128.446	157.946	13.4825	0.318185	17.7572	42.5099	3.65491	31.2853	305.953	121.367	0.0669387	26.1163	28.6899	8.52878	96.7231	9.69754	9.2981	8.25482	0.114948	3.55131e-12	0.0456562	0.135729	0.0403773	0.00185882	1.30256e-23	0.337235	0.000176857	5.94597	538.029
2284	583.288	637.6	542.955	1541.65	379.493	747.765	128.446	157.946	13.4825	0.318185	17.7572	42.5099	3.65491	31.2853	305.953	121.367	0.0669387	26.1163	28.6899	8.52878	96.7231	9.69754	9.2981	8.25482	0.114948	3.55131e-12	0.0456562	0.135729	0.0403773	0.00185882	1.30256e-23	0.337235	0.000176857	5.94597	538.029
2285	583.288	637.6	542.955	1541.65	379.493	747.765	128.446	157.946	13.4825	0.318185	17.7572	42.5099	3.65491	31.2853	305.953	121.367	0.0669387	26.1163	28.6899	8.52878	96.7231	9.69754	9.2981	8.25482	0.114948	3.55131e-12	0.0456562	0.135729	0.0403773	0.00185882	1.30256e-23	0.337235	0.000176857	5.94597	538.029
2286	583.288	637.6	542.955	1541.65	379.493	747.765	128.446	157.946	13.4825	0.318185	17.7572	42.5099	3.65491	31.2853	305.953	121.367	0.0669387	26.1163	28.6899	8.52878	96.7231	9.69754	9.2981	8.25482	0.114948	3.55131e-12	0.0456562	0.135729	0.0403773	0.00185882	1.30256e-23	0.337235	0.000176857	5.94597	538.029
2287	583.288	637.6	542.955	1541.65	379.493	747.765	128.446	157.946	13.4825	0.318185	17.7572	42.5099	3.65491	31.2853	305.953	121.367	0.0669387	26.1163	28.6899	8.52878	96.7231	9.69754	9.2981	8.25482	0.114948	3.55131e-12	0.0456562	0.135729	0.0403773	0.00185882	1.30256e-23	0.337235	0.000176857	5.94597	538.029
2288	583.288	637.6	542.955	1541.65	379.493	747.765	128.446	157.946	13.4825	0.318185	17.7572	42.5099	3.65491	31.2853	305.953	121.367	0.0669387	26.1163	28.6899	8.52878	96.7231	9.69754	9.2981	8.25482	0.114948	3.55131e-12	0.0456562	0.135729	0.0403773	0.00185882	1.30256e-23	0.337235	0.000176857	5.94597	538.029
2289	583.288	637.6	542.955	1541.65	379.493	747.765	128.446	157.946	13.4825	0.318185	17.7572	42.5099	3.65491	31.2853	305.953	121.367	0.0669387	26.1163	28.6899	8.52878	96.7231	9.69754	9.2981	8.25482	0.114948	3.55131e-12	0.0456562	0.135729	0.0403773	0.00185882	1.30256e-23	0.337235	0.000176857	5.94597	538.029
2290	583.288	637.6	542.955	1541.65	379.493	747.765	128.446	157.946	13.4825	0.318185	17.7572	42.5099	3.65491	31.2853	305.953	121.367	0.0669387	26.1163	28.6899	8.52878	96.7231	9.69754	9.2981	8.25482	0.114948	3.55131e-12	0.0456562	0.135729	0.0403773	0.00185882	1.30256e-23	0.337235	0.000176857	5.94597	538.029
2291	583.288	637.6	542.955	1541.65	379.493	747.765	128.446	157.946	13.4825	0.318185	17.7572	42.5099	3.65491	31.2853	305.953	121.367	0.0669387	26.1163	28.6899	8.52878	96.7231	9.69754	9.2981	8.25482	0.114948	3.55131e-12	0.0456562	0.135729	0.0403773	0.00185882	1.30256e-23	0.337235	0.000176857	5.94597	538.029
2292	583.288	637.6	542.955	1541.65	379.493	747.765	128.446	157.946	13.4825	0.318185	17.7572	42.5099	3.65491	31.2853	305.953	121.367	0.0669387	26.1163	28.6899	8.52878	96.7231	9.69754	9.2981	8.25482	0.114948	3.55131e-12	0.0456562	0.135729	0.0403773	0.00185882	1.30256e-23	0.337235	0.000176857	5.94597	538.029
2293	583.288	637.6	542.955	1541.65	379.493	747.765	128.446	157.946	13.4825	0.318185	17.7572	42.5099	3.65491	31.2853	305.953	121.367	0.0669387	26.1163	28.6899	8.52878	96.7231	9.69754	9.2981	8.25482	0.114948	3.55131e-12	0.0456562	0.135729	0.0403773	0.00185882	1.30256e-23	0.337235	0.000176857	5.94597	538.029
2294	583.288	637.6	542.955	1541.65	379.493	747.765	128.446	157.946	13.4825	0.318185	17.7572	42.5099	3.65491	31.2853	305.953	121.367	0.0669387	26.1163	28.6899	8.52878	96.7231	9.69754	9.2981	8.25482	0.114948	3.55131e-12	0.0456562	0.135729	0.0403773	0.00185882	1.30256e-23	0.337235	0.000176857	5.94597	538.029
2295	583.288	637.6	542.955	1541.65	379.493	747.765	128.446	157.946	13.4825	0.318185	17.7572	42.5099	3.65491	31.2853	305.953	121.367	0.0669387	26.1163	28.6899	8.52878	96.7231	9.69754	9.2981	8.25482	0.114948	3.55131e-12	0.0456562	0.135729	0.0403773	0.00185882	1.30256e-23	0.337235	0.000176857	5.94597	538.029
2296	583.288	637.6	542.955	1541.65	379.493	747.765	128.446	157.946	13.4825	0.318185	17.7572	42.5099	3.65491	31.2853	305.953	121.367	0.0669387	26.1163	28.6899	8.52878	96.7231	9.69754	9.2981	8.25482	0.114948	3.55131e-12	0.0456562	0.135729	0.0403773	0.00185882	1.30256e-23	0.337235	0.000176857	5.94597	538.029
2297	583.288	637.6	542.955	1541.65	379.493	747.765	128.446	157.946	13.4825	0.318185	17.7572	42.5099	3.65491	31.2853	305.953	121.367	0.0669387	26.1163	28.6899	8.52878	96.7231	9.69754	9.2981	8.25482	0.114948	3.55131e-12	0.0456562	0.135729	0.0403773	0.00185882	1.30256e-23	0.337235	0.000176857	5.94597	538.029
2298	583.288	637.6	542.955	1541.65	379.493	747.765	128.446	157.946	13.4825	0.318185	17.7572	42.5099	3.65491	31.2853	305.953	121.367	0.0669387	26.1163	28.6899	8.52878	96.7231	9.69754	9.2981	8.25482	0.114948	3.55131e-12	0.0456562	0.135729	0.0403773	0.00185882	1.30256e-23	0.337235	0.000176857	5.94597	538.029
2299	583.288	637.6	542.955	1541.65	379.493	747.765	128.446	157.946	13.4825	0.318185	17.7572	42.5099	3.65491	31.2853	305.953	121.367	0.0669387	26.1163	28.6899	8.52878	96.7231	9.69754	9.2981	8.25482	0.114948	3.55131e-12	0.0456562	0.135729	0.0403773	0.00185882	1.30256e-23	0.337235	0.000176857	5.94597	538.029
2300	583.288	637.6	542.955	1541.65	379.493	747.765	128.446	157.946	13.4825	0.318185	17.7572	42.5099	3.65491	31.2853	305.953	121.367	0.0669387	26.1163	28.6899	8.52878	96.7231	9.69754	9.2981	8.25482	0.114948	3.55131e-12	0.0456562	0.135729	0.0403773	0.00185882	1.30256e-23	0.337235	0.000176857	5.94597	538.029
2301	583.288	637.6	542.955	1541.65	379.493	747.765	128.446	157.946	13.4825	0.318185	17.7572	42.5099	3.65491	31.2853	305.953	121.367	0.0669387	26.1163	28.6899	8.52878	96.7231	9.69754	9.2981	8.25482	0.114948	3.55131e-12	0.0456562	0.135729	0.0403773	0.00185882	1.30256e-23	0.337235	0.000176857	5.94597	538.029
2302	583.288	637.6	542.955	1541.65	379.493	747.765	128.446	157.946	13.4825	0.318185	17.7572	42.5099	3.65491	31.2853	305.953	121.367	0.0669387	26.1163	28.6899	8.52878	96.7231	9.69754	9.2981	8.25482	0.114948	3.55131e-12	0.0456562	0.135729	0.0403773	0.00185882	1.30256e-23	0.337235	0.000176857	5.94597	538.029
2303	583.288	637.6	542.955	1541.65	379.493	747.765	128.446	157.946	13.4825	0.318185	17.7572	42.5099	3.65491	31.2853	305.953	121.367	0.0669387	26.1163	28.6899	8.52878	96.7231	9.69754	9.2981	8.25482	0.114948	3.55131e-12	0.0456562	0.135729	0.0403773	0.00185882	1.30256e-23	0.337235	0.000176857	5.94597	538.029
2304	583.288	637.6	542.955	1541.65	379.493	747.765	128.446	157.946	13.4825	0.318185	17.7572	42.5099	3.65491	31.2853	305.953	121.367	0.0669387	26.1163	28.6899	8.52878	96.7231	9.69754	9.2981	8.25482	0.114948	3.55131e-12	0.0456562	0.135729	0.0403773	0.00185882	1.30256e-23	0.337235	0.000176857	5.94597	538.029
2305	583.288	637.6	542.955	1541.65	379.493	747.765	128.446	157.946	13.4825	0.318185	17.7572	42.5099	3.65491	31.2853	305.953	121.367	0.0669387	26.1163	28.6899	8.52878	96.7231	9.69754	9.2981	8.25482	0.114948	3.55131e-12	0.0456562	0.135729	0.0403773	0.00185882	1.30256e-23	0.337235	0.000176857	5.94597	538.029
2306	583.288	637.6	542.955	1541.65	379.493	747.765	128.446	157.946	13.4825	0.318185	17.7572	42.5099	3.65491	31.2853	305.953	121.367	0.0669387	26.1163	28.6899	8.52878	96.7231	9.69754	9.2981	8.25482	0.114948	3.55131e-12	0.0456562	0.135729	0.0403773	0.00185882	1.30256e-23	0.337235	0.000176857	5.94597	538.029
2307	583.288	637.6	542.955	1541.65	379.493	747.765	128.446	157.946	13.4825	0.318185	17.7572	42.5099	3.65491	31.2853	305.953	121.367	0.0669387	26.1163	28.6899	8.52878	96.7231	9.69754	9.2981	8.25482	0.114948	3.55131e-12	0.0456562	0.135729	0.0403773	0.00185882	1.30256e-23	0.337235	0.000176857	5.94597	538.029
2308	583.288	637.6	542.955	1541.65	379.493	747.765	128.446	157.946	13.4825	0.318185	17.7572	42.5099	3.65491	31.2853	305.953	121.367	0.0669387	26.1163	28.6899	8.52878	96.7231	9.69754	9.2981	8.25482	0.114948	3.55131e-12	0.0456562	0.135729	0.0403773	0.00185882	1.30256e-23	0.337235	0.000176857	5.94597	538.029
2309	583.288	637.6	542.955	1541.65	379.493	747.765	128.446	157.946	13.4825	0.318185	17.7572	42.5099	3.65491	31.2853	305.953	121.367	0.0669387	26.1163	28.6899	8.52878	96.7231	9.69754	9.2981	8.25482	0.114948	3.55131e-12	0.0456562	0.135729	0.0403773	0.00185882	1.30256e-23	0.337235	0.000176857	5.94597	538.029
2310	583.288	637.6	542.955	1541.65	379.493	747.765	128.446	157.946	13.4825	0.318185	17.7572	42.5099	3.65491	31.2853	305.953	121.367	0.0669387	26.1163	28.6899	8.52878	96.7231	9.69754	9.2981	8.25482	0.114948	3.55131e-12	0.0456562	0.135729	0.0403773	0.00185882	1.30256e-23	0.337235	0.000176857	5.94597	538.029
2311	583.288	637.6	542.955	1541.65	379.493	747.765	128.446	157.946	13.4825	0.318185	17.7572	42.5099	3.65491	31.2853	305.953	121.367	0.0669387	26.1163	28.6899	8.52878	96.7231	9.69754	9.2981	8.25482	0.114948	3.55131e-12	0.0456562	0.135729	0.0403773	0.00185882	1.30256e-23	0.337235	0.000176857	5.94597	538.029
2312	583.288	637.6	542.955	1541.65	379.493	747.765	128.446	157.946	13.4825	0.318185	17.7572	42.5099	3.65491	31.2853	305.953	121.367	0.0669387	26.1163	28.6899	8.52878	96.7231	9.69754	9.2981	8.25482	0.114948	3.55131e-12	0.0456562	0.135729	0.0403773	0.00185882	1.30256e-23	0.337235	0.000176857	5.94597	538.029
2313	583.288	637.6	542.955	1541.65	379.493	747.765	128.446	157.946	13.4825	0.318185	17.7572	42.5099	3.65491	31.2853	305.953	121.367	0.0669387	26.1163	28.6899	8.52878	96.7231	9.69754	9.2981	8.25482	0.114948	3.55131e-12	0.0456562	0.135729	0.0403773	0.00185882	1.30256e-23	0.337235	0.000176857	5.94597	538.029
2314	583.288	637.6	542.955	1541.65	379.493	747.765	128.446	157.946	13.4825	0.318185	17.7572	42.5099	3.65491	31.2853	305.953	121.367	0.0669387	26.1163	28.6899	8.52878	96.7231	9.69754	9.2981	8.25482	0.114948	3.55131e-12	0.0456562	0.135729	0.0403773	0.00185882	1.30256e-23	0.337235	0.000176857	5.94597	538.029
2315	583.288	637.6	542.955	1541.65	379.493	747.765	128.446	157.946	13.4825	0.318185	17.7572	42.5099	3.65491	31.2853	305.953	121.367	0.0669387	26.1163	28.6899	8.52878	96.7231	9.69754	9.2981	8.25482	0.114948	3.55131e-12	0.0456562	0.135729	0.0403773	0.00185882	1.30256e-23	0.337235	0.000176857	5.94597	538.029
2316	583.288	637.6	542.955	1541.65	379.493	747.765	128.446	157.946	13.4825	0.318185	17.7572	42.5099	3.65491	31.2853	305.953	121.367	0.0669387	26.1163	28.6899	8.52878	96.7231	9.69754	9.2981	8.25482	0.114948	3.55131e-12	0.0456562	0.135729	0.0403773	0.00185882	1.30256e-23	0.337235	0.000176857	5.94597	538.029
2317	583.288	637.6	542.955	1541.65	379.493	747.765	128.446	157.946	13.4825	0.318185	17.7572	42.5099	3.65491	31.2853	305.953	121.367	0.0669387	26.1163	28.6899	8.52878	96.7231	9.69754	9.2981	8.25482	0.114948	3.55131e-12	0.0456562	0.135729	0.0403773	0.00185882	1.30256e-23	0.337235	0.000176857	5.94597	538.029
2318	583.288	637.6	542.955	1541.65	379.493	747.765	128.446	157.946	13.4825	0.318185	17.7572	42.5099	3.65491	31.2853	305.953	121.367	0.0669387	26.1163	28.6899	8.52878	96.7231	9.69754	9.2981	8.25482	0.114948	3.55131e-12	0.0456562	0.135729	0.0403773	0.00185882	1.30256e-23	0.337235	0.000176857	5.94597	538.029
2319	583.288	637.6	542.955	1541.65	379.493	747.765	128.446	157.946	13.4825	0.318185	17.7572	42.5099	3.65491	31.2853	305.953	121.367	0.0669387	26.1163	28.6899	8.52878	96.7231	9.69754	9.2981	8.25482	0.114948	3.55131e-12	0.0456562	0.135729	0.0403773	0.00185882	1.30256e-23	0.337235	0.000176857	5.94597	538.029
2320	583.288	637.6	542.955	1541.65	379.493	747.765	128.446	157.946	13.4825	0.318185	17.7572	42.5099	3.65491	31.2853	305.953	121.367	0.0669387	26.1163	28.6899	8.52878	96.7231	9.69754	9.2981	8.25482	0.114948	3.55131e-12	0.0456562	0.135729	0.0403773	0.00185882	1.30256e-23	0.337235	0.000176857	5.94597	538.029
2321	583.288	637.6	542.955	1541.65	379.493	747.765	128.446	157.946	13.4825	0.318185	17.7572	42.5099	3.65491	31.2853	305.953	121.367	0.0669387	26.1163	28.6899	8.52878	96.7231	9.69754	9.2981	8.25482	0.114948	3.55131e-12	0.0456562	0.135729	0.0403773	0.00185882	1.30256e-23	0.337235	0.000176857	5.94597	538.029
2322	583.288	637.6	542.955	1541.65	379.493	747.765	128.446	157.946	13.4825	0.318185	17.7572	42.5099	3.65491	31.2853	305.953	121.367	0.0669387	26.1163	28.6899	8.52878	96.7231	9.69754	9.2981	8.25482	0.114948	3.55131e-12	0.0456562	0.135729	0.0403773	0.00185882	1.30256e-23	0.337235	0.000176857	5.94597	538.029
2323	583.288	637.6	542.955	1541.65	379.493	747.765	128.446	157.946	13.4825	0.318185	17.7572	42.5099	3.65491	31.2853	305.953	121.367	0.0669387	26.1163	28.6899	8.52878	96.7231	9.69754	9.2981	8.25482	0.114948	3.55131e-12	0.0456562	0.135729	0.0403773	0.00185882	1.30256e-23	0.337235	0.000176857	5.94597	538.029
2324	583.288	637.6	542.955	1541.65	379.493	747.765	128.446	157.946	13.4825	0.318185	17.7572	42.5099	3.65491	31.2853	305.953	121.367	0.0669387	26.1163	28.6899	8.52878	96.7231	9.69754	9.2981	8.25482	0.114948	3.55131e-12	0.0456562	0.135729	0.0403773	0.00185882	1.30256e-23	0.337235	0.000176857	5.94597	538.029
2325	583.288	637.6	542.955	1541.65	379.493	747.765	128.446	157.946	13.4825	0.318185	17.7572	42.5099	3.65491	31.2853	305.953	121.367	0.0669387	26.1163	28.6899	8.52878	96.7231	9.69754	9.2981	8.25482	0.114948	3.55131e-12	0.0456562	0.135729	0.0403773	0.00185882	1.30256e-23	0.337235	0.000176857	5.94597	538.029
2326	583.288	637.6	542.955	1541.65	379.493	747.765	128.446	157.946	13.4825	0.318185	17.7572	42.5099	3.65491	31.2853	305.953	121.367	0.0669387	26.1163	28.6899	8.52878	96.7231	9.69754	9.2981	8.25482	0.114948	3.55131e-12	0.0456562	0.135729	0.0403773	0.00185882	1.30256e-23	0.337235	0.000176857	5.94597	538.029
2327	583.288	637.6	542.955	1541.65	379.493	747.765	128.446	157.946	13.4825	0.318185	17.7572	42.5099	3.65491	31.2853	305.953	121.367	0.0669387	26.1163	28.6899	8.52878	96.7231	9.69754	9.2981	8.25482	0.114948	3.55131e-12	0.0456562	0.135729	0.0403773	0.00185882	1.30256e-23	0.337235	0.000176857	5.94597	538.029
2328	583.288	637.6	542.955	1541.65	379.493	747.765	128.446	157.946	13.4825	0.318185	17.7572	42.5099	3.65491	31.2853	305.953	121.367	0.0669387	26.1163	28.6899	8.52878	96.7231	9.69754	9.2981	8.25482	0.114948	3.55131e-12	0.0456562	0.135729	0.0403773	0.00185882	1.30256e-23	0.337235	0.000176857	5.94597	538.029
2329	583.288	637.6	542.955	1541.65	379.493	747.765	128.446	157.946	13.4825	0.318185	17.7572	42.5099	3.65491	31.2853	305.953	121.367	0.0669387	26.1163	28.6899	8.52878	96.7231	9.69754	9.2981	8.25482	0.114948	3.55131e-12	0.0456562	0.135729	0.0403773	0.00185882	1.30256e-23	0.337235	0.000176857	5.94597	538.029
2330	583.288	637.6	542.955	1541.65	379.493	747.765	128.446	157.946	13.4825	0.318185	17.7572	42.5099	3.65491	31.2853	305.953	121.367	0.0669387	26.1163	28.6899	8.52878	96.7231	9.69754	9.2981	8.25482	0.114948	3.55131e-12	0.0456562	0.135729	0.0403773	0.00185882	1.30256e-23	0.337235	0.000176857	5.94597	538.029
2331	583.288	637.6	542.955	1541.65	379.493	747.765	128.446	157.946	13.4825	0.318185	17.7572	42.5099	3.65491	31.2853	305.953	121.367	0.0669387	26.1163	28.6899	8.52878	96.7231	9.69754	9.2981	8.25482	0.114948	3.55131e-12	0.0456562	0.135729	0.0403773	0.00185882	1.30256e-23	0.337235	0.000176857	5.94597	538.029
2332	583.288	637.6	542.955	1541.65	379.493	747.765	128.446	157.946	13.4825	0.318185	17.7572	42.5099	3.65491	31.2853	305.953	121.367	0.0669387	26.1163	28.6899	8.52878	96.7231	9.69754	9.2981	8.25482	0.114948	3.55131e-12	0.0456562	0.135729	0.0403773	0.00185882	1.30256e-23	0.337235	0.000176857	5.94597	538.029
2333	583.288	637.6	542.955	1541.65	379.493	747.765	128.446	157.946	13.4825	0.318185	17.7572	42.5099	3.65491	31.2853	305.953	121.367	0.0669387	26.1163	28.6899	8.52878	96.7231	9.69754	9.2981	8.25482	0.114948	3.55131e-12	0.0456562	0.135729	0.0403773	0.00185882	1.30256e-23	0.337235	0.000176857	5.94597	538.029
2334	583.288	637.6	542.955	1541.65	379.493	747.765	128.446	157.946	13.4825	0.318185	17.7572	42.5099	3.65491	31.2853	305.953	121.367	0.0669387	26.1163	28.6899	8.52878	96.7231	9.69754	9.2981	8.25482	0.114948	3.55131e-12	0.0456562	0.135729	0.0403773	0.00185882	1.30256e-23	0.337235	0.000176857	5.94597	538.029
2335	583.288	637.6	542.955	1541.65	379.493	747.765	128.446	157.946	13.4825	0.318185	17.7572	42.5099	3.65491	31.2853	305.953	121.367	0.0669387	26.1163	28.6899	8.52878	96.7231	9.69754	9.2981	8.25482	0.114948	3.55131e-12	0.0456562	0.135729	0.0403773	0.00185882	1.30256e-23	0.337235	0.000176857	5.94597	538.029
2336	583.288	637.6	542.955	1541.65	379.493	747.765	128.446	157.946	13.4825	0.318185	17.7572	42.5099	3.65491	31.2853	305.953	121.367	0.0669387	26.1163	28.6899	8.52878	96.7231	9.69754	9.2981	8.25482	0.114948	3.55131e-12	0.0456562	0.135729	0.0403773	0.00185882	1.30256e-23	0.337235	0.000176857	5.94597	538.029
2337	583.288	637.6	542.955	1541.65	379.493	747.765	128.446	157.946	13.4825	0.318185	17.7572	42.5099	3.65491	31.2853	305.953	121.367	0.0669387	26.1163	28.6899	8.52878	96.7231	9.69754	9.2981	8.25482	0.114948	3.55131e-12	0.0456562	0.135729	0.0403773	0.00185882	1.30256e-23	0.337235	0.000176857	5.94597	538.029
2338	583.288	637.6	542.955	1541.65	379.493	747.765	128.446	157.946	13.4825	0.318185	17.7572	42.5099	3.65491	31.2853	305.953	121.367	0.0669387	26.1163	28.6899	8.52878	96.7231	9.69754	9.2981	8.25482	0.114948	3.55131e-12	0.0456562	0.135729	0.0403773	0.00185882	1.30256e-23	0.337235	0.000176857	5.94597	538.029
2339	583.288	637.6	542.955	1541.65	379.493	747.765	128.446	157.946	13.4825	0.318185	17.7572	42.5099	3.65491	31.2853	305.953	121.367	0.0669387	26.1163	28.6899	8.52878	96.7231	9.69754	9.2981	8.25482	0.114948	3.55131e-12	0.0456562	0.135729	0.0403773	0.00185882	1.30256e-23	0.337235	0.000176857	5.94597	538.029
2340	583.288	637.6	542.955	1541.65	379.493	747.765	128.446	157.946	13.4825	0.318185	17.7572	42.5099	3.65491	31.2853	305.953	121.367	0.0669387	26.1163	28.6899	8.52878	96.7231	9.69754	9.2981	8.25482	0.114948	3.55131e-12	0.0456562	0.135729	0.0403773	0.00185882	1.30256e-23	0.337235	0.000176857	5.94597	538.029
2341	583.288	637.6	542.955	1541.65	379.493	747.765	128.446	157.946	13.4825	0.318185	17.7572	42.5099	3.65491	31.2853	305.953	121.367	0.0669387	26.1163	28.6899	8.52878	96.7231	9.69754	9.2981	8.25482	0.114948	3.55131e-12	0.0456562	0.135729	0.0403773	0.00185882	1.30256e-23	0.337235	0.000176857	5.94597	538.029
2342	583.288	637.6	542.955	1541.65	379.493	747.765	128.446	157.946	13.4825	0.318185	17.7572	42.5099	3.65491	31.2853	305.953	121.367	0.0669387	26.1163	28.6899	8.52878	96.7231	9.69754	9.2981	8.25482	0.114948	3.55131e-12	0.0456562	0.135729	0.0403773	0.00185882	1.30256e-23	0.337235	0.000176857	5.94597	538.029
2343	583.288	637.6	542.955	1541.65	379.493	747.765	128.446	157.946	13.4825	0.318185	17.7572	42.5099	3.65491	31.2853	305.953	121.367	0.0669387	26.1163	28.6899	8.52878	96.7231	9.69754	9.2981	8.25482	0.114948	3.55131e-12	0.0456562	0.135729	0.0403773	0.00185882	1.30256e-23	0.337235	0.000176857	5.94597	538.029
2344	583.288	637.6	542.955	1541.65	379.493	747.765	128.446	157.946	13.4825	0.318185	17.7572	42.5099	3.65491	31.2853	305.953	121.367	0.0669387	26.1163	28.6899	8.52878	96.7231	9.69754	9.2981	8.25482	0.114948	3.55131e-12	0.0456562	0.135729	0.0403773	0.00185882	1.30256e-23	0.337235	0.000176857	5.94597	538.029
2345	583.288	637.6	542.955	1541.65	379.493	747.765	128.446	157.946	13.4825	0.318185	17.7572	42.5099	3.65491	31.2853	305.953	121.367	0.0669387	26.1163	28.6899	8.52878	96.7231	9.69754	9.2981	8.25482	0.114948	3.55131e-12	0.0456562	0.135729	0.0403773	0.00185882	1.30256e-23	0.337235	0.000176857	5.94597	538.029
2346	583.288	637.6	542.955	1541.65	379.493	747.765	128.446	157.946	13.4825	0.318185	17.7572	42.5099	3.65491	31.2853	305.953	121.367	0.0669387	26.1163	28.6899	8.52878	96.7231	9.69754	9.2981	8.25482	0.114948	3.55131e-12	0.0456562	0.135729	0.0403773	0.00185882	1.30256e-23	0.337235	0.000176857	5.94597	538.029
2347	583.288	637.6	542.955	1541.65	379.493	747.765	128.446	157.946	13.4825	0.318185	17.7572	42.5099	3.65491	31.2853	305.953	121.367	0.0669387	26.1163	28.6899	8.52878	96.7231	9.69754	9.2981	8.25482	0.114948	3.55131e-12	0.0456562	0.135729	0.0403773	0.00185882	1.30256e-23	0.337235	0.000176857	5.94597	538.029
2348	583.288	637.6	542.955	1541.65	379.493	747.765	128.446	157.946	13.4825	0.318185	17.7572	42.5099	3.65491	31.2853	305.953	121.367	0.0669387	26.1163	28.6899	8.52878	96.7231	9.69754	9.2981	8.25482	0.114948	3.55131e-12	0.0456562	0.135729	0.0403773	0.00185882	1.30256e-23	0.337235	0.000176857	5.94597	538.029
2349	583.288	637.6	542.955	1541.65	379.493	747.765	128.446	157.946	13.4825	0.318185	17.7572	42.5099	3.65491	31.2853	305.953	121.367	0.0669387	26.1163	28.6899	8.52878	96.7231	9.69754	9.2981	8.25482	0.114948	3.55131e-12	0.0456562	0.135729	0.0403773	0.00185882	1.30256e-23	0.337235	0.000176857	5.94597	538.029
2350	583.288	637.6	542.955	1541.65	379.493	747.765	128.446	157.946	13.4825	0.318185	17.7572	42.5099	3.65491	31.2853	305.953	121.367	0.0669387	26.1163	28.6899	8.52878	96.7231	9.69754	9.2981	8.25482	0.114948	3.55131e-12	0.0456562	0.135729	0.0403773	0.00185882	1.30256e-23	0.337235	0.000176857	5.94597	538.029
2351	583.288	637.6	542.955	1541.65	379.493	747.765	128.446	157.946	13.4825	0.318185	17.7572	42.5099	3.65491	31.2853	305.953	121.367	0.0669387	26.1163	28.6899	8.52878	96.7231	9.69754	9.2981	8.25482	0.114948	3.55131e-12	0.0456562	0.135729	0.0403773	0.00185882	1.30256e-23	0.337235	0.000176857	5.94597	538.029
2352	583.288	637.6	542.955	1541.65	379.493	747.765	128.446	157.946	13.4825	0.318185	17.7572	42.5099	3.65491	31.2853	305.953	121.367	0.0669387	26.1163	28.6899	8.52878	96.7231	9.69754	9.2981	8.25482	0.114948	3.55131e-12	0.0456562	0.135729	0.0403773	0.00185882	1.30256e-23	0.337235	0.000176857	5.94597	538.029
2353	583.288	637.6	542.955	1541.65	379.493	747.765	128.446	157.946	13.4825	0.318185	17.7572	42.5099	3.65491	31.2853	305.953	121.367	0.0669387	26.1163	28.6899	8.52878	96.7231	9.69754	9.2981	8.25482	0.114948	3.55131e-12	0.0456562	0.135729	0.0403773	0.00185882	1.30256e-23	0.337235	0.000176857	5.94597	538.029
2354	583.288	637.6	542.955	1541.65	379.493	747.765	128.446	157.946	13.4825	0.318185	17.7572	42.5099	3.65491	31.2853	305.953	121.367	0.0669387	26.1163	28.6899	8.52878	96.7231	9.69754	9.2981	8.25482	0.114948	3.55131e-12	0.0456562	0.135729	0.0403773	0.00185882	1.30256e-23	0.337235	0.000176857	5.94597	538.029
2355	583.288	637.6	542.955	1541.65	379.493	747.765	128.446	157.946	13.4825	0.318185	17.7572	42.5099	3.65491	31.2853	305.953	121.367	0.0669387	26.1163	28.6899	8.52878	96.7231	9.69754	9.2981	8.25482	0.114948	3.55131e-12	0.0456562	0.135729	0.0403773	0.00185882	1.30256e-23	0.337235	0.000176857	5.94597	538.029
2356	583.288	637.6	542.955	1541.65	379.493	747.765	128.446	157.946	13.4825	0.318185	17.7572	42.5099	3.65491	31.2853	305.953	121.367	0.0669387	26.1163	28.6899	8.52878	96.7231	9.69754	9.2981	8.25482	0.114948	3.55131e-12	0.0456562	0.135729	0.0403773	0.00185882	1.30256e-23	0.337235	0.000176857	5.94597	538.029
2357	583.288	637.6	542.955	1541.65	379.493	747.765	128.446	157.946	13.4825	0.318185	17.7572	42.5099	3.65491	31.2853	305.953	121.367	0.0669387	26.1163	28.6899	8.52878	96.7231	9.69754	9.2981	8.25482	0.114948	3.55131e-12	0.0456562	0.135729	0.0403773	0.00185882	1.30256e-23	0.337235	0.000176857	5.94597	538.029
2358	583.288	637.6	542.955	1541.65	379.493	747.765	128.446	157.946	13.4825	0.318185	17.7572	42.5099	3.65491	31.2853	305.953	121.367	0.0669387	26.1163	28.6899	8.52878	96.7231	9.69754	9.2981	8.25482	0.114948	3.55131e-12	0.0456562	0.135729	0.0403773	0.00185882	1.30256e-23	0.337235	0.000176857	5.94597	538.029
2359	583.288	637.6	542.955	1541.65	379.493	747.765	128.446	157.946	13.4825	0.318185	17.7572	42.5099	3.65491	31.2853	305.953	121.367	0.0669387	26.1163	28.6899	8.52878	96.7231	9.69754	9.2981	8.25482	0.114948	3.55131e-12	0.0456562	0.135729	0.0403773	0.00185882	1.30256e-23	0.337235	0.000176857	5.94597	538.029
2360	583.288	637.6	542.955	1541.65	379.493	747.765	128.446	157.946	13.4825	0.318185	17.7572	42.5099	3.65491	31.2853	305.953	121.367	0.0669387	26.1163	28.6899	8.52878	96.7231	9.69754	9.2981	8.25482	0.114948	3.55131e-12	0.0456562	0.135729	0.0403773	0.00185882	1.30256e-23	0.337235	0.000176857	5.94597	538.029
2361	583.288	637.6	542.955	1541.65	379.493	747.765	128.446	157.946	13.4825	0.318185	17.7572	42.5099	3.65491	31.2853	305.953	121.367	0.0669387	26.1163	28.6899	8.52878	96.7231	9.69754	9.2981	8.25482	0.114948	3.55131e-12	0.0456562	0.135729	0.0403773	0.00185882	1.30256e-23	0.337235	0.000176857	5.94597	538.029
2362	583.288	637.6	542.955	1541.65	379.493	747.765	128.446	157.946	13.4825	0.318185	17.7572	42.5099	3.65491	31.2853	305.953	121.367	0.0669387	26.1163	28.6899	8.52878	96.7231	9.69754	9.2981	8.25482	0.114948	3.55131e-12	0.0456562	0.135729	0.0403773	0.00185882	1.30256e-23	0.337235	0.000176857	5.94597	538.029
2363	583.288	637.6	542.955	1541.65	379.493	747.765	128.446	157.946	13.4825	0.318185	17.7572	42.5099	3.65491	31.2853	305.953	121.367	0.0669387	26.1163	28.6899	8.52878	96.7231	9.69754	9.2981	8.25482	0.114948	3.55131e-12	0.0456562	0.135729	0.0403773	0.00185882	1.30256e-23	0.337235	0.000176857	5.94597	538.029
2364	583.288	637.6	542.955	1541.65	379.493	747.765	128.446	157.946	13.4825	0.318185	17.7572	42.5099	3.65491	31.2853	305.953	121.367	0.0669387	26.1163	28.6899	8.52878	96.7231	9.69754	9.2981	8.25482	0.114948	3.55131e-12	0.0456562	0.135729	0.0403773	0.00185882	1.30256e-23	0.337235	0.000176857	5.94597	538.029
2365	583.288	637.6	542.955	1541.65	379.493	747.765	128.446	157.946	13.4825	0.318185	17.7572	42.5099	3.65491	31.2853	305.953	121.367	0.0669387	26.1163	28.6899	8.52878	96.7231	9.69754	9.2981	8.25482	0.114948	3.55131e-12	0.0456562	0.135729	0.0403773	0.00185882	1.30256e-23	0.337235	0.000176857	5.94597	538.029
2366	583.288	637.6	542.955	1541.65	379.493	747.765	128.446	157.946	13.4825	0.318185	17.7572	42.5099	3.65491	31.2853	305.953	121.367	0.0669387	26.1163	28.6899	8.52878	96.7231	9.69754	9.2981	8.25482	0.114948	3.55131e-12	0.0456562	0.135729	0.0403773	0.00185882	1.30256e-23	0.337235	0.000176857	5.94597	538.029
2367	583.288	637.6	542.955	1541.65	379.493	747.765	128.446	157.946	13.4825	0.318185	17.7572	42.5099	3.65491	31.2853	305.953	121.367	0.0669387	26.1163	28.6899	8.52878	96.7231	9.69754	9.2981	8.25482	0.114948	3.55131e-12	0.0456562	0.135729	0.0403773	0.00185882	1.30256e-23	0.337235	0.000176857	5.94597	538.029
2368	583.288	637.6	542.955	1541.65	379.493	747.765	128.446	157.946	13.4825	0.318185	17.7572	42.5099	3.65491	31.2853	305.953	121.367	0.0669387	26.1163	28.6899	8.52878	96.7231	9.69754	9.2981	8.25482	0.114948	3.55131e-12	0.0456562	0.135729	0.0403773	0.00185882	1.30256e-23	0.337235	0.000176857	5.94597	538.029
2369	583.288	637.6	542.955	1541.65	379.493	747.765	128.446	157.946	13.4825	0.318185	17.7572	42.5099	3.65491	31.2853	305.953	121.367	0.0669387	26.1163	28.6899	8.52878	96.7231	9.69754	9.2981	8.25482	0.114948	3.55131e-12	0.0456562	0.135729	0.0403773	0.00185882	1.30256e-23	0.337235	0.000176857	5.94597	538.029
2370	583.288	637.6	542.955	1541.65	379.493	747.765	128.446	157.946	13.4825	0.318185	17.7572	42.5099	3.65491	31.2853	305.953	121.367	0.0669387	26.1163	28.6899	8.52878	96.7231	9.69754	9.2981	8.25482	0.114948	3.55131e-12	0.0456562	0.135729	0.0403773	0.00185882	1.30256e-23	0.337235	0.000176857	5.94597	538.029
2371	583.288	637.6	542.955	1541.65	379.493	747.765	128.446	157.946	13.4825	0.318185	17.7572	42.5099	3.65491	31.2853	305.953	121.367	0.0669387	26.1163	28.6899	8.52878	96.7231	9.69754	9.2981	8.25482	0.114948	3.55131e-12	0.0456562	0.135729	0.0403773	0.00185882	1.30256e-23	0.337235	0.000176857	5.94597	538.029
2372	583.288	637.6	542.955	1541.65	379.493	747.765	128.446	157.946	13.4825	0.318185	17.7572	42.5099	3.65491	31.2853	305.953	121.367	0.0669387	26.1163	28.6899	8.52878	96.7231	9.69754	9.2981	8.25482	0.114948	3.55131e-12	0.0456562	0.135729	0.0403773	0.00185882	1.30256e-23	0.337235	0.000176857	5.94597	538.029
2373	583.288	637.6	542.955	1541.65	379.493	747.765	128.446	157.946	13.4825	0.318185	17.7572	42.5099	3.65491	31.2853	305.953	121.367	0.0669387	26.1163	28.6899	8.52878	96.7231	9.69754	9.2981	8.25482	0.114948	3.55131e-12	0.0456562	0.135729	0.0403773	0.00185882	1.30256e-23	0.337235	0.000176857	5.94597	538.029
2374	583.288	637.6	542.955	1541.65	379.493	747.765	128.446	157.946	13.4825	0.318185	17.7572	42.5099	3.65491	31.2853	305.953	121.367	0.0669387	26.1163	28.6899	8.52878	96.7231	9.69754	9.2981	8.25482	0.114948	3.55131e-12	0.0456562	0.135729	0.0403773	0.00185882	1.30256e-23	0.337235	0.000176857	5.94597	538.029
2375	583.288	637.6	542.955	1541.65	379.493	747.765	128.446	157.946	13.4825	0.318185	17.7572	42.5099	3.65491	31.2853	305.953	121.367	0.0669387	26.1163	28.6899	8.52878	96.7231	9.69754	9.2981	8.25482	0.114948	3.55131e-12	0.0456562	0.135729	0.0403773	0.00185882	1.30256e-23	0.337235	0.000176857	5.94597	538.029
2376	583.288	637.6	542.955	1541.65	379.493	747.765	128.446	157.946	13.4825	0.318185	17.7572	42.5099	3.65491	31.2853	305.953	121.367	0.0669387	26.1163	28.6899	8.52878	96.7231	9.69754	9.2981	8.25482	0.114948	3.55131e-12	0.0456562	0.135729	0.0403773	0.00185882	1.30256e-23	0.337235	0.000176857	5.94597	538.029
2377	583.288	637.6	542.955	1541.65	379.493	747.765	128.446	157.946	13.4825	0.318185	17.7572	42.5099	3.65491	31.2853	305.953	121.367	0.0669387	26.1163	28.6899	8.52878	96.7231	9.69754	9.2981	8.25482	0.114948	3.55131e-12	0.0456562	0.135729	0.0403773	0.00185882	1.30256e-23	0.337235	0.000176857	5.94597	538.029
2378	583.288	637.6	542.955	1541.65	379.493	747.765	128.446	157.946	13.4825	0.318185	17.7572	42.5099	3.65491	31.2853	305.953	121.367	0.0669387	26.1163	28.6899	8.52878	96.7231	9.69754	9.2981	8.25482	0.114948	3.55131e-12	0.0456562	0.135729	0.0403773	0.00185882	1.30256e-23	0.337235	0.000176857	5.94597	538.029
2379	583.288	637.6	542.955	1541.65	379.493	747.765	128.446	157.946	13.4825	0.318185	17.7572	42.5099	3.65491	31.2853	305.953	121.367	0.0669387	26.1163	28.6899	8.52878	96.7231	9.69754	9.2981	8.25482	0.114948	3.55131e-12	0.0456562	0.135729	0.0403773	0.00185882	1.30256e-23	0.337235	0.000176857	5.94597	538.029
2380	583.288	637.6	542.955	1541.65	379.493	747.765	128.446	157.946	13.4825	0.318185	17.7572	42.5099	3.65491	31.2853	305.953	121.367	0.0669387	26.1163	28.6899	8.52878	96.7231	9.69754	9.2981	8.25482	0.114948	3.55131e-12	0.0456562	0.135729	0.0403773	0.00185882	1.30256e-23	0.337235	0.000176857	5.94597	538.029
2381	583.288	637.6	542.955	1541.65	379.493	747.765	128.446	157.946	13.4825	0.318185	17.7572	42.5099	3.65491	31.2853	305.953	121.367	0.0669387	26.1163	28.6899	8.52878	96.7231	9.69754	9.2981	8.25482	0.114948	3.55131e-12	0.0456562	0.135729	0.0403773	0.00185882	1.30256e-23	0.337235	0.000176857	5.94597	538.029
2382	583.288	637.6	542.955	1541.65	379.493	747.765	128.446	157.946	13.4825	0.318185	17.7572	42.5099	3.65491	31.2853	305.953	121.367	0.0669387	26.1163	28.6899	8.52878	96.7231	9.69754	9.2981	8.25482	0.114948	3.55131e-12	0.0456562	0.135729	0.0403773	0.00185882	1.30256e-23	0.337235	0.000176857	5.94597	538.029
2383	583.288	637.6	542.955	1541.65	379.493	747.765	128.446	157.946	13.4825	0.318185	17.7572	42.5099	3.65491	31.2853	305.953	121.367	0.0669387	26.1163	28.6899	8.52878	96.7231	9.69754	9.2981	8.25482	0.114948	3.55131e-12	0.0456562	0.135729	0.0403773	0.00185882	1.30256e-23	0.337235	0.000176857	5.94597	538.029
2384	583.288	637.6	542.955	1541.65	379.493	747.765	128.446	157.946	13.4825	0.318185	17.7572	42.5099	3.65491	31.2853	305.953	121.367	0.0669387	26.1163	28.6899	8.52878	96.7231	9.69754	9.2981	8.25482	0.114948	3.55131e-12	0.0456562	0.135729	0.0403773	0.00185882	1.30256e-23	0.337235	0.000176857	5.94597	538.029
2385	583.288	637.6	542.955	1541.65	379.493	747.765	128.446	157.946	13.4825	0.318185	17.7572	42.5099	3.65491	31.2853	305.953	121.367	0.0669387	26.1163	28.6899	8.52878	96.7231	9.69754	9.2981	8.25482	0.114948	3.55131e-12	0.0456562	0.135729	0.0403773	0.00185882	1.30256e-23	0.337235	0.000176857	5.94597	538.029
2386	583.288	637.6	542.955	1541.65	379.493	747.765	128.446	157.946	13.4825	0.318185	17.7572	42.5099	3.65491	31.2853	305.953	121.367	0.0669387	26.1163	28.6899	8.52878	96.7231	9.69754	9.2981	8.25482	0.114948	3.55131e-12	0.0456562	0.135729	0.0403773	0.00185882	1.30256e-23	0.337235	0.000176857	5.94597	538.029
2387	583.288	637.6	542.955	1541.65	379.493	747.765	128.446	157.946	13.4825	0.318185	17.7572	42.5099	3.65491	31.2853	305.953	121.367	0.0669387	26.1163	28.6899	8.52878	96.7231	9.69754	9.2981	8.25482	0.114948	3.55131e-12	0.0456562	0.135729	0.0403773	0.00185882	1.30256e-23	0.337235	0.000176857	5.94597	538.029
2388	583.288	637.6	542.955	1541.65	379.493	747.765	128.446	157.946	13.4825	0.318185	17.7572	42.5099	3.65491	31.2853	305.953	121.367	0.0669387	26.1163	28.6899	8.52878	96.7231	9.69754	9.2981	8.25482	0.114948	3.55131e-12	0.0456562	0.135729	0.0403773	0.00185882	1.30256e-23	0.337235	0.000176857	5.94597	538.029
2389	583.288	637.6	542.955	1541.65	379.493	747.765	128.446	157.946	13.4825	0.318185	17.7572	42.5099	3.65491	31.2853	305.953	121.367	0.0669387	26.1163	28.6899	8.52878	96.7231	9.69754	9.2981	8.25482	0.114948	3.55131e-12	0.0456562	0.135729	0.0403773	0.00185882	1.30256e-23	0.337235	0.000176857	5.94597	538.029
2390	583.288	637.6	542.955	1541.65	379.493	747.765	128.446	157.946	13.4825	0.318185	17.7572	42.5099	3.65491	31.2853	305.953	121.367	0.0669387	26.1163	28.6899	8.52878	96.7231	9.69754	9.2981	8.25482	0.114948	3.55131e-12	0.0456562	0.135729	0.0403773	0.00185882	1.30256e-23	0.337235	0.000176857	5.94597	538.029
2391	583.288	637.6	542.955	1541.65	379.493	747.765	128.446	157.946	13.4825	0.318185	17.7572	42.5099	3.65491	31.2853	305.953	121.367	0.0669387	26.1163	28.6899	8.52878	96.7231	9.69754	9.2981	8.25482	0.114948	3.55131e-12	0.0456562	0.135729	0.0403773	0.00185882	1.30256e-23	0.337235	0.000176857	5.94597	538.029
2392	583.288	637.6	542.955	1541.65	379.493	747.765	128.446	157.946	13.4825	0.318185	17.7572	42.5099	3.65491	31.2853	305.953	121.367	0.0669387	26.1163	28.6899	8.52878	96.7231	9.69754	9.2981	8.25482	0.114948	3.55131e-12	0.0456562	0.135729	0.0403773	0.00185882	1.30256e-23	0.337235	0.000176857	5.94597	538.029
2393	583.288	637.6	542.955	1541.65	379.493	747.765	128.446	157.946	13.4825	0.318185	17.7572	42.5099	3.65491	31.2853	305.953	121.367	0.0669387	26.1163	28.6899	8.52878	96.7231	9.69754	9.2981	8.25482	0.114948	3.55131e-12	0.0456562	0.135729	0.0403773	0.00185882	1.30256e-23	0.337235	0.000176857	5.94597	538.029
2394	583.288	637.6	542.955	1541.65	379.493	747.765	128.446	157.946	13.4825	0.318185	17.7572	42.5099	3.65491	31.2853	305.953	121.367	0.0669387	26.1163	28.6899	8.52878	96.7231	9.69754	9.2981	8.25482	0.114948	3.55131e-12	0.0456562	0.135729	0.0403773	0.00185882	1.30256e-23	0.337235	0.000176857	5.94597	538.029
2395	583.288	637.6	542.955	1541.65	379.493	747.765	128.446	157.946	13.4825	0.318185	17.7572	42.5099	3.65491	31.2853	305.953	121.367	0.0669387	26.1163	28.6899	8.52878	96.7231	9.69754	9.2981	8.25482	0.114948	3.55131e-12	0.0456562	0.135729	0.0403773	0.00185882	1.30256e-23	0.337235	0.000176857	5.94597	538.029
2396	583.288	637.6	542.955	1541.65	379.493	747.765	128.446	157.946	13.4825	0.318185	17.7572	42.5099	3.65491	31.2853	305.953	121.367	0.0669387	26.1163	28.6899	8.52878	96.7231	9.69754	9.2981	8.25482	0.114948	3.55131e-12	0.0456562	0.135729	0.0403773	0.00185882	1.30256e-23	0.337235	0.000176857	5.94597	538.029
2397	583.288	637.6	542.955	1541.65	379.493	747.765	128.446	157.946	13.4825	0.318185	17.7572	42.5099	3.65491	31.2853	305.953	121.367	0.0669387	26.1163	28.6899	8.52878	96.7231	9.69754	9.2981	8.25482	0.114948	3.55131e-12	0.0456562	0.135729	0.0403773	0.00185882	1.30256e-23	0.337235	0.000176857	5.94597	538.029
2398	583.288	637.6	542.955	1541.65	379.493	747.765	128.446	157.946	13.4825	0.318185	17.7572	42.5099	3.65491	31.2853	305.953	121.367	0.0669387	26.1163	28.6899	8.52878	96.7231	9.69754	9.2981	8.25482	0.114948	3.55131e-12	0.0456562	0.135729	0.0403773	0.00185882	1.30256e-23	0.337235	0.000176857	5.94597	538.029
2399	583.288	637.6	542.955	1541.65	379.493	747.765	128.446	157.946	13.4825	0.318185	17.7572	42.5099	3.65491	31.2853	305.953	121.367	0.0669387	26.1163	28.6899	8.52878	96.7231	9.69754	9.2981	8.25482	0.114948	3.55131e-12	0.0456562	0.135729	0.0403773	0.00185882	1.30256e-23	0.337235	0.000176857	5.94597	538.029
2400	583.288	637.6	542.955	1541.65	379.493	747.765	128.446	157.946	13.4825	0.318185	17.7572	42.5099	3.65491	31.2853	305.953	121.367	0.0669387	26.1163	28.6899	8.52878	96.7231	9.69754	9.2981	8.25482	0.114948	3.55131e-12	0.0456562	0.135729	0.0403773	0.00185882	1.30256e-23	0.337235	0.000176857	5.94597	538.029
2401	583.288	637.6	542.955	1541.65	379.493	747.765	128.446	157.946	13.4825	0.318185	17.7572	42.5099	3.65491	31.2853	305.953	121.367	0.0669387	26.1163	28.6899	8.52878	96.7231	9.69754	9.2981	8.25482	0.114948	3.55131e-12	0.0456562	0.135729	0.0403773	0.00185882	1.30256e-23	0.337235	0.000176857	5.94597	538.029
2402	583.288	637.6	542.955	1541.65	379.493	747.765	128.446	157.946	13.4825	0.318185	17.7572	42.5099	3.65491	31.2853	305.953	121.367	0.0669387	26.1163	28.6899	8.52878	96.7231	9.69754	9.2981	8.25482	0.114948	3.55131e-12	0.0456562	0.135729	0.0403773	0.00185882	1.30256e-23	0.337235	0.000176857	5.94597	538.029
2403	583.288	637.6	542.955	1541.65	379.493	747.765	128.446	157.946	13.4825	0.318185	17.7572	42.5099	3.65491	31.2853	305.953	121.367	0.0669387	26.1163	28.6899	8.52878	96.7231	9.69754	9.2981	8.25482	0.114948	3.55131e-12	0.0456562	0.135729	0.0403773	0.00185882	1.30256e-23	0.337235	0.000176857	5.94597	538.029
2404	583.288	637.6	542.955	1541.65	379.493	747.765	128.446	157.946	13.4825	0.318185	17.7572	42.5099	3.65491	31.2853	305.953	121.367	0.0669387	26.1163	28.6899	8.52878	96.7231	9.69754	9.2981	8.25482	0.114948	3.55131e-12	0.0456562	0.135729	0.0403773	0.00185882	1.30256e-23	0.337235	0.000176857	5.94597	538.029
2405	583.288	637.6	542.955	1541.65	379.493	747.765	128.446	157.946	13.4825	0.318185	17.7572	42.5099	3.65491	31.2853	305.953	121.367	0.0669387	26.1163	28.6899	8.52878	96.7231	9.69754	9.2981	8.25482	0.114948	3.55131e-12	0.0456562	0.135729	0.0403773	0.00185882	1.30256e-23	0.337235	0.000176857	5.94597	538.029
2406	583.288	637.6	542.955	1541.65	379.493	747.765	128.446	157.946	13.4825	0.318185	17.7572	42.5099	3.65491	31.2853	305.953	121.367	0.0669387	26.1163	28.6899	8.52878	96.7231	9.69754	9.2981	8.25482	0.114948	3.55131e-12	0.0456562	0.135729	0.0403773	0.00185882	1.30256e-23	0.337235	0.000176857	5.94597	538.029
2407	583.288	637.6	542.955	1541.65	379.493	747.765	128.446	157.946	13.4825	0.318185	17.7572	42.5099	3.65491	31.2853	305.953	121.367	0.0669387	26.1163	28.6899	8.52878	96.7231	9.69754	9.2981	8.25482	0.114948	3.55131e-12	0.0456562	0.135729	0.0403773	0.00185882	1.30256e-23	0.337235	0.000176857	5.94597	538.029
2408	583.288	637.6	542.955	1541.65	379.493	747.765	128.446	157.946	13.4825	0.318185	17.7572	42.5099	3.65491	31.2853	305.953	121.367	0.0669387	26.1163	28.6899	8.52878	96.7231	9.69754	9.2981	8.25482	0.114948	3.55131e-12	0.0456562	0.135729	0.0403773	0.00185882	1.30256e-23	0.337235	0.000176857	5.94597	538.029
2409	583.288	637.6	542.955	1541.65	379.493	747.765	128.446	157.946	13.4825	0.318185	17.7572	42.5099	3.65491	31.2853	305.953	121.367	0.0669387	26.1163	28.6899	8.52878	96.7231	9.69754	9.2981	8.25482	0.114948	3.55131e-12	0.0456562	0.135729	0.0403773	0.00185882	1.30256e-23	0.337235	0.000176857	5.94597	538.029
2410	583.288	637.6	542.955	1541.65	379.493	747.765	128.446	157.946	13.4825	0.318185	17.7572	42.5099	3.65491	31.2853	305.953	121.367	0.0669387	26.1163	28.6899	8.52878	96.7231	9.69754	9.2981	8.25482	0.114948	3.55131e-12	0.0456562	0.135729	0.0403773	0.00185882	1.30256e-23	0.337235	0.000176857	5.94597	538.029
2411	583.288	637.6	542.955	1541.65	379.493	747.765	128.446	157.946	13.4825	0.318185	17.7572	42.5099	3.65491	31.2853	305.953	121.367	0.0669387	26.1163	28.6899	8.52878	96.7231	9.69754	9.2981	8.25482	0.114948	3.55131e-12	0.0456562	0.135729	0.0403773	0.00185882	1.30256e-23	0.337235	0.000176857	5.94597	538.029
2412	583.288	637.6	542.955	1541.65	379.493	747.765	128.446	157.946	13.4825	0.318185	17.7572	42.5099	3.65491	31.2853	305.953	121.367	0.0669387	26.1163	28.6899	8.52878	96.7231	9.69754	9.2981	8.25482	0.114948	3.55131e-12	0.0456562	0.135729	0.0403773	0.00185882	1.30256e-23	0.337235	0.000176857	5.94597	538.029
2413	583.288	637.6	542.955	1541.65	379.493	747.765	128.446	157.946	13.4825	0.318185	17.7572	42.5099	3.65491	31.2853	305.953	121.367	0.0669387	26.1163	28.6899	8.52878	96.7231	9.69754	9.2981	8.25482	0.114948	3.55131e-12	0.0456562	0.135729	0.0403773	0.00185882	1.30256e-23	0.337235	0.000176857	5.94597	538.029
2414	583.288	637.6	542.955	1541.65	379.493	747.765	128.446	157.946	13.4825	0.318185	17.7572	42.5099	3.65491	31.2853	305.953	121.367	0.0669387	26.1163	28.6899	8.52878	96.7231	9.69754	9.2981	8.25482	0.114948	3.55131e-12	0.0456562	0.135729	0.0403773	0.00185882	1.30256e-23	0.337235	0.000176857	5.94597	538.029
2415	583.288	637.6	542.955	1541.65	379.493	747.765	128.446	157.946	13.4825	0.318185	17.7572	42.5099	3.65491	31.2853	305.953	121.367	0.0669387	26.1163	28.6899	8.52878	96.7231	9.69754	9.2981	8.25482	0.114948	3.55131e-12	0.0456562	0.135729	0.0403773	0.00185882	1.30256e-23	0.337235	0.000176857	5.94597	538.029
2416	583.288	637.6	542.955	1541.65	379.493	747.765	128.446	157.946	13.4825	0.318185	17.7572	42.5099	3.65491	31.2853	305.953	121.367	0.0669387	26.1163	28.6899	8.52878	96.7231	9.69754	9.2981	8.25482	0.114948	3.55131e-12	0.0456562	0.135729	0.0403773	0.00185882	1.30256e-23	0.337235	0.000176857	5.94597	538.029
2417	583.288	637.6	542.955	1541.65	379.493	747.765	128.446	157.946	13.4825	0.318185	17.7572	42.5099	3.65491	31.2853	305.953	121.367	0.0669387	26.1163	28.6899	8.52878	96.7231	9.69754	9.2981	8.25482	0.114948	3.55131e-12	0.0456562	0.135729	0.0403773	0.00185882	1.30256e-23	0.337235	0.000176857	5.94597	538.029
2418	583.288	637.6	542.955	1541.65	379.493	747.765	128.446	157.946	13.4825	0.318185	17.7572	42.5099	3.65491	31.2853	305.953	121.367	0.0669387	26.1163	28.6899	8.52878	96.7231	9.69754	9.2981	8.25482	0.114948	3.55131e-12	0.0456562	0.135729	0.0403773	0.00185882	1.30256e-23	0.337235	0.000176857	5.94597	538.029
2419	583.288	637.6	542.955	1541.65	379.493	747.765	128.446	157.946	13.4825	0.318185	17.7572	42.5099	3.65491	31.2853	305.953	121.367	0.0669387	26.1163	28.6899	8.52878	96.7231	9.69754	9.2981	8.25482	0.114948	3.55131e-12	0.0456562	0.135729	0.0403773	0.00185882	1.30256e-23	0.337235	0.000176857	5.94597	538.029
2420	583.288	637.6	542.955	1541.65	379.493	747.765	128.446	157.946	13.4825	0.318185	17.7572	42.5099	3.65491	31.2853	305.953	121.367	0.0669387	26.1163	28.6899	8.52878	96.7231	9.69754	9.2981	8.25482	0.114948	3.55131e-12	0.0456562	0.135729	0.0403773	0.00185882	1.30256e-23	0.337235	0.000176857	5.94597	538.029
2421	583.288	637.6	542.955	1541.65	379.493	747.765	128.446	157.946	13.4825	0.318185	17.7572	42.5099	3.65491	31.2853	305.953	121.367	0.0669387	26.1163	28.6899	8.52878	96.7231	9.69754	9.2981	8.25482	0.114948	3.55131e-12	0.0456562	0.135729	0.0403773	0.00185882	1.30256e-23	0.337235	0.000176857	5.94597	538.029
2422	583.288	637.6	542.955	1541.65	379.493	747.765	128.446	157.946	13.4825	0.318185	17.7572	42.5099	3.65491	31.2853	305.953	121.367	0.0669387	26.1163	28.6899	8.52878	96.7231	9.69754	9.2981	8.25482	0.114948	3.55131e-12	0.0456562	0.135729	0.0403773	0.00185882	1.30256e-23	0.337235	0.000176857	5.94597	538.029
2423	583.288	637.6	542.955	1541.65	379.493	747.765	128.446	157.946	13.4825	0.318185	17.7572	42.5099	3.65491	31.2853	305.953	121.367	0.0669387	26.1163	28.6899	8.52878	96.7231	9.69754	9.2981	8.25482	0.114948	3.55131e-12	0.0456562	0.135729	0.0403773	0.00185882	1.30256e-23	0.337235	0.000176857	5.94597	538.029
2424	583.288	637.6	542.955	1541.65	379.493	747.765	128.446	157.946	13.4825	0.318185	17.7572	42.5099	3.65491	31.2853	305.953	121.367	0.0669387	26.1163	28.6899	8.52878	96.7231	9.69754	9.2981	8.25482	0.114948	3.55131e-12	0.0456562	0.135729	0.0403773	0.00185882	1.30256e-23	0.337235	0.000176857	5.94597	538.029
2425	583.288	637.6	542.955	1541.65	379.493	747.765	128.446	157.946	13.4825	0.318185	17.7572	42.5099	3.65491	31.2853	305.953	121.367	0.0669387	26.1163	28.6899	8.52878	96.7231	9.69754	9.2981	8.25482	0.114948	3.55131e-12	0.0456562	0.135729	0.0403773	0.00185882	1.30256e-23	0.337235	0.000176857	5.94597	538.029
2426	583.288	637.6	542.955	1541.65	379.493	747.765	128.446	157.946	13.4825	0.318185	17.7572	42.5099	3.65491	31.2853	305.953	121.367	0.0669387	26.1163	28.6899	8.52878	96.7231	9.69754	9.2981	8.25482	0.114948	3.55131e-12	0.0456562	0.135729	0.0403773	0.00185882	1.30256e-23	0.337235	0.000176857	5.94597	538.029
2427	583.288	637.6	542.955	1541.65	379.493	747.765	128.446	157.946	13.4825	0.318185	17.7572	42.5099	3.65491	31.2853	305.953	121.367	0.0669387	26.1163	28.6899	8.52878	96.7231	9.69754	9.2981	8.25482	0.114948	3.55131e-12	0.0456562	0.135729	0.0403773	0.00185882	1.30256e-23	0.337235	0.000176857	5.94597	538.029
2428	583.288	637.6	542.955	1541.65	379.493	747.765	128.446	157.946	13.4825	0.318185	17.7572	42.5099	3.65491	31.2853	305.953	121.367	0.0669387	26.1163	28.6899	8.52878	96.7231	9.69754	9.2981	8.25482	0.114948	3.55131e-12	0.0456562	0.135729	0.0403773	0.00185882	1.30256e-23	0.337235	0.000176857	5.94597	538.029
2429	583.288	637.6	542.955	1541.65	379.493	747.765	128.446	157.946	13.4825	0.318185	17.7572	42.5099	3.65491	31.2853	305.953	121.367	0.0669387	26.1163	28.6899	8.52878	96.7231	9.69754	9.2981	8.25482	0.114948	3.55131e-12	0.0456562	0.135729	0.0403773	0.00185882	1.30256e-23	0.337235	0.000176857	5.94597	538.029
2430	583.288	637.6	542.955	1541.65	379.493	747.765	128.446	157.946	13.4825	0.318185	17.7572	42.5099	3.65491	31.2853	305.953	121.367	0.0669387	26.1163	28.6899	8.52878	96.7231	9.69754	9.2981	8.25482	0.114948	3.55131e-12	0.0456562	0.135729	0.0403773	0.00185882	1.30256e-23	0.337235	0.000176857	5.94597	538.029
2431	583.288	637.6	542.955	1541.65	379.493	747.765	128.446	157.946	13.4825	0.318185	17.7572	42.5099	3.65491	31.2853	305.953	121.367	0.0669387	26.1163	28.6899	8.52878	96.7231	9.69754	9.2981	8.25482	0.114948	3.55131e-12	0.0456562	0.135729	0.0403773	0.00185882	1.30256e-23	0.337235	0.000176857	5.94597	538.029
2432	583.288	637.6	542.955	1541.65	379.493	747.765	128.446	157.946	13.4825	0.318185	17.7572	42.5099	3.65491	31.2853	305.953	121.367	0.0669387	26.1163	28.6899	8.52878	96.7231	9.69754	9.2981	8.25482	0.114948	3.55131e-12	0.0456562	0.135729	0.0403773	0.00185882	1.30256e-23	0.337235	0.000176857	5.94597	538.029
2433	583.288	637.6	542.955	1541.65	379.493	747.765	128.446	157.946	13.4825	0.318185	17.7572	42.5099	3.65491	31.2853	305.953	121.367	0.0669387	26.1163	28.6899	8.52878	96.7231	9.69754	9.2981	8.25482	0.114948	3.55131e-12	0.0456562	0.135729	0.0403773	0.00185882	1.30256e-23	0.337235	0.000176857	5.94597	538.029
2434	583.288	637.6	542.955	1541.65	379.493	747.765	128.446	157.946	13.4825	0.318185	17.7572	42.5099	3.65491	31.2853	305.953	121.367	0.0669387	26.1163	28.6899	8.52878	96.7231	9.69754	9.2981	8.25482	0.114948	3.55131e-12	0.0456562	0.135729	0.0403773	0.00185882	1.30256e-23	0.337235	0.000176857	5.94597	538.029
2435	583.288	637.6	542.955	1541.65	379.493	747.765	128.446	157.946	13.4825	0.318185	17.7572	42.5099	3.65491	31.2853	305.953	121.367	0.0669387	26.1163	28.6899	8.52878	96.7231	9.69754	9.2981	8.25482	0.114948	3.55131e-12	0.0456562	0.135729	0.0403773	0.00185882	1.30256e-23	0.337235	0.000176857	5.94597	538.029
2436	583.288	637.6	542.955	1541.65	379.493	747.765	128.446	157.946	13.4825	0.318185	17.7572	42.5099	3.65491	31.2853	305.953	121.367	0.0669387	26.1163	28.6899	8.52878	96.7231	9.69754	9.2981	8.25482	0.114948	3.55131e-12	0.0456562	0.135729	0.0403773	0.00185882	1.30256e-23	0.337235	0.000176857	5.94597	538.029
2437	583.288	637.6	542.955	1541.65	379.493	747.765	128.446	157.946	13.4825	0.318185	17.7572	42.5099	3.65491	31.2853	305.953	121.367	0.0669387	26.1163	28.6899	8.52878	96.7231	9.69754	9.2981	8.25482	0.114948	3.55131e-12	0.0456562	0.135729	0.0403773	0.00185882	1.30256e-23	0.337235	0.000176857	5.94597	538.029
2438	583.288	637.6	542.955	1541.65	379.493	747.765	128.446	157.946	13.4825	0.318185	17.7572	42.5099	3.65491	31.2853	305.953	121.367	0.0669387	26.1163	28.6899	8.52878	96.7231	9.69754	9.2981	8.25482	0.114948	3.55131e-12	0.0456562	0.135729	0.0403773	0.00185882	1.30256e-23	0.337235	0.000176857	5.94597	538.029
2439	583.288	637.6	542.955	1541.65	379.493	747.765	128.446	157.946	13.4825	0.318185	17.7572	42.5099	3.65491	31.2853	305.953	121.367	0.0669387	26.1163	28.6899	8.52878	96.7231	9.69754	9.2981	8.25482	0.114948	3.55131e-12	0.0456562	0.135729	0.0403773	0.00185882	1.30256e-23	0.337235	0.000176857	5.94597	538.029
2440	583.288	637.6	542.955	1541.65	379.493	747.765	128.446	157.946	13.4825	0.318185	17.7572	42.5099	3.65491	31.2853	305.953	121.367	0.0669387	26.1163	28.6899	8.52878	96.7231	9.69754	9.2981	8.25482	0.114948	3.55131e-12	0.0456562	0.135729	0.0403773	0.00185882	1.30256e-23	0.337235	0.000176857	5.94597	538.029
2441	583.288	637.6	542.955	1541.65	379.493	747.765	128.446	157.946	13.4825	0.318185	17.7572	42.5099	3.65491	31.2853	305.953	121.367	0.0669387	26.1163	28.6899	8.52878	96.7231	9.69754	9.2981	8.25482	0.114948	3.55131e-12	0.0456562	0.135729	0.0403773	0.00185882	1.30256e-23	0.337235	0.000176857	5.94597	538.029
2442	583.288	637.6	542.955	1541.65	379.493	747.765	128.446	157.946	13.4825	0.318185	17.7572	42.5099	3.65491	31.2853	305.953	121.367	0.0669387	26.1163	28.6899	8.52878	96.7231	9.69754	9.2981	8.25482	0.114948	3.55131e-12	0.0456562	0.135729	0.0403773	0.00185882	1.30256e-23	0.337235	0.000176857	5.94597	538.029
2443	583.288	637.6	542.955	1541.65	379.493	747.765	128.446	157.946	13.4825	0.318185	17.7572	42.5099	3.65491	31.2853	305.953	121.367	0.0669387	26.1163	28.6899	8.52878	96.7231	9.69754	9.2981	8.25482	0.114948	3.55131e-12	0.0456562	0.135729	0.0403773	0.00185882	1.30256e-23	0.337235	0.000176857	5.94597	538.029
2444	583.288	637.6	542.955	1541.65	379.493	747.765	128.446	157.946	13.4825	0.318185	17.7572	42.5099	3.65491	31.2853	305.953	121.367	0.0669387	26.1163	28.6899	8.52878	96.7231	9.69754	9.2981	8.25482	0.114948	3.55131e-12	0.0456562	0.135729	0.0403773	0.00185882	1.30256e-23	0.337235	0.000176857	5.94597	538.029
2445	583.288	637.6	542.955	1541.65	379.493	747.765	128.446	157.946	13.4825	0.318185	17.7572	42.5099	3.65491	31.2853	305.953	121.367	0.0669387	26.1163	28.6899	8.52878	96.7231	9.69754	9.2981	8.25482	0.114948	3.55131e-12	0.0456562	0.135729	0.0403773	0.00185882	1.30256e-23	0.337235	0.000176857	5.94597	538.029
2446	583.288	637.6	542.955	1541.65	379.493	747.765	128.446	157.946	13.4825	0.318185	17.7572	42.5099	3.65491	31.2853	305.953	121.367	0.0669387	26.1163	28.6899	8.52878	96.7231	9.69754	9.2981	8.25482	0.114948	3.55131e-12	0.0456562	0.135729	0.0403773	0.00185882	1.30256e-23	0.337235	0.000176857	5.94597	538.029
2447	583.288	637.6	542.955	1541.65	379.493	747.765	128.446	157.946	13.4825	0.318185	17.7572	42.5099	3.65491	31.2853	305.953	121.367	0.0669387	26.1163	28.6899	8.52878	96.7231	9.69754	9.2981	8.25482	0.114948	3.55131e-12	0.0456562	0.135729	0.0403773	0.00185882	1.30256e-23	0.337235	0.000176857	5.94597	538.029
2448	583.288	637.6	542.955	1541.65	379.493	747.765	128.446	157.946	13.4825	0.318185	17.7572	42.5099	3.65491	31.2853	305.953	121.367	0.0669387	26.1163	28.6899	8.52878	96.7231	9.69754	9.2981	8.25482	0.114948	3.55131e-12	0.0456562	0.135729	0.0403773	0.00185882	1.30256e-23	0.337235	0.000176857	5.94597	538.029
2449	583.288	637.6	542.955	1541.65	379.493	747.765	128.446	157.946	13.4825	0.318185	17.7572	42.5099	3.65491	31.2853	305.953	121.367	0.0669387	26.1163	28.6899	8.52878	96.7231	9.69754	9.2981	8.25482	0.114948	3.55131e-12	0.0456562	0.135729	0.0403773	0.00185882	1.30256e-23	0.337235	0.000176857	5.94597	538.029
2450	583.288	637.6	542.955	1541.65	379.493	747.765	128.446	157.946	13.4825	0.318185	17.7572	42.5099	3.65491	31.2853	305.953	121.367	0.0669387	26.1163	28.6899	8.52878	96.7231	9.69754	9.2981	8.25482	0.114948	3.55131e-12	0.0456562	0.135729	0.0403773	0.00185882	1.30256e-23	0.337235	0.000176857	5.94597	538.029
2451	583.288	637.6	542.955	1541.65	379.493	747.765	128.446	157.946	13.4825	0.318185	17.7572	42.5099	3.65491	31.2853	305.953	121.367	0.0669387	26.1163	28.6899	8.52878	96.7231	9.69754	9.2981	8.25482	0.114948	3.55131e-12	0.0456562	0.135729	0.0403773	0.00185882	1.30256e-23	0.337235	0.000176857	5.94597	538.029
2452	583.288	637.6	542.955	1541.65	379.493	747.765	128.446	157.946	13.4825	0.318185	17.7572	42.5099	3.65491	31.2853	305.953	121.367	0.0669387	26.1163	28.6899	8.52878	96.7231	9.69754	9.2981	8.25482	0.114948	3.55131e-12	0.0456562	0.135729	0.0403773	0.00185882	1.30256e-23	0.337235	0.000176857	5.94597	538.029
2453	583.288	637.6	542.955	1541.65	379.493	747.765	128.446	157.946	13.4825	0.318185	17.7572	42.5099	3.65491	31.2853	305.953	121.367	0.0669387	26.1163	28.6899	8.52878	96.7231	9.69754	9.2981	8.25482	0.114948	3.55131e-12	0.0456562	0.135729	0.0403773	0.00185882	1.30256e-23	0.337235	0.000176857	5.94597	538.029
2454	583.288	637.6	542.955	1541.65	379.493	747.765	128.446	157.946	13.4825	0.318185	17.7572	42.5099	3.65491	31.2853	305.953	121.367	0.0669387	26.1163	28.6899	8.52878	96.7231	9.69754	9.2981	8.25482	0.114948	3.55131e-12	0.0456562	0.135729	0.0403773	0.00185882	1.30256e-23	0.337235	0.000176857	5.94597	538.029
2455	583.288	637.6	542.955	1541.65	379.493	747.765	128.446	157.946	13.4825	0.318185	17.7572	42.5099	3.65491	31.2853	305.953	121.367	0.0669387	26.1163	28.6899	8.52878	96.7231	9.69754	9.2981	8.25482	0.114948	3.55131e-12	0.0456562	0.135729	0.0403773	0.00185882	1.30256e-23	0.337235	0.000176857	5.94597	538.029
2456	583.288	637.6	542.955	1541.65	379.493	747.765	128.446	157.946	13.4825	0.318185	17.7572	42.5099	3.65491	31.2853	305.953	121.367	0.0669387	26.1163	28.6899	8.52878	96.7231	9.69754	9.2981	8.25482	0.114948	3.55131e-12	0.0456562	0.135729	0.0403773	0.00185882	1.30256e-23	0.337235	0.000176857	5.94597	538.029
2457	583.288	637.6	542.955	1541.65	379.493	747.765	128.446	157.946	13.4825	0.318185	17.7572	42.5099	3.65491	31.2853	305.953	121.367	0.0669387	26.1163	28.6899	8.52878	96.7231	9.69754	9.2981	8.25482	0.114948	3.55131e-12	0.0456562	0.135729	0.0403773	0.00185882	1.30256e-23	0.337235	0.000176857	5.94597	538.029
2458	583.288	637.6	542.955	1541.65	379.493	747.765	128.446	157.946	13.4825	0.318185	17.7572	42.5099	3.65491	31.2853	305.953	121.367	0.0669387	26.1163	28.6899	8.52878	96.7231	9.69754	9.2981	8.25482	0.114948	3.55131e-12	0.0456562	0.135729	0.0403773	0.00185882	1.30256e-23	0.337235	0.000176857	5.94597	538.029
2459	583.288	637.6	542.955	1541.65	379.493	747.765	128.446	157.946	13.4825	0.318185	17.7572	42.5099	3.65491	31.2853	305.953	121.367	0.0669387	26.1163	28.6899	8.52878	96.7231	9.69754	9.2981	8.25482	0.114948	3.55131e-12	0.0456562	0.135729	0.0403773	0.00185882	1.30256e-23	0.337235	0.000176857	5.94597	538.029
2460	583.288	637.6	542.955	1541.65	379.493	747.765	128.446	157.946	13.4825	0.318185	17.7572	42.5099	3.65491	31.2853	305.953	121.367	0.0669387	26.1163	28.6899	8.52878	96.7231	9.69754	9.2981	8.25482	0.114948	3.55131e-12	0.0456562	0.135729	0.0403773	0.00185882	1.30256e-23	0.337235	0.000176857	5.94597	538.029
2461	583.288	637.6	542.955	1541.65	379.493	747.765	128.446	157.946	13.4825	0.318185	17.7572	42.5099	3.65491	31.2853	305.953	121.367	0.0669387	26.1163	28.6899	8.52878	96.7231	9.69754	9.2981	8.25482	0.114948	3.55131e-12	0.0456562	0.135729	0.0403773	0.00185882	1.30256e-23	0.337235	0.000176857	5.94597	538.029
2462	583.288	637.6	542.955	1541.65	379.493	747.765	128.446	157.946	13.4825	0.318185	17.7572	42.5099	3.65491	31.2853	305.953	121.367	0.0669387	26.1163	28.6899	8.52878	96.7231	9.69754	9.2981	8.25482	0.114948	3.55131e-12	0.0456562	0.135729	0.0403773	0.00185882	1.30256e-23	0.337235	0.000176857	5.94597	538.029
2463	583.288	637.6	542.955	1541.65	379.493	747.765	128.446	157.946	13.4825	0.318185	17.7572	42.5099	3.65491	31.2853	305.953	121.367	0.0669387	26.1163	28.6899	8.52878	96.7231	9.69754	9.2981	8.25482	0.114948	3.55131e-12	0.0456562	0.135729	0.0403773	0.00185882	1.30256e-23	0.337235	0.000176857	5.94597	538.029
2464	583.288	637.6	542.955	1541.65	379.493	747.765	128.446	157.946	13.4825	0.318185	17.7572	42.5099	3.65491	31.2853	305.953	121.367	0.0669387	26.1163	28.6899	8.52878	96.7231	9.69754	9.2981	8.25482	0.114948	3.55131e-12	0.0456562	0.135729	0.0403773	0.00185882	1.30256e-23	0.337235	0.000176857	5.94597	538.029
2465	583.288	637.6	542.955	1541.65	379.493	747.765	128.446	157.946	13.4825	0.318185	17.7572	42.5099	3.65491	31.2853	305.953	121.367	0.0669387	26.1163	28.6899	8.52878	96.7231	9.69754	9.2981	8.25482	0.114948	3.55131e-12	0.0456562	0.135729	0.0403773	0.00185882	1.30256e-23	0.337235	0.000176857	5.94597	538.029
2466	583.288	637.6	542.955	1541.65	379.493	747.765	128.446	157.946	13.4825	0.318185	17.7572	42.5099	3.65491	31.2853	305.953	121.367	0.0669387	26.1163	28.6899	8.52878	96.7231	9.69754	9.2981	8.25482	0.114948	3.55131e-12	0.0456562	0.135729	0.0403773	0.00185882	1.30256e-23	0.337235	0.000176857	5.94597	538.029
2467	583.288	637.6	542.955	1541.65	379.493	747.765	128.446	157.946	13.4825	0.318185	17.7572	42.5099	3.65491	31.2853	305.953	121.367	0.0669387	26.1163	28.6899	8.52878	96.7231	9.69754	9.2981	8.25482	0.114948	3.55131e-12	0.0456562	0.135729	0.0403773	0.00185882	1.30256e-23	0.337235	0.000176857	5.94597	538.029
2468	583.288	637.6	542.955	1541.65	379.493	747.765	128.446	157.946	13.4825	0.318185	17.7572	42.5099	3.65491	31.2853	305.953	121.367	0.0669387	26.1163	28.6899	8.52878	96.7231	9.69754	9.2981	8.25482	0.114948	3.55131e-12	0.0456562	0.135729	0.0403773	0.00185882	1.30256e-23	0.337235	0.000176857	5.94597	538.029
2469	583.288	637.6	542.955	1541.65	379.493	747.765	128.446	157.946	13.4825	0.318185	17.7572	42.5099	3.65491	31.2853	305.953	121.367	0.0669387	26.1163	28.6899	8.52878	96.7231	9.69754	9.2981	8.25482	0.114948	3.55131e-12	0.0456562	0.135729	0.0403773	0.00185882	1.30256e-23	0.337235	0.000176857	5.94597	538.029
2470	583.288	637.6	542.955	1541.65	379.493	747.765	128.446	157.946	13.4825	0.318185	17.7572	42.5099	3.65491	31.2853	305.953	121.367	0.0669387	26.1163	28.6899	8.52878	96.7231	9.69754	9.2981	8.25482	0.114948	3.55131e-12	0.0456562	0.135729	0.0403773	0.00185882	1.30256e-23	0.337235	0.000176857	5.94597	538.029
2471	583.288	637.6	542.955	1541.65	379.493	747.765	128.446	157.946	13.4825	0.318185	17.7572	42.5099	3.65491	31.2853	305.953	121.367	0.0669387	26.1163	28.6899	8.52878	96.7231	9.69754	9.2981	8.25482	0.114948	3.55131e-12	0.0456562	0.135729	0.0403773	0.00185882	1.30256e-23	0.337235	0.000176857	5.94597	538.029
2472	583.288	637.6	542.955	1541.65	379.493	747.765	128.446	157.946	13.4825	0.318185	17.7572	42.5099	3.65491	31.2853	305.953	121.367	0.0669387	26.1163	28.6899	8.52878	96.7231	9.69754	9.2981	8.25482	0.114948	3.55131e-12	0.0456562	0.135729	0.0403773	0.00185882	1.30256e-23	0.337235	0.000176857	5.94597	538.029
2473	583.288	637.6	542.955	1541.65	379.493	747.765	128.446	157.946	13.4825	0.318185	17.7572	42.5099	3.65491	31.2853	305.953	121.367	0.0669387	26.1163	28.6899	8.52878	96.7231	9.69754	9.2981	8.25482	0.114948	3.55131e-12	0.0456562	0.135729	0.0403773	0.00185882	1.30256e-23	0.337235	0.000176857	5.94597	538.029
2474	583.288	637.6	542.955	1541.65	379.493	747.765	128.446	157.946	13.4825	0.318185	17.7572	42.5099	3.65491	31.2853	305.953	121.367	0.0669387	26.1163	28.6899	8.52878	96.7231	9.69754	9.2981	8.25482	0.114948	3.55131e-12	0.0456562	0.135729	0.0403773	0.00185882	1.30256e-23	0.337235	0.000176857	5.94597	538.029
2475	583.288	637.6	542.955	1541.65	379.493	747.765	128.446	157.946	13.4825	0.318185	17.7572	42.5099	3.65491	31.2853	305.953	121.367	0.0669387	26.1163	28.6899	8.52878	96.7231	9.69754	9.2981	8.25482	0.114948	3.55131e-12	0.0456562	0.135729	0.0403773	0.00185882	1.30256e-23	0.337235	0.000176857	5.94597	538.029
2476	583.288	637.6	542.955	1541.65	379.493	747.765	128.446	157.946	13.4825	0.318185	17.7572	42.5099	3.65491	31.2853	305.953	121.367	0.0669387	26.1163	28.6899	8.52878	96.7231	9.69754	9.2981	8.25482	0.114948	3.55131e-12	0.0456562	0.135729	0.0403773	0.00185882	1.30256e-23	0.337235	0.000176857	5.94597	538.029
2477	583.288	637.6	542.955	1541.65	379.493	747.765	128.446	157.946	13.4825	0.318185	17.7572	42.5099	3.65491	31.2853	305.953	121.367	0.0669387	26.1163	28.6899	8.52878	96.7231	9.69754	9.2981	8.25482	0.114948	3.55131e-12	0.0456562	0.135729	0.0403773	0.00185882	1.30256e-23	0.337235	0.000176857	5.94597	538.029
2478	583.288	637.6	542.955	1541.65	379.493	747.765	128.446	157.946	13.4825	0.318185	17.7572	42.5099	3.65491	31.2853	305.953	121.367	0.0669387	26.1163	28.6899	8.52878	96.7231	9.69754	9.2981	8.25482	0.114948	3.55131e-12	0.0456562	0.135729	0.0403773	0.00185882	1.30256e-23	0.337235	0.000176857	5.94597	538.029
2479	583.288	637.6	542.955	1541.65	379.493	747.765	128.446	157.946	13.4825	0.318185	17.7572	42.5099	3.65491	31.2853	305.953	121.367	0.0669387	26.1163	28.6899	8.52878	96.7231	9.69754	9.2981	8.25482	0.114948	3.55131e-12	0.0456562	0.135729	0.0403773	0.00185882	1.30256e-23	0.337235	0.000176857	5.94597	538.029
2480	583.288	637.6	542.955	1541.65	379.493	747.765	128.446	157.946	13.4825	0.318185	17.7572	42.5099	3.65491	31.2853	305.953	121.367	0.0669387	26.1163	28.6899	8.52878	96.7231	9.69754	9.2981	8.25482	0.114948	3.55131e-12	0.0456562	0.135729	0.0403773	0.00185882	1.30256e-23	0.337235	0.000176857	5.94597	538.029
2481	583.288	637.6	542.955	1541.65	379.493	747.765	128.446	157.946	13.4825	0.318185	17.7572	42.5099	3.65491	31.2853	305.953	121.367	0.0669387	26.1163	28.6899	8.52878	96.7231	9.69754	9.2981	8.25482	0.114948	3.55131e-12	0.0456562	0.135729	0.0403773	0.00185882	1.30256e-23	0.337235	0.000176857	5.94597	538.029
2482	583.288	637.6	542.955	1541.65	379.493	747.765	128.446	157.946	13.4825	0.318185	17.7572	42.5099	3.65491	31.2853	305.953	121.367	0.0669387	26.1163	28.6899	8.52878	96.7231	9.69754	9.2981	8.25482	0.114948	3.55131e-12	0.0456562	0.135729	0.0403773	0.00185882	1.30256e-23	0.337235	0.000176857	5.94597	538.029
2483	583.288	637.6	542.955	1541.65	379.493	747.765	128.446	157.946	13.4825	0.318185	17.7572	42.5099	3.65491	31.2853	305.953	121.367	0.0669387	26.1163	28.6899	8.52878	96.7231	9.69754	9.2981	8.25482	0.114948	3.55131e-12	0.0456562	0.135729	0.0403773	0.00185882	1.30256e-23	0.337235	0.000176857	5.94597	538.029
2484	583.288	637.6	542.955	1541.65	379.493	747.765	128.446	157.946	13.4825	0.318185	17.7572	42.5099	3.65491	31.2853	305.953	121.367	0.0669387	26.1163	28.6899	8.52878	96.7231	9.69754	9.2981	8.25482	0.114948	3.55131e-12	0.0456562	0.135729	0.0403773	0.00185882	1.30256e-23	0.337235	0.000176857	5.94597	538.029
2485	583.288	637.6	542.955	1541.65	379.493	747.765	128.446	157.946	13.4825	0.318185	17.7572	42.5099	3.65491	31.2853	305.953	121.367	0.0669387	26.1163	28.6899	8.52878	96.7231	9.69754	9.2981	8.25482	0.114948	3.55131e-12	0.0456562	0.135729	0.0403773	0.00185882	1.30256e-23	0.337235	0.000176857	5.94597	538.029
2486	583.288	637.6	542.955	1541.65	379.493	747.765	128.446	157.946	13.4825	0.318185	17.7572	42.5099	3.65491	31.2853	305.953	121.367	0.0669387	26.1163	28.6899	8.52878	96.7231	9.69754	9.2981	8.25482	0.114948	3.55131e-12	0.0456562	0.135729	0.0403773	0.00185882	1.30256e-23	0.337235	0.000176857	5.94597	538.029
2487	583.288	637.6	542.955	1541.65	379.493	747.765	128.446	157.946	13.4825	0.318185	17.7572	42.5099	3.65491	31.2853	305.953	121.367	0.0669387	26.1163	28.6899	8.52878	96.7231	9.69754	9.2981	8.25482	0.114948	3.55131e-12	0.0456562	0.135729	0.0403773	0.00185882	1.30256e-23	0.337235	0.000176857	5.94597	538.029
2488	583.288	637.6	542.955	1541.65	379.493	747.765	128.446	157.946	13.4825	0.318185	17.7572	42.5099	3.65491	31.2853	305.953	121.367	0.0669387	26.1163	28.6899	8.52878	96.7231	9.69754	9.2981	8.25482	0.114948	3.55131e-12	0.0456562	0.135729	0.0403773	0.00185882	1.30256e-23	0.337235	0.000176857	5.94597	538.029
2489	583.288	637.6	542.955	1541.65	379.493	747.765	128.446	157.946	13.4825	0.318185	17.7572	42.5099	3.65491	31.2853	305.953	121.367	0.0669387	26.1163	28.6899	8.52878	96.7231	9.69754	9.2981	8.25482	0.114948	3.55131e-12	0.0456562	0.135729	0.0403773	0.00185882	1.30256e-23	0.337235	0.000176857	5.94597	538.029
2490	583.288	637.6	542.955	1541.65	379.493	747.765	128.446	157.946	13.4825	0.318185	17.7572	42.5099	3.65491	31.2853	305.953	121.367	0.0669387	26.1163	28.6899	8.52878	96.7231	9.69754	9.2981	8.25482	0.114948	3.55131e-12	0.0456562	0.135729	0.0403773	0.00185882	1.30256e-23	0.337235	0.000176857	5.94597	538.029
2491	583.288	637.6	542.955	1541.65	379.493	747.765	128.446	157.946	13.4825	0.318185	17.7572	42.5099	3.65491	31.2853	305.953	121.367	0.0669387	26.1163	28.6899	8.52878	96.7231	9.69754	9.2981	8.25482	0.114948	3.55131e-12	0.0456562	0.135729	0.0403773	0.00185882	1.30256e-23	0.337235	0.000176857	5.94597	538.029
2492	583.288	637.6	542.955	1541.65	379.493	747.765	128.446	157.946	13.4825	0.318185	17.7572	42.5099	3.65491	31.2853	305.953	121.367	0.0669387	26.1163	28.6899	8.52878	96.7231	9.69754	9.2981	8.25482	0.114948	3.55131e-12	0.0456562	0.135729	0.0403773	0.00185882	1.30256e-23	0.337235	0.000176857	5.94597	538.029
2493	583.288	637.6	542.955	1541.65	379.493	747.765	128.446	157.946	13.4825	0.318185	17.7572	42.5099	3.65491	31.2853	305.953	121.367	0.0669387	26.1163	28.6899	8.52878	96.7231	9.69754	9.2981	8.25482	0.114948	3.55131e-12	0.0456562	0.135729	0.0403773	0.00185882	1.30256e-23	0.337235	0.000176857	5.94597	538.029
2494	583.288	637.6	542.955	1541.65	379.493	747.765	128.446	157.946	13.4825	0.318185	17.7572	42.5099	3.65491	31.2853	305.953	121.367	0.0669387	26.1163	28.6899	8.52878	96.7231	9.69754	9.2981	8.25482	0.114948	3.55131e-12	0.0456562	0.135729	0.0403773	0.00185882	1.30256e-23	0.337235	0.000176857	5.94597	538.029
2495	583.288	637.6	542.955	1541.65	379.493	747.765	128.446	157.946	13.4825	0.318185	17.7572	42.5099	3.65491	31.2853	305.953	121.367	0.0669387	26.1163	28.6899	8.52878	96.7231	9.69754	9.2981	8.25482	0.114948	3.55131e-12	0.0456562	0.135729	0.0403773	0.00185882	1.30256e-23	0.337235	0.000176857	5.94597	538.029
2496	583.288	637.6	542.955	1541.65	379.493	747.765	128.446	157.946	13.4825	0.318185	17.7572	42.5099	3.65491	31.2853	305.953	121.367	0.0669387	26.1163	28.6899	8.52878	96.7231	9.69754	9.2981	8.25482	0.114948	3.55131e-12	0.0456562	0.135729	0.0403773	0.00185882	1.30256e-23	0.337235	0.000176857	5.94597	538.029
2497	583.288	637.6	542.955	1541.65	379.493	747.765	128.446	157.946	13.4825	0.318185	17.7572	42.5099	3.65491	31.2853	305.953	121.367	0.0669387	26.1163	28.6899	8.52878	96.7231	9.69754	9.2981	8.25482	0.114948	3.55131e-12	0.0456562	0.135729	0.0403773	0.00185882	1.30256e-23	0.337235	0.000176857	5.94597	538.029
2498	583.288	637.6	542.955	1541.65	379.493	747.765	128.446	157.946	13.4825	0.318185	17.7572	42.5099	3.65491	31.2853	305.953	121.367	0.0669387	26.1163	28.6899	8.52878	96.7231	9.69754	9.2981	8.25482	0.114948	3.55131e-12	0.0456562	0.135729	0.0403773	0.00185882	1.30256e-23	0.337235	0.000176857	5.94597	538.029
2499	583.288	637.6	542.955	1541.65	379.493	747.765	128.446	157.946	13.4825	0.318185	17.7572	42.5099	3.65491	31.2853	305.953	121.367	0.0669387	26.1163	28.6899	8.52878	96.7231	9.69754	9.2981	8.25482	0.114948	3.55131e-12	0.0456562	0.135729	0.0403773	0.00185882	1.30256e-23	0.337235	0.000176857	5.94597	538.029
2500	583.288	637.6	542.955	1541.65	379.493	747.765	128.446	157.946	13.4825	0.318185	17.7572	42.5099	3.65491	31.2853	305.953	121.367	0.0669387	26.1163	28.6899	8.52878	96.7231	9.69754	9.2981	8.25482	0.114948	3.55131e-12	0.0456562	0.135729	0.0403773	0.00185882	1.30256e-23	0.337235	0.000176857	5.94597	538.029
