# Supplementary material for: The Social Cost of Fossil and Industrial CO2 Emissions from 1950 to 2018
Source: Research Square preprint supplement (doi:10.21203/rs.3.rs-2244259/v1), 2022-11-17
Supplement: Supplementary file 20 [file RCP45_MIDYEAR_RADFORCING.xls]

## Sheet: RCP45_MIDYEAR_RADFORCING
RCP4.5__RADIATIVE FORCINGS____________________________
CONTENT: ANNUAL AVERAGE, GLOBAL MEAN RADIATIVE FORCING.
RUN: RCP45, FINAL RELEASE, 29. Nov 2009
RCP4.5 CONTACT: MiniCAM group, Allison Thomson (Allison.Thomson@pnl.gov)
DATE: 30/5/2010 01:02:33 (updated description)
MAGICC-VERSION: 6.3.09, 25 November 2009
FILE PRODUCED BY: RCP Concentration Calculation & Data Group, M. Meinshausen, S. Smith, K. Riahi, D. van Vuuren et al.
DOCUMENTATION: M. Meinshausen, S. Smith et al. (2011) "The RCP GHG concentrations and their extension from 1765 to 2300", DOI 10.1007/s10584-011-0156-z, Climatic Change.
CMIP5 INFO: http://cmip-pcmdi.llnl.gov/cmip5/
RCP DATABASE: http://www.iiasa.ac.at/web-apps/tnt/RcpDb
FURTHER INFO: For data sources, aknowledgements and further information, see http://www.pik-potsdam.de/~mmalte/rcps.
NOTE: THIS FORCING DATASET IS NOT CMIP5 RECOMMENDATION, AS CONCENTRATIONS, NOT FORCING, SHALL BE PRESCRIBED IN MAIN CMIP5 RUNS. SEE OZONE, LANDUSE AND AEROSOL DATA SOURCES DESCRIBED IN CMIP5 NOTES AND RCP DATABASE.
Radiative Forcing after strat. temp. adjustment.;
RCP4.5 starts 2005; 20th century data and earlier is provided for convenience.
COLUMN_DESCRIPTION________________________________________
1 TOTAL_INCLVOLCANIC_RF Total anthropogenic and natural radiative forcing
2 VOLCANIC_ANNUAL_RF Annual mean volcanic stratospheric aerosol forcing
3 SOLAR_RF Solar irradience forcing
4 TOTAL_ANTHRO_RF Total anthropogenic forcing
5 GHG_RF Total greenhouse gas forcing (CO2, CH4, N2O, HFCs, PFCs, SF6, and Montreal Protocol gases).
6 KYOTOGHG_RF Total forcing from greenhouse gases controlled under the Kyoto Protocol (CO2, CH4, N2O, HFCs, PFCs, SF6).
7 CO2CH4N2O_RF Total forcing from CO2, methan and nitrous oxide.
8 CO2_RF CO2 Forcing
9 CH4_RF Methane Forcing
10 N2O_RF Nitrous Oxide Forcing
11 FGASSUM_RF Total forcing from all flourinated gases controlled under the Kyoto Protocol (HFCs, PFCs, SF6; i.e. columns 13-24)
12 MHALOSUM_RF Total forcing from all gases controlled under the Montreal Protocol (columns 25-40)
13-24 Flourinated gases controlled under the Kyoto Protocol
25-40 Ozone Depleting Substances controlled under the Montreal Protocol
41 TOTAER_DIR_RF Total direct aerosol forcing (aggregating columns 42 to 47)
42 OCI_RF Direct fossil fuel aerosol (organic carbon)
43 BCI_RF Direct fossil fuel aerosol (black carbon)
44 SOXI_RF Direct sulphate aerosol
45 NOXI_RF Direct nitrate aerosol
46 BIOMASSAER_RF Direct biomass burning related aerosol
47 MINERALDUST_RF Direct Forcing from mineral dust aerosol
48 CLOUD_TOT_RF Cloud albedo effect
49 STRATOZ_RF Stratospheric ozone forcing
50 TROPOZ_RF Tropospheric ozone forcing
51 CH4OXSTRATH2O_RF Stratospheric water-vapour from methane oxidisation
52 LANDUSE_RF Landuse albedo
53 BCSNOW_RF Black carbon on snow.
&THISFILE_SPECIFICATIONS
THISFILE_DATACOLUMNS	53
THISFILE_FIRSTYEAR	1765
THISFILE_LASTYEAR	2500
THISFILE_ANNUALSTEPS	1
THISFILE_FIRSTDATAROW	61
THISFILE_UNITS	SEE ROW 59
THISFILE_DATTYPE	RCPDAT
/
COLUMN:	1	2	3	4	5	6	7	8	9	10	11	12	13	14	15	16	17	18	19	20	21	22	23	24	25	26	27	28	29	30	31	32	33	34	35	36	37	38	39	40	41	42	43	44	45	46	47	48	49
UNITS:	W/m2	W/m2	W/m2	W/m2	W/m2	W/m2	W/m2	W/m2	W/m2	W/m2	W/m2	W/m2	W/m2	W/m2	W/m2	W/m2	W/m2	W/m2	W/m2	W/m2	W/m2	W/m2	W/m2	W/m2	W/m2	W/m2	W/m2	W/m2	W/m2	W/m2	W/m2	W/m2	W/m2	W/m2	W/m2	W/m2	W/m2	W/m2	W/m2	W/m2	W/m2	W/m2	W/m2	W/m2	W/m2	W/m2	W/m2	W/m2	W/m2
v YEARS/GAS >	TOTAL_INCLVOLCANIC_RF	VOLCANIC_ANNUAL_RF	SOLAR_RF	TOTAL_ANTHRO_RF	GHG_RF	KYOTOGHG_RF	CO2CH4N2O_RF	CO2_RF	CH4_RF	N2O_RF	FGASSUM_RF	MHALOSUM_RF	CF4	C2F6	C6F14	HFC23	HFC32	HFC43_10	HFC125	HFC134a	HFC143a	HFC227ea	HFC245fa	SF6	CFC_11	CFC_12	CFC_113	CFC_114	CFC_115	CARB_TET	MCF	HCFC_22	HCFC_141B	HCFC_142B	HALON1211	HALON1202	HALON1301	HALON2402	CH3BR	CH3CL	TOTAER_DIR_RF	OCI_RF	BCI_RF	SOXI_RF	NOXI_RF	BIOMASSAER_RF	MINERALDUST_RF	CLOUD_TOT_RF	STRATOZ_RF
1765	0	0	-0.0283587	0	0	0	0	0	0	0	0	0	0	0	0	0	0	0	0	0	0	0	0	0	0	0	0	0	0	0	0	0	0	0	0	0	0	0	0	0	0	0	0	0	0	0	0	0	0
1766	0.126027	0.116222	-0.0206938	0.0163188	0.0153635	0.0153635	0.0153635	0.0110491	0.00357577	0.000738661	0	0	0	0	0	0	0	0	0	0	0	0	0	0	0	0	0	0	0	0	0	0	0	0	0	0	0	0	0	0	1.77672e-05	0	0	-2.86731e-05	-1.2928e-05	0.000250103	-0.000190735	-0.000801451	0
1767	0.273031	0.232444	0.00703937	0.0335479	0.0321232	0.0321232	0.0321232	0.023246	0.00736074	0.00151637	0	0	0	0	0	0	0	0	0	0	0	0	0	0	0	0	0	0	0	0	0	0	0	0	0	0	0	0	0	0	-6.46768e-06	0	0	-7.97657e-05	-3.19082e-05	0.000672939	-0.000567733	-0.00238112	0
1768	0.278871	0.197444	0.0462569	0.0351696	0.0349722	0.0349722	0.0349722	0.0256052	0.00777313	0.00159381	0	0	0	0	0	0	0	0	0	0	0	0	0	0	0	0	0	0	0	0	0	0	0	0	0	0	0	0	0	0	-0.000120356	0	0	-0.000120421	-4.16465e-05	0.000977553	-0.000935841	-0.00391494	0
1769	0.242045	0.131819	0.073605	0.036621	0.0378995	0.0378995	0.0378995	0.028057	0.00817237	0.00167006	0	0	0	0	0	0	0	0	0	0	0	0	0	0	0	0	0	0	0	0	0	0	0	0	0	0	0	0	0	0	-0.00028157	0	0	-0.000153962	-4.79302e-05	0.00121549	-0.00129517	-0.0054041	0
1770	0.242824	0.127444	0.0772581	0.038122	0.0408559	0.0408559	0.0408559	0.0305529	0.00855779	0.00174523	0	0	0	0	0	0	0	0	0	0	0	0	0	0	0	0	0	0	0	0	0	0	0	0	0	0	0	0	0	0	-0.000470954	0	0	-0.000182439	-5.25379e-05	0.00140985	-0.00164582	-0.00684976	0
1771	0.284142	0.179944	0.0648944	0.0393037	0.043845	0.043845	0.043845	0.0330936	0.00893207	0.00181931	0	0	0	0	0	0	0	0	0	0	0	0	0	0	0	0	0	0	0	0	0	0	0	0	0	0	0	0	0	0	-0.000888303	-1.68577e-05	6.06652e-05	-0.000242598	-5.69856e-05	0.00135539	-0.00198792	-0.00844667	0
1772	0.299857	0.214944	0.0443363	0.0405766	0.0468967	0.0468967	0.0468967	0.0357058	0.00929859	0.00189228	0	0	0	0	0	0	0	0	0	0	0	0	0	0	0	0	0	0	0	0	0	0	0	0	0	0	0	0	0	0	-0.00132732	-3.37153e-05	0.00012133	-0.000298156	-6.07885e-05	0.00126556	-0.00232155	-0.0100013	0
1773	0.290756	0.228069	0.0203481	0.0423385	0.0500195	0.0500195	0.0500195	0.0383971	0.00965806	0.00196426	0	0	0	0	0	0	0	0	0	0	0	0	0	0	0	0	0	0	0	0	0	0	0	0	0	0	0	0	0	0	-0.00157118	-3.37153e-05	0.00012133	-0.000314621	-6.33834e-05	0.00136606	-0.00264685	-0.0113213	0
1774	0.2781	0.232444	0.00144375	0.0442116	0.0532061	0.0532061	0.0532061	0.0411609	0.0100098	0.00203544	0	0	0	0	0	0	0	0	0	0	0	0	0	0	0	0	0	0	0	0	0	0	0	0	0	0	0	0	0	0	-0.00181491	-3.37153e-05	0.00012133	-0.000329868	-6.57492e-05	0.001457	-0.00296391	-0.012602	0
1775	0.268839	0.232444	-0.00981313	0.046208	0.0564687	0.0564687	0.0564687	0.0440096	0.0103531	0.00210598	0	0	0	0	0	0	0	0	0	0	0	0	0	0	0	0	0	0	0	0	0	0	0	0	0	0	0	0	0	0	-0.00205687	-3.37153e-05	0.00012133	-0.000344145	-6.79547e-05	0.00154045	-0.00327284	-0.0138446	0
1776	0.276856	0.232444	-0.00395063	0.0483625	0.0598423	0.0598423	0.0598423	0.0469792	0.0106873	0.00217585	0	0	0	0	0	0	0	0	0	0	0	0	0	0	0	0	0	0	0	0	0	0	0	0	0	0	0	0	0	0	-0.00229589	-3.37153e-05	0.00012133	-0.00035764	-7.0046e-05	0.00161793	-0.00357375	-0.0150498	0
1777	0.305761	0.232444	0.022645	0.0506714	0.0633239	0.0633239	0.0633239	0.0500673	0.0110116	0.00224499	0	0	0	0	0	0	0	0	0	0	0	0	0	0	0	0	0	0	0	0	0	0	0	0	0	0	0	0	0	0	-0.00253112	-3.37153e-05	0.00012133	-0.000370499	-7.2055e-05	0.00169058	-0.00386676	-0.0162188	0
1778	0.337875	0.232444	0.0523687	0.0530622	0.0668415	0.0668415	0.0668415	0.0532026	0.0113254	0.0023135	0	0	0	0	0	0	0	0	0	0	0	0	0	0	0	0	0	0	0	0	0	0	0	0	0	0	0	0	0	0	-0.0027619	-3.37153e-05	0.00012133	-0.000382835	-7.40046e-05	0.00175929	-0.00415196	-0.0173523	0
1779	0.347581	0.232444	0.0597012	0.0554354	0.0702966	0.0702966	0.0702966	0.0562871	0.0116279	0.00238163	0	0	0	0	0	0	0	0	0	0	0	0	0	0	0	0	0	0	0	0	0	0	0	0	0	0	0	0	0	0	-0.00298778	-3.37153e-05	0.00012133	-0.000394738	-7.59118e-05	0.00182473	-0.00442948	-0.0184512	0
1780	0.341674	0.232444	0.0515287	0.057701	0.0736012	0.0736012	0.0736012	0.0592345	0.0119171	0.00244953	0	0	0	0	0	0	0	0	0	0	0	0	0	0	0	0	0	0	0	0	0	0	0	0	0	0	0	0	0	0	-0.0032084	-3.37153e-05	0.00012133	-0.00040628	-7.77893e-05	0.00188746	-0.00469941	-0.0195164	0
1781	0.333722	0.232444	0.041895	0.0593826	0.0767183	0.0767183	0.0767183	0.0620123	0.0121889	0.00251718	0	0	0	0	0	0	0	0	0	0	0	0	0	0	0	0	0	0	0	0	0	0	0	0	0	0	0	0	0	0	-0.0036953	-5.0573e-05	0.000181996	-0.000443034	-8.00993e-05	0.00165829	-0.00496187	-0.0207342	0
1782	0.29102	0.210569	0.019495	0.0609557	0.0796905	0.0796905	0.0796905	0.0646641	0.0124419	0.00258449	0	0	0	0	0	0	0	0	0	0	0	0	0	0	0	0	0	0	0	0	0	0	0	0	0	0	0	0	0	0	-0.00417917	-6.74306e-05	0.000242661	-0.000479101	-8.23858e-05	0.00142406	-0.00521697	-0.0219192	0
1783	0.175605	0.118694	-0.00603313	0.0629442	0.0826033	0.0826033	0.0826033	0.0672719	0.0126798	0.00265156	0	0	0	0	0	0	0	0	0	0	0	0	0	0	0	0	0	0	0	0	0	0	0	0	0	0	0	0	0	0	-0.0043878	-6.74306e-05	0.000242661	-0.000489063	-8.42044e-05	0.00147505	-0.00546481	-0.0228868	0
1784	0.0902692	0.0443192	-0.0190575	0.0650075	0.0855481	0.0855481	0.0855481	0.0699211	0.0129083	0.00271864	0	0	0	0	0	0	0	0	0	0	0	0	0	0	0	0	0	0	0	0	0	0	0	0	0	0	0	0	0	0	-0.00458993	-6.74306e-05	0.000242661	-0.000498942	-8.60251e-05	0.00152532	-0.00570551	-0.0238237	0
1785	0.162453	0.101194	-0.00597625	0.0672351	0.0886122	0.0886122	0.0886122	0.0726933	0.013133	0.00278589	0	0	0	0	0	0	0	0	0	0	0	0	0	0	0	0	0	0	0	0	0	0	0	0	0	0	0	0	0	0	-0.00478558	-6.74306e-05	0.000242661	-0.000508756	-8.78518e-05	0.00157496	-0.00593917	-0.0247309	0
1786	0.289562	0.188694	0.0311894	0.0696782	0.0918446	0.0918446	0.0918446	0.0756317	0.0133596	0.00285332	0	0	0	0	0	0	0	0	0	0	0	0	0	0	0	0	0	0	0	0	0	0	0	0	0	0	0	0	0	0	-0.00497481	-6.74306e-05	0.000242661	-0.00051852	-8.96878e-05	0.00162407	-0.00616591	-0.025609	0
1787	0.352999	0.223694	0.0569931	0.0723117	0.0952178	0.0952178	0.0952178	0.0787033	0.0135937	0.00292083	0	0	0	0	0	0	0	0	0	0	0	0	0	0	0	0	0	0	0	0	0	0	0	0	0	0	0	0	0	0	-0.00515766	-6.74306e-05	0.000242661	-0.000528246	-9.15357e-05	0.00167271	-0.00638582	-0.0264587	0
1788	0.361769	0.228069	0.0586425	0.0750571	0.0986512	0.0986512	0.0986512	0.0818218	0.0138409	0.0029885	0	0	0	0	0	0	0	0	0	0	0	0	0	0	0	0	0	0	0	0	0	0	0	0	0	0	0	0	0	0	-0.0053342	-6.74306e-05	0.000242661	-0.000537943	-9.3398e-05	0.00172093	-0.00659903	-0.0272807	0
1789	0.251054	0.123069	0.0501594	0.0778252	0.102053	0.102053	0.102053	0.0848899	0.0141068	0.00305652	0	0	0	0	0	0	0	0	0	0	0	0	0	0	0	0	0	0	0	0	0	0	0	0	0	0	0	0	0	0	-0.00550453	-6.74306e-05	0.000242661	-0.00054762	-9.52767e-05	0.00176877	-0.00680563	-0.0280756	0
1790	0.0888822	-0.0256808	0.0340112	0.0805518	0.105358	0.105358	0.105358	0.0878369	0.014396	0.00312507	0	0	0	0	0	0	0	0	0	0	0	0	0	0	0	0	0	0	0	0	0	0	0	0	0	0	0	0	0	0	-0.00566872	-6.74306e-05	0.000242661	-0.000557285	-9.71739e-05	0.00181626	-0.00700575	-0.0288442	0
1791	0.10802	0.00931922	0.0159119	0.0827889	0.108565	0.108565	0.108565	0.090661	0.0147095	0.00319415	0	0	0	0	0	0	0	0	0	0	0	0	0	0	0	0	0	0	0	0	0	0	0	0	0	0	0	0	0	0	-0.00611429	-8.42883e-05	0.000303326	-0.000589915	-9.94791e-05	0.00155555	-0.00719948	-0.0297669	0
1792	0.232799	0.140569	0.00721438	0.0850151	0.111707	0.111707	0.111707	0.0933979	0.0150454	0.00326368	0	0	0	0	0	0	0	0	0	0	0	0	0	0	0	0	0	0	0	0	0	0	0	0	0	0	0	0	0	0	-0.00655452	-0.000101146	0.000363991	-0.000622448	-0.000101804	0.00129383	-0.00738694	-0.030664	0
1793	0.294575	0.206194	0.000695625	0.0876853	0.114796	0.114796	0.114796	0.0960604	0.0154015	0.00333373	0	0	0	0	0	0	0	0	0	0	0	0	0	0	0	0	0	0	0	0	0	0	0	0	0	0	0	0	0	0	-0.00670198	-0.000101146	0.000363991	-0.000631935	-0.000103761	0.0013391	-0.00756823	-0.0313564	0
1794	0.291738	0.214944	-0.0135494	0.0903436	0.117822	0.117822	0.117822	0.0986421	0.0157759	0.00340449	0	0	0	0	0	0	0	0	0	0	0	0	0	0	0	0	0	0	0	0	0	0	0	0	0	0	0	0	0	0	-0.00684351	-0.000101146	0.000363991	-0.000641468	-0.000105745	0.00138433	-0.00774347	-0.0320248	0
1795	0.256846	0.193069	-0.0292075	0.0929845	0.120784	0.120784	0.120784	0.101141	0.016167	0.00347613	0	0	0	0	0	0	0	0	0	0	0	0	0	0	0	0	0	0	0	0	0	0	0	0	0	0	0	0	0	0	-0.00697922	-0.000101146	0.000363991	-0.000651046	-0.000107754	0.0014295	-0.00791277	-0.03267	0
1796	0.245053	0.188694	-0.0392525	0.0956109	0.123685	0.123685	0.123685	0.103563	0.0165732	0.00354868	0	0	0	0	0	0	0	0	0	0	0	0	0	0	0	0	0	0	0	0	0	0	0	0	0	0	0	0	0	0	-0.00710926	-0.000101146	0.000363991	-0.000660671	-0.000109792	0.00147458	-0.00807622	-0.0332925	0
1797	0.262057	0.210569	-0.0462919	0.0977792	0.12653	0.12653	0.12653	0.105915	0.0169925	0.00362206	0	0	0	0	0	0	0	0	0	0	0	0	0	0	0	0	0	0	0	0	0	0	0	0	0	0	0	0	0	0	-0.00752309	-0.000118004	0.000424656	-0.000693	-0.000112238	0.00120944	-0.00823395	-0.0340702	0
1798	0.277467	0.228069	-0.0505312	0.0999294	0.129313	0.129313	0.129313	0.108193	0.0174234	0.00369635	0	0	0	0	0	0	0	0	0	0	0	0	0	0	0	0	0	0	0	0	0	0	0	0	0	0	0	0	0	0	-0.00793151	-0.000134861	0.000485322	-0.000725378	-0.000114715	0.000944184	-0.00838606	-0.0348259	0
1799	0.285635	0.232444	-0.0493063	0.102497	0.132027	0.132027	0.132027	0.110391	0.0178642	0.00377173	0	0	0	0	0	0	0	0	0	0	0	0	0	0	0	0	0	0	0	0	0	0	0	0	0	0	0	0	0	0	-0.00804523	-0.000134861	0.000485322	-0.000735158	-0.000116843	0.000988968	-0.00853266	-0.035383	0
1800	0.30346	0.232444	-0.0335737	0.104589	0.134669	0.134669	0.134669	0.112505	0.0183161	0.00384836	0	0	0	0	0	0	0	0	0	0	0	0	0	0	0	0	0	0	0	0	0	0	0	0	0	0	0	0	0	0	-0.00844273	-0.000151719	0.000545987	-0.000767714	-0.000119385	0.000723959	-0.00867386	-0.0360958	0
1801	0.325814	0.232444	-0.0133	0.10667	0.137256	0.137256	0.137256	0.114543	0.0187862	0.00392631	0	0	0	0	0	0	0	0	0	0	0	0	0	0	0	0	0	0	0	0	0	0	0	0	0	0	0	0	0	0	-0.00883486	-0.000168577	0.000606652	-0.000800378	-0.000121961	0.000459176	-0.00880977	-0.0367883	0
1802	0.322938	0.232444	-0.0178194	0.108313	0.139798	0.139798	0.139798	0.116513	0.0192802	0.00400554	0	0	0	0	0	0	0	0	0	0	0	0	0	0	0	0	0	0	0	0	0	0	0	0	0	0	0	0	0	0	-0.00950964	-0.000202292	0.000727983	-0.000856043	-0.00012496	-0.000113837	-0.00894049	-0.0376356	0
1803	0.308295	0.232444	-0.034545	0.110395	0.142293	0.142293	0.142293	0.11841	0.0197968	0.0040861	0	0	0	0	0	0	0	0	0	0	0	0	0	0	0	0	0	0	0	0	0	0	0	0	0	0	0	0	0	0	-0.00989057	-0.00021915	0.000788648	-0.000889063	-0.000127612	-0.000377254	-0.00906614	-0.0382885	0
1804	0.306252	0.232444	-0.0395369	0.113344	0.144725	0.144725	0.144725	0.120225	0.0203315	0.00416812	0	0	0	0	0	0	0	0	0	0	0	0	0	0	0	0	0	0	0	0	0	0	0	0	0	0	0	0	0	0	-0.00968924	-0.000202292	0.000727983	-0.000876652	-0.000129537	-2.19124e-05	-0.00918683	-0.0385724	0
1805	0.305549	0.232444	-0.0427263	0.115831	0.147099	0.147099	0.147099	0.121968	0.0208796	0.00425172	0	0	0	0	0	0	0	0	0	0	0	0	0	0	0	0	0	0	0	0	0	0	0	0	0	0	0	0	0	0	-0.00977162	-0.000202292	0.000727983	-0.000887137	-0.000131884	2.43633e-05	-0.00930266	-0.0390136	0
1806	0.296562	0.232444	-0.0537644	0.117883	0.149444	0.149444	0.149444	0.12367	0.0214367	0.00433697	0	0	0	0	0	0	0	0	0	0	0	0	0	0	0	0	0	0	0	0	0	0	0	0	0	0	0	0	0	0	-0.010136	-0.00021915	0.000788648	-0.000920814	-0.000134662	-0.000236318	-0.00941374	-0.0396116	0
1807	0.287336	0.232444	-0.0650431	0.119935	0.151757	0.151757	0.151757	0.125335	0.0219981	0.00442389	0	0	0	0	0	0	0	0	0	0	0	0	0	0	0	0	0	0	0	0	0	0	0	0	0	0	0	0	0	0	-0.0104954	-0.000236007	0.000849313	-0.000954685	-0.000137484	-0.000496324	-0.00952019	-0.0401925	0
1808	-0.206609	-0.257556	-0.0714175	0.122364	0.153977	0.153977	0.153977	0.126905	0.0225594	0.00451253	0	0	0	0	0	0	0	0	0	0	0	0	0	0	0	0	0	0	0	0	0	0	0	0	0	0	0	0	0	0	-0.0105631	-0.000236007	0.000849313	-0.000965661	-0.00013996	-0.00044866	-0.0096221	-0.0405827	0
1809	-1.35012	-1.39943	-0.0753287	0.124641	0.156019	0.156019	0.156019	0.1283	0.023116	0.00460296	0	0	0	0	0	0	0	0	0	0	0	0	0	0	0	0	0	0	0	0	0	0	0	0	0	0	0	0	0	0	-0.0106265	-0.000236007	0.000849313	-0.000976744	-0.00014248	-0.000400998	-0.0097196	-0.040957	0
1810	-1.75196	-1.80193	-0.0767375	0.126704	0.157824	0.157824	0.157824	0.129463	0.0236656	0.00469527	0	0	0	0	0	0	0	0	0	0	0	0	0	0	0	0	0	0	0	0	0	0	0	0	0	0	0	0	0	0	-0.0106858	-0.000236007	0.000849313	-0.00098793	-0.000145046	-0.000353387	-0.00981279	-0.041316	0
1811	-0.956129	-1.01006	-0.0742044	0.128132	0.159405	0.159405	0.159405	0.130404	0.0242113	0.00478954	0	0	0	0	0	0	0	0	0	0	0	0	0	0	0	0	0	0	0	0	0	0	0	0	0	0	0	0	0	0	-0.0110244	-0.000252865	0.000909978	-0.00102288	-0.000148063	-0.000608758	-0.00990177	-0.0418329	0
1812	-0.279183	-0.340681	-0.0679394	0.129438	0.160837	0.160837	0.160837	0.131194	0.0247577	0.00488582	0	0	0	0	0	0	0	0	0	0	0	0	0	0	0	0	0	0	0	0	0	0	0	0	0	0	0	0	0	0	-0.0113582	-0.000269723	0.000970643	-0.00105807	-0.000151131	-0.000863292	-0.00998666	-0.0423352	0
1813	-0.0779071	-0.148181	-0.0608563	0.13113	0.162193	0.162193	0.162193	0.131903	0.0253063	0.00498417	0	0	0	0	0	0	0	0	0	0	0	0	0	0	0	0	0	0	0	0	0	0	0	0	0	0	0	0	0	0	-0.0114044	-0.000269723	0.000970643	-0.00106982	-0.000153847	-0.000814097	-0.0100676	-0.0426505	0
1814	-0.598962	-0.677556	-0.0542369	0.132831	0.163532	0.163532	0.163532	0.132591	0.0258564	0.00508465	0	0	0	0	0	0	0	0	0	0	0	0	0	0	0	0	0	0	0	0	0	0	0	0	0	0	0	0	0	0	-0.011447	-0.000269723	0.000970643	-0.00108169	-0.000156615	-0.000765034	-0.0101446	-0.0429521	0
1815	-2.06194	-2.15193	-0.0441744	0.134164	0.16491	0.16491	0.16491	0.133315	0.0264075	0.00518734	0	0	0	0	0	0	0	0	0	0	0	0	0	0	0	0	0	0	0	0	0	0	0	0	0	0	0	0	0	0	-0.0117657	-0.00028658	0.00103131	-0.00111791	-0.000159854	-0.00101481	-0.0102179	-0.0434128	0
1816	-2.56318	-2.66381	-0.0345275	0.135154	0.166351	0.166351	0.166351	0.134099	0.0269592	0.00529233	0	0	0	0	0	0	0	0	0	0	0	0	0	0	0	0	0	0	0	0	0	0	0	0	0	0	0	0	0	0	-0.0123587	-0.000320295	0.00115264	-0.00117881	-0.000163576	-0.00156113	-0.0102875	-0.0440324	0
1817	-1.39423	-1.49568	-0.0347594	0.13621	0.167829	0.167829	0.167829	0.134918	0.0275109	0.00539971	0	0	0	0	0	0	0	0	0	0	0	0	0	0	0	0	0	0	0	0	0	0	0	0	0	0	0	0	0	0	-0.0129443	-0.000354011	0.00127397	-0.00124048	-0.000167371	-0.00210289	-0.0103535	-0.0446389	0
1818	-0.265648	-0.362556	-0.0407925	0.137701	0.169288	0.169288	0.169288	0.135717	0.028062	0.00550955	0	0	0	0	0	0	0	0	0	0	0	0	0	0	0	0	0	0	0	0	0	0	0	0	0	0	0	0	0	0	-0.0132463	-0.000370868	0.00133463	-0.00127819	-0.000170809	-0.00234485	-0.0104162	-0.0450616	0
1819	0.185347	0.0924442	-0.0466594	0.139562	0.170669	0.170669	0.170669	0.136435	0.0286121	0.00562183	0	0	0	0	0	0	0	0	0	0	0	0	0	0	0	0	0	0	0	0	0	0	0	0	0	0	0	0	0	0	-0.0132666	-0.000370868	0.00133463	-0.00129161	-0.000173885	-0.00228941	-0.0104755	-0.0453015	0
1820	0.311867	0.223694	-0.0531475	0.14132	0.171926	0.171926	0.171926	0.137029	0.0291608	0.00573657	0	0	0	0	0	0	0	0	0	0	0	0	0	0	0	0	0	0	0	0	0	0	0	0	0	0	0	0	0	0	-0.0132841	-0.000370868	0.00133463	-0.00130516	-0.000177022	-0.0022341	-0.0105315	-0.0455305	0
1821	0.318984	0.232444	-0.0564375	0.142978	0.173064	0.173064	0.173064	0.137502	0.0297081	0.00585384	0	0	0	0	0	0	0	0	0	0	0	0	0	0	0	0	0	0	0	0	0	0	0	0	0	0	0	0	0	0	-0.0132988	-0.000370868	0.00133463	-0.00131884	-0.000180224	-0.00217896	-0.0105845	-0.0457491	0
1822	0.321522	0.232444	-0.0550769	0.144155	0.174125	0.174125	0.174125	0.137897	0.0302546	0.00597377	0	0	0	0	0	0	0	0	0	0	0	0	0	0	0	0	0	0	0	0	0	0	0	0	0	0	0	0	0	0	-0.0135826	-0.000387726	0.0013953	-0.00135815	-0.000183944	-0.00241361	-0.0106345	-0.0461284	0
1823	0.325542	0.232444	-0.0517956	0.144894	0.175148	0.175148	0.175148	0.138251	0.0308006	0.00609643	0	0	0	0	0	0	0	0	0	0	0	0	0	0	0	0	0	0	0	0	0	0	0	0	0	0	0	0	0	0	-0.0141332	-0.000421441	0.00151663	-0.0014235	-0.000188197	-0.00293517	-0.0106815	-0.0466684	0
1824	0.333737	0.232444	-0.0447738	0.146066	0.176162	0.176162	0.176162	0.138595	0.0313461	0.00622184	0	0	0	0	0	0	0	0	0	0	0	0	0	0	0	0	0	0	0	0	0	0	0	0	0	0	0	0	0	0	-0.0144072	-0.000438299	0.0015773	-0.00146387	-0.000192079	-0.00316445	-0.0107258	-0.0470284	0
1825	0.347678	0.232444	-0.0320425	0.147276	0.177192	0.177192	0.177192	0.138951	0.0318913	0.00635001	0	0	0	0	0	0	0	0	0	0	0	0	0	0	0	0	0	0	0	0	0	0	0	0	0	0	0	0	0	0	-0.0146751	-0.000455157	0.00163796	-0.001505	-0.000196051	-0.00338943	-0.0107674	-0.0473792	0
1826	0.366029	0.232444	-0.0149362	0.148521	0.17824	0.17824	0.17824	0.139322	0.0324366	0.00648103	0	0	0	0	0	0	0	0	0	0	0	0	0	0	0	0	0	0	0	0	0	0	0	0	0	0	0	0	0	0	-0.0149395	-0.000472014	0.00169863	-0.00154647	-0.000200106	-0.00361307	-0.0108065	-0.0477217	0
1827	0.385377	0.232444	0.00313687	0.149795	0.179296	0.179296	0.179296	0.139699	0.0329819	0.00661505	0	0	0	0	0	0	0	0	0	0	0	0	0	0	0	0	0	0	0	0	0	0	0	0	0	0	0	0	0	0	-0.0151978	-0.000488872	0.00175929	-0.00158874	-0.000204258	-0.00383219	-0.0108431	-0.0480558	0
1828	0.3956	0.228069	0.0164413	0.15109	0.180355	0.180355	0.180355	0.140075	0.0335275	0.00675215	0	0	0	0	0	0	0	0	0	0	0	0	0	0	0	0	0	0	0	0	0	0	0	0	0	0	0	0	0	0	-0.0154529	-0.00050573	0.00181996	-0.00163137	-0.000208498	-0.0040499	-0.0108773	-0.0483824	0
1829	0.369518	0.193069	0.0236294	0.152819	0.181418	0.181418	0.181418	0.140452	0.0340735	0.00689231	0	0	0	0	0	0	0	0	0	0	0	0	0	0	0	0	0	0	0	0	0	0	0	0	0	0	0	0	0	0	-0.0154395	-0.00050573	0.00181996	-0.00164779	-0.000212348	-0.00398423	-0.0109093	-0.0485322	0
1830	0.151585	-0.0213058	0.0207813	0.152109	0.182483	0.182483	0.182483	0.140828	0.034619	0.00703549	0	0	0	0	0	0	0	0	0	0	0	0	0	0	0	0	0	0	0	0	0	0	0	0	0	0	0	0	0	0	-0.01699	-0.000606876	0.00218395	-0.00182798	-0.00021929	-0.00558057	-0.0109392	-0.0496887	0
1831	-0.242712	-0.397556	0.003675	0.151168	0.182889	0.182889	0.182889	0.140546	0.035161	0.00718177	0	0	0	0	0	0	0	0	0	0	0	0	0	0	0	0	0	0	0	0	0	0	0	0	0	0	0	0	0	0	-0.0182706	-0.000691164	0.00248727	-0.00198224	-0.000225857	-0.00689156	-0.010967	-0.0506703	0
1832	-0.35069	-0.485056	-0.0166381	0.151004	0.181598	0.181598	0.181598	0.138569	0.0356978	0.0073313	0	0	0	0	0	0	0	0	0	0	0	0	0	0	0	0	0	0	0	0	0	0	0	0	0	0	0	0	0	0	-0.0179767	-0.000674306	0.00242661	-0.00197423	-0.000229549	-0.00653227	-0.010993	-0.0506325	0
1833	-0.0619758	-0.183181	-0.0278906	0.149096	0.179365	0.179365	0.179365	0.13565	0.0362309	0.00748419	0	0	0	0	0	0	0	0	0	0	0	0	0	0	0	0	0	0	0	0	0	0	0	0	0	0	0	0	0	0	-0.0181987	-0.000691164	0.00248727	-0.00202167	-0.000234363	-0.00672163	-0.0110171	-0.050926	0
1834	-0.2153	-0.345056	-0.0175394	0.147295	0.177227	0.177227	0.177227	0.132824	0.0367633	0.00764044	0	0	0	0	0	0	0	0	0	0	0	0	0	0	0	0	0	0	0	0	0	0	0	0	0	0	0	0	0	0	-0.0184177	-0.000708022	0.00254794	-0.00206953	-0.000239287	-0.00690921	-0.0110395	-0.0512145	0
1835	-0.819113	-0.988181	0.0235506	0.145517	0.175094	0.175094	0.175094	0.129996	0.0372979	0.00780001	0	0	0	0	0	0	0	0	0	0	0	0	0	0	0	0	0	0	0	0	0	0	0	0	0	0	0	0	0	0	-0.0186307	-0.000724879	0.0026086	-0.00211834	-0.000244341	-0.00709135	-0.0110604	-0.0514981	0
1836	-0.735064	-0.948806	0.071575	0.142167	0.172967	0.172967	0.172967	0.127166	0.0378376	0.00796301	0	0	0	0	0	0	0	0	0	0	0	0	0	0	0	0	0	0	0	0	0	0	0	0	0	0	0	0	0	0	-0.0198478	-0.000809168	0.00291193	-0.00228265	-0.000251692	-0.00833648	-0.0110798	-0.0524478	0
1837	-0.124807	-0.349431	0.0853737	0.13925	0.17085	0.17085	0.17085	0.124335	0.0383853	0.0081296	0	0	0	0	0	0	0	0	0	0	0	0	0	0	0	0	0	0	0	0	0	0	0	0	0	0	0	0	0	0	-0.0208025	-0.000876598	0.00315459	-0.00241995	-0.000258661	-0.00930414	-0.0110978	-0.0532255	0
1838	0.249179	0.0443192	0.0663469	0.138513	0.169691	0.169691	0.169691	0.122447	0.038944	0.0082999	0	0	0	0	0	0	0	0	0	0	0	0	0	0	0	0	0	0	0	0	0	0	0	0	0	0	0	0	0	0	-0.0209913	-0.000893456	0.00321526	-0.00247272	-0.000264165	-0.00946171	-0.0111145	-0.0534965	0
1839	0.363501	0.179944	0.0447212	0.138836	0.169966	0.169966	0.169966	0.121975	0.0395165	0.00847385	0	0	0	0	0	0	0	0	0	0	0	0	0	0	0	0	0	0	0	0	0	0	0	0	0	0	0	0	0	0	-0.0214243	-0.000927171	0.00333659	-0.00255554	-0.000270371	-0.00987763	-0.0111302	-0.0539314	0
1840	0.343505	0.179944	0.0242725	0.139288	0.170735	0.170735	0.170735	0.121975	0.0401075	0.00865206	0	0	0	0	0	0	0	0	0	0	0	0	0	0	0	0	0	0	0	0	0	0	0	0	0	0	0	0	0	0	-0.0220948	-0.000977744	0.00351858	-0.00266948	-0.00027732	-0.0105441	-0.0111447	-0.0545298	0
1841	0.31934	0.175569	0.00348687	0.140284	0.172016	0.172016	0.172016	0.122447	0.0407232	0.00884589	0	0	0	0	0	0	0	0	0	0	0	0	0	0	0	0	0	0	0	0	0	0	0	0	0	0	0	0	0	0	-0.022756	-0.00102832	0.00370058	-0.00278502	-0.000284448	-0.0112005	-0.0111584	-0.0551254	0
1842	0.319973	0.188694	-0.0110381	0.142317	0.174299	0.174299	0.174299	0.123863	0.0413656	0.00907048	0	0	0	0	0	0	0	0	0	0	0	0	0	0	0	0	0	0	0	0	0	0	0	0	0	0	0	0	0	0	-0.0234046	-0.00107889	0.00388257	-0.00290272	-0.000291779	-0.0118426	-0.0111712	-0.055718	0
1843	0.293452	0.166819	-0.0182569	0.14489	0.177093	0.177093	0.177093	0.125751	0.0420297	0.00931265	0	0	0	0	0	0	0	0	0	0	0	0	0	0	0	0	0	0	0	0	0	0	0	0	0	0	0	0	0	0	-0.0240439	-0.00112946	0.00406457	-0.00302205	-0.000299302	-0.0124744	-0.0111833	-0.0563087	0
1844	0.288578	0.153694	-0.0130681	0.147952	0.180349	0.180349	0.180349	0.12811	0.0427082	0.00953103	0	0	0	0	0	0	0	0	0	0	0	0	0	0	0	0	0	0	0	0	0	0	0	0	0	0	0	0	0	0	-0.0246704	-0.00118004	0.00424656	-0.0031436	-0.000307044	-0.0130916	-0.0111948	-0.0568972	0
1845	0.338834	0.184319	0.003745	0.15077	0.184482	0.184482	0.184482	0.13141	0.0433937	0.00967897	0	0	0	0	0	0	0	0	0	0	0	0	0	0	0	0	0	0	0	0	0	0	0	0	0	0	0	0	0	0	-0.025997	-0.00128118	0.00461056	-0.00336054	-0.000316863	-0.0144432	-0.0112058	-0.0579789	0
1846	0.391591	0.214944	0.022365	0.154282	0.188527	0.188527	0.188527	0.134708	0.0440787	0.00974026	0	0	0	0	0	0	0	0	0	0	0	0	0	0	0	0	0	0	0	0	0	0	0	0	0	0	0	0	0	0	-0.026836	-0.00134861	0.00485322	-0.00351756	-0.000325679	-0.0152809	-0.0112164	-0.0587295	0
1847	0.429859	0.228069	0.0441262	0.157663	0.19204	0.19204	0.19204	0.137534	0.044756	0.00975013	0	0	0	0	0	0	0	0	0	0	0	0	0	0	0	0	0	0	0	0	0	0	0	0	0	0	0	0	0	0	-0.0274202	-0.00139919	0.00503521	-0.00364652	-0.000334144	-0.0158488	-0.0112267	-0.0593136	0
1848	0.458917	0.232444	0.0653581	0.161115	0.195995	0.195995	0.195995	0.140828	0.0454182	0.00974841	0	0	0	0	0	0	0	0	0	0	0	0	0	0	0	0	0	0	0	0	0	0	0	0	0	0	0	0	0	0	-0.0282296	-0.00146662	0.00527787	-0.00380874	-0.000343474	-0.0166518	-0.0112369	-0.0600621	0
1849	0.444998	0.215994	0.0644481	0.164556	0.199925	0.199925	0.199925	0.144121	0.0460579	0.00974679	0	0	0	0	0	0	0	0	0	0	0	0	0	0	0	0	0	0	0	0	0	0	0	0	0	0	0	0	0	0	-0.0290206	-0.00153405	0.00552053	-0.0039742	-0.000353096	-0.0174328	-0.011247	-0.0608094	0
1850	0.405396	0.192005	0.0468169	0.166575	0.203438	0.203438	0.203438	0.146941	0.0466654	0.00983124	0	0	0	0	0	0	0	0	0	0	0	0	0	0	0	0	0	0	0	0	0	0	0	0	0	0	0	0	0	0	-0.0303756	-0.00165205	0.00594519	-0.0042566	-0.000366397	-0.0187885	-0.0112572	-0.0620457	0
1851	0.398625	0.193033	0.0350131	0.170579	0.207233	0.20723	0.20723	0.14976	0.0473827	0.010087	0	3.37155e-06	0	0	0	0	0	0	0	0	0	0	0	0	0	0	0	0	0	3.37155e-06	0	0	0	0	0	0	0	0	0	0	-0.0310854	-0.00171948	0.00618785	-0.00446059	-0.000380927	-0.0196019	-0.0111103	-0.0624378	0
1852	0.400521	0.208797	0.0234325	0.168291	0.210775	0.210765	0.210765	0.152108	0.0482287	0.0104282	0	1.0112e-05	0	0	0	0	0	0	0	0	0	0	0	0	0	0	0	0	0	1.0112e-05	0	0	0	0	0	0	0	0	0	0	-0.031923	-0.00177005	0.00636985	-0.00477111	-0.000426812	-0.01914	-0.0121848	-0.0667802	0
1853	0.393475	0.223534	0.00493063	0.165011	0.214315	0.214298	0.214298	0.154455	0.0490739	0.0107693	0	1.68545e-05	0	0	0	0	0	0	0	0	0	0	0	0	0	0	0	0	0	1.68545e-05	0	0	0	0	0	0	0	0	0	0	-0.0328911	-0.00185434	0.00667317	-0.00516171	-0.00047338	-0.0187067	-0.0133681	-0.0716228	0
1854	0.384141	0.231759	-0.0141137	0.166496	0.218323	0.218299	0.218299	0.15727	0.0499183	0.0111104	0	2.36015e-05	0	0	0	0	0	0	0	0	0	0	0	0	0	0	0	0	0	2.36015e-05	0	0	0	0	0	0	0	0	0	0	-0.0347687	-0.00205663	0.00740116	-0.00568177	-0.000494128	-0.0206647	-0.0132727	-0.0732375	0
1855	0.242826	0.101187	-0.0262806	0.16792	0.222187	0.222157	0.222157	0.160084	0.0506214	0.0114514	0	3.03485e-05	0	0	0	0	0	0	0	0	0	0	0	0	0	0	0	0	0	3.03485e-05	0	0	0	0	0	0	0	0	0	0	-0.0365941	-0.00225893	0.00812914	-0.00620497	-0.000514249	-0.0225881	-0.013157	-0.0747763	0
1856	-0.211073	-0.356671	-0.0247188	0.170318	0.226049	0.226012	0.226012	0.162896	0.0513238	0.0117924	0	3.7089e-05	0	0	0	0	0	0	0	0	0	0	0	0	0	0	0	0	0	3.7089e-05	0	0	0	0	0	0	0	0	0	0	-0.0373583	-0.00237693	0.00855379	-0.00657552	-0.000535075	-0.023216	-0.0132085	-0.0760571	0
1857	-0.44449	-0.610276	-0.00660625	0.172392	0.23005	0.230006	0.230006	0.165707	0.0521659	0.0121333	0	4.38295e-05	0	0	0	0	0	0	0	0	0	0	0	0	0	0	0	0	0	4.38295e-05	0	0	0	0	0	0	0	0	0	0	-0.0379593	-0.00247808	0.00891779	-0.00692952	-0.000560068	-0.0234691	-0.0134404	-0.0777602	0
1858	-0.0968363	-0.297726	0.0245875	0.176302	0.234516	0.234465	0.234465	0.168984	0.0530073	0.0124741	0	5.05765e-05	0	0	0	0	0	0	0	0	0	0	0	0	0	0	0	0	0	5.05765e-05	0	0	0	0	0	0	0	0	0	0	-0.0377434	-0.00251179	0.00903912	-0.00713598	-0.000582046	-0.0228811	-0.0136716	-0.0788276	0
1859	0.262109	0.0281901	0.0549981	0.178921	0.238979	0.238922	0.238922	0.172259	0.0538479	0.0128149	0	5.7317e-05	0	0	0	0	0	0	0	0	0	0	0	0	0	0	0	0	0	5.7317e-05	0	0	0	0	0	0	0	0	0	0	-0.0382962	-0.00261294	0.00940311	-0.00749556	-0.000607703	-0.0230821	-0.013901	-0.080499	0
1860	0.390709	0.150537	0.0655506	0.174622	0.242972	0.242908	0.242908	0.175065	0.0546876	0.0131556	0	6.40575e-05	0	0	0	0	0	0	0	0	0	0	0	0	0	0	0	0	0	6.40575e-05	0	0	0	0	0	0	0	0	0	0	-0.040746	-0.00374144	0.0115562	-0.00823371	-0.000642153	-0.0255547	-0.0141302	-0.0868929	0
1861	0.35779	0.13957	0.0522987	0.165921	0.246963	0.246892	0.246892	0.177869	0.0555265	0.0134962	0	7.08045e-05	0	0	0	0	0	0	0	0	0	0	0	0	0	0	0	0	0	7.08045e-05	0	0	0	0	0	0	0	0	0	0	-0.0438139	-0.00559474	0.0147615	-0.00907053	-0.000693842	-0.0286875	-0.0145288	-0.0968016	0
1862	0.258114	0.055264	0.030695	0.172155	0.250484	0.250406	0.250406	0.180205	0.0563646	0.0138368	0	7.7545e-05	0	0	0	0	0	0	0	0	0	0	0	0	0	0	0	0	0	7.7545e-05	0	0	0	0	0	0	0	0	0	0	-0.0442782	-0.0059419	0.0154946	-0.00939863	-0.000698698	-0.0302114	-0.0135223	-0.0957985	0
1863	0.263904	0.0676015	0.01407	0.182233	0.254003	0.253919	0.253919	0.18254	0.0572019	0.0141773	0	8.42855e-05	0	0	0	0	0	0	0	0	0	0	0	0	0	0	0	0	0	8.42855e-05	0	0	0	0	0	0	0	0	0	0	-0.0443449	-0.00574691	0.0155204	-0.00976109	-0.000690694	-0.0314319	-0.0122347	-0.0918583	0
1864	0.336234	0.15088	0.0009975	0.184357	0.257987	0.257896	0.257896	0.18534	0.0580385	0.0145178	0	9.10325e-05	0	0	0	0	0	0	0	0	0	0	0	0	0	0	0	0	0	9.10325e-05	0	0	0	0	0	0	0	0	0	0	-0.0458134	-0.00571758	0.0160069	-0.0105293	-0.000729976	-0.0325981	-0.0122454	-0.0931968	0
1865	0.370764	0.198516	-0.0124294	0.184677	0.261642	0.261544	0.261544	0.187673	0.0590133	0.0148582	0	9.77795e-05	0	0	0	0	0	0	0	0	0	0	0	0	0	0	0	0	0	9.77795e-05	0	0	0	0	0	0	0	0	0	0	-0.0474597	-0.00604244	0.0170249	-0.0113447	-0.000770023	-0.0340651	-0.0122624	-0.0959086	0
1866	0.375045	0.219079	-0.0242375	0.180204	0.264828	0.264723	0.264723	0.189538	0.0599872	0.0151985	0	0.00010452	0	0	0	0	0	0	0	0	0	0	0	0	0	0	0	0	0	0.00010452	0	0	0	0	0	0	0	0	0	0	-0.0491525	-0.00759759	0.0197121	-0.0120904	-0.000805345	-0.0360972	-0.0122741	-0.102845	0
1867	0.37954	0.229017	-0.0246006	0.175123	0.267873	0.267762	0.267762	0.191402	0.060821	0.0155388	0	0.00011126	0	0	0	0	0	0	0	0	0	0	0	0	0	0	0	0	0	0.00011126	0	0	0	0	0	0	0	0	0	0	-0.0509982	-0.00929334	0.0226456	-0.0128979	-0.000840293	-0.0383731	-0.0122391	-0.110111	0
1868	0.404765	0.231073	-0.0025725	0.176264	0.271383	0.271265	0.271265	0.193732	0.0616541	0.015879	0	0.000118008	0	0	0	0	0	0	0	0	0	0	0	0	0	0	0	0	0	0.000118008	0	0	0	0	0	0	0	0	0	0	-0.0521573	-0.00964501	0.0236331	-0.0136428	-0.000875393	-0.0394672	-0.01216	-0.112368	0
1869	0.440705	0.222848	0.0355338	0.182323	0.275357	0.275232	0.275232	0.196527	0.0624863	0.0162191	0	0.000124748	0	0	0	0	0	0	0	0	0	0	0	0	0	0	0	0	0	0.000124748	0	0	0	0	0	0	0	0	0	0	-0.0524795	-0.00903414	0.0231409	-0.0142438	-0.00090931	-0.0393557	-0.0120775	-0.110963	0
1870	0.469869	0.218736	0.0641287	0.187004	0.279382	0.27925	0.27925	0.19932	0.0634562	0.0164742	0	0.000131463	0	0	0	0	0	0	0	0	0	0	0	0	0	0	0	0	0	0.000131463	0	0	0	0	0	0	0	0	0	0	-0.0528636	-0.00881258	0.023233	-0.0149213	-0.000944553	-0.0394142	-0.012004	-0.110999	0
1871	0.468819	0.219421	0.06727	0.182128	0.283784	0.283646	0.283646	0.202576	0.0644252	0.0166442	0	0.00013819	0	0	0	0	0	0	0	0	0	0	0	0	0	0	0	0	0	0.00013819	0	0	0	0	0	0	0	0	0	0	-0.0563441	-0.00923964	0.0243689	-0.0159158	-0.0010687	-0.0419427	-0.0125462	-0.116906	0
1872	0.422773	0.207084	0.0517606	0.163928	0.288595	0.28845	0.28845	0.206296	0.0652549	0.0168992	0	0.00014495	0	0	0	0	0	0	0	0	0	0	0	0	0	0	0	0	0	0.00014495	0	0	0	0	0	0	0	0	0	0	-0.0623654	-0.0100273	0.0264705	-0.0177966	-0.0013119	-0.0446397	-0.0150604	-0.131321	0
1873	0.369789	0.193375	0.0265125	0.149901	0.293952	0.2938	0.2938	0.210477	0.0660837	0.0172392	0	0.00015171	0	0	0	0	0	0	0	0	0	0	0	0	0	0	0	0	0	0.00015171	0	0	0	0	0	0	0	0	0	0	-0.0665409	-0.0110844	0.029047	-0.0197738	-0.00150616	-0.0459737	-0.0172498	-0.144588	0
1874	0.353735	0.201258	-2.1875e-05	0.152499	0.300232	0.300074	0.300074	0.215583	0.0669118	0.017579	0	0.00015847	0	0	0	0	0	0	0	0	0	0	0	0	0	0	0	0	0	0.00015847	0	0	0	0	0	0	0	0	0	0	-0.0663417	-0.0117345	0.0300578	-0.0202242	-0.00158161	-0.0452238	-0.0176353	-0.14859	0
1875	0.332461	0.194061	-0.0208469	0.159247	0.307024	0.306858	0.306858	0.221148	0.0678768	0.0178339	0	0.00016523	0	0	0	0	0	0	0	0	0	0	0	0	0	0	0	0	0	0.00016523	0	0	0	0	0	0	0	0	0	0	-0.065587	-0.0116861	0.0301266	-0.0207088	-0.00164652	-0.0437521	-0.0179201	-0.149792	0
1876	0.288309	0.152936	-0.0317319	0.167105	0.314187	0.314014	0.314014	0.227169	0.0688409	0.0180038	0	0.000172315	0	0	0	0	0	0	0	0	0	0	0	0	0	0	0	0	0	0.000172315	0	0	0	0	0	0	0	0	0	0	-0.0665589	-0.0105746	0.0290978	-0.0216445	-0.00174032	-0.0434441	-0.0182533	-0.148668	0
1877	0.292982	0.148481	-0.0351575	0.179658	0.322214	0.322034	0.322034	0.234109	0.0696664	0.0182586	0	0.00017992	0	0	0	0	0	0	0	0	0	0	0	0	0	0	0	0	0	0.00017992	0	0	0	0	0	0	0	0	0	0	-0.065809	-0.00905825	0.0273256	-0.021951	-0.0018211	-0.0417316	-0.0185726	-0.145192	0
1878	0.334209	0.180353	-0.0366756	0.190532	0.330779	0.330592	0.330592	0.241502	0.0704911	0.0185984	0	0.000187915	0	0	0	0	0	0	0	0	0	0	0	0	0	0	0	0	0	0.000187915	0	0	0	0	0	0	0	0	0	0	-0.0644004	-0.0085663	0.0274192	-0.0222863	-0.00188831	-0.0402392	-0.0188395	-0.144794	0
1879	0.368246	0.201943	-0.0295531	0.195856	0.339795	0.339599	0.339599	0.249345	0.0713151	0.018938	0	0.0001963	0	0	0	0	0	0	0	0	0	0	0	0	0	0	0	0	0	0.0001963	0	0	0	0	0	0	0	0	0	0	-0.0655452	-0.00884175	0.0281805	-0.0232649	-0.00197026	-0.0405532	-0.0190956	-0.147846	0
1880	0.399955	0.215652	-0.00942375	0.193727	0.349856	0.349651	0.349651	0.258098	0.0722753	0.0192776	0	0.00020501	0	0	0	0	0	0	0	0	0	0	0	0	0	0	0	0	0	0.00020501	0	0	0	0	0	0	0	0	0	0	-0.0711233	-0.00985504	0.0292261	-0.0255507	-0.0020891	-0.0435052	-0.0193494	-0.155044	0
1881	0.429205	0.222848	0.01064	0.195717	0.360499	0.360285	0.360285	0.267296	0.0733715	0.0196171	0	0.00021411	0	0	0	0	0	0	0	0	0	0	0	0	0	0	0	0	0	0.00021411	0	0	0	0	0	0	0	0	0	0	-0.0740412	-0.0101177	0.0295307	-0.0274976	-0.00223281	-0.0434902	-0.0202335	-0.160541	0
1882	0.33982	0.111125	0.0210525	0.207642	0.370667	0.370443	0.370443	0.27602	0.0744664	0.0199566	0	0.000223665	0	0	0	0	0	0	0	0	0	0	0	0	0	0	0	0	0	0.000223665	0	0	0	0	0	0	0	0	0	0	-0.0741249	-0.009878	0.0294625	-0.0285753	-0.00230008	-0.0428917	-0.0199423	-0.160133	0
1883	-0.563533	-0.802535	0.0219013	0.2171	0.380361	0.380127	0.380127	0.284271	0.0755599	0.020296	0	0.00023361	0	0	0	0	0	0	0	0	0	0	0	0	0	0	0	0	0	0.00023361	0	0	0	0	0	0	0	0	0	0	-0.0762233	-0.0102509	0.0301271	-0.03011	-0.00234804	-0.0446772	-0.0189643	-0.160765	0
1884	-1.30178	-1.5373	0.0105831	0.224943	0.389905	0.389661	0.389661	0.29251	0.0765157	0.0206353	0	0.000243945	0	0	0	0	0	0	0	0	0	0	0	0	0	0	0	0	0	0.000243945	0	0	0	0	0	0	0	0	0	0	-0.076439	-0.0104628	0.0311033	-0.0312892	-0.00243688	-0.044279	-0.0190744	-0.163192	0
1885	-0.718939	-0.944073	-0.0105306	0.235665	0.398387	0.398132	0.398132	0.299823	0.0773341	0.0209746	0	0.000254735	0	0	0	0	0	0	0	0	0	0	0	0	0	0	0	0	0	0.000254735	0	0	0	0	0	0	0	0	0	0	-0.0744818	-0.0104264	0.0320677	-0.0317289	-0.0025029	-0.0427405	-0.0191509	-0.163813	0
1886	-0.235809	-0.448517	-0.0316925	0.244401	0.405626	0.40536	0.40536	0.305758	0.0782878	0.0213138	0	0.000266045	0	0	0	0	0	0	0	0	0	0	0	0	0	0	0	0	0	0.000266045	0	0	0	0	0	0	0	0	0	0	-0.0731332	-0.0103427	0.0329968	-0.0321938	-0.00258703	-0.0417672	-0.0192393	-0.164617	0
1887	-0.117215	-0.321372	-0.0442794	0.248437	0.411997	0.411719	0.411719	0.310774	0.0793767	0.0215682	0	0.000277875	0	0	0	0	0	0	0	0	0	0	0	0	0	0	0	0	0	0.000277875	0	0	0	0	0	0	0	0	0	0	-0.0737549	-0.0106555	0.0344594	-0.0333255	-0.00269147	-0.0422728	-0.0192691	-0.167532	0
1888	-0.0165989	-0.21102	-0.0505225	0.244944	0.417367	0.417077	0.417077	0.314875	0.0804642	0.0217377	0	0.000290225	0	0	0	0	0	0	0	0	0	0	0	0	0	0	0	0	0	0.000290225	0	0	0	0	0	0	0	0	0	0	-0.0782374	-0.0114674	0.0358514	-0.0359193	-0.00282376	-0.0446739	-0.0192044	-0.173259	0
1889	-0.0845096	-0.277506	-0.0530425	0.246039	0.422363	0.42206	0.42206	0.318517	0.0815504	0.021992	0	0.000303095	0	0	0	0	0	0	0	0	0	0	0	0	0	0	0	0	0	0.000303095	0	0	0	0	0	0	0	0	0	0	-0.080007	-0.0119144	0.0374632	-0.0377391	-0.00293162	-0.0457459	-0.0191391	-0.176851	0
1890	-0.123486	-0.331654	-0.0402588	0.248427	0.426985	0.426669	0.426669	0.321702	0.0826352	0.022331	0	0.00031655	0	0	0	0	0	0	0	0	0	0	0	0	0	0	0	0	0	0.00031655	0	0	0	0	0	0	0	0	0	0	-0.080852	-0.0122197	0.0390162	-0.0394044	-0.00304059	-0.0461154	-0.0190881	-0.179694	0
1891	-0.0281683	-0.261741	-0.0124338	0.246007	0.431286	0.430955	0.430955	0.324431	0.0838541	0.02267	0	0.00033059	0	0	0	0	0	0	0	0	0	0	0	0	0	0	0	0	0	0.00033059	0	0	0	0	0	0	0	0	0	0	-0.0848516	-0.0126245	0.0396731	-0.0422521	-0.00319693	-0.0474605	-0.0189906	-0.183801	0
1892	0.171455	-0.0876454	0.0133612	0.245739	0.435719	0.435373	0.435373	0.327158	0.0852065	0.0230089	0	0.000345215	0	0	0	0	0	0	0	0	0	0	0	0	0	0	0	0	0	0.000345215	0	0	0	0	0	0	0	0	0	0	-0.0869271	-0.0128256	0.0404906	-0.0446772	-0.00334476	-0.0473381	-0.019232	-0.187404	0
1893	0.340367	0.0600619	0.0341819	0.246123	0.439475	0.439115	0.439115	0.32943	0.086422	0.0232631	0	0.000360555	0	0	0	0	0	0	0	0	0	0	0	0	0	0	0	0	0	0.000360555	0	0	0	0	0	0	0	0	0	0	-0.0877202	-0.0129807	0.042014	-0.0468947	-0.00348751	-0.046792	-0.0195792	-0.190904	0
1894	0.458547	0.169386	0.0436013	0.24556	0.442556	0.44218	0.44218	0.331246	0.087501	0.0234325	0	0.00037661	0	0	0	0	0	0	0	0	0	0	0	0	0	0	0	0	0	0.00037661	0	0	0	0	0	0	0	0	0	0	-0.0879802	-0.0133624	0.0439162	-0.0489577	-0.0036267	-0.0459367	-0.0200129	-0.195117	0
1895	0.434966	0.161846	0.02968	0.24344	0.44577	0.445377	0.445377	0.333062	0.0887132	0.0236019	0	0.000393315	0	0	0	0	0	0	0	0	0	0	0	0	0	0	0	0	0	0.000393315	0	0	0	0	0	0	0	0	0	0	-0.0886382	-0.0141698	0.0456155	-0.0509215	-0.00376398	-0.0448917	-0.0205066	-0.200563	0
1896	0.262909	0.016538	0.0023975	0.243974	0.449118	0.448707	0.448707	0.334877	0.0900583	0.0237712	0	0.000410735	0	0	0	0	0	0	0	0	0	0	0	0	0	0	0	0	0	0.000410735	0	0	0	0	0	0	0	0	0	0	-0.0886154	-0.0148691	0.0481709	-0.0528425	-0.00390118	-0.0445245	-0.020649	-0.205048	0
1897	0.163166	-0.0646839	-0.0192413	0.247091	0.452867	0.452438	0.452438	0.337146	0.0912673	0.0240253	0	0.000429	0	0	0	0	0	0	0	0	0	0	0	0	0	0	0	0	0	0.000429	0	0	0	0	0	0	0	0	0	0	-0.087262	-0.0153758	0.0519425	-0.0547784	-0.00404027	-0.0442391	-0.020771	-0.209075	0
1898	0.258699	0.0377859	-0.0298594	0.250773	0.457974	0.457526	0.457526	0.340772	0.0924745	0.0242793	0	0.000448045	0	0	0	0	0	0	0	0	0	0	0	0	0	0	0	0	0	0.000448045	0	0	0	0	0	0	0	0	0	0	-0.0858324	-0.0162168	0.0563086	-0.0567877	-0.00418333	-0.0440767	-0.0208766	-0.214127	0
1899	0.36799	0.150537	-0.0367281	0.254182	0.464486	0.464018	0.464018	0.345756	0.0938141	0.0244486	0	0.000467935	0	0	0	0	0	0	0	0	0	0	0	0	0	0	0	0	0	0.000467935	0	0	0	0	0	0	0	0	0	0	-0.0857853	-0.017186	0.0597363	-0.0589296	-0.0043326	-0.0441358	-0.0209375	-0.219422	0
1900	0.414758	0.201943	-0.0451019	0.257917	0.471668	0.47118	0.471174	0.351187	0.0952852	0.0247025	5.26505e-06	0.000488735	0	5.26505e-06	0	0	0	0	0	0	0	0	0	0	0	0	0	0	0	0.000488735	0	0	0	0	0	0	0	0	0	0	-0.0866805	-0.0179615	0.0622837	-0.061285	-0.0045019	-0.0442715	-0.0209443	-0.22409	0
1901	0.39849	0.191662	-0.0529112	0.259739	0.47978	0.47927	0.479259	0.357064	0.0971539	0.025041	1.08072e-05	0.00051038	0	1.08072e-05	0	0	0	0	0	0	0	0	0	0	0	0	0	0	0	0.00051038	0	0	0	0	0	0	0	0	0	0	-0.0855945	-0.0186976	0.0650834	-0.0637067	-0.00470643	-0.0411879	-0.0223793	-0.231464	0
1902	-0.0416702	-0.256943	-0.0463881	0.261661	0.488595	0.488063	0.488051	0.363387	0.0992852	0.0253795	1.1376e-05	0.00053235	0	1.1376e-05	0	0	0	0	0	0	0	0	0	0	0	0	0	0	0	0.00053235	0	0	0	0	0	0	0	0	0	0	-0.0857321	-0.0190455	0.0663163	-0.0662422	-0.00493724	-0.0379648	-0.0238586	-0.237806	0
1903	-0.403369	-0.651058	-0.0158112	0.2635	0.49753	0.496976	0.496964	0.369701	0.101544	0.0257179	1.19747e-05	0.00055419	0	1.19747e-05	0	0	0	0	0	0	0	0	0	0	0	0	0	0	0	0.00055419	0	0	0	0	0	0	0	0	0	0	-0.0888614	-0.0194816	0.0662008	-0.0690836	-0.00518172	-0.036875	-0.0244402	-0.242613	0
1904	-0.0817013	-0.356329	0.00875	0.265877	0.507034	0.506458	0.506445	0.376459	0.10393	0.0260563	1.2605e-05	0.000575965	0	1.2605e-05	0	0	0	0	0	0	0	0	0	0	0	0	0	0	0	0.000575965	0	0	0	0	0	0	0	0	0	0	-0.0909065	-0.0198276	0.0670198	-0.072126	-0.00543742	-0.0350491	-0.0254863	-0.24822	0
1905	0.285079	0.00214422	0.0126306	0.270304	0.517422	0.516825	0.516811	0.384107	0.10631	0.0263946	1.32684e-05	0.00059774	0	1.32684e-05	0	0	0	0	0	0	0	0	0	0	0	0	0	0	0	0.00059774	0	0	0	0	0	0	0	0	0	0	-0.0926819	-0.01998	0.0682005	-0.0752667	-0.00570165	-0.0335032	-0.0264309	-0.253178	0
1906	0.389716	0.100159	0.016485	0.273072	0.528244	0.527624	0.52761	0.392194	0.108683	0.0267328	1.39667e-05	0.000620425	0	1.39667e-05	0	0	0	0	0	0	0	0	0	0	0	0	0	0	0	0.000620425	0	0	0	0	0	0	0	0	0	0	-0.0944081	-0.0208963	0.0701172	-0.0784052	-0.00597146	-0.0317893	-0.0274631	-0.260295	0
1907	0.3695	0.0761692	0.0177931	0.275537	0.538691	0.538041	0.538026	0.39982	0.111051	0.0271555	1.47018e-05	0.00064948	0	1.47018e-05	0	0	0	0	0	0	0	0	0	0	0	0	0	0	0	0.00064948	0	0	0	0	0	0	0	0	0	0	-0.0965804	-0.0221755	0.0721422	-0.0814429	-0.00624367	-0.0307328	-0.0281276	-0.267524	0
1908	0.386643	0.0878213	0.0135844	0.285237	0.548893	0.548209	0.548193	0.406988	0.113543	0.0276626	1.54756e-05	0.00068406	0	1.54756e-05	0	0	0	0	0	0	0	0	0	0	0	0	0	0	0	0.00068406	0	0	0	0	0	0	0	0	0	0	-0.0963313	-0.0222577	0.0755254	-0.0842829	-0.00651489	-0.0304833	-0.0283179	-0.270873	0
1909	0.45258	0.153964	0.000923125	0.297693	0.559209	0.558491	0.558475	0.414146	0.116159	0.0281696	1.62901e-05	0.00071864	0	1.62901e-05	0	0	0	0	0	0	0	0	0	0	0	0	0	0	0	0.00071864	0	0	0	0	0	0	0	0	0	0	-0.095366	-0.0217224	0.0785678	-0.0868298	-0.00678153	-0.0301259	-0.0284741	-0.27231	0
1910	0.474067	0.18892	-0.0192369	0.304384	0.569379	0.568626	0.568609	0.421294	0.118638	0.0286764	1.71475e-05	0.00075322	0	1.71475e-05	0	0	0	0	0	0	0	0	0	0	0	0	0	0	0	0.00075322	0	0	0	0	0	0	0	0	0	0	-0.0973185	-0.0222365	0.0792201	-0.0889837	-0.00704258	-0.0297163	-0.0285595	-0.275709	0
1911	0.475024	0.195089	-0.0344094	0.314345	0.578957	0.578169	0.578151	0.427988	0.12098	0.0291831	1.805e-05	0.000787735	0	1.805e-05	0	0	0	0	0	0	0	0	0	0	0	0	0	0	0	0.000787735	0	0	0	0	0	0	0	0	0	0	-0.0987111	-0.0227275	0.0807683	-0.0907383	-0.00729931	-0.0311982	-0.027516	-0.277429	0
1912	0.237872	-0.0485766	-0.0413963	0.327845	0.588289	0.587466	0.587447	0.434227	0.123446	0.029774	1.9e-05	0.000823615	0	1.9e-05	0	0	0	0	0	0	0	0	0	0	0	0	0	0	0	0.000823615	0	0	0	0	0	0	0	0	0	0	-0.09969	-0.0230286	0.0829117	-0.0922324	-0.00755132	-0.0341549	-0.0256345	-0.277167	0
1913	0.142892	-0.15653	-0.0390513	0.338473	0.597882	0.597007	0.596987	0.440459	0.126164	0.0303648	2e-05	0.00087458	0	2e-05	0	0	0	0	0	0	0	0	0	0	0	0	0	0	0	0.000874445	0	0	0	0	0	0	0	0	1.35e-07	0	-0.101757	-0.023801	0.0839213	-0.0935757	-0.00779867	-0.0363541	-0.0241485	-0.278121	0
1914	0.387926	0.0556067	-0.0191494	0.351469	0.60707	0.606134	0.606113	0.446239	0.129003	0.0308711	2.10526e-05	0.00093589	0	2.10526e-05	0	0	0	0	0	0	0	0	0	0	0	0	0	0	0	0.00093548	0	0	0	0	0	0	0	0	4.1e-07	0	-0.103025	-0.0230232	0.083467	-0.0948027	-0.00804319	-0.0374209	-0.0232021	-0.275846	0
1915	0.544847	0.159447	0.0196175	0.365782	0.61586	0.614886	0.614864	0.45157	0.131833	0.0314615	2.21607e-05	0.00097361	0	2.21607e-05	0	0	0	0	0	0	0	0	0	0	0	0	0	0	0	0.00097292	0	0	0	0	0	0	0	0	6.9e-07	0	-0.104047	-0.0212311	0.0818106	-0.0959469	-0.00828684	-0.0378242	-0.0225686	-0.271311	0
1916	0.619466	0.187549	0.0578375	0.374079	0.625143	0.624152	0.624129	0.457338	0.134655	0.0321361	2.3327e-05	0.000991055	0	2.3327e-05	0	0	0	0	0	0	0	0	0	0	0	0	0	0	0	0.00099008	0	0	0	0	0	0	0	0	9.75e-07	0	-0.106959	-0.0211044	0.0796577	-0.0970414	-0.00853174	-0.0377971	-0.0221423	-0.271094	0
1917	0.65508	0.196117	0.0783825	0.38058	0.634956	0.63393	0.633906	0.463543	0.137468	0.0328947	2.45547e-05	0.00102605	0	2.45547e-05	0	0	0	0	0	0	0	0	0	0	0	0	0	0	0	0.00102479	0	0	0	0	0	0	0	0	1.265e-06	0	-0.109292	-0.0218517	0.0786552	-0.098119	-0.00878013	-0.0371815	-0.0220147	-0.273662	0
1918	0.66255	0.201943	0.071505	0.389102	0.644548	0.643462	0.643436	0.469299	0.1404	0.0337372	2.58471e-05	0.00108614	0	2.58471e-05	0	0	0	0	0	0	0	0	0	0	0	0	0	0	0	0.00108459	0	0	0	0	0	0	0	0	1.555e-06	0	-0.11107	-0.0218246	0.0774364	-0.0992118	-0.00903437	-0.0365154	-0.02192	-0.274388	0
1919	0.640626	0.194746	0.0426475	0.403232	0.653733	0.652579	0.652552	0.474606	0.143451	0.0344951	2.72075e-05	0.00115384	0	2.72075e-05	0	0	0	0	0	0	0	0	0	0	0	0	0	0	0	0.001152	0	0	0	0	0	0	0	0	1.845e-06	0	-0.11051	-0.0200828	0.0767811	-0.100352	-0.00929696	-0.0355837	-0.0219764	-0.271262	0
1920	0.538608	0.110783	0.0138031	0.414022	0.663217	0.661996	0.661967	0.480349	0.146365	0.0352528	2.86395e-05	0.00122153	0	2.86395e-05	0	0	0	0	0	0	0	0	0	0	0	0	0	0	0	0.0012194	0	0	0	0	0	0	0	0	2.135e-06	0	-0.109767	-0.0199637	0.0781727	-0.10156	-0.00955195	-0.0348032	-0.0220605	-0.272523	0
1921	0.513908	0.0957036	-0.00765625	0.425861	0.673527	0.672237	0.672207	0.486969	0.149144	0.0360942	3.01468e-05	0.00128936	0	3.01468e-05	0	0	0	0	0	0	0	0	0	0	0	0	0	0	0	0.00128693	0	0	0	0	0	0	0	0	2.425e-06	0	-0.105712	-0.0197725	0.0820658	-0.102846	-0.00978369	-0.0321637	-0.023212	-0.275991	0
1922	0.599174	0.181038	-0.0211838	0.43932	0.683862	0.682504	0.682473	0.49358	0.152041	0.0368512	3.17335e-05	0.00135731	0	3.17335e-05	0	0	0	0	0	0	0	0	0	0	0	0	0	0	0	0.0013546	0	0	0	0	0	0	0	0	2.715e-06	0	-0.103054	-0.018506	0.0839562	-0.104206	-0.0100124	-0.0301092	-0.0241763	-0.276371	0
1923	0.618842	0.202286	-0.0221856	0.438741	0.693783	0.692359	0.692322	0.499744	0.155054	0.0375238	3.66556e-05	0.00142456	3.25193e-06	3.34036e-05	0	0	0	0	0	0	0	0	0	0	0	0	0	0	0	0.00142155	0	0	0	0	0	0	0	0	3.01e-06	0	-0.110078	-0.0198458	0.080011	-0.105624	-0.010255	-0.0302266	-0.0241372	-0.280736	0
1924	0.621606	0.189263	-0.00910437	0.441447	0.70457	0.703079	0.703033	0.506778	0.158059	0.0381962	4.5521e-05	0.00149181	1.03592e-05	3.51617e-05	0	0	0	0	0	0	0	0	0	0	0	0	0	0	0	0.0014885	0	0	0	0	0	0	0	0	3.31e-06	0	-0.114414	-0.0210079	0.0783979	-0.107078	-0.0105083	-0.0298239	-0.0243929	-0.285478	0
1925	0.656901	0.189263	0.01456	0.453078	0.716218	0.714659	0.714603	0.514682	0.161053	0.0388684	5.52852e-05	0.0015597	1.82729e-05	3.70124e-05	0	0	0	0	0	0	0	0	0	0	0	0	0	0	0	0.0015561	0	0	0	0	0	0	0	0	3.605e-06	0	-0.114389	-0.021049	0.0801858	-0.108546	-0.010769	-0.0296705	-0.0245403	-0.287664	0
1926	0.701245	0.197145	0.0403637	0.463736	0.727498	0.725864	0.725799	0.522136	0.164039	0.0396242	6.55634e-05	0.00163345	2.6603e-05	3.89604e-05	0	0	0	0	0	0	0	0	0	0	0	0	0	0	0	0.00162955	0	0	0	0	0	0	0	0	3.9e-06	0	-0.115335	-0.0208707	0.0811658	-0.11028	-0.0110317	-0.0296462	-0.024672	-0.289333	0
1927	0.721251	0.195089	0.0554925	0.47067	0.738763	0.73705	0.736974	0.529579	0.167015	0.0403798	7.63825e-05	0.00171305	3.53716e-05	4.10109e-05	0	0	0	0	0	0	0	0	0	0	0	0	0	0	0	0.00170885	0	0	0	0	0	0	0	0	4.2e-06	0	-0.116603	-0.0210432	0.0817083	-0.112257	-0.0112929	-0.0281011	-0.0256174	-0.29315	0
1928	0.674629	0.145739	0.0510169	0.477873	0.750716	0.748923	0.748835	0.537885	0.169983	0.0409673	8.77711e-05	0.00179265	4.46017e-05	4.31694e-05	0	0	0	0	0	0	0	0	0	0	0	0	0	0	0	0.00178815	0	0	0	0	0	0	0	0	4.505e-06	0	-0.118565	-0.0211149	0.081411	-0.114179	-0.0115513	-0.0266062	-0.0265239	-0.296512	0
1929	0.624013	0.0960463	0.0412825	0.486684	0.762524	0.760652	0.760552	0.546179	0.172818	0.0415546	9.9759e-05	0.00187226	5.43176e-05	4.54415e-05	0	0	0	0	0	0	0	0	0	0	0	0	0	0	0	0.00186745	0	0	0	0	0	0	0	0	4.81e-06	0	-0.121538	-0.0211039	0.0807338	-0.116025	-0.0118033	-0.0267785	-0.0265606	-0.2982	0
1930	0.652519	0.121749	0.0325894	0.49818	0.773754	0.771802	0.771689	0.554025	0.175523	0.0421417	0.000112378	0.00195251	6.45448e-05	4.78331e-05	0	0	0	0	0	0	0	0	0	0	0	0	0	0	0	0.0019474	0	0	0	0	0	0	0	0	5.115e-06	0	-0.123198	-0.0202739	0.0803249	-0.117778	-0.0120476	-0.0268103	-0.0266129	-0.297915	0
1931	0.678528	0.146424	0.0164544	0.51565	0.785323	0.78329	0.783158	0.562294	0.17822	0.0426447	0.000131699	0.00203277	7.53103e-05	5.03506e-05	0	6.03845e-06	0	0	0	0	0	0	0	0	0	0	0	0	0	0.00202735	0	0	0	0	0	0	0	0	5.42e-06	0	-0.121491	-0.0178248	0.0807677	-0.119418	-0.0122827	-0.0256014	-0.0271321	-0.294813	0
1932	0.64515	0.114895	-0.00354375	0.533799	0.796956	0.794843	0.794691	0.57055	0.180909	0.0432315	0.000152245	0.00211315	8.66424e-05	5.30007e-05	0	1.2602e-05	0	0	0	0	0	0	0	0	0	7.7616e-07	0	0	0	0.00210665	0	0	0	0	0	0	0	0	5.725e-06	0	-0.119225	-0.0155089	0.081711	-0.120927	-0.0125055	-0.0244386	-0.0275566	-0.291853	0
1933	0.656846	0.123806	-0.0139081	0.546949	0.807785	0.805588	0.80542	0.577927	0.183592	0.0439018	0.000168059	0.00219626	9.8571e-05	5.57902e-05	0	1.36978e-05	0	0	0	0	0	0	0	0	0	2.3208e-06	0	0	0	0.0021879	0	0	0	0	0	0	0	0	6.035e-06	0	-0.119079	-0.0147961	0.0826036	-0.122323	-0.012717	-0.0243865	-0.0274605	-0.291607	0
1934	0.717064	0.162189	6.5625e-05	0.554809	0.818061	0.815762	0.815577	0.58486	0.186146	0.0445719	0.000184743	0.00229885	0.000111127	5.87265e-05	0	1.48889e-05	0	0	0	0	0	0	0	0	0	3.85024e-06	0	0	0	0.00228865	0	0	0	0	0	0	0	0	6.345e-06	0	-0.12096	-0.0155197	0.083063	-0.123646	-0.0129221	-0.0248268	-0.0271077	-0.294285	0
1935	0.773297	0.169386	0.0409325	0.562979	0.82822	0.8258	0.825597	0.591784	0.188572	0.0452418	0.000202346	0.00242039	0.000124345	6.18174e-05	0	1.61836e-05	0	0	0	0	0	0	0	0	0	6.1408e-06	0	6.43715e-07	0	0.00240695	0	0	0	0	0	0	0	0	6.66e-06	0	-0.122688	-0.0161833	0.083596	-0.124937	-0.013126	-0.0252924	-0.0267455	-0.296735	0
1936	0.831551	0.180695	0.0815981	0.569258	0.837504	0.83496	0.834739	0.597836	0.190992	0.0459114	0.000220919	0.00254411	0.000138257	6.50709e-05	0	1.75909e-05	0	0	0	0	0	0	0	0	0	9.96e-06	0	1.92898e-06	0	0.00252525	0	0	0	0	0	0	0	0	6.975e-06	0	-0.123914	-0.0169668	0.0843626	-0.126237	-0.0133337	-0.0249097	-0.0268302	-0.300144	0
1937	0.84505	0.179324	0.0900637	0.575662	0.844968	0.842298	0.842058	0.602154	0.193406	0.0464972	0.000240519	0.00267012	0.000152903	6.84957e-05	0	1.91205e-05	0	0	0	0	0	0	0	0	0	1.60704e-05	0	3.21036e-06	0	0.00264355	0	0	0	0	0	0	0	0	7.29e-06	0	-0.124345	-0.017938	0.0866517	-0.127586	-0.0135503	-0.0254587	-0.026464	-0.303503	0
1938	0.833606	0.163217	0.0808325	0.589556	0.851051	0.84825	0.847989	0.605175	0.195814	0.0469991	0.000261202	0.00280165	0.000168319	7.21008e-05	0	2.07832e-05	0	0	0	0	0	0	0	0	0	2.59936e-05	0	5.1305e-06	0	0.00276185	0	1.069e-06	0	0	0	0	0	0	7.61e-06	0	-0.119579	-0.017775	0.0932865	-0.129026	-0.0137813	-0.026308	-0.0259756	-0.304568	0
1939	0.837512	0.163903	0.0738456	0.599764	0.856275	0.853333	0.85305	0.607332	0.198217	0.0475009	0.000283032	0.00294214	0.000184546	7.58955e-05	0	2.25904e-05	0	0	0	0	0	0	0	0	8.80625e-07	4.1264e-05	0	7.688e-06	0	0.00288015	0	4.231e-06	0	0	0	0	0	0	7.93e-06	0	-0.11641	-0.0173578	0.0978697	-0.130598	-0.014032	-0.026358	-0.0259336	-0.305603	0
1940	0.848384	0.18378	0.0641944	0.60041	0.86076	0.857667	0.857361	0.608625	0.200733	0.0480025	0.000306072	0.00309298	0.000201627	7.989e-05	0	2.45548e-05	0	0	0	0	0	0	0	0	2.62188e-06	6.3376e-05	0	1.0881e-05	0	0.00299845	0	9.399e-06	0	0	0	0	0	0	8.25e-06	0	-0.11984	-0.017966	0.0973886	-0.132344	-0.014345	-0.0270441	-0.0255301	-0.308068	0
1941	0.840653	0.193033	0.0500194	0.597601	0.864168	0.860907	0.860576	0.608625	0.203363	0.0485876	0.000330392	0.00326112	0.000219608	8.40948e-05	0	2.669e-05	0	0	0	0	0	0	0	0	4.325e-06	9.3792e-05	0	1.53496e-05	0	0.0031226	0	1.6487e-05	0	0	0	0	0	0	8.57e-06	0	-0.122763	-0.0186007	0.0967339	-0.134336	-0.0147654	-0.0263064	-0.0254879	-0.31246	0
1942	0.796379	0.171442	0.030625	0.594312	0.866261	0.862811	0.862455	0.607332	0.205867	0.049256	0.000356066	0.00344994	0.000238534	8.85208e-05	0	2.90109e-05	0	0	0	0	0	0	0	0	5.99125e-06	0.000134	0	2.10924e-05	0	0.00325455	0	2.542e-05	0	0	0	0	0	0	8.89e-06	0	-0.124111	-0.0185215	0.0964305	-0.136669	-0.0152651	-0.0237347	-0.0263512	-0.317009	0
1943	0.77291	0.166302	0.0136106	0.592998	0.867815	0.86416	0.863777	0.605607	0.208246	0.0499242	0.000382943	0.00365547	0.000258457	9.29526e-05	0	3.15336e-05	0	0	0	0	0	0	0	0	7.62125e-06	0.000184672	0	2.87416e-05	0	0.0033891	0	3.612e-05	0	0	0	0	0	0	9.215e-06	0	-0.125877	-0.0183919	0.0970053	-0.139371	-0.0158103	-0.022385	-0.0269234	-0.320373	0
1944	0.801498	0.189263	0.0210044	0.591231	0.870015	0.866137	0.865726	0.604313	0.210738	0.0506757	0.000410891	0.00387787	0.000279429	9.71867e-05	0	3.42756e-05	0	0	0	0	0	0	0	0	1.00963e-05	0.00024648	0	3.9587e-05	0	0.00352365	0	4.851e-05	0	0	0	0	0	0	9.545e-06	0	-0.129281	-0.0183034	0.0969316	-0.142423	-0.0163988	-0.021961	-0.0271265	-0.323498	0
1945	0.840125	0.199887	0.0499669	0.590271	0.873297	0.869173	0.868733	0.603881	0.213342	0.0515103	0.000440012	0.00412386	0.000301504	0.000101252	0	3.72561e-05	0	0	0	0	0	0	0	0	1.33963e-05	0.000326256	0	5.42655e-05	0	0.00365755	0	6.252e-05	0	0	0	0	0	0	9.87e-06	0	-0.135138	-0.0165944	0.0931975	-0.145805	-0.017028	-0.0214422	-0.0274659	-0.323067	0
1946	0.874348	0.207084	0.0807056	0.586558	0.877606	0.873184	0.872714	0.604313	0.216057	0.0523445	0.000470409	0.00442245	0.000324741	0.000105173	0	4.04957e-05	0	0	0	0	0	0	0	0	1.75037e-05	0.00043248	9.0345e-06	8.37e-05	0	0.00379145	0	7.809e-05	0	0	0	0	0	0	1.0195e-05	0	-0.13945	-0.0152848	0.0903358	-0.149498	-0.0176952	-0.0178593	-0.0294488	-0.326102	0
1947	0.88947	0.198859	0.111654	0.578957	0.883122	0.878287	0.877785	0.605607	0.219	0.0531784	0.000502189	0.00483527	0.000349201	0.000108971	0	4.40171e-05	0	0	0	0	0	0	0	0	2.504e-05	0.00059824	3.82845e-05	0.000139423	0	0.0039286	0	9.515e-05	0	0	0	0	0	0	1.053e-05	0	-0.143688	-0.0161481	0.0898363	-0.153481	-0.0183974	-0.0137008	-0.031797	-0.334831	0
1948	0.898865	0.196803	0.129456	0.572607	0.889774	0.884362	0.883826	0.607763	0.222052	0.0540119	0.000535464	0.00541175	0.000374948	0.000112671	0	4.78447e-05	0	0	0	0	0	0	0	0	4.1225e-05	0.00086544	8.301e-05	0.000211684	0	0.0040859	0	0.00011363	0	0	0	0	0	0	1.0865e-05	0	-0.151439	-0.0170579	0.0877219	-0.157734	-0.0191312	-0.0125818	-0.0326551	-0.34153	0
1949	0.878521	0.189263	0.116379	0.572878	0.897523	0.891407	0.890837	0.61078	0.225211	0.054845	0.000570351	0.00611578	0.000402051	0.000116295	0	5.20051e-05	0	0	0	0	0	0	0	0	7.2025e-05	0.00121456	0.000136245	0.000288827	0	0.00425945	0	0.00013348	0	0	0	0	0	0	1.1195e-05	0	-0.156901	-0.0169254	0.0875266	-0.162238	-0.0198935	-0.0121625	-0.0332081	-0.345925	0
1950	0.841639	0.186864	0.0807275	0.574047	0.906841	0.899883	0.899276	0.615088	0.228594	0.0555945	0.000606975	0.00695764	0.00043058	0.000119868	0	5.65273e-05	0	0	0	0	0	0	0	0	0.00012415	0.00160144	0.00019563	0.000370295	0	0.00449995	0	0.00015464	0	0	0	0	0	0	1.153e-05	0	-0.161256	-0.0178153	0.0895368	-0.167001	-0.0207256	-0.0115693	-0.0336817	-0.35283	0
1951	0.801351	0.190634	0.0490306	0.561687	0.918081	0.910219	0.909571	0.621112	0.232198	0.0562605	0.000648064	0.00786257	0.00046061	0.000123411	0	6.14427e-05	0	0	0	0	0	0	0	2.6e-06	0.0002033	0.00202048	0.000263145	0.000455855	0	0.00473005	0	0.00017787	0	0	0	0	0	0	1.187e-05	0	-0.159047	-0.0194497	0.0905994	-0.17159	-0.0216929	0.00300376	-0.0399182	-0.372243	0
1952	0.76631	0.184465	0.0318106	0.550034	0.930544	0.921829	0.921135	0.62799	0.236136	0.0570094	0.000693755	0.00871521	0.000492221	0.000126948	0	6.67855e-05	0	0	0	0	0	0	0	7.8e-06	0.000291875	0.00249968	0.00030735	0.000537695	0	0.0048789	0	0.0001875	0	0	0	0	0	0	1.221e-05	0	-0.155813	-0.0197917	0.0898049	-0.176295	-0.0227926	0.0206974	-0.0474357	-0.391158	0
1953	0.746104	0.175555	0.0204662	0.550083	0.943868	0.934275	0.933534	0.635287	0.240405	0.0578412	0.000741592	0.00959221	0.000525496	0.000130503	0	7.2593e-05	0	0	0	0	0	0	0	1.3e-05	0.00039425	0.00302768	0.00032325	0.000615195	0	0.0050349	0	0.0001844	0	0	0	0	0	0	1.2535e-05	0	-0.162431	-0.0195614	0.0869756	-0.181796	-0.023995	0.0251348	-0.0491888	-0.398612	0
1954	0.754805	0.180695	0.0221156	0.551994	0.958592	0.948012	0.947221	0.643859	0.244772	0.0585896	0.000791727	0.0105795	0.000560522	0.000134099	0	7.89054e-05	0	0	0	0	0	0	0	1.82e-05	0.00053725	0.0035968	0.0003417	0.00069409	0	0.0052104	0	0.0001864	0	0	0	0	0	0	1.2845e-05	0	-0.169982	-0.0193372	0.0848911	-0.18798	-0.0252888	0.0283572	-0.0506242	-0.405595	0
1955	0.815376	0.202971	0.0572644	0.555141	0.974832	0.963117	0.962273	0.653701	0.249234	0.0593376	0.000844317	0.0117156	0.000597392	0.000137759	0	8.57667e-05	0	0	0	0	0	0	0	2.34e-05	0.0007215	0.0042368	0.000363	0.00077345	0	0.0054041	1.5e-06	0.0001941	0	0	0	0	0	0	1.3155e-05	8e-06	-0.174956	-0.0198992	0.086395	-0.194737	-0.0266616	0.0329276	-0.0529809	-0.415361	0
1956	0.899099	0.215309	0.124871	0.558919	0.991948	0.978924	0.978025	0.663951	0.253905	0.0601684	0.000899532	0.0130236	0.000636202	0.000141506	0	9.32247e-05	0	0	0	0	0	0	0	2.86e-05	0.00094875	0.0049552	0.00038775	0.0008525	0	0.005616	7.08e-06	0.0002114	0	0	0	0	0	0	1.3465e-05	3.15e-05	-0.17987	-0.0208644	0.0890639	-0.20196	-0.0281002	0.0373827	-0.0553921	-0.425955	0
1957	0.9668	0.22559	0.177927	0.563283	1.0098	0.995263	0.994305	0.674607	0.258782	0.0609158	0.000957549	0.0145336	0.000677055	0.000145363	0	0.000101331	0	0	0	0	0	0	0	3.38e-05	0.00123025	0.0057776	0.00041685	0.000930465	0	0.0058448	1.785e-05	0.000238	0	0	0	0	0	0	1.3785e-05	6.4e-05	-0.186979	-0.0213623	0.0901206	-0.209548	-0.0295904	0.040692	-0.0572916	-0.434877	0
1958	0.982448	0.230731	0.179528	0.57219	1.02788	1.01163	1.01061	0.685201	0.26375	0.0616629	0.00101855	0.016249	0.000720058	0.000149354	0	0.000110143	0	0	0	0	0	0	0	3.9e-05	0.00155912	0.0067232	0.0004506	0.00100734	0	0.0060905	3.405e-05	0.0002711	0	0	0	0	0	0	1.412e-05	9.9e-05	-0.192885	-0.0215095	0.0930989	-0.217398	-0.0311175	0.0424956	-0.0584545	-0.442406	0
1959	0.968833	0.226961	0.151467	0.590405	1.04683	1.02875	1.02766	0.696281	0.268806	0.0625756	0.00108275	0.0180848	0.000765324	0.000153503	0	0.00011972	0	0	0	0	0	0	0	4.42e-05	0.00188925	0.0077488	0.00048915	0.00108361	0	0.00635245	5.298e-05	0.0003186	0	0	0	0	0	0	1.446e-05	0.0001355	-0.198203	-0.021802	0.0996986	-0.225412	-0.032666	0.0387934	-0.0568148	-0.447318	0
1960	0.880204	0.151908	0.115636	0.61266	1.06818	1.04815	1.047	0.709369	0.274062	0.0635708	0.00115033	0.0200263	0.000812972	0.000157831	0	0.000130131	0	0	0	0	0	0	0	4.94e-05	0.00220462	0.008856	0.0005337	0.00115924	0	0.0066287	7.497e-05	0.0003813	0	0	0	0	0	0	1.4805e-05	0.000173	-0.204271	-0.0223408	0.107055	-0.233483	-0.0341549	0.032864	-0.0542114	-0.45157	0
1961	0.751567	0.0607473	0.0722706	0.618549	1.09038	1.06815	1.06693	0.722933	0.279514	0.0644827	0.00122414	0.0222278	0.000863129	0.000162363	0	0.000141446	0	0	0	0	0	0	0	5.72e-05	0.00257388	0.0101392	0.00058515	0.00123116	0	0.0069199	0.00010233	0.00045	0	0	0	0	0	0	1.5165e-05	0.000211	-0.21075	-0.022317	0.10604	-0.240013	-0.0355224	0.037965	-0.0569018	-0.461607	0
1962	0.645151	-0.0139631	0.039375	0.619739	1.11162	1.08685	1.08555	0.735074	0.285159	0.0653112	0.00130439	0.0247749	0.000915925	0.000167122	0	0.000153746	0	0	0	0	0	0	0	6.76e-05	0.00305875	0.0116208	0.00064395	0.00130123	0	0.00722605	0.0001314	0.0005292	0	0	0	0	0	0	1.5535e-05	0.000248	-0.218924	-0.0221193	0.101353	-0.245452	-0.0368629	0.0445787	-0.0604224	-0.471841	0
1963	0.162053	-0.495468	0.02737	0.630152	1.13151	1.1038	1.1024	0.745213	0.290886	0.0663049	0.00139135	0.0277104	0.0009715	0.000172131	0	0.000167115	0	0	0	0	0	0	0	8.06e-05	0.00367875	0.0133072	0.00071115	0.00137423	0	0.00754325	0.00016743	0.0006285	0	0	0	0	0	0	1.5915e-05	0.000284	-0.226771	-0.0223355	0.10191	-0.25166	-0.0382559	0.0449589	-0.0613878	-0.478558	0
1964	-0.185672	-0.853256	0.0268012	0.640783	1.15094	1.11981	1.11831	0.754074	0.296692	0.0675464	0.00150266	0.0311298	0.00105	0.000177412	0	0.000181647	0	0	0	0	0	0	0	9.36e-05	0.00444875	0.0152752	0.00078855	0.00144987	0	0.00786825	0.00021102	0.0007534	0	0	0	0	0	0	1.6305e-05	0.0003185	-0.233538	-0.0228099	0.10438	-0.258387	-0.0396945	0.0455175	-0.062544	-0.48608	0
1965	0.162675	-0.532481	0.0380887	0.657067	1.17445	1.13937	1.13774	0.766182	0.302685	0.0688698	0.00162943	0.0350864	0.001145	0.000182991	0	0.000197443	0	0	0	0	0	0	0	0.000104	0.00537375	0.0175776	0.00087765	0.00152815	8.1e-07	0.00820105	0.00025659	0.0009034	0	0	1.5e-07	0	0	0	1.6705e-05	0.0003505	-0.239091	-0.0233691	0.10864	-0.265401	-0.0411719	0.0458755	-0.0636659	-0.493865	0
1966	0.593344	-0.150018	0.0643563	0.679006	1.20317	1.1636	1.16184	0.782898	0.308753	0.0701923	0.0017529	0.0395719	0.001235	0.000188889	0	0.000214611	0	0	0	0	0	0	0	0.0001144	0.00644375	0.0202096	0.00097995	0.00160936	3.15e-06	0.00853125	0.00031452	0.0010826	0	0	4.5e-07	0	0	1.65e-07	1.712e-05	0.00038	-0.244194	-0.0238464	0.113252	-0.272481	-0.0426813	0.0465875	-0.0650247	-0.501547	0
1967	0.768755	-0.0215027	0.0917788	0.698479	1.23173	1.18715	1.18527	0.79886	0.314896	0.0715138	0.0018782	0.0445849	0.001325	0.00019513	0	0.000233273	0	0	0	0	0	0	0	0.0001248	0.00764375	0.0231648	0.00109755	0.00169368	6.93e-06	0.0088491	0.00040332	0.0012997	0	0	9e-07	0	1.6e-07	4.95e-07	1.7545e-05	0.000407	-0.252397	-0.0241906	0.114983	-0.279423	-0.0442158	0.0464213	-0.0659727	-0.508198	0
1968	0.609199	-0.220273	0.108399	0.721073	1.26232	1.21212	1.21011	0.81597	0.321219	0.0729169	0.00201069	0.0502039	0.001415	0.000201737	0	0.000253558	0	0	0	0	0	0	0	0.0001404	0.00898875	0.0264864	0.00123255	0.00178111	1.215e-05	0.00915525	0.00053316	0.0015621	0	0	1.65e-06	0	3.2e-07	9.9e-07	1.7985e-05	0.0004315	-0.260835	-0.0246537	0.1168	-0.286028	-0.0457687	0.0452117	-0.0663959	-0.514337	0
1969	0.575317	-0.296355	0.117652	0.75402	1.29782	1.2413	1.23916	0.836955	0.327719	0.0744839	0.00214534	0.0565135	0.001505	0.000208734	0	0.000275606	0	0	0	0	0	0	0	0.000156	0.0105125	0.0302192	0.00138735	0.00187193	1.881e-05	0.0094497	0.0006954	0.0018822	0	0	2.85e-06	0	4.8e-07	1.65e-06	1.844e-05	0.000453	-0.264434	-0.0254765	0.123135	-0.292109	-0.0473331	0.0443333	-0.0669843	-0.521149	0
1970	0.847402	-0.0554308	0.108404	0.794429	1.33108	1.26752	1.26524	0.854819	0.334288	0.076132	0.00227972	0.0635577	0.001595	0.000216143	0	0.000299572	0	0	0	0	0	0	0	0.000169	0.0122625	0.034384	0.00156495	0.00196649	2.7e-05	0.0097331	0.0008787	0.002242	0	0	4.8e-06	0	8e-07	2.475e-06	1.8905e-05	0.000472	-0.261939	-0.0265622	0.135936	-0.29744	-0.0489504	0.0418569	-0.06678	-0.527605	0
1971	1.03702	0.11421	0.0874169	0.835393	1.36147	1.29014	1.28773	0.869128	0.340819	0.0777787	0.00241617	0.0713233	0.00168	0.000223988	0	0.000325622	0	0	3.358e-07	0	1.625e-06	0	0	0.0001846	0.0142662	0.038976	0.00176865	0.0020646	3.69e-05	0.0100061	0.0010617	0.002623	0	0	7.5e-06	0	1.12e-06	3.63e-06	1.938e-05	0.0004885	-0.262831	-0.0275096	0.149843	-0.304062	-0.0507025	0.0333	-0.0636999	-0.531736	0
1972	1.09744	0.153279	0.0721481	0.872013	1.39941	1.31966	1.3171	0.890181	0.347417	0.0795061	0.00255991	0.0797421	0.001765	0.000232292	0	0.000353937	0	0	1.0074e-06	0	4.875e-06	0	0	0.0002028	0.0164912	0.043936	0.0020022	0.00216628	4.869e-05	0.0102687	0.0012552	0.003029	0	3.6e-06	1.125e-05	0	1.92e-06	5.115e-06	1.987e-05	0.000503	-0.274952	-0.0281269	0.154949	-0.312309	-0.0525839	0.0233267	-0.0602077	-0.534763	0
1973	1.06245	0.106328	0.05096	0.905161	1.44241	1.35347	1.35076	0.915283	0.354081	0.0813963	0.0027116	0.0889365	0.001855	0.000241079	0	0.000384714	0	0	1.679e-06	0	8.125e-06	0	0	0.000221	0.0189587	0.049296	0.00227055	0.00227199	6.264e-05	0.0105209	0.0015039	0.003478	0	1.06e-05	1.65e-05	0	3.68e-06	7.095e-06	2.038e-05	0.0005155	-0.287701	-0.0289192	0.156593	-0.320339	-0.0545382	0.0194641	-0.0599616	-0.540351	0
1974	0.915371	-0.0406943	0.0251475	0.930917	1.47871	1.37955	1.37668	0.932607	0.360707	0.0833667	0.00286646	0.0991643	0.001945	0.000250372	0	0.000418167	0	0	2.3506e-06	0	1.1375e-05	0	0	0.0002392	0.02176	0.055184	0.0025785	0.00238204	7.893e-05	0.010764	0.0018264	0.003987	0	1.72e-05	2.34e-05	0	6.56e-06	9.405e-06	2.0905e-05	0.000526	-0.299043	-0.0292697	0.158025	-0.328138	-0.0565375	0.0175236	-0.0606474	-0.546424	0
1975	0.82177	-0.141108	0.0099925	0.952885	1.51231	1.40192	1.39889	0.946263	0.367296	0.0853351	0.00302237	0.110392	0.00203	0.000260193	0	0.00045453	0	0	3.0222e-06	0	1.4625e-05	0	0	0.00026	0.02489	0.061632	0.00293145	0.00249612	9.801e-05	0.010998	0.0022038	0.004508	0	2.35e-05	3.225e-05	0	1.072e-05	1.2045e-05	2.1445e-05	0.000535	-0.312462	-0.0288483	0.156694	-0.335695	-0.0585538	0.0148233	-0.0608822	-0.551084	0
1976	0.977694	-0.0173902	0.0194775	0.975607	1.5514	1.42954	1.42636	0.965046	0.373847	0.0874652	0.00318199	0.121857	0.002115	0.000270567	0	0.000494054	0	0	3.6938e-06	0	1.7875e-05	0	0	0.0002808	0.028075	0.068208	0.003336	0.00261438	0.00012033	0.0112229	0.0025659	0.005045	0	2.95e-05	4.335e-05	0	1.632e-05	1.5345e-05	2.2005e-05	0.0005425	-0.322936	-0.0291938	0.155858	-0.343	-0.0605584	0.0181688	-0.0642113	-0.559173	0
1977	1.19883	0.134087	0.0600775	1.00466	1.59633	1.4632	1.45984	0.989588	0.380463	0.0897893	0.00335582	0.133138	0.002205	0.000281516	0	0.000537015	0	0	4.3654e-06	0	2.1125e-05	0	0	0.0003068	0.031175	0.074528	0.003801	0.00273746	0.00014625	0.0114393	0.0029574	0.005646	0	3.51e-05	5.745e-05	0	2.448e-05	1.8975e-05	2.258e-05	0.000549	-0.33147	-0.0300851	0.1566	-0.35004	-0.0625224	0.0227389	-0.0681617	-0.568346	0
1978	1.27583	0.109069	0.122688	1.04408	1.64199	1.49766	1.49412	1.01483	0.387144	0.0921515	0.00354027	0.144325	0.00229	0.000293063	0	0.000587191	0	0	5.037e-06	0	2.4375e-05	0	0	0.0003406	0.034175	0.080608	0.0043335	0.00286533	0.00017631	0.0116474	0.0034674	0.006302	0	4.04e-05	7.425e-05	0	3.584e-05	2.2935e-05	2.317e-05	0.000554	-0.339285	-0.0303308	0.15998	-0.356804	-0.0644164	0.0213071	-0.0690211	-0.573911	0
1979	1.35619	0.0939901	0.174103	1.0881	1.68909	1.53339	1.52965	1.04157	0.393787	0.0942987	0.00373869	0.155695	0.002375	0.000305233	0	0.000644551	0	0	5.7086e-06	0	2.6e-05	0	0	0.0003822	0.0372	0.08656	0.0049425	0.00299785	0.00021132	0.0118482	0.0041391	0.006997	0	4.54e-05	9.375e-05	0	4.992e-05	2.739e-05	2.378e-05	0.0005585	-0.341683	-0.0310135	0.16757	-0.363282	-0.0662111	0.0212962	-0.0700427	-0.582178	0
1980	1.46606	0.148138	0.193082	1.12484	1.73799	1.57181	1.56786	1.07067	0.400791	0.0963945	0.00395006	0.166177	0.00246	0.000318047	0	0.000705428	0	0	6.3802e-06	0	2.6e-05	0	0	0.0004342	0.03985	0.091952	0.0056415	0.00313534	0.00025218	0.0120412	0.0047235	0.007728	0	5.01e-05	0.00011685	0	6.72e-05	3.2175e-05	2.441e-05	0.0005625	-0.352177	-0.0313835	0.166983	-0.369435	-0.0678056	0.0200112	-0.0705475	-0.589257	-0.000302352
1981	1.40776	0.0795963	0.179869	1.1483	1.78022	1.60393	1.59975	1.09228	0.40835	0.0991227	0.00417632	0.176289	0.002545	0.00033153	0	0.000769824	0	0	6.716e-06	0	2.925e-05	0	0	0.000494	0.0421375	0.09736	0.0064425	0.00327825	0.00029889	0.0122135	0.0051564	0.008488	0	5.46e-05	0.00014385	0	8.8e-05	3.729e-05	2.506e-05	0.0005655	-0.365704	-0.0309345	0.162083	-0.375649	-0.0691591	0.0207254	-0.0727701	-0.595711	-0.00131576
1982	0.714776	-0.591427	0.142323	1.16388	1.81808	1.63148	1.62706	1.10903	0.41606	0.101978	0.0044152	0.186603	0.00263	0.000345705	0	0.000837737	0	0	7.0035e-06	0	3.575e-05	0	0	0.000559	0.0444625	0.102944	0.007335	0.00342395	0.00035091	0.012337	0.0055299	0.009234	0	6.26e-05	0.0001746	0	0.00011232	4.2735e-05	2.573e-05	0.000568	-0.369038	-0.0310128	0.163277	-0.382236	-0.0704323	0.0317897	-0.0804231	-0.608207	-0.00322646
1983	0.408766	-0.876217	0.09982	1.18516	1.85996	1.66374	1.65908	1.13104	0.423758	0.104277	0.00466057	0.196223	0.002715	0.000360594	0	0.000909167	0	0	7.613e-06	0	3.9e-05	0	0	0.0006292	0.04645	0.108208	0.0082815	0.00356655	0.00040779	0.0124612	0.0057795	0.01	0	7.22e-05	0.00020925	0	0.0001416	4.8675e-05	2.642e-05	0.00057	-0.373851	-0.0313875	0.165322	-0.388993	-0.071723	0.0397582	-0.0868282	-0.618959	-0.00551124
1984	0.951877	-0.320002	0.0546175	1.21726	1.90382	1.69763	1.69271	1.15578	0.430734	0.1062	0.00491543	0.206195	0.0028	0.000376222	0	0.000984116	0	0	8.2455e-06	0	4.225e-05	0	0	0.0007046	0.0484375	0.1136	0.0092955	0.00370915	0.00046989	0.0126451	0.006045	0.010834	0	8.08e-05	0.0002484	0	0.00017584	5.4945e-05	2.713e-05	0.000572	-0.379048	-0.0323878	0.171632	-0.39573	-0.0729956	0.0399564	-0.0895234	-0.626897	-0.00804971
1985	1.25132	-0.0232162	0.02268	1.25186	1.94606	1.72898	1.7238	1.17908	0.436286	0.108436	0.00517506	0.217081	0.00288	0.000392611	0	0.00106258	0	0	8.5215e-06	0	4.875e-05	0	0	0.0007826	0.0507125	0.1192	0.010629	0.0038564	0.00053658	0.0128498	0.006342	0.011693	0	9.11e-05	0.00029325	0	0.00021488	6.138e-05	2.7865e-05	0.0005735	-0.381707	-0.0339184	0.181599	-0.402256	-0.0742145	0.0385309	-0.0914475	-0.634669	-0.0108835
1986	1.34237	0.0350442	0.0216256	1.2857	1.98758	1.75971	1.75427	1.20251	0.4411	0.110655	0.0054426	0.227867	0.00296	0.000409785	0	0.00114457	0	0	7.8545e-06	0	5.2e-05	0	0	0.0008684	0.053025	0.124736	0.011985	0.0040114	0.00060534	0.0129812	0.006576	0.01257	0	9.99e-05	0.0003456	0	0.00026	6.831e-05	2.8625e-05	0.0005745	-0.384827	-0.0354755	0.190877	-0.408376	-0.0753445	0.0366024	-0.093109	-0.641843	-0.0137224
1987	1.43528	0.065888	0.0475694	1.32183	2.03403	1.79455	1.78882	1.23094	0.445635	0.11224	0.00573024	0.23948	0.003045	0.000427766	0	0.00123007	0	0	7.5555e-06	0	5.525e-05	0	0	0.0009646	0.0557	0.130768	0.0132855	0.0041757	0.00067563	0.013143	0.006729	0.013483	0	0.0001215	0.00040635	0	0.00031168	7.557e-05	2.9405e-05	0.0005755	-0.390046	-0.0370307	0.19742	-0.413896	-0.0763509	0.0343842	-0.0945727	-0.648322	-0.0170523
1988	1.57609	0.105985	0.104563	1.36554	2.08662	1.83406	1.82803	1.26297	0.44981	0.115252	0.0060303	0.25256	0.00313	0.000446578	0	0.00131909	0	0	8.832e-06	0	6.5e-05	0	0	0.0010608	0.058725	0.137104	0.015159	0.0043431	0.00074943	0.0133185	0.006978	0.014488	0	0.0001582	0.0004773	0	0.00036976	8.283e-05	3.0205e-05	0.0005765	-0.39478	-0.0387166	0.204	-0.418617	-0.0771988	0.0311876	-0.0954342	-0.65393	-0.0211152
1989	1.70061	0.129289	0.162693	1.40863	2.13489	1.86923	1.8629	1.28962	0.453791	0.119486	0.00633033	0.265664	0.00321	0.000466245	0	0.00141162	0	0	1.07065e-05	0	7.475e-05	0	0	0.001157	0.061225	0.14344	0.017376	0.0045105	0.00082791	0.0134485	0.007302	0.015642	0	0.000198	0.0005607	0	0.00043408	9.0915e-05	3.103e-05	0.0005775	-0.39732	-0.0403412	0.211596	-0.422342	-0.0778539	0.0275134	-0.0958918	-0.658672	-0.0253641
1990	1.74564	0.126547	0.17444	1.44465	2.17459	1.89729	1.89065	1.31035	0.457668	0.122633	0.0066441	0.277301	0.00329	0.00048679	0	0.00150768	0	0	1.2581e-05	4.8e-06	8.125e-05	0	0	0.001261	0.0631875	0.149168	0.0193455	0.00467325	0.00091143	0.0135785	0.007467	0.016861	0	0.0002498	0.00064935	0	0.00049984	9.9495e-05	3.188e-05	0.000578	-0.398765	-0.0415859	0.217668	-0.424881	-0.0784437	0.0245183	-0.0960408	-0.662209	-0.030199
1991	0.806741	-0.814872	0.154604	1.46701	2.20888	1.92107	1.9141	1.32791	0.461544	0.124651	0.00697266	0.287807	0.00337	0.000508642	0	0.00160725	0	0	1.4421e-05	1.44e-05	8.775e-05	0	0	0.0013702	0.0650375	0.154016	0.02109	0.00482205	0.0009981	0.013728	0.007674	0.018088	0	0.0003392	0.00073455	0	0.00056096	0.00010758	3.2755e-05	0.0005785	-0.396841	-0.0424656	0.216613	-0.424334	-0.0791428	0.033451	-0.100962	-0.667004	-0.03631
1992	0.183167	-1.41975	0.125366	1.47755	2.23594	1.93909	1.93177	1.34097	0.464573	0.126224	0.00731543	0.296858	0.00345	0.000533	0	0.00171034	0	0	1.6215e-05	2.96e-05	9.425e-05	2.11225e-08	0	0.001482	0.0662375	0.158208	0.022788	0.0049569	0.00108423	0.0137475	0.007854	0.019343	0	0.0004848	0.00081375	0	0.000612	0.0001155	3.3655e-05	0.000579	-0.396023	-0.0424604	0.206985	-0.419207	-0.0798931	0.0425393	-0.103987	-0.671575	-0.0429799
1993	0.897138	-0.681902	0.0850237	1.49402	2.2597	1.95608	1.9484	1.35438	0.466274	0.127749	0.00768499	0.303616	0.00353	0.000559	0	0.00181695	0	0	1.85725e-05	6e-05	0.000104	6.27613e-08	0	0.0015964	0.0669375	0.161536	0.0240705	0.00507005	0.00116901	0.013637	0.00783	0.020428	0	0.0006789	0.00087555	0	0.00064688	0.000122925	3.458e-05	0.000579	-0.395358	-0.0422396	0.197842	-0.411007	-0.0806352	0.0427057	-0.102023	-0.672354	-0.0490306
1994	1.4368	-0.131512	0.0485363	1.51978	2.28862	1.98017	1.97207	1.37458	0.468059	0.129433	0.00810121	0.308449	0.00361	0.000585	0	0.00192708	0	0	2.19765e-05	0.00012	0.00012025	9.11702e-07	0	0.001716	0.067375	0.164192	0.0247035	0.0051553	0.00125226	0.0135655	0.00756	0.02132	7.973e-05	0.0008974	0.000927	0	0.00067648	0.00012969	3.553e-05	0.0005795	-0.392182	-0.0428387	0.191688	-0.402127	-0.0814255	0.0440421	-0.101521	-0.671509	-0.0551646
1995	1.64121	0.0586911	0.0260487	1.55647	2.32199	2.01042	2.0018	1.40007	0.470075	0.131651	0.00861607	0.311569	0.00369	0.000611	0	0.00204072	0	0	3.4569e-05	0.0002632	0.00014625	2.5313e-06	0	0.0018278	0.067375	0.166256	0.025038	0.0052173	0.00133191	0.0134615	0.006954	0.02209	0.00026803	0.0011316	0.0009741	0	0.00071856	0.000136125	3.65e-05	0.00058	-0.385604	-0.0439983	0.192353	-0.394949	-0.0823215	0.04384	-0.100528	-0.671594	-0.0603537
1996	1.73788	0.123806	0.0197181	1.59435	2.35324	2.03899	2.02971	1.4242	0.471455	0.134059	0.00927565	0.31425	0.003765	0.000637	0	0.00217712	0	0	6.25025e-05	0.0005048	0.0001885	3.72321e-06	0	0.001937	0.0672375	0.168016	0.025152	0.00525915	0.00140229	0.013364	0.0062454	0.02317	0.00050218	0.0013636	0.00101745	0	0.00076432	0.000140745	3.4995e-05	0.00058	-0.377983	-0.0453446	0.198817	-0.390468	-0.0836122	0.0418986	-0.0992733	-0.673231	-0.0635822
1997	1.81567	0.153279	0.0429187	1.61947	2.38518	2.06886	2.05879	1.44919	0.473265	0.136336	0.010067	0.316319	0.00384	0.000663	0	0.00233452	0	0	9.91415e-05	0.0008272	0.0002405	6.02431e-06	0	0.0020566	0.06705	0.169328	0.025104	0.00528395	0.00145845	0.0132535	0.0054729	0.02439	0.00077322	0.0015878	0.0010668	0	0.000796	0.0001419	3.28e-05	0.00058	-0.381987	-0.0465864	0.197514	-0.38756	-0.0857344	0.0385575	-0.0981783	-0.675861	-0.0652346
1998	1.92421	0.187549	0.0925838	1.64408	2.42451	2.10701	2.09607	1.48103	0.476231	0.138802	0.0109462	0.317498	0.00392	0.000689	0	0.00249192	0	0	0.000148914	0.0012336	0.0002925	9.64025e-06	0	0.0021606	0.0667375	0.170368	0.025035	0.00529325	0.00150165	0.013117	0.0046689	0.02527	0.00103278	0.0017892	0.00111255	0	0.00081808	0.000140745	3.355e-05	0.00058	-0.394515	-0.0470696	0.190006	-0.385373	-0.0887675	0.033855	-0.0971659	-0.678376	-0.0650724
1999	2.03322	0.216337	0.146252	1.67063	2.46087	2.14234	2.13043	1.51064	0.478682	0.141114	0.011905	0.318533	0.004	0.000715	0	0.00264931	4.96902e-07	0	0.000219914	0.0017088	0.0003445	1.53537e-05	0	0.0022516	0.0663	0.171184	0.0249045	0.00529325	0.00153495	0.0130201	0.0039363	0.02634	0.00128884	0.0019876	0.00115065	0	0.00083856	0.00013926	3.46e-05	0.00058	-0.404255	-0.046596	0.18688	-0.384069	-0.0925101	0.0282813	-0.0962409	-0.681142	-0.0634833
2000	2.09619	0.228674	0.181191	1.68633	2.48757	2.16801	2.15506	1.5327	0.479349	0.143001	0.0129504	0.319561	0.004075	0.000741	0	0.00280671	5.3733e-06	0	0.000305451	0.0022344	0.0003965	2.51441e-05	0	0.0023608	0.0658625	0.171856	0.0247545	0.00528705	0.00156069	0.0129181	0.0032898	0.02748	0.0015505	0.002208	0.0011859	0	0.00085728	0.00013761	3.2845e-05	0.00058	-0.412784	-0.0466785	0.186982	-0.383899	-0.0965845	0.023583	-0.0961873	-0.686086	-0.0611506
2001	2.12798	0.232444	0.190562	1.70497	2.51467	2.19434	2.18016	1.5559	0.479231	0.14503	0.0141809	0.320331	0.00415	0.000766999	1.95493e-06	0.00296411	3.16084e-05	0	0.000396152	0.0028016	0.000446886	3.92378e-05	0.000104522	0.0024778	0.065475	0.172432	0.024621	0.0052762	0.00158076	0.012792	0.0027471	0.02839	0.0017773	0.002407	0.00121365	0	0.00087456	0.0001353	2.889e-05	0.00058	-0.417581	-0.0478466	0.189391	-0.386164	-0.0988064	0.0228134	-0.0969686	-0.690713	-0.0592393
2002	2.14536	0.232444	0.174151	1.73876	2.54935	2.22832	2.21272	1.5855	0.479785	0.147437	0.0155953	0.321029	0.004225	0.000793324	5.87561e-06	0.00312151	7.92228e-05	2.96218e-06	0.000490601	0.0034184	0.000500933	5.42274e-05	0.000311056	0.0025922	0.065025	0.172784	0.0244785	0.0052638	0.00159642	0.0126601	0.0022884	0.02949	0.0019852	0.002595	0.0012336	0	0.0008904	0.00013266	2.549e-05	0.00058	-0.41749	-0.0490211	0.193791	-0.39016	-0.0991473	0.0248743	-0.0978269	-0.693303	-0.0574986
2003	2.1379	0.232444	0.130187	1.77527	2.58656	2.26528	2.24819	1.61755	0.480748	0.14989	0.017084	0.321281	0.00429915	0.000820285	9.55576e-06	0.0032789	0.00013392	1.16663e-05	0.000598771	0.0040704	0.000565359	7.12803e-05	0.000512873	0.0027118	0.0644875	0.172816	0.024279	0.0052514	0.00160848	0.0125223	0.0019068	0.03059	0.0021791	0.002751	0.00125085	0	0.00090496	0.000129855	2.394e-05	0.00058	-0.418209	-0.049655	0.196804	-0.3941	-0.0994884	0.0269294	-0.0986996	-0.695994	-0.0551123
2004	2.12582	0.232444	0.0860781	1.8073	2.61965	2.2984	2.27974	1.64679	0.480862	0.152086	0.0186534	0.321257	0.0043772	0.000847858	1.29337e-05	0.0034363	0.000194381	2.57604e-05	0.000717704	0.004764	0.000639868	9.54443e-05	0.000710546	0.0028314	0.0640125	0.172768	0.024036	0.005239	0.00161784	0.0124	0.0015885	0.03149	0.0023247	0.00287	0.0012621	0	0.0009184	0.00012672	2.2885e-05	0.00058	-0.419405	-0.0498851	0.198935	-0.398034	-0.0998295	0.0289768	-0.0995682	-0.698667	-0.0522666
2005	2.08375	0.184018	0.0592681	1.84047	2.65132	2.33017	2.30989	1.67512	0.480365	0.154397	0.0202831	0.321146	0.00445471	0.000876018	1.63124e-05	0.00359346	0.000259513	4.49136e-05	0.000834021	0.0054976	0.000724224	0.000126803	0.000904534	0.002951	0.063525	0.172608	0.023793	0.00522505	0.00162513	0.0122766	0.0013245	0.03245	0.0024073	0.002988	0.00126795	0	0.00093056	0.000123255	2.133e-05	0.00058	-0.418699	-0.0499248	0.200378	-0.400144	-0.0999537	0.0309461	-0.1	-0.699822	-0.0497123
2006	1.99052	0.0677962	0.0431769	1.87955	2.68339	2.3629	2.34098	1.70352	0.480656	0.156801	0.0219181	0.320488	0.00453168	0.000904742	1.98671e-05	0.00375221	0.000328414	6.88119e-05	0.000952782	0.0062088	0.000818212	0.000164195	0.00109521	0.0030732	0.062825	0.172	0.023544	0.0052111	0.00163062	0.0121466	0.0011112	0.03354	0.0024738	0.003073	0.0012723	0	0.0009416	0.00011979	1.948e-05	0.00058	-0.414636	-0.0495843	0.200445	-0.398612	-0.0996446	0.03276	-0.1	-0.697954	-0.0477661
2007	1.95195	0	0.0322656	1.91968	2.71465	2.39512	2.37153	1.73086	0.48169	0.15898	0.0235883	0.31953	0.00460773	0.000933365	2.3575e-05	0.00391043	0.000400335	9.7155e-05	0.00107836	0.0069064	0.000917571	0.0002045	0.00129787	0.003211	0.0619875	0.171104	0.0232785	0.0051956	0.00163458	0.011999	0.0009366	0.03478	0.0025508	0.003125	0.00127275	0	0.00095152	0.00011616	1.7945e-05	0.00058	-0.409113	-0.049053	0.199824	-0.395261	-0.0991191	0.034496	-0.1	-0.694561	-0.0461083
2008	1.98589	0	0.025655	1.96024	2.74699	2.42836	2.40308	1.75906	0.482853	0.161162	0.0252864	0.31862	0.00468248	0.000961237	2.73384e-05	0.00406391	0.000474808	0.00012967	0.00120741	0.00759471	0.00101816	0.000246061	0.00152618	0.00335443	0.06115	0.170176	0.023016	0.00517855	0.00163728	0.0118248	0.0007938	0.0361	0.0026334	0.003173	0.00126765	0	0.00096016	0.000112365	1.7405e-05	0.00058	-0.40359	-0.0485205	0.199203	-0.391911	-0.0985938	0.0362327	-0.1	-0.691146	-0.0443753
2009	2.07529	0	0.0725288	2.00276	2.78098	2.46334	2.43637	1.78891	0.484117	0.163345	0.0269739	0.317638	0.00475591	0.00098836	3.11528e-05	0.00421267	0.000551351	0.00016609	0.00133964	0.00825581	0.00111997	0.000288795	0.00177694	0.00348718	0.0602571	0.169132	0.0227458	0.00516193	0.00163897	0.0116064	0.000676373	0.0374441	0.00271447	0.00333391	0.00125589	0	0.000966757	0.000108587	1.59575e-05	0.000580078	-0.398066	-0.0479876	0.198581	-0.388561	-0.0980687	0.0379697	-0.1	-0.68771	-0.0424774
2010	2.1917	0	0.146252	2.04545	2.81506	2.49848	2.46981	1.81893	0.485355	0.165529	0.0286708	0.316581	0.004828	0.00101473	3.50153e-05	0.00435673	0.000629425	0.000206158	0.00147478	0.00891001	0.00122295	0.000332626	0.00204704	0.00361335	0.059321	0.167982	0.0224699	0.00514406	0.00163991	0.0113447	0.000579569	0.0388018	0.00279299	0.00359618	0.00123812	0	0.0009714	0.000104664	1.42266e-05	0.000580191	-0.392545	-0.047453	0.197957	-0.385212	-0.097544	0.0397072	-0.1	-0.684249	-0.0405882
2011	2.26852	0	0.181191	2.08733	2.84851	2.53302	2.50265	1.84836	0.486574	0.167715	0.0303745	0.315489	0.00489875	0.00104036	3.89259e-05	0.00449608	0.000708731	0.000249646	0.00161273	0.00955775	0.00132707	0.000377518	0.00233404	0.00373294	0.0583846	0.166786	0.022194	0.00512598	0.00164035	0.0110595	0.000495958	0.0402139	0.00287148	0.00383073	0.00121712	0	0.000974921	0.000100759	1.36875e-05	0.000580244	-0.387026	-0.0469153	0.19733	-0.381866	-0.0970202	0.0414454	-0.1	-0.680758	-0.0389831
2012	2.32002	0	0.190562	2.12946	2.8818	2.56744	2.53535	1.87766	0.48779	0.169904	0.0320938	0.314353	0.00496812	0.00106525	4.27407e-05	0.00462609	0.000805433	0.000293755	0.0017576	0.0102009	0.00143235	0.000419758	0.00263586	0.00384593	0.0574491	0.165544	0.0219176	0.0051078	0.00164042	0.0107526	0.000423172	0.0416721	0.00294847	0.00403649	0.00119342	0	0.000977347	9.68924e-05	1.34563e-05	0.000580268	-0.381509	-0.0463759	0.1967	-0.378521	-0.0964969	0.043184	-0.1	-0.677242	-0.0370555
2013	2.34602	0	0.174151	2.17187	2.9151	2.60192	2.56809	1.90698	0.48901	0.172095	0.0338347	0.313178	0.00503604	0.0010894	4.63156e-05	0.00474212	0.000932689	0.000335856	0.00191337	0.0108413	0.0015388	0.000455734	0.00295068	0.00395235	0.0565162	0.164264	0.0216425	0.00508955	0.00164021	0.0104252	0.000363633	0.0431693	0.00302271	0.00421262	0.0011675	0	0.000978755	9.30825e-05	1.33181e-05	0.000580279	-0.375992	-0.0458365	0.19607	-0.375175	-0.0959735	0.0449225	-0.1	-0.673705	-0.0349723
2014	2.34437	0	0.130187	2.21418	2.94851	2.63654	2.60095	1.93642	0.490247	0.174288	0.0355901	0.311964	0.00510254	0.00111282	4.96508e-05	0.00484422	0.00108484	0.000376076	0.00207969	0.0114792	0.00164639	0.000485632	0.00327694	0.00405219	0.0555876	0.162949	0.0213693	0.00507128	0.00163979	0.0100786	0.000314942	0.0446995	0.00309315	0.00435856	0.00113975	0	0.000979221	8.93431e-05	1.32222e-05	0.000580285	-0.370476	-0.0452971	0.195441	-0.37183	-0.0954502	0.0466611	-0.1	-0.670147	-0.0331911
2015	2.34274	0	0.0860781	2.25666	2.98203	2.67132	2.63396	1.96597	0.491512	0.176484	0.0373547	0.310712	0.00516759	0.0011355	5.27464e-05	0.00493245	0.0012573	0.000414534	0.00225619	0.0121149	0.00175512	0.000509631	0.00361329	0.00414545	0.054665	0.161608	0.0210989	0.00505302	0.00163922	0.00971399	0.000275133	0.0462577	0.00315894	0.00447395	0.00111055	0	0.000978816	8.56839e-05	1.31624e-05	0.000580287	-0.364959	-0.0447577	0.194811	-0.368485	-0.0949269	0.0483997	-0.1	-0.666568	-0.0314808
2016	2.35852	0	0.0592681	2.29925	3.01559	2.70618	2.66705	1.99557	0.492805	0.178682	0.0391234	0.309411	0.00523121	0.00115745	5.56023e-05	0.00500686	0.00144632	0.00045134	0.00244255	0.0127486	0.00186496	0.000527903	0.0039585	0.00423213	0.0537489	0.160242	0.0208312	0.00503478	0.00163852	0.00933228	0.000233781	0.0478393	0.00321932	0.00455858	0.00108022	0	0.000977603	8.21121e-05	1.11629e-05	0.000580288	-0.359442	-0.0442183	0.194181	-0.36514	-0.0944035	0.0501382	-0.1	-0.662967	-0.0298054
2017	2.38503	0	0.0431769	2.34186	3.04907	2.74101	2.70011	2.02512	0.494115	0.180882	0.0408921	0.308068	0.0052934	0.00117866	5.82188e-05	0.0050675	0.00164878	0.000486593	0.00263841	0.0133804	0.00197589	0.000540611	0.00431143	0.00431224	0.052839	0.158856	0.0205663	0.00501655	0.00163773	0.00894966	0.00019116	0.0494313	0.00327419	0.00461423	0.00104902	0	0.000975621	7.86334e-05	8.70911e-06	0.000580289	-0.353925	-0.0436789	0.193552	-0.361794	-0.0938802	0.0518768	-0.1	-0.659345	-0.0281537
2018	2.41671	0	0.0322656	2.38444	3.08245	2.77576	2.7331	2.05458	0.495435	0.183085	0.0426573	0.306699	0.00535415	0.00119914	6.05958e-05	0.00511443	0.00186217	0.000520386	0.00284345	0.0140103	0.00208788	0.000547917	0.00467107	0.00438578	0.0519353	0.15745	0.020304	0.00499835	0.00163688	0.00858179	0.000156309	0.0510145	0.00332406	0.00464441	0.00101718	0	0.000972917	7.52537e-05	8.09595e-06	0.000580289	-0.348408	-0.0431395	0.192922	-0.358449	-0.0933568	0.0536154	-0.1	-0.655701	-0.0265273
2019	2.4531	0	0.025655	2.42744	3.11572	2.81043	2.76602	2.08397	0.496761	0.18529	0.0444161	0.305292	0.00541346	0.00121888	6.27335e-05	0.00514769	0.00208445	0.000552807	0.00305734	0.0146385	0.00220091	0.000549977	0.00503656	0.00445274	0.0510378	0.156027	0.0200443	0.00498015	0.00163598	0.00822808	0.000127809	0.0525739	0.0033694	0.00465229	0.000984932	0	0.000969535	7.19755e-05	7.89802e-06	0.000580289	-0.342891	-0.0426001	0.192293	-0.355104	-0.0928335	0.0553539	-0.1	-0.652035	-0.0244828
2020	2.54248	0	0.0725288	2.46996	3.14889	2.84505	2.79889	2.1133	0.498091	0.187497	0.046166	0.303838	0.00547133	0.00123789	6.46319e-05	0.00516733	0.00231393	0.000583939	0.00327978	0.015265	0.00231496	0.000546943	0.00540715	0.00451314	0.0501468	0.154591	0.0197872	0.00496197	0.00163503	0.00788798	0.000104503	0.0540979	0.00341062	0.00464074	0.000952456	0	0.000965523	6.87971e-05	7.79028e-06	0.000580289	-0.337596	-0.04215	0.191489	-0.351194	-0.0923836	0.0566421	-0.1	-0.648557	-0.0223816
2021	2.657	0	0.146252	2.51075	3.18183	2.87951	2.8316	2.1425	0.499395	0.189705	0.0479042	0.302326	0.00552777	0.00125617	6.62911e-05	0.00517339	0.00254906	0.000613844	0.00351043	0.0158894	0.00242999	0.000538955	0.00578189	0.00456698	0.0492603	0.153139	0.0195322	0.00494376	0.00163405	0.00756043	8.54392e-05	0.0555754	0.00344797	0.00461224	0.000919886	0	0.000960893	6.57223e-05	7.65692e-06	0.000580289	-0.332745	-0.0418785	0.19034	-0.346155	-0.0920807	0.0570296	-0.1	-0.645482	-0.0207624
2022	2.73231	0	0.181191	2.55112	3.21457	2.91382	2.86424	2.1717	0.500624	0.191915	0.0495816	0.300748	0.00558349	0.00127417	6.77997e-05	0.00517231	0.00277102	0.00064266	0.00374134	0.0164995	0.00254567	0.000528522	0.00613718	0.00461795	0.0483776	0.151673	0.019279	0.00492552	0.00163305	0.00724467	6.98469e-05	0.0570004	0.00348186	0.00456913	0.000887358	0	0.000955662	6.27519e-05	7.49709e-06	0.000580289	-0.328115	-0.0416963	0.189016	-0.340551	-0.0918513	0.0569668	-0.1	-0.642601	-0.0193
2023	2.78247	0	0.190562	2.59191	3.24735	2.94824	2.89708	2.20119	0.501765	0.194125	0.0511579	0.299111	0.00563921	0.00129235	6.92463e-05	0.00517049	0.00296472	0.000670533	0.00396491	0.0170842	0.00266167	0.000518088	0.00645273	0.00466975	0.0475005	0.150196	0.0190279	0.00490726	0.00163203	0.0069407	5.71013e-05	0.0583708	0.00351281	0.00451364	0.000855029	0	0.000949892	5.9883e-05	7.36712e-06	0.000580289	-0.323486	-0.0415141	0.187693	-0.334946	-0.0916219	0.0569039	-0.1	-0.639703	-0.0179208
2024	2.80697	0	0.174151	2.63282	3.28029	2.98287	2.93023	2.23105	0.50284	0.196335	0.052646	0.297421	0.00569494	0.00131071	7.06311e-05	0.00516793	0.00313551	0.000697529	0.00418143	0.0176456	0.00277801	0.000507656	0.00673364	0.00472238	0.0466302	0.148712	0.0187791	0.00488899	0.00163099	0.00664839	4.66839e-05	0.0596839	0.00354116	0.00444768	0.000823032	0	0.000943637	5.71193e-05	7.26516e-06	0.000580289	-0.318856	-0.041332	0.18637	-0.329342	-0.0913925	0.056841	-0.1	-0.636787	-0.0165962
2025	2.80409	0	0.130187	2.6739	3.31345	3.01777	2.96371	2.2613	0.503866	0.198545	0.0540569	0.295681	0.00575066	0.00132926	7.19539e-05	0.00516466	0.00328778	0.000723709	0.00439115	0.0181856	0.00289468	0.000497226	0.00698437	0.00477584	0.0457682	0.147224	0.0185329	0.00487074	0.00162993	0.00636758	3.817e-05	0.0609386	0.00356722	0.00437294	0.000791481	0	0.000936944	5.44605e-05	7.18982e-06	0.000580289	-0.314227	-0.0411498	0.185046	-0.323738	-0.0911631	0.0567781	-0.1	-0.633854	-0.0153231
2026	2.80125	0	0.0860781	2.71517	3.34682	3.05293	2.99753	2.29191	0.504862	0.200754	0.0554002	0.293897	0.00580639	0.00134799	7.32149e-05	0.00516066	0.00342511	0.000749135	0.00459435	0.0187058	0.0030117	0.000486802	0.00720888	0.00483014	0.0449158	0.145735	0.0182894	0.00485253	0.00162887	0.0060981	3.12124e-05	0.0621348	0.00359128	0.00429094	0.000760471	0	0.000929862	5.19065e-05	7.14496e-06	0.000580289	-0.309597	-0.0409676	0.183723	-0.318134	-0.0909337	0.0567153	-0.1	-0.630903	-0.0141126
2027	2.81579	0	0.0592681	2.75652	3.38033	3.08825	3.03157	2.32277	0.505834	0.202964	0.0566838	0.292073	0.00586212	0.0013669	7.44139e-05	0.00515595	0.00355033	0.000773855	0.00479126	0.0192078	0.00312907	0.000476383	0.00741047	0.00488526	0.0440732	0.144245	0.0180487	0.00483434	0.00162781	0.00583956	2.55261e-05	0.0632722	0.00361353	0.00420301	0.000730071	0	0.000922419	4.94559e-05	7.11038e-06	0.000580289	-0.304968	-0.0407854	0.1824	-0.31253	-0.0907043	0.0566524	-0.1	-0.627934	-0.0129639
2028	2.84103	0	0.0431769	2.79785	3.41383	3.12362	3.06571	2.35376	0.506775	0.205173	0.057914	0.290207	0.00591785	0.00138599	7.55512e-05	0.00515053	0.00366562	0.000797909	0.00498208	0.0196926	0.00324676	0.000465967	0.00759192	0.00494122	0.0432401	0.142757	0.0178105	0.00481619	0.00162674	0.00559142	2.08777e-05	0.0643506	0.00363409	0.00411028	0.000700328	0	0.000914638	4.7103e-05	7.0651e-06	0.000580289	-0.300338	-0.0406033	0.181076	-0.306926	-0.0904749	0.0565895	-0.1	-0.624947	-0.011876
2029	2.87135	0	0.0322656	2.83909	3.44729	3.15899	3.09989	2.38482	0.507683	0.207382	0.0590964	0.288303	0.00597358	0.00140526	7.66266e-05	0.00514439	0.00377279	0.000821334	0.00516702	0.0201614	0.00336477	0.000455553	0.00775565	0.004998	0.0424163	0.14127	0.017575	0.00479805	0.00162566	0.0053532	1.70772e-05	0.0653705	0.00365309	0.00401376	0.000671286	0	0.000906547	4.485e-05	7.00888e-06	0.000580289	-0.295709	-0.0404211	0.179753	-0.301322	-0.0902455	0.0565267	-0.1	-0.621941	-0.0108491
2030	2.90619	0	0.025655	2.88054	3.4807	3.19433	3.1341	2.41595	0.508558	0.209591	0.060236	0.286361	0.00602932	0.00142472	7.76402e-05	0.00513754	0.00387333	0.000844168	0.00534626	0.0206153	0.0034831	0.000445139	0.00790384	0.00505561	0.0416018	0.139785	0.0173418	0.00477993	0.00162458	0.00512452	1.39696e-05	0.0663331	0.00367063	0.00391436	0.000642981	0	0.000898167	4.26919e-05	6.9466e-06	0.000580289	-0.290894	-0.0402428	0.178403	-0.295621	-0.0899328	0.0564996	-0.1	-0.61879	-0.00987837
2031	2.99505	0	0.0725288	2.92252	3.51407	3.22968	3.16834	2.44714	0.509401	0.2118	0.061337	0.284385	0.00608505	0.00144436	7.8592e-05	0.00512997	0.00396845	0.000866445	0.00552001	0.0210552	0.00360173	0.000434725	0.00803837	0.00511406	0.0407966	0.138303	0.0171111	0.00476183	0.0016235	0.00490497	1.14281e-05	0.0672398	0.00368685	0.00381288	0.000615438	0	0.00088952	4.06239e-05	6.87917e-06	0.000580289	-0.285707	-0.0400722	0.177001	-0.289726	-0.0894538	0.0565441	-0.1	-0.615362	-0.00895855
2032	3.11018	0	0.146252	2.96393	3.54703	3.2647	3.2023	2.47815	0.510149	0.214001	0.0623995	0.282327	0.00614086	0.00146416	7.95132e-05	0.00512184	0.00405722	0.000888327	0.00568785	0.0214824	0.00372064	0.000424456	0.0081589	0.00517335	0.0399991	0.136822	0.0168825	0.00474371	0.00162241	0.00469387	9.34884e-06	0.0680483	0.00370066	0.00370983	0.000588662	0	0.000880604	3.86437e-05	6.76232e-06	0.000580289	-0.280335	-0.0399055	0.175573	-0.283735	-0.0888914	0.0566243	-0.1	-0.611783	-0.00808831
2033	3.18541	0	0.181191	3.00422	3.57934	3.29923	3.23581	2.50887	0.510756	0.216188	0.0634241	0.280108	0.00619681	0.00148411	8.0435e-05	0.00511328	0.00413894	0.00090997	0.00584944	0.0218981	0.00383982	0.000414477	0.00826521	0.00523351	0.0392083	0.135341	0.0166555	0.00472556	0.00162132	0.0044907	7.64705e-06	0.0686845	0.00371019	0.00360557	0.000562661	0	0.000871425	3.67462e-05	6.60291e-06	0.000580289	-0.274963	-0.0397388	0.174144	-0.277744	-0.0883291	0.0567046	-0.1	-0.608178	-0.0072672
2034	3.23457	0	0.190562	3.04401	3.61123	3.33355	3.26914	2.53952	0.51125	0.218361	0.0644156	0.277678	0.00625291	0.00150421	8.13573e-05	0.00510429	0.00421508	0.000931399	0.00600501	0.0223035	0.00395927	0.00040478	0.00835928	0.00529453	0.0384256	0.133863	0.0164306	0.00470739	0.00162022	0.00429543	6.25459e-06	0.0690943	0.0037141	0.00350057	0.000537463	0	0.000862019	3.49321e-05	6.46218e-06	0.000580289	-0.269591	-0.039572	0.172716	-0.271753	-0.0877668	0.0567848	-0.1	-0.604547	-0.00649424
2035	3.25759	0	0.174151	3.08344	3.6428	3.3678	3.30242	2.57025	0.511656	0.220519	0.065378	0.274999	0.00630914	0.00152445	8.22802e-05	0.00509489	0.00428678	0.000952636	0.0061548	0.0226995	0.00407899	0.000395361	0.00844277	0.00535642	0.0376521	0.132389	0.0162079	0.00468922	0.00161911	0.00410796	5.11548e-06	0.0692363	0.00371125	0.0033952	0.000513083	0	0.000852424	3.32018e-05	6.34775e-06	0.000580289	-0.264218	-0.0394053	0.171288	-0.265761	-0.0872045	0.0568651	-0.1	-0.600889	-0.00575986
2036	3.25273	0	0.130187	3.12254	3.67408	3.40204	3.33572	2.60106	0.511994	0.222663	0.0663149	0.272041	0.00636552	0.00154485	8.32036e-05	0.00508507	0.00435498	0.000973701	0.00629904	0.0230869	0.004199	0.000386213	0.00851717	0.00541917	0.0368888	0.130922	0.0159875	0.00467107	0.001618	0.00392815	4.18377e-06	0.0690807	0.00370071	0.00328979	0.000489538	0	0.000842675	3.15518e-05	6.25977e-06	0.000580289	-0.258846	-0.0392386	0.169859	-0.25977	-0.0866422	0.0569453	-0.1	-0.597203	-0.00506063
2037	3.2474	0	0.0860781	3.16132	3.70507	3.43628	3.36905	2.63197	0.512285	0.224794	0.0672295	0.268788	0.00642205	0.00156539	8.41276e-05	0.00507484	0.00442051	0.000994617	0.00643797	0.0234668	0.00431931	0.000377331	0.00858382	0.0054828	0.0361366	0.129463	0.0157697	0.00465295	0.00161689	0.00375588	3.42184e-06	0.0686068	0.00368177	0.00318466	0.000466839	0	0.000832803	2.99754e-05	6.20235e-06	0.000580289	-0.253474	-0.0390719	0.168431	-0.253779	-0.0860799	0.0570256	-0.1	-0.593491	-0.00440265
2038	3.25896	0	0.0592681	3.19969	3.73567	3.47045	3.40232	2.66288	0.512536	0.22691	0.0681243	0.265226	0.00647871	0.00158607	8.50521e-05	0.00506421	0.00448388	0.00101539	0.00657177	0.0238396	0.0044399	0.000368706	0.00864371	0.00554728	0.0353958	0.128014	0.0155545	0.00463487	0.00161578	0.00359089	2.79874e-06	0.0678007	0.00365377	0.00308002	0.000444977	0	0.000822827	2.84726e-05	6.15573e-06	0.000580289	-0.248102	-0.0389052	0.167003	-0.247787	-0.0855175	0.0571059	-0.1	-0.58975	-0.00378579
2039	3.2807	0	0.0431769	3.23752	3.76577	3.50443	3.43543	2.69367	0.512744	0.229013	0.0690005	0.261344	0.00653552	0.00160691	8.59772e-05	0.00505317	0.00454539	0.00103603	0.00670058	0.0242057	0.00456077	0.000360331	0.00869754	0.00561263	0.0346658	0.126574	0.0153418	0.00461682	0.00161467	0.0034328	2.28913e-06	0.0666539	0.00361615	0.00297606	0.000423937	0	0.000812753	2.70429e-05	6.09934e-06	0.000580289	-0.24273	-0.0387385	0.165574	-0.241796	-0.0849552	0.0571861	-0.1	-0.58598	-0.0032097
2040	3.30733	0	0.0322656	3.27507	3.79531	3.53817	3.46831	2.7243	0.512905	0.231102	0.0698596	0.257138	0.00659247	0.00162789	8.69029e-05	0.00504172	0.00460529	0.00105654	0.00682456	0.0245653	0.0046819	0.000352197	0.00874596	0.00567885	0.0339464	0.125142	0.0151315	0.0045988	0.00161356	0.00328129	1.87228e-06	0.0651633	0.00356849	0.00287292	0.000403707	0	0.000802593	2.5679e-05	6.03303e-06	0.000580289	-0.237171	-0.0385756	0.164119	-0.235707	-0.0843095	0.0573021	-0.1	-0.582045	-0.00267507
2041	3.3383	0	0.025655	3.31265	3.82428	3.57167	3.50097	2.75477	0.513024	0.233178	0.0707029	0.25261	0.00664957	0.00164902	8.78291e-05	0.00502986	0.00466386	0.00107691	0.00694385	0.0249189	0.00480329	0.000344297	0.00878959	0.00574593	0.0332376	0.12372	0.0149235	0.0045808	0.00161244	0.00313611	1.53132e-06	0.0633301	0.00351051	0.00277075	0.000384268	0	0.000792355	2.43774e-05	5.96134e-06	0.000580289	-0.231238	-0.0384205	0.16261	-0.22942	-0.083497	0.0574894	-0.1	-0.577802	-0.00218073
2042	3.42191	0	0.0725288	3.34938	3.85254	3.60474	3.53321	2.78492	0.513065	0.235233	0.0715225	0.247806	0.00670689	0.00167028	8.87537e-05	0.00501768	0.0047128	0.00109738	0.00705844	0.0252676	0.0049249	0.000336547	0.00882736	0.00581389	0.0325392	0.122306	0.0147178	0.00456283	0.00161132	0.00299697	1.25239e-06	0.0612	0.00344299	0.00266973	0.000365601	0	0.00078205	2.31387e-05	5.88352e-06	0.000580289	-0.225119	-0.0382691	0.161074	-0.223035	-0.0826011	0.0577123	-0.1	-0.573385	-0.00172618
2043	3.53097	0	0.146252	3.38472	3.87986	3.63706	3.56475	2.81452	0.512973	0.237261	0.0723106	0.242801	0.00676453	0.00169165	8.96744e-05	0.00500527	0.00474503	0.00111813	0.00716817	0.025612	0.00504669	0.000328863	0.00885789	0.00588276	0.0318499	0.1209	0.0145141	0.00454484	0.0016102	0.00286344	1.02414e-06	0.058852	0.00336748	0.00257008	0.000347681	0	0.000771677	2.19589e-05	5.75849e-06	0.000580289	-0.219	-0.0381178	0.159538	-0.21665	-0.0817052	0.0579353	-0.1	-0.568929	-0.00131371
2044	3.60036	0	0.181191	3.41916	3.90636	3.6687	3.59563	2.84362	0.51274	0.239263	0.0730701	0.237661	0.00682247	0.00171313	9.05913e-05	0.00499261	0.00476335	0.0011391	0.00727313	0.0259517	0.00516861	0.000321241	0.00888172	0.00595252	0.0311689	0.1195	0.014312	0.00452683	0.00160907	0.00273518	8.37321e-07	0.0563525	0.00328545	0.00247202	0.000330488	0	0.000761229	2.08344e-05	5.59477e-06	0.000580289	-0.212881	-0.0379665	0.158002	-0.210266	-0.0808093	0.0581583	-0.1	-0.564433	-0.000946724
2045	3.64361	0	0.190562	3.45305	3.93236	3.69991	3.6261	2.87247	0.512396	0.241239	0.0738058	0.232449	0.00688073	0.00173473	9.15044e-05	0.00497971	0.00477052	0.00116031	0.00737353	0.0262873	0.00529067	0.000313682	0.00889989	0.00602319	0.0304972	0.118107	0.014112	0.00450881	0.00160794	0.00261213	6.84471e-07	0.0537586	0.00319834	0.0023758	0.000314011	0	0.000750731	1.97633e-05	5.45042e-06	0.000580289	-0.206762	-0.0378152	0.156466	-0.203881	-0.0799135	0.0583813	-0.1	-0.559896	-0.000629907
2046	3.66073	0	0.174151	3.48658	3.95807	3.73085	3.65633	2.90118	0.511965	0.243188	0.0745214	0.227215	0.0069393	0.00175644	9.24136e-05	0.00496657	0.00476878	0.00118175	0.00746956	0.0266195	0.0054129	0.000306184	0.0089133	0.00609476	0.0298355	0.116724	0.013914	0.0044908	0.0016068	0.00249423	5.59451e-07	0.0511171	0.00310741	0.00228161	0.00029824	0	0.000740211	1.87434e-05	5.33266e-06	0.000580289	-0.200643	-0.0376639	0.154931	-0.197496	-0.0790176	0.0586043	-0.1	-0.555318	-0.000367529
2047	3.65005	0	0.130187	3.51986	3.98358	3.76158	3.68636	2.92978	0.511468	0.24511	0.0752204	0.222	0.00699818	0.00177827	9.3319e-05	0.00495321	0.00475991	0.00120341	0.00756141	0.0269487	0.00553529	0.000298749	0.00892273	0.00616722	0.0291846	0.115352	0.0137183	0.00447281	0.00160567	0.00238136	4.57219e-07	0.0484657	0.00301375	0.00218963	0.000283157	0	0.000729686	1.7776e-05	5.24133e-06	0.000580289	-0.194524	-0.0375126	0.153395	-0.191111	-0.0781217	0.0588272	-0.1	-0.550696	-0.000167466
2048	3.63903	0	0.0860781	3.55296	4.00897	3.79213	3.71623	2.95829	0.510926	0.247008	0.0759057	0.216838	0.00705737	0.00180021	9.42205e-05	0.00493962	0.00474545	0.00122529	0.00764927	0.0272755	0.00565786	0.000291377	0.0089289	0.00624059	0.028545	0.113991	0.0135251	0.00445487	0.00160453	0.00227342	3.73645e-07	0.0458349	0.0029183	0.0021	0.000268747	0	0.000719177	1.68554e-05	5.18023e-06	0.000580289	-0.188405	-0.0373613	0.151859	-0.184727	-0.0772258	0.0590502	-0.1	-0.546032	-4.34669e-05
2049	3.64508	0	0.0592681	3.58581	4.03418	3.82243	3.74585	2.98662	0.510346	0.248879	0.0765791	0.211753	0.00711687	0.00182226	9.51182e-05	0.0049258	0.00472645	0.00124738	0.00773329	0.0276002	0.00578061	0.000284065	0.00893224	0.00631486	0.0279169	0.112643	0.0133343	0.00443697	0.00160339	0.00217022	3.0533e-07	0.0432485	0.00282184	0.0020128	0.000254988	0	0.000708699	1.59792e-05	5.12985e-06	0.000580289	-0.182285	-0.03721	0.150323	-0.178342	-0.0763299	0.0592732	-0.1	-0.541323	-1.1648e-06
2050	3.66048	0	0.0431769	3.61731	4.05912	3.85235	3.77511	3.01466	0.509724	0.250726	0.0772416	0.206764	0.00717669	0.00184442	9.60121e-05	0.00491176	0.00470365	0.00126966	0.00781355	0.0279225	0.00590353	0.000276813	0.00893296	0.00639003	0.0272999	0.111307	0.0131458	0.00441911	0.00160225	0.00207153	2.49485e-07	0.0407241	0.00272496	0.00192809	0.000241858	0	0.000698253	1.51486e-05	5.06989e-06	0.000580289	-0.177042	-0.0370293	0.148767	-0.172691	-0.0754301	0.0593407	-0.1	-0.53676	0
2051	3.67864	0	0.0322656	3.64637	4.08375	3.88187	3.80397	3.04237	0.509058	0.252547	0.077894	0.201882	0.00723681	0.0018667	9.69022e-05	0.00489749	0.0046777	0.00129211	0.00789017	0.0282425	0.0060266	0.000269616	0.00893131	0.0064661	0.0266936	0.109982	0.0129596	0.00440129	0.0016011	0.00197712	2.03835e-07	0.0382757	0.00262822	0.00184591	0.000229332	0	0.000687836	1.43611e-05	5.00144e-06	0.000580289	-0.173549	-0.0367898	0.147173	-0.168506	-0.0745226	0.0590972	-0.1	-0.532538	0
2052	3.69928	0	0.025655	3.67362	4.10768	3.91056	3.83204	3.06939	0.508302	0.254345	0.0785219	0.197119	0.00729702	0.00188903	9.77897e-05	0.00488304	0.00465796	0.00131393	0.0079611	0.0285452	0.00614824	0.000262523	0.00892296	0.00654313	0.0260979	0.108669	0.0127757	0.0043835	0.00159996	0.00188683	1.6652e-07	0.0359134	0.00253208	0.00176628	0.000217386	0	0.00067746	1.3611e-05	4.92953e-06	0.000580289	-0.170931	-0.036521	0.145559	-0.165056	-0.0736113	0.0586982	-0.1	-0.528475	0
2053	3.77228	0	0.0725288	3.69975	4.13054	3.93806	3.85895	3.09542	0.507411	0.256119	0.0791109	0.192482	0.00735707	0.00191133	9.86759e-05	0.00486846	0.00465203	0.00133435	0.00802435	0.0288168	0.00626692	0.000255579	0.00890411	0.00662121	0.0255128	0.107368	0.012594	0.00436574	0.00159881	0.00180048	1.36018e-07	0.0336445	0.00243691	0.00168921	0.000206001	0	0.000667132	1.28963e-05	4.85419e-06	0.000580289	-0.168313	-0.0362522	0.143945	-0.161606	-0.0726999	0.0582993	-0.1	-0.52438	0
2054	3.87099	0	0.146252	3.72474	4.15229	3.96431	3.88465	3.12042	0.506368	0.25787	0.0796599	0.187972	0.00741696	0.00193362	9.95608e-05	0.00485373	0.00465692	0.00135343	0.00808007	0.0290583	0.00638264	0.000248776	0.00887556	0.00670032	0.0249372	0.106077	0.0124141	0.00434799	0.00159767	0.00171778	1.11079e-07	0.031473	0.00234295	0.00161466	0.000195149	0	0.000656837	1.22184e-05	4.73492e-06	0.000580289	-0.165696	-0.0359834	0.142331	-0.158155	-0.0717886	0.0579003	-0.1	-0.520253	0
2055	3.9298	0	0.181191	3.74861	4.17295	3.98936	3.90919	3.14442	0.505168	0.259599	0.0801691	0.183587	0.0074767	0.00195588	0.000100444	0.00483885	0.00467031	0.00137121	0.00812841	0.0292712	0.00649539	0.000242109	0.00883815	0.00678047	0.0243701	0.104794	0.012236	0.00433022	0.00159651	0.00163851	9.06883e-08	0.0294013	0.00225043	0.00154259	0.000184808	0	0.000646569	1.15751e-05	4.57832e-06	0.000580289	-0.163078	-0.0357146	0.140717	-0.154705	-0.0708772	0.0575013	-0.1	-0.516094	0
2056	3.96224	0	0.190562	3.77168	4.1928	4.01347	3.93283	3.16768	0.503843	0.261305	0.0806414	0.179335	0.00753629	0.00197812	0.000101327	0.00482383	0.00469079	0.00138779	0.00816967	0.0294578	0.00660527	0.000235575	0.00879323	0.00686166	0.0238125	0.103521	0.0120599	0.00431246	0.00159535	0.00156262	7.40225e-08	0.0274317	0.00215969	0.00147303	0.000174963	0	0.000636344	1.0965e-05	4.44142e-06	0.000580289	-0.16046	-0.0354458	0.139103	-0.151254	-0.0699658	0.0571024	-0.1	-0.511902	0
2057	3.96826	0	0.174151	3.79411	4.21203	4.03681	3.95574	3.19033	0.502417	0.262989	0.0810792	0.175217	0.00759572	0.00200035	0.000102208	0.00480867	0.00471716	0.00140326	0.00820416	0.0296204	0.00671234	0.000229172	0.00874195	0.00694388	0.0232649	0.102259	0.0118857	0.00429473	0.00159419	0.00149004	6.04067e-08	0.0255649	0.00207096	0.00140596	0.000165595	0	0.000626185	1.03867e-05	4.33132e-06	0.000580289	-0.157843	-0.0351769	0.137489	-0.147804	-0.0690545	0.0567034	-0.1	-0.507676	0
2058	3.94618	0	0.130187	3.816	4.23071	4.05947	3.97799	3.21242	0.500914	0.264651	0.0814851	0.171235	0.00765499	0.00202255	0.000103088	0.00479338	0.00474846	0.0014177	0.00823213	0.0297608	0.00681667	0.000222899	0.00868531	0.00702714	0.0227276	0.101009	0.0117138	0.00427703	0.00159303	0.00142071	4.92864e-08	0.0238004	0.00198445	0.00134137	0.00015669	0	0.000616101	9.83877e-06	4.24771e-06	0.000580289	-0.155225	-0.0349081	0.135875	-0.144353	-0.0681431	0.0563044	-0.1	-0.503416	0
2059	3.92347	0	0.0860781	3.83739	4.24887	4.08148	3.99962	3.23397	0.499356	0.266291	0.0818616	0.167388	0.00771411	0.00204473	0.000103966	0.00477795	0.00478393	0.00143118	0.00825388	0.0298811	0.00691834	0.000216752	0.00862421	0.00711144	0.0222013	0.0997725	0.0115441	0.00425939	0.00159187	0.00135453	4.02075e-08	0.0221367	0.00190034	0.00127924	0.000148231	0	0.00060611	9.3199e-06	4.19426e-06	0.000580289	-0.152607	-0.0346393	0.134261	-0.140903	-0.0672318	0.0559055	-0.1	-0.499121	0
2060	3.91726	0	0.0592681	3.85799	4.26646	4.10279	4.02058	3.25492	0.49775	0.26791	0.0822104	0.163675	0.00777308	0.0020669	0.000104843	0.00476239	0.0048228	0.00144378	0.00826963	0.0299828	0.0070174	0.000210729	0.00855927	0.00719677	0.0216857	0.0985497	0.0113768	0.00424181	0.00159071	0.00129139	3.27965e-08	0.0205713	0.00181871	0.00121952	0.000140196	0	0.000596217	8.8286e-06	4.1518e-06	0.000580289	-0.150197	-0.0343633	0.132632	-0.13758	-0.0663318	0.0554462	-0.1	-0.494827	0
2061	3.92062	0	0.0431769	3.87745	4.28338	4.12329	4.04076	3.27515	0.496095	0.269508	0.0825322	0.160091	0.00783189	0.00208904	0.000105719	0.00474669	0.00486431	0.00145552	0.00827955	0.0300668	0.00711389	0.000204826	0.00849084	0.00728314	0.0211805	0.0973398	0.0112117	0.00422428	0.00158955	0.00123112	2.67472e-08	0.0191008	0.00173961	0.00116216	0.000132565	0	0.000586417	8.36332e-06	4.10075e-06	0.000580289	-0.1482	-0.0340728	0.130972	-0.134512	-0.0654546	0.0548664	-0.1	-0.490571	0
2062	3.92803	0	0.0322656	3.89577	4.2994	4.14277	4.05993	3.29449	0.49436	0.271082	0.0828438	0.156632	0.00789066	0.00211115	0.000106594	0.0047309	0.00490792	0.00146642	0.00828504	0.0301449	0.00720922	0.000199059	0.00842135	0.00737064	0.0206855	0.0961426	0.0110488	0.0042068	0.00158839	0.00117359	2.18094e-08	0.0177214	0.00166303	0.00110708	0.000125324	0	0.000576713	7.91904e-06	4.03894e-06	0.000580289	-0.146411	-0.0337751	0.129298	-0.131571	-0.0645888	0.0542264	-0.1	-0.486318	0
2063	3.9387	0	0.025655	3.91305	4.31438	4.16109	4.07793	3.31277	0.492524	0.272632	0.0831607	0.153291	0.00794949	0.0021332	0.000107468	0.00471504	0.00495323	0.00147645	0.00828747	0.0302278	0.00730479	0.000193447	0.00835297	0.00745936	0.0202004	0.0949579	0.010888	0.00418936	0.00158722	0.00111866	1.7779e-08	0.0164293	0.00158898	0.00105423	0.000118452	0	0.000567109	7.49467e-06	3.97034e-06	0.000580289	-0.144621	-0.0334774	0.127623	-0.128631	-0.063723	0.0535864	-0.1	-0.48203	0
2064	4.00185	0	0.0725288	3.92932	4.32835	4.17828	4.0948	3.33005	0.490593	0.274157	0.083482	0.150067	0.00800838	0.00215519	0.00010834	0.00469911	0.00499984	0.00148567	0.00828692	0.0303152	0.00740059	0.000187985	0.00828552	0.0075493	0.0197251	0.0937856	0.0107293	0.00417197	0.00158606	0.00106623	1.449e-08	0.0152206	0.00151746	0.00100353	0.000111935	0	0.000557602	7.09275e-06	3.89816e-06	0.000580289	-0.142832	-0.0331797	0.125949	-0.12569	-0.0628572	0.0529463	-0.1	-0.477709	0
2065	4.09074	0	0.146252	3.94449	4.34121	4.19426	4.11045	3.34625	0.488548	0.275658	0.083805	0.146949	0.00806734	0.00217713	0.000109212	0.00468311	0.00504705	0.00149409	0.00828337	0.0304056	0.00749654	0.000182666	0.00821844	0.00764046	0.0192586	0.0926237	0.0105725	0.0041546	0.00158489	0.0010161	1.18056e-08	0.0140908	0.0014484	0.000954923	0.000105753	0	0.000548175	6.71186e-06	3.78337e-06	0.000580289	-0.141042	-0.032882	0.124275	-0.12275	-0.0619913	0.0523063	-0.1	-0.473352	0
2066	4.13975	0	0.181191	3.95856	4.35298	4.20904	4.12492	3.3614	0.486381	0.277135	0.0841279	0.143933	0.00812637	0.00219902	0.000110083	0.00466702	0.00509441	0.00150172	0.00827683	0.0304982	0.00759258	0.000177485	0.00815137	0.00773285	0.0188002	0.0914712	0.0104173	0.00413722	0.00158372	0.000968137	9.61489e-09	0.0130358	0.00138178	0.000908322	9.9887e-05	0	0.000538829	6.35074e-06	3.63258e-06	0.000580289	-0.139252	-0.0325843	0.1226	-0.119809	-0.0611255	0.0516663	-0.1	-0.468959	0
2067	4.16236	0	0.190562	3.9718	4.36391	4.2229	4.13844	3.37574	0.484121	0.278587	0.0844518	0.141015	0.00818546	0.00222085	0.000110953	0.00465086	0.00514206	0.00150863	0.00826747	0.0305933	0.00768874	0.00017244	0.00808457	0.00782646	0.0183506	0.0903292	0.0102639	0.00411987	0.00158254	0.000922301	7.82797e-09	0.012052	0.0013176	0.000863688	9.43246e-05	0	0.000529576	6.00858e-06	3.50168e-06	0.000580289	-0.137463	-0.0322866	0.120926	-0.116868	-0.0602597	0.0510262	-0.1	-0.46453	0
2068	4.15853	0	0.174151	3.98437	4.37417	4.23597	4.1512	3.38939	0.481789	0.280016	0.0847772	0.138195	0.00824461	0.00224263	0.000111822	0.00463463	0.00519009	0.00151488	0.00825544	0.030691	0.00778504	0.000167528	0.00801823	0.00792128	0.01791	0.0891988	0.0101124	0.00410256	0.00158137	0.000878543	6.37117e-09	0.0111359	0.00125589	0.000820973	8.90542e-05	0	0.000520422	5.68453e-06	3.3975e-06	0.000580289	-0.135673	-0.0319889	0.119251	-0.113928	-0.0593939	0.0503862	-0.1	-0.460064	0
2069	4.12656	0	0.130187	3.99637	4.38382	4.24835	4.16324	3.40241	0.479406	0.281422	0.0851048	0.13547	0.00830383	0.00226435	0.000112691	0.00461833	0.00523858	0.00152054	0.00824088	0.0307916	0.00788148	0.000162746	0.00795249	0.00801733	0.0174787	0.0880807	0.00996303	0.00408529	0.00158019	0.000836807	5.18402e-09	0.0102838	0.00119662	0.000780126	8.40639e-05	0	0.000511382	5.37777e-06	3.31957e-06	0.000580289	-0.133884	-0.0316912	0.117577	-0.110987	-0.0585281	0.0497461	-0.1	-0.45556	0
2070	4.09365	0	0.0860781	4.00757	4.39288	4.26005	4.17461	3.41481	0.476993	0.282805	0.0854354	0.132836	0.00836311	0.00228602	0.000113558	0.00460196	0.00528762	0.00152565	0.00822396	0.0308952	0.00797811	0.000158093	0.00788753	0.00811459	0.017057	0.0869761	0.00981577	0.00406809	0.00157902	0.000797039	4.21707e-09	0.0094921	0.00113979	0.000741099	7.93376e-05	0	0.000502463	5.08752e-06	3.2714e-06	0.000580289	-0.132301	-0.0313863	0.115887	-0.108174	-0.0576737	0.0490457	-0.1	-0.451059	0
2071	4.07692	0	0.0592681	4.01765	4.40131	4.27102	4.18525	3.42653	0.474555	0.284164	0.0857688	0.130292	0.00842245	0.00230763	0.000114424	0.00458553	0.00533713	0.00153025	0.00820476	0.0310018	0.0080749	0.000153565	0.0078233	0.00821308	0.0166449	0.0858848	0.00967067	0.00405096	0.00157784	0.000759155	3.42968e-09	0.00875722	0.00108533	0.000703826	7.48637e-05	0	0.000493665	4.81291e-06	3.23448e-06	0.000580289	-0.131134	-0.0310669	0.114167	-0.105616	-0.0568421	0.0482244	-0.1	-0.446601	0
2072	4.06975	0	0.0431769	4.02658	4.4088	4.28097	4.19486	3.4373	0.472059	0.285499	0.0861168	0.12783	0.00848198	0.00232917	0.000115288	0.00456905	0.00538254	0.00153435	0.0081843	0.0311231	0.0081733	0.000149159	0.0077617	0.00831288	0.0162419	0.0848065	0.00952763	0.0040339	0.00157666	0.000723053	2.78855e-09	0.00807543	0.00103315	0.000668232	7.06351e-05	0	0.000484988	4.55306e-06	3.18728e-06	0.000580289	-0.130173	-0.0307404	0.112432	-0.103186	-0.0560218	0.0473426	-0.1	-0.442149	0
2073	4.06664	0	0.0322656	4.03437	4.41515	4.2897	4.20321	3.44693	0.469477	0.286808	0.086491	0.125448	0.00854182	0.00235062	0.000116149	0.00455255	0.00542018	0.00153793	0.00816355	0.0312702	0.00827471	0.000144874	0.0077044	0.00841408	0.0158479	0.0837407	0.00938661	0.00401689	0.00157549	0.000688642	2.26655e-09	0.00744324	0.000983184	0.000634255	6.66358e-05	0	0.000476427	4.30715e-06	3.12901e-06	0.000580289	-0.129213	-0.0304138	0.110697	-0.100755	-0.0552016	0.0464609	-0.1	-0.43766	0
2074	4.06671	0	0.025655	4.04105	4.42037	4.29723	4.21034	3.45543	0.466815	0.288091	0.0868901	0.12314	0.00860195	0.00237198	0.000117007	0.00453603	0.00545146	0.00154103	0.0081425	0.0314409	0.00837905	0.000140707	0.00765081	0.00851669	0.0154625	0.0826873	0.00924755	0.00399994	0.00157431	0.000655842	1.84166e-09	0.00685743	0.000935348	0.000601832	6.28506e-05	0	0.000467982	4.07444e-06	3.06632e-06	0.000580289	-0.128253	-0.0300872	0.108962	-0.0983248	-0.0543814	0.0455791	-0.1	-0.433133	0
2075	4.11917	0	0.0725288	4.04664	4.42448	4.30357	4.21626	3.46284	0.464078	0.289347	0.0873129	0.120904	0.00866239	0.00239325	0.000117862	0.00451947	0.00547752	0.00154367	0.00812117	0.0316335	0.00848624	0.000136653	0.00760043	0.00862071	0.0150857	0.0816461	0.00911044	0.00398304	0.00157314	0.000624579	1.49592e-09	0.00631495	0.000889585	0.000570902	5.92708e-05	0	0.000459654	3.85421e-06	3.00094e-06	0.000580289	-0.127292	-0.0297607	0.107227	-0.0958943	-0.0535611	0.0446974	-0.1	-0.428569	0
2076	4.19728	0	0.146252	4.05103	4.42737	4.30864	4.22088	3.46906	0.461246	0.290578	0.0877561	0.118734	0.00872314	0.00241444	0.000118713	0.00450289	0.00549887	0.00154583	0.00809942	0.0318453	0.00859614	0.000132709	0.00755245	0.00872612	0.0147166	0.0806153	0.00897504	0.00396618	0.00157196	0.000594736	1.21459e-09	0.00581271	0.000845795	0.000541402	5.58862e-05	0	0.00045143	3.64566e-06	2.89427e-06	0.000580289	-0.126332	-0.0294341	0.105491	-0.0934638	-0.0527409	0.0438156	-0.1	-0.423965	0
2077	4.2354	0	0.181191	4.05421	4.42906	4.31244	4.22422	3.47413	0.45831	0.291783	0.0882173	0.116624	0.00878419	0.00243554	0.000119562	0.00448626	0.00551609	0.00154752	0.0080772	0.0320742	0.00870864	0.00012887	0.00750628	0.00883295	0.0143547	0.079594	0.0088412	0.00394933	0.00157078	0.000566224	9.85696e-10	0.0053479	0.000803891	0.000513266	5.26831e-05	0	0.000443304	3.44809e-06	2.75284e-06	0.000580289	-0.125371	-0.0291075	0.103756	-0.0910333	-0.0519207	0.0429339	-0.1	-0.419322	0
2078	4.24702	0	0.190562	4.05646	4.42979	4.31522	4.22652	3.47826	0.455303	0.292964	0.0886975	0.114573	0.00884554	0.00245654	0.000120407	0.00446961	0.0055303	0.0015488	0.00805462	0.0323196	0.00882373	0.000125135	0.00746204	0.00894118	0.0140003	0.0785831	0.00870904	0.00393252	0.0015696	0.000539016	7.99604e-10	0.00491816	0.000763854	0.000486451	4.96513e-05	0	0.000435285	3.26102e-06	2.63338e-06	0.000580289	-0.124411	-0.028781	0.102021	-0.0886028	-0.0511004	0.0420522	-0.1	-0.414638	0
2079	4.23216	0	0.174151	4.05801	4.42978	4.31719	4.22799	3.48158	0.452293	0.294119	0.0892001	0.112581	0.0089072	0.00247746	0.000121249	0.00445294	0.00554303	0.00154978	0.00803194	0.0325823	0.00894152	0.000121505	0.00742036	0.00905081	0.0136537	0.0775836	0.00857868	0.00391575	0.00156842	0.000513079	6.48475e-10	0.00452142	0.000725695	0.00046093	4.67912e-05	0	0.000427373	3.08398e-06	2.5541e-06	0.000580289	-0.123451	-0.0284544	0.100286	-0.0861724	-0.0502802	0.0411704	-0.1	-0.409913	0
2080	4.18818	0	0.130187	4.058	4.42911	4.31846	4.22874	3.48415	0.449335	0.29525	0.0897277	0.110647	0.00896916	0.00249829	0.000122088	0.00443626	0.00555541	0.00155056	0.00800941	0.0328629	0.00906207	0.00011798	0.00738169	0.00916184	0.0133151	0.076596	0.00845019	0.00389904	0.00156723	0.000488375	5.25856e-10	0.00415564	0.000689396	0.000436671	4.40925e-05	0	0.000419579	2.9165e-06	2.51492e-06	0.000580289	-0.122686	-0.0281927	0.0989048	-0.0842319	-0.0496318	0.0404652	-0.1	-0.406114	0
2081	4.14152	0	0.0860781	4.05544	4.42782	4.31905	4.22877	3.48598	0.446437	0.296356	0.0902799	0.108769	0.00903142	0.00251903	0.000122924	0.00441959	0.00556779	0.00155117	0.0079871	0.0331608	0.00918539	0.000114557	0.0073459	0.00927428	0.0129847	0.0756212	0.00832366	0.00388241	0.00156605	0.000464868	4.26398e-10	0.00381863	0.000654891	0.00041362	4.15459e-05	0	0.000411916	2.75814e-06	2.50941e-06	0.000580289	-0.122315	-0.0280606	0.0982313	-0.0832715	-0.049327	0.0401129	-0.1	-0.404224	0
2082	4.11208	0	0.0592681	4.05281	4.42663	4.31968	4.22882	3.4877	0.443681	0.297445	0.090858	0.106945	0.0090942	0.00253977	0.000123756	0.00440292	0.00557601	0.0015516	0.00796525	0.0334791	0.0093116	0.000111234	0.00731465	0.00938784	0.0126623	0.0746595	0.00819912	0.00386586	0.00156487	0.000442508	3.45737e-10	0.00350824	0.000622101	0.000391723	3.91414e-05	0	0.000404383	2.60843e-06	2.51837e-06	0.000580289	-0.12214	-0.0279934	0.0979117	-0.0828012	-0.049194	0.0399371	-0.1	-0.403295	0
2083	4.09489	0	0.0431769	4.05171	4.42611	4.32094	4.22948	3.48983	0.441125	0.298521	0.0914625	0.105172	0.00915773	0.00256057	0.000124582	0.00438625	0.00557655	0.00155177	0.00794408	0.0338207	0.00944081	0.00010801	0.00728926	0.00950224	0.0123477	0.0737101	0.00807647	0.00384939	0.00156369	0.00042123	2.80318e-10	0.00322244	0.000590932	0.000370934	3.68695e-05	0	0.000396975	2.46687e-06	2.52021e-06	0.000580289	-0.121965	-0.0279262	0.097592	-0.0823309	-0.0490611	0.0397613	-0.1	-0.402364	0
2084	4.08345	0	0.0322656	4.05119	4.42611	4.32267	4.23057	3.49225	0.43874	0.299586	0.0920922	0.103447	0.00922199	0.00258144	0.000125403	0.00436957	0.00557081	0.00155171	0.00792353	0.0341835	0.00957294	0.00010488	0.00726888	0.00961749	0.0120406	0.0727728	0.00795566	0.00383299	0.00156251	0.000400974	2.27261e-10	0.00295934	0.000561303	0.000351202	3.47262e-05	0	0.000389686	2.33298e-06	2.51251e-06	0.000580289	-0.12179	-0.0278589	0.0972724	-0.0818605	-0.0489281	0.0395855	-0.1	-0.401432	0
2085	4.07682	0	0.025655	4.05117	4.42655	4.32478	4.23204	3.49489	0.436507	0.300639	0.0927457	0.101767	0.00928699	0.00260238	0.000126219	0.0043529	0.00555999	0.00155142	0.00790358	0.0345661	0.00970793	0.000101842	0.00725285	0.00973358	0.0117407	0.0718471	0.00783664	0.00381665	0.00156134	0.000381689	1.84231e-10	0.00271721	0.000533141	0.000332465	3.2703e-05	0	0.000382514	2.20636e-06	2.50007e-06	0.000580289	-0.121615	-0.0277917	0.0969528	-0.0813902	-0.0487951	0.0394097	-0.1	-0.400498	0
2086	4.12411	0	0.0725288	4.05158	4.42736	4.32723	4.23381	3.49773	0.434406	0.301681	0.0934219	0.100131	0.00935272	0.00262339	0.000127029	0.00433622	0.00554504	0.00155092	0.00788419	0.0349667	0.0098457	9.88938e-05	0.00724058	0.00985051	0.0114479	0.070933	0.00771937	0.00380038	0.00156016	0.000363328	1.49336e-10	0.00249443	0.000506373	0.00031468	3.0797e-05	0	0.000375455	2.08659e-06	2.48419e-06	0.000580289	-0.121439	-0.0277245	0.0966332	-0.0809198	-0.0486622	0.0392339	-0.1	-0.399563	0
2087	4.19849	0	0.146252	4.05224	4.42839	4.32985	4.23574	3.50063	0.432395	0.302712	0.0941177	0.0985333	0.0094192	0.00264447	0.000127834	0.00431954	0.00552635	0.00155017	0.00786525	0.0353832	0.00998613	9.60306e-05	0.00723121	0.00996829	0.0111616	0.0700288	0.00760364	0.00378415	0.00155898	0.00034582	1.21033e-10	0.00228944	0.00048091	0.000297801	2.89995e-05	0	0.000368502	1.97323e-06	2.42664e-06	0.000580289	-0.121264	-0.0276572	0.0963136	-0.0804495	-0.0485292	0.0390581	-0.1	-0.398627	0
2088	4.23427	0	0.181191	4.05308	4.42957	4.33259	4.23776	3.50358	0.430449	0.303732	0.0948307	0.0969716	0.00948641	0.00266562	0.000128634	0.00430284	0.00550437	0.00154918	0.00784665	0.0358136	0.0101291	9.32496e-05	0.00722411	0.0100869	0.0108812	0.0691335	0.00748932	0.00376795	0.0015578	0.000329107	9.8073e-11	0.00210083	0.000456678	0.000281782	2.73028e-05	0	0.000361646	1.86589e-06	2.33393e-06	0.000580289	-0.121089	-0.02759	0.0959939	-0.0799792	-0.0483963	0.0388823	-0.1	-0.397689	0
2089	4.24487	0	0.190562	4.0543	4.4311	4.33565	4.24009	3.50678	0.428574	0.304741	0.0955614	0.0954455	0.00955436	0.00268684	0.000129428	0.00428613	0.00548001	0.00154798	0.00782846	0.0362575	0.0102746	9.0549e-05	0.00721924	0.0102064	0.010607	0.0682479	0.00737651	0.00375178	0.00155662	0.000313174	7.94559e-11	0.00192737	0.000433637	0.000266577	2.57011e-05	0	0.000354892	1.7643e-06	2.26014e-06	0.000580289	-0.120914	-0.0275228	0.0956743	-0.0795088	-0.0482633	0.0387065	-0.1	-0.396749	0
2090	4.23017	0	0.174151	4.05602	4.4331	4.33914	4.24283	3.51032	0.426779	0.305739	0.0963102	0.0939547	0.00962305	0.00270812	0.000130217	0.00426941	0.00545397	0.00154661	0.00781073	0.0367143	0.0104226	8.79273e-05	0.0072165	0.0103267	0.0103392	0.0673727	0.00726529	0.00373566	0.00155544	0.000297995	6.43651e-11	0.00176792	0.000411743	0.000252156	2.41888e-05	0	0.000348245	1.66819e-06	2.21139e-06	0.000580289	-0.120741	-0.0274551	0.0953523	-0.0790336	-0.0481312	0.0385265	-0.1	-0.395808	0
2091	4.18845	0	0.130187	4.05826	4.43559	4.34309	4.24602	3.51423	0.425065	0.306726	0.0970769	0.0924988	0.00969247	0.00272948	0.000131001	0.0042527	0.00542678	0.0015451	0.00779349	0.0371838	0.0105732	8.53825e-05	0.00721578	0.0104478	0.0100778	0.0665084	0.0071557	0.00371961	0.00155426	0.000283548	5.21359e-11	0.00162143	0.000390949	0.00023849	2.27656e-05	0	0.000341709	1.5773e-06	2.18688e-06	0.000580289	-0.120573	-0.0273866	0.0950255	-0.0785487	-0.0480008	0.0383379	-0.1	-0.394867	0
2092	4.1471	0	0.0860781	4.06102	4.43858	4.3475	4.24964	3.5185	0.423438	0.307703	0.0978604	0.0910773	0.00976254	0.00275092	0.000131779	0.00423601	0.00539613	0.0015434	0.0077765	0.037667	0.0107263	8.29133e-05	0.00721705	0.0105698	0.0098229	0.0656557	0.00704783	0.00370364	0.00155308	0.000269809	4.22283e-11	0.00148689	0.000371207	0.000225538	2.14261e-05	0	0.000335292	1.49139e-06	2.1898e-06	0.000580289	-0.120406	-0.0273176	0.0946964	-0.0780588	-0.0478714	0.038145	-0.1	-0.393925	0
2093	4.12347	0	0.0592681	4.06421	4.44195	4.35226	4.2536	3.52304	0.42189	0.30867	0.0986587	0.0896891	0.00983314	0.00277246	0.000132549	0.00421939	0.00535997	0.00154148	0.0077595	0.0381649	0.0108821	8.05177e-05	0.00722007	0.0106926	0.00957442	0.0648145	0.00694167	0.00368775	0.0015519	0.000256745	3.42023e-11	0.00136337	0.000352463	0.000213267	2.01649e-05	0	0.000328994	1.41018e-06	2.20176e-06	0.000580289	-0.12024	-0.0272487	0.0943672	-0.077569	-0.0477419	0.0379521	-0.1	-0.392981	0
2094	4.11083	0	0.0431769	4.06765	4.44556	4.35723	4.25776	3.52772	0.420405	0.309626	0.0994709	0.0883323	0.00990428	0.00279409	0.000133311	0.00420283	0.00531924	0.00153934	0.00774245	0.0386759	0.0110404	7.81932e-05	0.00722451	0.0108163	0.00933207	0.0639842	0.00683712	0.00367192	0.00155072	0.000244316	2.77002e-11	0.00124996	0.000334664	0.000201641	1.89766e-05	0	0.000322808	1.33341e-06	2.20389e-06	0.000580289	-0.120074	-0.0271798	0.0940381	-0.0770792	-0.0476124	0.0377593	-0.1	-0.392035	0
2095	4.10353	0	0.0322656	4.07126	4.44932	4.36231	4.26202	3.53247	0.418971	0.310572	0.100296	0.0870051	0.00997595	0.00281582	0.000134066	0.00418633	0.00527477	0.00153698	0.00772533	0.039199	0.0112012	7.59376e-05	0.00723011	0.0109408	0.00909563	0.0631645	0.00673415	0.00365617	0.00154955	0.000232489	2.24326e-11	0.00114584	0.000317763	0.000190629	1.78561e-05	0	0.000316726	1.26081e-06	2.19638e-06	0.000580289	-0.119908	-0.0271108	0.0937089	-0.0765893	-0.0474829	0.0375664	-0.1	-0.391088	0
2096	4.10067	0	0.025655	4.07501	4.45319	4.36749	4.26635	3.53727	0.417579	0.311507	0.101134	0.0857063	0.0100482	0.00283764	0.000134814	0.00416988	0.00522727	0.00153441	0.00770814	0.039733	0.0113645	7.37487e-05	0.0072367	0.0110662	0.00886493	0.0623552	0.00663271	0.00364048	0.00154837	0.000221233	1.81654e-11	0.00105027	0.000301711	0.000180202	1.67991e-05	0	0.000310743	1.19216e-06	2.18393e-06	0.000580289	-0.119741	-0.0270419	0.0933798	-0.0760995	-0.0473534	0.0373736	-0.1	-0.390138	0
2097	4.15142	0	0.0725288	4.07889	4.45718	4.37274	4.27076	3.5421	0.416224	0.312433	0.101985	0.0844348	0.0101209	0.00285956	0.000135554	0.00415349	0.0051773	0.00153165	0.00769087	0.0402771	0.0115302	7.16245e-05	0.00724411	0.0111924	0.00863982	0.061556	0.00653278	0.00362486	0.0015472	0.000210518	1.47087e-11	0.000962567	0.000286464	0.000170325	1.58013e-05	0	0.000304864	1.12724e-06	2.16775e-06	0.000580289	-0.119575	-0.0269729	0.0930506	-0.0756097	-0.0472239	0.0371807	-0.1	-0.389188	0
2098	4.22898	0	0.146252	4.08272	4.46113	4.37794	4.27509	3.54687	0.414874	0.313348	0.102845	0.0831875	0.0101942	0.00288157	0.000136287	0.00413716	0.00512495	0.00152867	0.00767342	0.0408294	0.011698	6.95621e-05	0.00725187	0.0113194	0.00841978	0.0607655	0.00643417	0.00360927	0.00154602	0.000200305	1.1908e-11	0.000882059	0.000271971	0.000160964	1.48583e-05	0	0.000299083	1.06581e-06	2.10997e-06	0.000580289	-0.119409	-0.026904	0.0927214	-0.0751199	-0.0470944	0.0369879	-0.1	-0.388235	0
2099	4.26769	0	0.181191	4.0865	4.46502	4.38306	4.27934	3.55158	0.413512	0.314254	0.103712	0.0819624	0.010268	0.00290368	0.000137012	0.00412087	0.00507045	0.00152546	0.00765571	0.0413883	0.011868	6.75593e-05	0.00725967	0.0114473	0.00820447	0.059983	0.00633676	0.0035937	0.00154484	0.000190559	9.63861e-12	0.000808149	0.00025819	0.000152093	1.39712e-05	0	0.000293393	1.00764e-06	2.01721e-06	0.000580289	-0.119243	-0.0268351	0.0923923	-0.07463	-0.0469649	0.036795	-0.1	-0.387281	0
2100	4.28077	0	0.190562	4.0902	4.46908	4.38832	4.28373	3.55642	0.412156	0.31515	0.104589	0.08076	0.0103424	0.00292588	0.00013773	0.00410463	0.00501448	0.00152205	0.00763784	0.0419541	0.0120402	6.56148e-05	0.00726774	0.011576	0.00799406	0.059209	0.00624065	0.00357817	0.00154366	0.00018127	7.80044e-12	0.000740327	0.000245097	0.000143693	1.31368e-05	0	0.000287792	9.52599e-07	1.94317e-06	0.000580289	-0.119118	-0.0267833	0.0921454	-0.0742626	-0.0468678	0.0366503	-0.1	-0.386565	0
2101	4.26789	0	0.174151	4.09373	4.47343	4.39385	4.28838	3.56152	0.410818	0.316036	0.105475	0.0795805	0.0104173	0.00294818	0.000138441	0.00408844	0.00495754	0.00151849	0.00761986	0.0425268	0.0122144	6.37274e-05	0.00727625	0.0117056	0.00778862	0.0584442	0.00614589	0.0035627	0.00154248	0.000172424	6.31207e-12	0.00067811	0.000232662	0.000135745	1.2352e-05	0	0.000282283	9.00538e-07	1.89421e-06	0.000580289	-0.119076	-0.0267661	0.0920631	-0.0741402	-0.0468354	0.0366021	-0.1	-0.386325	0
2102	4.22757	0	0.130187	4.09738	4.4779	4.39947	4.29313	3.56665	0.40957	0.316907	0.106345	0.078424	0.0104917	0.0029703	0.00013914	0.00407231	0.00490584	0.00151497	0.00760216	0.043081	0.0123869	6.18969e-05	0.00728442	0.0118342	0.00758823	0.057689	0.00605255	0.00354728	0.0015413	0.000164008	5.1074e-12	0.000621067	0.000220862	0.000128226	1.16138e-05	0	0.00027687	8.51316e-07	1.87295e-06	0.000580289	-0.119076	-0.0267661	0.0920631	-0.0741402	-0.0468354	0.0366021	-0.1	-0.386325	0
2103	4.18729	0	0.0860781	4.10121	4.48226	4.40497	4.2978	3.57157	0.408476	0.317755	0.107173	0.0772907	0.0105646	0.00299197	0.000139826	0.00405625	0.00486436	0.00151168	0.00758514	0.0435932	0.0125539	6.01231e-05	0.00729163	0.0119602	0.00739297	0.0569439	0.00596067	0.00353194	0.00154012	0.000156006	4.13271e-12	0.000568794	0.000209672	0.000121115	1.09193e-05	0	0.00027156	8.04796e-07	1.88302e-06	0.000580289	-0.119076	-0.0267661	0.0920631	-0.0741402	-0.0468354	0.0366021	-0.1	-0.386325	0
2104	4.16419	0	0.0592681	4.10493	4.48645	4.41027	4.30231	3.57621	0.407521	0.318582	0.107961	0.07618	0.0106361	0.0030132	0.000140497	0.00404026	0.00483114	0.00150863	0.00756877	0.0440666	0.0127155	5.84043e-05	0.00729804	0.0120836	0.00720273	0.056209	0.00587026	0.00351668	0.00153895	0.000148401	3.34414e-12	0.0005209	0.000199059	0.000114393	1.02657e-05	0	0.000266353	7.60833e-07	1.9031e-06	0.000580289	-0.119076	-0.0267661	0.0920631	-0.0741402	-0.0468354	0.0366021	-0.1	-0.386325	0
2105	4.15156	0	0.0431769	4.10839	4.49033	4.41524	4.30653	3.58046	0.406681	0.319387	0.108709	0.0750907	0.010706	0.00303398	0.000141153	0.00402433	0.00480447	0.00150578	0.00755301	0.0445039	0.0128717	5.67387e-05	0.00730365	0.0122043	0.00701729	0.0554838	0.00578124	0.00350149	0.00153777	0.000141168	2.70606e-12	0.000477018	0.000188992	0.000108037	9.65018e-06	0	0.000261239	7.19277e-07	1.91409e-06	0.000580289	-0.119076	-0.0267661	0.0920631	-0.0741402	-0.0468354	0.0366021	-0.1	-0.386325	0
2106	4.14378	0	0.0322656	4.11151	4.49383	4.41981	4.31039	3.58428	0.405938	0.320171	0.109419	0.0740218	0.0107744	0.0030543	0.000141796	0.00400846	0.004783	0.00150311	0.00753781	0.0449073	0.0130227	5.51245e-05	0.00730851	0.0123224	0.0068365	0.054768	0.00569357	0.00348636	0.0015366	0.000134288	2.18972e-12	0.000436811	0.00017944	0.000102026	9.07011e-06	0	0.000256219	6.79992e-07	1.91617e-06	0.000580289	-0.119076	-0.0267661	0.0920631	-0.0741402	-0.0468354	0.0366021	-0.1	-0.386325	0
2107	4.13994	0	0.025655	4.11428	4.49694	4.42397	4.31387	3.58766	0.40528	0.320933	0.110092	0.0729726	0.0108413	0.00307419	0.000142424	0.00399265	0.00476568	0.00150062	0.00752314	0.0452794	0.0131686	5.356e-05	0.0073127	0.0124379	0.0066602	0.0540613	0.00560723	0.0034713	0.00153542	0.000127743	1.77189e-12	0.000399972	0.000170379	9.63455e-05	8.52317e-06	0	0.000251292	6.4285e-07	1.91402e-06	0.000580289	-0.119076	-0.0267661	0.0920631	-0.0741402	-0.0468354	0.0366021	-0.1	-0.386325	0
2108	4.18922	0	0.0725288	4.11669	4.49965	4.42771	4.31698	3.59061	0.404696	0.321674	0.11073	0.0719424	0.0109067	0.00309362	0.000143038	0.0039769	0.0047517	0.00149828	0.00750899	0.0456223	0.0133095	5.20438e-05	0.00731627	0.0125507	0.0064883	0.0533636	0.00552218	0.0034563	0.00153425	0.000121516	1.43377e-12	0.000366221	0.000161777	9.09761e-05	8.01226e-06	0	0.000246456	6.07735e-07	1.90885e-06	0.000580289	-0.119076	-0.0267661	0.0920631	-0.0741402	-0.0468354	0.0366021	-0.1	-0.386325	0
2109	4.26484	0	0.146252	4.11859	4.50183	4.4309	4.31957	3.59303	0.404151	0.322394	0.111332	0.0709292	0.0109706	0.0031126	0.000143637	0.00396121	0.00474003	0.00149604	0.00749523	0.0459369	0.0134453	5.05737e-05	0.00731894	0.0126609	0.00632038	0.0526738	0.00543827	0.00344134	0.00153307	0.000115582	1.16009e-12	0.000335291	0.000153605	8.5898e-05	7.52961e-06	0	0.000241701	5.74512e-07	1.86303e-06	0.000580289	-0.119076	-0.0267661	0.0920631	-0.0741402	-0.0468354	0.0366021	-0.1	-0.386325	0
2110	4.30116	0	0.181191	4.11997	4.50348	4.43355	4.32165	3.59493	0.403625	0.323093	0.111898	0.0699314	0.0110329	0.00313114	0.000144222	0.00394557	0.00472999	0.00149388	0.00748178	0.0462243	0.0135761	4.9148e-05	0.00732057	0.0127685	0.0061562	0.051991	0.00535542	0.0034264	0.0015319	0.000109923	9.38514e-13	0.000306941	0.000145841	8.10932e-05	7.07321e-06	0	0.000237014	5.43064e-07	1.78319e-06	0.000580289	-0.119076	-0.0267661	0.0920631	-0.0741402	-0.0468354	0.0366021	-0.1	-0.386325	0
2111	4.31161	0	0.190562	4.12105	4.50482	4.43587	4.32343	3.59653	0.403131	0.323772	0.112432	0.0689497	0.0110938	0.00314923	0.000144793	0.00392999	0.00472149	0.00149182	0.00746868	0.0464874	0.013702	4.77657e-05	0.00732155	0.0128734	0.00599586	0.0513158	0.00527368	0.0034115	0.00153072	0.000104532	7.59194e-13	0.00028097	0.000138468	7.65475e-05	6.64666e-06	0	0.000232407	5.13314e-07	1.72272e-06	0.000580289	-0.119076	-0.0267661	0.0920631	-0.0741402	-0.0468354	0.0366021	-0.1	-0.386325	0
2112	4.29621	0	0.174151	4.12206	4.50606	4.43807	4.32514	3.59803	0.402679	0.324431	0.112937	0.0679845	0.0111532	0.00316687	0.000145349	0.00391446	0.00471443	0.00148987	0.007456	0.0467288	0.0138233	4.64258e-05	0.00732217	0.0129757	0.00583944	0.0506488	0.00519313	0.00339666	0.00152954	9.94009e-05	6.14108e-13	0.000257181	0.000131469	7.22527e-05	6.24305e-06	0	0.000227887	4.85182e-07	1.68758e-06	0.000580289	-0.119076	-0.0267661	0.0920631	-0.0741402	-0.0468354	0.0366021	-0.1	-0.386325	0
2113	4.25331	0	0.130187	4.12313	4.50733	4.4403	4.32688	3.59953	0.402278	0.325069	0.113414	0.0670361	0.0112111	0.00318406	0.000145891	0.00389899	0.00470871	0.00148804	0.00744376	0.0469505	0.0139401	4.51272e-05	0.00732266	0.0130753	0.00568697	0.0499904	0.00511379	0.00338187	0.00152837	9.45207e-05	4.96743e-13	0.000235393	0.000124825	6.81953e-05	5.86099e-06	0	0.00022345	4.58589e-07	1.67687e-06	0.000580289	-0.119076	-0.0267661	0.0920631	-0.0741402	-0.0468354	0.0366021	-0.1	-0.386325	0
2114	4.21034	0	0.0860781	4.12426	4.50865	4.44254	4.32868	3.60105	0.401936	0.325688	0.113868	0.0661048	0.0112674	0.00320081	0.000146419	0.00388359	0.00470428	0.00148635	0.00743201	0.047155	0.0140524	4.3869e-05	0.00732326	0.0131724	0.0055385	0.049341	0.00503572	0.00336716	0.00152719	8.98835e-05	4.01821e-13	0.000215447	0.000118525	6.43623e-05	5.50429e-06	0	0.000219099	4.33463e-07	1.6937e-06	0.000580289	-0.119076	-0.0267661	0.0920631	-0.0741402	-0.0468354	0.0366021	-0.1	-0.386325	0
2115	4.18465	0	0.0592681	4.12538	4.50992	4.44473	4.33043	3.6025	0.401648	0.326287	0.114298	0.0651905	0.0113223	0.0032171	0.000146933	0.00386825	0.00470091	0.00148479	0.00742074	0.0473435	0.0141605	4.265e-05	0.00732399	0.0132667	0.00539394	0.0487007	0.00495891	0.00335253	0.00152602	8.54777e-05	3.25051e-13	0.000197193	0.000112549	6.07466e-05	5.17128e-06	0	0.000214832	4.09723e-07	1.71985e-06	0.000580289	-0.119076	-0.0267661	0.0920631	-0.0741402	-0.0468354	0.0366021	-0.1	-0.386325	0
2116	4.16952	0	0.0431769	4.12634	4.51101	4.44672	4.33201	3.60374	0.401402	0.326866	0.114707	0.0642921	0.0113757	0.00323295	0.000147432	0.00385297	0.00469831	0.00148334	0.00740992	0.047517	0.0142644	4.14689e-05	0.00732473	0.0133585	0.00525314	0.0480689	0.00488331	0.00333797	0.00152485	8.12898e-05	2.62954e-13	0.000180483	0.000106877	5.7335e-05	4.86032e-06	0	0.000210646	3.87288e-07	1.73674e-06	0.000580289	-0.119076	-0.0267661	0.0920631	-0.0741402	-0.0468354	0.0366021	-0.1	-0.386325	0
2117	4.15933	0	0.0322656	4.12706	4.51185	4.44844	4.33334	3.60473	0.401187	0.327426	0.115093	0.063409	0.0114275	0.00324835	0.000147916	0.00383776	0.00469625	0.00148199	0.00739949	0.0476761	0.0143641	4.03242e-05	0.00732541	0.0134476	0.00511594	0.0474454	0.00480887	0.00332348	0.00152368	7.73077e-05	2.12721e-13	0.000165185	0.000101494	5.41099e-05	4.56482e-06	0	0.000206543	3.66084e-07	1.74463e-06	0.000580289	-0.119076	-0.0267661	0.0920631	-0.0741402	-0.0468354	0.0366021	-0.1	-0.386325	0
2118	4.15317	0	0.025655	4.12752	4.5124	4.44986	4.3344	3.60544	0.400999	0.327967	0.115458	0.0625408	0.0114779	0.0032633	0.000148386	0.0038226	0.00469461	0.00148072	0.00738945	0.047822	0.0144597	3.9215e-05	0.00732601	0.0135341	0.00498225	0.0468301	0.00473558	0.00330904	0.00152251	7.35211e-05	1.72085e-13	0.000151178	9.63864e-05	5.10602e-05	4.28374e-06	0	0.000202517	3.46041e-07	1.74822e-06	0.000580289	-0.119076	-0.0267661	0.0920631	-0.0741402	-0.0468354	0.0366021	-0.1	-0.386325	0
2119	4.20023	0	0.0725288	4.12771	4.51268	4.45099	4.33519	3.60587	0.400832	0.328489	0.115803	0.061687	0.0115267	0.00327781	0.000148842	0.00380751	0.00469329	0.00147954	0.00737976	0.0479556	0.0145514	3.81401e-05	0.00732653	0.013618	0.00485196	0.0462227	0.0046634	0.00329468	0.00152134	6.99199e-05	1.39212e-13	0.000138358	9.15373e-05	4.81815e-05	4.02122e-06	0	0.000198564	3.27096e-07	1.7487e-06	0.000580289	-0.119076	-0.0267661	0.0920631	-0.0741402	-0.0468354	0.0366021	-0.1	-0.386325	0
2120	4.27373	0	0.146252	4.12748	4.51254	4.4517	4.33557	3.60592	0.40066	0.328992	0.116126	0.0608461	0.0115741	0.00329187	0.000149284	0.00379246	0.00469185	0.0014784	0.00737033	0.0480762	0.014639	3.7098e-05	0.0073266	0.0136993	0.00472478	0.0456223	0.00459221	0.00328035	0.00152017	6.649e-05	1.12611e-13	0.00012662	8.69282e-05	4.54628e-05	3.7759e-06	0	0.000194684	3.09175e-07	1.70858e-06	0.000580289	-0.119076	-0.0267661	0.0920631	-0.0741402	-0.0468354	0.0366021	-0.1	-0.386325	0
2121	4.30801	0	0.181191	4.12682	4.51198	4.45196	4.33554	3.6056	0.400465	0.329476	0.116428	0.0600168	0.0116199	0.00330547	0.000149711	0.00377747	0.00469009	0.00147727	0.00736105	0.0481841	0.0147225	3.60873e-05	0.00732602	0.0137779	0.00460052	0.0450282	0.00452193	0.00326604	0.001519	6.32201e-05	9.10811e-14	0.000115862	8.25478e-05	4.28943e-05	3.54657e-06	0	0.000190865	2.92216e-07	1.63449e-06	0.000580289	-0.119076	-0.0267661	0.0920631	-0.0741402	-0.0468354	0.0366021	-0.1	-0.386325	0
2122	4.31663	0	0.190562	4.12607	4.51133	4.45213	4.33542	3.60521	0.400267	0.329943	0.116709	0.0591999	0.0116643	0.00331864	0.000150124	0.00376253	0.0046883	0.00147617	0.00735201	0.0482809	0.0148022	3.51076e-05	0.00732513	0.0138539	0.00447923	0.0444409	0.00445261	0.00325178	0.00151782	6.01062e-05	7.36618e-14	0.000106012	7.83875e-05	4.0468e-05	3.33228e-06	0	0.00018711	2.76175e-07	1.57961e-06	0.000580289	-0.119076	-0.0267661	0.0920631	-0.0741402	-0.0468354	0.0366021	-0.1	-0.386325	0
2123	4.29963	0	0.174151	4.12548	4.51083	4.45244	4.33546	3.60499	0.40008	0.33039	0.116974	0.0583957	0.0117071	0.00333135	0.000150523	0.00374765	0.00468669	0.00147513	0.00734324	0.0483682	0.0148782	3.41583e-05	0.00732416	0.0139273	0.00436098	0.0438608	0.00438431	0.00323757	0.00151665	5.71435e-05	5.95717e-14	9.70015e-05	7.44357e-05	3.81764e-05	3.13211e-06	0	0.000183428	2.61009e-07	1.54974e-06	0.000580289	-0.119076	-0.0267661	0.0920631	-0.0741402	-0.0468354	0.0366021	-0.1	-0.386325	0
2124	4.25529	0	0.130187	4.1251	4.51053	4.45293	4.33571	3.60497	0.399914	0.33082	0.117223	0.0576046	0.0117484	0.00334362	0.000150907	0.00373282	0.00468538	0.00147415	0.00733478	0.0484475	0.0149505	3.32385e-05	0.00732332	0.013998	0.00424578	0.0432882	0.00431706	0.00322342	0.00151548	5.43268e-05	4.81766e-14	8.87532e-05	7.06847e-05	3.60178e-05	2.94008e-06	0	0.000179819	2.46676e-07	1.54388e-06	0.000580289	-0.119076	-0.0267661	0.0920631	-0.0741402	-0.0468354	0.0366021	-0.1	-0.386325	0
2125	4.21103	0	0.0860781	4.12495	4.51045	4.45362	4.33616	3.60515	0.399783	0.331232	0.117458	0.056827	0.0117883	0.00335543	0.000151277	0.00371806	0.00468454	0.00147326	0.00732669	0.0485201	0.0150194	3.23477e-05	0.0073228	0.0140662	0.00413366	0.0427237	0.00425089	0.00320935	0.00151431	5.16513e-05	3.89627e-14	8.12041e-05	6.7128e-05	3.39792e-05	2.75571e-06	0	0.000176279	2.33136e-07	1.56516e-06	0.000580289	-0.119076	-0.0267661	0.0920631	-0.0741402	-0.0468354	0.0366021	-0.1	-0.386325	0
2126	4.18421	0	0.0592681	4.12495	4.51048	4.45442	4.33674	3.60543	0.399683	0.331627	0.117681	0.0560626	0.0118266	0.00336681	0.000151633	0.00370336	0.00468409	0.00147245	0.00731896	0.0485867	0.0150849	3.14849e-05	0.0073226	0.0141317	0.00402455	0.042167	0.00418581	0.00319535	0.00151314	4.911e-05	3.15126e-14	7.4301e-05	6.37546e-05	3.20536e-05	2.58361e-06	0	0.000172808	2.20345e-07	1.59542e-06	0.000580289	-0.119076	-0.0267661	0.0920631	-0.0741402	-0.0468354	0.0366021	-0.1	-0.386325	0
2127	4.16811	0	0.0431769	4.12493	4.5105	4.45519	4.3373	3.60569	0.399605	0.332003	0.117891	0.0553109	0.0118634	0.00337773	0.000151975	0.00368872	0.00468386	0.0014717	0.00731155	0.0486472	0.0151471	3.06491e-05	0.00732256	0.0141946	0.00391832	0.041618	0.00412176	0.00318142	0.00151197	4.66951e-05	2.54877e-14	6.79813e-05	6.05503e-05	3.024e-05	2.42293e-06	0	0.000169408	2.08259e-07	1.61616e-06	0.000580289	-0.119076	-0.0267661	0.0920631	-0.0741402	-0.0468354	0.0366021	-0.1	-0.386325	0
2128	4.15709	0	0.0322656	4.12483	4.51043	4.45586	4.33777	3.60587	0.399541	0.332363	0.118088	0.0545712	0.0118987	0.00338821	0.000152302	0.00367414	0.00468375	0.00147102	0.00730443	0.0487019	0.0152059	2.98395e-05	0.00732259	0.0142548	0.00381487	0.0410762	0.0040587	0.00316755	0.00151081	4.43997e-05	2.0615e-14	6.21946e-05	5.75063e-05	2.8526e-05	2.2729e-06	0	0.000166076	1.96838e-07	1.62767e-06	0.000580289	-0.119076	-0.0267661	0.0920631	-0.0741402	-0.0468354	0.0366021	-0.1	-0.386325	0
2129	4.15027	0	0.025655	4.12461	4.51024	4.45639	4.33812	3.60593	0.399487	0.332705	0.118272	0.0538434	0.0119325	0.00339824	0.000152616	0.00365962	0.0046837	0.00147038	0.00729758	0.0487511	0.0152616	2.90553e-05	0.00732267	0.0143125	0.00371411	0.0405416	0.00399663	0.00315375	0.00150965	4.22175e-05	1.6674e-14	5.69018e-05	5.46184e-05	2.69058e-05	2.1328e-06	0	0.000162812	1.86043e-07	1.63464e-06	0.000580289	-0.119076	-0.0267661	0.0920631	-0.0741402	-0.0468354	0.0366021	-0.1	-0.386325	0
2130	4.19681	0	0.0725288	4.12428	4.50992	4.4568	4.33835	3.60588	0.399441	0.33303	0.118443	0.0531271	0.0119648	0.00340782	0.000152915	0.00364515	0.00468368	0.00146978	0.00729098	0.0487951	0.015314	2.82956e-05	0.00732275	0.0143675	0.00361596	0.040014	0.0039355	0.00314001	0.00150848	4.01427e-05	1.34865e-14	5.20607e-05	5.18762e-05	2.53796e-05	2.00197e-06	0	0.000159607	1.75842e-07	1.63824e-06	0.000580289	-0.119076	-0.0267661	0.0920631	-0.0741402	-0.0468354	0.0366021	-0.1	-0.386325	0
2131	4.26993	0	0.146252	4.12368	4.50935	4.45693	4.33833	3.60562	0.399376	0.333338	0.1186	0.052421	0.0119957	0.00341696	0.000153199	0.00363074	0.00468332	0.00146919	0.00728452	0.0488329	0.0153632	2.75593e-05	0.00732246	0.0144199	0.00352021	0.0394925	0.00387523	0.00312631	0.00150732	3.81671e-05	1.09076e-14	4.76311e-05	4.92685e-05	2.39414e-05	1.87973e-06	0	0.000156455	1.66193e-07	1.60112e-06	0.000580289	-0.119076	-0.0267661	0.0920631	-0.0741402	-0.0468354	0.0366021	-0.1	-0.386325	0
2132	4.30401	0	0.181191	4.12281	4.50853	4.45681	4.33807	3.60516	0.399278	0.33363	0.118741	0.0517241	0.012025	0.00342565	0.00015347	0.00361637	0.00468244	0.00146858	0.00727813	0.048864	0.0154092	2.68454e-05	0.0073216	0.0144697	0.00342669	0.0389765	0.00381573	0.00311263	0.00150615	3.62842e-05	8.82079e-15	4.35769e-05	4.67896e-05	2.258e-05	1.76546e-06	0	0.000153358	1.57063e-07	1.5299e-06	0.000580289	-0.119076	-0.0267661	0.0920631	-0.0741402	-0.0468354	0.0366021	-0.1	-0.386325	0
2133	4.31249	0	0.190562	4.12193	4.5077	4.45666	4.33779	3.60472	0.399166	0.333905	0.118869	0.051037	0.0120528	0.00343389	0.000153726	0.00360206	0.00468138	0.00146796	0.00727186	0.0488898	0.015452	2.61533e-05	0.00732048	0.0145169	0.00333546	0.0384665	0.00375706	0.003099	0.00150499	3.44915e-05	7.13269e-15	3.98676e-05	4.4437e-05	2.12915e-05	1.6587e-06	0	0.000150319	1.48428e-07	1.47762e-06	0.000580289	-0.119076	-0.0267661	0.0920631	-0.0741402	-0.0468354	0.0366021	-0.1	-0.386325	0
2134	4.29533	0	0.174151	4.12117	4.50699	4.45663	4.33764	3.60442	0.399057	0.334164	0.118986	0.0503602	0.0120791	0.00344169	0.000153969	0.0035878	0.00468037	0.00146738	0.00726578	0.0489115	0.0154919	2.54827e-05	0.00731934	0.0145615	0.00324654	0.0379629	0.00369925	0.00308541	0.00150382	3.27863e-05	5.76745e-15	3.64746e-05	4.2205e-05	2.00775e-05	1.55899e-06	0	0.000147339	1.40266e-07	1.45006e-06	0.000580289	-0.119076	-0.0267661	0.0920631	-0.0741402	-0.0468354	0.0366021	-0.1	-0.386325	0
2135	4.2508	0	0.130187	4.12061	4.50647	4.45677	4.33768	3.60431	0.398961	0.334406	0.119092	0.049694	0.0121038	0.00344904	0.000154197	0.00357359	0.00467957	0.00146683	0.00725993	0.0489299	0.0155289	2.48329e-05	0.00731836	0.0146034	0.00315996	0.0374658	0.00364233	0.00307189	0.00150266	3.11654e-05	4.66353e-15	3.33648e-05	4.00848e-05	1.89341e-05	1.46589e-06	0	0.000144419	1.32552e-07	1.44632e-06	0.000580289	-0.119076	-0.0267661	0.0920631	-0.0741402	-0.0468354	0.0366021	-0.1	-0.386325	0
2136	4.20633	0	0.0860781	4.12026	4.50614	4.45711	4.33791	3.60439	0.398892	0.334632	0.119191	0.0490386	0.0121271	0.00345594	0.00015441	0.00355945	0.00467915	0.00146634	0.00725434	0.0489463	0.0155631	2.42035e-05	0.00731774	0.0146427	0.00307572	0.0369758	0.00358635	0.00305843	0.00150149	2.96261e-05	3.77107e-15	3.05149e-05	3.80718e-05	1.78574e-05	1.37899e-06	0	0.000141553	1.25266e-07	1.46955e-06	0.000580289	-0.119076	-0.0267661	0.0920631	-0.0741402	-0.0468354	0.0366021	-0.1	-0.386325	0
2137	4.1793	0	0.0592681	4.12003	4.50594	4.45754	4.33826	3.60457	0.398848	0.334843	0.119281	0.0483941	0.0121489	0.00346239	0.00015461	0.00354537	0.00467905	0.0014659	0.00724903	0.0489607	0.0155947	2.35939e-05	0.00731746	0.0146795	0.00299378	0.0364926	0.00353128	0.00304505	0.00150033	2.81643e-05	3.04955e-15	2.7909e-05	3.61611e-05	1.68435e-05	1.29788e-06	0	0.000138742	1.18384e-07	1.50163e-06	0.000580289	-0.119076	-0.0267661	0.0920631	-0.0741402	-0.0468354	0.0366021	-0.1	-0.386325	0
2138	4.16297	0	0.0431769	4.11979	4.50571	4.45795	4.33859	3.60473	0.398821	0.335037	0.119363	0.0477598	0.0121692	0.0034684	0.000154796	0.00353134	0.00467913	0.00146552	0.00724396	0.0489731	0.0156237	2.30033e-05	0.00731738	0.0147136	0.00291403	0.0360161	0.00347709	0.00303174	0.00149917	2.67755e-05	2.46616e-15	2.5526e-05	3.43479e-05	1.58829e-05	1.22216e-06	0	0.00013599	1.11882e-07	1.52412e-06	0.000580289	-0.119076	-0.0267661	0.0920631	-0.0741402	-0.0468354	0.0366021	-0.1	-0.386325	0
2139	4.15172	0	0.0322656	4.11946	4.50538	4.45825	4.33881	3.60479	0.398802	0.335216	0.119436	0.0471353	0.012188	0.00347396	0.000154967	0.00351737	0.00467926	0.00146516	0.00723909	0.0489832	0.01565	2.24312e-05	0.00731738	0.0147451	0.00283639	0.0355459	0.00342375	0.00301849	0.00149801	2.54557e-05	1.99441e-15	2.33467e-05	3.26246e-05	1.49723e-05	1.14636e-06	0	0.000133293	1.05738e-07	1.53735e-06	0.000580289	-0.119076	-0.0267661	0.0920631	-0.0741402	-0.0468354	0.0366021	-0.1	-0.386325	0
2140	4.14467	0	0.025655	4.11901	4.50494	4.45842	4.33892	3.60475	0.398789	0.33538	0.1195	0.0465205	0.0122053	0.00347907	0.000155124	0.00350346	0.00467943	0.00146483	0.00723441	0.0489912	0.0156738	2.1877e-05	0.00731745	0.014774	0.00276081	0.035082	0.00337124	0.0030053	0.00149686	2.42012e-05	1.61292e-15	2.13536e-05	3.09879e-05	1.41147e-05	1.07047e-06	0	0.000130651	9.99323e-08	1.54601e-06	0.000580289	-0.119076	-0.0267661	0.0920631	-0.0741402	-0.0468354	0.0366021	-0.1	-0.386325	0
2141	4.19098	0	0.0725288	4.11845	4.50438	4.45847	4.33891	3.60461	0.39878	0.335528	0.119555	0.0459151	0.012221	0.00348374	0.000155267	0.0034896	0.0046796	0.00146453	0.00722992	0.048997	0.015695	2.134e-05	0.00731754	0.0148003	0.00268721	0.0346242	0.00331954	0.00299217	0.0014957	2.30087e-05	1.30441e-15	1.95307e-05	2.94352e-05	1.33069e-05	9.99607e-07	0	0.000128062	9.44456e-08	1.55127e-06	0.000580289	-0.119076	-0.0267661	0.0920631	-0.0741402	-0.0468354	0.0366021	-0.1	-0.386325	0
2142	4.26387	0	0.146252	4.11762	4.50357	4.45825	4.33865	3.60424	0.398749	0.335661	0.119599	0.0453179	0.0122353	0.00348796	0.000155396	0.00347579	0.0046794	0.00146422	0.00722549	0.0489995	0.0157137	2.08197e-05	0.00731727	0.0148239	0.00261543	0.0341717	0.00326857	0.00297908	0.00149454	2.18734e-05	1.05484e-15	1.78629e-05	2.79593e-05	1.25457e-05	9.33404e-07	0	0.000125521	8.92567e-08	1.51586e-06	0.000580289	-0.119076	-0.0267661	0.0920631	-0.0741402	-0.0468354	0.0366021	-0.1	-0.386325	0
2143	4.29769	0	0.181191	4.1165	4.50249	4.45776	4.33813	3.60367	0.398681	0.335779	0.11963	0.0447283	0.0122481	0.00349174	0.00015551	0.00346203	0.00467867	0.00146386	0.00722105	0.048998	0.0157297	2.03154e-05	0.00731644	0.014845	0.00254535	0.0337241	0.00321825	0.00296602	0.00149338	2.07916e-05	8.52923e-16	1.63365e-05	2.65546e-05	1.18283e-05	8.71531e-07	0	0.000123025	8.43474e-08	1.44645e-06	0.000580289	-0.119076	-0.0267661	0.0920631	-0.0741402	-0.0468354	0.0366021	-0.1	-0.386325	0
2144	4.3059	0	0.190562	4.11534	4.50136	4.45721	4.33756	3.60308	0.398598	0.335882	0.119652	0.0441468	0.0122593	0.00349506	0.00015561	0.00344832	0.00467774	0.00146349	0.00721669	0.0489936	0.0157432	1.98269e-05	0.00731536	0.0148635	0.002477	0.0332817	0.00316864	0.00295299	0.00149222	1.97618e-05	6.89606e-16	1.49401e-05	2.52211e-05	1.11523e-05	8.13731e-07	0	0.000120576	7.97049e-08	1.39596e-06	0.000580289	-0.119076	-0.0267661	0.0920631	-0.0741402	-0.0468354	0.0366021	-0.1	-0.386325	0
2145	4.28843	0	0.174151	4.11428	4.50034	4.45676	4.3371	3.60261	0.398514	0.335971	0.119664	0.0435737	0.0122691	0.00349794	0.000155697	0.00343466	0.00467685	0.00146313	0.00721244	0.0489873	0.0157543	1.93539e-05	0.00731426	0.0148793	0.00241041	0.0328449	0.00311977	0.00294001	0.00149107	1.87824e-05	5.57544e-16	1.36629e-05	2.39549e-05	1.05155e-05	7.59751e-07	0	0.000118174	7.53167e-08	1.37014e-06	0.000580289	-0.119076	-0.0267661	0.0920631	-0.0741402	-0.0468354	0.0366021	-0.1	-0.386325	0
2146	4.24357	0	0.130187	4.11338	4.49947	4.45646	4.33679	3.60231	0.398441	0.336044	0.11967	0.0430093	0.0122774	0.00350038	0.000155769	0.00342105	0.00467616	0.0014628	0.00720835	0.0489799	0.0157632	1.88958e-05	0.00731334	0.0148926	0.00234559	0.0324138	0.00307165	0.00292709	0.00148991	1.78516e-05	4.50773e-16	1.24948e-05	2.27526e-05	9.91573e-06	7.09354e-07	0	0.000115815	7.11702e-08	1.36806e-06	0.000580289	-0.119076	-0.0267661	0.0920631	-0.0741402	-0.0468354	0.0366021	-0.1	-0.386325	0
2147	4.19876	0	0.0860781	4.11268	4.49879	4.45633	4.33666	3.60217	0.398394	0.336103	0.119669	0.0424539	0.0122841	0.00350237	0.000155826	0.0034075	0.00467583	0.00146251	0.00720447	0.0489723	0.0157699	1.84526e-05	0.00731278	0.0149032	0.00228255	0.0319888	0.00302432	0.00291424	0.00148875	1.69678e-05	3.64465e-16	1.14269e-05	2.16112e-05	9.35096e-06	6.62316e-07	0	0.000113499	6.72538e-08	1.39285e-06	0.000580289	-0.119076	-0.0267661	0.0920631	-0.0741402	-0.0468354	0.0366021	-0.1	-0.386325	0
2148	4.17134	0	0.0592681	4.11208	4.4982	4.45629	4.33663	3.60211	0.39837	0.336148	0.119663	0.0419074	0.0122894	0.00350391	0.00015587	0.00339401	0.00467582	0.00146227	0.00720081	0.0489647	0.0157745	1.80235e-05	0.00731257	0.0149113	0.00222125	0.0315698	0.00297778	0.00290147	0.0014876	1.61287e-05	2.94698e-16	1.04505e-05	2.05275e-05	8.81916e-06	6.18415e-07	0	0.000111233	6.35548e-08	1.42644e-06	0.000580289	-0.119076	-0.0267661	0.0920631	-0.0741402	-0.0468354	0.0366021	-0.1	-0.386325	0
2149	4.18776	0	0.0763211	4.11144	4.49756	4.4562	4.33654	3.60201	0.39836	0.336179	0.11965	0.0413695	0.0122931	0.003505	0.000155899	0.00338058	0.00467598	0.00146206	0.00719732	0.0489567	0.015777	1.76083e-05	0.00731255	0.0149167	0.00216161	0.0311566	0.00293198	0.00288875	0.00148644	1.53316e-05	2.38295e-16	9.5577e-06	1.95015e-05	8.31835e-06	5.77434e-07	0	0.000109013	6.00605e-08	1.45045e-06	0.000580289	-0.119076	-0.0267661	0.0920631	-0.0741402	-0.0468354	0.0366021	-0.1	-0.386325	0
2150	4.21486	0	0.103756	4.1111	4.49723	4.45612	4.33648	3.60193	0.398358	0.336191	0.119642	0.0411026	0.0122946	0.00350544	0.00015591	0.00337387	0.00467608	0.00146196	0.00719562	0.0489525	0.0157777	1.74041e-05	0.00731257	0.0149188	0.0021322	0.0309514	0.00290926	0.00288241	0.00148587	1.49433e-05	2.13079e-16	9.13124e-06	1.90021e-05	8.07545e-06	5.57647e-07	0	0.000107915	5.83629e-08	1.45972e-06	0.000580289	-0.119076	-0.0267661	0.0920631	-0.0741402	-0.0468354	0.0366021	-0.1	-0.386325	0
2151	4.21486	0	0.103756	4.1111	4.49723	4.45612	4.33648	3.60193	0.398358	0.336191	0.119642	0.0411026	0.0122946	0.00350544	0.00015591	0.00337387	0.00467608	0.00146196	0.00719562	0.0489525	0.0157777	1.74041e-05	0.00731257	0.0149188	0.0021322	0.0309514	0.00290926	0.00288241	0.00148587	1.49433e-05	2.13079e-16	9.13124e-06	1.90021e-05	8.07545e-06	5.57647e-07	0	0.000107915	5.83629e-08	1.45972e-06	0.000580289	-0.119076	-0.0267661	0.0920631	-0.0741402	-0.0468354	0.0366021	-0.1	-0.386325	0
2152	4.21486	0	0.103756	4.1111	4.49723	4.45612	4.33648	3.60193	0.398358	0.336191	0.119642	0.0411026	0.0122946	0.00350544	0.00015591	0.00337387	0.00467608	0.00146196	0.00719562	0.0489525	0.0157777	1.74041e-05	0.00731257	0.0149188	0.0021322	0.0309514	0.00290926	0.00288241	0.00148587	1.49433e-05	2.13079e-16	9.13124e-06	1.90021e-05	8.07545e-06	5.57647e-07	0	0.000107915	5.83629e-08	1.45972e-06	0.000580289	-0.119076	-0.0267661	0.0920631	-0.0741402	-0.0468354	0.0366021	-0.1	-0.386325	0
2153	4.21486	0	0.103756	4.1111	4.49723	4.45612	4.33648	3.60193	0.398358	0.336191	0.119642	0.0411026	0.0122946	0.00350544	0.00015591	0.00337387	0.00467608	0.00146196	0.00719562	0.0489525	0.0157777	1.74041e-05	0.00731257	0.0149188	0.0021322	0.0309514	0.00290926	0.00288241	0.00148587	1.49433e-05	2.13079e-16	9.13124e-06	1.90021e-05	8.07545e-06	5.57647e-07	0	0.000107915	5.83629e-08	1.45972e-06	0.000580289	-0.119076	-0.0267661	0.0920631	-0.0741402	-0.0468354	0.0366021	-0.1	-0.386325	0
2154	4.21486	0	0.103756	4.1111	4.49723	4.45612	4.33648	3.60193	0.398358	0.336191	0.119642	0.0411026	0.0122946	0.00350544	0.00015591	0.00337387	0.00467608	0.00146196	0.00719562	0.0489525	0.0157777	1.74041e-05	0.00731257	0.0149188	0.0021322	0.0309514	0.00290926	0.00288241	0.00148587	1.49433e-05	2.13079e-16	9.13124e-06	1.90021e-05	8.07545e-06	5.57647e-07	0	0.000107915	5.83629e-08	1.45972e-06	0.000580289	-0.119076	-0.0267661	0.0920631	-0.0741402	-0.0468354	0.0366021	-0.1	-0.386325	0
2155	4.21486	0	0.103756	4.1111	4.49723	4.45612	4.33648	3.60193	0.398358	0.336191	0.119642	0.0411026	0.0122946	0.00350544	0.00015591	0.00337387	0.00467608	0.00146196	0.00719562	0.0489525	0.0157777	1.74041e-05	0.00731257	0.0149188	0.0021322	0.0309514	0.00290926	0.00288241	0.00148587	1.49433e-05	2.13079e-16	9.13124e-06	1.90021e-05	8.07545e-06	5.57647e-07	0	0.000107915	5.83629e-08	1.45972e-06	0.000580289	-0.119076	-0.0267661	0.0920631	-0.0741402	-0.0468354	0.0366021	-0.1	-0.386325	0
2156	4.21486	0	0.103756	4.1111	4.49723	4.45612	4.33648	3.60193	0.398358	0.336191	0.119642	0.0411026	0.0122946	0.00350544	0.00015591	0.00337387	0.00467608	0.00146196	0.00719562	0.0489525	0.0157777	1.74041e-05	0.00731257	0.0149188	0.0021322	0.0309514	0.00290926	0.00288241	0.00148587	1.49433e-05	2.13079e-16	9.13124e-06	1.90021e-05	8.07545e-06	5.57647e-07	0	0.000107915	5.83629e-08	1.45972e-06	0.000580289	-0.119076	-0.0267661	0.0920631	-0.0741402	-0.0468354	0.0366021	-0.1	-0.386325	0
2157	4.21486	0	0.103756	4.1111	4.49723	4.45612	4.33648	3.60193	0.398358	0.336191	0.119642	0.0411026	0.0122946	0.00350544	0.00015591	0.00337387	0.00467608	0.00146196	0.00719562	0.0489525	0.0157777	1.74041e-05	0.00731257	0.0149188	0.0021322	0.0309514	0.00290926	0.00288241	0.00148587	1.49433e-05	2.13079e-16	9.13124e-06	1.90021e-05	8.07545e-06	5.57647e-07	0	0.000107915	5.83629e-08	1.45972e-06	0.000580289	-0.119076	-0.0267661	0.0920631	-0.0741402	-0.0468354	0.0366021	-0.1	-0.386325	0
2158	4.21486	0	0.103756	4.1111	4.49723	4.45612	4.33648	3.60193	0.398358	0.336191	0.119642	0.0411026	0.0122946	0.00350544	0.00015591	0.00337387	0.00467608	0.00146196	0.00719562	0.0489525	0.0157777	1.74041e-05	0.00731257	0.0149188	0.0021322	0.0309514	0.00290926	0.00288241	0.00148587	1.49433e-05	2.13079e-16	9.13124e-06	1.90021e-05	8.07545e-06	5.57647e-07	0	0.000107915	5.83629e-08	1.45972e-06	0.000580289	-0.119076	-0.0267661	0.0920631	-0.0741402	-0.0468354	0.0366021	-0.1	-0.386325	0
2159	4.21486	0	0.103756	4.1111	4.49723	4.45612	4.33648	3.60193	0.398358	0.336191	0.119642	0.0411026	0.0122946	0.00350544	0.00015591	0.00337387	0.00467608	0.00146196	0.00719562	0.0489525	0.0157777	1.74041e-05	0.00731257	0.0149188	0.0021322	0.0309514	0.00290926	0.00288241	0.00148587	1.49433e-05	2.13079e-16	9.13124e-06	1.90021e-05	8.07545e-06	5.57647e-07	0	0.000107915	5.83629e-08	1.45972e-06	0.000580289	-0.119076	-0.0267661	0.0920631	-0.0741402	-0.0468354	0.0366021	-0.1	-0.386325	0
2160	4.21486	0	0.103756	4.1111	4.49723	4.45612	4.33648	3.60193	0.398358	0.336191	0.119642	0.0411026	0.0122946	0.00350544	0.00015591	0.00337387	0.00467608	0.00146196	0.00719562	0.0489525	0.0157777	1.74041e-05	0.00731257	0.0149188	0.0021322	0.0309514	0.00290926	0.00288241	0.00148587	1.49433e-05	2.13079e-16	9.13124e-06	1.90021e-05	8.07545e-06	5.57647e-07	0	0.000107915	5.83629e-08	1.45972e-06	0.000580289	-0.119076	-0.0267661	0.0920631	-0.0741402	-0.0468354	0.0366021	-0.1	-0.386325	0
2161	4.21486	0	0.103756	4.1111	4.49723	4.45612	4.33648	3.60193	0.398358	0.336191	0.119642	0.0411026	0.0122946	0.00350544	0.00015591	0.00337387	0.00467608	0.00146196	0.00719562	0.0489525	0.0157777	1.74041e-05	0.00731257	0.0149188	0.0021322	0.0309514	0.00290926	0.00288241	0.00148587	1.49433e-05	2.13079e-16	9.13124e-06	1.90021e-05	8.07545e-06	5.57647e-07	0	0.000107915	5.83629e-08	1.45972e-06	0.000580289	-0.119076	-0.0267661	0.0920631	-0.0741402	-0.0468354	0.0366021	-0.1	-0.386325	0
2162	4.21486	0	0.103756	4.1111	4.49723	4.45612	4.33648	3.60193	0.398358	0.336191	0.119642	0.0411026	0.0122946	0.00350544	0.00015591	0.00337387	0.00467608	0.00146196	0.00719562	0.0489525	0.0157777	1.74041e-05	0.00731257	0.0149188	0.0021322	0.0309514	0.00290926	0.00288241	0.00148587	1.49433e-05	2.13079e-16	9.13124e-06	1.90021e-05	8.07545e-06	5.57647e-07	0	0.000107915	5.83629e-08	1.45972e-06	0.000580289	-0.119076	-0.0267661	0.0920631	-0.0741402	-0.0468354	0.0366021	-0.1	-0.386325	0
2163	4.21486	0	0.103756	4.1111	4.49723	4.45612	4.33648	3.60193	0.398358	0.336191	0.119642	0.0411026	0.0122946	0.00350544	0.00015591	0.00337387	0.00467608	0.00146196	0.00719562	0.0489525	0.0157777	1.74041e-05	0.00731257	0.0149188	0.0021322	0.0309514	0.00290926	0.00288241	0.00148587	1.49433e-05	2.13079e-16	9.13124e-06	1.90021e-05	8.07545e-06	5.57647e-07	0	0.000107915	5.83629e-08	1.45972e-06	0.000580289	-0.119076	-0.0267661	0.0920631	-0.0741402	-0.0468354	0.0366021	-0.1	-0.386325	0
2164	4.21486	0	0.103756	4.1111	4.49723	4.45612	4.33648	3.60193	0.398358	0.336191	0.119642	0.0411026	0.0122946	0.00350544	0.00015591	0.00337387	0.00467608	0.00146196	0.00719562	0.0489525	0.0157777	1.74041e-05	0.00731257	0.0149188	0.0021322	0.0309514	0.00290926	0.00288241	0.00148587	1.49433e-05	2.13079e-16	9.13124e-06	1.90021e-05	8.07545e-06	5.57647e-07	0	0.000107915	5.83629e-08	1.45972e-06	0.000580289	-0.119076	-0.0267661	0.0920631	-0.0741402	-0.0468354	0.0366021	-0.1	-0.386325	0
2165	4.21486	0	0.103756	4.1111	4.49723	4.45612	4.33648	3.60193	0.398358	0.336191	0.119642	0.0411026	0.0122946	0.00350544	0.00015591	0.00337387	0.00467608	0.00146196	0.00719562	0.0489525	0.0157777	1.74041e-05	0.00731257	0.0149188	0.0021322	0.0309514	0.00290926	0.00288241	0.00148587	1.49433e-05	2.13079e-16	9.13124e-06	1.90021e-05	8.07545e-06	5.57647e-07	0	0.000107915	5.83629e-08	1.45972e-06	0.000580289	-0.119076	-0.0267661	0.0920631	-0.0741402	-0.0468354	0.0366021	-0.1	-0.386325	0
2166	4.21486	0	0.103756	4.1111	4.49723	4.45612	4.33648	3.60193	0.398358	0.336191	0.119642	0.0411026	0.0122946	0.00350544	0.00015591	0.00337387	0.00467608	0.00146196	0.00719562	0.0489525	0.0157777	1.74041e-05	0.00731257	0.0149188	0.0021322	0.0309514	0.00290926	0.00288241	0.00148587	1.49433e-05	2.13079e-16	9.13124e-06	1.90021e-05	8.07545e-06	5.57647e-07	0	0.000107915	5.83629e-08	1.45972e-06	0.000580289	-0.119076	-0.0267661	0.0920631	-0.0741402	-0.0468354	0.0366021	-0.1	-0.386325	0
2167	4.21486	0	0.103756	4.1111	4.49723	4.45612	4.33648	3.60193	0.398358	0.336191	0.119642	0.0411026	0.0122946	0.00350544	0.00015591	0.00337387	0.00467608	0.00146196	0.00719562	0.0489525	0.0157777	1.74041e-05	0.00731257	0.0149188	0.0021322	0.0309514	0.00290926	0.00288241	0.00148587	1.49433e-05	2.13079e-16	9.13124e-06	1.90021e-05	8.07545e-06	5.57647e-07	0	0.000107915	5.83629e-08	1.45972e-06	0.000580289	-0.119076	-0.0267661	0.0920631	-0.0741402	-0.0468354	0.0366021	-0.1	-0.386325	0
2168	4.21486	0	0.103756	4.1111	4.49723	4.45612	4.33648	3.60193	0.398358	0.336191	0.119642	0.0411026	0.0122946	0.00350544	0.00015591	0.00337387	0.00467608	0.00146196	0.00719562	0.0489525	0.0157777	1.74041e-05	0.00731257	0.0149188	0.0021322	0.0309514	0.00290926	0.00288241	0.00148587	1.49433e-05	2.13079e-16	9.13124e-06	1.90021e-05	8.07545e-06	5.57647e-07	0	0.000107915	5.83629e-08	1.45972e-06	0.000580289	-0.119076	-0.0267661	0.0920631	-0.0741402	-0.0468354	0.0366021	-0.1	-0.386325	0
2169	4.21486	0	0.103756	4.1111	4.49723	4.45612	4.33648	3.60193	0.398358	0.336191	0.119642	0.0411026	0.0122946	0.00350544	0.00015591	0.00337387	0.00467608	0.00146196	0.00719562	0.0489525	0.0157777	1.74041e-05	0.00731257	0.0149188	0.0021322	0.0309514	0.00290926	0.00288241	0.00148587	1.49433e-05	2.13079e-16	9.13124e-06	1.90021e-05	8.07545e-06	5.57647e-07	0	0.000107915	5.83629e-08	1.45972e-06	0.000580289	-0.119076	-0.0267661	0.0920631	-0.0741402	-0.0468354	0.0366021	-0.1	-0.386325	0
2170	4.21486	0	0.103756	4.1111	4.49723	4.45612	4.33648	3.60193	0.398358	0.336191	0.119642	0.0411026	0.0122946	0.00350544	0.00015591	0.00337387	0.00467608	0.00146196	0.00719562	0.0489525	0.0157777	1.74041e-05	0.00731257	0.0149188	0.0021322	0.0309514	0.00290926	0.00288241	0.00148587	1.49433e-05	2.13079e-16	9.13124e-06	1.90021e-05	8.07545e-06	5.57647e-07	0	0.000107915	5.83629e-08	1.45972e-06	0.000580289	-0.119076	-0.0267661	0.0920631	-0.0741402	-0.0468354	0.0366021	-0.1	-0.386325	0
2171	4.21486	0	0.103756	4.1111	4.49723	4.45612	4.33648	3.60193	0.398358	0.336191	0.119642	0.0411026	0.0122946	0.00350544	0.00015591	0.00337387	0.00467608	0.00146196	0.00719562	0.0489525	0.0157777	1.74041e-05	0.00731257	0.0149188	0.0021322	0.0309514	0.00290926	0.00288241	0.00148587	1.49433e-05	2.13079e-16	9.13124e-06	1.90021e-05	8.07545e-06	5.57647e-07	0	0.000107915	5.83629e-08	1.45972e-06	0.000580289	-0.119076	-0.0267661	0.0920631	-0.0741402	-0.0468354	0.0366021	-0.1	-0.386325	0
2172	4.21486	0	0.103756	4.1111	4.49723	4.45612	4.33648	3.60193	0.398358	0.336191	0.119642	0.0411026	0.0122946	0.00350544	0.00015591	0.00337387	0.00467608	0.00146196	0.00719562	0.0489525	0.0157777	1.74041e-05	0.00731257	0.0149188	0.0021322	0.0309514	0.00290926	0.00288241	0.00148587	1.49433e-05	2.13079e-16	9.13124e-06	1.90021e-05	8.07545e-06	5.57647e-07	0	0.000107915	5.83629e-08	1.45972e-06	0.000580289	-0.119076	-0.0267661	0.0920631	-0.0741402	-0.0468354	0.0366021	-0.1	-0.386325	0
2173	4.21486	0	0.103756	4.1111	4.49723	4.45612	4.33648	3.60193	0.398358	0.336191	0.119642	0.0411026	0.0122946	0.00350544	0.00015591	0.00337387	0.00467608	0.00146196	0.00719562	0.0489525	0.0157777	1.74041e-05	0.00731257	0.0149188	0.0021322	0.0309514	0.00290926	0.00288241	0.00148587	1.49433e-05	2.13079e-16	9.13124e-06	1.90021e-05	8.07545e-06	5.57647e-07	0	0.000107915	5.83629e-08	1.45972e-06	0.000580289	-0.119076	-0.0267661	0.0920631	-0.0741402	-0.0468354	0.0366021	-0.1	-0.386325	0
2174	4.21486	0	0.103756	4.1111	4.49723	4.45612	4.33648	3.60193	0.398358	0.336191	0.119642	0.0411026	0.0122946	0.00350544	0.00015591	0.00337387	0.00467608	0.00146196	0.00719562	0.0489525	0.0157777	1.74041e-05	0.00731257	0.0149188	0.0021322	0.0309514	0.00290926	0.00288241	0.00148587	1.49433e-05	2.13079e-16	9.13124e-06	1.90021e-05	8.07545e-06	5.57647e-07	0	0.000107915	5.83629e-08	1.45972e-06	0.000580289	-0.119076	-0.0267661	0.0920631	-0.0741402	-0.0468354	0.0366021	-0.1	-0.386325	0
2175	4.21486	0	0.103756	4.1111	4.49723	4.45612	4.33648	3.60193	0.398358	0.336191	0.119642	0.0411026	0.0122946	0.00350544	0.00015591	0.00337387	0.00467608	0.00146196	0.00719562	0.0489525	0.0157777	1.74041e-05	0.00731257	0.0149188	0.0021322	0.0309514	0.00290926	0.00288241	0.00148587	1.49433e-05	2.13079e-16	9.13124e-06	1.90021e-05	8.07545e-06	5.57647e-07	0	0.000107915	5.83629e-08	1.45972e-06	0.000580289	-0.119076	-0.0267661	0.0920631	-0.0741402	-0.0468354	0.0366021	-0.1	-0.386325	0
2176	4.21486	0	0.103756	4.1111	4.49723	4.45612	4.33648	3.60193	0.398358	0.336191	0.119642	0.0411026	0.0122946	0.00350544	0.00015591	0.00337387	0.00467608	0.00146196	0.00719562	0.0489525	0.0157777	1.74041e-05	0.00731257	0.0149188	0.0021322	0.0309514	0.00290926	0.00288241	0.00148587	1.49433e-05	2.13079e-16	9.13124e-06	1.90021e-05	8.07545e-06	5.57647e-07	0	0.000107915	5.83629e-08	1.45972e-06	0.000580289	-0.119076	-0.0267661	0.0920631	-0.0741402	-0.0468354	0.0366021	-0.1	-0.386325	0
2177	4.21486	0	0.103756	4.1111	4.49723	4.45612	4.33648	3.60193	0.398358	0.336191	0.119642	0.0411026	0.0122946	0.00350544	0.00015591	0.00337387	0.00467608	0.00146196	0.00719562	0.0489525	0.0157777	1.74041e-05	0.00731257	0.0149188	0.0021322	0.0309514	0.00290926	0.00288241	0.00148587	1.49433e-05	2.13079e-16	9.13124e-06	1.90021e-05	8.07545e-06	5.57647e-07	0	0.000107915	5.83629e-08	1.45972e-06	0.000580289	-0.119076	-0.0267661	0.0920631	-0.0741402	-0.0468354	0.0366021	-0.1	-0.386325	0
2178	4.21486	0	0.103756	4.1111	4.49723	4.45612	4.33648	3.60193	0.398358	0.336191	0.119642	0.0411026	0.0122946	0.00350544	0.00015591	0.00337387	0.00467608	0.00146196	0.00719562	0.0489525	0.0157777	1.74041e-05	0.00731257	0.0149188	0.0021322	0.0309514	0.00290926	0.00288241	0.00148587	1.49433e-05	2.13079e-16	9.13124e-06	1.90021e-05	8.07545e-06	5.57647e-07	0	0.000107915	5.83629e-08	1.45972e-06	0.000580289	-0.119076	-0.0267661	0.0920631	-0.0741402	-0.0468354	0.0366021	-0.1	-0.386325	0
2179	4.21486	0	0.103756	4.1111	4.49723	4.45612	4.33648	3.60193	0.398358	0.336191	0.119642	0.0411026	0.0122946	0.00350544	0.00015591	0.00337387	0.00467608	0.00146196	0.00719562	0.0489525	0.0157777	1.74041e-05	0.00731257	0.0149188	0.0021322	0.0309514	0.00290926	0.00288241	0.00148587	1.49433e-05	2.13079e-16	9.13124e-06	1.90021e-05	8.07545e-06	5.57647e-07	0	0.000107915	5.83629e-08	1.45972e-06	0.000580289	-0.119076	-0.0267661	0.0920631	-0.0741402	-0.0468354	0.0366021	-0.1	-0.386325	0
2180	4.21486	0	0.103756	4.1111	4.49723	4.45612	4.33648	3.60193	0.398358	0.336191	0.119642	0.0411026	0.0122946	0.00350544	0.00015591	0.00337387	0.00467608	0.00146196	0.00719562	0.0489525	0.0157777	1.74041e-05	0.00731257	0.0149188	0.0021322	0.0309514	0.00290926	0.00288241	0.00148587	1.49433e-05	2.13079e-16	9.13124e-06	1.90021e-05	8.07545e-06	5.57647e-07	0	0.000107915	5.83629e-08	1.45972e-06	0.000580289	-0.119076	-0.0267661	0.0920631	-0.0741402	-0.0468354	0.0366021	-0.1	-0.386325	0
2181	4.21486	0	0.103756	4.1111	4.49723	4.45612	4.33648	3.60193	0.398358	0.336191	0.119642	0.0411026	0.0122946	0.00350544	0.00015591	0.00337387	0.00467608	0.00146196	0.00719562	0.0489525	0.0157777	1.74041e-05	0.00731257	0.0149188	0.0021322	0.0309514	0.00290926	0.00288241	0.00148587	1.49433e-05	2.13079e-16	9.13124e-06	1.90021e-05	8.07545e-06	5.57647e-07	0	0.000107915	5.83629e-08	1.45972e-06	0.000580289	-0.119076	-0.0267661	0.0920631	-0.0741402	-0.0468354	0.0366021	-0.1	-0.386325	0
2182	4.21486	0	0.103756	4.1111	4.49723	4.45612	4.33648	3.60193	0.398358	0.336191	0.119642	0.0411026	0.0122946	0.00350544	0.00015591	0.00337387	0.00467608	0.00146196	0.00719562	0.0489525	0.0157777	1.74041e-05	0.00731257	0.0149188	0.0021322	0.0309514	0.00290926	0.00288241	0.00148587	1.49433e-05	2.13079e-16	9.13124e-06	1.90021e-05	8.07545e-06	5.57647e-07	0	0.000107915	5.83629e-08	1.45972e-06	0.000580289	-0.119076	-0.0267661	0.0920631	-0.0741402	-0.0468354	0.0366021	-0.1	-0.386325	0
2183	4.21486	0	0.103756	4.1111	4.49723	4.45612	4.33648	3.60193	0.398358	0.336191	0.119642	0.0411026	0.0122946	0.00350544	0.00015591	0.00337387	0.00467608	0.00146196	0.00719562	0.0489525	0.0157777	1.74041e-05	0.00731257	0.0149188	0.0021322	0.0309514	0.00290926	0.00288241	0.00148587	1.49433e-05	2.13079e-16	9.13124e-06	1.90021e-05	8.07545e-06	5.57647e-07	0	0.000107915	5.83629e-08	1.45972e-06	0.000580289	-0.119076	-0.0267661	0.0920631	-0.0741402	-0.0468354	0.0366021	-0.1	-0.386325	0
2184	4.21486	0	0.103756	4.1111	4.49723	4.45612	4.33648	3.60193	0.398358	0.336191	0.119642	0.0411026	0.0122946	0.00350544	0.00015591	0.00337387	0.00467608	0.00146196	0.00719562	0.0489525	0.0157777	1.74041e-05	0.00731257	0.0149188	0.0021322	0.0309514	0.00290926	0.00288241	0.00148587	1.49433e-05	2.13079e-16	9.13124e-06	1.90021e-05	8.07545e-06	5.57647e-07	0	0.000107915	5.83629e-08	1.45972e-06	0.000580289	-0.119076	-0.0267661	0.0920631	-0.0741402	-0.0468354	0.0366021	-0.1	-0.386325	0
2185	4.21486	0	0.103756	4.1111	4.49723	4.45612	4.33648	3.60193	0.398358	0.336191	0.119642	0.0411026	0.0122946	0.00350544	0.00015591	0.00337387	0.00467608	0.00146196	0.00719562	0.0489525	0.0157777	1.74041e-05	0.00731257	0.0149188	0.0021322	0.0309514	0.00290926	0.00288241	0.00148587	1.49433e-05	2.13079e-16	9.13124e-06	1.90021e-05	8.07545e-06	5.57647e-07	0	0.000107915	5.83629e-08	1.45972e-06	0.000580289	-0.119076	-0.0267661	0.0920631	-0.0741402	-0.0468354	0.0366021	-0.1	-0.386325	0
2186	4.21486	0	0.103756	4.1111	4.49723	4.45612	4.33648	3.60193	0.398358	0.336191	0.119642	0.0411026	0.0122946	0.00350544	0.00015591	0.00337387	0.00467608	0.00146196	0.00719562	0.0489525	0.0157777	1.74041e-05	0.00731257	0.0149188	0.0021322	0.0309514	0.00290926	0.00288241	0.00148587	1.49433e-05	2.13079e-16	9.13124e-06	1.90021e-05	8.07545e-06	5.57647e-07	0	0.000107915	5.83629e-08	1.45972e-06	0.000580289	-0.119076	-0.0267661	0.0920631	-0.0741402	-0.0468354	0.0366021	-0.1	-0.386325	0
2187	4.21486	0	0.103756	4.1111	4.49723	4.45612	4.33648	3.60193	0.398358	0.336191	0.119642	0.0411026	0.0122946	0.00350544	0.00015591	0.00337387	0.00467608	0.00146196	0.00719562	0.0489525	0.0157777	1.74041e-05	0.00731257	0.0149188	0.0021322	0.0309514	0.00290926	0.00288241	0.00148587	1.49433e-05	2.13079e-16	9.13124e-06	1.90021e-05	8.07545e-06	5.57647e-07	0	0.000107915	5.83629e-08	1.45972e-06	0.000580289	-0.119076	-0.0267661	0.0920631	-0.0741402	-0.0468354	0.0366021	-0.1	-0.386325	0
2188	4.21486	0	0.103756	4.1111	4.49723	4.45612	4.33648	3.60193	0.398358	0.336191	0.119642	0.0411026	0.0122946	0.00350544	0.00015591	0.00337387	0.00467608	0.00146196	0.00719562	0.0489525	0.0157777	1.74041e-05	0.00731257	0.0149188	0.0021322	0.0309514	0.00290926	0.00288241	0.00148587	1.49433e-05	2.13079e-16	9.13124e-06	1.90021e-05	8.07545e-06	5.57647e-07	0	0.000107915	5.83629e-08	1.45972e-06	0.000580289	-0.119076	-0.0267661	0.0920631	-0.0741402	-0.0468354	0.0366021	-0.1	-0.386325	0
2189	4.21486	0	0.103756	4.1111	4.49723	4.45612	4.33648	3.60193	0.398358	0.336191	0.119642	0.0411026	0.0122946	0.00350544	0.00015591	0.00337387	0.00467608	0.00146196	0.00719562	0.0489525	0.0157777	1.74041e-05	0.00731257	0.0149188	0.0021322	0.0309514	0.00290926	0.00288241	0.00148587	1.49433e-05	2.13079e-16	9.13124e-06	1.90021e-05	8.07545e-06	5.57647e-07	0	0.000107915	5.83629e-08	1.45972e-06	0.000580289	-0.119076	-0.0267661	0.0920631	-0.0741402	-0.0468354	0.0366021	-0.1	-0.386325	0
2190	4.21486	0	0.103756	4.1111	4.49723	4.45612	4.33648	3.60193	0.398358	0.336191	0.119642	0.0411026	0.0122946	0.00350544	0.00015591	0.00337387	0.00467608	0.00146196	0.00719562	0.0489525	0.0157777	1.74041e-05	0.00731257	0.0149188	0.0021322	0.0309514	0.00290926	0.00288241	0.00148587	1.49433e-05	2.13079e-16	9.13124e-06	1.90021e-05	8.07545e-06	5.57647e-07	0	0.000107915	5.83629e-08	1.45972e-06	0.000580289	-0.119076	-0.0267661	0.0920631	-0.0741402	-0.0468354	0.0366021	-0.1	-0.386325	0
2191	4.21486	0	0.103756	4.1111	4.49723	4.45612	4.33648	3.60193	0.398358	0.336191	0.119642	0.0411026	0.0122946	0.00350544	0.00015591	0.00337387	0.00467608	0.00146196	0.00719562	0.0489525	0.0157777	1.74041e-05	0.00731257	0.0149188	0.0021322	0.0309514	0.00290926	0.00288241	0.00148587	1.49433e-05	2.13079e-16	9.13124e-06	1.90021e-05	8.07545e-06	5.57647e-07	0	0.000107915	5.83629e-08	1.45972e-06	0.000580289	-0.119076	-0.0267661	0.0920631	-0.0741402	-0.0468354	0.0366021	-0.1	-0.386325	0
2192	4.21486	0	0.103756	4.1111	4.49723	4.45612	4.33648	3.60193	0.398358	0.336191	0.119642	0.0411026	0.0122946	0.00350544	0.00015591	0.00337387	0.00467608	0.00146196	0.00719562	0.0489525	0.0157777	1.74041e-05	0.00731257	0.0149188	0.0021322	0.0309514	0.00290926	0.00288241	0.00148587	1.49433e-05	2.13079e-16	9.13124e-06	1.90021e-05	8.07545e-06	5.57647e-07	0	0.000107915	5.83629e-08	1.45972e-06	0.000580289	-0.119076	-0.0267661	0.0920631	-0.0741402	-0.0468354	0.0366021	-0.1	-0.386325	0
2193	4.21486	0	0.103756	4.1111	4.49723	4.45612	4.33648	3.60193	0.398358	0.336191	0.119642	0.0411026	0.0122946	0.00350544	0.00015591	0.00337387	0.00467608	0.00146196	0.00719562	0.0489525	0.0157777	1.74041e-05	0.00731257	0.0149188	0.0021322	0.0309514	0.00290926	0.00288241	0.00148587	1.49433e-05	2.13079e-16	9.13124e-06	1.90021e-05	8.07545e-06	5.57647e-07	0	0.000107915	5.83629e-08	1.45972e-06	0.000580289	-0.119076	-0.0267661	0.0920631	-0.0741402	-0.0468354	0.0366021	-0.1	-0.386325	0
2194	4.21486	0	0.103756	4.1111	4.49723	4.45612	4.33648	3.60193	0.398358	0.336191	0.119642	0.0411026	0.0122946	0.00350544	0.00015591	0.00337387	0.00467608	0.00146196	0.00719562	0.0489525	0.0157777	1.74041e-05	0.00731257	0.0149188	0.0021322	0.0309514	0.00290926	0.00288241	0.00148587	1.49433e-05	2.13079e-16	9.13124e-06	1.90021e-05	8.07545e-06	5.57647e-07	0	0.000107915	5.83629e-08	1.45972e-06	0.000580289	-0.119076	-0.0267661	0.0920631	-0.0741402	-0.0468354	0.0366021	-0.1	-0.386325	0
2195	4.21486	0	0.103756	4.1111	4.49723	4.45612	4.33648	3.60193	0.398358	0.336191	0.119642	0.0411026	0.0122946	0.00350544	0.00015591	0.00337387	0.00467608	0.00146196	0.00719562	0.0489525	0.0157777	1.74041e-05	0.00731257	0.0149188	0.0021322	0.0309514	0.00290926	0.00288241	0.00148587	1.49433e-05	2.13079e-16	9.13124e-06	1.90021e-05	8.07545e-06	5.57647e-07	0	0.000107915	5.83629e-08	1.45972e-06	0.000580289	-0.119076	-0.0267661	0.0920631	-0.0741402	-0.0468354	0.0366021	-0.1	-0.386325	0
2196	4.21486	0	0.103756	4.1111	4.49723	4.45612	4.33648	3.60193	0.398358	0.336191	0.119642	0.0411026	0.0122946	0.00350544	0.00015591	0.00337387	0.00467608	0.00146196	0.00719562	0.0489525	0.0157777	1.74041e-05	0.00731257	0.0149188	0.0021322	0.0309514	0.00290926	0.00288241	0.00148587	1.49433e-05	2.13079e-16	9.13124e-06	1.90021e-05	8.07545e-06	5.57647e-07	0	0.000107915	5.83629e-08	1.45972e-06	0.000580289	-0.119076	-0.0267661	0.0920631	-0.0741402	-0.0468354	0.0366021	-0.1	-0.386325	0
2197	4.21486	0	0.103756	4.1111	4.49723	4.45612	4.33648	3.60193	0.398358	0.336191	0.119642	0.0411026	0.0122946	0.00350544	0.00015591	0.00337387	0.00467608	0.00146196	0.00719562	0.0489525	0.0157777	1.74041e-05	0.00731257	0.0149188	0.0021322	0.0309514	0.00290926	0.00288241	0.00148587	1.49433e-05	2.13079e-16	9.13124e-06	1.90021e-05	8.07545e-06	5.57647e-07	0	0.000107915	5.83629e-08	1.45972e-06	0.000580289	-0.119076	-0.0267661	0.0920631	-0.0741402	-0.0468354	0.0366021	-0.1	-0.386325	0
2198	4.21486	0	0.103756	4.1111	4.49723	4.45612	4.33648	3.60193	0.398358	0.336191	0.119642	0.0411026	0.0122946	0.00350544	0.00015591	0.00337387	0.00467608	0.00146196	0.00719562	0.0489525	0.0157777	1.74041e-05	0.00731257	0.0149188	0.0021322	0.0309514	0.00290926	0.00288241	0.00148587	1.49433e-05	2.13079e-16	9.13124e-06	1.90021e-05	8.07545e-06	5.57647e-07	0	0.000107915	5.83629e-08	1.45972e-06	0.000580289	-0.119076	-0.0267661	0.0920631	-0.0741402	-0.0468354	0.0366021	-0.1	-0.386325	0
2199	4.21486	0	0.103756	4.1111	4.49723	4.45612	4.33648	3.60193	0.398358	0.336191	0.119642	0.0411026	0.0122946	0.00350544	0.00015591	0.00337387	0.00467608	0.00146196	0.00719562	0.0489525	0.0157777	1.74041e-05	0.00731257	0.0149188	0.0021322	0.0309514	0.00290926	0.00288241	0.00148587	1.49433e-05	2.13079e-16	9.13124e-06	1.90021e-05	8.07545e-06	5.57647e-07	0	0.000107915	5.83629e-08	1.45972e-06	0.000580289	-0.119076	-0.0267661	0.0920631	-0.0741402	-0.0468354	0.0366021	-0.1	-0.386325	0
2200	4.21486	0	0.103756	4.1111	4.49723	4.45612	4.33648	3.60193	0.398358	0.336191	0.119642	0.0411026	0.0122946	0.00350544	0.00015591	0.00337387	0.00467608	0.00146196	0.00719562	0.0489525	0.0157777	1.74041e-05	0.00731257	0.0149188	0.0021322	0.0309514	0.00290926	0.00288241	0.00148587	1.49433e-05	2.13079e-16	9.13124e-06	1.90021e-05	8.07545e-06	5.57647e-07	0	0.000107915	5.83629e-08	1.45972e-06	0.000580289	-0.119076	-0.0267661	0.0920631	-0.0741402	-0.0468354	0.0366021	-0.1	-0.386325	0
2201	4.21486	0	0.103756	4.1111	4.49723	4.45612	4.33648	3.60193	0.398358	0.336191	0.119642	0.0411026	0.0122946	0.00350544	0.00015591	0.00337387	0.00467608	0.00146196	0.00719562	0.0489525	0.0157777	1.74041e-05	0.00731257	0.0149188	0.0021322	0.0309514	0.00290926	0.00288241	0.00148587	1.49433e-05	2.13079e-16	9.13124e-06	1.90021e-05	8.07545e-06	5.57647e-07	0	0.000107915	5.83629e-08	1.45972e-06	0.000580289	-0.119076	-0.0267661	0.0920631	-0.0741402	-0.0468354	0.0366021	-0.1	-0.386325	0
2202	4.21486	0	0.103756	4.1111	4.49723	4.45612	4.33648	3.60193	0.398358	0.336191	0.119642	0.0411026	0.0122946	0.00350544	0.00015591	0.00337387	0.00467608	0.00146196	0.00719562	0.0489525	0.0157777	1.74041e-05	0.00731257	0.0149188	0.0021322	0.0309514	0.00290926	0.00288241	0.00148587	1.49433e-05	2.13079e-16	9.13124e-06	1.90021e-05	8.07545e-06	5.57647e-07	0	0.000107915	5.83629e-08	1.45972e-06	0.000580289	-0.119076	-0.0267661	0.0920631	-0.0741402	-0.0468354	0.0366021	-0.1	-0.386325	0
2203	4.21486	0	0.103756	4.1111	4.49723	4.45612	4.33648	3.60193	0.398358	0.336191	0.119642	0.0411026	0.0122946	0.00350544	0.00015591	0.00337387	0.00467608	0.00146196	0.00719562	0.0489525	0.0157777	1.74041e-05	0.00731257	0.0149188	0.0021322	0.0309514	0.00290926	0.00288241	0.00148587	1.49433e-05	2.13079e-16	9.13124e-06	1.90021e-05	8.07545e-06	5.57647e-07	0	0.000107915	5.83629e-08	1.45972e-06	0.000580289	-0.119076	-0.0267661	0.0920631	-0.0741402	-0.0468354	0.0366021	-0.1	-0.386325	0
2204	4.21486	0	0.103756	4.1111	4.49723	4.45612	4.33648	3.60193	0.398358	0.336191	0.119642	0.0411026	0.0122946	0.00350544	0.00015591	0.00337387	0.00467608	0.00146196	0.00719562	0.0489525	0.0157777	1.74041e-05	0.00731257	0.0149188	0.0021322	0.0309514	0.00290926	0.00288241	0.00148587	1.49433e-05	2.13079e-16	9.13124e-06	1.90021e-05	8.07545e-06	5.57647e-07	0	0.000107915	5.83629e-08	1.45972e-06	0.000580289	-0.119076	-0.0267661	0.0920631	-0.0741402	-0.0468354	0.0366021	-0.1	-0.386325	0
2205	4.21486	0	0.103756	4.1111	4.49723	4.45612	4.33648	3.60193	0.398358	0.336191	0.119642	0.0411026	0.0122946	0.00350544	0.00015591	0.00337387	0.00467608	0.00146196	0.00719562	0.0489525	0.0157777	1.74041e-05	0.00731257	0.0149188	0.0021322	0.0309514	0.00290926	0.00288241	0.00148587	1.49433e-05	2.13079e-16	9.13124e-06	1.90021e-05	8.07545e-06	5.57647e-07	0	0.000107915	5.83629e-08	1.45972e-06	0.000580289	-0.119076	-0.0267661	0.0920631	-0.0741402	-0.0468354	0.0366021	-0.1	-0.386325	0
2206	4.21486	0	0.103756	4.1111	4.49723	4.45612	4.33648	3.60193	0.398358	0.336191	0.119642	0.0411026	0.0122946	0.00350544	0.00015591	0.00337387	0.00467608	0.00146196	0.00719562	0.0489525	0.0157777	1.74041e-05	0.00731257	0.0149188	0.0021322	0.0309514	0.00290926	0.00288241	0.00148587	1.49433e-05	2.13079e-16	9.13124e-06	1.90021e-05	8.07545e-06	5.57647e-07	0	0.000107915	5.83629e-08	1.45972e-06	0.000580289	-0.119076	-0.0267661	0.0920631	-0.0741402	-0.0468354	0.0366021	-0.1	-0.386325	0
2207	4.21486	0	0.103756	4.1111	4.49723	4.45612	4.33648	3.60193	0.398358	0.336191	0.119642	0.0411026	0.0122946	0.00350544	0.00015591	0.00337387	0.00467608	0.00146196	0.00719562	0.0489525	0.0157777	1.74041e-05	0.00731257	0.0149188	0.0021322	0.0309514	0.00290926	0.00288241	0.00148587	1.49433e-05	2.13079e-16	9.13124e-06	1.90021e-05	8.07545e-06	5.57647e-07	0	0.000107915	5.83629e-08	1.45972e-06	0.000580289	-0.119076	-0.0267661	0.0920631	-0.0741402	-0.0468354	0.0366021	-0.1	-0.386325	0
2208	4.21486	0	0.103756	4.1111	4.49723	4.45612	4.33648	3.60193	0.398358	0.336191	0.119642	0.0411026	0.0122946	0.00350544	0.00015591	0.00337387	0.00467608	0.00146196	0.00719562	0.0489525	0.0157777	1.74041e-05	0.00731257	0.0149188	0.0021322	0.0309514	0.00290926	0.00288241	0.00148587	1.49433e-05	2.13079e-16	9.13124e-06	1.90021e-05	8.07545e-06	5.57647e-07	0	0.000107915	5.83629e-08	1.45972e-06	0.000580289	-0.119076	-0.0267661	0.0920631	-0.0741402	-0.0468354	0.0366021	-0.1	-0.386325	0
2209	4.21486	0	0.103756	4.1111	4.49723	4.45612	4.33648	3.60193	0.398358	0.336191	0.119642	0.0411026	0.0122946	0.00350544	0.00015591	0.00337387	0.00467608	0.00146196	0.00719562	0.0489525	0.0157777	1.74041e-05	0.00731257	0.0149188	0.0021322	0.0309514	0.00290926	0.00288241	0.00148587	1.49433e-05	2.13079e-16	9.13124e-06	1.90021e-05	8.07545e-06	5.57647e-07	0	0.000107915	5.83629e-08	1.45972e-06	0.000580289	-0.119076	-0.0267661	0.0920631	-0.0741402	-0.0468354	0.0366021	-0.1	-0.386325	0
2210	4.21486	0	0.103756	4.1111	4.49723	4.45612	4.33648	3.60193	0.398358	0.336191	0.119642	0.0411026	0.0122946	0.00350544	0.00015591	0.00337387	0.00467608	0.00146196	0.00719562	0.0489525	0.0157777	1.74041e-05	0.00731257	0.0149188	0.0021322	0.0309514	0.00290926	0.00288241	0.00148587	1.49433e-05	2.13079e-16	9.13124e-06	1.90021e-05	8.07545e-06	5.57647e-07	0	0.000107915	5.83629e-08	1.45972e-06	0.000580289	-0.119076	-0.0267661	0.0920631	-0.0741402	-0.0468354	0.0366021	-0.1	-0.386325	0
2211	4.21486	0	0.103756	4.1111	4.49723	4.45612	4.33648	3.60193	0.398358	0.336191	0.119642	0.0411026	0.0122946	0.00350544	0.00015591	0.00337387	0.00467608	0.00146196	0.00719562	0.0489525	0.0157777	1.74041e-05	0.00731257	0.0149188	0.0021322	0.0309514	0.00290926	0.00288241	0.00148587	1.49433e-05	2.13079e-16	9.13124e-06	1.90021e-05	8.07545e-06	5.57647e-07	0	0.000107915	5.83629e-08	1.45972e-06	0.000580289	-0.119076	-0.0267661	0.0920631	-0.0741402	-0.0468354	0.0366021	-0.1	-0.386325	0
2212	4.21486	0	0.103756	4.1111	4.49723	4.45612	4.33648	3.60193	0.398358	0.336191	0.119642	0.0411026	0.0122946	0.00350544	0.00015591	0.00337387	0.00467608	0.00146196	0.00719562	0.0489525	0.0157777	1.74041e-05	0.00731257	0.0149188	0.0021322	0.0309514	0.00290926	0.00288241	0.00148587	1.49433e-05	2.13079e-16	9.13124e-06	1.90021e-05	8.07545e-06	5.57647e-07	0	0.000107915	5.83629e-08	1.45972e-06	0.000580289	-0.119076	-0.0267661	0.0920631	-0.0741402	-0.0468354	0.0366021	-0.1	-0.386325	0
2213	4.21486	0	0.103756	4.1111	4.49723	4.45612	4.33648	3.60193	0.398358	0.336191	0.119642	0.0411026	0.0122946	0.00350544	0.00015591	0.00337387	0.00467608	0.00146196	0.00719562	0.0489525	0.0157777	1.74041e-05	0.00731257	0.0149188	0.0021322	0.0309514	0.00290926	0.00288241	0.00148587	1.49433e-05	2.13079e-16	9.13124e-06	1.90021e-05	8.07545e-06	5.57647e-07	0	0.000107915	5.83629e-08	1.45972e-06	0.000580289	-0.119076	-0.0267661	0.0920631	-0.0741402	-0.0468354	0.0366021	-0.1	-0.386325	0
2214	4.21486	0	0.103756	4.1111	4.49723	4.45612	4.33648	3.60193	0.398358	0.336191	0.119642	0.0411026	0.0122946	0.00350544	0.00015591	0.00337387	0.00467608	0.00146196	0.00719562	0.0489525	0.0157777	1.74041e-05	0.00731257	0.0149188	0.0021322	0.0309514	0.00290926	0.00288241	0.00148587	1.49433e-05	2.13079e-16	9.13124e-06	1.90021e-05	8.07545e-06	5.57647e-07	0	0.000107915	5.83629e-08	1.45972e-06	0.000580289	-0.119076	-0.0267661	0.0920631	-0.0741402	-0.0468354	0.0366021	-0.1	-0.386325	0
2215	4.21486	0	0.103756	4.1111	4.49723	4.45612	4.33648	3.60193	0.398358	0.336191	0.119642	0.0411026	0.0122946	0.00350544	0.00015591	0.00337387	0.00467608	0.00146196	0.00719562	0.0489525	0.0157777	1.74041e-05	0.00731257	0.0149188	0.0021322	0.0309514	0.00290926	0.00288241	0.00148587	1.49433e-05	2.13079e-16	9.13124e-06	1.90021e-05	8.07545e-06	5.57647e-07	0	0.000107915	5.83629e-08	1.45972e-06	0.000580289	-0.119076	-0.0267661	0.0920631	-0.0741402	-0.0468354	0.0366021	-0.1	-0.386325	0
2216	4.21486	0	0.103756	4.1111	4.49723	4.45612	4.33648	3.60193	0.398358	0.336191	0.119642	0.0411026	0.0122946	0.00350544	0.00015591	0.00337387	0.00467608	0.00146196	0.00719562	0.0489525	0.0157777	1.74041e-05	0.00731257	0.0149188	0.0021322	0.0309514	0.00290926	0.00288241	0.00148587	1.49433e-05	2.13079e-16	9.13124e-06	1.90021e-05	8.07545e-06	5.57647e-07	0	0.000107915	5.83629e-08	1.45972e-06	0.000580289	-0.119076	-0.0267661	0.0920631	-0.0741402	-0.0468354	0.0366021	-0.1	-0.386325	0
2217	4.21486	0	0.103756	4.1111	4.49723	4.45612	4.33648	3.60193	0.398358	0.336191	0.119642	0.0411026	0.0122946	0.00350544	0.00015591	0.00337387	0.00467608	0.00146196	0.00719562	0.0489525	0.0157777	1.74041e-05	0.00731257	0.0149188	0.0021322	0.0309514	0.00290926	0.00288241	0.00148587	1.49433e-05	2.13079e-16	9.13124e-06	1.90021e-05	8.07545e-06	5.57647e-07	0	0.000107915	5.83629e-08	1.45972e-06	0.000580289	-0.119076	-0.0267661	0.0920631	-0.0741402	-0.0468354	0.0366021	-0.1	-0.386325	0
2218	4.21486	0	0.103756	4.1111	4.49723	4.45612	4.33648	3.60193	0.398358	0.336191	0.119642	0.0411026	0.0122946	0.00350544	0.00015591	0.00337387	0.00467608	0.00146196	0.00719562	0.0489525	0.0157777	1.74041e-05	0.00731257	0.0149188	0.0021322	0.0309514	0.00290926	0.00288241	0.00148587	1.49433e-05	2.13079e-16	9.13124e-06	1.90021e-05	8.07545e-06	5.57647e-07	0	0.000107915	5.83629e-08	1.45972e-06	0.000580289	-0.119076	-0.0267661	0.0920631	-0.0741402	-0.0468354	0.0366021	-0.1	-0.386325	0
2219	4.21486	0	0.103756	4.1111	4.49723	4.45612	4.33648	3.60193	0.398358	0.336191	0.119642	0.0411026	0.0122946	0.00350544	0.00015591	0.00337387	0.00467608	0.00146196	0.00719562	0.0489525	0.0157777	1.74041e-05	0.00731257	0.0149188	0.0021322	0.0309514	0.00290926	0.00288241	0.00148587	1.49433e-05	2.13079e-16	9.13124e-06	1.90021e-05	8.07545e-06	5.57647e-07	0	0.000107915	5.83629e-08	1.45972e-06	0.000580289	-0.119076	-0.0267661	0.0920631	-0.0741402	-0.0468354	0.0366021	-0.1	-0.386325	0
2220	4.21486	0	0.103756	4.1111	4.49723	4.45612	4.33648	3.60193	0.398358	0.336191	0.119642	0.0411026	0.0122946	0.00350544	0.00015591	0.00337387	0.00467608	0.00146196	0.00719562	0.0489525	0.0157777	1.74041e-05	0.00731257	0.0149188	0.0021322	0.0309514	0.00290926	0.00288241	0.00148587	1.49433e-05	2.13079e-16	9.13124e-06	1.90021e-05	8.07545e-06	5.57647e-07	0	0.000107915	5.83629e-08	1.45972e-06	0.000580289	-0.119076	-0.0267661	0.0920631	-0.0741402	-0.0468354	0.0366021	-0.1	-0.386325	0
2221	4.21486	0	0.103756	4.1111	4.49723	4.45612	4.33648	3.60193	0.398358	0.336191	0.119642	0.0411026	0.0122946	0.00350544	0.00015591	0.00337387	0.00467608	0.00146196	0.00719562	0.0489525	0.0157777	1.74041e-05	0.00731257	0.0149188	0.0021322	0.0309514	0.00290926	0.00288241	0.00148587	1.49433e-05	2.13079e-16	9.13124e-06	1.90021e-05	8.07545e-06	5.57647e-07	0	0.000107915	5.83629e-08	1.45972e-06	0.000580289	-0.119076	-0.0267661	0.0920631	-0.0741402	-0.0468354	0.0366021	-0.1	-0.386325	0
2222	4.21486	0	0.103756	4.1111	4.49723	4.45612	4.33648	3.60193	0.398358	0.336191	0.119642	0.0411026	0.0122946	0.00350544	0.00015591	0.00337387	0.00467608	0.00146196	0.00719562	0.0489525	0.0157777	1.74041e-05	0.00731257	0.0149188	0.0021322	0.0309514	0.00290926	0.00288241	0.00148587	1.49433e-05	2.13079e-16	9.13124e-06	1.90021e-05	8.07545e-06	5.57647e-07	0	0.000107915	5.83629e-08	1.45972e-06	0.000580289	-0.119076	-0.0267661	0.0920631	-0.0741402	-0.0468354	0.0366021	-0.1	-0.386325	0
2223	4.21486	0	0.103756	4.1111	4.49723	4.45612	4.33648	3.60193	0.398358	0.336191	0.119642	0.0411026	0.0122946	0.00350544	0.00015591	0.00337387	0.00467608	0.00146196	0.00719562	0.0489525	0.0157777	1.74041e-05	0.00731257	0.0149188	0.0021322	0.0309514	0.00290926	0.00288241	0.00148587	1.49433e-05	2.13079e-16	9.13124e-06	1.90021e-05	8.07545e-06	5.57647e-07	0	0.000107915	5.83629e-08	1.45972e-06	0.000580289	-0.119076	-0.0267661	0.0920631	-0.0741402	-0.0468354	0.0366021	-0.1	-0.386325	0
2224	4.21486	0	0.103756	4.1111	4.49723	4.45612	4.33648	3.60193	0.398358	0.336191	0.119642	0.0411026	0.0122946	0.00350544	0.00015591	0.00337387	0.00467608	0.00146196	0.00719562	0.0489525	0.0157777	1.74041e-05	0.00731257	0.0149188	0.0021322	0.0309514	0.00290926	0.00288241	0.00148587	1.49433e-05	2.13079e-16	9.13124e-06	1.90021e-05	8.07545e-06	5.57647e-07	0	0.000107915	5.83629e-08	1.45972e-06	0.000580289	-0.119076	-0.0267661	0.0920631	-0.0741402	-0.0468354	0.0366021	-0.1	-0.386325	0
2225	4.21486	0	0.103756	4.1111	4.49723	4.45612	4.33648	3.60193	0.398358	0.336191	0.119642	0.0411026	0.0122946	0.00350544	0.00015591	0.00337387	0.00467608	0.00146196	0.00719562	0.0489525	0.0157777	1.74041e-05	0.00731257	0.0149188	0.0021322	0.0309514	0.00290926	0.00288241	0.00148587	1.49433e-05	2.13079e-16	9.13124e-06	1.90021e-05	8.07545e-06	5.57647e-07	0	0.000107915	5.83629e-08	1.45972e-06	0.000580289	-0.119076	-0.0267661	0.0920631	-0.0741402	-0.0468354	0.0366021	-0.1	-0.386325	0
2226	4.21486	0	0.103756	4.1111	4.49723	4.45612	4.33648	3.60193	0.398358	0.336191	0.119642	0.0411026	0.0122946	0.00350544	0.00015591	0.00337387	0.00467608	0.00146196	0.00719562	0.0489525	0.0157777	1.74041e-05	0.00731257	0.0149188	0.0021322	0.0309514	0.00290926	0.00288241	0.00148587	1.49433e-05	2.13079e-16	9.13124e-06	1.90021e-05	8.07545e-06	5.57647e-07	0	0.000107915	5.83629e-08	1.45972e-06	0.000580289	-0.119076	-0.0267661	0.0920631	-0.0741402	-0.0468354	0.0366021	-0.1	-0.386325	0
2227	4.21486	0	0.103756	4.1111	4.49723	4.45612	4.33648	3.60193	0.398358	0.336191	0.119642	0.0411026	0.0122946	0.00350544	0.00015591	0.00337387	0.00467608	0.00146196	0.00719562	0.0489525	0.0157777	1.74041e-05	0.00731257	0.0149188	0.0021322	0.0309514	0.00290926	0.00288241	0.00148587	1.49433e-05	2.13079e-16	9.13124e-06	1.90021e-05	8.07545e-06	5.57647e-07	0	0.000107915	5.83629e-08	1.45972e-06	0.000580289	-0.119076	-0.0267661	0.0920631	-0.0741402	-0.0468354	0.0366021	-0.1	-0.386325	0
2228	4.21486	0	0.103756	4.1111	4.49723	4.45612	4.33648	3.60193	0.398358	0.336191	0.119642	0.0411026	0.0122946	0.00350544	0.00015591	0.00337387	0.00467608	0.00146196	0.00719562	0.0489525	0.0157777	1.74041e-05	0.00731257	0.0149188	0.0021322	0.0309514	0.00290926	0.00288241	0.00148587	1.49433e-05	2.13079e-16	9.13124e-06	1.90021e-05	8.07545e-06	5.57647e-07	0	0.000107915	5.83629e-08	1.45972e-06	0.000580289	-0.119076	-0.0267661	0.0920631	-0.0741402	-0.0468354	0.0366021	-0.1	-0.386325	0
2229	4.21486	0	0.103756	4.1111	4.49723	4.45612	4.33648	3.60193	0.398358	0.336191	0.119642	0.0411026	0.0122946	0.00350544	0.00015591	0.00337387	0.00467608	0.00146196	0.00719562	0.0489525	0.0157777	1.74041e-05	0.00731257	0.0149188	0.0021322	0.0309514	0.00290926	0.00288241	0.00148587	1.49433e-05	2.13079e-16	9.13124e-06	1.90021e-05	8.07545e-06	5.57647e-07	0	0.000107915	5.83629e-08	1.45972e-06	0.000580289	-0.119076	-0.0267661	0.0920631	-0.0741402	-0.0468354	0.0366021	-0.1	-0.386325	0
2230	4.21486	0	0.103756	4.1111	4.49723	4.45612	4.33648	3.60193	0.398358	0.336191	0.119642	0.0411026	0.0122946	0.00350544	0.00015591	0.00337387	0.00467608	0.00146196	0.00719562	0.0489525	0.0157777	1.74041e-05	0.00731257	0.0149188	0.0021322	0.0309514	0.00290926	0.00288241	0.00148587	1.49433e-05	2.13079e-16	9.13124e-06	1.90021e-05	8.07545e-06	5.57647e-07	0	0.000107915	5.83629e-08	1.45972e-06	0.000580289	-0.119076	-0.0267661	0.0920631	-0.0741402	-0.0468354	0.0366021	-0.1	-0.386325	0
2231	4.21486	0	0.103756	4.1111	4.49723	4.45612	4.33648	3.60193	0.398358	0.336191	0.119642	0.0411026	0.0122946	0.00350544	0.00015591	0.00337387	0.00467608	0.00146196	0.00719562	0.0489525	0.0157777	1.74041e-05	0.00731257	0.0149188	0.0021322	0.0309514	0.00290926	0.00288241	0.00148587	1.49433e-05	2.13079e-16	9.13124e-06	1.90021e-05	8.07545e-06	5.57647e-07	0	0.000107915	5.83629e-08	1.45972e-06	0.000580289	-0.119076	-0.0267661	0.0920631	-0.0741402	-0.0468354	0.0366021	-0.1	-0.386325	0
2232	4.21486	0	0.103756	4.1111	4.49723	4.45612	4.33648	3.60193	0.398358	0.336191	0.119642	0.0411026	0.0122946	0.00350544	0.00015591	0.00337387	0.00467608	0.00146196	0.00719562	0.0489525	0.0157777	1.74041e-05	0.00731257	0.0149188	0.0021322	0.0309514	0.00290926	0.00288241	0.00148587	1.49433e-05	2.13079e-16	9.13124e-06	1.90021e-05	8.07545e-06	5.57647e-07	0	0.000107915	5.83629e-08	1.45972e-06	0.000580289	-0.119076	-0.0267661	0.0920631	-0.0741402	-0.0468354	0.0366021	-0.1	-0.386325	0
2233	4.21486	0	0.103756	4.1111	4.49723	4.45612	4.33648	3.60193	0.398358	0.336191	0.119642	0.0411026	0.0122946	0.00350544	0.00015591	0.00337387	0.00467608	0.00146196	0.00719562	0.0489525	0.0157777	1.74041e-05	0.00731257	0.0149188	0.0021322	0.0309514	0.00290926	0.00288241	0.00148587	1.49433e-05	2.13079e-16	9.13124e-06	1.90021e-05	8.07545e-06	5.57647e-07	0	0.000107915	5.83629e-08	1.45972e-06	0.000580289	-0.119076	-0.0267661	0.0920631	-0.0741402	-0.0468354	0.0366021	-0.1	-0.386325	0
2234	4.21486	0	0.103756	4.1111	4.49723	4.45612	4.33648	3.60193	0.398358	0.336191	0.119642	0.0411026	0.0122946	0.00350544	0.00015591	0.00337387	0.00467608	0.00146196	0.00719562	0.0489525	0.0157777	1.74041e-05	0.00731257	0.0149188	0.0021322	0.0309514	0.00290926	0.00288241	0.00148587	1.49433e-05	2.13079e-16	9.13124e-06	1.90021e-05	8.07545e-06	5.57647e-07	0	0.000107915	5.83629e-08	1.45972e-06	0.000580289	-0.119076	-0.0267661	0.0920631	-0.0741402	-0.0468354	0.0366021	-0.1	-0.386325	0
2235	4.21486	0	0.103756	4.1111	4.49723	4.45612	4.33648	3.60193	0.398358	0.336191	0.119642	0.0411026	0.0122946	0.00350544	0.00015591	0.00337387	0.00467608	0.00146196	0.00719562	0.0489525	0.0157777	1.74041e-05	0.00731257	0.0149188	0.0021322	0.0309514	0.00290926	0.00288241	0.00148587	1.49433e-05	2.13079e-16	9.13124e-06	1.90021e-05	8.07545e-06	5.57647e-07	0	0.000107915	5.83629e-08	1.45972e-06	0.000580289	-0.119076	-0.0267661	0.0920631	-0.0741402	-0.0468354	0.0366021	-0.1	-0.386325	0
2236	4.21486	0	0.103756	4.1111	4.49723	4.45612	4.33648	3.60193	0.398358	0.336191	0.119642	0.0411026	0.0122946	0.00350544	0.00015591	0.00337387	0.00467608	0.00146196	0.00719562	0.0489525	0.0157777	1.74041e-05	0.00731257	0.0149188	0.0021322	0.0309514	0.00290926	0.00288241	0.00148587	1.49433e-05	2.13079e-16	9.13124e-06	1.90021e-05	8.07545e-06	5.57647e-07	0	0.000107915	5.83629e-08	1.45972e-06	0.000580289	-0.119076	-0.0267661	0.0920631	-0.0741402	-0.0468354	0.0366021	-0.1	-0.386325	0
2237	4.21486	0	0.103756	4.1111	4.49723	4.45612	4.33648	3.60193	0.398358	0.336191	0.119642	0.0411026	0.0122946	0.00350544	0.00015591	0.00337387	0.00467608	0.00146196	0.00719562	0.0489525	0.0157777	1.74041e-05	0.00731257	0.0149188	0.0021322	0.0309514	0.00290926	0.00288241	0.00148587	1.49433e-05	2.13079e-16	9.13124e-06	1.90021e-05	8.07545e-06	5.57647e-07	0	0.000107915	5.83629e-08	1.45972e-06	0.000580289	-0.119076	-0.0267661	0.0920631	-0.0741402	-0.0468354	0.0366021	-0.1	-0.386325	0
2238	4.21486	0	0.103756	4.1111	4.49723	4.45612	4.33648	3.60193	0.398358	0.336191	0.119642	0.0411026	0.0122946	0.00350544	0.00015591	0.00337387	0.00467608	0.00146196	0.00719562	0.0489525	0.0157777	1.74041e-05	0.00731257	0.0149188	0.0021322	0.0309514	0.00290926	0.00288241	0.00148587	1.49433e-05	2.13079e-16	9.13124e-06	1.90021e-05	8.07545e-06	5.57647e-07	0	0.000107915	5.83629e-08	1.45972e-06	0.000580289	-0.119076	-0.0267661	0.0920631	-0.0741402	-0.0468354	0.0366021	-0.1	-0.386325	0
2239	4.21486	0	0.103756	4.1111	4.49723	4.45612	4.33648	3.60193	0.398358	0.336191	0.119642	0.0411026	0.0122946	0.00350544	0.00015591	0.00337387	0.00467608	0.00146196	0.00719562	0.0489525	0.0157777	1.74041e-05	0.00731257	0.0149188	0.0021322	0.0309514	0.00290926	0.00288241	0.00148587	1.49433e-05	2.13079e-16	9.13124e-06	1.90021e-05	8.07545e-06	5.57647e-07	0	0.000107915	5.83629e-08	1.45972e-06	0.000580289	-0.119076	-0.0267661	0.0920631	-0.0741402	-0.0468354	0.0366021	-0.1	-0.386325	0
2240	4.21486	0	0.103756	4.1111	4.49723	4.45612	4.33648	3.60193	0.398358	0.336191	0.119642	0.0411026	0.0122946	0.00350544	0.00015591	0.00337387	0.00467608	0.00146196	0.00719562	0.0489525	0.0157777	1.74041e-05	0.00731257	0.0149188	0.0021322	0.0309514	0.00290926	0.00288241	0.00148587	1.49433e-05	2.13079e-16	9.13124e-06	1.90021e-05	8.07545e-06	5.57647e-07	0	0.000107915	5.83629e-08	1.45972e-06	0.000580289	-0.119076	-0.0267661	0.0920631	-0.0741402	-0.0468354	0.0366021	-0.1	-0.386325	0
2241	4.21486	0	0.103756	4.1111	4.49723	4.45612	4.33648	3.60193	0.398358	0.336191	0.119642	0.0411026	0.0122946	0.00350544	0.00015591	0.00337387	0.00467608	0.00146196	0.00719562	0.0489525	0.0157777	1.74041e-05	0.00731257	0.0149188	0.0021322	0.0309514	0.00290926	0.00288241	0.00148587	1.49433e-05	2.13079e-16	9.13124e-06	1.90021e-05	8.07545e-06	5.57647e-07	0	0.000107915	5.83629e-08	1.45972e-06	0.000580289	-0.119076	-0.0267661	0.0920631	-0.0741402	-0.0468354	0.0366021	-0.1	-0.386325	0
2242	4.21486	0	0.103756	4.1111	4.49723	4.45612	4.33648	3.60193	0.398358	0.336191	0.119642	0.0411026	0.0122946	0.00350544	0.00015591	0.00337387	0.00467608	0.00146196	0.00719562	0.0489525	0.0157777	1.74041e-05	0.00731257	0.0149188	0.0021322	0.0309514	0.00290926	0.00288241	0.00148587	1.49433e-05	2.13079e-16	9.13124e-06	1.90021e-05	8.07545e-06	5.57647e-07	0	0.000107915	5.83629e-08	1.45972e-06	0.000580289	-0.119076	-0.0267661	0.0920631	-0.0741402	-0.0468354	0.0366021	-0.1	-0.386325	0
2243	4.21486	0	0.103756	4.1111	4.49723	4.45612	4.33648	3.60193	0.398358	0.336191	0.119642	0.0411026	0.0122946	0.00350544	0.00015591	0.00337387	0.00467608	0.00146196	0.00719562	0.0489525	0.0157777	1.74041e-05	0.00731257	0.0149188	0.0021322	0.0309514	0.00290926	0.00288241	0.00148587	1.49433e-05	2.13079e-16	9.13124e-06	1.90021e-05	8.07545e-06	5.57647e-07	0	0.000107915	5.83629e-08	1.45972e-06	0.000580289	-0.119076	-0.0267661	0.0920631	-0.0741402	-0.0468354	0.0366021	-0.1	-0.386325	0
2244	4.21486	0	0.103756	4.1111	4.49723	4.45612	4.33648	3.60193	0.398358	0.336191	0.119642	0.0411026	0.0122946	0.00350544	0.00015591	0.00337387	0.00467608	0.00146196	0.00719562	0.0489525	0.0157777	1.74041e-05	0.00731257	0.0149188	0.0021322	0.0309514	0.00290926	0.00288241	0.00148587	1.49433e-05	2.13079e-16	9.13124e-06	1.90021e-05	8.07545e-06	5.57647e-07	0	0.000107915	5.83629e-08	1.45972e-06	0.000580289	-0.119076	-0.0267661	0.0920631	-0.0741402	-0.0468354	0.0366021	-0.1	-0.386325	0
2245	4.21486	0	0.103756	4.1111	4.49723	4.45612	4.33648	3.60193	0.398358	0.336191	0.119642	0.0411026	0.0122946	0.00350544	0.00015591	0.00337387	0.00467608	0.00146196	0.00719562	0.0489525	0.0157777	1.74041e-05	0.00731257	0.0149188	0.0021322	0.0309514	0.00290926	0.00288241	0.00148587	1.49433e-05	2.13079e-16	9.13124e-06	1.90021e-05	8.07545e-06	5.57647e-07	0	0.000107915	5.83629e-08	1.45972e-06	0.000580289	-0.119076	-0.0267661	0.0920631	-0.0741402	-0.0468354	0.0366021	-0.1	-0.386325	0
2246	4.21486	0	0.103756	4.1111	4.49723	4.45612	4.33648	3.60193	0.398358	0.336191	0.119642	0.0411026	0.0122946	0.00350544	0.00015591	0.00337387	0.00467608	0.00146196	0.00719562	0.0489525	0.0157777	1.74041e-05	0.00731257	0.0149188	0.0021322	0.0309514	0.00290926	0.00288241	0.00148587	1.49433e-05	2.13079e-16	9.13124e-06	1.90021e-05	8.07545e-06	5.57647e-07	0	0.000107915	5.83629e-08	1.45972e-06	0.000580289	-0.119076	-0.0267661	0.0920631	-0.0741402	-0.0468354	0.0366021	-0.1	-0.386325	0
2247	4.21486	0	0.103756	4.1111	4.49723	4.45612	4.33648	3.60193	0.398358	0.336191	0.119642	0.0411026	0.0122946	0.00350544	0.00015591	0.00337387	0.00467608	0.00146196	0.00719562	0.0489525	0.0157777	1.74041e-05	0.00731257	0.0149188	0.0021322	0.0309514	0.00290926	0.00288241	0.00148587	1.49433e-05	2.13079e-16	9.13124e-06	1.90021e-05	8.07545e-06	5.57647e-07	0	0.000107915	5.83629e-08	1.45972e-06	0.000580289	-0.119076	-0.0267661	0.0920631	-0.0741402	-0.0468354	0.0366021	-0.1	-0.386325	0
2248	4.21486	0	0.103756	4.1111	4.49723	4.45612	4.33648	3.60193	0.398358	0.336191	0.119642	0.0411026	0.0122946	0.00350544	0.00015591	0.00337387	0.00467608	0.00146196	0.00719562	0.0489525	0.0157777	1.74041e-05	0.00731257	0.0149188	0.0021322	0.0309514	0.00290926	0.00288241	0.00148587	1.49433e-05	2.13079e-16	9.13124e-06	1.90021e-05	8.07545e-06	5.57647e-07	0	0.000107915	5.83629e-08	1.45972e-06	0.000580289	-0.119076	-0.0267661	0.0920631	-0.0741402	-0.0468354	0.0366021	-0.1	-0.386325	0
2249	4.21486	0	0.103756	4.1111	4.49723	4.45612	4.33648	3.60193	0.398358	0.336191	0.119642	0.0411026	0.0122946	0.00350544	0.00015591	0.00337387	0.00467608	0.00146196	0.00719562	0.0489525	0.0157777	1.74041e-05	0.00731257	0.0149188	0.0021322	0.0309514	0.00290926	0.00288241	0.00148587	1.49433e-05	2.13079e-16	9.13124e-06	1.90021e-05	8.07545e-06	5.57647e-07	0	0.000107915	5.83629e-08	1.45972e-06	0.000580289	-0.119076	-0.0267661	0.0920631	-0.0741402	-0.0468354	0.0366021	-0.1	-0.386325	0
2250	4.21486	0	0.103756	4.1111	4.49723	4.45612	4.33648	3.60193	0.398358	0.336191	0.119642	0.0411026	0.0122946	0.00350544	0.00015591	0.00337387	0.00467608	0.00146196	0.00719562	0.0489525	0.0157777	1.74041e-05	0.00731257	0.0149188	0.0021322	0.0309514	0.00290926	0.00288241	0.00148587	1.49433e-05	2.13079e-16	9.13124e-06	1.90021e-05	8.07545e-06	5.57647e-07	0	0.000107915	5.83629e-08	1.45972e-06	0.000580289	-0.119076	-0.0267661	0.0920631	-0.0741402	-0.0468354	0.0366021	-0.1	-0.386325	0
2251	4.21486	0	0.103756	4.1111	4.49723	4.45612	4.33648	3.60193	0.398358	0.336191	0.119642	0.0411026	0.0122946	0.00350544	0.00015591	0.00337387	0.00467608	0.00146196	0.00719562	0.0489525	0.0157777	1.74041e-05	0.00731257	0.0149188	0.0021322	0.0309514	0.00290926	0.00288241	0.00148587	1.49433e-05	2.13079e-16	9.13124e-06	1.90021e-05	8.07545e-06	5.57647e-07	0	0.000107915	5.83629e-08	1.45972e-06	0.000580289	-0.119076	-0.0267661	0.0920631	-0.0741402	-0.0468354	0.0366021	-0.1	-0.386325	0
2252	4.21486	0	0.103756	4.1111	4.49723	4.45612	4.33648	3.60193	0.398358	0.336191	0.119642	0.0411026	0.0122946	0.00350544	0.00015591	0.00337387	0.00467608	0.00146196	0.00719562	0.0489525	0.0157777	1.74041e-05	0.00731257	0.0149188	0.0021322	0.0309514	0.00290926	0.00288241	0.00148587	1.49433e-05	2.13079e-16	9.13124e-06	1.90021e-05	8.07545e-06	5.57647e-07	0	0.000107915	5.83629e-08	1.45972e-06	0.000580289	-0.119076	-0.0267661	0.0920631	-0.0741402	-0.0468354	0.0366021	-0.1	-0.386325	0
2253	4.21486	0	0.103756	4.1111	4.49723	4.45612	4.33648	3.60193	0.398358	0.336191	0.119642	0.0411026	0.0122946	0.00350544	0.00015591	0.00337387	0.00467608	0.00146196	0.00719562	0.0489525	0.0157777	1.74041e-05	0.00731257	0.0149188	0.0021322	0.0309514	0.00290926	0.00288241	0.00148587	1.49433e-05	2.13079e-16	9.13124e-06	1.90021e-05	8.07545e-06	5.57647e-07	0	0.000107915	5.83629e-08	1.45972e-06	0.000580289	-0.119076	-0.0267661	0.0920631	-0.0741402	-0.0468354	0.0366021	-0.1	-0.386325	0
2254	4.21486	0	0.103756	4.1111	4.49723	4.45612	4.33648	3.60193	0.398358	0.336191	0.119642	0.0411026	0.0122946	0.00350544	0.00015591	0.00337387	0.00467608	0.00146196	0.00719562	0.0489525	0.0157777	1.74041e-05	0.00731257	0.0149188	0.0021322	0.0309514	0.00290926	0.00288241	0.00148587	1.49433e-05	2.13079e-16	9.13124e-06	1.90021e-05	8.07545e-06	5.57647e-07	0	0.000107915	5.83629e-08	1.45972e-06	0.000580289	-0.119076	-0.0267661	0.0920631	-0.0741402	-0.0468354	0.0366021	-0.1	-0.386325	0
2255	4.21486	0	0.103756	4.1111	4.49723	4.45612	4.33648	3.60193	0.398358	0.336191	0.119642	0.0411026	0.0122946	0.00350544	0.00015591	0.00337387	0.00467608	0.00146196	0.00719562	0.0489525	0.0157777	1.74041e-05	0.00731257	0.0149188	0.0021322	0.0309514	0.00290926	0.00288241	0.00148587	1.49433e-05	2.13079e-16	9.13124e-06	1.90021e-05	8.07545e-06	5.57647e-07	0	0.000107915	5.83629e-08	1.45972e-06	0.000580289	-0.119076	-0.0267661	0.0920631	-0.0741402	-0.0468354	0.0366021	-0.1	-0.386325	0
2256	4.21486	0	0.103756	4.1111	4.49723	4.45612	4.33648	3.60193	0.398358	0.336191	0.119642	0.0411026	0.0122946	0.00350544	0.00015591	0.00337387	0.00467608	0.00146196	0.00719562	0.0489525	0.0157777	1.74041e-05	0.00731257	0.0149188	0.0021322	0.0309514	0.00290926	0.00288241	0.00148587	1.49433e-05	2.13079e-16	9.13124e-06	1.90021e-05	8.07545e-06	5.57647e-07	0	0.000107915	5.83629e-08	1.45972e-06	0.000580289	-0.119076	-0.0267661	0.0920631	-0.0741402	-0.0468354	0.0366021	-0.1	-0.386325	0
2257	4.21486	0	0.103756	4.1111	4.49723	4.45612	4.33648	3.60193	0.398358	0.336191	0.119642	0.0411026	0.0122946	0.00350544	0.00015591	0.00337387	0.00467608	0.00146196	0.00719562	0.0489525	0.0157777	1.74041e-05	0.00731257	0.0149188	0.0021322	0.0309514	0.00290926	0.00288241	0.00148587	1.49433e-05	2.13079e-16	9.13124e-06	1.90021e-05	8.07545e-06	5.57647e-07	0	0.000107915	5.83629e-08	1.45972e-06	0.000580289	-0.119076	-0.0267661	0.0920631	-0.0741402	-0.0468354	0.0366021	-0.1	-0.386325	0
2258	4.21486	0	0.103756	4.1111	4.49723	4.45612	4.33648	3.60193	0.398358	0.336191	0.119642	0.0411026	0.0122946	0.00350544	0.00015591	0.00337387	0.00467608	0.00146196	0.00719562	0.0489525	0.0157777	1.74041e-05	0.00731257	0.0149188	0.0021322	0.0309514	0.00290926	0.00288241	0.00148587	1.49433e-05	2.13079e-16	9.13124e-06	1.90021e-05	8.07545e-06	5.57647e-07	0	0.000107915	5.83629e-08	1.45972e-06	0.000580289	-0.119076	-0.0267661	0.0920631	-0.0741402	-0.0468354	0.0366021	-0.1	-0.386325	0
2259	4.21486	0	0.103756	4.1111	4.49723	4.45612	4.33648	3.60193	0.398358	0.336191	0.119642	0.0411026	0.0122946	0.00350544	0.00015591	0.00337387	0.00467608	0.00146196	0.00719562	0.0489525	0.0157777	1.74041e-05	0.00731257	0.0149188	0.0021322	0.0309514	0.00290926	0.00288241	0.00148587	1.49433e-05	2.13079e-16	9.13124e-06	1.90021e-05	8.07545e-06	5.57647e-07	0	0.000107915	5.83629e-08	1.45972e-06	0.000580289	-0.119076	-0.0267661	0.0920631	-0.0741402	-0.0468354	0.0366021	-0.1	-0.386325	0
2260	4.21486	0	0.103756	4.1111	4.49723	4.45612	4.33648	3.60193	0.398358	0.336191	0.119642	0.0411026	0.0122946	0.00350544	0.00015591	0.00337387	0.00467608	0.00146196	0.00719562	0.0489525	0.0157777	1.74041e-05	0.00731257	0.0149188	0.0021322	0.0309514	0.00290926	0.00288241	0.00148587	1.49433e-05	2.13079e-16	9.13124e-06	1.90021e-05	8.07545e-06	5.57647e-07	0	0.000107915	5.83629e-08	1.45972e-06	0.000580289	-0.119076	-0.0267661	0.0920631	-0.0741402	-0.0468354	0.0366021	-0.1	-0.386325	0
2261	4.21486	0	0.103756	4.1111	4.49723	4.45612	4.33648	3.60193	0.398358	0.336191	0.119642	0.0411026	0.0122946	0.00350544	0.00015591	0.00337387	0.00467608	0.00146196	0.00719562	0.0489525	0.0157777	1.74041e-05	0.00731257	0.0149188	0.0021322	0.0309514	0.00290926	0.00288241	0.00148587	1.49433e-05	2.13079e-16	9.13124e-06	1.90021e-05	8.07545e-06	5.57647e-07	0	0.000107915	5.83629e-08	1.45972e-06	0.000580289	-0.119076	-0.0267661	0.0920631	-0.0741402	-0.0468354	0.0366021	-0.1	-0.386325	0
2262	4.21486	0	0.103756	4.1111	4.49723	4.45612	4.33648	3.60193	0.398358	0.336191	0.119642	0.0411026	0.0122946	0.00350544	0.00015591	0.00337387	0.00467608	0.00146196	0.00719562	0.0489525	0.0157777	1.74041e-05	0.00731257	0.0149188	0.0021322	0.0309514	0.00290926	0.00288241	0.00148587	1.49433e-05	2.13079e-16	9.13124e-06	1.90021e-05	8.07545e-06	5.57647e-07	0	0.000107915	5.83629e-08	1.45972e-06	0.000580289	-0.119076	-0.0267661	0.0920631	-0.0741402	-0.0468354	0.0366021	-0.1	-0.386325	0
2263	4.21486	0	0.103756	4.1111	4.49723	4.45612	4.33648	3.60193	0.398358	0.336191	0.119642	0.0411026	0.0122946	0.00350544	0.00015591	0.00337387	0.00467608	0.00146196	0.00719562	0.0489525	0.0157777	1.74041e-05	0.00731257	0.0149188	0.0021322	0.0309514	0.00290926	0.00288241	0.00148587	1.49433e-05	2.13079e-16	9.13124e-06	1.90021e-05	8.07545e-06	5.57647e-07	0	0.000107915	5.83629e-08	1.45972e-06	0.000580289	-0.119076	-0.0267661	0.0920631	-0.0741402	-0.0468354	0.0366021	-0.1	-0.386325	0
2264	4.21486	0	0.103756	4.1111	4.49723	4.45612	4.33648	3.60193	0.398358	0.336191	0.119642	0.0411026	0.0122946	0.00350544	0.00015591	0.00337387	0.00467608	0.00146196	0.00719562	0.0489525	0.0157777	1.74041e-05	0.00731257	0.0149188	0.0021322	0.0309514	0.00290926	0.00288241	0.00148587	1.49433e-05	2.13079e-16	9.13124e-06	1.90021e-05	8.07545e-06	5.57647e-07	0	0.000107915	5.83629e-08	1.45972e-06	0.000580289	-0.119076	-0.0267661	0.0920631	-0.0741402	-0.0468354	0.0366021	-0.1	-0.386325	0
2265	4.21486	0	0.103756	4.1111	4.49723	4.45612	4.33648	3.60193	0.398358	0.336191	0.119642	0.0411026	0.0122946	0.00350544	0.00015591	0.00337387	0.00467608	0.00146196	0.00719562	0.0489525	0.0157777	1.74041e-05	0.00731257	0.0149188	0.0021322	0.0309514	0.00290926	0.00288241	0.00148587	1.49433e-05	2.13079e-16	9.13124e-06	1.90021e-05	8.07545e-06	5.57647e-07	0	0.000107915	5.83629e-08	1.45972e-06	0.000580289	-0.119076	-0.0267661	0.0920631	-0.0741402	-0.0468354	0.0366021	-0.1	-0.386325	0
2266	4.21486	0	0.103756	4.1111	4.49723	4.45612	4.33648	3.60193	0.398358	0.336191	0.119642	0.0411026	0.0122946	0.00350544	0.00015591	0.00337387	0.00467608	0.00146196	0.00719562	0.0489525	0.0157777	1.74041e-05	0.00731257	0.0149188	0.0021322	0.0309514	0.00290926	0.00288241	0.00148587	1.49433e-05	2.13079e-16	9.13124e-06	1.90021e-05	8.07545e-06	5.57647e-07	0	0.000107915	5.83629e-08	1.45972e-06	0.000580289	-0.119076	-0.0267661	0.0920631	-0.0741402	-0.0468354	0.0366021	-0.1	-0.386325	0
2267	4.21486	0	0.103756	4.1111	4.49723	4.45612	4.33648	3.60193	0.398358	0.336191	0.119642	0.0411026	0.0122946	0.00350544	0.00015591	0.00337387	0.00467608	0.00146196	0.00719562	0.0489525	0.0157777	1.74041e-05	0.00731257	0.0149188	0.0021322	0.0309514	0.00290926	0.00288241	0.00148587	1.49433e-05	2.13079e-16	9.13124e-06	1.90021e-05	8.07545e-06	5.57647e-07	0	0.000107915	5.83629e-08	1.45972e-06	0.000580289	-0.119076	-0.0267661	0.0920631	-0.0741402	-0.0468354	0.0366021	-0.1	-0.386325	0
2268	4.21486	0	0.103756	4.1111	4.49723	4.45612	4.33648	3.60193	0.398358	0.336191	0.119642	0.0411026	0.0122946	0.00350544	0.00015591	0.00337387	0.00467608	0.00146196	0.00719562	0.0489525	0.0157777	1.74041e-05	0.00731257	0.0149188	0.0021322	0.0309514	0.00290926	0.00288241	0.00148587	1.49433e-05	2.13079e-16	9.13124e-06	1.90021e-05	8.07545e-06	5.57647e-07	0	0.000107915	5.83629e-08	1.45972e-06	0.000580289	-0.119076	-0.0267661	0.0920631	-0.0741402	-0.0468354	0.0366021	-0.1	-0.386325	0
2269	4.21486	0	0.103756	4.1111	4.49723	4.45612	4.33648	3.60193	0.398358	0.336191	0.119642	0.0411026	0.0122946	0.00350544	0.00015591	0.00337387	0.00467608	0.00146196	0.00719562	0.0489525	0.0157777	1.74041e-05	0.00731257	0.0149188	0.0021322	0.0309514	0.00290926	0.00288241	0.00148587	1.49433e-05	2.13079e-16	9.13124e-06	1.90021e-05	8.07545e-06	5.57647e-07	0	0.000107915	5.83629e-08	1.45972e-06	0.000580289	-0.119076	-0.0267661	0.0920631	-0.0741402	-0.0468354	0.0366021	-0.1	-0.386325	0
2270	4.21486	0	0.103756	4.1111	4.49723	4.45612	4.33648	3.60193	0.398358	0.336191	0.119642	0.0411026	0.0122946	0.00350544	0.00015591	0.00337387	0.00467608	0.00146196	0.00719562	0.0489525	0.0157777	1.74041e-05	0.00731257	0.0149188	0.0021322	0.0309514	0.00290926	0.00288241	0.00148587	1.49433e-05	2.13079e-16	9.13124e-06	1.90021e-05	8.07545e-06	5.57647e-07	0	0.000107915	5.83629e-08	1.45972e-06	0.000580289	-0.119076	-0.0267661	0.0920631	-0.0741402	-0.0468354	0.0366021	-0.1	-0.386325	0
2271	4.21486	0	0.103756	4.1111	4.49723	4.45612	4.33648	3.60193	0.398358	0.336191	0.119642	0.0411026	0.0122946	0.00350544	0.00015591	0.00337387	0.00467608	0.00146196	0.00719562	0.0489525	0.0157777	1.74041e-05	0.00731257	0.0149188	0.0021322	0.0309514	0.00290926	0.00288241	0.00148587	1.49433e-05	2.13079e-16	9.13124e-06	1.90021e-05	8.07545e-06	5.57647e-07	0	0.000107915	5.83629e-08	1.45972e-06	0.000580289	-0.119076	-0.0267661	0.0920631	-0.0741402	-0.0468354	0.0366021	-0.1	-0.386325	0
2272	4.21486	0	0.103756	4.1111	4.49723	4.45612	4.33648	3.60193	0.398358	0.336191	0.119642	0.0411026	0.0122946	0.00350544	0.00015591	0.00337387	0.00467608	0.00146196	0.00719562	0.0489525	0.0157777	1.74041e-05	0.00731257	0.0149188	0.0021322	0.0309514	0.00290926	0.00288241	0.00148587	1.49433e-05	2.13079e-16	9.13124e-06	1.90021e-05	8.07545e-06	5.57647e-07	0	0.000107915	5.83629e-08	1.45972e-06	0.000580289	-0.119076	-0.0267661	0.0920631	-0.0741402	-0.0468354	0.0366021	-0.1	-0.386325	0
2273	4.21486	0	0.103756	4.1111	4.49723	4.45612	4.33648	3.60193	0.398358	0.336191	0.119642	0.0411026	0.0122946	0.00350544	0.00015591	0.00337387	0.00467608	0.00146196	0.00719562	0.0489525	0.0157777	1.74041e-05	0.00731257	0.0149188	0.0021322	0.0309514	0.00290926	0.00288241	0.00148587	1.49433e-05	2.13079e-16	9.13124e-06	1.90021e-05	8.07545e-06	5.57647e-07	0	0.000107915	5.83629e-08	1.45972e-06	0.000580289	-0.119076	-0.0267661	0.0920631	-0.0741402	-0.0468354	0.0366021	-0.1	-0.386325	0
2274	4.21486	0	0.103756	4.1111	4.49723	4.45612	4.33648	3.60193	0.398358	0.336191	0.119642	0.0411026	0.0122946	0.00350544	0.00015591	0.00337387	0.00467608	0.00146196	0.00719562	0.0489525	0.0157777	1.74041e-05	0.00731257	0.0149188	0.0021322	0.0309514	0.00290926	0.00288241	0.00148587	1.49433e-05	2.13079e-16	9.13124e-06	1.90021e-05	8.07545e-06	5.57647e-07	0	0.000107915	5.83629e-08	1.45972e-06	0.000580289	-0.119076	-0.0267661	0.0920631	-0.0741402	-0.0468354	0.0366021	-0.1	-0.386325	0
2275	4.21486	0	0.103756	4.1111	4.49723	4.45612	4.33648	3.60193	0.398358	0.336191	0.119642	0.0411026	0.0122946	0.00350544	0.00015591	0.00337387	0.00467608	0.00146196	0.00719562	0.0489525	0.0157777	1.74041e-05	0.00731257	0.0149188	0.0021322	0.0309514	0.00290926	0.00288241	0.00148587	1.49433e-05	2.13079e-16	9.13124e-06	1.90021e-05	8.07545e-06	5.57647e-07	0	0.000107915	5.83629e-08	1.45972e-06	0.000580289	-0.119076	-0.0267661	0.0920631	-0.0741402	-0.0468354	0.0366021	-0.1	-0.386325	0
2276	4.21486	0	0.103756	4.1111	4.49723	4.45612	4.33648	3.60193	0.398358	0.336191	0.119642	0.0411026	0.0122946	0.00350544	0.00015591	0.00337387	0.00467608	0.00146196	0.00719562	0.0489525	0.0157777	1.74041e-05	0.00731257	0.0149188	0.0021322	0.0309514	0.00290926	0.00288241	0.00148587	1.49433e-05	2.13079e-16	9.13124e-06	1.90021e-05	8.07545e-06	5.57647e-07	0	0.000107915	5.83629e-08	1.45972e-06	0.000580289	-0.119076	-0.0267661	0.0920631	-0.0741402	-0.0468354	0.0366021	-0.1	-0.386325	0
2277	4.21486	0	0.103756	4.1111	4.49723	4.45612	4.33648	3.60193	0.398358	0.336191	0.119642	0.0411026	0.0122946	0.00350544	0.00015591	0.00337387	0.00467608	0.00146196	0.00719562	0.0489525	0.0157777	1.74041e-05	0.00731257	0.0149188	0.0021322	0.0309514	0.00290926	0.00288241	0.00148587	1.49433e-05	2.13079e-16	9.13124e-06	1.90021e-05	8.07545e-06	5.57647e-07	0	0.000107915	5.83629e-08	1.45972e-06	0.000580289	-0.119076	-0.0267661	0.0920631	-0.0741402	-0.0468354	0.0366021	-0.1	-0.386325	0
2278	4.21486	0	0.103756	4.1111	4.49723	4.45612	4.33648	3.60193	0.398358	0.336191	0.119642	0.0411026	0.0122946	0.00350544	0.00015591	0.00337387	0.00467608	0.00146196	0.00719562	0.0489525	0.0157777	1.74041e-05	0.00731257	0.0149188	0.0021322	0.0309514	0.00290926	0.00288241	0.00148587	1.49433e-05	2.13079e-16	9.13124e-06	1.90021e-05	8.07545e-06	5.57647e-07	0	0.000107915	5.83629e-08	1.45972e-06	0.000580289	-0.119076	-0.0267661	0.0920631	-0.0741402	-0.0468354	0.0366021	-0.1	-0.386325	0
2279	4.21486	0	0.103756	4.1111	4.49723	4.45612	4.33648	3.60193	0.398358	0.336191	0.119642	0.0411026	0.0122946	0.00350544	0.00015591	0.00337387	0.00467608	0.00146196	0.00719562	0.0489525	0.0157777	1.74041e-05	0.00731257	0.0149188	0.0021322	0.0309514	0.00290926	0.00288241	0.00148587	1.49433e-05	2.13079e-16	9.13124e-06	1.90021e-05	8.07545e-06	5.57647e-07	0	0.000107915	5.83629e-08	1.45972e-06	0.000580289	-0.119076	-0.0267661	0.0920631	-0.0741402	-0.0468354	0.0366021	-0.1	-0.386325	0
2280	4.21486	0	0.103756	4.1111	4.49723	4.45612	4.33648	3.60193	0.398358	0.336191	0.119642	0.0411026	0.0122946	0.00350544	0.00015591	0.00337387	0.00467608	0.00146196	0.00719562	0.0489525	0.0157777	1.74041e-05	0.00731257	0.0149188	0.0021322	0.0309514	0.00290926	0.00288241	0.00148587	1.49433e-05	2.13079e-16	9.13124e-06	1.90021e-05	8.07545e-06	5.57647e-07	0	0.000107915	5.83629e-08	1.45972e-06	0.000580289	-0.119076	-0.0267661	0.0920631	-0.0741402	-0.0468354	0.0366021	-0.1	-0.386325	0
2281	4.21486	0	0.103756	4.1111	4.49723	4.45612	4.33648	3.60193	0.398358	0.336191	0.119642	0.0411026	0.0122946	0.00350544	0.00015591	0.00337387	0.00467608	0.00146196	0.00719562	0.0489525	0.0157777	1.74041e-05	0.00731257	0.0149188	0.0021322	0.0309514	0.00290926	0.00288241	0.00148587	1.49433e-05	2.13079e-16	9.13124e-06	1.90021e-05	8.07545e-06	5.57647e-07	0	0.000107915	5.83629e-08	1.45972e-06	0.000580289	-0.119076	-0.0267661	0.0920631	-0.0741402	-0.0468354	0.0366021	-0.1	-0.386325	0
2282	4.21486	0	0.103756	4.1111	4.49723	4.45612	4.33648	3.60193	0.398358	0.336191	0.119642	0.0411026	0.0122946	0.00350544	0.00015591	0.00337387	0.00467608	0.00146196	0.00719562	0.0489525	0.0157777	1.74041e-05	0.00731257	0.0149188	0.0021322	0.0309514	0.00290926	0.00288241	0.00148587	1.49433e-05	2.13079e-16	9.13124e-06	1.90021e-05	8.07545e-06	5.57647e-07	0	0.000107915	5.83629e-08	1.45972e-06	0.000580289	-0.119076	-0.0267661	0.0920631	-0.0741402	-0.0468354	0.0366021	-0.1	-0.386325	0
2283	4.21486	0	0.103756	4.1111	4.49723	4.45612	4.33648	3.60193	0.398358	0.336191	0.119642	0.0411026	0.0122946	0.00350544	0.00015591	0.00337387	0.00467608	0.00146196	0.00719562	0.0489525	0.0157777	1.74041e-05	0.00731257	0.0149188	0.0021322	0.0309514	0.00290926	0.00288241	0.00148587	1.49433e-05	2.13079e-16	9.13124e-06	1.90021e-05	8.07545e-06	5.57647e-07	0	0.000107915	5.83629e-08	1.45972e-06	0.000580289	-0.119076	-0.0267661	0.0920631	-0.0741402	-0.0468354	0.0366021	-0.1	-0.386325	0
2284	4.21486	0	0.103756	4.1111	4.49723	4.45612	4.33648	3.60193	0.398358	0.336191	0.119642	0.0411026	0.0122946	0.00350544	0.00015591	0.00337387	0.00467608	0.00146196	0.00719562	0.0489525	0.0157777	1.74041e-05	0.00731257	0.0149188	0.0021322	0.0309514	0.00290926	0.00288241	0.00148587	1.49433e-05	2.13079e-16	9.13124e-06	1.90021e-05	8.07545e-06	5.57647e-07	0	0.000107915	5.83629e-08	1.45972e-06	0.000580289	-0.119076	-0.0267661	0.0920631	-0.0741402	-0.0468354	0.0366021	-0.1	-0.386325	0
2285	4.21486	0	0.103756	4.1111	4.49723	4.45612	4.33648	3.60193	0.398358	0.336191	0.119642	0.0411026	0.0122946	0.00350544	0.00015591	0.00337387	0.00467608	0.00146196	0.00719562	0.0489525	0.0157777	1.74041e-05	0.00731257	0.0149188	0.0021322	0.0309514	0.00290926	0.00288241	0.00148587	1.49433e-05	2.13079e-16	9.13124e-06	1.90021e-05	8.07545e-06	5.57647e-07	0	0.000107915	5.83629e-08	1.45972e-06	0.000580289	-0.119076	-0.0267661	0.0920631	-0.0741402	-0.0468354	0.0366021	-0.1	-0.386325	0
2286	4.21486	0	0.103756	4.1111	4.49723	4.45612	4.33648	3.60193	0.398358	0.336191	0.119642	0.0411026	0.0122946	0.00350544	0.00015591	0.00337387	0.00467608	0.00146196	0.00719562	0.0489525	0.0157777	1.74041e-05	0.00731257	0.0149188	0.0021322	0.0309514	0.00290926	0.00288241	0.00148587	1.49433e-05	2.13079e-16	9.13124e-06	1.90021e-05	8.07545e-06	5.57647e-07	0	0.000107915	5.83629e-08	1.45972e-06	0.000580289	-0.119076	-0.0267661	0.0920631	-0.0741402	-0.0468354	0.0366021	-0.1	-0.386325	0
2287	4.21486	0	0.103756	4.1111	4.49723	4.45612	4.33648	3.60193	0.398358	0.336191	0.119642	0.0411026	0.0122946	0.00350544	0.00015591	0.00337387	0.00467608	0.00146196	0.00719562	0.0489525	0.0157777	1.74041e-05	0.00731257	0.0149188	0.0021322	0.0309514	0.00290926	0.00288241	0.00148587	1.49433e-05	2.13079e-16	9.13124e-06	1.90021e-05	8.07545e-06	5.57647e-07	0	0.000107915	5.83629e-08	1.45972e-06	0.000580289	-0.119076	-0.0267661	0.0920631	-0.0741402	-0.0468354	0.0366021	-0.1	-0.386325	0
2288	4.21486	0	0.103756	4.1111	4.49723	4.45612	4.33648	3.60193	0.398358	0.336191	0.119642	0.0411026	0.0122946	0.00350544	0.00015591	0.00337387	0.00467608	0.00146196	0.00719562	0.0489525	0.0157777	1.74041e-05	0.00731257	0.0149188	0.0021322	0.0309514	0.00290926	0.00288241	0.00148587	1.49433e-05	2.13079e-16	9.13124e-06	1.90021e-05	8.07545e-06	5.57647e-07	0	0.000107915	5.83629e-08	1.45972e-06	0.000580289	-0.119076	-0.0267661	0.0920631	-0.0741402	-0.0468354	0.0366021	-0.1	-0.386325	0
2289	4.21486	0	0.103756	4.1111	4.49723	4.45612	4.33648	3.60193	0.398358	0.336191	0.119642	0.0411026	0.0122946	0.00350544	0.00015591	0.00337387	0.00467608	0.00146196	0.00719562	0.0489525	0.0157777	1.74041e-05	0.00731257	0.0149188	0.0021322	0.0309514	0.00290926	0.00288241	0.00148587	1.49433e-05	2.13079e-16	9.13124e-06	1.90021e-05	8.07545e-06	5.57647e-07	0	0.000107915	5.83629e-08	1.45972e-06	0.000580289	-0.119076	-0.0267661	0.0920631	-0.0741402	-0.0468354	0.0366021	-0.1	-0.386325	0
2290	4.21486	0	0.103756	4.1111	4.49723	4.45612	4.33648	3.60193	0.398358	0.336191	0.119642	0.0411026	0.0122946	0.00350544	0.00015591	0.00337387	0.00467608	0.00146196	0.00719562	0.0489525	0.0157777	1.74041e-05	0.00731257	0.0149188	0.0021322	0.0309514	0.00290926	0.00288241	0.00148587	1.49433e-05	2.13079e-16	9.13124e-06	1.90021e-05	8.07545e-06	5.57647e-07	0	0.000107915	5.83629e-08	1.45972e-06	0.000580289	-0.119076	-0.0267661	0.0920631	-0.0741402	-0.0468354	0.0366021	-0.1	-0.386325	0
2291	4.21486	0	0.103756	4.1111	4.49723	4.45612	4.33648	3.60193	0.398358	0.336191	0.119642	0.0411026	0.0122946	0.00350544	0.00015591	0.00337387	0.00467608	0.00146196	0.00719562	0.0489525	0.0157777	1.74041e-05	0.00731257	0.0149188	0.0021322	0.0309514	0.00290926	0.00288241	0.00148587	1.49433e-05	2.13079e-16	9.13124e-06	1.90021e-05	8.07545e-06	5.57647e-07	0	0.000107915	5.83629e-08	1.45972e-06	0.000580289	-0.119076	-0.0267661	0.0920631	-0.0741402	-0.0468354	0.0366021	-0.1	-0.386325	0
2292	4.21486	0	0.103756	4.1111	4.49723	4.45612	4.33648	3.60193	0.398358	0.336191	0.119642	0.0411026	0.0122946	0.00350544	0.00015591	0.00337387	0.00467608	0.00146196	0.00719562	0.0489525	0.0157777	1.74041e-05	0.00731257	0.0149188	0.0021322	0.0309514	0.00290926	0.00288241	0.00148587	1.49433e-05	2.13079e-16	9.13124e-06	1.90021e-05	8.07545e-06	5.57647e-07	0	0.000107915	5.83629e-08	1.45972e-06	0.000580289	-0.119076	-0.0267661	0.0920631	-0.0741402	-0.0468354	0.0366021	-0.1	-0.386325	0
2293	4.21486	0	0.103756	4.1111	4.49723	4.45612	4.33648	3.60193	0.398358	0.336191	0.119642	0.0411026	0.0122946	0.00350544	0.00015591	0.00337387	0.00467608	0.00146196	0.00719562	0.0489525	0.0157777	1.74041e-05	0.00731257	0.0149188	0.0021322	0.0309514	0.00290926	0.00288241	0.00148587	1.49433e-05	2.13079e-16	9.13124e-06	1.90021e-05	8.07545e-06	5.57647e-07	0	0.000107915	5.83629e-08	1.45972e-06	0.000580289	-0.119076	-0.0267661	0.0920631	-0.0741402	-0.0468354	0.0366021	-0.1	-0.386325	0
2294	4.21486	0	0.103756	4.1111	4.49723	4.45612	4.33648	3.60193	0.398358	0.336191	0.119642	0.0411026	0.0122946	0.00350544	0.00015591	0.00337387	0.00467608	0.00146196	0.00719562	0.0489525	0.0157777	1.74041e-05	0.00731257	0.0149188	0.0021322	0.0309514	0.00290926	0.00288241	0.00148587	1.49433e-05	2.13079e-16	9.13124e-06	1.90021e-05	8.07545e-06	5.57647e-07	0	0.000107915	5.83629e-08	1.45972e-06	0.000580289	-0.119076	-0.0267661	0.0920631	-0.0741402	-0.0468354	0.0366021	-0.1	-0.386325	0
2295	4.21486	0	0.103756	4.1111	4.49723	4.45612	4.33648	3.60193	0.398358	0.336191	0.119642	0.0411026	0.0122946	0.00350544	0.00015591	0.00337387	0.00467608	0.00146196	0.00719562	0.0489525	0.0157777	1.74041e-05	0.00731257	0.0149188	0.0021322	0.0309514	0.00290926	0.00288241	0.00148587	1.49433e-05	2.13079e-16	9.13124e-06	1.90021e-05	8.07545e-06	5.57647e-07	0	0.000107915	5.83629e-08	1.45972e-06	0.000580289	-0.119076	-0.0267661	0.0920631	-0.0741402	-0.0468354	0.0366021	-0.1	-0.386325	0
2296	4.21486	0	0.103756	4.1111	4.49723	4.45612	4.33648	3.60193	0.398358	0.336191	0.119642	0.0411026	0.0122946	0.00350544	0.00015591	0.00337387	0.00467608	0.00146196	0.00719562	0.0489525	0.0157777	1.74041e-05	0.00731257	0.0149188	0.0021322	0.0309514	0.00290926	0.00288241	0.00148587	1.49433e-05	2.13079e-16	9.13124e-06	1.90021e-05	8.07545e-06	5.57647e-07	0	0.000107915	5.83629e-08	1.45972e-06	0.000580289	-0.119076	-0.0267661	0.0920631	-0.0741402	-0.0468354	0.0366021	-0.1	-0.386325	0
2297	4.21486	0	0.103756	4.1111	4.49723	4.45612	4.33648	3.60193	0.398358	0.336191	0.119642	0.0411026	0.0122946	0.00350544	0.00015591	0.00337387	0.00467608	0.00146196	0.00719562	0.0489525	0.0157777	1.74041e-05	0.00731257	0.0149188	0.0021322	0.0309514	0.00290926	0.00288241	0.00148587	1.49433e-05	2.13079e-16	9.13124e-06	1.90021e-05	8.07545e-06	5.57647e-07	0	0.000107915	5.83629e-08	1.45972e-06	0.000580289	-0.119076	-0.0267661	0.0920631	-0.0741402	-0.0468354	0.0366021	-0.1	-0.386325	0
2298	4.21486	0	0.103756	4.1111	4.49723	4.45612	4.33648	3.60193	0.398358	0.336191	0.119642	0.0411026	0.0122946	0.00350544	0.00015591	0.00337387	0.00467608	0.00146196	0.00719562	0.0489525	0.0157777	1.74041e-05	0.00731257	0.0149188	0.0021322	0.0309514	0.00290926	0.00288241	0.00148587	1.49433e-05	2.13079e-16	9.13124e-06	1.90021e-05	8.07545e-06	5.57647e-07	0	0.000107915	5.83629e-08	1.45972e-06	0.000580289	-0.119076	-0.0267661	0.0920631	-0.0741402	-0.0468354	0.0366021	-0.1	-0.386325	0
2299	4.21486	0	0.103756	4.1111	4.49723	4.45612	4.33648	3.60193	0.398358	0.336191	0.119642	0.0411026	0.0122946	0.00350544	0.00015591	0.00337387	0.00467608	0.00146196	0.00719562	0.0489525	0.0157777	1.74041e-05	0.00731257	0.0149188	0.0021322	0.0309514	0.00290926	0.00288241	0.00148587	1.49433e-05	2.13079e-16	9.13124e-06	1.90021e-05	8.07545e-06	5.57647e-07	0	0.000107915	5.83629e-08	1.45972e-06	0.000580289	-0.119076	-0.0267661	0.0920631	-0.0741402	-0.0468354	0.0366021	-0.1	-0.386325	0
2300	4.21486	0	0.103756	4.1111	4.49723	4.45612	4.33648	3.60193	0.398358	0.336191	0.119642	0.0411026	0.0122946	0.00350544	0.00015591	0.00337387	0.00467608	0.00146196	0.00719562	0.0489525	0.0157777	1.74041e-05	0.00731257	0.0149188	0.0021322	0.0309514	0.00290926	0.00288241	0.00148587	1.49433e-05	2.13079e-16	9.13124e-06	1.90021e-05	8.07545e-06	5.57647e-07	0	0.000107915	5.83629e-08	1.45972e-06	0.000580289	-0.119076	-0.0267661	0.0920631	-0.0741402	-0.0468354	0.0366021	-0.1	-0.386325	0
2301	4.21486	0	0.103756	4.1111	4.49723	4.45612	4.33648	3.60193	0.398358	0.336191	0.119642	0.0411026	0.0122946	0.00350544	0.00015591	0.00337387	0.00467608	0.00146196	0.00719562	0.0489525	0.0157777	1.74041e-05	0.00731257	0.0149188	0.0021322	0.0309514	0.00290926	0.00288241	0.00148587	1.49433e-05	2.13079e-16	9.13124e-06	1.90021e-05	8.07545e-06	5.57647e-07	0	0.000107915	5.83629e-08	1.45972e-06	0.000580289	-0.119076	-0.0267661	0.0920631	-0.0741402	-0.0468354	0.0366021	-0.1	-0.386325	0
2302	4.21486	0	0.103756	4.1111	4.49723	4.45612	4.33648	3.60193	0.398358	0.336191	0.119642	0.0411026	0.0122946	0.00350544	0.00015591	0.00337387	0.00467608	0.00146196	0.00719562	0.0489525	0.0157777	1.74041e-05	0.00731257	0.0149188	0.0021322	0.0309514	0.00290926	0.00288241	0.00148587	1.49433e-05	2.13079e-16	9.13124e-06	1.90021e-05	8.07545e-06	5.57647e-07	0	0.000107915	5.83629e-08	1.45972e-06	0.000580289	-0.119076	-0.0267661	0.0920631	-0.0741402	-0.0468354	0.0366021	-0.1	-0.386325	0
2303	4.21486	0	0.103756	4.1111	4.49723	4.45612	4.33648	3.60193	0.398358	0.336191	0.119642	0.0411026	0.0122946	0.00350544	0.00015591	0.00337387	0.00467608	0.00146196	0.00719562	0.0489525	0.0157777	1.74041e-05	0.00731257	0.0149188	0.0021322	0.0309514	0.00290926	0.00288241	0.00148587	1.49433e-05	2.13079e-16	9.13124e-06	1.90021e-05	8.07545e-06	5.57647e-07	0	0.000107915	5.83629e-08	1.45972e-06	0.000580289	-0.119076	-0.0267661	0.0920631	-0.0741402	-0.0468354	0.0366021	-0.1	-0.386325	0
2304	4.21486	0	0.103756	4.1111	4.49723	4.45612	4.33648	3.60193	0.398358	0.336191	0.119642	0.0411026	0.0122946	0.00350544	0.00015591	0.00337387	0.00467608	0.00146196	0.00719562	0.0489525	0.0157777	1.74041e-05	0.00731257	0.0149188	0.0021322	0.0309514	0.00290926	0.00288241	0.00148587	1.49433e-05	2.13079e-16	9.13124e-06	1.90021e-05	8.07545e-06	5.57647e-07	0	0.000107915	5.83629e-08	1.45972e-06	0.000580289	-0.119076	-0.0267661	0.0920631	-0.0741402	-0.0468354	0.0366021	-0.1	-0.386325	0
2305	4.21486	0	0.103756	4.1111	4.49723	4.45612	4.33648	3.60193	0.398358	0.336191	0.119642	0.0411026	0.0122946	0.00350544	0.00015591	0.00337387	0.00467608	0.00146196	0.00719562	0.0489525	0.0157777	1.74041e-05	0.00731257	0.0149188	0.0021322	0.0309514	0.00290926	0.00288241	0.00148587	1.49433e-05	2.13079e-16	9.13124e-06	1.90021e-05	8.07545e-06	5.57647e-07	0	0.000107915	5.83629e-08	1.45972e-06	0.000580289	-0.119076	-0.0267661	0.0920631	-0.0741402	-0.0468354	0.0366021	-0.1	-0.386325	0
2306	4.21486	0	0.103756	4.1111	4.49723	4.45612	4.33648	3.60193	0.398358	0.336191	0.119642	0.0411026	0.0122946	0.00350544	0.00015591	0.00337387	0.00467608	0.00146196	0.00719562	0.0489525	0.0157777	1.74041e-05	0.00731257	0.0149188	0.0021322	0.0309514	0.00290926	0.00288241	0.00148587	1.49433e-05	2.13079e-16	9.13124e-06	1.90021e-05	8.07545e-06	5.57647e-07	0	0.000107915	5.83629e-08	1.45972e-06	0.000580289	-0.119076	-0.0267661	0.0920631	-0.0741402	-0.0468354	0.0366021	-0.1	-0.386325	0
2307	4.21486	0	0.103756	4.1111	4.49723	4.45612	4.33648	3.60193	0.398358	0.336191	0.119642	0.0411026	0.0122946	0.00350544	0.00015591	0.00337387	0.00467608	0.00146196	0.00719562	0.0489525	0.0157777	1.74041e-05	0.00731257	0.0149188	0.0021322	0.0309514	0.00290926	0.00288241	0.00148587	1.49433e-05	2.13079e-16	9.13124e-06	1.90021e-05	8.07545e-06	5.57647e-07	0	0.000107915	5.83629e-08	1.45972e-06	0.000580289	-0.119076	-0.0267661	0.0920631	-0.0741402	-0.0468354	0.0366021	-0.1	-0.386325	0
2308	4.21486	0	0.103756	4.1111	4.49723	4.45612	4.33648	3.60193	0.398358	0.336191	0.119642	0.0411026	0.0122946	0.00350544	0.00015591	0.00337387	0.00467608	0.00146196	0.00719562	0.0489525	0.0157777	1.74041e-05	0.00731257	0.0149188	0.0021322	0.0309514	0.00290926	0.00288241	0.00148587	1.49433e-05	2.13079e-16	9.13124e-06	1.90021e-05	8.07545e-06	5.57647e-07	0	0.000107915	5.83629e-08	1.45972e-06	0.000580289	-0.119076	-0.0267661	0.0920631	-0.0741402	-0.0468354	0.0366021	-0.1	-0.386325	0
2309	4.21486	0	0.103756	4.1111	4.49723	4.45612	4.33648	3.60193	0.398358	0.336191	0.119642	0.0411026	0.0122946	0.00350544	0.00015591	0.00337387	0.00467608	0.00146196	0.00719562	0.0489525	0.0157777	1.74041e-05	0.00731257	0.0149188	0.0021322	0.0309514	0.00290926	0.00288241	0.00148587	1.49433e-05	2.13079e-16	9.13124e-06	1.90021e-05	8.07545e-06	5.57647e-07	0	0.000107915	5.83629e-08	1.45972e-06	0.000580289	-0.119076	-0.0267661	0.0920631	-0.0741402	-0.0468354	0.0366021	-0.1	-0.386325	0
2310	4.21486	0	0.103756	4.1111	4.49723	4.45612	4.33648	3.60193	0.398358	0.336191	0.119642	0.0411026	0.0122946	0.00350544	0.00015591	0.00337387	0.00467608	0.00146196	0.00719562	0.0489525	0.0157777	1.74041e-05	0.00731257	0.0149188	0.0021322	0.0309514	0.00290926	0.00288241	0.00148587	1.49433e-05	2.13079e-16	9.13124e-06	1.90021e-05	8.07545e-06	5.57647e-07	0	0.000107915	5.83629e-08	1.45972e-06	0.000580289	-0.119076	-0.0267661	0.0920631	-0.0741402	-0.0468354	0.0366021	-0.1	-0.386325	0
2311	4.21486	0	0.103756	4.1111	4.49723	4.45612	4.33648	3.60193	0.398358	0.336191	0.119642	0.0411026	0.0122946	0.00350544	0.00015591	0.00337387	0.00467608	0.00146196	0.00719562	0.0489525	0.0157777	1.74041e-05	0.00731257	0.0149188	0.0021322	0.0309514	0.00290926	0.00288241	0.00148587	1.49433e-05	2.13079e-16	9.13124e-06	1.90021e-05	8.07545e-06	5.57647e-07	0	0.000107915	5.83629e-08	1.45972e-06	0.000580289	-0.119076	-0.0267661	0.0920631	-0.0741402	-0.0468354	0.0366021	-0.1	-0.386325	0
2312	4.21486	0	0.103756	4.1111	4.49723	4.45612	4.33648	3.60193	0.398358	0.336191	0.119642	0.0411026	0.0122946	0.00350544	0.00015591	0.00337387	0.00467608	0.00146196	0.00719562	0.0489525	0.0157777	1.74041e-05	0.00731257	0.0149188	0.0021322	0.0309514	0.00290926	0.00288241	0.00148587	1.49433e-05	2.13079e-16	9.13124e-06	1.90021e-05	8.07545e-06	5.57647e-07	0	0.000107915	5.83629e-08	1.45972e-06	0.000580289	-0.119076	-0.0267661	0.0920631	-0.0741402	-0.0468354	0.0366021	-0.1	-0.386325	0
2313	4.21486	0	0.103756	4.1111	4.49723	4.45612	4.33648	3.60193	0.398358	0.336191	0.119642	0.0411026	0.0122946	0.00350544	0.00015591	0.00337387	0.00467608	0.00146196	0.00719562	0.0489525	0.0157777	1.74041e-05	0.00731257	0.0149188	0.0021322	0.0309514	0.00290926	0.00288241	0.00148587	1.49433e-05	2.13079e-16	9.13124e-06	1.90021e-05	8.07545e-06	5.57647e-07	0	0.000107915	5.83629e-08	1.45972e-06	0.000580289	-0.119076	-0.0267661	0.0920631	-0.0741402	-0.0468354	0.0366021	-0.1	-0.386325	0
2314	4.21486	0	0.103756	4.1111	4.49723	4.45612	4.33648	3.60193	0.398358	0.336191	0.119642	0.0411026	0.0122946	0.00350544	0.00015591	0.00337387	0.00467608	0.00146196	0.00719562	0.0489525	0.0157777	1.74041e-05	0.00731257	0.0149188	0.0021322	0.0309514	0.00290926	0.00288241	0.00148587	1.49433e-05	2.13079e-16	9.13124e-06	1.90021e-05	8.07545e-06	5.57647e-07	0	0.000107915	5.83629e-08	1.45972e-06	0.000580289	-0.119076	-0.0267661	0.0920631	-0.0741402	-0.0468354	0.0366021	-0.1	-0.386325	0
2315	4.21486	0	0.103756	4.1111	4.49723	4.45612	4.33648	3.60193	0.398358	0.336191	0.119642	0.0411026	0.0122946	0.00350544	0.00015591	0.00337387	0.00467608	0.00146196	0.00719562	0.0489525	0.0157777	1.74041e-05	0.00731257	0.0149188	0.0021322	0.0309514	0.00290926	0.00288241	0.00148587	1.49433e-05	2.13079e-16	9.13124e-06	1.90021e-05	8.07545e-06	5.57647e-07	0	0.000107915	5.83629e-08	1.45972e-06	0.000580289	-0.119076	-0.0267661	0.0920631	-0.0741402	-0.0468354	0.0366021	-0.1	-0.386325	0
2316	4.21486	0	0.103756	4.1111	4.49723	4.45612	4.33648	3.60193	0.398358	0.336191	0.119642	0.0411026	0.0122946	0.00350544	0.00015591	0.00337387	0.00467608	0.00146196	0.00719562	0.0489525	0.0157777	1.74041e-05	0.00731257	0.0149188	0.0021322	0.0309514	0.00290926	0.00288241	0.00148587	1.49433e-05	2.13079e-16	9.13124e-06	1.90021e-05	8.07545e-06	5.57647e-07	0	0.000107915	5.83629e-08	1.45972e-06	0.000580289	-0.119076	-0.0267661	0.0920631	-0.0741402	-0.0468354	0.0366021	-0.1	-0.386325	0
2317	4.21486	0	0.103756	4.1111	4.49723	4.45612	4.33648	3.60193	0.398358	0.336191	0.119642	0.0411026	0.0122946	0.00350544	0.00015591	0.00337387	0.00467608	0.00146196	0.00719562	0.0489525	0.0157777	1.74041e-05	0.00731257	0.0149188	0.0021322	0.0309514	0.00290926	0.00288241	0.00148587	1.49433e-05	2.13079e-16	9.13124e-06	1.90021e-05	8.07545e-06	5.57647e-07	0	0.000107915	5.83629e-08	1.45972e-06	0.000580289	-0.119076	-0.0267661	0.0920631	-0.0741402	-0.0468354	0.0366021	-0.1	-0.386325	0
2318	4.21486	0	0.103756	4.1111	4.49723	4.45612	4.33648	3.60193	0.398358	0.336191	0.119642	0.0411026	0.0122946	0.00350544	0.00015591	0.00337387	0.00467608	0.00146196	0.00719562	0.0489525	0.0157777	1.74041e-05	0.00731257	0.0149188	0.0021322	0.0309514	0.00290926	0.00288241	0.00148587	1.49433e-05	2.13079e-16	9.13124e-06	1.90021e-05	8.07545e-06	5.57647e-07	0	0.000107915	5.83629e-08	1.45972e-06	0.000580289	-0.119076	-0.0267661	0.0920631	-0.0741402	-0.0468354	0.0366021	-0.1	-0.386325	0
2319	4.21486	0	0.103756	4.1111	4.49723	4.45612	4.33648	3.60193	0.398358	0.336191	0.119642	0.0411026	0.0122946	0.00350544	0.00015591	0.00337387	0.00467608	0.00146196	0.00719562	0.0489525	0.0157777	1.74041e-05	0.00731257	0.0149188	0.0021322	0.0309514	0.00290926	0.00288241	0.00148587	1.49433e-05	2.13079e-16	9.13124e-06	1.90021e-05	8.07545e-06	5.57647e-07	0	0.000107915	5.83629e-08	1.45972e-06	0.000580289	-0.119076	-0.0267661	0.0920631	-0.0741402	-0.0468354	0.0366021	-0.1	-0.386325	0
2320	4.21486	0	0.103756	4.1111	4.49723	4.45612	4.33648	3.60193	0.398358	0.336191	0.119642	0.0411026	0.0122946	0.00350544	0.00015591	0.00337387	0.00467608	0.00146196	0.00719562	0.0489525	0.0157777	1.74041e-05	0.00731257	0.0149188	0.0021322	0.0309514	0.00290926	0.00288241	0.00148587	1.49433e-05	2.13079e-16	9.13124e-06	1.90021e-05	8.07545e-06	5.57647e-07	0	0.000107915	5.83629e-08	1.45972e-06	0.000580289	-0.119076	-0.0267661	0.0920631	-0.0741402	-0.0468354	0.0366021	-0.1	-0.386325	0
2321	4.21486	0	0.103756	4.1111	4.49723	4.45612	4.33648	3.60193	0.398358	0.336191	0.119642	0.0411026	0.0122946	0.00350544	0.00015591	0.00337387	0.00467608	0.00146196	0.00719562	0.0489525	0.0157777	1.74041e-05	0.00731257	0.0149188	0.0021322	0.0309514	0.00290926	0.00288241	0.00148587	1.49433e-05	2.13079e-16	9.13124e-06	1.90021e-05	8.07545e-06	5.57647e-07	0	0.000107915	5.83629e-08	1.45972e-06	0.000580289	-0.119076	-0.0267661	0.0920631	-0.0741402	-0.0468354	0.0366021	-0.1	-0.386325	0
2322	4.21486	0	0.103756	4.1111	4.49723	4.45612	4.33648	3.60193	0.398358	0.336191	0.119642	0.0411026	0.0122946	0.00350544	0.00015591	0.00337387	0.00467608	0.00146196	0.00719562	0.0489525	0.0157777	1.74041e-05	0.00731257	0.0149188	0.0021322	0.0309514	0.00290926	0.00288241	0.00148587	1.49433e-05	2.13079e-16	9.13124e-06	1.90021e-05	8.07545e-06	5.57647e-07	0	0.000107915	5.83629e-08	1.45972e-06	0.000580289	-0.119076	-0.0267661	0.0920631	-0.0741402	-0.0468354	0.0366021	-0.1	-0.386325	0
2323	4.21486	0	0.103756	4.1111	4.49723	4.45612	4.33648	3.60193	0.398358	0.336191	0.119642	0.0411026	0.0122946	0.00350544	0.00015591	0.00337387	0.00467608	0.00146196	0.00719562	0.0489525	0.0157777	1.74041e-05	0.00731257	0.0149188	0.0021322	0.0309514	0.00290926	0.00288241	0.00148587	1.49433e-05	2.13079e-16	9.13124e-06	1.90021e-05	8.07545e-06	5.57647e-07	0	0.000107915	5.83629e-08	1.45972e-06	0.000580289	-0.119076	-0.0267661	0.0920631	-0.0741402	-0.0468354	0.0366021	-0.1	-0.386325	0
2324	4.21486	0	0.103756	4.1111	4.49723	4.45612	4.33648	3.60193	0.398358	0.336191	0.119642	0.0411026	0.0122946	0.00350544	0.00015591	0.00337387	0.00467608	0.00146196	0.00719562	0.0489525	0.0157777	1.74041e-05	0.00731257	0.0149188	0.0021322	0.0309514	0.00290926	0.00288241	0.00148587	1.49433e-05	2.13079e-16	9.13124e-06	1.90021e-05	8.07545e-06	5.57647e-07	0	0.000107915	5.83629e-08	1.45972e-06	0.000580289	-0.119076	-0.0267661	0.0920631	-0.0741402	-0.0468354	0.0366021	-0.1	-0.386325	0
2325	4.21486	0	0.103756	4.1111	4.49723	4.45612	4.33648	3.60193	0.398358	0.336191	0.119642	0.0411026	0.0122946	0.00350544	0.00015591	0.00337387	0.00467608	0.00146196	0.00719562	0.0489525	0.0157777	1.74041e-05	0.00731257	0.0149188	0.0021322	0.0309514	0.00290926	0.00288241	0.00148587	1.49433e-05	2.13079e-16	9.13124e-06	1.90021e-05	8.07545e-06	5.57647e-07	0	0.000107915	5.83629e-08	1.45972e-06	0.000580289	-0.119076	-0.0267661	0.0920631	-0.0741402	-0.0468354	0.0366021	-0.1	-0.386325	0
2326	4.21486	0	0.103756	4.1111	4.49723	4.45612	4.33648	3.60193	0.398358	0.336191	0.119642	0.0411026	0.0122946	0.00350544	0.00015591	0.00337387	0.00467608	0.00146196	0.00719562	0.0489525	0.0157777	1.74041e-05	0.00731257	0.0149188	0.0021322	0.0309514	0.00290926	0.00288241	0.00148587	1.49433e-05	2.13079e-16	9.13124e-06	1.90021e-05	8.07545e-06	5.57647e-07	0	0.000107915	5.83629e-08	1.45972e-06	0.000580289	-0.119076	-0.0267661	0.0920631	-0.0741402	-0.0468354	0.0366021	-0.1	-0.386325	0
2327	4.21486	0	0.103756	4.1111	4.49723	4.45612	4.33648	3.60193	0.398358	0.336191	0.119642	0.0411026	0.0122946	0.00350544	0.00015591	0.00337387	0.00467608	0.00146196	0.00719562	0.0489525	0.0157777	1.74041e-05	0.00731257	0.0149188	0.0021322	0.0309514	0.00290926	0.00288241	0.00148587	1.49433e-05	2.13079e-16	9.13124e-06	1.90021e-05	8.07545e-06	5.57647e-07	0	0.000107915	5.83629e-08	1.45972e-06	0.000580289	-0.119076	-0.0267661	0.0920631	-0.0741402	-0.0468354	0.0366021	-0.1	-0.386325	0
2328	4.21486	0	0.103756	4.1111	4.49723	4.45612	4.33648	3.60193	0.398358	0.336191	0.119642	0.0411026	0.0122946	0.00350544	0.00015591	0.00337387	0.00467608	0.00146196	0.00719562	0.0489525	0.0157777	1.74041e-05	0.00731257	0.0149188	0.0021322	0.0309514	0.00290926	0.00288241	0.00148587	1.49433e-05	2.13079e-16	9.13124e-06	1.90021e-05	8.07545e-06	5.57647e-07	0	0.000107915	5.83629e-08	1.45972e-06	0.000580289	-0.119076	-0.0267661	0.0920631	-0.0741402	-0.0468354	0.0366021	-0.1	-0.386325	0
2329	4.21486	0	0.103756	4.1111	4.49723	4.45612	4.33648	3.60193	0.398358	0.336191	0.119642	0.0411026	0.0122946	0.00350544	0.00015591	0.00337387	0.00467608	0.00146196	0.00719562	0.0489525	0.0157777	1.74041e-05	0.00731257	0.0149188	0.0021322	0.0309514	0.00290926	0.00288241	0.00148587	1.49433e-05	2.13079e-16	9.13124e-06	1.90021e-05	8.07545e-06	5.57647e-07	0	0.000107915	5.83629e-08	1.45972e-06	0.000580289	-0.119076	-0.0267661	0.0920631	-0.0741402	-0.0468354	0.0366021	-0.1	-0.386325	0
2330	4.21486	0	0.103756	4.1111	4.49723	4.45612	4.33648	3.60193	0.398358	0.336191	0.119642	0.0411026	0.0122946	0.00350544	0.00015591	0.00337387	0.00467608	0.00146196	0.00719562	0.0489525	0.0157777	1.74041e-05	0.00731257	0.0149188	0.0021322	0.0309514	0.00290926	0.00288241	0.00148587	1.49433e-05	2.13079e-16	9.13124e-06	1.90021e-05	8.07545e-06	5.57647e-07	0	0.000107915	5.83629e-08	1.45972e-06	0.000580289	-0.119076	-0.0267661	0.0920631	-0.0741402	-0.0468354	0.0366021	-0.1	-0.386325	0
2331	4.21486	0	0.103756	4.1111	4.49723	4.45612	4.33648	3.60193	0.398358	0.336191	0.119642	0.0411026	0.0122946	0.00350544	0.00015591	0.00337387	0.00467608	0.00146196	0.00719562	0.0489525	0.0157777	1.74041e-05	0.00731257	0.0149188	0.0021322	0.0309514	0.00290926	0.00288241	0.00148587	1.49433e-05	2.13079e-16	9.13124e-06	1.90021e-05	8.07545e-06	5.57647e-07	0	0.000107915	5.83629e-08	1.45972e-06	0.000580289	-0.119076	-0.0267661	0.0920631	-0.0741402	-0.0468354	0.0366021	-0.1	-0.386325	0
2332	4.21486	0	0.103756	4.1111	4.49723	4.45612	4.33648	3.60193	0.398358	0.336191	0.119642	0.0411026	0.0122946	0.00350544	0.00015591	0.00337387	0.00467608	0.00146196	0.00719562	0.0489525	0.0157777	1.74041e-05	0.00731257	0.0149188	0.0021322	0.0309514	0.00290926	0.00288241	0.00148587	1.49433e-05	2.13079e-16	9.13124e-06	1.90021e-05	8.07545e-06	5.57647e-07	0	0.000107915	5.83629e-08	1.45972e-06	0.000580289	-0.119076	-0.0267661	0.0920631	-0.0741402	-0.0468354	0.0366021	-0.1	-0.386325	0
2333	4.21486	0	0.103756	4.1111	4.49723	4.45612	4.33648	3.60193	0.398358	0.336191	0.119642	0.0411026	0.0122946	0.00350544	0.00015591	0.00337387	0.00467608	0.00146196	0.00719562	0.0489525	0.0157777	1.74041e-05	0.00731257	0.0149188	0.0021322	0.0309514	0.00290926	0.00288241	0.00148587	1.49433e-05	2.13079e-16	9.13124e-06	1.90021e-05	8.07545e-06	5.57647e-07	0	0.000107915	5.83629e-08	1.45972e-06	0.000580289	-0.119076	-0.0267661	0.0920631	-0.0741402	-0.0468354	0.0366021	-0.1	-0.386325	0
2334	4.21486	0	0.103756	4.1111	4.49723	4.45612	4.33648	3.60193	0.398358	0.336191	0.119642	0.0411026	0.0122946	0.00350544	0.00015591	0.00337387	0.00467608	0.00146196	0.00719562	0.0489525	0.0157777	1.74041e-05	0.00731257	0.0149188	0.0021322	0.0309514	0.00290926	0.00288241	0.00148587	1.49433e-05	2.13079e-16	9.13124e-06	1.90021e-05	8.07545e-06	5.57647e-07	0	0.000107915	5.83629e-08	1.45972e-06	0.000580289	-0.119076	-0.0267661	0.0920631	-0.0741402	-0.0468354	0.0366021	-0.1	-0.386325	0
2335	4.21486	0	0.103756	4.1111	4.49723	4.45612	4.33648	3.60193	0.398358	0.336191	0.119642	0.0411026	0.0122946	0.00350544	0.00015591	0.00337387	0.00467608	0.00146196	0.00719562	0.0489525	0.0157777	1.74041e-05	0.00731257	0.0149188	0.0021322	0.0309514	0.00290926	0.00288241	0.00148587	1.49433e-05	2.13079e-16	9.13124e-06	1.90021e-05	8.07545e-06	5.57647e-07	0	0.000107915	5.83629e-08	1.45972e-06	0.000580289	-0.119076	-0.0267661	0.0920631	-0.0741402	-0.0468354	0.0366021	-0.1	-0.386325	0
2336	4.21486	0	0.103756	4.1111	4.49723	4.45612	4.33648	3.60193	0.398358	0.336191	0.119642	0.0411026	0.0122946	0.00350544	0.00015591	0.00337387	0.00467608	0.00146196	0.00719562	0.0489525	0.0157777	1.74041e-05	0.00731257	0.0149188	0.0021322	0.0309514	0.00290926	0.00288241	0.00148587	1.49433e-05	2.13079e-16	9.13124e-06	1.90021e-05	8.07545e-06	5.57647e-07	0	0.000107915	5.83629e-08	1.45972e-06	0.000580289	-0.119076	-0.0267661	0.0920631	-0.0741402	-0.0468354	0.0366021	-0.1	-0.386325	0
2337	4.21486	0	0.103756	4.1111	4.49723	4.45612	4.33648	3.60193	0.398358	0.336191	0.119642	0.0411026	0.0122946	0.00350544	0.00015591	0.00337387	0.00467608	0.00146196	0.00719562	0.0489525	0.0157777	1.74041e-05	0.00731257	0.0149188	0.0021322	0.0309514	0.00290926	0.00288241	0.00148587	1.49433e-05	2.13079e-16	9.13124e-06	1.90021e-05	8.07545e-06	5.57647e-07	0	0.000107915	5.83629e-08	1.45972e-06	0.000580289	-0.119076	-0.0267661	0.0920631	-0.0741402	-0.0468354	0.0366021	-0.1	-0.386325	0
2338	4.21486	0	0.103756	4.1111	4.49723	4.45612	4.33648	3.60193	0.398358	0.336191	0.119642	0.0411026	0.0122946	0.00350544	0.00015591	0.00337387	0.00467608	0.00146196	0.00719562	0.0489525	0.0157777	1.74041e-05	0.00731257	0.0149188	0.0021322	0.0309514	0.00290926	0.00288241	0.00148587	1.49433e-05	2.13079e-16	9.13124e-06	1.90021e-05	8.07545e-06	5.57647e-07	0	0.000107915	5.83629e-08	1.45972e-06	0.000580289	-0.119076	-0.0267661	0.0920631	-0.0741402	-0.0468354	0.0366021	-0.1	-0.386325	0
2339	4.21486	0	0.103756	4.1111	4.49723	4.45612	4.33648	3.60193	0.398358	0.336191	0.119642	0.0411026	0.0122946	0.00350544	0.00015591	0.00337387	0.00467608	0.00146196	0.00719562	0.0489525	0.0157777	1.74041e-05	0.00731257	0.0149188	0.0021322	0.0309514	0.00290926	0.00288241	0.00148587	1.49433e-05	2.13079e-16	9.13124e-06	1.90021e-05	8.07545e-06	5.57647e-07	0	0.000107915	5.83629e-08	1.45972e-06	0.000580289	-0.119076	-0.0267661	0.0920631	-0.0741402	-0.0468354	0.0366021	-0.1	-0.386325	0
2340	4.21486	0	0.103756	4.1111	4.49723	4.45612	4.33648	3.60193	0.398358	0.336191	0.119642	0.0411026	0.0122946	0.00350544	0.00015591	0.00337387	0.00467608	0.00146196	0.00719562	0.0489525	0.0157777	1.74041e-05	0.00731257	0.0149188	0.0021322	0.0309514	0.00290926	0.00288241	0.00148587	1.49433e-05	2.13079e-16	9.13124e-06	1.90021e-05	8.07545e-06	5.57647e-07	0	0.000107915	5.83629e-08	1.45972e-06	0.000580289	-0.119076	-0.0267661	0.0920631	-0.0741402	-0.0468354	0.0366021	-0.1	-0.386325	0
2341	4.21486	0	0.103756	4.1111	4.49723	4.45612	4.33648	3.60193	0.398358	0.336191	0.119642	0.0411026	0.0122946	0.00350544	0.00015591	0.00337387	0.00467608	0.00146196	0.00719562	0.0489525	0.0157777	1.74041e-05	0.00731257	0.0149188	0.0021322	0.0309514	0.00290926	0.00288241	0.00148587	1.49433e-05	2.13079e-16	9.13124e-06	1.90021e-05	8.07545e-06	5.57647e-07	0	0.000107915	5.83629e-08	1.45972e-06	0.000580289	-0.119076	-0.0267661	0.0920631	-0.0741402	-0.0468354	0.0366021	-0.1	-0.386325	0
2342	4.21486	0	0.103756	4.1111	4.49723	4.45612	4.33648	3.60193	0.398358	0.336191	0.119642	0.0411026	0.0122946	0.00350544	0.00015591	0.00337387	0.00467608	0.00146196	0.00719562	0.0489525	0.0157777	1.74041e-05	0.00731257	0.0149188	0.0021322	0.0309514	0.00290926	0.00288241	0.00148587	1.49433e-05	2.13079e-16	9.13124e-06	1.90021e-05	8.07545e-06	5.57647e-07	0	0.000107915	5.83629e-08	1.45972e-06	0.000580289	-0.119076	-0.0267661	0.0920631	-0.0741402	-0.0468354	0.0366021	-0.1	-0.386325	0
2343	4.21486	0	0.103756	4.1111	4.49723	4.45612	4.33648	3.60193	0.398358	0.336191	0.119642	0.0411026	0.0122946	0.00350544	0.00015591	0.00337387	0.00467608	0.00146196	0.00719562	0.0489525	0.0157777	1.74041e-05	0.00731257	0.0149188	0.0021322	0.0309514	0.00290926	0.00288241	0.00148587	1.49433e-05	2.13079e-16	9.13124e-06	1.90021e-05	8.07545e-06	5.57647e-07	0	0.000107915	5.83629e-08	1.45972e-06	0.000580289	-0.119076	-0.0267661	0.0920631	-0.0741402	-0.0468354	0.0366021	-0.1	-0.386325	0
2344	4.21486	0	0.103756	4.1111	4.49723	4.45612	4.33648	3.60193	0.398358	0.336191	0.119642	0.0411026	0.0122946	0.00350544	0.00015591	0.00337387	0.00467608	0.00146196	0.00719562	0.0489525	0.0157777	1.74041e-05	0.00731257	0.0149188	0.0021322	0.0309514	0.00290926	0.00288241	0.00148587	1.49433e-05	2.13079e-16	9.13124e-06	1.90021e-05	8.07545e-06	5.57647e-07	0	0.000107915	5.83629e-08	1.45972e-06	0.000580289	-0.119076	-0.0267661	0.0920631	-0.0741402	-0.0468354	0.0366021	-0.1	-0.386325	0
2345	4.21486	0	0.103756	4.1111	4.49723	4.45612	4.33648	3.60193	0.398358	0.336191	0.119642	0.0411026	0.0122946	0.00350544	0.00015591	0.00337387	0.00467608	0.00146196	0.00719562	0.0489525	0.0157777	1.74041e-05	0.00731257	0.0149188	0.0021322	0.0309514	0.00290926	0.00288241	0.00148587	1.49433e-05	2.13079e-16	9.13124e-06	1.90021e-05	8.07545e-06	5.57647e-07	0	0.000107915	5.83629e-08	1.45972e-06	0.000580289	-0.119076	-0.0267661	0.0920631	-0.0741402	-0.0468354	0.0366021	-0.1	-0.386325	0
2346	4.21486	0	0.103756	4.1111	4.49723	4.45612	4.33648	3.60193	0.398358	0.336191	0.119642	0.0411026	0.0122946	0.00350544	0.00015591	0.00337387	0.00467608	0.00146196	0.00719562	0.0489525	0.0157777	1.74041e-05	0.00731257	0.0149188	0.0021322	0.0309514	0.00290926	0.00288241	0.00148587	1.49433e-05	2.13079e-16	9.13124e-06	1.90021e-05	8.07545e-06	5.57647e-07	0	0.000107915	5.83629e-08	1.45972e-06	0.000580289	-0.119076	-0.0267661	0.0920631	-0.0741402	-0.0468354	0.0366021	-0.1	-0.386325	0
2347	4.21486	0	0.103756	4.1111	4.49723	4.45612	4.33648	3.60193	0.398358	0.336191	0.119642	0.0411026	0.0122946	0.00350544	0.00015591	0.00337387	0.00467608	0.00146196	0.00719562	0.0489525	0.0157777	1.74041e-05	0.00731257	0.0149188	0.0021322	0.0309514	0.00290926	0.00288241	0.00148587	1.49433e-05	2.13079e-16	9.13124e-06	1.90021e-05	8.07545e-06	5.57647e-07	0	0.000107915	5.83629e-08	1.45972e-06	0.000580289	-0.119076	-0.0267661	0.0920631	-0.0741402	-0.0468354	0.0366021	-0.1	-0.386325	0
2348	4.21486	0	0.103756	4.1111	4.49723	4.45612	4.33648	3.60193	0.398358	0.336191	0.119642	0.0411026	0.0122946	0.00350544	0.00015591	0.00337387	0.00467608	0.00146196	0.00719562	0.0489525	0.0157777	1.74041e-05	0.00731257	0.0149188	0.0021322	0.0309514	0.00290926	0.00288241	0.00148587	1.49433e-05	2.13079e-16	9.13124e-06	1.90021e-05	8.07545e-06	5.57647e-07	0	0.000107915	5.83629e-08	1.45972e-06	0.000580289	-0.119076	-0.0267661	0.0920631	-0.0741402	-0.0468354	0.0366021	-0.1	-0.386325	0
2349	4.21486	0	0.103756	4.1111	4.49723	4.45612	4.33648	3.60193	0.398358	0.336191	0.119642	0.0411026	0.0122946	0.00350544	0.00015591	0.00337387	0.00467608	0.00146196	0.00719562	0.0489525	0.0157777	1.74041e-05	0.00731257	0.0149188	0.0021322	0.0309514	0.00290926	0.00288241	0.00148587	1.49433e-05	2.13079e-16	9.13124e-06	1.90021e-05	8.07545e-06	5.57647e-07	0	0.000107915	5.83629e-08	1.45972e-06	0.000580289	-0.119076	-0.0267661	0.0920631	-0.0741402	-0.0468354	0.0366021	-0.1	-0.386325	0
2350	4.21486	0	0.103756	4.1111	4.49723	4.45612	4.33648	3.60193	0.398358	0.336191	0.119642	0.0411026	0.0122946	0.00350544	0.00015591	0.00337387	0.00467608	0.00146196	0.00719562	0.0489525	0.0157777	1.74041e-05	0.00731257	0.0149188	0.0021322	0.0309514	0.00290926	0.00288241	0.00148587	1.49433e-05	2.13079e-16	9.13124e-06	1.90021e-05	8.07545e-06	5.57647e-07	0	0.000107915	5.83629e-08	1.45972e-06	0.000580289	-0.119076	-0.0267661	0.0920631	-0.0741402	-0.0468354	0.0366021	-0.1	-0.386325	0
2351	4.21486	0	0.103756	4.1111	4.49723	4.45612	4.33648	3.60193	0.398358	0.336191	0.119642	0.0411026	0.0122946	0.00350544	0.00015591	0.00337387	0.00467608	0.00146196	0.00719562	0.0489525	0.0157777	1.74041e-05	0.00731257	0.0149188	0.0021322	0.0309514	0.00290926	0.00288241	0.00148587	1.49433e-05	2.13079e-16	9.13124e-06	1.90021e-05	8.07545e-06	5.57647e-07	0	0.000107915	5.83629e-08	1.45972e-06	0.000580289	-0.119076	-0.0267661	0.0920631	-0.0741402	-0.0468354	0.0366021	-0.1	-0.386325	0
2352	4.21486	0	0.103756	4.1111	4.49723	4.45612	4.33648	3.60193	0.398358	0.336191	0.119642	0.0411026	0.0122946	0.00350544	0.00015591	0.00337387	0.00467608	0.00146196	0.00719562	0.0489525	0.0157777	1.74041e-05	0.00731257	0.0149188	0.0021322	0.0309514	0.00290926	0.00288241	0.00148587	1.49433e-05	2.13079e-16	9.13124e-06	1.90021e-05	8.07545e-06	5.57647e-07	0	0.000107915	5.83629e-08	1.45972e-06	0.000580289	-0.119076	-0.0267661	0.0920631	-0.0741402	-0.0468354	0.0366021	-0.1	-0.386325	0
2353	4.21486	0	0.103756	4.1111	4.49723	4.45612	4.33648	3.60193	0.398358	0.336191	0.119642	0.0411026	0.0122946	0.00350544	0.00015591	0.00337387	0.00467608	0.00146196	0.00719562	0.0489525	0.0157777	1.74041e-05	0.00731257	0.0149188	0.0021322	0.0309514	0.00290926	0.00288241	0.00148587	1.49433e-05	2.13079e-16	9.13124e-06	1.90021e-05	8.07545e-06	5.57647e-07	0	0.000107915	5.83629e-08	1.45972e-06	0.000580289	-0.119076	-0.0267661	0.0920631	-0.0741402	-0.0468354	0.0366021	-0.1	-0.386325	0
2354	4.21486	0	0.103756	4.1111	4.49723	4.45612	4.33648	3.60193	0.398358	0.336191	0.119642	0.0411026	0.0122946	0.00350544	0.00015591	0.00337387	0.00467608	0.00146196	0.00719562	0.0489525	0.0157777	1.74041e-05	0.00731257	0.0149188	0.0021322	0.0309514	0.00290926	0.00288241	0.00148587	1.49433e-05	2.13079e-16	9.13124e-06	1.90021e-05	8.07545e-06	5.57647e-07	0	0.000107915	5.83629e-08	1.45972e-06	0.000580289	-0.119076	-0.0267661	0.0920631	-0.0741402	-0.0468354	0.0366021	-0.1	-0.386325	0
2355	4.21486	0	0.103756	4.1111	4.49723	4.45612	4.33648	3.60193	0.398358	0.336191	0.119642	0.0411026	0.0122946	0.00350544	0.00015591	0.00337387	0.00467608	0.00146196	0.00719562	0.0489525	0.0157777	1.74041e-05	0.00731257	0.0149188	0.0021322	0.0309514	0.00290926	0.00288241	0.00148587	1.49433e-05	2.13079e-16	9.13124e-06	1.90021e-05	8.07545e-06	5.57647e-07	0	0.000107915	5.83629e-08	1.45972e-06	0.000580289	-0.119076	-0.0267661	0.0920631	-0.0741402	-0.0468354	0.0366021	-0.1	-0.386325	0
2356	4.21486	0	0.103756	4.1111	4.49723	4.45612	4.33648	3.60193	0.398358	0.336191	0.119642	0.0411026	0.0122946	0.00350544	0.00015591	0.00337387	0.00467608	0.00146196	0.00719562	0.0489525	0.0157777	1.74041e-05	0.00731257	0.0149188	0.0021322	0.0309514	0.00290926	0.00288241	0.00148587	1.49433e-05	2.13079e-16	9.13124e-06	1.90021e-05	8.07545e-06	5.57647e-07	0	0.000107915	5.83629e-08	1.45972e-06	0.000580289	-0.119076	-0.0267661	0.0920631	-0.0741402	-0.0468354	0.0366021	-0.1	-0.386325	0
2357	4.21486	0	0.103756	4.1111	4.49723	4.45612	4.33648	3.60193	0.398358	0.336191	0.119642	0.0411026	0.0122946	0.00350544	0.00015591	0.00337387	0.00467608	0.00146196	0.00719562	0.0489525	0.0157777	1.74041e-05	0.00731257	0.0149188	0.0021322	0.0309514	0.00290926	0.00288241	0.00148587	1.49433e-05	2.13079e-16	9.13124e-06	1.90021e-05	8.07545e-06	5.57647e-07	0	0.000107915	5.83629e-08	1.45972e-06	0.000580289	-0.119076	-0.0267661	0.0920631	-0.0741402	-0.0468354	0.0366021	-0.1	-0.386325	0
2358	4.21486	0	0.103756	4.1111	4.49723	4.45612	4.33648	3.60193	0.398358	0.336191	0.119642	0.0411026	0.0122946	0.00350544	0.00015591	0.00337387	0.00467608	0.00146196	0.00719562	0.0489525	0.0157777	1.74041e-05	0.00731257	0.0149188	0.0021322	0.0309514	0.00290926	0.00288241	0.00148587	1.49433e-05	2.13079e-16	9.13124e-06	1.90021e-05	8.07545e-06	5.57647e-07	0	0.000107915	5.83629e-08	1.45972e-06	0.000580289	-0.119076	-0.0267661	0.0920631	-0.0741402	-0.0468354	0.0366021	-0.1	-0.386325	0
2359	4.21486	0	0.103756	4.1111	4.49723	4.45612	4.33648	3.60193	0.398358	0.336191	0.119642	0.0411026	0.0122946	0.00350544	0.00015591	0.00337387	0.00467608	0.00146196	0.00719562	0.0489525	0.0157777	1.74041e-05	0.00731257	0.0149188	0.0021322	0.0309514	0.00290926	0.00288241	0.00148587	1.49433e-05	2.13079e-16	9.13124e-06	1.90021e-05	8.07545e-06	5.57647e-07	0	0.000107915	5.83629e-08	1.45972e-06	0.000580289	-0.119076	-0.0267661	0.0920631	-0.0741402	-0.0468354	0.0366021	-0.1	-0.386325	0
2360	4.21486	0	0.103756	4.1111	4.49723	4.45612	4.33648	3.60193	0.398358	0.336191	0.119642	0.0411026	0.0122946	0.00350544	0.00015591	0.00337387	0.00467608	0.00146196	0.00719562	0.0489525	0.0157777	1.74041e-05	0.00731257	0.0149188	0.0021322	0.0309514	0.00290926	0.00288241	0.00148587	1.49433e-05	2.13079e-16	9.13124e-06	1.90021e-05	8.07545e-06	5.57647e-07	0	0.000107915	5.83629e-08	1.45972e-06	0.000580289	-0.119076	-0.0267661	0.0920631	-0.0741402	-0.0468354	0.0366021	-0.1	-0.386325	0
2361	4.21486	0	0.103756	4.1111	4.49723	4.45612	4.33648	3.60193	0.398358	0.336191	0.119642	0.0411026	0.0122946	0.00350544	0.00015591	0.00337387	0.00467608	0.00146196	0.00719562	0.0489525	0.0157777	1.74041e-05	0.00731257	0.0149188	0.0021322	0.0309514	0.00290926	0.00288241	0.00148587	1.49433e-05	2.13079e-16	9.13124e-06	1.90021e-05	8.07545e-06	5.57647e-07	0	0.000107915	5.83629e-08	1.45972e-06	0.000580289	-0.119076	-0.0267661	0.0920631	-0.0741402	-0.0468354	0.0366021	-0.1	-0.386325	0
2362	4.21486	0	0.103756	4.1111	4.49723	4.45612	4.33648	3.60193	0.398358	0.336191	0.119642	0.0411026	0.0122946	0.00350544	0.00015591	0.00337387	0.00467608	0.00146196	0.00719562	0.0489525	0.0157777	1.74041e-05	0.00731257	0.0149188	0.0021322	0.0309514	0.00290926	0.00288241	0.00148587	1.49433e-05	2.13079e-16	9.13124e-06	1.90021e-05	8.07545e-06	5.57647e-07	0	0.000107915	5.83629e-08	1.45972e-06	0.000580289	-0.119076	-0.0267661	0.0920631	-0.0741402	-0.0468354	0.0366021	-0.1	-0.386325	0
2363	4.21486	0	0.103756	4.1111	4.49723	4.45612	4.33648	3.60193	0.398358	0.336191	0.119642	0.0411026	0.0122946	0.00350544	0.00015591	0.00337387	0.00467608	0.00146196	0.00719562	0.0489525	0.0157777	1.74041e-05	0.00731257	0.0149188	0.0021322	0.0309514	0.00290926	0.00288241	0.00148587	1.49433e-05	2.13079e-16	9.13124e-06	1.90021e-05	8.07545e-06	5.57647e-07	0	0.000107915	5.83629e-08	1.45972e-06	0.000580289	-0.119076	-0.0267661	0.0920631	-0.0741402	-0.0468354	0.0366021	-0.1	-0.386325	0
2364	4.21486	0	0.103756	4.1111	4.49723	4.45612	4.33648	3.60193	0.398358	0.336191	0.119642	0.0411026	0.0122946	0.00350544	0.00015591	0.00337387	0.00467608	0.00146196	0.00719562	0.0489525	0.0157777	1.74041e-05	0.00731257	0.0149188	0.0021322	0.0309514	0.00290926	0.00288241	0.00148587	1.49433e-05	2.13079e-16	9.13124e-06	1.90021e-05	8.07545e-06	5.57647e-07	0	0.000107915	5.83629e-08	1.45972e-06	0.000580289	-0.119076	-0.0267661	0.0920631	-0.0741402	-0.0468354	0.0366021	-0.1	-0.386325	0
2365	4.21486	0	0.103756	4.1111	4.49723	4.45612	4.33648	3.60193	0.398358	0.336191	0.119642	0.0411026	0.0122946	0.00350544	0.00015591	0.00337387	0.00467608	0.00146196	0.00719562	0.0489525	0.0157777	1.74041e-05	0.00731257	0.0149188	0.0021322	0.0309514	0.00290926	0.00288241	0.00148587	1.49433e-05	2.13079e-16	9.13124e-06	1.90021e-05	8.07545e-06	5.57647e-07	0	0.000107915	5.83629e-08	1.45972e-06	0.000580289	-0.119076	-0.0267661	0.0920631	-0.0741402	-0.0468354	0.0366021	-0.1	-0.386325	0
2366	4.21486	0	0.103756	4.1111	4.49723	4.45612	4.33648	3.60193	0.398358	0.336191	0.119642	0.0411026	0.0122946	0.00350544	0.00015591	0.00337387	0.00467608	0.00146196	0.00719562	0.0489525	0.0157777	1.74041e-05	0.00731257	0.0149188	0.0021322	0.0309514	0.00290926	0.00288241	0.00148587	1.49433e-05	2.13079e-16	9.13124e-06	1.90021e-05	8.07545e-06	5.57647e-07	0	0.000107915	5.83629e-08	1.45972e-06	0.000580289	-0.119076	-0.0267661	0.0920631	-0.0741402	-0.0468354	0.0366021	-0.1	-0.386325	0
2367	4.21486	0	0.103756	4.1111	4.49723	4.45612	4.33648	3.60193	0.398358	0.336191	0.119642	0.0411026	0.0122946	0.00350544	0.00015591	0.00337387	0.00467608	0.00146196	0.00719562	0.0489525	0.0157777	1.74041e-05	0.00731257	0.0149188	0.0021322	0.0309514	0.00290926	0.00288241	0.00148587	1.49433e-05	2.13079e-16	9.13124e-06	1.90021e-05	8.07545e-06	5.57647e-07	0	0.000107915	5.83629e-08	1.45972e-06	0.000580289	-0.119076	-0.0267661	0.0920631	-0.0741402	-0.0468354	0.0366021	-0.1	-0.386325	0
2368	4.21486	0	0.103756	4.1111	4.49723	4.45612	4.33648	3.60193	0.398358	0.336191	0.119642	0.0411026	0.0122946	0.00350544	0.00015591	0.00337387	0.00467608	0.00146196	0.00719562	0.0489525	0.0157777	1.74041e-05	0.00731257	0.0149188	0.0021322	0.0309514	0.00290926	0.00288241	0.00148587	1.49433e-05	2.13079e-16	9.13124e-06	1.90021e-05	8.07545e-06	5.57647e-07	0	0.000107915	5.83629e-08	1.45972e-06	0.000580289	-0.119076	-0.0267661	0.0920631	-0.0741402	-0.0468354	0.0366021	-0.1	-0.386325	0
2369	4.21486	0	0.103756	4.1111	4.49723	4.45612	4.33648	3.60193	0.398358	0.336191	0.119642	0.0411026	0.0122946	0.00350544	0.00015591	0.00337387	0.00467608	0.00146196	0.00719562	0.0489525	0.0157777	1.74041e-05	0.00731257	0.0149188	0.0021322	0.0309514	0.00290926	0.00288241	0.00148587	1.49433e-05	2.13079e-16	9.13124e-06	1.90021e-05	8.07545e-06	5.57647e-07	0	0.000107915	5.83629e-08	1.45972e-06	0.000580289	-0.119076	-0.0267661	0.0920631	-0.0741402	-0.0468354	0.0366021	-0.1	-0.386325	0
2370	4.21486	0	0.103756	4.1111	4.49723	4.45612	4.33648	3.60193	0.398358	0.336191	0.119642	0.0411026	0.0122946	0.00350544	0.00015591	0.00337387	0.00467608	0.00146196	0.00719562	0.0489525	0.0157777	1.74041e-05	0.00731257	0.0149188	0.0021322	0.0309514	0.00290926	0.00288241	0.00148587	1.49433e-05	2.13079e-16	9.13124e-06	1.90021e-05	8.07545e-06	5.57647e-07	0	0.000107915	5.83629e-08	1.45972e-06	0.000580289	-0.119076	-0.0267661	0.0920631	-0.0741402	-0.0468354	0.0366021	-0.1	-0.386325	0
2371	4.21486	0	0.103756	4.1111	4.49723	4.45612	4.33648	3.60193	0.398358	0.336191	0.119642	0.0411026	0.0122946	0.00350544	0.00015591	0.00337387	0.00467608	0.00146196	0.00719562	0.0489525	0.0157777	1.74041e-05	0.00731257	0.0149188	0.0021322	0.0309514	0.00290926	0.00288241	0.00148587	1.49433e-05	2.13079e-16	9.13124e-06	1.90021e-05	8.07545e-06	5.57647e-07	0	0.000107915	5.83629e-08	1.45972e-06	0.000580289	-0.119076	-0.0267661	0.0920631	-0.0741402	-0.0468354	0.0366021	-0.1	-0.386325	0
2372	4.21486	0	0.103756	4.1111	4.49723	4.45612	4.33648	3.60193	0.398358	0.336191	0.119642	0.0411026	0.0122946	0.00350544	0.00015591	0.00337387	0.00467608	0.00146196	0.00719562	0.0489525	0.0157777	1.74041e-05	0.00731257	0.0149188	0.0021322	0.0309514	0.00290926	0.00288241	0.00148587	1.49433e-05	2.13079e-16	9.13124e-06	1.90021e-05	8.07545e-06	5.57647e-07	0	0.000107915	5.83629e-08	1.45972e-06	0.000580289	-0.119076	-0.0267661	0.0920631	-0.0741402	-0.0468354	0.0366021	-0.1	-0.386325	0
2373	4.21486	0	0.103756	4.1111	4.49723	4.45612	4.33648	3.60193	0.398358	0.336191	0.119642	0.0411026	0.0122946	0.00350544	0.00015591	0.00337387	0.00467608	0.00146196	0.00719562	0.0489525	0.0157777	1.74041e-05	0.00731257	0.0149188	0.0021322	0.0309514	0.00290926	0.00288241	0.00148587	1.49433e-05	2.13079e-16	9.13124e-06	1.90021e-05	8.07545e-06	5.57647e-07	0	0.000107915	5.83629e-08	1.45972e-06	0.000580289	-0.119076	-0.0267661	0.0920631	-0.0741402	-0.0468354	0.0366021	-0.1	-0.386325	0
2374	4.21486	0	0.103756	4.1111	4.49723	4.45612	4.33648	3.60193	0.398358	0.336191	0.119642	0.0411026	0.0122946	0.00350544	0.00015591	0.00337387	0.00467608	0.00146196	0.00719562	0.0489525	0.0157777	1.74041e-05	0.00731257	0.0149188	0.0021322	0.0309514	0.00290926	0.00288241	0.00148587	1.49433e-05	2.13079e-16	9.13124e-06	1.90021e-05	8.07545e-06	5.57647e-07	0	0.000107915	5.83629e-08	1.45972e-06	0.000580289	-0.119076	-0.0267661	0.0920631	-0.0741402	-0.0468354	0.0366021	-0.1	-0.386325	0
2375	4.21486	0	0.103756	4.1111	4.49723	4.45612	4.33648	3.60193	0.398358	0.336191	0.119642	0.0411026	0.0122946	0.00350544	0.00015591	0.00337387	0.00467608	0.00146196	0.00719562	0.0489525	0.0157777	1.74041e-05	0.00731257	0.0149188	0.0021322	0.0309514	0.00290926	0.00288241	0.00148587	1.49433e-05	2.13079e-16	9.13124e-06	1.90021e-05	8.07545e-06	5.57647e-07	0	0.000107915	5.83629e-08	1.45972e-06	0.000580289	-0.119076	-0.0267661	0.0920631	-0.0741402	-0.0468354	0.0366021	-0.1	-0.386325	0
2376	4.21486	0	0.103756	4.1111	4.49723	4.45612	4.33648	3.60193	0.398358	0.336191	0.119642	0.0411026	0.0122946	0.00350544	0.00015591	0.00337387	0.00467608	0.00146196	0.00719562	0.0489525	0.0157777	1.74041e-05	0.00731257	0.0149188	0.0021322	0.0309514	0.00290926	0.00288241	0.00148587	1.49433e-05	2.13079e-16	9.13124e-06	1.90021e-05	8.07545e-06	5.57647e-07	0	0.000107915	5.83629e-08	1.45972e-06	0.000580289	-0.119076	-0.0267661	0.0920631	-0.0741402	-0.0468354	0.0366021	-0.1	-0.386325	0
2377	4.21486	0	0.103756	4.1111	4.49723	4.45612	4.33648	3.60193	0.398358	0.336191	0.119642	0.0411026	0.0122946	0.00350544	0.00015591	0.00337387	0.00467608	0.00146196	0.00719562	0.0489525	0.0157777	1.74041e-05	0.00731257	0.0149188	0.0021322	0.0309514	0.00290926	0.00288241	0.00148587	1.49433e-05	2.13079e-16	9.13124e-06	1.90021e-05	8.07545e-06	5.57647e-07	0	0.000107915	5.83629e-08	1.45972e-06	0.000580289	-0.119076	-0.0267661	0.0920631	-0.0741402	-0.0468354	0.0366021	-0.1	-0.386325	0
2378	4.21486	0	0.103756	4.1111	4.49723	4.45612	4.33648	3.60193	0.398358	0.336191	0.119642	0.0411026	0.0122946	0.00350544	0.00015591	0.00337387	0.00467608	0.00146196	0.00719562	0.0489525	0.0157777	1.74041e-05	0.00731257	0.0149188	0.0021322	0.0309514	0.00290926	0.00288241	0.00148587	1.49433e-05	2.13079e-16	9.13124e-06	1.90021e-05	8.07545e-06	5.57647e-07	0	0.000107915	5.83629e-08	1.45972e-06	0.000580289	-0.119076	-0.0267661	0.0920631	-0.0741402	-0.0468354	0.0366021	-0.1	-0.386325	0
2379	4.21486	0	0.103756	4.1111	4.49723	4.45612	4.33648	3.60193	0.398358	0.336191	0.119642	0.0411026	0.0122946	0.00350544	0.00015591	0.00337387	0.00467608	0.00146196	0.00719562	0.0489525	0.0157777	1.74041e-05	0.00731257	0.0149188	0.0021322	0.0309514	0.00290926	0.00288241	0.00148587	1.49433e-05	2.13079e-16	9.13124e-06	1.90021e-05	8.07545e-06	5.57647e-07	0	0.000107915	5.83629e-08	1.45972e-06	0.000580289	-0.119076	-0.0267661	0.0920631	-0.0741402	-0.0468354	0.0366021	-0.1	-0.386325	0
2380	4.21486	0	0.103756	4.1111	4.49723	4.45612	4.33648	3.60193	0.398358	0.336191	0.119642	0.0411026	0.0122946	0.00350544	0.00015591	0.00337387	0.00467608	0.00146196	0.00719562	0.0489525	0.0157777	1.74041e-05	0.00731257	0.0149188	0.0021322	0.0309514	0.00290926	0.00288241	0.00148587	1.49433e-05	2.13079e-16	9.13124e-06	1.90021e-05	8.07545e-06	5.57647e-07	0	0.000107915	5.83629e-08	1.45972e-06	0.000580289	-0.119076	-0.0267661	0.0920631	-0.0741402	-0.0468354	0.0366021	-0.1	-0.386325	0
2381	4.21486	0	0.103756	4.1111	4.49723	4.45612	4.33648	3.60193	0.398358	0.336191	0.119642	0.0411026	0.0122946	0.00350544	0.00015591	0.00337387	0.00467608	0.00146196	0.00719562	0.0489525	0.0157777	1.74041e-05	0.00731257	0.0149188	0.0021322	0.0309514	0.00290926	0.00288241	0.00148587	1.49433e-05	2.13079e-16	9.13124e-06	1.90021e-05	8.07545e-06	5.57647e-07	0	0.000107915	5.83629e-08	1.45972e-06	0.000580289	-0.119076	-0.0267661	0.0920631	-0.0741402	-0.0468354	0.0366021	-0.1	-0.386325	0
2382	4.21486	0	0.103756	4.1111	4.49723	4.45612	4.33648	3.60193	0.398358	0.336191	0.119642	0.0411026	0.0122946	0.00350544	0.00015591	0.00337387	0.00467608	0.00146196	0.00719562	0.0489525	0.0157777	1.74041e-05	0.00731257	0.0149188	0.0021322	0.0309514	0.00290926	0.00288241	0.00148587	1.49433e-05	2.13079e-16	9.13124e-06	1.90021e-05	8.07545e-06	5.57647e-07	0	0.000107915	5.83629e-08	1.45972e-06	0.000580289	-0.119076	-0.0267661	0.0920631	-0.0741402	-0.0468354	0.0366021	-0.1	-0.386325	0
2383	4.21486	0	0.103756	4.1111	4.49723	4.45612	4.33648	3.60193	0.398358	0.336191	0.119642	0.0411026	0.0122946	0.00350544	0.00015591	0.00337387	0.00467608	0.00146196	0.00719562	0.0489525	0.0157777	1.74041e-05	0.00731257	0.0149188	0.0021322	0.0309514	0.00290926	0.00288241	0.00148587	1.49433e-05	2.13079e-16	9.13124e-06	1.90021e-05	8.07545e-06	5.57647e-07	0	0.000107915	5.83629e-08	1.45972e-06	0.000580289	-0.119076	-0.0267661	0.0920631	-0.0741402	-0.0468354	0.0366021	-0.1	-0.386325	0
2384	4.21486	0	0.103756	4.1111	4.49723	4.45612	4.33648	3.60193	0.398358	0.336191	0.119642	0.0411026	0.0122946	0.00350544	0.00015591	0.00337387	0.00467608	0.00146196	0.00719562	0.0489525	0.0157777	1.74041e-05	0.00731257	0.0149188	0.0021322	0.0309514	0.00290926	0.00288241	0.00148587	1.49433e-05	2.13079e-16	9.13124e-06	1.90021e-05	8.07545e-06	5.57647e-07	0	0.000107915	5.83629e-08	1.45972e-06	0.000580289	-0.119076	-0.0267661	0.0920631	-0.0741402	-0.0468354	0.0366021	-0.1	-0.386325	0
2385	4.21486	0	0.103756	4.1111	4.49723	4.45612	4.33648	3.60193	0.398358	0.336191	0.119642	0.0411026	0.0122946	0.00350544	0.00015591	0.00337387	0.00467608	0.00146196	0.00719562	0.0489525	0.0157777	1.74041e-05	0.00731257	0.0149188	0.0021322	0.0309514	0.00290926	0.00288241	0.00148587	1.49433e-05	2.13079e-16	9.13124e-06	1.90021e-05	8.07545e-06	5.57647e-07	0	0.000107915	5.83629e-08	1.45972e-06	0.000580289	-0.119076	-0.0267661	0.0920631	-0.0741402	-0.0468354	0.0366021	-0.1	-0.386325	0
2386	4.21486	0	0.103756	4.1111	4.49723	4.45612	4.33648	3.60193	0.398358	0.336191	0.119642	0.0411026	0.0122946	0.00350544	0.00015591	0.00337387	0.00467608	0.00146196	0.00719562	0.0489525	0.0157777	1.74041e-05	0.00731257	0.0149188	0.0021322	0.0309514	0.00290926	0.00288241	0.00148587	1.49433e-05	2.13079e-16	9.13124e-06	1.90021e-05	8.07545e-06	5.57647e-07	0	0.000107915	5.83629e-08	1.45972e-06	0.000580289	-0.119076	-0.0267661	0.0920631	-0.0741402	-0.0468354	0.0366021	-0.1	-0.386325	0
2387	4.21486	0	0.103756	4.1111	4.49723	4.45612	4.33648	3.60193	0.398358	0.336191	0.119642	0.0411026	0.0122946	0.00350544	0.00015591	0.00337387	0.00467608	0.00146196	0.00719562	0.0489525	0.0157777	1.74041e-05	0.00731257	0.0149188	0.0021322	0.0309514	0.00290926	0.00288241	0.00148587	1.49433e-05	2.13079e-16	9.13124e-06	1.90021e-05	8.07545e-06	5.57647e-07	0	0.000107915	5.83629e-08	1.45972e-06	0.000580289	-0.119076	-0.0267661	0.0920631	-0.0741402	-0.0468354	0.0366021	-0.1	-0.386325	0
2388	4.21486	0	0.103756	4.1111	4.49723	4.45612	4.33648	3.60193	0.398358	0.336191	0.119642	0.0411026	0.0122946	0.00350544	0.00015591	0.00337387	0.00467608	0.00146196	0.00719562	0.0489525	0.0157777	1.74041e-05	0.00731257	0.0149188	0.0021322	0.0309514	0.00290926	0.00288241	0.00148587	1.49433e-05	2.13079e-16	9.13124e-06	1.90021e-05	8.07545e-06	5.57647e-07	0	0.000107915	5.83629e-08	1.45972e-06	0.000580289	-0.119076	-0.0267661	0.0920631	-0.0741402	-0.0468354	0.0366021	-0.1	-0.386325	0
2389	4.21486	0	0.103756	4.1111	4.49723	4.45612	4.33648	3.60193	0.398358	0.336191	0.119642	0.0411026	0.0122946	0.00350544	0.00015591	0.00337387	0.00467608	0.00146196	0.00719562	0.0489525	0.0157777	1.74041e-05	0.00731257	0.0149188	0.0021322	0.0309514	0.00290926	0.00288241	0.00148587	1.49433e-05	2.13079e-16	9.13124e-06	1.90021e-05	8.07545e-06	5.57647e-07	0	0.000107915	5.83629e-08	1.45972e-06	0.000580289	-0.119076	-0.0267661	0.0920631	-0.0741402	-0.0468354	0.0366021	-0.1	-0.386325	0
2390	4.21486	0	0.103756	4.1111	4.49723	4.45612	4.33648	3.60193	0.398358	0.336191	0.119642	0.0411026	0.0122946	0.00350544	0.00015591	0.00337387	0.00467608	0.00146196	0.00719562	0.0489525	0.0157777	1.74041e-05	0.00731257	0.0149188	0.0021322	0.0309514	0.00290926	0.00288241	0.00148587	1.49433e-05	2.13079e-16	9.13124e-06	1.90021e-05	8.07545e-06	5.57647e-07	0	0.000107915	5.83629e-08	1.45972e-06	0.000580289	-0.119076	-0.0267661	0.0920631	-0.0741402	-0.0468354	0.0366021	-0.1	-0.386325	0
2391	4.21486	0	0.103756	4.1111	4.49723	4.45612	4.33648	3.60193	0.398358	0.336191	0.119642	0.0411026	0.0122946	0.00350544	0.00015591	0.00337387	0.00467608	0.00146196	0.00719562	0.0489525	0.0157777	1.74041e-05	0.00731257	0.0149188	0.0021322	0.0309514	0.00290926	0.00288241	0.00148587	1.49433e-05	2.13079e-16	9.13124e-06	1.90021e-05	8.07545e-06	5.57647e-07	0	0.000107915	5.83629e-08	1.45972e-06	0.000580289	-0.119076	-0.0267661	0.0920631	-0.0741402	-0.0468354	0.0366021	-0.1	-0.386325	0
2392	4.21486	0	0.103756	4.1111	4.49723	4.45612	4.33648	3.60193	0.398358	0.336191	0.119642	0.0411026	0.0122946	0.00350544	0.00015591	0.00337387	0.00467608	0.00146196	0.00719562	0.0489525	0.0157777	1.74041e-05	0.00731257	0.0149188	0.0021322	0.0309514	0.00290926	0.00288241	0.00148587	1.49433e-05	2.13079e-16	9.13124e-06	1.90021e-05	8.07545e-06	5.57647e-07	0	0.000107915	5.83629e-08	1.45972e-06	0.000580289	-0.119076	-0.0267661	0.0920631	-0.0741402	-0.0468354	0.0366021	-0.1	-0.386325	0
2393	4.21486	0	0.103756	4.1111	4.49723	4.45612	4.33648	3.60193	0.398358	0.336191	0.119642	0.0411026	0.0122946	0.00350544	0.00015591	0.00337387	0.00467608	0.00146196	0.00719562	0.0489525	0.0157777	1.74041e-05	0.00731257	0.0149188	0.0021322	0.0309514	0.00290926	0.00288241	0.00148587	1.49433e-05	2.13079e-16	9.13124e-06	1.90021e-05	8.07545e-06	5.57647e-07	0	0.000107915	5.83629e-08	1.45972e-06	0.000580289	-0.119076	-0.0267661	0.0920631	-0.0741402	-0.0468354	0.0366021	-0.1	-0.386325	0
2394	4.21486	0	0.103756	4.1111	4.49723	4.45612	4.33648	3.60193	0.398358	0.336191	0.119642	0.0411026	0.0122946	0.00350544	0.00015591	0.00337387	0.00467608	0.00146196	0.00719562	0.0489525	0.0157777	1.74041e-05	0.00731257	0.0149188	0.0021322	0.0309514	0.00290926	0.00288241	0.00148587	1.49433e-05	2.13079e-16	9.13124e-06	1.90021e-05	8.07545e-06	5.57647e-07	0	0.000107915	5.83629e-08	1.45972e-06	0.000580289	-0.119076	-0.0267661	0.0920631	-0.0741402	-0.0468354	0.0366021	-0.1	-0.386325	0
2395	4.21486	0	0.103756	4.1111	4.49723	4.45612	4.33648	3.60193	0.398358	0.336191	0.119642	0.0411026	0.0122946	0.00350544	0.00015591	0.00337387	0.00467608	0.00146196	0.00719562	0.0489525	0.0157777	1.74041e-05	0.00731257	0.0149188	0.0021322	0.0309514	0.00290926	0.00288241	0.00148587	1.49433e-05	2.13079e-16	9.13124e-06	1.90021e-05	8.07545e-06	5.57647e-07	0	0.000107915	5.83629e-08	1.45972e-06	0.000580289	-0.119076	-0.0267661	0.0920631	-0.0741402	-0.0468354	0.0366021	-0.1	-0.386325	0
2396	4.21486	0	0.103756	4.1111	4.49723	4.45612	4.33648	3.60193	0.398358	0.336191	0.119642	0.0411026	0.0122946	0.00350544	0.00015591	0.00337387	0.00467608	0.00146196	0.00719562	0.0489525	0.0157777	1.74041e-05	0.00731257	0.0149188	0.0021322	0.0309514	0.00290926	0.00288241	0.00148587	1.49433e-05	2.13079e-16	9.13124e-06	1.90021e-05	8.07545e-06	5.57647e-07	0	0.000107915	5.83629e-08	1.45972e-06	0.000580289	-0.119076	-0.0267661	0.0920631	-0.0741402	-0.0468354	0.0366021	-0.1	-0.386325	0
2397	4.21486	0	0.103756	4.1111	4.49723	4.45612	4.33648	3.60193	0.398358	0.336191	0.119642	0.0411026	0.0122946	0.00350544	0.00015591	0.00337387	0.00467608	0.00146196	0.00719562	0.0489525	0.0157777	1.74041e-05	0.00731257	0.0149188	0.0021322	0.0309514	0.00290926	0.00288241	0.00148587	1.49433e-05	2.13079e-16	9.13124e-06	1.90021e-05	8.07545e-06	5.57647e-07	0	0.000107915	5.83629e-08	1.45972e-06	0.000580289	-0.119076	-0.0267661	0.0920631	-0.0741402	-0.0468354	0.0366021	-0.1	-0.386325	0
2398	4.21486	0	0.103756	4.1111	4.49723	4.45612	4.33648	3.60193	0.398358	0.336191	0.119642	0.0411026	0.0122946	0.00350544	0.00015591	0.00337387	0.00467608	0.00146196	0.00719562	0.0489525	0.0157777	1.74041e-05	0.00731257	0.0149188	0.0021322	0.0309514	0.00290926	0.00288241	0.00148587	1.49433e-05	2.13079e-16	9.13124e-06	1.90021e-05	8.07545e-06	5.57647e-07	0	0.000107915	5.83629e-08	1.45972e-06	0.000580289	-0.119076	-0.0267661	0.0920631	-0.0741402	-0.0468354	0.0366021	-0.1	-0.386325	0
2399	4.21486	0	0.103756	4.1111	4.49723	4.45612	4.33648	3.60193	0.398358	0.336191	0.119642	0.0411026	0.0122946	0.00350544	0.00015591	0.00337387	0.00467608	0.00146196	0.00719562	0.0489525	0.0157777	1.74041e-05	0.00731257	0.0149188	0.0021322	0.0309514	0.00290926	0.00288241	0.00148587	1.49433e-05	2.13079e-16	9.13124e-06	1.90021e-05	8.07545e-06	5.57647e-07	0	0.000107915	5.83629e-08	1.45972e-06	0.000580289	-0.119076	-0.0267661	0.0920631	-0.0741402	-0.0468354	0.0366021	-0.1	-0.386325	0
2400	4.21486	0	0.103756	4.1111	4.49723	4.45612	4.33648	3.60193	0.398358	0.336191	0.119642	0.0411026	0.0122946	0.00350544	0.00015591	0.00337387	0.00467608	0.00146196	0.00719562	0.0489525	0.0157777	1.74041e-05	0.00731257	0.0149188	0.0021322	0.0309514	0.00290926	0.00288241	0.00148587	1.49433e-05	2.13079e-16	9.13124e-06	1.90021e-05	8.07545e-06	5.57647e-07	0	0.000107915	5.83629e-08	1.45972e-06	0.000580289	-0.119076	-0.0267661	0.0920631	-0.0741402	-0.0468354	0.0366021	-0.1	-0.386325	0
2401	4.21486	0	0.103756	4.1111	4.49723	4.45612	4.33648	3.60193	0.398358	0.336191	0.119642	0.0411026	0.0122946	0.00350544	0.00015591	0.00337387	0.00467608	0.00146196	0.00719562	0.0489525	0.0157777	1.74041e-05	0.00731257	0.0149188	0.0021322	0.0309514	0.00290926	0.00288241	0.00148587	1.49433e-05	2.13079e-16	9.13124e-06	1.90021e-05	8.07545e-06	5.57647e-07	0	0.000107915	5.83629e-08	1.45972e-06	0.000580289	-0.119076	-0.0267661	0.0920631	-0.0741402	-0.0468354	0.0366021	-0.1	-0.386325	0
2402	4.21486	0	0.103756	4.1111	4.49723	4.45612	4.33648	3.60193	0.398358	0.336191	0.119642	0.0411026	0.0122946	0.00350544	0.00015591	0.00337387	0.00467608	0.00146196	0.00719562	0.0489525	0.0157777	1.74041e-05	0.00731257	0.0149188	0.0021322	0.0309514	0.00290926	0.00288241	0.00148587	1.49433e-05	2.13079e-16	9.13124e-06	1.90021e-05	8.07545e-06	5.57647e-07	0	0.000107915	5.83629e-08	1.45972e-06	0.000580289	-0.119076	-0.0267661	0.0920631	-0.0741402	-0.0468354	0.0366021	-0.1	-0.386325	0
2403	4.21486	0	0.103756	4.1111	4.49723	4.45612	4.33648	3.60193	0.398358	0.336191	0.119642	0.0411026	0.0122946	0.00350544	0.00015591	0.00337387	0.00467608	0.00146196	0.00719562	0.0489525	0.0157777	1.74041e-05	0.00731257	0.0149188	0.0021322	0.0309514	0.00290926	0.00288241	0.00148587	1.49433e-05	2.13079e-16	9.13124e-06	1.90021e-05	8.07545e-06	5.57647e-07	0	0.000107915	5.83629e-08	1.45972e-06	0.000580289	-0.119076	-0.0267661	0.0920631	-0.0741402	-0.0468354	0.0366021	-0.1	-0.386325	0
2404	4.21486	0	0.103756	4.1111	4.49723	4.45612	4.33648	3.60193	0.398358	0.336191	0.119642	0.0411026	0.0122946	0.00350544	0.00015591	0.00337387	0.00467608	0.00146196	0.00719562	0.0489525	0.0157777	1.74041e-05	0.00731257	0.0149188	0.0021322	0.0309514	0.00290926	0.00288241	0.00148587	1.49433e-05	2.13079e-16	9.13124e-06	1.90021e-05	8.07545e-06	5.57647e-07	0	0.000107915	5.83629e-08	1.45972e-06	0.000580289	-0.119076	-0.0267661	0.0920631	-0.0741402	-0.0468354	0.0366021	-0.1	-0.386325	0
2405	4.21486	0	0.103756	4.1111	4.49723	4.45612	4.33648	3.60193	0.398358	0.336191	0.119642	0.0411026	0.0122946	0.00350544	0.00015591	0.00337387	0.00467608	0.00146196	0.00719562	0.0489525	0.0157777	1.74041e-05	0.00731257	0.0149188	0.0021322	0.0309514	0.00290926	0.00288241	0.00148587	1.49433e-05	2.13079e-16	9.13124e-06	1.90021e-05	8.07545e-06	5.57647e-07	0	0.000107915	5.83629e-08	1.45972e-06	0.000580289	-0.119076	-0.0267661	0.0920631	-0.0741402	-0.0468354	0.0366021	-0.1	-0.386325	0
2406	4.21486	0	0.103756	4.1111	4.49723	4.45612	4.33648	3.60193	0.398358	0.336191	0.119642	0.0411026	0.0122946	0.00350544	0.00015591	0.00337387	0.00467608	0.00146196	0.00719562	0.0489525	0.0157777	1.74041e-05	0.00731257	0.0149188	0.0021322	0.0309514	0.00290926	0.00288241	0.00148587	1.49433e-05	2.13079e-16	9.13124e-06	1.90021e-05	8.07545e-06	5.57647e-07	0	0.000107915	5.83629e-08	1.45972e-06	0.000580289	-0.119076	-0.0267661	0.0920631	-0.0741402	-0.0468354	0.0366021	-0.1	-0.386325	0
2407	4.21486	0	0.103756	4.1111	4.49723	4.45612	4.33648	3.60193	0.398358	0.336191	0.119642	0.0411026	0.0122946	0.00350544	0.00015591	0.00337387	0.00467608	0.00146196	0.00719562	0.0489525	0.0157777	1.74041e-05	0.00731257	0.0149188	0.0021322	0.0309514	0.00290926	0.00288241	0.00148587	1.49433e-05	2.13079e-16	9.13124e-06	1.90021e-05	8.07545e-06	5.57647e-07	0	0.000107915	5.83629e-08	1.45972e-06	0.000580289	-0.119076	-0.0267661	0.0920631	-0.0741402	-0.0468354	0.0366021	-0.1	-0.386325	0
2408	4.21486	0	0.103756	4.1111	4.49723	4.45612	4.33648	3.60193	0.398358	0.336191	0.119642	0.0411026	0.0122946	0.00350544	0.00015591	0.00337387	0.00467608	0.00146196	0.00719562	0.0489525	0.0157777	1.74041e-05	0.00731257	0.0149188	0.0021322	0.0309514	0.00290926	0.00288241	0.00148587	1.49433e-05	2.13079e-16	9.13124e-06	1.90021e-05	8.07545e-06	5.57647e-07	0	0.000107915	5.83629e-08	1.45972e-06	0.000580289	-0.119076	-0.0267661	0.0920631	-0.0741402	-0.0468354	0.0366021	-0.1	-0.386325	0
2409	4.21486	0	0.103756	4.1111	4.49723	4.45612	4.33648	3.60193	0.398358	0.336191	0.119642	0.0411026	0.0122946	0.00350544	0.00015591	0.00337387	0.00467608	0.00146196	0.00719562	0.0489525	0.0157777	1.74041e-05	0.00731257	0.0149188	0.0021322	0.0309514	0.00290926	0.00288241	0.00148587	1.49433e-05	2.13079e-16	9.13124e-06	1.90021e-05	8.07545e-06	5.57647e-07	0	0.000107915	5.83629e-08	1.45972e-06	0.000580289	-0.119076	-0.0267661	0.0920631	-0.0741402	-0.0468354	0.0366021	-0.1	-0.386325	0
2410	4.21486	0	0.103756	4.1111	4.49723	4.45612	4.33648	3.60193	0.398358	0.336191	0.119642	0.0411026	0.0122946	0.00350544	0.00015591	0.00337387	0.00467608	0.00146196	0.00719562	0.0489525	0.0157777	1.74041e-05	0.00731257	0.0149188	0.0021322	0.0309514	0.00290926	0.00288241	0.00148587	1.49433e-05	2.13079e-16	9.13124e-06	1.90021e-05	8.07545e-06	5.57647e-07	0	0.000107915	5.83629e-08	1.45972e-06	0.000580289	-0.119076	-0.0267661	0.0920631	-0.0741402	-0.0468354	0.0366021	-0.1	-0.386325	0
2411	4.21486	0	0.103756	4.1111	4.49723	4.45612	4.33648	3.60193	0.398358	0.336191	0.119642	0.0411026	0.0122946	0.00350544	0.00015591	0.00337387	0.00467608	0.00146196	0.00719562	0.0489525	0.0157777	1.74041e-05	0.00731257	0.0149188	0.0021322	0.0309514	0.00290926	0.00288241	0.00148587	1.49433e-05	2.13079e-16	9.13124e-06	1.90021e-05	8.07545e-06	5.57647e-07	0	0.000107915	5.83629e-08	1.45972e-06	0.000580289	-0.119076	-0.0267661	0.0920631	-0.0741402	-0.0468354	0.0366021	-0.1	-0.386325	0
2412	4.21486	0	0.103756	4.1111	4.49723	4.45612	4.33648	3.60193	0.398358	0.336191	0.119642	0.0411026	0.0122946	0.00350544	0.00015591	0.00337387	0.00467608	0.00146196	0.00719562	0.0489525	0.0157777	1.74041e-05	0.00731257	0.0149188	0.0021322	0.0309514	0.00290926	0.00288241	0.00148587	1.49433e-05	2.13079e-16	9.13124e-06	1.90021e-05	8.07545e-06	5.57647e-07	0	0.000107915	5.83629e-08	1.45972e-06	0.000580289	-0.119076	-0.0267661	0.0920631	-0.0741402	-0.0468354	0.0366021	-0.1	-0.386325	0
2413	4.21486	0	0.103756	4.1111	4.49723	4.45612	4.33648	3.60193	0.398358	0.336191	0.119642	0.0411026	0.0122946	0.00350544	0.00015591	0.00337387	0.00467608	0.00146196	0.00719562	0.0489525	0.0157777	1.74041e-05	0.00731257	0.0149188	0.0021322	0.0309514	0.00290926	0.00288241	0.00148587	1.49433e-05	2.13079e-16	9.13124e-06	1.90021e-05	8.07545e-06	5.57647e-07	0	0.000107915	5.83629e-08	1.45972e-06	0.000580289	-0.119076	-0.0267661	0.0920631	-0.0741402	-0.0468354	0.0366021	-0.1	-0.386325	0
2414	4.21486	0	0.103756	4.1111	4.49723	4.45612	4.33648	3.60193	0.398358	0.336191	0.119642	0.0411026	0.0122946	0.00350544	0.00015591	0.00337387	0.00467608	0.00146196	0.00719562	0.0489525	0.0157777	1.74041e-05	0.00731257	0.0149188	0.0021322	0.0309514	0.00290926	0.00288241	0.00148587	1.49433e-05	2.13079e-16	9.13124e-06	1.90021e-05	8.07545e-06	5.57647e-07	0	0.000107915	5.83629e-08	1.45972e-06	0.000580289	-0.119076	-0.0267661	0.0920631	-0.0741402	-0.0468354	0.0366021	-0.1	-0.386325	0
2415	4.21486	0	0.103756	4.1111	4.49723	4.45612	4.33648	3.60193	0.398358	0.336191	0.119642	0.0411026	0.0122946	0.00350544	0.00015591	0.00337387	0.00467608	0.00146196	0.00719562	0.0489525	0.0157777	1.74041e-05	0.00731257	0.0149188	0.0021322	0.0309514	0.00290926	0.00288241	0.00148587	1.49433e-05	2.13079e-16	9.13124e-06	1.90021e-05	8.07545e-06	5.57647e-07	0	0.000107915	5.83629e-08	1.45972e-06	0.000580289	-0.119076	-0.0267661	0.0920631	-0.0741402	-0.0468354	0.0366021	-0.1	-0.386325	0
2416	4.21486	0	0.103756	4.1111	4.49723	4.45612	4.33648	3.60193	0.398358	0.336191	0.119642	0.0411026	0.0122946	0.00350544	0.00015591	0.00337387	0.00467608	0.00146196	0.00719562	0.0489525	0.0157777	1.74041e-05	0.00731257	0.0149188	0.0021322	0.0309514	0.00290926	0.00288241	0.00148587	1.49433e-05	2.13079e-16	9.13124e-06	1.90021e-05	8.07545e-06	5.57647e-07	0	0.000107915	5.83629e-08	1.45972e-06	0.000580289	-0.119076	-0.0267661	0.0920631	-0.0741402	-0.0468354	0.0366021	-0.1	-0.386325	0
2417	4.21486	0	0.103756	4.1111	4.49723	4.45612	4.33648	3.60193	0.398358	0.336191	0.119642	0.0411026	0.0122946	0.00350544	0.00015591	0.00337387	0.00467608	0.00146196	0.00719562	0.0489525	0.0157777	1.74041e-05	0.00731257	0.0149188	0.0021322	0.0309514	0.00290926	0.00288241	0.00148587	1.49433e-05	2.13079e-16	9.13124e-06	1.90021e-05	8.07545e-06	5.57647e-07	0	0.000107915	5.83629e-08	1.45972e-06	0.000580289	-0.119076	-0.0267661	0.0920631	-0.0741402	-0.0468354	0.0366021	-0.1	-0.386325	0
2418	4.21486	0	0.103756	4.1111	4.49723	4.45612	4.33648	3.60193	0.398358	0.336191	0.119642	0.0411026	0.0122946	0.00350544	0.00015591	0.00337387	0.00467608	0.00146196	0.00719562	0.0489525	0.0157777	1.74041e-05	0.00731257	0.0149188	0.0021322	0.0309514	0.00290926	0.00288241	0.00148587	1.49433e-05	2.13079e-16	9.13124e-06	1.90021e-05	8.07545e-06	5.57647e-07	0	0.000107915	5.83629e-08	1.45972e-06	0.000580289	-0.119076	-0.0267661	0.0920631	-0.0741402	-0.0468354	0.0366021	-0.1	-0.386325	0
2419	4.21486	0	0.103756	4.1111	4.49723	4.45612	4.33648	3.60193	0.398358	0.336191	0.119642	0.0411026	0.0122946	0.00350544	0.00015591	0.00337387	0.00467608	0.00146196	0.00719562	0.0489525	0.0157777	1.74041e-05	0.00731257	0.0149188	0.0021322	0.0309514	0.00290926	0.00288241	0.00148587	1.49433e-05	2.13079e-16	9.13124e-06	1.90021e-05	8.07545e-06	5.57647e-07	0	0.000107915	5.83629e-08	1.45972e-06	0.000580289	-0.119076	-0.0267661	0.0920631	-0.0741402	-0.0468354	0.0366021	-0.1	-0.386325	0
2420	4.21486	0	0.103756	4.1111	4.49723	4.45612	4.33648	3.60193	0.398358	0.336191	0.119642	0.0411026	0.0122946	0.00350544	0.00015591	0.00337387	0.00467608	0.00146196	0.00719562	0.0489525	0.0157777	1.74041e-05	0.00731257	0.0149188	0.0021322	0.0309514	0.00290926	0.00288241	0.00148587	1.49433e-05	2.13079e-16	9.13124e-06	1.90021e-05	8.07545e-06	5.57647e-07	0	0.000107915	5.83629e-08	1.45972e-06	0.000580289	-0.119076	-0.0267661	0.0920631	-0.0741402	-0.0468354	0.0366021	-0.1	-0.386325	0
2421	4.21486	0	0.103756	4.1111	4.49723	4.45612	4.33648	3.60193	0.398358	0.336191	0.119642	0.0411026	0.0122946	0.00350544	0.00015591	0.00337387	0.00467608	0.00146196	0.00719562	0.0489525	0.0157777	1.74041e-05	0.00731257	0.0149188	0.0021322	0.0309514	0.00290926	0.00288241	0.00148587	1.49433e-05	2.13079e-16	9.13124e-06	1.90021e-05	8.07545e-06	5.57647e-07	0	0.000107915	5.83629e-08	1.45972e-06	0.000580289	-0.119076	-0.0267661	0.0920631	-0.0741402	-0.0468354	0.0366021	-0.1	-0.386325	0
2422	4.21486	0	0.103756	4.1111	4.49723	4.45612	4.33648	3.60193	0.398358	0.336191	0.119642	0.0411026	0.0122946	0.00350544	0.00015591	0.00337387	0.00467608	0.00146196	0.00719562	0.0489525	0.0157777	1.74041e-05	0.00731257	0.0149188	0.0021322	0.0309514	0.00290926	0.00288241	0.00148587	1.49433e-05	2.13079e-16	9.13124e-06	1.90021e-05	8.07545e-06	5.57647e-07	0	0.000107915	5.83629e-08	1.45972e-06	0.000580289	-0.119076	-0.0267661	0.0920631	-0.0741402	-0.0468354	0.0366021	-0.1	-0.386325	0
2423	4.21486	0	0.103756	4.1111	4.49723	4.45612	4.33648	3.60193	0.398358	0.336191	0.119642	0.0411026	0.0122946	0.00350544	0.00015591	0.00337387	0.00467608	0.00146196	0.00719562	0.0489525	0.0157777	1.74041e-05	0.00731257	0.0149188	0.0021322	0.0309514	0.00290926	0.00288241	0.00148587	1.49433e-05	2.13079e-16	9.13124e-06	1.90021e-05	8.07545e-06	5.57647e-07	0	0.000107915	5.83629e-08	1.45972e-06	0.000580289	-0.119076	-0.0267661	0.0920631	-0.0741402	-0.0468354	0.0366021	-0.1	-0.386325	0
2424	4.21486	0	0.103756	4.1111	4.49723	4.45612	4.33648	3.60193	0.398358	0.336191	0.119642	0.0411026	0.0122946	0.00350544	0.00015591	0.00337387	0.00467608	0.00146196	0.00719562	0.0489525	0.0157777	1.74041e-05	0.00731257	0.0149188	0.0021322	0.0309514	0.00290926	0.00288241	0.00148587	1.49433e-05	2.13079e-16	9.13124e-06	1.90021e-05	8.07545e-06	5.57647e-07	0	0.000107915	5.83629e-08	1.45972e-06	0.000580289	-0.119076	-0.0267661	0.0920631	-0.0741402	-0.0468354	0.0366021	-0.1	-0.386325	0
2425	4.21486	0	0.103756	4.1111	4.49723	4.45612	4.33648	3.60193	0.398358	0.336191	0.119642	0.0411026	0.0122946	0.00350544	0.00015591	0.00337387	0.00467608	0.00146196	0.00719562	0.0489525	0.0157777	1.74041e-05	0.00731257	0.0149188	0.0021322	0.0309514	0.00290926	0.00288241	0.00148587	1.49433e-05	2.13079e-16	9.13124e-06	1.90021e-05	8.07545e-06	5.57647e-07	0	0.000107915	5.83629e-08	1.45972e-06	0.000580289	-0.119076	-0.0267661	0.0920631	-0.0741402	-0.0468354	0.0366021	-0.1	-0.386325	0
2426	4.21486	0	0.103756	4.1111	4.49723	4.45612	4.33648	3.60193	0.398358	0.336191	0.119642	0.0411026	0.0122946	0.00350544	0.00015591	0.00337387	0.00467608	0.00146196	0.00719562	0.0489525	0.0157777	1.74041e-05	0.00731257	0.0149188	0.0021322	0.0309514	0.00290926	0.00288241	0.00148587	1.49433e-05	2.13079e-16	9.13124e-06	1.90021e-05	8.07545e-06	5.57647e-07	0	0.000107915	5.83629e-08	1.45972e-06	0.000580289	-0.119076	-0.0267661	0.0920631	-0.0741402	-0.0468354	0.0366021	-0.1	-0.386325	0
2427	4.21486	0	0.103756	4.1111	4.49723	4.45612	4.33648	3.60193	0.398358	0.336191	0.119642	0.0411026	0.0122946	0.00350544	0.00015591	0.00337387	0.00467608	0.00146196	0.00719562	0.0489525	0.0157777	1.74041e-05	0.00731257	0.0149188	0.0021322	0.0309514	0.00290926	0.00288241	0.00148587	1.49433e-05	2.13079e-16	9.13124e-06	1.90021e-05	8.07545e-06	5.57647e-07	0	0.000107915	5.83629e-08	1.45972e-06	0.000580289	-0.119076	-0.0267661	0.0920631	-0.0741402	-0.0468354	0.0366021	-0.1	-0.386325	0
2428	4.21486	0	0.103756	4.1111	4.49723	4.45612	4.33648	3.60193	0.398358	0.336191	0.119642	0.0411026	0.0122946	0.00350544	0.00015591	0.00337387	0.00467608	0.00146196	0.00719562	0.0489525	0.0157777	1.74041e-05	0.00731257	0.0149188	0.0021322	0.0309514	0.00290926	0.00288241	0.00148587	1.49433e-05	2.13079e-16	9.13124e-06	1.90021e-05	8.07545e-06	5.57647e-07	0	0.000107915	5.83629e-08	1.45972e-06	0.000580289	-0.119076	-0.0267661	0.0920631	-0.0741402	-0.0468354	0.0366021	-0.1	-0.386325	0
2429	4.21486	0	0.103756	4.1111	4.49723	4.45612	4.33648	3.60193	0.398358	0.336191	0.119642	0.0411026	0.0122946	0.00350544	0.00015591	0.00337387	0.00467608	0.00146196	0.00719562	0.0489525	0.0157777	1.74041e-05	0.00731257	0.0149188	0.0021322	0.0309514	0.00290926	0.00288241	0.00148587	1.49433e-05	2.13079e-16	9.13124e-06	1.90021e-05	8.07545e-06	5.57647e-07	0	0.000107915	5.83629e-08	1.45972e-06	0.000580289	-0.119076	-0.0267661	0.0920631	-0.0741402	-0.0468354	0.0366021	-0.1	-0.386325	0
2430	4.21486	0	0.103756	4.1111	4.49723	4.45612	4.33648	3.60193	0.398358	0.336191	0.119642	0.0411026	0.0122946	0.00350544	0.00015591	0.00337387	0.00467608	0.00146196	0.00719562	0.0489525	0.0157777	1.74041e-05	0.00731257	0.0149188	0.0021322	0.0309514	0.00290926	0.00288241	0.00148587	1.49433e-05	2.13079e-16	9.13124e-06	1.90021e-05	8.07545e-06	5.57647e-07	0	0.000107915	5.83629e-08	1.45972e-06	0.000580289	-0.119076	-0.0267661	0.0920631	-0.0741402	-0.0468354	0.0366021	-0.1	-0.386325	0
2431	4.21486	0	0.103756	4.1111	4.49723	4.45612	4.33648	3.60193	0.398358	0.336191	0.119642	0.0411026	0.0122946	0.00350544	0.00015591	0.00337387	0.00467608	0.00146196	0.00719562	0.0489525	0.0157777	1.74041e-05	0.00731257	0.0149188	0.0021322	0.0309514	0.00290926	0.00288241	0.00148587	1.49433e-05	2.13079e-16	9.13124e-06	1.90021e-05	8.07545e-06	5.57647e-07	0	0.000107915	5.83629e-08	1.45972e-06	0.000580289	-0.119076	-0.0267661	0.0920631	-0.0741402	-0.0468354	0.0366021	-0.1	-0.386325	0
2432	4.21486	0	0.103756	4.1111	4.49723	4.45612	4.33648	3.60193	0.398358	0.336191	0.119642	0.0411026	0.0122946	0.00350544	0.00015591	0.00337387	0.00467608	0.00146196	0.00719562	0.0489525	0.0157777	1.74041e-05	0.00731257	0.0149188	0.0021322	0.0309514	0.00290926	0.00288241	0.00148587	1.49433e-05	2.13079e-16	9.13124e-06	1.90021e-05	8.07545e-06	5.57647e-07	0	0.000107915	5.83629e-08	1.45972e-06	0.000580289	-0.119076	-0.0267661	0.0920631	-0.0741402	-0.0468354	0.0366021	-0.1	-0.386325	0
2433	4.21486	0	0.103756	4.1111	4.49723	4.45612	4.33648	3.60193	0.398358	0.336191	0.119642	0.0411026	0.0122946	0.00350544	0.00015591	0.00337387	0.00467608	0.00146196	0.00719562	0.0489525	0.0157777	1.74041e-05	0.00731257	0.0149188	0.0021322	0.0309514	0.00290926	0.00288241	0.00148587	1.49433e-05	2.13079e-16	9.13124e-06	1.90021e-05	8.07545e-06	5.57647e-07	0	0.000107915	5.83629e-08	1.45972e-06	0.000580289	-0.119076	-0.0267661	0.0920631	-0.0741402	-0.0468354	0.0366021	-0.1	-0.386325	0
2434	4.21486	0	0.103756	4.1111	4.49723	4.45612	4.33648	3.60193	0.398358	0.336191	0.119642	0.0411026	0.0122946	0.00350544	0.00015591	0.00337387	0.00467608	0.00146196	0.00719562	0.0489525	0.0157777	1.74041e-05	0.00731257	0.0149188	0.0021322	0.0309514	0.00290926	0.00288241	0.00148587	1.49433e-05	2.13079e-16	9.13124e-06	1.90021e-05	8.07545e-06	5.57647e-07	0	0.000107915	5.83629e-08	1.45972e-06	0.000580289	-0.119076	-0.0267661	0.0920631	-0.0741402	-0.0468354	0.0366021	-0.1	-0.386325	0
2435	4.21486	0	0.103756	4.1111	4.49723	4.45612	4.33648	3.60193	0.398358	0.336191	0.119642	0.0411026	0.0122946	0.00350544	0.00015591	0.00337387	0.00467608	0.00146196	0.00719562	0.0489525	0.0157777	1.74041e-05	0.00731257	0.0149188	0.0021322	0.0309514	0.00290926	0.00288241	0.00148587	1.49433e-05	2.13079e-16	9.13124e-06	1.90021e-05	8.07545e-06	5.57647e-07	0	0.000107915	5.83629e-08	1.45972e-06	0.000580289	-0.119076	-0.0267661	0.0920631	-0.0741402	-0.0468354	0.0366021	-0.1	-0.386325	0
2436	4.21486	0	0.103756	4.1111	4.49723	4.45612	4.33648	3.60193	0.398358	0.336191	0.119642	0.0411026	0.0122946	0.00350544	0.00015591	0.00337387	0.00467608	0.00146196	0.00719562	0.0489525	0.0157777	1.74041e-05	0.00731257	0.0149188	0.0021322	0.0309514	0.00290926	0.00288241	0.00148587	1.49433e-05	2.13079e-16	9.13124e-06	1.90021e-05	8.07545e-06	5.57647e-07	0	0.000107915	5.83629e-08	1.45972e-06	0.000580289	-0.119076	-0.0267661	0.0920631	-0.0741402	-0.0468354	0.0366021	-0.1	-0.386325	0
2437	4.21486	0	0.103756	4.1111	4.49723	4.45612	4.33648	3.60193	0.398358	0.336191	0.119642	0.0411026	0.0122946	0.00350544	0.00015591	0.00337387	0.00467608	0.00146196	0.00719562	0.0489525	0.0157777	1.74041e-05	0.00731257	0.0149188	0.0021322	0.0309514	0.00290926	0.00288241	0.00148587	1.49433e-05	2.13079e-16	9.13124e-06	1.90021e-05	8.07545e-06	5.57647e-07	0	0.000107915	5.83629e-08	1.45972e-06	0.000580289	-0.119076	-0.0267661	0.0920631	-0.0741402	-0.0468354	0.0366021	-0.1	-0.386325	0
2438	4.21486	0	0.103756	4.1111	4.49723	4.45612	4.33648	3.60193	0.398358	0.336191	0.119642	0.0411026	0.0122946	0.00350544	0.00015591	0.00337387	0.00467608	0.00146196	0.00719562	0.0489525	0.0157777	1.74041e-05	0.00731257	0.0149188	0.0021322	0.0309514	0.00290926	0.00288241	0.00148587	1.49433e-05	2.13079e-16	9.13124e-06	1.90021e-05	8.07545e-06	5.57647e-07	0	0.000107915	5.83629e-08	1.45972e-06	0.000580289	-0.119076	-0.0267661	0.0920631	-0.0741402	-0.0468354	0.0366021	-0.1	-0.386325	0
2439	4.21486	0	0.103756	4.1111	4.49723	4.45612	4.33648	3.60193	0.398358	0.336191	0.119642	0.0411026	0.0122946	0.00350544	0.00015591	0.00337387	0.00467608	0.00146196	0.00719562	0.0489525	0.0157777	1.74041e-05	0.00731257	0.0149188	0.0021322	0.0309514	0.00290926	0.00288241	0.00148587	1.49433e-05	2.13079e-16	9.13124e-06	1.90021e-05	8.07545e-06	5.57647e-07	0	0.000107915	5.83629e-08	1.45972e-06	0.000580289	-0.119076	-0.0267661	0.0920631	-0.0741402	-0.0468354	0.0366021	-0.1	-0.386325	0
2440	4.21486	0	0.103756	4.1111	4.49723	4.45612	4.33648	3.60193	0.398358	0.336191	0.119642	0.0411026	0.0122946	0.00350544	0.00015591	0.00337387	0.00467608	0.00146196	0.00719562	0.0489525	0.0157777	1.74041e-05	0.00731257	0.0149188	0.0021322	0.0309514	0.00290926	0.00288241	0.00148587	1.49433e-05	2.13079e-16	9.13124e-06	1.90021e-05	8.07545e-06	5.57647e-07	0	0.000107915	5.83629e-08	1.45972e-06	0.000580289	-0.119076	-0.0267661	0.0920631	-0.0741402	-0.0468354	0.0366021	-0.1	-0.386325	0
2441	4.21486	0	0.103756	4.1111	4.49723	4.45612	4.33648	3.60193	0.398358	0.336191	0.119642	0.0411026	0.0122946	0.00350544	0.00015591	0.00337387	0.00467608	0.00146196	0.00719562	0.0489525	0.0157777	1.74041e-05	0.00731257	0.0149188	0.0021322	0.0309514	0.00290926	0.00288241	0.00148587	1.49433e-05	2.13079e-16	9.13124e-06	1.90021e-05	8.07545e-06	5.57647e-07	0	0.000107915	5.83629e-08	1.45972e-06	0.000580289	-0.119076	-0.0267661	0.0920631	-0.0741402	-0.0468354	0.0366021	-0.1	-0.386325	0
2442	4.21486	0	0.103756	4.1111	4.49723	4.45612	4.33648	3.60193	0.398358	0.336191	0.119642	0.0411026	0.0122946	0.00350544	0.00015591	0.00337387	0.00467608	0.00146196	0.00719562	0.0489525	0.0157777	1.74041e-05	0.00731257	0.0149188	0.0021322	0.0309514	0.00290926	0.00288241	0.00148587	1.49433e-05	2.13079e-16	9.13124e-06	1.90021e-05	8.07545e-06	5.57647e-07	0	0.000107915	5.83629e-08	1.45972e-06	0.000580289	-0.119076	-0.0267661	0.0920631	-0.0741402	-0.0468354	0.0366021	-0.1	-0.386325	0
2443	4.21486	0	0.103756	4.1111	4.49723	4.45612	4.33648	3.60193	0.398358	0.336191	0.119642	0.0411026	0.0122946	0.00350544	0.00015591	0.00337387	0.00467608	0.00146196	0.00719562	0.0489525	0.0157777	1.74041e-05	0.00731257	0.0149188	0.0021322	0.0309514	0.00290926	0.00288241	0.00148587	1.49433e-05	2.13079e-16	9.13124e-06	1.90021e-05	8.07545e-06	5.57647e-07	0	0.000107915	5.83629e-08	1.45972e-06	0.000580289	-0.119076	-0.0267661	0.0920631	-0.0741402	-0.0468354	0.0366021	-0.1	-0.386325	0
2444	4.21486	0	0.103756	4.1111	4.49723	4.45612	4.33648	3.60193	0.398358	0.336191	0.119642	0.0411026	0.0122946	0.00350544	0.00015591	0.00337387	0.00467608	0.00146196	0.00719562	0.0489525	0.0157777	1.74041e-05	0.00731257	0.0149188	0.0021322	0.0309514	0.00290926	0.00288241	0.00148587	1.49433e-05	2.13079e-16	9.13124e-06	1.90021e-05	8.07545e-06	5.57647e-07	0	0.000107915	5.83629e-08	1.45972e-06	0.000580289	-0.119076	-0.0267661	0.0920631	-0.0741402	-0.0468354	0.0366021	-0.1	-0.386325	0
2445	4.21486	0	0.103756	4.1111	4.49723	4.45612	4.33648	3.60193	0.398358	0.336191	0.119642	0.0411026	0.0122946	0.00350544	0.00015591	0.00337387	0.00467608	0.00146196	0.00719562	0.0489525	0.0157777	1.74041e-05	0.00731257	0.0149188	0.0021322	0.0309514	0.00290926	0.00288241	0.00148587	1.49433e-05	2.13079e-16	9.13124e-06	1.90021e-05	8.07545e-06	5.57647e-07	0	0.000107915	5.83629e-08	1.45972e-06	0.000580289	-0.119076	-0.0267661	0.0920631	-0.0741402	-0.0468354	0.0366021	-0.1	-0.386325	0
2446	4.21486	0	0.103756	4.1111	4.49723	4.45612	4.33648	3.60193	0.398358	0.336191	0.119642	0.0411026	0.0122946	0.00350544	0.00015591	0.00337387	0.00467608	0.00146196	0.00719562	0.0489525	0.0157777	1.74041e-05	0.00731257	0.0149188	0.0021322	0.0309514	0.00290926	0.00288241	0.00148587	1.49433e-05	2.13079e-16	9.13124e-06	1.90021e-05	8.07545e-06	5.57647e-07	0	0.000107915	5.83629e-08	1.45972e-06	0.000580289	-0.119076	-0.0267661	0.0920631	-0.0741402	-0.0468354	0.0366021	-0.1	-0.386325	0
2447	4.21486	0	0.103756	4.1111	4.49723	4.45612	4.33648	3.60193	0.398358	0.336191	0.119642	0.0411026	0.0122946	0.00350544	0.00015591	0.00337387	0.00467608	0.00146196	0.00719562	0.0489525	0.0157777	1.74041e-05	0.00731257	0.0149188	0.0021322	0.0309514	0.00290926	0.00288241	0.00148587	1.49433e-05	2.13079e-16	9.13124e-06	1.90021e-05	8.07545e-06	5.57647e-07	0	0.000107915	5.83629e-08	1.45972e-06	0.000580289	-0.119076	-0.0267661	0.0920631	-0.0741402	-0.0468354	0.0366021	-0.1	-0.386325	0
2448	4.21486	0	0.103756	4.1111	4.49723	4.45612	4.33648	3.60193	0.398358	0.336191	0.119642	0.0411026	0.0122946	0.00350544	0.00015591	0.00337387	0.00467608	0.00146196	0.00719562	0.0489525	0.0157777	1.74041e-05	0.00731257	0.0149188	0.0021322	0.0309514	0.00290926	0.00288241	0.00148587	1.49433e-05	2.13079e-16	9.13124e-06	1.90021e-05	8.07545e-06	5.57647e-07	0	0.000107915	5.83629e-08	1.45972e-06	0.000580289	-0.119076	-0.0267661	0.0920631	-0.0741402	-0.0468354	0.0366021	-0.1	-0.386325	0
2449	4.21486	0	0.103756	4.1111	4.49723	4.45612	4.33648	3.60193	0.398358	0.336191	0.119642	0.0411026	0.0122946	0.00350544	0.00015591	0.00337387	0.00467608	0.00146196	0.00719562	0.0489525	0.0157777	1.74041e-05	0.00731257	0.0149188	0.0021322	0.0309514	0.00290926	0.00288241	0.00148587	1.49433e-05	2.13079e-16	9.13124e-06	1.90021e-05	8.07545e-06	5.57647e-07	0	0.000107915	5.83629e-08	1.45972e-06	0.000580289	-0.119076	-0.0267661	0.0920631	-0.0741402	-0.0468354	0.0366021	-0.1	-0.386325	0
2450	4.21486	0	0.103756	4.1111	4.49723	4.45612	4.33648	3.60193	0.398358	0.336191	0.119642	0.0411026	0.0122946	0.00350544	0.00015591	0.00337387	0.00467608	0.00146196	0.00719562	0.0489525	0.0157777	1.74041e-05	0.00731257	0.0149188	0.0021322	0.0309514	0.00290926	0.00288241	0.00148587	1.49433e-05	2.13079e-16	9.13124e-06	1.90021e-05	8.07545e-06	5.57647e-07	0	0.000107915	5.83629e-08	1.45972e-06	0.000580289	-0.119076	-0.0267661	0.0920631	-0.0741402	-0.0468354	0.0366021	-0.1	-0.386325	0
2451	4.21486	0	0.103756	4.1111	4.49723	4.45612	4.33648	3.60193	0.398358	0.336191	0.119642	0.0411026	0.0122946	0.00350544	0.00015591	0.00337387	0.00467608	0.00146196	0.00719562	0.0489525	0.0157777	1.74041e-05	0.00731257	0.0149188	0.0021322	0.0309514	0.00290926	0.00288241	0.00148587	1.49433e-05	2.13079e-16	9.13124e-06	1.90021e-05	8.07545e-06	5.57647e-07	0	0.000107915	5.83629e-08	1.45972e-06	0.000580289	-0.119076	-0.0267661	0.0920631	-0.0741402	-0.0468354	0.0366021	-0.1	-0.386325	0
2452	4.21486	0	0.103756	4.1111	4.49723	4.45612	4.33648	3.60193	0.398358	0.336191	0.119642	0.0411026	0.0122946	0.00350544	0.00015591	0.00337387	0.00467608	0.00146196	0.00719562	0.0489525	0.0157777	1.74041e-05	0.00731257	0.0149188	0.0021322	0.0309514	0.00290926	0.00288241	0.00148587	1.49433e-05	2.13079e-16	9.13124e-06	1.90021e-05	8.07545e-06	5.57647e-07	0	0.000107915	5.83629e-08	1.45972e-06	0.000580289	-0.119076	-0.0267661	0.0920631	-0.0741402	-0.0468354	0.0366021	-0.1	-0.386325	0
2453	4.21486	0	0.103756	4.1111	4.49723	4.45612	4.33648	3.60193	0.398358	0.336191	0.119642	0.0411026	0.0122946	0.00350544	0.00015591	0.00337387	0.00467608	0.00146196	0.00719562	0.0489525	0.0157777	1.74041e-05	0.00731257	0.0149188	0.0021322	0.0309514	0.00290926	0.00288241	0.00148587	1.49433e-05	2.13079e-16	9.13124e-06	1.90021e-05	8.07545e-06	5.57647e-07	0	0.000107915	5.83629e-08	1.45972e-06	0.000580289	-0.119076	-0.0267661	0.0920631	-0.0741402	-0.0468354	0.0366021	-0.1	-0.386325	0
2454	4.21486	0	0.103756	4.1111	4.49723	4.45612	4.33648	3.60193	0.398358	0.336191	0.119642	0.0411026	0.0122946	0.00350544	0.00015591	0.00337387	0.00467608	0.00146196	0.00719562	0.0489525	0.0157777	1.74041e-05	0.00731257	0.0149188	0.0021322	0.0309514	0.00290926	0.00288241	0.00148587	1.49433e-05	2.13079e-16	9.13124e-06	1.90021e-05	8.07545e-06	5.57647e-07	0	0.000107915	5.83629e-08	1.45972e-06	0.000580289	-0.119076	-0.0267661	0.0920631	-0.0741402	-0.0468354	0.0366021	-0.1	-0.386325	0
2455	4.21486	0	0.103756	4.1111	4.49723	4.45612	4.33648	3.60193	0.398358	0.336191	0.119642	0.0411026	0.0122946	0.00350544	0.00015591	0.00337387	0.00467608	0.00146196	0.00719562	0.0489525	0.0157777	1.74041e-05	0.00731257	0.0149188	0.0021322	0.0309514	0.00290926	0.00288241	0.00148587	1.49433e-05	2.13079e-16	9.13124e-06	1.90021e-05	8.07545e-06	5.57647e-07	0	0.000107915	5.83629e-08	1.45972e-06	0.000580289	-0.119076	-0.0267661	0.0920631	-0.0741402	-0.0468354	0.0366021	-0.1	-0.386325	0
2456	4.21486	0	0.103756	4.1111	4.49723	4.45612	4.33648	3.60193	0.398358	0.336191	0.119642	0.0411026	0.0122946	0.00350544	0.00015591	0.00337387	0.00467608	0.00146196	0.00719562	0.0489525	0.0157777	1.74041e-05	0.00731257	0.0149188	0.0021322	0.0309514	0.00290926	0.00288241	0.00148587	1.49433e-05	2.13079e-16	9.13124e-06	1.90021e-05	8.07545e-06	5.57647e-07	0	0.000107915	5.83629e-08	1.45972e-06	0.000580289	-0.119076	-0.0267661	0.0920631	-0.0741402	-0.0468354	0.0366021	-0.1	-0.386325	0
2457	4.21486	0	0.103756	4.1111	4.49723	4.45612	4.33648	3.60193	0.398358	0.336191	0.119642	0.0411026	0.0122946	0.00350544	0.00015591	0.00337387	0.00467608	0.00146196	0.00719562	0.0489525	0.0157777	1.74041e-05	0.00731257	0.0149188	0.0021322	0.0309514	0.00290926	0.00288241	0.00148587	1.49433e-05	2.13079e-16	9.13124e-06	1.90021e-05	8.07545e-06	5.57647e-07	0	0.000107915	5.83629e-08	1.45972e-06	0.000580289	-0.119076	-0.0267661	0.0920631	-0.0741402	-0.0468354	0.0366021	-0.1	-0.386325	0
2458	4.21486	0	0.103756	4.1111	4.49723	4.45612	4.33648	3.60193	0.398358	0.336191	0.119642	0.0411026	0.0122946	0.00350544	0.00015591	0.00337387	0.00467608	0.00146196	0.00719562	0.0489525	0.0157777	1.74041e-05	0.00731257	0.0149188	0.0021322	0.0309514	0.00290926	0.00288241	0.00148587	1.49433e-05	2.13079e-16	9.13124e-06	1.90021e-05	8.07545e-06	5.57647e-07	0	0.000107915	5.83629e-08	1.45972e-06	0.000580289	-0.119076	-0.0267661	0.0920631	-0.0741402	-0.0468354	0.0366021	-0.1	-0.386325	0
2459	4.21486	0	0.103756	4.1111	4.49723	4.45612	4.33648	3.60193	0.398358	0.336191	0.119642	0.0411026	0.0122946	0.00350544	0.00015591	0.00337387	0.00467608	0.00146196	0.00719562	0.0489525	0.0157777	1.74041e-05	0.00731257	0.0149188	0.0021322	0.0309514	0.00290926	0.00288241	0.00148587	1.49433e-05	2.13079e-16	9.13124e-06	1.90021e-05	8.07545e-06	5.57647e-07	0	0.000107915	5.83629e-08	1.45972e-06	0.000580289	-0.119076	-0.0267661	0.0920631	-0.0741402	-0.0468354	0.0366021	-0.1	-0.386325	0
2460	4.21486	0	0.103756	4.1111	4.49723	4.45612	4.33648	3.60193	0.398358	0.336191	0.119642	0.0411026	0.0122946	0.00350544	0.00015591	0.00337387	0.00467608	0.00146196	0.00719562	0.0489525	0.0157777	1.74041e-05	0.00731257	0.0149188	0.0021322	0.0309514	0.00290926	0.00288241	0.00148587	1.49433e-05	2.13079e-16	9.13124e-06	1.90021e-05	8.07545e-06	5.57647e-07	0	0.000107915	5.83629e-08	1.45972e-06	0.000580289	-0.119076	-0.0267661	0.0920631	-0.0741402	-0.0468354	0.0366021	-0.1	-0.386325	0
2461	4.21486	0	0.103756	4.1111	4.49723	4.45612	4.33648	3.60193	0.398358	0.336191	0.119642	0.0411026	0.0122946	0.00350544	0.00015591	0.00337387	0.00467608	0.00146196	0.00719562	0.0489525	0.0157777	1.74041e-05	0.00731257	0.0149188	0.0021322	0.0309514	0.00290926	0.00288241	0.00148587	1.49433e-05	2.13079e-16	9.13124e-06	1.90021e-05	8.07545e-06	5.57647e-07	0	0.000107915	5.83629e-08	1.45972e-06	0.000580289	-0.119076	-0.0267661	0.0920631	-0.0741402	-0.0468354	0.0366021	-0.1	-0.386325	0
2462	4.21486	0	0.103756	4.1111	4.49723	4.45612	4.33648	3.60193	0.398358	0.336191	0.119642	0.0411026	0.0122946	0.00350544	0.00015591	0.00337387	0.00467608	0.00146196	0.00719562	0.0489525	0.0157777	1.74041e-05	0.00731257	0.0149188	0.0021322	0.0309514	0.00290926	0.00288241	0.00148587	1.49433e-05	2.13079e-16	9.13124e-06	1.90021e-05	8.07545e-06	5.57647e-07	0	0.000107915	5.83629e-08	1.45972e-06	0.000580289	-0.119076	-0.0267661	0.0920631	-0.0741402	-0.0468354	0.0366021	-0.1	-0.386325	0
2463	4.21486	0	0.103756	4.1111	4.49723	4.45612	4.33648	3.60193	0.398358	0.336191	0.119642	0.0411026	0.0122946	0.00350544	0.00015591	0.00337387	0.00467608	0.00146196	0.00719562	0.0489525	0.0157777	1.74041e-05	0.00731257	0.0149188	0.0021322	0.0309514	0.00290926	0.00288241	0.00148587	1.49433e-05	2.13079e-16	9.13124e-06	1.90021e-05	8.07545e-06	5.57647e-07	0	0.000107915	5.83629e-08	1.45972e-06	0.000580289	-0.119076	-0.0267661	0.0920631	-0.0741402	-0.0468354	0.0366021	-0.1	-0.386325	0
2464	4.21486	0	0.103756	4.1111	4.49723	4.45612	4.33648	3.60193	0.398358	0.336191	0.119642	0.0411026	0.0122946	0.00350544	0.00015591	0.00337387	0.00467608	0.00146196	0.00719562	0.0489525	0.0157777	1.74041e-05	0.00731257	0.0149188	0.0021322	0.0309514	0.00290926	0.00288241	0.00148587	1.49433e-05	2.13079e-16	9.13124e-06	1.90021e-05	8.07545e-06	5.57647e-07	0	0.000107915	5.83629e-08	1.45972e-06	0.000580289	-0.119076	-0.0267661	0.0920631	-0.0741402	-0.0468354	0.0366021	-0.1	-0.386325	0
2465	4.21486	0	0.103756	4.1111	4.49723	4.45612	4.33648	3.60193	0.398358	0.336191	0.119642	0.0411026	0.0122946	0.00350544	0.00015591	0.00337387	0.00467608	0.00146196	0.00719562	0.0489525	0.0157777	1.74041e-05	0.00731257	0.0149188	0.0021322	0.0309514	0.00290926	0.00288241	0.00148587	1.49433e-05	2.13079e-16	9.13124e-06	1.90021e-05	8.07545e-06	5.57647e-07	0	0.000107915	5.83629e-08	1.45972e-06	0.000580289	-0.119076	-0.0267661	0.0920631	-0.0741402	-0.0468354	0.0366021	-0.1	-0.386325	0
2466	4.21486	0	0.103756	4.1111	4.49723	4.45612	4.33648	3.60193	0.398358	0.336191	0.119642	0.0411026	0.0122946	0.00350544	0.00015591	0.00337387	0.00467608	0.00146196	0.00719562	0.0489525	0.0157777	1.74041e-05	0.00731257	0.0149188	0.0021322	0.0309514	0.00290926	0.00288241	0.00148587	1.49433e-05	2.13079e-16	9.13124e-06	1.90021e-05	8.07545e-06	5.57647e-07	0	0.000107915	5.83629e-08	1.45972e-06	0.000580289	-0.119076	-0.0267661	0.0920631	-0.0741402	-0.0468354	0.0366021	-0.1	-0.386325	0
2467	4.21486	0	0.103756	4.1111	4.49723	4.45612	4.33648	3.60193	0.398358	0.336191	0.119642	0.0411026	0.0122946	0.00350544	0.00015591	0.00337387	0.00467608	0.00146196	0.00719562	0.0489525	0.0157777	1.74041e-05	0.00731257	0.0149188	0.0021322	0.0309514	0.00290926	0.00288241	0.00148587	1.49433e-05	2.13079e-16	9.13124e-06	1.90021e-05	8.07545e-06	5.57647e-07	0	0.000107915	5.83629e-08	1.45972e-06	0.000580289	-0.119076	-0.0267661	0.0920631	-0.0741402	-0.0468354	0.0366021	-0.1	-0.386325	0
2468	4.21486	0	0.103756	4.1111	4.49723	4.45612	4.33648	3.60193	0.398358	0.336191	0.119642	0.0411026	0.0122946	0.00350544	0.00015591	0.00337387	0.00467608	0.00146196	0.00719562	0.0489525	0.0157777	1.74041e-05	0.00731257	0.0149188	0.0021322	0.0309514	0.00290926	0.00288241	0.00148587	1.49433e-05	2.13079e-16	9.13124e-06	1.90021e-05	8.07545e-06	5.57647e-07	0	0.000107915	5.83629e-08	1.45972e-06	0.000580289	-0.119076	-0.0267661	0.0920631	-0.0741402	-0.0468354	0.0366021	-0.1	-0.386325	0
2469	4.21486	0	0.103756	4.1111	4.49723	4.45612	4.33648	3.60193	0.398358	0.336191	0.119642	0.0411026	0.0122946	0.00350544	0.00015591	0.00337387	0.00467608	0.00146196	0.00719562	0.0489525	0.0157777	1.74041e-05	0.00731257	0.0149188	0.0021322	0.0309514	0.00290926	0.00288241	0.00148587	1.49433e-05	2.13079e-16	9.13124e-06	1.90021e-05	8.07545e-06	5.57647e-07	0	0.000107915	5.83629e-08	1.45972e-06	0.000580289	-0.119076	-0.0267661	0.0920631	-0.0741402	-0.0468354	0.0366021	-0.1	-0.386325	0
2470	4.21486	0	0.103756	4.1111	4.49723	4.45612	4.33648	3.60193	0.398358	0.336191	0.119642	0.0411026	0.0122946	0.00350544	0.00015591	0.00337387	0.00467608	0.00146196	0.00719562	0.0489525	0.0157777	1.74041e-05	0.00731257	0.0149188	0.0021322	0.0309514	0.00290926	0.00288241	0.00148587	1.49433e-05	2.13079e-16	9.13124e-06	1.90021e-05	8.07545e-06	5.57647e-07	0	0.000107915	5.83629e-08	1.45972e-06	0.000580289	-0.119076	-0.0267661	0.0920631	-0.0741402	-0.0468354	0.0366021	-0.1	-0.386325	0
2471	4.21486	0	0.103756	4.1111	4.49723	4.45612	4.33648	3.60193	0.398358	0.336191	0.119642	0.0411026	0.0122946	0.00350544	0.00015591	0.00337387	0.00467608	0.00146196	0.00719562	0.0489525	0.0157777	1.74041e-05	0.00731257	0.0149188	0.0021322	0.0309514	0.00290926	0.00288241	0.00148587	1.49433e-05	2.13079e-16	9.13124e-06	1.90021e-05	8.07545e-06	5.57647e-07	0	0.000107915	5.83629e-08	1.45972e-06	0.000580289	-0.119076	-0.0267661	0.0920631	-0.0741402	-0.0468354	0.0366021	-0.1	-0.386325	0
2472	4.21486	0	0.103756	4.1111	4.49723	4.45612	4.33648	3.60193	0.398358	0.336191	0.119642	0.0411026	0.0122946	0.00350544	0.00015591	0.00337387	0.00467608	0.00146196	0.00719562	0.0489525	0.0157777	1.74041e-05	0.00731257	0.0149188	0.0021322	0.0309514	0.00290926	0.00288241	0.00148587	1.49433e-05	2.13079e-16	9.13124e-06	1.90021e-05	8.07545e-06	5.57647e-07	0	0.000107915	5.83629e-08	1.45972e-06	0.000580289	-0.119076	-0.0267661	0.0920631	-0.0741402	-0.0468354	0.0366021	-0.1	-0.386325	0
2473	4.21486	0	0.103756	4.1111	4.49723	4.45612	4.33648	3.60193	0.398358	0.336191	0.119642	0.0411026	0.0122946	0.00350544	0.00015591	0.00337387	0.00467608	0.00146196	0.00719562	0.0489525	0.0157777	1.74041e-05	0.00731257	0.0149188	0.0021322	0.0309514	0.00290926	0.00288241	0.00148587	1.49433e-05	2.13079e-16	9.13124e-06	1.90021e-05	8.07545e-06	5.57647e-07	0	0.000107915	5.83629e-08	1.45972e-06	0.000580289	-0.119076	-0.0267661	0.0920631	-0.0741402	-0.0468354	0.0366021	-0.1	-0.386325	0
2474	4.21486	0	0.103756	4.1111	4.49723	4.45612	4.33648	3.60193	0.398358	0.336191	0.119642	0.0411026	0.0122946	0.00350544	0.00015591	0.00337387	0.00467608	0.00146196	0.00719562	0.0489525	0.0157777	1.74041e-05	0.00731257	0.0149188	0.0021322	0.0309514	0.00290926	0.00288241	0.00148587	1.49433e-05	2.13079e-16	9.13124e-06	1.90021e-05	8.07545e-06	5.57647e-07	0	0.000107915	5.83629e-08	1.45972e-06	0.000580289	-0.119076	-0.0267661	0.0920631	-0.0741402	-0.0468354	0.0366021	-0.1	-0.386325	0
2475	4.21486	0	0.103756	4.1111	4.49723	4.45612	4.33648	3.60193	0.398358	0.336191	0.119642	0.0411026	0.0122946	0.00350544	0.00015591	0.00337387	0.00467608	0.00146196	0.00719562	0.0489525	0.0157777	1.74041e-05	0.00731257	0.0149188	0.0021322	0.0309514	0.00290926	0.00288241	0.00148587	1.49433e-05	2.13079e-16	9.13124e-06	1.90021e-05	8.07545e-06	5.57647e-07	0	0.000107915	5.83629e-08	1.45972e-06	0.000580289	-0.119076	-0.0267661	0.0920631	-0.0741402	-0.0468354	0.0366021	-0.1	-0.386325	0
2476	4.21486	0	0.103756	4.1111	4.49723	4.45612	4.33648	3.60193	0.398358	0.336191	0.119642	0.0411026	0.0122946	0.00350544	0.00015591	0.00337387	0.00467608	0.00146196	0.00719562	0.0489525	0.0157777	1.74041e-05	0.00731257	0.0149188	0.0021322	0.0309514	0.00290926	0.00288241	0.00148587	1.49433e-05	2.13079e-16	9.13124e-06	1.90021e-05	8.07545e-06	5.57647e-07	0	0.000107915	5.83629e-08	1.45972e-06	0.000580289	-0.119076	-0.0267661	0.0920631	-0.0741402	-0.0468354	0.0366021	-0.1	-0.386325	0
2477	4.21486	0	0.103756	4.1111	4.49723	4.45612	4.33648	3.60193	0.398358	0.336191	0.119642	0.0411026	0.0122946	0.00350544	0.00015591	0.00337387	0.00467608	0.00146196	0.00719562	0.0489525	0.0157777	1.74041e-05	0.00731257	0.0149188	0.0021322	0.0309514	0.00290926	0.00288241	0.00148587	1.49433e-05	2.13079e-16	9.13124e-06	1.90021e-05	8.07545e-06	5.57647e-07	0	0.000107915	5.83629e-08	1.45972e-06	0.000580289	-0.119076	-0.0267661	0.0920631	-0.0741402	-0.0468354	0.0366021	-0.1	-0.386325	0
2478	4.21486	0	0.103756	4.1111	4.49723	4.45612	4.33648	3.60193	0.398358	0.336191	0.119642	0.0411026	0.0122946	0.00350544	0.00015591	0.00337387	0.00467608	0.00146196	0.00719562	0.0489525	0.0157777	1.74041e-05	0.00731257	0.0149188	0.0021322	0.0309514	0.00290926	0.00288241	0.00148587	1.49433e-05	2.13079e-16	9.13124e-06	1.90021e-05	8.07545e-06	5.57647e-07	0	0.000107915	5.83629e-08	1.45972e-06	0.000580289	-0.119076	-0.0267661	0.0920631	-0.0741402	-0.0468354	0.0366021	-0.1	-0.386325	0
2479	4.21486	0	0.103756	4.1111	4.49723	4.45612	4.33648	3.60193	0.398358	0.336191	0.119642	0.0411026	0.0122946	0.00350544	0.00015591	0.00337387	0.00467608	0.00146196	0.00719562	0.0489525	0.0157777	1.74041e-05	0.00731257	0.0149188	0.0021322	0.0309514	0.00290926	0.00288241	0.00148587	1.49433e-05	2.13079e-16	9.13124e-06	1.90021e-05	8.07545e-06	5.57647e-07	0	0.000107915	5.83629e-08	1.45972e-06	0.000580289	-0.119076	-0.0267661	0.0920631	-0.0741402	-0.0468354	0.0366021	-0.1	-0.386325	0
2480	4.21486	0	0.103756	4.1111	4.49723	4.45612	4.33648	3.60193	0.398358	0.336191	0.119642	0.0411026	0.0122946	0.00350544	0.00015591	0.00337387	0.00467608	0.00146196	0.00719562	0.0489525	0.0157777	1.74041e-05	0.00731257	0.0149188	0.0021322	0.0309514	0.00290926	0.00288241	0.00148587	1.49433e-05	2.13079e-16	9.13124e-06	1.90021e-05	8.07545e-06	5.57647e-07	0	0.000107915	5.83629e-08	1.45972e-06	0.000580289	-0.119076	-0.0267661	0.0920631	-0.0741402	-0.0468354	0.0366021	-0.1	-0.386325	0
2481	4.21486	0	0.103756	4.1111	4.49723	4.45612	4.33648	3.60193	0.398358	0.336191	0.119642	0.0411026	0.0122946	0.00350544	0.00015591	0.00337387	0.00467608	0.00146196	0.00719562	0.0489525	0.0157777	1.74041e-05	0.00731257	0.0149188	0.0021322	0.0309514	0.00290926	0.00288241	0.00148587	1.49433e-05	2.13079e-16	9.13124e-06	1.90021e-05	8.07545e-06	5.57647e-07	0	0.000107915	5.83629e-08	1.45972e-06	0.000580289	-0.119076	-0.0267661	0.0920631	-0.0741402	-0.0468354	0.0366021	-0.1	-0.386325	0
2482	4.21486	0	0.103756	4.1111	4.49723	4.45612	4.33648	3.60193	0.398358	0.336191	0.119642	0.0411026	0.0122946	0.00350544	0.00015591	0.00337387	0.00467608	0.00146196	0.00719562	0.0489525	0.0157777	1.74041e-05	0.00731257	0.0149188	0.0021322	0.0309514	0.00290926	0.00288241	0.00148587	1.49433e-05	2.13079e-16	9.13124e-06	1.90021e-05	8.07545e-06	5.57647e-07	0	0.000107915	5.83629e-08	1.45972e-06	0.000580289	-0.119076	-0.0267661	0.0920631	-0.0741402	-0.0468354	0.0366021	-0.1	-0.386325	0
2483	4.21486	0	0.103756	4.1111	4.49723	4.45612	4.33648	3.60193	0.398358	0.336191	0.119642	0.0411026	0.0122946	0.00350544	0.00015591	0.00337387	0.00467608	0.00146196	0.00719562	0.0489525	0.0157777	1.74041e-05	0.00731257	0.0149188	0.0021322	0.0309514	0.00290926	0.00288241	0.00148587	1.49433e-05	2.13079e-16	9.13124e-06	1.90021e-05	8.07545e-06	5.57647e-07	0	0.000107915	5.83629e-08	1.45972e-06	0.000580289	-0.119076	-0.0267661	0.0920631	-0.0741402	-0.0468354	0.0366021	-0.1	-0.386325	0
2484	4.21486	0	0.103756	4.1111	4.49723	4.45612	4.33648	3.60193	0.398358	0.336191	0.119642	0.0411026	0.0122946	0.00350544	0.00015591	0.00337387	0.00467608	0.00146196	0.00719562	0.0489525	0.0157777	1.74041e-05	0.00731257	0.0149188	0.0021322	0.0309514	0.00290926	0.00288241	0.00148587	1.49433e-05	2.13079e-16	9.13124e-06	1.90021e-05	8.07545e-06	5.57647e-07	0	0.000107915	5.83629e-08	1.45972e-06	0.000580289	-0.119076	-0.0267661	0.0920631	-0.0741402	-0.0468354	0.0366021	-0.1	-0.386325	0
2485	4.21486	0	0.103756	4.1111	4.49723	4.45612	4.33648	3.60193	0.398358	0.336191	0.119642	0.0411026	0.0122946	0.00350544	0.00015591	0.00337387	0.00467608	0.00146196	0.00719562	0.0489525	0.0157777	1.74041e-05	0.00731257	0.0149188	0.0021322	0.0309514	0.00290926	0.00288241	0.00148587	1.49433e-05	2.13079e-16	9.13124e-06	1.90021e-05	8.07545e-06	5.57647e-07	0	0.000107915	5.83629e-08	1.45972e-06	0.000580289	-0.119076	-0.0267661	0.0920631	-0.0741402	-0.0468354	0.0366021	-0.1	-0.386325	0
2486	4.21486	0	0.103756	4.1111	4.49723	4.45612	4.33648	3.60193	0.398358	0.336191	0.119642	0.0411026	0.0122946	0.00350544	0.00015591	0.00337387	0.00467608	0.00146196	0.00719562	0.0489525	0.0157777	1.74041e-05	0.00731257	0.0149188	0.0021322	0.0309514	0.00290926	0.00288241	0.00148587	1.49433e-05	2.13079e-16	9.13124e-06	1.90021e-05	8.07545e-06	5.57647e-07	0	0.000107915	5.83629e-08	1.45972e-06	0.000580289	-0.119076	-0.0267661	0.0920631	-0.0741402	-0.0468354	0.0366021	-0.1	-0.386325	0
2487	4.21486	0	0.103756	4.1111	4.49723	4.45612	4.33648	3.60193	0.398358	0.336191	0.119642	0.0411026	0.0122946	0.00350544	0.00015591	0.00337387	0.00467608	0.00146196	0.00719562	0.0489525	0.0157777	1.74041e-05	0.00731257	0.0149188	0.0021322	0.0309514	0.00290926	0.00288241	0.00148587	1.49433e-05	2.13079e-16	9.13124e-06	1.90021e-05	8.07545e-06	5.57647e-07	0	0.000107915	5.83629e-08	1.45972e-06	0.000580289	-0.119076	-0.0267661	0.0920631	-0.0741402	-0.0468354	0.0366021	-0.1	-0.386325	0
2488	4.21486	0	0.103756	4.1111	4.49723	4.45612	4.33648	3.60193	0.398358	0.336191	0.119642	0.0411026	0.0122946	0.00350544	0.00015591	0.00337387	0.00467608	0.00146196	0.00719562	0.0489525	0.0157777	1.74041e-05	0.00731257	0.0149188	0.0021322	0.0309514	0.00290926	0.00288241	0.00148587	1.49433e-05	2.13079e-16	9.13124e-06	1.90021e-05	8.07545e-06	5.57647e-07	0	0.000107915	5.83629e-08	1.45972e-06	0.000580289	-0.119076	-0.0267661	0.0920631	-0.0741402	-0.0468354	0.0366021	-0.1	-0.386325	0
2489	4.21486	0	0.103756	4.1111	4.49723	4.45612	4.33648	3.60193	0.398358	0.336191	0.119642	0.0411026	0.0122946	0.00350544	0.00015591	0.00337387	0.00467608	0.00146196	0.00719562	0.0489525	0.0157777	1.74041e-05	0.00731257	0.0149188	0.0021322	0.0309514	0.00290926	0.00288241	0.00148587	1.49433e-05	2.13079e-16	9.13124e-06	1.90021e-05	8.07545e-06	5.57647e-07	0	0.000107915	5.83629e-08	1.45972e-06	0.000580289	-0.119076	-0.0267661	0.0920631	-0.0741402	-0.0468354	0.0366021	-0.1	-0.386325	0
2490	4.21486	0	0.103756	4.1111	4.49723	4.45612	4.33648	3.60193	0.398358	0.336191	0.119642	0.0411026	0.0122946	0.00350544	0.00015591	0.00337387	0.00467608	0.00146196	0.00719562	0.0489525	0.0157777	1.74041e-05	0.00731257	0.0149188	0.0021322	0.0309514	0.00290926	0.00288241	0.00148587	1.49433e-05	2.13079e-16	9.13124e-06	1.90021e-05	8.07545e-06	5.57647e-07	0	0.000107915	5.83629e-08	1.45972e-06	0.000580289	-0.119076	-0.0267661	0.0920631	-0.0741402	-0.0468354	0.0366021	-0.1	-0.386325	0
2491	4.21486	0	0.103756	4.1111	4.49723	4.45612	4.33648	3.60193	0.398358	0.336191	0.119642	0.0411026	0.0122946	0.00350544	0.00015591	0.00337387	0.00467608	0.00146196	0.00719562	0.0489525	0.0157777	1.74041e-05	0.00731257	0.0149188	0.0021322	0.0309514	0.00290926	0.00288241	0.00148587	1.49433e-05	2.13079e-16	9.13124e-06	1.90021e-05	8.07545e-06	5.57647e-07	0	0.000107915	5.83629e-08	1.45972e-06	0.000580289	-0.119076	-0.0267661	0.0920631	-0.0741402	-0.0468354	0.0366021	-0.1	-0.386325	0
2492	4.21486	0	0.103756	4.1111	4.49723	4.45612	4.33648	3.60193	0.398358	0.336191	0.119642	0.0411026	0.0122946	0.00350544	0.00015591	0.00337387	0.00467608	0.00146196	0.00719562	0.0489525	0.0157777	1.74041e-05	0.00731257	0.0149188	0.0021322	0.0309514	0.00290926	0.00288241	0.00148587	1.49433e-05	2.13079e-16	9.13124e-06	1.90021e-05	8.07545e-06	5.57647e-07	0	0.000107915	5.83629e-08	1.45972e-06	0.000580289	-0.119076	-0.0267661	0.0920631	-0.0741402	-0.0468354	0.0366021	-0.1	-0.386325	0
2493	4.21486	0	0.103756	4.1111	4.49723	4.45612	4.33648	3.60193	0.398358	0.336191	0.119642	0.0411026	0.0122946	0.00350544	0.00015591	0.00337387	0.00467608	0.00146196	0.00719562	0.0489525	0.0157777	1.74041e-05	0.00731257	0.0149188	0.0021322	0.0309514	0.00290926	0.00288241	0.00148587	1.49433e-05	2.13079e-16	9.13124e-06	1.90021e-05	8.07545e-06	5.57647e-07	0	0.000107915	5.83629e-08	1.45972e-06	0.000580289	-0.119076	-0.0267661	0.0920631	-0.0741402	-0.0468354	0.0366021	-0.1	-0.386325	0
2494	4.21486	0	0.103756	4.1111	4.49723	4.45612	4.33648	3.60193	0.398358	0.336191	0.119642	0.0411026	0.0122946	0.00350544	0.00015591	0.00337387	0.00467608	0.00146196	0.00719562	0.0489525	0.0157777	1.74041e-05	0.00731257	0.0149188	0.0021322	0.0309514	0.00290926	0.00288241	0.00148587	1.49433e-05	2.13079e-16	9.13124e-06	1.90021e-05	8.07545e-06	5.57647e-07	0	0.000107915	5.83629e-08	1.45972e-06	0.000580289	-0.119076	-0.0267661	0.0920631	-0.0741402	-0.0468354	0.0366021	-0.1	-0.386325	0
2495	4.21486	0	0.103756	4.1111	4.49723	4.45612	4.33648	3.60193	0.398358	0.336191	0.119642	0.0411026	0.0122946	0.00350544	0.00015591	0.00337387	0.00467608	0.00146196	0.00719562	0.0489525	0.0157777	1.74041e-05	0.00731257	0.0149188	0.0021322	0.0309514	0.00290926	0.00288241	0.00148587	1.49433e-05	2.13079e-16	9.13124e-06	1.90021e-05	8.07545e-06	5.57647e-07	0	0.000107915	5.83629e-08	1.45972e-06	0.000580289	-0.119076	-0.0267661	0.0920631	-0.0741402	-0.0468354	0.0366021	-0.1	-0.386325	0
2496	4.21486	0	0.103756	4.1111	4.49723	4.45612	4.33648	3.60193	0.398358	0.336191	0.119642	0.0411026	0.0122946	0.00350544	0.00015591	0.00337387	0.00467608	0.00146196	0.00719562	0.0489525	0.0157777	1.74041e-05	0.00731257	0.0149188	0.0021322	0.0309514	0.00290926	0.00288241	0.00148587	1.49433e-05	2.13079e-16	9.13124e-06	1.90021e-05	8.07545e-06	5.57647e-07	0	0.000107915	5.83629e-08	1.45972e-06	0.000580289	-0.119076	-0.0267661	0.0920631	-0.0741402	-0.0468354	0.0366021	-0.1	-0.386325	0
2497	4.21486	0	0.103756	4.1111	4.49723	4.45612	4.33648	3.60193	0.398358	0.336191	0.119642	0.0411026	0.0122946	0.00350544	0.00015591	0.00337387	0.00467608	0.00146196	0.00719562	0.0489525	0.0157777	1.74041e-05	0.00731257	0.0149188	0.0021322	0.0309514	0.00290926	0.00288241	0.00148587	1.49433e-05	2.13079e-16	9.13124e-06	1.90021e-05	8.07545e-06	5.57647e-07	0	0.000107915	5.83629e-08	1.45972e-06	0.000580289	-0.119076	-0.0267661	0.0920631	-0.0741402	-0.0468354	0.0366021	-0.1	-0.386325	0
2498	4.21486	0	0.103756	4.1111	4.49723	4.45612	4.33648	3.60193	0.398358	0.336191	0.119642	0.0411026	0.0122946	0.00350544	0.00015591	0.00337387	0.00467608	0.00146196	0.00719562	0.0489525	0.0157777	1.74041e-05	0.00731257	0.0149188	0.0021322	0.0309514	0.00290926	0.00288241	0.00148587	1.49433e-05	2.13079e-16	9.13124e-06	1.90021e-05	8.07545e-06	5.57647e-07	0	0.000107915	5.83629e-08	1.45972e-06	0.000580289	-0.119076	-0.0267661	0.0920631	-0.0741402	-0.0468354	0.0366021	-0.1	-0.386325	0
2499	4.21486	0	0.103756	4.1111	4.49723	4.45612	4.33648	3.60193	0.398358	0.336191	0.119642	0.0411026	0.0122946	0.00350544	0.00015591	0.00337387	0.00467608	0.00146196	0.00719562	0.0489525	0.0157777	1.74041e-05	0.00731257	0.0149188	0.0021322	0.0309514	0.00290926	0.00288241	0.00148587	1.49433e-05	2.13079e-16	9.13124e-06	1.90021e-05	8.07545e-06	5.57647e-07	0	0.000107915	5.83629e-08	1.45972e-06	0.000580289	-0.119076	-0.0267661	0.0920631	-0.0741402	-0.0468354	0.0366021	-0.1	-0.386325	0
2500	4.21486	0	0.103756	4.1111	4.49723	4.45612	4.33648	3.60193	0.398358	0.336191	0.119642	0.0411026	0.0122946	0.00350544	0.00015591	0.00337387	0.00467608	0.00146196	0.00719562	0.0489525	0.0157777	1.74041e-05	0.00731257	0.0149188	0.0021322	0.0309514	0.00290926	0.00288241	0.00148587	1.49433e-05	2.13079e-16	9.13124e-06	1.90021e-05	8.07545e-06	5.57647e-07	0	0.000107915	5.83629e-08	1.45972e-06	0.000580289	-0.119076	-0.0267661	0.0920631	-0.0741402	-0.0468354	0.0366021	-0.1	-0.386325	0
[truncated: 4 more columns]
