# Supplementary material for: The Social Cost of Fossil and Industrial CO2 Emissions from 1950 to 2018
Source: Research Square preprint supplement (doi:10.21203/rs.3.rs-2244259/v1), 2022-11-17
Supplement: Supplementary file 21 [file RCP6SCP6TO45_EMISSIONS.xls]

## Sheet: RCP6SCP6to45_EMISSIONS
RCP6-WITH SUPPLEMENTARY EXTENSION SCP6to45__EMISSIONS____________________________
CONTENT: GLOBAL ANNUAL EMISSIONS;
RUN: RCP6SCP6to45, FINAL RELEASE, 30 May. 2010
RCP6.0 CONTACT: AIM group, Toshihiko Masui (masui@nies.go.jp) & Kenichi Matsumoto (matsumoto.kenichi@nies.go.jp)
DATE: 30/5/2010 01:02:33
MAGICC-VERSION: 6.3.09, 25 November 2009
FILE PRODUCED BY: RCP Concentration Calculation & Data Group, M. Meinshausen, S. Smith, K. Riahi, D. van Vuuren et al.
DOCUMENTATION: M. Meinshausen, S. Smith et al. (2011) "The RCP GHG concentrations and their extension from 1765 to 2300", DOI 10.1007/s10584-011-0156-z, Climatic Change.
CMIP5 INFO: http://cmip-pcmdi.llnl.gov/cmip5/
RCP DATABASE: http://www.iiasa.ac.at/web-apps/tnt/RcpDb
FURTHER INFO: For data sources, aknowledgements and further information, see http://www.pik-potsdam.de/~mmalte/rcps.
NOTE: THIS EMISSION DATASET ONLY TO BE USED FOR EMISSION-DRIVEN ESM CMIP5 RUNS, AS CONCENTRATIONS, NOT EMISSIONS, SHALL BE PRESCRIBED IN MAIN CMIP5 RUNS.
RCP6 starts 2005; 20th century data and earlier is provided for convenience; Supplementary extension back to 4.5 levels by 2250.
COLUMN_DESCRIPTION________________________________________
1. FossilCO2 - Fossil & Industrial CO2 (Fossil, Cement, Gas Flaring & Bunker Fuels)
2. OtherCO2 - Landuse related CO2 Emissions
3. CH4 - Methane
4. N2O - Nitrous Oxide
5. - 11. - Tropospheric ozone precursors, aerosols and reactive gas emissions
12. - 23. - Flourinated gases controlled under the Kyoto Protocol, (HFCs, PFCs, SF6)
24. - 39. - Ozone Depleting Substances controlled under the Montreal Protocol (CFCs, HFCFC, Halons, CCl4, MCF, CH3Br, CH3Cl)
&THISFILE_SPECIFICATIONS
THISFILE_DATACOLUMNS	39
THISFILE_FIRSTYEAR	1765
THISFILE_LASTYEAR	2500
THISFILE_ANNUALSTEPS	1
THISFILE_FIRSTDATAROW	39
THISFILE_UNITS	SEE ROW 37
THISFILE_DATTYPE	RCPDAT
/
COLUMN:	1	2	3	4	5	6	7	8	9	10	11	12	13	14	15	16	17	18	19	20	21	22	23	24	25	26	27	28	29	30	31	32	33	34	35	36	37	38	39
UNITS:	GtC/yr	GtC/yr	MtCH4/yr	MtN2O-N/yr	MtS/yr	MtCO/yr	Mt/yr	MtN/yr	Mt/yr	Mt/yr	MtN/yr	kt/yr	kt/yr	kt/yr	kt/yr	kt/yr	kt/yr	kt/yr	kt/yr	kt/yr	kt/yr	kt/yr	kt/yr	kt/yr	kt/yr	kt/yr	kt/yr	kt/yr	kt/yr	kt/yr	kt/yr	kt/yr	kt/yr	kt/yr	kt/yr	kt/yr	kt/yr	kt/yr	kt/yr
v YEARS/GAS >	FossilCO2	OtherCO2	CH4	N2O	SOx	CO	NMVOC	NOx	BC	OC	NH3	CF4	C2F6	C6F14	HFC23	HFC32	HFC43_10	HFC125	HFC134a	HFC143a	HFC227ea	HFC245fa	SF6	CFC_11	CFC_12	CFC_113	CFC_114	CFC_115	CARB_TET	MCF	HCFC_22	HCFC_141B	HCFC_142B	HALON1211	HALON1202	HALON1301	HALON2402	CH3BR	CH3CL
1765	0.003	0	0	0	0	0	0	0	0	0	0.833837	0.0107627	0	0	0	0	0	0	0	0	0	0	0	0	0	0	0	0	0	0	0	0	0	0	0	0	0	157.267	3100.21
1766	0.003	0.0053383	1.96326	0.00519108	0.0988826	9.05022	1.59687	0.109502	0.106998	0.56592	0.854231	0.0107521	0	0	0	0	0	0	0	0	0	0	0	0	0	0	0	0	0	0	0	0	0	0	0	0	0	157.267	3100.21
1767	0.003	0.0106766	2.43645	0.0101168	0.116306	12.9608	2.29232	0.168038	0.133383	0.781468	0.874167	0.0107479	0	0	0	0	0	0	0	0	0	0	0	0	0	0	0	0	0	0	0	0	0	0	0	0	0	157.267	3100.21
1768	0.003	0.0160149	2.91111	0.0150428	0.133811	16.8765	2.98865	0.226625	0.159847	0.997361	0.893654	0.0107438	0	0	0	0	0	0	0	0	0	0	0	0	0	0	0	0	0	0	0	0	0	0	0	0	0	157.267	3100.21
1769	0.003	0.0213532	3.38728	0.0199691	0.151398	20.7975	3.6859	0.285264	0.186393	1.21361	0.912699	0.0107397	0	0	0	0	0	0	0	0	0	0	0	0	0	0	0	0	0	0	0	0	0	0	0	0	0	157.267	3100.21
1770	0.003	0.0266915	3.86501	0.0248956	0.16907	24.7238	4.38409	0.343956	0.213024	1.43023	0.931309	0.0107355	0	0	0	0	0	0	0	0	0	0	0	0	0	0	0	0	0	0	0	0	0	0	0	0	0	157.267	3100.21
1771	0.004	0.0320298	4.34436	0.0298224	0.186831	28.6557	5.08326	0.402704	0.239742	1.64723	0.952532	0.0107314	0	0	0	0	0	0	0	0	0	0	0	0	0	0	0	0	0	0	0	0	0	0	0	0	0	157.267	3100.21
1772	0.004	0.0373681	4.82537	0.0347495	0.204683	32.5933	5.78343	0.461508	0.26655	1.86461	0.970294	0.0107273	0	0	0	0	0	0	0	0	0	0	0	0	0	0	0	0	0	0	0	0	0	0	0	0	0	157.267	3100.21
1773	0.004	0.0427064	5.30809	0.039677	0.222628	36.5368	6.48465	0.520371	0.29345	2.0824	0.987642	0.0107231	0	0	0	0	0	0	0	0	0	0	0	0	0	0	0	0	0	0	0	0	0	0	0	0	0	157.267	3100.21
1774	0.004	0.0480447	5.79258	0.0446047	0.24067	40.4864	7.18692	0.579294	0.320446	2.30061	1.00458	0.0107189	0	0	0	0	0	0	0	0	0	0	0	0	0	0	0	0	0	0	0	0	0	0	0	0	0	157.267	3100.21
1775	0.004	0.053383	6.27889	0.0495328	0.258811	44.4423	7.8903	0.638279	0.347541	2.51924	1.02113	0.0107148	0	0	0	0	0	0	0	0	0	0	0	0	0	0	0	0	0	0	0	0	0	0	0	0	0	157.267	3100.21
1776	0.004	0.0587213	6.76707	0.0544612	0.277055	48.4046	8.59482	0.697329	0.374737	2.73832	1.03728	0.0107106	0	0	0	0	0	0	0	0	0	0	0	0	0	0	0	0	0	0	0	0	0	0	0	0	0	157.267	3100.21
1777	0.004	0.0640596	7.25719	0.0593899	0.295404	52.3736	9.3005	0.756445	0.402037	2.95785	1.05305	0.0107064	0	0	0	0	0	0	0	0	0	0	0	0	0	0	0	0	0	0	0	0	0	0	0	0	0	157.267	3100.21
1778	0.004	0.0693979	7.74931	0.064319	0.313863	56.3496	10.0074	0.815629	0.429446	3.17784	1.06844	0.0107022	0	0	0	0	0	0	0	0	0	0	0	0	0	0	0	0	0	0	0	0	0	0	0	0	0	157.267	3100.21
1779	0.004	0.0747361	8.24348	0.0692485	0.332434	60.3326	10.7155	0.874883	0.456966	3.39833	1.08346	0.010698	0	0	0	0	0	0	0	0	0	0	0	0	0	0	0	0	0	0	0	0	0	0	0	0	0	157.267	3100.21
1780	0.004	0.0800744	8.73977	0.0741783	0.35112	64.3229	11.425	0.93421	0.4846	3.61931	1.09813	0.0106938	0	0	0	0	0	0	0	0	0	0	0	0	0	0	0	0	0	0	0	0	0	0	0	0	0	157.267	3100.21
1781	0.005	0.0854127	9.23824	0.0791086	0.369927	68.3207	12.1357	0.993612	0.512353	3.8408	1.11547	0.0106896	0	0	0	0	0	0	0	0	0	0	0	0	0	0	0	0	0	0	0	0	0	0	0	0	0	157.267	3100.21
1782	0.005	0.090751	9.73897	0.0840392	0.388856	72.3263	12.8478	1.05309	0.540227	4.06282	1.12943	0.0106854	0	0	0	0	0	0	0	0	0	0	0	0	0	0	0	0	0	0	0	0	0	0	0	0	0	157.267	3100.21
1783	0.005	0.0960893	10.242	0.0889702	0.407913	76.34	13.5613	1.11265	0.568228	4.28539	1.14305	0.0106812	0	0	0	0	0	0	0	0	0	0	0	0	0	0	0	0	0	0	0	0	0	0	0	0	0	157.267	3100.21
1784	0.005	0.101428	10.7475	0.0939017	0.4271	80.3619	14.2763	1.17229	0.596358	4.50853	1.15634	0.0106769	0	0	0	0	0	0	0	0	0	0	0	0	0	0	0	0	0	0	0	0	0	0	0	0	0	157.267	3100.21
1785	0.005	0.106766	11.2554	0.0988336	0.446422	84.3923	14.9927	1.23201	0.624621	4.73224	1.1693	0.0106727	0	0	0	0	0	0	0	0	0	0	0	0	0	0	0	0	0	0	0	0	0	0	0	0	0	157.267	3100.21
1786	0.005	0.112104	11.7658	0.103766	0.465884	88.4315	15.7107	1.29182	0.653022	4.95655	1.18194	0.0106684	0	0	0	0	0	0	0	0	0	0	0	0	0	0	0	0	0	0	0	0	0	0	0	0	0	157.267	3100.21
1787	0.005	0.117443	12.2789	0.108699	0.485489	92.4797	16.4303	1.35173	0.681565	5.18148	1.19428	0.0106642	0	0	0	0	0	0	0	0	0	0	0	0	0	0	0	0	0	0	0	0	0	0	0	0	0	157.267	3100.21
1788	0.005	0.122781	12.7947	0.113632	0.505241	96.5372	17.1515	1.41172	0.710254	5.40705	1.20631	0.0106599	0	0	0	0	0	0	0	0	0	0	0	0	0	0	0	0	0	0	0	0	0	0	0	0	0	157.267	3100.21
1789	0.005	0.128119	13.3133	0.118566	0.525147	100.604	17.8744	1.47181	0.739094	5.63327	1.21804	0.0106556	0	0	0	0	0	0	0	0	0	0	0	0	0	0	0	0	0	0	0	0	0	0	0	0	0	157.267	3100.21
1790	0.005	0.133457	13.8347	0.1235	0.545209	104.682	18.599	1.532	0.76809	5.86016	1.22948	0.0106513	0	0	0	0	0	0	0	0	0	0	0	0	0	0	0	0	0	0	0	0	0	0	0	0	0	157.267	3100.21
1791	0.006	0.138796	14.3591	0.128435	0.565433	108.769	19.3255	1.59228	0.797246	6.08776	1.24369	0.010647	0	0	0	0	0	0	0	0	0	0	0	0	0	0	0	0	0	0	0	0	0	0	0	0	0	157.267	3100.21
1792	0.006	0.144134	14.8866	0.133371	0.585825	112.867	20.0537	1.65268	0.826567	6.31607	1.25458	0.0106427	0	0	0	0	0	0	0	0	0	0	0	0	0	0	0	0	0	0	0	0	0	0	0	0	0	157.267	3100.21
1793	0.006	0.149472	15.4172	0.138306	0.606388	116.975	20.7839	1.71318	0.856059	6.54512	1.2652	0.0106384	0	0	0	0	0	0	0	0	0	0	0	0	0	0	0	0	0	0	0	0	0	0	0	0	0	157.267	3100.21
1794	0.006	0.154811	15.9511	0.143243	0.627129	121.095	21.5161	1.77379	0.885726	6.77493	1.27556	0.010634	0	0	0	0	0	0	0	0	0	0	0	0	0	0	0	0	0	0	0	0	0	0	0	0	0	157.267	3100.21
1795	0.006	0.160149	16.4883	0.14818	0.648053	125.227	22.2503	1.83452	0.915575	7.00554	1.28567	0.0106297	0	0	0	0	0	0	0	0	0	0	0	0	0	0	0	0	0	0	0	0	0	0	0	0	0	157.267	3100.21
1796	0.006	0.165487	17.029	0.153118	0.669166	129.37	22.9865	1.89536	0.94561	7.23695	1.29554	0.0106253	0	0	0	0	0	0	0	0	0	0	0	0	0	0	0	0	0	0	0	0	0	0	0	0	0	157.267	3100.21
1797	0.007	0.170825	17.5732	0.158056	0.690473	133.526	23.7249	1.95633	0.975837	7.4692	1.30821	0.0106209	0	0	0	0	0	0	0	0	0	0	0	0	0	0	0	0	0	0	0	0	0	0	0	0	0	157.267	3100.21
1798	0.007	0.176164	18.1211	0.162995	0.711981	137.694	24.4656	2.01742	1.00626	7.70232	1.31761	0.0106165	0	0	0	0	0	0	0	0	0	0	0	0	0	0	0	0	0	0	0	0	0	0	0	0	0	157.267	3100.21
1799	0.007	0.181502	18.6728	0.167935	0.733695	141.875	25.2085	2.07864	1.03689	7.93632	1.32679	0.0106121	0	0	0	0	0	0	0	0	0	0	0	0	0	0	0	0	0	0	0	0	0	0	0	0	0	157.267	3100.21
1800	0.008	0.18684	19.2283	0.172875	0.755622	146.07	25.9538	2.13999	1.06774	8.17124	1.33879	0.0106077	0	0	0	0	0	0	0	0	0	0	0	0	0	0	0	0	0	0	0	0	0	0	0	0	0	157.267	3100.21
1801	0.008	0.192179	19.7879	0.177817	0.777769	150.279	26.7015	2.20149	1.09879	8.4071	1.34754	0.0106032	0	0	0	0	0	0	0	0	0	0	0	0	0	0	0	0	0	0	0	0	0	0	0	0	0	157.267	3100.21
1802	0.01	0.197517	20.3516	0.182758	0.800143	154.502	27.4517	2.26312	1.13008	8.64394	1.36217	0.0105988	0	0	0	0	0	0	0	0	0	0	0	0	0	0	0	0	0	0	0	0	0	0	0	0	0	157.267	3100.21
1803	0.009	0.202855	20.9196	0.187701	0.82275	158.739	28.2045	2.3249	1.16159	8.88178	1.36749	0.0105943	0	0	0	0	0	0	0	0	0	0	0	0	0	0	0	0	0	0	0	0	0	0	0	0	0	157.267	3100.21
1804	0.009	0.208194	21.492	0.192644	0.845598	162.992	28.96	2.38683	1.19334	9.12066	1.37566	0.0105898	0	0	0	0	0	0	0	0	0	0	0	0	0	0	0	0	0	0	0	0	0	0	0	0	0	157.267	3100.21
1805	0.009	0.213532	22.069	0.197589	0.868694	167.261	29.7182	2.44892	1.22534	9.3606	1.38365	0.0105853	0	0	0	0	0	0	0	0	0	0	0	0	0	0	0	0	0	0	0	0	0	0	0	0	0	157.267	3100.21
1806	0.01	0.21887	22.6506	0.202534	0.892046	171.545	30.4792	2.51116	1.25759	9.60165	1.39452	0.0105808	0	0	0	0	0	0	0	0	0	0	0	0	0	0	0	0	0	0	0	0	0	0	0	0	0	157.267	3100.21
1807	0.01	0.224208	23.2371	0.20748	0.915662	175.847	31.2432	2.57357	1.2901	9.84383	1.40217	0.0105762	0	0	0	0	0	0	0	0	0	0	0	0	0	0	0	0	0	0	0	0	0	0	0	0	0	157.267	3100.21
1808	0.01	0.229547	23.8285	0.212426	0.939549	180.165	32.0101	2.63615	1.32289	10.0872	1.40967	0.0105717	0	0	0	0	0	0	0	0	0	0	0	0	0	0	0	0	0	0	0	0	0	0	0	0	0	157.267	3100.21
1809	0.01	0.234885	24.425	0.217374	0.963717	184.501	32.7802	2.69891	1.35594	10.3317	1.41702	0.0105671	0	0	0	0	0	0	0	0	0	0	0	0	0	0	0	0	0	0	0	0	0	0	0	0	0	157.267	3100.21
1810	0.01	0.240223	25.0269	0.222323	0.988174	188.856	33.5535	2.76184	1.38929	10.5775	1.42423	0.0105625	0	0	0	0	0	0	0	0	0	0	0	0	0	0	0	0	0	0	0	0	0	0	0	0	0	157.267	3100.21
1811	0.011	0.245562	25.6341	0.227272	1.01293	193.229	34.33	2.82497	1.42293	10.8246	1.43434	0.0105578	0	0	0	0	0	0	0	0	0	0	0	0	0	0	0	0	0	0	0	0	0	0	0	0	0	157.267	3100.21
1812	0.011	0.2509	26.247	0.232223	1.03799	197.621	35.11	2.88828	1.45687	11.073	1.44129	0.0105532	0	0	0	0	0	0	0	0	0	0	0	0	0	0	0	0	0	0	0	0	0	0	0	0	0	157.267	3100.21
1813	0.011	0.256238	26.8657	0.237175	1.06337	202.034	35.8935	2.9518	1.49113	11.3228	1.44811	0.0105485	0	0	0	0	0	0	0	0	0	0	0	0	0	0	0	0	0	0	0	0	0	0	0	0	0	157.267	3100.21
1814	0.011	0.261577	27.4904	0.242127	1.08907	206.467	36.6806	3.01551	1.52571	11.5739	1.45482	0.0105438	0	0	0	0	0	0	0	0	0	0	0	0	0	0	0	0	0	0	0	0	0	0	0	0	0	157.267	3100.21
1815	0.012	0.266915	28.1212	0.247081	1.11511	210.921	37.4714	3.07944	1.56062	11.8266	1.46447	0.0105391	0	0	0	0	0	0	0	0	0	0	0	0	0	0	0	0	0	0	0	0	0	0	0	0	0	157.267	3100.21
1816	0.013	0.272253	28.7584	0.252036	1.1415	215.398	38.266	3.14359	1.59588	12.0807	1.47402	0.0105343	0	0	0	0	0	0	0	0	0	0	0	0	0	0	0	0	0	0	0	0	0	0	0	0	0	157.267	3100.21
1817	0.014	0.277591	29.4021	0.256992	1.16825	219.896	39.0646	3.20796	1.63149	12.3363	1.48348	0.0105296	0	0	0	0	0	0	0	0	0	0	0	0	0	0	0	0	0	0	0	0	0	0	0	0	0	157.267	3100.21
1818	0.014	0.28293	30.0526	0.261949	1.19536	224.418	39.8673	3.27256	1.66746	12.5935	1.48981	0.0105248	0	0	0	0	0	0	0	0	0	0	0	0	0	0	0	0	0	0	0	0	0	0	0	0	0	157.267	3100.21
1819	0.014	0.288268	30.71	0.266908	1.22286	228.964	40.6742	3.33739	1.70381	12.8524	1.49607	0.0105199	0	0	0	0	0	0	0	0	0	0	0	0	0	0	0	0	0	0	0	0	0	0	0	0	0	157.267	3100.21
1820	0.014	0.293606	31.3745	0.271868	1.25075	233.535	41.4854	3.40248	1.74055	13.1129	1.50225	0.0105151	0	0	0	0	0	0	0	0	0	0	0	0	0	0	0	0	0	0	0	0	0	0	0	0	0	157.267	3100.21
1821	0.014	0.298945	32.0465	0.276829	1.27904	238.131	42.3011	3.46781	1.77769	13.3752	1.50838	0.0105102	0	0	0	0	0	0	0	0	0	0	0	0	0	0	0	0	0	0	0	0	0	0	0	0	0	157.267	3100.21
1822	0.015	0.304283	32.7261	0.281791	1.30774	242.754	43.1214	3.53341	1.81524	13.6393	1.51749	0.0105053	0	0	0	0	0	0	0	0	0	0	0	0	0	0	0	0	0	0	0	0	0	0	0	0	0	157.267	3100.21
1823	0.016	0.309621	33.4135	0.286755	1.33688	247.404	43.9465	3.59927	1.85322	13.9052	1.52655	0.0105003	0	0	0	0	0	0	0	0	0	0	0	0	0	0	0	0	0	0	0	0	0	0	0	0	0	157.267	3100.21
1824	0.016	0.314959	34.1091	0.29172	1.36646	252.081	44.7764	3.66542	1.89163	14.1731	1.53254	0.0104954	0	0	0	0	0	0	0	0	0	0	0	0	0	0	0	0	0	0	0	0	0	0	0	0	0	157.267	3100.21
1825	0.017	0.320298	34.813	0.296687	1.39649	256.788	45.6114	3.73184	1.9305	14.4429	1.54153	0.0104904	0	0	0	0	0	0	0	0	0	0	0	0	0	0	0	0	0	0	0	0	0	0	0	0	0	157.267	3100.21
1826	0.017	0.325636	35.5254	0.301656	1.427	261.524	46.4516	3.79856	1.96983	14.7147	1.54746	0.0104853	0	0	0	0	0	0	0	0	0	0	0	0	0	0	0	0	0	0	0	0	0	0	0	0	0	157.267	3100.21
1827	0.018	0.330974	36.2468	0.306626	1.45799	266.29	47.2972	3.86559	2.00964	14.9886	1.55641	0.0104802	0	0	0	0	0	0	0	0	0	0	0	0	0	0	0	0	0	0	0	0	0	0	0	0	0	157.267	3100.21
1828	0.018	0.336313	36.9773	0.311597	1.48948	271.088	48.1483	3.93293	2.04994	15.2646	1.5623	0.0104751	0	0	0	0	0	0	0	0	0	0	0	0	0	0	0	0	0	0	0	0	0	0	0	0	0	157.267	3100.21
1829	0.018	0.341651	37.7173	0.31657	1.52149	275.919	49.0051	4.00059	2.09076	15.5429	1.5682	0.0104699	0	0	0	0	0	0	0	0	0	0	0	0	0	0	0	0	0	0	0	0	0	0	0	0	0	157.267	3100.21
1830	0.024	0.346989	38.4669	0.321545	1.55403	280.783	49.8678	4.06858	2.1321	15.8235	1.59235	0.0104648	0	0	0	0	0	0	0	0	0	0	0	0	0	0	0	0	0	0	0	0	0	0	0	0	0	157.267	3100.21
1831	0.023	0.352328	39.2266	0.326522	1.58711	285.682	50.7366	4.13692	2.17399	16.1064	1.59521	0.0104595	0	0	0	0	0	0	0	0	0	0	0	0	0	0	0	0	0	0	0	0	0	0	0	0	0	157.267	3100.21
1832	0.023	0.357666	39.9966	0.331501	1.62076	290.617	51.6116	4.2056	2.21643	16.3917	1.60114	0.0104542	0	0	0	0	0	0	0	0	0	0	0	0	0	0	0	0	0	0	0	0	0	0	0	0	0	157.267	3100.21
1833	0.024	0.363004	40.7773	0.336481	1.655	295.588	52.493	4.27466	2.25945	16.6796	1.61014	0.0104489	0	0	0	0	0	0	0	0	0	0	0	0	0	0	0	0	0	0	0	0	0	0	0	0	0	157.267	3100.21
1834	0.024	0.368342	41.5689	0.341464	1.68983	300.597	53.3811	4.34409	2.30306	16.97	1.61613	0.0104436	0	0	0	0	0	0	0	0	0	0	0	0	0	0	0	0	0	0	0	0	0	0	0	0	0	157.267	3100.21
1835	0.025	0.373681	42.3719	0.346448	1.72528	305.645	54.2761	4.4139	2.34729	17.2631	1.6252	0.0104381	0	0	0	0	0	0	0	0	0	0	0	0	0	0	0	0	0	0	0	0	0	0	0	0	0	157.267	3100.21
1836	0.029	0.379019	43.1865	0.351435	1.76137	310.733	55.1781	4.48412	2.39214	17.5589	1.64344	0.0104327	0	0	0	0	0	0	0	0	0	0	0	0	0	0	0	0	0	0	0	0	0	0	0	0	0	157.267	3100.21
1837	0.029	0.384357	44.0132	0.356423	1.79812	315.863	56.0874	4.55474	2.43765	17.8576	1.64957	0.0104272	0	0	0	0	0	0	0	0	0	0	0	0	0	0	0	0	0	0	0	0	0	0	0	0	0	157.267	3100.21
1838	0.03	0.389696	44.8522	0.361414	1.83554	321.036	57.0041	4.6258	2.48383	18.1592	1.65881	0.0104216	0	0	0	0	0	0	0	0	0	0	0	0	0	0	0	0	0	0	0	0	0	0	0	0	0	157.267	3100.21
1839	0.031	0.395034	45.7041	0.366407	1.87367	326.252	57.9287	4.69728	2.5307	18.4638	1.66811	0.010416	0	0	0	0	0	0	0	0	0	0	0	0	0	0	0	0	0	0	0	0	0	0	0	0	0	157.267	3100.21
1840	0.033	0.400372	46.5691	0.371403	1.91251	331.515	58.8612	4.76922	2.57828	18.7714	1.68054	0.0104104	0	0	0	0	0	0	0	0	0	0	0	0	0	0	0	0	0	0	0	0	0	0	0	0	0	157.267	3100.21
1841	0.034	0.405711	47.4478	0.376401	1.9521	336.824	59.8019	4.84163	2.6266	19.0823	1.69001	0.0104047	0	0	0	0	0	0	0	0	0	0	0	0	0	0	0	0	0	0	0	0	0	0	0	0	0	157.267	3100.21
1842	0.036	0.411049	48.3404	0.381401	1.99246	342.181	60.7511	4.91451	2.67568	19.3965	1.70261	0.0103989	0	0	0	0	0	0	0	0	0	0	0	0	0	0	0	0	0	0	0	0	0	0	0	0	0	157.267	3100.21
1843	0.037	0.416387	49.2475	0.386404	2.0336	347.588	61.709	4.98789	2.72554	19.7141	1.71227	0.0103931	0	0	0	0	0	0	0	0	0	0	0	0	0	0	0	0	0	0	0	0	0	0	0	0	0	157.267	3100.21
1844	0.039	0.421725	50.1694	0.39141	2.07556	353.047	62.6759	5.06177	2.7762	20.0351	1.72507	0.0103872	0	0	0	0	0	0	0	0	0	0	0	0	0	0	0	0	0	0	0	0	0	0	0	0	0	157.267	3100.21
1845	0.043	0.427064	51.1068	0.396418	2.11836	358.558	63.6522	5.13618	2.8277	20.3598	1.74408	0.0103812	0	0	0	0	0	0	0	0	0	0	0	0	0	0	0	0	0	0	0	0	0	0	0	0	0	157.267	3100.21
1846	0.043	0.432402	52.0599	0.401429	2.16202	364.125	64.638	5.21114	2.88005	20.6882	1.75104	0.0103752	0	0	0	0	0	0	0	0	0	0	0	0	0	0	0	0	0	0	0	0	0	0	0	0	0	157.267	3100.21
1847	0.046	0.43774	53.0294	0.406443	2.20657	369.747	65.6336	5.28665	2.93328	21.0205	1.76725	0.0103691	0	0	0	0	0	0	0	0	0	0	0	0	0	0	0	0	0	0	0	0	0	0	0	0	0	157.267	3100.21
1848	0.047	0.443079	54.0156	0.411461	2.25204	375.427	66.6395	5.36273	2.98742	21.3567	1.77751	0.010363	0	0	0	0	0	0	0	0	0	0	0	0	0	0	0	0	0	0	0	0	0	0	0	0	0	157.267	3100.21
1849	0.05	0.448417	55.0193	0.416481	2.29847	381.167	67.6558	5.43941	3.0425	21.6969	1.79401	0.0103568	0	0	0	0	0	0	0	0	0	0	0	0	0	0	0	0	0	0	0	0	0	0	0	0	0	157.267	3100.21
1850	0.054	0.453755	56.0408	0.421504	2.34586	386.969	68.6829	5.5167	3.09855	22.0414	1.81369	0.0103505	0	0	0	0	0	0	0	0	0	0	0	0	0	0	0	0	1.395	0	0	0	0	0	0	0	0	157.267	3100.21
1851	0.054	0.446786	56.4613	0.427401	2.40128	387.461	68.7278	5.54232	3.11874	22.1051	1.84692	0.0103509	0	0	0	0	0	0	0	0	0	0	0	0	0	0	0	0	1.447	0	0	0	0	0	0	0	0	157.267	3100.21
1852	0.057	0.498623	56.8819	0.464661	2.4567	387.952	68.7726	5.56795	3.13893	22.1687	1.99469	0.0103513	0	0	0	0	0	0	0	0	0	0	0	0	0	0	0	0	1.502	0	0	0	0	0	0	0	0	157.267	3100.21
1853	0.059	0.497354	57.3024	0.464774	2.51212	388.443	68.8174	5.59357	3.15912	22.2324	2.00081	0.0103518	0	0	0	0	0	0	0	0	0	0	0	0	0	0	0	0	1.554	0	0	0	0	0	0	0	0	157.267	3100.21
1854	0.069	0.495817	57.723	0.464436	2.56753	388.935	68.8622	5.61919	3.17931	22.296	2.0303	0.0103522	0	0	0	0	0	0	0	0	0	0	0	0	0	0	0	0	1.607	0	0	0	0	0	0	0	0	157.267	3100.21
1855	0.071	0.493679	58.1436	0.463279	2.62295	389.426	68.9071	5.64481	3.1995	22.3597	2.03251	0.0103526	0	0	0	0	0	0	0	0	0	0	0	0	0	0	0	0	1.657	0	0	0	0	0	0	0	0	157.267	3100.21
1856	0.076	0.498935	58.5641	0.467293	2.67837	389.918	68.9519	5.67043	3.21969	22.4233	2.06176	0.0103531	0	0	0	0	0	0	0	0	0	0	0	0	0	0	0	0	1.712	0	0	0	0	0	0	0	0	157.267	3100.21
1857	0.077	0.504232	58.9847	0.471264	2.73379	390.409	68.9967	5.69605	3.23988	22.487	2.07845	0.0103535	0	0	0	0	0	0	0	0	0	0	0	0	0	0	0	0	1.765	0	0	0	0	0	0	0	0	157.267	3100.21
1858	0.078	0.509233	59.4052	0.475031	2.78921	390.9	69.0416	5.72167	3.26007	22.5506	2.0943	0.0103539	0	0	0	0	0	0	0	0	0	0	0	0	0	0	0	0	1.815	0	0	0	0	0	0	0	0	157.267	3100.21
1859	0.083	0.514254	59.8258	0.478766	2.84462	391.392	69.0864	5.74729	3.28025	22.6143	2.12297	0.0103544	0	0	0	0	0	0	0	0	0	0	0	0	0	0	0	0	1.87	0	0	0	0	0	0	0	0	157.267	3100.21
1860	0.091	0.518967	60.2464	0.482577	2.90004	391.883	69.1312	5.77291	3.30044	22.6779	2.16198	0.0103548	0	0	0	0	0	0	0	0	0	0	0	0	0	0	0	0	1.923	0	0	0	0	0	0	0	0	157.267	3100.21
1861	0.095	0.528224	59.6145	0.504995	2.99268	392.896	69.269	5.81284	3.32441	22.7345	2.27359	0.010355	0	0	0	0	0	0	0	0	0	0	0	0	0	0	0	0	1.973	0	0	0	0	0	0	0	0	157.267	3100.21
1862	0.097	0.473717	58.9826	0.471113	3.08532	393.909	69.4069	5.85276	3.34838	22.7911	2.15582	0.0103551	0	0	0	0	0	0	0	0	0	0	0	0	0	0	0	0	2.028	0	0	0	0	0	0	0	0	157.267	3100.21
1863	0.104	0.473749	58.3507	0.474449	3.17795	394.922	69.5447	5.89268	3.37235	22.8478	2.19233	0.0103553	0	0	0	0	0	0	0	0	0	0	0	0	0	0	0	0	2.081	0	0	0	0	0	0	0	0	157.267	3100.21
1864	0.112	0.474138	57.7188	0.477858	3.27059	395.935	69.6826	5.9326	3.39632	22.9044	2.22994	0.0103555	0	0	0	0	0	0	0	0	0	0	0	0	0	0	0	0	2.134	0	0	0	0	0	0	0	0	157.267	3100.21
1865	0.119	0.474795	57.0869	0.48145	3.36323	396.948	69.8204	5.97253	3.42029	22.961	2.26553	0.0103556	0	0	0	0	0	0	0	0	0	0	0	0	0	0	0	0	2.184	0	0	0	0	0	0	0	0	157.267	3100.21
1866	0.122	0.474912	56.455	0.484205	3.45587	397.961	69.9582	6.01245	3.44426	23.0176	2.2872	0.0103558	0	0	0	0	0	0	0	0	0	0	0	0	0	0	0	0	2.239	0	0	0	0	0	0	0	0	157.267	3100.21
1867	0.130223	0.473384	55.8231	0.484723	3.5485	398.974	70.0961	6.05237	3.46823	23.0742	2.31876	0.010356	0	0	0	0	0	0	0	0	0	0	0	0	0	0	0	0	2.291	0	0	0	0	0	0	0	0	157.267	3100.21
1868	0.135252	0.471983	55.1912	0.485953	3.64114	399.987	70.2339	6.09229	3.4922	23.1308	2.33718	0.0103561	0	0	0	0	0	0	0	0	0	0	0	0	0	0	0	0	2.341	0	0	0	0	0	0	0	0	157.267	3100.21
1869	0.142281	0.470485	54.5593	0.486862	3.73378	401	70.3717	6.13222	3.51617	23.1875	2.36281	0.0103563	0	0	0	0	0	0	0	0	0	0	0	0	0	0	0	0	2.386	0	0	0	0	0	0	0	0	157.267	3100.21
1870	0.147311	0.469334	53.9274	0.487744	3.82642	402.013	70.5096	6.17214	3.54014	23.2441	2.38241	0.0103565	0	0	0	0	0	0	0	0	0	0	0	0	0	0	0	0	2.452	0	0	0	0	0	0	0	0	157.267	3100.21
1871	0.15634	0.487325	56.6839	0.585016	3.99317	403.032	70.6533	6.21717	3.56245	23.2838	2.86067	0.0103569	0	0	0	0	0	0	0	0	0	0	0	0	0	0	0	0	2.505	0	0	0	0	0	0	0	0	157.267	3100.21
1872	0.173369	0.566964	59.4403	0.66674	4.15992	404.051	70.7971	6.26219	3.58477	23.3236	3.24017	0.0103573	0	0	0	0	0	0	0	0	0	0	0	0	0	0	0	0	2.557	0	0	0	0	0	0	0	0	157.267	3100.21
1873	0.184398	0.576901	62.1968	0.696371	4.32667	405.071	70.9408	6.30722	3.60708	23.3634	3.40336	0.0103577	0	0	0	0	0	0	0	0	0	0	0	0	0	0	0	0	2.61	0	0	0	0	0	0	0	0	157.267	3100.21
1874	0.174428	0.583284	64.9533	0.70875	4.49342	406.09	71.0846	6.35225	3.62939	23.4031	3.42716	0.0103581	0	0	0	0	0	0	0	0	0	0	0	0	0	0	0	0	2.663	0	0	0	0	0	0	0	0	157.267	3100.21
1875	0.188457	0.58997	67.7097	0.720343	4.66018	407.109	71.2283	6.39727	3.6517	23.4429	3.51731	0.0103585	0	0	0	0	0	0	0	0	0	0	0	0	0	0	0	0	2.85	0	0	0	0	0	0	0	0	157.267	3100.21
1876	0.191486	0.596392	70.4662	0.745243	4.82693	408.128	71.3721	6.4423	3.67401	23.4827	3.63755	0.0103589	0	0	0	0	0	0	0	0	0	0	0	0	0	0	0	0	2.989	0	0	0	0	0	0	0	0	157.267	3100.21
1877	0.194515	0.602623	73.2226	0.756332	4.99368	409.147	71.5158	6.48732	3.69633	23.5224	3.69585	0.0103593	0	0	0	0	0	0	0	0	0	0	0	0	0	0	0	0	3.13	0	0	0	0	0	0	0	0	157.267	3100.21
1878	0.196	0.609051	75.9791	0.766046	5.16043	410.166	71.6596	6.53235	3.71864	23.5622	3.74565	0.0103597	0	0	0	0	0	0	0	0	0	0	0	0	0	0	0	0	3.275	0	0	0	0	0	0	0	0	157.267	3100.21
1879	0.21	0.615348	78.7356	0.774911	5.32718	411.185	71.8033	6.57738	3.74095	23.602	3.83041	0.0103602	0	0	0	0	0	0	0	0	0	0	0	0	0	0	0	0	3.396	0	0	0	0	0	0	0	0	157.267	3100.21
1880	0.236	0.621243	81.492	0.784121	5.49393	412.204	71.9471	6.6224	3.76326	23.6417	3.95202	0.0103606	0	0	0	0	0	0	0	0	0	0	0	0	0	0	0	0	3.573	0	0	0	0	0	0	0	0	157.267	3100.21
1881	0.243	0.648873	84.3595	0.811578	5.76232	413.256	72.0998	6.67595	3.79257	23.6754	4.07131	0.0103613	0	0	0	0	0	0	0	0	0	0	0	0	0	0	0	0	3.726	0	0	0	0	0	0	0	0	157.267	3100.21
1882	0.256	0.604664	87.2269	0.78526	6.03071	414.308	72.2526	6.72949	3.82188	23.7092	4.01987	0.010362	0	0	0	0	0	0	0	0	0	0	0	0	0	0	0	0	3.883	0	0	0	0	0	0	0	0	157.267	3100.21
1883	0.272	0.608518	90.0943	0.792556	6.2991	415.36	72.4053	6.78304	3.85119	23.7429	4.09853	0.0103627	0	0	0	0	0	0	0	0	0	0	0	0	0	0	0	0	4.043	0	0	0	0	0	0	0	0	157.267	3100.21
1884	0.275	0.612128	92.9618	0.798751	6.56748	416.412	72.5581	6.83658	3.8805	23.7766	4.13334	0.0103634	0	0	0	0	0	0	0	0	0	0	0	0	0	0	0	0	4.233	0	0	0	0	0	0	0	0	157.267	3100.21
1885	0.277	0.615236	95.8292	0.804534	6.83587	417.464	72.7108	6.89012	3.90981	23.8103	4.16461	0.0103642	0	0	0	0	0	0	0	0	0	0	0	0	0	0	0	0	4.427	0	0	0	0	0	0	0	0	157.267	3100.21
1886	0.281	0.617144	98.6966	0.826194	7.10426	418.517	72.8636	6.94367	3.93912	23.844	4.27589	0.0103649	0	0	0	0	0	0	0	0	0	0	0	0	0	0	0	0	4.625	0	0	0	0	0	0	0	0	157.267	3100.21
1887	0.295	0.616163	101.564	0.832196	7.37264	419.569	73.0163	6.99721	3.96843	23.8777	4.35318	0.0103656	0	0	0	0	0	0	0	0	0	0	0	0	0	0	0	0	4.827	0	0	0	0	0	0	0	0	157.267	3100.21
1888	0.327	0.614734	104.431	0.837058	7.64103	420.621	73.169	7.05076	3.99774	23.9115	4.47487	0.0103663	0	0	0	0	0	0	0	0	0	0	0	0	0	0	0	0	5.033	0	0	0	0	0	0	0	0	157.267	3100.21
1889	0.327	0.6132	107.299	0.84144	7.90942	421.673	73.3218	7.1043	4.02704	23.9452	4.49842	0.010367	0	0	0	0	0	0	0	0	0	0	0	0	0	0	0	0	5.27	0	0	0	0	0	0	0	0	157.267	3100.21
1890	0.356	0.611754	110.166	0.845525	8.1778	422.725	73.4745	7.15784	4.05635	23.9789	4.6037	0.0103678	0	0	0	0	0	0	0	0	0	0	0	0	0	0	0	0	5.485	0	0	0	0	0	0	0	0	157.267	3100.21
1891	0.372	0.610249	111.524	0.850982	8.56737	424.293	73.7003	7.23586	4.08828	24.0114	4.68307	0.0103687	0	0	0	0	0	0	0	0	0	0	0	0	0	0	0	0	5.731	0	0	0	0	0	0	0	0	157.267	3100.21
1892	0.374	0.623191	112.881	0.85742	8.95694	425.861	73.9261	7.31388	4.12022	24.0439	4.75516	0.0103697	0	0	0	0	0	0	0	0	0	0	0	0	0	0	0	0	6.01	0	0	0	0	0	0	0	0	157.267	3100.21
1893	0.37	0.624403	114.238	0.864758	9.34651	427.429	74.152	7.3919	4.15215	24.0763	4.82174	0.0103706	0	0	0	0	0	0	0	0	0	0	0	0	0	0	0	0	6.267	0	0	0	0	0	0	0	0	157.267	3100.21
1894	0.383	0.640367	115.595	0.872945	9.73608	428.997	74.3778	7.46992	4.18408	24.1088	4.88457	0.0103716	0	0	0	0	0	0	0	0	0	0	0	0	0	0	0	0	6.529	0	0	0	0	0	0	0	0	157.267	3100.21
1895	0.406	0.644419	116.953	0.881882	10.1256	430.565	74.6036	7.54794	4.21601	24.1413	4.94542	0.0103726	0	0	0	0	0	0	0	0	0	0	0	0	0	0	0	0	6.824	0	0	0	0	0	0	0	0	157.267	3100.21
1896	0.419	0.646278	118.31	0.891418	10.5152	432.133	74.8294	7.62596	4.24794	24.1738	5.00605	0.0103735	0	0	0	0	0	0	0	0	0	0	0	0	0	0	0	0	7.151	0	0	0	0	0	0	0	0	157.267	3100.21
1897	0.44	0.649564	119.667	0.901402	10.9048	433.701	75.0552	7.70398	4.27987	24.2063	5.06823	0.0103745	0	0	0	0	0	0	0	0	0	0	0	0	0	0	0	0	7.432	0	0	0	0	0	0	0	0	157.267	3100.21
1898	0.465	0.651001	121.025	0.911681	11.2943	435.269	75.281	7.782	4.3118	24.2387	5.13374	0.0103754	0	0	0	0	0	0	0	0	0	0	0	0	0	0	0	0	7.798	0	0	0	0	0	0	0	0	157.267	3100.21
1899	0.507	0.652204	122.382	0.922105	11.6839	436.837	75.5068	7.86002	4.34373	24.2712	5.20432	0.0103764	0.959119	0	0	0	0	0	0	0	0	0	0	0	0	0	0	0	8.119	0	0	0	0	0	0	0	0	157.267	3100.21
1900	0.534	0.653206	123.739	0.932522	12.0735	438.405	75.7326	7.93804	4.37566	24.3037	5.28176	0.0103773	0.0505758	0	0	0	0	0	0	0	0	0	0	0	0	0	0	0	8.473	0	0	0	0	0	0	0	0	157.267	3100.21
1901	0.552	0.702943	124.841	0.944667	12.6299	439.892	75.9205	8.04414	4.41738	24.3365	5.36856	0.0103797	0.0532377	0	0	0	0	0	0	0	0	0	0	0	0	0	0	0	8.592	0	0	0	0	0	0	0	0	157.267	3100.21
1902	0.566	0.702974	125.944	0.959931	13.1863	441.378	76.1084	8.15023	4.45911	24.3693	5.46467	0.0103821	0.0560397	0	0	0	0	0	0	0	0	0	0	0	0	0	0	0	8.762	0	0	0	0	0	0	0	0	157.267	3100.21
1903	0.617	0.726671	127.046	0.977647	13.7427	442.865	76.2962	8.25633	4.50083	24.4021	5.56792	0.0103845	0.0589892	0	0	0	0	0	0	0	0	0	0	0	0	0	0	0	8.906	0	0	0	0	0	0	0	0	157.267	3100.21
1904	0.624	0.748293	128.149	0.997229	14.2991	444.351	76.4841	8.36242	4.54255	24.4349	5.6762	0.0103868	0.0620939	0	0	0	0	0	0	0	0	0	0	0	0	0	0	0	9.102	0	0	0	0	0	0	0	0	157.267	3100.21
1905	0.663	0.769815	129.251	1.01813	14.8555	445.838	76.672	8.46851	4.58427	24.4677	5.78736	0.0103892	0.065362	0	0	0	0	0	0	0	0	0	0	0	0	0	0	0	9.623	0	0	0	0	0	0	0	0	157.267	3100.21
1906	0.707	0.796534	130.354	1.03974	15.4119	447.324	76.8598	8.57461	4.62599	24.5005	5.89926	0.0103916	0.0688021	0	0	0	0	0	0	0	0	0	0	0	0	0	0	0	12.093	0	0	0	0	0	0	0	0	157.267	3100.21
1907	0.784	0.803763	131.456	1.06146	15.9683	448.811	77.0477	8.6807	4.66771	24.5333	6.00977	0.010394	0.0724232	0	0	0	0	0	0	0	0	0	0	0	0	0	0	0	12.363	0	0	0	0	0	0	0	0	157.267	3100.21
1908	0.75	0.811413	132.559	1.08267	16.5247	450.297	77.2356	8.78679	4.70944	24.5661	6.11675	0.0103964	0.076235	0	0	0	0	0	0	0	0	0	0	0	0	0	0	0	12.633	0	0	0	0	0	0	0	0	157.267	3100.21
1909	0.785	0.817378	133.661	1.10278	17.081	451.784	77.4235	8.89289	4.75116	24.5989	6.21805	0.0103987	0.0802474	0	0	0	0	0	0	0	0	0	0	0	0	0	0	0	12.903	0	0	0	0	0	0	0	0	157.267	3100.21
1910	0.819	0.821982	134.764	1.12118	17.6374	453.27	77.6113	8.99898	4.79288	24.6317	6.31156	0.0104011	0.0844709	0	0	0	0	0	0	0	0	0	0	0	0	0	0	0	13.146	0	0	0	0	0	0	0	0	157.267	3100.21
1911	0.836	0.778894	135.969	1.13897	17.8214	451.76	77.2727	9.05696	4.79495	24.4275	6.39756	0.0104064	0.0889167	0	0	0	0	0	0	0	0	0	0	0	0	0	0	0	14.007	0	0	0	0	0	0	0	0	157.267	3100.21
1912	0.879	0.747848	137.175	1.15756	18.0054	450.249	76.9341	9.11494	4.79702	24.2232	6.47866	0.0104117	0.0935966	0	0	0	0	0	0	0	0	0	0	0	0	0	0	0	19.895	0	0	0	0	0	0	0	0	157.267	3100.21
1913	0.943	0.72298	138.381	1.17675	18.1894	448.739	76.5955	9.17292	4.7991	24.0189	6.55615	0.010417	0.0985227	0	0	0	0	0	0	0	0	0	0	0	0	0	0	0	19.025	0	0	0	0	0	0	0	0	157.267	3100.21
1914	0.85	0.714792	139.587	1.19626	18.3734	447.228	76.2569	9.23089	4.80117	23.8146	6.63132	0.0104222	0.103708	0	0	0	0	0	0	0	0	0	0	0	0	0	0	0	11.082	0	0	0	0	0	0	0	0	157.267	3100.21
1915	0.838	0.70575	140.793	1.21584	18.5574	445.718	75.9183	9.28887	4.80324	23.6104	6.70546	0.0104275	0.109166	0	0	0	0	0	0	0	0	0	0	0	0	0	0	0	11.216	0	0	0	0	0	0	0	0	157.267	3100.21
1916	0.901	0.708116	141.999	1.23532	18.7413	444.208	75.5796	9.34685	4.80532	23.4061	6.77987	0.0104328	0.114912	0	0	0	0	0	0	0	0	0	0	0	0	0	0	0	18.614	0	0	0	0	0	0	0	0	157.267	3100.21
1917	0.955	0.711196	143.204	1.25452	18.9253	442.697	75.241	9.40483	4.80739	23.2018	6.85582	0.0104381	0.12096	0	0	0	0	0	0	0	0	0	0	0	0	0	0	0	22.143	0	0	0	0	0	0	0	0	157.267	3100.21
1918	0.936	0.714304	144.41	1.27326	19.1093	441.187	74.9024	9.46281	4.80946	22.9976	6.93462	0.0104434	0.127326	0	0	0	0	0	0	0	0	0	0	0	0	0	0	0	22.696	0	0	0	0	0	0	0	0	157.267	3100.21
1919	0.806	0.719654	145.616	1.29138	19.2933	439.676	74.5638	9.52079	4.81153	22.7933	7.01756	0.0104487	0.134028	0	0	0	0	0	0	0	0	0	0	0	0	0	0	0	23.196	0	0	0	0	0	0	0	0	157.267	3100.21
1920	0.932	0.721283	146.822	1.30869	19.4773	438.166	74.2252	9.57877	4.81361	22.589	7.10592	0.010454	0.141082	0	0	0	0	0	0	0	0	0	0	0	0	0	0	0	23.802	0	0	0	0	0	0	0	0	157.267	3100.21
1921	0.803	0.757417	147.862	1.32579	19.8639	440.996	74.6803	9.6457	4.79871	22.6052	7.20195	0.0104523	0.148507	0	0	0	0	0	0	0	0	0	0	0	0	0	0	0	24.304	0	0	0	0	0	0	0	0	157.267	3100.21
1922	0.845	0.747941	148.901	1.34327	20.2505	443.825	75.1354	9.71264	4.78382	22.6215	7.30583	0.98418	0.156323	0	0	0	0	0	0	0	0	0	0	0	0	0	0	0	24.563	0	0	0	0	0	0	0	0	157.267	3100.21
1923	0.97	0.753288	149.941	1.36094	20.6371	446.655	75.5905	9.77958	4.76893	22.6377	7.41577	1.16488	0.164551	0	0	0	0	0	0	0	0	0	0	0	0	0	0	0	25.35	0	0	0	0	0	0	0	0	157.267	3100.21
1924	0.963	0.756861	150.981	1.37962	21.0237	449.484	76.0456	9.84651	4.75404	22.6539	7.52998	1.22567	0.173211	0	0	0	0	0	0	0	0	0	0	0	0	0	0	0	25.878	0	0	0	0	0	0	0	0	157.267	3100.21
1925	0.975	0.758089	152.02	1.3999	21.4104	452.314	76.5007	9.91345	4.73914	22.6701	7.64667	1.28964	0.182328	0	0	0	0	0	0	0	0	0	0	0	0	0	0	0	28.827	0	0	0	0	0	0	0	0	157.267	3100.21
1926	0.983	0.761483	153.06	1.42119	21.797	455.143	76.9558	9.98039	4.72425	22.6863	7.76406	1.35699	0.191924	0	0	0	0	0	0	0	0	0	0	0	0	0	0	0	29.446	0	0	0	0	0	0	0	0	157.267	3100.21
1927	1.062	0.797183	154.1	1.44292	22.1836	457.973	77.4109	10.0473	4.70936	22.7026	7.88034	1.42788	0.202025	0	0	0	0	0	0	0	0	0	0	0	0	0	0	0	30.065	0	0	0	0	0	0	0	0	157.267	3100.21
1928	1.065	0.799671	155.14	1.4645	22.5702	460.803	77.866	10.1143	4.69447	22.7188	7.99374	1.5025	0.212658	0	0	0	0	0	0	0	0	0	0	0	0	0	0	0	30.685	0	0	0	0	0	0	0	0	157.267	3100.21
1929	1.145	0.824226	156.179	1.48535	22.9569	463.632	78.3211	10.1812	4.67957	22.735	8.10245	1.58105	0.223851	0	0	0	0	0	0	0	0	0	0	0	0	0	0	0	31.573	0	0	0	0	0	0	0	0	157.267	3100.21
1930	1.053	0.89588	157.219	1.50489	23.3435	466.462	78.7762	10.2481	4.66468	22.7512	8.2047	1.66374	0.235632	0	0.74682	0	0	0	0	0	0	0	0	0	0	0	0	0	31.933	0	0	0	0	0	0	0	0	157.267	3100.21
1931	0.94	0.903341	158.345	1.52262	23.755	468.031	78.9094	10.3025	4.6671	22.7486	8.29855	1.75078	0.248034	0	0.0676905	0	0	0	0	0	0	0	0	0	0.097	0	0	0	32.553	0	0	0	0	0	0	0	0	157.267	3100.21
1932	0.847	0.812226	159.472	1.53852	24.1664	469.6	79.0427	10.3568	4.66951	22.7459	8.38498	1.8424	0.261089	0	0.0735767	0	0	0	0	0	0	0	0	0	0.097	0	0	0	33.979	0	0	0	0	0	0	0	0	157.267	3100.21
1933	0.893	0.808588	160.598	1.55267	24.5779	471.169	79.176	10.4111	4.67193	22.7433	8.46663	1.93884	0.27483	0	0.0799748	0	0	0	0	0	0	0	0	0	0.097	0	0	0	41.893	0	0	0	0	0	0	0	0	157.267	3100.21
1934	0.973	0.796863	161.725	1.56531	24.9894	472.738	79.3092	10.4655	4.67434	22.7407	8.54609	2.04035	0.289295	0	0.0869292	0	0	0	0	0	0	0	0	0	0.194	0	0.117	0	42.817	0	0	0	0	0	0	0	0	157.267	3100.21
1935	1.027	0.794716	162.851	1.57712	25.4009	474.307	79.4425	10.5198	4.67676	22.738	8.62599	2.14721	0.304521	0	0.0944883	0	0	0	0	0	0	0	0	0	0.291	0	0.117	0	43.74	0	0	0	0	0	0	0	0	157.267	3100.21
1936	1.13	0.8013	163.977	1.58892	25.8123	475.876	79.5758	10.5741	4.67917	22.7354	8.70894	2.2597	0.320548	0	0.102705	0	0	0	0	0	0	0	0	0	0.485	0	0.117	0	44.664	0	0	0	0	0	0	0	0	157.267	3100.21
1937	1.209	0.779699	165.104	1.60151	26.2238	477.445	79.709	10.6285	4.68159	22.7327	8.79755	2.3781	0.337419	0	0.111636	0	0	0	0	0	0	0	0	0	0.776	0	0.234	0	45.588	0	0	0	0	0	0	0	0	157.267	3100.21
1938	1.142	0.781882	166.23	1.61572	26.6353	479.014	79.8423	10.6828	4.684	22.7301	8.89443	2.50274	0.355178	0	0.121343	0	0	0	0	0	0	0	0	0.161	1.164	0	0.234	0	46.512	0	0.165	0	0	0	0	0	0	157.267	3100.21
1939	1.192	0.779444	167.357	1.63235	27.0468	480.583	79.9756	10.7371	4.68642	22.7274	9.00221	2.63393	0.373872	0	0.131895	0	0	0	0	0	0	0	0	0.161	1.649	0	0.351	0	47.436	0	0.33	0	0	0	0	0	0	157.267	3100.21
1940	1.299	0.766832	168.483	1.65224	27.4583	482.152	80.1088	10.7914	4.68883	22.7248	9.12349	2.77203	0.393549	0	0.143364	0	0	0	0	0	0	0	0	0.161	2.231	0	0.468	0	50.781	0	0.496	0	0	0	0	0	0	157.267	3100.21
1941	1.334	0.750365	170.03	1.7002	27.8404	488.558	81.2433	11.1234	4.69324	22.6876	9.26539	2.91741	0.414262	0	0.155833	0	0	0	0	0	0	0	0	0.161	2.91	0	0.585	0	52.603	0	0.661	0	0	0	0	0	0	157.267	3100.21
1942	1.342	0.76905	171.578	1.79386	28.2226	494.963	82.3778	11.4554	4.69766	22.6505	9.43212	3.07043	0.394683	0	0.169386	0	0	0	0	0	0	0	0	0.161	3.589	0	0.819	0	53.918	0	0.826	0	0	0	0	0	0	157.267	3100.21
1943	1.391	0.763766	173.126	1.92316	28.6048	501.369	83.5123	11.7873	4.70207	22.6133	9.62193	3.23151	0.378322	0	0.184119	0	0	0	0	0	0	0	0	0.322	4.365	0	1.17	0	54.705	0	0.991	0	0	0	0	0	0	157.267	3100.21
1944	1.383	0.768399	174.673	2.08668	28.987	507.774	84.6468	12.1193	4.70648	22.5762	9.83308	3.40106	0.364076	0	0.200132	0	0	0	0	0	0	0	0	0.322	5.917	0	1.521	0	55.75	0	1.157	0	0	0	0	0	0	157.267	3100.21
1945	1.16	0.769147	176.221	2.2804	29.3692	514.18	85.7813	12.4513	4.71089	22.539	10.0638	3.57954	0.351947	0	0.217538	0	0	0	0	0	0	0	0	0.483	7.76	1.868	3.861	0	56.796	0	1.322	0	0	0	0	0	0	157.267	3100.21
1946	1.238	0.842149	177.768	2.49036	29.7513	520.585	86.9158	12.7832	4.71531	22.5019	10.3124	3.76742	0.341933	0	0.236458	0	0	0	0	0	0	0	0	0.966	13.483	4.203	6.318	0	59.187	0	1.487	0	0	0	0	0	0	157.267	3100.21
1947	1.392	0.87018	179.316	2.7026	30.1335	526.991	88.0503	13.1152	4.71972	22.4647	10.577	3.96518	0.334036	0	0.257024	0	0	0	0	0	0	0	0	2.093	20.661	5.137	6.903	0	67.278	0	1.652	0	0	0	0	0	0	157.267	3100.21
1948	1.469	0.87513	180.863	2.90316	30.5157	533.396	89.1848	13.4472	4.72413	22.4276	10.8561	4.17335	0.328255	0	0.279378	0	0	0	0	0	0	0	0	3.703	24.056	6.071	7.254	0	68.369	0	1.817	0	0	0	0	0	0	157.267	3100.21
1949	1.419	0.882126	182.411	3.07807	30.8979	539.802	90.3193	13.7791	4.72855	22.3904	11.1477	4.39247	0.32459	0	0.303676	0	0	0	0	0	0	0	0	6.118	25.802	6.538	7.722	0	74.34	0	1.983	0	0	0	0	0	0	157.267	3100.21
1950	1.63	0.892335	183.959	3.21338	31.28	546.207	91.4538	14.1111	4.73296	22.3532	11.4501	4.62313	0.323043	0	0.330088	0	0	0	0	0	0	0	0.261908	8.855	28.615	7.939	8.073	0	65	0	2.148	0	0	0	0	0	0	157.267	3100.21
1951	1.768	1.08852	189.11	3.3186	32.8669	558.446	94.8484	14.5285	4.77333	22.5413	11.7846	4.86592	0.323612	0	0.358782	0	0	0	0	0	0	0	0.26199	8.158	33.854	1.889	7.102	0	65	0	2.313	0	0	0	0	0	0	157.267	3100.21
1952	1.796	1.10964	194.262	3.41111	34.4538	570.685	98.2429	14.9459	4.8137	22.7293	12.1691	5.12148	0.326299	0	0.389971	0	0	0	0	0	0	0	0.262072	11.742	35.2	2.139	7.288	0	70	0	2.478	0	0	0	0	0	0	157.927	3117.78
1953	1.841	1.10452	199.413	3.48872	36.0407	582.924	101.638	15.3633	4.85407	22.9174	12.5966	5.3905	0.331104	0	0.42387	0	0	0	0	0	0	0	0.262153	15.985	39.582	2.437	7.43	0	75	0	2.644	0	0	0	0	0	0	158.604	3137.15
1954	1.865	1.15214	204.565	3.55435	37.6277	595.163	105.032	15.7807	4.89444	23.1054	13.0603	5.67367	0.338026	0	0.460717	0	0	0	0	0	0	0	0.262235	19.855	44.802	2.785	7.431	0	80	1.214	2.809	0	0	0	0	0	0	159.3	3158.22
1955	2.043	1.19119	209.716	3.61411	39.2146	607.401	108.427	16.1981	4.93481	23.2935	13.5532	5.97175	0.347066	0	0.500767	0	0	0	0	0	0	0	0.262317	24.604	50.343	3.233	7.388	0	85	3.512	2.974	0	0	0	0	0	0	160.014	3180.75
1956	2.178	1.24469	214.868	3.67068	40.8015	619.64	111.821	16.6154	4.97518	23.4815	14.0685	6.28552	0.358224	0	0.544298	0	0	0	0	0	0	0	0.262399	30.685	58.664	3.73	7.302	0	90	6.224	3.48	0	0	0	0	0	0	160.748	3204.5
1957	2.27	1.27187	220.019	3.72673	42.3884	631.879	115.216	17.0328	5.01555	23.6696	14.5993	6.6158	0.3715	0	0.591613	0	0	0	0	0	0	0	0.262481	34.375	66.689	4.227	7.25	0	95	9.469	4.251	0	0	0	0	0	0	161.502	3229.07
1958	2.33	1.31958	225.171	3.78495	43.9753	644.118	118.61	17.4502	5.05592	23.8576	15.1387	6.96346	0.386895	0	0.643041	0	0	0	0	0	0	0	0.262563	32.235	69.93	4.824	7.221	0	100	10.772	6.008	0	0	0	0	0	0	162.277	3254.04
1959	2.462	1.2036	230.322	3.848	45.5622	656.357	122.005	17.8676	5.09629	24.0457	15.6798	7.32943	0.404409	0	0.69894	0	0	0	0	0	0	0	0.262644	33.015	78.149	5.57	7.176	0	105	14.717	7.06	0	0	0	0	0	0	163.073	3278.97
1960	2.577	1.19228	235.474	3.91858	47.1491	668.596	125.4	18.285	5.13665	24.2337	16.2157	7.71465	0.424041	0	0.759698	0	0	0	0	0	0	0	0.524634	43.342	93.09	6.366	6.6	0	110	18.348	7.659	0	0	0	0	0	0	163.892	3303.39
1961	2.594	1.24432	238.522	4.02401	48.7708	682.676	129.241	18.9591	5.1796	24.5022	16.7593	8.12016	0.445793	0	0.825763	0	0	0	0	0	0	0	0.524798	55.722	104.6	7.212	6.88	0	115	20.077	9.426	0	0	0	0	0	0	164.735	3326.86
1962	2.7	1.23557	241.571	4.18365	50.3925	696.756	133.083	19.6333	5.22254	24.7707	17.326	8.54701	0.469664	0	0.897574	0	0	0	0	0	0	0	0.786869	69.881	120.668	8.248	7.168	0	119	28.22	11.573	0	0	0	0	0	0	165.601	3349.07
1963	2.848	1.24429	244.619	4.38831	52.0142	710.836	136.925	20.3074	5.26549	25.0392	17.9133	14.985	0.495655	0	0.97563	0	0	0	0	0	0	0	0.525207	85.539	141.744	9.476	7.421	0	123	31.46	14.396	0	0	0.005	0.001	0.001	0.007	166.493	3369.71
1964	3.008	1.25159	247.668	4.63747	53.6359	724.916	140.766	20.9815	5.30843	25.3077	18.5183	13.4881	0.523766	0	1.06047	0	0	0	0	0	0	0	0.525371	101.538	164.921	10.853	7.692	0.225	127	36.197	16.782	0	0	0.014	0.002	0.003	0.014	167.41	3388.63
1965	3.145	1.26426	250.717	4.89682	55.2576	738.995	144.608	21.6557	5.35138	25.5762	19.1382	13.4884	0.553997	0	1.1527	0	0	0	0	0	0	0	0.525534	115.75	185.933	12.426	7.975	0.444	127	48.096	20.514	0	0	0.032	0.005	0.005	0.028	168.355	3405.7
1966	3.305	1.2937	253.765	5.19558	56.8793	753.075	148.45	22.3298	5.39432	25.8447	19.7704	13.4886	0.586348	0	1.25294	0	0	0	0	0	0	0	0.525698	129.623	208.571	14.246	8.305	0.633	127	69.567	24.512	0	0	0.058	0.008	0.008	0.048	169.328	3420.92
1967	3.411	1.29763	256.814	5.45748	58.501	767.155	152.292	23.0039	5.43727	26.1132	20.412	13.4889	0.620819	0	1.3619	0	0	0	0	0	0	0	1.04968	147.119	235.269	16.313	8.623	0.825	127	94.137	29.817	0	0	0.1	0.013	0.013	0.075	170.329	3434.34
1968	3.588	1.2352	259.863	5.61974	60.1227	781.235	156.133	23.6781	5.48021	26.3817	21.0604	13.4892	0.657411	0	1.48033	0	0	0	0	0	0	0	0.526189	167.586	263.953	18.678	8.974	1.043	127	114.767	36.216	0	0	0.158	0.019	0.016	0.109	171.36	3446.07
1969	3.8	1.23839	262.911	5.78483	61.7444	795.315	159.975	24.3522	5.52316	26.6502	21.7128	13.4894	0.696124	0	1.60907	0	0	0	0	0	0	0	0.788261	194.513	294.486	21.388	9.344	1.283	127	134.875	39.381	0	0	0.229	0.026	0.024	0.15	172.423	3456.22
1970	4.076	1.19711	265.96	5.93688	63.3661	809.395	163.817	25.0263	5.5661	26.9187	22.3665	11.9926	0.736958	0	1.74899	0	0	0.0554463	0	0.356404	0	0	0.788506	221.119	321.743	24.494	9.687	1.537	127	141.326	43.652	0	0	0.329	0.035	0.043	0.197	173.518	3464.95
1971	4.231	1.07089	270.025	5.60498	63.5459	825.183	167.161	25.8097	5.70387	27.2218	23.0425	13.49	0.779913	0	1.90113	0	0	0.0573185	0	0.363166	0	0	1.05066	243.137	346.609	28.094	10.052	1.803	127	170.133	47.746	0	0.613	0.461	0.044	0.1	0.252	174.646	3472.41
1972	4.399	1.04706	274.09	5.91813	63.7256	840.97	170.506	26.593	5.84164	27.5248	23.7556	13.4902	0.82499	0	2.06649	0	0	0.0591929	0	0.369936	0	0	0.789079	274.26	378.471	32.236	10.471	2.127	127	214.168	54.79	0	0.613	0.63	0.055	0.17	0.313	175.809	3478.74
1973	4.635	1.0331	278.155	6.0449	63.9053	856.758	173.851	27.3763	5.97941	27.8279	24.4941	13.4905	0.872189	0	2.24624	0	0	0.0610694	0	0.376713	0	0	1.05123	314.04	419.239	36.92	10.883	2.495	127	266.209	61.912	0	0.613	0.839	0.067	0.277	0.391	177.007	3484.11
1974	4.644	1.03874	282.22	5.9406	64.0851	872.546	177.195	28.1597	6.11718	28.1309	25.2459	11.9936	0.921509	0	2.44163	0	0	0.0629482	0	0.383499	0	0	1.05156	345.881	454.701	42.295	11.29	2.921	127	305.489	62.543	0	0.613	1.086	0.08	0.372	0.468	178.243	3488.63
1975	4.615	1.03159	286.285	6.14097	64.2648	888.333	180.54	28.943	6.25495	28.434	25.9992	13.491	0.972952	0	2.65401	0	0	0.0648291	0	0.390292	0	0	1.05189	335.741	442.834	48.505	11.734	3.391	127	308.992	70.487	0	0.613	1.365	0.095	0.524	0.544	179.517	3492.43
1976	4.883	1.09061	290.35	6.30426	64.4445	904.121	183.885	29.7263	6.39272	28.7371	26.742	13.4913	1.02652	0	2.88486	0	0	0.0667121	0	0.397093	0	0	1.57603	343.24	432.28	55.552	12.2	3.943	127	382.3	78.51	0	0.613	1.767	0.11	0.783	0.621	180.83	3495.62
1977	5.029	1.09399	294.415	6.5344	64.6243	919.908	187.229	30.5097	6.53049	29.0401	27.4625	11.9945	1.0822	0	3.56608	0	0	0.0685974	0	0.403902	0	0	1.83843	330.711	419.447	63.634	12.68	4.582	127	462.112	85.789	0	0.613	2.035	0.127	1.006	0.697	182.185	3498.28
1978	5.105	1.09037	298.48	6.61937	64.804	935.696	190.574	31.293	6.66826	29.3432	28.1487	13.4919	1.14001	0	3.7964	0	0	0.0704848	0	0.0542996	0	0	2.36282	359.009	424.498	72.896	13.168	5.337	127	587.319	92.012	0	0.613	2.454	0.145	1.253	0.774	183.581	3500.51
1979	5.387	1.06471	302.545	7.00777	64.9837	951.483	193.919	32.0763	6.80603	29.6462	28.7887	11.995	1.19995	0	4.02754	0	0	0.0723744	0	0.0543309	0	0	2.88737	274.357	357.266	83.489	13.661	6.228	127	489.712	99.321	0	0.613	2.928	0.161	1.548	0.85	185.022	3502.36
1980	5.332	1.02521	306.61	7.06139	65.1634	967.271	197.263	32.8597	6.9438	29.9493	29.3705	13.4924	1.262	0	4.2595	0	0	0.0188144	0	0.767209	0	0	3.15018	304.998	432.044	95.641	14.194	7.006	121.849	550.707	104.973	0	0.613	3.453	0.185	1.805	0.927	186.506	3503.91
1981	5.168	1.04486	310.013	6.84175	65.0439	980.445	199.799	33.3572	7.021	30.4563	29.9319	11.9955	1.32618	0	4.49216	0	0	0.0662884	0	0.780793	0	0	3.41307	289.529	386.347	104.421	14.121	7.743	110.093	505.097	106.406	0	1.25	3.946	0.206	2.139	1.003	188.038	3505.19
1982	5.127	1.19041	313.415	7.11899	64.9243	993.619	202.334	33.8548	7.09821	30.9634	30.5084	13.4929	1.39249	0	4.72561	0	0	0.0735941	0	0.0815283	0	0	3.67604	252.419	400.317	108.943	13.905	8.399	123.807	505.343	116.821	0	0.961	4.522	0.229	2.645	1.105	189.616	3506.26
1983	5.11	1.22552	316.817	7.2169	64.8048	1006.79	204.87	34.3524	7.17542	31.4705	31.0856	11.996	1.46092	0	4.95987	0	0	0.0734967	0	0.794366	0	0	3.93909	299.092	408.416	120.93	14.252	9.207	135.729	553.718	125.343	0	1.165	5.168	0.249	2.98	1.183	191.243	3507.15
1984	5.29	1.26008	320.22	7.04813	64.6852	1019.97	207.406	34.85	7.25262	31.9775	31.6489	11.9962	1.53147	0	5.19493	0	0	0.0182631	0	0.807943	0	0	3.94032	310.901	432.125	177.397	14.781	9.71	134.867	569.476	130.447	0	1.331	6.032	0.269	3.475	1.262	192.92	3507.88
1985	5.444	1.27534	323.623	7.01692	64.5656	1033.14	209.941	35.3475	7.32983	32.4846	32.1839	11.9965	1.60414	0	5.43079	0	0	-0.0806812	0	0.108674	0	0	4.72727	315.327	407.669	128.622	15.705	9.792	109.714	546.714	138.367	0	1.011	7.083	0.289	3.997	1.355	194.648	3508.5
1986	5.61	1.2872	327.025	7.07049	64.4461	1046.31	212.477	35.8451	7.40703	32.9917	32.6758	13.4939	1.67894	0	5.66746	0	0	0.075292	0	0.821507	0	0	4.99065	388.346	502.712	169.103	16.379	10.152	149.931	539.076	146.048	0	3.575	8.22	0.309	4.579	1.434	196.427	3509
1987	5.753	1.29401	330.427	7.46167	64.3265	1059.49	215.012	36.3427	7.48424	33.4988	33.1102	11.997	1.75587	0	5.90492	0	0	0.177805	0	1.54792	0	0	4.7303	387.277	453.238	250.222	16.667	10.807	115.608	647.608	162.883	0	3.773	9.656	0.329	5.109	1.504	198.259	3509.43
1988	5.964	1.31672	333.83	7.20251	64.207	1072.66	217.548	36.8403	7.56145	34.0058	33.4725	11.9972	1.83492	0	6.14318	0	0	0.181183	0	0.862227	0	0	4.99368	303.816	507.99	245.07	16.593	11.493	135.667	635.816	180.113	0	4.458	11.362	0.349	5.696	1.728	200.146	3509.77
1989	6.089	1.32364	337.232	7.33104	64.0874	1085.84	220.083	37.3378	7.63865	34.5129	33.7481	11.9975	1.91609	0	6.38225	0	0	0.188294	0.945058	0.875792	0	0	5.51905	301.477	385.52	204.109	15.725	12.26	118.146	564.767	186.15	0	6.174	11.605	0.369	5.482	1.73	202.087	3510.06
1990	6.144	1.31948	340.635	7.58568	63.9678	1099.01	222.619	37.8354	7.71586	35.02	33.9226	11.9977	2.07357	0	6.62182	0	0	0.185942	1.01015	0.88921	0	0	5.52077	291.464	405.617	203.131	14.022	12.363	143.171	694.142	195.69	0	11.322	11.702	0.389	5.119	1.73	204.082	3510.3
1991	6.235	1.38098	336.592	7.40236	62.9552	1095.91	221.419	37.8681	7.72475	35.0723	34.026	11.9979	2.37291	0	6.86218	0	0	0.190921	2.17764	0.902612	0.00471002	0	5.7844	190.405	309.884	198.928	13.243	12.135	70.607	573.576	204.801	0	16.556	11.426	0.409	4.094	1.735	206.133	3510.5
1992	6.118	1.30353	332.549	7.79893	61.9425	1092.81	220.22	37.9008	7.73365	35.1247	34.1135	11.9981	2.37315	0	7.10299	0	0	0.2889	4.20799	1.62865	0.00471003	0	5.7862	203.23	303.369	121.343	10.324	12.018	91.022	554.986	185.994	0	20.911	9.343	0.429	2.74	1.715	208.24	3510.66
1993	6.124	1.2981	328.507	7.3131	60.9298	1089.71	219.02	37.9335	7.74254	35.177	34.2079	11.9984	2.37338	0	7.34531	0	0	0.376816	8.41616	2.3686	0.18499	0	6.31181	144.94	228.999	67.857	8.322	11.681	85.436	372.232	188.092	23.101	22.5	10.23	0.509	3.344	1.7	210.402	3510.8
1994	6.242	1.2896	324.464	7.50728	59.9172	1086.61	217.821	37.9662	7.75143	35.2294	34.3318	11.9986	2.37362	0	7.58821	0	0	1.8251	21.3991	3.83476	0.18199	0	5.00424	127.137	232.722	61.065	6.105	11.011	77.289	244.236	179.101	33.844	25.599	9.105	0.589	4.75	1.68	212.619	3510.91
1995	6.372	1.27501	320.421	7.6191	58.9045	1083.51	216.621	37.9989	7.76033	35.2817	34.5081	10.5017	2.37386	0	10.2115	0	0	2.98022	29.7261	6.04096	0.0999948	0	6.05342	119.235	194.71	22.978	4.784	9.083	85.021	201.637	243.238	41.961	24.275	10.035	0.669	3.991	1.3	200.199	3511.01
1996	6.51	1.2511	316.378	7.65206	57.8919	1080.4	215.421	38.0316	7.76922	35.3341	34.9605	11.9991	2.37409	0	10.2482	0	0	3.41888	40.5849	6.14999	0.436978	0	6.05531	115.437	178.907	27.962	2.943	7.019	70.403	89.184	211.181	51.431	26.411	10.743	0.729	2.691	0.85	201.834	3511.08
1997	6.619	1.21814	312.335	7.90975	56.8792	1077.3	214.222	38.0642	7.77812	35.3864	35.8337	11.9993	2.37433	0	10.2844	0	0	5.35405	50.6436	6.25875	0.407978	0	4.48574	95.388	160.981	18.663	1.886	5.429	74.423	62.53	208.614	46.639	22.493	9.909	0.789	2.594	0.7	207.696	3511.08
1998	6.588	1.21484	308.293	7.89573	55.8665	1074.2	213.022	38.0969	7.78701	35.4388	37.0316	11.9996	2.37457	0	10.3207	0.0873054	0	7.20318	59.6521	6.36768	0.927952	0	4.74904	92.401	152.715	14.831	1.199	4.223	84.361	29.412	249.912	58.131	27.683	9.837	0.607	2.491	0.71	206.946	3511.08
1999	6.569	1.18279	304.25	7.52698	54.8539	1071.1	211.823	38.1296	7.79591	35.4911	38.4586	10.5027	2.3748	0	10.3577	0.785737	0	8.15317	67.044	6.47752	1.35393	0	6.32196	94.931	145.169	14.362	0.784	3.32	69.242	24.668	230.91	55.817	28.047	9.806	0.467	2.39	0.631	195.938	3511.08
2000	6.735	1.1488	300.207	7.4566	53.8412	1068	210.623	38.1623	7.8048	35.5435	40.0186	12.0001	2.3749	0.4624	10.3949	4	0	8.5381	75.0393	6.234	1.9509	17.9257	5.5382	99.227	140.712	17.777	0.567	2.609	74.132	18.584	229.638	55.602	26.296	8.834	0.328	2.295	0.562	186.206	3511.08
2001	6.8959	1.132	303.409	7.503	54.4191	1066.74	211.594	38.2888	7.8945	35.7143	40.3916	11.925	2.4345	0.4651	10.4328	5.3987	0.6471	9.0301	84.0409	7.4947	1.6449	19.7183	5.699	81.839	117.202	12.051	0.45	2.069	65.195	13.253	270.443	57.19	28.001	8.669	0.282	2.209	0.5	181.525	3511.08
2002	6.949	1.2317	306.579	7.5487	54.9961	1065.47	212.563	38.4153	7.9842	35.8845	40.7646	11.8481	2.4915	0.4058	10.4708	6.7975	1.294	9.8852	94.7161	8.7389	2.508	21.5109	5.8596	81.408	100.258	6.019	0.423	1.609	69.565	13.487	243.015	57.77	22.43	8.524	0.235	2.131	0.445	181.887	3511.08
2003	7.286	1.2257	309.716	7.5942	55.5716	1064.17	213.531	38.5418	8.0734	36.0543	41.1378	11.7693	2.5463	0.3939	10.5083	8.196	1.9411	12.0788	101.416	9.9776	3.341	23.3035	6.0201	90.865	107.745	2.604	0.37	1.288	69.381	8.444	252.962	48.801	23.232	7.77	0.189	2.057	0.396	177.539	3511.08
2004	7.6719	1.2429	312.824	7.6394	56.1461	1062.86	214.498	38.6684	8.1623	36.2232	41.5107	11.6885	2.599	0.4062	10.5454	9.5947	2.5882	12.5073	113.93	11.2136	4.269	25.096	6.1805	78.182	87.647	5.237	0.378	1.046	67.383	10.874	263.062	43.847	23.348	7.653	0.189	1.987	0.353	174.26	3511.08
2005	7.971	1.1955	315.903	7.6841	56.7195	1061.53	215.463	38.7948	8.2512	36.3917	41.8837	11.6059	2.6494	0.4358	10.8116	10.9935	3.2351	13.7591	120.933	12.4483	4.8901	26.8885	6.3407	49.49	51.552	0.854	0.227	0.785	65	10.874	283.408	46.641	26.458	7.518	0.189	1.92	0.314	168.841	3511.08
2006	8.081	1.1319	317.662	7.7838	56.6405	1057.4	215.38	38.6291	8.228	36.3475	42.2514	13.735	2.6399	0.4426	10.5529	12.3831	3.8802	12.649	121.075	10.9216	5.6761	34.1569	6.4709	48.471	49.808	1.119	0.136	0.588	58.5	10.874	297.615	48.747	34.767	6.992	0.049	1.834	0.279	167.857	3511.08
2007	8.1899	1.0683	319.42	7.8838	56.5578	1053.26	215.294	38.4618	8.2049	36.3034	42.6192	15.8599	2.6308	0.4491	10.2946	13.773	4.5245	11.5302	129.622	9.3647	6.4623	41.4253	6.6013	47.083	46.366	0.911	0.082	0.441	52	10.874	311.265	50.583	39.869	6.502	0.049	1.752	0.249	167.857	3511.08
2008	8.29717	1.00467	321.175	7.98433	56.4678	1049.08	215.205	38.292	8.18167	36.2594	42.9869	17.9765	2.62143	0.454933	10.0371	15.1627	5.1676	10.3937	135.182	7.7477	7.2483	48.6937	6.99097	45.74	43.216	0.806	0.049	0.331	45.5	10.874	324.431	52.161	39.099	6.047	0.049	1.675	0.221	167.857	3511.08
2009	8.40443	0.941033	322.93	8.08487	56.3778	1044.9	215.116	38.1223	8.15843	36.2155	43.3546	20.0932	2.61207	0.460767	9.77967	16.5524	5.8107	9.25727	140.742	6.1307	8.0343	55.9622	7.38063	44.442	40.334	0.754	0.029	0.248	39	10.874	337.175	53.496	38.069	5.624	0.049	1.601	0.197	167.857	3511.08
2010	8.5117	0.8774	324.685	8.1854	56.2878	1040.72	215.027	37.9525	8.1352	36.1715	43.7223	22.2098	2.6027	0.4666	9.5222	17.9421	6.4538	8.1208	146.301	4.5137	8.8203	63.2306	7.7703	42.976	36.906	0.377	0.018	0.186	32.5	7.266	349.552	54.598	36.801	5.23	0	1.521	0.175	167.857	3511.08
2011	8.55557	0.83029	323.381	8.15982	55.6377	1039.19	214.892	37.7142	8.09546	36.1618	43.6317	22.2762	2.60843	0.43839	8.68522	22.2121	6.53096	8.19765	147.06	4.61769	8.08983	63.4781	7.93581	41.557	33.769	0.189	0.011	0.14	26	7.266	361.61	55.479	35.314	4.864	0	1.445	0.156	167.857	3511.08
2012	8.59944	0.78318	322.078	8.13424	54.9877	1037.66	214.758	37.4759	8.05572	36.1521	43.541	22.3425	2.61416	0.41018	7.84824	26.4821	6.60812	8.2745	147.819	4.72168	7.35936	63.7256	8.10132	40.186	30.898	0.094	0.006	0.105	19.5	7.266	373.391	56.152	33.625	4.524	0	1.373	0.139	167.857	3511.08
2013	8.64331	0.73607	320.774	8.10866	54.3376	1036.12	214.624	37.2377	8.01598	36.1425	43.4504	22.4089	2.61989	0.38197	7.01126	30.752	6.68528	8.35135	148.578	4.82567	6.62889	63.9731	8.26683	38.86	28.272	0.047	0.004	0.079	13	7.266	384.93	56.625	31.75	4.207	0	1.304	0.124	167.857	3511.08
2014	8.68718	0.68896	319.471	8.08308	53.6876	1034.59	214.49	36.9994	7.97624	36.1328	43.3597	22.4753	2.62562	0.35376	6.17428	35.022	6.76244	8.4282	149.337	4.92966	5.89842	64.2206	8.43234	37.578	25.869	0.024	0.002	0.059	6.5	7.266	396.259	56.909	29.705	3.913	0	1.239	0.11	167.857	3511.08
2015	8.73105	0.64185	318.167	8.0575	53.0375	1033.06	214.355	36.7611	7.9365	36.1231	43.2691	22.5417	2.63135	0.32555	5.3373	39.292	6.8396	8.50505	150.096	5.03365	5.16795	64.4681	8.59785	36.338	23.67	0.012	0.001	0.044	0	0	407.405	57.013	27.502	3.639	0	1.177	0.098	155.925	3511.08
2016	8.77492	0.59474	316.864	8.03192	52.3874	1031.53	214.221	36.5228	7.89676	36.1134	43.1785	22.608	2.63708	0.29734	4.50032	43.562	6.91676	8.5819	150.855	5.13764	4.43748	64.7156	8.76336	35.138	21.658	0.006	0.001	0.033	0	0	417.103	57.113	25.476	3.384	0	1.118	0.087	155.925	3511.08
2017	8.81879	0.54763	315.56	8.00634	51.7374	1030	214.087	36.2845	7.85702	36.1037	43.0878	22.6744	2.64281	0.26913	3.66334	47.832	6.99392	8.65875	151.614	5.24163	3.70701	64.9631	8.92887	33.979	19.817	0.003	0	0.025	0	0	425.539	57.207	23.611	3.147	0	1.062	0.078	155.925	3511.08
2018	8.86266	0.50052	314.257	7.98076	51.0873	1028.46	213.953	36.0463	7.81728	36.0941	42.9972	22.7408	2.64854	0.24092	2.82636	52.1019	7.07108	8.7356	152.373	5.34562	2.97654	65.2106	9.09438	32.858	18.133	0.001	0	0.019	0	0	432.879	57.297	21.896	2.927	0	1.009	0.069	155.925	3511.08
2019	8.90653	0.45341	312.953	7.95518	50.4373	1026.93	213.818	35.808	7.77754	36.0844	42.9065	22.8071	2.65427	0.21271	1.98938	56.3719	7.14824	8.81245	153.132	5.44961	2.24607	65.4581	9.25989	31.773	16.591	0.001	0	0.014	0	0	439.265	57.382	20.318	2.722	0	0.959	0.061	155.925	3511.08
2020	8.9504	0.4063	311.65	7.9296	49.7872	1025.4	213.684	35.5697	7.7378	36.0747	42.8159	22.8735	2.66	0.1845	1.1524	60.6419	7.2254	8.8893	153.891	5.5536	1.5156	65.7056	9.4254	30.725	15.181	0	0	0.01	0	0	444.821	57.463	18.867	2.531	0	0.911	0.055	155.925	3511.08
2021	9.05487	0.30994	313.116	8.01843	48.9413	1025.73	213.953	35.3551	7.71469	36.0567	43.1728	22.9386	2.66493	0.17723	1.1063	61.7812	7.31538	8.94218	154.414	5.60414	1.43416	65.8679	9.44312	29.711	13.891	0	0	0.008	0	0	449.654	57.54	17.531	2.354	0	0.865	0.049	155.925	3511.08
2022	9.15934	0.21358	314.582	8.10726	48.0954	1026.06	214.222	35.1405	7.69158	36.0388	43.5297	23.0037	2.66986	0.16996	1.0602	62.9206	7.40536	8.99506	154.936	5.65468	1.35272	66.0302	9.46084	28.73	12.71	0	0	0.006	0	0	453.859	57.613	16.302	2.189	0	0.822	0.043	155.925	3511.08
2023	9.26381	0.11722	316.048	8.19609	47.2495	1026.4	214.491	34.926	7.66847	36.0208	43.8867	23.0688	2.67479	0.16269	1.0141	64.06	7.49534	9.04794	155.459	5.70522	1.27128	66.1925	9.47856	27.782	11.63	0	0	0.004	0	0	457.517	57.682	15.172	2.036	0	0.781	0.039	155.925	3511.08
2024	9.36828	0.02086	317.514	8.28492	46.4036	1026.73	214.76	34.7114	7.64536	36.0028	44.2436	23.1339	2.67972	0.15542	0.968	65.1993	7.58532	9.10082	155.982	5.75576	1.18984	66.3548	9.49628	26.865	10.641	0	0	0.003	0	0	460.7	57.748	14.132	1.894	0	0.742	0.034	155.925	3511.08
2025	9.47275	-0.0755	318.98	8.37375	45.5577	1027.06	215.029	34.4968	7.62225	35.9849	44.6005	23.199	2.68465	0.14815	0.9219	66.3387	7.6753	9.1537	156.505	5.8063	1.1084	66.5172	9.514	25.979	9.737	0	0	0.002	0	0	463.469	57.811	13.175	1.761	0	0.705	0.031	155.925	3511.08
2026	9.57722	-0.17186	320.446	8.46258	44.7119	1027.4	215.298	34.2822	7.59914	35.9669	44.9574	23.2641	2.68958	0.14088	0.8758	67.478	7.76528	9.20658	157.028	5.85684	1.02696	66.6795	9.53172	25.122	8.909	0	0	0.002	0	0	465.878	57.87	12.295	1.638	0	0.669	0.027	155.925	3511.08
2027	9.68169	-0.26822	321.912	8.55141	43.866	1027.73	215.567	34.0676	7.57603	35.9489	45.3143	23.3292	2.69451	0.13361	0.8297	68.6174	7.85526	9.25946	157.551	5.90738	0.94552	66.8418	9.54944	24.293	8.152	0	0	0.001	0	0	467.974	57.927	11.485	1.523	0	0.636	0.024	155.925	3511.08
2028	9.78616	-0.36458	323.378	8.64024	43.0201	1028.06	215.836	33.8531	7.55292	35.9309	45.6713	23.3943	2.69944	0.12634	0.7836	69.7567	7.94524	9.31234	158.074	5.95792	0.86408	67.0041	9.56716	23.491	7.459	0	0	0.001	0	0	469.797	57.98	10.74	1.417	0	0.604	0.022	155.925	3511.08
2029	9.89063	-0.46094	324.844	8.72907	42.1742	1028.39	216.105	33.6385	7.52981	35.913	46.0282	23.4594	2.70437	0.11907	0.7375	70.8961	8.03522	9.36522	158.596	6.00846	0.78264	67.1664	9.58488	22.716	6.825	0	0	0.001	0	0	471.384	58.031	10.055	1.317	0	0.574	0.019	155.925	3511.08
2030	9.9951	-0.5573	326.31	8.8179	41.3283	1028.73	216.374	33.4239	7.5067	35.895	46.3851	23.5245	2.7093	0.1118	0.6914	72.0354	8.1252	9.4181	159.119	6.059	0.7012	67.3287	9.6026	21.966	6.245	0	0	0.001	0	0	472.764	58.08	9.424	1.225	0	0.545	0.017	155.925	3511.08
2031	10.151	-0.57298	328.092	8.90894	41.4562	1030.97	217.004	33.3712	7.4966	35.9507	46.7501	23.5554	2.70139	0.1119	0.66359	72.903	8.24913	9.47689	159.57	6.11699	0.70177	67.4469	9.61107	21.241	5.714	0	0	0	0	0	467.698	57.831	8.826	1.139	0	0.518	0.015	155.925	3511.08
2032	10.3069	-0.58866	329.873	8.99998	41.5842	1033.22	217.634	33.3184	7.4865	36.0064	47.115	23.5863	2.69348	0.112	0.63578	73.7707	8.37306	9.53568	160.021	6.17498	0.70234	67.5651	9.61954	20.54	5.228	0	0	0	0	0	457.026	57.299	8.259	1.06	0	0.492	0.013	155.925	3511.08
2033	10.4629	-0.60434	331.655	9.09102	41.7121	1035.46	218.264	33.2657	7.4764	36.0621	47.48	23.6171	2.68557	0.1121	0.60797	74.6383	8.49699	9.59447	160.472	6.23297	0.70291	67.6832	9.62801	19.862	4.784	0	0	0	0	0	441.474	56.499	7.72	0.985	0	0.467	0.012	155.925	3511.08
2034	10.6188	-0.62002	333.437	9.18206	41.84	1037.7	218.895	33.213	7.4663	36.1178	47.8449	23.648	2.67766	0.1122	0.58016	75.5059	8.62092	9.65326	160.923	6.29096	0.70348	67.8014	9.63648	19.207	4.377	0	0	0	0	0	421.679	55.444	7.207	0.916	0	0.444	0.011	155.925	3511.08
2035	10.7747	-0.6357	335.218	9.2731	41.968	1039.95	219.525	33.1602	7.4562	36.1735	48.2099	23.6789	2.66975	0.1123	0.55235	76.3735	8.74485	9.71205	161.374	6.34895	0.70405	67.9196	9.64495	18.573	4.005	0	0	0	0	0	398.19	54.147	6.717	0.852	0	0.422	0.01	155.925	3511.08
2036	10.9306	-0.65138	337	9.36414	42.0959	1042.19	220.155	33.1075	7.4461	36.2292	48.5749	23.7098	2.66184	0.1124	0.52454	77.2412	8.86878	9.77084	161.825	6.40694	0.70462	68.0378	9.65342	17.96	3.665	0	0	0	0	0	371.49	52.62	6.249	0.793	0	0.401	0.008	155.925	3511.08
2037	11.0865	-0.66706	338.782	9.45518	42.2238	1044.44	220.785	33.0548	7.436	36.2849	48.9398	23.7407	2.65393	0.1125	0.49673	78.1088	8.99271	9.82963	162.276	6.46493	0.70519	68.156	9.66189	17.368	3.353	0	0	0	0	0	341.994	50.874	5.801	0.737	0	0.381	0.008	155.925	3511.08
2038	11.2425	-0.68274	340.563	9.54622	42.3517	1046.68	221.416	33.0021	7.4259	36.3406	49.3048	23.7715	2.64602	0.1126	0.46892	78.9764	9.11664	9.88842	162.727	6.52292	0.70576	68.2741	9.67036	16.794	3.068	0	0	0	0	0	310.067	48.92	5.372	0.686	0	0.362	0.007	155.925	3511.08
2039	11.3984	-0.69842	342.345	9.63726	42.4797	1048.93	222.046	32.9493	7.4158	36.3963	49.6697	23.8024	2.63811	0.1127	0.44111	79.8441	9.24057	9.94721	163.178	6.58091	0.70633	68.3923	9.67883	16.24	2.807	0	0	0	0	0	276.024	46.769	4.96	0.638	0	0.344	0.006	155.925	3511.08
2040	11.5543	-0.7141	344.127	9.7283	42.6076	1051.17	222.676	32.8966	7.4057	36.452	50.0347	23.8333	2.6302	0.1128	0.4133	80.7117	9.3645	10.006	163.629	6.6389	0.7069	68.5105	9.6873	15.704	2.569	0	0	0	0	0	240.141	44.431	4.563	0.593	0	0.326	0.005	155.925	3511.08
2041	11.7033	-0.68907	345.22	9.80918	42.0652	1049.49	222.446	32.6571	7.37374	36.4707	50.3455	23.8212	2.6223	0.11238	0.3966	80.1013	9.53752	10.0439	163.976	6.68694	0.65691	68.554	9.69652	15.186	2.35	0	0	0	0	0	208.923	42.209	4.198	0.551	0	0.31	0.005	155.925	3511.08
2042	11.8522	-0.66404	346.314	9.89006	41.5228	1047.82	222.216	32.4176	7.34178	36.4894	50.6563	23.8092	2.6144	0.11196	0.3799	79.4908	9.71054	10.0818	164.324	6.73498	0.60692	68.5975	9.70574	14.685	2.151	0	0	0	0	0	181.763	40.099	3.862	0.513	0	0.295	0.004	155.925	3511.08
2043	12.0012	-0.63901	347.407	9.97094	40.9804	1046.14	221.987	32.1781	7.30982	36.5082	50.9671	23.7971	2.6065	0.11154	0.3632	78.8804	9.88356	10.1197	164.672	6.78302	0.55693	68.641	9.71496	14.2	1.968	0	0	0	0	0	158.134	38.094	3.553	0.477	0	0.28	0.004	155.925	3511.08
2044	12.1501	-0.61398	348.501	10.0518	40.438	1044.46	221.757	31.9386	7.27786	36.5269	51.2779	23.7851	2.5986	0.11112	0.3465	78.27	10.0566	10.1576	165.019	6.83106	0.50694	68.6845	9.72418	13.732	1.801	0	0	0	0	0	137.576	36.189	3.269	0.444	0	0.266	0.003	155.925	3511.08
2045	12.299	-0.58895	349.594	10.1327	39.8956	1042.79	221.527	31.6991	7.2459	36.5456	51.5887	23.7731	2.5907	0.1107	0.3298	77.6595	10.2296	10.1954	165.367	6.8791	0.45695	68.728	9.7334	13.279	1.648	0	0	0	0	0	119.691	34.38	3.007	0.413	0	0.253	0.003	155.925	3511.08
2046	12.448	-0.56392	350.687	10.2136	39.3532	1041.11	221.297	31.4597	7.21394	36.5643	51.8995	23.761	2.5828	0.11028	0.3131	77.0491	10.4026	10.2333	165.714	6.92714	0.40696	68.7715	9.74262	12.84	1.507	0	0	0	0	0	104.131	32.661	2.767	0.384	0	0.24	0.003	155.925	3511.08
2047	12.5969	-0.53889	351.781	10.2945	38.8108	1039.43	221.067	31.2202	7.18198	36.583	52.2103	23.749	2.5749	0.10986	0.2964	76.4387	10.5756	10.2712	166.062	6.97518	0.35697	68.815	9.75184	12.417	1.379	0	0	0	0	0	90.594	31.028	2.545	0.357	0	0.228	0.002	155.925	3511.08
2048	12.7459	-0.51386	352.874	10.3753	38.2684	1037.76	220.837	30.9807	7.15002	36.6018	52.5211	23.7369	2.567	0.10944	0.2797	75.8283	10.7487	10.3091	166.41	7.02322	0.30698	68.8585	9.76106	12.007	1.262	0	0	0	0	0	78.817	29.476	2.342	0.332	0	0.217	0.002	155.925	3511.08
2049	12.8948	-0.48883	353.968	10.4562	37.726	1036.08	220.608	30.7412	7.11806	36.6205	52.8319	23.7248	2.5591	0.10902	0.263	75.2178	10.9217	10.347	166.757	7.07126	0.25699	68.902	9.77028	11.611	1.155	0	0	0	0	0	68.571	28.002	2.154	0.309	0	0.206	0.002	155.925	3511.08
2050	13.0438	-0.4638	355.061	10.5371	37.1836	1034.4	220.378	30.5017	7.0861	36.6392	53.1427	23.7128	2.5512	0.1086	0.2463	74.6074	11.0947	10.3849	167.105	7.1193	0.207	68.9455	9.7795	11.227	1.057	0	0	0	0	0	59.657	26.602	1.982	0.287	0	0.195	0.002	155.925	3511.08
2051	13.2219	-0.44326	355.95	10.6195	36.9572	1030.57	219.75	30.2826	7.02414	36.5481	53.5066	23.7141	2.54411	0.10848	0.23543	75.5552	11.0965	10.4402	167.591	7.18313	0.1948	69.0534	9.79437	10.857	0.967	0	0	0	0	0	51.901	25.272	1.824	0.267	0	0.186	0.001	155.925	3511.08
2052	13.3999	-0.42272	356.839	10.7019	36.7307	1026.74	219.122	30.0635	6.96218	36.4571	53.8706	23.7153	2.53702	0.10836	0.22456	76.503	11.0983	10.4955	168.078	7.24696	0.1826	69.1613	9.80924	10.499	0.885	0	0	0	0	0	45.154	24.008	1.678	0.248	0	0.176	0.001	155.925	3511.08
2053	13.578	-0.40218	357.727	10.7843	36.5043	1022.92	218.495	29.8445	6.90022	36.366	54.2345	23.7166	2.52993	0.10824	0.21369	77.4509	11.1001	10.5508	168.564	7.31079	0.1704	69.2692	9.82411	10.152	0.809	0	0	0	0	0	39.284	22.808	1.543	0.231	0	0.168	0.001	155.925	3511.08
2054	13.756	-0.38164	358.616	10.8667	36.2779	1019.09	217.867	29.6254	6.83826	36.2749	54.5984	23.7178	2.52284	0.10812	0.20282	78.3987	11.1019	10.6061	169.05	7.37462	0.1582	69.3771	9.83898	9.817	0.741	0	0	0	0	0	34.177	21.668	1.42	0.215	0	0.159	0.001	155.925	3511.08
2055	13.9341	-0.3611	359.505	10.9491	36.0515	1015.26	217.239	29.4063	6.7763	36.1838	54.9624	23.719	2.51575	0.108	0.19195	79.3465	11.1037	10.6615	169.537	7.43845	0.146	69.485	9.85385	9.493	0.678	0	0	0	0	0	29.734	20.584	1.306	0.2	0	0.151	0.001	155.925	3511.08
2056	14.1122	-0.34056	360.393	11.0315	35.825	1011.43	216.612	29.1872	6.71434	36.0928	55.3263	23.7203	2.50866	0.10788	0.18108	80.2943	11.1055	10.7168	170.023	7.50228	0.1338	69.5929	9.86872	9.18	0.62	0	0	0	0	0	25.869	19.555	1.202	0.186	0	0.144	0.001	155.925	3511.08
2057	14.2902	-0.32002	361.282	11.1139	35.5986	1007.6	215.984	28.9681	6.65238	36.0017	55.6902	23.7216	2.50157	0.10776	0.17021	81.2421	11.1073	10.7721	170.509	7.56611	0.1216	69.7008	9.88359	8.877	0.567	0	0	0	0	0	22.506	18.577	1.106	0.173	0	0.136	0.001	155.925	3511.08
2058	14.4683	-0.29948	362.171	11.1963	35.3722	1003.77	215.356	28.7491	6.59042	35.9106	56.0541	23.7228	2.49448	0.10764	0.15934	82.19	11.1091	10.8274	170.996	7.62994	0.1094	69.8087	9.89846	8.584	0.519	0	0	0	0	0	19.58	17.648	1.017	0.161	0	0.13	0.001	155.925	3511.08
2059	14.6463	-0.27894	363.059	11.2787	35.1457	999.943	214.729	28.53	6.52846	35.8196	56.4181	23.724	2.48739	0.10752	0.14847	83.1378	11.1109	10.8827	171.482	7.69377	0.0972	69.9166	9.91333	8.301	0.475	0	0	0	0	0	17.035	16.766	0.936	0.149	0	0.123	0.001	155.925	3511.08
2060	14.8244	-0.2584	363.948	11.3611	34.9193	996.114	214.101	28.3109	6.4665	35.7285	56.782	23.7253	2.4803	0.1074	0.1376	84.0856	11.1127	10.938	171.969	7.7576	0.085	70.0245	9.9282	8.027	0.435	0	0	0	0	0	14.82	15.928	0.861	0.139	0	0.117	0.001	155.925	3511.08
2061	14.9926	-0.23549	363.548	11.4281	33.6575	990.169	213.117	27.8501	6.38933	35.5893	57.0936	23.6987	2.48426	0.10732	0.13115	85.0651	11.1061	10.9862	172.364	7.81599	0.08313	70.0892	9.94365	7.762	0.398	0	0	0	0	0	12.893	15.131	0.792	0.129	0	0.111	0	155.925	3511.08
2062	15.1607	-0.21258	363.149	11.4951	32.3956	984.224	212.132	27.3894	6.31216	35.45	57.4052	23.6721	2.48822	0.10724	0.1247	86.0445	11.0995	11.0344	172.759	7.87438	0.08126	70.1538	9.9591	7.506	0.364	0	0	0	0	0	11.217	14.375	0.729	0.12	0	0.106	0	155.925	3511.08
2063	15.3289	-0.18967	362.749	11.5621	31.1338	978.278	211.148	26.9287	6.23499	35.3108	57.7168	23.6456	2.49218	0.10716	0.11825	87.024	11.0929	11.0825	173.155	7.93277	0.07939	70.2185	9.97455	7.258	0.333	0	0	0	0	0	9.759	13.656	0.67	0.112	0	0.1	0	155.925	3511.08
2064	15.497	-0.16676	362.35	11.6291	29.872	972.333	210.163	26.4679	6.15782	35.1716	58.0284	23.619	2.49614	0.10708	0.1118	88.0034	11.0863	11.1307	173.55	7.99116	0.07752	70.2831	9.99	7.019	0.305	0	0	0	0	0	8.49	12.973	0.617	0.104	0	0.095	0	155.925	3511.08
2065	15.6652	-0.14385	361.95	11.6961	28.6102	966.388	209.179	26.0071	6.08065	35.0324	58.34	23.5924	2.5001	0.107	0.10535	88.9829	11.0798	11.1789	173.945	8.04955	0.07565	70.3478	10.0054	6.787	0.279	0	0	0	0	0	7.387	12.325	0.567	0.097	0	0.091	0	155.925	3511.08
2066	15.8334	-0.12094	361.55	11.7632	27.3483	960.443	208.195	25.5464	6.00348	34.8931	58.6515	23.5658	2.50406	0.10692	0.0989	89.9624	11.0732	11.2271	174.341	8.10794	0.07378	70.4124	10.0209	6.563	0.255	0	0	0	0	0	6.426	11.708	0.522	0.09	0	0.086	0	155.925	3511.08
2067	16.0015	-0.09803	361.151	11.8302	26.0865	954.497	207.21	25.0857	5.92631	34.7539	58.9631	23.5392	2.50802	0.10684	0.09245	90.9418	11.0666	11.2753	174.736	8.16633	0.07191	70.4771	10.0364	6.346	0.233	0	0	0	0	0	5.591	11.123	0.48	0.084	0	0.082	0	155.925	3511.08
2068	16.1697	-0.07512	360.751	11.8972	24.8247	948.552	206.226	24.6249	5.84914	34.6147	59.2747	23.5127	2.51198	0.10676	0.086	91.9213	11.06	11.3234	175.131	8.22472	0.07004	70.5417	10.0518	6.137	0.214	0	0	0	0	0	4.864	10.567	0.442	0.078	0	0.078	0	155.925	3511.08
2069	16.3378	-0.05221	360.352	11.9642	23.5628	942.607	205.242	24.1641	5.77197	34.4754	59.5863	23.4861	2.51594	0.10668	0.07955	92.9007	11.0534	11.3716	175.527	8.28311	0.06817	70.6064	10.0672	5.935	0.195	0	0	0	0	0	4.232	10.038	0.407	0.072	0	0.074	0	155.925	3511.08
2070	16.506	-0.0293	359.952	12.0312	22.301	936.662	204.257	23.7034	5.6948	34.3362	59.8979	23.4595	2.5199	0.1066	0.0731	93.8802	11.0468	11.4198	175.922	8.3415	0.0663	70.671	10.0827	5.739	0.179	0	0	0	0	0	3.682	9.537	0.374	0.067	0	0.07	0	155.925	3511.08
2071	16.5835	-0.00196	357.95	12.0643	21.5713	930.299	203.011	23.325	5.63556	34.2366	59.9915	23.407	2.5018	0.10626	0.06951	94.1193	11.0378	11.4517	176.037	8.38413	0.06477	70.6063	10.074	5.549	0.164	0	0	0	0	0	3.203	9.06	0.344	0.063	0	0.067	0	155.925	3511.08
2072	16.6609	0.02538	355.948	12.0975	20.8416	923.935	201.764	22.9466	5.57632	34.1369	60.085	23.3545	2.4837	0.10592	0.06592	94.3584	11.0287	11.4836	176.152	8.42676	0.06324	70.5417	10.0654	5.366	0.15	0	0	0	0	0	2.787	8.607	0.317	0.058	0	0.063	0	155.925	3511.08
2073	16.7384	0.05272	353.946	12.1306	20.112	917.572	200.518	22.5682	5.51708	34.0373	60.1786	23.3021	2.4656	0.10558	0.06233	94.5975	11.0197	11.5154	176.267	8.46939	0.06171	70.477	10.0567	5.189	0.137	0	0	0	0	0	2.424	8.176	0.291	0.054	0	0.06	0	155.925	3511.08
2074	16.8158	0.08006	351.943	12.1637	19.3823	911.209	199.271	22.1898	5.45784	33.9377	60.2721	23.2496	2.4475	0.10524	0.05874	94.8366	11.0107	11.5473	176.382	8.51202	0.06018	70.4124	10.0481	5.018	0.125	0	0	0	0	0	2.109	7.768	0.268	0.05	0	0.057	0	155.925	3511.08
2075	16.8933	0.1074	349.941	12.1968	18.6526	904.846	198.025	21.8115	5.3986	33.8381	60.3657	23.1971	2.4294	0.1049	0.05515	95.0757	11.0016	11.5792	176.497	8.55465	0.05865	70.3477	10.0395	4.852	0.115	0	0	0	0	0	1.835	7.379	0.247	0.047	0	0.054	0	155.925	3511.08
2076	16.9708	0.13474	347.939	12.23	17.9229	898.483	196.779	21.4331	5.33936	33.7384	60.4593	23.1446	2.4113	0.10456	0.05156	95.3148	10.9926	11.6111	176.612	8.59728	0.05712	70.283	10.0308	4.692	0.105	0	0	0	0	0	1.596	7.01	0.227	0.043	0	0.052	0	155.925	3511.08
2077	17.0482	0.16208	345.937	12.2631	17.1932	892.12	195.532	21.0547	5.28012	33.6388	60.5528	23.0921	2.3932	0.10422	0.04797	95.5539	10.9836	11.643	176.727	8.63991	0.05559	70.2184	10.0221	4.537	0.096	0	0	0	0	0	1.389	6.66	0.209	0.04	0	0.049	0	155.925	3511.08
2078	17.1257	0.18942	343.935	12.2962	16.4636	885.757	194.286	20.6763	5.22088	33.5392	60.6464	23.0397	2.3751	0.10388	0.04438	95.793	10.9746	11.6748	176.842	8.68254	0.05406	70.1537	10.0135	4.388	0.088	0	0	0	0	0	1.208	6.327	0.192	0.038	0	0.046	0	155.925	3511.08
2079	17.2031	0.21676	341.933	12.3294	15.7339	879.393	193.039	20.2979	5.16164	33.4395	60.7399	22.9872	2.357	0.10354	0.04079	96.0321	10.9655	11.7067	176.957	8.72517	0.05253	70.0891	10.0048	4.243	0.08	0	0	0	0	0	1.051	6.01	0.177	0.035	0	0.044	0	155.925	3511.08
2080	17.2806	0.2441	339.93	12.3625	15.0042	873.03	191.793	19.9195	5.1024	33.3399	60.8335	22.9347	2.3389	0.1032	0.0372	96.2712	10.9565	11.7386	177.072	8.7678	0.051	70.0244	9.9962	4.103	0.074	0	0	0	0	0	0.915	5.71	0.162	0.033	0	0.042	0	155.925	3511.08
2081	16.9839	0.24394	332.939	12.3622	14.7625	869.006	190.803	19.7249	5.0587	33.2732	60.9971	22.8353	2.33197	0.1026	0.03348	95.7644	10.9361	11.7427	176.821	8.79093	0.04968	69.7977	9.98408	3.967	0.067	0	0	0	0	0	0.796	5.424	0.149	0.03	0	0.04	0	155.925	3511.08
2082	16.6871	0.24378	325.947	12.3619	14.5208	864.981	189.813	19.5304	5.015	33.2066	61.1607	22.7358	2.32504	0.102	0.02976	95.2577	10.9157	11.7468	176.571	8.81406	0.04836	69.5711	9.97196	3.836	0.062	0	0	0	0	0	0.692	5.153	0.138	0.028	0	0.038	0	155.925	3511.08
2083	16.3904	0.24362	318.955	12.3617	14.2792	860.956	188.822	19.3358	4.9713	33.1399	61.3243	22.6364	2.31811	0.1014	0.02604	94.7509	10.8953	11.7508	176.32	8.83719	0.04704	69.3444	9.95984	3.71	0.056	0	0	0	0	0	0.602	4.895	0.127	0.026	0	0.036	0	155.925	3511.08
2084	16.0936	0.24346	311.964	12.3614	14.0375	856.932	187.832	19.1412	4.9276	33.0733	61.4879	22.537	2.31118	0.1008	0.02232	94.2442	10.8749	11.7549	176.07	8.86032	0.04572	69.1178	9.94772	3.587	0.052	0	0	0	0	0	0.524	4.651	0.116	0.024	0	0.034	0	155.925	3511.08
2085	15.7968	0.2433	304.972	12.3611	13.7958	852.907	186.842	18.9467	4.8839	33.0066	61.6514	22.4376	2.30425	0.1002	0.0186	93.7374	10.8545	11.759	175.819	8.88345	0.0444	68.8911	9.9356	3.469	0.047	0	0	0	0	0	0.456	4.418	0.107	0.023	0	0.032	0	155.925	3511.08
2086	15.5001	0.24314	297.98	12.3608	13.5541	848.883	185.852	18.7521	4.8402	32.9399	61.815	22.3381	2.29732	0.0996	0.01488	93.2306	10.8341	11.7631	175.568	8.90658	0.04308	68.6645	9.92348	3.355	0.043	0	0	0	0	0	0.397	4.197	0.099	0.021	0	0.031	0	155.925	3511.08
2087	15.2034	0.24298	290.988	12.3605	13.3124	844.858	184.862	18.5575	4.7965	32.8733	61.9786	22.2387	2.29039	0.099	0.01116	92.7239	10.8137	11.7672	175.318	8.92971	0.04176	68.4378	9.91136	3.244	0.039	0	0	0	0	0	0.345	3.987	0.091	0.02	0	0.029	0	155.925	3511.08
2088	14.9066	0.24282	283.997	12.3603	13.0708	840.833	183.872	18.3629	4.7528	32.8066	62.1422	22.1393	2.28346	0.0984	0.00744	92.2171	10.7933	11.7712	175.067	8.95284	0.04044	68.2112	9.89924	3.137	0.036	0	0	0	0	0	0.3	3.788	0.083	0.018	0	0.028	0	155.925	3511.08
2089	14.6098	0.24266	277.005	12.36	12.8291	836.809	182.882	18.1684	4.7091	32.74	62.3058	22.0398	2.27653	0.0978	0.00372	91.7104	10.7729	11.7753	174.816	8.97597	0.03912	67.9845	9.88712	3.033	0.033	0	0	0	0	0	0.261	3.599	0.077	0.017	0	0.026	0	155.925	3511.08
2090	14.3131	0.2425	270.013	12.3597	12.5874	832.784	181.892	17.9738	4.6654	32.6733	62.4694	21.9404	2.2696	0.0972	0	91.2036	10.7525	11.7794	174.566	8.9991	0.0378	67.7579	9.875	2.933	0.03	0	0	0	0	0	0.227	3.419	0.071	0.016	0	0.025	0	155.925	3511.08
2091	14.2571	0.23639	267.609	12.3507	12.3725	828.728	180.917	17.785	4.63501	32.6225	62.3866	21.8263	2.25281	0.09635	0	90.2059	10.7178	11.7714	174.159	9.00912	0.03676	67.4883	9.83722	2.836	0.028	0	0	0	0	0	0.198	3.248	0.065	0.015	0	0.024	0	155.925	3511.08
2092	14.2011	0.23028	265.206	12.3418	12.1577	824.672	179.943	17.5962	4.60462	32.5717	62.3039	21.7121	2.23602	0.0955	0	89.2083	10.6831	11.7634	173.753	9.01914	0.03572	67.2186	9.79944	2.743	0.025	0	0	0	0	0	0.172	3.085	0.06	0.014	0	0.023	0	155.925	3511.08
2093	14.1452	0.22417	262.802	12.3328	11.9428	820.617	178.969	17.4074	4.57423	32.5209	62.2211	21.598	2.21923	0.09465	0	88.2106	10.6484	11.7554	173.346	9.02916	0.03468	66.949	9.76166	2.652	0.023	0	0	0	0	0	0.15	2.931	0.055	0.013	0	0.022	0	155.925	3511.08
2094	14.0892	0.21806	260.398	12.3238	11.7279	816.561	177.994	17.2186	4.54384	32.4701	62.1384	21.4838	2.20244	0.0938	0	87.2129	10.6137	11.7474	172.939	9.03918	0.03364	66.6794	9.72388	2.565	0.021	0	0	0	0	0	0.13	2.785	0.051	0.012	0	0.02	0	155.925	3511.08
2095	14.0332	0.21195	257.994	12.3148	11.513	812.505	177.02	17.0298	4.51345	32.4192	62.0556	21.3697	2.18565	0.09295	0	86.2152	10.579	11.7393	172.533	9.0492	0.0326	66.4098	9.6861	2.48	0.019	0	0	0	0	0	0.113	2.645	0.047	0.011	0	0.019	0	155.925	3511.08
2096	13.9772	0.20584	255.591	12.3059	11.2982	808.449	176.045	16.8411	4.48306	32.3684	61.9728	21.2556	2.16886	0.0921	0	85.2176	10.5443	11.7313	172.126	9.05922	0.03156	66.1401	9.64832	2.398	0.018	0	0	0	0	0	0.099	2.513	0.043	0.01	0	0.018	0	155.925	3511.08
2097	13.9212	0.19973	253.187	12.2969	11.0833	804.393	175.071	16.6523	4.45267	32.3176	61.8901	21.1414	2.15207	0.09125	0	84.2199	10.5096	11.7233	171.72	9.06924	0.03052	65.8705	9.61054	2.319	0.016	0	0	0	0	0	0.086	2.387	0.039	0.009	0	0.018	0	155.925	3511.08
2098	13.8653	0.19362	250.783	12.2879	10.8684	800.337	174.097	16.4635	4.42228	32.2668	61.8073	21.0273	2.13528	0.0904	0	83.2222	10.4749	11.7153	171.313	9.07926	0.02948	65.6009	9.57276	2.243	0.015	0	0	0	0	0	0.075	2.268	0.036	0.009	0	0.017	0	155.925	3511.08
2099	13.8093	0.18751	248.379	12.279	10.6536	796.282	173.122	16.2747	4.39189	32.216	61.7246	20.9131	2.11849	0.08955	0	82.2246	10.4402	11.7073	170.906	9.08928	0.02844	65.3312	9.53498	2.169	0.014	0	0	0	0	0	0.065	2.155	0.033	0.008	0	0.016	0	155.925	3511.08
2100	13.7533	0.1814	245.975	12.27	10.4387	792.226	172.148	16.0859	4.3615	32.1652	61.6418	20.799	2.1017	0.0887	0	81.2269	10.4055	11.6993	170.5	9.0993	0.0274	65.0616	9.4972	2.097	0.012	0	0	0	0	0	0.056	2.047	0.031	0.008	0	0.015	0	155.925	3511.08
2101	13.4026	0.174144	246.143	12.1625	10.4441	790.126	171.934	16.099	4.35817	32.0801	61.5213	20.3847	2.06044	0.087056	0	81.2286	10.4068	11.6993	172.447	9.08131	0.0274	65.0616	9.31557	2.028	0.011	0	0	0	0	0	0.049	1.945	0.028	0.007	0	0.014	0	155.925	3511.08
2102	13.0518	0.166888	246.31	12.055	10.4496	788.027	171.72	16.1122	4.35484	31.995	61.4008	19.9705	2.01918	0.085412	0	81.2304	10.4081	11.6993	174.394	9.06332	0.0274	65.0616	9.13394	1.961	0.01	0	0	0	0	0	0.042	1.847	0.026	0.007	0	0.014	0	155.925	3511.08
2103	12.7011	0.159632	246.477	11.9475	10.455	785.927	171.505	16.1253	4.35152	31.9099	61.2803	19.5562	1.97792	0.083768	0	81.2321	10.4094	11.6993	176.341	9.04534	0.0274	65.0616	8.9523	1.896	0.01	0	0	0	0	0	0.037	1.755	0.024	0.006	0	0.013	0	155.925	3511.08
2104	12.3504	0.152376	246.645	11.84	10.4604	783.828	171.291	16.1384	4.34819	31.8248	61.1599	19.1419	1.93666	0.082124	0	81.2338	10.4107	11.6993	178.288	9.02735	0.0274	65.0616	8.77067	1.834	0.009	0	0	0	0	0	0.032	1.667	0.022	0.006	0	0.012	0	155.925	3511.08
2105	11.9997	0.14512	246.812	11.7325	10.4659	781.728	171.077	16.1516	4.34486	31.7397	61.0394	18.7277	1.8954	0.08048	0	81.2355	10.412	11.6993	180.235	9.00936	0.0274	65.0616	8.58904	1.773	0.008	0	0	0	0	0	0.028	1.584	0.02	0.005	0	0.012	0	155.925	3511.08
2106	11.6489	0.137864	246.979	11.625	10.4713	779.629	170.863	16.1647	4.34153	31.6546	60.9189	18.3134	1.85414	0.078836	0	81.2373	10.4133	11.6993	182.182	8.99137	0.0274	65.0616	8.40741	1.715	0.007	0	0	0	0	0	0.024	1.505	0.019	0.005	0	0.011	0	155.925	3511.08
2107	11.2982	0.130608	247.147	11.5174	10.4768	777.529	170.649	16.1779	4.3382	31.5695	60.7984	17.8991	1.81288	0.077192	0	81.239	10.4145	11.6993	184.13	8.97338	0.0274	65.0616	8.22578	1.658	0.007	0	0	0	0	0	0.021	1.429	0.017	0.005	0	0.011	0	155.925	3511.08
2108	10.9475	0.123352	247.314	11.4099	10.4822	775.43	170.435	16.191	4.33488	31.4844	60.6779	17.4849	1.77162	0.075548	0	81.2407	10.4158	11.6993	186.077	8.9554	0.0274	65.0616	8.04414	1.603	0.006	0	0	0	0	0	0.018	1.358	0.016	0.004	0	0.01	0	155.925	3511.08
2109	10.5967	0.116096	247.481	11.3024	10.4876	773.33	170.221	16.2041	4.33155	31.3993	60.5574	17.0706	1.73036	0.073904	0	81.2425	10.4171	11.6993	188.024	8.93741	0.0274	65.0616	7.86251	1.55	0.006	0	0	0	0	0	0.016	1.29	0.014	0.004	0	0.009	0	155.925	3511.08
2110	10.246	0.10884	247.649	11.1949	10.4931	771.231	170.007	16.2173	4.32822	31.3142	60.437	16.6563	1.6891	0.07226	0	81.2442	10.4184	11.6993	189.971	8.91942	0.0274	65.0616	7.68088	1.499	0.005	0	0	0	0	0	0.014	1.226	0.013	0.004	0	0.009	0	155.925	3511.08
2111	9.89529	0.101584	247.816	11.0874	10.4985	769.131	169.793	16.2304	4.32489	31.2291	60.3165	16.2421	1.64784	0.070616	0	81.2459	10.4197	11.6993	191.918	8.90143	0.0274	65.0616	7.49925	1.45	0.005	0	0	0	0	0	0.012	1.164	0.012	0.003	0	0.009	0	155.925	3511.08
2112	9.54456	0.094328	247.983	10.9799	10.5039	767.032	169.579	16.2435	4.32156	31.144	60.196	15.8278	1.60658	0.068972	0	81.2476	10.421	11.6993	193.865	8.88344	0.0274	65.0616	7.31762	1.402	0.004	0	0	0	0	0	0.01	1.106	0.011	0.003	0	0.008	0	155.925	3511.08
2113	9.19384	0.087072	248.151	10.8724	10.5094	764.932	169.364	16.2567	4.31824	31.0588	60.0755	15.4135	1.56532	0.067328	0	81.2494	10.4223	11.6993	195.812	8.86546	0.0274	65.0616	7.13598	1.356	0.004	0	0	0	0	0	0.009	1.051	0.01	0.003	0	0.008	0	155.925	3511.08
2114	8.84311	0.079816	248.318	10.7649	10.5148	762.833	169.15	16.2698	4.31491	30.9737	59.955	14.9992	1.52406	0.065684	0	81.2511	10.4236	11.6993	197.759	8.84747	0.0274	65.0616	6.95435	1.311	0.004	0	0	0	0	0	0.008	0.998	0.01	0.003	0	0.007	0	155.925	3511.08
2115	8.49238	0.07256	248.485	10.6574	10.5202	760.733	168.936	16.2829	4.31158	30.8886	59.8345	14.585	1.4828	0.06404	0	81.2528	10.4249	11.6993	199.706	8.82948	0.0274	65.0616	6.77272	1.268	0.003	0	0	0	0	0	0.007	0.948	0.009	0.003	0	0.007	0	155.925	3511.08
2116	8.14165	0.065304	248.652	10.5499	10.5257	758.634	168.722	16.2961	4.30825	30.8035	59.7141	14.1707	1.44154	0.062396	0	81.2545	10.4262	11.6993	201.653	8.81149	0.0274	65.0616	6.59109	1.226	0.003	0	0	0	0	0	0.006	0.901	0.008	0.002	0	0.007	0	155.925	3511.08
2117	7.79092	0.058048	248.82	10.4424	10.5311	756.534	168.508	16.3092	4.30492	30.7184	59.5936	13.7564	1.40028	0.060752	0	81.2563	10.4275	11.6993	203.601	8.7935	0.0274	65.0616	6.40946	1.185	0.003	0	0	0	0	0	0.005	0.856	0.007	0.002	0	0.006	0	155.925	3511.08
2118	7.4402	0.050792	248.987	10.3349	10.5365	754.435	168.294	16.3223	4.3016	30.6333	59.4731	13.3422	1.35902	0.059108	0	81.258	10.4288	11.6993	205.548	8.77552	0.0274	65.0616	6.22782	1.146	0.003	0	0	0	0	0	0.005	0.813	0.007	0.002	0	0.006	0	155.925	3511.08
2119	7.08947	0.043536	249.154	10.2273	10.542	752.335	168.08	16.3355	4.29827	30.5482	59.3526	12.9279	1.31776	0.057464	0	81.2597	10.43	11.6993	207.495	8.75753	0.0274	65.0616	6.04619	1.108	0.002	0	0	0	0	0	0.004	0.772	0.006	0.002	0	0.006	0	155.925	3511.08
2120	6.73874	0.03628	249.322	10.1198	10.5474	750.236	167.866	16.3486	4.29494	30.4631	59.2321	12.5136	1.2765	0.05582	0	81.2615	10.4313	11.6993	209.442	8.73954	0.0274	65.0616	5.86456	1.072	0.002	0	0	0	0	0	0.003	0.734	0.006	0.002	0	0.005	0	155.925	3511.08
2121	6.38801	0.029024	249.489	10.0123	10.5529	748.136	167.652	16.3618	4.29161	30.378	59.1116	12.0994	1.23524	0.054176	0	81.2632	10.4326	11.6993	211.389	8.72155	0.0274	65.0616	5.68293	1.036	0.002	0	0	0	0	0	0.003	0.697	0.005	0.002	0	0.005	0	155.925	3511.08
2122	6.03728	0.021768	249.656	9.90482	10.5583	746.037	167.438	16.3749	4.28828	30.2929	58.9912	11.6851	1.19398	0.052532	0	81.2649	10.4339	11.6993	213.336	8.70356	0.0274	65.0616	5.5013	1.002	0.002	0	0	0	0	0	0.003	0.662	0.005	0.002	0	0.005	0	155.925	3511.08
2123	5.68656	0.014512	249.824	9.79732	10.5637	743.937	167.223	16.388	4.28496	30.2078	58.8707	11.2708	1.15272	0.050888	0	81.2666	10.4352	11.6993	215.283	8.68558	0.0274	65.0616	5.31966	0.969	0.002	0	0	0	0	0	0.002	0.629	0.005	0.001	0	0.005	0	155.925	3511.08
2124	5.33583	0.007256	249.991	9.68981	10.5692	741.838	167.009	16.4012	4.28163	30.1227	58.7502	10.8566	1.11146	0.049244	0	81.2684	10.4365	11.6993	217.23	8.66759	0.0274	65.0616	5.13803	0.937	0.001	0	0	0	0	0	0.002	0.598	0.004	0.001	0	0.004	0	155.925	3511.08
2125	4.9851	0	250.158	9.5823	10.5746	739.738	166.795	16.4143	4.2783	30.0376	58.6297	10.4423	1.0702	0.0476	0	81.2701	10.4378	11.6993	219.177	8.6496	0.0274	65.0616	4.9564	0.906	0.001	0	0	0	0	0	0.002	0.568	0.004	0.001	0	0.004	0	155.925	3511.08
2126	4.63437	0	250.326	9.4748	10.58	737.638	166.581	16.4274	4.27497	29.9525	58.5092	10.028	1.02894	0.0459522	0	81.2718	10.4391	11.6993	221.124	8.63162	0.0274	65.0616	4.77477	0.876	0.001	0	0	0	0	0	0.001	0.539	0.004	0.001	0	0.004	0	155.925	3511.08
2127	4.28364	0	250.493	9.36731	10.5855	735.539	166.367	16.4406	4.27163	29.8674	58.3887	9.61376	0.987678	0.0443043	0	81.2736	10.4404	11.6993	223.072	8.61363	0.0274	65.0616	4.59315	0.847	0.001	0	0	0	0	0	0.001	0.512	0.003	0.001	0	0.004	0	155.925	3511.08
2128	3.93291	0	250.66	9.25981	10.5909	733.439	166.153	16.4537	4.2683	29.7823	58.2682	9.19949	0.946417	0.0426565	0	81.2753	10.4417	11.6993	225.019	8.59565	0.0274	65.0616	4.41152	0.819	0.001	0	0	0	0	0	0.001	0.487	0.003	0.001	0	0.004	0	155.925	3511.08
2129	3.58218	0	250.828	9.15232	10.5963	731.34	165.939	16.4668	4.26496	29.6972	58.1477	8.78522	0.905157	0.0410087	0	81.277	10.443	11.6993	226.966	8.57767	0.0274	65.0616	4.2299	0.792	0.001	0	0	0	0	0	0.001	0.462	0.003	0.001	0	0.003	0	155.925	3511.08
2130	3.23145	0	250.995	9.04482	10.6018	729.24	165.725	16.4799	4.26163	29.6121	58.0272	8.37095	0.863896	0.0393609	0	81.2787	10.4443	11.6993	228.913	8.55969	0.0274	65.0616	4.04827	0.766	0.001	0	0	0	0	0	0.001	0.439	0.003	0.001	0	0.003	0	155.925	3511.08
2131	2.88072	0	251.162	8.93733	10.6072	727.141	165.511	16.4931	4.25829	29.5271	57.9067	7.95668	0.822635	0.037713	0	81.2805	10.4456	11.6993	230.86	8.5417	0.0274	65.0616	3.86664	0.741	0.001	0	0	0	0	0	0.001	0.417	0.002	0.001	0	0.003	0	155.925	3511.08
2132	2.52999	0	251.329	8.82983	10.6126	725.041	165.297	16.5062	4.25496	29.442	57.7862	7.54241	0.781374	0.0360652	0	81.2822	10.4469	11.6993	232.807	8.52372	0.0274	65.0616	3.68502	0.717	0.001	0	0	0	0	0	0.001	0.397	0.002	0.001	0	0.003	0	155.925	3511.08
2133	2.17926	0	251.497	8.72233	10.618	722.942	165.083	16.5193	4.25162	29.3569	57.6657	7.12814	0.740113	0.0344174	0	81.2839	10.4482	11.6993	234.754	8.50574	0.0274	65.0616	3.50339	0.693	0.001	0	0	0	0	0	0.001	0.377	0.002	0.001	0	0.003	0	155.925	3511.08
2134	1.82853	0	251.664	8.61484	10.6235	720.842	164.869	16.5324	4.24829	29.2718	57.5452	6.71387	0.698852	0.0327696	0	81.2856	10.4495	11.6993	236.701	8.48776	0.0274	65.0616	3.32177	0.67	0.001	0	0	0	0	0	0	0.358	0.002	0.001	0	0.003	0	155.925	3511.08
2135	1.4778	0	251.831	8.50734	10.6289	718.743	164.654	16.5456	4.24495	29.1867	57.4247	6.2996	0.657591	0.0311217	0	81.2874	10.4508	11.6993	238.648	8.46977	0.0274	65.0616	3.14014	0.648	0.001	0	0	0	0	0	0	0.34	0.002	0.001	0	0.002	0	155.925	3511.08
2136	1.12707	0	251.999	8.39985	10.6343	716.643	164.44	16.5587	4.24162	29.1016	57.3042	5.88533	0.61633	0.0294739	0	81.2891	10.4521	11.6993	240.595	8.45179	0.0274	65.0616	2.95851	0.627	0.001	0	0	0	0	0	0	0.323	0.002	0.001	0	0.002	0	155.925	3511.08
2137	0.776335	0	252.166	8.29235	10.6398	714.544	164.226	16.5718	4.23828	29.0165	57.1838	5.47107	0.57507	0.0278261	0	81.2908	10.4534	11.6993	242.543	8.43381	0.0274	65.0616	2.77689	0.606	0	0	0	0	0	0	0	0.307	0.001	0.001	0	0.002	0	155.925	3511.08
2138	0.425604	0	252.333	8.18486	10.6452	712.444	164.012	16.5849	4.23495	28.9314	57.0633	5.0568	0.533809	0.0261783	0	81.2925	10.4547	11.6993	244.49	8.41583	0.0274	65.0616	2.59526	0.586	0	0	0	0	0	0	0	0.291	0.001	0	0	0.002	0	155.925	3511.08
2139	0.0748739	0	252.501	8.07736	10.6506	710.345	163.798	16.5981	4.23161	28.8463	56.9428	4.64253	0.492548	0.0245304	0	81.2943	10.456	11.6993	246.437	8.39784	0.0274	65.0616	2.41363	0.567	0	0	0	0	0	0	0	0.277	0.001	0	0	0.002	0	155.925	3511.08
2140	-0.275857	0	252.668	7.96987	10.6561	708.245	163.584	16.6112	4.22828	28.7612	56.8223	4.22826	0.451287	0.0228826	0	81.296	10.4573	11.6993	248.384	8.37986	0.0274	65.0616	2.23201	0.548	0	0	0	0	0	0	0	0.263	0.001	0	0	0.002	0	155.925	3511.08
2141	-0.626587	0	252.835	7.86237	10.6615	706.146	163.37	16.6243	4.22494	28.6761	56.7018	3.81399	0.410026	0.0212348	0	81.2977	10.4586	11.6993	250.331	8.36188	0.0274	65.0616	2.05038	0.53	0	0	0	0	0	0	0	0.25	0.001	0	0	0.002	0	155.925	3511.08
2142	-0.977317	0	253.003	7.75487	10.6669	704.046	163.156	16.6374	4.22161	28.591	56.5813	3.39972	0.368765	0.019587	0	81.2994	10.4599	11.6993	252.278	8.3439	0.0274	65.0616	1.86876	0.512	0	0	0	0	0	0	0	0.237	0.001	0	0	0.002	0	155.925	3511.08
2143	-1.32805	0	253.17	7.64738	10.6723	701.947	162.942	16.6506	4.21827	28.506	56.4608	2.98545	0.327504	0.0179391	0	81.3012	10.4612	11.6993	254.225	8.32591	0.0274	65.0616	1.68713	0.495	0	0	0	0	0	0	0	0.226	0.001	0	0	0.002	0	155.925	3511.08
2144	-1.67878	0	253.337	7.53988	10.6778	699.847	162.728	16.6637	4.21494	28.4209	56.3403	2.57118	0.286243	0.0162913	0	81.3029	10.4625	11.6993	256.172	8.30793	0.0274	65.0616	1.5055	6.497	29.177	5.336	1.319	0.187	0.171	0	0.123	0.406	0.065	0.005	0	0.193	0.001	155.954	3511.08
2145	-2.02951	0	253.505	7.43239	10.6832	697.748	162.514	16.6768	4.2116	28.3358	56.2198	2.15691	0.244983	0.0146435	0	81.3046	10.4638	11.6993	258.119	8.28995	0.0274	65.0616	1.32388	6.491	29.149	5.331	1.318	0.186	0.171	0	0.123	0.406	0.065	0.005	0	0.193	0.001	155.886	3511.08
2146	-2.38024	0	253.672	7.32489	10.6886	695.648	162.3	16.6899	4.20827	28.2507	56.0993	1.74264	0.203722	0.0129957	0	81.3063	10.4651	11.6993	260.066	8.27197	0.0274	65.0616	1.14225	6.479	29.097	5.322	1.315	0.186	0.171	0	0.123	0.406	0.065	0.005	0	0.192	0.001	155.747	3511.08
2147	-2.73097	0	253.839	7.2174	10.6941	693.549	162.085	16.7031	4.20493	28.1656	55.9788	1.32837	0.162461	0.0113478	0	81.3081	10.4664	11.6993	262.014	8.25398	0.0274	65.0616	0.960626	6.47	29.057	5.314	1.313	0.186	0.17	0	0.123	0.405	0.065	0.005	0	0.192	0.001	155.645	3511.08
2148	-3.0817	0	254.006	7.1099	10.6995	691.449	161.871	16.7162	4.2016	28.0805	55.8583	0.9141	0.1212	0.0097	0	81.3098	10.4677	11.6993	263.961	8.236	0.0274	65.0616	0.779	6.463	29.027	5.309	1.312	0.186	0.17	0	0.123	0.405	0.065	0.005	0	0.192	0.001	155.571	3511.08
2149	-3.4324	0	254.174	7.0023	10.705	689.35	161.657	16.7295	4.1984	27.9954	55.7378	0.0819	0.037	0.0058	0.8262	81.3751	10.5132	11.7206	265.908	8.1553	0.1092	65.1637	0.3953	6.469	29.053	5.314	1.313	0.186	0.17	0	0.123	0.406	0.066	0.005	0	0.192	0.001	155.668	3511.08
2150	-3.7832	0	254.341	6.8949	10.7104	687.25	161.443	16.7426	4.1949	27.9103	55.6175	0.0819	0.037	0.0058	0.8264	81.3904	10.5152	11.7228	267.855	8.157	0.1092	65.176	0.3953	6.467	29.043	5.312	1.313	0.186	0.17	0	0.123	0.406	0.066	0.005	0	0.192	0.001	155.656	3511.08
2151	-3.7832	0	254.508	6.7874	10.7159	685.151	161.229	16.7556	4.1917	27.8252	55.497	0.082	0.037	0.0058	0.8264	81.3986	10.5162	11.7239	269.802	8.1577	0.1092	65.1826	0.3953	6.463	29.024	5.308	1.312	0.186	0.17	0	0.123	0.406	0.066	0.005	0	0.192	0.001	155.616	3511.08
2152	-3.7832	0	254.676	6.6799	10.7212	683.051	161.015	16.7688	4.1884	27.7401	55.3765	0.082	0.037	0.0058	0.8265	81.4085	10.5175	11.7253	271.749	8.1585	0.1092	65.1904	0.3953	6.459	29.007	5.305	1.311	0.185	0.17	0	0.123	0.406	0.066	0.005	0	0.192	0.001	155.581	3511.08
2153	-3.7832	0	254.843	6.5723	10.7267	680.952	160.801	16.7819	4.1851	27.655	55.256	0.082	0.037	0.0058	0.8267	81.4185	10.5187	11.7267	273.696	8.1597	0.1092	65.1983	0.3953	6.455	28.989	5.302	1.31	0.185	0.17	0	0.123	0.406	0.066	0.005	0	0.192	0.001	155.547	3511.08
2154	-3.7832	0	255.01	6.4649	10.7322	678.852	160.587	16.7951	4.1816	27.5699	55.1354	0.082	0.037	0.0058	0.8268	81.4283	10.52	11.7282	275.643	8.1606	0.1092	65.2063	0.3953	6.451	28.972	5.299	1.31	0.185	0.17	0	0.123	0.406	0.066	0.005	0	0.192	0.001	155.512	3511.08
2155	-3.7832	0	255.178	6.3573	10.7376	676.753	160.373	16.8082	4.1783	27.4848	55.0149	0.082	0.037	0.0058	0.8268	81.4378	10.5215	11.7296	277.59	8.1617	0.1092	65.2139	0.3953	6.447	28.954	5.296	1.309	0.185	0.17	0	0.123	0.406	0.066	0.005	0	0.191	0.001	155.477	3511.08
2156	-3.7832	0	255.345	6.2498	10.743	674.653	160.158	16.8213	4.17498	27.3997	54.8944	0.082	0.037	0.0058	0.8269	81.4469	10.5226	11.7309	279.538	8.16262	0.10922	65.2212	0.3953	6.443	28.937	5.292	1.308	0.185	0.17	0	0.123	0.406	0.066	0.005	0	0.191	0.001	155.441	3511.08
2157	-3.7832	0	255.512	6.1423	10.7484	672.554	159.944	16.8345	4.17166	27.3146	54.7739	0.082	0.037	0.0058	0.827	81.4559	10.5237	11.7322	281.485	8.16354	0.10924	65.2284	0.3953	6.439	28.918	5.289	1.307	0.185	0.17	0	0.123	0.406	0.066	0.005	0	0.191	0.001	155.404	3511.08
2158	-3.7832	0	255.68	6.0348	10.7539	670.454	159.73	16.8476	4.16834	27.2295	54.6535	0.082	0.037	0.0058	0.8271	81.465	10.5249	11.7335	283.432	8.16446	0.10926	65.2357	0.3953	6.435	28.9	5.286	1.306	0.185	0.17	0	0.123	0.406	0.066	0.005	0	0.191	0.001	155.367	3511.08
2159	-3.7832	0	255.847	5.9273	10.7593	668.355	159.516	16.8608	4.16502	27.1444	54.533	0.082	0.037	0.0058	0.8272	81.474	10.526	11.7348	285.379	8.16538	0.10928	65.2429	0.3953	6.431	28.882	5.282	1.305	0.185	0.169	0	0.123	0.406	0.066	0.005	0	0.191	0.001	155.329	3511.08
2160	-3.7832	0	256.014	5.8198	10.7647	666.255	159.302	16.8739	4.1617	27.0593	54.4125	0.082	0.037	0.0058	0.8273	81.4831	10.5271	11.7361	287.326	8.1663	0.1093	65.2502	0.3953	6.427	28.863	5.279	1.305	0.185	0.169	0	0.123	0.406	0.066	0.005	0	0.191	0.001	155.29	3511.08
2161	-3.7832	0	256.182	5.71232	10.7702	664.156	159.088	16.8871	4.15836	26.9742	54.292	0.082	0.037	0.0058	0.82738	81.4914	10.5282	11.7373	289.273	8.16712	0.10932	65.2568	0.3953	6.423	28.845	5.276	1.304	0.184	0.169	0	0.123	0.406	0.066	0.005	0	0.191	0.001	155.252	3511.08
2162	-3.7832	0	256.349	5.60484	10.7756	662.056	158.874	16.9002	4.15502	26.8891	54.1715	0.082	0.037	0.0058	0.82746	81.4997	10.5293	11.7385	291.22	8.16794	0.10934	65.2634	0.3953	6.419	28.826	5.272	1.303	0.184	0.169	0	0.123	0.406	0.066	0.005	0	0.191	0.001	155.213	3511.08
2163	-3.7832	0	256.516	5.49736	10.7811	659.957	158.66	16.9134	4.15168	26.8041	54.0511	0.082	0.037	0.0058	0.82754	81.5079	10.5304	11.7397	293.167	8.16876	0.10936	65.2701	0.3953	6.414	28.807	5.269	1.302	0.184	0.169	0	0.123	0.407	0.066	0.005	0	0.19	0.001	155.173	3511.08
2164	-3.7832	0	256.684	5.38988	10.7865	657.857	158.446	16.9265	4.14834	26.719	53.9306	0.082	0.037	0.0058	0.82762	81.5162	10.5315	11.7409	295.114	8.16958	0.10938	65.2767	0.3953	6.41	28.788	5.265	1.301	0.184	0.169	0	0.123	0.407	0.066	0.005	0	0.19	0.001	155.134	3511.08
2165	-3.7832	0	256.851	5.2824	10.792	655.758	158.232	16.9397	4.145	26.6339	53.8101	0.082	0.037	0.0058	0.8277	81.5245	10.5326	11.7421	297.061	8.1704	0.1094	65.2833	0.3953	6.406	28.769	5.262	1.3	0.184	0.169	0	0.123	0.407	0.066	0.005	0	0.19	0.001	155.094	3511.08
2166	-3.7832	0	257.018	5.2824	10.7974	653.658	158.018	16.9528	4.1417	26.5488	53.6896	0.082	0.037	0.0058	0.82776	81.5322	10.5336	11.7432	299.008	8.17116	0.10942	65.2895	0.3953	6.402	28.75	5.258	1.299	0.184	0.169	0	0.123	0.407	0.066	0.005	0	0.19	0.001	155.053	3511.08
2167	-3.7832	0	257.185	5.2824	10.8028	651.559	157.804	16.9659	4.1384	26.4637	53.5692	0.082	0.037	0.0058	0.82782	81.5399	10.5346	11.7443	300.956	8.17192	0.10944	65.2957	0.3953	6.397	28.73	5.255	1.299	0.184	0.169	0	0.123	0.407	0.066	0.005	0	0.19	0.001	155.013	3511.08
2168	-3.7832	0	257.353	5.2824	10.8083	649.459	157.589	16.979	4.1351	26.3785	53.4487	0.082	0.037	0.0058	0.82788	81.5477	10.5355	11.7455	302.903	8.17268	0.10946	65.3018	0.3953	6.393	28.711	5.251	1.298	0.184	0.168	0	0.123	0.407	0.066	0.005	0	0.19	0.001	154.973	3511.08
2169	-3.7832	0	257.52	5.2824	10.8137	647.36	157.375	16.9921	4.1318	26.2934	53.3283	0.082	0.037	0.0058	0.82794	81.5554	10.5365	11.7466	304.85	8.17344	0.10948	65.308	0.3953	6.389	28.692	5.248	1.297	0.183	0.168	0	0.123	0.407	0.066	0.005	0	0.19	0.001	154.932	3511.08
2170	-3.7832	0	257.687	5.2824	10.8191	645.26	157.161	17.0052	4.1285	26.2083	53.2078	0.082	0.037	0.0058	0.828	81.5631	10.5375	11.7477	306.797	8.1742	0.1095	65.3142	0.3953	6.384	28.673	5.244	1.296	0.183	0.168	0	0.123	0.407	0.066	0.005	0	0.19	0.001	154.892	3511.08
2171	-3.7832	0	257.855	5.2824	10.8245	643.161	156.947	17.0184	4.12514	26.1232	53.0873	0.08202	0.037	0.0058	0.8281	81.5703	10.5384	11.7487	308.744	8.1749	0.1095	65.32	0.3953	6.38	28.653	5.241	1.295	0.183	0.168	0	0.123	0.407	0.066	0.005	0	0.189	0.001	154.852	3511.08
2172	-3.7832	0	258.022	5.2824	10.8299	641.061	156.733	17.0315	4.12178	26.0381	52.9668	0.08204	0.037	0.0058	0.8282	81.5776	10.5394	11.7497	310.691	8.1756	0.1095	65.3258	0.3953	6.376	28.634	5.237	1.294	0.183	0.168	0	0.123	0.407	0.066	0.005	0	0.189	0.001	154.811	3511.08
2173	-3.7832	0	258.189	5.2824	10.8354	638.962	156.519	17.0447	4.11842	25.9529	52.8462	0.08206	0.037	0.0058	0.8283	81.5848	10.5403	11.7508	312.638	8.1763	0.1095	65.3316	0.3953	6.372	28.615	5.233	1.293	0.183	0.168	0	0.123	0.407	0.066	0.005	0	0.189	0.001	154.771	3511.08
2174	-3.7832	0	258.357	5.2824	10.8408	636.862	156.305	17.0578	4.11506	25.8678	52.7257	0.08208	0.037	0.0058	0.8284	81.5921	10.5413	11.7518	314.585	8.177	0.1095	65.3374	0.3953	6.367	28.596	5.23	1.293	0.183	0.168	0	0.124	0.407	0.066	0.005	0	0.189	0.001	154.731	3511.08
2175	-3.7832	0	258.524	5.2824	10.8462	634.763	156.091	17.071	4.1117	25.7827	52.6052	0.0821	0.037	0.0058	0.8285	81.5993	10.5422	11.7528	316.533	8.1777	0.1095	65.3432	0.3953	6.363	28.576	5.226	1.292	0.183	0.168	0	0.124	0.407	0.066	0.005	0	0.189	0.001	154.69	3511.08
2176	-3.7832	0	258.691	5.2824	10.8517	632.663	155.877	17.0841	4.1084	25.6976	52.4847	0.0821	0.037	0.0058	0.82858	81.6061	10.5431	11.7538	318.48	8.17838	0.10952	65.3487	0.3953	6.359	28.557	5.223	1.291	0.183	0.168	0	0.124	0.407	0.066	0.005	0	0.189	0.001	154.65	3511.08
2177	-3.7832	0	258.859	5.2824	10.8571	630.564	155.663	17.0972	4.1051	25.6125	52.3642	0.0821	0.037	0.0058	0.82866	81.6129	10.5439	11.7548	320.427	8.17906	0.10954	65.3541	0.3953	6.355	28.538	5.219	1.29	0.182	0.167	0	0.124	0.407	0.066	0.005	0	0.189	0.001	154.61	3511.08
2178	-3.7832	0	259.026	5.2824	10.8626	628.464	155.449	17.1103	4.1018	25.5275	52.2438	0.0821	0.037	0.0058	0.82874	81.6197	10.5448	11.7557	322.374	8.17974	0.10956	65.3596	0.3953	6.35	28.519	5.216	1.289	0.182	0.167	0	0.124	0.407	0.066	0.005	0	0.189	0.001	154.57	3511.08
2179	-3.7832	0	259.193	5.2824	10.868	626.365	155.234	17.1234	4.0985	25.4424	52.1233	0.0821	0.037	0.0058	0.82882	81.6265	10.5456	11.7567	324.321	8.18042	0.10958	65.365	0.3953	6.346	28.5	5.212	1.288	0.182	0.167	0	0.124	0.407	0.066	0.005	0	0.188	0.001	154.53	3511.08
2180	-3.7832	0	259.361	5.2824	10.8735	624.265	155.02	17.1365	4.0952	25.3573	52.0028	0.0821	0.037	0.0058	0.8289	81.6333	10.5465	11.7577	326.268	8.1811	0.1096	65.3705	0.3953	6.342	28.48	5.209	1.287	0.182	0.167	0	0.124	0.407	0.066	0.005	0	0.188	0.001	154.49	3511.08
2181	-3.7832	0	259.528	5.2824	10.8789	622.166	154.806	17.1497	4.09184	25.2722	51.8823	0.0821	0.037	0.0058	0.82894	81.6398	10.5474	11.7586	328.215	8.18178	0.1096	65.3757	0.3953	6.337	28.461	5.205	1.286	0.182	0.167	0	0.124	0.407	0.066	0.005	0	0.188	0.001	154.45	3511.08
2182	-3.7832	0	259.695	5.2824	10.8843	620.066	154.592	17.1628	4.08848	25.1871	51.7618	0.0821	0.037	0.0058	0.82898	81.6463	10.5482	11.7595	330.162	8.18246	0.1096	65.3809	0.3953	6.333	28.442	5.202	1.286	0.182	0.167	0	0.124	0.408	0.066	0.005	0	0.188	0.001	154.41	3511.08
2183	-3.7832	0	259.862	5.2824	10.8898	617.967	154.378	17.176	4.08512	25.102	51.6414	0.0821	0.037	0.0058	0.82902	81.6527	10.5491	11.7605	332.109	8.18314	0.1096	65.386	0.3953	6.329	28.423	5.198	1.285	0.182	0.167	0	0.124	0.408	0.066	0.005	0	0.188	0.001	154.371	3511.08
2184	-3.7832	0	260.03	5.2824	10.8952	615.867	154.164	17.1891	4.08176	25.0169	51.5209	0.0821	0.037	0.0058	0.82906	81.6592	10.5499	11.7614	334.056	8.18382	0.1096	65.3912	0.3953	6.325	28.404	5.195	1.284	0.182	0.167	0	0.124	0.408	0.066	0.005	0	0.188	0.001	154.331	3511.08
2185	-3.7832	0	260.197	5.2824	10.9006	613.768	153.95	17.2023	4.0784	24.9318	51.4004	0.0821	0.037	0.0058	0.8291	81.6657	10.5508	11.7623	336.003	8.1845	0.1096	65.3964	0.3953	6.321	28.385	5.192	1.283	0.181	0.167	0	0.124	0.408	0.066	0.005	0	0.188	0.001	154.291	3511.08
2186	-3.7832	0	260.364	5.2824	10.9061	611.668	153.736	17.2154	4.0751	24.8467	51.2799	0.08212	0.037	0.0058	0.82918	81.6719	10.5516	11.7632	337.951	8.18512	0.1096	65.4013	0.3953	6.316	28.366	5.188	1.282	0.181	0.166	0	0.124	0.408	0.066	0.005	0	0.188	0.001	154.252	3511.08
2187	-3.7832	0	260.532	5.2824	10.9115	609.569	153.522	17.2285	4.0718	24.7616	51.1594	0.08214	0.037	0.0058	0.82926	81.678	10.5523	11.7641	339.898	8.18574	0.1096	65.4062	0.3953	6.312	28.347	5.185	1.281	0.181	0.166	0	0.124	0.408	0.066	0.005	0	0.187	0.001	154.213	3511.08
2188	-3.7832	0	260.699	5.2824	10.917	607.469	153.308	17.2417	4.0685	24.6765	51.0389	0.08216	0.037	0.0058	0.82934	81.6842	10.5531	11.765	341.845	8.18636	0.1096	65.4112	0.3953	6.308	28.328	5.181	1.28	0.181	0.166	0	0.124	0.408	0.066	0.005	0	0.187	0.001	154.173	3511.08
2189	-3.7832	0	260.866	5.2824	10.9224	605.37	153.093	17.2548	4.0652	24.5914	50.9184	0.08218	0.037	0.0058	0.82942	81.6903	10.5538	11.7659	343.792	8.18698	0.1096	65.4161	0.3953	6.304	28.31	5.178	1.28	0.181	0.166	0	0.124	0.408	0.066	0.005	0	0.187	0.001	154.134	3511.08
2190	-3.7832	0	261.034	5.2824	10.9279	603.27	152.879	17.2679	4.0619	24.5063	50.7979	0.0822	0.037	0.0058	0.8295	81.6965	10.5546	11.7668	345.739	8.1876	0.1096	65.421	0.3953	6.299	28.291	5.174	1.279	0.181	0.166	0	0.124	0.408	0.066	0.005	0	0.187	0.001	154.095	3511.08
2191	-3.7832	0	261.201	5.2824	10.9333	601.171	152.665	17.281	4.05858	24.4212	50.6774	0.0822	0.037	0.0058	0.82954	81.7024	10.5554	11.7676	347.686	8.18818	0.1096	65.4257	0.3953	6.295	28.272	5.171	1.278	0.181	0.166	0	0.124	0.408	0.066	0.005	0	0.187	0.001	154.056	3511.08
2192	-3.7832	0	261.368	5.2824	10.9387	599.071	152.451	17.2942	4.05526	24.3361	50.5569	0.0822	0.037	0.0058	0.82958	81.7083	10.5562	11.7685	349.633	8.18876	0.1096	65.4305	0.3953	6.291	28.253	5.167	1.277	0.181	0.166	0	0.124	0.408	0.066	0.005	0	0.187	0.001	154.017	3511.08
2193	-3.7832	0	261.536	5.2824	10.9441	596.972	152.237	17.3073	4.05194	24.2511	50.4365	0.0822	0.037	0.0058	0.82962	81.7142	10.5569	11.7693	351.58	8.18934	0.1096	65.4352	0.3953	6.287	28.234	5.164	1.276	0.181	0.166	0	0.124	0.408	0.066	0.005	0	0.187	0.001	153.978	3511.08
2194	-3.7832	0	261.703	5.2824	10.9495	594.872	152.023	17.3205	4.04862	24.166	50.316	0.0822	0.037	0.0058	0.82966	81.7201	10.5577	11.7702	353.527	8.18992	0.1096	65.44	0.3953	6.283	28.215	5.16	1.275	0.18	0.166	0	0.124	0.408	0.066	0.005	0	0.187	0.001	153.94	3511.08
2195	-3.7832	0	261.87	5.2824	10.9549	592.773	151.809	17.3336	4.0453	24.0809	50.1955	0.0822	0.037	0.0058	0.8297	81.726	10.5585	11.771	355.475	8.1905	0.1096	65.4447	0.3953	6.279	28.197	5.157	1.275	0.18	0.165	0	0.124	0.408	0.066	0.005	0	0.186	0.001	153.901	3511.08
2196	-3.7832	0	262.038	5.2824	10.9604	590.673	151.595	17.3467	4.04196	23.9958	50.075	0.0822	0.037	0.0058	0.82976	81.7316	10.5592	11.7718	357.422	8.19108	0.1096	65.4492	0.3953	6.274	28.178	5.154	1.274	0.18	0.165	0	0.124	0.408	0.066	0.005	0	0.186	0.001	153.862	3511.08
2197	-3.7832	0	262.205	5.2824	10.9658	588.573	151.381	17.3598	4.03862	23.9107	49.9545	0.0822	0.037	0.0058	0.82982	81.7372	10.56	11.7727	359.369	8.19166	0.1096	65.4537	0.3953	6.27	28.159	5.15	1.273	0.18	0.165	0	0.124	0.408	0.066	0.005	0	0.186	0.001	153.824	3511.08
2198	-3.7832	0	262.372	5.2824	10.9713	586.474	151.167	17.373	4.03528	23.8256	49.834	0.0822	0.037	0.0058	0.82988	81.7428	10.5607	11.7735	361.316	8.19224	0.1096	65.4583	0.3953	6.266	28.141	5.147	1.272	0.18	0.165	0	0.124	0.408	0.066	0.005	0	0.186	0.001	153.785	3511.08
2199	-3.7832	0	262.539	5.2824	10.9767	584.375	150.952	17.3861	4.03194	23.7405	49.7135	0.0822	0.037	0.0058	0.82994	81.7484	10.5615	11.7744	363.263	8.19282	0.1096	65.4628	0.3953	6.262	28.122	5.143	1.271	0.18	0.165	0	0.124	0.408	0.066	0.005	0	0.186	0.001	153.747	3511.08
2200	-3.7832	0	262.707	5.2824	10.9822	582.275	150.738	17.3992	4.0286	23.6554	49.593	0.0822	0.037	0.0058	0.83	81.754	10.5622	11.7752	365.21	8.1934	0.1096	65.4673	0.3953	6.258	28.103	5.14	1.27	0.18	0.165	0	0.124	0.409	0.066	0.005	0	0.186	0.001	153.709	3511.08
2201	-3.7832	0	262.874	5.3173	10.9876	580.175	150.524	17.4123	4.02526	23.5703	49.4725	0.0822	0.037	0.0058	0.83005	81.7593	10.5629	11.776	365.21	8.19394	0.10961	65.4715	0.3953	6.254	28.085	5.137	1.269	0.18	0.165	0	0.124	0.409	0.066	0.005	0	0.186	0.001	153.67	3511.08
2202	-3.7832	0	263.041	5.3522	10.993	578.076	150.31	17.4255	4.02192	23.4852	49.3521	0.0822	0.037	0.0058	0.8301	81.7646	10.5636	11.7767	365.21	8.19448	0.10962	65.4758	0.3953	6.249	28.066	5.133	1.269	0.179	0.165	0	0.124	0.409	0.066	0.005	0	0.186	0.001	153.632	3511.08
2203	-3.7832	0	263.209	5.3871	10.9985	575.976	150.096	17.4386	4.01858	23.4001	49.2316	0.0822	0.037	0.0058	0.83015	81.77	10.5643	11.7775	365.21	8.19502	0.10963	65.4801	0.3953	6.245	28.048	5.13	1.268	0.179	0.165	0	0.124	0.409	0.066	0.005	0	0.185	0.001	153.594	3511.08
2204	-3.7832	0	263.376	5.422	11.0039	573.877	149.882	17.4518	4.01524	23.315	49.1111	0.0822	0.037	0.0058	0.8302	81.7753	10.565	11.7783	365.21	8.19556	0.10964	65.4843	0.3953	6.241	28.029	5.126	1.267	0.179	0.164	0	0.124	0.409	0.066	0.005	0	0.185	0.001	153.556	3511.08
2205	-3.7832	0	263.543	5.4569	11.0093	571.777	149.668	17.4649	4.0119	23.2299	48.9907	0.0822	0.037	0.0058	0.83025	81.7806	10.5656	11.779	365.21	8.1961	0.10965	65.4886	0.3953	6.237	28.011	5.123	1.266	0.179	0.164	0	0.124	0.409	0.066	0.005	0	0.185	0.001	153.519	3511.08
2206	-3.7832	0	263.711	5.4918	11.0147	569.678	149.454	17.478	4.00856	23.1448	48.8702	0.0822	0.037	0.0058	0.8303	81.7859	10.5663	11.7798	365.21	8.19664	0.10966	65.4928	0.3953	6.233	27.992	5.12	1.265	0.179	0.164	0	0.124	0.409	0.066	0.005	0	0.185	0.001	153.481	3511.08
2207	-3.7832	0	263.878	5.5267	11.0201	567.578	149.24	17.4912	4.00522	23.0597	48.7497	0.0822	0.037	0.0058	0.83035	81.7912	10.567	11.7806	365.21	8.19718	0.10967	65.4971	0.3953	6.229	27.974	5.116	1.264	0.179	0.164	0	0.124	0.409	0.066	0.005	0	0.185	0.001	153.443	3511.08
2208	-3.7832	0	264.045	5.5616	11.0256	565.479	149.026	17.5043	4.00188	22.9746	48.6292	0.0822	0.037	0.0058	0.8304	81.7966	10.5677	11.7814	365.21	8.19772	0.10968	65.5013	0.3953	6.225	27.955	5.113	1.264	0.179	0.164	0	0.124	0.409	0.066	0.005	0	0.185	0.001	153.406	3511.08
2209	-3.7832	0	264.212	5.5965	11.031	563.379	148.812	17.5175	3.99854	22.8895	48.5088	0.0822	0.037	0.0058	0.83045	81.8019	10.5684	11.7821	365.21	8.19826	0.10969	65.5055	0.3953	6.221	27.937	5.11	1.263	0.179	0.164	0	0.124	0.409	0.066	0.005	0	0.185	0.001	153.368	3511.08
2210	-3.7832	0	264.38	5.6314	11.0364	561.28	148.597	17.5306	3.9952	22.8044	48.3883	0.0822	0.037	0.0058	0.8305	81.8072	10.5691	11.7829	365.21	8.1988	0.1097	65.5098	0.3953	6.217	27.919	5.106	1.262	0.179	0.164	0	0.124	0.409	0.066	0.005	0	0.185	0.001	153.331	3511.08
2211	-3.7832	0	264.547	5.66631	11.0418	559.18	148.383	17.5437	3.99187	22.7193	48.2678	0.08222	0.037	0.0058	0.83055	81.8121	10.5697	11.7836	365.21	8.19928	0.1097	65.5137	0.3953	6.213	27.901	5.103	1.261	0.178	0.164	0	0.124	0.409	0.066	0.005	0	0.184	0.001	153.294	3511.08
2212	-3.7832	0	264.714	5.70122	11.0473	557.081	148.169	17.5569	3.98854	22.6342	48.1473	0.08224	0.037	0.0058	0.8306	81.817	10.5704	11.7843	365.21	8.19976	0.1097	65.5177	0.3953	6.209	27.882	5.1	1.26	0.178	0.164	0	0.124	0.409	0.066	0.005	0	0.184	0.001	153.257	3511.08
2213	-3.7832	0	264.882	5.73613	11.0527	554.981	147.955	17.57	3.98521	22.5491	48.0268	0.08226	0.037	0.0058	0.83065	81.822	10.571	11.785	365.21	8.20024	0.1097	65.5216	0.3953	6.204	27.864	5.096	1.259	0.178	0.163	0	0.124	0.409	0.066	0.005	0	0.184	0.001	153.22	3511.08
2214	-3.7832	0	265.049	5.77104	11.0582	552.882	147.741	17.5832	3.98188	22.464	47.9063	0.08228	0.037	0.0058	0.8307	81.8269	10.5717	11.7857	365.21	8.20072	0.1097	65.5256	0.3953	6.2	27.846	5.093	1.259	0.178	0.163	0	0.124	0.409	0.066	0.005	0	0.184	0.001	153.183	3511.08
2215	-3.7832	0	265.216	5.80595	11.0636	550.782	147.527	17.5963	3.97855	22.3789	47.7858	0.0823	0.037	0.0058	0.83075	81.8318	10.5723	11.7864	365.21	8.2012	0.1097	65.5295	0.3953	6.196	27.828	5.09	1.258	0.178	0.163	0	0.124	0.409	0.066	0.005	0	0.184	0.001	153.146	3511.08
2216	-3.7832	0	265.384	5.84086	11.069	548.683	147.313	17.6094	3.97522	22.2938	47.6653	0.08232	0.037	0.0058	0.8308	81.8367	10.5729	11.7871	365.21	8.20168	0.1097	65.5334	0.3953	6.192	27.81	5.086	1.257	0.178	0.163	0	0.124	0.409	0.066	0.005	0	0.184	0.001	153.11	3511.08
2217	-3.7832	0	265.551	5.87577	11.0745	546.583	147.099	17.6226	3.97189	22.2087	47.5448	0.08234	0.037	0.0058	0.83085	81.8416	10.5736	11.7878	365.21	8.20216	0.1097	65.5374	0.3953	6.188	27.792	5.083	1.256	0.178	0.163	0	0.124	0.409	0.066	0.005	0	0.184	0.001	153.073	3511.08
2218	-3.7832	0	265.718	5.91068	11.0799	544.484	146.885	17.6357	3.96856	22.1236	47.4243	0.08236	0.037	0.0058	0.8309	81.8466	10.5742	11.7885	365.21	8.20264	0.1097	65.5413	0.3953	6.184	27.774	5.08	1.255	0.178	0.163	0	0.124	0.41	0.066	0.005	0	0.184	0.001	153.037	3511.08
2219	-3.7832	0	265.886	5.94559	11.0854	542.384	146.671	17.6489	3.96523	22.0385	47.3038	0.08238	0.037	0.0058	0.83095	81.8515	10.5749	11.7892	365.21	8.20312	0.1097	65.5453	0.3953	6.18	27.756	5.076	1.255	0.177	0.163	0	0.124	0.41	0.066	0.005	0	0.184	0.001	153	3511.08
2220	-3.7832	0	266.053	5.9805	11.0908	540.285	146.457	17.662	3.9619	21.9534	47.1833	0.0824	0.037	0.0058	0.831	81.8564	10.5755	11.7899	365.21	8.2036	0.1097	65.5492	0.3953	6.176	27.738	5.073	1.254	0.177	0.163	0	0.124	0.41	0.066	0.005	0	0.183	0.001	152.964	3511.08
2221	-3.7832	0	266.22	6.01542	11.0962	538.185	146.242	17.6751	3.95858	21.8683	47.0628	0.0824	0.037	0.0058	0.83106	81.861	10.5761	11.7906	365.21	8.20406	0.10971	65.5529	0.3953	6.172	27.72	5.07	1.253	0.177	0.163	0	0.124	0.41	0.066	0.005	0	0.183	0.001	152.928	3511.08
2222	-3.7832	0	266.388	6.05034	11.1017	536.086	146.028	17.6883	3.95526	21.7832	46.9423	0.0824	0.037	0.0058	0.83112	81.8656	10.5767	11.7912	365.21	8.20452	0.10972	65.5566	0.3953	6.168	27.702	5.067	1.252	0.177	0.163	0	0.124	0.41	0.066	0.005	0	0.183	0.001	152.892	3511.08
2223	-3.7832	0	266.555	6.08526	11.1071	533.986	145.814	17.7014	3.95194	21.6981	46.8218	0.0824	0.037	0.0058	0.83118	81.8702	10.5772	11.7919	365.21	8.20498	0.10973	65.5603	0.3953	6.164	27.684	5.063	1.251	0.177	0.162	0	0.124	0.41	0.066	0.005	0	0.183	0.001	152.857	3511.08
2224	-3.7832	0	266.722	6.12018	11.1126	531.887	145.6	17.7145	3.94862	21.613	46.7013	0.0824	0.037	0.0058	0.83124	81.8748	10.5778	11.7925	365.21	8.20544	0.10974	65.564	0.3953	6.16	27.666	5.06	1.251	0.177	0.162	0	0.124	0.41	0.066	0.005	0	0.183	0.001	152.821	3511.08
2225	-3.7832	0	266.89	6.1551	11.118	529.787	145.386	17.7277	3.9453	21.528	46.5808	0.0824	0.037	0.0058	0.8313	81.8795	10.5784	11.7932	365.21	8.2059	0.10975	65.5677	0.3953	6.156	27.648	5.057	1.25	0.177	0.162	0	0.124	0.41	0.066	0.005	0	0.183	0.001	152.785	3511.08
2226	-3.7832	0	267.057	6.19002	11.1234	527.688	145.172	17.7408	3.94198	21.4429	46.4604	0.0824	0.037	0.0058	0.83136	81.8841	10.579	11.7939	365.21	8.20636	0.10976	65.5713	0.3953	6.153	27.631	5.054	1.249	0.177	0.162	0	0.124	0.41	0.066	0.005	0	0.183	0.001	152.75	3511.08
2227	-3.7832	0	267.224	6.22494	11.1289	525.588	144.958	17.7539	3.93866	21.3578	46.3399	0.0824	0.037	0.0058	0.83142	81.8887	10.5796	11.7945	365.21	8.20682	0.10977	65.575	0.3953	6.149	27.613	5.05	1.248	0.177	0.162	0	0.124	0.41	0.066	0.005	0	0.183	0.001	152.715	3511.08
2228	-3.7832	0	267.392	6.25986	11.1343	523.489	144.744	17.767	3.93534	21.2727	46.2194	0.0824	0.037	0.0058	0.83148	81.8933	10.5801	11.7952	365.21	8.20728	0.10978	65.5787	0.3953	6.145	27.595	5.047	1.247	0.176	0.162	0	0.124	0.41	0.066	0.005	0	0.182	0.001	152.68	3511.08
2229	-3.7832	0	267.559	6.29478	11.1398	521.389	144.53	17.7802	3.93202	21.1876	46.0989	0.0824	0.037	0.0058	0.83154	81.8979	10.5807	11.7958	365.21	8.20774	0.10979	65.5824	0.3953	6.141	27.578	5.044	1.247	0.176	0.162	0	0.124	0.41	0.066	0.005	0	0.182	0.001	152.645	3511.08
2230	-3.7832	0	267.726	6.3297	11.1452	519.29	144.315	17.7933	3.9287	21.1025	45.9784	0.0824	0.037	0.0058	0.8316	81.9025	10.5813	11.7965	365.21	8.2082	0.1098	65.5861	0.3953	6.137	27.56	5.041	1.246	0.176	0.162	0	0.124	0.41	0.066	0.005	0	0.182	0.001	152.61	3511.08
2231	-3.61404	0	267.894	6.3646	11.1506	517.19	144.101	17.8064	3.92538	21.0174	45.8579	0.0824	0.037	0.0058	0.83164	81.9069	10.5819	11.7971	365.21	8.20864	0.10981	65.5896	0.3953	6.133	27.543	5.037	1.245	0.176	0.162	0	0.124	0.41	0.066	0.005	0	0.182	0.001	152.575	3511.08
2232	-3.44488	0	268.061	6.3995	11.1561	515.091	143.887	17.8196	3.92206	20.9323	45.7374	0.0824	0.037	0.0058	0.83168	81.9112	10.5825	11.7977	365.21	8.20908	0.10982	65.593	0.3953	6.129	27.526	5.034	1.244	0.176	0.162	0	0.124	0.41	0.066	0.005	0	0.182	0.001	152.542	3511.08
2233	-3.27572	0	268.228	6.4344	11.1615	512.991	143.673	17.8327	3.91874	20.8472	45.6169	0.0824	0.037	0.0058	0.83172	81.9155	10.583	11.7984	365.21	8.20952	0.10983	65.5965	0.3953	6.126	27.51	5.031	1.243	0.176	0.161	0	0.125	0.41	0.066	0.005	0	0.182	0.001	152.512	3511.08
2234	-3.10656	0	268.395	6.4693	11.1669	510.892	143.459	17.8458	3.91542	20.7621	45.4964	0.0824	0.037	0.0058	0.83176	81.9199	10.5836	11.799	365.21	8.20996	0.10984	65.6	0.3953	6.122	27.495	5.029	1.243	0.176	0.161	0	0.125	0.411	0.066	0.005	0	0.182	0.001	152.484	3511.08
2235	-2.9374	0	268.563	6.5042	11.1723	508.792	143.245	17.859	3.9121	20.677	45.376	0.0824	0.037	0.0058	0.8318	81.9243	10.5842	11.7996	365.21	8.2104	0.10985	65.6034	0.3953	6.119	27.48	5.026	1.242	0.176	0.161	0	0.125	0.411	0.066	0.005	0	0.182	0.001	152.459	3511.08
2236	-2.76824	0	268.73	6.5391	11.1778	506.693	143.031	17.8721	3.90878	20.5919	45.2555	0.0824	0.037	0.0058	0.83184	81.9286	10.5848	11.8002	365.21	8.21084	0.10986	65.6069	0.3953	6.116	27.466	5.023	1.241	0.176	0.161	0	0.125	0.411	0.066	0.005	0	0.182	0.001	152.435	3511.08
2237	-2.59908	0	268.897	6.574	11.1832	504.593	142.817	17.8852	3.90546	20.5068	45.135	0.0824	0.037	0.0058	0.83188	81.933	10.5854	11.8008	365.21	8.21128	0.10987	65.6104	0.3953	6.113	27.454	5.021	1.241	0.176	0.161	0	0.125	0.411	0.066	0.005	0	0.182	0.001	152.415	3511.08
2238	-2.42992	0	269.065	6.6089	11.1886	502.494	142.603	17.8983	3.90214	20.4217	45.0145	0.0824	0.037	0.0058	0.83192	81.9373	10.5859	11.8015	365.21	8.21172	0.10988	65.6139	0.3953	6.11	27.441	5.019	1.24	0.175	0.161	0	0.125	0.411	0.066	0.005	0	0.181	0.001	152.396	3511.08
2239	-2.26076	0	269.232	6.6438	11.1941	500.394	142.389	17.9115	3.89882	20.3366	44.894	0.0824	0.037	0.0058	0.83196	81.9416	10.5865	11.8021	365.21	8.21216	0.10989	65.6173	0.3953	6.108	27.43	5.017	1.24	0.175	0.161	0	0.125	0.411	0.066	0.005	0	0.181	0.001	152.381	3511.08
2240	-2.0916	0	269.399	6.6787	11.1995	498.295	142.175	17.9246	3.8955	20.2515	44.7735	0.0824	0.037	0.0058	0.832	81.946	10.5871	11.8027	365.21	8.2126	0.1099	65.6208	0.3953	6.106	27.42	5.015	1.239	0.175	0.161	0	0.125	0.411	0.066	0.005	0	0.181	0.001	152.368	3511.08
2241	-1.92244	0	269.399	6.71363	11.2049	496.195	141.961	17.9377	3.89215	20.1664	44.653	0.082425	0.037	0.0058	0.832037	81.9501	10.5876	11.8033	365.21	8.21301	0.109912	65.6241	0.3953	6.103	27.41	5.013	1.239	0.175	0.161	0	0.125	0.411	0.066	0.005	0	0.181	0.001	152.357	3511.08
2242	-1.75327	0	269.399	6.74855	11.2104	494.096	141.746	17.9509	3.8888	20.0813	44.5326	0.08245	0.037	0.0058	0.832075	81.9541	10.5882	11.8039	365.21	8.21343	0.109925	65.6273	0.3953	6.101	27.401	5.012	1.239	0.175	0.161	0	0.125	0.411	0.066	0.005	0	0.181	0.001	152.348	3511.08
2243	-1.58411	0	269.399	6.78348	11.2158	491.996	141.532	17.964	3.88545	19.9962	44.4121	0.082475	0.037	0.0058	0.832113	81.9582	10.5887	11.8045	365.21	8.21384	0.109937	65.6306	0.3953	6.1	27.394	5.01	1.238	0.175	0.161	0	0.125	0.411	0.066	0.005	0	0.181	0.001	152.343	3511.08
2244	-1.41495	0	269.399	6.8184	11.2212	489.897	141.318	17.9772	3.8821	19.9111	44.2916	0.0825	0.037	0.0058	0.83215	81.9622	10.5892	11.8051	365.21	8.21425	0.10995	65.6338	0.3953	6.098	27.386	5.009	1.238	0.175	0.161	0	0.125	0.411	0.066	0.005	0	0.181	0.001	152.339	3511.08
2245	-1.24579	0	269.399	6.85332	11.2267	487.797	141.104	17.9903	3.87875	19.826	44.1711	0.082525	0.037	0.0058	0.832187	81.9663	10.5897	11.8057	365.21	8.21466	0.109963	65.6371	0.3953	6.097	27.38	5.008	1.238	0.175	0.161	0	0.125	0.411	0.066	0.005	0	0.181	0.001	152.339	3511.08
2246	-1.07662	0	269.399	6.88825	11.2321	485.698	140.89	18.0034	3.8754	19.7409	44.0506	0.08255	0.037	0.0058	0.832225	81.9703	10.5902	11.8063	365.21	8.21508	0.109975	65.6404	0.3953	6.096	27.375	5.007	1.237	0.175	0.161	0	0.125	0.412	0.066	0.005	0	0.181	0.001	152.341	3511.08
2247	-0.907462	0	269.399	6.92317	11.2376	483.598	140.676	18.0166	3.87205	19.6558	43.9302	0.082575	0.037	0.0058	0.832263	81.9744	10.5908	11.8069	365.21	8.21549	0.109988	65.6436	0.3953	6.095	27.37	5.006	1.237	0.175	0.161	0	0.125	0.412	0.066	0.005	0	0.181	0.001	152.345	3511.08
2248	-0.7383	0	269.399	6.9581	11.243	481.499	140.462	18.0297	3.8687	19.5707	43.8097	0.0826	0.037	0.0058	0.8323	81.9784	10.5913	11.8075	365.21	8.2159	0.11	65.6469	0.3953	6.094	27.367	5.005	1.237	0.175	0.161	0	0.125	0.412	0.066	0.005	0	0.181	0.001	152.352	3511.08
2249	-0.5147	0	269.901	7.0117	11.2483	479.399	140.248	18.0427	3.8653	19.4855	43.6892	0.0839	0.037	0.0058	0.8419	82.0682	10.6167	11.849	365.642	8.259	0.1108	65.7442	0.3953	6.093	27.364	5.005	1.237	0.175	0.161	0	0.125	0.412	0.067	0.005	0	0.181	0.001	152.362	3511.08
2250	-0.4636	0	270.041	7.0103	11.2539	477.3	140.034	18.0559	3.8621	19.4005	43.5687	0.0839	0.037	0.0058	0.8422	82.0921	10.6197	11.8525	365.748	8.2613	0.1108	65.7632	0.3953	6.092	27.361	5.004	1.237	0.175	0.161	0	0.125	0.412	0.067	0.005	0	0.181	0.001	152.372	3511.08
2251	-0.4232	0	270.031	7.0094	11.2539	477.3	140.034	18.0559	3.8621	19.4005	43.5687	0.0839	0.037	0.0058	0.8422	82.0904	10.6195	11.8523	365.741	8.2612	0.1108	65.7619	0.3953	6.092	27.359	5.004	1.237	0.175	0.161	0	0.125	0.412	0.067	0.005	0	0.181	0.001	152.366	3511.08
2252	-0.3849	0	270.022	7.0088	11.2539	477.3	140.034	18.0559	3.8621	19.4005	43.5687	0.0839	0.037	0.0058	0.8422	82.0889	10.6194	11.8521	365.734	8.2611	0.1108	65.7606	0.3953	6.092	27.357	5.003	1.237	0.175	0.161	0	0.125	0.412	0.067	0.005	0	0.181	0.001	152.36	3511.08
2253	-0.35	0	270.014	7.0085	11.2539	477.3	140.034	18.0559	3.8621	19.4005	43.5687	0.0839	0.037	0.0058	0.8421	82.0875	10.6193	11.8518	365.728	8.2608	0.1108	65.7596	0.3953	6.091	27.355	5.003	1.236	0.175	0.161	0	0.125	0.412	0.067	0.005	0	0.181	0.001	152.355	3511.08
2254	-0.3177	0	270.008	7.0085	11.2539	477.3	140.034	18.0559	3.8621	19.4005	43.5687	0.0839	0.037	0.0058	0.8421	82.0864	10.6191	11.8516	365.723	8.2606	0.1108	65.7586	0.3953	6.091	27.354	5.003	1.236	0.175	0.16	0	0.125	0.412	0.067	0.005	0	0.181	0.001	152.35	3511.08
2255	-0.2877	0	270.002	7.0085	11.2539	477.3	140.034	18.0559	3.8621	19.4005	43.5687	0.0839	0.037	0.0058	0.8421	82.0855	10.619	11.8515	365.718	8.2605	0.1108	65.7578	0.3953	6.091	27.353	5.003	1.236	0.175	0.16	0	0.125	0.412	0.067	0.005	0	0.181	0.001	152.346	3511.08
2256	-0.26266	0	269.998	7.0085	11.2539	477.3	140.034	18.0559	3.8621	19.4005	43.5687	0.0839	0.037	0.0058	0.84208	82.0848	10.6189	11.8514	365.715	8.26046	0.1108	65.7573	0.3953	6.09	27.351	5.002	1.236	0.175	0.16	0	0.125	0.412	0.067	0.005	0	0.181	0.001	152.343	3511.08
2257	-0.23762	0	269.994	7.0085	11.2539	477.3	140.034	18.0559	3.8621	19.4005	43.5687	0.0839	0.037	0.0058	0.84206	82.0842	10.6188	11.8513	365.713	8.26042	0.1108	65.7568	0.3953	6.09	27.35	5.002	1.236	0.175	0.16	0	0.125	0.412	0.067	0.005	0	0.181	0.001	152.34	3511.08
2258	-0.21258	0	269.991	7.0085	11.2539	477.3	140.034	18.0559	3.8621	19.4005	43.5687	0.0839	0.037	0.0058	0.84204	82.0835	10.6187	11.8513	365.71	8.26038	0.1108	65.7564	0.3953	6.09	27.35	5.002	1.236	0.175	0.16	0	0.125	0.412	0.067	0.005	0	0.181	0.001	152.338	3511.08
2259	-0.18754	0	269.987	7.0085	11.2539	477.3	140.034	18.0559	3.8621	19.4005	43.5687	0.0839	0.037	0.0058	0.84202	82.0829	10.6186	11.8512	365.707	8.26034	0.1108	65.7559	0.3953	6.09	27.349	5.002	1.236	0.175	0.16	0	0.125	0.412	0.067	0.005	0	0.181	0.001	152.336	3511.08
2260	-0.1625	0	269.983	7.0085	11.2539	477.3	140.034	18.0559	3.8621	19.4005	43.5687	0.0839	0.037	0.0058	0.842	82.0822	10.6185	11.8511	365.704	8.2603	0.1108	65.7554	0.3953	6.09	27.348	5.002	1.236	0.175	0.16	0	0.125	0.412	0.067	0.005	0	0.181	0.001	152.334	3511.08
2261	-0.14292	0	269.982	7.0085	11.2539	477.3	140.034	18.0559	3.8621	19.4005	43.5687	0.0839	0.037	0.0058	0.842	82.082	10.6185	11.851	365.703	8.26028	0.1108	65.7552	0.3953	6.09	27.348	5.002	1.236	0.175	0.16	0	0.125	0.412	0.067	0.005	0	0.181	0.001	152.333	3511.08
2262	-0.12334	0	269.981	7.0085	11.2539	477.3	140.034	18.0559	3.8621	19.4005	43.5687	0.0839	0.037	0.0058	0.842	82.0818	10.6185	11.851	365.702	8.26026	0.1108	65.755	0.3953	6.089	27.348	5.002	1.236	0.175	0.16	0	0.125	0.412	0.067	0.005	0	0.181	0.001	152.332	3511.08
2263	-0.10376	0	269.98	7.0085	11.2539	477.3	140.034	18.0559	3.8621	19.4005	43.5687	0.0839	0.037	0.0058	0.842	82.0817	10.6185	11.8509	365.701	8.26024	0.1108	65.7549	0.3953	6.089	27.347	5.002	1.236	0.175	0.16	0	0.125	0.412	0.067	0.005	0	0.181	0.001	152.331	3511.08
2264	-0.08418	0	269.978	7.0085	11.2539	477.3	140.034	18.0559	3.8621	19.4005	43.5687	0.0839	0.037	0.0058	0.842	82.0815	10.6185	11.8509	365.701	8.26022	0.1108	65.7547	0.3953	6.089	27.347	5.002	1.236	0.175	0.16	0	0.125	0.412	0.067	0.005	0	0.181	0.001	152.33	3511.08
2265	-0.0646	0	269.977	7.0085	11.2539	477.3	140.034	18.0559	3.8621	19.4005	43.5687	0.0839	0.037	0.0058	0.842	82.0813	10.6185	11.8508	365.7	8.2602	0.1108	65.7545	0.3953	6.089	27.347	5.002	1.236	0.175	0.16	0	0.125	0.412	0.067	0.005	0	0.181	0.001	152.33	3511.08
2266	-0.04856	0	269.978	7.0085	11.2539	477.3	140.034	18.0559	3.8621	19.4005	43.5687	0.0839	0.037	0.0058	0.842	82.0814	10.6185	11.8508	365.7	8.26022	0.1108	65.7546	0.3953	6.089	27.347	5.002	1.236	0.175	0.16	0	0.125	0.412	0.067	0.005	0	0.181	0.001	152.33	3511.08
2267	-0.03252	0	269.979	7.0085	11.2539	477.3	140.034	18.0559	3.8621	19.4005	43.5687	0.0839	0.037	0.0058	0.842	82.0815	10.6185	11.8508	365.701	8.26024	0.1108	65.7547	0.3953	6.089	27.347	5.002	1.236	0.175	0.16	0	0.125	0.412	0.067	0.005	0	0.181	0.001	152.33	3511.08
2268	-0.01648	0	269.979	7.0085	11.2539	477.3	140.034	18.0559	3.8621	19.4005	43.5687	0.0839	0.037	0.0058	0.842	82.0815	10.6185	11.8509	365.701	8.26026	0.1108	65.7549	0.3953	6.089	27.347	5.002	1.236	0.175	0.16	0	0.125	0.412	0.067	0.005	0	0.181	0.001	152.331	3511.08
2269	-0.00044	0	269.98	7.0085	11.2539	477.3	140.034	18.0559	3.8621	19.4005	43.5687	0.0839	0.037	0.0058	0.842	82.0816	10.6185	11.8509	365.702	8.26028	0.1108	65.755	0.3953	6.089	27.348	5.002	1.236	0.175	0.16	0	0.125	0.412	0.067	0.005	0	0.181	0.001	152.331	3511.08
2270	0.0156	0	269.981	7.0085	11.2539	477.3	140.034	18.0559	3.8621	19.4005	43.5687	0.0839	0.037	0.0058	0.842	82.0817	10.6185	11.8509	365.702	8.2603	0.1108	65.7551	0.3953	6.09	27.348	5.002	1.236	0.175	0.16	0	0.125	0.412	0.067	0.005	0	0.181	0.001	152.332	3511.08
2271	0.02912	0	269.983	7.0085	11.2539	477.3	140.034	18.0559	3.8621	19.4005	43.5687	0.0839	0.037	0.0058	0.84202	82.0821	10.6185	11.851	365.704	8.26034	0.1108	65.7553	0.3953	6.09	27.348	5.002	1.236	0.175	0.16	0	0.125	0.412	0.067	0.005	0	0.181	0.001	152.333	3511.08
2272	0.04264	0	269.985	7.0085	11.2539	477.3	140.034	18.0559	3.8621	19.4005	43.5687	0.0839	0.037	0.0058	0.84204	82.0824	10.6186	11.851	365.705	8.26038	0.1108	65.7555	0.3953	6.09	27.349	5.002	1.236	0.175	0.16	0	0.125	0.412	0.067	0.005	0	0.181	0.001	152.334	3511.08
2273	0.05616	0	269.986	7.0085	11.2539	477.3	140.034	18.0559	3.8621	19.4005	43.5687	0.0839	0.037	0.0058	0.84206	82.0828	10.6186	11.8511	365.707	8.26042	0.1108	65.7558	0.3953	6.09	27.349	5.002	1.236	0.175	0.16	0	0.125	0.412	0.067	0.005	0	0.181	0.001	152.336	3511.08
2274	0.06968	0	269.988	7.0085	11.2539	477.3	140.034	18.0559	3.8621	19.4005	43.5687	0.0839	0.037	0.0058	0.84208	82.0831	10.6187	11.8511	365.708	8.26046	0.1108	65.756	0.3953	6.09	27.35	5.002	1.236	0.175	0.16	0	0.125	0.412	0.067	0.005	0	0.181	0.001	152.337	3511.08
2275	0.0832	0	269.99	7.0085	11.2539	477.3	140.034	18.0559	3.8621	19.4005	43.5687	0.0839	0.037	0.0058	0.8421	82.0835	10.6187	11.8512	365.71	8.2605	0.1108	65.7562	0.3953	6.09	27.35	5.002	1.236	0.175	0.16	0	0.125	0.412	0.067	0.005	0	0.181	0.001	152.339	3511.08
2276	0.091984	0	269.995	7.0085	11.2539	477.3	140.034	18.0559	3.8621	19.4005	43.5687	0.0839	0.037	0.0058	0.842108	82.0842	10.6188	11.8513	365.713	8.26057	0.1108	65.7568	0.3953	6.09	27.351	5.002	1.236	0.175	0.16	0	0.125	0.412	0.067	0.005	0	0.181	0.001	152.34	3511.08
2277	0.100768	0	269.999	7.0085	11.2539	477.3	140.034	18.0559	3.8621	19.4005	43.5687	0.0839	0.037	0.0058	0.842116	82.0849	10.6189	11.8514	365.716	8.26064	0.1108	65.7574	0.3953	6.09	27.351	5.002	1.236	0.175	0.16	0	0.125	0.412	0.067	0.005	0	0.181	0.001	152.342	3511.08
2278	0.109552	0	270.003	7.0085	11.2539	477.3	140.034	18.0559	3.8621	19.4005	43.5687	0.0839	0.037	0.0058	0.842124	82.0856	10.619	11.8515	365.719	8.2607	0.1108	65.7579	0.3953	6.09	27.352	5.003	1.236	0.175	0.16	0	0.125	0.412	0.067	0.005	0	0.181	0.001	152.344	3511.08
2279	0.118336	0	270.007	7.0085	11.2539	477.3	140.034	18.0559	3.8621	19.4005	43.5687	0.0839	0.037	0.0058	0.842132	82.0864	10.6191	11.8516	365.722	8.26077	0.1108	65.7585	0.3953	6.091	27.353	5.003	1.236	0.175	0.16	0	0.125	0.412	0.067	0.005	0	0.181	0.001	152.346	3511.08
2280	0.12712	0	270.011	7.0085	11.2539	477.3	140.034	18.0559	3.8621	19.4005	43.5687	0.0839	0.037	0.0058	0.84214	82.0871	10.6192	11.8517	365.726	8.26084	0.1108	65.7591	0.3953	6.091	27.353	5.003	1.236	0.175	0.16	0	0.125	0.412	0.067	0.005	0	0.181	0.001	152.348	3511.08
2281	0.135904	0	270.016	7.0085	11.2539	477.3	140.034	18.0559	3.8621	19.4005	43.5687	0.0839	0.037	0.0058	0.842148	82.0878	10.6193	11.8518	365.729	8.26091	0.1108	65.7597	0.3953	6.091	27.354	5.003	1.236	0.175	0.161	0	0.125	0.412	0.067	0.005	0	0.181	0.001	152.351	3511.08
2282	0.144688	0	270.02	7.0085	11.2539	477.3	140.034	18.0559	3.8621	19.4005	43.5687	0.0839	0.037	0.0058	0.842156	82.0885	10.6194	11.8519	365.732	8.26098	0.1108	65.7603	0.3953	6.091	27.355	5.003	1.236	0.175	0.161	0	0.125	0.412	0.067	0.005	0	0.181	0.001	152.353	3511.08
2283	0.153472	0	270.024	7.0085	11.2539	477.3	140.034	18.0559	3.8621	19.4005	43.5687	0.0839	0.037	0.0058	0.842164	82.0892	10.6195	11.852	365.735	8.26104	0.1108	65.7608	0.3953	6.091	27.356	5.003	1.236	0.175	0.161	0	0.125	0.412	0.067	0.005	0	0.181	0.001	152.356	3511.08
2284	0.162256	0	270.028	7.0085	11.2539	477.3	140.034	18.0559	3.8621	19.4005	43.5687	0.0839	0.037	0.0058	0.842172	82.0899	10.6196	11.8521	365.738	8.26111	0.1108	65.7614	0.3953	6.091	27.356	5.003	1.237	0.175	0.161	0	0.125	0.412	0.067	0.005	0	0.181	0.001	152.358	3511.08
2285	0.17104	0	270.032	7.0085	11.2539	477.3	140.034	18.0559	3.8621	19.4005	43.5687	0.0839	0.037	0.0058	0.84218	82.0907	10.6197	11.8522	365.742	8.26118	0.1108	65.762	0.3953	6.092	27.357	5.004	1.237	0.175	0.161	0	0.125	0.412	0.067	0.005	0	0.181	0.001	152.361	3511.08
2286	0.179824	0	270.037	7.0085	11.2539	477.3	140.034	18.0559	3.8621	19.4005	43.5687	0.0839	0.037	0.0058	0.842188	82.0914	10.6198	11.8523	365.745	8.26125	0.1108	65.7626	0.3953	6.092	27.358	5.004	1.237	0.175	0.161	0	0.125	0.412	0.067	0.005	0	0.181	0.001	152.363	3511.08
2287	0.188608	0	270.041	7.0085	11.2539	477.3	140.034	18.0559	3.8621	19.4005	43.5687	0.0839	0.037	0.0058	0.842196	82.0921	10.6199	11.8524	365.748	8.26132	0.1108	65.7632	0.3953	6.092	27.359	5.004	1.237	0.175	0.161	0	0.125	0.412	0.067	0.005	0	0.181	0.001	152.366	3511.08
2288	0.197392	0	270.045	7.0085	11.2539	477.3	140.034	18.0559	3.8621	19.4005	43.5687	0.0839	0.037	0.0058	0.842204	82.0928	10.6199	11.8525	365.751	8.26138	0.1108	65.7637	0.3953	6.092	27.36	5.004	1.237	0.175	0.161	0	0.125	0.412	0.067	0.005	0	0.181	0.001	152.369	3511.08
2289	0.206176	0	270.049	7.0085	11.2539	477.3	140.034	18.0559	3.8621	19.4005	43.5687	0.0839	0.037	0.0058	0.842212	82.0935	10.62	11.8526	365.754	8.26145	0.1108	65.7643	0.3953	6.092	27.361	5.004	1.237	0.175	0.161	0	0.125	0.412	0.067	0.005	0	0.181	0.001	152.372	3511.08
2290	0.21496	0	270.053	7.0085	11.2539	477.3	140.034	18.0559	3.8621	19.4005	43.5687	0.0839	0.037	0.0058	0.84222	82.0942	10.6201	11.8527	365.758	8.26152	0.1108	65.7649	0.3953	6.093	27.362	5.004	1.237	0.175	0.161	0	0.125	0.412	0.067	0.005	0	0.181	0.001	152.375	3511.08
2291	0.223744	0	270.058	7.0085	11.2539	477.3	140.034	18.0559	3.8621	19.4005	43.5687	0.0839	0.037	0.0058	0.842228	82.095	10.6202	11.8528	365.761	8.26159	0.1108	65.7655	0.3953	6.093	27.363	5.005	1.237	0.175	0.161	0	0.125	0.412	0.067	0.005	0	0.181	0.001	152.378	3511.08
2292	0.232528	0	270.062	7.0085	11.2539	477.3	140.034	18.0559	3.8621	19.4005	43.5687	0.0839	0.037	0.0058	0.842236	82.0957	10.6203	11.8529	365.764	8.26166	0.1108	65.7661	0.3953	6.093	27.364	5.005	1.237	0.175	0.161	0	0.125	0.412	0.067	0.005	0	0.181	0.001	152.381	3511.08
2293	0.241312	0	270.066	7.0085	11.2539	477.3	140.034	18.0559	3.8621	19.4005	43.5687	0.0839	0.037	0.0058	0.842244	82.0964	10.6204	11.853	365.767	8.26172	0.1108	65.7666	0.3953	6.093	27.365	5.005	1.237	0.175	0.161	0	0.125	0.412	0.067	0.005	0	0.181	0.001	152.384	3511.08
2294	0.250096	0	270.07	7.0085	11.2539	477.3	140.034	18.0559	3.8621	19.4005	43.5687	0.0839	0.037	0.0058	0.842252	82.0971	10.6205	11.8531	365.77	8.26179	0.1108	65.7672	0.3953	6.094	27.366	5.005	1.237	0.175	0.161	0	0.125	0.412	0.067	0.005	0	0.181	0.001	152.388	3511.08
2295	0.25888	0	270.074	7.0085	11.2539	477.3	140.034	18.0559	3.8621	19.4005	43.5687	0.0839	0.037	0.0058	0.84226	82.0978	10.6206	11.8532	365.774	8.26186	0.1108	65.7678	0.3953	6.094	27.367	5.005	1.237	0.175	0.161	0	0.125	0.412	0.067	0.005	0	0.181	0.001	152.391	3511.08
2296	0.267664	0	270.079	7.0085	11.2539	477.3	140.034	18.0559	3.8621	19.4005	43.5687	0.0839	0.037	0.0058	0.842268	82.0985	10.6207	11.8533	365.777	8.26193	0.1108	65.7684	0.3953	6.094	27.368	5.006	1.237	0.175	0.161	0	0.125	0.412	0.067	0.005	0	0.181	0.001	152.394	3511.08
2297	0.276448	0	270.083	7.0085	11.2539	477.3	140.034	18.0559	3.8621	19.4005	43.5687	0.0839	0.037	0.0058	0.842276	82.0993	10.6208	11.8534	365.78	8.262	0.1108	65.769	0.3953	6.094	27.369	5.006	1.237	0.175	0.161	0	0.125	0.412	0.067	0.005	0	0.181	0.001	152.398	3511.08
2298	0.285232	0	270.087	7.0085	11.2539	477.3	140.034	18.0559	3.8621	19.4005	43.5687	0.0839	0.037	0.0058	0.842284	82.1	10.6209	11.8535	365.783	8.26206	0.1108	65.7695	0.3953	6.095	27.371	5.006	1.237	0.175	0.161	0	0.125	0.412	0.067	0.005	0	0.181	0.001	152.401	3511.08
2299	0.294016	0	270.091	7.0085	11.2539	477.3	140.034	18.0559	3.8621	19.4005	43.5687	0.0839	0.037	0.0058	0.842292	82.1007	10.621	11.8536	365.786	8.26213	0.1108	65.7701	0.3953	6.095	27.372	5.006	1.237	0.175	0.161	0	0.125	0.412	0.067	0.005	0	0.181	0.001	152.404	3511.08
2300	0.3028	0	270.096	7.0085	11.2539	477.3	140.034	18.0559	3.8621	19.4005	43.5687	0.0839	0.037	0.0058	0.8423	82.1014	10.6211	11.8537	365.789	8.2622	0.1108	65.7707	0.3953	6.095	27.373	5.006	1.237	0.175	0.161	0	0.125	0.412	0.067	0.005	0	0.181	0.001	152.408	3511.08
2301	0.307172	0	270.101	7.0085	11.2539	477.3	140.034	18.0559	3.8621	19.4005	43.5687	0.083904	0.037	0.0058	0.842308	82.1024	10.6212	11.8539	365.794	8.26231	0.1108	65.7715	0.3953	6.095	27.374	5.007	1.237	0.175	0.161	0	0.125	0.412	0.067	0.005	0	0.181	0.001	152.412	3511.08
2302	0.311544	0	270.107	7.0085	11.2539	477.3	140.034	18.0559	3.8621	19.4005	43.5687	0.083908	0.037	0.0058	0.842316	82.1034	10.6213	11.854	365.799	8.26242	0.1108	65.7723	0.3953	6.096	27.375	5.007	1.237	0.175	0.161	0	0.125	0.412	0.067	0.005	0	0.181	0.001	152.415	3511.08
2303	0.315916	0	270.113	7.0085	11.2539	477.3	140.034	18.0559	3.8621	19.4005	43.5687	0.083912	0.037	0.0058	0.842324	82.1044	10.6215	11.8542	365.803	8.26252	0.1108	65.7731	0.3953	6.096	27.377	5.007	1.237	0.175	0.161	0	0.125	0.412	0.067	0.005	0	0.181	0.001	152.419	3511.08
2304	0.320288	0	270.119	7.0085	11.2539	477.3	140.034	18.0559	3.8621	19.4005	43.5687	0.083916	0.037	0.0058	0.842332	82.1054	10.6216	11.8543	365.808	8.26263	0.1108	65.7739	0.3953	6.096	27.378	5.007	1.237	0.175	0.161	0	0.125	0.412	0.067	0.005	0	0.181	0.001	152.422	3511.08
2305	0.32466	0	270.125	7.0085	11.2539	477.3	140.034	18.0559	3.8621	19.4005	43.5687	0.08392	0.037	0.0058	0.84234	82.1064	10.6217	11.8545	365.812	8.26274	0.1108	65.7747	0.3953	6.096	27.379	5.007	1.238	0.175	0.161	0	0.125	0.412	0.067	0.005	0	0.181	0.001	152.426	3511.08
2306	0.329032	0	270.131	7.0085	11.2539	477.3	140.034	18.0559	3.8621	19.4005	43.5687	0.083924	0.037	0.0058	0.842348	82.1074	10.6218	11.8546	365.817	8.26285	0.1108	65.7755	0.3953	6.097	27.38	5.008	1.238	0.175	0.161	0	0.125	0.412	0.067	0.005	0	0.181	0.001	152.43	3511.08
2307	0.333404	0	270.137	7.0085	11.2539	477.3	140.034	18.0559	3.8621	19.4005	43.5687	0.083928	0.037	0.0058	0.842356	82.1085	10.622	11.8548	365.821	8.26296	0.1108	65.7764	0.3953	6.097	27.381	5.008	1.238	0.175	0.161	0	0.125	0.412	0.067	0.005	0	0.181	0.001	152.434	3511.08
2308	0.337776	0	270.143	7.0085	11.2539	477.3	140.034	18.0559	3.8621	19.4005	43.5687	0.083932	0.037	0.0058	0.842364	82.1095	10.6221	11.8549	365.826	8.26306	0.1108	65.7772	0.3953	6.097	27.383	5.008	1.238	0.175	0.161	0	0.125	0.412	0.067	0.005	0	0.181	0.001	152.437	3511.08
2309	0.342148	0	270.149	7.0085	11.2539	477.3	140.034	18.0559	3.8621	19.4005	43.5687	0.083936	0.037	0.0058	0.842372	82.1105	10.6222	11.8551	365.83	8.26317	0.1108	65.778	0.3953	6.098	27.384	5.008	1.238	0.175	0.161	0	0.125	0.412	0.067	0.005	0	0.181	0.001	152.441	3511.08
2310	0.34652	0	270.155	7.0085	11.2539	477.3	140.034	18.0559	3.8621	19.4005	43.5687	0.08394	0.037	0.0058	0.84238	82.1115	10.6223	11.8552	365.835	8.26328	0.1108	65.7788	0.3953	6.098	27.385	5.009	1.238	0.175	0.161	0	0.125	0.412	0.067	0.005	0	0.181	0.001	152.445	3511.08
2311	0.350892	0	270.161	7.0085	11.2539	477.3	140.034	18.0559	3.8621	19.4005	43.5687	0.083944	0.037	0.0058	0.842388	82.1125	10.6225	11.8554	365.839	8.26339	0.1108	65.7796	0.3953	6.098	27.386	5.009	1.238	0.175	0.161	0	0.125	0.412	0.067	0.005	0	0.181	0.001	152.449	3511.08
2312	0.355264	0	270.167	7.0085	11.2539	477.3	140.034	18.0559	3.8621	19.4005	43.5687	0.083948	0.037	0.0058	0.842396	82.1135	10.6226	11.8555	365.844	8.2635	0.1108	65.7804	0.3953	6.098	27.388	5.009	1.238	0.175	0.161	0	0.125	0.412	0.067	0.005	0	0.181	0.001	152.453	3511.08
2313	0.359636	0	270.173	7.0085	11.2539	477.3	140.034	18.0559	3.8621	19.4005	43.5687	0.083952	0.037	0.0058	0.842404	82.1145	10.6227	11.8557	365.848	8.2636	0.1108	65.7812	0.3953	6.099	27.389	5.009	1.238	0.175	0.161	0	0.125	0.412	0.067	0.005	0	0.181	0.001	152.457	3511.08
2314	0.364008	0	270.179	7.0085	11.2539	477.3	140.034	18.0559	3.8621	19.4005	43.5687	0.083956	0.037	0.0058	0.842412	82.1155	10.6228	11.8558	365.853	8.26371	0.1108	65.782	0.3953	6.099	27.39	5.01	1.238	0.175	0.161	0	0.125	0.412	0.067	0.005	0	0.181	0.001	152.461	3511.08
2315	0.36838	0	270.185	7.0085	11.2539	477.3	140.034	18.0559	3.8621	19.4005	43.5687	0.08396	0.037	0.0058	0.84242	82.1165	10.623	11.856	365.857	8.26382	0.1108	65.7828	0.3953	6.099	27.392	5.01	1.238	0.175	0.161	0	0.125	0.412	0.067	0.005	0	0.181	0.001	152.465	3511.08
2316	0.372752	0	270.191	7.0085	11.2539	477.3	140.034	18.0559	3.8621	19.4005	43.5687	0.083964	0.037	0.0058	0.842428	82.1175	10.6231	11.8561	365.862	8.26393	0.1108	65.7836	0.3953	6.1	27.393	5.01	1.238	0.175	0.161	0	0.125	0.412	0.067	0.005	0	0.181	0.001	152.469	3511.08
2317	0.377124	0	270.197	7.0085	11.2539	477.3	140.034	18.0559	3.8621	19.4005	43.5687	0.083968	0.037	0.0058	0.842436	82.1185	10.6232	11.8563	365.866	8.26404	0.1108	65.7844	0.3953	6.1	27.394	5.01	1.238	0.175	0.161	0	0.125	0.412	0.067	0.005	0	0.181	0.001	152.473	3511.08
2318	0.381496	0	270.202	7.0085	11.2539	477.3	140.034	18.0559	3.8621	19.4005	43.5687	0.083972	0.037	0.0058	0.842444	82.1195	10.6233	11.8564	365.871	8.26414	0.1108	65.7852	0.3953	6.1	27.396	5.011	1.238	0.175	0.161	0	0.125	0.412	0.067	0.005	0	0.181	0.001	152.477	3511.08
2319	0.385868	0	270.208	7.0085	11.2539	477.3	140.034	18.0559	3.8621	19.4005	43.5687	0.083976	0.037	0.0058	0.842452	82.1206	10.6235	11.8566	365.875	8.26425	0.1108	65.7861	0.3953	6.1	27.397	5.011	1.238	0.175	0.161	0	0.125	0.412	0.067	0.005	0	0.181	0.001	152.481	3511.08
2320	0.39024	0	270.214	7.0085	11.2539	477.3	140.034	18.0559	3.8621	19.4005	43.5687	0.08398	0.037	0.0058	0.84246	82.1216	10.6236	11.8567	365.88	8.26436	0.1108	65.7869	0.3953	6.101	27.398	5.011	1.238	0.175	0.161	0	0.125	0.412	0.067	0.005	0	0.181	0.001	152.485	3511.08
2321	0.394612	0	270.22	7.0085	11.2539	477.3	140.034	18.0559	3.8621	19.4005	43.5687	0.083984	0.037	0.0058	0.842468	82.1226	10.6237	11.8569	365.884	8.26447	0.1108	65.7877	0.3953	6.101	27.4	5.011	1.238	0.175	0.161	0	0.125	0.412	0.067	0.005	0	0.181	0.001	152.489	3511.08
2322	0.398984	0	270.226	7.0085	11.2539	477.3	140.034	18.0559	3.8621	19.4005	43.5687	0.083988	0.037	0.0058	0.842476	82.1236	10.6238	11.857	365.889	8.26458	0.1108	65.7885	0.3953	6.101	27.401	5.012	1.239	0.175	0.161	0	0.125	0.412	0.067	0.005	0	0.181	0.001	152.493	3511.08
2323	0.403356	0	270.232	7.0085	11.2539	477.3	140.034	18.0559	3.8621	19.4005	43.5687	0.083992	0.037	0.0058	0.842484	82.1246	10.624	11.8572	365.893	8.26468	0.1108	65.7893	0.3953	6.102	27.402	5.012	1.239	0.175	0.161	0	0.125	0.412	0.067	0.005	0	0.181	0.001	152.497	3511.08
2324	0.407728	0	270.238	7.0085	11.2539	477.3	140.034	18.0559	3.8621	19.4005	43.5687	0.083996	0.037	0.0058	0.842492	82.1256	10.6241	11.8573	365.898	8.26479	0.1108	65.7901	0.3953	6.102	27.404	5.012	1.239	0.175	0.161	0	0.125	0.412	0.067	0.005	0	0.181	0.001	152.501	3511.08
2325	0.4121	0	270.244	7.0085	11.2539	477.3	140.034	18.0559	3.8621	19.4005	43.5687	0.084	0.037	0.0058	0.8425	82.1266	10.6242	11.8575	365.902	8.2649	0.1108	65.7909	0.3953	6.102	27.405	5.012	1.239	0.175	0.161	0	0.125	0.412	0.067	0.005	0	0.181	0.001	152.506	3511.08
2326	0.414264	0	270.251	7.0085	11.2539	477.3	140.034	18.0559	3.8621	19.4005	43.5687	0.084	0.037	0.0058	0.842516	82.1277	10.6243	11.8577	365.907	8.26501	0.1108	65.7918	0.3953	6.103	27.407	5.013	1.239	0.175	0.161	0	0.125	0.412	0.067	0.005	0	0.181	0.001	152.51	3511.08
2327	0.416428	0	270.257	7.0085	11.2539	477.3	140.034	18.0559	3.8621	19.4005	43.5687	0.084	0.037	0.0058	0.842532	82.1288	10.6245	11.8578	365.912	8.26512	0.1108	65.7927	0.3953	6.103	27.408	5.013	1.239	0.175	0.161	0	0.125	0.412	0.067	0.005	0	0.181	0.001	152.514	3511.08
2328	0.418592	0	270.264	7.0085	11.2539	477.3	140.034	18.0559	3.8621	19.4005	43.5687	0.084	0.037	0.0058	0.842548	82.1299	10.6246	11.858	365.917	8.26524	0.1108	65.7936	0.3953	6.103	27.409	5.013	1.239	0.175	0.161	0	0.125	0.412	0.067	0.005	0	0.181	0.001	152.518	3511.08
2329	0.420756	0	270.27	7.0085	11.2539	477.3	140.034	18.0559	3.8621	19.4005	43.5687	0.084	0.037	0.0058	0.842564	82.131	10.6248	11.8581	365.922	8.26535	0.1108	65.7944	0.3953	6.104	27.411	5.013	1.239	0.175	0.161	0	0.125	0.412	0.067	0.005	0	0.181	0.001	152.522	3511.08
2330	0.42292	0	270.277	7.0085	11.2539	477.3	140.034	18.0559	3.8621	19.4005	43.5687	0.084	0.037	0.0058	0.84258	82.1321	10.6249	11.8583	365.927	8.26546	0.1108	65.7953	0.3953	6.104	27.412	5.014	1.239	0.175	0.161	0	0.125	0.412	0.067	0.005	0	0.181	0.001	152.527	3511.08
2331	0.425084	0	270.283	7.0085	11.2539	477.3	140.034	18.0559	3.8621	19.4005	43.5687	0.084	0.037	0.0058	0.842596	82.1332	10.6251	11.8584	365.932	8.26557	0.1108	65.7962	0.3953	6.104	27.414	5.014	1.239	0.175	0.161	0	0.125	0.412	0.067	0.005	0	0.181	0.001	152.531	3511.08
2332	0.427248	0	270.29	7.0085	11.2539	477.3	140.034	18.0559	3.8621	19.4005	43.5687	0.084	0.037	0.0058	0.842612	82.1344	10.6252	11.8586	365.937	8.26568	0.1108	65.7971	0.3953	6.104	27.415	5.014	1.239	0.175	0.161	0	0.125	0.412	0.067	0.005	0	0.181	0.001	152.535	3511.08
2333	0.429412	0	270.296	7.0085	11.2539	477.3	140.034	18.0559	3.8621	19.4005	43.5687	0.084	0.037	0.0058	0.842628	82.1355	10.6254	11.8587	365.942	8.2658	0.1108	65.798	0.3953	6.105	27.416	5.014	1.239	0.175	0.161	0	0.125	0.412	0.067	0.005	0	0.181	0.001	152.539	3511.08
2334	0.431576	0	270.303	7.0085	11.2539	477.3	140.034	18.0559	3.8621	19.4005	43.5687	0.084	0.037	0.0058	0.842644	82.1366	10.6255	11.8589	365.947	8.26591	0.1108	65.7989	0.3953	6.105	27.418	5.015	1.239	0.175	0.161	0	0.125	0.412	0.067	0.005	0	0.181	0.001	152.544	3511.08
2335	0.43374	0	270.309	7.0085	11.2539	477.3	140.034	18.0559	3.8621	19.4005	43.5687	0.084	0.037	0.0058	0.84266	82.1377	10.6257	11.8591	365.952	8.26602	0.1108	65.7997	0.3953	6.105	27.419	5.015	1.239	0.175	0.161	0	0.125	0.412	0.067	0.005	0	0.181	0.001	152.548	3511.08
2336	0.435904	0	270.316	7.0085	11.2539	477.3	140.034	18.0559	3.8621	19.4005	43.5687	0.084	0.037	0.0058	0.842676	82.1388	10.6258	11.8592	365.956	8.26613	0.1108	65.8006	0.3953	6.106	27.421	5.015	1.239	0.175	0.161	0	0.125	0.412	0.067	0.005	0	0.181	0.001	152.552	3511.08
2337	0.438068	0	270.322	7.0085	11.2539	477.3	140.034	18.0559	3.8621	19.4005	43.5687	0.084	0.037	0.0058	0.842692	82.1399	10.626	11.8594	365.961	8.26624	0.1108	65.8015	0.3953	6.106	27.422	5.015	1.239	0.175	0.161	0	0.125	0.412	0.067	0.005	0	0.181	0.001	152.556	3511.08
2338	0.440232	0	270.329	7.0085	11.2539	477.3	140.034	18.0559	3.8621	19.4005	43.5687	0.084	0.037	0.0058	0.842708	82.141	10.6261	11.8595	365.966	8.26636	0.1108	65.8024	0.3953	6.106	27.423	5.016	1.24	0.175	0.161	0	0.125	0.412	0.067	0.005	0	0.181	0.001	152.561	3511.08
2339	0.442396	0	270.335	7.0085	11.2539	477.3	140.034	18.0559	3.8621	19.4005	43.5687	0.084	0.037	0.0058	0.842724	82.1421	10.6263	11.8597	365.971	8.26647	0.1108	65.8033	0.3953	6.107	27.425	5.016	1.24	0.175	0.161	0	0.125	0.412	0.067	0.005	0	0.181	0.001	152.565	3511.08
2340	0.44456	0	270.342	7.0085	11.2539	477.3	140.034	18.0559	3.8621	19.4005	43.5687	0.084	0.037	0.0058	0.84274	82.1432	10.6264	11.8598	365.976	8.26658	0.1108	65.8042	0.3953	6.107	27.426	5.016	1.24	0.175	0.161	0	0.125	0.412	0.067	0.005	0	0.181	0.001	152.569	3511.08
2341	0.446724	0	270.348	7.0085	11.2539	477.3	140.034	18.0559	3.8621	19.4005	43.5687	0.084	0.037	0.0058	0.842756	82.1443	10.6266	11.86	365.981	8.26669	0.1108	65.805	0.3953	6.107	27.428	5.016	1.24	0.175	0.161	0	0.125	0.412	0.067	0.005	0	0.181	0.001	152.574	3511.08
2342	0.448888	0	270.355	7.0085	11.2539	477.3	140.034	18.0559	3.8621	19.4005	43.5687	0.084	0.037	0.0058	0.842772	82.1454	10.6267	11.8602	365.986	8.2668	0.1108	65.8059	0.3953	6.108	27.429	5.017	1.24	0.175	0.161	0	0.125	0.412	0.067	0.005	0	0.181	0.001	152.578	3511.08
2343	0.451052	0	270.361	7.0085	11.2539	477.3	140.034	18.0559	3.8621	19.4005	43.5687	0.084	0.037	0.0058	0.842788	82.1465	10.6269	11.8603	365.991	8.26692	0.1108	65.8068	0.3953	6.108	27.431	5.017	1.24	0.175	0.161	0	0.125	0.412	0.067	0.005	0	0.181	0.001	152.582	3511.08
2344	0.453216	0	270.368	7.0085	11.2539	477.3	140.034	18.0559	3.8621	19.4005	43.5687	0.084	0.037	0.0058	0.842804	82.1477	10.627	11.8605	365.996	8.26703	0.1108	65.8077	0.3953	6.108	27.432	5.017	1.24	0.175	0.161	0	0.125	0.412	0.067	0.005	0	0.181	0.001	152.587	3511.08
2345	0.45538	0	270.374	7.0085	11.2539	477.3	140.034	18.0559	3.8621	19.4005	43.5687	0.084	0.037	0.0058	0.84282	82.1488	10.6272	11.8606	366.001	8.26714	0.1108	65.8086	0.3953	6.109	27.433	5.017	1.24	0.175	0.161	0	0.125	0.412	0.067	0.005	0	0.181	0.001	152.591	3511.08
2346	0.457544	0	270.381	7.0085	11.2539	477.3	140.034	18.0559	3.8621	19.4005	43.5687	0.084	0.037	0.0058	0.842836	82.1499	10.6273	11.8608	366.006	8.26725	0.1108	65.8095	0.3953	6.109	27.435	5.018	1.24	0.175	0.161	0	0.125	0.412	0.067	0.005	0	0.181	0.001	152.595	3511.08
2347	0.459708	0	270.387	7.0085	11.2539	477.3	140.034	18.0559	3.8621	19.4005	43.5687	0.084	0.037	0.0058	0.842852	82.151	10.6275	11.8609	366.011	8.26736	0.1108	65.8103	0.3953	6.109	27.436	5.018	1.24	0.175	0.161	0	0.125	0.412	0.067	0.005	0	0.181	0.001	152.6	3511.08
2348	0.461872	0	270.394	7.0085	11.2539	477.3	140.034	18.0559	3.8621	19.4005	43.5687	0.084	0.037	0.0058	0.842868	82.1521	10.6276	11.8611	366.016	8.26748	0.1108	65.8112	0.3953	6.11	27.438	5.018	1.24	0.175	0.161	0	0.125	0.412	0.067	0.005	0	0.181	0.001	152.604	3511.08
2349	0.464036	0	270.4	7.0085	11.2539	477.3	140.034	18.0559	3.8621	19.4005	43.5687	0.084	0.037	0.0058	0.842884	82.1532	10.6278	11.8612	366.021	8.26759	0.1108	65.8121	0.3953	6.11	27.439	5.018	1.24	0.175	0.161	0	0.125	0.412	0.067	0.005	0	0.181	0.001	152.608	3511.08
2350	0.4662	0	270.407	7.0085	11.2539	477.3	140.034	18.0559	3.8621	19.4005	43.5687	0.084	0.037	0.0058	0.8429	82.1543	10.6279	11.8614	366.026	8.2677	0.1108	65.813	0.3953	6.11	27.441	5.019	1.24	0.175	0.161	0	0.125	0.412	0.067	0.005	0	0.181	0.001	152.613	3511.08
2351	0.467188	0	270.413	7.0085	11.2539	477.3	140.034	18.0559	3.8621	19.4005	43.5687	0.084	0.037	0.0058	0.842908	82.1554	10.628	11.8616	366.031	8.26781	0.110804	65.8139	0.3953	6.11	27.442	5.019	1.24	0.175	0.161	0	0.125	0.412	0.067	0.005	0	0.181	0.001	152.617	3511.08
2352	0.468176	0	270.42	7.0085	11.2539	477.3	140.034	18.0559	3.8621	19.4005	43.5687	0.084	0.037	0.0058	0.842916	82.1566	10.6282	11.8617	366.036	8.26792	0.110808	65.8148	0.3953	6.111	27.443	5.019	1.24	0.175	0.161	0	0.125	0.412	0.067	0.005	0	0.181	0.001	152.621	3511.08
2353	0.469164	0	270.427	7.0085	11.2539	477.3	140.034	18.0559	3.8621	19.4005	43.5687	0.084	0.037	0.0058	0.842924	82.1577	10.6283	11.8619	366.041	8.26802	0.110812	65.8157	0.3953	6.111	27.445	5.02	1.241	0.175	0.161	0	0.125	0.412	0.067	0.005	0	0.181	0.001	152.626	3511.08
2354	0.470152	0	270.433	7.0085	11.2539	477.3	140.034	18.0559	3.8621	19.4005	43.5687	0.084	0.037	0.0058	0.842932	82.1588	10.6285	11.8621	366.046	8.26813	0.110816	65.8166	0.3953	6.111	27.446	5.02	1.241	0.175	0.161	0	0.125	0.412	0.067	0.005	0	0.181	0.001	152.63	3511.08
2355	0.47114	0	270.44	7.0085	11.2539	477.3	140.034	18.0559	3.8621	19.4005	43.5687	0.084	0.037	0.0058	0.84294	82.16	10.6286	11.8622	366.051	8.26824	0.11082	65.8175	0.3953	6.112	27.448	5.02	1.241	0.176	0.161	0	0.125	0.412	0.067	0.005	0	0.181	0.001	152.635	3511.08
2356	0.472128	0	270.447	7.0085	11.2539	477.3	140.034	18.0559	3.8621	19.4005	43.5687	0.084	0.037	0.0058	0.842948	82.1611	10.6288	11.8624	366.056	8.26835	0.110824	65.8184	0.3953	6.112	27.449	5.02	1.241	0.176	0.161	0	0.125	0.412	0.067	0.005	0	0.181	0.001	152.639	3511.08
2357	0.473116	0	270.453	7.0085	11.2539	477.3	140.034	18.0559	3.8621	19.4005	43.5687	0.084	0.037	0.0058	0.842956	82.1622	10.6289	11.8625	366.061	8.26846	0.110828	65.8194	0.3953	6.112	27.451	5.021	1.241	0.176	0.161	0	0.125	0.412	0.067	0.005	0	0.181	0.001	152.643	3511.08
2358	0.474104	0	270.46	7.0085	11.2539	477.3	140.034	18.0559	3.8621	19.4005	43.5687	0.084	0.037	0.0058	0.842964	82.1634	10.6291	11.8627	366.066	8.26856	0.110832	65.8203	0.3953	6.113	27.452	5.021	1.241	0.176	0.161	0	0.125	0.412	0.067	0.005	0	0.182	0.001	152.648	3511.08
2359	0.475092	0	270.467	7.0085	11.2539	477.3	140.034	18.0559	3.8621	19.4005	43.5687	0.084	0.037	0.0058	0.842972	82.1645	10.6292	11.8629	366.071	8.26867	0.110836	65.8212	0.3953	6.113	27.454	5.021	1.241	0.176	0.161	0	0.125	0.412	0.067	0.005	0	0.182	0.001	152.652	3511.08
2360	0.47608	0	270.473	7.0085	11.2539	477.3	140.034	18.0559	3.8621	19.4005	43.5687	0.084	0.037	0.0058	0.84298	82.1656	10.6294	11.863	366.076	8.26878	0.11084	65.8221	0.3953	6.113	27.455	5.021	1.241	0.176	0.161	0	0.125	0.412	0.067	0.005	0	0.182	0.001	152.656	3511.08
2361	0.477068	0	270.48	7.0085	11.2539	477.3	140.034	18.0559	3.8621	19.4005	43.5687	0.084	0.037	0.0058	0.842988	82.1668	10.6295	11.8632	366.081	8.26889	0.110844	65.823	0.3953	6.114	27.456	5.022	1.241	0.176	0.161	0	0.125	0.412	0.067	0.005	0	0.182	0.001	152.661	3511.08
2362	0.478056	0	270.486	7.0085	11.2539	477.3	140.034	18.0559	3.8621	19.4005	43.5687	0.084	0.037	0.0058	0.842996	82.1679	10.6297	11.8634	366.086	8.269	0.110848	65.8239	0.3953	6.114	27.458	5.022	1.241	0.176	0.161	0	0.125	0.412	0.067	0.005	0	0.182	0.001	152.665	3511.08
2363	0.479044	0	270.493	7.0085	11.2539	477.3	140.034	18.0559	3.8621	19.4005	43.5687	0.084	0.037	0.0058	0.843004	82.169	10.6298	11.8635	366.091	8.2691	0.110852	65.8248	0.3953	6.114	27.459	5.022	1.241	0.176	0.161	0	0.125	0.412	0.067	0.005	0	0.182	0.001	152.67	3511.08
2364	0.480032	0	270.5	7.0085	11.2539	477.3	140.034	18.0559	3.8621	19.4005	43.5687	0.084	0.037	0.0058	0.843012	82.1701	10.63	11.8637	366.096	8.26921	0.110856	65.8257	0.3953	6.115	27.461	5.022	1.241	0.176	0.161	0	0.125	0.412	0.067	0.005	0	0.182	0.001	152.674	3511.08
2365	0.48102	0	270.506	7.0085	11.2539	477.3	140.034	18.0559	3.8621	19.4005	43.5687	0.084	0.037	0.0058	0.84302	82.1713	10.6301	11.8639	366.101	8.26932	0.11086	65.8266	0.3953	6.115	27.462	5.023	1.241	0.176	0.161	0	0.125	0.412	0.067	0.005	0	0.182	0.001	152.678	3511.08
2366	0.482008	0	270.513	7.0085	11.2539	477.3	140.034	18.0559	3.8621	19.4005	43.5687	0.084	0.037	0.0058	0.843028	82.1724	10.6303	11.864	366.106	8.26943	0.110864	65.8275	0.3953	6.115	27.464	5.023	1.241	0.176	0.161	0	0.125	0.412	0.067	0.005	0	0.182	0.001	152.683	3511.08
2367	0.482996	0	270.52	7.0085	11.2539	477.3	140.034	18.0559	3.8621	19.4005	43.5687	0.084	0.037	0.0058	0.843036	82.1735	10.6304	11.8642	366.111	8.26954	0.110868	65.8284	0.3953	6.116	27.465	5.023	1.241	0.176	0.161	0	0.125	0.412	0.067	0.005	0	0.182	0.001	152.687	3511.08
2368	0.483984	0	270.526	7.0085	11.2539	477.3	140.034	18.0559	3.8621	19.4005	43.5687	0.084	0.037	0.0058	0.843044	82.1747	10.6306	11.8644	366.116	8.26964	0.110872	65.8293	0.3953	6.116	27.467	5.023	1.242	0.176	0.161	0	0.125	0.412	0.067	0.005	0	0.182	0.001	152.691	3511.08
2369	0.484972	0	270.533	7.0085	11.2539	477.3	140.034	18.0559	3.8621	19.4005	43.5687	0.084	0.037	0.0058	0.843052	82.1758	10.6307	11.8645	366.121	8.26975	0.110876	65.8303	0.3953	6.116	27.468	5.024	1.242	0.176	0.161	0	0.125	0.412	0.067	0.005	0	0.182	0.001	152.696	3511.08
2370	0.48596	0	270.54	7.0085	11.2539	477.3	140.034	18.0559	3.8621	19.4005	43.5687	0.084	0.037	0.0058	0.84306	82.1769	10.6309	11.8647	366.127	8.26986	0.11088	65.8312	0.3953	6.117	27.469	5.024	1.242	0.176	0.161	0	0.125	0.412	0.067	0.005	0	0.182	0.001	152.7	3511.08
2371	0.486948	0	270.546	7.0085	11.2539	477.3	140.034	18.0559	3.8621	19.4005	43.5687	0.084	0.037	0.0058	0.843068	82.1781	10.631	11.8648	366.132	8.26997	0.110884	65.8321	0.3953	6.117	27.471	5.024	1.242	0.176	0.161	0	0.125	0.412	0.067	0.005	0	0.182	0.001	152.705	3511.08
2372	0.487936	0	270.553	7.0085	11.2539	477.3	140.034	18.0559	3.8621	19.4005	43.5687	0.084	0.037	0.0058	0.843076	82.1792	10.6312	11.865	366.137	8.27008	0.110888	65.833	0.3953	6.117	27.472	5.025	1.242	0.176	0.161	0	0.125	0.412	0.067	0.005	0	0.182	0.001	152.709	3511.08
2373	0.488924	0	270.56	7.0085	11.2539	477.3	140.034	18.0559	3.8621	19.4005	43.5687	0.084	0.037	0.0058	0.843084	82.1803	10.6313	11.8652	366.142	8.27018	0.110892	65.8339	0.3953	6.118	27.474	5.025	1.242	0.176	0.161	0	0.125	0.413	0.067	0.005	0	0.182	0.001	152.713	3511.08
2374	0.489912	0	270.566	7.0085	11.2539	477.3	140.034	18.0559	3.8621	19.4005	43.5687	0.084	0.037	0.0058	0.843092	82.1815	10.6315	11.8653	366.147	8.27029	0.110896	65.8348	0.3953	6.118	27.475	5.025	1.242	0.176	0.161	0	0.125	0.413	0.067	0.005	0	0.182	0.001	152.718	3511.08
2375	0.4909	0	270.573	7.0085	11.2539	477.3	140.034	18.0559	3.8621	19.4005	43.5687	0.084	0.037	0.0058	0.8431	82.1826	10.6316	11.8655	366.152	8.2704	0.1109	65.8357	0.3953	6.118	27.477	5.025	1.242	0.176	0.161	0	0.125	0.413	0.067	0.005	0	0.182	0.001	152.722	3511.08
2376	0.491244	0	270.579	7.0085	11.2539	477.3	140.034	18.0559	3.8621	19.4005	43.5687	0.084	0.037	0.0058	0.843112	82.1837	10.6317	11.8657	366.157	8.27051	0.1109	65.8366	0.3953	6.119	27.478	5.026	1.242	0.176	0.161	0	0.125	0.413	0.067	0.005	0	0.182	0.001	152.726	3511.08
2377	0.491588	0	270.586	7.0085	11.2539	477.3	140.034	18.0559	3.8621	19.4005	43.5687	0.084	0.037	0.0058	0.843124	82.1848	10.6319	11.8658	366.162	8.27062	0.1109	65.8375	0.3953	6.119	27.48	5.026	1.242	0.176	0.161	0	0.125	0.413	0.067	0.005	0	0.182	0.001	152.731	3511.08
2378	0.491932	0	270.593	7.0085	11.2539	477.3	140.034	18.0559	3.8621	19.4005	43.5687	0.084	0.037	0.0058	0.843136	82.186	10.632	11.866	366.167	8.27072	0.1109	65.8384	0.3953	6.119	27.481	5.026	1.242	0.176	0.161	0	0.125	0.413	0.067	0.005	0	0.182	0.001	152.735	3511.08
2379	0.492276	0	270.599	7.0085	11.2539	477.3	140.034	18.0559	3.8621	19.4005	43.5687	0.084	0.037	0.0058	0.843148	82.1871	10.6322	11.8662	366.172	8.27083	0.1109	65.8393	0.3953	6.119	27.482	5.026	1.242	0.176	0.161	0	0.125	0.413	0.067	0.005	0	0.182	0.001	152.739	3511.08
2380	0.49262	0	270.606	7.0085	11.2539	477.3	140.034	18.0559	3.8621	19.4005	43.5687	0.084	0.037	0.0058	0.84316	82.1882	10.6323	11.8663	366.177	8.27094	0.1109	65.8402	0.3953	6.12	27.484	5.027	1.242	0.176	0.161	0	0.125	0.413	0.067	0.005	0	0.182	0.001	152.744	3511.08
2381	0.492964	0	270.612	7.0085	11.2539	477.3	140.034	18.0559	3.8621	19.4005	43.5687	0.084	0.037	0.0058	0.843172	82.1893	10.6324	11.8665	366.182	8.27105	0.1109	65.8411	0.3953	6.12	27.485	5.027	1.242	0.176	0.161	0	0.125	0.413	0.067	0.005	0	0.182	0.001	152.748	3511.08
2382	0.493308	0	270.619	7.0085	11.2539	477.3	140.034	18.0559	3.8621	19.4005	43.5687	0.084	0.037	0.0058	0.843184	82.1904	10.6326	11.8666	366.187	8.27116	0.1109	65.842	0.3953	6.12	27.487	5.027	1.242	0.176	0.161	0	0.125	0.413	0.067	0.005	0	0.182	0.001	152.752	3511.08
2383	0.493652	0	270.625	7.0085	11.2539	477.3	140.034	18.0559	3.8621	19.4005	43.5687	0.084	0.037	0.0058	0.843196	82.1916	10.6327	11.8668	366.192	8.27126	0.1109	65.8429	0.3953	6.121	27.488	5.027	1.242	0.176	0.161	0	0.125	0.413	0.067	0.005	0	0.182	0.001	152.757	3511.08
2384	0.493996	0	270.632	7.0085	11.2539	477.3	140.034	18.0559	3.8621	19.4005	43.5687	0.084	0.037	0.0058	0.843208	82.1927	10.6329	11.867	366.197	8.27137	0.1109	65.8438	0.3953	6.121	27.49	5.028	1.243	0.176	0.161	0	0.125	0.413	0.067	0.005	0	0.182	0.001	152.761	3511.08
2385	0.49434	0	270.639	7.0085	11.2539	477.3	140.034	18.0559	3.8621	19.4005	43.5687	0.084	0.037	0.0058	0.84322	82.1938	10.633	11.8671	366.202	8.27148	0.1109	65.8447	0.3953	6.121	27.491	5.028	1.243	0.176	0.161	0	0.125	0.413	0.067	0.005	0	0.182	0.001	152.765	3511.08
2386	0.494684	0	270.645	7.0085	11.2539	477.3	140.034	18.0559	3.8621	19.4005	43.5687	0.084	0.037	0.0058	0.843232	82.1949	10.6331	11.8673	366.206	8.27159	0.1109	65.8456	0.3953	6.122	27.493	5.028	1.243	0.176	0.161	0	0.125	0.413	0.067	0.005	0	0.182	0.001	152.77	3511.08
2387	0.495028	0	270.652	7.0085	11.2539	477.3	140.034	18.0559	3.8621	19.4005	43.5687	0.084	0.037	0.0058	0.843244	82.196	10.6333	11.8675	366.211	8.2717	0.1109	65.8465	0.3953	6.122	27.494	5.028	1.243	0.176	0.161	0	0.125	0.413	0.067	0.005	0	0.182	0.001	152.774	3511.08
2388	0.495372	0	270.658	7.0085	11.2539	477.3	140.034	18.0559	3.8621	19.4005	43.5687	0.084	0.037	0.0058	0.843256	82.1972	10.6334	11.8676	366.216	8.2718	0.1109	65.8474	0.3953	6.122	27.495	5.029	1.243	0.176	0.161	0	0.125	0.413	0.067	0.005	0	0.182	0.001	152.778	3511.08
2389	0.495716	0	270.665	7.0085	11.2539	477.3	140.034	18.0559	3.8621	19.4005	43.5687	0.084	0.037	0.0058	0.843268	82.1983	10.6336	11.8678	366.221	8.27191	0.1109	65.8483	0.3953	6.123	27.497	5.029	1.243	0.176	0.161	0	0.125	0.413	0.067	0.005	0	0.182	0.001	152.783	3511.08
2390	0.49606	0	270.671	7.0085	11.2539	477.3	140.034	18.0559	3.8621	19.4005	43.5687	0.084	0.037	0.0058	0.84328	82.1994	10.6337	11.868	366.226	8.27202	0.1109	65.8492	0.3953	6.123	27.498	5.029	1.243	0.176	0.161	0	0.125	0.413	0.067	0.005	0	0.182	0.001	152.787	3511.08
2391	0.496404	0	270.678	7.0085	11.2539	477.3	140.034	18.0559	3.8621	19.4005	43.5687	0.084	0.037	0.0058	0.843292	82.2005	10.6338	11.8681	366.231	8.27213	0.1109	65.8501	0.3953	6.123	27.5	5.03	1.243	0.176	0.161	0	0.125	0.413	0.067	0.005	0	0.182	0.001	152.791	3511.08
2392	0.496748	0	270.685	7.0085	11.2539	477.3	140.034	18.0559	3.8621	19.4005	43.5687	0.084	0.037	0.0058	0.843304	82.2016	10.634	11.8683	366.236	8.27224	0.1109	65.851	0.3953	6.124	27.501	5.03	1.243	0.176	0.161	0	0.125	0.413	0.067	0.005	0	0.182	0.001	152.796	3511.08
2393	0.497092	0	270.691	7.0085	11.2539	477.3	140.034	18.0559	3.8621	19.4005	43.5687	0.084	0.037	0.0058	0.843316	82.2028	10.6341	11.8685	366.241	8.27234	0.1109	65.8519	0.3953	6.124	27.502	5.03	1.243	0.176	0.161	0	0.125	0.413	0.067	0.005	0	0.182	0.001	152.8	3511.08
2394	0.497436	0	270.698	7.0085	11.2539	477.3	140.034	18.0559	3.8621	19.4005	43.5687	0.084	0.037	0.0058	0.843328	82.2039	10.6343	11.8686	366.246	8.27245	0.1109	65.8528	0.3953	6.124	27.504	5.03	1.243	0.176	0.161	0	0.125	0.413	0.067	0.005	0	0.182	0.001	152.804	3511.08
2395	0.49778	0	270.704	7.0085	11.2539	477.3	140.034	18.0559	3.8621	19.4005	43.5687	0.084	0.037	0.0058	0.84334	82.205	10.6344	11.8688	366.251	8.27256	0.1109	65.8537	0.3953	6.125	27.505	5.031	1.243	0.176	0.161	0	0.125	0.413	0.067	0.005	0	0.182	0.001	152.809	3511.08
2396	0.498124	0	270.711	7.0085	11.2539	477.3	140.034	18.0559	3.8621	19.4005	43.5687	0.084	0.037	0.0058	0.843352	82.2061	10.6345	11.8689	366.256	8.27267	0.1109	65.8546	0.3953	6.125	27.507	5.031	1.243	0.176	0.161	0	0.125	0.413	0.067	0.005	0	0.182	0.001	152.813	3511.08
2397	0.498468	0	270.717	7.0085	11.2539	477.3	140.034	18.0559	3.8621	19.4005	43.5687	0.084	0.037	0.0058	0.843364	82.2072	10.6347	11.8691	366.261	8.27278	0.1109	65.8555	0.3953	6.125	27.508	5.031	1.243	0.176	0.161	0	0.125	0.413	0.067	0.005	0	0.182	0.001	152.817	3511.08
2398	0.498812	0	270.724	7.0085	11.2539	477.3	140.034	18.0559	3.8621	19.4005	43.5687	0.084	0.037	0.0058	0.843376	82.2084	10.6348	11.8693	366.266	8.27288	0.1109	65.8564	0.3953	6.126	27.51	5.031	1.243	0.176	0.161	0	0.125	0.413	0.067	0.005	0	0.182	0.001	152.822	3511.08
2399	0.499156	0	270.731	7.0085	11.2539	477.3	140.034	18.0559	3.8621	19.4005	43.5687	0.084	0.037	0.0058	0.843388	82.2095	10.635	11.8694	366.271	8.27299	0.1109	65.8573	0.3953	6.126	27.511	5.032	1.244	0.176	0.161	0	0.125	0.413	0.067	0.005	0	0.182	0.001	152.826	3511.08
2400	0.4995	0	270.737	7.0085	11.2539	477.3	140.034	18.0559	3.8621	19.4005	43.5687	0.084	0.037	0.0058	0.8434	82.2106	10.6351	11.8696	366.276	8.2731	0.1109	65.8582	0.3953	6.126	27.512	5.032	1.244	0.176	0.161	0	0.125	0.413	0.067	0.005	0	0.182	0.001	152.83	3511.08
2401	0.499484	0	270.744	7.0085	11.2539	477.3	140.034	18.0559	3.8621	19.4005	43.5687	0.084004	0.037	0.0058	0.843408	82.2117	10.6352	11.8698	366.281	8.27322	0.1109	65.8591	0.3953	6.126	27.514	5.032	1.244	0.176	0.161	0	0.125	0.413	0.067	0.005	0	0.182	0.001	152.834	3511.08
2402	0.499468	0	270.75	7.0085	11.2539	477.3	140.034	18.0559	3.8621	19.4005	43.5687	0.084008	0.037	0.0058	0.843416	82.2128	10.6354	11.8699	366.286	8.27333	0.1109	65.8599	0.3953	6.127	27.515	5.032	1.244	0.176	0.161	0	0.125	0.413	0.067	0.005	0	0.182	0.001	152.839	3511.08
2403	0.499452	0	270.756	7.0085	11.2539	477.3	140.034	18.0559	3.8621	19.4005	43.5687	0.084012	0.037	0.0058	0.843424	82.2139	10.6355	11.8701	366.291	8.27345	0.1109	65.8608	0.3953	6.127	27.517	5.033	1.244	0.176	0.161	0	0.125	0.413	0.067	0.005	0	0.182	0.001	152.843	3511.08
2404	0.499436	0	270.763	7.0085	11.2539	477.3	140.034	18.0559	3.8621	19.4005	43.5687	0.084016	0.037	0.0058	0.843432	82.215	10.6357	11.8702	366.296	8.27356	0.1109	65.8617	0.3953	6.127	27.518	5.033	1.244	0.176	0.161	0	0.125	0.413	0.067	0.005	0	0.182	0.001	152.847	3511.08
2405	0.49942	0	270.769	7.0085	11.2539	477.3	140.034	18.0559	3.8621	19.4005	43.5687	0.08402	0.037	0.0058	0.84344	82.2161	10.6358	11.8704	366.3	8.27368	0.1109	65.8625	0.3953	6.128	27.519	5.033	1.244	0.176	0.161	0	0.125	0.413	0.067	0.005	0	0.182	0.001	152.851	3511.08
2406	0.499404	0	270.776	7.0085	11.2539	477.3	140.034	18.0559	3.8621	19.4005	43.5687	0.084024	0.037	0.0058	0.843448	82.2172	10.636	11.8705	366.305	8.2738	0.1109	65.8634	0.3953	6.128	27.521	5.033	1.244	0.176	0.161	0	0.125	0.413	0.067	0.005	0	0.182	0.001	152.856	3511.08
2407	0.499388	0	270.782	7.0085	11.2539	477.3	140.034	18.0559	3.8621	19.4005	43.5687	0.084028	0.037	0.0058	0.843456	82.2182	10.6361	11.8707	366.31	8.27391	0.1109	65.8643	0.3953	6.128	27.522	5.034	1.244	0.176	0.161	0	0.125	0.413	0.067	0.005	0	0.182	0.001	152.86	3511.08
2408	0.499372	0	270.788	7.0085	11.2539	477.3	140.034	18.0559	3.8621	19.4005	43.5687	0.084032	0.037	0.0058	0.843464	82.2193	10.6363	11.8708	366.315	8.27403	0.1109	65.8651	0.3953	6.129	27.524	5.034	1.244	0.176	0.161	0	0.125	0.413	0.067	0.005	0	0.182	0.001	152.864	3511.08
2409	0.499356	0	270.795	7.0085	11.2539	477.3	140.034	18.0559	3.8621	19.4005	43.5687	0.084036	0.037	0.0058	0.843472	82.2204	10.6364	11.871	366.32	8.27414	0.1109	65.866	0.3953	6.129	27.525	5.034	1.244	0.176	0.162	0	0.125	0.413	0.067	0.005	0	0.182	0.001	152.868	3511.08
2410	0.49934	0	270.801	7.0085	11.2539	477.3	140.034	18.0559	3.8621	19.4005	43.5687	0.08404	0.037	0.0058	0.84348	82.2215	10.6365	11.8711	366.325	8.27426	0.1109	65.8669	0.3953	6.129	27.526	5.034	1.244	0.176	0.162	0	0.125	0.413	0.067	0.005	0	0.182	0.001	152.873	3511.08
2411	0.499324	0	270.808	7.0085	11.2539	477.3	140.034	18.0559	3.8621	19.4005	43.5687	0.084044	0.037	0.0058	0.843488	82.2226	10.6367	11.8713	366.33	8.27438	0.1109	65.8677	0.3953	6.13	27.528	5.035	1.244	0.176	0.162	0	0.125	0.413	0.067	0.005	0	0.182	0.001	152.877	3511.08
2412	0.499308	0	270.814	7.0085	11.2539	477.3	140.034	18.0559	3.8621	19.4005	43.5687	0.084048	0.037	0.0058	0.843496	82.2237	10.6368	11.8714	366.335	8.27449	0.1109	65.8686	0.3953	6.13	27.529	5.035	1.244	0.176	0.162	0	0.125	0.413	0.067	0.005	0	0.182	0.001	152.881	3511.08
2413	0.499292	0	270.82	7.0085	11.2539	477.3	140.034	18.0559	3.8621	19.4005	43.5687	0.084052	0.037	0.0058	0.843504	82.2248	10.637	11.8716	366.339	8.27461	0.1109	65.8695	0.3953	6.13	27.531	5.035	1.244	0.176	0.162	0	0.125	0.413	0.067	0.005	0	0.182	0.001	152.885	3511.08
2414	0.499276	0	270.827	7.0085	11.2539	477.3	140.034	18.0559	3.8621	19.4005	43.5687	0.084056	0.037	0.0058	0.843512	82.2259	10.6371	11.8717	366.344	8.27472	0.1109	65.8704	0.3953	6.131	27.532	5.035	1.244	0.176	0.162	0	0.125	0.413	0.067	0.005	0	0.182	0.001	152.89	3511.08
2415	0.49926	0	270.833	7.0085	11.2539	477.3	140.034	18.0559	3.8621	19.4005	43.5687	0.08406	0.037	0.0058	0.84352	82.227	10.6373	11.8719	366.349	8.27484	0.1109	65.8712	0.3953	6.131	27.533	5.036	1.245	0.176	0.162	0	0.125	0.413	0.067	0.005	0	0.182	0.001	152.894	3511.08
2416	0.499244	0	270.84	7.0085	11.2539	477.3	140.034	18.0559	3.8621	19.4005	43.5687	0.084064	0.037	0.0058	0.843528	82.2281	10.6374	11.872	366.354	8.27496	0.1109	65.8721	0.3953	6.131	27.535	5.036	1.245	0.176	0.162	0	0.125	0.413	0.067	0.005	0	0.182	0.001	152.898	3511.08
2417	0.499228	0	270.846	7.0085	11.2539	477.3	140.034	18.0559	3.8621	19.4005	43.5687	0.084068	0.037	0.0058	0.843536	82.2292	10.6375	11.8722	366.359	8.27507	0.1109	65.873	0.3953	6.131	27.536	5.036	1.245	0.176	0.162	0	0.125	0.413	0.067	0.005	0	0.182	0.001	152.902	3511.08
2418	0.499212	0	270.852	7.0085	11.2539	477.3	140.034	18.0559	3.8621	19.4005	43.5687	0.084072	0.037	0.0058	0.843544	82.2303	10.6377	11.8723	366.364	8.27519	0.1109	65.8738	0.3953	6.132	27.538	5.036	1.245	0.176	0.162	0	0.125	0.413	0.067	0.005	0	0.182	0.001	152.906	3511.08
2419	0.499196	0	270.859	7.0085	11.2539	477.3	140.034	18.0559	3.8621	19.4005	43.5687	0.084076	0.037	0.0058	0.843552	82.2313	10.6378	11.8725	366.369	8.2753	0.1109	65.8747	0.3953	6.132	27.539	5.037	1.245	0.176	0.162	0	0.125	0.413	0.067	0.005	0	0.182	0.001	152.911	3511.08
2420	0.49918	0	270.865	7.0085	11.2539	477.3	140.034	18.0559	3.8621	19.4005	43.5687	0.08408	0.037	0.0058	0.84356	82.2324	10.638	11.8726	366.373	8.27542	0.1109	65.8756	0.3953	6.132	27.54	5.037	1.245	0.176	0.162	0	0.125	0.413	0.067	0.005	0	0.182	0.001	152.915	3511.08
2421	0.499164	0	270.872	7.0085	11.2539	477.3	140.034	18.0559	3.8621	19.4005	43.5687	0.084084	0.037	0.0058	0.843568	82.2335	10.6381	11.8728	366.378	8.27554	0.1109	65.8764	0.3953	6.133	27.542	5.037	1.245	0.176	0.162	0	0.125	0.413	0.067	0.005	0	0.182	0.001	152.919	3511.08
2422	0.499148	0	270.878	7.0085	11.2539	477.3	140.034	18.0559	3.8621	19.4005	43.5687	0.084088	0.037	0.0058	0.843576	82.2346	10.6383	11.8729	366.383	8.27565	0.1109	65.8773	0.3953	6.133	27.543	5.037	1.245	0.176	0.162	0	0.125	0.413	0.067	0.005	0	0.182	0.001	152.923	3511.08
2423	0.499132	0	270.884	7.0085	11.2539	477.3	140.034	18.0559	3.8621	19.4005	43.5687	0.084092	0.037	0.0058	0.843584	82.2357	10.6384	11.8731	366.388	8.27577	0.1109	65.8782	0.3953	6.133	27.545	5.038	1.245	0.176	0.162	0	0.125	0.413	0.067	0.005	0	0.182	0.001	152.927	3511.08
2424	0.499116	0	270.891	7.0085	11.2539	477.3	140.034	18.0559	3.8621	19.4005	43.5687	0.084096	0.037	0.0058	0.843592	82.2368	10.6386	11.8732	366.393	8.27588	0.1109	65.879	0.3953	6.134	27.546	5.038	1.245	0.176	0.162	0	0.125	0.413	0.067	0.005	0	0.182	0.001	152.931	3511.08
2425	0.4991	0	270.897	7.0085	11.2539	477.3	140.034	18.0559	3.8621	19.4005	43.5687	0.0841	0.037	0.0058	0.8436	82.2379	10.6387	11.8734	366.398	8.276	0.1109	65.8799	0.3953	6.134	27.547	5.038	1.245	0.176	0.162	0	0.125	0.413	0.067	0.005	0	0.182	0.001	152.936	3511.08
2426	0.498884	0	270.904	7.0085	11.2539	477.3	140.034	18.0559	3.8621	19.4005	43.5687	0.0841	0.037	0.0058	0.843616	82.239	10.6388	11.8736	366.402	8.27611	0.1109	65.8808	0.3953	6.134	27.549	5.038	1.245	0.176	0.162	0	0.125	0.413	0.067	0.005	0	0.182	0.001	152.94	3511.08
2427	0.498668	0	270.91	7.0085	11.2539	477.3	140.034	18.0559	3.8621	19.4005	43.5687	0.0841	0.037	0.0058	0.843632	82.24	10.639	11.8737	366.407	8.27622	0.1109	65.8816	0.3953	6.135	27.55	5.039	1.245	0.176	0.162	0	0.125	0.413	0.067	0.005	0	0.182	0.001	152.944	3511.08
2428	0.498452	0	270.916	7.0085	11.2539	477.3	140.034	18.0559	3.8621	19.4005	43.5687	0.0841	0.037	0.0058	0.843648	82.2411	10.6391	11.8739	366.412	8.27632	0.1109	65.8825	0.3953	6.135	27.551	5.039	1.245	0.176	0.162	0	0.125	0.413	0.067	0.005	0	0.182	0.001	152.948	3511.08
2429	0.498236	0	270.922	7.0085	11.2539	477.3	140.034	18.0559	3.8621	19.4005	43.5687	0.0841	0.037	0.0058	0.843664	82.2421	10.6392	11.874	366.417	8.27643	0.1109	65.8833	0.3953	6.135	27.553	5.039	1.245	0.176	0.162	0	0.125	0.413	0.067	0.005	0	0.182	0.001	152.952	3511.08
2430	0.49802	0	270.928	7.0085	11.2539	477.3	140.034	18.0559	3.8621	19.4005	43.5687	0.0841	0.037	0.0058	0.84368	82.2432	10.6394	11.8742	366.421	8.27654	0.1109	65.8842	0.3953	6.135	27.554	5.039	1.245	0.176	0.162	0	0.125	0.413	0.067	0.005	0	0.182	0.001	152.956	3511.08
2431	0.497804	0	270.935	7.0085	11.2539	477.3	140.034	18.0559	3.8621	19.4005	43.5687	0.0841	0.037	0.0058	0.843696	82.2442	10.6395	11.8743	366.426	8.27665	0.1109	65.885	0.3953	6.136	27.555	5.04	1.246	0.176	0.162	0	0.125	0.413	0.067	0.005	0	0.182	0.001	152.96	3511.08
2432	0.497588	0	270.941	7.0085	11.2539	477.3	140.034	18.0559	3.8621	19.4005	43.5687	0.0841	0.037	0.0058	0.843712	82.2453	10.6397	11.8745	366.431	8.27676	0.1109	65.8859	0.3953	6.136	27.557	5.04	1.246	0.176	0.162	0	0.125	0.413	0.067	0.005	0	0.182	0.001	152.964	3511.08
2433	0.497372	0	270.947	7.0085	11.2539	477.3	140.034	18.0559	3.8621	19.4005	43.5687	0.0841	0.037	0.0058	0.843728	82.2463	10.6398	11.8746	366.435	8.27686	0.1109	65.8867	0.3953	6.136	27.558	5.04	1.246	0.176	0.162	0	0.125	0.413	0.067	0.005	0	0.182	0.001	152.969	3511.08
2434	0.497156	0	270.953	7.0085	11.2539	477.3	140.034	18.0559	3.8621	19.4005	43.5687	0.0841	0.037	0.0058	0.843744	82.2474	10.6399	11.8748	366.44	8.27697	0.1109	65.8876	0.3953	6.137	27.56	5.04	1.246	0.176	0.162	0	0.125	0.413	0.067	0.005	0	0.182	0.001	152.973	3511.08
2435	0.49694	0	270.959	7.0085	11.2539	477.3	140.034	18.0559	3.8621	19.4005	43.5687	0.0841	0.037	0.0058	0.84376	82.2485	10.6401	11.875	366.445	8.27708	0.1109	65.8884	0.3953	6.137	27.561	5.041	1.246	0.176	0.162	0	0.125	0.413	0.067	0.005	0	0.182	0.001	152.977	3511.08
2436	0.496724	0	270.966	7.0085	11.2539	477.3	140.034	18.0559	3.8621	19.4005	43.5687	0.0841	0.037	0.0058	0.843776	82.2495	10.6402	11.8751	366.45	8.27719	0.1109	65.8893	0.3953	6.137	27.562	5.041	1.246	0.176	0.162	0	0.125	0.413	0.067	0.005	0	0.182	0.001	152.981	3511.08
2437	0.496508	0	270.972	7.0085	11.2539	477.3	140.034	18.0559	3.8621	19.4005	43.5687	0.0841	0.037	0.0058	0.843792	82.2506	10.6403	11.8753	366.454	8.2773	0.1109	65.8901	0.3953	6.138	27.564	5.041	1.246	0.176	0.162	0	0.125	0.413	0.067	0.005	0	0.182	0.001	152.985	3511.08
2438	0.496292	0	270.978	7.0085	11.2539	477.3	140.034	18.0559	3.8621	19.4005	43.5687	0.0841	0.037	0.0058	0.843808	82.2516	10.6405	11.8754	366.459	8.2774	0.1109	65.891	0.3953	6.138	27.565	5.041	1.246	0.176	0.162	0	0.125	0.413	0.067	0.005	0	0.182	0.001	152.989	3511.08
2439	0.496076	0	270.984	7.0085	11.2539	477.3	140.034	18.0559	3.8621	19.4005	43.5687	0.0841	0.037	0.0058	0.843824	82.2527	10.6406	11.8756	366.464	8.27751	0.1109	65.8918	0.3953	6.138	27.566	5.042	1.246	0.176	0.162	0	0.125	0.413	0.067	0.005	0	0.182	0.001	152.993	3511.08
2440	0.49586	0	270.99	7.0085	11.2539	477.3	140.034	18.0559	3.8621	19.4005	43.5687	0.0841	0.037	0.0058	0.84384	82.2537	10.6407	11.8757	366.468	8.27762	0.1109	65.8927	0.3953	6.138	27.568	5.042	1.246	0.176	0.162	0	0.125	0.413	0.067	0.005	0	0.182	0.001	152.997	3511.08
2441	0.495644	0	270.997	7.0085	11.2539	477.3	140.034	18.0559	3.8621	19.4005	43.5687	0.0841	0.037	0.0058	0.843856	82.2548	10.6409	11.8759	366.473	8.27773	0.1109	65.8935	0.3953	6.139	27.569	5.042	1.246	0.176	0.162	0	0.125	0.413	0.067	0.005	0	0.182	0.001	153.001	3511.08
2442	0.495428	0	271.003	7.0085	11.2539	477.3	140.034	18.0559	3.8621	19.4005	43.5687	0.0841	0.037	0.0058	0.843872	82.2559	10.641	11.8761	366.478	8.27784	0.1109	65.8944	0.3953	6.139	27.57	5.042	1.246	0.176	0.162	0	0.125	0.413	0.067	0.005	0	0.182	0.001	153.005	3511.08
2443	0.495212	0	271.009	7.0085	11.2539	477.3	140.034	18.0559	3.8621	19.4005	43.5687	0.0841	0.037	0.0058	0.843888	82.2569	10.6411	11.8762	366.483	8.27794	0.1109	65.8952	0.3953	6.139	27.572	5.043	1.246	0.176	0.162	0	0.125	0.413	0.067	0.005	0	0.182	0.001	153.009	3511.08
2444	0.494996	0	271.015	7.0085	11.2539	477.3	140.034	18.0559	3.8621	19.4005	43.5687	0.0841	0.037	0.0058	0.843904	82.258	10.6413	11.8764	366.487	8.27805	0.1109	65.8961	0.3953	6.14	27.573	5.043	1.246	0.176	0.162	0	0.125	0.413	0.067	0.005	0	0.182	0.001	153.013	3511.08
2445	0.49478	0	271.021	7.0085	11.2539	477.3	140.034	18.0559	3.8621	19.4005	43.5687	0.0841	0.037	0.0058	0.84392	82.259	10.6414	11.8765	366.492	8.27816	0.1109	65.8969	0.3953	6.14	27.574	5.043	1.246	0.176	0.162	0	0.125	0.413	0.067	0.005	0	0.182	0.001	153.017	3511.08
2446	0.494564	0	271.028	7.0085	11.2539	477.3	140.034	18.0559	3.8621	19.4005	43.5687	0.0841	0.037	0.0058	0.843936	82.2601	10.6416	11.8767	366.497	8.27827	0.1109	65.8978	0.3953	6.14	27.576	5.043	1.246	0.176	0.162	0	0.125	0.413	0.067	0.005	0	0.182	0.001	153.021	3511.08
2447	0.494348	0	271.034	7.0085	11.2539	477.3	140.034	18.0559	3.8621	19.4005	43.5687	0.0841	0.037	0.0058	0.843952	82.2611	10.6417	11.8768	366.501	8.27838	0.1109	65.8986	0.3953	6.141	27.577	5.044	1.246	0.176	0.162	0	0.125	0.413	0.067	0.005	0	0.182	0.001	153.026	3511.08
2448	0.494132	0	271.04	7.0085	11.2539	477.3	140.034	18.0559	3.8621	19.4005	43.5687	0.0841	0.037	0.0058	0.843968	82.2622	10.6418	11.877	366.506	8.27848	0.1109	65.8995	0.3953	6.141	27.578	5.044	1.247	0.176	0.162	0	0.125	0.413	0.067	0.005	0	0.182	0.001	153.03	3511.08
2449	0.493916	0	271.046	7.0085	11.2539	477.3	140.034	18.0559	3.8621	19.4005	43.5687	0.0841	0.037	0.0058	0.843984	82.2632	10.642	11.8771	366.511	8.27859	0.1109	65.9003	0.3953	6.141	27.58	5.044	1.247	0.176	0.162	0	0.125	0.413	0.067	0.005	0	0.182	0.001	153.034	3511.08
2450	0.4937	0	271.052	7.0085	11.2539	477.3	140.034	18.0559	3.8621	19.4005	43.5687	0.0841	0.037	0.0058	0.844	82.2643	10.6421	11.8773	366.515	8.2787	0.1109	65.9012	0.3953	6.141	27.581	5.044	1.247	0.176	0.162	0	0.125	0.413	0.067	0.005	0	0.182	0.001	153.038	3511.08
2451	0.493372	0	271.058	7.0085	11.2539	477.3	140.034	18.0559	3.8621	19.4005	43.5687	0.0841	0.037	0.0058	0.844008	82.2653	10.6422	11.8775	366.52	8.2788	0.1109	65.902	0.3953	6.142	27.582	5.045	1.247	0.176	0.162	0	0.125	0.413	0.067	0.005	0	0.182	0.001	153.042	3511.08
2452	0.493044	0	271.064	7.0085	11.2539	477.3	140.034	18.0559	3.8621	19.4005	43.5687	0.0841	0.037	0.0058	0.844016	82.2663	10.6424	11.8776	366.525	8.2789	0.1109	65.9028	0.3953	6.142	27.584	5.045	1.247	0.176	0.162	0	0.125	0.413	0.067	0.005	0	0.182	0.001	153.046	3511.08
2453	0.492716	0	271.07	7.0085	11.2539	477.3	140.034	18.0559	3.8621	19.4005	43.5687	0.0841	0.037	0.0058	0.844024	82.2674	10.6425	11.8778	366.529	8.279	0.1109	65.9036	0.3953	6.142	27.585	5.045	1.247	0.176	0.162	0	0.125	0.413	0.067	0.005	0	0.182	0.001	153.05	3511.08
2454	0.492388	0	271.076	7.0085	11.2539	477.3	140.034	18.0559	3.8621	19.4005	43.5687	0.0841	0.037	0.0058	0.844032	82.2684	10.6426	11.8779	366.534	8.2791	0.1109	65.9044	0.3953	6.143	27.586	5.045	1.247	0.176	0.162	0	0.125	0.413	0.067	0.005	0	0.182	0.001	153.054	3511.08
2455	0.49206	0	271.082	7.0085	11.2539	477.3	140.034	18.0559	3.8621	19.4005	43.5687	0.0841	0.037	0.0058	0.84404	82.2694	10.6428	11.8781	366.538	8.2792	0.1109	65.9052	0.3953	6.143	27.588	5.046	1.247	0.176	0.162	0	0.125	0.413	0.067	0.005	0	0.182	0.001	153.058	3511.08
2456	0.491732	0	271.088	7.0085	11.2539	477.3	140.034	18.0559	3.8621	19.4005	43.5687	0.0841	0.037	0.0058	0.844048	82.2704	10.6429	11.8782	366.543	8.2793	0.1109	65.906	0.3953	6.143	27.589	5.046	1.247	0.176	0.162	0	0.125	0.413	0.067	0.005	0	0.182	0.001	153.061	3511.08
2457	0.491404	0	271.094	7.0085	11.2539	477.3	140.034	18.0559	3.8621	19.4005	43.5687	0.0841	0.037	0.0058	0.844056	82.2714	10.643	11.8784	366.547	8.2794	0.1109	65.9069	0.3953	6.143	27.59	5.046	1.247	0.176	0.162	0	0.125	0.413	0.067	0.005	0	0.182	0.001	153.065	3511.08
2458	0.491076	0	271.1	7.0085	11.2539	477.3	140.034	18.0559	3.8621	19.4005	43.5687	0.0841	0.037	0.0058	0.844064	82.2725	10.6432	11.8785	366.552	8.2795	0.1109	65.9077	0.3953	6.144	27.591	5.046	1.247	0.176	0.162	0	0.125	0.413	0.067	0.005	0	0.182	0.001	153.069	3511.08
2459	0.490748	0	271.106	7.0085	11.2539	477.3	140.034	18.0559	3.8621	19.4005	43.5687	0.0841	0.037	0.0058	0.844072	82.2735	10.6433	11.8787	366.556	8.2796	0.1109	65.9085	0.3953	6.144	27.593	5.047	1.247	0.176	0.162	0	0.125	0.413	0.067	0.005	0	0.182	0.001	153.073	3511.08
2460	0.49042	0	271.112	7.0085	11.2539	477.3	140.034	18.0559	3.8621	19.4005	43.5687	0.0841	0.037	0.0058	0.84408	82.2745	10.6434	11.8788	366.561	8.2797	0.1109	65.9093	0.3953	6.144	27.594	5.047	1.247	0.176	0.162	0	0.125	0.413	0.067	0.005	0	0.182	0.001	153.077	3511.08
2461	0.490092	0	271.118	7.0085	11.2539	477.3	140.034	18.0559	3.8621	19.4005	43.5687	0.0841	0.037	0.0058	0.844088	82.2755	10.6436	11.879	366.565	8.2798	0.1109	65.9101	0.3953	6.145	27.595	5.047	1.247	0.176	0.162	0	0.125	0.413	0.067	0.005	0	0.182	0.001	153.081	3511.08
2462	0.489764	0	271.124	7.0085	11.2539	477.3	140.034	18.0559	3.8621	19.4005	43.5687	0.0841	0.037	0.0058	0.844096	82.2765	10.6437	11.8791	366.57	8.2799	0.1109	65.9109	0.3953	6.145	27.597	5.047	1.247	0.176	0.162	0	0.125	0.413	0.067	0.005	0	0.182	0.001	153.085	3511.08
2463	0.489436	0	271.13	7.0085	11.2539	477.3	140.034	18.0559	3.8621	19.4005	43.5687	0.0841	0.037	0.0058	0.844104	82.2776	10.6438	11.8793	366.574	8.28	0.1109	65.9117	0.3953	6.145	27.598	5.048	1.247	0.176	0.162	0	0.125	0.413	0.067	0.005	0	0.182	0.001	153.089	3511.08
2464	0.489108	0	271.136	7.0085	11.2539	477.3	140.034	18.0559	3.8621	19.4005	43.5687	0.0841	0.037	0.0058	0.844112	82.2786	10.6439	11.8794	366.579	8.2801	0.1109	65.9125	0.3953	6.146	27.599	5.048	1.248	0.176	0.162	0	0.125	0.413	0.067	0.005	0	0.182	0.001	153.093	3511.08
2465	0.48878	0	271.142	7.0085	11.2539	477.3	140.034	18.0559	3.8621	19.4005	43.5687	0.0841	0.037	0.0058	0.84412	82.2796	10.6441	11.8796	366.584	8.2802	0.1109	65.9133	0.3953	6.146	27.601	5.048	1.248	0.176	0.162	0	0.125	0.413	0.067	0.005	0	0.182	0.001	153.097	3511.08
2466	0.488452	0	271.148	7.0085	11.2539	477.3	140.034	18.0559	3.8621	19.4005	43.5687	0.0841	0.037	0.0058	0.844128	82.2806	10.6442	11.8797	366.588	8.2803	0.1109	65.9141	0.3953	6.146	27.602	5.048	1.248	0.176	0.162	0	0.125	0.413	0.067	0.005	0	0.182	0.001	153.101	3511.08
2467	0.488124	0	271.154	7.0085	11.2539	477.3	140.034	18.0559	3.8621	19.4005	43.5687	0.0841	0.037	0.0058	0.844136	82.2816	10.6443	11.8799	366.593	8.2804	0.1109	65.9149	0.3953	6.146	27.603	5.048	1.248	0.176	0.162	0	0.125	0.413	0.067	0.005	0	0.183	0.001	153.105	3511.08
2468	0.487796	0	271.16	7.0085	11.2539	477.3	140.034	18.0559	3.8621	19.4005	43.5687	0.0841	0.037	0.0058	0.844144	82.2827	10.6445	11.88	366.597	8.2805	0.1109	65.9157	0.3953	6.147	27.604	5.049	1.248	0.177	0.162	0	0.125	0.413	0.067	0.005	0	0.183	0.001	153.109	3511.08
2469	0.487468	0	271.166	7.0085	11.2539	477.3	140.034	18.0559	3.8621	19.4005	43.5687	0.0841	0.037	0.0058	0.844152	82.2837	10.6446	11.8802	366.602	8.2806	0.1109	65.9166	0.3953	6.147	27.606	5.049	1.248	0.177	0.162	0	0.125	0.413	0.067	0.005	0	0.183	0.001	153.113	3511.08
2470	0.48714	0	271.172	7.0085	11.2539	477.3	140.034	18.0559	3.8621	19.4005	43.5687	0.0841	0.037	0.0058	0.84416	82.2847	10.6447	11.8803	366.606	8.2807	0.1109	65.9174	0.3953	6.147	27.607	5.049	1.248	0.177	0.162	0	0.125	0.413	0.067	0.005	0	0.183	0.001	153.117	3511.08
2471	0.486812	0	271.178	7.0085	11.2539	477.3	140.034	18.0559	3.8621	19.4005	43.5687	0.0841	0.037	0.0058	0.844168	82.2857	10.6449	11.8805	366.611	8.2808	0.1109	65.9182	0.3953	6.148	27.608	5.049	1.248	0.177	0.162	0	0.125	0.413	0.067	0.005	0	0.183	0.001	153.12	3511.08
2472	0.486484	0	271.184	7.0085	11.2539	477.3	140.034	18.0559	3.8621	19.4005	43.5687	0.0841	0.037	0.0058	0.844176	82.2867	10.645	11.8806	366.615	8.2809	0.1109	65.919	0.3953	6.148	27.61	5.05	1.248	0.177	0.162	0	0.125	0.413	0.067	0.005	0	0.183	0.001	153.124	3511.08
2473	0.486156	0	271.19	7.0085	11.2539	477.3	140.034	18.0559	3.8621	19.4005	43.5687	0.0841	0.037	0.0058	0.844184	82.2878	10.6451	11.8808	366.62	8.281	0.1109	65.9198	0.3953	6.148	27.611	5.05	1.248	0.177	0.162	0	0.125	0.413	0.067	0.005	0	0.183	0.001	153.128	3511.08
2474	0.485828	0	271.196	7.0085	11.2539	477.3	140.034	18.0559	3.8621	19.4005	43.5687	0.0841	0.037	0.0058	0.844192	82.2888	10.6453	11.8809	366.624	8.2811	0.1109	65.9206	0.3953	6.148	27.612	5.05	1.248	0.177	0.162	0	0.125	0.413	0.067	0.005	0	0.183	0.001	153.132	3511.08
2475	0.4855	0	271.202	7.0085	11.2539	477.3	140.034	18.0559	3.8621	19.4005	43.5687	0.0841	0.037	0.0058	0.8442	82.2898	10.6454	11.8811	366.629	8.2812	0.1109	65.9214	0.3953	6.149	27.613	5.05	1.248	0.177	0.162	0	0.125	0.413	0.067	0.005	0	0.183	0.001	153.136	3511.08
2476	0.485104	0	271.208	7.0085	11.2539	477.3	140.034	18.0559	3.8621	19.4005	43.5687	0.084104	0.037	0.0058	0.844208	82.2908	10.6455	11.8812	366.633	8.2813	0.110908	65.9222	0.3953	6.149	27.615	5.051	1.248	0.177	0.162	0	0.125	0.413	0.067	0.005	0	0.183	0.001	153.14	3511.08
2477	0.484708	0	271.213	7.0085	11.2539	477.3	140.034	18.0559	3.8621	19.4005	43.5687	0.084108	0.037	0.0058	0.844216	82.2918	10.6456	11.8814	366.638	8.2814	0.110916	65.923	0.3953	6.149	27.616	5.051	1.248	0.177	0.162	0	0.125	0.413	0.067	0.005	0	0.183	0.001	153.144	3511.08
2478	0.484312	0	271.219	7.0085	11.2539	477.3	140.034	18.0559	3.8621	19.4005	43.5687	0.084112	0.037	0.0058	0.844224	82.2928	10.6458	11.8815	366.642	8.2815	0.110924	65.9238	0.3953	6.15	27.617	5.051	1.248	0.177	0.162	0	0.125	0.413	0.067	0.005	0	0.183	0.001	153.147	3511.08
2479	0.483916	0	271.225	7.0085	11.2539	477.3	140.034	18.0559	3.8621	19.4005	43.5687	0.084116	0.037	0.0058	0.844232	82.2937	10.6459	11.8816	366.646	8.2816	0.110932	65.9246	0.3953	6.15	27.619	5.051	1.248	0.177	0.162	0	0.125	0.413	0.067	0.005	0	0.183	0.001	153.151	3511.08
2480	0.48352	0	271.231	7.0085	11.2539	477.3	140.034	18.0559	3.8621	19.4005	43.5687	0.08412	0.037	0.0058	0.84424	82.2947	10.646	11.8818	366.651	8.2817	0.11094	65.9253	0.3953	6.15	27.62	5.052	1.248	0.177	0.162	0	0.125	0.413	0.067	0.005	0	0.183	0.001	153.155	3511.08
2481	0.483124	0	271.236	7.0085	11.2539	477.3	140.034	18.0559	3.8621	19.4005	43.5687	0.084124	0.037	0.0058	0.844248	82.2957	10.6461	11.8819	366.655	8.2818	0.110948	65.9261	0.3953	6.15	27.621	5.052	1.248	0.177	0.162	0	0.125	0.413	0.067	0.005	0	0.183	0.001	153.159	3511.08
2482	0.482728	0	271.242	7.0085	11.2539	477.3	140.034	18.0559	3.8621	19.4005	43.5687	0.084128	0.037	0.0058	0.844256	82.2967	10.6463	11.8821	366.659	8.2819	0.110956	65.9269	0.3953	6.151	27.622	5.052	1.249	0.177	0.162	0	0.125	0.413	0.067	0.005	0	0.183	0.001	153.163	3511.08
2483	0.482332	0	271.248	7.0085	11.2539	477.3	140.034	18.0559	3.8621	19.4005	43.5687	0.084132	0.037	0.0058	0.844264	82.2977	10.6464	11.8822	366.664	8.282	0.110964	65.9277	0.3953	6.151	27.624	5.052	1.249	0.177	0.162	0	0.125	0.413	0.067	0.005	0	0.183	0.001	153.167	3511.08
2484	0.481936	0	271.254	7.0085	11.2539	477.3	140.034	18.0559	3.8621	19.4005	43.5687	0.084136	0.037	0.0058	0.844272	82.2987	10.6465	11.8823	366.668	8.2821	0.110972	65.9285	0.3953	6.151	27.625	5.052	1.249	0.177	0.162	0	0.125	0.413	0.067	0.005	0	0.183	0.001	153.17	3511.08
2485	0.48154	0	271.259	7.0085	11.2539	477.3	140.034	18.0559	3.8621	19.4005	43.5687	0.08414	0.037	0.0058	0.84428	82.2996	10.6466	11.8825	366.673	8.2822	0.11098	65.9293	0.3953	6.151	27.626	5.053	1.249	0.177	0.162	0	0.125	0.413	0.067	0.005	0	0.183	0.001	153.174	3511.08
2486	0.481144	0	271.265	7.0085	11.2539	477.3	140.034	18.0559	3.8621	19.4005	43.5687	0.084144	0.037	0.0058	0.844288	82.3006	10.6468	11.8826	366.677	8.2823	0.110988	65.9301	0.3953	6.152	27.627	5.053	1.249	0.177	0.162	0	0.125	0.413	0.067	0.005	0	0.183	0.001	153.178	3511.08
2487	0.480748	0	271.271	7.0085	11.2539	477.3	140.034	18.0559	3.8621	19.4005	43.5687	0.084148	0.037	0.0058	0.844296	82.3016	10.6469	11.8827	366.681	8.2824	0.110996	65.9309	0.3953	6.152	27.629	5.053	1.249	0.177	0.162	0	0.125	0.413	0.067	0.005	0	0.183	0.001	153.182	3511.08
2488	0.480352	0	271.277	7.0085	11.2539	477.3	140.034	18.0559	3.8621	19.4005	43.5687	0.084152	0.037	0.0058	0.844304	82.3026	10.647	11.8829	366.686	8.2825	0.111004	65.9316	0.3953	6.152	27.63	5.053	1.249	0.177	0.162	0	0.125	0.413	0.067	0.005	0	0.183	0.001	153.186	3511.08
2489	0.479956	0	271.282	7.0085	11.2539	477.3	140.034	18.0559	3.8621	19.4005	43.5687	0.084156	0.037	0.0058	0.844312	82.3036	10.6471	11.883	366.69	8.2826	0.111012	65.9324	0.3953	6.153	27.631	5.054	1.249	0.177	0.162	0	0.125	0.413	0.067	0.005	0	0.183	0.001	153.189	3511.08
2490	0.47956	0	271.288	7.0085	11.2539	477.3	140.034	18.0559	3.8621	19.4005	43.5687	0.08416	0.037	0.0058	0.84432	82.3046	10.6473	11.8831	366.694	8.2827	0.11102	65.9332	0.3953	6.153	27.632	5.054	1.249	0.177	0.162	0	0.125	0.413	0.067	0.005	0	0.183	0.001	153.193	3511.08
2491	0.479164	0	271.294	7.0085	11.2539	477.3	140.034	18.0559	3.8621	19.4005	43.5687	0.084164	0.037	0.0058	0.844328	82.3055	10.6474	11.8833	366.699	8.2828	0.111028	65.934	0.3953	6.153	27.634	5.054	1.249	0.177	0.162	0	0.125	0.413	0.067	0.005	0	0.183	0.001	153.197	3511.08
2492	0.478768	0	271.3	7.0085	11.2539	477.3	140.034	18.0559	3.8621	19.4005	43.5687	0.084168	0.037	0.0058	0.844336	82.3065	10.6475	11.8834	366.703	8.2829	0.111036	65.9348	0.3953	6.153	27.635	5.054	1.249	0.177	0.162	0	0.125	0.413	0.067	0.005	0	0.183	0.001	153.201	3511.08
2493	0.478372	0	271.305	7.0085	11.2539	477.3	140.034	18.0559	3.8621	19.4005	43.5687	0.084172	0.037	0.0058	0.844344	82.3075	10.6476	11.8835	366.707	8.283	0.111044	65.9356	0.3953	6.154	27.636	5.054	1.249	0.177	0.162	0	0.125	0.413	0.067	0.005	0	0.183	0.001	153.204	3511.08
2494	0.477976	0	271.311	7.0085	11.2539	477.3	140.034	18.0559	3.8621	19.4005	43.5687	0.084176	0.037	0.0058	0.844352	82.3085	10.6478	11.8837	366.712	8.2831	0.111052	65.9364	0.3953	6.154	27.637	5.055	1.249	0.177	0.162	0	0.125	0.413	0.067	0.005	0	0.183	0.001	153.208	3511.08
2495	0.47758	0	271.317	7.0085	11.2539	477.3	140.034	18.0559	3.8621	19.4005	43.5687	0.08418	0.037	0.0058	0.84436	82.3095	10.6479	11.8838	366.716	8.2832	0.11106	65.9372	0.3953	6.154	27.639	5.055	1.249	0.177	0.162	0	0.125	0.413	0.067	0.005	0	0.183	0.001	153.212	3511.08
2496	0.477184	0	271.323	7.0085	11.2539	477.3	140.034	18.0559	3.8621	19.4005	43.5687	0.084184	0.037	0.0058	0.844368	82.3105	10.648	11.884	366.72	8.2833	0.111068	65.9379	0.3953	6.155	27.64	5.055	1.249	0.177	0.162	0	0.125	0.413	0.067	0.005	0	0.183	0.001	153.216	3511.08
2497	0.476788	0	271.328	7.0085	11.2539	477.3	140.034	18.0559	3.8621	19.4005	43.5687	0.084188	0.037	0.0058	0.844376	82.3114	10.6481	11.8841	366.725	8.2834	0.111076	65.9387	0.3953	6.155	27.641	5.055	1.249	0.177	0.162	0	0.125	0.413	0.067	0.005	0	0.183	0.001	153.219	3511.08
2498	0.476392	0	271.334	7.0085	11.2539	477.3	140.034	18.0559	3.8621	19.4005	43.5687	0.084192	0.037	0.0058	0.844384	82.3124	10.6483	11.8842	366.729	8.2835	0.111084	65.9395	0.3953	6.155	27.642	5.056	1.249	0.177	0.162	0	0.125	0.413	0.067	0.005	0	0.183	0.001	153.223	3511.08
2499	0.475996	0	271.34	7.0085	11.2539	477.3	140.034	18.0559	3.8621	19.4005	43.5687	0.084196	0.037	0.0058	0.844392	82.3134	10.6484	11.8844	366.734	8.2836	0.111092	65.9403	0.3953	6.155	27.643	5.056	1.249	0.177	0.162	0	0.125	0.413	0.067	0.005	0	0.183	0.001	153.227	3511.08
2500	0.4756	0	271.346	7.0085	11.2539	477.3	140.034	18.0559	3.8621	19.4005	43.5687	0.0842	0.037	0.0058	0.8444	82.3144	10.6485	11.8845	366.738	8.2837	0.1111	65.9411	0.3953	6.156	27.645	5.056	1.25	0.177	0.162	0	0.125	0.413	0.067	0.005	0	0.183	0.001	153.23	3511.08
