# Supplementary material for: The Social Cost of Fossil and Industrial CO2 Emissions from 1950 to 2018
Source: Research Square preprint supplement (doi:10.21203/rs.3.rs-2244259/v1), 2022-11-17
Supplement: Supplementary file 22 [file RCP6SCP6TO45_MIDYEAR_CONCENTRATIONS.xls]

## Sheet: RCP6SCP6to45_MIDYEAR_CONCENTRA
RCP6.0_WITH SUPPLEMENTARY EXTENSION SCP6.0to4.5__MIDYEAR__CONCENTRATIONS____________________________
CONTENT: CMIP5 RECOMMENDATIONS FOR ANNUAL AVERAGE, GLOBAL MEAN CONCENTRATIONS.
RUN: RCP6-SCP6to45, FINAL RELEASE, 30 May 2010
RCP6.0 CONTACT: AIM group, Toshihiko Masui (masui@nies.go.jp) & Kenichi Matsumoto (matsumoto.kenichi@nies.go.jp)
DATE: 30/5/2010 01:02:33
MAGICC-VERSION: 6.3.09, 25 November 2009
FILE PRODUCED BY: RCP Concentration Calculation & Data Group, M. Meinshausen, S. Smith, K. Riahi, D. van Vuuren et al.
DOCUMENTATION: M. Meinshausen, S. Smith et al. (2011) "The RCP GHG concentrations and their extension from 1765 to 2300", DOI 10.1007/s10584-011-0156-z, Climatic Change.
CMIP5 INFO: http://cmip-pcmdi.llnl.gov/cmip5/
RCP DATABASE: http://www.iiasa.ac.at/web-apps/tnt/RcpDb
FURTHER INFO: For data sources, aknowledgements and further information, see http://www.pik-potsdam.de/~mmalte/rcps
NOTE: RCP6 starts 2005; 20th century data and earlier is provided for convenience; supplementary extension beyond 2100 to match RCP4.5 levels by 2250.
COLUMN_DESCRIPTION________________________________________
1. CO2EQ - (For Information only, not CMIP5 recommendation) CO2 equivalence concentrations using CO2 radiative forcing relationship Q = 3.71/ln(2)*ln(C/278), aggregating all (efficacy-adjusted) anthropogenic forcings, including greenhouse gases listed below (i.e. columns 3,4,5 and 8-35), and aerosols, trop. ozone etc. (not listed below).
2. KYOTO-CO2EQ - (For information only, not CMIP5 recommendation) As column 1, but only aggregating greenhouse gases controlled under the Kyoto Protocol (columns 3,4,5 and 8-19).
3. CO2 - Atmospheric CO2 concentrations
4. CH4 - Atmospheric CH4 concentrations
5. N2O - Atmospheric N2O concentrations
6. FGASSUMHFC134AEQ - All flourinated gases controlled under the Kyoto Protocol, i.e. HFCs, PFCs, and SF6 (columns 8-19) expressed as HFC134a equivalence concentrations.
7. MHALOSUMCFC12EQ - All flourinated gases controlled under the Montreal Protocol, i.e. CFCs, HCFCs, Halons, CCl4, CH3Br, CH3Cl (columns 20-35) expressed as CFC-12 equivalence concentrations.
8. - 19. - Flourinated Gases controlled under the Kyoto Protocol
20. - 35. - Ozone Depleting Substances controlled under the Montreal Protocol
&THISFILE_SPECIFICATIONS
THISFILE_DATACOLUMNS	35
THISFILE_FIRSTYEAR	1765
THISFILE_LASTYEAR	2500
THISFILE_ANNUALSTEPS	1
THISFILE_FIRSTDATAROW	40
THISFILE_UNITS	SEE ROW 38
THISFILE_DATTYPE	RCPDAT
/
COLUMN:	1	2	3	4	5	6	7	8	9	10	11	12	13	14	15	16	17	18	19	20	21	22	23	24	25	26	27	28	29	30	31	32	33	34	35
UNITS:	ppm	ppm	ppm	ppb	ppb	ppt	ppt	ppt	ppt	ppt	ppt	ppt	ppt	ppt	ppt	ppt	ppt	ppt	ppt	ppt	ppt	ppt	ppt	ppt	ppt	ppt	ppt	ppt	ppt	ppt	ppt	ppt	ppt	ppt	ppt
v YEARS/GAS >	CO2EQ	KYOTO-CO2EQ	CO2	CH4	N2O	FGASSUMHFC134AEQ	MHALOSUMCFC12EQ	CF4	C2F6	C6F14	HFC23	HFC32	HFC43_10	HFC125	HFC134a	HFC143a	HFC227ea	HFC245fa	SF6	CFC_11	CFC_12	CFC_113	CFC_114	CFC_115	CARB_TET	MCF	HCFC_22	HCFC_141B	HCFC_142B	HALON1211	HALON1202	HALON1301	HALON2402	CH3BR	CH3CL
1765	277.015	277.015	278.052	721.894	272.96	0	0	35	0	0	0	0	0	0	0	0	0	0	0	0	0	0	0	0	0	0	0	0	0	0	0	0	0	5.8	480
1766	277.839	277.815	278.106	722.256	272.971	0	0	35	0	0	0	0	0	0	0	0	0	0	0	0	0	0	0	0	0	0	0	0	0	0	0	0	0	5.8	480
1767	278.694	278.687	278.22	722.971	272.994	0	0	35	0	0	0	0	0	0	0	0	0	0	0	0	0	0	0	0	0	0	0	0	0	0	0	0	0	5.8	480
1768	278.748	278.836	278.343	723.668	273.017	0	0	35	0	0	0	0	0	0	0	0	0	0	0	0	0	0	0	0	0	0	0	0	0	0	0	0	0	5.8	480
1769	278.796	278.989	278.471	724.343	273.039	0	0	35	0	0	0	0	0	0	0	0	0	0	0	0	0	0	0	0	0	0	0	0	0	0	0	0	0	5.8	480
1770	278.849	279.143	278.6	724.995	273.061	0	0	35	0	0	0	0	0	0	0	0	0	0	0	0	0	0	0	0	0	0	0	0	0	0	0	0	0	5.8	480
1771	278.884	279.299	278.733	725.629	273.083	0	0	35	0	0	0	0	0	0	0	0	0	0	0	0	0	0	0	0	0	0	0	0	0	0	0	0	0	5.8	480
1772	278.925	279.459	278.869	726.25	273.104	0	0	35	0	0	0	0	0	0	0	0	0	0	0	0	0	0	0	0	0	0	0	0	0	0	0	0	0	5.8	480
1773	278.994	279.622	279.009	726.859	273.125	0	0	35	0	0	0	0	0	0	0	0	0	0	0	0	0	0	0	0	0	0	0	0	0	0	0	0	0	5.8	480
1774	279.069	279.789	279.153	727.455	273.146	0	0	35	0	0	0	0	0	0	0	0	0	0	0	0	0	0	0	0	0	0	0	0	0	0	0	0	0	5.8	480
1775	279.151	279.96	279.302	728.037	273.166	0	0	35	0	0	0	0	0	0	0	0	0	0	0	0	0	0	0	0	0	0	0	0	0	0	0	0	0	5.8	480
1776	279.242	280.137	279.457	728.604	273.187	0	0	35	0	0	0	0	0	0	0	0	0	0	0	0	0	0	0	0	0	0	0	0	0	0	0	0	0	5.8	480
1777	279.342	280.319	279.618	729.154	273.207	0	0	35	0	0	0	0	0	0	0	0	0	0	0	0	0	0	0	0	0	0	0	0	0	0	0	0	0	5.8	480
1778	279.447	280.504	279.782	729.687	273.227	0	0	35	0	0	0	0	0	0	0	0	0	0	0	0	0	0	0	0	0	0	0	0	0	0	0	0	0	5.8	480
1779	279.551	280.685	279.943	730.201	273.247	0	0	35	0	0	0	0	0	0	0	0	0	0	0	0	0	0	0	0	0	0	0	0	0	0	0	0	0	5.8	480
1780	279.65	280.859	280.097	730.692	273.266	0	0	35	0	0	0	0	0	0	0	0	0	0	0	0	0	0	0	0	0	0	0	0	0	0	0	0	0	5.8	480
1781	279.718	281.022	280.243	731.154	273.286	0	0	35	0	0	0	0	0	0	0	0	0	0	0	0	0	0	0	0	0	0	0	0	0	0	0	0	0	5.8	480
1782	279.782	281.179	280.382	731.584	273.306	0	0	35	0	0	0	0	0	0	0	0	0	0	0	0	0	0	0	0	0	0	0	0	0	0	0	0	0	5.8	480
1783	279.868	281.332	280.518	731.989	273.325	0	0	35	0	0	0	0	0	0	0	0	0	0	0	0	0	0	0	0	0	0	0	0	0	0	0	0	0	5.8	480
1784	279.959	281.487	280.657	732.378	273.345	0	0	35	0	0	0	0	0	0	0	0	0	0	0	0	0	0	0	0	0	0	0	0	0	0	0	0	0	5.8	480
1785	280.058	281.648	280.803	732.76	273.365	0	0	35	0	0	0	0	0	0	0	0	0	0	0	0	0	0	0	0	0	0	0	0	0	0	0	0	0	5.8	480
1786	280.17	281.819	280.957	733.146	273.384	0	0	35	0	0	0	0	0	0	0	0	0	0	0	0	0	0	0	0	0	0	0	0	0	0	0	0	0	5.8	480
1787	280.291	281.996	281.118	733.544	273.404	0	0	35	0	0	0	0	0	0	0	0	0	0	0	0	0	0	0	0	0	0	0	0	0	0	0	0	0	5.8	480
1788	280.419	282.177	281.282	733.965	273.424	0	0	35	0	0	0	0	0	0	0	0	0	0	0	0	0	0	0	0	0	0	0	0	0	0	0	0	0	5.8	480
1789	280.548	282.357	281.443	734.418	273.444	0	0	35	0	0	0	0	0	0	0	0	0	0	0	0	0	0	0	0	0	0	0	0	0	0	0	0	0	5.8	480
1790	280.676	282.532	281.598	734.911	273.464	0	0	35	0	0	0	0	0	0	0	0	0	0	0	0	0	0	0	0	0	0	0	0	0	0	0	0	0	5.8	480
1791	280.778	282.701	281.747	735.445	273.484	0	0	35	0	0	0	0	0	0	0	0	0	0	0	0	0	0	0	0	0	0	0	0	0	0	0	0	0	5.8	480
1792	280.879	282.867	281.891	736.018	273.504	0	0	35	0	0	0	0	0	0	0	0	0	0	0	0	0	0	0	0	0	0	0	0	0	0	0	0	0	5.8	480
1793	281.005	283.031	282.031	736.626	273.525	0	0	35	0	0	0	0	0	0	0	0	0	0	0	0	0	0	0	0	0	0	0	0	0	0	0	0	0	5.8	480
1794	281.13	283.191	282.167	737.265	273.545	0	0	35	0	0	0	0	0	0	0	0	0	0	0	0	0	0	0	0	0	0	0	0	0	0	0	0	0	5.8	480
1795	281.254	283.348	282.299	737.933	273.566	0	0	35	0	0	0	0	0	0	0	0	0	0	0	0	0	0	0	0	0	0	0	0	0	0	0	0	0	5.8	480
1796	281.378	283.502	282.427	738.627	273.587	0	0	35	0	0	0	0	0	0	0	0	0	0	0	0	0	0	0	0	0	0	0	0	0	0	0	0	0	5.8	480
1797	281.478	283.653	282.551	739.343	273.609	0	0	35	0	0	0	0	0	0	0	0	0	0	0	0	0	0	0	0	0	0	0	0	0	0	0	0	0	5.8	480
1798	281.577	283.801	282.671	740.08	273.63	0	0	35	0	0	0	0	0	0	0	0	0	0	0	0	0	0	0	0	0	0	0	0	0	0	0	0	0	5.8	480
1799	281.699	283.945	282.787	740.834	273.652	0	0	35	0	0	0	0	0	0	0	0	0	0	0	0	0	0	0	0	0	0	0	0	0	0	0	0	0	5.8	480
1800	281.795	284.086	282.899	741.608	273.675	0	0	35	0	0	0	0	0	0	0	0	0	0	0	0	0	0	0	0	0	0	0	0	0	0	0	0	0	5.8	480
1801	281.891	284.224	283.007	742.413	273.698	0	0	35	0	0	0	0	0	0	0	0	0	0	0	0	0	0	0	0	0	0	0	0	0	0	0	0	0	5.8	480
1802	281.964	284.359	283.111	743.26	273.721	0	0	35	0	0	0	0	0	0	0	0	0	0	0	0	0	0	0	0	0	0	0	0	0	0	0	0	0	5.8	480
1803	282.061	284.492	283.211	744.146	273.744	0	0	35	0	0	0	0	0	0	0	0	0	0	0	0	0	0	0	0	0	0	0	0	0	0	0	0	0	5.8	480
1804	282.204	284.622	283.307	745.063	273.768	0	0	35	0	0	0	0	0	0	0	0	0	0	0	0	0	0	0	0	0	0	0	0	0	0	0	0	0	5.8	480
1805	282.323	284.748	283.4	746.005	273.793	0	0	35	0	0	0	0	0	0	0	0	0	0	0	0	0	0	0	0	0	0	0	0	0	0	0	0	0	5.8	480
1806	282.418	284.873	283.49	746.962	273.818	0	0	35	0	0	0	0	0	0	0	0	0	0	0	0	0	0	0	0	0	0	0	0	0	0	0	0	0	5.8	480
1807	282.514	284.997	283.578	747.927	273.843	0	0	35	0	0	0	0	0	0	0	0	0	0	0	0	0	0	0	0	0	0	0	0	0	0	0	0	0	5.8	480
1808	282.631	285.115	283.661	748.893	273.869	0	0	35	0	0	0	0	0	0	0	0	0	0	0	0	0	0	0	0	0	0	0	0	0	0	0	0	0	5.8	480
1809	282.739	285.225	283.735	749.851	273.895	0	0	35	0	0	0	0	0	0	0	0	0	0	0	0	0	0	0	0	0	0	0	0	0	0	0	0	0	5.8	480
1810	282.836	285.321	283.797	750.798	273.922	0	0	35	0	0	0	0	0	0	0	0	0	0	0	0	0	0	0	0	0	0	0	0	0	0	0	0	0	5.8	480
1811	282.9	285.406	283.847	751.739	273.95	0	0	35	0	0	0	0	0	0	0	0	0	0	0	0	0	0	0	0	0	0	0	0	0	0	0	0	0	5.8	480
1812	282.957	285.483	283.889	752.682	273.978	0	0	35	0	0	0	0	0	0	0	0	0	0	0	0	0	0	0	0	0	0	0	0	0	0	0	0	0	5.8	480
1813	283.036	285.555	283.926	753.628	274.007	0	0	35	0	0	0	0	0	0	0	0	0	0	0	0	0	0	0	0	0	0	0	0	0	0	0	0	0	5.8	480
1814	283.115	285.627	283.963	754.579	274.036	0	0	35	0	0	0	0	0	0	0	0	0	0	0	0	0	0	0	0	0	0	0	0	0	0	0	0	0	5.8	480
1815	283.174	285.701	284.001	755.531	274.066	0	0	35	0	0	0	0	0	0	0	0	0	0	0	0	0	0	0	0	0	0	0	0	0	0	0	0	0	5.8	480
1816	283.215	285.778	284.043	756.486	274.097	0	0	35	0	0	0	0	0	0	0	0	0	0	0	0	0	0	0	0	0	0	0	0	0	0	0	0	0	5.8	480
1817	283.259	285.858	284.086	757.44	274.128	0	0	35	0	0	0	0	0	0	0	0	0	0	0	0	0	0	0	0	0	0	0	0	0	0	0	0	0	5.8	480
1818	283.327	285.936	284.129	758.395	274.16	0	0	35	0	0	0	0	0	0	0	0	0	0	0	0	0	0	0	0	0	0	0	0	0	0	0	0	0	5.8	480
1819	283.415	286.01	284.167	759.348	274.193	0	0	35	0	0	0	0	0	0	0	0	0	0	0	0	0	0	0	0	0	0	0	0	0	0	0	0	0	5.8	480
1820	283.498	286.078	284.198	760.3	274.227	0	0	35	0	0	0	0	0	0	0	0	0	0	0	0	0	0	0	0	0	0	0	0	0	0	0	0	0	5.8	480
1821	283.575	286.139	284.223	761.249	274.261	0	0	35	0	0	0	0	0	0	0	0	0	0	0	0	0	0	0	0	0	0	0	0	0	0	0	0	0	5.8	480
1822	283.627	286.196	284.244	762.198	274.296	0	0	35	0	0	0	0	0	0	0	0	0	0	0	0	0	0	0	0	0	0	0	0	0	0	0	0	0	5.8	480
1823	283.655	286.251	284.263	763.147	274.332	0	0	35	0	0	0	0	0	0	0	0	0	0	0	0	0	0	0	0	0	0	0	0	0	0	0	0	0	5.8	480
1824	283.706	286.306	284.281	764.095	274.368	0	0	35	0	0	0	0	0	0	0	0	0	0	0	0	0	0	0	0	0	0	0	0	0	0	0	0	0	5.8	480
1825	283.76	286.361	284.3	765.044	274.406	0	0	35	0	0	0	0	0	0	0	0	0	0	0	0	0	0	0	0	0	0	0	0	0	0	0	0	0	5.8	480
1826	283.816	286.418	284.32	765.993	274.444	0	0	35	0	0	0	0	0	0	0	0	0	0	0	0	0	0	0	0	0	0	0	0	0	0	0	0	0	5.8	480
1827	283.873	286.475	284.34	766.943	274.484	0	0	35	0	0	0	0	0	0	0	0	0	0	0	0	0	0	0	0	0	0	0	0	0	0	0	0	0	5.8	480
1828	283.931	286.532	284.36	767.894	274.524	0	0	35	0	0	0	0	0	0	0	0	0	0	0	0	0	0	0	0	0	0	0	0	0	0	0	0	0	5.8	480
1829	284.013	286.589	284.38	768.846	274.565	0	0	35	0	0	0	0	0	0	0	0	0	0	0	0	0	0	0	0	0	0	0	0	0	0	0	0	0	5.8	480
1830	283.962	286.647	284.4	769.798	274.606	0	0	35	0	0	0	0	0	0	0	0	0	0	0	0	0	0	0	0	0	0	0	0	0	0	0	0	0	5.8	480
1831	283.9	286.669	284.385	770.745	274.649	0	0	35	0	0	0	0	0	0	0	0	0	0	0	0	0	0	0	0	0	0	0	0	0	0	0	0	0	5.8	480
1832	283.882	286.6	284.28	771.683	274.693	0	0	35	0	0	0	0	0	0	0	0	0	0	0	0	0	0	0	0	0	0	0	0	0	0	0	0	0	5.8	480
1833	283.77	286.481	284.125	772.615	274.738	0	0	35	0	0	0	0	0	0	0	0	0	0	0	0	0	0	0	0	0	0	0	0	0	0	0	0	0	5.8	480
1834	283.664	286.367	283.975	773.547	274.784	0	0	35	0	0	0	0	0	0	0	0	0	0	0	0	0	0	0	0	0	0	0	0	0	0	0	0	0	5.8	480
1835	283.56	286.253	283.825	774.483	274.83	0	0	35	0	0	0	0	0	0	0	0	0	0	0	0	0	0	0	0	0	0	0	0	0	0	0	0	0	5.8	480
1836	283.369	286.14	283.675	775.428	274.878	0	0	35	0	0	0	0	0	0	0	0	0	0	0	0	0	0	0	0	0	0	0	0	0	0	0	0	0	5.8	480
1837	283.203	286.027	283.525	776.389	274.927	0	0	35	0	0	0	0	0	0	0	0	0	0	0	0	0	0	0	0	0	0	0	0	0	0	0	0	0	5.8	480
1838	283.153	285.966	283.425	777.369	274.977	0	0	35	0	0	0	0	0	0	0	0	0	0	0	0	0	0	0	0	0	0	0	0	0	0	0	0	0	5.8	480
1839	283.159	285.981	283.4	778.374	275.027	0	0	35	0	0	0	0	0	0	0	0	0	0	0	0	0	0	0	0	0	0	0	0	0	0	0	0	0	5.8	480
1840	283.17	286.022	283.4	779.412	275.08	0	0	35	0	0	0	0	0	0	0	0	0	0	0	0	0	0	0	0	0	0	0	0	0	0	0	0	0	5.8	480
1841	283.211	286.091	283.425	780.494	275.136	0	0	35	0	0	0	0	0	0	0	0	0	0	0	0	0	0	0	0	0	0	0	0	0	0	0	0	0	5.8	480
1842	283.306	286.214	283.5	781.624	275.202	0	0	35	0	0	0	0	0	0	0	0	0	0	0	0	0	0	0	0	0	0	0	0	0	0	0	0	0	5.8	480
1843	283.429	286.364	283.6	782.793	275.273	0	0	35	0	0	0	0	0	0	0	0	0	0	0	0	0	0	0	0	0	0	0	0	0	0	0	0	0	5.8	480
1844	283.579	286.538	283.725	783.989	275.337	0	0	35	0	0	0	0	0	0	0	0	0	0	0	0	0	0	0	0	0	0	0	0	0	0	0	0	0	5.8	480
1845	283.713	286.76	283.9	785.197	275.38	0	0	35	0	0	0	0	0	0	0	0	0	0	0	0	0	0	0	0	0	0	0	0	0	0	0	0	0	5.8	480
1846	283.885	286.977	284.075	786.406	275.398	0	0	35	0	0	0	0	0	0	0	0	0	0	0	0	0	0	0	0	0	0	0	0	0	0	0	0	0	5.8	480
1847	284.051	287.166	284.225	787.602	275.401	0	0	35	0	0	0	0	0	0	0	0	0	0	0	0	0	0	0	0	0	0	0	0	0	0	0	0	0	5.8	480
1848	284.22	287.379	284.4	788.773	275.401	0	0	35	0	0	0	0	0	0	0	0	0	0	0	0	0	0	0	0	0	0	0	0	0	0	0	0	0	5.8	480
1849	284.388	287.591	284.575	789.904	275.4	0	0	35	0	0	0	0	0	0	0	0	0	0	0	0	0	0	0	0	0	0	0	0	0	0	0	0	0	5.8	480
1850	284.478	287.78	284.725	790.979	275.425	0	0	35	0	0	0	0	0	0	0	0	0	0	0	0	0	0	0	0	0	0	0	0	0	0	0	0	0	5.8	480
1851	284.678	287.984	284.875	792.25	275.5	0	0.0105361	35	0	0	0	0	0	0	0	0	0	0	0	0	0	0	0	0	0.025935	0	0	0	0	0	0	0	0	5.8	480
1852	284.494	288.175	285	793.75	275.6	0	0.0316002	35	0	0	0	0	0	0	0	0	0	0	0	0	0	0	0	0	0.077785	0	0	0	0	0	0	0	0	5.8	480
1853	284.254	288.366	285.125	795.25	275.7	0	0.0526703	35	0	0	0	0	0	0	0	0	0	0	0	0	0	0	0	0	0.12965	0	0	0	0	0	0	0	0	5.8	480
1854	284.317	288.582	285.275	796.75	275.8	0	0.0737547	35	0	0	0	0	0	0	0	0	0	0	0	0	0	0	0	0	0.18155	0	0	0	0	0	0	0	0	5.8	480
1855	284.378	288.791	285.425	798	275.9	0	0.0948391	35	0	0	0	0	0	0	0	0	0	0	0	0	0	0	0	0	0.23345	0	0	0	0	0	0	0	0	5.8	480
1856	284.487	289	285.575	799.25	276	0	0.115903	35	0	0	0	0	0	0	0	0	0	0	0	0	0	0	0	0	0.2853	0	0	0	0	0	0	0	0	5.8	480
1857	284.571	289.216	285.725	800.75	276.1	0	0.136967	35	0	0	0	0	0	0	0	0	0	0	0	0	0	0	0	0	0.33715	0	0	0	0	0	0	0	0	5.8	480
1858	284.758	289.458	285.9	802.25	276.2	0	0.158052	35	0	0	0	0	0	0	0	0	0	0	0	0	0	0	0	0	0.38905	0	0	0	0	0	0	0	0	5.8	480
1859	284.872	289.7	286.075	803.75	276.3	0	0.179116	35	0	0	0	0	0	0	0	0	0	0	0	0	0	0	0	0	0.4409	0	0	0	0	0	0	0	0	5.8	480
1860	284.54	289.916	286.225	805.25	276.4	0	0.20018	35	0	0	0	0	0	0	0	0	0	0	0	0	0	0	0	0	0.49275	0	0	0	0	0	0	0	0	5.8	480
1861	283.91	290.132	286.375	806.75	276.5	0	0.221264	35	0	0	0	0	0	0	0	0	0	0	0	0	0	0	0	0	0.54465	0	0	0	0	0	0	0	0	5.8	480
1862	284.24	290.324	286.5	808.25	276.6	0	0.242328	35	0	0	0	0	0	0	0	0	0	0	0	0	0	0	0	0	0.5965	0	0	0	0	0	0	0	0	5.8	480
1863	284.827	290.515	286.625	809.75	276.7	0	0.263392	35	0	0	0	0	0	0	0	0	0	0	0	0	0	0	0	0	0.64835	0	0	0	0	0	0	0	0	5.8	480
1864	284.929	290.732	286.775	811.25	276.8	0	0.284477	35	0	0	0	0	0	0	0	0	0	0	0	0	0	0	0	0	0.70025	0	0	0	0	0	0	0	0	5.8	480
1865	284.907	290.93	286.9	813	276.9	0	0.305561	35	0	0	0	0	0	0	0	0	0	0	0	0	0	0	0	0	0.75215	0	0	0	0	0	0	0	0	5.8	480
1866	284.538	291.104	287	814.75	277	0	0.326625	35	0	0	0	0	0	0	0	0	0	0	0	0	0	0	0	0	0.804	0	0	0	0	0	0	0	0	5.8	480
1867	284.133	291.27	287.1	816.25	277.1	0	0.347689	35	0	0	0	0	0	0	0	0	0	0	0	0	0	0	0	0	0.85585	0	0	0	0	0	0	0	0	5.8	480
1868	284.156	291.461	287.225	817.75	277.2	0	0.368773	35	0	0	0	0	0	0	0	0	0	0	0	0	0	0	0	0	0.90775	0	0	0	0	0	0	0	0	5.8	480
1869	284.51	291.678	287.375	819.25	277.3	0	0.389838	35	0	0	0	0	0	0	0	0	0	0	0	0	0	0	0	0	0.9596	0	0	0	0	0	0	0	0	5.8	480
1870	284.76	291.898	287.525	821	277.375	0	0.41082	35	0	0	0	0	0	0	0	0	0	0	0	0	0	0	0	0	1.01125	0	0	0	0	0	0	0	0	5.8	480
1871	284.422	292.138	287.7	822.75	277.425	0	0.431844	35	0	0	0	0	0	0	0	0	0	0	0	0	0	0	0	0	1.063	0	0	0	0	0	0	0	0	5.8	480
1872	283.277	292.401	287.9	824.25	277.5	0	0.452969	35	0	0	0	0	0	0	0	0	0	0	0	0	0	0	0	0	1.115	0	0	0	0	0	0	0	0	5.8	480
1873	282.357	292.694	288.125	825.75	277.6	0	0.474094	35	0	0	0	0	0	0	0	0	0	0	0	0	0	0	0	0	1.167	0	0	0	0	0	0	0	0	5.8	480
1874	282.412	293.038	288.4	827.25	277.7	0	0.495219	35	0	0	0	0	0	0	0	0	0	0	0	0	0	0	0	0	1.219	0	0	0	0	0	0	0	0	5.8	480
1875	282.738	293.411	288.7	829	277.775	0	0.516344	35	0	0	0	0	0	0	0	0	0	0	0	0	0	0	0	0	1.271	0	0	0	0	0	0	0	0	5.8	480
1876	283.196	293.804	289.025	830.75	277.825	0	0.538484	35	0	0	0	0	0	0	0	0	0	0	0	0	0	0	0	0	1.3255	0	0	0	0	0	0	0	0	5.8	480
1877	283.933	294.245	289.4	832.25	277.9	0	0.56225	35	0	0	0	0	0	0	0	0	0	0	0	0	0	0	0	0	1.384	0	0	0	0	0	0	0	0	5.8	480
1878	284.511	294.717	289.8	833.75	278	0	0.587234	35	0	0	0	0	0	0	0	0	0	0	0	0	0	0	0	0	1.4455	0	0	0	0	0	0	0	0	5.8	480
1879	284.747	295.214	290.225	835.25	278.1	0	0.613437	35	0	0	0	0	0	0	0	0	0	0	0	0	0	0	0	0	1.51	0	0	0	0	0	0	0	0	5.8	480
1880	284.541	295.769	290.7	837	278.2	0	0.640656	35	0	0	0	0	0	0	0	0	0	0	0	0	0	0	0	0	1.577	0	0	0	0	0	0	0	0	5.8	480
1881	284.58	296.359	291.2	839	278.3	0	0.669094	35	0	0	0	0	0	0	0	0	0	0	0	0	0	0	0	0	1.647	0	0	0	0	0	0	0	0	5.8	480
1882	285.216	296.922	291.675	841	278.4	0	0.698953	35	0	0	0	0	0	0	0	0	0	0	0	0	0	0	0	0	1.7205	0	0	0	0	0	0	0	0	5.8	480
1883	285.702	297.461	292.125	843	278.5	0	0.730031	35	0	0	0	0	0	0	0	0	0	0	0	0	0	0	0	0	1.797	0	0	0	0	0	0	0	0	5.8	480
1884	286.076	297.992	292.575	844.75	278.6	0	0.762328	35	0	0	0	0	0	0	0	0	0	0	0	0	0	0	0	0	1.8765	0	0	0	0	0	0	0	0	5.8	480
1885	286.62	298.465	292.975	846.25	278.7	0	0.796047	35	0	0	0	0	0	0	0	0	0	0	0	0	0	0	0	0	1.9595	0	0	0	0	0	0	0	0	5.8	480
1886	287.061	298.869	293.3	848	278.8	0	0.831391	35	0	0	0	0	0	0	0	0	0	0	0	0	0	0	0	0	2.0465	0	0	0	0	0	0	0	0	5.8	480
1887	287.225	299.225	293.575	850	278.875	0	0.868359	35	0	0	0	0	0	0	0	0	0	0	0	0	0	0	0	0	2.1375	0	0	0	0	0	0	0	0	5.8	480
1888	286.962	299.525	293.8	852	278.925	0	0.906953	35	0	0	0	0	0	0	0	0	0	0	0	0	0	0	0	0	2.2325	0	0	0	0	0	0	0	0	5.8	480
1889	286.965	299.805	294	854	279	0	0.947172	35	0	0	0	0	0	0	0	0	0	0	0	0	0	0	0	0	2.3315	0	0	0	0	0	0	0	0	5.8	480
1890	287.046	300.064	294.175	856	279.1	0	0.989219	35	0	0	0	0	0	0	0	0	0	0	0	0	0	0	0	0	2.435	0	0	0	0	0	0	0	0	5.8	480
1891	286.867	300.305	294.325	858.25	279.2	0	1.03309	35	0	0	0	0	0	0	0	0	0	0	0	0	0	0	0	0	2.543	0	0	0	0	0	0	0	0	5.8	480
1892	286.801	300.554	294.475	860.75	279.3	0	1.0788	35	0	0	0	0	0	0	0	0	0	0	0	0	0	0	0	0	2.6555	0	0	0	0	0	0	0	0	5.8	480
1893	286.764	300.765	294.6	863	279.375	0	1.12673	35	0	0	0	0	0	0	0	0	0	0	0	0	0	0	0	0	2.7735	0	0	0	0	0	0	0	0	5.8	480
1894	286.661	300.939	294.7	865	279.425	0	1.17691	35	0	0	0	0	0	0	0	0	0	0	0	0	0	0	0	0	2.897	0	0	0	0	0	0	0	0	5.8	480
1895	286.452	301.119	294.8	867.25	279.475	0	1.22911	35	0	0	0	0	0	0	0	0	0	0	0	0	0	0	0	0	3.0255	0	0	0	0	0	0	0	0	5.8	480
1896	286.397	301.308	294.9	869.75	279.525	0	1.28355	35	0	0	0	0	0	0	0	0	0	0	0	0	0	0	0	0	3.1595	0	0	0	0	0	0	0	0	5.8	480
1897	286.487	301.519	295.025	872	279.6	0	1.34062	35	0	0	0	0	0	0	0	0	0	0	0	0	0	0	0	0	3.3	0	0	0	0	0	0	0	0	5.8	480
1898	286.588	301.806	295.225	874.25	279.675	0	1.40014	35	0	0	0	0	0	0	0	0	0	0	0	0	0	0	0	0	3.4465	0	0	0	0	0	0	0	0	5.8	480
1899	286.676	302.174	295.5	876.75	279.725	0	1.4623	35	0	0	0	0	0	0	0	0	0	0	0	0	0	0	0	0	3.5995	0	0	0	0	0	0	0	0	5.8	480
1900	286.799	302.579	295.8	879.5	279.8	0.0329065	1.5273	35	0.0202502	0	0	0	0	0	0	0	0	0	0	0	0	0	0	0	3.7595	0	0	0	0	0	0	0	0	5.8	480
1901	286.77	303.038	296.125	883	279.9	0.067545	1.59494	35	0.0415662	0	0	0	0	0	0	0	0	0	0	0	0	0	0	0	3.926	0	0	0	0	0	0	0	0	5.8	480
1902	286.768	303.538	296.475	887	280	0.0711	1.66359	35	0.0437538	0	0	0	0	0	0	0	0	0	0	0	0	0	0	0	4.095	0	0	0	0	0	0	0	0	5.8	480
1903	286.797	304.046	296.825	891.25	280.1	0.0748421	1.73184	35	0.0460567	0	0	0	0	0	0	0	0	0	0	0	0	0	0	0	4.263	0	0	0	0	0	0	0	0	5.8	480
1904	286.845	304.587	297.2	895.75	280.2	0.0787812	1.79989	35	0.0484807	0	0	0	0	0	0	0	0	0	0	0	0	0	0	0	4.4305	0	0	0	0	0	0	0	0	5.8	480
1905	287.014	305.179	297.625	900.25	280.3	0.0829275	1.86794	35	0.0510323	0	0	0	0	0	0	0	0	0	0	0	0	0	0	0	4.598	0	0	0	0	0	0	0	0	5.8	480
1906	287.053	305.797	298.075	904.75	280.4	0.0872921	1.93883	35	0.0537182	0	0	0	0	0	0	0	0	0	0	0	0	0	0	0	4.7725	0	0	0	0	0	0	0	0	5.8	480
1907	287.071	306.395	298.5	909.25	280.525	0.0918865	2.02962	35	0.0565455	0	0	0	0	0	0	0	0	0	0	0	0	0	0	0	4.996	0	0	0	0	0	0	0	0	5.8	480
1908	287.536	306.979	298.9	914	280.675	0.0967226	2.13769	35	0.0595216	0	0	0	0	0	0	0	0	0	0	0	0	0	0	0	5.262	0	0	0	0	0	0	0	0	5.8	480
1909	288.179	307.571	299.3	919	280.825	0.101813	2.24575	35	0.0626543	0	0	0	0	0	0	0	0	0	0	0	0	0	0	0	5.528	0	0	0	0	0	0	0	0	5.8	480
1910	288.48	308.156	299.7	923.75	280.975	0.107172	2.35381	35	0.0659519	0	0	0	0	0	0	0	0	0	0	0	0	0	0	0	5.794	0	0	0	0	0	0	0	0	5.8	480
1911	288.963	308.708	300.075	928.25	281.125	0.112812	2.46167	35	0.0694231	0	0	0	0	0	0	0	0	0	0	0	0	0	0	0	6.0595	0	0	0	0	0	0	0	0	5.8	480
1912	289.664	309.247	300.425	933	281.3	0.11875	2.5738	35	0.0730769	0	0	0	0	0	0	0	0	0	0	0	0	0	0	0	6.3355	0	0	0	0	0	0	0	0	5.8	480
1913	290.202	309.8	300.775	938.25	281.475	0.125	2.73306	35	0.0769231	0	0	0	0	0	0	0	0	0	0	0	0	0	0	0	6.7265	0	0	0	0	0	0	0	0	5.8135	480
1914	290.933	310.331	301.1	943.75	281.625	0.131579	2.92466	35	0.0809716	0	0	0	0	0	0	0	0	0	0	0	0	0	0	0	7.196	0	0	0	0	0	0	0	0	5.841	480
1915	291.784	310.841	301.4	949.25	281.8	0.138504	3.04253	35	0.0852333	0	0	0	0	0	0	0	0	0	0	0	0	0	0	0	7.484	0	0	0	0	0	0	0	0	5.869	480
1916	292.238	311.382	301.725	954.75	282	0.145794	3.09705	35	0.0897193	0	0	0	0	0	0	0	0	0	0	0	0	0	0	0	7.616	0	0	0	0	0	0	0	0	5.8975	480
1917	292.544	311.954	302.075	960.25	282.225	0.153467	3.20642	35	0.0944413	0	0	0	0	0	0	0	0	0	0	0	0	0	0	0	7.883	0	0	0	0	0	0	0	0	5.9265	480
1918	292.992	312.512	302.4	966	282.475	0.161544	3.3942	35	0.0994119	0	0	0	0	0	0	0	0	0	0	0	0	0	0	0	8.343	0	0	0	0	0	0	0	0	5.9555	480
1919	293.813	313.047	302.7	972	282.7	0.170047	3.60575	35	0.104644	0	0	0	0	0	0	0	0	0	0	0	0	0	0	0	8.8615	0	0	0	0	0	0	0	0	5.9845	480
1920	294.371	313.601	303.025	977.75	282.925	0.178997	3.8173	35	0.110152	0	0	0	0	0	0	0	0	0	0	0	0	0	0	0	9.38	0	0	0	0	0	0	0	0	6.0135	480
1921	294.952	314.204	303.4	983.25	283.175	0.188417	4.02925	35	0.115949	0	0	0	0	0	0	0	0	0	0	0	0	0	0	0	9.8995	0	0	0	0	0	0	0	0	6.0425	480
1922	295.684	314.809	303.775	989	283.4	0.198334	4.24161	35	0.122052	0	0	0	0	0	0	0	0	0	0	0	0	0	0	0	10.42	0	0	0	0	0	0	0	0	6.0715	480
1923	295.586	315.392	304.125	995	283.6	0.229097	4.45175	35.0325	0.128476	0	0	0	0	0	0	0	0	0	0	0	0	0	0	0	10.935	0	0	0	0	0	0	0	0	6.101	480
1924	295.655	316.027	304.525	1001	283.8	0.284506	4.66191	35.1036	0.135237	0	0	0	0	0	0	0	0	0	0	0	0	0	0	0	11.45	0	0	0	0	0	0	0	0	6.131	480
1925	296.251	316.714	304.975	1007	284	0.345533	4.87408	35.1827	0.142355	0	0	0	0	0	0	0	0	0	0	0	0	0	0	0	11.97	0	0	0	0	0	0	0	0	6.1605	480
1926	296.811	317.38	305.4	1013	284.225	0.409771	5.10453	35.266	0.149848	0	0	0	0	0	0	0	0	0	0	0	0	0	0	0	12.535	0	0	0	0	0	0	0	0	6.19	480
1927	297.141	318.046	305.825	1019	284.45	0.477391	5.35328	35.3537	0.157734	0	0	0	0	0	0	0	0	0	0	0	0	0	0	0	13.145	0	0	0	0	0	0	0	0	6.22	480
1928	297.497	318.755	306.3	1025	284.625	0.548569	5.60205	35.446	0.166036	0	0	0	0	0	0	0	0	0	0	0	0	0	0	0	13.755	0	0	0	0	0	0	0	0	6.2505	480
1929	297.965	319.456	306.775	1030.75	284.8	0.623494	5.85081	35.5432	0.174775	0	0	0	0	0	0	0	0	0	0	0	0	0	0	0	14.365	0	0	0	0	0	0	0	0	6.281	480
1930	298.618	320.124	307.225	1036.25	284.975	0.702362	6.10161	35.6454	0.183974	0	0	0	0	0	0	0	0	0	0	0	0	0	0	0	14.98	0	0	0	0	0	0	0	0	6.3115	480
1931	299.65	320.814	307.7	1041.75	285.125	0.823121	6.35241	35.7531	0.193656	0	0.0317813	0	0	0	0	0	0	0	0	0	0	0	0	0	15.595	0	0	0	0	0	0	0	0	6.342	480
1932	300.716	321.51	308.175	1047.25	285.3	0.951532	6.6036	35.8664	0.203849	0	0.0663262	0	0	0	0	0	0	0	0	0	0.0024255	0	0	0	16.205	0	0	0	0	0	0	0	0	6.3725	480
1933	301.45	322.158	308.6	1052.75	285.5	1.05037	6.8633	35.9857	0.214578	0	0.0720937	0	0	0	0	0	0	0	0	0	0.0072525	0	0	0	16.83	0	0	0	0	0	0	0	0	6.4035	480
1934	301.835	322.773	309	1058	285.7	1.15464	7.18389	36.1113	0.225871	0	0.0783628	0	0	0	0	0	0	0	0	0	0.012032	0	0	0	17.605	0	0	0	0	0	0	0	0	6.4345	480
1935	302.244	323.381	309.4	1063	285.9	1.26466	7.56373	36.2434	0.237759	0	0.0851769	0	0	0	0	0	0	0	0	0	0.01919	0	0.0020765	0	18.515	0	0	0	0	0	0	0	0	6.466	480
1936	302.533	323.937	309.75	1068	286.1	1.38075	7.95036	36.3826	0.250273	0	0.0925836	0	0	0	0	0	0	0	0	0	0.031125	0	0.0062225	0	19.425	0	0	0	0	0	0	0	0	6.4975	480
1937	302.823	324.383	310	1073	286.275	1.50324	8.34413	36.529	0.263445	0	0.100634	0	0	0	0	0	0	0	0	0	0.05022	0	0.010356	0	20.335	0	0	0	0	0	0	0	0	6.529	480
1938	303.562	324.746	310.175	1078	286.425	1.63252	8.75517	36.6832	0.277311	0	0.109385	0	0	0	0	0	0	0	0	0	0.08123	0	0.01655	0	21.245	0	0.005345	0	0	0	0	0	0	6.561	480
1939	304.106	325.056	310.3	1083	286.575	1.76895	9.1942	36.8455	0.291906	0	0.118897	0	0	0	0	0	0	0	0	0.0035225	0.12895	0	0.0248	0	22.155	0	0.021155	0	0	0	0	0	0	6.593	480
1940	304.101	325.322	310.375	1088.25	286.725	1.91295	9.66556	37.0163	0.307269	0	0.129236	0	0	0	0	0	0	0	0	0.0104875	0.19805	0	0.0351	0	23.065	0	0.046995	0	0	0	0	0	0	6.625	480
1941	303.847	325.521	310.375	1093.75	286.9	2.06495	10.191	37.1961	0.323441	0	0.140474	0	0	0	0	0	0	0	0	0.0173	0.2931	0	0.049515	0	24.02	0	0.082435	0	0	0	0	0	0	6.657	480
1942	303.564	325.639	310.3	1099	287.1	2.22541	10.7811	37.3853	0.340465	0	0.152689	0	0	0	0	0	0	0	0	0.023965	0.41875	0	0.06804	0	25.035	0	0.1271	0	0	0	0	0	0	6.689	480
1943	303.426	325.723	310.2	1104	287.3	2.3934	11.4233	37.5846	0.35751	0	0.165966	0	0	0	0	0	0	0	0	0.030485	0.5771	0	0.092715	0	26.07	0	0.1806	0	0	0	0	0	0	6.7215	480
1944	303.267	325.845	310.125	1109.25	287.525	2.56807	12.1183	37.7943	0.373795	0	0.180398	0	0	0	0	0	0	0	0	0.040385	0.77025	0	0.1277	0	27.105	0	0.24255	0	0	0	0	0	0	6.7545	480
1945	303.234	326.032	310.1	1114.75	287.775	2.75008	12.8871	38.015	0.389432	0	0.196085	0	0	0	0	0	0	0	0	0.053585	1.01955	0	0.17505	0	28.135	0	0.3126	0	0	0	0	0	0	6.787	480
1946	303.004	326.279	310.125	1120.5	288.025	2.94006	13.8202	38.2474	0.404511	0	0.213136	0	0	0	0	0	0	0	0	0.070015	1.3515	0.030115	0.27	0	29.165	0	0.39045	0	0	0	0	0	0	6.8195	480
1947	302.458	326.593	310.2	1126.75	288.275	3.13868	15.1102	38.492	0.419121	0	0.231669	0	0	0	0	0	0	0	0	0.10016	1.8695	0.127615	0.44975	0	30.22	0	0.47575	0	0	0	0	0	0	6.853	480
1948	302.011	326.966	310.325	1133.25	288.525	3.34665	16.9117	38.7495	0.433351	0	0.251814	0	0	0	0	0	0	0	0	0.1649	2.7045	0.2767	0.68285	0	31.43	0	0.56815	0	0	0	0	0	0	6.8865	480
1949	301.97	327.399	310.5	1140	288.775	3.5647	19.1118	39.0205	0.44729	0	0.273711	0	0	0	0	0	0	0	0	0.2881	3.7955	0.45415	0.9317	0	32.765	0	0.6674	0	0	0	0	0	0	6.9195	480
1950	301.92	327.921	310.75	1147.25	289	3.79359	21.7426	39.3058	0.461029	0	0.297512	0	0	0	0	0	0	0	0	0.4966	5.0045	0.6521	1.1945	0	34.615	0	0.7732	0	0	0	0	0	0	6.953	480
1951	300.877	328.558	311.1	1155	289.2	4.0504	24.5705	39.6061	0.474657	0	0.323383	0	0	0	0	0	0	0	0.005	0.8132	6.314	0.87715	1.4705	0	36.385	0	0.88935	0	0	0	0	0	0	6.987	480
1952	299.885	329.275	311.5	1163.5	289.425	4.33597	27.235	39.9222	0.488262	0	0.351503	0	0	0	0	0	0	0	0.015	1.1675	7.8115	1.0245	1.7345	0	37.53	0	0.9375	0	0	0	0	0	0	7.021	480
1953	299.764	330.045	311.925	1172.75	289.675	4.63495	29.9757	40.255	0.501935	0	0.382068	0	0	0	0	0	0	0	0.025	1.577	9.4615	1.0775	1.9845	0	38.73	0	0.922	0	0	0	0	0	0	7.0535	480
1954	299.77	330.896	312.425	1182.25	289.9	4.94829	33.0609	40.6052	0.515765	0	0.415292	0	0	0	0	0	0	0	0.035	2.149	11.24	1.139	2.239	0	40.08	0	0.932	0	0	0	0	0	0	7.0845	480
1955	299.81	331.835	313	1192	290.125	5.27698	36.6113	40.9739	0.529841	0	0.451404	0	0	0	0	0	0	0	0.045	2.886	13.24	1.21	2.495	0	41.57	0.025	0.9705	0	0	0	0	0	0	7.1155	480.8
1956	299.88	332.821	313.6	1202.25	290.375	5.62208	40.6989	41.362	0.544253	0	0.490656	0	0	0	0	0	0	0	0.055	3.795	15.485	1.2925	2.75	0	43.2	0.118	1.057	0	0	0	0	0	0	7.1465	483.15
1957	300.018	333.842	314.225	1213	290.6	5.98468	45.4175	41.7705	0.559089	0	0.533322	0	0	0	0	0	0	0	0.065	4.921	18.055	1.3895	3.0015	0	44.96	0.2975	1.19	0	0	0	0	0	0	7.1785	486.4
1958	300.426	334.869	314.848	1224	290.825	6.36597	50.7782	42.2006	0.57444	0	0.579698	0	0	0	0	0	0	0	0.075	6.2365	21.01	1.502	3.2495	0	46.85	0.5675	1.3555	0	0	0	0	0	0	7.212	489.9
1959	301.366	335.945	315.5	1235.25	291.1	6.76717	56.515	42.6532	0.590395	0	0.630107	0	0	0	0	0	0	0	0.085	7.557	24.215	1.6305	3.4955	0	48.865	0.883	1.593	0	0	0	0	0	0	7.246	493.55
1960	302.541	337.17	316.272	1247	291.4	7.18959	62.5823	43.1297	0.607043	0	0.684898	0	0	0	0	0	0	0	0.095	8.8185	27.675	1.779	3.7395	0	50.99	1.2495	1.9065	0	0	0	0	0	0	7.2805	497.3
1961	302.717	338.437	317.075	1259.25	291.675	7.65086	69.4618	43.6313	0.624474	0	0.744455	0	0	0	0	0	0	0	0.11	10.2955	31.685	1.9505	3.9715	0	53.23	1.7055	2.25	0	0	0	0	0	0	7.3165	501.1
1962	302.623	339.626	317.795	1272	291.925	8.15246	77.4216	44.1593	0.642776	0	0.80919	0	0	0	0	0	0	0	0.13	12.235	36.315	2.1465	4.1975	0	55.585	2.19	2.646	0	0	0	0	0	0	7.3535	504.8
1963	303.114	340.707	318.397	1285	292.225	8.69591	86.5951	44.715	0.66204	0	0.879554	0	0	0	0	0	0	0	0.155	14.715	41.585	2.3705	4.433	0	58.025	2.7905	3.1425	0	0	0	0	0	0	7.3915	508.4
1964	303.609	341.733	318.925	1298.25	292.6	9.39162	97.2808	45.5	0.682355	0	0.956037	0	0	0	0	0	0	0	0.18	17.795	47.735	2.6285	4.677	0	60.525	3.517	3.767	0	0	0	0	0	0	7.4305	511.85
1965	304.42	342.989	319.647	1312	293	10.184	109.645	46.45	0.70381	0	1.03917	0	0	0	0	0	0	0	0.2	21.495	54.93	2.9255	4.9295	0.0045	63.085	4.2765	4.517	0	0	0.0005	0	0	0	7.4705	515.05
1966	305.564	344.551	320.647	1326	293.4	10.9556	123.662	47.35	0.726495	0	1.12953	0	0	0	0	0	0	0	0.22	25.775	63.155	3.2665	5.1915	0.0175	65.625	5.242	5.413	0	0	0.0015	0	0	0.0005	7.512	518
1967	306.594	346.076	321.605	1340.25	293.8	11.7388	139.328	48.25	0.750499	0	1.22775	0	0	0	0	0	0	0	0.24	30.575	72.39	3.6585	5.4635	0.0385	68.07	6.722	6.4985	0	0	0.003	0	0.0005	0.0015	7.5545	520.7
1968	307.808	347.7	322.635	1355	294.225	12.5668	156.887	49.15	0.775911	0	1.33452	0	0	0	0	0	0	0	0.27	35.955	82.77	4.1085	5.7455	0.0675	70.425	8.886	7.8105	0	0	0.0055	0.0005	0.001	0.003	7.5985	523.15
1969	309.598	349.607	323.902	1370.25	294.7	13.4084	176.605	50.05	0.802821	0	1.45056	0	0	0	0	0	0	0	0.3	42.05	94.435	4.6245	6.0385	0.1045	72.69	11.59	9.411	0	0	0.0095	0.001	0.0015	0.005	7.644	525.3
1970	311.808	351.328	324.985	1385.75	295.2	14.2482	198.618	50.95	0.831319	0	1.5767	0	0	0	0	0	0	0	0.325	49.05	107.45	5.2165	6.3435	0.15	74.87	14.645	11.21	0	0	0.016	0.001	0.0025	0.0075	7.6905	527.2
1971	314.087	352.822	325.855	1401.25	295.7	15.1011	222.885	51.8	0.861493	0	1.7138	0	0	0.00146	0	0.0125	0	0	0.355	57.065	121.8	5.8955	6.66	0.205	76.97	17.695	13.115	0	0	0.025	0.0015	0.0035	0.011	7.738	528.85
1972	316.193	354.781	327.14	1417	296.225	15.9994	249.194	52.65	0.893433	0	1.86283	0	0	0.00438	0	0.0375	0	0	0.39	65.965	137.3	6.674	6.988	0.2705	78.99	20.92	15.145	0	0.018	0.0375	0.002	0.006	0.0155	7.787	530.3
1973	318.115	357.034	328.678	1433	296.8	16.9475	277.927	53.55	0.927228	0	2.02481	0	0	0.0073	0	0.0625	0	0	0.425	75.835	154.05	7.5685	7.329	0.348	80.93	25.065	17.39	0	0.053	0.055	0.0025	0.0115	0.0215	7.838	531.55
1974	319.6	358.783	329.743	1449	297.4	17.9154	309.889	54.45	0.962969	0	2.20088	0	0	0.01022	0	0.0875	0	0	0.46	87.04	172.45	8.595	7.684	0.4385	82.8	30.44	19.935	0	0.086	0.078	0.0035	0.0205	0.0285	7.8905	532.6
1975	320.882	360.292	330.585	1465	298	18.8898	344.976	55.3	1.00074	0	2.39226	0	0	0.01314	0	0.1125	0	0	0.5	99.56	192.6	9.7715	8.052	0.5445	84.6	36.73	22.54	0	0.1175	0.1075	0.0045	0.0335	0.0365	7.9445	533.5
1976	322.191	362.163	331.748	1481	298.65	19.8874	380.802	56.15	1.04064	0	2.60029	0	0	0.01606	0	0.1375	0	0	0.54	112.3	213.15	11.12	8.4335	0.6685	86.33	42.765	25.225	0	0.1475	0.1445	0.0055	0.051	0.0465	8.0005	534.25
1977	323.874	364.454	333.272	1497.25	299.36	20.9739	416.056	57.05	1.08275	0	2.8264	0	0	0.01898	0	0.1625	0	0	0.59	124.7	232.9	12.67	8.8305	0.8125	87.995	49.29	28.23	0	0.1755	0.1915	0.0065	0.0765	0.0575	8.058	534.9
1978	326.21	366.815	334.848	1513.75	300.082	22.1267	451.017	57.9	1.12717	0	3.09048	0	0	0.0219	0	0.1875	0	0	0.655	136.7	251.9	14.445	9.243	0.9795	89.595	57.79	31.51	0	0.202	0.2475	0.0075	0.112	0.0695	8.117	535.4
1979	328.74	369.278	336.525	1530.25	300.74	23.3668	486.546	58.75	1.17397	0	3.39237	0	0	0.02482	0	0.2	0	0	0.735	148.8	270.5	16.475	9.6705	1.174	91.14	68.985	34.985	0	0.227	0.3125	0.0085	0.156	0.083	8.178	535.85
1980	330.864	371.945	338.36	1547.75	301.382	24.6879	519.303	59.6	1.22326	0	3.71278	0	0	0.02774	0	0.2	0	0	0.835	159.4	287.35	18.805	10.114	1.401	92.625	78.725	38.64	0	0.2505	0.3895	0.0095	0.21	0.0975	8.241	536.25
1981	332.228	374.19	339.728	1566.75	302.22	26.102	550.904	60.45	1.27512	0	4.0517	0	0	0.0292	0	0.225	0	0	0.95	168.55	304.25	21.475	10.575	1.6605	93.95	85.94	42.44	0	0.273	0.4795	0.011	0.275	0.113	8.306	536.55
1982	333.034	376.129	340.793	1586.25	303.098	27.595	583.135	61.3	1.32963	0	4.40914	0	0	0.03045	0	0.275	0	0	1.075	177.85	321.7	24.45	11.045	1.9495	94.9	92.165	46.17	0	0.313	0.582	0.0125	0.351	0.1295	8.373	536.8
1983	334.244	378.41	342.197	1605.85	303.805	29.1286	613.196	62.15	1.3869	0	4.78509	0	0	0.0331	0	0.3	0	0	1.21	185.8	338.15	27.605	11.505	2.2655	95.855	96.325	50	0	0.361	0.6975	0.014	0.4425	0.1475	8.442	537
1984	336.145	380.82	343.783	1623.7	304.397	30.7215	644.36	63	1.44701	0	5.17956	0	0	0.03585	0	0.325	0	0	1.355	193.75	355	30.985	11.965	2.6105	97.27	100.75	54.17	0	0.404	0.828	0.016	0.5495	0.1665	8.513	537.2
1985	338.198	383.063	345.283	1637.99	305.087	32.3442	678.379	63.8	1.51004	0	5.59254	0	0	0.03705	0	0.375	0	0	1.505	202.85	372.5	35.43	12.44	2.981	98.845	105.7	58.465	0	0.4555	0.9775	0.018	0.6715	0.186	8.5865	537.35
1986	340.223	385.274	346.798	1650.43	305.772	34.0163	712.084	64.6	1.57609	0	6.02403	0	0	0.03415	0	0.4	0	0	1.67	212.1	389.8	39.95	12.94	3.363	99.855	109.6	62.85	0	0.4995	1.152	0.0195	0.8125	0.207	8.6625	537.45
1987	342.409	387.795	348.645	1662.2	306.262	35.814	748.374	65.45	1.64525	0	6.47404	0	0	0.03285	0	0.425	0	0	1.855	222.8	408.65	44.285	13.47	3.7535	101.1	112.15	67.415	0	0.6075	1.3545	0.021	0.974	0.229	8.7405	537.55
1988	345.085	390.673	350.738	1673.07	307.195	37.6894	789.249	66.3	1.71761	0	6.94256	0	0	0.0384	0	0.5	0	0	2.04	234.9	428.45	50.53	14.01	4.1635	102.45	116.3	72.44	0	0.791	1.591	0.023	1.1555	0.251	8.8205	537.65
1989	347.729	393.252	352.488	1683.47	308.507	39.5645	830.2	67.1	1.79325	0	7.4296	0	0	0.04655	0	0.575	0	0	2.225	244.9	448.25	57.92	14.55	4.5995	103.45	121.7	78.21	0	0.99	1.869	0.0245	1.3565	0.2755	8.903	537.75
1990	349.911	395.324	353.855	1693.63	309.485	41.5256	866.564	67.9	1.87227	0	7.93515	0	0	0.0547	0.03	0.625	0	0	2.425	252.75	466.15	64.485	15.075	5.0635	104.45	124.45	84.305	0	1.249	2.1645	0.026	1.562	0.3015	8.988	537.8
1991	351.189	397.088	355.017	1703.82	310.113	43.5792	899.397	68.7	1.95632	0	8.45922	0	0	0.0627	0.09	0.675	0	0	2.635	260.15	481.3	70.3	15.555	5.545	105.6	127.9	90.44	0	1.696	2.4485	0.028	1.753	0.326	9.0755	537.85
1992	351.548	398.429	355.885	1711.8	310.603	45.7214	927.681	69.5	2.05	0	9.0018	0	0	0.0705	0.185	0.725	8.12405e-05	0	2.85	264.95	494.4	75.96	15.99	6.0235	105.75	130.9	96.715	0	2.424	2.7125	0.0295	1.9125	0.35	9.1655	537.9
1993	352.275	399.699	356.777	1716.29	311.077	48.0312	948.8	70.3	2.15	0	9.5629	0	0	0.08075	0.375	0.8	0.00024139	0	3.07	267.75	504.8	80.235	16.355	6.4945	104.9	130.5	102.14	0	3.3945	2.9185	0.031	2.0215	0.3725	9.258	537.9
1994	353.737	401.505	358.127	1721.01	311.603	50.6326	963.903	71.1	2.25	0	10.1425	0	0	0.09555	0.75	0.925	0.00350655	0	3.3	269.5	513.1	82.345	16.63	6.957	104.35	126	106.6	0.5695	4.487	3.09	0.0335	2.114	0.393	9.353	537.95
1995	355.939	403.782	359.837	1726.35	312.295	53.8504	973.652	71.9	2.35	0	10.7406	0	0	0.1503	1.645	1.125	0.00973579	0	3.515	269.5	519.55	83.46	16.83	7.3995	103.55	115.9	110.45	1.9145	5.658	3.247	0.037	2.2455	0.4125	9.45	538
1996	358.263	405.945	361.462	1730.01	313.048	57.9728	982.03	72.65	2.45	0	11.4585	0	0	0.27175	3.155	1.45	0.01432	0	3.725	268.95	525.05	83.84	16.965	7.7905	102.8	104.09	115.85	3.587	6.818	3.3915	0.0415	2.3885	0.4265	9.2995	538
1997	359.83	408.22	363.155	1734.82	313.76	62.9186	988.498	73.4	2.55	0	12.2869	0	0	0.43105	5.17	1.85	0.0231704	0	3.955	268.2	529.15	83.68	17.045	8.1025	101.95	91.215	121.95	5.523	7.939	3.556	0.0465	2.4875	0.43	9.08	538
1998	361.471	411.144	365.322	1742.71	314.533	68.4136	992.182	74.2	2.65	0	13.1153	0	0	0.64745	7.71	2.25	0.0370779	0	4.155	266.95	532.4	83.45	17.075	8.3425	100.9	77.815	126.35	7.377	8.946	3.7085	0.0515	2.5565	0.4265	9.155	538
1999	363.283	413.868	367.348	1749.24	315.257	74.4061	995.415	75	2.75	0	13.9438	0.0045173	0	0.95615	10.68	2.65	0.0590527	0	4.33	265.2	534.95	83.015	17.075	8.5275	100.155	65.605	131.7	9.206	9.938	3.8355	0.0535	2.6205	0.422	9.26	538
2000	364.367	415.858	368.865	1751.02	315.85	80.9399	998.627	75.75	2.85	0	14.7722	0.0488482	0	1.32805	13.965	3.05	0.0967079	0	4.54	263.45	537.05	82.515	17.055	8.6705	99.37	54.83	137.4	11.075	11.04	3.953	0.051	2.679	0.417	9.0845	538
2001	365.653	417.91	370.467	1750.71	316.488	88.6304	1001.03	76.5	2.95	0.00398966	15.6006	0.287349	0	1.7224	17.51	3.43758	0.150915	0.373294	4.765	261.9	538.85	82.07	17.02	8.782	98.4	45.785	141.95	12.695	12.035	4.0455	0.046	2.733	0.41	8.689	538
2002	367.978	420.573	372.522	1752.19	317.245	97.4707	1003.21	77.25	3.05124	0.011991	16.429	0.720208	0.00740544	2.13305	21.365	3.85333	0.208567	1.11091	4.985	260.1	539.95	81.595	16.98	8.869	97.385	38.14	147.45	14.18	12.975	4.112	0.04	2.7825	0.402	8.349	538
2003	370.52	423.488	374.76	1754.76	318.017	106.775	1004	77.9915	3.15494	0.0195016	17.2574	1.21745	0.0291657	2.60335	25.44	4.34892	0.274155	1.83169	5.215	257.95	540.05	80.93	16.94	8.936	96.325	31.78	152.95	15.565	13.755	4.1695	0.0345	2.828	0.3935	8.194	538
2004	372.785	426.116	376.812	1755.07	318.71	116.584	1003.93	78.772	3.26099	0.0263954	18.0858	1.7671	0.0644009	3.12045	29.775	4.92206	0.367093	2.53767	5.445	256.05	539.9	80.12	16.9	8.988	95.385	26.475	157.45	16.605	14.35	4.207	0.0295	2.87	0.384	8.0885	538
2005	375.014	428.653	378.812	1753.73	319.44	126.769	1003.58	79.5471	3.3693	0.0332905	18.9129	2.35921	0.112284	3.62618	34.36	5.57096	0.487703	3.23048	5.675	254.1	539.4	79.31	16.855	9.0285	94.435	22.075	162.25	17.195	14.94	4.2265	0.0255	2.908	0.3735	7.933	538
2006	377.407	431.283	380.827	1754.52	320.2	136.988	1001.53	80.3168	3.47978	0.0405451	19.7485	2.98559	0.17203	4.14253	38.805	6.29394	0.631518	3.91149	5.91	251.3	537.5	78.48	16.81	9.059	93.435	18.52	167.7	17.67	15.365	4.241	0.023	2.9425	0.363	7.748	538
2007	379.791	433.894	382.777	1757.39	320.896	147.482	998.531	81.1542	3.5911	0.0481114	20.5812	3.63957	0.24289	4.64466	43.165	6.99277	0.79542	4.69632	6.175	247.95	534.7	77.595	16.76	9.081	92.3	15.61	173.9	18.22	15.625	4.2425	0.0195	2.9735	0.352	7.5945	538
2008	382.257	436.616	384.8	1760.82	321.607	158.251	995.689	82.1325	3.70202	0.0557901	21.3891	4.31703	0.324185	5.07561	47.4683	7.57029	0.981725	5.68738	6.45082	244.6	531.8	76.72	16.705	9.096	90.96	13.23	180.5	18.81	15.865	4.2255	0.015	3.0005	0.3405	7.5405	538
2009	384.88	439.488	386.935	1764.7	322.332	169.113	992.635	83.2512	3.81255	0.0635728	22.1721	5.01368	0.415258	5.43715	51.6372	8.02564	1.18979	6.85914	6.7202	241.032	528.541	75.8199	16.6514	9.10541	89.2824	11.274	187.23	19.3903	16.6701	4.18635	0.0116919	3.02115	0.329055	7.39874	538.008
2010	387.607	442.38	389.072	1768.69	323.071	180.252	989.367	84.5101	3.92266	0.0714537	22.9304	5.72472	0.515467	5.73094	55.8295	8.35883	1.41893	8.18813	7.00506	237.297	524.956	74.9019	16.5939	9.11064	87.2747	9.66293	194.041	19.9541	17.9829	4.12724	0.00945723	3.03574	0.317179	7.23031	538.019
2011	390.461	445.239	391.166	1772.79	323.826	191.633	986.001	85.9091	4.03237	0.0794329	23.664	6.4475	0.624252	5.95931	60.0437	8.5722	1.66855	9.65485	7.30539	233.562	521.229	73.9838	16.5357	9.1131	85.0878	8.27164	201.131	20.5186	19.1576	4.0574	0.00728664	3.04684	0.305358	7.17932	538.024
2012	393.405	448.068	393.241	1776.56	324.581	202.889	982.509	87.3803	4.14199	0.0872164	24.3485	7.32944	0.734633	6.15414	64.1453	8.72847	1.91191	11.0967	7.61671	229.831	517.361	73.0646	16.4771	9.11349	82.7336	7.06089	208.464	21.0737	20.1892	3.97857	0.00516144	3.05452	0.293654	7.15914	538.027
2013	396.316	450.85	395.298	1779.59	325.325	213.676	978.907	88.8559	4.25184	0.0945108	24.9595	8.49066	0.840055	6.34623	68.0089	8.88917	2.12308	12.3711	7.93454	226.112	513.372	72.1496	16.4184	9.11235	80.2223	6.07108	216.008	21.611	21.0739	3.8923	0.00365606	3.05904	0.282122	7.1487	538.028
2014	399.17	453.596	397.346	1781.97	326.057	224.016	975.194	90.3359	4.36193	0.101316	25.4973	9.87983	0.940835	6.5357	71.6515	9.05422	2.30299	13.4992	8.25888	222.41	509.28	71.2415	16.3596	9.11003	77.5634	5.26187	223.729	22.1227	21.8085	3.79997	0.00258975	3.06062	0.270804	7.14243	538.028
2015	401.993	456.313	399.387	1783.79	326.778	233.932	971.374	91.8203	4.47224	0.107632	25.9622	11.4554	1.03727	6.72268	75.0893	9.22356	2.45257	14.4995	8.58973	218.734	505.103	70.3425	16.3009	9.10685	74.7668	4.60035	231.602	22.6023	22.3912	3.70282	0.00183443	3.0595	0.259729	7.1396	538.029
2016	404.785	458.996	401.418	1785.1	327.486	243.444	967.409	93.309	4.58279	0.11346	26.3544	13.1832	1.12964	6.90723	78.3366	9.39711	2.57269	15.3879	8.92709	215.086	500.853	69.4531	16.2423	9.10299	71.8388	3.9126	239.602	23.0441	22.8209	3.60191	0.0012994	3.05587	0.24892	6.94216	538.029
2017	407.543	461.638	403.431	1785.93	328.183	252.572	963.324	94.8021	4.69356	0.118799	26.6743	15.0351	1.21817	7.08941	81.4058	9.57475	2.66419	16.178	9.27095	211.463	496.539	68.5731	16.1837	9.09864	68.9042	3.20309	247.661	23.4471	23.106	3.49809	0.000920422	3.04985	0.238393	6.6987	538.029
2018	410.265	464.239	405.425	1786.3	328.867	261.335	959.165	96.2995	4.80457	0.123649	26.922	16.988	1.30311	7.26926	84.3083	9.75638	2.72788	16.8816	9.62131	207.866	492.166	67.7021	16.1252	9.09392	66.0835	2.62166	255.683	23.8147	23.2642	3.39217	0.000651974	3.04159	0.228168	6.63936	538.029
2019	412.998	466.8	407.401	1786.25	329.54	269.751	954.892	97.8014	4.91581	0.128012	27.0977	19.0234	1.38466	7.44684	87.0554	9.94191	2.76457	17.5094	9.97817	204.296	487.745	66.8402	16.0668	9.08893	63.3721	2.1451	263.591	24.15	23.311	3.28488	0.000461821	3.03124	0.21825	6.6217	538.029
2020	415.77	469.324	409.36	1785.79	330.202	277.838	950.482	99.3075	5.02727	0.131886	27.2019	21.1258	1.46302	7.62221	89.6571	10.1312	2.77502	18.0705	10.3415	200.754	483.281	65.9872	16.0084	9.08371	60.7657	1.75524	271.325	24.4559	23.2607	3.17685	0.000327127	3.01894	0.208635	6.6131	538.029
2021	418.577	471.804	411.298	1784.89	330.852	285.606	945.89	100.818	5.13897	0.135272	27.2346	23.2808	1.53834	7.7953	92.1204	10.3242	2.75995	18.572	10.7114	197.231	478.772	65.1415	15.95	9.07831	58.2561	1.4366	278.828	24.7338	23.1256	3.06852	0.000231718	3.00472	0.199335	6.60169	538.029
2022	421.431	474.263	413.219	1784.03	331.502	292.997	941.092	102.333	5.25089	0.13835	27.2297	25.3156	1.61094	7.96554	94.4464	10.5188	2.73126	19.0188	11.0848	193.723	474.219	64.302	15.8915	9.07276	55.8372	1.17613	286.062	24.9859	22.9168	2.96031	0.000164136	2.98864	0.19035	6.58663	538.029
2023	424.325	476.746	415.144	1783.73	332.165	299.978	936.105	103.852	5.363	0.141303	27.2209	27.0917	1.68115	8.13255	96.6404	10.7132	2.70058	19.4169	11.4588	190.239	469.634	63.4697	15.8329	9.06712	53.5086	0.962851	293.012	25.2154	22.6453	2.85277	0.000116264	2.97089	0.181672	6.57381	538.029
2024	427.265	479.264	417.083	1783.99	332.841	306.607	930.944	105.376	5.4753	0.144129	27.2082	28.6584	1.74915	8.2965	98.7133	10.9075	2.66799	19.7729	11.8334	186.782	465.027	62.6453	15.7744	9.06138	51.2695	0.788266	299.669	25.4252	22.3207	2.74632	8.2355e-05	2.95163	0.173313	6.56395	538.029
2025	430.257	481.819	419.036	1784.79	333.529	312.934	925.627	106.903	5.58781	0.146828	27.1917	30.056	1.81511	8.45759	100.676	11.1017	2.63356	20.0927	12.2085	183.359	460.408	61.8294	15.7159	9.05558	49.1185	0.645187	306.029	25.618	21.9518	2.64135	5.83355e-05	2.93101	0.165271	6.55705	538.029
2026	433.298	484.411	421.004	1786.12	334.23	319.001	920.173	108.435	5.70051	0.149402	27.1715	31.3178	1.87919	8.61602	102.537	11.2959	2.59736	20.3817	12.5843	179.974	455.786	61.0229	15.6575	9.04973	47.0543	0.527953	312.095	25.7962	21.5463	2.53817	4.13215e-05	2.90918	0.157545	6.55348	538.029
2027	436.382	487.032	422.978	1787.96	334.943	324.843	914.594	109.972	5.81341	0.151849	27.1474	32.4698	1.94152	8.77191	104.306	11.4901	2.55947	20.6439	12.9606	176.629	451.167	60.2256	15.5993	9.04385	45.0739	0.432087	317.869	25.9615	21.1109	2.43702	2.92698e-05	2.88623	0.150132	6.55121	538.029
2028	439.497	489.669	424.95	1790.24	335.669	330.486	908.891	111.512	5.9265	0.15417	27.1197	33.5324	2.00223	8.92536	105.989	11.6844	2.51991	20.8828	13.3376	173.322	446.55	59.4371	15.5412	9.03795	43.173	0.353681	323.353	26.1149	20.6514	2.33804	2.0733e-05	2.86224	0.143014	6.54808	538.029
2029	442.637	492.316	426.916	1792.91	336.408	335.953	903.069	113.057	6.03979	0.156364	27.0882	34.5225	2.0614	9.07644	107.591	11.8787	2.47874	21.1011	13.7151	170.051	441.938	58.6571	15.4831	9.03202	41.348	0.289545	328.55	26.2576	20.173	2.24139	1.46861e-05	2.83728	0.136197	6.54406	538.029
2030	445.562	494.974	428.876	1795.92	337.159	341.265	897.136	114.606	6.15328	0.158433	27.053	35.4539	2.11915	9.22527	109.119	12.0731	2.43601	21.3016	14.0932	166.818	437.334	57.8855	15.4251	9.02608	39.5958	0.237075	333.468	26.3906	19.6802	2.14717	1.04028e-05	2.81142	0.129668	6.5396	538.029
2031	448.022	497.643	430.832	1799.27	337.922	346.441	891.105	116.159	6.26697	0.160376	27.0141	36.338	2.17557	9.37194	110.579	12.2675	2.39176	21.4866	14.472	163.623	432.739	57.122	15.3672	9.02013	37.9138	0.194145	338.117	26.515	19.1771	2.0555	7.36873e-06	2.78473	0.123411	6.5352	538.029
2032	450.296	500.349	432.807	1802.86	338.697	351.475	884.829	117.716	6.38058	0.162256	26.9723	37.1665	2.23107	9.51652	111.969	12.4622	2.34741	21.6559	14.8511	160.459	428.15	56.3657	15.3093	9.01414	36.2969	0.159003	342.285	26.6231	18.6663	1.96638	5.21959e-06	2.75723	0.11742	6.52671	538.029
2033	452.642	503.125	434.831	1806.67	339.485	356.367	878.065	119.275	6.49384	0.164137	26.9282	37.9331	2.28605	9.65912	113.29	12.6573	2.30436	21.8095	15.2304	157.325	423.565	55.6156	15.2513	9.0081	34.7414	0.130223	345.604	26.7015	18.1495	1.87986	3.69726e-06	2.72894	0.11168	6.51442	538.029
2034	455.045	505.984	436.916	1810.73	340.285	361.138	870.652	120.835	6.60676	0.166019	26.882	38.6511	2.34059	9.79989	114.548	12.8528	2.26258	21.9501	15.61	154.225	418.99	54.8726	15.1933	9.00205	33.2467	0.106658	347.802	26.7408	17.6292	1.79602	2.61892e-06	2.69997	0.106193	6.50415	538.029
2035	457.509	508.937	439.068	1815.04	341.097	365.806	862.471	122.398	6.71934	0.167902	26.8337	39.3315	2.39474	9.93898	115.75	13.0488	2.22206	22.08	15.9897	151.163	414.433	54.1373	15.1353	8.99598	31.8122	0.0873669	348.674	26.7329	17.1073	1.7149	1.85509e-06	2.67043	0.10096	6.49668	538.029
2036	460.033	511.983	441.286	1819.63	341.922	370.388	853.435	123.962	6.83157	0.169787	26.7833	39.983	2.44858	10.0765	116.902	13.2454	2.18277	22.2012	16.3697	148.142	409.898	53.4103	15.0775	8.9899	30.4366	0.0715753	348.069	26.6713	16.5854	1.63657	1.31404e-06	2.64042	0.0959705	6.49204	538.029
2037	462.612	515.121	443.567	1824.51	342.759	374.896	843.486	125.529	6.94345	0.171673	26.7308	40.6132	2.50216	10.2127	118.01	13.4426	2.14469	22.3154	16.7499	145.168	405.393	52.6922	15.0197	8.98382	29.1188	0.0586494	345.885	26.5507	16.065	1.56105	9.30792e-07	2.61006	0.0912034	6.49061	538.029
2038	465.234	518.339	445.903	1829.67	343.607	379.342	832.58	127.098	7.05499	0.17356	26.6763	41.2268	2.55552	10.3476	119.077	13.6405	2.1078	22.424	17.1304	142.239	400.918	51.983	14.9622	8.97773	27.8568	0.0480681	342.051	26.3665	15.5474	1.48831	6.59319e-07	2.57938	0.0866587	6.49039	538.029
2039	467.886	521.623	448.282	1835.06	344.467	383.73	820.684	128.668	7.16618	0.175447	26.6197	41.8266	2.60867	10.4812	120.105	13.839	2.07204	22.5273	17.511	139.354	396.474	51.2823	14.9048	8.97164	26.6476	0.0394036	336.52	26.1145	15.0333	1.41831	4.67024e-07	2.54842	0.0823352	6.48926	538.029
2040	470.718	524.967	450.698	1840.65	345.339	388.065	807.782	130.241	7.27703	0.177337	26.561	42.4151	2.66163	10.6136	121.098	14.0382	2.03739	22.6259	17.8919	136.512	392.059	50.5897	14.8475	8.96555	25.4888	0.0323072	329.276	25.7917	14.5234	1.351	3.30813e-07	2.51719	0.0782103	6.48717	538.029
2041	473.888	528.366	453.15	1846.42	346.223	392.353	793.874	131.816	7.38754	0.179227	26.5004	42.9943	2.71441	10.7448	122.058	14.2379	2.00381	22.7203	18.273	133.712	387.673	49.905	14.7902	8.95944	24.3782	0.0264937	320.322	25.3958	14.0184	1.2863	2.34329e-07	2.48573	0.0742735	6.48438	538.029
2042	477.208	531.825	455.645	1852.23	347.116	396.537	779.103	133.391	7.4977	0.181114	26.4381	43.4895	2.76758	10.8743	122.983	14.4379	1.97038	22.8096	18.6543	130.954	383.316	49.228	14.7331	8.95332	23.3135	0.0217304	309.883	24.9322	13.5194	1.22417	1.65985e-07	2.45406	0.0705261	6.4808	538.029
2043	480.511	535.333	458.182	1857.89	348.02	400.565	763.705	134.965	7.60751	0.182993	26.3748	43.8366	2.82163	11.0017	123.871	14.6377	1.93623	22.8916	19.0359	128.23	378.981	48.5575	14.676	8.94718	22.2911	0.0178257	298.356	24.4124	13.0274	1.1645	1.17574e-07	2.42217	0.0669556	6.47239	538.029
2044	483.84	538.892	460.762	1863.35	348.932	404.453	747.882	136.539	7.71698	0.184864	26.3102	44.0599	2.87646	11.1267	124.721	14.8372	1.90133	22.9665	19.4177	125.538	374.664	47.8925	14.6188	8.94102	21.3085	0.0146235	286.066	23.8463	12.5434	1.10724	8.32828e-08	2.39004	0.0635518	6.45992	538.029
2045	487.223	542.526	463.405	1868.69	349.853	408.225	731.825	138.112	7.82611	0.186727	26.2446	44.184	2.93205	11.2496	125.537	15.0364	1.86573	23.0357	19.7998	122.882	370.37	47.2339	14.5615	8.93483	20.3653	0.0119977	273.298	23.244	12.0687	1.05235	5.89928e-08	2.35774	0.0603084	6.44928	538.029
2046	490.676	546.248	466.12	1873.95	350.783	411.902	715.691	139.684	7.93489	0.188583	26.1778	44.2284	2.98841	11.3706	126.324	15.2356	1.82946	23.1004	20.1821	120.264	366.105	46.5822	14.5043	8.92863	19.4608	0.00984472	260.281	22.6143	11.6041	0.999789	4.17871e-08	2.32536	0.0572188	6.4412	538.029
2047	494.205	550.062	468.908	1879.16	351.723	415.5	699.604	141.255	8.04332	0.190431	26.11	44.2091	3.04551	11.4897	127.086	15.4346	1.79254	23.1617	20.5647	117.688	361.871	45.9378	14.4472	8.92241	18.5943	0.00807939	247.203	21.9646	11.1504	0.949506	2.95996e-08	2.29294	0.0542874	6.43568	538.029
2048	497.814	553.97	471.768	1884.39	352.67	419.034	683.671	142.825	8.15141	0.192271	26.0411	44.1393	3.10337	11.6072	127.826	15.6336	1.755	23.2207	20.9475	115.155	357.674	45.3013	14.3902	8.91619	17.7651	0.00663195	234.214	21.3017	10.7083	0.901446	2.09666e-08	2.26056	0.0514964	6.43311	538.029
2049	501.495	557.962	474.692	1889.63	353.627	422.513	667.965	144.395	8.25916	0.194103	25.9712	44.0282	3.16195	11.723	128.545	15.8327	1.71686	23.2777	21.3306	112.667	353.513	44.6726	14.3333	8.90996	16.9716	0.00544495	221.429	20.6308	10.2783	0.855542	1.48516e-08	2.22825	0.048839	6.43151	538.029
2050	505.132	562.025	477.67	1894.85	354.592	425.942	652.54	145.964	8.36656	0.195927	25.9002	43.8822	3.22119	11.8373	129.244	16.0317	1.67812	23.3326	21.7139	110.22	349.389	44.0514	14.2765	8.90372	16.212	0.00447124	208.939	19.9561	9.86048	0.811718	1.052e-08	2.19602	0.0463187	6.42879	538.029
2051	508.615	566.154	480.697	1900.05	355.566	429.324	637.437	147.531	8.47362	0.197743	25.8281	43.7071	3.28105	11.95	129.925	16.2306	1.63879	23.3854	22.0975	107.814	345.298	43.4374	14.2199	8.89748	15.4848	0.00367228	196.81	19.2814	9.45506	0.769891	7.45175e-09	2.16385	0.0439281	6.42509	538.029
2052	512.053	570.351	483.777	1905.16	356.548	432.722	622.687	149.099	8.58035	0.199555	25.7552	43.5873	3.33949	12.0615	130.59	16.43	1.59954	23.4372	22.4814	105.449	341.242	42.8306	14.1633	8.89122	14.7887	0.00301649	185.091	18.6096	9.06206	0.729989	5.27839e-09	2.13179	0.0416499	6.42067	538.029
2053	515.559	574.622	486.916	1910.09	357.539	436.184	608.312	150.666	8.68678	0.201363	25.6816	43.5919	3.39458	12.1723	131.241	16.6303	1.56099	23.4886	22.8658	103.124	337.22	42.2308	14.1068	8.88495	14.1222	0.00247804	173.818	17.9431	8.68144	0.691941	3.73891e-09	2.09986	0.0394782	6.41545	538.029
2054	519.119	578.952	490.103	1914.8	358.539	439.687	594.312	152.234	8.79289	0.203169	25.6074	43.6945	3.44643	12.2821	131.877	16.8314	1.52311	23.5384	23.2507	100.834	333.226	41.637	14.0503	8.87866	13.4832	0.00203572	163.01	17.2836	8.31297	0.655658	2.64843e-09	2.068	0.0374172	6.40544	538.029
2055	522.733	583.34	493.338	1919.23	359.547	443.213	580.689	153.802	8.89869	0.204972	25.5326	43.8747	3.49517	12.3908	132.494	17.0331	1.48586	23.5859	23.636	98.5768	329.255	41.0484	13.9938	8.87235	12.87	0.00167227	152.681	16.6329	7.9565	0.62107	1.876e-09	2.03619	0.0354602	6.39133	538.029
2056	526.424	587.809	496.642	1923.46	360.564	446.76	567.458	155.369	9.00418	0.206773	25.4571	44.1202	3.54103	12.4986	133.097	17.2355	1.44924	23.6319	24.0218	96.3546	325.312	40.4658	13.9372	8.86601	12.2823	0.00137368	142.843	15.9933	7.61212	0.588121	1.32885e-09	2.00449	0.0336032	6.37902	538.029
2057	530.205	592.375	500.022	1927.55	361.589	450.325	554.63	156.937	9.10936	0.208571	25.3809	44.4205	3.58422	12.6055	133.687	17.4387	1.41323	23.6771	24.4081	94.1696	321.401	39.8895	13.8807	8.85965	11.7195	0.00112843	133.502	15.3666	7.2798	0.556758	9.41279e-10	1.97296	0.0318418	6.36925	538.029
2058	534.083	597.043	503.483	1931.54	362.623	453.907	542.208	158.505	9.21423	0.210367	25.3041	44.7671	3.62493	12.7117	134.267	17.6426	1.37783	23.7221	24.7949	92.0237	317.524	39.3199	13.8242	8.85328	11.1812	0.000927	124.656	14.7544	6.95948	0.526927	6.66748e-10	1.94163	0.030172	6.36201	538.029
2059	538.059	601.814	507.023	1935.48	363.664	457.504	530.194	160.073	9.3188	0.212159	25.2267	45.1535	3.66336	12.8173	134.84	17.8474	1.34302	23.7676	25.1821	89.9187	313.686	38.7575	13.7679	8.84691	10.6667	0.000761593	116.298	14.1579	6.65103	0.498576	4.72286e-10	1.91055	0.0285897	6.3577	538.029
2060	542.447	606.679	510.634	1939.39	364.714	461.115	518.581	161.641	9.42305	0.213949	25.1487	45.5727	3.69965	12.9223	135.406	18.053	1.30879	23.8136	25.5698	87.8544	309.886	38.2023	13.7118	8.84053	10.1752	0.000625756	108.418	13.5778	6.35424	0.47163	3.3454e-10	1.87974	0.0270904	6.35432	538.029
2061	547.568	611.623	514.305	1943.24	365.772	464.731	507.354	163.208	9.52699	0.215737	25.0701	46.0173	3.7339	13.0267	135.965	18.2594	1.27512	23.8595	25.958	85.8289	306.123	37.6539	13.6557	8.83414	9.70528	0.000514178	101	13.0145	6.06882	0.446029	2.36969e-10	1.84919	0.0256694	6.34944	538.029
2062	553.047	616.627	518.027	1946.83	366.836	468.35	496.499	164.776	9.63086	0.217522	24.9911	46.4857	3.76617	13.1304	136.515	18.4664	1.24216	23.9048	26.3467	83.8401	302.392	37.1118	13.5997	8.82773	9.25585	0.000422529	94.0271	12.4684	5.79455	0.421715	1.67855e-10	1.81887	0.0243115	6.34311	538.029
2063	558.556	621.682	521.797	1950.02	367.905	471.971	486.002	166.341	9.73488	0.219305	24.9119	46.977	3.79651	13.2333	137.057	18.6739	1.21009	23.9494	26.7358	81.8872	298.695	36.5759	13.5438	8.82132	8.82591	0.000347257	87.485	11.9401	5.53123	0.398622	1.18899e-10	1.7888	0.0230132	6.33623	538.029
2064	564.147	626.794	525.619	1952.84	368.979	475.591	475.852	167.904	9.83906	0.221087	24.8325	47.4864	3.82503	13.3353	137.59	18.8818	1.17888	23.993	27.1255	79.9695	295.029	36.046	13.4879	8.81488	8.41465	0.000285424	81.3538	11.4293	5.27851	0.376708	8.42212e-11	1.75898	0.0217825	6.32875	538.029
2065	569.807	631.949	529.486	1955.22	370.057	479.197	466.021	169.466	9.94339	0.222866	24.7529	48.0061	3.85173	13.4364	138.11	19.09	1.14849	24.0342	27.5157	78.0832	291.389	35.5212	13.432	8.80842	8.02068	0.000234605	75.6113	10.9356	5.03598	0.355903	5.96574e-11	1.72935	0.0206149	6.31651	538.029
2066	575.539	637.15	533.4	1957.15	371.14	482.781	456.49	171.026	10.0479	0.224644	24.6729	48.531	3.87661	13.5364	138.615	19.2983	1.11887	24.0723	27.9063	76.2258	287.772	35.0009	13.3759	8.80192	7.64292	0.000192824	70.2364	10.4585	4.80325	0.336146	4.22579e-11	1.6999	0.019507	6.30011	538.029
2067	581.37	642.425	537.381	1958.71	372.227	486.349	447.254	172.584	10.1525	0.226419	24.5927	49.0618	3.89983	13.6353	139.107	19.5068	1.09001	24.1081	28.2975	74.3995	284.18	34.4857	13.3198	8.7954	7.28118	0.00015848	65.2121	9.99825	4.58008	0.317399	2.99331e-11	1.67069	0.0184561	6.28534	538.029
2068	587.317	647.792	541.443	1959.97	373.318	489.904	438.306	174.14	10.2573	0.228193	24.5122	49.5988	3.92153	13.7334	139.588	19.7156	1.06191	24.1423	28.6891	72.6057	280.617	33.9759	13.2638	8.78885	6.93512	0.000130254	60.5206	9.55475	4.36623	0.299623	2.12029e-11	1.64172	0.01746	6.27296	538.029
2069	593.39	653.258	545.589	1960.99	374.414	493.451	429.639	175.695	10.3623	0.229965	24.4315	50.1422	3.94183	13.8306	140.061	19.9246	1.03453	24.1757	29.0812	70.8458	277.085	33.4719	13.2077	8.78229	6.60438	0.000107058	56.1443	9.12799	4.16146	0.28278	1.50189e-11	1.61305	0.016516	6.26296	538.029
2070	599.425	658.827	549.82	1961.83	375.515	496.994	421.247	177.248	10.4674	0.231734	24.3505	50.6927	3.96086	13.9272	140.528	20.134	1.00787	24.2089	29.4739	69.1211	273.588	32.9741	13.1518	8.77571	6.28859	8.79982e-05	52.0661	8.71782	3.96551	0.266818	1.06385e-11	1.58469	0.0156221	6.25573	538.029
2071	605.238	664.492	554.129	1962.51	376.619	500.534	413.117	178.799	10.5727	0.233502	24.2694	51.2492	3.9787	14.0231	140.989	20.3437	0.9819	24.2419	29.867	67.4316	270.126	32.4825	13.0959	8.76912	5.98719	7.23369e-05	48.2685	8.3239	3.77806	0.251699	7.53571e-12	1.55666	0.0147755	6.24953	538.029
2072	610.949	670.201	558.486	1962.73	377.725	504.019	405.236	180.347	10.6777	0.235266	24.1881	51.7691	3.99532	14.1178	141.435	20.5531	0.956605	24.2711	30.2601	65.776	266.698	31.9969	13.0401	8.76252	5.69944	5.94637e-05	44.7332	7.94556	3.59873	0.237401	5.33786e-12	1.52895	0.0139738	6.24216	538.029
2073	616.681	675.907	562.867	1962.18	378.828	507.406	397.59	181.892	10.7819	0.237023	24.1067	52.2169	4.01066	14.2108	141.854	20.7615	0.931959	24.2931	30.6528	64.1535	263.302	31.5171	12.9844	8.7559	5.42471	4.88789e-05	41.4428	7.58214	3.42719	0.223872	3.78104e-12	1.50155	0.0132146	6.23336	538.029
2074	622.422	681.614	567.272	1960.92	379.927	510.703	390.167	183.433	10.8853	0.238774	24.0254	52.6043	4.02478	14.302	142.247	20.9689	0.90794	24.3085	31.045	62.5635	259.939	31.043	12.9288	8.74927	5.16243	4.0175e-05	38.3819	7.23316	3.26313	0.211061	2.67827e-12	1.47447	0.0124955	6.22373	538.029
2075	628.174	687.324	571.701	1959.01	381.024	513.917	382.957	184.971	10.9879	0.240518	23.9439	52.9408	4.03771	14.3915	142.614	21.1751	0.884528	24.3176	31.4367	61.0055	256.607	30.5745	12.8732	8.74262	4.91203	3.30177e-05	35.5356	6.89821	3.10625	0.198941	1.89713e-12	1.44771	0.0118146	6.21348	538.029
2076	633.924	693.023	576.146	1956.41	382.118	517.047	375.941	186.505	11.0898	0.242256	23.8623	53.2302	4.04939	14.4791	142.952	21.3801	0.861693	24.3195	31.828	59.4763	253.302	30.1109	12.8176	8.73594	4.67266	2.71303e-05	32.889	6.5766	2.95624	0.187477	1.34382e-12	1.42122	0.0111693	6.19865	538.029
2077	639.672	698.711	580.606	1953.13	383.209	520.091	369.103	188.036	11.1909	0.243988	23.7806	53.4772	4.05979	14.5645	143.259	21.5836	0.83941	24.3139	32.2188	57.974	250.019	29.6517	12.7619	8.72923	4.44365	2.22868e-05	30.4284	6.26773	2.81277	0.176624	9.51884e-13	1.39499	0.0105577	6.17989	538.029
2078	645.448	704.419	585.105	1949.27	384.297	523.063	362.443	189.563	11.2912	0.245713	23.6988	53.6909	4.06903	14.6481	143.538	21.7858	0.817671	24.3023	32.6091	56.5001	246.764	29.1973	12.7062	8.7225	4.22484	1.83035e-05	28.1426	5.97149	2.67563	0.166349	6.7426e-13	1.36906	0.00997818	6.16287	538.029
2079	651.271	710.166	589.653	1944.92	385.383	525.974	355.956	191.087	11.3908	0.247432	23.6169	53.8784	4.07721	14.7298	143.793	21.9867	0.796464	24.2858	32.999	55.0559	243.537	28.748	12.6505	8.71574	4.01598	1.5029e-05	26.0204	5.68764	2.5446	0.156653	4.77607e-13	1.34342	0.00942948	6.14834	538.029
2080	656.941	715.961	594.257	1940.17	386.465	528.832	349.639	192.607	11.4895	0.249144	23.5348	54.0457	4.08443	14.8098	144.027	22.1864	0.775779	24.2653	33.3884	53.6421	240.342	28.3043	12.5949	8.70896	3.81682	1.23379e-05	24.0513	5.41588	2.4195	0.147502	3.38309e-13	1.31811	0.00891017	6.13627	538.029
2081	662.252	721.811	598.918	1935.09	387.545	531.649	343.491	194.124	11.5875	0.25085	23.4527	54.1987	4.0908	14.8883	144.242	22.385	0.755607	24.2421	33.7773	52.2597	237.182	27.8664	12.5393	8.70217	3.62711	1.01271e-05	22.2257	5.15597	2.30009	0.138866	2.39639e-13	1.29317	0.00841893	6.12722	538.029
2082	667.286	727.553	603.538	1928.85	388.618	534.377	337.504	195.636	11.685	0.252547	23.3705	54.2997	4.09618	14.9645	144.429	22.5817	0.735935	24.2125	34.1657	50.9088	234.057	27.4345	12.484	8.69538	3.44649	8.31096e-06	20.5333	4.90744	2.18612	0.130711	1.69746e-13	1.26861	0.00795435	6.11917	538.029
2083	672.087	733.025	608.02	1920.64	389.682	536.971	331.669	197.141	11.7821	0.254234	23.2881	54.3146	4.1004	15.0376	144.574	22.7757	0.716743	24.1725	34.5535	49.5883	230.965	27.0083	12.4287	8.68857	3.27449	6.81872e-06	18.9644	4.66966	2.07738	0.123006	1.20239e-13	1.24441	0.00751494	6.10979	538.029
2084	676.619	738.232	612.364	1910.61	390.736	539.437	325.979	198.639	11.879	0.255909	23.2056	54.2555	4.10343	15.1075	144.676	22.9669	0.698011	24.1223	34.9407	48.2973	227.907	26.5877	12.3736	8.68176	3.11067	5.59257e-06	17.51	4.44213	1.97362	0.115738	8.517e-14	1.22056	0.00709932	6.09904	538.029
2085	680.889	743.183	616.572	1898.9	391.78	541.783	320.428	200.131	11.9755	0.257574	23.1228	54.133	4.10527	15.1741	144.736	23.1551	0.679724	24.0624	35.3272	47.0354	224.882	26.1726	12.3185	8.67493	2.95467	4.58516e-06	16.1619	4.22443	1.87456	0.108879	6.03296e-14	1.19706	0.00670622	6.08751	538.029
2086	684.909	747.886	620.648	1885.67	392.815	544.017	315.009	201.616	12.0718	0.259228	23.0398	53.9559	4.10592	15.2375	144.753	23.3404	0.661865	23.9931	35.7132	45.802	221.889	25.763	12.2636	8.66809	2.80613	3.7576e-06	14.9127	4.01616	1.78001	0.102419	4.2734e-14	1.1739	0.00633446	6.07536	538.029
2087	688.669	752.332	624.583	1870.96	393.84	546.135	309.711	203.095	12.1677	0.26087	22.9566	53.728	4.10529	15.2973	144.724	23.5223	0.644413	23.9136	36.0986	44.5948	218.925	25.3582	12.2087	8.66123	2.66453	3.07774e-06	13.7547	3.81675	1.68977	0.0963298	3.02703e-14	1.15106	0.00598267	6.05879	538.029
2088	692.175	756.525	628.381	1854.86	394.856	548.136	304.523	204.567	12.2634	0.262502	22.873	53.4537	4.10332	15.3534	144.646	23.7009	0.627348	23.8238	36.4833	43.4122	215.985	24.9579	12.1538	8.65434	2.52944	2.51928e-06	12.6814	3.62579	1.60362	0.0905845	2.14417e-14	1.12851	0.00564965	6.03842	538.029
2089	695.462	760.503	632.065	1837.53	395.862	550.035	299.448	206.032	12.3587	0.264124	22.7891	53.1423	4.10011	15.406	144.525	23.876	0.610665	23.7252	36.8675	42.2553	213.075	24.5624	12.0989	8.64743	2.40072	2.06147e-06	11.6871	3.4431	1.52138	0.0851642	1.51881e-14	1.10629	0.00533461	6.0198	538.029
2090	698.566	764.288	635.649	1819.14	396.859	551.843	294.483	207.491	12.4538	0.265734	22.705	52.8015	4.09575	15.4551	144.362	24.0478	0.594356	23.6189	37.251	41.1248	210.195	24.1721	12.0441	8.64051	2.27821	1.68642e-06	10.7664	3.2685	1.44292	0.0800499	1.07584e-14	1.0844	0.00503673	6.00366	538.029
2091	701.514	767.896	639.141	1799.82	397.847	553.568	289.631	208.943	12.5485	0.267333	22.6205	52.4373	4.09031	15.5009	144.161	24.2164	0.578415	23.5062	37.634	40.0212	207.348	23.7872	11.9894	8.63358	2.16172	1.37876e-06	9.91443	3.10175	1.36814	0.0752405	7.62061e-15	1.06287	0.00475521	5.98992	538.029
2092	704.419	771.442	642.597	1780.48	398.825	555.195	284.889	210.388	12.6427	0.26892	22.5359	52.0299	4.08371	15.5432	143.922	24.3812	0.56284	23.3872	38.0158	38.9453	204.537	23.408	11.935	8.62665	2.05108	1.12655e-06	9.12643	2.94261	1.29685	0.0707177	5.398e-15	1.04171	0.00448929	5.9789	538.029
2093	707.37	775.019	646.061	1761.92	399.792	556.707	280.255	211.825	12.7362	0.270491	22.4513	51.5626	4.07587	15.5819	143.642	24.542	0.547627	23.2619	38.396	37.8965	201.761	23.0346	11.8807	8.61971	1.946	9.19916e-07	8.39795	2.79083	1.22893	0.0664631	3.82363e-15	1.02094	0.00423814	5.9689	538.029
2094	710.342	778.605	649.515	1744.04	400.749	558.117	275.724	213.255	12.829	0.272047	22.3668	51.0468	4.06687	15.617	143.325	24.6988	0.53277	23.1312	38.7746	36.8739	199.019	22.6666	11.8266	8.61277	1.84619	7.50727e-07	7.72477	2.64615	1.16425	0.062458	2.70844e-15	1.00054	0.00400089	5.9582	538.029
2095	713.323	782.185	652.951	1726.8	401.694	559.435	271.29	214.677	12.9211	0.273588	22.2823	50.4923	4.05676	15.6487	142.973	24.8516	0.51826	22.9957	39.1516	35.8765	196.311	22.304	11.7727	8.60583	1.75136	6.12281e-07	7.10296	2.50834	1.10266	0.0586856	1.91851e-15	0.980476	0.00377677	5.94682	538.029
2096	716.306	785.754	656.364	1710.13	402.629	560.673	266.95	216.091	13.0125	0.275114	22.1978	49.9075	4.04565	15.6771	142.589	25.0005	0.504091	22.8565	39.5269	34.9037	193.635	21.9466	11.719	8.59888	1.66125	4.99067e-07	6.52886	2.37713	1.04407	0.0551304	1.35896e-15	0.960737	0.00356504	5.93522	538.029
2097	719.288	789.309	659.754	1693.98	403.554	561.84	262.7	217.498	13.1031	0.276625	22.1134	49.2992	4.03361	15.7023	142.176	25.1455	0.490256	22.7141	39.9006	33.955	190.991	21.5944	11.6654	8.59193	1.57564	4.06545e-07	5.99909	2.25228	0.988326	0.0517779	9.62608e-16	0.941338	0.00336501	5.92351	538.029
2098	722.259	792.837	663.107	1678.41	404.468	562.955	258.532	218.898	13.193	0.27812	22.029	48.6776	4.02082	15.7247	141.742	25.2871	0.476756	22.5706	40.2727	33.0282	188.375	21.2467	11.6118	8.58496	1.4942	3.31007e-07	5.51067	2.13366	0.935316	0.048613	6.81856e-16	0.922265	0.00317593	5.90952	538.029
2099	725.228	796.347	666.423	1663.53	405.372	564.049	254.44	220.289	13.2822	0.279601	21.9448	48.056	4.00764	15.745	141.299	25.4257	0.463598	22.4295	40.6431	32.1221	185.784	20.9032	11.5583	8.57797	1.41665	2.69422e-07	5.06099	2.02124	0.884989	0.0456394	4.82988e-16	0.903492	0.00299711	5.89489	538.029
2100	728.149	799.868	669.723	1649.4	406.265	565.139	250.425	221.673	13.3707	0.281066	21.8609	47.4415	3.99426	15.7638	140.856	25.5619	0.450784	22.2926	41.0119	31.2372	183.22	20.5642	11.5049	8.57096	1.34289	2.19258e-07	4.64738	1.91488	0.83727	0.0428457	3.42121e-16	0.885016	0.00282811	5.88353	538.029
2101	730.961	803.417	673.022	1635.97	407.149	566.23	246.488	223.05	13.4585	0.282516	21.7773	46.835	3.98077	15.7811	140.414	25.6958	0.438306	22.1599	41.3791	30.3739	180.686	20.2298	11.4516	8.56394	1.27281	1.78412e-07	4.26708	1.81426	0.792056	0.0402211	2.42339e-16	0.866848	0.00266845	5.87503	538.029
2102	733.75	806.94	676.258	1623.6	408.012	567.415	242.628	224.409	13.545	0.283944	21.6939	46.2868	3.96757	15.7972	140.041	25.8264	0.426174	22.0368	41.7418	29.5326	178.182	19.9004	11.3985	8.55691	1.20629	1.45158e-07	3.91747	1.71907	0.74921	0.0377554	1.71659e-16	0.848998	0.00251768	5.86879	538.029
2103	736.551	810.383	679.369	1612.61	408.845	568.776	238.847	225.741	13.6298	0.285344	21.6108	45.8376	3.95508	15.8125	139.798	25.9528	0.414397	21.9275	42.0972	28.7135	175.712	19.5762	11.3455	8.54988	1.14319	1.18089e-07	3.59613	1.62899	0.708604	0.0354388	1.21593e-16	0.831494	0.00237539	5.86494	538.029
2104	739.296	813.734	682.353	1602.85	409.647	570.29	235.143	227.045	13.7128	0.286714	21.5279	45.4691	3.94326	15.8268	139.676	26.0752	0.402963	21.8306	42.4451	27.9162	173.274	19.257	11.2928	8.54286	1.08337	9.60571e-08	3.30083	1.54374	0.670146	0.0332615	8.61296e-17	0.814334	0.0022411	5.86202	538.029
2105	741.961	816.97	685.199	1594.16	410.419	571.931	231.511	228.321	13.7941	0.288056	21.4454	45.1653	3.93205	15.8403	139.665	26.1936	0.391863	21.7442	42.7857	27.1398	170.868	18.9428	11.2403	8.53583	1.02662	7.81263e-08	3.02949	1.46305	0.633713	0.0312137	6.10093e-17	0.797484	0.00211435	5.85826	538.029
2106	744.534	820.081	687.901	1586.42	411.162	573.681	227.949	229.57	13.8736	0.289369	21.363	44.9134	3.9214	15.8529	139.757	26.308	0.381087	21.6667	43.119	26.3836	168.493	18.6333	11.188	8.52881	0.972786	6.35341e-08	2.78017	1.38665	0.599192	0.0292867	4.32155e-17	0.780953	0.0019947	5.8537	538.029
2107	747.007	823.059	690.461	1579.51	411.874	575.522	224.454	230.792	13.9514	0.290653	21.281	44.7033	3.91126	15.8647	139.945	26.4184	0.370624	21.5972	43.4449	25.6471	166.148	18.3285	11.1358	8.52178	0.921711	5.16604e-08	2.5511	1.31433	0.566506	0.0274722	3.06113e-17	0.764735	0.00188175	5.8488	538.029
2108	749.375	825.901	692.879	1573.33	412.557	577.441	221.024	231.986	14.0274	0.291909	21.1991	44.5271	3.90161	15.8756	140.221	26.5251	0.360466	21.5344	43.7634	24.9298	163.832	18.0283	11.0838	8.51474	0.873256	4.19999e-08	2.34066	1.24582	0.535555	0.0257798	2.16833e-17	0.748822	0.00177513	5.8437	538.029
2109	751.615	828.586	695.144	1567.74	413.21	579.416	217.652	233.153	14.1017	0.293135	21.1175	44.375	3.89231	15.8855	140.575	26.6277	0.350601	21.4765	44.0746	24.2301	161.542	17.7322	11.0319	8.50769	0.827227	3.4139e-08	2.14729	1.18088	0.506231	0.0241834	1.53592e-17	0.733186	0.00167442	5.83474	538.029
2110	753.72	831.107	697.258	1562.63	413.834	581.431	214.334	234.292	14.1742	0.294333	21.0361	44.2401	3.88328	15.8942	140.999	26.7263	0.341016	21.4221	44.3785	23.547	159.276	17.4399	10.9801	8.50063	0.783465	2.77422e-08	1.96959	1.1193	0.478439	0.022676	1.08796e-17	0.717788	0.00157925	5.82253	538.029
2111	755.716	833.494	699.245	1557.98	414.43	583.484	211.071	235.404	14.245	0.295502	20.955	44.1216	3.87458	15.902	141.49	26.8211	0.331708	21.3716	44.6749	22.8808	157.036	17.1516	10.9284	8.49355	0.741907	2.25391e-08	1.80638	1.06095	0.452104	0.0212695	7.70647e-18	0.70266	0.00148937	5.8123	538.029
2112	757.621	835.766	701.122	1553.79	414.997	585.574	207.864	236.489	14.314	0.296643	20.874	44.0184	3.86624	15.909	142.047	26.9122	0.322671	21.3251	44.9641	22.2319	154.823	16.8675	10.8768	8.48646	0.702481	1.83089e-08	1.65652	1.00566	0.427181	0.0199406	5.45882e-18	0.68783	0.00140453	5.8047	538.029
2113	759.443	837.931	702.897	1550.04	415.536	587.697	204.716	237.546	14.3813	0.297754	20.7933	43.9294	3.85828	15.9154	142.666	26.9999	0.313899	21.2827	45.2459	21.6003	152.638	16.5879	10.8254	8.47937	0.665107	1.48707e-08	1.51893	0.953296	0.403598	0.0186846	3.86671e-18	0.673284	0.00132448	5.79963	538.029
2114	761.186	839.995	704.572	1546.7	416.046	589.852	201.626	238.575	14.4468	0.298837	20.7129	43.8541	3.85076	15.9213	143.345	27.0844	0.305387	21.2445	45.5203	20.9862	150.484	16.3128	10.7742	8.47228	0.629713	1.20772e-08	1.39268	0.903738	0.381286	0.017514	2.73896e-18	0.659029	0.00124898	5.79738	538.029
2115	762.837	841.945	706.142	1543.76	416.529	592.033	198.594	239.577	14.5106	0.299892	20.6328	43.7903	3.84366	15.9267	144.081	27.1657	0.297128	21.2103	45.7875	20.3893	148.36	16.0422	10.7233	8.4652	0.5962	9.80776e-09	1.27687	0.856822	0.360205	0.0164232	1.94012e-18	0.645063	0.00117778	5.79617	538.029
2116	764.378	843.762	707.593	1541.14	416.985	594.232	195.617	240.552	14.5727	0.300917	20.553	43.735	3.83692	15.9318	144.869	27.2439	0.289114	21.1792	46.0472	19.8088	146.265	15.776	10.6726	8.45812	0.564457	7.96411e-09	1.17062	0.812381	0.340283	0.0154064	1.37427e-18	0.631373	0.00111062	5.79417	538.029
2117	765.798	845.433	708.916	1538.79	417.413	596.441	192.693	241.499	14.6329	0.301914	20.4734	43.686	3.83051	15.9363	145.703	27.319	0.281337	21.1506	46.2997	19.2441	144.199	15.5141	10.6221	8.45104	0.534384	6.4664e-09	1.07314	0.770294	0.321425	0.0144416	9.73453e-19	0.61797	0.00104727	5.79138	538.029
2118	767.092	846.956	710.111	1536.69	417.815	598.654	189.82	242.418	14.6915	0.302882	20.3941	43.6419	3.82441	15.9404	146.582	27.391	0.27379	21.1242	46.5448	18.6949	142.16	15.2563	10.5717	8.44396	0.505892	5.2498e-09	0.983701	0.730434	0.303572	0.0135253	6.89538e-19	0.604828	0.000987519	5.78828	538.029
2119	768.258	848.327	711.178	1534.8	418.189	600.869	186.997	243.31	14.7483	0.303822	20.315	43.6018	3.81858	15.944	147.5	27.46	0.266467	21.0997	46.7826	18.1607	140.148	15.0026	10.5216	8.43689	0.478899	4.26166e-09	0.901666	0.692665	0.286696	0.0126712	4.88429e-19	0.591941	0.000931152	5.78499	538.029
2120	769.273	849.526	712.103	1533.04	418.537	603.07	184.22	244.175	14.8033	0.304733	20.2362	43.5614	3.81292	15.9469	148.451	27.5258	0.259356	21.0757	47.013	17.6402	138.16	14.7526	10.4717	8.4298	0.453291	3.45892e-09	0.826399	0.656835	0.270737	0.0118746	3.45975e-19	0.579306	0.000877945	5.77791	538.029
2121	770.133	850.548	712.887	1531.34	418.859	605.25	181.483	245.012	14.8566	0.305615	20.1576	43.5188	3.80736	15.949	149.43	27.5884	0.252451	21.0515	47.2362	17.1328	136.194	14.5059	10.4218	8.4227	0.428978	2.80675e-09	0.757291	0.622847	0.25564	0.0111314	2.45069e-19	0.566886	0.000827702	5.76763	538.029
2122	770.867	851.425	713.552	1529.75	419.155	607.414	178.79	245.822	14.9082	0.306469	20.0792	43.4765	3.80194	15.9506	150.436	27.648	0.245748	21.0278	47.452	16.6386	134.253	14.2629	10.372	8.41558	0.40592	2.27713e-09	0.693891	0.590626	0.241362	0.0104383	1.73593e-19	0.554692	0.000780283	5.75932	538.029
2123	771.496	852.177	714.117	1528.29	419.425	609.563	176.141	246.605	14.958	0.307294	20.0011	43.4365	3.79673	15.9516	151.472	27.7047	0.239243	21.0053	47.6605	16.1578	132.336	14.0236	10.3224	8.40847	0.384072	1.84721e-09	0.635774	0.560076	0.22786	0.00979231	1.22963e-19	0.542747	0.00073555	5.75363	538.029
2124	772.029	852.816	714.588	1526.98	419.67	611.702	173.538	247.359	15.006	0.30809	19.9232	43.4003	3.79176	15.9523	152.537	27.7587	0.232931	20.9843	47.8616	15.6904	130.445	13.7882	10.273	8.40135	0.363387	1.49831e-09	0.582483	0.531132	0.215124	0.00917331	8.71e-20	0.531056	0.00069337	5.75044	538.029
2125	772.471	853.347	714.968	1525.83	419.889	613.833	170.982	248.087	15.0523	0.308858	19.8456	43.3691	3.78708	15.9529	153.631	27.8102	0.226809	20.9653	48.0555	15.2365	128.582	13.5568	10.2238	8.39425	0.343822	1.21525e-09	0.533628	0.503735	0.203084	0.00857971	6.16966e-20	0.519606	0.000653614	5.75002	538.029
2126	772.811	853.759	715.25	1524.85	420.083	615.953	168.472	248.787	15.0969	0.309597	19.7683	43.3425	3.78268	15.9533	154.753	27.8594	0.220872	20.9482	48.242	14.7957	126.746	13.3294	10.175	8.38715	0.325319	9.85632e-10	0.488873	0.477796	0.191701	0.00802683	4.37023e-20	0.508392	0.000616146	5.75063	538.029
2127	773.034	854.036	715.421	1523.99	420.253	618.058	166.005	249.459	15.1397	0.310307	19.6913	43.3188	3.77852	15.9536	155.899	27.9061	0.215112	20.9326	48.4213	14.3677	124.937	13.1058	10.1263	8.38006	0.307813	7.99357e-10	0.447838	0.453203	0.180965	0.00751179	3.09562e-20	0.497424	0.000580827	5.75045	538.029
2128	773.13	854.168	715.475	1523.24	420.397	620.142	163.582	250.105	15.1807	0.310989	19.6145	43.2967	3.77457	15.9536	157.068	27.9504	0.209525	20.918	48.5932	13.9517	123.153	12.8859	10.0779	8.37297	0.291247	6.48243e-10	0.41021	0.429883	0.170812	0.00703196	2.19276e-20	0.486695	0.000547531	5.74949	538.029
2129	773.095	854.15	715.408	1522.56	420.518	622.205	161.199	250.722	15.2201	0.311642	19.538	43.276	3.77081	15.9534	158.257	27.9923	0.204106	20.9043	48.7578	13.5476	121.395	12.6697	10.0297	8.36589	0.27557	5.25659e-10	0.375736	0.407795	0.161207	0.00658491	1.55323e-20	0.476199	0.000516141	5.74823	538.029
2130	772.929	853.983	715.222	1521.96	420.614	624.243	158.858	251.312	15.2576	0.312267	19.4618	43.2561	3.76723	15.953	159.465	28.032	0.198848	20.8913	48.9151	13.155	119.661	12.4571	9.9817	8.35882	0.260732	4.26225e-10	0.344153	0.386858	0.152148	0.00616841	1.10022e-20	0.46591	0.000486546	5.74678	538.029
2131	772.609	853.645	714.903	1521.37	420.686	626.245	156.552	251.875	15.2935	0.312862	19.3859	43.2336	3.76371	15.9522	160.685	28.0691	0.193746	20.8778	49.0651	12.7729	117.949	12.2477	9.93387	8.35173	0.246672	3.45552e-10	0.315209	0.366981	0.143602	0.00578015	7.7933e-21	0.45581	0.000458627	5.74158	538.029
2132	772.132	853.132	714.448	1520.73	420.735	628.204	154.28	252.41	15.3275	0.31343	19.3101	43.2069	3.7602	15.9507	161.913	28.1036	0.188793	20.8632	49.2078	12.4007	116.257	12.0413	9.88615	8.34464	0.233336	2.80093e-10	0.288678	0.348116	0.135508	0.00541808	5.52032e-21	0.445907	0.000432276	5.73321	538.029
2133	771.526	852.476	713.882	1520.1	420.76	630.127	152.043	252.918	15.3599	0.313968	19.2346	43.1789	3.75675	15.9489	163.153	28.1357	0.183985	20.8484	49.3432	12.0387	114.587	11.838	9.83858	8.33754	0.220701	2.27e-10	0.264367	0.330241	0.127843	0.0050806	3.91028e-21	0.436205	0.000407419	5.72682	538.029
2134	770.816	851.699	713.223	1519.52	420.762	632.02	149.843	253.399	15.3905	0.314478	19.1593	43.152	3.75342	15.9469	164.405	28.1657	0.179322	20.834	49.4713	11.6869	112.94	11.638	9.7912	8.33044	0.208741	1.83952e-10	0.242097	0.313308	0.120615	0.00476615	2.76982e-21	0.42671	0.000383983	5.72302	538.029
2135	770.009	850.814	712.477	1519.01	420.741	633.885	147.68	253.852	15.4193	0.31496	19.0843	43.1277	3.75026	15.9447	165.671	28.1935	0.174799	20.8207	49.5922	11.3451	111.316	11.4414	9.74404	8.32335	0.197429	1.49059e-10	0.221669	0.297248	0.1138	0.00447327	1.96198e-21	0.417423	0.000361894	5.72169	538.029
2136	769.114	849.825	711.648	1518.6	420.697	635.728	145.555	254.277	15.4464	0.315413	19.0096	43.1076	3.74731	15.9426	166.953	28.2195	0.170413	20.8088	49.7057	11.0136	109.716	11.2483	9.69715	8.31626	0.186738	1.20782e-10	0.202933	0.282025	0.107376	0.00420056	1.38975e-21	0.408329	0.000341084	5.7231	538.029
2137	768.12	848.723	710.728	1518.29	420.63	637.548	143.468	254.675	15.4717	0.315837	18.9352	43.0913	3.74457	15.9405	168.251	28.2437	0.16616	20.7984	49.8119	10.692	108.142	11.0586	9.65054	8.3092	0.176636	9.78687e-11	0.18578	0.267599	0.10132	0.00394667	9.84421e-22	0.399425	0.00032148	5.72553	538.029
2138	767.009	847.488	709.702	1518.06	420.541	639.34	141.417	255.046	15.4954	0.316233	18.8611	43.0773	3.742	15.9384	169.562	28.2661	0.162037	20.789	49.9109	10.3799	106.591	10.8722	9.60418	8.30214	0.167087	7.93004e-11	0.170075	0.253929	0.0955835	0.00371025	6.97307e-22	0.390723	0.00030301	5.72715	538.029
2139	765.771	846.109	708.561	1517.88	420.43	641.1	139.402	255.389	15.5172	0.3166	18.7872	43.0645	3.73959	15.9363	170.885	28.2866	0.158039	20.7802	50.0025	10.077	105.063	10.6891	9.55806	8.29509	0.158057	6.42527e-11	0.155695	0.240957	0.0901465	0.00347306	4.93932e-22	0.382215	0.000285604	5.72801	538.029
2140	764.404	844.584	707.304	1517.74	420.296	642.829	137.42	255.705	15.5373	0.316938	18.7136	43.0526	3.7373	15.9341	172.218	28.3053	0.154161	20.7721	50.0869	9.78289	103.557	10.5091	9.51218	8.28805	0.149519	5.20583e-11	0.142528	0.228655	0.085021	0.00323513	3.49873e-22	0.373897	0.0002692	5.72857	538.029
2141	762.905	842.912	705.929	1517.64	420.141	644.523	135.472	255.993	15.5557	0.317248	18.6403	43.0412	3.73514	15.9319	173.56	28.3223	0.150401	20.7643	50.164	9.49739	102.073	10.3321	9.46653	8.28102	0.141444	4.21764e-11	0.130472	0.216999	0.0801891	0.00301352	2.4783e-22	0.365765	0.000253742	5.72895	538.029
2142	761.254	841.071	704.425	1517.5	419.964	646.173	133.554	256.254	15.5723	0.31753	18.5672	43.027	3.733	15.9294	174.906	28.3373	0.146753	20.7559	50.2339	9.21982	100.609	10.158	9.42106	8.27398	0.133798	3.41667e-11	0.11943	0.205937	0.0756324	0.00280702	1.75549e-22	0.357803	0.000239163	5.7256	538.029
2143	759.448	839.058	702.788	1517.31	419.766	647.772	131.664	256.487	15.5872	0.317783	18.4944	43.0084	3.73081	15.9265	176.251	28.3502	0.143212	20.7462	50.2964	8.94969	99.1632	9.98649	9.37571	8.26694	0.12655	2.76734e-11	0.109313	0.195423	0.0713341	0.00261452	1.24348e-22	0.349999	0.000225409	5.71912	538.029
2144	757.516	836.906	701.044	1517.09	419.546	649.327	129.803	256.693	15.6004	0.318007	18.4218	42.9884	3.72865	15.9233	177.6	28.3613	0.139777	20.7361	50.3517	8.68708	97.7366	9.81768	9.33053	8.25989	0.119689	2.24116e-11	0.100048	0.185453	0.0672808	0.00243515	8.80813e-23	0.34236	0.000212438	5.71462	538.029
2145	755.522	834.637	699.21	1516.9	419.306	650.844	128.879	256.872	15.6118	0.318203	18.3494	42.9693	3.72656	15.92	178.955	28.3707	0.136445	20.7263	50.3997	8.55768	97.0283	9.73396	9.30799	8.25638	0.116349	1.81489e-11	0.0956177	0.180621	0.0653001	0.00235315	6.23917e-23	0.338584	0.000211128	5.71313	538.029
2146	753.475	832.264	697.292	1516.76	419.045	652.329	128.88	257.023	15.6214	0.318371	18.2773	42.9527	3.7246	15.9168	180.318	28.3785	0.133214	20.7173	50.4405	8.55769	97.0283	9.73396	9.308	8.25638	0.116345	1.46965e-11	0.0956149	0.18064	0.0652733	0.00236189	4.41947e-23	0.338591	0.00022081	5.71313	538.029
2147	751.34	829.791	695.295	1516.7	418.763	653.786	128.88	257.147	15.6293	0.31851	18.2055	42.9401	3.72281	15.9137	181.691	28.3849	0.130083	20.7097	50.474	8.5577	97.0283	9.73396	9.30801	8.25637	0.11635	1.1901e-11	0.0956129	0.180659	0.0652484	0.00237012	3.1305e-23	0.338589	0.000229945	5.71315	538.029
2148	749.107	827.21	693.209	1516.73	418.46	655.215	128.88	257.243	15.6355	0.31862	18.134	42.9313	3.7212	15.9108	183.076	28.3901	0.127048	20.7035	50.5002	8.5577	97.0283	9.73396	9.308	8.25638	0.116346	9.63746e-12	0.0956121	0.180653	0.0652254	0.00237788	2.21747e-23	0.338579	0.000238565	5.71314	538.029
2149	746.76	824.501	691.022	1516.81	418.138	656.612	128.879	257.312	15.6399	0.318702	18.0628	42.9245	3.71973	15.908	184.468	28.3938	0.124106	20.6981	50.5191	8.55769	97.0283	9.73396	9.30799	8.25639	0.116331	7.80449e-12	0.0956115	0.180625	0.0652037	0.00238519	1.57073e-23	0.338579	0.000246698	5.71314	538.029
2150	744.289	821.655	688.723	1516.94	417.795	658	128.881	257.339	15.6417	0.318737	18.0269	42.9222	3.71888	15.9058	185.868	28.3941	0.122663	20.6954	50.5268	8.55792	97.0296	9.73411	9.30803	8.25641	0.116323	6.32009e-12	0.0956107	0.180623	0.065212	0.00239206	1.11261e-23	0.338585	0.000254372	5.71551	538.029
2151	741.691	818.668	686.312	1517.1	417.432	659.402	128.885	257.339	15.6417	0.318737	18.0262	42.924	3.71861	15.9043	187.274	28.3915	0.122674	20.6953	50.5268	8.55847	97.0324	9.73446	9.30812	8.25643	0.116322	5.11796e-12	0.0956095	0.180645	0.0652483	0.00239851	7.8811e-24	0.338599	0.000261611	5.71908	538.029
2152	739.054	815.638	683.869	1517.28	417.05	660.81	128.89	257.339	15.6417	0.318738	18.0255	42.9261	3.71838	15.9028	188.686	28.389	0.122684	20.6954	50.5268	8.55911	97.0358	9.73485	9.30823	8.25646	0.116326	4.14444e-12	0.0956078	0.180662	0.0652822	0.00240458	5.58252e-24	0.338618	0.000268442	5.72071	538.029
2153	736.437	812.632	681.455	1517.43	416.648	662.212	128.892	257.339	15.6417	0.318738	18.0248	42.9248	3.71807	15.9012	190.098	28.3863	0.122692	20.6946	50.5268	8.55942	97.0375	9.73504	9.30829	8.25647	0.116326	3.35583e-12	0.0956025	0.180669	0.0653124	0.0024102	3.95433e-24	0.338633	0.000274877	5.7179	538.029
2154	733.829	809.64	679.063	1517.5	416.227	663.604	128.89	257.339	15.6417	0.318739	18.024	42.9186	3.71764	15.8992	191.505	28.3834	0.122697	20.6922	50.5268	8.55915	97.0362	9.73488	9.30824	8.25645	0.116317	2.7169e-12	0.0955916	0.18066	0.0653381	0.00241534	2.80102e-24	0.338637	0.000280931	5.71183	538.029
2155	731.257	806.689	676.713	1517.54	415.787	664.993	128.886	257.339	15.6417	0.318739	18.0232	42.9106	3.71715	15.8972	192.912	28.3803	0.1227	20.6891	50.5268	8.55855	97.0333	9.73454	9.30816	8.25642	0.116305	2.19941e-12	0.0955778	0.180643	0.0653606	0.00242008	1.98408e-24	0.338636	0.000286633	5.70761	538.029
2156	728.74	803.799	674.418	1517.59	415.327	666.384	128.881	257.339	15.6417	0.31874	18.0224	42.903	3.71666	15.8951	194.322	28.3771	0.122703	20.6861	50.5268	8.55787	97.0299	9.73415	9.30806	8.2564	0.116294	1.7804e-12	0.0955631	0.180623	0.0653807	0.00242452	1.40541e-24	0.338617	0.000292009	5.70581	538.029
2157	726.284	800.974	672.183	1517.69	414.849	667.784	128.878	257.339	15.6417	0.31874	18.0216	42.8974	3.71622	15.8932	195.737	28.3741	0.122705	20.6836	50.5268	8.55729	97.027	9.7338	9.30797	8.25638	0.11629	1.4412e-12	0.0955492	0.180604	0.0653995	0.00242871	9.95512e-25	0.338586	0.000297084	5.70628	538.029
2158	723.891	798.219	670.008	1517.85	414.352	669.196	128.876	257.339	15.6417	0.318741	18.0209	42.8952	3.71587	15.8915	197.16	28.3713	0.122708	20.6822	50.5268	8.55702	97.0256	9.73364	9.30793	8.25638	0.116297	1.16666e-12	0.0955378	0.18059	0.0654178	0.00243273	7.05163e-25	0.338569	0.000301883	5.7093	538.029
2159	721.549	795.52	667.881	1518.09	413.837	670.622	128.877	257.339	15.6417	0.318741	18.0201	42.8962	3.71562	15.89	198.591	28.3688	0.122713	20.6818	50.5268	8.55711	97.026	9.73369	9.30793	8.25638	0.116315	9.44453e-13	0.0955291	0.180582	0.0654359	0.00243659	4.99497e-25	0.338566	0.000306423	5.71313	538.029
2160	719.24	792.855	665.786	1518.37	413.303	672.056	128.879	257.339	15.6417	0.318742	18.0194	42.8987	3.71544	15.8887	200.029	28.3664	0.122719	20.6821	50.5268	8.55741	97.0275	9.73387	9.30797	8.2564	0.116323	7.64584e-13	0.0955219	0.180577	0.0654533	0.00244028	3.53815e-25	0.338573	0.000310716	5.71599	538.029
2161	716.95	790.212	663.714	1518.68	412.751	673.497	128.882	257.339	15.6417	0.318742	18.0187	42.9018	3.7153	15.8875	201.47	28.3642	0.122725	20.6827	50.5268	8.55785	97.0298	9.73414	9.30804	8.25643	0.11632	6.18973e-13	0.0955155	0.180572	0.0654698	0.0024438	2.50622e-25	0.33859	0.000314774	5.71792	538.029
2162	714.675	787.586	661.659	1519	412.182	674.941	128.885	257.339	15.6417	0.318743	18.018	42.905	3.71519	15.8864	202.916	28.362	0.122732	20.6834	50.5268	8.5584	97.0326	9.73447	9.30814	8.25644	0.116323	5.01092e-13	0.0955095	0.180568	0.0654852	0.00244714	1.77526e-25	0.338614	0.000318609	5.71939	538.029
2163	712.412	784.974	659.622	1519.34	411.594	676.389	128.89	257.339	15.6417	0.318743	18.0173	42.9082	3.7151	15.8854	204.364	28.3599	0.122739	20.6843	50.5268	8.55903	97.0358	9.73486	9.30825	8.25644	0.116333	4.05658e-13	0.0955037	0.180564	0.0654996	0.00245032	1.25749e-25	0.338644	0.000322234	5.72054	538.029
2164	710.141	782.354	657.587	1519.62	410.989	677.829	128.892	257.339	15.6417	0.318744	18.0166	42.9078	3.71494	15.8842	205.809	28.3577	0.122745	20.684	50.5268	8.55932	97.0374	9.73505	9.3083	8.25644	0.116339	3.28375e-13	0.0954948	0.180575	0.0655115	0.00245325	8.90737e-26	0.338651	0.000325648	5.71779	538.029
2165	707.856	779.723	655.551	1519.82	410.366	679.254	128.89	257.338	15.6417	0.318744	18.0158	42.9025	3.71464	15.8828	207.247	28.3552	0.122749	20.6822	50.5268	8.55903	97.0362	9.7349	9.30826	8.25643	0.116335	2.65779e-13	0.0954809	0.180595	0.06552	0.00245589	6.30947e-26	0.338628	0.000328853	5.71179	538.029
2166	705.587	777.109	653.537	1519.97	409.726	680.672	128.886	257.338	15.6417	0.318745	18.015	42.8951	3.71428	15.8811	208.682	28.3525	0.122751	20.6796	50.5268	8.55845	97.0333	9.73456	9.30816	8.25642	0.116329	2.15097e-13	0.0954644	0.180605	0.0655263	0.00245831	4.46926e-26	0.338602	0.000331869	5.70762	538.029
2167	703.357	774.539	651.561	1520.13	409.08	682.092	128.881	257.338	15.6417	0.318745	18.0142	42.8881	3.7139	15.8795	210.117	28.3498	0.122753	20.677	50.5268	8.55779	97.0299	9.73417	9.30804	8.2564	0.116324	1.74071e-13	0.0954475	0.180608	0.0655314	0.00246059	3.16577e-26	0.338578	0.000334716	5.70582	538.029
2168	701.178	772.026	649.628	1520.32	408.44	683.517	128.878	257.338	15.6417	0.318746	18.0135	42.8828	3.71356	15.8779	211.556	28.3471	0.122756	20.6749	50.5268	8.55722	97.027	9.73382	9.30794	8.2564	0.116326	1.40869e-13	0.0954316	0.18061	0.0655359	0.00246278	2.24245e-26	0.338562	0.000337409	5.70628	538.029
2169	699.056	769.574	647.741	1520.57	407.805	684.954	128.876	257.338	15.6417	0.318746	18.0127	42.8809	3.71331	15.8766	213.001	28.3447	0.12276	20.6738	50.5268	8.55696	97.0257	9.73367	9.30791	8.2564	0.116321	1.14003e-13	0.0954185	0.180616	0.0655409	0.00246493	1.58842e-26	0.338559	0.000339966	5.7093	538.029
2170	696.979	767.172	645.889	1520.88	407.175	686.402	128.877	257.338	15.6417	0.318747	18.012	42.8821	3.71315	15.8755	214.453	28.3425	0.122766	20.6737	50.5268	8.55706	97.0261	9.73372	9.30793	8.25641	0.116309	9.2265e-14	0.0954083	0.180625	0.0655465	0.00246706	1.12515e-26	0.338571	0.000342395	5.71311	538.029
2171	694.93	764.799	644.058	1521.23	406.551	687.857	128.879	257.338	15.6417	0.318747	18.0112	42.8846	3.71305	15.8745	215.91	28.3405	0.122772	20.6742	50.5268	8.55736	97.0276	9.73391	9.30798	8.2564	0.116307	7.46735e-14	0.0953999	0.180635	0.0655521	0.00246913	7.96989e-27	0.338593	0.0003447	5.71595	538.029
2172	692.896	762.445	642.238	1521.59	405.933	689.316	128.882	257.338	15.6417	0.318748	18.0105	42.8876	3.71299	15.8736	217.37	28.3385	0.122779	20.6749	50.5268	8.55779	97.0298	9.73418	9.30804	8.2564	0.116313	6.04363e-14	0.0953923	0.180645	0.0655574	0.00247115	5.64541e-27	0.338604	0.000346886	5.71789	538.029
2173	690.876	760.105	640.427	1521.97	405.321	690.778	128.885	257.338	15.6417	0.318748	18.0098	42.8907	3.71294	15.8729	218.832	28.3367	0.122785	20.6757	50.5268	8.55833	97.0326	9.73451	9.30813	8.25641	0.116325	4.89134e-14	0.0953853	0.180653	0.0655625	0.0024731	3.99889e-27	0.338604	0.000348958	5.71936	538.029
2174	688.866	757.777	638.623	1522.36	404.714	692.242	128.89	257.338	15.6417	0.318749	18.0091	42.8936	3.71291	15.8721	220.295	28.3349	0.122791	20.6765	50.5268	8.55895	97.0358	9.73488	9.30822	8.25642	0.116343	3.95873e-14	0.0953786	0.18066	0.0655671	0.00247498	2.83258e-27	0.338611	0.000350921	5.72049	538.029
2175	686.848	755.442	636.814	1522.68	404.113	693.695	128.892	257.338	15.6417	0.318749	18.0084	42.893	3.7128	15.8712	221.754	28.3329	0.122795	20.6763	50.5268	8.55924	97.0374	9.73506	9.30827	8.25643	0.116357	3.2037e-14	0.0954019	0.180658	0.0655697	0.00247671	2.00644e-27	0.338615	0.000352769	5.71775	538.029
2176	684.817	753.096	634.997	1522.92	403.517	695.132	128.89	257.338	15.6417	0.31875	18.0077	42.8874	3.71255	15.87	223.203	28.3307	0.122796	20.6745	50.5268	8.55896	97.0361	9.73489	9.30825	8.25644	0.116362	2.59232e-14	0.0954504	0.180641	0.0655696	0.00247822	1.42124e-27	0.338608	0.000354496	5.71176	538.029
2177	682.802	750.767	633.195	1523.11	402.927	696.562	128.886	257.338	15.6417	0.31875	18.0069	42.8798	3.71223	15.8686	224.648	28.3282	0.122796	20.6719	50.5268	8.55838	97.0332	9.73455	9.30817	8.25644	0.116363	2.09743e-14	0.095491	0.180618	0.0655677	0.0024796	1.00673e-27	0.338598	0.000356121	5.7076	538.029
2178	680.821	748.479	631.424	1523.29	402.342	697.99	128.881	257.338	15.6416	0.31875	18.0061	42.8723	3.71189	15.8672	226.092	28.3258	0.122796	20.6692	50.5268	8.55773	97.0298	9.73414	9.30807	8.25642	0.116347	1.69694e-14	0.0955263	0.180593	0.065565	0.0024809	7.13108e-28	0.338589	0.000357655	5.70582	538.029
2179	678.884	746.238	629.689	1523.5	401.763	699.424	128.878	257.338	15.6416	0.318751	18.0053	42.8667	3.71158	15.8658	227.539	28.3234	0.122797	20.667	50.5268	8.55717	97.0269	9.73379	9.30797	8.25639	0.11632	1.37291e-14	0.0955583	0.180569	0.0655624	0.00248218	5.05125e-28	0.338589	0.000359112	5.7063	538.029
2180	676.996	744.05	627.993	1523.78	401.188	700.868	128.876	257.338	15.6416	0.318751	18.0046	42.8644	3.71135	15.8647	228.992	28.3212	0.122798	20.6658	50.5268	8.55692	97.0256	9.73363	9.30793	8.25637	0.116305	1.11079e-14	0.0955889	0.180552	0.0655605	0.00248348	3.57801e-28	0.338582	0.000360504	5.7093	538.029
2181	675.146	741.902	626.327	1524.11	400.62	702.323	128.877	257.338	15.6416	0.318752	18.0039	42.865	3.71121	15.8637	230.451	28.3192	0.122801	20.6655	50.5268	8.55702	97.026	9.73367	9.30793	8.25637	0.116303	8.98746e-15	0.0956187	0.180541	0.0655596	0.00248483	2.53446e-28	0.338569	0.000361837	5.7131	538.029
2182	673.316	739.778	624.675	1524.47	400.056	703.784	128.879	257.338	15.6416	0.318752	18.0032	42.867	3.71112	15.8629	231.914	28.3173	0.122805	20.6658	50.5268	8.55732	97.0275	9.73384	9.30796	8.25637	0.11631	7.27197e-15	0.0956468	0.180533	0.0655591	0.00248617	1.79526e-28	0.338568	0.000363109	5.71594	538.029
2183	671.496	737.664	623.03	1524.86	399.498	705.249	128.882	257.337	15.6416	0.318753	18.0024	42.8695	3.71107	15.8622	233.38	28.3156	0.122809	20.6663	50.5268	8.55774	97.0297	9.7341	9.30803	8.25638	0.116325	5.88394e-15	0.0956726	0.18055	0.0655587	0.00248751	1.27166e-28	0.338576	0.000364321	5.71785	538.029
2184	669.684	735.559	621.388	1525.25	398.944	706.715	128.885	257.337	15.6416	0.318753	18.0018	42.872	3.71103	15.8615	234.847	28.3139	0.122812	20.6669	50.5268	8.55828	97.0324	9.73442	9.30813	8.25641	0.116345	4.76085e-15	0.0956962	0.180589	0.0655583	0.00248882	9.00772e-29	0.338591	0.000365476	5.71933	538.029
2185	667.877	733.46	619.75	1525.64	398.396	708.183	128.89	257.337	15.6416	0.318754	18.0011	42.8744	3.711	15.8609	236.315	28.3123	0.122815	20.6676	50.5268	8.55889	97.0356	9.73479	9.30824	8.25643	0.11637	3.85209e-15	0.0957174	0.180623	0.0655578	0.00249011	6.38055e-29	0.338614	0.000366575	5.72047	538.029
2186	666.057	731.349	618.102	1525.98	397.853	709.639	128.892	257.337	15.6416	0.318754	18.0003	42.8732	3.71089	15.8601	237.776	28.3105	0.122817	20.6672	50.5268	8.5592	97.0372	9.73498	9.3083	8.25644	0.116392	3.11657e-15	0.0957332	0.180645	0.0655556	0.00249128	4.51962e-29	0.338633	0.000367608	5.71771	538.029
2187	664.22	729.221	616.442	1526.22	397.315	711.078	128.89	257.337	15.6416	0.318755	17.9996	42.867	3.71064	15.859	239.228	28.3084	0.122816	20.6651	50.5268	8.55893	97.0359	9.73483	9.30825	8.25642	0.116384	2.52115e-15	0.0957419	0.18065	0.0655508	0.00249228	3.20144e-29	0.33864	0.000368566	5.71174	538.029
2188	662.393	727.106	614.794	1526.41	396.781	712.508	128.886	257.337	15.6416	0.318755	17.9988	42.8589	3.71031	15.8577	240.674	28.3061	0.122813	20.6623	50.5267	8.55834	97.033	9.7345	9.30816	8.25639	0.116356	2.0393e-15	0.0957461	0.180646	0.0655447	0.00249318	2.26771e-29	0.338625	0.000369465	5.7076	538.029
2189	660.598	725.026	613.173	1526.6	396.253	713.937	128.881	257.337	15.6416	0.318756	17.998	42.851	3.70996	15.8563	242.119	28.3038	0.122809	20.6594	50.5267	8.55768	97.0296	9.73411	9.30804	8.25637	0.116331	1.64947e-15	0.0957481	0.180638	0.0655379	0.00249403	1.60632e-29	0.338592	0.000370316	5.70583	538.029
2190	658.841	722.989	611.584	1526.82	395.729	715.37	128.877	257.337	15.6416	0.318756	17.9972	42.8448	3.70964	15.855	243.566	28.3015	0.122805	20.6569	50.5267	8.55714	97.0267	9.73377	9.30794	8.25635	0.116313	1.33415e-15	0.0957495	0.18063	0.0655314	0.0024949	1.13782e-29	0.338568	0.000371129	5.70629	538.029
2191	657.127	720.998	610.03	1527.09	395.211	716.814	128.876	257.337	15.6416	0.318757	17.9964	42.842	3.7094	15.8539	245.02	28.2995	0.122802	20.6555	50.5267	8.55689	97.0254	9.73362	9.30791	8.25635	0.116307	1.07914e-15	0.0957522	0.180626	0.0655259	0.00249581	8.05968e-30	0.338557	0.000371914	5.7093	538.029
2192	655.447	719.043	608.501	1527.42	394.697	718.269	128.877	257.337	15.6416	0.318757	17.9957	42.8421	3.70925	15.853	246.479	28.2976	0.1228	20.655	50.5267	8.55696	97.0258	9.73366	9.30793	8.25635	0.116313	8.72902e-16	0.0957563	0.180626	0.0655215	0.00249679	5.70902e-30	0.33856	0.000372675	5.71309	538.029
2193	653.783	717.106	606.984	1527.79	394.187	719.729	128.879	257.337	15.6416	0.318758	17.995	42.8435	3.70914	15.8523	247.942	28.2959	0.122799	20.655	50.5267	8.55726	97.0273	9.73384	9.30798	8.25637	0.116328	7.06094e-16	0.0957609	0.180629	0.0655178	0.0024978	4.04394e-30	0.338573	0.000373409	5.71592	538.029
2194	652.126	715.176	605.469	1528.17	393.683	721.193	128.882	257.337	15.6416	0.318758	17.9943	42.8454	3.70906	15.8516	249.408	28.2942	0.122797	20.6553	50.5267	8.5577	97.0295	9.7341	9.30804	8.2564	0.116349	5.71165e-16	0.0957652	0.180631	0.0655143	0.00249882	2.86449e-30	0.338595	0.000374113	5.71783	538.029
2195	650.472	713.25	603.956	1528.56	393.183	722.658	128.885	257.337	15.6416	0.318759	17.9935	42.8474	3.709	15.851	250.874	28.2926	0.122795	20.6556	50.5267	8.55825	97.0322	9.73442	9.30812	8.25641	0.116376	4.62018e-16	0.095769	0.180633	0.0655109	0.00249984	2.02904e-30	0.338625	0.000374789	5.71931	538.029
2196	648.82	711.327	602.443	1528.95	392.687	724.125	128.889	257.337	15.6416	0.318759	17.9928	42.8493	3.70895	15.8504	252.342	28.2911	0.122794	20.656	50.5267	8.55887	97.0354	9.73478	9.30823	8.25642	0.11639	3.73726e-16	0.0957721	0.180634	0.0655076	0.00250085	1.43726e-30	0.338642	0.000375438	5.72045	538.029
2197	647.152	709.388	600.918	1529.28	392.197	725.579	128.891	257.337	15.6416	0.31876	17.9921	42.8476	3.70882	15.8496	253.802	28.2893	0.12279	20.6554	50.5267	8.55916	97.037	9.73497	9.30829	8.25642	0.116381	3.02283e-16	0.0957713	0.180626	0.0655028	0.00250177	1.01807e-30	0.338635	0.000376044	5.7177	538.029
2198	645.464	707.43	599.379	1529.52	391.71	727.015	128.889	257.337	15.6416	0.31876	17.9913	42.8409	3.70854	15.8484	255.252	28.2873	0.122784	20.6531	50.5267	8.55888	97.0357	9.73482	9.30826	8.25641	0.116364	2.44465e-16	0.0957649	0.180605	0.0654955	0.00250253	7.21142e-31	0.338619	0.000376601	5.71173	538.029
2199	643.784	705.483	597.849	1529.71	391.228	728.441	128.885	257.336	15.6416	0.318761	17.9905	42.8323	3.70819	15.8471	256.695	28.285	0.122777	20.65	50.5267	8.5583	97.0328	9.73448	9.30818	8.25639	0.116344	1.97688e-16	0.0957552	0.180577	0.065487	0.0025032	5.10816e-31	0.338599	0.000377121	5.7076	538.029
2200	642.132	703.566	596.343	1529.9	390.751	729.866	128.881	257.336	15.6416	0.318761	17.9897	42.8239	3.70781	15.8458	258.137	28.2828	0.122769	20.6469	50.5267	8.55764	97.0295	9.73408	9.30807	8.25638	0.116328	1.59855e-16	0.0957444	0.180547	0.0654781	0.00250385	3.61833e-31	0.338581	0.000377615	5.70583	538.029
2201	640.515	701.688	594.868	1530.11	390.278	731.296	128.877	257.336	15.6416	0.318762	17.9889	42.8173	3.70747	15.8445	259.581	28.2805	0.122761	20.6443	50.5267	8.55709	97.0266	9.73374	9.30797	8.25637	0.116318	1.2926e-16	0.0957341	0.180544	0.0654694	0.00250452	2.56301e-31	0.338571	0.000378091	5.70632	538.029
2202	638.939	699.853	593.424	1530.38	389.813	732.681	128.876	257.336	15.6416	0.318762	17.9881	42.814	3.70721	15.8434	260.977	28.2785	0.122754	20.6426	50.5267	8.55686	97.0253	9.73359	9.30791	8.25638	0.116319	1.04524e-16	0.0957261	0.180569	0.0654619	0.00250525	1.81549e-31	0.338574	0.000378559	5.70931	538.029
2203	637.393	698.051	592.002	1530.71	389.359	733.972	128.876	257.336	15.6416	0.318763	17.9873	42.8136	3.70702	15.8425	262.273	28.2766	0.122748	20.6419	50.5267	8.55695	97.0257	9.73364	9.30793	8.25638	0.116332	8.4525e-17	0.0957204	0.180595	0.0654557	0.00250606	1.28599e-31	0.33859	0.00037902	5.71308	538.029
2204	635.861	696.264	590.59	1531.07	388.917	735.171	128.878	257.336	15.6416	0.318763	17.9866	42.8145	3.70689	15.8417	263.476	28.2749	0.122743	20.6416	50.5267	8.55724	97.0271	9.73382	9.30798	8.25637	0.116354	6.83536e-17	0.0957159	0.180619	0.0654501	0.00250691	9.10921e-32	0.338598	0.000379472	5.7159	538.029
2205	634.333	694.481	589.178	1531.45	388.486	736.283	128.881	257.336	15.6416	0.318764	17.9859	42.8159	3.70678	15.8409	264.591	28.2732	0.122739	20.6417	50.5267	8.55766	97.0293	9.73408	9.30806	8.25638	0.116363	5.52763e-17	0.0957119	0.180642	0.0654448	0.00250778	6.45244e-32	0.338594	0.00037991	5.71781	538.029
2206	632.808	692.701	587.765	1531.83	388.067	737.313	128.885	257.336	15.6416	0.318764	17.9851	42.8174	3.70669	15.8403	265.623	28.2717	0.122735	20.6418	50.5267	8.55819	97.0321	9.73439	9.30815	8.25638	0.11636	4.47007e-17	0.095708	0.180661	0.0654398	0.00250866	4.57054e-32	0.338599	0.000380336	5.71929	538.029
2207	631.283	690.923	586.351	1532.22	387.659	738.266	128.889	257.336	15.6416	0.318765	17.9844	42.8187	3.70662	15.8396	266.578	28.2701	0.122731	20.642	50.5267	8.5588	97.0352	9.73477	9.30824	8.2564	0.116363	3.61482e-17	0.0957041	0.180677	0.065435	0.00250955	3.23751e-32	0.33861	0.000380748	5.72043	538.029
2208	629.741	689.128	584.923	1532.54	387.263	739.135	128.891	257.336	15.6416	0.318765	17.9836	42.8166	3.70645	15.8388	267.454	28.2684	0.122727	20.6411	50.5267	8.55909	97.0368	9.73495	9.30828	8.25641	0.116363	2.92298e-17	0.0956969	0.180683	0.0654286	0.00251034	2.29326e-32	0.338618	0.000381131	5.71768	538.029
2209	628.18	687.313	583.48	1532.77	386.877	739.918	128.889	257.336	15.6416	0.318766	17.9828	42.8095	3.70614	15.8376	268.251	28.2663	0.12272	20.6385	50.5267	8.55882	97.0355	9.7348	9.30824	8.25641	0.116354	2.36323e-17	0.0956845	0.180674	0.06542	0.00251099	1.62442e-32	0.338615	0.000381478	5.71172	538.029
2210	626.625	685.508	582.045	1532.96	386.502	740.63	128.885	257.336	15.6416	0.318766	17.982	42.8005	3.70575	15.8363	268.981	28.2641	0.122711	20.6353	50.5267	8.55826	97.0326	9.73447	9.30816	8.25641	0.116342	1.9105e-17	0.0956694	0.180658	0.0654102	0.00251156	1.15064e-32	0.338609	0.000381799	5.7076	538.029
2211	625.098	683.733	580.632	1533.14	386.139	741.283	128.881	257.336	15.6416	0.318767	17.9812	42.7917	3.70535	15.8349	269.652	28.2617	0.122703	20.632	50.5267	8.55762	97.0293	9.73408	9.30806	8.25641	0.116333	1.54443e-17	0.0956536	0.180638	0.0653999	0.00251211	8.15049e-33	0.338604	0.000382105	5.70584	538.029
2212	623.605	681.995	579.247	1533.35	385.786	741.888	128.877	257.336	15.6416	0.318767	17.9803	42.7848	3.70498	15.8335	270.272	28.2595	0.122694	20.6291	50.5267	8.55708	97.0264	9.73374	9.30797	8.25639	0.11633	1.24849e-17	0.0956387	0.180619	0.0653901	0.00251268	5.77334e-33	0.338587	0.000382404	5.70632	538.029
2213	622.15	680.299	577.892	1533.62	385.444	742.455	128.875	257.336	15.6416	0.318768	17.9795	42.7811	3.70468	15.8323	270.85	28.2574	0.122687	20.6272	50.5267	8.55686	97.0251	9.73359	9.30792	8.25637	0.116338	1.00928e-17	0.0956264	0.180606	0.0653815	0.00251333	4.0895e-33	0.338564	0.000382705	5.70932	538.029
2214	620.725	678.633	576.557	1533.94	385.112	742.987	128.876	257.335	15.6416	0.318768	17.9787	42.7802	3.70447	15.8314	271.389	28.2555	0.122681	20.6263	50.5267	8.55695	97.0255	9.73365	9.30792	8.25637	0.116338	8.15937e-18	0.0956168	0.180598	0.0653741	0.00251405	2.89677e-33	0.338556	0.00038301	5.7131	538.029
2215	619.312	676.981	575.229	1534.29	384.791	743.484	128.878	257.335	15.6416	0.318769	17.9779	42.7807	3.7043	15.8305	271.89	28.2537	0.122675	20.6259	50.5267	8.55723	97.027	9.73382	9.30796	8.25637	0.116329	6.59642e-18	0.0956087	0.180592	0.0653674	0.00251483	2.0519e-33	0.338557	0.000383313	5.71591	538.029
2216	617.902	675.332	573.901	1534.66	384.481	743.944	128.881	257.335	15.6416	0.318769	17.9772	42.7817	3.70416	15.8297	272.354	28.252	0.122669	20.6257	50.5267	8.55765	97.0292	9.73409	9.30804	8.25638	0.116328	5.33286e-18	0.0956013	0.180587	0.0653611	0.00251563	1.45345e-33	0.338568	0.000383612	5.71781	538.029
2217	616.493	673.685	572.57	1535.04	384.181	744.371	128.885	257.335	15.6416	0.31877	17.9764	42.7827	3.70404	15.8289	272.784	28.2504	0.122663	20.6256	50.5267	8.55817	97.0319	9.73441	9.30813	8.2564	0.116333	4.31132e-18	0.0955943	0.180582	0.0653552	0.00251644	1.02954e-33	0.338585	0.000383905	5.71928	538.029
2218	615.084	672.038	571.237	1535.42	383.891	744.764	128.889	257.335	15.6416	0.31877	17.9756	42.7837	3.70392	15.8282	273.18	28.2488	0.122658	20.6256	50.5267	8.55876	97.0351	9.73478	9.30823	8.25643	0.116344	3.48543e-18	0.0955875	0.180577	0.0653493	0.00251726	7.29267e-34	0.33861	0.000384192	5.72042	538.029
2219	613.657	670.373	569.888	1535.74	383.611	745.115	128.891	257.335	15.6416	0.318771	17.9748	42.7811	3.70372	15.8273	273.539	28.247	0.12265	20.6245	50.5267	8.55903	97.0367	9.73497	9.30827	8.25645	0.116351	2.81753e-18	0.0955775	0.180587	0.0653421	0.00251799	5.16571e-34	0.33863	0.000384458	5.71767	538.029
2220	612.21	668.689	568.525	1535.96	383.341	745.417	128.889	257.335	15.6416	0.318771	17.974	42.7736	3.70338	15.826	273.856	28.2448	0.122641	20.6217	50.5267	8.55875	97.0354	9.73481	9.30823	8.25644	0.116349	2.27731e-18	0.0955627	0.180606	0.0653326	0.00251858	3.65909e-34	0.33864	0.000384693	5.71172	538.029
2221	610.77	667.013	567.168	1536.14	383.081	745.683	128.885	257.335	15.6416	0.318772	17.9732	42.7642	3.70296	15.8246	274.141	28.2425	0.122629	20.6183	50.5267	8.55817	97.0326	9.73447	9.30816	8.25641	0.116344	1.84051e-18	0.0955453	0.180615	0.0653219	0.0025191	2.59189e-34	0.338626	0.00038491	5.7076	538.029
2222	609.355	665.365	565.832	1536.32	382.831	745.923	128.881	257.335	15.6416	0.318772	17.9723	42.7551	3.70253	15.8231	274.4	28.2401	0.122618	20.6148	50.5267	8.55751	97.0293	9.73408	9.30806	8.25638	0.116341	1.48741e-18	0.0955274	0.180617	0.0653109	0.00251959	1.83595e-34	0.338595	0.000385117	5.70584	538.029
2223	607.973	663.754	564.522	1536.52	382.591	746.145	128.877	257.335	15.6416	0.318773	17.9714	42.7477	3.70212	15.8216	274.638	28.2377	0.122607	20.6117	50.5267	8.55695	97.0264	9.73375	9.30796	8.25636	0.116344	1.20204e-18	0.0955105	0.180618	0.0653003	0.00252012	1.30048e-34	0.338571	0.000385322	5.70631	538.029
2224	606.628	662.181	563.241	1536.78	382.36	746.357	128.875	257.335	15.6416	0.318773	17.9706	42.7435	3.70179	15.8203	274.862	28.2355	0.122597	20.6096	50.5267	8.5567	97.0251	9.7336	9.30791	8.25635	0.116339	9.71447e-19	0.0954964	0.180622	0.0652909	0.00252072	9.21184e-35	0.33856	0.000385535	5.70931	538.029
2225	605.31	660.637	561.978	1537.09	382.139	746.56	128.876	257.335	15.6416	0.318773	17.9698	42.7423	3.70153	15.8193	275.073	28.2336	0.122589	20.6085	50.5267	8.55678	97.0255	9.73365	9.30793	8.25636	0.116327	7.85118e-19	0.095485	0.180629	0.0652828	0.00252141	6.52514e-35	0.338563	0.000385756	5.71309	538.029
2226	604.003	659.106	560.722	1537.44	381.928	746.752	128.878	257.335	15.6416	0.318774	17.969	42.7424	3.70133	15.8183	275.27	28.2317	0.122581	20.6079	50.5267	8.55707	97.027	9.73382	9.30799	8.25637	0.116324	6.34537e-19	0.0954752	0.180637	0.0652755	0.00252214	4.62203e-35	0.338577	0.000385981	5.71589	538.029
2227	602.698	657.576	559.463	1537.8	381.726	746.93	128.881	257.335	15.6416	0.318774	17.9682	42.7429	3.70115	15.8174	275.453	28.2299	0.122574	20.6075	50.5267	8.5575	97.0291	9.73409	9.30806	8.25639	0.116329	5.12837e-19	0.0954663	0.180644	0.0652685	0.0025229	3.27398e-35	0.338599	0.000386205	5.71779	538.029
2228	601.393	656.046	558.202	1538.17	381.533	747.094	128.884	257.334	15.6416	0.318775	17.9674	42.7435	3.70099	15.8165	275.621	28.2281	0.122567	20.6072	50.5267	8.55806	97.0319	9.73442	9.30815	8.25642	0.11634	4.14476e-19	0.0954578	0.180649	0.0652619	0.00252367	2.3191e-35	0.338627	0.000386428	5.71926	538.029
2229	600.086	654.516	556.937	1538.54	381.35	747.245	128.888	257.334	15.6416	0.318775	17.9666	42.744	3.70085	15.8157	275.776	28.2264	0.122561	20.607	50.5267	8.55868	97.035	9.73478	9.30824	8.25643	0.116356	3.34977e-19	0.0954496	0.180653	0.0652554	0.00252446	1.64272e-35	0.338643	0.000386649	5.72041	538.029
2230	598.762	652.967	555.657	1538.85	381.176	747.37	128.89	257.334	15.6416	0.318776	17.9658	42.7411	3.70061	15.8147	275.91	28.2245	0.122554	20.6057	50.5267	8.55898	97.0365	9.73496	9.3083	8.25643	0.116368	2.70705e-19	0.0954384	0.180648	0.0652476	0.00252516	1.16361e-35	0.338635	0.000386852	5.71767	538.029
2231	597.417	651.398	554.361	1539.07	381.01	747.464	128.888	257.334	15.6416	0.318776	17.9649	42.7332	3.70023	15.8133	276.02	28.2222	0.122544	20.6028	50.5267	8.55872	97.0352	9.73481	9.30827	8.25641	0.116371	2.18735e-19	0.0954223	0.180629	0.0652375	0.00252572	8.24232e-36	0.338617	0.000387028	5.71172	538.029
2232	596.119	649.882	553.109	1539.24	380.854	747.536	128.885	257.334	15.6416	0.318777	17.964	42.7234	3.69977	15.8117	276.112	28.2198	0.122534	20.5991	50.5267	8.55816	97.0324	9.73448	9.30819	8.25639	0.11637	1.76726e-19	0.0954038	0.180603	0.0652262	0.0025262	5.83838e-36	0.338596	0.000387188	5.70762	538.029
2233	594.925	648.48	551.952	1539.41	380.707	747.597	128.88	257.334	15.6416	0.318777	17.9631	42.7139	3.6993	15.8101	276.192	28.2173	0.122523	20.5954	50.5267	8.55751	97.0291	9.73407	9.30808	8.25637	0.116371	1.42779e-19	0.0953848	0.180575	0.0652146	0.00252667	4.13557e-36	0.338576	0.000387342	5.70585	538.029
2234	593.838	647.194	550.89	1539.6	380.569	747.652	128.877	257.334	15.6416	0.318778	17.9622	42.706	3.69885	15.8085	276.265	28.2148	0.122512	20.5921	50.5267	8.55697	97.0263	9.73373	9.30798	8.25636	0.116358	1.1535e-19	0.0953998	0.180548	0.0652034	0.00252716	2.9294e-36	0.338564	0.000387497	5.70632	538.029
2235	592.859	646.025	549.922	1539.85	380.439	747.708	128.875	257.334	15.6416	0.318778	17.9614	42.7013	3.69848	15.8071	276.335	28.2125	0.122503	20.5898	50.5267	8.55674	97.025	9.73357	9.30793	8.25636	0.116338	9.31927e-20	0.0954474	0.180551	0.0651934	0.00252773	2.07502e-36	0.338563	0.000387661	5.7093	538.029
2236	591.976	644.959	549.038	1540.15	380.318	747.767	128.876	257.334	15.6416	0.318779	17.9605	42.6993	3.69818	15.8059	276.403	28.2103	0.122495	20.5883	50.5267	8.55683	97.0254	9.73363	9.30794	8.25637	0.11633	7.52939e-20	0.0954923	0.180581	0.0651846	0.00252838	1.46983e-36	0.338576	0.000387835	5.71308	538.029
2237	591.171	643.979	548.222	1540.47	380.205	747.823	128.878	257.334	15.6415	0.318779	17.9597	42.6984	3.69793	15.8048	276.467	28.2083	0.122487	20.5873	50.5267	8.55714	97.0268	9.73379	9.30798	8.25639	0.11633	6.08333e-20	0.0955337	0.180608	0.0651764	0.00252907	1.04114e-36	0.338597	0.000388014	5.71588	538.029
2238	590.433	643.072	547.466	1540.81	380.101	747.875	128.881	257.334	15.6415	0.31878	17.9588	42.6977	3.69769	15.8037	276.525	28.2063	0.12248	20.5865	50.5267	8.55757	97.029	9.73404	9.30804	8.25642	0.116337	4.91495e-20	0.0955711	0.180631	0.0651685	0.00252978	7.37483e-37	0.338626	0.000388194	5.71779	538.029
2239	589.76	642.234	546.767	1541.15	380.006	747.92	128.884	257.334	15.6415	0.31878	17.958	42.697	3.69746	15.8026	276.577	28.2043	0.122474	20.5856	50.5267	8.5581	97.0317	9.73436	9.30812	8.25643	0.116348	3.97091e-20	0.0956046	0.18065	0.0651608	0.00253049	5.22391e-37	0.338641	0.000388373	5.71925	538.029
2240	589.148	641.465	546.123	1541.49	379.919	747.959	128.888	257.334	15.6415	0.318781	17.9571	42.6958	3.69724	15.8015	276.623	28.2023	0.122467	20.5847	50.5267	8.55869	97.0348	9.73473	9.30822	8.25643	0.116363	3.20813e-20	0.0956343	0.180665	0.065153	0.00253121	3.70032e-37	0.338641	0.00038855	5.72038	538.029
2241	588.581	640.744	545.522	1541.75	379.84	747.978	128.89	257.333	15.6415	0.318781	17.9563	42.691	3.69691	15.8002	276.654	28.2001	0.122459	20.5827	50.5267	8.55899	97.0364	9.73492	9.30827	8.25642	0.116373	2.59164e-20	0.0956572	0.180668	0.0651438	0.00253183	2.62109e-37	0.338636	0.000388709	5.71766	538.029
2242	588.052	640.069	544.962	1541.89	379.769	747.971	128.888	257.333	15.6415	0.318782	17.9553	42.6809	3.69643	15.7986	276.668	28.1975	0.122449	20.5789	50.5267	8.55872	97.0351	9.73476	9.30822	8.25641	0.116372	2.0933e-20	0.0956717	0.180655	0.0651321	0.00253229	1.85663e-37	0.338619	0.000388841	5.71172	538.029
2243	587.586	639.464	544.465	1541.93	379.707	747.948	128.884	257.333	15.6415	0.318782	17.9544	42.6688	3.69586	15.7967	276.669	28.1947	0.122437	20.5743	50.5267	8.55814	97.0322	9.73443	9.30814	8.25638	0.116366	1.69062e-20	0.0956805	0.180633	0.0651191	0.00253267	1.31513e-37	0.338596	0.000388956	5.70762	538.029
2244	587.199	638.947	544.042	1541.9	379.652	747.918	128.88	257.333	15.6415	0.318783	17.9534	42.6566	3.69526	15.7947	276.664	28.1918	0.122425	20.5695	50.5267	8.5575	97.0289	9.73404	9.30804	8.25636	0.116359	1.3653e-20	0.0956859	0.180607	0.0651055	0.00253302	9.31562e-38	0.338572	0.000389063	5.70586	538.029
2245	586.899	638.525	543.699	1541.85	379.606	747.887	128.876	257.333	15.6415	0.318783	17.9524	42.6459	3.69468	15.7927	276.655	28.1889	0.122413	20.5651	50.5267	8.55695	97.0261	9.73371	9.30795	8.25634	0.116357	1.10255e-20	0.0956894	0.18058	0.0650921	0.00253339	6.59865e-38	0.338554	0.000389171	5.70633	538.029
2246	586.689	638.2	543.435	1541.82	379.567	747.861	128.875	257.333	15.6415	0.318784	17.9515	42.6381	3.69415	15.7909	276.649	28.1861	0.122402	20.5615	50.5267	8.55672	97.0248	9.73357	9.30792	8.25633	0.116363	8.90372e-21	0.095693	0.180558	0.0650797	0.00253381	4.67411e-38	0.338546	0.000389288	5.70931	538.029
2247	586.558	637.961	543.242	1541.8	379.536	747.84	128.875	257.333	15.6415	0.318784	17.9505	42.6329	3.69369	15.7892	276.644	28.1834	0.122392	20.5588	50.5267	8.55683	97.0252	9.73362	9.30793	8.25633	0.116377	7.19037e-21	0.0956969	0.180563	0.0650683	0.00253431	3.31087e-38	0.338548	0.000389414	5.71308	538.029
2248	586.491	637.791	543.106	1541.78	379.513	747.821	128.878	257.333	15.6415	0.318785	17.9496	42.6287	3.69326	15.7875	276.638	28.1808	0.122382	20.5563	50.5267	8.55715	97.0266	9.7338	9.30797	8.25634	0.116397	5.80667e-21	0.0957001	0.18059	0.0650573	0.00253483	2.34523e-38	0.338557	0.000389543	5.71589	538.029
2249	586.479	637.681	543.019	1541.73	379.498	747.8	128.88	257.333	15.6415	0.318785	17.9486	42.6246	3.69284	15.7859	276.63	28.1782	0.122373	20.554	50.5267	8.5576	97.0288	9.73406	9.30803	8.25635	0.116419	4.68913e-21	0.0957019	0.180613	0.0650465	0.00253536	1.66122e-38	0.338571	0.000389673	5.71778	538.029
2250	586.487	637.641	542.987	1541.71	379.492	747.788	128.882	257.333	15.6415	0.318785	17.9481	42.6225	3.69263	15.7851	276.626	28.1769	0.122369	20.5529	50.5267	8.55785	97.03	9.7342	9.30807	8.25635	0.116431	4.18981e-21	0.0957024	0.180622	0.0650411	0.00253563	1.37761e-38	0.338579	0.000389737	5.71855	538.029
2251	586.487	637.641	542.987	1541.71	379.492	747.788	128.882	257.333	15.6415	0.318785	17.9481	42.6225	3.69263	15.7851	276.626	28.1769	0.122369	20.5529	50.5267	8.55785	97.03	9.7342	9.30807	8.25635	0.116431	4.18981e-21	0.0957024	0.180622	0.0650411	0.00253563	1.37761e-38	0.338579	0.000389737	5.71855	538.029
2252	586.487	637.641	542.987	1541.71	379.492	747.788	128.882	257.333	15.6415	0.318785	17.9481	42.6225	3.69263	15.7851	276.626	28.1769	0.122369	20.5529	50.5267	8.55785	97.03	9.7342	9.30807	8.25635	0.116431	4.18981e-21	0.0957024	0.180622	0.0650411	0.00253563	1.37761e-38	0.338579	0.000389737	5.71855	538.029
2253	586.487	637.641	542.987	1541.71	379.492	747.788	128.882	257.333	15.6415	0.318785	17.9481	42.6225	3.69263	15.7851	276.626	28.1769	0.122369	20.5529	50.5267	8.55785	97.03	9.7342	9.30807	8.25635	0.116431	4.18981e-21	0.0957024	0.180622	0.0650411	0.00253563	1.37761e-38	0.338579	0.000389737	5.71855	538.029
2254	586.487	637.641	542.987	1541.71	379.492	747.788	128.882	257.333	15.6415	0.318785	17.9481	42.6225	3.69263	15.7851	276.626	28.1769	0.122369	20.5529	50.5267	8.55785	97.03	9.7342	9.30807	8.25635	0.116431	4.18981e-21	0.0957024	0.180622	0.0650411	0.00253563	1.37761e-38	0.338579	0.000389737	5.71855	538.029
2255	586.487	637.641	542.987	1541.71	379.492	747.788	128.882	257.333	15.6415	0.318785	17.9481	42.6225	3.69263	15.7851	276.626	28.1769	0.122369	20.5529	50.5267	8.55785	97.03	9.7342	9.30807	8.25635	0.116431	4.18981e-21	0.0957024	0.180622	0.0650411	0.00253563	1.37761e-38	0.338579	0.000389737	5.71855	538.029
2256	586.487	637.641	542.987	1541.71	379.492	747.788	128.882	257.333	15.6415	0.318785	17.9481	42.6225	3.69263	15.7851	276.626	28.1769	0.122369	20.5529	50.5267	8.55785	97.03	9.7342	9.30807	8.25635	0.116431	4.18981e-21	0.0957024	0.180622	0.0650411	0.00253563	1.37761e-38	0.338579	0.000389737	5.71855	538.029
2257	586.487	637.641	542.987	1541.71	379.492	747.788	128.882	257.333	15.6415	0.318785	17.9481	42.6225	3.69263	15.7851	276.626	28.1769	0.122369	20.5529	50.5267	8.55785	97.03	9.7342	9.30807	8.25635	0.116431	4.18981e-21	0.0957024	0.180622	0.0650411	0.00253563	1.37761e-38	0.338579	0.000389737	5.71855	538.029
2258	586.487	637.641	542.987	1541.71	379.492	747.788	128.882	257.333	15.6415	0.318785	17.9481	42.6225	3.69263	15.7851	276.626	28.1769	0.122369	20.5529	50.5267	8.55785	97.03	9.7342	9.30807	8.25635	0.116431	4.18981e-21	0.0957024	0.180622	0.0650411	0.00253563	1.37761e-38	0.338579	0.000389737	5.71855	538.029
2259	586.487	637.641	542.987	1541.71	379.492	747.788	128.882	257.333	15.6415	0.318785	17.9481	42.6225	3.69263	15.7851	276.626	28.1769	0.122369	20.5529	50.5267	8.55785	97.03	9.7342	9.30807	8.25635	0.116431	4.18981e-21	0.0957024	0.180622	0.0650411	0.00253563	1.37761e-38	0.338579	0.000389737	5.71855	538.029
2260	586.487	637.641	542.987	1541.71	379.492	747.788	128.882	257.333	15.6415	0.318785	17.9481	42.6225	3.69263	15.7851	276.626	28.1769	0.122369	20.5529	50.5267	8.55785	97.03	9.7342	9.30807	8.25635	0.116431	4.18981e-21	0.0957024	0.180622	0.0650411	0.00253563	1.37761e-38	0.338579	0.000389737	5.71855	538.029
2261	586.487	637.641	542.987	1541.71	379.492	747.788	128.882	257.333	15.6415	0.318785	17.9481	42.6225	3.69263	15.7851	276.626	28.1769	0.122369	20.5529	50.5267	8.55785	97.03	9.7342	9.30807	8.25635	0.116431	4.18981e-21	0.0957024	0.180622	0.0650411	0.00253563	1.37761e-38	0.338579	0.000389737	5.71855	538.029
2262	586.487	637.641	542.987	1541.71	379.492	747.788	128.882	257.333	15.6415	0.318785	17.9481	42.6225	3.69263	15.7851	276.626	28.1769	0.122369	20.5529	50.5267	8.55785	97.03	9.7342	9.30807	8.25635	0.116431	4.18981e-21	0.0957024	0.180622	0.0650411	0.00253563	1.37761e-38	0.338579	0.000389737	5.71855	538.029
2263	586.487	637.641	542.987	1541.71	379.492	747.788	128.882	257.333	15.6415	0.318785	17.9481	42.6225	3.69263	15.7851	276.626	28.1769	0.122369	20.5529	50.5267	8.55785	97.03	9.7342	9.30807	8.25635	0.116431	4.18981e-21	0.0957024	0.180622	0.0650411	0.00253563	1.37761e-38	0.338579	0.000389737	5.71855	538.029
2264	586.487	637.641	542.987	1541.71	379.492	747.788	128.882	257.333	15.6415	0.318785	17.9481	42.6225	3.69263	15.7851	276.626	28.1769	0.122369	20.5529	50.5267	8.55785	97.03	9.7342	9.30807	8.25635	0.116431	4.18981e-21	0.0957024	0.180622	0.0650411	0.00253563	1.37761e-38	0.338579	0.000389737	5.71855	538.029
2265	586.487	637.641	542.987	1541.71	379.492	747.788	128.882	257.333	15.6415	0.318785	17.9481	42.6225	3.69263	15.7851	276.626	28.1769	0.122369	20.5529	50.5267	8.55785	97.03	9.7342	9.30807	8.25635	0.116431	4.18981e-21	0.0957024	0.180622	0.0650411	0.00253563	1.37761e-38	0.338579	0.000389737	5.71855	538.029
2266	586.487	637.641	542.987	1541.71	379.492	747.788	128.882	257.333	15.6415	0.318785	17.9481	42.6225	3.69263	15.7851	276.626	28.1769	0.122369	20.5529	50.5267	8.55785	97.03	9.7342	9.30807	8.25635	0.116431	4.18981e-21	0.0957024	0.180622	0.0650411	0.00253563	1.37761e-38	0.338579	0.000389737	5.71855	538.029
2267	586.487	637.641	542.987	1541.71	379.492	747.788	128.882	257.333	15.6415	0.318785	17.9481	42.6225	3.69263	15.7851	276.626	28.1769	0.122369	20.5529	50.5267	8.55785	97.03	9.7342	9.30807	8.25635	0.116431	4.18981e-21	0.0957024	0.180622	0.0650411	0.00253563	1.37761e-38	0.338579	0.000389737	5.71855	538.029
2268	586.487	637.641	542.987	1541.71	379.492	747.788	128.882	257.333	15.6415	0.318785	17.9481	42.6225	3.69263	15.7851	276.626	28.1769	0.122369	20.5529	50.5267	8.55785	97.03	9.7342	9.30807	8.25635	0.116431	4.18981e-21	0.0957024	0.180622	0.0650411	0.00253563	1.37761e-38	0.338579	0.000389737	5.71855	538.029
2269	586.487	637.641	542.987	1541.71	379.492	747.788	128.882	257.333	15.6415	0.318785	17.9481	42.6225	3.69263	15.7851	276.626	28.1769	0.122369	20.5529	50.5267	8.55785	97.03	9.7342	9.30807	8.25635	0.116431	4.18981e-21	0.0957024	0.180622	0.0650411	0.00253563	1.37761e-38	0.338579	0.000389737	5.71855	538.029
2270	586.487	637.641	542.987	1541.71	379.492	747.788	128.882	257.333	15.6415	0.318785	17.9481	42.6225	3.69263	15.7851	276.626	28.1769	0.122369	20.5529	50.5267	8.55785	97.03	9.7342	9.30807	8.25635	0.116431	4.18981e-21	0.0957024	0.180622	0.0650411	0.00253563	1.37761e-38	0.338579	0.000389737	5.71855	538.029
2271	586.487	637.641	542.987	1541.71	379.492	747.788	128.882	257.333	15.6415	0.318785	17.9481	42.6225	3.69263	15.7851	276.626	28.1769	0.122369	20.5529	50.5267	8.55785	97.03	9.7342	9.30807	8.25635	0.116431	4.18981e-21	0.0957024	0.180622	0.0650411	0.00253563	1.37761e-38	0.338579	0.000389737	5.71855	538.029
2272	586.487	637.641	542.987	1541.71	379.492	747.788	128.882	257.333	15.6415	0.318785	17.9481	42.6225	3.69263	15.7851	276.626	28.1769	0.122369	20.5529	50.5267	8.55785	97.03	9.7342	9.30807	8.25635	0.116431	4.18981e-21	0.0957024	0.180622	0.0650411	0.00253563	1.37761e-38	0.338579	0.000389737	5.71855	538.029
2273	586.487	637.641	542.987	1541.71	379.492	747.788	128.882	257.333	15.6415	0.318785	17.9481	42.6225	3.69263	15.7851	276.626	28.1769	0.122369	20.5529	50.5267	8.55785	97.03	9.7342	9.30807	8.25635	0.116431	4.18981e-21	0.0957024	0.180622	0.0650411	0.00253563	1.37761e-38	0.338579	0.000389737	5.71855	538.029
2274	586.487	637.641	542.987	1541.71	379.492	747.788	128.882	257.333	15.6415	0.318785	17.9481	42.6225	3.69263	15.7851	276.626	28.1769	0.122369	20.5529	50.5267	8.55785	97.03	9.7342	9.30807	8.25635	0.116431	4.18981e-21	0.0957024	0.180622	0.0650411	0.00253563	1.37761e-38	0.338579	0.000389737	5.71855	538.029
2275	586.487	637.641	542.987	1541.71	379.492	747.788	128.882	257.333	15.6415	0.318785	17.9481	42.6225	3.69263	15.7851	276.626	28.1769	0.122369	20.5529	50.5267	8.55785	97.03	9.7342	9.30807	8.25635	0.116431	4.18981e-21	0.0957024	0.180622	0.0650411	0.00253563	1.37761e-38	0.338579	0.000389737	5.71855	538.029
2276	586.487	637.641	542.987	1541.71	379.492	747.788	128.882	257.333	15.6415	0.318785	17.9481	42.6225	3.69263	15.7851	276.626	28.1769	0.122369	20.5529	50.5267	8.55785	97.03	9.7342	9.30807	8.25635	0.116431	4.18981e-21	0.0957024	0.180622	0.0650411	0.00253563	1.37761e-38	0.338579	0.000389737	5.71855	538.029
2277	586.487	637.641	542.987	1541.71	379.492	747.788	128.882	257.333	15.6415	0.318785	17.9481	42.6225	3.69263	15.7851	276.626	28.1769	0.122369	20.5529	50.5267	8.55785	97.03	9.7342	9.30807	8.25635	0.116431	4.18981e-21	0.0957024	0.180622	0.0650411	0.00253563	1.37761e-38	0.338579	0.000389737	5.71855	538.029
2278	586.487	637.641	542.987	1541.71	379.492	747.788	128.882	257.333	15.6415	0.318785	17.9481	42.6225	3.69263	15.7851	276.626	28.1769	0.122369	20.5529	50.5267	8.55785	97.03	9.7342	9.30807	8.25635	0.116431	4.18981e-21	0.0957024	0.180622	0.0650411	0.00253563	1.37761e-38	0.338579	0.000389737	5.71855	538.029
2279	586.487	637.641	542.987	1541.71	379.492	747.788	128.882	257.333	15.6415	0.318785	17.9481	42.6225	3.69263	15.7851	276.626	28.1769	0.122369	20.5529	50.5267	8.55785	97.03	9.7342	9.30807	8.25635	0.116431	4.18981e-21	0.0957024	0.180622	0.0650411	0.00253563	1.37761e-38	0.338579	0.000389737	5.71855	538.029
2280	586.487	637.641	542.987	1541.71	379.492	747.788	128.882	257.333	15.6415	0.318785	17.9481	42.6225	3.69263	15.7851	276.626	28.1769	0.122369	20.5529	50.5267	8.55785	97.03	9.7342	9.30807	8.25635	0.116431	4.18981e-21	0.0957024	0.180622	0.0650411	0.00253563	1.37761e-38	0.338579	0.000389737	5.71855	538.029
2281	586.487	637.641	542.987	1541.71	379.492	747.788	128.882	257.333	15.6415	0.318785	17.9481	42.6225	3.69263	15.7851	276.626	28.1769	0.122369	20.5529	50.5267	8.55785	97.03	9.7342	9.30807	8.25635	0.116431	4.18981e-21	0.0957024	0.180622	0.0650411	0.00253563	1.37761e-38	0.338579	0.000389737	5.71855	538.029
2282	586.487	637.641	542.987	1541.71	379.492	747.788	128.882	257.333	15.6415	0.318785	17.9481	42.6225	3.69263	15.7851	276.626	28.1769	0.122369	20.5529	50.5267	8.55785	97.03	9.7342	9.30807	8.25635	0.116431	4.18981e-21	0.0957024	0.180622	0.0650411	0.00253563	1.37761e-38	0.338579	0.000389737	5.71855	538.029
2283	586.487	637.641	542.987	1541.71	379.492	747.788	128.882	257.333	15.6415	0.318785	17.9481	42.6225	3.69263	15.7851	276.626	28.1769	0.122369	20.5529	50.5267	8.55785	97.03	9.7342	9.30807	8.25635	0.116431	4.18981e-21	0.0957024	0.180622	0.0650411	0.00253563	1.37761e-38	0.338579	0.000389737	5.71855	538.029
2284	586.487	637.641	542.987	1541.71	379.492	747.788	128.882	257.333	15.6415	0.318785	17.9481	42.6225	3.69263	15.7851	276.626	28.1769	0.122369	20.5529	50.5267	8.55785	97.03	9.7342	9.30807	8.25635	0.116431	4.18981e-21	0.0957024	0.180622	0.0650411	0.00253563	1.37761e-38	0.338579	0.000389737	5.71855	538.029
2285	586.487	637.641	542.987	1541.71	379.492	747.788	128.882	257.333	15.6415	0.318785	17.9481	42.6225	3.69263	15.7851	276.626	28.1769	0.122369	20.5529	50.5267	8.55785	97.03	9.7342	9.30807	8.25635	0.116431	4.18981e-21	0.0957024	0.180622	0.0650411	0.00253563	1.37761e-38	0.338579	0.000389737	5.71855	538.029
2286	586.487	637.641	542.987	1541.71	379.492	747.788	128.882	257.333	15.6415	0.318785	17.9481	42.6225	3.69263	15.7851	276.626	28.1769	0.122369	20.5529	50.5267	8.55785	97.03	9.7342	9.30807	8.25635	0.116431	4.18981e-21	0.0957024	0.180622	0.0650411	0.00253563	1.37761e-38	0.338579	0.000389737	5.71855	538.029
2287	586.487	637.641	542.987	1541.71	379.492	747.788	128.882	257.333	15.6415	0.318785	17.9481	42.6225	3.69263	15.7851	276.626	28.1769	0.122369	20.5529	50.5267	8.55785	97.03	9.7342	9.30807	8.25635	0.116431	4.18981e-21	0.0957024	0.180622	0.0650411	0.00253563	1.37761e-38	0.338579	0.000389737	5.71855	538.029
2288	586.487	637.641	542.987	1541.71	379.492	747.788	128.882	257.333	15.6415	0.318785	17.9481	42.6225	3.69263	15.7851	276.626	28.1769	0.122369	20.5529	50.5267	8.55785	97.03	9.7342	9.30807	8.25635	0.116431	4.18981e-21	0.0957024	0.180622	0.0650411	0.00253563	1.37761e-38	0.338579	0.000389737	5.71855	538.029
2289	586.487	637.641	542.987	1541.71	379.492	747.788	128.882	257.333	15.6415	0.318785	17.9481	42.6225	3.69263	15.7851	276.626	28.1769	0.122369	20.5529	50.5267	8.55785	97.03	9.7342	9.30807	8.25635	0.116431	4.18981e-21	0.0957024	0.180622	0.0650411	0.00253563	1.37761e-38	0.338579	0.000389737	5.71855	538.029
2290	586.487	637.641	542.987	1541.71	379.492	747.788	128.882	257.333	15.6415	0.318785	17.9481	42.6225	3.69263	15.7851	276.626	28.1769	0.122369	20.5529	50.5267	8.55785	97.03	9.7342	9.30807	8.25635	0.116431	4.18981e-21	0.0957024	0.180622	0.0650411	0.00253563	1.37761e-38	0.338579	0.000389737	5.71855	538.029
2291	586.487	637.641	542.987	1541.71	379.492	747.788	128.882	257.333	15.6415	0.318785	17.9481	42.6225	3.69263	15.7851	276.626	28.1769	0.122369	20.5529	50.5267	8.55785	97.03	9.7342	9.30807	8.25635	0.116431	4.18981e-21	0.0957024	0.180622	0.0650411	0.00253563	1.37761e-38	0.338579	0.000389737	5.71855	538.029
2292	586.487	637.641	542.987	1541.71	379.492	747.788	128.882	257.333	15.6415	0.318785	17.9481	42.6225	3.69263	15.7851	276.626	28.1769	0.122369	20.5529	50.5267	8.55785	97.03	9.7342	9.30807	8.25635	0.116431	4.18981e-21	0.0957024	0.180622	0.0650411	0.00253563	1.37761e-38	0.338579	0.000389737	5.71855	538.029
2293	586.487	637.641	542.987	1541.71	379.492	747.788	128.882	257.333	15.6415	0.318785	17.9481	42.6225	3.69263	15.7851	276.626	28.1769	0.122369	20.5529	50.5267	8.55785	97.03	9.7342	9.30807	8.25635	0.116431	4.18981e-21	0.0957024	0.180622	0.0650411	0.00253563	1.37761e-38	0.338579	0.000389737	5.71855	538.029
2294	586.487	637.641	542.987	1541.71	379.492	747.788	128.882	257.333	15.6415	0.318785	17.9481	42.6225	3.69263	15.7851	276.626	28.1769	0.122369	20.5529	50.5267	8.55785	97.03	9.7342	9.30807	8.25635	0.116431	4.18981e-21	0.0957024	0.180622	0.0650411	0.00253563	1.37761e-38	0.338579	0.000389737	5.71855	538.029
2295	586.487	637.641	542.987	1541.71	379.492	747.788	128.882	257.333	15.6415	0.318785	17.9481	42.6225	3.69263	15.7851	276.626	28.1769	0.122369	20.5529	50.5267	8.55785	97.03	9.7342	9.30807	8.25635	0.116431	4.18981e-21	0.0957024	0.180622	0.0650411	0.00253563	1.37761e-38	0.338579	0.000389737	5.71855	538.029
2296	586.487	637.641	542.987	1541.71	379.492	747.788	128.882	257.333	15.6415	0.318785	17.9481	42.6225	3.69263	15.7851	276.626	28.1769	0.122369	20.5529	50.5267	8.55785	97.03	9.7342	9.30807	8.25635	0.116431	4.18981e-21	0.0957024	0.180622	0.0650411	0.00253563	1.37761e-38	0.338579	0.000389737	5.71855	538.029
2297	586.487	637.641	542.987	1541.71	379.492	747.788	128.882	257.333	15.6415	0.318785	17.9481	42.6225	3.69263	15.7851	276.626	28.1769	0.122369	20.5529	50.5267	8.55785	97.03	9.7342	9.30807	8.25635	0.116431	4.18981e-21	0.0957024	0.180622	0.0650411	0.00253563	1.37761e-38	0.338579	0.000389737	5.71855	538.029
2298	586.487	637.641	542.987	1541.71	379.492	747.788	128.882	257.333	15.6415	0.318785	17.9481	42.6225	3.69263	15.7851	276.626	28.1769	0.122369	20.5529	50.5267	8.55785	97.03	9.7342	9.30807	8.25635	0.116431	4.18981e-21	0.0957024	0.180622	0.0650411	0.00253563	1.37761e-38	0.338579	0.000389737	5.71855	538.029
2299	586.487	637.641	542.987	1541.71	379.492	747.788	128.882	257.333	15.6415	0.318785	17.9481	42.6225	3.69263	15.7851	276.626	28.1769	0.122369	20.5529	50.5267	8.55785	97.03	9.7342	9.30807	8.25635	0.116431	4.18981e-21	0.0957024	0.180622	0.0650411	0.00253563	1.37761e-38	0.338579	0.000389737	5.71855	538.029
2300	586.487	637.641	542.987	1541.71	379.492	747.788	128.882	257.333	15.6415	0.318785	17.9481	42.6225	3.69263	15.7851	276.626	28.1769	0.122369	20.5529	50.5267	8.55785	97.03	9.7342	9.30807	8.25635	0.116431	4.18981e-21	0.0957024	0.180622	0.0650411	0.00253563	1.37761e-38	0.338579	0.000389737	5.71855	538.029
2301	586.487	637.641	542.987	1541.71	379.492	747.788	128.882	257.333	15.6415	0.318785	17.9481	42.6225	3.69263	15.7851	276.626	28.1769	0.122369	20.5529	50.5267	8.55785	97.03	9.7342	9.30807	8.25635	0.116431	4.18981e-21	0.0957024	0.180622	0.0650411	0.00253563	1.37761e-38	0.338579	0.000389737	5.71855	538.029
2302	586.487	637.641	542.987	1541.71	379.492	747.788	128.882	257.333	15.6415	0.318785	17.9481	42.6225	3.69263	15.7851	276.626	28.1769	0.122369	20.5529	50.5267	8.55785	97.03	9.7342	9.30807	8.25635	0.116431	4.18981e-21	0.0957024	0.180622	0.0650411	0.00253563	1.37761e-38	0.338579	0.000389737	5.71855	538.029
2303	586.487	637.641	542.987	1541.71	379.492	747.788	128.882	257.333	15.6415	0.318785	17.9481	42.6225	3.69263	15.7851	276.626	28.1769	0.122369	20.5529	50.5267	8.55785	97.03	9.7342	9.30807	8.25635	0.116431	4.18981e-21	0.0957024	0.180622	0.0650411	0.00253563	1.37761e-38	0.338579	0.000389737	5.71855	538.029
2304	586.487	637.641	542.987	1541.71	379.492	747.788	128.882	257.333	15.6415	0.318785	17.9481	42.6225	3.69263	15.7851	276.626	28.1769	0.122369	20.5529	50.5267	8.55785	97.03	9.7342	9.30807	8.25635	0.116431	4.18981e-21	0.0957024	0.180622	0.0650411	0.00253563	1.37761e-38	0.338579	0.000389737	5.71855	538.029
2305	586.487	637.641	542.987	1541.71	379.492	747.788	128.882	257.333	15.6415	0.318785	17.9481	42.6225	3.69263	15.7851	276.626	28.1769	0.122369	20.5529	50.5267	8.55785	97.03	9.7342	9.30807	8.25635	0.116431	4.18981e-21	0.0957024	0.180622	0.0650411	0.00253563	1.37761e-38	0.338579	0.000389737	5.71855	538.029
2306	586.487	637.641	542.987	1541.71	379.492	747.788	128.882	257.333	15.6415	0.318785	17.9481	42.6225	3.69263	15.7851	276.626	28.1769	0.122369	20.5529	50.5267	8.55785	97.03	9.7342	9.30807	8.25635	0.116431	4.18981e-21	0.0957024	0.180622	0.0650411	0.00253563	1.37761e-38	0.338579	0.000389737	5.71855	538.029
2307	586.487	637.641	542.987	1541.71	379.492	747.788	128.882	257.333	15.6415	0.318785	17.9481	42.6225	3.69263	15.7851	276.626	28.1769	0.122369	20.5529	50.5267	8.55785	97.03	9.7342	9.30807	8.25635	0.116431	4.18981e-21	0.0957024	0.180622	0.0650411	0.00253563	1.37761e-38	0.338579	0.000389737	5.71855	538.029
2308	586.487	637.641	542.987	1541.71	379.492	747.788	128.882	257.333	15.6415	0.318785	17.9481	42.6225	3.69263	15.7851	276.626	28.1769	0.122369	20.5529	50.5267	8.55785	97.03	9.7342	9.30807	8.25635	0.116431	4.18981e-21	0.0957024	0.180622	0.0650411	0.00253563	1.37761e-38	0.338579	0.000389737	5.71855	538.029
2309	586.487	637.641	542.987	1541.71	379.492	747.788	128.882	257.333	15.6415	0.318785	17.9481	42.6225	3.69263	15.7851	276.626	28.1769	0.122369	20.5529	50.5267	8.55785	97.03	9.7342	9.30807	8.25635	0.116431	4.18981e-21	0.0957024	0.180622	0.0650411	0.00253563	1.37761e-38	0.338579	0.000389737	5.71855	538.029
2310	586.487	637.641	542.987	1541.71	379.492	747.788	128.882	257.333	15.6415	0.318785	17.9481	42.6225	3.69263	15.7851	276.626	28.1769	0.122369	20.5529	50.5267	8.55785	97.03	9.7342	9.30807	8.25635	0.116431	4.18981e-21	0.0957024	0.180622	0.0650411	0.00253563	1.37761e-38	0.338579	0.000389737	5.71855	538.029
2311	586.487	637.641	542.987	1541.71	379.492	747.788	128.882	257.333	15.6415	0.318785	17.9481	42.6225	3.69263	15.7851	276.626	28.1769	0.122369	20.5529	50.5267	8.55785	97.03	9.7342	9.30807	8.25635	0.116431	4.18981e-21	0.0957024	0.180622	0.0650411	0.00253563	1.37761e-38	0.338579	0.000389737	5.71855	538.029
2312	586.487	637.641	542.987	1541.71	379.492	747.788	128.882	257.333	15.6415	0.318785	17.9481	42.6225	3.69263	15.7851	276.626	28.1769	0.122369	20.5529	50.5267	8.55785	97.03	9.7342	9.30807	8.25635	0.116431	4.18981e-21	0.0957024	0.180622	0.0650411	0.00253563	1.37761e-38	0.338579	0.000389737	5.71855	538.029
2313	586.487	637.641	542.987	1541.71	379.492	747.788	128.882	257.333	15.6415	0.318785	17.9481	42.6225	3.69263	15.7851	276.626	28.1769	0.122369	20.5529	50.5267	8.55785	97.03	9.7342	9.30807	8.25635	0.116431	4.18981e-21	0.0957024	0.180622	0.0650411	0.00253563	1.37761e-38	0.338579	0.000389737	5.71855	538.029
2314	586.487	637.641	542.987	1541.71	379.492	747.788	128.882	257.333	15.6415	0.318785	17.9481	42.6225	3.69263	15.7851	276.626	28.1769	0.122369	20.5529	50.5267	8.55785	97.03	9.7342	9.30807	8.25635	0.116431	4.18981e-21	0.0957024	0.180622	0.0650411	0.00253563	1.37761e-38	0.338579	0.000389737	5.71855	538.029
2315	586.487	637.641	542.987	1541.71	379.492	747.788	128.882	257.333	15.6415	0.318785	17.9481	42.6225	3.69263	15.7851	276.626	28.1769	0.122369	20.5529	50.5267	8.55785	97.03	9.7342	9.30807	8.25635	0.116431	4.18981e-21	0.0957024	0.180622	0.0650411	0.00253563	1.37761e-38	0.338579	0.000389737	5.71855	538.029
2316	586.487	637.641	542.987	1541.71	379.492	747.788	128.882	257.333	15.6415	0.318785	17.9481	42.6225	3.69263	15.7851	276.626	28.1769	0.122369	20.5529	50.5267	8.55785	97.03	9.7342	9.30807	8.25635	0.116431	4.18981e-21	0.0957024	0.180622	0.0650411	0.00253563	1.37761e-38	0.338579	0.000389737	5.71855	538.029
2317	586.487	637.641	542.987	1541.71	379.492	747.788	128.882	257.333	15.6415	0.318785	17.9481	42.6225	3.69263	15.7851	276.626	28.1769	0.122369	20.5529	50.5267	8.55785	97.03	9.7342	9.30807	8.25635	0.116431	4.18981e-21	0.0957024	0.180622	0.0650411	0.00253563	1.37761e-38	0.338579	0.000389737	5.71855	538.029
2318	586.487	637.641	542.987	1541.71	379.492	747.788	128.882	257.333	15.6415	0.318785	17.9481	42.6225	3.69263	15.7851	276.626	28.1769	0.122369	20.5529	50.5267	8.55785	97.03	9.7342	9.30807	8.25635	0.116431	4.18981e-21	0.0957024	0.180622	0.0650411	0.00253563	1.37761e-38	0.338579	0.000389737	5.71855	538.029
2319	586.487	637.641	542.987	1541.71	379.492	747.788	128.882	257.333	15.6415	0.318785	17.9481	42.6225	3.69263	15.7851	276.626	28.1769	0.122369	20.5529	50.5267	8.55785	97.03	9.7342	9.30807	8.25635	0.116431	4.18981e-21	0.0957024	0.180622	0.0650411	0.00253563	1.37761e-38	0.338579	0.000389737	5.71855	538.029
2320	586.487	637.641	542.987	1541.71	379.492	747.788	128.882	257.333	15.6415	0.318785	17.9481	42.6225	3.69263	15.7851	276.626	28.1769	0.122369	20.5529	50.5267	8.55785	97.03	9.7342	9.30807	8.25635	0.116431	4.18981e-21	0.0957024	0.180622	0.0650411	0.00253563	1.37761e-38	0.338579	0.000389737	5.71855	538.029
2321	586.487	637.641	542.987	1541.71	379.492	747.788	128.882	257.333	15.6415	0.318785	17.9481	42.6225	3.69263	15.7851	276.626	28.1769	0.122369	20.5529	50.5267	8.55785	97.03	9.7342	9.30807	8.25635	0.116431	4.18981e-21	0.0957024	0.180622	0.0650411	0.00253563	1.37761e-38	0.338579	0.000389737	5.71855	538.029
2322	586.487	637.641	542.987	1541.71	379.492	747.788	128.882	257.333	15.6415	0.318785	17.9481	42.6225	3.69263	15.7851	276.626	28.1769	0.122369	20.5529	50.5267	8.55785	97.03	9.7342	9.30807	8.25635	0.116431	4.18981e-21	0.0957024	0.180622	0.0650411	0.00253563	1.37761e-38	0.338579	0.000389737	5.71855	538.029
2323	586.487	637.641	542.987	1541.71	379.492	747.788	128.882	257.333	15.6415	0.318785	17.9481	42.6225	3.69263	15.7851	276.626	28.1769	0.122369	20.5529	50.5267	8.55785	97.03	9.7342	9.30807	8.25635	0.116431	4.18981e-21	0.0957024	0.180622	0.0650411	0.00253563	1.37761e-38	0.338579	0.000389737	5.71855	538.029
2324	586.487	637.641	542.987	1541.71	379.492	747.788	128.882	257.333	15.6415	0.318785	17.9481	42.6225	3.69263	15.7851	276.626	28.1769	0.122369	20.5529	50.5267	8.55785	97.03	9.7342	9.30807	8.25635	0.116431	4.18981e-21	0.0957024	0.180622	0.0650411	0.00253563	1.37761e-38	0.338579	0.000389737	5.71855	538.029
2325	586.487	637.641	542.987	1541.71	379.492	747.788	128.882	257.333	15.6415	0.318785	17.9481	42.6225	3.69263	15.7851	276.626	28.1769	0.122369	20.5529	50.5267	8.55785	97.03	9.7342	9.30807	8.25635	0.116431	4.18981e-21	0.0957024	0.180622	0.0650411	0.00253563	1.37761e-38	0.338579	0.000389737	5.71855	538.029
2326	586.487	637.641	542.987	1541.71	379.492	747.788	128.882	257.333	15.6415	0.318785	17.9481	42.6225	3.69263	15.7851	276.626	28.1769	0.122369	20.5529	50.5267	8.55785	97.03	9.7342	9.30807	8.25635	0.116431	4.18981e-21	0.0957024	0.180622	0.0650411	0.00253563	1.37761e-38	0.338579	0.000389737	5.71855	538.029
2327	586.487	637.641	542.987	1541.71	379.492	747.788	128.882	257.333	15.6415	0.318785	17.9481	42.6225	3.69263	15.7851	276.626	28.1769	0.122369	20.5529	50.5267	8.55785	97.03	9.7342	9.30807	8.25635	0.116431	4.18981e-21	0.0957024	0.180622	0.0650411	0.00253563	1.37761e-38	0.338579	0.000389737	5.71855	538.029
2328	586.487	637.641	542.987	1541.71	379.492	747.788	128.882	257.333	15.6415	0.318785	17.9481	42.6225	3.69263	15.7851	276.626	28.1769	0.122369	20.5529	50.5267	8.55785	97.03	9.7342	9.30807	8.25635	0.116431	4.18981e-21	0.0957024	0.180622	0.0650411	0.00253563	1.37761e-38	0.338579	0.000389737	5.71855	538.029
2329	586.487	637.641	542.987	1541.71	379.492	747.788	128.882	257.333	15.6415	0.318785	17.9481	42.6225	3.69263	15.7851	276.626	28.1769	0.122369	20.5529	50.5267	8.55785	97.03	9.7342	9.30807	8.25635	0.116431	4.18981e-21	0.0957024	0.180622	0.0650411	0.00253563	1.37761e-38	0.338579	0.000389737	5.71855	538.029
2330	586.487	637.641	542.987	1541.71	379.492	747.788	128.882	257.333	15.6415	0.318785	17.9481	42.6225	3.69263	15.7851	276.626	28.1769	0.122369	20.5529	50.5267	8.55785	97.03	9.7342	9.30807	8.25635	0.116431	4.18981e-21	0.0957024	0.180622	0.0650411	0.00253563	1.37761e-38	0.338579	0.000389737	5.71855	538.029
2331	586.487	637.641	542.987	1541.71	379.492	747.788	128.882	257.333	15.6415	0.318785	17.9481	42.6225	3.69263	15.7851	276.626	28.1769	0.122369	20.5529	50.5267	8.55785	97.03	9.7342	9.30807	8.25635	0.116431	4.18981e-21	0.0957024	0.180622	0.0650411	0.00253563	1.37761e-38	0.338579	0.000389737	5.71855	538.029
2332	586.487	637.641	542.987	1541.71	379.492	747.788	128.882	257.333	15.6415	0.318785	17.9481	42.6225	3.69263	15.7851	276.626	28.1769	0.122369	20.5529	50.5267	8.55785	97.03	9.7342	9.30807	8.25635	0.116431	4.18981e-21	0.0957024	0.180622	0.0650411	0.00253563	1.37761e-38	0.338579	0.000389737	5.71855	538.029
2333	586.487	637.641	542.987	1541.71	379.492	747.788	128.882	257.333	15.6415	0.318785	17.9481	42.6225	3.69263	15.7851	276.626	28.1769	0.122369	20.5529	50.5267	8.55785	97.03	9.7342	9.30807	8.25635	0.116431	4.18981e-21	0.0957024	0.180622	0.0650411	0.00253563	1.37761e-38	0.338579	0.000389737	5.71855	538.029
2334	586.487	637.641	542.987	1541.71	379.492	747.788	128.882	257.333	15.6415	0.318785	17.9481	42.6225	3.69263	15.7851	276.626	28.1769	0.122369	20.5529	50.5267	8.55785	97.03	9.7342	9.30807	8.25635	0.116431	4.18981e-21	0.0957024	0.180622	0.0650411	0.00253563	1.37761e-38	0.338579	0.000389737	5.71855	538.029
2335	586.487	637.641	542.987	1541.71	379.492	747.788	128.882	257.333	15.6415	0.318785	17.9481	42.6225	3.69263	15.7851	276.626	28.1769	0.122369	20.5529	50.5267	8.55785	97.03	9.7342	9.30807	8.25635	0.116431	4.18981e-21	0.0957024	0.180622	0.0650411	0.00253563	1.37761e-38	0.338579	0.000389737	5.71855	538.029
2336	586.487	637.641	542.987	1541.71	379.492	747.788	128.882	257.333	15.6415	0.318785	17.9481	42.6225	3.69263	15.7851	276.626	28.1769	0.122369	20.5529	50.5267	8.55785	97.03	9.7342	9.30807	8.25635	0.116431	4.18981e-21	0.0957024	0.180622	0.0650411	0.00253563	1.37761e-38	0.338579	0.000389737	5.71855	538.029
2337	586.487	637.641	542.987	1541.71	379.492	747.788	128.882	257.333	15.6415	0.318785	17.9481	42.6225	3.69263	15.7851	276.626	28.1769	0.122369	20.5529	50.5267	8.55785	97.03	9.7342	9.30807	8.25635	0.116431	4.18981e-21	0.0957024	0.180622	0.0650411	0.00253563	1.37761e-38	0.338579	0.000389737	5.71855	538.029
2338	586.487	637.641	542.987	1541.71	379.492	747.788	128.882	257.333	15.6415	0.318785	17.9481	42.6225	3.69263	15.7851	276.626	28.1769	0.122369	20.5529	50.5267	8.55785	97.03	9.7342	9.30807	8.25635	0.116431	4.18981e-21	0.0957024	0.180622	0.0650411	0.00253563	1.37761e-38	0.338579	0.000389737	5.71855	538.029
2339	586.487	637.641	542.987	1541.71	379.492	747.788	128.882	257.333	15.6415	0.318785	17.9481	42.6225	3.69263	15.7851	276.626	28.1769	0.122369	20.5529	50.5267	8.55785	97.03	9.7342	9.30807	8.25635	0.116431	4.18981e-21	0.0957024	0.180622	0.0650411	0.00253563	1.37761e-38	0.338579	0.000389737	5.71855	538.029
2340	586.487	637.641	542.987	1541.71	379.492	747.788	128.882	257.333	15.6415	0.318785	17.9481	42.6225	3.69263	15.7851	276.626	28.1769	0.122369	20.5529	50.5267	8.55785	97.03	9.7342	9.30807	8.25635	0.116431	4.18981e-21	0.0957024	0.180622	0.0650411	0.00253563	1.37761e-38	0.338579	0.000389737	5.71855	538.029
2341	586.487	637.641	542.987	1541.71	379.492	747.788	128.882	257.333	15.6415	0.318785	17.9481	42.6225	3.69263	15.7851	276.626	28.1769	0.122369	20.5529	50.5267	8.55785	97.03	9.7342	9.30807	8.25635	0.116431	4.18981e-21	0.0957024	0.180622	0.0650411	0.00253563	1.37761e-38	0.338579	0.000389737	5.71855	538.029
2342	586.487	637.641	542.987	1541.71	379.492	747.788	128.882	257.333	15.6415	0.318785	17.9481	42.6225	3.69263	15.7851	276.626	28.1769	0.122369	20.5529	50.5267	8.55785	97.03	9.7342	9.30807	8.25635	0.116431	4.18981e-21	0.0957024	0.180622	0.0650411	0.00253563	1.37761e-38	0.338579	0.000389737	5.71855	538.029
2343	586.487	637.641	542.987	1541.71	379.492	747.788	128.882	257.333	15.6415	0.318785	17.9481	42.6225	3.69263	15.7851	276.626	28.1769	0.122369	20.5529	50.5267	8.55785	97.03	9.7342	9.30807	8.25635	0.116431	4.18981e-21	0.0957024	0.180622	0.0650411	0.00253563	1.37761e-38	0.338579	0.000389737	5.71855	538.029
2344	586.487	637.641	542.987	1541.71	379.492	747.788	128.882	257.333	15.6415	0.318785	17.9481	42.6225	3.69263	15.7851	276.626	28.1769	0.122369	20.5529	50.5267	8.55785	97.03	9.7342	9.30807	8.25635	0.116431	4.18981e-21	0.0957024	0.180622	0.0650411	0.00253563	1.37761e-38	0.338579	0.000389737	5.71855	538.029
2345	586.487	637.641	542.987	1541.71	379.492	747.788	128.882	257.333	15.6415	0.318785	17.9481	42.6225	3.69263	15.7851	276.626	28.1769	0.122369	20.5529	50.5267	8.55785	97.03	9.7342	9.30807	8.25635	0.116431	4.18981e-21	0.0957024	0.180622	0.0650411	0.00253563	1.37761e-38	0.338579	0.000389737	5.71855	538.029
2346	586.487	637.641	542.987	1541.71	379.492	747.788	128.882	257.333	15.6415	0.318785	17.9481	42.6225	3.69263	15.7851	276.626	28.1769	0.122369	20.5529	50.5267	8.55785	97.03	9.7342	9.30807	8.25635	0.116431	4.18981e-21	0.0957024	0.180622	0.0650411	0.00253563	1.37761e-38	0.338579	0.000389737	5.71855	538.029
2347	586.487	637.641	542.987	1541.71	379.492	747.788	128.882	257.333	15.6415	0.318785	17.9481	42.6225	3.69263	15.7851	276.626	28.1769	0.122369	20.5529	50.5267	8.55785	97.03	9.7342	9.30807	8.25635	0.116431	4.18981e-21	0.0957024	0.180622	0.0650411	0.00253563	1.37761e-38	0.338579	0.000389737	5.71855	538.029
2348	586.487	637.641	542.987	1541.71	379.492	747.788	128.882	257.333	15.6415	0.318785	17.9481	42.6225	3.69263	15.7851	276.626	28.1769	0.122369	20.5529	50.5267	8.55785	97.03	9.7342	9.30807	8.25635	0.116431	4.18981e-21	0.0957024	0.180622	0.0650411	0.00253563	1.37761e-38	0.338579	0.000389737	5.71855	538.029
2349	586.487	637.641	542.987	1541.71	379.492	747.788	128.882	257.333	15.6415	0.318785	17.9481	42.6225	3.69263	15.7851	276.626	28.1769	0.122369	20.5529	50.5267	8.55785	97.03	9.7342	9.30807	8.25635	0.116431	4.18981e-21	0.0957024	0.180622	0.0650411	0.00253563	1.37761e-38	0.338579	0.000389737	5.71855	538.029
2350	586.487	637.641	542.987	1541.71	379.492	747.788	128.882	257.333	15.6415	0.318785	17.9481	42.6225	3.69263	15.7851	276.626	28.1769	0.122369	20.5529	50.5267	8.55785	97.03	9.7342	9.30807	8.25635	0.116431	4.18981e-21	0.0957024	0.180622	0.0650411	0.00253563	1.37761e-38	0.338579	0.000389737	5.71855	538.029
2351	586.487	637.641	542.987	1541.71	379.492	747.788	128.882	257.333	15.6415	0.318785	17.9481	42.6225	3.69263	15.7851	276.626	28.1769	0.122369	20.5529	50.5267	8.55785	97.03	9.7342	9.30807	8.25635	0.116431	4.18981e-21	0.0957024	0.180622	0.0650411	0.00253563	1.37761e-38	0.338579	0.000389737	5.71855	538.029
2352	586.487	637.641	542.987	1541.71	379.492	747.788	128.882	257.333	15.6415	0.318785	17.9481	42.6225	3.69263	15.7851	276.626	28.1769	0.122369	20.5529	50.5267	8.55785	97.03	9.7342	9.30807	8.25635	0.116431	4.18981e-21	0.0957024	0.180622	0.0650411	0.00253563	1.37761e-38	0.338579	0.000389737	5.71855	538.029
2353	586.487	637.641	542.987	1541.71	379.492	747.788	128.882	257.333	15.6415	0.318785	17.9481	42.6225	3.69263	15.7851	276.626	28.1769	0.122369	20.5529	50.5267	8.55785	97.03	9.7342	9.30807	8.25635	0.116431	4.18981e-21	0.0957024	0.180622	0.0650411	0.00253563	1.37761e-38	0.338579	0.000389737	5.71855	538.029
2354	586.487	637.641	542.987	1541.71	379.492	747.788	128.882	257.333	15.6415	0.318785	17.9481	42.6225	3.69263	15.7851	276.626	28.1769	0.122369	20.5529	50.5267	8.55785	97.03	9.7342	9.30807	8.25635	0.116431	4.18981e-21	0.0957024	0.180622	0.0650411	0.00253563	1.37761e-38	0.338579	0.000389737	5.71855	538.029
2355	586.487	637.641	542.987	1541.71	379.492	747.788	128.882	257.333	15.6415	0.318785	17.9481	42.6225	3.69263	15.7851	276.626	28.1769	0.122369	20.5529	50.5267	8.55785	97.03	9.7342	9.30807	8.25635	0.116431	4.18981e-21	0.0957024	0.180622	0.0650411	0.00253563	1.37761e-38	0.338579	0.000389737	5.71855	538.029
2356	586.487	637.641	542.987	1541.71	379.492	747.788	128.882	257.333	15.6415	0.318785	17.9481	42.6225	3.69263	15.7851	276.626	28.1769	0.122369	20.5529	50.5267	8.55785	97.03	9.7342	9.30807	8.25635	0.116431	4.18981e-21	0.0957024	0.180622	0.0650411	0.00253563	1.37761e-38	0.338579	0.000389737	5.71855	538.029
2357	586.487	637.641	542.987	1541.71	379.492	747.788	128.882	257.333	15.6415	0.318785	17.9481	42.6225	3.69263	15.7851	276.626	28.1769	0.122369	20.5529	50.5267	8.55785	97.03	9.7342	9.30807	8.25635	0.116431	4.18981e-21	0.0957024	0.180622	0.0650411	0.00253563	1.37761e-38	0.338579	0.000389737	5.71855	538.029
2358	586.487	637.641	542.987	1541.71	379.492	747.788	128.882	257.333	15.6415	0.318785	17.9481	42.6225	3.69263	15.7851	276.626	28.1769	0.122369	20.5529	50.5267	8.55785	97.03	9.7342	9.30807	8.25635	0.116431	4.18981e-21	0.0957024	0.180622	0.0650411	0.00253563	1.37761e-38	0.338579	0.000389737	5.71855	538.029
2359	586.487	637.641	542.987	1541.71	379.492	747.788	128.882	257.333	15.6415	0.318785	17.9481	42.6225	3.69263	15.7851	276.626	28.1769	0.122369	20.5529	50.5267	8.55785	97.03	9.7342	9.30807	8.25635	0.116431	4.18981e-21	0.0957024	0.180622	0.0650411	0.00253563	1.37761e-38	0.338579	0.000389737	5.71855	538.029
2360	586.487	637.641	542.987	1541.71	379.492	747.788	128.882	257.333	15.6415	0.318785	17.9481	42.6225	3.69263	15.7851	276.626	28.1769	0.122369	20.5529	50.5267	8.55785	97.03	9.7342	9.30807	8.25635	0.116431	4.18981e-21	0.0957024	0.180622	0.0650411	0.00253563	1.37761e-38	0.338579	0.000389737	5.71855	538.029
2361	586.487	637.641	542.987	1541.71	379.492	747.788	128.882	257.333	15.6415	0.318785	17.9481	42.6225	3.69263	15.7851	276.626	28.1769	0.122369	20.5529	50.5267	8.55785	97.03	9.7342	9.30807	8.25635	0.116431	4.18981e-21	0.0957024	0.180622	0.0650411	0.00253563	1.37761e-38	0.338579	0.000389737	5.71855	538.029
2362	586.487	637.641	542.987	1541.71	379.492	747.788	128.882	257.333	15.6415	0.318785	17.9481	42.6225	3.69263	15.7851	276.626	28.1769	0.122369	20.5529	50.5267	8.55785	97.03	9.7342	9.30807	8.25635	0.116431	4.18981e-21	0.0957024	0.180622	0.0650411	0.00253563	1.37761e-38	0.338579	0.000389737	5.71855	538.029
2363	586.487	637.641	542.987	1541.71	379.492	747.788	128.882	257.333	15.6415	0.318785	17.9481	42.6225	3.69263	15.7851	276.626	28.1769	0.122369	20.5529	50.5267	8.55785	97.03	9.7342	9.30807	8.25635	0.116431	4.18981e-21	0.0957024	0.180622	0.0650411	0.00253563	1.37761e-38	0.338579	0.000389737	5.71855	538.029
2364	586.487	637.641	542.987	1541.71	379.492	747.788	128.882	257.333	15.6415	0.318785	17.9481	42.6225	3.69263	15.7851	276.626	28.1769	0.122369	20.5529	50.5267	8.55785	97.03	9.7342	9.30807	8.25635	0.116431	4.18981e-21	0.0957024	0.180622	0.0650411	0.00253563	1.37761e-38	0.338579	0.000389737	5.71855	538.029
2365	586.487	637.641	542.987	1541.71	379.492	747.788	128.882	257.333	15.6415	0.318785	17.9481	42.6225	3.69263	15.7851	276.626	28.1769	0.122369	20.5529	50.5267	8.55785	97.03	9.7342	9.30807	8.25635	0.116431	4.18981e-21	0.0957024	0.180622	0.0650411	0.00253563	1.37761e-38	0.338579	0.000389737	5.71855	538.029
2366	586.487	637.641	542.987	1541.71	379.492	747.788	128.882	257.333	15.6415	0.318785	17.9481	42.6225	3.69263	15.7851	276.626	28.1769	0.122369	20.5529	50.5267	8.55785	97.03	9.7342	9.30807	8.25635	0.116431	4.18981e-21	0.0957024	0.180622	0.0650411	0.00253563	1.37761e-38	0.338579	0.000389737	5.71855	538.029
2367	586.487	637.641	542.987	1541.71	379.492	747.788	128.882	257.333	15.6415	0.318785	17.9481	42.6225	3.69263	15.7851	276.626	28.1769	0.122369	20.5529	50.5267	8.55785	97.03	9.7342	9.30807	8.25635	0.116431	4.18981e-21	0.0957024	0.180622	0.0650411	0.00253563	1.37761e-38	0.338579	0.000389737	5.71855	538.029
2368	586.487	637.641	542.987	1541.71	379.492	747.788	128.882	257.333	15.6415	0.318785	17.9481	42.6225	3.69263	15.7851	276.626	28.1769	0.122369	20.5529	50.5267	8.55785	97.03	9.7342	9.30807	8.25635	0.116431	4.18981e-21	0.0957024	0.180622	0.0650411	0.00253563	1.37761e-38	0.338579	0.000389737	5.71855	538.029
2369	586.487	637.641	542.987	1541.71	379.492	747.788	128.882	257.333	15.6415	0.318785	17.9481	42.6225	3.69263	15.7851	276.626	28.1769	0.122369	20.5529	50.5267	8.55785	97.03	9.7342	9.30807	8.25635	0.116431	4.18981e-21	0.0957024	0.180622	0.0650411	0.00253563	1.37761e-38	0.338579	0.000389737	5.71855	538.029
2370	586.487	637.641	542.987	1541.71	379.492	747.788	128.882	257.333	15.6415	0.318785	17.9481	42.6225	3.69263	15.7851	276.626	28.1769	0.122369	20.5529	50.5267	8.55785	97.03	9.7342	9.30807	8.25635	0.116431	4.18981e-21	0.0957024	0.180622	0.0650411	0.00253563	1.37761e-38	0.338579	0.000389737	5.71855	538.029
2371	586.487	637.641	542.987	1541.71	379.492	747.788	128.882	257.333	15.6415	0.318785	17.9481	42.6225	3.69263	15.7851	276.626	28.1769	0.122369	20.5529	50.5267	8.55785	97.03	9.7342	9.30807	8.25635	0.116431	4.18981e-21	0.0957024	0.180622	0.0650411	0.00253563	1.37761e-38	0.338579	0.000389737	5.71855	538.029
2372	586.487	637.641	542.987	1541.71	379.492	747.788	128.882	257.333	15.6415	0.318785	17.9481	42.6225	3.69263	15.7851	276.626	28.1769	0.122369	20.5529	50.5267	8.55785	97.03	9.7342	9.30807	8.25635	0.116431	4.18981e-21	0.0957024	0.180622	0.0650411	0.00253563	1.37761e-38	0.338579	0.000389737	5.71855	538.029
2373	586.487	637.641	542.987	1541.71	379.492	747.788	128.882	257.333	15.6415	0.318785	17.9481	42.6225	3.69263	15.7851	276.626	28.1769	0.122369	20.5529	50.5267	8.55785	97.03	9.7342	9.30807	8.25635	0.116431	4.18981e-21	0.0957024	0.180622	0.0650411	0.00253563	1.37761e-38	0.338579	0.000389737	5.71855	538.029
2374	586.487	637.641	542.987	1541.71	379.492	747.788	128.882	257.333	15.6415	0.318785	17.9481	42.6225	3.69263	15.7851	276.626	28.1769	0.122369	20.5529	50.5267	8.55785	97.03	9.7342	9.30807	8.25635	0.116431	4.18981e-21	0.0957024	0.180622	0.0650411	0.00253563	1.37761e-38	0.338579	0.000389737	5.71855	538.029
2375	586.487	637.641	542.987	1541.71	379.492	747.788	128.882	257.333	15.6415	0.318785	17.9481	42.6225	3.69263	15.7851	276.626	28.1769	0.122369	20.5529	50.5267	8.55785	97.03	9.7342	9.30807	8.25635	0.116431	4.18981e-21	0.0957024	0.180622	0.0650411	0.00253563	1.37761e-38	0.338579	0.000389737	5.71855	538.029
2376	586.487	637.641	542.987	1541.71	379.492	747.788	128.882	257.333	15.6415	0.318785	17.9481	42.6225	3.69263	15.7851	276.626	28.1769	0.122369	20.5529	50.5267	8.55785	97.03	9.7342	9.30807	8.25635	0.116431	4.18981e-21	0.0957024	0.180622	0.0650411	0.00253563	1.37761e-38	0.338579	0.000389737	5.71855	538.029
2377	586.487	637.641	542.987	1541.71	379.492	747.788	128.882	257.333	15.6415	0.318785	17.9481	42.6225	3.69263	15.7851	276.626	28.1769	0.122369	20.5529	50.5267	8.55785	97.03	9.7342	9.30807	8.25635	0.116431	4.18981e-21	0.0957024	0.180622	0.0650411	0.00253563	1.37761e-38	0.338579	0.000389737	5.71855	538.029
2378	586.487	637.641	542.987	1541.71	379.492	747.788	128.882	257.333	15.6415	0.318785	17.9481	42.6225	3.69263	15.7851	276.626	28.1769	0.122369	20.5529	50.5267	8.55785	97.03	9.7342	9.30807	8.25635	0.116431	4.18981e-21	0.0957024	0.180622	0.0650411	0.00253563	1.37761e-38	0.338579	0.000389737	5.71855	538.029
2379	586.487	637.641	542.987	1541.71	379.492	747.788	128.882	257.333	15.6415	0.318785	17.9481	42.6225	3.69263	15.7851	276.626	28.1769	0.122369	20.5529	50.5267	8.55785	97.03	9.7342	9.30807	8.25635	0.116431	4.18981e-21	0.0957024	0.180622	0.0650411	0.00253563	1.37761e-38	0.338579	0.000389737	5.71855	538.029
2380	586.487	637.641	542.987	1541.71	379.492	747.788	128.882	257.333	15.6415	0.318785	17.9481	42.6225	3.69263	15.7851	276.626	28.1769	0.122369	20.5529	50.5267	8.55785	97.03	9.7342	9.30807	8.25635	0.116431	4.18981e-21	0.0957024	0.180622	0.0650411	0.00253563	1.37761e-38	0.338579	0.000389737	5.71855	538.029
2381	586.487	637.641	542.987	1541.71	379.492	747.788	128.882	257.333	15.6415	0.318785	17.9481	42.6225	3.69263	15.7851	276.626	28.1769	0.122369	20.5529	50.5267	8.55785	97.03	9.7342	9.30807	8.25635	0.116431	4.18981e-21	0.0957024	0.180622	0.0650411	0.00253563	1.37761e-38	0.338579	0.000389737	5.71855	538.029
2382	586.487	637.641	542.987	1541.71	379.492	747.788	128.882	257.333	15.6415	0.318785	17.9481	42.6225	3.69263	15.7851	276.626	28.1769	0.122369	20.5529	50.5267	8.55785	97.03	9.7342	9.30807	8.25635	0.116431	4.18981e-21	0.0957024	0.180622	0.0650411	0.00253563	1.37761e-38	0.338579	0.000389737	5.71855	538.029
2383	586.487	637.641	542.987	1541.71	379.492	747.788	128.882	257.333	15.6415	0.318785	17.9481	42.6225	3.69263	15.7851	276.626	28.1769	0.122369	20.5529	50.5267	8.55785	97.03	9.7342	9.30807	8.25635	0.116431	4.18981e-21	0.0957024	0.180622	0.0650411	0.00253563	1.37761e-38	0.338579	0.000389737	5.71855	538.029
2384	586.487	637.641	542.987	1541.71	379.492	747.788	128.882	257.333	15.6415	0.318785	17.9481	42.6225	3.69263	15.7851	276.626	28.1769	0.122369	20.5529	50.5267	8.55785	97.03	9.7342	9.30807	8.25635	0.116431	4.18981e-21	0.0957024	0.180622	0.0650411	0.00253563	1.37761e-38	0.338579	0.000389737	5.71855	538.029
2385	586.487	637.641	542.987	1541.71	379.492	747.788	128.882	257.333	15.6415	0.318785	17.9481	42.6225	3.69263	15.7851	276.626	28.1769	0.122369	20.5529	50.5267	8.55785	97.03	9.7342	9.30807	8.25635	0.116431	4.18981e-21	0.0957024	0.180622	0.0650411	0.00253563	1.37761e-38	0.338579	0.000389737	5.71855	538.029
2386	586.487	637.641	542.987	1541.71	379.492	747.788	128.882	257.333	15.6415	0.318785	17.9481	42.6225	3.69263	15.7851	276.626	28.1769	0.122369	20.5529	50.5267	8.55785	97.03	9.7342	9.30807	8.25635	0.116431	4.18981e-21	0.0957024	0.180622	0.0650411	0.00253563	1.37761e-38	0.338579	0.000389737	5.71855	538.029
2387	586.487	637.641	542.987	1541.71	379.492	747.788	128.882	257.333	15.6415	0.318785	17.9481	42.6225	3.69263	15.7851	276.626	28.1769	0.122369	20.5529	50.5267	8.55785	97.03	9.7342	9.30807	8.25635	0.116431	4.18981e-21	0.0957024	0.180622	0.0650411	0.00253563	1.37761e-38	0.338579	0.000389737	5.71855	538.029
2388	586.487	637.641	542.987	1541.71	379.492	747.788	128.882	257.333	15.6415	0.318785	17.9481	42.6225	3.69263	15.7851	276.626	28.1769	0.122369	20.5529	50.5267	8.55785	97.03	9.7342	9.30807	8.25635	0.116431	4.18981e-21	0.0957024	0.180622	0.0650411	0.00253563	1.37761e-38	0.338579	0.000389737	5.71855	538.029
2389	586.487	637.641	542.987	1541.71	379.492	747.788	128.882	257.333	15.6415	0.318785	17.9481	42.6225	3.69263	15.7851	276.626	28.1769	0.122369	20.5529	50.5267	8.55785	97.03	9.7342	9.30807	8.25635	0.116431	4.18981e-21	0.0957024	0.180622	0.0650411	0.00253563	1.37761e-38	0.338579	0.000389737	5.71855	538.029
2390	586.487	637.641	542.987	1541.71	379.492	747.788	128.882	257.333	15.6415	0.318785	17.9481	42.6225	3.69263	15.7851	276.626	28.1769	0.122369	20.5529	50.5267	8.55785	97.03	9.7342	9.30807	8.25635	0.116431	4.18981e-21	0.0957024	0.180622	0.0650411	0.00253563	1.37761e-38	0.338579	0.000389737	5.71855	538.029
2391	586.487	637.641	542.987	1541.71	379.492	747.788	128.882	257.333	15.6415	0.318785	17.9481	42.6225	3.69263	15.7851	276.626	28.1769	0.122369	20.5529	50.5267	8.55785	97.03	9.7342	9.30807	8.25635	0.116431	4.18981e-21	0.0957024	0.180622	0.0650411	0.00253563	1.37761e-38	0.338579	0.000389737	5.71855	538.029
2392	586.487	637.641	542.987	1541.71	379.492	747.788	128.882	257.333	15.6415	0.318785	17.9481	42.6225	3.69263	15.7851	276.626	28.1769	0.122369	20.5529	50.5267	8.55785	97.03	9.7342	9.30807	8.25635	0.116431	4.18981e-21	0.0957024	0.180622	0.0650411	0.00253563	1.37761e-38	0.338579	0.000389737	5.71855	538.029
2393	586.487	637.641	542.987	1541.71	379.492	747.788	128.882	257.333	15.6415	0.318785	17.9481	42.6225	3.69263	15.7851	276.626	28.1769	0.122369	20.5529	50.5267	8.55785	97.03	9.7342	9.30807	8.25635	0.116431	4.18981e-21	0.0957024	0.180622	0.0650411	0.00253563	1.37761e-38	0.338579	0.000389737	5.71855	538.029
2394	586.487	637.641	542.987	1541.71	379.492	747.788	128.882	257.333	15.6415	0.318785	17.9481	42.6225	3.69263	15.7851	276.626	28.1769	0.122369	20.5529	50.5267	8.55785	97.03	9.7342	9.30807	8.25635	0.116431	4.18981e-21	0.0957024	0.180622	0.0650411	0.00253563	1.37761e-38	0.338579	0.000389737	5.71855	538.029
2395	586.487	637.641	542.987	1541.71	379.492	747.788	128.882	257.333	15.6415	0.318785	17.9481	42.6225	3.69263	15.7851	276.626	28.1769	0.122369	20.5529	50.5267	8.55785	97.03	9.7342	9.30807	8.25635	0.116431	4.18981e-21	0.0957024	0.180622	0.0650411	0.00253563	1.37761e-38	0.338579	0.000389737	5.71855	538.029
2396	586.487	637.641	542.987	1541.71	379.492	747.788	128.882	257.333	15.6415	0.318785	17.9481	42.6225	3.69263	15.7851	276.626	28.1769	0.122369	20.5529	50.5267	8.55785	97.03	9.7342	9.30807	8.25635	0.116431	4.18981e-21	0.0957024	0.180622	0.0650411	0.00253563	1.37761e-38	0.338579	0.000389737	5.71855	538.029
2397	586.487	637.641	542.987	1541.71	379.492	747.788	128.882	257.333	15.6415	0.318785	17.9481	42.6225	3.69263	15.7851	276.626	28.1769	0.122369	20.5529	50.5267	8.55785	97.03	9.7342	9.30807	8.25635	0.116431	4.18981e-21	0.0957024	0.180622	0.0650411	0.00253563	1.37761e-38	0.338579	0.000389737	5.71855	538.029
2398	586.487	637.641	542.987	1541.71	379.492	747.788	128.882	257.333	15.6415	0.318785	17.9481	42.6225	3.69263	15.7851	276.626	28.1769	0.122369	20.5529	50.5267	8.55785	97.03	9.7342	9.30807	8.25635	0.116431	4.18981e-21	0.0957024	0.180622	0.0650411	0.00253563	1.37761e-38	0.338579	0.000389737	5.71855	538.029
2399	586.487	637.641	542.987	1541.71	379.492	747.788	128.882	257.333	15.6415	0.318785	17.9481	42.6225	3.69263	15.7851	276.626	28.1769	0.122369	20.5529	50.5267	8.55785	97.03	9.7342	9.30807	8.25635	0.116431	4.18981e-21	0.0957024	0.180622	0.0650411	0.00253563	1.37761e-38	0.338579	0.000389737	5.71855	538.029
2400	586.487	637.641	542.987	1541.71	379.492	747.788	128.882	257.333	15.6415	0.318785	17.9481	42.6225	3.69263	15.7851	276.626	28.1769	0.122369	20.5529	50.5267	8.55785	97.03	9.7342	9.30807	8.25635	0.116431	4.18981e-21	0.0957024	0.180622	0.0650411	0.00253563	1.37761e-38	0.338579	0.000389737	5.71855	538.029
2401	586.487	637.641	542.987	1541.71	379.492	747.788	128.882	257.333	15.6415	0.318785	17.9481	42.6225	3.69263	15.7851	276.626	28.1769	0.122369	20.5529	50.5267	8.55785	97.03	9.7342	9.30807	8.25635	0.116431	4.18981e-21	0.0957024	0.180622	0.0650411	0.00253563	1.37761e-38	0.338579	0.000389737	5.71855	538.029
2402	586.487	637.641	542.987	1541.71	379.492	747.788	128.882	257.333	15.6415	0.318785	17.9481	42.6225	3.69263	15.7851	276.626	28.1769	0.122369	20.5529	50.5267	8.55785	97.03	9.7342	9.30807	8.25635	0.116431	4.18981e-21	0.0957024	0.180622	0.0650411	0.00253563	1.37761e-38	0.338579	0.000389737	5.71855	538.029
2403	586.487	637.641	542.987	1541.71	379.492	747.788	128.882	257.333	15.6415	0.318785	17.9481	42.6225	3.69263	15.7851	276.626	28.1769	0.122369	20.5529	50.5267	8.55785	97.03	9.7342	9.30807	8.25635	0.116431	4.18981e-21	0.0957024	0.180622	0.0650411	0.00253563	1.37761e-38	0.338579	0.000389737	5.71855	538.029
2404	586.487	637.641	542.987	1541.71	379.492	747.788	128.882	257.333	15.6415	0.318785	17.9481	42.6225	3.69263	15.7851	276.626	28.1769	0.122369	20.5529	50.5267	8.55785	97.03	9.7342	9.30807	8.25635	0.116431	4.18981e-21	0.0957024	0.180622	0.0650411	0.00253563	1.37761e-38	0.338579	0.000389737	5.71855	538.029
2405	586.487	637.641	542.987	1541.71	379.492	747.788	128.882	257.333	15.6415	0.318785	17.9481	42.6225	3.69263	15.7851	276.626	28.1769	0.122369	20.5529	50.5267	8.55785	97.03	9.7342	9.30807	8.25635	0.116431	4.18981e-21	0.0957024	0.180622	0.0650411	0.00253563	1.37761e-38	0.338579	0.000389737	5.71855	538.029
2406	586.487	637.641	542.987	1541.71	379.492	747.788	128.882	257.333	15.6415	0.318785	17.9481	42.6225	3.69263	15.7851	276.626	28.1769	0.122369	20.5529	50.5267	8.55785	97.03	9.7342	9.30807	8.25635	0.116431	4.18981e-21	0.0957024	0.180622	0.0650411	0.00253563	1.37761e-38	0.338579	0.000389737	5.71855	538.029
2407	586.487	637.641	542.987	1541.71	379.492	747.788	128.882	257.333	15.6415	0.318785	17.9481	42.6225	3.69263	15.7851	276.626	28.1769	0.122369	20.5529	50.5267	8.55785	97.03	9.7342	9.30807	8.25635	0.116431	4.18981e-21	0.0957024	0.180622	0.0650411	0.00253563	1.37761e-38	0.338579	0.000389737	5.71855	538.029
2408	586.487	637.641	542.987	1541.71	379.492	747.788	128.882	257.333	15.6415	0.318785	17.9481	42.6225	3.69263	15.7851	276.626	28.1769	0.122369	20.5529	50.5267	8.55785	97.03	9.7342	9.30807	8.25635	0.116431	4.18981e-21	0.0957024	0.180622	0.0650411	0.00253563	1.37761e-38	0.338579	0.000389737	5.71855	538.029
2409	586.487	637.641	542.987	1541.71	379.492	747.788	128.882	257.333	15.6415	0.318785	17.9481	42.6225	3.69263	15.7851	276.626	28.1769	0.122369	20.5529	50.5267	8.55785	97.03	9.7342	9.30807	8.25635	0.116431	4.18981e-21	0.0957024	0.180622	0.0650411	0.00253563	1.37761e-38	0.338579	0.000389737	5.71855	538.029
2410	586.487	637.641	542.987	1541.71	379.492	747.788	128.882	257.333	15.6415	0.318785	17.9481	42.6225	3.69263	15.7851	276.626	28.1769	0.122369	20.5529	50.5267	8.55785	97.03	9.7342	9.30807	8.25635	0.116431	4.18981e-21	0.0957024	0.180622	0.0650411	0.00253563	1.37761e-38	0.338579	0.000389737	5.71855	538.029
2411	586.487	637.641	542.987	1541.71	379.492	747.788	128.882	257.333	15.6415	0.318785	17.9481	42.6225	3.69263	15.7851	276.626	28.1769	0.122369	20.5529	50.5267	8.55785	97.03	9.7342	9.30807	8.25635	0.116431	4.18981e-21	0.0957024	0.180622	0.0650411	0.00253563	1.37761e-38	0.338579	0.000389737	5.71855	538.029
2412	586.487	637.641	542.987	1541.71	379.492	747.788	128.882	257.333	15.6415	0.318785	17.9481	42.6225	3.69263	15.7851	276.626	28.1769	0.122369	20.5529	50.5267	8.55785	97.03	9.7342	9.30807	8.25635	0.116431	4.18981e-21	0.0957024	0.180622	0.0650411	0.00253563	1.37761e-38	0.338579	0.000389737	5.71855	538.029
2413	586.487	637.641	542.987	1541.71	379.492	747.788	128.882	257.333	15.6415	0.318785	17.9481	42.6225	3.69263	15.7851	276.626	28.1769	0.122369	20.5529	50.5267	8.55785	97.03	9.7342	9.30807	8.25635	0.116431	4.18981e-21	0.0957024	0.180622	0.0650411	0.00253563	1.37761e-38	0.338579	0.000389737	5.71855	538.029
2414	586.487	637.641	542.987	1541.71	379.492	747.788	128.882	257.333	15.6415	0.318785	17.9481	42.6225	3.69263	15.7851	276.626	28.1769	0.122369	20.5529	50.5267	8.55785	97.03	9.7342	9.30807	8.25635	0.116431	4.18981e-21	0.0957024	0.180622	0.0650411	0.00253563	1.37761e-38	0.338579	0.000389737	5.71855	538.029
2415	586.487	637.641	542.987	1541.71	379.492	747.788	128.882	257.333	15.6415	0.318785	17.9481	42.6225	3.69263	15.7851	276.626	28.1769	0.122369	20.5529	50.5267	8.55785	97.03	9.7342	9.30807	8.25635	0.116431	4.18981e-21	0.0957024	0.180622	0.0650411	0.00253563	1.37761e-38	0.338579	0.000389737	5.71855	538.029
2416	586.487	637.641	542.987	1541.71	379.492	747.788	128.882	257.333	15.6415	0.318785	17.9481	42.6225	3.69263	15.7851	276.626	28.1769	0.122369	20.5529	50.5267	8.55785	97.03	9.7342	9.30807	8.25635	0.116431	4.18981e-21	0.0957024	0.180622	0.0650411	0.00253563	1.37761e-38	0.338579	0.000389737	5.71855	538.029
2417	586.487	637.641	542.987	1541.71	379.492	747.788	128.882	257.333	15.6415	0.318785	17.9481	42.6225	3.69263	15.7851	276.626	28.1769	0.122369	20.5529	50.5267	8.55785	97.03	9.7342	9.30807	8.25635	0.116431	4.18981e-21	0.0957024	0.180622	0.0650411	0.00253563	1.37761e-38	0.338579	0.000389737	5.71855	538.029
2418	586.487	637.641	542.987	1541.71	379.492	747.788	128.882	257.333	15.6415	0.318785	17.9481	42.6225	3.69263	15.7851	276.626	28.1769	0.122369	20.5529	50.5267	8.55785	97.03	9.7342	9.30807	8.25635	0.116431	4.18981e-21	0.0957024	0.180622	0.0650411	0.00253563	1.37761e-38	0.338579	0.000389737	5.71855	538.029
2419	586.487	637.641	542.987	1541.71	379.492	747.788	128.882	257.333	15.6415	0.318785	17.9481	42.6225	3.69263	15.7851	276.626	28.1769	0.122369	20.5529	50.5267	8.55785	97.03	9.7342	9.30807	8.25635	0.116431	4.18981e-21	0.0957024	0.180622	0.0650411	0.00253563	1.37761e-38	0.338579	0.000389737	5.71855	538.029
2420	586.487	637.641	542.987	1541.71	379.492	747.788	128.882	257.333	15.6415	0.318785	17.9481	42.6225	3.69263	15.7851	276.626	28.1769	0.122369	20.5529	50.5267	8.55785	97.03	9.7342	9.30807	8.25635	0.116431	4.18981e-21	0.0957024	0.180622	0.0650411	0.00253563	1.37761e-38	0.338579	0.000389737	5.71855	538.029
2421	586.487	637.641	542.987	1541.71	379.492	747.788	128.882	257.333	15.6415	0.318785	17.9481	42.6225	3.69263	15.7851	276.626	28.1769	0.122369	20.5529	50.5267	8.55785	97.03	9.7342	9.30807	8.25635	0.116431	4.18981e-21	0.0957024	0.180622	0.0650411	0.00253563	1.37761e-38	0.338579	0.000389737	5.71855	538.029
2422	586.487	637.641	542.987	1541.71	379.492	747.788	128.882	257.333	15.6415	0.318785	17.9481	42.6225	3.69263	15.7851	276.626	28.1769	0.122369	20.5529	50.5267	8.55785	97.03	9.7342	9.30807	8.25635	0.116431	4.18981e-21	0.0957024	0.180622	0.0650411	0.00253563	1.37761e-38	0.338579	0.000389737	5.71855	538.029
2423	586.487	637.641	542.987	1541.71	379.492	747.788	128.882	257.333	15.6415	0.318785	17.9481	42.6225	3.69263	15.7851	276.626	28.1769	0.122369	20.5529	50.5267	8.55785	97.03	9.7342	9.30807	8.25635	0.116431	4.18981e-21	0.0957024	0.180622	0.0650411	0.00253563	1.37761e-38	0.338579	0.000389737	5.71855	538.029
2424	586.487	637.641	542.987	1541.71	379.492	747.788	128.882	257.333	15.6415	0.318785	17.9481	42.6225	3.69263	15.7851	276.626	28.1769	0.122369	20.5529	50.5267	8.55785	97.03	9.7342	9.30807	8.25635	0.116431	4.18981e-21	0.0957024	0.180622	0.0650411	0.00253563	1.37761e-38	0.338579	0.000389737	5.71855	538.029
2425	586.487	637.641	542.987	1541.71	379.492	747.788	128.882	257.333	15.6415	0.318785	17.9481	42.6225	3.69263	15.7851	276.626	28.1769	0.122369	20.5529	50.5267	8.55785	97.03	9.7342	9.30807	8.25635	0.116431	4.18981e-21	0.0957024	0.180622	0.0650411	0.00253563	1.37761e-38	0.338579	0.000389737	5.71855	538.029
2426	586.487	637.641	542.987	1541.71	379.492	747.788	128.882	257.333	15.6415	0.318785	17.9481	42.6225	3.69263	15.7851	276.626	28.1769	0.122369	20.5529	50.5267	8.55785	97.03	9.7342	9.30807	8.25635	0.116431	4.18981e-21	0.0957024	0.180622	0.0650411	0.00253563	1.37761e-38	0.338579	0.000389737	5.71855	538.029
2427	586.487	637.641	542.987	1541.71	379.492	747.788	128.882	257.333	15.6415	0.318785	17.9481	42.6225	3.69263	15.7851	276.626	28.1769	0.122369	20.5529	50.5267	8.55785	97.03	9.7342	9.30807	8.25635	0.116431	4.18981e-21	0.0957024	0.180622	0.0650411	0.00253563	1.37761e-38	0.338579	0.000389737	5.71855	538.029
2428	586.487	637.641	542.987	1541.71	379.492	747.788	128.882	257.333	15.6415	0.318785	17.9481	42.6225	3.69263	15.7851	276.626	28.1769	0.122369	20.5529	50.5267	8.55785	97.03	9.7342	9.30807	8.25635	0.116431	4.18981e-21	0.0957024	0.180622	0.0650411	0.00253563	1.37761e-38	0.338579	0.000389737	5.71855	538.029
2429	586.487	637.641	542.987	1541.71	379.492	747.788	128.882	257.333	15.6415	0.318785	17.9481	42.6225	3.69263	15.7851	276.626	28.1769	0.122369	20.5529	50.5267	8.55785	97.03	9.7342	9.30807	8.25635	0.116431	4.18981e-21	0.0957024	0.180622	0.0650411	0.00253563	1.37761e-38	0.338579	0.000389737	5.71855	538.029
2430	586.487	637.641	542.987	1541.71	379.492	747.788	128.882	257.333	15.6415	0.318785	17.9481	42.6225	3.69263	15.7851	276.626	28.1769	0.122369	20.5529	50.5267	8.55785	97.03	9.7342	9.30807	8.25635	0.116431	4.18981e-21	0.0957024	0.180622	0.0650411	0.00253563	1.37761e-38	0.338579	0.000389737	5.71855	538.029
2431	586.487	637.641	542.987	1541.71	379.492	747.788	128.882	257.333	15.6415	0.318785	17.9481	42.6225	3.69263	15.7851	276.626	28.1769	0.122369	20.5529	50.5267	8.55785	97.03	9.7342	9.30807	8.25635	0.116431	4.18981e-21	0.0957024	0.180622	0.0650411	0.00253563	1.37761e-38	0.338579	0.000389737	5.71855	538.029
2432	586.487	637.641	542.987	1541.71	379.492	747.788	128.882	257.333	15.6415	0.318785	17.9481	42.6225	3.69263	15.7851	276.626	28.1769	0.122369	20.5529	50.5267	8.55785	97.03	9.7342	9.30807	8.25635	0.116431	4.18981e-21	0.0957024	0.180622	0.0650411	0.00253563	1.37761e-38	0.338579	0.000389737	5.71855	538.029
2433	586.487	637.641	542.987	1541.71	379.492	747.788	128.882	257.333	15.6415	0.318785	17.9481	42.6225	3.69263	15.7851	276.626	28.1769	0.122369	20.5529	50.5267	8.55785	97.03	9.7342	9.30807	8.25635	0.116431	4.18981e-21	0.0957024	0.180622	0.0650411	0.00253563	1.37761e-38	0.338579	0.000389737	5.71855	538.029
2434	586.487	637.641	542.987	1541.71	379.492	747.788	128.882	257.333	15.6415	0.318785	17.9481	42.6225	3.69263	15.7851	276.626	28.1769	0.122369	20.5529	50.5267	8.55785	97.03	9.7342	9.30807	8.25635	0.116431	4.18981e-21	0.0957024	0.180622	0.0650411	0.00253563	1.37761e-38	0.338579	0.000389737	5.71855	538.029
2435	586.487	637.641	542.987	1541.71	379.492	747.788	128.882	257.333	15.6415	0.318785	17.9481	42.6225	3.69263	15.7851	276.626	28.1769	0.122369	20.5529	50.5267	8.55785	97.03	9.7342	9.30807	8.25635	0.116431	4.18981e-21	0.0957024	0.180622	0.0650411	0.00253563	1.37761e-38	0.338579	0.000389737	5.71855	538.029
2436	586.487	637.641	542.987	1541.71	379.492	747.788	128.882	257.333	15.6415	0.318785	17.9481	42.6225	3.69263	15.7851	276.626	28.1769	0.122369	20.5529	50.5267	8.55785	97.03	9.7342	9.30807	8.25635	0.116431	4.18981e-21	0.0957024	0.180622	0.0650411	0.00253563	1.37761e-38	0.338579	0.000389737	5.71855	538.029
2437	586.487	637.641	542.987	1541.71	379.492	747.788	128.882	257.333	15.6415	0.318785	17.9481	42.6225	3.69263	15.7851	276.626	28.1769	0.122369	20.5529	50.5267	8.55785	97.03	9.7342	9.30807	8.25635	0.116431	4.18981e-21	0.0957024	0.180622	0.0650411	0.00253563	1.37761e-38	0.338579	0.000389737	5.71855	538.029
2438	586.487	637.641	542.987	1541.71	379.492	747.788	128.882	257.333	15.6415	0.318785	17.9481	42.6225	3.69263	15.7851	276.626	28.1769	0.122369	20.5529	50.5267	8.55785	97.03	9.7342	9.30807	8.25635	0.116431	4.18981e-21	0.0957024	0.180622	0.0650411	0.00253563	1.37761e-38	0.338579	0.000389737	5.71855	538.029
2439	586.487	637.641	542.987	1541.71	379.492	747.788	128.882	257.333	15.6415	0.318785	17.9481	42.6225	3.69263	15.7851	276.626	28.1769	0.122369	20.5529	50.5267	8.55785	97.03	9.7342	9.30807	8.25635	0.116431	4.18981e-21	0.0957024	0.180622	0.0650411	0.00253563	1.37761e-38	0.338579	0.000389737	5.71855	538.029
2440	586.487	637.641	542.987	1541.71	379.492	747.788	128.882	257.333	15.6415	0.318785	17.9481	42.6225	3.69263	15.7851	276.626	28.1769	0.122369	20.5529	50.5267	8.55785	97.03	9.7342	9.30807	8.25635	0.116431	4.18981e-21	0.0957024	0.180622	0.0650411	0.00253563	1.37761e-38	0.338579	0.000389737	5.71855	538.029
2441	586.487	637.641	542.987	1541.71	379.492	747.788	128.882	257.333	15.6415	0.318785	17.9481	42.6225	3.69263	15.7851	276.626	28.1769	0.122369	20.5529	50.5267	8.55785	97.03	9.7342	9.30807	8.25635	0.116431	4.18981e-21	0.0957024	0.180622	0.0650411	0.00253563	1.37761e-38	0.338579	0.000389737	5.71855	538.029
2442	586.487	637.641	542.987	1541.71	379.492	747.788	128.882	257.333	15.6415	0.318785	17.9481	42.6225	3.69263	15.7851	276.626	28.1769	0.122369	20.5529	50.5267	8.55785	97.03	9.7342	9.30807	8.25635	0.116431	4.18981e-21	0.0957024	0.180622	0.0650411	0.00253563	1.37761e-38	0.338579	0.000389737	5.71855	538.029
2443	586.487	637.641	542.987	1541.71	379.492	747.788	128.882	257.333	15.6415	0.318785	17.9481	42.6225	3.69263	15.7851	276.626	28.1769	0.122369	20.5529	50.5267	8.55785	97.03	9.7342	9.30807	8.25635	0.116431	4.18981e-21	0.0957024	0.180622	0.0650411	0.00253563	1.37761e-38	0.338579	0.000389737	5.71855	538.029
2444	586.487	637.641	542.987	1541.71	379.492	747.788	128.882	257.333	15.6415	0.318785	17.9481	42.6225	3.69263	15.7851	276.626	28.1769	0.122369	20.5529	50.5267	8.55785	97.03	9.7342	9.30807	8.25635	0.116431	4.18981e-21	0.0957024	0.180622	0.0650411	0.00253563	1.37761e-38	0.338579	0.000389737	5.71855	538.029
2445	586.487	637.641	542.987	1541.71	379.492	747.788	128.882	257.333	15.6415	0.318785	17.9481	42.6225	3.69263	15.7851	276.626	28.1769	0.122369	20.5529	50.5267	8.55785	97.03	9.7342	9.30807	8.25635	0.116431	4.18981e-21	0.0957024	0.180622	0.0650411	0.00253563	1.37761e-38	0.338579	0.000389737	5.71855	538.029
2446	586.487	637.641	542.987	1541.71	379.492	747.788	128.882	257.333	15.6415	0.318785	17.9481	42.6225	3.69263	15.7851	276.626	28.1769	0.122369	20.5529	50.5267	8.55785	97.03	9.7342	9.30807	8.25635	0.116431	4.18981e-21	0.0957024	0.180622	0.0650411	0.00253563	1.37761e-38	0.338579	0.000389737	5.71855	538.029
2447	586.487	637.641	542.987	1541.71	379.492	747.788	128.882	257.333	15.6415	0.318785	17.9481	42.6225	3.69263	15.7851	276.626	28.1769	0.122369	20.5529	50.5267	8.55785	97.03	9.7342	9.30807	8.25635	0.116431	4.18981e-21	0.0957024	0.180622	0.0650411	0.00253563	1.37761e-38	0.338579	0.000389737	5.71855	538.029
2448	586.487	637.641	542.987	1541.71	379.492	747.788	128.882	257.333	15.6415	0.318785	17.9481	42.6225	3.69263	15.7851	276.626	28.1769	0.122369	20.5529	50.5267	8.55785	97.03	9.7342	9.30807	8.25635	0.116431	4.18981e-21	0.0957024	0.180622	0.0650411	0.00253563	1.37761e-38	0.338579	0.000389737	5.71855	538.029
2449	586.487	637.641	542.987	1541.71	379.492	747.788	128.882	257.333	15.6415	0.318785	17.9481	42.6225	3.69263	15.7851	276.626	28.1769	0.122369	20.5529	50.5267	8.55785	97.03	9.7342	9.30807	8.25635	0.116431	4.18981e-21	0.0957024	0.180622	0.0650411	0.00253563	1.37761e-38	0.338579	0.000389737	5.71855	538.029
2450	586.487	637.641	542.987	1541.71	379.492	747.788	128.882	257.333	15.6415	0.318785	17.9481	42.6225	3.69263	15.7851	276.626	28.1769	0.122369	20.5529	50.5267	8.55785	97.03	9.7342	9.30807	8.25635	0.116431	4.18981e-21	0.0957024	0.180622	0.0650411	0.00253563	1.37761e-38	0.338579	0.000389737	5.71855	538.029
2451	586.487	637.641	542.987	1541.71	379.492	747.788	128.882	257.333	15.6415	0.318785	17.9481	42.6225	3.69263	15.7851	276.626	28.1769	0.122369	20.5529	50.5267	8.55785	97.03	9.7342	9.30807	8.25635	0.116431	4.18981e-21	0.0957024	0.180622	0.0650411	0.00253563	1.37761e-38	0.338579	0.000389737	5.71855	538.029
2452	586.487	637.641	542.987	1541.71	379.492	747.788	128.882	257.333	15.6415	0.318785	17.9481	42.6225	3.69263	15.7851	276.626	28.1769	0.122369	20.5529	50.5267	8.55785	97.03	9.7342	9.30807	8.25635	0.116431	4.18981e-21	0.0957024	0.180622	0.0650411	0.00253563	1.37761e-38	0.338579	0.000389737	5.71855	538.029
2453	586.487	637.641	542.987	1541.71	379.492	747.788	128.882	257.333	15.6415	0.318785	17.9481	42.6225	3.69263	15.7851	276.626	28.1769	0.122369	20.5529	50.5267	8.55785	97.03	9.7342	9.30807	8.25635	0.116431	4.18981e-21	0.0957024	0.180622	0.0650411	0.00253563	1.37761e-38	0.338579	0.000389737	5.71855	538.029
2454	586.487	637.641	542.987	1541.71	379.492	747.788	128.882	257.333	15.6415	0.318785	17.9481	42.6225	3.69263	15.7851	276.626	28.1769	0.122369	20.5529	50.5267	8.55785	97.03	9.7342	9.30807	8.25635	0.116431	4.18981e-21	0.0957024	0.180622	0.0650411	0.00253563	1.37761e-38	0.338579	0.000389737	5.71855	538.029
2455	586.487	637.641	542.987	1541.71	379.492	747.788	128.882	257.333	15.6415	0.318785	17.9481	42.6225	3.69263	15.7851	276.626	28.1769	0.122369	20.5529	50.5267	8.55785	97.03	9.7342	9.30807	8.25635	0.116431	4.18981e-21	0.0957024	0.180622	0.0650411	0.00253563	1.37761e-38	0.338579	0.000389737	5.71855	538.029
2456	586.487	637.641	542.987	1541.71	379.492	747.788	128.882	257.333	15.6415	0.318785	17.9481	42.6225	3.69263	15.7851	276.626	28.1769	0.122369	20.5529	50.5267	8.55785	97.03	9.7342	9.30807	8.25635	0.116431	4.18981e-21	0.0957024	0.180622	0.0650411	0.00253563	1.37761e-38	0.338579	0.000389737	5.71855	538.029
2457	586.487	637.641	542.987	1541.71	379.492	747.788	128.882	257.333	15.6415	0.318785	17.9481	42.6225	3.69263	15.7851	276.626	28.1769	0.122369	20.5529	50.5267	8.55785	97.03	9.7342	9.30807	8.25635	0.116431	4.18981e-21	0.0957024	0.180622	0.0650411	0.00253563	1.37761e-38	0.338579	0.000389737	5.71855	538.029
2458	586.487	637.641	542.987	1541.71	379.492	747.788	128.882	257.333	15.6415	0.318785	17.9481	42.6225	3.69263	15.7851	276.626	28.1769	0.122369	20.5529	50.5267	8.55785	97.03	9.7342	9.30807	8.25635	0.116431	4.18981e-21	0.0957024	0.180622	0.0650411	0.00253563	1.37761e-38	0.338579	0.000389737	5.71855	538.029
2459	586.487	637.641	542.987	1541.71	379.492	747.788	128.882	257.333	15.6415	0.318785	17.9481	42.6225	3.69263	15.7851	276.626	28.1769	0.122369	20.5529	50.5267	8.55785	97.03	9.7342	9.30807	8.25635	0.116431	4.18981e-21	0.0957024	0.180622	0.0650411	0.00253563	1.37761e-38	0.338579	0.000389737	5.71855	538.029
2460	586.487	637.641	542.987	1541.71	379.492	747.788	128.882	257.333	15.6415	0.318785	17.9481	42.6225	3.69263	15.7851	276.626	28.1769	0.122369	20.5529	50.5267	8.55785	97.03	9.7342	9.30807	8.25635	0.116431	4.18981e-21	0.0957024	0.180622	0.0650411	0.00253563	1.37761e-38	0.338579	0.000389737	5.71855	538.029
2461	586.487	637.641	542.987	1541.71	379.492	747.788	128.882	257.333	15.6415	0.318785	17.9481	42.6225	3.69263	15.7851	276.626	28.1769	0.122369	20.5529	50.5267	8.55785	97.03	9.7342	9.30807	8.25635	0.116431	4.18981e-21	0.0957024	0.180622	0.0650411	0.00253563	1.37761e-38	0.338579	0.000389737	5.71855	538.029
2462	586.487	637.641	542.987	1541.71	379.492	747.788	128.882	257.333	15.6415	0.318785	17.9481	42.6225	3.69263	15.7851	276.626	28.1769	0.122369	20.5529	50.5267	8.55785	97.03	9.7342	9.30807	8.25635	0.116431	4.18981e-21	0.0957024	0.180622	0.0650411	0.00253563	1.37761e-38	0.338579	0.000389737	5.71855	538.029
2463	586.487	637.641	542.987	1541.71	379.492	747.788	128.882	257.333	15.6415	0.318785	17.9481	42.6225	3.69263	15.7851	276.626	28.1769	0.122369	20.5529	50.5267	8.55785	97.03	9.7342	9.30807	8.25635	0.116431	4.18981e-21	0.0957024	0.180622	0.0650411	0.00253563	1.37761e-38	0.338579	0.000389737	5.71855	538.029
2464	586.487	637.641	542.987	1541.71	379.492	747.788	128.882	257.333	15.6415	0.318785	17.9481	42.6225	3.69263	15.7851	276.626	28.1769	0.122369	20.5529	50.5267	8.55785	97.03	9.7342	9.30807	8.25635	0.116431	4.18981e-21	0.0957024	0.180622	0.0650411	0.00253563	1.37761e-38	0.338579	0.000389737	5.71855	538.029
2465	586.487	637.641	542.987	1541.71	379.492	747.788	128.882	257.333	15.6415	0.318785	17.9481	42.6225	3.69263	15.7851	276.626	28.1769	0.122369	20.5529	50.5267	8.55785	97.03	9.7342	9.30807	8.25635	0.116431	4.18981e-21	0.0957024	0.180622	0.0650411	0.00253563	1.37761e-38	0.338579	0.000389737	5.71855	538.029
2466	586.487	637.641	542.987	1541.71	379.492	747.788	128.882	257.333	15.6415	0.318785	17.9481	42.6225	3.69263	15.7851	276.626	28.1769	0.122369	20.5529	50.5267	8.55785	97.03	9.7342	9.30807	8.25635	0.116431	4.18981e-21	0.0957024	0.180622	0.0650411	0.00253563	1.37761e-38	0.338579	0.000389737	5.71855	538.029
2467	586.487	637.641	542.987	1541.71	379.492	747.788	128.882	257.333	15.6415	0.318785	17.9481	42.6225	3.69263	15.7851	276.626	28.1769	0.122369	20.5529	50.5267	8.55785	97.03	9.7342	9.30807	8.25635	0.116431	4.18981e-21	0.0957024	0.180622	0.0650411	0.00253563	1.37761e-38	0.338579	0.000389737	5.71855	538.029
2468	586.487	637.641	542.987	1541.71	379.492	747.788	128.882	257.333	15.6415	0.318785	17.9481	42.6225	3.69263	15.7851	276.626	28.1769	0.122369	20.5529	50.5267	8.55785	97.03	9.7342	9.30807	8.25635	0.116431	4.18981e-21	0.0957024	0.180622	0.0650411	0.00253563	1.37761e-38	0.338579	0.000389737	5.71855	538.029
2469	586.487	637.641	542.987	1541.71	379.492	747.788	128.882	257.333	15.6415	0.318785	17.9481	42.6225	3.69263	15.7851	276.626	28.1769	0.122369	20.5529	50.5267	8.55785	97.03	9.7342	9.30807	8.25635	0.116431	4.18981e-21	0.0957024	0.180622	0.0650411	0.00253563	1.37761e-38	0.338579	0.000389737	5.71855	538.029
2470	586.487	637.641	542.987	1541.71	379.492	747.788	128.882	257.333	15.6415	0.318785	17.9481	42.6225	3.69263	15.7851	276.626	28.1769	0.122369	20.5529	50.5267	8.55785	97.03	9.7342	9.30807	8.25635	0.116431	4.18981e-21	0.0957024	0.180622	0.0650411	0.00253563	1.37761e-38	0.338579	0.000389737	5.71855	538.029
2471	586.487	637.641	542.987	1541.71	379.492	747.788	128.882	257.333	15.6415	0.318785	17.9481	42.6225	3.69263	15.7851	276.626	28.1769	0.122369	20.5529	50.5267	8.55785	97.03	9.7342	9.30807	8.25635	0.116431	4.18981e-21	0.0957024	0.180622	0.0650411	0.00253563	1.37761e-38	0.338579	0.000389737	5.71855	538.029
2472	586.487	637.641	542.987	1541.71	379.492	747.788	128.882	257.333	15.6415	0.318785	17.9481	42.6225	3.69263	15.7851	276.626	28.1769	0.122369	20.5529	50.5267	8.55785	97.03	9.7342	9.30807	8.25635	0.116431	4.18981e-21	0.0957024	0.180622	0.0650411	0.00253563	1.37761e-38	0.338579	0.000389737	5.71855	538.029
2473	586.487	637.641	542.987	1541.71	379.492	747.788	128.882	257.333	15.6415	0.318785	17.9481	42.6225	3.69263	15.7851	276.626	28.1769	0.122369	20.5529	50.5267	8.55785	97.03	9.7342	9.30807	8.25635	0.116431	4.18981e-21	0.0957024	0.180622	0.0650411	0.00253563	1.37761e-38	0.338579	0.000389737	5.71855	538.029
2474	586.487	637.641	542.987	1541.71	379.492	747.788	128.882	257.333	15.6415	0.318785	17.9481	42.6225	3.69263	15.7851	276.626	28.1769	0.122369	20.5529	50.5267	8.55785	97.03	9.7342	9.30807	8.25635	0.116431	4.18981e-21	0.0957024	0.180622	0.0650411	0.00253563	1.37761e-38	0.338579	0.000389737	5.71855	538.029
2475	586.487	637.641	542.987	1541.71	379.492	747.788	128.882	257.333	15.6415	0.318785	17.9481	42.6225	3.69263	15.7851	276.626	28.1769	0.122369	20.5529	50.5267	8.55785	97.03	9.7342	9.30807	8.25635	0.116431	4.18981e-21	0.0957024	0.180622	0.0650411	0.00253563	1.37761e-38	0.338579	0.000389737	5.71855	538.029
2476	586.487	637.641	542.987	1541.71	379.492	747.788	128.882	257.333	15.6415	0.318785	17.9481	42.6225	3.69263	15.7851	276.626	28.1769	0.122369	20.5529	50.5267	8.55785	97.03	9.7342	9.30807	8.25635	0.116431	4.18981e-21	0.0957024	0.180622	0.0650411	0.00253563	1.37761e-38	0.338579	0.000389737	5.71855	538.029
2477	586.487	637.641	542.987	1541.71	379.492	747.788	128.882	257.333	15.6415	0.318785	17.9481	42.6225	3.69263	15.7851	276.626	28.1769	0.122369	20.5529	50.5267	8.55785	97.03	9.7342	9.30807	8.25635	0.116431	4.18981e-21	0.0957024	0.180622	0.0650411	0.00253563	1.37761e-38	0.338579	0.000389737	5.71855	538.029
2478	586.487	637.641	542.987	1541.71	379.492	747.788	128.882	257.333	15.6415	0.318785	17.9481	42.6225	3.69263	15.7851	276.626	28.1769	0.122369	20.5529	50.5267	8.55785	97.03	9.7342	9.30807	8.25635	0.116431	4.18981e-21	0.0957024	0.180622	0.0650411	0.00253563	1.37761e-38	0.338579	0.000389737	5.71855	538.029
2479	586.487	637.641	542.987	1541.71	379.492	747.788	128.882	257.333	15.6415	0.318785	17.9481	42.6225	3.69263	15.7851	276.626	28.1769	0.122369	20.5529	50.5267	8.55785	97.03	9.7342	9.30807	8.25635	0.116431	4.18981e-21	0.0957024	0.180622	0.0650411	0.00253563	1.37761e-38	0.338579	0.000389737	5.71855	538.029
2480	586.487	637.641	542.987	1541.71	379.492	747.788	128.882	257.333	15.6415	0.318785	17.9481	42.6225	3.69263	15.7851	276.626	28.1769	0.122369	20.5529	50.5267	8.55785	97.03	9.7342	9.30807	8.25635	0.116431	4.18981e-21	0.0957024	0.180622	0.0650411	0.00253563	1.37761e-38	0.338579	0.000389737	5.71855	538.029
2481	586.487	637.641	542.987	1541.71	379.492	747.788	128.882	257.333	15.6415	0.318785	17.9481	42.6225	3.69263	15.7851	276.626	28.1769	0.122369	20.5529	50.5267	8.55785	97.03	9.7342	9.30807	8.25635	0.116431	4.18981e-21	0.0957024	0.180622	0.0650411	0.00253563	1.37761e-38	0.338579	0.000389737	5.71855	538.029
2482	586.487	637.641	542.987	1541.71	379.492	747.788	128.882	257.333	15.6415	0.318785	17.9481	42.6225	3.69263	15.7851	276.626	28.1769	0.122369	20.5529	50.5267	8.55785	97.03	9.7342	9.30807	8.25635	0.116431	4.18981e-21	0.0957024	0.180622	0.0650411	0.00253563	1.37761e-38	0.338579	0.000389737	5.71855	538.029
2483	586.487	637.641	542.987	1541.71	379.492	747.788	128.882	257.333	15.6415	0.318785	17.9481	42.6225	3.69263	15.7851	276.626	28.1769	0.122369	20.5529	50.5267	8.55785	97.03	9.7342	9.30807	8.25635	0.116431	4.18981e-21	0.0957024	0.180622	0.0650411	0.00253563	1.37761e-38	0.338579	0.000389737	5.71855	538.029
2484	586.487	637.641	542.987	1541.71	379.492	747.788	128.882	257.333	15.6415	0.318785	17.9481	42.6225	3.69263	15.7851	276.626	28.1769	0.122369	20.5529	50.5267	8.55785	97.03	9.7342	9.30807	8.25635	0.116431	4.18981e-21	0.0957024	0.180622	0.0650411	0.00253563	1.37761e-38	0.338579	0.000389737	5.71855	538.029
2485	586.487	637.641	542.987	1541.71	379.492	747.788	128.882	257.333	15.6415	0.318785	17.9481	42.6225	3.69263	15.7851	276.626	28.1769	0.122369	20.5529	50.5267	8.55785	97.03	9.7342	9.30807	8.25635	0.116431	4.18981e-21	0.0957024	0.180622	0.0650411	0.00253563	1.37761e-38	0.338579	0.000389737	5.71855	538.029
2486	586.487	637.641	542.987	1541.71	379.492	747.788	128.882	257.333	15.6415	0.318785	17.9481	42.6225	3.69263	15.7851	276.626	28.1769	0.122369	20.5529	50.5267	8.55785	97.03	9.7342	9.30807	8.25635	0.116431	4.18981e-21	0.0957024	0.180622	0.0650411	0.00253563	1.37761e-38	0.338579	0.000389737	5.71855	538.029
2487	586.487	637.641	542.987	1541.71	379.492	747.788	128.882	257.333	15.6415	0.318785	17.9481	42.6225	3.69263	15.7851	276.626	28.1769	0.122369	20.5529	50.5267	8.55785	97.03	9.7342	9.30807	8.25635	0.116431	4.18981e-21	0.0957024	0.180622	0.0650411	0.00253563	1.37761e-38	0.338579	0.000389737	5.71855	538.029
2488	586.487	637.641	542.987	1541.71	379.492	747.788	128.882	257.333	15.6415	0.318785	17.9481	42.6225	3.69263	15.7851	276.626	28.1769	0.122369	20.5529	50.5267	8.55785	97.03	9.7342	9.30807	8.25635	0.116431	4.18981e-21	0.0957024	0.180622	0.0650411	0.00253563	1.37761e-38	0.338579	0.000389737	5.71855	538.029
2489	586.487	637.641	542.987	1541.71	379.492	747.788	128.882	257.333	15.6415	0.318785	17.9481	42.6225	3.69263	15.7851	276.626	28.1769	0.122369	20.5529	50.5267	8.55785	97.03	9.7342	9.30807	8.25635	0.116431	4.18981e-21	0.0957024	0.180622	0.0650411	0.00253563	1.37761e-38	0.338579	0.000389737	5.71855	538.029
2490	586.487	637.641	542.987	1541.71	379.492	747.788	128.882	257.333	15.6415	0.318785	17.9481	42.6225	3.69263	15.7851	276.626	28.1769	0.122369	20.5529	50.5267	8.55785	97.03	9.7342	9.30807	8.25635	0.116431	4.18981e-21	0.0957024	0.180622	0.0650411	0.00253563	1.37761e-38	0.338579	0.000389737	5.71855	538.029
2491	586.487	637.641	542.987	1541.71	379.492	747.788	128.882	257.333	15.6415	0.318785	17.9481	42.6225	3.69263	15.7851	276.626	28.1769	0.122369	20.5529	50.5267	8.55785	97.03	9.7342	9.30807	8.25635	0.116431	4.18981e-21	0.0957024	0.180622	0.0650411	0.00253563	1.37761e-38	0.338579	0.000389737	5.71855	538.029
2492	586.487	637.641	542.987	1541.71	379.492	747.788	128.882	257.333	15.6415	0.318785	17.9481	42.6225	3.69263	15.7851	276.626	28.1769	0.122369	20.5529	50.5267	8.55785	97.03	9.7342	9.30807	8.25635	0.116431	4.18981e-21	0.0957024	0.180622	0.0650411	0.00253563	1.37761e-38	0.338579	0.000389737	5.71855	538.029
2493	586.487	637.641	542.987	1541.71	379.492	747.788	128.882	257.333	15.6415	0.318785	17.9481	42.6225	3.69263	15.7851	276.626	28.1769	0.122369	20.5529	50.5267	8.55785	97.03	9.7342	9.30807	8.25635	0.116431	4.18981e-21	0.0957024	0.180622	0.0650411	0.00253563	1.37761e-38	0.338579	0.000389737	5.71855	538.029
2494	586.487	637.641	542.987	1541.71	379.492	747.788	128.882	257.333	15.6415	0.318785	17.9481	42.6225	3.69263	15.7851	276.626	28.1769	0.122369	20.5529	50.5267	8.55785	97.03	9.7342	9.30807	8.25635	0.116431	4.18981e-21	0.0957024	0.180622	0.0650411	0.00253563	1.37761e-38	0.338579	0.000389737	5.71855	538.029
2495	586.487	637.641	542.987	1541.71	379.492	747.788	128.882	257.333	15.6415	0.318785	17.9481	42.6225	3.69263	15.7851	276.626	28.1769	0.122369	20.5529	50.5267	8.55785	97.03	9.7342	9.30807	8.25635	0.116431	4.18981e-21	0.0957024	0.180622	0.0650411	0.00253563	1.37761e-38	0.338579	0.000389737	5.71855	538.029
2496	586.487	637.641	542.987	1541.71	379.492	747.788	128.882	257.333	15.6415	0.318785	17.9481	42.6225	3.69263	15.7851	276.626	28.1769	0.122369	20.5529	50.5267	8.55785	97.03	9.7342	9.30807	8.25635	0.116431	4.18981e-21	0.0957024	0.180622	0.0650411	0.00253563	1.37761e-38	0.338579	0.000389737	5.71855	538.029
2497	586.487	637.641	542.987	1541.71	379.492	747.788	128.882	257.333	15.6415	0.318785	17.9481	42.6225	3.69263	15.7851	276.626	28.1769	0.122369	20.5529	50.5267	8.55785	97.03	9.7342	9.30807	8.25635	0.116431	4.18981e-21	0.0957024	0.180622	0.0650411	0.00253563	1.37761e-38	0.338579	0.000389737	5.71855	538.029
2498	586.487	637.641	542.987	1541.71	379.492	747.788	128.882	257.333	15.6415	0.318785	17.9481	42.6225	3.69263	15.7851	276.626	28.1769	0.122369	20.5529	50.5267	8.55785	97.03	9.7342	9.30807	8.25635	0.116431	4.18981e-21	0.0957024	0.180622	0.0650411	0.00253563	1.37761e-38	0.338579	0.000389737	5.71855	538.029
2499	586.487	637.641	542.987	1541.71	379.492	747.788	128.882	257.333	15.6415	0.318785	17.9481	42.6225	3.69263	15.7851	276.626	28.1769	0.122369	20.5529	50.5267	8.55785	97.03	9.7342	9.30807	8.25635	0.116431	4.18981e-21	0.0957024	0.180622	0.0650411	0.00253563	1.37761e-38	0.338579	0.000389737	5.71855	538.029
2500	586.487	637.641	542.987	1541.71	379.492	747.788	128.882	257.333	15.6415	0.318785	17.9481	42.6225	3.69263	15.7851	276.626	28.1769	0.122369	20.5529	50.5267	8.55785	97.03	9.7342	9.30807	8.25635	0.116431	4.18981e-21	0.0957024	0.180622	0.0650411	0.00253563	1.37761e-38	0.338579	0.000389737	5.71855	538.029
