# Supplementary material for: The Social Cost of Fossil and Industrial CO2 Emissions from 1950 to 2018
Source: Research Square preprint supplement (doi:10.21203/rs.3.rs-2244259/v1), 2022-11-17
Supplement: Supplementary file 23 [file RCP6SCP6TO45_MIDYEAR_RADFORCING.xls]

## Sheet: RCP6SCP6to45_MIDYEAR_RADFORCIN
RCP6 WITH SUPPLEMENTARY EXTENSION SCP6TO45__RADIATIVE FORCINGS____________________________
CONTENT: ANNUAL AVERAGE, GLOBAL MEAN RADIATIVE FORCING.
RUN: RCP6SCP6TO45, FINAL RELEASE, 30 MAY 2009
RCP6 CONTACT: AIM group, Toshihiko Masui (masui@nies.go.jp), Toshihiko Masui (masui@nies.go.jp) & Kenichi Matsumoto (matsumoto.kenichi@nies.go.jp)
DATE: 30/5/2010 01:02:33
MAGICC-VERSION: 6.3.09, 25 November 2009
FILE PRODUCED BY: RCP Concentration Calculation & Data Group, M. Meinshausen, S. Smith, K. Riahi, D. van Vuuren et al.
DOCUMENTATION: M. Meinshausen, S. Smith et al. (2011) "The RCP GHG concentrations and their extension from 1765 to 2300", DOI 10.1007/s10584-011-0156-z, Climatic Change.
CMIP5 INFO: http://cmip-pcmdi.llnl.gov/cmip5/
RCP DATABASE: http://www.iiasa.ac.at/web-apps/tnt/RcpDb
FURTHER INFO: For data sources, aknowledgements and further information, see http://www.pik-potsdam.de/~mmalte/rcps.
NOTE: THIS FORCING DATASET IS NOT CMIP5 RECOMMENDATION, AS CONCENTRATIONS, NOT FORCING, SHALL BE PRESCRIBED IN MAIN CMIP5 RUNS. SEE OZONE, LANDUSE AND AEROSOL DATA SOURCES DESCRIBED IN CMIP5 NOTES AND RCP DATABASE.
Radiative Forcing after strat. temp. adjustment.;
RCP6 starts 2005; 20th century data and earlier is provided for convenience. After 2100, the supplementary extension starts, and merges with the RCP4.5 extension concentration levels by 2250.
COLUMN_DESCRIPTION________________________________________
1 TOTAL_INCLVOLCANIC_RF Total anthropogenic and natural radiative forcing
2 VOLCANIC_ANNUAL_RF Annual mean volcanic stratospheric aerosol forcing
3 SOLAR_RF Solar irradience forcing
4 TOTAL_ANTHRO_RF Total anthropogenic forcing
5 GHG_RF Total greenhouse gas forcing (CO2, CH4, N2O, HFCs, PFCs, SF6, and Montreal Protocol gases).
6 KYOTOGHG_RF Total forcing from greenhouse gases controlled under the Kyoto Protocol (CO2, CH4, N2O, HFCs, PFCs, SF6).
7 CO2CH4N2O_RF Total forcing from CO2, methan and nitrous oxide.
8 CO2_RF CO2 Forcing
9 CH4_RF Methane Forcing
10 N2O_RF Nitrous Oxide Forcing
11 FGASSUM_RF Total forcing from all flourinated gases controlled under the Kyoto Protocol (HFCs, PFCs, SF6; i.e. columns 13-24)
12 MHALOSUM_RF Total forcing from all gases controlled under the Montreal Protocol (columns 25-40)
13-24 Flourinated gases controlled under the Kyoto Protocol
25-40 Ozone Depleting Substances controlled under the Montreal Protocol
41 TOTAER_DIR_RF Total direct aerosol forcing (aggregating columns 42 to 47)
42 OCI_RF Direct fossil fuel aerosol (organic carbon)
43 BCI_RF Direct fossil fuel aerosol (black carbon)
44 SOXI_RF Direct sulphate aerosol
45 NOXI_RF Direct nitrate aerosol
46 BIOMASSAER_RF Direct biomass burning related aerosol
47 MINERALDUST_RF Direct Forcing from mineral dust aerosol
48 CLOUD_TOT_RF Cloud albedo effect
49 STRATOZ_RF Stratospheric ozone forcing
50 TROPOZ_RF Tropospheric ozone forcing
51 CH4OXSTRATH2O_RF Stratospheric water-vapour from methane oxidisation
52 LANDUSE_RF Landuse albedo
53 BCSNOW_RF Black carbon on snow.
&THISFILE_SPECIFICATIONS
THISFILE_DATACOLUMNS	53
THISFILE_FIRSTYEAR	1765
THISFILE_LASTYEAR	2500
THISFILE_ANNUALSTEPS	1
THISFILE_FIRSTDATAROW	61
THISFILE_UNITS	SEE ROW 59
THISFILE_DATTYPE	RCPDAT
/
COLUMN:	1	2	3	4	5	6	7	8	9	10	11	12	13	14	15	16	17	18	19	20	21	22	23	24	25	26	27	28	29	30	31	32	33	34	35	36	37	38	39	40	41	42	43	44	45	46	47	48	49
UNITS:	W/m2	W/m2	W/m2	W/m2	W/m2	W/m2	W/m2	W/m2	W/m2	W/m2	W/m2	W/m2	W/m2	W/m2	W/m2	W/m2	W/m2	W/m2	W/m2	W/m2	W/m2	W/m2	W/m2	W/m2	W/m2	W/m2	W/m2	W/m2	W/m2	W/m2	W/m2	W/m2	W/m2	W/m2	W/m2	W/m2	W/m2	W/m2	W/m2	W/m2	W/m2	W/m2	W/m2	W/m2	W/m2	W/m2	W/m2	W/m2	W/m2
v YEARS/GAS >	TOTAL_INCLVOLCANIC_RF	VOLCANIC_ANNUAL_RF	SOLAR_RF	TOTAL_ANTHRO_RF	GHG_RF	KYOTOGHG_RF	CO2CH4N2O_RF	CO2_RF	CH4_RF	N2O_RF	FGASSUM_RF	MHALOSUM_RF	CF4	C2F6	C6F14	HFC23	HFC32	HFC43_10	HFC125	HFC134a	HFC143a	HFC227ea	HFC245fa	SF6	CFC_11	CFC_12	CFC_113	CFC_114	CFC_115	CARB_TET	MCF	HCFC_22	HCFC_141B	HCFC_142B	HALON1211	HALON1202	HALON1301	HALON2402	CH3BR	CH3CL	TOTAER_DIR_RF	OCI_RF	BCI_RF	SOXI_RF	NOXI_RF	BIOMASSAER_RF	MINERALDUST_RF	CLOUD_TOT_RF	STRATOZ_RF
1765	0	0	-0.0283587	0	0	0	0	0	0	0	0	0	0	0	0	0	0	0	0	0	0	0	0	0	0	0	0	0	0	0	0	0	0	0	0	0	0	0	0	0	0	0	0	0	0	0	0	0	0
1766	0.126027	0.116222	-0.0206938	0.0163188	0.0153635	0.0153635	0.0153635	0.0110491	0.00357577	0.000738661	0	0	0	0	0	0	0	0	0	0	0	0	0	0	0	0	0	0	0	0	0	0	0	0	0	0	0	0	0	0	1.77672e-05	0	0	-2.86731e-05	-1.2928e-05	0.000250103	-0.000190735	-0.000801451	0
1767	0.273031	0.232444	0.00703937	0.0335479	0.0321232	0.0321232	0.0321232	0.023246	0.00736074	0.00151637	0	0	0	0	0	0	0	0	0	0	0	0	0	0	0	0	0	0	0	0	0	0	0	0	0	0	0	0	0	0	-6.46768e-06	0	0	-7.97657e-05	-3.19082e-05	0.000672939	-0.000567733	-0.00238112	0
1768	0.278871	0.197444	0.0462569	0.0351696	0.0349722	0.0349722	0.0349722	0.0256052	0.00777313	0.00159381	0	0	0	0	0	0	0	0	0	0	0	0	0	0	0	0	0	0	0	0	0	0	0	0	0	0	0	0	0	0	-0.000120356	0	0	-0.000120421	-4.16465e-05	0.000977553	-0.000935841	-0.00391494	0
1769	0.242045	0.131819	0.073605	0.036621	0.0378995	0.0378995	0.0378995	0.028057	0.00817237	0.00167006	0	0	0	0	0	0	0	0	0	0	0	0	0	0	0	0	0	0	0	0	0	0	0	0	0	0	0	0	0	0	-0.00028157	0	0	-0.000153962	-4.79302e-05	0.00121549	-0.00129517	-0.0054041	0
1770	0.242824	0.127444	0.0772581	0.038122	0.0408559	0.0408559	0.0408559	0.0305529	0.00855779	0.00174523	0	0	0	0	0	0	0	0	0	0	0	0	0	0	0	0	0	0	0	0	0	0	0	0	0	0	0	0	0	0	-0.000470954	0	0	-0.000182439	-5.25379e-05	0.00140985	-0.00164582	-0.00684976	0
1771	0.284142	0.179944	0.0648944	0.0393037	0.043845	0.043845	0.043845	0.0330936	0.00893207	0.00181931	0	0	0	0	0	0	0	0	0	0	0	0	0	0	0	0	0	0	0	0	0	0	0	0	0	0	0	0	0	0	-0.000888303	-1.68577e-05	6.06652e-05	-0.000242598	-5.69856e-05	0.00135539	-0.00198792	-0.00844667	0
1772	0.299857	0.214944	0.0443363	0.0405766	0.0468967	0.0468967	0.0468967	0.0357058	0.00929859	0.00189228	0	0	0	0	0	0	0	0	0	0	0	0	0	0	0	0	0	0	0	0	0	0	0	0	0	0	0	0	0	0	-0.00132732	-3.37153e-05	0.00012133	-0.000298156	-6.07885e-05	0.00126556	-0.00232155	-0.0100013	0
1773	0.290756	0.228069	0.0203481	0.0423385	0.0500195	0.0500195	0.0500195	0.0383971	0.00965806	0.00196426	0	0	0	0	0	0	0	0	0	0	0	0	0	0	0	0	0	0	0	0	0	0	0	0	0	0	0	0	0	0	-0.00157118	-3.37153e-05	0.00012133	-0.000314621	-6.33834e-05	0.00136606	-0.00264685	-0.0113213	0
1774	0.2781	0.232444	0.00144375	0.0442116	0.0532061	0.0532061	0.0532061	0.0411609	0.0100098	0.00203544	0	0	0	0	0	0	0	0	0	0	0	0	0	0	0	0	0	0	0	0	0	0	0	0	0	0	0	0	0	0	-0.00181491	-3.37153e-05	0.00012133	-0.000329868	-6.57492e-05	0.001457	-0.00296391	-0.012602	0
1775	0.268839	0.232444	-0.00981313	0.046208	0.0564687	0.0564687	0.0564687	0.0440096	0.0103531	0.00210598	0	0	0	0	0	0	0	0	0	0	0	0	0	0	0	0	0	0	0	0	0	0	0	0	0	0	0	0	0	0	-0.00205687	-3.37153e-05	0.00012133	-0.000344145	-6.79547e-05	0.00154045	-0.00327284	-0.0138446	0
1776	0.276856	0.232444	-0.00395063	0.0483625	0.0598423	0.0598423	0.0598423	0.0469792	0.0106873	0.00217585	0	0	0	0	0	0	0	0	0	0	0	0	0	0	0	0	0	0	0	0	0	0	0	0	0	0	0	0	0	0	-0.00229589	-3.37153e-05	0.00012133	-0.00035764	-7.0046e-05	0.00161793	-0.00357375	-0.0150498	0
1777	0.305761	0.232444	0.022645	0.0506714	0.0633239	0.0633239	0.0633239	0.0500673	0.0110116	0.00224499	0	0	0	0	0	0	0	0	0	0	0	0	0	0	0	0	0	0	0	0	0	0	0	0	0	0	0	0	0	0	-0.00253112	-3.37153e-05	0.00012133	-0.000370499	-7.2055e-05	0.00169058	-0.00386676	-0.0162188	0
1778	0.337875	0.232444	0.0523687	0.0530622	0.0668415	0.0668415	0.0668415	0.0532026	0.0113254	0.0023135	0	0	0	0	0	0	0	0	0	0	0	0	0	0	0	0	0	0	0	0	0	0	0	0	0	0	0	0	0	0	-0.0027619	-3.37153e-05	0.00012133	-0.000382835	-7.40046e-05	0.00175929	-0.00415196	-0.0173523	0
1779	0.347581	0.232444	0.0597012	0.0554354	0.0702966	0.0702966	0.0702966	0.0562871	0.0116279	0.00238163	0	0	0	0	0	0	0	0	0	0	0	0	0	0	0	0	0	0	0	0	0	0	0	0	0	0	0	0	0	0	-0.00298778	-3.37153e-05	0.00012133	-0.000394738	-7.59118e-05	0.00182473	-0.00442948	-0.0184512	0
1780	0.341674	0.232444	0.0515287	0.057701	0.0736012	0.0736012	0.0736012	0.0592345	0.0119171	0.00244953	0	0	0	0	0	0	0	0	0	0	0	0	0	0	0	0	0	0	0	0	0	0	0	0	0	0	0	0	0	0	-0.0032084	-3.37153e-05	0.00012133	-0.00040628	-7.77893e-05	0.00188746	-0.00469941	-0.0195164	0
1781	0.333722	0.232444	0.041895	0.0593826	0.0767183	0.0767183	0.0767183	0.0620123	0.0121889	0.00251718	0	0	0	0	0	0	0	0	0	0	0	0	0	0	0	0	0	0	0	0	0	0	0	0	0	0	0	0	0	0	-0.0036953	-5.0573e-05	0.000181996	-0.000443034	-8.00993e-05	0.00165829	-0.00496187	-0.0207342	0
1782	0.29102	0.210569	0.019495	0.0609557	0.0796905	0.0796905	0.0796905	0.0646641	0.0124419	0.00258449	0	0	0	0	0	0	0	0	0	0	0	0	0	0	0	0	0	0	0	0	0	0	0	0	0	0	0	0	0	0	-0.00417917	-6.74306e-05	0.000242661	-0.000479101	-8.23858e-05	0.00142406	-0.00521697	-0.0219192	0
1783	0.175605	0.118694	-0.00603313	0.0629442	0.0826033	0.0826033	0.0826033	0.0672719	0.0126798	0.00265156	0	0	0	0	0	0	0	0	0	0	0	0	0	0	0	0	0	0	0	0	0	0	0	0	0	0	0	0	0	0	-0.0043878	-6.74306e-05	0.000242661	-0.000489063	-8.42044e-05	0.00147505	-0.00546481	-0.0228868	0
1784	0.0902692	0.0443192	-0.0190575	0.0650075	0.0855481	0.0855481	0.0855481	0.0699211	0.0129083	0.00271864	0	0	0	0	0	0	0	0	0	0	0	0	0	0	0	0	0	0	0	0	0	0	0	0	0	0	0	0	0	0	-0.00458993	-6.74306e-05	0.000242661	-0.000498942	-8.60251e-05	0.00152532	-0.00570551	-0.0238237	0
1785	0.162453	0.101194	-0.00597625	0.0672351	0.0886122	0.0886122	0.0886122	0.0726933	0.013133	0.00278589	0	0	0	0	0	0	0	0	0	0	0	0	0	0	0	0	0	0	0	0	0	0	0	0	0	0	0	0	0	0	-0.00478558	-6.74306e-05	0.000242661	-0.000508756	-8.78518e-05	0.00157496	-0.00593917	-0.0247309	0
1786	0.289562	0.188694	0.0311894	0.0696782	0.0918446	0.0918446	0.0918446	0.0756317	0.0133596	0.00285332	0	0	0	0	0	0	0	0	0	0	0	0	0	0	0	0	0	0	0	0	0	0	0	0	0	0	0	0	0	0	-0.00497481	-6.74306e-05	0.000242661	-0.00051852	-8.96878e-05	0.00162407	-0.00616591	-0.025609	0
1787	0.352999	0.223694	0.0569931	0.0723117	0.0952178	0.0952178	0.0952178	0.0787033	0.0135937	0.00292083	0	0	0	0	0	0	0	0	0	0	0	0	0	0	0	0	0	0	0	0	0	0	0	0	0	0	0	0	0	0	-0.00515766	-6.74306e-05	0.000242661	-0.000528246	-9.15357e-05	0.00167271	-0.00638582	-0.0264587	0
1788	0.361769	0.228069	0.0586425	0.0750571	0.0986512	0.0986512	0.0986512	0.0818218	0.0138409	0.0029885	0	0	0	0	0	0	0	0	0	0	0	0	0	0	0	0	0	0	0	0	0	0	0	0	0	0	0	0	0	0	-0.0053342	-6.74306e-05	0.000242661	-0.000537943	-9.3398e-05	0.00172093	-0.00659903	-0.0272807	0
1789	0.251054	0.123069	0.0501594	0.0778252	0.102053	0.102053	0.102053	0.0848899	0.0141068	0.00305652	0	0	0	0	0	0	0	0	0	0	0	0	0	0	0	0	0	0	0	0	0	0	0	0	0	0	0	0	0	0	-0.00550453	-6.74306e-05	0.000242661	-0.00054762	-9.52767e-05	0.00176877	-0.00680563	-0.0280756	0
1790	0.0888822	-0.0256808	0.0340112	0.0805518	0.105358	0.105358	0.105358	0.0878369	0.014396	0.00312507	0	0	0	0	0	0	0	0	0	0	0	0	0	0	0	0	0	0	0	0	0	0	0	0	0	0	0	0	0	0	-0.00566872	-6.74306e-05	0.000242661	-0.000557285	-9.71739e-05	0.00181626	-0.00700575	-0.0288442	0
1791	0.10802	0.00931922	0.0159119	0.0827889	0.108565	0.108565	0.108565	0.090661	0.0147095	0.00319415	0	0	0	0	0	0	0	0	0	0	0	0	0	0	0	0	0	0	0	0	0	0	0	0	0	0	0	0	0	0	-0.00611429	-8.42883e-05	0.000303326	-0.000589915	-9.94791e-05	0.00155555	-0.00719948	-0.0297669	0
1792	0.232799	0.140569	0.00721438	0.0850151	0.111707	0.111707	0.111707	0.0933979	0.0150454	0.00326368	0	0	0	0	0	0	0	0	0	0	0	0	0	0	0	0	0	0	0	0	0	0	0	0	0	0	0	0	0	0	-0.00655452	-0.000101146	0.000363991	-0.000622448	-0.000101804	0.00129383	-0.00738694	-0.030664	0
1793	0.294575	0.206194	0.000695625	0.0876853	0.114796	0.114796	0.114796	0.0960604	0.0154015	0.00333373	0	0	0	0	0	0	0	0	0	0	0	0	0	0	0	0	0	0	0	0	0	0	0	0	0	0	0	0	0	0	-0.00670198	-0.000101146	0.000363991	-0.000631935	-0.000103761	0.0013391	-0.00756823	-0.0313564	0
1794	0.291738	0.214944	-0.0135494	0.0903436	0.117822	0.117822	0.117822	0.0986421	0.0157759	0.00340449	0	0	0	0	0	0	0	0	0	0	0	0	0	0	0	0	0	0	0	0	0	0	0	0	0	0	0	0	0	0	-0.00684351	-0.000101146	0.000363991	-0.000641468	-0.000105745	0.00138433	-0.00774347	-0.0320248	0
1795	0.256846	0.193069	-0.0292075	0.0929845	0.120784	0.120784	0.120784	0.101141	0.016167	0.00347613	0	0	0	0	0	0	0	0	0	0	0	0	0	0	0	0	0	0	0	0	0	0	0	0	0	0	0	0	0	0	-0.00697922	-0.000101146	0.000363991	-0.000651046	-0.000107754	0.0014295	-0.00791277	-0.03267	0
1796	0.245053	0.188694	-0.0392525	0.0956109	0.123685	0.123685	0.123685	0.103563	0.0165732	0.00354868	0	0	0	0	0	0	0	0	0	0	0	0	0	0	0	0	0	0	0	0	0	0	0	0	0	0	0	0	0	0	-0.00710926	-0.000101146	0.000363991	-0.000660671	-0.000109792	0.00147458	-0.00807622	-0.0332925	0
1797	0.262057	0.210569	-0.0462919	0.0977792	0.12653	0.12653	0.12653	0.105915	0.0169925	0.00362206	0	0	0	0	0	0	0	0	0	0	0	0	0	0	0	0	0	0	0	0	0	0	0	0	0	0	0	0	0	0	-0.00752309	-0.000118004	0.000424656	-0.000693	-0.000112238	0.00120944	-0.00823395	-0.0340702	0
1798	0.277467	0.228069	-0.0505312	0.0999294	0.129313	0.129313	0.129313	0.108193	0.0174234	0.00369635	0	0	0	0	0	0	0	0	0	0	0	0	0	0	0	0	0	0	0	0	0	0	0	0	0	0	0	0	0	0	-0.00793151	-0.000134861	0.000485322	-0.000725378	-0.000114715	0.000944184	-0.00838606	-0.0348259	0
1799	0.285635	0.232444	-0.0493063	0.102497	0.132027	0.132027	0.132027	0.110391	0.0178642	0.00377173	0	0	0	0	0	0	0	0	0	0	0	0	0	0	0	0	0	0	0	0	0	0	0	0	0	0	0	0	0	0	-0.00804523	-0.000134861	0.000485322	-0.000735158	-0.000116843	0.000988968	-0.00853266	-0.035383	0
1800	0.30346	0.232444	-0.0335737	0.104589	0.134669	0.134669	0.134669	0.112505	0.0183161	0.00384836	0	0	0	0	0	0	0	0	0	0	0	0	0	0	0	0	0	0	0	0	0	0	0	0	0	0	0	0	0	0	-0.00844273	-0.000151719	0.000545987	-0.000767714	-0.000119385	0.000723959	-0.00867386	-0.0360958	0
1801	0.325814	0.232444	-0.0133	0.10667	0.137256	0.137256	0.137256	0.114543	0.0187862	0.00392631	0	0	0	0	0	0	0	0	0	0	0	0	0	0	0	0	0	0	0	0	0	0	0	0	0	0	0	0	0	0	-0.00883486	-0.000168577	0.000606652	-0.000800378	-0.000121961	0.000459176	-0.00880977	-0.0367883	0
1802	0.322938	0.232444	-0.0178194	0.108313	0.139798	0.139798	0.139798	0.116513	0.0192802	0.00400554	0	0	0	0	0	0	0	0	0	0	0	0	0	0	0	0	0	0	0	0	0	0	0	0	0	0	0	0	0	0	-0.00950964	-0.000202292	0.000727983	-0.000856043	-0.00012496	-0.000113837	-0.00894049	-0.0376356	0
1803	0.308295	0.232444	-0.034545	0.110395	0.142293	0.142293	0.142293	0.11841	0.0197968	0.0040861	0	0	0	0	0	0	0	0	0	0	0	0	0	0	0	0	0	0	0	0	0	0	0	0	0	0	0	0	0	0	-0.00989057	-0.00021915	0.000788648	-0.000889063	-0.000127612	-0.000377254	-0.00906614	-0.0382885	0
1804	0.306252	0.232444	-0.0395369	0.113344	0.144725	0.144725	0.144725	0.120225	0.0203315	0.00416812	0	0	0	0	0	0	0	0	0	0	0	0	0	0	0	0	0	0	0	0	0	0	0	0	0	0	0	0	0	0	-0.00968924	-0.000202292	0.000727983	-0.000876652	-0.000129537	-2.19124e-05	-0.00918683	-0.0385724	0
1805	0.305549	0.232444	-0.0427263	0.115831	0.147099	0.147099	0.147099	0.121968	0.0208796	0.00425172	0	0	0	0	0	0	0	0	0	0	0	0	0	0	0	0	0	0	0	0	0	0	0	0	0	0	0	0	0	0	-0.00977162	-0.000202292	0.000727983	-0.000887137	-0.000131884	2.43633e-05	-0.00930266	-0.0390136	0
1806	0.296562	0.232444	-0.0537644	0.117883	0.149444	0.149444	0.149444	0.12367	0.0214367	0.00433697	0	0	0	0	0	0	0	0	0	0	0	0	0	0	0	0	0	0	0	0	0	0	0	0	0	0	0	0	0	0	-0.010136	-0.00021915	0.000788648	-0.000920814	-0.000134662	-0.000236318	-0.00941374	-0.0396116	0
1807	0.287336	0.232444	-0.0650431	0.119935	0.151757	0.151757	0.151757	0.125335	0.0219981	0.00442389	0	0	0	0	0	0	0	0	0	0	0	0	0	0	0	0	0	0	0	0	0	0	0	0	0	0	0	0	0	0	-0.0104954	-0.000236007	0.000849313	-0.000954685	-0.000137484	-0.000496324	-0.00952019	-0.0401925	0
1808	-0.206609	-0.257556	-0.0714175	0.122364	0.153977	0.153977	0.153977	0.126905	0.0225594	0.00451253	0	0	0	0	0	0	0	0	0	0	0	0	0	0	0	0	0	0	0	0	0	0	0	0	0	0	0	0	0	0	-0.0105631	-0.000236007	0.000849313	-0.000965661	-0.00013996	-0.00044866	-0.0096221	-0.0405827	0
1809	-1.35012	-1.39943	-0.0753287	0.124641	0.156019	0.156019	0.156019	0.1283	0.023116	0.00460296	0	0	0	0	0	0	0	0	0	0	0	0	0	0	0	0	0	0	0	0	0	0	0	0	0	0	0	0	0	0	-0.0106265	-0.000236007	0.000849313	-0.000976744	-0.00014248	-0.000400998	-0.0097196	-0.040957	0
1810	-1.75196	-1.80193	-0.0767375	0.126704	0.157824	0.157824	0.157824	0.129463	0.0236656	0.00469527	0	0	0	0	0	0	0	0	0	0	0	0	0	0	0	0	0	0	0	0	0	0	0	0	0	0	0	0	0	0	-0.0106858	-0.000236007	0.000849313	-0.00098793	-0.000145046	-0.000353387	-0.00981279	-0.041316	0
1811	-0.956129	-1.01006	-0.0742044	0.128132	0.159405	0.159405	0.159405	0.130404	0.0242113	0.00478954	0	0	0	0	0	0	0	0	0	0	0	0	0	0	0	0	0	0	0	0	0	0	0	0	0	0	0	0	0	0	-0.0110244	-0.000252865	0.000909978	-0.00102288	-0.000148063	-0.000608758	-0.00990177	-0.0418329	0
1812	-0.279183	-0.340681	-0.0679394	0.129438	0.160837	0.160837	0.160837	0.131194	0.0247577	0.00488582	0	0	0	0	0	0	0	0	0	0	0	0	0	0	0	0	0	0	0	0	0	0	0	0	0	0	0	0	0	0	-0.0113582	-0.000269723	0.000970643	-0.00105807	-0.000151131	-0.000863292	-0.00998666	-0.0423352	0
1813	-0.0779071	-0.148181	-0.0608563	0.13113	0.162193	0.162193	0.162193	0.131903	0.0253063	0.00498417	0	0	0	0	0	0	0	0	0	0	0	0	0	0	0	0	0	0	0	0	0	0	0	0	0	0	0	0	0	0	-0.0114044	-0.000269723	0.000970643	-0.00106982	-0.000153847	-0.000814097	-0.0100676	-0.0426505	0
1814	-0.598962	-0.677556	-0.0542369	0.132831	0.163532	0.163532	0.163532	0.132591	0.0258564	0.00508465	0	0	0	0	0	0	0	0	0	0	0	0	0	0	0	0	0	0	0	0	0	0	0	0	0	0	0	0	0	0	-0.011447	-0.000269723	0.000970643	-0.00108169	-0.000156615	-0.000765034	-0.0101446	-0.0429521	0
1815	-2.06194	-2.15193	-0.0441744	0.134164	0.16491	0.16491	0.16491	0.133315	0.0264075	0.00518734	0	0	0	0	0	0	0	0	0	0	0	0	0	0	0	0	0	0	0	0	0	0	0	0	0	0	0	0	0	0	-0.0117657	-0.00028658	0.00103131	-0.00111791	-0.000159854	-0.00101481	-0.0102179	-0.0434128	0
1816	-2.56318	-2.66381	-0.0345275	0.135154	0.166351	0.166351	0.166351	0.134099	0.0269592	0.00529233	0	0	0	0	0	0	0	0	0	0	0	0	0	0	0	0	0	0	0	0	0	0	0	0	0	0	0	0	0	0	-0.0123587	-0.000320295	0.00115264	-0.00117881	-0.000163576	-0.00156113	-0.0102875	-0.0440324	0
1817	-1.39423	-1.49568	-0.0347594	0.13621	0.167829	0.167829	0.167829	0.134918	0.0275109	0.00539971	0	0	0	0	0	0	0	0	0	0	0	0	0	0	0	0	0	0	0	0	0	0	0	0	0	0	0	0	0	0	-0.0129443	-0.000354011	0.00127397	-0.00124048	-0.000167371	-0.00210289	-0.0103535	-0.0446389	0
1818	-0.265648	-0.362556	-0.0407925	0.137701	0.169288	0.169288	0.169288	0.135717	0.028062	0.00550955	0	0	0	0	0	0	0	0	0	0	0	0	0	0	0	0	0	0	0	0	0	0	0	0	0	0	0	0	0	0	-0.0132463	-0.000370868	0.00133463	-0.00127819	-0.000170809	-0.00234485	-0.0104162	-0.0450616	0
1819	0.185347	0.0924442	-0.0466594	0.139562	0.170669	0.170669	0.170669	0.136435	0.0286121	0.00562183	0	0	0	0	0	0	0	0	0	0	0	0	0	0	0	0	0	0	0	0	0	0	0	0	0	0	0	0	0	0	-0.0132666	-0.000370868	0.00133463	-0.00129161	-0.000173885	-0.00228941	-0.0104755	-0.0453015	0
1820	0.311867	0.223694	-0.0531475	0.14132	0.171926	0.171926	0.171926	0.137029	0.0291608	0.00573657	0	0	0	0	0	0	0	0	0	0	0	0	0	0	0	0	0	0	0	0	0	0	0	0	0	0	0	0	0	0	-0.0132841	-0.000370868	0.00133463	-0.00130516	-0.000177022	-0.0022341	-0.0105315	-0.0455305	0
1821	0.318984	0.232444	-0.0564375	0.142978	0.173064	0.173064	0.173064	0.137502	0.0297081	0.00585384	0	0	0	0	0	0	0	0	0	0	0	0	0	0	0	0	0	0	0	0	0	0	0	0	0	0	0	0	0	0	-0.0132988	-0.000370868	0.00133463	-0.00131884	-0.000180224	-0.00217896	-0.0105845	-0.0457491	0
1822	0.321522	0.232444	-0.0550769	0.144155	0.174125	0.174125	0.174125	0.137897	0.0302546	0.00597377	0	0	0	0	0	0	0	0	0	0	0	0	0	0	0	0	0	0	0	0	0	0	0	0	0	0	0	0	0	0	-0.0135826	-0.000387726	0.0013953	-0.00135815	-0.000183944	-0.00241361	-0.0106345	-0.0461284	0
1823	0.325542	0.232444	-0.0517956	0.144894	0.175148	0.175148	0.175148	0.138251	0.0308006	0.00609643	0	0	0	0	0	0	0	0	0	0	0	0	0	0	0	0	0	0	0	0	0	0	0	0	0	0	0	0	0	0	-0.0141332	-0.000421441	0.00151663	-0.0014235	-0.000188197	-0.00293517	-0.0106815	-0.0466684	0
1824	0.333737	0.232444	-0.0447738	0.146066	0.176162	0.176162	0.176162	0.138595	0.0313461	0.00622184	0	0	0	0	0	0	0	0	0	0	0	0	0	0	0	0	0	0	0	0	0	0	0	0	0	0	0	0	0	0	-0.0144072	-0.000438299	0.0015773	-0.00146387	-0.000192079	-0.00316445	-0.0107258	-0.0470284	0
1825	0.347678	0.232444	-0.0320425	0.147276	0.177192	0.177192	0.177192	0.138951	0.0318913	0.00635001	0	0	0	0	0	0	0	0	0	0	0	0	0	0	0	0	0	0	0	0	0	0	0	0	0	0	0	0	0	0	-0.0146751	-0.000455157	0.00163796	-0.001505	-0.000196051	-0.00338943	-0.0107674	-0.0473792	0
1826	0.366029	0.232444	-0.0149362	0.148521	0.17824	0.17824	0.17824	0.139322	0.0324366	0.00648103	0	0	0	0	0	0	0	0	0	0	0	0	0	0	0	0	0	0	0	0	0	0	0	0	0	0	0	0	0	0	-0.0149395	-0.000472014	0.00169863	-0.00154647	-0.000200106	-0.00361307	-0.0108065	-0.0477217	0
1827	0.385377	0.232444	0.00313687	0.149795	0.179296	0.179296	0.179296	0.139699	0.0329819	0.00661505	0	0	0	0	0	0	0	0	0	0	0	0	0	0	0	0	0	0	0	0	0	0	0	0	0	0	0	0	0	0	-0.0151978	-0.000488872	0.00175929	-0.00158874	-0.000204258	-0.00383219	-0.0108431	-0.0480558	0
1828	0.3956	0.228069	0.0164413	0.15109	0.180355	0.180355	0.180355	0.140075	0.0335275	0.00675215	0	0	0	0	0	0	0	0	0	0	0	0	0	0	0	0	0	0	0	0	0	0	0	0	0	0	0	0	0	0	-0.0154529	-0.00050573	0.00181996	-0.00163137	-0.000208498	-0.0040499	-0.0108773	-0.0483824	0
1829	0.369518	0.193069	0.0236294	0.152819	0.181418	0.181418	0.181418	0.140452	0.0340735	0.00689231	0	0	0	0	0	0	0	0	0	0	0	0	0	0	0	0	0	0	0	0	0	0	0	0	0	0	0	0	0	0	-0.0154395	-0.00050573	0.00181996	-0.00164779	-0.000212348	-0.00398423	-0.0109093	-0.0485322	0
1830	0.151585	-0.0213058	0.0207813	0.152109	0.182483	0.182483	0.182483	0.140828	0.034619	0.00703549	0	0	0	0	0	0	0	0	0	0	0	0	0	0	0	0	0	0	0	0	0	0	0	0	0	0	0	0	0	0	-0.01699	-0.000606876	0.00218395	-0.00182798	-0.00021929	-0.00558057	-0.0109392	-0.0496887	0
1831	-0.242712	-0.397556	0.003675	0.151168	0.182889	0.182889	0.182889	0.140546	0.035161	0.00718177	0	0	0	0	0	0	0	0	0	0	0	0	0	0	0	0	0	0	0	0	0	0	0	0	0	0	0	0	0	0	-0.0182706	-0.000691164	0.00248727	-0.00198224	-0.000225857	-0.00689156	-0.010967	-0.0506703	0
1832	-0.35069	-0.485056	-0.0166381	0.151004	0.181598	0.181598	0.181598	0.138569	0.0356978	0.0073313	0	0	0	0	0	0	0	0	0	0	0	0	0	0	0	0	0	0	0	0	0	0	0	0	0	0	0	0	0	0	-0.0179767	-0.000674306	0.00242661	-0.00197423	-0.000229549	-0.00653227	-0.010993	-0.0506325	0
1833	-0.0619758	-0.183181	-0.0278906	0.149096	0.179365	0.179365	0.179365	0.13565	0.0362309	0.00748419	0	0	0	0	0	0	0	0	0	0	0	0	0	0	0	0	0	0	0	0	0	0	0	0	0	0	0	0	0	0	-0.0181987	-0.000691164	0.00248727	-0.00202167	-0.000234363	-0.00672163	-0.0110171	-0.050926	0
1834	-0.2153	-0.345056	-0.0175394	0.147295	0.177227	0.177227	0.177227	0.132824	0.0367633	0.00764044	0	0	0	0	0	0	0	0	0	0	0	0	0	0	0	0	0	0	0	0	0	0	0	0	0	0	0	0	0	0	-0.0184177	-0.000708022	0.00254794	-0.00206953	-0.000239287	-0.00690921	-0.0110395	-0.0512145	0
1835	-0.819113	-0.988181	0.0235506	0.145517	0.175094	0.175094	0.175094	0.129996	0.0372979	0.00780001	0	0	0	0	0	0	0	0	0	0	0	0	0	0	0	0	0	0	0	0	0	0	0	0	0	0	0	0	0	0	-0.0186307	-0.000724879	0.0026086	-0.00211834	-0.000244341	-0.00709135	-0.0110604	-0.0514981	0
1836	-0.735064	-0.948806	0.071575	0.142167	0.172967	0.172967	0.172967	0.127166	0.0378376	0.00796301	0	0	0	0	0	0	0	0	0	0	0	0	0	0	0	0	0	0	0	0	0	0	0	0	0	0	0	0	0	0	-0.0198478	-0.000809168	0.00291193	-0.00228265	-0.000251692	-0.00833648	-0.0110798	-0.0524478	0
1837	-0.124807	-0.349431	0.0853737	0.13925	0.17085	0.17085	0.17085	0.124335	0.0383853	0.0081296	0	0	0	0	0	0	0	0	0	0	0	0	0	0	0	0	0	0	0	0	0	0	0	0	0	0	0	0	0	0	-0.0208025	-0.000876598	0.00315459	-0.00241995	-0.000258661	-0.00930414	-0.0110978	-0.0532255	0
1838	0.249179	0.0443192	0.0663469	0.138513	0.169691	0.169691	0.169691	0.122447	0.038944	0.0082999	0	0	0	0	0	0	0	0	0	0	0	0	0	0	0	0	0	0	0	0	0	0	0	0	0	0	0	0	0	0	-0.0209913	-0.000893456	0.00321526	-0.00247272	-0.000264165	-0.00946171	-0.0111145	-0.0534965	0
1839	0.363501	0.179944	0.0447212	0.138836	0.169966	0.169966	0.169966	0.121975	0.0395165	0.00847385	0	0	0	0	0	0	0	0	0	0	0	0	0	0	0	0	0	0	0	0	0	0	0	0	0	0	0	0	0	0	-0.0214243	-0.000927171	0.00333659	-0.00255554	-0.000270371	-0.00987763	-0.0111302	-0.0539314	0
1840	0.343505	0.179944	0.0242725	0.139288	0.170735	0.170735	0.170735	0.121975	0.0401075	0.00865206	0	0	0	0	0	0	0	0	0	0	0	0	0	0	0	0	0	0	0	0	0	0	0	0	0	0	0	0	0	0	-0.0220948	-0.000977744	0.00351858	-0.00266948	-0.00027732	-0.0105441	-0.0111447	-0.0545298	0
1841	0.31934	0.175569	0.00348687	0.140284	0.172016	0.172016	0.172016	0.122447	0.0407232	0.00884589	0	0	0	0	0	0	0	0	0	0	0	0	0	0	0	0	0	0	0	0	0	0	0	0	0	0	0	0	0	0	-0.022756	-0.00102832	0.00370058	-0.00278502	-0.000284448	-0.0112005	-0.0111584	-0.0551254	0
1842	0.319973	0.188694	-0.0110381	0.142317	0.174299	0.174299	0.174299	0.123863	0.0413656	0.00907048	0	0	0	0	0	0	0	0	0	0	0	0	0	0	0	0	0	0	0	0	0	0	0	0	0	0	0	0	0	0	-0.0234046	-0.00107889	0.00388257	-0.00290272	-0.000291779	-0.0118426	-0.0111712	-0.055718	0
1843	0.293452	0.166819	-0.0182569	0.14489	0.177093	0.177093	0.177093	0.125751	0.0420297	0.00931265	0	0	0	0	0	0	0	0	0	0	0	0	0	0	0	0	0	0	0	0	0	0	0	0	0	0	0	0	0	0	-0.0240439	-0.00112946	0.00406457	-0.00302205	-0.000299302	-0.0124744	-0.0111833	-0.0563087	0
1844	0.288578	0.153694	-0.0130681	0.147952	0.180349	0.180349	0.180349	0.12811	0.0427082	0.00953103	0	0	0	0	0	0	0	0	0	0	0	0	0	0	0	0	0	0	0	0	0	0	0	0	0	0	0	0	0	0	-0.0246704	-0.00118004	0.00424656	-0.0031436	-0.000307044	-0.0130916	-0.0111948	-0.0568972	0
1845	0.338834	0.184319	0.003745	0.15077	0.184482	0.184482	0.184482	0.13141	0.0433937	0.00967897	0	0	0	0	0	0	0	0	0	0	0	0	0	0	0	0	0	0	0	0	0	0	0	0	0	0	0	0	0	0	-0.025997	-0.00128118	0.00461056	-0.00336054	-0.000316863	-0.0144432	-0.0112058	-0.0579789	0
1846	0.391591	0.214944	0.022365	0.154282	0.188527	0.188527	0.188527	0.134708	0.0440787	0.00974026	0	0	0	0	0	0	0	0	0	0	0	0	0	0	0	0	0	0	0	0	0	0	0	0	0	0	0	0	0	0	-0.026836	-0.00134861	0.00485322	-0.00351756	-0.000325679	-0.0152809	-0.0112164	-0.0587295	0
1847	0.429859	0.228069	0.0441262	0.157663	0.19204	0.19204	0.19204	0.137534	0.044756	0.00975013	0	0	0	0	0	0	0	0	0	0	0	0	0	0	0	0	0	0	0	0	0	0	0	0	0	0	0	0	0	0	-0.0274202	-0.00139919	0.00503521	-0.00364652	-0.000334144	-0.0158488	-0.0112267	-0.0593136	0
1848	0.458917	0.232444	0.0653581	0.161115	0.195995	0.195995	0.195995	0.140828	0.0454182	0.00974841	0	0	0	0	0	0	0	0	0	0	0	0	0	0	0	0	0	0	0	0	0	0	0	0	0	0	0	0	0	0	-0.0282296	-0.00146662	0.00527787	-0.00380874	-0.000343474	-0.0166518	-0.0112369	-0.0600621	0
1849	0.444998	0.215994	0.0644481	0.164556	0.199925	0.199925	0.199925	0.144121	0.0460579	0.00974679	0	0	0	0	0	0	0	0	0	0	0	0	0	0	0	0	0	0	0	0	0	0	0	0	0	0	0	0	0	0	-0.0290206	-0.00153405	0.00552053	-0.0039742	-0.000353096	-0.0174328	-0.011247	-0.0608094	0
1850	0.405396	0.192005	0.0468169	0.166575	0.203438	0.203438	0.203438	0.146941	0.0466654	0.00983124	0	0	0	0	0	0	0	0	0	0	0	0	0	0	0	0	0	0	0	0	0	0	0	0	0	0	0	0	0	0	-0.0303756	-0.00165205	0.00594519	-0.0042566	-0.000366397	-0.0187885	-0.0112572	-0.0620457	0
1851	0.398625	0.193033	0.0350131	0.170579	0.207233	0.20723	0.20723	0.14976	0.0473827	0.010087	0	3.37155e-06	0	0	0	0	0	0	0	0	0	0	0	0	0	0	0	0	0	3.37155e-06	0	0	0	0	0	0	0	0	0	0	-0.0310854	-0.00171948	0.00618785	-0.00446059	-0.000380927	-0.0196019	-0.0111103	-0.0624378	0
1852	0.400521	0.208797	0.0234325	0.168291	0.210775	0.210765	0.210765	0.152108	0.0482287	0.0104282	0	1.0112e-05	0	0	0	0	0	0	0	0	0	0	0	0	0	0	0	0	0	1.0112e-05	0	0	0	0	0	0	0	0	0	0	-0.031923	-0.00177005	0.00636985	-0.00477111	-0.000426812	-0.01914	-0.0121848	-0.0667802	0
1853	0.393475	0.223534	0.00493063	0.165011	0.214315	0.214298	0.214298	0.154455	0.0490739	0.0107693	0	1.68545e-05	0	0	0	0	0	0	0	0	0	0	0	0	0	0	0	0	0	1.68545e-05	0	0	0	0	0	0	0	0	0	0	-0.0328911	-0.00185434	0.00667317	-0.00516171	-0.00047338	-0.0187067	-0.0133681	-0.0716228	0
1854	0.384141	0.231759	-0.0141137	0.166496	0.218323	0.218299	0.218299	0.15727	0.0499183	0.0111104	0	2.36015e-05	0	0	0	0	0	0	0	0	0	0	0	0	0	0	0	0	0	2.36015e-05	0	0	0	0	0	0	0	0	0	0	-0.0347687	-0.00205663	0.00740116	-0.00568177	-0.000494128	-0.0206647	-0.0132727	-0.0732375	0
1855	0.242826	0.101187	-0.0262806	0.16792	0.222187	0.222157	0.222157	0.160084	0.0506214	0.0114514	0	3.03485e-05	0	0	0	0	0	0	0	0	0	0	0	0	0	0	0	0	0	3.03485e-05	0	0	0	0	0	0	0	0	0	0	-0.0365941	-0.00225893	0.00812914	-0.00620497	-0.000514249	-0.0225881	-0.013157	-0.0747763	0
1856	-0.211073	-0.356671	-0.0247188	0.170318	0.226049	0.226012	0.226012	0.162896	0.0513238	0.0117924	0	3.7089e-05	0	0	0	0	0	0	0	0	0	0	0	0	0	0	0	0	0	3.7089e-05	0	0	0	0	0	0	0	0	0	0	-0.0373583	-0.00237693	0.00855379	-0.00657552	-0.000535075	-0.023216	-0.0132085	-0.0760571	0
1857	-0.44449	-0.610276	-0.00660625	0.172392	0.23005	0.230006	0.230006	0.165707	0.0521659	0.0121333	0	4.38295e-05	0	0	0	0	0	0	0	0	0	0	0	0	0	0	0	0	0	4.38295e-05	0	0	0	0	0	0	0	0	0	0	-0.0379593	-0.00247808	0.00891779	-0.00692952	-0.000560068	-0.0234691	-0.0134404	-0.0777602	0
1858	-0.0968363	-0.297726	0.0245875	0.176302	0.234516	0.234465	0.234465	0.168984	0.0530073	0.0124741	0	5.05765e-05	0	0	0	0	0	0	0	0	0	0	0	0	0	0	0	0	0	5.05765e-05	0	0	0	0	0	0	0	0	0	0	-0.0377434	-0.00251179	0.00903912	-0.00713598	-0.000582046	-0.0228811	-0.0136716	-0.0788276	0
1859	0.262109	0.0281901	0.0549981	0.178921	0.238979	0.238922	0.238922	0.172259	0.0538479	0.0128149	0	5.7317e-05	0	0	0	0	0	0	0	0	0	0	0	0	0	0	0	0	0	5.7317e-05	0	0	0	0	0	0	0	0	0	0	-0.0382962	-0.00261294	0.00940311	-0.00749556	-0.000607703	-0.0230821	-0.013901	-0.080499	0
1860	0.390709	0.150537	0.0655506	0.174622	0.242972	0.242908	0.242908	0.175065	0.0546876	0.0131556	0	6.40575e-05	0	0	0	0	0	0	0	0	0	0	0	0	0	0	0	0	0	6.40575e-05	0	0	0	0	0	0	0	0	0	0	-0.040746	-0.00374144	0.0115562	-0.00823371	-0.000642153	-0.0255547	-0.0141302	-0.0868929	0
1861	0.35779	0.13957	0.0522987	0.165921	0.246963	0.246892	0.246892	0.177869	0.0555265	0.0134962	0	7.08045e-05	0	0	0	0	0	0	0	0	0	0	0	0	0	0	0	0	0	7.08045e-05	0	0	0	0	0	0	0	0	0	0	-0.0438139	-0.00559474	0.0147615	-0.00907053	-0.000693842	-0.0286875	-0.0145288	-0.0968016	0
1862	0.258114	0.055264	0.030695	0.172155	0.250484	0.250406	0.250406	0.180205	0.0563646	0.0138368	0	7.7545e-05	0	0	0	0	0	0	0	0	0	0	0	0	0	0	0	0	0	7.7545e-05	0	0	0	0	0	0	0	0	0	0	-0.0442782	-0.0059419	0.0154946	-0.00939863	-0.000698698	-0.0302114	-0.0135223	-0.0957985	0
1863	0.263904	0.0676015	0.01407	0.182233	0.254003	0.253919	0.253919	0.18254	0.0572019	0.0141773	0	8.42855e-05	0	0	0	0	0	0	0	0	0	0	0	0	0	0	0	0	0	8.42855e-05	0	0	0	0	0	0	0	0	0	0	-0.0443449	-0.00574691	0.0155204	-0.00976109	-0.000690694	-0.0314319	-0.0122347	-0.0918583	0
1864	0.336234	0.15088	0.0009975	0.184357	0.257987	0.257896	0.257896	0.18534	0.0580385	0.0145178	0	9.10325e-05	0	0	0	0	0	0	0	0	0	0	0	0	0	0	0	0	0	9.10325e-05	0	0	0	0	0	0	0	0	0	0	-0.0458134	-0.00571758	0.0160069	-0.0105293	-0.000729976	-0.0325981	-0.0122454	-0.0931968	0
1865	0.370764	0.198516	-0.0124294	0.184677	0.261642	0.261544	0.261544	0.187673	0.0590133	0.0148582	0	9.77795e-05	0	0	0	0	0	0	0	0	0	0	0	0	0	0	0	0	0	9.77795e-05	0	0	0	0	0	0	0	0	0	0	-0.0474597	-0.00604244	0.0170249	-0.0113447	-0.000770023	-0.0340651	-0.0122624	-0.0959086	0
1866	0.375045	0.219079	-0.0242375	0.180204	0.264828	0.264723	0.264723	0.189538	0.0599872	0.0151985	0	0.00010452	0	0	0	0	0	0	0	0	0	0	0	0	0	0	0	0	0	0.00010452	0	0	0	0	0	0	0	0	0	0	-0.0491525	-0.00759759	0.0197121	-0.0120904	-0.000805345	-0.0360972	-0.0122741	-0.102845	0
1867	0.37954	0.229017	-0.0246006	0.175123	0.267873	0.267762	0.267762	0.191402	0.060821	0.0155388	0	0.00011126	0	0	0	0	0	0	0	0	0	0	0	0	0	0	0	0	0	0.00011126	0	0	0	0	0	0	0	0	0	0	-0.0509982	-0.00929334	0.0226456	-0.0128979	-0.000840293	-0.0383731	-0.0122391	-0.110111	0
1868	0.404765	0.231073	-0.0025725	0.176264	0.271383	0.271265	0.271265	0.193732	0.0616541	0.015879	0	0.000118008	0	0	0	0	0	0	0	0	0	0	0	0	0	0	0	0	0	0.000118008	0	0	0	0	0	0	0	0	0	0	-0.0521573	-0.00964501	0.0236331	-0.0136428	-0.000875393	-0.0394672	-0.01216	-0.112368	0
1869	0.440705	0.222848	0.0355338	0.182323	0.275357	0.275232	0.275232	0.196527	0.0624863	0.0162191	0	0.000124748	0	0	0	0	0	0	0	0	0	0	0	0	0	0	0	0	0	0.000124748	0	0	0	0	0	0	0	0	0	0	-0.0524795	-0.00903414	0.0231409	-0.0142438	-0.00090931	-0.0393557	-0.0120775	-0.110963	0
1870	0.469869	0.218736	0.0641287	0.187004	0.279382	0.27925	0.27925	0.19932	0.0634562	0.0164742	0	0.000131463	0	0	0	0	0	0	0	0	0	0	0	0	0	0	0	0	0	0.000131463	0	0	0	0	0	0	0	0	0	0	-0.0528636	-0.00881258	0.023233	-0.0149213	-0.000944553	-0.0394142	-0.012004	-0.110999	0
1871	0.468819	0.219421	0.06727	0.182128	0.283784	0.283646	0.283646	0.202576	0.0644252	0.0166442	0	0.00013819	0	0	0	0	0	0	0	0	0	0	0	0	0	0	0	0	0	0.00013819	0	0	0	0	0	0	0	0	0	0	-0.0563441	-0.00923964	0.0243689	-0.0159158	-0.0010687	-0.0419427	-0.0125462	-0.116906	0
1872	0.422773	0.207084	0.0517606	0.163928	0.288595	0.28845	0.28845	0.206296	0.0652549	0.0168992	0	0.00014495	0	0	0	0	0	0	0	0	0	0	0	0	0	0	0	0	0	0.00014495	0	0	0	0	0	0	0	0	0	0	-0.0623654	-0.0100273	0.0264705	-0.0177966	-0.0013119	-0.0446397	-0.0150604	-0.131321	0
1873	0.369789	0.193375	0.0265125	0.149901	0.293952	0.2938	0.2938	0.210477	0.0660837	0.0172392	0	0.00015171	0	0	0	0	0	0	0	0	0	0	0	0	0	0	0	0	0	0.00015171	0	0	0	0	0	0	0	0	0	0	-0.0665409	-0.0110844	0.029047	-0.0197738	-0.00150616	-0.0459737	-0.0172498	-0.144588	0
1874	0.353735	0.201258	-2.1875e-05	0.152499	0.300232	0.300074	0.300074	0.215583	0.0669118	0.017579	0	0.00015847	0	0	0	0	0	0	0	0	0	0	0	0	0	0	0	0	0	0.00015847	0	0	0	0	0	0	0	0	0	0	-0.0663417	-0.0117345	0.0300578	-0.0202242	-0.00158161	-0.0452238	-0.0176353	-0.14859	0
1875	0.332461	0.194061	-0.0208469	0.159247	0.307024	0.306858	0.306858	0.221148	0.0678768	0.0178339	0	0.00016523	0	0	0	0	0	0	0	0	0	0	0	0	0	0	0	0	0	0.00016523	0	0	0	0	0	0	0	0	0	0	-0.065587	-0.0116861	0.0301266	-0.0207088	-0.00164652	-0.0437521	-0.0179201	-0.149792	0
1876	0.288309	0.152936	-0.0317319	0.167105	0.314187	0.314014	0.314014	0.227169	0.0688409	0.0180038	0	0.000172315	0	0	0	0	0	0	0	0	0	0	0	0	0	0	0	0	0	0.000172315	0	0	0	0	0	0	0	0	0	0	-0.0665589	-0.0105746	0.0290978	-0.0216445	-0.00174032	-0.0434441	-0.0182533	-0.148668	0
1877	0.292982	0.148481	-0.0351575	0.179658	0.322214	0.322034	0.322034	0.234109	0.0696664	0.0182586	0	0.00017992	0	0	0	0	0	0	0	0	0	0	0	0	0	0	0	0	0	0.00017992	0	0	0	0	0	0	0	0	0	0	-0.065809	-0.00905825	0.0273256	-0.021951	-0.0018211	-0.0417316	-0.0185726	-0.145192	0
1878	0.334209	0.180353	-0.0366756	0.190532	0.330779	0.330592	0.330592	0.241502	0.0704911	0.0185984	0	0.000187915	0	0	0	0	0	0	0	0	0	0	0	0	0	0	0	0	0	0.000187915	0	0	0	0	0	0	0	0	0	0	-0.0644004	-0.0085663	0.0274192	-0.0222863	-0.00188831	-0.0402392	-0.0188395	-0.144794	0
1879	0.368246	0.201943	-0.0295531	0.195856	0.339795	0.339599	0.339599	0.249345	0.0713151	0.018938	0	0.0001963	0	0	0	0	0	0	0	0	0	0	0	0	0	0	0	0	0	0.0001963	0	0	0	0	0	0	0	0	0	0	-0.0655452	-0.00884175	0.0281805	-0.0232649	-0.00197026	-0.0405532	-0.0190956	-0.147846	0
1880	0.399955	0.215652	-0.00942375	0.193727	0.349856	0.349651	0.349651	0.258098	0.0722753	0.0192776	0	0.00020501	0	0	0	0	0	0	0	0	0	0	0	0	0	0	0	0	0	0.00020501	0	0	0	0	0	0	0	0	0	0	-0.0711233	-0.00985504	0.0292261	-0.0255507	-0.0020891	-0.0435052	-0.0193494	-0.155044	0
1881	0.429205	0.222848	0.01064	0.195717	0.360499	0.360285	0.360285	0.267296	0.0733715	0.0196171	0	0.00021411	0	0	0	0	0	0	0	0	0	0	0	0	0	0	0	0	0	0.00021411	0	0	0	0	0	0	0	0	0	0	-0.0740412	-0.0101177	0.0295307	-0.0274976	-0.00223281	-0.0434902	-0.0202335	-0.160541	0
1882	0.33982	0.111125	0.0210525	0.207642	0.370667	0.370443	0.370443	0.27602	0.0744664	0.0199566	0	0.000223665	0	0	0	0	0	0	0	0	0	0	0	0	0	0	0	0	0	0.000223665	0	0	0	0	0	0	0	0	0	0	-0.0741249	-0.009878	0.0294625	-0.0285753	-0.00230008	-0.0428917	-0.0199423	-0.160133	0
1883	-0.563533	-0.802535	0.0219013	0.2171	0.380361	0.380127	0.380127	0.284271	0.0755599	0.020296	0	0.00023361	0	0	0	0	0	0	0	0	0	0	0	0	0	0	0	0	0	0.00023361	0	0	0	0	0	0	0	0	0	0	-0.0762233	-0.0102509	0.0301271	-0.03011	-0.00234804	-0.0446772	-0.0189643	-0.160765	0
1884	-1.30178	-1.5373	0.0105831	0.224943	0.389905	0.389661	0.389661	0.29251	0.0765157	0.0206353	0	0.000243945	0	0	0	0	0	0	0	0	0	0	0	0	0	0	0	0	0	0.000243945	0	0	0	0	0	0	0	0	0	0	-0.076439	-0.0104628	0.0311033	-0.0312892	-0.00243688	-0.044279	-0.0190744	-0.163192	0
1885	-0.718939	-0.944073	-0.0105306	0.235665	0.398387	0.398132	0.398132	0.299823	0.0773341	0.0209746	0	0.000254735	0	0	0	0	0	0	0	0	0	0	0	0	0	0	0	0	0	0.000254735	0	0	0	0	0	0	0	0	0	0	-0.0744818	-0.0104264	0.0320677	-0.0317289	-0.0025029	-0.0427405	-0.0191509	-0.163813	0
1886	-0.235809	-0.448517	-0.0316925	0.244401	0.405626	0.40536	0.40536	0.305758	0.0782878	0.0213138	0	0.000266045	0	0	0	0	0	0	0	0	0	0	0	0	0	0	0	0	0	0.000266045	0	0	0	0	0	0	0	0	0	0	-0.0731332	-0.0103427	0.0329968	-0.0321938	-0.00258703	-0.0417672	-0.0192393	-0.164617	0
1887	-0.117215	-0.321372	-0.0442794	0.248437	0.411997	0.411719	0.411719	0.310774	0.0793767	0.0215682	0	0.000277875	0	0	0	0	0	0	0	0	0	0	0	0	0	0	0	0	0	0.000277875	0	0	0	0	0	0	0	0	0	0	-0.0737549	-0.0106555	0.0344594	-0.0333255	-0.00269147	-0.0422728	-0.0192691	-0.167532	0
1888	-0.0165989	-0.21102	-0.0505225	0.244944	0.417367	0.417077	0.417077	0.314875	0.0804642	0.0217377	0	0.000290225	0	0	0	0	0	0	0	0	0	0	0	0	0	0	0	0	0	0.000290225	0	0	0	0	0	0	0	0	0	0	-0.0782374	-0.0114674	0.0358514	-0.0359193	-0.00282376	-0.0446739	-0.0192044	-0.173259	0
1889	-0.0845096	-0.277506	-0.0530425	0.246039	0.422363	0.42206	0.42206	0.318517	0.0815504	0.021992	0	0.000303095	0	0	0	0	0	0	0	0	0	0	0	0	0	0	0	0	0	0.000303095	0	0	0	0	0	0	0	0	0	0	-0.080007	-0.0119144	0.0374632	-0.0377391	-0.00293162	-0.0457459	-0.0191391	-0.176851	0
1890	-0.123486	-0.331654	-0.0402588	0.248427	0.426985	0.426669	0.426669	0.321702	0.0826352	0.022331	0	0.00031655	0	0	0	0	0	0	0	0	0	0	0	0	0	0	0	0	0	0.00031655	0	0	0	0	0	0	0	0	0	0	-0.080852	-0.0122197	0.0390162	-0.0394044	-0.00304059	-0.0461154	-0.0190881	-0.179694	0
1891	-0.0281683	-0.261741	-0.0124338	0.246007	0.431286	0.430955	0.430955	0.324431	0.0838541	0.02267	0	0.00033059	0	0	0	0	0	0	0	0	0	0	0	0	0	0	0	0	0	0.00033059	0	0	0	0	0	0	0	0	0	0	-0.0848516	-0.0126245	0.0396731	-0.0422521	-0.00319693	-0.0474605	-0.0189906	-0.183801	0
1892	0.171455	-0.0876454	0.0133612	0.245739	0.435719	0.435373	0.435373	0.327158	0.0852065	0.0230089	0	0.000345215	0	0	0	0	0	0	0	0	0	0	0	0	0	0	0	0	0	0.000345215	0	0	0	0	0	0	0	0	0	0	-0.0869271	-0.0128256	0.0404906	-0.0446772	-0.00334476	-0.0473381	-0.019232	-0.187404	0
1893	0.340367	0.0600619	0.0341819	0.246123	0.439475	0.439115	0.439115	0.32943	0.086422	0.0232631	0	0.000360555	0	0	0	0	0	0	0	0	0	0	0	0	0	0	0	0	0	0.000360555	0	0	0	0	0	0	0	0	0	0	-0.0877202	-0.0129807	0.042014	-0.0468947	-0.00348751	-0.046792	-0.0195792	-0.190904	0
1894	0.458547	0.169386	0.0436013	0.24556	0.442556	0.44218	0.44218	0.331246	0.087501	0.0234325	0	0.00037661	0	0	0	0	0	0	0	0	0	0	0	0	0	0	0	0	0	0.00037661	0	0	0	0	0	0	0	0	0	0	-0.0879802	-0.0133624	0.0439162	-0.0489577	-0.0036267	-0.0459367	-0.0200129	-0.195117	0
1895	0.434966	0.161846	0.02968	0.24344	0.44577	0.445377	0.445377	0.333062	0.0887132	0.0236019	0	0.000393315	0	0	0	0	0	0	0	0	0	0	0	0	0	0	0	0	0	0.000393315	0	0	0	0	0	0	0	0	0	0	-0.0886382	-0.0141698	0.0456155	-0.0509215	-0.00376398	-0.0448917	-0.0205066	-0.200563	0
1896	0.262909	0.016538	0.0023975	0.243974	0.449118	0.448707	0.448707	0.334877	0.0900583	0.0237712	0	0.000410735	0	0	0	0	0	0	0	0	0	0	0	0	0	0	0	0	0	0.000410735	0	0	0	0	0	0	0	0	0	0	-0.0886154	-0.0148691	0.0481709	-0.0528425	-0.00390118	-0.0445245	-0.020649	-0.205048	0
1897	0.163166	-0.0646839	-0.0192413	0.247091	0.452867	0.452438	0.452438	0.337146	0.0912673	0.0240253	0	0.000429	0	0	0	0	0	0	0	0	0	0	0	0	0	0	0	0	0	0.000429	0	0	0	0	0	0	0	0	0	0	-0.087262	-0.0153758	0.0519425	-0.0547784	-0.00404027	-0.0442391	-0.020771	-0.209075	0
1898	0.258699	0.0377859	-0.0298594	0.250773	0.457974	0.457526	0.457526	0.340772	0.0924745	0.0242793	0	0.000448045	0	0	0	0	0	0	0	0	0	0	0	0	0	0	0	0	0	0.000448045	0	0	0	0	0	0	0	0	0	0	-0.0858324	-0.0162168	0.0563086	-0.0567877	-0.00418333	-0.0440767	-0.0208766	-0.214127	0
1899	0.36799	0.150537	-0.0367281	0.254182	0.464486	0.464018	0.464018	0.345756	0.0938141	0.0244486	0	0.000467935	0	0	0	0	0	0	0	0	0	0	0	0	0	0	0	0	0	0.000467935	0	0	0	0	0	0	0	0	0	0	-0.0857853	-0.017186	0.0597363	-0.0589296	-0.0043326	-0.0441358	-0.0209375	-0.219422	0
1900	0.414758	0.201943	-0.0451019	0.257917	0.471668	0.47118	0.471174	0.351187	0.0952852	0.0247025	5.26505e-06	0.000488735	0	5.26505e-06	0	0	0	0	0	0	0	0	0	0	0	0	0	0	0	0.000488735	0	0	0	0	0	0	0	0	0	0	-0.0866805	-0.0179615	0.0622837	-0.061285	-0.0045019	-0.0442715	-0.0209443	-0.22409	0
1901	0.39849	0.191662	-0.0529112	0.259739	0.47978	0.47927	0.479259	0.357064	0.0971539	0.025041	1.08072e-05	0.00051038	0	1.08072e-05	0	0	0	0	0	0	0	0	0	0	0	0	0	0	0	0.00051038	0	0	0	0	0	0	0	0	0	0	-0.0855945	-0.0186976	0.0650834	-0.0637067	-0.00470643	-0.0411879	-0.0223793	-0.231464	0
1902	-0.0416702	-0.256943	-0.0463881	0.261661	0.488595	0.488063	0.488051	0.363387	0.0992852	0.0253795	1.1376e-05	0.00053235	0	1.1376e-05	0	0	0	0	0	0	0	0	0	0	0	0	0	0	0	0.00053235	0	0	0	0	0	0	0	0	0	0	-0.0857321	-0.0190455	0.0663163	-0.0662422	-0.00493724	-0.0379648	-0.0238586	-0.237806	0
1903	-0.403369	-0.651058	-0.0158112	0.2635	0.49753	0.496976	0.496964	0.369701	0.101544	0.0257179	1.19747e-05	0.00055419	0	1.19747e-05	0	0	0	0	0	0	0	0	0	0	0	0	0	0	0	0.00055419	0	0	0	0	0	0	0	0	0	0	-0.0888614	-0.0194816	0.0662008	-0.0690836	-0.00518172	-0.036875	-0.0244402	-0.242613	0
1904	-0.0817013	-0.356329	0.00875	0.265877	0.507034	0.506458	0.506445	0.376459	0.10393	0.0260563	1.2605e-05	0.000575965	0	1.2605e-05	0	0	0	0	0	0	0	0	0	0	0	0	0	0	0	0.000575965	0	0	0	0	0	0	0	0	0	0	-0.0909065	-0.0198276	0.0670198	-0.072126	-0.00543742	-0.0350491	-0.0254863	-0.24822	0
1905	0.285079	0.00214422	0.0126306	0.270304	0.517422	0.516825	0.516811	0.384107	0.10631	0.0263946	1.32684e-05	0.00059774	0	1.32684e-05	0	0	0	0	0	0	0	0	0	0	0	0	0	0	0	0.00059774	0	0	0	0	0	0	0	0	0	0	-0.0926819	-0.01998	0.0682005	-0.0752667	-0.00570165	-0.0335032	-0.0264309	-0.253178	0
1906	0.389716	0.100159	0.016485	0.273072	0.528244	0.527624	0.52761	0.392194	0.108683	0.0267328	1.39667e-05	0.000620425	0	1.39667e-05	0	0	0	0	0	0	0	0	0	0	0	0	0	0	0	0.000620425	0	0	0	0	0	0	0	0	0	0	-0.0944081	-0.0208963	0.0701172	-0.0784052	-0.00597146	-0.0317893	-0.0274631	-0.260295	0
1907	0.3695	0.0761692	0.0177931	0.275537	0.538691	0.538041	0.538026	0.39982	0.111051	0.0271555	1.47018e-05	0.00064948	0	1.47018e-05	0	0	0	0	0	0	0	0	0	0	0	0	0	0	0	0.00064948	0	0	0	0	0	0	0	0	0	0	-0.0965804	-0.0221755	0.0721422	-0.0814429	-0.00624367	-0.0307328	-0.0281276	-0.267524	0
1908	0.386643	0.0878213	0.0135844	0.285237	0.548893	0.548209	0.548193	0.406988	0.113543	0.0276626	1.54756e-05	0.00068406	0	1.54756e-05	0	0	0	0	0	0	0	0	0	0	0	0	0	0	0	0.00068406	0	0	0	0	0	0	0	0	0	0	-0.0963313	-0.0222577	0.0755254	-0.0842829	-0.00651489	-0.0304833	-0.0283179	-0.270873	0
1909	0.45258	0.153964	0.000923125	0.297693	0.559209	0.558491	0.558475	0.414146	0.116159	0.0281696	1.62901e-05	0.00071864	0	1.62901e-05	0	0	0	0	0	0	0	0	0	0	0	0	0	0	0	0.00071864	0	0	0	0	0	0	0	0	0	0	-0.095366	-0.0217224	0.0785678	-0.0868298	-0.00678153	-0.0301259	-0.0284741	-0.27231	0
1910	0.474067	0.18892	-0.0192369	0.304384	0.569379	0.568626	0.568609	0.421294	0.118638	0.0286764	1.71475e-05	0.00075322	0	1.71475e-05	0	0	0	0	0	0	0	0	0	0	0	0	0	0	0	0.00075322	0	0	0	0	0	0	0	0	0	0	-0.0973185	-0.0222365	0.0792201	-0.0889837	-0.00704258	-0.0297163	-0.0285595	-0.275709	0
1911	0.475024	0.195089	-0.0344094	0.314345	0.578957	0.578169	0.578151	0.427988	0.12098	0.0291831	1.805e-05	0.000787735	0	1.805e-05	0	0	0	0	0	0	0	0	0	0	0	0	0	0	0	0.000787735	0	0	0	0	0	0	0	0	0	0	-0.0987111	-0.0227275	0.0807683	-0.0907383	-0.00729931	-0.0311982	-0.027516	-0.277429	0
1912	0.237872	-0.0485766	-0.0413963	0.327845	0.588289	0.587466	0.587447	0.434227	0.123446	0.029774	1.9e-05	0.000823615	0	1.9e-05	0	0	0	0	0	0	0	0	0	0	0	0	0	0	0	0.000823615	0	0	0	0	0	0	0	0	0	0	-0.09969	-0.0230286	0.0829117	-0.0922324	-0.00755132	-0.0341549	-0.0256345	-0.277167	0
1913	0.142892	-0.15653	-0.0390513	0.338473	0.597882	0.597007	0.596987	0.440459	0.126164	0.0303648	2e-05	0.00087458	0	2e-05	0	0	0	0	0	0	0	0	0	0	0	0	0	0	0	0.000874445	0	0	0	0	0	0	0	0	1.35e-07	0	-0.101757	-0.023801	0.0839213	-0.0935757	-0.00779867	-0.0363541	-0.0241485	-0.278121	0
1914	0.387926	0.0556067	-0.0191494	0.351469	0.60707	0.606134	0.606113	0.446239	0.129003	0.0308711	2.10526e-05	0.00093589	0	2.10526e-05	0	0	0	0	0	0	0	0	0	0	0	0	0	0	0	0.00093548	0	0	0	0	0	0	0	0	4.1e-07	0	-0.103025	-0.0230232	0.083467	-0.0948027	-0.00804319	-0.0374209	-0.0232021	-0.275846	0
1915	0.544847	0.159447	0.0196175	0.365782	0.61586	0.614886	0.614864	0.45157	0.131833	0.0314615	2.21607e-05	0.00097361	0	2.21607e-05	0	0	0	0	0	0	0	0	0	0	0	0	0	0	0	0.00097292	0	0	0	0	0	0	0	0	6.9e-07	0	-0.104047	-0.0212311	0.0818106	-0.0959469	-0.00828684	-0.0378242	-0.0225686	-0.271311	0
1916	0.619466	0.187549	0.0578375	0.374079	0.625143	0.624152	0.624129	0.457338	0.134655	0.0321361	2.3327e-05	0.000991055	0	2.3327e-05	0	0	0	0	0	0	0	0	0	0	0	0	0	0	0	0.00099008	0	0	0	0	0	0	0	0	9.75e-07	0	-0.106959	-0.0211044	0.0796577	-0.0970414	-0.00853174	-0.0377971	-0.0221423	-0.271094	0
1917	0.65508	0.196117	0.0783825	0.38058	0.634956	0.63393	0.633906	0.463543	0.137468	0.0328947	2.45547e-05	0.00102605	0	2.45547e-05	0	0	0	0	0	0	0	0	0	0	0	0	0	0	0	0.00102479	0	0	0	0	0	0	0	0	1.265e-06	0	-0.109292	-0.0218517	0.0786552	-0.098119	-0.00878013	-0.0371815	-0.0220147	-0.273662	0
1918	0.66255	0.201943	0.071505	0.389102	0.644548	0.643462	0.643436	0.469299	0.1404	0.0337372	2.58471e-05	0.00108614	0	2.58471e-05	0	0	0	0	0	0	0	0	0	0	0	0	0	0	0	0.00108459	0	0	0	0	0	0	0	0	1.555e-06	0	-0.11107	-0.0218246	0.0774364	-0.0992118	-0.00903437	-0.0365154	-0.02192	-0.274388	0
1919	0.640626	0.194746	0.0426475	0.403232	0.653733	0.652579	0.652552	0.474606	0.143451	0.0344951	2.72075e-05	0.00115384	0	2.72075e-05	0	0	0	0	0	0	0	0	0	0	0	0	0	0	0	0.001152	0	0	0	0	0	0	0	0	1.845e-06	0	-0.11051	-0.0200828	0.0767811	-0.100352	-0.00929696	-0.0355837	-0.0219764	-0.271262	0
1920	0.538608	0.110783	0.0138031	0.414022	0.663217	0.661996	0.661967	0.480349	0.146365	0.0352528	2.86395e-05	0.00122153	0	2.86395e-05	0	0	0	0	0	0	0	0	0	0	0	0	0	0	0	0.0012194	0	0	0	0	0	0	0	0	2.135e-06	0	-0.109767	-0.0199637	0.0781727	-0.10156	-0.00955195	-0.0348032	-0.0220605	-0.272523	0
1921	0.513908	0.0957036	-0.00765625	0.425861	0.673527	0.672237	0.672207	0.486969	0.149144	0.0360942	3.01468e-05	0.00128936	0	3.01468e-05	0	0	0	0	0	0	0	0	0	0	0	0	0	0	0	0.00128693	0	0	0	0	0	0	0	0	2.425e-06	0	-0.105712	-0.0197725	0.0820658	-0.102846	-0.00978369	-0.0321637	-0.023212	-0.275991	0
1922	0.599174	0.181038	-0.0211838	0.43932	0.683862	0.682504	0.682473	0.49358	0.152041	0.0368512	3.17335e-05	0.00135731	0	3.17335e-05	0	0	0	0	0	0	0	0	0	0	0	0	0	0	0	0.0013546	0	0	0	0	0	0	0	0	2.715e-06	0	-0.103054	-0.018506	0.0839562	-0.104206	-0.0100124	-0.0301092	-0.0241763	-0.276371	0
1923	0.618842	0.202286	-0.0221856	0.438741	0.693783	0.692359	0.692322	0.499744	0.155054	0.0375238	3.66556e-05	0.00142456	3.25193e-06	3.34036e-05	0	0	0	0	0	0	0	0	0	0	0	0	0	0	0	0.00142155	0	0	0	0	0	0	0	0	3.01e-06	0	-0.110078	-0.0198458	0.080011	-0.105624	-0.010255	-0.0302266	-0.0241372	-0.280736	0
1924	0.621606	0.189263	-0.00910437	0.441447	0.70457	0.703079	0.703033	0.506778	0.158059	0.0381962	4.5521e-05	0.00149181	1.03592e-05	3.51617e-05	0	0	0	0	0	0	0	0	0	0	0	0	0	0	0	0.0014885	0	0	0	0	0	0	0	0	3.31e-06	0	-0.114414	-0.0210079	0.0783979	-0.107078	-0.0105083	-0.0298239	-0.0243929	-0.285478	0
1925	0.656901	0.189263	0.01456	0.453078	0.716218	0.714659	0.714603	0.514682	0.161053	0.0388684	5.52852e-05	0.0015597	1.82729e-05	3.70124e-05	0	0	0	0	0	0	0	0	0	0	0	0	0	0	0	0.0015561	0	0	0	0	0	0	0	0	3.605e-06	0	-0.114389	-0.021049	0.0801858	-0.108546	-0.010769	-0.0296705	-0.0245403	-0.287664	0
1926	0.701245	0.197145	0.0403637	0.463736	0.727498	0.725864	0.725799	0.522136	0.164039	0.0396242	6.55634e-05	0.00163345	2.6603e-05	3.89604e-05	0	0	0	0	0	0	0	0	0	0	0	0	0	0	0	0.00162955	0	0	0	0	0	0	0	0	3.9e-06	0	-0.115335	-0.0208707	0.0811658	-0.11028	-0.0110317	-0.0296462	-0.024672	-0.289333	0
1927	0.721251	0.195089	0.0554925	0.47067	0.738763	0.73705	0.736974	0.529579	0.167015	0.0403798	7.63825e-05	0.00171305	3.53716e-05	4.10109e-05	0	0	0	0	0	0	0	0	0	0	0	0	0	0	0	0.00170885	0	0	0	0	0	0	0	0	4.2e-06	0	-0.116603	-0.0210432	0.0817083	-0.112257	-0.0112929	-0.0281011	-0.0256174	-0.29315	0
1928	0.674629	0.145739	0.0510169	0.477873	0.750716	0.748923	0.748835	0.537885	0.169983	0.0409673	8.77711e-05	0.00179265	4.46017e-05	4.31694e-05	0	0	0	0	0	0	0	0	0	0	0	0	0	0	0	0.00178815	0	0	0	0	0	0	0	0	4.505e-06	0	-0.118565	-0.0211149	0.081411	-0.114179	-0.0115513	-0.0266062	-0.0265239	-0.296512	0
1929	0.624013	0.0960463	0.0412825	0.486684	0.762524	0.760652	0.760552	0.546179	0.172818	0.0415546	9.9759e-05	0.00187226	5.43176e-05	4.54415e-05	0	0	0	0	0	0	0	0	0	0	0	0	0	0	0	0.00186745	0	0	0	0	0	0	0	0	4.81e-06	0	-0.121538	-0.0211039	0.0807338	-0.116025	-0.0118033	-0.0267785	-0.0265606	-0.2982	0
1930	0.652519	0.121749	0.0325894	0.49818	0.773754	0.771802	0.771689	0.554025	0.175523	0.0421417	0.000112378	0.00195251	6.45448e-05	4.78331e-05	0	0	0	0	0	0	0	0	0	0	0	0	0	0	0	0.0019474	0	0	0	0	0	0	0	0	5.115e-06	0	-0.123198	-0.0202739	0.0803249	-0.117778	-0.0120476	-0.0268103	-0.0266129	-0.297915	0
1931	0.678528	0.146424	0.0164544	0.51565	0.785323	0.78329	0.783158	0.562294	0.17822	0.0426447	0.000131699	0.00203277	7.53103e-05	5.03506e-05	0	6.03845e-06	0	0	0	0	0	0	0	0	0	0	0	0	0	0.00202735	0	0	0	0	0	0	0	0	5.42e-06	0	-0.121491	-0.0178248	0.0807677	-0.119418	-0.0122827	-0.0256014	-0.0271321	-0.294813	0
1932	0.64515	0.114895	-0.00354375	0.533799	0.796956	0.794843	0.794691	0.57055	0.180909	0.0432315	0.000152245	0.00211315	8.66424e-05	5.30007e-05	0	1.2602e-05	0	0	0	0	0	0	0	0	0	7.7616e-07	0	0	0	0.00210665	0	0	0	0	0	0	0	0	5.725e-06	0	-0.119225	-0.0155089	0.081711	-0.120927	-0.0125055	-0.0244386	-0.0275566	-0.291853	0
1933	0.656846	0.123806	-0.0139081	0.546949	0.807785	0.805588	0.80542	0.577927	0.183592	0.0439018	0.000168059	0.00219626	9.8571e-05	5.57902e-05	0	1.36978e-05	0	0	0	0	0	0	0	0	0	2.3208e-06	0	0	0	0.0021879	0	0	0	0	0	0	0	0	6.035e-06	0	-0.119079	-0.0147961	0.0826036	-0.122323	-0.012717	-0.0243865	-0.0274605	-0.291607	0
1934	0.717064	0.162189	6.5625e-05	0.554809	0.818061	0.815762	0.815577	0.58486	0.186146	0.0445719	0.000184743	0.00229885	0.000111127	5.87265e-05	0	1.48889e-05	0	0	0	0	0	0	0	0	0	3.85024e-06	0	0	0	0.00228865	0	0	0	0	0	0	0	0	6.345e-06	0	-0.12096	-0.0155197	0.083063	-0.123646	-0.0129221	-0.0248268	-0.0271077	-0.294285	0
1935	0.773297	0.169386	0.0409325	0.562979	0.82822	0.8258	0.825597	0.591784	0.188572	0.0452418	0.000202346	0.00242039	0.000124345	6.18174e-05	0	1.61836e-05	0	0	0	0	0	0	0	0	0	6.1408e-06	0	6.43715e-07	0	0.00240695	0	0	0	0	0	0	0	0	6.66e-06	0	-0.122688	-0.0161833	0.083596	-0.124937	-0.013126	-0.0252924	-0.0267455	-0.296735	0
1936	0.831551	0.180695	0.0815981	0.569258	0.837504	0.83496	0.834739	0.597836	0.190992	0.0459114	0.000220919	0.00254411	0.000138257	6.50709e-05	0	1.75909e-05	0	0	0	0	0	0	0	0	0	9.96e-06	0	1.92898e-06	0	0.00252525	0	0	0	0	0	0	0	0	6.975e-06	0	-0.123914	-0.0169668	0.0843626	-0.126237	-0.0133337	-0.0249097	-0.0268302	-0.300144	0
1937	0.84505	0.179324	0.0900637	0.575662	0.844968	0.842298	0.842058	0.602154	0.193406	0.0464972	0.000240519	0.00267012	0.000152903	6.84957e-05	0	1.91205e-05	0	0	0	0	0	0	0	0	0	1.60704e-05	0	3.21036e-06	0	0.00264355	0	0	0	0	0	0	0	0	7.29e-06	0	-0.124345	-0.017938	0.0866517	-0.127586	-0.0135503	-0.0254587	-0.026464	-0.303503	0
1938	0.833606	0.163217	0.0808325	0.589556	0.851051	0.84825	0.847989	0.605175	0.195814	0.0469991	0.000261202	0.00280165	0.000168319	7.21008e-05	0	2.07832e-05	0	0	0	0	0	0	0	0	0	2.59936e-05	0	5.1305e-06	0	0.00276185	0	1.069e-06	0	0	0	0	0	0	7.61e-06	0	-0.119579	-0.017775	0.0932865	-0.129026	-0.0137813	-0.026308	-0.0259756	-0.304568	0
1939	0.837512	0.163903	0.0738456	0.599764	0.856275	0.853333	0.85305	0.607332	0.198217	0.0475009	0.000283032	0.00294214	0.000184546	7.58955e-05	0	2.25904e-05	0	0	0	0	0	0	0	0	8.80625e-07	4.1264e-05	0	7.688e-06	0	0.00288015	0	4.231e-06	0	0	0	0	0	0	7.93e-06	0	-0.11641	-0.0173578	0.0978697	-0.130598	-0.014032	-0.026358	-0.0259336	-0.305603	0
1940	0.848384	0.18378	0.0641944	0.60041	0.86076	0.857667	0.857361	0.608625	0.200733	0.0480025	0.000306072	0.00309298	0.000201627	7.989e-05	0	2.45548e-05	0	0	0	0	0	0	0	0	2.62188e-06	6.3376e-05	0	1.0881e-05	0	0.00299845	0	9.399e-06	0	0	0	0	0	0	8.25e-06	0	-0.11984	-0.017966	0.0973886	-0.132344	-0.014345	-0.0270441	-0.0255301	-0.308068	0
1941	0.840653	0.193033	0.0500194	0.597601	0.864168	0.860907	0.860576	0.608625	0.203363	0.0485876	0.000330392	0.00326112	0.000219608	8.40948e-05	0	2.669e-05	0	0	0	0	0	0	0	0	4.325e-06	9.3792e-05	0	1.53496e-05	0	0.0031226	0	1.6487e-05	0	0	0	0	0	0	8.57e-06	0	-0.122763	-0.0186007	0.0967339	-0.134336	-0.0147654	-0.0263064	-0.0254879	-0.31246	0
1942	0.796379	0.171442	0.030625	0.594312	0.866261	0.862811	0.862455	0.607332	0.205867	0.049256	0.000356066	0.00344994	0.000238534	8.85208e-05	0	2.90109e-05	0	0	0	0	0	0	0	0	5.99125e-06	0.000134	0	2.10924e-05	0	0.00325455	0	2.542e-05	0	0	0	0	0	0	8.89e-06	0	-0.124111	-0.0185215	0.0964305	-0.136669	-0.0152651	-0.0237347	-0.0263512	-0.317009	0
1943	0.77291	0.166302	0.0136106	0.592998	0.867815	0.86416	0.863777	0.605607	0.208246	0.0499242	0.000382943	0.00365547	0.000258457	9.29526e-05	0	3.15336e-05	0	0	0	0	0	0	0	0	7.62125e-06	0.000184672	0	2.87416e-05	0	0.0033891	0	3.612e-05	0	0	0	0	0	0	9.215e-06	0	-0.125877	-0.0183919	0.0970053	-0.139371	-0.0158103	-0.022385	-0.0269234	-0.320373	0
1944	0.801498	0.189263	0.0210044	0.591231	0.870015	0.866137	0.865726	0.604313	0.210738	0.0506757	0.000410891	0.00387787	0.000279429	9.71867e-05	0	3.42756e-05	0	0	0	0	0	0	0	0	1.00963e-05	0.00024648	0	3.9587e-05	0	0.00352365	0	4.851e-05	0	0	0	0	0	0	9.545e-06	0	-0.129281	-0.0183034	0.0969316	-0.142423	-0.0163988	-0.021961	-0.0271265	-0.323498	0
1945	0.840125	0.199887	0.0499669	0.590271	0.873297	0.869173	0.868733	0.603881	0.213342	0.0515103	0.000440012	0.00412386	0.000301504	0.000101252	0	3.72561e-05	0	0	0	0	0	0	0	0	1.33963e-05	0.000326256	0	5.42655e-05	0	0.00365755	0	6.252e-05	0	0	0	0	0	0	9.87e-06	0	-0.135138	-0.0165944	0.0931975	-0.145805	-0.017028	-0.0214422	-0.0274659	-0.323067	0
1946	0.874348	0.207084	0.0807056	0.586558	0.877606	0.873184	0.872714	0.604313	0.216057	0.0523445	0.000470409	0.00442245	0.000324741	0.000105173	0	4.04957e-05	0	0	0	0	0	0	0	0	1.75037e-05	0.00043248	9.0345e-06	8.37e-05	0	0.00379145	0	7.809e-05	0	0	0	0	0	0	1.0195e-05	0	-0.13945	-0.0152848	0.0903358	-0.149498	-0.0176952	-0.0178593	-0.0294488	-0.326102	0
1947	0.88947	0.198859	0.111654	0.578957	0.883122	0.878287	0.877785	0.605607	0.219	0.0531784	0.000502189	0.00483527	0.000349201	0.000108971	0	4.40171e-05	0	0	0	0	0	0	0	0	2.504e-05	0.00059824	3.82845e-05	0.000139423	0	0.0039286	0	9.515e-05	0	0	0	0	0	0	1.053e-05	0	-0.143688	-0.0161481	0.0898363	-0.153481	-0.0183974	-0.0137008	-0.031797	-0.334831	0
1948	0.898865	0.196803	0.129456	0.572607	0.889774	0.884362	0.883826	0.607763	0.222052	0.0540119	0.000535464	0.00541175	0.000374948	0.000112671	0	4.78447e-05	0	0	0	0	0	0	0	0	4.1225e-05	0.00086544	8.301e-05	0.000211684	0	0.0040859	0	0.00011363	0	0	0	0	0	0	1.0865e-05	0	-0.151439	-0.0170579	0.0877219	-0.157734	-0.0191312	-0.0125818	-0.0326551	-0.34153	0
1949	0.878521	0.189263	0.116379	0.572878	0.897523	0.891407	0.890837	0.61078	0.225211	0.054845	0.000570351	0.00611578	0.000402051	0.000116295	0	5.20051e-05	0	0	0	0	0	0	0	0	7.2025e-05	0.00121456	0.000136245	0.000288827	0	0.00425945	0	0.00013348	0	0	0	0	0	0	1.1195e-05	0	-0.156901	-0.0169254	0.0875266	-0.162238	-0.0198935	-0.0121625	-0.0332081	-0.345925	0
1950	0.841639	0.186864	0.0807275	0.574047	0.906841	0.899883	0.899276	0.615088	0.228594	0.0555945	0.000606975	0.00695764	0.00043058	0.000119868	0	5.65273e-05	0	0	0	0	0	0	0	0	0.00012415	0.00160144	0.00019563	0.000370295	0	0.00449995	0	0.00015464	0	0	0	0	0	0	1.153e-05	0	-0.161256	-0.0178153	0.0895368	-0.167001	-0.0207256	-0.0115693	-0.0336817	-0.35283	0
1951	0.801351	0.190634	0.0490306	0.561687	0.918081	0.910219	0.909571	0.621112	0.232198	0.0562605	0.000648064	0.00786257	0.00046061	0.000123411	0	6.14427e-05	0	0	0	0	0	0	0	2.6e-06	0.0002033	0.00202048	0.000263145	0.000455855	0	0.00473005	0	0.00017787	0	0	0	0	0	0	1.187e-05	0	-0.159047	-0.0194497	0.0905994	-0.17159	-0.0216929	0.00300376	-0.0399182	-0.372243	0
1952	0.76631	0.184465	0.0318106	0.550034	0.930544	0.921829	0.921135	0.62799	0.236136	0.0570094	0.000693755	0.00871521	0.000492221	0.000126948	0	6.67855e-05	0	0	0	0	0	0	0	7.8e-06	0.000291875	0.00249968	0.00030735	0.000537695	0	0.0048789	0	0.0001875	0	0	0	0	0	0	1.221e-05	0	-0.155813	-0.0197917	0.0898049	-0.176295	-0.0227926	0.0206974	-0.0474357	-0.391158	0
1953	0.746104	0.175555	0.0204662	0.550083	0.943868	0.934275	0.933534	0.635287	0.240405	0.0578412	0.000741592	0.00959221	0.000525496	0.000130503	0	7.2593e-05	0	0	0	0	0	0	0	1.3e-05	0.00039425	0.00302768	0.00032325	0.000615195	0	0.0050349	0	0.0001844	0	0	0	0	0	0	1.2535e-05	0	-0.162431	-0.0195614	0.0869756	-0.181796	-0.023995	0.0251348	-0.0491888	-0.398612	0
1954	0.754805	0.180695	0.0221156	0.551994	0.958592	0.948012	0.947221	0.643859	0.244772	0.0585896	0.000791727	0.0105795	0.000560522	0.000134099	0	7.89054e-05	0	0	0	0	0	0	0	1.82e-05	0.00053725	0.0035968	0.0003417	0.00069409	0	0.0052104	0	0.0001864	0	0	0	0	0	0	1.2845e-05	0	-0.169982	-0.0193372	0.0848911	-0.18798	-0.0252888	0.0283572	-0.0506242	-0.405595	0
1955	0.815376	0.202971	0.0572644	0.555141	0.974832	0.963117	0.962273	0.653701	0.249234	0.0593376	0.000844317	0.0117156	0.000597392	0.000137759	0	8.57667e-05	0	0	0	0	0	0	0	2.34e-05	0.0007215	0.0042368	0.000363	0.00077345	0	0.0054041	1.5e-06	0.0001941	0	0	0	0	0	0	1.3155e-05	8e-06	-0.174956	-0.0198992	0.086395	-0.194737	-0.0266616	0.0329276	-0.0529809	-0.415361	0
1956	0.899099	0.215309	0.124871	0.558919	0.991948	0.978924	0.978025	0.663951	0.253905	0.0601684	0.000899532	0.0130236	0.000636202	0.000141506	0	9.32247e-05	0	0	0	0	0	0	0	2.86e-05	0.00094875	0.0049552	0.00038775	0.0008525	0	0.005616	7.08e-06	0.0002114	0	0	0	0	0	0	1.3465e-05	3.15e-05	-0.17987	-0.0208644	0.0890639	-0.20196	-0.0281002	0.0373827	-0.0553921	-0.425955	0
1957	0.9668	0.22559	0.177927	0.563283	1.0098	0.995263	0.994305	0.674607	0.258782	0.0609158	0.000957549	0.0145336	0.000677055	0.000145363	0	0.000101331	0	0	0	0	0	0	0	3.38e-05	0.00123025	0.0057776	0.00041685	0.000930465	0	0.0058448	1.785e-05	0.000238	0	0	0	0	0	0	1.3785e-05	6.4e-05	-0.186979	-0.0213623	0.0901206	-0.209548	-0.0295904	0.040692	-0.0572916	-0.434877	0
1958	0.982448	0.230731	0.179528	0.57219	1.02788	1.01163	1.01061	0.685201	0.26375	0.0616629	0.00101855	0.016249	0.000720058	0.000149354	0	0.000110143	0	0	0	0	0	0	0	3.9e-05	0.00155912	0.0067232	0.0004506	0.00100734	0	0.0060905	3.405e-05	0.0002711	0	0	0	0	0	0	1.412e-05	9.9e-05	-0.192885	-0.0215095	0.0930989	-0.217398	-0.0311175	0.0424956	-0.0584545	-0.442406	0
1959	0.968833	0.226961	0.151467	0.590405	1.04683	1.02875	1.02766	0.696281	0.268806	0.0625756	0.00108275	0.0180848	0.000765324	0.000153503	0	0.00011972	0	0	0	0	0	0	0	4.42e-05	0.00188925	0.0077488	0.00048915	0.00108361	0	0.00635245	5.298e-05	0.0003186	0	0	0	0	0	0	1.446e-05	0.0001355	-0.198203	-0.021802	0.0996986	-0.225412	-0.032666	0.0387934	-0.0568148	-0.447318	0
1960	0.880204	0.151908	0.115636	0.61266	1.06818	1.04815	1.047	0.709369	0.274062	0.0635708	0.00115033	0.0200263	0.000812972	0.000157831	0	0.000130131	0	0	0	0	0	0	0	4.94e-05	0.00220462	0.008856	0.0005337	0.00115924	0	0.0066287	7.497e-05	0.0003813	0	0	0	0	0	0	1.4805e-05	0.000173	-0.204271	-0.0223408	0.107055	-0.233483	-0.0341549	0.032864	-0.0542114	-0.45157	0
1961	0.751567	0.0607473	0.0722706	0.618549	1.09038	1.06815	1.06693	0.722933	0.279514	0.0644827	0.00122414	0.0222278	0.000863129	0.000162363	0	0.000141446	0	0	0	0	0	0	0	5.72e-05	0.00257388	0.0101392	0.00058515	0.00123116	0	0.0069199	0.00010233	0.00045	0	0	0	0	0	0	1.5165e-05	0.000211	-0.21075	-0.022317	0.10604	-0.240013	-0.0355224	0.037965	-0.0569018	-0.461607	0
1962	0.645151	-0.0139631	0.039375	0.619739	1.11162	1.08685	1.08555	0.735074	0.285159	0.0653112	0.00130439	0.0247749	0.000915925	0.000167122	0	0.000153746	0	0	0	0	0	0	0	6.76e-05	0.00305875	0.0116208	0.00064395	0.00130123	0	0.00722605	0.0001314	0.0005292	0	0	0	0	0	0	1.5535e-05	0.000248	-0.218924	-0.0221193	0.101353	-0.245452	-0.0368629	0.0445787	-0.0604224	-0.471841	0
1963	0.162053	-0.495468	0.02737	0.630152	1.13151	1.1038	1.1024	0.745213	0.290886	0.0663049	0.00139135	0.0277104	0.0009715	0.000172131	0	0.000167115	0	0	0	0	0	0	0	8.06e-05	0.00367875	0.0133072	0.00071115	0.00137423	0	0.00754325	0.00016743	0.0006285	0	0	0	0	0	0	1.5915e-05	0.000284	-0.226771	-0.0223355	0.10191	-0.25166	-0.0382559	0.0449589	-0.0613878	-0.478558	0
1964	-0.185672	-0.853256	0.0268012	0.640783	1.15094	1.11981	1.11831	0.754074	0.296692	0.0675464	0.00150266	0.0311298	0.00105	0.000177412	0	0.000181647	0	0	0	0	0	0	0	9.36e-05	0.00444875	0.0152752	0.00078855	0.00144987	0	0.00786825	0.00021102	0.0007534	0	0	0	0	0	0	1.6305e-05	0.0003185	-0.233538	-0.0228099	0.10438	-0.258387	-0.0396945	0.0455175	-0.062544	-0.48608	0
1965	0.162675	-0.532481	0.0380887	0.657067	1.17445	1.13937	1.13774	0.766182	0.302685	0.0688698	0.00162943	0.0350864	0.001145	0.000182991	0	0.000197443	0	0	0	0	0	0	0	0.000104	0.00537375	0.0175776	0.00087765	0.00152815	8.1e-07	0.00820105	0.00025659	0.0009034	0	0	1.5e-07	0	0	0	1.6705e-05	0.0003505	-0.239091	-0.0233691	0.10864	-0.265401	-0.0411719	0.0458755	-0.0636659	-0.493865	0
1966	0.593344	-0.150018	0.0643563	0.679006	1.20317	1.1636	1.16184	0.782898	0.308753	0.0701923	0.0017529	0.0395719	0.001235	0.000188889	0	0.000214611	0	0	0	0	0	0	0	0.0001144	0.00644375	0.0202096	0.00097995	0.00160936	3.15e-06	0.00853125	0.00031452	0.0010826	0	0	4.5e-07	0	0	1.65e-07	1.712e-05	0.00038	-0.244194	-0.0238464	0.113252	-0.272481	-0.0426813	0.0465875	-0.0650247	-0.501547	0
1967	0.768755	-0.0215027	0.0917788	0.698479	1.23173	1.18715	1.18527	0.79886	0.314896	0.0715138	0.0018782	0.0445849	0.001325	0.00019513	0	0.000233273	0	0	0	0	0	0	0	0.0001248	0.00764375	0.0231648	0.00109755	0.00169368	6.93e-06	0.0088491	0.00040332	0.0012997	0	0	9e-07	0	1.6e-07	4.95e-07	1.7545e-05	0.000407	-0.252397	-0.0241906	0.114983	-0.279423	-0.0442158	0.0464213	-0.0659727	-0.508198	0
1968	0.609199	-0.220273	0.108399	0.721073	1.26232	1.21212	1.21011	0.81597	0.321219	0.0729169	0.00201069	0.0502039	0.001415	0.000201737	0	0.000253558	0	0	0	0	0	0	0	0.0001404	0.00898875	0.0264864	0.00123255	0.00178111	1.215e-05	0.00915525	0.00053316	0.0015621	0	0	1.65e-06	0	3.2e-07	9.9e-07	1.7985e-05	0.0004315	-0.260835	-0.0246537	0.1168	-0.286028	-0.0457687	0.0452117	-0.0663959	-0.514337	0
1969	0.575317	-0.296355	0.117652	0.75402	1.29782	1.2413	1.23916	0.836955	0.327719	0.0744839	0.00214534	0.0565135	0.001505	0.000208734	0	0.000275606	0	0	0	0	0	0	0	0.000156	0.0105125	0.0302192	0.00138735	0.00187193	1.881e-05	0.0094497	0.0006954	0.0018822	0	0	2.85e-06	0	4.8e-07	1.65e-06	1.844e-05	0.000453	-0.264434	-0.0254765	0.123135	-0.292109	-0.0473331	0.0443333	-0.0669843	-0.521149	0
1970	0.847402	-0.0554308	0.108404	0.794429	1.33108	1.26752	1.26524	0.854819	0.334288	0.076132	0.00227972	0.0635577	0.001595	0.000216143	0	0.000299572	0	0	0	0	0	0	0	0.000169	0.0122625	0.034384	0.00156495	0.00196649	2.7e-05	0.0097331	0.0008787	0.002242	0	0	4.8e-06	0	8e-07	2.475e-06	1.8905e-05	0.000472	-0.261939	-0.0265622	0.135936	-0.29744	-0.0489504	0.0418569	-0.06678	-0.527605	0
1971	1.03702	0.11421	0.0874169	0.835393	1.36147	1.29014	1.28773	0.869128	0.340819	0.0777787	0.00241617	0.0713233	0.00168	0.000223988	0	0.000325622	0	0	3.358e-07	0	1.625e-06	0	0	0.0001846	0.0142662	0.038976	0.00176865	0.0020646	3.69e-05	0.0100061	0.0010617	0.002623	0	0	7.5e-06	0	1.12e-06	3.63e-06	1.938e-05	0.0004885	-0.262831	-0.0275096	0.149843	-0.304062	-0.0507025	0.0333	-0.0636999	-0.531736	0
1972	1.09744	0.153279	0.0721481	0.872013	1.39941	1.31966	1.3171	0.890181	0.347417	0.0795061	0.00255991	0.0797421	0.001765	0.000232292	0	0.000353937	0	0	1.0074e-06	0	4.875e-06	0	0	0.0002028	0.0164912	0.043936	0.0020022	0.00216628	4.869e-05	0.0102687	0.0012552	0.003029	0	3.6e-06	1.125e-05	0	1.92e-06	5.115e-06	1.987e-05	0.000503	-0.274952	-0.0281269	0.154949	-0.312309	-0.0525839	0.0233267	-0.0602077	-0.534763	0
1973	1.06245	0.106328	0.05096	0.905161	1.44241	1.35347	1.35076	0.915283	0.354081	0.0813963	0.0027116	0.0889365	0.001855	0.000241079	0	0.000384714	0	0	1.679e-06	0	8.125e-06	0	0	0.000221	0.0189587	0.049296	0.00227055	0.00227199	6.264e-05	0.0105209	0.0015039	0.003478	0	1.06e-05	1.65e-05	0	3.68e-06	7.095e-06	2.038e-05	0.0005155	-0.287701	-0.0289192	0.156593	-0.320339	-0.0545382	0.0194641	-0.0599616	-0.540351	0
1974	0.915371	-0.0406943	0.0251475	0.930917	1.47871	1.37955	1.37668	0.932607	0.360707	0.0833667	0.00286646	0.0991643	0.001945	0.000250372	0	0.000418167	0	0	2.3506e-06	0	1.1375e-05	0	0	0.0002392	0.02176	0.055184	0.0025785	0.00238204	7.893e-05	0.010764	0.0018264	0.003987	0	1.72e-05	2.34e-05	0	6.56e-06	9.405e-06	2.0905e-05	0.000526	-0.299043	-0.0292697	0.158025	-0.328138	-0.0565375	0.0175236	-0.0606474	-0.546424	0
1975	0.82177	-0.141108	0.0099925	0.952885	1.51231	1.40192	1.39889	0.946263	0.367296	0.0853351	0.00302237	0.110392	0.00203	0.000260193	0	0.00045453	0	0	3.0222e-06	0	1.4625e-05	0	0	0.00026	0.02489	0.061632	0.00293145	0.00249612	9.801e-05	0.010998	0.0022038	0.004508	0	2.35e-05	3.225e-05	0	1.072e-05	1.2045e-05	2.1445e-05	0.000535	-0.312462	-0.0288483	0.156694	-0.335695	-0.0585538	0.0148233	-0.0608822	-0.551084	0
1976	0.977694	-0.0173902	0.0194775	0.975607	1.5514	1.42954	1.42636	0.965046	0.373847	0.0874652	0.00318199	0.121857	0.002115	0.000270567	0	0.000494054	0	0	3.6938e-06	0	1.7875e-05	0	0	0.0002808	0.028075	0.068208	0.003336	0.00261438	0.00012033	0.0112229	0.0025659	0.005045	0	2.95e-05	4.335e-05	0	1.632e-05	1.5345e-05	2.2005e-05	0.0005425	-0.322936	-0.0291938	0.155858	-0.343	-0.0605584	0.0181688	-0.0642113	-0.559173	0
1977	1.19883	0.134087	0.0600775	1.00466	1.59633	1.4632	1.45984	0.989588	0.380463	0.0897893	0.00335582	0.133138	0.002205	0.000281516	0	0.000537015	0	0	4.3654e-06	0	2.1125e-05	0	0	0.0003068	0.031175	0.074528	0.003801	0.00273746	0.00014625	0.0114393	0.0029574	0.005646	0	3.51e-05	5.745e-05	0	2.448e-05	1.8975e-05	2.258e-05	0.000549	-0.33147	-0.0300851	0.1566	-0.35004	-0.0625224	0.0227389	-0.0681617	-0.568346	0
1978	1.27583	0.109069	0.122688	1.04408	1.64199	1.49766	1.49412	1.01483	0.387144	0.0921515	0.00354027	0.144325	0.00229	0.000293063	0	0.000587191	0	0	5.037e-06	0	2.4375e-05	0	0	0.0003406	0.034175	0.080608	0.0043335	0.00286533	0.00017631	0.0116474	0.0034674	0.006302	0	4.04e-05	7.425e-05	0	3.584e-05	2.2935e-05	2.317e-05	0.000554	-0.339285	-0.0303308	0.15998	-0.356804	-0.0644164	0.0213071	-0.0690211	-0.573911	0
1979	1.35619	0.0939901	0.174103	1.0881	1.68909	1.53339	1.52965	1.04157	0.393787	0.0942987	0.00373869	0.155695	0.002375	0.000305233	0	0.000644551	0	0	5.7086e-06	0	2.6e-05	0	0	0.0003822	0.0372	0.08656	0.0049425	0.00299785	0.00021132	0.0118482	0.0041391	0.006997	0	4.54e-05	9.375e-05	0	4.992e-05	2.739e-05	2.378e-05	0.0005585	-0.341683	-0.0310135	0.16757	-0.363282	-0.0662111	0.0212962	-0.0700427	-0.582178	0
1980	1.46606	0.148138	0.193082	1.12484	1.73799	1.57181	1.56786	1.07067	0.400791	0.0963945	0.00395006	0.166177	0.00246	0.000318047	0	0.000705428	0	0	6.3802e-06	0	2.6e-05	0	0	0.0004342	0.03985	0.091952	0.0056415	0.00313534	0.00025218	0.0120412	0.0047235	0.007728	0	5.01e-05	0.00011685	0	6.72e-05	3.2175e-05	2.441e-05	0.0005625	-0.352177	-0.0313835	0.166983	-0.369435	-0.0678056	0.0200112	-0.0705475	-0.589257	-0.000302352
1981	1.40776	0.0795963	0.179869	1.1483	1.78022	1.60393	1.59975	1.09228	0.40835	0.0991227	0.00417632	0.176289	0.002545	0.00033153	0	0.000769824	0	0	6.716e-06	0	2.925e-05	0	0	0.000494	0.0421375	0.09736	0.0064425	0.00327825	0.00029889	0.0122135	0.0051564	0.008488	0	5.46e-05	0.00014385	0	8.8e-05	3.729e-05	2.506e-05	0.0005655	-0.365704	-0.0309345	0.162083	-0.375649	-0.0691591	0.0207254	-0.0727701	-0.595711	-0.00131576
1982	0.714776	-0.591427	0.142323	1.16388	1.81808	1.63148	1.62706	1.10903	0.41606	0.101978	0.0044152	0.186603	0.00263	0.000345705	0	0.000837737	0	0	7.0035e-06	0	3.575e-05	0	0	0.000559	0.0444625	0.102944	0.007335	0.00342395	0.00035091	0.012337	0.0055299	0.009234	0	6.26e-05	0.0001746	0	0.00011232	4.2735e-05	2.573e-05	0.000568	-0.369038	-0.0310128	0.163277	-0.382236	-0.0704323	0.0317897	-0.0804231	-0.608207	-0.00322646
1983	0.408766	-0.876217	0.09982	1.18516	1.85996	1.66374	1.65908	1.13104	0.423758	0.104277	0.00466057	0.196223	0.002715	0.000360594	0	0.000909167	0	0	7.613e-06	0	3.9e-05	0	0	0.0006292	0.04645	0.108208	0.0082815	0.00356655	0.00040779	0.0124612	0.0057795	0.01	0	7.22e-05	0.00020925	0	0.0001416	4.8675e-05	2.642e-05	0.00057	-0.373851	-0.0313875	0.165322	-0.388993	-0.071723	0.0397582	-0.0868282	-0.618959	-0.00551124
1984	0.951877	-0.320002	0.0546175	1.21726	1.90382	1.69763	1.69271	1.15578	0.430734	0.1062	0.00491543	0.206195	0.0028	0.000376222	0	0.000984116	0	0	8.2455e-06	0	4.225e-05	0	0	0.0007046	0.0484375	0.1136	0.0092955	0.00370915	0.00046989	0.0126451	0.006045	0.010834	0	8.08e-05	0.0002484	0	0.00017584	5.4945e-05	2.713e-05	0.000572	-0.379048	-0.0323878	0.171632	-0.39573	-0.0729956	0.0399564	-0.0895234	-0.626897	-0.00804971
1985	1.25132	-0.0232162	0.02268	1.25186	1.94606	1.72898	1.7238	1.17908	0.436286	0.108436	0.00517506	0.217081	0.00288	0.000392611	0	0.00106258	0	0	8.5215e-06	0	4.875e-05	0	0	0.0007826	0.0507125	0.1192	0.010629	0.0038564	0.00053658	0.0128498	0.006342	0.011693	0	9.11e-05	0.00029325	0	0.00021488	6.138e-05	2.7865e-05	0.0005735	-0.381707	-0.0339184	0.181599	-0.402256	-0.0742145	0.0385309	-0.0914475	-0.634669	-0.0108835
1986	1.34237	0.0350442	0.0216256	1.2857	1.98758	1.75971	1.75427	1.20251	0.4411	0.110655	0.0054426	0.227867	0.00296	0.000409785	0	0.00114457	0	0	7.8545e-06	0	5.2e-05	0	0	0.0008684	0.053025	0.124736	0.011985	0.0040114	0.00060534	0.0129812	0.006576	0.01257	0	9.99e-05	0.0003456	0	0.00026	6.831e-05	2.8625e-05	0.0005745	-0.384827	-0.0354755	0.190877	-0.408376	-0.0753445	0.0366024	-0.093109	-0.641843	-0.0137224
1987	1.43528	0.065888	0.0475694	1.32183	2.03403	1.79455	1.78882	1.23094	0.445635	0.11224	0.00573024	0.23948	0.003045	0.000427766	0	0.00123007	0	0	7.5555e-06	0	5.525e-05	0	0	0.0009646	0.0557	0.130768	0.0132855	0.0041757	0.00067563	0.013143	0.006729	0.013483	0	0.0001215	0.00040635	0	0.00031168	7.557e-05	2.9405e-05	0.0005755	-0.390046	-0.0370307	0.19742	-0.413896	-0.0763509	0.0343842	-0.0945727	-0.648322	-0.0170523
1988	1.57609	0.105985	0.104563	1.36554	2.08662	1.83406	1.82803	1.26297	0.44981	0.115252	0.0060303	0.25256	0.00313	0.000446578	0	0.00131909	0	0	8.832e-06	0	6.5e-05	0	0	0.0010608	0.058725	0.137104	0.015159	0.0043431	0.00074943	0.0133185	0.006978	0.014488	0	0.0001582	0.0004773	0	0.00036976	8.283e-05	3.0205e-05	0.0005765	-0.39478	-0.0387166	0.204	-0.418617	-0.0771988	0.0311876	-0.0954342	-0.65393	-0.0211152
1989	1.70061	0.129289	0.162693	1.40863	2.13489	1.86923	1.8629	1.28962	0.453791	0.119486	0.00633033	0.265664	0.00321	0.000466245	0	0.00141162	0	0	1.07065e-05	0	7.475e-05	0	0	0.001157	0.061225	0.14344	0.017376	0.0045105	0.00082791	0.0134485	0.007302	0.015642	0	0.000198	0.0005607	0	0.00043408	9.0915e-05	3.103e-05	0.0005775	-0.39732	-0.0403412	0.211596	-0.422342	-0.0778539	0.0275134	-0.0958918	-0.658672	-0.0253641
1990	1.74564	0.126547	0.17444	1.44465	2.17459	1.89729	1.89065	1.31035	0.457668	0.122633	0.0066441	0.277301	0.00329	0.00048679	0	0.00150768	0	0	1.2581e-05	4.8e-06	8.125e-05	0	0	0.001261	0.0631875	0.149168	0.0193455	0.00467325	0.00091143	0.0135785	0.007467	0.016861	0	0.0002498	0.00064935	0	0.00049984	9.9495e-05	3.188e-05	0.000578	-0.398765	-0.0415859	0.217668	-0.424881	-0.0784437	0.0245183	-0.0960408	-0.662209	-0.030199
1991	0.806741	-0.814872	0.154604	1.46701	2.20888	1.92107	1.9141	1.32791	0.461544	0.124651	0.00697266	0.287807	0.00337	0.000508642	0	0.00160725	0	0	1.4421e-05	1.44e-05	8.775e-05	0	0	0.0013702	0.0650375	0.154016	0.02109	0.00482205	0.0009981	0.013728	0.007674	0.018088	0	0.0003392	0.00073455	0	0.00056096	0.00010758	3.2755e-05	0.0005785	-0.396841	-0.0424656	0.216613	-0.424334	-0.0791428	0.033451	-0.100962	-0.667004	-0.03631
1992	0.183167	-1.41975	0.125366	1.47755	2.23594	1.93909	1.93177	1.34097	0.464573	0.126224	0.00731543	0.296858	0.00345	0.000533	0	0.00171034	0	0	1.6215e-05	2.96e-05	9.425e-05	2.11225e-08	0	0.001482	0.0662375	0.158208	0.022788	0.0049569	0.00108423	0.0137475	0.007854	0.019343	0	0.0004848	0.00081375	0	0.000612	0.0001155	3.3655e-05	0.000579	-0.396023	-0.0424604	0.206985	-0.419207	-0.0798931	0.0425393	-0.103987	-0.671575	-0.0429799
1993	0.897138	-0.681902	0.0850237	1.49402	2.2597	1.95608	1.9484	1.35438	0.466274	0.127749	0.00768499	0.303616	0.00353	0.000559	0	0.00181695	0	0	1.85725e-05	6e-05	0.000104	6.27613e-08	0	0.0015964	0.0669375	0.161536	0.0240705	0.00507005	0.00116901	0.013637	0.00783	0.020428	0	0.0006789	0.00087555	0	0.00064688	0.000122925	3.458e-05	0.000579	-0.395358	-0.0422396	0.197842	-0.411007	-0.0806352	0.0427057	-0.102023	-0.672354	-0.0490306
1994	1.4368	-0.131512	0.0485363	1.51978	2.28862	1.98017	1.97207	1.37458	0.468059	0.129433	0.00810121	0.308449	0.00361	0.000585	0	0.00192708	0	0	2.19765e-05	0.00012	0.00012025	9.11702e-07	0	0.001716	0.067375	0.164192	0.0247035	0.0051553	0.00125226	0.0135655	0.00756	0.02132	7.973e-05	0.0008974	0.000927	0	0.00067648	0.00012969	3.553e-05	0.0005795	-0.392182	-0.0428387	0.191688	-0.402127	-0.0814255	0.0440421	-0.101521	-0.671509	-0.0551646
1995	1.64121	0.0586911	0.0260487	1.55647	2.32199	2.01042	2.0018	1.40007	0.470075	0.131651	0.00861607	0.311569	0.00369	0.000611	0	0.00204072	0	0	3.4569e-05	0.0002632	0.00014625	2.5313e-06	0	0.0018278	0.067375	0.166256	0.025038	0.0052173	0.00133191	0.0134615	0.006954	0.02209	0.00026803	0.0011316	0.0009741	0	0.00071856	0.000136125	3.65e-05	0.00058	-0.385604	-0.0439983	0.192353	-0.394949	-0.0823215	0.04384	-0.100528	-0.671594	-0.0603537
1996	1.73788	0.123806	0.0197181	1.59435	2.35324	2.03899	2.02971	1.4242	0.471455	0.134059	0.00927565	0.31425	0.003765	0.000637	0	0.00217712	0	0	6.25025e-05	0.0005048	0.0001885	3.72321e-06	0	0.001937	0.0672375	0.168016	0.025152	0.00525915	0.00140229	0.013364	0.0062454	0.02317	0.00050218	0.0013636	0.00101745	0	0.00076432	0.000140745	3.4995e-05	0.00058	-0.377983	-0.0453446	0.198817	-0.390468	-0.0836122	0.0418986	-0.0992733	-0.673231	-0.0635822
1997	1.81567	0.153279	0.0429187	1.61947	2.38518	2.06886	2.05879	1.44919	0.473265	0.136336	0.010067	0.316319	0.00384	0.000663	0	0.00233452	0	0	9.91415e-05	0.0008272	0.0002405	6.02431e-06	0	0.0020566	0.06705	0.169328	0.025104	0.00528395	0.00145845	0.0132535	0.0054729	0.02439	0.00077322	0.0015878	0.0010668	0	0.000796	0.0001419	3.28e-05	0.00058	-0.381987	-0.0465864	0.197514	-0.38756	-0.0857344	0.0385575	-0.0981783	-0.675861	-0.0652346
1998	1.92421	0.187549	0.0925838	1.64408	2.42451	2.10701	2.09607	1.48103	0.476231	0.138802	0.0109462	0.317498	0.00392	0.000689	0	0.00249192	0	0	0.000148914	0.0012336	0.0002925	9.64025e-06	0	0.0021606	0.0667375	0.170368	0.025035	0.00529325	0.00150165	0.013117	0.0046689	0.02527	0.00103278	0.0017892	0.00111255	0	0.00081808	0.000140745	3.355e-05	0.00058	-0.394515	-0.0470696	0.190006	-0.385373	-0.0887675	0.033855	-0.0971659	-0.678376	-0.0650724
1999	2.03322	0.216337	0.146252	1.67063	2.46087	2.14234	2.13043	1.51064	0.478682	0.141114	0.011905	0.318533	0.004	0.000715	0	0.00264931	4.96902e-07	0	0.000219914	0.0017088	0.0003445	1.53537e-05	0	0.0022516	0.0663	0.171184	0.0249045	0.00529325	0.00153495	0.0130201	0.0039363	0.02634	0.00128884	0.0019876	0.00115065	0	0.00083856	0.00013926	3.46e-05	0.00058	-0.404255	-0.046596	0.18688	-0.384069	-0.0925101	0.0282813	-0.0962409	-0.681142	-0.0634833
2000	2.09619	0.228674	0.181191	1.68633	2.48757	2.16801	2.15506	1.5327	0.479349	0.143001	0.0129504	0.319561	0.004075	0.000741	0	0.00280671	5.3733e-06	0	0.000305451	0.0022344	0.0003965	2.51441e-05	0	0.0023608	0.0658625	0.171856	0.0247545	0.00528705	0.00156069	0.0129181	0.0032898	0.02748	0.0015505	0.002208	0.0011859	0	0.00085728	0.00013761	3.2845e-05	0.00058	-0.412784	-0.0466785	0.186982	-0.383899	-0.0965845	0.023583	-0.0961873	-0.686086	-0.0611506
2001	2.12798	0.232444	0.190562	1.70497	2.51467	2.19434	2.18016	1.5559	0.479231	0.14503	0.0141809	0.320331	0.00415	0.000766999	1.95493e-06	0.00296411	3.16084e-05	0	0.000396152	0.0028016	0.000446886	3.92378e-05	0.000104522	0.0024778	0.065475	0.172432	0.024621	0.0052762	0.00158076	0.012792	0.0027471	0.02839	0.0017773	0.002407	0.00121365	0	0.00087456	0.0001353	2.889e-05	0.00058	-0.417581	-0.0478466	0.189391	-0.386164	-0.0988064	0.0228134	-0.0969686	-0.690713	-0.0592393
2002	2.14536	0.232444	0.174151	1.73876	2.54935	2.22832	2.21272	1.5855	0.479785	0.147437	0.0155953	0.321029	0.004225	0.000793324	5.87561e-06	0.00312151	7.92228e-05	2.96218e-06	0.000490601	0.0034184	0.000500933	5.42274e-05	0.000311056	0.0025922	0.065025	0.172784	0.0244785	0.0052638	0.00159642	0.0126601	0.0022884	0.02949	0.0019852	0.002595	0.0012336	0	0.0008904	0.00013266	2.549e-05	0.00058	-0.41749	-0.0490211	0.193791	-0.39016	-0.0991473	0.0248743	-0.0978269	-0.693303	-0.0574986
2003	2.1379	0.232444	0.130187	1.77527	2.58656	2.26528	2.24819	1.61755	0.480748	0.14989	0.017084	0.321281	0.00429915	0.000820285	9.55576e-06	0.0032789	0.00013392	1.16663e-05	0.000598771	0.0040704	0.000565359	7.12803e-05	0.000512873	0.0027118	0.0644875	0.172816	0.024279	0.0052514	0.00160848	0.0125223	0.0019068	0.03059	0.0021791	0.002751	0.00125085	0	0.00090496	0.000129855	2.394e-05	0.00058	-0.418209	-0.049655	0.196804	-0.3941	-0.0994884	0.0269294	-0.0986996	-0.695994	-0.0551123
2004	2.12582	0.232444	0.0860781	1.8073	2.61965	2.2984	2.27974	1.64679	0.480862	0.152086	0.0186534	0.321257	0.0043772	0.000847858	1.29337e-05	0.0034363	0.000194381	2.57604e-05	0.000717704	0.004764	0.000639868	9.54443e-05	0.000710546	0.0028314	0.0640125	0.172768	0.024036	0.005239	0.00161784	0.0124	0.0015885	0.03149	0.0023247	0.00287	0.0012621	0	0.0009184	0.00012672	2.2885e-05	0.00058	-0.419405	-0.0498851	0.198935	-0.398034	-0.0998295	0.0289768	-0.0995682	-0.698667	-0.0522666
2005	2.08183	0.184018	0.0592681	1.83855	2.65132	2.33017	2.30989	1.67512	0.480365	0.154397	0.0202831	0.321146	0.00445471	0.000876018	1.63124e-05	0.00359346	0.000259513	4.49136e-05	0.000834021	0.0054976	0.000724224	0.000126803	0.000904534	0.002951	0.063525	0.172608	0.023793	0.00522505	0.00162513	0.0122766	0.0013245	0.03245	0.0024073	0.002988	0.00126795	0	0.00093056	0.000123255	2.133e-05	0.00058	-0.420027	-0.050044	0.200407	-0.400832	-0.0999777	0.0304204	-0.1	-0.700433	-0.0497123
2006	1.98286	0.0677962	0.0431769	1.87189	2.68339	2.3629	2.34098	1.70352	0.480658	0.156801	0.0219181	0.320488	0.00453168	0.000904742	1.98671e-05	0.00375221	0.000328415	6.8812e-05	0.000952783	0.0062088	0.000818212	0.000164195	0.00109522	0.0030732	0.062825	0.172	0.023544	0.0052111	0.00163062	0.0121466	0.0011112	0.03354	0.0024738	0.003073	0.0012723	0	0.0009416	0.00011979	1.948e-05	0.00058	-0.419935	-0.0500614	0.200563	-0.401358	-0.0997395	0.030661	-0.1	-0.7004	-0.0477661
2007	1.93693	0	0.0322656	1.90467	2.71472	2.39519	2.37159	1.73086	0.481733	0.159001	0.0235971	0.31953	0.00461542	0.000933686	2.35746e-05	0.00391043	0.000400353	9.71559e-05	0.00106827	0.0069064	0.00090906	0.000206809	0.00131497	0.003211	0.0619875	0.171104	0.0232785	0.0051956	0.00163458	0.011999	0.0009366	0.03478	0.0025508	0.003125	0.00127275	0	0.00095152	0.00011616	1.7945e-05	0.00058	-0.419668	-0.0500082	0.200062	-0.400725	-0.0993049	0.0303081	-0.1	-0.69946	-0.0461083
2008	1.96391	0	0.025655	1.93825	2.74726	2.42864	2.40332	1.75906	0.483012	0.161244	0.0253202	0.31862	0.00471325	0.000962526	2.73371e-05	0.00406392	0.000474874	0.000129674	0.00116739	0.00759493	0.000984137	0.000255249	0.00159247	0.00335443	0.06115	0.170176	0.023016	0.00517855	0.00163728	0.0118248	0.0007938	0.0361	0.0026334	0.003173	0.00126765	0	0.00096016	0.000112365	1.7405e-05	0.00058	-0.419355	-0.0499552	0.199559	-0.400058	-0.0988662	0.0299656	-0.1	-0.698505	-0.0443753
2009	2.04627	0	0.0725288	1.97374	2.78136	2.46372	2.43666	1.78867	0.48446	0.16353	0.0270581	0.317643	0.00482512	0.000991262	3.11507e-05	0.0042127	0.000551505	0.000166103	0.00125054	0.00826196	0.00104333	0.000309345	0.00192056	0.0034945	0.0602581	0.169133	0.022746	0.00516194	0.00163897	0.0116067	0.000676441	0.037446	0.00271465	0.00333403	0.00125591	0	0.000966768	0.000108588	1.59874e-05	0.000580078	-0.419024	-0.0499021	0.199056	-0.399379	-0.0984258	0.0296264	-0.1	-0.697543	-0.0424774
2010	2.15681	0	0.146252	2.01056	2.8154	2.4988	2.46996	1.81815	0.485948	0.16586	0.0288403	0.316597	0.00495101	0.00101989	3.50123e-05	0.00435678	0.00062972	0.000206187	0.00131812	0.00893273	0.00108665	0.000368922	0.00229268	0.00364263	0.0593242	0.167986	0.0224706	0.0051441	0.00163991	0.0113457	0.000579776	0.0388082	0.00279358	0.00359658	0.00123817	0	0.000971435	0.000104669	1.43031e-05	0.000580191	-0.417636	-0.0498585	0.198424	-0.397651	-0.0979426	0.0293927	-0.1	-0.696265	-0.0405882
2011	2.23033	0	0.181191	2.04914	2.84878	2.53326	2.5026	1.84689	0.487475	0.168231	0.0306613	0.31552	0.00509091	0.00104842	3.89221e-05	0.00449616	0.000709225	0.000249701	0.00137064	0.009607	0.00111439	0.000433823	0.00270336	0.0037988	0.0583904	0.166793	0.0221951	0.00512606	0.00164036	0.0110614	0.000496299	0.0402263	0.0028726	0.00383153	0.00121722	0	0.000974988	0.000100768	1.37932e-05	0.000580244	-0.414132	-0.0498335	0.197535	-0.393829	-0.0973735	0.0293698	-0.1	-0.694352	-0.0389831
2012	2.2792	0	0.190562	2.08864	2.88155	2.56715	2.53468	1.8752	0.488878	0.170605	0.0324623	0.314403	0.00523803	0.00107692	4.27361e-05	0.00462622	0.000806238	0.000293853	0.00141545	0.0102633	0.0011347	0.000497098	0.00310707	0.00396069	0.0574577	0.165556	0.0219194	0.00510791	0.00164043	0.0107554	0.000423653	0.0416929	0.00295032	0.00403785	0.00119357	0	0.000977447	9.69058e-05	1.35914e-05	0.000580268	-0.40957	-0.0498179	0.196517	-0.38896	-0.0967614	0.0294523	-0.1	-0.692115	-0.0370653
2013	2.3015	0	0.174151	2.12734	2.91351	2.60026	2.56607	1.90313	0.490003	0.17294	0.0341882	0.31325	0.00538559	0.00110548	4.63103e-05	0.00474231	0.000933972	0.000336022	0.00145963	0.0108814	0.00115559	0.000552001	0.00346391	0.00412596	0.0565279	0.164279	0.0216449	0.00508971	0.00164022	0.0104289	0.000364265	0.0432015	0.00302554	0.00421477	0.00116769	0	0.000978893	9.31002e-05	1.3487e-05	0.000580279	-0.405008	-0.0498024	0.1955	-0.384091	-0.0961494	0.0295348	-0.1	-0.689867	-0.0349986
2014	2.29525	0	0.130187	2.16507	2.94481	2.63275	2.59691	1.93079	0.490886	0.175235	0.0358426	0.312062	0.00553359	0.0011341	4.96449e-05	0.00484449	0.00108678	0.000376334	0.00150321	0.0114642	0.00117705	0.000598779	0.00377979	0.00429462	0.0556026	0.16297	0.0213725	0.00507149	0.00163981	0.0100832	0.000315712	0.0447458	0.00309718	0.0043617	0.00113999	0	0.000979399	8.93652e-05	1.34243e-05	0.000580285	-0.400446	-0.0497868	0.194482	-0.379221	-0.0955373	0.0296173	-0.1	-0.687609	-0.0332296
2015	2.28821	0	0.0860781	2.20213	2.97554	2.6647	2.62727	1.95822	0.491562	0.177491	0.0374291	0.31084	0.00568203	0.00116278	5.27399e-05	0.00493282	0.00126009	0.000414909	0.00154622	0.0120143	0.00119906	0.000637668	0.00405987	0.00446666	0.0546836	0.161633	0.0211027	0.00505328	0.00163923	0.00971968	0.000276021	0.0463205	0.00316432	0.00447825	0.00111085	0	0.000979041	8.57106e-05	1.3396e-05	0.000580287	-0.395884	-0.0497712	0.193465	-0.374352	-0.0949253	0.0296998	-0.1	-0.685339	-0.0315318
2016	2.2978	0	0.0592681	2.23853	3.00564	2.69607	2.65712	1.98536	0.49205	0.179706	0.0389511	0.309571	0.0058309	0.00119152	5.55954e-05	0.00500734	0.00145015	0.000451855	0.00158866	0.0125339	0.00122162	0.000668899	0.00430861	0.00464209	0.0537714	0.160273	0.0208359	0.0050351	0.00163854	0.00933904	0.000234756	0.0479204	0.00322617	0.00456417	0.00108057	0	0.000977878	8.21435e-05	1.14216e-05	0.000580288	-0.391322	-0.0497556	0.192447	-0.369483	-0.0943132	0.0297823	-0.1	-0.683059	-0.02987
2017	2.3174	0	0.0431769	2.27422	3.03506	2.72679	2.68638	2.01214	0.492358	0.181882	0.0404116	0.308264	0.00598021	0.00122033	5.82115e-05	0.00506811	0.00165386	0.000487269	0.00163056	0.0130249	0.00124472	0.000692689	0.00452983	0.00482089	0.0528657	0.158892	0.0205719	0.00501694	0.00163776	0.00895754	0.000192186	0.0495322	0.00328259	0.00462121	0.00104943	0	0.000975952	7.86698e-05	8.987e-06	0.000580289	-0.38676	-0.04974	0.19143	-0.364613	-0.0937011	0.0298648	-0.1	-0.680767	-0.0282318
2018	2.34148	0	0.0322656	2.30921	3.06379	2.75686	2.71504	2.03853	0.492495	0.184019	0.0418136	0.306933	0.00612995	0.00124919	6.05882e-05	0.00511517	0.00186868	0.000521243	0.00167193	0.0134893	0.00126833	0.00070925	0.00472685	0.00500308	0.0519666	0.157493	0.0203106	0.00499881	0.00163691	0.00859085	0.000157299	0.0511366	0.00333406	0.00465284	0.00101765	0	0.000973309	7.52953e-05	8.39355e-06	0.000580289	-0.382198	-0.0497244	0.190412	-0.359744	-0.0930891	0.0299473	-0.1	-0.678464	-0.0266183
2019	2.36963	0	0.025655	2.34398	3.09187	2.7863	2.74314	2.06455	0.492474	0.186117	0.0431601	0.305566	0.00628014	0.00127811	6.27257e-05	0.00514857	0.00209257	0.000553862	0.00171277	0.0139289	0.00129245	0.000718789	0.00490263	0.00518865	0.0510741	0.156078	0.0200521	0.0049807	0.00163601	0.00823837	0.000128706	0.0527182	0.003381	0.00466221	0.000985465	0	0.000969996	7.20224e-05	8.21703e-06	0.000580289	-0.377636	-0.0497088	0.189395	-0.354874	-0.092477	0.0300298	-0.1	-0.67615	-0.0245843
2020	2.45156	0	0.0725288	2.37903	3.11932	2.81517	2.77071	2.09023	0.492305	0.188176	0.044454	0.304154	0.00643075	0.00130709	6.46239e-05	0.00516836	0.00232383	0.000585207	0.00175311	0.0143451	0.00131706	0.000721506	0.00505973	0.0053776	0.0501884	0.15465	0.0197962	0.0049626	0.00163507	0.00789955	0.000105314	0.0542649	0.00342382	0.00465215	0.000953055	0	0.000966059	6.88496e-05	8.131e-06	0.000580289	-0.372412	-0.0496916	0.188488	-0.349687	-0.0918815	0.030361	-0.1	-0.673724	-0.0224917
2021	2.56084	0	0.146252	2.41458	3.14606	2.84337	2.79767	2.1155	0.491972	0.190198	0.045697	0.302685	0.00658181	0.00133613	6.6283e-05	0.00517458	0.00256089	0.000615337	0.00179292	0.0147393	0.00134215	0.000717587	0.00520015	0.00556992	0.0493076	0.153207	0.0195424	0.0049445	0.0016341	0.0075733	8.61962e-05	0.0557656	0.00346274	0.00462511	0.000920555	0	0.000961511	6.57804e-05	8.01689e-06	0.000580289	-0.365865	-0.0496711	0.187801	-0.343865	-0.091319	0.0311895	-0.1	-0.671087	-0.0208815
2022	2.63181	0	0.181191	2.45062	3.17235	2.8712	2.82432	2.14045	0.491652	0.19222	0.0468795	0.30115	0.0067333	0.00136523	6.77917e-05	0.00517365	0.00278471	0.000644375	0.00183208	0.0151114	0.00136744	0.000710129	0.00532528	0.00576409	0.0484308	0.15175	0.0192906	0.00492636	0.0016331	0.00725883	7.05678e-05	0.0572124	0.00349802	0.00458336	0.000888094	0	0.000956365	6.28156e-05	7.86627e-06	0.000580289	-0.358656	-0.0496491	0.187225	-0.337725	-0.090773	0.0322666	-0.1	-0.668336	-0.0194283
2023	2.67754	0	0.190562	2.48698	3.1987	2.89915	2.85115	2.16533	0.491541	0.194278	0.0479965	0.299554	0.00688521	0.00139438	6.92383e-05	0.00517197	0.00298009	0.000672459	0.00187049	0.0154625	0.00139272	0.000702152	0.00543673	0.00595857	0.0475596	0.150283	0.0190409	0.00490821	0.00163208	0.00695612	5.77711e-05	0.0586024	0.00353015	0.00452905	0.00085583	0	0.000950684	5.99519e-05	7.73806e-06	0.000580289	-0.351446	-0.049627	0.186649	-0.331586	-0.090227	0.0333438	-0.1	-0.665569	-0.0180581
2024	2.69786	0	0.174151	2.52371	3.22523	2.92733	2.87827	2.19027	0.491636	0.196373	0.0490571	0.297902	0.00703755	0.00142358	7.06231e-05	0.00516957	0.00315243	0.000699659	0.0019082	0.0157941	0.00141797	0.000693677	0.00553641	0.00615335	0.0466955	0.148809	0.0187936	0.00489006	0.00163105	0.00666504	4.72959e-05	0.0599337	0.00355953	0.00446414	0.000823896	0	0.000944521	5.71932e-05	7.63949e-06	0.000580289	-0.344237	-0.049605	0.186073	-0.325446	-0.0896809	0.0344209	-0.1	-0.662786	-0.0167417
2025	2.69104	0	0.130187	2.56085	3.25198	2.95578	2.90571	2.21527	0.491932	0.198505	0.0500694	0.296201	0.00719033	0.00145283	7.19459e-05	0.00516643	0.00330616	0.000726042	0.00194525	0.0161081	0.00144322	0.000684725	0.00562596	0.00634844	0.0458397	0.147331	0.0185488	0.00487193	0.00163	0.00638541	3.87112e-05	0.0612057	0.00358652	0.00439036	0.000792405	0	0.000937923	5.45393e-05	7.57045e-06	0.000580289	-0.337028	-0.049583	0.185497	-0.319306	-0.0891349	0.0354981	-0.1	-0.659987	-0.0154742
2026	2.68446	0	0.0860781	2.59838	3.27894	2.98449	2.93345	2.24035	0.492428	0.200675	0.0510402	0.294455	0.00734352	0.00148213	7.32069e-05	0.00516258	0.00344495	0.000751675	0.00198168	0.0164059	0.00146846	0.000675314	0.00570687	0.00654383	0.0449935	0.145852	0.0183069	0.00485384	0.00162895	0.00611706	3.16772e-05	0.062419	0.00361147	0.00430926	0.000761452	0	0.000930938	5.19898e-05	7.53483e-06	0.000580289	-0.329819	-0.0495609	0.184921	-0.313166	-0.0885889	0.0365753	-0.1	-0.657171	-0.0142671
2027	2.69546	0	0.0592681	2.63619	3.30602	3.01335	2.96138	2.26539	0.493109	0.202881	0.0519749	0.29267	0.00749715	0.00151149	7.44059e-05	0.00515801	0.00357168	0.00077661	0.00201754	0.016689	0.00149372	0.000665461	0.0057803	0.00673954	0.0441572	0.144373	0.0180677	0.00483579	0.00162789	0.0058596	2.59252e-05	0.0635739	0.00363461	0.00422219	0.000731105	0	0.000923595	4.95434e-05	7.51209e-06	0.000580289	-0.32261	-0.0495389	0.184345	-0.307026	-0.0880429	0.0376524	-0.1	-0.654339	-0.0131215
2028	2.71733	0	0.0431769	2.67416	3.33309	3.04224	2.98936	2.29029	0.493953	0.205123	0.0528778	0.290845	0.00765121	0.00154089	7.55432e-05	0.00515274	0.00368857	0.000800891	0.00205283	0.0169582	0.00151897	0.000655177	0.00584718	0.00693555	0.0433304	0.142896	0.0178311	0.00481777	0.00162683	0.00561249	2.12208e-05	0.0646706	0.00365609	0.00413029	0.000701411	0	0.000915917	4.71945e-05	7.48083e-06	0.000580289	-0.315401	-0.0495168	0.18377	-0.300886	-0.0874969	0.0387296	-0.1	-0.65149	-0.0120365
2029	2.74446	0	0.0322656	2.7122	3.36007	3.07109	3.01733	2.31499	0.49494	0.207402	0.0537525	0.288982	0.00780569	0.00157035	7.66186e-05	0.00514676	0.00379748	0.00082456	0.00208758	0.0172146	0.00154423	0.000644474	0.00590831	0.00713186	0.0425128	0.14142	0.0175971	0.00479977	0.00162576	0.00537524	1.73727e-05	0.06571	0.00367607	0.00403459	0.000672416	0	0.000907928	4.49451e-05	7.44058e-06	0.000580289	-0.308192	-0.0494948	0.183194	-0.294746	-0.0869509	0.0398067	-0.1	-0.648624	-0.0110123
2030	2.77295	0	0.025655	2.74729	3.38697	3.09988	3.04528	2.33951	0.496056	0.209716	0.0546025	0.287084	0.00796061	0.00159985	7.76322e-05	0.00514007	0.00389993	0.000847659	0.00212181	0.0174591	0.0015695	0.000633363	0.00596445	0.00732849	0.0417045	0.139947	0.0173656	0.00478179	0.0016247	0.00514745	1.42245e-05	0.0666935	0.00369469	0.00393603	0.000644152	0	0.000899653	4.27903e-05	7.39603e-06	0.000580289	-0.303198	-0.0494988	0.182703	-0.290313	-0.0865092	0.04042	-0.1	-0.646553	-0.0100441
2031	2.84896	0	0.0725288	2.77643	3.4138	3.12865	3.07322	2.36386	0.49729	0.212064	0.0554305	0.285154	0.00811595	0.00162941	7.8584e-05	0.00513268	0.00399718	0.000870227	0.00215555	0.0176926	0.00159478	0.000621857	0.00601626	0.00752542	0.0409057	0.138477	0.0171366	0.00476384	0.00162362	0.00492879	1.16487e-05	0.0676233	0.0037121	0.00383541	0.000616649	0	0.000891115	4.07255e-05	7.35201e-06	0.000580289	-0.302633	-0.0495548	0.182384	-0.289292	-0.0862761	0.0401054	-0.1	-0.646094	-0.00912638
2032	2.9494	0	0.146252	2.80315	3.44079	3.15765	3.10141	2.38835	0.498618	0.214448	0.0562361	0.283145	0.0082716	0.00165895	7.95052e-05	0.00512473	0.00408832	0.000892428	0.0021888	0.0179151	0.00162009	0.000610327	0.00606366	0.00772256	0.0401148	0.137008	0.0169097	0.00474588	0.00162255	0.0047186	9.54017e-06	0.0684571	0.00372724	0.00373325	0.000589915	0	0.000882315	3.87486e-05	7.26713e-06	0.000580289	-0.304283	-0.049637	0.182151	-0.289977	-0.0861473	0.0393268	-0.1	-0.646445	-0.00825788
2033	3.01189	0	0.181191	2.8307	3.46821	3.18723	3.13021	2.41332	0.500024	0.216868	0.0570188	0.280981	0.00842746	0.0016884	8.0427e-05	0.00511637	0.00417264	0.000914422	0.0022216	0.0181264	0.00164544	0.000599133	0.00610666	0.00791981	0.0393312	0.135541	0.0166847	0.0047279	0.00162146	0.00451638	7.81336e-06	0.0691208	0.00373822	0.00362991	0.000563959	0	0.000873261	3.68544e-05	7.14421e-06	0.000580289	-0.305934	-0.0497191	0.181918	-0.290663	-0.0860186	0.0385483	-0.1	-0.646796	-0.00743803
2034	3.04935	0	0.190562	2.85879	3.49615	3.21754	3.15976	2.43892	0.501517	0.219322	0.0577821	0.278609	0.00858352	0.00171776	8.13493e-05	0.00510759	0.00425162	0.000936236	0.00225397	0.0183277	0.00167086	0.000588271	0.00614603	0.00811718	0.0385562	0.134077	0.0164618	0.00470992	0.00162037	0.00432208	6.39949e-06	0.0695604	0.00374371	0.00352585	0.000538806	0	0.00086399	3.50437e-05	7.04152e-06	0.000580289	-0.307584	-0.0498012	0.181685	-0.291348	-0.0858898	0.0377698	-0.1	-0.647146	-0.00666645
2035	3.06161	0	0.174151	2.88746	3.52464	3.24865	3.19012	2.46521	0.503103	0.221811	0.058529	0.275991	0.00873978	0.00174703	8.22722e-05	0.00509841	0.00432646	0.000957897	0.00228597	0.0185201	0.00169635	0.000577735	0.0061824	0.00831466	0.0377907	0.132619	0.0162412	0.00469195	0.00161928	0.00413558	5.24201e-06	0.0697347	0.00374261	0.00342146	0.000514471	0	0.000854536	3.33169e-05	6.96682e-06	0.000580289	-0.309235	-0.0498833	0.181452	-0.292033	-0.085761	0.0369912	-0.1	-0.647496	-0.00593392
2036	3.04688	0	0.130187	2.91669	3.55366	3.28056	3.2213	2.49218	0.504789	0.224334	0.059262	0.273099	0.00889624	0.00177621	8.31956e-05	0.00508883	0.00439813	0.000979431	0.0023176	0.0187044	0.0017219	0.00056752	0.00621632	0.00851226	0.0370356	0.131167	0.0160231	0.00467401	0.00161818	0.00395675	4.29452e-06	0.0696138	0.00373398	0.00331708	0.000490971	0	0.000844936	3.16703e-05	6.92036e-06	0.000580289	-0.310885	-0.0499655	0.181219	-0.292719	-0.0856322	0.0362127	-0.1	-0.647847	-0.00523629
2037	3.03249	0	0.0860781	2.94641	3.58315	3.31323	3.25325	2.51978	0.506579	0.22689	0.0599834	0.269915	0.0090529	0.0018053	8.41196e-05	0.00507885	0.00446745	0.00100086	0.00234892	0.0188816	0.00174754	0.00055762	0.00624833	0.00870997	0.0362919	0.129726	0.0158077	0.00465612	0.00161709	0.00378544	3.51896e-06	0.069177	0.0037171	0.00321301	0.000468315	0	0.000835219	3.00971e-05	6.90615e-06	0.000580289	-0.312535	-0.0500476	0.180985	-0.293404	-0.0855034	0.0354342	-0.1	-0.648196	-0.00457915
2038	3.03576	0	0.0592681	2.97649	3.61296	3.34653	3.28584	2.54789	0.508469	0.22948	0.0606948	0.266426	0.00920977	0.0018343	8.50442e-05	0.00506849	0.00453495	0.00102221	0.00237995	0.0190523	0.00177327	0.000548027	0.00627871	0.0089078	0.0355597	0.128294	0.0155949	0.00463828	0.00161599	0.00362138	2.88408e-06	0.0684101	0.00369131	0.00310948	0.000446494	0	0.000825402	2.85974e-05	6.90394e-06	0.000580289	-0.314186	-0.0501297	0.180752	-0.294089	-0.0853747	0.0346557	-0.1	-0.648546	-0.00396219
2039	3.04992	0	0.0431769	3.00675	3.64293	3.38031	3.31891	2.57637	0.510442	0.232102	0.0613969	0.262619	0.00936683	0.00186321	8.59693e-05	0.00505774	0.00460093	0.00104347	0.00241068	0.0192168	0.00179908	0.000538731	0.00630763	0.00910574	0.0348385	0.126872	0.0153847	0.00462048	0.0016149	0.00346419	2.36422e-06	0.0673041	0.00365604	0.00300665	0.000425493	0	0.000815493	2.71706e-05	6.89259e-06	0.000580289	-0.315836	-0.0502119	0.180519	-0.294775	-0.0852459	0.0338771	-0.1	-0.648896	-0.00338484
2040	3.0712	0	0.0322656	3.03894	3.67296	3.41447	3.35238	2.60514	0.512485	0.234757	0.0620905	0.25849	0.0095241	0.00189203	8.68949e-05	0.0050466	0.00466566	0.00106465	0.00244113	0.0193757	0.00182496	0.000529721	0.00633524	0.00930379	0.034128	0.125459	0.0151769	0.00460271	0.0016138	0.00331355	1.93843e-06	0.0658553	0.00361084	0.00290468	0.000405299	0	0.000805502	2.58094e-05	6.87169e-06	0.000580289	-0.316137	-0.0502799	0.180141	-0.29431	-0.0849963	0.0333087	-0.1	-0.648653	-0.0028476
2041	3.10052	0	0.025655	3.07486	3.70303	3.44899	3.38621	2.63418	0.514589	0.237443	0.0627764	0.25404	0.00968157	0.00192076	8.78211e-05	0.00503507	0.00472937	0.00108576	0.0024713	0.0195292	0.00185093	0.000520989	0.00636169	0.00950196	0.0334281	0.124055	0.0149715	0.00458497	0.0016127	0.00316917	1.58962e-06	0.0640644	0.00355541	0.00280369	0.000385891	0	0.000795435	2.45103e-05	6.84375e-06	0.000580289	-0.313737	-0.0503196	0.179473	-0.291545	-0.084505	0.0331603	-0.1	-0.647221	-0.00234893
2042	3.1847	0	0.0725288	3.11217	3.73319	3.48387	3.42043	2.66357	0.516704	0.240158	0.0634459	0.249313	0.0098391	0.0019494	8.87457e-05	0.00502324	0.00478385	0.00110703	0.0025011	0.0196773	0.00187693	0.0005123	0.00638668	0.00970025	0.0327384	0.122661	0.0147684	0.00456727	0.0016116	0.00303075	1.30382e-06	0.0619767	0.00349051	0.00270388	0.00036725	0	0.000785301	2.32736e-05	6.80798e-06	0.000580289	-0.309987	-0.0503452	0.17866	-0.28763	-0.0838929	0.033222	-0.1	-0.645189	-0.00188795
2043	3.29521	0	0.146252	3.14895	3.76342	3.51903	3.45494	2.69328	0.51876	0.242897	0.0640904	0.244385	0.00999655	0.00197795	8.96665e-05	0.0050112	0.00482202	0.00112865	0.00253038	0.0198193	0.0019029	0.000503419	0.00640965	0.00989867	0.0320575	0.121274	0.0145672	0.00454955	0.00161049	0.00289784	1.06954e-06	0.0596711	0.00341774	0.00260548	0.000349351	0	0.000775096	2.20954e-05	6.72387e-06	0.000580289	-0.306237	-0.0503708	0.177846	-0.283715	-0.0832808	0.0332837	-0.1	-0.643147	-0.00146659
2044	3.36697	0	0.181191	3.18577	3.79378	3.55446	3.48975	2.72334	0.520744	0.24566	0.0647125	0.239322	0.0101539	0.00200641	9.05834e-05	0.00499895	0.00484659	0.00115058	0.00255914	0.0199553	0.00192883	0.000494346	0.00643061	0.0100972	0.0313845	0.119892	0.0143678	0.00453181	0.00160938	0.0027701	8.77409e-07	0.0572133	0.00333848	0.00250869	0.000332172	0	0.000764814	2.09721e-05	6.59923e-06	0.000580289	-0.302487	-0.0503965	0.177033	-0.2798	-0.0826687	0.0333453	-0.1	-0.641097	-0.00108772
2045	3.41349	0	0.190562	3.22293	3.82458	3.5904	3.52508	2.75396	0.522679	0.248446	0.0653161	0.234184	0.0103112	0.00203479	9.14964e-05	0.00498647	0.00486024	0.00117282	0.00258741	0.0200859	0.00195474	0.000485091	0.00644999	0.0102959	0.0307205	0.118518	0.0141702	0.00451407	0.00160827	0.00264748	7.19863e-07	0.0546596	0.00325416	0.00241373	0.000315705	0	0.000754477	1.99018e-05	6.49284e-06	0.000580289	-0.298737	-0.0504221	0.17622	-0.275885	-0.0820566	0.033407	-0.1	-0.639038	-0.000755565
2046	3.43475	0	0.174151	3.2606	3.85598	3.62696	3.56105	2.78521	0.524581	0.251256	0.0659044	0.229021	0.0104684	0.00206307	9.24056e-05	0.00497379	0.00486513	0.00119536	0.00261523	0.0202119	0.00198063	0.00047566	0.00646811	0.0104947	0.0300661	0.117154	0.0139747	0.00449633	0.00160715	0.0025299	5.90683e-07	0.0520563	0.003166	0.00232081	0.000299937	0	0.000744114	1.88822e-05	6.41203e-06	0.000580289	-0.294987	-0.0504477	0.175407	-0.271971	-0.0814446	0.0334687	-0.1	-0.63697	-0.000473654
2047	3.42903	0	0.130187	3.29884	3.88804	3.66417	3.59769	2.81713	0.526467	0.254089	0.0664801	0.223873	0.0106255	0.00209126	9.3311e-05	0.0049609	0.004863	0.0012182	0.00264263	0.0203338	0.0020065	0.000466061	0.00648528	0.0106936	0.029422	0.115799	0.0137813	0.00447862	0.00160603	0.00241726	4.84763e-07	0.0494406	0.00307505	0.00223008	0.000284852	0	0.000733741	1.79148e-05	6.35678e-06	0.000580289	-0.291237	-0.0504733	0.174594	-0.268056	-0.0808325	0.0335304	-0.1	-0.634892	-0.000248631
2048	3.42376	0	0.0860781	3.33768	3.9208	3.70202	3.63498	2.84968	0.528352	0.256945	0.0670455	0.218775	0.0107825	0.00211937	9.42126e-05	0.00494781	0.00485532	0.00124135	0.00266965	0.0204521	0.00203237	0.000456301	0.00650179	0.0108927	0.0287888	0.114456	0.0135904	0.00446095	0.00160491	0.00230946	3.97917e-07	0.0468427	0.00298224	0.00214167	0.000270434	0	0.000723378	1.69938e-05	6.33111e-06	0.000580289	-0.287487	-0.0504989	0.173781	-0.264141	-0.0802204	0.0335921	-0.1	-0.632805	-9.10165e-05
2049	3.4363	0	0.0592681	3.37703	3.95417	3.74042	3.67282	2.88276	0.53024	0.259823	0.0676021	0.213749	0.0109395	0.00214738	9.51103e-05	0.00493452	0.0048431	0.00126478	0.00269629	0.0205672	0.00205825	0.000446383	0.00651774	0.0110919	0.0281667	0.113124	0.0134018	0.00444332	0.00160379	0.00220631	3.26697e-07	0.0442859	0.00288832	0.00205566	0.000256663	0	0.000713039	1.61169e-05	6.31511e-06	0.000580289	-0.283737	-0.0505245	0.172968	-0.260226	-0.0796083	0.0336538	-0.1	-0.630708	-1.51224e-05
2050	3.45868	0	0.0431769	3.41551	3.98804	3.77922	3.71107	2.91623	0.53212	0.262722	0.0681507	0.208813	0.0110964	0.00217531	9.60042e-05	0.00492103	0.00482704	0.00128848	0.00272257	0.0206791	0.00208412	0.00043631	0.00653311	0.0112912	0.027555	0.111804	0.0132154	0.00442573	0.00160267	0.00210756	2.68274e-07	0.0417877	0.00279386	0.0019721	0.000243515	0	0.000702725	1.52852e-05	6.28793e-06	0.000580289	-0.28109	-0.0505108	0.171957	-0.256875	-0.0790092	0.0333478	-0.1	-0.628675	0
2051	3.48408	0	0.0322656	3.45182	4.02234	3.81836	3.74967	2.95004	0.533989	0.265644	0.0686919	0.20398	0.0112531	0.00220314	9.68942e-05	0.00490733	0.00480778	0.00131242	0.0027485	0.020788	0.00210998	0.000426085	0.00654791	0.0114907	0.0269535	0.110495	0.0130312	0.00440816	0.00160155	0.00201303	2.20337e-07	0.0393619	0.0026994	0.00189101	0.000230967	0	0.000692433	1.44963e-05	6.25088e-06	0.000580289	-0.280648	-0.0504184	0.17055	-0.25465	-0.0784362	0.0323067	-0.1	-0.626781	0
2052	3.51292	0	0.025655	3.48727	4.05712	3.85786	3.78863	2.98422	0.53582	0.268587	0.0692355	0.19926	0.0114099	0.00223089	9.77817e-05	0.00489348	0.00479461	0.00133579	0.00277415	0.0208944	0.0021359	0.000415879	0.00656241	0.0116903	0.0263622	0.109197	0.0128492	0.00439063	0.00160042	0.00192252	1.8099e-07	0.0370182	0.00260534	0.00181241	0.000218997	0	0.000682174	1.37445e-05	6.20674e-06	0.000580289	-0.28131	-0.0502866	0.168945	-0.252989	-0.0778763	0.0308979	-0.1	-0.624954	0
2053	3.5957	0	0.0725288	3.52317	4.09242	3.89776	3.82797	3.01883	0.53759	0.271551	0.0697894	0.19466	0.0115666	0.00225856	9.86679e-05	0.00487951	0.00479511	0.00135783	0.00279962	0.0209986	0.00216194	0.000405857	0.00657681	0.0118902	0.025781	0.10791	0.0126692	0.00437312	0.00159929	0.00183589	1.48682e-07	0.0347635	0.00251203	0.00173629	0.000207582	0	0.000671954	1.30278e-05	6.15453e-06	0.000580289	-0.281971	-0.0501549	0.16734	-0.251329	-0.0773163	0.0294891	-0.1	-0.623119	0
2054	3.70563	0	0.146252	3.55938	4.12809	3.93791	3.86756	3.05375	0.539273	0.274538	0.0703499	0.19018	0.0117234	0.00228615	9.95528e-05	0.00486541	0.0048064	0.00137857	0.00282487	0.0211003	0.00218808	0.000396008	0.00659076	0.0120903	0.0252086	0.106632	0.0124911	0.00435561	0.00159816	0.00175282	1.22143e-07	0.0326019	0.0024197	0.00166259	0.000196698	0	0.000661759	1.23477e-05	6.05438e-06	0.000580289	-0.282632	-0.0500231	0.165735	-0.249668	-0.0767564	0.0280804	-0.1	-0.621278	0
2055	3.77707	0	0.181191	3.59588	4.16411	3.97829	3.90738	3.08897	0.540857	0.277546	0.0709141	0.18582	0.0118802	0.00231366	0.000100436	0.00485119	0.00482622	0.00139807	0.00284988	0.0211991	0.0022143	0.000386324	0.00660405	0.0122907	0.0246442	0.105362	0.0123145	0.00433807	0.00159702	0.0016731	1.00336e-07	0.0305361	0.00232861	0.0015913	0.000186321	0	0.000651582	1.17019e-05	5.91334e-06	0.000580289	-0.283294	-0.0498914	0.164129	-0.248007	-0.0761964	0.0266716	-0.1	-0.61943	0
2056	3.82345	0	0.190562	3.63289	4.2007	4.01912	3.94763	3.12469	0.542368	0.280574	0.0714816	0.181587	0.0120369	0.00234109	0.000101319	0.00483684	0.00485322	0.00141641	0.00287467	0.0212955	0.00224062	0.000376802	0.00661692	0.0124913	0.0240886	0.1041	0.0121397	0.00432054	0.00159588	0.0015967	8.24209e-08	0.0285686	0.00223906	0.00152242	0.000176436	0	0.000641437	1.1089e-05	5.79019e-06	0.000580289	-0.283955	-0.0497596	0.162524	-0.246346	-0.0756365	0.0252628	-0.1	-0.617574	0
2057	3.8447	0	0.174151	3.67055	4.23798	4.0605	3.98845	3.161	0.543825	0.283623	0.072052	0.177482	0.0121937	0.00236843	0.0001022	0.00482237	0.00488625	0.00143369	0.00289927	0.0213899	0.00226703	0.00036744	0.00662958	0.0126922	0.0235424	0.102848	0.0119668	0.00430302	0.00159474	0.00152354	6.77056e-08	0.0267004	0.00215132	0.00145596	0.000167028	0	0.000631347	1.05078e-05	5.6925e-06	0.000580289	-0.284616	-0.0496279	0.160919	-0.244685	-0.0750766	0.023854	-0.1	-0.615712	0
2058	3.83907	0	0.130187	3.70889	4.27599	4.10248	4.02985	3.19791	0.545247	0.286693	0.0726251	0.173506	0.0123505	0.0023957	0.00010308	0.00480778	0.00492438	0.00144997	0.00292369	0.0214827	0.00229354	0.000358235	0.00664218	0.0128933	0.0230059	0.101608	0.011796	0.00428552	0.00159359	0.00145355	5.562e-08	0.0249312	0.00206561	0.0013919	0.000158078	0	0.000621322	9.95676e-06	5.62013e-06	0.000580289	-0.285278	-0.0494961	0.159314	-0.243024	-0.0745166	0.0224453	-0.1	-0.613843	0
2059	3.834	0	0.0860781	3.74792	4.31471	4.14505	4.07185	3.23542	0.54665	0.289782	0.0732007	0.169662	0.0125073	0.00242289	0.000103958	0.00479308	0.00496688	0.00146534	0.00294798	0.0215744	0.00232016	0.000349185	0.00665492	0.0130947	0.0224797	0.10038	0.0116273	0.00426806	0.00159244	0.00138667	4.56956e-08	0.0232597	0.0019821	0.00133021	0.000149573	0	0.000611376	9.43459e-06	5.57696e-06	0.000580289	-0.285939	-0.0493643	0.157709	-0.241364	-0.0739567	0.0210365	-0.1	-0.611967	0
2060	3.85007	0	0.0592681	3.7908	4.35406	4.18811	4.11434	3.2734	0.54804	0.292892	0.0737784	0.165946	0.0126641	0.00244999	0.000104835	0.00477826	0.00501299	0.00147986	0.00297214	0.021665	0.00234689	0.000340286	0.0066678	0.0132963	0.0219636	0.0991636	0.0114607	0.00425065	0.00159129	0.00132277	3.75454e-08	0.0216837	0.00190089	0.00127085	0.000141489	0	0.000601518	8.93982e-06	5.54324e-06	0.000580289	-0.284244	-0.0492153	0.156007	-0.237903	-0.0732411	0.0201091	-0.1	-0.609138	0
2061	3.88381	0	0.0431769	3.84063	4.39388	4.23153	4.15717	3.31174	0.549405	0.29602	0.0743569	0.162353	0.0128208	0.00247702	0.000105711	0.00476333	0.0050619	0.00149356	0.00299614	0.0217544	0.00237372	0.00033153	0.00668065	0.0134982	0.0214572	0.0979592	0.0112962	0.00423327	0.00159014	0.00126169	3.08507e-08	0.0201999	0.00182203	0.00121376	0.000133809	0	0.000591739	8.47092e-06	5.4944e-06	0.000580289	-0.277834	-0.0490318	0.154111	-0.230844	-0.0722142	0.0201445	-0.1	-0.60439	0
2062	3.9257	0	0.0322656	3.89344	4.43399	4.27511	4.20018	3.35033	0.550681	0.299163	0.074936	0.15888	0.0129776	0.00250402	0.000106586	0.00474832	0.00511343	0.00150647	0.00301999	0.0218424	0.00240063	0.000322962	0.00669335	0.0137003	0.02096	0.0967656	0.0111335	0.00421591	0.00158899	0.00120326	2.53518e-08	0.0188054	0.00174558	0.00115891	0.000126514	0	0.000582038	8.0228e-06	5.43114e-06	0.000580289	-0.269068	-0.048831	0.152118	-0.221985	-0.0710316	0.0206613	-0.1	-0.598637	0
2063	3.97151	0	0.025655	3.94586	4.47431	4.31879	4.24327	3.38915	0.551813	0.302315	0.0755154	0.155521	0.0131341	0.00253107	0.00010746	0.00473327	0.00516747	0.0015186	0.00304365	0.0219291	0.0024276	0.000314625	0.00670583	0.0139026	0.0204718	0.0955823	0.0109728	0.00419857	0.00158784	0.00114737	2.08354e-08	0.017497	0.00167161	0.00110625	0.000119587	0	0.000572417	7.59436e-06	5.36226e-06	0.000580289	-0.260302	-0.0486302	0.150126	-0.213127	-0.0698491	0.021178	-0.1	-0.592815	0
2064	4.07102	0	0.0725288	3.99849	4.51487	4.36259	4.2865	3.42821	0.55281	0.305476	0.0760946	0.152273	0.0132904	0.00255815	0.000108333	0.00471818	0.0052235	0.00153001	0.00306713	0.0220144	0.00245463	0.00030651	0.00671803	0.0141053	0.0199924	0.0944093	0.0108138	0.00418125	0.00158668	0.0010939	1.71254e-08	0.0162708	0.00160011	0.0010557	0.000113012	0	0.000562873	7.18821e-06	5.28751e-06	0.000580289	-0.251536	-0.0484293	0.148133	-0.204268	-0.0686665	0.0216948	-0.1	-0.586923	0
2065	4.19747	0	0.146252	4.05122	4.55554	4.40641	4.32974	3.46744	0.553654	0.308646	0.0766715	0.149127	0.0134466	0.00258528	0.000109204	0.00470304	0.00528067	0.00154069	0.00309038	0.0220976	0.0024817	0.000298606	0.00672958	0.0143081	0.0195208	0.0932446	0.0106564	0.00416391	0.00158552	0.00104269	1.40763e-08	0.0151223	0.00153099	0.0010072	0.000106771	0	0.000553391	6.80293e-06	5.16508e-06	0.000580289	-0.24277	-0.0482285	0.14614	-0.195409	-0.067484	0.0222116	-0.1	-0.580959	0
2066	4.28523	0	0.181191	4.10404	4.59634	4.45026	4.37302	3.50686	0.554336	0.311825	0.077245	0.146077	0.0136026	0.00261245	0.000110075	0.00468785	0.00533841	0.00155064	0.00311337	0.0221784	0.00250878	0.000290906	0.00674023	0.0145113	0.0190565	0.0920869	0.0105003	0.00414654	0.00158435	0.00099358	1.15694e-08	0.0140473	0.0014642	0.000960649	0.000100844	0	0.000543969	6.4373e-06	5.00108e-06	0.000580289	-0.234004	-0.0480277	0.144147	-0.186551	-0.0663014	0.0227284	-0.1	-0.574921	0
2067	4.34776	0	0.190562	4.1572	4.6375	4.49438	4.41656	3.54666	0.554887	0.315011	0.0778158	0.143121	0.0137584	0.00263966	0.000110945	0.00467261	0.0053968	0.00155993	0.00313613	0.0222571	0.00253589	0.000283404	0.00675026	0.0147147	0.0185999	0.0909376	0.0103457	0.00412915	0.00158317	0.000946553	9.5088e-09	0.0130424	0.00139975	0.000916015	9.52196e-05	0	0.000534619	6.09052e-06	4.85336e-06	0.000580289	-0.225238	-0.0478269	0.142154	-0.177692	-0.0651189	0.0232451	-0.1	-0.568806	0
2068	4.385	0	0.174151	4.21085	4.67915	4.53889	4.4605	3.58697	0.555331	0.318207	0.0783846	0.140258	0.013914	0.00266691	0.000111815	0.00465732	0.00545587	0.00156861	0.00315868	0.0223341	0.00256302	0.000276096	0.00675986	0.0149183	0.0181514	0.0897974	0.0101928	0.00411177	0.00158199	0.000901566	7.81522e-09	0.0121041	0.00133767	0.000873246	8.98869e-05	0	0.00052535	5.76178e-06	4.72959e-06	0.000580289	-0.216472	-0.0476261	0.140162	-0.168833	-0.0639363	0.0237619	-0.1	-0.562612	0
2069	4.39524	0	0.130187	4.26505	4.72133	4.58384	4.50489	3.62779	0.555691	0.32141	0.0789521	0.137485	0.0140695	0.0026942	0.000112683	0.00464198	0.00551564	0.00157673	0.00318105	0.0224097	0.0025902	0.000268978	0.0067692	0.0151222	0.0177115	0.0886674	0.0100416	0.00409439	0.00158081	0.000858569	6.42346e-09	0.0112289	0.00127792	0.000832291	8.48341e-05	0	0.000516175	5.45029e-06	4.62963e-06	0.000580289	-0.207706	-0.0474253	0.138169	-0.159975	-0.0627538	0.0242787	-0.1	-0.556338	0
2070	4.4044	0	0.0860781	4.31832	4.76406	4.62927	4.54975	3.66914	0.555988	0.324621	0.079519	0.134799	0.0142248	0.00272153	0.00011355	0.0046266	0.0055762	0.00158434	0.00320325	0.0224844	0.00261742	0.000262045	0.00677848	0.0153264	0.0172803	0.0875483	0.00989224	0.00407705	0.00157963	0.000817517	5.27989e-09	0.0104132	0.00122049	0.000793101	8.00454e-05	0	0.000507101	5.15528e-06	4.55733e-06	0.000580289	-0.199956	-0.0472386	0.136292	-0.152058	-0.0616234	0.0246716	-0.1	-0.550528	0
2071	4.42832	0	0.0592681	4.36906	4.80728	4.67508	4.59499	3.71092	0.55623	0.32784	0.0800854	0.132198	0.0143799	0.0027489	0.000114416	0.00461118	0.00563742	0.00159148	0.00322531	0.0225583	0.00264468	0.000255294	0.00678772	0.0155308	0.0168579	0.0864405	0.00974475	0.00405973	0.00157844	0.000778334	4.34021e-09	0.0096537	0.00116535	0.000755611	7.55097e-05	0	0.00049813	4.87592e-06	4.49526e-06	0.000580289	-0.194237	-0.0470803	0.134647	-0.146023	-0.0605972	0.0248167	-0.1	-0.545748	0
2072	4.46158	0	0.0431769	4.41841	4.85053	4.72085	4.64021	3.75284	0.556306	0.331056	0.0806431	0.129676	0.0145347	0.00277619	0.00011528	0.00459573	0.0056946	0.00159813	0.00324709	0.0226296	0.00267191	0.000248717	0.0067959	0.0157353	0.016444	0.0853434	0.00959907	0.00404244	0.00157725	0.000740927	3.56782e-09	0.00894664	0.00111238	0.000719746	7.12204e-05	0	0.000489263	4.61136e-06	4.4216e-06	0.000580289	-0.189533	-0.0469362	0.133119	-0.140931	-0.0596232	0.024838	-0.1	-0.541473	0
2073	4.49974	0	0.0322656	4.46747	4.89345	4.76622	4.68504	3.79467	0.556112	0.33426	0.0811849	0.127229	0.0146892	0.00280328	0.000116141	0.00458028	0.00574386	0.00160427	0.00326848	0.0226966	0.002699	0.000242309	0.00680208	0.0159395	0.0160384	0.0842568	0.00945512	0.00402517	0.00157606	0.000705213	2.93273e-09	0.00828857	0.0010615	0.000685439	6.71615e-05	0	0.000480497	4.36081e-06	4.33358e-06	0.000580289	-0.184829	-0.046792	0.13159	-0.135838	-0.0586491	0.0248592	-0.1	-0.53716	0
2074	4.54178	0	0.025655	4.51612	4.93607	4.81122	4.72951	3.83639	0.555668	0.33745	0.0817124	0.124854	0.0148433	0.00283017	0.000116999	0.00456482	0.00578647	0.00160991	0.00328946	0.0227595	0.00272596	0.000236064	0.00680638	0.0161434	0.0156409	0.0831804	0.00931289	0.00400792	0.00157487	0.000671115	2.4105e-09	0.00767638	0.00101264	0.000652627	6.33183e-05	0	0.00047183	4.12352e-06	4.23732e-06	0.000580289	-0.180126	-0.0466478	0.130062	-0.130745	-0.0576751	0.0248805	-0.1	-0.532808	0
2075	4.63692	0	0.0725288	4.56439	4.97841	4.85587	4.77364	3.87802	0.554992	0.340628	0.0822268	0.122546	0.0149971	0.00285686	0.000117854	0.00454934	0.00582349	0.00161508	0.00331005	0.0228182	0.00275277	0.000229977	0.00680892	0.0163471	0.0152514	0.0821142	0.00917235	0.00399069	0.00157367	0.000638563	1.98106e-09	0.00710712	0.00096575	0.000621251	5.96822e-05	0	0.000463266	3.89881e-06	4.13482e-06	0.000580289	-0.175422	-0.0465037	0.128533	-0.125652	-0.0567011	0.0249017	-0.1	-0.528416	0
2076	4.75842	0	0.146252	4.61216	5.02036	4.90006	4.81733	3.91947	0.554073	0.343792	0.0827275	0.120301	0.0151505	0.00288335	0.000118705	0.00453385	0.00585533	0.00161975	0.00333019	0.0228723	0.00277941	0.00022404	0.00680945	0.0165506	0.0148691	0.0810565	0.00903327	0.00397346	0.00157247	0.000607446	1.62782e-09	0.0065778	0.000920724	0.000591248	5.6243e-05	0	0.000454789	3.68588e-06	3.98652e-06	0.000580289	-0.170718	-0.0463595	0.127005	-0.12056	-0.0557271	0.024923	-0.1	-0.523984	0
2077	4.84065	0	0.181191	4.65945	5.06193	4.94382	4.8606	3.96075	0.552911	0.346943	0.0832145	0.118113	0.0153036	0.00290963	0.000119554	0.00451832	0.00588249	0.00162391	0.00334985	0.0229214	0.00280587	0.000218247	0.00680789	0.0167538	0.0144935	0.0800062	0.0088955	0.00395619	0.00157126	0.000577675	1.33721e-09	0.00608569	0.000877483	0.000562554	5.29872e-05	0	0.000446397	3.48403e-06	3.79887e-06	0.000580289	-0.166015	-0.0462153	0.125476	-0.115467	-0.054753	0.0249443	-0.1	-0.51951	0
2078	4.89707	0	0.190562	4.70651	5.10335	4.98737	4.90368	4.00206	0.551544	0.350082	0.0836901	0.115982	0.0154563	0.00293571	0.000120399	0.00450278	0.005906	0.00162761	0.00336906	0.0229661	0.00283216	0.000212594	0.00680464	0.0169567	0.014125	0.0789644	0.00875918	0.00393892	0.00157005	0.000549229	1.09821e-09	0.00562851	0.000836008	0.000535125	4.99046e-05	0	0.000438099	3.2928e-06	3.62866e-06	0.000580289	-0.161311	-0.0460712	0.123948	-0.110374	-0.053779	0.0249655	-0.1	-0.514994	0
2079	4.92765	0	0.174151	4.7535	5.14478	5.03087	4.94671	4.0435	0.550002	0.353208	0.0841558	0.113906	0.0156087	0.0029616	0.000121241	0.00448721	0.00592662	0.00163088	0.00338785	0.0230069	0.00285827	0.000207081	0.00680001	0.0171595	0.013764	0.0779319	0.00862441	0.00392165	0.00156883	0.000522077	9.01738e-10	0.00520407	0.000796269	0.000508921	4.69958e-05	0	0.000429894	3.11173e-06	3.48342e-06	0.000580289	-0.156607	-0.045927	0.122419	-0.105282	-0.052805	0.0249868	-0.1	-0.510435	0
2080	4.92902	0	0.130187	4.79883	5.18626	5.07438	4.98977	4.08513	0.548315	0.356321	0.0846132	0.111885	0.0157607	0.00298728	0.000122081	0.00447162	0.00594502	0.00163377	0.00340625	0.0230443	0.00288423	0.000201703	0.00679429	0.017362	0.0134105	0.0769095	0.00849129	0.0039044	0.00156761	0.000496187	7.40273e-10	0.00481027	0.000758223	0.0004839	4.42507e-05	0	0.000421795	2.94035e-06	3.36275e-06	0.000580289	-0.152978	-0.0457946	0.12099	-0.101042	-0.0519493	0.0248174	-0.1	-0.506474	0
2081	4.92699	0	0.0860781	4.84091	5.22786	5.11794	5.03288	4.12695	0.546511	0.359421	0.0850638	0.109917	0.0159124	0.00301276	0.000122916	0.00445601	0.00596186	0.00163632	0.0034243	0.0230788	0.00291004	0.000196458	0.00678778	0.0175642	0.0130649	0.0758982	0.00835993	0.0038872	0.00156639	0.000471525	6.07626e-10	0.00444514	0.000721836	0.000460018	4.16597e-05	0	0.000413815	2.77825e-06	3.2722e-06	0.000580289	-0.151499	-0.0456855	0.119759	-0.0985097	-0.0513302	0.0242668	-0.1	-0.503766	0
2082	4.93979	0	0.0592681	4.88052	5.26837	5.16037	5.07487	4.16808	0.54429	0.3625	0.0855003	0.108001	0.0160636	0.00303809	0.000123748	0.00444039	0.00597297	0.00163847	0.00344183	0.0231087	0.00293562	0.000191343	0.00677949	0.0177662	0.0127272	0.0748981	0.00823035	0.00387003	0.00156517	0.000448044	4.98658e-10	0.00410667	0.000687042	0.000437224	3.92133e-05	0	0.000405956	2.62493e-06	3.19175e-06	0.000580289	-0.151095	-0.0455882	0.118627	-0.0968307	-0.0508294	0.0235256	-0.1	-0.501686	0
2083	4.96122	0	0.0431769	4.91804	5.30664	5.20051	5.11459	4.20768	0.54136	0.365546	0.0859153	0.106134	0.0162141	0.00306336	0.000124574	0.00442474	0.00597461	0.00164016	0.00345864	0.0231319	0.00296084	0.000186353	0.0067683	0.0179678	0.0123971	0.0739089	0.00810249	0.0038529	0.00156394	0.000425683	4.09123e-10	0.00379289	0.000653753	0.000415476	3.69018e-05	0	0.000398212	2.47993e-06	3.0979e-06	0.000580289	-0.150691	-0.0454909	0.117496	-0.0951516	-0.0503286	0.0227844	-0.1	-0.499598	0
2084	4.9854	0	0.0322656	4.95313	5.34275	5.23843	5.15212	4.24579	0.537772	0.368561	0.0863099	0.104313	0.0163639	0.00308854	0.000125395	0.00440905	0.00596811	0.00164137	0.00347472	0.0231482	0.00298569	0.000181483	0.00675426	0.0181691	0.0120743	0.0729303	0.0079763	0.0038358	0.00156272	0.000404387	3.35554e-10	0.003502	0.000621899	0.000394724	3.47215e-05	0	0.00039058	2.34277e-06	2.99044e-06	0.000580289	-0.150287	-0.0453935	0.116364	-0.0934726	-0.0498279	0.0220433	-0.1	-0.4975	0
2085	5.01157	0	0.025655	4.98591	5.37679	5.27425	5.18756	4.28245	0.533575	0.371543	0.0866853	0.102537	0.0165131	0.00311364	0.000126211	0.00439333	0.00595462	0.00164211	0.00349004	0.0231578	0.00301016	0.000176728	0.00673747	0.0183702	0.0117588	0.0719622	0.00785178	0.00381874	0.00156149	0.000384107	2.7511e-10	0.00323239	0.000591421	0.000374912	3.26637e-05	0	0.000383059	2.21305e-06	2.87505e-06	0.000580289	-0.149883	-0.0452962	0.115232	-0.0917935	-0.0493271	0.0213021	-0.1	-0.495393	0
2086	5.08903	0	0.0725288	5.0165	5.40887	5.30807	5.22102	4.31772	0.528813	0.374495	0.0870428	0.100803	0.0166616	0.00313867	0.000127021	0.00437757	0.00593515	0.00164237	0.00350461	0.0231605	0.00303425	0.000172085	0.00671806	0.0185709	0.0114505	0.0710045	0.00772889	0.00380171	0.00156026	0.000364797	2.25456e-10	0.00298254	0.000562262	0.000356002	3.07258e-05	0	0.000375647	2.09037e-06	2.75365e-06	0.000580289	-0.149479	-0.0451989	0.1141	-0.0901145	-0.0488263	0.0205609	-0.1	-0.493277	0
2087	5.19111	0	0.146252	5.04486	5.43895	5.33985	5.25246	4.35155	0.5235	0.377415	0.0873816	0.0991075	0.0168095	0.00316361	0.000127827	0.00436175	0.00591008	0.00164211	0.00351837	0.0231558	0.0030579	0.000167547	0.00669582	0.0187713	0.0111487	0.0700559	0.00760746	0.00378469	0.00155902	0.000346389	1.84665e-10	0.00275095	0.000534345	0.000337954	2.88989e-05	0	0.000368338	1.97428e-06	2.58787e-06	0.000580289	-0.149074	-0.0451016	0.112968	-0.0884354	-0.0483255	0.0198197	-0.1	-0.491151	0
2088	5.25226	0	0.181191	5.07107	5.46711	5.36966	5.28196	4.384	0.517657	0.380305	0.0877018	0.0974475	0.0169567	0.00318848	0.000128626	0.00434587	0.00587991	0.00164133	0.00353128	0.0231434	0.00308111	0.000163111	0.00667067	0.0189713	0.0108531	0.0691153	0.00748736	0.00376766	0.00155778	0.000328827	1.51157e-10	0.00253628	0.00050761	0.000320724	2.71754e-05	0	0.000361125	1.86439e-06	2.38418e-06	0.000580289	-0.14867	-0.0450042	0.111837	-0.0867564	-0.0478248	0.0190785	-0.1	-0.489015	0
2089	5.286	0	0.190562	5.09544	5.49362	5.3978	5.30979	4.41528	0.511343	0.383164	0.0880056	0.0958232	0.0171032	0.00321327	0.000129421	0.00432994	0.00584565	0.00164004	0.00354337	0.0231239	0.00310388	0.000158773	0.00664304	0.0191711	0.0105638	0.0681839	0.00736872	0.00375065	0.00155654	0.000312094	1.23688e-10	0.00233742	0.000482034	0.000304275	2.55492e-05	0	0.000354013	1.76042e-06	2.19797e-06	0.000580289	-0.148266	-0.0449069	0.110705	-0.0850773	-0.047324	0.0183373	-0.1	-0.48687	0
2090	5.29245	0	0.174151	5.1183	5.51868	5.42445	5.33615	4.44555	0.504606	0.385993	0.0882948	0.0942347	0.0172491	0.00323798	0.00013021	0.00431394	0.00580816	0.0016383	0.00355467	0.0230979	0.00312622	0.000154533	0.00661329	0.0193705	0.0102812	0.0672623	0.00725162	0.00373367	0.00155529	0.000296168	1.01185e-10	0.00215328	0.00045759	0.000288584	2.4015e-05	0	0.000347009	1.66212e-06	2.03656e-06	0.000580289	-0.147724	-0.0448158	0.109662	-0.0834511	-0.0468267	0.0177079	-0.1	-0.484782	0
2091	5.27011	0	0.130187	5.13992	5.54241	5.44973	5.36116	4.47488	0.497491	0.388792	0.0885709	0.0926818	0.0173943	0.00326261	0.000130993	0.00429789	0.0057681	0.00163612	0.0035652	0.0230658	0.00314813	0.000150388	0.00658173	0.0195697	0.0100053	0.0663513	0.00713616	0.00371673	0.00155404	0.000281024	8.27258e-11	0.00198289	0.000434245	0.000273627	2.25721e-05	0	0.000340117	1.56922e-06	1.89924e-06	0.000580289	-0.146904	-0.0447369	0.108798	-0.0819307	-0.0463365	0.0173022	-0.1	-0.482818	0
2092	5.24722	0	0.0860781	5.16114	5.56563	5.47447	5.38563	4.50374	0.49033	0.39156	0.0888312	0.0911645	0.0175388	0.00328711	0.000131771	0.00428182	0.00572329	0.00163348	0.00357494	0.0230275	0.00316956	0.000146338	0.00654841	0.0197682	0.00973631	0.0654517	0.00702241	0.00369985	0.0015528	0.00026664	6.75929e-11	0.00182529	0.000411966	0.00025937	2.12153e-05	0	0.000333348	1.48147e-06	1.78899e-06	0.000580289	-0.145947	-0.0446643	0.108022	-0.0804632	-0.0458497	0.0170083	-0.1	-0.480914	0
2093	5.24189	0	0.0592681	5.18262	5.58898	5.4993	5.41023	4.53252	0.483418	0.394294	0.0890732	0.0896817	0.0176825	0.00331142	0.000132541	0.00426575	0.00567188	0.00163035	0.00358384	0.0229828	0.00319046	0.000142383	0.00651333	0.0199659	0.00947412	0.0645635	0.00691037	0.00368302	0.00155155	0.00025298	5.5195e-11	0.00167959	0.000390716	0.000245786	1.99389e-05	0	0.000326702	1.39859e-06	1.68898e-06	0.000580289	-0.144989	-0.0445916	0.107247	-0.0789956	-0.045363	0.0167144	-0.1	-0.479002	0
2094	5.24736	0	0.0431769	5.20418	5.61231	5.52408	5.43478	4.56106	0.476729	0.396994	0.0892987	0.0882316	0.0178255	0.00333555	0.000133303	0.00424969	0.00561514	0.00162675	0.00359191	0.022932	0.00321084	0.00013852	0.00647672	0.0201628	0.00921847	0.0636862	0.00679999	0.00366626	0.0015503	0.000240005	4.50436e-11	0.00154495	0.00037046	0.000232849	1.87374e-05	0	0.000320174	1.3203e-06	1.58201e-06	0.000580289	-0.144032	-0.044519	0.106471	-0.0775281	-0.0448763	0.0164205	-0.1	-0.477082	0
2095	5.25798	0	0.0322656	5.22571	5.63552	5.54871	5.4592	4.5893	0.47024	0.39966	0.0895097	0.0868127	0.0179677	0.00335949	0.000134058	0.00423363	0.00555415	0.00162271	0.0035992	0.0228757	0.0032307	0.000134748	0.00643881	0.0203588	0.00896912	0.0628195	0.00669121	0.00364955	0.00154905	0.000227676	3.67369e-11	0.00142059	0.000351167	0.000220533	1.76057e-05	0	0.000313752	1.24633e-06	1.4682e-06	0.000580289	-0.143074	-0.0444463	0.105696	-0.0760605	-0.0443895	0.0161266	-0.1	-0.475155	0
2096	5.27282	0	0.025655	5.24717	5.65857	5.57314	5.48343	4.6172	0.463936	0.402294	0.0897077	0.0854239	0.0181091	0.00338324	0.000134806	0.00421758	0.00548982	0.00161826	0.00360573	0.0228143	0.00325006	0.000131064	0.00639982	0.020554	0.00872593	0.0619632	0.00658399	0.00363288	0.0015478	0.000215963	2.9944e-11	0.00130577	0.000332799	0.000208815	1.65391e-05	0	0.000307436	1.17646e-06	1.3522e-06	0.000580289	-0.142117	-0.0443736	0.10492	-0.074593	-0.0439028	0.0158327	-0.1	-0.47322	0
2097	5.34105	0	0.0725288	5.26852	5.68143	5.59737	5.50747	4.64478	0.4578	0.404895	0.0898944	0.084064	0.0182498	0.00340681	0.000135546	0.00420154	0.00542291	0.00161344	0.00361152	0.0227482	0.00326892	0.000127467	0.00635995	0.0207483	0.00848874	0.0611171	0.00647832	0.00361627	0.00154655	0.000204834	2.43927e-11	0.00119982	0.00031532	0.000197665	1.55334e-05	0	0.000301228	1.11045e-06	1.23513e-06	0.000580289	-0.141159	-0.044301	0.104145	-0.0731254	-0.043416	0.0155388	-0.1	-0.471278	0
2098	5.43596	0	0.146252	5.2897	5.70403	5.6213	5.53123	4.67191	0.451852	0.407463	0.0900728	0.0827302	0.0183898	0.00343019	0.000136279	0.00418551	0.00535454	0.00160833	0.00361668	0.0226787	0.00328732	0.000123957	0.00631978	0.0209418	0.00825705	0.0602799	0.00637401	0.00359967	0.00154529	0.000194246	1.98604e-11	0.00110213	0.000298713	0.000187063	1.45839e-05	0	0.000295125	1.04806e-06	1.09519e-06	0.000580289	-0.140201	-0.0442283	0.103369	-0.0716579	-0.0429293	0.0152449	-0.1	-0.469328	0
2099	5.49198	0	0.181191	5.31079	5.72642	5.645	5.55475	4.69861	0.446144	0.41	0.0902478	0.0814207	0.0185289	0.00345338	0.000137004	0.00416952	0.00528616	0.00160306	0.00362135	0.0226078	0.00330534	0.000120536	0.00628026	0.0211344	0.00803052	0.0594508	0.00627096	0.00358309	0.00154403	0.000184164	1.61653e-11	0.0010122	0.000282974	0.000176998	1.36918e-05	0	0.000289117	9.89048e-07	9.48947e-07	0.000580289	-0.139244	-0.0441557	0.102594	-0.0701903	-0.0424425	0.014951	-0.1	-0.467369	0
2100	5.52207	0	0.190562	5.33151	5.74881	5.66868	5.57825	4.72505	0.440698	0.412506	0.0904222	0.0801359	0.0186673	0.00347638	0.000137722	0.00415358	0.00521856	0.0015977	0.00362566	0.0225369	0.00332305	0.000117204	0.00624192	0.0213262	0.0078093	0.0586304	0.00616925	0.00356652	0.00154277	0.000174576	1.31555e-11	0.000929477	0.000268083	0.000167454	1.28537e-05	0	0.000283205	9.33275e-07	8.35255e-07	0.000580289	-0.138494	-0.0440723	0.101996	-0.0690987	-0.0420856	0.0147671	-0.1	-0.465773	0
2101	5.52563	0	0.174151	5.35148	5.7713	5.69242	5.60183	4.75135	0.435501	0.41498	0.0905968	0.078876	0.018805	0.0034992	0.000138433	0.00413769	0.00515185	0.00159231	0.00362965	0.0224663	0.00334045	0.00011396	0.00620478	0.0215171	0.00759349	0.0578194	0.00606895	0.00355	0.00154151	0.000165465	1.07047e-11	0.000853416	0.000253997	0.000158411	1.20663e-05	0	0.000277391	8.80587e-07	7.50276e-07	0.000580289	-0.138158	-0.0439675	0.101753	-0.0687589	-0.0419883	0.0148034	-0.1	-0.464911	0
2102	5.50158	0	0.130187	5.37139	5.79354	5.7159	5.62511	4.77702	0.430694	0.417395	0.0907864	0.077641	0.0189409	0.0035217	0.000139133	0.00412184	0.00509154	0.00158703	0.00363336	0.0224066	0.00335743	0.000110805	0.00617029	0.0217057	0.00738315	0.0570183	0.00597013	0.00353353	0.00154024	0.000156817	8.7095e-12	0.000783494	0.00024067	0.000149842	1.13266e-05	0	0.000271679	8.30835e-07	6.87851e-07	0.000580289	-0.13803	-0.0438521	0.101688	-0.068795	-0.0420209	0.0149498	-0.1	-0.464418	0
2103	5.47751	0	0.0860781	5.39143	5.81516	5.73873	5.64772	4.80159	0.426407	0.419722	0.0910042	0.0764312	0.0190741	0.00354374	0.000139818	0.00410605	0.00504213	0.00158203	0.00363686	0.0223677	0.00337387	0.000107743	0.0061397	0.0218905	0.00717837	0.0562278	0.00587285	0.00351712	0.00153898	0.000148615	7.08532e-12	0.000719226	0.000228058	0.000141721	1.06316e-05	0	0.000266078	7.83878e-07	6.49419e-07	0.000580289	-0.137902	-0.0437366	0.101623	-0.0688312	-0.0420534	0.0150962	-0.1	-0.463924	0
2104	5.47026	0	0.0592681	5.41099	5.8361	5.76085	5.6696	4.82505	0.422588	0.421962	0.0912464	0.0752458	0.0192045	0.00356533	0.00014049	0.00409031	0.00500161	0.0015773	0.00364017	0.0223481	0.00338978	0.00010477	0.00611256	0.0220715	0.00697904	0.0554478	0.0057771	0.00350077	0.00153771	0.000140838	5.76342e-12	0.000660166	0.000216123	0.000134029	9.97844e-06	0	0.000260587	7.39563e-07	6.20213e-07	0.000580289	-0.137774	-0.0436212	0.101558	-0.0688673	-0.042086	0.0152426	-0.1	-0.463429	0
2105	5.4731	0	0.0431769	5.42993	5.85622	5.78213	5.69062	4.84733	0.419179	0.424116	0.091509	0.0740837	0.0193321	0.00358646	0.000141147	0.00407462	0.00496819	0.00157282	0.00364327	0.0223464	0.00340517	0.000101884	0.00608837	0.0222486	0.00678495	0.0546779	0.00568283	0.00348449	0.00153645	0.000133461	4.68758e-12	0.000605898	0.000204827	0.000126743	9.36411e-06	0	0.000255195	6.97735e-07	5.82623e-07	0.000580289	-0.137645	-0.0435057	0.101493	-0.0689034	-0.0421185	0.0153889	-0.1	-0.462934	0
2106	5.48041	0	0.0322656	5.44814	5.87545	5.8025	5.71071	4.8684	0.416132	0.426184	0.091789	0.0729437	0.019457	0.00360714	0.000141791	0.00405898	0.00494047	0.00156856	0.00364617	0.0223611	0.00342004	9.90826e-05	0.00606669	0.0224219	0.00659591	0.0539178	0.00558998	0.00346827	0.00153519	0.000126462	3.81205e-12	0.000556033	0.000194131	0.000119838	8.786e-06	0	0.000249905	6.5825e-07	5.36963e-07	0.000580289	-0.137517	-0.0433903	0.101428	-0.0689395	-0.042151	0.0155353	-0.1	-0.462439	0
2107	5.49124	0	0.025655	5.46559	5.89376	5.82193	5.72985	4.88827	0.413405	0.428167	0.0920836	0.0718253	0.0195792	0.00362736	0.00014242	0.00404338	0.00491736	0.0015645	0.00364887	0.0223912	0.0034344	9.63623e-05	0.00604721	0.0225913	0.00641179	0.0531673	0.00549854	0.0034521	0.00153392	0.000119822	3.09962e-12	0.000510219	0.000184006	0.000113301	8.24166e-06	0	0.000244715	6.20977e-07	4.8799e-07	0.000580289	-0.137389	-0.0432748	0.101363	-0.0689757	-0.0421836	0.0156817	-0.1	-0.461944	0
2108	5.55477	0	0.0725288	5.48224	5.91113	5.84041	5.74802	4.90699	0.410963	0.430066	0.0923906	0.0707277	0.0196986	0.00364713	0.000143035	0.00402784	0.00489798	0.00156064	0.00365138	0.0224353	0.00344826	9.37213e-05	0.00602963	0.022757	0.00623246	0.0524262	0.00540848	0.00343598	0.00153265	0.000113523	2.52e-12	0.000468131	0.000174415	0.000107111	7.73394e-06	0	0.000239623	5.85793e-07	4.37013e-07	0.000580289	-0.137261	-0.0431594	0.101298	-0.0690118	-0.0422161	0.0158281	-0.1	-0.461447	0
2109	5.64419	0	0.146252	5.49794	5.92745	5.8578	5.76509	4.92446	0.408749	0.431882	0.0927065	0.0696486	0.0198153	0.00366644	0.000143636	0.00401233	0.00488125	0.00155692	0.00365366	0.022492	0.0034616	9.11562e-05	0.00601342	0.0229188	0.00605754	0.0516935	0.00531965	0.0034199	0.00153138	0.000107539	2.04834e-12	0.000429458	0.000165323	0.000101246	7.25501e-06	0	0.000234619	5.52558e-07	3.47404e-07	0.000580289	-0.137133	-0.0430439	0.101233	-0.0690479	-0.0422486	0.0159744	-0.1	-0.460951	0
2110	5.69382	0	0.181191	5.51263	5.94267	5.87408	5.78105	4.94072	0.40672	0.433616	0.0930289	0.0685867	0.0199292	0.0036853	0.000144223	0.00399687	0.00486641	0.00155331	0.00365566	0.0225598	0.00347442	8.86642e-05	0.00599819	0.0230768	0.00588675	0.0509684	0.00523196	0.00340383	0.00153011	0.000101851	1.66453e-12	0.000393919	0.000156702	9.56879e-05	6.80279e-06	0	0.000229692	5.21153e-07	2.25257e-07	0.000580289	-0.137005	-0.0429285	0.101168	-0.069084	-0.0422812	0.0161208	-0.1	-0.460454	0
2111	5.71708	0	0.190562	5.52652	5.95699	5.88945	5.79609	4.95595	0.404874	0.435269	0.0933575	0.0675426	0.0200404	0.0037037	0.000144796	0.00398144	0.00485338	0.00154983	0.00365745	0.0226385	0.00348674	8.62441e-05	0.00598404	0.023231	0.00572021	0.0502515	0.00514547	0.00338779	0.00152884	9.6448e-05	1.35235e-12	0.000361277	0.000148533	9.04208e-05	6.38084e-06	0	0.000224851	4.91493e-07	1.22964e-07	0.000580289	-0.136876	-0.042813	0.101103	-0.0691201	-0.0423137	0.0162672	-0.1	-0.459957	0
2112	5.71389	0	0.174151	5.53974	5.97055	5.90403	5.81034	4.97029	0.403206	0.436841	0.0936918	0.0665166	0.0201489	0.00372165	0.000145355	0.00396606	0.00484202	0.00154649	0.00365907	0.0227275	0.00349859	8.38944e-05	0.00597102	0.0233813	0.00555798	0.0495433	0.00506026	0.0033718	0.00152756	9.13225e-05	1.09853e-12	0.000331303	0.000140793	8.54363e-05	5.98218e-06	0	0.000220106	4.63495e-07	4.70005e-08	0.000580289	-0.136748	-0.0426975	0.101038	-0.0691563	-0.0423463	0.0164135	-0.1	-0.459459	0
2113	5.68253	0	0.130187	5.55235	5.98341	5.9179	5.82387	4.98382	0.401708	0.438334	0.0940315	0.0655091	0.0202546	0.00373914	0.0001459	0.00395074	0.00483224	0.00154331	0.00366053	0.0228265	0.00350999	8.16137e-05	0.00595914	0.0235279	0.00540008	0.0488443	0.00497636	0.00335587	0.00152629	8.64639e-05	8.92241e-13	0.000303786	0.000133461	8.07197e-05	5.60539e-06	0	0.000215451	4.37077e-07	-3.67263e-09	0.000580289	-0.13662	-0.0425821	0.100973	-0.0691924	-0.0423788	0.0165599	-0.1	-0.458961	0
2114	5.65045	0	0.0860781	5.56437	5.9956	5.93108	5.8367	4.99657	0.400379	0.439749	0.0943764	0.0645203	0.0203575	0.00375618	0.00014643	0.00393546	0.00482395	0.0015403	0.00366189	0.0229352	0.00352097	7.94006e-05	0.00594847	0.0236706	0.00524655	0.0481549	0.00489383	0.00334	0.00152501	8.18627e-05	7.2463e-13	0.000278537	0.000126523	7.62573e-05	5.25421e-06	0	0.000210889	4.12162e-07	-2.61666e-08	0.000580289	-0.136492	-0.0424666	0.100908	-0.0692285	-0.0424113	0.0167063	-0.1	-0.458462	0
2115	5.635	0	0.0592681	5.57573	6.00705	5.9435	5.84877	5.00848	0.399203	0.441086	0.0947253	0.0635501	0.0204577	0.00377276	0.000146947	0.00392024	0.00481693	0.00153746	0.00366315	0.023053	0.00353154	7.72534e-05	0.00593889	0.0238095	0.00509731	0.0474753	0.00481267	0.00332422	0.00152374	7.7506e-05	5.88466e-13	0.000255375	0.000119955	7.2041e-05	4.92695e-06	0	0.00020642	3.88666e-07	-3.82607e-08	0.000580289	-0.136364	-0.0423512	0.100843	-0.0692646	-0.0424439	0.0168527	-0.1	-0.457963	0
2116	5.62949	0	0.0431769	5.58631	6.01764	5.95504	5.85997	5.01947	0.398155	0.442346	0.0950771	0.0625974	0.0205552	0.00378889	0.000147449	0.00390506	0.00481085	0.00153477	0.00366431	0.023179	0.00354171	7.51697e-05	0.00593018	0.0239446	0.00495219	0.0468049	0.00473281	0.00330849	0.00152246	7.33794e-05	4.77847e-13	0.000234125	0.000113733	6.80566e-05	4.62192e-06	0	0.000202039	3.66505e-07	-5.83029e-08	0.000580289	-0.136236	-0.0422357	0.100778	-0.0693008	-0.0424764	0.016999	-0.1	-0.457464	0
2117	5.62828	0	0.0322656	5.59602	6.02731	5.96565	5.87021	5.02947	0.397216	0.44353	0.0954305	0.0616617	0.0206499	0.00380457	0.000147938	0.00388994	0.00480546	0.0015322	0.00366535	0.0233126	0.00355147	7.31477e-05	0.00592218	0.0240758	0.00481103	0.0461436	0.00465423	0.00329284	0.00152119	6.94699e-05	3.87984e-13	0.000214629	0.000107841	6.4285e-05	4.33249e-06	0	0.00019775	3.45601e-07	-8.61836e-08	0.000580289	-0.136107	-0.0421203	0.100713	-0.0693369	-0.0425089	0.0171454	-0.1	-0.456964	0
2118	5.63049	0	0.025655	5.60483	6.03602	5.97528	5.8795	5.03848	0.396375	0.444639	0.0957847	0.0607425	0.0207418	0.00381979	0.000148412	0.00387487	0.00480061	0.00152976	0.00366629	0.0234531	0.00356083	7.11855e-05	0.00591479	0.0242033	0.00467373	0.0454911	0.00457689	0.00327724	0.00151991	6.5766e-05	3.14988e-13	0.00019674	0.000102261	6.07144e-05	4.05759e-06	0	0.000193545	3.25881e-07	-1.17203e-07	0.000580289	-0.135979	-0.0420048	0.100648	-0.069373	-0.0425415	0.0172918	-0.1	-0.456464	0
2119	5.68527	0	0.0725288	5.61274	6.04379	5.98395	5.88781	5.04652	0.395618	0.445674	0.096139	0.0598392	0.020831	0.00383455	0.000148873	0.00385985	0.00479619	0.00152743	0.00366712	0.0236	0.0035698	6.92813e-05	0.00590792	0.0243269	0.00454017	0.0448473	0.00450078	0.00326171	0.00151864	6.22568e-05	2.557e-13	0.000180333	9.69731e-05	5.73393e-05	3.80135e-06	0	0.000189421	3.0728e-07	-1.50072e-07	0.000580289	-0.135851	-0.0418894	0.100583	-0.0694091	-0.042574	0.0174381	-0.1	-0.455963	0
2120	5.76585	0	0.146252	5.6196	6.05047	5.99152	5.89502	5.05348	0.39491	0.446635	0.0964912	0.0589503	0.0209175	0.00384886	0.000149319	0.00384488	0.00479176	0.00152517	0.00366779	0.0237521	0.00357836	6.74326e-05	0.00590121	0.0244468	0.00441006	0.0442113	0.00442577	0.00324621	0.00151736	5.89279e-05	2.07535e-13	0.00016528	9.1957e-05	5.41475e-05	3.56237e-06	0	0.000185378	2.89722e-07	-2.20925e-07	0.000580289	-0.135723	-0.0417739	0.100518	-0.0694453	-0.0426066	0.0175845	-0.1	-0.455462	0
2121	5.80657	0	0.181191	5.62538	6.05603	5.99796	5.90112	5.05936	0.39423	0.447523	0.09684	0.0580746	0.0210012	0.00386272	0.000149751	0.00382994	0.00478707	0.00152294	0.00366828	0.0239087	0.0035865	6.56374e-05	0.00589443	0.0245628	0.0042832	0.0435822	0.00435178	0.00323074	0.00151609	5.57672e-05	1.68405e-13	0.000151458	8.71986e-05	5.11281e-05	3.33942e-06	0	0.000181404	2.73142e-07	-3.23727e-07	0.000580289	-0.135595	-0.0416585	0.100453	-0.0694814	-0.0426391	0.0177309	-0.1	-0.45496	0
2122	5.82083	0	0.190562	5.63027	6.06069	6.00348	5.90629	5.06436	0.393591	0.448339	0.0971862	0.0572127	0.0210822	0.00387612	0.00015017	0.00381505	0.00478241	0.00152078	0.00366863	0.0240698	0.00359424	6.38946e-05	0.00588779	0.024675	0.00415966	0.0429608	0.00427887	0.00321531	0.00151481	5.27696e-05	1.36628e-13	0.000138778	8.26876e-05	4.82724e-05	3.1315e-06	0	0.000177501	2.57493e-07	-4.06755e-07	0.000580289	-0.135467	-0.041543	0.100388	-0.0695175	-0.0426716	0.0178773	-0.1	-0.454458	0
2123	5.80858	0	0.174151	5.63443	6.06458	6.00821	5.91068	5.06859	0.393004	0.449084	0.0975301	0.0563652	0.0211605	0.00388907	0.000150574	0.0038002	0.00477802	0.00151869	0.00366887	0.0242355	0.00360161	6.22032e-05	0.00588147	0.0247834	0.00403945	0.0423474	0.00420708	0.00319994	0.00151352	4.99293e-05	1.10832e-13	0.000127155	7.84106e-05	4.55721e-05	2.93769e-06	0	0.000173679	2.42732e-07	-4.63682e-07	0.000580289	-0.135338	-0.0414276	0.100323	-0.0695536	-0.0427042	0.0180236	-0.1	-0.453956	0
2124	5.76811	0	0.130187	5.63792	6.06776	6.01223	5.91436	5.07212	0.392476	0.449758	0.0978723	0.0555322	0.0212359	0.00390156	0.000150964	0.0037854	0.00477403	0.00151671	0.00366904	0.0244059	0.00360863	6.05622e-05	0.00587559	0.0248881	0.0039226	0.0417424	0.00413646	0.00318463	0.00151224	4.72404e-05	8.98985e-14	0.000116497	7.43584e-05	4.30248e-05	2.75199e-06	0	0.000169938	2.28812e-07	-4.95622e-07	0.000580289	-0.13521	-0.0413121	0.100258	-0.0695897	-0.0427367	0.01817	-0.1	-0.453453	0
2125	5.72687	0	0.0860781	5.64079	6.07028	6.01556	5.91735	5.07497	0.392017	0.450363	0.0982132	0.0547142	0.0213087	0.0039136	0.00015134	0.00377066	0.00477061	0.00151483	0.00366917	0.0245809	0.00361533	5.89704e-05	0.00587028	0.0249889	0.00380912	0.0411462	0.00406704	0.00316939	0.00151096	4.46969e-05	7.2915e-14	0.000106726	7.05229e-05	4.06167e-05	2.57391e-06	0	0.000166274	2.15693e-07	-4.99759e-07	0.000580289	-0.135082	-0.0411967	0.100193	-0.0696259	-0.0427692	0.0183163	-0.1	-0.45295	0
2126	5.70223	0	0.0592681	5.64296	6.07206	6.01815	5.9196	5.07708	0.391622	0.450898	0.0985525	0.0539109	0.0213787	0.00392518	0.000151702	0.00375598	0.00476768	0.00151307	0.00366926	0.0247604	0.00362172	5.74267e-05	0.00586551	0.0250859	0.00369894	0.0405588	0.00399881	0.00315424	0.00150969	4.22914e-05	5.91379e-14	9.77746e-05	6.68915e-05	3.83401e-05	2.40805e-06	0	0.000162685	2.03328e-07	-4.93681e-07	0.000580289	-0.134954	-0.0410812	0.100128	-0.069662	-0.0428018	0.0184624	-0.1	-0.452446	0
2127	5.68749	0	0.0431769	5.64431	6.07301	6.01989	5.921	5.07836	0.391277	0.451364	0.0988892	0.0531217	0.0214459	0.00393632	0.00015205	0.00374134	0.00476507	0.00151141	0.00366932	0.0249439	0.00362779	5.59292e-05	0.00586113	0.0251791	0.00359191	0.0399799	0.00393174	0.00313915	0.00150841	4.00157e-05	4.79614e-14	8.95676e-05	6.34485e-05	3.61931e-05	2.25354e-06	0	0.000159176	1.91673e-07	-4.95505e-07	0.000580289	-0.134827	-0.0409658	0.100063	-0.069698	-0.0428343	0.0186085	-0.1	-0.451942	0
2128	5.67705	0	0.0322656	5.64478	6.07307	6.02072	5.9215	5.07876	0.390972	0.451763	0.0992228	0.0523461	0.0215105	0.00394699	0.000152385	0.00372676	0.00476264	0.00150983	0.00366933	0.0251309	0.00363355	5.44766e-05	0.00585704	0.0252685	0.00348793	0.0394091	0.00386578	0.00312414	0.00150714	3.78621e-05	3.88946e-14	8.2042e-05	6.01836e-05	3.41624e-05	2.10959e-06	0	0.000155742	1.80685e-07	-5.05079e-07	0.000580289	-0.134699	-0.0408503	0.0999978	-0.0697341	-0.0428668	0.0187546	-0.1	-0.451438	0
2129	5.67001	0	0.025655	5.64435	6.0722	6.02061	5.92106	5.07827	0.390701	0.452095	0.0995528	0.0515838	0.0215722	0.00395721	0.000152705	0.00371223	0.00476036	0.00150832	0.00366928	0.0253211	0.003639	5.30675e-05	0.0058532	0.0253541	0.0033869	0.0388463	0.00380092	0.0031092	0.00150586	3.5824e-05	3.15395e-14	7.51472e-05	5.70913e-05	3.22414e-05	1.97547e-06	0	0.000152384	1.70326e-07	-5.17733e-07	0.000580289	-0.134571	-0.0407349	0.0999326	-0.0697702	-0.0428993	0.0189006	-0.1	-0.450933	0
2130	5.71554	0	0.0725288	5.64301	6.07041	6.01957	5.91969	5.07687	0.39046	0.45236	0.0998788	0.0508344	0.0216312	0.00396698	0.000153011	0.00369775	0.00475817	0.00150689	0.00366919	0.0255143	0.00364416	5.17006e-05	0.00584955	0.0254359	0.00328874	0.0382915	0.00373713	0.00309433	0.00150459	3.38952e-05	2.55735e-14	6.88307e-05	5.41601e-05	3.04297e-05	1.85052e-06	0	0.000149091	1.6056e-07	-5.32191e-07	0.000580289	-0.134443	-0.0406195	0.0998674	-0.0698063	-0.0429318	0.0190467	-0.1	-0.450427	0
2131	5.78686	0	0.146252	5.64061	6.06755	6.01746	5.91726	5.07448	0.39022	0.452559	0.100199	0.0500967	0.0216875	0.0039763	0.000153303	0.00368331	0.0047557	0.00150548	0.003669	0.0257096	0.00364898	5.03739e-05	0.00584578	0.0255139	0.00319322	0.0377437	0.00367431	0.0030795	0.00150331	3.20674e-05	2.07331e-14	6.30418e-05	5.13774e-05	2.87204e-05	1.73404e-06	0	0.000145859	1.51347e-07	-5.84248e-07	0.000580289	-0.134316	-0.040504	0.0998022	-0.0698424	-0.0429643	0.0191928	-0.1	-0.449921	0
2132	5.81831	0	0.181191	5.63711	6.06361	6.01424	5.91373	5.07107	0.389964	0.452693	0.100513	0.0493696	0.021741	0.00398516	0.000153581	0.00366892	0.00475276	0.00150408	0.00366867	0.0259061	0.00365347	4.9086e-05	0.0058417	0.0255881	0.00310019	0.0372023	0.00361238	0.00306471	0.00150204	3.03337e-05	1.68056e-14	5.77356e-05	4.87363e-05	2.71016e-05	1.62542e-06	0	0.00014269	1.42651e-07	-6.67869e-07	0.000580289	-0.134188	-0.0403886	0.0997371	-0.0698785	-0.0429968	0.0193389	-0.1	-0.449415	0
2133	5.82329	0	0.190562	5.63273	6.05878	6.01012	5.9093	5.06683	0.389711	0.452762	0.10082	0.0486538	0.0217918	0.00399356	0.000153844	0.00365457	0.00474968	0.0015027	0.00366825	0.0261044	0.00365765	4.78362e-05	0.00583755	0.0256585	0.00300968	0.0366679	0.0035514	0.00304996	0.00150076	2.86912e-05	1.362e-14	5.28734e-05	4.62337e-05	2.55687e-05	1.52418e-06	0	0.000139586	1.34448e-07	-7.31785e-07	0.000580289	-0.13406	-0.0402731	0.0996719	-0.0699146	-0.0430293	0.0194849	-0.1	-0.448908	0
2134	5.80176	0	0.174151	5.62761	6.0532	6.00525	5.90413	5.06189	0.389475	0.452767	0.101123	0.0479497	0.0218399	0.00400152	0.000154094	0.00364027	0.00474672	0.00150137	0.00366778	0.0263047	0.00366154	4.66237e-05	0.00583353	0.0257251	0.00292171	0.0361407	0.00349141	0.00303527	0.00149948	2.71364e-05	1.10371e-14	4.84194e-05	4.38631e-05	2.4123e-05	1.42985e-06	0	0.000136547	1.26714e-07	-7.69816e-07	0.000580289	-0.133933	-0.0401577	0.0996067	-0.0699507	-0.0430619	0.019631	-0.1	-0.448401	0
2135	5.75201	0	0.130187	5.62182	6.04695	5.99969	5.89827	5.05629	0.38927	0.452708	0.101422	0.0472575	0.0218852	0.00400902	0.00015433	0.00362602	0.00474405	0.0015001	0.00366728	0.0265073	0.00366516	4.54476e-05	0.00582978	0.0257879	0.00283628	0.035621	0.00343242	0.00302065	0.0014982	2.56657e-05	8.94353e-15	4.43338e-05	4.16147e-05	2.276e-05	1.34198e-06	0	0.000133575	1.19425e-07	-7.83131e-07	0.000580289	-0.133805	-0.0400423	0.0995415	-0.0699867	-0.0430944	0.0197771	-0.1	-0.447894	0
2136	5.70149	0	0.0860781	5.61541	6.04005	5.99347	5.89175	5.05006	0.389106	0.452587	0.101716	0.0465776	0.0219277	0.00401606	0.000154552	0.00361183	0.00474184	0.00149892	0.00366679	0.0267125	0.00366854	4.43073e-05	0.00582646	0.025847	0.0027534	0.0351093	0.00337448	0.00300612	0.00149693	2.42759e-05	7.24691e-15	4.05867e-05	3.94835e-05	2.14751e-05	1.26017e-06	0	0.000130665	1.12558e-07	-7.68951e-07	0.000580289	-0.133677	-0.0399268	0.0994763	-0.0700228	-0.0431269	0.0199231	-0.1	-0.447386	0
2137	5.66757	0	0.0592681	5.60831	6.03243	5.98652	5.88452	5.04313	0.388982	0.452403	0.102008	0.0459098	0.0219675	0.00402265	0.00015476	0.00359769	0.00474005	0.00149783	0.00366631	0.0269202	0.00367168	4.32017e-05	0.00582355	0.0259022	0.002673	0.0346054	0.00331757	0.00299167	0.00149566	2.29627e-05	5.87212e-15	3.71561e-05	3.74639e-05	2.02641e-05	1.184e-06	0	0.000127816	1.06089e-07	-7.44742e-07	0.000580289	-0.133549	-0.0398114	0.0994112	-0.0700589	-0.0431594	0.0200692	-0.1	-0.446877	0
2138	5.64356	0	0.0431769	5.60038	6.02399	5.97874	5.87644	5.0354	0.388887	0.452158	0.102294	0.0452536	0.0220046	0.00402879	0.000154954	0.0035836	0.0047385	0.0014968	0.00366583	0.02713	0.00367459	4.21297e-05	0.00582091	0.0259537	0.00259498	0.0341091	0.00326166	0.0029773	0.00149438	2.17213e-05	4.75803e-15	3.40151e-05	3.55501e-05	1.91167e-05	1.11308e-06	0	0.000125031	9.99932e-08	-7.28453e-07	0.000580289	-0.133422	-0.039696	0.099346	-0.070095	-0.0431919	0.0202153	-0.1	-0.446368	0
2139	5.62382	0	0.0322656	5.59156	6.01464	5.97003	5.86745	5.02679	0.388813	0.451851	0.102576	0.0446086	0.0220389	0.00403448	0.000155134	0.00356957	0.0047371	0.00149584	0.00366534	0.0273416	0.00367726	4.10901e-05	0.00581847	0.0260013	0.00251924	0.03362	0.00320672	0.002963	0.00149312	2.05475e-05	3.85516e-15	3.11391e-05	3.3734e-05	1.80293e-05	1.04192e-06	0	0.000122309	9.42492e-08	-7.19863e-07	0.000580289	-0.133294	-0.0395805	0.0992808	-0.0701311	-0.0432244	0.0203613	-0.1	-0.445859	0
2140	5.60746	0	0.025655	5.58181	6.00435	5.96037	5.85752	5.01728	0.388757	0.451484	0.102853	0.0439745	0.0220705	0.00403971	0.0001553	0.00355559	0.00473578	0.00149492	0.00366484	0.0275548	0.00367969	4.00819e-05	0.00581618	0.0260452	0.00244572	0.0331382	0.00315272	0.00294878	0.00149185	1.94375e-05	3.1235e-15	2.85057e-05	3.20117e-05	1.70042e-05	9.70538e-07	0	0.000119647	8.88361e-08	-7.14289e-07	0.000580289	-0.133166	-0.0394651	0.0992156	-0.0701672	-0.0432569	0.0205074	-0.1	-0.445349	0
2141	5.64365	0	0.0725288	5.57112	5.99312	5.94977	5.84664	5.00687	0.388716	0.451057	0.103124	0.0433511	0.0220993	0.00404448	0.000155452	0.00354166	0.00473453	0.00149406	0.00366433	0.0277696	0.0036819	3.91043e-05	0.00581402	0.0260853	0.00237435	0.0326634	0.00309964	0.00293463	0.00149058	1.83878e-05	2.53059e-15	2.60945e-05	3.03799e-05	1.60378e-05	9.04057e-07	0	0.000117045	8.37347e-08	-7.10457e-07	0.000580289	-0.133038	-0.0393496	0.0991504	-0.0702033	-0.0432894	0.0206535	-0.1	-0.444839	0
2142	5.70561	0	0.146252	5.55935	5.98081	5.93807	5.83468	4.99545	0.388663	0.450569	0.103388	0.0427373	0.0221254	0.00404881	0.00015559	0.00352777	0.00473297	0.0014932	0.00366376	0.0279849	0.00368385	3.81557e-05	0.00581166	0.0261216	0.00230496	0.0321949	0.00304741	0.00292053	0.00148932	1.73937e-05	2.05e-15	2.38859e-05	2.88312e-05	1.51265e-05	8.42106e-07	0	0.000114497	7.89238e-08	-7.4398e-07	0.000580289	-0.132911	-0.0392342	0.0990853	-0.0702394	-0.043322	0.0207995	-0.1	-0.444328	0
2143	5.72765	0	0.181191	5.54646	5.96738	5.92525	5.8216	4.983	0.388583	0.450023	0.103643	0.0421324	0.0221487	0.00405268	0.000155714	0.00351393	0.00473092	0.00149232	0.00366309	0.0282002	0.00368553	3.72351e-05	0.00580894	0.0261541	0.00223742	0.0317322	0.00299595	0.00290647	0.00148805	1.64516e-05	1.66041e-15	2.18626e-05	2.73592e-05	1.42668e-05	7.84356e-07	0	0.000112	7.43848e-08	-8.08762e-07	0.000580289	-0.132783	-0.0391188	0.0990201	-0.0702754	-0.0433545	0.0209456	-0.1	-0.443817	0
2144	5.7232	0	0.190562	5.53264	5.95304	5.91151	5.80761	4.9697	0.388496	0.449418	0.103892	0.0415368	0.0221693	0.00405609	0.000155824	0.00350014	0.00472872	0.00149146	0.00366236	0.028416	0.00368697	3.63419e-05	0.00580612	0.0261829	0.00217177	0.0312757	0.0029453	0.00289246	0.00148678	1.55595e-05	1.3447e-15	2.00096e-05	2.59635e-05	1.34562e-05	7.30545e-07	0	0.000109555	7.01047e-08	-8.53789e-07	0.000580289	-0.132655	-0.0390033	0.0989549	-0.0703115	-0.043387	0.0210917	-0.1	-0.443305	0
2145	5.69251	0	0.174151	5.51836	5.93822	5.89698	5.79285	4.95567	0.388418	0.448755	0.104135	0.0412414	0.0221872	0.00405906	0.00015592	0.00348639	0.00472662	0.00149062	0.00366161	0.0286328	0.00368819	3.54757e-05	0.00580337	0.0262079	0.00213942	0.0310491	0.00292019	0.00288548	0.00148615	1.51253e-05	1.08894e-15	1.91235e-05	2.5287e-05	1.306e-05	7.05945e-07	0	0.000108347	6.96721e-08	-8.68682e-07	0.000580289	-0.132528	-0.0388879	0.0988897	-0.0703476	-0.0434195	0.0212377	-0.1	-0.442793	0
2146	5.63385	0	0.130187	5.50366	5.92299	5.88175	5.77737	4.94098	0.388361	0.448035	0.104373	0.0412414	0.0222023	0.00406157	0.000156002	0.00347269	0.0047248	0.00148984	0.00366086	0.0288508	0.0036892	3.46357e-05	0.00580086	0.0262291	0.00213942	0.0310491	0.00292019	0.00288548	0.00148615	1.51248e-05	8.81791e-16	1.9123e-05	2.52896e-05	1.30547e-05	7.08567e-07	0	0.000108349	7.28674e-08	-8.68657e-07	0.000580289	-0.1324	-0.0387725	0.0988245	-0.0703837	-0.043452	0.0213838	-0.1	-0.442281	0
2147	5.57437	0	0.0860781	5.48829	5.90707	5.86582	5.76122	4.92562	0.388339	0.447257	0.104606	0.0412415	0.0222147	0.00406362	0.00015607	0.00345905	0.00472342	0.00148912	0.00366015	0.0290706	0.00369004	3.38215e-05	0.00579873	0.0262465	0.00213943	0.0310491	0.00292019	0.00288548	0.00148615	1.51254e-05	7.14059e-16	1.91226e-05	2.52922e-05	1.30497e-05	7.11036e-07	0	0.000108348	7.58818e-08	-8.68543e-07	0.000580289	-0.132272	-0.038657	0.0987594	-0.0704198	-0.0434845	0.0215299	-0.1	-0.441768	0
2148	5.53146	0	0.0592681	5.47219	5.89039	5.84915	5.74432	4.90954	0.38835	0.446422	0.104834	0.0412414	0.0222243	0.00406523	0.000156124	0.00344547	0.00472244	0.00148848	0.00365948	0.0292921	0.00369071	3.30324e-05	0.00579697	0.0262601	0.00213943	0.0310491	0.00292019	0.00288548	0.00148615	1.51249e-05	5.78248e-16	1.91224e-05	2.52915e-05	1.30451e-05	7.13365e-07	0	0.000108345	7.87265e-08	-8.68589e-07	0.000580289	-0.132142	-0.0385416	0.0986951	-0.0704561	-0.0435171	0.0216772	-0.1	-0.441255	0
2149	5.4984	0	0.0431769	5.45523	5.87284	5.8316	5.72654	4.89262	0.388384	0.445531	0.105058	0.0412414	0.0222312	0.00406638	0.000156164	0.00343194	0.0047217	0.00148789	0.00365884	0.0295149	0.0036912	3.22674e-05	0.00579547	0.02627	0.00213942	0.0310491	0.00292019	0.00288548	0.00148615	1.5123e-05	4.68269e-16	1.91223e-05	2.52875e-05	1.30407e-05	7.15557e-07	0	0.000108345	8.14104e-08	-8.68618e-07	0.000580289	-0.132014	-0.0384261	0.0986307	-0.0704924	-0.0435499	0.021824	-0.1	-0.440742	0
2150	5.46957	0	0.0322656	5.43731	5.85433	5.81309	5.70781	4.87479	0.388435	0.444585	0.10528	0.041242	0.0222339	0.00406684	0.000156181	0.00342512	0.00472144	0.00148755	0.00365834	0.0297389	0.00369123	3.18923e-05	0.00579472	0.0262739	0.00213948	0.0310495	0.00292023	0.00288549	0.00148615	1.5122e-05	3.79205e-16	1.91221e-05	2.52873e-05	1.30424e-05	7.17617e-07	0	0.000108347	8.39426e-08	-8.44929e-07	0.000580289	-0.131887	-0.0383107	0.098565	-0.0705285	-0.0435824	0.0219696	-0.1	-0.440227	0
2151	5.44408	0	0.025655	5.41843	5.83485	5.79361	5.6881	4.85602	0.388499	0.443583	0.105504	0.0412432	0.0222339	0.00406684	0.000156181	0.00342498	0.00472164	0.00148744	0.00365798	0.0299639	0.00369089	3.18951e-05	0.00579469	0.0262739	0.00213962	0.0310504	0.00292034	0.00288552	0.00148616	1.51218e-05	3.07078e-16	1.91219e-05	2.52902e-05	1.30497e-05	7.19553e-07	0	0.000108352	8.63317e-08	-8.09154e-07	0.000580289	-0.131756	-0.0381952	0.0985005	-0.0705645	-0.0436148	0.0221179	-0.1	-0.439712	0
2152	5.47172	0	0.0725288	5.39919	5.81501	5.77376	5.66803	4.83693	0.388573	0.442526	0.10573	0.0412447	0.0222339	0.00406684	0.000156181	0.00342485	0.00472187	0.00148735	0.00365764	0.0301898	0.00369057	3.18978e-05	0.00579473	0.0262739	0.00213978	0.0310515	0.00292046	0.00288555	0.00148616	1.51223e-05	2.48666e-16	1.91216e-05	2.52927e-05	1.30564e-05	7.21374e-07	0	0.000108358	8.85859e-08	-7.92897e-07	0.000580289	-0.131624	-0.0380798	0.0984369	-0.0706005	-0.0436473	0.0222665	-0.1	-0.439197	0
2153	5.52628	0	0.146252	5.38003	5.79525	5.75401	5.64805	4.81801	0.388632	0.441414	0.105954	0.0412453	0.0222339	0.00406684	0.000156182	0.00342471	0.00472172	0.00148723	0.00365727	0.0304156	0.00369022	3.18999e-05	0.00579448	0.0262739	0.00213986	0.031052	0.00292051	0.00288557	0.00148616	1.51224e-05	2.0135e-16	1.91205e-05	2.52936e-05	1.30625e-05	7.2306e-07	0	0.000108363	9.07095e-08	-8.21039e-07	0.000580289	-0.131498	-0.0379643	0.0983714	-0.0706368	-0.0436798	0.0224118	-0.1	-0.438682	0
2154	5.54206	0	0.181191	5.36087	5.77552	5.73427	5.62809	4.79919	0.38866	0.440248	0.106177	0.0412447	0.0222339	0.00406684	0.000156182	0.00342456	0.00472104	0.00148706	0.00365683	0.0306408	0.00368984	3.19013e-05	0.00579381	0.0262739	0.00213979	0.0310516	0.00292046	0.00288556	0.00148616	1.51212e-05	1.63014e-16	1.91183e-05	2.52924e-05	1.30676e-05	7.24601e-07	0	0.000108364	9.27072e-08	-8.81671e-07	0.000580289	-0.131375	-0.0378489	0.0983043	-0.0706732	-0.0437124	0.0225554	-0.1	-0.438166	0
2155	5.53247	0	0.190562	5.34191	5.75598	5.71474	5.60834	4.78063	0.388677	0.439029	0.106399	0.0412435	0.0222339	0.00406684	0.000156182	0.00342441	0.00472016	0.00148686	0.00365635	0.0308659	0.00368943	3.19021e-05	0.00579295	0.0262739	0.00213964	0.0310507	0.00292036	0.00288553	0.00148616	1.51196e-05	1.31965e-16	1.91156e-05	2.529e-05	1.30721e-05	7.26025e-07	0	0.000108363	9.45888e-08	-9.23859e-07	0.000580289	-0.131248	-0.0377335	0.0982386	-0.0707092	-0.043745	0.0227006	-0.1	-0.437649	0
2156	5.49743	0	0.174151	5.32328	5.73677	5.69553	5.58891	4.76245	0.388698	0.437757	0.106621	0.041242	0.0222339	0.00406684	0.000156182	0.00342426	0.00471933	0.00148666	0.00365588	0.0310914	0.00368903	3.19026e-05	0.0057921	0.0262739	0.00213947	0.0310496	0.00292024	0.0028855	0.00148615	1.51182e-05	1.06824e-16	1.91126e-05	2.52872e-05	1.30761e-05	7.27356e-07	0	0.000108357	9.63628e-08	-9.41923e-07	0.000580289	-0.131119	-0.037618	0.0981741	-0.0707451	-0.0437775	0.0228472	-0.1	-0.437132	0
2157	5.43522	0	0.130187	5.30503	5.71794	5.67669	5.56985	4.74468	0.388736	0.436431	0.106845	0.0412408	0.0222339	0.00406684	0.000156183	0.00342411	0.00471871	0.00148649	0.00365543	0.0313178	0.00368864	3.19032e-05	0.0057914	0.0262739	0.00213932	0.0310486	0.00292014	0.00288547	0.00148615	1.51177e-05	8.6472e-17	1.91098e-05	2.52846e-05	1.30799e-05	7.28614e-07	0	0.000108348	9.80377e-08	-9.37154e-07	0.000580289	-0.130991	-0.0375026	0.0981094	-0.0707811	-0.04381	0.0229938	-0.1	-0.436614	0
2158	5.37328	0	0.0860781	5.2872	5.6995	5.65826	5.55119	4.72733	0.388803	0.435053	0.107071	0.0412403	0.0222339	0.00406684	0.000156183	0.00342396	0.00471847	0.00148635	0.00365504	0.0315456	0.00368827	3.19041e-05	0.00579101	0.0262739	0.00213926	0.0310482	0.00292009	0.00288546	0.00148615	1.51186e-05	6.99994e-17	1.91076e-05	2.52826e-05	1.30836e-05	7.29819e-07	0	0.000108342	9.96213e-08	-9.06988e-07	0.000580289	-0.130862	-0.0373871	0.0980446	-0.0708171	-0.0438426	0.0231404	-0.1	-0.436096	0
2159	5.32896	0	0.0592681	5.26969	5.68138	5.64013	5.53284	4.71031	0.388899	0.433623	0.1073	0.0412405	0.0222339	0.00406684	0.000156183	0.00342382	0.00471858	0.00148625	0.0036547	0.0317746	0.00368794	3.19054e-05	0.00579092	0.0262739	0.00213928	0.0310483	0.00292011	0.00288546	0.00148615	1.5121e-05	5.66672e-17	1.91058e-05	2.52815e-05	1.30872e-05	7.30977e-07	0	0.000108341	1.0112e-07	-8.68712e-07	0.000580289	-0.130733	-0.0372717	0.0979799	-0.0708531	-0.0438751	0.023287	-0.1	-0.435578	0
2160	5.29554	0	0.0431769	5.25236	5.66342	5.62218	5.51465	4.6935	0.389012	0.432141	0.107529	0.0412412	0.0222339	0.00406684	0.000156183	0.00342369	0.00471885	0.00148618	0.0036544	0.0320046	0.00368763	3.19069e-05	0.00579099	0.0262739	0.00213935	0.0310488	0.00292016	0.00288547	0.00148615	1.51221e-05	4.5875e-17	1.91044e-05	2.52808e-05	1.30907e-05	7.32085e-07	0	0.000108344	1.02536e-07	-8.40054e-07	0.000580289	-0.130605	-0.0371562	0.097915	-0.0708892	-0.0439077	0.0234333	-0.1	-0.435059	0
2161	5.26739	0	0.0322656	5.23513	5.64556	5.60432	5.49656	4.67681	0.389136	0.430608	0.107759	0.0412421	0.0222339	0.00406684	0.000156184	0.00342355	0.00471919	0.00148612	0.00365413	0.0322353	0.00368734	3.19085e-05	0.00579115	0.0262739	0.00213946	0.0310495	0.00292024	0.00288549	0.00148616	1.51216e-05	3.71384e-17	1.91031e-05	2.52801e-05	1.3094e-05	7.33139e-07	0	0.000108349	1.03875e-07	-8.20828e-07	0.000580289	-0.130478	-0.0370408	0.0978499	-0.0709255	-0.0439403	0.023579	-0.1	-0.43454	0
2162	5.2436	0	0.025655	5.21794	5.62775	5.5865	5.47851	4.66022	0.389267	0.429024	0.107991	0.0412433	0.0222339	0.00406684	0.000156184	0.00342342	0.00471955	0.00148608	0.00365388	0.0324665	0.00368706	3.19103e-05	0.00579136	0.0262739	0.0021396	0.0310504	0.00292034	0.00288552	0.00148616	1.5122e-05	3.00655e-17	1.91019e-05	2.52796e-05	1.3097e-05	7.34142e-07	0	0.000108356	1.05141e-07	-8.06101e-07	0.000580289	-0.130351	-0.0369254	0.0977847	-0.0709618	-0.0439729	0.0237245	-0.1	-0.434021	0
2163	5.27333	0	0.0725288	5.2008	5.60997	5.56873	5.46051	4.64372	0.389403	0.427389	0.108222	0.0412447	0.0222339	0.00406684	0.000156184	0.00342329	0.0047199	0.00148604	0.00365364	0.0326983	0.00368679	3.19121e-05	0.00579159	0.0262739	0.00213976	0.0310515	0.00292046	0.00288556	0.00148616	1.51233e-05	2.43395e-17	1.91007e-05	2.52789e-05	1.30999e-05	7.35096e-07	0	0.000108366	1.06337e-07	-7.946e-07	0.000580289	-0.130224	-0.0368099	0.0977195	-0.0709982	-0.0440055	0.0238699	-0.1	-0.433501	0
2164	5.3298	0	0.146252	5.18355	5.59209	5.55085	5.4424	4.62717	0.389517	0.425703	0.108453	0.0412453	0.0222339	0.00406683	0.000156184	0.00342315	0.00471986	0.00148598	0.00365338	0.0329295	0.0036865	3.19137e-05	0.00579153	0.0262739	0.00213983	0.031052	0.00292052	0.00288557	0.00148616	1.5124e-05	1.97025e-17	1.9099e-05	2.52805e-05	1.31023e-05	7.35975e-07	0	0.000108368	1.07464e-07	-8.22122e-07	0.000580289	-0.130097	-0.0366945	0.0976543	-0.0710345	-0.0440381	0.0240154	-0.1	-0.43298	0
2165	5.34732	0	0.181191	5.16613	5.57407	5.53282	5.42414	4.61058	0.389595	0.423968	0.108681	0.0412447	0.0222338	0.00406683	0.000156185	0.00342301	0.00471927	0.00148586	0.00365304	0.0331595	0.00368617	3.19146e-05	0.00579102	0.0262739	0.00213976	0.0310516	0.00292047	0.00288556	0.00148616	1.51236e-05	1.59467e-17	1.90962e-05	2.52834e-05	1.3104e-05	7.36767e-07	0	0.000108361	1.08521e-07	-8.82128e-07	0.000580289	-0.12997	-0.0365791	0.0975892	-0.0710708	-0.0440706	0.0241615	-0.1	-0.432459	0
2166	5.33933	0	0.190562	5.14877	5.5561	5.51486	5.40595	4.59411	0.389658	0.422183	0.108908	0.0412435	0.0222338	0.00406683	0.000156185	0.00342286	0.00471847	0.00148571	0.00365266	0.0333891	0.00368582	3.19153e-05	0.0057903	0.0262739	0.00213961	0.0310507	0.00292037	0.00288553	0.00148616	1.51227e-05	1.29058e-17	1.90929e-05	2.52846e-05	1.31053e-05	7.37494e-07	0	0.000108353	1.09517e-07	-9.23817e-07	0.000580289	-0.12984	-0.0364636	0.0975246	-0.0711069	-0.0441031	0.0243089	-0.1	-0.431938	0
2167	5.30581	0	0.174151	5.13165	5.53838	5.49714	5.388	4.5779	0.389721	0.42038	0.109135	0.0412421	0.0222338	0.00406683	0.000156185	0.00342271	0.00471769	0.00148556	0.00365228	0.0336187	0.00368547	3.19159e-05	0.00578957	0.0262739	0.00213945	0.0310496	0.00292025	0.00288549	0.00148615	1.51222e-05	1.04443e-17	1.90895e-05	2.52851e-05	1.31063e-05	7.38177e-07	0	0.000108345	1.10456e-07	-9.41835e-07	0.000580289	-0.129709	-0.0363481	0.0974602	-0.0711429	-0.0441355	0.024457	-0.1	-0.431415	0
2168	5.24507	0	0.130187	5.11488	5.52099	5.47975	5.37039	4.562	0.389796	0.418591	0.109363	0.0412409	0.0222338	0.00406683	0.000156185	0.00342256	0.00471711	0.00148543	0.00365192	0.0338489	0.00368513	3.19166e-05	0.00578898	0.0262739	0.00213931	0.0310486	0.00292015	0.00288546	0.00148615	1.51224e-05	8.45212e-18	1.90863e-05	2.52854e-05	1.31072e-05	7.38833e-07	0	0.00010834	1.11345e-07	-9.37212e-07	0.000580289	-0.129579	-0.0362327	0.0973958	-0.0711789	-0.044168	0.0246051	-0.1	-0.430892	0
2169	5.18457	0	0.0860781	5.09849	5.50397	5.46273	5.35314	4.54643	0.389897	0.416815	0.109593	0.0412403	0.0222338	0.00406683	0.000156186	0.00342241	0.0047169	0.00148533	0.00365161	0.0340802	0.00368481	3.19177e-05	0.00578867	0.0262739	0.00213924	0.0310482	0.0029201	0.00288545	0.00148615	1.51217e-05	6.84018e-18	1.90837e-05	2.52862e-05	1.31082e-05	7.39478e-07	0	0.000108339	1.12189e-07	-9.07035e-07	0.000580289	-0.129448	-0.0361172	0.0973313	-0.0712149	-0.0442004	0.0247532	-0.1	-0.430369	0
2170	5.14166	0	0.0592681	5.08239	5.48725	5.44601	5.33618	4.53111	0.390023	0.415054	0.109824	0.0412405	0.0222338	0.00406683	0.000156186	0.00342227	0.00471703	0.00148526	0.00365136	0.0343126	0.00368453	3.19191e-05	0.00578864	0.0262739	0.00213926	0.0310483	0.00292012	0.00288546	0.00148615	1.51202e-05	5.5359e-18	1.90817e-05	2.52875e-05	1.31093e-05	7.40117e-07	0	0.000108343	1.1299e-07	-8.68947e-07	0.000580289	-0.129319	-0.0360017	0.0972666	-0.0712509	-0.0442329	0.0249005	-0.1	-0.429845	0
2171	5.10964	0	0.0431769	5.06646	5.47068	5.42943	5.31938	4.51591	0.390163	0.413307	0.110057	0.0412412	0.0222338	0.00406683	0.000156186	0.00342214	0.0047173	0.00148522	0.00365114	0.0345456	0.00368426	3.19207e-05	0.00578877	0.0262739	0.00213934	0.0310488	0.00292017	0.00288547	0.00148615	1.512e-05	4.48041e-18	1.908e-05	2.5289e-05	1.31104e-05	7.4074e-07	0	0.00010835	1.13751e-07	-8.40498e-07	0.000580289	-0.129191	-0.0358862	0.0972012	-0.0712869	-0.0442655	0.0250461	-0.1	-0.429321	0
2172	5.08288	0	0.0322656	5.05061	5.45418	5.41294	5.30265	4.50076	0.390311	0.411575	0.110291	0.0412422	0.0222338	0.00406683	0.000156186	0.003422	0.00471763	0.00148519	0.00365094	0.0347792	0.00368401	3.19224e-05	0.00578896	0.0262739	0.00213945	0.0310495	0.00292025	0.00288549	0.00148615	1.51207e-05	3.62618e-18	1.90785e-05	2.52903e-05	1.31115e-05	7.41345e-07	0	0.000108353	1.14472e-07	-8.21121e-07	0.000580289	-0.129065	-0.0357708	0.0971354	-0.0713229	-0.0442981	0.025191	-0.1	-0.428796	0
2173	5.06046	0	0.025655	5.03481	5.43774	5.39649	5.28597	4.48565	0.390463	0.409858	0.110524	0.0412433	0.0222338	0.00406683	0.000156187	0.00342187	0.00471797	0.00148518	0.00365076	0.0350131	0.00368377	3.19241e-05	0.00578919	0.0262739	0.00213958	0.0310504	0.00292035	0.00288552	0.00148615	1.51223e-05	2.93481e-18	1.90771e-05	2.52915e-05	1.31125e-05	7.4193e-07	0	0.000108353	1.15156e-07	-8.06429e-07	0.000580289	-0.128939	-0.0356553	0.0970697	-0.0713589	-0.0443307	0.0253358	-0.1	-0.428271	0
2174	5.09158	0	0.0725288	5.01905	5.42133	5.38009	5.26933	4.47055	0.390619	0.408155	0.110759	0.0412447	0.0222338	0.00406683	0.000156187	0.00342173	0.0047183	0.00148517	0.00365059	0.0352472	0.00368354	3.19256e-05	0.00578943	0.0262739	0.00213974	0.0310515	0.00292046	0.00288555	0.00148616	1.51246e-05	2.37524e-18	1.90757e-05	2.52924e-05	1.31134e-05	7.42494e-07	0	0.000108356	1.15804e-07	-7.95105e-07	0.000580289	-0.128813	-0.0355398	0.097004	-0.0713949	-0.0443633	0.0254806	-0.1	-0.427746	0
2175	5.14943	0	0.146252	5.00318	5.40482	5.36358	5.25258	4.45537	0.39075	0.406466	0.110991	0.0412453	0.0222338	0.00406683	0.000156187	0.0034216	0.00471823	0.00148512	0.00365038	0.0354806	0.00368328	3.19267e-05	0.00578938	0.0262739	0.00213981	0.031052	0.00292052	0.00288557	0.00148616	1.51264e-05	1.92222e-18	1.90804e-05	2.52921e-05	1.3114e-05	7.43012e-07	0	0.000108357	1.16414e-07	-8.22458e-07	0.000580289	-0.128686	-0.0354243	0.0969385	-0.071431	-0.0443958	0.0256262	-0.1	-0.427219	0
2176	5.16834	0	0.181191	4.98715	5.38817	5.34693	5.23571	4.44007	0.390843	0.404792	0.111221	0.0412447	0.0222338	0.00406683	0.000156187	0.00342146	0.00471761	0.00148502	0.0036501	0.0357125	0.00368299	3.19271e-05	0.00578886	0.0262739	0.00213974	0.0310516	0.00292047	0.00288556	0.00148616	1.5127e-05	1.55539e-18	1.90901e-05	2.52898e-05	1.31139e-05	7.43466e-07	0	0.000108355	1.16984e-07	-8.82372e-07	0.000580289	-0.128557	-0.0353089	0.0968738	-0.0714673	-0.0444283	0.0257733	-0.1	-0.426693	0
2177	5.16177	0	0.190562	4.9712	5.37161	5.33036	5.21892	4.42486	0.39092	0.403132	0.11145	0.0412435	0.0222338	0.00406683	0.000156187	0.00342131	0.00471677	0.00148489	0.00364978	0.0359437	0.00368267	3.19271e-05	0.00578813	0.0262739	0.0021396	0.0310506	0.00292036	0.00288553	0.00148616	1.51272e-05	1.25846e-18	1.90982e-05	2.52866e-05	1.31135e-05	7.43879e-07	0	0.000108351	1.1752e-07	-9.24048e-07	0.000580289	-0.128427	-0.0351935	0.0968094	-0.0715036	-0.0444608	0.0259212	-0.1	-0.426167	0
2178	5.12964	0	0.174151	4.95548	5.35527	5.31403	5.20235	4.40987	0.390994	0.401485	0.111678	0.0412421	0.0222338	0.00406683	0.000156188	0.00342116	0.00471596	0.00148476	0.00364945	0.0361747	0.00368235	3.1927e-05	0.00578738	0.0262739	0.00213943	0.0310495	0.00292024	0.0028855	0.00148616	1.51251e-05	1.01817e-18	1.91053e-05	2.5283e-05	1.3113e-05	7.4427e-07	0	0.000108349	1.18026e-07	-9.41811e-07	0.000580289	-0.128297	-0.0350781	0.0967449	-0.0715399	-0.0444932	0.0260691	-0.1	-0.425639	0
2179	5.07025	0	0.130187	4.94007	5.33923	5.29799	5.18608	4.39515	0.39108	0.399853	0.111908	0.0412409	0.0222338	0.00406683	0.000156188	0.00342101	0.00471534	0.00148463	0.00364914	0.0364062	0.00368204	3.19271e-05	0.00578676	0.0262739	0.00213929	0.0310486	0.00292014	0.00288547	0.00148615	1.51216e-05	8.23746e-19	1.91117e-05	2.52797e-05	1.31125e-05	7.44654e-07	0	0.000108348	1.18507e-07	-9.3703e-07	0.000580289	-0.128167	-0.0349627	0.0966805	-0.0715762	-0.0445257	0.0262169	-0.1	-0.425112	0
2180	5.01106	0	0.0860781	4.92499	5.32352	5.28228	5.17014	4.38072	0.39119	0.398235	0.112139	0.0412403	0.0222338	0.00406683	0.000156188	0.00342087	0.00471508	0.00148454	0.00364887	0.0366387	0.00368175	3.19275e-05	0.00578642	0.0262739	0.00213923	0.0310482	0.00292009	0.00288546	0.00148615	1.51197e-05	6.66472e-19	1.91178e-05	2.52773e-05	1.31121e-05	7.45045e-07	0	0.000108346	1.18966e-07	-9.06959e-07	0.000580289	-0.128038	-0.0348472	0.0966158	-0.0716124	-0.0445581	0.026364	-0.1	-0.424584	0
2181	4.96943	0	0.0592681	4.91017	5.30806	5.26682	5.15445	4.36649	0.391324	0.39663	0.112372	0.0412405	0.0222338	0.00406683	0.000156188	0.00342073	0.00471515	0.00148449	0.00364865	0.0368722	0.00368149	3.19283e-05	0.00578635	0.0262739	0.00213925	0.0310483	0.0029201	0.00288546	0.00148615	1.51194e-05	5.39248e-19	1.91237e-05	2.52757e-05	1.31119e-05	7.45448e-07	0	0.000108342	1.19406e-07	-8.68954e-07	0.000580289	-0.127911	-0.0347318	0.0965503	-0.0716485	-0.0445907	0.0265095	-0.1	-0.424055	0
2182	4.93864	0	0.0431769	4.89547	5.29271	5.25147	5.13887	4.35236	0.39147	0.395039	0.112605	0.0412412	0.0222338	0.00406683	0.000156189	0.0034206	0.00471537	0.00148445	0.00364847	0.0371063	0.00368125	3.19293e-05	0.00578643	0.0262739	0.00213933	0.0310488	0.00292015	0.00288547	0.00148615	1.51204e-05	4.36318e-19	1.91294e-05	2.52746e-05	1.31118e-05	7.45852e-07	0	0.000108342	1.19826e-07	-8.40601e-07	0.000580289	-0.127785	-0.0346163	0.0964846	-0.0716844	-0.0446233	0.0266542	-0.1	-0.423525	0
2183	4.91308	0	0.0322656	4.88081	5.27741	5.23617	5.12333	4.33824	0.391624	0.393461	0.11284	0.0412421	0.0222337	0.00406683	0.000156189	0.00342047	0.00471564	0.00148443	0.0036483	0.0373407	0.00368103	3.19303e-05	0.00578657	0.0262739	0.00213944	0.0310495	0.00292023	0.00288549	0.00148615	1.51222e-05	3.53037e-19	1.91345e-05	2.5277e-05	1.31117e-05	7.46252e-07	0	0.000108344	1.20226e-07	-8.21458e-07	0.000580289	-0.127659	-0.0345009	0.0964189	-0.0717204	-0.0446559	0.026799	-0.1	-0.422995	0
2184	4.89183	0	0.025655	4.86617	5.26212	5.22087	5.1078	4.32412	0.391781	0.391897	0.113074	0.0412433	0.0222337	0.00406683	0.000156189	0.00342033	0.00471592	0.00148441	0.00364815	0.0375755	0.00368081	3.19312e-05	0.00578674	0.0262739	0.00213957	0.0310504	0.00292033	0.00288552	0.00148615	1.51248e-05	2.85651e-19	1.91392e-05	2.52824e-05	1.31117e-05	7.46646e-07	0	0.000108349	1.20607e-07	-8.06723e-07	0.000580289	-0.127533	-0.0343854	0.0963531	-0.0717564	-0.0446885	0.0269437	-0.1	-0.422465	0
2185	4.92407	0	0.0725288	4.85154	5.24683	5.20559	5.09228	4.30999	0.39194	0.390346	0.113309	0.0412447	0.0222337	0.00406683	0.000156189	0.0034202	0.00471618	0.0014844	0.00364801	0.0378103	0.0036806	3.1932e-05	0.00578692	0.0262739	0.00213972	0.0310514	0.00292044	0.00288555	0.00148616	1.51281e-05	2.31126e-19	1.91435e-05	2.52872e-05	1.31116e-05	7.47033e-07	0	0.000108356	1.2097e-07	-7.95314e-07	0.000580289	-0.127407	-0.03427	0.0962878	-0.0717924	-0.0447211	0.0270891	-0.1	-0.421934	0
2186	4.98301	0	0.146252	4.83676	5.23141	5.19016	5.07662	4.29574	0.392074	0.388808	0.113542	0.0412453	0.0222337	0.00406683	0.00015619	0.00342006	0.00471606	0.00148436	0.00364783	0.0380442	0.00368037	3.19324e-05	0.00578681	0.0262739	0.0021398	0.0310519	0.00292049	0.00288557	0.00148616	1.51309e-05	1.86994e-19	1.91466e-05	2.52903e-05	1.31111e-05	7.47384e-07	0	0.000108362	1.21311e-07	-8.22869e-07	0.000580289	-0.127278	-0.0341545	0.0962232	-0.0718286	-0.0447536	0.0272359	-0.1	-0.421403	0
2187	5.00299	0	0.181191	4.8218	5.21582	5.17457	5.0608	4.28135	0.39217	0.387283	0.113772	0.0412447	0.0222337	0.00406682	0.00015619	0.00341992	0.00471537	0.00148426	0.00364757	0.0382765	0.0036801	3.19321e-05	0.00578622	0.0262739	0.00213973	0.0310515	0.00292045	0.00288556	0.00148616	1.513e-05	1.51269e-19	1.91484e-05	2.5291e-05	1.31102e-05	7.47684e-07	0	0.000108365	1.21627e-07	-8.82649e-07	0.000580289	-0.127148	-0.0340391	0.0961589	-0.071865	-0.0447861	0.0273834	-0.1	-0.420871	0
2188	4.99745	0	0.190562	4.80689	5.20028	5.15904	5.04504	4.26702	0.392249	0.385772	0.114001	0.0412434	0.0222337	0.00406682	0.00015619	0.00341977	0.00471448	0.00148412	0.00364727	0.0385079	0.0036798	3.19314e-05	0.00578543	0.0262739	0.00213959	0.0310506	0.00292035	0.00288553	0.00148615	1.51263e-05	1.22358e-19	1.91492e-05	2.52905e-05	1.31089e-05	7.47954e-07	0	0.00010836	1.21924e-07	-9.23963e-07	0.000580289	-0.127018	-0.0339236	0.0960947	-0.0719013	-0.0448186	0.0275308	-0.1	-0.420339	0
2189	4.96634	0	0.174151	4.79218	5.18495	5.14371	5.02948	4.25288	0.392325	0.384273	0.11423	0.041242	0.0222337	0.00406682	0.00015619	0.00341962	0.00471361	0.00148398	0.00364695	0.038739	0.0036795	3.19304e-05	0.00578462	0.0262739	0.00213942	0.0310495	0.00292023	0.00288549	0.00148615	1.5123e-05	9.89684e-20	1.91496e-05	2.52893e-05	1.31076e-05	7.4821e-07	0	0.00010835	1.22204e-07	-9.41716e-07	0.000580289	-0.126888	-0.0338082	0.0960305	-0.0719376	-0.0448511	0.0276783	-0.1	-0.419807	0
2190	4.90794	0	0.130187	4.77776	5.1699	5.12866	5.0142	4.239	0.392412	0.382786	0.114459	0.0412408	0.0222337	0.00406682	0.000156191	0.00341947	0.00471293	0.00148386	0.00364666	0.0389706	0.0036792	3.19294e-05	0.00578394	0.0262739	0.00213928	0.0310485	0.00292013	0.00288546	0.00148614	1.51207e-05	8.00489e-20	1.91499e-05	2.52882e-05	1.31063e-05	7.48469e-07	0	0.000108342	1.22473e-07	-9.37051e-07	0.000580289	-0.126758	-0.0336928	0.0959661	-0.0719738	-0.0448836	0.0278256	-0.1	-0.419274	0
2191	4.84972	0	0.0860781	4.76364	5.15515	5.11391	4.99922	4.22538	0.392523	0.381313	0.11469	0.0412403	0.0222337	0.00406682	0.000156191	0.00341933	0.00471262	0.00148376	0.00364641	0.0392031	0.00367893	3.19286e-05	0.00578353	0.0262739	0.00213922	0.0310481	0.00292008	0.00288545	0.00148614	1.51199e-05	6.47481e-20	1.91504e-05	2.52876e-05	1.31052e-05	7.48744e-07	0	0.000108338	1.22732e-07	-9.07017e-07	0.000580289	-0.126629	-0.0335773	0.0959014	-0.0720098	-0.0449161	0.0279726	-0.1	-0.41874	0
2192	4.80903	0	0.0592681	4.74977	5.14062	5.09938	4.98446	4.21195	0.392656	0.379852	0.114923	0.0412405	0.0222337	0.00406682	0.000156191	0.00341918	0.00471263	0.0014837	0.0036462	0.0394367	0.00367869	3.19281e-05	0.0057834	0.0262739	0.00213924	0.0310483	0.0029201	0.00288546	0.00148614	1.51207e-05	5.23741e-20	1.91513e-05	2.52877e-05	1.31043e-05	7.49038e-07	0	0.000108339	1.22983e-07	-8.69076e-07	0.000580289	-0.1265	-0.0334619	0.0958365	-0.0720456	-0.0449487	0.0281195	-0.1	-0.418206	0
2193	4.77917	0	0.0431769	4.73599	5.12619	5.08495	4.96979	4.19859	0.392803	0.378403	0.115157	0.0412412	0.0222337	0.00406682	0.000156191	0.00341905	0.00471279	0.00148366	0.00364602	0.0396708	0.00367846	3.19276e-05	0.0057834	0.0262739	0.00213932	0.0310487	0.00292015	0.00288547	0.00148615	1.51226e-05	4.23657e-20	1.91522e-05	2.5288e-05	1.31036e-05	7.4934e-07	0	0.000108343	1.23225e-07	-8.4078e-07	0.000580289	-0.126371	-0.0333465	0.0957717	-0.0720815	-0.0449812	0.0282664	-0.1	-0.417671	0
2194	4.75449	0	0.0322656	4.72223	5.11177	5.07053	4.95514	4.18522	0.392956	0.376967	0.115391	0.0412421	0.0222337	0.00406682	0.000156192	0.00341891	0.004713	0.00148362	0.00364587	0.0399052	0.00367825	3.19272e-05	0.00578347	0.0262739	0.00213943	0.0310494	0.00292023	0.00288549	0.00148615	1.51254e-05	3.42699e-20	1.9153e-05	2.52884e-05	1.31029e-05	7.49646e-07	0	0.000108351	1.23457e-07	-8.21658e-07	0.000580289	-0.126242	-0.0332311	0.0957068	-0.0721173	-0.0450138	0.0284132	-0.1	-0.417136	0
2195	4.73412	0	0.025655	4.70846	5.09734	5.0561	4.94048	4.17182	0.393112	0.375543	0.115625	0.0412433	0.0222337	0.00406682	0.000156192	0.00341877	0.00471322	0.0014836	0.00364572	0.0401399	0.00367804	3.19268e-05	0.00578358	0.0262739	0.00213956	0.0310503	0.00292032	0.00288552	0.00148615	1.51289e-05	2.77211e-20	1.91538e-05	2.52886e-05	1.31022e-05	7.49951e-07	0	0.00010836	1.2368e-07	-8.06921e-07	0.000580289	-0.126114	-0.0331156	0.0956418	-0.0721533	-0.0450463	0.0285598	-0.1	-0.4166	0
2196	4.76721	0	0.0725288	4.69468	5.0829	5.04166	4.9258	4.1584	0.39327	0.374131	0.11586	0.0412446	0.0222337	0.00406682	0.000156192	0.00341864	0.00471342	0.00148358	0.00364558	0.0403747	0.00367784	3.19264e-05	0.00578369	0.0262739	0.00213972	0.0310513	0.00292043	0.00288555	0.00148615	1.51307e-05	2.24235e-20	1.91544e-05	2.52887e-05	1.31015e-05	7.50256e-07	0	0.000108365	1.23894e-07	-7.955e-07	0.000580289	-0.125986	-0.0330002	0.0955766	-0.0721895	-0.0450788	0.0287059	-0.1	-0.416064	0
2197	4.82697	0	0.146252	4.68072	5.0683	5.02705	4.91096	4.14483	0.393403	0.372732	0.116093	0.0412452	0.0222337	0.00406682	0.000156192	0.0034185	0.00471324	0.00148353	0.0036454	0.0406084	0.00367761	3.19255e-05	0.00578351	0.0262739	0.00213979	0.0310518	0.00292049	0.00288557	0.00148615	1.51295e-05	1.8137e-20	1.91543e-05	2.52876e-05	1.31006e-05	7.5053e-07	0	0.000108363	1.24095e-07	-8.23022e-07	0.000580289	-0.125859	-0.0328848	0.0955113	-0.0722258	-0.0451113	0.0288518	-0.1	-0.415527	0
2198	4.84776	0	0.181191	4.66657	5.05351	5.01227	4.89594	4.1311	0.393498	0.371344	0.116322	0.0412446	0.0222337	0.00406682	0.000156193	0.00341835	0.0047125	0.00148342	0.00364514	0.0408402	0.00367735	3.1924e-05	0.00578286	0.0262739	0.00213972	0.0310514	0.00292045	0.00288556	0.00148615	1.51273e-05	1.46679e-20	1.9153e-05	2.52846e-05	1.30991e-05	7.50758e-07	0	0.000108358	1.24278e-07	-8.82682e-07	0.000580289	-0.125732	-0.0327693	0.095446	-0.0722621	-0.0451438	0.0289976	-0.1	-0.41499	0
2199	4.843	0	0.190562	4.65244	5.03876	4.99752	4.88097	4.11742	0.393575	0.369968	0.116551	0.0412433	0.0222336	0.00406682	0.000156193	0.0034182	0.00471155	0.00148327	0.00364484	0.0410712	0.00367706	3.1922e-05	0.00578201	0.0262739	0.00213957	0.0310505	0.00292034	0.00288553	0.00148615	1.51248e-05	1.18613e-20	1.9151e-05	2.52808e-05	1.30974e-05	7.50961e-07	0	0.000108352	1.2445e-07	-9.2399e-07	0.000580289	-0.125604	-0.0326539	0.0953807	-0.0722984	-0.0451763	0.0291435	-0.1	-0.414452	0
2200	4.81266	0	0.174151	4.63851	5.0242	4.98296	4.86618	4.10393	0.39365	0.368604	0.116779	0.0412419	0.0222336	0.00406682	0.000156193	0.00341804	0.00471063	0.00148313	0.00364453	0.0413019	0.00367676	3.19199e-05	0.00578114	0.0262739	0.00213941	0.0310494	0.00292022	0.0028855	0.00148615	1.51226e-05	9.59128e-21	1.91489e-05	2.52766e-05	1.30956e-05	7.51155e-07	0	0.000108346	1.24613e-07	-9.41682e-07	0.000580289	-0.125477	-0.0325384	0.0953154	-0.0723347	-0.0452088	0.0292894	-0.1	-0.413914	0
2201	4.75502	0	0.130187	4.62484	5.0099	4.96866	4.85165	4.09067	0.393735	0.367251	0.117007	0.0412407	0.0222336	0.00406682	0.000156193	0.00341789	0.00470991	0.00148299	0.00364423	0.041533	0.00367647	3.19178e-05	0.00578039	0.0262739	0.00213927	0.0310485	0.00292012	0.00288547	0.00148615	1.51213e-05	7.7556e-21	1.91468e-05	2.52762e-05	1.30939e-05	7.51355e-07	0	0.000108343	1.2477e-07	-9.36837e-07	0.000580289	-0.12535	-0.032423	0.0952501	-0.0723708	-0.0452414	0.0294353	-0.1	-0.413375	0
2202	4.69755	0	0.0860781	4.61147	4.99589	4.95465	4.83742	4.07766	0.393844	0.365921	0.117229	0.0412402	0.0222336	0.00406682	0.000156194	0.00341774	0.00470954	0.00148288	0.00364398	0.0417563	0.0036762	3.1916e-05	0.00577992	0.0262739	0.00213922	0.0310481	0.00292008	0.00288545	0.00148615	1.51215e-05	6.27144e-21	1.91452e-05	2.52796e-05	1.30924e-05	7.51576e-07	0	0.000108344	1.24924e-07	-9.06938e-07	0.000580289	-0.125222	-0.0323075	0.0951847	-0.0724068	-0.0452739	0.0295813	-0.1	-0.412836	0
2203	4.65759	0	0.0592681	4.59832	4.9821	4.94086	4.82342	4.06482	0.393976	0.364623	0.117436	0.0412404	0.0222336	0.00406682	0.000156194	0.0034176	0.0047095	0.00148281	0.00364377	0.0419637	0.00367596	3.19145e-05	0.00577972	0.0262739	0.00213924	0.0310482	0.00292009	0.00288546	0.00148615	1.51232e-05	5.0715e-21	1.91441e-05	2.52832e-05	1.30911e-05	7.51819e-07	0	0.000108349	1.25077e-07	-8.69216e-07	0.000580289	-0.125095	-0.0321921	0.0951193	-0.0724428	-0.0453065	0.0297273	-0.1	-0.412296	0
2204	4.62844	0	0.0431769	4.58527	4.96838	4.92714	4.80951	4.05204	0.394121	0.363356	0.117627	0.0412411	0.0222336	0.00406682	0.000156194	0.00341745	0.0047096	0.00148276	0.00364358	0.0421562	0.00367574	3.19133e-05	0.00577966	0.0262739	0.00213931	0.0310487	0.00292015	0.00288547	0.00148615	1.5126e-05	4.10122e-21	1.91432e-05	2.52867e-05	1.309e-05	7.52074e-07	0	0.000108351	1.25226e-07	-8.40989e-07	0.000580289	-0.124967	-0.0320766	0.0950539	-0.0724789	-0.045339	0.0298733	-0.1	-0.411755	0
2205	4.60448	0	0.0322656	4.57221	4.95467	4.91343	4.79562	4.03923	0.394271	0.362123	0.117805	0.041242	0.0222336	0.00406682	0.000156194	0.00341731	0.00470975	0.00148271	0.00364342	0.0423345	0.00367552	3.19121e-05	0.00577967	0.0262739	0.00213942	0.0310494	0.00292022	0.0028855	0.00148615	1.51272e-05	3.31658e-21	1.91424e-05	2.52898e-05	1.3089e-05	7.52334e-07	0	0.00010835	1.2537e-07	-8.21876e-07	0.000580289	-0.12484	-0.0319612	0.0949885	-0.0725149	-0.0453715	0.0300193	-0.1	-0.411215	0
2206	4.5848	0	0.025655	4.55915	4.94094	4.89969	4.78172	4.02638	0.394425	0.360921	0.11797	0.0412432	0.0222336	0.00406682	0.000156194	0.00341717	0.00470991	0.00148268	0.00364326	0.0424996	0.00367532	3.19111e-05	0.0057797	0.0262739	0.00213955	0.0310503	0.00292032	0.00288553	0.00148615	1.51268e-05	2.68204e-21	1.91416e-05	2.52925e-05	1.3088e-05	7.52599e-07	0	0.000108352	1.25511e-07	-8.07124e-07	0.000580289	-0.124712	-0.0318457	0.0949232	-0.0725509	-0.0454041	0.0301653	-0.1	-0.410673	0
2207	4.61858	0	0.0725288	4.54606	4.92718	4.88594	4.76782	4.01348	0.394581	0.359751	0.118123	0.0412445	0.0222336	0.00406682	0.000156195	0.00341703	0.00471006	0.00148265	0.00364312	0.0426525	0.00367511	3.19102e-05	0.00577975	0.0262739	0.0021397	0.0310513	0.00292043	0.00288555	0.00148615	1.51272e-05	2.16889e-21	1.91408e-05	2.52948e-05	1.3087e-05	7.52864e-07	0	0.000108355	1.25647e-07	-7.95685e-07	0.000580289	-0.124585	-0.0317303	0.0948578	-0.0725869	-0.0454366	0.0303113	-0.1	-0.410131	0
2208	4.67904	0	0.146252	4.53279	4.91326	4.87202	4.75376	4.00043	0.394712	0.358612	0.118262	0.0412451	0.0222336	0.00406682	0.000156195	0.00341689	0.00470983	0.00148258	0.00364293	0.0427926	0.00367489	3.19089e-05	0.0057795	0.0262739	0.00213977	0.0310518	0.00292049	0.00288557	0.00148615	1.51272e-05	1.75379e-21	1.91394e-05	2.52957e-05	1.30857e-05	7.53102e-07	0	0.000108358	1.25773e-07	-8.23183e-07	0.000580289	-0.124457	-0.0316148	0.0947924	-0.072623	-0.0454692	0.0304573	-0.1	-0.409589	0
2209	4.70051	0	0.181191	4.51932	4.89915	4.85791	4.73952	3.98721	0.394804	0.357505	0.118387	0.0412445	0.0222336	0.00406681	0.000156195	0.00341674	0.00470904	0.00148246	0.00364266	0.0429202	0.00367462	3.19071e-05	0.00577879	0.0262739	0.0021397	0.0310514	0.00292044	0.00288556	0.00148615	1.5126e-05	1.41794e-21	1.91369e-05	2.52944e-05	1.3084e-05	7.53296e-07	0	0.000108357	1.25888e-07	-8.82756e-07	0.000580289	-0.12433	-0.0314994	0.094727	-0.072659	-0.0455017	0.0306032	-0.1	-0.409046	0
2210	4.69644	0	0.190562	4.50588	4.88508	4.84384	4.72534	3.97403	0.394879	0.356429	0.118501	0.0412433	0.0222336	0.00406681	0.000156195	0.00341658	0.00470805	0.0014823	0.00364234	0.043037	0.00367433	3.19049e-05	0.00577788	0.0262739	0.00213956	0.0310504	0.00292034	0.00288553	0.00148615	1.51245e-05	1.1463e-21	1.91339e-05	2.52921e-05	1.3082e-05	7.53467e-07	0	0.000108355	1.25994e-07	-9.23958e-07	0.000580289	-0.124202	-0.0313839	0.0946617	-0.0726951	-0.0455343	0.0307493	-0.1	-0.408502	0
2211	4.66678	0	0.174151	4.49263	4.87121	4.82996	4.71136	3.96102	0.394952	0.355383	0.118605	0.0412419	0.0222336	0.00406681	0.000156196	0.00341642	0.00470709	0.00148214	0.00364202	0.0431443	0.00367403	3.19027e-05	0.00577695	0.0262739	0.0021394	0.0310494	0.00292022	0.0028855	0.00148615	1.51232e-05	9.26659e-22	1.91307e-05	2.52893e-05	1.308e-05	7.53631e-07	0	0.000108353	1.26095e-07	-9.41619e-07	0.000580289	-0.124075	-0.0312685	0.0945966	-0.0727312	-0.0455668	0.0308953	-0.1	-0.407958	0
2212	4.60983	0	0.130187	4.47965	4.85759	4.81635	4.69765	3.94824	0.395035	0.354369	0.118702	0.0412407	0.0222336	0.00406681	0.000156196	0.00341626	0.00470633	0.00148199	0.00364171	0.0432436	0.00367373	3.19006e-05	0.00577615	0.0262739	0.00213927	0.0310485	0.00292012	0.00288547	0.00148615	1.51229e-05	7.49092e-22	1.91277e-05	2.52867e-05	1.3078e-05	7.53803e-07	0	0.000108348	1.26193e-07	-9.36803e-07	0.000580289	-0.123947	-0.031153	0.0945317	-0.0727673	-0.0455994	0.0310414	-0.1	-0.407414	0
2213	4.55304	0	0.0860781	4.46696	4.84426	4.80302	4.68423	3.9357	0.395142	0.353385	0.118793	0.0412402	0.0222336	0.00406681	0.000156196	0.00341611	0.00470592	0.00148187	0.00364144	0.043336	0.00367346	3.18986e-05	0.00577563	0.0262739	0.00213921	0.031048	0.00292008	0.00288546	0.00148615	1.51239e-05	6.05569e-22	1.91253e-05	2.52848e-05	1.30763e-05	7.53998e-07	0	0.000108341	1.26293e-07	-9.06829e-07	0.000580289	-0.123819	-0.0310376	0.0944667	-0.0728034	-0.0456319	0.0311875	-0.1	-0.406869	0
2214	4.51377	0	0.0592681	4.4545	4.83114	4.7899	4.67103	3.92332	0.395271	0.35243	0.118878	0.0412403	0.0222335	0.00406681	0.000156196	0.00341596	0.00470582	0.00148179	0.00364121	0.0434223	0.00367322	3.1897e-05	0.00577537	0.0262739	0.00213924	0.0310482	0.00292009	0.00288545	0.00148615	1.5124e-05	4.89562e-22	1.91234e-05	2.52837e-05	1.30748e-05	7.54217e-07	0	0.000108338	1.26393e-07	-8.69042e-07	0.000580289	-0.123691	-0.0309221	0.0944017	-0.0728396	-0.0456645	0.0313335	-0.1	-0.406324	0
2215	4.4853	0	0.0431769	4.44212	4.8181	4.77686	4.6579	3.91098	0.395413	0.351506	0.118957	0.041241	0.0222335	0.00406681	0.000156197	0.00341581	0.00470588	0.00148172	0.00364101	0.0435024	0.00367298	3.18954e-05	0.00577525	0.0262739	0.00213931	0.0310486	0.00292015	0.00288547	0.00148615	1.51228e-05	3.95785e-22	1.91217e-05	2.52829e-05	1.30735e-05	7.54448e-07	0	0.000108338	1.26493e-07	-8.40896e-07	0.000580289	-0.123563	-0.0308067	0.0943367	-0.0728757	-0.045697	0.0314796	-0.1	-0.405778	0
2216	4.46201	0	0.0322656	4.42974	4.80506	4.76381	4.64478	3.89861	0.395561	0.350611	0.119031	0.0412419	0.0222335	0.00406681	0.000156197	0.00341566	0.00470599	0.00148166	0.00364083	0.0435767	0.00367276	3.18939e-05	0.00577519	0.0262739	0.00213941	0.0310493	0.00292023	0.00288549	0.00148615	1.51226e-05	3.19972e-22	1.91203e-05	2.52822e-05	1.30722e-05	7.54688e-07	0	0.000108342	1.26592e-07	-8.21868e-07	0.000580289	-0.123435	-0.0306912	0.0942717	-0.0729118	-0.0457296	0.0316257	-0.1	-0.405231	0
2217	4.443	0	0.025655	4.41734	4.79199	4.75074	4.63164	3.88618	0.395712	0.349746	0.119099	0.0412431	0.0222335	0.00406681	0.000156197	0.00341551	0.0047061	0.00148161	0.00364065	0.0436454	0.00367255	3.18924e-05	0.00577517	0.0262739	0.00213954	0.0310502	0.00292032	0.00288552	0.00148615	1.51233e-05	2.58679e-22	1.91189e-05	2.52815e-05	1.3071e-05	7.54931e-07	0	0.000108347	1.26689e-07	-8.07195e-07	0.000580289	-0.123307	-0.0305758	0.0942068	-0.072948	-0.0457621	0.0317718	-0.1	-0.404684	0
2218	4.47744	0	0.0725288	4.40491	4.77889	4.73764	4.61848	3.8737	0.395865	0.34891	0.119162	0.0412444	0.0222335	0.00406681	0.000156197	0.00341537	0.0047062	0.00148157	0.00364049	0.0437089	0.00367234	3.1891e-05	0.00577516	0.0262739	0.00213969	0.0310512	0.00292043	0.00288555	0.00148616	1.51247e-05	2.09126e-22	1.91175e-05	2.52807e-05	1.30699e-05	7.55178e-07	0	0.000108355	1.26783e-07	-7.95837e-07	0.000580289	-0.12318	-0.0304603	0.0941418	-0.0729841	-0.0457947	0.0319178	-0.1	-0.404136	0
2219	4.53855	0	0.146252	4.3923	4.76562	4.72437	4.60515	3.86106	0.395993	0.348103	0.119218	0.041245	0.0222335	0.00406681	0.000156198	0.00341522	0.00470592	0.00148149	0.00364028	0.0437662	0.0036721	3.18891e-05	0.00577485	0.0262739	0.00213976	0.0310517	0.00292049	0.00288556	0.00148616	1.51257e-05	1.69052e-22	1.91155e-05	2.52822e-05	1.30684e-05	7.55398e-07	0	0.000108362	1.26871e-07	-8.23262e-07	0.000580289	-0.123052	-0.0303449	0.0940768	-0.0730203	-0.0458272	0.0320639	-0.1	-0.403588	0
2220	4.56067	0	0.181191	4.37948	4.75215	4.71091	4.59164	3.84823	0.396083	0.347325	0.119267	0.0412444	0.0222335	0.00406681	0.000156198	0.00341506	0.00470509	0.00148135	0.00363999	0.043817	0.00367182	3.18865e-05	0.00577409	0.0262739	0.00213969	0.0310513	0.00292044	0.00288555	0.00148616	1.51254e-05	1.36639e-22	1.91125e-05	2.52849e-05	1.30665e-05	7.55575e-07	0	0.000108365	1.26949e-07	-8.8283e-07	0.000580289	-0.122924	-0.0302294	0.0940119	-0.0730564	-0.0458598	0.0322101	-0.1	-0.40304	0
2221	4.55725	0	0.190562	4.36669	4.73872	4.69748	4.57817	3.83544	0.396155	0.346575	0.119309	0.0412432	0.0222335	0.00406681	0.000156198	0.0034149	0.00470406	0.00148119	0.00363965	0.0438626	0.00367152	3.18837e-05	0.00577312	0.0262739	0.00213954	0.0310504	0.00292034	0.00288553	0.00148615	1.51248e-05	1.1043e-22	1.91091e-05	2.5286e-05	1.30644e-05	7.55729e-07	0	0.00010836	1.2702e-07	-9.24036e-07	0.000580289	-0.122795	-0.030114	0.093947	-0.0730925	-0.0458923	0.0323567	-0.1	-0.402491	0
2222	4.52824	0	0.174151	4.35409	4.72549	4.68425	4.5649	3.82282	0.396225	0.345853	0.119348	0.0412418	0.0222335	0.00406681	0.000156198	0.00341473	0.00470306	0.00148101	0.00363931	0.043904	0.00367121	3.18806e-05	0.00577214	0.0262739	0.00213938	0.0310494	0.00292022	0.0028855	0.00148615	1.51243e-05	8.92447e-23	1.91055e-05	2.52864e-05	1.30622e-05	7.55879e-07	0	0.00010835	1.27088e-07	-9.41619e-07	0.000580289	-0.122666	-0.0299986	0.0938822	-0.0731287	-0.0459248	0.0325034	-0.1	-0.401941	0
2223	4.47193	0	0.130187	4.34175	4.71251	4.67127	4.55188	3.81042	0.396305	0.345159	0.119383	0.0412406	0.0222335	0.00406681	0.000156199	0.00341457	0.00470224	0.00148085	0.00363897	0.0439421	0.0036709	3.18778e-05	0.00577128	0.0262739	0.00213924	0.0310485	0.00292013	0.00288547	0.00148615	1.51247e-05	7.21224e-23	1.91021e-05	2.52865e-05	1.30601e-05	7.56036e-07	0	0.000108343	1.27156e-07	-9.36895e-07	0.000580289	-0.122538	-0.0298831	0.0938174	-0.0731649	-0.0459574	0.0326501	-0.1	-0.401391	0
2224	4.41578	0	0.0860781	4.3297	4.69981	4.65857	4.53916	3.79825	0.396409	0.344493	0.119417	0.0412401	0.0222335	0.00406681	0.000156199	0.00341441	0.00470179	0.00148071	0.00363868	0.0439779	0.00367062	3.18752e-05	0.0057707	0.0262739	0.00213917	0.031048	0.00292008	0.00288545	0.00148614	1.5124e-05	5.82868e-23	1.90993e-05	2.5287e-05	1.30582e-05	7.56217e-07	0	0.000108339	1.27227e-07	-9.06919e-07	0.000580289	-0.122409	-0.0297677	0.0937526	-0.073201	-0.0459899	0.0327969	-0.1	-0.40084	0
2225	4.37714	0	0.0592681	4.31787	4.68732	4.64608	4.52663	3.78624	0.396535	0.343854	0.11945	0.0412403	0.0222335	0.00406681	0.000156199	0.00341426	0.00470165	0.00148061	0.00363843	0.0440117	0.00367036	3.1873e-05	0.00577038	0.0262739	0.00213919	0.0310482	0.00292009	0.00288546	0.00148614	1.51225e-05	4.71071e-23	1.9097e-05	2.5288e-05	1.30566e-05	7.56423e-07	0	0.00010834	1.273e-07	-8.69133e-07	0.000580289	-0.12228	-0.0296523	0.0936878	-0.0732372	-0.0460224	0.0329436	-0.1	-0.400289	0
2226	4.3493	0	0.0431769	4.30612	4.6749	4.63366	4.51418	3.77426	0.396674	0.343243	0.11948	0.0412409	0.0222335	0.00406681	0.000156199	0.0034141	0.00470166	0.00148053	0.00363821	0.0440433	0.00367012	3.18711e-05	0.00577021	0.0262739	0.00213927	0.0310486	0.00292015	0.00288548	0.00148615	1.51221e-05	3.80722e-23	1.9095e-05	2.52892e-05	1.30551e-05	7.56642e-07	0	0.000108345	1.27374e-07	-8.41125e-07	0.000580289	-0.122152	-0.0295368	0.093623	-0.0732733	-0.0460549	0.0330903	-0.1	-0.399737	0
2227	4.32662	0	0.0322656	4.29436	4.66247	4.62123	4.50172	3.76224	0.396818	0.342659	0.119509	0.0412418	0.0222335	0.00406681	0.000156199	0.00341395	0.00470172	0.00148046	0.003638	0.0440725	0.00366988	3.18692e-05	0.00577009	0.0262739	0.00213938	0.0310493	0.00292023	0.0028855	0.00148615	1.51227e-05	3.07702e-23	1.90933e-05	2.52901e-05	1.30537e-05	7.5687e-07	0	0.000108352	1.27448e-07	-8.22083e-07	0.000580289	-0.122023	-0.0294214	0.0935582	-0.0733095	-0.0460874	0.033237	-0.1	-0.399185	0
2228	4.30822	0	0.025655	4.28257	4.65	4.60876	4.48923	3.75016	0.396966	0.342102	0.119535	0.041243	0.0222334	0.00406681	0.0001562	0.0034138	0.00470179	0.0014804	0.0036378	0.0440994	0.00366965	3.18675e-05	0.00577002	0.0262739	0.00213951	0.0310502	0.00292032	0.00288553	0.00148616	1.51242e-05	2.48686e-23	1.90916e-05	2.52909e-05	1.30524e-05	7.57102e-07	0	0.000108361	1.27521e-07	-8.07359e-07	0.000580289	-0.121894	-0.029306	0.0934934	-0.0733456	-0.04612	0.0333838	-0.1	-0.398632	0
2229	4.34327	0	0.0725288	4.27074	4.6375	4.59626	4.4767	3.73801	0.397116	0.341571	0.119559	0.0412443	0.0222334	0.00406681	0.0001562	0.00341365	0.00470184	0.00148034	0.00363761	0.0441242	0.00366943	3.18659e-05	0.00576995	0.0262739	0.00213967	0.0310512	0.00292043	0.00288556	0.00148616	1.51263e-05	2.00986e-23	1.90899e-05	2.52915e-05	1.30511e-05	7.57338e-07	0	0.000108366	1.27594e-07	-7.95944e-07	0.000580289	-0.121766	-0.0291905	0.0934286	-0.0733818	-0.0461525	0.0335305	-0.1	-0.398078	0
2230	4.40498	0	0.146252	4.25873	4.62483	4.58358	4.464	3.72569	0.397241	0.341067	0.119579	0.0412449	0.0222334	0.00406681	0.0001562	0.0034135	0.00470152	0.00148024	0.00363737	0.0441457	0.00366918	3.1864e-05	0.00576959	0.0262739	0.00213975	0.0310517	0.00292049	0.00288557	0.00148616	1.51278e-05	1.62423e-23	1.90877e-05	2.52907e-05	1.30495e-05	7.57548e-07	0	0.000108363	1.27661e-07	-8.23305e-07	0.000580289	-0.121637	-0.0290751	0.0933638	-0.0734179	-0.046185	0.0336772	-0.1	-0.397524	0
2231	4.42769	0	0.181191	4.2465	4.61195	4.57071	4.45111	3.7132	0.397327	0.340589	0.119594	0.0412443	0.0222334	0.00406681	0.0001562	0.00341333	0.00470065	0.00148009	0.00363706	0.0441632	0.00366889	3.18615e-05	0.00576877	0.0262739	0.00213968	0.0310513	0.00292044	0.00288556	0.00148615	1.51282e-05	1.31241e-23	1.90845e-05	2.5288e-05	1.30475e-05	7.57715e-07	0	0.000108358	1.27719e-07	-8.82759e-07	0.000580289	-0.121508	-0.0289596	0.0932989	-0.0734541	-0.0462175	0.033824	-0.1	-0.39697	0
2232	4.42523	0	0.190562	4.23467	4.59948	4.55824	4.43863	3.7011	0.397396	0.340137	0.119606	0.0412431	0.0222334	0.0040668	0.000156201	0.00341317	0.00469958	0.00147991	0.0036367	0.044178	0.00366857	3.18588e-05	0.00576775	0.0262739	0.00213954	0.0310504	0.00292034	0.00288554	0.00148615	1.51281e-05	1.06036e-23	1.90808e-05	2.52844e-05	1.30452e-05	7.57861e-07	0	0.000108351	1.27772e-07	-9.23838e-07	0.000580289	-0.12138	-0.0288442	0.0932341	-0.0734902	-0.04625	0.0339707	-0.1	-0.396415	0
2233	4.3979	0	0.174151	4.22375	4.58792	4.54668	4.42706	3.68989	0.397463	0.33971	0.119615	0.0412417	0.0222334	0.0040668	0.000156201	0.003413	0.00469853	0.00147972	0.00363633	0.0441908	0.00366824	3.18559e-05	0.00576672	0.0262739	0.00213938	0.0310493	0.00292022	0.0028855	0.00148615	1.51282e-05	8.56672e-24	1.9077e-05	2.52804e-05	1.30429e-05	7.58001e-07	0	0.000108344	1.27823e-07	-9.41507e-07	0.000580289	-0.121251	-0.0287287	0.0931693	-0.0735263	-0.0462826	0.0341175	-0.1	-0.395859	0
2234	4.34395	0	0.130187	4.21377	4.57729	4.53605	4.41643	3.67958	0.397539	0.339309	0.119624	0.0412405	0.0222334	0.0040668	0.000156201	0.00341283	0.00469766	0.00147954	0.00363597	0.0442024	0.00366792	3.18532e-05	0.0057658	0.0262739	0.00213924	0.0310484	0.00292012	0.00288547	0.00148614	1.51266e-05	6.921e-24	1.908e-05	2.52767e-05	1.30407e-05	7.58149e-07	0	0.00010834	1.27874e-07	-9.36826e-07	0.000580289	-0.121122	-0.0286133	0.0931045	-0.0735624	-0.0463151	0.0342643	-0.1	-0.395303	0
2235	4.29082	0	0.0860781	4.20474	4.56761	4.52637	4.40674	3.67017	0.397638	0.338933	0.119633	0.04124	0.0222334	0.0040668	0.000156201	0.00341266	0.00469714	0.00147939	0.00363564	0.0442136	0.00366762	3.18507e-05	0.00576514	0.0262739	0.00213919	0.031048	0.00292007	0.00288546	0.00148614	1.5124e-05	5.59156e-24	1.90895e-05	2.52771e-05	1.30387e-05	7.5832e-07	0	0.00010834	1.27928e-07	-9.06963e-07	0.000580289	-0.120993	-0.0284978	0.0930397	-0.0735985	-0.0463476	0.034411	-0.1	-0.394746	0
2236	4.25584	0	0.0592681	4.19657	4.55878	4.51754	4.3979	3.66156	0.397758	0.338583	0.119643	0.0412402	0.0222334	0.0040668	0.000156202	0.0034125	0.00469692	0.00147927	0.00363536	0.0442245	0.00366734	3.18486e-05	0.00576473	0.0262739	0.00213921	0.0310481	0.00292009	0.00288546	0.00148615	1.51229e-05	4.51763e-24	1.90985e-05	2.52813e-05	1.30369e-05	7.58514e-07	0	0.000108344	1.27986e-07	-8.69223e-07	0.000580289	-0.120864	-0.0283824	0.0929748	-0.0736346	-0.0463801	0.0345578	-0.1	-0.394189	0
2237	4.23228	0	0.0431769	4.1891	4.55064	4.5094	4.38974	3.6536	0.397888	0.338257	0.119652	0.0412409	0.0222334	0.0040668	0.000156202	0.00341234	0.00469682	0.00147917	0.0036351	0.0442347	0.00366708	3.18467e-05	0.00576445	0.0262739	0.00213928	0.0310486	0.00292014	0.00288547	0.00148615	1.51229e-05	3.65e-24	1.91067e-05	2.52851e-05	1.30353e-05	7.5872e-07	0	0.000108351	1.28045e-07	-8.41159e-07	0.000580289	-0.120736	-0.0282669	0.09291	-0.0736707	-0.0464127	0.0347046	-0.1	-0.393631	0
2238	4.2145	0	0.0322656	4.18223	4.54309	4.50185	4.38219	3.64621	0.398023	0.337956	0.11966	0.0412418	0.0222334	0.0040668	0.000156202	0.00341218	0.00469675	0.00147908	0.00363485	0.044244	0.00366682	3.18449e-05	0.00576421	0.0262739	0.00213939	0.0310493	0.00292021	0.00288549	0.00148615	1.51238e-05	2.94897e-24	1.91142e-05	2.52884e-05	1.30337e-05	7.58933e-07	0	0.00010836	1.28104e-07	-8.22109e-07	0.000580289	-0.120607	-0.0281515	0.0928452	-0.0737068	-0.0464452	0.0348513	-0.1	-0.393072	0
2239	4.20159	0	0.025655	4.17593	4.53612	4.49488	4.37521	3.63937	0.398159	0.337679	0.119667	0.041243	0.0222334	0.0040668	0.000156202	0.00341202	0.00469667	0.00147899	0.0036346	0.0442523	0.00366656	3.18431e-05	0.00576397	0.0262739	0.00213952	0.0310501	0.00292031	0.00288552	0.00148616	1.51252e-05	2.38255e-24	1.91209e-05	2.52911e-05	1.30322e-05	7.59147e-07	0	0.000108365	1.28163e-07	-8.07485e-07	0.000580289	-0.120478	-0.028036	0.0927804	-0.0737429	-0.0464777	0.0349981	-0.1	-0.392513	0
2240	4.24272	0	0.0725288	4.17019	4.5297	4.48846	4.36879	3.63307	0.398294	0.337426	0.119673	0.0412443	0.0222334	0.0040668	0.000156203	0.00341186	0.00469654	0.00147889	0.00363436	0.0442596	0.0036663	3.18414e-05	0.00576372	0.0262739	0.00213967	0.0310511	0.00292042	0.00288555	0.00148616	1.51272e-05	1.92488e-24	1.91269e-05	2.52931e-05	1.30306e-05	7.59362e-07	0	0.000108365	1.28222e-07	-7.96154e-07	0.000580289	-0.12035	-0.0279206	0.0927154	-0.073779	-0.0465102	0.0351445	-0.1	-0.391953	0
2241	4.31109	0	0.146252	4.16484	4.52369	4.48245	4.36277	3.62717	0.398401	0.337198	0.119676	0.0412449	0.0222333	0.0040668	0.000156203	0.00341169	0.00469601	0.00147876	0.00363406	0.0442647	0.00366602	3.18393e-05	0.00576315	0.0262739	0.00213975	0.0310516	0.00292048	0.00288556	0.00148616	1.51285e-05	1.55499e-24	1.91314e-05	2.52935e-05	1.30288e-05	7.59548e-07	0	0.000108364	1.28274e-07	-8.2341e-07	0.000580289	-0.120223	-0.0278051	0.09265	-0.0738152	-0.0465428	0.0352903	-0.1	-0.391393	0
2242	4.34102	0	0.181191	4.15983	4.51805	4.4768	4.35713	3.62168	0.398456	0.336993	0.119675	0.0412443	0.0222333	0.0040668	0.000156203	0.00341152	0.0046949	0.00147857	0.00363367	0.0442669	0.00366568	3.18366e-05	0.00576209	0.0262739	0.00213968	0.0310512	0.00292043	0.00288555	0.00148615	1.51283e-05	1.25598e-24	1.91343e-05	2.52917e-05	1.30264e-05	7.59688e-07	0	0.000108358	1.28317e-07	-8.82764e-07	0.000580289	-0.120096	-0.0276897	0.0925844	-0.0738513	-0.0465753	0.0354357	-0.1	-0.390832	0
2243	4.34595	0	0.190562	4.15539	4.51299	4.47174	4.35207	3.61679	0.39847	0.336811	0.119672	0.041243	0.0222333	0.0040668	0.000156203	0.00341134	0.00469357	0.00147835	0.00363324	0.0442671	0.00366531	3.18336e-05	0.00576081	0.0262739	0.00213954	0.0310503	0.00292033	0.00288552	0.00148615	1.51275e-05	1.01437e-24	1.91361e-05	2.52887e-05	1.30238e-05	7.59802e-07	0	0.000108351	1.28355e-07	-9.23832e-07	0.000580289	-0.11997	-0.0275742	0.0925189	-0.0738874	-0.0466079	0.035581	-0.1	-0.390271	0
2244	4.32582	0	0.174151	4.15167	4.50866	4.46741	4.34775	3.61263	0.39846	0.336653	0.119667	0.0412416	0.0222333	0.0040668	0.000156204	0.00341115	0.00469223	0.00147811	0.00363278	0.0442662	0.00366494	3.18304e-05	0.00575947	0.0262739	0.00213937	0.0310493	0.00292021	0.00288549	0.00148614	1.51267e-05	8.19181e-25	1.91372e-05	2.5285e-05	1.30211e-05	7.59907e-07	0	0.000108343	1.28391e-07	-9.41378e-07	0.000580289	-0.119843	-0.0274588	0.0924533	-0.0739235	-0.0466404	0.0357264	-0.1	-0.389709	0
2245	4.27892	0	0.130187	4.14874	4.50512	4.46388	4.34422	3.60926	0.398441	0.336519	0.119662	0.0412404	0.0222333	0.0040668	0.000156204	0.00341097	0.00469105	0.00147787	0.00363233	0.0442649	0.00366456	3.18273e-05	0.00575823	0.0262739	0.00213924	0.0310483	0.00292011	0.00288546	0.00148614	1.51264e-05	6.61531e-25	1.91379e-05	2.52812e-05	1.30184e-05	7.60016e-07	0	0.000108337	1.28426e-07	-9.36666e-07	0.000580289	-0.119716	-0.0273434	0.0923878	-0.0739597	-0.0466729	0.0358718	-0.1	-0.389146	0
2246	4.2327	0	0.0860781	4.14662	4.50239	4.46115	4.34149	3.60666	0.398428	0.336407	0.119658	0.0412399	0.0222333	0.0040668	0.000156204	0.00341078	0.00469019	0.00147766	0.0036319	0.0442638	0.00366419	3.18245e-05	0.00575723	0.0262739	0.00213918	0.0310479	0.00292007	0.00288545	0.00148614	1.51271e-05	5.34223e-25	1.91386e-05	2.52781e-05	1.30159e-05	7.60144e-07	0	0.000108335	1.28465e-07	-9.06876e-07	0.000580289	-0.11959	-0.0272279	0.0923222	-0.0739958	-0.0467055	0.0360172	-0.1	-0.388583	0
2247	4.20449	0	0.0592681	4.14523	4.50039	4.45915	4.33949	3.60475	0.39842	0.336317	0.119654	0.0412401	0.0222333	0.0040668	0.000156204	0.0034106	0.00468962	0.00147748	0.00363151	0.044263	0.00366384	3.18219e-05	0.00575645	0.0262739	0.00213921	0.0310481	0.00292009	0.00288546	0.00148614	1.5129e-05	4.31422e-25	1.91394e-05	2.52788e-05	1.30137e-05	7.60292e-07	0	0.000108335	1.28506e-07	-8.69156e-07	0.000580289	-0.119463	-0.0271125	0.0922567	-0.0740319	-0.046738	0.0361626	-0.1	-0.38802	0
2248	4.18759	0	0.0431769	4.14442	4.49897	4.45773	4.33807	3.60341	0.39841	0.336251	0.119651	0.0412408	0.0222333	0.0040668	0.000156204	0.00341042	0.00468916	0.0014773	0.00363113	0.0442621	0.0036635	3.18194e-05	0.00575578	0.0262739	0.00213929	0.0310485	0.00292014	0.00288547	0.00148614	1.51316e-05	3.484e-25	1.914e-05	2.52827e-05	1.30115e-05	7.60449e-07	0	0.000108338	1.28549e-07	-8.41143e-07	0.000580289	-0.119337	-0.026997	0.0921909	-0.0740678	-0.0467705	0.0363075	-0.1	-0.387455	0
2249	4.21472	0	0.0706117	4.14411	4.49805	4.4568	4.33716	3.60256	0.398393	0.336207	0.119648	0.0412417	0.0222333	0.0040668	0.000156205	0.00341024	0.00468871	0.00147713	0.00363075	0.0442608	0.00366316	3.18171e-05	0.00575513	0.0262739	0.0021394	0.0310492	0.00292022	0.00288549	0.00148614	1.51345e-05	2.81348e-25	1.91404e-05	2.52858e-05	1.30093e-05	7.60608e-07	0	0.000108343	1.28592e-07	-8.22174e-07	0.000580289	-0.119209	-0.0268815	0.0921259	-0.0741037	-0.0468029	0.0364532	-0.1	-0.38689	0
2250	4.24783	0	0.103756	4.14407	4.49771	4.45646	4.33682	3.60224	0.398382	0.33619	0.119646	0.0412423	0.0222333	0.0040668	0.000156205	0.00341015	0.00468848	0.00147705	0.00363057	0.0442601	0.00366299	3.18159e-05	0.0057548	0.0262739	0.00213946	0.0310496	0.00292026	0.0028855	0.00148614	1.51361e-05	2.51389e-25	1.91405e-05	2.52871e-05	1.30082e-05	7.60688e-07	0	0.000108345	1.28613e-07	-8.14496e-07	0.000580289	-0.119144	-0.0268238	0.0920939	-0.0741218	-0.0468191	0.0365267	-0.1	-0.386607	0
2251	4.24783	0	0.103756	4.14407	4.49771	4.45646	4.33682	3.60224	0.398382	0.33619	0.119646	0.0412423	0.0222333	0.0040668	0.000156205	0.00341015	0.00468848	0.00147705	0.00363057	0.0442601	0.00366299	3.18159e-05	0.0057548	0.0262739	0.00213946	0.0310496	0.00292026	0.0028855	0.00148614	1.51361e-05	2.51389e-25	1.91405e-05	2.52871e-05	1.30082e-05	7.60688e-07	0	0.000108345	1.28613e-07	-8.14496e-07	0.000580289	-0.119144	-0.0268238	0.0920939	-0.0741218	-0.0468191	0.0365267	-0.1	-0.386607	0
2252	4.24783	0	0.103756	4.14407	4.49771	4.45646	4.33682	3.60224	0.398382	0.33619	0.119646	0.0412423	0.0222333	0.0040668	0.000156205	0.00341015	0.00468848	0.00147705	0.00363057	0.0442601	0.00366299	3.18159e-05	0.0057548	0.0262739	0.00213946	0.0310496	0.00292026	0.0028855	0.00148614	1.51361e-05	2.51389e-25	1.91405e-05	2.52871e-05	1.30082e-05	7.60688e-07	0	0.000108345	1.28613e-07	-8.14496e-07	0.000580289	-0.119144	-0.0268238	0.0920939	-0.0741218	-0.0468191	0.0365267	-0.1	-0.386607	0
2253	4.24783	0	0.103756	4.14407	4.49771	4.45646	4.33682	3.60224	0.398382	0.33619	0.119646	0.0412423	0.0222333	0.0040668	0.000156205	0.00341015	0.00468848	0.00147705	0.00363057	0.0442601	0.00366299	3.18159e-05	0.0057548	0.0262739	0.00213946	0.0310496	0.00292026	0.0028855	0.00148614	1.51361e-05	2.51389e-25	1.91405e-05	2.52871e-05	1.30082e-05	7.60688e-07	0	0.000108345	1.28613e-07	-8.14496e-07	0.000580289	-0.119144	-0.0268238	0.0920939	-0.0741218	-0.0468191	0.0365267	-0.1	-0.386607	0
2254	4.24783	0	0.103756	4.14407	4.49771	4.45646	4.33682	3.60224	0.398382	0.33619	0.119646	0.0412423	0.0222333	0.0040668	0.000156205	0.00341015	0.00468848	0.00147705	0.00363057	0.0442601	0.00366299	3.18159e-05	0.0057548	0.0262739	0.00213946	0.0310496	0.00292026	0.0028855	0.00148614	1.51361e-05	2.51389e-25	1.91405e-05	2.52871e-05	1.30082e-05	7.60688e-07	0	0.000108345	1.28613e-07	-8.14496e-07	0.000580289	-0.119144	-0.0268238	0.0920939	-0.0741218	-0.0468191	0.0365267	-0.1	-0.386607	0
2255	4.24783	0	0.103756	4.14407	4.49771	4.45646	4.33682	3.60224	0.398382	0.33619	0.119646	0.0412423	0.0222333	0.0040668	0.000156205	0.00341015	0.00468848	0.00147705	0.00363057	0.0442601	0.00366299	3.18159e-05	0.0057548	0.0262739	0.00213946	0.0310496	0.00292026	0.0028855	0.00148614	1.51361e-05	2.51389e-25	1.91405e-05	2.52871e-05	1.30082e-05	7.60688e-07	0	0.000108345	1.28613e-07	-8.14496e-07	0.000580289	-0.119144	-0.0268238	0.0920939	-0.0741218	-0.0468191	0.0365267	-0.1	-0.386607	0
2256	4.24783	0	0.103756	4.14407	4.49771	4.45646	4.33682	3.60224	0.398382	0.33619	0.119646	0.0412423	0.0222333	0.0040668	0.000156205	0.00341015	0.00468848	0.00147705	0.00363057	0.0442601	0.00366299	3.18159e-05	0.0057548	0.0262739	0.00213946	0.0310496	0.00292026	0.0028855	0.00148614	1.51361e-05	2.51389e-25	1.91405e-05	2.52871e-05	1.30082e-05	7.60688e-07	0	0.000108345	1.28613e-07	-8.14496e-07	0.000580289	-0.119144	-0.0268238	0.0920939	-0.0741218	-0.0468191	0.0365267	-0.1	-0.386607	0
2257	4.24783	0	0.103756	4.14407	4.49771	4.45646	4.33682	3.60224	0.398382	0.33619	0.119646	0.0412423	0.0222333	0.0040668	0.000156205	0.00341015	0.00468848	0.00147705	0.00363057	0.0442601	0.00366299	3.18159e-05	0.0057548	0.0262739	0.00213946	0.0310496	0.00292026	0.0028855	0.00148614	1.51361e-05	2.51389e-25	1.91405e-05	2.52871e-05	1.30082e-05	7.60688e-07	0	0.000108345	1.28613e-07	-8.14496e-07	0.000580289	-0.119144	-0.0268238	0.0920939	-0.0741218	-0.0468191	0.0365267	-0.1	-0.386607	0
2258	4.24783	0	0.103756	4.14407	4.49771	4.45646	4.33682	3.60224	0.398382	0.33619	0.119646	0.0412423	0.0222333	0.0040668	0.000156205	0.00341015	0.00468848	0.00147705	0.00363057	0.0442601	0.00366299	3.18159e-05	0.0057548	0.0262739	0.00213946	0.0310496	0.00292026	0.0028855	0.00148614	1.51361e-05	2.51389e-25	1.91405e-05	2.52871e-05	1.30082e-05	7.60688e-07	0	0.000108345	1.28613e-07	-8.14496e-07	0.000580289	-0.119144	-0.0268238	0.0920939	-0.0741218	-0.0468191	0.0365267	-0.1	-0.386607	0
2259	4.24783	0	0.103756	4.14407	4.49771	4.45646	4.33682	3.60224	0.398382	0.33619	0.119646	0.0412423	0.0222333	0.0040668	0.000156205	0.00341015	0.00468848	0.00147705	0.00363057	0.0442601	0.00366299	3.18159e-05	0.0057548	0.0262739	0.00213946	0.0310496	0.00292026	0.0028855	0.00148614	1.51361e-05	2.51389e-25	1.91405e-05	2.52871e-05	1.30082e-05	7.60688e-07	0	0.000108345	1.28613e-07	-8.14496e-07	0.000580289	-0.119144	-0.0268238	0.0920939	-0.0741218	-0.0468191	0.0365267	-0.1	-0.386607	0
2260	4.24783	0	0.103756	4.14407	4.49771	4.45646	4.33682	3.60224	0.398382	0.33619	0.119646	0.0412423	0.0222333	0.0040668	0.000156205	0.00341015	0.00468848	0.00147705	0.00363057	0.0442601	0.00366299	3.18159e-05	0.0057548	0.0262739	0.00213946	0.0310496	0.00292026	0.0028855	0.00148614	1.51361e-05	2.51389e-25	1.91405e-05	2.52871e-05	1.30082e-05	7.60688e-07	0	0.000108345	1.28613e-07	-8.14496e-07	0.000580289	-0.119144	-0.0268238	0.0920939	-0.0741218	-0.0468191	0.0365267	-0.1	-0.386607	0
2261	4.24783	0	0.103756	4.14407	4.49771	4.45646	4.33682	3.60224	0.398382	0.33619	0.119646	0.0412423	0.0222333	0.0040668	0.000156205	0.00341015	0.00468848	0.00147705	0.00363057	0.0442601	0.00366299	3.18159e-05	0.0057548	0.0262739	0.00213946	0.0310496	0.00292026	0.0028855	0.00148614	1.51361e-05	2.51389e-25	1.91405e-05	2.52871e-05	1.30082e-05	7.60688e-07	0	0.000108345	1.28613e-07	-8.14496e-07	0.000580289	-0.119144	-0.0268238	0.0920939	-0.0741218	-0.0468191	0.0365267	-0.1	-0.386607	0
2262	4.24783	0	0.103756	4.14407	4.49771	4.45646	4.33682	3.60224	0.398382	0.33619	0.119646	0.0412423	0.0222333	0.0040668	0.000156205	0.00341015	0.00468848	0.00147705	0.00363057	0.0442601	0.00366299	3.18159e-05	0.0057548	0.0262739	0.00213946	0.0310496	0.00292026	0.0028855	0.00148614	1.51361e-05	2.51389e-25	1.91405e-05	2.52871e-05	1.30082e-05	7.60688e-07	0	0.000108345	1.28613e-07	-8.14496e-07	0.000580289	-0.119144	-0.0268238	0.0920939	-0.0741218	-0.0468191	0.0365267	-0.1	-0.386607	0
2263	4.24783	0	0.103756	4.14407	4.49771	4.45646	4.33682	3.60224	0.398382	0.33619	0.119646	0.0412423	0.0222333	0.0040668	0.000156205	0.00341015	0.00468848	0.00147705	0.00363057	0.0442601	0.00366299	3.18159e-05	0.0057548	0.0262739	0.00213946	0.0310496	0.00292026	0.0028855	0.00148614	1.51361e-05	2.51389e-25	1.91405e-05	2.52871e-05	1.30082e-05	7.60688e-07	0	0.000108345	1.28613e-07	-8.14496e-07	0.000580289	-0.119144	-0.0268238	0.0920939	-0.0741218	-0.0468191	0.0365267	-0.1	-0.386607	0
2264	4.24783	0	0.103756	4.14407	4.49771	4.45646	4.33682	3.60224	0.398382	0.33619	0.119646	0.0412423	0.0222333	0.0040668	0.000156205	0.00341015	0.00468848	0.00147705	0.00363057	0.0442601	0.00366299	3.18159e-05	0.0057548	0.0262739	0.00213946	0.0310496	0.00292026	0.0028855	0.00148614	1.51361e-05	2.51389e-25	1.91405e-05	2.52871e-05	1.30082e-05	7.60688e-07	0	0.000108345	1.28613e-07	-8.14496e-07	0.000580289	-0.119144	-0.0268238	0.0920939	-0.0741218	-0.0468191	0.0365267	-0.1	-0.386607	0
2265	4.24783	0	0.103756	4.14407	4.49771	4.45646	4.33682	3.60224	0.398382	0.33619	0.119646	0.0412423	0.0222333	0.0040668	0.000156205	0.00341015	0.00468848	0.00147705	0.00363057	0.0442601	0.00366299	3.18159e-05	0.0057548	0.0262739	0.00213946	0.0310496	0.00292026	0.0028855	0.00148614	1.51361e-05	2.51389e-25	1.91405e-05	2.52871e-05	1.30082e-05	7.60688e-07	0	0.000108345	1.28613e-07	-8.14496e-07	0.000580289	-0.119144	-0.0268238	0.0920939	-0.0741218	-0.0468191	0.0365267	-0.1	-0.386607	0
2266	4.24783	0	0.103756	4.14407	4.49771	4.45646	4.33682	3.60224	0.398382	0.33619	0.119646	0.0412423	0.0222333	0.0040668	0.000156205	0.00341015	0.00468848	0.00147705	0.00363057	0.0442601	0.00366299	3.18159e-05	0.0057548	0.0262739	0.00213946	0.0310496	0.00292026	0.0028855	0.00148614	1.51361e-05	2.51389e-25	1.91405e-05	2.52871e-05	1.30082e-05	7.60688e-07	0	0.000108345	1.28613e-07	-8.14496e-07	0.000580289	-0.119144	-0.0268238	0.0920939	-0.0741218	-0.0468191	0.0365267	-0.1	-0.386607	0
2267	4.24783	0	0.103756	4.14407	4.49771	4.45646	4.33682	3.60224	0.398382	0.33619	0.119646	0.0412423	0.0222333	0.0040668	0.000156205	0.00341015	0.00468848	0.00147705	0.00363057	0.0442601	0.00366299	3.18159e-05	0.0057548	0.0262739	0.00213946	0.0310496	0.00292026	0.0028855	0.00148614	1.51361e-05	2.51389e-25	1.91405e-05	2.52871e-05	1.30082e-05	7.60688e-07	0	0.000108345	1.28613e-07	-8.14496e-07	0.000580289	-0.119144	-0.0268238	0.0920939	-0.0741218	-0.0468191	0.0365267	-0.1	-0.386607	0
2268	4.24783	0	0.103756	4.14407	4.49771	4.45646	4.33682	3.60224	0.398382	0.33619	0.119646	0.0412423	0.0222333	0.0040668	0.000156205	0.00341015	0.00468848	0.00147705	0.00363057	0.0442601	0.00366299	3.18159e-05	0.0057548	0.0262739	0.00213946	0.0310496	0.00292026	0.0028855	0.00148614	1.51361e-05	2.51389e-25	1.91405e-05	2.52871e-05	1.30082e-05	7.60688e-07	0	0.000108345	1.28613e-07	-8.14496e-07	0.000580289	-0.119144	-0.0268238	0.0920939	-0.0741218	-0.0468191	0.0365267	-0.1	-0.386607	0
2269	4.24783	0	0.103756	4.14407	4.49771	4.45646	4.33682	3.60224	0.398382	0.33619	0.119646	0.0412423	0.0222333	0.0040668	0.000156205	0.00341015	0.00468848	0.00147705	0.00363057	0.0442601	0.00366299	3.18159e-05	0.0057548	0.0262739	0.00213946	0.0310496	0.00292026	0.0028855	0.00148614	1.51361e-05	2.51389e-25	1.91405e-05	2.52871e-05	1.30082e-05	7.60688e-07	0	0.000108345	1.28613e-07	-8.14496e-07	0.000580289	-0.119144	-0.0268238	0.0920939	-0.0741218	-0.0468191	0.0365267	-0.1	-0.386607	0
2270	4.24783	0	0.103756	4.14407	4.49771	4.45646	4.33682	3.60224	0.398382	0.33619	0.119646	0.0412423	0.0222333	0.0040668	0.000156205	0.00341015	0.00468848	0.00147705	0.00363057	0.0442601	0.00366299	3.18159e-05	0.0057548	0.0262739	0.00213946	0.0310496	0.00292026	0.0028855	0.00148614	1.51361e-05	2.51389e-25	1.91405e-05	2.52871e-05	1.30082e-05	7.60688e-07	0	0.000108345	1.28613e-07	-8.14496e-07	0.000580289	-0.119144	-0.0268238	0.0920939	-0.0741218	-0.0468191	0.0365267	-0.1	-0.386607	0
2271	4.24783	0	0.103756	4.14407	4.49771	4.45646	4.33682	3.60224	0.398382	0.33619	0.119646	0.0412423	0.0222333	0.0040668	0.000156205	0.00341015	0.00468848	0.00147705	0.00363057	0.0442601	0.00366299	3.18159e-05	0.0057548	0.0262739	0.00213946	0.0310496	0.00292026	0.0028855	0.00148614	1.51361e-05	2.51389e-25	1.91405e-05	2.52871e-05	1.30082e-05	7.60688e-07	0	0.000108345	1.28613e-07	-8.14496e-07	0.000580289	-0.119144	-0.0268238	0.0920939	-0.0741218	-0.0468191	0.0365267	-0.1	-0.386607	0
2272	4.24783	0	0.103756	4.14407	4.49771	4.45646	4.33682	3.60224	0.398382	0.33619	0.119646	0.0412423	0.0222333	0.0040668	0.000156205	0.00341015	0.00468848	0.00147705	0.00363057	0.0442601	0.00366299	3.18159e-05	0.0057548	0.0262739	0.00213946	0.0310496	0.00292026	0.0028855	0.00148614	1.51361e-05	2.51389e-25	1.91405e-05	2.52871e-05	1.30082e-05	7.60688e-07	0	0.000108345	1.28613e-07	-8.14496e-07	0.000580289	-0.119144	-0.0268238	0.0920939	-0.0741218	-0.0468191	0.0365267	-0.1	-0.386607	0
2273	4.24783	0	0.103756	4.14407	4.49771	4.45646	4.33682	3.60224	0.398382	0.33619	0.119646	0.0412423	0.0222333	0.0040668	0.000156205	0.00341015	0.00468848	0.00147705	0.00363057	0.0442601	0.00366299	3.18159e-05	0.0057548	0.0262739	0.00213946	0.0310496	0.00292026	0.0028855	0.00148614	1.51361e-05	2.51389e-25	1.91405e-05	2.52871e-05	1.30082e-05	7.60688e-07	0	0.000108345	1.28613e-07	-8.14496e-07	0.000580289	-0.119144	-0.0268238	0.0920939	-0.0741218	-0.0468191	0.0365267	-0.1	-0.386607	0
2274	4.24783	0	0.103756	4.14407	4.49771	4.45646	4.33682	3.60224	0.398382	0.33619	0.119646	0.0412423	0.0222333	0.0040668	0.000156205	0.00341015	0.00468848	0.00147705	0.00363057	0.0442601	0.00366299	3.18159e-05	0.0057548	0.0262739	0.00213946	0.0310496	0.00292026	0.0028855	0.00148614	1.51361e-05	2.51389e-25	1.91405e-05	2.52871e-05	1.30082e-05	7.60688e-07	0	0.000108345	1.28613e-07	-8.14496e-07	0.000580289	-0.119144	-0.0268238	0.0920939	-0.0741218	-0.0468191	0.0365267	-0.1	-0.386607	0
2275	4.24783	0	0.103756	4.14407	4.49771	4.45646	4.33682	3.60224	0.398382	0.33619	0.119646	0.0412423	0.0222333	0.0040668	0.000156205	0.00341015	0.00468848	0.00147705	0.00363057	0.0442601	0.00366299	3.18159e-05	0.0057548	0.0262739	0.00213946	0.0310496	0.00292026	0.0028855	0.00148614	1.51361e-05	2.51389e-25	1.91405e-05	2.52871e-05	1.30082e-05	7.60688e-07	0	0.000108345	1.28613e-07	-8.14496e-07	0.000580289	-0.119144	-0.0268238	0.0920939	-0.0741218	-0.0468191	0.0365267	-0.1	-0.386607	0
2276	4.24783	0	0.103756	4.14407	4.49771	4.45646	4.33682	3.60224	0.398382	0.33619	0.119646	0.0412423	0.0222333	0.0040668	0.000156205	0.00341015	0.00468848	0.00147705	0.00363057	0.0442601	0.00366299	3.18159e-05	0.0057548	0.0262739	0.00213946	0.0310496	0.00292026	0.0028855	0.00148614	1.51361e-05	2.51389e-25	1.91405e-05	2.52871e-05	1.30082e-05	7.60688e-07	0	0.000108345	1.28613e-07	-8.14496e-07	0.000580289	-0.119144	-0.0268238	0.0920939	-0.0741218	-0.0468191	0.0365267	-0.1	-0.386607	0
2277	4.24783	0	0.103756	4.14407	4.49771	4.45646	4.33682	3.60224	0.398382	0.33619	0.119646	0.0412423	0.0222333	0.0040668	0.000156205	0.00341015	0.00468848	0.00147705	0.00363057	0.0442601	0.00366299	3.18159e-05	0.0057548	0.0262739	0.00213946	0.0310496	0.00292026	0.0028855	0.00148614	1.51361e-05	2.51389e-25	1.91405e-05	2.52871e-05	1.30082e-05	7.60688e-07	0	0.000108345	1.28613e-07	-8.14496e-07	0.000580289	-0.119144	-0.0268238	0.0920939	-0.0741218	-0.0468191	0.0365267	-0.1	-0.386607	0
2278	4.24783	0	0.103756	4.14407	4.49771	4.45646	4.33682	3.60224	0.398382	0.33619	0.119646	0.0412423	0.0222333	0.0040668	0.000156205	0.00341015	0.00468848	0.00147705	0.00363057	0.0442601	0.00366299	3.18159e-05	0.0057548	0.0262739	0.00213946	0.0310496	0.00292026	0.0028855	0.00148614	1.51361e-05	2.51389e-25	1.91405e-05	2.52871e-05	1.30082e-05	7.60688e-07	0	0.000108345	1.28613e-07	-8.14496e-07	0.000580289	-0.119144	-0.0268238	0.0920939	-0.0741218	-0.0468191	0.0365267	-0.1	-0.386607	0
2279	4.24783	0	0.103756	4.14407	4.49771	4.45646	4.33682	3.60224	0.398382	0.33619	0.119646	0.0412423	0.0222333	0.0040668	0.000156205	0.00341015	0.00468848	0.00147705	0.00363057	0.0442601	0.00366299	3.18159e-05	0.0057548	0.0262739	0.00213946	0.0310496	0.00292026	0.0028855	0.00148614	1.51361e-05	2.51389e-25	1.91405e-05	2.52871e-05	1.30082e-05	7.60688e-07	0	0.000108345	1.28613e-07	-8.14496e-07	0.000580289	-0.119144	-0.0268238	0.0920939	-0.0741218	-0.0468191	0.0365267	-0.1	-0.386607	0
2280	4.24783	0	0.103756	4.14407	4.49771	4.45646	4.33682	3.60224	0.398382	0.33619	0.119646	0.0412423	0.0222333	0.0040668	0.000156205	0.00341015	0.00468848	0.00147705	0.00363057	0.0442601	0.00366299	3.18159e-05	0.0057548	0.0262739	0.00213946	0.0310496	0.00292026	0.0028855	0.00148614	1.51361e-05	2.51389e-25	1.91405e-05	2.52871e-05	1.30082e-05	7.60688e-07	0	0.000108345	1.28613e-07	-8.14496e-07	0.000580289	-0.119144	-0.0268238	0.0920939	-0.0741218	-0.0468191	0.0365267	-0.1	-0.386607	0
2281	4.24783	0	0.103756	4.14407	4.49771	4.45646	4.33682	3.60224	0.398382	0.33619	0.119646	0.0412423	0.0222333	0.0040668	0.000156205	0.00341015	0.00468848	0.00147705	0.00363057	0.0442601	0.00366299	3.18159e-05	0.0057548	0.0262739	0.00213946	0.0310496	0.00292026	0.0028855	0.00148614	1.51361e-05	2.51389e-25	1.91405e-05	2.52871e-05	1.30082e-05	7.60688e-07	0	0.000108345	1.28613e-07	-8.14496e-07	0.000580289	-0.119144	-0.0268238	0.0920939	-0.0741218	-0.0468191	0.0365267	-0.1	-0.386607	0
2282	4.24783	0	0.103756	4.14407	4.49771	4.45646	4.33682	3.60224	0.398382	0.33619	0.119646	0.0412423	0.0222333	0.0040668	0.000156205	0.00341015	0.00468848	0.00147705	0.00363057	0.0442601	0.00366299	3.18159e-05	0.0057548	0.0262739	0.00213946	0.0310496	0.00292026	0.0028855	0.00148614	1.51361e-05	2.51389e-25	1.91405e-05	2.52871e-05	1.30082e-05	7.60688e-07	0	0.000108345	1.28613e-07	-8.14496e-07	0.000580289	-0.119144	-0.0268238	0.0920939	-0.0741218	-0.0468191	0.0365267	-0.1	-0.386607	0
2283	4.24783	0	0.103756	4.14407	4.49771	4.45646	4.33682	3.60224	0.398382	0.33619	0.119646	0.0412423	0.0222333	0.0040668	0.000156205	0.00341015	0.00468848	0.00147705	0.00363057	0.0442601	0.00366299	3.18159e-05	0.0057548	0.0262739	0.00213946	0.0310496	0.00292026	0.0028855	0.00148614	1.51361e-05	2.51389e-25	1.91405e-05	2.52871e-05	1.30082e-05	7.60688e-07	0	0.000108345	1.28613e-07	-8.14496e-07	0.000580289	-0.119144	-0.0268238	0.0920939	-0.0741218	-0.0468191	0.0365267	-0.1	-0.386607	0
2284	4.24783	0	0.103756	4.14407	4.49771	4.45646	4.33682	3.60224	0.398382	0.33619	0.119646	0.0412423	0.0222333	0.0040668	0.000156205	0.00341015	0.00468848	0.00147705	0.00363057	0.0442601	0.00366299	3.18159e-05	0.0057548	0.0262739	0.00213946	0.0310496	0.00292026	0.0028855	0.00148614	1.51361e-05	2.51389e-25	1.91405e-05	2.52871e-05	1.30082e-05	7.60688e-07	0	0.000108345	1.28613e-07	-8.14496e-07	0.000580289	-0.119144	-0.0268238	0.0920939	-0.0741218	-0.0468191	0.0365267	-0.1	-0.386607	0
2285	4.24783	0	0.103756	4.14407	4.49771	4.45646	4.33682	3.60224	0.398382	0.33619	0.119646	0.0412423	0.0222333	0.0040668	0.000156205	0.00341015	0.00468848	0.00147705	0.00363057	0.0442601	0.00366299	3.18159e-05	0.0057548	0.0262739	0.00213946	0.0310496	0.00292026	0.0028855	0.00148614	1.51361e-05	2.51389e-25	1.91405e-05	2.52871e-05	1.30082e-05	7.60688e-07	0	0.000108345	1.28613e-07	-8.14496e-07	0.000580289	-0.119144	-0.0268238	0.0920939	-0.0741218	-0.0468191	0.0365267	-0.1	-0.386607	0
2286	4.24783	0	0.103756	4.14407	4.49771	4.45646	4.33682	3.60224	0.398382	0.33619	0.119646	0.0412423	0.0222333	0.0040668	0.000156205	0.00341015	0.00468848	0.00147705	0.00363057	0.0442601	0.00366299	3.18159e-05	0.0057548	0.0262739	0.00213946	0.0310496	0.00292026	0.0028855	0.00148614	1.51361e-05	2.51389e-25	1.91405e-05	2.52871e-05	1.30082e-05	7.60688e-07	0	0.000108345	1.28613e-07	-8.14496e-07	0.000580289	-0.119144	-0.0268238	0.0920939	-0.0741218	-0.0468191	0.0365267	-0.1	-0.386607	0
2287	4.24783	0	0.103756	4.14407	4.49771	4.45646	4.33682	3.60224	0.398382	0.33619	0.119646	0.0412423	0.0222333	0.0040668	0.000156205	0.00341015	0.00468848	0.00147705	0.00363057	0.0442601	0.00366299	3.18159e-05	0.0057548	0.0262739	0.00213946	0.0310496	0.00292026	0.0028855	0.00148614	1.51361e-05	2.51389e-25	1.91405e-05	2.52871e-05	1.30082e-05	7.60688e-07	0	0.000108345	1.28613e-07	-8.14496e-07	0.000580289	-0.119144	-0.0268238	0.0920939	-0.0741218	-0.0468191	0.0365267	-0.1	-0.386607	0
2288	4.24783	0	0.103756	4.14407	4.49771	4.45646	4.33682	3.60224	0.398382	0.33619	0.119646	0.0412423	0.0222333	0.0040668	0.000156205	0.00341015	0.00468848	0.00147705	0.00363057	0.0442601	0.00366299	3.18159e-05	0.0057548	0.0262739	0.00213946	0.0310496	0.00292026	0.0028855	0.00148614	1.51361e-05	2.51389e-25	1.91405e-05	2.52871e-05	1.30082e-05	7.60688e-07	0	0.000108345	1.28613e-07	-8.14496e-07	0.000580289	-0.119144	-0.0268238	0.0920939	-0.0741218	-0.0468191	0.0365267	-0.1	-0.386607	0
2289	4.24783	0	0.103756	4.14407	4.49771	4.45646	4.33682	3.60224	0.398382	0.33619	0.119646	0.0412423	0.0222333	0.0040668	0.000156205	0.00341015	0.00468848	0.00147705	0.00363057	0.0442601	0.00366299	3.18159e-05	0.0057548	0.0262739	0.00213946	0.0310496	0.00292026	0.0028855	0.00148614	1.51361e-05	2.51389e-25	1.91405e-05	2.52871e-05	1.30082e-05	7.60688e-07	0	0.000108345	1.28613e-07	-8.14496e-07	0.000580289	-0.119144	-0.0268238	0.0920939	-0.0741218	-0.0468191	0.0365267	-0.1	-0.386607	0
2290	4.24783	0	0.103756	4.14407	4.49771	4.45646	4.33682	3.60224	0.398382	0.33619	0.119646	0.0412423	0.0222333	0.0040668	0.000156205	0.00341015	0.00468848	0.00147705	0.00363057	0.0442601	0.00366299	3.18159e-05	0.0057548	0.0262739	0.00213946	0.0310496	0.00292026	0.0028855	0.00148614	1.51361e-05	2.51389e-25	1.91405e-05	2.52871e-05	1.30082e-05	7.60688e-07	0	0.000108345	1.28613e-07	-8.14496e-07	0.000580289	-0.119144	-0.0268238	0.0920939	-0.0741218	-0.0468191	0.0365267	-0.1	-0.386607	0
2291	4.24783	0	0.103756	4.14407	4.49771	4.45646	4.33682	3.60224	0.398382	0.33619	0.119646	0.0412423	0.0222333	0.0040668	0.000156205	0.00341015	0.00468848	0.00147705	0.00363057	0.0442601	0.00366299	3.18159e-05	0.0057548	0.0262739	0.00213946	0.0310496	0.00292026	0.0028855	0.00148614	1.51361e-05	2.51389e-25	1.91405e-05	2.52871e-05	1.30082e-05	7.60688e-07	0	0.000108345	1.28613e-07	-8.14496e-07	0.000580289	-0.119144	-0.0268238	0.0920939	-0.0741218	-0.0468191	0.0365267	-0.1	-0.386607	0
2292	4.24783	0	0.103756	4.14407	4.49771	4.45646	4.33682	3.60224	0.398382	0.33619	0.119646	0.0412423	0.0222333	0.0040668	0.000156205	0.00341015	0.00468848	0.00147705	0.00363057	0.0442601	0.00366299	3.18159e-05	0.0057548	0.0262739	0.00213946	0.0310496	0.00292026	0.0028855	0.00148614	1.51361e-05	2.51389e-25	1.91405e-05	2.52871e-05	1.30082e-05	7.60688e-07	0	0.000108345	1.28613e-07	-8.14496e-07	0.000580289	-0.119144	-0.0268238	0.0920939	-0.0741218	-0.0468191	0.0365267	-0.1	-0.386607	0
2293	4.24783	0	0.103756	4.14407	4.49771	4.45646	4.33682	3.60224	0.398382	0.33619	0.119646	0.0412423	0.0222333	0.0040668	0.000156205	0.00341015	0.00468848	0.00147705	0.00363057	0.0442601	0.00366299	3.18159e-05	0.0057548	0.0262739	0.00213946	0.0310496	0.00292026	0.0028855	0.00148614	1.51361e-05	2.51389e-25	1.91405e-05	2.52871e-05	1.30082e-05	7.60688e-07	0	0.000108345	1.28613e-07	-8.14496e-07	0.000580289	-0.119144	-0.0268238	0.0920939	-0.0741218	-0.0468191	0.0365267	-0.1	-0.386607	0
2294	4.24783	0	0.103756	4.14407	4.49771	4.45646	4.33682	3.60224	0.398382	0.33619	0.119646	0.0412423	0.0222333	0.0040668	0.000156205	0.00341015	0.00468848	0.00147705	0.00363057	0.0442601	0.00366299	3.18159e-05	0.0057548	0.0262739	0.00213946	0.0310496	0.00292026	0.0028855	0.00148614	1.51361e-05	2.51389e-25	1.91405e-05	2.52871e-05	1.30082e-05	7.60688e-07	0	0.000108345	1.28613e-07	-8.14496e-07	0.000580289	-0.119144	-0.0268238	0.0920939	-0.0741218	-0.0468191	0.0365267	-0.1	-0.386607	0
2295	4.24783	0	0.103756	4.14407	4.49771	4.45646	4.33682	3.60224	0.398382	0.33619	0.119646	0.0412423	0.0222333	0.0040668	0.000156205	0.00341015	0.00468848	0.00147705	0.00363057	0.0442601	0.00366299	3.18159e-05	0.0057548	0.0262739	0.00213946	0.0310496	0.00292026	0.0028855	0.00148614	1.51361e-05	2.51389e-25	1.91405e-05	2.52871e-05	1.30082e-05	7.60688e-07	0	0.000108345	1.28613e-07	-8.14496e-07	0.000580289	-0.119144	-0.0268238	0.0920939	-0.0741218	-0.0468191	0.0365267	-0.1	-0.386607	0
2296	4.24783	0	0.103756	4.14407	4.49771	4.45646	4.33682	3.60224	0.398382	0.33619	0.119646	0.0412423	0.0222333	0.0040668	0.000156205	0.00341015	0.00468848	0.00147705	0.00363057	0.0442601	0.00366299	3.18159e-05	0.0057548	0.0262739	0.00213946	0.0310496	0.00292026	0.0028855	0.00148614	1.51361e-05	2.51389e-25	1.91405e-05	2.52871e-05	1.30082e-05	7.60688e-07	0	0.000108345	1.28613e-07	-8.14496e-07	0.000580289	-0.119144	-0.0268238	0.0920939	-0.0741218	-0.0468191	0.0365267	-0.1	-0.386607	0
2297	4.24783	0	0.103756	4.14407	4.49771	4.45646	4.33682	3.60224	0.398382	0.33619	0.119646	0.0412423	0.0222333	0.0040668	0.000156205	0.00341015	0.00468848	0.00147705	0.00363057	0.0442601	0.00366299	3.18159e-05	0.0057548	0.0262739	0.00213946	0.0310496	0.00292026	0.0028855	0.00148614	1.51361e-05	2.51389e-25	1.91405e-05	2.52871e-05	1.30082e-05	7.60688e-07	0	0.000108345	1.28613e-07	-8.14496e-07	0.000580289	-0.119144	-0.0268238	0.0920939	-0.0741218	-0.0468191	0.0365267	-0.1	-0.386607	0
2298	4.24783	0	0.103756	4.14407	4.49771	4.45646	4.33682	3.60224	0.398382	0.33619	0.119646	0.0412423	0.0222333	0.0040668	0.000156205	0.00341015	0.00468848	0.00147705	0.00363057	0.0442601	0.00366299	3.18159e-05	0.0057548	0.0262739	0.00213946	0.0310496	0.00292026	0.0028855	0.00148614	1.51361e-05	2.51389e-25	1.91405e-05	2.52871e-05	1.30082e-05	7.60688e-07	0	0.000108345	1.28613e-07	-8.14496e-07	0.000580289	-0.119144	-0.0268238	0.0920939	-0.0741218	-0.0468191	0.0365267	-0.1	-0.386607	0
2299	4.24783	0	0.103756	4.14407	4.49771	4.45646	4.33682	3.60224	0.398382	0.33619	0.119646	0.0412423	0.0222333	0.0040668	0.000156205	0.00341015	0.00468848	0.00147705	0.00363057	0.0442601	0.00366299	3.18159e-05	0.0057548	0.0262739	0.00213946	0.0310496	0.00292026	0.0028855	0.00148614	1.51361e-05	2.51389e-25	1.91405e-05	2.52871e-05	1.30082e-05	7.60688e-07	0	0.000108345	1.28613e-07	-8.14496e-07	0.000580289	-0.119144	-0.0268238	0.0920939	-0.0741218	-0.0468191	0.0365267	-0.1	-0.386607	0
2300	4.24783	0	0.103756	4.14407	4.49771	4.45646	4.33682	3.60224	0.398382	0.33619	0.119646	0.0412423	0.0222333	0.0040668	0.000156205	0.00341015	0.00468848	0.00147705	0.00363057	0.0442601	0.00366299	3.18159e-05	0.0057548	0.0262739	0.00213946	0.0310496	0.00292026	0.0028855	0.00148614	1.51361e-05	2.51389e-25	1.91405e-05	2.52871e-05	1.30082e-05	7.60688e-07	0	0.000108345	1.28613e-07	-8.14496e-07	0.000580289	-0.119144	-0.0268238	0.0920939	-0.0741218	-0.0468191	0.0365267	-0.1	-0.386607	0
2301	4.24783	0	0.103756	4.14407	4.49771	4.45646	4.33682	3.60224	0.398382	0.33619	0.119646	0.0412423	0.0222333	0.0040668	0.000156205	0.00341015	0.00468848	0.00147705	0.00363057	0.0442601	0.00366299	3.18159e-05	0.0057548	0.0262739	0.00213946	0.0310496	0.00292026	0.0028855	0.00148614	1.51361e-05	2.51389e-25	1.91405e-05	2.52871e-05	1.30082e-05	7.60688e-07	0	0.000108345	1.28613e-07	-8.14496e-07	0.000580289	-0.119144	-0.0268238	0.0920939	-0.0741218	-0.0468191	0.0365267	-0.1	-0.386607	0
2302	4.24783	0	0.103756	4.14407	4.49771	4.45646	4.33682	3.60224	0.398382	0.33619	0.119646	0.0412423	0.0222333	0.0040668	0.000156205	0.00341015	0.00468848	0.00147705	0.00363057	0.0442601	0.00366299	3.18159e-05	0.0057548	0.0262739	0.00213946	0.0310496	0.00292026	0.0028855	0.00148614	1.51361e-05	2.51389e-25	1.91405e-05	2.52871e-05	1.30082e-05	7.60688e-07	0	0.000108345	1.28613e-07	-8.14496e-07	0.000580289	-0.119144	-0.0268238	0.0920939	-0.0741218	-0.0468191	0.0365267	-0.1	-0.386607	0
2303	4.24783	0	0.103756	4.14407	4.49771	4.45646	4.33682	3.60224	0.398382	0.33619	0.119646	0.0412423	0.0222333	0.0040668	0.000156205	0.00341015	0.00468848	0.00147705	0.00363057	0.0442601	0.00366299	3.18159e-05	0.0057548	0.0262739	0.00213946	0.0310496	0.00292026	0.0028855	0.00148614	1.51361e-05	2.51389e-25	1.91405e-05	2.52871e-05	1.30082e-05	7.60688e-07	0	0.000108345	1.28613e-07	-8.14496e-07	0.000580289	-0.119144	-0.0268238	0.0920939	-0.0741218	-0.0468191	0.0365267	-0.1	-0.386607	0
2304	4.24783	0	0.103756	4.14407	4.49771	4.45646	4.33682	3.60224	0.398382	0.33619	0.119646	0.0412423	0.0222333	0.0040668	0.000156205	0.00341015	0.00468848	0.00147705	0.00363057	0.0442601	0.00366299	3.18159e-05	0.0057548	0.0262739	0.00213946	0.0310496	0.00292026	0.0028855	0.00148614	1.51361e-05	2.51389e-25	1.91405e-05	2.52871e-05	1.30082e-05	7.60688e-07	0	0.000108345	1.28613e-07	-8.14496e-07	0.000580289	-0.119144	-0.0268238	0.0920939	-0.0741218	-0.0468191	0.0365267	-0.1	-0.386607	0
2305	4.24783	0	0.103756	4.14407	4.49771	4.45646	4.33682	3.60224	0.398382	0.33619	0.119646	0.0412423	0.0222333	0.0040668	0.000156205	0.00341015	0.00468848	0.00147705	0.00363057	0.0442601	0.00366299	3.18159e-05	0.0057548	0.0262739	0.00213946	0.0310496	0.00292026	0.0028855	0.00148614	1.51361e-05	2.51389e-25	1.91405e-05	2.52871e-05	1.30082e-05	7.60688e-07	0	0.000108345	1.28613e-07	-8.14496e-07	0.000580289	-0.119144	-0.0268238	0.0920939	-0.0741218	-0.0468191	0.0365267	-0.1	-0.386607	0
2306	4.24783	0	0.103756	4.14407	4.49771	4.45646	4.33682	3.60224	0.398382	0.33619	0.119646	0.0412423	0.0222333	0.0040668	0.000156205	0.00341015	0.00468848	0.00147705	0.00363057	0.0442601	0.00366299	3.18159e-05	0.0057548	0.0262739	0.00213946	0.0310496	0.00292026	0.0028855	0.00148614	1.51361e-05	2.51389e-25	1.91405e-05	2.52871e-05	1.30082e-05	7.60688e-07	0	0.000108345	1.28613e-07	-8.14496e-07	0.000580289	-0.119144	-0.0268238	0.0920939	-0.0741218	-0.0468191	0.0365267	-0.1	-0.386607	0
2307	4.24783	0	0.103756	4.14407	4.49771	4.45646	4.33682	3.60224	0.398382	0.33619	0.119646	0.0412423	0.0222333	0.0040668	0.000156205	0.00341015	0.00468848	0.00147705	0.00363057	0.0442601	0.00366299	3.18159e-05	0.0057548	0.0262739	0.00213946	0.0310496	0.00292026	0.0028855	0.00148614	1.51361e-05	2.51389e-25	1.91405e-05	2.52871e-05	1.30082e-05	7.60688e-07	0	0.000108345	1.28613e-07	-8.14496e-07	0.000580289	-0.119144	-0.0268238	0.0920939	-0.0741218	-0.0468191	0.0365267	-0.1	-0.386607	0
2308	4.24783	0	0.103756	4.14407	4.49771	4.45646	4.33682	3.60224	0.398382	0.33619	0.119646	0.0412423	0.0222333	0.0040668	0.000156205	0.00341015	0.00468848	0.00147705	0.00363057	0.0442601	0.00366299	3.18159e-05	0.0057548	0.0262739	0.00213946	0.0310496	0.00292026	0.0028855	0.00148614	1.51361e-05	2.51389e-25	1.91405e-05	2.52871e-05	1.30082e-05	7.60688e-07	0	0.000108345	1.28613e-07	-8.14496e-07	0.000580289	-0.119144	-0.0268238	0.0920939	-0.0741218	-0.0468191	0.0365267	-0.1	-0.386607	0
2309	4.24783	0	0.103756	4.14407	4.49771	4.45646	4.33682	3.60224	0.398382	0.33619	0.119646	0.0412423	0.0222333	0.0040668	0.000156205	0.00341015	0.00468848	0.00147705	0.00363057	0.0442601	0.00366299	3.18159e-05	0.0057548	0.0262739	0.00213946	0.0310496	0.00292026	0.0028855	0.00148614	1.51361e-05	2.51389e-25	1.91405e-05	2.52871e-05	1.30082e-05	7.60688e-07	0	0.000108345	1.28613e-07	-8.14496e-07	0.000580289	-0.119144	-0.0268238	0.0920939	-0.0741218	-0.0468191	0.0365267	-0.1	-0.386607	0
2310	4.24783	0	0.103756	4.14407	4.49771	4.45646	4.33682	3.60224	0.398382	0.33619	0.119646	0.0412423	0.0222333	0.0040668	0.000156205	0.00341015	0.00468848	0.00147705	0.00363057	0.0442601	0.00366299	3.18159e-05	0.0057548	0.0262739	0.00213946	0.0310496	0.00292026	0.0028855	0.00148614	1.51361e-05	2.51389e-25	1.91405e-05	2.52871e-05	1.30082e-05	7.60688e-07	0	0.000108345	1.28613e-07	-8.14496e-07	0.000580289	-0.119144	-0.0268238	0.0920939	-0.0741218	-0.0468191	0.0365267	-0.1	-0.386607	0
2311	4.24783	0	0.103756	4.14407	4.49771	4.45646	4.33682	3.60224	0.398382	0.33619	0.119646	0.0412423	0.0222333	0.0040668	0.000156205	0.00341015	0.00468848	0.00147705	0.00363057	0.0442601	0.00366299	3.18159e-05	0.0057548	0.0262739	0.00213946	0.0310496	0.00292026	0.0028855	0.00148614	1.51361e-05	2.51389e-25	1.91405e-05	2.52871e-05	1.30082e-05	7.60688e-07	0	0.000108345	1.28613e-07	-8.14496e-07	0.000580289	-0.119144	-0.0268238	0.0920939	-0.0741218	-0.0468191	0.0365267	-0.1	-0.386607	0
2312	4.24783	0	0.103756	4.14407	4.49771	4.45646	4.33682	3.60224	0.398382	0.33619	0.119646	0.0412423	0.0222333	0.0040668	0.000156205	0.00341015	0.00468848	0.00147705	0.00363057	0.0442601	0.00366299	3.18159e-05	0.0057548	0.0262739	0.00213946	0.0310496	0.00292026	0.0028855	0.00148614	1.51361e-05	2.51389e-25	1.91405e-05	2.52871e-05	1.30082e-05	7.60688e-07	0	0.000108345	1.28613e-07	-8.14496e-07	0.000580289	-0.119144	-0.0268238	0.0920939	-0.0741218	-0.0468191	0.0365267	-0.1	-0.386607	0
2313	4.24783	0	0.103756	4.14407	4.49771	4.45646	4.33682	3.60224	0.398382	0.33619	0.119646	0.0412423	0.0222333	0.0040668	0.000156205	0.00341015	0.00468848	0.00147705	0.00363057	0.0442601	0.00366299	3.18159e-05	0.0057548	0.0262739	0.00213946	0.0310496	0.00292026	0.0028855	0.00148614	1.51361e-05	2.51389e-25	1.91405e-05	2.52871e-05	1.30082e-05	7.60688e-07	0	0.000108345	1.28613e-07	-8.14496e-07	0.000580289	-0.119144	-0.0268238	0.0920939	-0.0741218	-0.0468191	0.0365267	-0.1	-0.386607	0
2314	4.24783	0	0.103756	4.14407	4.49771	4.45646	4.33682	3.60224	0.398382	0.33619	0.119646	0.0412423	0.0222333	0.0040668	0.000156205	0.00341015	0.00468848	0.00147705	0.00363057	0.0442601	0.00366299	3.18159e-05	0.0057548	0.0262739	0.00213946	0.0310496	0.00292026	0.0028855	0.00148614	1.51361e-05	2.51389e-25	1.91405e-05	2.52871e-05	1.30082e-05	7.60688e-07	0	0.000108345	1.28613e-07	-8.14496e-07	0.000580289	-0.119144	-0.0268238	0.0920939	-0.0741218	-0.0468191	0.0365267	-0.1	-0.386607	0
2315	4.24783	0	0.103756	4.14407	4.49771	4.45646	4.33682	3.60224	0.398382	0.33619	0.119646	0.0412423	0.0222333	0.0040668	0.000156205	0.00341015	0.00468848	0.00147705	0.00363057	0.0442601	0.00366299	3.18159e-05	0.0057548	0.0262739	0.00213946	0.0310496	0.00292026	0.0028855	0.00148614	1.51361e-05	2.51389e-25	1.91405e-05	2.52871e-05	1.30082e-05	7.60688e-07	0	0.000108345	1.28613e-07	-8.14496e-07	0.000580289	-0.119144	-0.0268238	0.0920939	-0.0741218	-0.0468191	0.0365267	-0.1	-0.386607	0
2316	4.24783	0	0.103756	4.14407	4.49771	4.45646	4.33682	3.60224	0.398382	0.33619	0.119646	0.0412423	0.0222333	0.0040668	0.000156205	0.00341015	0.00468848	0.00147705	0.00363057	0.0442601	0.00366299	3.18159e-05	0.0057548	0.0262739	0.00213946	0.0310496	0.00292026	0.0028855	0.00148614	1.51361e-05	2.51389e-25	1.91405e-05	2.52871e-05	1.30082e-05	7.60688e-07	0	0.000108345	1.28613e-07	-8.14496e-07	0.000580289	-0.119144	-0.0268238	0.0920939	-0.0741218	-0.0468191	0.0365267	-0.1	-0.386607	0
2317	4.24783	0	0.103756	4.14407	4.49771	4.45646	4.33682	3.60224	0.398382	0.33619	0.119646	0.0412423	0.0222333	0.0040668	0.000156205	0.00341015	0.00468848	0.00147705	0.00363057	0.0442601	0.00366299	3.18159e-05	0.0057548	0.0262739	0.00213946	0.0310496	0.00292026	0.0028855	0.00148614	1.51361e-05	2.51389e-25	1.91405e-05	2.52871e-05	1.30082e-05	7.60688e-07	0	0.000108345	1.28613e-07	-8.14496e-07	0.000580289	-0.119144	-0.0268238	0.0920939	-0.0741218	-0.0468191	0.0365267	-0.1	-0.386607	0
2318	4.24783	0	0.103756	4.14407	4.49771	4.45646	4.33682	3.60224	0.398382	0.33619	0.119646	0.0412423	0.0222333	0.0040668	0.000156205	0.00341015	0.00468848	0.00147705	0.00363057	0.0442601	0.00366299	3.18159e-05	0.0057548	0.0262739	0.00213946	0.0310496	0.00292026	0.0028855	0.00148614	1.51361e-05	2.51389e-25	1.91405e-05	2.52871e-05	1.30082e-05	7.60688e-07	0	0.000108345	1.28613e-07	-8.14496e-07	0.000580289	-0.119144	-0.0268238	0.0920939	-0.0741218	-0.0468191	0.0365267	-0.1	-0.386607	0
2319	4.24783	0	0.103756	4.14407	4.49771	4.45646	4.33682	3.60224	0.398382	0.33619	0.119646	0.0412423	0.0222333	0.0040668	0.000156205	0.00341015	0.00468848	0.00147705	0.00363057	0.0442601	0.00366299	3.18159e-05	0.0057548	0.0262739	0.00213946	0.0310496	0.00292026	0.0028855	0.00148614	1.51361e-05	2.51389e-25	1.91405e-05	2.52871e-05	1.30082e-05	7.60688e-07	0	0.000108345	1.28613e-07	-8.14496e-07	0.000580289	-0.119144	-0.0268238	0.0920939	-0.0741218	-0.0468191	0.0365267	-0.1	-0.386607	0
2320	4.24783	0	0.103756	4.14407	4.49771	4.45646	4.33682	3.60224	0.398382	0.33619	0.119646	0.0412423	0.0222333	0.0040668	0.000156205	0.00341015	0.00468848	0.00147705	0.00363057	0.0442601	0.00366299	3.18159e-05	0.0057548	0.0262739	0.00213946	0.0310496	0.00292026	0.0028855	0.00148614	1.51361e-05	2.51389e-25	1.91405e-05	2.52871e-05	1.30082e-05	7.60688e-07	0	0.000108345	1.28613e-07	-8.14496e-07	0.000580289	-0.119144	-0.0268238	0.0920939	-0.0741218	-0.0468191	0.0365267	-0.1	-0.386607	0
2321	4.24783	0	0.103756	4.14407	4.49771	4.45646	4.33682	3.60224	0.398382	0.33619	0.119646	0.0412423	0.0222333	0.0040668	0.000156205	0.00341015	0.00468848	0.00147705	0.00363057	0.0442601	0.00366299	3.18159e-05	0.0057548	0.0262739	0.00213946	0.0310496	0.00292026	0.0028855	0.00148614	1.51361e-05	2.51389e-25	1.91405e-05	2.52871e-05	1.30082e-05	7.60688e-07	0	0.000108345	1.28613e-07	-8.14496e-07	0.000580289	-0.119144	-0.0268238	0.0920939	-0.0741218	-0.0468191	0.0365267	-0.1	-0.386607	0
2322	4.24783	0	0.103756	4.14407	4.49771	4.45646	4.33682	3.60224	0.398382	0.33619	0.119646	0.0412423	0.0222333	0.0040668	0.000156205	0.00341015	0.00468848	0.00147705	0.00363057	0.0442601	0.00366299	3.18159e-05	0.0057548	0.0262739	0.00213946	0.0310496	0.00292026	0.0028855	0.00148614	1.51361e-05	2.51389e-25	1.91405e-05	2.52871e-05	1.30082e-05	7.60688e-07	0	0.000108345	1.28613e-07	-8.14496e-07	0.000580289	-0.119144	-0.0268238	0.0920939	-0.0741218	-0.0468191	0.0365267	-0.1	-0.386607	0
2323	4.24783	0	0.103756	4.14407	4.49771	4.45646	4.33682	3.60224	0.398382	0.33619	0.119646	0.0412423	0.0222333	0.0040668	0.000156205	0.00341015	0.00468848	0.00147705	0.00363057	0.0442601	0.00366299	3.18159e-05	0.0057548	0.0262739	0.00213946	0.0310496	0.00292026	0.0028855	0.00148614	1.51361e-05	2.51389e-25	1.91405e-05	2.52871e-05	1.30082e-05	7.60688e-07	0	0.000108345	1.28613e-07	-8.14496e-07	0.000580289	-0.119144	-0.0268238	0.0920939	-0.0741218	-0.0468191	0.0365267	-0.1	-0.386607	0
2324	4.24783	0	0.103756	4.14407	4.49771	4.45646	4.33682	3.60224	0.398382	0.33619	0.119646	0.0412423	0.0222333	0.0040668	0.000156205	0.00341015	0.00468848	0.00147705	0.00363057	0.0442601	0.00366299	3.18159e-05	0.0057548	0.0262739	0.00213946	0.0310496	0.00292026	0.0028855	0.00148614	1.51361e-05	2.51389e-25	1.91405e-05	2.52871e-05	1.30082e-05	7.60688e-07	0	0.000108345	1.28613e-07	-8.14496e-07	0.000580289	-0.119144	-0.0268238	0.0920939	-0.0741218	-0.0468191	0.0365267	-0.1	-0.386607	0
2325	4.24783	0	0.103756	4.14407	4.49771	4.45646	4.33682	3.60224	0.398382	0.33619	0.119646	0.0412423	0.0222333	0.0040668	0.000156205	0.00341015	0.00468848	0.00147705	0.00363057	0.0442601	0.00366299	3.18159e-05	0.0057548	0.0262739	0.00213946	0.0310496	0.00292026	0.0028855	0.00148614	1.51361e-05	2.51389e-25	1.91405e-05	2.52871e-05	1.30082e-05	7.60688e-07	0	0.000108345	1.28613e-07	-8.14496e-07	0.000580289	-0.119144	-0.0268238	0.0920939	-0.0741218	-0.0468191	0.0365267	-0.1	-0.386607	0
2326	4.24783	0	0.103756	4.14407	4.49771	4.45646	4.33682	3.60224	0.398382	0.33619	0.119646	0.0412423	0.0222333	0.0040668	0.000156205	0.00341015	0.00468848	0.00147705	0.00363057	0.0442601	0.00366299	3.18159e-05	0.0057548	0.0262739	0.00213946	0.0310496	0.00292026	0.0028855	0.00148614	1.51361e-05	2.51389e-25	1.91405e-05	2.52871e-05	1.30082e-05	7.60688e-07	0	0.000108345	1.28613e-07	-8.14496e-07	0.000580289	-0.119144	-0.0268238	0.0920939	-0.0741218	-0.0468191	0.0365267	-0.1	-0.386607	0
2327	4.24783	0	0.103756	4.14407	4.49771	4.45646	4.33682	3.60224	0.398382	0.33619	0.119646	0.0412423	0.0222333	0.0040668	0.000156205	0.00341015	0.00468848	0.00147705	0.00363057	0.0442601	0.00366299	3.18159e-05	0.0057548	0.0262739	0.00213946	0.0310496	0.00292026	0.0028855	0.00148614	1.51361e-05	2.51389e-25	1.91405e-05	2.52871e-05	1.30082e-05	7.60688e-07	0	0.000108345	1.28613e-07	-8.14496e-07	0.000580289	-0.119144	-0.0268238	0.0920939	-0.0741218	-0.0468191	0.0365267	-0.1	-0.386607	0
2328	4.24783	0	0.103756	4.14407	4.49771	4.45646	4.33682	3.60224	0.398382	0.33619	0.119646	0.0412423	0.0222333	0.0040668	0.000156205	0.00341015	0.00468848	0.00147705	0.00363057	0.0442601	0.00366299	3.18159e-05	0.0057548	0.0262739	0.00213946	0.0310496	0.00292026	0.0028855	0.00148614	1.51361e-05	2.51389e-25	1.91405e-05	2.52871e-05	1.30082e-05	7.60688e-07	0	0.000108345	1.28613e-07	-8.14496e-07	0.000580289	-0.119144	-0.0268238	0.0920939	-0.0741218	-0.0468191	0.0365267	-0.1	-0.386607	0
2329	4.24783	0	0.103756	4.14407	4.49771	4.45646	4.33682	3.60224	0.398382	0.33619	0.119646	0.0412423	0.0222333	0.0040668	0.000156205	0.00341015	0.00468848	0.00147705	0.00363057	0.0442601	0.00366299	3.18159e-05	0.0057548	0.0262739	0.00213946	0.0310496	0.00292026	0.0028855	0.00148614	1.51361e-05	2.51389e-25	1.91405e-05	2.52871e-05	1.30082e-05	7.60688e-07	0	0.000108345	1.28613e-07	-8.14496e-07	0.000580289	-0.119144	-0.0268238	0.0920939	-0.0741218	-0.0468191	0.0365267	-0.1	-0.386607	0
2330	4.24783	0	0.103756	4.14407	4.49771	4.45646	4.33682	3.60224	0.398382	0.33619	0.119646	0.0412423	0.0222333	0.0040668	0.000156205	0.00341015	0.00468848	0.00147705	0.00363057	0.0442601	0.00366299	3.18159e-05	0.0057548	0.0262739	0.00213946	0.0310496	0.00292026	0.0028855	0.00148614	1.51361e-05	2.51389e-25	1.91405e-05	2.52871e-05	1.30082e-05	7.60688e-07	0	0.000108345	1.28613e-07	-8.14496e-07	0.000580289	-0.119144	-0.0268238	0.0920939	-0.0741218	-0.0468191	0.0365267	-0.1	-0.386607	0
2331	4.24783	0	0.103756	4.14407	4.49771	4.45646	4.33682	3.60224	0.398382	0.33619	0.119646	0.0412423	0.0222333	0.0040668	0.000156205	0.00341015	0.00468848	0.00147705	0.00363057	0.0442601	0.00366299	3.18159e-05	0.0057548	0.0262739	0.00213946	0.0310496	0.00292026	0.0028855	0.00148614	1.51361e-05	2.51389e-25	1.91405e-05	2.52871e-05	1.30082e-05	7.60688e-07	0	0.000108345	1.28613e-07	-8.14496e-07	0.000580289	-0.119144	-0.0268238	0.0920939	-0.0741218	-0.0468191	0.0365267	-0.1	-0.386607	0
2332	4.24783	0	0.103756	4.14407	4.49771	4.45646	4.33682	3.60224	0.398382	0.33619	0.119646	0.0412423	0.0222333	0.0040668	0.000156205	0.00341015	0.00468848	0.00147705	0.00363057	0.0442601	0.00366299	3.18159e-05	0.0057548	0.0262739	0.00213946	0.0310496	0.00292026	0.0028855	0.00148614	1.51361e-05	2.51389e-25	1.91405e-05	2.52871e-05	1.30082e-05	7.60688e-07	0	0.000108345	1.28613e-07	-8.14496e-07	0.000580289	-0.119144	-0.0268238	0.0920939	-0.0741218	-0.0468191	0.0365267	-0.1	-0.386607	0
2333	4.24783	0	0.103756	4.14407	4.49771	4.45646	4.33682	3.60224	0.398382	0.33619	0.119646	0.0412423	0.0222333	0.0040668	0.000156205	0.00341015	0.00468848	0.00147705	0.00363057	0.0442601	0.00366299	3.18159e-05	0.0057548	0.0262739	0.00213946	0.0310496	0.00292026	0.0028855	0.00148614	1.51361e-05	2.51389e-25	1.91405e-05	2.52871e-05	1.30082e-05	7.60688e-07	0	0.000108345	1.28613e-07	-8.14496e-07	0.000580289	-0.119144	-0.0268238	0.0920939	-0.0741218	-0.0468191	0.0365267	-0.1	-0.386607	0
2334	4.24783	0	0.103756	4.14407	4.49771	4.45646	4.33682	3.60224	0.398382	0.33619	0.119646	0.0412423	0.0222333	0.0040668	0.000156205	0.00341015	0.00468848	0.00147705	0.00363057	0.0442601	0.00366299	3.18159e-05	0.0057548	0.0262739	0.00213946	0.0310496	0.00292026	0.0028855	0.00148614	1.51361e-05	2.51389e-25	1.91405e-05	2.52871e-05	1.30082e-05	7.60688e-07	0	0.000108345	1.28613e-07	-8.14496e-07	0.000580289	-0.119144	-0.0268238	0.0920939	-0.0741218	-0.0468191	0.0365267	-0.1	-0.386607	0
2335	4.24783	0	0.103756	4.14407	4.49771	4.45646	4.33682	3.60224	0.398382	0.33619	0.119646	0.0412423	0.0222333	0.0040668	0.000156205	0.00341015	0.00468848	0.00147705	0.00363057	0.0442601	0.00366299	3.18159e-05	0.0057548	0.0262739	0.00213946	0.0310496	0.00292026	0.0028855	0.00148614	1.51361e-05	2.51389e-25	1.91405e-05	2.52871e-05	1.30082e-05	7.60688e-07	0	0.000108345	1.28613e-07	-8.14496e-07	0.000580289	-0.119144	-0.0268238	0.0920939	-0.0741218	-0.0468191	0.0365267	-0.1	-0.386607	0
2336	4.24783	0	0.103756	4.14407	4.49771	4.45646	4.33682	3.60224	0.398382	0.33619	0.119646	0.0412423	0.0222333	0.0040668	0.000156205	0.00341015	0.00468848	0.00147705	0.00363057	0.0442601	0.00366299	3.18159e-05	0.0057548	0.0262739	0.00213946	0.0310496	0.00292026	0.0028855	0.00148614	1.51361e-05	2.51389e-25	1.91405e-05	2.52871e-05	1.30082e-05	7.60688e-07	0	0.000108345	1.28613e-07	-8.14496e-07	0.000580289	-0.119144	-0.0268238	0.0920939	-0.0741218	-0.0468191	0.0365267	-0.1	-0.386607	0
2337	4.24783	0	0.103756	4.14407	4.49771	4.45646	4.33682	3.60224	0.398382	0.33619	0.119646	0.0412423	0.0222333	0.0040668	0.000156205	0.00341015	0.00468848	0.00147705	0.00363057	0.0442601	0.00366299	3.18159e-05	0.0057548	0.0262739	0.00213946	0.0310496	0.00292026	0.0028855	0.00148614	1.51361e-05	2.51389e-25	1.91405e-05	2.52871e-05	1.30082e-05	7.60688e-07	0	0.000108345	1.28613e-07	-8.14496e-07	0.000580289	-0.119144	-0.0268238	0.0920939	-0.0741218	-0.0468191	0.0365267	-0.1	-0.386607	0
2338	4.24783	0	0.103756	4.14407	4.49771	4.45646	4.33682	3.60224	0.398382	0.33619	0.119646	0.0412423	0.0222333	0.0040668	0.000156205	0.00341015	0.00468848	0.00147705	0.00363057	0.0442601	0.00366299	3.18159e-05	0.0057548	0.0262739	0.00213946	0.0310496	0.00292026	0.0028855	0.00148614	1.51361e-05	2.51389e-25	1.91405e-05	2.52871e-05	1.30082e-05	7.60688e-07	0	0.000108345	1.28613e-07	-8.14496e-07	0.000580289	-0.119144	-0.0268238	0.0920939	-0.0741218	-0.0468191	0.0365267	-0.1	-0.386607	0
2339	4.24783	0	0.103756	4.14407	4.49771	4.45646	4.33682	3.60224	0.398382	0.33619	0.119646	0.0412423	0.0222333	0.0040668	0.000156205	0.00341015	0.00468848	0.00147705	0.00363057	0.0442601	0.00366299	3.18159e-05	0.0057548	0.0262739	0.00213946	0.0310496	0.00292026	0.0028855	0.00148614	1.51361e-05	2.51389e-25	1.91405e-05	2.52871e-05	1.30082e-05	7.60688e-07	0	0.000108345	1.28613e-07	-8.14496e-07	0.000580289	-0.119144	-0.0268238	0.0920939	-0.0741218	-0.0468191	0.0365267	-0.1	-0.386607	0
2340	4.24783	0	0.103756	4.14407	4.49771	4.45646	4.33682	3.60224	0.398382	0.33619	0.119646	0.0412423	0.0222333	0.0040668	0.000156205	0.00341015	0.00468848	0.00147705	0.00363057	0.0442601	0.00366299	3.18159e-05	0.0057548	0.0262739	0.00213946	0.0310496	0.00292026	0.0028855	0.00148614	1.51361e-05	2.51389e-25	1.91405e-05	2.52871e-05	1.30082e-05	7.60688e-07	0	0.000108345	1.28613e-07	-8.14496e-07	0.000580289	-0.119144	-0.0268238	0.0920939	-0.0741218	-0.0468191	0.0365267	-0.1	-0.386607	0
2341	4.24783	0	0.103756	4.14407	4.49771	4.45646	4.33682	3.60224	0.398382	0.33619	0.119646	0.0412423	0.0222333	0.0040668	0.000156205	0.00341015	0.00468848	0.00147705	0.00363057	0.0442601	0.00366299	3.18159e-05	0.0057548	0.0262739	0.00213946	0.0310496	0.00292026	0.0028855	0.00148614	1.51361e-05	2.51389e-25	1.91405e-05	2.52871e-05	1.30082e-05	7.60688e-07	0	0.000108345	1.28613e-07	-8.14496e-07	0.000580289	-0.119144	-0.0268238	0.0920939	-0.0741218	-0.0468191	0.0365267	-0.1	-0.386607	0
2342	4.24783	0	0.103756	4.14407	4.49771	4.45646	4.33682	3.60224	0.398382	0.33619	0.119646	0.0412423	0.0222333	0.0040668	0.000156205	0.00341015	0.00468848	0.00147705	0.00363057	0.0442601	0.00366299	3.18159e-05	0.0057548	0.0262739	0.00213946	0.0310496	0.00292026	0.0028855	0.00148614	1.51361e-05	2.51389e-25	1.91405e-05	2.52871e-05	1.30082e-05	7.60688e-07	0	0.000108345	1.28613e-07	-8.14496e-07	0.000580289	-0.119144	-0.0268238	0.0920939	-0.0741218	-0.0468191	0.0365267	-0.1	-0.386607	0
2343	4.24783	0	0.103756	4.14407	4.49771	4.45646	4.33682	3.60224	0.398382	0.33619	0.119646	0.0412423	0.0222333	0.0040668	0.000156205	0.00341015	0.00468848	0.00147705	0.00363057	0.0442601	0.00366299	3.18159e-05	0.0057548	0.0262739	0.00213946	0.0310496	0.00292026	0.0028855	0.00148614	1.51361e-05	2.51389e-25	1.91405e-05	2.52871e-05	1.30082e-05	7.60688e-07	0	0.000108345	1.28613e-07	-8.14496e-07	0.000580289	-0.119144	-0.0268238	0.0920939	-0.0741218	-0.0468191	0.0365267	-0.1	-0.386607	0
2344	4.24783	0	0.103756	4.14407	4.49771	4.45646	4.33682	3.60224	0.398382	0.33619	0.119646	0.0412423	0.0222333	0.0040668	0.000156205	0.00341015	0.00468848	0.00147705	0.00363057	0.0442601	0.00366299	3.18159e-05	0.0057548	0.0262739	0.00213946	0.0310496	0.00292026	0.0028855	0.00148614	1.51361e-05	2.51389e-25	1.91405e-05	2.52871e-05	1.30082e-05	7.60688e-07	0	0.000108345	1.28613e-07	-8.14496e-07	0.000580289	-0.119144	-0.0268238	0.0920939	-0.0741218	-0.0468191	0.0365267	-0.1	-0.386607	0
2345	4.24783	0	0.103756	4.14407	4.49771	4.45646	4.33682	3.60224	0.398382	0.33619	0.119646	0.0412423	0.0222333	0.0040668	0.000156205	0.00341015	0.00468848	0.00147705	0.00363057	0.0442601	0.00366299	3.18159e-05	0.0057548	0.0262739	0.00213946	0.0310496	0.00292026	0.0028855	0.00148614	1.51361e-05	2.51389e-25	1.91405e-05	2.52871e-05	1.30082e-05	7.60688e-07	0	0.000108345	1.28613e-07	-8.14496e-07	0.000580289	-0.119144	-0.0268238	0.0920939	-0.0741218	-0.0468191	0.0365267	-0.1	-0.386607	0
2346	4.24783	0	0.103756	4.14407	4.49771	4.45646	4.33682	3.60224	0.398382	0.33619	0.119646	0.0412423	0.0222333	0.0040668	0.000156205	0.00341015	0.00468848	0.00147705	0.00363057	0.0442601	0.00366299	3.18159e-05	0.0057548	0.0262739	0.00213946	0.0310496	0.00292026	0.0028855	0.00148614	1.51361e-05	2.51389e-25	1.91405e-05	2.52871e-05	1.30082e-05	7.60688e-07	0	0.000108345	1.28613e-07	-8.14496e-07	0.000580289	-0.119144	-0.0268238	0.0920939	-0.0741218	-0.0468191	0.0365267	-0.1	-0.386607	0
2347	4.24783	0	0.103756	4.14407	4.49771	4.45646	4.33682	3.60224	0.398382	0.33619	0.119646	0.0412423	0.0222333	0.0040668	0.000156205	0.00341015	0.00468848	0.00147705	0.00363057	0.0442601	0.00366299	3.18159e-05	0.0057548	0.0262739	0.00213946	0.0310496	0.00292026	0.0028855	0.00148614	1.51361e-05	2.51389e-25	1.91405e-05	2.52871e-05	1.30082e-05	7.60688e-07	0	0.000108345	1.28613e-07	-8.14496e-07	0.000580289	-0.119144	-0.0268238	0.0920939	-0.0741218	-0.0468191	0.0365267	-0.1	-0.386607	0
2348	4.24783	0	0.103756	4.14407	4.49771	4.45646	4.33682	3.60224	0.398382	0.33619	0.119646	0.0412423	0.0222333	0.0040668	0.000156205	0.00341015	0.00468848	0.00147705	0.00363057	0.0442601	0.00366299	3.18159e-05	0.0057548	0.0262739	0.00213946	0.0310496	0.00292026	0.0028855	0.00148614	1.51361e-05	2.51389e-25	1.91405e-05	2.52871e-05	1.30082e-05	7.60688e-07	0	0.000108345	1.28613e-07	-8.14496e-07	0.000580289	-0.119144	-0.0268238	0.0920939	-0.0741218	-0.0468191	0.0365267	-0.1	-0.386607	0
2349	4.24783	0	0.103756	4.14407	4.49771	4.45646	4.33682	3.60224	0.398382	0.33619	0.119646	0.0412423	0.0222333	0.0040668	0.000156205	0.00341015	0.00468848	0.00147705	0.00363057	0.0442601	0.00366299	3.18159e-05	0.0057548	0.0262739	0.00213946	0.0310496	0.00292026	0.0028855	0.00148614	1.51361e-05	2.51389e-25	1.91405e-05	2.52871e-05	1.30082e-05	7.60688e-07	0	0.000108345	1.28613e-07	-8.14496e-07	0.000580289	-0.119144	-0.0268238	0.0920939	-0.0741218	-0.0468191	0.0365267	-0.1	-0.386607	0
2350	4.24783	0	0.103756	4.14407	4.49771	4.45646	4.33682	3.60224	0.398382	0.33619	0.119646	0.0412423	0.0222333	0.0040668	0.000156205	0.00341015	0.00468848	0.00147705	0.00363057	0.0442601	0.00366299	3.18159e-05	0.0057548	0.0262739	0.00213946	0.0310496	0.00292026	0.0028855	0.00148614	1.51361e-05	2.51389e-25	1.91405e-05	2.52871e-05	1.30082e-05	7.60688e-07	0	0.000108345	1.28613e-07	-8.14496e-07	0.000580289	-0.119144	-0.0268238	0.0920939	-0.0741218	-0.0468191	0.0365267	-0.1	-0.386607	0
2351	4.24783	0	0.103756	4.14407	4.49771	4.45646	4.33682	3.60224	0.398382	0.33619	0.119646	0.0412423	0.0222333	0.0040668	0.000156205	0.00341015	0.00468848	0.00147705	0.00363057	0.0442601	0.00366299	3.18159e-05	0.0057548	0.0262739	0.00213946	0.0310496	0.00292026	0.0028855	0.00148614	1.51361e-05	2.51389e-25	1.91405e-05	2.52871e-05	1.30082e-05	7.60688e-07	0	0.000108345	1.28613e-07	-8.14496e-07	0.000580289	-0.119144	-0.0268238	0.0920939	-0.0741218	-0.0468191	0.0365267	-0.1	-0.386607	0
2352	4.24783	0	0.103756	4.14407	4.49771	4.45646	4.33682	3.60224	0.398382	0.33619	0.119646	0.0412423	0.0222333	0.0040668	0.000156205	0.00341015	0.00468848	0.00147705	0.00363057	0.0442601	0.00366299	3.18159e-05	0.0057548	0.0262739	0.00213946	0.0310496	0.00292026	0.0028855	0.00148614	1.51361e-05	2.51389e-25	1.91405e-05	2.52871e-05	1.30082e-05	7.60688e-07	0	0.000108345	1.28613e-07	-8.14496e-07	0.000580289	-0.119144	-0.0268238	0.0920939	-0.0741218	-0.0468191	0.0365267	-0.1	-0.386607	0
2353	4.24783	0	0.103756	4.14407	4.49771	4.45646	4.33682	3.60224	0.398382	0.33619	0.119646	0.0412423	0.0222333	0.0040668	0.000156205	0.00341015	0.00468848	0.00147705	0.00363057	0.0442601	0.00366299	3.18159e-05	0.0057548	0.0262739	0.00213946	0.0310496	0.00292026	0.0028855	0.00148614	1.51361e-05	2.51389e-25	1.91405e-05	2.52871e-05	1.30082e-05	7.60688e-07	0	0.000108345	1.28613e-07	-8.14496e-07	0.000580289	-0.119144	-0.0268238	0.0920939	-0.0741218	-0.0468191	0.0365267	-0.1	-0.386607	0
2354	4.24783	0	0.103756	4.14407	4.49771	4.45646	4.33682	3.60224	0.398382	0.33619	0.119646	0.0412423	0.0222333	0.0040668	0.000156205	0.00341015	0.00468848	0.00147705	0.00363057	0.0442601	0.00366299	3.18159e-05	0.0057548	0.0262739	0.00213946	0.0310496	0.00292026	0.0028855	0.00148614	1.51361e-05	2.51389e-25	1.91405e-05	2.52871e-05	1.30082e-05	7.60688e-07	0	0.000108345	1.28613e-07	-8.14496e-07	0.000580289	-0.119144	-0.0268238	0.0920939	-0.0741218	-0.0468191	0.0365267	-0.1	-0.386607	0
2355	4.24783	0	0.103756	4.14407	4.49771	4.45646	4.33682	3.60224	0.398382	0.33619	0.119646	0.0412423	0.0222333	0.0040668	0.000156205	0.00341015	0.00468848	0.00147705	0.00363057	0.0442601	0.00366299	3.18159e-05	0.0057548	0.0262739	0.00213946	0.0310496	0.00292026	0.0028855	0.00148614	1.51361e-05	2.51389e-25	1.91405e-05	2.52871e-05	1.30082e-05	7.60688e-07	0	0.000108345	1.28613e-07	-8.14496e-07	0.000580289	-0.119144	-0.0268238	0.0920939	-0.0741218	-0.0468191	0.0365267	-0.1	-0.386607	0
2356	4.24783	0	0.103756	4.14407	4.49771	4.45646	4.33682	3.60224	0.398382	0.33619	0.119646	0.0412423	0.0222333	0.0040668	0.000156205	0.00341015	0.00468848	0.00147705	0.00363057	0.0442601	0.00366299	3.18159e-05	0.0057548	0.0262739	0.00213946	0.0310496	0.00292026	0.0028855	0.00148614	1.51361e-05	2.51389e-25	1.91405e-05	2.52871e-05	1.30082e-05	7.60688e-07	0	0.000108345	1.28613e-07	-8.14496e-07	0.000580289	-0.119144	-0.0268238	0.0920939	-0.0741218	-0.0468191	0.0365267	-0.1	-0.386607	0
2357	4.24783	0	0.103756	4.14407	4.49771	4.45646	4.33682	3.60224	0.398382	0.33619	0.119646	0.0412423	0.0222333	0.0040668	0.000156205	0.00341015	0.00468848	0.00147705	0.00363057	0.0442601	0.00366299	3.18159e-05	0.0057548	0.0262739	0.00213946	0.0310496	0.00292026	0.0028855	0.00148614	1.51361e-05	2.51389e-25	1.91405e-05	2.52871e-05	1.30082e-05	7.60688e-07	0	0.000108345	1.28613e-07	-8.14496e-07	0.000580289	-0.119144	-0.0268238	0.0920939	-0.0741218	-0.0468191	0.0365267	-0.1	-0.386607	0
2358	4.24783	0	0.103756	4.14407	4.49771	4.45646	4.33682	3.60224	0.398382	0.33619	0.119646	0.0412423	0.0222333	0.0040668	0.000156205	0.00341015	0.00468848	0.00147705	0.00363057	0.0442601	0.00366299	3.18159e-05	0.0057548	0.0262739	0.00213946	0.0310496	0.00292026	0.0028855	0.00148614	1.51361e-05	2.51389e-25	1.91405e-05	2.52871e-05	1.30082e-05	7.60688e-07	0	0.000108345	1.28613e-07	-8.14496e-07	0.000580289	-0.119144	-0.0268238	0.0920939	-0.0741218	-0.0468191	0.0365267	-0.1	-0.386607	0
2359	4.24783	0	0.103756	4.14407	4.49771	4.45646	4.33682	3.60224	0.398382	0.33619	0.119646	0.0412423	0.0222333	0.0040668	0.000156205	0.00341015	0.00468848	0.00147705	0.00363057	0.0442601	0.00366299	3.18159e-05	0.0057548	0.0262739	0.00213946	0.0310496	0.00292026	0.0028855	0.00148614	1.51361e-05	2.51389e-25	1.91405e-05	2.52871e-05	1.30082e-05	7.60688e-07	0	0.000108345	1.28613e-07	-8.14496e-07	0.000580289	-0.119144	-0.0268238	0.0920939	-0.0741218	-0.0468191	0.0365267	-0.1	-0.386607	0
2360	4.24783	0	0.103756	4.14407	4.49771	4.45646	4.33682	3.60224	0.398382	0.33619	0.119646	0.0412423	0.0222333	0.0040668	0.000156205	0.00341015	0.00468848	0.00147705	0.00363057	0.0442601	0.00366299	3.18159e-05	0.0057548	0.0262739	0.00213946	0.0310496	0.00292026	0.0028855	0.00148614	1.51361e-05	2.51389e-25	1.91405e-05	2.52871e-05	1.30082e-05	7.60688e-07	0	0.000108345	1.28613e-07	-8.14496e-07	0.000580289	-0.119144	-0.0268238	0.0920939	-0.0741218	-0.0468191	0.0365267	-0.1	-0.386607	0
2361	4.24783	0	0.103756	4.14407	4.49771	4.45646	4.33682	3.60224	0.398382	0.33619	0.119646	0.0412423	0.0222333	0.0040668	0.000156205	0.00341015	0.00468848	0.00147705	0.00363057	0.0442601	0.00366299	3.18159e-05	0.0057548	0.0262739	0.00213946	0.0310496	0.00292026	0.0028855	0.00148614	1.51361e-05	2.51389e-25	1.91405e-05	2.52871e-05	1.30082e-05	7.60688e-07	0	0.000108345	1.28613e-07	-8.14496e-07	0.000580289	-0.119144	-0.0268238	0.0920939	-0.0741218	-0.0468191	0.0365267	-0.1	-0.386607	0
2362	4.24783	0	0.103756	4.14407	4.49771	4.45646	4.33682	3.60224	0.398382	0.33619	0.119646	0.0412423	0.0222333	0.0040668	0.000156205	0.00341015	0.00468848	0.00147705	0.00363057	0.0442601	0.00366299	3.18159e-05	0.0057548	0.0262739	0.00213946	0.0310496	0.00292026	0.0028855	0.00148614	1.51361e-05	2.51389e-25	1.91405e-05	2.52871e-05	1.30082e-05	7.60688e-07	0	0.000108345	1.28613e-07	-8.14496e-07	0.000580289	-0.119144	-0.0268238	0.0920939	-0.0741218	-0.0468191	0.0365267	-0.1	-0.386607	0
2363	4.24783	0	0.103756	4.14407	4.49771	4.45646	4.33682	3.60224	0.398382	0.33619	0.119646	0.0412423	0.0222333	0.0040668	0.000156205	0.00341015	0.00468848	0.00147705	0.00363057	0.0442601	0.00366299	3.18159e-05	0.0057548	0.0262739	0.00213946	0.0310496	0.00292026	0.0028855	0.00148614	1.51361e-05	2.51389e-25	1.91405e-05	2.52871e-05	1.30082e-05	7.60688e-07	0	0.000108345	1.28613e-07	-8.14496e-07	0.000580289	-0.119144	-0.0268238	0.0920939	-0.0741218	-0.0468191	0.0365267	-0.1	-0.386607	0
2364	4.24783	0	0.103756	4.14407	4.49771	4.45646	4.33682	3.60224	0.398382	0.33619	0.119646	0.0412423	0.0222333	0.0040668	0.000156205	0.00341015	0.00468848	0.00147705	0.00363057	0.0442601	0.00366299	3.18159e-05	0.0057548	0.0262739	0.00213946	0.0310496	0.00292026	0.0028855	0.00148614	1.51361e-05	2.51389e-25	1.91405e-05	2.52871e-05	1.30082e-05	7.60688e-07	0	0.000108345	1.28613e-07	-8.14496e-07	0.000580289	-0.119144	-0.0268238	0.0920939	-0.0741218	-0.0468191	0.0365267	-0.1	-0.386607	0
2365	4.24783	0	0.103756	4.14407	4.49771	4.45646	4.33682	3.60224	0.398382	0.33619	0.119646	0.0412423	0.0222333	0.0040668	0.000156205	0.00341015	0.00468848	0.00147705	0.00363057	0.0442601	0.00366299	3.18159e-05	0.0057548	0.0262739	0.00213946	0.0310496	0.00292026	0.0028855	0.00148614	1.51361e-05	2.51389e-25	1.91405e-05	2.52871e-05	1.30082e-05	7.60688e-07	0	0.000108345	1.28613e-07	-8.14496e-07	0.000580289	-0.119144	-0.0268238	0.0920939	-0.0741218	-0.0468191	0.0365267	-0.1	-0.386607	0
2366	4.24783	0	0.103756	4.14407	4.49771	4.45646	4.33682	3.60224	0.398382	0.33619	0.119646	0.0412423	0.0222333	0.0040668	0.000156205	0.00341015	0.00468848	0.00147705	0.00363057	0.0442601	0.00366299	3.18159e-05	0.0057548	0.0262739	0.00213946	0.0310496	0.00292026	0.0028855	0.00148614	1.51361e-05	2.51389e-25	1.91405e-05	2.52871e-05	1.30082e-05	7.60688e-07	0	0.000108345	1.28613e-07	-8.14496e-07	0.000580289	-0.119144	-0.0268238	0.0920939	-0.0741218	-0.0468191	0.0365267	-0.1	-0.386607	0
2367	4.24783	0	0.103756	4.14407	4.49771	4.45646	4.33682	3.60224	0.398382	0.33619	0.119646	0.0412423	0.0222333	0.0040668	0.000156205	0.00341015	0.00468848	0.00147705	0.00363057	0.0442601	0.00366299	3.18159e-05	0.0057548	0.0262739	0.00213946	0.0310496	0.00292026	0.0028855	0.00148614	1.51361e-05	2.51389e-25	1.91405e-05	2.52871e-05	1.30082e-05	7.60688e-07	0	0.000108345	1.28613e-07	-8.14496e-07	0.000580289	-0.119144	-0.0268238	0.0920939	-0.0741218	-0.0468191	0.0365267	-0.1	-0.386607	0
2368	4.24783	0	0.103756	4.14407	4.49771	4.45646	4.33682	3.60224	0.398382	0.33619	0.119646	0.0412423	0.0222333	0.0040668	0.000156205	0.00341015	0.00468848	0.00147705	0.00363057	0.0442601	0.00366299	3.18159e-05	0.0057548	0.0262739	0.00213946	0.0310496	0.00292026	0.0028855	0.00148614	1.51361e-05	2.51389e-25	1.91405e-05	2.52871e-05	1.30082e-05	7.60688e-07	0	0.000108345	1.28613e-07	-8.14496e-07	0.000580289	-0.119144	-0.0268238	0.0920939	-0.0741218	-0.0468191	0.0365267	-0.1	-0.386607	0
2369	4.24783	0	0.103756	4.14407	4.49771	4.45646	4.33682	3.60224	0.398382	0.33619	0.119646	0.0412423	0.0222333	0.0040668	0.000156205	0.00341015	0.00468848	0.00147705	0.00363057	0.0442601	0.00366299	3.18159e-05	0.0057548	0.0262739	0.00213946	0.0310496	0.00292026	0.0028855	0.00148614	1.51361e-05	2.51389e-25	1.91405e-05	2.52871e-05	1.30082e-05	7.60688e-07	0	0.000108345	1.28613e-07	-8.14496e-07	0.000580289	-0.119144	-0.0268238	0.0920939	-0.0741218	-0.0468191	0.0365267	-0.1	-0.386607	0
2370	4.24783	0	0.103756	4.14407	4.49771	4.45646	4.33682	3.60224	0.398382	0.33619	0.119646	0.0412423	0.0222333	0.0040668	0.000156205	0.00341015	0.00468848	0.00147705	0.00363057	0.0442601	0.00366299	3.18159e-05	0.0057548	0.0262739	0.00213946	0.0310496	0.00292026	0.0028855	0.00148614	1.51361e-05	2.51389e-25	1.91405e-05	2.52871e-05	1.30082e-05	7.60688e-07	0	0.000108345	1.28613e-07	-8.14496e-07	0.000580289	-0.119144	-0.0268238	0.0920939	-0.0741218	-0.0468191	0.0365267	-0.1	-0.386607	0
2371	4.24783	0	0.103756	4.14407	4.49771	4.45646	4.33682	3.60224	0.398382	0.33619	0.119646	0.0412423	0.0222333	0.0040668	0.000156205	0.00341015	0.00468848	0.00147705	0.00363057	0.0442601	0.00366299	3.18159e-05	0.0057548	0.0262739	0.00213946	0.0310496	0.00292026	0.0028855	0.00148614	1.51361e-05	2.51389e-25	1.91405e-05	2.52871e-05	1.30082e-05	7.60688e-07	0	0.000108345	1.28613e-07	-8.14496e-07	0.000580289	-0.119144	-0.0268238	0.0920939	-0.0741218	-0.0468191	0.0365267	-0.1	-0.386607	0
2372	4.24783	0	0.103756	4.14407	4.49771	4.45646	4.33682	3.60224	0.398382	0.33619	0.119646	0.0412423	0.0222333	0.0040668	0.000156205	0.00341015	0.00468848	0.00147705	0.00363057	0.0442601	0.00366299	3.18159e-05	0.0057548	0.0262739	0.00213946	0.0310496	0.00292026	0.0028855	0.00148614	1.51361e-05	2.51389e-25	1.91405e-05	2.52871e-05	1.30082e-05	7.60688e-07	0	0.000108345	1.28613e-07	-8.14496e-07	0.000580289	-0.119144	-0.0268238	0.0920939	-0.0741218	-0.0468191	0.0365267	-0.1	-0.386607	0
2373	4.24783	0	0.103756	4.14407	4.49771	4.45646	4.33682	3.60224	0.398382	0.33619	0.119646	0.0412423	0.0222333	0.0040668	0.000156205	0.00341015	0.00468848	0.00147705	0.00363057	0.0442601	0.00366299	3.18159e-05	0.0057548	0.0262739	0.00213946	0.0310496	0.00292026	0.0028855	0.00148614	1.51361e-05	2.51389e-25	1.91405e-05	2.52871e-05	1.30082e-05	7.60688e-07	0	0.000108345	1.28613e-07	-8.14496e-07	0.000580289	-0.119144	-0.0268238	0.0920939	-0.0741218	-0.0468191	0.0365267	-0.1	-0.386607	0
2374	4.24783	0	0.103756	4.14407	4.49771	4.45646	4.33682	3.60224	0.398382	0.33619	0.119646	0.0412423	0.0222333	0.0040668	0.000156205	0.00341015	0.00468848	0.00147705	0.00363057	0.0442601	0.00366299	3.18159e-05	0.0057548	0.0262739	0.00213946	0.0310496	0.00292026	0.0028855	0.00148614	1.51361e-05	2.51389e-25	1.91405e-05	2.52871e-05	1.30082e-05	7.60688e-07	0	0.000108345	1.28613e-07	-8.14496e-07	0.000580289	-0.119144	-0.0268238	0.0920939	-0.0741218	-0.0468191	0.0365267	-0.1	-0.386607	0
2375	4.24783	0	0.103756	4.14407	4.49771	4.45646	4.33682	3.60224	0.398382	0.33619	0.119646	0.0412423	0.0222333	0.0040668	0.000156205	0.00341015	0.00468848	0.00147705	0.00363057	0.0442601	0.00366299	3.18159e-05	0.0057548	0.0262739	0.00213946	0.0310496	0.00292026	0.0028855	0.00148614	1.51361e-05	2.51389e-25	1.91405e-05	2.52871e-05	1.30082e-05	7.60688e-07	0	0.000108345	1.28613e-07	-8.14496e-07	0.000580289	-0.119144	-0.0268238	0.0920939	-0.0741218	-0.0468191	0.0365267	-0.1	-0.386607	0
2376	4.24783	0	0.103756	4.14407	4.49771	4.45646	4.33682	3.60224	0.398382	0.33619	0.119646	0.0412423	0.0222333	0.0040668	0.000156205	0.00341015	0.00468848	0.00147705	0.00363057	0.0442601	0.00366299	3.18159e-05	0.0057548	0.0262739	0.00213946	0.0310496	0.00292026	0.0028855	0.00148614	1.51361e-05	2.51389e-25	1.91405e-05	2.52871e-05	1.30082e-05	7.60688e-07	0	0.000108345	1.28613e-07	-8.14496e-07	0.000580289	-0.119144	-0.0268238	0.0920939	-0.0741218	-0.0468191	0.0365267	-0.1	-0.386607	0
2377	4.24783	0	0.103756	4.14407	4.49771	4.45646	4.33682	3.60224	0.398382	0.33619	0.119646	0.0412423	0.0222333	0.0040668	0.000156205	0.00341015	0.00468848	0.00147705	0.00363057	0.0442601	0.00366299	3.18159e-05	0.0057548	0.0262739	0.00213946	0.0310496	0.00292026	0.0028855	0.00148614	1.51361e-05	2.51389e-25	1.91405e-05	2.52871e-05	1.30082e-05	7.60688e-07	0	0.000108345	1.28613e-07	-8.14496e-07	0.000580289	-0.119144	-0.0268238	0.0920939	-0.0741218	-0.0468191	0.0365267	-0.1	-0.386607	0
2378	4.24783	0	0.103756	4.14407	4.49771	4.45646	4.33682	3.60224	0.398382	0.33619	0.119646	0.0412423	0.0222333	0.0040668	0.000156205	0.00341015	0.00468848	0.00147705	0.00363057	0.0442601	0.00366299	3.18159e-05	0.0057548	0.0262739	0.00213946	0.0310496	0.00292026	0.0028855	0.00148614	1.51361e-05	2.51389e-25	1.91405e-05	2.52871e-05	1.30082e-05	7.60688e-07	0	0.000108345	1.28613e-07	-8.14496e-07	0.000580289	-0.119144	-0.0268238	0.0920939	-0.0741218	-0.0468191	0.0365267	-0.1	-0.386607	0
2379	4.24783	0	0.103756	4.14407	4.49771	4.45646	4.33682	3.60224	0.398382	0.33619	0.119646	0.0412423	0.0222333	0.0040668	0.000156205	0.00341015	0.00468848	0.00147705	0.00363057	0.0442601	0.00366299	3.18159e-05	0.0057548	0.0262739	0.00213946	0.0310496	0.00292026	0.0028855	0.00148614	1.51361e-05	2.51389e-25	1.91405e-05	2.52871e-05	1.30082e-05	7.60688e-07	0	0.000108345	1.28613e-07	-8.14496e-07	0.000580289	-0.119144	-0.0268238	0.0920939	-0.0741218	-0.0468191	0.0365267	-0.1	-0.386607	0
2380	4.24783	0	0.103756	4.14407	4.49771	4.45646	4.33682	3.60224	0.398382	0.33619	0.119646	0.0412423	0.0222333	0.0040668	0.000156205	0.00341015	0.00468848	0.00147705	0.00363057	0.0442601	0.00366299	3.18159e-05	0.0057548	0.0262739	0.00213946	0.0310496	0.00292026	0.0028855	0.00148614	1.51361e-05	2.51389e-25	1.91405e-05	2.52871e-05	1.30082e-05	7.60688e-07	0	0.000108345	1.28613e-07	-8.14496e-07	0.000580289	-0.119144	-0.0268238	0.0920939	-0.0741218	-0.0468191	0.0365267	-0.1	-0.386607	0
2381	4.24783	0	0.103756	4.14407	4.49771	4.45646	4.33682	3.60224	0.398382	0.33619	0.119646	0.0412423	0.0222333	0.0040668	0.000156205	0.00341015	0.00468848	0.00147705	0.00363057	0.0442601	0.00366299	3.18159e-05	0.0057548	0.0262739	0.00213946	0.0310496	0.00292026	0.0028855	0.00148614	1.51361e-05	2.51389e-25	1.91405e-05	2.52871e-05	1.30082e-05	7.60688e-07	0	0.000108345	1.28613e-07	-8.14496e-07	0.000580289	-0.119144	-0.0268238	0.0920939	-0.0741218	-0.0468191	0.0365267	-0.1	-0.386607	0
2382	4.24783	0	0.103756	4.14407	4.49771	4.45646	4.33682	3.60224	0.398382	0.33619	0.119646	0.0412423	0.0222333	0.0040668	0.000156205	0.00341015	0.00468848	0.00147705	0.00363057	0.0442601	0.00366299	3.18159e-05	0.0057548	0.0262739	0.00213946	0.0310496	0.00292026	0.0028855	0.00148614	1.51361e-05	2.51389e-25	1.91405e-05	2.52871e-05	1.30082e-05	7.60688e-07	0	0.000108345	1.28613e-07	-8.14496e-07	0.000580289	-0.119144	-0.0268238	0.0920939	-0.0741218	-0.0468191	0.0365267	-0.1	-0.386607	0
2383	4.24783	0	0.103756	4.14407	4.49771	4.45646	4.33682	3.60224	0.398382	0.33619	0.119646	0.0412423	0.0222333	0.0040668	0.000156205	0.00341015	0.00468848	0.00147705	0.00363057	0.0442601	0.00366299	3.18159e-05	0.0057548	0.0262739	0.00213946	0.0310496	0.00292026	0.0028855	0.00148614	1.51361e-05	2.51389e-25	1.91405e-05	2.52871e-05	1.30082e-05	7.60688e-07	0	0.000108345	1.28613e-07	-8.14496e-07	0.000580289	-0.119144	-0.0268238	0.0920939	-0.0741218	-0.0468191	0.0365267	-0.1	-0.386607	0
2384	4.24783	0	0.103756	4.14407	4.49771	4.45646	4.33682	3.60224	0.398382	0.33619	0.119646	0.0412423	0.0222333	0.0040668	0.000156205	0.00341015	0.00468848	0.00147705	0.00363057	0.0442601	0.00366299	3.18159e-05	0.0057548	0.0262739	0.00213946	0.0310496	0.00292026	0.0028855	0.00148614	1.51361e-05	2.51389e-25	1.91405e-05	2.52871e-05	1.30082e-05	7.60688e-07	0	0.000108345	1.28613e-07	-8.14496e-07	0.000580289	-0.119144	-0.0268238	0.0920939	-0.0741218	-0.0468191	0.0365267	-0.1	-0.386607	0
2385	4.24783	0	0.103756	4.14407	4.49771	4.45646	4.33682	3.60224	0.398382	0.33619	0.119646	0.0412423	0.0222333	0.0040668	0.000156205	0.00341015	0.00468848	0.00147705	0.00363057	0.0442601	0.00366299	3.18159e-05	0.0057548	0.0262739	0.00213946	0.0310496	0.00292026	0.0028855	0.00148614	1.51361e-05	2.51389e-25	1.91405e-05	2.52871e-05	1.30082e-05	7.60688e-07	0	0.000108345	1.28613e-07	-8.14496e-07	0.000580289	-0.119144	-0.0268238	0.0920939	-0.0741218	-0.0468191	0.0365267	-0.1	-0.386607	0
2386	4.24783	0	0.103756	4.14407	4.49771	4.45646	4.33682	3.60224	0.398382	0.33619	0.119646	0.0412423	0.0222333	0.0040668	0.000156205	0.00341015	0.00468848	0.00147705	0.00363057	0.0442601	0.00366299	3.18159e-05	0.0057548	0.0262739	0.00213946	0.0310496	0.00292026	0.0028855	0.00148614	1.51361e-05	2.51389e-25	1.91405e-05	2.52871e-05	1.30082e-05	7.60688e-07	0	0.000108345	1.28613e-07	-8.14496e-07	0.000580289	-0.119144	-0.0268238	0.0920939	-0.0741218	-0.0468191	0.0365267	-0.1	-0.386607	0
2387	4.24783	0	0.103756	4.14407	4.49771	4.45646	4.33682	3.60224	0.398382	0.33619	0.119646	0.0412423	0.0222333	0.0040668	0.000156205	0.00341015	0.00468848	0.00147705	0.00363057	0.0442601	0.00366299	3.18159e-05	0.0057548	0.0262739	0.00213946	0.0310496	0.00292026	0.0028855	0.00148614	1.51361e-05	2.51389e-25	1.91405e-05	2.52871e-05	1.30082e-05	7.60688e-07	0	0.000108345	1.28613e-07	-8.14496e-07	0.000580289	-0.119144	-0.0268238	0.0920939	-0.0741218	-0.0468191	0.0365267	-0.1	-0.386607	0
2388	4.24783	0	0.103756	4.14407	4.49771	4.45646	4.33682	3.60224	0.398382	0.33619	0.119646	0.0412423	0.0222333	0.0040668	0.000156205	0.00341015	0.00468848	0.00147705	0.00363057	0.0442601	0.00366299	3.18159e-05	0.0057548	0.0262739	0.00213946	0.0310496	0.00292026	0.0028855	0.00148614	1.51361e-05	2.51389e-25	1.91405e-05	2.52871e-05	1.30082e-05	7.60688e-07	0	0.000108345	1.28613e-07	-8.14496e-07	0.000580289	-0.119144	-0.0268238	0.0920939	-0.0741218	-0.0468191	0.0365267	-0.1	-0.386607	0
2389	4.24783	0	0.103756	4.14407	4.49771	4.45646	4.33682	3.60224	0.398382	0.33619	0.119646	0.0412423	0.0222333	0.0040668	0.000156205	0.00341015	0.00468848	0.00147705	0.00363057	0.0442601	0.00366299	3.18159e-05	0.0057548	0.0262739	0.00213946	0.0310496	0.00292026	0.0028855	0.00148614	1.51361e-05	2.51389e-25	1.91405e-05	2.52871e-05	1.30082e-05	7.60688e-07	0	0.000108345	1.28613e-07	-8.14496e-07	0.000580289	-0.119144	-0.0268238	0.0920939	-0.0741218	-0.0468191	0.0365267	-0.1	-0.386607	0
2390	4.24783	0	0.103756	4.14407	4.49771	4.45646	4.33682	3.60224	0.398382	0.33619	0.119646	0.0412423	0.0222333	0.0040668	0.000156205	0.00341015	0.00468848	0.00147705	0.00363057	0.0442601	0.00366299	3.18159e-05	0.0057548	0.0262739	0.00213946	0.0310496	0.00292026	0.0028855	0.00148614	1.51361e-05	2.51389e-25	1.91405e-05	2.52871e-05	1.30082e-05	7.60688e-07	0	0.000108345	1.28613e-07	-8.14496e-07	0.000580289	-0.119144	-0.0268238	0.0920939	-0.0741218	-0.0468191	0.0365267	-0.1	-0.386607	0
2391	4.24783	0	0.103756	4.14407	4.49771	4.45646	4.33682	3.60224	0.398382	0.33619	0.119646	0.0412423	0.0222333	0.0040668	0.000156205	0.00341015	0.00468848	0.00147705	0.00363057	0.0442601	0.00366299	3.18159e-05	0.0057548	0.0262739	0.00213946	0.0310496	0.00292026	0.0028855	0.00148614	1.51361e-05	2.51389e-25	1.91405e-05	2.52871e-05	1.30082e-05	7.60688e-07	0	0.000108345	1.28613e-07	-8.14496e-07	0.000580289	-0.119144	-0.0268238	0.0920939	-0.0741218	-0.0468191	0.0365267	-0.1	-0.386607	0
2392	4.24783	0	0.103756	4.14407	4.49771	4.45646	4.33682	3.60224	0.398382	0.33619	0.119646	0.0412423	0.0222333	0.0040668	0.000156205	0.00341015	0.00468848	0.00147705	0.00363057	0.0442601	0.00366299	3.18159e-05	0.0057548	0.0262739	0.00213946	0.0310496	0.00292026	0.0028855	0.00148614	1.51361e-05	2.51389e-25	1.91405e-05	2.52871e-05	1.30082e-05	7.60688e-07	0	0.000108345	1.28613e-07	-8.14496e-07	0.000580289	-0.119144	-0.0268238	0.0920939	-0.0741218	-0.0468191	0.0365267	-0.1	-0.386607	0
2393	4.24783	0	0.103756	4.14407	4.49771	4.45646	4.33682	3.60224	0.398382	0.33619	0.119646	0.0412423	0.0222333	0.0040668	0.000156205	0.00341015	0.00468848	0.00147705	0.00363057	0.0442601	0.00366299	3.18159e-05	0.0057548	0.0262739	0.00213946	0.0310496	0.00292026	0.0028855	0.00148614	1.51361e-05	2.51389e-25	1.91405e-05	2.52871e-05	1.30082e-05	7.60688e-07	0	0.000108345	1.28613e-07	-8.14496e-07	0.000580289	-0.119144	-0.0268238	0.0920939	-0.0741218	-0.0468191	0.0365267	-0.1	-0.386607	0
2394	4.24783	0	0.103756	4.14407	4.49771	4.45646	4.33682	3.60224	0.398382	0.33619	0.119646	0.0412423	0.0222333	0.0040668	0.000156205	0.00341015	0.00468848	0.00147705	0.00363057	0.0442601	0.00366299	3.18159e-05	0.0057548	0.0262739	0.00213946	0.0310496	0.00292026	0.0028855	0.00148614	1.51361e-05	2.51389e-25	1.91405e-05	2.52871e-05	1.30082e-05	7.60688e-07	0	0.000108345	1.28613e-07	-8.14496e-07	0.000580289	-0.119144	-0.0268238	0.0920939	-0.0741218	-0.0468191	0.0365267	-0.1	-0.386607	0
2395	4.24783	0	0.103756	4.14407	4.49771	4.45646	4.33682	3.60224	0.398382	0.33619	0.119646	0.0412423	0.0222333	0.0040668	0.000156205	0.00341015	0.00468848	0.00147705	0.00363057	0.0442601	0.00366299	3.18159e-05	0.0057548	0.0262739	0.00213946	0.0310496	0.00292026	0.0028855	0.00148614	1.51361e-05	2.51389e-25	1.91405e-05	2.52871e-05	1.30082e-05	7.60688e-07	0	0.000108345	1.28613e-07	-8.14496e-07	0.000580289	-0.119144	-0.0268238	0.0920939	-0.0741218	-0.0468191	0.0365267	-0.1	-0.386607	0
2396	4.24783	0	0.103756	4.14407	4.49771	4.45646	4.33682	3.60224	0.398382	0.33619	0.119646	0.0412423	0.0222333	0.0040668	0.000156205	0.00341015	0.00468848	0.00147705	0.00363057	0.0442601	0.00366299	3.18159e-05	0.0057548	0.0262739	0.00213946	0.0310496	0.00292026	0.0028855	0.00148614	1.51361e-05	2.51389e-25	1.91405e-05	2.52871e-05	1.30082e-05	7.60688e-07	0	0.000108345	1.28613e-07	-8.14496e-07	0.000580289	-0.119144	-0.0268238	0.0920939	-0.0741218	-0.0468191	0.0365267	-0.1	-0.386607	0
2397	4.24783	0	0.103756	4.14407	4.49771	4.45646	4.33682	3.60224	0.398382	0.33619	0.119646	0.0412423	0.0222333	0.0040668	0.000156205	0.00341015	0.00468848	0.00147705	0.00363057	0.0442601	0.00366299	3.18159e-05	0.0057548	0.0262739	0.00213946	0.0310496	0.00292026	0.0028855	0.00148614	1.51361e-05	2.51389e-25	1.91405e-05	2.52871e-05	1.30082e-05	7.60688e-07	0	0.000108345	1.28613e-07	-8.14496e-07	0.000580289	-0.119144	-0.0268238	0.0920939	-0.0741218	-0.0468191	0.0365267	-0.1	-0.386607	0
2398	4.24783	0	0.103756	4.14407	4.49771	4.45646	4.33682	3.60224	0.398382	0.33619	0.119646	0.0412423	0.0222333	0.0040668	0.000156205	0.00341015	0.00468848	0.00147705	0.00363057	0.0442601	0.00366299	3.18159e-05	0.0057548	0.0262739	0.00213946	0.0310496	0.00292026	0.0028855	0.00148614	1.51361e-05	2.51389e-25	1.91405e-05	2.52871e-05	1.30082e-05	7.60688e-07	0	0.000108345	1.28613e-07	-8.14496e-07	0.000580289	-0.119144	-0.0268238	0.0920939	-0.0741218	-0.0468191	0.0365267	-0.1	-0.386607	0
2399	4.24783	0	0.103756	4.14407	4.49771	4.45646	4.33682	3.60224	0.398382	0.33619	0.119646	0.0412423	0.0222333	0.0040668	0.000156205	0.00341015	0.00468848	0.00147705	0.00363057	0.0442601	0.00366299	3.18159e-05	0.0057548	0.0262739	0.00213946	0.0310496	0.00292026	0.0028855	0.00148614	1.51361e-05	2.51389e-25	1.91405e-05	2.52871e-05	1.30082e-05	7.60688e-07	0	0.000108345	1.28613e-07	-8.14496e-07	0.000580289	-0.119144	-0.0268238	0.0920939	-0.0741218	-0.0468191	0.0365267	-0.1	-0.386607	0
2400	4.24783	0	0.103756	4.14407	4.49771	4.45646	4.33682	3.60224	0.398382	0.33619	0.119646	0.0412423	0.0222333	0.0040668	0.000156205	0.00341015	0.00468848	0.00147705	0.00363057	0.0442601	0.00366299	3.18159e-05	0.0057548	0.0262739	0.00213946	0.0310496	0.00292026	0.0028855	0.00148614	1.51361e-05	2.51389e-25	1.91405e-05	2.52871e-05	1.30082e-05	7.60688e-07	0	0.000108345	1.28613e-07	-8.14496e-07	0.000580289	-0.119144	-0.0268238	0.0920939	-0.0741218	-0.0468191	0.0365267	-0.1	-0.386607	0
2401	4.24783	0	0.103756	4.14407	4.49771	4.45646	4.33682	3.60224	0.398382	0.33619	0.119646	0.0412423	0.0222333	0.0040668	0.000156205	0.00341015	0.00468848	0.00147705	0.00363057	0.0442601	0.00366299	3.18159e-05	0.0057548	0.0262739	0.00213946	0.0310496	0.00292026	0.0028855	0.00148614	1.51361e-05	2.51389e-25	1.91405e-05	2.52871e-05	1.30082e-05	7.60688e-07	0	0.000108345	1.28613e-07	-8.14496e-07	0.000580289	-0.119144	-0.0268238	0.0920939	-0.0741218	-0.0468191	0.0365267	-0.1	-0.386607	0
2402	4.24783	0	0.103756	4.14407	4.49771	4.45646	4.33682	3.60224	0.398382	0.33619	0.119646	0.0412423	0.0222333	0.0040668	0.000156205	0.00341015	0.00468848	0.00147705	0.00363057	0.0442601	0.00366299	3.18159e-05	0.0057548	0.0262739	0.00213946	0.0310496	0.00292026	0.0028855	0.00148614	1.51361e-05	2.51389e-25	1.91405e-05	2.52871e-05	1.30082e-05	7.60688e-07	0	0.000108345	1.28613e-07	-8.14496e-07	0.000580289	-0.119144	-0.0268238	0.0920939	-0.0741218	-0.0468191	0.0365267	-0.1	-0.386607	0
2403	4.24783	0	0.103756	4.14407	4.49771	4.45646	4.33682	3.60224	0.398382	0.33619	0.119646	0.0412423	0.0222333	0.0040668	0.000156205	0.00341015	0.00468848	0.00147705	0.00363057	0.0442601	0.00366299	3.18159e-05	0.0057548	0.0262739	0.00213946	0.0310496	0.00292026	0.0028855	0.00148614	1.51361e-05	2.51389e-25	1.91405e-05	2.52871e-05	1.30082e-05	7.60688e-07	0	0.000108345	1.28613e-07	-8.14496e-07	0.000580289	-0.119144	-0.0268238	0.0920939	-0.0741218	-0.0468191	0.0365267	-0.1	-0.386607	0
2404	4.24783	0	0.103756	4.14407	4.49771	4.45646	4.33682	3.60224	0.398382	0.33619	0.119646	0.0412423	0.0222333	0.0040668	0.000156205	0.00341015	0.00468848	0.00147705	0.00363057	0.0442601	0.00366299	3.18159e-05	0.0057548	0.0262739	0.00213946	0.0310496	0.00292026	0.0028855	0.00148614	1.51361e-05	2.51389e-25	1.91405e-05	2.52871e-05	1.30082e-05	7.60688e-07	0	0.000108345	1.28613e-07	-8.14496e-07	0.000580289	-0.119144	-0.0268238	0.0920939	-0.0741218	-0.0468191	0.0365267	-0.1	-0.386607	0
2405	4.24783	0	0.103756	4.14407	4.49771	4.45646	4.33682	3.60224	0.398382	0.33619	0.119646	0.0412423	0.0222333	0.0040668	0.000156205	0.00341015	0.00468848	0.00147705	0.00363057	0.0442601	0.00366299	3.18159e-05	0.0057548	0.0262739	0.00213946	0.0310496	0.00292026	0.0028855	0.00148614	1.51361e-05	2.51389e-25	1.91405e-05	2.52871e-05	1.30082e-05	7.60688e-07	0	0.000108345	1.28613e-07	-8.14496e-07	0.000580289	-0.119144	-0.0268238	0.0920939	-0.0741218	-0.0468191	0.0365267	-0.1	-0.386607	0
2406	4.24783	0	0.103756	4.14407	4.49771	4.45646	4.33682	3.60224	0.398382	0.33619	0.119646	0.0412423	0.0222333	0.0040668	0.000156205	0.00341015	0.00468848	0.00147705	0.00363057	0.0442601	0.00366299	3.18159e-05	0.0057548	0.0262739	0.00213946	0.0310496	0.00292026	0.0028855	0.00148614	1.51361e-05	2.51389e-25	1.91405e-05	2.52871e-05	1.30082e-05	7.60688e-07	0	0.000108345	1.28613e-07	-8.14496e-07	0.000580289	-0.119144	-0.0268238	0.0920939	-0.0741218	-0.0468191	0.0365267	-0.1	-0.386607	0
2407	4.24783	0	0.103756	4.14407	4.49771	4.45646	4.33682	3.60224	0.398382	0.33619	0.119646	0.0412423	0.0222333	0.0040668	0.000156205	0.00341015	0.00468848	0.00147705	0.00363057	0.0442601	0.00366299	3.18159e-05	0.0057548	0.0262739	0.00213946	0.0310496	0.00292026	0.0028855	0.00148614	1.51361e-05	2.51389e-25	1.91405e-05	2.52871e-05	1.30082e-05	7.60688e-07	0	0.000108345	1.28613e-07	-8.14496e-07	0.000580289	-0.119144	-0.0268238	0.0920939	-0.0741218	-0.0468191	0.0365267	-0.1	-0.386607	0
2408	4.24783	0	0.103756	4.14407	4.49771	4.45646	4.33682	3.60224	0.398382	0.33619	0.119646	0.0412423	0.0222333	0.0040668	0.000156205	0.00341015	0.00468848	0.00147705	0.00363057	0.0442601	0.00366299	3.18159e-05	0.0057548	0.0262739	0.00213946	0.0310496	0.00292026	0.0028855	0.00148614	1.51361e-05	2.51389e-25	1.91405e-05	2.52871e-05	1.30082e-05	7.60688e-07	0	0.000108345	1.28613e-07	-8.14496e-07	0.000580289	-0.119144	-0.0268238	0.0920939	-0.0741218	-0.0468191	0.0365267	-0.1	-0.386607	0
2409	4.24783	0	0.103756	4.14407	4.49771	4.45646	4.33682	3.60224	0.398382	0.33619	0.119646	0.0412423	0.0222333	0.0040668	0.000156205	0.00341015	0.00468848	0.00147705	0.00363057	0.0442601	0.00366299	3.18159e-05	0.0057548	0.0262739	0.00213946	0.0310496	0.00292026	0.0028855	0.00148614	1.51361e-05	2.51389e-25	1.91405e-05	2.52871e-05	1.30082e-05	7.60688e-07	0	0.000108345	1.28613e-07	-8.14496e-07	0.000580289	-0.119144	-0.0268238	0.0920939	-0.0741218	-0.0468191	0.0365267	-0.1	-0.386607	0
2410	4.24783	0	0.103756	4.14407	4.49771	4.45646	4.33682	3.60224	0.398382	0.33619	0.119646	0.0412423	0.0222333	0.0040668	0.000156205	0.00341015	0.00468848	0.00147705	0.00363057	0.0442601	0.00366299	3.18159e-05	0.0057548	0.0262739	0.00213946	0.0310496	0.00292026	0.0028855	0.00148614	1.51361e-05	2.51389e-25	1.91405e-05	2.52871e-05	1.30082e-05	7.60688e-07	0	0.000108345	1.28613e-07	-8.14496e-07	0.000580289	-0.119144	-0.0268238	0.0920939	-0.0741218	-0.0468191	0.0365267	-0.1	-0.386607	0
2411	4.24783	0	0.103756	4.14407	4.49771	4.45646	4.33682	3.60224	0.398382	0.33619	0.119646	0.0412423	0.0222333	0.0040668	0.000156205	0.00341015	0.00468848	0.00147705	0.00363057	0.0442601	0.00366299	3.18159e-05	0.0057548	0.0262739	0.00213946	0.0310496	0.00292026	0.0028855	0.00148614	1.51361e-05	2.51389e-25	1.91405e-05	2.52871e-05	1.30082e-05	7.60688e-07	0	0.000108345	1.28613e-07	-8.14496e-07	0.000580289	-0.119144	-0.0268238	0.0920939	-0.0741218	-0.0468191	0.0365267	-0.1	-0.386607	0
2412	4.24783	0	0.103756	4.14407	4.49771	4.45646	4.33682	3.60224	0.398382	0.33619	0.119646	0.0412423	0.0222333	0.0040668	0.000156205	0.00341015	0.00468848	0.00147705	0.00363057	0.0442601	0.00366299	3.18159e-05	0.0057548	0.0262739	0.00213946	0.0310496	0.00292026	0.0028855	0.00148614	1.51361e-05	2.51389e-25	1.91405e-05	2.52871e-05	1.30082e-05	7.60688e-07	0	0.000108345	1.28613e-07	-8.14496e-07	0.000580289	-0.119144	-0.0268238	0.0920939	-0.0741218	-0.0468191	0.0365267	-0.1	-0.386607	0
2413	4.24783	0	0.103756	4.14407	4.49771	4.45646	4.33682	3.60224	0.398382	0.33619	0.119646	0.0412423	0.0222333	0.0040668	0.000156205	0.00341015	0.00468848	0.00147705	0.00363057	0.0442601	0.00366299	3.18159e-05	0.0057548	0.0262739	0.00213946	0.0310496	0.00292026	0.0028855	0.00148614	1.51361e-05	2.51389e-25	1.91405e-05	2.52871e-05	1.30082e-05	7.60688e-07	0	0.000108345	1.28613e-07	-8.14496e-07	0.000580289	-0.119144	-0.0268238	0.0920939	-0.0741218	-0.0468191	0.0365267	-0.1	-0.386607	0
2414	4.24783	0	0.103756	4.14407	4.49771	4.45646	4.33682	3.60224	0.398382	0.33619	0.119646	0.0412423	0.0222333	0.0040668	0.000156205	0.00341015	0.00468848	0.00147705	0.00363057	0.0442601	0.00366299	3.18159e-05	0.0057548	0.0262739	0.00213946	0.0310496	0.00292026	0.0028855	0.00148614	1.51361e-05	2.51389e-25	1.91405e-05	2.52871e-05	1.30082e-05	7.60688e-07	0	0.000108345	1.28613e-07	-8.14496e-07	0.000580289	-0.119144	-0.0268238	0.0920939	-0.0741218	-0.0468191	0.0365267	-0.1	-0.386607	0
2415	4.24783	0	0.103756	4.14407	4.49771	4.45646	4.33682	3.60224	0.398382	0.33619	0.119646	0.0412423	0.0222333	0.0040668	0.000156205	0.00341015	0.00468848	0.00147705	0.00363057	0.0442601	0.00366299	3.18159e-05	0.0057548	0.0262739	0.00213946	0.0310496	0.00292026	0.0028855	0.00148614	1.51361e-05	2.51389e-25	1.91405e-05	2.52871e-05	1.30082e-05	7.60688e-07	0	0.000108345	1.28613e-07	-8.14496e-07	0.000580289	-0.119144	-0.0268238	0.0920939	-0.0741218	-0.0468191	0.0365267	-0.1	-0.386607	0
2416	4.24783	0	0.103756	4.14407	4.49771	4.45646	4.33682	3.60224	0.398382	0.33619	0.119646	0.0412423	0.0222333	0.0040668	0.000156205	0.00341015	0.00468848	0.00147705	0.00363057	0.0442601	0.00366299	3.18159e-05	0.0057548	0.0262739	0.00213946	0.0310496	0.00292026	0.0028855	0.00148614	1.51361e-05	2.51389e-25	1.91405e-05	2.52871e-05	1.30082e-05	7.60688e-07	0	0.000108345	1.28613e-07	-8.14496e-07	0.000580289	-0.119144	-0.0268238	0.0920939	-0.0741218	-0.0468191	0.0365267	-0.1	-0.386607	0
2417	4.24783	0	0.103756	4.14407	4.49771	4.45646	4.33682	3.60224	0.398382	0.33619	0.119646	0.0412423	0.0222333	0.0040668	0.000156205	0.00341015	0.00468848	0.00147705	0.00363057	0.0442601	0.00366299	3.18159e-05	0.0057548	0.0262739	0.00213946	0.0310496	0.00292026	0.0028855	0.00148614	1.51361e-05	2.51389e-25	1.91405e-05	2.52871e-05	1.30082e-05	7.60688e-07	0	0.000108345	1.28613e-07	-8.14496e-07	0.000580289	-0.119144	-0.0268238	0.0920939	-0.0741218	-0.0468191	0.0365267	-0.1	-0.386607	0
2418	4.24783	0	0.103756	4.14407	4.49771	4.45646	4.33682	3.60224	0.398382	0.33619	0.119646	0.0412423	0.0222333	0.0040668	0.000156205	0.00341015	0.00468848	0.00147705	0.00363057	0.0442601	0.00366299	3.18159e-05	0.0057548	0.0262739	0.00213946	0.0310496	0.00292026	0.0028855	0.00148614	1.51361e-05	2.51389e-25	1.91405e-05	2.52871e-05	1.30082e-05	7.60688e-07	0	0.000108345	1.28613e-07	-8.14496e-07	0.000580289	-0.119144	-0.0268238	0.0920939	-0.0741218	-0.0468191	0.0365267	-0.1	-0.386607	0
2419	4.24783	0	0.103756	4.14407	4.49771	4.45646	4.33682	3.60224	0.398382	0.33619	0.119646	0.0412423	0.0222333	0.0040668	0.000156205	0.00341015	0.00468848	0.00147705	0.00363057	0.0442601	0.00366299	3.18159e-05	0.0057548	0.0262739	0.00213946	0.0310496	0.00292026	0.0028855	0.00148614	1.51361e-05	2.51389e-25	1.91405e-05	2.52871e-05	1.30082e-05	7.60688e-07	0	0.000108345	1.28613e-07	-8.14496e-07	0.000580289	-0.119144	-0.0268238	0.0920939	-0.0741218	-0.0468191	0.0365267	-0.1	-0.386607	0
2420	4.24783	0	0.103756	4.14407	4.49771	4.45646	4.33682	3.60224	0.398382	0.33619	0.119646	0.0412423	0.0222333	0.0040668	0.000156205	0.00341015	0.00468848	0.00147705	0.00363057	0.0442601	0.00366299	3.18159e-05	0.0057548	0.0262739	0.00213946	0.0310496	0.00292026	0.0028855	0.00148614	1.51361e-05	2.51389e-25	1.91405e-05	2.52871e-05	1.30082e-05	7.60688e-07	0	0.000108345	1.28613e-07	-8.14496e-07	0.000580289	-0.119144	-0.0268238	0.0920939	-0.0741218	-0.0468191	0.0365267	-0.1	-0.386607	0
2421	4.24783	0	0.103756	4.14407	4.49771	4.45646	4.33682	3.60224	0.398382	0.33619	0.119646	0.0412423	0.0222333	0.0040668	0.000156205	0.00341015	0.00468848	0.00147705	0.00363057	0.0442601	0.00366299	3.18159e-05	0.0057548	0.0262739	0.00213946	0.0310496	0.00292026	0.0028855	0.00148614	1.51361e-05	2.51389e-25	1.91405e-05	2.52871e-05	1.30082e-05	7.60688e-07	0	0.000108345	1.28613e-07	-8.14496e-07	0.000580289	-0.119144	-0.0268238	0.0920939	-0.0741218	-0.0468191	0.0365267	-0.1	-0.386607	0
2422	4.24783	0	0.103756	4.14407	4.49771	4.45646	4.33682	3.60224	0.398382	0.33619	0.119646	0.0412423	0.0222333	0.0040668	0.000156205	0.00341015	0.00468848	0.00147705	0.00363057	0.0442601	0.00366299	3.18159e-05	0.0057548	0.0262739	0.00213946	0.0310496	0.00292026	0.0028855	0.00148614	1.51361e-05	2.51389e-25	1.91405e-05	2.52871e-05	1.30082e-05	7.60688e-07	0	0.000108345	1.28613e-07	-8.14496e-07	0.000580289	-0.119144	-0.0268238	0.0920939	-0.0741218	-0.0468191	0.0365267	-0.1	-0.386607	0
2423	4.24783	0	0.103756	4.14407	4.49771	4.45646	4.33682	3.60224	0.398382	0.33619	0.119646	0.0412423	0.0222333	0.0040668	0.000156205	0.00341015	0.00468848	0.00147705	0.00363057	0.0442601	0.00366299	3.18159e-05	0.0057548	0.0262739	0.00213946	0.0310496	0.00292026	0.0028855	0.00148614	1.51361e-05	2.51389e-25	1.91405e-05	2.52871e-05	1.30082e-05	7.60688e-07	0	0.000108345	1.28613e-07	-8.14496e-07	0.000580289	-0.119144	-0.0268238	0.0920939	-0.0741218	-0.0468191	0.0365267	-0.1	-0.386607	0
2424	4.24783	0	0.103756	4.14407	4.49771	4.45646	4.33682	3.60224	0.398382	0.33619	0.119646	0.0412423	0.0222333	0.0040668	0.000156205	0.00341015	0.00468848	0.00147705	0.00363057	0.0442601	0.00366299	3.18159e-05	0.0057548	0.0262739	0.00213946	0.0310496	0.00292026	0.0028855	0.00148614	1.51361e-05	2.51389e-25	1.91405e-05	2.52871e-05	1.30082e-05	7.60688e-07	0	0.000108345	1.28613e-07	-8.14496e-07	0.000580289	-0.119144	-0.0268238	0.0920939	-0.0741218	-0.0468191	0.0365267	-0.1	-0.386607	0
2425	4.24783	0	0.103756	4.14407	4.49771	4.45646	4.33682	3.60224	0.398382	0.33619	0.119646	0.0412423	0.0222333	0.0040668	0.000156205	0.00341015	0.00468848	0.00147705	0.00363057	0.0442601	0.00366299	3.18159e-05	0.0057548	0.0262739	0.00213946	0.0310496	0.00292026	0.0028855	0.00148614	1.51361e-05	2.51389e-25	1.91405e-05	2.52871e-05	1.30082e-05	7.60688e-07	0	0.000108345	1.28613e-07	-8.14496e-07	0.000580289	-0.119144	-0.0268238	0.0920939	-0.0741218	-0.0468191	0.0365267	-0.1	-0.386607	0
2426	4.24783	0	0.103756	4.14407	4.49771	4.45646	4.33682	3.60224	0.398382	0.33619	0.119646	0.0412423	0.0222333	0.0040668	0.000156205	0.00341015	0.00468848	0.00147705	0.00363057	0.0442601	0.00366299	3.18159e-05	0.0057548	0.0262739	0.00213946	0.0310496	0.00292026	0.0028855	0.00148614	1.51361e-05	2.51389e-25	1.91405e-05	2.52871e-05	1.30082e-05	7.60688e-07	0	0.000108345	1.28613e-07	-8.14496e-07	0.000580289	-0.119144	-0.0268238	0.0920939	-0.0741218	-0.0468191	0.0365267	-0.1	-0.386607	0
2427	4.24783	0	0.103756	4.14407	4.49771	4.45646	4.33682	3.60224	0.398382	0.33619	0.119646	0.0412423	0.0222333	0.0040668	0.000156205	0.00341015	0.00468848	0.00147705	0.00363057	0.0442601	0.00366299	3.18159e-05	0.0057548	0.0262739	0.00213946	0.0310496	0.00292026	0.0028855	0.00148614	1.51361e-05	2.51389e-25	1.91405e-05	2.52871e-05	1.30082e-05	7.60688e-07	0	0.000108345	1.28613e-07	-8.14496e-07	0.000580289	-0.119144	-0.0268238	0.0920939	-0.0741218	-0.0468191	0.0365267	-0.1	-0.386607	0
2428	4.24783	0	0.103756	4.14407	4.49771	4.45646	4.33682	3.60224	0.398382	0.33619	0.119646	0.0412423	0.0222333	0.0040668	0.000156205	0.00341015	0.00468848	0.00147705	0.00363057	0.0442601	0.00366299	3.18159e-05	0.0057548	0.0262739	0.00213946	0.0310496	0.00292026	0.0028855	0.00148614	1.51361e-05	2.51389e-25	1.91405e-05	2.52871e-05	1.30082e-05	7.60688e-07	0	0.000108345	1.28613e-07	-8.14496e-07	0.000580289	-0.119144	-0.0268238	0.0920939	-0.0741218	-0.0468191	0.0365267	-0.1	-0.386607	0
2429	4.24783	0	0.103756	4.14407	4.49771	4.45646	4.33682	3.60224	0.398382	0.33619	0.119646	0.0412423	0.0222333	0.0040668	0.000156205	0.00341015	0.00468848	0.00147705	0.00363057	0.0442601	0.00366299	3.18159e-05	0.0057548	0.0262739	0.00213946	0.0310496	0.00292026	0.0028855	0.00148614	1.51361e-05	2.51389e-25	1.91405e-05	2.52871e-05	1.30082e-05	7.60688e-07	0	0.000108345	1.28613e-07	-8.14496e-07	0.000580289	-0.119144	-0.0268238	0.0920939	-0.0741218	-0.0468191	0.0365267	-0.1	-0.386607	0
2430	4.24783	0	0.103756	4.14407	4.49771	4.45646	4.33682	3.60224	0.398382	0.33619	0.119646	0.0412423	0.0222333	0.0040668	0.000156205	0.00341015	0.00468848	0.00147705	0.00363057	0.0442601	0.00366299	3.18159e-05	0.0057548	0.0262739	0.00213946	0.0310496	0.00292026	0.0028855	0.00148614	1.51361e-05	2.51389e-25	1.91405e-05	2.52871e-05	1.30082e-05	7.60688e-07	0	0.000108345	1.28613e-07	-8.14496e-07	0.000580289	-0.119144	-0.0268238	0.0920939	-0.0741218	-0.0468191	0.0365267	-0.1	-0.386607	0
2431	4.24783	0	0.103756	4.14407	4.49771	4.45646	4.33682	3.60224	0.398382	0.33619	0.119646	0.0412423	0.0222333	0.0040668	0.000156205	0.00341015	0.00468848	0.00147705	0.00363057	0.0442601	0.00366299	3.18159e-05	0.0057548	0.0262739	0.00213946	0.0310496	0.00292026	0.0028855	0.00148614	1.51361e-05	2.51389e-25	1.91405e-05	2.52871e-05	1.30082e-05	7.60688e-07	0	0.000108345	1.28613e-07	-8.14496e-07	0.000580289	-0.119144	-0.0268238	0.0920939	-0.0741218	-0.0468191	0.0365267	-0.1	-0.386607	0
2432	4.24783	0	0.103756	4.14407	4.49771	4.45646	4.33682	3.60224	0.398382	0.33619	0.119646	0.0412423	0.0222333	0.0040668	0.000156205	0.00341015	0.00468848	0.00147705	0.00363057	0.0442601	0.00366299	3.18159e-05	0.0057548	0.0262739	0.00213946	0.0310496	0.00292026	0.0028855	0.00148614	1.51361e-05	2.51389e-25	1.91405e-05	2.52871e-05	1.30082e-05	7.60688e-07	0	0.000108345	1.28613e-07	-8.14496e-07	0.000580289	-0.119144	-0.0268238	0.0920939	-0.0741218	-0.0468191	0.0365267	-0.1	-0.386607	0
2433	4.24783	0	0.103756	4.14407	4.49771	4.45646	4.33682	3.60224	0.398382	0.33619	0.119646	0.0412423	0.0222333	0.0040668	0.000156205	0.00341015	0.00468848	0.00147705	0.00363057	0.0442601	0.00366299	3.18159e-05	0.0057548	0.0262739	0.00213946	0.0310496	0.00292026	0.0028855	0.00148614	1.51361e-05	2.51389e-25	1.91405e-05	2.52871e-05	1.30082e-05	7.60688e-07	0	0.000108345	1.28613e-07	-8.14496e-07	0.000580289	-0.119144	-0.0268238	0.0920939	-0.0741218	-0.0468191	0.0365267	-0.1	-0.386607	0
2434	4.24783	0	0.103756	4.14407	4.49771	4.45646	4.33682	3.60224	0.398382	0.33619	0.119646	0.0412423	0.0222333	0.0040668	0.000156205	0.00341015	0.00468848	0.00147705	0.00363057	0.0442601	0.00366299	3.18159e-05	0.0057548	0.0262739	0.00213946	0.0310496	0.00292026	0.0028855	0.00148614	1.51361e-05	2.51389e-25	1.91405e-05	2.52871e-05	1.30082e-05	7.60688e-07	0	0.000108345	1.28613e-07	-8.14496e-07	0.000580289	-0.119144	-0.0268238	0.0920939	-0.0741218	-0.0468191	0.0365267	-0.1	-0.386607	0
2435	4.24783	0	0.103756	4.14407	4.49771	4.45646	4.33682	3.60224	0.398382	0.33619	0.119646	0.0412423	0.0222333	0.0040668	0.000156205	0.00341015	0.00468848	0.00147705	0.00363057	0.0442601	0.00366299	3.18159e-05	0.0057548	0.0262739	0.00213946	0.0310496	0.00292026	0.0028855	0.00148614	1.51361e-05	2.51389e-25	1.91405e-05	2.52871e-05	1.30082e-05	7.60688e-07	0	0.000108345	1.28613e-07	-8.14496e-07	0.000580289	-0.119144	-0.0268238	0.0920939	-0.0741218	-0.0468191	0.0365267	-0.1	-0.386607	0
2436	4.24783	0	0.103756	4.14407	4.49771	4.45646	4.33682	3.60224	0.398382	0.33619	0.119646	0.0412423	0.0222333	0.0040668	0.000156205	0.00341015	0.00468848	0.00147705	0.00363057	0.0442601	0.00366299	3.18159e-05	0.0057548	0.0262739	0.00213946	0.0310496	0.00292026	0.0028855	0.00148614	1.51361e-05	2.51389e-25	1.91405e-05	2.52871e-05	1.30082e-05	7.60688e-07	0	0.000108345	1.28613e-07	-8.14496e-07	0.000580289	-0.119144	-0.0268238	0.0920939	-0.0741218	-0.0468191	0.0365267	-0.1	-0.386607	0
2437	4.24783	0	0.103756	4.14407	4.49771	4.45646	4.33682	3.60224	0.398382	0.33619	0.119646	0.0412423	0.0222333	0.0040668	0.000156205	0.00341015	0.00468848	0.00147705	0.00363057	0.0442601	0.00366299	3.18159e-05	0.0057548	0.0262739	0.00213946	0.0310496	0.00292026	0.0028855	0.00148614	1.51361e-05	2.51389e-25	1.91405e-05	2.52871e-05	1.30082e-05	7.60688e-07	0	0.000108345	1.28613e-07	-8.14496e-07	0.000580289	-0.119144	-0.0268238	0.0920939	-0.0741218	-0.0468191	0.0365267	-0.1	-0.386607	0
2438	4.24783	0	0.103756	4.14407	4.49771	4.45646	4.33682	3.60224	0.398382	0.33619	0.119646	0.0412423	0.0222333	0.0040668	0.000156205	0.00341015	0.00468848	0.00147705	0.00363057	0.0442601	0.00366299	3.18159e-05	0.0057548	0.0262739	0.00213946	0.0310496	0.00292026	0.0028855	0.00148614	1.51361e-05	2.51389e-25	1.91405e-05	2.52871e-05	1.30082e-05	7.60688e-07	0	0.000108345	1.28613e-07	-8.14496e-07	0.000580289	-0.119144	-0.0268238	0.0920939	-0.0741218	-0.0468191	0.0365267	-0.1	-0.386607	0
2439	4.24783	0	0.103756	4.14407	4.49771	4.45646	4.33682	3.60224	0.398382	0.33619	0.119646	0.0412423	0.0222333	0.0040668	0.000156205	0.00341015	0.00468848	0.00147705	0.00363057	0.0442601	0.00366299	3.18159e-05	0.0057548	0.0262739	0.00213946	0.0310496	0.00292026	0.0028855	0.00148614	1.51361e-05	2.51389e-25	1.91405e-05	2.52871e-05	1.30082e-05	7.60688e-07	0	0.000108345	1.28613e-07	-8.14496e-07	0.000580289	-0.119144	-0.0268238	0.0920939	-0.0741218	-0.0468191	0.0365267	-0.1	-0.386607	0
2440	4.24783	0	0.103756	4.14407	4.49771	4.45646	4.33682	3.60224	0.398382	0.33619	0.119646	0.0412423	0.0222333	0.0040668	0.000156205	0.00341015	0.00468848	0.00147705	0.00363057	0.0442601	0.00366299	3.18159e-05	0.0057548	0.0262739	0.00213946	0.0310496	0.00292026	0.0028855	0.00148614	1.51361e-05	2.51389e-25	1.91405e-05	2.52871e-05	1.30082e-05	7.60688e-07	0	0.000108345	1.28613e-07	-8.14496e-07	0.000580289	-0.119144	-0.0268238	0.0920939	-0.0741218	-0.0468191	0.0365267	-0.1	-0.386607	0
2441	4.24783	0	0.103756	4.14407	4.49771	4.45646	4.33682	3.60224	0.398382	0.33619	0.119646	0.0412423	0.0222333	0.0040668	0.000156205	0.00341015	0.00468848	0.00147705	0.00363057	0.0442601	0.00366299	3.18159e-05	0.0057548	0.0262739	0.00213946	0.0310496	0.00292026	0.0028855	0.00148614	1.51361e-05	2.51389e-25	1.91405e-05	2.52871e-05	1.30082e-05	7.60688e-07	0	0.000108345	1.28613e-07	-8.14496e-07	0.000580289	-0.119144	-0.0268238	0.0920939	-0.0741218	-0.0468191	0.0365267	-0.1	-0.386607	0
2442	4.24783	0	0.103756	4.14407	4.49771	4.45646	4.33682	3.60224	0.398382	0.33619	0.119646	0.0412423	0.0222333	0.0040668	0.000156205	0.00341015	0.00468848	0.00147705	0.00363057	0.0442601	0.00366299	3.18159e-05	0.0057548	0.0262739	0.00213946	0.0310496	0.00292026	0.0028855	0.00148614	1.51361e-05	2.51389e-25	1.91405e-05	2.52871e-05	1.30082e-05	7.60688e-07	0	0.000108345	1.28613e-07	-8.14496e-07	0.000580289	-0.119144	-0.0268238	0.0920939	-0.0741218	-0.0468191	0.0365267	-0.1	-0.386607	0
2443	4.24783	0	0.103756	4.14407	4.49771	4.45646	4.33682	3.60224	0.398382	0.33619	0.119646	0.0412423	0.0222333	0.0040668	0.000156205	0.00341015	0.00468848	0.00147705	0.00363057	0.0442601	0.00366299	3.18159e-05	0.0057548	0.0262739	0.00213946	0.0310496	0.00292026	0.0028855	0.00148614	1.51361e-05	2.51389e-25	1.91405e-05	2.52871e-05	1.30082e-05	7.60688e-07	0	0.000108345	1.28613e-07	-8.14496e-07	0.000580289	-0.119144	-0.0268238	0.0920939	-0.0741218	-0.0468191	0.0365267	-0.1	-0.386607	0
2444	4.24783	0	0.103756	4.14407	4.49771	4.45646	4.33682	3.60224	0.398382	0.33619	0.119646	0.0412423	0.0222333	0.0040668	0.000156205	0.00341015	0.00468848	0.00147705	0.00363057	0.0442601	0.00366299	3.18159e-05	0.0057548	0.0262739	0.00213946	0.0310496	0.00292026	0.0028855	0.00148614	1.51361e-05	2.51389e-25	1.91405e-05	2.52871e-05	1.30082e-05	7.60688e-07	0	0.000108345	1.28613e-07	-8.14496e-07	0.000580289	-0.119144	-0.0268238	0.0920939	-0.0741218	-0.0468191	0.0365267	-0.1	-0.386607	0
2445	4.24783	0	0.103756	4.14407	4.49771	4.45646	4.33682	3.60224	0.398382	0.33619	0.119646	0.0412423	0.0222333	0.0040668	0.000156205	0.00341015	0.00468848	0.00147705	0.00363057	0.0442601	0.00366299	3.18159e-05	0.0057548	0.0262739	0.00213946	0.0310496	0.00292026	0.0028855	0.00148614	1.51361e-05	2.51389e-25	1.91405e-05	2.52871e-05	1.30082e-05	7.60688e-07	0	0.000108345	1.28613e-07	-8.14496e-07	0.000580289	-0.119144	-0.0268238	0.0920939	-0.0741218	-0.0468191	0.0365267	-0.1	-0.386607	0
2446	4.24783	0	0.103756	4.14407	4.49771	4.45646	4.33682	3.60224	0.398382	0.33619	0.119646	0.0412423	0.0222333	0.0040668	0.000156205	0.00341015	0.00468848	0.00147705	0.00363057	0.0442601	0.00366299	3.18159e-05	0.0057548	0.0262739	0.00213946	0.0310496	0.00292026	0.0028855	0.00148614	1.51361e-05	2.51389e-25	1.91405e-05	2.52871e-05	1.30082e-05	7.60688e-07	0	0.000108345	1.28613e-07	-8.14496e-07	0.000580289	-0.119144	-0.0268238	0.0920939	-0.0741218	-0.0468191	0.0365267	-0.1	-0.386607	0
2447	4.24783	0	0.103756	4.14407	4.49771	4.45646	4.33682	3.60224	0.398382	0.33619	0.119646	0.0412423	0.0222333	0.0040668	0.000156205	0.00341015	0.00468848	0.00147705	0.00363057	0.0442601	0.00366299	3.18159e-05	0.0057548	0.0262739	0.00213946	0.0310496	0.00292026	0.0028855	0.00148614	1.51361e-05	2.51389e-25	1.91405e-05	2.52871e-05	1.30082e-05	7.60688e-07	0	0.000108345	1.28613e-07	-8.14496e-07	0.000580289	-0.119144	-0.0268238	0.0920939	-0.0741218	-0.0468191	0.0365267	-0.1	-0.386607	0
2448	4.24783	0	0.103756	4.14407	4.49771	4.45646	4.33682	3.60224	0.398382	0.33619	0.119646	0.0412423	0.0222333	0.0040668	0.000156205	0.00341015	0.00468848	0.00147705	0.00363057	0.0442601	0.00366299	3.18159e-05	0.0057548	0.0262739	0.00213946	0.0310496	0.00292026	0.0028855	0.00148614	1.51361e-05	2.51389e-25	1.91405e-05	2.52871e-05	1.30082e-05	7.60688e-07	0	0.000108345	1.28613e-07	-8.14496e-07	0.000580289	-0.119144	-0.0268238	0.0920939	-0.0741218	-0.0468191	0.0365267	-0.1	-0.386607	0
2449	4.24783	0	0.103756	4.14407	4.49771	4.45646	4.33682	3.60224	0.398382	0.33619	0.119646	0.0412423	0.0222333	0.0040668	0.000156205	0.00341015	0.00468848	0.00147705	0.00363057	0.0442601	0.00366299	3.18159e-05	0.0057548	0.0262739	0.00213946	0.0310496	0.00292026	0.0028855	0.00148614	1.51361e-05	2.51389e-25	1.91405e-05	2.52871e-05	1.30082e-05	7.60688e-07	0	0.000108345	1.28613e-07	-8.14496e-07	0.000580289	-0.119144	-0.0268238	0.0920939	-0.0741218	-0.0468191	0.0365267	-0.1	-0.386607	0
2450	4.24783	0	0.103756	4.14407	4.49771	4.45646	4.33682	3.60224	0.398382	0.33619	0.119646	0.0412423	0.0222333	0.0040668	0.000156205	0.00341015	0.00468848	0.00147705	0.00363057	0.0442601	0.00366299	3.18159e-05	0.0057548	0.0262739	0.00213946	0.0310496	0.00292026	0.0028855	0.00148614	1.51361e-05	2.51389e-25	1.91405e-05	2.52871e-05	1.30082e-05	7.60688e-07	0	0.000108345	1.28613e-07	-8.14496e-07	0.000580289	-0.119144	-0.0268238	0.0920939	-0.0741218	-0.0468191	0.0365267	-0.1	-0.386607	0
2451	4.24783	0	0.103756	4.14407	4.49771	4.45646	4.33682	3.60224	0.398382	0.33619	0.119646	0.0412423	0.0222333	0.0040668	0.000156205	0.00341015	0.00468848	0.00147705	0.00363057	0.0442601	0.00366299	3.18159e-05	0.0057548	0.0262739	0.00213946	0.0310496	0.00292026	0.0028855	0.00148614	1.51361e-05	2.51389e-25	1.91405e-05	2.52871e-05	1.30082e-05	7.60688e-07	0	0.000108345	1.28613e-07	-8.14496e-07	0.000580289	-0.119144	-0.0268238	0.0920939	-0.0741218	-0.0468191	0.0365267	-0.1	-0.386607	0
2452	4.24783	0	0.103756	4.14407	4.49771	4.45646	4.33682	3.60224	0.398382	0.33619	0.119646	0.0412423	0.0222333	0.0040668	0.000156205	0.00341015	0.00468848	0.00147705	0.00363057	0.0442601	0.00366299	3.18159e-05	0.0057548	0.0262739	0.00213946	0.0310496	0.00292026	0.0028855	0.00148614	1.51361e-05	2.51389e-25	1.91405e-05	2.52871e-05	1.30082e-05	7.60688e-07	0	0.000108345	1.28613e-07	-8.14496e-07	0.000580289	-0.119144	-0.0268238	0.0920939	-0.0741218	-0.0468191	0.0365267	-0.1	-0.386607	0
2453	4.24783	0	0.103756	4.14407	4.49771	4.45646	4.33682	3.60224	0.398382	0.33619	0.119646	0.0412423	0.0222333	0.0040668	0.000156205	0.00341015	0.00468848	0.00147705	0.00363057	0.0442601	0.00366299	3.18159e-05	0.0057548	0.0262739	0.00213946	0.0310496	0.00292026	0.0028855	0.00148614	1.51361e-05	2.51389e-25	1.91405e-05	2.52871e-05	1.30082e-05	7.60688e-07	0	0.000108345	1.28613e-07	-8.14496e-07	0.000580289	-0.119144	-0.0268238	0.0920939	-0.0741218	-0.0468191	0.0365267	-0.1	-0.386607	0
2454	4.24783	0	0.103756	4.14407	4.49771	4.45646	4.33682	3.60224	0.398382	0.33619	0.119646	0.0412423	0.0222333	0.0040668	0.000156205	0.00341015	0.00468848	0.00147705	0.00363057	0.0442601	0.00366299	3.18159e-05	0.0057548	0.0262739	0.00213946	0.0310496	0.00292026	0.0028855	0.00148614	1.51361e-05	2.51389e-25	1.91405e-05	2.52871e-05	1.30082e-05	7.60688e-07	0	0.000108345	1.28613e-07	-8.14496e-07	0.000580289	-0.119144	-0.0268238	0.0920939	-0.0741218	-0.0468191	0.0365267	-0.1	-0.386607	0
2455	4.24783	0	0.103756	4.14407	4.49771	4.45646	4.33682	3.60224	0.398382	0.33619	0.119646	0.0412423	0.0222333	0.0040668	0.000156205	0.00341015	0.00468848	0.00147705	0.00363057	0.0442601	0.00366299	3.18159e-05	0.0057548	0.0262739	0.00213946	0.0310496	0.00292026	0.0028855	0.00148614	1.51361e-05	2.51389e-25	1.91405e-05	2.52871e-05	1.30082e-05	7.60688e-07	0	0.000108345	1.28613e-07	-8.14496e-07	0.000580289	-0.119144	-0.0268238	0.0920939	-0.0741218	-0.0468191	0.0365267	-0.1	-0.386607	0
2456	4.24783	0	0.103756	4.14407	4.49771	4.45646	4.33682	3.60224	0.398382	0.33619	0.119646	0.0412423	0.0222333	0.0040668	0.000156205	0.00341015	0.00468848	0.00147705	0.00363057	0.0442601	0.00366299	3.18159e-05	0.0057548	0.0262739	0.00213946	0.0310496	0.00292026	0.0028855	0.00148614	1.51361e-05	2.51389e-25	1.91405e-05	2.52871e-05	1.30082e-05	7.60688e-07	0	0.000108345	1.28613e-07	-8.14496e-07	0.000580289	-0.119144	-0.0268238	0.0920939	-0.0741218	-0.0468191	0.0365267	-0.1	-0.386607	0
2457	4.24783	0	0.103756	4.14407	4.49771	4.45646	4.33682	3.60224	0.398382	0.33619	0.119646	0.0412423	0.0222333	0.0040668	0.000156205	0.00341015	0.00468848	0.00147705	0.00363057	0.0442601	0.00366299	3.18159e-05	0.0057548	0.0262739	0.00213946	0.0310496	0.00292026	0.0028855	0.00148614	1.51361e-05	2.51389e-25	1.91405e-05	2.52871e-05	1.30082e-05	7.60688e-07	0	0.000108345	1.28613e-07	-8.14496e-07	0.000580289	-0.119144	-0.0268238	0.0920939	-0.0741218	-0.0468191	0.0365267	-0.1	-0.386607	0
2458	4.24783	0	0.103756	4.14407	4.49771	4.45646	4.33682	3.60224	0.398382	0.33619	0.119646	0.0412423	0.0222333	0.0040668	0.000156205	0.00341015	0.00468848	0.00147705	0.00363057	0.0442601	0.00366299	3.18159e-05	0.0057548	0.0262739	0.00213946	0.0310496	0.00292026	0.0028855	0.00148614	1.51361e-05	2.51389e-25	1.91405e-05	2.52871e-05	1.30082e-05	7.60688e-07	0	0.000108345	1.28613e-07	-8.14496e-07	0.000580289	-0.119144	-0.0268238	0.0920939	-0.0741218	-0.0468191	0.0365267	-0.1	-0.386607	0
2459	4.24783	0	0.103756	4.14407	4.49771	4.45646	4.33682	3.60224	0.398382	0.33619	0.119646	0.0412423	0.0222333	0.0040668	0.000156205	0.00341015	0.00468848	0.00147705	0.00363057	0.0442601	0.00366299	3.18159e-05	0.0057548	0.0262739	0.00213946	0.0310496	0.00292026	0.0028855	0.00148614	1.51361e-05	2.51389e-25	1.91405e-05	2.52871e-05	1.30082e-05	7.60688e-07	0	0.000108345	1.28613e-07	-8.14496e-07	0.000580289	-0.119144	-0.0268238	0.0920939	-0.0741218	-0.0468191	0.0365267	-0.1	-0.386607	0
2460	4.24783	0	0.103756	4.14407	4.49771	4.45646	4.33682	3.60224	0.398382	0.33619	0.119646	0.0412423	0.0222333	0.0040668	0.000156205	0.00341015	0.00468848	0.00147705	0.00363057	0.0442601	0.00366299	3.18159e-05	0.0057548	0.0262739	0.00213946	0.0310496	0.00292026	0.0028855	0.00148614	1.51361e-05	2.51389e-25	1.91405e-05	2.52871e-05	1.30082e-05	7.60688e-07	0	0.000108345	1.28613e-07	-8.14496e-07	0.000580289	-0.119144	-0.0268238	0.0920939	-0.0741218	-0.0468191	0.0365267	-0.1	-0.386607	0
2461	4.24783	0	0.103756	4.14407	4.49771	4.45646	4.33682	3.60224	0.398382	0.33619	0.119646	0.0412423	0.0222333	0.0040668	0.000156205	0.00341015	0.00468848	0.00147705	0.00363057	0.0442601	0.00366299	3.18159e-05	0.0057548	0.0262739	0.00213946	0.0310496	0.00292026	0.0028855	0.00148614	1.51361e-05	2.51389e-25	1.91405e-05	2.52871e-05	1.30082e-05	7.60688e-07	0	0.000108345	1.28613e-07	-8.14496e-07	0.000580289	-0.119144	-0.0268238	0.0920939	-0.0741218	-0.0468191	0.0365267	-0.1	-0.386607	0
2462	4.24783	0	0.103756	4.14407	4.49771	4.45646	4.33682	3.60224	0.398382	0.33619	0.119646	0.0412423	0.0222333	0.0040668	0.000156205	0.00341015	0.00468848	0.00147705	0.00363057	0.0442601	0.00366299	3.18159e-05	0.0057548	0.0262739	0.00213946	0.0310496	0.00292026	0.0028855	0.00148614	1.51361e-05	2.51389e-25	1.91405e-05	2.52871e-05	1.30082e-05	7.60688e-07	0	0.000108345	1.28613e-07	-8.14496e-07	0.000580289	-0.119144	-0.0268238	0.0920939	-0.0741218	-0.0468191	0.0365267	-0.1	-0.386607	0
2463	4.24783	0	0.103756	4.14407	4.49771	4.45646	4.33682	3.60224	0.398382	0.33619	0.119646	0.0412423	0.0222333	0.0040668	0.000156205	0.00341015	0.00468848	0.00147705	0.00363057	0.0442601	0.00366299	3.18159e-05	0.0057548	0.0262739	0.00213946	0.0310496	0.00292026	0.0028855	0.00148614	1.51361e-05	2.51389e-25	1.91405e-05	2.52871e-05	1.30082e-05	7.60688e-07	0	0.000108345	1.28613e-07	-8.14496e-07	0.000580289	-0.119144	-0.0268238	0.0920939	-0.0741218	-0.0468191	0.0365267	-0.1	-0.386607	0
2464	4.24783	0	0.103756	4.14407	4.49771	4.45646	4.33682	3.60224	0.398382	0.33619	0.119646	0.0412423	0.0222333	0.0040668	0.000156205	0.00341015	0.00468848	0.00147705	0.00363057	0.0442601	0.00366299	3.18159e-05	0.0057548	0.0262739	0.00213946	0.0310496	0.00292026	0.0028855	0.00148614	1.51361e-05	2.51389e-25	1.91405e-05	2.52871e-05	1.30082e-05	7.60688e-07	0	0.000108345	1.28613e-07	-8.14496e-07	0.000580289	-0.119144	-0.0268238	0.0920939	-0.0741218	-0.0468191	0.0365267	-0.1	-0.386607	0
2465	4.24783	0	0.103756	4.14407	4.49771	4.45646	4.33682	3.60224	0.398382	0.33619	0.119646	0.0412423	0.0222333	0.0040668	0.000156205	0.00341015	0.00468848	0.00147705	0.00363057	0.0442601	0.00366299	3.18159e-05	0.0057548	0.0262739	0.00213946	0.0310496	0.00292026	0.0028855	0.00148614	1.51361e-05	2.51389e-25	1.91405e-05	2.52871e-05	1.30082e-05	7.60688e-07	0	0.000108345	1.28613e-07	-8.14496e-07	0.000580289	-0.119144	-0.0268238	0.0920939	-0.0741218	-0.0468191	0.0365267	-0.1	-0.386607	0
2466	4.24783	0	0.103756	4.14407	4.49771	4.45646	4.33682	3.60224	0.398382	0.33619	0.119646	0.0412423	0.0222333	0.0040668	0.000156205	0.00341015	0.00468848	0.00147705	0.00363057	0.0442601	0.00366299	3.18159e-05	0.0057548	0.0262739	0.00213946	0.0310496	0.00292026	0.0028855	0.00148614	1.51361e-05	2.51389e-25	1.91405e-05	2.52871e-05	1.30082e-05	7.60688e-07	0	0.000108345	1.28613e-07	-8.14496e-07	0.000580289	-0.119144	-0.0268238	0.0920939	-0.0741218	-0.0468191	0.0365267	-0.1	-0.386607	0
2467	4.24783	0	0.103756	4.14407	4.49771	4.45646	4.33682	3.60224	0.398382	0.33619	0.119646	0.0412423	0.0222333	0.0040668	0.000156205	0.00341015	0.00468848	0.00147705	0.00363057	0.0442601	0.00366299	3.18159e-05	0.0057548	0.0262739	0.00213946	0.0310496	0.00292026	0.0028855	0.00148614	1.51361e-05	2.51389e-25	1.91405e-05	2.52871e-05	1.30082e-05	7.60688e-07	0	0.000108345	1.28613e-07	-8.14496e-07	0.000580289	-0.119144	-0.0268238	0.0920939	-0.0741218	-0.0468191	0.0365267	-0.1	-0.386607	0
2468	4.24783	0	0.103756	4.14407	4.49771	4.45646	4.33682	3.60224	0.398382	0.33619	0.119646	0.0412423	0.0222333	0.0040668	0.000156205	0.00341015	0.00468848	0.00147705	0.00363057	0.0442601	0.00366299	3.18159e-05	0.0057548	0.0262739	0.00213946	0.0310496	0.00292026	0.0028855	0.00148614	1.51361e-05	2.51389e-25	1.91405e-05	2.52871e-05	1.30082e-05	7.60688e-07	0	0.000108345	1.28613e-07	-8.14496e-07	0.000580289	-0.119144	-0.0268238	0.0920939	-0.0741218	-0.0468191	0.0365267	-0.1	-0.386607	0
2469	4.24783	0	0.103756	4.14407	4.49771	4.45646	4.33682	3.60224	0.398382	0.33619	0.119646	0.0412423	0.0222333	0.0040668	0.000156205	0.00341015	0.00468848	0.00147705	0.00363057	0.0442601	0.00366299	3.18159e-05	0.0057548	0.0262739	0.00213946	0.0310496	0.00292026	0.0028855	0.00148614	1.51361e-05	2.51389e-25	1.91405e-05	2.52871e-05	1.30082e-05	7.60688e-07	0	0.000108345	1.28613e-07	-8.14496e-07	0.000580289	-0.119144	-0.0268238	0.0920939	-0.0741218	-0.0468191	0.0365267	-0.1	-0.386607	0
2470	4.24783	0	0.103756	4.14407	4.49771	4.45646	4.33682	3.60224	0.398382	0.33619	0.119646	0.0412423	0.0222333	0.0040668	0.000156205	0.00341015	0.00468848	0.00147705	0.00363057	0.0442601	0.00366299	3.18159e-05	0.0057548	0.0262739	0.00213946	0.0310496	0.00292026	0.0028855	0.00148614	1.51361e-05	2.51389e-25	1.91405e-05	2.52871e-05	1.30082e-05	7.60688e-07	0	0.000108345	1.28613e-07	-8.14496e-07	0.000580289	-0.119144	-0.0268238	0.0920939	-0.0741218	-0.0468191	0.0365267	-0.1	-0.386607	0
2471	4.24783	0	0.103756	4.14407	4.49771	4.45646	4.33682	3.60224	0.398382	0.33619	0.119646	0.0412423	0.0222333	0.0040668	0.000156205	0.00341015	0.00468848	0.00147705	0.00363057	0.0442601	0.00366299	3.18159e-05	0.0057548	0.0262739	0.00213946	0.0310496	0.00292026	0.0028855	0.00148614	1.51361e-05	2.51389e-25	1.91405e-05	2.52871e-05	1.30082e-05	7.60688e-07	0	0.000108345	1.28613e-07	-8.14496e-07	0.000580289	-0.119144	-0.0268238	0.0920939	-0.0741218	-0.0468191	0.0365267	-0.1	-0.386607	0
2472	4.24783	0	0.103756	4.14407	4.49771	4.45646	4.33682	3.60224	0.398382	0.33619	0.119646	0.0412423	0.0222333	0.0040668	0.000156205	0.00341015	0.00468848	0.00147705	0.00363057	0.0442601	0.00366299	3.18159e-05	0.0057548	0.0262739	0.00213946	0.0310496	0.00292026	0.0028855	0.00148614	1.51361e-05	2.51389e-25	1.91405e-05	2.52871e-05	1.30082e-05	7.60688e-07	0	0.000108345	1.28613e-07	-8.14496e-07	0.000580289	-0.119144	-0.0268238	0.0920939	-0.0741218	-0.0468191	0.0365267	-0.1	-0.386607	0
2473	4.24783	0	0.103756	4.14407	4.49771	4.45646	4.33682	3.60224	0.398382	0.33619	0.119646	0.0412423	0.0222333	0.0040668	0.000156205	0.00341015	0.00468848	0.00147705	0.00363057	0.0442601	0.00366299	3.18159e-05	0.0057548	0.0262739	0.00213946	0.0310496	0.00292026	0.0028855	0.00148614	1.51361e-05	2.51389e-25	1.91405e-05	2.52871e-05	1.30082e-05	7.60688e-07	0	0.000108345	1.28613e-07	-8.14496e-07	0.000580289	-0.119144	-0.0268238	0.0920939	-0.0741218	-0.0468191	0.0365267	-0.1	-0.386607	0
2474	4.24783	0	0.103756	4.14407	4.49771	4.45646	4.33682	3.60224	0.398382	0.33619	0.119646	0.0412423	0.0222333	0.0040668	0.000156205	0.00341015	0.00468848	0.00147705	0.00363057	0.0442601	0.00366299	3.18159e-05	0.0057548	0.0262739	0.00213946	0.0310496	0.00292026	0.0028855	0.00148614	1.51361e-05	2.51389e-25	1.91405e-05	2.52871e-05	1.30082e-05	7.60688e-07	0	0.000108345	1.28613e-07	-8.14496e-07	0.000580289	-0.119144	-0.0268238	0.0920939	-0.0741218	-0.0468191	0.0365267	-0.1	-0.386607	0
2475	4.24783	0	0.103756	4.14407	4.49771	4.45646	4.33682	3.60224	0.398382	0.33619	0.119646	0.0412423	0.0222333	0.0040668	0.000156205	0.00341015	0.00468848	0.00147705	0.00363057	0.0442601	0.00366299	3.18159e-05	0.0057548	0.0262739	0.00213946	0.0310496	0.00292026	0.0028855	0.00148614	1.51361e-05	2.51389e-25	1.91405e-05	2.52871e-05	1.30082e-05	7.60688e-07	0	0.000108345	1.28613e-07	-8.14496e-07	0.000580289	-0.119144	-0.0268238	0.0920939	-0.0741218	-0.0468191	0.0365267	-0.1	-0.386607	0
2476	4.24783	0	0.103756	4.14407	4.49771	4.45646	4.33682	3.60224	0.398382	0.33619	0.119646	0.0412423	0.0222333	0.0040668	0.000156205	0.00341015	0.00468848	0.00147705	0.00363057	0.0442601	0.00366299	3.18159e-05	0.0057548	0.0262739	0.00213946	0.0310496	0.00292026	0.0028855	0.00148614	1.51361e-05	2.51389e-25	1.91405e-05	2.52871e-05	1.30082e-05	7.60688e-07	0	0.000108345	1.28613e-07	-8.14496e-07	0.000580289	-0.119144	-0.0268238	0.0920939	-0.0741218	-0.0468191	0.0365267	-0.1	-0.386607	0
2477	4.24783	0	0.103756	4.14407	4.49771	4.45646	4.33682	3.60224	0.398382	0.33619	0.119646	0.0412423	0.0222333	0.0040668	0.000156205	0.00341015	0.00468848	0.00147705	0.00363057	0.0442601	0.00366299	3.18159e-05	0.0057548	0.0262739	0.00213946	0.0310496	0.00292026	0.0028855	0.00148614	1.51361e-05	2.51389e-25	1.91405e-05	2.52871e-05	1.30082e-05	7.60688e-07	0	0.000108345	1.28613e-07	-8.14496e-07	0.000580289	-0.119144	-0.0268238	0.0920939	-0.0741218	-0.0468191	0.0365267	-0.1	-0.386607	0
2478	4.24783	0	0.103756	4.14407	4.49771	4.45646	4.33682	3.60224	0.398382	0.33619	0.119646	0.0412423	0.0222333	0.0040668	0.000156205	0.00341015	0.00468848	0.00147705	0.00363057	0.0442601	0.00366299	3.18159e-05	0.0057548	0.0262739	0.00213946	0.0310496	0.00292026	0.0028855	0.00148614	1.51361e-05	2.51389e-25	1.91405e-05	2.52871e-05	1.30082e-05	7.60688e-07	0	0.000108345	1.28613e-07	-8.14496e-07	0.000580289	-0.119144	-0.0268238	0.0920939	-0.0741218	-0.0468191	0.0365267	-0.1	-0.386607	0
2479	4.24783	0	0.103756	4.14407	4.49771	4.45646	4.33682	3.60224	0.398382	0.33619	0.119646	0.0412423	0.0222333	0.0040668	0.000156205	0.00341015	0.00468848	0.00147705	0.00363057	0.0442601	0.00366299	3.18159e-05	0.0057548	0.0262739	0.00213946	0.0310496	0.00292026	0.0028855	0.00148614	1.51361e-05	2.51389e-25	1.91405e-05	2.52871e-05	1.30082e-05	7.60688e-07	0	0.000108345	1.28613e-07	-8.14496e-07	0.000580289	-0.119144	-0.0268238	0.0920939	-0.0741218	-0.0468191	0.0365267	-0.1	-0.386607	0
2480	4.24783	0	0.103756	4.14407	4.49771	4.45646	4.33682	3.60224	0.398382	0.33619	0.119646	0.0412423	0.0222333	0.0040668	0.000156205	0.00341015	0.00468848	0.00147705	0.00363057	0.0442601	0.00366299	3.18159e-05	0.0057548	0.0262739	0.00213946	0.0310496	0.00292026	0.0028855	0.00148614	1.51361e-05	2.51389e-25	1.91405e-05	2.52871e-05	1.30082e-05	7.60688e-07	0	0.000108345	1.28613e-07	-8.14496e-07	0.000580289	-0.119144	-0.0268238	0.0920939	-0.0741218	-0.0468191	0.0365267	-0.1	-0.386607	0
2481	4.24783	0	0.103756	4.14407	4.49771	4.45646	4.33682	3.60224	0.398382	0.33619	0.119646	0.0412423	0.0222333	0.0040668	0.000156205	0.00341015	0.00468848	0.00147705	0.00363057	0.0442601	0.00366299	3.18159e-05	0.0057548	0.0262739	0.00213946	0.0310496	0.00292026	0.0028855	0.00148614	1.51361e-05	2.51389e-25	1.91405e-05	2.52871e-05	1.30082e-05	7.60688e-07	0	0.000108345	1.28613e-07	-8.14496e-07	0.000580289	-0.119144	-0.0268238	0.0920939	-0.0741218	-0.0468191	0.0365267	-0.1	-0.386607	0
2482	4.24783	0	0.103756	4.14407	4.49771	4.45646	4.33682	3.60224	0.398382	0.33619	0.119646	0.0412423	0.0222333	0.0040668	0.000156205	0.00341015	0.00468848	0.00147705	0.00363057	0.0442601	0.00366299	3.18159e-05	0.0057548	0.0262739	0.00213946	0.0310496	0.00292026	0.0028855	0.00148614	1.51361e-05	2.51389e-25	1.91405e-05	2.52871e-05	1.30082e-05	7.60688e-07	0	0.000108345	1.28613e-07	-8.14496e-07	0.000580289	-0.119144	-0.0268238	0.0920939	-0.0741218	-0.0468191	0.0365267	-0.1	-0.386607	0
2483	4.24783	0	0.103756	4.14407	4.49771	4.45646	4.33682	3.60224	0.398382	0.33619	0.119646	0.0412423	0.0222333	0.0040668	0.000156205	0.00341015	0.00468848	0.00147705	0.00363057	0.0442601	0.00366299	3.18159e-05	0.0057548	0.0262739	0.00213946	0.0310496	0.00292026	0.0028855	0.00148614	1.51361e-05	2.51389e-25	1.91405e-05	2.52871e-05	1.30082e-05	7.60688e-07	0	0.000108345	1.28613e-07	-8.14496e-07	0.000580289	-0.119144	-0.0268238	0.0920939	-0.0741218	-0.0468191	0.0365267	-0.1	-0.386607	0
2484	4.24783	0	0.103756	4.14407	4.49771	4.45646	4.33682	3.60224	0.398382	0.33619	0.119646	0.0412423	0.0222333	0.0040668	0.000156205	0.00341015	0.00468848	0.00147705	0.00363057	0.0442601	0.00366299	3.18159e-05	0.0057548	0.0262739	0.00213946	0.0310496	0.00292026	0.0028855	0.00148614	1.51361e-05	2.51389e-25	1.91405e-05	2.52871e-05	1.30082e-05	7.60688e-07	0	0.000108345	1.28613e-07	-8.14496e-07	0.000580289	-0.119144	-0.0268238	0.0920939	-0.0741218	-0.0468191	0.0365267	-0.1	-0.386607	0
2485	4.24783	0	0.103756	4.14407	4.49771	4.45646	4.33682	3.60224	0.398382	0.33619	0.119646	0.0412423	0.0222333	0.0040668	0.000156205	0.00341015	0.00468848	0.00147705	0.00363057	0.0442601	0.00366299	3.18159e-05	0.0057548	0.0262739	0.00213946	0.0310496	0.00292026	0.0028855	0.00148614	1.51361e-05	2.51389e-25	1.91405e-05	2.52871e-05	1.30082e-05	7.60688e-07	0	0.000108345	1.28613e-07	-8.14496e-07	0.000580289	-0.119144	-0.0268238	0.0920939	-0.0741218	-0.0468191	0.0365267	-0.1	-0.386607	0
2486	4.24783	0	0.103756	4.14407	4.49771	4.45646	4.33682	3.60224	0.398382	0.33619	0.119646	0.0412423	0.0222333	0.0040668	0.000156205	0.00341015	0.00468848	0.00147705	0.00363057	0.0442601	0.00366299	3.18159e-05	0.0057548	0.0262739	0.00213946	0.0310496	0.00292026	0.0028855	0.00148614	1.51361e-05	2.51389e-25	1.91405e-05	2.52871e-05	1.30082e-05	7.60688e-07	0	0.000108345	1.28613e-07	-8.14496e-07	0.000580289	-0.119144	-0.0268238	0.0920939	-0.0741218	-0.0468191	0.0365267	-0.1	-0.386607	0
2487	4.24783	0	0.103756	4.14407	4.49771	4.45646	4.33682	3.60224	0.398382	0.33619	0.119646	0.0412423	0.0222333	0.0040668	0.000156205	0.00341015	0.00468848	0.00147705	0.00363057	0.0442601	0.00366299	3.18159e-05	0.0057548	0.0262739	0.00213946	0.0310496	0.00292026	0.0028855	0.00148614	1.51361e-05	2.51389e-25	1.91405e-05	2.52871e-05	1.30082e-05	7.60688e-07	0	0.000108345	1.28613e-07	-8.14496e-07	0.000580289	-0.119144	-0.0268238	0.0920939	-0.0741218	-0.0468191	0.0365267	-0.1	-0.386607	0
2488	4.24783	0	0.103756	4.14407	4.49771	4.45646	4.33682	3.60224	0.398382	0.33619	0.119646	0.0412423	0.0222333	0.0040668	0.000156205	0.00341015	0.00468848	0.00147705	0.00363057	0.0442601	0.00366299	3.18159e-05	0.0057548	0.0262739	0.00213946	0.0310496	0.00292026	0.0028855	0.00148614	1.51361e-05	2.51389e-25	1.91405e-05	2.52871e-05	1.30082e-05	7.60688e-07	0	0.000108345	1.28613e-07	-8.14496e-07	0.000580289	-0.119144	-0.0268238	0.0920939	-0.0741218	-0.0468191	0.0365267	-0.1	-0.386607	0
2489	4.24783	0	0.103756	4.14407	4.49771	4.45646	4.33682	3.60224	0.398382	0.33619	0.119646	0.0412423	0.0222333	0.0040668	0.000156205	0.00341015	0.00468848	0.00147705	0.00363057	0.0442601	0.00366299	3.18159e-05	0.0057548	0.0262739	0.00213946	0.0310496	0.00292026	0.0028855	0.00148614	1.51361e-05	2.51389e-25	1.91405e-05	2.52871e-05	1.30082e-05	7.60688e-07	0	0.000108345	1.28613e-07	-8.14496e-07	0.000580289	-0.119144	-0.0268238	0.0920939	-0.0741218	-0.0468191	0.0365267	-0.1	-0.386607	0
2490	4.24783	0	0.103756	4.14407	4.49771	4.45646	4.33682	3.60224	0.398382	0.33619	0.119646	0.0412423	0.0222333	0.0040668	0.000156205	0.00341015	0.00468848	0.00147705	0.00363057	0.0442601	0.00366299	3.18159e-05	0.0057548	0.0262739	0.00213946	0.0310496	0.00292026	0.0028855	0.00148614	1.51361e-05	2.51389e-25	1.91405e-05	2.52871e-05	1.30082e-05	7.60688e-07	0	0.000108345	1.28613e-07	-8.14496e-07	0.000580289	-0.119144	-0.0268238	0.0920939	-0.0741218	-0.0468191	0.0365267	-0.1	-0.386607	0
2491	4.24783	0	0.103756	4.14407	4.49771	4.45646	4.33682	3.60224	0.398382	0.33619	0.119646	0.0412423	0.0222333	0.0040668	0.000156205	0.00341015	0.00468848	0.00147705	0.00363057	0.0442601	0.00366299	3.18159e-05	0.0057548	0.0262739	0.00213946	0.0310496	0.00292026	0.0028855	0.00148614	1.51361e-05	2.51389e-25	1.91405e-05	2.52871e-05	1.30082e-05	7.60688e-07	0	0.000108345	1.28613e-07	-8.14496e-07	0.000580289	-0.119144	-0.0268238	0.0920939	-0.0741218	-0.0468191	0.0365267	-0.1	-0.386607	0
2492	4.24783	0	0.103756	4.14407	4.49771	4.45646	4.33682	3.60224	0.398382	0.33619	0.119646	0.0412423	0.0222333	0.0040668	0.000156205	0.00341015	0.00468848	0.00147705	0.00363057	0.0442601	0.00366299	3.18159e-05	0.0057548	0.0262739	0.00213946	0.0310496	0.00292026	0.0028855	0.00148614	1.51361e-05	2.51389e-25	1.91405e-05	2.52871e-05	1.30082e-05	7.60688e-07	0	0.000108345	1.28613e-07	-8.14496e-07	0.000580289	-0.119144	-0.0268238	0.0920939	-0.0741218	-0.0468191	0.0365267	-0.1	-0.386607	0
2493	4.24783	0	0.103756	4.14407	4.49771	4.45646	4.33682	3.60224	0.398382	0.33619	0.119646	0.0412423	0.0222333	0.0040668	0.000156205	0.00341015	0.00468848	0.00147705	0.00363057	0.0442601	0.00366299	3.18159e-05	0.0057548	0.0262739	0.00213946	0.0310496	0.00292026	0.0028855	0.00148614	1.51361e-05	2.51389e-25	1.91405e-05	2.52871e-05	1.30082e-05	7.60688e-07	0	0.000108345	1.28613e-07	-8.14496e-07	0.000580289	-0.119144	-0.0268238	0.0920939	-0.0741218	-0.0468191	0.0365267	-0.1	-0.386607	0
2494	4.24783	0	0.103756	4.14407	4.49771	4.45646	4.33682	3.60224	0.398382	0.33619	0.119646	0.0412423	0.0222333	0.0040668	0.000156205	0.00341015	0.00468848	0.00147705	0.00363057	0.0442601	0.00366299	3.18159e-05	0.0057548	0.0262739	0.00213946	0.0310496	0.00292026	0.0028855	0.00148614	1.51361e-05	2.51389e-25	1.91405e-05	2.52871e-05	1.30082e-05	7.60688e-07	0	0.000108345	1.28613e-07	-8.14496e-07	0.000580289	-0.119144	-0.0268238	0.0920939	-0.0741218	-0.0468191	0.0365267	-0.1	-0.386607	0
2495	4.24783	0	0.103756	4.14407	4.49771	4.45646	4.33682	3.60224	0.398382	0.33619	0.119646	0.0412423	0.0222333	0.0040668	0.000156205	0.00341015	0.00468848	0.00147705	0.00363057	0.0442601	0.00366299	3.18159e-05	0.0057548	0.0262739	0.00213946	0.0310496	0.00292026	0.0028855	0.00148614	1.51361e-05	2.51389e-25	1.91405e-05	2.52871e-05	1.30082e-05	7.60688e-07	0	0.000108345	1.28613e-07	-8.14496e-07	0.000580289	-0.119144	-0.0268238	0.0920939	-0.0741218	-0.0468191	0.0365267	-0.1	-0.386607	0
2496	4.24783	0	0.103756	4.14407	4.49771	4.45646	4.33682	3.60224	0.398382	0.33619	0.119646	0.0412423	0.0222333	0.0040668	0.000156205	0.00341015	0.00468848	0.00147705	0.00363057	0.0442601	0.00366299	3.18159e-05	0.0057548	0.0262739	0.00213946	0.0310496	0.00292026	0.0028855	0.00148614	1.51361e-05	2.51389e-25	1.91405e-05	2.52871e-05	1.30082e-05	7.60688e-07	0	0.000108345	1.28613e-07	-8.14496e-07	0.000580289	-0.119144	-0.0268238	0.0920939	-0.0741218	-0.0468191	0.0365267	-0.1	-0.386607	0
2497	4.24783	0	0.103756	4.14407	4.49771	4.45646	4.33682	3.60224	0.398382	0.33619	0.119646	0.0412423	0.0222333	0.0040668	0.000156205	0.00341015	0.00468848	0.00147705	0.00363057	0.0442601	0.00366299	3.18159e-05	0.0057548	0.0262739	0.00213946	0.0310496	0.00292026	0.0028855	0.00148614	1.51361e-05	2.51389e-25	1.91405e-05	2.52871e-05	1.30082e-05	7.60688e-07	0	0.000108345	1.28613e-07	-8.14496e-07	0.000580289	-0.119144	-0.0268238	0.0920939	-0.0741218	-0.0468191	0.0365267	-0.1	-0.386607	0
2498	4.24783	0	0.103756	4.14407	4.49771	4.45646	4.33682	3.60224	0.398382	0.33619	0.119646	0.0412423	0.0222333	0.0040668	0.000156205	0.00341015	0.00468848	0.00147705	0.00363057	0.0442601	0.00366299	3.18159e-05	0.0057548	0.0262739	0.00213946	0.0310496	0.00292026	0.0028855	0.00148614	1.51361e-05	2.51389e-25	1.91405e-05	2.52871e-05	1.30082e-05	7.60688e-07	0	0.000108345	1.28613e-07	-8.14496e-07	0.000580289	-0.119144	-0.0268238	0.0920939	-0.0741218	-0.0468191	0.0365267	-0.1	-0.386607	0
2499	4.24783	0	0.103756	4.14407	4.49771	4.45646	4.33682	3.60224	0.398382	0.33619	0.119646	0.0412423	0.0222333	0.0040668	0.000156205	0.00341015	0.00468848	0.00147705	0.00363057	0.0442601	0.00366299	3.18159e-05	0.0057548	0.0262739	0.00213946	0.0310496	0.00292026	0.0028855	0.00148614	1.51361e-05	2.51389e-25	1.91405e-05	2.52871e-05	1.30082e-05	7.60688e-07	0	0.000108345	1.28613e-07	-8.14496e-07	0.000580289	-0.119144	-0.0268238	0.0920939	-0.0741218	-0.0468191	0.0365267	-0.1	-0.386607	0
2500	4.24783	0	0.103756	4.14407	4.49771	4.45646	4.33682	3.60224	0.398382	0.33619	0.119646	0.0412423	0.0222333	0.0040668	0.000156205	0.00341015	0.00468848	0.00147705	0.00363057	0.0442601	0.00366299	3.18159e-05	0.0057548	0.0262739	0.00213946	0.0310496	0.00292026	0.0028855	0.00148614	1.51361e-05	2.51389e-25	1.91405e-05	2.52871e-05	1.30082e-05	7.60688e-07	0	0.000108345	1.28613e-07	-8.14496e-07	0.000580289	-0.119144	-0.0268238	0.0920939	-0.0741218	-0.0468191	0.0365267	-0.1	-0.386607	0
[truncated: 4 more columns]
