# Supplementary material for: The Social Cost of Fossil and Industrial CO2 Emissions from 1950 to 2018
Source: Research Square preprint supplement (doi:10.21203/rs.3.rs-2244259/v1), 2022-11-17
Supplement: Supplementary file 24 [file RCP6_EMISSIONS.xls]

## Sheet: RCP6_EMISSIONS
_RCP6__EMISSIONS____________________________
CONTENT: GLOBAL ANNUAL EMISSIONS;
RUN: RCP6, FINAL RELEASE, 30 May. 2010
RCP6.0 CONTACT: AIM group, Toshihiko Masui (masui@nies.go.jp) & Kenichi Matsumoto (matsumoto.kenichi@nies.go.jp)
DATE: 30/5/2010 01:02:33
MAGICC-VERSION: 6.3.09, 25 November 2009
FILE PRODUCED BY: RCP Concentration Calculation & Data Group, M. Meinshausen, S. Smith, K. Riahi, D. van Vuuren et al.
DOCUMENTATION: M. Meinshausen, S. Smith et al. (2011) "The RCP GHG concentrations and their extension from 1765 to 2300", DOI 10.1007/s10584-011-0156-z, Climatic Change.
CMIP5 INFO: http://cmip-pcmdi.llnl.gov/cmip5/
RCP DATABASE: http://www.iiasa.ac.at/web-apps/tnt/RcpDb
FURTHER INFO: For data sources, aknowledgements and further information, see http://www.pik-potsdam.de/~mmalte/rcps.
NOTE: THIS EMISSION DATASET ONLY TO BE USED FOR EMISSION-DRIVEN ESM CMIP5 RUNS, AS CONCENTRATIONS, NOT EMISSIONS, SHALL BE PRESCRIBED IN MAIN CMIP5 RUNS.
RCP6 starts 2005; 20th century data and earlier is provided for convenience; ECP6.0 standard extension with stabilisation beyond 2150.
COLUMN_DESCRIPTION________________________________________
1. FossilCO2 - Fossil & Industrial CO2 (Fossil, Cement, Gas Flaring & Bunker Fuels)
2. OtherCO2 - Landuse related CO2 Emissions
3. CH4 - Methane
4. N2O - Nitrous Oxide
5. - 11. - Tropospheric ozone precursors, aerosols and reactive gas emissions
12. - 23. - Flourinated gases controlled under the Kyoto Protocol, (HFCs, PFCs, SF6)
24. - 39. - Ozone Depleting Substances controlled under the Montreal Protocol (CFCs, HFCFC, Halons, CCl4, MCF, CH3Br, CH3Cl)
&THISFILE_SPECIFICATIONS
THISFILE_DATACOLUMNS	39
THISFILE_FIRSTYEAR	1765
THISFILE_LASTYEAR	2500
THISFILE_ANNUALSTEPS	1
THISFILE_FIRSTDATAROW	39
THISFILE_UNITS	SEE ROW 37
THISFILE_DATTYPE	RCPDAT
/
COLUMN:	1	2	3	4	5	6	7	8	9	10	11	12	13	14	15	16	17	18	19	20	21	22	23	24	25	26	27	28	29	30	31	32	33	34	35	36	37	38	39
UNITS:	GtC/yr	GtC/yr	MtCH4/yr	MtN2O-N/yr	MtS/yr	MtCO/yr	Mt/yr	MtN/yr	Mt/yr	Mt/yr	MtN/yr	kt/yr	kt/yr	kt/yr	kt/yr	kt/yr	kt/yr	kt/yr	kt/yr	kt/yr	kt/yr	kt/yr	kt/yr	kt/yr	kt/yr	kt/yr	kt/yr	kt/yr	kt/yr	kt/yr	kt/yr	kt/yr	kt/yr	kt/yr	kt/yr	kt/yr	kt/yr	kt/yr	kt/yr
v YEARS/GAS >	FossilCO2	OtherCO2	CH4	N2O	SOx	CO	NMVOC	NOx	BC	OC	NH3	CF4	C2F6	C6F14	HFC23	HFC32	HFC43_10	HFC125	HFC134a	HFC143a	HFC227ea	HFC245fa	SF6	CFC_11	CFC_12	CFC_113	CFC_114	CFC_115	CARB_TET	MCF	HCFC_22	HCFC_141B	HCFC_142B	HALON1211	HALON1202	HALON1301	HALON2402	CH3BR	CH3CL
1765	0.003	0	0	0	0	0	0	0	0	0	0.833837	0.0107627	0	0	0	0	0	0	0	0	0	0	0	0	0	0	0	0	0	0	0	0	0	0	0	0	0	157.267	3100.21
1766	0.003	0.0053383	1.96326	0.00519108	0.0988826	9.05022	1.59687	0.109502	0.106998	0.56592	0.854231	0.0107521	0	0	0	0	0	0	0	0	0	0	0	0	0	0	0	0	0	0	0	0	0	0	0	0	0	157.267	3100.21
1767	0.003	0.0106766	2.43645	0.0101168	0.116306	12.9608	2.29232	0.168038	0.133383	0.781468	0.874167	0.0107479	0	0	0	0	0	0	0	0	0	0	0	0	0	0	0	0	0	0	0	0	0	0	0	0	0	157.267	3100.21
1768	0.003	0.0160149	2.91111	0.0150428	0.133811	16.8765	2.98865	0.226625	0.159847	0.997361	0.893654	0.0107438	0	0	0	0	0	0	0	0	0	0	0	0	0	0	0	0	0	0	0	0	0	0	0	0	0	157.267	3100.21
1769	0.003	0.0213532	3.38728	0.0199691	0.151398	20.7975	3.6859	0.285264	0.186393	1.21361	0.912699	0.0107397	0	0	0	0	0	0	0	0	0	0	0	0	0	0	0	0	0	0	0	0	0	0	0	0	0	157.267	3100.21
1770	0.003	0.0266915	3.86501	0.0248956	0.16907	24.7238	4.38409	0.343956	0.213024	1.43023	0.931309	0.0107355	0	0	0	0	0	0	0	0	0	0	0	0	0	0	0	0	0	0	0	0	0	0	0	0	0	157.267	3100.21
1771	0.004	0.0320298	4.34436	0.0298224	0.186831	28.6557	5.08326	0.402704	0.239742	1.64723	0.952532	0.0107314	0	0	0	0	0	0	0	0	0	0	0	0	0	0	0	0	0	0	0	0	0	0	0	0	0	157.267	3100.21
1772	0.004	0.0373681	4.82537	0.0347495	0.204683	32.5933	5.78343	0.461508	0.26655	1.86461	0.970294	0.0107273	0	0	0	0	0	0	0	0	0	0	0	0	0	0	0	0	0	0	0	0	0	0	0	0	0	157.267	3100.21
1773	0.004	0.0427064	5.30809	0.039677	0.222628	36.5368	6.48465	0.520371	0.29345	2.0824	0.987642	0.0107231	0	0	0	0	0	0	0	0	0	0	0	0	0	0	0	0	0	0	0	0	0	0	0	0	0	157.267	3100.21
1774	0.004	0.0480447	5.79258	0.0446047	0.24067	40.4864	7.18692	0.579294	0.320446	2.30061	1.00458	0.0107189	0	0	0	0	0	0	0	0	0	0	0	0	0	0	0	0	0	0	0	0	0	0	0	0	0	157.267	3100.21
1775	0.004	0.053383	6.27889	0.0495328	0.258811	44.4423	7.8903	0.638279	0.347541	2.51924	1.02113	0.0107148	0	0	0	0	0	0	0	0	0	0	0	0	0	0	0	0	0	0	0	0	0	0	0	0	0	157.267	3100.21
1776	0.004	0.0587213	6.76707	0.0544612	0.277055	48.4046	8.59482	0.697329	0.374737	2.73832	1.03728	0.0107106	0	0	0	0	0	0	0	0	0	0	0	0	0	0	0	0	0	0	0	0	0	0	0	0	0	157.267	3100.21
1777	0.004	0.0640596	7.25719	0.0593899	0.295404	52.3736	9.3005	0.756445	0.402037	2.95785	1.05305	0.0107064	0	0	0	0	0	0	0	0	0	0	0	0	0	0	0	0	0	0	0	0	0	0	0	0	0	157.267	3100.21
1778	0.004	0.0693979	7.74931	0.064319	0.313863	56.3496	10.0074	0.815629	0.429446	3.17784	1.06844	0.0107022	0	0	0	0	0	0	0	0	0	0	0	0	0	0	0	0	0	0	0	0	0	0	0	0	0	157.267	3100.21
1779	0.004	0.0747361	8.24348	0.0692485	0.332434	60.3326	10.7155	0.874883	0.456966	3.39833	1.08346	0.010698	0	0	0	0	0	0	0	0	0	0	0	0	0	0	0	0	0	0	0	0	0	0	0	0	0	157.267	3100.21
1780	0.004	0.0800744	8.73977	0.0741783	0.35112	64.3229	11.425	0.93421	0.4846	3.61931	1.09813	0.0106938	0	0	0	0	0	0	0	0	0	0	0	0	0	0	0	0	0	0	0	0	0	0	0	0	0	157.267	3100.21
1781	0.005	0.0854127	9.23824	0.0791086	0.369927	68.3207	12.1357	0.993612	0.512353	3.8408	1.11547	0.0106896	0	0	0	0	0	0	0	0	0	0	0	0	0	0	0	0	0	0	0	0	0	0	0	0	0	157.267	3100.21
1782	0.005	0.090751	9.73897	0.0840392	0.388856	72.3263	12.8478	1.05309	0.540227	4.06282	1.12943	0.0106854	0	0	0	0	0	0	0	0	0	0	0	0	0	0	0	0	0	0	0	0	0	0	0	0	0	157.267	3100.21
1783	0.005	0.0960893	10.242	0.0889702	0.407913	76.34	13.5613	1.11265	0.568228	4.28539	1.14305	0.0106812	0	0	0	0	0	0	0	0	0	0	0	0	0	0	0	0	0	0	0	0	0	0	0	0	0	157.267	3100.21
1784	0.005	0.101428	10.7475	0.0939017	0.4271	80.3619	14.2763	1.17229	0.596358	4.50853	1.15634	0.0106769	0	0	0	0	0	0	0	0	0	0	0	0	0	0	0	0	0	0	0	0	0	0	0	0	0	157.267	3100.21
1785	0.005	0.106766	11.2554	0.0988336	0.446422	84.3923	14.9927	1.23201	0.624621	4.73224	1.1693	0.0106727	0	0	0	0	0	0	0	0	0	0	0	0	0	0	0	0	0	0	0	0	0	0	0	0	0	157.267	3100.21
1786	0.005	0.112104	11.7658	0.103766	0.465884	88.4315	15.7107	1.29182	0.653022	4.95655	1.18194	0.0106684	0	0	0	0	0	0	0	0	0	0	0	0	0	0	0	0	0	0	0	0	0	0	0	0	0	157.267	3100.21
1787	0.005	0.117443	12.2789	0.108699	0.485489	92.4797	16.4303	1.35173	0.681565	5.18148	1.19428	0.0106642	0	0	0	0	0	0	0	0	0	0	0	0	0	0	0	0	0	0	0	0	0	0	0	0	0	157.267	3100.21
1788	0.005	0.122781	12.7947	0.113632	0.505241	96.5372	17.1515	1.41172	0.710254	5.40705	1.20631	0.0106599	0	0	0	0	0	0	0	0	0	0	0	0	0	0	0	0	0	0	0	0	0	0	0	0	0	157.267	3100.21
1789	0.005	0.128119	13.3133	0.118566	0.525147	100.604	17.8744	1.47181	0.739094	5.63327	1.21804	0.0106556	0	0	0	0	0	0	0	0	0	0	0	0	0	0	0	0	0	0	0	0	0	0	0	0	0	157.267	3100.21
1790	0.005	0.133457	13.8347	0.1235	0.545209	104.682	18.599	1.532	0.76809	5.86016	1.22948	0.0106513	0	0	0	0	0	0	0	0	0	0	0	0	0	0	0	0	0	0	0	0	0	0	0	0	0	157.267	3100.21
1791	0.006	0.138796	14.3591	0.128435	0.565433	108.769	19.3255	1.59228	0.797246	6.08776	1.24369	0.010647	0	0	0	0	0	0	0	0	0	0	0	0	0	0	0	0	0	0	0	0	0	0	0	0	0	157.267	3100.21
1792	0.006	0.144134	14.8866	0.133371	0.585825	112.867	20.0537	1.65268	0.826567	6.31607	1.25458	0.0106427	0	0	0	0	0	0	0	0	0	0	0	0	0	0	0	0	0	0	0	0	0	0	0	0	0	157.267	3100.21
1793	0.006	0.149472	15.4172	0.138306	0.606388	116.975	20.7839	1.71318	0.856059	6.54512	1.2652	0.0106384	0	0	0	0	0	0	0	0	0	0	0	0	0	0	0	0	0	0	0	0	0	0	0	0	0	157.267	3100.21
1794	0.006	0.154811	15.9511	0.143243	0.627129	121.095	21.5161	1.77379	0.885726	6.77493	1.27556	0.010634	0	0	0	0	0	0	0	0	0	0	0	0	0	0	0	0	0	0	0	0	0	0	0	0	0	157.267	3100.21
1795	0.006	0.160149	16.4883	0.14818	0.648053	125.227	22.2503	1.83452	0.915575	7.00554	1.28567	0.0106297	0	0	0	0	0	0	0	0	0	0	0	0	0	0	0	0	0	0	0	0	0	0	0	0	0	157.267	3100.21
1796	0.006	0.165487	17.029	0.153118	0.669166	129.37	22.9865	1.89536	0.94561	7.23695	1.29554	0.0106253	0	0	0	0	0	0	0	0	0	0	0	0	0	0	0	0	0	0	0	0	0	0	0	0	0	157.267	3100.21
1797	0.007	0.170825	17.5732	0.158056	0.690473	133.526	23.7249	1.95633	0.975837	7.4692	1.30821	0.0106209	0	0	0	0	0	0	0	0	0	0	0	0	0	0	0	0	0	0	0	0	0	0	0	0	0	157.267	3100.21
1798	0.007	0.176164	18.1211	0.162995	0.711981	137.694	24.4656	2.01742	1.00626	7.70232	1.31761	0.0106165	0	0	0	0	0	0	0	0	0	0	0	0	0	0	0	0	0	0	0	0	0	0	0	0	0	157.267	3100.21
1799	0.007	0.181502	18.6728	0.167935	0.733695	141.875	25.2085	2.07864	1.03689	7.93632	1.32679	0.0106121	0	0	0	0	0	0	0	0	0	0	0	0	0	0	0	0	0	0	0	0	0	0	0	0	0	157.267	3100.21
1800	0.008	0.18684	19.2283	0.172875	0.755622	146.07	25.9538	2.13999	1.06774	8.17124	1.33879	0.0106077	0	0	0	0	0	0	0	0	0	0	0	0	0	0	0	0	0	0	0	0	0	0	0	0	0	157.267	3100.21
1801	0.008	0.192179	19.7879	0.177817	0.777769	150.279	26.7015	2.20149	1.09879	8.4071	1.34754	0.0106032	0	0	0	0	0	0	0	0	0	0	0	0	0	0	0	0	0	0	0	0	0	0	0	0	0	157.267	3100.21
1802	0.01	0.197517	20.3516	0.182758	0.800143	154.502	27.4517	2.26312	1.13008	8.64394	1.36217	0.0105988	0	0	0	0	0	0	0	0	0	0	0	0	0	0	0	0	0	0	0	0	0	0	0	0	0	157.267	3100.21
1803	0.009	0.202855	20.9196	0.187701	0.82275	158.739	28.2045	2.3249	1.16159	8.88178	1.36749	0.0105943	0	0	0	0	0	0	0	0	0	0	0	0	0	0	0	0	0	0	0	0	0	0	0	0	0	157.267	3100.21
1804	0.009	0.208194	21.492	0.192644	0.845598	162.992	28.96	2.38683	1.19334	9.12066	1.37566	0.0105898	0	0	0	0	0	0	0	0	0	0	0	0	0	0	0	0	0	0	0	0	0	0	0	0	0	157.267	3100.21
1805	0.009	0.213532	22.069	0.197589	0.868694	167.261	29.7182	2.44892	1.22534	9.3606	1.38365	0.0105853	0	0	0	0	0	0	0	0	0	0	0	0	0	0	0	0	0	0	0	0	0	0	0	0	0	157.267	3100.21
1806	0.01	0.21887	22.6506	0.202534	0.892046	171.545	30.4792	2.51116	1.25759	9.60165	1.39452	0.0105808	0	0	0	0	0	0	0	0	0	0	0	0	0	0	0	0	0	0	0	0	0	0	0	0	0	157.267	3100.21
1807	0.01	0.224208	23.2371	0.20748	0.915662	175.847	31.2432	2.57357	1.2901	9.84383	1.40217	0.0105762	0	0	0	0	0	0	0	0	0	0	0	0	0	0	0	0	0	0	0	0	0	0	0	0	0	157.267	3100.21
1808	0.01	0.229547	23.8285	0.212426	0.939549	180.165	32.0101	2.63615	1.32289	10.0872	1.40967	0.0105717	0	0	0	0	0	0	0	0	0	0	0	0	0	0	0	0	0	0	0	0	0	0	0	0	0	157.267	3100.21
1809	0.01	0.234885	24.425	0.217374	0.963717	184.501	32.7802	2.69891	1.35594	10.3317	1.41702	0.0105671	0	0	0	0	0	0	0	0	0	0	0	0	0	0	0	0	0	0	0	0	0	0	0	0	0	157.267	3100.21
1810	0.01	0.240223	25.0269	0.222323	0.988174	188.856	33.5535	2.76184	1.38929	10.5775	1.42423	0.0105625	0	0	0	0	0	0	0	0	0	0	0	0	0	0	0	0	0	0	0	0	0	0	0	0	0	157.267	3100.21
1811	0.011	0.245562	25.6341	0.227272	1.01293	193.229	34.33	2.82497	1.42293	10.8246	1.43434	0.0105578	0	0	0	0	0	0	0	0	0	0	0	0	0	0	0	0	0	0	0	0	0	0	0	0	0	157.267	3100.21
1812	0.011	0.2509	26.247	0.232223	1.03799	197.621	35.11	2.88828	1.45687	11.073	1.44129	0.0105532	0	0	0	0	0	0	0	0	0	0	0	0	0	0	0	0	0	0	0	0	0	0	0	0	0	157.267	3100.21
1813	0.011	0.256238	26.8657	0.237175	1.06337	202.034	35.8935	2.9518	1.49113	11.3228	1.44811	0.0105485	0	0	0	0	0	0	0	0	0	0	0	0	0	0	0	0	0	0	0	0	0	0	0	0	0	157.267	3100.21
1814	0.011	0.261577	27.4904	0.242127	1.08907	206.467	36.6806	3.01551	1.52571	11.5739	1.45482	0.0105438	0	0	0	0	0	0	0	0	0	0	0	0	0	0	0	0	0	0	0	0	0	0	0	0	0	157.267	3100.21
1815	0.012	0.266915	28.1212	0.247081	1.11511	210.921	37.4714	3.07944	1.56062	11.8266	1.46447	0.0105391	0	0	0	0	0	0	0	0	0	0	0	0	0	0	0	0	0	0	0	0	0	0	0	0	0	157.267	3100.21
1816	0.013	0.272253	28.7584	0.252036	1.1415	215.398	38.266	3.14359	1.59588	12.0807	1.47402	0.0105343	0	0	0	0	0	0	0	0	0	0	0	0	0	0	0	0	0	0	0	0	0	0	0	0	0	157.267	3100.21
1817	0.014	0.277591	29.4021	0.256992	1.16825	219.896	39.0646	3.20796	1.63149	12.3363	1.48348	0.0105296	0	0	0	0	0	0	0	0	0	0	0	0	0	0	0	0	0	0	0	0	0	0	0	0	0	157.267	3100.21
1818	0.014	0.28293	30.0526	0.261949	1.19536	224.418	39.8673	3.27256	1.66746	12.5935	1.48981	0.0105248	0	0	0	0	0	0	0	0	0	0	0	0	0	0	0	0	0	0	0	0	0	0	0	0	0	157.267	3100.21
1819	0.014	0.288268	30.71	0.266908	1.22286	228.964	40.6742	3.33739	1.70381	12.8524	1.49607	0.0105199	0	0	0	0	0	0	0	0	0	0	0	0	0	0	0	0	0	0	0	0	0	0	0	0	0	157.267	3100.21
1820	0.014	0.293606	31.3745	0.271868	1.25075	233.535	41.4854	3.40248	1.74055	13.1129	1.50225	0.0105151	0	0	0	0	0	0	0	0	0	0	0	0	0	0	0	0	0	0	0	0	0	0	0	0	0	157.267	3100.21
1821	0.014	0.298945	32.0465	0.276829	1.27904	238.131	42.3011	3.46781	1.77769	13.3752	1.50838	0.0105102	0	0	0	0	0	0	0	0	0	0	0	0	0	0	0	0	0	0	0	0	0	0	0	0	0	157.267	3100.21
1822	0.015	0.304283	32.7261	0.281791	1.30774	242.754	43.1214	3.53341	1.81524	13.6393	1.51749	0.0105053	0	0	0	0	0	0	0	0	0	0	0	0	0	0	0	0	0	0	0	0	0	0	0	0	0	157.267	3100.21
1823	0.016	0.309621	33.4135	0.286755	1.33688	247.404	43.9465	3.59927	1.85322	13.9052	1.52655	0.0105003	0	0	0	0	0	0	0	0	0	0	0	0	0	0	0	0	0	0	0	0	0	0	0	0	0	157.267	3100.21
1824	0.016	0.314959	34.1091	0.29172	1.36646	252.081	44.7764	3.66542	1.89163	14.1731	1.53254	0.0104954	0	0	0	0	0	0	0	0	0	0	0	0	0	0	0	0	0	0	0	0	0	0	0	0	0	157.267	3100.21
1825	0.017	0.320298	34.813	0.296687	1.39649	256.788	45.6114	3.73184	1.9305	14.4429	1.54153	0.0104904	0	0	0	0	0	0	0	0	0	0	0	0	0	0	0	0	0	0	0	0	0	0	0	0	0	157.267	3100.21
1826	0.017	0.325636	35.5254	0.301656	1.427	261.524	46.4516	3.79856	1.96983	14.7147	1.54746	0.0104853	0	0	0	0	0	0	0	0	0	0	0	0	0	0	0	0	0	0	0	0	0	0	0	0	0	157.267	3100.21
1827	0.018	0.330974	36.2468	0.306626	1.45799	266.29	47.2972	3.86559	2.00964	14.9886	1.55641	0.0104802	0	0	0	0	0	0	0	0	0	0	0	0	0	0	0	0	0	0	0	0	0	0	0	0	0	157.267	3100.21
1828	0.018	0.336313	36.9773	0.311597	1.48948	271.088	48.1483	3.93293	2.04994	15.2646	1.5623	0.0104751	0	0	0	0	0	0	0	0	0	0	0	0	0	0	0	0	0	0	0	0	0	0	0	0	0	157.267	3100.21
1829	0.018	0.341651	37.7173	0.31657	1.52149	275.919	49.0051	4.00059	2.09076	15.5429	1.5682	0.0104699	0	0	0	0	0	0	0	0	0	0	0	0	0	0	0	0	0	0	0	0	0	0	0	0	0	157.267	3100.21
1830	0.024	0.346989	38.4669	0.321545	1.55403	280.783	49.8678	4.06858	2.1321	15.8235	1.59235	0.0104648	0	0	0	0	0	0	0	0	0	0	0	0	0	0	0	0	0	0	0	0	0	0	0	0	0	157.267	3100.21
1831	0.023	0.352328	39.2266	0.326522	1.58711	285.682	50.7366	4.13692	2.17399	16.1064	1.59521	0.0104595	0	0	0	0	0	0	0	0	0	0	0	0	0	0	0	0	0	0	0	0	0	0	0	0	0	157.267	3100.21
1832	0.023	0.357666	39.9966	0.331501	1.62076	290.617	51.6116	4.2056	2.21643	16.3917	1.60114	0.0104542	0	0	0	0	0	0	0	0	0	0	0	0	0	0	0	0	0	0	0	0	0	0	0	0	0	157.267	3100.21
1833	0.024	0.363004	40.7773	0.336481	1.655	295.588	52.493	4.27466	2.25945	16.6796	1.61014	0.0104489	0	0	0	0	0	0	0	0	0	0	0	0	0	0	0	0	0	0	0	0	0	0	0	0	0	157.267	3100.21
1834	0.024	0.368342	41.5689	0.341464	1.68983	300.597	53.3811	4.34409	2.30306	16.97	1.61613	0.0104436	0	0	0	0	0	0	0	0	0	0	0	0	0	0	0	0	0	0	0	0	0	0	0	0	0	157.267	3100.21
1835	0.025	0.373681	42.3719	0.346448	1.72528	305.645	54.2761	4.4139	2.34729	17.2631	1.6252	0.0104381	0	0	0	0	0	0	0	0	0	0	0	0	0	0	0	0	0	0	0	0	0	0	0	0	0	157.267	3100.21
1836	0.029	0.379019	43.1865	0.351435	1.76137	310.733	55.1781	4.48412	2.39214	17.5589	1.64344	0.0104327	0	0	0	0	0	0	0	0	0	0	0	0	0	0	0	0	0	0	0	0	0	0	0	0	0	157.267	3100.21
1837	0.029	0.384357	44.0132	0.356423	1.79812	315.863	56.0874	4.55474	2.43765	17.8576	1.64957	0.0104272	0	0	0	0	0	0	0	0	0	0	0	0	0	0	0	0	0	0	0	0	0	0	0	0	0	157.267	3100.21
1838	0.03	0.389696	44.8522	0.361414	1.83554	321.036	57.0041	4.6258	2.48383	18.1592	1.65881	0.0104216	0	0	0	0	0	0	0	0	0	0	0	0	0	0	0	0	0	0	0	0	0	0	0	0	0	157.267	3100.21
1839	0.031	0.395034	45.7041	0.366407	1.87367	326.252	57.9287	4.69728	2.5307	18.4638	1.66811	0.010416	0	0	0	0	0	0	0	0	0	0	0	0	0	0	0	0	0	0	0	0	0	0	0	0	0	157.267	3100.21
1840	0.033	0.400372	46.5691	0.371403	1.91251	331.515	58.8612	4.76922	2.57828	18.7714	1.68054	0.0104104	0	0	0	0	0	0	0	0	0	0	0	0	0	0	0	0	0	0	0	0	0	0	0	0	0	157.267	3100.21
1841	0.034	0.405711	47.4478	0.376401	1.9521	336.824	59.8019	4.84163	2.6266	19.0823	1.69001	0.0104047	0	0	0	0	0	0	0	0	0	0	0	0	0	0	0	0	0	0	0	0	0	0	0	0	0	157.267	3100.21
1842	0.036	0.411049	48.3404	0.381401	1.99246	342.181	60.7511	4.91451	2.67568	19.3965	1.70261	0.0103989	0	0	0	0	0	0	0	0	0	0	0	0	0	0	0	0	0	0	0	0	0	0	0	0	0	157.267	3100.21
1843	0.037	0.416387	49.2475	0.386404	2.0336	347.588	61.709	4.98789	2.72554	19.7141	1.71227	0.0103931	0	0	0	0	0	0	0	0	0	0	0	0	0	0	0	0	0	0	0	0	0	0	0	0	0	157.267	3100.21
1844	0.039	0.421725	50.1694	0.39141	2.07556	353.047	62.6759	5.06177	2.7762	20.0351	1.72507	0.0103872	0	0	0	0	0	0	0	0	0	0	0	0	0	0	0	0	0	0	0	0	0	0	0	0	0	157.267	3100.21
1845	0.043	0.427064	51.1068	0.396418	2.11836	358.558	63.6522	5.13618	2.8277	20.3598	1.74408	0.0103812	0	0	0	0	0	0	0	0	0	0	0	0	0	0	0	0	0	0	0	0	0	0	0	0	0	157.267	3100.21
1846	0.043	0.432402	52.0599	0.401429	2.16202	364.125	64.638	5.21114	2.88005	20.6882	1.75104	0.0103752	0	0	0	0	0	0	0	0	0	0	0	0	0	0	0	0	0	0	0	0	0	0	0	0	0	157.267	3100.21
1847	0.046	0.43774	53.0294	0.406443	2.20657	369.747	65.6336	5.28665	2.93328	21.0205	1.76725	0.0103691	0	0	0	0	0	0	0	0	0	0	0	0	0	0	0	0	0	0	0	0	0	0	0	0	0	157.267	3100.21
1848	0.047	0.443079	54.0156	0.411461	2.25204	375.427	66.6395	5.36273	2.98742	21.3567	1.77751	0.010363	0	0	0	0	0	0	0	0	0	0	0	0	0	0	0	0	0	0	0	0	0	0	0	0	0	157.267	3100.21
1849	0.05	0.448417	55.0193	0.416481	2.29847	381.167	67.6558	5.43941	3.0425	21.6969	1.79401	0.0103568	0	0	0	0	0	0	0	0	0	0	0	0	0	0	0	0	0	0	0	0	0	0	0	0	0	157.267	3100.21
1850	0.054	0.453755	56.0408	0.421504	2.34586	386.969	68.6829	5.5167	3.09855	22.0414	1.81369	0.0103505	0	0	0	0	0	0	0	0	0	0	0	0	0	0	0	0	1.395	0	0	0	0	0	0	0	0	157.267	3100.21
1851	0.054	0.446786	56.4613	0.427401	2.40128	387.461	68.7278	5.54232	3.11874	22.1051	1.84692	0.0103509	0	0	0	0	0	0	0	0	0	0	0	0	0	0	0	0	1.447	0	0	0	0	0	0	0	0	157.267	3100.21
1852	0.057	0.498623	56.8819	0.464661	2.4567	387.952	68.7726	5.56795	3.13893	22.1687	1.99469	0.0103513	0	0	0	0	0	0	0	0	0	0	0	0	0	0	0	0	1.502	0	0	0	0	0	0	0	0	157.267	3100.21
1853	0.059	0.497354	57.3024	0.464774	2.51212	388.443	68.8174	5.59357	3.15912	22.2324	2.00081	0.0103518	0	0	0	0	0	0	0	0	0	0	0	0	0	0	0	0	1.554	0	0	0	0	0	0	0	0	157.267	3100.21
1854	0.069	0.495817	57.723	0.464436	2.56753	388.935	68.8622	5.61919	3.17931	22.296	2.0303	0.0103522	0	0	0	0	0	0	0	0	0	0	0	0	0	0	0	0	1.607	0	0	0	0	0	0	0	0	157.267	3100.21
1855	0.071	0.493679	58.1436	0.463279	2.62295	389.426	68.9071	5.64481	3.1995	22.3597	2.03251	0.0103526	0	0	0	0	0	0	0	0	0	0	0	0	0	0	0	0	1.657	0	0	0	0	0	0	0	0	157.267	3100.21
1856	0.076	0.498935	58.5641	0.467293	2.67837	389.918	68.9519	5.67043	3.21969	22.4233	2.06176	0.0103531	0	0	0	0	0	0	0	0	0	0	0	0	0	0	0	0	1.712	0	0	0	0	0	0	0	0	157.267	3100.21
1857	0.077	0.504232	58.9847	0.471264	2.73379	390.409	68.9967	5.69605	3.23988	22.487	2.07845	0.0103535	0	0	0	0	0	0	0	0	0	0	0	0	0	0	0	0	1.765	0	0	0	0	0	0	0	0	157.267	3100.21
1858	0.078	0.509233	59.4052	0.475031	2.78921	390.9	69.0416	5.72167	3.26007	22.5506	2.0943	0.0103539	0	0	0	0	0	0	0	0	0	0	0	0	0	0	0	0	1.815	0	0	0	0	0	0	0	0	157.267	3100.21
1859	0.083	0.514254	59.8258	0.478766	2.84462	391.392	69.0864	5.74729	3.28025	22.6143	2.12297	0.0103544	0	0	0	0	0	0	0	0	0	0	0	0	0	0	0	0	1.87	0	0	0	0	0	0	0	0	157.267	3100.21
1860	0.091	0.518967	60.2464	0.482577	2.90004	391.883	69.1312	5.77291	3.30044	22.6779	2.16198	0.0103548	0	0	0	0	0	0	0	0	0	0	0	0	0	0	0	0	1.923	0	0	0	0	0	0	0	0	157.267	3100.21
1861	0.095	0.528224	59.6145	0.504995	2.99268	392.896	69.269	5.81284	3.32441	22.7345	2.27359	0.010355	0	0	0	0	0	0	0	0	0	0	0	0	0	0	0	0	1.973	0	0	0	0	0	0	0	0	157.267	3100.21
1862	0.097	0.473717	58.9826	0.471113	3.08532	393.909	69.4069	5.85276	3.34838	22.7911	2.15582	0.0103551	0	0	0	0	0	0	0	0	0	0	0	0	0	0	0	0	2.028	0	0	0	0	0	0	0	0	157.267	3100.21
1863	0.104	0.473749	58.3507	0.474449	3.17795	394.922	69.5447	5.89268	3.37235	22.8478	2.19233	0.0103553	0	0	0	0	0	0	0	0	0	0	0	0	0	0	0	0	2.081	0	0	0	0	0	0	0	0	157.267	3100.21
1864	0.112	0.474138	57.7188	0.477858	3.27059	395.935	69.6826	5.9326	3.39632	22.9044	2.22994	0.0103555	0	0	0	0	0	0	0	0	0	0	0	0	0	0	0	0	2.134	0	0	0	0	0	0	0	0	157.267	3100.21
1865	0.119	0.474795	57.0869	0.48145	3.36323	396.948	69.8204	5.97253	3.42029	22.961	2.26553	0.0103556	0	0	0	0	0	0	0	0	0	0	0	0	0	0	0	0	2.184	0	0	0	0	0	0	0	0	157.267	3100.21
1866	0.122	0.474912	56.455	0.484205	3.45587	397.961	69.9582	6.01245	3.44426	23.0176	2.2872	0.0103558	0	0	0	0	0	0	0	0	0	0	0	0	0	0	0	0	2.239	0	0	0	0	0	0	0	0	157.267	3100.21
1867	0.130223	0.473384	55.8231	0.484723	3.5485	398.974	70.0961	6.05237	3.46823	23.0742	2.31876	0.010356	0	0	0	0	0	0	0	0	0	0	0	0	0	0	0	0	2.291	0	0	0	0	0	0	0	0	157.267	3100.21
1868	0.135252	0.471983	55.1912	0.485953	3.64114	399.987	70.2339	6.09229	3.4922	23.1308	2.33718	0.0103561	0	0	0	0	0	0	0	0	0	0	0	0	0	0	0	0	2.341	0	0	0	0	0	0	0	0	157.267	3100.21
1869	0.142281	0.470485	54.5593	0.486862	3.73378	401	70.3717	6.13222	3.51617	23.1875	2.36281	0.0103563	0	0	0	0	0	0	0	0	0	0	0	0	0	0	0	0	2.386	0	0	0	0	0	0	0	0	157.267	3100.21
1870	0.147311	0.469334	53.9274	0.487744	3.82642	402.013	70.5096	6.17214	3.54014	23.2441	2.38241	0.0103565	0	0	0	0	0	0	0	0	0	0	0	0	0	0	0	0	2.452	0	0	0	0	0	0	0	0	157.267	3100.21
1871	0.15634	0.487325	56.6839	0.585016	3.99317	403.032	70.6533	6.21717	3.56245	23.2838	2.86067	0.0103569	0	0	0	0	0	0	0	0	0	0	0	0	0	0	0	0	2.505	0	0	0	0	0	0	0	0	157.267	3100.21
1872	0.173369	0.566964	59.4403	0.66674	4.15992	404.051	70.7971	6.26219	3.58477	23.3236	3.24017	0.0103573	0	0	0	0	0	0	0	0	0	0	0	0	0	0	0	0	2.557	0	0	0	0	0	0	0	0	157.267	3100.21
1873	0.184398	0.576901	62.1968	0.696371	4.32667	405.071	70.9408	6.30722	3.60708	23.3634	3.40336	0.0103577	0	0	0	0	0	0	0	0	0	0	0	0	0	0	0	0	2.61	0	0	0	0	0	0	0	0	157.267	3100.21
1874	0.174428	0.583284	64.9533	0.70875	4.49342	406.09	71.0846	6.35225	3.62939	23.4031	3.42716	0.0103581	0	0	0	0	0	0	0	0	0	0	0	0	0	0	0	0	2.663	0	0	0	0	0	0	0	0	157.267	3100.21
1875	0.188457	0.58997	67.7097	0.720343	4.66018	407.109	71.2283	6.39727	3.6517	23.4429	3.51731	0.0103585	0	0	0	0	0	0	0	0	0	0	0	0	0	0	0	0	2.85	0	0	0	0	0	0	0	0	157.267	3100.21
1876	0.191486	0.596392	70.4662	0.745243	4.82693	408.128	71.3721	6.4423	3.67401	23.4827	3.63755	0.0103589	0	0	0	0	0	0	0	0	0	0	0	0	0	0	0	0	2.989	0	0	0	0	0	0	0	0	157.267	3100.21
1877	0.194515	0.602623	73.2226	0.756332	4.99368	409.147	71.5158	6.48732	3.69633	23.5224	3.69585	0.0103593	0	0	0	0	0	0	0	0	0	0	0	0	0	0	0	0	3.13	0	0	0	0	0	0	0	0	157.267	3100.21
1878	0.196	0.609051	75.9791	0.766046	5.16043	410.166	71.6596	6.53235	3.71864	23.5622	3.74565	0.0103597	0	0	0	0	0	0	0	0	0	0	0	0	0	0	0	0	3.275	0	0	0	0	0	0	0	0	157.267	3100.21
1879	0.21	0.615348	78.7356	0.774911	5.32718	411.185	71.8033	6.57738	3.74095	23.602	3.83041	0.0103602	0	0	0	0	0	0	0	0	0	0	0	0	0	0	0	0	3.396	0	0	0	0	0	0	0	0	157.267	3100.21
1880	0.236	0.621243	81.492	0.784121	5.49393	412.204	71.9471	6.6224	3.76326	23.6417	3.95202	0.0103606	0	0	0	0	0	0	0	0	0	0	0	0	0	0	0	0	3.573	0	0	0	0	0	0	0	0	157.267	3100.21
1881	0.243	0.648873	84.3595	0.811578	5.76232	413.256	72.0998	6.67595	3.79257	23.6754	4.07131	0.0103613	0	0	0	0	0	0	0	0	0	0	0	0	0	0	0	0	3.726	0	0	0	0	0	0	0	0	157.267	3100.21
1882	0.256	0.604664	87.2269	0.78526	6.03071	414.308	72.2526	6.72949	3.82188	23.7092	4.01987	0.010362	0	0	0	0	0	0	0	0	0	0	0	0	0	0	0	0	3.883	0	0	0	0	0	0	0	0	157.267	3100.21
1883	0.272	0.608518	90.0943	0.792556	6.2991	415.36	72.4053	6.78304	3.85119	23.7429	4.09853	0.0103627	0	0	0	0	0	0	0	0	0	0	0	0	0	0	0	0	4.043	0	0	0	0	0	0	0	0	157.267	3100.21
1884	0.275	0.612128	92.9618	0.798751	6.56748	416.412	72.5581	6.83658	3.8805	23.7766	4.13334	0.0103634	0	0	0	0	0	0	0	0	0	0	0	0	0	0	0	0	4.233	0	0	0	0	0	0	0	0	157.267	3100.21
1885	0.277	0.615236	95.8292	0.804534	6.83587	417.464	72.7108	6.89012	3.90981	23.8103	4.16461	0.0103642	0	0	0	0	0	0	0	0	0	0	0	0	0	0	0	0	4.427	0	0	0	0	0	0	0	0	157.267	3100.21
1886	0.281	0.617144	98.6966	0.826194	7.10426	418.517	72.8636	6.94367	3.93912	23.844	4.27589	0.0103649	0	0	0	0	0	0	0	0	0	0	0	0	0	0	0	0	4.625	0	0	0	0	0	0	0	0	157.267	3100.21
1887	0.295	0.616163	101.564	0.832196	7.37264	419.569	73.0163	6.99721	3.96843	23.8777	4.35318	0.0103656	0	0	0	0	0	0	0	0	0	0	0	0	0	0	0	0	4.827	0	0	0	0	0	0	0	0	157.267	3100.21
1888	0.327	0.614734	104.431	0.837058	7.64103	420.621	73.169	7.05076	3.99774	23.9115	4.47487	0.0103663	0	0	0	0	0	0	0	0	0	0	0	0	0	0	0	0	5.033	0	0	0	0	0	0	0	0	157.267	3100.21
1889	0.327	0.6132	107.299	0.84144	7.90942	421.673	73.3218	7.1043	4.02704	23.9452	4.49842	0.010367	0	0	0	0	0	0	0	0	0	0	0	0	0	0	0	0	5.27	0	0	0	0	0	0	0	0	157.267	3100.21
1890	0.356	0.611754	110.166	0.845525	8.1778	422.725	73.4745	7.15784	4.05635	23.9789	4.6037	0.0103678	0	0	0	0	0	0	0	0	0	0	0	0	0	0	0	0	5.485	0	0	0	0	0	0	0	0	157.267	3100.21
1891	0.372	0.610249	111.524	0.850982	8.56737	424.293	73.7003	7.23586	4.08828	24.0114	4.68307	0.0103687	0	0	0	0	0	0	0	0	0	0	0	0	0	0	0	0	5.731	0	0	0	0	0	0	0	0	157.267	3100.21
1892	0.374	0.623191	112.881	0.85742	8.95694	425.861	73.9261	7.31388	4.12022	24.0439	4.75516	0.0103697	0	0	0	0	0	0	0	0	0	0	0	0	0	0	0	0	6.01	0	0	0	0	0	0	0	0	157.267	3100.21
1893	0.37	0.624403	114.238	0.864758	9.34651	427.429	74.152	7.3919	4.15215	24.0763	4.82174	0.0103706	0	0	0	0	0	0	0	0	0	0	0	0	0	0	0	0	6.267	0	0	0	0	0	0	0	0	157.267	3100.21
1894	0.383	0.640367	115.595	0.872945	9.73608	428.997	74.3778	7.46992	4.18408	24.1088	4.88457	0.0103716	0	0	0	0	0	0	0	0	0	0	0	0	0	0	0	0	6.529	0	0	0	0	0	0	0	0	157.267	3100.21
1895	0.406	0.644419	116.953	0.881882	10.1256	430.565	74.6036	7.54794	4.21601	24.1413	4.94542	0.0103726	0	0	0	0	0	0	0	0	0	0	0	0	0	0	0	0	6.824	0	0	0	0	0	0	0	0	157.267	3100.21
1896	0.419	0.646278	118.31	0.891418	10.5152	432.133	74.8294	7.62596	4.24794	24.1738	5.00605	0.0103735	0	0	0	0	0	0	0	0	0	0	0	0	0	0	0	0	7.151	0	0	0	0	0	0	0	0	157.267	3100.21
1897	0.44	0.649564	119.667	0.901402	10.9048	433.701	75.0552	7.70398	4.27987	24.2063	5.06823	0.0103745	0	0	0	0	0	0	0	0	0	0	0	0	0	0	0	0	7.432	0	0	0	0	0	0	0	0	157.267	3100.21
1898	0.465	0.651001	121.025	0.911681	11.2943	435.269	75.281	7.782	4.3118	24.2387	5.13374	0.0103754	0	0	0	0	0	0	0	0	0	0	0	0	0	0	0	0	7.798	0	0	0	0	0	0	0	0	157.267	3100.21
1899	0.507	0.652204	122.382	0.922105	11.6839	436.837	75.5068	7.86002	4.34373	24.2712	5.20432	0.0103764	0.959119	0	0	0	0	0	0	0	0	0	0	0	0	0	0	0	8.119	0	0	0	0	0	0	0	0	157.267	3100.21
1900	0.534	0.653206	123.739	0.932522	12.0735	438.405	75.7326	7.93804	4.37566	24.3037	5.28176	0.0103773	0.0505758	0	0	0	0	0	0	0	0	0	0	0	0	0	0	0	8.473	0	0	0	0	0	0	0	0	157.267	3100.21
1901	0.552	0.702943	124.841	0.944667	12.6299	439.892	75.9205	8.04414	4.41738	24.3365	5.36856	0.0103797	0.0532377	0	0	0	0	0	0	0	0	0	0	0	0	0	0	0	8.592	0	0	0	0	0	0	0	0	157.267	3100.21
1902	0.566	0.702974	125.944	0.959931	13.1863	441.378	76.1084	8.15023	4.45911	24.3693	5.46467	0.0103821	0.0560397	0	0	0	0	0	0	0	0	0	0	0	0	0	0	0	8.762	0	0	0	0	0	0	0	0	157.267	3100.21
1903	0.617	0.726671	127.046	0.977647	13.7427	442.865	76.2962	8.25633	4.50083	24.4021	5.56792	0.0103845	0.0589892	0	0	0	0	0	0	0	0	0	0	0	0	0	0	0	8.906	0	0	0	0	0	0	0	0	157.267	3100.21
1904	0.624	0.748293	128.149	0.997229	14.2991	444.351	76.4841	8.36242	4.54255	24.4349	5.6762	0.0103868	0.0620939	0	0	0	0	0	0	0	0	0	0	0	0	0	0	0	9.102	0	0	0	0	0	0	0	0	157.267	3100.21
1905	0.663	0.769815	129.251	1.01813	14.8555	445.838	76.672	8.46851	4.58427	24.4677	5.78736	0.0103892	0.065362	0	0	0	0	0	0	0	0	0	0	0	0	0	0	0	9.623	0	0	0	0	0	0	0	0	157.267	3100.21
1906	0.707	0.796534	130.354	1.03974	15.4119	447.324	76.8598	8.57461	4.62599	24.5005	5.89926	0.0103916	0.0688021	0	0	0	0	0	0	0	0	0	0	0	0	0	0	0	12.093	0	0	0	0	0	0	0	0	157.267	3100.21
1907	0.784	0.803763	131.456	1.06146	15.9683	448.811	77.0477	8.6807	4.66771	24.5333	6.00977	0.010394	0.0724232	0	0	0	0	0	0	0	0	0	0	0	0	0	0	0	12.363	0	0	0	0	0	0	0	0	157.267	3100.21
1908	0.75	0.811413	132.559	1.08267	16.5247	450.297	77.2356	8.78679	4.70944	24.5661	6.11675	0.0103964	0.076235	0	0	0	0	0	0	0	0	0	0	0	0	0	0	0	12.633	0	0	0	0	0	0	0	0	157.267	3100.21
1909	0.785	0.817378	133.661	1.10278	17.081	451.784	77.4235	8.89289	4.75116	24.5989	6.21805	0.0103987	0.0802474	0	0	0	0	0	0	0	0	0	0	0	0	0	0	0	12.903	0	0	0	0	0	0	0	0	157.267	3100.21
1910	0.819	0.821982	134.764	1.12118	17.6374	453.27	77.6113	8.99898	4.79288	24.6317	6.31156	0.0104011	0.0844709	0	0	0	0	0	0	0	0	0	0	0	0	0	0	0	13.146	0	0	0	0	0	0	0	0	157.267	3100.21
1911	0.836	0.778894	135.969	1.13897	17.8214	451.76	77.2727	9.05696	4.79495	24.4275	6.39756	0.0104064	0.0889167	0	0	0	0	0	0	0	0	0	0	0	0	0	0	0	14.007	0	0	0	0	0	0	0	0	157.267	3100.21
1912	0.879	0.747848	137.175	1.15756	18.0054	450.249	76.9341	9.11494	4.79702	24.2232	6.47866	0.0104117	0.0935966	0	0	0	0	0	0	0	0	0	0	0	0	0	0	0	19.895	0	0	0	0	0	0	0	0	157.267	3100.21
1913	0.943	0.72298	138.381	1.17675	18.1894	448.739	76.5955	9.17292	4.7991	24.0189	6.55615	0.010417	0.0985227	0	0	0	0	0	0	0	0	0	0	0	0	0	0	0	19.025	0	0	0	0	0	0	0	0	157.267	3100.21
1914	0.85	0.714792	139.587	1.19626	18.3734	447.228	76.2569	9.23089	4.80117	23.8146	6.63132	0.0104222	0.103708	0	0	0	0	0	0	0	0	0	0	0	0	0	0	0	11.082	0	0	0	0	0	0	0	0	157.267	3100.21
1915	0.838	0.70575	140.793	1.21584	18.5574	445.718	75.9183	9.28887	4.80324	23.6104	6.70546	0.0104275	0.109166	0	0	0	0	0	0	0	0	0	0	0	0	0	0	0	11.216	0	0	0	0	0	0	0	0	157.267	3100.21
1916	0.901	0.708116	141.999	1.23532	18.7413	444.208	75.5796	9.34685	4.80532	23.4061	6.77987	0.0104328	0.114912	0	0	0	0	0	0	0	0	0	0	0	0	0	0	0	18.614	0	0	0	0	0	0	0	0	157.267	3100.21
1917	0.955	0.711196	143.204	1.25452	18.9253	442.697	75.241	9.40483	4.80739	23.2018	6.85582	0.0104381	0.12096	0	0	0	0	0	0	0	0	0	0	0	0	0	0	0	22.143	0	0	0	0	0	0	0	0	157.267	3100.21
1918	0.936	0.714304	144.41	1.27326	19.1093	441.187	74.9024	9.46281	4.80946	22.9976	6.93462	0.0104434	0.127326	0	0	0	0	0	0	0	0	0	0	0	0	0	0	0	22.696	0	0	0	0	0	0	0	0	157.267	3100.21
1919	0.806	0.719654	145.616	1.29138	19.2933	439.676	74.5638	9.52079	4.81153	22.7933	7.01756	0.0104487	0.134028	0	0	0	0	0	0	0	0	0	0	0	0	0	0	0	23.196	0	0	0	0	0	0	0	0	157.267	3100.21
1920	0.932	0.721283	146.822	1.30869	19.4773	438.166	74.2252	9.57877	4.81361	22.589	7.10592	0.010454	0.141082	0	0	0	0	0	0	0	0	0	0	0	0	0	0	0	23.802	0	0	0	0	0	0	0	0	157.267	3100.21
1921	0.803	0.757417	147.862	1.32579	19.8639	440.996	74.6803	9.6457	4.79871	22.6052	7.20195	0.0104523	0.148507	0	0	0	0	0	0	0	0	0	0	0	0	0	0	0	24.304	0	0	0	0	0	0	0	0	157.267	3100.21
1922	0.845	0.747941	148.901	1.34327	20.2505	443.825	75.1354	9.71264	4.78382	22.6215	7.30583	0.98418	0.156323	0	0	0	0	0	0	0	0	0	0	0	0	0	0	0	24.563	0	0	0	0	0	0	0	0	157.267	3100.21
1923	0.97	0.753288	149.941	1.36094	20.6371	446.655	75.5905	9.77958	4.76893	22.6377	7.41577	1.16488	0.164551	0	0	0	0	0	0	0	0	0	0	0	0	0	0	0	25.35	0	0	0	0	0	0	0	0	157.267	3100.21
1924	0.963	0.756861	150.981	1.37962	21.0237	449.484	76.0456	9.84651	4.75404	22.6539	7.52998	1.22567	0.173211	0	0	0	0	0	0	0	0	0	0	0	0	0	0	0	25.878	0	0	0	0	0	0	0	0	157.267	3100.21
1925	0.975	0.758089	152.02	1.3999	21.4104	452.314	76.5007	9.91345	4.73914	22.6701	7.64667	1.28964	0.182328	0	0	0	0	0	0	0	0	0	0	0	0	0	0	0	28.827	0	0	0	0	0	0	0	0	157.267	3100.21
1926	0.983	0.761483	153.06	1.42119	21.797	455.143	76.9558	9.98039	4.72425	22.6863	7.76406	1.35699	0.191924	0	0	0	0	0	0	0	0	0	0	0	0	0	0	0	29.446	0	0	0	0	0	0	0	0	157.267	3100.21
1927	1.062	0.797183	154.1	1.44292	22.1836	457.973	77.4109	10.0473	4.70936	22.7026	7.88034	1.42788	0.202025	0	0	0	0	0	0	0	0	0	0	0	0	0	0	0	30.065	0	0	0	0	0	0	0	0	157.267	3100.21
1928	1.065	0.799671	155.14	1.4645	22.5702	460.803	77.866	10.1143	4.69447	22.7188	7.99374	1.5025	0.212658	0	0	0	0	0	0	0	0	0	0	0	0	0	0	0	30.685	0	0	0	0	0	0	0	0	157.267	3100.21
1929	1.145	0.824226	156.179	1.48535	22.9569	463.632	78.3211	10.1812	4.67957	22.735	8.10245	1.58105	0.223851	0	0	0	0	0	0	0	0	0	0	0	0	0	0	0	31.573	0	0	0	0	0	0	0	0	157.267	3100.21
1930	1.053	0.89588	157.219	1.50489	23.3435	466.462	78.7762	10.2481	4.66468	22.7512	8.2047	1.66374	0.235632	0	0.74682	0	0	0	0	0	0	0	0	0	0	0	0	0	31.933	0	0	0	0	0	0	0	0	157.267	3100.21
1931	0.94	0.903341	158.345	1.52262	23.755	468.031	78.9094	10.3025	4.6671	22.7486	8.29855	1.75078	0.248034	0	0.0676905	0	0	0	0	0	0	0	0	0	0.097	0	0	0	32.553	0	0	0	0	0	0	0	0	157.267	3100.21
1932	0.847	0.812226	159.472	1.53852	24.1664	469.6	79.0427	10.3568	4.66951	22.7459	8.38498	1.8424	0.261089	0	0.0735767	0	0	0	0	0	0	0	0	0	0.097	0	0	0	33.979	0	0	0	0	0	0	0	0	157.267	3100.21
1933	0.893	0.808588	160.598	1.55267	24.5779	471.169	79.176	10.4111	4.67193	22.7433	8.46663	1.93884	0.27483	0	0.0799748	0	0	0	0	0	0	0	0	0	0.097	0	0	0	41.893	0	0	0	0	0	0	0	0	157.267	3100.21
1934	0.973	0.796863	161.725	1.56531	24.9894	472.738	79.3092	10.4655	4.67434	22.7407	8.54609	2.04035	0.289295	0	0.0869292	0	0	0	0	0	0	0	0	0	0.194	0	0.117	0	42.817	0	0	0	0	0	0	0	0	157.267	3100.21
1935	1.027	0.794716	162.851	1.57712	25.4009	474.307	79.4425	10.5198	4.67676	22.738	8.62599	2.14721	0.304521	0	0.0944883	0	0	0	0	0	0	0	0	0	0.291	0	0.117	0	43.74	0	0	0	0	0	0	0	0	157.267	3100.21
1936	1.13	0.8013	163.977	1.58892	25.8123	475.876	79.5758	10.5741	4.67917	22.7354	8.70894	2.2597	0.320548	0	0.102705	0	0	0	0	0	0	0	0	0	0.485	0	0.117	0	44.664	0	0	0	0	0	0	0	0	157.267	3100.21
1937	1.209	0.779699	165.104	1.60151	26.2238	477.445	79.709	10.6285	4.68159	22.7327	8.79755	2.3781	0.337419	0	0.111636	0	0	0	0	0	0	0	0	0	0.776	0	0.234	0	45.588	0	0	0	0	0	0	0	0	157.267	3100.21
1938	1.142	0.781882	166.23	1.61572	26.6353	479.014	79.8423	10.6828	4.684	22.7301	8.89443	2.50274	0.355178	0	0.121343	0	0	0	0	0	0	0	0	0.161	1.164	0	0.234	0	46.512	0	0.165	0	0	0	0	0	0	157.267	3100.21
1939	1.192	0.779444	167.357	1.63235	27.0468	480.583	79.9756	10.7371	4.68642	22.7274	9.00221	2.63393	0.373872	0	0.131895	0	0	0	0	0	0	0	0	0.161	1.649	0	0.351	0	47.436	0	0.33	0	0	0	0	0	0	157.267	3100.21
1940	1.299	0.766832	168.483	1.65224	27.4583	482.152	80.1088	10.7914	4.68883	22.7248	9.12349	2.77203	0.393549	0	0.143364	0	0	0	0	0	0	0	0	0.161	2.231	0	0.468	0	50.781	0	0.496	0	0	0	0	0	0	157.267	3100.21
1941	1.334	0.750365	170.03	1.7002	27.8404	488.558	81.2433	11.1234	4.69324	22.6876	9.26539	2.91741	0.414262	0	0.155833	0	0	0	0	0	0	0	0	0.161	2.91	0	0.585	0	52.603	0	0.661	0	0	0	0	0	0	157.267	3100.21
1942	1.342	0.76905	171.578	1.79386	28.2226	494.963	82.3778	11.4554	4.69766	22.6505	9.43212	3.07043	0.394683	0	0.169386	0	0	0	0	0	0	0	0	0.161	3.589	0	0.819	0	53.918	0	0.826	0	0	0	0	0	0	157.267	3100.21
1943	1.391	0.763766	173.126	1.92316	28.6048	501.369	83.5123	11.7873	4.70207	22.6133	9.62193	3.23151	0.378322	0	0.184119	0	0	0	0	0	0	0	0	0.322	4.365	0	1.17	0	54.705	0	0.991	0	0	0	0	0	0	157.267	3100.21
1944	1.383	0.768399	174.673	2.08668	28.987	507.774	84.6468	12.1193	4.70648	22.5762	9.83308	3.40106	0.364076	0	0.200132	0	0	0	0	0	0	0	0	0.322	5.917	0	1.521	0	55.75	0	1.157	0	0	0	0	0	0	157.267	3100.21
1945	1.16	0.769147	176.221	2.2804	29.3692	514.18	85.7813	12.4513	4.71089	22.539	10.0638	3.57954	0.351947	0	0.217538	0	0	0	0	0	0	0	0	0.483	7.76	1.868	3.861	0	56.796	0	1.322	0	0	0	0	0	0	157.267	3100.21
1946	1.238	0.842149	177.768	2.49036	29.7513	520.585	86.9158	12.7832	4.71531	22.5019	10.3124	3.76742	0.341933	0	0.236458	0	0	0	0	0	0	0	0	0.966	13.483	4.203	6.318	0	59.187	0	1.487	0	0	0	0	0	0	157.267	3100.21
1947	1.392	0.87018	179.316	2.7026	30.1335	526.991	88.0503	13.1152	4.71972	22.4647	10.577	3.96518	0.334036	0	0.257024	0	0	0	0	0	0	0	0	2.093	20.661	5.137	6.903	0	67.278	0	1.652	0	0	0	0	0	0	157.267	3100.21
1948	1.469	0.87513	180.863	2.90316	30.5157	533.396	89.1848	13.4472	4.72413	22.4276	10.8561	4.17335	0.328255	0	0.279378	0	0	0	0	0	0	0	0	3.703	24.056	6.071	7.254	0	68.369	0	1.817	0	0	0	0	0	0	157.267	3100.21
1949	1.419	0.882126	182.411	3.07807	30.8979	539.802	90.3193	13.7791	4.72855	22.3904	11.1477	4.39247	0.32459	0	0.303676	0	0	0	0	0	0	0	0	6.118	25.802	6.538	7.722	0	74.34	0	1.983	0	0	0	0	0	0	157.267	3100.21
1950	1.63	0.892335	183.959	3.21338	31.28	546.207	91.4538	14.1111	4.73296	22.3532	11.4501	4.62313	0.323043	0	0.330088	0	0	0	0	0	0	0	0.261908	8.855	28.615	7.939	8.073	0	65	0	2.148	0	0	0	0	0	0	157.267	3100.21
1951	1.768	1.08852	189.11	3.3186	32.8669	558.446	94.8484	14.5285	4.77333	22.5413	11.7846	4.86592	0.323612	0	0.358782	0	0	0	0	0	0	0	0.26199	8.158	33.854	1.889	7.102	0	65	0	2.313	0	0	0	0	0	0	157.267	3100.21
1952	1.796	1.10964	194.262	3.41111	34.4538	570.685	98.2429	14.9459	4.8137	22.7293	12.1691	5.12148	0.326299	0	0.389971	0	0	0	0	0	0	0	0.262072	11.742	35.2	2.139	7.288	0	70	0	2.478	0	0	0	0	0	0	157.927	3117.78
1953	1.841	1.10452	199.413	3.48872	36.0407	582.924	101.638	15.3633	4.85407	22.9174	12.5966	5.3905	0.331104	0	0.42387	0	0	0	0	0	0	0	0.262153	15.985	39.582	2.437	7.43	0	75	0	2.644	0	0	0	0	0	0	158.604	3137.15
1954	1.865	1.15214	204.565	3.55435	37.6277	595.163	105.032	15.7807	4.89444	23.1054	13.0603	5.67367	0.338026	0	0.460717	0	0	0	0	0	0	0	0.262235	19.855	44.802	2.785	7.431	0	80	1.214	2.809	0	0	0	0	0	0	159.3	3158.22
1955	2.043	1.19119	209.716	3.61411	39.2146	607.401	108.427	16.1981	4.93481	23.2935	13.5532	5.97175	0.347066	0	0.500767	0	0	0	0	0	0	0	0.262317	24.604	50.343	3.233	7.388	0	85	3.512	2.974	0	0	0	0	0	0	160.014	3180.75
1956	2.178	1.24469	214.868	3.67068	40.8015	619.64	111.821	16.6154	4.97518	23.4815	14.0685	6.28552	0.358224	0	0.544298	0	0	0	0	0	0	0	0.262399	30.685	58.664	3.73	7.302	0	90	6.224	3.48	0	0	0	0	0	0	160.748	3204.5
1957	2.27	1.27187	220.019	3.72673	42.3884	631.879	115.216	17.0328	5.01555	23.6696	14.5993	6.6158	0.3715	0	0.591613	0	0	0	0	0	0	0	0.262481	34.375	66.689	4.227	7.25	0	95	9.469	4.251	0	0	0	0	0	0	161.502	3229.07
1958	2.33	1.31958	225.171	3.78495	43.9753	644.118	118.61	17.4502	5.05592	23.8576	15.1387	6.96346	0.386895	0	0.643041	0	0	0	0	0	0	0	0.262563	32.235	69.93	4.824	7.221	0	100	10.772	6.008	0	0	0	0	0	0	162.277	3254.04
1959	2.462	1.2036	230.322	3.848	45.5622	656.357	122.005	17.8676	5.09629	24.0457	15.6798	7.32943	0.404409	0	0.69894	0	0	0	0	0	0	0	0.262644	33.015	78.149	5.57	7.176	0	105	14.717	7.06	0	0	0	0	0	0	163.073	3278.97
1960	2.577	1.19228	235.474	3.91858	47.1491	668.596	125.4	18.285	5.13665	24.2337	16.2157	7.71465	0.424041	0	0.759698	0	0	0	0	0	0	0	0.524634	43.342	93.09	6.366	6.6	0	110	18.348	7.659	0	0	0	0	0	0	163.892	3303.39
1961	2.594	1.24432	238.522	4.02401	48.7708	682.676	129.241	18.9591	5.1796	24.5022	16.7593	8.12016	0.445793	0	0.825763	0	0	0	0	0	0	0	0.524798	55.722	104.6	7.212	6.88	0	115	20.077	9.426	0	0	0	0	0	0	164.735	3326.86
1962	2.7	1.23557	241.571	4.18365	50.3925	696.756	133.083	19.6333	5.22254	24.7707	17.326	8.54701	0.469664	0	0.897574	0	0	0	0	0	0	0	0.786869	69.881	120.668	8.248	7.168	0	119	28.22	11.573	0	0	0	0	0	0	165.601	3349.07
1963	2.848	1.24429	244.619	4.38831	52.0142	710.836	136.925	20.3074	5.26549	25.0392	17.9133	14.985	0.495655	0	0.97563	0	0	0	0	0	0	0	0.525207	85.539	141.744	9.476	7.421	0	123	31.46	14.396	0	0	0.005	0.001	0.001	0.007	166.493	3369.71
1964	3.008	1.25159	247.668	4.63747	53.6359	724.916	140.766	20.9815	5.30843	25.3077	18.5183	13.4881	0.523766	0	1.06047	0	0	0	0	0	0	0	0.525371	101.538	164.921	10.853	7.692	0.225	127	36.197	16.782	0	0	0.014	0.002	0.003	0.014	167.41	3388.63
1965	3.145	1.26426	250.717	4.89682	55.2576	738.995	144.608	21.6557	5.35138	25.5762	19.1382	13.4884	0.553997	0	1.1527	0	0	0	0	0	0	0	0.525534	115.75	185.933	12.426	7.975	0.444	127	48.096	20.514	0	0	0.032	0.005	0.005	0.028	168.355	3405.7
1966	3.305	1.2937	253.765	5.19558	56.8793	753.075	148.45	22.3298	5.39432	25.8447	19.7704	13.4886	0.586348	0	1.25294	0	0	0	0	0	0	0	0.525698	129.623	208.571	14.246	8.305	0.633	127	69.567	24.512	0	0	0.058	0.008	0.008	0.048	169.328	3420.92
1967	3.411	1.29763	256.814	5.45748	58.501	767.155	152.292	23.0039	5.43727	26.1132	20.412	13.4889	0.620819	0	1.3619	0	0	0	0	0	0	0	1.04968	147.119	235.269	16.313	8.623	0.825	127	94.137	29.817	0	0	0.1	0.013	0.013	0.075	170.329	3434.34
1968	3.588	1.2352	259.863	5.61974	60.1227	781.235	156.133	23.6781	5.48021	26.3817	21.0604	13.4892	0.657411	0	1.48033	0	0	0	0	0	0	0	0.526189	167.586	263.953	18.678	8.974	1.043	127	114.767	36.216	0	0	0.158	0.019	0.016	0.109	171.36	3446.07
1969	3.8	1.23839	262.911	5.78483	61.7444	795.315	159.975	24.3522	5.52316	26.6502	21.7128	13.4894	0.696124	0	1.60907	0	0	0	0	0	0	0	0.788261	194.513	294.486	21.388	9.344	1.283	127	134.875	39.381	0	0	0.229	0.026	0.024	0.15	172.423	3456.22
1970	4.076	1.19711	265.96	5.93688	63.3661	809.395	163.817	25.0263	5.5661	26.9187	22.3665	11.9926	0.736958	0	1.74899	0	0	0.0554463	0	0.356404	0	0	0.788506	221.119	321.743	24.494	9.687	1.537	127	141.326	43.652	0	0	0.329	0.035	0.043	0.197	173.518	3464.95
1971	4.231	1.07089	270.025	5.60498	63.5459	825.183	167.161	25.8097	5.70387	27.2218	23.0425	13.49	0.779913	0	1.90113	0	0	0.0573185	0	0.363166	0	0	1.05066	243.137	346.609	28.094	10.052	1.803	127	170.133	47.746	0	0.613	0.461	0.044	0.1	0.252	174.646	3472.41
1972	4.399	1.04706	274.09	5.91813	63.7256	840.97	170.506	26.593	5.84164	27.5248	23.7556	13.4902	0.82499	0	2.06649	0	0	0.0591929	0	0.369936	0	0	0.789079	274.26	378.471	32.236	10.471	2.127	127	214.168	54.79	0	0.613	0.63	0.055	0.17	0.313	175.809	3478.74
1973	4.635	1.0331	278.155	6.0449	63.9053	856.758	173.851	27.3763	5.97941	27.8279	24.4941	13.4905	0.872189	0	2.24624	0	0	0.0610694	0	0.376713	0	0	1.05123	314.04	419.239	36.92	10.883	2.495	127	266.209	61.912	0	0.613	0.839	0.067	0.277	0.391	177.007	3484.11
1974	4.644	1.03874	282.22	5.9406	64.0851	872.546	177.195	28.1597	6.11718	28.1309	25.2459	11.9936	0.921509	0	2.44163	0	0	0.0629482	0	0.383499	0	0	1.05156	345.881	454.701	42.295	11.29	2.921	127	305.489	62.543	0	0.613	1.086	0.08	0.372	0.468	178.243	3488.63
1975	4.615	1.03159	286.285	6.14097	64.2648	888.333	180.54	28.943	6.25495	28.434	25.9992	13.491	0.972952	0	2.65401	0	0	0.0648291	0	0.390292	0	0	1.05189	335.741	442.834	48.505	11.734	3.391	127	308.992	70.487	0	0.613	1.365	0.095	0.524	0.544	179.517	3492.43
1976	4.883	1.09061	290.35	6.30426	64.4445	904.121	183.885	29.7263	6.39272	28.7371	26.742	13.4913	1.02652	0	2.88486	0	0	0.0667121	0	0.397093	0	0	1.57603	343.24	432.28	55.552	12.2	3.943	127	382.3	78.51	0	0.613	1.767	0.11	0.783	0.621	180.83	3495.62
1977	5.029	1.09399	294.415	6.5344	64.6243	919.908	187.229	30.5097	6.53049	29.0401	27.4625	11.9945	1.0822	0	3.56608	0	0	0.0685974	0	0.403902	0	0	1.83843	330.711	419.447	63.634	12.68	4.582	127	462.112	85.789	0	0.613	2.035	0.127	1.006	0.697	182.185	3498.28
1978	5.105	1.09037	298.48	6.61937	64.804	935.696	190.574	31.293	6.66826	29.3432	28.1487	13.4919	1.14001	0	3.7964	0	0	0.0704848	0	0.0542996	0	0	2.36282	359.009	424.498	72.896	13.168	5.337	127	587.319	92.012	0	0.613	2.454	0.145	1.253	0.774	183.581	3500.51
1979	5.387	1.06471	302.545	7.00777	64.9837	951.483	193.919	32.0763	6.80603	29.6462	28.7887	11.995	1.19995	0	4.02754	0	0	0.0723744	0	0.0543309	0	0	2.88737	274.357	357.266	83.489	13.661	6.228	127	489.712	99.321	0	0.613	2.928	0.161	1.548	0.85	185.022	3502.36
1980	5.332	1.02521	306.61	7.06139	65.1634	967.271	197.263	32.8597	6.9438	29.9493	29.3705	13.4924	1.262	0	4.2595	0	0	0.0188144	0	0.767209	0	0	3.15018	304.998	432.044	95.641	14.194	7.006	121.849	550.707	104.973	0	0.613	3.453	0.185	1.805	0.927	186.506	3503.91
1981	5.168	1.04486	310.013	6.84175	65.0439	980.445	199.799	33.3572	7.021	30.4563	29.9319	11.9955	1.32618	0	4.49216	0	0	0.0662884	0	0.780793	0	0	3.41307	289.529	386.347	104.421	14.121	7.743	110.093	505.097	106.406	0	1.25	3.946	0.206	2.139	1.003	188.038	3505.19
1982	5.127	1.19041	313.415	7.11899	64.9243	993.619	202.334	33.8548	7.09821	30.9634	30.5084	13.4929	1.39249	0	4.72561	0	0	0.0735941	0	0.0815283	0	0	3.67604	252.419	400.317	108.943	13.905	8.399	123.807	505.343	116.821	0	0.961	4.522	0.229	2.645	1.105	189.616	3506.26
1983	5.11	1.22552	316.817	7.2169	64.8048	1006.79	204.87	34.3524	7.17542	31.4705	31.0856	11.996	1.46092	0	4.95987	0	0	0.0734967	0	0.794366	0	0	3.93909	299.092	408.416	120.93	14.252	9.207	135.729	553.718	125.343	0	1.165	5.168	0.249	2.98	1.183	191.243	3507.15
1984	5.29	1.26008	320.22	7.04813	64.6852	1019.97	207.406	34.85	7.25262	31.9775	31.6489	11.9962	1.53147	0	5.19493	0	0	0.0182631	0	0.807943	0	0	3.94032	310.901	432.125	177.397	14.781	9.71	134.867	569.476	130.447	0	1.331	6.032	0.269	3.475	1.262	192.92	3507.88
1985	5.444	1.27534	323.623	7.01692	64.5656	1033.14	209.941	35.3475	7.32983	32.4846	32.1839	11.9965	1.60414	0	5.43079	0	0	-0.0806812	0	0.108674	0	0	4.72727	315.327	407.669	128.622	15.705	9.792	109.714	546.714	138.367	0	1.011	7.083	0.289	3.997	1.355	194.648	3508.5
1986	5.61	1.2872	327.025	7.07049	64.4461	1046.31	212.477	35.8451	7.40703	32.9917	32.6758	13.4939	1.67894	0	5.66746	0	0	0.075292	0	0.821507	0	0	4.99065	388.346	502.712	169.103	16.379	10.152	149.931	539.076	146.048	0	3.575	8.22	0.309	4.579	1.434	196.427	3509
1987	5.753	1.29401	330.427	7.46167	64.3265	1059.49	215.012	36.3427	7.48424	33.4988	33.1102	11.997	1.75587	0	5.90492	0	0	0.177805	0	1.54792	0	0	4.7303	387.277	453.238	250.222	16.667	10.807	115.608	647.608	162.883	0	3.773	9.656	0.329	5.109	1.504	198.259	3509.43
1988	5.964	1.31672	333.83	7.20251	64.207	1072.66	217.548	36.8403	7.56145	34.0058	33.4725	11.9972	1.83492	0	6.14318	0	0	0.181183	0	0.862227	0	0	4.99368	303.816	507.99	245.07	16.593	11.493	135.667	635.816	180.113	0	4.458	11.362	0.349	5.696	1.728	200.146	3509.77
1989	6.089	1.32364	337.232	7.33104	64.0874	1085.84	220.083	37.3378	7.63865	34.5129	33.7481	11.9975	1.91609	0	6.38225	0	0	0.188294	0.945058	0.875792	0	0	5.51905	301.477	385.52	204.109	15.725	12.26	118.146	564.767	186.15	0	6.174	11.605	0.369	5.482	1.73	202.087	3510.06
1990	6.144	1.31948	340.635	7.58568	63.9678	1099.01	222.619	37.8354	7.71586	35.02	33.9226	11.9977	2.07357	0	6.62182	0	0	0.185942	1.01015	0.88921	0	0	5.52077	291.464	405.617	203.131	14.022	12.363	143.171	694.142	195.69	0	11.322	11.702	0.389	5.119	1.73	204.082	3510.3
1991	6.235	1.38098	336.592	7.40236	62.9552	1095.91	221.419	37.8681	7.72475	35.0723	34.026	11.9979	2.37291	0	6.86218	0	0	0.190921	2.17764	0.902612	0.00471002	0	5.7844	190.405	309.884	198.928	13.243	12.135	70.607	573.576	204.801	0	16.556	11.426	0.409	4.094	1.735	206.133	3510.5
1992	6.118	1.30353	332.549	7.79893	61.9425	1092.81	220.22	37.9008	7.73365	35.1247	34.1135	11.9981	2.37315	0	7.10299	0	0	0.2889	4.20799	1.62865	0.00471003	0	5.7862	203.23	303.369	121.343	10.324	12.018	91.022	554.986	185.994	0	20.911	9.343	0.429	2.74	1.715	208.24	3510.66
1993	6.124	1.2981	328.507	7.3131	60.9298	1089.71	219.02	37.9335	7.74254	35.177	34.2079	11.9984	2.37338	0	7.34531	0	0	0.376816	8.41616	2.3686	0.18499	0	6.31181	144.94	228.999	67.857	8.322	11.681	85.436	372.232	188.092	23.101	22.5	10.23	0.509	3.344	1.7	210.402	3510.8
1994	6.242	1.2896	324.464	7.50728	59.9172	1086.61	217.821	37.9662	7.75143	35.2294	34.3318	11.9986	2.37362	0	7.58821	0	0	1.8251	21.3991	3.83476	0.18199	0	5.00424	127.137	232.722	61.065	6.105	11.011	77.289	244.236	179.101	33.844	25.599	9.105	0.589	4.75	1.68	212.619	3510.91
1995	6.372	1.27501	320.421	7.6191	58.9045	1083.51	216.621	37.9989	7.76033	35.2817	34.5081	10.5017	2.37386	0	10.2115	0	0	2.98022	29.7261	6.04096	0.0999948	0	6.05342	119.235	194.71	22.978	4.784	9.083	85.021	201.637	243.238	41.961	24.275	10.035	0.669	3.991	1.3	200.199	3511.01
1996	6.51	1.2511	316.378	7.65206	57.8919	1080.4	215.421	38.0316	7.76922	35.3341	34.9605	11.9991	2.37409	0	10.2482	0	0	3.41888	40.5849	6.14999	0.436978	0	6.05531	115.437	178.907	27.962	2.943	7.019	70.403	89.184	211.181	51.431	26.411	10.743	0.729	2.691	0.85	201.834	3511.08
1997	6.619	1.21814	312.335	7.90975	56.8792	1077.3	214.222	38.0642	7.77812	35.3864	35.8337	11.9993	2.37433	0	10.2844	0	0	5.35405	50.6436	6.25875	0.407978	0	4.48574	95.388	160.981	18.663	1.886	5.429	74.423	62.53	208.614	46.639	22.493	9.909	0.789	2.594	0.7	207.696	3511.08
1998	6.588	1.21484	308.293	7.89573	55.8665	1074.2	213.022	38.0969	7.78701	35.4388	37.0316	11.9996	2.37457	0	10.3207	0.0873054	0	7.20318	59.6521	6.36768	0.927952	0	4.74904	92.401	152.715	14.831	1.199	4.223	84.361	29.412	249.912	58.131	27.683	9.837	0.607	2.491	0.71	206.946	3511.08
1999	6.569	1.18279	304.25	7.52698	54.8539	1071.1	211.823	38.1296	7.79591	35.4911	38.4586	10.5027	2.3748	0	10.3577	0.785737	0	8.15317	67.044	6.47752	1.35393	0	6.32196	94.931	145.169	14.362	0.784	3.32	69.242	24.668	230.91	55.817	28.047	9.806	0.467	2.39	0.631	195.938	3511.08
2000	6.735	1.1488	300.207	7.4566	53.8412	1068	210.623	38.1623	7.8048	35.5435	40.0186	12.0001	2.3749	0.4624	10.3949	4	0	8.5381	75.0393	6.234	1.9509	17.9257	5.5382	99.227	140.712	17.777	0.567	2.609	74.132	18.584	229.638	55.602	26.296	8.834	0.328	2.295	0.562	186.206	3511.08
2001	6.8959	1.132	303.409	7.503	54.4191	1066.74	211.594	38.2888	7.8945	35.7143	40.3916	11.925	2.4345	0.4651	10.4328	5.3987	0.6471	9.0301	84.0409	7.4947	1.6449	19.7183	5.699	81.839	117.202	12.051	0.45	2.069	65.195	13.253	270.443	57.19	28.001	8.669	0.282	2.209	0.5	181.525	3511.08
2002	6.949	1.2317	306.579	7.5487	54.9961	1065.47	212.563	38.4153	7.9842	35.8845	40.7646	11.8481	2.4915	0.4058	10.4708	6.7975	1.294	9.8852	94.7161	8.7389	2.508	21.5109	5.8596	81.408	100.258	6.019	0.423	1.609	69.565	13.487	243.015	57.77	22.43	8.524	0.235	2.131	0.445	181.887	3511.08
2003	7.286	1.2257	309.716	7.5942	55.5716	1064.17	213.531	38.5418	8.0734	36.0543	41.1378	11.7693	2.5463	0.3939	10.5083	8.196	1.9411	12.0788	101.416	9.9776	3.341	23.3035	6.0201	90.865	107.745	2.604	0.37	1.288	69.381	8.444	252.962	48.801	23.232	7.77	0.189	2.057	0.396	177.539	3511.08
2004	7.6719	1.2429	312.824	7.6394	56.1461	1062.86	214.498	38.6684	8.1623	36.2232	41.5107	11.6885	2.599	0.4062	10.5454	9.5947	2.5882	12.5073	113.93	11.2136	4.269	25.096	6.1805	78.182	87.647	5.237	0.378	1.046	67.383	10.874	263.062	43.847	23.348	7.653	0.189	1.987	0.353	174.26	3511.08
2005	7.971	1.1955	315.903	7.6841	56.7195	1061.53	215.463	38.7948	8.2512	36.3917	41.8837	11.6059	2.6494	0.4358	10.8116	10.9935	3.2351	13.7591	120.933	12.4483	4.8901	26.8885	6.3407	49.49	51.552	0.854	0.227	0.785	65	10.874	283.408	46.641	26.458	7.518	0.189	1.92	0.314	168.841	3511.08
2006	8.081	1.1319	317.662	7.7838	56.6405	1057.4	215.38	38.6291	8.228	36.3475	42.2514	13.735	2.6399	0.4426	10.5529	12.3831	3.8802	12.649	121.075	10.9216	5.6761	34.1569	6.4709	48.471	49.808	1.119	0.136	0.588	58.5	10.874	297.615	48.747	34.767	6.992	0.049	1.834	0.279	167.857	3511.08
2007	8.1899	1.0683	319.42	7.8838	56.5578	1053.26	215.294	38.4618	8.2049	36.3034	42.6192	15.8599	2.6308	0.4491	10.2946	13.773	4.5245	11.5302	129.622	9.3647	6.4623	41.4253	6.6013	47.083	46.366	0.911	0.082	0.441	52	10.874	311.265	50.583	39.869	6.502	0.049	1.752	0.249	167.857	3511.08
2008	8.29717	1.00467	321.175	7.98433	56.4678	1049.08	215.205	38.292	8.18167	36.2594	42.9869	17.9765	2.62143	0.454933	10.0371	15.1627	5.1676	10.3937	135.182	7.7477	7.2483	48.6937	6.99097	45.74	43.216	0.806	0.049	0.331	45.5	10.874	324.431	52.161	39.099	6.047	0.049	1.675	0.221	167.857	3511.08
2009	8.40443	0.941033	322.93	8.08487	56.3778	1044.9	215.116	38.1223	8.15843	36.2155	43.3546	20.0932	2.61207	0.460767	9.77967	16.5524	5.8107	9.25727	140.742	6.1307	8.0343	55.9622	7.38063	44.442	40.334	0.754	0.029	0.248	39	10.874	337.175	53.496	38.069	5.624	0.049	1.601	0.197	167.857	3511.08
2010	8.5117	0.8774	324.685	8.1854	56.2878	1040.72	215.027	37.9525	8.1352	36.1715	43.7223	22.2098	2.6027	0.4666	9.5222	17.9421	6.4538	8.1208	146.301	4.5137	8.8203	63.2306	7.7703	42.976	36.906	0.377	0.018	0.186	32.5	7.266	349.552	54.598	36.801	5.23	0	1.521	0.175	167.857	3511.08
2011	8.55557	0.83029	323.381	8.15982	55.6377	1039.19	214.892	37.7142	8.09546	36.1618	43.6317	22.2762	2.60843	0.43839	8.68522	22.2121	6.53096	8.19765	147.06	4.61769	8.08983	63.4781	7.93581	41.557	33.769	0.189	0.011	0.14	26	7.266	361.61	55.479	35.314	4.864	0	1.445	0.156	167.857	3511.08
2012	8.59944	0.78318	322.078	8.13424	54.9877	1037.66	214.758	37.4759	8.05572	36.1521	43.541	22.3425	2.61416	0.41018	7.84824	26.4821	6.60812	8.2745	147.819	4.72168	7.35936	63.7256	8.10132	40.186	30.898	0.094	0.006	0.105	19.5	7.266	373.391	56.152	33.625	4.524	0	1.373	0.139	167.857	3511.08
2013	8.64331	0.73607	320.774	8.10866	54.3376	1036.12	214.624	37.2377	8.01598	36.1425	43.4504	22.4089	2.61989	0.38197	7.01126	30.752	6.68528	8.35135	148.578	4.82567	6.62889	63.9731	8.26683	38.86	28.272	0.047	0.004	0.079	13	7.266	384.93	56.625	31.75	4.207	0	1.304	0.124	167.857	3511.08
2014	8.68718	0.68896	319.471	8.08308	53.6876	1034.59	214.49	36.9994	7.97624	36.1328	43.3597	22.4753	2.62562	0.35376	6.17428	35.022	6.76244	8.4282	149.337	4.92966	5.89842	64.2206	8.43234	37.578	25.869	0.024	0.002	0.059	6.5	7.266	396.259	56.909	29.705	3.913	0	1.239	0.11	167.857	3511.08
2015	8.73105	0.64185	318.167	8.0575	53.0375	1033.06	214.355	36.7611	7.9365	36.1231	43.2691	22.5417	2.63135	0.32555	5.3373	39.292	6.8396	8.50505	150.096	5.03365	5.16795	64.4681	8.59785	36.338	23.67	0.012	0.001	0.044	0	0	407.405	57.013	27.502	3.639	0	1.177	0.098	155.925	3511.08
2016	8.77492	0.59474	316.864	8.03192	52.3874	1031.53	214.221	36.5228	7.89676	36.1134	43.1785	22.608	2.63708	0.29734	4.50032	43.562	6.91676	8.5819	150.855	5.13764	4.43748	64.7156	8.76336	35.138	21.658	0.006	0.001	0.033	0	0	417.103	57.113	25.476	3.384	0	1.118	0.087	155.925	3511.08
2017	8.81879	0.54763	315.56	8.00634	51.7374	1030	214.087	36.2845	7.85702	36.1037	43.0878	22.6744	2.64281	0.26913	3.66334	47.832	6.99392	8.65875	151.614	5.24163	3.70701	64.9631	8.92887	33.979	19.817	0.003	0	0.025	0	0	425.539	57.207	23.611	3.147	0	1.062	0.078	155.925	3511.08
2018	8.86266	0.50052	314.257	7.98076	51.0873	1028.46	213.953	36.0463	7.81728	36.0941	42.9972	22.7408	2.64854	0.24092	2.82636	52.1019	7.07108	8.7356	152.373	5.34562	2.97654	65.2106	9.09438	32.858	18.133	0.001	0	0.019	0	0	432.879	57.297	21.896	2.927	0	1.009	0.069	155.925	3511.08
2019	8.90653	0.45341	312.953	7.95518	50.4373	1026.93	213.818	35.808	7.77754	36.0844	42.9065	22.8071	2.65427	0.21271	1.98938	56.3719	7.14824	8.81245	153.132	5.44961	2.24607	65.4581	9.25989	31.773	16.591	0.001	0	0.014	0	0	439.265	57.382	20.318	2.722	0	0.959	0.061	155.925	3511.08
2020	8.9504	0.4063	311.65	7.9296	49.7872	1025.4	213.684	35.5697	7.7378	36.0747	42.8159	22.8735	2.66	0.1845	1.1524	60.6419	7.2254	8.8893	153.891	5.5536	1.5156	65.7056	9.4254	30.725	15.181	0	0	0.01	0	0	444.821	57.463	18.867	2.531	0	0.911	0.055	155.925	3511.08
2021	9.05487	0.30994	313.116	8.01843	48.9413	1025.73	213.953	35.3551	7.71469	36.0567	43.1728	22.9386	2.66493	0.17723	1.1063	61.7812	7.31538	8.94218	154.414	5.60414	1.43416	65.8679	9.44312	29.711	13.891	0	0	0.008	0	0	449.654	57.54	17.531	2.354	0	0.865	0.049	155.925	3511.08
2022	9.15934	0.21358	314.582	8.10726	48.0954	1026.06	214.222	35.1405	7.69158	36.0388	43.5297	23.0037	2.66986	0.16996	1.0602	62.9206	7.40536	8.99506	154.936	5.65468	1.35272	66.0302	9.46084	28.73	12.71	0	0	0.006	0	0	453.859	57.613	16.302	2.189	0	0.822	0.043	155.925	3511.08
2023	9.26381	0.11722	316.048	8.19609	47.2495	1026.4	214.491	34.926	7.66847	36.0208	43.8867	23.0688	2.67479	0.16269	1.0141	64.06	7.49534	9.04794	155.459	5.70522	1.27128	66.1925	9.47856	27.782	11.63	0	0	0.004	0	0	457.517	57.682	15.172	2.036	0	0.781	0.039	155.925	3511.08
2024	9.36828	0.02086	317.514	8.28492	46.4036	1026.73	214.76	34.7114	7.64536	36.0028	44.2436	23.1339	2.67972	0.15542	0.968	65.1993	7.58532	9.10082	155.982	5.75576	1.18984	66.3548	9.49628	26.865	10.641	0	0	0.003	0	0	460.7	57.748	14.132	1.894	0	0.742	0.034	155.925	3511.08
2025	9.47275	-0.0755	318.98	8.37375	45.5577	1027.06	215.029	34.4968	7.62225	35.9849	44.6005	23.199	2.68465	0.14815	0.9219	66.3387	7.6753	9.1537	156.505	5.8063	1.1084	66.5172	9.514	25.979	9.737	0	0	0.002	0	0	463.469	57.811	13.175	1.761	0	0.705	0.031	155.925	3511.08
2026	9.57722	-0.17186	320.446	8.46258	44.7119	1027.4	215.298	34.2822	7.59914	35.9669	44.9574	23.2641	2.68958	0.14088	0.8758	67.478	7.76528	9.20658	157.028	5.85684	1.02696	66.6795	9.53172	25.122	8.909	0	0	0.002	0	0	465.878	57.87	12.295	1.638	0	0.669	0.027	155.925	3511.08
2027	9.68169	-0.26822	321.912	8.55141	43.866	1027.73	215.567	34.0676	7.57603	35.9489	45.3143	23.3292	2.69451	0.13361	0.8297	68.6174	7.85526	9.25946	157.551	5.90738	0.94552	66.8418	9.54944	24.293	8.152	0	0	0.001	0	0	467.974	57.927	11.485	1.523	0	0.636	0.024	155.925	3511.08
2028	9.78616	-0.36458	323.378	8.64024	43.0201	1028.06	215.836	33.8531	7.55292	35.9309	45.6713	23.3943	2.69944	0.12634	0.7836	69.7567	7.94524	9.31234	158.074	5.95792	0.86408	67.0041	9.56716	23.491	7.459	0	0	0.001	0	0	469.797	57.98	10.74	1.417	0	0.604	0.022	155.925	3511.08
2029	9.89063	-0.46094	324.844	8.72907	42.1742	1028.39	216.105	33.6385	7.52981	35.913	46.0282	23.4594	2.70437	0.11907	0.7375	70.8961	8.03522	9.36522	158.596	6.00846	0.78264	67.1664	9.58488	22.716	6.825	0	0	0.001	0	0	471.384	58.031	10.055	1.317	0	0.574	0.019	155.925	3511.08
2030	9.9951	-0.5573	326.31	8.8179	41.3283	1028.73	216.374	33.4239	7.5067	35.895	46.3851	23.5245	2.7093	0.1118	0.6914	72.0354	8.1252	9.4181	159.119	6.059	0.7012	67.3287	9.6026	21.966	6.245	0	0	0.001	0	0	472.764	58.08	9.424	1.225	0	0.545	0.017	155.925	3511.08
2031	10.151	-0.57298	328.092	8.90894	41.4562	1030.97	217.004	33.3712	7.4966	35.9507	46.7501	23.5554	2.70139	0.1119	0.66359	72.903	8.24913	9.47689	159.57	6.11699	0.70177	67.4469	9.61107	21.241	5.714	0	0	0	0	0	467.698	57.831	8.826	1.139	0	0.518	0.015	155.925	3511.08
2032	10.3069	-0.58866	329.873	8.99998	41.5842	1033.22	217.634	33.3184	7.4865	36.0064	47.115	23.5863	2.69348	0.112	0.63578	73.7707	8.37306	9.53568	160.021	6.17498	0.70234	67.5651	9.61954	20.54	5.228	0	0	0	0	0	457.026	57.299	8.259	1.06	0	0.492	0.013	155.925	3511.08
2033	10.4629	-0.60434	331.655	9.09102	41.7121	1035.46	218.264	33.2657	7.4764	36.0621	47.48	23.6171	2.68557	0.1121	0.60797	74.6383	8.49699	9.59447	160.472	6.23297	0.70291	67.6832	9.62801	19.862	4.784	0	0	0	0	0	441.474	56.499	7.72	0.985	0	0.467	0.012	155.925	3511.08
2034	10.6188	-0.62002	333.437	9.18206	41.84	1037.7	218.895	33.213	7.4663	36.1178	47.8449	23.648	2.67766	0.1122	0.58016	75.5059	8.62092	9.65326	160.923	6.29096	0.70348	67.8014	9.63648	19.207	4.377	0	0	0	0	0	421.679	55.444	7.207	0.916	0	0.444	0.011	155.925	3511.08
2035	10.7747	-0.6357	335.218	9.2731	41.968	1039.95	219.525	33.1602	7.4562	36.1735	48.2099	23.6789	2.66975	0.1123	0.55235	76.3735	8.74485	9.71205	161.374	6.34895	0.70405	67.9196	9.64495	18.573	4.005	0	0	0	0	0	398.19	54.147	6.717	0.852	0	0.422	0.01	155.925	3511.08
2036	10.9306	-0.65138	337	9.36414	42.0959	1042.19	220.155	33.1075	7.4461	36.2292	48.5749	23.7098	2.66184	0.1124	0.52454	77.2412	8.86878	9.77084	161.825	6.40694	0.70462	68.0378	9.65342	17.96	3.665	0	0	0	0	0	371.49	52.62	6.249	0.793	0	0.401	0.008	155.925	3511.08
2037	11.0865	-0.66706	338.782	9.45518	42.2238	1044.44	220.785	33.0548	7.436	36.2849	48.9398	23.7407	2.65393	0.1125	0.49673	78.1088	8.99271	9.82963	162.276	6.46493	0.70519	68.156	9.66189	17.368	3.353	0	0	0	0	0	341.994	50.874	5.801	0.737	0	0.381	0.008	155.925	3511.08
2038	11.2425	-0.68274	340.563	9.54622	42.3517	1046.68	221.416	33.0021	7.4259	36.3406	49.3048	23.7715	2.64602	0.1126	0.46892	78.9764	9.11664	9.88842	162.727	6.52292	0.70576	68.2741	9.67036	16.794	3.068	0	0	0	0	0	310.067	48.92	5.372	0.686	0	0.362	0.007	155.925	3511.08
2039	11.3984	-0.69842	342.345	9.63726	42.4797	1048.93	222.046	32.9493	7.4158	36.3963	49.6697	23.8024	2.63811	0.1127	0.44111	79.8441	9.24057	9.94721	163.178	6.58091	0.70633	68.3923	9.67883	16.24	2.807	0	0	0	0	0	276.024	46.769	4.96	0.638	0	0.344	0.006	155.925	3511.08
2040	11.5543	-0.7141	344.127	9.7283	42.6076	1051.17	222.676	32.8966	7.4057	36.452	50.0347	23.8333	2.6302	0.1128	0.4133	80.7117	9.3645	10.006	163.629	6.6389	0.7069	68.5105	9.6873	15.704	2.569	0	0	0	0	0	240.141	44.431	4.563	0.593	0	0.326	0.005	155.925	3511.08
2041	11.7033	-0.68907	345.22	9.80918	42.0652	1049.49	222.446	32.6571	7.37374	36.4707	50.3455	23.8212	2.6223	0.11238	0.3966	80.1013	9.53752	10.0439	163.976	6.68694	0.65691	68.554	9.69652	15.186	2.35	0	0	0	0	0	208.923	42.209	4.198	0.551	0	0.31	0.005	155.925	3511.08
2042	11.8522	-0.66404	346.314	9.89006	41.5228	1047.82	222.216	32.4176	7.34178	36.4894	50.6563	23.8092	2.6144	0.11196	0.3799	79.4908	9.71054	10.0818	164.324	6.73498	0.60692	68.5975	9.70574	14.685	2.151	0	0	0	0	0	181.763	40.099	3.862	0.513	0	0.295	0.004	155.925	3511.08
2043	12.0012	-0.63901	347.407	9.97094	40.9804	1046.14	221.987	32.1781	7.30982	36.5082	50.9671	23.7971	2.6065	0.11154	0.3632	78.8804	9.88356	10.1197	164.672	6.78302	0.55693	68.641	9.71496	14.2	1.968	0	0	0	0	0	158.134	38.094	3.553	0.477	0	0.28	0.004	155.925	3511.08
2044	12.1501	-0.61398	348.501	10.0518	40.438	1044.46	221.757	31.9386	7.27786	36.5269	51.2779	23.7851	2.5986	0.11112	0.3465	78.27	10.0566	10.1576	165.019	6.83106	0.50694	68.6845	9.72418	13.732	1.801	0	0	0	0	0	137.576	36.189	3.269	0.444	0	0.266	0.003	155.925	3511.08
2045	12.299	-0.58895	349.594	10.1327	39.8956	1042.79	221.527	31.6991	7.2459	36.5456	51.5887	23.7731	2.5907	0.1107	0.3298	77.6595	10.2296	10.1954	165.367	6.8791	0.45695	68.728	9.7334	13.279	1.648	0	0	0	0	0	119.691	34.38	3.007	0.413	0	0.253	0.003	155.925	3511.08
2046	12.448	-0.56392	350.687	10.2136	39.3532	1041.11	221.297	31.4597	7.21394	36.5643	51.8995	23.761	2.5828	0.11028	0.3131	77.0491	10.4026	10.2333	165.714	6.92714	0.40696	68.7715	9.74262	12.84	1.507	0	0	0	0	0	104.131	32.661	2.767	0.384	0	0.24	0.003	155.925	3511.08
2047	12.5969	-0.53889	351.781	10.2945	38.8108	1039.43	221.067	31.2202	7.18198	36.583	52.2103	23.749	2.5749	0.10986	0.2964	76.4387	10.5756	10.2712	166.062	6.97518	0.35697	68.815	9.75184	12.417	1.379	0	0	0	0	0	90.594	31.028	2.545	0.357	0	0.228	0.002	155.925	3511.08
2048	12.7459	-0.51386	352.874	10.3753	38.2684	1037.76	220.837	30.9807	7.15002	36.6018	52.5211	23.7369	2.567	0.10944	0.2797	75.8283	10.7487	10.3091	166.41	7.02322	0.30698	68.8585	9.76106	12.007	1.262	0	0	0	0	0	78.817	29.476	2.342	0.332	0	0.217	0.002	155.925	3511.08
2049	12.8948	-0.48883	353.968	10.4562	37.726	1036.08	220.608	30.7412	7.11806	36.6205	52.8319	23.7248	2.5591	0.10902	0.263	75.2178	10.9217	10.347	166.757	7.07126	0.25699	68.902	9.77028	11.611	1.155	0	0	0	0	0	68.571	28.002	2.154	0.309	0	0.206	0.002	155.925	3511.08
2050	13.0438	-0.4638	355.061	10.5371	37.1836	1034.4	220.378	30.5017	7.0861	36.6392	53.1427	23.7128	2.5512	0.1086	0.2463	74.6074	11.0947	10.3849	167.105	7.1193	0.207	68.9455	9.7795	11.227	1.057	0	0	0	0	0	59.657	26.602	1.982	0.287	0	0.195	0.002	155.925	3511.08
2051	13.2219	-0.44326	355.95	10.6195	36.9572	1030.57	219.75	30.2826	7.02414	36.5481	53.5066	23.7141	2.54411	0.10848	0.23543	75.5552	11.0965	10.4402	167.591	7.18313	0.1948	69.0534	9.79437	10.857	0.967	0	0	0	0	0	51.901	25.272	1.824	0.267	0	0.186	0.001	155.925	3511.08
2052	13.3999	-0.42272	356.839	10.7019	36.7307	1026.74	219.122	30.0635	6.96218	36.4571	53.8706	23.7153	2.53702	0.10836	0.22456	76.503	11.0983	10.4955	168.078	7.24696	0.1826	69.1613	9.80924	10.499	0.885	0	0	0	0	0	45.154	24.008	1.678	0.248	0	0.176	0.001	155.925	3511.08
2053	13.578	-0.40218	357.727	10.7843	36.5043	1022.92	218.495	29.8445	6.90022	36.366	54.2345	23.7166	2.52993	0.10824	0.21369	77.4509	11.1001	10.5508	168.564	7.31079	0.1704	69.2692	9.82411	10.152	0.809	0	0	0	0	0	39.284	22.808	1.543	0.231	0	0.168	0.001	155.925	3511.08
2054	13.756	-0.38164	358.616	10.8667	36.2779	1019.09	217.867	29.6254	6.83826	36.2749	54.5984	23.7178	2.52284	0.10812	0.20282	78.3987	11.1019	10.6061	169.05	7.37462	0.1582	69.3771	9.83898	9.817	0.741	0	0	0	0	0	34.177	21.668	1.42	0.215	0	0.159	0.001	155.925	3511.08
2055	13.9341	-0.3611	359.505	10.9491	36.0515	1015.26	217.239	29.4063	6.7763	36.1838	54.9624	23.719	2.51575	0.108	0.19195	79.3465	11.1037	10.6615	169.537	7.43845	0.146	69.485	9.85385	9.493	0.678	0	0	0	0	0	29.734	20.584	1.306	0.2	0	0.151	0.001	155.925	3511.08
2056	14.1122	-0.34056	360.393	11.0315	35.825	1011.43	216.612	29.1872	6.71434	36.0928	55.3263	23.7203	2.50866	0.10788	0.18108	80.2943	11.1055	10.7168	170.023	7.50228	0.1338	69.5929	9.86872	9.18	0.62	0	0	0	0	0	25.869	19.555	1.202	0.186	0	0.144	0.001	155.925	3511.08
2057	14.2902	-0.32002	361.282	11.1139	35.5986	1007.6	215.984	28.9681	6.65238	36.0017	55.6902	23.7216	2.50157	0.10776	0.17021	81.2421	11.1073	10.7721	170.509	7.56611	0.1216	69.7008	9.88359	8.877	0.567	0	0	0	0	0	22.506	18.577	1.106	0.173	0	0.136	0.001	155.925	3511.08
2058	14.4683	-0.29948	362.171	11.1963	35.3722	1003.77	215.356	28.7491	6.59042	35.9106	56.0541	23.7228	2.49448	0.10764	0.15934	82.19	11.1091	10.8274	170.996	7.62994	0.1094	69.8087	9.89846	8.584	0.519	0	0	0	0	0	19.58	17.648	1.017	0.161	0	0.13	0.001	155.925	3511.08
2059	14.6463	-0.27894	363.059	11.2787	35.1457	999.943	214.729	28.53	6.52846	35.8196	56.4181	23.724	2.48739	0.10752	0.14847	83.1378	11.1109	10.8827	171.482	7.69377	0.0972	69.9166	9.91333	8.301	0.475	0	0	0	0	0	17.035	16.766	0.936	0.149	0	0.123	0.001	155.925	3511.08
2060	14.8244	-0.2584	363.948	11.3611	34.9193	996.114	214.101	28.3109	6.4665	35.7285	56.782	23.7253	2.4803	0.1074	0.1376	84.0856	11.1127	10.938	171.969	7.7576	0.085	70.0245	9.9282	8.027	0.435	0	0	0	0	0	14.82	15.928	0.861	0.139	0	0.117	0.001	155.925	3511.08
2061	14.9926	-0.23549	363.548	11.4281	33.6575	990.169	213.117	27.8501	6.38933	35.5893	57.0936	23.6987	2.48426	0.10732	0.13115	85.0651	11.1061	10.9862	172.364	7.81599	0.08313	70.0892	9.94365	7.762	0.398	0	0	0	0	0	12.893	15.131	0.792	0.129	0	0.111	0	155.925	3511.08
2062	15.1607	-0.21258	363.149	11.4951	32.3956	984.224	212.132	27.3894	6.31216	35.45	57.4052	23.6721	2.48822	0.10724	0.1247	86.0445	11.0995	11.0344	172.759	7.87438	0.08126	70.1538	9.9591	7.506	0.364	0	0	0	0	0	11.217	14.375	0.729	0.12	0	0.106	0	155.925	3511.08
2063	15.3289	-0.18967	362.749	11.5621	31.1338	978.278	211.148	26.9287	6.23499	35.3108	57.7168	23.6456	2.49218	0.10716	0.11825	87.024	11.0929	11.0825	173.155	7.93277	0.07939	70.2185	9.97455	7.258	0.333	0	0	0	0	0	9.759	13.656	0.67	0.112	0	0.1	0	155.925	3511.08
2064	15.497	-0.16676	362.35	11.6291	29.872	972.333	210.163	26.4679	6.15782	35.1716	58.0284	23.619	2.49614	0.10708	0.1118	88.0034	11.0863	11.1307	173.55	7.99116	0.07752	70.2831	9.99	7.019	0.305	0	0	0	0	0	8.49	12.973	0.617	0.104	0	0.095	0	155.925	3511.08
2065	15.6652	-0.14385	361.95	11.6961	28.6102	966.388	209.179	26.0071	6.08065	35.0324	58.34	23.5924	2.5001	0.107	0.10535	88.9829	11.0798	11.1789	173.945	8.04955	0.07565	70.3478	10.0054	6.787	0.279	0	0	0	0	0	7.387	12.325	0.567	0.097	0	0.091	0	155.925	3511.08
2066	15.8334	-0.12094	361.55	11.7632	27.3483	960.443	208.195	25.5464	6.00348	34.8931	58.6515	23.5658	2.50406	0.10692	0.0989	89.9624	11.0732	11.2271	174.341	8.10794	0.07378	70.4124	10.0209	6.563	0.255	0	0	0	0	0	6.426	11.708	0.522	0.09	0	0.086	0	155.925	3511.08
2067	16.0015	-0.09803	361.151	11.8302	26.0865	954.497	207.21	25.0857	5.92631	34.7539	58.9631	23.5392	2.50802	0.10684	0.09245	90.9418	11.0666	11.2753	174.736	8.16633	0.07191	70.4771	10.0364	6.346	0.233	0	0	0	0	0	5.591	11.123	0.48	0.084	0	0.082	0	155.925	3511.08
2068	16.1697	-0.07512	360.751	11.8972	24.8247	948.552	206.226	24.6249	5.84914	34.6147	59.2747	23.5127	2.51198	0.10676	0.086	91.9213	11.06	11.3234	175.131	8.22472	0.07004	70.5417	10.0518	6.137	0.214	0	0	0	0	0	4.864	10.567	0.442	0.078	0	0.078	0	155.925	3511.08
2069	16.3378	-0.05221	360.352	11.9642	23.5628	942.607	205.242	24.1641	5.77197	34.4754	59.5863	23.4861	2.51594	0.10668	0.07955	92.9007	11.0534	11.3716	175.527	8.28311	0.06817	70.6064	10.0672	5.935	0.195	0	0	0	0	0	4.232	10.038	0.407	0.072	0	0.074	0	155.925	3511.08
2070	16.506	-0.0293	359.952	12.0312	22.301	936.662	204.257	23.7034	5.6948	34.3362	59.8979	23.4595	2.5199	0.1066	0.0731	93.8802	11.0468	11.4198	175.922	8.3415	0.0663	70.671	10.0827	5.739	0.179	0	0	0	0	0	3.682	9.537	0.374	0.067	0	0.07	0	155.925	3511.08
2071	16.5835	-0.00196	357.95	12.0643	21.5713	930.299	203.011	23.325	5.63556	34.2366	59.9915	23.407	2.5018	0.10626	0.06951	94.1193	11.0378	11.4517	176.037	8.38413	0.06477	70.6063	10.074	5.549	0.164	0	0	0	0	0	3.203	9.06	0.344	0.063	0	0.067	0	155.925	3511.08
2072	16.6609	0.02538	355.948	12.0975	20.8416	923.935	201.764	22.9466	5.57632	34.1369	60.085	23.3545	2.4837	0.10592	0.06592	94.3584	11.0287	11.4836	176.152	8.42676	0.06324	70.5417	10.0654	5.366	0.15	0	0	0	0	0	2.787	8.607	0.317	0.058	0	0.063	0	155.925	3511.08
2073	16.7384	0.05272	353.946	12.1306	20.112	917.572	200.518	22.5682	5.51708	34.0373	60.1786	23.3021	2.4656	0.10558	0.06233	94.5975	11.0197	11.5154	176.267	8.46939	0.06171	70.477	10.0567	5.189	0.137	0	0	0	0	0	2.424	8.176	0.291	0.054	0	0.06	0	155.925	3511.08
2074	16.8158	0.08006	351.943	12.1637	19.3823	911.209	199.271	22.1898	5.45784	33.9377	60.2721	23.2496	2.4475	0.10524	0.05874	94.8366	11.0107	11.5473	176.382	8.51202	0.06018	70.4124	10.0481	5.018	0.125	0	0	0	0	0	2.109	7.768	0.268	0.05	0	0.057	0	155.925	3511.08
2075	16.8933	0.1074	349.941	12.1968	18.6526	904.846	198.025	21.8115	5.3986	33.8381	60.3657	23.1971	2.4294	0.1049	0.05515	95.0757	11.0016	11.5792	176.497	8.55465	0.05865	70.3477	10.0395	4.852	0.115	0	0	0	0	0	1.835	7.379	0.247	0.047	0	0.054	0	155.925	3511.08
2076	16.9708	0.13474	347.939	12.23	17.9229	898.483	196.779	21.4331	5.33936	33.7384	60.4593	23.1446	2.4113	0.10456	0.05156	95.3148	10.9926	11.6111	176.612	8.59728	0.05712	70.283	10.0308	4.692	0.105	0	0	0	0	0	1.596	7.01	0.227	0.043	0	0.052	0	155.925	3511.08
2077	17.0482	0.16208	345.937	12.2631	17.1932	892.12	195.532	21.0547	5.28012	33.6388	60.5528	23.0921	2.3932	0.10422	0.04797	95.5539	10.9836	11.643	176.727	8.63991	0.05559	70.2184	10.0221	4.537	0.096	0	0	0	0	0	1.389	6.66	0.209	0.04	0	0.049	0	155.925	3511.08
2078	17.1257	0.18942	343.935	12.2962	16.4636	885.757	194.286	20.6763	5.22088	33.5392	60.6464	23.0397	2.3751	0.10388	0.04438	95.793	10.9746	11.6748	176.842	8.68254	0.05406	70.1537	10.0135	4.388	0.088	0	0	0	0	0	1.208	6.327	0.192	0.038	0	0.046	0	155.925	3511.08
2079	17.2031	0.21676	341.933	12.3294	15.7339	879.393	193.039	20.2979	5.16164	33.4395	60.7399	22.9872	2.357	0.10354	0.04079	96.0321	10.9655	11.7067	176.957	8.72517	0.05253	70.0891	10.0048	4.243	0.08	0	0	0	0	0	1.051	6.01	0.177	0.035	0	0.044	0	155.925	3511.08
2080	17.2806	0.2441	339.93	12.3625	15.0042	873.03	191.793	19.9195	5.1024	33.3399	60.8335	22.9347	2.3389	0.1032	0.0372	96.2712	10.9565	11.7386	177.072	8.7678	0.051	70.0244	9.9962	4.103	0.074	0	0	0	0	0	0.915	5.71	0.162	0.033	0	0.042	0	155.925	3511.08
2081	16.9839	0.24394	332.939	12.3622	14.7625	869.006	190.803	19.7249	5.0587	33.2732	60.9971	22.8353	2.33197	0.1026	0.03348	95.7644	10.9361	11.7427	176.821	8.79093	0.04968	69.7977	9.98408	3.967	0.067	0	0	0	0	0	0.796	5.424	0.149	0.03	0	0.04	0	155.925	3511.08
2082	16.6871	0.24378	325.947	12.3619	14.5208	864.981	189.813	19.5304	5.015	33.2066	61.1607	22.7358	2.32504	0.102	0.02976	95.2577	10.9157	11.7468	176.571	8.81406	0.04836	69.5711	9.97196	3.836	0.062	0	0	0	0	0	0.692	5.153	0.138	0.028	0	0.038	0	155.925	3511.08
2083	16.3904	0.24362	318.955	12.3617	14.2792	860.956	188.822	19.3358	4.9713	33.1399	61.3243	22.6364	2.31811	0.1014	0.02604	94.7509	10.8953	11.7508	176.32	8.83719	0.04704	69.3444	9.95984	3.71	0.056	0	0	0	0	0	0.602	4.895	0.127	0.026	0	0.036	0	155.925	3511.08
2084	16.0936	0.24346	311.964	12.3614	14.0375	856.932	187.832	19.1412	4.9276	33.0733	61.4879	22.537	2.31118	0.1008	0.02232	94.2442	10.8749	11.7549	176.07	8.86032	0.04572	69.1178	9.94772	3.587	0.052	0	0	0	0	0	0.524	4.651	0.116	0.024	0	0.034	0	155.925	3511.08
2085	15.7968	0.2433	304.972	12.3611	13.7958	852.907	186.842	18.9467	4.8839	33.0066	61.6514	22.4376	2.30425	0.1002	0.0186	93.7374	10.8545	11.759	175.819	8.88345	0.0444	68.8911	9.9356	3.469	0.047	0	0	0	0	0	0.456	4.418	0.107	0.023	0	0.032	0	155.925	3511.08
2086	15.5001	0.24314	297.98	12.3608	13.5541	848.883	185.852	18.7521	4.8402	32.9399	61.815	22.3381	2.29732	0.0996	0.01488	93.2306	10.8341	11.7631	175.568	8.90658	0.04308	68.6645	9.92348	3.355	0.043	0	0	0	0	0	0.397	4.197	0.099	0.021	0	0.031	0	155.925	3511.08
2087	15.2034	0.24298	290.988	12.3605	13.3124	844.858	184.862	18.5575	4.7965	32.8733	61.9786	22.2387	2.29039	0.099	0.01116	92.7239	10.8137	11.7672	175.318	8.92971	0.04176	68.4378	9.91136	3.244	0.039	0	0	0	0	0	0.345	3.987	0.091	0.02	0	0.029	0	155.925	3511.08
2088	14.9066	0.24282	283.997	12.3603	13.0708	840.833	183.872	18.3629	4.7528	32.8066	62.1422	22.1393	2.28346	0.0984	0.00744	92.2171	10.7933	11.7712	175.067	8.95284	0.04044	68.2112	9.89924	3.137	0.036	0	0	0	0	0	0.3	3.788	0.083	0.018	0	0.028	0	155.925	3511.08
2089	14.6098	0.24266	277.005	12.36	12.8291	836.809	182.882	18.1684	4.7091	32.74	62.3058	22.0398	2.27653	0.0978	0.00372	91.7104	10.7729	11.7753	174.816	8.97597	0.03912	67.9845	9.88712	3.033	0.033	0	0	0	0	0	0.261	3.599	0.077	0.017	0	0.026	0	155.925	3511.08
2090	14.3131	0.2425	270.013	12.3597	12.5874	832.784	181.892	17.9738	4.6654	32.6733	62.4694	21.9404	2.2696	0.0972	0	91.2036	10.7525	11.7794	174.566	8.9991	0.0378	67.7579	9.875	2.933	0.03	0	0	0	0	0	0.227	3.419	0.071	0.016	0	0.025	0	155.925	3511.08
2091	14.2571	0.23639	267.609	12.3507	12.3725	828.728	180.917	17.785	4.63501	32.6225	62.3866	21.8263	2.25281	0.09635	0	90.2059	10.7178	11.7714	174.159	9.00912	0.03676	67.4883	9.83722	2.836	0.028	0	0	0	0	0	0.198	3.248	0.065	0.015	0	0.024	0	155.925	3511.08
2092	14.2011	0.23028	265.206	12.3418	12.1577	824.672	179.943	17.5962	4.60462	32.5717	62.3039	21.7121	2.23602	0.0955	0	89.2083	10.6831	11.7634	173.753	9.01914	0.03572	67.2186	9.79944	2.743	0.025	0	0	0	0	0	0.172	3.085	0.06	0.014	0	0.023	0	155.925	3511.08
2093	14.1452	0.22417	262.802	12.3328	11.9428	820.617	178.969	17.4074	4.57423	32.5209	62.2211	21.598	2.21923	0.09465	0	88.2106	10.6484	11.7554	173.346	9.02916	0.03468	66.949	9.76166	2.652	0.023	0	0	0	0	0	0.15	2.931	0.055	0.013	0	0.022	0	155.925	3511.08
2094	14.0892	0.21806	260.398	12.3238	11.7279	816.561	177.994	17.2186	4.54384	32.4701	62.1384	21.4838	2.20244	0.0938	0	87.2129	10.6137	11.7474	172.939	9.03918	0.03364	66.6794	9.72388	2.565	0.021	0	0	0	0	0	0.13	2.785	0.051	0.012	0	0.02	0	155.925	3511.08
2095	14.0332	0.21195	257.994	12.3148	11.513	812.505	177.02	17.0298	4.51345	32.4192	62.0556	21.3697	2.18565	0.09295	0	86.2152	10.579	11.7393	172.533	9.0492	0.0326	66.4098	9.6861	2.48	0.019	0	0	0	0	0	0.113	2.645	0.047	0.011	0	0.019	0	155.925	3511.08
2096	13.9772	0.20584	255.591	12.3059	11.2982	808.449	176.045	16.8411	4.48306	32.3684	61.9728	21.2556	2.16886	0.0921	0	85.2176	10.5443	11.7313	172.126	9.05922	0.03156	66.1401	9.64832	2.398	0.018	0	0	0	0	0	0.099	2.513	0.043	0.01	0	0.018	0	155.925	3511.08
2097	13.9212	0.19973	253.187	12.2969	11.0833	804.393	175.071	16.6523	4.45267	32.3176	61.8901	21.1414	2.15207	0.09125	0	84.2199	10.5096	11.7233	171.72	9.06924	0.03052	65.8705	9.61054	2.319	0.016	0	0	0	0	0	0.086	2.387	0.039	0.009	0	0.018	0	155.925	3511.08
2098	13.8653	0.19362	250.783	12.2879	10.8684	800.337	174.097	16.4635	4.42228	32.2668	61.8073	21.0273	2.13528	0.0904	0	83.2222	10.4749	11.7153	171.313	9.07926	0.02948	65.6009	9.57276	2.243	0.015	0	0	0	0	0	0.075	2.268	0.036	0.009	0	0.017	0	155.925	3511.08
2099	13.8093	0.18751	248.379	12.279	10.6536	796.282	173.122	16.2747	4.39189	32.216	61.7246	20.9131	2.11849	0.08955	0	82.2246	10.4402	11.7073	170.906	9.08928	0.02844	65.3312	9.53498	2.169	0.014	0	0	0	0	0	0.065	2.155	0.033	0.008	0	0.016	0	155.925	3511.08
2100	13.7533	0.1814	245.975	12.27	10.4387	792.226	172.148	16.0859	4.3615	32.1652	61.6418	20.799	2.1017	0.0887	0	81.2269	10.4055	11.6993	170.5	9.0993	0.0274	65.0616	9.4972	2.097	0.012	0	0	0	0	0	0.056	2.047	0.031	0.008	0	0.015	0	155.925	3511.08
2101	13.5482	0.174144	245.995	12.2036	10.4387	792.226	172.148	16.0859	4.3615	32.1652	61.6418	20.3847	2.06044	0.087056	0	81.2286	10.4068	11.6993	170.5	9.08131	0.0274	65.0616	9.31557	2.028	0.011	0	0	0	0	0	0.049	1.945	0.028	0.007	0	0.014	0	155.925	3511.08
2102	13.3432	0.166888	246.014	12.1372	10.4387	792.226	172.148	16.0859	4.3615	32.1652	61.6418	19.9705	2.01918	0.085412	0	81.2304	10.4081	11.6993	170.5	9.06332	0.0274	65.0616	9.13394	1.961	0.01	0	0	0	0	0	0.042	1.847	0.026	0.007	0	0.014	0	155.925	3511.08
2103	13.1381	0.159632	246.033	12.0708	10.4387	792.226	172.148	16.0859	4.3615	32.1652	61.6418	19.5562	1.97792	0.083768	0	81.2321	10.4094	11.6993	170.5	9.04534	0.0274	65.0616	8.9523	1.896	0.01	0	0	0	0	0	0.037	1.755	0.024	0.006	0	0.013	0	155.925	3511.08
2104	12.933	0.152376	246.052	12.0044	10.4387	792.226	172.148	16.0859	4.3615	32.1652	61.6418	19.1419	1.93666	0.082124	0	81.2338	10.4107	11.6993	170.5	9.02735	0.0274	65.0616	8.77067	1.834	0.009	0	0	0	0	0	0.032	1.667	0.022	0.006	0	0.012	0	155.925	3511.08
2105	12.728	0.14512	246.072	11.938	10.4387	792.226	172.148	16.0859	4.3615	32.1652	61.6418	18.7277	1.8954	0.08048	0	81.2355	10.412	11.6993	170.5	9.00936	0.0274	65.0616	8.58904	1.773	0.008	0	0	0	0	0	0.028	1.584	0.02	0.005	0	0.012	0	155.925	3511.08
2106	12.5229	0.137864	246.091	11.8716	10.4387	792.226	172.148	16.0859	4.3615	32.1652	61.6418	18.3134	1.85414	0.078836	0	81.2373	10.4133	11.6993	170.5	8.99137	0.0274	65.0616	8.40741	1.715	0.007	0	0	0	0	0	0.024	1.505	0.019	0.005	0	0.011	0	155.925	3511.08
2107	12.3179	0.130608	246.11	11.8052	10.4387	792.226	172.148	16.0859	4.3615	32.1652	61.6418	17.8991	1.81288	0.077192	0	81.239	10.4145	11.6993	170.5	8.97338	0.0274	65.0616	8.22578	1.658	0.007	0	0	0	0	0	0.021	1.429	0.017	0.005	0	0.011	0	155.925	3511.08
2108	12.1128	0.123352	246.129	11.7388	10.4387	792.226	172.148	16.0859	4.3615	32.1652	61.6418	17.4849	1.77162	0.075548	0	81.2407	10.4158	11.6993	170.5	8.9554	0.0274	65.0616	8.04414	1.603	0.006	0	0	0	0	0	0.018	1.358	0.016	0.004	0	0.01	0	155.925	3511.08
2109	11.9077	0.116096	246.149	11.6724	10.4387	792.226	172.148	16.0859	4.3615	32.1652	61.6418	17.0706	1.73036	0.073904	0	81.2425	10.4171	11.6993	170.5	8.93741	0.0274	65.0616	7.86251	1.55	0.006	0	0	0	0	0	0.016	1.29	0.014	0.004	0	0.009	0	155.925	3511.08
2110	11.7027	0.10884	246.168	11.606	10.4387	792.226	172.148	16.0859	4.3615	32.1652	61.6418	16.6563	1.6891	0.07226	0	81.2442	10.4184	11.6993	170.5	8.91942	0.0274	65.0616	7.68088	1.499	0.005	0	0	0	0	0	0.014	1.226	0.013	0.004	0	0.009	0	155.925	3511.08
2111	11.4976	0.101584	246.187	11.5396	10.4387	792.226	172.148	16.0859	4.3615	32.1652	61.6418	16.2421	1.64784	0.070616	0	81.2459	10.4197	11.6993	170.5	8.90143	0.0274	65.0616	7.49925	1.45	0.005	0	0	0	0	0	0.012	1.164	0.012	0.003	0	0.009	0	155.925	3511.08
2112	11.2925	0.094328	246.206	11.4732	10.4387	792.226	172.148	16.0859	4.3615	32.1652	61.6418	15.8278	1.60658	0.068972	0	81.2476	10.421	11.6993	170.5	8.88344	0.0274	65.0616	7.31762	1.402	0.004	0	0	0	0	0	0.01	1.106	0.011	0.003	0	0.008	0	155.925	3511.08
2113	11.0875	0.087072	246.226	11.4069	10.4387	792.226	172.148	16.0859	4.3615	32.1652	61.6418	15.4135	1.56532	0.067328	0	81.2494	10.4223	11.6993	170.5	8.86546	0.0274	65.0616	7.13598	1.356	0.004	0	0	0	0	0	0.009	1.051	0.01	0.003	0	0.008	0	155.925	3511.08
2114	10.8824	0.079816	246.245	11.3405	10.4387	792.226	172.148	16.0859	4.3615	32.1652	61.6418	14.9992	1.52406	0.065684	0	81.2511	10.4236	11.6993	170.5	8.84747	0.0274	65.0616	6.95435	1.311	0.004	0	0	0	0	0	0.008	0.998	0.01	0.003	0	0.007	0	155.925	3511.08
2115	10.6773	0.07256	246.264	11.2741	10.4387	792.226	172.148	16.0859	4.3615	32.1652	61.6418	14.585	1.4828	0.06404	0	81.2528	10.4249	11.6993	170.5	8.82948	0.0274	65.0616	6.77272	1.268	0.003	0	0	0	0	0	0.007	0.948	0.009	0.003	0	0.007	0	155.925	3511.08
2116	10.4723	0.065304	246.283	11.2077	10.4387	792.226	172.148	16.0859	4.3615	32.1652	61.6418	14.1707	1.44154	0.062396	0	81.2545	10.4262	11.6993	170.5	8.81149	0.0274	65.0616	6.59109	1.226	0.003	0	0	0	0	0	0.006	0.901	0.008	0.002	0	0.007	0	155.925	3511.08
2117	10.2672	0.058048	246.303	11.1413	10.4387	792.226	172.148	16.0859	4.3615	32.1652	61.6418	13.7564	1.40028	0.060752	0	81.2563	10.4275	11.6993	170.5	8.7935	0.0274	65.0616	6.40946	1.185	0.003	0	0	0	0	0	0.005	0.856	0.007	0.002	0	0.006	0	155.925	3511.08
2118	10.0621	0.050792	246.322	11.0749	10.4387	792.226	172.148	16.0859	4.3615	32.1652	61.6418	13.3422	1.35902	0.059108	0	81.258	10.4288	11.6993	170.5	8.77552	0.0274	65.0616	6.22782	1.146	0.003	0	0	0	0	0	0.005	0.813	0.007	0.002	0	0.006	0	155.925	3511.08
2119	9.85708	0.043536	246.341	11.0085	10.4387	792.226	172.148	16.0859	4.3615	32.1652	61.6418	12.9279	1.31776	0.057464	0	81.2597	10.43	11.6993	170.5	8.75753	0.0274	65.0616	6.04619	1.108	0.002	0	0	0	0	0	0.004	0.772	0.006	0.002	0	0.006	0	155.925	3511.08
2120	9.65202	0.03628	246.36	10.9421	10.4387	792.226	172.148	16.0859	4.3615	32.1652	61.6418	12.5136	1.2765	0.05582	0	81.2615	10.4313	11.6993	170.5	8.73954	0.0274	65.0616	5.86456	1.072	0.002	0	0	0	0	0	0.003	0.734	0.006	0.002	0	0.005	0	155.925	3511.08
2121	9.44696	0.029024	246.38	10.8757	10.4387	792.226	172.148	16.0859	4.3615	32.1652	61.6418	12.0994	1.23524	0.054176	0	81.2632	10.4326	11.6993	170.5	8.72155	0.0274	65.0616	5.68293	1.036	0.002	0	0	0	0	0	0.003	0.697	0.005	0.002	0	0.005	0	155.925	3511.08
2122	9.24189	0.021768	246.399	10.8093	10.4387	792.226	172.148	16.0859	4.3615	32.1652	61.6418	11.6851	1.19398	0.052532	0	81.2649	10.4339	11.6993	170.5	8.70356	0.0274	65.0616	5.5013	1.002	0.002	0	0	0	0	0	0.003	0.662	0.005	0.002	0	0.005	0	155.925	3511.08
2123	9.03683	0.014512	246.418	10.7429	10.4387	792.226	172.148	16.0859	4.3615	32.1652	61.6418	11.2708	1.15272	0.050888	0	81.2666	10.4352	11.6993	170.5	8.68558	0.0274	65.0616	5.31966	0.969	0.002	0	0	0	0	0	0.002	0.629	0.005	0.001	0	0.005	0	155.925	3511.08
2124	8.83176	0.007256	246.437	10.6765	10.4387	792.226	172.148	16.0859	4.3615	32.1652	61.6418	10.8566	1.11146	0.049244	0	81.2684	10.4365	11.6993	170.5	8.66759	0.0274	65.0616	5.13803	0.937	0.001	0	0	0	0	0	0.002	0.598	0.004	0.001	0	0.004	0	155.925	3511.08
2125	8.6267	0	246.457	10.6101	10.4387	792.226	172.148	16.0859	4.3615	32.1652	61.6418	10.4423	1.0702	0.0476	0	81.2701	10.4378	11.6993	170.5	8.6496	0.0274	65.0616	4.9564	0.906	0.001	0	0	0	0	0	0.002	0.568	0.004	0.001	0	0.004	0	155.925	3511.08
2126	8.42163	0	246.476	10.5437	10.4387	792.226	172.148	16.0859	4.3615	32.1652	61.6418	10.028	1.02894	0.0459522	0	81.2718	10.4391	11.6993	170.5	8.63162	0.0274	65.0616	4.77477	0.876	0.001	0	0	0	0	0	0.001	0.539	0.004	0.001	0	0.004	0	155.925	3511.08
2127	8.21657	0	246.495	10.4773	10.4387	792.226	172.148	16.0859	4.3615	32.1652	61.6418	9.61376	0.987678	0.0443043	0	81.2736	10.4404	11.6993	170.5	8.61363	0.0274	65.0616	4.59315	0.847	0.001	0	0	0	0	0	0.001	0.512	0.003	0.001	0	0.004	0	155.925	3511.08
2128	8.0115	0	246.514	10.4109	10.4387	792.226	172.148	16.0859	4.3615	32.1652	61.6418	9.19949	0.946417	0.0426565	0	81.2753	10.4417	11.6993	170.5	8.59565	0.0274	65.0616	4.41152	0.819	0.001	0	0	0	0	0	0.001	0.487	0.003	0.001	0	0.004	0	155.925	3511.08
2129	7.80644	0	246.533	10.3445	10.4387	792.226	172.148	16.0859	4.3615	32.1652	61.6418	8.78522	0.905157	0.0410087	0	81.277	10.443	11.6993	170.5	8.57767	0.0274	65.0616	4.2299	0.792	0.001	0	0	0	0	0	0.001	0.462	0.003	0.001	0	0.003	0	155.925	3511.08
2130	7.60137	0	246.553	10.2781	10.4387	792.226	172.148	16.0859	4.3615	32.1652	61.6418	8.37095	0.863896	0.0393609	0	81.2787	10.4443	11.6993	170.5	8.55969	0.0274	65.0616	4.04827	0.766	0.001	0	0	0	0	0	0.001	0.439	0.003	0.001	0	0.003	0	155.925	3511.08
2131	7.39631	0	246.572	10.2117	10.4387	792.226	172.148	16.0859	4.3615	32.1652	61.6418	7.95668	0.822635	0.037713	0	81.2805	10.4456	11.6993	170.5	8.5417	0.0274	65.0616	3.86664	0.741	0.001	0	0	0	0	0	0.001	0.417	0.002	0.001	0	0.003	0	155.925	3511.08
2132	7.19124	0	246.591	10.1453	10.4387	792.226	172.148	16.0859	4.3615	32.1652	61.6418	7.54241	0.781374	0.0360652	0	81.2822	10.4469	11.6993	170.5	8.52372	0.0274	65.0616	3.68502	0.717	0.001	0	0	0	0	0	0.001	0.397	0.002	0.001	0	0.003	0	155.925	3511.08
2133	6.98618	0	246.61	10.0789	10.4387	792.226	172.148	16.0859	4.3615	32.1652	61.6418	7.12814	0.740113	0.0344174	0	81.2839	10.4482	11.6993	170.5	8.50574	0.0274	65.0616	3.50339	0.693	0.001	0	0	0	0	0	0.001	0.377	0.002	0.001	0	0.003	0	155.925	3511.08
2134	6.78111	0	246.63	10.0125	10.4387	792.226	172.148	16.0859	4.3615	32.1652	61.6418	6.71387	0.698852	0.0327696	0	81.2856	10.4495	11.6993	170.5	8.48776	0.0274	65.0616	3.32177	0.67	0.001	0	0	0	0	0	0	0.358	0.002	0.001	0	0.003	0	155.925	3511.08
2135	6.57605	0	246.649	9.94606	10.4387	792.226	172.148	16.0859	4.3615	32.1652	61.6418	6.2996	0.657591	0.0311217	0	81.2874	10.4508	11.6993	170.5	8.46977	0.0274	65.0616	3.14014	0.648	0.001	0	0	0	0	0	0	0.34	0.002	0.001	0	0.002	0	155.925	3511.08
2136	6.37098	0	246.668	9.87965	10.4387	792.226	172.148	16.0859	4.3615	32.1652	61.6418	5.88533	0.61633	0.0294739	0	81.2891	10.4521	11.6993	170.5	8.45179	0.0274	65.0616	2.95851	0.627	0.001	0	0	0	0	0	0	0.323	0.002	0.001	0	0.002	0	155.925	3511.08
2137	6.16592	0	246.687	9.81325	10.4387	792.226	172.148	16.0859	4.3615	32.1652	61.6418	5.47107	0.57507	0.0278261	0	81.2908	10.4534	11.6993	170.5	8.43381	0.0274	65.0616	2.77689	0.606	0	0	0	0	0	0	0	0.307	0.001	0.001	0	0.002	0	155.925	3511.08
2138	5.96085	0	246.707	9.74684	10.4387	792.226	172.148	16.0859	4.3615	32.1652	61.6418	5.0568	0.533809	0.0261783	0	81.2925	10.4547	11.6993	170.5	8.41583	0.0274	65.0616	2.59526	0.586	0	0	0	0	0	0	0	0.291	0.001	0	0	0.002	0	155.925	3511.08
2139	5.75579	0	246.726	9.68044	10.4387	792.226	172.148	16.0859	4.3615	32.1652	61.6418	4.64253	0.492548	0.0245304	0	81.2943	10.456	11.6993	170.5	8.39784	0.0274	65.0616	2.41363	0.567	0	0	0	0	0	0	0	0.277	0.001	0	0	0.002	0	155.925	3511.08
2140	5.55072	0	246.745	9.61403	10.4387	792.226	172.148	16.0859	4.3615	32.1652	61.6418	4.22826	0.451287	0.0228826	0	81.296	10.4573	11.6993	170.5	8.37986	0.0274	65.0616	2.23201	0.548	0	0	0	0	0	0	0	0.263	0.001	0	0	0.002	0	155.925	3511.08
2141	5.34566	0	246.764	9.54763	10.4387	792.226	172.148	16.0859	4.3615	32.1652	61.6418	3.81399	0.410026	0.0212348	0	81.2977	10.4586	11.6993	170.5	8.36188	0.0274	65.0616	2.05038	0.53	0	0	0	0	0	0	0	0.25	0.001	0	0	0.002	0	155.925	3511.08
2142	5.14059	0	246.783	9.48123	10.4387	792.226	172.148	16.0859	4.3615	32.1652	61.6418	3.39972	0.368765	0.019587	0	81.2994	10.4599	11.6993	170.5	8.3439	0.0274	65.0616	1.86876	0.512	0	0	0	0	0	0	0	0.237	0.001	0	0	0.002	0	155.925	3511.08
2143	4.93553	0	246.803	9.41482	10.4387	792.226	172.148	16.0859	4.3615	32.1652	61.6418	2.98545	0.327504	0.0179391	0	81.3012	10.4612	11.6993	170.5	8.32591	0.0274	65.0616	1.68713	0.495	0	0	0	0	0	0	0	0.226	0.001	0	0	0.002	0	155.925	3511.08
2144	4.73046	0	246.822	9.34842	10.4387	792.226	172.148	16.0859	4.3615	32.1652	61.6418	2.57118	0.286243	0.0162913	0	81.3029	10.4625	11.6993	170.5	8.30793	0.0274	65.0616	1.5055	0.479	0	0	0	0	0	0	0	0.214	0.001	0	0	0.002	0	155.925	3511.08
2145	4.5254	0	246.841	9.28201	10.4387	792.226	172.148	16.0859	4.3615	32.1652	61.6418	2.15691	0.244983	0.0146435	0	81.3046	10.4638	11.6993	170.5	8.28995	0.0274	65.0616	1.32388	0.463	0	0	0	0	0	0	0	0.204	0.001	0	0	0.001	0	155.925	3511.08
2146	4.32033	0	246.86	9.21561	10.4387	792.226	172.148	16.0859	4.3615	32.1652	61.6418	1.74264	0.203722	0.0129957	0	81.3063	10.4651	11.6993	170.5	8.27197	0.0274	65.0616	1.14225	0.448	0	0	0	0	0	0	0	0.193	0.001	0	0	0.001	0	155.925	3511.08
2147	4.11527	0	246.88	9.1492	10.4387	792.226	172.148	16.0859	4.3615	32.1652	61.6418	1.32837	0.162461	0.0113478	0	81.3081	10.4664	11.6993	170.5	8.25398	0.0274	65.0616	0.960626	0.433	0	0	0	0	0	0	0	0.184	0.001	0	0	0.001	0	155.925	3511.08
2148	3.9102	0	246.899	9.0828	10.4387	792.226	172.148	16.0859	4.3615	32.1652	61.6418	0.9141	0.1212	0.0097	0	81.3098	10.4677	11.6993	170.5	8.236	0.0274	65.0616	0.779	0.419	0	0	0	0	0	0	0	0.175	0.001	0	0	0.001	0	155.925	3511.08
2149	3.5678	0	247.644	9.0373	10.4387	792.226	172.148	16.0859	4.3615	32.1652	61.6418	0.0819	0.037	0.0058	0.8262	81.3751	10.5132	11.7206	171.263	8.1553	0.1092	65.1637	0.3953	5.888	26.472	4.838	1.2	0.17	0.154	0	0.058	0.306	0.04	0.004	0	0.175	0	155.922	3511.08
2150	3.5062	0	247.73	9.0391	10.4387	792.226	172.148	16.0859	4.3615	32.1652	61.6418	0.0819	0.037	0.0058	0.8264	81.3904	10.5152	11.7228	171.296	8.157	0.1092	65.176	0.3953	5.888	26.473	4.838	1.2	0.17	0.154	0	0.058	0.306	0.041	0.004	0	0.175	0	155.949	3511.08
2151	3.4375	0	247.777	9.0405	10.4387	792.226	172.148	16.0859	4.3615	32.1652	61.6418	0.082	0.037	0.0058	0.8264	81.3986	10.5162	11.7239	171.313	8.1577	0.1092	65.1826	0.3953	5.889	26.476	4.839	1.2	0.17	0.154	0	0.058	0.306	0.041	0.004	0	0.175	0	155.957	3511.08
2152	3.3717	0	247.833	9.0411	10.4387	792.226	172.148	16.0859	4.3615	32.1652	61.6418	0.082	0.037	0.0058	0.8265	81.4085	10.5175	11.7253	171.334	8.1585	0.1092	65.1904	0.3953	5.889	26.478	4.839	1.2	0.17	0.154	0	0.058	0.306	0.041	0.004	0	0.175	0	155.964	3511.08
2153	3.3114	0	247.89	9.0414	10.4387	792.226	172.148	16.0859	4.3615	32.1652	61.6418	0.082	0.037	0.0058	0.8267	81.4185	10.5187	11.7267	171.355	8.1597	0.1092	65.1983	0.3953	5.89	26.481	4.84	1.2	0.17	0.154	0	0.058	0.306	0.041	0.004	0	0.175	0	155.973	3511.08
2154	3.2545	0	247.945	9.0414	10.4387	792.226	172.148	16.0859	4.3615	32.1652	61.6418	0.082	0.037	0.0058	0.8268	81.4283	10.52	11.7282	171.375	8.1606	0.1092	65.2063	0.3953	5.891	26.484	4.84	1.2	0.17	0.154	0	0.058	0.306	0.041	0.004	0	0.175	0	155.983	3511.08
2155	3.2005	0	248	9.0414	10.4387	792.226	172.148	16.0859	4.3615	32.1652	61.6418	0.082	0.037	0.0058	0.8268	81.4378	10.5215	11.7296	171.395	8.1617	0.1092	65.2139	0.3953	5.891	26.488	4.841	1.2	0.17	0.154	0	0.058	0.306	0.041	0.004	0	0.175	0	155.994	3511.08
2156	3.15264	0	248.051	9.0414	10.4387	792.226	172.148	16.0859	4.3615	32.1652	61.6418	0.082	0.037	0.0058	0.8269	81.4469	10.5226	11.7309	171.414	8.16262	0.10922	65.2212	0.3953	5.892	26.491	4.842	1.201	0.17	0.154	0	0.058	0.306	0.041	0.004	0	0.175	0	156.005	3511.08
2157	3.10478	0	248.102	9.0414	10.4387	792.226	172.148	16.0859	4.3615	32.1652	61.6418	0.082	0.037	0.0058	0.827	81.4559	10.5237	11.7322	171.434	8.16354	0.10924	65.2284	0.3953	5.893	26.495	4.842	1.201	0.17	0.154	0	0.058	0.306	0.041	0.004	0	0.175	0	156.018	3511.08
2158	3.05692	0	248.153	9.0414	10.4387	792.226	172.148	16.0859	4.3615	32.1652	61.6418	0.082	0.037	0.0058	0.8271	81.465	10.5249	11.7335	171.453	8.16446	0.10926	65.2357	0.3953	5.894	26.499	4.843	1.201	0.17	0.154	0	0.058	0.306	0.041	0.004	0	0.175	0	156.03	3511.08
2159	3.00906	0	248.205	9.0414	10.4387	792.226	172.148	16.0859	4.3615	32.1652	61.6418	0.082	0.037	0.0058	0.8272	81.474	10.526	11.7348	171.472	8.16538	0.10928	65.2429	0.3953	5.895	26.504	4.844	1.201	0.17	0.154	0	0.058	0.306	0.041	0.004	0	0.175	0	156.044	3511.08
2160	2.9612	0	248.256	9.0414	10.4387	792.226	172.148	16.0859	4.3615	32.1652	61.6418	0.082	0.037	0.0058	0.8273	81.4831	10.5271	11.7361	171.491	8.1663	0.1093	65.2502	0.3953	5.896	26.508	4.845	1.201	0.17	0.154	0	0.058	0.306	0.041	0.004	0	0.175	0	156.057	3511.08
2161	2.92104	0	248.303	9.0414	10.4387	792.226	172.148	16.0859	4.3615	32.1652	61.6418	0.082	0.037	0.0058	0.82738	81.4914	10.5282	11.7373	171.508	8.16712	0.10932	65.2568	0.3953	5.897	26.512	4.845	1.201	0.17	0.154	0	0.058	0.306	0.041	0.004	0	0.175	0	156.071	3511.08
2162	2.88088	0	248.35	9.0414	10.4387	792.226	172.148	16.0859	4.3615	32.1652	61.6418	0.082	0.037	0.0058	0.82746	81.4997	10.5293	11.7385	171.526	8.16794	0.10934	65.2634	0.3953	5.898	26.517	4.846	1.202	0.17	0.154	0	0.058	0.306	0.041	0.004	0	0.175	0	156.084	3511.08
2163	2.84072	0	248.397	9.0414	10.4387	792.226	172.148	16.0859	4.3615	32.1652	61.6418	0.082	0.037	0.0058	0.82754	81.5079	10.5304	11.7397	171.543	8.16876	0.10936	65.2701	0.3953	5.899	26.521	4.847	1.202	0.17	0.154	0	0.058	0.306	0.041	0.004	0	0.175	0	156.098	3511.08
2164	2.80056	0	248.444	9.0414	10.4387	792.226	172.148	16.0859	4.3615	32.1652	61.6418	0.082	0.037	0.0058	0.82762	81.5162	10.5315	11.7409	171.56	8.16958	0.10938	65.2767	0.3953	5.9	26.525	4.848	1.202	0.17	0.154	0	0.058	0.306	0.041	0.004	0	0.175	0	156.112	3511.08
2165	2.7604	0	248.49	9.0414	10.4387	792.226	172.148	16.0859	4.3615	32.1652	61.6418	0.082	0.037	0.0058	0.8277	81.5245	10.5326	11.7421	171.578	8.1704	0.1094	65.2833	0.3953	5.901	26.53	4.849	1.202	0.17	0.154	0	0.058	0.306	0.041	0.004	0	0.175	0	156.127	3511.08
2166	2.7258	0	248.534	9.0414	10.4387	792.226	172.148	16.0859	4.3615	32.1652	61.6418	0.082	0.037	0.0058	0.82776	81.5322	10.5336	11.7432	171.594	8.17116	0.10942	65.2895	0.3953	5.902	26.534	4.849	1.202	0.17	0.154	0	0.058	0.306	0.041	0.004	0	0.175	0	156.141	3511.08
2167	2.6912	0	248.578	9.0414	10.4387	792.226	172.148	16.0859	4.3615	32.1652	61.6418	0.082	0.037	0.0058	0.82782	81.5399	10.5346	11.7443	171.61	8.17192	0.10944	65.2957	0.3953	5.903	26.539	4.85	1.203	0.17	0.154	0	0.058	0.306	0.041	0.004	0	0.175	0	156.155	3511.08
2168	2.6566	0	248.621	9.0414	10.4387	792.226	172.148	16.0859	4.3615	32.1652	61.6418	0.082	0.037	0.0058	0.82788	81.5477	10.5355	11.7455	171.627	8.17268	0.10946	65.3018	0.3953	5.904	26.544	4.851	1.203	0.17	0.154	0	0.058	0.306	0.041	0.004	0	0.175	0	156.169	3511.08
2169	2.622	0	248.665	9.0414	10.4387	792.226	172.148	16.0859	4.3615	32.1652	61.6418	0.082	0.037	0.0058	0.82794	81.5554	10.5365	11.7466	171.643	8.17344	0.10948	65.308	0.3953	5.905	26.548	4.852	1.203	0.17	0.154	0	0.058	0.306	0.041	0.004	0	0.175	0	156.183	3511.08
2170	2.5874	0	248.709	9.0414	10.4387	792.226	172.148	16.0859	4.3615	32.1652	61.6418	0.082	0.037	0.0058	0.828	81.5631	10.5375	11.7477	171.659	8.1742	0.1095	65.3142	0.3953	5.906	26.553	4.853	1.203	0.17	0.154	0	0.058	0.306	0.041	0.004	0	0.175	0	156.198	3511.08
2171	2.55704	0	248.75	9.0414	10.4387	792.226	172.148	16.0859	4.3615	32.1652	61.6418	0.08202	0.037	0.0058	0.8281	81.5703	10.5384	11.7487	171.674	8.1749	0.1095	65.32	0.3953	5.907	26.557	4.854	1.204	0.17	0.154	0	0.058	0.306	0.041	0.004	0	0.175	0	156.212	3511.08
2172	2.52668	0	248.791	9.0414	10.4387	792.226	172.148	16.0859	4.3615	32.1652	61.6418	0.08204	0.037	0.0058	0.8282	81.5776	10.5394	11.7497	171.69	8.1756	0.1095	65.3258	0.3953	5.908	26.562	4.854	1.204	0.17	0.154	0	0.058	0.306	0.041	0.004	0	0.175	0	156.226	3511.08
2173	2.49632	0	248.832	9.0414	10.4387	792.226	172.148	16.0859	4.3615	32.1652	61.6418	0.08206	0.037	0.0058	0.8283	81.5848	10.5403	11.7508	171.705	8.1763	0.1095	65.3316	0.3953	5.909	26.566	4.855	1.204	0.17	0.154	0	0.058	0.306	0.041	0.004	0	0.175	0	156.24	3511.08
2174	2.46596	0	248.873	9.0414	10.4387	792.226	172.148	16.0859	4.3615	32.1652	61.6418	0.08208	0.037	0.0058	0.8284	81.5921	10.5413	11.7518	171.72	8.177	0.1095	65.3374	0.3953	5.91	26.571	4.856	1.204	0.171	0.154	0	0.058	0.306	0.041	0.004	0	0.175	0	156.254	3511.08
2175	2.4356	0	248.914	9.0414	10.4387	792.226	172.148	16.0859	4.3615	32.1652	61.6418	0.0821	0.037	0.0058	0.8285	81.5993	10.5422	11.7528	171.735	8.1777	0.1095	65.3432	0.3953	5.911	26.575	4.857	1.204	0.171	0.154	0	0.058	0.306	0.041	0.004	0	0.175	0	156.268	3511.08
2176	2.40884	0	248.952	9.0414	10.4387	792.226	172.148	16.0859	4.3615	32.1652	61.6418	0.0821	0.037	0.0058	0.82858	81.6061	10.5431	11.7538	171.75	8.17838	0.10952	65.3487	0.3953	5.912	26.58	4.858	1.205	0.171	0.154	0	0.058	0.306	0.041	0.004	0	0.176	0	156.282	3511.08
2177	2.38208	0	248.991	9.0414	10.4387	792.226	172.148	16.0859	4.3615	32.1652	61.6418	0.0821	0.037	0.0058	0.82866	81.6129	10.5439	11.7548	171.764	8.17906	0.10954	65.3541	0.3953	5.913	26.584	4.859	1.205	0.171	0.154	0	0.058	0.306	0.041	0.004	0	0.176	0	156.296	3511.08
2178	2.35532	0	249.03	9.0414	10.4387	792.226	172.148	16.0859	4.3615	32.1652	61.6418	0.0821	0.037	0.0058	0.82874	81.6197	10.5448	11.7557	171.778	8.17974	0.10956	65.3596	0.3953	5.914	26.588	4.859	1.205	0.171	0.154	0	0.058	0.306	0.041	0.004	0	0.176	0	156.31	3511.08
2179	2.32856	0	249.068	9.0414	10.4387	792.226	172.148	16.0859	4.3615	32.1652	61.6418	0.0821	0.037	0.0058	0.82882	81.6265	10.5456	11.7567	171.793	8.18042	0.10958	65.365	0.3953	5.915	26.593	4.86	1.205	0.171	0.154	0	0.058	0.306	0.041	0.004	0	0.176	0	156.324	3511.08
2180	2.3018	0	249.107	9.0414	10.4387	792.226	172.148	16.0859	4.3615	32.1652	61.6418	0.0821	0.037	0.0058	0.8289	81.6333	10.5465	11.7577	171.807	8.1811	0.1096	65.3705	0.3953	5.916	26.597	4.861	1.205	0.171	0.154	0	0.058	0.306	0.041	0.004	0	0.176	0	156.338	3511.08
2181	2.27802	0	249.143	9.0414	10.4387	792.226	172.148	16.0859	4.3615	32.1652	61.6418	0.0821	0.037	0.0058	0.82894	81.6398	10.5474	11.7586	171.821	8.18178	0.1096	65.3757	0.3953	5.917	26.602	4.862	1.206	0.171	0.154	0	0.058	0.306	0.041	0.004	0	0.176	0	156.351	3511.08
2182	2.25424	0	249.18	9.0414	10.4387	792.226	172.148	16.0859	4.3615	32.1652	61.6418	0.0821	0.037	0.0058	0.82898	81.6463	10.5482	11.7595	171.834	8.18246	0.1096	65.3809	0.3953	5.918	26.606	4.863	1.206	0.171	0.154	0	0.058	0.306	0.041	0.004	0	0.176	0	156.365	3511.08
2183	2.23046	0	249.217	9.0414	10.4387	792.226	172.148	16.0859	4.3615	32.1652	61.6418	0.0821	0.037	0.0058	0.82902	81.6527	10.5491	11.7605	171.848	8.18314	0.1096	65.386	0.3953	5.919	26.61	4.863	1.206	0.171	0.154	0	0.058	0.306	0.041	0.004	0	0.176	0	156.379	3511.08
2184	2.20668	0	249.253	9.0414	10.4387	792.226	172.148	16.0859	4.3615	32.1652	61.6418	0.0821	0.037	0.0058	0.82906	81.6592	10.5499	11.7614	171.861	8.18382	0.1096	65.3912	0.3953	5.92	26.615	4.864	1.206	0.171	0.154	0	0.058	0.306	0.041	0.004	0	0.176	0	156.392	3511.08
2185	2.1829	0	249.29	9.0414	10.4387	792.226	172.148	16.0859	4.3615	32.1652	61.6418	0.0821	0.037	0.0058	0.8291	81.6657	10.5508	11.7623	171.875	8.1845	0.1096	65.3964	0.3953	5.921	26.619	4.865	1.206	0.171	0.154	0	0.058	0.306	0.041	0.004	0	0.176	0	156.406	3511.08
2186	2.1617	0	249.325	9.0414	10.4387	792.226	172.148	16.0859	4.3615	32.1652	61.6418	0.08212	0.037	0.0058	0.82918	81.6719	10.5516	11.7632	171.888	8.18512	0.1096	65.4013	0.3953	5.922	26.623	4.866	1.207	0.171	0.154	0	0.058	0.306	0.041	0.004	0	0.176	0	156.419	3511.08
2187	2.1405	0	249.36	9.0414	10.4387	792.226	172.148	16.0859	4.3615	32.1652	61.6418	0.08214	0.037	0.0058	0.82926	81.678	10.5523	11.7641	171.901	8.18574	0.1096	65.4062	0.3953	5.923	26.627	4.866	1.207	0.171	0.155	0	0.058	0.306	0.041	0.004	0	0.176	0	156.432	3511.08
2188	2.1193	0	249.395	9.0414	10.4387	792.226	172.148	16.0859	4.3615	32.1652	61.6418	0.08216	0.037	0.0058	0.82934	81.6842	10.5531	11.765	171.914	8.18636	0.1096	65.4112	0.3953	5.924	26.632	4.867	1.207	0.171	0.155	0	0.058	0.306	0.041	0.004	0	0.176	0	156.446	3511.08
2189	2.0981	0	249.43	9.0414	10.4387	792.226	172.148	16.0859	4.3615	32.1652	61.6418	0.08218	0.037	0.0058	0.82942	81.6903	10.5538	11.7659	171.927	8.18698	0.1096	65.4161	0.3953	5.924	26.636	4.868	1.207	0.171	0.155	0	0.058	0.306	0.041	0.004	0	0.176	0	156.459	3511.08
2190	2.0769	0	249.464	9.0414	10.4387	792.226	172.148	16.0859	4.3615	32.1652	61.6418	0.0822	0.037	0.0058	0.8295	81.6965	10.5546	11.7668	171.94	8.1876	0.1096	65.421	0.3953	5.925	26.64	4.869	1.207	0.171	0.155	0	0.058	0.306	0.041	0.004	0	0.176	0	156.472	3511.08
2191	2.05792	0	249.498	9.0414	10.4387	792.226	172.148	16.0859	4.3615	32.1652	61.6418	0.0822	0.037	0.0058	0.82954	81.7024	10.5554	11.7676	171.952	8.18818	0.1096	65.4257	0.3953	5.926	26.644	4.87	1.207	0.171	0.155	0	0.058	0.306	0.041	0.004	0	0.176	0	156.485	3511.08
2192	2.03894	0	249.531	9.0414	10.4387	792.226	172.148	16.0859	4.3615	32.1652	61.6418	0.0822	0.037	0.0058	0.82958	81.7083	10.5562	11.7685	171.965	8.18876	0.1096	65.4305	0.3953	5.927	26.648	4.87	1.208	0.171	0.155	0	0.058	0.306	0.041	0.004	0	0.176	0	156.498	3511.08
2193	2.01996	0	249.564	9.0414	10.4387	792.226	172.148	16.0859	4.3615	32.1652	61.6418	0.0822	0.037	0.0058	0.82962	81.7142	10.5569	11.7693	171.977	8.18934	0.1096	65.4352	0.3953	5.928	26.653	4.871	1.208	0.171	0.155	0	0.058	0.306	0.041	0.004	0	0.176	0	156.511	3511.08
2194	2.00098	0	249.598	9.0414	10.4387	792.226	172.148	16.0859	4.3615	32.1652	61.6418	0.0822	0.037	0.0058	0.82966	81.7201	10.5577	11.7702	171.989	8.18992	0.1096	65.44	0.3953	5.929	26.657	4.872	1.208	0.171	0.155	0	0.058	0.306	0.041	0.004	0	0.176	0	156.524	3511.08
2195	1.982	0	249.631	9.0414	10.4387	792.226	172.148	16.0859	4.3615	32.1652	61.6418	0.0822	0.037	0.0058	0.8297	81.726	10.5585	11.771	172.002	8.1905	0.1096	65.4447	0.3953	5.93	26.661	4.873	1.208	0.171	0.155	0	0.058	0.306	0.041	0.004	0	0.176	0	156.537	3511.08
2196	1.96498	0	249.663	9.0414	10.4387	792.226	172.148	16.0859	4.3615	32.1652	61.6418	0.0822	0.037	0.0058	0.82976	81.7316	10.5592	11.7718	172.014	8.19108	0.1096	65.4492	0.3953	5.931	26.665	4.873	1.208	0.171	0.155	0	0.058	0.306	0.041	0.004	0	0.176	0	156.549	3511.08
2197	1.94796	0	249.695	9.0414	10.4387	792.226	172.148	16.0859	4.3615	32.1652	61.6418	0.0822	0.037	0.0058	0.82982	81.7372	10.56	11.7727	172.026	8.19166	0.1096	65.4537	0.3953	5.932	26.669	4.874	1.209	0.171	0.155	0	0.058	0.306	0.041	0.004	0	0.176	0	156.562	3511.08
2198	1.93094	0	249.727	9.0414	10.4387	792.226	172.148	16.0859	4.3615	32.1652	61.6418	0.0822	0.037	0.0058	0.82988	81.7428	10.5607	11.7735	172.037	8.19224	0.1096	65.4583	0.3953	5.933	26.673	4.875	1.209	0.171	0.155	0	0.058	0.306	0.041	0.004	0	0.176	0	156.575	3511.08
2199	1.91392	0	249.759	9.0414	10.4387	792.226	172.148	16.0859	4.3615	32.1652	61.6418	0.0822	0.037	0.0058	0.82994	81.7484	10.5615	11.7744	172.049	8.19282	0.1096	65.4628	0.3953	5.934	26.677	4.875	1.209	0.171	0.155	0	0.058	0.307	0.041	0.004	0	0.176	0	156.587	3511.08
2200	1.8969	0	249.791	9.0414	10.4387	792.226	172.148	16.0859	4.3615	32.1652	61.6418	0.0822	0.037	0.0058	0.83	81.754	10.5622	11.7752	172.061	8.1934	0.1096	65.4673	0.3953	5.934	26.681	4.876	1.209	0.171	0.155	0	0.058	0.307	0.041	0.004	0	0.176	0	156.6	3511.08
2201	1.88235	0	249.821	9.0414	10.4387	792.226	172.148	16.0859	4.3615	32.1652	61.6418	0.0822	0.037	0.0058	0.83005	81.7593	10.5629	11.776	172.072	8.19394	0.10961	65.4715	0.3953	5.935	26.685	4.877	1.209	0.171	0.155	0	0.058	0.307	0.041	0.004	0	0.176	0	156.612	3511.08
2202	1.8678	0	249.851	9.0414	10.4387	792.226	172.148	16.0859	4.3615	32.1652	61.6418	0.0822	0.037	0.0058	0.8301	81.7646	10.5636	11.7767	172.084	8.19448	0.10962	65.4758	0.3953	5.936	26.689	4.878	1.209	0.171	0.155	0	0.058	0.307	0.041	0.004	0	0.176	0	156.624	3511.08
2203	1.85325	0	249.881	9.0414	10.4387	792.226	172.148	16.0859	4.3615	32.1652	61.6418	0.0822	0.037	0.0058	0.83015	81.77	10.5643	11.7775	172.095	8.19502	0.10963	65.4801	0.3953	5.937	26.693	4.878	1.21	0.171	0.155	0	0.058	0.307	0.041	0.004	0	0.176	0	156.637	3511.08
2204	1.8387	0	249.911	9.0414	10.4387	792.226	172.148	16.0859	4.3615	32.1652	61.6418	0.0822	0.037	0.0058	0.8302	81.7753	10.565	11.7783	172.106	8.19556	0.10964	65.4843	0.3953	5.938	26.696	4.879	1.21	0.171	0.155	0	0.058	0.307	0.041	0.004	0	0.176	0	156.649	3511.08
2205	1.82415	0	249.941	9.0414	10.4387	792.226	172.148	16.0859	4.3615	32.1652	61.6418	0.0822	0.037	0.0058	0.83025	81.7806	10.5656	11.779	172.117	8.1961	0.10965	65.4886	0.3953	5.939	26.7	4.88	1.21	0.171	0.155	0	0.058	0.307	0.041	0.004	0	0.176	0	156.661	3511.08
2206	1.8096	0	249.971	9.0414	10.4387	792.226	172.148	16.0859	4.3615	32.1652	61.6418	0.0822	0.037	0.0058	0.8303	81.7859	10.5663	11.7798	172.128	8.19664	0.10966	65.4928	0.3953	5.94	26.704	4.88	1.21	0.171	0.155	0	0.058	0.307	0.041	0.004	0	0.176	0	156.673	3511.08
2207	1.79505	0	250.001	9.0414	10.4387	792.226	172.148	16.0859	4.3615	32.1652	61.6418	0.0822	0.037	0.0058	0.83035	81.7912	10.567	11.7806	172.139	8.19718	0.10967	65.4971	0.3953	5.94	26.708	4.881	1.21	0.171	0.155	0	0.058	0.307	0.041	0.004	0	0.176	0	156.685	3511.08
2208	1.7805	0	250.031	9.0414	10.4387	792.226	172.148	16.0859	4.3615	32.1652	61.6418	0.0822	0.037	0.0058	0.8304	81.7966	10.5677	11.7814	172.15	8.19772	0.10968	65.5013	0.3953	5.941	26.712	4.882	1.211	0.171	0.155	0	0.058	0.307	0.041	0.004	0	0.176	0	156.697	3511.08
2209	1.76595	0	250.061	9.0414	10.4387	792.226	172.148	16.0859	4.3615	32.1652	61.6418	0.0822	0.037	0.0058	0.83045	81.8019	10.5684	11.7821	172.162	8.19826	0.10969	65.5055	0.3953	5.942	26.716	4.883	1.211	0.171	0.155	0	0.058	0.307	0.041	0.004	0	0.176	0	156.709	3511.08
2210	1.7514	0	250.091	9.0414	10.4387	792.226	172.148	16.0859	4.3615	32.1652	61.6418	0.0822	0.037	0.0058	0.8305	81.8072	10.5691	11.7829	172.173	8.1988	0.1097	65.5098	0.3953	5.943	26.719	4.883	1.211	0.171	0.155	0	0.058	0.307	0.041	0.004	0	0.176	0	156.721	3511.08
2211	1.73953	0	250.119	9.0414	10.4387	792.226	172.148	16.0859	4.3615	32.1652	61.6418	0.08222	0.037	0.0058	0.83055	81.8121	10.5697	11.7836	172.183	8.19928	0.1097	65.5137	0.3953	5.944	26.723	4.884	1.211	0.172	0.155	0	0.058	0.307	0.041	0.004	0	0.176	0	156.733	3511.08
2212	1.72766	0	250.147	9.0414	10.4387	792.226	172.148	16.0859	4.3615	32.1652	61.6418	0.08224	0.037	0.0058	0.8306	81.817	10.5704	11.7843	172.194	8.19976	0.1097	65.5177	0.3953	5.945	26.727	4.885	1.211	0.172	0.155	0	0.058	0.307	0.041	0.004	0	0.176	0	156.744	3511.08
2213	1.71579	0	250.175	9.0414	10.4387	792.226	172.148	16.0859	4.3615	32.1652	61.6418	0.08226	0.037	0.0058	0.83065	81.822	10.571	11.785	172.204	8.20024	0.1097	65.5216	0.3953	5.946	26.731	4.885	1.211	0.172	0.155	0	0.058	0.307	0.041	0.004	0	0.177	0	156.756	3511.08
2214	1.70392	0	250.203	9.0414	10.4387	792.226	172.148	16.0859	4.3615	32.1652	61.6418	0.08228	0.037	0.0058	0.8307	81.8269	10.5717	11.7857	172.214	8.20072	0.1097	65.5256	0.3953	5.946	26.734	4.886	1.212	0.172	0.155	0	0.058	0.307	0.041	0.004	0	0.177	0	156.768	3511.08
2215	1.69205	0	250.231	9.0414	10.4387	792.226	172.148	16.0859	4.3615	32.1652	61.6418	0.0823	0.037	0.0058	0.83075	81.8318	10.5723	11.7864	172.225	8.2012	0.1097	65.5295	0.3953	5.947	26.738	4.887	1.212	0.172	0.155	0	0.058	0.307	0.041	0.004	0	0.177	0	156.779	3511.08
2216	1.68018	0	250.259	9.0414	10.4387	792.226	172.148	16.0859	4.3615	32.1652	61.6418	0.08232	0.037	0.0058	0.8308	81.8367	10.5729	11.7871	172.235	8.20168	0.1097	65.5334	0.3953	5.948	26.742	4.887	1.212	0.172	0.155	0	0.058	0.307	0.041	0.004	0	0.177	0	156.791	3511.08
2217	1.66831	0	250.287	9.0414	10.4387	792.226	172.148	16.0859	4.3615	32.1652	61.6418	0.08234	0.037	0.0058	0.83085	81.8416	10.5736	11.7878	172.245	8.20216	0.1097	65.5374	0.3953	5.949	26.745	4.888	1.212	0.172	0.155	0	0.058	0.307	0.041	0.004	0	0.177	0	156.802	3511.08
2218	1.65644	0	250.315	9.0414	10.4387	792.226	172.148	16.0859	4.3615	32.1652	61.6418	0.08236	0.037	0.0058	0.8309	81.8466	10.5742	11.7885	172.256	8.20264	0.1097	65.5413	0.3953	5.95	26.749	4.889	1.212	0.172	0.155	0	0.058	0.307	0.041	0.004	0	0.177	0	156.813	3511.08
2219	1.64457	0	250.343	9.0414	10.4387	792.226	172.148	16.0859	4.3615	32.1652	61.6418	0.08238	0.037	0.0058	0.83095	81.8515	10.5749	11.7892	172.266	8.20312	0.1097	65.5453	0.3953	5.95	26.752	4.889	1.212	0.172	0.155	0	0.058	0.307	0.041	0.004	0	0.177	0	156.825	3511.08
2220	1.6327	0	250.37	9.0414	10.4387	792.226	172.148	16.0859	4.3615	32.1652	61.6418	0.0824	0.037	0.0058	0.831	81.8564	10.5755	11.7899	172.276	8.2036	0.1097	65.5492	0.3953	5.951	26.756	4.89	1.213	0.172	0.155	0	0.058	0.307	0.041	0.004	0	0.177	0	156.836	3511.08
2221	1.62294	0	250.397	9.0414	10.4387	792.226	172.148	16.0859	4.3615	32.1652	61.6418	0.0824	0.037	0.0058	0.83106	81.861	10.5761	11.7906	172.286	8.20406	0.10971	65.5529	0.3953	5.952	26.76	4.891	1.213	0.172	0.155	0	0.058	0.307	0.041	0.004	0	0.177	0	156.847	3511.08
2222	1.61318	0	250.423	9.0414	10.4387	792.226	172.148	16.0859	4.3615	32.1652	61.6418	0.0824	0.037	0.0058	0.83112	81.8656	10.5767	11.7912	172.296	8.20452	0.10972	65.5566	0.3953	5.953	26.763	4.891	1.213	0.172	0.155	0	0.058	0.307	0.041	0.004	0	0.177	0	156.858	3511.08
2223	1.60342	0	250.449	9.0414	10.4387	792.226	172.148	16.0859	4.3615	32.1652	61.6418	0.0824	0.037	0.0058	0.83118	81.8702	10.5772	11.7919	172.306	8.20498	0.10973	65.5603	0.3953	5.954	26.767	4.892	1.213	0.172	0.155	0	0.058	0.307	0.041	0.004	0	0.177	0	156.869	3511.08
2224	1.59366	0	250.475	9.0414	10.4387	792.226	172.148	16.0859	4.3615	32.1652	61.6418	0.0824	0.037	0.0058	0.83124	81.8748	10.5778	11.7925	172.315	8.20544	0.10974	65.564	0.3953	5.954	26.77	4.893	1.213	0.172	0.155	0	0.058	0.307	0.041	0.004	0	0.177	0	156.88	3511.08
2225	1.5839	0	250.501	9.0414	10.4387	792.226	172.148	16.0859	4.3615	32.1652	61.6418	0.0824	0.037	0.0058	0.8313	81.8795	10.5784	11.7932	172.325	8.2059	0.10975	65.5677	0.3953	5.955	26.774	4.893	1.213	0.172	0.155	0	0.058	0.307	0.041	0.004	0	0.177	0	156.891	3511.08
2226	1.57414	0	250.527	9.0414	10.4387	792.226	172.148	16.0859	4.3615	32.1652	61.6418	0.0824	0.037	0.0058	0.83136	81.8841	10.579	11.7939	172.335	8.20636	0.10976	65.5713	0.3953	5.956	26.777	4.894	1.213	0.172	0.155	0	0.058	0.307	0.041	0.004	0	0.177	0	156.902	3511.08
2227	1.56438	0	250.553	9.0414	10.4387	792.226	172.148	16.0859	4.3615	32.1652	61.6418	0.0824	0.037	0.0058	0.83142	81.8887	10.5796	11.7945	172.344	8.20682	0.10977	65.575	0.3953	5.957	26.781	4.894	1.214	0.172	0.155	0	0.058	0.307	0.041	0.004	0	0.177	0	156.913	3511.08
2228	1.55462	0	250.579	9.0414	10.4387	792.226	172.148	16.0859	4.3615	32.1652	61.6418	0.0824	0.037	0.0058	0.83148	81.8933	10.5801	11.7952	172.354	8.20728	0.10978	65.5787	0.3953	5.957	26.784	4.895	1.214	0.172	0.155	0	0.058	0.307	0.041	0.004	0	0.177	0	156.924	3511.08
2229	1.54486	0	250.605	9.0414	10.4387	792.226	172.148	16.0859	4.3615	32.1652	61.6418	0.0824	0.037	0.0058	0.83154	81.8979	10.5807	11.7958	172.364	8.20774	0.10979	65.5824	0.3953	5.958	26.788	4.896	1.214	0.172	0.155	0	0.058	0.307	0.041	0.004	0	0.177	0	156.935	3511.08
2230	1.5351	0	250.631	9.0414	10.4387	792.226	172.148	16.0859	4.3615	32.1652	61.6418	0.0824	0.037	0.0058	0.8316	81.9025	10.5813	11.7965	172.374	8.2082	0.1098	65.5861	0.3953	5.959	26.791	4.896	1.214	0.172	0.155	0	0.058	0.307	0.041	0.004	0	0.177	0	156.945	3511.08
2231	1.52697	0	250.656	9.0414	10.4387	792.226	172.148	16.0859	4.3615	32.1652	61.6418	0.0824	0.037	0.0058	0.83164	81.9069	10.5819	11.7971	172.383	8.20864	0.10981	65.5896	0.3953	5.96	26.794	4.897	1.214	0.172	0.155	0	0.058	0.307	0.041	0.004	0	0.177	0	156.956	3511.08
2232	1.51884	0	250.681	9.0414	10.4387	792.226	172.148	16.0859	4.3615	32.1652	61.6418	0.0824	0.037	0.0058	0.83168	81.9112	10.5825	11.7977	172.392	8.20908	0.10982	65.593	0.3953	5.96	26.798	4.898	1.214	0.172	0.155	0	0.058	0.307	0.041	0.004	0	0.177	0	156.967	3511.08
2233	1.51071	0	250.705	9.0414	10.4387	792.226	172.148	16.0859	4.3615	32.1652	61.6418	0.0824	0.037	0.0058	0.83172	81.9155	10.583	11.7984	172.401	8.20952	0.10983	65.5965	0.3953	5.961	26.801	4.898	1.215	0.172	0.156	0	0.058	0.307	0.041	0.004	0	0.177	0	156.977	3511.08
2234	1.50258	0	250.73	9.0414	10.4387	792.226	172.148	16.0859	4.3615	32.1652	61.6418	0.0824	0.037	0.0058	0.83176	81.9199	10.5836	11.799	172.41	8.20996	0.10984	65.6	0.3953	5.962	26.804	4.899	1.215	0.172	0.156	0	0.058	0.307	0.041	0.004	0	0.177	0	156.988	3511.08
2235	1.49445	0	250.754	9.0414	10.4387	792.226	172.148	16.0859	4.3615	32.1652	61.6418	0.0824	0.037	0.0058	0.8318	81.9243	10.5842	11.7996	172.419	8.2104	0.10985	65.6034	0.3953	5.963	26.808	4.899	1.215	0.172	0.156	0	0.058	0.307	0.041	0.004	0	0.177	0	156.998	3511.08
2236	1.48632	0	250.779	9.0414	10.4387	792.226	172.148	16.0859	4.3615	32.1652	61.6418	0.0824	0.037	0.0058	0.83184	81.9286	10.5848	11.8002	172.428	8.21084	0.10986	65.6069	0.3953	5.963	26.811	4.9	1.215	0.172	0.156	0	0.058	0.307	0.041	0.004	0	0.177	0	157.008	3511.08
2237	1.47819	0	250.803	9.0414	10.4387	792.226	172.148	16.0859	4.3615	32.1652	61.6418	0.0824	0.037	0.0058	0.83188	81.933	10.5854	11.8008	172.437	8.21128	0.10987	65.6104	0.3953	5.964	26.814	4.901	1.215	0.172	0.156	0	0.058	0.307	0.041	0.004	0	0.177	0	157.019	3511.08
2238	1.47006	0	250.828	9.0414	10.4387	792.226	172.148	16.0859	4.3615	32.1652	61.6418	0.0824	0.037	0.0058	0.83192	81.9373	10.5859	11.8015	172.446	8.21172	0.10988	65.6139	0.3953	5.965	26.818	4.901	1.215	0.172	0.156	0	0.058	0.307	0.041	0.004	0	0.177	0	157.029	3511.08
2239	1.46193	0	250.852	9.0414	10.4387	792.226	172.148	16.0859	4.3615	32.1652	61.6418	0.0824	0.037	0.0058	0.83196	81.9416	10.5865	11.8021	172.455	8.21216	0.10989	65.6173	0.3953	5.966	26.821	4.902	1.215	0.172	0.156	0	0.058	0.307	0.041	0.004	0	0.177	0	157.039	3511.08
2240	1.4538	0	250.877	9.0414	10.4387	792.226	172.148	16.0859	4.3615	32.1652	61.6418	0.0824	0.037	0.0058	0.832	81.946	10.5871	11.8027	172.465	8.2126	0.1099	65.6208	0.3953	5.966	26.824	4.902	1.216	0.172	0.156	0	0.058	0.307	0.041	0.004	0	0.177	0	157.05	3511.08
2241	1.44702	0	250.9	9.0414	10.4387	792.226	172.148	16.0859	4.3615	32.1652	61.6418	0.08242	0.037	0.0058	0.83203	81.9501	10.5876	11.8033	172.473	8.21301	0.10991	65.6241	0.3953	5.967	26.827	4.903	1.216	0.172	0.156	0	0.058	0.307	0.041	0.004	0	0.177	0	157.06	3511.08
2242	1.44024	0	250.923	9.0414	10.4387	792.226	172.148	16.0859	4.3615	32.1652	61.6418	0.08244	0.037	0.0058	0.83206	81.9541	10.5881	11.8039	172.482	8.21342	0.10992	65.6273	0.3953	5.968	26.831	4.904	1.216	0.172	0.156	0	0.058	0.307	0.041	0.004	0	0.177	0	157.07	3511.08
2243	1.43346	0	250.946	9.0414	10.4387	792.226	172.148	16.0859	4.3615	32.1652	61.6418	0.08246	0.037	0.0058	0.83209	81.9582	10.5886	11.8045	172.49	8.21383	0.10993	65.6306	0.3953	5.968	26.834	4.904	1.216	0.172	0.156	0	0.058	0.307	0.041	0.004	0	0.177	0	157.08	3511.08
2244	1.42668	0	250.969	9.0414	10.4387	792.226	172.148	16.0859	4.3615	32.1652	61.6418	0.08248	0.037	0.0058	0.83212	81.9622	10.5891	11.8051	172.499	8.21424	0.10994	65.6338	0.3953	5.969	26.837	4.905	1.216	0.172	0.156	0	0.058	0.307	0.041	0.004	0	0.177	0	157.09	3511.08
2245	1.4199	0	250.992	9.0414	10.4387	792.226	172.148	16.0859	4.3615	32.1652	61.6418	0.0825	0.037	0.0058	0.83215	81.9663	10.5897	11.8056	172.508	8.21465	0.10995	65.6371	0.3953	5.97	26.84	4.905	1.216	0.172	0.156	0	0.058	0.307	0.041	0.004	0	0.177	0	157.1	3511.08
2246	1.41312	0	251.015	9.0414	10.4387	792.226	172.148	16.0859	4.3615	32.1652	61.6418	0.08252	0.037	0.0058	0.83218	81.9704	10.5902	11.8062	172.516	8.21506	0.10996	65.6404	0.3953	5.971	26.843	4.906	1.216	0.172	0.156	0	0.058	0.307	0.041	0.004	0	0.177	0	157.11	3511.08
2247	1.40634	0	251.038	9.0414	10.4387	792.226	172.148	16.0859	4.3615	32.1652	61.6418	0.08254	0.037	0.0058	0.83221	81.9744	10.5907	11.8068	172.525	8.21547	0.10997	65.6436	0.3953	5.971	26.847	4.906	1.217	0.172	0.156	0	0.058	0.307	0.041	0.004	0	0.177	0	157.12	3511.08
2248	1.39956	0	251.062	9.0414	10.4387	792.226	172.148	16.0859	4.3615	32.1652	61.6418	0.08256	0.037	0.0058	0.83224	81.9785	10.5912	11.8074	172.533	8.21588	0.10998	65.6469	0.3953	5.972	26.85	4.907	1.217	0.172	0.156	0	0.058	0.307	0.041	0.004	0	0.177	0	157.13	3511.08
2249	1.39278	0	251.085	9.0414	10.4387	792.226	172.148	16.0859	4.3615	32.1652	61.6418	0.08258	0.037	0.0058	0.83227	81.9825	10.5917	11.808	172.542	8.21629	0.10999	65.6501	0.3953	5.973	26.853	4.908	1.217	0.172	0.156	0	0.058	0.307	0.041	0.004	0	0.177	0	157.139	3511.08
2250	1.386	0	251.108	9.0414	10.4387	792.226	172.148	16.0859	4.3615	32.1652	61.6418	0.0826	0.037	0.0058	0.8323	81.9866	10.5922	11.8086	172.551	8.2167	0.11	65.6534	0.3953	5.973	26.856	4.908	1.217	0.172	0.156	0	0.058	0.307	0.041	0.004	0	0.177	0	157.149	3511.08
2251	1.38087	0	251.129	9.0414	10.4387	792.226	172.148	16.0859	4.3615	32.1652	61.6418	0.0826	0.037	0.0058	0.83234	81.9903	10.5927	11.8091	172.558	8.21707	0.11	65.6564	0.3953	5.974	26.859	4.909	1.217	0.172	0.156	0	0.058	0.307	0.041	0.004	0	0.177	0	157.159	3511.08
2252	1.37574	0	251.15	9.0414	10.4387	792.226	172.148	16.0859	4.3615	32.1652	61.6418	0.0826	0.037	0.0058	0.83238	81.994	10.5932	11.8097	172.566	8.21744	0.11	65.6594	0.3953	5.975	26.862	4.909	1.217	0.172	0.156	0	0.058	0.307	0.041	0.004	0	0.177	0	157.168	3511.08
2253	1.37062	0	251.171	9.0414	10.4387	792.226	172.148	16.0859	4.3615	32.1652	61.6418	0.0826	0.037	0.0058	0.83242	81.9978	10.5936	11.8102	172.574	8.21782	0.11	65.6623	0.3953	5.975	26.865	4.91	1.217	0.172	0.156	0	0.058	0.307	0.041	0.004	0	0.177	0	157.178	3511.08
2254	1.36549	0	251.192	9.0414	10.4387	792.226	172.148	16.0859	4.3615	32.1652	61.6418	0.0826	0.037	0.0058	0.83246	82.0015	10.5941	11.8107	172.582	8.21819	0.11	65.6653	0.3953	5.976	26.868	4.91	1.218	0.172	0.156	0	0.058	0.307	0.041	0.004	0	0.177	0	157.188	3511.08
2255	1.36036	0	251.213	9.0414	10.4387	792.226	172.148	16.0859	4.3615	32.1652	61.6418	0.0826	0.037	0.0058	0.8325	82.0052	10.5946	11.8113	172.59	8.21856	0.11	65.6683	0.3953	5.977	26.871	4.911	1.218	0.172	0.156	0	0.058	0.307	0.041	0.004	0	0.177	0	157.197	3511.08
2256	1.35523	0	251.234	9.0414	10.4387	792.226	172.148	16.0859	4.3615	32.1652	61.6418	0.0826	0.037	0.0058	0.83254	82.0089	10.5951	11.8118	172.598	8.21893	0.11	65.6713	0.3953	5.977	26.874	4.912	1.218	0.172	0.156	0	0.058	0.307	0.041	0.004	0	0.177	0	157.207	3511.08
2257	1.3501	0	251.255	9.0414	10.4387	792.226	172.148	16.0859	4.3615	32.1652	61.6418	0.0826	0.037	0.0058	0.83258	82.0126	10.5955	11.8124	172.605	8.2193	0.11	65.6742	0.3953	5.978	26.877	4.912	1.218	0.172	0.156	0	0.058	0.307	0.041	0.004	0	0.177	0	157.216	3511.08
2258	1.34498	0	251.276	9.0414	10.4387	792.226	172.148	16.0859	4.3615	32.1652	61.6418	0.0826	0.037	0.0058	0.83262	82.0164	10.596	11.8129	172.613	8.21968	0.11	65.6772	0.3953	5.979	26.88	4.913	1.218	0.173	0.156	0	0.058	0.307	0.041	0.004	0	0.178	0	157.226	3511.08
2259	1.33985	0	251.297	9.0414	10.4387	792.226	172.148	16.0859	4.3615	32.1652	61.6418	0.0826	0.037	0.0058	0.83266	82.0201	10.5965	11.8134	172.621	8.22005	0.11	65.6802	0.3953	5.979	26.883	4.913	1.218	0.173	0.156	0	0.058	0.307	0.041	0.004	0	0.178	0	157.235	3511.08
2260	1.33472	0	251.319	9.0414	10.4387	792.226	172.148	16.0859	4.3615	32.1652	61.6418	0.0826	0.037	0.0058	0.8327	82.0238	10.597	11.814	172.629	8.22042	0.11	65.6832	0.3953	5.98	26.886	4.914	1.218	0.173	0.156	0	0.058	0.307	0.041	0.004	0	0.178	0	157.244	3511.08
2261	1.32959	0	251.34	9.0414	10.4387	792.226	172.148	16.0859	4.3615	32.1652	61.6418	0.0826	0.037	0.0058	0.83274	82.0275	10.5974	11.8145	172.637	8.22079	0.11	65.6861	0.3953	5.981	26.889	4.914	1.219	0.173	0.156	0	0.058	0.307	0.041	0.004	0	0.178	0	157.253	3511.08
2262	1.32446	0	251.361	9.0414	10.4387	792.226	172.148	16.0859	4.3615	32.1652	61.6418	0.0826	0.037	0.0058	0.83278	82.0312	10.5979	11.815	172.645	8.22116	0.11	65.6891	0.3953	5.981	26.892	4.915	1.219	0.173	0.156	0	0.058	0.307	0.041	0.004	0	0.178	0	157.263	3511.08
2263	1.31934	0	251.382	9.0414	10.4387	792.226	172.148	16.0859	4.3615	32.1652	61.6418	0.0826	0.037	0.0058	0.83282	82.035	10.5984	11.8156	172.652	8.22154	0.11	65.6921	0.3953	5.982	26.895	4.915	1.219	0.173	0.156	0	0.058	0.307	0.041	0.004	0	0.178	0	157.272	3511.08
2264	1.31421	0	251.403	9.0414	10.4387	792.226	172.148	16.0859	4.3615	32.1652	61.6418	0.0826	0.037	0.0058	0.83286	82.0387	10.5989	11.8161	172.66	8.22191	0.11	65.6951	0.3953	5.983	26.898	4.916	1.219	0.173	0.156	0	0.058	0.307	0.041	0.004	0	0.178	0	157.281	3511.08
2265	1.30908	0	251.424	9.0414	10.4387	792.226	172.148	16.0859	4.3615	32.1652	61.6418	0.0826	0.037	0.0058	0.8329	82.0424	10.5993	11.8166	172.668	8.22228	0.11	65.698	0.3953	5.983	26.901	4.916	1.219	0.173	0.156	0	0.058	0.307	0.041	0.004	0	0.178	0	157.29	3511.08
2266	1.30395	0	251.445	9.0414	10.4387	792.226	172.148	16.0859	4.3615	32.1652	61.6418	0.0826	0.037	0.0058	0.83294	82.0461	10.5998	11.8172	172.676	8.22265	0.11	65.701	0.3953	5.984	26.904	4.917	1.219	0.173	0.156	0	0.058	0.307	0.041	0.004	0	0.178	0	157.299	3511.08
2267	1.29882	0	251.466	9.0414	10.4387	792.226	172.148	16.0859	4.3615	32.1652	61.6418	0.0826	0.037	0.0058	0.83298	82.0498	10.6003	11.8177	172.684	8.22302	0.11	65.704	0.3953	5.985	26.907	4.917	1.219	0.173	0.156	0	0.058	0.307	0.041	0.004	0	0.178	0	157.308	3511.08
2268	1.2937	0	251.487	9.0414	10.4387	792.226	172.148	16.0859	4.3615	32.1652	61.6418	0.0826	0.037	0.0058	0.83302	82.0536	10.6008	11.8182	172.691	8.2234	0.11	65.707	0.3953	5.985	26.91	4.918	1.219	0.173	0.156	0	0.058	0.307	0.041	0.004	0	0.178	0	157.317	3511.08
2269	1.28857	0	251.508	9.0414	10.4387	792.226	172.148	16.0859	4.3615	32.1652	61.6418	0.0826	0.037	0.0058	0.83306	82.0573	10.6012	11.8188	172.699	8.22377	0.11	65.7099	0.3953	5.986	26.912	4.919	1.22	0.173	0.156	0	0.058	0.307	0.041	0.004	0	0.178	0	157.326	3511.08
2270	1.28344	0	251.529	9.0414	10.4387	792.226	172.148	16.0859	4.3615	32.1652	61.6418	0.0826	0.037	0.0058	0.8331	82.061	10.6017	11.8193	172.707	8.22414	0.11	65.7129	0.3953	5.987	26.915	4.919	1.22	0.173	0.156	0	0.058	0.307	0.041	0.004	0	0.178	0	157.335	3511.08
2271	1.27831	0	251.55	9.0414	10.4387	792.226	172.148	16.0859	4.3615	32.1652	61.6418	0.0826	0.037	0.0058	0.83314	82.0647	10.6022	11.8199	172.715	8.22451	0.11	65.7159	0.3953	5.987	26.918	4.92	1.22	0.173	0.156	0	0.058	0.307	0.041	0.004	0	0.178	0	157.344	3511.08
2272	1.27318	0	251.571	9.0414	10.4387	792.226	172.148	16.0859	4.3615	32.1652	61.6418	0.0826	0.037	0.0058	0.83318	82.0684	10.6027	11.8204	172.723	8.22488	0.11	65.7189	0.3953	5.988	26.921	4.92	1.22	0.173	0.156	0	0.058	0.307	0.041	0.004	0	0.178	0	157.353	3511.08
2273	1.26806	0	251.593	9.0414	10.4387	792.226	172.148	16.0859	4.3615	32.1652	61.6418	0.0826	0.037	0.0058	0.83322	82.0722	10.6031	11.8209	172.731	8.22526	0.11	65.7218	0.3953	5.988	26.924	4.921	1.22	0.173	0.156	0	0.058	0.307	0.041	0.004	0	0.178	0	157.362	3511.08
2274	1.26293	0	251.614	9.0414	10.4387	792.226	172.148	16.0859	4.3615	32.1652	61.6418	0.0826	0.037	0.0058	0.83326	82.0759	10.6036	11.8215	172.738	8.22563	0.11	65.7248	0.3953	5.989	26.927	4.921	1.22	0.173	0.156	0	0.058	0.307	0.041	0.004	0	0.178	0	157.371	3511.08
2275	1.2578	0	251.635	9.0414	10.4387	792.226	172.148	16.0859	4.3615	32.1652	61.6418	0.0826	0.037	0.0058	0.8333	82.0796	10.6041	11.822	172.746	8.226	0.11	65.7278	0.3953	5.99	26.929	4.922	1.22	0.173	0.156	0	0.058	0.307	0.041	0.004	0	0.178	0	157.379	3511.08
2276	1.25423	0	251.653	9.0414	10.4387	792.226	172.148	16.0859	4.3615	32.1652	61.6418	0.082604	0.037	0.0058	0.833336	82.0829	10.6045	11.8225	172.753	8.22633	0.110008	65.7304	0.3953	5.99	26.932	4.922	1.221	0.173	0.156	0	0.058	0.307	0.041	0.004	0	0.178	0	157.388	3511.08
2277	1.25066	0	251.672	9.0414	10.4387	792.226	172.148	16.0859	4.3615	32.1652	61.6418	0.082608	0.037	0.0058	0.833372	82.0862	10.605	11.823	172.76	8.22666	0.110016	65.7331	0.3953	5.991	26.935	4.923	1.221	0.173	0.156	0	0.058	0.307	0.041	0.004	0	0.178	0	157.397	3511.08
2278	1.2471	0	251.691	9.0414	10.4387	792.226	172.148	16.0859	4.3615	32.1652	61.6418	0.082612	0.037	0.0058	0.833408	82.0895	10.6054	11.8234	172.767	8.22698	0.110024	65.7357	0.3953	5.992	26.938	4.923	1.221	0.173	0.156	0	0.058	0.307	0.041	0.004	0	0.178	0	157.406	3511.08
2279	1.24353	0	251.709	9.0414	10.4387	792.226	172.148	16.0859	4.3615	32.1652	61.6418	0.082616	0.037	0.0058	0.833444	82.0928	10.6058	11.8239	172.774	8.22731	0.110032	65.7384	0.3953	5.992	26.94	4.924	1.221	0.173	0.156	0	0.058	0.307	0.041	0.004	0	0.178	0	157.414	3511.08
2280	1.23996	0	251.728	9.0414	10.4387	792.226	172.148	16.0859	4.3615	32.1652	61.6418	0.08262	0.037	0.0058	0.83348	82.0961	10.6062	11.8244	172.781	8.22764	0.11004	65.741	0.3953	5.993	26.943	4.924	1.221	0.173	0.156	0	0.058	0.307	0.041	0.004	0	0.178	0	157.423	3511.08
2281	1.23639	0	251.747	9.0414	10.4387	792.226	172.148	16.0859	4.3615	32.1652	61.6418	0.082624	0.037	0.0058	0.833516	82.0994	10.6067	11.8249	172.788	8.22797	0.110048	65.7437	0.3953	5.993	26.946	4.925	1.221	0.173	0.156	0	0.058	0.307	0.041	0.004	0	0.178	0	157.431	3511.08
2282	1.23282	0	251.766	9.0414	10.4387	792.226	172.148	16.0859	4.3615	32.1652	61.6418	0.082628	0.037	0.0058	0.833552	82.1027	10.6071	11.8253	172.795	8.2283	0.110056	65.7463	0.3953	5.994	26.949	4.925	1.221	0.173	0.156	0	0.058	0.307	0.041	0.004	0	0.178	0	157.44	3511.08
2283	1.22926	0	251.784	9.0414	10.4387	792.226	172.148	16.0859	4.3615	32.1652	61.6418	0.082632	0.037	0.0058	0.833588	82.106	10.6075	11.8258	172.802	8.22862	0.110064	65.749	0.3953	5.995	26.951	4.926	1.221	0.173	0.156	0	0.058	0.307	0.041	0.004	0	0.178	0	157.448	3511.08
2284	1.22569	0	251.803	9.0414	10.4387	792.226	172.148	16.0859	4.3615	32.1652	61.6418	0.082636	0.037	0.0058	0.833624	82.1093	10.608	11.8263	172.809	8.22895	0.110072	65.7516	0.3953	5.995	26.954	4.926	1.221	0.173	0.156	0	0.058	0.307	0.041	0.004	0	0.178	0	157.457	3511.08
2285	1.22212	0	251.822	9.0414	10.4387	792.226	172.148	16.0859	4.3615	32.1652	61.6418	0.08264	0.037	0.0058	0.83366	82.1126	10.6084	11.8268	172.816	8.22928	0.11008	65.7543	0.3953	5.996	26.957	4.927	1.222	0.173	0.156	0	0.058	0.307	0.041	0.004	0	0.178	0	157.465	3511.08
2286	1.21855	0	251.84	9.0414	10.4387	792.226	172.148	16.0859	4.3615	32.1652	61.6418	0.082644	0.037	0.0058	0.833696	82.1159	10.6088	11.8272	172.823	8.22961	0.110088	65.7569	0.3953	5.996	26.959	4.927	1.222	0.173	0.156	0	0.058	0.307	0.041	0.004	0	0.178	0	157.473	3511.08
2287	1.21498	0	251.859	9.0414	10.4387	792.226	172.148	16.0859	4.3615	32.1652	61.6418	0.082648	0.037	0.0058	0.833732	82.1192	10.6092	11.8277	172.83	8.22994	0.110096	65.7596	0.3953	5.997	26.962	4.928	1.222	0.173	0.156	0	0.058	0.307	0.041	0.004	0	0.178	0	157.482	3511.08
2288	1.21142	0	251.878	9.0414	10.4387	792.226	172.148	16.0859	4.3615	32.1652	61.6418	0.082652	0.037	0.0058	0.833768	82.1226	10.6097	11.8282	172.837	8.23026	0.110104	65.7622	0.3953	5.998	26.965	4.928	1.222	0.173	0.156	0	0.058	0.307	0.041	0.004	0	0.178	0	157.49	3511.08
2289	1.20785	0	251.896	9.0414	10.4387	792.226	172.148	16.0859	4.3615	32.1652	61.6418	0.082656	0.037	0.0058	0.833804	82.1259	10.6101	11.8287	172.844	8.23059	0.110112	65.7649	0.3953	5.998	26.967	4.929	1.222	0.173	0.156	0	0.058	0.307	0.041	0.004	0	0.178	0	157.498	3511.08
2290	1.20428	0	251.915	9.0414	10.4387	792.226	172.148	16.0859	4.3615	32.1652	61.6418	0.08266	0.037	0.0058	0.83384	82.1292	10.6105	11.8291	172.851	8.23092	0.11012	65.7675	0.3953	5.999	26.97	4.929	1.222	0.173	0.156	0	0.058	0.307	0.041	0.004	0	0.178	0	157.507	3511.08
2291	1.20071	0	251.934	9.0414	10.4387	792.226	172.148	16.0859	4.3615	32.1652	61.6418	0.082664	0.037	0.0058	0.833876	82.1325	10.6109	11.8296	172.857	8.23125	0.110128	65.7702	0.3953	5.999	26.972	4.93	1.222	0.173	0.157	0	0.058	0.307	0.041	0.004	0	0.178	0	157.515	3511.08
2292	1.19714	0	251.952	9.0414	10.4387	792.226	172.148	16.0859	4.3615	32.1652	61.6418	0.082668	0.037	0.0058	0.833912	82.1358	10.6114	11.8301	172.864	8.23158	0.110136	65.7728	0.3953	6	26.975	4.93	1.222	0.173	0.157	0	0.058	0.307	0.041	0.004	0	0.178	0	157.523	3511.08
2293	1.19358	0	251.971	9.0414	10.4387	792.226	172.148	16.0859	4.3615	32.1652	61.6418	0.082672	0.037	0.0058	0.833948	82.1391	10.6118	11.8306	172.871	8.2319	0.110144	65.7755	0.3953	6	26.978	4.93	1.223	0.173	0.157	0	0.058	0.307	0.041	0.004	0	0.178	0	157.531	3511.08
2294	1.19001	0	251.99	9.0414	10.4387	792.226	172.148	16.0859	4.3615	32.1652	61.6418	0.082676	0.037	0.0058	0.833984	82.1424	10.6122	11.831	172.878	8.23223	0.110152	65.7781	0.3953	6.001	26.98	4.931	1.223	0.173	0.157	0	0.058	0.307	0.041	0.004	0	0.178	0	157.539	3511.08
2295	1.18644	0	252.008	9.0414	10.4387	792.226	172.148	16.0859	4.3615	32.1652	61.6418	0.08268	0.037	0.0058	0.83402	82.1457	10.6127	11.8315	172.885	8.23256	0.11016	65.7808	0.3953	6.002	26.983	4.931	1.223	0.173	0.157	0	0.058	0.307	0.041	0.004	0	0.178	0	157.547	3511.08
2296	1.18287	0	252.027	9.0414	10.4387	792.226	172.148	16.0859	4.3615	32.1652	61.6418	0.082684	0.037	0.0058	0.834056	82.149	10.6131	11.832	172.892	8.23289	0.110168	65.7834	0.3953	6.002	26.985	4.932	1.223	0.173	0.157	0	0.058	0.307	0.041	0.004	0	0.178	0	157.555	3511.08
2297	1.1793	0	252.046	9.0414	10.4387	792.226	172.148	16.0859	4.3615	32.1652	61.6418	0.082688	0.037	0.0058	0.834092	82.1523	10.6135	11.8325	172.899	8.23322	0.110176	65.7861	0.3953	6.003	26.988	4.932	1.223	0.173	0.157	0	0.058	0.307	0.041	0.004	0	0.178	0	157.564	3511.08
2298	1.17574	0	252.065	9.0414	10.4387	792.226	172.148	16.0859	4.3615	32.1652	61.6418	0.082692	0.037	0.0058	0.834128	82.1556	10.6139	11.8329	172.906	8.23354	0.110184	65.7887	0.3953	6.003	26.991	4.933	1.223	0.173	0.157	0	0.058	0.307	0.041	0.004	0	0.178	0	157.572	3511.08
2299	1.17217	0	252.083	9.0414	10.4387	792.226	172.148	16.0859	4.3615	32.1652	61.6418	0.082696	0.037	0.0058	0.834164	82.1589	10.6144	11.8334	172.913	8.23387	0.110192	65.7914	0.3953	6.004	26.993	4.933	1.223	0.173	0.157	0	0.058	0.307	0.041	0.004	0	0.178	0	157.579	3511.08
2300	1.1686	0	252.102	9.0414	10.4387	792.226	172.148	16.0859	4.3615	32.1652	61.6418	0.0827	0.037	0.0058	0.8342	82.1622	10.6148	11.8339	172.92	8.2342	0.1102	65.794	0.3953	6.004	26.996	4.934	1.223	0.173	0.157	0	0.058	0.307	0.041	0.004	0	0.178	0	157.587	3511.08
2301	1.16596	0	252.119	9.0414	10.4387	792.226	172.148	16.0859	4.3615	32.1652	61.6418	0.082704	0.037	0.0058	0.834228	82.1652	10.6152	11.8343	172.926	8.2345	0.110204	65.7964	0.3953	6.005	26.998	4.934	1.223	0.173	0.157	0	0.058	0.307	0.041	0.004	0	0.178	0	157.595	3511.08
2302	1.16333	0	252.136	9.0414	10.4387	792.226	172.148	16.0859	4.3615	32.1652	61.6418	0.082708	0.037	0.0058	0.834256	82.1681	10.6156	11.8347	172.932	8.2348	0.110208	65.7987	0.3953	6.006	27.001	4.935	1.224	0.173	0.157	0	0.058	0.307	0.041	0.004	0	0.178	0	157.603	3511.08
2303	1.16069	0	252.152	9.0414	10.4387	792.226	172.148	16.0859	4.3615	32.1652	61.6418	0.082712	0.037	0.0058	0.834284	82.1711	10.616	11.8352	172.939	8.2351	0.110212	65.8011	0.3953	6.006	27.003	4.935	1.224	0.173	0.157	0	0.058	0.307	0.041	0.004	0	0.178	0	157.611	3511.08
2304	1.15806	0	252.169	9.0414	10.4387	792.226	172.148	16.0859	4.3615	32.1652	61.6418	0.082716	0.037	0.0058	0.834312	82.1741	10.6163	11.8356	172.945	8.2354	0.110216	65.8035	0.3953	6.007	27.006	4.936	1.224	0.173	0.157	0	0.058	0.307	0.041	0.004	0	0.178	0	157.619	3511.08
2305	1.15542	0	252.186	9.0414	10.4387	792.226	172.148	16.0859	4.3615	32.1652	61.6418	0.08272	0.037	0.0058	0.83434	82.177	10.6167	11.836	172.951	8.2357	0.11022	65.8059	0.3953	6.007	27.008	4.936	1.224	0.173	0.157	0	0.058	0.307	0.041	0.004	0	0.178	0	157.627	3511.08
2306	1.15278	0	252.203	9.0414	10.4387	792.226	172.148	16.0859	4.3615	32.1652	61.6418	0.082724	0.037	0.0058	0.834368	82.18	10.6171	11.8364	172.957	8.236	0.110224	65.8082	0.3953	6.008	27.011	4.936	1.224	0.173	0.157	0	0.058	0.307	0.041	0.004	0	0.178	0	157.634	3511.08
2307	1.15015	0	252.22	9.0414	10.4387	792.226	172.148	16.0859	4.3615	32.1652	61.6418	0.082728	0.037	0.0058	0.834396	82.1829	10.6175	11.8369	172.964	8.2363	0.110228	65.8106	0.3953	6.008	27.013	4.937	1.224	0.173	0.157	0	0.058	0.307	0.041	0.004	0	0.178	0	157.642	3511.08
2308	1.14751	0	252.236	9.0414	10.4387	792.226	172.148	16.0859	4.3615	32.1652	61.6418	0.082732	0.037	0.0058	0.834424	82.1859	10.6179	11.8373	172.97	8.2366	0.110232	65.813	0.3953	6.009	27.016	4.937	1.224	0.173	0.157	0	0.058	0.307	0.041	0.004	0	0.178	0	157.65	3511.08
2309	1.14488	0	252.253	9.0414	10.4387	792.226	172.148	16.0859	4.3615	32.1652	61.6418	0.082736	0.037	0.0058	0.834452	82.1889	10.6183	11.8377	172.976	8.2369	0.110236	65.8153	0.3953	6.009	27.018	4.938	1.224	0.173	0.157	0	0.058	0.307	0.041	0.004	0	0.178	0	157.658	3511.08
2310	1.14224	0	252.27	9.0414	10.4387	792.226	172.148	16.0859	4.3615	32.1652	61.6418	0.08274	0.037	0.0058	0.83448	82.1918	10.6186	11.8381	172.982	8.2372	0.11024	65.8177	0.3953	6.01	27.02	4.938	1.225	0.173	0.157	0	0.058	0.308	0.041	0.004	0	0.178	0	157.665	3511.08
2311	1.1396	0	252.287	9.0414	10.4387	792.226	172.148	16.0859	4.3615	32.1652	61.6418	0.082744	0.037	0.0058	0.834508	82.1948	10.619	11.8386	172.989	8.2375	0.110244	65.8201	0.3953	6.011	27.023	4.939	1.225	0.173	0.157	0	0.058	0.308	0.041	0.004	0	0.178	0	157.673	3511.08
2312	1.13697	0	252.304	9.0414	10.4387	792.226	172.148	16.0859	4.3615	32.1652	61.6418	0.082748	0.037	0.0058	0.834536	82.1978	10.6194	11.839	172.995	8.2378	0.110248	65.8225	0.3953	6.011	27.025	4.939	1.225	0.173	0.157	0	0.058	0.308	0.041	0.004	0	0.178	0	157.68	3511.08
2313	1.13433	0	252.32	9.0414	10.4387	792.226	172.148	16.0859	4.3615	32.1652	61.6418	0.082752	0.037	0.0058	0.834564	82.2007	10.6198	11.8394	173.001	8.2381	0.110252	65.8248	0.3953	6.012	27.028	4.94	1.225	0.173	0.157	0	0.058	0.308	0.041	0.004	0	0.178	0	157.688	3511.08
2314	1.1317	0	252.337	9.0414	10.4387	792.226	172.148	16.0859	4.3615	32.1652	61.6418	0.082756	0.037	0.0058	0.834592	82.2037	10.6202	11.8398	173.007	8.2384	0.110256	65.8272	0.3953	6.012	27.03	4.94	1.225	0.173	0.157	0	0.058	0.308	0.041	0.004	0	0.178	0	157.696	3511.08
2315	1.12906	0	252.354	9.0414	10.4387	792.226	172.148	16.0859	4.3615	32.1652	61.6418	0.08276	0.037	0.0058	0.83462	82.2067	10.6206	11.8403	173.014	8.2387	0.11026	65.8296	0.3953	6.013	27.032	4.94	1.225	0.173	0.157	0	0.058	0.308	0.041	0.004	0	0.179	0	157.703	3511.08
2316	1.12642	0	252.371	9.0414	10.4387	792.226	172.148	16.0859	4.3615	32.1652	61.6418	0.082764	0.037	0.0058	0.834648	82.2096	10.6209	11.8407	173.02	8.239	0.110264	65.832	0.3953	6.013	27.035	4.941	1.225	0.174	0.157	0	0.058	0.308	0.041	0.004	0	0.179	0	157.711	3511.08
2317	1.12379	0	252.387	9.0414	10.4387	792.226	172.148	16.0859	4.3615	32.1652	61.6418	0.082768	0.037	0.0058	0.834676	82.2126	10.6213	11.8411	173.026	8.2393	0.110268	65.8343	0.3953	6.014	27.037	4.941	1.225	0.174	0.157	0	0.058	0.308	0.041	0.004	0	0.179	0	157.718	3511.08
2318	1.12115	0	252.404	9.0414	10.4387	792.226	172.148	16.0859	4.3615	32.1652	61.6418	0.082772	0.037	0.0058	0.834704	82.2156	10.6217	11.8415	173.032	8.2396	0.110272	65.8367	0.3953	6.014	27.04	4.942	1.225	0.174	0.157	0	0.058	0.308	0.041	0.004	0	0.179	0	157.725	3511.08
2319	1.11852	0	252.421	9.0414	10.4387	792.226	172.148	16.0859	4.3615	32.1652	61.6418	0.082776	0.037	0.0058	0.834732	82.2185	10.6221	11.842	173.039	8.2399	0.110276	65.8391	0.3953	6.015	27.042	4.942	1.225	0.174	0.157	0	0.058	0.308	0.041	0.004	0	0.179	0	157.733	3511.08
2320	1.11588	0	252.438	9.0414	10.4387	792.226	172.148	16.0859	4.3615	32.1652	61.6418	0.08278	0.037	0.0058	0.83476	82.2215	10.6225	11.8424	173.045	8.2402	0.11028	65.8414	0.3953	6.015	27.044	4.943	1.226	0.174	0.157	0	0.058	0.308	0.041	0.004	0	0.179	0	157.74	3511.08
2321	1.11324	0	252.455	9.0414	10.4387	792.226	172.148	16.0859	4.3615	32.1652	61.6418	0.082784	0.037	0.0058	0.834788	82.2244	10.6229	11.8428	173.051	8.2405	0.110284	65.8438	0.3953	6.016	27.047	4.943	1.226	0.174	0.157	0	0.058	0.308	0.041	0.004	0	0.179	0	157.748	3511.08
2322	1.11061	0	252.471	9.0414	10.4387	792.226	172.148	16.0859	4.3615	32.1652	61.6418	0.082788	0.037	0.0058	0.834816	82.2274	10.6232	11.8432	173.057	8.2408	0.110288	65.8462	0.3953	6.016	27.049	4.943	1.226	0.174	0.157	0	0.058	0.308	0.041	0.004	0	0.179	0	157.755	3511.08
2323	1.10797	0	252.488	9.0414	10.4387	792.226	172.148	16.0859	4.3615	32.1652	61.6418	0.082792	0.037	0.0058	0.834844	82.2304	10.6236	11.8437	173.064	8.2411	0.110292	65.8486	0.3953	6.017	27.051	4.944	1.226	0.174	0.157	0	0.058	0.308	0.041	0.004	0	0.179	0	157.762	3511.08
2324	1.10534	0	252.505	9.0414	10.4387	792.226	172.148	16.0859	4.3615	32.1652	61.6418	0.082796	0.037	0.0058	0.834872	82.2333	10.624	11.8441	173.07	8.2414	0.110296	65.8509	0.3953	6.017	27.054	4.944	1.226	0.174	0.157	0	0.058	0.308	0.041	0.004	0	0.179	0	157.77	3511.08
2325	1.1027	0	252.522	9.0414	10.4387	792.226	172.148	16.0859	4.3615	32.1652	61.6418	0.0828	0.037	0.0058	0.8349	82.2363	10.6244	11.8445	173.076	8.2417	0.1103	65.8533	0.3953	6.018	27.056	4.945	1.226	0.174	0.157	0	0.058	0.308	0.041	0.004	0	0.179	0	157.777	3511.08
2326	1.10063	0	252.537	9.0414	10.4387	792.226	172.148	16.0859	4.3615	32.1652	61.6418	0.0828	0.037	0.0058	0.834924	82.239	10.6247	11.8449	173.082	8.24197	0.110304	65.8555	0.3953	6.018	27.058	4.945	1.226	0.174	0.157	0	0.058	0.308	0.041	0.004	0	0.179	0	157.784	3511.08
2327	1.09856	0	252.552	9.0414	10.4387	792.226	172.148	16.0859	4.3615	32.1652	61.6418	0.0828	0.037	0.0058	0.834948	82.2417	10.6251	11.8453	173.087	8.24224	0.110308	65.8576	0.3953	6.019	27.061	4.946	1.226	0.174	0.157	0	0.058	0.308	0.041	0.004	0	0.179	0	157.791	3511.08
2328	1.0965	0	252.568	9.0414	10.4387	792.226	172.148	16.0859	4.3615	32.1652	61.6418	0.0828	0.037	0.0058	0.834972	82.2444	10.6254	11.8457	173.093	8.2425	0.110312	65.8598	0.3953	6.019	27.063	4.946	1.226	0.174	0.157	0	0.058	0.308	0.041	0.004	0	0.179	0	157.798	3511.08
2329	1.09443	0	252.583	9.0414	10.4387	792.226	172.148	16.0859	4.3615	32.1652	61.6418	0.0828	0.037	0.0058	0.834996	82.2471	10.6258	11.8461	173.099	8.24277	0.110316	65.8619	0.3953	6.02	27.065	4.946	1.227	0.174	0.157	0	0.058	0.308	0.041	0.004	0	0.179	0	157.806	3511.08
2330	1.09236	0	252.598	9.0414	10.4387	792.226	172.148	16.0859	4.3615	32.1652	61.6418	0.0828	0.037	0.0058	0.83502	82.2498	10.6261	11.8464	173.104	8.24304	0.11032	65.8641	0.3953	6.02	27.067	4.947	1.227	0.174	0.157	0	0.058	0.308	0.041	0.004	0	0.179	0	157.813	3511.08
2331	1.09029	0	252.613	9.0414	10.4387	792.226	172.148	16.0859	4.3615	32.1652	61.6418	0.0828	0.037	0.0058	0.835044	82.2525	10.6265	11.8468	173.11	8.24331	0.110324	65.8663	0.3953	6.021	27.07	4.947	1.227	0.174	0.157	0	0.058	0.308	0.041	0.004	0	0.179	0	157.82	3511.08
2332	1.08822	0	252.629	9.0414	10.4387	792.226	172.148	16.0859	4.3615	32.1652	61.6418	0.0828	0.037	0.0058	0.835068	82.2551	10.6268	11.8472	173.116	8.24358	0.110328	65.8684	0.3953	6.021	27.072	4.948	1.227	0.174	0.157	0	0.058	0.308	0.041	0.004	0	0.179	0	157.827	3511.08
2333	1.08616	0	252.644	9.0414	10.4387	792.226	172.148	16.0859	4.3615	32.1652	61.6418	0.0828	0.037	0.0058	0.835092	82.2578	10.6272	11.8476	173.121	8.24384	0.110332	65.8706	0.3953	6.022	27.074	4.948	1.227	0.174	0.157	0	0.058	0.308	0.041	0.004	0	0.179	0	157.834	3511.08
2334	1.08409	0	252.659	9.0414	10.4387	792.226	172.148	16.0859	4.3615	32.1652	61.6418	0.0828	0.037	0.0058	0.835116	82.2605	10.6275	11.848	173.127	8.24411	0.110336	65.8727	0.3953	6.022	27.076	4.948	1.227	0.174	0.157	0	0.058	0.308	0.041	0.004	0	0.179	0	157.841	3511.08
2335	1.08202	0	252.674	9.0414	10.4387	792.226	172.148	16.0859	4.3615	32.1652	61.6418	0.0828	0.037	0.0058	0.83514	82.2632	10.6279	11.8484	173.133	8.24438	0.11034	65.8749	0.3953	6.023	27.079	4.949	1.227	0.174	0.157	0	0.058	0.308	0.041	0.004	0	0.179	0	157.848	3511.08
2336	1.07995	0	252.69	9.0414	10.4387	792.226	172.148	16.0859	4.3615	32.1652	61.6418	0.0828	0.037	0.0058	0.835164	82.2659	10.6282	11.8488	173.138	8.24465	0.110344	65.8771	0.3953	6.023	27.081	4.949	1.227	0.174	0.157	0	0.058	0.308	0.041	0.004	0	0.179	0	157.855	3511.08
2337	1.07788	0	252.705	9.0414	10.4387	792.226	172.148	16.0859	4.3615	32.1652	61.6418	0.0828	0.037	0.0058	0.835188	82.2686	10.6286	11.8492	173.144	8.24492	0.110348	65.8792	0.3953	6.024	27.083	4.95	1.227	0.174	0.157	0	0.058	0.308	0.041	0.004	0	0.179	0	157.862	3511.08
2338	1.07582	0	252.72	9.0414	10.4387	792.226	172.148	16.0859	4.3615	32.1652	61.6418	0.0828	0.037	0.0058	0.835212	82.2713	10.6289	11.8495	173.15	8.24518	0.110352	65.8814	0.3953	6.024	27.085	4.95	1.227	0.174	0.157	0	0.058	0.308	0.041	0.004	0	0.179	0	157.869	3511.08
2339	1.07375	0	252.735	9.0414	10.4387	792.226	172.148	16.0859	4.3615	32.1652	61.6418	0.0828	0.037	0.0058	0.835236	82.274	10.6293	11.8499	173.155	8.24545	0.110356	65.8835	0.3953	6.025	27.088	4.951	1.228	0.174	0.157	0	0.058	0.308	0.041	0.004	0	0.179	0	157.876	3511.08
2340	1.07168	0	252.751	9.0414	10.4387	792.226	172.148	16.0859	4.3615	32.1652	61.6418	0.0828	0.037	0.0058	0.83526	82.2767	10.6296	11.8503	173.161	8.24572	0.11036	65.8857	0.3953	6.025	27.09	4.951	1.228	0.174	0.157	0	0.058	0.308	0.041	0.004	0	0.179	0	157.883	3511.08
2341	1.06961	0	252.766	9.0414	10.4387	792.226	172.148	16.0859	4.3615	32.1652	61.6418	0.0828	0.037	0.0058	0.835284	82.2794	10.63	11.8507	173.167	8.24599	0.110364	65.8879	0.3953	6.026	27.092	4.951	1.228	0.174	0.157	0	0.058	0.308	0.041	0.004	0	0.179	0	157.89	3511.08
2342	1.06754	0	252.781	9.0414	10.4387	792.226	172.148	16.0859	4.3615	32.1652	61.6418	0.0828	0.037	0.0058	0.835308	82.2821	10.6303	11.8511	173.172	8.24626	0.110368	65.89	0.3953	6.026	27.094	4.952	1.228	0.174	0.157	0	0.058	0.308	0.041	0.004	0	0.179	0	157.896	3511.08
2343	1.06548	0	252.796	9.0414	10.4387	792.226	172.148	16.0859	4.3615	32.1652	61.6418	0.0828	0.037	0.0058	0.835332	82.2848	10.6307	11.8515	173.178	8.24652	0.110372	65.8922	0.3953	6.027	27.096	4.952	1.228	0.174	0.157	0	0.058	0.308	0.041	0.004	0	0.179	0	157.903	3511.08
2344	1.06341	0	252.812	9.0414	10.4387	792.226	172.148	16.0859	4.3615	32.1652	61.6418	0.0828	0.037	0.0058	0.835356	82.2874	10.631	11.8519	173.184	8.24679	0.110376	65.8943	0.3953	6.027	27.098	4.953	1.228	0.174	0.157	0	0.058	0.308	0.041	0.004	0	0.179	0	157.91	3511.08
2345	1.06134	0	252.827	9.0414	10.4387	792.226	172.148	16.0859	4.3615	32.1652	61.6418	0.0828	0.037	0.0058	0.83538	82.2901	10.6314	11.8523	173.189	8.24706	0.11038	65.8965	0.3953	6.028	27.101	4.953	1.228	0.174	0.157	0	0.058	0.308	0.041	0.004	0	0.179	0	157.917	3511.08
2346	1.05927	0	252.842	9.0414	10.4387	792.226	172.148	16.0859	4.3615	32.1652	61.6418	0.0828	0.037	0.0058	0.835404	82.2928	10.6317	11.8526	173.195	8.24733	0.110384	65.8987	0.3953	6.028	27.103	4.953	1.228	0.174	0.157	0	0.058	0.308	0.041	0.004	0	0.179	0	157.924	3511.08
2347	1.0572	0	252.857	9.0414	10.4387	792.226	172.148	16.0859	4.3615	32.1652	61.6418	0.0828	0.037	0.0058	0.835428	82.2955	10.6321	11.853	173.201	8.2476	0.110388	65.9008	0.3953	6.029	27.105	4.954	1.228	0.174	0.157	0	0.058	0.308	0.041	0.004	0	0.179	0	157.93	3511.08
2348	1.05514	0	252.873	9.0414	10.4387	792.226	172.148	16.0859	4.3615	32.1652	61.6418	0.0828	0.037	0.0058	0.835452	82.2982	10.6324	11.8534	173.206	8.24786	0.110392	65.903	0.3953	6.029	27.107	4.954	1.228	0.174	0.157	0	0.058	0.308	0.041	0.004	0	0.179	0	157.937	3511.08
2349	1.05307	0	252.888	9.0414	10.4387	792.226	172.148	16.0859	4.3615	32.1652	61.6418	0.0828	0.037	0.0058	0.835476	82.3009	10.6328	11.8538	173.212	8.24813	0.110396	65.9051	0.3953	6.03	27.109	4.954	1.229	0.174	0.157	0	0.058	0.308	0.041	0.004	0	0.179	0	157.944	3511.08
2350	1.051	0	252.903	9.0414	10.4387	792.226	172.148	16.0859	4.3615	32.1652	61.6418	0.0828	0.037	0.0058	0.8355	82.3036	10.6331	11.8542	173.218	8.2484	0.1104	65.9073	0.3953	6.03	27.111	4.955	1.229	0.174	0.157	0	0.058	0.308	0.041	0.004	0	0.179	0	157.951	3511.08
2351	1.04929	0	252.917	9.0414	10.4387	792.226	172.148	16.0859	4.3615	32.1652	61.6418	0.082804	0.037	0.0058	0.835528	82.3061	10.6334	11.8546	173.223	8.24864	0.110408	65.9093	0.3953	6.031	27.113	4.955	1.229	0.174	0.157	0	0.058	0.308	0.041	0.004	0	0.179	0	157.957	3511.08
2352	1.04758	0	252.931	9.0414	10.4387	792.226	172.148	16.0859	4.3615	32.1652	61.6418	0.082808	0.037	0.0058	0.835556	82.3085	10.6337	11.8549	173.228	8.24889	0.110416	65.9113	0.3953	6.031	27.116	4.956	1.229	0.174	0.157	0	0.058	0.308	0.041	0.004	0	0.179	0	157.964	3511.08
2353	1.04588	0	252.945	9.0414	10.4387	792.226	172.148	16.0859	4.3615	32.1652	61.6418	0.082812	0.037	0.0058	0.835584	82.311	10.6341	11.8553	173.233	8.24913	0.110424	65.9132	0.3953	6.032	27.118	4.956	1.229	0.174	0.157	0	0.058	0.308	0.041	0.004	0	0.179	0	157.97	3511.08
2354	1.04417	0	252.959	9.0414	10.4387	792.226	172.148	16.0859	4.3615	32.1652	61.6418	0.082816	0.037	0.0058	0.835612	82.3135	10.6344	11.8556	173.238	8.24938	0.110432	65.9152	0.3953	6.032	27.12	4.956	1.229	0.174	0.157	0	0.058	0.308	0.041	0.004	0	0.179	0	157.977	3511.08
2355	1.04246	0	252.973	9.0414	10.4387	792.226	172.148	16.0859	4.3615	32.1652	61.6418	0.08282	0.037	0.0058	0.83564	82.3159	10.6347	11.856	173.244	8.24962	0.11044	65.9172	0.3953	6.033	27.122	4.957	1.229	0.174	0.157	0	0.058	0.308	0.041	0.004	0	0.179	0	157.984	3511.08
2356	1.04075	0	252.987	9.0414	10.4387	792.226	172.148	16.0859	4.3615	32.1652	61.6418	0.082824	0.037	0.0058	0.835668	82.3184	10.635	11.8564	173.249	8.24986	0.110448	65.9192	0.3953	6.033	27.124	4.957	1.229	0.174	0.157	0	0.058	0.308	0.041	0.004	0	0.179	0	157.99	3511.08
2357	1.03904	0	253.001	9.0414	10.4387	792.226	172.148	16.0859	4.3615	32.1652	61.6418	0.082828	0.037	0.0058	0.835696	82.3209	10.6354	11.8567	173.254	8.25011	0.110456	65.9211	0.3953	6.033	27.126	4.958	1.229	0.174	0.157	0	0.058	0.308	0.041	0.004	0	0.179	0	157.997	3511.08
2358	1.03734	0	253.015	9.0414	10.4387	792.226	172.148	16.0859	4.3615	32.1652	61.6418	0.082832	0.037	0.0058	0.835724	82.3233	10.6357	11.8571	173.259	8.25035	0.110464	65.9231	0.3953	6.034	27.128	4.958	1.229	0.174	0.157	0	0.058	0.308	0.041	0.004	0	0.179	0	158.003	3511.08
2359	1.03563	0	253.029	9.0414	10.4387	792.226	172.148	16.0859	4.3615	32.1652	61.6418	0.082836	0.037	0.0058	0.835752	82.3258	10.636	11.8574	173.264	8.2506	0.110472	65.9251	0.3953	6.034	27.13	4.958	1.229	0.174	0.157	0	0.058	0.308	0.041	0.004	0	0.179	0	158.01	3511.08
2360	1.03392	0	253.043	9.0414	10.4387	792.226	172.148	16.0859	4.3615	32.1652	61.6418	0.08284	0.037	0.0058	0.83578	82.3283	10.6363	11.8578	173.27	8.25084	0.11048	65.9271	0.3953	6.035	27.132	4.959	1.23	0.174	0.157	0	0.058	0.308	0.041	0.004	0	0.179	0	158.016	3511.08
2361	1.03221	0	253.057	9.0414	10.4387	792.226	172.148	16.0859	4.3615	32.1652	61.6418	0.082844	0.037	0.0058	0.835808	82.3307	10.6367	11.8582	173.275	8.25108	0.110488	65.929	0.3953	6.035	27.134	4.959	1.23	0.174	0.157	0	0.058	0.308	0.041	0.004	0	0.179	0	158.023	3511.08
2362	1.0305	0	253.071	9.0414	10.4387	792.226	172.148	16.0859	4.3615	32.1652	61.6418	0.082848	0.037	0.0058	0.835836	82.3332	10.637	11.8585	173.28	8.25133	0.110496	65.931	0.3953	6.036	27.136	4.959	1.23	0.174	0.157	0	0.058	0.308	0.041	0.004	0	0.179	0	158.029	3511.08
2363	1.0288	0	253.085	9.0414	10.4387	792.226	172.148	16.0859	4.3615	32.1652	61.6418	0.082852	0.037	0.0058	0.835864	82.3357	10.6373	11.8589	173.285	8.25157	0.110504	65.933	0.3953	6.036	27.138	4.96	1.23	0.174	0.157	0	0.058	0.308	0.041	0.004	0	0.179	0	158.035	3511.08
2364	1.02709	0	253.099	9.0414	10.4387	792.226	172.148	16.0859	4.3615	32.1652	61.6418	0.082856	0.037	0.0058	0.835892	82.3382	10.6376	11.8592	173.29	8.25182	0.110512	65.935	0.3953	6.037	27.14	4.96	1.23	0.174	0.157	0	0.058	0.308	0.041	0.004	0	0.179	0	158.042	3511.08
2365	1.02538	0	253.113	9.0414	10.4387	792.226	172.148	16.0859	4.3615	32.1652	61.6418	0.08286	0.037	0.0058	0.83592	82.3406	10.638	11.8596	173.296	8.25206	0.11052	65.9369	0.3953	6.037	27.142	4.961	1.23	0.174	0.157	0	0.058	0.308	0.041	0.004	0	0.179	0	158.048	3511.08
2366	1.02367	0	253.127	9.0414	10.4387	792.226	172.148	16.0859	4.3615	32.1652	61.6418	0.082864	0.037	0.0058	0.835948	82.3431	10.6383	11.86	173.301	8.2523	0.110528	65.9389	0.3953	6.038	27.144	4.961	1.23	0.174	0.158	0	0.058	0.308	0.041	0.004	0	0.179	0	158.055	3511.08
2367	1.02196	0	253.141	9.0414	10.4387	792.226	172.148	16.0859	4.3615	32.1652	61.6418	0.082868	0.037	0.0058	0.835976	82.3456	10.6386	11.8603	173.306	8.25255	0.110536	65.9409	0.3953	6.038	27.147	4.961	1.23	0.174	0.158	0	0.058	0.308	0.041	0.004	0	0.179	0	158.061	3511.08
2368	1.02026	0	253.155	9.0414	10.4387	792.226	172.148	16.0859	4.3615	32.1652	61.6418	0.082872	0.037	0.0058	0.836004	82.348	10.6389	11.8607	173.311	8.25279	0.110544	65.9429	0.3953	6.038	27.149	4.962	1.23	0.174	0.158	0	0.058	0.308	0.041	0.004	0	0.179	0	158.067	3511.08
2369	1.01855	0	253.169	9.0414	10.4387	792.226	172.148	16.0859	4.3615	32.1652	61.6418	0.082876	0.037	0.0058	0.836032	82.3505	10.6393	11.861	173.316	8.25304	0.110552	65.9448	0.3953	6.039	27.151	4.962	1.23	0.174	0.158	0	0.058	0.308	0.041	0.004	0	0.179	0	158.073	3511.08
2370	1.01684	0	253.182	9.0414	10.4387	792.226	172.148	16.0859	4.3615	32.1652	61.6418	0.08288	0.037	0.0058	0.83606	82.353	10.6396	11.8614	173.322	8.25328	0.11056	65.9468	0.3953	6.039	27.153	4.962	1.23	0.174	0.158	0	0.058	0.308	0.041	0.004	0	0.179	0	158.08	3511.08
2371	1.01513	0	253.196	9.0414	10.4387	792.226	172.148	16.0859	4.3615	32.1652	61.6418	0.082884	0.037	0.0058	0.836088	82.3554	10.6399	11.8618	173.327	8.25352	0.110568	65.9488	0.3953	6.04	27.155	4.963	1.231	0.174	0.158	0	0.058	0.308	0.041	0.004	0	0.179	0	158.086	3511.08
2372	1.01342	0	253.21	9.0414	10.4387	792.226	172.148	16.0859	4.3615	32.1652	61.6418	0.082888	0.037	0.0058	0.836116	82.3579	10.6402	11.8621	173.332	8.25377	0.110576	65.9508	0.3953	6.04	27.157	4.963	1.231	0.174	0.158	0	0.058	0.308	0.041	0.004	0	0.179	0	158.092	3511.08
2373	1.01172	0	253.224	9.0414	10.4387	792.226	172.148	16.0859	4.3615	32.1652	61.6418	0.082892	0.037	0.0058	0.836144	82.3604	10.6406	11.8625	173.337	8.25401	0.110584	65.9527	0.3953	6.041	27.158	4.963	1.231	0.174	0.158	0	0.058	0.308	0.041	0.004	0	0.179	0	158.098	3511.08
2374	1.01001	0	253.238	9.0414	10.4387	792.226	172.148	16.0859	4.3615	32.1652	61.6418	0.082896	0.037	0.0058	0.836172	82.3628	10.6409	11.8628	173.342	8.25426	0.110592	65.9547	0.3953	6.041	27.16	4.964	1.231	0.174	0.158	0	0.058	0.308	0.041	0.004	0	0.179	0	158.105	3511.08
2375	1.0083	0	253.252	9.0414	10.4387	792.226	172.148	16.0859	4.3615	32.1652	61.6418	0.0829	0.037	0.0058	0.8362	82.3653	10.6412	11.8632	173.347	8.2545	0.1106	65.9567	0.3953	6.042	27.162	4.964	1.231	0.174	0.158	0	0.058	0.308	0.041	0.004	0	0.179	0	158.111	3511.08
2376	1.00682	0	253.265	9.0414	10.4387	792.226	172.148	16.0859	4.3615	32.1652	61.6418	0.082904	0.037	0.0058	0.836224	82.3676	10.6415	11.8635	173.352	8.25473	0.1106	65.9585	0.3953	6.042	27.164	4.965	1.231	0.174	0.158	0	0.058	0.308	0.041	0.004	0	0.179	0	158.117	3511.08
2377	1.00533	0	253.278	9.0414	10.4387	792.226	172.148	16.0859	4.3615	32.1652	61.6418	0.082908	0.037	0.0058	0.836248	82.3699	10.6418	11.8639	173.357	8.25496	0.1106	65.9603	0.3953	6.042	27.166	4.965	1.231	0.174	0.158	0	0.058	0.308	0.041	0.004	0	0.179	0	158.123	3511.08
2378	1.00385	0	253.291	9.0414	10.4387	792.226	172.148	16.0859	4.3615	32.1652	61.6418	0.082912	0.037	0.0058	0.836272	82.3721	10.6421	11.8642	173.362	8.2552	0.1106	65.9622	0.3953	6.043	27.168	4.965	1.231	0.174	0.158	0	0.058	0.308	0.041	0.004	0	0.179	0	158.129	3511.08
2379	1.00236	0	253.304	9.0414	10.4387	792.226	172.148	16.0859	4.3615	32.1652	61.6418	0.082916	0.037	0.0058	0.836296	82.3744	10.6424	11.8645	173.367	8.25543	0.1106	65.964	0.3953	6.043	27.17	4.966	1.231	0.174	0.158	0	0.058	0.308	0.041	0.004	0	0.179	0	158.135	3511.08
2380	1.00088	0	253.317	9.0414	10.4387	792.226	172.148	16.0859	4.3615	32.1652	61.6418	0.08292	0.037	0.0058	0.83632	82.3767	10.6427	11.8648	173.371	8.25566	0.1106	65.9658	0.3953	6.044	27.172	4.966	1.231	0.174	0.158	0	0.058	0.308	0.041	0.004	0	0.179	0	158.141	3511.08
2381	0.999396	0	253.33	9.0414	10.4387	792.226	172.148	16.0859	4.3615	32.1652	61.6418	0.082924	0.037	0.0058	0.836344	82.379	10.643	11.8652	173.376	8.25589	0.1106	65.9676	0.3953	6.044	27.174	4.966	1.231	0.174	0.158	0	0.058	0.308	0.041	0.004	0	0.179	0	158.148	3511.08
2382	0.997912	0	253.342	9.0414	10.4387	792.226	172.148	16.0859	4.3615	32.1652	61.6418	0.082928	0.037	0.0058	0.836368	82.3813	10.6432	11.8655	173.381	8.25612	0.1106	65.9694	0.3953	6.045	27.176	4.967	1.232	0.174	0.158	0	0.058	0.308	0.041	0.004	0	0.179	0	158.154	3511.08
2383	0.996428	0	253.355	9.0414	10.4387	792.226	172.148	16.0859	4.3615	32.1652	61.6418	0.082932	0.037	0.0058	0.836392	82.3835	10.6435	11.8658	173.386	8.25636	0.1106	65.9713	0.3953	6.045	27.178	4.967	1.232	0.174	0.158	0	0.058	0.308	0.041	0.004	0	0.179	0	158.16	3511.08
2384	0.994944	0	253.368	9.0414	10.4387	792.226	172.148	16.0859	4.3615	32.1652	61.6418	0.082936	0.037	0.0058	0.836416	82.3858	10.6438	11.8662	173.391	8.25659	0.1106	65.9731	0.3953	6.045	27.18	4.967	1.232	0.174	0.158	0	0.058	0.308	0.041	0.004	0	0.179	0	158.166	3511.08
2385	0.99346	0	253.381	9.0414	10.4387	792.226	172.148	16.0859	4.3615	32.1652	61.6418	0.08294	0.037	0.0058	0.83644	82.3881	10.6441	11.8665	173.395	8.25682	0.1106	65.9749	0.3953	6.046	27.182	4.968	1.232	0.174	0.158	0	0.058	0.308	0.041	0.004	0	0.179	0	158.172	3511.08
2386	0.991976	0	253.394	9.0414	10.4387	792.226	172.148	16.0859	4.3615	32.1652	61.6418	0.082944	0.037	0.0058	0.836464	82.3904	10.6444	11.8668	173.4	8.25705	0.1106	65.9767	0.3953	6.046	27.184	4.968	1.232	0.174	0.158	0	0.058	0.308	0.041	0.004	0	0.18	0	158.178	3511.08
2387	0.990492	0	253.407	9.0414	10.4387	792.226	172.148	16.0859	4.3615	32.1652	61.6418	0.082948	0.037	0.0058	0.836488	82.3927	10.6447	11.8671	173.405	8.25728	0.1106	65.9785	0.3953	6.047	27.186	4.968	1.232	0.174	0.158	0	0.058	0.308	0.041	0.004	0	0.18	0	158.184	3511.08
2388	0.989008	0	253.42	9.0414	10.4387	792.226	172.148	16.0859	4.3615	32.1652	61.6418	0.082952	0.037	0.0058	0.836512	82.3949	10.645	11.8675	173.41	8.25752	0.1106	65.9804	0.3953	6.047	27.188	4.969	1.232	0.174	0.158	0	0.058	0.308	0.041	0.004	0	0.18	0	158.19	3511.08
2389	0.987524	0	253.433	9.0414	10.4387	792.226	172.148	16.0859	4.3615	32.1652	61.6418	0.082956	0.037	0.0058	0.836536	82.3972	10.6453	11.8678	173.415	8.25775	0.1106	65.9822	0.3953	6.048	27.189	4.969	1.232	0.174	0.158	0	0.058	0.308	0.041	0.004	0	0.18	0	158.195	3511.08
2390	0.98604	0	253.445	9.0414	10.4387	792.226	172.148	16.0859	4.3615	32.1652	61.6418	0.08296	0.037	0.0058	0.83656	82.3995	10.6456	11.8681	173.419	8.25798	0.1106	65.984	0.3953	6.048	27.191	4.969	1.232	0.175	0.158	0	0.058	0.308	0.041	0.004	0	0.18	0	158.201	3511.08
2391	0.984556	0	253.458	9.0414	10.4387	792.226	172.148	16.0859	4.3615	32.1652	61.6418	0.082964	0.037	0.0058	0.836584	82.4018	10.6459	11.8684	173.424	8.25821	0.1106	65.9858	0.3953	6.048	27.193	4.97	1.232	0.175	0.158	0	0.058	0.308	0.041	0.004	0	0.18	0	158.207	3511.08
2392	0.983072	0	253.471	9.0414	10.4387	792.226	172.148	16.0859	4.3615	32.1652	61.6418	0.082968	0.037	0.0058	0.836608	82.4041	10.6462	11.8688	173.429	8.25844	0.1106	65.9876	0.3953	6.049	27.195	4.97	1.232	0.175	0.158	0	0.058	0.308	0.041	0.004	0	0.18	0	158.213	3511.08
2393	0.981588	0	253.484	9.0414	10.4387	792.226	172.148	16.0859	4.3615	32.1652	61.6418	0.082972	0.037	0.0058	0.836632	82.4063	10.6465	11.8691	173.434	8.25868	0.1106	65.9895	0.3953	6.049	27.197	4.971	1.233	0.175	0.158	0	0.058	0.308	0.041	0.004	0	0.18	0	158.219	3511.08
2394	0.980104	0	253.497	9.0414	10.4387	792.226	172.148	16.0859	4.3615	32.1652	61.6418	0.082976	0.037	0.0058	0.836656	82.4086	10.6467	11.8694	173.438	8.25891	0.1106	65.9913	0.3953	6.05	27.199	4.971	1.233	0.175	0.158	0	0.058	0.308	0.041	0.004	0	0.18	0	158.225	3511.08
2395	0.97862	0	253.51	9.0414	10.4387	792.226	172.148	16.0859	4.3615	32.1652	61.6418	0.08298	0.037	0.0058	0.83668	82.4109	10.647	11.8698	173.443	8.25914	0.1106	65.9931	0.3953	6.05	27.201	4.971	1.233	0.175	0.158	0	0.058	0.308	0.041	0.004	0	0.18	0	158.231	3511.08
2396	0.977136	0	253.523	9.0414	10.4387	792.226	172.148	16.0859	4.3615	32.1652	61.6418	0.082984	0.037	0.0058	0.836704	82.4132	10.6473	11.8701	173.448	8.25937	0.1106	65.9949	0.3953	6.05	27.203	4.972	1.233	0.175	0.158	0	0.058	0.308	0.041	0.004	0	0.18	0	158.237	3511.08
2397	0.975652	0	253.536	9.0414	10.4387	792.226	172.148	16.0859	4.3615	32.1652	61.6418	0.082988	0.037	0.0058	0.836728	82.4155	10.6476	11.8704	173.453	8.2596	0.1106	65.9967	0.3953	6.051	27.204	4.972	1.233	0.175	0.158	0	0.058	0.308	0.041	0.004	0	0.18	0	158.242	3511.08
2398	0.974168	0	253.548	9.0414	10.4387	792.226	172.148	16.0859	4.3615	32.1652	61.6418	0.082992	0.037	0.0058	0.836752	82.4177	10.6479	11.8707	173.458	8.25984	0.1106	65.9986	0.3953	6.051	27.206	4.972	1.233	0.175	0.158	0	0.058	0.308	0.041	0.004	0	0.18	0	158.248	3511.08
2399	0.972684	0	253.561	9.0414	10.4387	792.226	172.148	16.0859	4.3615	32.1652	61.6418	0.082996	0.037	0.0058	0.836776	82.42	10.6482	11.8711	173.462	8.26007	0.1106	66.0004	0.3953	6.052	27.208	4.973	1.233	0.175	0.158	0	0.058	0.308	0.041	0.004	0	0.18	0	158.254	3511.08
2400	0.9712	0	253.574	9.0414	10.4387	792.226	172.148	16.0859	4.3615	32.1652	61.6418	0.083	0.037	0.0058	0.8368	82.4223	10.6485	11.8714	173.467	8.2603	0.1106	66.0022	0.3953	6.052	27.21	4.973	1.233	0.175	0.158	0	0.058	0.308	0.041	0.004	0	0.18	0	158.26	3511.08
2401	0.969888	0	253.586	9.0414	10.4387	792.226	172.148	16.0859	4.3615	32.1652	61.6418	0.083	0.037	0.0058	0.836828	82.4244	10.6488	11.8717	173.472	8.26051	0.1106	66.0039	0.3953	6.053	27.212	4.973	1.233	0.175	0.158	0	0.058	0.308	0.041	0.004	0	0.18	0	158.265	3511.08
2402	0.968576	0	253.598	9.0414	10.4387	792.226	172.148	16.0859	4.3615	32.1652	61.6418	0.083	0.037	0.0058	0.836856	82.4265	10.649	11.872	173.476	8.26072	0.1106	66.0056	0.3953	6.053	27.214	4.974	1.233	0.175	0.158	0	0.058	0.308	0.041	0.004	0	0.18	0	158.271	3511.08
2403	0.967264	0	253.61	9.0414	10.4387	792.226	172.148	16.0859	4.3615	32.1652	61.6418	0.083	0.037	0.0058	0.836884	82.4286	10.6493	11.8723	173.481	8.26094	0.1106	66.0073	0.3953	6.053	27.215	4.974	1.233	0.175	0.158	0	0.058	0.308	0.041	0.004	0	0.18	0	158.277	3511.08
2404	0.965952	0	253.622	9.0414	10.4387	792.226	172.148	16.0859	4.3615	32.1652	61.6418	0.083	0.037	0.0058	0.836912	82.4307	10.6496	11.8726	173.485	8.26115	0.1106	66.0089	0.3953	6.054	27.217	4.974	1.233	0.175	0.158	0	0.058	0.308	0.041	0.004	0	0.18	0	158.282	3511.08
2405	0.96464	0	253.634	9.0414	10.4387	792.226	172.148	16.0859	4.3615	32.1652	61.6418	0.083	0.037	0.0058	0.83694	82.4328	10.6499	11.8729	173.489	8.26136	0.1106	66.0106	0.3953	6.054	27.219	4.975	1.234	0.175	0.158	0	0.058	0.308	0.041	0.004	0	0.18	0	158.288	3511.08
2406	0.963328	0	253.646	9.0414	10.4387	792.226	172.148	16.0859	4.3615	32.1652	61.6418	0.083	0.037	0.0058	0.836968	82.4349	10.6501	11.8732	173.494	8.26157	0.1106	66.0123	0.3953	6.055	27.221	4.975	1.234	0.175	0.158	0	0.058	0.308	0.041	0.004	0	0.18	0	158.294	3511.08
2407	0.962016	0	253.658	9.0414	10.4387	792.226	172.148	16.0859	4.3615	32.1652	61.6418	0.083	0.037	0.0058	0.836996	82.437	10.6504	11.8736	173.498	8.26178	0.1106	66.014	0.3953	6.055	27.223	4.975	1.234	0.175	0.158	0	0.058	0.308	0.041	0.004	0	0.18	0	158.299	3511.08
2408	0.960704	0	253.67	9.0414	10.4387	792.226	172.148	16.0859	4.3615	32.1652	61.6418	0.083	0.037	0.0058	0.837024	82.4391	10.6507	11.8739	173.503	8.262	0.1106	66.0157	0.3953	6.055	27.224	4.976	1.234	0.175	0.158	0	0.058	0.308	0.041	0.004	0	0.18	0	158.305	3511.08
2409	0.959392	0	253.682	9.0414	10.4387	792.226	172.148	16.0859	4.3615	32.1652	61.6418	0.083	0.037	0.0058	0.837052	82.4412	10.6509	11.8742	173.507	8.26221	0.1106	66.0174	0.3953	6.056	27.226	4.976	1.234	0.175	0.158	0	0.058	0.308	0.041	0.004	0	0.18	0	158.311	3511.08
2410	0.95808	0	253.694	9.0414	10.4387	792.226	172.148	16.0859	4.3615	32.1652	61.6418	0.083	0.037	0.0058	0.83708	82.4433	10.6512	11.8745	173.512	8.26242	0.1106	66.019	0.3953	6.056	27.228	4.976	1.234	0.175	0.158	0	0.058	0.308	0.041	0.004	0	0.18	0	158.316	3511.08
2411	0.956768	0	253.706	9.0414	10.4387	792.226	172.148	16.0859	4.3615	32.1652	61.6418	0.083	0.037	0.0058	0.837108	82.4454	10.6515	11.8748	173.516	8.26263	0.1106	66.0207	0.3953	6.057	27.23	4.977	1.234	0.175	0.158	0	0.058	0.308	0.041	0.004	0	0.18	0	158.322	3511.08
2412	0.955456	0	253.718	9.0414	10.4387	792.226	172.148	16.0859	4.3615	32.1652	61.6418	0.083	0.037	0.0058	0.837136	82.4475	10.6518	11.8751	173.52	8.26284	0.1106	66.0224	0.3953	6.057	27.231	4.977	1.234	0.175	0.158	0	0.058	0.308	0.041	0.004	0	0.18	0	158.327	3511.08
2413	0.954144	0	253.729	9.0414	10.4387	792.226	172.148	16.0859	4.3615	32.1652	61.6418	0.083	0.037	0.0058	0.837164	82.4496	10.652	11.8754	173.525	8.26306	0.1106	66.0241	0.3953	6.057	27.233	4.977	1.234	0.175	0.158	0	0.058	0.308	0.041	0.004	0	0.18	0	158.333	3511.08
2414	0.952832	0	253.741	9.0414	10.4387	792.226	172.148	16.0859	4.3615	32.1652	61.6418	0.083	0.037	0.0058	0.837192	82.4517	10.6523	11.8757	173.529	8.26327	0.1106	66.0258	0.3953	6.058	27.235	4.977	1.234	0.175	0.158	0	0.058	0.308	0.041	0.004	0	0.18	0	158.338	3511.08
2415	0.95152	0	253.753	9.0414	10.4387	792.226	172.148	16.0859	4.3615	32.1652	61.6418	0.083	0.037	0.0058	0.83722	82.4538	10.6526	11.876	173.534	8.26348	0.1106	66.0275	0.3953	6.058	27.237	4.978	1.234	0.175	0.158	0	0.058	0.308	0.041	0.004	0	0.18	0	158.344	3511.08
2416	0.950208	0	253.765	9.0414	10.4387	792.226	172.148	16.0859	4.3615	32.1652	61.6418	0.083	0.037	0.0058	0.837248	82.4559	10.6529	11.8763	173.538	8.26369	0.1106	66.0291	0.3953	6.058	27.239	4.978	1.234	0.175	0.158	0	0.058	0.308	0.041	0.004	0	0.18	0	158.349	3511.08
2417	0.948896	0	253.777	9.0414	10.4387	792.226	172.148	16.0859	4.3615	32.1652	61.6418	0.083	0.037	0.0058	0.837276	82.458	10.6531	11.8766	173.543	8.2639	0.1106	66.0308	0.3953	6.059	27.24	4.978	1.234	0.175	0.158	0	0.058	0.308	0.041	0.004	0	0.18	0	158.355	3511.08
2418	0.947584	0	253.789	9.0414	10.4387	792.226	172.148	16.0859	4.3615	32.1652	61.6418	0.083	0.037	0.0058	0.837304	82.4601	10.6534	11.8769	173.547	8.26412	0.1106	66.0325	0.3953	6.059	27.242	4.979	1.235	0.175	0.158	0	0.058	0.308	0.041	0.004	0	0.18	0	158.36	3511.08
2419	0.946272	0	253.801	9.0414	10.4387	792.226	172.148	16.0859	4.3615	32.1652	61.6418	0.083	0.037	0.0058	0.837332	82.4622	10.6537	11.8773	173.551	8.26433	0.1106	66.0342	0.3953	6.06	27.244	4.979	1.235	0.175	0.158	0	0.058	0.308	0.041	0.004	0	0.18	0	158.366	3511.08
2420	0.94496	0	253.813	9.0414	10.4387	792.226	172.148	16.0859	4.3615	32.1652	61.6418	0.083	0.037	0.0058	0.83736	82.4643	10.6539	11.8776	173.556	8.26454	0.1106	66.0359	0.3953	6.06	27.245	4.979	1.235	0.175	0.158	0	0.058	0.308	0.041	0.004	0	0.18	0	158.371	3511.08
2421	0.943648	0	253.825	9.0414	10.4387	792.226	172.148	16.0859	4.3615	32.1652	61.6418	0.083	0.037	0.0058	0.837388	82.4664	10.6542	11.8779	173.56	8.26475	0.1106	66.0376	0.3953	6.06	27.247	4.98	1.235	0.175	0.158	0	0.058	0.308	0.041	0.004	0	0.18	0	158.377	3511.08
2422	0.942336	0	253.837	9.0414	10.4387	792.226	172.148	16.0859	4.3615	32.1652	61.6418	0.083	0.037	0.0058	0.837416	82.4685	10.6545	11.8782	173.565	8.26496	0.1106	66.0392	0.3953	6.061	27.249	4.98	1.235	0.175	0.158	0	0.058	0.308	0.041	0.004	0	0.18	0	158.382	3511.08
2423	0.941024	0	253.849	9.0414	10.4387	792.226	172.148	16.0859	4.3615	32.1652	61.6418	0.083	0.037	0.0058	0.837444	82.4706	10.6548	11.8785	173.569	8.26518	0.1106	66.0409	0.3953	6.061	27.251	4.98	1.235	0.175	0.158	0	0.058	0.308	0.041	0.004	0	0.18	0	158.388	3511.08
2424	0.939712	0	253.861	9.0414	10.4387	792.226	172.148	16.0859	4.3615	32.1652	61.6418	0.083	0.037	0.0058	0.837472	82.4727	10.655	11.8788	173.574	8.26539	0.1106	66.0426	0.3953	6.062	27.252	4.981	1.235	0.175	0.158	0	0.058	0.308	0.041	0.004	0	0.18	0	158.393	3511.08
2425	0.9384	0	253.873	9.0414	10.4387	792.226	172.148	16.0859	4.3615	32.1652	61.6418	0.083	0.037	0.0058	0.8375	82.4748	10.6553	11.8791	173.578	8.2656	0.1106	66.0443	0.3953	6.062	27.254	4.981	1.235	0.175	0.158	0	0.058	0.308	0.041	0.004	0	0.18	0	158.398	3511.08
2426	0.937196	0	253.884	9.0414	10.4387	792.226	172.148	16.0859	4.3615	32.1652	61.6418	0.083004	0.037	0.0058	0.83752	82.4768	10.6556	11.8794	173.582	8.2658	0.110608	66.0459	0.3953	6.062	27.256	4.981	1.235	0.175	0.158	0	0.058	0.308	0.041	0.004	0	0.18	0	158.404	3511.08
2427	0.935992	0	253.895	9.0414	10.4387	792.226	172.148	16.0859	4.3615	32.1652	61.6418	0.083008	0.037	0.0058	0.83754	82.4787	10.6558	11.8797	173.586	8.26599	0.110616	66.0475	0.3953	6.063	27.257	4.982	1.235	0.175	0.158	0	0.058	0.308	0.041	0.004	0	0.18	0	158.409	3511.08
2428	0.934788	0	253.906	9.0414	10.4387	792.226	172.148	16.0859	4.3615	32.1652	61.6418	0.083012	0.037	0.0058	0.83756	82.4807	10.6561	11.8799	173.59	8.26619	0.110624	66.049	0.3953	6.063	27.259	4.982	1.235	0.175	0.158	0	0.058	0.308	0.041	0.004	0	0.18	0	158.414	3511.08
2429	0.933584	0	253.917	9.0414	10.4387	792.226	172.148	16.0859	4.3615	32.1652	61.6418	0.083016	0.037	0.0058	0.83758	82.4827	10.6563	11.8802	173.595	8.26638	0.110632	66.0506	0.3953	6.063	27.261	4.982	1.235	0.175	0.158	0	0.058	0.308	0.041	0.004	0	0.18	0	158.42	3511.08
2430	0.93238	0	253.928	9.0414	10.4387	792.226	172.148	16.0859	4.3615	32.1652	61.6418	0.08302	0.037	0.0058	0.8376	82.4846	10.6566	11.8805	173.599	8.26658	0.11064	66.0522	0.3953	6.064	27.263	4.983	1.235	0.175	0.158	0	0.058	0.308	0.041	0.004	0	0.18	0	158.425	3511.08
2431	0.931176	0	253.94	9.0414	10.4387	792.226	172.148	16.0859	4.3615	32.1652	61.6418	0.083024	0.037	0.0058	0.83762	82.4866	10.6568	11.8808	173.603	8.26678	0.110648	66.0538	0.3953	6.064	27.264	4.983	1.236	0.175	0.158	0	0.058	0.308	0.041	0.004	0	0.18	0	158.43	3511.08
2432	0.929972	0	253.951	9.0414	10.4387	792.226	172.148	16.0859	4.3615	32.1652	61.6418	0.083028	0.037	0.0058	0.83764	82.4886	10.6571	11.881	173.607	8.26697	0.110656	66.0553	0.3953	6.065	27.266	4.983	1.236	0.175	0.158	0	0.058	0.308	0.041	0.004	0	0.18	0	158.436	3511.08
2433	0.928768	0	253.962	9.0414	10.4387	792.226	172.148	16.0859	4.3615	32.1652	61.6418	0.083032	0.037	0.0058	0.83766	82.4905	10.6573	11.8813	173.611	8.26717	0.110664	66.0569	0.3953	6.065	27.268	4.983	1.236	0.175	0.158	0	0.058	0.308	0.041	0.004	0	0.18	0	158.441	3511.08
2434	0.927564	0	253.973	9.0414	10.4387	792.226	172.148	16.0859	4.3615	32.1652	61.6418	0.083036	0.037	0.0058	0.83768	82.4925	10.6576	11.8816	173.615	8.26736	0.110672	66.0585	0.3953	6.065	27.269	4.984	1.236	0.175	0.158	0	0.058	0.308	0.041	0.004	0	0.18	0	158.446	3511.08
2435	0.92636	0	253.984	9.0414	10.4387	792.226	172.148	16.0859	4.3615	32.1652	61.6418	0.08304	0.037	0.0058	0.8377	82.4945	10.6579	11.8819	173.619	8.26756	0.11068	66.0601	0.3953	6.066	27.271	4.984	1.236	0.175	0.158	0	0.058	0.308	0.041	0.004	0	0.18	0	158.451	3511.08
2436	0.925156	0	253.995	9.0414	10.4387	792.226	172.148	16.0859	4.3615	32.1652	61.6418	0.083044	0.037	0.0058	0.83772	82.4964	10.6581	11.8821	173.624	8.26776	0.110688	66.0616	0.3953	6.066	27.273	4.984	1.236	0.175	0.158	0	0.058	0.308	0.041	0.004	0	0.18	0	158.457	3511.08
2437	0.923952	0	254.006	9.0414	10.4387	792.226	172.148	16.0859	4.3615	32.1652	61.6418	0.083048	0.037	0.0058	0.83774	82.4984	10.6584	11.8824	173.628	8.26795	0.110696	66.0632	0.3953	6.066	27.274	4.985	1.236	0.175	0.158	0	0.058	0.308	0.041	0.004	0	0.18	0	158.462	3511.08
2438	0.922748	0	254.017	9.0414	10.4387	792.226	172.148	16.0859	4.3615	32.1652	61.6418	0.083052	0.037	0.0058	0.83776	82.5004	10.6586	11.8827	173.632	8.26815	0.110704	66.0648	0.3953	6.067	27.276	4.985	1.236	0.175	0.158	0	0.058	0.308	0.041	0.004	0	0.18	0	158.467	3511.08
2439	0.921544	0	254.029	9.0414	10.4387	792.226	172.148	16.0859	4.3615	32.1652	61.6418	0.083056	0.037	0.0058	0.83778	82.5024	10.6589	11.883	173.636	8.26834	0.110712	66.0664	0.3953	6.067	27.278	4.985	1.236	0.175	0.158	0	0.058	0.308	0.041	0.004	0	0.18	0	158.472	3511.08
2440	0.92034	0	254.04	9.0414	10.4387	792.226	172.148	16.0859	4.3615	32.1652	61.6418	0.08306	0.037	0.0058	0.8378	82.5043	10.6591	11.8832	173.64	8.26854	0.11072	66.0679	0.3953	6.068	27.279	4.986	1.236	0.175	0.158	0	0.058	0.308	0.041	0.004	0	0.18	0	158.477	3511.08
2441	0.919136	0	254.051	9.0414	10.4387	792.226	172.148	16.0859	4.3615	32.1652	61.6418	0.083064	0.037	0.0058	0.83782	82.5063	10.6594	11.8835	173.644	8.26874	0.110728	66.0695	0.3953	6.068	27.281	4.986	1.236	0.175	0.158	0	0.058	0.308	0.041	0.004	0	0.18	0	158.482	3511.08
2442	0.917932	0	254.062	9.0414	10.4387	792.226	172.148	16.0859	4.3615	32.1652	61.6418	0.083068	0.037	0.0058	0.83784	82.5083	10.6597	11.8838	173.648	8.26893	0.110736	66.0711	0.3953	6.068	27.283	4.986	1.236	0.175	0.158	0	0.058	0.308	0.041	0.004	0	0.18	0	158.488	3511.08
2443	0.916728	0	254.073	9.0414	10.4387	792.226	172.148	16.0859	4.3615	32.1652	61.6418	0.083072	0.037	0.0058	0.83786	82.5102	10.6599	11.8841	173.652	8.26913	0.110744	66.0727	0.3953	6.069	27.284	4.986	1.236	0.175	0.158	0	0.058	0.308	0.041	0.004	0	0.18	0	158.493	3511.08
2444	0.915524	0	254.084	9.0414	10.4387	792.226	172.148	16.0859	4.3615	32.1652	61.6418	0.083076	0.037	0.0058	0.83788	82.5122	10.6602	11.8843	173.657	8.26932	0.110752	66.0742	0.3953	6.069	27.286	4.987	1.237	0.175	0.158	0	0.058	0.308	0.041	0.004	0	0.18	0	158.498	3511.08
2445	0.91432	0	254.095	9.0414	10.4387	792.226	172.148	16.0859	4.3615	32.1652	61.6418	0.08308	0.037	0.0058	0.8379	82.5142	10.6604	11.8846	173.661	8.26952	0.11076	66.0758	0.3953	6.069	27.287	4.987	1.237	0.175	0.158	0	0.058	0.308	0.041	0.004	0	0.18	0	158.503	3511.08
2446	0.913116	0	254.106	9.0414	10.4387	792.226	172.148	16.0859	4.3615	32.1652	61.6418	0.083084	0.037	0.0058	0.83792	82.5161	10.6607	11.8849	173.665	8.26972	0.110768	66.0774	0.3953	6.07	27.289	4.987	1.237	0.175	0.158	0	0.058	0.308	0.041	0.004	0	0.18	0	158.508	3511.08
2447	0.911912	0	254.118	9.0414	10.4387	792.226	172.148	16.0859	4.3615	32.1652	61.6418	0.083088	0.037	0.0058	0.83794	82.5181	10.6609	11.8852	173.669	8.26991	0.110776	66.079	0.3953	6.07	27.291	4.988	1.237	0.175	0.158	0	0.058	0.308	0.041	0.004	0	0.18	0	158.513	3511.08
2448	0.910708	0	254.129	9.0414	10.4387	792.226	172.148	16.0859	4.3615	32.1652	61.6418	0.083092	0.037	0.0058	0.83796	82.5201	10.6612	11.8854	173.673	8.27011	0.110784	66.0805	0.3953	6.07	27.292	4.988	1.237	0.175	0.158	0	0.058	0.308	0.041	0.004	0	0.18	0	158.518	3511.08
2449	0.909504	0	254.14	9.0414	10.4387	792.226	172.148	16.0859	4.3615	32.1652	61.6418	0.083096	0.037	0.0058	0.83798	82.522	10.6614	11.8857	173.677	8.2703	0.110792	66.0821	0.3953	6.071	27.294	4.988	1.237	0.175	0.158	0	0.058	0.308	0.041	0.004	0	0.18	0	158.523	3511.08
2450	0.9083	0	254.151	9.0414	10.4387	792.226	172.148	16.0859	4.3615	32.1652	61.6418	0.0831	0.037	0.0058	0.838	82.524	10.6617	11.886	173.681	8.2705	0.1108	66.0837	0.3953	6.071	27.295	4.989	1.237	0.175	0.158	0	0.058	0.308	0.041	0.004	0	0.18	0	158.528	3511.08
2451	0.907176	0	254.161	9.0414	10.4387	792.226	172.148	16.0859	4.3615	32.1652	61.6418	0.0831	0.037	0.0058	0.838016	82.5258	10.6619	11.8863	173.685	8.27068	0.1108	66.0852	0.3953	6.072	27.297	4.989	1.237	0.175	0.158	0	0.058	0.308	0.041	0.004	0	0.18	0	158.533	3511.08
2452	0.906052	0	254.172	9.0414	10.4387	792.226	172.148	16.0859	4.3615	32.1652	61.6418	0.0831	0.037	0.0058	0.838032	82.5277	10.6622	11.8865	173.689	8.27087	0.1108	66.0866	0.3953	6.072	27.299	4.989	1.237	0.175	0.158	0	0.058	0.308	0.041	0.004	0	0.18	0	158.538	3511.08
2453	0.904928	0	254.182	9.0414	10.4387	792.226	172.148	16.0859	4.3615	32.1652	61.6418	0.0831	0.037	0.0058	0.838048	82.5295	10.6624	11.8868	173.693	8.27105	0.1108	66.0881	0.3953	6.072	27.3	4.989	1.237	0.175	0.158	0	0.058	0.308	0.041	0.004	0	0.18	0	158.543	3511.08
2454	0.903804	0	254.193	9.0414	10.4387	792.226	172.148	16.0859	4.3615	32.1652	61.6418	0.0831	0.037	0.0058	0.838064	82.5314	10.6627	11.8871	173.697	8.27124	0.1108	66.0896	0.3953	6.073	27.302	4.99	1.237	0.175	0.158	0	0.058	0.308	0.041	0.004	0	0.18	0	158.548	3511.08
2455	0.90268	0	254.203	9.0414	10.4387	792.226	172.148	16.0859	4.3615	32.1652	61.6418	0.0831	0.037	0.0058	0.83808	82.5332	10.6629	11.8873	173.701	8.27142	0.1108	66.0911	0.3953	6.073	27.303	4.99	1.237	0.175	0.158	0	0.058	0.308	0.041	0.004	0	0.18	0	158.553	3511.08
2456	0.901556	0	254.213	9.0414	10.4387	792.226	172.148	16.0859	4.3615	32.1652	61.6418	0.0831	0.037	0.0058	0.838096	82.5351	10.6631	11.8876	173.705	8.2716	0.1108	66.0925	0.3953	6.073	27.305	4.99	1.237	0.175	0.158	0	0.058	0.308	0.041	0.004	0	0.18	0	158.558	3511.08
2457	0.900432	0	254.224	9.0414	10.4387	792.226	172.148	16.0859	4.3615	32.1652	61.6418	0.0831	0.037	0.0058	0.838112	82.5369	10.6634	11.8878	173.708	8.27179	0.1108	66.094	0.3953	6.074	27.307	4.991	1.237	0.175	0.158	0	0.058	0.308	0.041	0.004	0	0.18	0	158.563	3511.08
2458	0.899308	0	254.234	9.0414	10.4387	792.226	172.148	16.0859	4.3615	32.1652	61.6418	0.0831	0.037	0.0058	0.838128	82.5388	10.6636	11.8881	173.712	8.27197	0.1108	66.0955	0.3953	6.074	27.308	4.991	1.238	0.175	0.158	0	0.058	0.308	0.041	0.004	0	0.18	0	158.568	3511.08
2459	0.898184	0	254.245	9.0414	10.4387	792.226	172.148	16.0859	4.3615	32.1652	61.6418	0.0831	0.037	0.0058	0.838144	82.5406	10.6639	11.8884	173.716	8.27216	0.1108	66.0969	0.3953	6.074	27.31	4.991	1.238	0.175	0.158	0	0.058	0.308	0.041	0.004	0	0.18	0	158.573	3511.08
2460	0.89706	0	254.255	9.0414	10.4387	792.226	172.148	16.0859	4.3615	32.1652	61.6418	0.0831	0.037	0.0058	0.83816	82.5424	10.6641	11.8886	173.72	8.27234	0.1108	66.0984	0.3953	6.075	27.311	4.991	1.238	0.175	0.158	0	0.058	0.308	0.041	0.004	0	0.18	0	158.578	3511.08
2461	0.895936	0	254.266	9.0414	10.4387	792.226	172.148	16.0859	4.3615	32.1652	61.6418	0.0831	0.037	0.0058	0.838176	82.5443	10.6643	11.8889	173.724	8.27252	0.1108	66.0999	0.3953	6.075	27.313	4.992	1.238	0.175	0.158	0	0.058	0.308	0.041	0.004	0	0.18	0	158.583	3511.08
2462	0.894812	0	254.276	9.0414	10.4387	792.226	172.148	16.0859	4.3615	32.1652	61.6418	0.0831	0.037	0.0058	0.838192	82.5461	10.6646	11.8892	173.728	8.27271	0.1108	66.1014	0.3953	6.075	27.314	4.992	1.238	0.175	0.158	0	0.058	0.308	0.041	0.004	0	0.18	0	158.588	3511.08
2463	0.893688	0	254.286	9.0414	10.4387	792.226	172.148	16.0859	4.3615	32.1652	61.6418	0.0831	0.037	0.0058	0.838208	82.548	10.6648	11.8894	173.732	8.27289	0.1108	66.1028	0.3953	6.076	27.316	4.992	1.238	0.175	0.158	0	0.058	0.308	0.041	0.004	0	0.18	0	158.593	3511.08
2464	0.892564	0	254.297	9.0414	10.4387	792.226	172.148	16.0859	4.3615	32.1652	61.6418	0.0831	0.037	0.0058	0.838224	82.5498	10.6651	11.8897	173.736	8.27308	0.1108	66.1043	0.3953	6.076	27.318	4.993	1.238	0.175	0.159	0	0.058	0.308	0.041	0.004	0	0.18	0	158.597	3511.08
2465	0.89144	0	254.307	9.0414	10.4387	792.226	172.148	16.0859	4.3615	32.1652	61.6418	0.0831	0.037	0.0058	0.83824	82.5517	10.6653	11.89	173.739	8.27326	0.1108	66.1058	0.3953	6.076	27.319	4.993	1.238	0.175	0.159	0	0.058	0.308	0.041	0.004	0	0.18	0	158.602	3511.08
2466	0.890316	0	254.318	9.0414	10.4387	792.226	172.148	16.0859	4.3615	32.1652	61.6418	0.0831	0.037	0.0058	0.838256	82.5535	10.6655	11.8902	173.743	8.27344	0.1108	66.1073	0.3953	6.077	27.321	4.993	1.238	0.175	0.159	0	0.058	0.308	0.041	0.004	0	0.18	0	158.607	3511.08
2467	0.889192	0	254.328	9.0414	10.4387	792.226	172.148	16.0859	4.3615	32.1652	61.6418	0.0831	0.037	0.0058	0.838272	82.5553	10.6658	11.8905	173.747	8.27363	0.1108	66.1087	0.3953	6.077	27.322	4.993	1.238	0.175	0.159	0	0.058	0.308	0.041	0.004	0	0.18	0	158.612	3511.08
2468	0.888068	0	254.338	9.0414	10.4387	792.226	172.148	16.0859	4.3615	32.1652	61.6418	0.0831	0.037	0.0058	0.838288	82.5572	10.666	11.8908	173.751	8.27381	0.1108	66.1102	0.3953	6.077	27.324	4.994	1.238	0.175	0.159	0	0.058	0.308	0.041	0.004	0	0.18	0	158.617	3511.08
2469	0.886944	0	254.349	9.0414	10.4387	792.226	172.148	16.0859	4.3615	32.1652	61.6418	0.0831	0.037	0.0058	0.838304	82.559	10.6663	11.891	173.755	8.274	0.1108	66.1117	0.3953	6.078	27.325	4.994	1.238	0.175	0.159	0	0.058	0.308	0.041	0.004	0	0.18	0	158.622	3511.08
2470	0.88582	0	254.359	9.0414	10.4387	792.226	172.148	16.0859	4.3615	32.1652	61.6418	0.0831	0.037	0.0058	0.83832	82.5609	10.6665	11.8913	173.759	8.27418	0.1108	66.1131	0.3953	6.078	27.327	4.994	1.238	0.175	0.159	0	0.058	0.308	0.041	0.004	0	0.18	0	158.626	3511.08
2471	0.884696	0	254.37	9.0414	10.4387	792.226	172.148	16.0859	4.3615	32.1652	61.6418	0.0831	0.037	0.0058	0.838336	82.5627	10.6667	11.8915	173.763	8.27436	0.1108	66.1146	0.3953	6.078	27.328	4.995	1.238	0.175	0.159	0	0.058	0.308	0.041	0.004	0	0.18	0	158.631	3511.08
2472	0.883572	0	254.38	9.0414	10.4387	792.226	172.148	16.0859	4.3615	32.1652	61.6418	0.0831	0.037	0.0058	0.838352	82.5646	10.667	11.8918	173.767	8.27455	0.1108	66.1161	0.3953	6.079	27.33	4.995	1.239	0.175	0.159	0	0.058	0.308	0.041	0.004	0	0.18	0	158.636	3511.08
2473	0.882448	0	254.39	9.0414	10.4387	792.226	172.148	16.0859	4.3615	32.1652	61.6418	0.0831	0.037	0.0058	0.838368	82.5664	10.6672	11.8921	173.77	8.27473	0.1108	66.1176	0.3953	6.079	27.331	4.995	1.239	0.175	0.159	0	0.058	0.308	0.041	0.004	0	0.18	0	158.641	3511.08
2474	0.881324	0	254.401	9.0414	10.4387	792.226	172.148	16.0859	4.3615	32.1652	61.6418	0.0831	0.037	0.0058	0.838384	82.5683	10.6675	11.8923	173.774	8.27492	0.1108	66.119	0.3953	6.079	27.333	4.995	1.239	0.175	0.159	0	0.058	0.308	0.041	0.004	0	0.18	0	158.645	3511.08
2475	0.8802	0	254.411	9.0414	10.4387	792.226	172.148	16.0859	4.3615	32.1652	61.6418	0.0831	0.037	0.0058	0.8384	82.5701	10.6677	11.8926	173.778	8.2751	0.1108	66.1205	0.3953	6.08	27.334	4.996	1.239	0.175	0.159	0	0.058	0.308	0.041	0.004	0	0.18	0	158.65	3511.08
2476	0.879152	0	254.421	9.0414	10.4387	792.226	172.148	16.0859	4.3615	32.1652	61.6418	0.0831	0.037	0.0058	0.838416	82.5718	10.6679	11.8928	173.782	8.27528	0.1108	66.1219	0.3953	6.08	27.336	4.996	1.239	0.175	0.159	0	0.058	0.308	0.041	0.004	0	0.181	0	158.655	3511.08
2477	0.878104	0	254.431	9.0414	10.4387	792.226	172.148	16.0859	4.3615	32.1652	61.6418	0.0831	0.037	0.0058	0.838432	82.5735	10.6681	11.8931	173.785	8.27545	0.1108	66.1233	0.3953	6.08	27.337	4.996	1.239	0.175	0.159	0	0.058	0.308	0.041	0.004	0	0.181	0	158.66	3511.08
2478	0.877056	0	254.441	9.0414	10.4387	792.226	172.148	16.0859	4.3615	32.1652	61.6418	0.0831	0.037	0.0058	0.838448	82.5753	10.6683	11.8933	173.789	8.27563	0.1108	66.1247	0.3953	6.081	27.339	4.996	1.239	0.175	0.159	0	0.058	0.308	0.041	0.004	0	0.181	0	158.664	3511.08
2479	0.876008	0	254.45	9.0414	10.4387	792.226	172.148	16.0859	4.3615	32.1652	61.6418	0.0831	0.037	0.0058	0.838464	82.577	10.6686	11.8936	173.793	8.2758	0.1108	66.126	0.3953	6.081	27.34	4.997	1.239	0.175	0.159	0	0.058	0.308	0.041	0.004	0	0.181	0	158.669	3511.08
2480	0.87496	0	254.46	9.0414	10.4387	792.226	172.148	16.0859	4.3615	32.1652	61.6418	0.0831	0.037	0.0058	0.83848	82.5787	10.6688	11.8938	173.796	8.27598	0.1108	66.1274	0.3953	6.081	27.342	4.997	1.239	0.175	0.159	0	0.058	0.308	0.041	0.004	0	0.181	0	158.674	3511.08
2481	0.873912	0	254.47	9.0414	10.4387	792.226	172.148	16.0859	4.3615	32.1652	61.6418	0.0831	0.037	0.0058	0.838496	82.5804	10.669	11.8941	173.8	8.27616	0.1108	66.1288	0.3953	6.082	27.343	4.997	1.239	0.175	0.159	0	0.058	0.308	0.041	0.004	0	0.181	0	158.678	3511.08
2482	0.872864	0	254.48	9.0414	10.4387	792.226	172.148	16.0859	4.3615	32.1652	61.6418	0.0831	0.037	0.0058	0.838512	82.5821	10.6692	11.8943	173.804	8.27633	0.1108	66.1302	0.3953	6.082	27.345	4.998	1.239	0.175	0.159	0	0.058	0.308	0.041	0.004	0	0.181	0	158.683	3511.08
2483	0.871816	0	254.49	9.0414	10.4387	792.226	172.148	16.0859	4.3615	32.1652	61.6418	0.0831	0.037	0.0058	0.838528	82.5839	10.6694	11.8946	173.807	8.27651	0.1108	66.1316	0.3953	6.082	27.346	4.998	1.239	0.176	0.159	0	0.058	0.308	0.041	0.004	0	0.181	0	158.688	3511.08
2484	0.870768	0	254.499	9.0414	10.4387	792.226	172.148	16.0859	4.3615	32.1652	61.6418	0.0831	0.037	0.0058	0.838544	82.5856	10.6696	11.8948	173.811	8.27668	0.1108	66.133	0.3953	6.083	27.348	4.998	1.239	0.176	0.159	0	0.058	0.308	0.041	0.004	0	0.181	0	158.692	3511.08
2485	0.86972	0	254.509	9.0414	10.4387	792.226	172.148	16.0859	4.3615	32.1652	61.6418	0.0831	0.037	0.0058	0.83856	82.5873	10.6699	11.8951	173.815	8.27686	0.1108	66.1343	0.3953	6.083	27.349	4.998	1.239	0.176	0.159	0	0.058	0.308	0.041	0.004	0	0.181	0	158.697	3511.08
2486	0.868672	0	254.519	9.0414	10.4387	792.226	172.148	16.0859	4.3615	32.1652	61.6418	0.0831	0.037	0.0058	0.838576	82.589	10.6701	11.8953	173.818	8.27704	0.1108	66.1357	0.3953	6.083	27.351	4.999	1.239	0.176	0.159	0	0.058	0.308	0.041	0.004	0	0.181	0	158.702	3511.08
2487	0.867624	0	254.529	9.0414	10.4387	792.226	172.148	16.0859	4.3615	32.1652	61.6418	0.0831	0.037	0.0058	0.838592	82.5907	10.6703	11.8956	173.822	8.27721	0.1108	66.1371	0.3953	6.084	27.352	4.999	1.24	0.176	0.159	0	0.058	0.308	0.041	0.004	0	0.181	0	158.706	3511.08
2488	0.866576	0	254.538	9.0414	10.4387	792.226	172.148	16.0859	4.3615	32.1652	61.6418	0.0831	0.037	0.0058	0.838608	82.5925	10.6705	11.8958	173.825	8.27739	0.1108	66.1385	0.3953	6.084	27.354	4.999	1.24	0.176	0.159	0	0.058	0.308	0.041	0.004	0	0.181	0	158.711	3511.08
2489	0.865528	0	254.548	9.0414	10.4387	792.226	172.148	16.0859	4.3615	32.1652	61.6418	0.0831	0.037	0.0058	0.838624	82.5942	10.6707	11.8961	173.829	8.27756	0.1108	66.1399	0.3953	6.084	27.355	4.999	1.24	0.176	0.159	0	0.058	0.308	0.041	0.004	0	0.181	0	158.715	3511.08
2490	0.86448	0	254.558	9.0414	10.4387	792.226	172.148	16.0859	4.3615	32.1652	61.6418	0.0831	0.037	0.0058	0.83864	82.5959	10.6709	11.8963	173.833	8.27774	0.1108	66.1413	0.3953	6.085	27.357	5	1.24	0.176	0.159	0	0.058	0.308	0.041	0.004	0	0.181	0	158.72	3511.08
2491	0.863432	0	254.568	9.0414	10.4387	792.226	172.148	16.0859	4.3615	32.1652	61.6418	0.0831	0.037	0.0058	0.838656	82.5976	10.6712	11.8966	173.836	8.27792	0.1108	66.1426	0.3953	6.085	27.358	5	1.24	0.176	0.159	0	0.058	0.308	0.041	0.004	0	0.181	0	158.725	3511.08
2492	0.862384	0	254.578	9.0414	10.4387	792.226	172.148	16.0859	4.3615	32.1652	61.6418	0.0831	0.037	0.0058	0.838672	82.5993	10.6714	11.8968	173.84	8.27809	0.1108	66.144	0.3953	6.085	27.359	5	1.24	0.176	0.159	0	0.058	0.308	0.041	0.004	0	0.181	0	158.729	3511.08
2493	0.861336	0	254.587	9.0414	10.4387	792.226	172.148	16.0859	4.3615	32.1652	61.6418	0.0831	0.037	0.0058	0.838688	82.6011	10.6716	11.8971	173.844	8.27827	0.1108	66.1454	0.3953	6.086	27.361	5	1.24	0.176	0.159	0	0.058	0.308	0.041	0.004	0	0.181	0	158.734	3511.08
2494	0.860288	0	254.597	9.0414	10.4387	792.226	172.148	16.0859	4.3615	32.1652	61.6418	0.0831	0.037	0.0058	0.838704	82.6028	10.6718	11.8973	173.847	8.27844	0.1108	66.1468	0.3953	6.086	27.362	5.001	1.24	0.176	0.159	0	0.059	0.308	0.041	0.004	0	0.181	0	158.738	3511.08
2495	0.85924	0	254.607	9.0414	10.4387	792.226	172.148	16.0859	4.3615	32.1652	61.6418	0.0831	0.037	0.0058	0.83872	82.6045	10.672	11.8976	173.851	8.27862	0.1108	66.1482	0.3953	6.086	27.364	5.001	1.24	0.176	0.159	0	0.059	0.309	0.041	0.004	0	0.181	0	158.743	3511.08
2496	0.858192	0	254.617	9.0414	10.4387	792.226	172.148	16.0859	4.3615	32.1652	61.6418	0.0831	0.037	0.0058	0.838736	82.6062	10.6722	11.8978	173.854	8.2788	0.1108	66.1496	0.3953	6.087	27.365	5.001	1.24	0.176	0.159	0	0.059	0.309	0.041	0.004	0	0.181	0	158.747	3511.08
2497	0.857144	0	254.627	9.0414	10.4387	792.226	172.148	16.0859	4.3615	32.1652	61.6418	0.0831	0.037	0.0058	0.838752	82.6079	10.6725	11.8981	173.858	8.27897	0.1108	66.1509	0.3953	6.087	27.367	5.002	1.24	0.176	0.159	0	0.059	0.309	0.041	0.004	0	0.181	0	158.752	3511.08
2498	0.856096	0	254.636	9.0414	10.4387	792.226	172.148	16.0859	4.3615	32.1652	61.6418	0.0831	0.037	0.0058	0.838768	82.6097	10.6727	11.8983	173.862	8.27915	0.1108	66.1523	0.3953	6.087	27.368	5.002	1.24	0.176	0.159	0	0.059	0.309	0.041	0.004	0	0.181	0	158.756	3511.08
2499	0.855048	0	254.646	9.0414	10.4387	792.226	172.148	16.0859	4.3615	32.1652	61.6418	0.0831	0.037	0.0058	0.838784	82.6114	10.6729	11.8986	173.865	8.27932	0.1108	66.1537	0.3953	6.088	27.37	5.002	1.24	0.176	0.159	0	0.059	0.309	0.041	0.004	0	0.181	0	158.761	3511.08
2500	0.854	0	254.656	9.0414	10.4387	792.226	172.148	16.0859	4.3615	32.1652	61.6418	0.0831	0.037	0.0058	0.8388	82.6131	10.6731	11.8988	173.869	8.2795	0.1108	66.1551	0.3953	6.088	27.37	5.002	1.24	0.176	0.159	0	0.059	0.309	0.041	0.004	0	0.181	0	158.761	3511.08
