# Supplementary material for: The Social Cost of Fossil and Industrial CO2 Emissions from 1950 to 2018
Source: Research Square preprint supplement (doi:10.21203/rs.3.rs-2244259/v1), 2022-11-17
Supplement: Supplementary file 25 [file RCP6_MIDYEAR_CONCENTRATIONS.xls]

## Sheet: RCP6_MIDYEAR_CONCENTRATIONS
RCP6.0_MIDYEAR__CONCENTRATIONS____________________________
CONTENT: CMIP5 RECOMMENDATIONS FOR ANNUAL AVERAGE, GLOBAL MEAN CONCENTRATIONS.
RUN: RCP6, FINAL RELEASE, 30 May 2010
RCP6.0 CONTACT: AIM group, Toshihiko Masui (masui@nies.go.jp) & Kenichi Matsumoto (matsumoto.kenichi@nies.go.jp)
DATE: 30/5/2010 01:02:33 (updated description)
MAGICC-VERSION: 6.3.09, 25 November 2009
FILE PRODUCED BY: RCP Concentration Calculation & Data Group, M. Meinshausen, S. Smith, K. Riahi, D. van Vuuren et al.
DOCUMENTATION: M. Meinshausen, S. Smith et al. (2011) "The RCP GHG concentrations and their extension from 1765 to 2300", DOI 10.1007/s10584-011-0156-z, Climatic Change.
CMIP5 INFO: http://cmip-pcmdi.llnl.gov/cmip5/
RCP DATABASE: http://www.iiasa.ac.at/web-apps/tnt/RcpDb
FURTHER INFO: For data sources, aknowledgements and further information, see http://www.pik-potsdam.de/~mmalte/rcps
NOTE: RCP6 starts 2005; 20th century data and earlier is provided for convenience;
COLUMN_DESCRIPTION________________________________________
1. CO2EQ - (For Information only, not CMIP5 recommendation) CO2 equivalence concentrations using CO2 radiative forcing relationship Q = 3.71/ln(2)*ln(C/278), aggregating all (efficacy-adjusted) anthropogenic forcings, including greenhouse gases listed below (i.e. columns 3,4,5 and 8-35), and aerosols, trop. ozone etc. (not listed below).
2. KYOTO-CO2EQ - (For information only, not CMIP5 recommendation) As column 1, but only aggregating greenhouse gases controlled under the Kyoto Protocol (columns 3,4,5 and 8-19).
3. CO2 - Atmospheric CO2 concentrations
4. CH4 - Atmospheric CH4 concentrations
5. N2O - Atmospheric N2O concentrations
6. FGASSUMHFC134AEQ - All flourinated gases controlled under the Kyoto Protocol, i.e. HFCs, PFCs, and SF6 (columns 8-19) expressed as HFC134a equivalence concentrations.
7. MHALOSUMCFC12EQ - All flourinated gases controlled under the Montreal Protocol, i.e. CFCs, HCFCs, Halons, CCl4, CH3Br, CH3Cl (columns 20-35) expressed as CFC-12 equivalence concentrations.
8. - 19. - Flourinated Gases controlled under the Kyoto Protocol
20. - 35. - Ozone Depleting Substances controlled under the Montreal Protocol
&THISFILE_SPECIFICATIONS
THISFILE_DATACOLUMNS	35
THISFILE_FIRSTYEAR	1765
THISFILE_LASTYEAR	2500
THISFILE_ANNUALSTEPS	1
THISFILE_FIRSTDATAROW	40
THISFILE_UNITS	SEE ROW 38
THISFILE_DATTYPE	RCPDAT
/
COLUMN:	1	2	3	4	5	6	7	8	9	10	11	12	13	14	15	16	17	18	19	20	21	22	23	24	25	26	27	28	29	30	31	32	33	34	35
UNITS:	ppm	ppm	ppm	ppb	ppb	ppt	ppt	ppt	ppt	ppt	ppt	ppt	ppt	ppt	ppt	ppt	ppt	ppt	ppt	ppt	ppt	ppt	ppt	ppt	ppt	ppt	ppt	ppt	ppt	ppt	ppt	ppt	ppt	ppt	ppt
v YEARS/GAS >	CO2EQ	KYOTO-CO2EQ	CO2	CH4	N2O	FGASSUMHFC134AEQ	MHALOSUMCFC12EQ	CF4	C2F6	C6F14	HFC23	HFC32	HFC43_10	HFC125	HFC134a	HFC143a	HFC227ea	HFC245fa	SF6	CFC_11	CFC_12	CFC_113	CFC_114	CFC_115	CARB_TET	MCF	HCFC_22	HCFC_141B	HCFC_142B	HALON1211	HALON1202	HALON1301	HALON2402	CH3BR	CH3CL
1765	277.015	277.015	278.052	721.894	272.96	0	0	35	0	0	0	0	0	0	0	0	0	0	0	0	0	0	0	0	0	0	0	0	0	0	0	0	0	5.8	480
1766	277.839	277.815	278.106	722.256	272.971	0	0	35	0	0	0	0	0	0	0	0	0	0	0	0	0	0	0	0	0	0	0	0	0	0	0	0	0	5.8	480
1767	278.694	278.687	278.22	722.971	272.994	0	0	35	0	0	0	0	0	0	0	0	0	0	0	0	0	0	0	0	0	0	0	0	0	0	0	0	0	5.8	480
1768	278.748	278.836	278.343	723.668	273.017	0	0	35	0	0	0	0	0	0	0	0	0	0	0	0	0	0	0	0	0	0	0	0	0	0	0	0	0	5.8	480
1769	278.796	278.989	278.471	724.343	273.039	0	0	35	0	0	0	0	0	0	0	0	0	0	0	0	0	0	0	0	0	0	0	0	0	0	0	0	0	5.8	480
1770	278.849	279.143	278.6	724.995	273.061	0	0	35	0	0	0	0	0	0	0	0	0	0	0	0	0	0	0	0	0	0	0	0	0	0	0	0	0	5.8	480
1771	278.884	279.299	278.733	725.629	273.083	0	0	35	0	0	0	0	0	0	0	0	0	0	0	0	0	0	0	0	0	0	0	0	0	0	0	0	0	5.8	480
1772	278.925	279.459	278.869	726.25	273.104	0	0	35	0	0	0	0	0	0	0	0	0	0	0	0	0	0	0	0	0	0	0	0	0	0	0	0	0	5.8	480
1773	278.994	279.622	279.009	726.859	273.125	0	0	35	0	0	0	0	0	0	0	0	0	0	0	0	0	0	0	0	0	0	0	0	0	0	0	0	0	5.8	480
1774	279.069	279.789	279.153	727.455	273.146	0	0	35	0	0	0	0	0	0	0	0	0	0	0	0	0	0	0	0	0	0	0	0	0	0	0	0	0	5.8	480
1775	279.151	279.96	279.302	728.037	273.166	0	0	35	0	0	0	0	0	0	0	0	0	0	0	0	0	0	0	0	0	0	0	0	0	0	0	0	0	5.8	480
1776	279.242	280.137	279.457	728.604	273.187	0	0	35	0	0	0	0	0	0	0	0	0	0	0	0	0	0	0	0	0	0	0	0	0	0	0	0	0	5.8	480
1777	279.342	280.319	279.618	729.154	273.207	0	0	35	0	0	0	0	0	0	0	0	0	0	0	0	0	0	0	0	0	0	0	0	0	0	0	0	0	5.8	480
1778	279.447	280.504	279.782	729.687	273.227	0	0	35	0	0	0	0	0	0	0	0	0	0	0	0	0	0	0	0	0	0	0	0	0	0	0	0	0	5.8	480
1779	279.551	280.685	279.943	730.201	273.247	0	0	35	0	0	0	0	0	0	0	0	0	0	0	0	0	0	0	0	0	0	0	0	0	0	0	0	0	5.8	480
1780	279.65	280.859	280.097	730.692	273.266	0	0	35	0	0	0	0	0	0	0	0	0	0	0	0	0	0	0	0	0	0	0	0	0	0	0	0	0	5.8	480
1781	279.718	281.022	280.243	731.154	273.286	0	0	35	0	0	0	0	0	0	0	0	0	0	0	0	0	0	0	0	0	0	0	0	0	0	0	0	0	5.8	480
1782	279.782	281.179	280.382	731.584	273.306	0	0	35	0	0	0	0	0	0	0	0	0	0	0	0	0	0	0	0	0	0	0	0	0	0	0	0	0	5.8	480
1783	279.868	281.332	280.518	731.989	273.325	0	0	35	0	0	0	0	0	0	0	0	0	0	0	0	0	0	0	0	0	0	0	0	0	0	0	0	0	5.8	480
1784	279.959	281.487	280.657	732.378	273.345	0	0	35	0	0	0	0	0	0	0	0	0	0	0	0	0	0	0	0	0	0	0	0	0	0	0	0	0	5.8	480
1785	280.058	281.648	280.803	732.76	273.365	0	0	35	0	0	0	0	0	0	0	0	0	0	0	0	0	0	0	0	0	0	0	0	0	0	0	0	0	5.8	480
1786	280.17	281.819	280.957	733.146	273.384	0	0	35	0	0	0	0	0	0	0	0	0	0	0	0	0	0	0	0	0	0	0	0	0	0	0	0	0	5.8	480
1787	280.291	281.996	281.118	733.544	273.404	0	0	35	0	0	0	0	0	0	0	0	0	0	0	0	0	0	0	0	0	0	0	0	0	0	0	0	0	5.8	480
1788	280.419	282.177	281.282	733.965	273.424	0	0	35	0	0	0	0	0	0	0	0	0	0	0	0	0	0	0	0	0	0	0	0	0	0	0	0	0	5.8	480
1789	280.548	282.357	281.443	734.418	273.444	0	0	35	0	0	0	0	0	0	0	0	0	0	0	0	0	0	0	0	0	0	0	0	0	0	0	0	0	5.8	480
1790	280.676	282.532	281.598	734.911	273.464	0	0	35	0	0	0	0	0	0	0	0	0	0	0	0	0	0	0	0	0	0	0	0	0	0	0	0	0	5.8	480
1791	280.778	282.701	281.747	735.445	273.484	0	0	35	0	0	0	0	0	0	0	0	0	0	0	0	0	0	0	0	0	0	0	0	0	0	0	0	0	5.8	480
1792	280.879	282.867	281.891	736.018	273.504	0	0	35	0	0	0	0	0	0	0	0	0	0	0	0	0	0	0	0	0	0	0	0	0	0	0	0	0	5.8	480
1793	281.005	283.031	282.031	736.626	273.525	0	0	35	0	0	0	0	0	0	0	0	0	0	0	0	0	0	0	0	0	0	0	0	0	0	0	0	0	5.8	480
1794	281.13	283.191	282.167	737.265	273.545	0	0	35	0	0	0	0	0	0	0	0	0	0	0	0	0	0	0	0	0	0	0	0	0	0	0	0	0	5.8	480
1795	281.254	283.348	282.299	737.933	273.566	0	0	35	0	0	0	0	0	0	0	0	0	0	0	0	0	0	0	0	0	0	0	0	0	0	0	0	0	5.8	480
1796	281.378	283.502	282.427	738.627	273.587	0	0	35	0	0	0	0	0	0	0	0	0	0	0	0	0	0	0	0	0	0	0	0	0	0	0	0	0	5.8	480
1797	281.478	283.653	282.551	739.343	273.609	0	0	35	0	0	0	0	0	0	0	0	0	0	0	0	0	0	0	0	0	0	0	0	0	0	0	0	0	5.8	480
1798	281.577	283.801	282.671	740.08	273.63	0	0	35	0	0	0	0	0	0	0	0	0	0	0	0	0	0	0	0	0	0	0	0	0	0	0	0	0	5.8	480
1799	281.699	283.945	282.787	740.834	273.652	0	0	35	0	0	0	0	0	0	0	0	0	0	0	0	0	0	0	0	0	0	0	0	0	0	0	0	0	5.8	480
1800	281.795	284.086	282.899	741.608	273.675	0	0	35	0	0	0	0	0	0	0	0	0	0	0	0	0	0	0	0	0	0	0	0	0	0	0	0	0	5.8	480
1801	281.891	284.224	283.007	742.413	273.698	0	0	35	0	0	0	0	0	0	0	0	0	0	0	0	0	0	0	0	0	0	0	0	0	0	0	0	0	5.8	480
1802	281.964	284.359	283.111	743.26	273.721	0	0	35	0	0	0	0	0	0	0	0	0	0	0	0	0	0	0	0	0	0	0	0	0	0	0	0	0	5.8	480
1803	282.061	284.492	283.211	744.146	273.744	0	0	35	0	0	0	0	0	0	0	0	0	0	0	0	0	0	0	0	0	0	0	0	0	0	0	0	0	5.8	480
1804	282.204	284.622	283.307	745.063	273.768	0	0	35	0	0	0	0	0	0	0	0	0	0	0	0	0	0	0	0	0	0	0	0	0	0	0	0	0	5.8	480
1805	282.323	284.748	283.4	746.005	273.793	0	0	35	0	0	0	0	0	0	0	0	0	0	0	0	0	0	0	0	0	0	0	0	0	0	0	0	0	5.8	480
1806	282.418	284.873	283.49	746.962	273.818	0	0	35	0	0	0	0	0	0	0	0	0	0	0	0	0	0	0	0	0	0	0	0	0	0	0	0	0	5.8	480
1807	282.514	284.997	283.578	747.927	273.843	0	0	35	0	0	0	0	0	0	0	0	0	0	0	0	0	0	0	0	0	0	0	0	0	0	0	0	0	5.8	480
1808	282.631	285.115	283.661	748.893	273.869	0	0	35	0	0	0	0	0	0	0	0	0	0	0	0	0	0	0	0	0	0	0	0	0	0	0	0	0	5.8	480
1809	282.739	285.225	283.735	749.851	273.895	0	0	35	0	0	0	0	0	0	0	0	0	0	0	0	0	0	0	0	0	0	0	0	0	0	0	0	0	5.8	480
1810	282.836	285.321	283.797	750.798	273.922	0	0	35	0	0	0	0	0	0	0	0	0	0	0	0	0	0	0	0	0	0	0	0	0	0	0	0	0	5.8	480
1811	282.9	285.406	283.847	751.739	273.95	0	0	35	0	0	0	0	0	0	0	0	0	0	0	0	0	0	0	0	0	0	0	0	0	0	0	0	0	5.8	480
1812	282.957	285.483	283.889	752.682	273.978	0	0	35	0	0	0	0	0	0	0	0	0	0	0	0	0	0	0	0	0	0	0	0	0	0	0	0	0	5.8	480
1813	283.036	285.555	283.926	753.628	274.007	0	0	35	0	0	0	0	0	0	0	0	0	0	0	0	0	0	0	0	0	0	0	0	0	0	0	0	0	5.8	480
1814	283.115	285.627	283.963	754.579	274.036	0	0	35	0	0	0	0	0	0	0	0	0	0	0	0	0	0	0	0	0	0	0	0	0	0	0	0	0	5.8	480
1815	283.174	285.701	284.001	755.531	274.066	0	0	35	0	0	0	0	0	0	0	0	0	0	0	0	0	0	0	0	0	0	0	0	0	0	0	0	0	5.8	480
1816	283.215	285.778	284.043	756.486	274.097	0	0	35	0	0	0	0	0	0	0	0	0	0	0	0	0	0	0	0	0	0	0	0	0	0	0	0	0	5.8	480
1817	283.259	285.858	284.086	757.44	274.128	0	0	35	0	0	0	0	0	0	0	0	0	0	0	0	0	0	0	0	0	0	0	0	0	0	0	0	0	5.8	480
1818	283.327	285.936	284.129	758.395	274.16	0	0	35	0	0	0	0	0	0	0	0	0	0	0	0	0	0	0	0	0	0	0	0	0	0	0	0	0	5.8	480
1819	283.415	286.01	284.167	759.348	274.193	0	0	35	0	0	0	0	0	0	0	0	0	0	0	0	0	0	0	0	0	0	0	0	0	0	0	0	0	5.8	480
1820	283.498	286.078	284.198	760.3	274.227	0	0	35	0	0	0	0	0	0	0	0	0	0	0	0	0	0	0	0	0	0	0	0	0	0	0	0	0	5.8	480
1821	283.575	286.139	284.223	761.249	274.261	0	0	35	0	0	0	0	0	0	0	0	0	0	0	0	0	0	0	0	0	0	0	0	0	0	0	0	0	5.8	480
1822	283.627	286.196	284.244	762.198	274.296	0	0	35	0	0	0	0	0	0	0	0	0	0	0	0	0	0	0	0	0	0	0	0	0	0	0	0	0	5.8	480
1823	283.655	286.251	284.263	763.147	274.332	0	0	35	0	0	0	0	0	0	0	0	0	0	0	0	0	0	0	0	0	0	0	0	0	0	0	0	0	5.8	480
1824	283.706	286.306	284.281	764.095	274.368	0	0	35	0	0	0	0	0	0	0	0	0	0	0	0	0	0	0	0	0	0	0	0	0	0	0	0	0	5.8	480
1825	283.76	286.361	284.3	765.044	274.406	0	0	35	0	0	0	0	0	0	0	0	0	0	0	0	0	0	0	0	0	0	0	0	0	0	0	0	0	5.8	480
1826	283.816	286.418	284.32	765.993	274.444	0	0	35	0	0	0	0	0	0	0	0	0	0	0	0	0	0	0	0	0	0	0	0	0	0	0	0	0	5.8	480
1827	283.873	286.475	284.34	766.943	274.484	0	0	35	0	0	0	0	0	0	0	0	0	0	0	0	0	0	0	0	0	0	0	0	0	0	0	0	0	5.8	480
1828	283.931	286.532	284.36	767.894	274.524	0	0	35	0	0	0	0	0	0	0	0	0	0	0	0	0	0	0	0	0	0	0	0	0	0	0	0	0	5.8	480
1829	284.013	286.589	284.38	768.846	274.565	0	0	35	0	0	0	0	0	0	0	0	0	0	0	0	0	0	0	0	0	0	0	0	0	0	0	0	0	5.8	480
1830	283.962	286.647	284.4	769.798	274.606	0	0	35	0	0	0	0	0	0	0	0	0	0	0	0	0	0	0	0	0	0	0	0	0	0	0	0	0	5.8	480
1831	283.9	286.669	284.385	770.745	274.649	0	0	35	0	0	0	0	0	0	0	0	0	0	0	0	0	0	0	0	0	0	0	0	0	0	0	0	0	5.8	480
1832	283.882	286.6	284.28	771.683	274.693	0	0	35	0	0	0	0	0	0	0	0	0	0	0	0	0	0	0	0	0	0	0	0	0	0	0	0	0	5.8	480
1833	283.77	286.481	284.125	772.615	274.738	0	0	35	0	0	0	0	0	0	0	0	0	0	0	0	0	0	0	0	0	0	0	0	0	0	0	0	0	5.8	480
1834	283.664	286.367	283.975	773.547	274.784	0	0	35	0	0	0	0	0	0	0	0	0	0	0	0	0	0	0	0	0	0	0	0	0	0	0	0	0	5.8	480
1835	283.56	286.253	283.825	774.483	274.83	0	0	35	0	0	0	0	0	0	0	0	0	0	0	0	0	0	0	0	0	0	0	0	0	0	0	0	0	5.8	480
1836	283.369	286.14	283.675	775.428	274.878	0	0	35	0	0	0	0	0	0	0	0	0	0	0	0	0	0	0	0	0	0	0	0	0	0	0	0	0	5.8	480
1837	283.203	286.027	283.525	776.389	274.927	0	0	35	0	0	0	0	0	0	0	0	0	0	0	0	0	0	0	0	0	0	0	0	0	0	0	0	0	5.8	480
1838	283.153	285.966	283.425	777.369	274.977	0	0	35	0	0	0	0	0	0	0	0	0	0	0	0	0	0	0	0	0	0	0	0	0	0	0	0	0	5.8	480
1839	283.159	285.981	283.4	778.374	275.027	0	0	35	0	0	0	0	0	0	0	0	0	0	0	0	0	0	0	0	0	0	0	0	0	0	0	0	0	5.8	480
1840	283.17	286.022	283.4	779.412	275.08	0	0	35	0	0	0	0	0	0	0	0	0	0	0	0	0	0	0	0	0	0	0	0	0	0	0	0	0	5.8	480
1841	283.211	286.091	283.425	780.494	275.136	0	0	35	0	0	0	0	0	0	0	0	0	0	0	0	0	0	0	0	0	0	0	0	0	0	0	0	0	5.8	480
1842	283.306	286.214	283.5	781.624	275.202	0	0	35	0	0	0	0	0	0	0	0	0	0	0	0	0	0	0	0	0	0	0	0	0	0	0	0	0	5.8	480
1843	283.429	286.364	283.6	782.793	275.273	0	0	35	0	0	0	0	0	0	0	0	0	0	0	0	0	0	0	0	0	0	0	0	0	0	0	0	0	5.8	480
1844	283.579	286.538	283.725	783.989	275.337	0	0	35	0	0	0	0	0	0	0	0	0	0	0	0	0	0	0	0	0	0	0	0	0	0	0	0	0	5.8	480
1845	283.713	286.76	283.9	785.197	275.38	0	0	35	0	0	0	0	0	0	0	0	0	0	0	0	0	0	0	0	0	0	0	0	0	0	0	0	0	5.8	480
1846	283.885	286.977	284.075	786.406	275.398	0	0	35	0	0	0	0	0	0	0	0	0	0	0	0	0	0	0	0	0	0	0	0	0	0	0	0	0	5.8	480
1847	284.051	287.166	284.225	787.602	275.401	0	0	35	0	0	0	0	0	0	0	0	0	0	0	0	0	0	0	0	0	0	0	0	0	0	0	0	0	5.8	480
1848	284.22	287.379	284.4	788.773	275.401	0	0	35	0	0	0	0	0	0	0	0	0	0	0	0	0	0	0	0	0	0	0	0	0	0	0	0	0	5.8	480
1849	284.388	287.591	284.575	789.904	275.4	0	0	35	0	0	0	0	0	0	0	0	0	0	0	0	0	0	0	0	0	0	0	0	0	0	0	0	0	5.8	480
1850	284.478	287.78	284.725	790.979	275.425	0	0	35	0	0	0	0	0	0	0	0	0	0	0	0	0	0	0	0	0	0	0	0	0	0	0	0	0	5.8	480
1851	284.678	287.984	284.875	792.25	275.5	0	0.0105361	35	0	0	0	0	0	0	0	0	0	0	0	0	0	0	0	0	0.025935	0	0	0	0	0	0	0	0	5.8	480
1852	284.494	288.175	285	793.75	275.6	0	0.0316002	35	0	0	0	0	0	0	0	0	0	0	0	0	0	0	0	0	0.077785	0	0	0	0	0	0	0	0	5.8	480
1853	284.254	288.366	285.125	795.25	275.7	0	0.0526703	35	0	0	0	0	0	0	0	0	0	0	0	0	0	0	0	0	0.12965	0	0	0	0	0	0	0	0	5.8	480
1854	284.317	288.582	285.275	796.75	275.8	0	0.0737547	35	0	0	0	0	0	0	0	0	0	0	0	0	0	0	0	0	0.18155	0	0	0	0	0	0	0	0	5.8	480
1855	284.378	288.791	285.425	798	275.9	0	0.0948391	35	0	0	0	0	0	0	0	0	0	0	0	0	0	0	0	0	0.23345	0	0	0	0	0	0	0	0	5.8	480
1856	284.487	289	285.575	799.25	276	0	0.115903	35	0	0	0	0	0	0	0	0	0	0	0	0	0	0	0	0	0.2853	0	0	0	0	0	0	0	0	5.8	480
1857	284.571	289.216	285.725	800.75	276.1	0	0.136967	35	0	0	0	0	0	0	0	0	0	0	0	0	0	0	0	0	0.33715	0	0	0	0	0	0	0	0	5.8	480
1858	284.758	289.458	285.9	802.25	276.2	0	0.158052	35	0	0	0	0	0	0	0	0	0	0	0	0	0	0	0	0	0.38905	0	0	0	0	0	0	0	0	5.8	480
1859	284.872	289.7	286.075	803.75	276.3	0	0.179116	35	0	0	0	0	0	0	0	0	0	0	0	0	0	0	0	0	0.4409	0	0	0	0	0	0	0	0	5.8	480
1860	284.54	289.916	286.225	805.25	276.4	0	0.20018	35	0	0	0	0	0	0	0	0	0	0	0	0	0	0	0	0	0.49275	0	0	0	0	0	0	0	0	5.8	480
1861	283.91	290.132	286.375	806.75	276.5	0	0.221264	35	0	0	0	0	0	0	0	0	0	0	0	0	0	0	0	0	0.54465	0	0	0	0	0	0	0	0	5.8	480
1862	284.24	290.324	286.5	808.25	276.6	0	0.242328	35	0	0	0	0	0	0	0	0	0	0	0	0	0	0	0	0	0.5965	0	0	0	0	0	0	0	0	5.8	480
1863	284.827	290.515	286.625	809.75	276.7	0	0.263392	35	0	0	0	0	0	0	0	0	0	0	0	0	0	0	0	0	0.64835	0	0	0	0	0	0	0	0	5.8	480
1864	284.929	290.732	286.775	811.25	276.8	0	0.284477	35	0	0	0	0	0	0	0	0	0	0	0	0	0	0	0	0	0.70025	0	0	0	0	0	0	0	0	5.8	480
1865	284.907	290.93	286.9	813	276.9	0	0.305561	35	0	0	0	0	0	0	0	0	0	0	0	0	0	0	0	0	0.75215	0	0	0	0	0	0	0	0	5.8	480
1866	284.538	291.104	287	814.75	277	0	0.326625	35	0	0	0	0	0	0	0	0	0	0	0	0	0	0	0	0	0.804	0	0	0	0	0	0	0	0	5.8	480
1867	284.133	291.27	287.1	816.25	277.1	0	0.347689	35	0	0	0	0	0	0	0	0	0	0	0	0	0	0	0	0	0.85585	0	0	0	0	0	0	0	0	5.8	480
1868	284.156	291.461	287.225	817.75	277.2	0	0.368773	35	0	0	0	0	0	0	0	0	0	0	0	0	0	0	0	0	0.90775	0	0	0	0	0	0	0	0	5.8	480
1869	284.51	291.678	287.375	819.25	277.3	0	0.389838	35	0	0	0	0	0	0	0	0	0	0	0	0	0	0	0	0	0.9596	0	0	0	0	0	0	0	0	5.8	480
1870	284.76	291.898	287.525	821	277.375	0	0.41082	35	0	0	0	0	0	0	0	0	0	0	0	0	0	0	0	0	1.01125	0	0	0	0	0	0	0	0	5.8	480
1871	284.422	292.138	287.7	822.75	277.425	0	0.431844	35	0	0	0	0	0	0	0	0	0	0	0	0	0	0	0	0	1.063	0	0	0	0	0	0	0	0	5.8	480
1872	283.277	292.401	287.9	824.25	277.5	0	0.452969	35	0	0	0	0	0	0	0	0	0	0	0	0	0	0	0	0	1.115	0	0	0	0	0	0	0	0	5.8	480
1873	282.357	292.694	288.125	825.75	277.6	0	0.474094	35	0	0	0	0	0	0	0	0	0	0	0	0	0	0	0	0	1.167	0	0	0	0	0	0	0	0	5.8	480
1874	282.412	293.038	288.4	827.25	277.7	0	0.495219	35	0	0	0	0	0	0	0	0	0	0	0	0	0	0	0	0	1.219	0	0	0	0	0	0	0	0	5.8	480
1875	282.738	293.411	288.7	829	277.775	0	0.516344	35	0	0	0	0	0	0	0	0	0	0	0	0	0	0	0	0	1.271	0	0	0	0	0	0	0	0	5.8	480
1876	283.196	293.804	289.025	830.75	277.825	0	0.538484	35	0	0	0	0	0	0	0	0	0	0	0	0	0	0	0	0	1.3255	0	0	0	0	0	0	0	0	5.8	480
1877	283.933	294.245	289.4	832.25	277.9	0	0.56225	35	0	0	0	0	0	0	0	0	0	0	0	0	0	0	0	0	1.384	0	0	0	0	0	0	0	0	5.8	480
1878	284.511	294.717	289.8	833.75	278	0	0.587234	35	0	0	0	0	0	0	0	0	0	0	0	0	0	0	0	0	1.4455	0	0	0	0	0	0	0	0	5.8	480
1879	284.747	295.214	290.225	835.25	278.1	0	0.613437	35	0	0	0	0	0	0	0	0	0	0	0	0	0	0	0	0	1.51	0	0	0	0	0	0	0	0	5.8	480
1880	284.541	295.769	290.7	837	278.2	0	0.640656	35	0	0	0	0	0	0	0	0	0	0	0	0	0	0	0	0	1.577	0	0	0	0	0	0	0	0	5.8	480
1881	284.58	296.359	291.2	839	278.3	0	0.669094	35	0	0	0	0	0	0	0	0	0	0	0	0	0	0	0	0	1.647	0	0	0	0	0	0	0	0	5.8	480
1882	285.216	296.922	291.675	841	278.4	0	0.698953	35	0	0	0	0	0	0	0	0	0	0	0	0	0	0	0	0	1.7205	0	0	0	0	0	0	0	0	5.8	480
1883	285.702	297.461	292.125	843	278.5	0	0.730031	35	0	0	0	0	0	0	0	0	0	0	0	0	0	0	0	0	1.797	0	0	0	0	0	0	0	0	5.8	480
1884	286.076	297.992	292.575	844.75	278.6	0	0.762328	35	0	0	0	0	0	0	0	0	0	0	0	0	0	0	0	0	1.8765	0	0	0	0	0	0	0	0	5.8	480
1885	286.62	298.465	292.975	846.25	278.7	0	0.796047	35	0	0	0	0	0	0	0	0	0	0	0	0	0	0	0	0	1.9595	0	0	0	0	0	0	0	0	5.8	480
1886	287.061	298.869	293.3	848	278.8	0	0.831391	35	0	0	0	0	0	0	0	0	0	0	0	0	0	0	0	0	2.0465	0	0	0	0	0	0	0	0	5.8	480
1887	287.225	299.225	293.575	850	278.875	0	0.868359	35	0	0	0	0	0	0	0	0	0	0	0	0	0	0	0	0	2.1375	0	0	0	0	0	0	0	0	5.8	480
1888	286.962	299.525	293.8	852	278.925	0	0.906953	35	0	0	0	0	0	0	0	0	0	0	0	0	0	0	0	0	2.2325	0	0	0	0	0	0	0	0	5.8	480
1889	286.965	299.805	294	854	279	0	0.947172	35	0	0	0	0	0	0	0	0	0	0	0	0	0	0	0	0	2.3315	0	0	0	0	0	0	0	0	5.8	480
1890	287.046	300.064	294.175	856	279.1	0	0.989219	35	0	0	0	0	0	0	0	0	0	0	0	0	0	0	0	0	2.435	0	0	0	0	0	0	0	0	5.8	480
1891	286.867	300.305	294.325	858.25	279.2	0	1.03309	35	0	0	0	0	0	0	0	0	0	0	0	0	0	0	0	0	2.543	0	0	0	0	0	0	0	0	5.8	480
1892	286.801	300.554	294.475	860.75	279.3	0	1.0788	35	0	0	0	0	0	0	0	0	0	0	0	0	0	0	0	0	2.6555	0	0	0	0	0	0	0	0	5.8	480
1893	286.764	300.765	294.6	863	279.375	0	1.12673	35	0	0	0	0	0	0	0	0	0	0	0	0	0	0	0	0	2.7735	0	0	0	0	0	0	0	0	5.8	480
1894	286.661	300.939	294.7	865	279.425	0	1.17691	35	0	0	0	0	0	0	0	0	0	0	0	0	0	0	0	0	2.897	0	0	0	0	0	0	0	0	5.8	480
1895	286.452	301.119	294.8	867.25	279.475	0	1.22911	35	0	0	0	0	0	0	0	0	0	0	0	0	0	0	0	0	3.0255	0	0	0	0	0	0	0	0	5.8	480
1896	286.397	301.308	294.9	869.75	279.525	0	1.28355	35	0	0	0	0	0	0	0	0	0	0	0	0	0	0	0	0	3.1595	0	0	0	0	0	0	0	0	5.8	480
1897	286.487	301.519	295.025	872	279.6	0	1.34062	35	0	0	0	0	0	0	0	0	0	0	0	0	0	0	0	0	3.3	0	0	0	0	0	0	0	0	5.8	480
1898	286.588	301.806	295.225	874.25	279.675	0	1.40014	35	0	0	0	0	0	0	0	0	0	0	0	0	0	0	0	0	3.4465	0	0	0	0	0	0	0	0	5.8	480
1899	286.676	302.174	295.5	876.75	279.725	0	1.4623	35	0	0	0	0	0	0	0	0	0	0	0	0	0	0	0	0	3.5995	0	0	0	0	0	0	0	0	5.8	480
1900	286.799	302.579	295.8	879.5	279.8	0.0329065	1.5273	35	0.0202502	0	0	0	0	0	0	0	0	0	0	0	0	0	0	0	3.7595	0	0	0	0	0	0	0	0	5.8	480
1901	286.77	303.038	296.125	883	279.9	0.067545	1.59494	35	0.0415662	0	0	0	0	0	0	0	0	0	0	0	0	0	0	0	3.926	0	0	0	0	0	0	0	0	5.8	480
1902	286.768	303.538	296.475	887	280	0.0711	1.66359	35	0.0437538	0	0	0	0	0	0	0	0	0	0	0	0	0	0	0	4.095	0	0	0	0	0	0	0	0	5.8	480
1903	286.797	304.046	296.825	891.25	280.1	0.0748421	1.73184	35	0.0460567	0	0	0	0	0	0	0	0	0	0	0	0	0	0	0	4.263	0	0	0	0	0	0	0	0	5.8	480
1904	286.845	304.587	297.2	895.75	280.2	0.0787812	1.79989	35	0.0484807	0	0	0	0	0	0	0	0	0	0	0	0	0	0	0	4.4305	0	0	0	0	0	0	0	0	5.8	480
1905	287.014	305.179	297.625	900.25	280.3	0.0829275	1.86794	35	0.0510323	0	0	0	0	0	0	0	0	0	0	0	0	0	0	0	4.598	0	0	0	0	0	0	0	0	5.8	480
1906	287.053	305.797	298.075	904.75	280.4	0.0872921	1.93883	35	0.0537182	0	0	0	0	0	0	0	0	0	0	0	0	0	0	0	4.7725	0	0	0	0	0	0	0	0	5.8	480
1907	287.071	306.395	298.5	909.25	280.525	0.0918865	2.02962	35	0.0565455	0	0	0	0	0	0	0	0	0	0	0	0	0	0	0	4.996	0	0	0	0	0	0	0	0	5.8	480
1908	287.536	306.979	298.9	914	280.675	0.0967226	2.13769	35	0.0595216	0	0	0	0	0	0	0	0	0	0	0	0	0	0	0	5.262	0	0	0	0	0	0	0	0	5.8	480
1909	288.179	307.571	299.3	919	280.825	0.101813	2.24575	35	0.0626543	0	0	0	0	0	0	0	0	0	0	0	0	0	0	0	5.528	0	0	0	0	0	0	0	0	5.8	480
1910	288.48	308.156	299.7	923.75	280.975	0.107172	2.35381	35	0.0659519	0	0	0	0	0	0	0	0	0	0	0	0	0	0	0	5.794	0	0	0	0	0	0	0	0	5.8	480
1911	288.963	308.708	300.075	928.25	281.125	0.112812	2.46167	35	0.0694231	0	0	0	0	0	0	0	0	0	0	0	0	0	0	0	6.0595	0	0	0	0	0	0	0	0	5.8	480
1912	289.664	309.247	300.425	933	281.3	0.11875	2.5738	35	0.0730769	0	0	0	0	0	0	0	0	0	0	0	0	0	0	0	6.3355	0	0	0	0	0	0	0	0	5.8	480
1913	290.202	309.8	300.775	938.25	281.475	0.125	2.73306	35	0.0769231	0	0	0	0	0	0	0	0	0	0	0	0	0	0	0	6.7265	0	0	0	0	0	0	0	0	5.8135	480
1914	290.933	310.331	301.1	943.75	281.625	0.131579	2.92466	35	0.0809716	0	0	0	0	0	0	0	0	0	0	0	0	0	0	0	7.196	0	0	0	0	0	0	0	0	5.841	480
1915	291.784	310.841	301.4	949.25	281.8	0.138504	3.04253	35	0.0852333	0	0	0	0	0	0	0	0	0	0	0	0	0	0	0	7.484	0	0	0	0	0	0	0	0	5.869	480
1916	292.238	311.382	301.725	954.75	282	0.145794	3.09705	35	0.0897193	0	0	0	0	0	0	0	0	0	0	0	0	0	0	0	7.616	0	0	0	0	0	0	0	0	5.8975	480
1917	292.544	311.954	302.075	960.25	282.225	0.153467	3.20642	35	0.0944413	0	0	0	0	0	0	0	0	0	0	0	0	0	0	0	7.883	0	0	0	0	0	0	0	0	5.9265	480
1918	292.992	312.512	302.4	966	282.475	0.161544	3.3942	35	0.0994119	0	0	0	0	0	0	0	0	0	0	0	0	0	0	0	8.343	0	0	0	0	0	0	0	0	5.9555	480
1919	293.813	313.047	302.7	972	282.7	0.170047	3.60575	35	0.104644	0	0	0	0	0	0	0	0	0	0	0	0	0	0	0	8.8615	0	0	0	0	0	0	0	0	5.9845	480
1920	294.371	313.601	303.025	977.75	282.925	0.178997	3.8173	35	0.110152	0	0	0	0	0	0	0	0	0	0	0	0	0	0	0	9.38	0	0	0	0	0	0	0	0	6.0135	480
1921	294.952	314.204	303.4	983.25	283.175	0.188417	4.02925	35	0.115949	0	0	0	0	0	0	0	0	0	0	0	0	0	0	0	9.8995	0	0	0	0	0	0	0	0	6.0425	480
1922	295.684	314.809	303.775	989	283.4	0.198334	4.24161	35	0.122052	0	0	0	0	0	0	0	0	0	0	0	0	0	0	0	10.42	0	0	0	0	0	0	0	0	6.0715	480
1923	295.586	315.392	304.125	995	283.6	0.229097	4.45175	35.0325	0.128476	0	0	0	0	0	0	0	0	0	0	0	0	0	0	0	10.935	0	0	0	0	0	0	0	0	6.101	480
1924	295.655	316.027	304.525	1001	283.8	0.284506	4.66191	35.1036	0.135237	0	0	0	0	0	0	0	0	0	0	0	0	0	0	0	11.45	0	0	0	0	0	0	0	0	6.131	480
1925	296.251	316.714	304.975	1007	284	0.345533	4.87408	35.1827	0.142355	0	0	0	0	0	0	0	0	0	0	0	0	0	0	0	11.97	0	0	0	0	0	0	0	0	6.1605	480
1926	296.811	317.38	305.4	1013	284.225	0.409771	5.10453	35.266	0.149848	0	0	0	0	0	0	0	0	0	0	0	0	0	0	0	12.535	0	0	0	0	0	0	0	0	6.19	480
1927	297.141	318.046	305.825	1019	284.45	0.477391	5.35328	35.3537	0.157734	0	0	0	0	0	0	0	0	0	0	0	0	0	0	0	13.145	0	0	0	0	0	0	0	0	6.22	480
1928	297.497	318.755	306.3	1025	284.625	0.548569	5.60205	35.446	0.166036	0	0	0	0	0	0	0	0	0	0	0	0	0	0	0	13.755	0	0	0	0	0	0	0	0	6.2505	480
1929	297.965	319.456	306.775	1030.75	284.8	0.623494	5.85081	35.5432	0.174775	0	0	0	0	0	0	0	0	0	0	0	0	0	0	0	14.365	0	0	0	0	0	0	0	0	6.281	480
1930	298.618	320.124	307.225	1036.25	284.975	0.702362	6.10161	35.6454	0.183974	0	0	0	0	0	0	0	0	0	0	0	0	0	0	0	14.98	0	0	0	0	0	0	0	0	6.3115	480
1931	299.65	320.814	307.7	1041.75	285.125	0.823121	6.35241	35.7531	0.193656	0	0.0317813	0	0	0	0	0	0	0	0	0	0	0	0	0	15.595	0	0	0	0	0	0	0	0	6.342	480
1932	300.716	321.51	308.175	1047.25	285.3	0.951532	6.6036	35.8664	0.203849	0	0.0663262	0	0	0	0	0	0	0	0	0	0.0024255	0	0	0	16.205	0	0	0	0	0	0	0	0	6.3725	480
1933	301.45	322.158	308.6	1052.75	285.5	1.05037	6.8633	35.9857	0.214578	0	0.0720937	0	0	0	0	0	0	0	0	0	0.0072525	0	0	0	16.83	0	0	0	0	0	0	0	0	6.4035	480
1934	301.835	322.773	309	1058	285.7	1.15464	7.18389	36.1113	0.225871	0	0.0783628	0	0	0	0	0	0	0	0	0	0.012032	0	0	0	17.605	0	0	0	0	0	0	0	0	6.4345	480
1935	302.244	323.381	309.4	1063	285.9	1.26466	7.56373	36.2434	0.237759	0	0.0851769	0	0	0	0	0	0	0	0	0	0.01919	0	0.0020765	0	18.515	0	0	0	0	0	0	0	0	6.466	480
1936	302.533	323.937	309.75	1068	286.1	1.38075	7.95036	36.3826	0.250273	0	0.0925836	0	0	0	0	0	0	0	0	0	0.031125	0	0.0062225	0	19.425	0	0	0	0	0	0	0	0	6.4975	480
1937	302.823	324.383	310	1073	286.275	1.50324	8.34413	36.529	0.263445	0	0.100634	0	0	0	0	0	0	0	0	0	0.05022	0	0.010356	0	20.335	0	0	0	0	0	0	0	0	6.529	480
1938	303.562	324.746	310.175	1078	286.425	1.63252	8.75517	36.6832	0.277311	0	0.109385	0	0	0	0	0	0	0	0	0	0.08123	0	0.01655	0	21.245	0	0.005345	0	0	0	0	0	0	6.561	480
1939	304.106	325.056	310.3	1083	286.575	1.76895	9.1942	36.8455	0.291906	0	0.118897	0	0	0	0	0	0	0	0	0.0035225	0.12895	0	0.0248	0	22.155	0	0.021155	0	0	0	0	0	0	6.593	480
1940	304.101	325.322	310.375	1088.25	286.725	1.91295	9.66556	37.0163	0.307269	0	0.129236	0	0	0	0	0	0	0	0	0.0104875	0.19805	0	0.0351	0	23.065	0	0.046995	0	0	0	0	0	0	6.625	480
1941	303.847	325.521	310.375	1093.75	286.9	2.06495	10.191	37.1961	0.323441	0	0.140474	0	0	0	0	0	0	0	0	0.0173	0.2931	0	0.049515	0	24.02	0	0.082435	0	0	0	0	0	0	6.657	480
1942	303.564	325.639	310.3	1099	287.1	2.22541	10.7811	37.3853	0.340465	0	0.152689	0	0	0	0	0	0	0	0	0.023965	0.41875	0	0.06804	0	25.035	0	0.1271	0	0	0	0	0	0	6.689	480
1943	303.426	325.723	310.2	1104	287.3	2.3934	11.4233	37.5846	0.35751	0	0.165966	0	0	0	0	0	0	0	0	0.030485	0.5771	0	0.092715	0	26.07	0	0.1806	0	0	0	0	0	0	6.7215	480
1944	303.267	325.845	310.125	1109.25	287.525	2.56807	12.1183	37.7943	0.373795	0	0.180398	0	0	0	0	0	0	0	0	0.040385	0.77025	0	0.1277	0	27.105	0	0.24255	0	0	0	0	0	0	6.7545	480
1945	303.234	326.032	310.1	1114.75	287.775	2.75008	12.8871	38.015	0.389432	0	0.196085	0	0	0	0	0	0	0	0	0.053585	1.01955	0	0.17505	0	28.135	0	0.3126	0	0	0	0	0	0	6.787	480
1946	303.004	326.279	310.125	1120.5	288.025	2.94006	13.8202	38.2474	0.404511	0	0.213136	0	0	0	0	0	0	0	0	0.070015	1.3515	0.030115	0.27	0	29.165	0	0.39045	0	0	0	0	0	0	6.8195	480
1947	302.458	326.593	310.2	1126.75	288.275	3.13868	15.1102	38.492	0.419121	0	0.231669	0	0	0	0	0	0	0	0	0.10016	1.8695	0.127615	0.44975	0	30.22	0	0.47575	0	0	0	0	0	0	6.853	480
1948	302.011	326.966	310.325	1133.25	288.525	3.34665	16.9117	38.7495	0.433351	0	0.251814	0	0	0	0	0	0	0	0	0.1649	2.7045	0.2767	0.68285	0	31.43	0	0.56815	0	0	0	0	0	0	6.8865	480
1949	301.97	327.399	310.5	1140	288.775	3.5647	19.1118	39.0205	0.44729	0	0.273711	0	0	0	0	0	0	0	0	0.2881	3.7955	0.45415	0.9317	0	32.765	0	0.6674	0	0	0	0	0	0	6.9195	480
1950	301.92	327.921	310.75	1147.25	289	3.79359	21.7426	39.3058	0.461029	0	0.297512	0	0	0	0	0	0	0	0	0.4966	5.0045	0.6521	1.1945	0	34.615	0	0.7732	0	0	0	0	0	0	6.953	480
1951	300.877	328.558	311.1	1155	289.2	4.0504	24.5705	39.6061	0.474657	0	0.323383	0	0	0	0	0	0	0	0.005	0.8132	6.314	0.87715	1.4705	0	36.385	0	0.88935	0	0	0	0	0	0	6.987	480
1952	299.885	329.275	311.5	1163.5	289.425	4.33597	27.235	39.9222	0.488262	0	0.351503	0	0	0	0	0	0	0	0.015	1.1675	7.8115	1.0245	1.7345	0	37.53	0	0.9375	0	0	0	0	0	0	7.021	480
1953	299.764	330.045	311.925	1172.75	289.675	4.63495	29.9757	40.255	0.501935	0	0.382068	0	0	0	0	0	0	0	0.025	1.577	9.4615	1.0775	1.9845	0	38.73	0	0.922	0	0	0	0	0	0	7.0535	480
1954	299.77	330.896	312.425	1182.25	289.9	4.94829	33.0609	40.6052	0.515765	0	0.415292	0	0	0	0	0	0	0	0.035	2.149	11.24	1.139	2.239	0	40.08	0	0.932	0	0	0	0	0	0	7.0845	480
1955	299.81	331.835	313	1192	290.125	5.27698	36.6113	40.9739	0.529841	0	0.451404	0	0	0	0	0	0	0	0.045	2.886	13.24	1.21	2.495	0	41.57	0.025	0.9705	0	0	0	0	0	0	7.1155	480.8
1956	299.88	332.821	313.6	1202.25	290.375	5.62208	40.6989	41.362	0.544253	0	0.490656	0	0	0	0	0	0	0	0.055	3.795	15.485	1.2925	2.75	0	43.2	0.118	1.057	0	0	0	0	0	0	7.1465	483.15
1957	300.018	333.842	314.225	1213	290.6	5.98468	45.4175	41.7705	0.559089	0	0.533322	0	0	0	0	0	0	0	0.065	4.921	18.055	1.3895	3.0015	0	44.96	0.2975	1.19	0	0	0	0	0	0	7.1785	486.4
1958	300.426	334.869	314.848	1224	290.825	6.36597	50.7782	42.2006	0.57444	0	0.579698	0	0	0	0	0	0	0	0.075	6.2365	21.01	1.502	3.2495	0	46.85	0.5675	1.3555	0	0	0	0	0	0	7.212	489.9
1959	301.366	335.945	315.5	1235.25	291.1	6.76717	56.515	42.6532	0.590395	0	0.630107	0	0	0	0	0	0	0	0.085	7.557	24.215	1.6305	3.4955	0	48.865	0.883	1.593	0	0	0	0	0	0	7.246	493.55
1960	302.541	337.17	316.272	1247	291.4	7.18959	62.5823	43.1297	0.607043	0	0.684898	0	0	0	0	0	0	0	0.095	8.8185	27.675	1.779	3.7395	0	50.99	1.2495	1.9065	0	0	0	0	0	0	7.2805	497.3
1961	302.717	338.437	317.075	1259.25	291.675	7.65086	69.4618	43.6313	0.624474	0	0.744455	0	0	0	0	0	0	0	0.11	10.2955	31.685	1.9505	3.9715	0	53.23	1.7055	2.25	0	0	0	0	0	0	7.3165	501.1
1962	302.623	339.626	317.795	1272	291.925	8.15246	77.4216	44.1593	0.642776	0	0.80919	0	0	0	0	0	0	0	0.13	12.235	36.315	2.1465	4.1975	0	55.585	2.19	2.646	0	0	0	0	0	0	7.3535	504.8
1963	303.114	340.707	318.397	1285	292.225	8.69591	86.5951	44.715	0.66204	0	0.879554	0	0	0	0	0	0	0	0.155	14.715	41.585	2.3705	4.433	0	58.025	2.7905	3.1425	0	0	0	0	0	0	7.3915	508.4
1964	303.609	341.733	318.925	1298.25	292.6	9.39162	97.2808	45.5	0.682355	0	0.956037	0	0	0	0	0	0	0	0.18	17.795	47.735	2.6285	4.677	0	60.525	3.517	3.767	0	0	0	0	0	0	7.4305	511.85
1965	304.42	342.989	319.647	1312	293	10.184	109.645	46.45	0.70381	0	1.03917	0	0	0	0	0	0	0	0.2	21.495	54.93	2.9255	4.9295	0.0045	63.085	4.2765	4.517	0	0	0.0005	0	0	0	7.4705	515.05
1966	305.564	344.551	320.647	1326	293.4	10.9556	123.662	47.35	0.726495	0	1.12953	0	0	0	0	0	0	0	0.22	25.775	63.155	3.2665	5.1915	0.0175	65.625	5.242	5.413	0	0	0.0015	0	0	0.0005	7.512	518
1967	306.594	346.076	321.605	1340.25	293.8	11.7388	139.328	48.25	0.750499	0	1.22775	0	0	0	0	0	0	0	0.24	30.575	72.39	3.6585	5.4635	0.0385	68.07	6.722	6.4985	0	0	0.003	0	0.0005	0.0015	7.5545	520.7
1968	307.808	347.7	322.635	1355	294.225	12.5668	156.887	49.15	0.775911	0	1.33452	0	0	0	0	0	0	0	0.27	35.955	82.77	4.1085	5.7455	0.0675	70.425	8.886	7.8105	0	0	0.0055	0.0005	0.001	0.003	7.5985	523.15
1969	309.598	349.607	323.902	1370.25	294.7	13.4084	176.605	50.05	0.802821	0	1.45056	0	0	0	0	0	0	0	0.3	42.05	94.435	4.6245	6.0385	0.1045	72.69	11.59	9.411	0	0	0.0095	0.001	0.0015	0.005	7.644	525.3
1970	311.808	351.328	324.985	1385.75	295.2	14.2482	198.618	50.95	0.831319	0	1.5767	0	0	0	0	0	0	0	0.325	49.05	107.45	5.2165	6.3435	0.15	74.87	14.645	11.21	0	0	0.016	0.001	0.0025	0.0075	7.6905	527.2
1971	314.087	352.822	325.855	1401.25	295.7	15.1011	222.885	51.8	0.861493	0	1.7138	0	0	0.00146	0	0.0125	0	0	0.355	57.065	121.8	5.8955	6.66	0.205	76.97	17.695	13.115	0	0	0.025	0.0015	0.0035	0.011	7.738	528.85
1972	316.193	354.781	327.14	1417	296.225	15.9994	249.194	52.65	0.893433	0	1.86283	0	0	0.00438	0	0.0375	0	0	0.39	65.965	137.3	6.674	6.988	0.2705	78.99	20.92	15.145	0	0.018	0.0375	0.002	0.006	0.0155	7.787	530.3
1973	318.115	357.034	328.678	1433	296.8	16.9475	277.927	53.55	0.927228	0	2.02481	0	0	0.0073	0	0.0625	0	0	0.425	75.835	154.05	7.5685	7.329	0.348	80.93	25.065	17.39	0	0.053	0.055	0.0025	0.0115	0.0215	7.838	531.55
1974	319.6	358.783	329.743	1449	297.4	17.9154	309.889	54.45	0.962969	0	2.20088	0	0	0.01022	0	0.0875	0	0	0.46	87.04	172.45	8.595	7.684	0.4385	82.8	30.44	19.935	0	0.086	0.078	0.0035	0.0205	0.0285	7.8905	532.6
1975	320.882	360.292	330.585	1465	298	18.8898	344.976	55.3	1.00074	0	2.39226	0	0	0.01314	0	0.1125	0	0	0.5	99.56	192.6	9.7715	8.052	0.5445	84.6	36.73	22.54	0	0.1175	0.1075	0.0045	0.0335	0.0365	7.9445	533.5
1976	322.191	362.163	331.748	1481	298.65	19.8874	380.802	56.15	1.04064	0	2.60029	0	0	0.01606	0	0.1375	0	0	0.54	112.3	213.15	11.12	8.4335	0.6685	86.33	42.765	25.225	0	0.1475	0.1445	0.0055	0.051	0.0465	8.0005	534.25
1977	323.874	364.454	333.272	1497.25	299.36	20.9739	416.056	57.05	1.08275	0	2.8264	0	0	0.01898	0	0.1625	0	0	0.59	124.7	232.9	12.67	8.8305	0.8125	87.995	49.29	28.23	0	0.1755	0.1915	0.0065	0.0765	0.0575	8.058	534.9
1978	326.21	366.815	334.848	1513.75	300.082	22.1267	451.017	57.9	1.12717	0	3.09048	0	0	0.0219	0	0.1875	0	0	0.655	136.7	251.9	14.445	9.243	0.9795	89.595	57.79	31.51	0	0.202	0.2475	0.0075	0.112	0.0695	8.117	535.4
1979	328.74	369.278	336.525	1530.25	300.74	23.3668	486.546	58.75	1.17397	0	3.39237	0	0	0.02482	0	0.2	0	0	0.735	148.8	270.5	16.475	9.6705	1.174	91.14	68.985	34.985	0	0.227	0.3125	0.0085	0.156	0.083	8.178	535.85
1980	330.864	371.945	338.36	1547.75	301.382	24.6879	519.303	59.6	1.22326	0	3.71278	0	0	0.02774	0	0.2	0	0	0.835	159.4	287.35	18.805	10.114	1.401	92.625	78.725	38.64	0	0.2505	0.3895	0.0095	0.21	0.0975	8.241	536.25
1981	332.228	374.19	339.728	1566.75	302.22	26.102	550.904	60.45	1.27512	0	4.0517	0	0	0.0292	0	0.225	0	0	0.95	168.55	304.25	21.475	10.575	1.6605	93.95	85.94	42.44	0	0.273	0.4795	0.011	0.275	0.113	8.306	536.55
1982	333.034	376.129	340.793	1586.25	303.098	27.595	583.135	61.3	1.32963	0	4.40914	0	0	0.03045	0	0.275	0	0	1.075	177.85	321.7	24.45	11.045	1.9495	94.9	92.165	46.17	0	0.313	0.582	0.0125	0.351	0.1295	8.373	536.8
1983	334.244	378.41	342.197	1605.85	303.805	29.1286	613.196	62.15	1.3869	0	4.78509	0	0	0.0331	0	0.3	0	0	1.21	185.8	338.15	27.605	11.505	2.2655	95.855	96.325	50	0	0.361	0.6975	0.014	0.4425	0.1475	8.442	537
1984	336.145	380.82	343.783	1623.7	304.397	30.7215	644.36	63	1.44701	0	5.17956	0	0	0.03585	0	0.325	0	0	1.355	193.75	355	30.985	11.965	2.6105	97.27	100.75	54.17	0	0.404	0.828	0.016	0.5495	0.1665	8.513	537.2
1985	338.198	383.063	345.283	1637.99	305.087	32.3442	678.379	63.8	1.51004	0	5.59254	0	0	0.03705	0	0.375	0	0	1.505	202.85	372.5	35.43	12.44	2.981	98.845	105.7	58.465	0	0.4555	0.9775	0.018	0.6715	0.186	8.5865	537.35
1986	340.223	385.274	346.798	1650.43	305.772	34.0163	712.084	64.6	1.57609	0	6.02403	0	0	0.03415	0	0.4	0	0	1.67	212.1	389.8	39.95	12.94	3.363	99.855	109.6	62.85	0	0.4995	1.152	0.0195	0.8125	0.207	8.6625	537.45
1987	342.409	387.795	348.645	1662.2	306.262	35.814	748.374	65.45	1.64525	0	6.47404	0	0	0.03285	0	0.425	0	0	1.855	222.8	408.65	44.285	13.47	3.7535	101.1	112.15	67.415	0	0.6075	1.3545	0.021	0.974	0.229	8.7405	537.55
1988	345.085	390.673	350.738	1673.07	307.195	37.6894	789.249	66.3	1.71761	0	6.94256	0	0	0.0384	0	0.5	0	0	2.04	234.9	428.45	50.53	14.01	4.1635	102.45	116.3	72.44	0	0.791	1.591	0.023	1.1555	0.251	8.8205	537.65
1989	347.729	393.252	352.488	1683.47	308.507	39.5645	830.2	67.1	1.79325	0	7.4296	0	0	0.04655	0	0.575	0	0	2.225	244.9	448.25	57.92	14.55	4.5995	103.45	121.7	78.21	0	0.99	1.869	0.0245	1.3565	0.2755	8.903	537.75
1990	349.911	395.324	353.855	1693.63	309.485	41.5256	866.564	67.9	1.87227	0	7.93515	0	0	0.0547	0.03	0.625	0	0	2.425	252.75	466.15	64.485	15.075	5.0635	104.45	124.45	84.305	0	1.249	2.1645	0.026	1.562	0.3015	8.988	537.8
1991	351.189	397.088	355.017	1703.82	310.113	43.5792	899.397	68.7	1.95632	0	8.45922	0	0	0.0627	0.09	0.675	0	0	2.635	260.15	481.3	70.3	15.555	5.545	105.6	127.9	90.44	0	1.696	2.4485	0.028	1.753	0.326	9.0755	537.85
1992	351.548	398.429	355.885	1711.8	310.603	45.7214	927.681	69.5	2.05	0	9.0018	0	0	0.0705	0.185	0.725	8.12405e-05	0	2.85	264.95	494.4	75.96	15.99	6.0235	105.75	130.9	96.715	0	2.424	2.7125	0.0295	1.9125	0.35	9.1655	537.9
1993	352.275	399.699	356.777	1716.29	311.077	48.0312	948.8	70.3	2.15	0	9.5629	0	0	0.08075	0.375	0.8	0.00024139	0	3.07	267.75	504.8	80.235	16.355	6.4945	104.9	130.5	102.14	0	3.3945	2.9185	0.031	2.0215	0.3725	9.258	537.9
1994	353.737	401.505	358.127	1721.01	311.603	50.6326	963.903	71.1	2.25	0	10.1425	0	0	0.09555	0.75	0.925	0.00350655	0	3.3	269.5	513.1	82.345	16.63	6.957	104.35	126	106.6	0.5695	4.487	3.09	0.0335	2.114	0.393	9.353	537.95
1995	355.939	403.782	359.837	1726.35	312.295	53.8504	973.652	71.9	2.35	0	10.7406	0	0	0.1503	1.645	1.125	0.00973579	0	3.515	269.5	519.55	83.46	16.83	7.3995	103.55	115.9	110.45	1.9145	5.658	3.247	0.037	2.2455	0.4125	9.45	538
1996	358.263	405.945	361.462	1730.01	313.048	57.9728	982.03	72.65	2.45	0	11.4585	0	0	0.27175	3.155	1.45	0.01432	0	3.725	268.95	525.05	83.84	16.965	7.7905	102.8	104.09	115.85	3.587	6.818	3.3915	0.0415	2.3885	0.4265	9.2995	538
1997	359.83	408.22	363.155	1734.82	313.76	62.9186	988.498	73.4	2.55	0	12.2869	0	0	0.43105	5.17	1.85	0.0231704	0	3.955	268.2	529.15	83.68	17.045	8.1025	101.95	91.215	121.95	5.523	7.939	3.556	0.0465	2.4875	0.43	9.08	538
1998	361.471	411.144	365.322	1742.71	314.533	68.4136	992.182	74.2	2.65	0	13.1153	0	0	0.64745	7.71	2.25	0.0370779	0	4.155	266.95	532.4	83.45	17.075	8.3425	100.9	77.815	126.35	7.377	8.946	3.7085	0.0515	2.5565	0.4265	9.155	538
1999	363.283	413.868	367.348	1749.24	315.257	74.4061	995.415	75	2.75	0	13.9438	0.0045173	0	0.95615	10.68	2.65	0.0590527	0	4.33	265.2	534.95	83.015	17.075	8.5275	100.155	65.605	131.7	9.206	9.938	3.8355	0.0535	2.6205	0.422	9.26	538
2000	364.367	415.858	368.865	1751.02	315.85	80.9399	998.627	75.75	2.85	0	14.7722	0.0488482	0	1.32805	13.965	3.05	0.0967079	0	4.54	263.45	537.05	82.515	17.055	8.6705	99.37	54.83	137.4	11.075	11.04	3.953	0.051	2.679	0.417	9.0845	538
2001	365.653	417.91	370.467	1750.71	316.488	88.6304	1001.03	76.5	2.95	0.00398966	15.6006	0.287349	0	1.7224	17.51	3.43758	0.150915	0.373294	4.765	261.9	538.85	82.07	17.02	8.782	98.4	45.785	141.95	12.695	12.035	4.0455	0.046	2.733	0.41	8.689	538
2002	367.978	420.573	372.522	1752.19	317.245	97.4707	1003.21	77.25	3.05124	0.011991	16.429	0.720208	0.00740544	2.13305	21.365	3.85333	0.208567	1.11091	4.985	260.1	539.95	81.595	16.98	8.869	97.385	38.14	147.45	14.18	12.975	4.112	0.04	2.7825	0.402	8.349	538
2003	370.52	423.488	374.76	1754.76	318.017	106.775	1004	77.9915	3.15494	0.0195016	17.2574	1.21745	0.0291657	2.60335	25.44	4.34892	0.274155	1.83169	5.215	257.95	540.05	80.93	16.94	8.936	96.325	31.78	152.95	15.565	13.755	4.1695	0.0345	2.828	0.3935	8.194	538
2004	372.785	426.116	376.812	1755.07	318.71	116.584	1003.93	78.772	3.26099	0.0263954	18.0858	1.7671	0.0644009	3.12045	29.775	4.92206	0.367093	2.53767	5.445	256.05	539.9	80.12	16.9	8.988	95.385	26.475	157.45	16.605	14.35	4.207	0.0295	2.87	0.384	8.0885	538
2005	375.014	428.653	378.812	1753.73	319.44	126.769	1003.58	79.5471	3.3693	0.0332905	18.9129	2.35921	0.112284	3.62618	34.36	5.57096	0.487703	3.23048	5.675	254.1	539.4	79.31	16.855	9.0285	94.435	22.075	162.25	17.195	14.94	4.2265	0.0255	2.908	0.3735	7.933	538
2006	377.407	431.283	380.827	1754.52	320.2	136.988	1001.53	80.3168	3.47978	0.0405451	19.7485	2.98559	0.17203	4.14253	38.805	6.29394	0.631518	3.91149	5.91	251.3	537.5	78.48	16.81	9.059	93.435	18.52	167.7	17.67	15.365	4.241	0.023	2.9425	0.363	7.748	538
2007	379.791	433.894	382.777	1757.39	320.896	147.482	998.531	81.1542	3.5911	0.0481114	20.5812	3.63957	0.24289	4.64466	43.165	6.99277	0.79542	4.69632	6.175	247.95	534.7	77.595	16.76	9.081	92.3	15.61	173.9	18.22	15.625	4.2425	0.0195	2.9735	0.352	7.5945	538
2008	382.257	436.616	384.8	1760.82	321.607	158.251	995.689	82.1325	3.70202	0.0557901	21.3891	4.31703	0.324185	5.07561	47.4683	7.57029	0.981725	5.68738	6.45082	244.6	531.8	76.72	16.705	9.096	90.96	13.23	180.5	18.81	15.865	4.2255	0.015	3.0005	0.3405	7.5405	538
2009	384.88	439.488	386.935	1764.7	322.332	169.113	992.635	83.2512	3.81255	0.0635728	22.1721	5.01368	0.415258	5.43715	51.6372	8.02564	1.18979	6.85914	6.7202	241.032	528.541	75.8199	16.6514	9.10541	89.2824	11.274	187.23	19.3903	16.6701	4.18635	0.0116919	3.02115	0.329055	7.39874	538.008
2010	387.607	442.38	389.072	1768.69	323.071	180.252	989.367	84.5101	3.92266	0.0714537	22.9304	5.72472	0.515467	5.73094	55.8295	8.35883	1.41893	8.18813	7.00506	237.297	524.956	74.9019	16.5939	9.11064	87.2747	9.66293	194.041	19.9541	17.9829	4.12724	0.00945723	3.03574	0.317179	7.23031	538.019
2011	390.461	445.239	391.166	1772.79	323.826	191.633	986.001	85.9091	4.03237	0.0794329	23.664	6.4475	0.624252	5.95931	60.0437	8.5722	1.66855	9.65485	7.30539	233.562	521.229	73.9838	16.5357	9.1131	85.0878	8.27164	201.131	20.5186	19.1576	4.0574	0.00728664	3.04684	0.305358	7.17932	538.024
2012	393.405	448.068	393.241	1776.56	324.581	202.889	982.509	87.3803	4.14199	0.0872164	24.3485	7.32944	0.734633	6.15414	64.1453	8.72847	1.91191	11.0967	7.61671	229.831	517.361	73.0646	16.4771	9.11349	82.7336	7.06089	208.464	21.0737	20.1892	3.97857	0.00516144	3.05452	0.293654	7.15914	538.027
2013	396.316	450.85	395.298	1779.59	325.325	213.676	978.907	88.8559	4.25184	0.0945108	24.9595	8.49066	0.840055	6.34623	68.0089	8.88917	2.12308	12.3711	7.93454	226.112	513.372	72.1496	16.4184	9.11235	80.2223	6.07108	216.008	21.611	21.0739	3.8923	0.00365606	3.05904	0.282122	7.1487	538.028
2014	399.17	453.596	397.346	1781.97	326.057	224.016	975.194	90.3359	4.36193	0.101316	25.4973	9.87983	0.940835	6.5357	71.6515	9.05422	2.30299	13.4992	8.25888	222.41	509.28	71.2415	16.3596	9.11003	77.5634	5.26187	223.729	22.1227	21.8085	3.79997	0.00258975	3.06062	0.270804	7.14243	538.028
2015	401.993	456.313	399.387	1783.79	326.778	233.932	971.374	91.8203	4.47224	0.107632	25.9622	11.4554	1.03727	6.72268	75.0893	9.22356	2.45257	14.4995	8.58973	218.734	505.103	70.3425	16.3009	9.10685	74.7668	4.60035	231.602	22.6023	22.3912	3.70282	0.00183443	3.0595	0.259729	7.1396	538.029
2016	404.785	458.996	401.418	1785.1	327.486	243.444	967.409	93.309	4.58279	0.11346	26.3544	13.1832	1.12964	6.90723	78.3366	9.39711	2.57269	15.3879	8.92709	215.086	500.853	69.4531	16.2423	9.10299	71.8388	3.9126	239.602	23.0441	22.8209	3.60191	0.0012994	3.05587	0.24892	6.94216	538.029
2017	407.543	461.638	403.431	1785.93	328.183	252.572	963.324	94.8021	4.69356	0.118799	26.6743	15.0351	1.21817	7.08941	81.4058	9.57475	2.66419	16.178	9.27095	211.463	496.539	68.5731	16.1837	9.09864	68.9042	3.20309	247.661	23.4471	23.106	3.49809	0.000920422	3.04985	0.238393	6.6987	538.029
2018	410.265	464.239	405.425	1786.3	328.867	261.335	959.165	96.2995	4.80457	0.123649	26.922	16.988	1.30311	7.26926	84.3083	9.75638	2.72788	16.8816	9.62131	207.866	492.166	67.7021	16.1252	9.09392	66.0835	2.62166	255.683	23.8147	23.2642	3.39217	0.000651974	3.04159	0.228168	6.63936	538.029
2019	412.998	466.8	407.401	1786.25	329.54	269.751	954.892	97.8014	4.91581	0.128012	27.0977	19.0234	1.38466	7.44684	87.0554	9.94191	2.76457	17.5094	9.97817	204.296	487.745	66.8402	16.0668	9.08893	63.3721	2.1451	263.591	24.15	23.311	3.28488	0.000461821	3.03124	0.21825	6.6217	538.029
2020	415.77	469.324	409.36	1785.79	330.202	277.838	950.482	99.3075	5.02727	0.131886	27.2019	21.1258	1.46302	7.62221	89.6571	10.1312	2.77502	18.0705	10.3415	200.754	483.281	65.9872	16.0084	9.08371	60.7657	1.75524	271.325	24.4559	23.2607	3.17685	0.000327127	3.01894	0.208635	6.6131	538.029
2021	418.577	471.804	411.298	1784.89	330.852	285.606	945.89	100.818	5.13897	0.135272	27.2346	23.2808	1.53834	7.7953	92.1204	10.3242	2.75995	18.572	10.7114	197.231	478.772	65.1415	15.95	9.07831	58.2561	1.4366	278.828	24.7338	23.1256	3.06852	0.000231718	3.00472	0.199335	6.60169	538.029
2022	421.431	474.263	413.219	1784.03	331.502	292.997	941.092	102.333	5.25089	0.13835	27.2297	25.3156	1.61094	7.96554	94.4464	10.5188	2.73126	19.0188	11.0848	193.723	474.219	64.302	15.8915	9.07276	55.8372	1.17613	286.062	24.9859	22.9168	2.96031	0.000164136	2.98864	0.19035	6.58663	538.029
2023	424.325	476.746	415.144	1783.73	332.165	299.978	936.105	103.852	5.363	0.141303	27.2209	27.0917	1.68115	8.13255	96.6404	10.7132	2.70058	19.4169	11.4588	190.239	469.634	63.4697	15.8329	9.06712	53.5086	0.962851	293.012	25.2154	22.6453	2.85277	0.000116264	2.97089	0.181672	6.57381	538.029
2024	427.265	479.264	417.083	1783.99	332.841	306.607	930.944	105.376	5.4753	0.144129	27.2082	28.6584	1.74915	8.2965	98.7133	10.9075	2.66799	19.7729	11.8334	186.782	465.027	62.6453	15.7744	9.06138	51.2695	0.788266	299.669	25.4252	22.3207	2.74632	8.2355e-05	2.95163	0.173313	6.56395	538.029
2025	430.257	481.819	419.036	1784.79	333.529	312.934	925.627	106.903	5.58781	0.146828	27.1917	30.056	1.81511	8.45759	100.676	11.1017	2.63356	20.0927	12.2085	183.359	460.408	61.8294	15.7159	9.05558	49.1185	0.645187	306.029	25.618	21.9518	2.64135	5.83355e-05	2.93101	0.165271	6.55705	538.029
2026	433.298	484.411	421.004	1786.12	334.23	319.001	920.173	108.435	5.70051	0.149402	27.1715	31.3178	1.87919	8.61602	102.537	11.2959	2.59736	20.3817	12.5843	179.974	455.786	61.0229	15.6575	9.04973	47.0543	0.527953	312.095	25.7962	21.5463	2.53817	4.13215e-05	2.90918	0.157545	6.55348	538.029
2027	436.382	487.032	422.978	1787.96	334.943	324.843	914.594	109.972	5.81341	0.151849	27.1474	32.4698	1.94152	8.77191	104.306	11.4901	2.55947	20.6439	12.9606	176.629	451.167	60.2256	15.5993	9.04385	45.0739	0.432087	317.869	25.9615	21.1109	2.43702	2.92698e-05	2.88623	0.150132	6.55121	538.029
2028	439.497	489.669	424.95	1790.24	335.669	330.486	908.891	111.512	5.9265	0.15417	27.1197	33.5324	2.00223	8.92536	105.989	11.6844	2.51991	20.8828	13.3376	173.322	446.55	59.4371	15.5412	9.03795	43.173	0.353681	323.353	26.1149	20.6514	2.33804	2.0733e-05	2.86224	0.143014	6.54808	538.029
2029	442.637	492.316	426.916	1792.91	336.408	335.953	903.069	113.057	6.03979	0.156364	27.0882	34.5225	2.0614	9.07644	107.591	11.8787	2.47874	21.1011	13.7151	170.051	441.938	58.6571	15.4831	9.03202	41.348	0.289545	328.55	26.2576	20.173	2.24139	1.46861e-05	2.83728	0.136197	6.54406	538.029
2030	445.562	494.974	428.876	1795.92	337.159	341.265	897.136	114.606	6.15328	0.158433	27.053	35.4539	2.11915	9.22527	109.119	12.0731	2.43601	21.3016	14.0932	166.818	437.334	57.8855	15.4251	9.02608	39.5958	0.237075	333.468	26.3906	19.6802	2.14717	1.04028e-05	2.81142	0.129668	6.5396	538.029
2031	448.022	497.643	430.832	1799.27	337.922	346.441	891.105	116.159	6.26697	0.160376	27.0141	36.338	2.17557	9.37194	110.579	12.2675	2.39176	21.4866	14.472	163.623	432.739	57.122	15.3672	9.02013	37.9138	0.194145	338.117	26.515	19.1771	2.0555	7.36873e-06	2.78473	0.123411	6.5352	538.029
2032	450.296	500.349	432.807	1802.86	338.697	351.475	884.829	117.716	6.38058	0.162256	26.9723	37.1665	2.23107	9.51652	111.969	12.4622	2.34741	21.6559	14.8511	160.459	428.15	56.3657	15.3093	9.01414	36.2969	0.159003	342.285	26.6231	18.6663	1.96638	5.21959e-06	2.75723	0.11742	6.52671	538.029
2033	452.642	503.125	434.831	1806.67	339.485	356.367	878.065	119.275	6.49384	0.164137	26.9282	37.9331	2.28605	9.65912	113.29	12.6573	2.30436	21.8095	15.2304	157.325	423.565	55.6156	15.2513	9.0081	34.7414	0.130223	345.604	26.7015	18.1495	1.87986	3.69726e-06	2.72894	0.11168	6.51442	538.029
2034	455.045	505.984	436.916	1810.73	340.285	361.138	870.652	120.835	6.60676	0.166019	26.882	38.6511	2.34059	9.79989	114.548	12.8528	2.26258	21.9501	15.61	154.225	418.99	54.8726	15.1933	9.00205	33.2467	0.106658	347.802	26.7408	17.6292	1.79602	2.61892e-06	2.69997	0.106193	6.50415	538.029
2035	457.509	508.937	439.068	1815.04	341.097	365.806	862.471	122.398	6.71934	0.167902	26.8337	39.3315	2.39474	9.93898	115.75	13.0488	2.22206	22.08	15.9897	151.163	414.433	54.1373	15.1353	8.99598	31.8122	0.0873669	348.674	26.7329	17.1073	1.7149	1.85509e-06	2.67043	0.10096	6.49668	538.029
2036	460.033	511.983	441.286	1819.63	341.922	370.388	853.435	123.962	6.83157	0.169787	26.7833	39.983	2.44858	10.0765	116.902	13.2454	2.18277	22.2012	16.3697	148.142	409.898	53.4103	15.0775	8.9899	30.4366	0.0715753	348.069	26.6713	16.5854	1.63657	1.31404e-06	2.64042	0.0959705	6.49204	538.029
2037	462.612	515.121	443.567	1824.51	342.759	374.896	843.486	125.529	6.94345	0.171673	26.7308	40.6132	2.50216	10.2127	118.01	13.4426	2.14469	22.3154	16.7499	145.168	405.393	52.6922	15.0197	8.98382	29.1188	0.0586494	345.885	26.5507	16.065	1.56105	9.30792e-07	2.61006	0.0912034	6.49061	538.029
2038	465.234	518.339	445.903	1829.67	343.607	379.342	832.58	127.098	7.05499	0.17356	26.6763	41.2268	2.55552	10.3476	119.077	13.6405	2.1078	22.424	17.1304	142.239	400.918	51.983	14.9622	8.97773	27.8568	0.0480681	342.051	26.3665	15.5474	1.48831	6.59319e-07	2.57938	0.0866587	6.49039	538.029
2039	467.886	521.623	448.282	1835.06	344.467	383.73	820.684	128.668	7.16618	0.175447	26.6197	41.8266	2.60867	10.4812	120.105	13.839	2.07204	22.5273	17.511	139.354	396.474	51.2823	14.9048	8.97164	26.6476	0.0394036	336.52	26.1145	15.0333	1.41831	4.67024e-07	2.54842	0.0823352	6.48926	538.029
2040	470.718	524.967	450.698	1840.65	345.339	388.065	807.782	130.241	7.27703	0.177337	26.561	42.4151	2.66163	10.6136	121.098	14.0382	2.03739	22.6259	17.8919	136.512	392.059	50.5897	14.8475	8.96555	25.4888	0.0323072	329.276	25.7917	14.5234	1.351	3.30813e-07	2.51719	0.0782103	6.48717	538.029
2041	473.888	528.366	453.15	1846.42	346.223	392.353	793.874	131.816	7.38754	0.179227	26.5004	42.9943	2.71441	10.7448	122.058	14.2379	2.00381	22.7203	18.273	133.712	387.673	49.905	14.7902	8.95944	24.3782	0.0264937	320.322	25.3958	14.0184	1.2863	2.34329e-07	2.48573	0.0742735	6.48438	538.029
2042	477.208	531.825	455.645	1852.23	347.116	396.537	779.103	133.391	7.4977	0.181114	26.4381	43.4895	2.76758	10.8743	122.983	14.4379	1.97038	22.8096	18.6543	130.954	383.316	49.228	14.7331	8.95332	23.3135	0.0217304	309.883	24.9322	13.5194	1.22417	1.65985e-07	2.45406	0.0705261	6.4808	538.029
2043	480.511	535.333	458.182	1857.89	348.02	400.565	763.705	134.965	7.60751	0.182993	26.3748	43.8366	2.82163	11.0017	123.871	14.6377	1.93623	22.8916	19.0359	128.23	378.981	48.5575	14.676	8.94718	22.2911	0.0178257	298.356	24.4124	13.0274	1.1645	1.17574e-07	2.42217	0.0669556	6.47239	538.029
2044	483.84	538.892	460.762	1863.35	348.932	404.453	747.882	136.539	7.71698	0.184864	26.3102	44.0599	2.87646	11.1267	124.721	14.8372	1.90133	22.9665	19.4177	125.538	374.664	47.8925	14.6188	8.94102	21.3085	0.0146235	286.066	23.8463	12.5434	1.10724	8.32828e-08	2.39004	0.0635518	6.45992	538.029
2045	487.223	542.526	463.405	1868.69	349.853	408.225	731.825	138.112	7.82611	0.186727	26.2446	44.184	2.93205	11.2496	125.537	15.0364	1.86573	23.0357	19.7998	122.882	370.37	47.2339	14.5615	8.93483	20.3653	0.0119977	273.298	23.244	12.0687	1.05235	5.89928e-08	2.35774	0.0603084	6.44928	538.029
2046	490.676	546.248	466.12	1873.95	350.783	411.902	715.691	139.684	7.93489	0.188583	26.1778	44.2284	2.98841	11.3706	126.324	15.2356	1.82946	23.1004	20.1821	120.264	366.105	46.5822	14.5043	8.92863	19.4608	0.00984472	260.281	22.6143	11.6041	0.999789	4.17871e-08	2.32536	0.0572188	6.4412	538.029
2047	494.205	550.062	468.908	1879.16	351.723	415.5	699.604	141.255	8.04332	0.190431	26.11	44.2091	3.04551	11.4897	127.086	15.4346	1.79254	23.1617	20.5647	117.688	361.871	45.9378	14.4472	8.92241	18.5943	0.00807939	247.203	21.9646	11.1504	0.949506	2.95996e-08	2.29294	0.0542874	6.43568	538.029
2048	497.814	553.97	471.768	1884.39	352.67	419.034	683.671	142.825	8.15141	0.192271	26.0411	44.1393	3.10337	11.6072	127.826	15.6336	1.755	23.2207	20.9475	115.155	357.674	45.3013	14.3902	8.91619	17.7651	0.00663195	234.214	21.3017	10.7083	0.901446	2.09666e-08	2.26056	0.0514964	6.43311	538.029
2049	501.495	557.962	474.692	1889.63	353.627	422.513	667.965	144.395	8.25916	0.194103	25.9712	44.0282	3.16195	11.723	128.545	15.8327	1.71686	23.2777	21.3306	112.667	353.513	44.6726	14.3333	8.90996	16.9716	0.00544495	221.429	20.6308	10.2783	0.855542	1.48516e-08	2.22825	0.048839	6.43151	538.029
2050	505.132	562.025	477.67	1894.85	354.592	425.942	652.54	145.964	8.36656	0.195927	25.9002	43.8822	3.22119	11.8373	129.244	16.0317	1.67812	23.3326	21.7139	110.22	349.389	44.0514	14.2765	8.90372	16.212	0.00447124	208.939	19.9561	9.86048	0.811718	1.052e-08	2.19602	0.0463187	6.42879	538.029
2051	508.615	566.154	480.697	1900.05	355.566	429.324	637.437	147.531	8.47362	0.197743	25.8281	43.7071	3.28105	11.95	129.925	16.2306	1.63879	23.3854	22.0975	107.814	345.298	43.4374	14.2199	8.89748	15.4848	0.00367228	196.81	19.2814	9.45506	0.769891	7.45175e-09	2.16385	0.0439281	6.42509	538.029
2052	512.053	570.351	483.777	1905.16	356.548	432.722	622.687	149.099	8.58035	0.199555	25.7552	43.5873	3.33949	12.0615	130.59	16.43	1.59954	23.4372	22.4814	105.449	341.242	42.8306	14.1633	8.89122	14.7887	0.00301649	185.091	18.6096	9.06206	0.729989	5.27839e-09	2.13179	0.0416499	6.42067	538.029
2053	515.559	574.622	486.916	1910.09	357.539	436.184	608.312	150.666	8.68678	0.201363	25.6816	43.5919	3.39458	12.1723	131.241	16.6303	1.56099	23.4886	22.8658	103.124	337.22	42.2308	14.1068	8.88495	14.1222	0.00247804	173.818	17.9431	8.68144	0.691941	3.73891e-09	2.09986	0.0394782	6.41545	538.029
2054	519.119	578.952	490.103	1914.8	358.539	439.687	594.312	152.234	8.79289	0.203169	25.6074	43.6945	3.44643	12.2821	131.877	16.8314	1.52311	23.5384	23.2507	100.834	333.226	41.637	14.0503	8.87866	13.4832	0.00203572	163.01	17.2836	8.31297	0.655658	2.64843e-09	2.068	0.0374172	6.40544	538.029
2055	522.733	583.34	493.338	1919.23	359.547	443.213	580.689	153.802	8.89869	0.204972	25.5326	43.8747	3.49517	12.3908	132.494	17.0331	1.48586	23.5859	23.636	98.5768	329.255	41.0484	13.9938	8.87235	12.87	0.00167227	152.681	16.6329	7.9565	0.62107	1.876e-09	2.03619	0.0354602	6.39133	538.029
2056	526.424	587.809	496.642	1923.46	360.564	446.76	567.458	155.369	9.00418	0.206773	25.4571	44.1202	3.54103	12.4986	133.097	17.2355	1.44924	23.6319	24.0218	96.3546	325.312	40.4658	13.9372	8.86601	12.2823	0.00137368	142.843	15.9933	7.61212	0.588121	1.32885e-09	2.00449	0.0336032	6.37902	538.029
2057	530.205	592.375	500.022	1927.55	361.589	450.325	554.63	156.937	9.10936	0.208571	25.3809	44.4205	3.58422	12.6055	133.687	17.4387	1.41323	23.6771	24.4081	94.1696	321.401	39.8895	13.8807	8.85965	11.7195	0.00112843	133.502	15.3666	7.2798	0.556758	9.41279e-10	1.97296	0.0318418	6.36925	538.029
2058	534.083	597.043	503.483	1931.54	362.623	453.907	542.208	158.505	9.21423	0.210367	25.3041	44.7671	3.62493	12.7117	134.267	17.6426	1.37783	23.7221	24.7949	92.0237	317.524	39.3199	13.8242	8.85328	11.1812	0.000927	124.656	14.7544	6.95948	0.526927	6.66748e-10	1.94163	0.030172	6.36201	538.029
2059	538.059	601.814	507.023	1935.48	363.664	457.504	530.194	160.073	9.3188	0.212159	25.2267	45.1535	3.66336	12.8173	134.84	17.8474	1.34302	23.7676	25.1821	89.9187	313.686	38.7575	13.7679	8.84691	10.6667	0.000761593	116.298	14.1579	6.65103	0.498576	4.72286e-10	1.91055	0.0285897	6.3577	538.029
2060	542.447	606.679	510.634	1939.39	364.714	461.115	518.581	161.641	9.42305	0.213949	25.1487	45.5727	3.69965	12.9223	135.406	18.053	1.30879	23.8136	25.5698	87.8544	309.886	38.2023	13.7118	8.84053	10.1752	0.000625756	108.418	13.5778	6.35424	0.47163	3.3454e-10	1.87974	0.0270904	6.35432	538.029
2061	547.568	611.623	514.305	1943.24	365.772	464.731	507.354	163.208	9.52699	0.215737	25.0701	46.0173	3.7339	13.0267	135.965	18.2594	1.27512	23.8595	25.958	85.8289	306.123	37.6539	13.6557	8.83414	9.70528	0.000514178	101	13.0145	6.06882	0.446029	2.36969e-10	1.84919	0.0256694	6.34944	538.029
2062	553.047	616.627	518.027	1946.83	366.836	468.35	496.499	164.776	9.63086	0.217522	24.9911	46.4857	3.76617	13.1304	136.515	18.4664	1.24216	23.9048	26.3467	83.8401	302.392	37.1118	13.5997	8.82773	9.25585	0.000422529	94.0271	12.4684	5.79455	0.421715	1.67855e-10	1.81887	0.0243115	6.34311	538.029
2063	558.556	621.682	521.797	1950.02	367.905	471.971	486.002	166.341	9.73488	0.219305	24.9119	46.977	3.79651	13.2333	137.057	18.6739	1.21009	23.9494	26.7358	81.8872	298.695	36.5759	13.5438	8.82132	8.82591	0.000347257	87.485	11.9401	5.53123	0.398622	1.18899e-10	1.7888	0.0230132	6.33623	538.029
2064	564.147	626.794	525.619	1952.84	368.979	475.591	475.852	167.904	9.83906	0.221087	24.8325	47.4864	3.82503	13.3353	137.59	18.8818	1.17888	23.993	27.1255	79.9695	295.029	36.046	13.4879	8.81488	8.41465	0.000285424	81.3538	11.4293	5.27851	0.376708	8.42212e-11	1.75898	0.0217825	6.32875	538.029
2065	569.807	631.949	529.486	1955.22	370.057	479.197	466.021	169.466	9.94339	0.222866	24.7529	48.0061	3.85173	13.4364	138.11	19.09	1.14849	24.0342	27.5157	78.0832	291.389	35.5212	13.432	8.80842	8.02068	0.000234605	75.6113	10.9356	5.03598	0.355903	5.96574e-11	1.72935	0.0206149	6.31651	538.029
2066	575.539	637.15	533.4	1957.15	371.14	482.781	456.49	171.026	10.0479	0.224644	24.6729	48.531	3.87661	13.5364	138.615	19.2983	1.11887	24.0723	27.9063	76.2258	287.772	35.0009	13.3759	8.80192	7.64292	0.000192824	70.2364	10.4585	4.80325	0.336146	4.22579e-11	1.6999	0.019507	6.30011	538.029
2067	581.37	642.425	537.381	1958.71	372.227	486.349	447.254	172.584	10.1525	0.226419	24.5927	49.0618	3.89983	13.6353	139.107	19.5068	1.09001	24.1081	28.2975	74.3995	284.18	34.4857	13.3198	8.7954	7.28118	0.00015848	65.2121	9.99825	4.58008	0.317399	2.99331e-11	1.67069	0.0184561	6.28534	538.029
2068	587.317	647.792	541.443	1959.97	373.318	489.904	438.306	174.14	10.2573	0.228193	24.5122	49.5988	3.92153	13.7334	139.588	19.7156	1.06191	24.1423	28.6891	72.6057	280.617	33.9759	13.2638	8.78885	6.93512	0.000130254	60.5206	9.55475	4.36623	0.299623	2.12029e-11	1.64172	0.01746	6.27296	538.029
2069	593.39	653.258	545.589	1960.99	374.414	493.451	429.639	175.695	10.3623	0.229965	24.4315	50.1422	3.94183	13.8306	140.061	19.9246	1.03453	24.1757	29.0812	70.8458	277.085	33.4719	13.2077	8.78229	6.60438	0.000107058	56.1443	9.12799	4.16146	0.28278	1.50189e-11	1.61305	0.016516	6.26296	538.029
2070	599.425	658.827	549.82	1961.83	375.515	496.994	421.247	177.248	10.4674	0.231734	24.3505	50.6927	3.96086	13.9272	140.528	20.134	1.00787	24.2089	29.4739	69.1211	273.588	32.9741	13.1518	8.77571	6.28859	8.79982e-05	52.0661	8.71782	3.96551	0.266818	1.06385e-11	1.58469	0.0156221	6.25573	538.029
2071	605.238	664.492	554.129	1962.51	376.619	500.534	413.117	178.799	10.5727	0.233502	24.2694	51.2492	3.9787	14.0231	140.989	20.3437	0.9819	24.2419	29.867	67.4316	270.126	32.4825	13.0959	8.76912	5.98719	7.23369e-05	48.2685	8.3239	3.77806	0.251699	7.53571e-12	1.55666	0.0147755	6.24953	538.029
2072	610.949	670.201	558.486	1962.73	377.725	504.019	405.236	180.347	10.6777	0.235266	24.1881	51.7691	3.99532	14.1178	141.435	20.5531	0.956605	24.2711	30.2601	65.776	266.698	31.9969	13.0401	8.76252	5.69944	5.94637e-05	44.7332	7.94556	3.59873	0.237401	5.33786e-12	1.52895	0.0139738	6.24216	538.029
2073	616.681	675.907	562.867	1962.18	378.828	507.406	397.59	181.892	10.7819	0.237023	24.1067	52.2169	4.01066	14.2108	141.854	20.7615	0.931959	24.2931	30.6528	64.1535	263.302	31.5171	12.9844	8.7559	5.42471	4.88789e-05	41.4428	7.58214	3.42719	0.223872	3.78104e-12	1.50155	0.0132146	6.23336	538.029
2074	622.422	681.614	567.272	1960.92	379.927	510.703	390.167	183.433	10.8853	0.238774	24.0254	52.6043	4.02478	14.302	142.247	20.9689	0.90794	24.3085	31.045	62.5635	259.939	31.043	12.9288	8.74927	5.16243	4.0175e-05	38.3819	7.23316	3.26313	0.211061	2.67827e-12	1.47447	0.0124955	6.22373	538.029
2075	628.174	687.324	571.701	1959.01	381.024	513.917	382.957	184.971	10.9879	0.240518	23.9439	52.9408	4.03771	14.3915	142.614	21.1751	0.884528	24.3176	31.4367	61.0055	256.607	30.5745	12.8732	8.74262	4.91203	3.30177e-05	35.5356	6.89821	3.10625	0.198941	1.89713e-12	1.44771	0.0118146	6.21348	538.029
2076	633.924	693.023	576.146	1956.41	382.118	517.047	375.941	186.505	11.0898	0.242256	23.8623	53.2302	4.04939	14.4791	142.952	21.3801	0.861693	24.3195	31.828	59.4763	253.302	30.1109	12.8176	8.73594	4.67266	2.71303e-05	32.889	6.5766	2.95624	0.187477	1.34382e-12	1.42122	0.0111693	6.19865	538.029
2077	639.672	698.711	580.606	1953.13	383.209	520.091	369.103	188.036	11.1909	0.243988	23.7806	53.4772	4.05979	14.5645	143.259	21.5836	0.83941	24.3139	32.2188	57.974	250.019	29.6517	12.7619	8.72923	4.44365	2.22868e-05	30.4284	6.26773	2.81277	0.176624	9.51884e-13	1.39499	0.0105577	6.17989	538.029
2078	645.448	704.419	585.105	1949.27	384.297	523.063	362.443	189.563	11.2912	0.245713	23.6988	53.6909	4.06903	14.6481	143.538	21.7858	0.817671	24.3023	32.6091	56.5001	246.764	29.1973	12.7062	8.7225	4.22484	1.83035e-05	28.1426	5.97149	2.67563	0.166349	6.7426e-13	1.36906	0.00997818	6.16287	538.029
2079	651.271	710.166	589.653	1944.92	385.383	525.974	355.956	191.087	11.3908	0.247432	23.6169	53.8784	4.07721	14.7298	143.793	21.9867	0.796464	24.2858	32.999	55.0559	243.537	28.748	12.6505	8.71574	4.01598	1.5029e-05	26.0204	5.68764	2.5446	0.156653	4.77607e-13	1.34342	0.00942948	6.14834	538.029
2080	656.941	715.961	594.257	1940.17	386.465	528.832	349.639	192.607	11.4895	0.249144	23.5348	54.0457	4.08443	14.8098	144.027	22.1864	0.775779	24.2653	33.3884	53.6421	240.342	28.3043	12.5949	8.70896	3.81682	1.23379e-05	24.0513	5.41588	2.4195	0.147502	3.38309e-13	1.31811	0.00891017	6.13627	538.029
2081	662.252	721.811	598.918	1935.09	387.545	531.649	343.491	194.124	11.5875	0.25085	23.4527	54.1987	4.0908	14.8883	144.242	22.385	0.755607	24.2421	33.7773	52.2597	237.182	27.8664	12.5393	8.70217	3.62711	1.01271e-05	22.2257	5.15597	2.30009	0.138866	2.39639e-13	1.29317	0.00841893	6.12722	538.029
2082	667.286	727.553	603.538	1928.85	388.618	534.377	337.504	195.636	11.685	0.252547	23.3705	54.2997	4.09618	14.9645	144.429	22.5817	0.735935	24.2125	34.1657	50.9088	234.057	27.4345	12.484	8.69538	3.44649	8.31096e-06	20.5333	4.90744	2.18612	0.130711	1.69746e-13	1.26861	0.00795435	6.11917	538.029
2083	672.087	733.025	608.02	1920.64	389.682	536.971	331.669	197.141	11.7821	0.254234	23.2881	54.3146	4.1004	15.0376	144.574	22.7757	0.716743	24.1725	34.5535	49.5883	230.965	27.0083	12.4287	8.68857	3.27449	6.81872e-06	18.9644	4.66966	2.07738	0.123006	1.20239e-13	1.24441	0.00751494	6.10979	538.029
2084	676.619	738.232	612.364	1910.61	390.736	539.437	325.979	198.639	11.879	0.255909	23.2056	54.2555	4.10343	15.1075	144.676	22.9669	0.698011	24.1223	34.9407	48.2973	227.907	26.5877	12.3736	8.68176	3.11067	5.59257e-06	17.51	4.44213	1.97362	0.115738	8.517e-14	1.22056	0.00709932	6.09904	538.029
2085	680.889	743.183	616.572	1898.9	391.78	541.783	320.428	200.131	11.9755	0.257574	23.1228	54.133	4.10527	15.1741	144.736	23.1551	0.679724	24.0624	35.3272	47.0354	224.882	26.1726	12.3185	8.67493	2.95467	4.58516e-06	16.1619	4.22443	1.87456	0.108879	6.03296e-14	1.19706	0.00670622	6.08751	538.029
2086	684.909	747.886	620.648	1885.67	392.815	544.017	315.009	201.616	12.0718	0.259228	23.0398	53.9559	4.10592	15.2375	144.753	23.3404	0.661865	23.9931	35.7132	45.802	221.889	25.763	12.2636	8.66809	2.80613	3.7576e-06	14.9127	4.01616	1.78001	0.102419	4.2734e-14	1.1739	0.00633446	6.07536	538.029
2087	688.669	752.332	624.583	1870.96	393.84	546.135	309.711	203.095	12.1677	0.26087	22.9566	53.728	4.10529	15.2973	144.724	23.5223	0.644413	23.9136	36.0986	44.5948	218.925	25.3582	12.2087	8.66123	2.66453	3.07774e-06	13.7547	3.81675	1.68977	0.0963298	3.02703e-14	1.15106	0.00598267	6.05879	538.029
2088	692.175	756.525	628.381	1854.86	394.856	548.136	304.523	204.567	12.2634	0.262502	22.873	53.4537	4.10332	15.3534	144.646	23.7009	0.627348	23.8238	36.4833	43.4122	215.985	24.9579	12.1538	8.65434	2.52944	2.51928e-06	12.6814	3.62579	1.60362	0.0905845	2.14417e-14	1.12851	0.00564965	6.03842	538.029
2089	695.462	760.503	632.065	1837.53	395.862	550.035	299.448	206.032	12.3587	0.264124	22.7891	53.1423	4.10011	15.406	144.525	23.876	0.610665	23.7252	36.8675	42.2553	213.075	24.5624	12.0989	8.64743	2.40072	2.06147e-06	11.6871	3.4431	1.52138	0.0851642	1.51881e-14	1.10629	0.00533461	6.0198	538.029
2090	698.566	764.288	635.649	1819.14	396.859	551.843	294.483	207.491	12.4538	0.265734	22.705	52.8015	4.09575	15.4551	144.362	24.0478	0.594356	23.6189	37.251	41.1248	210.195	24.1721	12.0441	8.64051	2.27821	1.68642e-06	10.7664	3.2685	1.44292	0.0800499	1.07584e-14	1.0844	0.00503673	6.00366	538.029
2091	701.514	767.896	639.141	1799.82	397.847	553.568	289.631	208.943	12.5485	0.267333	22.6205	52.4373	4.09031	15.5009	144.161	24.2164	0.578415	23.5062	37.634	40.0212	207.348	23.7872	11.9894	8.63358	2.16172	1.37876e-06	9.91443	3.10175	1.36814	0.0752405	7.62061e-15	1.06287	0.00475521	5.98992	538.029
2092	704.419	771.442	642.597	1780.48	398.825	555.195	284.889	210.388	12.6427	0.26892	22.5359	52.0299	4.08371	15.5432	143.922	24.3812	0.56284	23.3872	38.0158	38.9453	204.537	23.408	11.935	8.62665	2.05108	1.12655e-06	9.12643	2.94261	1.29685	0.0707177	5.398e-15	1.04171	0.00448929	5.9789	538.029
2093	707.37	775.019	646.061	1761.92	399.792	556.707	280.255	211.825	12.7362	0.270491	22.4513	51.5626	4.07587	15.5819	143.642	24.542	0.547627	23.2619	38.396	37.8965	201.761	23.0346	11.8807	8.61971	1.946	9.19916e-07	8.39795	2.79083	1.22893	0.0664631	3.82363e-15	1.02094	0.00423814	5.9689	538.029
2094	710.342	778.605	649.515	1744.04	400.749	558.117	275.724	213.255	12.829	0.272047	22.3668	51.0468	4.06687	15.617	143.325	24.6988	0.53277	23.1312	38.7746	36.8739	199.019	22.6666	11.8266	8.61277	1.84619	7.50727e-07	7.72477	2.64615	1.16425	0.062458	2.70844e-15	1.00054	0.00400089	5.9582	538.029
2095	713.323	782.185	652.951	1726.8	401.694	559.435	271.29	214.677	12.9211	0.273588	22.2823	50.4923	4.05676	15.6487	142.973	24.8516	0.51826	22.9957	39.1516	35.8765	196.311	22.304	11.7727	8.60583	1.75136	6.12281e-07	7.10296	2.50834	1.10266	0.0586856	1.91851e-15	0.980476	0.00377677	5.94682	538.029
2096	716.306	785.754	656.364	1710.13	402.629	560.673	266.95	216.091	13.0125	0.275114	22.1978	49.9075	4.04565	15.6771	142.589	25.0005	0.504091	22.8565	39.5269	34.9037	193.635	21.9466	11.719	8.59888	1.66125	4.99067e-07	6.52886	2.37713	1.04407	0.0551304	1.35896e-15	0.960737	0.00356504	5.93522	538.029
2097	719.288	789.309	659.754	1693.98	403.554	561.84	262.7	217.498	13.1031	0.276625	22.1134	49.2992	4.03361	15.7023	142.176	25.1455	0.490256	22.7141	39.9006	33.955	190.991	21.5944	11.6654	8.59193	1.57564	4.06545e-07	5.99909	2.25228	0.988326	0.0517779	9.62608e-16	0.941338	0.00336501	5.92351	538.029
2098	722.259	792.837	663.107	1678.41	404.468	562.955	258.532	218.898	13.193	0.27812	22.029	48.6776	4.02082	15.7247	141.742	25.2871	0.476756	22.5706	40.2727	33.0282	188.375	21.2467	11.6118	8.58496	1.4942	3.31007e-07	5.51067	2.13366	0.935316	0.048613	6.81856e-16	0.922265	0.00317593	5.90952	538.029
2099	725.228	796.347	666.423	1663.53	405.372	564.049	254.44	220.289	13.2822	0.279601	21.9448	48.056	4.00764	15.745	141.299	25.4257	0.463598	22.4295	40.6431	32.1221	185.784	20.9032	11.5583	8.57797	1.41665	2.69422e-07	5.06099	2.02124	0.884989	0.0456394	4.82988e-16	0.903492	0.00299711	5.89489	538.029
2100	728.124	799.868	669.723	1649.4	406.265	565.139	250.425	221.673	13.3707	0.281066	21.8609	47.4415	3.99426	15.7638	140.856	25.5619	0.450784	22.2926	41.0119	31.2372	183.22	20.5642	11.5049	8.57096	1.34289	2.19258e-07	4.64738	1.91488	0.83727	0.0428457	3.42121e-16	0.885016	0.00282811	5.88353	538.029
2101	730.857	803.417	673.022	1635.97	407.149	566.23	246.488	223.05	13.4585	0.282516	21.7773	46.835	3.98077	15.7811	140.415	25.6958	0.438306	22.1599	41.3791	30.374	180.686	20.2298	11.4516	8.56394	1.27281	1.78412e-07	4.26708	1.81426	0.792056	0.0402211	2.42339e-16	0.866848	0.00266845	5.87505	538.029
2102	733.583	806.981	676.291	1623.6	408.016	567.364	242.628	224.409	13.545	0.283944	21.6939	46.2882	3.96761	15.7973	139.988	25.8265	0.426177	22.0372	41.7418	29.5326	178.182	19.9005	11.3985	8.55691	1.20629	1.45162e-07	3.91752	1.7191	0.749217	0.0377554	1.71659e-16	0.848998	0.00251769	5.86914	538.029
2103	736.393	810.543	679.501	1612.61	408.862	568.576	238.848	225.741	13.6298	0.285344	21.6108	45.843	3.95524	15.8128	139.589	25.9532	0.414405	21.9293	42.0972	28.7136	175.712	19.5762	11.3455	8.54988	1.1432	1.18102e-07	3.59633	1.6291	0.708631	0.0354389	1.21593e-16	0.831496	0.00237539	5.86596	538.029
2104	739.214	814.088	682.645	1602.86	409.686	569.848	235.144	227.045	13.7128	0.286714	21.5281	45.4806	3.94361	15.8276	139.216	26.076	0.402981	21.8344	42.4451	27.9163	173.275	19.257	11.2928	8.54286	1.08337	9.60817e-08	3.30124	1.54397	0.670202	0.0332616	8.61296e-17	0.814336	0.00224111	5.86372	538.029
2105	742.021	817.593	685.711	1594.18	410.488	571.162	231.513	228.321	13.7941	0.288056	21.4456	45.1842	3.93266	15.8417	138.866	26.1949	0.391894	21.7506	42.7857	27.1399	170.869	18.9428	11.2403	8.53584	1.02663	7.8162e-08	3.03016	1.46343	0.633806	0.0312138	6.10093e-17	0.797487	0.00211436	5.8606	538.029
2106	744.799	821.043	688.693	1586.44	411.268	572.504	227.951	229.57	13.8736	0.289369	21.3634	44.9409	3.92232	15.8551	138.537	26.31	0.381133	21.6763	43.119	26.3838	168.493	18.6333	11.188	8.52881	0.972795	6.35795e-08	2.78112	1.38721	0.599329	0.0292868	4.32155e-17	0.780956	0.00199471	5.85661	538.029
2107	747.541	824.43	691.589	1579.53	412.027	573.863	224.456	230.792	13.9514	0.290653	21.2814	44.7404	3.91255	15.8677	138.226	26.4213	0.370688	21.6103	43.4449	25.6472	166.148	18.3285	11.1358	8.52178	0.921717	5.17134e-08	2.55235	1.31507	0.566693	0.0274723	3.06113e-17	0.764736	0.00188176	5.85223	538.029
2108	750.239	827.751	694.4	1573.35	412.765	575.23	221.026	231.986	14.0274	0.291909	21.1998	44.5743	3.90332	15.8796	137.934	26.5289	0.360551	21.5514	43.7634	24.9298	163.832	18.0283	11.0838	8.51474	0.873256	4.20584e-08	2.34222	1.24676	0.535794	0.0257798	2.16833e-17	0.748821	0.00177513	5.84759	538.029
2109	752.87	830.982	697.114	1567.75	413.482	576.589	217.653	233.153	14.1017	0.293135	21.1184	44.4328	3.89448	15.8907	137.654	26.6327	0.350707	21.4977	44.0746	24.23	161.542	17.7321	11.0319	8.50769	0.827217	3.42009e-08	2.14915	1.18202	0.506525	0.0241832	1.53592e-17	0.733182	0.00167441	5.83902	538.029
2110	755.425	834.118	699.732	1562.63	414.178	577.929	214.334	234.292	14.1742	0.294333	21.0372	44.3089	3.88596	15.9007	137.382	26.7326	0.341146	21.4477	44.3785	23.5466	159.275	17.4397	10.9801	8.50062	0.783443	2.78055e-08	1.97174	1.12063	0.478788	0.0226757	1.08796e-17	0.71778	0.00157923	5.82712	538.029
2111	757.931	837.185	702.276	1557.96	414.854	579.251	211.07	235.404	14.245	0.295502	20.9562	44.2015	3.87779	15.9098	137.122	26.8288	0.331863	21.4018	44.6749	22.8801	157.034	17.1513	10.9283	8.49354	0.741868	2.26024e-08	1.8088	1.06247	0.452509	0.0212689	7.70647e-18	0.702645	0.00148933	5.81714	538.029
2112	760.405	840.203	704.764	1553.75	415.509	580.558	207.862	236.489	14.314	0.296643	20.8755	44.1096	3.87002	15.9183	136.874	26.9214	0.322852	21.36	44.9641	22.2308	154.819	16.8671	10.8767	8.48645	0.702421	1.83708e-08	1.65919	1.00737	0.427641	0.0199398	5.45882e-18	0.687807	0.00140447	5.80973	538.029
2113	762.853	843.18	707.203	1549.96	416.144	581.849	204.712	237.546	14.3813	0.297754	20.7951	44.0319	3.86266	15.9263	136.64	27.0108	0.314107	21.3225	45.2459	21.5987	152.633	16.5872	10.8253	8.47935	0.665023	1.49303e-08	1.52183	0.955176	0.404112	0.0186835	3.86671e-18	0.67325	0.00132439	5.80479	538.029
2114	765.28	846.12	709.595	1546.59	416.759	583.128	201.62	238.575	14.4468	0.298837	20.715	43.9679	3.85576	15.9339	136.421	27.097	0.305623	21.2893	45.5203	20.9841	150.477	16.3119	10.774	8.47226	0.6296	1.21337e-08	1.39579	0.905782	0.381853	0.0175125	2.73896e-18	0.658982	0.00124886	5.8026	538.029
2115	767.673	849.011	711.934	1543.61	417.353	584.392	198.585	239.577	14.5106	0.299892	20.6352	43.9154	3.8493	15.9411	136.216	27.1802	0.297393	21.26	45.7875	20.3864	148.351	16.041	10.7231	8.46517	0.596056	9.86073e-09	1.28016	0.859016	0.360822	0.0164212	1.94012e-18	0.645001	0.00117762	5.8014	538.029
2116	770.013	851.833	714.205	1540.94	417.928	585.633	195.604	240.552	14.5727	0.300917	20.5557	43.8712	3.84323	15.948	136.024	27.2604	0.289408	21.2339	46.0472	19.8052	146.253	15.7745	10.6723	8.45808	0.564278	8.01325e-09	1.17406	0.814713	0.340948	0.015404	1.37427e-18	0.631293	0.00111043	5.79933	538.029
2117	772.289	854.573	716.401	1538.54	418.484	586.849	192.676	241.499	14.6329	0.301914	20.4764	43.8332	3.8375	15.9545	135.843	27.3375	0.28166	21.2104	46.2997	19.2397	144.183	15.5122	10.6217	8.45099	0.534167	6.51155e-09	1.07671	0.77275	0.322135	0.0144388	9.73453e-19	0.61787	0.00104705	5.79642	538.029
2118	774.495	857.228	718.519	1536.37	419.02	588.037	189.798	242.418	14.6915	0.302882	20.3975	43.8	3.83208	15.9605	135.672	27.4117	0.274143	21.189	46.5448	18.6895	142.141	15.2539	10.5713	8.4439	0.505635	5.29097e-09	0.987367	0.733002	0.304325	0.013522	6.89538e-19	0.604705	0.00098725	5.79312	538.029
2119	776.629	859.795	720.56	1534.41	419.538	589.194	186.97	243.311	14.7483	0.303822	20.3188	43.7706	3.82696	15.9662	135.51	27.483	0.266848	21.1695	46.7826	18.1541	140.125	14.9997	10.5211	8.43681	0.478598	4.29893e-09	0.905412	0.695331	0.287489	0.0126673	4.88429e-19	0.591793	0.000930839	5.78957	538.029
2120	778.67	862.252	722.51	1532.57	420.036	590.31	184.186	244.175	14.8033	0.304733	20.2403	43.7408	3.82202	15.9712	135.353	27.5512	0.259767	21.1504	47.013	17.6325	138.133	14.7491	10.471	8.4297	0.452945	3.49245e-09	0.830202	0.659586	0.271566	0.0118702	3.45975e-19	0.579129	0.000877586	5.78215	538.029
2121	780.61	864.595	724.368	1530.79	420.515	591.378	181.443	245.013	14.8566	0.305615	20.1621	43.7084	3.81717	15.9755	135.197	27.6162	0.252891	21.1311	47.2362	17.1238	136.162	14.5019	10.4209	8.42258	0.428585	2.83673e-09	0.76113	0.625668	0.256501	0.0111265	2.45069e-19	0.566679	0.000827295	5.77146	538.029
2122	782.48	866.853	726.158	1529.11	420.976	592.406	178.742	245.823	14.9082	0.306469	20.0841	43.6762	3.81248	15.9792	135.045	27.6782	0.246216	21.1122	47.452	16.6283	134.214	14.2581	10.371	8.41544	0.405477	2.3038e-09	0.697745	0.593505	0.242253	0.0104329	1.73593e-19	0.55445	0.000779827	5.76267	538.029
2123	784.298	869.049	727.896	1527.55	421.418	593.397	176.085	246.605	14.958	0.307294	20.0064	43.646	3.80799	15.9825	134.899	27.7375	0.239739	21.0944	47.6605	16.1459	132.291	14.0181	10.3212	8.4083	0.383579	1.87081e-09	0.639627	0.563002	0.228777	0.00978627	1.22963e-19	0.542468	0.000735045	5.75644	538.029
2124	786.077	871.194	729.591	1526.13	421.842	594.355	173.473	247.36	15.006	0.30809	19.929	43.6193	3.80375	15.9855	134.76	27.7942	0.233455	21.0781	47.8616	15.677	130.394	13.7819	10.2716	8.40116	0.362843	1.51912e-09	0.586318	0.534093	0.216064	0.00916671	8.71e-20	0.530738	0.000692813	5.75265	538.029
2125	787.819	873.291	731.244	1524.88	422.248	595.285	170.907	248.087	15.0523	0.308858	19.8519	43.5975	3.79979	15.9884	134.631	27.8484	0.22736	21.0637	48.0555	15.2214	128.524	13.5496	10.2223	8.39402	0.343225	1.23352e-09	0.537429	0.506721	0.204043	0.00857255	6.16966e-20	0.519245	0.000653006	5.75159	538.029
2126	789.515	875.331	732.848	1523.77	422.635	596.186	168.387	248.787	15.0969	0.309597	19.775	43.5801	3.79612	15.9912	134.511	27.9003	0.221448	21.0511	48.242	14.7789	126.68	13.3212	10.1732	8.38689	0.324669	1.00162e-09	0.492628	0.480796	0.192677	0.00801912	4.37023e-20	0.507986	0.000615487	5.75148	538.029
2127	791.148	877.297	734.389	1522.79	423.005	597.053	165.909	249.46	15.1397	0.310307	19.6985	43.5652	3.79268	15.9938	134.399	27.9499	0.215715	21.0399	48.4213	14.349	124.863	13.0966	10.1243	8.37977	0.30711	8.13301e-10	0.451536	0.456209	0.181956	0.00750355	3.09562e-20	0.49697	0.000580117	5.75052	538.029
2128	792.708	879.177	735.862	1521.89	423.358	597.885	163.474	250.105	15.1807	0.310989	19.6222	43.5518	3.78945	15.9962	134.293	27.997	0.210153	21.0296	48.5932	13.9311	123.07	12.8757	10.0756	8.37264	0.290492	6.60366e-10	0.41384	0.432885	0.171813	0.0070232	2.19276e-20	0.48619	0.00054677	5.74871	538.029
2129	794.191	880.969	737.263	1521.08	423.693	598.68	161.079	250.723	15.2201	0.311642	19.5462	43.5395	3.7864	15.9984	134.193	28.0419	0.204757	21.0201	48.7578	13.525	121.302	12.6584	10.0271	8.36552	0.274762	5.36169e-10	0.379289	0.410785	0.162216	0.00657565	1.55323e-20	0.47564	0.00051533	5.74653	538.029
2130	795.596	882.671	738.592	1520.33	424.01	599.436	158.724	251.313	15.2576	0.312267	19.4705	43.5278	3.78352	16.0004	134.098	28.0845	0.199523	21.0112	48.9151	13.1303	119.558	12.4445	9.97884	8.35839	0.259872	4.35311e-10	0.347622	0.389829	0.153163	0.00615867	1.10022e-20	0.465296	0.000485686	5.7441	538.029
2131	796.901	884.26	739.834	1519.58	424.311	600.144	156.404	251.876	15.2935	0.312862	19.3951	43.5132	3.78071	16.002	134.003	28.1246	0.194443	21.0018	49.0651	12.7461	117.836	12.2338	9.93068	8.35126	0.245761	3.53388e-10	0.318587	0.369926	0.14462	0.00576994	7.7933e-21	0.455137	0.000457719	5.73783	538.029
2132	798.1	885.733	740.989	1518.77	424.594	600.799	154.117	252.411	15.3275	0.31343	19.3198	43.4941	3.77788	16.003	133.907	28.1622	0.189511	20.9911	49.2078	12.3717	116.132	12.0261	9.88261	8.34411	0.232375	2.86833e-10	0.291959	0.351028	0.136527	0.00540744	5.52032e-21	0.445173	0.000431321	5.72834	538.029
2133	799.224	887.12	742.08	1517.97	424.861	601.407	151.865	252.919	15.3599	0.313968	19.2448	43.4734	3.77511	16.0036	133.811	28.1974	0.184725	20.98	49.3432	12.0074	114.45	11.8214	9.83466	8.33695	0.219691	2.32785e-10	0.267548	0.333114	0.128861	0.00506953	3.91028e-21	0.435407	0.000406419	5.72074	538.029
2134	800.294	888.445	743.124	1517.21	425.11	601.974	149.648	253.399	15.3905	0.314478	19.1701	43.4535	3.77245	16.0039	133.719	28.2304	0.180081	20.9693	49.4713	11.6532	112.79	11.6199	9.78688	8.32979	0.207683	1.88907e-10	0.245174	0.316137	0.121629	0.00475469	2.76982e-21	0.425845	0.000382939	5.71567	538.029
2135	801.321	889.719	744.128	1516.51	425.344	602.505	147.468	253.852	15.4193	0.31496	19.0956	43.4359	3.76994	16.0041	133.631	28.2613	0.175577	20.9594	49.5922	11.3091	111.153	11.4218	9.7393	8.32263	0.196324	1.53293e-10	0.224639	0.30003	0.114808	0.00446143	1.96198e-21	0.416489	0.000360808	5.71302	538.029
2136	802.311	890.948	745.096	1515.91	425.561	603.003	145.325	254.278	15.4464	0.315413	19.0215	43.4224	3.76763	16.0044	133.55	28.2904	0.171209	20.951	49.7057	10.9752	109.54	11.227	9.69196	8.31548	0.185589	1.24395e-10	0.205795	0.284755	0.108376	0.00418838	1.38975e-21	0.407324	0.000339959	5.71305	538.029
2137	803.254	892.121	746.019	1515.39	425.761	603.469	143.22	254.676	15.4717	0.315837	18.9476	43.4124	3.76552	16.0047	133.476	28.3178	0.166973	20.9439	49.8119	10.6511	107.952	11.0357	9.64487	8.30833	0.175444	1.00946e-10	0.188534	0.270274	0.102312	0.00393416	9.84421e-22	0.398347	0.000320317	5.71402	538.029
2138	804.133	893.219	746.882	1514.95	425.946	603.899	141.15	255.047	15.4954	0.316233	18.874	43.4045	3.76358	16.005	133.407	28.3433	0.162866	20.9376	49.9109	10.3365	106.386	10.8476	9.59801	8.3012	0.165853	8.19173e-11	0.17272	0.256546	0.0965642	0.00369744	6.97307e-22	0.389569	0.00030181	5.71413	538.029
2139	804.936	894.23	747.677	1514.55	426.115	604.29	139.115	255.39	15.5172	0.3166	18.8007	43.3975	3.76177	16.0052	133.342	28.367	0.158883	20.932	50.0025	10.031	104.842	10.6627	9.55136	8.29406	0.156785	6.64746e-11	0.158232	0.243514	0.0911152	0.00345997	4.93932e-22	0.380984	0.00028437	5.7134	538.029
2140	805.659	895.15	748.4	1514.18	426.268	604.641	137.112	255.706	15.5373	0.316938	18.7277	43.3912	3.76008	16.0053	133.281	28.3888	0.15502	20.9268	50.0869	9.73437	103.32	10.4808	9.50492	8.28693	0.148209	5.3942e-11	0.144957	0.231149	0.0859765	0.00322179	3.49873e-22	0.372586	0.000267935	5.71229	538.029
2141	806.301	895.978	749.052	1513.84	426.405	604.952	135.143	255.994	15.5557	0.317248	18.6549	43.3852	3.75849	16.0054	133.223	28.409	0.151273	20.9219	50.164	9.44628	101.82	10.302	9.45869	8.2798	0.140099	4.37711e-11	0.132795	0.21943	0.0811302	0.00299998	2.4783e-22	0.364372	0.000252447	5.71094	538.029
2142	806.841	896.691	749.617	1513.47	426.527	605.213	133.203	256.255	15.5723	0.31753	18.5824	43.376	3.75691	16.0051	133.164	28.4271	0.147637	20.9162	50.2339	9.16609	100.339	10.1259	9.4126	8.27267	0.132419	3.55148e-11	0.121647	0.208302	0.0765579	0.0027933	1.75549e-22	0.356327	0.000237841	5.70578	538.029
2143	807.272	897.284	750.093	1513.02	426.633	605.419	131.29	256.489	15.5872	0.317783	18.5101	43.362	3.75526	16.0044	133.101	28.4432	0.144107	20.9091	50.2964	8.89333	98.8748	9.95232	9.36661	8.26552	0.125141	2.88114e-11	0.111428	0.197721	0.0722432	0.00260065	1.24348e-22	0.348438	0.000224061	5.69742	538.029
2144	807.626	897.791	750.506	1512.55	426.724	605.577	129.405	256.695	15.6004	0.318007	18.4381	43.3464	3.75362	16.0035	133.038	28.4574	0.140682	20.9014	50.3517	8.62807	97.4298	9.78142	9.32075	8.25837	0.11825	2.33709e-11	0.102062	0.187684	0.0681726	0.00242116	8.80813e-23	0.340712	0.000211067	5.69095	538.029
2145	807.925	898.235	750.871	1512.08	426.801	605.693	127.55	256.873	15.6118	0.318203	18.3663	43.3313	3.75204	16.0024	132.977	28.4698	0.13736	20.8938	50.3997	8.37038	96.0044	9.61329	9.27508	8.25121	0.111732	1.89566e-11	0.0934802	0.178162	0.0643335	0.002254	6.23917e-23	0.333151	0.000198821	5.687	538.029
2146	808.18	898.628	751.198	1511.67	426.862	605.771	125.725	257.024	15.6214	0.318371	18.2948	43.3186	3.75057	16.0012	132.919	28.4807	0.134138	20.887	50.4405	8.12023	94.5994	9.44799	9.22961	8.24406	0.105571	1.53758e-11	0.0856197	0.16913	0.0607135	0.00209836	4.41947e-23	0.325738	0.000187284	5.68543	538.029
2147	808.398	898.975	751.489	1511.33	426.908	605.815	123.932	257.148	15.6293	0.31851	18.2236	43.3097	3.74926	16.0002	132.866	28.4902	0.131014	20.8815	50.474	7.87764	93.2157	9.28561	9.18439	8.23692	0.0997528	1.24717e-11	0.078421	0.160562	0.0573008	0.00195349	3.1305e-23	0.318475	0.000176418	5.68652	538.029
2148	808.569	899.267	751.735	1511.07	426.94	605.826	122.169	257.244	15.6355	0.31862	18.1527	43.3043	3.7481	15.9993	132.819	28.4983	0.127986	20.8772	50.5002	7.6424	91.8531	9.12613	9.13942	8.22978	0.0942589	1.01164e-11	0.0718289	0.152435	0.0540839	0.00181866	2.21747e-23	0.31138	0.000166187	5.68854	538.029
2149	808.675	899.483	751.922	1510.86	426.957	605.8	120.436	257.313	15.6399	0.318702	18.082	43.3008	3.74707	15.9986	132.777	28.5051	0.12505	20.8737	50.5191	7.41421	90.5109	8.96944	9.09468	8.22266	0.0890692	8.20613e-12	0.0657913	0.144746	0.051051	0.00169315	1.57073e-23	0.304446	0.00015655	5.68969	538.029
2150	808.71	899.57	751.999	1510.76	426.962	605.778	119.577	257.341	15.6417	0.318736	18.0467	43.2994	3.74659	15.9982	132.756	28.5082	0.123604	20.872	50.5268	7.30183	89.8447	8.89178	9.07237	8.2191	0.0865479	7.35057e-12	0.0629051	0.141005	0.0495792	0.00163263	1.30256e-23	0.301018	0.000151876	5.69001	538.029
2151	808.71	899.57	751.999	1510.76	426.962	605.778	119.577	257.341	15.6417	0.318736	18.0467	43.2994	3.74659	15.9982	132.756	28.5082	0.123604	20.872	50.5268	7.30183	89.8447	8.89178	9.07237	8.2191	0.0865479	7.35057e-12	0.0629051	0.141005	0.0495792	0.00163263	1.30256e-23	0.301018	0.000151876	5.69001	538.029
2152	808.71	899.57	751.999	1510.76	426.962	605.778	119.577	257.341	15.6417	0.318736	18.0467	43.2994	3.74659	15.9982	132.756	28.5082	0.123604	20.872	50.5268	7.30183	89.8447	8.89178	9.07237	8.2191	0.0865479	7.35057e-12	0.0629051	0.141005	0.0495792	0.00163263	1.30256e-23	0.301018	0.000151876	5.69001	538.029
2153	808.71	899.57	751.999	1510.76	426.962	605.778	119.577	257.341	15.6417	0.318736	18.0467	43.2994	3.74659	15.9982	132.756	28.5082	0.123604	20.872	50.5268	7.30183	89.8447	8.89178	9.07237	8.2191	0.0865479	7.35057e-12	0.0629051	0.141005	0.0495792	0.00163263	1.30256e-23	0.301018	0.000151876	5.69001	538.029
2154	808.71	899.57	751.999	1510.76	426.962	605.778	119.577	257.341	15.6417	0.318736	18.0467	43.2994	3.74659	15.9982	132.756	28.5082	0.123604	20.872	50.5268	7.30183	89.8447	8.89178	9.07237	8.2191	0.0865479	7.35057e-12	0.0629051	0.141005	0.0495792	0.00163263	1.30256e-23	0.301018	0.000151876	5.69001	538.029
2155	808.71	899.57	751.999	1510.76	426.962	605.778	119.577	257.341	15.6417	0.318736	18.0467	43.2994	3.74659	15.9982	132.756	28.5082	0.123604	20.872	50.5268	7.30183	89.8447	8.89178	9.07237	8.2191	0.0865479	7.35057e-12	0.0629051	0.141005	0.0495792	0.00163263	1.30256e-23	0.301018	0.000151876	5.69001	538.029
2156	808.71	899.57	751.999	1510.76	426.962	605.778	119.577	257.341	15.6417	0.318736	18.0467	43.2994	3.74659	15.9982	132.756	28.5082	0.123604	20.872	50.5268	7.30183	89.8447	8.89178	9.07237	8.2191	0.0865479	7.35057e-12	0.0629051	0.141005	0.0495792	0.00163263	1.30256e-23	0.301018	0.000151876	5.69001	538.029
2157	808.71	899.57	751.999	1510.76	426.962	605.778	119.577	257.341	15.6417	0.318736	18.0467	43.2994	3.74659	15.9982	132.756	28.5082	0.123604	20.872	50.5268	7.30183	89.8447	8.89178	9.07237	8.2191	0.0865479	7.35057e-12	0.0629051	0.141005	0.0495792	0.00163263	1.30256e-23	0.301018	0.000151876	5.69001	538.029
2158	808.71	899.57	751.999	1510.76	426.962	605.778	119.577	257.341	15.6417	0.318736	18.0467	43.2994	3.74659	15.9982	132.756	28.5082	0.123604	20.872	50.5268	7.30183	89.8447	8.89178	9.07237	8.2191	0.0865479	7.35057e-12	0.0629051	0.141005	0.0495792	0.00163263	1.30256e-23	0.301018	0.000151876	5.69001	538.029
2159	808.71	899.57	751.999	1510.76	426.962	605.778	119.577	257.341	15.6417	0.318736	18.0467	43.2994	3.74659	15.9982	132.756	28.5082	0.123604	20.872	50.5268	7.30183	89.8447	8.89178	9.07237	8.2191	0.0865479	7.35057e-12	0.0629051	0.141005	0.0495792	0.00163263	1.30256e-23	0.301018	0.000151876	5.69001	538.029
2160	808.71	899.57	751.999	1510.76	426.962	605.778	119.577	257.341	15.6417	0.318736	18.0467	43.2994	3.74659	15.9982	132.756	28.5082	0.123604	20.872	50.5268	7.30183	89.8447	8.89178	9.07237	8.2191	0.0865479	7.35057e-12	0.0629051	0.141005	0.0495792	0.00163263	1.30256e-23	0.301018	0.000151876	5.69001	538.029
2161	808.71	899.57	751.999	1510.76	426.962	605.778	119.577	257.341	15.6417	0.318736	18.0467	43.2994	3.74659	15.9982	132.756	28.5082	0.123604	20.872	50.5268	7.30183	89.8447	8.89178	9.07237	8.2191	0.0865479	7.35057e-12	0.0629051	0.141005	0.0495792	0.00163263	1.30256e-23	0.301018	0.000151876	5.69001	538.029
2162	808.71	899.57	751.999	1510.76	426.962	605.778	119.577	257.341	15.6417	0.318736	18.0467	43.2994	3.74659	15.9982	132.756	28.5082	0.123604	20.872	50.5268	7.30183	89.8447	8.89178	9.07237	8.2191	0.0865479	7.35057e-12	0.0629051	0.141005	0.0495792	0.00163263	1.30256e-23	0.301018	0.000151876	5.69001	538.029
2163	808.71	899.57	751.999	1510.76	426.962	605.778	119.577	257.341	15.6417	0.318736	18.0467	43.2994	3.74659	15.9982	132.756	28.5082	0.123604	20.872	50.5268	7.30183	89.8447	8.89178	9.07237	8.2191	0.0865479	7.35057e-12	0.0629051	0.141005	0.0495792	0.00163263	1.30256e-23	0.301018	0.000151876	5.69001	538.029
2164	808.71	899.57	751.999	1510.76	426.962	605.778	119.577	257.341	15.6417	0.318736	18.0467	43.2994	3.74659	15.9982	132.756	28.5082	0.123604	20.872	50.5268	7.30183	89.8447	8.89178	9.07237	8.2191	0.0865479	7.35057e-12	0.0629051	0.141005	0.0495792	0.00163263	1.30256e-23	0.301018	0.000151876	5.69001	538.029
2165	808.71	899.57	751.999	1510.76	426.962	605.778	119.577	257.341	15.6417	0.318736	18.0467	43.2994	3.74659	15.9982	132.756	28.5082	0.123604	20.872	50.5268	7.30183	89.8447	8.89178	9.07237	8.2191	0.0865479	7.35057e-12	0.0629051	0.141005	0.0495792	0.00163263	1.30256e-23	0.301018	0.000151876	5.69001	538.029
2166	808.71	899.57	751.999	1510.76	426.962	605.778	119.577	257.341	15.6417	0.318736	18.0467	43.2994	3.74659	15.9982	132.756	28.5082	0.123604	20.872	50.5268	7.30183	89.8447	8.89178	9.07237	8.2191	0.0865479	7.35057e-12	0.0629051	0.141005	0.0495792	0.00163263	1.30256e-23	0.301018	0.000151876	5.69001	538.029
2167	808.71	899.57	751.999	1510.76	426.962	605.778	119.577	257.341	15.6417	0.318736	18.0467	43.2994	3.74659	15.9982	132.756	28.5082	0.123604	20.872	50.5268	7.30183	89.8447	8.89178	9.07237	8.2191	0.0865479	7.35057e-12	0.0629051	0.141005	0.0495792	0.00163263	1.30256e-23	0.301018	0.000151876	5.69001	538.029
2168	808.71	899.57	751.999	1510.76	426.962	605.778	119.577	257.341	15.6417	0.318736	18.0467	43.2994	3.74659	15.9982	132.756	28.5082	0.123604	20.872	50.5268	7.30183	89.8447	8.89178	9.07237	8.2191	0.0865479	7.35057e-12	0.0629051	0.141005	0.0495792	0.00163263	1.30256e-23	0.301018	0.000151876	5.69001	538.029
2169	808.71	899.57	751.999	1510.76	426.962	605.778	119.577	257.341	15.6417	0.318736	18.0467	43.2994	3.74659	15.9982	132.756	28.5082	0.123604	20.872	50.5268	7.30183	89.8447	8.89178	9.07237	8.2191	0.0865479	7.35057e-12	0.0629051	0.141005	0.0495792	0.00163263	1.30256e-23	0.301018	0.000151876	5.69001	538.029
2170	808.71	899.57	751.999	1510.76	426.962	605.778	119.577	257.341	15.6417	0.318736	18.0467	43.2994	3.74659	15.9982	132.756	28.5082	0.123604	20.872	50.5268	7.30183	89.8447	8.89178	9.07237	8.2191	0.0865479	7.35057e-12	0.0629051	0.141005	0.0495792	0.00163263	1.30256e-23	0.301018	0.000151876	5.69001	538.029
2171	808.71	899.57	751.999	1510.76	426.962	605.778	119.577	257.341	15.6417	0.318736	18.0467	43.2994	3.74659	15.9982	132.756	28.5082	0.123604	20.872	50.5268	7.30183	89.8447	8.89178	9.07237	8.2191	0.0865479	7.35057e-12	0.0629051	0.141005	0.0495792	0.00163263	1.30256e-23	0.301018	0.000151876	5.69001	538.029
2172	808.71	899.57	751.999	1510.76	426.962	605.778	119.577	257.341	15.6417	0.318736	18.0467	43.2994	3.74659	15.9982	132.756	28.5082	0.123604	20.872	50.5268	7.30183	89.8447	8.89178	9.07237	8.2191	0.0865479	7.35057e-12	0.0629051	0.141005	0.0495792	0.00163263	1.30256e-23	0.301018	0.000151876	5.69001	538.029
2173	808.71	899.57	751.999	1510.76	426.962	605.778	119.577	257.341	15.6417	0.318736	18.0467	43.2994	3.74659	15.9982	132.756	28.5082	0.123604	20.872	50.5268	7.30183	89.8447	8.89178	9.07237	8.2191	0.0865479	7.35057e-12	0.0629051	0.141005	0.0495792	0.00163263	1.30256e-23	0.301018	0.000151876	5.69001	538.029
2174	808.71	899.57	751.999	1510.76	426.962	605.778	119.577	257.341	15.6417	0.318736	18.0467	43.2994	3.74659	15.9982	132.756	28.5082	0.123604	20.872	50.5268	7.30183	89.8447	8.89178	9.07237	8.2191	0.0865479	7.35057e-12	0.0629051	0.141005	0.0495792	0.00163263	1.30256e-23	0.301018	0.000151876	5.69001	538.029
2175	808.71	899.57	751.999	1510.76	426.962	605.778	119.577	257.341	15.6417	0.318736	18.0467	43.2994	3.74659	15.9982	132.756	28.5082	0.123604	20.872	50.5268	7.30183	89.8447	8.89178	9.07237	8.2191	0.0865479	7.35057e-12	0.0629051	0.141005	0.0495792	0.00163263	1.30256e-23	0.301018	0.000151876	5.69001	538.029
2176	808.71	899.57	751.999	1510.76	426.962	605.778	119.577	257.341	15.6417	0.318736	18.0467	43.2994	3.74659	15.9982	132.756	28.5082	0.123604	20.872	50.5268	7.30183	89.8447	8.89178	9.07237	8.2191	0.0865479	7.35057e-12	0.0629051	0.141005	0.0495792	0.00163263	1.30256e-23	0.301018	0.000151876	5.69001	538.029
2177	808.71	899.57	751.999	1510.76	426.962	605.778	119.577	257.341	15.6417	0.318736	18.0467	43.2994	3.74659	15.9982	132.756	28.5082	0.123604	20.872	50.5268	7.30183	89.8447	8.89178	9.07237	8.2191	0.0865479	7.35057e-12	0.0629051	0.141005	0.0495792	0.00163263	1.30256e-23	0.301018	0.000151876	5.69001	538.029
2178	808.71	899.57	751.999	1510.76	426.962	605.778	119.577	257.341	15.6417	0.318736	18.0467	43.2994	3.74659	15.9982	132.756	28.5082	0.123604	20.872	50.5268	7.30183	89.8447	8.89178	9.07237	8.2191	0.0865479	7.35057e-12	0.0629051	0.141005	0.0495792	0.00163263	1.30256e-23	0.301018	0.000151876	5.69001	538.029
2179	808.71	899.57	751.999	1510.76	426.962	605.778	119.577	257.341	15.6417	0.318736	18.0467	43.2994	3.74659	15.9982	132.756	28.5082	0.123604	20.872	50.5268	7.30183	89.8447	8.89178	9.07237	8.2191	0.0865479	7.35057e-12	0.0629051	0.141005	0.0495792	0.00163263	1.30256e-23	0.301018	0.000151876	5.69001	538.029
2180	808.71	899.57	751.999	1510.76	426.962	605.778	119.577	257.341	15.6417	0.318736	18.0467	43.2994	3.74659	15.9982	132.756	28.5082	0.123604	20.872	50.5268	7.30183	89.8447	8.89178	9.07237	8.2191	0.0865479	7.35057e-12	0.0629051	0.141005	0.0495792	0.00163263	1.30256e-23	0.301018	0.000151876	5.69001	538.029
2181	808.71	899.57	751.999	1510.76	426.962	605.778	119.577	257.341	15.6417	0.318736	18.0467	43.2994	3.74659	15.9982	132.756	28.5082	0.123604	20.872	50.5268	7.30183	89.8447	8.89178	9.07237	8.2191	0.0865479	7.35057e-12	0.0629051	0.141005	0.0495792	0.00163263	1.30256e-23	0.301018	0.000151876	5.69001	538.029
2182	808.71	899.57	751.999	1510.76	426.962	605.778	119.577	257.341	15.6417	0.318736	18.0467	43.2994	3.74659	15.9982	132.756	28.5082	0.123604	20.872	50.5268	7.30183	89.8447	8.89178	9.07237	8.2191	0.0865479	7.35057e-12	0.0629051	0.141005	0.0495792	0.00163263	1.30256e-23	0.301018	0.000151876	5.69001	538.029
2183	808.71	899.57	751.999	1510.76	426.962	605.778	119.577	257.341	15.6417	0.318736	18.0467	43.2994	3.74659	15.9982	132.756	28.5082	0.123604	20.872	50.5268	7.30183	89.8447	8.89178	9.07237	8.2191	0.0865479	7.35057e-12	0.0629051	0.141005	0.0495792	0.00163263	1.30256e-23	0.301018	0.000151876	5.69001	538.029
2184	808.71	899.57	751.999	1510.76	426.962	605.778	119.577	257.341	15.6417	0.318736	18.0467	43.2994	3.74659	15.9982	132.756	28.5082	0.123604	20.872	50.5268	7.30183	89.8447	8.89178	9.07237	8.2191	0.0865479	7.35057e-12	0.0629051	0.141005	0.0495792	0.00163263	1.30256e-23	0.301018	0.000151876	5.69001	538.029
2185	808.71	899.57	751.999	1510.76	426.962	605.778	119.577	257.341	15.6417	0.318736	18.0467	43.2994	3.74659	15.9982	132.756	28.5082	0.123604	20.872	50.5268	7.30183	89.8447	8.89178	9.07237	8.2191	0.0865479	7.35057e-12	0.0629051	0.141005	0.0495792	0.00163263	1.30256e-23	0.301018	0.000151876	5.69001	538.029
2186	808.71	899.57	751.999	1510.76	426.962	605.778	119.577	257.341	15.6417	0.318736	18.0467	43.2994	3.74659	15.9982	132.756	28.5082	0.123604	20.872	50.5268	7.30183	89.8447	8.89178	9.07237	8.2191	0.0865479	7.35057e-12	0.0629051	0.141005	0.0495792	0.00163263	1.30256e-23	0.301018	0.000151876	5.69001	538.029
2187	808.71	899.57	751.999	1510.76	426.962	605.778	119.577	257.341	15.6417	0.318736	18.0467	43.2994	3.74659	15.9982	132.756	28.5082	0.123604	20.872	50.5268	7.30183	89.8447	8.89178	9.07237	8.2191	0.0865479	7.35057e-12	0.0629051	0.141005	0.0495792	0.00163263	1.30256e-23	0.301018	0.000151876	5.69001	538.029
2188	808.71	899.57	751.999	1510.76	426.962	605.778	119.577	257.341	15.6417	0.318736	18.0467	43.2994	3.74659	15.9982	132.756	28.5082	0.123604	20.872	50.5268	7.30183	89.8447	8.89178	9.07237	8.2191	0.0865479	7.35057e-12	0.0629051	0.141005	0.0495792	0.00163263	1.30256e-23	0.301018	0.000151876	5.69001	538.029
2189	808.71	899.57	751.999	1510.76	426.962	605.778	119.577	257.341	15.6417	0.318736	18.0467	43.2994	3.74659	15.9982	132.756	28.5082	0.123604	20.872	50.5268	7.30183	89.8447	8.89178	9.07237	8.2191	0.0865479	7.35057e-12	0.0629051	0.141005	0.0495792	0.00163263	1.30256e-23	0.301018	0.000151876	5.69001	538.029
2190	808.71	899.57	751.999	1510.76	426.962	605.778	119.577	257.341	15.6417	0.318736	18.0467	43.2994	3.74659	15.9982	132.756	28.5082	0.123604	20.872	50.5268	7.30183	89.8447	8.89178	9.07237	8.2191	0.0865479	7.35057e-12	0.0629051	0.141005	0.0495792	0.00163263	1.30256e-23	0.301018	0.000151876	5.69001	538.029
2191	808.71	899.57	751.999	1510.76	426.962	605.778	119.577	257.341	15.6417	0.318736	18.0467	43.2994	3.74659	15.9982	132.756	28.5082	0.123604	20.872	50.5268	7.30183	89.8447	8.89178	9.07237	8.2191	0.0865479	7.35057e-12	0.0629051	0.141005	0.0495792	0.00163263	1.30256e-23	0.301018	0.000151876	5.69001	538.029
2192	808.71	899.57	751.999	1510.76	426.962	605.778	119.577	257.341	15.6417	0.318736	18.0467	43.2994	3.74659	15.9982	132.756	28.5082	0.123604	20.872	50.5268	7.30183	89.8447	8.89178	9.07237	8.2191	0.0865479	7.35057e-12	0.0629051	0.141005	0.0495792	0.00163263	1.30256e-23	0.301018	0.000151876	5.69001	538.029
2193	808.71	899.57	751.999	1510.76	426.962	605.778	119.577	257.341	15.6417	0.318736	18.0467	43.2994	3.74659	15.9982	132.756	28.5082	0.123604	20.872	50.5268	7.30183	89.8447	8.89178	9.07237	8.2191	0.0865479	7.35057e-12	0.0629051	0.141005	0.0495792	0.00163263	1.30256e-23	0.301018	0.000151876	5.69001	538.029
2194	808.71	899.57	751.999	1510.76	426.962	605.778	119.577	257.341	15.6417	0.318736	18.0467	43.2994	3.74659	15.9982	132.756	28.5082	0.123604	20.872	50.5268	7.30183	89.8447	8.89178	9.07237	8.2191	0.0865479	7.35057e-12	0.0629051	0.141005	0.0495792	0.00163263	1.30256e-23	0.301018	0.000151876	5.69001	538.029
2195	808.71	899.57	751.999	1510.76	426.962	605.778	119.577	257.341	15.6417	0.318736	18.0467	43.2994	3.74659	15.9982	132.756	28.5082	0.123604	20.872	50.5268	7.30183	89.8447	8.89178	9.07237	8.2191	0.0865479	7.35057e-12	0.0629051	0.141005	0.0495792	0.00163263	1.30256e-23	0.301018	0.000151876	5.69001	538.029
2196	808.71	899.57	751.999	1510.76	426.962	605.778	119.577	257.341	15.6417	0.318736	18.0467	43.2994	3.74659	15.9982	132.756	28.5082	0.123604	20.872	50.5268	7.30183	89.8447	8.89178	9.07237	8.2191	0.0865479	7.35057e-12	0.0629051	0.141005	0.0495792	0.00163263	1.30256e-23	0.301018	0.000151876	5.69001	538.029
2197	808.71	899.57	751.999	1510.76	426.962	605.778	119.577	257.341	15.6417	0.318736	18.0467	43.2994	3.74659	15.9982	132.756	28.5082	0.123604	20.872	50.5268	7.30183	89.8447	8.89178	9.07237	8.2191	0.0865479	7.35057e-12	0.0629051	0.141005	0.0495792	0.00163263	1.30256e-23	0.301018	0.000151876	5.69001	538.029
2198	808.71	899.57	751.999	1510.76	426.962	605.778	119.577	257.341	15.6417	0.318736	18.0467	43.2994	3.74659	15.9982	132.756	28.5082	0.123604	20.872	50.5268	7.30183	89.8447	8.89178	9.07237	8.2191	0.0865479	7.35057e-12	0.0629051	0.141005	0.0495792	0.00163263	1.30256e-23	0.301018	0.000151876	5.69001	538.029
2199	808.71	899.57	751.999	1510.76	426.962	605.778	119.577	257.341	15.6417	0.318736	18.0467	43.2994	3.74659	15.9982	132.756	28.5082	0.123604	20.872	50.5268	7.30183	89.8447	8.89178	9.07237	8.2191	0.0865479	7.35057e-12	0.0629051	0.141005	0.0495792	0.00163263	1.30256e-23	0.301018	0.000151876	5.69001	538.029
2200	808.71	899.57	751.999	1510.76	426.962	605.778	119.577	257.341	15.6417	0.318736	18.0467	43.2994	3.74659	15.9982	132.756	28.5082	0.123604	20.872	50.5268	7.30183	89.8447	8.89178	9.07237	8.2191	0.0865479	7.35057e-12	0.0629051	0.141005	0.0495792	0.00163263	1.30256e-23	0.301018	0.000151876	5.69001	538.029
2201	808.71	899.57	751.999	1510.76	426.962	605.778	119.577	257.341	15.6417	0.318736	18.0467	43.2994	3.74659	15.9982	132.756	28.5082	0.123604	20.872	50.5268	7.30183	89.8447	8.89178	9.07237	8.2191	0.0865479	7.35057e-12	0.0629051	0.141005	0.0495792	0.00163263	1.30256e-23	0.301018	0.000151876	5.69001	538.029
2202	808.71	899.57	751.999	1510.76	426.962	605.778	119.577	257.341	15.6417	0.318736	18.0467	43.2994	3.74659	15.9982	132.756	28.5082	0.123604	20.872	50.5268	7.30183	89.8447	8.89178	9.07237	8.2191	0.0865479	7.35057e-12	0.0629051	0.141005	0.0495792	0.00163263	1.30256e-23	0.301018	0.000151876	5.69001	538.029
2203	808.71	899.57	751.999	1510.76	426.962	605.778	119.577	257.341	15.6417	0.318736	18.0467	43.2994	3.74659	15.9982	132.756	28.5082	0.123604	20.872	50.5268	7.30183	89.8447	8.89178	9.07237	8.2191	0.0865479	7.35057e-12	0.0629051	0.141005	0.0495792	0.00163263	1.30256e-23	0.301018	0.000151876	5.69001	538.029
2204	808.71	899.57	751.999	1510.76	426.962	605.778	119.577	257.341	15.6417	0.318736	18.0467	43.2994	3.74659	15.9982	132.756	28.5082	0.123604	20.872	50.5268	7.30183	89.8447	8.89178	9.07237	8.2191	0.0865479	7.35057e-12	0.0629051	0.141005	0.0495792	0.00163263	1.30256e-23	0.301018	0.000151876	5.69001	538.029
2205	808.71	899.57	751.999	1510.76	426.962	605.778	119.577	257.341	15.6417	0.318736	18.0467	43.2994	3.74659	15.9982	132.756	28.5082	0.123604	20.872	50.5268	7.30183	89.8447	8.89178	9.07237	8.2191	0.0865479	7.35057e-12	0.0629051	0.141005	0.0495792	0.00163263	1.30256e-23	0.301018	0.000151876	5.69001	538.029
2206	808.71	899.57	751.999	1510.76	426.962	605.778	119.577	257.341	15.6417	0.318736	18.0467	43.2994	3.74659	15.9982	132.756	28.5082	0.123604	20.872	50.5268	7.30183	89.8447	8.89178	9.07237	8.2191	0.0865479	7.35057e-12	0.0629051	0.141005	0.0495792	0.00163263	1.30256e-23	0.301018	0.000151876	5.69001	538.029
2207	808.71	899.57	751.999	1510.76	426.962	605.778	119.577	257.341	15.6417	0.318736	18.0467	43.2994	3.74659	15.9982	132.756	28.5082	0.123604	20.872	50.5268	7.30183	89.8447	8.89178	9.07237	8.2191	0.0865479	7.35057e-12	0.0629051	0.141005	0.0495792	0.00163263	1.30256e-23	0.301018	0.000151876	5.69001	538.029
2208	808.71	899.57	751.999	1510.76	426.962	605.778	119.577	257.341	15.6417	0.318736	18.0467	43.2994	3.74659	15.9982	132.756	28.5082	0.123604	20.872	50.5268	7.30183	89.8447	8.89178	9.07237	8.2191	0.0865479	7.35057e-12	0.0629051	0.141005	0.0495792	0.00163263	1.30256e-23	0.301018	0.000151876	5.69001	538.029
2209	808.71	899.57	751.999	1510.76	426.962	605.778	119.577	257.341	15.6417	0.318736	18.0467	43.2994	3.74659	15.9982	132.756	28.5082	0.123604	20.872	50.5268	7.30183	89.8447	8.89178	9.07237	8.2191	0.0865479	7.35057e-12	0.0629051	0.141005	0.0495792	0.00163263	1.30256e-23	0.301018	0.000151876	5.69001	538.029
2210	808.71	899.57	751.999	1510.76	426.962	605.778	119.577	257.341	15.6417	0.318736	18.0467	43.2994	3.74659	15.9982	132.756	28.5082	0.123604	20.872	50.5268	7.30183	89.8447	8.89178	9.07237	8.2191	0.0865479	7.35057e-12	0.0629051	0.141005	0.0495792	0.00163263	1.30256e-23	0.301018	0.000151876	5.69001	538.029
2211	808.71	899.57	751.999	1510.76	426.962	605.778	119.577	257.341	15.6417	0.318736	18.0467	43.2994	3.74659	15.9982	132.756	28.5082	0.123604	20.872	50.5268	7.30183	89.8447	8.89178	9.07237	8.2191	0.0865479	7.35057e-12	0.0629051	0.141005	0.0495792	0.00163263	1.30256e-23	0.301018	0.000151876	5.69001	538.029
2212	808.71	899.57	751.999	1510.76	426.962	605.778	119.577	257.341	15.6417	0.318736	18.0467	43.2994	3.74659	15.9982	132.756	28.5082	0.123604	20.872	50.5268	7.30183	89.8447	8.89178	9.07237	8.2191	0.0865479	7.35057e-12	0.0629051	0.141005	0.0495792	0.00163263	1.30256e-23	0.301018	0.000151876	5.69001	538.029
2213	808.71	899.57	751.999	1510.76	426.962	605.778	119.577	257.341	15.6417	0.318736	18.0467	43.2994	3.74659	15.9982	132.756	28.5082	0.123604	20.872	50.5268	7.30183	89.8447	8.89178	9.07237	8.2191	0.0865479	7.35057e-12	0.0629051	0.141005	0.0495792	0.00163263	1.30256e-23	0.301018	0.000151876	5.69001	538.029
2214	808.71	899.57	751.999	1510.76	426.962	605.778	119.577	257.341	15.6417	0.318736	18.0467	43.2994	3.74659	15.9982	132.756	28.5082	0.123604	20.872	50.5268	7.30183	89.8447	8.89178	9.07237	8.2191	0.0865479	7.35057e-12	0.0629051	0.141005	0.0495792	0.00163263	1.30256e-23	0.301018	0.000151876	5.69001	538.029
2215	808.71	899.57	751.999	1510.76	426.962	605.778	119.577	257.341	15.6417	0.318736	18.0467	43.2994	3.74659	15.9982	132.756	28.5082	0.123604	20.872	50.5268	7.30183	89.8447	8.89178	9.07237	8.2191	0.0865479	7.35057e-12	0.0629051	0.141005	0.0495792	0.00163263	1.30256e-23	0.301018	0.000151876	5.69001	538.029
2216	808.71	899.57	751.999	1510.76	426.962	605.778	119.577	257.341	15.6417	0.318736	18.0467	43.2994	3.74659	15.9982	132.756	28.5082	0.123604	20.872	50.5268	7.30183	89.8447	8.89178	9.07237	8.2191	0.0865479	7.35057e-12	0.0629051	0.141005	0.0495792	0.00163263	1.30256e-23	0.301018	0.000151876	5.69001	538.029
2217	808.71	899.57	751.999	1510.76	426.962	605.778	119.577	257.341	15.6417	0.318736	18.0467	43.2994	3.74659	15.9982	132.756	28.5082	0.123604	20.872	50.5268	7.30183	89.8447	8.89178	9.07237	8.2191	0.0865479	7.35057e-12	0.0629051	0.141005	0.0495792	0.00163263	1.30256e-23	0.301018	0.000151876	5.69001	538.029
2218	808.71	899.57	751.999	1510.76	426.962	605.778	119.577	257.341	15.6417	0.318736	18.0467	43.2994	3.74659	15.9982	132.756	28.5082	0.123604	20.872	50.5268	7.30183	89.8447	8.89178	9.07237	8.2191	0.0865479	7.35057e-12	0.0629051	0.141005	0.0495792	0.00163263	1.30256e-23	0.301018	0.000151876	5.69001	538.029
2219	808.71	899.57	751.999	1510.76	426.962	605.778	119.577	257.341	15.6417	0.318736	18.0467	43.2994	3.74659	15.9982	132.756	28.5082	0.123604	20.872	50.5268	7.30183	89.8447	8.89178	9.07237	8.2191	0.0865479	7.35057e-12	0.0629051	0.141005	0.0495792	0.00163263	1.30256e-23	0.301018	0.000151876	5.69001	538.029
2220	808.71	899.57	751.999	1510.76	426.962	605.778	119.577	257.341	15.6417	0.318736	18.0467	43.2994	3.74659	15.9982	132.756	28.5082	0.123604	20.872	50.5268	7.30183	89.8447	8.89178	9.07237	8.2191	0.0865479	7.35057e-12	0.0629051	0.141005	0.0495792	0.00163263	1.30256e-23	0.301018	0.000151876	5.69001	538.029
2221	808.71	899.57	751.999	1510.76	426.962	605.778	119.577	257.341	15.6417	0.318736	18.0467	43.2994	3.74659	15.9982	132.756	28.5082	0.123604	20.872	50.5268	7.30183	89.8447	8.89178	9.07237	8.2191	0.0865479	7.35057e-12	0.0629051	0.141005	0.0495792	0.00163263	1.30256e-23	0.301018	0.000151876	5.69001	538.029
2222	808.71	899.57	751.999	1510.76	426.962	605.778	119.577	257.341	15.6417	0.318736	18.0467	43.2994	3.74659	15.9982	132.756	28.5082	0.123604	20.872	50.5268	7.30183	89.8447	8.89178	9.07237	8.2191	0.0865479	7.35057e-12	0.0629051	0.141005	0.0495792	0.00163263	1.30256e-23	0.301018	0.000151876	5.69001	538.029
2223	808.71	899.57	751.999	1510.76	426.962	605.778	119.577	257.341	15.6417	0.318736	18.0467	43.2994	3.74659	15.9982	132.756	28.5082	0.123604	20.872	50.5268	7.30183	89.8447	8.89178	9.07237	8.2191	0.0865479	7.35057e-12	0.0629051	0.141005	0.0495792	0.00163263	1.30256e-23	0.301018	0.000151876	5.69001	538.029
2224	808.71	899.57	751.999	1510.76	426.962	605.778	119.577	257.341	15.6417	0.318736	18.0467	43.2994	3.74659	15.9982	132.756	28.5082	0.123604	20.872	50.5268	7.30183	89.8447	8.89178	9.07237	8.2191	0.0865479	7.35057e-12	0.0629051	0.141005	0.0495792	0.00163263	1.30256e-23	0.301018	0.000151876	5.69001	538.029
2225	808.71	899.57	751.999	1510.76	426.962	605.778	119.577	257.341	15.6417	0.318736	18.0467	43.2994	3.74659	15.9982	132.756	28.5082	0.123604	20.872	50.5268	7.30183	89.8447	8.89178	9.07237	8.2191	0.0865479	7.35057e-12	0.0629051	0.141005	0.0495792	0.00163263	1.30256e-23	0.301018	0.000151876	5.69001	538.029
2226	808.71	899.57	751.999	1510.76	426.962	605.778	119.577	257.341	15.6417	0.318736	18.0467	43.2994	3.74659	15.9982	132.756	28.5082	0.123604	20.872	50.5268	7.30183	89.8447	8.89178	9.07237	8.2191	0.0865479	7.35057e-12	0.0629051	0.141005	0.0495792	0.00163263	1.30256e-23	0.301018	0.000151876	5.69001	538.029
2227	808.71	899.57	751.999	1510.76	426.962	605.778	119.577	257.341	15.6417	0.318736	18.0467	43.2994	3.74659	15.9982	132.756	28.5082	0.123604	20.872	50.5268	7.30183	89.8447	8.89178	9.07237	8.2191	0.0865479	7.35057e-12	0.0629051	0.141005	0.0495792	0.00163263	1.30256e-23	0.301018	0.000151876	5.69001	538.029
2228	808.71	899.57	751.999	1510.76	426.962	605.778	119.577	257.341	15.6417	0.318736	18.0467	43.2994	3.74659	15.9982	132.756	28.5082	0.123604	20.872	50.5268	7.30183	89.8447	8.89178	9.07237	8.2191	0.0865479	7.35057e-12	0.0629051	0.141005	0.0495792	0.00163263	1.30256e-23	0.301018	0.000151876	5.69001	538.029
2229	808.71	899.57	751.999	1510.76	426.962	605.778	119.577	257.341	15.6417	0.318736	18.0467	43.2994	3.74659	15.9982	132.756	28.5082	0.123604	20.872	50.5268	7.30183	89.8447	8.89178	9.07237	8.2191	0.0865479	7.35057e-12	0.0629051	0.141005	0.0495792	0.00163263	1.30256e-23	0.301018	0.000151876	5.69001	538.029
2230	808.71	899.57	751.999	1510.76	426.962	605.778	119.577	257.341	15.6417	0.318736	18.0467	43.2994	3.74659	15.9982	132.756	28.5082	0.123604	20.872	50.5268	7.30183	89.8447	8.89178	9.07237	8.2191	0.0865479	7.35057e-12	0.0629051	0.141005	0.0495792	0.00163263	1.30256e-23	0.301018	0.000151876	5.69001	538.029
2231	808.71	899.57	751.999	1510.76	426.962	605.778	119.577	257.341	15.6417	0.318736	18.0467	43.2994	3.74659	15.9982	132.756	28.5082	0.123604	20.872	50.5268	7.30183	89.8447	8.89178	9.07237	8.2191	0.0865479	7.35057e-12	0.0629051	0.141005	0.0495792	0.00163263	1.30256e-23	0.301018	0.000151876	5.69001	538.029
2232	808.71	899.57	751.999	1510.76	426.962	605.778	119.577	257.341	15.6417	0.318736	18.0467	43.2994	3.74659	15.9982	132.756	28.5082	0.123604	20.872	50.5268	7.30183	89.8447	8.89178	9.07237	8.2191	0.0865479	7.35057e-12	0.0629051	0.141005	0.0495792	0.00163263	1.30256e-23	0.301018	0.000151876	5.69001	538.029
2233	808.71	899.57	751.999	1510.76	426.962	605.778	119.577	257.341	15.6417	0.318736	18.0467	43.2994	3.74659	15.9982	132.756	28.5082	0.123604	20.872	50.5268	7.30183	89.8447	8.89178	9.07237	8.2191	0.0865479	7.35057e-12	0.0629051	0.141005	0.0495792	0.00163263	1.30256e-23	0.301018	0.000151876	5.69001	538.029
2234	808.71	899.57	751.999	1510.76	426.962	605.778	119.577	257.341	15.6417	0.318736	18.0467	43.2994	3.74659	15.9982	132.756	28.5082	0.123604	20.872	50.5268	7.30183	89.8447	8.89178	9.07237	8.2191	0.0865479	7.35057e-12	0.0629051	0.141005	0.0495792	0.00163263	1.30256e-23	0.301018	0.000151876	5.69001	538.029
2235	808.71	899.57	751.999	1510.76	426.962	605.778	119.577	257.341	15.6417	0.318736	18.0467	43.2994	3.74659	15.9982	132.756	28.5082	0.123604	20.872	50.5268	7.30183	89.8447	8.89178	9.07237	8.2191	0.0865479	7.35057e-12	0.0629051	0.141005	0.0495792	0.00163263	1.30256e-23	0.301018	0.000151876	5.69001	538.029
2236	808.71	899.57	751.999	1510.76	426.962	605.778	119.577	257.341	15.6417	0.318736	18.0467	43.2994	3.74659	15.9982	132.756	28.5082	0.123604	20.872	50.5268	7.30183	89.8447	8.89178	9.07237	8.2191	0.0865479	7.35057e-12	0.0629051	0.141005	0.0495792	0.00163263	1.30256e-23	0.301018	0.000151876	5.69001	538.029
2237	808.71	899.57	751.999	1510.76	426.962	605.778	119.577	257.341	15.6417	0.318736	18.0467	43.2994	3.74659	15.9982	132.756	28.5082	0.123604	20.872	50.5268	7.30183	89.8447	8.89178	9.07237	8.2191	0.0865479	7.35057e-12	0.0629051	0.141005	0.0495792	0.00163263	1.30256e-23	0.301018	0.000151876	5.69001	538.029
2238	808.71	899.57	751.999	1510.76	426.962	605.778	119.577	257.341	15.6417	0.318736	18.0467	43.2994	3.74659	15.9982	132.756	28.5082	0.123604	20.872	50.5268	7.30183	89.8447	8.89178	9.07237	8.2191	0.0865479	7.35057e-12	0.0629051	0.141005	0.0495792	0.00163263	1.30256e-23	0.301018	0.000151876	5.69001	538.029
2239	808.71	899.57	751.999	1510.76	426.962	605.778	119.577	257.341	15.6417	0.318736	18.0467	43.2994	3.74659	15.9982	132.756	28.5082	0.123604	20.872	50.5268	7.30183	89.8447	8.89178	9.07237	8.2191	0.0865479	7.35057e-12	0.0629051	0.141005	0.0495792	0.00163263	1.30256e-23	0.301018	0.000151876	5.69001	538.029
2240	808.71	899.57	751.999	1510.76	426.962	605.778	119.577	257.341	15.6417	0.318736	18.0467	43.2994	3.74659	15.9982	132.756	28.5082	0.123604	20.872	50.5268	7.30183	89.8447	8.89178	9.07237	8.2191	0.0865479	7.35057e-12	0.0629051	0.141005	0.0495792	0.00163263	1.30256e-23	0.301018	0.000151876	5.69001	538.029
2241	808.71	899.57	751.999	1510.76	426.962	605.778	119.577	257.341	15.6417	0.318736	18.0467	43.2994	3.74659	15.9982	132.756	28.5082	0.123604	20.872	50.5268	7.30183	89.8447	8.89178	9.07237	8.2191	0.0865479	7.35057e-12	0.0629051	0.141005	0.0495792	0.00163263	1.30256e-23	0.301018	0.000151876	5.69001	538.029
2242	808.71	899.57	751.999	1510.76	426.962	605.778	119.577	257.341	15.6417	0.318736	18.0467	43.2994	3.74659	15.9982	132.756	28.5082	0.123604	20.872	50.5268	7.30183	89.8447	8.89178	9.07237	8.2191	0.0865479	7.35057e-12	0.0629051	0.141005	0.0495792	0.00163263	1.30256e-23	0.301018	0.000151876	5.69001	538.029
2243	808.71	899.57	751.999	1510.76	426.962	605.778	119.577	257.341	15.6417	0.318736	18.0467	43.2994	3.74659	15.9982	132.756	28.5082	0.123604	20.872	50.5268	7.30183	89.8447	8.89178	9.07237	8.2191	0.0865479	7.35057e-12	0.0629051	0.141005	0.0495792	0.00163263	1.30256e-23	0.301018	0.000151876	5.69001	538.029
2244	808.71	899.57	751.999	1510.76	426.962	605.778	119.577	257.341	15.6417	0.318736	18.0467	43.2994	3.74659	15.9982	132.756	28.5082	0.123604	20.872	50.5268	7.30183	89.8447	8.89178	9.07237	8.2191	0.0865479	7.35057e-12	0.0629051	0.141005	0.0495792	0.00163263	1.30256e-23	0.301018	0.000151876	5.69001	538.029
2245	808.71	899.57	751.999	1510.76	426.962	605.778	119.577	257.341	15.6417	0.318736	18.0467	43.2994	3.74659	15.9982	132.756	28.5082	0.123604	20.872	50.5268	7.30183	89.8447	8.89178	9.07237	8.2191	0.0865479	7.35057e-12	0.0629051	0.141005	0.0495792	0.00163263	1.30256e-23	0.301018	0.000151876	5.69001	538.029
2246	808.71	899.57	751.999	1510.76	426.962	605.778	119.577	257.341	15.6417	0.318736	18.0467	43.2994	3.74659	15.9982	132.756	28.5082	0.123604	20.872	50.5268	7.30183	89.8447	8.89178	9.07237	8.2191	0.0865479	7.35057e-12	0.0629051	0.141005	0.0495792	0.00163263	1.30256e-23	0.301018	0.000151876	5.69001	538.029
2247	808.71	899.57	751.999	1510.76	426.962	605.778	119.577	257.341	15.6417	0.318736	18.0467	43.2994	3.74659	15.9982	132.756	28.5082	0.123604	20.872	50.5268	7.30183	89.8447	8.89178	9.07237	8.2191	0.0865479	7.35057e-12	0.0629051	0.141005	0.0495792	0.00163263	1.30256e-23	0.301018	0.000151876	5.69001	538.029
2248	808.71	899.57	751.999	1510.76	426.962	605.778	119.577	257.341	15.6417	0.318736	18.0467	43.2994	3.74659	15.9982	132.756	28.5082	0.123604	20.872	50.5268	7.30183	89.8447	8.89178	9.07237	8.2191	0.0865479	7.35057e-12	0.0629051	0.141005	0.0495792	0.00163263	1.30256e-23	0.301018	0.000151876	5.69001	538.029
2249	808.71	899.57	751.999	1510.76	426.962	605.778	119.577	257.341	15.6417	0.318736	18.0467	43.2994	3.74659	15.9982	132.756	28.5082	0.123604	20.872	50.5268	7.30183	89.8447	8.89178	9.07237	8.2191	0.0865479	7.35057e-12	0.0629051	0.141005	0.0495792	0.00163263	1.30256e-23	0.301018	0.000151876	5.69001	538.029
2250	808.71	899.57	751.999	1510.76	426.962	605.778	119.577	257.341	15.6417	0.318736	18.0467	43.2994	3.74659	15.9982	132.756	28.5082	0.123604	20.872	50.5268	7.30183	89.8447	8.89178	9.07237	8.2191	0.0865479	7.35057e-12	0.0629051	0.141005	0.0495792	0.00163263	1.30256e-23	0.301018	0.000151876	5.69001	538.029
2251	808.71	899.57	751.999	1510.76	426.962	605.778	119.577	257.341	15.6417	0.318736	18.0467	43.2994	3.74659	15.9982	132.756	28.5082	0.123604	20.872	50.5268	7.30183	89.8447	8.89178	9.07237	8.2191	0.0865479	7.35057e-12	0.0629051	0.141005	0.0495792	0.00163263	1.30256e-23	0.301018	0.000151876	5.69001	538.029
2252	808.71	899.57	751.999	1510.76	426.962	605.778	119.577	257.341	15.6417	0.318736	18.0467	43.2994	3.74659	15.9982	132.756	28.5082	0.123604	20.872	50.5268	7.30183	89.8447	8.89178	9.07237	8.2191	0.0865479	7.35057e-12	0.0629051	0.141005	0.0495792	0.00163263	1.30256e-23	0.301018	0.000151876	5.69001	538.029
2253	808.71	899.57	751.999	1510.76	426.962	605.778	119.577	257.341	15.6417	0.318736	18.0467	43.2994	3.74659	15.9982	132.756	28.5082	0.123604	20.872	50.5268	7.30183	89.8447	8.89178	9.07237	8.2191	0.0865479	7.35057e-12	0.0629051	0.141005	0.0495792	0.00163263	1.30256e-23	0.301018	0.000151876	5.69001	538.029
2254	808.71	899.57	751.999	1510.76	426.962	605.778	119.577	257.341	15.6417	0.318736	18.0467	43.2994	3.74659	15.9982	132.756	28.5082	0.123604	20.872	50.5268	7.30183	89.8447	8.89178	9.07237	8.2191	0.0865479	7.35057e-12	0.0629051	0.141005	0.0495792	0.00163263	1.30256e-23	0.301018	0.000151876	5.69001	538.029
2255	808.71	899.57	751.999	1510.76	426.962	605.778	119.577	257.341	15.6417	0.318736	18.0467	43.2994	3.74659	15.9982	132.756	28.5082	0.123604	20.872	50.5268	7.30183	89.8447	8.89178	9.07237	8.2191	0.0865479	7.35057e-12	0.0629051	0.141005	0.0495792	0.00163263	1.30256e-23	0.301018	0.000151876	5.69001	538.029
2256	808.71	899.57	751.999	1510.76	426.962	605.778	119.577	257.341	15.6417	0.318736	18.0467	43.2994	3.74659	15.9982	132.756	28.5082	0.123604	20.872	50.5268	7.30183	89.8447	8.89178	9.07237	8.2191	0.0865479	7.35057e-12	0.0629051	0.141005	0.0495792	0.00163263	1.30256e-23	0.301018	0.000151876	5.69001	538.029
2257	808.71	899.57	751.999	1510.76	426.962	605.778	119.577	257.341	15.6417	0.318736	18.0467	43.2994	3.74659	15.9982	132.756	28.5082	0.123604	20.872	50.5268	7.30183	89.8447	8.89178	9.07237	8.2191	0.0865479	7.35057e-12	0.0629051	0.141005	0.0495792	0.00163263	1.30256e-23	0.301018	0.000151876	5.69001	538.029
2258	808.71	899.57	751.999	1510.76	426.962	605.778	119.577	257.341	15.6417	0.318736	18.0467	43.2994	3.74659	15.9982	132.756	28.5082	0.123604	20.872	50.5268	7.30183	89.8447	8.89178	9.07237	8.2191	0.0865479	7.35057e-12	0.0629051	0.141005	0.0495792	0.00163263	1.30256e-23	0.301018	0.000151876	5.69001	538.029
2259	808.71	899.57	751.999	1510.76	426.962	605.778	119.577	257.341	15.6417	0.318736	18.0467	43.2994	3.74659	15.9982	132.756	28.5082	0.123604	20.872	50.5268	7.30183	89.8447	8.89178	9.07237	8.2191	0.0865479	7.35057e-12	0.0629051	0.141005	0.0495792	0.00163263	1.30256e-23	0.301018	0.000151876	5.69001	538.029
2260	808.71	899.57	751.999	1510.76	426.962	605.778	119.577	257.341	15.6417	0.318736	18.0467	43.2994	3.74659	15.9982	132.756	28.5082	0.123604	20.872	50.5268	7.30183	89.8447	8.89178	9.07237	8.2191	0.0865479	7.35057e-12	0.0629051	0.141005	0.0495792	0.00163263	1.30256e-23	0.301018	0.000151876	5.69001	538.029
2261	808.71	899.57	751.999	1510.76	426.962	605.778	119.577	257.341	15.6417	0.318736	18.0467	43.2994	3.74659	15.9982	132.756	28.5082	0.123604	20.872	50.5268	7.30183	89.8447	8.89178	9.07237	8.2191	0.0865479	7.35057e-12	0.0629051	0.141005	0.0495792	0.00163263	1.30256e-23	0.301018	0.000151876	5.69001	538.029
2262	808.71	899.57	751.999	1510.76	426.962	605.778	119.577	257.341	15.6417	0.318736	18.0467	43.2994	3.74659	15.9982	132.756	28.5082	0.123604	20.872	50.5268	7.30183	89.8447	8.89178	9.07237	8.2191	0.0865479	7.35057e-12	0.0629051	0.141005	0.0495792	0.00163263	1.30256e-23	0.301018	0.000151876	5.69001	538.029
2263	808.71	899.57	751.999	1510.76	426.962	605.778	119.577	257.341	15.6417	0.318736	18.0467	43.2994	3.74659	15.9982	132.756	28.5082	0.123604	20.872	50.5268	7.30183	89.8447	8.89178	9.07237	8.2191	0.0865479	7.35057e-12	0.0629051	0.141005	0.0495792	0.00163263	1.30256e-23	0.301018	0.000151876	5.69001	538.029
2264	808.71	899.57	751.999	1510.76	426.962	605.778	119.577	257.341	15.6417	0.318736	18.0467	43.2994	3.74659	15.9982	132.756	28.5082	0.123604	20.872	50.5268	7.30183	89.8447	8.89178	9.07237	8.2191	0.0865479	7.35057e-12	0.0629051	0.141005	0.0495792	0.00163263	1.30256e-23	0.301018	0.000151876	5.69001	538.029
2265	808.71	899.57	751.999	1510.76	426.962	605.778	119.577	257.341	15.6417	0.318736	18.0467	43.2994	3.74659	15.9982	132.756	28.5082	0.123604	20.872	50.5268	7.30183	89.8447	8.89178	9.07237	8.2191	0.0865479	7.35057e-12	0.0629051	0.141005	0.0495792	0.00163263	1.30256e-23	0.301018	0.000151876	5.69001	538.029
2266	808.71	899.57	751.999	1510.76	426.962	605.778	119.577	257.341	15.6417	0.318736	18.0467	43.2994	3.74659	15.9982	132.756	28.5082	0.123604	20.872	50.5268	7.30183	89.8447	8.89178	9.07237	8.2191	0.0865479	7.35057e-12	0.0629051	0.141005	0.0495792	0.00163263	1.30256e-23	0.301018	0.000151876	5.69001	538.029
2267	808.71	899.57	751.999	1510.76	426.962	605.778	119.577	257.341	15.6417	0.318736	18.0467	43.2994	3.74659	15.9982	132.756	28.5082	0.123604	20.872	50.5268	7.30183	89.8447	8.89178	9.07237	8.2191	0.0865479	7.35057e-12	0.0629051	0.141005	0.0495792	0.00163263	1.30256e-23	0.301018	0.000151876	5.69001	538.029
2268	808.71	899.57	751.999	1510.76	426.962	605.778	119.577	257.341	15.6417	0.318736	18.0467	43.2994	3.74659	15.9982	132.756	28.5082	0.123604	20.872	50.5268	7.30183	89.8447	8.89178	9.07237	8.2191	0.0865479	7.35057e-12	0.0629051	0.141005	0.0495792	0.00163263	1.30256e-23	0.301018	0.000151876	5.69001	538.029
2269	808.71	899.57	751.999	1510.76	426.962	605.778	119.577	257.341	15.6417	0.318736	18.0467	43.2994	3.74659	15.9982	132.756	28.5082	0.123604	20.872	50.5268	7.30183	89.8447	8.89178	9.07237	8.2191	0.0865479	7.35057e-12	0.0629051	0.141005	0.0495792	0.00163263	1.30256e-23	0.301018	0.000151876	5.69001	538.029
2270	808.71	899.57	751.999	1510.76	426.962	605.778	119.577	257.341	15.6417	0.318736	18.0467	43.2994	3.74659	15.9982	132.756	28.5082	0.123604	20.872	50.5268	7.30183	89.8447	8.89178	9.07237	8.2191	0.0865479	7.35057e-12	0.0629051	0.141005	0.0495792	0.00163263	1.30256e-23	0.301018	0.000151876	5.69001	538.029
2271	808.71	899.57	751.999	1510.76	426.962	605.778	119.577	257.341	15.6417	0.318736	18.0467	43.2994	3.74659	15.9982	132.756	28.5082	0.123604	20.872	50.5268	7.30183	89.8447	8.89178	9.07237	8.2191	0.0865479	7.35057e-12	0.0629051	0.141005	0.0495792	0.00163263	1.30256e-23	0.301018	0.000151876	5.69001	538.029
2272	808.71	899.57	751.999	1510.76	426.962	605.778	119.577	257.341	15.6417	0.318736	18.0467	43.2994	3.74659	15.9982	132.756	28.5082	0.123604	20.872	50.5268	7.30183	89.8447	8.89178	9.07237	8.2191	0.0865479	7.35057e-12	0.0629051	0.141005	0.0495792	0.00163263	1.30256e-23	0.301018	0.000151876	5.69001	538.029
2273	808.71	899.57	751.999	1510.76	426.962	605.778	119.577	257.341	15.6417	0.318736	18.0467	43.2994	3.74659	15.9982	132.756	28.5082	0.123604	20.872	50.5268	7.30183	89.8447	8.89178	9.07237	8.2191	0.0865479	7.35057e-12	0.0629051	0.141005	0.0495792	0.00163263	1.30256e-23	0.301018	0.000151876	5.69001	538.029
2274	808.71	899.57	751.999	1510.76	426.962	605.778	119.577	257.341	15.6417	0.318736	18.0467	43.2994	3.74659	15.9982	132.756	28.5082	0.123604	20.872	50.5268	7.30183	89.8447	8.89178	9.07237	8.2191	0.0865479	7.35057e-12	0.0629051	0.141005	0.0495792	0.00163263	1.30256e-23	0.301018	0.000151876	5.69001	538.029
2275	808.71	899.57	751.999	1510.76	426.962	605.778	119.577	257.341	15.6417	0.318736	18.0467	43.2994	3.74659	15.9982	132.756	28.5082	0.123604	20.872	50.5268	7.30183	89.8447	8.89178	9.07237	8.2191	0.0865479	7.35057e-12	0.0629051	0.141005	0.0495792	0.00163263	1.30256e-23	0.301018	0.000151876	5.69001	538.029
2276	808.71	899.57	751.999	1510.76	426.962	605.778	119.577	257.341	15.6417	0.318736	18.0467	43.2994	3.74659	15.9982	132.756	28.5082	0.123604	20.872	50.5268	7.30183	89.8447	8.89178	9.07237	8.2191	0.0865479	7.35057e-12	0.0629051	0.141005	0.0495792	0.00163263	1.30256e-23	0.301018	0.000151876	5.69001	538.029
2277	808.71	899.57	751.999	1510.76	426.962	605.778	119.577	257.341	15.6417	0.318736	18.0467	43.2994	3.74659	15.9982	132.756	28.5082	0.123604	20.872	50.5268	7.30183	89.8447	8.89178	9.07237	8.2191	0.0865479	7.35057e-12	0.0629051	0.141005	0.0495792	0.00163263	1.30256e-23	0.301018	0.000151876	5.69001	538.029
2278	808.71	899.57	751.999	1510.76	426.962	605.778	119.577	257.341	15.6417	0.318736	18.0467	43.2994	3.74659	15.9982	132.756	28.5082	0.123604	20.872	50.5268	7.30183	89.8447	8.89178	9.07237	8.2191	0.0865479	7.35057e-12	0.0629051	0.141005	0.0495792	0.00163263	1.30256e-23	0.301018	0.000151876	5.69001	538.029
2279	808.71	899.57	751.999	1510.76	426.962	605.778	119.577	257.341	15.6417	0.318736	18.0467	43.2994	3.74659	15.9982	132.756	28.5082	0.123604	20.872	50.5268	7.30183	89.8447	8.89178	9.07237	8.2191	0.0865479	7.35057e-12	0.0629051	0.141005	0.0495792	0.00163263	1.30256e-23	0.301018	0.000151876	5.69001	538.029
2280	808.71	899.57	751.999	1510.76	426.962	605.778	119.577	257.341	15.6417	0.318736	18.0467	43.2994	3.74659	15.9982	132.756	28.5082	0.123604	20.872	50.5268	7.30183	89.8447	8.89178	9.07237	8.2191	0.0865479	7.35057e-12	0.0629051	0.141005	0.0495792	0.00163263	1.30256e-23	0.301018	0.000151876	5.69001	538.029
2281	808.71	899.57	751.999	1510.76	426.962	605.778	119.577	257.341	15.6417	0.318736	18.0467	43.2994	3.74659	15.9982	132.756	28.5082	0.123604	20.872	50.5268	7.30183	89.8447	8.89178	9.07237	8.2191	0.0865479	7.35057e-12	0.0629051	0.141005	0.0495792	0.00163263	1.30256e-23	0.301018	0.000151876	5.69001	538.029
2282	808.71	899.57	751.999	1510.76	426.962	605.778	119.577	257.341	15.6417	0.318736	18.0467	43.2994	3.74659	15.9982	132.756	28.5082	0.123604	20.872	50.5268	7.30183	89.8447	8.89178	9.07237	8.2191	0.0865479	7.35057e-12	0.0629051	0.141005	0.0495792	0.00163263	1.30256e-23	0.301018	0.000151876	5.69001	538.029
2283	808.71	899.57	751.999	1510.76	426.962	605.778	119.577	257.341	15.6417	0.318736	18.0467	43.2994	3.74659	15.9982	132.756	28.5082	0.123604	20.872	50.5268	7.30183	89.8447	8.89178	9.07237	8.2191	0.0865479	7.35057e-12	0.0629051	0.141005	0.0495792	0.00163263	1.30256e-23	0.301018	0.000151876	5.69001	538.029
2284	808.71	899.57	751.999	1510.76	426.962	605.778	119.577	257.341	15.6417	0.318736	18.0467	43.2994	3.74659	15.9982	132.756	28.5082	0.123604	20.872	50.5268	7.30183	89.8447	8.89178	9.07237	8.2191	0.0865479	7.35057e-12	0.0629051	0.141005	0.0495792	0.00163263	1.30256e-23	0.301018	0.000151876	5.69001	538.029
2285	808.71	899.57	751.999	1510.76	426.962	605.778	119.577	257.341	15.6417	0.318736	18.0467	43.2994	3.74659	15.9982	132.756	28.5082	0.123604	20.872	50.5268	7.30183	89.8447	8.89178	9.07237	8.2191	0.0865479	7.35057e-12	0.0629051	0.141005	0.0495792	0.00163263	1.30256e-23	0.301018	0.000151876	5.69001	538.029
2286	808.71	899.57	751.999	1510.76	426.962	605.778	119.577	257.341	15.6417	0.318736	18.0467	43.2994	3.74659	15.9982	132.756	28.5082	0.123604	20.872	50.5268	7.30183	89.8447	8.89178	9.07237	8.2191	0.0865479	7.35057e-12	0.0629051	0.141005	0.0495792	0.00163263	1.30256e-23	0.301018	0.000151876	5.69001	538.029
2287	808.71	899.57	751.999	1510.76	426.962	605.778	119.577	257.341	15.6417	0.318736	18.0467	43.2994	3.74659	15.9982	132.756	28.5082	0.123604	20.872	50.5268	7.30183	89.8447	8.89178	9.07237	8.2191	0.0865479	7.35057e-12	0.0629051	0.141005	0.0495792	0.00163263	1.30256e-23	0.301018	0.000151876	5.69001	538.029
2288	808.71	899.57	751.999	1510.76	426.962	605.778	119.577	257.341	15.6417	0.318736	18.0467	43.2994	3.74659	15.9982	132.756	28.5082	0.123604	20.872	50.5268	7.30183	89.8447	8.89178	9.07237	8.2191	0.0865479	7.35057e-12	0.0629051	0.141005	0.0495792	0.00163263	1.30256e-23	0.301018	0.000151876	5.69001	538.029
2289	808.71	899.57	751.999	1510.76	426.962	605.778	119.577	257.341	15.6417	0.318736	18.0467	43.2994	3.74659	15.9982	132.756	28.5082	0.123604	20.872	50.5268	7.30183	89.8447	8.89178	9.07237	8.2191	0.0865479	7.35057e-12	0.0629051	0.141005	0.0495792	0.00163263	1.30256e-23	0.301018	0.000151876	5.69001	538.029
2290	808.71	899.57	751.999	1510.76	426.962	605.778	119.577	257.341	15.6417	0.318736	18.0467	43.2994	3.74659	15.9982	132.756	28.5082	0.123604	20.872	50.5268	7.30183	89.8447	8.89178	9.07237	8.2191	0.0865479	7.35057e-12	0.0629051	0.141005	0.0495792	0.00163263	1.30256e-23	0.301018	0.000151876	5.69001	538.029
2291	808.71	899.57	751.999	1510.76	426.962	605.778	119.577	257.341	15.6417	0.318736	18.0467	43.2994	3.74659	15.9982	132.756	28.5082	0.123604	20.872	50.5268	7.30183	89.8447	8.89178	9.07237	8.2191	0.0865479	7.35057e-12	0.0629051	0.141005	0.0495792	0.00163263	1.30256e-23	0.301018	0.000151876	5.69001	538.029
2292	808.71	899.57	751.999	1510.76	426.962	605.778	119.577	257.341	15.6417	0.318736	18.0467	43.2994	3.74659	15.9982	132.756	28.5082	0.123604	20.872	50.5268	7.30183	89.8447	8.89178	9.07237	8.2191	0.0865479	7.35057e-12	0.0629051	0.141005	0.0495792	0.00163263	1.30256e-23	0.301018	0.000151876	5.69001	538.029
2293	808.71	899.57	751.999	1510.76	426.962	605.778	119.577	257.341	15.6417	0.318736	18.0467	43.2994	3.74659	15.9982	132.756	28.5082	0.123604	20.872	50.5268	7.30183	89.8447	8.89178	9.07237	8.2191	0.0865479	7.35057e-12	0.0629051	0.141005	0.0495792	0.00163263	1.30256e-23	0.301018	0.000151876	5.69001	538.029
2294	808.71	899.57	751.999	1510.76	426.962	605.778	119.577	257.341	15.6417	0.318736	18.0467	43.2994	3.74659	15.9982	132.756	28.5082	0.123604	20.872	50.5268	7.30183	89.8447	8.89178	9.07237	8.2191	0.0865479	7.35057e-12	0.0629051	0.141005	0.0495792	0.00163263	1.30256e-23	0.301018	0.000151876	5.69001	538.029
2295	808.71	899.57	751.999	1510.76	426.962	605.778	119.577	257.341	15.6417	0.318736	18.0467	43.2994	3.74659	15.9982	132.756	28.5082	0.123604	20.872	50.5268	7.30183	89.8447	8.89178	9.07237	8.2191	0.0865479	7.35057e-12	0.0629051	0.141005	0.0495792	0.00163263	1.30256e-23	0.301018	0.000151876	5.69001	538.029
2296	808.71	899.57	751.999	1510.76	426.962	605.778	119.577	257.341	15.6417	0.318736	18.0467	43.2994	3.74659	15.9982	132.756	28.5082	0.123604	20.872	50.5268	7.30183	89.8447	8.89178	9.07237	8.2191	0.0865479	7.35057e-12	0.0629051	0.141005	0.0495792	0.00163263	1.30256e-23	0.301018	0.000151876	5.69001	538.029
2297	808.71	899.57	751.999	1510.76	426.962	605.778	119.577	257.341	15.6417	0.318736	18.0467	43.2994	3.74659	15.9982	132.756	28.5082	0.123604	20.872	50.5268	7.30183	89.8447	8.89178	9.07237	8.2191	0.0865479	7.35057e-12	0.0629051	0.141005	0.0495792	0.00163263	1.30256e-23	0.301018	0.000151876	5.69001	538.029
2298	808.71	899.57	751.999	1510.76	426.962	605.778	119.577	257.341	15.6417	0.318736	18.0467	43.2994	3.74659	15.9982	132.756	28.5082	0.123604	20.872	50.5268	7.30183	89.8447	8.89178	9.07237	8.2191	0.0865479	7.35057e-12	0.0629051	0.141005	0.0495792	0.00163263	1.30256e-23	0.301018	0.000151876	5.69001	538.029
2299	808.71	899.57	751.999	1510.76	426.962	605.778	119.577	257.341	15.6417	0.318736	18.0467	43.2994	3.74659	15.9982	132.756	28.5082	0.123604	20.872	50.5268	7.30183	89.8447	8.89178	9.07237	8.2191	0.0865479	7.35057e-12	0.0629051	0.141005	0.0495792	0.00163263	1.30256e-23	0.301018	0.000151876	5.69001	538.029
2300	808.71	899.57	751.999	1510.76	426.962	605.778	119.577	257.341	15.6417	0.318736	18.0467	43.2994	3.74659	15.9982	132.756	28.5082	0.123604	20.872	50.5268	7.30183	89.8447	8.89178	9.07237	8.2191	0.0865479	7.35057e-12	0.0629051	0.141005	0.0495792	0.00163263	1.30256e-23	0.301018	0.000151876	5.69001	538.029
2301	808.71	899.57	751.999	1510.76	426.962	605.778	119.577	257.341	15.6417	0.318736	18.0467	43.2994	3.74659	15.9982	132.756	28.5082	0.123604	20.872	50.5268	7.30183	89.8447	8.89178	9.07237	8.2191	0.0865479	7.35057e-12	0.0629051	0.141005	0.0495792	0.00163263	1.30256e-23	0.301018	0.000151876	5.69001	538.029
2302	808.71	899.57	751.999	1510.76	426.962	605.778	119.577	257.341	15.6417	0.318736	18.0467	43.2994	3.74659	15.9982	132.756	28.5082	0.123604	20.872	50.5268	7.30183	89.8447	8.89178	9.07237	8.2191	0.0865479	7.35057e-12	0.0629051	0.141005	0.0495792	0.00163263	1.30256e-23	0.301018	0.000151876	5.69001	538.029
2303	808.71	899.57	751.999	1510.76	426.962	605.778	119.577	257.341	15.6417	0.318736	18.0467	43.2994	3.74659	15.9982	132.756	28.5082	0.123604	20.872	50.5268	7.30183	89.8447	8.89178	9.07237	8.2191	0.0865479	7.35057e-12	0.0629051	0.141005	0.0495792	0.00163263	1.30256e-23	0.301018	0.000151876	5.69001	538.029
2304	808.71	899.57	751.999	1510.76	426.962	605.778	119.577	257.341	15.6417	0.318736	18.0467	43.2994	3.74659	15.9982	132.756	28.5082	0.123604	20.872	50.5268	7.30183	89.8447	8.89178	9.07237	8.2191	0.0865479	7.35057e-12	0.0629051	0.141005	0.0495792	0.00163263	1.30256e-23	0.301018	0.000151876	5.69001	538.029
2305	808.71	899.57	751.999	1510.76	426.962	605.778	119.577	257.341	15.6417	0.318736	18.0467	43.2994	3.74659	15.9982	132.756	28.5082	0.123604	20.872	50.5268	7.30183	89.8447	8.89178	9.07237	8.2191	0.0865479	7.35057e-12	0.0629051	0.141005	0.0495792	0.00163263	1.30256e-23	0.301018	0.000151876	5.69001	538.029
2306	808.71	899.57	751.999	1510.76	426.962	605.778	119.577	257.341	15.6417	0.318736	18.0467	43.2994	3.74659	15.9982	132.756	28.5082	0.123604	20.872	50.5268	7.30183	89.8447	8.89178	9.07237	8.2191	0.0865479	7.35057e-12	0.0629051	0.141005	0.0495792	0.00163263	1.30256e-23	0.301018	0.000151876	5.69001	538.029
2307	808.71	899.57	751.999	1510.76	426.962	605.778	119.577	257.341	15.6417	0.318736	18.0467	43.2994	3.74659	15.9982	132.756	28.5082	0.123604	20.872	50.5268	7.30183	89.8447	8.89178	9.07237	8.2191	0.0865479	7.35057e-12	0.0629051	0.141005	0.0495792	0.00163263	1.30256e-23	0.301018	0.000151876	5.69001	538.029
2308	808.71	899.57	751.999	1510.76	426.962	605.778	119.577	257.341	15.6417	0.318736	18.0467	43.2994	3.74659	15.9982	132.756	28.5082	0.123604	20.872	50.5268	7.30183	89.8447	8.89178	9.07237	8.2191	0.0865479	7.35057e-12	0.0629051	0.141005	0.0495792	0.00163263	1.30256e-23	0.301018	0.000151876	5.69001	538.029
2309	808.71	899.57	751.999	1510.76	426.962	605.778	119.577	257.341	15.6417	0.318736	18.0467	43.2994	3.74659	15.9982	132.756	28.5082	0.123604	20.872	50.5268	7.30183	89.8447	8.89178	9.07237	8.2191	0.0865479	7.35057e-12	0.0629051	0.141005	0.0495792	0.00163263	1.30256e-23	0.301018	0.000151876	5.69001	538.029
2310	808.71	899.57	751.999	1510.76	426.962	605.778	119.577	257.341	15.6417	0.318736	18.0467	43.2994	3.74659	15.9982	132.756	28.5082	0.123604	20.872	50.5268	7.30183	89.8447	8.89178	9.07237	8.2191	0.0865479	7.35057e-12	0.0629051	0.141005	0.0495792	0.00163263	1.30256e-23	0.301018	0.000151876	5.69001	538.029
2311	808.71	899.57	751.999	1510.76	426.962	605.778	119.577	257.341	15.6417	0.318736	18.0467	43.2994	3.74659	15.9982	132.756	28.5082	0.123604	20.872	50.5268	7.30183	89.8447	8.89178	9.07237	8.2191	0.0865479	7.35057e-12	0.0629051	0.141005	0.0495792	0.00163263	1.30256e-23	0.301018	0.000151876	5.69001	538.029
2312	808.71	899.57	751.999	1510.76	426.962	605.778	119.577	257.341	15.6417	0.318736	18.0467	43.2994	3.74659	15.9982	132.756	28.5082	0.123604	20.872	50.5268	7.30183	89.8447	8.89178	9.07237	8.2191	0.0865479	7.35057e-12	0.0629051	0.141005	0.0495792	0.00163263	1.30256e-23	0.301018	0.000151876	5.69001	538.029
2313	808.71	899.57	751.999	1510.76	426.962	605.778	119.577	257.341	15.6417	0.318736	18.0467	43.2994	3.74659	15.9982	132.756	28.5082	0.123604	20.872	50.5268	7.30183	89.8447	8.89178	9.07237	8.2191	0.0865479	7.35057e-12	0.0629051	0.141005	0.0495792	0.00163263	1.30256e-23	0.301018	0.000151876	5.69001	538.029
2314	808.71	899.57	751.999	1510.76	426.962	605.778	119.577	257.341	15.6417	0.318736	18.0467	43.2994	3.74659	15.9982	132.756	28.5082	0.123604	20.872	50.5268	7.30183	89.8447	8.89178	9.07237	8.2191	0.0865479	7.35057e-12	0.0629051	0.141005	0.0495792	0.00163263	1.30256e-23	0.301018	0.000151876	5.69001	538.029
2315	808.71	899.57	751.999	1510.76	426.962	605.778	119.577	257.341	15.6417	0.318736	18.0467	43.2994	3.74659	15.9982	132.756	28.5082	0.123604	20.872	50.5268	7.30183	89.8447	8.89178	9.07237	8.2191	0.0865479	7.35057e-12	0.0629051	0.141005	0.0495792	0.00163263	1.30256e-23	0.301018	0.000151876	5.69001	538.029
2316	808.71	899.57	751.999	1510.76	426.962	605.778	119.577	257.341	15.6417	0.318736	18.0467	43.2994	3.74659	15.9982	132.756	28.5082	0.123604	20.872	50.5268	7.30183	89.8447	8.89178	9.07237	8.2191	0.0865479	7.35057e-12	0.0629051	0.141005	0.0495792	0.00163263	1.30256e-23	0.301018	0.000151876	5.69001	538.029
2317	808.71	899.57	751.999	1510.76	426.962	605.778	119.577	257.341	15.6417	0.318736	18.0467	43.2994	3.74659	15.9982	132.756	28.5082	0.123604	20.872	50.5268	7.30183	89.8447	8.89178	9.07237	8.2191	0.0865479	7.35057e-12	0.0629051	0.141005	0.0495792	0.00163263	1.30256e-23	0.301018	0.000151876	5.69001	538.029
2318	808.71	899.57	751.999	1510.76	426.962	605.778	119.577	257.341	15.6417	0.318736	18.0467	43.2994	3.74659	15.9982	132.756	28.5082	0.123604	20.872	50.5268	7.30183	89.8447	8.89178	9.07237	8.2191	0.0865479	7.35057e-12	0.0629051	0.141005	0.0495792	0.00163263	1.30256e-23	0.301018	0.000151876	5.69001	538.029
2319	808.71	899.57	751.999	1510.76	426.962	605.778	119.577	257.341	15.6417	0.318736	18.0467	43.2994	3.74659	15.9982	132.756	28.5082	0.123604	20.872	50.5268	7.30183	89.8447	8.89178	9.07237	8.2191	0.0865479	7.35057e-12	0.0629051	0.141005	0.0495792	0.00163263	1.30256e-23	0.301018	0.000151876	5.69001	538.029
2320	808.71	899.57	751.999	1510.76	426.962	605.778	119.577	257.341	15.6417	0.318736	18.0467	43.2994	3.74659	15.9982	132.756	28.5082	0.123604	20.872	50.5268	7.30183	89.8447	8.89178	9.07237	8.2191	0.0865479	7.35057e-12	0.0629051	0.141005	0.0495792	0.00163263	1.30256e-23	0.301018	0.000151876	5.69001	538.029
2321	808.71	899.57	751.999	1510.76	426.962	605.778	119.577	257.341	15.6417	0.318736	18.0467	43.2994	3.74659	15.9982	132.756	28.5082	0.123604	20.872	50.5268	7.30183	89.8447	8.89178	9.07237	8.2191	0.0865479	7.35057e-12	0.0629051	0.141005	0.0495792	0.00163263	1.30256e-23	0.301018	0.000151876	5.69001	538.029
2322	808.71	899.57	751.999	1510.76	426.962	605.778	119.577	257.341	15.6417	0.318736	18.0467	43.2994	3.74659	15.9982	132.756	28.5082	0.123604	20.872	50.5268	7.30183	89.8447	8.89178	9.07237	8.2191	0.0865479	7.35057e-12	0.0629051	0.141005	0.0495792	0.00163263	1.30256e-23	0.301018	0.000151876	5.69001	538.029
2323	808.71	899.57	751.999	1510.76	426.962	605.778	119.577	257.341	15.6417	0.318736	18.0467	43.2994	3.74659	15.9982	132.756	28.5082	0.123604	20.872	50.5268	7.30183	89.8447	8.89178	9.07237	8.2191	0.0865479	7.35057e-12	0.0629051	0.141005	0.0495792	0.00163263	1.30256e-23	0.301018	0.000151876	5.69001	538.029
2324	808.71	899.57	751.999	1510.76	426.962	605.778	119.577	257.341	15.6417	0.318736	18.0467	43.2994	3.74659	15.9982	132.756	28.5082	0.123604	20.872	50.5268	7.30183	89.8447	8.89178	9.07237	8.2191	0.0865479	7.35057e-12	0.0629051	0.141005	0.0495792	0.00163263	1.30256e-23	0.301018	0.000151876	5.69001	538.029
2325	808.71	899.57	751.999	1510.76	426.962	605.778	119.577	257.341	15.6417	0.318736	18.0467	43.2994	3.74659	15.9982	132.756	28.5082	0.123604	20.872	50.5268	7.30183	89.8447	8.89178	9.07237	8.2191	0.0865479	7.35057e-12	0.0629051	0.141005	0.0495792	0.00163263	1.30256e-23	0.301018	0.000151876	5.69001	538.029
2326	808.71	899.57	751.999	1510.76	426.962	605.778	119.577	257.341	15.6417	0.318736	18.0467	43.2994	3.74659	15.9982	132.756	28.5082	0.123604	20.872	50.5268	7.30183	89.8447	8.89178	9.07237	8.2191	0.0865479	7.35057e-12	0.0629051	0.141005	0.0495792	0.00163263	1.30256e-23	0.301018	0.000151876	5.69001	538.029
2327	808.71	899.57	751.999	1510.76	426.962	605.778	119.577	257.341	15.6417	0.318736	18.0467	43.2994	3.74659	15.9982	132.756	28.5082	0.123604	20.872	50.5268	7.30183	89.8447	8.89178	9.07237	8.2191	0.0865479	7.35057e-12	0.0629051	0.141005	0.0495792	0.00163263	1.30256e-23	0.301018	0.000151876	5.69001	538.029
2328	808.71	899.57	751.999	1510.76	426.962	605.778	119.577	257.341	15.6417	0.318736	18.0467	43.2994	3.74659	15.9982	132.756	28.5082	0.123604	20.872	50.5268	7.30183	89.8447	8.89178	9.07237	8.2191	0.0865479	7.35057e-12	0.0629051	0.141005	0.0495792	0.00163263	1.30256e-23	0.301018	0.000151876	5.69001	538.029
2329	808.71	899.57	751.999	1510.76	426.962	605.778	119.577	257.341	15.6417	0.318736	18.0467	43.2994	3.74659	15.9982	132.756	28.5082	0.123604	20.872	50.5268	7.30183	89.8447	8.89178	9.07237	8.2191	0.0865479	7.35057e-12	0.0629051	0.141005	0.0495792	0.00163263	1.30256e-23	0.301018	0.000151876	5.69001	538.029
2330	808.71	899.57	751.999	1510.76	426.962	605.778	119.577	257.341	15.6417	0.318736	18.0467	43.2994	3.74659	15.9982	132.756	28.5082	0.123604	20.872	50.5268	7.30183	89.8447	8.89178	9.07237	8.2191	0.0865479	7.35057e-12	0.0629051	0.141005	0.0495792	0.00163263	1.30256e-23	0.301018	0.000151876	5.69001	538.029
2331	808.71	899.57	751.999	1510.76	426.962	605.778	119.577	257.341	15.6417	0.318736	18.0467	43.2994	3.74659	15.9982	132.756	28.5082	0.123604	20.872	50.5268	7.30183	89.8447	8.89178	9.07237	8.2191	0.0865479	7.35057e-12	0.0629051	0.141005	0.0495792	0.00163263	1.30256e-23	0.301018	0.000151876	5.69001	538.029
2332	808.71	899.57	751.999	1510.76	426.962	605.778	119.577	257.341	15.6417	0.318736	18.0467	43.2994	3.74659	15.9982	132.756	28.5082	0.123604	20.872	50.5268	7.30183	89.8447	8.89178	9.07237	8.2191	0.0865479	7.35057e-12	0.0629051	0.141005	0.0495792	0.00163263	1.30256e-23	0.301018	0.000151876	5.69001	538.029
2333	808.71	899.57	751.999	1510.76	426.962	605.778	119.577	257.341	15.6417	0.318736	18.0467	43.2994	3.74659	15.9982	132.756	28.5082	0.123604	20.872	50.5268	7.30183	89.8447	8.89178	9.07237	8.2191	0.0865479	7.35057e-12	0.0629051	0.141005	0.0495792	0.00163263	1.30256e-23	0.301018	0.000151876	5.69001	538.029
2334	808.71	899.57	751.999	1510.76	426.962	605.778	119.577	257.341	15.6417	0.318736	18.0467	43.2994	3.74659	15.9982	132.756	28.5082	0.123604	20.872	50.5268	7.30183	89.8447	8.89178	9.07237	8.2191	0.0865479	7.35057e-12	0.0629051	0.141005	0.0495792	0.00163263	1.30256e-23	0.301018	0.000151876	5.69001	538.029
2335	808.71	899.57	751.999	1510.76	426.962	605.778	119.577	257.341	15.6417	0.318736	18.0467	43.2994	3.74659	15.9982	132.756	28.5082	0.123604	20.872	50.5268	7.30183	89.8447	8.89178	9.07237	8.2191	0.0865479	7.35057e-12	0.0629051	0.141005	0.0495792	0.00163263	1.30256e-23	0.301018	0.000151876	5.69001	538.029
2336	808.71	899.57	751.999	1510.76	426.962	605.778	119.577	257.341	15.6417	0.318736	18.0467	43.2994	3.74659	15.9982	132.756	28.5082	0.123604	20.872	50.5268	7.30183	89.8447	8.89178	9.07237	8.2191	0.0865479	7.35057e-12	0.0629051	0.141005	0.0495792	0.00163263	1.30256e-23	0.301018	0.000151876	5.69001	538.029
2337	808.71	899.57	751.999	1510.76	426.962	605.778	119.577	257.341	15.6417	0.318736	18.0467	43.2994	3.74659	15.9982	132.756	28.5082	0.123604	20.872	50.5268	7.30183	89.8447	8.89178	9.07237	8.2191	0.0865479	7.35057e-12	0.0629051	0.141005	0.0495792	0.00163263	1.30256e-23	0.301018	0.000151876	5.69001	538.029
2338	808.71	899.57	751.999	1510.76	426.962	605.778	119.577	257.341	15.6417	0.318736	18.0467	43.2994	3.74659	15.9982	132.756	28.5082	0.123604	20.872	50.5268	7.30183	89.8447	8.89178	9.07237	8.2191	0.0865479	7.35057e-12	0.0629051	0.141005	0.0495792	0.00163263	1.30256e-23	0.301018	0.000151876	5.69001	538.029
2339	808.71	899.57	751.999	1510.76	426.962	605.778	119.577	257.341	15.6417	0.318736	18.0467	43.2994	3.74659	15.9982	132.756	28.5082	0.123604	20.872	50.5268	7.30183	89.8447	8.89178	9.07237	8.2191	0.0865479	7.35057e-12	0.0629051	0.141005	0.0495792	0.00163263	1.30256e-23	0.301018	0.000151876	5.69001	538.029
2340	808.71	899.57	751.999	1510.76	426.962	605.778	119.577	257.341	15.6417	0.318736	18.0467	43.2994	3.74659	15.9982	132.756	28.5082	0.123604	20.872	50.5268	7.30183	89.8447	8.89178	9.07237	8.2191	0.0865479	7.35057e-12	0.0629051	0.141005	0.0495792	0.00163263	1.30256e-23	0.301018	0.000151876	5.69001	538.029
2341	808.71	899.57	751.999	1510.76	426.962	605.778	119.577	257.341	15.6417	0.318736	18.0467	43.2994	3.74659	15.9982	132.756	28.5082	0.123604	20.872	50.5268	7.30183	89.8447	8.89178	9.07237	8.2191	0.0865479	7.35057e-12	0.0629051	0.141005	0.0495792	0.00163263	1.30256e-23	0.301018	0.000151876	5.69001	538.029
2342	808.71	899.57	751.999	1510.76	426.962	605.778	119.577	257.341	15.6417	0.318736	18.0467	43.2994	3.74659	15.9982	132.756	28.5082	0.123604	20.872	50.5268	7.30183	89.8447	8.89178	9.07237	8.2191	0.0865479	7.35057e-12	0.0629051	0.141005	0.0495792	0.00163263	1.30256e-23	0.301018	0.000151876	5.69001	538.029
2343	808.71	899.57	751.999	1510.76	426.962	605.778	119.577	257.341	15.6417	0.318736	18.0467	43.2994	3.74659	15.9982	132.756	28.5082	0.123604	20.872	50.5268	7.30183	89.8447	8.89178	9.07237	8.2191	0.0865479	7.35057e-12	0.0629051	0.141005	0.0495792	0.00163263	1.30256e-23	0.301018	0.000151876	5.69001	538.029
2344	808.71	899.57	751.999	1510.76	426.962	605.778	119.577	257.341	15.6417	0.318736	18.0467	43.2994	3.74659	15.9982	132.756	28.5082	0.123604	20.872	50.5268	7.30183	89.8447	8.89178	9.07237	8.2191	0.0865479	7.35057e-12	0.0629051	0.141005	0.0495792	0.00163263	1.30256e-23	0.301018	0.000151876	5.69001	538.029
2345	808.71	899.57	751.999	1510.76	426.962	605.778	119.577	257.341	15.6417	0.318736	18.0467	43.2994	3.74659	15.9982	132.756	28.5082	0.123604	20.872	50.5268	7.30183	89.8447	8.89178	9.07237	8.2191	0.0865479	7.35057e-12	0.0629051	0.141005	0.0495792	0.00163263	1.30256e-23	0.301018	0.000151876	5.69001	538.029
2346	808.71	899.57	751.999	1510.76	426.962	605.778	119.577	257.341	15.6417	0.318736	18.0467	43.2994	3.74659	15.9982	132.756	28.5082	0.123604	20.872	50.5268	7.30183	89.8447	8.89178	9.07237	8.2191	0.0865479	7.35057e-12	0.0629051	0.141005	0.0495792	0.00163263	1.30256e-23	0.301018	0.000151876	5.69001	538.029
2347	808.71	899.57	751.999	1510.76	426.962	605.778	119.577	257.341	15.6417	0.318736	18.0467	43.2994	3.74659	15.9982	132.756	28.5082	0.123604	20.872	50.5268	7.30183	89.8447	8.89178	9.07237	8.2191	0.0865479	7.35057e-12	0.0629051	0.141005	0.0495792	0.00163263	1.30256e-23	0.301018	0.000151876	5.69001	538.029
2348	808.71	899.57	751.999	1510.76	426.962	605.778	119.577	257.341	15.6417	0.318736	18.0467	43.2994	3.74659	15.9982	132.756	28.5082	0.123604	20.872	50.5268	7.30183	89.8447	8.89178	9.07237	8.2191	0.0865479	7.35057e-12	0.0629051	0.141005	0.0495792	0.00163263	1.30256e-23	0.301018	0.000151876	5.69001	538.029
2349	808.71	899.57	751.999	1510.76	426.962	605.778	119.577	257.341	15.6417	0.318736	18.0467	43.2994	3.74659	15.9982	132.756	28.5082	0.123604	20.872	50.5268	7.30183	89.8447	8.89178	9.07237	8.2191	0.0865479	7.35057e-12	0.0629051	0.141005	0.0495792	0.00163263	1.30256e-23	0.301018	0.000151876	5.69001	538.029
2350	808.71	899.57	751.999	1510.76	426.962	605.778	119.577	257.341	15.6417	0.318736	18.0467	43.2994	3.74659	15.9982	132.756	28.5082	0.123604	20.872	50.5268	7.30183	89.8447	8.89178	9.07237	8.2191	0.0865479	7.35057e-12	0.0629051	0.141005	0.0495792	0.00163263	1.30256e-23	0.301018	0.000151876	5.69001	538.029
2351	808.71	899.57	751.999	1510.76	426.962	605.778	119.577	257.341	15.6417	0.318736	18.0467	43.2994	3.74659	15.9982	132.756	28.5082	0.123604	20.872	50.5268	7.30183	89.8447	8.89178	9.07237	8.2191	0.0865479	7.35057e-12	0.0629051	0.141005	0.0495792	0.00163263	1.30256e-23	0.301018	0.000151876	5.69001	538.029
2352	808.71	899.57	751.999	1510.76	426.962	605.778	119.577	257.341	15.6417	0.318736	18.0467	43.2994	3.74659	15.9982	132.756	28.5082	0.123604	20.872	50.5268	7.30183	89.8447	8.89178	9.07237	8.2191	0.0865479	7.35057e-12	0.0629051	0.141005	0.0495792	0.00163263	1.30256e-23	0.301018	0.000151876	5.69001	538.029
2353	808.71	899.57	751.999	1510.76	426.962	605.778	119.577	257.341	15.6417	0.318736	18.0467	43.2994	3.74659	15.9982	132.756	28.5082	0.123604	20.872	50.5268	7.30183	89.8447	8.89178	9.07237	8.2191	0.0865479	7.35057e-12	0.0629051	0.141005	0.0495792	0.00163263	1.30256e-23	0.301018	0.000151876	5.69001	538.029
2354	808.71	899.57	751.999	1510.76	426.962	605.778	119.577	257.341	15.6417	0.318736	18.0467	43.2994	3.74659	15.9982	132.756	28.5082	0.123604	20.872	50.5268	7.30183	89.8447	8.89178	9.07237	8.2191	0.0865479	7.35057e-12	0.0629051	0.141005	0.0495792	0.00163263	1.30256e-23	0.301018	0.000151876	5.69001	538.029
2355	808.71	899.57	751.999	1510.76	426.962	605.778	119.577	257.341	15.6417	0.318736	18.0467	43.2994	3.74659	15.9982	132.756	28.5082	0.123604	20.872	50.5268	7.30183	89.8447	8.89178	9.07237	8.2191	0.0865479	7.35057e-12	0.0629051	0.141005	0.0495792	0.00163263	1.30256e-23	0.301018	0.000151876	5.69001	538.029
2356	808.71	899.57	751.999	1510.76	426.962	605.778	119.577	257.341	15.6417	0.318736	18.0467	43.2994	3.74659	15.9982	132.756	28.5082	0.123604	20.872	50.5268	7.30183	89.8447	8.89178	9.07237	8.2191	0.0865479	7.35057e-12	0.0629051	0.141005	0.0495792	0.00163263	1.30256e-23	0.301018	0.000151876	5.69001	538.029
2357	808.71	899.57	751.999	1510.76	426.962	605.778	119.577	257.341	15.6417	0.318736	18.0467	43.2994	3.74659	15.9982	132.756	28.5082	0.123604	20.872	50.5268	7.30183	89.8447	8.89178	9.07237	8.2191	0.0865479	7.35057e-12	0.0629051	0.141005	0.0495792	0.00163263	1.30256e-23	0.301018	0.000151876	5.69001	538.029
2358	808.71	899.57	751.999	1510.76	426.962	605.778	119.577	257.341	15.6417	0.318736	18.0467	43.2994	3.74659	15.9982	132.756	28.5082	0.123604	20.872	50.5268	7.30183	89.8447	8.89178	9.07237	8.2191	0.0865479	7.35057e-12	0.0629051	0.141005	0.0495792	0.00163263	1.30256e-23	0.301018	0.000151876	5.69001	538.029
2359	808.71	899.57	751.999	1510.76	426.962	605.778	119.577	257.341	15.6417	0.318736	18.0467	43.2994	3.74659	15.9982	132.756	28.5082	0.123604	20.872	50.5268	7.30183	89.8447	8.89178	9.07237	8.2191	0.0865479	7.35057e-12	0.0629051	0.141005	0.0495792	0.00163263	1.30256e-23	0.301018	0.000151876	5.69001	538.029
2360	808.71	899.57	751.999	1510.76	426.962	605.778	119.577	257.341	15.6417	0.318736	18.0467	43.2994	3.74659	15.9982	132.756	28.5082	0.123604	20.872	50.5268	7.30183	89.8447	8.89178	9.07237	8.2191	0.0865479	7.35057e-12	0.0629051	0.141005	0.0495792	0.00163263	1.30256e-23	0.301018	0.000151876	5.69001	538.029
2361	808.71	899.57	751.999	1510.76	426.962	605.778	119.577	257.341	15.6417	0.318736	18.0467	43.2994	3.74659	15.9982	132.756	28.5082	0.123604	20.872	50.5268	7.30183	89.8447	8.89178	9.07237	8.2191	0.0865479	7.35057e-12	0.0629051	0.141005	0.0495792	0.00163263	1.30256e-23	0.301018	0.000151876	5.69001	538.029
2362	808.71	899.57	751.999	1510.76	426.962	605.778	119.577	257.341	15.6417	0.318736	18.0467	43.2994	3.74659	15.9982	132.756	28.5082	0.123604	20.872	50.5268	7.30183	89.8447	8.89178	9.07237	8.2191	0.0865479	7.35057e-12	0.0629051	0.141005	0.0495792	0.00163263	1.30256e-23	0.301018	0.000151876	5.69001	538.029
2363	808.71	899.57	751.999	1510.76	426.962	605.778	119.577	257.341	15.6417	0.318736	18.0467	43.2994	3.74659	15.9982	132.756	28.5082	0.123604	20.872	50.5268	7.30183	89.8447	8.89178	9.07237	8.2191	0.0865479	7.35057e-12	0.0629051	0.141005	0.0495792	0.00163263	1.30256e-23	0.301018	0.000151876	5.69001	538.029
2364	808.71	899.57	751.999	1510.76	426.962	605.778	119.577	257.341	15.6417	0.318736	18.0467	43.2994	3.74659	15.9982	132.756	28.5082	0.123604	20.872	50.5268	7.30183	89.8447	8.89178	9.07237	8.2191	0.0865479	7.35057e-12	0.0629051	0.141005	0.0495792	0.00163263	1.30256e-23	0.301018	0.000151876	5.69001	538.029
2365	808.71	899.57	751.999	1510.76	426.962	605.778	119.577	257.341	15.6417	0.318736	18.0467	43.2994	3.74659	15.9982	132.756	28.5082	0.123604	20.872	50.5268	7.30183	89.8447	8.89178	9.07237	8.2191	0.0865479	7.35057e-12	0.0629051	0.141005	0.0495792	0.00163263	1.30256e-23	0.301018	0.000151876	5.69001	538.029
2366	808.71	899.57	751.999	1510.76	426.962	605.778	119.577	257.341	15.6417	0.318736	18.0467	43.2994	3.74659	15.9982	132.756	28.5082	0.123604	20.872	50.5268	7.30183	89.8447	8.89178	9.07237	8.2191	0.0865479	7.35057e-12	0.0629051	0.141005	0.0495792	0.00163263	1.30256e-23	0.301018	0.000151876	5.69001	538.029
2367	808.71	899.57	751.999	1510.76	426.962	605.778	119.577	257.341	15.6417	0.318736	18.0467	43.2994	3.74659	15.9982	132.756	28.5082	0.123604	20.872	50.5268	7.30183	89.8447	8.89178	9.07237	8.2191	0.0865479	7.35057e-12	0.0629051	0.141005	0.0495792	0.00163263	1.30256e-23	0.301018	0.000151876	5.69001	538.029
2368	808.71	899.57	751.999	1510.76	426.962	605.778	119.577	257.341	15.6417	0.318736	18.0467	43.2994	3.74659	15.9982	132.756	28.5082	0.123604	20.872	50.5268	7.30183	89.8447	8.89178	9.07237	8.2191	0.0865479	7.35057e-12	0.0629051	0.141005	0.0495792	0.00163263	1.30256e-23	0.301018	0.000151876	5.69001	538.029
2369	808.71	899.57	751.999	1510.76	426.962	605.778	119.577	257.341	15.6417	0.318736	18.0467	43.2994	3.74659	15.9982	132.756	28.5082	0.123604	20.872	50.5268	7.30183	89.8447	8.89178	9.07237	8.2191	0.0865479	7.35057e-12	0.0629051	0.141005	0.0495792	0.00163263	1.30256e-23	0.301018	0.000151876	5.69001	538.029
2370	808.71	899.57	751.999	1510.76	426.962	605.778	119.577	257.341	15.6417	0.318736	18.0467	43.2994	3.74659	15.9982	132.756	28.5082	0.123604	20.872	50.5268	7.30183	89.8447	8.89178	9.07237	8.2191	0.0865479	7.35057e-12	0.0629051	0.141005	0.0495792	0.00163263	1.30256e-23	0.301018	0.000151876	5.69001	538.029
2371	808.71	899.57	751.999	1510.76	426.962	605.778	119.577	257.341	15.6417	0.318736	18.0467	43.2994	3.74659	15.9982	132.756	28.5082	0.123604	20.872	50.5268	7.30183	89.8447	8.89178	9.07237	8.2191	0.0865479	7.35057e-12	0.0629051	0.141005	0.0495792	0.00163263	1.30256e-23	0.301018	0.000151876	5.69001	538.029
2372	808.71	899.57	751.999	1510.76	426.962	605.778	119.577	257.341	15.6417	0.318736	18.0467	43.2994	3.74659	15.9982	132.756	28.5082	0.123604	20.872	50.5268	7.30183	89.8447	8.89178	9.07237	8.2191	0.0865479	7.35057e-12	0.0629051	0.141005	0.0495792	0.00163263	1.30256e-23	0.301018	0.000151876	5.69001	538.029
2373	808.71	899.57	751.999	1510.76	426.962	605.778	119.577	257.341	15.6417	0.318736	18.0467	43.2994	3.74659	15.9982	132.756	28.5082	0.123604	20.872	50.5268	7.30183	89.8447	8.89178	9.07237	8.2191	0.0865479	7.35057e-12	0.0629051	0.141005	0.0495792	0.00163263	1.30256e-23	0.301018	0.000151876	5.69001	538.029
2374	808.71	899.57	751.999	1510.76	426.962	605.778	119.577	257.341	15.6417	0.318736	18.0467	43.2994	3.74659	15.9982	132.756	28.5082	0.123604	20.872	50.5268	7.30183	89.8447	8.89178	9.07237	8.2191	0.0865479	7.35057e-12	0.0629051	0.141005	0.0495792	0.00163263	1.30256e-23	0.301018	0.000151876	5.69001	538.029
2375	808.71	899.57	751.999	1510.76	426.962	605.778	119.577	257.341	15.6417	0.318736	18.0467	43.2994	3.74659	15.9982	132.756	28.5082	0.123604	20.872	50.5268	7.30183	89.8447	8.89178	9.07237	8.2191	0.0865479	7.35057e-12	0.0629051	0.141005	0.0495792	0.00163263	1.30256e-23	0.301018	0.000151876	5.69001	538.029
2376	808.71	899.57	751.999	1510.76	426.962	605.778	119.577	257.341	15.6417	0.318736	18.0467	43.2994	3.74659	15.9982	132.756	28.5082	0.123604	20.872	50.5268	7.30183	89.8447	8.89178	9.07237	8.2191	0.0865479	7.35057e-12	0.0629051	0.141005	0.0495792	0.00163263	1.30256e-23	0.301018	0.000151876	5.69001	538.029
2377	808.71	899.57	751.999	1510.76	426.962	605.778	119.577	257.341	15.6417	0.318736	18.0467	43.2994	3.74659	15.9982	132.756	28.5082	0.123604	20.872	50.5268	7.30183	89.8447	8.89178	9.07237	8.2191	0.0865479	7.35057e-12	0.0629051	0.141005	0.0495792	0.00163263	1.30256e-23	0.301018	0.000151876	5.69001	538.029
2378	808.71	899.57	751.999	1510.76	426.962	605.778	119.577	257.341	15.6417	0.318736	18.0467	43.2994	3.74659	15.9982	132.756	28.5082	0.123604	20.872	50.5268	7.30183	89.8447	8.89178	9.07237	8.2191	0.0865479	7.35057e-12	0.0629051	0.141005	0.0495792	0.00163263	1.30256e-23	0.301018	0.000151876	5.69001	538.029
2379	808.71	899.57	751.999	1510.76	426.962	605.778	119.577	257.341	15.6417	0.318736	18.0467	43.2994	3.74659	15.9982	132.756	28.5082	0.123604	20.872	50.5268	7.30183	89.8447	8.89178	9.07237	8.2191	0.0865479	7.35057e-12	0.0629051	0.141005	0.0495792	0.00163263	1.30256e-23	0.301018	0.000151876	5.69001	538.029
2380	808.71	899.57	751.999	1510.76	426.962	605.778	119.577	257.341	15.6417	0.318736	18.0467	43.2994	3.74659	15.9982	132.756	28.5082	0.123604	20.872	50.5268	7.30183	89.8447	8.89178	9.07237	8.2191	0.0865479	7.35057e-12	0.0629051	0.141005	0.0495792	0.00163263	1.30256e-23	0.301018	0.000151876	5.69001	538.029
2381	808.71	899.57	751.999	1510.76	426.962	605.778	119.577	257.341	15.6417	0.318736	18.0467	43.2994	3.74659	15.9982	132.756	28.5082	0.123604	20.872	50.5268	7.30183	89.8447	8.89178	9.07237	8.2191	0.0865479	7.35057e-12	0.0629051	0.141005	0.0495792	0.00163263	1.30256e-23	0.301018	0.000151876	5.69001	538.029
2382	808.71	899.57	751.999	1510.76	426.962	605.778	119.577	257.341	15.6417	0.318736	18.0467	43.2994	3.74659	15.9982	132.756	28.5082	0.123604	20.872	50.5268	7.30183	89.8447	8.89178	9.07237	8.2191	0.0865479	7.35057e-12	0.0629051	0.141005	0.0495792	0.00163263	1.30256e-23	0.301018	0.000151876	5.69001	538.029
2383	808.71	899.57	751.999	1510.76	426.962	605.778	119.577	257.341	15.6417	0.318736	18.0467	43.2994	3.74659	15.9982	132.756	28.5082	0.123604	20.872	50.5268	7.30183	89.8447	8.89178	9.07237	8.2191	0.0865479	7.35057e-12	0.0629051	0.141005	0.0495792	0.00163263	1.30256e-23	0.301018	0.000151876	5.69001	538.029
2384	808.71	899.57	751.999	1510.76	426.962	605.778	119.577	257.341	15.6417	0.318736	18.0467	43.2994	3.74659	15.9982	132.756	28.5082	0.123604	20.872	50.5268	7.30183	89.8447	8.89178	9.07237	8.2191	0.0865479	7.35057e-12	0.0629051	0.141005	0.0495792	0.00163263	1.30256e-23	0.301018	0.000151876	5.69001	538.029
2385	808.71	899.57	751.999	1510.76	426.962	605.778	119.577	257.341	15.6417	0.318736	18.0467	43.2994	3.74659	15.9982	132.756	28.5082	0.123604	20.872	50.5268	7.30183	89.8447	8.89178	9.07237	8.2191	0.0865479	7.35057e-12	0.0629051	0.141005	0.0495792	0.00163263	1.30256e-23	0.301018	0.000151876	5.69001	538.029
2386	808.71	899.57	751.999	1510.76	426.962	605.778	119.577	257.341	15.6417	0.318736	18.0467	43.2994	3.74659	15.9982	132.756	28.5082	0.123604	20.872	50.5268	7.30183	89.8447	8.89178	9.07237	8.2191	0.0865479	7.35057e-12	0.0629051	0.141005	0.0495792	0.00163263	1.30256e-23	0.301018	0.000151876	5.69001	538.029
2387	808.71	899.57	751.999	1510.76	426.962	605.778	119.577	257.341	15.6417	0.318736	18.0467	43.2994	3.74659	15.9982	132.756	28.5082	0.123604	20.872	50.5268	7.30183	89.8447	8.89178	9.07237	8.2191	0.0865479	7.35057e-12	0.0629051	0.141005	0.0495792	0.00163263	1.30256e-23	0.301018	0.000151876	5.69001	538.029
2388	808.71	899.57	751.999	1510.76	426.962	605.778	119.577	257.341	15.6417	0.318736	18.0467	43.2994	3.74659	15.9982	132.756	28.5082	0.123604	20.872	50.5268	7.30183	89.8447	8.89178	9.07237	8.2191	0.0865479	7.35057e-12	0.0629051	0.141005	0.0495792	0.00163263	1.30256e-23	0.301018	0.000151876	5.69001	538.029
2389	808.71	899.57	751.999	1510.76	426.962	605.778	119.577	257.341	15.6417	0.318736	18.0467	43.2994	3.74659	15.9982	132.756	28.5082	0.123604	20.872	50.5268	7.30183	89.8447	8.89178	9.07237	8.2191	0.0865479	7.35057e-12	0.0629051	0.141005	0.0495792	0.00163263	1.30256e-23	0.301018	0.000151876	5.69001	538.029
2390	808.71	899.57	751.999	1510.76	426.962	605.778	119.577	257.341	15.6417	0.318736	18.0467	43.2994	3.74659	15.9982	132.756	28.5082	0.123604	20.872	50.5268	7.30183	89.8447	8.89178	9.07237	8.2191	0.0865479	7.35057e-12	0.0629051	0.141005	0.0495792	0.00163263	1.30256e-23	0.301018	0.000151876	5.69001	538.029
2391	808.71	899.57	751.999	1510.76	426.962	605.778	119.577	257.341	15.6417	0.318736	18.0467	43.2994	3.74659	15.9982	132.756	28.5082	0.123604	20.872	50.5268	7.30183	89.8447	8.89178	9.07237	8.2191	0.0865479	7.35057e-12	0.0629051	0.141005	0.0495792	0.00163263	1.30256e-23	0.301018	0.000151876	5.69001	538.029
2392	808.71	899.57	751.999	1510.76	426.962	605.778	119.577	257.341	15.6417	0.318736	18.0467	43.2994	3.74659	15.9982	132.756	28.5082	0.123604	20.872	50.5268	7.30183	89.8447	8.89178	9.07237	8.2191	0.0865479	7.35057e-12	0.0629051	0.141005	0.0495792	0.00163263	1.30256e-23	0.301018	0.000151876	5.69001	538.029
2393	808.71	899.57	751.999	1510.76	426.962	605.778	119.577	257.341	15.6417	0.318736	18.0467	43.2994	3.74659	15.9982	132.756	28.5082	0.123604	20.872	50.5268	7.30183	89.8447	8.89178	9.07237	8.2191	0.0865479	7.35057e-12	0.0629051	0.141005	0.0495792	0.00163263	1.30256e-23	0.301018	0.000151876	5.69001	538.029
2394	808.71	899.57	751.999	1510.76	426.962	605.778	119.577	257.341	15.6417	0.318736	18.0467	43.2994	3.74659	15.9982	132.756	28.5082	0.123604	20.872	50.5268	7.30183	89.8447	8.89178	9.07237	8.2191	0.0865479	7.35057e-12	0.0629051	0.141005	0.0495792	0.00163263	1.30256e-23	0.301018	0.000151876	5.69001	538.029
2395	808.71	899.57	751.999	1510.76	426.962	605.778	119.577	257.341	15.6417	0.318736	18.0467	43.2994	3.74659	15.9982	132.756	28.5082	0.123604	20.872	50.5268	7.30183	89.8447	8.89178	9.07237	8.2191	0.0865479	7.35057e-12	0.0629051	0.141005	0.0495792	0.00163263	1.30256e-23	0.301018	0.000151876	5.69001	538.029
2396	808.71	899.57	751.999	1510.76	426.962	605.778	119.577	257.341	15.6417	0.318736	18.0467	43.2994	3.74659	15.9982	132.756	28.5082	0.123604	20.872	50.5268	7.30183	89.8447	8.89178	9.07237	8.2191	0.0865479	7.35057e-12	0.0629051	0.141005	0.0495792	0.00163263	1.30256e-23	0.301018	0.000151876	5.69001	538.029
2397	808.71	899.57	751.999	1510.76	426.962	605.778	119.577	257.341	15.6417	0.318736	18.0467	43.2994	3.74659	15.9982	132.756	28.5082	0.123604	20.872	50.5268	7.30183	89.8447	8.89178	9.07237	8.2191	0.0865479	7.35057e-12	0.0629051	0.141005	0.0495792	0.00163263	1.30256e-23	0.301018	0.000151876	5.69001	538.029
2398	808.71	899.57	751.999	1510.76	426.962	605.778	119.577	257.341	15.6417	0.318736	18.0467	43.2994	3.74659	15.9982	132.756	28.5082	0.123604	20.872	50.5268	7.30183	89.8447	8.89178	9.07237	8.2191	0.0865479	7.35057e-12	0.0629051	0.141005	0.0495792	0.00163263	1.30256e-23	0.301018	0.000151876	5.69001	538.029
2399	808.71	899.57	751.999	1510.76	426.962	605.778	119.577	257.341	15.6417	0.318736	18.0467	43.2994	3.74659	15.9982	132.756	28.5082	0.123604	20.872	50.5268	7.30183	89.8447	8.89178	9.07237	8.2191	0.0865479	7.35057e-12	0.0629051	0.141005	0.0495792	0.00163263	1.30256e-23	0.301018	0.000151876	5.69001	538.029
2400	808.71	899.57	751.999	1510.76	426.962	605.778	119.577	257.341	15.6417	0.318736	18.0467	43.2994	3.74659	15.9982	132.756	28.5082	0.123604	20.872	50.5268	7.30183	89.8447	8.89178	9.07237	8.2191	0.0865479	7.35057e-12	0.0629051	0.141005	0.0495792	0.00163263	1.30256e-23	0.301018	0.000151876	5.69001	538.029
2401	808.71	899.57	751.999	1510.76	426.962	605.778	119.577	257.341	15.6417	0.318736	18.0467	43.2994	3.74659	15.9982	132.756	28.5082	0.123604	20.872	50.5268	7.30183	89.8447	8.89178	9.07237	8.2191	0.0865479	7.35057e-12	0.0629051	0.141005	0.0495792	0.00163263	1.30256e-23	0.301018	0.000151876	5.69001	538.029
2402	808.71	899.57	751.999	1510.76	426.962	605.778	119.577	257.341	15.6417	0.318736	18.0467	43.2994	3.74659	15.9982	132.756	28.5082	0.123604	20.872	50.5268	7.30183	89.8447	8.89178	9.07237	8.2191	0.0865479	7.35057e-12	0.0629051	0.141005	0.0495792	0.00163263	1.30256e-23	0.301018	0.000151876	5.69001	538.029
2403	808.71	899.57	751.999	1510.76	426.962	605.778	119.577	257.341	15.6417	0.318736	18.0467	43.2994	3.74659	15.9982	132.756	28.5082	0.123604	20.872	50.5268	7.30183	89.8447	8.89178	9.07237	8.2191	0.0865479	7.35057e-12	0.0629051	0.141005	0.0495792	0.00163263	1.30256e-23	0.301018	0.000151876	5.69001	538.029
2404	808.71	899.57	751.999	1510.76	426.962	605.778	119.577	257.341	15.6417	0.318736	18.0467	43.2994	3.74659	15.9982	132.756	28.5082	0.123604	20.872	50.5268	7.30183	89.8447	8.89178	9.07237	8.2191	0.0865479	7.35057e-12	0.0629051	0.141005	0.0495792	0.00163263	1.30256e-23	0.301018	0.000151876	5.69001	538.029
2405	808.71	899.57	751.999	1510.76	426.962	605.778	119.577	257.341	15.6417	0.318736	18.0467	43.2994	3.74659	15.9982	132.756	28.5082	0.123604	20.872	50.5268	7.30183	89.8447	8.89178	9.07237	8.2191	0.0865479	7.35057e-12	0.0629051	0.141005	0.0495792	0.00163263	1.30256e-23	0.301018	0.000151876	5.69001	538.029
2406	808.71	899.57	751.999	1510.76	426.962	605.778	119.577	257.341	15.6417	0.318736	18.0467	43.2994	3.74659	15.9982	132.756	28.5082	0.123604	20.872	50.5268	7.30183	89.8447	8.89178	9.07237	8.2191	0.0865479	7.35057e-12	0.0629051	0.141005	0.0495792	0.00163263	1.30256e-23	0.301018	0.000151876	5.69001	538.029
2407	808.71	899.57	751.999	1510.76	426.962	605.778	119.577	257.341	15.6417	0.318736	18.0467	43.2994	3.74659	15.9982	132.756	28.5082	0.123604	20.872	50.5268	7.30183	89.8447	8.89178	9.07237	8.2191	0.0865479	7.35057e-12	0.0629051	0.141005	0.0495792	0.00163263	1.30256e-23	0.301018	0.000151876	5.69001	538.029
2408	808.71	899.57	751.999	1510.76	426.962	605.778	119.577	257.341	15.6417	0.318736	18.0467	43.2994	3.74659	15.9982	132.756	28.5082	0.123604	20.872	50.5268	7.30183	89.8447	8.89178	9.07237	8.2191	0.0865479	7.35057e-12	0.0629051	0.141005	0.0495792	0.00163263	1.30256e-23	0.301018	0.000151876	5.69001	538.029
2409	808.71	899.57	751.999	1510.76	426.962	605.778	119.577	257.341	15.6417	0.318736	18.0467	43.2994	3.74659	15.9982	132.756	28.5082	0.123604	20.872	50.5268	7.30183	89.8447	8.89178	9.07237	8.2191	0.0865479	7.35057e-12	0.0629051	0.141005	0.0495792	0.00163263	1.30256e-23	0.301018	0.000151876	5.69001	538.029
2410	808.71	899.57	751.999	1510.76	426.962	605.778	119.577	257.341	15.6417	0.318736	18.0467	43.2994	3.74659	15.9982	132.756	28.5082	0.123604	20.872	50.5268	7.30183	89.8447	8.89178	9.07237	8.2191	0.0865479	7.35057e-12	0.0629051	0.141005	0.0495792	0.00163263	1.30256e-23	0.301018	0.000151876	5.69001	538.029
2411	808.71	899.57	751.999	1510.76	426.962	605.778	119.577	257.341	15.6417	0.318736	18.0467	43.2994	3.74659	15.9982	132.756	28.5082	0.123604	20.872	50.5268	7.30183	89.8447	8.89178	9.07237	8.2191	0.0865479	7.35057e-12	0.0629051	0.141005	0.0495792	0.00163263	1.30256e-23	0.301018	0.000151876	5.69001	538.029
2412	808.71	899.57	751.999	1510.76	426.962	605.778	119.577	257.341	15.6417	0.318736	18.0467	43.2994	3.74659	15.9982	132.756	28.5082	0.123604	20.872	50.5268	7.30183	89.8447	8.89178	9.07237	8.2191	0.0865479	7.35057e-12	0.0629051	0.141005	0.0495792	0.00163263	1.30256e-23	0.301018	0.000151876	5.69001	538.029
2413	808.71	899.57	751.999	1510.76	426.962	605.778	119.577	257.341	15.6417	0.318736	18.0467	43.2994	3.74659	15.9982	132.756	28.5082	0.123604	20.872	50.5268	7.30183	89.8447	8.89178	9.07237	8.2191	0.0865479	7.35057e-12	0.0629051	0.141005	0.0495792	0.00163263	1.30256e-23	0.301018	0.000151876	5.69001	538.029
2414	808.71	899.57	751.999	1510.76	426.962	605.778	119.577	257.341	15.6417	0.318736	18.0467	43.2994	3.74659	15.9982	132.756	28.5082	0.123604	20.872	50.5268	7.30183	89.8447	8.89178	9.07237	8.2191	0.0865479	7.35057e-12	0.0629051	0.141005	0.0495792	0.00163263	1.30256e-23	0.301018	0.000151876	5.69001	538.029
2415	808.71	899.57	751.999	1510.76	426.962	605.778	119.577	257.341	15.6417	0.318736	18.0467	43.2994	3.74659	15.9982	132.756	28.5082	0.123604	20.872	50.5268	7.30183	89.8447	8.89178	9.07237	8.2191	0.0865479	7.35057e-12	0.0629051	0.141005	0.0495792	0.00163263	1.30256e-23	0.301018	0.000151876	5.69001	538.029
2416	808.71	899.57	751.999	1510.76	426.962	605.778	119.577	257.341	15.6417	0.318736	18.0467	43.2994	3.74659	15.9982	132.756	28.5082	0.123604	20.872	50.5268	7.30183	89.8447	8.89178	9.07237	8.2191	0.0865479	7.35057e-12	0.0629051	0.141005	0.0495792	0.00163263	1.30256e-23	0.301018	0.000151876	5.69001	538.029
2417	808.71	899.57	751.999	1510.76	426.962	605.778	119.577	257.341	15.6417	0.318736	18.0467	43.2994	3.74659	15.9982	132.756	28.5082	0.123604	20.872	50.5268	7.30183	89.8447	8.89178	9.07237	8.2191	0.0865479	7.35057e-12	0.0629051	0.141005	0.0495792	0.00163263	1.30256e-23	0.301018	0.000151876	5.69001	538.029
2418	808.71	899.57	751.999	1510.76	426.962	605.778	119.577	257.341	15.6417	0.318736	18.0467	43.2994	3.74659	15.9982	132.756	28.5082	0.123604	20.872	50.5268	7.30183	89.8447	8.89178	9.07237	8.2191	0.0865479	7.35057e-12	0.0629051	0.141005	0.0495792	0.00163263	1.30256e-23	0.301018	0.000151876	5.69001	538.029
2419	808.71	899.57	751.999	1510.76	426.962	605.778	119.577	257.341	15.6417	0.318736	18.0467	43.2994	3.74659	15.9982	132.756	28.5082	0.123604	20.872	50.5268	7.30183	89.8447	8.89178	9.07237	8.2191	0.0865479	7.35057e-12	0.0629051	0.141005	0.0495792	0.00163263	1.30256e-23	0.301018	0.000151876	5.69001	538.029
2420	808.71	899.57	751.999	1510.76	426.962	605.778	119.577	257.341	15.6417	0.318736	18.0467	43.2994	3.74659	15.9982	132.756	28.5082	0.123604	20.872	50.5268	7.30183	89.8447	8.89178	9.07237	8.2191	0.0865479	7.35057e-12	0.0629051	0.141005	0.0495792	0.00163263	1.30256e-23	0.301018	0.000151876	5.69001	538.029
2421	808.71	899.57	751.999	1510.76	426.962	605.778	119.577	257.341	15.6417	0.318736	18.0467	43.2994	3.74659	15.9982	132.756	28.5082	0.123604	20.872	50.5268	7.30183	89.8447	8.89178	9.07237	8.2191	0.0865479	7.35057e-12	0.0629051	0.141005	0.0495792	0.00163263	1.30256e-23	0.301018	0.000151876	5.69001	538.029
2422	808.71	899.57	751.999	1510.76	426.962	605.778	119.577	257.341	15.6417	0.318736	18.0467	43.2994	3.74659	15.9982	132.756	28.5082	0.123604	20.872	50.5268	7.30183	89.8447	8.89178	9.07237	8.2191	0.0865479	7.35057e-12	0.0629051	0.141005	0.0495792	0.00163263	1.30256e-23	0.301018	0.000151876	5.69001	538.029
2423	808.71	899.57	751.999	1510.76	426.962	605.778	119.577	257.341	15.6417	0.318736	18.0467	43.2994	3.74659	15.9982	132.756	28.5082	0.123604	20.872	50.5268	7.30183	89.8447	8.89178	9.07237	8.2191	0.0865479	7.35057e-12	0.0629051	0.141005	0.0495792	0.00163263	1.30256e-23	0.301018	0.000151876	5.69001	538.029
2424	808.71	899.57	751.999	1510.76	426.962	605.778	119.577	257.341	15.6417	0.318736	18.0467	43.2994	3.74659	15.9982	132.756	28.5082	0.123604	20.872	50.5268	7.30183	89.8447	8.89178	9.07237	8.2191	0.0865479	7.35057e-12	0.0629051	0.141005	0.0495792	0.00163263	1.30256e-23	0.301018	0.000151876	5.69001	538.029
2425	808.71	899.57	751.999	1510.76	426.962	605.778	119.577	257.341	15.6417	0.318736	18.0467	43.2994	3.74659	15.9982	132.756	28.5082	0.123604	20.872	50.5268	7.30183	89.8447	8.89178	9.07237	8.2191	0.0865479	7.35057e-12	0.0629051	0.141005	0.0495792	0.00163263	1.30256e-23	0.301018	0.000151876	5.69001	538.029
2426	808.71	899.57	751.999	1510.76	426.962	605.778	119.577	257.341	15.6417	0.318736	18.0467	43.2994	3.74659	15.9982	132.756	28.5082	0.123604	20.872	50.5268	7.30183	89.8447	8.89178	9.07237	8.2191	0.0865479	7.35057e-12	0.0629051	0.141005	0.0495792	0.00163263	1.30256e-23	0.301018	0.000151876	5.69001	538.029
2427	808.71	899.57	751.999	1510.76	426.962	605.778	119.577	257.341	15.6417	0.318736	18.0467	43.2994	3.74659	15.9982	132.756	28.5082	0.123604	20.872	50.5268	7.30183	89.8447	8.89178	9.07237	8.2191	0.0865479	7.35057e-12	0.0629051	0.141005	0.0495792	0.00163263	1.30256e-23	0.301018	0.000151876	5.69001	538.029
2428	808.71	899.57	751.999	1510.76	426.962	605.778	119.577	257.341	15.6417	0.318736	18.0467	43.2994	3.74659	15.9982	132.756	28.5082	0.123604	20.872	50.5268	7.30183	89.8447	8.89178	9.07237	8.2191	0.0865479	7.35057e-12	0.0629051	0.141005	0.0495792	0.00163263	1.30256e-23	0.301018	0.000151876	5.69001	538.029
2429	808.71	899.57	751.999	1510.76	426.962	605.778	119.577	257.341	15.6417	0.318736	18.0467	43.2994	3.74659	15.9982	132.756	28.5082	0.123604	20.872	50.5268	7.30183	89.8447	8.89178	9.07237	8.2191	0.0865479	7.35057e-12	0.0629051	0.141005	0.0495792	0.00163263	1.30256e-23	0.301018	0.000151876	5.69001	538.029
2430	808.71	899.57	751.999	1510.76	426.962	605.778	119.577	257.341	15.6417	0.318736	18.0467	43.2994	3.74659	15.9982	132.756	28.5082	0.123604	20.872	50.5268	7.30183	89.8447	8.89178	9.07237	8.2191	0.0865479	7.35057e-12	0.0629051	0.141005	0.0495792	0.00163263	1.30256e-23	0.301018	0.000151876	5.69001	538.029
2431	808.71	899.57	751.999	1510.76	426.962	605.778	119.577	257.341	15.6417	0.318736	18.0467	43.2994	3.74659	15.9982	132.756	28.5082	0.123604	20.872	50.5268	7.30183	89.8447	8.89178	9.07237	8.2191	0.0865479	7.35057e-12	0.0629051	0.141005	0.0495792	0.00163263	1.30256e-23	0.301018	0.000151876	5.69001	538.029
2432	808.71	899.57	751.999	1510.76	426.962	605.778	119.577	257.341	15.6417	0.318736	18.0467	43.2994	3.74659	15.9982	132.756	28.5082	0.123604	20.872	50.5268	7.30183	89.8447	8.89178	9.07237	8.2191	0.0865479	7.35057e-12	0.0629051	0.141005	0.0495792	0.00163263	1.30256e-23	0.301018	0.000151876	5.69001	538.029
2433	808.71	899.57	751.999	1510.76	426.962	605.778	119.577	257.341	15.6417	0.318736	18.0467	43.2994	3.74659	15.9982	132.756	28.5082	0.123604	20.872	50.5268	7.30183	89.8447	8.89178	9.07237	8.2191	0.0865479	7.35057e-12	0.0629051	0.141005	0.0495792	0.00163263	1.30256e-23	0.301018	0.000151876	5.69001	538.029
2434	808.71	899.57	751.999	1510.76	426.962	605.778	119.577	257.341	15.6417	0.318736	18.0467	43.2994	3.74659	15.9982	132.756	28.5082	0.123604	20.872	50.5268	7.30183	89.8447	8.89178	9.07237	8.2191	0.0865479	7.35057e-12	0.0629051	0.141005	0.0495792	0.00163263	1.30256e-23	0.301018	0.000151876	5.69001	538.029
2435	808.71	899.57	751.999	1510.76	426.962	605.778	119.577	257.341	15.6417	0.318736	18.0467	43.2994	3.74659	15.9982	132.756	28.5082	0.123604	20.872	50.5268	7.30183	89.8447	8.89178	9.07237	8.2191	0.0865479	7.35057e-12	0.0629051	0.141005	0.0495792	0.00163263	1.30256e-23	0.301018	0.000151876	5.69001	538.029
2436	808.71	899.57	751.999	1510.76	426.962	605.778	119.577	257.341	15.6417	0.318736	18.0467	43.2994	3.74659	15.9982	132.756	28.5082	0.123604	20.872	50.5268	7.30183	89.8447	8.89178	9.07237	8.2191	0.0865479	7.35057e-12	0.0629051	0.141005	0.0495792	0.00163263	1.30256e-23	0.301018	0.000151876	5.69001	538.029
2437	808.71	899.57	751.999	1510.76	426.962	605.778	119.577	257.341	15.6417	0.318736	18.0467	43.2994	3.74659	15.9982	132.756	28.5082	0.123604	20.872	50.5268	7.30183	89.8447	8.89178	9.07237	8.2191	0.0865479	7.35057e-12	0.0629051	0.141005	0.0495792	0.00163263	1.30256e-23	0.301018	0.000151876	5.69001	538.029
2438	808.71	899.57	751.999	1510.76	426.962	605.778	119.577	257.341	15.6417	0.318736	18.0467	43.2994	3.74659	15.9982	132.756	28.5082	0.123604	20.872	50.5268	7.30183	89.8447	8.89178	9.07237	8.2191	0.0865479	7.35057e-12	0.0629051	0.141005	0.0495792	0.00163263	1.30256e-23	0.301018	0.000151876	5.69001	538.029
2439	808.71	899.57	751.999	1510.76	426.962	605.778	119.577	257.341	15.6417	0.318736	18.0467	43.2994	3.74659	15.9982	132.756	28.5082	0.123604	20.872	50.5268	7.30183	89.8447	8.89178	9.07237	8.2191	0.0865479	7.35057e-12	0.0629051	0.141005	0.0495792	0.00163263	1.30256e-23	0.301018	0.000151876	5.69001	538.029
2440	808.71	899.57	751.999	1510.76	426.962	605.778	119.577	257.341	15.6417	0.318736	18.0467	43.2994	3.74659	15.9982	132.756	28.5082	0.123604	20.872	50.5268	7.30183	89.8447	8.89178	9.07237	8.2191	0.0865479	7.35057e-12	0.0629051	0.141005	0.0495792	0.00163263	1.30256e-23	0.301018	0.000151876	5.69001	538.029
2441	808.71	899.57	751.999	1510.76	426.962	605.778	119.577	257.341	15.6417	0.318736	18.0467	43.2994	3.74659	15.9982	132.756	28.5082	0.123604	20.872	50.5268	7.30183	89.8447	8.89178	9.07237	8.2191	0.0865479	7.35057e-12	0.0629051	0.141005	0.0495792	0.00163263	1.30256e-23	0.301018	0.000151876	5.69001	538.029
2442	808.71	899.57	751.999	1510.76	426.962	605.778	119.577	257.341	15.6417	0.318736	18.0467	43.2994	3.74659	15.9982	132.756	28.5082	0.123604	20.872	50.5268	7.30183	89.8447	8.89178	9.07237	8.2191	0.0865479	7.35057e-12	0.0629051	0.141005	0.0495792	0.00163263	1.30256e-23	0.301018	0.000151876	5.69001	538.029
2443	808.71	899.57	751.999	1510.76	426.962	605.778	119.577	257.341	15.6417	0.318736	18.0467	43.2994	3.74659	15.9982	132.756	28.5082	0.123604	20.872	50.5268	7.30183	89.8447	8.89178	9.07237	8.2191	0.0865479	7.35057e-12	0.0629051	0.141005	0.0495792	0.00163263	1.30256e-23	0.301018	0.000151876	5.69001	538.029
2444	808.71	899.57	751.999	1510.76	426.962	605.778	119.577	257.341	15.6417	0.318736	18.0467	43.2994	3.74659	15.9982	132.756	28.5082	0.123604	20.872	50.5268	7.30183	89.8447	8.89178	9.07237	8.2191	0.0865479	7.35057e-12	0.0629051	0.141005	0.0495792	0.00163263	1.30256e-23	0.301018	0.000151876	5.69001	538.029
2445	808.71	899.57	751.999	1510.76	426.962	605.778	119.577	257.341	15.6417	0.318736	18.0467	43.2994	3.74659	15.9982	132.756	28.5082	0.123604	20.872	50.5268	7.30183	89.8447	8.89178	9.07237	8.2191	0.0865479	7.35057e-12	0.0629051	0.141005	0.0495792	0.00163263	1.30256e-23	0.301018	0.000151876	5.69001	538.029
2446	808.71	899.57	751.999	1510.76	426.962	605.778	119.577	257.341	15.6417	0.318736	18.0467	43.2994	3.74659	15.9982	132.756	28.5082	0.123604	20.872	50.5268	7.30183	89.8447	8.89178	9.07237	8.2191	0.0865479	7.35057e-12	0.0629051	0.141005	0.0495792	0.00163263	1.30256e-23	0.301018	0.000151876	5.69001	538.029
2447	808.71	899.57	751.999	1510.76	426.962	605.778	119.577	257.341	15.6417	0.318736	18.0467	43.2994	3.74659	15.9982	132.756	28.5082	0.123604	20.872	50.5268	7.30183	89.8447	8.89178	9.07237	8.2191	0.0865479	7.35057e-12	0.0629051	0.141005	0.0495792	0.00163263	1.30256e-23	0.301018	0.000151876	5.69001	538.029
2448	808.71	899.57	751.999	1510.76	426.962	605.778	119.577	257.341	15.6417	0.318736	18.0467	43.2994	3.74659	15.9982	132.756	28.5082	0.123604	20.872	50.5268	7.30183	89.8447	8.89178	9.07237	8.2191	0.0865479	7.35057e-12	0.0629051	0.141005	0.0495792	0.00163263	1.30256e-23	0.301018	0.000151876	5.69001	538.029
2449	808.71	899.57	751.999	1510.76	426.962	605.778	119.577	257.341	15.6417	0.318736	18.0467	43.2994	3.74659	15.9982	132.756	28.5082	0.123604	20.872	50.5268	7.30183	89.8447	8.89178	9.07237	8.2191	0.0865479	7.35057e-12	0.0629051	0.141005	0.0495792	0.00163263	1.30256e-23	0.301018	0.000151876	5.69001	538.029
2450	808.71	899.57	751.999	1510.76	426.962	605.778	119.577	257.341	15.6417	0.318736	18.0467	43.2994	3.74659	15.9982	132.756	28.5082	0.123604	20.872	50.5268	7.30183	89.8447	8.89178	9.07237	8.2191	0.0865479	7.35057e-12	0.0629051	0.141005	0.0495792	0.00163263	1.30256e-23	0.301018	0.000151876	5.69001	538.029
2451	808.71	899.57	751.999	1510.76	426.962	605.778	119.577	257.341	15.6417	0.318736	18.0467	43.2994	3.74659	15.9982	132.756	28.5082	0.123604	20.872	50.5268	7.30183	89.8447	8.89178	9.07237	8.2191	0.0865479	7.35057e-12	0.0629051	0.141005	0.0495792	0.00163263	1.30256e-23	0.301018	0.000151876	5.69001	538.029
2452	808.71	899.57	751.999	1510.76	426.962	605.778	119.577	257.341	15.6417	0.318736	18.0467	43.2994	3.74659	15.9982	132.756	28.5082	0.123604	20.872	50.5268	7.30183	89.8447	8.89178	9.07237	8.2191	0.0865479	7.35057e-12	0.0629051	0.141005	0.0495792	0.00163263	1.30256e-23	0.301018	0.000151876	5.69001	538.029
2453	808.71	899.57	751.999	1510.76	426.962	605.778	119.577	257.341	15.6417	0.318736	18.0467	43.2994	3.74659	15.9982	132.756	28.5082	0.123604	20.872	50.5268	7.30183	89.8447	8.89178	9.07237	8.2191	0.0865479	7.35057e-12	0.0629051	0.141005	0.0495792	0.00163263	1.30256e-23	0.301018	0.000151876	5.69001	538.029
2454	808.71	899.57	751.999	1510.76	426.962	605.778	119.577	257.341	15.6417	0.318736	18.0467	43.2994	3.74659	15.9982	132.756	28.5082	0.123604	20.872	50.5268	7.30183	89.8447	8.89178	9.07237	8.2191	0.0865479	7.35057e-12	0.0629051	0.141005	0.0495792	0.00163263	1.30256e-23	0.301018	0.000151876	5.69001	538.029
2455	808.71	899.57	751.999	1510.76	426.962	605.778	119.577	257.341	15.6417	0.318736	18.0467	43.2994	3.74659	15.9982	132.756	28.5082	0.123604	20.872	50.5268	7.30183	89.8447	8.89178	9.07237	8.2191	0.0865479	7.35057e-12	0.0629051	0.141005	0.0495792	0.00163263	1.30256e-23	0.301018	0.000151876	5.69001	538.029
2456	808.71	899.57	751.999	1510.76	426.962	605.778	119.577	257.341	15.6417	0.318736	18.0467	43.2994	3.74659	15.9982	132.756	28.5082	0.123604	20.872	50.5268	7.30183	89.8447	8.89178	9.07237	8.2191	0.0865479	7.35057e-12	0.0629051	0.141005	0.0495792	0.00163263	1.30256e-23	0.301018	0.000151876	5.69001	538.029
2457	808.71	899.57	751.999	1510.76	426.962	605.778	119.577	257.341	15.6417	0.318736	18.0467	43.2994	3.74659	15.9982	132.756	28.5082	0.123604	20.872	50.5268	7.30183	89.8447	8.89178	9.07237	8.2191	0.0865479	7.35057e-12	0.0629051	0.141005	0.0495792	0.00163263	1.30256e-23	0.301018	0.000151876	5.69001	538.029
2458	808.71	899.57	751.999	1510.76	426.962	605.778	119.577	257.341	15.6417	0.318736	18.0467	43.2994	3.74659	15.9982	132.756	28.5082	0.123604	20.872	50.5268	7.30183	89.8447	8.89178	9.07237	8.2191	0.0865479	7.35057e-12	0.0629051	0.141005	0.0495792	0.00163263	1.30256e-23	0.301018	0.000151876	5.69001	538.029
2459	808.71	899.57	751.999	1510.76	426.962	605.778	119.577	257.341	15.6417	0.318736	18.0467	43.2994	3.74659	15.9982	132.756	28.5082	0.123604	20.872	50.5268	7.30183	89.8447	8.89178	9.07237	8.2191	0.0865479	7.35057e-12	0.0629051	0.141005	0.0495792	0.00163263	1.30256e-23	0.301018	0.000151876	5.69001	538.029
2460	808.71	899.57	751.999	1510.76	426.962	605.778	119.577	257.341	15.6417	0.318736	18.0467	43.2994	3.74659	15.9982	132.756	28.5082	0.123604	20.872	50.5268	7.30183	89.8447	8.89178	9.07237	8.2191	0.0865479	7.35057e-12	0.0629051	0.141005	0.0495792	0.00163263	1.30256e-23	0.301018	0.000151876	5.69001	538.029
2461	808.71	899.57	751.999	1510.76	426.962	605.778	119.577	257.341	15.6417	0.318736	18.0467	43.2994	3.74659	15.9982	132.756	28.5082	0.123604	20.872	50.5268	7.30183	89.8447	8.89178	9.07237	8.2191	0.0865479	7.35057e-12	0.0629051	0.141005	0.0495792	0.00163263	1.30256e-23	0.301018	0.000151876	5.69001	538.029
2462	808.71	899.57	751.999	1510.76	426.962	605.778	119.577	257.341	15.6417	0.318736	18.0467	43.2994	3.74659	15.9982	132.756	28.5082	0.123604	20.872	50.5268	7.30183	89.8447	8.89178	9.07237	8.2191	0.0865479	7.35057e-12	0.0629051	0.141005	0.0495792	0.00163263	1.30256e-23	0.301018	0.000151876	5.69001	538.029
2463	808.71	899.57	751.999	1510.76	426.962	605.778	119.577	257.341	15.6417	0.318736	18.0467	43.2994	3.74659	15.9982	132.756	28.5082	0.123604	20.872	50.5268	7.30183	89.8447	8.89178	9.07237	8.2191	0.0865479	7.35057e-12	0.0629051	0.141005	0.0495792	0.00163263	1.30256e-23	0.301018	0.000151876	5.69001	538.029
2464	808.71	899.57	751.999	1510.76	426.962	605.778	119.577	257.341	15.6417	0.318736	18.0467	43.2994	3.74659	15.9982	132.756	28.5082	0.123604	20.872	50.5268	7.30183	89.8447	8.89178	9.07237	8.2191	0.0865479	7.35057e-12	0.0629051	0.141005	0.0495792	0.00163263	1.30256e-23	0.301018	0.000151876	5.69001	538.029
2465	808.71	899.57	751.999	1510.76	426.962	605.778	119.577	257.341	15.6417	0.318736	18.0467	43.2994	3.74659	15.9982	132.756	28.5082	0.123604	20.872	50.5268	7.30183	89.8447	8.89178	9.07237	8.2191	0.0865479	7.35057e-12	0.0629051	0.141005	0.0495792	0.00163263	1.30256e-23	0.301018	0.000151876	5.69001	538.029
2466	808.71	899.57	751.999	1510.76	426.962	605.778	119.577	257.341	15.6417	0.318736	18.0467	43.2994	3.74659	15.9982	132.756	28.5082	0.123604	20.872	50.5268	7.30183	89.8447	8.89178	9.07237	8.2191	0.0865479	7.35057e-12	0.0629051	0.141005	0.0495792	0.00163263	1.30256e-23	0.301018	0.000151876	5.69001	538.029
2467	808.71	899.57	751.999	1510.76	426.962	605.778	119.577	257.341	15.6417	0.318736	18.0467	43.2994	3.74659	15.9982	132.756	28.5082	0.123604	20.872	50.5268	7.30183	89.8447	8.89178	9.07237	8.2191	0.0865479	7.35057e-12	0.0629051	0.141005	0.0495792	0.00163263	1.30256e-23	0.301018	0.000151876	5.69001	538.029
2468	808.71	899.57	751.999	1510.76	426.962	605.778	119.577	257.341	15.6417	0.318736	18.0467	43.2994	3.74659	15.9982	132.756	28.5082	0.123604	20.872	50.5268	7.30183	89.8447	8.89178	9.07237	8.2191	0.0865479	7.35057e-12	0.0629051	0.141005	0.0495792	0.00163263	1.30256e-23	0.301018	0.000151876	5.69001	538.029
2469	808.71	899.57	751.999	1510.76	426.962	605.778	119.577	257.341	15.6417	0.318736	18.0467	43.2994	3.74659	15.9982	132.756	28.5082	0.123604	20.872	50.5268	7.30183	89.8447	8.89178	9.07237	8.2191	0.0865479	7.35057e-12	0.0629051	0.141005	0.0495792	0.00163263	1.30256e-23	0.301018	0.000151876	5.69001	538.029
2470	808.71	899.57	751.999	1510.76	426.962	605.778	119.577	257.341	15.6417	0.318736	18.0467	43.2994	3.74659	15.9982	132.756	28.5082	0.123604	20.872	50.5268	7.30183	89.8447	8.89178	9.07237	8.2191	0.0865479	7.35057e-12	0.0629051	0.141005	0.0495792	0.00163263	1.30256e-23	0.301018	0.000151876	5.69001	538.029
2471	808.71	899.57	751.999	1510.76	426.962	605.778	119.577	257.341	15.6417	0.318736	18.0467	43.2994	3.74659	15.9982	132.756	28.5082	0.123604	20.872	50.5268	7.30183	89.8447	8.89178	9.07237	8.2191	0.0865479	7.35057e-12	0.0629051	0.141005	0.0495792	0.00163263	1.30256e-23	0.301018	0.000151876	5.69001	538.029
2472	808.71	899.57	751.999	1510.76	426.962	605.778	119.577	257.341	15.6417	0.318736	18.0467	43.2994	3.74659	15.9982	132.756	28.5082	0.123604	20.872	50.5268	7.30183	89.8447	8.89178	9.07237	8.2191	0.0865479	7.35057e-12	0.0629051	0.141005	0.0495792	0.00163263	1.30256e-23	0.301018	0.000151876	5.69001	538.029
2473	808.71	899.57	751.999	1510.76	426.962	605.778	119.577	257.341	15.6417	0.318736	18.0467	43.2994	3.74659	15.9982	132.756	28.5082	0.123604	20.872	50.5268	7.30183	89.8447	8.89178	9.07237	8.2191	0.0865479	7.35057e-12	0.0629051	0.141005	0.0495792	0.00163263	1.30256e-23	0.301018	0.000151876	5.69001	538.029
2474	808.71	899.57	751.999	1510.76	426.962	605.778	119.577	257.341	15.6417	0.318736	18.0467	43.2994	3.74659	15.9982	132.756	28.5082	0.123604	20.872	50.5268	7.30183	89.8447	8.89178	9.07237	8.2191	0.0865479	7.35057e-12	0.0629051	0.141005	0.0495792	0.00163263	1.30256e-23	0.301018	0.000151876	5.69001	538.029
2475	808.71	899.57	751.999	1510.76	426.962	605.778	119.577	257.341	15.6417	0.318736	18.0467	43.2994	3.74659	15.9982	132.756	28.5082	0.123604	20.872	50.5268	7.30183	89.8447	8.89178	9.07237	8.2191	0.0865479	7.35057e-12	0.0629051	0.141005	0.0495792	0.00163263	1.30256e-23	0.301018	0.000151876	5.69001	538.029
2476	808.71	899.57	751.999	1510.76	426.962	605.778	119.577	257.341	15.6417	0.318736	18.0467	43.2994	3.74659	15.9982	132.756	28.5082	0.123604	20.872	50.5268	7.30183	89.8447	8.89178	9.07237	8.2191	0.0865479	7.35057e-12	0.0629051	0.141005	0.0495792	0.00163263	1.30256e-23	0.301018	0.000151876	5.69001	538.029
2477	808.71	899.57	751.999	1510.76	426.962	605.778	119.577	257.341	15.6417	0.318736	18.0467	43.2994	3.74659	15.9982	132.756	28.5082	0.123604	20.872	50.5268	7.30183	89.8447	8.89178	9.07237	8.2191	0.0865479	7.35057e-12	0.0629051	0.141005	0.0495792	0.00163263	1.30256e-23	0.301018	0.000151876	5.69001	538.029
2478	808.71	899.57	751.999	1510.76	426.962	605.778	119.577	257.341	15.6417	0.318736	18.0467	43.2994	3.74659	15.9982	132.756	28.5082	0.123604	20.872	50.5268	7.30183	89.8447	8.89178	9.07237	8.2191	0.0865479	7.35057e-12	0.0629051	0.141005	0.0495792	0.00163263	1.30256e-23	0.301018	0.000151876	5.69001	538.029
2479	808.71	899.57	751.999	1510.76	426.962	605.778	119.577	257.341	15.6417	0.318736	18.0467	43.2994	3.74659	15.9982	132.756	28.5082	0.123604	20.872	50.5268	7.30183	89.8447	8.89178	9.07237	8.2191	0.0865479	7.35057e-12	0.0629051	0.141005	0.0495792	0.00163263	1.30256e-23	0.301018	0.000151876	5.69001	538.029
2480	808.71	899.57	751.999	1510.76	426.962	605.778	119.577	257.341	15.6417	0.318736	18.0467	43.2994	3.74659	15.9982	132.756	28.5082	0.123604	20.872	50.5268	7.30183	89.8447	8.89178	9.07237	8.2191	0.0865479	7.35057e-12	0.0629051	0.141005	0.0495792	0.00163263	1.30256e-23	0.301018	0.000151876	5.69001	538.029
2481	808.71	899.57	751.999	1510.76	426.962	605.778	119.577	257.341	15.6417	0.318736	18.0467	43.2994	3.74659	15.9982	132.756	28.5082	0.123604	20.872	50.5268	7.30183	89.8447	8.89178	9.07237	8.2191	0.0865479	7.35057e-12	0.0629051	0.141005	0.0495792	0.00163263	1.30256e-23	0.301018	0.000151876	5.69001	538.029
2482	808.71	899.57	751.999	1510.76	426.962	605.778	119.577	257.341	15.6417	0.318736	18.0467	43.2994	3.74659	15.9982	132.756	28.5082	0.123604	20.872	50.5268	7.30183	89.8447	8.89178	9.07237	8.2191	0.0865479	7.35057e-12	0.0629051	0.141005	0.0495792	0.00163263	1.30256e-23	0.301018	0.000151876	5.69001	538.029
2483	808.71	899.57	751.999	1510.76	426.962	605.778	119.577	257.341	15.6417	0.318736	18.0467	43.2994	3.74659	15.9982	132.756	28.5082	0.123604	20.872	50.5268	7.30183	89.8447	8.89178	9.07237	8.2191	0.0865479	7.35057e-12	0.0629051	0.141005	0.0495792	0.00163263	1.30256e-23	0.301018	0.000151876	5.69001	538.029
2484	808.71	899.57	751.999	1510.76	426.962	605.778	119.577	257.341	15.6417	0.318736	18.0467	43.2994	3.74659	15.9982	132.756	28.5082	0.123604	20.872	50.5268	7.30183	89.8447	8.89178	9.07237	8.2191	0.0865479	7.35057e-12	0.0629051	0.141005	0.0495792	0.00163263	1.30256e-23	0.301018	0.000151876	5.69001	538.029
2485	808.71	899.57	751.999	1510.76	426.962	605.778	119.577	257.341	15.6417	0.318736	18.0467	43.2994	3.74659	15.9982	132.756	28.5082	0.123604	20.872	50.5268	7.30183	89.8447	8.89178	9.07237	8.2191	0.0865479	7.35057e-12	0.0629051	0.141005	0.0495792	0.00163263	1.30256e-23	0.301018	0.000151876	5.69001	538.029
2486	808.71	899.57	751.999	1510.76	426.962	605.778	119.577	257.341	15.6417	0.318736	18.0467	43.2994	3.74659	15.9982	132.756	28.5082	0.123604	20.872	50.5268	7.30183	89.8447	8.89178	9.07237	8.2191	0.0865479	7.35057e-12	0.0629051	0.141005	0.0495792	0.00163263	1.30256e-23	0.301018	0.000151876	5.69001	538.029
2487	808.71	899.57	751.999	1510.76	426.962	605.778	119.577	257.341	15.6417	0.318736	18.0467	43.2994	3.74659	15.9982	132.756	28.5082	0.123604	20.872	50.5268	7.30183	89.8447	8.89178	9.07237	8.2191	0.0865479	7.35057e-12	0.0629051	0.141005	0.0495792	0.00163263	1.30256e-23	0.301018	0.000151876	5.69001	538.029
2488	808.71	899.57	751.999	1510.76	426.962	605.778	119.577	257.341	15.6417	0.318736	18.0467	43.2994	3.74659	15.9982	132.756	28.5082	0.123604	20.872	50.5268	7.30183	89.8447	8.89178	9.07237	8.2191	0.0865479	7.35057e-12	0.0629051	0.141005	0.0495792	0.00163263	1.30256e-23	0.301018	0.000151876	5.69001	538.029
2489	808.71	899.57	751.999	1510.76	426.962	605.778	119.577	257.341	15.6417	0.318736	18.0467	43.2994	3.74659	15.9982	132.756	28.5082	0.123604	20.872	50.5268	7.30183	89.8447	8.89178	9.07237	8.2191	0.0865479	7.35057e-12	0.0629051	0.141005	0.0495792	0.00163263	1.30256e-23	0.301018	0.000151876	5.69001	538.029
2490	808.71	899.57	751.999	1510.76	426.962	605.778	119.577	257.341	15.6417	0.318736	18.0467	43.2994	3.74659	15.9982	132.756	28.5082	0.123604	20.872	50.5268	7.30183	89.8447	8.89178	9.07237	8.2191	0.0865479	7.35057e-12	0.0629051	0.141005	0.0495792	0.00163263	1.30256e-23	0.301018	0.000151876	5.69001	538.029
2491	808.71	899.57	751.999	1510.76	426.962	605.778	119.577	257.341	15.6417	0.318736	18.0467	43.2994	3.74659	15.9982	132.756	28.5082	0.123604	20.872	50.5268	7.30183	89.8447	8.89178	9.07237	8.2191	0.0865479	7.35057e-12	0.0629051	0.141005	0.0495792	0.00163263	1.30256e-23	0.301018	0.000151876	5.69001	538.029
2492	808.71	899.57	751.999	1510.76	426.962	605.778	119.577	257.341	15.6417	0.318736	18.0467	43.2994	3.74659	15.9982	132.756	28.5082	0.123604	20.872	50.5268	7.30183	89.8447	8.89178	9.07237	8.2191	0.0865479	7.35057e-12	0.0629051	0.141005	0.0495792	0.00163263	1.30256e-23	0.301018	0.000151876	5.69001	538.029
2493	808.71	899.57	751.999	1510.76	426.962	605.778	119.577	257.341	15.6417	0.318736	18.0467	43.2994	3.74659	15.9982	132.756	28.5082	0.123604	20.872	50.5268	7.30183	89.8447	8.89178	9.07237	8.2191	0.0865479	7.35057e-12	0.0629051	0.141005	0.0495792	0.00163263	1.30256e-23	0.301018	0.000151876	5.69001	538.029
2494	808.71	899.57	751.999	1510.76	426.962	605.778	119.577	257.341	15.6417	0.318736	18.0467	43.2994	3.74659	15.9982	132.756	28.5082	0.123604	20.872	50.5268	7.30183	89.8447	8.89178	9.07237	8.2191	0.0865479	7.35057e-12	0.0629051	0.141005	0.0495792	0.00163263	1.30256e-23	0.301018	0.000151876	5.69001	538.029
2495	808.71	899.57	751.999	1510.76	426.962	605.778	119.577	257.341	15.6417	0.318736	18.0467	43.2994	3.74659	15.9982	132.756	28.5082	0.123604	20.872	50.5268	7.30183	89.8447	8.89178	9.07237	8.2191	0.0865479	7.35057e-12	0.0629051	0.141005	0.0495792	0.00163263	1.30256e-23	0.301018	0.000151876	5.69001	538.029
2496	808.71	899.57	751.999	1510.76	426.962	605.778	119.577	257.341	15.6417	0.318736	18.0467	43.2994	3.74659	15.9982	132.756	28.5082	0.123604	20.872	50.5268	7.30183	89.8447	8.89178	9.07237	8.2191	0.0865479	7.35057e-12	0.0629051	0.141005	0.0495792	0.00163263	1.30256e-23	0.301018	0.000151876	5.69001	538.029
2497	808.71	899.57	751.999	1510.76	426.962	605.778	119.577	257.341	15.6417	0.318736	18.0467	43.2994	3.74659	15.9982	132.756	28.5082	0.123604	20.872	50.5268	7.30183	89.8447	8.89178	9.07237	8.2191	0.0865479	7.35057e-12	0.0629051	0.141005	0.0495792	0.00163263	1.30256e-23	0.301018	0.000151876	5.69001	538.029
2498	808.71	899.57	751.999	1510.76	426.962	605.778	119.577	257.341	15.6417	0.318736	18.0467	43.2994	3.74659	15.9982	132.756	28.5082	0.123604	20.872	50.5268	7.30183	89.8447	8.89178	9.07237	8.2191	0.0865479	7.35057e-12	0.0629051	0.141005	0.0495792	0.00163263	1.30256e-23	0.301018	0.000151876	5.69001	538.029
2499	808.71	899.57	751.999	1510.76	426.962	605.778	119.577	257.341	15.6417	0.318736	18.0467	43.2994	3.74659	15.9982	132.756	28.5082	0.123604	20.872	50.5268	7.30183	89.8447	8.89178	9.07237	8.2191	0.0865479	7.35057e-12	0.0629051	0.141005	0.0495792	0.00163263	1.30256e-23	0.301018	0.000151876	5.69001	538.029
2500	808.71	899.57	751.999	1510.76	426.962	605.778	119.577	257.341	15.6417	0.318736	18.0467	43.2994	3.74659	15.9982	132.756	28.5082	0.123604	20.872	50.5268	7.30183	89.8447	8.89178	9.07237	8.2191	0.0865479	7.35057e-12	0.0629051	0.141005	0.0495792	0.00163263	1.30256e-23	0.301018	0.000151876	5.69001	538.029
