# Supplementary material for: The Social Cost of Fossil and Industrial CO2 Emissions from 1950 to 2018
Source: Research Square preprint supplement (doi:10.21203/rs.3.rs-2244259/v1), 2022-11-17
Supplement: Supplementary file 27 [file RCP85_EMISSIONS.xls]

## Sheet: RCP85_EMISSIONS
RCP85__EMISSIONS____________________________
CONTENT: GLOBAL ANNUAL EMISSIONS.
RUN: RCP8.5, FINAL RELEASE, 26 Nov. 2009
RCP8.5 CONTACT: MESSAGE group, Keywan Riahi (riahi@iiasa.ac.at)
DATE: 26/11/2009 11:29:06
MAGICC-VERSION: 6.3.09, 25 November 2009
FILE PRODUCED BY: RCP Concentration Calculation & Data Group, M. Meinshausen, S. Smith, K. Riahi, D. van Vuuren
DOCUMENTATION: M. Meinshausen, S. Smith et al. (2011) "The RCP GHG concentrations and their extension from 1765 to 2300", DOI 10.1007/s10584-011-0156-z, Climatic Change.
CMIP5 INFO: http://cmip-pcmdi.llnl.gov/cmip5/
RCP DATABASE: http://www.iiasa.ac.at/web-apps/tnt/RcpDb
FURTHER INFO: For data sources, aknowledgements and further information, see http://www.pik-potsdam.de/~mmalte/rcps.
NOTE: THIS EMISSION DATASET ONLY TO BE USED FOR EMISSION-DRIVEN ESM CMIP5 RUNS, AS CONCENTRATIONS, NOT EMISSIONS, SHALL BE PRESCRIBED IN MAIN CMIP5 RUNS.
RCP8.5 starts 2005; 20th century data and earlier is provided for convenience.
COLUMN_DESCRIPTION________________________________________
1. FossilCO2 - Fossil & Industrial CO2 (Fossil, Cement, Gas Flaring & Bunker Fuels)
2. OtherCO2 - Landuse related CO2 Emissions
3. CH4 - Methane
4. N2O - Nitrous Oxide
5. - 11. - Tropospheric ozone precursors, aerosols and reactive gas emissions
12. - 23. - Flourinated gases controlled under the Kyoto Protocol, (HFCs, PFCs, SF6)
24. - 39. - Ozone Depleting Substances controlled under the Montreal Protocol (CFCs, HFCFC, Halons, CCl4, MCF, CH3Br, CH3Cl)
&THISFILE_SPECIFICATIONS
THISFILE_DATACOLUMNS	39
THISFILE_FIRSTYEAR	1765
THISFILE_LASTYEAR	2500
THISFILE_ANNUALSTEPS	1
THISFILE_FIRSTDATAROW	39
THISFILE_UNITS	SEE ROW 37
THISFILE_DATTYPE	RCPDAT
/
COLUMN:	1	2	3	4	5	6	7	8	9	10	11	12	13	14	15	16	17	18	19	20	21	22	23	24	25	26	27	28	29	30	31	32	33	34	35	36	37	38	39
UNITS:	GtC/yr	GtC/yr	MtCH4/yr	MtN2O-N/yr	MtS/yr	MtCO/yr	Mt/yr	MtN/yr	Mt/yr	Mt/yr	MtN/yr	kt/yr	kt/yr	kt/yr	kt/yr	kt/yr	kt/yr	kt/yr	kt/yr	kt/yr	kt/yr	kt/yr	kt/yr	kt/yr	kt/yr	kt/yr	kt/yr	kt/yr	kt/yr	kt/yr	kt/yr	kt/yr	kt/yr	kt/yr	kt/yr	kt/yr	kt/yr	kt/yr	kt/yr
v YEARS/GAS >	FossilCO2	OtherCO2	CH4	N2O	SOx	CO	NMVOC	NOx	BC	OC	NH3	CF4	C2F6	C6F14	HFC23	HFC32	HFC43_10	HFC125	HFC134a	HFC143a	HFC227ea	HFC245fa	SF6	CFC_11	CFC_12	CFC_113	CFC_114	CFC_115	CARB_TET	MCF	HCFC_22	HCFC_141B	HCFC_142B	HALON1211	HALON1202	HALON1301	HALON2402	CH3BR	CH3CL
1765	0.003	0	0	0	0	0	0	0	0	0	0.833837	0.0107627	0	0	0	0	0	0	0	0	0	0	0	0	0	0	0	0	0	0	0	0	0	0	0	0	0	157.267	3100.21
1766	0.003	0.0053383	1.96326	0.00519108	0.0988826	9.05022	1.59687	0.109502	0.106998	0.56592	0.854231	0.0107521	0	0	0	0	0	0	0	0	0	0	0	0	0	0	0	0	0	0	0	0	0	0	0	0	0	157.267	3100.21
1767	0.003	0.0106766	2.43645	0.0101168	0.116306	12.9608	2.29232	0.168038	0.133383	0.781468	0.874167	0.0107479	0	0	0	0	0	0	0	0	0	0	0	0	0	0	0	0	0	0	0	0	0	0	0	0	0	157.267	3100.21
1768	0.003	0.0160149	2.91111	0.0150428	0.133811	16.8765	2.98865	0.226625	0.159847	0.997361	0.893654	0.0107438	0	0	0	0	0	0	0	0	0	0	0	0	0	0	0	0	0	0	0	0	0	0	0	0	0	157.267	3100.21
1769	0.003	0.0213532	3.38728	0.0199691	0.151398	20.7975	3.6859	0.285264	0.186393	1.21361	0.912699	0.0107397	0	0	0	0	0	0	0	0	0	0	0	0	0	0	0	0	0	0	0	0	0	0	0	0	0	157.267	3100.21
1770	0.003	0.0266915	3.86501	0.0248956	0.16907	24.7238	4.38409	0.343956	0.213024	1.43023	0.931309	0.0107355	0	0	0	0	0	0	0	0	0	0	0	0	0	0	0	0	0	0	0	0	0	0	0	0	0	157.267	3100.21
1771	0.004	0.0320298	4.34436	0.0298224	0.186831	28.6557	5.08326	0.402704	0.239742	1.64723	0.952532	0.0107314	0	0	0	0	0	0	0	0	0	0	0	0	0	0	0	0	0	0	0	0	0	0	0	0	0	157.267	3100.21
1772	0.004	0.0373681	4.82537	0.0347495	0.204683	32.5933	5.78343	0.461508	0.26655	1.86461	0.970294	0.0107273	0	0	0	0	0	0	0	0	0	0	0	0	0	0	0	0	0	0	0	0	0	0	0	0	0	157.267	3100.21
1773	0.004	0.0427064	5.30809	0.039677	0.222628	36.5368	6.48465	0.520371	0.29345	2.0824	0.987642	0.0107231	0	0	0	0	0	0	0	0	0	0	0	0	0	0	0	0	0	0	0	0	0	0	0	0	0	157.267	3100.21
1774	0.004	0.0480447	5.79258	0.0446047	0.24067	40.4864	7.18692	0.579294	0.320446	2.30061	1.00458	0.0107189	0	0	0	0	0	0	0	0	0	0	0	0	0	0	0	0	0	0	0	0	0	0	0	0	0	157.267	3100.21
1775	0.004	0.053383	6.27889	0.0495328	0.258811	44.4423	7.8903	0.638279	0.347541	2.51924	1.02113	0.0107148	0	0	0	0	0	0	0	0	0	0	0	0	0	0	0	0	0	0	0	0	0	0	0	0	0	157.267	3100.21
1776	0.004	0.0587213	6.76707	0.0544612	0.277055	48.4046	8.59482	0.697329	0.374737	2.73832	1.03728	0.0107106	0	0	0	0	0	0	0	0	0	0	0	0	0	0	0	0	0	0	0	0	0	0	0	0	0	157.267	3100.21
1777	0.004	0.0640596	7.25719	0.0593899	0.295404	52.3736	9.3005	0.756445	0.402037	2.95785	1.05305	0.0107064	0	0	0	0	0	0	0	0	0	0	0	0	0	0	0	0	0	0	0	0	0	0	0	0	0	157.267	3100.21
1778	0.004	0.0693979	7.74931	0.064319	0.313863	56.3496	10.0074	0.815629	0.429446	3.17784	1.06844	0.0107022	0	0	0	0	0	0	0	0	0	0	0	0	0	0	0	0	0	0	0	0	0	0	0	0	0	157.267	3100.21
1779	0.004	0.0747361	8.24348	0.0692485	0.332434	60.3326	10.7155	0.874883	0.456966	3.39833	1.08346	0.010698	0	0	0	0	0	0	0	0	0	0	0	0	0	0	0	0	0	0	0	0	0	0	0	0	0	157.267	3100.21
1780	0.004	0.0800744	8.73977	0.0741783	0.35112	64.3229	11.425	0.93421	0.4846	3.61931	1.09813	0.0106938	0	0	0	0	0	0	0	0	0	0	0	0	0	0	0	0	0	0	0	0	0	0	0	0	0	157.267	3100.21
1781	0.005	0.0854127	9.23824	0.0791086	0.369927	68.3207	12.1357	0.993612	0.512353	3.8408	1.11547	0.0106896	0	0	0	0	0	0	0	0	0	0	0	0	0	0	0	0	0	0	0	0	0	0	0	0	0	157.267	3100.21
1782	0.005	0.090751	9.73897	0.0840392	0.388856	72.3263	12.8478	1.05309	0.540227	4.06282	1.12943	0.0106854	0	0	0	0	0	0	0	0	0	0	0	0	0	0	0	0	0	0	0	0	0	0	0	0	0	157.267	3100.21
1783	0.005	0.0960893	10.242	0.0889702	0.407913	76.34	13.5613	1.11265	0.568228	4.28539	1.14305	0.0106812	0	0	0	0	0	0	0	0	0	0	0	0	0	0	0	0	0	0	0	0	0	0	0	0	0	157.267	3100.21
1784	0.005	0.101428	10.7475	0.0939017	0.4271	80.3619	14.2763	1.17229	0.596358	4.50853	1.15634	0.0106769	0	0	0	0	0	0	0	0	0	0	0	0	0	0	0	0	0	0	0	0	0	0	0	0	0	157.267	3100.21
1785	0.005	0.106766	11.2554	0.0988336	0.446422	84.3923	14.9927	1.23201	0.624621	4.73224	1.1693	0.0106727	0	0	0	0	0	0	0	0	0	0	0	0	0	0	0	0	0	0	0	0	0	0	0	0	0	157.267	3100.21
1786	0.005	0.112104	11.7658	0.103766	0.465884	88.4315	15.7107	1.29182	0.653022	4.95655	1.18194	0.0106684	0	0	0	0	0	0	0	0	0	0	0	0	0	0	0	0	0	0	0	0	0	0	0	0	0	157.267	3100.21
1787	0.005	0.117443	12.2789	0.108699	0.485489	92.4797	16.4303	1.35173	0.681565	5.18148	1.19428	0.0106642	0	0	0	0	0	0	0	0	0	0	0	0	0	0	0	0	0	0	0	0	0	0	0	0	0	157.267	3100.21
1788	0.005	0.122781	12.7947	0.113632	0.505241	96.5372	17.1515	1.41172	0.710254	5.40705	1.20631	0.0106599	0	0	0	0	0	0	0	0	0	0	0	0	0	0	0	0	0	0	0	0	0	0	0	0	0	157.267	3100.21
1789	0.005	0.128119	13.3133	0.118566	0.525147	100.604	17.8744	1.47181	0.739094	5.63327	1.21804	0.0106556	0	0	0	0	0	0	0	0	0	0	0	0	0	0	0	0	0	0	0	0	0	0	0	0	0	157.267	3100.21
1790	0.005	0.133457	13.8347	0.1235	0.545209	104.682	18.599	1.532	0.76809	5.86016	1.22948	0.0106513	0	0	0	0	0	0	0	0	0	0	0	0	0	0	0	0	0	0	0	0	0	0	0	0	0	157.267	3100.21
1791	0.006	0.138796	14.3591	0.128435	0.565433	108.769	19.3255	1.59228	0.797246	6.08776	1.24369	0.010647	0	0	0	0	0	0	0	0	0	0	0	0	0	0	0	0	0	0	0	0	0	0	0	0	0	157.267	3100.21
1792	0.006	0.144134	14.8866	0.133371	0.585825	112.867	20.0537	1.65268	0.826567	6.31607	1.25458	0.0106427	0	0	0	0	0	0	0	0	0	0	0	0	0	0	0	0	0	0	0	0	0	0	0	0	0	157.267	3100.21
1793	0.006	0.149472	15.4172	0.138306	0.606388	116.975	20.7839	1.71318	0.856059	6.54512	1.2652	0.0106384	0	0	0	0	0	0	0	0	0	0	0	0	0	0	0	0	0	0	0	0	0	0	0	0	0	157.267	3100.21
1794	0.006	0.154811	15.9511	0.143243	0.627129	121.095	21.5161	1.77379	0.885726	6.77493	1.27556	0.010634	0	0	0	0	0	0	0	0	0	0	0	0	0	0	0	0	0	0	0	0	0	0	0	0	0	157.267	3100.21
1795	0.006	0.160149	16.4883	0.14818	0.648053	125.227	22.2503	1.83452	0.915575	7.00554	1.28567	0.0106297	0	0	0	0	0	0	0	0	0	0	0	0	0	0	0	0	0	0	0	0	0	0	0	0	0	157.267	3100.21
1796	0.006	0.165487	17.029	0.153118	0.669166	129.37	22.9865	1.89536	0.94561	7.23695	1.29554	0.0106253	0	0	0	0	0	0	0	0	0	0	0	0	0	0	0	0	0	0	0	0	0	0	0	0	0	157.267	3100.21
1797	0.007	0.170825	17.5732	0.158056	0.690473	133.526	23.7249	1.95633	0.975837	7.4692	1.30821	0.0106209	0	0	0	0	0	0	0	0	0	0	0	0	0	0	0	0	0	0	0	0	0	0	0	0	0	157.267	3100.21
1798	0.007	0.176164	18.1211	0.162995	0.711981	137.694	24.4656	2.01742	1.00626	7.70232	1.31761	0.0106165	0	0	0	0	0	0	0	0	0	0	0	0	0	0	0	0	0	0	0	0	0	0	0	0	0	157.267	3100.21
1799	0.007	0.181502	18.6728	0.167935	0.733695	141.875	25.2085	2.07864	1.03689	7.93632	1.32679	0.0106121	0	0	0	0	0	0	0	0	0	0	0	0	0	0	0	0	0	0	0	0	0	0	0	0	0	157.267	3100.21
1800	0.008	0.18684	19.2283	0.172875	0.755622	146.07	25.9538	2.13999	1.06774	8.17124	1.33879	0.0106077	0	0	0	0	0	0	0	0	0	0	0	0	0	0	0	0	0	0	0	0	0	0	0	0	0	157.267	3100.21
1801	0.008	0.192179	19.7879	0.177817	0.777769	150.279	26.7015	2.20149	1.09879	8.4071	1.34754	0.0106032	0	0	0	0	0	0	0	0	0	0	0	0	0	0	0	0	0	0	0	0	0	0	0	0	0	157.267	3100.21
1802	0.01	0.197517	20.3516	0.182758	0.800143	154.502	27.4517	2.26312	1.13008	8.64394	1.36217	0.0105988	0	0	0	0	0	0	0	0	0	0	0	0	0	0	0	0	0	0	0	0	0	0	0	0	0	157.267	3100.21
1803	0.009	0.202855	20.9196	0.187701	0.82275	158.739	28.2045	2.3249	1.16159	8.88178	1.36749	0.0105943	0	0	0	0	0	0	0	0	0	0	0	0	0	0	0	0	0	0	0	0	0	0	0	0	0	157.267	3100.21
1804	0.009	0.208194	21.492	0.192644	0.845598	162.992	28.96	2.38683	1.19334	9.12066	1.37566	0.0105898	0	0	0	0	0	0	0	0	0	0	0	0	0	0	0	0	0	0	0	0	0	0	0	0	0	157.267	3100.21
1805	0.009	0.213532	22.069	0.197589	0.868694	167.261	29.7182	2.44892	1.22534	9.3606	1.38365	0.0105853	0	0	0	0	0	0	0	0	0	0	0	0	0	0	0	0	0	0	0	0	0	0	0	0	0	157.267	3100.21
1806	0.01	0.21887	22.6506	0.202534	0.892046	171.545	30.4792	2.51116	1.25759	9.60165	1.39452	0.0105808	0	0	0	0	0	0	0	0	0	0	0	0	0	0	0	0	0	0	0	0	0	0	0	0	0	157.267	3100.21
1807	0.01	0.224208	23.2371	0.20748	0.915662	175.847	31.2432	2.57357	1.2901	9.84383	1.40217	0.0105762	0	0	0	0	0	0	0	0	0	0	0	0	0	0	0	0	0	0	0	0	0	0	0	0	0	157.267	3100.21
1808	0.01	0.229547	23.8285	0.212426	0.939549	180.165	32.0101	2.63615	1.32289	10.0872	1.40967	0.0105717	0	0	0	0	0	0	0	0	0	0	0	0	0	0	0	0	0	0	0	0	0	0	0	0	0	157.267	3100.21
1809	0.01	0.234885	24.425	0.217374	0.963717	184.501	32.7802	2.69891	1.35594	10.3317	1.41702	0.0105671	0	0	0	0	0	0	0	0	0	0	0	0	0	0	0	0	0	0	0	0	0	0	0	0	0	157.267	3100.21
1810	0.01	0.240223	25.0269	0.222323	0.988174	188.856	33.5535	2.76184	1.38929	10.5775	1.42423	0.0105625	0	0	0	0	0	0	0	0	0	0	0	0	0	0	0	0	0	0	0	0	0	0	0	0	0	157.267	3100.21
1811	0.011	0.245562	25.6341	0.227272	1.01293	193.229	34.33	2.82497	1.42293	10.8246	1.43434	0.0105578	0	0	0	0	0	0	0	0	0	0	0	0	0	0	0	0	0	0	0	0	0	0	0	0	0	157.267	3100.21
1812	0.011	0.2509	26.247	0.232223	1.03799	197.621	35.11	2.88828	1.45687	11.073	1.44129	0.0105532	0	0	0	0	0	0	0	0	0	0	0	0	0	0	0	0	0	0	0	0	0	0	0	0	0	157.267	3100.21
1813	0.011	0.256238	26.8657	0.237175	1.06337	202.034	35.8935	2.9518	1.49113	11.3228	1.44811	0.0105485	0	0	0	0	0	0	0	0	0	0	0	0	0	0	0	0	0	0	0	0	0	0	0	0	0	157.267	3100.21
1814	0.011	0.261577	27.4904	0.242127	1.08907	206.467	36.6806	3.01551	1.52571	11.5739	1.45482	0.0105438	0	0	0	0	0	0	0	0	0	0	0	0	0	0	0	0	0	0	0	0	0	0	0	0	0	157.267	3100.21
1815	0.012	0.266915	28.1212	0.247081	1.11511	210.921	37.4714	3.07944	1.56062	11.8266	1.46447	0.0105391	0	0	0	0	0	0	0	0	0	0	0	0	0	0	0	0	0	0	0	0	0	0	0	0	0	157.267	3100.21
1816	0.013	0.272253	28.7584	0.252036	1.1415	215.398	38.266	3.14359	1.59588	12.0807	1.47402	0.0105343	0	0	0	0	0	0	0	0	0	0	0	0	0	0	0	0	0	0	0	0	0	0	0	0	0	157.267	3100.21
1817	0.014	0.277591	29.4021	0.256992	1.16825	219.896	39.0646	3.20796	1.63149	12.3363	1.48348	0.0105296	0	0	0	0	0	0	0	0	0	0	0	0	0	0	0	0	0	0	0	0	0	0	0	0	0	157.267	3100.21
1818	0.014	0.28293	30.0526	0.261949	1.19536	224.418	39.8673	3.27256	1.66746	12.5935	1.48981	0.0105248	0	0	0	0	0	0	0	0	0	0	0	0	0	0	0	0	0	0	0	0	0	0	0	0	0	157.267	3100.21
1819	0.014	0.288268	30.71	0.266908	1.22286	228.964	40.6742	3.33739	1.70381	12.8524	1.49607	0.0105199	0	0	0	0	0	0	0	0	0	0	0	0	0	0	0	0	0	0	0	0	0	0	0	0	0	157.267	3100.21
1820	0.014	0.293606	31.3745	0.271868	1.25075	233.535	41.4854	3.40248	1.74055	13.1129	1.50225	0.0105151	0	0	0	0	0	0	0	0	0	0	0	0	0	0	0	0	0	0	0	0	0	0	0	0	0	157.267	3100.21
1821	0.014	0.298945	32.0465	0.276829	1.27904	238.131	42.3011	3.46781	1.77769	13.3752	1.50838	0.0105102	0	0	0	0	0	0	0	0	0	0	0	0	0	0	0	0	0	0	0	0	0	0	0	0	0	157.267	3100.21
1822	0.015	0.304283	32.7261	0.281791	1.30774	242.754	43.1214	3.53341	1.81524	13.6393	1.51749	0.0105053	0	0	0	0	0	0	0	0	0	0	0	0	0	0	0	0	0	0	0	0	0	0	0	0	0	157.267	3100.21
1823	0.016	0.309621	33.4135	0.286755	1.33688	247.404	43.9465	3.59927	1.85322	13.9052	1.52655	0.0105003	0	0	0	0	0	0	0	0	0	0	0	0	0	0	0	0	0	0	0	0	0	0	0	0	0	157.267	3100.21
1824	0.016	0.314959	34.1091	0.29172	1.36646	252.081	44.7764	3.66542	1.89163	14.1731	1.53254	0.0104954	0	0	0	0	0	0	0	0	0	0	0	0	0	0	0	0	0	0	0	0	0	0	0	0	0	157.267	3100.21
1825	0.017	0.320298	34.813	0.296687	1.39649	256.788	45.6114	3.73184	1.9305	14.4429	1.54153	0.0104904	0	0	0	0	0	0	0	0	0	0	0	0	0	0	0	0	0	0	0	0	0	0	0	0	0	157.267	3100.21
1826	0.017	0.325636	35.5254	0.301656	1.427	261.524	46.4516	3.79856	1.96983	14.7147	1.54746	0.0104853	0	0	0	0	0	0	0	0	0	0	0	0	0	0	0	0	0	0	0	0	0	0	0	0	0	157.267	3100.21
1827	0.018	0.330974	36.2468	0.306626	1.45799	266.29	47.2972	3.86559	2.00964	14.9886	1.55641	0.0104802	0	0	0	0	0	0	0	0	0	0	0	0	0	0	0	0	0	0	0	0	0	0	0	0	0	157.267	3100.21
1828	0.018	0.336313	36.9773	0.311597	1.48948	271.088	48.1483	3.93293	2.04994	15.2646	1.5623	0.0104751	0	0	0	0	0	0	0	0	0	0	0	0	0	0	0	0	0	0	0	0	0	0	0	0	0	157.267	3100.21
1829	0.018	0.341651	37.7173	0.31657	1.52149	275.919	49.0051	4.00059	2.09076	15.5429	1.5682	0.0104699	0	0	0	0	0	0	0	0	0	0	0	0	0	0	0	0	0	0	0	0	0	0	0	0	0	157.267	3100.21
1830	0.024	0.346989	38.4669	0.321545	1.55403	280.783	49.8678	4.06858	2.1321	15.8235	1.59235	0.0104648	0	0	0	0	0	0	0	0	0	0	0	0	0	0	0	0	0	0	0	0	0	0	0	0	0	157.267	3100.21
1831	0.023	0.352328	39.2266	0.326522	1.58711	285.682	50.7366	4.13692	2.17399	16.1064	1.59521	0.0104595	0	0	0	0	0	0	0	0	0	0	0	0	0	0	0	0	0	0	0	0	0	0	0	0	0	157.267	3100.21
1832	0.023	0.357666	39.9966	0.331501	1.62076	290.617	51.6116	4.2056	2.21643	16.3917	1.60114	0.0104542	0	0	0	0	0	0	0	0	0	0	0	0	0	0	0	0	0	0	0	0	0	0	0	0	0	157.267	3100.21
1833	0.024	0.363004	40.7773	0.336481	1.655	295.588	52.493	4.27466	2.25945	16.6796	1.61014	0.0104489	0	0	0	0	0	0	0	0	0	0	0	0	0	0	0	0	0	0	0	0	0	0	0	0	0	157.267	3100.21
1834	0.024	0.368342	41.5689	0.341464	1.68983	300.597	53.3811	4.34409	2.30306	16.97	1.61613	0.0104436	0	0	0	0	0	0	0	0	0	0	0	0	0	0	0	0	0	0	0	0	0	0	0	0	0	157.267	3100.21
1835	0.025	0.373681	42.3719	0.346448	1.72528	305.645	54.2761	4.4139	2.34729	17.2631	1.6252	0.0104381	0	0	0	0	0	0	0	0	0	0	0	0	0	0	0	0	0	0	0	0	0	0	0	0	0	157.267	3100.21
1836	0.029	0.379019	43.1865	0.351435	1.76137	310.733	55.1781	4.48412	2.39214	17.5589	1.64344	0.0104327	0	0	0	0	0	0	0	0	0	0	0	0	0	0	0	0	0	0	0	0	0	0	0	0	0	157.267	3100.21
1837	0.029	0.384357	44.0132	0.356423	1.79812	315.863	56.0874	4.55474	2.43765	17.8576	1.64957	0.0104272	0	0	0	0	0	0	0	0	0	0	0	0	0	0	0	0	0	0	0	0	0	0	0	0	0	157.267	3100.21
1838	0.03	0.389696	44.8522	0.361414	1.83554	321.036	57.0041	4.6258	2.48383	18.1592	1.65881	0.0104216	0	0	0	0	0	0	0	0	0	0	0	0	0	0	0	0	0	0	0	0	0	0	0	0	0	157.267	3100.21
1839	0.031	0.395034	45.7041	0.366407	1.87367	326.252	57.9287	4.69728	2.5307	18.4638	1.66811	0.010416	0	0	0	0	0	0	0	0	0	0	0	0	0	0	0	0	0	0	0	0	0	0	0	0	0	157.267	3100.21
1840	0.033	0.400372	46.5691	0.371403	1.91251	331.515	58.8612	4.76922	2.57828	18.7714	1.68054	0.0104104	0	0	0	0	0	0	0	0	0	0	0	0	0	0	0	0	0	0	0	0	0	0	0	0	0	157.267	3100.21
1841	0.034	0.405711	47.4478	0.376401	1.9521	336.824	59.8019	4.84163	2.6266	19.0823	1.69001	0.0104047	0	0	0	0	0	0	0	0	0	0	0	0	0	0	0	0	0	0	0	0	0	0	0	0	0	157.267	3100.21
1842	0.036	0.411049	48.3404	0.381401	1.99246	342.181	60.7511	4.91451	2.67568	19.3965	1.70261	0.0103989	0	0	0	0	0	0	0	0	0	0	0	0	0	0	0	0	0	0	0	0	0	0	0	0	0	157.267	3100.21
1843	0.037	0.416387	49.2475	0.386404	2.0336	347.588	61.709	4.98789	2.72554	19.7141	1.71227	0.0103931	0	0	0	0	0	0	0	0	0	0	0	0	0	0	0	0	0	0	0	0	0	0	0	0	0	157.267	3100.21
1844	0.039	0.421725	50.1694	0.39141	2.07556	353.047	62.6759	5.06177	2.7762	20.0351	1.72507	0.0103872	0	0	0	0	0	0	0	0	0	0	0	0	0	0	0	0	0	0	0	0	0	0	0	0	0	157.267	3100.21
1845	0.043	0.427064	51.1068	0.396418	2.11836	358.558	63.6522	5.13618	2.8277	20.3598	1.74408	0.0103812	0	0	0	0	0	0	0	0	0	0	0	0	0	0	0	0	0	0	0	0	0	0	0	0	0	157.267	3100.21
1846	0.043	0.432402	52.0599	0.401429	2.16202	364.125	64.638	5.21114	2.88005	20.6882	1.75104	0.0103752	0	0	0	0	0	0	0	0	0	0	0	0	0	0	0	0	0	0	0	0	0	0	0	0	0	157.267	3100.21
1847	0.046	0.43774	53.0294	0.406443	2.20657	369.747	65.6336	5.28665	2.93328	21.0205	1.76725	0.0103691	0	0	0	0	0	0	0	0	0	0	0	0	0	0	0	0	0	0	0	0	0	0	0	0	0	157.267	3100.21
1848	0.047	0.443079	54.0156	0.411461	2.25204	375.427	66.6395	5.36273	2.98742	21.3567	1.77751	0.010363	0	0	0	0	0	0	0	0	0	0	0	0	0	0	0	0	0	0	0	0	0	0	0	0	0	157.267	3100.21
1849	0.05	0.448417	55.0193	0.416481	2.29847	381.167	67.6558	5.43941	3.0425	21.6969	1.79401	0.0103568	0	0	0	0	0	0	0	0	0	0	0	0	0	0	0	0	0	0	0	0	0	0	0	0	0	157.267	3100.21
1850	0.054	0.453755	56.0408	0.421504	2.34586	386.969	68.6829	5.5167	3.09855	22.0414	1.81369	0.0103505	0	0	0	0	0	0	0	0	0	0	0	0	0	0	0	0	1.395	0	0	0	0	0	0	0	0	157.267	3100.21
1851	0.054	0.446786	56.4613	0.427401	2.40128	387.461	68.7278	5.54232	3.11874	22.1051	1.84692	0.0103509	0	0	0	0	0	0	0	0	0	0	0	0	0	0	0	0	1.447	0	0	0	0	0	0	0	0	157.267	3100.21
1852	0.057	0.498623	56.8819	0.464661	2.4567	387.952	68.7726	5.56795	3.13893	22.1687	1.99469	0.0103513	0	0	0	0	0	0	0	0	0	0	0	0	0	0	0	0	1.502	0	0	0	0	0	0	0	0	157.267	3100.21
1853	0.059	0.497354	57.3024	0.464774	2.51212	388.443	68.8174	5.59357	3.15912	22.2324	2.00081	0.0103518	0	0	0	0	0	0	0	0	0	0	0	0	0	0	0	0	1.554	0	0	0	0	0	0	0	0	157.267	3100.21
1854	0.069	0.495817	57.723	0.464436	2.56753	388.935	68.8622	5.61919	3.17931	22.296	2.0303	0.0103522	0	0	0	0	0	0	0	0	0	0	0	0	0	0	0	0	1.607	0	0	0	0	0	0	0	0	157.267	3100.21
1855	0.071	0.493679	58.1436	0.463279	2.62295	389.426	68.9071	5.64481	3.1995	22.3597	2.03251	0.0103526	0	0	0	0	0	0	0	0	0	0	0	0	0	0	0	0	1.657	0	0	0	0	0	0	0	0	157.267	3100.21
1856	0.076	0.498935	58.5641	0.467293	2.67837	389.918	68.9519	5.67043	3.21969	22.4233	2.06176	0.0103531	0	0	0	0	0	0	0	0	0	0	0	0	0	0	0	0	1.712	0	0	0	0	0	0	0	0	157.267	3100.21
1857	0.077	0.504232	58.9847	0.471264	2.73379	390.409	68.9967	5.69605	3.23988	22.487	2.07845	0.0103535	0	0	0	0	0	0	0	0	0	0	0	0	0	0	0	0	1.765	0	0	0	0	0	0	0	0	157.267	3100.21
1858	0.078	0.509233	59.4052	0.475031	2.78921	390.9	69.0416	5.72167	3.26007	22.5506	2.0943	0.0103539	0	0	0	0	0	0	0	0	0	0	0	0	0	0	0	0	1.815	0	0	0	0	0	0	0	0	157.267	3100.21
1859	0.083	0.514254	59.8258	0.478766	2.84462	391.392	69.0864	5.74729	3.28025	22.6143	2.12297	0.0103544	0	0	0	0	0	0	0	0	0	0	0	0	0	0	0	0	1.87	0	0	0	0	0	0	0	0	157.267	3100.21
1860	0.091	0.518967	60.2464	0.482577	2.90004	391.883	69.1312	5.77291	3.30044	22.6779	2.16198	0.0103548	0	0	0	0	0	0	0	0	0	0	0	0	0	0	0	0	1.923	0	0	0	0	0	0	0	0	157.267	3100.21
1861	0.095	0.528224	59.6145	0.504995	2.99268	392.896	69.269	5.81284	3.32441	22.7345	2.27359	0.010355	0	0	0	0	0	0	0	0	0	0	0	0	0	0	0	0	1.973	0	0	0	0	0	0	0	0	157.267	3100.21
1862	0.097	0.473717	58.9826	0.471113	3.08532	393.909	69.4069	5.85276	3.34838	22.7911	2.15582	0.0103551	0	0	0	0	0	0	0	0	0	0	0	0	0	0	0	0	2.028	0	0	0	0	0	0	0	0	157.267	3100.21
1863	0.104	0.473749	58.3507	0.474449	3.17795	394.922	69.5447	5.89268	3.37235	22.8478	2.19233	0.0103553	0	0	0	0	0	0	0	0	0	0	0	0	0	0	0	0	2.081	0	0	0	0	0	0	0	0	157.267	3100.21
1864	0.112	0.474138	57.7188	0.477858	3.27059	395.935	69.6826	5.9326	3.39632	22.9044	2.22994	0.0103555	0	0	0	0	0	0	0	0	0	0	0	0	0	0	0	0	2.134	0	0	0	0	0	0	0	0	157.267	3100.21
1865	0.119	0.474795	57.0869	0.48145	3.36323	396.948	69.8204	5.97253	3.42029	22.961	2.26553	0.0103556	0	0	0	0	0	0	0	0	0	0	0	0	0	0	0	0	2.184	0	0	0	0	0	0	0	0	157.267	3100.21
1866	0.122	0.474912	56.455	0.484205	3.45587	397.961	69.9582	6.01245	3.44426	23.0176	2.2872	0.0103558	0	0	0	0	0	0	0	0	0	0	0	0	0	0	0	0	2.239	0	0	0	0	0	0	0	0	157.267	3100.21
1867	0.130223	0.473384	55.8231	0.484723	3.5485	398.974	70.0961	6.05237	3.46823	23.0742	2.31876	0.010356	0	0	0	0	0	0	0	0	0	0	0	0	0	0	0	0	2.291	0	0	0	0	0	0	0	0	157.267	3100.21
1868	0.135252	0.471983	55.1912	0.485953	3.64114	399.987	70.2339	6.09229	3.4922	23.1308	2.33718	0.0103561	0	0	0	0	0	0	0	0	0	0	0	0	0	0	0	0	2.341	0	0	0	0	0	0	0	0	157.267	3100.21
1869	0.142281	0.470485	54.5593	0.486862	3.73378	401	70.3717	6.13222	3.51617	23.1875	2.36281	0.0103563	0	0	0	0	0	0	0	0	0	0	0	0	0	0	0	0	2.386	0	0	0	0	0	0	0	0	157.267	3100.21
1870	0.147311	0.469334	53.9274	0.487744	3.82642	402.013	70.5096	6.17214	3.54014	23.2441	2.38241	0.0103565	0	0	0	0	0	0	0	0	0	0	0	0	0	0	0	0	2.452	0	0	0	0	0	0	0	0	157.267	3100.21
1871	0.15634	0.487325	56.6839	0.585016	3.99317	403.032	70.6533	6.21717	3.56245	23.2838	2.86067	0.0103569	0	0	0	0	0	0	0	0	0	0	0	0	0	0	0	0	2.505	0	0	0	0	0	0	0	0	157.267	3100.21
1872	0.173369	0.566964	59.4403	0.66674	4.15992	404.051	70.7971	6.26219	3.58477	23.3236	3.24017	0.0103573	0	0	0	0	0	0	0	0	0	0	0	0	0	0	0	0	2.557	0	0	0	0	0	0	0	0	157.267	3100.21
1873	0.184398	0.576901	62.1968	0.696371	4.32667	405.071	70.9408	6.30722	3.60708	23.3634	3.40336	0.0103577	0	0	0	0	0	0	0	0	0	0	0	0	0	0	0	0	2.61	0	0	0	0	0	0	0	0	157.267	3100.21
1874	0.174428	0.583284	64.9533	0.70875	4.49342	406.09	71.0846	6.35225	3.62939	23.4031	3.42716	0.0103581	0	0	0	0	0	0	0	0	0	0	0	0	0	0	0	0	2.663	0	0	0	0	0	0	0	0	157.267	3100.21
1875	0.188457	0.58997	67.7097	0.720343	4.66018	407.109	71.2283	6.39727	3.6517	23.4429	3.51731	0.0103585	0	0	0	0	0	0	0	0	0	0	0	0	0	0	0	0	2.85	0	0	0	0	0	0	0	0	157.267	3100.21
1876	0.191486	0.596392	70.4662	0.745243	4.82693	408.128	71.3721	6.4423	3.67401	23.4827	3.63755	0.0103589	0	0	0	0	0	0	0	0	0	0	0	0	0	0	0	0	2.989	0	0	0	0	0	0	0	0	157.267	3100.21
1877	0.194515	0.602623	73.2226	0.756332	4.99368	409.147	71.5158	6.48732	3.69633	23.5224	3.69585	0.0103593	0	0	0	0	0	0	0	0	0	0	0	0	0	0	0	0	3.13	0	0	0	0	0	0	0	0	157.267	3100.21
1878	0.196	0.609051	75.9791	0.766046	5.16043	410.166	71.6596	6.53235	3.71864	23.5622	3.74565	0.0103597	0	0	0	0	0	0	0	0	0	0	0	0	0	0	0	0	3.275	0	0	0	0	0	0	0	0	157.267	3100.21
1879	0.21	0.615348	78.7356	0.774911	5.32718	411.185	71.8033	6.57738	3.74095	23.602	3.83041	0.0103602	0	0	0	0	0	0	0	0	0	0	0	0	0	0	0	0	3.396	0	0	0	0	0	0	0	0	157.267	3100.21
1880	0.236	0.621243	81.492	0.784121	5.49393	412.204	71.9471	6.6224	3.76326	23.6417	3.95202	0.0103606	0	0	0	0	0	0	0	0	0	0	0	0	0	0	0	0	3.573	0	0	0	0	0	0	0	0	157.267	3100.21
1881	0.243	0.648873	84.3595	0.811578	5.76232	413.256	72.0998	6.67595	3.79257	23.6754	4.07131	0.0103613	0	0	0	0	0	0	0	0	0	0	0	0	0	0	0	0	3.726	0	0	0	0	0	0	0	0	157.267	3100.21
1882	0.256	0.604664	87.2269	0.78526	6.03071	414.308	72.2526	6.72949	3.82188	23.7092	4.01987	0.010362	0	0	0	0	0	0	0	0	0	0	0	0	0	0	0	0	3.883	0	0	0	0	0	0	0	0	157.267	3100.21
1883	0.272	0.608518	90.0943	0.792556	6.2991	415.36	72.4053	6.78304	3.85119	23.7429	4.09853	0.0103627	0	0	0	0	0	0	0	0	0	0	0	0	0	0	0	0	4.043	0	0	0	0	0	0	0	0	157.267	3100.21
1884	0.275	0.612128	92.9618	0.798751	6.56748	416.412	72.5581	6.83658	3.8805	23.7766	4.13334	0.0103634	0	0	0	0	0	0	0	0	0	0	0	0	0	0	0	0	4.233	0	0	0	0	0	0	0	0	157.267	3100.21
1885	0.277	0.615236	95.8292	0.804534	6.83587	417.464	72.7108	6.89012	3.90981	23.8103	4.16461	0.0103642	0	0	0	0	0	0	0	0	0	0	0	0	0	0	0	0	4.427	0	0	0	0	0	0	0	0	157.267	3100.21
1886	0.281	0.617144	98.6966	0.826194	7.10426	418.517	72.8636	6.94367	3.93912	23.844	4.27589	0.0103649	0	0	0	0	0	0	0	0	0	0	0	0	0	0	0	0	4.625	0	0	0	0	0	0	0	0	157.267	3100.21
1887	0.295	0.616163	101.564	0.832196	7.37264	419.569	73.0163	6.99721	3.96843	23.8777	4.35318	0.0103656	0	0	0	0	0	0	0	0	0	0	0	0	0	0	0	0	4.827	0	0	0	0	0	0	0	0	157.267	3100.21
1888	0.327	0.614734	104.431	0.837058	7.64103	420.621	73.169	7.05076	3.99774	23.9115	4.47487	0.0103663	0	0	0	0	0	0	0	0	0	0	0	0	0	0	0	0	5.033	0	0	0	0	0	0	0	0	157.267	3100.21
1889	0.327	0.6132	107.299	0.84144	7.90942	421.673	73.3218	7.1043	4.02704	23.9452	4.49842	0.010367	0	0	0	0	0	0	0	0	0	0	0	0	0	0	0	0	5.27	0	0	0	0	0	0	0	0	157.267	3100.21
1890	0.356	0.611754	110.166	0.845525	8.1778	422.725	73.4745	7.15784	4.05635	23.9789	4.6037	0.0103678	0	0	0	0	0	0	0	0	0	0	0	0	0	0	0	0	5.485	0	0	0	0	0	0	0	0	157.267	3100.21
1891	0.372	0.610249	111.524	0.850982	8.56737	424.293	73.7003	7.23586	4.08828	24.0114	4.68307	0.0103687	0	0	0	0	0	0	0	0	0	0	0	0	0	0	0	0	5.731	0	0	0	0	0	0	0	0	157.267	3100.21
1892	0.374	0.623191	112.881	0.85742	8.95694	425.861	73.9261	7.31388	4.12022	24.0439	4.75516	0.0103697	0	0	0	0	0	0	0	0	0	0	0	0	0	0	0	0	6.01	0	0	0	0	0	0	0	0	157.267	3100.21
1893	0.37	0.624403	114.238	0.864758	9.34651	427.429	74.152	7.3919	4.15215	24.0763	4.82174	0.0103706	0	0	0	0	0	0	0	0	0	0	0	0	0	0	0	0	6.267	0	0	0	0	0	0	0	0	157.267	3100.21
1894	0.383	0.640367	115.595	0.872945	9.73608	428.997	74.3778	7.46992	4.18408	24.1088	4.88457	0.0103716	0	0	0	0	0	0	0	0	0	0	0	0	0	0	0	0	6.529	0	0	0	0	0	0	0	0	157.267	3100.21
1895	0.406	0.644419	116.953	0.881882	10.1256	430.565	74.6036	7.54794	4.21601	24.1413	4.94542	0.0103726	0	0	0	0	0	0	0	0	0	0	0	0	0	0	0	0	6.824	0	0	0	0	0	0	0	0	157.267	3100.21
1896	0.419	0.646278	118.31	0.891418	10.5152	432.133	74.8294	7.62596	4.24794	24.1738	5.00605	0.0103735	0	0	0	0	0	0	0	0	0	0	0	0	0	0	0	0	7.151	0	0	0	0	0	0	0	0	157.267	3100.21
1897	0.44	0.649564	119.667	0.901402	10.9048	433.701	75.0552	7.70398	4.27987	24.2063	5.06823	0.0103745	0	0	0	0	0	0	0	0	0	0	0	0	0	0	0	0	7.432	0	0	0	0	0	0	0	0	157.267	3100.21
1898	0.465	0.651001	121.025	0.911681	11.2943	435.269	75.281	7.782	4.3118	24.2387	5.13374	0.0103754	0	0	0	0	0	0	0	0	0	0	0	0	0	0	0	0	7.798	0	0	0	0	0	0	0	0	157.267	3100.21
1899	0.507	0.652204	122.382	0.922105	11.6839	436.837	75.5068	7.86002	4.34373	24.2712	5.20432	0.0103764	0.959119	0	0	0	0	0	0	0	0	0	0	0	0	0	0	0	8.119	0	0	0	0	0	0	0	0	157.267	3100.21
1900	0.534	0.653206	123.739	0.932522	12.0735	438.405	75.7326	7.93804	4.37566	24.3037	5.28176	0.0103773	0.0505758	0	0	0	0	0	0	0	0	0	0	0	0	0	0	0	8.473	0	0	0	0	0	0	0	0	157.267	3100.21
1901	0.552	0.702943	124.841	0.944667	12.6299	439.892	75.9205	8.04414	4.41738	24.3365	5.36856	0.0103797	0.0532377	0	0	0	0	0	0	0	0	0	0	0	0	0	0	0	8.592	0	0	0	0	0	0	0	0	157.267	3100.21
1902	0.566	0.702974	125.944	0.959931	13.1863	441.378	76.1084	8.15023	4.45911	24.3693	5.46467	0.0103821	0.0560397	0	0	0	0	0	0	0	0	0	0	0	0	0	0	0	8.762	0	0	0	0	0	0	0	0	157.267	3100.21
1903	0.617	0.726671	127.046	0.977647	13.7427	442.865	76.2962	8.25633	4.50083	24.4021	5.56792	0.0103845	0.0589892	0	0	0	0	0	0	0	0	0	0	0	0	0	0	0	8.906	0	0	0	0	0	0	0	0	157.267	3100.21
1904	0.624	0.748293	128.149	0.997229	14.2991	444.351	76.4841	8.36242	4.54255	24.4349	5.6762	0.0103868	0.0620939	0	0	0	0	0	0	0	0	0	0	0	0	0	0	0	9.102	0	0	0	0	0	0	0	0	157.267	3100.21
1905	0.663	0.769815	129.251	1.01813	14.8555	445.838	76.672	8.46851	4.58427	24.4677	5.78736	0.0103892	0.065362	0	0	0	0	0	0	0	0	0	0	0	0	0	0	0	9.623	0	0	0	0	0	0	0	0	157.267	3100.21
1906	0.707	0.796534	130.354	1.03974	15.4119	447.324	76.8598	8.57461	4.62599	24.5005	5.89926	0.0103916	0.0688021	0	0	0	0	0	0	0	0	0	0	0	0	0	0	0	12.093	0	0	0	0	0	0	0	0	157.267	3100.21
1907	0.784	0.803763	131.456	1.06146	15.9683	448.811	77.0477	8.6807	4.66771	24.5333	6.00977	0.010394	0.0724232	0	0	0	0	0	0	0	0	0	0	0	0	0	0	0	12.363	0	0	0	0	0	0	0	0	157.267	3100.21
1908	0.75	0.811413	132.559	1.08267	16.5247	450.297	77.2356	8.78679	4.70944	24.5661	6.11675	0.0103964	0.076235	0	0	0	0	0	0	0	0	0	0	0	0	0	0	0	12.633	0	0	0	0	0	0	0	0	157.267	3100.21
1909	0.785	0.817378	133.661	1.10278	17.081	451.784	77.4235	8.89289	4.75116	24.5989	6.21805	0.0103987	0.0802474	0	0	0	0	0	0	0	0	0	0	0	0	0	0	0	12.903	0	0	0	0	0	0	0	0	157.267	3100.21
1910	0.819	0.821982	134.764	1.12118	17.6374	453.27	77.6113	8.99898	4.79288	24.6317	6.31156	0.0104011	0.0844709	0	0	0	0	0	0	0	0	0	0	0	0	0	0	0	13.146	0	0	0	0	0	0	0	0	157.267	3100.21
1911	0.836	0.778894	135.969	1.13897	17.8214	451.76	77.2727	9.05696	4.79495	24.4275	6.39756	0.0104064	0.0889167	0	0	0	0	0	0	0	0	0	0	0	0	0	0	0	14.007	0	0	0	0	0	0	0	0	157.267	3100.21
1912	0.879	0.747848	137.175	1.15756	18.0054	450.249	76.9341	9.11494	4.79702	24.2232	6.47866	0.0104117	0.0935966	0	0	0	0	0	0	0	0	0	0	0	0	0	0	0	19.895	0	0	0	0	0	0	0	0	157.267	3100.21
1913	0.943	0.72298	138.381	1.17675	18.1894	448.739	76.5955	9.17292	4.7991	24.0189	6.55615	0.010417	0.0985227	0	0	0	0	0	0	0	0	0	0	0	0	0	0	0	19.025	0	0	0	0	0	0	0	0	157.267	3100.21
1914	0.85	0.714792	139.587	1.19626	18.3734	447.228	76.2569	9.23089	4.80117	23.8146	6.63132	0.0104222	0.103708	0	0	0	0	0	0	0	0	0	0	0	0	0	0	0	11.082	0	0	0	0	0	0	0	0	157.267	3100.21
1915	0.838	0.70575	140.793	1.21584	18.5574	445.718	75.9183	9.28887	4.80324	23.6104	6.70546	0.0104275	0.109166	0	0	0	0	0	0	0	0	0	0	0	0	0	0	0	11.216	0	0	0	0	0	0	0	0	157.267	3100.21
1916	0.901	0.708116	141.999	1.23532	18.7413	444.208	75.5796	9.34685	4.80532	23.4061	6.77987	0.0104328	0.114912	0	0	0	0	0	0	0	0	0	0	0	0	0	0	0	18.614	0	0	0	0	0	0	0	0	157.267	3100.21
1917	0.955	0.711196	143.204	1.25452	18.9253	442.697	75.241	9.40483	4.80739	23.2018	6.85582	0.0104381	0.12096	0	0	0	0	0	0	0	0	0	0	0	0	0	0	0	22.143	0	0	0	0	0	0	0	0	157.267	3100.21
1918	0.936	0.714304	144.41	1.27326	19.1093	441.187	74.9024	9.46281	4.80946	22.9976	6.93462	0.0104434	0.127326	0	0	0	0	0	0	0	0	0	0	0	0	0	0	0	22.696	0	0	0	0	0	0	0	0	157.267	3100.21
1919	0.806	0.719654	145.616	1.29138	19.2933	439.676	74.5638	9.52079	4.81153	22.7933	7.01756	0.0104487	0.134028	0	0	0	0	0	0	0	0	0	0	0	0	0	0	0	23.196	0	0	0	0	0	0	0	0	157.267	3100.21
1920	0.932	0.721283	146.822	1.30869	19.4773	438.166	74.2252	9.57877	4.81361	22.589	7.10592	0.010454	0.141082	0	0	0	0	0	0	0	0	0	0	0	0	0	0	0	23.802	0	0	0	0	0	0	0	0	157.267	3100.21
1921	0.803	0.757417	147.862	1.32579	19.8639	440.996	74.6803	9.6457	4.79871	22.6052	7.20195	0.0104523	0.148507	0	0	0	0	0	0	0	0	0	0	0	0	0	0	0	24.304	0	0	0	0	0	0	0	0	157.267	3100.21
1922	0.845	0.747941	148.901	1.34327	20.2505	443.825	75.1354	9.71264	4.78382	22.6215	7.30583	0.98418	0.156323	0	0	0	0	0	0	0	0	0	0	0	0	0	0	0	24.563	0	0	0	0	0	0	0	0	157.267	3100.21
1923	0.97	0.753288	149.941	1.36094	20.6371	446.655	75.5905	9.77958	4.76893	22.6377	7.41577	1.16488	0.164551	0	0	0	0	0	0	0	0	0	0	0	0	0	0	0	25.35	0	0	0	0	0	0	0	0	157.267	3100.21
1924	0.963	0.756861	150.981	1.37962	21.0237	449.484	76.0456	9.84651	4.75404	22.6539	7.52998	1.22567	0.173211	0	0	0	0	0	0	0	0	0	0	0	0	0	0	0	25.878	0	0	0	0	0	0	0	0	157.267	3100.21
1925	0.975	0.758089	152.02	1.3999	21.4104	452.314	76.5007	9.91345	4.73914	22.6701	7.64667	1.28964	0.182328	0	0	0	0	0	0	0	0	0	0	0	0	0	0	0	28.827	0	0	0	0	0	0	0	0	157.267	3100.21
1926	0.983	0.761483	153.06	1.42119	21.797	455.143	76.9558	9.98039	4.72425	22.6863	7.76406	1.35699	0.191924	0	0	0	0	0	0	0	0	0	0	0	0	0	0	0	29.446	0	0	0	0	0	0	0	0	157.267	3100.21
1927	1.062	0.797183	154.1	1.44292	22.1836	457.973	77.4109	10.0473	4.70936	22.7026	7.88034	1.42788	0.202025	0	0	0	0	0	0	0	0	0	0	0	0	0	0	0	30.065	0	0	0	0	0	0	0	0	157.267	3100.21
1928	1.065	0.799671	155.14	1.4645	22.5702	460.803	77.866	10.1143	4.69447	22.7188	7.99374	1.5025	0.212658	0	0	0	0	0	0	0	0	0	0	0	0	0	0	0	30.685	0	0	0	0	0	0	0	0	157.267	3100.21
1929	1.145	0.824226	156.179	1.48535	22.9569	463.632	78.3211	10.1812	4.67957	22.735	8.10245	1.58105	0.223851	0	0	0	0	0	0	0	0	0	0	0	0	0	0	0	31.573	0	0	0	0	0	0	0	0	157.267	3100.21
1930	1.053	0.89588	157.219	1.50489	23.3435	466.462	78.7762	10.2481	4.66468	22.7512	8.2047	1.66374	0.235632	0	0.74682	0	0	0	0	0	0	0	0	0	0	0	0	0	31.933	0	0	0	0	0	0	0	0	157.267	3100.21
1931	0.94	0.903341	158.345	1.52262	23.755	468.031	78.9094	10.3025	4.6671	22.7486	8.29855	1.75078	0.248034	0	0.0676905	0	0	0	0	0	0	0	0	0	0.097	0	0	0	32.553	0	0	0	0	0	0	0	0	157.267	3100.21
1932	0.847	0.812226	159.472	1.53852	24.1664	469.6	79.0427	10.3568	4.66951	22.7459	8.38498	1.8424	0.261089	0	0.0735767	0	0	0	0	0	0	0	0	0	0.097	0	0	0	33.979	0	0	0	0	0	0	0	0	157.267	3100.21
1933	0.893	0.808588	160.598	1.55267	24.5779	471.169	79.176	10.4111	4.67193	22.7433	8.46663	1.93884	0.27483	0	0.0799748	0	0	0	0	0	0	0	0	0	0.097	0	0	0	41.893	0	0	0	0	0	0	0	0	157.267	3100.21
1934	0.973	0.796863	161.725	1.56531	24.9894	472.738	79.3092	10.4655	4.67434	22.7407	8.54609	2.04035	0.289295	0	0.0869292	0	0	0	0	0	0	0	0	0	0.194	0	0.117	0	42.817	0	0	0	0	0	0	0	0	157.267	3100.21
1935	1.027	0.794716	162.851	1.57712	25.4009	474.307	79.4425	10.5198	4.67676	22.738	8.62599	2.14721	0.304521	0	0.0944883	0	0	0	0	0	0	0	0	0	0.291	0	0.117	0	43.74	0	0	0	0	0	0	0	0	157.267	3100.21
1936	1.13	0.8013	163.977	1.58892	25.8123	475.876	79.5758	10.5741	4.67917	22.7354	8.70894	2.2597	0.320548	0	0.102705	0	0	0	0	0	0	0	0	0	0.485	0	0.117	0	44.664	0	0	0	0	0	0	0	0	157.267	3100.21
1937	1.209	0.779699	165.104	1.60151	26.2238	477.445	79.709	10.6285	4.68159	22.7327	8.79755	2.3781	0.337419	0	0.111636	0	0	0	0	0	0	0	0	0	0.776	0	0.234	0	45.588	0	0	0	0	0	0	0	0	157.267	3100.21
1938	1.142	0.781882	166.23	1.61572	26.6353	479.014	79.8423	10.6828	4.684	22.7301	8.89443	2.50274	0.355178	0	0.121343	0	0	0	0	0	0	0	0	0.161	1.164	0	0.234	0	46.512	0	0.165	0	0	0	0	0	0	157.267	3100.21
1939	1.192	0.779444	167.357	1.63235	27.0468	480.583	79.9756	10.7371	4.68642	22.7274	9.00221	2.63393	0.373872	0	0.131895	0	0	0	0	0	0	0	0	0.161	1.649	0	0.351	0	47.436	0	0.33	0	0	0	0	0	0	157.267	3100.21
1940	1.299	0.766832	168.483	1.65224	27.4583	482.152	80.1088	10.7914	4.68883	22.7248	9.12349	2.77203	0.393549	0	0.143364	0	0	0	0	0	0	0	0	0.161	2.231	0	0.468	0	50.781	0	0.496	0	0	0	0	0	0	157.267	3100.21
1941	1.334	0.750365	170.03	1.7002	27.8404	488.558	81.2433	11.1234	4.69324	22.6876	9.26539	2.91741	0.414262	0	0.155833	0	0	0	0	0	0	0	0	0.161	2.91	0	0.585	0	52.603	0	0.661	0	0	0	0	0	0	157.267	3100.21
1942	1.342	0.76905	171.578	1.79386	28.2226	494.963	82.3778	11.4554	4.69766	22.6505	9.43212	3.07043	0.394683	0	0.169386	0	0	0	0	0	0	0	0	0.161	3.589	0	0.819	0	53.918	0	0.826	0	0	0	0	0	0	157.267	3100.21
1943	1.391	0.763766	173.126	1.92316	28.6048	501.369	83.5123	11.7873	4.70207	22.6133	9.62193	3.23151	0.378322	0	0.184119	0	0	0	0	0	0	0	0	0.322	4.365	0	1.17	0	54.705	0	0.991	0	0	0	0	0	0	157.267	3100.21
1944	1.383	0.768399	174.673	2.08668	28.987	507.774	84.6468	12.1193	4.70648	22.5762	9.83308	3.40106	0.364076	0	0.200132	0	0	0	0	0	0	0	0	0.322	5.917	0	1.521	0	55.75	0	1.157	0	0	0	0	0	0	157.267	3100.21
1945	1.16	0.769147	176.221	2.2804	29.3692	514.18	85.7813	12.4513	4.71089	22.539	10.0638	3.57954	0.351947	0	0.217538	0	0	0	0	0	0	0	0	0.483	7.76	1.868	3.861	0	56.796	0	1.322	0	0	0	0	0	0	157.267	3100.21
1946	1.238	0.842149	177.768	2.49036	29.7513	520.585	86.9158	12.7832	4.71531	22.5019	10.3124	3.76742	0.341933	0	0.236458	0	0	0	0	0	0	0	0	0.966	13.483	4.203	6.318	0	59.187	0	1.487	0	0	0	0	0	0	157.267	3100.21
1947	1.392	0.87018	179.316	2.7026	30.1335	526.991	88.0503	13.1152	4.71972	22.4647	10.577	3.96518	0.334036	0	0.257024	0	0	0	0	0	0	0	0	2.093	20.661	5.137	6.903	0	67.278	0	1.652	0	0	0	0	0	0	157.267	3100.21
1948	1.469	0.87513	180.863	2.90316	30.5157	533.396	89.1848	13.4472	4.72413	22.4276	10.8561	4.17335	0.328255	0	0.279378	0	0	0	0	0	0	0	0	3.703	24.056	6.071	7.254	0	68.369	0	1.817	0	0	0	0	0	0	157.267	3100.21
1949	1.419	0.882126	182.411	3.07807	30.8979	539.802	90.3193	13.7791	4.72855	22.3904	11.1477	4.39247	0.32459	0	0.303676	0	0	0	0	0	0	0	0	6.118	25.802	6.538	7.722	0	74.34	0	1.983	0	0	0	0	0	0	157.267	3100.21
1950	1.63	0.892335	183.959	3.21338	31.28	546.207	91.4538	14.1111	4.73296	22.3532	11.4501	4.62313	0.323043	0	0.330088	0	0	0	0	0	0	0	0.261908	8.855	28.615	7.939	8.073	0	65	0	2.148	0	0	0	0	0	0	157.267	3100.21
1951	1.768	1.08852	189.11	3.3186	32.8669	558.446	94.8484	14.5285	4.77333	22.5413	11.7846	4.86592	0.323612	0	0.358782	0	0	0	0	0	0	0	0.26199	8.158	33.854	1.889	7.102	0	65	0	2.313	0	0	0	0	0	0	157.267	3100.21
1952	1.796	1.10964	194.262	3.41111	34.4538	570.685	98.2429	14.9459	4.8137	22.7293	12.1691	5.12148	0.326299	0	0.389971	0	0	0	0	0	0	0	0.262072	11.742	35.2	2.139	7.288	0	70	0	2.478	0	0	0	0	0	0	157.927	3117.78
1953	1.841	1.10452	199.413	3.48872	36.0407	582.924	101.638	15.3633	4.85407	22.9174	12.5966	5.3905	0.331104	0	0.42387	0	0	0	0	0	0	0	0.262153	15.985	39.582	2.437	7.43	0	75	0	2.644	0	0	0	0	0	0	158.604	3137.15
1954	1.865	1.15214	204.565	3.55435	37.6277	595.163	105.032	15.7807	4.89444	23.1054	13.0603	5.67367	0.338026	0	0.460717	0	0	0	0	0	0	0	0.262235	19.855	44.802	2.785	7.431	0	80	1.214	2.809	0	0	0	0	0	0	159.3	3158.22
1955	2.043	1.19119	209.716	3.61411	39.2146	607.401	108.427	16.1981	4.93481	23.2935	13.5532	5.97175	0.347066	0	0.500767	0	0	0	0	0	0	0	0.262317	24.604	50.343	3.233	7.388	0	85	3.512	2.974	0	0	0	0	0	0	160.014	3180.75
1956	2.178	1.24469	214.868	3.67068	40.8015	619.64	111.821	16.6154	4.97518	23.4815	14.0685	6.28552	0.358224	0	0.544298	0	0	0	0	0	0	0	0.262399	30.685	58.664	3.73	7.302	0	90	6.224	3.48	0	0	0	0	0	0	160.748	3204.5
1957	2.27	1.27187	220.019	3.72673	42.3884	631.879	115.216	17.0328	5.01555	23.6696	14.5993	6.6158	0.3715	0	0.591613	0	0	0	0	0	0	0	0.262481	34.375	66.689	4.227	7.25	0	95	9.469	4.251	0	0	0	0	0	0	161.502	3229.07
1958	2.33	1.31958	225.171	3.78495	43.9753	644.118	118.61	17.4502	5.05592	23.8576	15.1387	6.96346	0.386895	0	0.643041	0	0	0	0	0	0	0	0.262563	32.235	69.93	4.824	7.221	0	100	10.772	6.008	0	0	0	0	0	0	162.277	3254.04
1959	2.462	1.2036	230.322	3.848	45.5622	656.357	122.005	17.8676	5.09629	24.0457	15.6798	7.32943	0.404409	0	0.69894	0	0	0	0	0	0	0	0.262644	33.015	78.149	5.57	7.176	0	105	14.717	7.06	0	0	0	0	0	0	163.073	3278.97
1960	2.577	1.19228	235.474	3.91858	47.1491	668.596	125.4	18.285	5.13665	24.2337	16.2157	7.71465	0.424041	0	0.759698	0	0	0	0	0	0	0	0.524634	43.342	93.09	6.366	6.6	0	110	18.348	7.659	0	0	0	0	0	0	163.892	3303.39
1961	2.594	1.24432	238.522	4.02401	48.7708	682.676	129.241	18.9591	5.1796	24.5022	16.7593	8.12016	0.445793	0	0.825763	0	0	0	0	0	0	0	0.524798	55.722	104.6	7.212	6.88	0	115	20.077	9.426	0	0	0	0	0	0	164.735	3326.86
1962	2.7	1.23557	241.571	4.18365	50.3925	696.756	133.083	19.6333	5.22254	24.7707	17.326	8.54701	0.469664	0	0.897574	0	0	0	0	0	0	0	0.786869	69.881	120.668	8.248	7.168	0	119	28.22	11.573	0	0	0	0	0	0	165.601	3349.07
1963	2.848	1.24429	244.619	4.38831	52.0142	710.836	136.925	20.3074	5.26549	25.0392	17.9133	14.985	0.495655	0	0.97563	0	0	0	0	0	0	0	0.525207	85.539	141.744	9.476	7.421	0	123	31.46	14.396	0	0	0.005	0.001	0.001	0.007	166.493	3369.71
1964	3.008	1.25159	247.668	4.63747	53.6359	724.916	140.766	20.9815	5.30843	25.3077	18.5183	13.4881	0.523766	0	1.06047	0	0	0	0	0	0	0	0.525371	101.538	164.921	10.853	7.692	0.225	127	36.197	16.782	0	0	0.014	0.002	0.003	0.014	167.41	3388.63
1965	3.145	1.26426	250.717	4.89682	55.2576	738.995	144.608	21.6557	5.35138	25.5762	19.1382	13.4884	0.553997	0	1.1527	0	0	0	0	0	0	0	0.525534	115.75	185.933	12.426	7.975	0.444	127	48.096	20.514	0	0	0.032	0.005	0.005	0.028	168.355	3405.7
1966	3.305	1.2937	253.765	5.19558	56.8793	753.075	148.45	22.3298	5.39432	25.8447	19.7704	13.4886	0.586348	0	1.25294	0	0	0	0	0	0	0	0.525698	129.623	208.571	14.246	8.305	0.633	127	69.567	24.512	0	0	0.058	0.008	0.008	0.048	169.328	3420.92
1967	3.411	1.29763	256.814	5.45748	58.501	767.155	152.292	23.0039	5.43727	26.1132	20.412	13.4889	0.620819	0	1.3619	0	0	0	0	0	0	0	1.04968	147.119	235.269	16.313	8.623	0.825	127	94.137	29.817	0	0	0.1	0.013	0.013	0.075	170.329	3434.34
1968	3.588	1.2352	259.863	5.61974	60.1227	781.235	156.133	23.6781	5.48021	26.3817	21.0604	13.4892	0.657411	0	1.48033	0	0	0	0	0	0	0	0.526189	167.586	263.953	18.678	8.974	1.043	127	114.767	36.216	0	0	0.158	0.019	0.016	0.109	171.36	3446.07
1969	3.8	1.23839	262.911	5.78483	61.7444	795.315	159.975	24.3522	5.52316	26.6502	21.7128	13.4894	0.696124	0	1.60907	0	0	0	0	0	0	0	0.788261	194.513	294.486	21.388	9.344	1.283	127	134.875	39.381	0	0	0.229	0.026	0.024	0.15	172.423	3456.22
1970	4.076	1.19711	265.96	5.93688	63.3661	809.395	163.817	25.0263	5.5661	26.9187	22.3665	11.9926	0.736958	0	1.74899	0	0	0.0554463	0	0.356404	0	0	0.788506	221.119	321.743	24.494	9.687	1.537	127	141.326	43.652	0	0	0.329	0.035	0.043	0.197	173.518	3464.95
1971	4.231	1.07089	270.025	5.60498	63.5459	825.183	167.161	25.8097	5.70387	27.2218	23.0425	13.49	0.779913	0	1.90113	0	0	0.0573185	0	0.363166	0	0	1.05066	243.137	346.609	28.094	10.052	1.803	127	170.133	47.746	0	0.613	0.461	0.044	0.1	0.252	174.646	3472.41
1972	4.399	1.04706	274.09	5.91813	63.7256	840.97	170.506	26.593	5.84164	27.5248	23.7556	13.4902	0.82499	0	2.06649	0	0	0.0591929	0	0.369936	0	0	0.789079	274.26	378.471	32.236	10.471	2.127	127	214.168	54.79	0	0.613	0.63	0.055	0.17	0.313	175.809	3478.74
1973	4.635	1.0331	278.155	6.0449	63.9053	856.758	173.851	27.3763	5.97941	27.8279	24.4941	13.4905	0.872189	0	2.24624	0	0	0.0610694	0	0.376713	0	0	1.05123	314.04	419.239	36.92	10.883	2.495	127	266.209	61.912	0	0.613	0.839	0.067	0.277	0.391	177.007	3484.11
1974	4.644	1.03874	282.22	5.9406	64.0851	872.546	177.195	28.1597	6.11718	28.1309	25.2459	11.9936	0.921509	0	2.44163	0	0	0.0629482	0	0.383499	0	0	1.05156	345.881	454.701	42.295	11.29	2.921	127	305.489	62.543	0	0.613	1.086	0.08	0.372	0.468	178.243	3488.63
1975	4.615	1.03159	286.285	6.14097	64.2648	888.333	180.54	28.943	6.25495	28.434	25.9992	13.491	0.972952	0	2.65401	0	0	0.0648291	0	0.390292	0	0	1.05189	335.741	442.834	48.505	11.734	3.391	127	308.992	70.487	0	0.613	1.365	0.095	0.524	0.544	179.517	3492.43
1976	4.883	1.09061	290.35	6.30426	64.4445	904.121	183.885	29.7263	6.39272	28.7371	26.742	13.4913	1.02652	0	2.88486	0	0	0.0667121	0	0.397093	0	0	1.57603	343.24	432.28	55.552	12.2	3.943	127	382.3	78.51	0	0.613	1.767	0.11	0.783	0.621	180.83	3495.62
1977	5.029	1.09399	294.415	6.5344	64.6243	919.908	187.229	30.5097	6.53049	29.0401	27.4625	11.9945	1.0822	0	3.56608	0	0	0.0685974	0	0.403902	0	0	1.83843	330.711	419.447	63.634	12.68	4.582	127	462.112	85.789	0	0.613	2.035	0.127	1.006	0.697	182.185	3498.28
1978	5.105	1.09037	298.48	6.61937	64.804	935.696	190.574	31.293	6.66826	29.3432	28.1487	13.4919	1.14001	0	3.7964	0	0	0.0704848	0	0.0542996	0	0	2.36282	359.009	424.498	72.896	13.168	5.337	127	587.319	92.012	0	0.613	2.454	0.145	1.253	0.774	183.581	3500.51
1979	5.387	1.06471	302.545	7.00777	64.9837	951.483	193.919	32.0763	6.80603	29.6462	28.7887	11.995	1.19995	0	4.02754	0	0	0.0723744	0	0.0543309	0	0	2.88737	274.357	357.266	83.489	13.661	6.228	127	489.712	99.321	0	0.613	2.928	0.161	1.548	0.85	185.022	3502.36
1980	5.332	1.02521	306.61	7.06139	65.1634	967.271	197.263	32.8597	6.9438	29.9493	29.3705	13.4924	1.262	0	4.2595	0	0	0.0188144	0	0.767209	0	0	3.15018	304.998	432.044	95.641	14.194	7.006	121.849	550.707	104.973	0	0.613	3.453	0.185	1.805	0.927	186.506	3503.91
1981	5.168	1.04486	310.013	6.84175	65.0439	980.445	199.799	33.3572	7.021	30.4563	29.9319	11.9955	1.32618	0	4.49216	0	0	0.0662884	0	0.780793	0	0	3.41307	289.529	386.347	104.421	14.121	7.743	110.093	505.097	106.406	0	1.25	3.946	0.206	2.139	1.003	188.038	3505.19
1982	5.127	1.19041	313.415	7.11899	64.9243	993.619	202.334	33.8548	7.09821	30.9634	30.5084	13.4929	1.39249	0	4.72561	0	0	0.0735941	0	0.0815283	0	0	3.67604	252.419	400.317	108.943	13.905	8.399	123.807	505.343	116.821	0	0.961	4.522	0.229	2.645	1.105	189.616	3506.26
1983	5.11	1.22552	316.817	7.2169	64.8048	1006.79	204.87	34.3524	7.17542	31.4705	31.0856	11.996	1.46092	0	4.95987	0	0	0.0734967	0	0.794366	0	0	3.93909	299.092	408.416	120.93	14.252	9.207	135.729	553.718	125.343	0	1.165	5.168	0.249	2.98	1.183	191.243	3507.15
1984	5.29	1.26008	320.22	7.04813	64.6852	1019.97	207.406	34.85	7.25262	31.9775	31.6489	11.9962	1.53147	0	5.19493	0	0	0.0182631	0	0.807943	0	0	3.94032	310.901	432.125	177.397	14.781	9.71	134.867	569.476	130.447	0	1.331	6.032	0.269	3.475	1.262	192.92	3507.88
1985	5.444	1.27534	323.623	7.01692	64.5656	1033.14	209.941	35.3475	7.32983	32.4846	32.1839	11.9965	1.60414	0	5.43079	0	0	-0.0806812	0	0.108674	0	0	4.72727	315.327	407.669	128.622	15.705	9.792	109.714	546.714	138.367	0	1.011	7.083	0.289	3.997	1.355	194.648	3508.5
1986	5.61	1.2872	327.025	7.07049	64.4461	1046.31	212.477	35.8451	7.40703	32.9917	32.6758	13.4939	1.67894	0	5.66746	0	0	0.075292	0	0.821507	0	0	4.99065	388.346	502.712	169.103	16.379	10.152	149.931	539.076	146.048	0	3.575	8.22	0.309	4.579	1.434	196.427	3509
1987	5.753	1.29401	330.427	7.46167	64.3265	1059.49	215.012	36.3427	7.48424	33.4988	33.1102	11.997	1.75587	0	5.90492	0	0	0.177805	0	1.54792	0	0	4.7303	387.277	453.238	250.222	16.667	10.807	115.608	647.608	162.883	0	3.773	9.656	0.329	5.109	1.504	198.259	3509.43
1988	5.964	1.31672	333.83	7.20251	64.207	1072.66	217.548	36.8403	7.56145	34.0058	33.4725	11.9972	1.83492	0	6.14318	0	0	0.181183	0	0.862227	0	0	4.99368	303.816	507.99	245.07	16.593	11.493	135.667	635.816	180.113	0	4.458	11.362	0.349	5.696	1.728	200.146	3509.77
1989	6.089	1.32364	337.232	7.33104	64.0874	1085.84	220.083	37.3378	7.63865	34.5129	33.7481	11.9975	1.91609	0	6.38225	0	0	0.188294	0.945058	0.875792	0	0	5.51905	301.477	385.52	204.109	15.725	12.26	118.146	564.767	186.15	0	6.174	11.605	0.369	5.482	1.73	202.087	3510.06
1990	6.144	1.31948	340.635	7.58568	63.9678	1099.01	222.619	37.8354	7.71586	35.02	33.9226	11.9977	2.07357	0	6.62182	0	0	0.185942	1.01015	0.88921	0	0	5.52077	291.464	405.617	203.131	14.022	12.363	143.171	694.142	195.69	0	11.322	11.702	0.389	5.119	1.73	204.082	3510.3
1991	6.235	1.38098	336.592	7.40236	62.9552	1095.91	221.419	37.8681	7.72475	35.0723	34.026	11.9979	2.37291	0	6.86218	0	0	0.190921	2.17764	0.902612	0.00471002	0	5.7844	190.405	309.884	198.928	13.243	12.135	70.607	573.576	204.801	0	16.556	11.426	0.409	4.094	1.735	206.133	3510.5
1992	6.118	1.30353	332.549	7.79893	61.9425	1092.81	220.22	37.9008	7.73365	35.1247	34.1135	11.9981	2.37315	0	7.10299	0	0	0.2889	4.20799	1.62865	0.00471003	0	5.7862	203.23	303.369	121.343	10.324	12.018	91.022	554.986	185.994	0	20.911	9.343	0.429	2.74	1.715	208.24	3510.66
1993	6.124	1.2981	328.507	7.3131	60.9298	1089.71	219.02	37.9335	7.74254	35.177	34.2079	11.9984	2.37338	0	7.34531	0	0	0.376816	8.41616	2.3686	0.18499	0	6.31181	144.94	228.999	67.857	8.322	11.681	85.436	372.232	188.092	23.101	22.5	10.23	0.509	3.344	1.7	210.402	3510.8
1994	6.242	1.2896	324.464	7.50728	59.9172	1086.61	217.821	37.9662	7.75143	35.2294	34.3318	11.9986	2.37362	0	7.58821	0	0	1.8251	21.3991	3.83476	0.18199	0	5.00424	127.137	232.722	61.065	6.105	11.011	77.289	244.236	179.101	33.844	25.599	9.105	0.589	4.75	1.68	212.619	3510.91
1995	6.372	1.27501	320.421	7.6191	58.9045	1083.51	216.621	37.9989	7.76033	35.2817	34.5081	10.5017	2.37386	0	10.2115	0	0	2.98022	29.7261	6.04096	0.0999948	0	6.05342	119.235	194.71	22.978	4.784	9.083	85.021	201.637	243.238	41.961	24.275	10.035	0.669	3.991	1.3	200.199	3511.01
1996	6.51	1.2511	316.378	7.65206	57.8919	1080.4	215.421	38.0316	7.76922	35.3341	34.9605	11.9991	2.37409	0	10.2482	0	0	3.41888	40.5849	6.14999	0.436978	0	6.05531	115.437	178.907	27.962	2.943	7.019	70.403	89.184	211.181	51.431	26.411	10.743	0.729	2.691	0.85	201.834	3511.08
1997	6.619	1.21814	312.335	7.90975	56.8792	1077.3	214.222	38.0642	7.77812	35.3864	35.8337	11.9993	2.37433	0	10.2844	0	0	5.35405	50.6436	6.25875	0.407978	0	4.48574	95.388	160.981	18.663	1.886	5.429	74.423	62.53	208.614	46.639	22.493	9.909	0.789	2.594	0.7	207.696	3511.08
1998	6.588	1.21484	308.293	7.89573	55.8665	1074.2	213.022	38.0969	7.78701	35.4388	37.0316	11.9996	2.37457	0	10.3207	0.0873054	0	7.20318	59.6521	6.36768	0.927952	0	4.74904	92.401	152.715	14.831	1.199	4.223	84.361	29.412	249.912	58.131	27.683	9.837	0.607	2.491	0.71	206.946	3511.08
1999	6.569	1.18279	304.25	7.52698	54.8539	1071.1	211.823	38.1296	7.79591	35.4911	38.4586	10.5027	2.3748	0	10.3577	0.785737	0	8.15317	67.044	6.47752	1.35393	0	6.32196	94.931	145.169	14.362	0.784	3.32	69.242	24.668	230.91	55.817	28.047	9.806	0.467	2.39	0.631	195.938	3511.08
2000	6.735	1.1488	300.207	7.4566	53.8412	1068	210.623	38.1623	7.8048	35.5435	40.0186	12.0001	2.3749	0.4624	10.3949	4	0	8.5381	75.0393	6.234	1.9509	17.9257	5.5382	99.227	140.712	17.777	0.567	2.609	74.132	18.584	229.638	55.602	26.296	8.834	0.328	2.295	0.562	186.206	3511.08
2001	6.8959	1.132	303.409	7.503	54.4191	1066.74	211.594	38.2888	7.8945	35.7143	40.3916	11.925	2.4345	0.4651	10.4328	5.3987	0.6471	9.0301	84.0409	7.4947	1.6449	19.7183	5.699	81.839	117.202	12.051	0.45	2.069	65.195	13.253	270.443	57.19	28.001	8.669	0.282	2.209	0.5	181.525	3511.08
2002	6.949	1.2317	306.579	7.5487	54.9961	1065.47	212.563	38.4153	7.9842	35.8845	40.7646	11.8481	2.4915	0.4058	10.4708	6.7975	1.294	9.8852	94.7161	8.7389	2.508	21.5109	5.8596	81.408	100.258	6.019	0.423	1.609	69.565	13.487	243.015	57.77	22.43	8.524	0.235	2.131	0.445	181.887	3511.08
2003	7.286	1.2257	309.716	7.5942	55.5716	1064.17	213.531	38.5418	8.0734	36.0543	41.1378	11.7693	2.5463	0.3939	10.5083	8.196	1.9411	12.0788	101.416	9.9776	3.341	23.3035	6.0201	90.865	107.745	2.604	0.37	1.288	69.381	8.444	252.962	48.801	23.232	7.77	0.189	2.057	0.396	177.539	3511.08
2004	7.6719	1.2429	312.824	7.6394	56.1461	1062.86	214.498	38.6684	8.1623	36.2232	41.5107	11.6885	2.599	0.4062	10.5454	9.5947	2.5882	12.5073	113.93	11.2136	4.269	25.096	6.1805	78.182	87.647	5.237	0.378	1.046	67.383	10.874	263.062	43.847	23.348	7.653	0.189	1.987	0.353	174.26	3511.08
2005	7.971	1.1955	315.903	7.6841	56.7195	1061.53	215.463	38.7948	8.2512	36.3917	41.8837	11.6059	2.6494	0.4358	10.8116	10.9935	3.2351	13.7591	120.933	12.4483	4.8901	26.8885	6.3407	49.49	51.552	0.854	0.227	0.785	65	10.874	283.408	46.641	26.458	7.518	0.189	1.92	0.314	168.841	3511.08
2006	8.1615	1.165	322.158	7.778	55.4143	1058.94	215.643	38.9081	8.2076	36.1912	42.2092	11.4149	2.6001	0.4427	10.5529	12.3831	3.8842	17.9373	121.075	15.3186	6.2176	38.6318	6.4709	48.471	49.808	1.119	0.136	0.588	58.5	10.874	297.615	48.747	34.767	6.992	0.049	1.834	0.279	167.857	3511.08
2007	8.3523	1.1349	328.434	7.8717	54.1117	1056.38	215.829	39.0226	8.1641	35.9908	42.5348	11.2221	2.5502	0.4492	10.2947	13.7731	4.5338	22.1104	129.622	18.1628	7.5465	50.375	6.6013	47.083	46.366	0.911	0.082	0.441	52	10.874	311.265	50.583	39.869	6.502	0.049	1.752	0.249	167.857	3511.08
2008	8.5434	1.1045	334.754	7.96537	52.8147	1053.88	216.025	39.1394	8.12087	35.7901	42.8608	11.0262	2.49983	0.455033	10.0372	15.1628	5.18477	26.273	137.253	20.9543	8.8781	62.1183	6.74893	45.74	43.216	0.806	0.049	0.331	45.5	10.874	324.431	52.161	39.099	6.047	0.049	1.675	0.221	167.857	3511.08
2009	8.7345	1.0741	341.074	8.05903	51.5178	1051.39	216.22	39.2562	8.07763	35.5894	43.1867	10.8303	2.44947	0.460867	9.77977	16.5524	5.83573	30.4357	144.883	23.7459	10.2097	73.8615	6.89657	44.442	40.334	0.754	0.029	0.248	39	10.874	337.175	53.496	38.069	5.624	0.049	1.601	0.197	167.857	3511.08
2010	8.9256	1.0437	347.394	8.1527	50.2208	1048.89	216.416	39.373	8.0344	35.3887	43.5127	10.6344	2.3991	0.4667	9.5223	17.9421	6.4867	34.5983	152.513	26.5374	11.5413	85.6048	7.0442	42.976	36.906	0.377	0.018	0.186	32.5	7.266	349.552	54.598	36.801	5.23	0	1.521	0.175	167.857	3511.08
2011	9.18679	1.02998	354.561	8.29296	49.9685	1050.55	217.32	39.6333	7.99705	35.2984	44.0117	10.7484	2.42213	0.43848	8.68531	22.2121	6.56469	37.8081	163.77	27.3903	10.5031	91.8666	7.1479	41.557	33.769	0.189	0.011	0.14	26	7.266	361.61	55.479	35.314	4.864	0	1.445	0.156	167.857	3511.08
2012	9.44798	1.01626	361.728	8.43322	49.7162	1052.2	218.224	39.8936	7.9597	35.2082	44.5108	10.8624	2.44516	0.41026	7.84832	26.4821	6.64268	41.0179	175.027	28.2432	9.46494	98.1284	7.2516	40.186	30.898	0.094	0.006	0.105	19.5	7.266	373.391	56.152	33.625	4.524	0	1.373	0.139	167.857	3511.08
2013	9.70917	1.00254	368.895	8.57348	49.4639	1053.85	219.128	40.1539	7.92235	35.1179	45.0098	10.9764	2.46819	0.38204	7.01133	30.752	6.72067	44.2277	186.283	29.0962	8.42676	104.39	7.3553	38.86	28.272	0.047	0.004	0.079	13	7.266	384.93	56.625	31.75	4.207	0	1.304	0.124	167.857	3511.08
2014	9.97036	0.98882	376.063	8.71374	49.2116	1055.51	220.032	40.4142	7.885	35.0277	45.5089	11.0904	2.49122	0.35382	6.17434	35.022	6.79866	47.4375	197.54	29.9491	7.38858	110.652	7.459	37.578	25.869	0.024	0.002	0.059	6.5	7.266	396.259	56.909	29.705	3.913	0	1.239	0.11	167.857	3511.08
2015	10.2316	0.9751	383.23	8.854	48.9593	1057.16	220.937	40.6745	7.84765	34.9374	46.0079	11.2044	2.51425	0.3256	5.33735	39.292	6.87665	50.6474	208.797	30.802	6.3504	116.914	7.5627	36.338	23.67	0.012	0.001	0.044	0	0	407.405	57.013	27.502	3.639	0	1.177	0.098	155.925	3511.08
2016	10.4927	0.96138	390.397	8.99426	48.707	1058.81	221.841	40.9348	7.8103	34.8471	46.5069	11.3185	2.53728	0.29738	4.50036	43.562	6.95464	53.8572	220.053	31.6549	5.31222	123.176	7.6664	35.138	21.658	0.006	0.001	0.033	0	0	417.103	57.113	25.476	3.384	0	1.118	0.087	155.925	3511.08
2017	10.7539	0.94766	397.564	9.13452	48.4547	1060.47	222.745	41.1951	7.77295	34.7569	47.006	11.4325	2.56031	0.26916	3.66337	47.832	7.03263	57.067	231.31	32.5078	4.27404	129.437	7.7701	33.979	19.817	0.003	0	0.025	0	0	425.539	57.207	23.611	3.147	0	1.062	0.078	155.925	3511.08
2018	11.0151	0.93394	404.732	9.27478	48.2024	1062.12	223.649	41.4554	7.7356	34.6666	47.505	11.5465	2.58334	0.24094	2.82638	52.1019	7.11062	60.2768	242.567	33.3608	3.23586	135.699	7.8738	32.858	18.133	0.001	0	0.019	0	0	432.879	57.297	21.896	2.927	0	1.009	0.069	155.925	3511.08
2019	11.2763	0.92022	411.899	9.41504	47.9501	1063.78	224.553	41.7157	7.69825	34.5764	48.0041	11.6605	2.60637	0.21272	1.98939	56.3719	7.18861	63.4866	253.823	34.2137	2.19768	141.961	7.9775	31.773	16.591	0.001	0	0.014	0	0	439.265	57.382	20.318	2.722	0	0.959	0.061	155.925	3511.08
2020	11.5375	0.9065	419.066	9.5553	47.6978	1065.43	225.457	41.976	7.6609	34.4861	48.5031	11.7745	2.6294	0.1845	1.1524	60.6419	7.2666	66.6964	265.08	35.0666	1.1595	148.223	8.0812	30.725	15.181	0	0	0.01	0	0	444.821	57.463	18.867	2.531	0	0.911	0.055	155.925	3511.08
2021	11.7677	0.88735	425.58	9.67767	47.176	1060.7	225.457	41.9129	7.59914	34.35	48.8888	11.8385	2.64399	0.17723	1.1063	61.7812	7.35248	67.9223	271.96	35.3783	1.10411	152.777	8.27191	29.711	13.891	0	0	0.008	0	0	449.654	57.54	17.531	2.354	0	0.865	0.049	155.925	3511.08
2022	11.9978	0.8682	432.094	9.80004	46.6541	1055.97	225.457	41.8498	7.53738	34.2138	49.2745	11.9026	2.65858	0.16996	1.0602	62.9206	7.43836	69.1482	278.839	35.69	1.04872	157.331	8.46262	28.73	12.71	0	0	0.006	0	0	453.859	57.613	16.302	2.189	0	0.822	0.043	155.925	3511.08
2023	12.228	0.84905	438.608	9.92241	46.1323	1051.24	225.456	41.7867	7.47562	34.0777	49.6602	11.9666	2.67317	0.16269	1.0141	64.06	7.52424	70.3742	285.719	36.0017	0.99333	161.885	8.65333	27.782	11.63	0	0	0.004	0	0	457.517	57.682	15.172	2.036	0	0.781	0.039	155.925	3511.08
2024	12.4581	0.8299	445.123	10.0448	45.6104	1046.51	225.456	41.7236	7.41386	33.9416	50.0459	12.0306	2.68776	0.15542	0.968	65.1993	7.61012	71.6001	292.598	36.3134	0.93794	166.44	8.84404	26.865	10.641	0	0	0.003	0	0	460.7	57.748	14.132	1.894	0	0.742	0.034	155.925	3511.08
2025	12.6883	0.81075	451.637	10.1671	45.0886	1041.78	225.456	41.6605	7.3521	33.8055	50.4316	12.0946	2.70235	0.14815	0.9219	66.3387	7.696	72.826	299.478	36.6251	0.88255	170.994	9.03475	25.979	9.737	0	0	0.002	0	0	463.469	57.811	13.175	1.761	0	0.705	0.031	155.925	3511.08
2026	12.9185	0.7916	458.151	10.2895	44.5668	1037.05	225.455	41.5974	7.29034	33.6693	50.8172	12.1587	2.71694	0.14088	0.8758	67.478	7.78188	74.0519	306.358	36.9368	0.82716	175.548	9.22546	25.122	8.909	0	0	0.002	0	0	465.878	57.87	12.295	1.638	0	0.669	0.027	155.925	3511.08
2027	13.1486	0.77245	464.665	10.4119	44.0449	1032.32	225.455	41.5343	7.22858	33.5332	51.2029	12.2227	2.73153	0.13361	0.8297	68.6174	7.86776	75.2778	313.237	37.2485	0.77177	180.103	9.41617	24.293	8.152	0	0	0.001	0	0	467.974	57.927	11.485	1.523	0	0.636	0.024	155.925	3511.08
2028	13.3788	0.7533	471.179	10.5343	43.5231	1027.6	225.454	41.4712	7.16682	33.3971	51.5886	12.2867	2.74612	0.12634	0.7836	69.7567	7.95364	76.5038	320.117	37.5602	0.71638	184.657	9.60688	23.491	7.459	0	0	0.001	0	0	469.797	57.98	10.74	1.417	0	0.604	0.022	155.925	3511.08
2029	13.6089	0.73415	477.693	10.6566	43.0012	1022.87	225.454	41.4081	7.10506	33.2609	51.9743	12.3508	2.76071	0.11907	0.7375	70.8961	8.03952	77.7297	326.996	37.8719	0.66099	189.211	9.79759	22.716	6.825	0	0	0.001	0	0	471.384	58.031	10.055	1.317	0	0.574	0.019	155.925	3511.08
2030	13.8391	0.715	484.207	10.779	42.4794	1018.14	225.454	41.345	7.0433	33.1248	52.36	12.4148	2.7753	0.1118	0.6914	72.0354	8.1254	78.9556	333.876	38.1836	0.6056	193.765	9.9883	21.966	6.245	0	0	0.001	0	0	472.764	58.08	9.424	1.225	0	0.545	0.017	155.925	3511.08
2031	14.1339	0.708	493.525	10.9039	41.5045	1011.83	224.726	40.9027	6.95231	32.966	52.7122	12.3873	2.77061	0.1119	0.66362	72.903	8.22403	81.085	341.185	38.9489	0.6214	192.506	10.1155	21.241	5.714	0	0	0	0	0	467.698	57.831	8.826	1.139	0	0.518	0.015	155.925	3511.08
2032	14.4286	0.701	502.844	11.0288	40.5296	1005.51	223.999	40.4605	6.86132	32.8072	53.0644	12.3597	2.76592	0.112	0.63584	73.7707	8.32266	83.2144	348.493	39.7142	0.6372	191.246	10.2427	20.54	5.228	0	0	0	0	0	457.026	57.299	8.259	1.06	0	0.492	0.013	155.925	3511.08
2033	14.7233	0.694	512.162	11.1537	39.5548	999.201	223.271	40.0182	6.77033	32.6484	53.4166	12.3322	2.76123	0.1121	0.60806	74.6383	8.42129	85.3439	355.802	40.4795	0.653	189.987	10.3699	19.862	4.784	0	0	0	0	0	441.474	56.499	7.72	0.985	0	0.467	0.012	155.925	3511.08
2034	15.0181	0.687	521.48	11.2786	38.5799	992.889	222.544	39.5759	6.67934	32.4896	53.7688	12.3047	2.75654	0.1122	0.58028	75.5059	8.51992	87.4733	363.111	41.2448	0.6688	188.727	10.4971	19.207	4.377	0	0	0	0	0	421.679	55.444	7.207	0.916	0	0.444	0.011	155.925	3511.08
2035	15.3128	0.68	530.798	11.4035	37.605	986.577	221.816	39.1337	6.58835	32.3308	54.121	12.2772	2.75185	0.1123	0.5525	76.3735	8.61855	89.6027	370.419	42.0102	0.6846	187.468	10.6243	18.573	4.005	0	0	0	0	0	398.19	54.147	6.717	0.852	0	0.422	0.01	155.925	3511.08
2036	15.6076	0.673	540.116	11.5285	36.6301	980.265	221.089	38.6914	6.49736	32.1721	54.4732	12.2496	2.74716	0.1124	0.52472	77.2412	8.71718	91.7321	377.728	42.7755	0.7004	186.209	10.7516	17.96	3.665	0	0	0	0	0	371.49	52.62	6.249	0.793	0	0.401	0.008	155.925	3511.08
2037	15.9024	0.666	549.434	11.6534	35.6552	973.953	220.361	38.2491	6.40637	32.0133	54.8254	12.2221	2.74247	0.1125	0.49694	78.1088	8.81581	93.8615	385.037	43.5408	0.7162	184.949	10.8788	17.368	3.353	0	0	0	0	0	341.994	50.874	5.801	0.737	0	0.381	0.008	155.925	3511.08
2038	16.1971	0.659	558.753	11.7783	34.6804	967.641	219.634	37.8068	6.31538	31.8545	55.1776	12.1946	2.73778	0.1126	0.46916	78.9764	8.91444	95.991	392.345	44.3061	0.732	183.69	11.006	16.794	3.068	0	0	0	0	0	310.067	48.92	5.372	0.686	0	0.362	0.007	155.925	3511.08
2039	16.4918	0.652	568.071	11.9032	33.7055	961.329	218.906	37.3646	6.22439	31.6957	55.5298	12.167	2.73309	0.1127	0.44138	79.8441	9.01307	98.1204	399.654	45.0714	0.7478	182.43	11.1332	16.24	2.807	0	0	0	0	0	276.024	46.769	4.96	0.638	0	0.344	0.006	155.925	3511.08
2040	16.7866	0.645	577.389	12.0281	32.7306	955.018	218.179	36.9223	6.1334	31.5369	55.882	12.1395	2.7284	0.1128	0.4136	80.7117	9.1117	100.25	406.963	45.8367	0.7636	181.171	11.2604	15.704	2.569	0	0	0	0	0	240.141	44.431	4.563	0.593	0	0.326	0.005	155.925	3511.08
2041	17.1284	0.6381	587.331	12.1049	32.0686	950.135	217.204	36.5808	6.08412	31.3874	56.1582	12.1746	2.73746	0.11238	0.39687	80.1013	9.23927	101.838	412.757	46.2737	0.71926	179.225	11.3309	15.186	2.35	0	0	0	0	0	208.923	42.209	4.198	0.551	0	0.31	0.005	155.925	3511.08
2042	17.4702	0.6312	597.274	12.1817	31.4067	945.252	216.229	36.2394	6.03484	31.2378	56.4344	12.2097	2.74652	0.11196	0.38014	79.4908	9.36684	103.427	418.551	46.7108	0.67492	177.279	11.4014	14.685	2.151	0	0	0	0	0	181.763	40.099	3.862	0.513	0	0.295	0.004	155.925	3511.08
2043	17.812	0.6243	607.216	12.2584	30.7447	940.37	215.254	35.898	5.98556	31.0883	56.7106	12.2449	2.75558	0.11154	0.36341	78.8804	9.49441	105.015	424.345	47.1478	0.63058	175.333	11.4719	14.2	1.968	0	0	0	0	0	158.134	38.094	3.553	0.477	0	0.28	0.004	155.925	3511.08
2044	18.1538	0.6174	617.159	12.3352	30.0827	935.487	214.279	35.5565	5.93628	30.9388	56.9868	12.28	2.76464	0.11112	0.34668	78.27	9.62198	106.604	430.139	47.5848	0.58624	173.387	11.5424	13.732	1.801	0	0	0	0	0	137.576	36.189	3.269	0.444	0	0.266	0.003	155.925	3511.08
2045	18.4956	0.6105	627.101	12.412	29.4208	930.605	213.305	35.215	5.887	30.7892	57.263	12.3151	2.7737	0.1107	0.32995	77.6595	9.74955	108.192	435.933	48.0219	0.5419	171.441	11.6129	13.279	1.648	0	0	0	0	0	119.691	34.38	3.007	0.413	0	0.253	0.003	155.925	3511.08
2046	18.8374	0.6036	637.044	12.4888	28.7588	925.722	212.33	34.8736	5.83772	30.6397	57.5393	12.3502	2.78276	0.11028	0.31322	77.0491	9.87712	109.781	441.727	48.4589	0.49756	169.495	11.6834	12.84	1.507	0	0	0	0	0	104.131	32.661	2.767	0.384	0	0.24	0.003	155.925	3511.08
2047	19.1792	0.5967	646.986	12.5656	28.0968	920.839	211.355	34.5322	5.78844	30.4902	57.8155	12.3853	2.79182	0.10986	0.29649	76.4387	10.0047	111.369	447.521	48.8959	0.45322	167.549	11.7539	12.417	1.379	0	0	0	0	0	90.594	31.028	2.545	0.357	0	0.228	0.002	155.925	3511.08
2048	19.521	0.5898	656.929	12.6423	27.4348	915.957	210.38	34.1907	5.73916	30.3407	58.0917	12.4205	2.80088	0.10944	0.27976	75.8283	10.1323	112.958	453.315	49.3329	0.40888	165.603	11.8244	12.007	1.262	0	0	0	0	0	78.817	29.476	2.342	0.332	0	0.217	0.002	155.925	3511.08
2049	19.8628	0.5829	666.871	12.7191	26.7729	911.074	209.405	33.8492	5.68988	30.1911	58.3679	12.4556	2.80994	0.10902	0.26303	75.2178	10.2598	114.546	459.109	49.77	0.36454	163.657	11.8949	11.611	1.155	0	0	0	0	0	68.571	28.002	2.154	0.309	0	0.206	0.002	155.925	3511.08
2050	20.2046	0.576	676.814	12.7959	26.1109	906.192	208.43	33.5078	5.6406	30.0416	58.6441	12.4907	2.819	0.1086	0.2463	74.6074	10.3874	116.135	464.903	50.207	0.3202	161.711	11.9654	11.227	1.057	0	0	0	0	0	59.657	26.602	1.982	0.287	0	0.195	0.002	155.925	3511.08
2051	20.5437	0.5685	683.65	12.8585	25.7704	899.689	207.708	33.3226	5.59518	29.8791	58.8509	12.419	2.80583	0.10848	0.23542	75.5552	10.5643	117.329	469.218	50.4287	0.30297	160.45	12.1748	10.857	0.967	0	0	0	0	0	51.901	25.272	1.824	0.267	0	0.186	0.001	155.925	3511.08
2052	20.8829	0.561	690.486	12.921	25.4298	893.187	206.985	33.1373	5.54976	29.7167	59.0576	12.3472	2.79266	0.10836	0.22454	76.503	10.7412	118.524	473.534	50.6504	0.28574	159.19	12.3843	10.499	0.885	0	0	0	0	0	45.154	24.008	1.678	0.248	0	0.176	0.001	155.925	3511.08
2053	21.222	0.5535	697.322	12.9836	25.0893	886.685	206.262	32.9521	5.50434	29.5542	59.2644	12.2755	2.77949	0.10824	0.21366	77.4509	10.9181	119.718	477.849	50.8721	0.26851	157.93	12.5937	10.152	0.809	0	0	0	0	0	39.284	22.808	1.543	0.231	0	0.168	0.001	155.925	3511.08
2054	21.5612	0.546	704.158	13.0462	24.7488	880.183	205.54	32.7669	5.45892	29.3917	59.4711	12.2038	2.76632	0.10812	0.20278	78.3987	11.095	120.913	482.165	51.0938	0.25128	156.67	12.8031	9.817	0.741	0	0	0	0	0	34.177	21.668	1.42	0.215	0	0.159	0.001	155.925	3511.08
2055	21.9003	0.5385	710.994	13.1088	24.4082	873.681	204.817	32.5817	5.4135	29.2293	59.6778	12.132	2.75315	0.108	0.1919	79.3465	11.272	122.108	486.481	51.3156	0.23405	155.41	13.0125	9.493	0.678	0	0	0	0	0	29.734	20.584	1.306	0.2	0	0.151	0.001	155.925	3511.08
2056	22.2395	0.531	717.83	13.1713	24.0677	867.179	204.095	32.3964	5.36808	29.0668	59.8846	12.0603	2.73998	0.10788	0.18102	80.2943	11.4489	123.302	490.796	51.5373	0.21682	154.15	13.222	9.18	0.62	0	0	0	0	0	25.869	19.555	1.202	0.186	0	0.144	0.001	155.925	3511.08
2057	22.5786	0.5235	724.666	13.2339	23.7272	860.677	203.372	32.2112	5.32266	28.9043	60.0913	11.9886	2.72681	0.10776	0.17014	81.2421	11.6258	124.497	495.112	51.759	0.19959	152.89	13.4314	8.877	0.567	0	0	0	0	0	22.506	18.577	1.106	0.173	0	0.136	0.001	155.925	3511.08
2058	22.9178	0.516	731.502	13.2965	23.3867	854.175	202.649	32.026	5.27724	28.7418	60.2981	11.9169	2.71364	0.10764	0.15926	82.19	11.8027	125.691	499.427	51.9807	0.18236	151.629	13.6408	8.584	0.519	0	0	0	0	0	19.58	17.648	1.017	0.161	0	0.13	0.001	155.925	3511.08
2059	23.2569	0.5085	738.338	13.359	23.0461	847.672	201.927	31.8407	5.23182	28.5794	60.5048	11.8451	2.70047	0.10752	0.14838	83.1378	11.9796	126.886	503.743	52.2024	0.16513	150.369	13.8503	8.301	0.475	0	0	0	0	0	17.035	16.766	0.936	0.149	0	0.123	0.001	155.925	3511.08
2060	23.5961	0.501	745.174	13.4216	22.7056	841.17	201.204	31.6555	5.1864	28.4169	60.7116	11.7734	2.6873	0.1074	0.1375	84.0856	12.1565	128.08	508.058	52.4241	0.1479	149.109	14.0597	8.027	0.435	0	0	0	0	0	14.82	15.928	0.861	0.139	0	0.117	0.001	155.925	3511.08
2061	23.8327	0.4921	748.668	13.4735	22.4415	836.6	200.441	31.5088	5.15328	28.3048	60.8913	11.7802	2.69384	0.10732	0.13105	85.0651	12.3364	129.344	512.724	52.6436	0.146	147.847	14.0029	7.762	0.398	0	0	0	0	0	12.893	15.131	0.792	0.129	0	0.111	0	155.925	3511.08
2062	24.0693	0.4832	752.162	13.5253	22.1774	832.03	199.677	31.362	5.12016	28.1927	61.0711	11.7869	2.70038	0.10724	0.1246	86.0445	12.5164	130.607	517.389	52.8631	0.1441	146.585	13.9462	7.506	0.364	0	0	0	0	0	11.217	14.375	0.729	0.12	0	0.106	0	155.925	3511.08
2063	24.3059	0.4743	755.656	13.5772	21.9132	827.459	198.914	31.2153	5.08704	28.0806	61.2508	11.7936	2.70692	0.10716	0.11815	87.024	12.6963	131.87	522.055	53.0826	0.1422	145.324	13.8894	7.258	0.333	0	0	0	0	0	9.759	13.656	0.67	0.112	0	0.1	0	155.925	3511.08
2064	24.5425	0.4654	759.149	13.629	21.6491	822.889	198.15	31.0685	5.05392	27.9685	61.4305	11.8004	2.71346	0.10708	0.1117	88.0034	12.8763	133.134	526.72	53.3021	0.1403	144.062	13.8326	7.019	0.305	0	0	0	0	0	8.49	12.973	0.617	0.104	0	0.095	0	155.925	3511.08
2065	24.7792	0.4565	762.643	13.6809	21.385	818.319	197.387	30.9218	5.0208	27.8564	61.6103	11.8072	2.72	0.107	0.10525	88.9829	13.0562	134.397	531.386	53.5215	0.1384	142.8	13.7759	6.787	0.279	0	0	0	0	0	7.387	12.325	0.567	0.097	0	0.091	0	155.925	3511.08
2066	25.0158	0.4476	766.137	13.7328	21.1209	813.749	196.623	30.7751	4.98768	27.7444	61.79	11.8139	2.72654	0.10692	0.0988	89.9624	13.2361	135.661	536.051	53.741	0.1365	141.538	13.7191	6.563	0.255	0	0	0	0	0	6.426	11.708	0.522	0.09	0	0.086	0	155.925	3511.08
2067	25.2524	0.4387	769.631	13.7846	20.8568	809.178	195.86	30.6283	4.95456	27.6323	61.9697	11.8207	2.73308	0.10684	0.09235	90.9418	13.4161	136.924	540.717	53.9605	0.1346	140.276	13.6623	6.346	0.233	0	0	0	0	0	5.591	11.123	0.48	0.084	0	0.082	0	155.925	3511.08
2068	25.489	0.4298	773.125	13.8365	20.5926	804.608	195.096	30.4816	4.92144	27.5202	62.1494	11.8274	2.73962	0.10676	0.0859	91.9213	13.596	138.187	545.382	54.18	0.1327	139.014	13.6055	6.137	0.214	0	0	0	0	0	4.864	10.567	0.442	0.078	0	0.078	0	155.925	3511.08
2069	25.7256	0.4209	776.619	13.8883	20.3285	800.038	194.333	30.3348	4.88832	27.4081	62.3292	11.8341	2.74616	0.10668	0.07945	92.9007	13.776	139.451	550.048	54.3995	0.1308	137.753	13.5488	5.935	0.195	0	0	0	0	0	4.232	10.038	0.407	0.072	0	0.074	0	155.925	3511.08
2070	25.9622	0.412	780.112	13.9402	20.0644	795.467	193.569	30.1881	4.8552	27.296	62.5089	11.8409	2.7527	0.1066	0.073	93.8802	13.9559	140.714	554.713	54.619	0.1289	136.491	13.492	5.739	0.179	0	0	0	0	0	3.682	9.537	0.374	0.067	0	0.07	0	155.925	3511.08
2071	26.1066	0.4017	784.241	14.002	19.9025	791.647	193.076	30.0656	4.83481	27.2036	62.6424	11.8161	2.75174	0.10626	0.06942	94.1193	14.1811	141.115	559.747	54.4278	0.12734	135.665	13.6304	5.549	0.164	0	0	0	0	0	3.203	9.06	0.344	0.063	0	0.067	0	155.925	3511.08
2072	26.251	0.3914	788.369	14.0639	19.7406	787.826	192.583	29.9432	4.81442	27.1113	62.7758	11.7913	2.75078	0.10592	0.06584	94.3584	14.4063	141.517	564.781	54.2367	0.12578	134.84	13.7688	5.366	0.15	0	0	0	0	0	2.787	8.607	0.317	0.058	0	0.063	0	155.925	3511.08
2073	26.3954	0.3811	792.497	14.1257	19.5788	784.005	192.09	29.8207	4.79403	27.0189	62.9093	11.7665	2.74982	0.10558	0.06226	94.5975	14.6314	141.918	569.815	54.0455	0.12422	134.014	13.9071	5.189	0.137	0	0	0	0	0	2.424	8.176	0.291	0.054	0	0.06	0	155.925	3511.08
2074	26.5398	0.3708	796.625	14.1876	19.4169	780.184	191.596	29.6983	4.77364	26.9266	63.0427	11.7417	2.74886	0.10524	0.05868	94.8366	14.8566	142.319	574.848	53.8543	0.12266	133.189	14.0455	5.018	0.125	0	0	0	0	0	2.109	7.768	0.268	0.05	0	0.057	0	155.925	3511.08
2075	26.6841	0.3605	800.753	14.2494	19.255	776.364	191.103	29.5758	4.75325	26.8342	63.1762	11.7169	2.7479	0.1049	0.0551	95.0757	15.0818	142.72	579.882	53.6632	0.1211	132.364	14.1839	4.852	0.115	0	0	0	0	0	1.835	7.379	0.247	0.047	0	0.054	0	155.925	3511.08
2076	26.8285	0.3502	804.881	14.3112	19.0931	772.543	190.61	29.4533	4.73286	26.7418	63.3097	11.6921	2.74694	0.10456	0.05152	95.3148	15.307	143.121	584.916	53.472	0.11954	131.538	14.3223	4.692	0.105	0	0	0	0	0	1.596	7.01	0.227	0.043	0	0.052	0	155.925	3511.08
2077	26.9729	0.3399	809.009	14.3731	18.9312	768.722	190.117	29.3309	4.71247	26.6495	63.4431	11.6673	2.74598	0.10422	0.04794	95.5539	15.5322	143.523	589.95	53.2808	0.11798	130.713	14.4607	4.537	0.096	0	0	0	0	0	1.389	6.66	0.209	0.04	0	0.049	0	155.925	3511.08
2078	27.1173	0.3296	813.138	14.4349	18.7694	764.901	189.624	29.2084	4.69208	26.5571	63.5766	11.6425	2.74502	0.10388	0.04436	95.793	15.7573	143.924	594.983	53.0896	0.11642	129.887	14.599	4.388	0.088	0	0	0	0	0	1.208	6.327	0.192	0.038	0	0.046	0	155.925	3511.08
2079	27.2617	0.3193	817.266	14.4968	18.6075	761.081	189.13	29.086	4.67169	26.4648	63.71	11.6177	2.74406	0.10354	0.04078	96.0321	15.9825	144.325	600.017	52.8985	0.11486	129.062	14.7374	4.243	0.08	0	0	0	0	0	1.051	6.01	0.177	0.035	0	0.044	0	155.925	3511.08
2080	27.4061	0.309	821.394	14.5586	18.4456	757.26	188.637	28.9635	4.6513	26.3724	63.8435	11.5929	2.7431	0.1032	0.0372	96.2712	16.2077	144.726	605.051	52.7073	0.1133	128.236	14.8758	4.103	0.074	0	0	0	0	0	0.915	5.71	0.162	0.033	0	0.042	0	155.925	3511.08
2081	27.4992	0.2975	826.329	14.632	18.0487	753.343	187.89	28.7861	4.62775	26.2312	63.9956	11.5429	2.73607	0.1026	0.03348	95.7644	16.4879	145.008	609.859	52.4543	0.11214	127.437	14.9935	3.967	0.067	0	0	0	0	0	0.796	5.424	0.149	0.03	0	0.04	0	155.925	3511.08
2082	27.5922	0.286	831.265	14.7054	17.6518	749.427	187.143	28.6088	4.6042	26.0901	64.1478	11.493	2.72904	0.102	0.02976	95.2577	16.768	145.29	614.667	52.2013	0.11098	126.638	15.1112	3.836	0.062	0	0	0	0	0	0.692	5.153	0.138	0.028	0	0.038	0	155.925	3511.08
2083	27.6853	0.2745	836.2	14.7788	17.2549	745.51	186.396	28.4315	4.58065	25.9489	64.2999	11.443	2.72201	0.1014	0.02604	94.7509	17.0482	145.572	619.475	51.9483	0.10982	125.839	15.2289	3.71	0.056	0	0	0	0	0	0.602	4.895	0.127	0.026	0	0.036	0	155.925	3511.08
2084	27.7783	0.263	841.136	14.8522	16.858	741.593	185.649	28.2541	4.5571	25.8077	64.4521	11.393	2.71498	0.1008	0.02232	94.2442	17.3283	145.855	624.283	51.6953	0.10866	125.04	15.3466	3.587	0.052	0	0	0	0	0	0.524	4.651	0.116	0.024	0	0.034	0	155.925	3511.08
2085	27.8714	0.2515	846.071	14.9256	16.4611	737.676	184.901	28.0768	4.53355	25.6666	64.6042	11.343	2.70795	0.1002	0.0186	93.7374	17.6085	146.137	629.092	51.4423	0.1075	124.241	15.4642	3.469	0.047	0	0	0	0	0	0.456	4.418	0.107	0.023	0	0.032	0	155.925	3511.08
2086	27.9645	0.24	851.007	14.9991	16.0641	733.76	184.154	27.8994	4.51	25.5254	64.7564	11.2931	2.70092	0.0996	0.01488	93.2306	17.8887	146.419	633.9	51.1894	0.10634	123.442	15.5819	3.355	0.043	0	0	0	0	0	0.397	4.197	0.099	0.021	0	0.031	0	155.925	3511.08
2087	28.0575	0.2285	855.942	15.0725	15.6672	729.843	183.407	27.722	4.48645	25.3842	64.9086	11.2431	2.69389	0.099	0.01116	92.7239	18.1688	146.701	638.708	50.9364	0.10518	122.642	15.6996	3.244	0.039	0	0	0	0	0	0.345	3.987	0.091	0.02	0	0.029	0	155.925	3511.08
2088	28.1506	0.217	860.878	15.1459	15.2703	725.926	182.66	27.5447	4.4629	25.243	65.0607	11.1931	2.68686	0.0984	0.00744	92.2171	18.449	146.983	643.516	50.6834	0.10402	121.843	15.8173	3.137	0.036	0	0	0	0	0	0.3	3.788	0.083	0.018	0	0.028	0	155.925	3511.08
2089	28.2436	0.2055	865.813	15.2193	14.8734	722.01	181.913	27.3673	4.43935	25.1019	65.2129	11.1432	2.67983	0.0978	0.00372	91.7104	18.7291	147.265	648.324	50.4304	0.10286	121.044	15.935	3.033	0.033	0	0	0	0	0	0.261	3.599	0.077	0.017	0	0.026	0	155.925	3511.08
2090	28.3367	0.194	870.749	15.2927	14.4765	718.093	181.166	27.19	4.4158	24.9607	65.365	11.0932	2.6728	0.0972	0	91.2036	19.0093	147.547	653.132	50.1774	0.1017	120.245	16.0527	2.933	0.03	0	0	0	0	0	0.227	3.419	0.071	0.016	0	0.025	0	155.925	3511.08
2091	28.377	0.1823	872.433	15.341	14.3145	715.312	180.673	27.0952	4.39918	24.8554	65.5462	11.0604	2.66808	0.09635	0	90.2059	19.2916	147.623	658.165	49.8439	0.10064	121.401	16.1397	2.836	0.028	0	0	0	0	0	0.198	3.248	0.065	0.015	0	0.024	0	155.925	3511.08
2092	28.4174	0.1706	874.117	15.3893	14.1525	712.531	180.181	27.0003	4.38256	24.75	65.7274	11.0277	2.66336	0.0955	0	89.2083	19.5739	147.699	663.197	49.5103	0.09958	122.557	16.2266	2.743	0.025	0	0	0	0	0	0.172	3.085	0.06	0.014	0	0.023	0	155.925	3511.08
2093	28.4577	0.1589	875.802	15.4376	13.9905	709.75	179.688	26.9055	4.36594	24.6446	65.9086	10.9949	2.65864	0.09465	0	88.2106	19.8562	147.774	668.23	49.1768	0.09852	123.713	16.3136	2.652	0.023	0	0	0	0	0	0.15	2.931	0.055	0.013	0	0.022	0	155.925	3511.08
2094	28.498	0.1472	877.486	15.4859	13.8285	706.969	179.195	26.8106	4.34932	24.5393	66.0898	10.9621	2.65392	0.0938	0	87.2129	20.1385	147.85	673.263	48.8432	0.09746	124.869	16.4005	2.565	0.021	0	0	0	0	0	0.13	2.785	0.051	0.012	0	0.02	0	155.925	3511.08
2095	28.5384	0.1355	879.17	15.5342	13.6664	704.188	178.703	26.7158	4.3327	24.4339	66.2709	10.9293	2.6492	0.09295	0	86.2152	20.4208	147.926	678.295	48.5097	0.0964	126.025	16.4875	2.48	0.019	0	0	0	0	0	0.113	2.645	0.047	0.011	0	0.019	0	155.925	3511.08
2096	28.5787	0.1238	880.854	15.5824	13.5044	701.407	178.21	26.621	4.31608	24.3286	66.4521	10.8966	2.64448	0.0921	0	85.2176	20.7031	148.001	683.328	48.1762	0.09534	127.181	16.5745	2.398	0.018	0	0	0	0	0	0.099	2.513	0.043	0.01	0	0.018	0	155.925	3511.08
2097	28.619	0.1121	882.538	15.6307	13.3424	698.626	177.717	26.5261	4.29946	24.2233	66.6333	10.8638	2.63976	0.09125	0	84.2199	20.9854	148.077	688.361	47.8426	0.09428	128.337	16.6614	2.319	0.016	0	0	0	0	0	0.086	2.387	0.039	0.009	0	0.018	0	155.925	3511.08
2098	28.6593	0.1004	884.223	15.679	13.1804	695.845	177.225	26.4313	4.28284	24.1179	66.8145	10.831	2.63504	0.0904	0	83.2222	21.2677	148.153	693.393	47.5091	0.09322	129.493	16.7484	2.243	0.015	0	0	0	0	0	0.075	2.268	0.036	0.009	0	0.017	0	155.925	3511.08
2099	28.6997	0.0887	885.907	15.7273	13.0184	693.064	176.732	26.3364	4.26622	24.0126	66.9957	10.7983	2.63032	0.08955	0	82.2246	21.55	148.229	698.426	47.1755	0.09216	130.649	16.8353	2.169	0.014	0	0	0	0	0	0.065	2.155	0.033	0.008	0	0.016	0	155.925	3511.08
2100	28.74	0.077	887.591	15.7756	12.8564	690.283	176.24	26.2416	4.2496	23.9072	67.1769	10.7655	2.6256	0.0887	0	81.2269	21.8323	148.304	703.459	46.842	0.0911	131.805	16.9223	2.097	0.012	0	0	0	0	0	0.056	2.047	0.031	0.008	0	0.015	0	155.925	3511.08
2101	28.74	0.07392	887.591	15.7756	12.8564	690.283	176.24	26.2416	4.2496	23.9072	67.1769	10.7655	2.6256	0.0887	0	81.2269	21.8323	148.304	703.459	46.842	0.0911	131.805	16.9223	2.028	0.011	0	0	0	0	0	0.049	1.945	0.028	0.007	0	0.014	0	155.925	3511.08
2102	28.74	0.07084	887.591	15.7756	12.8564	690.283	176.24	26.2416	4.2496	23.9072	67.1769	10.7655	2.6256	0.0887	0	81.2269	21.8323	148.304	703.459	46.842	0.0911	131.805	16.9223	1.961	0.01	0	0	0	0	0	0.042	1.847	0.026	0.007	0	0.014	0	155.925	3511.08
2103	28.74	0.06776	887.591	15.7756	12.8564	690.283	176.24	26.2416	4.2496	23.9072	67.1769	10.7655	2.6256	0.0887	0	81.2269	21.8323	148.304	703.459	46.842	0.0911	131.805	16.9223	1.896	0.01	0	0	0	0	0	0.037	1.755	0.024	0.006	0	0.013	0	155.925	3511.08
2104	28.74	0.06468	887.591	15.7756	12.8564	690.283	176.24	26.2416	4.2496	23.9072	67.1769	10.7655	2.6256	0.0887	0	81.2269	21.8323	148.304	703.459	46.842	0.0911	131.805	16.9223	1.834	0.009	0	0	0	0	0	0.032	1.667	0.022	0.006	0	0.012	0	155.925	3511.08
2105	28.74	0.0616	887.591	15.7756	12.8564	690.283	176.24	26.2416	4.2496	23.9072	67.1769	10.7655	2.6256	0.0887	0	81.2269	21.8323	148.304	703.459	46.842	0.0911	131.805	16.9223	1.773	0.008	0	0	0	0	0	0.028	1.584	0.02	0.005	0	0.012	0	155.925	3511.08
2106	28.74	0.05852	887.591	15.7756	12.8564	690.283	176.24	26.2416	4.2496	23.9072	67.1769	10.7655	2.6256	0.0887	0	81.2269	21.8323	148.304	703.459	46.842	0.0911	131.805	16.9223	1.715	0.007	0	0	0	0	0	0.024	1.505	0.019	0.005	0	0.011	0	155.925	3511.08
2107	28.74	0.05544	887.591	15.7756	12.8564	690.283	176.24	26.2416	4.2496	23.9072	67.1769	10.7655	2.6256	0.0887	0	81.2269	21.8323	148.304	703.459	46.842	0.0911	131.805	16.9223	1.658	0.007	0	0	0	0	0	0.021	1.429	0.017	0.005	0	0.011	0	155.925	3511.08
2108	28.74	0.05236	887.591	15.7756	12.8564	690.283	176.24	26.2416	4.2496	23.9072	67.1769	10.7655	2.6256	0.0887	0	81.2269	21.8323	148.304	703.459	46.842	0.0911	131.805	16.9223	1.603	0.006	0	0	0	0	0	0.018	1.358	0.016	0.004	0	0.01	0	155.925	3511.08
2109	28.74	0.04928	887.591	15.7756	12.8564	690.283	176.24	26.2416	4.2496	23.9072	67.1769	10.7655	2.6256	0.0887	0	81.2269	21.8323	148.304	703.459	46.842	0.0911	131.805	16.9223	1.55	0.006	0	0	0	0	0	0.016	1.29	0.014	0.004	0	0.009	0	155.925	3511.08
2110	28.74	0.0462	887.591	15.7756	12.8564	690.283	176.24	26.2416	4.2496	23.9072	67.1769	10.7655	2.6256	0.0887	0	81.2269	21.8323	148.304	703.459	46.842	0.0911	131.805	16.9223	1.499	0.005	0	0	0	0	0	0.014	1.226	0.013	0.004	0	0.009	0	155.925	3511.08
2111	28.74	0.04312	887.591	15.7756	12.8564	690.283	176.24	26.2416	4.2496	23.9072	67.1769	10.7655	2.6256	0.0887	0	81.2269	21.8323	148.304	703.459	46.842	0.0911	131.805	16.9223	1.45	0.005	0	0	0	0	0	0.012	1.164	0.012	0.003	0	0.009	0	155.925	3511.08
2112	28.74	0.04004	887.591	15.7756	12.8564	690.283	176.24	26.2416	4.2496	23.9072	67.1769	10.7655	2.6256	0.0887	0	81.2269	21.8323	148.304	703.459	46.842	0.0911	131.805	16.9223	1.402	0.004	0	0	0	0	0	0.01	1.106	0.011	0.003	0	0.008	0	155.925	3511.08
2113	28.74	0.03696	887.591	15.7756	12.8564	690.283	176.24	26.2416	4.2496	23.9072	67.1769	10.7655	2.6256	0.0887	0	81.2269	21.8323	148.304	703.459	46.842	0.0911	131.805	16.9223	1.356	0.004	0	0	0	0	0	0.009	1.051	0.01	0.003	0	0.008	0	155.925	3511.08
2114	28.74	0.03388	887.591	15.7756	12.8564	690.283	176.24	26.2416	4.2496	23.9072	67.1769	10.7655	2.6256	0.0887	0	81.2269	21.8323	148.304	703.459	46.842	0.0911	131.805	16.9223	1.311	0.004	0	0	0	0	0	0.008	0.998	0.01	0.003	0	0.007	0	155.925	3511.08
2115	28.74	0.0308	887.591	15.7756	12.8564	690.283	176.24	26.2416	4.2496	23.9072	67.1769	10.7655	2.6256	0.0887	0	81.2269	21.8323	148.304	703.459	46.842	0.0911	131.805	16.9223	1.268	0.003	0	0	0	0	0	0.007	0.948	0.009	0.003	0	0.007	0	155.925	3511.08
2116	28.74	0.02772	887.591	15.7756	12.8564	690.283	176.24	26.2416	4.2496	23.9072	67.1769	10.7655	2.6256	0.0887	0	81.2269	21.8323	148.304	703.459	46.842	0.0911	131.805	16.9223	1.226	0.003	0	0	0	0	0	0.006	0.901	0.008	0.002	0	0.007	0	155.925	3511.08
2117	28.74	0.02464	887.591	15.7756	12.8564	690.283	176.24	26.2416	4.2496	23.9072	67.1769	10.7655	2.6256	0.0887	0	81.2269	21.8323	148.304	703.459	46.842	0.0911	131.805	16.9223	1.185	0.003	0	0	0	0	0	0.005	0.856	0.007	0.002	0	0.006	0	155.925	3511.08
2118	28.74	0.02156	887.591	15.7756	12.8564	690.283	176.24	26.2416	4.2496	23.9072	67.1769	10.7655	2.6256	0.0887	0	81.2269	21.8323	148.304	703.459	46.842	0.0911	131.805	16.9223	1.146	0.003	0	0	0	0	0	0.005	0.813	0.007	0.002	0	0.006	0	155.925	3511.08
2119	28.74	0.01848	887.591	15.7756	12.8564	690.283	176.24	26.2416	4.2496	23.9072	67.1769	10.7655	2.6256	0.0887	0	81.2269	21.8323	148.304	703.459	46.842	0.0911	131.805	16.9223	1.108	0.002	0	0	0	0	0	0.004	0.772	0.006	0.002	0	0.006	0	155.925	3511.08
2120	28.74	0.0154	887.591	15.7756	12.8564	690.283	176.24	26.2416	4.2496	23.9072	67.1769	10.7655	2.6256	0.0887	0	81.2269	21.8323	148.304	703.459	46.842	0.0911	131.805	16.9223	1.072	0.002	0	0	0	0	0	0.003	0.734	0.006	0.002	0	0.005	0	155.925	3511.08
2121	28.74	0.01232	887.591	15.7756	12.8564	690.283	176.24	26.2416	4.2496	23.9072	67.1769	10.7655	2.6256	0.0887	0	81.2269	21.8323	148.304	703.459	46.842	0.0911	131.805	16.9223	1.036	0.002	0	0	0	0	0	0.003	0.697	0.005	0.002	0	0.005	0	155.925	3511.08
2122	28.74	0.00924	887.591	15.7756	12.8564	690.283	176.24	26.2416	4.2496	23.9072	67.1769	10.7655	2.6256	0.0887	0	81.2269	21.8323	148.304	703.459	46.842	0.0911	131.805	16.9223	1.002	0.002	0	0	0	0	0	0.003	0.662	0.005	0.002	0	0.005	0	155.925	3511.08
2123	28.74	0.00616	887.591	15.7756	12.8564	690.283	176.24	26.2416	4.2496	23.9072	67.1769	10.7655	2.6256	0.0887	0	81.2269	21.8323	148.304	703.459	46.842	0.0911	131.805	16.9223	0.969	0.002	0	0	0	0	0	0.002	0.629	0.005	0.001	0	0.005	0	155.925	3511.08
2124	28.74	0.00308	887.591	15.7756	12.8564	690.283	176.24	26.2416	4.2496	23.9072	67.1769	10.7655	2.6256	0.0887	0	81.2269	21.8323	148.304	703.459	46.842	0.0911	131.805	16.9223	0.937	0.001	0	0	0	0	0	0.002	0.598	0.004	0.001	0	0.004	0	155.925	3511.08
2125	28.74	0	887.591	15.7756	12.8564	690.283	176.24	26.2416	4.2496	23.9072	67.1769	10.7655	2.6256	0.0887	0	81.2269	21.8323	148.304	703.459	46.842	0.0911	131.805	16.9223	0.906	0.001	0	0	0	0	0	0.002	0.568	0.004	0.001	0	0.004	0	155.925	3511.08
2126	28.74	0	887.591	15.7756	12.8564	690.283	176.24	26.2416	4.2496	23.9072	67.1769	10.7655	2.6256	0.0887	0	81.2269	21.8323	148.304	703.459	46.842	0.0911	131.805	16.9223	0.876	0.001	0	0	0	0	0	0.001	0.539	0.004	0.001	0	0.004	0	155.925	3511.08
2127	28.74	0	887.591	15.7756	12.8564	690.283	176.24	26.2416	4.2496	23.9072	67.1769	10.7655	2.6256	0.0887	0	81.2269	21.8323	148.304	703.459	46.842	0.0911	131.805	16.9223	0.847	0.001	0	0	0	0	0	0.001	0.512	0.003	0.001	0	0.004	0	155.925	3511.08
2128	28.74	0	887.591	15.7756	12.8564	690.283	176.24	26.2416	4.2496	23.9072	67.1769	10.7655	2.6256	0.0887	0	81.2269	21.8323	148.304	703.459	46.842	0.0911	131.805	16.9223	0.819	0.001	0	0	0	0	0	0.001	0.487	0.003	0.001	0	0.004	0	155.925	3511.08
2129	28.74	0	887.591	15.7756	12.8564	690.283	176.24	26.2416	4.2496	23.9072	67.1769	10.7655	2.6256	0.0887	0	81.2269	21.8323	148.304	703.459	46.842	0.0911	131.805	16.9223	0.792	0.001	0	0	0	0	0	0.001	0.462	0.003	0.001	0	0.003	0	155.925	3511.08
2130	28.74	0	887.591	15.7756	12.8564	690.283	176.24	26.2416	4.2496	23.9072	67.1769	10.7655	2.6256	0.0887	0	81.2269	21.8323	148.304	703.459	46.842	0.0911	131.805	16.9223	0.766	0.001	0	0	0	0	0	0.001	0.439	0.003	0.001	0	0.003	0	155.925	3511.08
2131	28.74	0	887.591	15.7756	12.8564	690.283	176.24	26.2416	4.2496	23.9072	67.1769	10.7655	2.6256	0.0887	0	81.2269	21.8323	148.304	703.459	46.842	0.0911	131.805	16.9223	0.741	0.001	0	0	0	0	0	0.001	0.417	0.002	0.001	0	0.003	0	155.925	3511.08
2132	28.74	0	887.591	15.7756	12.8564	690.283	176.24	26.2416	4.2496	23.9072	67.1769	10.7655	2.6256	0.0887	0	81.2269	21.8323	148.304	703.459	46.842	0.0911	131.805	16.9223	0.717	0.001	0	0	0	0	0	0.001	0.397	0.002	0.001	0	0.003	0	155.925	3511.08
2133	28.74	0	887.591	15.7756	12.8564	690.283	176.24	26.2416	4.2496	23.9072	67.1769	10.7655	2.6256	0.0887	0	81.2269	21.8323	148.304	703.459	46.842	0.0911	131.805	16.9223	0.693	0.001	0	0	0	0	0	0.001	0.377	0.002	0.001	0	0.003	0	155.925	3511.08
2134	28.74	0	887.591	15.7756	12.8564	690.283	176.24	26.2416	4.2496	23.9072	67.1769	10.7655	2.6256	0.0887	0	81.2269	21.8323	148.304	703.459	46.842	0.0911	131.805	16.9223	0.67	0.001	0	0	0	0	0	0	0.358	0.002	0.001	0	0.003	0	155.925	3511.08
2135	28.74	0	887.591	15.7756	12.8564	690.283	176.24	26.2416	4.2496	23.9072	67.1769	10.7655	2.6256	0.0887	0	81.2269	21.8323	148.304	703.459	46.842	0.0911	131.805	16.9223	0.648	0.001	0	0	0	0	0	0	0.34	0.002	0.001	0	0.002	0	155.925	3511.08
2136	28.74	0	887.591	15.7756	12.8564	690.283	176.24	26.2416	4.2496	23.9072	67.1769	10.7655	2.6256	0.0887	0	81.2269	21.8323	148.304	703.459	46.842	0.0911	131.805	16.9223	0.627	0.001	0	0	0	0	0	0	0.323	0.002	0.001	0	0.002	0	155.925	3511.08
2137	28.74	0	887.591	15.7756	12.8564	690.283	176.24	26.2416	4.2496	23.9072	67.1769	10.7655	2.6256	0.0887	0	81.2269	21.8323	148.304	703.459	46.842	0.0911	131.805	16.9223	0.606	0	0	0	0	0	0	0	0.307	0.001	0.001	0	0.002	0	155.925	3511.08
2138	28.74	0	887.591	15.7756	12.8564	690.283	176.24	26.2416	4.2496	23.9072	67.1769	10.7655	2.6256	0.0887	0	81.2269	21.8323	148.304	703.459	46.842	0.0911	131.805	16.9223	0.586	0	0	0	0	0	0	0	0.291	0.001	0	0	0.002	0	155.925	3511.08
2139	28.74	0	887.591	15.7756	12.8564	690.283	176.24	26.2416	4.2496	23.9072	67.1769	10.7655	2.6256	0.0887	0	81.2269	21.8323	148.304	703.459	46.842	0.0911	131.805	16.9223	0.567	0	0	0	0	0	0	0	0.277	0.001	0	0	0.002	0	155.925	3511.08
2140	28.74	0	887.591	15.7756	12.8564	690.283	176.24	26.2416	4.2496	23.9072	67.1769	10.7655	2.6256	0.0887	0	81.2269	21.8323	148.304	703.459	46.842	0.0911	131.805	16.9223	0.548	0	0	0	0	0	0	0	0.263	0.001	0	0	0.002	0	155.925	3511.08
2141	28.74	0	887.591	15.7756	12.8564	690.283	176.24	26.2416	4.2496	23.9072	67.1769	10.7655	2.6256	0.0887	0	81.2269	21.8323	148.304	703.459	46.842	0.0911	131.805	16.9223	0.53	0	0	0	0	0	0	0	0.25	0.001	0	0	0.002	0	155.925	3511.08
2142	28.74	0	887.591	15.7756	12.8564	690.283	176.24	26.2416	4.2496	23.9072	67.1769	10.7655	2.6256	0.0887	0	81.2269	21.8323	148.304	703.459	46.842	0.0911	131.805	16.9223	0.512	0	0	0	0	0	0	0	0.237	0.001	0	0	0.002	0	155.925	3511.08
2143	28.74	0	887.591	15.7756	12.8564	690.283	176.24	26.2416	4.2496	23.9072	67.1769	10.7655	2.6256	0.0887	0	81.2269	21.8323	148.304	703.459	46.842	0.0911	131.805	16.9223	0.495	0	0	0	0	0	0	0	0.226	0.001	0	0	0.002	0	155.925	3511.08
2144	28.74	0	887.591	15.7756	12.8564	690.283	176.24	26.2416	4.2496	23.9072	67.1769	10.7655	2.6256	0.0887	0	81.2269	21.8323	148.304	703.459	46.842	0.0911	131.805	16.9223	0.479	0	0	0	0	0	0	0	0.214	0.001	0	0	0.002	0	155.925	3511.08
2145	28.74	0	887.591	15.7756	12.8564	690.283	176.24	26.2416	4.2496	23.9072	67.1769	10.7655	2.6256	0.0887	0	81.2269	21.8323	148.304	703.459	46.842	0.0911	131.805	16.9223	0.463	0	0	0	0	0	0	0	0.204	0.001	0	0	0.001	0	155.925	3511.08
2146	28.74	0	887.591	15.7756	12.8564	690.283	176.24	26.2416	4.2496	23.9072	67.1769	10.7655	2.6256	0.0887	0	81.2269	21.8323	148.304	703.459	46.842	0.0911	131.805	16.9223	0.448	0	0	0	0	0	0	0	0.193	0.001	0	0	0.001	0	155.925	3511.08
2147	28.74	0	887.591	15.7756	12.8564	690.283	176.24	26.2416	4.2496	23.9072	67.1769	10.7655	2.6256	0.0887	0	81.2269	21.8323	148.304	703.459	46.842	0.0911	131.805	16.9223	0.433	0	0	0	0	0	0	0	0.184	0.001	0	0	0.001	0	155.925	3511.08
2148	28.74	0	887.591	15.7756	12.8564	690.283	176.24	26.2416	4.2496	23.9072	67.1769	10.7655	2.6256	0.0887	0	81.2269	21.8323	148.304	703.459	46.842	0.0911	131.805	16.9223	0.419	0	0	0	0	0	0	0	0.175	0.001	0	0	0.001	0	155.925	3511.08
2149	28.74	0	887.591	15.7756	12.8564	690.283	176.24	26.2416	4.2496	23.9072	67.1769	10.7655	2.6256	0.0887	0	81.2269	21.8323	148.304	703.459	46.842	0.0911	131.805	16.9223	0.405	0	0	0	0	0	0	0	0.166	0.001	0	0	0.001	0	155.925	3511.08
2150	28.74	0	887.591	15.7756	12.8564	690.283	176.24	26.2416	4.2496	23.9072	67.1769	10.7655	2.6256	0.0887	0	81.2269	21.8323	148.304	703.459	46.842	0.0911	131.805	16.9223	0.392	0	0	0	0	0	0	0	0.157	0	0	0	0.001	0	155.925	3511.08
2151	28.4702	0	887.761	15.7507	12.8564	690.283	176.24	26.2416	4.2496	23.9072	67.1769	10.6564	2.59942	0.0878735	0.00714694	81.2372	21.8378	148.358	703.622	46.8597	0.0913857	131.826	16.7589	0.379	0	0	0	0	0	0	0	0.15	0	0	0	0.001	0	155.925	3511.08
2152	28.2004	0	887.932	15.7259	12.8564	690.283	176.24	26.2416	4.2496	23.9072	67.1769	10.5472	2.57323	0.0870469	0.0142939	81.2476	21.8433	148.412	703.785	46.8773	0.0916714	131.847	16.5955	0.366	0	0	0	0	0	0	0	0.142	0	0	0	0.001	0	155.925	3511.08
2153	27.9306	0	888.102	15.701	12.8564	690.283	176.24	26.2416	4.2496	23.9072	67.1769	10.4381	2.54705	0.0862204	0.0214408	81.2579	21.8488	148.467	703.948	46.895	0.0919571	131.868	16.4322	0.354	0	0	0	0	0	0	0	0.135	0	0	0	0.001	0	155.925	3511.08
2154	27.6608	0	888.272	15.6761	12.8564	690.283	176.24	26.2416	4.2496	23.9072	67.1769	10.329	2.52087	0.0853939	0.0285878	81.2683	21.8543	148.521	704.111	46.9127	0.0922429	131.888	16.2688	0.342	0	0	0	0	0	0	0	0.128	0	0	0	0.001	0	155.925	3511.08
2155	27.391	0	888.442	15.6512	12.8564	690.283	176.24	26.2416	4.2496	23.9072	67.1769	10.2199	2.49468	0.0845673	0.0357347	81.2786	21.8598	148.575	704.274	46.9304	0.0925286	131.909	16.1054	0.331	0	0	0	0	0	0	0	0.122	0	0	0	0.001	0	155.925	3511.08
2156	27.1212	0	888.613	15.6264	12.8564	690.283	176.24	26.2416	4.2496	23.9072	67.1769	10.1107	2.4685	0.0837408	0.0428816	81.289	21.8653	148.629	704.437	46.948	0.0928143	131.93	15.942	0.32	0	0	0	0	0	0	0	0.116	0	0	0	0.001	0	155.925	3511.08
2157	26.8514	0	888.783	15.6015	12.8564	690.283	176.24	26.2416	4.2496	23.9072	67.1769	10.0016	2.44231	0.0829143	0.0500286	81.2993	21.8708	148.683	704.601	46.9657	0.0931	131.951	15.7787	0.31	0	0	0	0	0	0	0	0.11	0	0	0	0.001	0	155.925	3511.08
2158	26.5816	0	888.953	15.5766	12.8564	690.283	176.24	26.2416	4.2496	23.9072	67.1769	9.89247	2.41613	0.0820878	0.0571755	81.3097	21.8763	148.737	704.764	46.9834	0.0933857	131.971	15.6153	0.299	0	0	0	0	0	0	0	0.104	0	0	0	0.001	0	155.925	3511.08
2159	26.3118	0	889.124	15.5517	12.8564	690.283	176.24	26.2416	4.2496	23.9072	67.1769	9.78334	2.38995	0.0812612	0.0643224	81.32	21.8817	148.791	704.927	47.0011	0.0936714	131.992	15.4519	0.29	0	0	0	0	0	0	0	0.099	0	0	0	0.001	0	155.925	3511.08
2160	26.0421	0	889.294	15.5269	12.8564	690.283	176.24	26.2416	4.2496	23.9072	67.1769	9.67421	2.36376	0.0804347	0.0714694	81.3304	21.8872	148.845	705.09	47.0187	0.0939571	132.013	15.2885	0.28	0	0	0	0	0	0	0	0.094	0	0	0	0.001	0	155.925	3511.08
2161	25.7723	0	889.464	15.502	12.8564	690.283	176.24	26.2416	4.2496	23.9072	67.1769	9.56509	2.33758	0.0796082	0.0786163	81.3407	21.8927	148.899	705.253	47.0364	0.0942429	132.033	15.1252	0.271	0	0	0	0	0	0	0	0.09	0	0	0	0.001	0	155.925	3511.08
2162	25.5025	0	889.635	15.4771	12.8564	690.283	176.24	26.2416	4.2496	23.9072	67.1769	9.45596	2.3114	0.0787816	0.0857633	81.3511	21.8982	148.953	705.416	47.0541	0.0945286	132.054	14.9618	0.262	0	0	0	0	0	0	0	0.085	0	0	0	0.001	0	155.925	3511.08
2163	25.2327	0	889.805	15.4522	12.8564	690.283	176.24	26.2416	4.2496	23.9072	67.1769	9.34683	2.28521	0.0779551	0.0929102	81.3614	21.9037	149.007	705.579	47.0718	0.0948143	132.075	14.7984	0.253	0	0	0	0	0	0	0	0.081	0	0	0	0.001	0	155.925	3511.08
2164	24.9629	0	889.975	15.4274	12.8564	690.283	176.24	26.2416	4.2496	23.9072	67.1769	9.2377	2.25903	0.0771286	0.100057	81.3717	21.9092	149.061	705.742	47.0894	0.0951	132.096	14.635	0.245	0	0	0	0	0	0	0	0.077	0	0	0	0.001	0	155.925	3511.08
2165	24.6931	0	890.145	15.4025	12.8564	690.283	176.24	26.2416	4.2496	23.9072	67.1769	9.12857	2.23284	0.076302	0.107204	81.3821	21.9147	149.115	705.906	47.1071	0.0953857	132.116	14.4717	0.237	0	0	0	0	0	0	0	0.073	0	0	0	0.001	0	155.925	3511.08
2166	24.4233	0	890.316	15.3776	12.8564	690.283	176.24	26.2416	4.2496	23.9072	67.1769	9.01944	2.20666	0.0754755	0.114351	81.3924	21.9202	149.169	706.069	47.1248	0.0956714	132.137	14.3083	0.229	0	0	0	0	0	0	0	0.069	0	0	0	0.001	0	155.925	3511.08
2167	24.1535	0	890.486	15.3528	12.8564	690.283	176.24	26.2416	4.2496	23.9072	67.1769	8.91031	2.18048	0.074649	0.121498	81.4028	21.9257	149.224	706.232	47.1424	0.0959571	132.158	14.1449	0.221	0	0	0	0	0	0	0	0.066	0	0	0	0	0	155.925	3511.08
2168	23.8837	0	890.656	15.3279	12.8564	690.283	176.24	26.2416	4.2496	23.9072	67.1769	8.80119	2.15429	0.0738224	0.128645	81.4131	21.9312	149.278	706.395	47.1601	0.0962429	132.178	13.9815	0.214	0	0	0	0	0	0	0	0.063	0	0	0	0	0	155.925	3511.08
2169	23.6139	0	890.827	15.303	12.8564	690.283	176.24	26.2416	4.2496	23.9072	67.1769	8.69206	2.12811	0.0729959	0.135792	81.4235	21.9367	149.332	706.558	47.1778	0.0965286	132.199	13.8181	0.207	0	0	0	0	0	0	0	0.059	0	0	0	0	0	155.925	3511.08
2170	23.3441	0	890.997	15.2781	12.8564	690.283	176.24	26.2416	4.2496	23.9072	67.1769	8.58293	2.10193	0.0721694	0.142939	81.4338	21.9422	149.386	706.721	47.1955	0.0968143	132.22	13.6548	0.2	0	0	0	0	0	0	0	0.056	0	0	0	0	0	155.925	3511.08
2171	23.0743	0	891.167	15.2533	12.8564	690.283	176.24	26.2416	4.2496	23.9072	67.1769	8.4738	2.07574	0.0713429	0.150086	81.4442	21.9477	149.44	706.884	47.2131	0.0971	132.241	13.4914	0.194	0	0	0	0	0	0	0	0.054	0	0	0	0	0	155.925	3511.08
2172	22.8045	0	891.338	15.2284	12.8564	690.283	176.24	26.2416	4.2496	23.9072	67.1769	8.36467	2.04956	0.0705163	0.157233	81.4545	21.9532	149.494	707.047	47.2308	0.0973857	132.261	13.328	0.187	0	0	0	0	0	0	0	0.051	0	0	0	0	0	155.925	3511.08
2173	22.5347	0	891.508	15.2035	12.8564	690.283	176.24	26.2416	4.2496	23.9072	67.1769	8.25554	2.02338	0.0696898	0.16438	81.4649	21.9587	149.548	707.21	47.2485	0.0976714	132.282	13.1646	0.181	0	0	0	0	0	0	0	0.048	0	0	0	0	0	155.925	3511.08
2174	22.2649	0	891.678	15.1786	12.8564	690.283	176.24	26.2416	4.2496	23.9072	67.1769	8.14641	1.99719	0.0688633	0.171527	81.4752	21.9642	149.602	707.374	47.2662	0.0979571	132.303	13.0013	0.175	0	0	0	0	0	0	0	0.046	0	0	0	0	0	155.925	3511.08
2175	21.9951	0	891.848	15.1538	12.8564	690.283	176.24	26.2416	4.2496	23.9072	67.1769	8.03729	1.97101	0.0680367	0.178673	81.4855	21.9696	149.656	707.537	47.2838	0.0982429	132.323	12.8379	0.169	0	0	0	0	0	0	0	0.044	0	0	0	0	0	155.925	3511.08
2176	21.7253	0	892.019	15.1289	12.8564	690.283	176.24	26.2416	4.2496	23.9072	67.1769	7.92816	1.94482	0.0672102	0.18582	81.4959	21.9751	149.71	707.7	47.3015	0.0985286	132.344	12.6745	0.164	0	0	0	0	0	0	0	0.042	0	0	0	0	0	155.925	3511.08
2177	21.4555	0	892.189	15.104	12.8564	690.283	176.24	26.2416	4.2496	23.9072	67.1769	7.81903	1.91864	0.0663837	0.192967	81.5062	21.9806	149.764	707.863	47.3192	0.0988143	132.365	12.5111	0.158	0	0	0	0	0	0	0	0.039	0	0	0	0	0	155.925	3511.08
2178	21.1857	0	892.359	15.0791	12.8564	690.283	176.24	26.2416	4.2496	23.9072	67.1769	7.7099	1.89246	0.0655571	0.200114	81.5166	21.9861	149.818	708.026	47.3369	0.0991	132.386	12.3478	0.153	0	0	0	0	0	0	0	0.037	0	0	0	0	0	155.925	3511.08
2179	20.9159	0	892.53	15.0543	12.8564	690.283	176.24	26.2416	4.2496	23.9072	67.1769	7.60077	1.86627	0.0647306	0.207261	81.5269	21.9916	149.872	708.189	47.3545	0.0993857	132.406	12.1844	0.148	0	0	0	0	0	0	0	0.036	0	0	0	0	0	155.925	3511.08
2180	20.6462	0	892.7	15.0294	12.8564	690.283	176.24	26.2416	4.2496	23.9072	67.1769	7.49164	1.84009	0.0639041	0.214408	81.5373	21.9971	149.927	708.352	47.3722	0.0996714	132.427	12.021	0.143	0	0	0	0	0	0	0	0.034	0	0	0	0	0	155.925	3511.08
2181	20.3764	0	892.87	15.0045	12.8564	690.283	176.24	26.2416	4.2496	23.9072	67.1769	7.38251	1.81391	0.0630776	0.221555	81.5476	22.0026	149.981	708.515	47.3899	0.0999571	132.448	11.8576	0.138	0	0	0	0	0	0	0	0.032	0	0	0	0	0	155.925	3511.08
2182	20.1066	0	893.041	14.9796	12.8564	690.283	176.24	26.2416	4.2496	23.9072	67.1769	7.27339	1.78772	0.062251	0.228702	81.558	22.0081	150.035	708.679	47.4076	0.100243	132.468	11.6943	0.134	0	0	0	0	0	0	0	0.031	0	0	0	0	0	155.925	3511.08
2183	19.8368	0	893.211	14.9548	12.8564	690.283	176.24	26.2416	4.2496	23.9072	67.1769	7.16426	1.76154	0.0614245	0.235849	81.5683	22.0136	150.089	708.842	47.4252	0.100529	132.489	11.5309	0.129	0	0	0	0	0	0	0	0.029	0	0	0	0	0	155.925	3511.08
2184	19.567	0	893.381	14.9299	12.8564	690.283	176.24	26.2416	4.2496	23.9072	67.1769	7.05513	1.73536	0.060598	0.242996	81.5787	22.0191	150.143	709.005	47.4429	0.100814	132.51	11.3675	0.125	0	0	0	0	0	0	0	0.028	0	0	0	0	0	155.925	3511.08
2185	19.2972	0	893.552	14.905	12.8564	690.283	176.24	26.2416	4.2496	23.9072	67.1769	6.946	1.70917	0.0597714	0.250143	81.589	22.0246	150.197	709.168	47.4606	0.1011	132.531	11.2041	0.121	0	0	0	0	0	0	0	0.026	0	0	0	0	0	155.925	3511.08
2186	19.0274	0	893.722	14.8802	12.8564	690.283	176.24	26.2416	4.2496	23.9072	67.1769	6.83687	1.68299	0.0589449	0.25729	81.5994	22.0301	150.251	709.331	47.4782	0.101386	132.551	11.0407	0.117	0	0	0	0	0	0	0	0.025	0	0	0	0	0	155.925	3511.08
2187	18.7576	0	893.892	14.8553	12.8564	690.283	176.24	26.2416	4.2496	23.9072	67.1769	6.72774	1.6568	0.0581184	0.264437	81.6097	22.0356	150.305	709.494	47.4959	0.101671	132.572	10.8774	0.113	0	0	0	0	0	0	0	0.024	0	0	0	0	0	155.925	3511.08
2188	18.4878	0	894.062	14.8304	12.8564	690.283	176.24	26.2416	4.2496	23.9072	67.1769	6.61861	1.63062	0.0572918	0.271584	81.62	22.0411	150.359	709.657	47.5136	0.101957	132.593	10.714	0.109	0	0	0	0	0	0	0	0.022	0	0	0	0	0	155.925	3511.08
2189	18.218	0	894.233	14.8055	12.8564	690.283	176.24	26.2416	4.2496	23.9072	67.1769	6.50949	1.60444	0.0564653	0.278731	81.6304	22.0466	150.413	709.82	47.5313	0.102243	132.613	10.5506	0.106	0	0	0	0	0	0	0	0.021	0	0	0	0	0	155.925	3511.08
2190	17.9482	0	894.403	14.7807	12.8564	690.283	176.24	26.2416	4.2496	23.9072	67.1769	6.40036	1.57825	0.0556388	0.285878	81.6407	22.0521	150.467	709.984	47.5489	0.102529	132.634	10.3872	0.102	0	0	0	0	0	0	0	0.02	0	0	0	0	0	155.925	3511.08
2191	17.6784	0	894.573	14.7558	12.8564	690.283	176.24	26.2416	4.2496	23.9072	67.1769	6.29123	1.55207	0.0548122	0.293024	81.6511	22.0575	150.521	710.147	47.5666	0.102814	132.655	10.2239	0.099	0	0	0	0	0	0	0	0.019	0	0	0	0	0	155.925	3511.08
2192	17.4086	0	894.744	14.7309	12.8564	690.283	176.24	26.2416	4.2496	23.9072	67.1769	6.1821	1.52589	0.0539857	0.300171	81.6614	22.063	150.575	710.31	47.5843	0.1031	132.676	10.0605	0.096	0	0	0	0	0	0	0	0.018	0	0	0	0	0	155.925	3511.08
2193	17.1388	0	894.914	14.706	12.8564	690.283	176.24	26.2416	4.2496	23.9072	67.1769	6.07297	1.4997	0.0531592	0.307318	81.6718	22.0685	150.63	710.473	47.602	0.103386	132.696	9.89711	0.093	0	0	0	0	0	0	0	0.017	0	0	0	0	0	155.925	3511.08
2194	16.869	0	895.084	14.6812	12.8564	690.283	176.24	26.2416	4.2496	23.9072	67.1769	5.96384	1.47352	0.0523327	0.314465	81.6821	22.074	150.684	710.636	47.6196	0.103671	132.717	9.73373	0.089	0	0	0	0	0	0	0	0.016	0	0	0	0	0	155.925	3511.08
2195	16.5992	0	895.255	14.6563	12.8564	690.283	176.24	26.2416	4.2496	23.9072	67.1769	5.85471	1.44733	0.0515061	0.321612	81.6925	22.0795	150.738	710.799	47.6373	0.103957	132.738	9.57036	0.087	0	0	0	0	0	0	0	0.016	0	0	0	0	0	155.925	3511.08
2196	16.3294	0	895.425	14.6314	12.8564	690.283	176.24	26.2416	4.2496	23.9072	67.1769	5.74559	1.42115	0.0506796	0.328759	81.7028	22.085	150.792	710.962	47.655	0.104243	132.758	9.40698	0.084	0	0	0	0	0	0	0	0.015	0	0	0	0	0	155.925	3511.08
2197	16.0596	0	895.595	14.6065	12.8564	690.283	176.24	26.2416	4.2496	23.9072	67.1769	5.63646	1.39497	0.0498531	0.335906	81.7132	22.0905	150.846	711.125	47.6727	0.104529	132.779	9.2436	0.081	0	0	0	0	0	0	0	0.014	0	0	0	0	0	155.925	3511.08
2198	15.7898	0	895.765	14.5817	12.8564	690.283	176.24	26.2416	4.2496	23.9072	67.1769	5.52733	1.36878	0.0490265	0.343053	81.7235	22.096	150.9	711.288	47.6903	0.104814	132.8	9.08023	0.078	0	0	0	0	0	0	0	0.013	0	0	0	0	0	155.925	3511.08
2199	15.52	0	895.936	14.5568	12.8564	690.283	176.24	26.2416	4.2496	23.9072	67.1769	5.4182	1.3426	0.0482	0.3502	81.7339	22.1015	150.954	711.452	47.708	0.1051	132.821	8.91685	0.076	0	0	0	0	0	0	0	0.013	0	0	0	0	0	155.925	3511.08
2200	15.2503	0	896.106	14.5319	12.8564	690.283	176.24	26.2416	4.2496	23.9072	67.1769	5.30907	1.31642	0.0473735	0.357347	81.7442	22.107	151.008	711.615	47.7257	0.105386	132.841	8.75347	0.073	0	0	0	0	0	0	0	0.012	0	0	0	0	0	155.925	3511.08
2201	14.9805	0	896.276	14.5071	12.8564	690.283	176.24	26.2416	4.2496	23.9072	67.1769	5.19994	1.29023	0.0465469	0.364494	81.7545	22.1125	151.062	711.778	47.7433	0.105671	132.862	8.5901	0.071	0	0	0	0	0	0	0	0.012	0	0	0	0	0	155.925	3511.08
2202	14.7107	0	896.447	14.4822	12.8564	690.283	176.24	26.2416	4.2496	23.9072	67.1769	5.09081	1.26405	0.0457204	0.371641	81.7649	22.118	151.116	711.941	47.761	0.105957	132.883	8.42672	0.068	0	0	0	0	0	0	0	0.011	0	0	0	0	0	155.925	3511.08
2203	14.4409	0	896.617	14.4573	12.8564	690.283	176.24	26.2416	4.2496	23.9072	67.1769	4.98169	1.23787	0.0448939	0.378788	81.7752	22.1235	151.17	712.104	47.7787	0.106243	132.903	8.26334	0.066	0	0	0	0	0	0	0	0.01	0	0	0	0	0	155.925	3511.08
2204	14.1711	0	896.787	14.4324	12.8564	690.283	176.24	26.2416	4.2496	23.9072	67.1769	4.87256	1.21168	0.0440673	0.385935	81.7856	22.129	151.224	712.267	47.7964	0.106529	132.924	8.09997	0.064	0	0	0	0	0	0	0	0.01	0	0	0	0	0	155.925	3511.08
2205	13.9013	0	896.958	14.4076	12.8564	690.283	176.24	26.2416	4.2496	23.9072	67.1769	4.76343	1.1855	0.0432408	0.393082	81.7959	22.1345	151.278	712.43	47.814	0.106814	132.945	7.93659	0.062	0	0	0	0	0	0	0	0.009	0	0	0	0	0	155.925	3511.08
2206	13.6315	0	897.128	14.3827	12.8564	690.283	176.24	26.2416	4.2496	23.9072	67.1769	4.6543	1.15931	0.0424143	0.400229	81.8063	22.14	151.332	712.593	47.8317	0.1071	132.966	7.77321	0.06	0	0	0	0	0	0	0	0.009	0	0	0	0	0	155.925	3511.08
2207	13.3617	0	897.298	14.3578	12.8564	690.283	176.24	26.2416	4.2496	23.9072	67.1769	4.54517	1.13313	0.0415878	0.407376	81.8166	22.1455	151.387	712.757	47.8494	0.107386	132.986	7.60984	0.058	0	0	0	0	0	0	0	0.008	0	0	0	0	0	155.925	3511.08
2208	13.0919	0	897.468	14.3329	12.8564	690.283	176.24	26.2416	4.2496	23.9072	67.1769	4.43604	1.10695	0.0407612	0.414522	81.827	22.1509	151.441	712.92	47.8671	0.107671	133.007	7.44646	0.056	0	0	0	0	0	0	0	0.008	0	0	0	0	0	155.925	3511.08
2209	12.8221	0	897.639	14.3081	12.8564	690.283	176.24	26.2416	4.2496	23.9072	67.1769	4.32691	1.08076	0.0399347	0.421669	81.8373	22.1564	151.495	713.083	47.8847	0.107957	133.028	7.28308	0.054	0	0	0	0	0	0	0	0.008	0	0	0	0	0	155.925	3511.08
2210	12.5523	0	897.809	14.2832	12.8564	690.283	176.24	26.2416	4.2496	23.9072	67.1769	4.21779	1.05458	0.0391082	0.428816	81.8477	22.1619	151.549	713.246	47.9024	0.108243	133.048	7.11971	0.052	0	0	0	0	0	0	0	0.007	0	0	0	0	0	155.925	3511.08
2211	12.2825	0	897.979	14.2583	12.8564	690.283	176.24	26.2416	4.2496	23.9072	67.1769	4.10866	1.0284	0.0382816	0.435963	81.858	22.1674	151.603	713.409	47.9201	0.108529	133.069	6.95633	0.051	0	0	0	0	0	0	0	0.007	0	0	0	0	0	155.925	3511.08
2212	12.0127	0	898.15	14.2334	12.8564	690.283	176.24	26.2416	4.2496	23.9072	67.1769	3.99953	1.00221	0.0374551	0.44311	81.8683	22.1729	151.657	713.572	47.9378	0.108814	133.09	6.79296	0.049	0	0	0	0	0	0	0	0.007	0	0	0	0	0	155.925	3511.08
2213	11.7429	0	898.32	14.2086	12.8564	690.283	176.24	26.2416	4.2496	23.9072	67.1769	3.8904	0.976029	0.0366286	0.450257	81.8787	22.1784	151.711	713.735	47.9554	0.1091	133.111	6.62958	0.047	0	0	0	0	0	0	0	0.006	0	0	0	0	0	155.925	3511.08
2214	11.4731	0	898.49	14.1837	12.8564	690.283	176.24	26.2416	4.2496	23.9072	67.1769	3.78127	0.949845	0.035802	0.457404	81.889	22.1839	151.765	713.898	47.9731	0.109386	133.131	6.4662	0.046	0	0	0	0	0	0	0	0.006	0	0	0	0	0	155.925	3511.08
2215	11.2033	0	898.661	14.1588	12.8564	690.283	176.24	26.2416	4.2496	23.9072	67.1769	3.67214	0.923661	0.0349755	0.464551	81.8994	22.1894	151.819	714.062	47.9908	0.109671	133.152	6.30283	0.044	0	0	0	0	0	0	0	0.006	0	0	0	0	0	155.925	3511.08
2216	10.9335	0	898.831	14.134	12.8564	690.283	176.24	26.2416	4.2496	23.9072	67.1769	3.56301	0.897478	0.034149	0.471698	81.9097	22.1949	151.873	714.225	48.0084	0.109957	133.173	6.13945	0.043	0	0	0	0	0	0	0	0.005	0	0	0	0	0	155.925	3511.08
2217	10.6637	0	899.001	14.1091	12.8564	690.283	176.24	26.2416	4.2496	23.9072	67.1769	3.45389	0.871294	0.0333224	0.478845	81.9201	22.2004	151.927	714.388	48.0261	0.110243	133.193	5.97607	0.041	0	0	0	0	0	0	0	0.005	0	0	0	0	0	155.925	3511.08
2218	10.3939	0	899.172	14.0842	12.8564	690.283	176.24	26.2416	4.2496	23.9072	67.1769	3.34476	0.84511	0.0324959	0.485992	81.9304	22.2059	151.981	714.551	48.0438	0.110529	133.214	5.8127	0.04	0	0	0	0	0	0	0	0.005	0	0	0	0	0	155.925	3511.08
2219	10.1242	0	899.342	14.0593	12.8564	690.283	176.24	26.2416	4.2496	23.9072	67.1769	3.23563	0.818927	0.0316694	0.493139	81.9408	22.2114	152.035	714.714	48.0615	0.110814	133.235	5.64932	0.039	0	0	0	0	0	0	0	0.005	0	0	0	0	0	155.925	3511.08
2220	9.85436	0	899.512	14.0345	12.8564	690.283	176.24	26.2416	4.2496	23.9072	67.1769	3.1265	0.792743	0.0308429	0.500286	81.9511	22.2169	152.09	714.877	48.0791	0.1111	133.256	5.48594	0.037	0	0	0	0	0	0	0	0.004	0	0	0	0	0	155.925	3511.08
2221	9.58456	0	899.682	14.0096	12.8564	690.283	176.24	26.2416	4.2496	23.9072	67.1769	3.01737	0.766559	0.0300163	0.507433	81.9615	22.2224	152.144	715.04	48.0968	0.111386	133.276	5.32257	0.036	0	0	0	0	0	0	0	0.004	0	0	0	0	0	155.925	3511.08
2222	9.31477	0	899.853	13.9847	12.8564	690.283	176.24	26.2416	4.2496	23.9072	67.1769	2.90824	0.740376	0.0291898	0.51458	81.9718	22.2279	152.198	715.203	48.1145	0.111671	133.297	5.15919	0.035	0	0	0	0	0	0	0	0.004	0	0	0	0	0	155.925	3511.08
2223	9.04497	0	900.023	13.9598	12.8564	690.283	176.24	26.2416	4.2496	23.9072	67.1769	2.79911	0.714192	0.0283633	0.521727	81.9822	22.2334	152.252	715.366	48.1322	0.111957	133.318	4.99581	0.034	0	0	0	0	0	0	0	0.004	0	0	0	0	0	155.925	3511.08
2224	8.77518	0	900.193	13.935	12.8564	690.283	176.24	26.2416	4.2496	23.9072	67.1769	2.68999	0.688008	0.0275367	0.528873	81.9925	22.2388	152.306	715.53	48.1498	0.112243	133.339	4.83244	0.033	0	0	0	0	0	0	0	0.004	0	0	0	0	0	155.925	3511.08
2225	8.50538	0	900.364	13.9101	12.8564	690.283	176.24	26.2416	4.2496	23.9072	67.1769	2.58086	0.661824	0.0267102	0.53602	82.0028	22.2443	152.36	715.693	48.1675	0.112529	133.359	4.66906	0.032	0	0	0	0	0	0	0	0.003	0	0	0	0	0	155.925	3511.08
2226	8.23559	0	900.534	13.8852	12.8564	690.283	176.24	26.2416	4.2496	23.9072	67.1769	2.47173	0.635641	0.0258837	0.543167	82.0132	22.2498	152.414	715.856	48.1852	0.112814	133.38	4.50568	0.031	0	0	0	0	0	0	0	0.003	0	0	0	0	0	155.925	3511.08
2227	7.96579	0	900.704	13.8603	12.8564	690.283	176.24	26.2416	4.2496	23.9072	67.1769	2.3626	0.609457	0.0250571	0.550314	82.0235	22.2553	152.468	716.019	48.2029	0.1131	133.401	4.34231	0.03	0	0	0	0	0	0	0	0.003	0	0	0	0	0	155.925	3511.08
2228	7.696	0	900.875	13.8355	12.8564	690.283	176.24	26.2416	4.2496	23.9072	67.1769	2.25347	0.583273	0.0242306	0.557461	82.0339	22.2608	152.522	716.182	48.2205	0.113386	133.421	4.17893	0.029	0	0	0	0	0	0	0	0.003	0	0	0	0	0	155.925	3511.08
2229	7.4262	0	901.045	13.8106	12.8564	690.283	176.24	26.2416	4.2496	23.9072	67.1769	2.14434	0.55709	0.0234041	0.564608	82.0442	22.2663	152.576	716.345	48.2382	0.113671	133.442	4.01555	0.028	0	0	0	0	0	0	0	0.003	0	0	0	0	0	155.925	3511.08
2230	7.15641	0	901.215	13.7857	12.8564	690.283	176.24	26.2416	4.2496	23.9072	67.1769	2.03521	0.530906	0.0225776	0.571755	82.0546	22.2718	152.63	716.508	48.2559	0.113957	133.463	3.85218	0.027	0	0	0	0	0	0	0	0.003	0	0	0	0	0	155.925	3511.08
2231	6.88661	0	901.385	13.7608	12.8564	690.283	176.24	26.2416	4.2496	23.9072	67.1769	1.92609	0.504722	0.021751	0.578902	82.0649	22.2773	152.684	716.671	48.2736	0.114243	133.484	3.6888	0.026	0	0	0	0	0	0	0	0.002	0	0	0	0	0	155.925	3511.08
2232	6.61682	0	901.556	13.736	12.8564	690.283	176.24	26.2416	4.2496	23.9072	67.1769	1.81696	0.478539	0.0209245	0.586049	82.0753	22.2828	152.738	716.835	48.2912	0.114529	133.504	3.52542	0.025	0	0	0	0	0	0	0	0.002	0	0	0	0	0	155.925	3511.08
2233	6.34702	0	901.726	13.7111	12.8564	690.283	176.24	26.2416	4.2496	23.9072	67.1769	1.70783	0.452355	0.020098	0.593196	82.0856	22.2883	152.792	716.998	48.3089	0.114814	133.525	3.36205	0.024	0	0	0	0	0	0	0	0.002	0	0	0	0	0	155.925	3511.08
2234	6.07723	0	901.896	13.6862	12.8564	690.283	176.24	26.2416	4.2496	23.9072	67.1769	1.5987	0.426171	0.0192714	0.600343	82.096	22.2938	152.847	717.161	48.3266	0.1151	133.546	3.19867	0.023	0	0	0	0	0	0	0	0.002	0	0	0	0	0	155.925	3511.08
2235	5.80743	0	902.067	13.6614	12.8564	690.283	176.24	26.2416	4.2496	23.9072	67.1769	1.48957	0.399988	0.0184449	0.60749	82.1063	22.2993	152.901	717.324	48.3442	0.115386	133.566	3.03529	0.023	0	0	0	0	0	0	0	0.002	0	0	0	0	0	155.925	3511.08
2236	5.53764	0	902.237	13.6365	12.8564	690.283	176.24	26.2416	4.2496	23.9072	67.1769	1.38044	0.373804	0.0176184	0.614637	82.1166	22.3048	152.955	717.487	48.3619	0.115671	133.587	2.87192	0.022	0	0	0	0	0	0	0	0.002	0	0	0	0	0	155.925	3511.08
2237	5.26784	0	902.407	13.6116	12.8564	690.283	176.24	26.2416	4.2496	23.9072	67.1769	1.27131	0.34762	0.0167918	0.621784	82.127	22.3103	153.009	717.65	48.3796	0.115957	133.608	2.70854	0.021	0	0	0	0	0	0	0	0.002	0	0	0	0	0	155.925	3511.08
2238	4.99805	0	902.578	13.5867	12.8564	690.283	176.24	26.2416	4.2496	23.9072	67.1769	1.16219	0.321437	0.0159653	0.628931	82.1373	22.3158	153.063	717.813	48.3973	0.116243	133.629	2.54517	0.02	0	0	0	0	0	0	0	0.002	0	0	0	0	0	155.925	3511.08
2239	4.72825	0	902.748	13.5619	12.8564	690.283	176.24	26.2416	4.2496	23.9072	67.1769	1.05306	0.295253	0.0151388	0.636078	82.1477	22.3213	153.117	717.976	48.4149	0.116529	133.649	2.38179	0.02	0	0	0	0	0	0	0	0.002	0	0	0	0	0	155.925	3511.08
2240	4.45846	0	902.918	13.537	12.8564	690.283	176.24	26.2416	4.2496	23.9072	67.1769	0.943929	0.269069	0.0143122	0.643224	82.158	22.3267	153.171	718.14	48.4326	0.116814	133.67	2.21841	0.019	0	0	0	0	0	0	0	0.002	0	0	0	0	0	155.925	3511.08
2241	4.18866	0	903.088	13.5121	12.8564	690.283	176.24	26.2416	4.2496	23.9072	67.1769	0.8348	0.242886	0.0134857	0.650371	82.1684	22.3322	153.225	718.303	48.4503	0.1171	133.691	2.05504	0.018	0	0	0	0	0	0	0	0.001	0	0	0	0	0	155.925	3511.08
2242	3.91887	0	903.259	13.4872	12.8564	690.283	176.24	26.2416	4.2496	23.9072	67.1769	0.725671	0.216702	0.0126592	0.657518	82.1787	22.3377	153.279	718.466	48.468	0.117386	133.711	1.89166	0.018	0	0	0	0	0	0	0	0.001	0	0	0	0	0	155.925	3511.08
2243	3.64907	0	903.429	13.4624	12.8564	690.283	176.24	26.2416	4.2496	23.9072	67.1769	0.616543	0.190518	0.0118327	0.664665	82.1891	22.3432	153.333	718.629	48.4856	0.117671	133.732	1.72828	0.017	0	0	0	0	0	0	0	0.001	0	0	0	0	0	155.925	3511.08
2244	3.37928	0	903.599	13.4375	12.8564	690.283	176.24	26.2416	4.2496	23.9072	67.1769	0.507414	0.164335	0.0110061	0.671812	82.1994	22.3487	153.387	718.792	48.5033	0.117957	133.753	1.56491	0.017	0	0	0	0	0	0	0	0.001	0	0	0	0	0	155.925	3511.08
2245	3.10948	0	903.77	13.4126	12.8564	690.283	176.24	26.2416	4.2496	23.9072	67.1769	0.398286	0.138151	0.0101796	0.678959	82.2098	22.3542	153.441	718.955	48.521	0.118243	133.774	1.40153	0.016	0	0	0	0	0	0	0	0.001	0	0	0	0	0	155.925	3511.08
2246	2.83969	0	903.94	13.3877	12.8564	690.283	176.24	26.2416	4.2496	23.9072	67.1769	0.289157	0.111967	0.00935306	0.686106	82.2201	22.3597	153.495	719.118	48.5387	0.118529	133.794	1.23815	0.016	0	0	0	0	0	0	0	0.001	0	0	0	0	0	155.925	3511.08
2247	2.56989	0	904.11	13.3629	12.8564	690.283	176.24	26.2416	4.2496	23.9072	67.1769	0.180029	0.0857837	0.00852653	0.693253	82.2305	22.3652	153.55	719.281	48.5563	0.118814	133.815	1.07478	0.015	0	0	0	0	0	0	0	0.001	0	0	0	0	0	155.925	3511.08
2248	2.3001	0	904.281	13.338	12.8564	690.283	176.24	26.2416	4.2496	23.9072	67.1769	0.0709	0.0596	0.0077	0.7004	82.2408	22.3707	153.604	719.444	48.574	0.1191	133.836	0.9114	0.015	0	0	0	0	0	0	0	0.001	0	0	0	0	0	155.925	3511.08
2249	2.088	0	904.789	13.343	12.8564	690.283	176.24	26.2416	4.2496	23.9072	67.1769	0.0705	0.0592	0.0077	0.7033	82.2473	22.3987	153.976	720.203	48.7474	0.1179	133.888	0.9044	0.092	4.013	0.483	0.877	0.238	0	0	0	0.002	0	0	0	0.008	0	155.92	3511.08
2250	2.0458	0	904.86	13.3436	12.8564	690.283	176.24	26.2416	4.2496	23.9072	67.1769	0.0705	0.0592	0.0077	0.7033	82.2527	22.4002	153.987	720.252	48.7506	0.1179	133.897	0.9044	0.092	4.013	0.484	0.878	0.238	0	0	0	0.002	0	0	0	0.008	0	155.937	3511.08
2251	2.05004	0	904.955	13.3437	12.8564	690.283	176.24	26.2416	4.2496	23.9072	67.1769	0.0705	0.0592	0.0077	0.70338	82.2602	22.4023	154.001	720.318	48.7551	0.1179	133.909	0.9044	0.092	4.014	0.484	0.878	0.238	0	0	0	0.002	0	0	0	0.008	0	155.96	3511.08
2252	2.05428	0	905.05	13.3438	12.8564	690.283	176.24	26.2416	4.2496	23.9072	67.1769	0.0705	0.0592	0.0077	0.70346	82.2677	22.4043	154.015	720.384	48.7595	0.1179	133.921	0.9044	0.092	4.015	0.484	0.878	0.238	0	0	0	0.002	0	0	0	0.008	0	155.983	3511.08
2253	2.05852	0	905.145	13.3438	12.8564	690.283	176.24	26.2416	4.2496	23.9072	67.1769	0.0705	0.0592	0.0077	0.70354	82.2753	22.4064	154.029	720.45	48.764	0.1179	133.933	0.9044	0.092	4.016	0.484	0.878	0.238	0	0	0	0.002	0	0	0	0.008	0	156.006	3511.08
2254	2.06276	0	905.24	13.3439	12.8564	690.283	176.24	26.2416	4.2496	23.9072	67.1769	0.0705	0.0592	0.0077	0.70362	82.2828	22.4084	154.043	720.515	48.7684	0.1179	133.946	0.9044	0.092	4.017	0.484	0.878	0.238	0	0	0	0.002	0	0	0	0.008	0	156.029	3511.08
2255	2.067	0	905.335	13.344	12.8564	690.283	176.24	26.2416	4.2496	23.9072	67.1769	0.0705	0.0592	0.0077	0.7037	82.2903	22.4105	154.057	720.581	48.7729	0.1179	133.958	0.9044	0.092	4.018	0.484	0.878	0.238	0	0	0	0.002	0	0	0	0.008	0	156.051	3511.08
2256	2.07852	0	905.442	13.344	12.8564	690.283	176.24	26.2416	4.2496	23.9072	67.1769	0.0705	0.0592	0.0077	0.70376	82.2987	22.4128	154.073	720.655	48.7779	0.11794	133.972	0.9044	0.092	4.018	0.484	0.879	0.238	0	0	0	0.002	0	0	0	0.008	0	156.074	3511.08
2257	2.09004	0	905.548	13.344	12.8564	690.283	176.24	26.2416	4.2496	23.9072	67.1769	0.0705	0.0592	0.0077	0.70382	82.3072	22.415	154.089	720.729	48.7829	0.11798	133.985	0.9044	0.092	4.019	0.484	0.879	0.238	0	0	0	0.002	0	0	0	0.008	0	156.097	3511.08
2258	2.10156	0	905.655	13.344	12.8564	690.283	176.24	26.2416	4.2496	23.9072	67.1769	0.0705	0.0592	0.0077	0.70388	82.3156	22.4173	154.104	720.803	48.788	0.11802	133.999	0.9044	0.092	4.02	0.484	0.879	0.238	0	0	0	0.002	0	0	0	0.008	0	156.125	3511.08
2259	2.11308	0	905.762	13.344	12.8564	690.283	176.24	26.2416	4.2496	23.9072	67.1769	0.0705	0.0592	0.0077	0.70394	82.3241	22.4195	154.12	720.877	48.793	0.11806	134.013	0.9044	0.092	4.021	0.484	0.879	0.238	0	0	0	0.002	0	0	0	0.008	0	156.152	3511.08
2260	2.1246	0	905.869	13.344	12.8564	690.283	176.24	26.2416	4.2496	23.9072	67.1769	0.0705	0.0592	0.0077	0.704	82.3325	22.4218	154.136	720.951	48.798	0.1181	134.027	0.9044	0.092	4.022	0.485	0.879	0.238	0	0	0	0.002	0	0	0	0.008	0	156.18	3511.08
2261	2.12173	0	905.981	13.344	12.8564	690.283	176.24	26.2416	4.2496	23.9072	67.1769	0.0705133	0.0592	0.0077	0.704073	82.3414	22.4242	154.153	721.028	48.8033	0.118107	134.041	0.9044	0.092	4.023	0.485	0.88	0.238	0	0	0	0.002	0	0	0	0.008	0	156.207	3511.08
2262	2.11885	0	906.093	13.344	12.8564	690.283	176.24	26.2416	4.2496	23.9072	67.1769	0.0705267	0.0592	0.0077	0.704147	82.3502	22.4266	154.169	721.106	48.8085	0.118113	134.056	0.9044	0.092	4.024	0.485	0.88	0.238	0	0	0	0.002	0	0	0	0.008	0	156.235	3511.08
2263	2.11598	0	906.205	13.344	12.8564	690.283	176.24	26.2416	4.2496	23.9072	67.1769	0.07054	0.0592	0.0077	0.70422	82.3591	22.4291	154.186	721.184	48.8138	0.11812	134.07	0.9044	0.092	4.025	0.485	0.88	0.238	0	0	0	0.002	0	0	0	0.008	0	156.263	3511.08
2264	2.11311	0	906.317	13.344	12.8564	690.283	176.24	26.2416	4.2496	23.9072	67.1769	0.0705533	0.0592	0.0077	0.704293	82.368	22.4315	154.202	721.261	48.819	0.118127	134.084	0.9044	0.092	4.026	0.485	0.88	0.238	0	0	0	0.002	0	0	0	0.008	0	156.29	3511.08
2265	2.11023	0	906.429	13.344	12.8564	690.283	176.24	26.2416	4.2496	23.9072	67.1769	0.0705667	0.0592	0.0077	0.704367	82.3768	22.4339	154.219	721.339	48.8243	0.118133	134.099	0.9044	0.092	4.028	0.485	0.881	0.238	0	0	0	0.002	0	0	0	0.008	0	156.318	3511.08
2266	2.10736	0	906.541	13.344	12.8564	690.283	176.24	26.2416	4.2496	23.9072	67.1769	0.07058	0.0592	0.0077	0.70444	82.3857	22.4363	154.236	721.417	48.8295	0.11814	134.113	0.9044	0.092	4.029	0.485	0.881	0.238	0	0	0	0.002	0	0	0	0.008	0	156.345	3511.08
2267	2.10449	0	906.653	13.344	12.8564	690.283	176.24	26.2416	4.2496	23.9072	67.1769	0.0705933	0.0592	0.0077	0.704513	82.3946	22.4387	154.252	721.494	48.8348	0.118147	134.128	0.9044	0.093	4.03	0.485	0.881	0.239	0	0	0	0.002	0	0	0	0.008	0	156.372	3511.08
2268	2.10161	0	906.765	13.344	12.8564	690.283	176.24	26.2416	4.2496	23.9072	67.1769	0.0706067	0.0592	0.0077	0.704587	82.4034	22.4412	154.269	721.572	48.84	0.118153	134.142	0.9044	0.093	4.031	0.486	0.881	0.239	0	0	0	0.002	0	0	0	0.008	0	156.399	3511.08
2269	2.09874	0	906.878	13.344	12.8564	690.283	176.24	26.2416	4.2496	23.9072	67.1769	0.07062	0.0592	0.0077	0.70466	82.4123	22.4436	154.285	721.65	48.8453	0.11816	134.157	0.9044	0.093	4.032	0.486	0.882	0.239	0	0	0	0.002	0	0	0	0.008	0	156.426	3511.08
2270	2.09587	0	906.99	13.344	12.8564	690.283	176.24	26.2416	4.2496	23.9072	67.1769	0.0706333	0.0592	0.0077	0.704733	82.4212	22.446	154.302	721.727	48.8505	0.118167	134.171	0.9044	0.093	4.033	0.486	0.882	0.239	0	0	0	0.002	0	0	0	0.008	0	156.453	3511.08
2271	2.09299	0	907.102	13.344	12.8564	690.283	176.24	26.2416	4.2496	23.9072	67.1769	0.0706467	0.0592	0.0077	0.704807	82.43	22.4484	154.319	721.805	48.8558	0.118173	134.185	0.9044	0.093	4.034	0.486	0.882	0.239	0	0	0	0.002	0	0	0	0.008	0	156.48	3511.08
2272	2.09012	0	907.214	13.344	12.8564	690.283	176.24	26.2416	4.2496	23.9072	67.1769	0.07066	0.0592	0.0077	0.70488	82.4389	22.4508	154.335	721.883	48.861	0.11818	134.2	0.9044	0.093	4.035	0.486	0.882	0.239	0	0	0	0.002	0	0	0	0.008	0	156.506	3511.08
2273	2.08725	0	907.326	13.344	12.8564	690.283	176.24	26.2416	4.2496	23.9072	67.1769	0.0706733	0.0592	0.0077	0.704953	82.4478	22.4533	154.352	721.96	48.8663	0.118187	134.214	0.9044	0.093	4.036	0.486	0.882	0.239	0	0	0	0.002	0	0	0	0.008	0	156.532	3511.08
2274	2.08437	0	907.438	13.344	12.8564	690.283	176.24	26.2416	4.2496	23.9072	67.1769	0.0706867	0.0592	0.0077	0.705027	82.4566	22.4557	154.368	722.038	48.8715	0.118193	134.229	0.9044	0.093	4.037	0.486	0.883	0.239	0	0	0	0.002	0	0	0	0.008	0	156.559	3511.08
2275	2.0815	0	907.55	13.344	12.8564	690.283	176.24	26.2416	4.2496	23.9072	67.1769	0.0707	0.0592	0.0077	0.7051	82.4655	22.4581	154.385	722.116	48.8768	0.1182	134.243	0.9044	0.093	4.037	0.486	0.883	0.239	0	0	0	0.002	0	0	0	0.008	0	156.585	3511.08
2276	2.078	0	907.651	13.344	12.8564	690.283	176.24	26.2416	4.2496	23.9072	67.1769	0.070708	0.0592	0.0077	0.705172	82.4734	22.4603	154.4	722.185	48.8815	0.118216	134.256	0.9044	0.093	4.038	0.487	0.883	0.239	0	0	0	0.002	0	0	0	0.008	0	156.611	3511.08
2277	2.07451	0	907.751	13.344	12.8564	690.283	176.24	26.2416	4.2496	23.9072	67.1769	0.070716	0.0592	0.0077	0.705244	82.4814	22.4624	154.415	722.255	48.8862	0.118232	134.269	0.9044	0.093	4.039	0.487	0.883	0.239	0	0	0	0.002	0	0	0	0.008	0	156.636	3511.08
2278	2.07101	0	907.851	13.344	12.8564	690.283	176.24	26.2416	4.2496	23.9072	67.1769	0.070724	0.0592	0.0077	0.705316	82.4893	22.4646	154.43	722.324	48.8909	0.118248	134.282	0.9044	0.093	4.04	0.487	0.883	0.239	0	0	0	0.002	0	0	0	0.008	0	156.662	3511.08
2279	2.06752	0	907.952	13.344	12.8564	690.283	176.24	26.2416	4.2496	23.9072	67.1769	0.070732	0.0592	0.0077	0.705388	82.4973	22.4668	154.445	722.394	48.8956	0.118264	134.295	0.9044	0.093	4.041	0.487	0.884	0.239	0	0	0	0.002	0	0	0	0.008	0	156.687	3511.08
2280	2.06402	0	908.052	13.344	12.8564	690.283	176.24	26.2416	4.2496	23.9072	67.1769	0.07074	0.0592	0.0077	0.70546	82.5052	22.4689	154.459	722.464	48.9003	0.11828	134.308	0.9044	0.093	4.042	0.487	0.884	0.239	0	0	0	0.002	0	0	0	0.008	0	156.713	3511.08
2281	2.06052	0	908.153	13.344	12.8564	690.283	176.24	26.2416	4.2496	23.9072	67.1769	0.070748	0.0592	0.0077	0.705532	82.5132	22.4711	154.474	722.533	48.905	0.118296	134.321	0.9044	0.093	4.043	0.487	0.884	0.239	0	0	0	0.002	0	0	0	0.008	0	156.738	3511.08
2282	2.05703	0	908.253	13.344	12.8564	690.283	176.24	26.2416	4.2496	23.9072	67.1769	0.070756	0.0592	0.0077	0.705604	82.5211	22.4732	154.489	722.603	48.9098	0.118312	134.334	0.9044	0.093	4.044	0.487	0.884	0.239	0	0	0	0.002	0	0	0	0.008	0	156.763	3511.08
2283	2.05353	0	908.354	13.344	12.8564	690.283	176.24	26.2416	4.2496	23.9072	67.1769	0.070764	0.0592	0.0077	0.705676	82.5291	22.4754	154.504	722.672	48.9145	0.118328	134.347	0.9044	0.093	4.045	0.487	0.884	0.239	0	0	0	0.002	0	0	0	0.008	0	156.788	3511.08
2284	2.05004	0	908.454	13.344	12.8564	690.283	176.24	26.2416	4.2496	23.9072	67.1769	0.070772	0.0592	0.0077	0.705748	82.537	22.4776	154.519	722.742	48.9192	0.118344	134.36	0.9044	0.093	4.046	0.487	0.885	0.24	0	0	0	0.002	0	0	0	0.008	0	156.812	3511.08
2285	2.04654	0	908.554	13.344	12.8564	690.283	176.24	26.2416	4.2496	23.9072	67.1769	0.07078	0.0592	0.0077	0.70582	82.5449	22.4797	154.534	722.812	48.9239	0.11836	134.373	0.9044	0.093	4.047	0.488	0.885	0.24	0	0	0	0.002	0	0	0	0.008	0	156.837	3511.08
2286	2.04304	0	908.655	13.344	12.8564	690.283	176.24	26.2416	4.2496	23.9072	67.1769	0.070788	0.0592	0.0077	0.705892	82.5529	22.4819	154.549	722.881	48.9286	0.118376	134.386	0.9044	0.093	4.048	0.488	0.885	0.24	0	0	0	0.002	0	0	0	0.008	0	156.861	3511.08
2287	2.03955	0	908.755	13.344	12.8564	690.283	176.24	26.2416	4.2496	23.9072	67.1769	0.070796	0.0592	0.0077	0.705964	82.5608	22.4841	154.564	722.951	48.9333	0.118392	134.398	0.9044	0.093	4.049	0.488	0.885	0.24	0	0	0	0.002	0	0	0	0.008	0	156.886	3511.08
2288	2.03605	0	908.856	13.344	12.8564	690.283	176.24	26.2416	4.2496	23.9072	67.1769	0.070804	0.0592	0.0077	0.706036	82.5688	22.4862	154.578	723.02	48.938	0.118408	134.411	0.9044	0.093	4.05	0.488	0.885	0.24	0	0	0	0.002	0	0	0	0.008	0	156.91	3511.08
2289	2.03256	0	908.956	13.344	12.8564	690.283	176.24	26.2416	4.2496	23.9072	67.1769	0.070812	0.0592	0.0077	0.706108	82.5767	22.4884	154.593	723.09	48.9427	0.118424	134.424	0.9044	0.093	4.051	0.488	0.886	0.24	0	0	0	0.002	0	0	0	0.008	0	156.934	3511.08
2290	2.02906	0	909.057	13.344	12.8564	690.283	176.24	26.2416	4.2496	23.9072	67.1769	0.07082	0.0592	0.0077	0.70618	82.5847	22.4906	154.608	723.159	48.9474	0.11844	134.437	0.9044	0.093	4.051	0.488	0.886	0.24	0	0	0	0.002	0	0	0	0.008	0	156.958	3511.08
2291	2.02556	0	909.157	13.344	12.8564	690.283	176.24	26.2416	4.2496	23.9072	67.1769	0.070828	0.0592	0.0077	0.706252	82.5926	22.4927	154.623	723.229	48.9521	0.118456	134.45	0.9044	0.093	4.052	0.488	0.886	0.24	0	0	0	0.002	0	0	0	0.008	0	156.981	3511.08
2292	2.02207	0	909.258	13.344	12.8564	690.283	176.24	26.2416	4.2496	23.9072	67.1769	0.070836	0.0592	0.0077	0.706324	82.6005	22.4949	154.638	723.299	48.9568	0.118472	134.463	0.9044	0.093	4.053	0.488	0.886	0.24	0	0	0	0.002	0	0	0	0.008	0	157.005	3511.08
2293	2.01857	0	909.358	13.344	12.8564	690.283	176.24	26.2416	4.2496	23.9072	67.1769	0.070844	0.0592	0.0077	0.706396	82.6085	22.4971	154.653	723.368	48.9615	0.118488	134.476	0.9044	0.093	4.054	0.488	0.886	0.24	0	0	0	0.002	0	0	0	0.008	0	157.028	3511.08
2294	2.01508	0	909.458	13.344	12.8564	690.283	176.24	26.2416	4.2496	23.9072	67.1769	0.070852	0.0592	0.0077	0.706468	82.6164	22.4992	154.668	723.438	48.9663	0.118504	134.489	0.9044	0.093	4.055	0.489	0.887	0.24	0	0	0	0.002	0	0	0	0.008	0	157.052	3511.08
2295	2.01158	0	909.559	13.344	12.8564	690.283	176.24	26.2416	4.2496	23.9072	67.1769	0.07086	0.0592	0.0077	0.70654	82.6244	22.5014	154.683	723.507	48.971	0.11852	134.502	0.9044	0.093	4.056	0.489	0.887	0.24	0	0	0	0.002	0	0	0	0.008	0	157.075	3511.08
2296	2.00808	0	909.659	13.344	12.8564	690.283	176.24	26.2416	4.2496	23.9072	67.1769	0.070868	0.0592	0.0077	0.706612	82.6323	22.5035	154.698	723.577	48.9757	0.118536	134.515	0.9044	0.093	4.057	0.489	0.887	0.24	0	0	0	0.002	0	0	0	0.008	0	157.098	3511.08
2297	2.00459	0	909.76	13.344	12.8564	690.283	176.24	26.2416	4.2496	23.9072	67.1769	0.070876	0.0592	0.0077	0.706684	82.6403	22.5057	154.712	723.647	48.9804	0.118552	134.528	0.9044	0.093	4.058	0.489	0.887	0.24	0	0	0	0.002	0	0	0	0.008	0	157.121	3511.08
2298	2.00109	0	909.86	13.344	12.8564	690.283	176.24	26.2416	4.2496	23.9072	67.1769	0.070884	0.0592	0.0077	0.706756	82.6482	22.5079	154.727	723.716	48.9851	0.118568	134.541	0.9044	0.093	4.058	0.489	0.887	0.24	0	0	0	0.002	0	0	0	0.008	0	157.144	3511.08
2299	1.9976	0	909.961	13.344	12.8564	690.283	176.24	26.2416	4.2496	23.9072	67.1769	0.070892	0.0592	0.0077	0.706828	82.6562	22.51	154.742	723.786	48.9898	0.118584	134.554	0.9044	0.093	4.059	0.489	0.888	0.24	0	0	0	0.002	0	0	0	0.008	0	157.167	3511.08
2300	1.9941	0	910.061	13.344	12.8564	690.283	176.24	26.2416	4.2496	23.9072	67.1769	0.0709	0.0592	0.0077	0.7069	82.6641	22.5122	154.757	723.855	48.9945	0.1186	134.567	0.9044	0.093	4.06	0.489	0.888	0.24	0	0	0	0.002	0	0	0	0.008	0	157.189	3511.08
2301	1.99199	0	910.145	13.344	12.8564	690.283	176.24	26.2416	4.2496	23.9072	67.1769	0.070904	0.0592	0.0077	0.706956	82.6707	22.514	154.769	723.913	48.9984	0.118608	134.577	0.9044	0.093	4.061	0.489	0.888	0.24	0	0	0	0.002	0	0	0	0.008	0	157.212	3511.08
2302	1.98988	0	910.228	13.344	12.8564	690.283	176.24	26.2416	4.2496	23.9072	67.1769	0.070908	0.0592	0.0077	0.707012	82.6773	22.5158	154.782	723.971	49.0023	0.118616	134.588	0.9044	0.093	4.062	0.489	0.888	0.24	0	0	0	0.002	0	0	0	0.008	0	157.234	3511.08
2303	1.98776	0	910.312	13.344	12.8564	690.283	176.24	26.2416	4.2496	23.9072	67.1769	0.070912	0.0592	0.0077	0.707068	82.6839	22.5176	154.794	724.029	49.0062	0.118624	134.599	0.9044	0.093	4.063	0.489	0.888	0.24	0	0	0	0.002	0	0	0	0.008	0	157.256	3511.08
2304	1.98565	0	910.395	13.344	12.8564	690.283	176.24	26.2416	4.2496	23.9072	67.1769	0.070916	0.0592	0.0077	0.707124	82.6905	22.5194	154.807	724.087	49.0102	0.118632	134.61	0.9044	0.093	4.063	0.49	0.888	0.241	0	0	0	0.002	0	0	0	0.008	0	157.278	3511.08
2305	1.98354	0	910.479	13.344	12.8564	690.283	176.24	26.2416	4.2496	23.9072	67.1769	0.07092	0.0592	0.0077	0.70718	82.6971	22.5212	154.819	724.144	49.0141	0.11864	134.62	0.9044	0.093	4.064	0.49	0.889	0.241	0	0	0	0.002	0	0	0	0.008	0	157.3	3511.08
2306	1.98143	0	910.562	13.344	12.8564	690.283	176.24	26.2416	4.2496	23.9072	67.1769	0.070924	0.0592	0.0077	0.707236	82.7037	22.523	154.831	724.202	49.018	0.118648	134.631	0.9044	0.093	4.065	0.49	0.889	0.241	0	0	0	0.002	0	0	0	0.008	0	157.322	3511.08
2307	1.97932	0	910.645	13.344	12.8564	690.283	176.24	26.2416	4.2496	23.9072	67.1769	0.070928	0.0592	0.0077	0.707292	82.7103	22.5248	154.844	724.26	49.0219	0.118656	134.642	0.9044	0.093	4.066	0.49	0.889	0.241	0	0	0	0.002	0	0	0	0.008	0	157.344	3511.08
2308	1.9772	0	910.729	13.344	12.8564	690.283	176.24	26.2416	4.2496	23.9072	67.1769	0.070932	0.0592	0.0077	0.707348	82.7169	22.5266	154.856	724.318	49.0258	0.118664	134.653	0.9044	0.093	4.067	0.49	0.889	0.241	0	0	0	0.002	0	0	0	0.008	0	157.366	3511.08
2309	1.97509	0	910.812	13.344	12.8564	690.283	176.24	26.2416	4.2496	23.9072	67.1769	0.070936	0.0592	0.0077	0.707404	82.7236	22.5284	154.868	724.376	49.0297	0.118672	134.663	0.9044	0.093	4.068	0.49	0.889	0.241	0	0	0	0.002	0	0	0	0.008	0	157.387	3511.08
2310	1.97298	0	910.896	13.344	12.8564	690.283	176.24	26.2416	4.2496	23.9072	67.1769	0.07094	0.0592	0.0077	0.70746	82.7302	22.5302	154.881	724.434	49.0337	0.11868	134.674	0.9044	0.093	4.068	0.49	0.89	0.241	0	0	0	0.002	0	0	0	0.008	0	157.409	3511.08
2311	1.97087	0	910.979	13.344	12.8564	690.283	176.24	26.2416	4.2496	23.9072	67.1769	0.070944	0.0592	0.0077	0.707516	82.7368	22.532	154.893	724.491	49.0376	0.118688	134.685	0.9044	0.093	4.069	0.49	0.89	0.241	0	0	0	0.002	0	0	0	0.008	0	157.43	3511.08
2312	1.96876	0	911.063	13.344	12.8564	690.283	176.24	26.2416	4.2496	23.9072	67.1769	0.070948	0.0592	0.0077	0.707572	82.7434	22.5338	154.905	724.549	49.0415	0.118696	134.696	0.9044	0.093	4.07	0.49	0.89	0.241	0	0	0	0.002	0	0	0	0.008	0	157.452	3511.08
2313	1.96664	0	911.146	13.344	12.8564	690.283	176.24	26.2416	4.2496	23.9072	67.1769	0.070952	0.0592	0.0077	0.707628	82.75	22.5356	154.918	724.607	49.0454	0.118704	134.706	0.9044	0.093	4.071	0.49	0.89	0.241	0	0	0	0.002	0	0	0	0.008	0	157.473	3511.08
2314	1.96453	0	911.23	13.344	12.8564	690.283	176.24	26.2416	4.2496	23.9072	67.1769	0.070956	0.0592	0.0077	0.707684	82.7566	22.5374	154.93	724.665	49.0493	0.118712	134.717	0.9044	0.093	4.071	0.491	0.89	0.241	0	0	0	0.002	0	0	0	0.008	0	157.494	3511.08
2315	1.96242	0	911.313	13.344	12.8564	690.283	176.24	26.2416	4.2496	23.9072	67.1769	0.07096	0.0592	0.0077	0.70774	82.7632	22.5392	154.943	724.723	49.0532	0.11872	134.728	0.9044	0.093	4.072	0.491	0.89	0.241	0	0	0	0.002	0	0	0	0.008	0	157.515	3511.08
2316	1.96031	0	911.397	13.344	12.8564	690.283	176.24	26.2416	4.2496	23.9072	67.1769	0.070964	0.0592	0.0077	0.707796	82.7698	22.541	154.955	724.781	49.0572	0.118728	134.739	0.9044	0.094	4.073	0.491	0.891	0.241	0	0	0	0.002	0	0	0	0.008	0	157.536	3511.08
2317	1.9582	0	911.48	13.344	12.8564	690.283	176.24	26.2416	4.2496	23.9072	67.1769	0.070968	0.0592	0.0077	0.707852	82.7764	22.5428	154.967	724.839	49.0611	0.118736	134.749	0.9044	0.094	4.074	0.491	0.891	0.241	0	0	0	0.002	0	0	0	0.008	0	157.556	3511.08
2318	1.95608	0	911.564	13.344	12.8564	690.283	176.24	26.2416	4.2496	23.9072	67.1769	0.070972	0.0592	0.0077	0.707908	82.783	22.5446	154.98	724.896	49.065	0.118744	134.76	0.9044	0.094	4.075	0.491	0.891	0.241	0	0	0	0.002	0	0	0	0.008	0	157.577	3511.08
2319	1.95397	0	911.647	13.344	12.8564	690.283	176.24	26.2416	4.2496	23.9072	67.1769	0.070976	0.0592	0.0077	0.707964	82.7896	22.5464	154.992	724.954	49.0689	0.118752	134.771	0.9044	0.094	4.075	0.491	0.891	0.241	0	0	0	0.002	0	0	0	0.008	0	157.598	3511.08
2320	1.95186	0	911.731	13.344	12.8564	690.283	176.24	26.2416	4.2496	23.9072	67.1769	0.07098	0.0592	0.0077	0.70802	82.7962	22.5482	155.004	725.012	49.0728	0.11876	134.782	0.9044	0.094	4.076	0.491	0.891	0.241	0	0	0	0.002	0	0	0	0.008	0	157.618	3511.08
2321	1.94975	0	911.814	13.344	12.8564	690.283	176.24	26.2416	4.2496	23.9072	67.1769	0.070984	0.0592	0.0077	0.708076	82.8028	22.55	155.017	725.07	49.0767	0.118768	134.792	0.9044	0.094	4.077	0.491	0.891	0.241	0	0	0	0.002	0	0	0	0.008	0	157.639	3511.08
2322	1.94764	0	911.898	13.344	12.8564	690.283	176.24	26.2416	4.2496	23.9072	67.1769	0.070988	0.0592	0.0077	0.708132	82.8094	22.5518	155.029	725.128	49.0807	0.118776	134.803	0.9044	0.094	4.078	0.491	0.892	0.241	0	0	0	0.002	0	0	0	0.008	0	157.659	3511.08
2323	1.94552	0	911.981	13.344	12.8564	690.283	176.24	26.2416	4.2496	23.9072	67.1769	0.070992	0.0592	0.0077	0.708188	82.816	22.5536	155.041	725.186	49.0846	0.118784	134.814	0.9044	0.094	4.078	0.491	0.892	0.241	0	0	0	0.002	0	0	0	0.008	0	157.679	3511.08
2324	1.94341	0	912.065	13.344	12.8564	690.283	176.24	26.2416	4.2496	23.9072	67.1769	0.070996	0.0592	0.0077	0.708244	82.8226	22.5554	155.054	725.243	49.0885	0.118792	134.825	0.9044	0.094	4.079	0.491	0.892	0.241	0	0	0	0.002	0	0	0	0.008	0	157.699	3511.08
2325	1.9413	0	912.148	13.344	12.8564	690.283	176.24	26.2416	4.2496	23.9072	67.1769	0.071	0.0592	0.0077	0.7083	82.8293	22.5572	155.066	725.301	49.0924	0.1188	134.835	0.9044	0.094	4.08	0.492	0.892	0.242	0	0	0	0.002	0	0	0	0.008	0	157.719	3511.08
2326	1.93919	0	912.232	13.344	12.8564	690.283	176.24	26.2416	4.2496	23.9072	67.1769	0.071004	0.0592	0.0077	0.708356	82.8359	22.5591	155.079	725.359	49.0963	0.118808	134.846	0.9044	0.094	4.081	0.492	0.892	0.242	0	0	0	0.002	0	0	0	0.008	0	157.739	3511.08
2327	1.93708	0	912.315	13.344	12.8564	690.283	176.24	26.2416	4.2496	23.9072	67.1769	0.071008	0.0592	0.0077	0.708412	82.8425	22.5609	155.091	725.417	49.1002	0.118816	134.857	0.9044	0.094	4.081	0.492	0.892	0.242	0	0	0	0.002	0	0	0	0.008	0	157.759	3511.08
2328	1.93496	0	912.399	13.344	12.8564	690.283	176.24	26.2416	4.2496	23.9072	67.1769	0.071012	0.0592	0.0077	0.708468	82.8491	22.5627	155.103	725.475	49.1041	0.118824	134.868	0.9044	0.094	4.082	0.492	0.893	0.242	0	0	0	0.002	0	0	0	0.008	0	157.779	3511.08
2329	1.93285	0	912.482	13.344	12.8564	690.283	176.24	26.2416	4.2496	23.9072	67.1769	0.071016	0.0592	0.0077	0.708524	82.8557	22.5645	155.116	725.533	49.1081	0.118832	134.878	0.9044	0.094	4.083	0.492	0.893	0.242	0	0	0	0.002	0	0	0	0.008	0	157.799	3511.08
2330	1.93074	0	912.566	13.344	12.8564	690.283	176.24	26.2416	4.2496	23.9072	67.1769	0.07102	0.0592	0.0077	0.70858	82.8623	22.5663	155.128	725.59	49.112	0.11884	134.889	0.9044	0.094	4.084	0.492	0.893	0.242	0	0	0	0.002	0	0	0	0.008	0	157.818	3511.08
2331	1.92863	0	912.649	13.344	12.8564	690.283	176.24	26.2416	4.2496	23.9072	67.1769	0.071024	0.0592	0.0077	0.708636	82.8689	22.5681	155.14	725.648	49.1159	0.118848	134.9	0.9044	0.094	4.084	0.492	0.893	0.242	0	0	0	0.002	0	0	0	0.008	0	157.838	3511.08
2332	1.92652	0	912.733	13.344	12.8564	690.283	176.24	26.2416	4.2496	23.9072	67.1769	0.071028	0.0592	0.0077	0.708692	82.8755	22.5699	155.153	725.706	49.1198	0.118856	134.911	0.9044	0.094	4.085	0.492	0.893	0.242	0	0	0	0.002	0	0	0	0.008	0	157.857	3511.08
2333	1.9244	0	912.816	13.344	12.8564	690.283	176.24	26.2416	4.2496	23.9072	67.1769	0.071032	0.0592	0.0077	0.708748	82.8821	22.5717	155.165	725.764	49.1237	0.118864	134.921	0.9044	0.094	4.086	0.492	0.893	0.242	0	0	0	0.002	0	0	0	0.008	0	157.877	3511.08
2334	1.92229	0	912.9	13.344	12.8564	690.283	176.24	26.2416	4.2496	23.9072	67.1769	0.071036	0.0592	0.0077	0.708804	82.8887	22.5735	155.177	725.822	49.1276	0.118872	134.932	0.9044	0.094	4.087	0.492	0.894	0.242	0	0	0	0.002	0	0	0	0.008	0	157.896	3511.08
2335	1.92018	0	912.983	13.344	12.8564	690.283	176.24	26.2416	4.2496	23.9072	67.1769	0.07104	0.0592	0.0077	0.70886	82.8953	22.5753	155.19	725.88	49.1316	0.11888	134.943	0.9044	0.094	4.087	0.492	0.894	0.242	0	0	0	0.002	0	0	0	0.008	0	157.915	3511.08
2336	1.91807	0	913.067	13.344	12.8564	690.283	176.24	26.2416	4.2496	23.9072	67.1769	0.071044	0.0592	0.0077	0.708916	82.9019	22.5771	155.202	725.937	49.1355	0.118888	134.954	0.9044	0.094	4.088	0.493	0.894	0.242	0	0	0	0.002	0	0	0	0.008	0	157.934	3511.08
2337	1.91596	0	913.15	13.344	12.8564	690.283	176.24	26.2416	4.2496	23.9072	67.1769	0.071048	0.0592	0.0077	0.708972	82.9085	22.5789	155.214	725.995	49.1394	0.118896	134.964	0.9044	0.094	4.089	0.493	0.894	0.242	0	0	0	0.002	0	0	0	0.008	0	157.953	3511.08
2338	1.91384	0	913.233	13.344	12.8564	690.283	176.24	26.2416	4.2496	23.9072	67.1769	0.071052	0.0592	0.0077	0.709028	82.9151	22.5807	155.227	726.053	49.1433	0.118904	134.975	0.9044	0.094	4.089	0.493	0.894	0.242	0	0	0	0.002	0	0	0	0.008	0	157.972	3511.08
2339	1.91173	0	913.317	13.344	12.8564	690.283	176.24	26.2416	4.2496	23.9072	67.1769	0.071056	0.0592	0.0077	0.709084	82.9217	22.5825	155.239	726.111	49.1472	0.118912	134.986	0.9044	0.094	4.09	0.493	0.894	0.242	0	0	0	0.002	0	0	0	0.008	0	157.991	3511.08
2340	1.90962	0	913.4	13.344	12.8564	690.283	176.24	26.2416	4.2496	23.9072	67.1769	0.07106	0.0592	0.0077	0.70914	82.9283	22.5843	155.252	726.169	49.1511	0.11892	134.997	0.9044	0.094	4.091	0.493	0.894	0.242	0	0	0	0.002	0	0	0	0.008	0	158.01	3511.08
2341	1.90751	0	913.484	13.344	12.8564	690.283	176.24	26.2416	4.2496	23.9072	67.1769	0.071064	0.0592	0.0077	0.709196	82.9349	22.5861	155.264	726.227	49.1551	0.118928	135.008	0.9044	0.094	4.091	0.493	0.895	0.242	0	0	0	0.002	0	0	0	0.008	0	158.029	3511.08
2342	1.9054	0	913.567	13.344	12.8564	690.283	176.24	26.2416	4.2496	23.9072	67.1769	0.071068	0.0592	0.0077	0.709252	82.9416	22.5879	155.276	726.284	49.159	0.118936	135.018	0.9044	0.094	4.092	0.493	0.895	0.242	0	0	0	0.002	0	0	0	0.008	0	158.047	3511.08
2343	1.90328	0	913.651	13.344	12.8564	690.283	176.24	26.2416	4.2496	23.9072	67.1769	0.071072	0.0592	0.0077	0.709308	82.9482	22.5897	155.289	726.342	49.1629	0.118944	135.029	0.9044	0.094	4.093	0.493	0.895	0.242	0	0	0	0.002	0	0	0	0.008	0	158.066	3511.08
2344	1.90117	0	913.734	13.344	12.8564	690.283	176.24	26.2416	4.2496	23.9072	67.1769	0.071076	0.0592	0.0077	0.709364	82.9548	22.5915	155.301	726.4	49.1668	0.118952	135.04	0.9044	0.094	4.094	0.493	0.895	0.242	0	0	0	0.002	0	0	0	0.008	0	158.085	3511.08
2345	1.89906	0	913.818	13.344	12.8564	690.283	176.24	26.2416	4.2496	23.9072	67.1769	0.07108	0.0592	0.0077	0.70942	82.9614	22.5933	155.313	726.458	49.1707	0.11896	135.051	0.9044	0.094	4.094	0.493	0.895	0.242	0	0	0	0.002	0	0	0	0.008	0	158.103	3511.08
2346	1.89695	0	913.901	13.344	12.8564	690.283	176.24	26.2416	4.2496	23.9072	67.1769	0.071084	0.0592	0.0077	0.709476	82.968	22.5951	155.326	726.516	49.1746	0.118968	135.061	0.9044	0.094	4.095	0.493	0.895	0.242	0	0	0	0.002	0	0	0	0.008	0	158.121	3511.08
2347	1.89484	0	913.985	13.344	12.8564	690.283	176.24	26.2416	4.2496	23.9072	67.1769	0.071088	0.0592	0.0077	0.709532	82.9746	22.5969	155.338	726.574	49.1786	0.118976	135.072	0.9044	0.094	4.096	0.493	0.896	0.242	0	0	0	0.002	0	0	0	0.008	0	158.14	3511.08
2348	1.89272	0	914.068	13.344	12.8564	690.283	176.24	26.2416	4.2496	23.9072	67.1769	0.071092	0.0592	0.0077	0.709588	82.9812	22.5987	155.35	726.631	49.1825	0.118984	135.083	0.9044	0.094	4.096	0.494	0.896	0.242	0	0	0	0.002	0	0	0	0.008	0	158.158	3511.08
2349	1.89061	0	914.152	13.344	12.8564	690.283	176.24	26.2416	4.2496	23.9072	67.1769	0.071096	0.0592	0.0077	0.709644	82.9878	22.6005	155.363	726.689	49.1864	0.118992	135.094	0.9044	0.094	4.097	0.494	0.896	0.243	0	0	0	0.002	0	0	0	0.008	0	158.176	3511.08
2350	1.8885	0	914.235	13.344	12.8564	690.283	176.24	26.2416	4.2496	23.9072	67.1769	0.0711	0.0592	0.0077	0.7097	82.9944	22.6023	155.375	726.747	49.1903	0.119	135.104	0.9044	0.094	4.098	0.494	0.896	0.243	0	0	0	0.002	0	0	0	0.008	0	158.194	3511.08
2351	1.88599	0	914.304	13.344	12.8564	690.283	176.24	26.2416	4.2496	23.9072	67.1769	0.071106	0.0592	0.0077	0.709744	82.9999	22.6038	155.385	726.795	49.1935	0.119008	135.113	0.9044	0.094	4.098	0.494	0.896	0.243	0	0	0	0.002	0	0	0	0.008	0	158.212	3511.08
2352	1.88349	0	914.373	13.344	12.8564	690.283	176.24	26.2416	4.2496	23.9072	67.1769	0.071112	0.0592	0.0077	0.709788	83.0053	22.6053	155.396	726.843	49.1968	0.119016	135.122	0.9044	0.094	4.099	0.494	0.896	0.243	0	0	0	0.002	0	0	0	0.008	0	158.23	3511.08
2353	1.88098	0	914.442	13.344	12.8564	690.283	176.24	26.2416	4.2496	23.9072	67.1769	0.071118	0.0592	0.0077	0.709832	83.0108	22.6067	155.406	726.89	49.2	0.119024	135.131	0.9044	0.094	4.1	0.494	0.896	0.243	0	0	0	0.002	0	0	0	0.008	0	158.248	3511.08
2354	1.87848	0	914.511	13.344	12.8564	690.283	176.24	26.2416	4.2496	23.9072	67.1769	0.071124	0.0592	0.0077	0.709876	83.0162	22.6082	155.416	726.938	49.2032	0.119032	135.14	0.9044	0.094	4.1	0.494	0.897	0.243	0	0	0	0.002	0	0	0	0.008	0	158.266	3511.08
2355	1.87597	0	914.58	13.344	12.8564	690.283	176.24	26.2416	4.2496	23.9072	67.1769	0.07113	0.0592	0.0077	0.70992	83.0217	22.6097	155.426	726.986	49.2064	0.11904	135.149	0.9044	0.094	4.101	0.494	0.897	0.243	0	0	0	0.002	0	0	0	0.008	0	158.284	3511.08
2356	1.87346	0	914.649	13.344	12.8564	690.283	176.24	26.2416	4.2496	23.9072	67.1769	0.071136	0.0592	0.0077	0.709964	83.0271	22.6112	155.436	727.033	49.2097	0.119048	135.158	0.9044	0.094	4.102	0.494	0.897	0.243	0	0	0	0.002	0	0	0	0.008	0	158.301	3511.08
2357	1.87096	0	914.718	13.344	12.8564	690.283	176.24	26.2416	4.2496	23.9072	67.1769	0.071142	0.0592	0.0077	0.710008	83.0326	22.6127	155.447	727.081	49.2129	0.119056	135.166	0.9044	0.094	4.102	0.494	0.897	0.243	0	0	0	0.002	0	0	0	0.008	0	158.319	3511.08
2358	1.86845	0	914.786	13.344	12.8564	690.283	176.24	26.2416	4.2496	23.9072	67.1769	0.071148	0.0592	0.0077	0.710052	83.038	22.6142	155.457	727.129	49.2161	0.119064	135.175	0.9044	0.094	4.103	0.494	0.897	0.243	0	0	0	0.002	0	0	0	0.008	0	158.337	3511.08
2359	1.86595	0	914.855	13.344	12.8564	690.283	176.24	26.2416	4.2496	23.9072	67.1769	0.071154	0.0592	0.0077	0.710096	83.0435	22.6156	155.467	727.177	49.2194	0.119072	135.184	0.9044	0.094	4.104	0.494	0.897	0.243	0	0	0	0.002	0	0	0	0.008	0	158.354	3511.08
2360	1.86344	0	914.924	13.344	12.8564	690.283	176.24	26.2416	4.2496	23.9072	67.1769	0.07116	0.0592	0.0077	0.71014	83.0489	22.6171	155.477	727.224	49.2226	0.11908	135.193	0.9044	0.094	4.104	0.494	0.897	0.243	0	0	0	0.002	0	0	0	0.008	0	158.372	3511.08
2361	1.86093	0	914.993	13.344	12.8564	690.283	176.24	26.2416	4.2496	23.9072	67.1769	0.071166	0.0592	0.0077	0.710184	83.0544	22.6186	155.487	727.272	49.2258	0.119088	135.202	0.9044	0.094	4.105	0.495	0.898	0.243	0	0	0	0.002	0	0	0	0.008	0	158.389	3511.08
2362	1.85843	0	915.062	13.344	12.8564	690.283	176.24	26.2416	4.2496	23.9072	67.1769	0.071172	0.0592	0.0077	0.710228	83.0598	22.6201	155.498	727.32	49.2291	0.119096	135.211	0.9044	0.094	4.106	0.495	0.898	0.243	0	0	0	0.002	0	0	0	0.008	0	158.406	3511.08
2363	1.85592	0	915.131	13.344	12.8564	690.283	176.24	26.2416	4.2496	23.9072	67.1769	0.071178	0.0592	0.0077	0.710272	83.0653	22.6216	155.508	727.368	49.2323	0.119104	135.22	0.9044	0.094	4.106	0.495	0.898	0.243	0	0	0	0.002	0	0	0	0.008	0	158.424	3511.08
2364	1.85342	0	915.2	13.344	12.8564	690.283	176.24	26.2416	4.2496	23.9072	67.1769	0.071184	0.0592	0.0077	0.710316	83.0707	22.623	155.518	727.415	49.2355	0.119112	135.229	0.9044	0.094	4.107	0.495	0.898	0.243	0	0	0	0.002	0	0	0	0.008	0	158.441	3511.08
2365	1.85091	0	915.269	13.344	12.8564	690.283	176.24	26.2416	4.2496	23.9072	67.1769	0.07119	0.0592	0.0077	0.71036	83.0762	22.6245	155.528	727.463	49.2388	0.11912	135.237	0.9044	0.094	4.108	0.495	0.898	0.243	0	0	0	0.002	0	0	0	0.008	0	158.458	3511.08
2366	1.8484	0	915.338	13.344	12.8564	690.283	176.24	26.2416	4.2496	23.9072	67.1769	0.071196	0.0592	0.0077	0.710404	83.0816	22.626	155.538	727.511	49.242	0.119128	135.246	0.9044	0.094	4.108	0.495	0.898	0.243	0	0	0	0.002	0	0	0	0.008	0	158.475	3511.08
2367	1.8459	0	915.407	13.344	12.8564	690.283	176.24	26.2416	4.2496	23.9072	67.1769	0.071202	0.0592	0.0077	0.710448	83.0871	22.6275	155.549	727.558	49.2452	0.119136	135.255	0.9044	0.094	4.109	0.495	0.898	0.243	0	0	0	0.002	0	0	0	0.008	0	158.492	3511.08
2368	1.84339	0	915.475	13.344	12.8564	690.283	176.24	26.2416	4.2496	23.9072	67.1769	0.071208	0.0592	0.0077	0.710492	83.0925	22.629	155.559	727.606	49.2484	0.119144	135.264	0.9044	0.094	4.109	0.495	0.899	0.243	0	0	0	0.002	0	0	0	0.008	0	158.509	3511.08
2369	1.84089	0	915.544	13.344	12.8564	690.283	176.24	26.2416	4.2496	23.9072	67.1769	0.071214	0.0592	0.0077	0.710536	83.098	22.6305	155.569	727.654	49.2517	0.119152	135.273	0.9044	0.094	4.11	0.495	0.899	0.243	0	0	0	0.002	0	0	0	0.008	0	158.526	3511.08
2370	1.83838	0	915.613	13.344	12.8564	690.283	176.24	26.2416	4.2496	23.9072	67.1769	0.07122	0.0592	0.0077	0.71058	83.1034	22.6319	155.579	727.702	49.2549	0.11916	135.282	0.9044	0.094	4.111	0.495	0.899	0.243	0	0	0	0.002	0	0	0	0.008	0	158.543	3511.08
2371	1.83587	0	915.682	13.344	12.8564	690.283	176.24	26.2416	4.2496	23.9072	67.1769	0.071226	0.0592	0.0077	0.710624	83.1089	22.6334	155.589	727.749	49.2581	0.119168	135.291	0.9044	0.094	4.111	0.495	0.899	0.243	0	0	0	0.002	0	0	0	0.008	0	158.56	3511.08
2372	1.83337	0	915.751	13.344	12.8564	690.283	176.24	26.2416	4.2496	23.9072	67.1769	0.071232	0.0592	0.0077	0.710668	83.1143	22.6349	155.6	727.797	49.2614	0.119176	135.299	0.9044	0.094	4.112	0.495	0.899	0.243	0	0	0	0.002	0	0	0	0.008	0	158.576	3511.08
2373	1.83086	0	915.82	13.344	12.8564	690.283	176.24	26.2416	4.2496	23.9072	67.1769	0.071238	0.0592	0.0077	0.710712	83.1198	22.6364	155.61	727.845	49.2646	0.119184	135.308	0.9044	0.094	4.113	0.495	0.899	0.243	0	0	0	0.002	0	0	0	0.008	0	158.593	3511.08
2374	1.82836	0	915.889	13.344	12.8564	690.283	176.24	26.2416	4.2496	23.9072	67.1769	0.071244	0.0592	0.0077	0.710756	83.1252	22.6379	155.62	727.893	49.2678	0.119192	135.317	0.9044	0.094	4.113	0.496	0.899	0.243	0	0	0	0.002	0	0	0	0.008	0	158.61	3511.08
2375	1.82585	0	915.958	13.344	12.8564	690.283	176.24	26.2416	4.2496	23.9072	67.1769	0.07125	0.0592	0.0077	0.7108	83.1307	22.6394	155.63	727.94	49.2711	0.1192	135.326	0.9044	0.094	4.114	0.496	0.899	0.244	0	0	0	0.002	0	0	0	0.008	0	158.626	3511.08
2376	1.82334	0	916.027	13.344	12.8564	690.283	176.24	26.2416	4.2496	23.9072	67.1769	0.071256	0.0592	0.0077	0.710844	83.1362	22.6408	155.641	727.988	49.2743	0.119208	135.335	0.9044	0.094	4.114	0.496	0.9	0.244	0	0	0	0.002	0	0	0	0.008	0	158.643	3511.08
2377	1.82084	0	916.095	13.344	12.8564	690.283	176.24	26.2416	4.2496	23.9072	67.1769	0.071262	0.0592	0.0077	0.710888	83.1416	22.6423	155.651	728.036	49.2775	0.119216	135.344	0.9044	0.094	4.115	0.496	0.9	0.244	0	0	0	0.002	0	0	0	0.008	0	158.659	3511.08
2378	1.81833	0	916.164	13.344	12.8564	690.283	176.24	26.2416	4.2496	23.9072	67.1769	0.071268	0.0592	0.0077	0.710932	83.1471	22.6438	155.661	728.083	49.2807	0.119224	135.353	0.9044	0.094	4.116	0.496	0.9	0.244	0	0	0	0.002	0	0	0	0.008	0	158.676	3511.08
2379	1.81583	0	916.233	13.344	12.8564	690.283	176.24	26.2416	4.2496	23.9072	67.1769	0.071274	0.0592	0.0077	0.710976	83.1525	22.6453	155.671	728.131	49.284	0.119232	135.362	0.9044	0.095	4.116	0.496	0.9	0.244	0	0	0	0.002	0	0	0	0.008	0	158.692	3511.08
2380	1.81332	0	916.302	13.344	12.8564	690.283	176.24	26.2416	4.2496	23.9072	67.1769	0.07128	0.0592	0.0077	0.71102	83.158	22.6468	155.681	728.179	49.2872	0.11924	135.37	0.9044	0.095	4.117	0.496	0.9	0.244	0	0	0	0.002	0	0	0	0.008	0	158.708	3511.08
2381	1.81081	0	916.371	13.344	12.8564	690.283	176.24	26.2416	4.2496	23.9072	67.1769	0.071286	0.0592	0.0077	0.711064	83.1634	22.6482	155.692	728.227	49.2904	0.119248	135.379	0.9044	0.095	4.118	0.496	0.9	0.244	0	0	0	0.002	0	0	0	0.008	0	158.724	3511.08
2382	1.80831	0	916.44	13.344	12.8564	690.283	176.24	26.2416	4.2496	23.9072	67.1769	0.071292	0.0592	0.0077	0.711108	83.1689	22.6497	155.702	728.274	49.2937	0.119256	135.388	0.9044	0.095	4.118	0.496	0.9	0.244	0	0	0	0.002	0	0	0	0.008	0	158.741	3511.08
2383	1.8058	0	916.509	13.344	12.8564	690.283	176.24	26.2416	4.2496	23.9072	67.1769	0.071298	0.0592	0.0077	0.711152	83.1743	22.6512	155.712	728.322	49.2969	0.119264	135.397	0.9044	0.095	4.119	0.496	0.901	0.244	0	0	0	0.002	0	0	0	0.008	0	158.757	3511.08
2384	1.8033	0	916.578	13.344	12.8564	690.283	176.24	26.2416	4.2496	23.9072	67.1769	0.071304	0.0592	0.0077	0.711196	83.1798	22.6527	155.722	728.37	49.3001	0.119272	135.406	0.9044	0.095	4.119	0.496	0.901	0.244	0	0	0	0.002	0	0	0	0.008	0	158.773	3511.08
2385	1.80079	0	916.647	13.344	12.8564	690.283	176.24	26.2416	4.2496	23.9072	67.1769	0.07131	0.0592	0.0077	0.71124	83.1852	22.6542	155.732	728.418	49.3034	0.11928	135.415	0.9044	0.095	4.12	0.496	0.901	0.244	0	0	0	0.002	0	0	0	0.008	0	158.789	3511.08
2386	1.79828	0	916.716	13.344	12.8564	690.283	176.24	26.2416	4.2496	23.9072	67.1769	0.071316	0.0592	0.0077	0.711284	83.1907	22.6557	155.743	728.465	49.3066	0.119288	135.424	0.9044	0.095	4.121	0.496	0.901	0.244	0	0	0	0.002	0	0	0	0.008	0	158.805	3511.08
2387	1.79578	0	916.784	13.344	12.8564	690.283	176.24	26.2416	4.2496	23.9072	67.1769	0.071322	0.0592	0.0077	0.711328	83.1961	22.6571	155.753	728.513	49.3098	0.119296	135.433	0.9044	0.095	4.121	0.496	0.901	0.244	0	0	0	0.002	0	0	0	0.008	0	158.821	3511.08
2388	1.79327	0	916.853	13.344	12.8564	690.283	176.24	26.2416	4.2496	23.9072	67.1769	0.071328	0.0592	0.0077	0.711372	83.2016	22.6586	155.763	728.561	49.313	0.119304	135.441	0.9044	0.095	4.122	0.497	0.901	0.244	0	0	0	0.002	0	0	0	0.008	0	158.837	3511.08
2389	1.79077	0	916.922	13.344	12.8564	690.283	176.24	26.2416	4.2496	23.9072	67.1769	0.071334	0.0592	0.0077	0.711416	83.207	22.6601	155.773	728.608	49.3163	0.119312	135.45	0.9044	0.095	4.122	0.497	0.901	0.244	0	0	0	0.002	0	0	0	0.008	0	158.853	3511.08
2390	1.78826	0	916.991	13.344	12.8564	690.283	176.24	26.2416	4.2496	23.9072	67.1769	0.07134	0.0592	0.0077	0.71146	83.2125	22.6616	155.783	728.656	49.3195	0.11932	135.459	0.9044	0.095	4.123	0.497	0.901	0.244	0	0	0	0.002	0	0	0	0.008	0	158.868	3511.08
2391	1.78575	0	917.06	13.344	12.8564	690.283	176.24	26.2416	4.2496	23.9072	67.1769	0.071346	0.0592	0.0077	0.711504	83.2179	22.6631	155.794	728.704	49.3227	0.119328	135.468	0.9044	0.095	4.123	0.497	0.902	0.244	0	0	0	0.002	0	0	0	0.008	0	158.884	3511.08
2392	1.78325	0	917.129	13.344	12.8564	690.283	176.24	26.2416	4.2496	23.9072	67.1769	0.071352	0.0592	0.0077	0.711548	83.2234	22.6645	155.804	728.752	49.326	0.119336	135.477	0.9044	0.095	4.124	0.497	0.902	0.244	0	0	0	0.002	0	0	0	0.008	0	158.9	3511.08
2393	1.78074	0	917.198	13.344	12.8564	690.283	176.24	26.2416	4.2496	23.9072	67.1769	0.071358	0.0592	0.0077	0.711592	83.2288	22.666	155.814	728.799	49.3292	0.119344	135.486	0.9044	0.095	4.125	0.497	0.902	0.244	0	0	0	0.002	0	0	0	0.008	0	158.915	3511.08
2394	1.77824	0	917.267	13.344	12.8564	690.283	176.24	26.2416	4.2496	23.9072	67.1769	0.071364	0.0592	0.0077	0.711636	83.2343	22.6675	155.824	728.847	49.3324	0.119352	135.495	0.9044	0.095	4.125	0.497	0.902	0.244	0	0	0	0.002	0	0	0	0.008	0	158.931	3511.08
2395	1.77573	0	917.336	13.344	12.8564	690.283	176.24	26.2416	4.2496	23.9072	67.1769	0.07137	0.0592	0.0077	0.71168	83.2397	22.669	155.834	728.895	49.3357	0.11936	135.504	0.9044	0.095	4.126	0.497	0.902	0.244	0	0	0	0.002	0	0	0	0.008	0	158.947	3511.08
2396	1.77322	0	917.405	13.344	12.8564	690.283	176.24	26.2416	4.2496	23.9072	67.1769	0.071376	0.0592	0.0077	0.711724	83.2452	22.6705	155.845	728.943	49.3389	0.119368	135.512	0.9044	0.095	4.126	0.497	0.902	0.244	0	0	0	0.002	0	0	0	0.008	0	158.962	3511.08
2397	1.77072	0	917.473	13.344	12.8564	690.283	176.24	26.2416	4.2496	23.9072	67.1769	0.071382	0.0592	0.0077	0.711768	83.2506	22.672	155.855	728.99	49.3421	0.119376	135.521	0.9044	0.095	4.127	0.497	0.902	0.244	0	0	0	0.002	0	0	0	0.008	0	158.977	3511.08
2398	1.76821	0	917.542	13.344	12.8564	690.283	176.24	26.2416	4.2496	23.9072	67.1769	0.071388	0.0592	0.0077	0.711812	83.2561	22.6734	155.865	729.038	49.3453	0.119384	135.53	0.9044	0.095	4.128	0.497	0.902	0.244	0	0	0	0.002	0	0	0	0.008	0	158.993	3511.08
2399	1.76571	0	917.611	13.344	12.8564	690.283	176.24	26.2416	4.2496	23.9072	67.1769	0.071394	0.0592	0.0077	0.711856	83.2615	22.6749	155.875	729.086	49.3486	0.119392	135.539	0.9044	0.095	4.128	0.497	0.903	0.244	0	0	0	0.002	0	0	0	0.008	0	159.008	3511.08
2400	1.7632	0	917.68	13.344	12.8564	690.283	176.24	26.2416	4.2496	23.9072	67.1769	0.0714	0.0592	0.0077	0.7119	83.267	22.6764	155.885	729.134	49.3518	0.1194	135.548	0.9044	0.095	4.129	0.497	0.903	0.244	0	0	0	0.002	0	0	0	0.008	0	159.024	3511.08
2401	1.76028	0	917.739	13.344	12.8564	690.283	176.24	26.2416	4.2496	23.9072	67.1769	0.071404	0.0592	0.0077	0.711942	83.2717	22.6777	155.894	729.175	49.3546	0.119406	135.556	0.9044	0.095	4.129	0.497	0.903	0.244	0	0	0	0.002	0	0	0	0.008	0	159.039	3511.08
2402	1.75736	0	917.798	13.344	12.8564	690.283	176.24	26.2416	4.2496	23.9072	67.1769	0.071408	0.0592	0.0077	0.711984	83.2764	22.6789	155.903	729.216	49.3574	0.119412	135.563	0.9044	0.095	4.13	0.498	0.903	0.244	0	0	0	0.002	0	0	0	0.008	0	159.054	3511.08
2403	1.75443	0	917.858	13.344	12.8564	690.283	176.24	26.2416	4.2496	23.9072	67.1769	0.071412	0.0592	0.0077	0.712026	83.281	22.6802	155.912	729.257	49.3601	0.119418	135.571	0.9044	0.095	4.13	0.498	0.903	0.245	0	0	0	0.002	0	0	0	0.008	0	159.069	3511.08
2404	1.75151	0	917.917	13.344	12.8564	690.283	176.24	26.2416	4.2496	23.9072	67.1769	0.071416	0.0592	0.0077	0.712068	83.2857	22.6815	155.92	729.298	49.3629	0.119424	135.578	0.9044	0.095	4.131	0.498	0.903	0.245	0	0	0	0.002	0	0	0	0.008	0	159.084	3511.08
2405	1.74859	0	917.976	13.344	12.8564	690.283	176.24	26.2416	4.2496	23.9072	67.1769	0.07142	0.0592	0.0077	0.71211	83.2904	22.6828	155.929	729.339	49.3657	0.11943	135.586	0.9044	0.095	4.132	0.498	0.903	0.245	0	0	0	0.002	0	0	0	0.008	0	159.099	3511.08
2406	1.74567	0	918.035	13.344	12.8564	690.283	176.24	26.2416	4.2496	23.9072	67.1769	0.071424	0.0592	0.0077	0.712152	83.2951	22.684	155.938	729.38	49.3685	0.119436	135.594	0.9044	0.095	4.132	0.498	0.903	0.245	0	0	0	0.002	0	0	0	0.008	0	159.114	3511.08
2407	1.74275	0	918.094	13.344	12.8564	690.283	176.24	26.2416	4.2496	23.9072	67.1769	0.071428	0.0592	0.0077	0.712194	83.2998	22.6853	155.947	729.421	49.3712	0.119442	135.601	0.9044	0.095	4.133	0.498	0.904	0.245	0	0	0	0.002	0	0	0	0.008	0	159.129	3511.08
2408	1.73982	0	918.154	13.344	12.8564	690.283	176.24	26.2416	4.2496	23.9072	67.1769	0.071432	0.0592	0.0077	0.712236	83.3045	22.6866	155.956	729.462	49.374	0.119448	135.609	0.9044	0.095	4.133	0.498	0.904	0.245	0	0	0	0.002	0	0	0	0.008	0	159.144	3511.08
2409	1.7369	0	918.213	13.344	12.8564	690.283	176.24	26.2416	4.2496	23.9072	67.1769	0.071436	0.0592	0.0077	0.712278	83.3091	22.6879	155.964	729.503	49.3768	0.119454	135.617	0.9044	0.095	4.134	0.498	0.904	0.245	0	0	0	0.002	0	0	0	0.008	0	159.159	3511.08
2410	1.73398	0	918.272	13.344	12.8564	690.283	176.24	26.2416	4.2496	23.9072	67.1769	0.07144	0.0592	0.0077	0.71232	83.3138	22.6891	155.973	729.544	49.3796	0.11946	135.624	0.9044	0.095	4.134	0.498	0.904	0.245	0	0	0	0.002	0	0	0	0.008	0	159.174	3511.08
2411	1.73106	0	918.331	13.344	12.8564	690.283	176.24	26.2416	4.2496	23.9072	67.1769	0.071444	0.0592	0.0077	0.712362	83.3185	22.6904	155.982	729.585	49.3823	0.119466	135.632	0.9044	0.095	4.135	0.498	0.904	0.245	0	0	0	0.002	0	0	0	0.008	0	159.189	3511.08
2412	1.72814	0	918.39	13.344	12.8564	690.283	176.24	26.2416	4.2496	23.9072	67.1769	0.071448	0.0592	0.0077	0.712404	83.3232	22.6917	155.991	729.626	49.3851	0.119472	135.639	0.9044	0.095	4.135	0.498	0.904	0.245	0	0	0	0.002	0	0	0	0.008	0	159.204	3511.08
2413	1.72521	0	918.45	13.344	12.8564	690.283	176.24	26.2416	4.2496	23.9072	67.1769	0.071452	0.0592	0.0077	0.712446	83.3279	22.693	155.999	729.667	49.3879	0.119478	135.647	0.9044	0.095	4.136	0.498	0.904	0.245	0	0	0	0.002	0	0	0	0.008	0	159.218	3511.08
2414	1.72229	0	918.509	13.344	12.8564	690.283	176.24	26.2416	4.2496	23.9072	67.1769	0.071456	0.0592	0.0077	0.712488	83.3325	22.6942	156.008	729.708	49.3907	0.119484	135.655	0.9044	0.095	4.137	0.498	0.904	0.245	0	0	0	0.002	0	0	0	0.008	0	159.233	3511.08
2415	1.71937	0	918.568	13.344	12.8564	690.283	176.24	26.2416	4.2496	23.9072	67.1769	0.07146	0.0592	0.0077	0.71253	83.3372	22.6955	156.017	729.749	49.3934	0.11949	135.662	0.9044	0.095	4.137	0.498	0.905	0.245	0	0	0	0.002	0	0	0	0.008	0	159.248	3511.08
2416	1.71645	0	918.627	13.344	12.8564	690.283	176.24	26.2416	4.2496	23.9072	67.1769	0.071464	0.0592	0.0077	0.712572	83.3419	22.6968	156.026	729.79	49.3962	0.119496	135.67	0.9044	0.095	4.138	0.498	0.905	0.245	0	0	0	0.002	0	0	0	0.008	0	159.262	3511.08
2417	1.71353	0	918.686	13.344	12.8564	690.283	176.24	26.2416	4.2496	23.9072	67.1769	0.071468	0.0592	0.0077	0.712614	83.3466	22.6981	156.034	729.831	49.399	0.119502	135.677	0.9044	0.095	4.138	0.499	0.905	0.245	0	0	0	0.002	0	0	0	0.008	0	159.277	3511.08
2418	1.7106	0	918.746	13.344	12.8564	690.283	176.24	26.2416	4.2496	23.9072	67.1769	0.071472	0.0592	0.0077	0.712656	83.3513	22.6993	156.043	729.872	49.4018	0.119508	135.685	0.9044	0.095	4.139	0.499	0.905	0.245	0	0	0	0.002	0	0	0	0.008	0	159.292	3511.08
2419	1.70768	0	918.805	13.344	12.8564	690.283	176.24	26.2416	4.2496	23.9072	67.1769	0.071476	0.0592	0.0077	0.712698	83.356	22.7006	156.052	729.913	49.4045	0.119514	135.693	0.9044	0.095	4.139	0.499	0.905	0.245	0	0	0	0.002	0	0	0	0.008	0	159.306	3511.08
2420	1.70476	0	918.864	13.344	12.8564	690.283	176.24	26.2416	4.2496	23.9072	67.1769	0.07148	0.0592	0.0077	0.71274	83.3606	22.7019	156.061	729.954	49.4073	0.11952	135.7	0.9044	0.095	4.14	0.499	0.905	0.245	0	0	0	0.002	0	0	0	0.008	0	159.32	3511.08
2421	1.70184	0	918.923	13.344	12.8564	690.283	176.24	26.2416	4.2496	23.9072	67.1769	0.071484	0.0592	0.0077	0.712782	83.3653	22.7032	156.07	729.995	49.4101	0.119526	135.708	0.9044	0.095	4.14	0.499	0.905	0.245	0	0	0	0.002	0	0	0	0.008	0	159.335	3511.08
2422	1.69892	0	918.982	13.344	12.8564	690.283	176.24	26.2416	4.2496	23.9072	67.1769	0.071488	0.0592	0.0077	0.712824	83.37	22.7044	156.078	730.036	49.4129	0.119532	135.716	0.9044	0.095	4.141	0.499	0.905	0.245	0	0	0	0.002	0	0	0	0.008	0	159.349	3511.08
2423	1.69599	0	919.042	13.344	12.8564	690.283	176.24	26.2416	4.2496	23.9072	67.1769	0.071492	0.0592	0.0077	0.712866	83.3747	22.7057	156.087	730.077	49.4156	0.119538	135.723	0.9044	0.095	4.141	0.499	0.906	0.245	0	0	0	0.002	0	0	0	0.008	0	159.364	3511.08
2424	1.69307	0	919.101	13.344	12.8564	690.283	176.24	26.2416	4.2496	23.9072	67.1769	0.071496	0.0592	0.0077	0.712908	83.3794	22.707	156.096	730.118	49.4184	0.119544	135.731	0.9044	0.095	4.142	0.499	0.906	0.245	0	0	0	0.002	0	0	0	0.008	0	159.378	3511.08
2425	1.69015	0	919.16	13.344	12.8564	690.283	176.24	26.2416	4.2496	23.9072	67.1769	0.0715	0.0592	0.0077	0.71295	83.3841	22.7082	156.105	730.159	49.4212	0.11955	135.738	0.9044	0.095	4.142	0.499	0.906	0.245	0	0	0	0.002	0	0	0	0.008	0	159.392	3511.08
2426	1.68723	0	919.219	13.344	12.8564	690.283	176.24	26.2416	4.2496	23.9072	67.1769	0.071504	0.0592	0.0077	0.712992	83.3887	22.7095	156.113	730.2	49.424	0.119556	135.746	0.9044	0.095	4.143	0.499	0.906	0.245	0	0	0	0.002	0	0	0	0.008	0	159.406	3511.08
2427	1.68431	0	919.278	13.344	12.8564	690.283	176.24	26.2416	4.2496	23.9072	67.1769	0.071508	0.0592	0.0077	0.713034	83.3934	22.7108	156.122	730.241	49.4268	0.119562	135.754	0.9044	0.095	4.144	0.499	0.906	0.245	0	0	0	0.002	0	0	0	0.008	0	159.421	3511.08
2428	1.68138	0	919.338	13.344	12.8564	690.283	176.24	26.2416	4.2496	23.9072	67.1769	0.071512	0.0592	0.0077	0.713076	83.3981	22.7121	156.131	730.282	49.4295	0.119568	135.761	0.9044	0.095	4.144	0.499	0.906	0.245	0	0	0	0.002	0	0	0	0.008	0	159.435	3511.08
2429	1.67846	0	919.397	13.344	12.8564	690.283	176.24	26.2416	4.2496	23.9072	67.1769	0.071516	0.0592	0.0077	0.713118	83.4028	22.7133	156.14	730.323	49.4323	0.119574	135.769	0.9044	0.095	4.145	0.499	0.906	0.245	0	0	0	0.002	0	0	0	0.008	0	159.449	3511.08
2430	1.67554	0	919.456	13.344	12.8564	690.283	176.24	26.2416	4.2496	23.9072	67.1769	0.07152	0.0592	0.0077	0.71316	83.4075	22.7146	156.149	730.364	49.4351	0.11958	135.777	0.9044	0.095	4.145	0.499	0.906	0.245	0	0	0	0.002	0	0	0	0.008	0	159.463	3511.08
2431	1.67262	0	919.515	13.344	12.8564	690.283	176.24	26.2416	4.2496	23.9072	67.1769	0.071524	0.0592	0.0077	0.713202	83.4121	22.7159	156.157	730.405	49.4379	0.119586	135.784	0.9044	0.095	4.146	0.499	0.906	0.245	0	0	0	0.002	0	0	0	0.008	0	159.477	3511.08
2432	1.6697	0	919.574	13.344	12.8564	690.283	176.24	26.2416	4.2496	23.9072	67.1769	0.071528	0.0592	0.0077	0.713244	83.4168	22.7172	156.166	730.446	49.4406	0.119592	135.792	0.9044	0.095	4.146	0.5	0.907	0.245	0	0	0	0.002	0	0	0	0.008	0	159.491	3511.08
2433	1.66677	0	919.634	13.344	12.8564	690.283	176.24	26.2416	4.2496	23.9072	67.1769	0.071532	0.0592	0.0077	0.713286	83.4215	22.7184	156.175	730.487	49.4434	0.119598	135.799	0.9044	0.095	4.147	0.5	0.907	0.245	0	0	0	0.002	0	0	0	0.008	0	159.505	3511.08
2434	1.66385	0	919.693	13.344	12.8564	690.283	176.24	26.2416	4.2496	23.9072	67.1769	0.071536	0.0592	0.0077	0.713328	83.4262	22.7197	156.184	730.528	49.4462	0.119604	135.807	0.9044	0.095	4.147	0.5	0.907	0.245	0	0	0	0.002	0	0	0	0.008	0	159.519	3511.08
2435	1.66093	0	919.752	13.344	12.8564	690.283	176.24	26.2416	4.2496	23.9072	67.1769	0.07154	0.0592	0.0077	0.71337	83.4309	22.721	156.192	730.569	49.449	0.11961	135.815	0.9044	0.095	4.148	0.5	0.907	0.246	0	0	0	0.002	0	0	0	0.008	0	159.532	3511.08
2436	1.65801	0	919.811	13.344	12.8564	690.283	176.24	26.2416	4.2496	23.9072	67.1769	0.071544	0.0592	0.0077	0.713412	83.4356	22.7223	156.201	730.61	49.4517	0.119616	135.822	0.9044	0.095	4.148	0.5	0.907	0.246	0	0	0	0.002	0	0	0	0.008	0	159.546	3511.08
2437	1.65509	0	919.87	13.344	12.8564	690.283	176.24	26.2416	4.2496	23.9072	67.1769	0.071548	0.0592	0.0077	0.713454	83.4402	22.7235	156.21	730.651	49.4545	0.119622	135.83	0.9044	0.095	4.149	0.5	0.907	0.246	0	0	0	0.002	0	0	0	0.008	0	159.56	3511.08
2438	1.65216	0	919.93	13.344	12.8564	690.283	176.24	26.2416	4.2496	23.9072	67.1769	0.071552	0.0592	0.0077	0.713496	83.4449	22.7248	156.219	730.692	49.4573	0.119628	135.838	0.9044	0.095	4.149	0.5	0.907	0.246	0	0	0	0.002	0	0	0	0.008	0	159.574	3511.08
2439	1.64924	0	919.989	13.344	12.8564	690.283	176.24	26.2416	4.2496	23.9072	67.1769	0.071556	0.0592	0.0077	0.713538	83.4496	22.7261	156.227	730.733	49.4601	0.119634	135.845	0.9044	0.095	4.15	0.5	0.907	0.246	0	0	0	0.002	0	0	0	0.008	0	159.588	3511.08
2440	1.64632	0	920.048	13.344	12.8564	690.283	176.24	26.2416	4.2496	23.9072	67.1769	0.07156	0.0592	0.0077	0.71358	83.4543	22.7274	156.236	730.774	49.4628	0.11964	135.853	0.9044	0.095	4.15	0.5	0.907	0.246	0	0	0	0.002	0	0	0	0.008	0	159.601	3511.08
2441	1.6434	0	920.107	13.344	12.8564	690.283	176.24	26.2416	4.2496	23.9072	67.1769	0.071564	0.0592	0.0077	0.713622	83.459	22.7286	156.245	730.815	49.4656	0.119646	135.86	0.9044	0.095	4.151	0.5	0.908	0.246	0	0	0	0.002	0	0	0	0.008	0	159.615	3511.08
2442	1.64048	0	920.166	13.344	12.8564	690.283	176.24	26.2416	4.2496	23.9072	67.1769	0.071568	0.0592	0.0077	0.713664	83.4636	22.7299	156.254	730.856	49.4684	0.119652	135.868	0.9044	0.095	4.151	0.5	0.908	0.246	0	0	0	0.002	0	0	0	0.008	0	159.629	3511.08
2443	1.63755	0	920.226	13.344	12.8564	690.283	176.24	26.2416	4.2496	23.9072	67.1769	0.071572	0.0592	0.0077	0.713706	83.4683	22.7312	156.263	730.897	49.4712	0.119658	135.876	0.9044	0.095	4.152	0.5	0.908	0.246	0	0	0	0.002	0	0	0	0.008	0	159.642	3511.08
2444	1.63463	0	920.285	13.344	12.8564	690.283	176.24	26.2416	4.2496	23.9072	67.1769	0.071576	0.0592	0.0077	0.713748	83.473	22.7325	156.271	730.938	49.4739	0.119664	135.883	0.9044	0.095	4.152	0.5	0.908	0.246	0	0	0	0.002	0	0	0	0.008	0	159.656	3511.08
2445	1.63171	0	920.344	13.344	12.8564	690.283	176.24	26.2416	4.2496	23.9072	67.1769	0.07158	0.0592	0.0077	0.71379	83.4777	22.7337	156.28	730.979	49.4767	0.11967	135.891	0.9044	0.095	4.153	0.5	0.908	0.246	0	0	0	0.002	0	0	0	0.008	0	159.669	3511.08
2446	1.62879	0	920.403	13.344	12.8564	690.283	176.24	26.2416	4.2496	23.9072	67.1769	0.071584	0.0592	0.0077	0.713832	83.4824	22.735	156.289	731.02	49.4795	0.119676	135.899	0.9044	0.095	4.153	0.5	0.908	0.246	0	0	0	0.002	0	0	0	0.008	0	159.683	3511.08
2447	1.62587	0	920.462	13.344	12.8564	690.283	176.24	26.2416	4.2496	23.9072	67.1769	0.071588	0.0592	0.0077	0.713874	83.4871	22.7363	156.298	731.061	49.4823	0.119682	135.906	0.9044	0.095	4.154	0.5	0.908	0.246	0	0	0	0.002	0	0	0	0.008	0	159.696	3511.08
2448	1.62294	0	920.522	13.344	12.8564	690.283	176.24	26.2416	4.2496	23.9072	67.1769	0.071592	0.0592	0.0077	0.713916	83.4917	22.7376	156.306	731.102	49.485	0.119688	135.914	0.9044	0.095	4.154	0.5	0.908	0.246	0	0	0	0.002	0	0	0	0.008	0	159.709	3511.08
2449	1.62002	0	920.581	13.344	12.8564	690.283	176.24	26.2416	4.2496	23.9072	67.1769	0.071596	0.0592	0.0077	0.713958	83.4964	22.7388	156.315	731.143	49.4878	0.119694	135.921	0.9044	0.095	4.155	0.501	0.908	0.246	0	0	0	0.002	0	0	0	0.008	0	159.723	3511.08
2450	1.6171	0	920.64	13.344	12.8564	690.283	176.24	26.2416	4.2496	23.9072	67.1769	0.0716	0.0592	0.0077	0.714	83.5011	22.7401	156.324	731.184	49.4906	0.1197	135.929	0.9044	0.095	4.155	0.501	0.909	0.246	0	0	0	0.002	0	0	0	0.008	0	159.736	3511.08
2451	1.61445	0	920.691	13.344	12.8564	690.283	176.24	26.2416	4.2496	23.9072	67.1769	0.0716	0.0592	0.0077	0.714	83.5011	22.7401	156.324	731.184	49.4906	0.1197	135.929	0.9044	0.095	4.156	0.501	0.909	0.246	0	0	0	0.002	0	0	0	0.008	0	159.749	3511.08
2452	1.6118	0	920.742	13.344	12.8564	690.283	176.24	26.2416	4.2496	23.9072	67.1769	0.0716	0.0592	0.0077	0.714	83.5011	22.7401	156.324	731.184	49.4906	0.1197	135.929	0.9044	0.095	4.156	0.501	0.909	0.246	0	0	0	0.002	0	0	0	0.008	0	159.763	3511.08
2453	1.60915	0	920.793	13.344	12.8564	690.283	176.24	26.2416	4.2496	23.9072	67.1769	0.0716	0.0592	0.0077	0.714	83.5011	22.7401	156.324	731.184	49.4906	0.1197	135.929	0.9044	0.095	4.157	0.501	0.909	0.246	0	0	0	0.002	0	0	0	0.008	0	159.776	3511.08
2454	1.6065	0	920.844	13.344	12.8564	690.283	176.24	26.2416	4.2496	23.9072	67.1769	0.0716	0.0592	0.0077	0.714	83.5011	22.7401	156.324	731.184	49.4906	0.1197	135.929	0.9044	0.095	4.157	0.501	0.909	0.246	0	0	0	0.002	0	0	0	0.008	0	159.789	3511.08
2455	1.60385	0	920.895	13.344	12.8564	690.283	176.24	26.2416	4.2496	23.9072	67.1769	0.0716	0.0592	0.0077	0.714	83.5011	22.7401	156.324	731.184	49.4906	0.1197	135.929	0.9044	0.095	4.158	0.501	0.909	0.246	0	0	0	0.002	0	0	0	0.008	0	159.802	3511.08
2456	1.6012	0	920.946	13.344	12.8564	690.283	176.24	26.2416	4.2496	23.9072	67.1769	0.0716	0.0592	0.0077	0.714	83.5011	22.7401	156.324	731.184	49.4906	0.1197	135.929	0.9044	0.095	4.158	0.501	0.909	0.246	0	0	0	0.002	0	0	0	0.008	0	159.815	3511.08
2457	1.59855	0	920.998	13.344	12.8564	690.283	176.24	26.2416	4.2496	23.9072	67.1769	0.0716	0.0592	0.0077	0.714	83.5011	22.7401	156.324	731.184	49.4906	0.1197	135.929	0.9044	0.095	4.159	0.501	0.909	0.246	0	0	0	0.002	0	0	0	0.008	0	159.829	3511.08
2458	1.5959	0	921.049	13.344	12.8564	690.283	176.24	26.2416	4.2496	23.9072	67.1769	0.0716	0.0592	0.0077	0.714	83.5011	22.7401	156.324	731.184	49.4906	0.1197	135.929	0.9044	0.095	4.159	0.501	0.909	0.246	0	0	0	0.002	0	0	0	0.008	0	159.842	3511.08
2459	1.59325	0	921.1	13.344	12.8564	690.283	176.24	26.2416	4.2496	23.9072	67.1769	0.0716	0.0592	0.0077	0.714	83.5011	22.7401	156.324	731.184	49.4906	0.1197	135.929	0.9044	0.096	4.16	0.501	0.91	0.246	0	0	0	0.002	0	0	0	0.008	0	159.855	3511.08
2460	1.5906	0	921.151	13.344	12.8564	690.283	176.24	26.2416	4.2496	23.9072	67.1769	0.0716	0.0592	0.0077	0.714	83.5011	22.7401	156.324	731.184	49.4906	0.1197	135.929	0.9044	0.096	4.16	0.501	0.91	0.246	0	0	0	0.002	0	0	0	0.008	0	159.868	3511.08
2461	1.58795	0	921.202	13.344	12.8564	690.283	176.24	26.2416	4.2496	23.9072	67.1769	0.0716	0.0592	0.0077	0.714	83.5011	22.7401	156.324	731.184	49.4906	0.1197	135.929	0.9044	0.096	4.161	0.501	0.91	0.246	0	0	0	0.002	0	0	0	0.008	0	159.881	3511.08
2462	1.5853	0	921.253	13.344	12.8564	690.283	176.24	26.2416	4.2496	23.9072	67.1769	0.0716	0.0592	0.0077	0.714	83.5011	22.7401	156.324	731.184	49.4906	0.1197	135.929	0.9044	0.096	4.161	0.501	0.91	0.246	0	0	0	0.002	0	0	0	0.008	0	159.894	3511.08
2463	1.58265	0	921.304	13.344	12.8564	690.283	176.24	26.2416	4.2496	23.9072	67.1769	0.0716	0.0592	0.0077	0.714	83.5011	22.7401	156.324	731.184	49.4906	0.1197	135.929	0.9044	0.096	4.162	0.501	0.91	0.246	0	0	0	0.002	0	0	0	0.008	0	159.907	3511.08
2464	1.58	0	921.355	13.344	12.8564	690.283	176.24	26.2416	4.2496	23.9072	67.1769	0.0716	0.0592	0.0077	0.714	83.5011	22.7401	156.324	731.184	49.4906	0.1197	135.929	0.9044	0.096	4.162	0.501	0.91	0.246	0	0	0	0.002	0	0	0	0.008	0	159.919	3511.08
2465	1.57735	0	921.406	13.344	12.8564	690.283	176.24	26.2416	4.2496	23.9072	67.1769	0.0716	0.0592	0.0077	0.714	83.5011	22.7401	156.324	731.184	49.4906	0.1197	135.929	0.9044	0.096	4.163	0.502	0.91	0.246	0	0	0	0.002	0	0	0	0.008	0	159.932	3511.08
2466	1.5747	0	921.457	13.344	12.8564	690.283	176.24	26.2416	4.2496	23.9072	67.1769	0.0716	0.0592	0.0077	0.714	83.5011	22.7401	156.324	731.184	49.4906	0.1197	135.929	0.9044	0.096	4.163	0.502	0.91	0.246	0	0	0	0.002	0	0	0	0.008	0	159.945	3511.08
2467	1.57205	0	921.509	13.344	12.8564	690.283	176.24	26.2416	4.2496	23.9072	67.1769	0.0716	0.0592	0.0077	0.714	83.5011	22.7401	156.324	731.184	49.4906	0.1197	135.929	0.9044	0.096	4.164	0.502	0.91	0.246	0	0	0	0.002	0	0	0	0.008	0	159.958	3511.08
2468	1.5694	0	921.56	13.344	12.8564	690.283	176.24	26.2416	4.2496	23.9072	67.1769	0.0716	0.0592	0.0077	0.714	83.5011	22.7401	156.324	731.184	49.4906	0.1197	135.929	0.9044	0.096	4.164	0.502	0.91	0.246	0	0	0	0.002	0	0	0	0.008	0	159.971	3511.08
2469	1.56675	0	921.611	13.344	12.8564	690.283	176.24	26.2416	4.2496	23.9072	67.1769	0.0716	0.0592	0.0077	0.714	83.5011	22.7401	156.324	731.184	49.4906	0.1197	135.929	0.9044	0.096	4.165	0.502	0.911	0.247	0	0	0	0.002	0	0	0	0.008	0	159.983	3511.08
2470	1.5641	0	921.662	13.344	12.8564	690.283	176.24	26.2416	4.2496	23.9072	67.1769	0.0716	0.0592	0.0077	0.714	83.5011	22.7401	156.324	731.184	49.4906	0.1197	135.929	0.9044	0.096	4.165	0.502	0.911	0.247	0	0	0	0.002	0	0	0	0.008	0	159.996	3511.08
2471	1.56145	0	921.713	13.344	12.8564	690.283	176.24	26.2416	4.2496	23.9072	67.1769	0.0716	0.0592	0.0077	0.714	83.5011	22.7401	156.324	731.184	49.4906	0.1197	135.929	0.9044	0.096	4.166	0.502	0.911	0.247	0	0	0	0.002	0	0	0	0.008	0	160.009	3511.08
2472	1.5588	0	921.764	13.344	12.8564	690.283	176.24	26.2416	4.2496	23.9072	67.1769	0.0716	0.0592	0.0077	0.714	83.5011	22.7401	156.324	731.184	49.4906	0.1197	135.929	0.9044	0.096	4.166	0.502	0.911	0.247	0	0	0	0.002	0	0	0	0.008	0	160.021	3511.08
2473	1.55615	0	921.815	13.344	12.8564	690.283	176.24	26.2416	4.2496	23.9072	67.1769	0.0716	0.0592	0.0077	0.714	83.5011	22.7401	156.324	731.184	49.4906	0.1197	135.929	0.9044	0.096	4.166	0.502	0.911	0.247	0	0	0	0.002	0	0	0	0.008	0	160.034	3511.08
2474	1.5535	0	921.866	13.344	12.8564	690.283	176.24	26.2416	4.2496	23.9072	67.1769	0.0716	0.0592	0.0077	0.714	83.5011	22.7401	156.324	731.184	49.4906	0.1197	135.929	0.9044	0.096	4.167	0.502	0.911	0.247	0	0	0	0.002	0	0	0	0.008	0	160.046	3511.08
2475	1.55085	0	921.917	13.344	12.8564	690.283	176.24	26.2416	4.2496	23.9072	67.1769	0.0716	0.0592	0.0077	0.714	83.5011	22.7401	156.324	731.184	49.4906	0.1197	135.929	0.9044	0.096	4.167	0.502	0.911	0.247	0	0	0	0.002	0	0	0	0.008	0	160.059	3511.08
2476	1.5482	0	921.968	13.344	12.8564	690.283	176.24	26.2416	4.2496	23.9072	67.1769	0.0716	0.0592	0.0077	0.714	83.5011	22.7401	156.324	731.184	49.4906	0.1197	135.929	0.9044	0.096	4.168	0.502	0.911	0.247	0	0	0	0.002	0	0	0	0.008	0	160.071	3511.08
2477	1.54555	0	922.019	13.344	12.8564	690.283	176.24	26.2416	4.2496	23.9072	67.1769	0.0716	0.0592	0.0077	0.714	83.5011	22.7401	156.324	731.184	49.4906	0.1197	135.929	0.9044	0.096	4.168	0.502	0.911	0.247	0	0	0	0.002	0	0	0	0.008	0	160.084	3511.08
2478	1.5429	0	922.071	13.344	12.8564	690.283	176.24	26.2416	4.2496	23.9072	67.1769	0.0716	0.0592	0.0077	0.714	83.5011	22.7401	156.324	731.184	49.4906	0.1197	135.929	0.9044	0.096	4.169	0.502	0.912	0.247	0	0	0	0.002	0	0	0	0.008	0	160.096	3511.08
2479	1.54025	0	922.122	13.344	12.8564	690.283	176.24	26.2416	4.2496	23.9072	67.1769	0.0716	0.0592	0.0077	0.714	83.5011	22.7401	156.324	731.184	49.4906	0.1197	135.929	0.9044	0.096	4.169	0.502	0.912	0.247	0	0	0	0.002	0	0	0	0.008	0	160.109	3511.08
2480	1.5376	0	922.173	13.344	12.8564	690.283	176.24	26.2416	4.2496	23.9072	67.1769	0.0716	0.0592	0.0077	0.714	83.5011	22.7401	156.324	731.184	49.4906	0.1197	135.929	0.9044	0.096	4.17	0.502	0.912	0.247	0	0	0	0.002	0	0	0	0.008	0	160.121	3511.08
2481	1.53495	0	922.224	13.344	12.8564	690.283	176.24	26.2416	4.2496	23.9072	67.1769	0.0716	0.0592	0.0077	0.714	83.5011	22.7401	156.324	731.184	49.4906	0.1197	135.929	0.9044	0.096	4.17	0.502	0.912	0.247	0	0	0	0.002	0	0	0	0.008	0	160.134	3511.08
2482	1.5323	0	922.275	13.344	12.8564	690.283	176.24	26.2416	4.2496	23.9072	67.1769	0.0716	0.0592	0.0077	0.714	83.5011	22.7401	156.324	731.184	49.4906	0.1197	135.929	0.9044	0.096	4.171	0.502	0.912	0.247	0	0	0	0.002	0	0	0	0.008	0	160.146	3511.08
2483	1.52965	0	922.326	13.344	12.8564	690.283	176.24	26.2416	4.2496	23.9072	67.1769	0.0716	0.0592	0.0077	0.714	83.5011	22.7401	156.324	731.184	49.4906	0.1197	135.929	0.9044	0.096	4.171	0.503	0.912	0.247	0	0	0	0.002	0	0	0	0.008	0	160.158	3511.08
2484	1.527	0	922.377	13.344	12.8564	690.283	176.24	26.2416	4.2496	23.9072	67.1769	0.0716	0.0592	0.0077	0.714	83.5011	22.7401	156.324	731.184	49.4906	0.1197	135.929	0.9044	0.096	4.172	0.503	0.912	0.247	0	0	0	0.002	0	0	0	0.008	0	160.17	3511.08
2485	1.52435	0	922.428	13.344	12.8564	690.283	176.24	26.2416	4.2496	23.9072	67.1769	0.0716	0.0592	0.0077	0.714	83.5011	22.7401	156.324	731.184	49.4906	0.1197	135.929	0.9044	0.096	4.172	0.503	0.912	0.247	0	0	0	0.002	0	0	0	0.008	0	160.183	3511.08
2486	1.5217	0	922.479	13.344	12.8564	690.283	176.24	26.2416	4.2496	23.9072	67.1769	0.0716	0.0592	0.0077	0.714	83.5011	22.7401	156.324	731.184	49.4906	0.1197	135.929	0.9044	0.096	4.173	0.503	0.912	0.247	0	0	0	0.002	0	0	0	0.008	0	160.195	3511.08
2487	1.51905	0	922.53	13.344	12.8564	690.283	176.24	26.2416	4.2496	23.9072	67.1769	0.0716	0.0592	0.0077	0.714	83.5011	22.7401	156.324	731.184	49.4906	0.1197	135.929	0.9044	0.096	4.173	0.503	0.912	0.247	0	0	0	0.002	0	0	0	0.008	0	160.207	3511.08
2488	1.5164	0	922.582	13.344	12.8564	690.283	176.24	26.2416	4.2496	23.9072	67.1769	0.0716	0.0592	0.0077	0.714	83.5011	22.7401	156.324	731.184	49.4906	0.1197	135.929	0.9044	0.096	4.173	0.503	0.913	0.247	0	0	0	0.002	0	0	0	0.008	0	160.219	3511.08
2489	1.51375	0	922.633	13.344	12.8564	690.283	176.24	26.2416	4.2496	23.9072	67.1769	0.0716	0.0592	0.0077	0.714	83.5011	22.7401	156.324	731.184	49.4906	0.1197	135.929	0.9044	0.096	4.174	0.503	0.913	0.247	0	0	0	0.002	0	0	0	0.008	0	160.231	3511.08
2490	1.5111	0	922.684	13.344	12.8564	690.283	176.24	26.2416	4.2496	23.9072	67.1769	0.0716	0.0592	0.0077	0.714	83.5011	22.7401	156.324	731.184	49.4906	0.1197	135.929	0.9044	0.096	4.174	0.503	0.913	0.247	0	0	0	0.002	0	0	0	0.008	0	160.244	3511.08
2491	1.50845	0	922.735	13.344	12.8564	690.283	176.24	26.2416	4.2496	23.9072	67.1769	0.0716	0.0592	0.0077	0.714	83.5011	22.7401	156.324	731.184	49.4906	0.1197	135.929	0.9044	0.096	4.175	0.503	0.913	0.247	0	0	0	0.002	0	0	0	0.008	0	160.256	3511.08
2492	1.5058	0	922.786	13.344	12.8564	690.283	176.24	26.2416	4.2496	23.9072	67.1769	0.0716	0.0592	0.0077	0.714	83.5011	22.7401	156.324	731.184	49.4906	0.1197	135.929	0.9044	0.096	4.175	0.503	0.913	0.247	0	0	0	0.002	0	0	0	0.008	0	160.268	3511.08
2493	1.50315	0	922.837	13.344	12.8564	690.283	176.24	26.2416	4.2496	23.9072	67.1769	0.0716	0.0592	0.0077	0.714	83.5011	22.7401	156.324	731.184	49.4906	0.1197	135.929	0.9044	0.096	4.176	0.503	0.913	0.247	0	0	0	0.002	0	0	0	0.008	0	160.28	3511.08
2494	1.5005	0	922.888	13.344	12.8564	690.283	176.24	26.2416	4.2496	23.9072	67.1769	0.0716	0.0592	0.0077	0.714	83.5011	22.7401	156.324	731.184	49.4906	0.1197	135.929	0.9044	0.096	4.176	0.503	0.913	0.247	0	0	0	0.002	0	0	0	0.008	0	160.292	3511.08
2495	1.49785	0	922.939	13.344	12.8564	690.283	176.24	26.2416	4.2496	23.9072	67.1769	0.0716	0.0592	0.0077	0.714	83.5011	22.7401	156.324	731.184	49.4906	0.1197	135.929	0.9044	0.096	4.177	0.503	0.913	0.247	0	0	0	0.002	0	0	0	0.008	0	160.304	3511.08
2496	1.4952	0	922.99	13.344	12.8564	690.283	176.24	26.2416	4.2496	23.9072	67.1769	0.0716	0.0592	0.0077	0.714	83.5011	22.7401	156.324	731.184	49.4906	0.1197	135.929	0.9044	0.096	4.177	0.503	0.913	0.247	0	0	0	0.002	0	0	0	0.008	0	160.316	3511.08
2497	1.49255	0	923.041	13.344	12.8564	690.283	176.24	26.2416	4.2496	23.9072	67.1769	0.0716	0.0592	0.0077	0.714	83.5011	22.7401	156.324	731.184	49.4906	0.1197	135.929	0.9044	0.096	4.177	0.503	0.913	0.247	0	0	0	0.002	0	0	0	0.008	0	160.328	3511.08
2498	1.4899	0	923.093	13.344	12.8564	690.283	176.24	26.2416	4.2496	23.9072	67.1769	0.0716	0.0592	0.0077	0.714	83.5011	22.7401	156.324	731.184	49.4906	0.1197	135.929	0.9044	0.096	4.178	0.503	0.913	0.247	0	0	0	0.002	0	0	0	0.008	0	160.339	3511.08
2499	1.48725	0	923.144	13.344	12.8564	690.283	176.24	26.2416	4.2496	23.9072	67.1769	0.0716	0.0592	0.0077	0.714	83.5011	22.7401	156.324	731.184	49.4906	0.1197	135.929	0.9044	0.096	4.178	0.503	0.914	0.247	0	0	0	0.002	0	0	0	0.008	0	160.351	3511.08
2500	1.4846	0	923.195	13.344	12.8564	690.283	176.24	26.2416	4.2496	23.9072	67.1769	0.0716	0.0592	0.0077	0.714	83.5011	22.7401	156.324	731.184	49.4906	0.1197	135.929	0.9044	0.096	4.178	0.503	0.914	0.247	0	0	0	0.002	0	0	0	0.008	0	160.351	3511.08
