# Supplementary material for: The Social Cost of Fossil and Industrial CO2 Emissions from 1950 to 2018
Source: Research Square preprint supplement (doi:10.21203/rs.3.rs-2244259/v1), 2022-11-17
Supplement: Supplementary file 28 [file RCP85_MIDYEAR_CONCENTRATIONS.xls]

## Sheet: RCP85_MIDYEAR_CONCENTRATIONS
RCP85__MIDYEAR__CONCENTRATIONS____________________________
CONTENT: CMIP5 RECOMMENDATIONS FOR ANNUAL AVERAGE, GLOBAL MEAN CONCENTRATIONS.
RUN: RCP8.5, FINAL RELEASE, 26 Nov. 2009
RCP4.5 CONTACT: MESSAGE group, Keywan Riahi (riahi@iiasa.ac.at)
DATE: 26/11/2009 11:11:43 (updated description, 30 May 2010)
MAGICC-VERSION: 6.3.09, 25 November 2009
FILE PRODUCED BY: RCP Concentration Calculation & Data Group, M. Meinshausen, S. Smith, K. Riahi, D. van Vuuren
DOCUMENTATION: M. Meinshausen, S. Smith et al. (2011) "The RCP GHG concentrations and their extension from 1765 to 2300", DOI 10.1007/s10584-011-0156-z, Climatic Change.
CMIP5 INFO: http://cmip-pcmdi.llnl.gov/cmip5/
RCP DATABASE: http://www.iiasa.ac.at/web-apps/tnt/RcpDb
FURTHER INFO: For data sources, aknowledgements and further information, see http://www.pik-potsdam.de/~mmalte/rcps
NOTE: RCP8.5 starts 2005; 20th century data and earlier is provided for convenience.
COLUMN_DESCRIPTION________________________________________
1. CO2EQ - (For Information only, not CMIP5 recommendation) CO2 equivalence concentrations using CO2 radiative forcing relationship Q = 3.71/ln(2)*ln(C/278), aggregating all (efficacy-adjusted) anthropogenic forcings, including greenhouse gases listed below (i.e. columns 3,4,5 and 8-35), and aerosols, trop. ozone etc. (not listed below).
2. KYOTO-CO2EQ - (For information only, not CMIP5 recommendation) As column 1, but only aggregating greenhouse gases controlled under the Kyoto Protocol (columns 3,4,5 and 8-19).
3. CO2 - Atmospheric CO2 concentrations
4. CH4 - Atmospheric CH4 concentrations
5. N2O - Atmospheric N2O concentrations
6. FGASSUMHFC134AEQ - All flourinated gases controlled under the Kyoto Protocol, i.e. HFCs, PFCs, and SF6 (columns 8-19) expressed as HFC134a equivalence concentrations.
7. MHALOSUMCFC12EQ - All flourinated gases controlled under the Montreal Protocol, i.e. CFCs, HCFCs, Halons, CCl4, CH3Br, CH3Cl (columns 20-35) expressed as CFC-12 equivalence concentrations.
8. - 19. - Flourinated Gases controlled under the Kyoto Protocol
20. - 35. - Ozone Depleting Substances controlled under the Montreal Protocol
&THISFILE_SPECIFICATIONS
THISFILE_DATACOLUMNS	35
THISFILE_FIRSTYEAR	1765
THISFILE_LASTYEAR	2500
THISFILE_ANNUALSTEPS	1
THISFILE_FIRSTDATAROW	40
THISFILE_UNITS	SEE ROW 38
THISFILE_DATTYPE	RCPDAT
/
COLUMN:	1	2	3	4	5	6	7	8	9	10	11	12	13	14	15	16	17	18	19	20	21	22	23	24	25	26	27	28	29	30	31	32	33	34	35
UNITS:	ppm	ppm	ppm	ppb	ppb	ppt	ppt	ppt	ppt	ppt	ppt	ppt	ppt	ppt	ppt	ppt	ppt	ppt	ppt	ppt	ppt	ppt	ppt	ppt	ppt	ppt	ppt	ppt	ppt	ppt	ppt	ppt	ppt	ppt	ppt
v YEARS/GAS >	CO2EQ	KYOTO-CO2EQ	CO2	CH4	N2O	FGASSUMHFC134AEQ	MHALOSUMCFC12EQ	CF4	C2F6	C6F14	HFC23	HFC32	HFC43_10	HFC125	HFC134a	HFC143a	HFC227ea	HFC245fa	SF6	CFC_11	CFC_12	CFC_113	CFC_114	CFC_115	CARB_TET	MCF	HCFC_22	HCFC_141B	HCFC_142B	HALON1211	HALON1202	HALON1301	HALON2402	CH3BR	CH3CL
1765	277.015	277.015	278.052	721.894	272.96	0	0	35	0	0	0	0	0	0	0	0	0	0	0	0	0	0	0	0	0	0	0	0	0	0	0	0	0	5.8	480
1766	277.839	277.815	278.106	722.256	272.971	0	0	35	0	0	0	0	0	0	0	0	0	0	0	0	0	0	0	0	0	0	0	0	0	0	0	0	0	5.8	480
1767	278.694	278.687	278.22	722.971	272.994	0	0	35	0	0	0	0	0	0	0	0	0	0	0	0	0	0	0	0	0	0	0	0	0	0	0	0	0	5.8	480
1768	278.748	278.836	278.343	723.668	273.017	0	0	35	0	0	0	0	0	0	0	0	0	0	0	0	0	0	0	0	0	0	0	0	0	0	0	0	0	5.8	480
1769	278.796	278.989	278.471	724.343	273.039	0	0	35	0	0	0	0	0	0	0	0	0	0	0	0	0	0	0	0	0	0	0	0	0	0	0	0	0	5.8	480
1770	278.849	279.143	278.6	724.995	273.061	0	0	35	0	0	0	0	0	0	0	0	0	0	0	0	0	0	0	0	0	0	0	0	0	0	0	0	0	5.8	480
1771	278.884	279.299	278.733	725.629	273.083	0	0	35	0	0	0	0	0	0	0	0	0	0	0	0	0	0	0	0	0	0	0	0	0	0	0	0	0	5.8	480
1772	278.925	279.459	278.869	726.25	273.104	0	0	35	0	0	0	0	0	0	0	0	0	0	0	0	0	0	0	0	0	0	0	0	0	0	0	0	0	5.8	480
1773	278.994	279.622	279.009	726.859	273.125	0	0	35	0	0	0	0	0	0	0	0	0	0	0	0	0	0	0	0	0	0	0	0	0	0	0	0	0	5.8	480
1774	279.069	279.789	279.153	727.455	273.146	0	0	35	0	0	0	0	0	0	0	0	0	0	0	0	0	0	0	0	0	0	0	0	0	0	0	0	0	5.8	480
1775	279.151	279.96	279.302	728.037	273.166	0	0	35	0	0	0	0	0	0	0	0	0	0	0	0	0	0	0	0	0	0	0	0	0	0	0	0	0	5.8	480
1776	279.242	280.137	279.457	728.604	273.187	0	0	35	0	0	0	0	0	0	0	0	0	0	0	0	0	0	0	0	0	0	0	0	0	0	0	0	0	5.8	480
1777	279.342	280.319	279.618	729.154	273.207	0	0	35	0	0	0	0	0	0	0	0	0	0	0	0	0	0	0	0	0	0	0	0	0	0	0	0	0	5.8	480
1778	279.447	280.504	279.782	729.687	273.227	0	0	35	0	0	0	0	0	0	0	0	0	0	0	0	0	0	0	0	0	0	0	0	0	0	0	0	0	5.8	480
1779	279.551	280.685	279.943	730.201	273.247	0	0	35	0	0	0	0	0	0	0	0	0	0	0	0	0	0	0	0	0	0	0	0	0	0	0	0	0	5.8	480
1780	279.65	280.859	280.097	730.692	273.266	0	0	35	0	0	0	0	0	0	0	0	0	0	0	0	0	0	0	0	0	0	0	0	0	0	0	0	0	5.8	480
1781	279.718	281.022	280.243	731.154	273.286	0	0	35	0	0	0	0	0	0	0	0	0	0	0	0	0	0	0	0	0	0	0	0	0	0	0	0	0	5.8	480
1782	279.782	281.179	280.382	731.584	273.306	0	0	35	0	0	0	0	0	0	0	0	0	0	0	0	0	0	0	0	0	0	0	0	0	0	0	0	0	5.8	480
1783	279.868	281.332	280.518	731.989	273.325	0	0	35	0	0	0	0	0	0	0	0	0	0	0	0	0	0	0	0	0	0	0	0	0	0	0	0	0	5.8	480
1784	279.959	281.487	280.657	732.378	273.345	0	0	35	0	0	0	0	0	0	0	0	0	0	0	0	0	0	0	0	0	0	0	0	0	0	0	0	0	5.8	480
1785	280.058	281.648	280.803	732.76	273.365	0	0	35	0	0	0	0	0	0	0	0	0	0	0	0	0	0	0	0	0	0	0	0	0	0	0	0	0	5.8	480
1786	280.17	281.819	280.957	733.146	273.384	0	0	35	0	0	0	0	0	0	0	0	0	0	0	0	0	0	0	0	0	0	0	0	0	0	0	0	0	5.8	480
1787	280.291	281.996	281.118	733.544	273.404	0	0	35	0	0	0	0	0	0	0	0	0	0	0	0	0	0	0	0	0	0	0	0	0	0	0	0	0	5.8	480
1788	280.419	282.177	281.282	733.965	273.424	0	0	35	0	0	0	0	0	0	0	0	0	0	0	0	0	0	0	0	0	0	0	0	0	0	0	0	0	5.8	480
1789	280.548	282.357	281.443	734.418	273.444	0	0	35	0	0	0	0	0	0	0	0	0	0	0	0	0	0	0	0	0	0	0	0	0	0	0	0	0	5.8	480
1790	280.676	282.532	281.598	734.911	273.464	0	0	35	0	0	0	0	0	0	0	0	0	0	0	0	0	0	0	0	0	0	0	0	0	0	0	0	0	5.8	480
1791	280.778	282.701	281.747	735.445	273.484	0	0	35	0	0	0	0	0	0	0	0	0	0	0	0	0	0	0	0	0	0	0	0	0	0	0	0	0	5.8	480
1792	280.879	282.867	281.891	736.018	273.504	0	0	35	0	0	0	0	0	0	0	0	0	0	0	0	0	0	0	0	0	0	0	0	0	0	0	0	0	5.8	480
1793	281.005	283.031	282.031	736.626	273.525	0	0	35	0	0	0	0	0	0	0	0	0	0	0	0	0	0	0	0	0	0	0	0	0	0	0	0	0	5.8	480
1794	281.13	283.191	282.167	737.265	273.545	0	0	35	0	0	0	0	0	0	0	0	0	0	0	0	0	0	0	0	0	0	0	0	0	0	0	0	0	5.8	480
1795	281.254	283.348	282.299	737.933	273.566	0	0	35	0	0	0	0	0	0	0	0	0	0	0	0	0	0	0	0	0	0	0	0	0	0	0	0	0	5.8	480
1796	281.378	283.502	282.427	738.627	273.587	0	0	35	0	0	0	0	0	0	0	0	0	0	0	0	0	0	0	0	0	0	0	0	0	0	0	0	0	5.8	480
1797	281.478	283.653	282.551	739.343	273.609	0	0	35	0	0	0	0	0	0	0	0	0	0	0	0	0	0	0	0	0	0	0	0	0	0	0	0	0	5.8	480
1798	281.577	283.801	282.671	740.08	273.63	0	0	35	0	0	0	0	0	0	0	0	0	0	0	0	0	0	0	0	0	0	0	0	0	0	0	0	0	5.8	480
1799	281.699	283.945	282.787	740.834	273.652	0	0	35	0	0	0	0	0	0	0	0	0	0	0	0	0	0	0	0	0	0	0	0	0	0	0	0	0	5.8	480
1800	281.795	284.086	282.899	741.608	273.675	0	0	35	0	0	0	0	0	0	0	0	0	0	0	0	0	0	0	0	0	0	0	0	0	0	0	0	0	5.8	480
1801	281.891	284.224	283.007	742.413	273.698	0	0	35	0	0	0	0	0	0	0	0	0	0	0	0	0	0	0	0	0	0	0	0	0	0	0	0	0	5.8	480
1802	281.964	284.359	283.111	743.26	273.721	0	0	35	0	0	0	0	0	0	0	0	0	0	0	0	0	0	0	0	0	0	0	0	0	0	0	0	0	5.8	480
1803	282.061	284.492	283.211	744.146	273.744	0	0	35	0	0	0	0	0	0	0	0	0	0	0	0	0	0	0	0	0	0	0	0	0	0	0	0	0	5.8	480
1804	282.204	284.622	283.307	745.063	273.768	0	0	35	0	0	0	0	0	0	0	0	0	0	0	0	0	0	0	0	0	0	0	0	0	0	0	0	0	5.8	480
1805	282.323	284.748	283.4	746.005	273.793	0	0	35	0	0	0	0	0	0	0	0	0	0	0	0	0	0	0	0	0	0	0	0	0	0	0	0	0	5.8	480
1806	282.418	284.873	283.49	746.962	273.818	0	0	35	0	0	0	0	0	0	0	0	0	0	0	0	0	0	0	0	0	0	0	0	0	0	0	0	0	5.8	480
1807	282.514	284.997	283.578	747.927	273.843	0	0	35	0	0	0	0	0	0	0	0	0	0	0	0	0	0	0	0	0	0	0	0	0	0	0	0	0	5.8	480
1808	282.631	285.115	283.661	748.893	273.869	0	0	35	0	0	0	0	0	0	0	0	0	0	0	0	0	0	0	0	0	0	0	0	0	0	0	0	0	5.8	480
1809	282.739	285.225	283.735	749.851	273.895	0	0	35	0	0	0	0	0	0	0	0	0	0	0	0	0	0	0	0	0	0	0	0	0	0	0	0	0	5.8	480
1810	282.836	285.321	283.797	750.798	273.922	0	0	35	0	0	0	0	0	0	0	0	0	0	0	0	0	0	0	0	0	0	0	0	0	0	0	0	0	5.8	480
1811	282.9	285.406	283.847	751.739	273.95	0	0	35	0	0	0	0	0	0	0	0	0	0	0	0	0	0	0	0	0	0	0	0	0	0	0	0	0	5.8	480
1812	282.957	285.483	283.889	752.682	273.978	0	0	35	0	0	0	0	0	0	0	0	0	0	0	0	0	0	0	0	0	0	0	0	0	0	0	0	0	5.8	480
1813	283.036	285.555	283.926	753.628	274.007	0	0	35	0	0	0	0	0	0	0	0	0	0	0	0	0	0	0	0	0	0	0	0	0	0	0	0	0	5.8	480
1814	283.115	285.627	283.963	754.579	274.036	0	0	35	0	0	0	0	0	0	0	0	0	0	0	0	0	0	0	0	0	0	0	0	0	0	0	0	0	5.8	480
1815	283.174	285.701	284.001	755.531	274.066	0	0	35	0	0	0	0	0	0	0	0	0	0	0	0	0	0	0	0	0	0	0	0	0	0	0	0	0	5.8	480
1816	283.215	285.778	284.043	756.486	274.097	0	0	35	0	0	0	0	0	0	0	0	0	0	0	0	0	0	0	0	0	0	0	0	0	0	0	0	0	5.8	480
1817	283.259	285.858	284.086	757.44	274.128	0	0	35	0	0	0	0	0	0	0	0	0	0	0	0	0	0	0	0	0	0	0	0	0	0	0	0	0	5.8	480
1818	283.327	285.936	284.129	758.395	274.16	0	0	35	0	0	0	0	0	0	0	0	0	0	0	0	0	0	0	0	0	0	0	0	0	0	0	0	0	5.8	480
1819	283.415	286.01	284.167	759.348	274.193	0	0	35	0	0	0	0	0	0	0	0	0	0	0	0	0	0	0	0	0	0	0	0	0	0	0	0	0	5.8	480
1820	283.498	286.078	284.198	760.3	274.227	0	0	35	0	0	0	0	0	0	0	0	0	0	0	0	0	0	0	0	0	0	0	0	0	0	0	0	0	5.8	480
1821	283.575	286.139	284.223	761.249	274.261	0	0	35	0	0	0	0	0	0	0	0	0	0	0	0	0	0	0	0	0	0	0	0	0	0	0	0	0	5.8	480
1822	283.627	286.196	284.244	762.198	274.296	0	0	35	0	0	0	0	0	0	0	0	0	0	0	0	0	0	0	0	0	0	0	0	0	0	0	0	0	5.8	480
1823	283.655	286.251	284.263	763.147	274.332	0	0	35	0	0	0	0	0	0	0	0	0	0	0	0	0	0	0	0	0	0	0	0	0	0	0	0	0	5.8	480
1824	283.706	286.306	284.281	764.095	274.368	0	0	35	0	0	0	0	0	0	0	0	0	0	0	0	0	0	0	0	0	0	0	0	0	0	0	0	0	5.8	480
1825	283.76	286.361	284.3	765.044	274.406	0	0	35	0	0	0	0	0	0	0	0	0	0	0	0	0	0	0	0	0	0	0	0	0	0	0	0	0	5.8	480
1826	283.816	286.418	284.32	765.993	274.444	0	0	35	0	0	0	0	0	0	0	0	0	0	0	0	0	0	0	0	0	0	0	0	0	0	0	0	0	5.8	480
1827	283.873	286.475	284.34	766.943	274.484	0	0	35	0	0	0	0	0	0	0	0	0	0	0	0	0	0	0	0	0	0	0	0	0	0	0	0	0	5.8	480
1828	283.931	286.532	284.36	767.894	274.524	0	0	35	0	0	0	0	0	0	0	0	0	0	0	0	0	0	0	0	0	0	0	0	0	0	0	0	0	5.8	480
1829	284.013	286.589	284.38	768.846	274.565	0	0	35	0	0	0	0	0	0	0	0	0	0	0	0	0	0	0	0	0	0	0	0	0	0	0	0	0	5.8	480
1830	283.962	286.647	284.4	769.798	274.606	0	0	35	0	0	0	0	0	0	0	0	0	0	0	0	0	0	0	0	0	0	0	0	0	0	0	0	0	5.8	480
1831	283.9	286.669	284.385	770.745	274.649	0	0	35	0	0	0	0	0	0	0	0	0	0	0	0	0	0	0	0	0	0	0	0	0	0	0	0	0	5.8	480
1832	283.882	286.6	284.28	771.683	274.693	0	0	35	0	0	0	0	0	0	0	0	0	0	0	0	0	0	0	0	0	0	0	0	0	0	0	0	0	5.8	480
1833	283.77	286.481	284.125	772.615	274.738	0	0	35	0	0	0	0	0	0	0	0	0	0	0	0	0	0	0	0	0	0	0	0	0	0	0	0	0	5.8	480
1834	283.664	286.367	283.975	773.547	274.784	0	0	35	0	0	0	0	0	0	0	0	0	0	0	0	0	0	0	0	0	0	0	0	0	0	0	0	0	5.8	480
1835	283.56	286.253	283.825	774.483	274.83	0	0	35	0	0	0	0	0	0	0	0	0	0	0	0	0	0	0	0	0	0	0	0	0	0	0	0	0	5.8	480
1836	283.369	286.14	283.675	775.428	274.878	0	0	35	0	0	0	0	0	0	0	0	0	0	0	0	0	0	0	0	0	0	0	0	0	0	0	0	0	5.8	480
1837	283.203	286.027	283.525	776.389	274.927	0	0	35	0	0	0	0	0	0	0	0	0	0	0	0	0	0	0	0	0	0	0	0	0	0	0	0	0	5.8	480
1838	283.153	285.966	283.425	777.369	274.977	0	0	35	0	0	0	0	0	0	0	0	0	0	0	0	0	0	0	0	0	0	0	0	0	0	0	0	0	5.8	480
1839	283.159	285.981	283.4	778.374	275.027	0	0	35	0	0	0	0	0	0	0	0	0	0	0	0	0	0	0	0	0	0	0	0	0	0	0	0	0	5.8	480
1840	283.17	286.022	283.4	779.412	275.08	0	0	35	0	0	0	0	0	0	0	0	0	0	0	0	0	0	0	0	0	0	0	0	0	0	0	0	0	5.8	480
1841	283.211	286.091	283.425	780.494	275.136	0	0	35	0	0	0	0	0	0	0	0	0	0	0	0	0	0	0	0	0	0	0	0	0	0	0	0	0	5.8	480
1842	283.306	286.214	283.5	781.624	275.202	0	0	35	0	0	0	0	0	0	0	0	0	0	0	0	0	0	0	0	0	0	0	0	0	0	0	0	0	5.8	480
1843	283.429	286.364	283.6	782.793	275.273	0	0	35	0	0	0	0	0	0	0	0	0	0	0	0	0	0	0	0	0	0	0	0	0	0	0	0	0	5.8	480
1844	283.579	286.538	283.725	783.989	275.337	0	0	35	0	0	0	0	0	0	0	0	0	0	0	0	0	0	0	0	0	0	0	0	0	0	0	0	0	5.8	480
1845	283.713	286.76	283.9	785.197	275.38	0	0	35	0	0	0	0	0	0	0	0	0	0	0	0	0	0	0	0	0	0	0	0	0	0	0	0	0	5.8	480
1846	283.885	286.977	284.075	786.406	275.398	0	0	35	0	0	0	0	0	0	0	0	0	0	0	0	0	0	0	0	0	0	0	0	0	0	0	0	0	5.8	480
1847	284.051	287.166	284.225	787.602	275.401	0	0	35	0	0	0	0	0	0	0	0	0	0	0	0	0	0	0	0	0	0	0	0	0	0	0	0	0	5.8	480
1848	284.22	287.379	284.4	788.773	275.401	0	0	35	0	0	0	0	0	0	0	0	0	0	0	0	0	0	0	0	0	0	0	0	0	0	0	0	0	5.8	480
1849	284.388	287.591	284.575	789.904	275.4	0	0	35	0	0	0	0	0	0	0	0	0	0	0	0	0	0	0	0	0	0	0	0	0	0	0	0	0	5.8	480
1850	284.478	287.78	284.725	790.979	275.425	0	0	35	0	0	0	0	0	0	0	0	0	0	0	0	0	0	0	0	0	0	0	0	0	0	0	0	0	5.8	480
1851	284.678	287.984	284.875	792.25	275.5	0	0.0105361	35	0	0	0	0	0	0	0	0	0	0	0	0	0	0	0	0	0.025935	0	0	0	0	0	0	0	0	5.8	480
1852	284.494	288.175	285	793.75	275.6	0	0.0316002	35	0	0	0	0	0	0	0	0	0	0	0	0	0	0	0	0	0.077785	0	0	0	0	0	0	0	0	5.8	480
1853	284.254	288.366	285.125	795.25	275.7	0	0.0526703	35	0	0	0	0	0	0	0	0	0	0	0	0	0	0	0	0	0.12965	0	0	0	0	0	0	0	0	5.8	480
1854	284.317	288.582	285.275	796.75	275.8	0	0.0737547	35	0	0	0	0	0	0	0	0	0	0	0	0	0	0	0	0	0.18155	0	0	0	0	0	0	0	0	5.8	480
1855	284.378	288.791	285.425	798	275.9	0	0.0948391	35	0	0	0	0	0	0	0	0	0	0	0	0	0	0	0	0	0.23345	0	0	0	0	0	0	0	0	5.8	480
1856	284.487	289	285.575	799.25	276	0	0.115903	35	0	0	0	0	0	0	0	0	0	0	0	0	0	0	0	0	0.2853	0	0	0	0	0	0	0	0	5.8	480
1857	284.571	289.216	285.725	800.75	276.1	0	0.136967	35	0	0	0	0	0	0	0	0	0	0	0	0	0	0	0	0	0.33715	0	0	0	0	0	0	0	0	5.8	480
1858	284.758	289.458	285.9	802.25	276.2	0	0.158052	35	0	0	0	0	0	0	0	0	0	0	0	0	0	0	0	0	0.38905	0	0	0	0	0	0	0	0	5.8	480
1859	284.872	289.7	286.075	803.75	276.3	0	0.179116	35	0	0	0	0	0	0	0	0	0	0	0	0	0	0	0	0	0.4409	0	0	0	0	0	0	0	0	5.8	480
1860	284.54	289.916	286.225	805.25	276.4	0	0.20018	35	0	0	0	0	0	0	0	0	0	0	0	0	0	0	0	0	0.49275	0	0	0	0	0	0	0	0	5.8	480
1861	283.91	290.132	286.375	806.75	276.5	0	0.221264	35	0	0	0	0	0	0	0	0	0	0	0	0	0	0	0	0	0.54465	0	0	0	0	0	0	0	0	5.8	480
1862	284.24	290.324	286.5	808.25	276.6	0	0.242328	35	0	0	0	0	0	0	0	0	0	0	0	0	0	0	0	0	0.5965	0	0	0	0	0	0	0	0	5.8	480
1863	284.827	290.515	286.625	809.75	276.7	0	0.263392	35	0	0	0	0	0	0	0	0	0	0	0	0	0	0	0	0	0.64835	0	0	0	0	0	0	0	0	5.8	480
1864	284.929	290.732	286.775	811.25	276.8	0	0.284477	35	0	0	0	0	0	0	0	0	0	0	0	0	0	0	0	0	0.70025	0	0	0	0	0	0	0	0	5.8	480
1865	284.907	290.93	286.9	813	276.9	0	0.305561	35	0	0	0	0	0	0	0	0	0	0	0	0	0	0	0	0	0.75215	0	0	0	0	0	0	0	0	5.8	480
1866	284.538	291.104	287	814.75	277	0	0.326625	35	0	0	0	0	0	0	0	0	0	0	0	0	0	0	0	0	0.804	0	0	0	0	0	0	0	0	5.8	480
1867	284.133	291.27	287.1	816.25	277.1	0	0.347689	35	0	0	0	0	0	0	0	0	0	0	0	0	0	0	0	0	0.85585	0	0	0	0	0	0	0	0	5.8	480
1868	284.156	291.461	287.225	817.75	277.2	0	0.368773	35	0	0	0	0	0	0	0	0	0	0	0	0	0	0	0	0	0.90775	0	0	0	0	0	0	0	0	5.8	480
1869	284.51	291.678	287.375	819.25	277.3	0	0.389838	35	0	0	0	0	0	0	0	0	0	0	0	0	0	0	0	0	0.9596	0	0	0	0	0	0	0	0	5.8	480
1870	284.76	291.898	287.525	821	277.375	0	0.41082	35	0	0	0	0	0	0	0	0	0	0	0	0	0	0	0	0	1.01125	0	0	0	0	0	0	0	0	5.8	480
1871	284.422	292.138	287.7	822.75	277.425	0	0.431844	35	0	0	0	0	0	0	0	0	0	0	0	0	0	0	0	0	1.063	0	0	0	0	0	0	0	0	5.8	480
1872	283.277	292.401	287.9	824.25	277.5	0	0.452969	35	0	0	0	0	0	0	0	0	0	0	0	0	0	0	0	0	1.115	0	0	0	0	0	0	0	0	5.8	480
1873	282.357	292.694	288.125	825.75	277.6	0	0.474094	35	0	0	0	0	0	0	0	0	0	0	0	0	0	0	0	0	1.167	0	0	0	0	0	0	0	0	5.8	480
1874	282.412	293.038	288.4	827.25	277.7	0	0.495219	35	0	0	0	0	0	0	0	0	0	0	0	0	0	0	0	0	1.219	0	0	0	0	0	0	0	0	5.8	480
1875	282.738	293.411	288.7	829	277.775	0	0.516344	35	0	0	0	0	0	0	0	0	0	0	0	0	0	0	0	0	1.271	0	0	0	0	0	0	0	0	5.8	480
1876	283.196	293.804	289.025	830.75	277.825	0	0.538484	35	0	0	0	0	0	0	0	0	0	0	0	0	0	0	0	0	1.3255	0	0	0	0	0	0	0	0	5.8	480
1877	283.933	294.245	289.4	832.25	277.9	0	0.56225	35	0	0	0	0	0	0	0	0	0	0	0	0	0	0	0	0	1.384	0	0	0	0	0	0	0	0	5.8	480
1878	284.511	294.717	289.8	833.75	278	0	0.587234	35	0	0	0	0	0	0	0	0	0	0	0	0	0	0	0	0	1.4455	0	0	0	0	0	0	0	0	5.8	480
1879	284.747	295.214	290.225	835.25	278.1	0	0.613437	35	0	0	0	0	0	0	0	0	0	0	0	0	0	0	0	0	1.51	0	0	0	0	0	0	0	0	5.8	480
1880	284.541	295.769	290.7	837	278.2	0	0.640656	35	0	0	0	0	0	0	0	0	0	0	0	0	0	0	0	0	1.577	0	0	0	0	0	0	0	0	5.8	480
1881	284.58	296.359	291.2	839	278.3	0	0.669094	35	0	0	0	0	0	0	0	0	0	0	0	0	0	0	0	0	1.647	0	0	0	0	0	0	0	0	5.8	480
1882	285.216	296.922	291.675	841	278.4	0	0.698953	35	0	0	0	0	0	0	0	0	0	0	0	0	0	0	0	0	1.7205	0	0	0	0	0	0	0	0	5.8	480
1883	285.702	297.461	292.125	843	278.5	0	0.730031	35	0	0	0	0	0	0	0	0	0	0	0	0	0	0	0	0	1.797	0	0	0	0	0	0	0	0	5.8	480
1884	286.076	297.992	292.575	844.75	278.6	0	0.762328	35	0	0	0	0	0	0	0	0	0	0	0	0	0	0	0	0	1.8765	0	0	0	0	0	0	0	0	5.8	480
1885	286.62	298.465	292.975	846.25	278.7	0	0.796047	35	0	0	0	0	0	0	0	0	0	0	0	0	0	0	0	0	1.9595	0	0	0	0	0	0	0	0	5.8	480
1886	287.061	298.869	293.3	848	278.8	0	0.831391	35	0	0	0	0	0	0	0	0	0	0	0	0	0	0	0	0	2.0465	0	0	0	0	0	0	0	0	5.8	480
1887	287.225	299.225	293.575	850	278.875	0	0.868359	35	0	0	0	0	0	0	0	0	0	0	0	0	0	0	0	0	2.1375	0	0	0	0	0	0	0	0	5.8	480
1888	286.962	299.525	293.8	852	278.925	0	0.906953	35	0	0	0	0	0	0	0	0	0	0	0	0	0	0	0	0	2.2325	0	0	0	0	0	0	0	0	5.8	480
1889	286.965	299.805	294	854	279	0	0.947172	35	0	0	0	0	0	0	0	0	0	0	0	0	0	0	0	0	2.3315	0	0	0	0	0	0	0	0	5.8	480
1890	287.046	300.064	294.175	856	279.1	0	0.989219	35	0	0	0	0	0	0	0	0	0	0	0	0	0	0	0	0	2.435	0	0	0	0	0	0	0	0	5.8	480
1891	286.867	300.305	294.325	858.25	279.2	0	1.03309	35	0	0	0	0	0	0	0	0	0	0	0	0	0	0	0	0	2.543	0	0	0	0	0	0	0	0	5.8	480
1892	286.801	300.554	294.475	860.75	279.3	0	1.0788	35	0	0	0	0	0	0	0	0	0	0	0	0	0	0	0	0	2.6555	0	0	0	0	0	0	0	0	5.8	480
1893	286.764	300.765	294.6	863	279.375	0	1.12673	35	0	0	0	0	0	0	0	0	0	0	0	0	0	0	0	0	2.7735	0	0	0	0	0	0	0	0	5.8	480
1894	286.661	300.939	294.7	865	279.425	0	1.17691	35	0	0	0	0	0	0	0	0	0	0	0	0	0	0	0	0	2.897	0	0	0	0	0	0	0	0	5.8	480
1895	286.452	301.119	294.8	867.25	279.475	0	1.22911	35	0	0	0	0	0	0	0	0	0	0	0	0	0	0	0	0	3.0255	0	0	0	0	0	0	0	0	5.8	480
1896	286.397	301.308	294.9	869.75	279.525	0	1.28355	35	0	0	0	0	0	0	0	0	0	0	0	0	0	0	0	0	3.1595	0	0	0	0	0	0	0	0	5.8	480
1897	286.487	301.519	295.025	872	279.6	0	1.34062	35	0	0	0	0	0	0	0	0	0	0	0	0	0	0	0	0	3.3	0	0	0	0	0	0	0	0	5.8	480
1898	286.588	301.806	295.225	874.25	279.675	0	1.40014	35	0	0	0	0	0	0	0	0	0	0	0	0	0	0	0	0	3.4465	0	0	0	0	0	0	0	0	5.8	480
1899	286.676	302.174	295.5	876.75	279.725	0	1.4623	35	0	0	0	0	0	0	0	0	0	0	0	0	0	0	0	0	3.5995	0	0	0	0	0	0	0	0	5.8	480
1900	286.799	302.579	295.8	879.5	279.8	0.0329065	1.5273	35	0.0202502	0	0	0	0	0	0	0	0	0	0	0	0	0	0	0	3.7595	0	0	0	0	0	0	0	0	5.8	480
1901	286.77	303.038	296.125	883	279.9	0.067545	1.59494	35	0.0415662	0	0	0	0	0	0	0	0	0	0	0	0	0	0	0	3.926	0	0	0	0	0	0	0	0	5.8	480
1902	286.768	303.538	296.475	887	280	0.0711	1.66359	35	0.0437538	0	0	0	0	0	0	0	0	0	0	0	0	0	0	0	4.095	0	0	0	0	0	0	0	0	5.8	480
1903	286.797	304.046	296.825	891.25	280.1	0.0748421	1.73184	35	0.0460567	0	0	0	0	0	0	0	0	0	0	0	0	0	0	0	4.263	0	0	0	0	0	0	0	0	5.8	480
1904	286.845	304.587	297.2	895.75	280.2	0.0787812	1.79989	35	0.0484807	0	0	0	0	0	0	0	0	0	0	0	0	0	0	0	4.4305	0	0	0	0	0	0	0	0	5.8	480
1905	287.014	305.179	297.625	900.25	280.3	0.0829275	1.86794	35	0.0510323	0	0	0	0	0	0	0	0	0	0	0	0	0	0	0	4.598	0	0	0	0	0	0	0	0	5.8	480
1906	287.053	305.797	298.075	904.75	280.4	0.0872921	1.93883	35	0.0537182	0	0	0	0	0	0	0	0	0	0	0	0	0	0	0	4.7725	0	0	0	0	0	0	0	0	5.8	480
1907	287.071	306.395	298.5	909.25	280.525	0.0918865	2.02962	35	0.0565455	0	0	0	0	0	0	0	0	0	0	0	0	0	0	0	4.996	0	0	0	0	0	0	0	0	5.8	480
1908	287.536	306.979	298.9	914	280.675	0.0967226	2.13769	35	0.0595216	0	0	0	0	0	0	0	0	0	0	0	0	0	0	0	5.262	0	0	0	0	0	0	0	0	5.8	480
1909	288.179	307.571	299.3	919	280.825	0.101813	2.24575	35	0.0626543	0	0	0	0	0	0	0	0	0	0	0	0	0	0	0	5.528	0	0	0	0	0	0	0	0	5.8	480
1910	288.48	308.156	299.7	923.75	280.975	0.107172	2.35381	35	0.0659519	0	0	0	0	0	0	0	0	0	0	0	0	0	0	0	5.794	0	0	0	0	0	0	0	0	5.8	480
1911	288.963	308.708	300.075	928.25	281.125	0.112812	2.46167	35	0.0694231	0	0	0	0	0	0	0	0	0	0	0	0	0	0	0	6.0595	0	0	0	0	0	0	0	0	5.8	480
1912	289.664	309.247	300.425	933	281.3	0.11875	2.5738	35	0.0730769	0	0	0	0	0	0	0	0	0	0	0	0	0	0	0	6.3355	0	0	0	0	0	0	0	0	5.8	480
1913	290.202	309.8	300.775	938.25	281.475	0.125	2.73306	35	0.0769231	0	0	0	0	0	0	0	0	0	0	0	0	0	0	0	6.7265	0	0	0	0	0	0	0	0	5.8135	480
1914	290.933	310.331	301.1	943.75	281.625	0.131579	2.92466	35	0.0809716	0	0	0	0	0	0	0	0	0	0	0	0	0	0	0	7.196	0	0	0	0	0	0	0	0	5.841	480
1915	291.784	310.841	301.4	949.25	281.8	0.138504	3.04253	35	0.0852333	0	0	0	0	0	0	0	0	0	0	0	0	0	0	0	7.484	0	0	0	0	0	0	0	0	5.869	480
1916	292.238	311.382	301.725	954.75	282	0.145794	3.09705	35	0.0897193	0	0	0	0	0	0	0	0	0	0	0	0	0	0	0	7.616	0	0	0	0	0	0	0	0	5.8975	480
1917	292.544	311.954	302.075	960.25	282.225	0.153467	3.20642	35	0.0944413	0	0	0	0	0	0	0	0	0	0	0	0	0	0	0	7.883	0	0	0	0	0	0	0	0	5.9265	480
1918	292.992	312.512	302.4	966	282.475	0.161544	3.3942	35	0.0994119	0	0	0	0	0	0	0	0	0	0	0	0	0	0	0	8.343	0	0	0	0	0	0	0	0	5.9555	480
1919	293.813	313.047	302.7	972	282.7	0.170047	3.60575	35	0.104644	0	0	0	0	0	0	0	0	0	0	0	0	0	0	0	8.8615	0	0	0	0	0	0	0	0	5.9845	480
1920	294.371	313.601	303.025	977.75	282.925	0.178997	3.8173	35	0.110152	0	0	0	0	0	0	0	0	0	0	0	0	0	0	0	9.38	0	0	0	0	0	0	0	0	6.0135	480
1921	294.952	314.204	303.4	983.25	283.175	0.188417	4.02925	35	0.115949	0	0	0	0	0	0	0	0	0	0	0	0	0	0	0	9.8995	0	0	0	0	0	0	0	0	6.0425	480
1922	295.684	314.809	303.775	989	283.4	0.198334	4.24161	35	0.122052	0	0	0	0	0	0	0	0	0	0	0	0	0	0	0	10.42	0	0	0	0	0	0	0	0	6.0715	480
1923	295.586	315.392	304.125	995	283.6	0.229097	4.45175	35.0325	0.128476	0	0	0	0	0	0	0	0	0	0	0	0	0	0	0	10.935	0	0	0	0	0	0	0	0	6.101	480
1924	295.655	316.027	304.525	1001	283.8	0.284506	4.66191	35.1036	0.135237	0	0	0	0	0	0	0	0	0	0	0	0	0	0	0	11.45	0	0	0	0	0	0	0	0	6.131	480
1925	296.251	316.714	304.975	1007	284	0.345533	4.87408	35.1827	0.142355	0	0	0	0	0	0	0	0	0	0	0	0	0	0	0	11.97	0	0	0	0	0	0	0	0	6.1605	480
1926	296.811	317.38	305.4	1013	284.225	0.409771	5.10453	35.266	0.149848	0	0	0	0	0	0	0	0	0	0	0	0	0	0	0	12.535	0	0	0	0	0	0	0	0	6.19	480
1927	297.141	318.046	305.825	1019	284.45	0.477391	5.35328	35.3537	0.157734	0	0	0	0	0	0	0	0	0	0	0	0	0	0	0	13.145	0	0	0	0	0	0	0	0	6.22	480
1928	297.497	318.755	306.3	1025	284.625	0.548569	5.60205	35.446	0.166036	0	0	0	0	0	0	0	0	0	0	0	0	0	0	0	13.755	0	0	0	0	0	0	0	0	6.2505	480
1929	297.965	319.456	306.775	1030.75	284.8	0.623494	5.85081	35.5432	0.174775	0	0	0	0	0	0	0	0	0	0	0	0	0	0	0	14.365	0	0	0	0	0	0	0	0	6.281	480
1930	298.618	320.124	307.225	1036.25	284.975	0.702362	6.10161	35.6454	0.183974	0	0	0	0	0	0	0	0	0	0	0	0	0	0	0	14.98	0	0	0	0	0	0	0	0	6.3115	480
1931	299.65	320.814	307.7	1041.75	285.125	0.823121	6.35241	35.7531	0.193656	0	0.0317813	0	0	0	0	0	0	0	0	0	0	0	0	0	15.595	0	0	0	0	0	0	0	0	6.342	480
1932	300.716	321.51	308.175	1047.25	285.3	0.951532	6.6036	35.8664	0.203849	0	0.0663262	0	0	0	0	0	0	0	0	0	0.0024255	0	0	0	16.205	0	0	0	0	0	0	0	0	6.3725	480
1933	301.45	322.158	308.6	1052.75	285.5	1.05037	6.8633	35.9857	0.214578	0	0.0720937	0	0	0	0	0	0	0	0	0	0.0072525	0	0	0	16.83	0	0	0	0	0	0	0	0	6.4035	480
1934	301.835	322.773	309	1058	285.7	1.15464	7.18389	36.1113	0.225871	0	0.0783628	0	0	0	0	0	0	0	0	0	0.012032	0	0	0	17.605	0	0	0	0	0	0	0	0	6.4345	480
1935	302.244	323.381	309.4	1063	285.9	1.26466	7.56373	36.2434	0.237759	0	0.0851769	0	0	0	0	0	0	0	0	0	0.01919	0	0.0020765	0	18.515	0	0	0	0	0	0	0	0	6.466	480
1936	302.533	323.937	309.75	1068	286.1	1.38075	7.95036	36.3826	0.250273	0	0.0925836	0	0	0	0	0	0	0	0	0	0.031125	0	0.0062225	0	19.425	0	0	0	0	0	0	0	0	6.4975	480
1937	302.823	324.383	310	1073	286.275	1.50324	8.34413	36.529	0.263445	0	0.100634	0	0	0	0	0	0	0	0	0	0.05022	0	0.010356	0	20.335	0	0	0	0	0	0	0	0	6.529	480
1938	303.562	324.746	310.175	1078	286.425	1.63252	8.75517	36.6832	0.277311	0	0.109385	0	0	0	0	0	0	0	0	0	0.08123	0	0.01655	0	21.245	0	0.005345	0	0	0	0	0	0	6.561	480
1939	304.106	325.056	310.3	1083	286.575	1.76895	9.1942	36.8455	0.291906	0	0.118897	0	0	0	0	0	0	0	0	0.0035225	0.12895	0	0.0248	0	22.155	0	0.021155	0	0	0	0	0	0	6.593	480
1940	304.101	325.322	310.375	1088.25	286.725	1.91295	9.66556	37.0163	0.307269	0	0.129236	0	0	0	0	0	0	0	0	0.0104875	0.19805	0	0.0351	0	23.065	0	0.046995	0	0	0	0	0	0	6.625	480
1941	303.847	325.521	310.375	1093.75	286.9	2.06495	10.191	37.1961	0.323441	0	0.140474	0	0	0	0	0	0	0	0	0.0173	0.2931	0	0.049515	0	24.02	0	0.082435	0	0	0	0	0	0	6.657	480
1942	303.564	325.639	310.3	1099	287.1	2.22541	10.7811	37.3853	0.340465	0	0.152689	0	0	0	0	0	0	0	0	0.023965	0.41875	0	0.06804	0	25.035	0	0.1271	0	0	0	0	0	0	6.689	480
1943	303.426	325.723	310.2	1104	287.3	2.3934	11.4233	37.5846	0.35751	0	0.165966	0	0	0	0	0	0	0	0	0.030485	0.5771	0	0.092715	0	26.07	0	0.1806	0	0	0	0	0	0	6.7215	480
1944	303.267	325.845	310.125	1109.25	287.525	2.56807	12.1183	37.7943	0.373795	0	0.180398	0	0	0	0	0	0	0	0	0.040385	0.77025	0	0.1277	0	27.105	0	0.24255	0	0	0	0	0	0	6.7545	480
1945	303.234	326.032	310.1	1114.75	287.775	2.75008	12.8871	38.015	0.389432	0	0.196085	0	0	0	0	0	0	0	0	0.053585	1.01955	0	0.17505	0	28.135	0	0.3126	0	0	0	0	0	0	6.787	480
1946	303.004	326.279	310.125	1120.5	288.025	2.94006	13.8202	38.2474	0.404511	0	0.213136	0	0	0	0	0	0	0	0	0.070015	1.3515	0.030115	0.27	0	29.165	0	0.39045	0	0	0	0	0	0	6.8195	480
1947	302.458	326.593	310.2	1126.75	288.275	3.13868	15.1102	38.492	0.419121	0	0.231669	0	0	0	0	0	0	0	0	0.10016	1.8695	0.127615	0.44975	0	30.22	0	0.47575	0	0	0	0	0	0	6.853	480
1948	302.011	326.966	310.325	1133.25	288.525	3.34665	16.9117	38.7495	0.433351	0	0.251814	0	0	0	0	0	0	0	0	0.1649	2.7045	0.2767	0.68285	0	31.43	0	0.56815	0	0	0	0	0	0	6.8865	480
1949	301.97	327.399	310.5	1140	288.775	3.5647	19.1118	39.0205	0.44729	0	0.273711	0	0	0	0	0	0	0	0	0.2881	3.7955	0.45415	0.9317	0	32.765	0	0.6674	0	0	0	0	0	0	6.9195	480
1950	301.92	327.921	310.75	1147.25	289	3.79359	21.7426	39.3058	0.461029	0	0.297512	0	0	0	0	0	0	0	0	0.4966	5.0045	0.6521	1.1945	0	34.615	0	0.7732	0	0	0	0	0	0	6.953	480
1951	300.877	328.558	311.1	1155	289.2	4.0504	24.5705	39.6061	0.474657	0	0.323383	0	0	0	0	0	0	0	0.005	0.8132	6.314	0.87715	1.4705	0	36.385	0	0.88935	0	0	0	0	0	0	6.987	480
1952	299.885	329.275	311.5	1163.5	289.425	4.33597	27.235	39.9222	0.488262	0	0.351503	0	0	0	0	0	0	0	0.015	1.1675	7.8115	1.0245	1.7345	0	37.53	0	0.9375	0	0	0	0	0	0	7.021	480
1953	299.764	330.045	311.925	1172.75	289.675	4.63495	29.9757	40.255	0.501935	0	0.382068	0	0	0	0	0	0	0	0.025	1.577	9.4615	1.0775	1.9845	0	38.73	0	0.922	0	0	0	0	0	0	7.0535	480
1954	299.77	330.896	312.425	1182.25	289.9	4.94829	33.0609	40.6052	0.515765	0	0.415292	0	0	0	0	0	0	0	0.035	2.149	11.24	1.139	2.239	0	40.08	0	0.932	0	0	0	0	0	0	7.0845	480
1955	299.81	331.835	313	1192	290.125	5.27698	36.6113	40.9739	0.529841	0	0.451404	0	0	0	0	0	0	0	0.045	2.886	13.24	1.21	2.495	0	41.57	0.025	0.9705	0	0	0	0	0	0	7.1155	480.8
1956	299.88	332.821	313.6	1202.25	290.375	5.62208	40.6989	41.362	0.544253	0	0.490656	0	0	0	0	0	0	0	0.055	3.795	15.485	1.2925	2.75	0	43.2	0.118	1.057	0	0	0	0	0	0	7.1465	483.15
1957	300.018	333.842	314.225	1213	290.6	5.98468	45.4175	41.7705	0.559089	0	0.533322	0	0	0	0	0	0	0	0.065	4.921	18.055	1.3895	3.0015	0	44.96	0.2975	1.19	0	0	0	0	0	0	7.1785	486.4
1958	300.426	334.869	314.848	1224	290.825	6.36597	50.7782	42.2006	0.57444	0	0.579698	0	0	0	0	0	0	0	0.075	6.2365	21.01	1.502	3.2495	0	46.85	0.5675	1.3555	0	0	0	0	0	0	7.212	489.9
1959	301.366	335.945	315.5	1235.25	291.1	6.76717	56.515	42.6532	0.590395	0	0.630107	0	0	0	0	0	0	0	0.085	7.557	24.215	1.6305	3.4955	0	48.865	0.883	1.593	0	0	0	0	0	0	7.246	493.55
1960	302.541	337.17	316.272	1247	291.4	7.18959	62.5823	43.1297	0.607043	0	0.684898	0	0	0	0	0	0	0	0.095	8.8185	27.675	1.779	3.7395	0	50.99	1.2495	1.9065	0	0	0	0	0	0	7.2805	497.3
1961	302.717	338.437	317.075	1259.25	291.675	7.65086	69.4618	43.6313	0.624474	0	0.744455	0	0	0	0	0	0	0	0.11	10.2955	31.685	1.9505	3.9715	0	53.23	1.7055	2.25	0	0	0	0	0	0	7.3165	501.1
1962	302.623	339.626	317.795	1272	291.925	8.15246	77.4216	44.1593	0.642776	0	0.80919	0	0	0	0	0	0	0	0.13	12.235	36.315	2.1465	4.1975	0	55.585	2.19	2.646	0	0	0	0	0	0	7.3535	504.8
1963	303.114	340.707	318.397	1285	292.225	8.69591	86.5951	44.715	0.66204	0	0.879554	0	0	0	0	0	0	0	0.155	14.715	41.585	2.3705	4.433	0	58.025	2.7905	3.1425	0	0	0	0	0	0	7.3915	508.4
1964	303.609	341.733	318.925	1298.25	292.6	9.39162	97.2808	45.5	0.682355	0	0.956037	0	0	0	0	0	0	0	0.18	17.795	47.735	2.6285	4.677	0	60.525	3.517	3.767	0	0	0	0	0	0	7.4305	511.85
1965	304.42	342.989	319.647	1312	293	10.184	109.645	46.45	0.70381	0	1.03917	0	0	0	0	0	0	0	0.2	21.495	54.93	2.9255	4.9295	0.0045	63.085	4.2765	4.517	0	0	0.0005	0	0	0	7.4705	515.05
1966	305.564	344.551	320.647	1326	293.4	10.9556	123.662	47.35	0.726495	0	1.12953	0	0	0	0	0	0	0	0.22	25.775	63.155	3.2665	5.1915	0.0175	65.625	5.242	5.413	0	0	0.0015	0	0	0.0005	7.512	518
1967	306.594	346.076	321.605	1340.25	293.8	11.7388	139.328	48.25	0.750499	0	1.22775	0	0	0	0	0	0	0	0.24	30.575	72.39	3.6585	5.4635	0.0385	68.07	6.722	6.4985	0	0	0.003	0	0.0005	0.0015	7.5545	520.7
1968	307.808	347.7	322.635	1355	294.225	12.5668	156.887	49.15	0.775911	0	1.33452	0	0	0	0	0	0	0	0.27	35.955	82.77	4.1085	5.7455	0.0675	70.425	8.886	7.8105	0	0	0.0055	0.0005	0.001	0.003	7.5985	523.15
1969	309.598	349.607	323.902	1370.25	294.7	13.4084	176.605	50.05	0.802821	0	1.45056	0	0	0	0	0	0	0	0.3	42.05	94.435	4.6245	6.0385	0.1045	72.69	11.59	9.411	0	0	0.0095	0.001	0.0015	0.005	7.644	525.3
1970	311.808	351.328	324.985	1385.75	295.2	14.2482	198.618	50.95	0.831319	0	1.5767	0	0	0	0	0	0	0	0.325	49.05	107.45	5.2165	6.3435	0.15	74.87	14.645	11.21	0	0	0.016	0.001	0.0025	0.0075	7.6905	527.2
1971	314.087	352.822	325.855	1401.25	295.7	15.1011	222.885	51.8	0.861493	0	1.7138	0	0	0.00146	0	0.0125	0	0	0.355	57.065	121.8	5.8955	6.66	0.205	76.97	17.695	13.115	0	0	0.025	0.0015	0.0035	0.011	7.738	528.85
1972	316.193	354.781	327.14	1417	296.225	15.9994	249.194	52.65	0.893433	0	1.86283	0	0	0.00438	0	0.0375	0	0	0.39	65.965	137.3	6.674	6.988	0.2705	78.99	20.92	15.145	0	0.018	0.0375	0.002	0.006	0.0155	7.787	530.3
1973	318.115	357.034	328.678	1433	296.8	16.9475	277.927	53.55	0.927228	0	2.02481	0	0	0.0073	0	0.0625	0	0	0.425	75.835	154.05	7.5685	7.329	0.348	80.93	25.065	17.39	0	0.053	0.055	0.0025	0.0115	0.0215	7.838	531.55
1974	319.6	358.783	329.743	1449	297.4	17.9154	309.889	54.45	0.962969	0	2.20088	0	0	0.01022	0	0.0875	0	0	0.46	87.04	172.45	8.595	7.684	0.4385	82.8	30.44	19.935	0	0.086	0.078	0.0035	0.0205	0.0285	7.8905	532.6
1975	320.882	360.292	330.585	1465	298	18.8898	344.976	55.3	1.00074	0	2.39226	0	0	0.01314	0	0.1125	0	0	0.5	99.56	192.6	9.7715	8.052	0.5445	84.6	36.73	22.54	0	0.1175	0.1075	0.0045	0.0335	0.0365	7.9445	533.5
1976	322.191	362.163	331.748	1481	298.65	19.8874	380.802	56.15	1.04064	0	2.60029	0	0	0.01606	0	0.1375	0	0	0.54	112.3	213.15	11.12	8.4335	0.6685	86.33	42.765	25.225	0	0.1475	0.1445	0.0055	0.051	0.0465	8.0005	534.25
1977	323.874	364.454	333.272	1497.25	299.36	20.9739	416.056	57.05	1.08275	0	2.8264	0	0	0.01898	0	0.1625	0	0	0.59	124.7	232.9	12.67	8.8305	0.8125	87.995	49.29	28.23	0	0.1755	0.1915	0.0065	0.0765	0.0575	8.058	534.9
1978	326.21	366.815	334.848	1513.75	300.082	22.1267	451.017	57.9	1.12717	0	3.09048	0	0	0.0219	0	0.1875	0	0	0.655	136.7	251.9	14.445	9.243	0.9795	89.595	57.79	31.51	0	0.202	0.2475	0.0075	0.112	0.0695	8.117	535.4
1979	328.74	369.278	336.525	1530.25	300.74	23.3668	486.546	58.75	1.17397	0	3.39237	0	0	0.02482	0	0.2	0	0	0.735	148.8	270.5	16.475	9.6705	1.174	91.14	68.985	34.985	0	0.227	0.3125	0.0085	0.156	0.083	8.178	535.85
1980	330.864	371.945	338.36	1547.75	301.382	24.6879	519.303	59.6	1.22326	0	3.71278	0	0	0.02774	0	0.2	0	0	0.835	159.4	287.35	18.805	10.114	1.401	92.625	78.725	38.64	0	0.2505	0.3895	0.0095	0.21	0.0975	8.241	536.25
1981	332.228	374.19	339.728	1566.75	302.22	26.102	550.904	60.45	1.27512	0	4.0517	0	0	0.0292	0	0.225	0	0	0.95	168.55	304.25	21.475	10.575	1.6605	93.95	85.94	42.44	0	0.273	0.4795	0.011	0.275	0.113	8.306	536.55
1982	333.034	376.129	340.793	1586.25	303.098	27.595	583.135	61.3	1.32963	0	4.40914	0	0	0.03045	0	0.275	0	0	1.075	177.85	321.7	24.45	11.045	1.9495	94.9	92.165	46.17	0	0.313	0.582	0.0125	0.351	0.1295	8.373	536.8
1983	334.244	378.41	342.197	1605.85	303.805	29.1286	613.196	62.15	1.3869	0	4.78509	0	0	0.0331	0	0.3	0	0	1.21	185.8	338.15	27.605	11.505	2.2655	95.855	96.325	50	0	0.361	0.6975	0.014	0.4425	0.1475	8.442	537
1984	336.145	380.82	343.783	1623.7	304.397	30.7215	644.36	63	1.44701	0	5.17956	0	0	0.03585	0	0.325	0	0	1.355	193.75	355	30.985	11.965	2.6105	97.27	100.75	54.17	0	0.404	0.828	0.016	0.5495	0.1665	8.513	537.2
1985	338.198	383.063	345.283	1637.99	305.087	32.3442	678.379	63.8	1.51004	0	5.59254	0	0	0.03705	0	0.375	0	0	1.505	202.85	372.5	35.43	12.44	2.981	98.845	105.7	58.465	0	0.4555	0.9775	0.018	0.6715	0.186	8.5865	537.35
1986	340.223	385.274	346.798	1650.43	305.772	34.0163	712.084	64.6	1.57609	0	6.02403	0	0	0.03415	0	0.4	0	0	1.67	212.1	389.8	39.95	12.94	3.363	99.855	109.6	62.85	0	0.4995	1.152	0.0195	0.8125	0.207	8.6625	537.45
1987	342.409	387.795	348.645	1662.2	306.262	35.814	748.374	65.45	1.64525	0	6.47404	0	0	0.03285	0	0.425	0	0	1.855	222.8	408.65	44.285	13.47	3.7535	101.1	112.15	67.415	0	0.6075	1.3545	0.021	0.974	0.229	8.7405	537.55
1988	345.085	390.673	350.738	1673.07	307.195	37.6894	789.249	66.3	1.71761	0	6.94256	0	0	0.0384	0	0.5	0	0	2.04	234.9	428.45	50.53	14.01	4.1635	102.45	116.3	72.44	0	0.791	1.591	0.023	1.1555	0.251	8.8205	537.65
1989	347.729	393.252	352.488	1683.47	308.507	39.5645	830.2	67.1	1.79325	0	7.4296	0	0	0.04655	0	0.575	0	0	2.225	244.9	448.25	57.92	14.55	4.5995	103.45	121.7	78.21	0	0.99	1.869	0.0245	1.3565	0.2755	8.903	537.75
1990	349.911	395.324	353.855	1693.63	309.485	41.5256	866.564	67.9	1.87227	0	7.93515	0	0	0.0547	0.03	0.625	0	0	2.425	252.75	466.15	64.485	15.075	5.0635	104.45	124.45	84.305	0	1.249	2.1645	0.026	1.562	0.3015	8.988	537.8
1991	351.189	397.088	355.017	1703.82	310.113	43.5792	899.397	68.7	1.95632	0	8.45922	0	0	0.0627	0.09	0.675	0	0	2.635	260.15	481.3	70.3	15.555	5.545	105.6	127.9	90.44	0	1.696	2.4485	0.028	1.753	0.326	9.0755	537.85
1992	351.548	398.429	355.885	1711.8	310.603	45.7214	927.681	69.5	2.05	0	9.0018	0	0	0.0705	0.185	0.725	8.12405e-05	0	2.85	264.95	494.4	75.96	15.99	6.0235	105.75	130.9	96.715	0	2.424	2.7125	0.0295	1.9125	0.35	9.1655	537.9
1993	352.275	399.699	356.777	1716.29	311.077	48.0312	948.8	70.3	2.15	0	9.5629	0	0	0.08075	0.375	0.8	0.00024139	0	3.07	267.75	504.8	80.235	16.355	6.4945	104.9	130.5	102.14	0	3.3945	2.9185	0.031	2.0215	0.3725	9.258	537.9
1994	353.737	401.505	358.127	1721.01	311.603	50.6326	963.903	71.1	2.25	0	10.1425	0	0	0.09555	0.75	0.925	0.00350655	0	3.3	269.5	513.1	82.345	16.63	6.957	104.35	126	106.6	0.5695	4.487	3.09	0.0335	2.114	0.393	9.353	537.95
1995	355.939	403.782	359.837	1726.35	312.295	53.8504	973.652	71.9	2.35	0	10.7406	0	0	0.1503	1.645	1.125	0.00973579	0	3.515	269.5	519.55	83.46	16.83	7.3995	103.55	115.9	110.45	1.9145	5.658	3.247	0.037	2.2455	0.4125	9.45	538
1996	358.263	405.945	361.462	1730.01	313.048	57.9728	982.03	72.65	2.45	0	11.4585	0	0	0.27175	3.155	1.45	0.01432	0	3.725	268.95	525.05	83.84	16.965	7.7905	102.8	104.09	115.85	3.587	6.818	3.3915	0.0415	2.3885	0.4265	9.2995	538
1997	359.83	408.22	363.155	1734.82	313.76	62.9186	988.498	73.4	2.55	0	12.2869	0	0	0.43105	5.17	1.85	0.0231704	0	3.955	268.2	529.15	83.68	17.045	8.1025	101.95	91.215	121.95	5.523	7.939	3.556	0.0465	2.4875	0.43	9.08	538
1998	361.471	411.144	365.322	1742.71	314.533	68.4136	992.182	74.2	2.65	0	13.1153	0	0	0.64745	7.71	2.25	0.0370779	0	4.155	266.95	532.4	83.45	17.075	8.3425	100.9	77.815	126.35	7.377	8.946	3.7085	0.0515	2.5565	0.4265	9.155	538
1999	363.283	413.868	367.348	1749.24	315.257	74.4061	995.415	75	2.75	0	13.9438	0.0045173	0	0.95615	10.68	2.65	0.0590527	0	4.33	265.2	534.95	83.015	17.075	8.5275	100.155	65.605	131.7	9.206	9.938	3.8355	0.0535	2.6205	0.422	9.26	538
2000	364.367	415.858	368.865	1751.02	315.85	80.9399	998.627	75.75	2.85	0	14.7722	0.0488482	0	1.32805	13.965	3.05	0.0967079	0	4.54	263.45	537.05	82.515	17.055	8.6705	99.37	54.83	137.4	11.075	11.04	3.953	0.051	2.679	0.417	9.0845	538
2001	365.653	417.91	370.467	1750.71	316.488	88.6304	1001.03	76.5	2.95	0.00398966	15.6006	0.287349	0	1.7224	17.51	3.43758	0.150915	0.373294	4.765	261.9	538.85	82.07	17.02	8.782	98.4	45.785	141.95	12.695	12.035	4.0455	0.046	2.733	0.41	8.689	538
2002	367.978	420.573	372.522	1752.19	317.245	97.4707	1003.21	77.25	3.05124	0.011991	16.429	0.720208	0.00740544	2.13305	21.365	3.85333	0.208567	1.11091	4.985	260.1	539.95	81.595	16.98	8.869	97.385	38.14	147.45	14.18	12.975	4.112	0.04	2.7825	0.402	8.349	538
2003	370.52	423.488	374.76	1754.76	318.017	106.775	1004	77.9915	3.15494	0.0195016	17.2574	1.21745	0.0291657	2.60335	25.44	4.34892	0.274155	1.83169	5.215	257.95	540.05	80.93	16.94	8.936	96.325	31.78	152.95	15.565	13.755	4.1695	0.0345	2.828	0.3935	8.194	538
2004	372.785	426.116	376.812	1755.07	318.71	116.584	1003.93	78.772	3.26099	0.0263954	18.0858	1.7671	0.0644009	3.12045	29.775	4.92206	0.367093	2.53767	5.445	256.05	539.9	80.12	16.9	8.988	95.385	26.475	157.45	16.605	14.35	4.207	0.0295	2.87	0.384	8.0885	538
2005	375.2	428.653	378.812	1753.73	319.44	126.769	1003.58	79.5471	3.3693	0.0332905	18.9129	2.35921	0.112284	3.62618	34.36	5.57096	0.487703	3.23048	5.675	254.1	539.4	79.31	16.855	9.0285	94.435	22.075	162.25	17.195	14.94	4.2265	0.0255	2.908	0.3735	7.933	538
2006	378.155	431.283	380.827	1754.51	320.2	136.988	1001.53	80.3168	3.47978	0.0405451	19.7485	2.98557	0.17203	4.14253	38.805	6.29394	0.631517	3.91147	5.91	251.3	537.5	78.48	16.81	9.059	93.435	18.52	167.7	17.67	15.365	4.241	0.023	2.9425	0.363	7.748	538
2007	381.357	433.92	382.777	1758.05	320.895	147.92	998.531	81.0774	3.59026	0.0481122	20.5812	3.63915	0.242926	4.77343	43.165	7.14688	0.804745	4.78912	6.175	247.95	534.7	77.595	16.76	9.081	92.3	15.61	173.9	18.22	15.625	4.2425	0.0195	2.9735	0.352	7.5945	538
2008	384.741	436.718	384.8	1763.42	321.604	159.972	995.689	81.8253	3.69864	0.0557926	21.3889	4.31552	0.324344	5.58642	47.4651	8.18396	1.01878	6.04713	6.45082	244.6	531.8	76.72	16.705	9.096	90.96	13.23	180.5	18.81	15.865	4.2255	0.015	3.0005	0.3405	7.5405	538
2009	388.426	439.804	387.012	1770.44	322.326	172.948	992.606	82.5603	3.8049	0.0635771	22.1718	5.01045	0.415657	6.5749	51.6846	9.39889	1.2725	7.63823	6.71537	241.026	528.534	75.8188	16.6514	9.1054	89.2782	11.2717	187.211	19.3877	16.6689	4.18625	0.0116919	3.02109	0.329047	7.39312	538.008
2010	392.058	443.065	389.324	1778.67	323.061	187.022	989.271	83.2824	3.90901	0.0714598	22.9298	5.71925	0.516243	7.73235	56.0379	10.7862	1.56476	9.51985	6.98573	237.274	524.934	74.8982	16.5936	9.11061	87.2606	9.65634	193.98	19.9461	17.9791	4.12691	0.00945723	3.03554	0.317152	7.21637	538.019
2011	395.272	446.388	391.638	1788.03	323.809	202.107	985.829	83.9914	4.01099	0.0794406	23.6632	6.43945	0.625533	9.053	60.5163	12.3425	1.89444	11.6559	7.2619	233.52	521.187	73.9768	16.5352	9.11305	85.0621	8.26174	201.024	20.5048	19.1508	4.05681	0.00728664	3.04647	0.305309	7.1613	538.024
2012	398.435	449.838	394.009	1798.61	324.575	217.938	982.256	84.6977	4.11238	0.0872258	24.3474	7.31839	0.736451	10.5082	65.2153	13.9968	2.21961	13.9012	7.543	229.77	517.298	73.0542	16.4765	9.11343	82.6958	7.04857	208.308	21.0539	20.179	3.97771	0.00516144	3.05397	0.293582	7.13883	538.027
2013	401.794	453.448	396.464	1810.52	325.364	234.259	978.569	85.4116	4.21473	0.0945216	24.958	8.47612	0.842362	12.0703	70.2237	15.6792	2.49957	16.1288	7.82816	226.03	513.287	72.1355	16.4175	9.11226	80.1726	6.05709	215.8	21.585	21.06	3.89118	0.00365606	3.05829	0.282028	7.12686	538.028
2014	405.276	457.216	399.004	1823.66	326.176	251.022	974.772	86.1329	4.31805	0.101328	25.4955	9.86167	0.943599	13.7359	75.5221	17.3895	2.73564	18.3421	8.11737	222.307	509.172	71.2237	16.3585	9.10992	77.5017	5.24709	223.473	22.0911	21.791	3.79858	0.00258975	3.05966	0.270689	7.11959	538.028
2015	408.901	461.14	401.628	1837.97	327.01	268.184	970.87	86.8619	4.42233	0.107646	25.9601	11.434	1.04048	15.5017	81.0932	19.1272	2.92916	20.5441	8.41063	218.608	504.97	70.3205	16.2995	9.1067	74.6925	4.58561	231.305	22.5662	22.3707	3.70116	0.00183443	3.05831	0.259592	7.11629	538.029
2016	412.663	465.21	404.328	1853.35	327.867	285.708	966.827	87.5983	4.52757	0.113474	26.3521	13.1595	1.13331	17.3646	86.9202	20.8921	3.08139	22.7375	8.70794	214.935	500.693	69.4267	16.2405	9.10282	71.7514	3.89866	239.277	23.0053	22.798	3.59995	0.0012994	3.05443	0.24876	6.91924	538.029
2017	416.549	469.411	407.096	1869.71	328.746	303.56	962.672	88.3423	4.63377	0.118814	26.6717	15.0108	1.22234	19.3214	92.9867	22.6836	3.19353	24.9241	9.0093	211.285	496.347	68.5417	16.1816	9.09843	68.8031	3.19058	247.325	23.4077	23.0821	3.49583	0.000920422	3.04813	0.238209	6.67684	538.029
2018	420.554	473.737	409.927	1886.93	329.647	321.711	958.45	89.0939	4.74093	0.123665	26.9193	16.9657	1.30783	21.3692	99.2774	24.5014	3.26676	27.1058	9.3147	207.659	491.941	67.6653	16.1227	9.09367	65.9678	2.61177	255.356	23.7772	23.2404	3.38959	0.000651974	3.03956	0.227959	6.61861	538.029
2019	424.722	478.187	412.822	1904.94	330.57	340.137	954.126	89.853	4.84906	0.128028	27.0952	19.0065	1.39002	23.5051	105.779	26.3451	3.30221	29.284	9.62415	204.056	487.481	66.7973	16.0638	9.08863	63.2411	2.1379	263.298	24.1172	23.289	3.28195	0.000461821	3.02885	0.218014	6.60204	538.029
2020	429.091	482.759	415.78	1923.67	331.514	358.815	949.675	90.6196	4.95815	0.131902	27.1995	21.1184	1.46912	25.7265	112.478	28.2143	3.30097	31.4603	9.93764	200.478	482.975	65.9377	16.005	9.08337	60.6185	1.74986	271.091	24.4306	23.242	3.17355	0.000327127	3.01616	0.208372	6.59458	538.029
2021	433.675	487.441	418.796	1942.97	332.481	377.719	945.055	91.3937	5.06819	0.135288	27.2326	23.2882	1.5453	28.0303	119.36	30.1085	3.26407	33.6342	10.2552	196.916	478.42	65.0846	15.946	9.07791	58.0917	1.43256	278.684	24.7192	23.1119	3.06482	0.000231718	3.00151	0.199042	6.58439	538.029
2022	438.357	492.216	421.864	1962.65	333.466	396.519	940.244	92.1737	5.17903	0.138367	27.2282	25.3438	1.61884	30.3655	126.289	32.0083	3.20948	35.7709	10.5785	193.366	473.816	64.237	15.8869	9.0723	55.6545	1.17304	286.041	24.9852	22.91	2.9562	0.000164136	2.98496	0.190027	6.57077	538.029
2023	443.073	497.092	424.995	1982.67	334.469	414.939	935.258	92.958	5.29046	0.141319	27.22	27.1475	1.69005	32.6835	133.145	33.895	3.15469	37.8422	10.9093	189.836	469.174	63.3959	15.8277	9.06659	53.3071	0.960799	293.148	25.232	22.6472	2.84822	0.000116264	2.96668	0.181317	6.55951	538.029
2024	447.892	502.081	428.197	2003.02	335.489	433.04	930.113	93.7465	5.4025	0.144145	27.2082	28.7475	1.7591	34.9852	139.935	35.769	3.09972	39.8578	11.2477	186.331	464.506	62.5619	15.7684	9.06078	51.0484	0.787218	299.993	25.4619	22.3328	2.74132	8.2355e-05	2.94684	0.172925	6.55102	538.029
2025	452.82	507.188	431.475	2023.73	336.526	450.876	924.822	94.5392	5.51515	0.146845	27.1927	30.1833	1.82617	37.2717	146.669	37.631	3.04459	41.8265	11.5935	182.855	459.821	61.7358	15.7092	9.05489	48.8773	0.645228	306.571	25.6771	21.9753	2.63589	5.83355e-05	2.92561	0.16485	6.54516	538.029
2026	457.857	512.415	434.826	2044.8	337.58	468.494	919.404	95.3362	5.6284	0.149418	27.1736	31.4874	1.8914	39.5442	153.353	39.4813	2.98933	43.7563	11.9469	179.415	455.129	60.9183	15.6499	9.04895	46.7927	0.529059	312.88	25.8796	21.5821	2.53225	4.13215e-05	2.90312	0.157091	6.54229	538.029
2027	462.997	517.753	438.245	2066.21	338.65	485.929	913.868	96.1373	5.74226	0.151865	27.1509	32.6852	1.95495	41.8036	159.995	41.3205	2.93392	45.6532	12.3078	176.012	450.433	60.1094	15.5908	9.04298	44.7915	0.433983	318.92	26.0708	21.1599	2.43062	2.92698e-05	2.87946	0.149644	6.54038	538.029
2028	468.228	523.191	441.721	2087.9	339.737	503.207	908.212	96.9427	5.85672	0.154186	27.1245	33.7962	2.0169	44.0504	166.597	43.1487	2.87835	47.5215	12.6761	172.643	445.736	59.3085	15.5316	9.03698	42.8697	0.356131	324.688	26.2513	20.714	2.33117	2.0733e-05	2.85471	0.142493	6.5373	538.029
2029	473.546	528.725	445.251	2109.85	340.841	520.351	902.442	97.7524	5.97179	0.156381	27.0946	34.8366	2.07737	46.2853	173.164	44.9663	2.82263	49.3653	13.052	169.31	441.039	58.5155	15.4725	9.03093	41.0237	0.292353	330.186	26.422	20.2495	2.23405	1.46861e-05	2.82895	0.135643	6.53301	538.029
2030	479.089	534.353	448.835	2132.01	341.96	537.383	896.562	98.5662	6.08746	0.158449	27.0611	35.8211	2.13644	48.5089	179.698	46.7736	2.76673	51.1881	13.4354	166.01	436.344	57.7301	15.4134	9.02487	39.2506	0.240084	335.42	26.5836	19.7707	2.13938	1.04028e-05	2.80224	0.129081	6.52798	538.029
2031	485.003	540.078	452.474	2154.37	343.096	554.319	890.581	99.3843	6.20373	0.160392	27.0239	36.7601	2.19422	50.7218	186.204	48.5709	2.71065	52.9929	13.8262	162.745	431.654	56.9521	15.3542	9.01879	37.5474	0.197229	340.395	26.7369	19.2817	2.04723	7.36873e-06	2.77466	0.122792	6.52217	538.029
2032	491.12	545.925	456.177	2177.39	344.247	571.01	884.359	100.204	6.3202	0.162272	26.984	37.6474	2.25094	52.9468	192.697	50.3744	2.65563	54.6622	14.2233	159.508	426.961	56.18	15.295	9.01265	35.9085	0.162082	344.916	26.8756	18.7853	1.95764	5.21959e-06	2.74619	0.116767	6.51217	538.029
2033	497.336	551.934	459.964	2201.56	345.415	587.337	877.662	101.021	6.43647	0.164153	26.9421	38.481	2.30688	55.2063	199.197	52.2004	2.60288	56.0937	14.6254	156.293	422.263	55.4129	15.2355	9.00646	34.3302	0.133254	348.628	26.9882	18.284	1.87061	3.69726e-06	2.71685	0.110993	6.4992	538.029
2034	503.728	558.126	463.852	2226.85	346.599	603.372	870.33	101.837	6.55252	0.166035	26.8982	39.274	2.36214	57.5004	205.711	54.049	2.55235	57.3195	15.0324	153.108	417.567	54.6516	15.1759	9.00023	32.8121	0.109605	351.26	27.0648	17.78	1.78626	2.61892e-06	2.68674	0.105471	6.4885	538.029
2035	510.305	564.514	467.85	2253.2	347.8	619.175	862.24	102.65	6.66836	0.167919	26.8525	40.0365	2.41682	59.8288	212.244	55.9203	2.504	58.3672	15.4443	149.957	412.88	53.8969	15.1162	8.99398	31.3536	0.0902013	352.603	27.0972	17.2751	1.70462	1.85509e-06	2.65599	0.100202	6.48058	538.029
2036	517.067	571.101	471.96	2280.57	349.015	634.801	853.303	103.462	6.784	0.169803	26.8049	40.7769	2.47103	62.1914	218.802	57.8144	2.45778	59.2607	15.8612	146.842	408.207	53.1492	15.0565	8.9877	29.9536	0.0742752	352.502	27.0786	16.7709	1.62577	1.31404e-06	2.6247	0.0951768	6.47534	538.029
2037	524.013	577.888	476.182	2308.95	350.247	650.296	843.458	104.273	6.89942	0.171689	26.7554	41.5023	2.52485	64.5884	225.389	59.7313	2.41363	60.0212	16.2831	143.769	403.554	52.4091	14.9968	8.9814	28.6114	0.0611994	350.848	27.0034	16.2687	1.54972	9.30792e-07	2.59297	0.090374	6.47318	538.029
2038	531.131	584.865	480.508	2338.24	351.494	665.696	832.657	105.081	7.01463	0.173576	26.7041	42.2168	2.57834	67.0192	232.01	61.6711	2.37151	60.6659	16.7099	140.737	398.924	51.6768	14.9372	8.97508	27.3248	0.0504581	347.564	26.8663	15.7695	1.47647	6.59319e-07	2.56085	0.085794	6.47204	538.029
2039	538.407	592.019	484.927	2368.37	352.757	681.024	820.861	105.887	7.12964	0.175464	26.651	42.9228	2.63153	69.4832	238.663	63.6335	2.33133	61.2085	17.1416	137.746	394.315	50.9517	14.8775	8.96874	26.0911	0.0416282	342.598	26.6628	15.274	1.40596	4.67024e-07	2.52837	0.0814359	6.46979	538.029
2040	545.794	599.343	489.435	2399.24	354.035	696.304	808.05	106.692	7.24443	0.177353	26.5961	43.6222	2.68446	71.9799	245.348	65.6182	2.29304	61.6609	17.5783	134.793	389.728	50.2337	14.8178	8.96238	24.908	0.0343647	335.922	26.3893	14.7827	1.33815	3.30813e-07	2.49557	0.0772771	6.46637	538.029
2041	553.251	606.836	494.032	2430.8	355.328	711.553	794.22	107.495	7.35902	0.179243	26.5394	44.3169	2.73715	74.5086	252.067	67.6252	2.25656	62.0341	18.02	131.88	385.162	49.5225	14.758	8.95599	23.7735	0.028386	327.531	26.0429	14.2963	1.27298	2.34329e-07	2.46245	0.0733076	6.46228	538.029
2042	560.845	614.51	498.73	2463.05	356.631	726.632	779.506	108.298	7.47369	0.18113	26.4813	44.93	2.78994	77.0553	258.774	69.6424	2.22081	62.3218	18.4654	129.005	380.618	48.8182	14.6982	8.94958	22.6856	0.0234612	317.641	25.6284	13.8154	1.21039	1.65985e-07	2.42908	0.0695291	6.45739	538.029
2043	568.617	622.361	503.53	2495.89	357.939	741.395	764.139	109.103	7.58872	0.183009	26.4222	45.3943	2.84308	79.6051	265.42	71.6577	2.18466	62.5153	18.9136	126.165	376.09	48.1194	14.6383	8.94313	21.641	0.0194002	306.633	25.1559	13.341	1.15031	1.17574e-07	2.39544	0.0659295	6.44736	538.029
2044	576.55	630.389	508.433	2529.22	359.251	755.874	748.317	109.911	7.70413	0.18488	26.3621	45.734	2.89652	82.1577	272.006	73.6708	2.14811	62.6235	19.3644	123.354	371.573	47.4254	14.5782	8.93664	20.6372	0.0160488	294.83	24.6354	12.8739	1.09265	8.32828e-08	2.36151	0.0624985	6.43303	538.029
2045	584.673	638.617	513.456	2563.05	360.568	770.12	732.231	110.721	7.81991	0.186744	26.3011	45.9729	2.95029	84.714	278.542	75.6824	2.11118	62.6581	19.8178	120.578	367.074	46.737	14.5179	8.93011	19.6738	0.0132826	282.512	24.0766	12.4154	1.0374	5.89928e-08	2.32737	0.0592297	6.42041	538.029
2046	593.007	647.062	518.611	2597.4	361.89	784.173	716.033	111.533	7.93606	0.188599	26.2392	46.1306	3.00442	87.275	285.037	77.6929	2.07389	62.6291	20.274	117.84	362.597	46.0547	14.4576	8.92354	18.7502	0.0109986	269.907	23.4882	11.9664	0.984511	4.17871e-08	2.2931	0.0561168	6.41031	538.029
2047	601.562	655.73	523.9	2632.27	363.216	798.072	699.851	112.348	8.05258	0.190447	26.1763	46.2229	3.05895	89.8414	291.5	79.7029	2.03624	62.5453	20.7328	115.142	358.146	45.3791	14.3972	8.91695	17.8657	0.00911218	257.2	22.8775	11.5275	0.93393	2.95996e-08	2.25876	0.0531641	6.40272	538.029
2048	610.344	664.627	529.324	2667.68	364.546	811.848	683.788	113.165	8.16948	0.192287	26.1126	46.2629	3.11392	92.4143	297.941	81.7129	1.99826	62.4144	21.1943	112.488	353.726	44.7107	14.3368	8.91034	17.0195	0.00755355	244.541	22.2512	11.0995	0.885605	2.09666e-08	2.22442	0.0503539	6.39801	538.029
2049	619.346	673.742	534.875	2703.61	365.881	825.524	667.92	113.984	8.28674	0.194119	26.0479	46.26	3.16931	94.9941	304.363	83.7231	1.95995	62.242	21.6584	109.877	349.338	44.0495	14.2764	8.9037	16.2103	0.0062651	232.045	21.6142	10.6827	0.839467	1.48516e-08	2.19012	0.0476793	6.39419	538.029
2050	628.43	683.062	540.543	2739.98	367.22	839.111	652.299	114.805	8.40438	0.195943	25.9824	46.2201	3.22511	97.5805	310.767	85.7335	1.92129	62.0314	22.1253	107.308	344.98	43.3952	14.216	8.89704	15.4362	0.00519924	219.8	20.9708	10.2774	0.795442	1.052e-08	2.15588	0.0451438	6.38913	538.029
2051	637.456	692.58	546.322	2776.74	368.563	852.618	636.968	115.629	8.52238	0.19776	25.9159	46.1486	3.28129	100.174	317.155	87.7443	1.88229	61.7861	22.5948	104.781	340.652	42.7476	14.1555	8.89036	14.6957	0.00431698	207.875	20.3246	9.88351	0.753446	7.45175e-09	2.12167	0.0427401	6.3829	538.029
2052	646.552	702.273	552.212	2813.24	369.909	866.072	621.956	116.452	8.64029	0.199571	25.8487	46.1293	3.33833	102.763	323.481	89.7475	1.8434	61.5213	23.0697	102.295	336.354	42.1066	14.0951	8.88364	13.9873	0.00358608	196.317	19.6783	9.50118	0.713405	5.27839e-09	2.08755	0.0404508	6.37556	538.029
2053	655.823	712.115	558.212	2848.87	371.256	879.482	607.285	117.27	8.75763	0.201379	25.7811	46.231	3.39669	105.338	329.699	91.735	1.80506	61.2502	23.5529	99.8493	332.085	41.4721	14.0346	8.8769	13.3099	0.00298007	185.159	19.0338	9.13021	0.675248	3.73891e-09	2.05352	0.0382699	6.3669	538.029
2054	665.226	722.093	564.313	2883.57	372.604	892.817	592.956	118.083	8.8744	0.203185	25.7129	46.4279	3.45617	107.897	335.805	93.7062	1.7672	60.9688	24.0443	97.4402	327.84	40.8432	13.9739	8.87012	12.6613	0.00247717	174.423	18.3928	8.77031	0.638887	2.64843e-09	2.01956	0.0362015	6.35309	538.029
2055	674.764	732.207	570.517	2917.31	373.953	906.055	578.971	118.891	8.9906	0.204989	25.6441	46.7003	3.51665	110.439	341.795	95.6608	1.72981	60.6747	24.5439	95.0645	323.615	40.2192	13.9131	8.8633	12.0396	0.00205954	164.122	17.757	8.42134	0.604249	1.876e-09	1.98564	0.0342392	6.33486	538.029
2056	684.468	742.491	576.843	2950.25	375.304	919.205	565.349	119.695	9.10624	0.206789	25.5747	47.0364	3.57809	112.966	347.682	97.5993	1.69286	60.3703	25.0516	92.7255	319.414	39.6006	13.8521	8.85643	11.4447	0.00171268	154.273	17.1286	8.08336	0.571279	1.32885e-09	1.9518	0.0323787	6.31815	538.029
2057	694.36	752.964	583.305	2982.5	376.655	932.275	552.101	120.494	9.2213	0.208587	25.5048	47.4264	3.64047	115.478	353.475	99.5224	1.65634	60.0574	25.5676	90.4255	315.241	38.9882	13.7911	8.84953	10.8761	0.00142458	144.883	16.5098	7.75639	0.539923	9.41279e-10	1.91814	0.0306157	6.30383	538.029
2058	704.454	763.638	589.905	3014.16	378.008	945.273	539.235	121.288	9.3358	0.210383	25.4343	47.8623	3.70377	117.977	359.183	101.43	1.62026	59.7375	26.0918	88.1663	311.099	38.3822	13.73	8.8426	10.333	0.00118524	135.952	15.9022	7.44038	0.510124	6.66748e-10	1.88466	0.0289459	6.29191	538.029
2059	714.759	774.52	596.647	3045.36	379.361	958.21	526.754	122.077	9.44974	0.212175	25.3633	48.3377	3.76799	120.464	364.817	103.324	1.58459	59.4123	26.6242	85.9502	306.994	37.7831	13.669	8.83565	9.81498	0.000986379	127.479	15.3073	7.13525	0.481832	4.72286e-10	1.85145	0.0273653	6.28278	538.029
2060	725.227	785.604	603.52	3076.13	380.716	971.089	514.655	122.862	9.5631	0.213966	25.2917	48.846	3.83307	122.939	370.381	105.204	1.54933	59.0821	27.1648	83.777	302.924	37.1912	13.6079	8.82868	9.32104	0.000821108	119.455	14.7259	6.84081	0.45497	3.3454e-10	1.8185	0.0258693	6.27448	538.029
2061	735.802	796.875	610.516	3106.48	382.072	983.901	502.925	123.642	9.6759	0.215753	25.2196	49.3801	3.89894	125.402	375.876	107.07	1.51445	58.7458	27.7136	81.6453	298.889	36.6059	13.5469	8.82168	8.84994	0.000683691	111.867	14.1585	6.55683	0.429477	2.36969e-10	1.78582	0.0244534	6.26497	538.029
2062	746.472	808.271	617.605	3135.82	383.427	996.643	491.553	124.419	9.78854	0.217538	25.1471	49.9362	3.96556	127.855	381.313	108.921	1.4802	58.4029	28.2653	79.5542	294.888	36.0272	13.4859	8.81465	8.40062	0.00056939	104.701	13.6056	6.28305	0.405299	1.67855e-10	1.75341	0.0231022	6.25428	538.029
2063	757.223	819.74	624.764	3163.67	384.782	1009.31	480.529	125.198	9.90145	0.219322	25.0744	50.5111	4.0329	130.3	386.703	110.758	1.44682	58.053	28.8145	77.5031	290.92	35.4549	13.4248	8.8076	7.97212	0.000474287	97.9418	13.0675	6.01924	0.382368	1.18899e-10	1.72128	0.0218125	6.24284	538.029
2064	768.049	831.289	631.995	3190.13	386.135	1021.9	469.841	125.976	10.0146	0.221103	25.0014	51.1003	4.10088	132.735	392.044	112.582	1.41427	57.6954	29.3613	75.4916	286.985	34.8891	13.3638	8.80051	7.56357	0.00039513	91.5733	12.5443	5.7651	0.36064	8.42212e-11	1.68943	0.020592	6.23068	538.029
2065	778.938	842.904	639.291	3215.15	387.487	1034.37	459.466	126.755	10.1281	0.222882	24.9282	51.6959	4.16934	135.159	397.325	114.389	1.38251	57.3269	29.9056	73.5159	283.078	34.3287	13.3026	8.79339	7.17356	0.000329202	85.5757	12.0356	5.52025	0.340043	5.96574e-11	1.65781	0.0194363	6.21378	538.029
2066	789.889	854.585	646.653	3238.75	388.837	1046.72	449.387	127.534	10.2418	0.22466	24.8546	52.2926	4.23812	137.57	402.537	116.182	1.3515	56.9454	30.4476	71.5739	279.194	33.7733	13.2413	8.78622	6.80102	0.000274267	79.9309	11.5412	5.28435	0.320516	4.22579e-11	1.62642	0.0183416	6.19273	538.029
2067	800.932	866.363	654.098	3261.1	390.187	1058.96	439.6	128.314	10.3557	0.226435	24.7808	52.8915	4.30725	139.969	407.687	117.958	1.32123	56.5533	30.987	69.6675	275.339	33.2235	13.1799	8.77902	6.44562	0.000228497	74.6245	11.0617	5.05724	0.302017	2.99331e-11	1.59531	0.0173055	6.17333	538.029
2068	812.098	878.267	661.645	3282.39	391.535	1071.09	430.102	129.095	10.47	0.228209	24.7066	53.4934	4.37674	142.357	412.784	119.72	1.29168	56.1527	31.5241	67.7986	271.515	32.6796	13.1184	8.77177	6.10698	0.000190368	69.6417	10.5972	4.83876	0.284507	2.12029e-11	1.5645	0.0163252	6.15646	538.029
2069	823.41	890.32	669.305	3302.75	392.882	1083.14	420.887	129.875	10.5845	0.229981	24.6322	54.099	4.4466	144.734	417.834	121.468	1.26284	55.7453	32.0587	65.9683	267.725	32.1421	13.0569	8.7645	5.78463	0.000158608	64.9675	10.148	4.62871	0.267945	1.50189e-11	1.53403	0.0153984	6.14211	538.029
2070	834.844	902.529	677.078	3322.34	394.227	1095.12	411.951	130.656	10.6992	0.23175	24.5575	54.7094	4.51686	147.103	422.845	123.202	1.23469	55.333	32.5908	64.178	263.973	31.6114	12.9954	8.75721	5.47814	0.000132154	60.5871	9.71424	4.42691	0.252278	1.06385e-11	1.50394	0.0145225	6.13064	538.029
2071	846.358	914.884	684.954	3341.23	395.572	1107.02	403.283	131.438	10.8143	0.233518	24.4825	55.3236	4.5875	149.464	427.818	124.922	1.20722	54.9161	33.1206	62.4275	260.259	31.0876	12.934	8.7499	5.18684	0.00011012	56.4848	9.29571	4.2331	0.237465	7.53571e-12	1.47421	0.013695	6.12015	538.029
2072	857.96	927.347	692.902	3359.54	396.916	1118.81	394.871	132.219	10.9294	0.235282	24.4074	55.9006	4.65896	151.793	432.763	126.615	1.18041	54.5032	33.6518	60.7156	256.581	30.5703	12.8727	8.74256	4.90992	9.17624e-05	52.6447	8.89212	4.04698	0.223482	5.33786e-12	1.44487	0.0129131	6.10866	538.029
2073	869.655	939.889	700.894	3377.41	398.261	1130.47	386.702	132.998	11.0445	0.237039	24.3322	56.4067	4.73169	154.072	437.687	128.265	1.15424	54.1022	34.1883	59.0412	252.94	30.0594	12.8114	8.7352	4.64669	7.64663e-05	49.0519	8.50315	3.86833	0.210276	3.78104e-12	1.41589	0.0121742	6.09616	538.029
2074	881.434	952.509	708.932	3394.86	399.607	1142	378.766	133.776	11.1595	0.23879	24.257	56.853	4.80561	156.302	442.59	129.874	1.12869	53.7112	34.7303	57.4036	249.333	29.5549	12.7501	8.72781	4.39649	6.372e-05	45.692	8.1285	3.69688	0.197795	2.67827e-12	1.38728	0.0114762	6.08311	538.029
2075	893.3	965.212	717.015	3411.91	400.954	1153.41	371.052	134.552	11.2745	0.240534	24.1817	57.2489	4.88063	158.482	447.471	131.442	1.10375	53.3288	35.2775	55.8022	245.762	29.0566	12.6888	8.72039	4.15872	5.30977e-05	42.5513	7.76788	3.53238	0.186008	1.89713e-12	1.35903	0.0108167	6.06965	538.029
2076	905.232	977.976	725.136	3428.43	402.302	1164.67	363.543	135.326	11.3894	0.242272	24.1063	57.5975	4.95653	160.613	452.317	132.968	1.07938	52.9507	35.8302	54.2341	242.22	28.5639	12.6275	8.71293	3.93252	4.42422e-05	39.6156	7.42066	3.37454	0.174882	1.34382e-12	1.33112	0.0101933	6.05187	538.029
2077	917.241	990.816	733.307	3444.36	403.651	1175.77	356.224	136.099	11.5043	0.244004	24.0308	57.9029	5.03316	162.693	457.118	134.452	1.05556	52.5742	36.3882	52.6973	238.706	28.0761	12.566	8.70543	3.71718	3.68577e-05	36.8716	7.08632	3.22307	0.16437	9.51884e-13	1.30353	0.00960386	6.03031	538.029
2078	929.33	1003.73	741.524	3459.83	405	1186.73	349.094	136.87	11.6191	0.245729	23.9552	58.1746	5.11054	164.726	461.883	135.896	1.03228	52.2006	36.9515	51.1931	235.221	27.5939	12.5045	8.6979	3.51244	3.07019e-05	34.3087	6.76484	3.0778	0.154437	6.7426e-13	1.27628	0.00904686	6.01056	538.029
2079	941.53	1016.76	749.805	3474.96	406.351	1197.58	342.15	137.639	11.7339	0.247448	23.8794	58.4204	5.18869	166.713	466.62	137.3	1.00954	51.831	37.5202	49.7227	231.769	27.1175	12.4429	8.69033	3.31801	2.5572e-05	31.9168	6.45609	2.93855	0.145083	4.77607e-13	1.24938	0.00852083	5.99354	538.029
2080	954.053	1029.94	758.182	3489.84	407.702	1208.33	335.389	138.407	11.8486	0.24916	23.8036	58.6468	5.26761	168.658	471.338	138.666	0.987327	51.4662	38.0942	48.2866	228.352	26.6472	12.3814	8.68273	3.13355	2.12981e-05	29.6856	6.15985	2.80516	0.136275	3.38309e-13	1.22287	0.0080243	5.97917	538.029
2081	967.063	1043.26	766.645	3504.58	409.054	1219	328.808	139.173	11.9633	0.250866	23.7278	58.8594	5.34734	170.563	476.044	139.995	0.965634	51.1072	38.6736	46.8858	224.974	26.1835	12.32	8.67511	2.95874	1.77382e-05	27.6058	5.87592	2.67743	0.127978	2.39639e-13	1.19678	0.00755587	5.96765	538.029
2082	980.376	1056.72	775.174	3519.35	410.408	1229.56	322.4	139.936	12.0778	0.252563	23.6518	59.0223	5.42849	172.426	480.736	141.285	0.944458	50.7542	39.2579	45.5196	221.633	25.7263	12.2586	8.66747	2.79311	1.47734e-05	25.6678	5.60397	2.55515	0.12016	1.69746e-13	1.17111	0.00711402	5.95708	538.029
2083	993.813	1070.29	783.751	3534.26	411.766	1239.97	316.157	140.697	12.192	0.25425	23.5758	59.1038	5.51157	174.245	485.404	142.536	0.92379	50.4067	39.8468	44.1868	218.33	25.2753	12.1973	8.65981	2.63617	1.2304e-05	23.8623	5.34355	2.43816	0.112788	1.20239e-13	1.14584	0.0066972	5.94554	538.029
2084	1007.38	1083.95	792.366	3549.26	413.126	1250.24	310.069	141.454	12.3058	0.255925	23.4998	59.1167	5.59647	176.022	490.048	143.746	0.903613	50.0635	40.4401	42.8864	215.062	24.8304	12.1361	8.65213	2.48744	1.0247e-05	22.1805	5.09424	2.32625	0.105847	8.517e-14	1.12097	0.00630399	5.93303	538.029
2085	1021.07	1097.71	801.019	3564.33	414.49	1260.38	304.131	142.207	12.4194	0.25759	23.4236	59.0721	5.68305	177.757	494.667	144.918	0.883915	49.7239	41.038	41.6178	211.828	24.3915	12.075	8.64441	2.34652	8.53366e-06	20.6144	4.85565	2.21917	0.0993106	6.03296e-14	1.09648	0.00593307	5.92005	538.029
2086	1034.89	1111.57	809.715	3579.46	415.857	1270.39	298.336	142.957	12.5326	0.259244	23.3474	58.9793	5.77122	179.451	499.263	146.051	0.864683	49.3874	41.6403	40.3803	208.63	23.9584	12.0138	8.63667	2.21303	7.10647e-06	19.1563	4.62739	2.11674	0.0931674	4.2734e-14	1.07237	0.00558323	5.90673	538.029
2087	1048.8	1125.48	818.422	3594.48	417.228	1280.26	292.672	143.704	12.6456	0.260886	23.271	58.8415	5.86072	181.103	503.82	147.145	0.845894	49.0508	42.2472	39.1716	205.462	23.5307	11.9527	8.6289	2.08643	5.9173e-06	17.7984	4.40888	2.01876	0.0873881	3.02703e-14	1.04862	0.00525307	5.88928	538.029
2088	1062.81	1139.45	827.157	3609.26	418.601	1289.96	287.128	144.448	12.7582	0.262518	23.1945	58.6625	5.95135	182.712	508.328	148.2	0.827528	48.7121	42.8586	37.99	202.32	23.1078	11.8914	8.62108	1.96629	4.92622e-06	16.5336	4.19965	1.92503	0.0819469	2.14417e-14	1.0252	0.00494139	5.86819	538.029
2089	1076.96	1153.55	835.956	3623.94	419.978	1299.54	281.706	145.188	12.8706	0.26414	23.1179	58.4522	6.04313	184.281	512.8	149.216	0.809583	48.3733	43.4745	36.8362	199.209	22.6901	11.8301	8.61322	1.85243	4.10056e-06	15.3563	3.99952	1.83536	0.0768237	1.51881e-14	1.00214	0.00464734	5.84892	538.029
2090	1091.07	1167.75	844.805	3638.59	421.357	1309.01	276.404	145.925	12.9826	0.26575	23.0411	58.2184	6.13608	185.812	517.245	150.196	0.792052	48.0357	44.0949	35.711	196.131	22.2779	11.7688	8.60533	1.74464	3.41296e-06	14.2609	3.80829	1.74964	0.0719995	1.07584e-14	0.979441	0.00437008	5.83234	538.029
2091	1104.99	1182.09	853.725	3653.31	422.74	1318.39	271.222	146.659	13.0943	0.267349	22.9643	57.9678	6.23021	187.308	521.673	151.14	0.774931	47.7007	44.7199	34.6147	193.087	21.8714	11.7076	8.59741	1.6427	2.8405e-06	13.2422	3.6257	1.66776	0.0674731	7.62061e-15	0.957126	0.0041088	5.81849	538.029
2092	1118.89	1196.57	862.726	3667.61	424.123	1327.75	266.161	147.39	13.2057	0.268936	22.8876	57.6799	6.32556	188.766	526.099	152.047	0.758217	47.4104	45.3487	33.5478	190.08	21.4711	11.6464	8.58947	1.5464	2.36402e-06	12.2953	3.45148	1.58957	0.0632262	5.398e-15	0.935228	0.00386272	5.8077	538.029
2093	1132.89	1211.1	871.777	3680.99	425.504	1337.13	261.215	148.118	13.317	0.270507	22.8111	57.3351	6.4221	190.183	530.53	152.915	0.7419	47.2005	45.9807	32.5101	187.11	21.0769	11.5855	8.58151	1.45547	1.96745e-06	11.4152	3.28528	1.5149	0.0592402	3.82363e-15	0.913744	0.00363102	5.798	538.029
2094	1146.92	1225.67	880.864	3693.45	426.883	1346.53	256.38	148.845	13.428	0.272063	22.7348	56.9411	6.51967	191.558	534.958	153.744	0.725966	47.061	46.6161	31.5003	184.177	20.6885	11.5246	8.57354	1.3696	1.63732e-06	10.5971	3.1267	1.44359	0.0554968	2.70844e-15	0.892661	0.00341282	5.78733	538.029
2095	1160.99	1240.26	889.982	3705.04	428.259	1355.91	251.651	149.569	13.5388	0.273604	22.6588	56.5045	6.61815	192.892	539.377	154.533	0.710402	46.9831	47.2547	30.5177	181.279	20.3059	11.4638	8.56554	1.28851	1.36248e-06	9.83665	2.9754	1.37551	0.0519792	1.91851e-15	0.871947	0.00320735	5.77564	538.029
2096	1175.09	1254.88	899.124	3715.82	429.633	1365.28	247.023	150.291	13.6495	0.27513	22.583	56.0317	6.71744	194.185	543.784	155.284	0.695197	46.9593	47.8967	29.5616	178.416	19.929	11.4031	8.55752	1.21193	1.13367e-06	9.12982	2.83104	1.31051	0.0486719	1.35896e-15	0.851595	0.00301387	5.76343	538.029
2097	1189.22	1269.53	908.289	3725.84	431.005	1374.61	242.494	151.011	13.7599	0.276641	22.5074	55.528	6.81748	195.437	548.176	155.997	0.680341	46.9831	48.5418	28.6313	175.587	19.5576	11.3425	8.54948	1.13963	9.43186e-07	8.47291	2.6933	1.24844	0.0455605	9.62608e-16	0.831619	0.0028317	5.75086	538.029
2098	1203.35	1284.17	917.471	3734.99	432.374	1383.88	238.053	151.729	13.8701	0.278136	22.4319	54.9936	6.91798	196.648	552.535	156.671	0.665814	47.0461	49.1903	27.7251	172.788	19.1913	11.2819	8.5414	1.0713	7.84559e-07	7.86215	2.5618	1.18914	0.0426303	6.81856e-16	0.812005	0.00266009	5.73427	538.029
2099	1217.48	1298.81	926.665	3743.21	433.741	1393.05	233.696	152.445	13.98	0.279617	22.3566	54.43	7.01876	197.815	556.848	157.305	0.651603	47.1418	49.842	26.8415	170.017	18.8297	11.2212	8.53328	1.00669	6.52437e-07	7.29416	2.43619	1.13246	0.0398848	4.82988e-16	0.79273	0.00249838	5.71409	538.029
2100	1231.45	1313.45	935.874	3750.68	435.106	1402.15	229.422	153.158	14.0898	0.281082	22.2814	53.8445	7.11986	198.941	561.124	157.901	0.637704	47.2675	50.497	25.9811	167.277	18.473	11.1606	8.52512	0.945669	5.42441e-07	6.76616	2.31634	1.07834	0.0373127	3.42121e-16	0.773789	0.00234608	5.69567	538.029
2101	1245.11	1328.15	945.132	3757.57	436.469	1411.18	225.233	153.869	14.1994	0.282532	22.2064	53.2435	7.22136	200.029	565.374	158.461	0.624113	47.4213	51.1553	25.1442	164.569	18.1216	11.1	8.51694	0.888097	4.50904e-07	6.27553	2.20206	1.02669	0.0349034	2.42339e-16	0.755194	0.00220274	5.68	538.029
2102	1258.71	1342.94	954.466	3763.72	437.824	1420.02	221.13	154.579	14.3088	0.283974	22.1316	52.6845	7.32009	201.08	569.467	158.996	0.610847	47.5771	51.815	24.3309	161.894	17.7756	11.0396	8.50873	0.833839	3.74759e-07	5.81985	2.09317	0.977422	0.0326466	1.71659e-16	0.736954	0.0020679	5.66713	538.029
2103	1272.36	1357.74	963.839	3769.03	439.168	1428.52	217.113	155.289	14.4183	0.285416	22.0569	52.2152	7.41307	202.094	573.28	159.52	0.59792	47.7121	52.4746	23.5415	159.256	17.4352	10.9793	8.50051	0.782757	3.11442e-07	5.39679	1.98948	0.930424	0.0305325	1.21593e-16	0.719098	0.00194114	5.65725	538.029
2104	1286	1372.53	973.241	3773.58	440.499	1436.71	213.181	156	14.5277	0.286858	21.9825	51.8205	7.50062	203.074	576.832	160.034	0.585324	47.8286	53.134	22.7756	156.655	17.1006	10.9191	8.49228	0.734686	2.58798e-07	5.00408	1.89078	0.885618	0.0285514	8.61296e-17	0.701623	0.00182198	5.64844	538.029
2105	1299.64	1387.35	982.68	3777.4	441.818	1444.58	209.329	156.71	14.6371	0.288299	21.9083	51.4863	7.58297	204.018	580.131	160.536	0.573048	47.9277	53.7932	22.0322	154.088	16.7714	10.8592	8.48403	0.68944	2.15027e-07	4.63954	1.7968	0.842891	0.0266938	6.10093e-17	0.684496	0.00170997	5.63877	538.029
2106	1313.27	1402.15	992.143	3780.51	443.125	1452.15	205.554	157.42	14.7465	0.289739	21.8343	51.201	7.66032	204.927	583.187	161.027	0.561082	48.0105	54.4521	21.3105	151.556	16.4475	10.7993	8.47576	0.646852	1.78632e-07	4.30111	1.70733	0.802136	0.0249509	4.32155e-17	0.667727	0.00160468	5.62814	538.029
2107	1326.87	1416.95	1001.63	3782.96	444.419	1459.41	201.854	158.13	14.8559	0.29118	21.7604	50.9556	7.73291	205.801	586.013	161.507	0.549416	48.0785	55.1109	20.6101	149.057	16.1289	10.7397	8.46748	0.606769	1.48373e-07	3.98695	1.62215	0.763285	0.0233146	3.06113e-17	0.651307	0.0015057	5.61705	538.029
2108	1340.43	1431.72	1011.12	3784.78	445.702	1466.39	198.227	158.84	14.9653	0.292619	21.6867	50.7427	7.80098	206.641	588.621	161.975	0.538043	48.1328	55.7694	19.9302	146.592	15.8155	10.6801	8.45917	0.569051	1.23218e-07	3.69533	1.54103	0.726243	0.0217945	2.16833e-17	0.635229	0.00141268	5.60565	538.029
2109	1353.94	1446.43	1020.61	3785.85	446.973	1473.05	194.666	159.55	15.0747	0.294058	21.6131	50.5523	7.86453	207.445	591.002	162.431	0.526948	48.1722	56.4278	19.2696	144.156	15.5067	10.6206	8.45084	0.533523	1.02302e-07	3.42453	1.46375	0.690906	0.0203647	1.53592e-17	0.619467	0.00132519	5.59039	538.029
2110	1367.38	1461.1	1030.1	3786.12	448.232	1479.39	191.167	160.26	15.184	0.295497	21.5397	50.377	7.92362	208.21	593.157	162.873	0.516119	48.1959	57.0859	18.627	141.748	15.2024	10.5611	8.44247	0.500037	8.49086e-08	3.17301	1.39008	0.65718	0.0190185	1.08796e-17	0.603982	0.00124288	5.57169	538.029
2111	1380.76	1475.72	1039.59	3785.75	449.48	1485.45	187.73	160.97	15.2934	0.296935	21.4663	50.2164	7.97859	208.941	595.108	163.302	0.505553	48.2072	57.7439	18.0028	139.369	14.9026	10.5017	8.43406	0.46851	7.04518e-08	2.93951	1.31993	0.624999	0.0177676	7.70647e-18	0.588804	0.0011655	5.55471	538.029
2112	1394.16	1490.37	1049.12	3784.9	450.716	1491.25	184.358	161.68	15.4027	0.298373	21.3931	50.0703	8.02979	209.638	596.876	163.719	0.495247	48.2089	58.4016	17.397	137.021	14.6077	10.4424	8.42564	0.438861	5.84419e-08	2.72282	1.25315	0.594327	0.0165888	5.45882e-18	0.573958	0.00109279	5.5404	538.029
2113	1407.59	1505.06	1058.7	3783.71	451.941	1496.82	181.051	162.39	15.5121	0.299811	21.3201	49.9385	8.07753	210.305	598.484	164.125	0.485199	48.2034	59.0591	16.8097	134.705	14.3176	10.3832	8.41719	0.411005	4.84692e-08	2.52179	1.18963	0.565102	0.0154776	3.86671e-18	0.55943	0.00102451	5.52867	538.029
2114	1421.06	1519.79	1068.32	3782.3	453.154	1502.21	177.809	163.099	15.6214	0.301248	21.2472	49.821	8.12213	210.945	599.952	164.521	0.475406	48.1931	59.7164	16.2408	132.424	14.0327	10.3243	8.40874	0.384858	4.01918e-08	2.33537	1.12927	0.537262	0.0144466	2.73896e-18	0.545226	0.00096041	5.51977	538.029
2115	1434.59	1534.6	1078	3780.72	454.357	1507.41	174.633	163.809	15.7307	0.302684	21.1746	49.716	8.16379	211.559	601.291	164.908	0.465863	48.179	60.3736	15.69	130.176	13.7529	10.2655	8.40028	0.360326	3.33231e-08	2.16257	1.07192	0.51077	0.0134901	1.94012e-18	0.531343	0.000900257	5.51196	538.029
2116	1448.13	1549.43	1087.7	3778.95	455.548	1512.43	171.518	164.519	15.84	0.30412	21.102	49.62	8.2026	212.147	602.504	165.285	0.456562	48.1606	61.0305	15.1565	127.961	13.478	10.207	8.3918	0.337304	2.76234e-08	2.00236	1.0174	0.485557	0.0126028	1.37427e-18	0.517768	0.000843801	5.50332	538.029
2117	1461.7	1564.28	1097.43	3776.96	456.728	1517.27	168.463	165.229	15.9493	0.305556	21.0297	49.5306	8.23867	212.708	603.594	165.651	0.447495	48.1379	61.6872	14.6398	125.778	13.2079	10.1486	8.38331	0.315697	2.28943e-08	1.85383	0.965585	0.461531	0.0117625	9.73453e-19	0.504511	0.000790809	5.49375	538.029
2118	1475.27	1579.14	1107.18	3774.75	457.897	1521.94	165.466	165.939	16.0585	0.306991	20.9575	49.4461	8.27213	213.243	604.566	166.008	0.438656	48.111	62.3437	14.1392	123.627	12.9425	10.0904	8.37481	0.295419	1.8971e-08	1.71612	0.916356	0.438632	0.0109659	6.89538e-19	0.491545	0.000741073	5.48374	538.029
2119	1488.8	1593.97	1116.91	3772.34	459.055	1526.44	162.526	166.649	16.1678	0.308426	20.8855	49.3654	8.30309	213.753	605.427	166.354	0.430039	48.0802	63	13.6543	121.506	12.6817	10.0324	8.36629	0.276392	1.57167e-08	1.58847	0.869567	0.416834	0.0102269	4.88429e-19	0.478863	0.000694395	5.47344	538.029
2120	1502.31	1608.79	1126.66	3769.57	460.203	1530.75	159.637	167.359	16.2771	0.30986	20.8136	49.2835	8.33145	214.235	606.163	166.689	0.421632	48.0431	63.6561	13.184	119.413	12.4251	9.97442	8.35774	0.258521	1.3017e-08	1.47011	0.825055	0.396075	0.00954098	3.45975e-19	0.466464	0.000650563	5.45941	538.029
2121	1515.77	1623.56	1136.4	3766.34	461.34	1534.86	156.796	168.068	16.3863	0.311294	20.7418	49.1973	8.35717	214.687	606.767	167.012	0.413428	47.9983	64.3119	12.7275	117.346	12.1725	9.91653	8.34916	0.241724	1.07771e-08	1.3603	0.782706	0.376296	0.00890417	2.45069e-19	0.454312	0.000609388	5.44201	538.029
2122	1529.18	1638.28	1146.13	3762.79	462.467	1538.78	154.004	168.778	16.4955	0.312727	20.6701	49.1098	8.38052	215.112	607.258	167.323	0.405423	47.9481	64.9676	12.2849	115.307	11.9239	9.85874	8.34055	0.225954	8.91984e-09	1.25848	0.742449	0.357459	0.00831323	1.73593e-19	0.442412	0.000570732	5.42629	538.029
2123	1542.63	1653.05	1155.91	3759.07	463.583	1542.55	151.263	169.488	16.6047	0.31416	20.5985	49.0238	8.40176	215.512	607.654	167.624	0.397617	47.8948	65.6231	11.8562	113.296	11.6796	9.80108	8.33192	0.211163	7.38067e-09	1.16416	0.704189	0.339522	0.00776511	1.22963e-19	0.430789	0.000534461	5.41321	538.029
2124	1556.15	1667.9	1165.74	3755.27	464.689	1546.21	148.573	170.198	16.714	0.315593	20.5271	48.9414	8.42114	215.89	607.972	167.916	0.390007	47.8402	66.2784	11.4413	111.314	11.4397	9.74361	8.32328	0.197304	6.10571e-09	1.07677	0.667861	0.322478	0.00723999	8.71e-20	0.419445	0.000500446	5.40266	538.029
2125	1569.72	1682.82	1175.62	3751.52	465.785	1549.76	145.935	170.907	16.8232	0.317025	20.4558	48.8645	8.43891	216.249	608.228	168.199	0.382592	47.7862	66.9334	11.0401	109.364	11.2042	9.68636	8.31463	0.18433	5.05012e-09	0.995842	0.633406	0.306258	0.00673641	6.16966e-20	0.408364	0.000468562	5.39488	538.029
2126	1583.35	1697.78	1185.53	3747.83	466.87	1553.24	143.349	171.617	16.9323	0.318456	20.3848	48.793	8.4552	216.59	608.43	168.475	0.375369	47.7332	67.5883	10.6524	107.444	10.9732	9.62935	8.30597	0.17219	4.17637e-09	0.920937	0.600727	0.290824	0.00626986	4.37023e-20	0.397543	0.000438682	5.38817	538.029
2127	1597.04	1712.81	1195.48	3744.17	467.946	1556.62	140.812	172.327	17.0415	0.319887	20.3139	48.7248	8.47004	216.913	608.577	168.742	0.36833	47.6804	68.2429	10.2775	105.554	10.7465	9.57257	8.29731	0.160826	3.45318e-09	0.851571	0.569703	0.276163	0.00583756	3.09562e-20	0.386991	0.000410678	5.38066	538.029
2128	1610.78	1727.9	1205.48	3740.48	469.011	1559.91	138.322	173.036	17.1507	0.321318	20.2431	48.6584	8.48344	217.218	608.667	169.001	0.36147	47.6272	68.8974	9.91504	103.694	10.5239	9.51598	8.28863	0.150189	2.85466e-09	0.787332	0.540245	0.262209	0.00543699	2.19276e-20	0.376699	0.000384428	5.37222	538.029
2129	1624.5	1742.97	1215.47	3736.76	470.067	1563.11	135.879	173.746	17.2598	0.322748	20.1726	48.5932	8.49547	217.504	608.702	169.251	0.354785	47.5733	69.5516	9.56449	101.861	10.3055	9.45959	8.27994	0.140231	2.35939e-09	0.727872	0.512305	0.248924	0.00506582	1.55323e-20	0.366661	0.000359824	5.3633	538.029
2130	1638.21	1758.03	1225.45	3733	471.113	1566.21	133.482	174.456	17.369	0.324178	20.1022	48.5286	8.50619	217.772	608.685	169.493	0.34827	47.5187	70.2057	9.2255	100.057	10.091	9.4034	8.27124	0.130912	1.94963e-09	0.672842	0.485789	0.236306	0.0047219	1.10022e-20	0.35685	0.000336763	5.3541	538.029
2131	1651.91	1773.09	1235.45	3729.03	472.149	1569.2	131.125	175.165	17.4781	0.325607	20.0319	48.4604	8.51543	218.019	608.599	169.726	0.341915	47.4608	70.8595	8.89729	98.2776	9.88026	9.34733	8.26252	0.12218	1.61058e-09	0.621891	0.460593	0.224315	0.00440307	7.7933e-21	0.347251	0.000315137	5.34127	538.029
2132	1665.53	1788.08	1245.42	3724.74	473.176	1572.05	128.807	175.875	17.5872	0.327036	19.9617	48.3859	8.52308	218.243	608.433	169.947	0.335714	47.3977	71.5131	8.57926	96.5221	9.67295	9.29134	8.25376	0.113994	1.33001e-09	0.574706	0.436653	0.212888	0.00410742	5.52032e-21	0.337869	0.00029485	5.32512	538.029
2133	1679.14	1803.05	1255.4	3720.25	474.193	1574.79	126.528	176.584	17.6964	0.328465	19.8916	48.3085	8.52935	218.447	608.204	170.159	0.329665	47.3315	72.1666	8.2714	94.7912	9.4692	9.23547	8.24498	0.106328	1.09797e-09	0.531028	0.413939	0.202002	0.00383338	3.91028e-21	0.328708	0.000275828	5.31059	538.029
2134	1692.8	1818.09	1265.42	3715.7	475.201	1577.45	124.291	177.294	17.8055	0.329893	19.8216	48.2314	8.53449	218.633	607.927	170.362	0.323768	47.2644	72.8198	7.97367	93.0861	9.26912	9.17975	8.23618	0.0991552	9.06168e-10	0.490612	0.392402	0.191663	0.00357949	2.76982e-21	0.319771	0.000258002	5.29864	538.029
2135	1706.51	1833.18	1275.48	3711.19	476.199	1580.04	122.094	178.004	17.9145	0.33132	19.7518	48.1568	8.53868	218.804	607.616	170.558	0.318021	47.198	73.4728	7.68598	91.4076	9.07279	9.12424	8.22737	0.0924506	7.47707e-10	0.453197	0.371968	0.181846	0.00334439	1.96198e-21	0.311059	0.000241307	5.28919	538.029
2136	1720.29	1848.35	1285.59	3706.82	477.189	1582.59	119.94	178.713	18.0236	0.332747	19.6822	48.0871	8.54215	218.963	607.286	170.746	0.312424	47.1339	74.1256	7.40826	89.7567	8.88032	9.06898	8.21855	0.0861894	6.16852e-10	0.418573	0.352594	0.172528	0.00312678	1.38975e-21	0.302554	0.000225678	5.28245	538.029
2137	1734.17	1863.62	1295.76	3702.61	478.169	1585.12	117.827	179.423	18.1327	0.334174	19.6128	48.0222	8.54497	219.11	606.943	170.929	0.306973	47.0725	74.7782	7.14027	88.1333	8.69166	9.01397	8.20973	0.0803442	5.08823e-10	0.386566	0.334232	0.163687	0.00292539	9.84421e-22	0.294253	0.00021105	5.27677	538.029
2138	1748.1	1878.94	1305.96	3698.51	479.14	1587.61	115.755	180.132	18.2417	0.3356	19.5436	47.9602	8.54712	219.245	606.582	171.105	0.301663	47.0127	75.4306	6.88156	86.5365	8.50668	8.9592	8.20091	0.0748861	4.19641e-10	0.356978	0.316832	0.155267	0.00273899	6.97307e-22	0.286168	0.000197357	5.27028	538.029
2139	1762.05	1894.27	1316.17	3694.45	480.102	1590.05	113.721	180.842	18.3508	0.337026	19.4745	47.8997	8.54859	219.368	606.2	171.275	0.29649	46.9538	76.0828	6.63175	84.9654	8.32527	8.90465	8.19208	0.0697888	3.46025e-10	0.329626	0.300323	0.147247	0.00254949	4.93932e-22	0.278291	0.000184539	5.26286	538.029
2140	1776.02	1909.63	1326.39	3690.44	481.055	1592.45	111.725	181.551	18.4598	0.338451	19.4056	47.8401	8.54939	219.479	605.796	171.438	0.291451	46.8953	76.7349	6.39053	83.4195	8.14736	8.85031	8.18323	0.0650284	2.85267e-10	0.304341	0.284669	0.139635	0.00235714	3.49873e-22	0.270616	0.000172539	5.25495	538.029
2141	1790	1925.01	1336.63	3686.44	481.999	1594.81	109.765	182.26	18.5689	0.339876	19.3368	47.7808	8.54955	219.577	605.372	171.594	0.286541	46.8372	77.3866	6.15761	81.8984	7.97285	8.79619	8.17438	0.0605832	2.3513e-10	0.280969	0.269837	0.132412	0.00217913	2.4783e-22	0.263139	0.000161305	5.24674	538.029
2142	1803.95	1940.36	1346.86	3682.28	482.935	1597.09	107.84	182.97	18.6779	0.341301	19.2682	47.7179	8.54886	219.661	604.908	171.742	0.281754	46.7766	78.0382	5.93242	80.3998	7.80151	8.74221	8.1655	0.0564281	1.93751e-10	0.259357	0.255762	0.125554	0.00201433	1.75549e-22	0.255845	0.000150783	5.23497	538.029
2143	1817.84	1955.66	1357.07	3677.86	483.861	1599.27	105.945	183.679	18.7869	0.342725	19.1996	47.6485	8.54717	219.726	604.392	171.88	0.277083	46.7117	78.6896	5.71451	78.9224	7.63311	8.68833	8.1566	0.0525417	1.59598e-10	0.239368	0.24239	0.119041	0.00186169	1.24348e-22	0.248725	0.000140924	5.21993	538.029
2144	1831.7	1970.93	1367.28	3673.29	484.78	1601.37	104.083	184.389	18.8959	0.344148	19.1312	47.5762	8.54467	219.777	603.837	172.011	0.272528	46.6445	79.3408	5.50383	77.4667	7.46776	8.63458	8.14767	0.04891	1.31424e-10	0.220887	0.22971	0.112858	0.0017204	8.80813e-23	0.241779	0.000131691	5.20644	538.029
2145	1845.59	1986.22	1377.51	3668.69	485.69	1603.42	102.254	185.098	19.0048	0.345571	19.063	47.504	8.54157	219.815	603.259	172.134	0.268088	46.577	79.9918	5.30038	76.0339	7.30552	8.58102	8.13873	0.0455199	1.08196e-10	0.203808	0.217689	0.10699	0.00158967	6.23917e-23	0.23501	0.000123049	5.19549	538.029
2146	1859.55	2001.6	1387.79	3664.17	486.591	1605.45	100.459	185.807	19.1138	0.346994	18.9949	47.4345	8.53803	219.844	602.671	172.252	0.263763	46.5108	80.6426	5.10406	74.6245	7.14646	8.52766	8.12978	0.042358	8.9054e-11	0.188031	0.206297	0.101424	0.00146876	4.41947e-23	0.2284	0.000114965	5.18701	538.029
2147	1873.61	2017.08	1398.14	3659.83	487.484	1607.48	98.6978	186.517	19.2228	0.348416	18.9269	47.3698	8.53426	219.865	602.087	172.364	0.259551	46.4475	81.2932	4.91482	73.2393	6.99065	8.47457	8.12082	0.0394118	7.32875e-11	0.173463	0.195504	0.0961452	0.00135698	3.1305e-23	0.221948	0.000107406	5.1812	538.029
2148	1887.74	2032.64	1408.52	3655.68	488.369	1609.5	96.9713	187.226	19.3317	0.349838	18.8592	47.31	8.53031	219.879	601.509	172.472	0.255452	46.3874	81.9435	4.73243	71.8782	6.83806	8.42175	8.11187	0.0366673	6.03042e-11	0.160014	0.18528	0.0911406	0.00125365	2.21747e-23	0.215673	0.000100339	5.17642	538.029
2149	1901.95	2048.27	1418.95	3651.67	489.245	1611.52	95.2777	187.935	19.4407	0.351259	18.7917	47.2531	8.52613	219.886	600.933	172.574	0.25146	46.3294	82.5937	4.5566	70.5403	6.68857	8.36917	8.10291	0.0341103	4.96132e-11	0.147596	0.175616	0.0863953	0.00115813	1.57073e-23	0.209566	9.37322e-05	5.17084	538.029
2150	1916.19	2063.94	1429.4	3647.74	490.113	1613.52	93.6157	188.644	19.5496	0.35268	18.7243	47.1977	8.52168	219.886	600.354	172.672	0.247573	46.2726	83.2437	4.38704	69.2251	6.54209	8.31683	8.09394	0.0317274	4.08104e-11	0.136131	0.166455	0.0818954	0.00106981	1.11261e-23	0.203623	8.7554e-05	5.16432	538.029
2151	1930.43	2079.6	1439.84	3643.87	490.974	1615.5	91.9845	189.354	19.6585	0.354101	18.6571	47.1432	8.51694	219.878	599.771	172.764	0.243787	46.2167	83.8934	4.22353	67.9318	6.39854	8.26471	8.08497	0.0295068	3.35632e-11	0.125545	0.157751	0.0775996	0.000988164	7.8811e-24	0.197839	8.17767e-05	5.15729	538.029
2152	1944.58	2095.17	1450.21	3640.06	491.824	1617.46	90.3834	190.059	19.7669	0.355514	18.5903	47.0896	8.512	219.863	599.187	172.852	0.240104	46.1618	84.5397	4.06585	66.6602	6.25786	8.21282	8.07598	0.0274375	2.75978e-11	0.115773	0.149506	0.0734974	0.00091268	5.58252e-24	0.192209	7.63747e-05	5.14994	538.029
2153	1958.57	2110.57	1460.48	3636.17	492.66	1619.36	88.8099	190.758	19.8741	0.356912	18.5243	47.0333	8.50667	219.841	598.588	172.934	0.236524	46.1055	85.1793	3.91358	65.4084	6.11984	8.16109	8.06698	0.0255075	2.26866e-11	0.106747	0.141694	0.0696061	0.000842867	3.95433e-24	0.186722	7.13207e-05	5.13912	538.029
2154	1972.32	2125.71	1470.59	3632.08	493.484	1621.16	87.2621	191.449	19.9802	0.358295	18.459	46.9716	8.50079	219.807	597.959	173.01	0.233042	46.046	85.8121	3.76643	64.1751	5.98431	8.10947	8.05796	0.0237061	1.86431e-11	0.0984091	0.13427	0.0659137	0.000778277	2.80102e-24	0.181372	6.65904e-05	5.12513	538.029
2155	1985.84	2140.62	1480.56	3627.91	494.295	1622.9	85.7409	192.133	20.0852	0.359664	18.3945	46.9076	8.49453	219.764	597.313	173.08	0.229656	45.9851	86.4383	3.62435	62.9609	5.85134	8.058	8.04891	0.0220264	1.53157e-11	0.09071	0.127225	0.0624114	0.000718547	1.98408e-24	0.176158	6.21655e-05	5.11268	538.029
2156	1999.27	2155.42	1490.46	3623.77	495.093	1624.6	84.2471	192.809	20.1891	0.361018	18.3307	46.8446	8.48807	219.716	596.664	173.145	0.226366	45.9247	87.0577	3.4873	61.7667	5.72097	8.00672	8.03985	0.0204617	1.25791e-11	0.0836037	0.120552	0.0590908	0.000663337	1.40541e-24	0.171082	5.80285e-05	5.10278	538.029
2157	2012.63	2170.15	1500.3	3619.77	495.878	1626.28	82.7811	193.479	20.2919	0.362357	18.2676	46.7849	8.48157	219.664	596.025	173.207	0.223172	45.8665	87.6704	3.35523	60.5928	5.59328	7.95568	8.03078	0.0190055	1.03295e-11	0.0770473	0.114243	0.0559435	0.000612327	9.95512e-25	0.166144	5.41628e-05	5.09538	538.029
2158	2025.9	2184.78	1510.06	3616	496.651	1627.96	81.3437	194.141	20.3935	0.363682	18.2054	46.7308	8.4752	219.611	595.408	173.267	0.220074	45.8121	88.2763	3.22809	59.44	5.46829	7.9049	8.02171	0.0176514	8.48115e-12	0.0710007	0.108267	0.0529616	0.000565215	7.05163e-25	0.161344	5.05523e-05	5.09065	538.029
2159	2039.09	2199.31	1519.73	3612.49	497.411	1629.64	79.9344	194.796	20.4941	0.364992	18.1439	46.6823	8.46902	219.557	594.816	173.325	0.217069	45.7616	88.8756	3.10571	58.3081	5.34599	7.8544	8.01264	0.0163927	6.96275e-12	0.0654252	0.102592	0.0501369	0.000521712	4.99497e-25	0.15668	4.71808e-05	5.08701	538.029
2160	2052.19	2213.73	1529.33	3609.16	498.158	1631.33	78.5523	195.443	20.5935	0.366288	18.0832	46.6374	8.46296	219.503	594.243	173.38	0.214154	45.7139	89.4681	2.98787	57.1964	5.22628	7.80417	8.00357	0.0152224	5.71545e-12	0.0602839	0.0972128	0.047461	0.000481535	3.53815e-25	0.152146	4.40321e-05	5.08264	538.029
2161	2065.17	2228.02	1538.83	3605.96	498.894	1633	77.1963	196.084	20.6918	0.367568	18.0233	46.5944	8.45695	219.447	593.685	173.433	0.211326	45.6681	90.054	2.8744	56.1043	5.10908	7.75418	7.9945	0.0141341	4.6909e-12	0.0555427	0.092123	0.0449257	0.000444429	2.50622e-25	0.147739	4.10911e-05	5.07737	538.029
2162	2078.01	2242.16	1548.22	3602.86	499.617	1634.65	75.8659	196.717	20.789	0.368834	17.9641	46.5528	8.45098	219.389	593.137	173.484	0.208583	45.6238	90.6331	2.7651	55.0314	4.99433	7.70443	7.98543	0.0131221	3.84942e-12	0.0511707	0.0873183	0.0425238	0.000410157	1.77526e-25	0.143453	3.8344e-05	5.07163	538.029
2163	2090.7	2256.14	1557.5	3599.84	500.328	1636.28	74.5603	197.343	20.8851	0.370086	17.9058	46.5121	8.44502	219.328	592.598	173.531	0.205923	45.5807	91.2055	2.65982	53.9772	4.88196	7.65492	7.97635	0.012181	3.15838e-12	0.0471392	0.0827708	0.0402483	0.000378505	1.25749e-25	0.139285	3.57783e-05	5.0656	538.029
2164	2103.24	2269.95	1566.68	3596.73	501.028	1637.86	73.2777	197.962	20.98	0.371322	17.8481	46.468	8.43884	219.262	592.05	173.575	0.203339	45.536	91.7713	2.55829	52.9403	4.77182	7.60559	7.96725	0.011305	2.59078e-12	0.0434205	0.0784517	0.0380917	0.00034926	8.90737e-26	0.135229	3.33805e-05	5.05619	538.029
2165	2115.52	2283.5	1575.71	3593.4	501.715	1639.36	72.0164	198.573	21.0739	0.372544	17.7911	46.418	8.43226	219.188	591.476	173.613	0.200829	45.4877	92.3303	2.4603	51.9196	4.66376	7.55639	7.95813	0.0104891	2.12453e-12	0.0399892	0.0743603	0.0360471	0.000322229	6.30947e-26	0.131277	3.11387e-05	5.04364	538.029
2166	2127.57	2296.8	1584.58	3589.96	502.391	1640.8	70.7771	199.177	21.1666	0.373752	17.7349	46.3653	8.42543	219.108	590.889	173.646	0.198391	45.4377	92.8826	2.3658	50.9155	4.55783	7.50736	7.949	0.00972979	1.74172e-12	0.0368245	0.0704769	0.0341093	0.000297256	4.46926e-26	0.12743	2.90438e-05	5.03258	538.029
2167	2139.54	2310.01	1593.39	3586.55	503.055	1642.21	69.5604	199.774	21.2582	0.374945	17.6794	46.3132	8.41853	219.024	590.304	173.677	0.196026	45.3881	93.4282	2.27476	49.9285	4.45407	7.45854	7.93985	0.00902389	1.42758e-12	0.0339069	0.066784	0.0322736	0.000274195	3.16577e-26	0.123688	2.70874e-05	5.02404	538.029
2168	2151.43	2323.14	1602.14	3583.26	503.708	1643.61	68.3667	200.364	21.3487	0.376123	17.6246	46.2641	8.41171	218.94	589.731	173.705	0.193733	45.3404	93.9672	2.18712	48.9592	4.35251	7.40996	7.9307	0.00836821	1.16991e-12	0.0312181	0.0632893	0.0305351	0.000252908	2.24245e-26	0.120032	2.52611e-05	5.01795	538.029
2169	2163.25	2336.18	1610.82	3580.2	504.349	1645.01	67.1966	200.946	21.4381	0.377286	17.5706	46.2203	8.40515	218.856	589.184	173.732	0.191512	45.2963	94.4994	2.10283	48.008	4.25319	7.36166	7.92155	0.0077597	9.58654e-13	0.0287411	0.0599997	0.0288894	0.000233267	1.58842e-26	0.116463	2.35572e-05	5.01451	538.029
2170	2174.99	2349.12	1619.42	3577.38	504.979	1646.43	66.0498	201.522	21.5264	0.378435	17.5174	46.1818	8.39888	218.775	588.666	173.758	0.189363	45.256	95.0249	2.02179	47.0747	4.15609	7.31364	7.91241	0.00719514	7.85483e-13	0.0264598	0.0568712	0.0273317	0.000215147	1.12515e-26	0.112998	2.19678e-05	5.01212	538.029
2171	2186.63	2361.94	1627.93	3574.74	505.598	1647.86	64.9254	202.09	21.6135	0.379569	17.465	46.1466	8.39283	218.695	588.169	173.783	0.187281	45.2183	95.5438	1.94385	46.1588	4.06112	7.2659	7.90327	0.00667122	6.4353e-13	0.0243583	0.0538873	0.0258572	0.000198428	7.96989e-27	0.109633	2.04849e-05	5.009	538.029
2172	2198.15	2374.64	1636.34	3572.21	506.206	1649.28	63.8225	202.65	21.6996	0.380689	17.4133	46.1133	8.38693	218.615	587.689	173.806	0.185266	45.1824	96.056	1.86888	45.2597	3.96821	7.21841	7.89413	0.00618491	5.2717e-13	0.0224225	0.0510814	0.0244614	0.000183	5.64541e-27	0.106365	1.91011e-05	5.00496	538.029
2173	2209.53	2387.18	1644.65	3569.77	506.802	1650.68	62.7407	203.204	21.7845	0.381794	17.3623	46.0811	8.38115	218.536	587.222	173.828	0.183314	45.1478	96.5615	1.79674	44.377	3.87731	7.17118	7.88499	0.0057335	4.31795e-13	0.0206394	0.0484355	0.0231399	0.000168764	3.99889e-27	0.10319	1.781e-05	5.00044	538.029
2174	2220.78	2399.58	1652.86	3567.4	507.388	1652.07	61.6794	203.75	21.8683	0.382885	17.3121	46.0496	8.37546	218.456	586.766	173.849	0.181424	45.1142	97.0603	1.72732	43.5103	3.78838	7.12419	7.87585	0.00531448	3.53628e-13	0.0189968	0.0459096	0.021889	0.000155627	2.83258e-27	0.100106	1.66052e-05	4.9956	538.029
2175	2231.84	2411.77	1660.95	3564.93	507.963	1653.41	60.637	204.289	21.951	0.38396	17.2626	46.0146	8.36963	218.372	586.301	173.866	0.179592	45.0788	97.5524	1.66045	42.6584	3.70127	7.07739	7.86669	0.00492515	2.89552e-13	0.0174833	0.0435138	0.0207042	0.000143499	2.00644e-27	0.0971063	1.54803e-05	4.98742	538.029
2176	2242.64	2423.69	1668.87	3562.23	508.528	1654.68	59.6122	204.821	22.0326	0.385022	17.2139	45.9735	8.36346	218.282	585.813	173.879	0.177814	45.0397	98.0378	1.59596	41.8204	3.61588	7.03074	7.85752	0.00456316	2.37019e-13	0.0160882	0.041258	0.0195819	0.0001323	1.42124e-27	0.094187	1.44296e-05	4.97614	538.029
2177	2253.21	2435.37	1676.65	3559.42	509.082	1655.89	58.6055	205.346	22.1131	0.386068	17.1658	45.9296	8.3571	218.188	585.313	173.888	0.17609	44.9988	98.5166	1.53384	40.9966	3.53222	6.98426	7.84833	0.00422687	1.93969e-13	0.0148027	0.0391296	0.018519	0.000121961	1.00673e-27	0.0913476	1.34487e-05	4.9663	538.029
2178	2263.67	2446.93	1684.35	3556.62	509.625	1657.07	57.6175	205.863	22.1924	0.3871	17.1184	45.8861	8.35073	218.092	584.815	173.895	0.17442	44.9581	98.9887	1.47405	40.1874	3.45035	6.93801	7.83913	0.00391476	1.58758e-13	0.0136187	0.0370934	0.0175127	0.000112422	7.13108e-28	0.0885885	1.25334e-05	4.95893	538.029
2179	2274.06	2458.4	1691.99	3553.93	510.158	1658.25	56.6485	206.373	22.2707	0.388118	17.0717	45.8455	8.3445	217.997	584.331	173.901	0.172804	44.9191	99.4541	1.41654	39.3932	3.37027	6.892	7.82993	0.00362535	1.29969e-13	0.0125287	0.0351415	0.0165605	0.000103624	5.05125e-28	0.0859093	1.16799e-05	4.95399	538.029
2180	2284.37	2469.79	1699.55	3551.47	510.681	1659.44	55.6988	206.876	22.3478	0.389121	17.0258	45.8102	8.33858	217.904	583.873	173.906	0.171243	44.8837	99.9129	1.36129	38.6143	3.29201	6.84628	7.82074	0.0033572	1.06393e-13	0.0115256	0.0333151	0.0156597	9.55132e-05	3.57801e-28	0.0833099	1.08842e-05	4.95165	538.029
2181	2294.63	2481.1	1707.05	3549.24	511.193	1660.65	54.7683	207.371	22.4238	0.390109	16.9807	45.7799	8.33299	217.815	583.445	173.912	0.169736	44.8519	100.365	1.30822	37.8506	3.21554	6.80084	7.81155	0.00310882	8.7089e-14	0.0106025	0.0316017	0.0148076	8.80359e-05	2.53446e-28	0.0807885	1.01426e-05	4.95034	538.029
2182	2304.78	2492.3	1714.47	3547.18	511.696	1661.86	53.8561	207.86	22.4987	0.391083	16.9363	45.753	8.32767	217.729	583.039	173.918	0.16828	44.8227	100.81	1.25721	37.1016	3.14081	6.75569	7.80237	0.00287869	7.12827e-14	0.00975296	0.0299656	0.0140016	8.11423e-05	1.79526e-28	0.078342	9.45136e-06	4.94828	538.029
2183	2314.82	2503.36	1721.79	3545.22	512.188	1663.07	52.9616	208.341	22.5725	0.392042	16.8927	45.7278	8.32254	217.644	582.65	173.923	0.166873	44.7951	101.249	1.20818	36.3668	3.06776	6.71079	7.7932	0.00266542	5.834e-14	0.00897115	0.0284227	0.0132391	7.4786e-05	1.27166e-28	0.0759676	8.80689e-06	4.9453	538.029
2184	2324.72	2514.27	1729	3543.35	512.67	1664.27	52.0844	208.815	22.6452	0.392986	16.8498	45.7035	8.31756	217.561	582.274	173.927	0.165514	44.7686	101.681	1.16105	35.6458	2.99633	6.66615	7.78403	0.00246776	4.77426e-14	0.00825162	0.0269636	0.0125177	6.8925e-05	9.00772e-29	0.0736629	8.20602e-06	4.9418	538.029
2185	2334.44	2524.98	1736.07	3541.54	513.143	1665.46	51.224	209.281	22.7168	0.393916	16.8076	45.6797	8.31271	217.479	581.91	173.93	0.164202	44.743	102.107	1.11572	34.9384	2.92649	6.62175	7.77485	0.00228457	3.90661e-14	0.00758943	0.0255797	0.0118352	6.35206e-05	6.38055e-29	0.0714257	7.64581e-06	4.93798	538.029
2186	2343.95	2535.48	1743.02	3539.61	513.606	1666.6	50.3791	209.741	22.7872	0.394832	16.7661	45.6524	8.30773	217.395	581.537	173.931	0.162932	44.7155	102.525	1.07211	34.2434	2.85813	6.57756	7.76567	0.00211461	3.19606e-14	0.00697976	0.0242623	0.0111893	5.85352e-05	4.51962e-29	0.0692517	7.12319e-06	4.93085	538.029
2187	2353.23	2545.73	1749.83	3537.46	514.059	1667.67	49.5486	210.193	22.8566	0.395733	16.7253	45.6189	8.30245	217.305	581.14	173.929	0.161701	44.6842	102.938	1.03008	33.5602	2.79116	6.53352	7.75647	0.00195683	2.61408e-14	0.00641828	0.023004	0.0105778	5.39345e-05	3.20144e-29	0.0671373	6.63543e-06	4.92067	538.029
2188	2362.28	2555.74	1756.48	3535.18	514.503	1668.69	48.7331	210.638	22.9248	0.396619	16.6852	45.5825	8.297	217.212	580.731	173.923	0.160511	44.651	103.343	0.989623	32.889	2.7256	6.48967	7.74726	0.00181046	2.13761e-14	0.00590137	0.0218237	0.00999896	4.96906e-05	2.26771e-29	0.0650825	6.18043e-06	4.9119	538.029
2189	2371.19	2565.59	1763.05	3532.9	514.938	1669.67	47.9327	211.075	22.9919	0.397491	16.6457	45.5464	8.29157	217.118	580.324	173.916	0.159361	44.6179	103.742	0.950701	32.23	2.66147	6.44603	7.73804	0.00167482	1.74771e-14	0.00542568	0.0206903	0.00945136	4.57777e-05	1.60632e-29	0.0630872	5.75622e-06	4.90556	538.029
2190	2380.02	2575.36	1769.54	3530.74	515.363	1670.66	47.148	211.506	23.0579	0.398348	16.607	45.5132	8.28629	217.026	579.931	173.909	0.158252	44.5864	104.134	0.913304	31.5836	2.59878	6.40265	7.72882	0.00154922	1.42878e-14	0.00498808	0.0195998	0.00893345	4.21712e-05	1.13782e-29	0.0611512	5.3609e-06	4.90161	538.029
2191	2388.79	2585.04	1775.97	3528.79	515.778	1671.66	46.3791	211.929	23.1228	0.399191	16.569	45.485	8.28133	216.937	579.565	173.902	0.157183	44.5584	104.52	0.877399	30.9501	2.53756	6.35955	7.71962	0.00143301	1.16799e-14	0.00458568	0.0185727	0.00844381	3.88485e-05	8.05968e-30	0.0592741	4.99267e-06	4.90022	538.029
2192	2397.49	2594.65	1782.33	3527.06	516.185	1672.67	45.6258	212.345	23.1866	0.400019	16.5318	45.462	8.27674	216.854	579.227	173.896	0.156155	44.5339	104.898	0.84293	30.3292	2.47778	6.31674	7.71042	0.00132552	9.54777e-15	0.0042157	0.0176027	0.00798093	3.57875e-05	5.70902e-30	0.0574547	4.64974e-06	4.89982	538.029
2193	2406.1	2604.13	1788.6	3525.5	516.582	1673.7	44.8875	212.754	23.2493	0.400833	16.4953	45.4421	8.27241	216.773	578.911	173.89	0.155165	44.5119	105.271	0.809843	29.7206	2.41939	6.27421	7.70123	0.00122606	7.80451e-15	0.00387548	0.0166839	0.00754332	3.29674e-05	4.04394e-30	0.0556905	4.33031e-06	4.89867	538.029
2194	2414.56	2613.47	1794.76	3524.04	516.97	1674.72	44.1636	213.155	23.3108	0.401632	16.4595	45.4238	8.26829	216.696	578.612	173.884	0.154213	44.4914	105.636	0.778067	29.1239	2.36234	6.23193	7.69205	0.001134	6.37913e-15	0.0035626	0.0158107	0.00712955	3.03687e-05	2.86449e-30	0.0539795	4.03271e-06	4.89658	538.029
2195	2422.87	2622.63	1800.8	3522.66	517.35	1675.74	43.4539	213.549	23.3713	0.402417	16.4244	45.4063	8.26433	216.62	578.325	173.879	0.153296	44.4719	105.995	0.747521	28.5387	2.30659	6.18991	7.68287	0.0010488	5.21367e-15	0.00327486	0.0149784	0.00673832	2.79741e-05	2.02904e-30	0.0523197	3.75545e-06	4.89397	538.029
2196	2431.03	2631.63	1806.73	3521.32	517.72	1676.74	42.7578	213.936	23.4306	0.403187	16.39	45.3893	8.26051	216.546	578.049	173.873	0.152413	44.4532	106.348	0.718171	27.9647	2.25212	6.14813	7.6737	0.000969935	4.2608e-15	0.00301025	0.0142071	0.00636839	2.57675e-05	1.43726e-30	0.0507097	3.49713e-06	4.89103	538.029
2197	2438.96	2640.39	1812.52	3519.87	518.082	1677.7	42.0744	214.316	23.4888	0.403943	16.3563	45.3686	8.25657	216.471	577.764	173.865	0.151562	44.4325	106.693	0.689951	27.4012	2.19882	6.10656	7.66451	0.000896863	3.48152e-15	0.00276681	0.0134898	0.00601845	2.37331e-05	1.01807e-30	0.0491462	3.25631e-06	4.88481	538.029
2198	2446.63	2648.86	1818.14	3518.18	518.435	1678.58	41.4028	214.689	23.5459	0.404684	16.3233	45.3417	8.25233	216.391	577.454	173.855	0.15074	44.4079	107.032	0.662769	26.8475	2.14664	6.06515	7.65531	0.000829109	2.84411e-15	0.00254277	0.0127965	0.00568732	2.18569e-05	7.21142e-31	0.0476266	3.0317e-06	4.87557	538.029
2199	2454.1	2657.14	1823.65	3516.36	518.779	1679.41	40.7433	215.054	23.6019	0.405411	16.2909	45.3118	8.24792	216.308	577.132	173.842	0.149947	44.3813	107.365	0.636604	26.3038	2.09559	6.02392	7.64611	0.000766337	2.32294e-15	0.00233665	0.0121251	0.00537408	2.01272e-05	5.10816e-31	0.0461507	2.82232e-06	4.86773	538.029
2200	2461.43	2665.25	1829.06	3514.54	519.115	1680.22	40.0962	215.412	23.6568	0.406123	16.2592	45.2821	8.24353	216.225	576.811	173.828	0.149183	44.3547	107.691	0.611457	25.7703	2.04567	5.98292	7.6369	0.000708235	1.89701e-15	0.00214711	0.011498	0.00507787	1.85334e-05	3.61833e-31	0.0447185	2.62724e-06	4.86228	538.029
2201	2468.65	2673.25	1834.37	3512.83	519.443	1681.02	39.4618	215.763	23.7106	0.406821	16.2282	45.2552	8.23931	216.145	576.503	173.814	0.14845	44.3297	108.01	0.587305	25.2472	1.99691	5.94216	7.62769	0.000654498	1.54905e-15	0.00197286	0.0109112	0.00479786	1.70652e-05	2.56301e-31	0.0433297	2.44556e-06	4.85917	538.029
2202	2475.8	2681.14	1839.61	3511.32	519.762	1681.84	38.8404	216.107	23.7632	0.407504	16.1979	45.2333	8.2354	216.068	576.221	173.801	0.147747	44.308	108.322	0.564124	24.7348	1.94931	5.90169	7.61849	0.000604836	1.26489e-15	0.00181273	0.0103608	0.00453326	1.57134e-05	1.81549e-31	0.0419839	2.27644e-06	4.85855	538.029
2203	2482.87	2688.96	1844.78	3510.03	520.073	1682.67	38.2316	216.443	23.8148	0.408173	16.1684	45.2163	8.23185	215.997	575.967	173.79	0.147075	44.2898	108.628	0.541878	24.2328	1.90285	5.86149	7.60931	0.000558951	1.03284e-15	0.0016656	0.00984322	0.00428325	1.44687e-05	1.28599e-31	0.0406803	2.11904e-06	4.8589	538.029
2204	2489.86	2696.67	1849.87	3508.9	520.375	1683.52	37.6349	216.772	23.8652	0.408827	16.1395	45.2024	8.22857	215.93	575.734	173.78	0.146432	44.2739	108.928	0.520516	23.741	1.8575	5.82157	7.60014	0.000516543	8.43348e-16	0.00153039	0.00933083	0.00404699	1.33226e-05	9.10921e-32	0.0394169	1.9725e-06	4.85847	538.029
2205	2496.71	2704.23	1854.85	3507.86	520.67	1684.36	37.05	217.094	23.9146	0.409467	16.1114	45.1899	8.22549	215.866	575.516	173.77	0.145816	44.2594	109.22	0.500014	23.2589	1.81321	5.7819	7.59097	0.000477337	6.88588e-16	0.00140613	0.00884712	0.0038237	1.2267e-05	6.45244e-32	0.0381923	1.83607e-06	4.8571	538.029
2206	2503.4	2711.61	1859.71	3506.88	520.956	1685.19	36.4766	217.409	23.9628	0.410092	16.0839	45.1782	8.22257	215.804	575.309	173.76	0.145227	44.2458	109.506	0.480329	22.7864	1.76994	5.74247	7.58182	0.000441086	5.62196e-16	0.00129192	0.0083891	0.00361267	1.12949e-05	4.57054e-32	0.0370051	1.70904e-06	4.85521	538.029
2207	2509.93	2718.81	1864.45	3505.96	521.234	1686.01	35.9142	217.716	24.0099	0.410703	16.0571	45.1668	8.21977	215.745	575.113	173.751	0.144663	44.2329	109.786	0.461426	22.3231	1.72769	5.70329	7.57266	0.000407568	4.58975e-16	0.00118695	0.00795409	0.00341322	1.03995e-05	3.23751e-32	0.035854	1.59075e-06	4.85297	538.029
2208	2516.22	2725.77	1869.04	3504.9	521.505	1686.78	35.3621	218.016	24.0559	0.4113	16.031	45.1516	8.21685	215.684	574.906	173.74	0.144122	44.2179	110.059	0.443248	21.8685	1.68637	5.66431	7.5635	0.000376545	3.74654e-16	0.00109044	0.00753939	0.00322464	9.57441e-06	2.29326e-32	0.0347368	1.48053e-06	4.84748	538.029
2209	2522.25	2732.44	1873.47	3503.6	521.767	1687.48	34.8195	218.309	24.1008	0.411882	16.0055	45.1301	8.21362	215.619	574.673	173.727	0.143602	44.1989	110.325	0.425748	21.422	1.64593	5.6255	7.55433	0.000347809	3.05758e-16	0.00100167	0.00714264	0.00304626	8.81389e-06	1.62442e-32	0.0336516	1.3778e-06	4.83901	538.029
2210	2528.09	2738.92	1877.78	3502.17	522.022	1688.12	34.2868	218.595	24.1446	0.412449	15.9807	45.1055	8.21023	215.551	574.428	173.712	0.143103	44.1778	110.585	0.408911	20.9837	1.60639	5.58687	7.54515	0.000321214	2.49487e-16	0.000920048	0.00678637	0.00287759	8.11313e-06	1.15064e-32	0.0325981	1.28209e-06	4.83192	538.029
2211	2533.78	2745.23	1881.99	3500.74	522.269	1688.75	33.7642	218.873	24.1872	0.413002	15.9565	45.0812	8.20684	215.484	574.183	173.697	0.142626	44.1566	110.838	0.392724	20.5538	1.56774	5.54845	7.53597	0.000296623	2.03549e-16	0.000845033	0.00644257	0.00271816	7.4677e-06	8.15049e-33	0.0315764	1.19295e-06	4.82722	538.029
2212	2539.35	2751.41	1886.11	3499.4	522.508	1689.36	33.2519	219.144	24.2288	0.413541	15.933	45.0595	8.20362	215.419	573.95	173.681	0.142171	44.1371	111.084	0.377192	20.1325	1.53	5.51028	7.52679	0.000273901	1.66058e-16	0.000776111	0.00611016	0.00256751	6.87346e-06	5.77334e-33	0.0305861	1.10999e-06	4.82482	538.029
2213	2544.85	2757.5	1890.16	3498.27	522.74	1689.99	32.7501	219.408	24.2692	0.414065	15.9102	45.0428	8.20071	215.359	573.742	173.668	0.141739	44.1207	111.324	0.3623	19.72	1.49318	5.47238	7.51763	0.000252923	1.35471e-16	0.000712809	0.0058123	0.00242521	6.32654e-06	4.0895e-33	0.029627	1.03281e-06	4.82489	538.029
2214	2550.29	2763.52	1894.13	3497.35	522.965	1690.64	32.2585	219.665	24.3086	0.414575	15.8881	45.0311	8.19814	215.304	573.561	173.656	0.14133	44.1077	111.557	0.348001	19.316	1.45726	5.43475	7.50848	0.000233559	1.10521e-16	0.000654675	0.00552136	0.00229081	5.82324e-06	2.89677e-33	0.0286984	9.61003e-07	4.82589	538.029
2215	2555.62	2769.4	1898.01	3496.58	523.182	1691.3	31.7767	219.915	24.3468	0.415071	15.8666	45.0222	8.19585	215.253	573.401	173.645	0.140943	44.097	111.784	0.334283	18.9203	1.4222	5.39739	7.49935	0.000215678	9.01645e-17	0.000601279	0.00523654	0.00216384	5.35998e-06	2.0519e-33	0.0277989	8.94194e-07	4.82611	538.029
2216	2560.8	2775.13	1901.78	3495.9	523.391	1691.95	31.3045	220.157	24.3839	0.415552	15.8459	45.0148	8.19374	215.205	573.254	173.635	0.140576	44.0876	112.004	0.321117	18.5326	1.38798	5.36027	7.49022	0.000199163	7.35557e-17	0.000552232	0.00498125	0.0020439	4.93354e-06	1.45345e-33	0.0269274	8.32022e-07	4.82539	538.029
2217	2565.83	2780.68	1905.42	3495.28	523.594	1692.6	30.8415	220.392	24.42	0.416018	15.8258	45.008	8.19178	215.161	573.119	173.626	0.14023	44.0791	112.217	0.308475	18.1527	1.35457	5.3234	7.4811	0.000183907	6.00041e-17	0.000507176	0.0047283	0.00193058	4.54095e-06	1.02954e-33	0.026083	7.7416e-07	4.82414	538.029
2218	2570.7	2786.06	1908.96	3494.7	523.789	1693.23	30.3874	220.62	24.4549	0.41647	15.8064	45.0015	8.18994	215.118	572.992	173.618	0.139902	44.0712	112.424	0.296333	17.7805	1.32195	5.28676	7.47199	0.000169813	4.8947e-17	0.000465787	0.00447742	0.00182352	4.17953e-06	7.29267e-34	0.0252646	7.20307e-07	4.82255	538.029
2219	2575.34	2791.2	1912.34	3494	523.977	1693.81	29.9417	220.841	24.4887	0.416908	15.7876	44.9912	8.18797	215.075	572.854	173.608	0.139591	44.0611	112.624	0.284655	17.4153	1.29006	5.25031	7.46287	0.00015678	3.99226e-17	0.000427749	0.00425234	0.00172233	3.84664e-06	5.16571e-34	0.0244706	6.70156e-07	4.81774	538.029
2220	2579.68	2796.01	1915.55	3493.04	524.158	1694.33	29.5036	221.054	24.5213	0.417332	15.7695	44.9745	8.18569	215.027	572.691	173.596	0.139294	44.047	112.818	0.273431	17.0567	1.25887	5.21403	7.45375	0.000144718	3.25556e-17	0.000392781	0.00405021	0.00162665	3.53991e-06	3.65909e-34	0.0236998	6.23431e-07	4.80998	538.029
2221	2583.82	2800.61	1918.62	3491.95	524.331	1694.79	29.0735	221.26	24.5529	0.417741	15.7519	44.9548	8.18324	214.977	572.514	173.583	0.139012	44.0308	113.005	0.262629	16.7049	1.22838	5.17793	7.44461	0.000133565	2.65438e-17	0.000360645	0.00384468	0.00153621	3.25741e-06	2.59189e-34	0.0229519	5.79918e-07	4.80362	538.029
2222	2587.82	2805.08	1921.61	3490.86	524.498	1695.22	28.6516	221.459	24.5834	0.418135	15.735	44.9353	8.1808	214.928	572.336	173.57	0.138746	44.0145	113.185	0.252241	16.3599	1.19859	5.14204	7.43548	0.00012326	2.16401e-17	0.000331123	0.00363627	0.00145075	2.99732e-06	1.83595e-34	0.0222268	5.39416e-07	4.79961	538.029
2223	2591.74	2809.43	1924.52	3489.86	524.658	1695.65	28.2381	221.651	24.6127	0.418515	15.7188	44.9185	8.1785	214.881	572.171	173.557	0.138497	43.9998	113.359	0.242279	16.022	1.16952	5.10639	7.42636	0.000113747	1.76414e-17	0.00030401	0.00344952	0.00137003	2.75795e-06	1.30048e-34	0.0215243	5.01735e-07	4.79788	538.029
2224	2595.56	2813.69	1927.35	3489.06	524.812	1696.09	27.833	221.835	24.641	0.418881	15.7032	44.9066	8.17652	214.838	572.029	173.546	0.138266	43.9882	113.527	0.23273	15.6912	1.14116	5.071	7.41725	0.000104971	1.43818e-17	0.00027912	0.0032823	0.0012938	2.53773e-06	9.21184e-35	0.0208443	4.66692e-07	4.79857	538.029
2225	2599.32	2817.85	1930.1	3488.47	524.958	1696.55	27.4362	222.012	24.6681	0.419233	15.6883	44.8995	8.17488	214.802	571.914	173.537	0.138052	43.98	113.688	0.223578	15.3673	1.1135	5.03587	7.40816	9.68759e-05	1.17248e-17	0.000256271	0.0031326	0.00122183	2.33515e-06	6.52514e-35	0.0201861	4.34108e-07	4.80016	538.029
2226	2602.95	2821.88	1932.75	3488.03	525.098	1697.02	27.0473	222.182	24.6942	0.41957	15.6741	44.8953	8.17349	214.769	571.819	173.529	0.137854	43.974	113.842	0.214802	15.0502	1.08652	5.001	7.39908	8.9407e-05	9.55886e-18	0.000235294	0.00297442	0.00115387	2.14876e-06	4.62203e-35	0.0195489	4.03802e-07	4.80097	538.029
2227	2606.45	2825.75	1935.29	3487.67	525.231	1697.48	26.6661	222.345	24.7191	0.419892	15.6605	44.8924	8.17228	214.74	571.736	173.523	0.137672	43.9692	113.989	0.20638	14.7397	1.06019	4.96636	7.39001	8.25136e-05	7.79293e-18	0.000216033	0.00280863	0.00108968	1.97725e-06	3.27398e-35	0.0189317	3.75611e-07	4.80084	538.029
2228	2609.79	2829.44	1937.71	3487.38	525.357	1697.94	26.2923	222.5	24.7429	0.420201	15.6476	44.8902	8.17122	214.714	571.665	173.518	0.137504	43.9653	114.13	0.198297	14.4354	1.03449	4.93196	7.38095	7.61504e-05	6.35311e-18	0.000198347	0.0026601	0.00102905	1.8194e-06	2.3191e-35	0.0183339	3.49385e-07	4.80018	538.029
2229	2612.96	2832.96	1940.01	3487.11	525.477	1698.38	25.9257	222.649	24.7656	0.420495	15.6353	44.8881	8.17027	214.69	571.601	173.513	0.137351	43.9618	114.265	0.190536	14.1374	1.00941	4.89778	7.3719	7.02761e-05	5.17916e-18	0.000182106	0.00252704	0.000971794	1.67414e-06	1.64272e-35	0.0177548	3.24986e-07	4.79917	538.029
2230	2615.9	2836.22	1942.16	3486.72	525.591	1698.77	25.5658	222.79	24.7872	0.420774	15.6237	44.8822	8.16918	214.665	571.525	173.508	0.137209	43.9562	114.393	0.183073	13.8451	0.984903	4.86379	7.36284	6.48478e-05	4.22171e-18	0.000167186	0.00240772	0.000917688	1.54039e-06	1.16361e-35	0.0171932	3.02273e-07	4.79497	538.029
2231	2618.58	2839.22	1944.16	3486.08	525.698	1699.09	25.2121	222.924	24.8077	0.421039	15.6126	44.8699	8.16778	214.636	571.424	173.501	0.137078	43.9465	114.514	0.175889	13.5582	0.960937	4.82996	7.35378	5.98278e-05	3.44062e-18	0.000153475	0.00230061	0.000866544	1.4172e-06	8.24232e-36	0.0166481	2.8112e-07	4.78786	538.029
2232	2621.06	2841.99	1946.03	3485.3	525.799	1699.36	24.8649	223.05	24.8271	0.42129	15.6022	44.8546	8.1662	214.605	571.308	173.492	0.136957	43.9347	114.629	0.168976	13.2768	0.937515	4.79631	7.34471	5.51889e-05	2.80366e-18	0.00014088	0.00218041	0.000818215	1.30377e-06	5.83838e-36	0.0161195	2.61427e-07	4.78212	538.029
2233	2623.36	2844.58	1947.78	3484.51	525.894	1699.6	24.5242	223.17	24.8454	0.421527	15.5923	44.8395	8.16461	214.574	571.191	173.483	0.136848	43.9228	114.737	0.162331	13.001	0.914644	4.76287	7.33565	5.0906e-05	2.28443e-18	0.000129313	0.00204858	0.000772561	1.19938e-06	4.13557e-36	0.0156071	2.43105e-07	4.77873	538.029
2234	2625.55	2847.05	1949.44	3483.82	525.982	1699.84	24.1903	223.282	24.8625	0.421749	15.5831	44.827	8.16318	214.546	571.086	173.476	0.136751	43.9125	114.839	0.155945	12.7309	0.892326	4.72965	7.32659	4.69545e-05	1.8613e-18	0.000118694	0.00193052	0.000729448	1.10334e-06	2.9294e-36	0.015111	2.26065e-07	4.77758	538.029
2235	2627.65	2849.4	1951.01	3483.32	526.064	1700.09	23.8631	223.387	24.8786	0.421957	15.5745	44.8194	8.16204	214.523	571.004	173.47	0.136668	43.9052	114.934	0.149812	12.4665	0.870564	4.69668	7.31755	4.33115e-05	1.51659e-18	0.000108949	0.00182486	0.000688748	1.015e-06	2.07502e-36	0.0146309	2.10223e-07	4.77884	538.029
2236	2629.69	2851.68	1952.51	3483.03	526.14	1700.36	23.5427	223.484	24.8936	0.422151	15.5666	44.8166	8.16124	214.505	570.948	173.466	0.136598	43.9012	115.022	0.143943	12.2077	0.849347	4.66396	7.30853	3.99534e-05	1.23578e-18	0.000100006	0.0017303	0.000650328	9.33767e-07	1.46983e-36	0.0141663	1.95498e-07	4.78097	538.029
2237	2631.64	2853.86	1953.94	3482.89	526.21	1700.63	23.2286	223.575	24.9074	0.42233	15.5594	44.8165	8.16069	214.491	570.911	173.465	0.13654	43.8994	115.105	0.138323	11.9545	0.828654	4.63148	7.29953	3.68569e-05	1.00699e-18	9.17988e-05	0.00164567	0.000614057	8.59048e-07	1.04114e-36	0.0137167	1.81807e-07	4.78232	538.029
2238	2633.47	2855.9	1955.27	3482.82	526.274	1700.91	22.9207	223.658	24.9201	0.422495	15.5528	44.8178	8.16031	214.481	570.887	173.464	0.136494	43.8988	115.18	0.132917	11.7065	0.808468	4.59924	7.29053	3.40005e-05	8.20562e-19	8.4265e-05	0.0015699	0.000579809	7.90309e-07	7.37483e-37	0.0132814	1.69076e-07	4.78272	538.029
2239	2635.12	2857.73	1956.46	3482.81	526.333	1701.17	22.6188	223.734	24.9318	0.422646	15.5468	44.8197	8.16007	214.474	570.873	173.465	0.13646	43.899	115.249	0.127716	11.4636	0.788773	4.56721	7.28155	3.13654e-05	6.68646e-19	7.73493e-05	0.00150205	0.000547471	7.2707e-07	5.22391e-37	0.0128598	1.57235e-07	4.78259	538.029
2240	2636.55	2859.34	1957.49	3482.84	526.385	1701.41	22.3227	223.803	24.9423	0.422782	15.5414	44.8216	8.15993	214.469	570.866	173.467	0.136435	43.8996	115.311	0.12273	11.2258	0.769554	4.5354	7.27257	2.89342e-05	5.44848e-19	7.10008e-05	0.0014413	0.000516934	6.68886e-07	3.70032e-37	0.0124516	1.46223e-07	4.78212	538.029
2241	2637.81	2860.76	1958.43	3482.73	526.431	1701.61	22.0319	223.864	24.9517	0.422904	15.5366	44.8198	8.15965	214.462	570.846	173.468	0.13642	43.898	115.367	0.117944	10.9926	0.75078	4.50378	7.2636	2.66888e-05	4.43932e-19	6.51704e-05	0.00138682	0.000488086	6.15329e-07	2.62109e-37	0.0120559	1.35975e-07	4.77849	538.029
2242	2638.79	2861.89	1959.19	3482.37	526.472	1701.73	21.7461	223.918	24.96	0.423012	15.5324	44.8115	8.15905	214.452	570.801	173.467	0.136411	43.8924	115.416	0.113323	10.7637	0.732426	4.47231	7.25461	2.46134e-05	3.61647e-19	5.98141e-05	0.00131381	0.000460824	5.66013e-07	1.85663e-37	0.0116719	1.26434e-07	4.77195	538.029
2243	2639.49	2862.72	1959.77	3481.88	526.507	1701.81	21.4654	223.965	24.9672	0.423105	15.5288	44.8002	8.15827	214.44	570.74	173.465	0.136409	43.8847	115.459	0.108885	10.5393	0.714495	4.44101	7.24563	2.26967e-05	2.94577e-19	5.48948e-05	0.00122425	0.000435067	5.20617e-07	1.31513e-37	0.0112996	1.17554e-07	4.76681	538.029
2244	2640.09	2863.44	1960.28	3481.37	526.536	1701.85	21.1901	224.005	24.9733	0.423184	15.5258	44.7892	8.15748	214.428	570.679	173.464	0.136416	43.8768	115.495	0.104626	10.3194	0.696989	4.40991	7.23665	2.09279e-05	2.3993e-19	5.03785e-05	0.00114404	0.000410742	4.78847e-07	9.31562e-38	0.010939	1.09295e-07	4.76399	538.029
2245	2640.61	2864.07	1960.73	3480.96	526.56	1701.89	20.9202	224.038	24.9783	0.423249	15.5234	44.7807	8.15683	214.419	570.629	173.463	0.136432	43.8704	115.525	0.100541	10.1041	0.679911	4.37902	7.22768	1.92968e-05	1.95418e-19	4.62336e-05	0.00107223	0.000387775	4.40428e-07	6.59865e-38	0.0105898	1.01615e-07	4.7634	538.029
2246	2641.01	2864.56	1961.07	3480.74	526.578	1701.95	20.6558	224.063	24.9822	0.423299	15.5216	44.7771	8.15648	214.414	570.602	173.465	0.136458	43.8671	115.548	0.0966243	9.89344	0.663263	4.34837	7.21872	1.77938e-05	1.59171e-19	4.24305e-05	0.00100799	0.000366097	4.05101e-07	4.67411e-38	0.010252	9.44782e-08	4.76518	538.029
2247	2641.33	2864.95	1961.32	3480.73	526.591	1702.02	20.3967	224.081	24.985	0.423336	15.5204	44.7782	8.15646	214.415	570.6	173.469	0.136495	43.8671	115.565	0.0928703	9.68732	0.647036	4.31796	7.20979	1.6409e-05	1.29655e-19	3.89415e-05	0.000950518	0.000345639	3.72621e-07	3.31087e-38	0.00992519	8.78455e-08	4.76782	538.029
2248	2641.56	2865.24	1961.5	3480.85	526.598	1702.1	20.1428	224.092	24.9867	0.423358	15.5199	44.7821	8.15668	214.421	570.617	173.474	0.136542	43.8691	115.575	0.0892694	9.4856	0.631214	4.28778	7.20087	1.51327e-05	1.05617e-19	3.57401e-05	0.000899096	0.000326328	3.42752e-07	2.34523e-38	0.009609	8.16803e-08	4.76967	538.029
2249	2641.67	2865.38	1961.57	3481.06	526.6	1702.17	19.8938	224.096	24.9873	0.423365	15.52	44.7872	8.15707	214.429	570.646	173.482	0.136598	43.8724	115.578	0.0858132	9.28812	0.615782	4.25782	7.19197	1.39558e-05	8.60374e-20	3.28022e-05	0.000853074	0.000308098	3.15281e-07	1.66122e-38	0.00930296	7.59486e-08	4.77059	538.029
2250	2641.68	2865.42	1961.58	3481.18	526.599	1702.2	19.7706	224.096	24.9873	0.423366	15.5202	44.79	8.1573	214.434	570.663	173.486	0.136628	43.8743	115.578	0.0841257	9.19043	0.608162	4.24289	7.18752	1.33913e-05	7.7248e-20	3.13962e-05	0.000831338	0.000299245	3.02119e-07	1.37761e-38	0.00915242	7.31871e-08	4.77084	538.029
2251	2641.68	2865.42	1961.58	3481.18	526.599	1702.2	19.7706	224.096	24.9873	0.423366	15.5202	44.79	8.1573	214.434	570.663	173.486	0.136628	43.8743	115.578	0.0841257	9.19043	0.608162	4.24289	7.18752	1.33913e-05	7.7248e-20	3.13962e-05	0.000831338	0.000299245	3.02119e-07	1.37761e-38	0.00915242	7.31871e-08	4.77084	538.029
2252	2641.68	2865.42	1961.58	3481.18	526.599	1702.2	19.7706	224.096	24.9873	0.423366	15.5202	44.79	8.1573	214.434	570.663	173.486	0.136628	43.8743	115.578	0.0841257	9.19043	0.608162	4.24289	7.18752	1.33913e-05	7.7248e-20	3.13962e-05	0.000831338	0.000299245	3.02119e-07	1.37761e-38	0.00915242	7.31871e-08	4.77084	538.029
2253	2641.68	2865.42	1961.58	3481.18	526.599	1702.2	19.7706	224.096	24.9873	0.423366	15.5202	44.79	8.1573	214.434	570.663	173.486	0.136628	43.8743	115.578	0.0841257	9.19043	0.608162	4.24289	7.18752	1.33913e-05	7.7248e-20	3.13962e-05	0.000831338	0.000299245	3.02119e-07	1.37761e-38	0.00915242	7.31871e-08	4.77084	538.029
2254	2641.68	2865.42	1961.58	3481.18	526.599	1702.2	19.7706	224.096	24.9873	0.423366	15.5202	44.79	8.1573	214.434	570.663	173.486	0.136628	43.8743	115.578	0.0841257	9.19043	0.608162	4.24289	7.18752	1.33913e-05	7.7248e-20	3.13962e-05	0.000831338	0.000299245	3.02119e-07	1.37761e-38	0.00915242	7.31871e-08	4.77084	538.029
2255	2641.68	2865.42	1961.58	3481.18	526.599	1702.2	19.7706	224.096	24.9873	0.423366	15.5202	44.79	8.1573	214.434	570.663	173.486	0.136628	43.8743	115.578	0.0841257	9.19043	0.608162	4.24289	7.18752	1.33913e-05	7.7248e-20	3.13962e-05	0.000831338	0.000299245	3.02119e-07	1.37761e-38	0.00915242	7.31871e-08	4.77084	538.029
2256	2641.68	2865.42	1961.58	3481.18	526.599	1702.2	19.7706	224.096	24.9873	0.423366	15.5202	44.79	8.1573	214.434	570.663	173.486	0.136628	43.8743	115.578	0.0841257	9.19043	0.608162	4.24289	7.18752	1.33913e-05	7.7248e-20	3.13962e-05	0.000831338	0.000299245	3.02119e-07	1.37761e-38	0.00915242	7.31871e-08	4.77084	538.029
2257	2641.68	2865.42	1961.58	3481.18	526.599	1702.2	19.7706	224.096	24.9873	0.423366	15.5202	44.79	8.1573	214.434	570.663	173.486	0.136628	43.8743	115.578	0.0841257	9.19043	0.608162	4.24289	7.18752	1.33913e-05	7.7248e-20	3.13962e-05	0.000831338	0.000299245	3.02119e-07	1.37761e-38	0.00915242	7.31871e-08	4.77084	538.029
2258	2641.68	2865.42	1961.58	3481.18	526.599	1702.2	19.7706	224.096	24.9873	0.423366	15.5202	44.79	8.1573	214.434	570.663	173.486	0.136628	43.8743	115.578	0.0841257	9.19043	0.608162	4.24289	7.18752	1.33913e-05	7.7248e-20	3.13962e-05	0.000831338	0.000299245	3.02119e-07	1.37761e-38	0.00915242	7.31871e-08	4.77084	538.029
2259	2641.68	2865.42	1961.58	3481.18	526.599	1702.2	19.7706	224.096	24.9873	0.423366	15.5202	44.79	8.1573	214.434	570.663	173.486	0.136628	43.8743	115.578	0.0841257	9.19043	0.608162	4.24289	7.18752	1.33913e-05	7.7248e-20	3.13962e-05	0.000831338	0.000299245	3.02119e-07	1.37761e-38	0.00915242	7.31871e-08	4.77084	538.029
2260	2641.68	2865.42	1961.58	3481.18	526.599	1702.2	19.7706	224.096	24.9873	0.423366	15.5202	44.79	8.1573	214.434	570.663	173.486	0.136628	43.8743	115.578	0.0841257	9.19043	0.608162	4.24289	7.18752	1.33913e-05	7.7248e-20	3.13962e-05	0.000831338	0.000299245	3.02119e-07	1.37761e-38	0.00915242	7.31871e-08	4.77084	538.029
2261	2641.68	2865.42	1961.58	3481.18	526.599	1702.2	19.7706	224.096	24.9873	0.423366	15.5202	44.79	8.1573	214.434	570.663	173.486	0.136628	43.8743	115.578	0.0841257	9.19043	0.608162	4.24289	7.18752	1.33913e-05	7.7248e-20	3.13962e-05	0.000831338	0.000299245	3.02119e-07	1.37761e-38	0.00915242	7.31871e-08	4.77084	538.029
2262	2641.68	2865.42	1961.58	3481.18	526.599	1702.2	19.7706	224.096	24.9873	0.423366	15.5202	44.79	8.1573	214.434	570.663	173.486	0.136628	43.8743	115.578	0.0841257	9.19043	0.608162	4.24289	7.18752	1.33913e-05	7.7248e-20	3.13962e-05	0.000831338	0.000299245	3.02119e-07	1.37761e-38	0.00915242	7.31871e-08	4.77084	538.029
2263	2641.68	2865.42	1961.58	3481.18	526.599	1702.2	19.7706	224.096	24.9873	0.423366	15.5202	44.79	8.1573	214.434	570.663	173.486	0.136628	43.8743	115.578	0.0841257	9.19043	0.608162	4.24289	7.18752	1.33913e-05	7.7248e-20	3.13962e-05	0.000831338	0.000299245	3.02119e-07	1.37761e-38	0.00915242	7.31871e-08	4.77084	538.029
2264	2641.68	2865.42	1961.58	3481.18	526.599	1702.2	19.7706	224.096	24.9873	0.423366	15.5202	44.79	8.1573	214.434	570.663	173.486	0.136628	43.8743	115.578	0.0841257	9.19043	0.608162	4.24289	7.18752	1.33913e-05	7.7248e-20	3.13962e-05	0.000831338	0.000299245	3.02119e-07	1.37761e-38	0.00915242	7.31871e-08	4.77084	538.029
2265	2641.68	2865.42	1961.58	3481.18	526.599	1702.2	19.7706	224.096	24.9873	0.423366	15.5202	44.79	8.1573	214.434	570.663	173.486	0.136628	43.8743	115.578	0.0841257	9.19043	0.608162	4.24289	7.18752	1.33913e-05	7.7248e-20	3.13962e-05	0.000831338	0.000299245	3.02119e-07	1.37761e-38	0.00915242	7.31871e-08	4.77084	538.029
2266	2641.68	2865.42	1961.58	3481.18	526.599	1702.2	19.7706	224.096	24.9873	0.423366	15.5202	44.79	8.1573	214.434	570.663	173.486	0.136628	43.8743	115.578	0.0841257	9.19043	0.608162	4.24289	7.18752	1.33913e-05	7.7248e-20	3.13962e-05	0.000831338	0.000299245	3.02119e-07	1.37761e-38	0.00915242	7.31871e-08	4.77084	538.029
2267	2641.68	2865.42	1961.58	3481.18	526.599	1702.2	19.7706	224.096	24.9873	0.423366	15.5202	44.79	8.1573	214.434	570.663	173.486	0.136628	43.8743	115.578	0.0841257	9.19043	0.608162	4.24289	7.18752	1.33913e-05	7.7248e-20	3.13962e-05	0.000831338	0.000299245	3.02119e-07	1.37761e-38	0.00915242	7.31871e-08	4.77084	538.029
2268	2641.68	2865.42	1961.58	3481.18	526.599	1702.2	19.7706	224.096	24.9873	0.423366	15.5202	44.79	8.1573	214.434	570.663	173.486	0.136628	43.8743	115.578	0.0841257	9.19043	0.608162	4.24289	7.18752	1.33913e-05	7.7248e-20	3.13962e-05	0.000831338	0.000299245	3.02119e-07	1.37761e-38	0.00915242	7.31871e-08	4.77084	538.029
2269	2641.68	2865.42	1961.58	3481.18	526.599	1702.2	19.7706	224.096	24.9873	0.423366	15.5202	44.79	8.1573	214.434	570.663	173.486	0.136628	43.8743	115.578	0.0841257	9.19043	0.608162	4.24289	7.18752	1.33913e-05	7.7248e-20	3.13962e-05	0.000831338	0.000299245	3.02119e-07	1.37761e-38	0.00915242	7.31871e-08	4.77084	538.029
2270	2641.68	2865.42	1961.58	3481.18	526.599	1702.2	19.7706	224.096	24.9873	0.423366	15.5202	44.79	8.1573	214.434	570.663	173.486	0.136628	43.8743	115.578	0.0841257	9.19043	0.608162	4.24289	7.18752	1.33913e-05	7.7248e-20	3.13962e-05	0.000831338	0.000299245	3.02119e-07	1.37761e-38	0.00915242	7.31871e-08	4.77084	538.029
2271	2641.68	2865.42	1961.58	3481.18	526.599	1702.2	19.7706	224.096	24.9873	0.423366	15.5202	44.79	8.1573	214.434	570.663	173.486	0.136628	43.8743	115.578	0.0841257	9.19043	0.608162	4.24289	7.18752	1.33913e-05	7.7248e-20	3.13962e-05	0.000831338	0.000299245	3.02119e-07	1.37761e-38	0.00915242	7.31871e-08	4.77084	538.029
2272	2641.68	2865.42	1961.58	3481.18	526.599	1702.2	19.7706	224.096	24.9873	0.423366	15.5202	44.79	8.1573	214.434	570.663	173.486	0.136628	43.8743	115.578	0.0841257	9.19043	0.608162	4.24289	7.18752	1.33913e-05	7.7248e-20	3.13962e-05	0.000831338	0.000299245	3.02119e-07	1.37761e-38	0.00915242	7.31871e-08	4.77084	538.029
2273	2641.68	2865.42	1961.58	3481.18	526.599	1702.2	19.7706	224.096	24.9873	0.423366	15.5202	44.79	8.1573	214.434	570.663	173.486	0.136628	43.8743	115.578	0.0841257	9.19043	0.608162	4.24289	7.18752	1.33913e-05	7.7248e-20	3.13962e-05	0.000831338	0.000299245	3.02119e-07	1.37761e-38	0.00915242	7.31871e-08	4.77084	538.029
2274	2641.68	2865.42	1961.58	3481.18	526.599	1702.2	19.7706	224.096	24.9873	0.423366	15.5202	44.79	8.1573	214.434	570.663	173.486	0.136628	43.8743	115.578	0.0841257	9.19043	0.608162	4.24289	7.18752	1.33913e-05	7.7248e-20	3.13962e-05	0.000831338	0.000299245	3.02119e-07	1.37761e-38	0.00915242	7.31871e-08	4.77084	538.029
2275	2641.68	2865.42	1961.58	3481.18	526.599	1702.2	19.7706	224.096	24.9873	0.423366	15.5202	44.79	8.1573	214.434	570.663	173.486	0.136628	43.8743	115.578	0.0841257	9.19043	0.608162	4.24289	7.18752	1.33913e-05	7.7248e-20	3.13962e-05	0.000831338	0.000299245	3.02119e-07	1.37761e-38	0.00915242	7.31871e-08	4.77084	538.029
2276	2641.68	2865.42	1961.58	3481.18	526.599	1702.2	19.7706	224.096	24.9873	0.423366	15.5202	44.79	8.1573	214.434	570.663	173.486	0.136628	43.8743	115.578	0.0841257	9.19043	0.608162	4.24289	7.18752	1.33913e-05	7.7248e-20	3.13962e-05	0.000831338	0.000299245	3.02119e-07	1.37761e-38	0.00915242	7.31871e-08	4.77084	538.029
2277	2641.68	2865.42	1961.58	3481.18	526.599	1702.2	19.7706	224.096	24.9873	0.423366	15.5202	44.79	8.1573	214.434	570.663	173.486	0.136628	43.8743	115.578	0.0841257	9.19043	0.608162	4.24289	7.18752	1.33913e-05	7.7248e-20	3.13962e-05	0.000831338	0.000299245	3.02119e-07	1.37761e-38	0.00915242	7.31871e-08	4.77084	538.029
2278	2641.68	2865.42	1961.58	3481.18	526.599	1702.2	19.7706	224.096	24.9873	0.423366	15.5202	44.79	8.1573	214.434	570.663	173.486	0.136628	43.8743	115.578	0.0841257	9.19043	0.608162	4.24289	7.18752	1.33913e-05	7.7248e-20	3.13962e-05	0.000831338	0.000299245	3.02119e-07	1.37761e-38	0.00915242	7.31871e-08	4.77084	538.029
2279	2641.68	2865.42	1961.58	3481.18	526.599	1702.2	19.7706	224.096	24.9873	0.423366	15.5202	44.79	8.1573	214.434	570.663	173.486	0.136628	43.8743	115.578	0.0841257	9.19043	0.608162	4.24289	7.18752	1.33913e-05	7.7248e-20	3.13962e-05	0.000831338	0.000299245	3.02119e-07	1.37761e-38	0.00915242	7.31871e-08	4.77084	538.029
2280	2641.68	2865.42	1961.58	3481.18	526.599	1702.2	19.7706	224.096	24.9873	0.423366	15.5202	44.79	8.1573	214.434	570.663	173.486	0.136628	43.8743	115.578	0.0841257	9.19043	0.608162	4.24289	7.18752	1.33913e-05	7.7248e-20	3.13962e-05	0.000831338	0.000299245	3.02119e-07	1.37761e-38	0.00915242	7.31871e-08	4.77084	538.029
2281	2641.68	2865.42	1961.58	3481.18	526.599	1702.2	19.7706	224.096	24.9873	0.423366	15.5202	44.79	8.1573	214.434	570.663	173.486	0.136628	43.8743	115.578	0.0841257	9.19043	0.608162	4.24289	7.18752	1.33913e-05	7.7248e-20	3.13962e-05	0.000831338	0.000299245	3.02119e-07	1.37761e-38	0.00915242	7.31871e-08	4.77084	538.029
2282	2641.68	2865.42	1961.58	3481.18	526.599	1702.2	19.7706	224.096	24.9873	0.423366	15.5202	44.79	8.1573	214.434	570.663	173.486	0.136628	43.8743	115.578	0.0841257	9.19043	0.608162	4.24289	7.18752	1.33913e-05	7.7248e-20	3.13962e-05	0.000831338	0.000299245	3.02119e-07	1.37761e-38	0.00915242	7.31871e-08	4.77084	538.029
2283	2641.68	2865.42	1961.58	3481.18	526.599	1702.2	19.7706	224.096	24.9873	0.423366	15.5202	44.79	8.1573	214.434	570.663	173.486	0.136628	43.8743	115.578	0.0841257	9.19043	0.608162	4.24289	7.18752	1.33913e-05	7.7248e-20	3.13962e-05	0.000831338	0.000299245	3.02119e-07	1.37761e-38	0.00915242	7.31871e-08	4.77084	538.029
2284	2641.68	2865.42	1961.58	3481.18	526.599	1702.2	19.7706	224.096	24.9873	0.423366	15.5202	44.79	8.1573	214.434	570.663	173.486	0.136628	43.8743	115.578	0.0841257	9.19043	0.608162	4.24289	7.18752	1.33913e-05	7.7248e-20	3.13962e-05	0.000831338	0.000299245	3.02119e-07	1.37761e-38	0.00915242	7.31871e-08	4.77084	538.029
2285	2641.68	2865.42	1961.58	3481.18	526.599	1702.2	19.7706	224.096	24.9873	0.423366	15.5202	44.79	8.1573	214.434	570.663	173.486	0.136628	43.8743	115.578	0.0841257	9.19043	0.608162	4.24289	7.18752	1.33913e-05	7.7248e-20	3.13962e-05	0.000831338	0.000299245	3.02119e-07	1.37761e-38	0.00915242	7.31871e-08	4.77084	538.029
2286	2641.68	2865.42	1961.58	3481.18	526.599	1702.2	19.7706	224.096	24.9873	0.423366	15.5202	44.79	8.1573	214.434	570.663	173.486	0.136628	43.8743	115.578	0.0841257	9.19043	0.608162	4.24289	7.18752	1.33913e-05	7.7248e-20	3.13962e-05	0.000831338	0.000299245	3.02119e-07	1.37761e-38	0.00915242	7.31871e-08	4.77084	538.029
2287	2641.68	2865.42	1961.58	3481.18	526.599	1702.2	19.7706	224.096	24.9873	0.423366	15.5202	44.79	8.1573	214.434	570.663	173.486	0.136628	43.8743	115.578	0.0841257	9.19043	0.608162	4.24289	7.18752	1.33913e-05	7.7248e-20	3.13962e-05	0.000831338	0.000299245	3.02119e-07	1.37761e-38	0.00915242	7.31871e-08	4.77084	538.029
2288	2641.68	2865.42	1961.58	3481.18	526.599	1702.2	19.7706	224.096	24.9873	0.423366	15.5202	44.79	8.1573	214.434	570.663	173.486	0.136628	43.8743	115.578	0.0841257	9.19043	0.608162	4.24289	7.18752	1.33913e-05	7.7248e-20	3.13962e-05	0.000831338	0.000299245	3.02119e-07	1.37761e-38	0.00915242	7.31871e-08	4.77084	538.029
2289	2641.68	2865.42	1961.58	3481.18	526.599	1702.2	19.7706	224.096	24.9873	0.423366	15.5202	44.79	8.1573	214.434	570.663	173.486	0.136628	43.8743	115.578	0.0841257	9.19043	0.608162	4.24289	7.18752	1.33913e-05	7.7248e-20	3.13962e-05	0.000831338	0.000299245	3.02119e-07	1.37761e-38	0.00915242	7.31871e-08	4.77084	538.029
2290	2641.68	2865.42	1961.58	3481.18	526.599	1702.2	19.7706	224.096	24.9873	0.423366	15.5202	44.79	8.1573	214.434	570.663	173.486	0.136628	43.8743	115.578	0.0841257	9.19043	0.608162	4.24289	7.18752	1.33913e-05	7.7248e-20	3.13962e-05	0.000831338	0.000299245	3.02119e-07	1.37761e-38	0.00915242	7.31871e-08	4.77084	538.029
2291	2641.68	2865.42	1961.58	3481.18	526.599	1702.2	19.7706	224.096	24.9873	0.423366	15.5202	44.79	8.1573	214.434	570.663	173.486	0.136628	43.8743	115.578	0.0841257	9.19043	0.608162	4.24289	7.18752	1.33913e-05	7.7248e-20	3.13962e-05	0.000831338	0.000299245	3.02119e-07	1.37761e-38	0.00915242	7.31871e-08	4.77084	538.029
2292	2641.68	2865.42	1961.58	3481.18	526.599	1702.2	19.7706	224.096	24.9873	0.423366	15.5202	44.79	8.1573	214.434	570.663	173.486	0.136628	43.8743	115.578	0.0841257	9.19043	0.608162	4.24289	7.18752	1.33913e-05	7.7248e-20	3.13962e-05	0.000831338	0.000299245	3.02119e-07	1.37761e-38	0.00915242	7.31871e-08	4.77084	538.029
2293	2641.68	2865.42	1961.58	3481.18	526.599	1702.2	19.7706	224.096	24.9873	0.423366	15.5202	44.79	8.1573	214.434	570.663	173.486	0.136628	43.8743	115.578	0.0841257	9.19043	0.608162	4.24289	7.18752	1.33913e-05	7.7248e-20	3.13962e-05	0.000831338	0.000299245	3.02119e-07	1.37761e-38	0.00915242	7.31871e-08	4.77084	538.029
2294	2641.68	2865.42	1961.58	3481.18	526.599	1702.2	19.7706	224.096	24.9873	0.423366	15.5202	44.79	8.1573	214.434	570.663	173.486	0.136628	43.8743	115.578	0.0841257	9.19043	0.608162	4.24289	7.18752	1.33913e-05	7.7248e-20	3.13962e-05	0.000831338	0.000299245	3.02119e-07	1.37761e-38	0.00915242	7.31871e-08	4.77084	538.029
2295	2641.68	2865.42	1961.58	3481.18	526.599	1702.2	19.7706	224.096	24.9873	0.423366	15.5202	44.79	8.1573	214.434	570.663	173.486	0.136628	43.8743	115.578	0.0841257	9.19043	0.608162	4.24289	7.18752	1.33913e-05	7.7248e-20	3.13962e-05	0.000831338	0.000299245	3.02119e-07	1.37761e-38	0.00915242	7.31871e-08	4.77084	538.029
2296	2641.68	2865.42	1961.58	3481.18	526.599	1702.2	19.7706	224.096	24.9873	0.423366	15.5202	44.79	8.1573	214.434	570.663	173.486	0.136628	43.8743	115.578	0.0841257	9.19043	0.608162	4.24289	7.18752	1.33913e-05	7.7248e-20	3.13962e-05	0.000831338	0.000299245	3.02119e-07	1.37761e-38	0.00915242	7.31871e-08	4.77084	538.029
2297	2641.68	2865.42	1961.58	3481.18	526.599	1702.2	19.7706	224.096	24.9873	0.423366	15.5202	44.79	8.1573	214.434	570.663	173.486	0.136628	43.8743	115.578	0.0841257	9.19043	0.608162	4.24289	7.18752	1.33913e-05	7.7248e-20	3.13962e-05	0.000831338	0.000299245	3.02119e-07	1.37761e-38	0.00915242	7.31871e-08	4.77084	538.029
2298	2641.68	2865.42	1961.58	3481.18	526.599	1702.2	19.7706	224.096	24.9873	0.423366	15.5202	44.79	8.1573	214.434	570.663	173.486	0.136628	43.8743	115.578	0.0841257	9.19043	0.608162	4.24289	7.18752	1.33913e-05	7.7248e-20	3.13962e-05	0.000831338	0.000299245	3.02119e-07	1.37761e-38	0.00915242	7.31871e-08	4.77084	538.029
2299	2641.68	2865.42	1961.58	3481.18	526.599	1702.2	19.7706	224.096	24.9873	0.423366	15.5202	44.79	8.1573	214.434	570.663	173.486	0.136628	43.8743	115.578	0.0841257	9.19043	0.608162	4.24289	7.18752	1.33913e-05	7.7248e-20	3.13962e-05	0.000831338	0.000299245	3.02119e-07	1.37761e-38	0.00915242	7.31871e-08	4.77084	538.029
2300	2641.68	2865.42	1961.58	3481.18	526.599	1702.2	19.7706	224.096	24.9873	0.423366	15.5202	44.79	8.1573	214.434	570.663	173.486	0.136628	43.8743	115.578	0.0841257	9.19043	0.608162	4.24289	7.18752	1.33913e-05	7.7248e-20	3.13962e-05	0.000831338	0.000299245	3.02119e-07	1.37761e-38	0.00915242	7.31871e-08	4.77084	538.029
2301	2641.68	2865.42	1961.58	3481.18	526.599	1702.2	19.7706	224.096	24.9873	0.423366	15.5202	44.79	8.1573	214.434	570.663	173.486	0.136628	43.8743	115.578	0.0841257	9.19043	0.608162	4.24289	7.18752	1.33913e-05	7.7248e-20	3.13962e-05	0.000831338	0.000299245	3.02119e-07	1.37761e-38	0.00915242	7.31871e-08	4.77084	538.029
2302	2641.68	2865.42	1961.58	3481.18	526.599	1702.2	19.7706	224.096	24.9873	0.423366	15.5202	44.79	8.1573	214.434	570.663	173.486	0.136628	43.8743	115.578	0.0841257	9.19043	0.608162	4.24289	7.18752	1.33913e-05	7.7248e-20	3.13962e-05	0.000831338	0.000299245	3.02119e-07	1.37761e-38	0.00915242	7.31871e-08	4.77084	538.029
2303	2641.68	2865.42	1961.58	3481.18	526.599	1702.2	19.7706	224.096	24.9873	0.423366	15.5202	44.79	8.1573	214.434	570.663	173.486	0.136628	43.8743	115.578	0.0841257	9.19043	0.608162	4.24289	7.18752	1.33913e-05	7.7248e-20	3.13962e-05	0.000831338	0.000299245	3.02119e-07	1.37761e-38	0.00915242	7.31871e-08	4.77084	538.029
2304	2641.68	2865.42	1961.58	3481.18	526.599	1702.2	19.7706	224.096	24.9873	0.423366	15.5202	44.79	8.1573	214.434	570.663	173.486	0.136628	43.8743	115.578	0.0841257	9.19043	0.608162	4.24289	7.18752	1.33913e-05	7.7248e-20	3.13962e-05	0.000831338	0.000299245	3.02119e-07	1.37761e-38	0.00915242	7.31871e-08	4.77084	538.029
2305	2641.68	2865.42	1961.58	3481.18	526.599	1702.2	19.7706	224.096	24.9873	0.423366	15.5202	44.79	8.1573	214.434	570.663	173.486	0.136628	43.8743	115.578	0.0841257	9.19043	0.608162	4.24289	7.18752	1.33913e-05	7.7248e-20	3.13962e-05	0.000831338	0.000299245	3.02119e-07	1.37761e-38	0.00915242	7.31871e-08	4.77084	538.029
2306	2641.68	2865.42	1961.58	3481.18	526.599	1702.2	19.7706	224.096	24.9873	0.423366	15.5202	44.79	8.1573	214.434	570.663	173.486	0.136628	43.8743	115.578	0.0841257	9.19043	0.608162	4.24289	7.18752	1.33913e-05	7.7248e-20	3.13962e-05	0.000831338	0.000299245	3.02119e-07	1.37761e-38	0.00915242	7.31871e-08	4.77084	538.029
2307	2641.68	2865.42	1961.58	3481.18	526.599	1702.2	19.7706	224.096	24.9873	0.423366	15.5202	44.79	8.1573	214.434	570.663	173.486	0.136628	43.8743	115.578	0.0841257	9.19043	0.608162	4.24289	7.18752	1.33913e-05	7.7248e-20	3.13962e-05	0.000831338	0.000299245	3.02119e-07	1.37761e-38	0.00915242	7.31871e-08	4.77084	538.029
2308	2641.68	2865.42	1961.58	3481.18	526.599	1702.2	19.7706	224.096	24.9873	0.423366	15.5202	44.79	8.1573	214.434	570.663	173.486	0.136628	43.8743	115.578	0.0841257	9.19043	0.608162	4.24289	7.18752	1.33913e-05	7.7248e-20	3.13962e-05	0.000831338	0.000299245	3.02119e-07	1.37761e-38	0.00915242	7.31871e-08	4.77084	538.029
2309	2641.68	2865.42	1961.58	3481.18	526.599	1702.2	19.7706	224.096	24.9873	0.423366	15.5202	44.79	8.1573	214.434	570.663	173.486	0.136628	43.8743	115.578	0.0841257	9.19043	0.608162	4.24289	7.18752	1.33913e-05	7.7248e-20	3.13962e-05	0.000831338	0.000299245	3.02119e-07	1.37761e-38	0.00915242	7.31871e-08	4.77084	538.029
2310	2641.68	2865.42	1961.58	3481.18	526.599	1702.2	19.7706	224.096	24.9873	0.423366	15.5202	44.79	8.1573	214.434	570.663	173.486	0.136628	43.8743	115.578	0.0841257	9.19043	0.608162	4.24289	7.18752	1.33913e-05	7.7248e-20	3.13962e-05	0.000831338	0.000299245	3.02119e-07	1.37761e-38	0.00915242	7.31871e-08	4.77084	538.029
2311	2641.68	2865.42	1961.58	3481.18	526.599	1702.2	19.7706	224.096	24.9873	0.423366	15.5202	44.79	8.1573	214.434	570.663	173.486	0.136628	43.8743	115.578	0.0841257	9.19043	0.608162	4.24289	7.18752	1.33913e-05	7.7248e-20	3.13962e-05	0.000831338	0.000299245	3.02119e-07	1.37761e-38	0.00915242	7.31871e-08	4.77084	538.029
2312	2641.68	2865.42	1961.58	3481.18	526.599	1702.2	19.7706	224.096	24.9873	0.423366	15.5202	44.79	8.1573	214.434	570.663	173.486	0.136628	43.8743	115.578	0.0841257	9.19043	0.608162	4.24289	7.18752	1.33913e-05	7.7248e-20	3.13962e-05	0.000831338	0.000299245	3.02119e-07	1.37761e-38	0.00915242	7.31871e-08	4.77084	538.029
2313	2641.68	2865.42	1961.58	3481.18	526.599	1702.2	19.7706	224.096	24.9873	0.423366	15.5202	44.79	8.1573	214.434	570.663	173.486	0.136628	43.8743	115.578	0.0841257	9.19043	0.608162	4.24289	7.18752	1.33913e-05	7.7248e-20	3.13962e-05	0.000831338	0.000299245	3.02119e-07	1.37761e-38	0.00915242	7.31871e-08	4.77084	538.029
2314	2641.68	2865.42	1961.58	3481.18	526.599	1702.2	19.7706	224.096	24.9873	0.423366	15.5202	44.79	8.1573	214.434	570.663	173.486	0.136628	43.8743	115.578	0.0841257	9.19043	0.608162	4.24289	7.18752	1.33913e-05	7.7248e-20	3.13962e-05	0.000831338	0.000299245	3.02119e-07	1.37761e-38	0.00915242	7.31871e-08	4.77084	538.029
2315	2641.68	2865.42	1961.58	3481.18	526.599	1702.2	19.7706	224.096	24.9873	0.423366	15.5202	44.79	8.1573	214.434	570.663	173.486	0.136628	43.8743	115.578	0.0841257	9.19043	0.608162	4.24289	7.18752	1.33913e-05	7.7248e-20	3.13962e-05	0.000831338	0.000299245	3.02119e-07	1.37761e-38	0.00915242	7.31871e-08	4.77084	538.029
2316	2641.68	2865.42	1961.58	3481.18	526.599	1702.2	19.7706	224.096	24.9873	0.423366	15.5202	44.79	8.1573	214.434	570.663	173.486	0.136628	43.8743	115.578	0.0841257	9.19043	0.608162	4.24289	7.18752	1.33913e-05	7.7248e-20	3.13962e-05	0.000831338	0.000299245	3.02119e-07	1.37761e-38	0.00915242	7.31871e-08	4.77084	538.029
2317	2641.68	2865.42	1961.58	3481.18	526.599	1702.2	19.7706	224.096	24.9873	0.423366	15.5202	44.79	8.1573	214.434	570.663	173.486	0.136628	43.8743	115.578	0.0841257	9.19043	0.608162	4.24289	7.18752	1.33913e-05	7.7248e-20	3.13962e-05	0.000831338	0.000299245	3.02119e-07	1.37761e-38	0.00915242	7.31871e-08	4.77084	538.029
2318	2641.68	2865.42	1961.58	3481.18	526.599	1702.2	19.7706	224.096	24.9873	0.423366	15.5202	44.79	8.1573	214.434	570.663	173.486	0.136628	43.8743	115.578	0.0841257	9.19043	0.608162	4.24289	7.18752	1.33913e-05	7.7248e-20	3.13962e-05	0.000831338	0.000299245	3.02119e-07	1.37761e-38	0.00915242	7.31871e-08	4.77084	538.029
2319	2641.68	2865.42	1961.58	3481.18	526.599	1702.2	19.7706	224.096	24.9873	0.423366	15.5202	44.79	8.1573	214.434	570.663	173.486	0.136628	43.8743	115.578	0.0841257	9.19043	0.608162	4.24289	7.18752	1.33913e-05	7.7248e-20	3.13962e-05	0.000831338	0.000299245	3.02119e-07	1.37761e-38	0.00915242	7.31871e-08	4.77084	538.029
2320	2641.68	2865.42	1961.58	3481.18	526.599	1702.2	19.7706	224.096	24.9873	0.423366	15.5202	44.79	8.1573	214.434	570.663	173.486	0.136628	43.8743	115.578	0.0841257	9.19043	0.608162	4.24289	7.18752	1.33913e-05	7.7248e-20	3.13962e-05	0.000831338	0.000299245	3.02119e-07	1.37761e-38	0.00915242	7.31871e-08	4.77084	538.029
2321	2641.68	2865.42	1961.58	3481.18	526.599	1702.2	19.7706	224.096	24.9873	0.423366	15.5202	44.79	8.1573	214.434	570.663	173.486	0.136628	43.8743	115.578	0.0841257	9.19043	0.608162	4.24289	7.18752	1.33913e-05	7.7248e-20	3.13962e-05	0.000831338	0.000299245	3.02119e-07	1.37761e-38	0.00915242	7.31871e-08	4.77084	538.029
2322	2641.68	2865.42	1961.58	3481.18	526.599	1702.2	19.7706	224.096	24.9873	0.423366	15.5202	44.79	8.1573	214.434	570.663	173.486	0.136628	43.8743	115.578	0.0841257	9.19043	0.608162	4.24289	7.18752	1.33913e-05	7.7248e-20	3.13962e-05	0.000831338	0.000299245	3.02119e-07	1.37761e-38	0.00915242	7.31871e-08	4.77084	538.029
2323	2641.68	2865.42	1961.58	3481.18	526.599	1702.2	19.7706	224.096	24.9873	0.423366	15.5202	44.79	8.1573	214.434	570.663	173.486	0.136628	43.8743	115.578	0.0841257	9.19043	0.608162	4.24289	7.18752	1.33913e-05	7.7248e-20	3.13962e-05	0.000831338	0.000299245	3.02119e-07	1.37761e-38	0.00915242	7.31871e-08	4.77084	538.029
2324	2641.68	2865.42	1961.58	3481.18	526.599	1702.2	19.7706	224.096	24.9873	0.423366	15.5202	44.79	8.1573	214.434	570.663	173.486	0.136628	43.8743	115.578	0.0841257	9.19043	0.608162	4.24289	7.18752	1.33913e-05	7.7248e-20	3.13962e-05	0.000831338	0.000299245	3.02119e-07	1.37761e-38	0.00915242	7.31871e-08	4.77084	538.029
2325	2641.68	2865.42	1961.58	3481.18	526.599	1702.2	19.7706	224.096	24.9873	0.423366	15.5202	44.79	8.1573	214.434	570.663	173.486	0.136628	43.8743	115.578	0.0841257	9.19043	0.608162	4.24289	7.18752	1.33913e-05	7.7248e-20	3.13962e-05	0.000831338	0.000299245	3.02119e-07	1.37761e-38	0.00915242	7.31871e-08	4.77084	538.029
2326	2641.68	2865.42	1961.58	3481.18	526.599	1702.2	19.7706	224.096	24.9873	0.423366	15.5202	44.79	8.1573	214.434	570.663	173.486	0.136628	43.8743	115.578	0.0841257	9.19043	0.608162	4.24289	7.18752	1.33913e-05	7.7248e-20	3.13962e-05	0.000831338	0.000299245	3.02119e-07	1.37761e-38	0.00915242	7.31871e-08	4.77084	538.029
2327	2641.68	2865.42	1961.58	3481.18	526.599	1702.2	19.7706	224.096	24.9873	0.423366	15.5202	44.79	8.1573	214.434	570.663	173.486	0.136628	43.8743	115.578	0.0841257	9.19043	0.608162	4.24289	7.18752	1.33913e-05	7.7248e-20	3.13962e-05	0.000831338	0.000299245	3.02119e-07	1.37761e-38	0.00915242	7.31871e-08	4.77084	538.029
2328	2641.68	2865.42	1961.58	3481.18	526.599	1702.2	19.7706	224.096	24.9873	0.423366	15.5202	44.79	8.1573	214.434	570.663	173.486	0.136628	43.8743	115.578	0.0841257	9.19043	0.608162	4.24289	7.18752	1.33913e-05	7.7248e-20	3.13962e-05	0.000831338	0.000299245	3.02119e-07	1.37761e-38	0.00915242	7.31871e-08	4.77084	538.029
2329	2641.68	2865.42	1961.58	3481.18	526.599	1702.2	19.7706	224.096	24.9873	0.423366	15.5202	44.79	8.1573	214.434	570.663	173.486	0.136628	43.8743	115.578	0.0841257	9.19043	0.608162	4.24289	7.18752	1.33913e-05	7.7248e-20	3.13962e-05	0.000831338	0.000299245	3.02119e-07	1.37761e-38	0.00915242	7.31871e-08	4.77084	538.029
2330	2641.68	2865.42	1961.58	3481.18	526.599	1702.2	19.7706	224.096	24.9873	0.423366	15.5202	44.79	8.1573	214.434	570.663	173.486	0.136628	43.8743	115.578	0.0841257	9.19043	0.608162	4.24289	7.18752	1.33913e-05	7.7248e-20	3.13962e-05	0.000831338	0.000299245	3.02119e-07	1.37761e-38	0.00915242	7.31871e-08	4.77084	538.029
2331	2641.68	2865.42	1961.58	3481.18	526.599	1702.2	19.7706	224.096	24.9873	0.423366	15.5202	44.79	8.1573	214.434	570.663	173.486	0.136628	43.8743	115.578	0.0841257	9.19043	0.608162	4.24289	7.18752	1.33913e-05	7.7248e-20	3.13962e-05	0.000831338	0.000299245	3.02119e-07	1.37761e-38	0.00915242	7.31871e-08	4.77084	538.029
2332	2641.68	2865.42	1961.58	3481.18	526.599	1702.2	19.7706	224.096	24.9873	0.423366	15.5202	44.79	8.1573	214.434	570.663	173.486	0.136628	43.8743	115.578	0.0841257	9.19043	0.608162	4.24289	7.18752	1.33913e-05	7.7248e-20	3.13962e-05	0.000831338	0.000299245	3.02119e-07	1.37761e-38	0.00915242	7.31871e-08	4.77084	538.029
2333	2641.68	2865.42	1961.58	3481.18	526.599	1702.2	19.7706	224.096	24.9873	0.423366	15.5202	44.79	8.1573	214.434	570.663	173.486	0.136628	43.8743	115.578	0.0841257	9.19043	0.608162	4.24289	7.18752	1.33913e-05	7.7248e-20	3.13962e-05	0.000831338	0.000299245	3.02119e-07	1.37761e-38	0.00915242	7.31871e-08	4.77084	538.029
2334	2641.68	2865.42	1961.58	3481.18	526.599	1702.2	19.7706	224.096	24.9873	0.423366	15.5202	44.79	8.1573	214.434	570.663	173.486	0.136628	43.8743	115.578	0.0841257	9.19043	0.608162	4.24289	7.18752	1.33913e-05	7.7248e-20	3.13962e-05	0.000831338	0.000299245	3.02119e-07	1.37761e-38	0.00915242	7.31871e-08	4.77084	538.029
2335	2641.68	2865.42	1961.58	3481.18	526.599	1702.2	19.7706	224.096	24.9873	0.423366	15.5202	44.79	8.1573	214.434	570.663	173.486	0.136628	43.8743	115.578	0.0841257	9.19043	0.608162	4.24289	7.18752	1.33913e-05	7.7248e-20	3.13962e-05	0.000831338	0.000299245	3.02119e-07	1.37761e-38	0.00915242	7.31871e-08	4.77084	538.029
2336	2641.68	2865.42	1961.58	3481.18	526.599	1702.2	19.7706	224.096	24.9873	0.423366	15.5202	44.79	8.1573	214.434	570.663	173.486	0.136628	43.8743	115.578	0.0841257	9.19043	0.608162	4.24289	7.18752	1.33913e-05	7.7248e-20	3.13962e-05	0.000831338	0.000299245	3.02119e-07	1.37761e-38	0.00915242	7.31871e-08	4.77084	538.029
2337	2641.68	2865.42	1961.58	3481.18	526.599	1702.2	19.7706	224.096	24.9873	0.423366	15.5202	44.79	8.1573	214.434	570.663	173.486	0.136628	43.8743	115.578	0.0841257	9.19043	0.608162	4.24289	7.18752	1.33913e-05	7.7248e-20	3.13962e-05	0.000831338	0.000299245	3.02119e-07	1.37761e-38	0.00915242	7.31871e-08	4.77084	538.029
2338	2641.68	2865.42	1961.58	3481.18	526.599	1702.2	19.7706	224.096	24.9873	0.423366	15.5202	44.79	8.1573	214.434	570.663	173.486	0.136628	43.8743	115.578	0.0841257	9.19043	0.608162	4.24289	7.18752	1.33913e-05	7.7248e-20	3.13962e-05	0.000831338	0.000299245	3.02119e-07	1.37761e-38	0.00915242	7.31871e-08	4.77084	538.029
2339	2641.68	2865.42	1961.58	3481.18	526.599	1702.2	19.7706	224.096	24.9873	0.423366	15.5202	44.79	8.1573	214.434	570.663	173.486	0.136628	43.8743	115.578	0.0841257	9.19043	0.608162	4.24289	7.18752	1.33913e-05	7.7248e-20	3.13962e-05	0.000831338	0.000299245	3.02119e-07	1.37761e-38	0.00915242	7.31871e-08	4.77084	538.029
2340	2641.68	2865.42	1961.58	3481.18	526.599	1702.2	19.7706	224.096	24.9873	0.423366	15.5202	44.79	8.1573	214.434	570.663	173.486	0.136628	43.8743	115.578	0.0841257	9.19043	0.608162	4.24289	7.18752	1.33913e-05	7.7248e-20	3.13962e-05	0.000831338	0.000299245	3.02119e-07	1.37761e-38	0.00915242	7.31871e-08	4.77084	538.029
2341	2641.68	2865.42	1961.58	3481.18	526.599	1702.2	19.7706	224.096	24.9873	0.423366	15.5202	44.79	8.1573	214.434	570.663	173.486	0.136628	43.8743	115.578	0.0841257	9.19043	0.608162	4.24289	7.18752	1.33913e-05	7.7248e-20	3.13962e-05	0.000831338	0.000299245	3.02119e-07	1.37761e-38	0.00915242	7.31871e-08	4.77084	538.029
2342	2641.68	2865.42	1961.58	3481.18	526.599	1702.2	19.7706	224.096	24.9873	0.423366	15.5202	44.79	8.1573	214.434	570.663	173.486	0.136628	43.8743	115.578	0.0841257	9.19043	0.608162	4.24289	7.18752	1.33913e-05	7.7248e-20	3.13962e-05	0.000831338	0.000299245	3.02119e-07	1.37761e-38	0.00915242	7.31871e-08	4.77084	538.029
2343	2641.68	2865.42	1961.58	3481.18	526.599	1702.2	19.7706	224.096	24.9873	0.423366	15.5202	44.79	8.1573	214.434	570.663	173.486	0.136628	43.8743	115.578	0.0841257	9.19043	0.608162	4.24289	7.18752	1.33913e-05	7.7248e-20	3.13962e-05	0.000831338	0.000299245	3.02119e-07	1.37761e-38	0.00915242	7.31871e-08	4.77084	538.029
2344	2641.68	2865.42	1961.58	3481.18	526.599	1702.2	19.7706	224.096	24.9873	0.423366	15.5202	44.79	8.1573	214.434	570.663	173.486	0.136628	43.8743	115.578	0.0841257	9.19043	0.608162	4.24289	7.18752	1.33913e-05	7.7248e-20	3.13962e-05	0.000831338	0.000299245	3.02119e-07	1.37761e-38	0.00915242	7.31871e-08	4.77084	538.029
2345	2641.68	2865.42	1961.58	3481.18	526.599	1702.2	19.7706	224.096	24.9873	0.423366	15.5202	44.79	8.1573	214.434	570.663	173.486	0.136628	43.8743	115.578	0.0841257	9.19043	0.608162	4.24289	7.18752	1.33913e-05	7.7248e-20	3.13962e-05	0.000831338	0.000299245	3.02119e-07	1.37761e-38	0.00915242	7.31871e-08	4.77084	538.029
2346	2641.68	2865.42	1961.58	3481.18	526.599	1702.2	19.7706	224.096	24.9873	0.423366	15.5202	44.79	8.1573	214.434	570.663	173.486	0.136628	43.8743	115.578	0.0841257	9.19043	0.608162	4.24289	7.18752	1.33913e-05	7.7248e-20	3.13962e-05	0.000831338	0.000299245	3.02119e-07	1.37761e-38	0.00915242	7.31871e-08	4.77084	538.029
2347	2641.68	2865.42	1961.58	3481.18	526.599	1702.2	19.7706	224.096	24.9873	0.423366	15.5202	44.79	8.1573	214.434	570.663	173.486	0.136628	43.8743	115.578	0.0841257	9.19043	0.608162	4.24289	7.18752	1.33913e-05	7.7248e-20	3.13962e-05	0.000831338	0.000299245	3.02119e-07	1.37761e-38	0.00915242	7.31871e-08	4.77084	538.029
2348	2641.68	2865.42	1961.58	3481.18	526.599	1702.2	19.7706	224.096	24.9873	0.423366	15.5202	44.79	8.1573	214.434	570.663	173.486	0.136628	43.8743	115.578	0.0841257	9.19043	0.608162	4.24289	7.18752	1.33913e-05	7.7248e-20	3.13962e-05	0.000831338	0.000299245	3.02119e-07	1.37761e-38	0.00915242	7.31871e-08	4.77084	538.029
2349	2641.68	2865.42	1961.58	3481.18	526.599	1702.2	19.7706	224.096	24.9873	0.423366	15.5202	44.79	8.1573	214.434	570.663	173.486	0.136628	43.8743	115.578	0.0841257	9.19043	0.608162	4.24289	7.18752	1.33913e-05	7.7248e-20	3.13962e-05	0.000831338	0.000299245	3.02119e-07	1.37761e-38	0.00915242	7.31871e-08	4.77084	538.029
2350	2641.68	2865.42	1961.58	3481.18	526.599	1702.2	19.7706	224.096	24.9873	0.423366	15.5202	44.79	8.1573	214.434	570.663	173.486	0.136628	43.8743	115.578	0.0841257	9.19043	0.608162	4.24289	7.18752	1.33913e-05	7.7248e-20	3.13962e-05	0.000831338	0.000299245	3.02119e-07	1.37761e-38	0.00915242	7.31871e-08	4.77084	538.029
2351	2641.68	2865.42	1961.58	3481.18	526.599	1702.2	19.7706	224.096	24.9873	0.423366	15.5202	44.79	8.1573	214.434	570.663	173.486	0.136628	43.8743	115.578	0.0841257	9.19043	0.608162	4.24289	7.18752	1.33913e-05	7.7248e-20	3.13962e-05	0.000831338	0.000299245	3.02119e-07	1.37761e-38	0.00915242	7.31871e-08	4.77084	538.029
2352	2641.68	2865.42	1961.58	3481.18	526.599	1702.2	19.7706	224.096	24.9873	0.423366	15.5202	44.79	8.1573	214.434	570.663	173.486	0.136628	43.8743	115.578	0.0841257	9.19043	0.608162	4.24289	7.18752	1.33913e-05	7.7248e-20	3.13962e-05	0.000831338	0.000299245	3.02119e-07	1.37761e-38	0.00915242	7.31871e-08	4.77084	538.029
2353	2641.68	2865.42	1961.58	3481.18	526.599	1702.2	19.7706	224.096	24.9873	0.423366	15.5202	44.79	8.1573	214.434	570.663	173.486	0.136628	43.8743	115.578	0.0841257	9.19043	0.608162	4.24289	7.18752	1.33913e-05	7.7248e-20	3.13962e-05	0.000831338	0.000299245	3.02119e-07	1.37761e-38	0.00915242	7.31871e-08	4.77084	538.029
2354	2641.68	2865.42	1961.58	3481.18	526.599	1702.2	19.7706	224.096	24.9873	0.423366	15.5202	44.79	8.1573	214.434	570.663	173.486	0.136628	43.8743	115.578	0.0841257	9.19043	0.608162	4.24289	7.18752	1.33913e-05	7.7248e-20	3.13962e-05	0.000831338	0.000299245	3.02119e-07	1.37761e-38	0.00915242	7.31871e-08	4.77084	538.029
2355	2641.68	2865.42	1961.58	3481.18	526.599	1702.2	19.7706	224.096	24.9873	0.423366	15.5202	44.79	8.1573	214.434	570.663	173.486	0.136628	43.8743	115.578	0.0841257	9.19043	0.608162	4.24289	7.18752	1.33913e-05	7.7248e-20	3.13962e-05	0.000831338	0.000299245	3.02119e-07	1.37761e-38	0.00915242	7.31871e-08	4.77084	538.029
2356	2641.68	2865.42	1961.58	3481.18	526.599	1702.2	19.7706	224.096	24.9873	0.423366	15.5202	44.79	8.1573	214.434	570.663	173.486	0.136628	43.8743	115.578	0.0841257	9.19043	0.608162	4.24289	7.18752	1.33913e-05	7.7248e-20	3.13962e-05	0.000831338	0.000299245	3.02119e-07	1.37761e-38	0.00915242	7.31871e-08	4.77084	538.029
2357	2641.68	2865.42	1961.58	3481.18	526.599	1702.2	19.7706	224.096	24.9873	0.423366	15.5202	44.79	8.1573	214.434	570.663	173.486	0.136628	43.8743	115.578	0.0841257	9.19043	0.608162	4.24289	7.18752	1.33913e-05	7.7248e-20	3.13962e-05	0.000831338	0.000299245	3.02119e-07	1.37761e-38	0.00915242	7.31871e-08	4.77084	538.029
2358	2641.68	2865.42	1961.58	3481.18	526.599	1702.2	19.7706	224.096	24.9873	0.423366	15.5202	44.79	8.1573	214.434	570.663	173.486	0.136628	43.8743	115.578	0.0841257	9.19043	0.608162	4.24289	7.18752	1.33913e-05	7.7248e-20	3.13962e-05	0.000831338	0.000299245	3.02119e-07	1.37761e-38	0.00915242	7.31871e-08	4.77084	538.029
2359	2641.68	2865.42	1961.58	3481.18	526.599	1702.2	19.7706	224.096	24.9873	0.423366	15.5202	44.79	8.1573	214.434	570.663	173.486	0.136628	43.8743	115.578	0.0841257	9.19043	0.608162	4.24289	7.18752	1.33913e-05	7.7248e-20	3.13962e-05	0.000831338	0.000299245	3.02119e-07	1.37761e-38	0.00915242	7.31871e-08	4.77084	538.029
2360	2641.68	2865.42	1961.58	3481.18	526.599	1702.2	19.7706	224.096	24.9873	0.423366	15.5202	44.79	8.1573	214.434	570.663	173.486	0.136628	43.8743	115.578	0.0841257	9.19043	0.608162	4.24289	7.18752	1.33913e-05	7.7248e-20	3.13962e-05	0.000831338	0.000299245	3.02119e-07	1.37761e-38	0.00915242	7.31871e-08	4.77084	538.029
2361	2641.68	2865.42	1961.58	3481.18	526.599	1702.2	19.7706	224.096	24.9873	0.423366	15.5202	44.79	8.1573	214.434	570.663	173.486	0.136628	43.8743	115.578	0.0841257	9.19043	0.608162	4.24289	7.18752	1.33913e-05	7.7248e-20	3.13962e-05	0.000831338	0.000299245	3.02119e-07	1.37761e-38	0.00915242	7.31871e-08	4.77084	538.029
2362	2641.68	2865.42	1961.58	3481.18	526.599	1702.2	19.7706	224.096	24.9873	0.423366	15.5202	44.79	8.1573	214.434	570.663	173.486	0.136628	43.8743	115.578	0.0841257	9.19043	0.608162	4.24289	7.18752	1.33913e-05	7.7248e-20	3.13962e-05	0.000831338	0.000299245	3.02119e-07	1.37761e-38	0.00915242	7.31871e-08	4.77084	538.029
2363	2641.68	2865.42	1961.58	3481.18	526.599	1702.2	19.7706	224.096	24.9873	0.423366	15.5202	44.79	8.1573	214.434	570.663	173.486	0.136628	43.8743	115.578	0.0841257	9.19043	0.608162	4.24289	7.18752	1.33913e-05	7.7248e-20	3.13962e-05	0.000831338	0.000299245	3.02119e-07	1.37761e-38	0.00915242	7.31871e-08	4.77084	538.029
2364	2641.68	2865.42	1961.58	3481.18	526.599	1702.2	19.7706	224.096	24.9873	0.423366	15.5202	44.79	8.1573	214.434	570.663	173.486	0.136628	43.8743	115.578	0.0841257	9.19043	0.608162	4.24289	7.18752	1.33913e-05	7.7248e-20	3.13962e-05	0.000831338	0.000299245	3.02119e-07	1.37761e-38	0.00915242	7.31871e-08	4.77084	538.029
2365	2641.68	2865.42	1961.58	3481.18	526.599	1702.2	19.7706	224.096	24.9873	0.423366	15.5202	44.79	8.1573	214.434	570.663	173.486	0.136628	43.8743	115.578	0.0841257	9.19043	0.608162	4.24289	7.18752	1.33913e-05	7.7248e-20	3.13962e-05	0.000831338	0.000299245	3.02119e-07	1.37761e-38	0.00915242	7.31871e-08	4.77084	538.029
2366	2641.68	2865.42	1961.58	3481.18	526.599	1702.2	19.7706	224.096	24.9873	0.423366	15.5202	44.79	8.1573	214.434	570.663	173.486	0.136628	43.8743	115.578	0.0841257	9.19043	0.608162	4.24289	7.18752	1.33913e-05	7.7248e-20	3.13962e-05	0.000831338	0.000299245	3.02119e-07	1.37761e-38	0.00915242	7.31871e-08	4.77084	538.029
2367	2641.68	2865.42	1961.58	3481.18	526.599	1702.2	19.7706	224.096	24.9873	0.423366	15.5202	44.79	8.1573	214.434	570.663	173.486	0.136628	43.8743	115.578	0.0841257	9.19043	0.608162	4.24289	7.18752	1.33913e-05	7.7248e-20	3.13962e-05	0.000831338	0.000299245	3.02119e-07	1.37761e-38	0.00915242	7.31871e-08	4.77084	538.029
2368	2641.68	2865.42	1961.58	3481.18	526.599	1702.2	19.7706	224.096	24.9873	0.423366	15.5202	44.79	8.1573	214.434	570.663	173.486	0.136628	43.8743	115.578	0.0841257	9.19043	0.608162	4.24289	7.18752	1.33913e-05	7.7248e-20	3.13962e-05	0.000831338	0.000299245	3.02119e-07	1.37761e-38	0.00915242	7.31871e-08	4.77084	538.029
2369	2641.68	2865.42	1961.58	3481.18	526.599	1702.2	19.7706	224.096	24.9873	0.423366	15.5202	44.79	8.1573	214.434	570.663	173.486	0.136628	43.8743	115.578	0.0841257	9.19043	0.608162	4.24289	7.18752	1.33913e-05	7.7248e-20	3.13962e-05	0.000831338	0.000299245	3.02119e-07	1.37761e-38	0.00915242	7.31871e-08	4.77084	538.029
2370	2641.68	2865.42	1961.58	3481.18	526.599	1702.2	19.7706	224.096	24.9873	0.423366	15.5202	44.79	8.1573	214.434	570.663	173.486	0.136628	43.8743	115.578	0.0841257	9.19043	0.608162	4.24289	7.18752	1.33913e-05	7.7248e-20	3.13962e-05	0.000831338	0.000299245	3.02119e-07	1.37761e-38	0.00915242	7.31871e-08	4.77084	538.029
2371	2641.68	2865.42	1961.58	3481.18	526.599	1702.2	19.7706	224.096	24.9873	0.423366	15.5202	44.79	8.1573	214.434	570.663	173.486	0.136628	43.8743	115.578	0.0841257	9.19043	0.608162	4.24289	7.18752	1.33913e-05	7.7248e-20	3.13962e-05	0.000831338	0.000299245	3.02119e-07	1.37761e-38	0.00915242	7.31871e-08	4.77084	538.029
2372	2641.68	2865.42	1961.58	3481.18	526.599	1702.2	19.7706	224.096	24.9873	0.423366	15.5202	44.79	8.1573	214.434	570.663	173.486	0.136628	43.8743	115.578	0.0841257	9.19043	0.608162	4.24289	7.18752	1.33913e-05	7.7248e-20	3.13962e-05	0.000831338	0.000299245	3.02119e-07	1.37761e-38	0.00915242	7.31871e-08	4.77084	538.029
2373	2641.68	2865.42	1961.58	3481.18	526.599	1702.2	19.7706	224.096	24.9873	0.423366	15.5202	44.79	8.1573	214.434	570.663	173.486	0.136628	43.8743	115.578	0.0841257	9.19043	0.608162	4.24289	7.18752	1.33913e-05	7.7248e-20	3.13962e-05	0.000831338	0.000299245	3.02119e-07	1.37761e-38	0.00915242	7.31871e-08	4.77084	538.029
2374	2641.68	2865.42	1961.58	3481.18	526.599	1702.2	19.7706	224.096	24.9873	0.423366	15.5202	44.79	8.1573	214.434	570.663	173.486	0.136628	43.8743	115.578	0.0841257	9.19043	0.608162	4.24289	7.18752	1.33913e-05	7.7248e-20	3.13962e-05	0.000831338	0.000299245	3.02119e-07	1.37761e-38	0.00915242	7.31871e-08	4.77084	538.029
2375	2641.68	2865.42	1961.58	3481.18	526.599	1702.2	19.7706	224.096	24.9873	0.423366	15.5202	44.79	8.1573	214.434	570.663	173.486	0.136628	43.8743	115.578	0.0841257	9.19043	0.608162	4.24289	7.18752	1.33913e-05	7.7248e-20	3.13962e-05	0.000831338	0.000299245	3.02119e-07	1.37761e-38	0.00915242	7.31871e-08	4.77084	538.029
2376	2641.68	2865.42	1961.58	3481.18	526.599	1702.2	19.7706	224.096	24.9873	0.423366	15.5202	44.79	8.1573	214.434	570.663	173.486	0.136628	43.8743	115.578	0.0841257	9.19043	0.608162	4.24289	7.18752	1.33913e-05	7.7248e-20	3.13962e-05	0.000831338	0.000299245	3.02119e-07	1.37761e-38	0.00915242	7.31871e-08	4.77084	538.029
2377	2641.68	2865.42	1961.58	3481.18	526.599	1702.2	19.7706	224.096	24.9873	0.423366	15.5202	44.79	8.1573	214.434	570.663	173.486	0.136628	43.8743	115.578	0.0841257	9.19043	0.608162	4.24289	7.18752	1.33913e-05	7.7248e-20	3.13962e-05	0.000831338	0.000299245	3.02119e-07	1.37761e-38	0.00915242	7.31871e-08	4.77084	538.029
2378	2641.68	2865.42	1961.58	3481.18	526.599	1702.2	19.7706	224.096	24.9873	0.423366	15.5202	44.79	8.1573	214.434	570.663	173.486	0.136628	43.8743	115.578	0.0841257	9.19043	0.608162	4.24289	7.18752	1.33913e-05	7.7248e-20	3.13962e-05	0.000831338	0.000299245	3.02119e-07	1.37761e-38	0.00915242	7.31871e-08	4.77084	538.029
2379	2641.68	2865.42	1961.58	3481.18	526.599	1702.2	19.7706	224.096	24.9873	0.423366	15.5202	44.79	8.1573	214.434	570.663	173.486	0.136628	43.8743	115.578	0.0841257	9.19043	0.608162	4.24289	7.18752	1.33913e-05	7.7248e-20	3.13962e-05	0.000831338	0.000299245	3.02119e-07	1.37761e-38	0.00915242	7.31871e-08	4.77084	538.029
2380	2641.68	2865.42	1961.58	3481.18	526.599	1702.2	19.7706	224.096	24.9873	0.423366	15.5202	44.79	8.1573	214.434	570.663	173.486	0.136628	43.8743	115.578	0.0841257	9.19043	0.608162	4.24289	7.18752	1.33913e-05	7.7248e-20	3.13962e-05	0.000831338	0.000299245	3.02119e-07	1.37761e-38	0.00915242	7.31871e-08	4.77084	538.029
2381	2641.68	2865.42	1961.58	3481.18	526.599	1702.2	19.7706	224.096	24.9873	0.423366	15.5202	44.79	8.1573	214.434	570.663	173.486	0.136628	43.8743	115.578	0.0841257	9.19043	0.608162	4.24289	7.18752	1.33913e-05	7.7248e-20	3.13962e-05	0.000831338	0.000299245	3.02119e-07	1.37761e-38	0.00915242	7.31871e-08	4.77084	538.029
2382	2641.68	2865.42	1961.58	3481.18	526.599	1702.2	19.7706	224.096	24.9873	0.423366	15.5202	44.79	8.1573	214.434	570.663	173.486	0.136628	43.8743	115.578	0.0841257	9.19043	0.608162	4.24289	7.18752	1.33913e-05	7.7248e-20	3.13962e-05	0.000831338	0.000299245	3.02119e-07	1.37761e-38	0.00915242	7.31871e-08	4.77084	538.029
2383	2641.68	2865.42	1961.58	3481.18	526.599	1702.2	19.7706	224.096	24.9873	0.423366	15.5202	44.79	8.1573	214.434	570.663	173.486	0.136628	43.8743	115.578	0.0841257	9.19043	0.608162	4.24289	7.18752	1.33913e-05	7.7248e-20	3.13962e-05	0.000831338	0.000299245	3.02119e-07	1.37761e-38	0.00915242	7.31871e-08	4.77084	538.029
2384	2641.68	2865.42	1961.58	3481.18	526.599	1702.2	19.7706	224.096	24.9873	0.423366	15.5202	44.79	8.1573	214.434	570.663	173.486	0.136628	43.8743	115.578	0.0841257	9.19043	0.608162	4.24289	7.18752	1.33913e-05	7.7248e-20	3.13962e-05	0.000831338	0.000299245	3.02119e-07	1.37761e-38	0.00915242	7.31871e-08	4.77084	538.029
2385	2641.68	2865.42	1961.58	3481.18	526.599	1702.2	19.7706	224.096	24.9873	0.423366	15.5202	44.79	8.1573	214.434	570.663	173.486	0.136628	43.8743	115.578	0.0841257	9.19043	0.608162	4.24289	7.18752	1.33913e-05	7.7248e-20	3.13962e-05	0.000831338	0.000299245	3.02119e-07	1.37761e-38	0.00915242	7.31871e-08	4.77084	538.029
2386	2641.68	2865.42	1961.58	3481.18	526.599	1702.2	19.7706	224.096	24.9873	0.423366	15.5202	44.79	8.1573	214.434	570.663	173.486	0.136628	43.8743	115.578	0.0841257	9.19043	0.608162	4.24289	7.18752	1.33913e-05	7.7248e-20	3.13962e-05	0.000831338	0.000299245	3.02119e-07	1.37761e-38	0.00915242	7.31871e-08	4.77084	538.029
2387	2641.68	2865.42	1961.58	3481.18	526.599	1702.2	19.7706	224.096	24.9873	0.423366	15.5202	44.79	8.1573	214.434	570.663	173.486	0.136628	43.8743	115.578	0.0841257	9.19043	0.608162	4.24289	7.18752	1.33913e-05	7.7248e-20	3.13962e-05	0.000831338	0.000299245	3.02119e-07	1.37761e-38	0.00915242	7.31871e-08	4.77084	538.029
2388	2641.68	2865.42	1961.58	3481.18	526.599	1702.2	19.7706	224.096	24.9873	0.423366	15.5202	44.79	8.1573	214.434	570.663	173.486	0.136628	43.8743	115.578	0.0841257	9.19043	0.608162	4.24289	7.18752	1.33913e-05	7.7248e-20	3.13962e-05	0.000831338	0.000299245	3.02119e-07	1.37761e-38	0.00915242	7.31871e-08	4.77084	538.029
2389	2641.68	2865.42	1961.58	3481.18	526.599	1702.2	19.7706	224.096	24.9873	0.423366	15.5202	44.79	8.1573	214.434	570.663	173.486	0.136628	43.8743	115.578	0.0841257	9.19043	0.608162	4.24289	7.18752	1.33913e-05	7.7248e-20	3.13962e-05	0.000831338	0.000299245	3.02119e-07	1.37761e-38	0.00915242	7.31871e-08	4.77084	538.029
2390	2641.68	2865.42	1961.58	3481.18	526.599	1702.2	19.7706	224.096	24.9873	0.423366	15.5202	44.79	8.1573	214.434	570.663	173.486	0.136628	43.8743	115.578	0.0841257	9.19043	0.608162	4.24289	7.18752	1.33913e-05	7.7248e-20	3.13962e-05	0.000831338	0.000299245	3.02119e-07	1.37761e-38	0.00915242	7.31871e-08	4.77084	538.029
2391	2641.68	2865.42	1961.58	3481.18	526.599	1702.2	19.7706	224.096	24.9873	0.423366	15.5202	44.79	8.1573	214.434	570.663	173.486	0.136628	43.8743	115.578	0.0841257	9.19043	0.608162	4.24289	7.18752	1.33913e-05	7.7248e-20	3.13962e-05	0.000831338	0.000299245	3.02119e-07	1.37761e-38	0.00915242	7.31871e-08	4.77084	538.029
2392	2641.68	2865.42	1961.58	3481.18	526.599	1702.2	19.7706	224.096	24.9873	0.423366	15.5202	44.79	8.1573	214.434	570.663	173.486	0.136628	43.8743	115.578	0.0841257	9.19043	0.608162	4.24289	7.18752	1.33913e-05	7.7248e-20	3.13962e-05	0.000831338	0.000299245	3.02119e-07	1.37761e-38	0.00915242	7.31871e-08	4.77084	538.029
2393	2641.68	2865.42	1961.58	3481.18	526.599	1702.2	19.7706	224.096	24.9873	0.423366	15.5202	44.79	8.1573	214.434	570.663	173.486	0.136628	43.8743	115.578	0.0841257	9.19043	0.608162	4.24289	7.18752	1.33913e-05	7.7248e-20	3.13962e-05	0.000831338	0.000299245	3.02119e-07	1.37761e-38	0.00915242	7.31871e-08	4.77084	538.029
2394	2641.68	2865.42	1961.58	3481.18	526.599	1702.2	19.7706	224.096	24.9873	0.423366	15.5202	44.79	8.1573	214.434	570.663	173.486	0.136628	43.8743	115.578	0.0841257	9.19043	0.608162	4.24289	7.18752	1.33913e-05	7.7248e-20	3.13962e-05	0.000831338	0.000299245	3.02119e-07	1.37761e-38	0.00915242	7.31871e-08	4.77084	538.029
2395	2641.68	2865.42	1961.58	3481.18	526.599	1702.2	19.7706	224.096	24.9873	0.423366	15.5202	44.79	8.1573	214.434	570.663	173.486	0.136628	43.8743	115.578	0.0841257	9.19043	0.608162	4.24289	7.18752	1.33913e-05	7.7248e-20	3.13962e-05	0.000831338	0.000299245	3.02119e-07	1.37761e-38	0.00915242	7.31871e-08	4.77084	538.029
2396	2641.68	2865.42	1961.58	3481.18	526.599	1702.2	19.7706	224.096	24.9873	0.423366	15.5202	44.79	8.1573	214.434	570.663	173.486	0.136628	43.8743	115.578	0.0841257	9.19043	0.608162	4.24289	7.18752	1.33913e-05	7.7248e-20	3.13962e-05	0.000831338	0.000299245	3.02119e-07	1.37761e-38	0.00915242	7.31871e-08	4.77084	538.029
2397	2641.68	2865.42	1961.58	3481.18	526.599	1702.2	19.7706	224.096	24.9873	0.423366	15.5202	44.79	8.1573	214.434	570.663	173.486	0.136628	43.8743	115.578	0.0841257	9.19043	0.608162	4.24289	7.18752	1.33913e-05	7.7248e-20	3.13962e-05	0.000831338	0.000299245	3.02119e-07	1.37761e-38	0.00915242	7.31871e-08	4.77084	538.029
2398	2641.68	2865.42	1961.58	3481.18	526.599	1702.2	19.7706	224.096	24.9873	0.423366	15.5202	44.79	8.1573	214.434	570.663	173.486	0.136628	43.8743	115.578	0.0841257	9.19043	0.608162	4.24289	7.18752	1.33913e-05	7.7248e-20	3.13962e-05	0.000831338	0.000299245	3.02119e-07	1.37761e-38	0.00915242	7.31871e-08	4.77084	538.029
2399	2641.68	2865.42	1961.58	3481.18	526.599	1702.2	19.7706	224.096	24.9873	0.423366	15.5202	44.79	8.1573	214.434	570.663	173.486	0.136628	43.8743	115.578	0.0841257	9.19043	0.608162	4.24289	7.18752	1.33913e-05	7.7248e-20	3.13962e-05	0.000831338	0.000299245	3.02119e-07	1.37761e-38	0.00915242	7.31871e-08	4.77084	538.029
2400	2641.68	2865.42	1961.58	3481.18	526.599	1702.2	19.7706	224.096	24.9873	0.423366	15.5202	44.79	8.1573	214.434	570.663	173.486	0.136628	43.8743	115.578	0.0841257	9.19043	0.608162	4.24289	7.18752	1.33913e-05	7.7248e-20	3.13962e-05	0.000831338	0.000299245	3.02119e-07	1.37761e-38	0.00915242	7.31871e-08	4.77084	538.029
2401	2641.68	2865.42	1961.58	3481.18	526.599	1702.2	19.7706	224.096	24.9873	0.423366	15.5202	44.79	8.1573	214.434	570.663	173.486	0.136628	43.8743	115.578	0.0841257	9.19043	0.608162	4.24289	7.18752	1.33913e-05	7.7248e-20	3.13962e-05	0.000831338	0.000299245	3.02119e-07	1.37761e-38	0.00915242	7.31871e-08	4.77084	538.029
2402	2641.68	2865.42	1961.58	3481.18	526.599	1702.2	19.7706	224.096	24.9873	0.423366	15.5202	44.79	8.1573	214.434	570.663	173.486	0.136628	43.8743	115.578	0.0841257	9.19043	0.608162	4.24289	7.18752	1.33913e-05	7.7248e-20	3.13962e-05	0.000831338	0.000299245	3.02119e-07	1.37761e-38	0.00915242	7.31871e-08	4.77084	538.029
2403	2641.68	2865.42	1961.58	3481.18	526.599	1702.2	19.7706	224.096	24.9873	0.423366	15.5202	44.79	8.1573	214.434	570.663	173.486	0.136628	43.8743	115.578	0.0841257	9.19043	0.608162	4.24289	7.18752	1.33913e-05	7.7248e-20	3.13962e-05	0.000831338	0.000299245	3.02119e-07	1.37761e-38	0.00915242	7.31871e-08	4.77084	538.029
2404	2641.68	2865.42	1961.58	3481.18	526.599	1702.2	19.7706	224.096	24.9873	0.423366	15.5202	44.79	8.1573	214.434	570.663	173.486	0.136628	43.8743	115.578	0.0841257	9.19043	0.608162	4.24289	7.18752	1.33913e-05	7.7248e-20	3.13962e-05	0.000831338	0.000299245	3.02119e-07	1.37761e-38	0.00915242	7.31871e-08	4.77084	538.029
2405	2641.68	2865.42	1961.58	3481.18	526.599	1702.2	19.7706	224.096	24.9873	0.423366	15.5202	44.79	8.1573	214.434	570.663	173.486	0.136628	43.8743	115.578	0.0841257	9.19043	0.608162	4.24289	7.18752	1.33913e-05	7.7248e-20	3.13962e-05	0.000831338	0.000299245	3.02119e-07	1.37761e-38	0.00915242	7.31871e-08	4.77084	538.029
2406	2641.68	2865.42	1961.58	3481.18	526.599	1702.2	19.7706	224.096	24.9873	0.423366	15.5202	44.79	8.1573	214.434	570.663	173.486	0.136628	43.8743	115.578	0.0841257	9.19043	0.608162	4.24289	7.18752	1.33913e-05	7.7248e-20	3.13962e-05	0.000831338	0.000299245	3.02119e-07	1.37761e-38	0.00915242	7.31871e-08	4.77084	538.029
2407	2641.68	2865.42	1961.58	3481.18	526.599	1702.2	19.7706	224.096	24.9873	0.423366	15.5202	44.79	8.1573	214.434	570.663	173.486	0.136628	43.8743	115.578	0.0841257	9.19043	0.608162	4.24289	7.18752	1.33913e-05	7.7248e-20	3.13962e-05	0.000831338	0.000299245	3.02119e-07	1.37761e-38	0.00915242	7.31871e-08	4.77084	538.029
2408	2641.68	2865.42	1961.58	3481.18	526.599	1702.2	19.7706	224.096	24.9873	0.423366	15.5202	44.79	8.1573	214.434	570.663	173.486	0.136628	43.8743	115.578	0.0841257	9.19043	0.608162	4.24289	7.18752	1.33913e-05	7.7248e-20	3.13962e-05	0.000831338	0.000299245	3.02119e-07	1.37761e-38	0.00915242	7.31871e-08	4.77084	538.029
2409	2641.68	2865.42	1961.58	3481.18	526.599	1702.2	19.7706	224.096	24.9873	0.423366	15.5202	44.79	8.1573	214.434	570.663	173.486	0.136628	43.8743	115.578	0.0841257	9.19043	0.608162	4.24289	7.18752	1.33913e-05	7.7248e-20	3.13962e-05	0.000831338	0.000299245	3.02119e-07	1.37761e-38	0.00915242	7.31871e-08	4.77084	538.029
2410	2641.68	2865.42	1961.58	3481.18	526.599	1702.2	19.7706	224.096	24.9873	0.423366	15.5202	44.79	8.1573	214.434	570.663	173.486	0.136628	43.8743	115.578	0.0841257	9.19043	0.608162	4.24289	7.18752	1.33913e-05	7.7248e-20	3.13962e-05	0.000831338	0.000299245	3.02119e-07	1.37761e-38	0.00915242	7.31871e-08	4.77084	538.029
2411	2641.68	2865.42	1961.58	3481.18	526.599	1702.2	19.7706	224.096	24.9873	0.423366	15.5202	44.79	8.1573	214.434	570.663	173.486	0.136628	43.8743	115.578	0.0841257	9.19043	0.608162	4.24289	7.18752	1.33913e-05	7.7248e-20	3.13962e-05	0.000831338	0.000299245	3.02119e-07	1.37761e-38	0.00915242	7.31871e-08	4.77084	538.029
2412	2641.68	2865.42	1961.58	3481.18	526.599	1702.2	19.7706	224.096	24.9873	0.423366	15.5202	44.79	8.1573	214.434	570.663	173.486	0.136628	43.8743	115.578	0.0841257	9.19043	0.608162	4.24289	7.18752	1.33913e-05	7.7248e-20	3.13962e-05	0.000831338	0.000299245	3.02119e-07	1.37761e-38	0.00915242	7.31871e-08	4.77084	538.029
2413	2641.68	2865.42	1961.58	3481.18	526.599	1702.2	19.7706	224.096	24.9873	0.423366	15.5202	44.79	8.1573	214.434	570.663	173.486	0.136628	43.8743	115.578	0.0841257	9.19043	0.608162	4.24289	7.18752	1.33913e-05	7.7248e-20	3.13962e-05	0.000831338	0.000299245	3.02119e-07	1.37761e-38	0.00915242	7.31871e-08	4.77084	538.029
2414	2641.68	2865.42	1961.58	3481.18	526.599	1702.2	19.7706	224.096	24.9873	0.423366	15.5202	44.79	8.1573	214.434	570.663	173.486	0.136628	43.8743	115.578	0.0841257	9.19043	0.608162	4.24289	7.18752	1.33913e-05	7.7248e-20	3.13962e-05	0.000831338	0.000299245	3.02119e-07	1.37761e-38	0.00915242	7.31871e-08	4.77084	538.029
2415	2641.68	2865.42	1961.58	3481.18	526.599	1702.2	19.7706	224.096	24.9873	0.423366	15.5202	44.79	8.1573	214.434	570.663	173.486	0.136628	43.8743	115.578	0.0841257	9.19043	0.608162	4.24289	7.18752	1.33913e-05	7.7248e-20	3.13962e-05	0.000831338	0.000299245	3.02119e-07	1.37761e-38	0.00915242	7.31871e-08	4.77084	538.029
2416	2641.68	2865.42	1961.58	3481.18	526.599	1702.2	19.7706	224.096	24.9873	0.423366	15.5202	44.79	8.1573	214.434	570.663	173.486	0.136628	43.8743	115.578	0.0841257	9.19043	0.608162	4.24289	7.18752	1.33913e-05	7.7248e-20	3.13962e-05	0.000831338	0.000299245	3.02119e-07	1.37761e-38	0.00915242	7.31871e-08	4.77084	538.029
2417	2641.68	2865.42	1961.58	3481.18	526.599	1702.2	19.7706	224.096	24.9873	0.423366	15.5202	44.79	8.1573	214.434	570.663	173.486	0.136628	43.8743	115.578	0.0841257	9.19043	0.608162	4.24289	7.18752	1.33913e-05	7.7248e-20	3.13962e-05	0.000831338	0.000299245	3.02119e-07	1.37761e-38	0.00915242	7.31871e-08	4.77084	538.029
2418	2641.68	2865.42	1961.58	3481.18	526.599	1702.2	19.7706	224.096	24.9873	0.423366	15.5202	44.79	8.1573	214.434	570.663	173.486	0.136628	43.8743	115.578	0.0841257	9.19043	0.608162	4.24289	7.18752	1.33913e-05	7.7248e-20	3.13962e-05	0.000831338	0.000299245	3.02119e-07	1.37761e-38	0.00915242	7.31871e-08	4.77084	538.029
2419	2641.68	2865.42	1961.58	3481.18	526.599	1702.2	19.7706	224.096	24.9873	0.423366	15.5202	44.79	8.1573	214.434	570.663	173.486	0.136628	43.8743	115.578	0.0841257	9.19043	0.608162	4.24289	7.18752	1.33913e-05	7.7248e-20	3.13962e-05	0.000831338	0.000299245	3.02119e-07	1.37761e-38	0.00915242	7.31871e-08	4.77084	538.029
2420	2641.68	2865.42	1961.58	3481.18	526.599	1702.2	19.7706	224.096	24.9873	0.423366	15.5202	44.79	8.1573	214.434	570.663	173.486	0.136628	43.8743	115.578	0.0841257	9.19043	0.608162	4.24289	7.18752	1.33913e-05	7.7248e-20	3.13962e-05	0.000831338	0.000299245	3.02119e-07	1.37761e-38	0.00915242	7.31871e-08	4.77084	538.029
2421	2641.68	2865.42	1961.58	3481.18	526.599	1702.2	19.7706	224.096	24.9873	0.423366	15.5202	44.79	8.1573	214.434	570.663	173.486	0.136628	43.8743	115.578	0.0841257	9.19043	0.608162	4.24289	7.18752	1.33913e-05	7.7248e-20	3.13962e-05	0.000831338	0.000299245	3.02119e-07	1.37761e-38	0.00915242	7.31871e-08	4.77084	538.029
2422	2641.68	2865.42	1961.58	3481.18	526.599	1702.2	19.7706	224.096	24.9873	0.423366	15.5202	44.79	8.1573	214.434	570.663	173.486	0.136628	43.8743	115.578	0.0841257	9.19043	0.608162	4.24289	7.18752	1.33913e-05	7.7248e-20	3.13962e-05	0.000831338	0.000299245	3.02119e-07	1.37761e-38	0.00915242	7.31871e-08	4.77084	538.029
2423	2641.68	2865.42	1961.58	3481.18	526.599	1702.2	19.7706	224.096	24.9873	0.423366	15.5202	44.79	8.1573	214.434	570.663	173.486	0.136628	43.8743	115.578	0.0841257	9.19043	0.608162	4.24289	7.18752	1.33913e-05	7.7248e-20	3.13962e-05	0.000831338	0.000299245	3.02119e-07	1.37761e-38	0.00915242	7.31871e-08	4.77084	538.029
2424	2641.68	2865.42	1961.58	3481.18	526.599	1702.2	19.7706	224.096	24.9873	0.423366	15.5202	44.79	8.1573	214.434	570.663	173.486	0.136628	43.8743	115.578	0.0841257	9.19043	0.608162	4.24289	7.18752	1.33913e-05	7.7248e-20	3.13962e-05	0.000831338	0.000299245	3.02119e-07	1.37761e-38	0.00915242	7.31871e-08	4.77084	538.029
2425	2641.68	2865.42	1961.58	3481.18	526.599	1702.2	19.7706	224.096	24.9873	0.423366	15.5202	44.79	8.1573	214.434	570.663	173.486	0.136628	43.8743	115.578	0.0841257	9.19043	0.608162	4.24289	7.18752	1.33913e-05	7.7248e-20	3.13962e-05	0.000831338	0.000299245	3.02119e-07	1.37761e-38	0.00915242	7.31871e-08	4.77084	538.029
2426	2641.68	2865.42	1961.58	3481.18	526.599	1702.2	19.7706	224.096	24.9873	0.423366	15.5202	44.79	8.1573	214.434	570.663	173.486	0.136628	43.8743	115.578	0.0841257	9.19043	0.608162	4.24289	7.18752	1.33913e-05	7.7248e-20	3.13962e-05	0.000831338	0.000299245	3.02119e-07	1.37761e-38	0.00915242	7.31871e-08	4.77084	538.029
2427	2641.68	2865.42	1961.58	3481.18	526.599	1702.2	19.7706	224.096	24.9873	0.423366	15.5202	44.79	8.1573	214.434	570.663	173.486	0.136628	43.8743	115.578	0.0841257	9.19043	0.608162	4.24289	7.18752	1.33913e-05	7.7248e-20	3.13962e-05	0.000831338	0.000299245	3.02119e-07	1.37761e-38	0.00915242	7.31871e-08	4.77084	538.029
2428	2641.68	2865.42	1961.58	3481.18	526.599	1702.2	19.7706	224.096	24.9873	0.423366	15.5202	44.79	8.1573	214.434	570.663	173.486	0.136628	43.8743	115.578	0.0841257	9.19043	0.608162	4.24289	7.18752	1.33913e-05	7.7248e-20	3.13962e-05	0.000831338	0.000299245	3.02119e-07	1.37761e-38	0.00915242	7.31871e-08	4.77084	538.029
2429	2641.68	2865.42	1961.58	3481.18	526.599	1702.2	19.7706	224.096	24.9873	0.423366	15.5202	44.79	8.1573	214.434	570.663	173.486	0.136628	43.8743	115.578	0.0841257	9.19043	0.608162	4.24289	7.18752	1.33913e-05	7.7248e-20	3.13962e-05	0.000831338	0.000299245	3.02119e-07	1.37761e-38	0.00915242	7.31871e-08	4.77084	538.029
2430	2641.68	2865.42	1961.58	3481.18	526.599	1702.2	19.7706	224.096	24.9873	0.423366	15.5202	44.79	8.1573	214.434	570.663	173.486	0.136628	43.8743	115.578	0.0841257	9.19043	0.608162	4.24289	7.18752	1.33913e-05	7.7248e-20	3.13962e-05	0.000831338	0.000299245	3.02119e-07	1.37761e-38	0.00915242	7.31871e-08	4.77084	538.029
2431	2641.68	2865.42	1961.58	3481.18	526.599	1702.2	19.7706	224.096	24.9873	0.423366	15.5202	44.79	8.1573	214.434	570.663	173.486	0.136628	43.8743	115.578	0.0841257	9.19043	0.608162	4.24289	7.18752	1.33913e-05	7.7248e-20	3.13962e-05	0.000831338	0.000299245	3.02119e-07	1.37761e-38	0.00915242	7.31871e-08	4.77084	538.029
2432	2641.68	2865.42	1961.58	3481.18	526.599	1702.2	19.7706	224.096	24.9873	0.423366	15.5202	44.79	8.1573	214.434	570.663	173.486	0.136628	43.8743	115.578	0.0841257	9.19043	0.608162	4.24289	7.18752	1.33913e-05	7.7248e-20	3.13962e-05	0.000831338	0.000299245	3.02119e-07	1.37761e-38	0.00915242	7.31871e-08	4.77084	538.029
2433	2641.68	2865.42	1961.58	3481.18	526.599	1702.2	19.7706	224.096	24.9873	0.423366	15.5202	44.79	8.1573	214.434	570.663	173.486	0.136628	43.8743	115.578	0.0841257	9.19043	0.608162	4.24289	7.18752	1.33913e-05	7.7248e-20	3.13962e-05	0.000831338	0.000299245	3.02119e-07	1.37761e-38	0.00915242	7.31871e-08	4.77084	538.029
2434	2641.68	2865.42	1961.58	3481.18	526.599	1702.2	19.7706	224.096	24.9873	0.423366	15.5202	44.79	8.1573	214.434	570.663	173.486	0.136628	43.8743	115.578	0.0841257	9.19043	0.608162	4.24289	7.18752	1.33913e-05	7.7248e-20	3.13962e-05	0.000831338	0.000299245	3.02119e-07	1.37761e-38	0.00915242	7.31871e-08	4.77084	538.029
2435	2641.68	2865.42	1961.58	3481.18	526.599	1702.2	19.7706	224.096	24.9873	0.423366	15.5202	44.79	8.1573	214.434	570.663	173.486	0.136628	43.8743	115.578	0.0841257	9.19043	0.608162	4.24289	7.18752	1.33913e-05	7.7248e-20	3.13962e-05	0.000831338	0.000299245	3.02119e-07	1.37761e-38	0.00915242	7.31871e-08	4.77084	538.029
2436	2641.68	2865.42	1961.58	3481.18	526.599	1702.2	19.7706	224.096	24.9873	0.423366	15.5202	44.79	8.1573	214.434	570.663	173.486	0.136628	43.8743	115.578	0.0841257	9.19043	0.608162	4.24289	7.18752	1.33913e-05	7.7248e-20	3.13962e-05	0.000831338	0.000299245	3.02119e-07	1.37761e-38	0.00915242	7.31871e-08	4.77084	538.029
2437	2641.68	2865.42	1961.58	3481.18	526.599	1702.2	19.7706	224.096	24.9873	0.423366	15.5202	44.79	8.1573	214.434	570.663	173.486	0.136628	43.8743	115.578	0.0841257	9.19043	0.608162	4.24289	7.18752	1.33913e-05	7.7248e-20	3.13962e-05	0.000831338	0.000299245	3.02119e-07	1.37761e-38	0.00915242	7.31871e-08	4.77084	538.029
2438	2641.68	2865.42	1961.58	3481.18	526.599	1702.2	19.7706	224.096	24.9873	0.423366	15.5202	44.79	8.1573	214.434	570.663	173.486	0.136628	43.8743	115.578	0.0841257	9.19043	0.608162	4.24289	7.18752	1.33913e-05	7.7248e-20	3.13962e-05	0.000831338	0.000299245	3.02119e-07	1.37761e-38	0.00915242	7.31871e-08	4.77084	538.029
2439	2641.68	2865.42	1961.58	3481.18	526.599	1702.2	19.7706	224.096	24.9873	0.423366	15.5202	44.79	8.1573	214.434	570.663	173.486	0.136628	43.8743	115.578	0.0841257	9.19043	0.608162	4.24289	7.18752	1.33913e-05	7.7248e-20	3.13962e-05	0.000831338	0.000299245	3.02119e-07	1.37761e-38	0.00915242	7.31871e-08	4.77084	538.029
2440	2641.68	2865.42	1961.58	3481.18	526.599	1702.2	19.7706	224.096	24.9873	0.423366	15.5202	44.79	8.1573	214.434	570.663	173.486	0.136628	43.8743	115.578	0.0841257	9.19043	0.608162	4.24289	7.18752	1.33913e-05	7.7248e-20	3.13962e-05	0.000831338	0.000299245	3.02119e-07	1.37761e-38	0.00915242	7.31871e-08	4.77084	538.029
2441	2641.68	2865.42	1961.58	3481.18	526.599	1702.2	19.7706	224.096	24.9873	0.423366	15.5202	44.79	8.1573	214.434	570.663	173.486	0.136628	43.8743	115.578	0.0841257	9.19043	0.608162	4.24289	7.18752	1.33913e-05	7.7248e-20	3.13962e-05	0.000831338	0.000299245	3.02119e-07	1.37761e-38	0.00915242	7.31871e-08	4.77084	538.029
2442	2641.68	2865.42	1961.58	3481.18	526.599	1702.2	19.7706	224.096	24.9873	0.423366	15.5202	44.79	8.1573	214.434	570.663	173.486	0.136628	43.8743	115.578	0.0841257	9.19043	0.608162	4.24289	7.18752	1.33913e-05	7.7248e-20	3.13962e-05	0.000831338	0.000299245	3.02119e-07	1.37761e-38	0.00915242	7.31871e-08	4.77084	538.029
2443	2641.68	2865.42	1961.58	3481.18	526.599	1702.2	19.7706	224.096	24.9873	0.423366	15.5202	44.79	8.1573	214.434	570.663	173.486	0.136628	43.8743	115.578	0.0841257	9.19043	0.608162	4.24289	7.18752	1.33913e-05	7.7248e-20	3.13962e-05	0.000831338	0.000299245	3.02119e-07	1.37761e-38	0.00915242	7.31871e-08	4.77084	538.029
2444	2641.68	2865.42	1961.58	3481.18	526.599	1702.2	19.7706	224.096	24.9873	0.423366	15.5202	44.79	8.1573	214.434	570.663	173.486	0.136628	43.8743	115.578	0.0841257	9.19043	0.608162	4.24289	7.18752	1.33913e-05	7.7248e-20	3.13962e-05	0.000831338	0.000299245	3.02119e-07	1.37761e-38	0.00915242	7.31871e-08	4.77084	538.029
2445	2641.68	2865.42	1961.58	3481.18	526.599	1702.2	19.7706	224.096	24.9873	0.423366	15.5202	44.79	8.1573	214.434	570.663	173.486	0.136628	43.8743	115.578	0.0841257	9.19043	0.608162	4.24289	7.18752	1.33913e-05	7.7248e-20	3.13962e-05	0.000831338	0.000299245	3.02119e-07	1.37761e-38	0.00915242	7.31871e-08	4.77084	538.029
2446	2641.68	2865.42	1961.58	3481.18	526.599	1702.2	19.7706	224.096	24.9873	0.423366	15.5202	44.79	8.1573	214.434	570.663	173.486	0.136628	43.8743	115.578	0.0841257	9.19043	0.608162	4.24289	7.18752	1.33913e-05	7.7248e-20	3.13962e-05	0.000831338	0.000299245	3.02119e-07	1.37761e-38	0.00915242	7.31871e-08	4.77084	538.029
2447	2641.68	2865.42	1961.58	3481.18	526.599	1702.2	19.7706	224.096	24.9873	0.423366	15.5202	44.79	8.1573	214.434	570.663	173.486	0.136628	43.8743	115.578	0.0841257	9.19043	0.608162	4.24289	7.18752	1.33913e-05	7.7248e-20	3.13962e-05	0.000831338	0.000299245	3.02119e-07	1.37761e-38	0.00915242	7.31871e-08	4.77084	538.029
2448	2641.68	2865.42	1961.58	3481.18	526.599	1702.2	19.7706	224.096	24.9873	0.423366	15.5202	44.79	8.1573	214.434	570.663	173.486	0.136628	43.8743	115.578	0.0841257	9.19043	0.608162	4.24289	7.18752	1.33913e-05	7.7248e-20	3.13962e-05	0.000831338	0.000299245	3.02119e-07	1.37761e-38	0.00915242	7.31871e-08	4.77084	538.029
2449	2641.68	2865.42	1961.58	3481.18	526.599	1702.2	19.7706	224.096	24.9873	0.423366	15.5202	44.79	8.1573	214.434	570.663	173.486	0.136628	43.8743	115.578	0.0841257	9.19043	0.608162	4.24289	7.18752	1.33913e-05	7.7248e-20	3.13962e-05	0.000831338	0.000299245	3.02119e-07	1.37761e-38	0.00915242	7.31871e-08	4.77084	538.029
2450	2641.68	2865.42	1961.58	3481.18	526.599	1702.2	19.7706	224.096	24.9873	0.423366	15.5202	44.79	8.1573	214.434	570.663	173.486	0.136628	43.8743	115.578	0.0841257	9.19043	0.608162	4.24289	7.18752	1.33913e-05	7.7248e-20	3.13962e-05	0.000831338	0.000299245	3.02119e-07	1.37761e-38	0.00915242	7.31871e-08	4.77084	538.029
2451	2641.68	2865.42	1961.58	3481.18	526.599	1702.2	19.7706	224.096	24.9873	0.423366	15.5202	44.79	8.1573	214.434	570.663	173.486	0.136628	43.8743	115.578	0.0841257	9.19043	0.608162	4.24289	7.18752	1.33913e-05	7.7248e-20	3.13962e-05	0.000831338	0.000299245	3.02119e-07	1.37761e-38	0.00915242	7.31871e-08	4.77084	538.029
2452	2641.68	2865.42	1961.58	3481.18	526.599	1702.2	19.7706	224.096	24.9873	0.423366	15.5202	44.79	8.1573	214.434	570.663	173.486	0.136628	43.8743	115.578	0.0841257	9.19043	0.608162	4.24289	7.18752	1.33913e-05	7.7248e-20	3.13962e-05	0.000831338	0.000299245	3.02119e-07	1.37761e-38	0.00915242	7.31871e-08	4.77084	538.029
2453	2641.68	2865.42	1961.58	3481.18	526.599	1702.2	19.7706	224.096	24.9873	0.423366	15.5202	44.79	8.1573	214.434	570.663	173.486	0.136628	43.8743	115.578	0.0841257	9.19043	0.608162	4.24289	7.18752	1.33913e-05	7.7248e-20	3.13962e-05	0.000831338	0.000299245	3.02119e-07	1.37761e-38	0.00915242	7.31871e-08	4.77084	538.029
2454	2641.68	2865.42	1961.58	3481.18	526.599	1702.2	19.7706	224.096	24.9873	0.423366	15.5202	44.79	8.1573	214.434	570.663	173.486	0.136628	43.8743	115.578	0.0841257	9.19043	0.608162	4.24289	7.18752	1.33913e-05	7.7248e-20	3.13962e-05	0.000831338	0.000299245	3.02119e-07	1.37761e-38	0.00915242	7.31871e-08	4.77084	538.029
2455	2641.68	2865.42	1961.58	3481.18	526.599	1702.2	19.7706	224.096	24.9873	0.423366	15.5202	44.79	8.1573	214.434	570.663	173.486	0.136628	43.8743	115.578	0.0841257	9.19043	0.608162	4.24289	7.18752	1.33913e-05	7.7248e-20	3.13962e-05	0.000831338	0.000299245	3.02119e-07	1.37761e-38	0.00915242	7.31871e-08	4.77084	538.029
2456	2641.68	2865.42	1961.58	3481.18	526.599	1702.2	19.7706	224.096	24.9873	0.423366	15.5202	44.79	8.1573	214.434	570.663	173.486	0.136628	43.8743	115.578	0.0841257	9.19043	0.608162	4.24289	7.18752	1.33913e-05	7.7248e-20	3.13962e-05	0.000831338	0.000299245	3.02119e-07	1.37761e-38	0.00915242	7.31871e-08	4.77084	538.029
2457	2641.68	2865.42	1961.58	3481.18	526.599	1702.2	19.7706	224.096	24.9873	0.423366	15.5202	44.79	8.1573	214.434	570.663	173.486	0.136628	43.8743	115.578	0.0841257	9.19043	0.608162	4.24289	7.18752	1.33913e-05	7.7248e-20	3.13962e-05	0.000831338	0.000299245	3.02119e-07	1.37761e-38	0.00915242	7.31871e-08	4.77084	538.029
2458	2641.68	2865.42	1961.58	3481.18	526.599	1702.2	19.7706	224.096	24.9873	0.423366	15.5202	44.79	8.1573	214.434	570.663	173.486	0.136628	43.8743	115.578	0.0841257	9.19043	0.608162	4.24289	7.18752	1.33913e-05	7.7248e-20	3.13962e-05	0.000831338	0.000299245	3.02119e-07	1.37761e-38	0.00915242	7.31871e-08	4.77084	538.029
2459	2641.68	2865.42	1961.58	3481.18	526.599	1702.2	19.7706	224.096	24.9873	0.423366	15.5202	44.79	8.1573	214.434	570.663	173.486	0.136628	43.8743	115.578	0.0841257	9.19043	0.608162	4.24289	7.18752	1.33913e-05	7.7248e-20	3.13962e-05	0.000831338	0.000299245	3.02119e-07	1.37761e-38	0.00915242	7.31871e-08	4.77084	538.029
2460	2641.68	2865.42	1961.58	3481.18	526.599	1702.2	19.7706	224.096	24.9873	0.423366	15.5202	44.79	8.1573	214.434	570.663	173.486	0.136628	43.8743	115.578	0.0841257	9.19043	0.608162	4.24289	7.18752	1.33913e-05	7.7248e-20	3.13962e-05	0.000831338	0.000299245	3.02119e-07	1.37761e-38	0.00915242	7.31871e-08	4.77084	538.029
2461	2641.68	2865.42	1961.58	3481.18	526.599	1702.2	19.7706	224.096	24.9873	0.423366	15.5202	44.79	8.1573	214.434	570.663	173.486	0.136628	43.8743	115.578	0.0841257	9.19043	0.608162	4.24289	7.18752	1.33913e-05	7.7248e-20	3.13962e-05	0.000831338	0.000299245	3.02119e-07	1.37761e-38	0.00915242	7.31871e-08	4.77084	538.029
2462	2641.68	2865.42	1961.58	3481.18	526.599	1702.2	19.7706	224.096	24.9873	0.423366	15.5202	44.79	8.1573	214.434	570.663	173.486	0.136628	43.8743	115.578	0.0841257	9.19043	0.608162	4.24289	7.18752	1.33913e-05	7.7248e-20	3.13962e-05	0.000831338	0.000299245	3.02119e-07	1.37761e-38	0.00915242	7.31871e-08	4.77084	538.029
2463	2641.68	2865.42	1961.58	3481.18	526.599	1702.2	19.7706	224.096	24.9873	0.423366	15.5202	44.79	8.1573	214.434	570.663	173.486	0.136628	43.8743	115.578	0.0841257	9.19043	0.608162	4.24289	7.18752	1.33913e-05	7.7248e-20	3.13962e-05	0.000831338	0.000299245	3.02119e-07	1.37761e-38	0.00915242	7.31871e-08	4.77084	538.029
2464	2641.68	2865.42	1961.58	3481.18	526.599	1702.2	19.7706	224.096	24.9873	0.423366	15.5202	44.79	8.1573	214.434	570.663	173.486	0.136628	43.8743	115.578	0.0841257	9.19043	0.608162	4.24289	7.18752	1.33913e-05	7.7248e-20	3.13962e-05	0.000831338	0.000299245	3.02119e-07	1.37761e-38	0.00915242	7.31871e-08	4.77084	538.029
2465	2641.68	2865.42	1961.58	3481.18	526.599	1702.2	19.7706	224.096	24.9873	0.423366	15.5202	44.79	8.1573	214.434	570.663	173.486	0.136628	43.8743	115.578	0.0841257	9.19043	0.608162	4.24289	7.18752	1.33913e-05	7.7248e-20	3.13962e-05	0.000831338	0.000299245	3.02119e-07	1.37761e-38	0.00915242	7.31871e-08	4.77084	538.029
2466	2641.68	2865.42	1961.58	3481.18	526.599	1702.2	19.7706	224.096	24.9873	0.423366	15.5202	44.79	8.1573	214.434	570.663	173.486	0.136628	43.8743	115.578	0.0841257	9.19043	0.608162	4.24289	7.18752	1.33913e-05	7.7248e-20	3.13962e-05	0.000831338	0.000299245	3.02119e-07	1.37761e-38	0.00915242	7.31871e-08	4.77084	538.029
2467	2641.68	2865.42	1961.58	3481.18	526.599	1702.2	19.7706	224.096	24.9873	0.423366	15.5202	44.79	8.1573	214.434	570.663	173.486	0.136628	43.8743	115.578	0.0841257	9.19043	0.608162	4.24289	7.18752	1.33913e-05	7.7248e-20	3.13962e-05	0.000831338	0.000299245	3.02119e-07	1.37761e-38	0.00915242	7.31871e-08	4.77084	538.029
2468	2641.68	2865.42	1961.58	3481.18	526.599	1702.2	19.7706	224.096	24.9873	0.423366	15.5202	44.79	8.1573	214.434	570.663	173.486	0.136628	43.8743	115.578	0.0841257	9.19043	0.608162	4.24289	7.18752	1.33913e-05	7.7248e-20	3.13962e-05	0.000831338	0.000299245	3.02119e-07	1.37761e-38	0.00915242	7.31871e-08	4.77084	538.029
2469	2641.68	2865.42	1961.58	3481.18	526.599	1702.2	19.7706	224.096	24.9873	0.423366	15.5202	44.79	8.1573	214.434	570.663	173.486	0.136628	43.8743	115.578	0.0841257	9.19043	0.608162	4.24289	7.18752	1.33913e-05	7.7248e-20	3.13962e-05	0.000831338	0.000299245	3.02119e-07	1.37761e-38	0.00915242	7.31871e-08	4.77084	538.029
2470	2641.68	2865.42	1961.58	3481.18	526.599	1702.2	19.7706	224.096	24.9873	0.423366	15.5202	44.79	8.1573	214.434	570.663	173.486	0.136628	43.8743	115.578	0.0841257	9.19043	0.608162	4.24289	7.18752	1.33913e-05	7.7248e-20	3.13962e-05	0.000831338	0.000299245	3.02119e-07	1.37761e-38	0.00915242	7.31871e-08	4.77084	538.029
2471	2641.68	2865.42	1961.58	3481.18	526.599	1702.2	19.7706	224.096	24.9873	0.423366	15.5202	44.79	8.1573	214.434	570.663	173.486	0.136628	43.8743	115.578	0.0841257	9.19043	0.608162	4.24289	7.18752	1.33913e-05	7.7248e-20	3.13962e-05	0.000831338	0.000299245	3.02119e-07	1.37761e-38	0.00915242	7.31871e-08	4.77084	538.029
2472	2641.68	2865.42	1961.58	3481.18	526.599	1702.2	19.7706	224.096	24.9873	0.423366	15.5202	44.79	8.1573	214.434	570.663	173.486	0.136628	43.8743	115.578	0.0841257	9.19043	0.608162	4.24289	7.18752	1.33913e-05	7.7248e-20	3.13962e-05	0.000831338	0.000299245	3.02119e-07	1.37761e-38	0.00915242	7.31871e-08	4.77084	538.029
2473	2641.68	2865.42	1961.58	3481.18	526.599	1702.2	19.7706	224.096	24.9873	0.423366	15.5202	44.79	8.1573	214.434	570.663	173.486	0.136628	43.8743	115.578	0.0841257	9.19043	0.608162	4.24289	7.18752	1.33913e-05	7.7248e-20	3.13962e-05	0.000831338	0.000299245	3.02119e-07	1.37761e-38	0.00915242	7.31871e-08	4.77084	538.029
2474	2641.68	2865.42	1961.58	3481.18	526.599	1702.2	19.7706	224.096	24.9873	0.423366	15.5202	44.79	8.1573	214.434	570.663	173.486	0.136628	43.8743	115.578	0.0841257	9.19043	0.608162	4.24289	7.18752	1.33913e-05	7.7248e-20	3.13962e-05	0.000831338	0.000299245	3.02119e-07	1.37761e-38	0.00915242	7.31871e-08	4.77084	538.029
2475	2641.68	2865.42	1961.58	3481.18	526.599	1702.2	19.7706	224.096	24.9873	0.423366	15.5202	44.79	8.1573	214.434	570.663	173.486	0.136628	43.8743	115.578	0.0841257	9.19043	0.608162	4.24289	7.18752	1.33913e-05	7.7248e-20	3.13962e-05	0.000831338	0.000299245	3.02119e-07	1.37761e-38	0.00915242	7.31871e-08	4.77084	538.029
2476	2641.68	2865.42	1961.58	3481.18	526.599	1702.2	19.7706	224.096	24.9873	0.423366	15.5202	44.79	8.1573	214.434	570.663	173.486	0.136628	43.8743	115.578	0.0841257	9.19043	0.608162	4.24289	7.18752	1.33913e-05	7.7248e-20	3.13962e-05	0.000831338	0.000299245	3.02119e-07	1.37761e-38	0.00915242	7.31871e-08	4.77084	538.029
2477	2641.68	2865.42	1961.58	3481.18	526.599	1702.2	19.7706	224.096	24.9873	0.423366	15.5202	44.79	8.1573	214.434	570.663	173.486	0.136628	43.8743	115.578	0.0841257	9.19043	0.608162	4.24289	7.18752	1.33913e-05	7.7248e-20	3.13962e-05	0.000831338	0.000299245	3.02119e-07	1.37761e-38	0.00915242	7.31871e-08	4.77084	538.029
2478	2641.68	2865.42	1961.58	3481.18	526.599	1702.2	19.7706	224.096	24.9873	0.423366	15.5202	44.79	8.1573	214.434	570.663	173.486	0.136628	43.8743	115.578	0.0841257	9.19043	0.608162	4.24289	7.18752	1.33913e-05	7.7248e-20	3.13962e-05	0.000831338	0.000299245	3.02119e-07	1.37761e-38	0.00915242	7.31871e-08	4.77084	538.029
2479	2641.68	2865.42	1961.58	3481.18	526.599	1702.2	19.7706	224.096	24.9873	0.423366	15.5202	44.79	8.1573	214.434	570.663	173.486	0.136628	43.8743	115.578	0.0841257	9.19043	0.608162	4.24289	7.18752	1.33913e-05	7.7248e-20	3.13962e-05	0.000831338	0.000299245	3.02119e-07	1.37761e-38	0.00915242	7.31871e-08	4.77084	538.029
2480	2641.68	2865.42	1961.58	3481.18	526.599	1702.2	19.7706	224.096	24.9873	0.423366	15.5202	44.79	8.1573	214.434	570.663	173.486	0.136628	43.8743	115.578	0.0841257	9.19043	0.608162	4.24289	7.18752	1.33913e-05	7.7248e-20	3.13962e-05	0.000831338	0.000299245	3.02119e-07	1.37761e-38	0.00915242	7.31871e-08	4.77084	538.029
2481	2641.68	2865.42	1961.58	3481.18	526.599	1702.2	19.7706	224.096	24.9873	0.423366	15.5202	44.79	8.1573	214.434	570.663	173.486	0.136628	43.8743	115.578	0.0841257	9.19043	0.608162	4.24289	7.18752	1.33913e-05	7.7248e-20	3.13962e-05	0.000831338	0.000299245	3.02119e-07	1.37761e-38	0.00915242	7.31871e-08	4.77084	538.029
2482	2641.68	2865.42	1961.58	3481.18	526.599	1702.2	19.7706	224.096	24.9873	0.423366	15.5202	44.79	8.1573	214.434	570.663	173.486	0.136628	43.8743	115.578	0.0841257	9.19043	0.608162	4.24289	7.18752	1.33913e-05	7.7248e-20	3.13962e-05	0.000831338	0.000299245	3.02119e-07	1.37761e-38	0.00915242	7.31871e-08	4.77084	538.029
2483	2641.68	2865.42	1961.58	3481.18	526.599	1702.2	19.7706	224.096	24.9873	0.423366	15.5202	44.79	8.1573	214.434	570.663	173.486	0.136628	43.8743	115.578	0.0841257	9.19043	0.608162	4.24289	7.18752	1.33913e-05	7.7248e-20	3.13962e-05	0.000831338	0.000299245	3.02119e-07	1.37761e-38	0.00915242	7.31871e-08	4.77084	538.029
2484	2641.68	2865.42	1961.58	3481.18	526.599	1702.2	19.7706	224.096	24.9873	0.423366	15.5202	44.79	8.1573	214.434	570.663	173.486	0.136628	43.8743	115.578	0.0841257	9.19043	0.608162	4.24289	7.18752	1.33913e-05	7.7248e-20	3.13962e-05	0.000831338	0.000299245	3.02119e-07	1.37761e-38	0.00915242	7.31871e-08	4.77084	538.029
2485	2641.68	2865.42	1961.58	3481.18	526.599	1702.2	19.7706	224.096	24.9873	0.423366	15.5202	44.79	8.1573	214.434	570.663	173.486	0.136628	43.8743	115.578	0.0841257	9.19043	0.608162	4.24289	7.18752	1.33913e-05	7.7248e-20	3.13962e-05	0.000831338	0.000299245	3.02119e-07	1.37761e-38	0.00915242	7.31871e-08	4.77084	538.029
2486	2641.68	2865.42	1961.58	3481.18	526.599	1702.2	19.7706	224.096	24.9873	0.423366	15.5202	44.79	8.1573	214.434	570.663	173.486	0.136628	43.8743	115.578	0.0841257	9.19043	0.608162	4.24289	7.18752	1.33913e-05	7.7248e-20	3.13962e-05	0.000831338	0.000299245	3.02119e-07	1.37761e-38	0.00915242	7.31871e-08	4.77084	538.029
2487	2641.68	2865.42	1961.58	3481.18	526.599	1702.2	19.7706	224.096	24.9873	0.423366	15.5202	44.79	8.1573	214.434	570.663	173.486	0.136628	43.8743	115.578	0.0841257	9.19043	0.608162	4.24289	7.18752	1.33913e-05	7.7248e-20	3.13962e-05	0.000831338	0.000299245	3.02119e-07	1.37761e-38	0.00915242	7.31871e-08	4.77084	538.029
2488	2641.68	2865.42	1961.58	3481.18	526.599	1702.2	19.7706	224.096	24.9873	0.423366	15.5202	44.79	8.1573	214.434	570.663	173.486	0.136628	43.8743	115.578	0.0841257	9.19043	0.608162	4.24289	7.18752	1.33913e-05	7.7248e-20	3.13962e-05	0.000831338	0.000299245	3.02119e-07	1.37761e-38	0.00915242	7.31871e-08	4.77084	538.029
2489	2641.68	2865.42	1961.58	3481.18	526.599	1702.2	19.7706	224.096	24.9873	0.423366	15.5202	44.79	8.1573	214.434	570.663	173.486	0.136628	43.8743	115.578	0.0841257	9.19043	0.608162	4.24289	7.18752	1.33913e-05	7.7248e-20	3.13962e-05	0.000831338	0.000299245	3.02119e-07	1.37761e-38	0.00915242	7.31871e-08	4.77084	538.029
2490	2641.68	2865.42	1961.58	3481.18	526.599	1702.2	19.7706	224.096	24.9873	0.423366	15.5202	44.79	8.1573	214.434	570.663	173.486	0.136628	43.8743	115.578	0.0841257	9.19043	0.608162	4.24289	7.18752	1.33913e-05	7.7248e-20	3.13962e-05	0.000831338	0.000299245	3.02119e-07	1.37761e-38	0.00915242	7.31871e-08	4.77084	538.029
2491	2641.68	2865.42	1961.58	3481.18	526.599	1702.2	19.7706	224.096	24.9873	0.423366	15.5202	44.79	8.1573	214.434	570.663	173.486	0.136628	43.8743	115.578	0.0841257	9.19043	0.608162	4.24289	7.18752	1.33913e-05	7.7248e-20	3.13962e-05	0.000831338	0.000299245	3.02119e-07	1.37761e-38	0.00915242	7.31871e-08	4.77084	538.029
2492	2641.68	2865.42	1961.58	3481.18	526.599	1702.2	19.7706	224.096	24.9873	0.423366	15.5202	44.79	8.1573	214.434	570.663	173.486	0.136628	43.8743	115.578	0.0841257	9.19043	0.608162	4.24289	7.18752	1.33913e-05	7.7248e-20	3.13962e-05	0.000831338	0.000299245	3.02119e-07	1.37761e-38	0.00915242	7.31871e-08	4.77084	538.029
2493	2641.68	2865.42	1961.58	3481.18	526.599	1702.2	19.7706	224.096	24.9873	0.423366	15.5202	44.79	8.1573	214.434	570.663	173.486	0.136628	43.8743	115.578	0.0841257	9.19043	0.608162	4.24289	7.18752	1.33913e-05	7.7248e-20	3.13962e-05	0.000831338	0.000299245	3.02119e-07	1.37761e-38	0.00915242	7.31871e-08	4.77084	538.029
2494	2641.68	2865.42	1961.58	3481.18	526.599	1702.2	19.7706	224.096	24.9873	0.423366	15.5202	44.79	8.1573	214.434	570.663	173.486	0.136628	43.8743	115.578	0.0841257	9.19043	0.608162	4.24289	7.18752	1.33913e-05	7.7248e-20	3.13962e-05	0.000831338	0.000299245	3.02119e-07	1.37761e-38	0.00915242	7.31871e-08	4.77084	538.029
2495	2641.68	2865.42	1961.58	3481.18	526.599	1702.2	19.7706	224.096	24.9873	0.423366	15.5202	44.79	8.1573	214.434	570.663	173.486	0.136628	43.8743	115.578	0.0841257	9.19043	0.608162	4.24289	7.18752	1.33913e-05	7.7248e-20	3.13962e-05	0.000831338	0.000299245	3.02119e-07	1.37761e-38	0.00915242	7.31871e-08	4.77084	538.029
2496	2641.68	2865.42	1961.58	3481.18	526.599	1702.2	19.7706	224.096	24.9873	0.423366	15.5202	44.79	8.1573	214.434	570.663	173.486	0.136628	43.8743	115.578	0.0841257	9.19043	0.608162	4.24289	7.18752	1.33913e-05	7.7248e-20	3.13962e-05	0.000831338	0.000299245	3.02119e-07	1.37761e-38	0.00915242	7.31871e-08	4.77084	538.029
2497	2641.68	2865.42	1961.58	3481.18	526.599	1702.2	19.7706	224.096	24.9873	0.423366	15.5202	44.79	8.1573	214.434	570.663	173.486	0.136628	43.8743	115.578	0.0841257	9.19043	0.608162	4.24289	7.18752	1.33913e-05	7.7248e-20	3.13962e-05	0.000831338	0.000299245	3.02119e-07	1.37761e-38	0.00915242	7.31871e-08	4.77084	538.029
2498	2641.68	2865.42	1961.58	3481.18	526.599	1702.2	19.7706	224.096	24.9873	0.423366	15.5202	44.79	8.1573	214.434	570.663	173.486	0.136628	43.8743	115.578	0.0841257	9.19043	0.608162	4.24289	7.18752	1.33913e-05	7.7248e-20	3.13962e-05	0.000831338	0.000299245	3.02119e-07	1.37761e-38	0.00915242	7.31871e-08	4.77084	538.029
2499	2641.68	2865.42	1961.58	3481.18	526.599	1702.2	19.7706	224.096	24.9873	0.423366	15.5202	44.79	8.1573	214.434	570.663	173.486	0.136628	43.8743	115.578	0.0841257	9.19043	0.608162	4.24289	7.18752	1.33913e-05	7.7248e-20	3.13962e-05	0.000831338	0.000299245	3.02119e-07	1.37761e-38	0.00915242	7.31871e-08	4.77084	538.029
2500	2641.68	2865.42	1961.58	3481.18	526.599	1702.2	19.7706	224.096	24.9873	0.423366	15.5202	44.79	8.1573	214.434	570.663	173.486	0.136628	43.8743	115.578	0.0841257	9.19043	0.608162	4.24289	7.18752	1.33913e-05	7.7248e-20	3.13962e-05	0.000831338	0.000299245	3.02119e-07	1.37761e-38	0.00915242	7.31871e-08	4.77084	538.029
