# Supplementary material for: The Social Cost of Fossil and Industrial CO2 Emissions from 1950 to 2018
Source: Research Square preprint supplement (doi:10.21203/rs.3.rs-2244259/v1), 2022-11-17
Supplement: Supplementary file 29 [file RCP85_MIDYEAR_RADFORCING.xls]

## Sheet: RCP85_MIDYEAR_RADFORCING
RCP8.5__RADIATIVE FORCINGS____________________________
CONTENT: ANNUAL AVERAGE, GLOBAL MEAN RADIATIVE FORCING.
RUN: RCP85, FINAL RELEASE, 26 Nov. 2009
RCP8.5 CONTACT: MESSAGE group, Keywan Riahi (riahi@iiasa.ac.at)
DATE: 26/11/2009 11:29:06 (updated description)
MAGICC-VERSION: 6.3.09, 25 November 2009
FILE PRODUCED BY: RCP Concentration Calculation & Data Group, M. Meinshausen, S. Smith, K. Riahi, D. van Vuuren et al.
DOCUMENTATION: M. Meinshausen, S. Smith et al. (2011) "The RCP GHG concentrations and their extension from 1765 to 2300", DOI 10.1007/s10584-011-0156-z, Climatic Change.
CMIP5 INFO: http://cmip-pcmdi.llnl.gov/cmip5/
RCP DATABASE: http://www.iiasa.ac.at/web-apps/tnt/RcpDb
FURTHER INFO: For data sources, aknowledgements and further information, see http://www.pik-potsdam.de/~mmalte/rcps.
NOTE: THIS FORCING DATASET IS NOT CMIP5 RECOMMENDATION, AS CONCENTRATIONS, NOT FORCING, SHALL BE PRESCRIBED IN MAIN CMIP5 RUNS.
Radiative Forcing after strat. temp. adjustment.;
RCP8.5 starts 2005; 20th century data and earlier is provided for convenience.
COLUMN_DESCRIPTION________________________________________
1 TOTAL_INCLVOLCANIC_RF Total anthropogenic and natural radiative forcing
2 VOLCANIC_ANNUAL_RF Annual mean volcanic stratospheric aerosol forcing
3 SOLAR_RF Solar irradience forcing
4 TOTAL_ANTHRO_RF Total anthropogenic forcing
5 GHG_RF Total greenhouse gas forcing (CO2, CH4, N2O, HFCs, PFCs, SF6, and Montreal Protocol gases).
6 KYOTOGHG_RF Total forcing from greenhouse gases controlled under the Kyoto Protocol (CO2, CH4, N2O, HFCs, PFCs, SF6).
7 CO2CH4N2O_RF Total forcing from CO2, methan and nitrous oxide.
8 CO2_RF CO2 Forcing
9 CH4_RF Methane Forcing
10 N2O_RF Nitrous Oxide Forcing
11 FGASSUM_RF Total forcing from all flourinated gases controlled under the Kyoto Protocol (HFCs, PFCs, SF6; i.e. columns 13-24)
12 MHALOSUM_RF Total forcing from all gases controlled under the Montreal Protocol (columns 25-40)
13-24 Flourinated gases controlled under the Kyoto Protocol
25-40 Ozone Depleting Substances controlled under the Montreal Protocol
41 TOTAER_DIR_RF Total direct aerosol forcing (aggregating columns 42 to 47)
42 OCI_RF Direct fossil fuel aerosol (organic carbon)
43 BCI_RF Direct fossil fuel aerosol (black carbon)
44 SOXI_RF Direct sulphate aerosol
45 NOXI_RF Direct nitrate aerosol
46 BIOMASSAER_RF Direct biomass burning related aerosol
47 MINERALDUST_RF Direct Forcing from mineral dust aerosol
48 CLOUD_TOT_RF Cloud albedo effect
49 STRATOZ_RF Stratospheric ozone forcing
50 TROPOZ_RF Tropospheric ozone forcing
51 CH4OXSTRATH2O_RF Stratospheric water-vapour from methane oxidisation
52 LANDUSE_RF Landuse albedo
53 BCSNOW_RF Black carbon on snow.
&THISFILE_SPECIFICATIONS
THISFILE_DATACOLUMNS	53
THISFILE_FIRSTYEAR	1765
THISFILE_LASTYEAR	2500
THISFILE_ANNUALSTEPS	1
THISFILE_FIRSTDATAROW	61
THISFILE_UNITS	SEE ROW 59
THISFILE_DATTYPE	RCPDAT
/
COLUMN:	1	2	3	4	5	6	7	8	9	10	11	12	13	14	15	16	17	18	19	20	21	22	23	24	25	26	27	28	29	30	31	32	33	34	35	36	37	38	39	40	41	42	43	44	45	46	47	48	49
UNITS:	W/m2	W/m2	W/m2	W/m2	W/m2	W/m2	W/m2	W/m2	W/m2	W/m2	W/m2	W/m2	W/m2	W/m2	W/m2	W/m2	W/m2	W/m2	W/m2	W/m2	W/m2	W/m2	W/m2	W/m2	W/m2	W/m2	W/m2	W/m2	W/m2	W/m2	W/m2	W/m2	W/m2	W/m2	W/m2	W/m2	W/m2	W/m2	W/m2	W/m2	W/m2	W/m2	W/m2	W/m2	W/m2	W/m2	W/m2	W/m2	W/m2
v YEARS/GAS >	TOTAL_INCLVOLCANIC_RF	VOLCANIC_ANNUAL_RF	SOLAR_RF	TOTAL_ANTHRO_RF	GHG_RF	KYOTOGHG_RF	CO2CH4N2O_RF	CO2_RF	CH4_RF	N2O_RF	FGASSUM_RF	MHALOSUM_RF	CF4	C2F6	C6F14	HFC23	HFC32	HFC43_10	HFC125	HFC134a	HFC143a	HFC227ea	HFC245fa	SF6	CFC_11	CFC_12	CFC_113	CFC_114	CFC_115	CARB_TET	MCF	HCFC_22	HCFC_141B	HCFC_142B	HALON1211	HALON1202	HALON1301	HALON2402	CH3BR	CH3CL	TOTAER_DIR_RF	OCI_RF	BCI_RF	SOXI_RF	NOXI_RF	BIOMASSAER_RF	MINERALDUST_RF	CLOUD_TOT_RF	STRATOZ_RF
1765	0	0	-0.0283587	0	0	0	0	0	0	0	0	0	0	0	0	0	0	0	0	0	0	0	0	0	0	0	0	0	0	0	0	0	0	0	0	0	0	0	0	0	0	0	0	0	0	0	0	0	0
1766	0.126027	0.116222	-0.0206938	0.0163188	0.0153635	0.0153635	0.0153635	0.0110491	0.00357577	0.000738661	0	0	0	0	0	0	0	0	0	0	0	0	0	0	0	0	0	0	0	0	0	0	0	0	0	0	0	0	0	0	1.77672e-05	0	0	-2.86731e-05	-1.2928e-05	0.000250103	-0.000190735	-0.000801451	0
1767	0.273031	0.232444	0.00703937	0.0335479	0.0321232	0.0321232	0.0321232	0.023246	0.00736074	0.00151637	0	0	0	0	0	0	0	0	0	0	0	0	0	0	0	0	0	0	0	0	0	0	0	0	0	0	0	0	0	0	-6.46768e-06	0	0	-7.97657e-05	-3.19082e-05	0.000672939	-0.000567733	-0.00238112	0
1768	0.278871	0.197444	0.0462569	0.0351696	0.0349722	0.0349722	0.0349722	0.0256052	0.00777313	0.00159381	0	0	0	0	0	0	0	0	0	0	0	0	0	0	0	0	0	0	0	0	0	0	0	0	0	0	0	0	0	0	-0.000120356	0	0	-0.000120421	-4.16465e-05	0.000977553	-0.000935841	-0.00391494	0
1769	0.242045	0.131819	0.073605	0.036621	0.0378995	0.0378995	0.0378995	0.028057	0.00817237	0.00167006	0	0	0	0	0	0	0	0	0	0	0	0	0	0	0	0	0	0	0	0	0	0	0	0	0	0	0	0	0	0	-0.00028157	0	0	-0.000153962	-4.79302e-05	0.00121549	-0.00129517	-0.0054041	0
1770	0.242824	0.127444	0.0772581	0.038122	0.0408559	0.0408559	0.0408559	0.0305529	0.00855779	0.00174523	0	0	0	0	0	0	0	0	0	0	0	0	0	0	0	0	0	0	0	0	0	0	0	0	0	0	0	0	0	0	-0.000470954	0	0	-0.000182439	-5.25379e-05	0.00140985	-0.00164582	-0.00684976	0
1771	0.284142	0.179944	0.0648944	0.0393037	0.043845	0.043845	0.043845	0.0330936	0.00893207	0.00181931	0	0	0	0	0	0	0	0	0	0	0	0	0	0	0	0	0	0	0	0	0	0	0	0	0	0	0	0	0	0	-0.000888303	-1.68577e-05	6.06652e-05	-0.000242598	-5.69856e-05	0.00135539	-0.00198792	-0.00844667	0
1772	0.299857	0.214944	0.0443363	0.0405766	0.0468967	0.0468967	0.0468967	0.0357058	0.00929859	0.00189228	0	0	0	0	0	0	0	0	0	0	0	0	0	0	0	0	0	0	0	0	0	0	0	0	0	0	0	0	0	0	-0.00132732	-3.37153e-05	0.00012133	-0.000298156	-6.07885e-05	0.00126556	-0.00232155	-0.0100013	0
1773	0.290756	0.228069	0.0203481	0.0423385	0.0500195	0.0500195	0.0500195	0.0383971	0.00965806	0.00196426	0	0	0	0	0	0	0	0	0	0	0	0	0	0	0	0	0	0	0	0	0	0	0	0	0	0	0	0	0	0	-0.00157118	-3.37153e-05	0.00012133	-0.000314621	-6.33834e-05	0.00136606	-0.00264685	-0.0113213	0
1774	0.2781	0.232444	0.00144375	0.0442116	0.0532061	0.0532061	0.0532061	0.0411609	0.0100098	0.00203544	0	0	0	0	0	0	0	0	0	0	0	0	0	0	0	0	0	0	0	0	0	0	0	0	0	0	0	0	0	0	-0.00181491	-3.37153e-05	0.00012133	-0.000329868	-6.57492e-05	0.001457	-0.00296391	-0.012602	0
1775	0.268839	0.232444	-0.00981313	0.046208	0.0564687	0.0564687	0.0564687	0.0440096	0.0103531	0.00210598	0	0	0	0	0	0	0	0	0	0	0	0	0	0	0	0	0	0	0	0	0	0	0	0	0	0	0	0	0	0	-0.00205687	-3.37153e-05	0.00012133	-0.000344145	-6.79547e-05	0.00154045	-0.00327284	-0.0138446	0
1776	0.276856	0.232444	-0.00395063	0.0483625	0.0598423	0.0598423	0.0598423	0.0469792	0.0106873	0.00217585	0	0	0	0	0	0	0	0	0	0	0	0	0	0	0	0	0	0	0	0	0	0	0	0	0	0	0	0	0	0	-0.00229589	-3.37153e-05	0.00012133	-0.00035764	-7.0046e-05	0.00161793	-0.00357375	-0.0150498	0
1777	0.305761	0.232444	0.022645	0.0506714	0.0633239	0.0633239	0.0633239	0.0500673	0.0110116	0.00224499	0	0	0	0	0	0	0	0	0	0	0	0	0	0	0	0	0	0	0	0	0	0	0	0	0	0	0	0	0	0	-0.00253112	-3.37153e-05	0.00012133	-0.000370499	-7.2055e-05	0.00169058	-0.00386676	-0.0162188	0
1778	0.337875	0.232444	0.0523687	0.0530622	0.0668415	0.0668415	0.0668415	0.0532026	0.0113254	0.0023135	0	0	0	0	0	0	0	0	0	0	0	0	0	0	0	0	0	0	0	0	0	0	0	0	0	0	0	0	0	0	-0.0027619	-3.37153e-05	0.00012133	-0.000382835	-7.40046e-05	0.00175929	-0.00415196	-0.0173523	0
1779	0.347581	0.232444	0.0597012	0.0554354	0.0702966	0.0702966	0.0702966	0.0562871	0.0116279	0.00238163	0	0	0	0	0	0	0	0	0	0	0	0	0	0	0	0	0	0	0	0	0	0	0	0	0	0	0	0	0	0	-0.00298778	-3.37153e-05	0.00012133	-0.000394738	-7.59118e-05	0.00182473	-0.00442948	-0.0184512	0
1780	0.341674	0.232444	0.0515287	0.057701	0.0736012	0.0736012	0.0736012	0.0592345	0.0119171	0.00244953	0	0	0	0	0	0	0	0	0	0	0	0	0	0	0	0	0	0	0	0	0	0	0	0	0	0	0	0	0	0	-0.0032084	-3.37153e-05	0.00012133	-0.00040628	-7.77893e-05	0.00188746	-0.00469941	-0.0195164	0
1781	0.333722	0.232444	0.041895	0.0593826	0.0767183	0.0767183	0.0767183	0.0620123	0.0121889	0.00251718	0	0	0	0	0	0	0	0	0	0	0	0	0	0	0	0	0	0	0	0	0	0	0	0	0	0	0	0	0	0	-0.0036953	-5.0573e-05	0.000181996	-0.000443034	-8.00993e-05	0.00165829	-0.00496187	-0.0207342	0
1782	0.29102	0.210569	0.019495	0.0609557	0.0796905	0.0796905	0.0796905	0.0646641	0.0124419	0.00258449	0	0	0	0	0	0	0	0	0	0	0	0	0	0	0	0	0	0	0	0	0	0	0	0	0	0	0	0	0	0	-0.00417917	-6.74306e-05	0.000242661	-0.000479101	-8.23858e-05	0.00142406	-0.00521697	-0.0219192	0
1783	0.175605	0.118694	-0.00603313	0.0629442	0.0826033	0.0826033	0.0826033	0.0672719	0.0126798	0.00265156	0	0	0	0	0	0	0	0	0	0	0	0	0	0	0	0	0	0	0	0	0	0	0	0	0	0	0	0	0	0	-0.0043878	-6.74306e-05	0.000242661	-0.000489063	-8.42044e-05	0.00147505	-0.00546481	-0.0228868	0
1784	0.0902692	0.0443192	-0.0190575	0.0650075	0.0855481	0.0855481	0.0855481	0.0699211	0.0129083	0.00271864	0	0	0	0	0	0	0	0	0	0	0	0	0	0	0	0	0	0	0	0	0	0	0	0	0	0	0	0	0	0	-0.00458993	-6.74306e-05	0.000242661	-0.000498942	-8.60251e-05	0.00152532	-0.00570551	-0.0238237	0
1785	0.162453	0.101194	-0.00597625	0.0672351	0.0886122	0.0886122	0.0886122	0.0726933	0.013133	0.00278589	0	0	0	0	0	0	0	0	0	0	0	0	0	0	0	0	0	0	0	0	0	0	0	0	0	0	0	0	0	0	-0.00478558	-6.74306e-05	0.000242661	-0.000508756	-8.78518e-05	0.00157496	-0.00593917	-0.0247309	0
1786	0.289562	0.188694	0.0311894	0.0696782	0.0918446	0.0918446	0.0918446	0.0756317	0.0133596	0.00285332	0	0	0	0	0	0	0	0	0	0	0	0	0	0	0	0	0	0	0	0	0	0	0	0	0	0	0	0	0	0	-0.00497481	-6.74306e-05	0.000242661	-0.00051852	-8.96878e-05	0.00162407	-0.00616591	-0.025609	0
1787	0.352999	0.223694	0.0569931	0.0723117	0.0952178	0.0952178	0.0952178	0.0787033	0.0135937	0.00292083	0	0	0	0	0	0	0	0	0	0	0	0	0	0	0	0	0	0	0	0	0	0	0	0	0	0	0	0	0	0	-0.00515766	-6.74306e-05	0.000242661	-0.000528246	-9.15357e-05	0.00167271	-0.00638582	-0.0264587	0
1788	0.361769	0.228069	0.0586425	0.0750571	0.0986512	0.0986512	0.0986512	0.0818218	0.0138409	0.0029885	0	0	0	0	0	0	0	0	0	0	0	0	0	0	0	0	0	0	0	0	0	0	0	0	0	0	0	0	0	0	-0.0053342	-6.74306e-05	0.000242661	-0.000537943	-9.3398e-05	0.00172093	-0.00659903	-0.0272807	0
1789	0.251054	0.123069	0.0501594	0.0778252	0.102053	0.102053	0.102053	0.0848899	0.0141068	0.00305652	0	0	0	0	0	0	0	0	0	0	0	0	0	0	0	0	0	0	0	0	0	0	0	0	0	0	0	0	0	0	-0.00550453	-6.74306e-05	0.000242661	-0.00054762	-9.52767e-05	0.00176877	-0.00680563	-0.0280756	0
1790	0.0888822	-0.0256808	0.0340112	0.0805518	0.105358	0.105358	0.105358	0.0878369	0.014396	0.00312507	0	0	0	0	0	0	0	0	0	0	0	0	0	0	0	0	0	0	0	0	0	0	0	0	0	0	0	0	0	0	-0.00566872	-6.74306e-05	0.000242661	-0.000557285	-9.71739e-05	0.00181626	-0.00700575	-0.0288442	0
1791	0.10802	0.00931922	0.0159119	0.0827889	0.108565	0.108565	0.108565	0.090661	0.0147095	0.00319415	0	0	0	0	0	0	0	0	0	0	0	0	0	0	0	0	0	0	0	0	0	0	0	0	0	0	0	0	0	0	-0.00611429	-8.42883e-05	0.000303326	-0.000589915	-9.94791e-05	0.00155555	-0.00719948	-0.0297669	0
1792	0.232799	0.140569	0.00721438	0.0850151	0.111707	0.111707	0.111707	0.0933979	0.0150454	0.00326368	0	0	0	0	0	0	0	0	0	0	0	0	0	0	0	0	0	0	0	0	0	0	0	0	0	0	0	0	0	0	-0.00655452	-0.000101146	0.000363991	-0.000622448	-0.000101804	0.00129383	-0.00738694	-0.030664	0
1793	0.294575	0.206194	0.000695625	0.0876853	0.114796	0.114796	0.114796	0.0960604	0.0154015	0.00333373	0	0	0	0	0	0	0	0	0	0	0	0	0	0	0	0	0	0	0	0	0	0	0	0	0	0	0	0	0	0	-0.00670198	-0.000101146	0.000363991	-0.000631935	-0.000103761	0.0013391	-0.00756823	-0.0313564	0
1794	0.291738	0.214944	-0.0135494	0.0903436	0.117822	0.117822	0.117822	0.0986421	0.0157759	0.00340449	0	0	0	0	0	0	0	0	0	0	0	0	0	0	0	0	0	0	0	0	0	0	0	0	0	0	0	0	0	0	-0.00684351	-0.000101146	0.000363991	-0.000641468	-0.000105745	0.00138433	-0.00774347	-0.0320248	0
1795	0.256846	0.193069	-0.0292075	0.0929845	0.120784	0.120784	0.120784	0.101141	0.016167	0.00347613	0	0	0	0	0	0	0	0	0	0	0	0	0	0	0	0	0	0	0	0	0	0	0	0	0	0	0	0	0	0	-0.00697922	-0.000101146	0.000363991	-0.000651046	-0.000107754	0.0014295	-0.00791277	-0.03267	0
1796	0.245053	0.188694	-0.0392525	0.0956109	0.123685	0.123685	0.123685	0.103563	0.0165732	0.00354868	0	0	0	0	0	0	0	0	0	0	0	0	0	0	0	0	0	0	0	0	0	0	0	0	0	0	0	0	0	0	-0.00710926	-0.000101146	0.000363991	-0.000660671	-0.000109792	0.00147458	-0.00807622	-0.0332925	0
1797	0.262057	0.210569	-0.0462919	0.0977792	0.12653	0.12653	0.12653	0.105915	0.0169925	0.00362206	0	0	0	0	0	0	0	0	0	0	0	0	0	0	0	0	0	0	0	0	0	0	0	0	0	0	0	0	0	0	-0.00752309	-0.000118004	0.000424656	-0.000693	-0.000112238	0.00120944	-0.00823395	-0.0340702	0
1798	0.277467	0.228069	-0.0505312	0.0999294	0.129313	0.129313	0.129313	0.108193	0.0174234	0.00369635	0	0	0	0	0	0	0	0	0	0	0	0	0	0	0	0	0	0	0	0	0	0	0	0	0	0	0	0	0	0	-0.00793151	-0.000134861	0.000485322	-0.000725378	-0.000114715	0.000944184	-0.00838606	-0.0348259	0
1799	0.285635	0.232444	-0.0493063	0.102497	0.132027	0.132027	0.132027	0.110391	0.0178642	0.00377173	0	0	0	0	0	0	0	0	0	0	0	0	0	0	0	0	0	0	0	0	0	0	0	0	0	0	0	0	0	0	-0.00804523	-0.000134861	0.000485322	-0.000735158	-0.000116843	0.000988968	-0.00853266	-0.035383	0
1800	0.30346	0.232444	-0.0335737	0.104589	0.134669	0.134669	0.134669	0.112505	0.0183161	0.00384836	0	0	0	0	0	0	0	0	0	0	0	0	0	0	0	0	0	0	0	0	0	0	0	0	0	0	0	0	0	0	-0.00844273	-0.000151719	0.000545987	-0.000767714	-0.000119385	0.000723959	-0.00867386	-0.0360958	0
1801	0.325814	0.232444	-0.0133	0.10667	0.137256	0.137256	0.137256	0.114543	0.0187862	0.00392631	0	0	0	0	0	0	0	0	0	0	0	0	0	0	0	0	0	0	0	0	0	0	0	0	0	0	0	0	0	0	-0.00883486	-0.000168577	0.000606652	-0.000800378	-0.000121961	0.000459176	-0.00880977	-0.0367883	0
1802	0.322938	0.232444	-0.0178194	0.108313	0.139798	0.139798	0.139798	0.116513	0.0192802	0.00400554	0	0	0	0	0	0	0	0	0	0	0	0	0	0	0	0	0	0	0	0	0	0	0	0	0	0	0	0	0	0	-0.00950964	-0.000202292	0.000727983	-0.000856043	-0.00012496	-0.000113837	-0.00894049	-0.0376356	0
1803	0.308295	0.232444	-0.034545	0.110395	0.142293	0.142293	0.142293	0.11841	0.0197968	0.0040861	0	0	0	0	0	0	0	0	0	0	0	0	0	0	0	0	0	0	0	0	0	0	0	0	0	0	0	0	0	0	-0.00989057	-0.00021915	0.000788648	-0.000889063	-0.000127612	-0.000377254	-0.00906614	-0.0382885	0
1804	0.306252	0.232444	-0.0395369	0.113344	0.144725	0.144725	0.144725	0.120225	0.0203315	0.00416812	0	0	0	0	0	0	0	0	0	0	0	0	0	0	0	0	0	0	0	0	0	0	0	0	0	0	0	0	0	0	-0.00968924	-0.000202292	0.000727983	-0.000876652	-0.000129537	-2.19124e-05	-0.00918683	-0.0385724	0
1805	0.305549	0.232444	-0.0427263	0.115831	0.147099	0.147099	0.147099	0.121968	0.0208796	0.00425172	0	0	0	0	0	0	0	0	0	0	0	0	0	0	0	0	0	0	0	0	0	0	0	0	0	0	0	0	0	0	-0.00977162	-0.000202292	0.000727983	-0.000887137	-0.000131884	2.43633e-05	-0.00930266	-0.0390136	0
1806	0.296562	0.232444	-0.0537644	0.117883	0.149444	0.149444	0.149444	0.12367	0.0214367	0.00433697	0	0	0	0	0	0	0	0	0	0	0	0	0	0	0	0	0	0	0	0	0	0	0	0	0	0	0	0	0	0	-0.010136	-0.00021915	0.000788648	-0.000920814	-0.000134662	-0.000236318	-0.00941374	-0.0396116	0
1807	0.287336	0.232444	-0.0650431	0.119935	0.151757	0.151757	0.151757	0.125335	0.0219981	0.00442389	0	0	0	0	0	0	0	0	0	0	0	0	0	0	0	0	0	0	0	0	0	0	0	0	0	0	0	0	0	0	-0.0104954	-0.000236007	0.000849313	-0.000954685	-0.000137484	-0.000496324	-0.00952019	-0.0401925	0
1808	-0.206609	-0.257556	-0.0714175	0.122364	0.153977	0.153977	0.153977	0.126905	0.0225594	0.00451253	0	0	0	0	0	0	0	0	0	0	0	0	0	0	0	0	0	0	0	0	0	0	0	0	0	0	0	0	0	0	-0.0105631	-0.000236007	0.000849313	-0.000965661	-0.00013996	-0.00044866	-0.0096221	-0.0405827	0
1809	-1.35012	-1.39943	-0.0753287	0.124641	0.156019	0.156019	0.156019	0.1283	0.023116	0.00460296	0	0	0	0	0	0	0	0	0	0	0	0	0	0	0	0	0	0	0	0	0	0	0	0	0	0	0	0	0	0	-0.0106265	-0.000236007	0.000849313	-0.000976744	-0.00014248	-0.000400998	-0.0097196	-0.040957	0
1810	-1.75196	-1.80193	-0.0767375	0.126704	0.157824	0.157824	0.157824	0.129463	0.0236656	0.00469527	0	0	0	0	0	0	0	0	0	0	0	0	0	0	0	0	0	0	0	0	0	0	0	0	0	0	0	0	0	0	-0.0106858	-0.000236007	0.000849313	-0.00098793	-0.000145046	-0.000353387	-0.00981279	-0.041316	0
1811	-0.956129	-1.01006	-0.0742044	0.128132	0.159405	0.159405	0.159405	0.130404	0.0242113	0.00478954	0	0	0	0	0	0	0	0	0	0	0	0	0	0	0	0	0	0	0	0	0	0	0	0	0	0	0	0	0	0	-0.0110244	-0.000252865	0.000909978	-0.00102288	-0.000148063	-0.000608758	-0.00990177	-0.0418329	0
1812	-0.279183	-0.340681	-0.0679394	0.129438	0.160837	0.160837	0.160837	0.131194	0.0247577	0.00488582	0	0	0	0	0	0	0	0	0	0	0	0	0	0	0	0	0	0	0	0	0	0	0	0	0	0	0	0	0	0	-0.0113582	-0.000269723	0.000970643	-0.00105807	-0.000151131	-0.000863292	-0.00998666	-0.0423352	0
1813	-0.0779071	-0.148181	-0.0608563	0.13113	0.162193	0.162193	0.162193	0.131903	0.0253063	0.00498417	0	0	0	0	0	0	0	0	0	0	0	0	0	0	0	0	0	0	0	0	0	0	0	0	0	0	0	0	0	0	-0.0114044	-0.000269723	0.000970643	-0.00106982	-0.000153847	-0.000814097	-0.0100676	-0.0426505	0
1814	-0.598962	-0.677556	-0.0542369	0.132831	0.163532	0.163532	0.163532	0.132591	0.0258564	0.00508465	0	0	0	0	0	0	0	0	0	0	0	0	0	0	0	0	0	0	0	0	0	0	0	0	0	0	0	0	0	0	-0.011447	-0.000269723	0.000970643	-0.00108169	-0.000156615	-0.000765034	-0.0101446	-0.0429521	0
1815	-2.06194	-2.15193	-0.0441744	0.134164	0.16491	0.16491	0.16491	0.133315	0.0264075	0.00518734	0	0	0	0	0	0	0	0	0	0	0	0	0	0	0	0	0	0	0	0	0	0	0	0	0	0	0	0	0	0	-0.0117657	-0.00028658	0.00103131	-0.00111791	-0.000159854	-0.00101481	-0.0102179	-0.0434128	0
1816	-2.56318	-2.66381	-0.0345275	0.135154	0.166351	0.166351	0.166351	0.134099	0.0269592	0.00529233	0	0	0	0	0	0	0	0	0	0	0	0	0	0	0	0	0	0	0	0	0	0	0	0	0	0	0	0	0	0	-0.0123587	-0.000320295	0.00115264	-0.00117881	-0.000163576	-0.00156113	-0.0102875	-0.0440324	0
1817	-1.39423	-1.49568	-0.0347594	0.13621	0.167829	0.167829	0.167829	0.134918	0.0275109	0.00539971	0	0	0	0	0	0	0	0	0	0	0	0	0	0	0	0	0	0	0	0	0	0	0	0	0	0	0	0	0	0	-0.0129443	-0.000354011	0.00127397	-0.00124048	-0.000167371	-0.00210289	-0.0103535	-0.0446389	0
1818	-0.265648	-0.362556	-0.0407925	0.137701	0.169288	0.169288	0.169288	0.135717	0.028062	0.00550955	0	0	0	0	0	0	0	0	0	0	0	0	0	0	0	0	0	0	0	0	0	0	0	0	0	0	0	0	0	0	-0.0132463	-0.000370868	0.00133463	-0.00127819	-0.000170809	-0.00234485	-0.0104162	-0.0450616	0
1819	0.185347	0.0924442	-0.0466594	0.139562	0.170669	0.170669	0.170669	0.136435	0.0286121	0.00562183	0	0	0	0	0	0	0	0	0	0	0	0	0	0	0	0	0	0	0	0	0	0	0	0	0	0	0	0	0	0	-0.0132666	-0.000370868	0.00133463	-0.00129161	-0.000173885	-0.00228941	-0.0104755	-0.0453015	0
1820	0.311867	0.223694	-0.0531475	0.14132	0.171926	0.171926	0.171926	0.137029	0.0291608	0.00573657	0	0	0	0	0	0	0	0	0	0	0	0	0	0	0	0	0	0	0	0	0	0	0	0	0	0	0	0	0	0	-0.0132841	-0.000370868	0.00133463	-0.00130516	-0.000177022	-0.0022341	-0.0105315	-0.0455305	0
1821	0.318984	0.232444	-0.0564375	0.142978	0.173064	0.173064	0.173064	0.137502	0.0297081	0.00585384	0	0	0	0	0	0	0	0	0	0	0	0	0	0	0	0	0	0	0	0	0	0	0	0	0	0	0	0	0	0	-0.0132988	-0.000370868	0.00133463	-0.00131884	-0.000180224	-0.00217896	-0.0105845	-0.0457491	0
1822	0.321522	0.232444	-0.0550769	0.144155	0.174125	0.174125	0.174125	0.137897	0.0302546	0.00597377	0	0	0	0	0	0	0	0	0	0	0	0	0	0	0	0	0	0	0	0	0	0	0	0	0	0	0	0	0	0	-0.0135826	-0.000387726	0.0013953	-0.00135815	-0.000183944	-0.00241361	-0.0106345	-0.0461284	0
1823	0.325542	0.232444	-0.0517956	0.144894	0.175148	0.175148	0.175148	0.138251	0.0308006	0.00609643	0	0	0	0	0	0	0	0	0	0	0	0	0	0	0	0	0	0	0	0	0	0	0	0	0	0	0	0	0	0	-0.0141332	-0.000421441	0.00151663	-0.0014235	-0.000188197	-0.00293517	-0.0106815	-0.0466684	0
1824	0.333737	0.232444	-0.0447738	0.146066	0.176162	0.176162	0.176162	0.138595	0.0313461	0.00622184	0	0	0	0	0	0	0	0	0	0	0	0	0	0	0	0	0	0	0	0	0	0	0	0	0	0	0	0	0	0	-0.0144072	-0.000438299	0.0015773	-0.00146387	-0.000192079	-0.00316445	-0.0107258	-0.0470284	0
1825	0.347678	0.232444	-0.0320425	0.147276	0.177192	0.177192	0.177192	0.138951	0.0318913	0.00635001	0	0	0	0	0	0	0	0	0	0	0	0	0	0	0	0	0	0	0	0	0	0	0	0	0	0	0	0	0	0	-0.0146751	-0.000455157	0.00163796	-0.001505	-0.000196051	-0.00338943	-0.0107674	-0.0473792	0
1826	0.366029	0.232444	-0.0149362	0.148521	0.17824	0.17824	0.17824	0.139322	0.0324366	0.00648103	0	0	0	0	0	0	0	0	0	0	0	0	0	0	0	0	0	0	0	0	0	0	0	0	0	0	0	0	0	0	-0.0149395	-0.000472014	0.00169863	-0.00154647	-0.000200106	-0.00361307	-0.0108065	-0.0477217	0
1827	0.385377	0.232444	0.00313687	0.149795	0.179296	0.179296	0.179296	0.139699	0.0329819	0.00661505	0	0	0	0	0	0	0	0	0	0	0	0	0	0	0	0	0	0	0	0	0	0	0	0	0	0	0	0	0	0	-0.0151978	-0.000488872	0.00175929	-0.00158874	-0.000204258	-0.00383219	-0.0108431	-0.0480558	0
1828	0.3956	0.228069	0.0164413	0.15109	0.180355	0.180355	0.180355	0.140075	0.0335275	0.00675215	0	0	0	0	0	0	0	0	0	0	0	0	0	0	0	0	0	0	0	0	0	0	0	0	0	0	0	0	0	0	-0.0154529	-0.00050573	0.00181996	-0.00163137	-0.000208498	-0.0040499	-0.0108773	-0.0483824	0
1829	0.369518	0.193069	0.0236294	0.152819	0.181418	0.181418	0.181418	0.140452	0.0340735	0.00689231	0	0	0	0	0	0	0	0	0	0	0	0	0	0	0	0	0	0	0	0	0	0	0	0	0	0	0	0	0	0	-0.0154395	-0.00050573	0.00181996	-0.00164779	-0.000212348	-0.00398423	-0.0109093	-0.0485322	0
1830	0.151585	-0.0213058	0.0207813	0.152109	0.182483	0.182483	0.182483	0.140828	0.034619	0.00703549	0	0	0	0	0	0	0	0	0	0	0	0	0	0	0	0	0	0	0	0	0	0	0	0	0	0	0	0	0	0	-0.01699	-0.000606876	0.00218395	-0.00182798	-0.00021929	-0.00558057	-0.0109392	-0.0496887	0
1831	-0.242712	-0.397556	0.003675	0.151168	0.182889	0.182889	0.182889	0.140546	0.035161	0.00718177	0	0	0	0	0	0	0	0	0	0	0	0	0	0	0	0	0	0	0	0	0	0	0	0	0	0	0	0	0	0	-0.0182706	-0.000691164	0.00248727	-0.00198224	-0.000225857	-0.00689156	-0.010967	-0.0506703	0
1832	-0.35069	-0.485056	-0.0166381	0.151004	0.181598	0.181598	0.181598	0.138569	0.0356978	0.0073313	0	0	0	0	0	0	0	0	0	0	0	0	0	0	0	0	0	0	0	0	0	0	0	0	0	0	0	0	0	0	-0.0179767	-0.000674306	0.00242661	-0.00197423	-0.000229549	-0.00653227	-0.010993	-0.0506325	0
1833	-0.0619758	-0.183181	-0.0278906	0.149096	0.179365	0.179365	0.179365	0.13565	0.0362309	0.00748419	0	0	0	0	0	0	0	0	0	0	0	0	0	0	0	0	0	0	0	0	0	0	0	0	0	0	0	0	0	0	-0.0181987	-0.000691164	0.00248727	-0.00202167	-0.000234363	-0.00672163	-0.0110171	-0.050926	0
1834	-0.2153	-0.345056	-0.0175394	0.147295	0.177227	0.177227	0.177227	0.132824	0.0367633	0.00764044	0	0	0	0	0	0	0	0	0	0	0	0	0	0	0	0	0	0	0	0	0	0	0	0	0	0	0	0	0	0	-0.0184177	-0.000708022	0.00254794	-0.00206953	-0.000239287	-0.00690921	-0.0110395	-0.0512145	0
1835	-0.819113	-0.988181	0.0235506	0.145517	0.175094	0.175094	0.175094	0.129996	0.0372979	0.00780001	0	0	0	0	0	0	0	0	0	0	0	0	0	0	0	0	0	0	0	0	0	0	0	0	0	0	0	0	0	0	-0.0186307	-0.000724879	0.0026086	-0.00211834	-0.000244341	-0.00709135	-0.0110604	-0.0514981	0
1836	-0.735064	-0.948806	0.071575	0.142167	0.172967	0.172967	0.172967	0.127166	0.0378376	0.00796301	0	0	0	0	0	0	0	0	0	0	0	0	0	0	0	0	0	0	0	0	0	0	0	0	0	0	0	0	0	0	-0.0198478	-0.000809168	0.00291193	-0.00228265	-0.000251692	-0.00833648	-0.0110798	-0.0524478	0
1837	-0.124807	-0.349431	0.0853737	0.13925	0.17085	0.17085	0.17085	0.124335	0.0383853	0.0081296	0	0	0	0	0	0	0	0	0	0	0	0	0	0	0	0	0	0	0	0	0	0	0	0	0	0	0	0	0	0	-0.0208025	-0.000876598	0.00315459	-0.00241995	-0.000258661	-0.00930414	-0.0110978	-0.0532255	0
1838	0.249179	0.0443192	0.0663469	0.138513	0.169691	0.169691	0.169691	0.122447	0.038944	0.0082999	0	0	0	0	0	0	0	0	0	0	0	0	0	0	0	0	0	0	0	0	0	0	0	0	0	0	0	0	0	0	-0.0209913	-0.000893456	0.00321526	-0.00247272	-0.000264165	-0.00946171	-0.0111145	-0.0534965	0
1839	0.363501	0.179944	0.0447212	0.138836	0.169966	0.169966	0.169966	0.121975	0.0395165	0.00847385	0	0	0	0	0	0	0	0	0	0	0	0	0	0	0	0	0	0	0	0	0	0	0	0	0	0	0	0	0	0	-0.0214243	-0.000927171	0.00333659	-0.00255554	-0.000270371	-0.00987763	-0.0111302	-0.0539314	0
1840	0.343505	0.179944	0.0242725	0.139288	0.170735	0.170735	0.170735	0.121975	0.0401075	0.00865206	0	0	0	0	0	0	0	0	0	0	0	0	0	0	0	0	0	0	0	0	0	0	0	0	0	0	0	0	0	0	-0.0220948	-0.000977744	0.00351858	-0.00266948	-0.00027732	-0.0105441	-0.0111447	-0.0545298	0
1841	0.31934	0.175569	0.00348687	0.140284	0.172016	0.172016	0.172016	0.122447	0.0407232	0.00884589	0	0	0	0	0	0	0	0	0	0	0	0	0	0	0	0	0	0	0	0	0	0	0	0	0	0	0	0	0	0	-0.022756	-0.00102832	0.00370058	-0.00278502	-0.000284448	-0.0112005	-0.0111584	-0.0551254	0
1842	0.319973	0.188694	-0.0110381	0.142317	0.174299	0.174299	0.174299	0.123863	0.0413656	0.00907048	0	0	0	0	0	0	0	0	0	0	0	0	0	0	0	0	0	0	0	0	0	0	0	0	0	0	0	0	0	0	-0.0234046	-0.00107889	0.00388257	-0.00290272	-0.000291779	-0.0118426	-0.0111712	-0.055718	0
1843	0.293452	0.166819	-0.0182569	0.14489	0.177093	0.177093	0.177093	0.125751	0.0420297	0.00931265	0	0	0	0	0	0	0	0	0	0	0	0	0	0	0	0	0	0	0	0	0	0	0	0	0	0	0	0	0	0	-0.0240439	-0.00112946	0.00406457	-0.00302205	-0.000299302	-0.0124744	-0.0111833	-0.0563087	0
1844	0.288578	0.153694	-0.0130681	0.147952	0.180349	0.180349	0.180349	0.12811	0.0427082	0.00953103	0	0	0	0	0	0	0	0	0	0	0	0	0	0	0	0	0	0	0	0	0	0	0	0	0	0	0	0	0	0	-0.0246704	-0.00118004	0.00424656	-0.0031436	-0.000307044	-0.0130916	-0.0111948	-0.0568972	0
1845	0.338834	0.184319	0.003745	0.15077	0.184482	0.184482	0.184482	0.13141	0.0433937	0.00967897	0	0	0	0	0	0	0	0	0	0	0	0	0	0	0	0	0	0	0	0	0	0	0	0	0	0	0	0	0	0	-0.025997	-0.00128118	0.00461056	-0.00336054	-0.000316863	-0.0144432	-0.0112058	-0.0579789	0
1846	0.391591	0.214944	0.022365	0.154282	0.188527	0.188527	0.188527	0.134708	0.0440787	0.00974026	0	0	0	0	0	0	0	0	0	0	0	0	0	0	0	0	0	0	0	0	0	0	0	0	0	0	0	0	0	0	-0.026836	-0.00134861	0.00485322	-0.00351756	-0.000325679	-0.0152809	-0.0112164	-0.0587295	0
1847	0.429859	0.228069	0.0441262	0.157663	0.19204	0.19204	0.19204	0.137534	0.044756	0.00975013	0	0	0	0	0	0	0	0	0	0	0	0	0	0	0	0	0	0	0	0	0	0	0	0	0	0	0	0	0	0	-0.0274202	-0.00139919	0.00503521	-0.00364652	-0.000334144	-0.0158488	-0.0112267	-0.0593136	0
1848	0.458917	0.232444	0.0653581	0.161115	0.195995	0.195995	0.195995	0.140828	0.0454182	0.00974841	0	0	0	0	0	0	0	0	0	0	0	0	0	0	0	0	0	0	0	0	0	0	0	0	0	0	0	0	0	0	-0.0282296	-0.00146662	0.00527787	-0.00380874	-0.000343474	-0.0166518	-0.0112369	-0.0600621	0
1849	0.444998	0.215994	0.0644481	0.164556	0.199925	0.199925	0.199925	0.144121	0.0460579	0.00974679	0	0	0	0	0	0	0	0	0	0	0	0	0	0	0	0	0	0	0	0	0	0	0	0	0	0	0	0	0	0	-0.0290206	-0.00153405	0.00552053	-0.0039742	-0.000353096	-0.0174328	-0.011247	-0.0608094	0
1850	0.405396	0.192005	0.0468169	0.166575	0.203438	0.203438	0.203438	0.146941	0.0466654	0.00983124	0	0	0	0	0	0	0	0	0	0	0	0	0	0	0	0	0	0	0	0	0	0	0	0	0	0	0	0	0	0	-0.0303756	-0.00165205	0.00594519	-0.0042566	-0.000366397	-0.0187885	-0.0112572	-0.0620457	0
1851	0.398625	0.193033	0.0350131	0.170579	0.207233	0.20723	0.20723	0.14976	0.0473827	0.010087	0	3.37155e-06	0	0	0	0	0	0	0	0	0	0	0	0	0	0	0	0	0	3.37155e-06	0	0	0	0	0	0	0	0	0	0	-0.0310854	-0.00171948	0.00618785	-0.00446059	-0.000380927	-0.0196019	-0.0111103	-0.0624378	0
1852	0.400521	0.208797	0.0234325	0.168291	0.210775	0.210765	0.210765	0.152108	0.0482287	0.0104282	0	1.0112e-05	0	0	0	0	0	0	0	0	0	0	0	0	0	0	0	0	0	1.0112e-05	0	0	0	0	0	0	0	0	0	0	-0.031923	-0.00177005	0.00636985	-0.00477111	-0.000426812	-0.01914	-0.0121848	-0.0667802	0
1853	0.393475	0.223534	0.00493063	0.165011	0.214315	0.214298	0.214298	0.154455	0.0490739	0.0107693	0	1.68545e-05	0	0	0	0	0	0	0	0	0	0	0	0	0	0	0	0	0	1.68545e-05	0	0	0	0	0	0	0	0	0	0	-0.0328911	-0.00185434	0.00667317	-0.00516171	-0.00047338	-0.0187067	-0.0133681	-0.0716228	0
1854	0.384141	0.231759	-0.0141137	0.166496	0.218323	0.218299	0.218299	0.15727	0.0499183	0.0111104	0	2.36015e-05	0	0	0	0	0	0	0	0	0	0	0	0	0	0	0	0	0	2.36015e-05	0	0	0	0	0	0	0	0	0	0	-0.0347687	-0.00205663	0.00740116	-0.00568177	-0.000494128	-0.0206647	-0.0132727	-0.0732375	0
1855	0.242826	0.101187	-0.0262806	0.16792	0.222187	0.222157	0.222157	0.160084	0.0506214	0.0114514	0	3.03485e-05	0	0	0	0	0	0	0	0	0	0	0	0	0	0	0	0	0	3.03485e-05	0	0	0	0	0	0	0	0	0	0	-0.0365941	-0.00225893	0.00812914	-0.00620497	-0.000514249	-0.0225881	-0.013157	-0.0747763	0
1856	-0.211073	-0.356671	-0.0247188	0.170318	0.226049	0.226012	0.226012	0.162896	0.0513238	0.0117924	0	3.7089e-05	0	0	0	0	0	0	0	0	0	0	0	0	0	0	0	0	0	3.7089e-05	0	0	0	0	0	0	0	0	0	0	-0.0373583	-0.00237693	0.00855379	-0.00657552	-0.000535075	-0.023216	-0.0132085	-0.0760571	0
1857	-0.44449	-0.610276	-0.00660625	0.172392	0.23005	0.230006	0.230006	0.165707	0.0521659	0.0121333	0	4.38295e-05	0	0	0	0	0	0	0	0	0	0	0	0	0	0	0	0	0	4.38295e-05	0	0	0	0	0	0	0	0	0	0	-0.0379593	-0.00247808	0.00891779	-0.00692952	-0.000560068	-0.0234691	-0.0134404	-0.0777602	0
1858	-0.0968363	-0.297726	0.0245875	0.176302	0.234516	0.234465	0.234465	0.168984	0.0530073	0.0124741	0	5.05765e-05	0	0	0	0	0	0	0	0	0	0	0	0	0	0	0	0	0	5.05765e-05	0	0	0	0	0	0	0	0	0	0	-0.0377434	-0.00251179	0.00903912	-0.00713598	-0.000582046	-0.0228811	-0.0136716	-0.0788276	0
1859	0.262109	0.0281901	0.0549981	0.178921	0.238979	0.238922	0.238922	0.172259	0.0538479	0.0128149	0	5.7317e-05	0	0	0	0	0	0	0	0	0	0	0	0	0	0	0	0	0	5.7317e-05	0	0	0	0	0	0	0	0	0	0	-0.0382962	-0.00261294	0.00940311	-0.00749556	-0.000607703	-0.0230821	-0.013901	-0.080499	0
1860	0.390709	0.150537	0.0655506	0.174622	0.242972	0.242908	0.242908	0.175065	0.0546876	0.0131556	0	6.40575e-05	0	0	0	0	0	0	0	0	0	0	0	0	0	0	0	0	0	6.40575e-05	0	0	0	0	0	0	0	0	0	0	-0.040746	-0.00374144	0.0115562	-0.00823371	-0.000642153	-0.0255547	-0.0141302	-0.0868929	0
1861	0.35779	0.13957	0.0522987	0.165921	0.246963	0.246892	0.246892	0.177869	0.0555265	0.0134962	0	7.08045e-05	0	0	0	0	0	0	0	0	0	0	0	0	0	0	0	0	0	7.08045e-05	0	0	0	0	0	0	0	0	0	0	-0.0438139	-0.00559474	0.0147615	-0.00907053	-0.000693842	-0.0286875	-0.0145288	-0.0968016	0
1862	0.258114	0.055264	0.030695	0.172155	0.250484	0.250406	0.250406	0.180205	0.0563646	0.0138368	0	7.7545e-05	0	0	0	0	0	0	0	0	0	0	0	0	0	0	0	0	0	7.7545e-05	0	0	0	0	0	0	0	0	0	0	-0.0442782	-0.0059419	0.0154946	-0.00939863	-0.000698698	-0.0302114	-0.0135223	-0.0957985	0
1863	0.263904	0.0676015	0.01407	0.182233	0.254003	0.253919	0.253919	0.18254	0.0572019	0.0141773	0	8.42855e-05	0	0	0	0	0	0	0	0	0	0	0	0	0	0	0	0	0	8.42855e-05	0	0	0	0	0	0	0	0	0	0	-0.0443449	-0.00574691	0.0155204	-0.00976109	-0.000690694	-0.0314319	-0.0122347	-0.0918583	0
1864	0.336234	0.15088	0.0009975	0.184357	0.257987	0.257896	0.257896	0.18534	0.0580385	0.0145178	0	9.10325e-05	0	0	0	0	0	0	0	0	0	0	0	0	0	0	0	0	0	9.10325e-05	0	0	0	0	0	0	0	0	0	0	-0.0458134	-0.00571758	0.0160069	-0.0105293	-0.000729976	-0.0325981	-0.0122454	-0.0931968	0
1865	0.370764	0.198516	-0.0124294	0.184677	0.261642	0.261544	0.261544	0.187673	0.0590133	0.0148582	0	9.77795e-05	0	0	0	0	0	0	0	0	0	0	0	0	0	0	0	0	0	9.77795e-05	0	0	0	0	0	0	0	0	0	0	-0.0474597	-0.00604244	0.0170249	-0.0113447	-0.000770023	-0.0340651	-0.0122624	-0.0959086	0
1866	0.375045	0.219079	-0.0242375	0.180204	0.264828	0.264723	0.264723	0.189538	0.0599872	0.0151985	0	0.00010452	0	0	0	0	0	0	0	0	0	0	0	0	0	0	0	0	0	0.00010452	0	0	0	0	0	0	0	0	0	0	-0.0491525	-0.00759759	0.0197121	-0.0120904	-0.000805345	-0.0360972	-0.0122741	-0.102845	0
1867	0.37954	0.229017	-0.0246006	0.175123	0.267873	0.267762	0.267762	0.191402	0.060821	0.0155388	0	0.00011126	0	0	0	0	0	0	0	0	0	0	0	0	0	0	0	0	0	0.00011126	0	0	0	0	0	0	0	0	0	0	-0.0509982	-0.00929334	0.0226456	-0.0128979	-0.000840293	-0.0383731	-0.0122391	-0.110111	0
1868	0.404765	0.231073	-0.0025725	0.176264	0.271383	0.271265	0.271265	0.193732	0.0616541	0.015879	0	0.000118008	0	0	0	0	0	0	0	0	0	0	0	0	0	0	0	0	0	0.000118008	0	0	0	0	0	0	0	0	0	0	-0.0521573	-0.00964501	0.0236331	-0.0136428	-0.000875393	-0.0394672	-0.01216	-0.112368	0
1869	0.440705	0.222848	0.0355338	0.182323	0.275357	0.275232	0.275232	0.196527	0.0624863	0.0162191	0	0.000124748	0	0	0	0	0	0	0	0	0	0	0	0	0	0	0	0	0	0.000124748	0	0	0	0	0	0	0	0	0	0	-0.0524795	-0.00903414	0.0231409	-0.0142438	-0.00090931	-0.0393557	-0.0120775	-0.110963	0
1870	0.469869	0.218736	0.0641287	0.187004	0.279382	0.27925	0.27925	0.19932	0.0634562	0.0164742	0	0.000131463	0	0	0	0	0	0	0	0	0	0	0	0	0	0	0	0	0	0.000131463	0	0	0	0	0	0	0	0	0	0	-0.0528636	-0.00881258	0.023233	-0.0149213	-0.000944553	-0.0394142	-0.012004	-0.110999	0
1871	0.468819	0.219421	0.06727	0.182128	0.283784	0.283646	0.283646	0.202576	0.0644252	0.0166442	0	0.00013819	0	0	0	0	0	0	0	0	0	0	0	0	0	0	0	0	0	0.00013819	0	0	0	0	0	0	0	0	0	0	-0.0563441	-0.00923964	0.0243689	-0.0159158	-0.0010687	-0.0419427	-0.0125462	-0.116906	0
1872	0.422773	0.207084	0.0517606	0.163928	0.288595	0.28845	0.28845	0.206296	0.0652549	0.0168992	0	0.00014495	0	0	0	0	0	0	0	0	0	0	0	0	0	0	0	0	0	0.00014495	0	0	0	0	0	0	0	0	0	0	-0.0623654	-0.0100273	0.0264705	-0.0177966	-0.0013119	-0.0446397	-0.0150604	-0.131321	0
1873	0.369789	0.193375	0.0265125	0.149901	0.293952	0.2938	0.2938	0.210477	0.0660837	0.0172392	0	0.00015171	0	0	0	0	0	0	0	0	0	0	0	0	0	0	0	0	0	0.00015171	0	0	0	0	0	0	0	0	0	0	-0.0665409	-0.0110844	0.029047	-0.0197738	-0.00150616	-0.0459737	-0.0172498	-0.144588	0
1874	0.353735	0.201258	-2.1875e-05	0.152499	0.300232	0.300074	0.300074	0.215583	0.0669118	0.017579	0	0.00015847	0	0	0	0	0	0	0	0	0	0	0	0	0	0	0	0	0	0.00015847	0	0	0	0	0	0	0	0	0	0	-0.0663417	-0.0117345	0.0300578	-0.0202242	-0.00158161	-0.0452238	-0.0176353	-0.14859	0
1875	0.332461	0.194061	-0.0208469	0.159247	0.307024	0.306858	0.306858	0.221148	0.0678768	0.0178339	0	0.00016523	0	0	0	0	0	0	0	0	0	0	0	0	0	0	0	0	0	0.00016523	0	0	0	0	0	0	0	0	0	0	-0.065587	-0.0116861	0.0301266	-0.0207088	-0.00164652	-0.0437521	-0.0179201	-0.149792	0
1876	0.288309	0.152936	-0.0317319	0.167105	0.314187	0.314014	0.314014	0.227169	0.0688409	0.0180038	0	0.000172315	0	0	0	0	0	0	0	0	0	0	0	0	0	0	0	0	0	0.000172315	0	0	0	0	0	0	0	0	0	0	-0.0665589	-0.0105746	0.0290978	-0.0216445	-0.00174032	-0.0434441	-0.0182533	-0.148668	0
1877	0.292982	0.148481	-0.0351575	0.179658	0.322214	0.322034	0.322034	0.234109	0.0696664	0.0182586	0	0.00017992	0	0	0	0	0	0	0	0	0	0	0	0	0	0	0	0	0	0.00017992	0	0	0	0	0	0	0	0	0	0	-0.065809	-0.00905825	0.0273256	-0.021951	-0.0018211	-0.0417316	-0.0185726	-0.145192	0
1878	0.334209	0.180353	-0.0366756	0.190532	0.330779	0.330592	0.330592	0.241502	0.0704911	0.0185984	0	0.000187915	0	0	0	0	0	0	0	0	0	0	0	0	0	0	0	0	0	0.000187915	0	0	0	0	0	0	0	0	0	0	-0.0644004	-0.0085663	0.0274192	-0.0222863	-0.00188831	-0.0402392	-0.0188395	-0.144794	0
1879	0.368246	0.201943	-0.0295531	0.195856	0.339795	0.339599	0.339599	0.249345	0.0713151	0.018938	0	0.0001963	0	0	0	0	0	0	0	0	0	0	0	0	0	0	0	0	0	0.0001963	0	0	0	0	0	0	0	0	0	0	-0.0655452	-0.00884175	0.0281805	-0.0232649	-0.00197026	-0.0405532	-0.0190956	-0.147846	0
1880	0.399955	0.215652	-0.00942375	0.193727	0.349856	0.349651	0.349651	0.258098	0.0722753	0.0192776	0	0.00020501	0	0	0	0	0	0	0	0	0	0	0	0	0	0	0	0	0	0.00020501	0	0	0	0	0	0	0	0	0	0	-0.0711233	-0.00985504	0.0292261	-0.0255507	-0.0020891	-0.0435052	-0.0193494	-0.155044	0
1881	0.429205	0.222848	0.01064	0.195717	0.360499	0.360285	0.360285	0.267296	0.0733715	0.0196171	0	0.00021411	0	0	0	0	0	0	0	0	0	0	0	0	0	0	0	0	0	0.00021411	0	0	0	0	0	0	0	0	0	0	-0.0740412	-0.0101177	0.0295307	-0.0274976	-0.00223281	-0.0434902	-0.0202335	-0.160541	0
1882	0.33982	0.111125	0.0210525	0.207642	0.370667	0.370443	0.370443	0.27602	0.0744664	0.0199566	0	0.000223665	0	0	0	0	0	0	0	0	0	0	0	0	0	0	0	0	0	0.000223665	0	0	0	0	0	0	0	0	0	0	-0.0741249	-0.009878	0.0294625	-0.0285753	-0.00230008	-0.0428917	-0.0199423	-0.160133	0
1883	-0.563533	-0.802535	0.0219013	0.2171	0.380361	0.380127	0.380127	0.284271	0.0755599	0.020296	0	0.00023361	0	0	0	0	0	0	0	0	0	0	0	0	0	0	0	0	0	0.00023361	0	0	0	0	0	0	0	0	0	0	-0.0762233	-0.0102509	0.0301271	-0.03011	-0.00234804	-0.0446772	-0.0189643	-0.160765	0
1884	-1.30178	-1.5373	0.0105831	0.224943	0.389905	0.389661	0.389661	0.29251	0.0765157	0.0206353	0	0.000243945	0	0	0	0	0	0	0	0	0	0	0	0	0	0	0	0	0	0.000243945	0	0	0	0	0	0	0	0	0	0	-0.076439	-0.0104628	0.0311033	-0.0312892	-0.00243688	-0.044279	-0.0190744	-0.163192	0
1885	-0.718939	-0.944073	-0.0105306	0.235665	0.398387	0.398132	0.398132	0.299823	0.0773341	0.0209746	0	0.000254735	0	0	0	0	0	0	0	0	0	0	0	0	0	0	0	0	0	0.000254735	0	0	0	0	0	0	0	0	0	0	-0.0744818	-0.0104264	0.0320677	-0.0317289	-0.0025029	-0.0427405	-0.0191509	-0.163813	0
1886	-0.235809	-0.448517	-0.0316925	0.244401	0.405626	0.40536	0.40536	0.305758	0.0782878	0.0213138	0	0.000266045	0	0	0	0	0	0	0	0	0	0	0	0	0	0	0	0	0	0.000266045	0	0	0	0	0	0	0	0	0	0	-0.0731332	-0.0103427	0.0329968	-0.0321938	-0.00258703	-0.0417672	-0.0192393	-0.164617	0
1887	-0.117215	-0.321372	-0.0442794	0.248437	0.411997	0.411719	0.411719	0.310774	0.0793767	0.0215682	0	0.000277875	0	0	0	0	0	0	0	0	0	0	0	0	0	0	0	0	0	0.000277875	0	0	0	0	0	0	0	0	0	0	-0.0737549	-0.0106555	0.0344594	-0.0333255	-0.00269147	-0.0422728	-0.0192691	-0.167532	0
1888	-0.0165989	-0.21102	-0.0505225	0.244944	0.417367	0.417077	0.417077	0.314875	0.0804642	0.0217377	0	0.000290225	0	0	0	0	0	0	0	0	0	0	0	0	0	0	0	0	0	0.000290225	0	0	0	0	0	0	0	0	0	0	-0.0782374	-0.0114674	0.0358514	-0.0359193	-0.00282376	-0.0446739	-0.0192044	-0.173259	0
1889	-0.0845096	-0.277506	-0.0530425	0.246039	0.422363	0.42206	0.42206	0.318517	0.0815504	0.021992	0	0.000303095	0	0	0	0	0	0	0	0	0	0	0	0	0	0	0	0	0	0.000303095	0	0	0	0	0	0	0	0	0	0	-0.080007	-0.0119144	0.0374632	-0.0377391	-0.00293162	-0.0457459	-0.0191391	-0.176851	0
1890	-0.123486	-0.331654	-0.0402588	0.248427	0.426985	0.426669	0.426669	0.321702	0.0826352	0.022331	0	0.00031655	0	0	0	0	0	0	0	0	0	0	0	0	0	0	0	0	0	0.00031655	0	0	0	0	0	0	0	0	0	0	-0.080852	-0.0122197	0.0390162	-0.0394044	-0.00304059	-0.0461154	-0.0190881	-0.179694	0
1891	-0.0281683	-0.261741	-0.0124338	0.246007	0.431286	0.430955	0.430955	0.324431	0.0838541	0.02267	0	0.00033059	0	0	0	0	0	0	0	0	0	0	0	0	0	0	0	0	0	0.00033059	0	0	0	0	0	0	0	0	0	0	-0.0848516	-0.0126245	0.0396731	-0.0422521	-0.00319693	-0.0474605	-0.0189906	-0.183801	0
1892	0.171455	-0.0876454	0.0133612	0.245739	0.435719	0.435373	0.435373	0.327158	0.0852065	0.0230089	0	0.000345215	0	0	0	0	0	0	0	0	0	0	0	0	0	0	0	0	0	0.000345215	0	0	0	0	0	0	0	0	0	0	-0.0869271	-0.0128256	0.0404906	-0.0446772	-0.00334476	-0.0473381	-0.019232	-0.187404	0
1893	0.340367	0.0600619	0.0341819	0.246123	0.439475	0.439115	0.439115	0.32943	0.086422	0.0232631	0	0.000360555	0	0	0	0	0	0	0	0	0	0	0	0	0	0	0	0	0	0.000360555	0	0	0	0	0	0	0	0	0	0	-0.0877202	-0.0129807	0.042014	-0.0468947	-0.00348751	-0.046792	-0.0195792	-0.190904	0
1894	0.458547	0.169386	0.0436013	0.24556	0.442556	0.44218	0.44218	0.331246	0.087501	0.0234325	0	0.00037661	0	0	0	0	0	0	0	0	0	0	0	0	0	0	0	0	0	0.00037661	0	0	0	0	0	0	0	0	0	0	-0.0879802	-0.0133624	0.0439162	-0.0489577	-0.0036267	-0.0459367	-0.0200129	-0.195117	0
1895	0.434966	0.161846	0.02968	0.24344	0.44577	0.445377	0.445377	0.333062	0.0887132	0.0236019	0	0.000393315	0	0	0	0	0	0	0	0	0	0	0	0	0	0	0	0	0	0.000393315	0	0	0	0	0	0	0	0	0	0	-0.0886382	-0.0141698	0.0456155	-0.0509215	-0.00376398	-0.0448917	-0.0205066	-0.200563	0
1896	0.262909	0.016538	0.0023975	0.243974	0.449118	0.448707	0.448707	0.334877	0.0900583	0.0237712	0	0.000410735	0	0	0	0	0	0	0	0	0	0	0	0	0	0	0	0	0	0.000410735	0	0	0	0	0	0	0	0	0	0	-0.0886154	-0.0148691	0.0481709	-0.0528425	-0.00390118	-0.0445245	-0.020649	-0.205048	0
1897	0.163166	-0.0646839	-0.0192413	0.247091	0.452867	0.452438	0.452438	0.337146	0.0912673	0.0240253	0	0.000429	0	0	0	0	0	0	0	0	0	0	0	0	0	0	0	0	0	0.000429	0	0	0	0	0	0	0	0	0	0	-0.087262	-0.0153758	0.0519425	-0.0547784	-0.00404027	-0.0442391	-0.020771	-0.209075	0
1898	0.258699	0.0377859	-0.0298594	0.250773	0.457974	0.457526	0.457526	0.340772	0.0924745	0.0242793	0	0.000448045	0	0	0	0	0	0	0	0	0	0	0	0	0	0	0	0	0	0.000448045	0	0	0	0	0	0	0	0	0	0	-0.0858324	-0.0162168	0.0563086	-0.0567877	-0.00418333	-0.0440767	-0.0208766	-0.214127	0
1899	0.36799	0.150537	-0.0367281	0.254182	0.464486	0.464018	0.464018	0.345756	0.0938141	0.0244486	0	0.000467935	0	0	0	0	0	0	0	0	0	0	0	0	0	0	0	0	0	0.000467935	0	0	0	0	0	0	0	0	0	0	-0.0857853	-0.017186	0.0597363	-0.0589296	-0.0043326	-0.0441358	-0.0209375	-0.219422	0
1900	0.414758	0.201943	-0.0451019	0.257917	0.471668	0.47118	0.471174	0.351187	0.0952852	0.0247025	5.26505e-06	0.000488735	0	5.26505e-06	0	0	0	0	0	0	0	0	0	0	0	0	0	0	0	0.000488735	0	0	0	0	0	0	0	0	0	0	-0.0866805	-0.0179615	0.0622837	-0.061285	-0.0045019	-0.0442715	-0.0209443	-0.22409	0
1901	0.39849	0.191662	-0.0529112	0.259739	0.47978	0.47927	0.479259	0.357064	0.0971539	0.025041	1.08072e-05	0.00051038	0	1.08072e-05	0	0	0	0	0	0	0	0	0	0	0	0	0	0	0	0.00051038	0	0	0	0	0	0	0	0	0	0	-0.0855945	-0.0186976	0.0650834	-0.0637067	-0.00470643	-0.0411879	-0.0223793	-0.231464	0
1902	-0.0416702	-0.256943	-0.0463881	0.261661	0.488595	0.488063	0.488051	0.363387	0.0992852	0.0253795	1.1376e-05	0.00053235	0	1.1376e-05	0	0	0	0	0	0	0	0	0	0	0	0	0	0	0	0.00053235	0	0	0	0	0	0	0	0	0	0	-0.0857321	-0.0190455	0.0663163	-0.0662422	-0.00493724	-0.0379648	-0.0238586	-0.237806	0
1903	-0.403369	-0.651058	-0.0158112	0.2635	0.49753	0.496976	0.496964	0.369701	0.101544	0.0257179	1.19747e-05	0.00055419	0	1.19747e-05	0	0	0	0	0	0	0	0	0	0	0	0	0	0	0	0.00055419	0	0	0	0	0	0	0	0	0	0	-0.0888614	-0.0194816	0.0662008	-0.0690836	-0.00518172	-0.036875	-0.0244402	-0.242613	0
1904	-0.0817013	-0.356329	0.00875	0.265877	0.507034	0.506458	0.506445	0.376459	0.10393	0.0260563	1.2605e-05	0.000575965	0	1.2605e-05	0	0	0	0	0	0	0	0	0	0	0	0	0	0	0	0.000575965	0	0	0	0	0	0	0	0	0	0	-0.0909065	-0.0198276	0.0670198	-0.072126	-0.00543742	-0.0350491	-0.0254863	-0.24822	0
1905	0.285079	0.00214422	0.0126306	0.270304	0.517422	0.516825	0.516811	0.384107	0.10631	0.0263946	1.32684e-05	0.00059774	0	1.32684e-05	0	0	0	0	0	0	0	0	0	0	0	0	0	0	0	0.00059774	0	0	0	0	0	0	0	0	0	0	-0.0926819	-0.01998	0.0682005	-0.0752667	-0.00570165	-0.0335032	-0.0264309	-0.253178	0
1906	0.389716	0.100159	0.016485	0.273072	0.528244	0.527624	0.52761	0.392194	0.108683	0.0267328	1.39667e-05	0.000620425	0	1.39667e-05	0	0	0	0	0	0	0	0	0	0	0	0	0	0	0	0.000620425	0	0	0	0	0	0	0	0	0	0	-0.0944081	-0.0208963	0.0701172	-0.0784052	-0.00597146	-0.0317893	-0.0274631	-0.260295	0
1907	0.3695	0.0761692	0.0177931	0.275537	0.538691	0.538041	0.538026	0.39982	0.111051	0.0271555	1.47018e-05	0.00064948	0	1.47018e-05	0	0	0	0	0	0	0	0	0	0	0	0	0	0	0	0.00064948	0	0	0	0	0	0	0	0	0	0	-0.0965804	-0.0221755	0.0721422	-0.0814429	-0.00624367	-0.0307328	-0.0281276	-0.267524	0
1908	0.386643	0.0878213	0.0135844	0.285237	0.548893	0.548209	0.548193	0.406988	0.113543	0.0276626	1.54756e-05	0.00068406	0	1.54756e-05	0	0	0	0	0	0	0	0	0	0	0	0	0	0	0	0.00068406	0	0	0	0	0	0	0	0	0	0	-0.0963313	-0.0222577	0.0755254	-0.0842829	-0.00651489	-0.0304833	-0.0283179	-0.270873	0
1909	0.45258	0.153964	0.000923125	0.297693	0.559209	0.558491	0.558475	0.414146	0.116159	0.0281696	1.62901e-05	0.00071864	0	1.62901e-05	0	0	0	0	0	0	0	0	0	0	0	0	0	0	0	0.00071864	0	0	0	0	0	0	0	0	0	0	-0.095366	-0.0217224	0.0785678	-0.0868298	-0.00678153	-0.0301259	-0.0284741	-0.27231	0
1910	0.474067	0.18892	-0.0192369	0.304384	0.569379	0.568626	0.568609	0.421294	0.118638	0.0286764	1.71475e-05	0.00075322	0	1.71475e-05	0	0	0	0	0	0	0	0	0	0	0	0	0	0	0	0.00075322	0	0	0	0	0	0	0	0	0	0	-0.0973185	-0.0222365	0.0792201	-0.0889837	-0.00704258	-0.0297163	-0.0285595	-0.275709	0
1911	0.475024	0.195089	-0.0344094	0.314345	0.578957	0.578169	0.578151	0.427988	0.12098	0.0291831	1.805e-05	0.000787735	0	1.805e-05	0	0	0	0	0	0	0	0	0	0	0	0	0	0	0	0.000787735	0	0	0	0	0	0	0	0	0	0	-0.0987111	-0.0227275	0.0807683	-0.0907383	-0.00729931	-0.0311982	-0.027516	-0.277429	0
1912	0.237872	-0.0485766	-0.0413963	0.327845	0.588289	0.587466	0.587447	0.434227	0.123446	0.029774	1.9e-05	0.000823615	0	1.9e-05	0	0	0	0	0	0	0	0	0	0	0	0	0	0	0	0.000823615	0	0	0	0	0	0	0	0	0	0	-0.09969	-0.0230286	0.0829117	-0.0922324	-0.00755132	-0.0341549	-0.0256345	-0.277167	0
1913	0.142892	-0.15653	-0.0390513	0.338473	0.597882	0.597007	0.596987	0.440459	0.126164	0.0303648	2e-05	0.00087458	0	2e-05	0	0	0	0	0	0	0	0	0	0	0	0	0	0	0	0.000874445	0	0	0	0	0	0	0	0	1.35e-07	0	-0.101757	-0.023801	0.0839213	-0.0935757	-0.00779867	-0.0363541	-0.0241485	-0.278121	0
1914	0.387926	0.0556067	-0.0191494	0.351469	0.60707	0.606134	0.606113	0.446239	0.129003	0.0308711	2.10526e-05	0.00093589	0	2.10526e-05	0	0	0	0	0	0	0	0	0	0	0	0	0	0	0	0.00093548	0	0	0	0	0	0	0	0	4.1e-07	0	-0.103025	-0.0230232	0.083467	-0.0948027	-0.00804319	-0.0374209	-0.0232021	-0.275846	0
1915	0.544847	0.159447	0.0196175	0.365782	0.61586	0.614886	0.614864	0.45157	0.131833	0.0314615	2.21607e-05	0.00097361	0	2.21607e-05	0	0	0	0	0	0	0	0	0	0	0	0	0	0	0	0.00097292	0	0	0	0	0	0	0	0	6.9e-07	0	-0.104047	-0.0212311	0.0818106	-0.0959469	-0.00828684	-0.0378242	-0.0225686	-0.271311	0
1916	0.619466	0.187549	0.0578375	0.374079	0.625143	0.624152	0.624129	0.457338	0.134655	0.0321361	2.3327e-05	0.000991055	0	2.3327e-05	0	0	0	0	0	0	0	0	0	0	0	0	0	0	0	0.00099008	0	0	0	0	0	0	0	0	9.75e-07	0	-0.106959	-0.0211044	0.0796577	-0.0970414	-0.00853174	-0.0377971	-0.0221423	-0.271094	0
1917	0.65508	0.196117	0.0783825	0.38058	0.634956	0.63393	0.633906	0.463543	0.137468	0.0328947	2.45547e-05	0.00102605	0	2.45547e-05	0	0	0	0	0	0	0	0	0	0	0	0	0	0	0	0.00102479	0	0	0	0	0	0	0	0	1.265e-06	0	-0.109292	-0.0218517	0.0786552	-0.098119	-0.00878013	-0.0371815	-0.0220147	-0.273662	0
1918	0.66255	0.201943	0.071505	0.389102	0.644548	0.643462	0.643436	0.469299	0.1404	0.0337372	2.58471e-05	0.00108614	0	2.58471e-05	0	0	0	0	0	0	0	0	0	0	0	0	0	0	0	0.00108459	0	0	0	0	0	0	0	0	1.555e-06	0	-0.11107	-0.0218246	0.0774364	-0.0992118	-0.00903437	-0.0365154	-0.02192	-0.274388	0
1919	0.640626	0.194746	0.0426475	0.403232	0.653733	0.652579	0.652552	0.474606	0.143451	0.0344951	2.72075e-05	0.00115384	0	2.72075e-05	0	0	0	0	0	0	0	0	0	0	0	0	0	0	0	0.001152	0	0	0	0	0	0	0	0	1.845e-06	0	-0.11051	-0.0200828	0.0767811	-0.100352	-0.00929696	-0.0355837	-0.0219764	-0.271262	0
1920	0.538608	0.110783	0.0138031	0.414022	0.663217	0.661996	0.661967	0.480349	0.146365	0.0352528	2.86395e-05	0.00122153	0	2.86395e-05	0	0	0	0	0	0	0	0	0	0	0	0	0	0	0	0.0012194	0	0	0	0	0	0	0	0	2.135e-06	0	-0.109767	-0.0199637	0.0781727	-0.10156	-0.00955195	-0.0348032	-0.0220605	-0.272523	0
1921	0.513908	0.0957036	-0.00765625	0.425861	0.673527	0.672237	0.672207	0.486969	0.149144	0.0360942	3.01468e-05	0.00128936	0	3.01468e-05	0	0	0	0	0	0	0	0	0	0	0	0	0	0	0	0.00128693	0	0	0	0	0	0	0	0	2.425e-06	0	-0.105712	-0.0197725	0.0820658	-0.102846	-0.00978369	-0.0321637	-0.023212	-0.275991	0
1922	0.599174	0.181038	-0.0211838	0.43932	0.683862	0.682504	0.682473	0.49358	0.152041	0.0368512	3.17335e-05	0.00135731	0	3.17335e-05	0	0	0	0	0	0	0	0	0	0	0	0	0	0	0	0.0013546	0	0	0	0	0	0	0	0	2.715e-06	0	-0.103054	-0.018506	0.0839562	-0.104206	-0.0100124	-0.0301092	-0.0241763	-0.276371	0
1923	0.618842	0.202286	-0.0221856	0.438741	0.693783	0.692359	0.692322	0.499744	0.155054	0.0375238	3.66556e-05	0.00142456	3.25193e-06	3.34036e-05	0	0	0	0	0	0	0	0	0	0	0	0	0	0	0	0.00142155	0	0	0	0	0	0	0	0	3.01e-06	0	-0.110078	-0.0198458	0.080011	-0.105624	-0.010255	-0.0302266	-0.0241372	-0.280736	0
1924	0.621606	0.189263	-0.00910437	0.441447	0.70457	0.703079	0.703033	0.506778	0.158059	0.0381962	4.5521e-05	0.00149181	1.03592e-05	3.51617e-05	0	0	0	0	0	0	0	0	0	0	0	0	0	0	0	0.0014885	0	0	0	0	0	0	0	0	3.31e-06	0	-0.114414	-0.0210079	0.0783979	-0.107078	-0.0105083	-0.0298239	-0.0243929	-0.285478	0
1925	0.656901	0.189263	0.01456	0.453078	0.716218	0.714659	0.714603	0.514682	0.161053	0.0388684	5.52852e-05	0.0015597	1.82729e-05	3.70124e-05	0	0	0	0	0	0	0	0	0	0	0	0	0	0	0	0.0015561	0	0	0	0	0	0	0	0	3.605e-06	0	-0.114389	-0.021049	0.0801858	-0.108546	-0.010769	-0.0296705	-0.0245403	-0.287664	0
1926	0.701245	0.197145	0.0403637	0.463736	0.727498	0.725864	0.725799	0.522136	0.164039	0.0396242	6.55634e-05	0.00163345	2.6603e-05	3.89604e-05	0	0	0	0	0	0	0	0	0	0	0	0	0	0	0	0.00162955	0	0	0	0	0	0	0	0	3.9e-06	0	-0.115335	-0.0208707	0.0811658	-0.11028	-0.0110317	-0.0296462	-0.024672	-0.289333	0
1927	0.721251	0.195089	0.0554925	0.47067	0.738763	0.73705	0.736974	0.529579	0.167015	0.0403798	7.63825e-05	0.00171305	3.53716e-05	4.10109e-05	0	0	0	0	0	0	0	0	0	0	0	0	0	0	0	0.00170885	0	0	0	0	0	0	0	0	4.2e-06	0	-0.116603	-0.0210432	0.0817083	-0.112257	-0.0112929	-0.0281011	-0.0256174	-0.29315	0
1928	0.674629	0.145739	0.0510169	0.477873	0.750716	0.748923	0.748835	0.537885	0.169983	0.0409673	8.77711e-05	0.00179265	4.46017e-05	4.31694e-05	0	0	0	0	0	0	0	0	0	0	0	0	0	0	0	0.00178815	0	0	0	0	0	0	0	0	4.505e-06	0	-0.118565	-0.0211149	0.081411	-0.114179	-0.0115513	-0.0266062	-0.0265239	-0.296512	0
1929	0.624013	0.0960463	0.0412825	0.486684	0.762524	0.760652	0.760552	0.546179	0.172818	0.0415546	9.9759e-05	0.00187226	5.43176e-05	4.54415e-05	0	0	0	0	0	0	0	0	0	0	0	0	0	0	0	0.00186745	0	0	0	0	0	0	0	0	4.81e-06	0	-0.121538	-0.0211039	0.0807338	-0.116025	-0.0118033	-0.0267785	-0.0265606	-0.2982	0
1930	0.652519	0.121749	0.0325894	0.49818	0.773754	0.771802	0.771689	0.554025	0.175523	0.0421417	0.000112378	0.00195251	6.45448e-05	4.78331e-05	0	0	0	0	0	0	0	0	0	0	0	0	0	0	0	0.0019474	0	0	0	0	0	0	0	0	5.115e-06	0	-0.123198	-0.0202739	0.0803249	-0.117778	-0.0120476	-0.0268103	-0.0266129	-0.297915	0
1931	0.678528	0.146424	0.0164544	0.51565	0.785323	0.78329	0.783158	0.562294	0.17822	0.0426447	0.000131699	0.00203277	7.53103e-05	5.03506e-05	0	6.03845e-06	0	0	0	0	0	0	0	0	0	0	0	0	0	0.00202735	0	0	0	0	0	0	0	0	5.42e-06	0	-0.121491	-0.0178248	0.0807677	-0.119418	-0.0122827	-0.0256014	-0.0271321	-0.294813	0
1932	0.64515	0.114895	-0.00354375	0.533799	0.796956	0.794843	0.794691	0.57055	0.180909	0.0432315	0.000152245	0.00211315	8.66424e-05	5.30007e-05	0	1.2602e-05	0	0	0	0	0	0	0	0	0	7.7616e-07	0	0	0	0.00210665	0	0	0	0	0	0	0	0	5.725e-06	0	-0.119225	-0.0155089	0.081711	-0.120927	-0.0125055	-0.0244386	-0.0275566	-0.291853	0
1933	0.656846	0.123806	-0.0139081	0.546949	0.807785	0.805588	0.80542	0.577927	0.183592	0.0439018	0.000168059	0.00219626	9.8571e-05	5.57902e-05	0	1.36978e-05	0	0	0	0	0	0	0	0	0	2.3208e-06	0	0	0	0.0021879	0	0	0	0	0	0	0	0	6.035e-06	0	-0.119079	-0.0147961	0.0826036	-0.122323	-0.012717	-0.0243865	-0.0274605	-0.291607	0
1934	0.717064	0.162189	6.5625e-05	0.554809	0.818061	0.815762	0.815577	0.58486	0.186146	0.0445719	0.000184743	0.00229885	0.000111127	5.87265e-05	0	1.48889e-05	0	0	0	0	0	0	0	0	0	3.85024e-06	0	0	0	0.00228865	0	0	0	0	0	0	0	0	6.345e-06	0	-0.12096	-0.0155197	0.083063	-0.123646	-0.0129221	-0.0248268	-0.0271077	-0.294285	0
1935	0.773297	0.169386	0.0409325	0.562979	0.82822	0.8258	0.825597	0.591784	0.188572	0.0452418	0.000202346	0.00242039	0.000124345	6.18174e-05	0	1.61836e-05	0	0	0	0	0	0	0	0	0	6.1408e-06	0	6.43715e-07	0	0.00240695	0	0	0	0	0	0	0	0	6.66e-06	0	-0.122688	-0.0161833	0.083596	-0.124937	-0.013126	-0.0252924	-0.0267455	-0.296735	0
1936	0.831551	0.180695	0.0815981	0.569258	0.837504	0.83496	0.834739	0.597836	0.190992	0.0459114	0.000220919	0.00254411	0.000138257	6.50709e-05	0	1.75909e-05	0	0	0	0	0	0	0	0	0	9.96e-06	0	1.92898e-06	0	0.00252525	0	0	0	0	0	0	0	0	6.975e-06	0	-0.123914	-0.0169668	0.0843626	-0.126237	-0.0133337	-0.0249097	-0.0268302	-0.300144	0
1937	0.84505	0.179324	0.0900637	0.575662	0.844968	0.842298	0.842058	0.602154	0.193406	0.0464972	0.000240519	0.00267012	0.000152903	6.84957e-05	0	1.91205e-05	0	0	0	0	0	0	0	0	0	1.60704e-05	0	3.21036e-06	0	0.00264355	0	0	0	0	0	0	0	0	7.29e-06	0	-0.124345	-0.017938	0.0866517	-0.127586	-0.0135503	-0.0254587	-0.026464	-0.303503	0
1938	0.833606	0.163217	0.0808325	0.589556	0.851051	0.84825	0.847989	0.605175	0.195814	0.0469991	0.000261202	0.00280165	0.000168319	7.21008e-05	0	2.07832e-05	0	0	0	0	0	0	0	0	0	2.59936e-05	0	5.1305e-06	0	0.00276185	0	1.069e-06	0	0	0	0	0	0	7.61e-06	0	-0.119579	-0.017775	0.0932865	-0.129026	-0.0137813	-0.026308	-0.0259756	-0.304568	0
1939	0.837512	0.163903	0.0738456	0.599764	0.856275	0.853333	0.85305	0.607332	0.198217	0.0475009	0.000283032	0.00294214	0.000184546	7.58955e-05	0	2.25904e-05	0	0	0	0	0	0	0	0	8.80625e-07	4.1264e-05	0	7.688e-06	0	0.00288015	0	4.231e-06	0	0	0	0	0	0	7.93e-06	0	-0.11641	-0.0173578	0.0978697	-0.130598	-0.014032	-0.026358	-0.0259336	-0.305603	0
1940	0.848384	0.18378	0.0641944	0.60041	0.86076	0.857667	0.857361	0.608625	0.200733	0.0480025	0.000306072	0.00309298	0.000201627	7.989e-05	0	2.45548e-05	0	0	0	0	0	0	0	0	2.62188e-06	6.3376e-05	0	1.0881e-05	0	0.00299845	0	9.399e-06	0	0	0	0	0	0	8.25e-06	0	-0.11984	-0.017966	0.0973886	-0.132344	-0.014345	-0.0270441	-0.0255301	-0.308068	0
1941	0.840653	0.193033	0.0500194	0.597601	0.864168	0.860907	0.860576	0.608625	0.203363	0.0485876	0.000330392	0.00326112	0.000219608	8.40948e-05	0	2.669e-05	0	0	0	0	0	0	0	0	4.325e-06	9.3792e-05	0	1.53496e-05	0	0.0031226	0	1.6487e-05	0	0	0	0	0	0	8.57e-06	0	-0.122763	-0.0186007	0.0967339	-0.134336	-0.0147654	-0.0263064	-0.0254879	-0.31246	0
1942	0.796379	0.171442	0.030625	0.594312	0.866261	0.862811	0.862455	0.607332	0.205867	0.049256	0.000356066	0.00344994	0.000238534	8.85208e-05	0	2.90109e-05	0	0	0	0	0	0	0	0	5.99125e-06	0.000134	0	2.10924e-05	0	0.00325455	0	2.542e-05	0	0	0	0	0	0	8.89e-06	0	-0.124111	-0.0185215	0.0964305	-0.136669	-0.0152651	-0.0237347	-0.0263512	-0.317009	0
1943	0.77291	0.166302	0.0136106	0.592998	0.867815	0.86416	0.863777	0.605607	0.208246	0.0499242	0.000382943	0.00365547	0.000258457	9.29526e-05	0	3.15336e-05	0	0	0	0	0	0	0	0	7.62125e-06	0.000184672	0	2.87416e-05	0	0.0033891	0	3.612e-05	0	0	0	0	0	0	9.215e-06	0	-0.125877	-0.0183919	0.0970053	-0.139371	-0.0158103	-0.022385	-0.0269234	-0.320373	0
1944	0.801498	0.189263	0.0210044	0.591231	0.870015	0.866137	0.865726	0.604313	0.210738	0.0506757	0.000410891	0.00387787	0.000279429	9.71867e-05	0	3.42756e-05	0	0	0	0	0	0	0	0	1.00963e-05	0.00024648	0	3.9587e-05	0	0.00352365	0	4.851e-05	0	0	0	0	0	0	9.545e-06	0	-0.129281	-0.0183034	0.0969316	-0.142423	-0.0163988	-0.021961	-0.0271265	-0.323498	0
1945	0.840125	0.199887	0.0499669	0.590271	0.873297	0.869173	0.868733	0.603881	0.213342	0.0515103	0.000440012	0.00412386	0.000301504	0.000101252	0	3.72561e-05	0	0	0	0	0	0	0	0	1.33963e-05	0.000326256	0	5.42655e-05	0	0.00365755	0	6.252e-05	0	0	0	0	0	0	9.87e-06	0	-0.135138	-0.0165944	0.0931975	-0.145805	-0.017028	-0.0214422	-0.0274659	-0.323067	0
1946	0.874348	0.207084	0.0807056	0.586558	0.877606	0.873184	0.872714	0.604313	0.216057	0.0523445	0.000470409	0.00442245	0.000324741	0.000105173	0	4.04957e-05	0	0	0	0	0	0	0	0	1.75037e-05	0.00043248	9.0345e-06	8.37e-05	0	0.00379145	0	7.809e-05	0	0	0	0	0	0	1.0195e-05	0	-0.13945	-0.0152848	0.0903358	-0.149498	-0.0176952	-0.0178593	-0.0294488	-0.326102	0
1947	0.88947	0.198859	0.111654	0.578957	0.883122	0.878287	0.877785	0.605607	0.219	0.0531784	0.000502189	0.00483527	0.000349201	0.000108971	0	4.40171e-05	0	0	0	0	0	0	0	0	2.504e-05	0.00059824	3.82845e-05	0.000139423	0	0.0039286	0	9.515e-05	0	0	0	0	0	0	1.053e-05	0	-0.143688	-0.0161481	0.0898363	-0.153481	-0.0183974	-0.0137008	-0.031797	-0.334831	0
1948	0.898865	0.196803	0.129456	0.572607	0.889774	0.884362	0.883826	0.607763	0.222052	0.0540119	0.000535464	0.00541175	0.000374948	0.000112671	0	4.78447e-05	0	0	0	0	0	0	0	0	4.1225e-05	0.00086544	8.301e-05	0.000211684	0	0.0040859	0	0.00011363	0	0	0	0	0	0	1.0865e-05	0	-0.151439	-0.0170579	0.0877219	-0.157734	-0.0191312	-0.0125818	-0.0326551	-0.34153	0
1949	0.878521	0.189263	0.116379	0.572878	0.897523	0.891407	0.890837	0.61078	0.225211	0.054845	0.000570351	0.00611578	0.000402051	0.000116295	0	5.20051e-05	0	0	0	0	0	0	0	0	7.2025e-05	0.00121456	0.000136245	0.000288827	0	0.00425945	0	0.00013348	0	0	0	0	0	0	1.1195e-05	0	-0.156901	-0.0169254	0.0875266	-0.162238	-0.0198935	-0.0121625	-0.0332081	-0.345925	0
1950	0.841639	0.186864	0.0807275	0.574047	0.906841	0.899883	0.899276	0.615088	0.228594	0.0555945	0.000606975	0.00695764	0.00043058	0.000119868	0	5.65273e-05	0	0	0	0	0	0	0	0	0.00012415	0.00160144	0.00019563	0.000370295	0	0.00449995	0	0.00015464	0	0	0	0	0	0	1.153e-05	0	-0.161256	-0.0178153	0.0895368	-0.167001	-0.0207256	-0.0115693	-0.0336817	-0.35283	0
1951	0.801351	0.190634	0.0490306	0.561687	0.918081	0.910219	0.909571	0.621112	0.232198	0.0562605	0.000648064	0.00786257	0.00046061	0.000123411	0	6.14427e-05	0	0	0	0	0	0	0	2.6e-06	0.0002033	0.00202048	0.000263145	0.000455855	0	0.00473005	0	0.00017787	0	0	0	0	0	0	1.187e-05	0	-0.159047	-0.0194497	0.0905994	-0.17159	-0.0216929	0.00300376	-0.0399182	-0.372243	0
1952	0.76631	0.184465	0.0318106	0.550034	0.930544	0.921829	0.921135	0.62799	0.236136	0.0570094	0.000693755	0.00871521	0.000492221	0.000126948	0	6.67855e-05	0	0	0	0	0	0	0	7.8e-06	0.000291875	0.00249968	0.00030735	0.000537695	0	0.0048789	0	0.0001875	0	0	0	0	0	0	1.221e-05	0	-0.155813	-0.0197917	0.0898049	-0.176295	-0.0227926	0.0206974	-0.0474357	-0.391158	0
1953	0.746104	0.175555	0.0204662	0.550083	0.943868	0.934275	0.933534	0.635287	0.240405	0.0578412	0.000741592	0.00959221	0.000525496	0.000130503	0	7.2593e-05	0	0	0	0	0	0	0	1.3e-05	0.00039425	0.00302768	0.00032325	0.000615195	0	0.0050349	0	0.0001844	0	0	0	0	0	0	1.2535e-05	0	-0.162431	-0.0195614	0.0869756	-0.181796	-0.023995	0.0251348	-0.0491888	-0.398612	0
1954	0.754805	0.180695	0.0221156	0.551994	0.958592	0.948012	0.947221	0.643859	0.244772	0.0585896	0.000791727	0.0105795	0.000560522	0.000134099	0	7.89054e-05	0	0	0	0	0	0	0	1.82e-05	0.00053725	0.0035968	0.0003417	0.00069409	0	0.0052104	0	0.0001864	0	0	0	0	0	0	1.2845e-05	0	-0.169982	-0.0193372	0.0848911	-0.18798	-0.0252888	0.0283572	-0.0506242	-0.405595	0
1955	0.815376	0.202971	0.0572644	0.555141	0.974832	0.963117	0.962273	0.653701	0.249234	0.0593376	0.000844317	0.0117156	0.000597392	0.000137759	0	8.57667e-05	0	0	0	0	0	0	0	2.34e-05	0.0007215	0.0042368	0.000363	0.00077345	0	0.0054041	1.5e-06	0.0001941	0	0	0	0	0	0	1.3155e-05	8e-06	-0.174956	-0.0198992	0.086395	-0.194737	-0.0266616	0.0329276	-0.0529809	-0.415361	0
1956	0.899099	0.215309	0.124871	0.558919	0.991948	0.978924	0.978025	0.663951	0.253905	0.0601684	0.000899532	0.0130236	0.000636202	0.000141506	0	9.32247e-05	0	0	0	0	0	0	0	2.86e-05	0.00094875	0.0049552	0.00038775	0.0008525	0	0.005616	7.08e-06	0.0002114	0	0	0	0	0	0	1.3465e-05	3.15e-05	-0.17987	-0.0208644	0.0890639	-0.20196	-0.0281002	0.0373827	-0.0553921	-0.425955	0
1957	0.9668	0.22559	0.177927	0.563283	1.0098	0.995263	0.994305	0.674607	0.258782	0.0609158	0.000957549	0.0145336	0.000677055	0.000145363	0	0.000101331	0	0	0	0	0	0	0	3.38e-05	0.00123025	0.0057776	0.00041685	0.000930465	0	0.0058448	1.785e-05	0.000238	0	0	0	0	0	0	1.3785e-05	6.4e-05	-0.186979	-0.0213623	0.0901206	-0.209548	-0.0295904	0.040692	-0.0572916	-0.434877	0
1958	0.982448	0.230731	0.179528	0.57219	1.02788	1.01163	1.01061	0.685201	0.26375	0.0616629	0.00101855	0.016249	0.000720058	0.000149354	0	0.000110143	0	0	0	0	0	0	0	3.9e-05	0.00155912	0.0067232	0.0004506	0.00100734	0	0.0060905	3.405e-05	0.0002711	0	0	0	0	0	0	1.412e-05	9.9e-05	-0.192885	-0.0215095	0.0930989	-0.217398	-0.0311175	0.0424956	-0.0584545	-0.442406	0
1959	0.968833	0.226961	0.151467	0.590405	1.04683	1.02875	1.02766	0.696281	0.268806	0.0625756	0.00108275	0.0180848	0.000765324	0.000153503	0	0.00011972	0	0	0	0	0	0	0	4.42e-05	0.00188925	0.0077488	0.00048915	0.00108361	0	0.00635245	5.298e-05	0.0003186	0	0	0	0	0	0	1.446e-05	0.0001355	-0.198203	-0.021802	0.0996986	-0.225412	-0.032666	0.0387934	-0.0568148	-0.447318	0
1960	0.880204	0.151908	0.115636	0.61266	1.06818	1.04815	1.047	0.709369	0.274062	0.0635708	0.00115033	0.0200263	0.000812972	0.000157831	0	0.000130131	0	0	0	0	0	0	0	4.94e-05	0.00220462	0.008856	0.0005337	0.00115924	0	0.0066287	7.497e-05	0.0003813	0	0	0	0	0	0	1.4805e-05	0.000173	-0.204271	-0.0223408	0.107055	-0.233483	-0.0341549	0.032864	-0.0542114	-0.45157	0
1961	0.751567	0.0607473	0.0722706	0.618549	1.09038	1.06815	1.06693	0.722933	0.279514	0.0644827	0.00122414	0.0222278	0.000863129	0.000162363	0	0.000141446	0	0	0	0	0	0	0	5.72e-05	0.00257388	0.0101392	0.00058515	0.00123116	0	0.0069199	0.00010233	0.00045	0	0	0	0	0	0	1.5165e-05	0.000211	-0.21075	-0.022317	0.10604	-0.240013	-0.0355224	0.037965	-0.0569018	-0.461607	0
1962	0.645151	-0.0139631	0.039375	0.619739	1.11162	1.08685	1.08555	0.735074	0.285159	0.0653112	0.00130439	0.0247749	0.000915925	0.000167122	0	0.000153746	0	0	0	0	0	0	0	6.76e-05	0.00305875	0.0116208	0.00064395	0.00130123	0	0.00722605	0.0001314	0.0005292	0	0	0	0	0	0	1.5535e-05	0.000248	-0.218924	-0.0221193	0.101353	-0.245452	-0.0368629	0.0445787	-0.0604224	-0.471841	0
1963	0.162053	-0.495468	0.02737	0.630152	1.13151	1.1038	1.1024	0.745213	0.290886	0.0663049	0.00139135	0.0277104	0.0009715	0.000172131	0	0.000167115	0	0	0	0	0	0	0	8.06e-05	0.00367875	0.0133072	0.00071115	0.00137423	0	0.00754325	0.00016743	0.0006285	0	0	0	0	0	0	1.5915e-05	0.000284	-0.226771	-0.0223355	0.10191	-0.25166	-0.0382559	0.0449589	-0.0613878	-0.478558	0
1964	-0.185672	-0.853256	0.0268012	0.640783	1.15094	1.11981	1.11831	0.754074	0.296692	0.0675464	0.00150266	0.0311298	0.00105	0.000177412	0	0.000181647	0	0	0	0	0	0	0	9.36e-05	0.00444875	0.0152752	0.00078855	0.00144987	0	0.00786825	0.00021102	0.0007534	0	0	0	0	0	0	1.6305e-05	0.0003185	-0.233538	-0.0228099	0.10438	-0.258387	-0.0396945	0.0455175	-0.062544	-0.48608	0
1965	0.162675	-0.532481	0.0380887	0.657067	1.17445	1.13937	1.13774	0.766182	0.302685	0.0688698	0.00162943	0.0350864	0.001145	0.000182991	0	0.000197443	0	0	0	0	0	0	0	0.000104	0.00537375	0.0175776	0.00087765	0.00152815	8.1e-07	0.00820105	0.00025659	0.0009034	0	0	1.5e-07	0	0	0	1.6705e-05	0.0003505	-0.239091	-0.0233691	0.10864	-0.265401	-0.0411719	0.0458755	-0.0636659	-0.493865	0
1966	0.593344	-0.150018	0.0643563	0.679006	1.20317	1.1636	1.16184	0.782898	0.308753	0.0701923	0.0017529	0.0395719	0.001235	0.000188889	0	0.000214611	0	0	0	0	0	0	0	0.0001144	0.00644375	0.0202096	0.00097995	0.00160936	3.15e-06	0.00853125	0.00031452	0.0010826	0	0	4.5e-07	0	0	1.65e-07	1.712e-05	0.00038	-0.244194	-0.0238464	0.113252	-0.272481	-0.0426813	0.0465875	-0.0650247	-0.501547	0
1967	0.768755	-0.0215027	0.0917788	0.698479	1.23173	1.18715	1.18527	0.79886	0.314896	0.0715138	0.0018782	0.0445849	0.001325	0.00019513	0	0.000233273	0	0	0	0	0	0	0	0.0001248	0.00764375	0.0231648	0.00109755	0.00169368	6.93e-06	0.0088491	0.00040332	0.0012997	0	0	9e-07	0	1.6e-07	4.95e-07	1.7545e-05	0.000407	-0.252397	-0.0241906	0.114983	-0.279423	-0.0442158	0.0464213	-0.0659727	-0.508198	0
1968	0.609199	-0.220273	0.108399	0.721073	1.26232	1.21212	1.21011	0.81597	0.321219	0.0729169	0.00201069	0.0502039	0.001415	0.000201737	0	0.000253558	0	0	0	0	0	0	0	0.0001404	0.00898875	0.0264864	0.00123255	0.00178111	1.215e-05	0.00915525	0.00053316	0.0015621	0	0	1.65e-06	0	3.2e-07	9.9e-07	1.7985e-05	0.0004315	-0.260835	-0.0246537	0.1168	-0.286028	-0.0457687	0.0452117	-0.0663959	-0.514337	0
1969	0.575317	-0.296355	0.117652	0.75402	1.29782	1.2413	1.23916	0.836955	0.327719	0.0744839	0.00214534	0.0565135	0.001505	0.000208734	0	0.000275606	0	0	0	0	0	0	0	0.000156	0.0105125	0.0302192	0.00138735	0.00187193	1.881e-05	0.0094497	0.0006954	0.0018822	0	0	2.85e-06	0	4.8e-07	1.65e-06	1.844e-05	0.000453	-0.264434	-0.0254765	0.123135	-0.292109	-0.0473331	0.0443333	-0.0669843	-0.521149	0
1970	0.847402	-0.0554308	0.108404	0.794429	1.33108	1.26752	1.26524	0.854819	0.334288	0.076132	0.00227972	0.0635577	0.001595	0.000216143	0	0.000299572	0	0	0	0	0	0	0	0.000169	0.0122625	0.034384	0.00156495	0.00196649	2.7e-05	0.0097331	0.0008787	0.002242	0	0	4.8e-06	0	8e-07	2.475e-06	1.8905e-05	0.000472	-0.261939	-0.0265622	0.135936	-0.29744	-0.0489504	0.0418569	-0.06678	-0.527605	0
1971	1.03702	0.11421	0.0874169	0.835393	1.36147	1.29014	1.28773	0.869128	0.340819	0.0777787	0.00241617	0.0713233	0.00168	0.000223988	0	0.000325622	0	0	3.358e-07	0	1.625e-06	0	0	0.0001846	0.0142662	0.038976	0.00176865	0.0020646	3.69e-05	0.0100061	0.0010617	0.002623	0	0	7.5e-06	0	1.12e-06	3.63e-06	1.938e-05	0.0004885	-0.262831	-0.0275096	0.149843	-0.304062	-0.0507025	0.0333	-0.0636999	-0.531736	0
1972	1.09744	0.153279	0.0721481	0.872013	1.39941	1.31966	1.3171	0.890181	0.347417	0.0795061	0.00255991	0.0797421	0.001765	0.000232292	0	0.000353937	0	0	1.0074e-06	0	4.875e-06	0	0	0.0002028	0.0164912	0.043936	0.0020022	0.00216628	4.869e-05	0.0102687	0.0012552	0.003029	0	3.6e-06	1.125e-05	0	1.92e-06	5.115e-06	1.987e-05	0.000503	-0.274952	-0.0281269	0.154949	-0.312309	-0.0525839	0.0233267	-0.0602077	-0.534763	0
1973	1.06245	0.106328	0.05096	0.905161	1.44241	1.35347	1.35076	0.915283	0.354081	0.0813963	0.0027116	0.0889365	0.001855	0.000241079	0	0.000384714	0	0	1.679e-06	0	8.125e-06	0	0	0.000221	0.0189587	0.049296	0.00227055	0.00227199	6.264e-05	0.0105209	0.0015039	0.003478	0	1.06e-05	1.65e-05	0	3.68e-06	7.095e-06	2.038e-05	0.0005155	-0.287701	-0.0289192	0.156593	-0.320339	-0.0545382	0.0194641	-0.0599616	-0.540351	0
1974	0.915371	-0.0406943	0.0251475	0.930917	1.47871	1.37955	1.37668	0.932607	0.360707	0.0833667	0.00286646	0.0991643	0.001945	0.000250372	0	0.000418167	0	0	2.3506e-06	0	1.1375e-05	0	0	0.0002392	0.02176	0.055184	0.0025785	0.00238204	7.893e-05	0.010764	0.0018264	0.003987	0	1.72e-05	2.34e-05	0	6.56e-06	9.405e-06	2.0905e-05	0.000526	-0.299043	-0.0292697	0.158025	-0.328138	-0.0565375	0.0175236	-0.0606474	-0.546424	0
1975	0.82177	-0.141108	0.0099925	0.952885	1.51231	1.40192	1.39889	0.946263	0.367296	0.0853351	0.00302237	0.110392	0.00203	0.000260193	0	0.00045453	0	0	3.0222e-06	0	1.4625e-05	0	0	0.00026	0.02489	0.061632	0.00293145	0.00249612	9.801e-05	0.010998	0.0022038	0.004508	0	2.35e-05	3.225e-05	0	1.072e-05	1.2045e-05	2.1445e-05	0.000535	-0.312462	-0.0288483	0.156694	-0.335695	-0.0585538	0.0148233	-0.0608822	-0.551084	0
1976	0.977694	-0.0173902	0.0194775	0.975607	1.5514	1.42954	1.42636	0.965046	0.373847	0.0874652	0.00318199	0.121857	0.002115	0.000270567	0	0.000494054	0	0	3.6938e-06	0	1.7875e-05	0	0	0.0002808	0.028075	0.068208	0.003336	0.00261438	0.00012033	0.0112229	0.0025659	0.005045	0	2.95e-05	4.335e-05	0	1.632e-05	1.5345e-05	2.2005e-05	0.0005425	-0.322936	-0.0291938	0.155858	-0.343	-0.0605584	0.0181688	-0.0642113	-0.559173	0
1977	1.19883	0.134087	0.0600775	1.00466	1.59633	1.4632	1.45984	0.989588	0.380463	0.0897893	0.00335582	0.133138	0.002205	0.000281516	0	0.000537015	0	0	4.3654e-06	0	2.1125e-05	0	0	0.0003068	0.031175	0.074528	0.003801	0.00273746	0.00014625	0.0114393	0.0029574	0.005646	0	3.51e-05	5.745e-05	0	2.448e-05	1.8975e-05	2.258e-05	0.000549	-0.33147	-0.0300851	0.1566	-0.35004	-0.0625224	0.0227389	-0.0681617	-0.568346	0
1978	1.27583	0.109069	0.122688	1.04408	1.64199	1.49766	1.49412	1.01483	0.387144	0.0921515	0.00354027	0.144325	0.00229	0.000293063	0	0.000587191	0	0	5.037e-06	0	2.4375e-05	0	0	0.0003406	0.034175	0.080608	0.0043335	0.00286533	0.00017631	0.0116474	0.0034674	0.006302	0	4.04e-05	7.425e-05	0	3.584e-05	2.2935e-05	2.317e-05	0.000554	-0.339285	-0.0303308	0.15998	-0.356804	-0.0644164	0.0213071	-0.0690211	-0.573911	0
1979	1.35619	0.0939901	0.174103	1.0881	1.68909	1.53339	1.52965	1.04157	0.393787	0.0942987	0.00373869	0.155695	0.002375	0.000305233	0	0.000644551	0	0	5.7086e-06	0	2.6e-05	0	0	0.0003822	0.0372	0.08656	0.0049425	0.00299785	0.00021132	0.0118482	0.0041391	0.006997	0	4.54e-05	9.375e-05	0	4.992e-05	2.739e-05	2.378e-05	0.0005585	-0.341683	-0.0310135	0.16757	-0.363282	-0.0662111	0.0212962	-0.0700427	-0.582178	0
1980	1.46606	0.148138	0.193082	1.12484	1.73799	1.57181	1.56786	1.07067	0.400791	0.0963945	0.00395006	0.166177	0.00246	0.000318047	0	0.000705428	0	0	6.3802e-06	0	2.6e-05	0	0	0.0004342	0.03985	0.091952	0.0056415	0.00313534	0.00025218	0.0120412	0.0047235	0.007728	0	5.01e-05	0.00011685	0	6.72e-05	3.2175e-05	2.441e-05	0.0005625	-0.352177	-0.0313835	0.166983	-0.369435	-0.0678056	0.0200112	-0.0705475	-0.589257	-0.000302352
1981	1.40776	0.0795963	0.179869	1.1483	1.78022	1.60393	1.59975	1.09228	0.40835	0.0991227	0.00417632	0.176289	0.002545	0.00033153	0	0.000769824	0	0	6.716e-06	0	2.925e-05	0	0	0.000494	0.0421375	0.09736	0.0064425	0.00327825	0.00029889	0.0122135	0.0051564	0.008488	0	5.46e-05	0.00014385	0	8.8e-05	3.729e-05	2.506e-05	0.0005655	-0.365704	-0.0309345	0.162083	-0.375649	-0.0691591	0.0207254	-0.0727701	-0.595711	-0.00131576
1982	0.714776	-0.591427	0.142323	1.16388	1.81808	1.63148	1.62706	1.10903	0.41606	0.101978	0.0044152	0.186603	0.00263	0.000345705	0	0.000837737	0	0	7.0035e-06	0	3.575e-05	0	0	0.000559	0.0444625	0.102944	0.007335	0.00342395	0.00035091	0.012337	0.0055299	0.009234	0	6.26e-05	0.0001746	0	0.00011232	4.2735e-05	2.573e-05	0.000568	-0.369038	-0.0310128	0.163277	-0.382236	-0.0704323	0.0317897	-0.0804231	-0.608207	-0.00322646
1983	0.408766	-0.876217	0.09982	1.18516	1.85996	1.66374	1.65908	1.13104	0.423758	0.104277	0.00466057	0.196223	0.002715	0.000360594	0	0.000909167	0	0	7.613e-06	0	3.9e-05	0	0	0.0006292	0.04645	0.108208	0.0082815	0.00356655	0.00040779	0.0124612	0.0057795	0.01	0	7.22e-05	0.00020925	0	0.0001416	4.8675e-05	2.642e-05	0.00057	-0.373851	-0.0313875	0.165322	-0.388993	-0.071723	0.0397582	-0.0868282	-0.618959	-0.00551124
1984	0.951877	-0.320002	0.0546175	1.21726	1.90382	1.69763	1.69271	1.15578	0.430734	0.1062	0.00491543	0.206195	0.0028	0.000376222	0	0.000984116	0	0	8.2455e-06	0	4.225e-05	0	0	0.0007046	0.0484375	0.1136	0.0092955	0.00370915	0.00046989	0.0126451	0.006045	0.010834	0	8.08e-05	0.0002484	0	0.00017584	5.4945e-05	2.713e-05	0.000572	-0.379048	-0.0323878	0.171632	-0.39573	-0.0729956	0.0399564	-0.0895234	-0.626897	-0.00804971
1985	1.25132	-0.0232162	0.02268	1.25186	1.94606	1.72898	1.7238	1.17908	0.436286	0.108436	0.00517506	0.217081	0.00288	0.000392611	0	0.00106258	0	0	8.5215e-06	0	4.875e-05	0	0	0.0007826	0.0507125	0.1192	0.010629	0.0038564	0.00053658	0.0128498	0.006342	0.011693	0	9.11e-05	0.00029325	0	0.00021488	6.138e-05	2.7865e-05	0.0005735	-0.381707	-0.0339184	0.181599	-0.402256	-0.0742145	0.0385309	-0.0914475	-0.634669	-0.0108835
1986	1.34237	0.0350442	0.0216256	1.2857	1.98758	1.75971	1.75427	1.20251	0.4411	0.110655	0.0054426	0.227867	0.00296	0.000409785	0	0.00114457	0	0	7.8545e-06	0	5.2e-05	0	0	0.0008684	0.053025	0.124736	0.011985	0.0040114	0.00060534	0.0129812	0.006576	0.01257	0	9.99e-05	0.0003456	0	0.00026	6.831e-05	2.8625e-05	0.0005745	-0.384827	-0.0354755	0.190877	-0.408376	-0.0753445	0.0366024	-0.093109	-0.641843	-0.0137224
1987	1.43528	0.065888	0.0475694	1.32183	2.03403	1.79455	1.78882	1.23094	0.445635	0.11224	0.00573024	0.23948	0.003045	0.000427766	0	0.00123007	0	0	7.5555e-06	0	5.525e-05	0	0	0.0009646	0.0557	0.130768	0.0132855	0.0041757	0.00067563	0.013143	0.006729	0.013483	0	0.0001215	0.00040635	0	0.00031168	7.557e-05	2.9405e-05	0.0005755	-0.390046	-0.0370307	0.19742	-0.413896	-0.0763509	0.0343842	-0.0945727	-0.648322	-0.0170523
1988	1.57609	0.105985	0.104563	1.36554	2.08662	1.83406	1.82803	1.26297	0.44981	0.115252	0.0060303	0.25256	0.00313	0.000446578	0	0.00131909	0	0	8.832e-06	0	6.5e-05	0	0	0.0010608	0.058725	0.137104	0.015159	0.0043431	0.00074943	0.0133185	0.006978	0.014488	0	0.0001582	0.0004773	0	0.00036976	8.283e-05	3.0205e-05	0.0005765	-0.39478	-0.0387166	0.204	-0.418617	-0.0771988	0.0311876	-0.0954342	-0.65393	-0.0211152
1989	1.70061	0.129289	0.162693	1.40863	2.13489	1.86923	1.8629	1.28962	0.453791	0.119486	0.00633033	0.265664	0.00321	0.000466245	0	0.00141162	0	0	1.07065e-05	0	7.475e-05	0	0	0.001157	0.061225	0.14344	0.017376	0.0045105	0.00082791	0.0134485	0.007302	0.015642	0	0.000198	0.0005607	0	0.00043408	9.0915e-05	3.103e-05	0.0005775	-0.39732	-0.0403412	0.211596	-0.422342	-0.0778539	0.0275134	-0.0958918	-0.658672	-0.0253641
1990	1.74564	0.126547	0.17444	1.44465	2.17459	1.89729	1.89065	1.31035	0.457668	0.122633	0.0066441	0.277301	0.00329	0.00048679	0	0.00150768	0	0	1.2581e-05	4.8e-06	8.125e-05	0	0	0.001261	0.0631875	0.149168	0.0193455	0.00467325	0.00091143	0.0135785	0.007467	0.016861	0	0.0002498	0.00064935	0	0.00049984	9.9495e-05	3.188e-05	0.000578	-0.398765	-0.0415859	0.217668	-0.424881	-0.0784437	0.0245183	-0.0960408	-0.662209	-0.030199
1991	0.806741	-0.814872	0.154604	1.46701	2.20888	1.92107	1.9141	1.32791	0.461544	0.124651	0.00697266	0.287807	0.00337	0.000508642	0	0.00160725	0	0	1.4421e-05	1.44e-05	8.775e-05	0	0	0.0013702	0.0650375	0.154016	0.02109	0.00482205	0.0009981	0.013728	0.007674	0.018088	0	0.0003392	0.00073455	0	0.00056096	0.00010758	3.2755e-05	0.0005785	-0.396841	-0.0424656	0.216613	-0.424334	-0.0791428	0.033451	-0.100962	-0.667004	-0.03631
1992	0.183167	-1.41975	0.125366	1.47755	2.23594	1.93909	1.93177	1.34097	0.464573	0.126224	0.00731543	0.296858	0.00345	0.000533	0	0.00171034	0	0	1.6215e-05	2.96e-05	9.425e-05	2.11225e-08	0	0.001482	0.0662375	0.158208	0.022788	0.0049569	0.00108423	0.0137475	0.007854	0.019343	0	0.0004848	0.00081375	0	0.000612	0.0001155	3.3655e-05	0.000579	-0.396023	-0.0424604	0.206985	-0.419207	-0.0798931	0.0425393	-0.103987	-0.671575	-0.0429799
1993	0.897138	-0.681902	0.0850237	1.49402	2.2597	1.95608	1.9484	1.35438	0.466274	0.127749	0.00768499	0.303616	0.00353	0.000559	0	0.00181695	0	0	1.85725e-05	6e-05	0.000104	6.27613e-08	0	0.0015964	0.0669375	0.161536	0.0240705	0.00507005	0.00116901	0.013637	0.00783	0.020428	0	0.0006789	0.00087555	0	0.00064688	0.000122925	3.458e-05	0.000579	-0.395358	-0.0422396	0.197842	-0.411007	-0.0806352	0.0427057	-0.102023	-0.672354	-0.0490306
1994	1.4368	-0.131512	0.0485363	1.51978	2.28862	1.98017	1.97207	1.37458	0.468059	0.129433	0.00810121	0.308449	0.00361	0.000585	0	0.00192708	0	0	2.19765e-05	0.00012	0.00012025	9.11702e-07	0	0.001716	0.067375	0.164192	0.0247035	0.0051553	0.00125226	0.0135655	0.00756	0.02132	7.973e-05	0.0008974	0.000927	0	0.00067648	0.00012969	3.553e-05	0.0005795	-0.392182	-0.0428387	0.191688	-0.402127	-0.0814255	0.0440421	-0.101521	-0.671509	-0.0551646
1995	1.64121	0.0586911	0.0260487	1.55647	2.32199	2.01042	2.0018	1.40007	0.470075	0.131651	0.00861607	0.311569	0.00369	0.000611	0	0.00204072	0	0	3.4569e-05	0.0002632	0.00014625	2.5313e-06	0	0.0018278	0.067375	0.166256	0.025038	0.0052173	0.00133191	0.0134615	0.006954	0.02209	0.00026803	0.0011316	0.0009741	0	0.00071856	0.000136125	3.65e-05	0.00058	-0.385604	-0.0439983	0.192353	-0.394949	-0.0823215	0.04384	-0.100528	-0.671594	-0.0603537
1996	1.73788	0.123806	0.0197181	1.59435	2.35324	2.03899	2.02971	1.4242	0.471455	0.134059	0.00927565	0.31425	0.003765	0.000637	0	0.00217712	0	0	6.25025e-05	0.0005048	0.0001885	3.72321e-06	0	0.001937	0.0672375	0.168016	0.025152	0.00525915	0.00140229	0.013364	0.0062454	0.02317	0.00050218	0.0013636	0.00101745	0	0.00076432	0.000140745	3.4995e-05	0.00058	-0.377983	-0.0453446	0.198817	-0.390468	-0.0836122	0.0418986	-0.0992733	-0.673231	-0.0635822
1997	1.81567	0.153279	0.0429187	1.61947	2.38518	2.06886	2.05879	1.44919	0.473265	0.136336	0.010067	0.316319	0.00384	0.000663	0	0.00233452	0	0	9.91415e-05	0.0008272	0.0002405	6.02431e-06	0	0.0020566	0.06705	0.169328	0.025104	0.00528395	0.00145845	0.0132535	0.0054729	0.02439	0.00077322	0.0015878	0.0010668	0	0.000796	0.0001419	3.28e-05	0.00058	-0.381987	-0.0465864	0.197514	-0.38756	-0.0857344	0.0385575	-0.0981783	-0.675861	-0.0652346
1998	1.92421	0.187549	0.0925838	1.64408	2.42451	2.10701	2.09607	1.48103	0.476231	0.138802	0.0109462	0.317498	0.00392	0.000689	0	0.00249192	0	0	0.000148914	0.0012336	0.0002925	9.64025e-06	0	0.0021606	0.0667375	0.170368	0.025035	0.00529325	0.00150165	0.013117	0.0046689	0.02527	0.00103278	0.0017892	0.00111255	0	0.00081808	0.000140745	3.355e-05	0.00058	-0.394515	-0.0470696	0.190006	-0.385373	-0.0887675	0.033855	-0.0971659	-0.678376	-0.0650724
1999	2.03322	0.216337	0.146252	1.67063	2.46087	2.14234	2.13043	1.51064	0.478682	0.141114	0.011905	0.318533	0.004	0.000715	0	0.00264931	4.96902e-07	0	0.000219914	0.0017088	0.0003445	1.53537e-05	0	0.0022516	0.0663	0.171184	0.0249045	0.00529325	0.00153495	0.0130201	0.0039363	0.02634	0.00128884	0.0019876	0.00115065	0	0.00083856	0.00013926	3.46e-05	0.00058	-0.404255	-0.046596	0.18688	-0.384069	-0.0925101	0.0282813	-0.0962409	-0.681142	-0.0634833
2000	2.09619	0.228674	0.181191	1.68633	2.48757	2.16801	2.15506	1.5327	0.479349	0.143001	0.0129504	0.319561	0.004075	0.000741	0	0.00280671	5.3733e-06	0	0.000305451	0.0022344	0.0003965	2.51441e-05	0	0.0023608	0.0658625	0.171856	0.0247545	0.00528705	0.00156069	0.0129181	0.0032898	0.02748	0.0015505	0.002208	0.0011859	0	0.00085728	0.00013761	3.2845e-05	0.00058	-0.412784	-0.0466785	0.186982	-0.383899	-0.0965845	0.023583	-0.0961873	-0.686086	-0.0611506
2001	2.12798	0.232444	0.190562	1.70497	2.51467	2.19434	2.18016	1.5559	0.479231	0.14503	0.0141809	0.320331	0.00415	0.000766999	1.95493e-06	0.00296411	3.16084e-05	0	0.000396152	0.0028016	0.000446886	3.92378e-05	0.000104522	0.0024778	0.065475	0.172432	0.024621	0.0052762	0.00158076	0.012792	0.0027471	0.02839	0.0017773	0.002407	0.00121365	0	0.00087456	0.0001353	2.889e-05	0.00058	-0.417581	-0.0478466	0.189391	-0.386164	-0.0988064	0.0228134	-0.0969686	-0.690713	-0.0592393
2002	2.14536	0.232444	0.174151	1.73876	2.54935	2.22832	2.21272	1.5855	0.479785	0.147437	0.0155953	0.321029	0.004225	0.000793324	5.87561e-06	0.00312151	7.92228e-05	2.96218e-06	0.000490601	0.0034184	0.000500933	5.42274e-05	0.000311056	0.0025922	0.065025	0.172784	0.0244785	0.0052638	0.00159642	0.0126601	0.0022884	0.02949	0.0019852	0.002595	0.0012336	0	0.0008904	0.00013266	2.549e-05	0.00058	-0.41749	-0.0490211	0.193791	-0.39016	-0.0991473	0.0248743	-0.0978269	-0.693303	-0.0574986
2003	2.1379	0.232444	0.130187	1.77527	2.58656	2.26528	2.24819	1.61755	0.480748	0.14989	0.017084	0.321281	0.00429915	0.000820285	9.55576e-06	0.0032789	0.00013392	1.16663e-05	0.000598771	0.0040704	0.000565359	7.12803e-05	0.000512873	0.0027118	0.0644875	0.172816	0.024279	0.0052514	0.00160848	0.0125223	0.0019068	0.03059	0.0021791	0.002751	0.00125085	0	0.00090496	0.000129855	2.394e-05	0.00058	-0.418209	-0.049655	0.196804	-0.3941	-0.0994884	0.0269294	-0.0986996	-0.695994	-0.0551123
2004	2.12582	0.232444	0.0860781	1.8073	2.61965	2.2984	2.27974	1.64679	0.480862	0.152086	0.0186534	0.321257	0.0043772	0.000847858	1.29337e-05	0.0034363	0.000194381	2.57604e-05	0.000717704	0.004764	0.000639868	9.54443e-05	0.000710546	0.0028314	0.0640125	0.172768	0.024036	0.005239	0.00161784	0.0124	0.0015885	0.03149	0.0023247	0.00287	0.0012621	0	0.0009184	0.00012672	2.2885e-05	0.00058	-0.419405	-0.0498851	0.198935	-0.398034	-0.0998295	0.0289768	-0.0995682	-0.698667	-0.0522666
2005	2.08469	0.184018	0.0592681	1.84141	2.65132	2.33017	2.30989	1.67512	0.480365	0.154397	0.0202831	0.321146	0.00445471	0.000876018	1.63124e-05	0.00359346	0.000259513	4.49136e-05	0.000834021	0.0054976	0.000724224	0.000126803	0.000904534	0.002951	0.063525	0.172608	0.023793	0.00522505	0.00162513	0.0122766	0.0013245	0.03245	0.0024073	0.002988	0.00126795	0	0.00093056	0.000123255	2.133e-05	0.00058	-0.417712	-0.0499846	0.200246	-0.398526	-0.100163	0.0307166	-0.1	-0.699783	-0.0497123
2006	1.99428	0.0677962	0.0431769	1.88331	2.68339	2.3629	2.34098	1.70352	0.480655	0.156801	0.0219181	0.320488	0.00453168	0.000904742	1.98671e-05	0.00375221	0.000328413	6.88119e-05	0.000952782	0.0062088	0.000818212	0.000164195	0.00109521	0.0030732	0.062825	0.172	0.023544	0.0052111	0.00163062	0.0121466	0.0011112	0.03354	0.0024738	0.003073	0.0012723	0	0.0009416	0.00011979	1.948e-05	0.00058	-0.410691	-0.0498236	0.199921	-0.392146	-0.100484	0.0318417	-0.1	-0.697796	-0.0477661
2007	1.96072	0	0.0322656	1.92846	2.71503	2.3955	2.37184	1.73086	0.481977	0.158999	0.0236673	0.31953	0.00460774	0.000933468	2.3575e-05	0.00391042	0.000400307	9.71706e-05	0.00109789	0.0069064	0.000929095	0.000209234	0.00134095	0.003211	0.0619875	0.171104	0.0232785	0.0051956	0.00163458	0.011999	0.0009366	0.03478	0.0025508	0.003125	0.00127275	0	0.00095152	0.00011616	1.7945e-05	0.00058	-0.401243	-0.0495325	0.198781	-0.382348	-0.100801	0.0326574	-0.1	-0.694248	-0.0461083
2008	2.0014	0	0.025655	1.97574	2.7485	2.42988	2.40428	1.75906	0.483983	0.161236	0.0255956	0.31862	0.00468253	0.000961647	2.73384e-05	0.00406389	0.000474707	0.000129738	0.00128488	0.00759441	0.00106392	0.000264882	0.0016932	0.00335443	0.06115	0.170176	0.023016	0.00517855	0.00163728	0.0118248	0.0007938	0.0361	0.0026334	0.003173	0.00126765	0	0.00096016	0.000112365	1.7405e-05	0.00058	-0.391822	-0.0492412	0.197645	-0.372574	-0.101121	0.0334701	-0.1	-0.69068	-0.0443753
2009	2.09924	0	0.0725288	2.02671	2.78516	2.46753	2.43986	1.78974	0.486601	0.163513	0.0276717	0.317634	0.00475603	0.000989273	3.11528e-05	0.00421264	0.00055115	0.000166263	0.00151223	0.00826954	0.00122186	0.000330849	0.00213871	0.00349199	0.0602564	0.169131	0.0227456	0.00516192	0.00163897	0.0116062	0.000676302	0.0374421	0.00271428	0.00333379	0.00125588	0	0.000966749	0.000108585	1.59312e-05	0.000580078	-0.382411	-0.0489499	0.196511	-0.36281	-0.101443	0.0342815	-0.1	-0.687085	-0.0424774
2010	2.22263	0	0.146252	2.07638	2.8236	2.50704	2.47711	1.82162	0.489663	0.165827	0.0299236	0.316567	0.00482824	0.00101634	3.50153e-05	0.00435667	0.000629117	0.000206497	0.00177844	0.00896606	0.0014022	0.000406837	0.00266556	0.00363258	0.0593186	0.167979	0.0224694	0.00514403	0.00163991	0.0113439	0.00057938	0.0387959	0.00279245	0.00359582	0.00123807	0	0.000971372	0.00010466	1.41637e-05	0.000580191	-0.375522	-0.0486972	0.195402	-0.354904	-0.101856	0.0345341	-0.1	-0.684281	-0.0405882
2011	2.30092	0	0.181191	2.11972	2.86245	2.54699	2.51465	1.85334	0.493132	0.16818	0.0323372	0.315465	0.00489914	0.00104286	3.89259e-05	0.004496	0.000708339	0.000250213	0.00208219	0.00968261	0.00160452	0.000492555	0.00326365	0.00377619	0.0583801	0.16678	0.022193	0.00512592	0.00164035	0.0110581	0.000495704	0.0402049	0.00287067	0.00383016	0.00121704	0	0.00097487	0.000100752	1.3613e-05	0.000580244	-0.373675	-0.0485221	0.194343	-0.350713	-0.102451	0.0336688	-0.1	-0.683099	-0.0389831
2012	2.35241	0	0.190562	2.16185	2.90246	2.58814	2.55327	1.88564	0.497048	0.170587	0.03487	0.314322	0.00496977	0.00106922	4.27407e-05	0.004626	0.000805023	0.00029458	0.00241689	0.0104344	0.00181958	0.0005771	0.00389233	0.00392236	0.0574424	0.165535	0.0219163	0.00510771	0.00164042	0.0107505	0.000422914	0.0416617	0.00294754	0.00403581	0.00119331	0	0.000977269	9.6882e-05	1.33883e-05	0.000580268	-0.37435	-0.0483856	0.193308	-0.34838	-0.103137	0.0322446	-0.1	-0.682734	-0.0370471
2013	2.38045	0	0.174151	2.2063	2.94401	2.63087	2.59338	1.91889	0.501437	0.173062	0.0374815	0.313142	0.00504116	0.00109583	4.63156e-05	0.00474203	0.000932373	0.000336945	0.00277617	0.0112358	0.0020383	0.000649887	0.00451607	0.00407064	0.0565075	0.164252	0.0216407	0.00508943	0.00164021	0.0104224	0.000363425	0.04316	0.0030219	0.004212	0.00116735	0	0.000978653	9.30693e-05	1.32686e-05	0.000580279	-0.375025	-0.0482492	0.192274	-0.346047	-0.103823	0.0308204	-0.1	-0.682367	-0.034951
2014	2.38231	0	0.130187	2.25212	2.98703	2.6751	2.63494	1.95307	0.506264	0.175606	0.0401635	0.311927	0.00511329	0.00112269	4.96508e-05	0.00484415	0.00108478	0.000377439	0.00315926	0.0120835	0.00226064	0.000711267	0.00513578	0.00422103	0.0555768	0.162935	0.0213671	0.00507113	0.00163979	0.0100752	0.000314825	0.0446946	0.00309275	0.00435821	0.00113958	0	0.000979092	8.93273e-05	1.31959e-05	0.000580285	-0.3757	-0.0481128	0.19124	-0.343713	-0.10451	0.0293962	-0.1	-0.681999	-0.0331631
2015	2.38553	0	0.0860781	2.29946	3.03146	2.72078	2.67787	1.98815	0.511502	0.178217	0.0429094	0.310678	0.00518619	0.00114981	5.27464e-05	0.00493242	0.00125774	0.000416193	0.00356539	0.0129749	0.00248654	0.000761583	0.00575235	0.00437353	0.054652	0.16159	0.0210962	0.00505283	0.00163921	0.00971003	0.000275137	0.0462611	0.00315927	0.00447414	0.00111035	0	0.000978661	8.56653e-05	1.31629e-05	0.000580287	-0.376375	-0.0479764	0.190205	-0.34138	-0.105196	0.027972	-0.1	-0.681628	-0.0314512
2016	2.40742	0	0.0592681	2.34816	3.07712	2.76773	2.72202	2.02401	0.51711	0.180895	0.0457132	0.309385	0.00525983	0.00117717	5.56023e-05	0.00500689	0.00144754	0.000453324	0.00399385	0.0139072	0.00271597	0.000801162	0.0063665	0.00452813	0.0537336	0.160222	0.020828	0.00503456	0.00163851	0.00932769	0.00023392	0.0478554	0.00322074	0.00455961	0.00107999	0	0.000977416	8.20907e-05	1.11924e-05	0.000580288	-0.377049	-0.04784	0.189171	-0.339046	-0.105882	0.0265478	-0.1	-0.681257	-0.0297778
2017	2.44121	0	0.0431769	2.39804	3.12383	2.81578	2.76721	2.06053	0.523045	0.183639	0.0485695	0.308055	0.00533423	0.00120478	5.82188e-05	0.00506763	0.00165119	0.000488937	0.00444392	0.0148779	0.00294886	0.000830318	0.00697876	0.00468483	0.0528212	0.158831	0.0205625	0.00501629	0.00163772	0.0089444	0.000191435	0.049465	0.00327708	0.00461641	0.00104875	0	0.000975401	7.86091e-05	8.76837e-06	0.000580289	-0.377724	-0.0477036	0.188137	-0.336713	-0.106568	0.0251236	-0.1	-0.680883	-0.0281298
2018	2.48125	0	0.0322656	2.44898	3.17151	2.86481	2.81333	2.09762	0.529266	0.186448	0.0514738	0.306704	0.00540939	0.00123264	6.05958e-05	0.00511467	0.00186623	0.000523133	0.00491491	0.0158844	0.00318518	0.000849358	0.00758961	0.00484364	0.0519146	0.157421	0.0202996	0.00499804	0.00163686	0.00857582	0.000156706	0.0510713	0.00332881	0.00464808	0.00101688	0	0.000972658	7.52263e-05	8.18611e-06	0.000580289	-0.378399	-0.0475671	0.187102	-0.33438	-0.107254	0.0236995	-0.1	-0.680508	-0.026508
2019	2.52701	0	0.025655	2.50136	3.22008	2.91476	2.86034	2.13528	0.535741	0.189321	0.0544219	0.30532	0.0054853	0.00126076	6.27335e-05	0.00514808	0.00209071	0.000556007	0.00540618	0.0169246	0.00342486	0.000858574	0.00819953	0.00500456	0.051014	0.155994	0.0200392	0.00497979	0.00163595	0.00822134	0.000128274	0.0526595	0.0033764	0.00465779	0.000984585	0	0.000969233	7.19447e-05	8.02041e-06	0.000580289	-0.379074	-0.0474307	0.186068	-0.332046	-0.10794	0.0222753	-0.1	-0.680131	-0.0244691
2020	2.6282	0	0.0725288	2.55567	3.2695	2.96561	2.9082	2.1735	0.542439	0.192258	0.0574104	0.303896	0.00556196	0.00128912	6.46319e-05	0.00516791	0.00232303	0.000587647	0.0059171	0.0179965	0.00366786	0.000858253	0.00880889	0.00516758	0.0501195	0.154552	0.0197813	0.00496155	0.00163501	0.0078804	0.000104991	0.0542183	0.00342029	0.00464841	0.000952064	0	0.000965172	6.87627e-05	7.94576e-06	0.000580289	-0.379215	-0.0472817	0.184899	-0.329356	-0.108415	0.0209384	-0.1	-0.679297	-0.0223735
2021	2.75837	0	0.146252	2.61212	3.3196	3.01718	2.95675	2.21219	0.549306	0.195256	0.060435	0.302418	0.00563937	0.00131773	6.62911e-05	0.00517419	0.0025617	0.00061812	0.00644697	0.0190975	0.00391411	0.000848659	0.00941758	0.00533269	0.049229	0.153094	0.0195254	0.00494327	0.00163402	0.00755192	8.59537e-05	0.0557368	0.00346069	0.00462239	0.000919445	0	0.000960485	6.56839e-05	7.84388e-06	0.000580289	-0.378288	-0.0471074	0.183462	-0.325951	-0.108468	0.0197763	-0.1	-0.677549	-0.02076
2022	2.85022	0	0.181191	2.66902	3.37016	3.06928	3.00584	2.25125	0.556275	0.198311	0.063443	0.300878	0.00571738	0.00134655	6.77997e-05	0.00517335	0.00278782	0.000647537	0.00698407	0.0202062	0.00416108	0.000834464	0.0100159	0.00550082	0.0483416	0.151621	0.0192711	0.00492495	0.00163301	0.00723509	7.03821e-05	0.0572082	0.00349793	0.00458201	0.00088686	0	0.000955186	6.27089e-05	7.70767e-06	0.000580289	-0.376827	-0.0469206	0.18189	-0.322189	-0.108309	0.0187015	-0.1	-0.675337	-0.0193033
2023	2.91613	0	0.190562	2.72557	3.42123	3.12195	3.05556	2.29082	0.563324	0.201415	0.0663902	0.299283	0.0057958	0.00137552	6.92463e-05	0.00517181	0.00298622	0.00067602	0.00751719	0.0213032	0.00440635	0.000820219	0.0105958	0.00567285	0.047459	0.150136	0.0190188	0.00490659	0.00163199	0.00692992	5.7648e-05	0.0586296	0.00353248	0.00452943	0.000854466	0	0.000949336	5.98347e-05	7.59511e-06	0.000580289	-0.375365	-0.0467337	0.180318	-0.318426	-0.10815	0.0176267	-0.1	-0.673117	-0.0179296
2024	2.95692	0	0.174151	2.78276	3.47295	3.17531	3.10603	2.331	0.570456	0.204567	0.0692865	0.297636	0.00587465	0.00140465	7.06311e-05	0.00516956	0.00316222	0.000703641	0.00804659	0.0223896	0.00464998	0.000805927	0.0111602	0.00584879	0.0465826	0.148642	0.0187686	0.00488822	0.00163094	0.00663629	4.72331e-05	0.0599987	0.00356467	0.00446656	0.000822397	0	0.00094299	5.70653e-05	7.51022e-06	0.000580289	-0.373904	-0.0465469	0.178747	-0.314664	-0.107992	0.0165519	-0.1	-0.670887	-0.01661
2025	2.97083	0	0.130187	2.84064	3.52533	3.22939	3.15725	2.37181	0.577671	0.207766	0.0721402	0.295943	0.00595392	0.00143394	7.19539e-05	0.00516662	0.00332016	0.000730466	0.00857249	0.023467	0.00489203	0.000791595	0.0117114	0.00602864	0.0457138	0.147143	0.0185208	0.00486984	0.00162988	0.00635405	3.87137e-05	0.0613142	0.00359479	0.00439505	0.000790768	0	0.000936195	5.44005e-05	7.45157e-06	0.000580289	-0.372443	-0.04636	0.177175	-0.310902	-0.107833	0.0154771	-0.1	-0.668649	-0.0153399
2026	2.98526	0	0.0860781	2.89918	3.57838	3.28417	3.20921	2.41323	0.584975	0.211012	0.074959	0.294209	0.00603362	0.00146338	7.32149e-05	0.00516299	0.00346362	0.000756561	0.00909518	0.0245365	0.00513257	0.000777225	0.0122518	0.00621238	0.0448537	0.145641	0.0182755	0.00485148	0.00162881	0.00608305	3.17435e-05	0.062576	0.00362315	0.00431643	0.000759675	0	0.000928998	5.184e-05	7.42289e-06	0.000580289	-0.370982	-0.0461732	0.175603	-0.30714	-0.107674	0.0144024	-0.1	-0.6664	-0.0141306
2027	3.01754	0	0.0592681	2.95827	3.63199	3.33955	3.2618	2.45514	0.592357	0.214304	0.0777486	0.292438	0.00611373	0.00149299	7.44139e-05	0.00515867	0.00359537	0.000781978	0.00961483	0.0255992	0.00537166	0.000762819	0.0127829	0.00640003	0.0440029	0.144139	0.0180328	0.00483314	0.00162774	0.00582289	2.6039e-05	0.0637839	0.00364991	0.00423197	0.000729186	0	0.000921428	4.93826e-05	7.40379e-06	0.000580289	-0.36952	-0.0459863	0.174031	-0.303378	-0.107515	0.0133276	-0.1	-0.664143	-0.0129825
2028	3.06094	0	0.0431769	3.01777	3.68601	3.39538	3.31487	2.49743	0.599798	0.217642	0.080513	0.290628	0.00619427	0.00152275	7.55512e-05	0.00515366	0.00371758	0.00080676	0.0101316	0.0266556	0.00560933	0.000748372	0.013306	0.00659159	0.0431609	0.142636	0.0177926	0.00481481	0.00162666	0.00557306	2.13679e-05	0.0649376	0.00367518	0.0041428	0.000699352	0	0.000913508	4.70226e-05	7.37298e-06	0.000580289	-0.368059	-0.0457994	0.172459	-0.299615	-0.107357	0.0122528	-0.1	-0.661876	-0.011895
2029	3.10986	0	0.0322656	3.0776	3.74038	3.4516	3.36834	2.54003	0.607284	0.221024	0.0832561	0.288781	0.00627524	0.00155266	7.66266e-05	0.00514797	0.00383202	0.000830946	0.0106456	0.0277062	0.00584562	0.000733883	0.0138223	0.00678704	0.0423274	0.141132	0.0175546	0.00479648	0.00162557	0.00533308	1.75412e-05	0.0660373	0.00369908	0.00404989	0.000670215	0	0.000905263	4.47624e-05	7.33006e-06	0.000580289	-0.366598	-0.0456126	0.170888	-0.295853	-0.107198	0.011178	-0.1	-0.659599	-0.0108678
2030	3.16493	0	0.025655	3.13927	3.79508	3.50818	3.4222	2.58294	0.614804	0.22445	0.0859812	0.2869	0.00635662	0.00158274	7.76402e-05	0.0051416	0.00394032	0.000854577	0.0111571	0.0287517	0.00608057	0.000719349	0.0143327	0.00698639	0.0415025	0.13963	0.017319	0.00477815	0.00162448	0.00510258	1.4405e-05	0.0670841	0.00372171	0.00395415	0.000641813	0	0.000896718	4.25968e-05	7.27984e-06	0.000580289	-0.364091	-0.0454178	0.169128	-0.29126	-0.106795	0.0102535	-0.1	-0.656724	-0.00989642
2031	3.27687	0	0.0725288	3.20434	3.8501	3.56512	3.47643	2.62616	0.622347	0.22792	0.0886911	0.284986	0.00643843	0.00161297	7.8592e-05	0.00513454	0.00404361	0.000877687	0.011666	0.0297926	0.00631422	0.000704769	0.014838	0.00718964	0.0406863	0.138129	0.0170856	0.00475982	0.00162338	0.00488116	1.18337e-05	0.0680791	0.00374316	0.00385633	0.00061417	0	0.000887893	4.05212e-05	7.22168e-06	0.000580289	-0.359491	-0.0452071	0.166994	-0.285003	-0.105904	0.00962959	-0.1	-0.652647	-0.00897552
2032	3.41693	0	0.146252	3.27068	3.90565	3.62266	3.53129	2.66979	0.630074	0.231432	0.0913616	0.282995	0.00652036	0.00164325	7.95132e-05	0.00512696	0.00414122	0.000900376	0.0121778	0.0308315	0.00654867	0.000690463	0.0153054	0.00739613	0.0398769	0.136628	0.016854	0.00474144	0.00162228	0.00466811	9.72494e-06	0.0689831	0.00376259	0.00375705	0.000587291	0	0.000878782	3.85332e-05	7.12174e-06	0.000580289	-0.353846	-0.0449886	0.164672	-0.277916	-0.10477	0.00915596	-0.1	-0.647943	-0.00810381
2033	3.51826	0	0.181191	3.33707	3.96199	3.68114	3.58717	2.71404	0.638142	0.234989	0.093974	0.280852	0.00660211	0.00167348	8.0435e-05	0.005119	0.00423292	0.00092275	0.0126975	0.0318716	0.00678606	0.000676748	0.0157062	0.00760519	0.0390734	0.135124	0.0166239	0.00472301	0.00162116	0.00446292	7.99523e-06	0.0697256	0.00377834	0.0036568	0.000561184	0	0.000869391	3.66277e-05	6.99201e-06	0.000580289	-0.348201	-0.04477	0.16235	-0.270828	-0.103635	0.00868234	-0.1	-0.643196	-0.00728089
2034	3.59507	0	0.190562	3.40451	4.01925	3.74074	3.6442	2.75908	0.646531	0.238588	0.0965395	0.278505	0.00668367	0.00170365	8.13573e-05	0.00511067	0.00432014	0.000944855	0.0132251	0.0329138	0.00702638	0.000663611	0.0160495	0.00781683	0.0382771	0.133621	0.0163955	0.00470454	0.00162004	0.00426557	6.57632e-06	0.070252	0.00378907	0.003556	0.000535878	0	0.000859757	3.48054e-05	6.88501e-06	0.000580289	-0.342556	-0.0445514	0.160028	-0.26374	-0.1025	0.00820872	-0.1	-0.638405	-0.0065056
2035	3.64718	0	0.174151	3.47303	4.07746	3.80154	3.70247	2.80502	0.655223	0.24223	0.0990681	0.275917	0.00676505	0.00173377	8.22802e-05	0.00510197	0.00440402	0.000966729	0.0137606	0.0339591	0.00726964	0.00065104	0.0163428	0.00803105	0.0374892	0.132122	0.0161691	0.00468604	0.00161892	0.00407597	5.41208e-06	0.0705206	0.00379361	0.00345503	0.000511387	0	0.000849916	3.30667e-05	6.80576e-06	0.000580289	-0.33691	-0.0443328	0.157705	-0.256653	-0.101365	0.0077351	-0.1	-0.633569	-0.00576977
2036	3.67276	0	0.130187	3.54258	4.13657	3.86352	3.76195	2.85184	0.664196	0.245913	0.101568	0.273057	0.00684624	0.00176384	8.32036e-05	0.00509293	0.00448546	0.000988412	0.014304	0.0350083	0.00751587	0.000639022	0.016593	0.00824784	0.0367106	0.130626	0.0159448	0.00466752	0.00161779	0.00389397	4.45651e-06	0.0705004	0.00379101	0.00335418	0.00048773	0	0.000839904	3.14083e-05	6.75342e-06	0.000580289	-0.331265	-0.0441142	0.155383	-0.249565	-0.100231	0.00726148	-0.1	-0.628687	-0.00507069
2037	3.69916	0	0.0860781	3.61308	4.19653	3.92663	3.82258	2.8995	0.673439	0.249637	0.104047	0.269907	0.00692725	0.00179385	8.41276e-05	0.00508353	0.00456525	0.00100994	0.0148553	0.0360623	0.00776507	0.000627545	0.0168059	0.00846721	0.0359422	0.129137	0.0157227	0.00464902	0.00161665	0.00371948	3.67197e-06	0.0701697	0.00378047	0.00325374	0.000464917	0	0.00082975	2.98234e-05	6.73176e-06	0.000580289	-0.32562	-0.0438956	0.153061	-0.242477	-0.0990957	0.00678785	-0.1	-0.623759	-0.00441323
2038	3.74364	0	0.0592681	3.68438	4.25719	3.99074	3.88423	2.9479	0.682922	0.253401	0.106511	0.26645	0.00700808	0.0018238	8.50521e-05	0.00507379	0.00464385	0.00103134	0.0154144	0.0371215	0.00801725	0.000616592	0.0169865	0.00868914	0.0351843	0.127656	0.015503	0.00463052	0.00161551	0.00355222	3.02748e-06	0.0695129	0.00376128	0.0031539	0.000442942	0	0.000819472	2.8312e-05	6.7204e-06	0.000580289	-0.319974	-0.0436771	0.150739	-0.23539	-0.097961	0.00631423	-0.1	-0.618782	-0.00379691
2039	3.79945	0	0.0431769	3.75628	4.31836	4.05568	3.94672	2.9969	0.692609	0.257205	0.108964	0.262675	0.00708873	0.00185371	8.59772e-05	0.0050637	0.00472151	0.00105261	0.0159811	0.038186	0.00827235	0.000606146	0.0171384	0.00891365	0.0344364	0.126181	0.0152855	0.00461202	0.00161437	0.00339184	2.49769e-06	0.0685195	0.00373279	0.00305479	0.000421788	0	0.000809079	2.68738e-05	6.69791e-06	0.000580289	-0.314329	-0.0434585	0.148417	-0.228302	-0.0968262	0.00584061	-0.1	-0.613757	-0.00322117
2040	3.8606	0	0.0322656	3.82833	4.37993	4.12136	4.00995	3.04643	0.70247	0.261048	0.111409	0.258576	0.00716919	0.00188355	8.69029e-05	0.00505326	0.00479845	0.00107378	0.0165554	0.0392557	0.00853037	0.00059619	0.0172651	0.00914074	0.0336983	0.124713	0.0150701	0.00459351	0.00161323	0.00323804	2.06188e-06	0.0671843	0.0036945	0.00295654	0.000401445	0	0.000798581	2.55014e-05	6.66368e-06	0.000580289	-0.308824	-0.0432442	0.146373	-0.221799	-0.0957549	0.00560112	-0.1	-0.609013	-0.00268664
2041	3.92582	0	0.025655	3.90016	4.44188	4.18773	4.07388	3.09647	0.712482	0.264929	0.113848	0.25415	0.00724947	0.00191335	8.78291e-05	0.00504248	0.00487486	0.00109486	0.017137	0.0403307	0.00879127	0.000586707	0.0173695	0.00937039	0.0329699	0.123252	0.0148568	0.00457499	0.00161208	0.00309055	1.70316e-06	0.0655063	0.00364601	0.00285926	0.000381895	0	0.000787986	2.41915e-05	6.62278e-06	0.000580289	-0.3036	-0.0430386	0.144886	-0.216466	-0.0948102	0.00582989	-0.1	-0.604891	-0.00219203
2042	4.04494	0	0.0725288	3.97241	4.5043	4.25485	4.13859	3.14712	0.722645	0.268833	0.116261	0.249442	0.00732977	0.00194316	8.87537e-05	0.00503144	0.0049423	0.00111598	0.0177227	0.0414039	0.00905351	0.000577409	0.0174501	0.00960202	0.0322513	0.121798	0.0146454	0.00455646	0.00161092	0.00294913	1.40767e-06	0.0635282	0.00358797	0.00276308	0.000363118	0	0.000777306	2.29446e-05	6.57387e-06	0.000580289	-0.298516	-0.0428373	0.143676	-0.211718	-0.093929	0.0062928	-0.1	-0.601072	-0.00173677
2043	4.19164	0	0.146252	4.04539	4.5672	4.32267	4.20405	3.19838	0.732926	0.272744	0.118623	0.244525	0.00741031	0.00197307	8.96744e-05	0.00502021	0.00499338	0.00113723	0.0183092	0.0424673	0.0093155	0.000568011	0.0175043	0.00983505	0.0315411	0.120349	0.0144358	0.00453788	0.00160976	0.00281333	1.16401e-06	0.0613265	0.00352183	0.0026682	0.000345093	0	0.000766541	2.17567e-05	6.47357e-06	0.000580289	-0.293432	-0.0426359	0.142467	-0.206971	-0.0930478	0.0067557	-0.1	-0.597226	-0.00132312
2044	4.30007	0	0.181191	4.11888	4.6306	4.39113	4.27019	3.25025	0.743286	0.276662	0.12094	0.239462	0.00749108	0.00200307	9.05913e-05	0.0050088	0.00503073	0.00115861	0.0188963	0.043521	0.00957721	0.000558509	0.0175346	0.0100695	0.0308385	0.118903	0.0142276	0.00451924	0.00160859	0.00268283	9.62931e-07	0.058966	0.00344895	0.00257479	0.000327797	0	0.000755683	2.06245e-05	6.33034e-06	0.000580289	-0.288348	-0.0424346	0.141257	-0.202223	-0.0921665	0.0072186	-0.1	-0.593352	-0.000954578
2045	4.38366	0	0.190562	4.1931	4.69472	4.4604	4.33719	3.30287	0.753731	0.280586	0.123219	0.234314	0.00757208	0.00203318	9.15044e-05	0.00499721	0.00505702	0.00118011	0.0194842	0.0445667	0.00983871	0.000548907	0.0175443	0.0103053	0.0301445	0.117464	0.0140211	0.00450056	0.00160742	0.00255759	7.96956e-07	0.0565025	0.00337072	0.00248309	0.00031122	0	0.000744758	1.95458e-05	6.20413e-06	0.000580289	-0.283264	-0.0422333	0.140048	-0.197475	-0.0912853	0.00768151	-0.1	-0.589451	-0.000635908
2046	4.44234	0	0.174151	4.26819	4.75971	4.53058	4.40511	3.35633	0.764262	0.284517	0.125468	0.229131	0.00765331	0.00206338	9.24136e-05	0.00498544	0.00507437	0.00120177	0.0200732	0.0456059	0.0101001	0.000539211	0.0175362	0.0105425	0.0294599	0.116031	0.0138164	0.00448185	0.00160624	0.00243752	6.59917e-07	0.0539815	0.00328835	0.00239327	0.000295353	0	0.000733791	1.85185e-05	6.10311e-06	0.000580289	-0.27818	-0.042032	0.138839	-0.192727	-0.090404	0.00814441	-0.1	-0.585521	-0.00037144
2047	4.47438	0	0.130187	4.3442	4.82562	4.60167	4.47398	3.41064	0.774881	0.288453	0.127691	0.223952	0.00773477	0.00209367	9.3319e-05	0.0049735	0.00508452	0.00122358	0.0206635	0.04664	0.0103614	0.000529423	0.0175127	0.0107811	0.0287855	0.114607	0.0136137	0.00446312	0.00160505	0.00232254	5.46731e-07	0.05144	0.00320286	0.0023055	0.000280179	0	0.000722803	1.75441e-05	6.02715e-06	0.000580289	-0.273096	-0.0418307	0.137629	-0.187979	-0.0895228	0.00860732	-0.1	-0.581563	-0.000169353
2048	4.5072	0	0.0860781	4.42113	4.89246	4.67365	4.54376	3.46577	0.785591	0.292394	0.129896	0.218812	0.00781646	0.00212406	9.42205e-05	0.00496139	0.00508892	0.00124557	0.0212553	0.0476705	0.0106227	0.000519548	0.017476	0.011021	0.0281219	0.113192	0.0134132	0.00444439	0.00160386	0.00221254	4.53213e-07	0.0489082	0.00311516	0.0022199	0.000265681	0	0.000711814	1.66168e-05	5.98012e-06	0.000580289	-0.268012	-0.0416294	0.13642	-0.183231	-0.0886415	0.00907022	-0.1	-0.577575	-4.39308e-05
2049	4.55814	0	0.0592681	4.49887	4.96015	4.74641	4.61433	3.52161	0.796383	0.296342	0.132084	0.213734	0.00789839	0.00215455	9.51182e-05	0.0049491	0.00508859	0.00126773	0.0218486	0.048698	0.010884	0.000509586	0.0174278	0.0112624	0.0274692	0.111788	0.0132148	0.00442567	0.00160267	0.00210734	3.75906e-07	0.046409	0.00302599	0.00213655	0.00025184	0	0.00070084	1.57342e-05	5.94192e-06	0.000580289	-0.262928	-0.041428	0.13521	-0.178483	-0.0877603	0.00953313	-0.1	-0.573557	-1.15338e-06
2050	4.61934	0	0.0431769	4.57616	5.02854	4.8198	4.68555	3.57802	0.807231	0.300294	0.134258	0.208736	0.00798055	0.00218514	9.60121e-05	0.00493665	0.00508421	0.00129004	0.0224435	0.0497227	0.0111454	0.000499536	0.0173688	0.0115051	0.0268271	0.110394	0.0130186	0.00440695	0.00160147	0.00200671	3.11955e-07	0.04396	0.00293592	0.00205547	0.000238633	0	0.000689881	1.48974e-05	5.89128e-06	0.000580289	-0.25868	-0.0412225	0.134032	-0.174309	-0.0869794	0.00979869	-0.1	-0.569856	0
2051	4.68406	0	0.0322656	4.65179	5.09756	4.89373	4.75731	3.63494	0.81812	0.304252	0.136419	0.20383	0.00806294	0.00221582	9.69022e-05	0.00492402	0.00507635	0.00131251	0.02304	0.0507449	0.0114068	0.000489396	0.0173001	0.0117493	0.0261953	0.109009	0.0128243	0.00438821	0.00160026	0.00191044	2.59019e-07	0.0415749	0.00284545	0.0019767	0.000226034	0	0.000678935	1.41042e-05	5.82899e-06	0.000580289	-0.256103	-0.0410086	0.132917	-0.171282	-0.0863991	0.00966959	-0.1	-0.566825	0
2052	4.7526	0	0.025655	4.72694	5.167	4.96798	4.8294	3.69234	0.828859	0.30821	0.138571	0.199026	0.0081452	0.00224647	9.77897e-05	0.00491126	0.00507422	0.00133533	0.0236355	0.051757	0.0116672	0.000479285	0.017226	0.0119963	0.0255737	0.107633	0.012632	0.00436947	0.00159906	0.00181835	2.15165e-07	0.0392633	0.00275496	0.00190024	0.000214021	0	0.000668015	1.33487e-05	5.75559e-06	0.000580289	-0.254363	-0.0407904	0.131833	-0.168829	-0.0859192	0.00934315	-0.1	-0.564126	0
2053	4.87504	0	0.0725288	4.80251	5.23667	5.04233	4.90162	3.75018	0.839272	0.312165	0.140717	0.194331	0.00822699	0.00227698	9.86759e-05	0.00489841	0.00508541	0.00135867	0.0242277	0.0527519	0.0119255	0.000469315	0.0171501	0.0122475	0.0249623	0.106267	0.0124416	0.00435071	0.00159784	0.00173029	1.78804e-07	0.0370318	0.00266473	0.00182604	0.000202574	0	0.000657127	1.26291e-05	5.66904e-06	0.000580289	-0.252622	-0.0405722	0.13075	-0.166377	-0.0854393	0.00901672	-0.1	-0.561414	0
2054	5.02432	0	0.146252	4.87806	5.30642	5.11668	4.97382	3.80836	0.849349	0.316116	0.142851	0.189746	0.00830831	0.00230734	9.95608e-05	0.00488545	0.00510707	0.00138247	0.0248163	0.0537287	0.0121818	0.000459473	0.0170713	0.012503	0.02436	0.104909	0.012253	0.00433191	0.00159662	0.00164596	1.4863e-07	0.0348845	0.00257499	0.00175406	0.000191666	0	0.000646258	1.19465e-05	5.53095e-06	0.000580289	-0.250881	-0.040354	0.129666	-0.163924	-0.0849594	0.00869028	-0.1	-0.558689	0
2055	5.13479	0	0.181191	4.9536	5.37627	5.191	5.04603	3.86688	0.859089	0.320063	0.144969	0.185271	0.00838915	0.00233756	0.000100444	0.00487238	0.00513703	0.00140666	0.025401	0.0546872	0.0124359	0.00044975	0.0169889	0.0127628	0.0237661	0.103557	0.0120657	0.00431306	0.00159539	0.00156515	1.23572e-07	0.0328245	0.00248598	0.00168427	0.000181275	0	0.000635404	1.12989e-05	5.3486e-06	0.000580289	-0.24914	-0.0401358	0.128582	-0.161471	-0.0844795	0.00836384	-0.1	-0.555952	0
2056	5.21991	0	0.190562	5.02935	5.44643	5.26552	5.11845	3.9259	0.868539	0.324005	0.147073	0.180912	0.00846951	0.00236762	0.000101327	0.0048592	0.005174	0.00143123	0.0259822	0.0556291	0.0126879	0.000440143	0.0169037	0.0130269	0.0231814	0.102212	0.0118802	0.00429416	0.00159416	0.00148782	1.02761e-07	0.0308546	0.00239801	0.00161667	0.000171384	0	0.000624577	1.0685e-05	5.18146e-06	0.000580289	-0.2474	-0.0399177	0.127498	-0.159018	-0.0839995	0.0080374	-0.1	-0.553201	0
2057	5.27962	0	0.174151	5.10547	5.51704	5.34037	5.19121	3.98552	0.877739	0.327944	0.149164	0.176672	0.0085494	0.00239754	0.000102208	0.00484591	0.0052169	0.00145619	0.02656	0.056556	0.0129379	0.000430649	0.0168161	0.0132952	0.0226064	0.100877	0.0116964	0.00427524	0.00159292	0.00141389	8.54748e-08	0.0289765	0.00231138	0.00155128	0.000161977	0	0.000613803	1.01032e-05	5.03828e-06	0.000580289	-0.245659	-0.0396995	0.126414	-0.156565	-0.0835196	0.00771097	-0.1	-0.550437	0
2058	5.31221	0	0.130187	5.18203	5.58815	5.41559	5.26435	4.04575	0.886723	0.331879	0.151244	0.172555	0.00862881	0.00242731	0.000103088	0.00483252	0.00526485	0.00148151	0.0271348	0.0574693	0.013186	0.000421267	0.0167265	0.0135678	0.0220416	0.0995518	0.0115146	0.0042563	0.00159167	0.00134329	7.11143e-08	0.0271905	0.00222631	0.00148808	0.000153037	0	0.000603093	9.55214e-06	4.91907e-06	0.000580289	-0.243918	-0.0394813	0.125331	-0.154112	-0.0830397	0.00738453	-0.1	-0.547659	0
2059	5.34513	0	0.0860781	5.25905	5.65977	5.49121	5.3379	4.10656	0.895526	0.335809	0.153314	0.168561	0.00870774	0.00245693	0.000103966	0.00481902	0.00531715	0.0015072	0.0277067	0.0583707	0.0134321	0.000411994	0.0166355	0.0138446	0.0214875	0.098238	0.0113349	0.00423738	0.00159042	0.00127595	5.91828e-08	0.0254959	0.00214302	0.00142705	0.00014455	0	0.000592463	9.03053e-06	4.82777e-06	0.000580289	-0.242177	-0.0392631	0.124247	-0.151659	-0.0825598	0.00705809	-0.1	-0.544868	0
2060	5.39547	0	0.0592681	5.3362	5.73184	5.56715	5.41177	4.16788	0.904164	0.339736	0.155374	0.16469	0.0087862	0.00248641	0.000104843	0.00480543	0.00537307	0.00153323	0.028276	0.059261	0.0136765	0.000402826	0.016543	0.0141257	0.0209442	0.0969357	0.0111573	0.00421846	0.00158916	0.00121173	4.92665e-08	0.023891	0.00206163	0.00136816	0.000136491	0	0.000581921	8.53687e-06	4.74482e-06	0.000580289	-0.240554	-0.0390618	0.123234	-0.149384	-0.0821042	0.00676237	-0.1	-0.54225	0
2061	5.45626	0	0.0431769	5.41308	5.80422	5.64328	5.48586	4.22956	0.912637	0.343658	0.157424	0.160936	0.00886418	0.00251573	0.000105719	0.00479172	0.00543181	0.00155958	0.0288426	0.0601401	0.013919	0.000393757	0.0164488	0.0144111	0.0204113	0.0956445	0.0109818	0.00419954	0.0015879	0.00115049	4.10214e-08	0.0223734	0.0019822	0.00131137	0.000128843	0	0.000571462	8.06961e-06	4.64972e-06	0.000580289	-0.239164	-0.0388942	0.122364	-0.147465	-0.0816974	0.00652808	-0.1	-0.539994	0
2062	5.52186	0	0.0322656	5.48959	5.87648	5.71918	5.55972	4.29135	0.920792	0.347573	0.159463	0.157297	0.00894195	0.00254502	0.000106594	0.00477794	0.00549298	0.00158622	0.0294067	0.06101	0.0141597	0.000384852	0.0163528	0.0146979	0.0198886	0.0943641	0.0108082	0.00418063	0.00158664	0.00109208	3.41634e-08	0.0209402	0.00190479	0.00125661	0.00012159	0	0.00056109	7.62373e-06	4.5428e-06	0.000580289	-0.237892	-0.0387435	0.121565	-0.145723	-0.0813149	0.0063245	-0.1	-0.537916	0
2063	5.59124	0	0.025655	5.56559	5.94826	5.79449	5.633	4.35303	0.928494	0.351477	0.16149	0.153769	0.00901976	0.00257438	0.000107468	0.00476413	0.00555623	0.00161316	0.0299689	0.0618724	0.0143986	0.000376172	0.0162548	0.0149835	0.0193758	0.0930944	0.0106365	0.0041617	0.00158537	0.00103638	2.84572e-08	0.0195884	0.00182945	0.00120385	0.00011471	0	0.000550808	7.19812e-06	4.42836e-06	0.000580289	-0.23662	-0.0385928	0.120766	-0.143981	-0.0809324	0.00612093	-0.1	-0.535831	0
2064	5.71355	0	0.0725288	5.64102	6.01963	5.86928	5.70577	4.41463	0.935777	0.355371	0.163503	0.150349	0.00909761	0.0026038	0.00010834	0.00475027	0.00562104	0.00164035	0.030529	0.062727	0.0146356	0.00036771	0.0161547	0.0152679	0.0188729	0.0918353	0.0104667	0.00414278	0.00158409	0.000983264	2.37078e-08	0.0183147	0.0017562	0.00115302	0.000108192	0	0.000540617	6.79535e-06	4.30682e-06	0.000580289	-0.235347	-0.0384421	0.119967	-0.142239	-0.0805499	0.00591736	-0.1	-0.533739	0
2065	5.86206	0	0.146252	5.71581	6.09048	5.94345	5.77795	4.47606	0.942637	0.359254	0.1655	0.147029	0.00917551	0.0026333	0.000109212	0.00473635	0.00568655	0.00166773	0.0310865	0.063572	0.0148706	0.000359453	0.0160515	0.0155509	0.018379	0.0905849	0.0102986	0.00412381	0.00158281	0.000932563	1.97521e-08	0.0171151	0.00168498	0.00110405	0.000102013	0	0.000530498	6.41397e-06	4.13782e-06	0.000580289	-0.234075	-0.0382914	0.119168	-0.140498	-0.0801674	0.00571378	-0.1	-0.531639	0
2066	5.97116	0	0.181191	5.78997	6.16084	6.01703	5.84956	4.53735	0.949081	0.363127	0.167475	0.143804	0.00925345	0.00266286	0.000110083	0.00472238	0.00575219	0.00169525	0.031641	0.0644059	0.0151036	0.000351391	0.0159447	0.0158327	0.0178935	0.0893422	0.010132	0.0041048	0.00158152	0.000884132	1.6456e-08	0.0159862	0.00161577	0.00105687	9.61547e-05	0	0.000520456	6.05274e-06	3.92728e-06	0.000580289	-0.232803	-0.0381407	0.118369	-0.138756	-0.0797849	0.00551021	-0.1	-0.529532	0
2067	6.05426	0	0.190562	5.8637	6.23089	6.09021	5.92078	4.59863	0.955164	0.36699	0.169433	0.140672	0.00933143	0.00269249	0.000110953	0.00470835	0.00581807	0.0017229	0.0321928	0.06523	0.0153346	0.00034352	0.0158349	0.0161133	0.0174169	0.0881084	0.00996705	0.00408575	0.00158022	0.000837931	1.37098e-08	0.0149249	0.00154863	0.00101145	9.06051e-05	0	0.0005105	5.7108e-06	3.73326e-06	0.000580289	-0.23153	-0.0379899	0.11757	-0.137014	-0.0794024	0.00530663	-0.1	-0.527417	0
2068	6.11137	0	0.174151	5.93721	6.30081	6.16318	5.9918	4.66002	0.960936	0.370842	0.171375	0.137633	0.00940945	0.0027222	0.000111822	0.00469426	0.00588427	0.0017507	0.032742	0.0660455	0.0155636	0.000335837	0.0157228	0.0163925	0.0169496	0.0868847	0.00980389	0.00406669	0.00157892	0.000793907	1.14221e-08	0.0139283	0.00148361	0.000967752	8.53521e-05	0	0.00050064	5.38733e-06	3.56462e-06	0.000580289	-0.230258	-0.0378392	0.116771	-0.135272	-0.0790199	0.00510306	-0.1	-0.525294	0
2069	6.14084	0	0.130187	6.01066	6.37074	6.23606	6.06275	4.72163	0.966439	0.374684	0.173303	0.134684	0.00948752	0.00275197	0.000112691	0.00468012	0.00595089	0.00177864	0.0332889	0.0668535	0.0157908	0.000328339	0.0156087	0.0166705	0.0164921	0.0856719	0.00964264	0.00404763	0.00157761	0.000752002	9.51646e-09	0.0129935	0.00142072	0.000925741	8.03836e-05	0	0.00049089	5.08147e-06	3.42114e-06	0.000580289	-0.228986	-0.0376885	0.115972	-0.133531	-0.0786374	0.00489948	-0.1	-0.523164	0
2070	6.16997	0	0.0860781	6.0839	6.44071	6.30888	6.13366	4.78343	0.971716	0.378516	0.175218	0.131824	0.00956564	0.0027818	0.000113558	0.00466593	0.00601803	0.00180675	0.0338338	0.0676552	0.0160162	0.00032102	0.0154932	0.0169472	0.0160445	0.0844712	0.00948343	0.00402858	0.0015763	0.000712158	7.92926e-09	0.0121174	0.00135999	0.000885382	7.56833e-05	0	0.000481259	4.79243e-06	3.3064e-06	0.000580289	-0.227784	-0.0375445	0.115253	-0.131976	-0.0782705	0.00475328	-0.1	-0.521173	0
2071	6.21596	0	0.0592681	6.15669	6.51064	6.38159	6.20447	4.84534	0.976789	0.382338	0.177123	0.129051	0.00964379	0.00281171	0.000114424	0.00465168	0.00608559	0.001835	0.0343766	0.0684509	0.0162399	0.000313878	0.0153765	0.0172227	0.0156069	0.0832827	0.00932627	0.00400955	0.00157498	0.000674289	6.60719e-09	0.011297	0.0013014	0.00084662	7.12394e-05	0	0.000471749	4.51935e-06	3.20146e-06	0.000580289	-0.226725	-0.0374141	0.114697	-0.130795	-0.0779349	0.00472181	-0.1	-0.519469	0
2072	6.27226	0	0.0431769	6.22908	6.5803	6.45394	6.27493	4.90709	0.981693	0.386153	0.17901	0.126359	0.00972189	0.00284165	0.000115288	0.00463741	0.00614906	0.00186358	0.0349125	0.069242	0.0164599	0.000306906	0.0152609	0.0174989	0.0151789	0.082106	0.00917109	0.00399053	0.00157366	0.00063829	5.50574e-09	0.0105289	0.0012449	0.000809397	6.70447e-05	0	0.000462359	4.26131e-06	3.08663e-06	0.000580289	-0.225737	-0.0372903	0.114221	-0.1298	-0.077615	0.0047477	-0.1	-0.517908	0
2073	6.33334	0	0.0322656	6.30107	6.64952	6.52578	6.3449	4.96847	0.986466	0.389963	0.180876	0.123745	0.00979982	0.00287157	0.000116149	0.00462313	0.00620474	0.00189268	0.0354367	0.0700299	0.0166745	0.000300102	0.0151486	0.0177779	0.0147603	0.0809407	0.00901783	0.00397153	0.00157234	0.000604069	4.58798e-09	0.00981038	0.00119044	0.000773666	6.30828e-05	0	0.000453086	4.0175e-06	2.96162e-06	0.000580289	-0.224749	-0.0371666	0.113745	-0.128806	-0.077295	0.0047736	-0.1	-0.516343	0
2074	6.39827	0	0.025655	6.37261	6.71831	6.59711	6.41438	5.0295	0.991113	0.39377	0.182721	0.121205	0.00987758	0.00290148	0.000117007	0.00460883	0.00625383	0.00192224	0.0359494	0.0708144	0.0168836	0.000293459	0.0150391	0.0180597	0.0143509	0.0797866	0.00886647	0.00395252	0.00157101	0.000571543	3.8232e-09	0.0091384	0.00113799	0.000739376	5.93384e-05	0	0.000443929	3.78714e-06	2.83108e-06	0.000580289	-0.22376	-0.0370428	0.11327	-0.127812	-0.076975	0.00479949	-0.1	-0.514774	0
2075	6.51624	0	0.0725288	6.44371	6.78669	6.66795	6.4834	5.09019	0.995642	0.397573	0.184546	0.118737	0.00995518	0.00293137	0.000117862	0.00459453	0.00629738	0.00195225	0.0364509	0.0715954	0.0170874	0.000286974	0.0149321	0.0183443	0.0139505	0.0786438	0.00871699	0.00393353	0.00156967	0.000540633	3.18586e-09	0.00851026	0.0010875	0.000706475	5.58025e-05	0	0.000434891	3.56951e-06	2.69654e-06	0.000580289	-0.222772	-0.0369191	0.112794	-0.126817	-0.076655	0.00482539	-0.1	-0.513201	0
2076	6.6605	0	0.146252	6.51425	6.85454	6.73821	6.55186	5.15047	1.00002	0.401372	0.186347	0.116334	0.0100326	0.00296125	0.000118713	0.0045802	0.00633572	0.00198261	0.0369409	0.0723707	0.0172858	0.000280638	0.0148262	0.0186317	0.0135585	0.0775105	0.00856916	0.00391451	0.00156833	0.000511227	2.65453e-09	0.00792311	0.00103889	0.000674907	5.24647e-05	0	0.000425959	3.36379e-06	2.51875e-06	0.000580289	-0.221784	-0.0367953	0.112318	-0.125823	-0.0763351	0.00485128	-0.1	-0.511624	0
2077	6.7655	0	0.181191	6.58431	6.92195	6.80796	6.61984	5.21044	1.00423	0.405166	0.188123	0.113992	0.0101099	0.00299112	0.000119562	0.00456585	0.00636932	0.00201326	0.0374194	0.0731388	0.0174788	0.000274445	0.0147208	0.0189218	0.0131743	0.0763858	0.00842284	0.00389546	0.00156698	0.000483233	2.21146e-09	0.00737431	0.000992085	0.000644614	4.9311e-05	0	0.000417129	3.16927e-06	2.30305e-06	0.000580289	-0.220796	-0.0366716	0.111843	-0.124829	-0.0760151	0.00487718	-0.1	-0.510042	0
2078	6.84448	0	0.190562	6.65391	6.98894	6.87723	6.68735	5.27009	1.00831	0.408957	0.189877	0.11171	0.010187	0.00302097	0.000120407	0.00455148	0.0063992	0.00204422	0.0378869	0.0739012	0.0176664	0.000268393	0.0146162	0.0192148	0.0127983	0.0752706	0.00827816	0.00387638	0.00156562	0.000456618	1.84211e-09	0.00686175	0.000947078	0.000615559	4.6331e-05	0	0.00040841	2.98546e-06	2.10565e-06	0.000580289	-0.219807	-0.0365478	0.111367	-0.123834	-0.0756951	0.00490307	-0.1	-0.508457	0
2079	6.89739	0	0.174151	6.72323	7.05566	6.94617	6.75456	5.32953	1.01229	0.412744	0.191613	0.109488	0.0102639	0.00305082	0.000121249	0.00453709	0.00642624	0.00207547	0.0383441	0.0746592	0.017849	0.00026248	0.0145127	0.0195105	0.0124307	0.074166	0.00813524	0.0038573	0.00156426	0.000431342	1.53432e-09	0.00638335	0.000903852	0.00058771	4.3525e-05	0	0.000399802	2.81187e-06	1.93538e-06	0.000580289	-0.218819	-0.0364241	0.110891	-0.12284	-0.0753751	0.00492897	-0.1	-0.506867	0
2080	6.92364	0	0.130187	6.79345	7.12238	7.01505	6.82172	5.389	1.01619	0.416527	0.193333	0.107325	0.0103407	0.00308064	0.000122088	0.00452269	0.00645115	0.00210704	0.0387914	0.075414	0.0180265	0.000256705	0.0144105	0.019809	0.0120717	0.0730727	0.00799417	0.00383823	0.00156289	0.000407362	1.27788e-09	0.00593712	0.000862378	0.000561031	4.08824e-05	0	0.000391317	2.64802e-06	1.79169e-06	0.000580289	-0.217235	-0.0362832	0.110397	-0.121433	-0.0750195	0.00510476	-0.1	-0.504955	0
2081	6.95149	0	0.0860781	6.86541	7.18902	7.0838	6.88877	5.44841	1.02005	0.420306	0.19504	0.105219	0.0104173	0.00311046	0.000122924	0.00450827	0.00647454	0.00213894	0.0392294	0.0761671	0.0181993	0.000251065	0.01431	0.0201103	0.0117214	0.0719916	0.00785506	0.00381919	0.00156152	0.000384636	1.06429e-09	0.00552116	0.000822629	0.000535485	3.83934e-05	0	0.000382968	2.49344e-06	1.67655e-06	0.000580289	-0.214458	-0.0361079	0.109865	-0.119202	-0.0745925	0.00558035	-0.1	-0.502401	0
2082	6.9973	0	0.0592681	6.93803	7.25553	7.15236	6.95563	5.50763	1.02391	0.424085	0.196729	0.103168	0.0104936	0.00314022	0.000123756	0.00449385	0.00649245	0.0021714	0.039658	0.0769177	0.0183671	0.000245559	0.0142112	0.0204141	0.0113799	0.0709227	0.00771789	0.00380017	0.00156015	0.000363105	8.86406e-10	0.00513356	0.000784556	0.00051103	3.6048e-05	0	0.000374754	2.34763e-06	1.57076e-06	0.000580289	-0.211084	-0.0359155	0.109314	-0.116558	-0.0741299	0.00620584	-0.1	-0.499516	0
2083	7.05347	0	0.0431769	7.01029	7.32176	7.22059	7.02219	5.56653	1.0278	0.427866	0.198395	0.10117	0.0105697	0.00316991	0.000124582	0.00447941	0.00650142	0.00220463	0.0400764	0.0776646	0.0185296	0.000240185	0.0141139	0.0207203	0.0110467	0.0698655	0.00758259	0.00378118	0.00155877	0.000342702	7.3824e-10	0.00477246	0.000748097	0.000487632	3.38363e-05	0	0.000366669	2.21008e-06	1.45536e-06	0.000580289	-0.207711	-0.0357231	0.108763	-0.113914	-0.0736673	0.00683133	-0.1	-0.496616	0
2084	7.11452	0	0.0322656	7.08225	7.38765	7.28843	7.08839	5.62504	1.0317	0.43165	0.200038	0.0992221	0.0106454	0.00319951	0.000125403	0.00446495	0.00650283	0.00223859	0.0404851	0.0784076	0.018687	0.000234939	0.0140178	0.0210289	0.0107216	0.0688197	0.00744912	0.0037622	0.00155738	0.000323368	6.14822e-10	0.00443611	0.000713193	0.000465251	3.17542e-05	0	0.00035871	2.08032e-06	1.3303e-06	0.000580289	-0.204338	-0.0355307	0.108212	-0.111271	-0.0732047	0.00745681	-0.1	-0.493701	0
2085	7.17957	0	0.025655	7.15391	7.45321	7.35589	7.15423	5.68317	1.03562	0.435436	0.20166	0.0973219	0.0107207	0.00322904	0.000126219	0.00445049	0.00649793	0.00227322	0.0408841	0.0791468	0.0188393	0.000229818	0.0139227	0.0213397	0.0104045	0.0677851	0.00731744	0.00374324	0.00155599	0.000305048	5.12019e-10	0.00412288	0.000679791	0.000443835	2.97932e-05	0	0.000350874	1.95791e-06	1.20048e-06	0.000580289	-0.200964	-0.0353383	0.107661	-0.108627	-0.0727421	0.0080823	-0.1	-0.490771	0
2086	7.29782	0	0.0725288	7.22529	7.51846	7.42299	7.21973	5.74097	1.03953	0.439225	0.203262	0.0954675	0.0107957	0.00325849	0.000127029	0.004436	0.00648772	0.00230849	0.0412738	0.079882	0.0189866	0.000224818	0.0138285	0.021653	0.0100951	0.0667616	0.00718753	0.00372429	0.0015546	0.000287693	4.26388e-10	0.00383126	0.000647835	0.000423348	2.79502e-05	0	0.000343158	1.84246e-06	1.06735e-06	0.000580289	-0.197591	-0.0351459	0.10711	-0.105983	-0.0722795	0.00870779	-0.1	-0.487825	0
2087	7.44239	0	0.146252	7.29614	7.58315	7.48949	7.28465	5.79822	1.04341	0.443016	0.204841	0.0936549	0.0108704	0.00328785	0.000127834	0.00442149	0.00647256	0.00234429	0.0416538	0.0806111	0.0191289	0.000219932	0.0137342	0.0219686	0.0097929	0.0657477	0.0070592	0.00370532	0.0015532	0.000271235	3.55038e-10	0.00355968	0.000617243	0.000403753	2.62164e-05	0	0.000335558	1.73351e-06	8.92827e-07	0.000580289	-0.194218	-0.0349535	0.106559	-0.103339	-0.0718169	0.00933328	-0.1	-0.484864	0
2088	7.5477	0	0.181191	7.36651	7.64736	7.55548	7.34908	5.85504	1.04723	0.44681	0.206394	0.0918811	0.0109448	0.00331714	0.000128634	0.00440696	0.00645288	0.00238054	0.0420238	0.0813325	0.019266	0.000215157	0.0136394	0.0222865	0.00949749	0.0647426	0.00693233	0.00368633	0.00155179	0.000255618	2.95573e-10	0.00330673	0.000587951	0.000385005	2.45841e-05	0	0.000328065	1.63066e-06	6.81893e-07	0.000580289	-0.190844	-0.0347611	0.106008	-0.100695	-0.0713543	0.00995877	-0.1	-0.481887	0
2089	7.62726	0	0.190562	7.4367	7.71136	7.62122	7.41329	5.91168	1.05101	0.450606	0.207926	0.0901459	0.0110188	0.00334634	0.000129428	0.0043924	0.00642974	0.00241725	0.0423846	0.082048	0.0193981	0.000210491	0.0135445	0.0226068	0.00920906	0.063747	0.00680702	0.00366733	0.00155038	0.000240816	2.46034e-10	0.00307126	0.000559933	0.000367071	2.30471e-05	0	0.000320684	1.53362e-06	4.89169e-07	0.000580289	-0.187471	-0.0345687	0.105457	-0.0980516	-0.0708917	0.0105843	-0.1	-0.478894	0
2090	7.67994	0	0.174151	7.50579	7.7751	7.68665	7.47721	5.96804	1.05477	0.454404	0.209441	0.0884494	0.0110925	0.00337547	0.000130217	0.00437782	0.00640403	0.00245443	0.0427368	0.0827592	0.0195255	0.000205933	0.01345	0.0229294	0.00892775	0.0627618	0.00668335	0.00364833	0.00154896	0.000226803	2.04777e-10	0.00285218	0.00053316	0.000349928	2.15998e-05	0	0.000313421	1.44213e-06	3.23391e-07	0.000580289	-0.184632	-0.0343881	0.104945	-0.0958019	-0.0704832	0.0110966	-0.1	-0.476231	0
2091	7.70327	0	0.130187	7.57308	7.83874	7.75195	7.541	6.02426	1.05854	0.458205	0.210942	0.0867912	0.0111659	0.00340452	0.000131001	0.00436322	0.00637645	0.00249208	0.0430808	0.0834677	0.0196482	0.000201482	0.0133562	0.0232543	0.00865367	0.0617877	0.00656143	0.00362935	0.00154753	0.000213551	1.7043e-10	0.00264844	0.000507598	0.000333553	2.02419e-05	0	0.00030628	1.3559e-06	1.84919e-07	0.000580289	-0.182862	-0.0342313	0.10451	-0.0943406	-0.0701829	0.0113827	-0.1	-0.474247	0
2092	7.72561	0	0.0860781	7.63953	7.9022	7.81703	7.60459	6.08039	1.0622	0.462	0.212439	0.0851714	0.011239	0.00343349	0.000131779	0.00434864	0.00634479	0.00253023	0.0434162	0.0841759	0.0197661	0.000197136	0.0132749	0.0235813	0.00838696	0.0608255	0.00644133	0.0036104	0.0015461	0.000201032	1.41841e-10	0.00245906	0.000483208	0.000317914	1.89678e-05	0	0.000299273	1.2747e-06	7.70322e-08	0.000580289	-0.181627	-0.0340864	0.104114	-0.0932734	-0.0699367	0.0115557	-0.1	-0.472603	0
2093	7.7649	0	0.0592681	7.70564	7.96518	7.88159	7.66765	6.13625	1.06561	0.465783	0.213941	0.0835888	0.0113118	0.00346242	0.000132549	0.00433411	0.00630686	0.00256884	0.0437421	0.0848848	0.019879	0.000192894	0.0132161	0.02391	0.00812751	0.0598753	0.00632305	0.00359149	0.00154467	0.000189212	1.18047e-10	0.00228303	0.000459939	0.00030298	1.77721e-05	0	0.000292398	1.19824e-06	-2.0021e-08	0.000580289	-0.180392	-0.0339414	0.103718	-0.0922062	-0.0696905	0.0117287	-0.1	-0.470953	0
2094	7.81429	0	0.0431769	7.77111	8.02759	7.94554	7.7301	6.19176	1.06879	0.469553	0.215445	0.0820417	0.0113845	0.00349129	0.000133311	0.00431962	0.00626352	0.00260787	0.0440583	0.0855932	0.0199867	0.000188751	0.0131771	0.0242404	0.00787508	0.0589367	0.00620655	0.00357262	0.00154324	0.000178048	9.8239e-11	0.00211942	0.000437737	0.000288719	1.66491e-05	0	0.000285652	1.12623e-06	-1.26697e-07	0.000580289	-0.179157	-0.0337965	0.103321	-0.091139	-0.0694444	0.0119017	-0.1	-0.469299	0
2095	7.8682	0	0.0322656	7.83593	8.0894	8.00887	7.79192	6.24688	1.07174	0.473311	0.216946	0.0805283	0.0114569	0.0035201	0.000134066	0.00430517	0.0062155	0.00264726	0.0443651	0.0863003	0.0200893	0.000184705	0.0131553	0.0245725	0.00762942	0.0580093	0.00609178	0.00355377	0.0015418	0.000167506	8.17488e-11	0.00196733	0.000416556	0.000275102	1.55938e-05	0	0.000279023	1.05842e-06	-2.43603e-07	0.000580289	-0.177922	-0.0336516	0.102925	-0.0900719	-0.0691982	0.0120747	-0.1	-0.46764	0
2096	7.92575	0	0.025655	7.9001	8.1506	8.07155	7.85311	6.30158	1.07447	0.477057	0.218444	0.0790474	0.0115291	0.00354886	0.000134814	0.00429077	0.00616349	0.00268698	0.0446624	0.0870054	0.020187	0.000180751	0.0131486	0.0249063	0.00739039	0.057093	0.0059787	0.00353496	0.00154035	0.00015755	6.80203e-11	0.00182596	0.000396345	0.000262102	1.46016e-05	0	0.00027251	9.94577e-07	-3.65744e-07	0.000580289	-0.176686	-0.0335066	0.102529	-0.0890047	-0.068952	0.0122477	-0.1	-0.465976	0
2097	8.03614	0	0.0725288	7.96361	8.2112	8.1336	7.91366	6.35586	1.07701	0.48079	0.219938	0.0775979	0.0116011	0.00357756	0.000135554	0.0042764	0.00610808	0.00272699	0.0449506	0.0877081	0.0202796	0.000176889	0.0131553	0.0252418	0.00715782	0.0561877	0.00586729	0.00351617	0.00153891	0.000148152	5.65912e-11	0.00169458	0.000377062	0.000249689	1.36682e-05	0	0.000266118	9.34461e-07	-4.91424e-07	0.000580289	-0.175451	-0.0333617	0.102133	-0.0879375	-0.0687059	0.0124207	-0.1	-0.464307	0
2098	8.17266	0	0.146252	8.02641	8.27114	8.19496	7.97354	6.4097	1.07933	0.484511	0.221421	0.076177	0.0116729	0.00360621	0.000136287	0.00426206	0.0060493	0.00276719	0.0452291	0.0884056	0.0203672	0.000173112	0.0131729	0.0255789	0.00693126	0.0552922	0.0057574	0.00349738	0.00153745	0.00013927	4.70736e-11	0.00157243	0.000358651	0.000237827	1.27891e-05	0	0.000259841	8.77831e-07	-6.57349e-07	0.000580289	-0.174216	-0.0332167	0.101737	-0.0868703	-0.0684597	0.0125937	-0.1	-0.462633	0
2099	8.26962	0	0.181191	8.08843	8.33037	8.25559	8.0327	6.46307	1.08141	0.488221	0.222889	0.0747826	0.0117445	0.00363481	0.000137012	0.00424775	0.0059873	0.0028075	0.0454975	0.0890956	0.0204497	0.000169417	0.0131997	0.0259178	0.00671038	0.0544056	0.00564891	0.00347858	0.00153599	0.00013087	3.91462e-11	0.00145883	0.000341067	0.000226492	1.19654e-05	0	0.000253674	8.24465e-07	-8.59056e-07	0.000580289	-0.172981	-0.0330718	0.101341	-0.0858031	-0.0682135	0.0127667	-0.1	-0.460954	0
2100	8.33966	0	0.190562	8.1491	8.38898	8.31556	8.09122	6.516	1.0833	0.491918	0.224344	0.0734151	0.0118158	0.00366335	0.00013773	0.00423347	0.0059229	0.00284795	0.0457565	0.0897798	0.0205272	0.000165803	0.0132349	0.0262584	0.00649528	0.0535286	0.00554191	0.00345979	0.00153452	0.000122937	3.25464e-11	0.00135323	0.000324287	0.000215668	1.11938e-05	0	0.000247613	7.74207e-07	-1.04329e-06	0.000580289	-0.172054	-0.0329631	0.101044	-0.0850027	-0.0680289	0.0128965	-0.1	-0.459692	0
2101	8.38213	0	0.174151	8.20797	8.44719	8.37511	8.14933	6.56869	1.08503	0.495603	0.225789	0.0720747	0.0118869	0.00369184	0.000138441	0.00421921	0.00585679	0.00288855	0.0460067	0.0904599	0.0205999	0.000162269	0.013278	0.0266007	0.00628605	0.052662	0.00543648	0.00344101	0.00153305	0.000115453	2.70542e-11	0.00125511	0.000308288	0.000205339	1.0471e-05	0	0.000241662	7.26904e-07	-1.20002e-06	0.000580289	-0.171746	-0.0329269	0.100945	-0.0847359	-0.0679673	0.0129397	-0.1	-0.45927	0
2102	8.39627	0	0.130187	8.26608	8.5051	8.43434	8.20714	6.62129	1.08658	0.499263	0.227203	0.0707616	0.0119579	0.00372029	0.000139147	0.004205	0.00579529	0.00292804	0.0462484	0.0911148	0.0206695	0.00015882	0.0133216	0.0269438	0.00608273	0.0518062	0.00533267	0.00342226	0.00153157	0.000108399	2.24855e-11	0.00116397	0.000293043	0.000195484	9.79397e-06	0	0.000235825	6.82408e-07	-1.32871e-06	0.000580289	-0.171746	-0.0329269	0.100945	-0.0847359	-0.0679673	0.0129397	-0.1	-0.45927	0
2103	8.4099	0	0.0860781	8.32382	8.56244	8.49297	8.2644	6.6736	1.08792	0.502884	0.228563	0.0694762	0.0120289	0.00374875	0.000139854	0.00419082	0.00574367	0.00296523	0.0464817	0.0917249	0.0207376	0.000155459	0.0133594	0.0272868	0.00588538	0.0509621	0.00523057	0.00340357	0.00153009	0.000101758	1.86865e-11	0.00107936	0.000278528	0.000186085	9.15974e-06	0	0.000230111	6.40575e-07	-1.42752e-06	0.000580289	-0.171746	-0.0329269	0.100945	-0.0847359	-0.0679673	0.0129397	-0.1	-0.45927	0
2104	8.44016	0	0.0592681	8.38089	8.61918	8.55096	8.32109	6.72555	1.08907	0.506467	0.229873	0.0682178	0.0121	0.0037772	0.00014056	0.00417668	0.00570026	0.00300025	0.0467069	0.0922931	0.0208044	0.000152184	0.013392	0.0276297	0.00569389	0.0501296	0.00513018	0.00338493	0.00152861	9.55092e-05	1.55279e-11	0.00100082	0.000264709	0.000177124	8.56542e-06	0	0.000224519	6.01254e-07	-1.5156e-06	0.000580289	-0.171746	-0.0329269	0.100945	-0.0847359	-0.0679673	0.0129397	-0.1	-0.45927	0
2105	8.48054	0	0.0431769	8.43736	8.67538	8.60839	8.37726	6.77722	1.09003	0.510012	0.231133	0.0669852	0.012171	0.00380565	0.000141266	0.00416258	0.00566349	0.00303319	0.0469241	0.0928209	0.0208697	0.000148993	0.0134197	0.0279724	0.00550804	0.0493083	0.00503142	0.00336634	0.00152713	8.96272e-05	1.29016e-11	0.000927907	0.000251552	0.000168578	8.00814e-06	0	0.000219039	5.64292e-07	-1.61233e-06	0.000580289	-0.171746	-0.0329269	0.100945	-0.0847359	-0.0679673	0.0129397	-0.1	-0.45927	0
2106	8.52542	0	0.0322656	8.49316	8.73096	8.66519	8.43284	6.82851	1.09081	0.513519	0.232343	0.0657773	0.012242	0.00383409	0.000141972	0.00414851	0.00563211	0.00306413	0.0471331	0.09331	0.0209335	0.000145881	0.0134429	0.0283151	0.00532763	0.0484979	0.00493426	0.0033478	0.00152564	8.40907e-05	1.07179e-11	0.000860223	0.000239026	0.000160427	7.48526e-06	0	0.000213673	5.29545e-07	-1.71858e-06	0.000580289	-0.171746	-0.0329269	0.100945	-0.0847359	-0.0679673	0.0129397	-0.1	-0.45927	0
2107	8.57398	0	0.025655	8.54832	8.78597	8.72138	8.48787	6.87946	1.09143	0.516988	0.233506	0.0645933	0.012313	0.00386254	0.000142678	0.00413448	0.00560512	0.00309317	0.0473342	0.0937622	0.0209959	0.000142848	0.013462	0.0286577	0.00515252	0.0476983	0.00483868	0.00332929	0.00152415	7.888e-05	8.90238e-12	0.000797391	0.0002271	0.000152657	6.99438e-06	0	0.000208418	4.96883e-07	-1.82953e-06	0.000580289	-0.171746	-0.0329269	0.100945	-0.0847359	-0.0679673	0.0129397	-0.1	-0.45927	0
2108	8.67526	0	0.0725288	8.60274	8.84028	8.77685	8.54222	6.92992	1.09188	0.520421	0.234622	0.0634327	0.012384	0.00389098	0.000143383	0.00412047	0.0055817	0.00312039	0.0475275	0.0941793	0.0210568	0.000139891	0.0134772	0.0290001	0.00498256	0.0469093	0.00474464	0.00331083	0.00152265	7.39766e-05	7.3931e-12	0.000739066	0.000215745	0.000145249	6.53836e-06	0	0.000203273	4.66183e-07	-1.94353e-06	0.000580289	-0.171746	-0.0329269	0.100945	-0.0847359	-0.0679673	0.0129397	-0.1	-0.45927	0
2109	8.80262	0	0.146252	8.65637	8.89387	8.83158	8.59589	6.97992	1.09215	0.523817	0.235688	0.0622932	0.012455	0.00391941	0.000144089	0.0041065	0.00556075	0.00314581	0.0477123	0.0945604	0.021116	0.000137007	0.0134882	0.0293425	0.00481739	0.0461299	0.00465202	0.00329239	0.00152115	6.9358e-05	6.13813e-12	0.000684906	0.000204924	0.000138181	6.10942e-06	0	0.000198229	4.37312e-07	-2.09607e-06	0.000580289	-0.171746	-0.0329269	0.100945	-0.0847359	-0.0679673	0.0129397	-0.1	-0.45927	0
2110	8.89041	0	0.181191	8.70922	8.94674	8.88557	8.64887	7.02947	1.09222	0.527176	0.236703	0.0611734	0.012526	0.00394785	0.000144794	0.00409254	0.00554147	0.00316945	0.0478884	0.0949051	0.0211735	0.000134191	0.0134949	0.0296847	0.00465675	0.0453593	0.00456071	0.00327395	0.00151964	6.50048e-05	5.09452e-12	0.000634602	0.000194611	0.000131436	5.70555e-06	0	0.000193274	4.10152e-07	-2.28309e-06	0.000580289	-0.171746	-0.0329269	0.100945	-0.0847359	-0.0679673	0.0129397	-0.1	-0.45927	0
2111	8.95188	0	0.190562	8.76132	8.99892	8.93885	8.70118	7.07855	1.09213	0.5305	0.237672	0.0600737	0.012597	0.00397628	0.000145498	0.00407861	0.0055238	0.00319144	0.0480563	0.0952172	0.0212292	0.000131444	0.013498	0.0300268	0.00450069	0.044598	0.00447079	0.00325553	0.00151813	6.09063e-05	4.22711e-12	0.000587902	0.00018479	0.000125	5.33027e-06	0	0.000188417	3.84616e-07	-2.45286e-06	0.000580289	-0.171746	-0.0329269	0.100945	-0.0847359	-0.0679673	0.0129397	-0.1	-0.45927	0
2112	8.98714	0	0.174151	8.81299	9.05071	8.99172	8.75312	7.12741	1.09192	0.533789	0.2386	0.0589946	0.012668	0.00400471	0.000146203	0.0040647	0.00550774	0.00321192	0.0482168	0.0955002	0.0212835	0.000128764	0.0134985	0.0303688	0.00434925	0.0438466	0.0043823	0.00323714	0.00151661	5.7052e-05	3.50652e-12	0.000544564	0.000175441	0.000118865	4.97664e-06	0	0.000183666	3.60622e-07	-2.59595e-06	0.000580289	-0.171746	-0.0329269	0.100945	-0.0847359	-0.0679673	0.0129397	-0.1	-0.45927	0
2113	8.99446	0	0.130187	8.86427	9.10214	9.0442	8.80471	7.17605	1.09162	0.537043	0.239492	0.0579362	0.012739	0.00403313	0.000146907	0.00405082	0.00549324	0.00323101	0.0483702	0.0957575	0.0213363	0.000126152	0.0134969	0.0307107	0.00420241	0.0431057	0.00429529	0.0032188	0.00151509	5.34306e-05	2.90815e-12	0.000504357	0.000166548	0.00011302	4.64328e-06	0	0.000179018	3.38087e-07	-2.71327e-06	0.000580289	-0.171746	-0.0329269	0.100945	-0.0847359	-0.0679673	0.0129397	-0.1	-0.45927	0
2114	9.0013	0	0.0860781	8.91522	9.15325	9.09635	8.856	7.22447	1.09126	0.540263	0.240353	0.0568989	0.0128099	0.00406156	0.000147611	0.00403698	0.00548031	0.00324885	0.0485174	0.0959923	0.0213878	0.000123606	0.0134941	0.0310526	0.0040602	0.0423756	0.00420982	0.00320052	0.00151357	5.00316e-05	2.41151e-12	0.000467075	0.000158098	0.000107452	4.33398e-06	0	0.000174472	3.16935e-07	-2.80231e-06	0.000580289	-0.171746	-0.0329269	0.100945	-0.0847359	-0.0679673	0.0129397	-0.1	-0.45927	0
2115	9.02519	0	0.0592681	8.96592	9.20412	9.14824	8.90705	7.27274	1.09087	0.543448	0.241185	0.0558824	0.0128809	0.00408998	0.000148315	0.00402317	0.00546876	0.00326551	0.0486586	0.0962066	0.021438	0.000121124	0.0134901	0.0313943	0.0039225	0.0416563	0.00412588	0.00318231	0.00151205	4.68424e-05	1.99938e-12	0.000432514	0.000150068	0.000102154	4.04704e-06	0	0.00017003	2.97085e-07	-2.88044e-06	0.000580289	-0.171746	-0.0329269	0.100945	-0.0847359	-0.0679673	0.0129397	-0.1	-0.45927	0
2116	9.05938	0	0.0431769	9.0162	9.25458	9.1997	8.95771	7.32069	1.09042	0.5466	0.241989	0.0548858	0.0129519	0.00411839	0.000149019	0.00400939	0.0054582	0.00328104	0.0487937	0.0964006	0.021487	0.000118706	0.013485	0.0317358	0.00378913	0.0409476	0.00404341	0.00316416	0.00151052	4.38495e-05	1.65741e-12	0.000400473	0.000142435	9.71114e-05	3.78083e-06	0	0.000165686	2.78454e-07	-2.96684e-06	0.000580289	-0.171746	-0.0329269	0.100945	-0.0847359	-0.0679673	0.0129397	-0.1	-0.45927	0
2117	9.09835	0	0.0322656	9.06608	9.30467	9.25076	9.008	7.36836	1.08992	0.549718	0.242764	0.0539082	0.0130229	0.00414681	0.000149722	0.00399564	0.00544836	0.00329547	0.0489228	0.096575	0.0215346	0.000116349	0.0134786	0.0320773	0.00365994	0.0402491	0.00396238	0.00314606	0.001509	4.10406e-05	1.37366e-12	0.000370766	0.000135182	9.23061e-05	3.52874e-06	0	0.000161444	2.60967e-07	-3.06245e-06	0.000580289	-0.171746	-0.0329269	0.100945	-0.0847359	-0.0679673	0.0129397	-0.1	-0.45927	0
2118	9.14116	0	0.025655	9.11551	9.35431	9.30136	9.05785	7.41569	1.08936	0.552804	0.243511	0.0529492	0.0130939	0.00417522	0.000150426	0.00398193	0.00543907	0.00330885	0.0490459	0.0967305	0.021581	0.00011405	0.0134711	0.0324187	0.0035348	0.0395606	0.00388276	0.00312802	0.00150746	3.84045e-05	1.13826e-12	0.000343223	0.00012829	8.77263e-05	3.28976e-06	0	0.000157294	2.44554e-07	-3.16263e-06	0.000580289	-0.171746	-0.0329269	0.100945	-0.0847359	-0.0679673	0.0129397	-0.1	-0.45927	0
2119	9.23689	0	0.0725288	9.16436	9.4034	9.35139	9.10716	7.46255	1.08876	0.555858	0.244231	0.0520083	0.0131649	0.00420363	0.000151129	0.00396824	0.00543019	0.00332124	0.0491632	0.0968683	0.021626	0.00011181	0.0134625	0.03276	0.00341357	0.038882	0.00380451	0.00311003	0.00150593	3.5931e-05	9.43002e-13	0.000317694	0.000121739	8.33668e-05	3.06806e-06	0	0.000153236	2.2915e-07	-3.26564e-06	0.000580289	-0.171746	-0.0329269	0.100945	-0.0847359	-0.0679673	0.0129397	-0.1	-0.45927	0
2120	9.35895	0	0.146252	9.2127	9.45199	9.40091	9.15599	7.50905	1.08806	0.558879	0.244921	0.0510838	0.0132359	0.00423203	0.000151831	0.00395458	0.00542118	0.00333258	0.049274	0.0969861	0.0216696	0.000109624	0.0134521	0.0331011	0.003296	0.0382123	0.00372753	0.00309207	0.00150439	3.36077e-05	7.81017e-13	0.000294022	0.000115508	7.92149e-05	2.86229e-06	0	0.000149269	2.14686e-07	-3.40591e-06	0.000580289	-0.171746	-0.0329269	0.100945	-0.0847359	-0.0679673	0.0129397	-0.1	-0.45927	0
2121	9.4416	0	0.181191	9.26041	9.5	9.44983	9.20425	7.55514	1.08725	0.561869	0.245577	0.0501747	0.0133068	0.00426044	0.000152534	0.00394093	0.0054117	0.00334287	0.049378	0.0970828	0.0217116	0.000107491	0.0134395	0.0334422	0.00318188	0.0375508	0.00365174	0.00307413	0.00150285	3.14241e-05	6.46626e-13	0.000272059	0.000109579	7.52593e-05	2.67125e-06	0	0.00014538	2.01098e-07	-3.57986e-06	0.000580289	-0.171746	-0.0329269	0.100945	-0.0847359	-0.0679673	0.0129397	-0.1	-0.45927	0
2122	9.49809	0	0.190562	9.30753	9.54745	9.49817	9.25196	7.60078	1.08635	0.564827	0.246204	0.0492813	0.0133778	0.00428884	0.000153236	0.00392731	0.00540208	0.00335221	0.0494757	0.0971613	0.021752	0.00010541	0.0134255	0.0337832	0.00307123	0.0368981	0.00357717	0.00305621	0.0015013	2.9374e-05	5.3519e-13	0.000251697	0.000103943	7.14917e-05	2.49397e-06	0	0.000141572	1.88341e-07	-3.73707e-06	0.000580289	-0.171746	-0.0329269	0.100945	-0.0847359	-0.0679673	0.0129397	-0.1	-0.45927	0
2123	9.5285	0	0.174151	9.35435	9.5946	9.5462	9.29939	7.64623	1.08541	0.567755	0.246808	0.0484041	0.0134488	0.00431723	0.000153938	0.00391371	0.00539262	0.0033607	0.0495677	0.0972246	0.0217912	0.00010338	0.0134105	0.034124	0.00296404	0.0362546	0.00350388	0.00303834	0.00149975	2.74512e-05	4.4284e-13	0.000232832	9.85864e-05	6.79045e-05	2.32953e-06	0	0.000137852	1.76372e-07	-3.86794e-06	0.000580289	-0.171746	-0.0329269	0.100945	-0.0847359	-0.0679673	0.0129397	-0.1	-0.45927	0
2124	9.5312	0	0.130187	9.40101	9.64161	9.59407	9.34667	7.69157	1.08445	0.570651	0.247393	0.0475433	0.0135198	0.00434563	0.00015464	0.00390014	0.00538355	0.00336846	0.0496547	0.0972755	0.0218291	0.000101402	0.0133952	0.0344647	0.00286031	0.0356205	0.0034319	0.00302052	0.00149819	2.56495e-05	3.66343e-13	0.000215354	9.35005e-05	6.44956e-05	2.172e-06	0	0.000134222	1.65147e-07	-3.97339e-06	0.000580289	-0.171746	-0.0329269	0.100945	-0.0847359	-0.0679673	0.0129397	-0.1	-0.45927	0
2125	9.53356	0	0.0860781	9.44749	9.68842	9.64172	9.39375	7.73673	1.08351	0.573518	0.247962	0.0466992	0.0135907	0.00437402	0.000155342	0.00388661	0.0053751	0.00337556	0.0497373	0.0973165	0.0218659	9.9474e-05	0.0133801	0.0348054	0.00276003	0.0349964	0.00336126	0.00300277	0.00149663	2.3963e-05	3.03007e-13	0.000199168	8.86768e-05	6.12516e-05	2.02092e-06	0	0.000130677	1.54625e-07	-4.05117e-06	0.000580289	-0.171746	-0.0329269	0.100945	-0.0847359	-0.0679673	0.0129397	-0.1	-0.45927	0
2126	9.553	0	0.0592681	9.49373	9.73499	9.68912	9.4406	7.78167	1.08258	0.576355	0.248518	0.0458716	0.0136617	0.00440241	0.000156044	0.0038731	0.00536723	0.00338208	0.0498158	0.0973488	0.0219017	9.75958e-05	0.0133653	0.0351459	0.0026631	0.0343821	0.00329195	0.0029851	0.00149508	2.23847e-05	2.50582e-13	0.000184187	8.41018e-05	5.81648e-05	1.88096e-06	0	0.000127214	1.44765e-07	-4.11825e-06	0.000580289	-0.171746	-0.0329269	0.100945	-0.0847359	-0.0679673	0.0129397	-0.1	-0.45927	0
2127	9.58295	0	0.0431769	9.53977	9.78135	9.73629	9.48723	7.82642	1.08165	0.579162	0.249059	0.0450598	0.0137327	0.0044308	0.000156745	0.00385963	0.00535973	0.00338801	0.04989	0.0973722	0.0219364	9.57657e-05	0.0133505	0.0354863	0.00256938	0.0337774	0.00322394	0.0029675	0.00149352	2.09074e-05	2.07191e-13	0.000170314	7.97584e-05	5.52327e-05	1.75127e-06	0	0.000123837	1.35524e-07	-4.19339e-06	0.000580289	-0.171746	-0.0329269	0.100945	-0.0847359	-0.0679673	0.0129397	-0.1	-0.45927	0
2128	9.61784	0	0.0322656	9.58558	9.82749	9.78322	9.53364	7.87098	1.08072	0.58194	0.249585	0.0442632	0.0138036	0.00445918	0.000157446	0.0038462	0.00535243	0.00339338	0.04996	0.0973867	0.0219701	9.39823e-05	0.0133356	0.0358266	0.00247876	0.0331819	0.00315718	0.00294995	0.00149195	1.95245e-05	1.71279e-13	0.000157466	7.56343e-05	5.24417e-05	1.6311e-06	0	0.000120544	1.26861e-07	-4.27781e-06	0.000580289	-0.171746	-0.0329269	0.100945	-0.0847359	-0.0679673	0.0129397	-0.1	-0.45927	0
2129	9.65661	0	0.025655	9.63095	9.87319	9.82971	9.57962	7.91515	1.07978	0.58469	0.250097	0.0434814	0.0138746	0.00448756	0.000158147	0.00383279	0.00534525	0.00339819	0.0500258	0.0973923	0.0220026	9.22441e-05	0.0133205	0.0361668	0.00239112	0.0325956	0.00309164	0.00293247	0.00149039	1.82301e-05	1.41563e-13	0.000145574	7.17227e-05	4.97848e-05	1.51974e-06	0	0.000117332	1.18742e-07	-4.36696e-06	0.000580289	-0.171746	-0.0329269	0.100945	-0.0847359	-0.0679673	0.0129397	-0.1	-0.45927	0
2130	9.74845	0	0.0725288	9.67592	9.91849	9.87578	9.62518	7.95895	1.07883	0.58741	0.250594	0.0427141	0.0139456	0.00451594	0.000158847	0.00381941	0.00533814	0.00340248	0.0500875	0.0973896	0.0220341	9.05501e-05	0.0133052	0.0365069	0.00230637	0.0320181	0.00302731	0.00291505	0.00148882	1.70185e-05	1.16978e-13	0.000134568	6.80105e-05	4.72611e-05	1.41657e-06	0	0.000114192	1.11132e-07	-4.45897e-06	0.000580289	-0.171746	-0.0329269	0.100945	-0.0847359	-0.0679673	0.0129397	-0.1	-0.45927	0
2131	9.86671	0	0.146252	9.72046	9.96339	9.92143	9.67036	8.00243	1.07782	0.590103	0.251073	0.04196	0.0140165	0.00454431	0.000159548	0.00380605	0.00533064	0.00340617	0.0501443	0.0973758	0.0220643	8.88979e-05	0.013289	0.0368469	0.00222432	0.0314488	0.00296408	0.00289767	0.00148725	1.58834e-05	9.66347e-14	0.000124378	6.44831e-05	4.4863e-05	1.32092e-06	0	0.00011112	1.03995e-07	-4.58735e-06	0.000580289	-0.171746	-0.0329269	0.100945	-0.0847359	-0.0679673	0.0129397	-0.1	-0.45927	0
2132	9.94558	0	0.181191	9.76439	10.0077	9.96648	9.71495	8.04545	1.07673	0.592768	0.251529	0.0412182	0.0140875	0.00457268	0.000160248	0.00379272	0.00532245	0.00340923	0.0501959	0.0973494	0.0220931	8.72856e-05	0.0132713	0.0371868	0.00214482	0.0308871	0.00290189	0.00288032	0.00148568	1.48193e-05	7.98006e-14	0.000114941	6.11314e-05	4.25777e-05	1.23223e-06	0	0.000108118	9.73004e-08	-4.74881e-06	0.000580289	-0.171746	-0.0329269	0.100945	-0.0847359	-0.0679673	0.0129397	-0.1	-0.45927	0
2133	9.99847	0	0.190562	9.80791	10.0516	10.0111	9.75916	8.08816	1.0756	0.595405	0.251967	0.0404891	0.0141584	0.00460105	0.000160948	0.0037794	0.00531394	0.00341174	0.0502428	0.0973126	0.0221207	8.5713e-05	0.0132528	0.0375266	0.00206785	0.0303332	0.00284076	0.00286299	0.0014841	1.38226e-05	6.58781e-14	0.000106206	5.79515e-05	4.04005e-05	1.15001e-06	0	0.000105187	9.10231e-08	-4.89411e-06	0.000580289	-0.171746	-0.0329269	0.100945	-0.0847359	-0.0679673	0.0129397	-0.1	-0.45927	0
2134	10.0254	0	0.174151	9.85123	10.0954	10.0556	9.80319	8.13073	1.07444	0.598015	0.252391	0.039773	0.0142294	0.00462942	0.000161647	0.00376611	0.00530545	0.0034138	0.0502856	0.0972683	0.0221471	8.41797e-05	0.013234	0.0378663	0.00199342	0.0297875	0.00278074	0.00284572	0.00148251	1.28902e-05	5.43701e-14	9.81224e-05	5.49363e-05	3.83325e-05	1.07385e-06	0	0.000102327	8.51408e-08	-5.0136e-06	0.000580289	-0.171746	-0.0329269	0.100945	-0.0847359	-0.0679673	0.0129397	-0.1	-0.45927	0
2135	10.0246	0	0.130187	9.89438	10.1389	10.0998	9.84702	8.17313	1.0733	0.600598	0.252806	0.0390701	0.0143004	0.00465778	0.000162347	0.00375285	0.00529725	0.00341547	0.050325	0.0972185	0.0221725	8.26855e-05	0.0132154	0.0382059	0.00192149	0.0292504	0.00272184	0.00282852	0.00148093	1.20186e-05	4.48624e-14	9.06395e-05	5.20755e-05	3.63691e-05	1.00332e-06	0	9.95388e-05	7.96314e-08	-5.10812e-06	0.000580289	-0.171746	-0.0329269	0.100945	-0.0847359	-0.0679673	0.0129397	-0.1	-0.45927	0
2136	10.0235	0	0.0860781	9.93741	10.1823	10.1439	9.89073	8.21539	1.07219	0.603155	0.253215	0.0383808	0.0143713	0.00468614	0.000163046	0.00373963	0.00528958	0.00341686	0.0503615	0.0971658	0.022197	8.12302e-05	0.0131975	0.0385453	0.00185207	0.0287221	0.0026641	0.00281138	0.00147934	1.12046e-05	3.70111e-14	8.37145e-05	4.93632e-05	3.45057e-05	9.38034e-07	0	9.68173e-05	7.44738e-08	-5.17545e-06	0.000580289	-0.171746	-0.0329269	0.100945	-0.0847359	-0.0679673	0.0129397	-0.1	-0.45927	0
2137	10.0397	0	0.0592681	9.98039	10.2257	10.188	9.93436	8.25756	1.07112	0.605685	0.253619	0.0377048	0.0144423	0.0047145	0.000163745	0.00372643	0.00528244	0.00341799	0.0503953	0.0971109	0.0222208	7.98129e-05	0.0131803	0.0388847	0.00178507	0.0282027	0.0026075	0.00279433	0.00147775	1.04447e-05	3.05294e-14	7.73132e-05	4.67925e-05	3.27373e-05	8.77618e-07	0	9.4161e-05	6.96466e-08	-5.23226e-06	0.000580289	-0.171746	-0.0329269	0.100945	-0.0847359	-0.0679673	0.0129397	-0.1	-0.45927	0
2138	10.0664	0	0.0431769	10.0232	10.2688	10.2318	9.97779	8.29952	1.07007	0.608189	0.254017	0.0370416	0.0145132	0.00474286	0.000164444	0.00371328	0.00527562	0.00341885	0.0504264	0.0970531	0.0222437	7.84324e-05	0.0131636	0.0392239	0.00172039	0.0276917	0.002552	0.00277735	0.00147616	9.73519e-06	2.51785e-14	7.13957e-05	4.43564e-05	3.10534e-05	8.21698e-07	0	9.15737e-05	6.5128e-08	-5.29716e-06	0.000580289	-0.171746	-0.0329269	0.100945	-0.0847359	-0.0679673	0.0129397	-0.1	-0.45927	0
2139	10.098	0	0.0322656	10.0657	10.3117	10.2753	10.0209	8.3412	1.06904	0.610667	0.254409	0.0363908	0.0145842	0.00477121	0.000165143	0.00370015	0.00526897	0.00341944	0.0504547	0.0969919	0.0222657	7.70875e-05	0.0131471	0.0395631	0.00165794	0.0271889	0.00249758	0.00276044	0.00147457	9.07254e-06	2.07615e-14	6.59252e-05	4.20452e-05	2.94494e-05	7.64848e-07	0	8.90531e-05	6.08978e-08	-5.37141e-06	0.000580289	-0.171746	-0.0329269	0.100945	-0.0847359	-0.0679673	0.0129397	-0.1	-0.45927	0
2140	10.1336	0	0.025655	10.1079	10.3543	10.3185	10.0638	8.38261	1.06802	0.61312	0.254793	0.035752	0.0146551	0.00479956	0.000165841	0.00368705	0.00526241	0.00341976	0.0504801	0.0969274	0.0222869	7.57773e-05	0.0131307	0.0399021	0.00159763	0.0266942	0.00244421	0.0027436	0.00147298	8.4537e-06	1.7116e-14	6.08682e-05	3.98536e-05	2.79271e-05	7.07143e-07	0	8.65972e-05	5.69377e-08	-5.45048e-06	0.000580289	-0.171746	-0.0329269	0.100945	-0.0847359	-0.0679673	0.0129397	-0.1	-0.45927	0
2141	10.2224	0	0.0725288	10.1499	10.3966	10.3615	10.1063	8.42375	1.067	0.615548	0.25517	0.0351249	0.014726	0.0048279	0.000166539	0.00367399	0.00525589	0.00341982	0.0505028	0.0968594	0.0223072	7.45007e-05	0.0131144	0.0402411	0.0015394	0.0262075	0.00239186	0.00272682	0.00147139	7.87581e-06	1.41078e-14	5.61937e-05	3.77772e-05	2.64824e-05	6.5374e-07	0	8.42044e-05	5.32306e-08	-5.53257e-06	0.000580289	-0.171746	-0.0329269	0.100945	-0.0847359	-0.0679673	0.0129397	-0.1	-0.45927	0
2142	10.3376	0	0.146252	10.1914	10.4385	10.404	10.1485	8.46457	1.06594	0.617951	0.255534	0.0345087	0.014797	0.00485625	0.000167237	0.00366095	0.00524897	0.00341954	0.050522	0.0967852	0.0223264	7.3256e-05	0.0130975	0.0405799	0.0014831	0.0257279	0.00234045	0.00271009	0.00146979	7.33566e-06	1.16251e-14	5.18714e-05	3.58067e-05	2.51108e-05	6.04298e-07	0	8.18704e-05	4.97584e-08	-5.65034e-06	0.000580289	-0.171746	-0.0329269	0.100945	-0.0847359	-0.0679673	0.0129397	-0.1	-0.45927	0
2143	10.4136	0	0.181191	10.2324	10.4799	10.446	10.1901	8.505	1.06481	0.62033	0.255883	0.0339024	0.0148679	0.00488459	0.000167935	0.00364793	0.00524134	0.00341887	0.0505371	0.0967026	0.0223445	7.20416e-05	0.0130793	0.0409186	0.00142863	0.0252552	0.00228993	0.00269338	0.00146819	6.83042e-06	9.57587e-15	4.78735e-05	3.39346e-05	2.38082e-05	5.58508e-07	0	7.95919e-05	4.6505e-08	-5.8007e-06	0.000580289	-0.171746	-0.0329269	0.100945	-0.0847359	-0.0679673	0.0129397	-0.1	-0.45927	0
2144	10.4636	0	0.190562	10.273	10.521	10.4877	10.2314	8.54511	1.06365	0.622684	0.256219	0.0333065	0.0149389	0.00491292	0.000168633	0.00363493	0.00523338	0.00341787	0.0505487	0.0966139	0.0223614	7.08572e-05	0.0130605	0.0412572	0.00137596	0.0247894	0.00224033	0.00267672	0.00146658	6.3583e-06	7.88543e-15	4.41774e-05	3.21593e-05	2.25715e-05	5.16121e-07	0	7.73694e-05	4.34581e-08	-5.93559e-06	0.000580289	-0.171746	-0.0329269	0.100945	-0.0847359	-0.0679673	0.0129397	-0.1	-0.45927	0
2145	10.4876	0	0.174151	10.3134	10.5618	10.529	10.2725	8.58501	1.06247	0.625014	0.256548	0.0327212	0.0150098	0.00494126	0.00016933	0.00362196	0.00522544	0.00341663	0.0505575	0.0965215	0.0223775	6.97029e-05	0.0130416	0.0415957	0.00132509	0.0243308	0.00219166	0.00266011	0.00146497	5.91758e-06	6.49173e-15	4.07616e-05	3.04765e-05	2.1398e-05	4.76902e-07	0	7.52034e-05	4.06063e-08	-6.0451e-06	0.000580289	-0.171746	-0.0329269	0.100945	-0.0847359	-0.0679673	0.0129397	-0.1	-0.45927	0
2146	10.4839	0	0.130187	10.3537	10.6025	10.5703	10.3135	8.62482	1.06132	0.62732	0.256872	0.0321467	0.0150807	0.00496959	0.000170027	0.00360902	0.00521779	0.00341521	0.050564	0.0964274	0.0223927	6.85783e-05	0.013023	0.0419341	0.00127602	0.0238798	0.00214394	0.00264358	0.00146336	5.50654e-06	5.34324e-15	3.76063e-05	2.88816e-05	2.02847e-05	4.40629e-07	0	7.30879e-05	3.79385e-08	-6.12991e-06	0.000580289	-0.171746	-0.0329269	0.100945	-0.0847359	-0.0679673	0.0129397	-0.1	-0.45927	0
2147	10.4801	0	0.0860781	10.394	10.6432	10.6116	10.3544	8.66456	1.06021	0.629603	0.257196	0.0315833	0.0151517	0.00499792	0.000170724	0.00359612	0.00521068	0.0034137	0.0505688	0.0963338	0.0224073	6.74834e-05	0.0130053	0.0422724	0.0012287	0.0234366	0.0020972	0.00262712	0.00146175	5.12353e-06	4.39725e-15	3.46927e-05	2.73706e-05	1.9229e-05	4.07094e-07	0	7.10234e-05	3.5444e-08	-6.18802e-06	0.000580289	-0.171746	-0.0329269	0.100945	-0.0847359	-0.0679673	0.0129397	-0.1	-0.45927	0
2148	10.4935	0	0.0592681	10.4342	10.6837	10.6527	10.3952	8.70417	1.05915	0.631863	0.25752	0.0310308	0.0152226	0.00502625	0.000171421	0.00358325	0.00520409	0.00341212	0.0505722	0.0962414	0.0224213	6.64175e-05	0.0129885	0.0426106	0.00118311	0.023001	0.00205142	0.00261074	0.00146014	4.76676e-06	3.61825e-15	3.20028e-05	2.59392e-05	1.82281e-05	3.76095e-07	0	6.90152e-05	3.3112e-08	-6.23582e-06	0.000580289	-0.171746	-0.0329269	0.100945	-0.0847359	-0.0679673	0.0129397	-0.1	-0.45927	0
2149	10.5175	0	0.0431769	10.4743	10.7242	10.6937	10.4359	8.74364	1.05812	0.6341	0.257843	0.0304889	0.0152935	0.00505457	0.000172117	0.00357041	0.00519784	0.00341045	0.0505739	0.0961493	0.0224347	6.53797e-05	0.0129722	0.0429487	0.00113915	0.0225729	0.00200657	0.00259444	0.00145852	4.43433e-06	2.97679e-15	2.95193e-05	2.45862e-05	1.72791e-05	3.47438e-07	0	6.70612e-05	3.09316e-08	-6.29159e-06	0.000580289	-0.171746	-0.0329269	0.100945	-0.0847359	-0.0679673	0.0129397	-0.1	-0.45927	0
2150	10.5465	0	0.0322656	10.5142	10.7645	10.7345	10.4763	8.78292	1.05711	0.636313	0.258163	0.029957	0.0153644	0.00508289	0.000172813	0.00355761	0.00519175	0.00340867	0.0505738	0.0960567	0.0224473	6.4369e-05	0.0129563	0.0432867	0.00109676	0.022152	0.00196263	0.00257822	0.00145691	4.12456e-06	2.44862e-15	2.72262e-05	2.33038e-05	1.63791e-05	3.20944e-07	0	6.51595e-05	2.88928e-08	-6.35683e-06	0.000580289	-0.171746	-0.0329269	0.100945	-0.0847359	-0.0679673	0.0129397	-0.1	-0.45927	0
2151	10.5795	0	0.025655	10.5538	10.8044	10.775	10.5165	8.82186	1.05612	0.638505	0.258481	0.029435	0.0154354	0.00511121	0.000173509	0.00354484	0.00518575	0.00340678	0.0505719	0.0959634	0.0224593	6.33846e-05	0.0129407	0.0436246	0.00105588	0.0217382	0.00191956	0.00256206	0.00145529	3.83588e-06	2.01379e-15	2.51091e-05	2.20851e-05	1.55199e-05	2.96449e-07	0	6.33085e-05	2.69863e-08	-6.42713e-06	0.000580289	-0.171746	-0.0329269	0.100945	-0.0847359	-0.0679673	0.0129397	-0.1	-0.45927	0
2152	10.6654	0	0.0725288	10.5929	10.8438	10.8149	10.5561	8.86029	1.05514	0.640668	0.258794	0.0289227	0.0155059	0.00513938	0.000174202	0.00353216	0.00517986	0.0034048	0.0505686	0.0958699	0.0224708	6.24272e-05	0.0129253	0.0439607	0.00101646	0.0213313	0.00187736	0.00254597	0.00145368	3.56688e-06	1.65587e-15	2.31545e-05	2.09308e-05	1.46995e-05	2.73804e-07	0	6.15068e-05	2.52037e-08	-6.50057e-06	0.000580289	-0.171746	-0.0329269	0.100945	-0.0847359	-0.0679673	0.0129397	-0.1	-0.45927	0
2153	10.7775	0	0.146252	10.6312	10.8825	10.8541	10.595	8.89806	1.05415	0.642795	0.259097	0.0284192	0.0155758	0.00516726	0.000174887	0.00351962	0.00517367	0.00340267	0.0505633	0.095774	0.0224814	6.14963e-05	0.0129096	0.0442932	0.000978396	0.0209307	0.00183595	0.00252994	0.00145206	3.31598e-06	1.3612e-15	2.13494e-05	1.98372e-05	1.39212e-05	2.5286e-07	0	5.97511e-05	2.35358e-08	-6.60876e-06	0.000580289	-0.171746	-0.0329269	0.100945	-0.0847359	-0.0679673	0.0129397	-0.1	-0.45927	0
2154	10.8498	0	0.181191	10.6686	10.9203	10.8924	10.633	8.93499	1.0531	0.644888	0.259386	0.0279239	0.0156449	0.00519485	0.000175565	0.00350722	0.00516687	0.00340032	0.0505556	0.0956734	0.0224913	6.05908e-05	0.0128929	0.0446223	0.000941607	0.020536	0.00179529	0.00251393	0.00145043	3.0818e-06	1.11858e-15	1.96818e-05	1.87978e-05	1.31827e-05	2.33483e-07	0	5.8039e-05	2.19748e-08	-6.7487e-06	0.000580289	-0.171746	-0.0329269	0.100945	-0.0847359	-0.0679673	0.0129397	-0.1	-0.45927	0
2155	10.8957	0	0.190562	10.7052	10.9572	10.9298	10.6701	8.97114	1.05203	0.646946	0.259664	0.0274371	0.0157133	0.00522215	0.000176235	0.00349495	0.00515984	0.00339781	0.0505458	0.0955701	0.0225004	5.97105e-05	0.0128758	0.0449479	0.000906086	0.0201475	0.0017554	0.00249798	0.0014488	2.86343e-06	9.18941e-16	1.8142e-05	1.78115e-05	1.24823e-05	2.15564e-07	0	5.63705e-05	2.05146e-08	-6.87322e-06	0.000580289	-0.171746	-0.0329269	0.100945	-0.0847359	-0.0679673	0.0129397	-0.1	-0.45927	0
2156	10.9154	0	0.174151	10.7412	10.9936	10.9667	10.7067	9.00681	1.05096	0.64897	0.259936	0.0269591	0.0157809	0.00524916	0.000176899	0.00348283	0.0051529	0.00339523	0.0505347	0.0954663	0.0225089	5.88552e-05	0.0128589	0.04527	0.000871825	0.0197653	0.00171629	0.00248208	0.00144717	2.66002e-06	7.54747e-16	1.67207e-05	1.68773e-05	1.18182e-05	1.99001e-07	0	5.47462e-05	1.91494e-08	-6.97215e-06	0.000580289	-0.171746	-0.0329269	0.100945	-0.0847359	-0.0679673	0.0129397	-0.1	-0.45927	0
2157	10.907	0	0.130187	10.7769	11.0296	11.0031	10.7429	9.04204	1.04993	0.65096	0.260204	0.02649	0.0158479	0.00527588	0.000177555	0.00347085	0.00514634	0.00339263	0.0505227	0.095364	0.022517	5.80248e-05	0.0128426	0.0455886	0.000838808	0.0193897	0.00167798	0.00246626	0.00144554	2.47071e-06	6.19773e-16	1.54095e-05	1.5994e-05	1.11887e-05	1.83698e-07	0	5.3166e-05	1.78737e-08	-7.0462e-06	0.000580289	-0.171746	-0.0329269	0.100945	-0.0847359	-0.0679673	0.0129397	-0.1	-0.45927	0
2158	10.8981	0	0.0860781	10.812	11.0651	11.0391	10.7786	9.07674	1.04897	0.652916	0.260473	0.02603	0.0159141	0.00530232	0.000178204	0.00345902	0.00514039	0.00339008	0.0505105	0.0952652	0.0225247	5.72192e-05	0.0128274	0.0459037	0.000807022	0.0190208	0.00164049	0.00245052	0.00144391	2.29468e-06	5.08869e-16	1.42001e-05	1.51573e-05	1.05923e-05	1.69565e-07	0	5.16301e-05	1.66822e-08	-7.09345e-06	0.000580289	-0.171746	-0.0329269	0.100945	-0.0847359	-0.0679673	0.0129397	-0.1	-0.45927	0
2159	10.906	0	0.0592681	10.8467	11.1002	11.0746	10.8138	9.11093	1.04806	0.65484	0.260743	0.025579	0.0159796	0.00532846	0.000178846	0.00344734	0.00513506	0.00338761	0.0504982	0.0951706	0.0225322	5.64378e-05	0.0128132	0.0462153	0.000776427	0.0186586	0.0016038	0.00243487	0.00144228	2.13105e-06	4.17765e-16	1.3085e-05	1.43629e-05	1.00274e-05	1.56513e-07	0	5.01376e-05	1.55697e-08	-7.12987e-06	0.000580289	-0.171746	-0.0329269	0.100945	-0.0847359	-0.0679673	0.0129397	-0.1	-0.45927	0
2160	10.9241	0	0.0431769	10.881	11.1347	11.1096	10.8485	9.14462	1.0472	0.65673	0.261012	0.0251367	0.0160443	0.00535431	0.000179481	0.00343581	0.00513011	0.00338518	0.0504857	0.0950789	0.0225395	5.568e-05	0.0127999	0.0465234	0.000746968	0.0183028	0.00156788	0.00241929	0.00144064	1.97892e-06	3.42927e-16	1.20568e-05	1.36098e-05	9.49219e-06	1.44461e-07	0	4.86868e-05	1.45306e-08	-7.1736e-06	0.000580289	-0.171746	-0.0329269	0.100945	-0.0847359	-0.0679673	0.0129397	-0.1	-0.45927	0
2161	10.9469	0	0.0322656	10.9147	11.1687	11.144	10.8827	9.17776	1.04638	0.658588	0.26128	0.0247028	0.0161084	0.00537987	0.000180108	0.00342443	0.00512539	0.00338278	0.0504728	0.0949895	0.0225463	5.49448e-05	0.0127871	0.0468281	0.0007186	0.0179534	0.00153272	0.0024038	0.00143901	1.83744e-06	2.81454e-16	1.11085e-05	1.28972e-05	8.98515e-06	1.33329e-07	0	4.72763e-05	1.356e-08	-7.2263e-06	0.000580289	-0.171746	-0.0329269	0.100945	-0.0847359	-0.0679673	0.0129397	-0.1	-0.45927	0
2162	10.9735	0	0.025655	10.9478	11.2022	11.1779	10.9163	9.21034	1.04558	0.660414	0.261544	0.0242771	0.0161717	0.00540513	0.000180729	0.00341319	0.00512081	0.00338039	0.0504594	0.0949019	0.0225529	5.42317e-05	0.0127747	0.0471292	0.000691274	0.01761	0.0014983	0.00238837	0.00143738	1.70587e-06	2.30965e-16	1.02341e-05	1.22246e-05	8.50477e-06	1.23047e-07	0	4.59049e-05	1.26535e-08	-7.28371e-06	0.000580289	-0.171746	-0.0329269	0.100945	-0.0847359	-0.0679673	0.0129397	-0.1	-0.45927	0
2163	11.0529	0	0.0725288	10.9804	11.235	11.2111	10.9493	9.24233	1.0448	0.662209	0.261805	0.0238593	0.0162343	0.00543011	0.000181342	0.00340209	0.00511633	0.00337801	0.0504455	0.0948157	0.0225591	5.35399e-05	0.0127626	0.0474269	0.000664956	0.0172727	0.00146459	0.00237303	0.00143574	1.58353e-06	1.89503e-16	9.42784e-06	1.15879e-05	8.04966e-06	1.13552e-07	0	4.45713e-05	1.18068e-08	-7.34395e-06	0.000580289	-0.171746	-0.0329269	0.100945	-0.0847359	-0.0679673	0.0129397	-0.1	-0.45927	0
2164	11.1586	0	0.146252	11.0124	11.2673	11.2438	10.9818	9.27379	1.044	0.663972	0.262058	0.0234489	0.0162962	0.0054548	0.000181948	0.00339114	0.00511148	0.00337554	0.0504303	0.094728	0.0225647	5.28682e-05	0.0127501	0.0477211	0.000639573	0.0169409	0.00143155	0.00235773	0.00143411	1.46965e-06	1.55447e-16	8.68409e-06	1.09832e-05	7.61833e-06	1.04778e-07	0	4.32732e-05	1.10155e-08	-7.43808e-06	0.000580289	-0.171746	-0.0329269	0.100945	-0.0847359	-0.0679673	0.0129397	-0.1	-0.45927	0
2165	11.2247	0	0.181191	11.0435	11.2987	11.2757	11.0134	9.30454	1.04314	0.665704	0.262298	0.0230452	0.0163573	0.0054792	0.000182547	0.00338031	0.00510598	0.0033729	0.0504133	0.0946362	0.0225697	5.22155e-05	0.0127365	0.0480117	0.000615074	0.0166143	0.00139913	0.00234248	0.00143246	1.36358e-06	1.27472e-16	7.99784e-06	1.04104e-05	7.20941e-06	9.66687e-08	0	4.20086e-05	1.02758e-08	-7.56356e-06	0.000580289	-0.171746	-0.0329269	0.100945	-0.0847359	-0.0679673	0.0129397	-0.1	-0.45927	0
2166	11.2645	0	0.190562	11.0739	11.3294	11.3068	11.0442	9.33458	1.04225	0.667405	0.262528	0.0226487	0.0164177	0.00550331	0.000183138	0.00336963	0.00510019	0.00337017	0.0503948	0.0945423	0.022574	5.15816e-05	0.0127226	0.0482989	0.000591451	0.016293	0.00136735	0.00232728	0.00143082	1.26487e-06	1.04503e-16	7.3649e-06	9.86677e-06	6.82186e-06	8.91768e-08	0	4.07775e-05	9.58445e-09	-7.67416e-06	0.000580289	-0.171746	-0.0329269	0.100945	-0.0847359	-0.0679673	0.0129397	-0.1	-0.45927	0
2167	11.2781	0	0.174151	11.1039	11.3597	11.3375	11.0747	9.36426	1.04137	0.669076	0.262754	0.0222593	0.0164774	0.00552713	0.000183723	0.00335908	0.00509446	0.00336741	0.0503756	0.0944486	0.022578	5.09667e-05	0.0127087	0.0485827	0.000568691	0.0159771	0.00133622	0.00231215	0.00142917	1.17311e-06	8.56547e-17	6.78137e-06	9.34976e-06	6.45472e-06	8.22586e-08	0	3.95801e-05	8.93883e-09	-7.75959e-06	0.000580289	-0.171746	-0.0329269	0.100945	-0.0847359	-0.0679673	0.0129397	-0.1	-0.45927	0
2168	11.2637	0	0.130187	11.1336	11.3897	11.3678	11.1048	9.39359	1.04052	0.670717	0.262977	0.0218774	0.0165364	0.00555067	0.0001843	0.00334868	0.00508905	0.00336468	0.0503561	0.094357	0.0225816	5.03706e-05	0.0126953	0.0488629	0.00054678	0.0156669	0.00130575	0.00229709	0.00142753	1.08787e-06	7.01947e-17	6.24361e-06	8.8605e-06	6.10703e-06	7.58725e-08	0	3.84103e-05	8.33617e-09	-7.82046e-06	0.000580289	-0.171746	-0.0329269	0.100945	-0.0847359	-0.0679673	0.0129397	-0.1	-0.45927	0
2169	11.2489	0	0.0860781	11.1629	11.4193	11.3978	11.1346	9.4225	1.03973	0.672328	0.263202	0.0215029	0.0165946	0.00557391	0.00018487	0.00333842	0.00508424	0.00336206	0.0503369	0.0942695	0.0225851	4.97932e-05	0.012683	0.0491397	0.000525707	0.0153626	0.00127596	0.00228211	0.00142588	1.00876e-06	5.75192e-17	5.74823e-06	8.39995e-06	5.77789e-06	6.99802e-08	0	3.72681e-05	7.77388e-09	-7.85494e-06	0.000580289	-0.171746	-0.0329269	0.100945	-0.0847359	-0.0679673	0.0129397	-0.1	-0.45927	0
2170	11.2511	0	0.0592681	11.1918	11.4485	11.4273	11.1639	9.45099	1.039	0.67391	0.263429	0.0211359	0.0166522	0.00559686	0.000185433	0.00332831	0.00508	0.00335955	0.0503182	0.0941865	0.0225885	4.92343e-05	0.0126717	0.049413	0.000505448	0.0150639	0.00124683	0.00226723	0.00142423	9.35368e-07	4.7129e-17	5.29195e-06	7.96197e-06	5.46635e-06	6.45441e-08	0	3.61593e-05	7.24937e-09	-7.87881e-06	0.000580289	-0.171746	-0.0329269	0.100945	-0.0847359	-0.0679673	0.0129397	-0.1	-0.45927	0
2171	11.2635	0	0.0431769	11.2203	11.4773	11.4565	11.1928	9.47904	1.03831	0.675463	0.263657	0.0207761	0.016709	0.00561952	0.000185989	0.00331834	0.00507613	0.00335713	0.0502998	0.0941071	0.0225918	4.86931e-05	0.0126611	0.0496828	0.000485963	0.0147708	0.00121833	0.00225243	0.00142259	8.67259e-07	3.86118e-17	4.87166e-06	7.54423e-06	5.17145e-06	5.95284e-08	0	3.50826e-05	6.76e-09	-7.91003e-06	0.000580289	-0.171746	-0.0329269	0.100945	-0.0847359	-0.0679673	0.0129397	-0.1	-0.45927	0
2172	11.2807	0	0.0322656	11.2485	11.5056	11.4852	11.2213	9.50664	1.03766	0.676987	0.263884	0.0204232	0.016765	0.00564189	0.000186538	0.00330852	0.00507247	0.00335477	0.0502815	0.0940302	0.0225948	4.81691e-05	0.0126511	0.0499491	0.00046722	0.0144831	0.00119046	0.00223771	0.00142094	8.04039e-07	3.16302e-17	4.48451e-06	7.15139e-06	4.89227e-06	5.49e-08	0	3.40368e-05	6.30338e-09	-7.95036e-06	0.000580289	-0.171746	-0.0329269	0.100945	-0.0847359	-0.0679673	0.0129397	-0.1	-0.45927	0
2173	11.3017	0	0.025655	11.2761	11.5335	11.5134	11.2493	9.53376	1.03703	0.678482	0.264109	0.020077	0.0168204	0.00566397	0.000187079	0.00329884	0.00506892	0.00335246	0.0502632	0.0939555	0.0225977	4.76616e-05	0.0126414	0.050212	0.000449186	0.0142006	0.00116319	0.00222307	0.0014193	7.45354e-07	2.59077e-17	4.12788e-06	6.78097e-06	4.62798e-06	5.06291e-08	0	3.30208e-05	5.87729e-09	-7.99563e-06	0.000580289	-0.171746	-0.0329269	0.100945	-0.0847359	-0.0679673	0.0129397	-0.1	-0.45927	0
2174	11.3758	0	0.0725288	11.3033	11.5608	11.5411	11.2768	9.5604	1.03641	0.67995	0.264331	0.0197374	0.016875	0.00568576	0.000187613	0.00328931	0.00506546	0.00335019	0.0502448	0.0938825	0.0226003	4.71702e-05	0.012632	0.0504713	0.000431831	0.0139233	0.00113651	0.0022085	0.00141765	6.90882e-07	2.12177e-17	3.79937e-06	6.42734e-06	4.37779e-06	4.66881e-08	0	3.20338e-05	5.4797e-09	-8.04396e-06	0.000580289	-0.171746	-0.0329269	0.100945	-0.0847359	-0.0679673	0.0129397	-0.1	-0.45927	0
2175	11.4761	0	0.146252	11.3298	11.5876	11.5682	11.3037	9.58652	1.03577	0.681389	0.264546	0.0194038	0.0169289	0.00570726	0.000188141	0.0032799	0.00506161	0.00334785	0.0502256	0.0938082	0.0226026	4.66938e-05	0.0126221	0.0507272	0.000415112	0.0136507	0.00111038	0.00219399	0.001416	6.4027e-07	1.73731e-17	3.49666e-06	6.09193e-06	4.14085e-06	4.30498e-08	0	3.1074e-05	5.1085e-09	-8.1258e-06	0.000580289	-0.171746	-0.0329269	0.100945	-0.0847359	-0.0679673	0.0129397	-0.1	-0.45927	0
2176	11.5368	0	0.181191	11.3556	11.6137	11.5946	11.3299	9.612	1.03507	0.682802	0.264749	0.0190759	0.0169821	0.00572848	0.000188661	0.00327063	0.00505709	0.00334538	0.050205	0.09373	0.0226043	4.62315e-05	0.0126111	0.0509797	0.00039899	0.0133825	0.00108476	0.00217953	0.00141435	5.9321e-07	1.42211e-17	3.21763e-06	5.77612e-06	3.91637e-06	3.96899e-08	0	3.01398e-05	4.76177e-09	-8.23864e-06	0.000580289	-0.171746	-0.0329269	0.100945	-0.0847359	-0.0679673	0.0129397	-0.1	-0.45927	0
2177	11.5714	0	0.190562	11.3808	11.6391	11.6204	11.3554	9.63688	1.03434	0.684187	0.264943	0.0187538	0.0170346	0.0057494	0.000189173	0.00326149	0.00505226	0.00334284	0.0501833	0.09365	0.0226055	4.57833e-05	0.0125997	0.0512286	0.00038346	0.0131189	0.00105967	0.00216512	0.0014127	5.49493e-07	1.16382e-17	2.96054e-06	5.47815e-06	3.70379e-06	3.65884e-08	0	2.92312e-05	4.43807e-09	-8.33702e-06	0.000580289	-0.171746	-0.0329269	0.100945	-0.0847359	-0.0679673	0.0129397	-0.1	-0.45927	0
2178	11.5797	0	0.174151	11.4056	11.6641	11.6457	11.3806	9.6614	1.03362	0.685545	0.265132	0.0184376	0.0170863	0.00577003	0.000189679	0.00325249	0.00504747	0.00334029	0.0501612	0.0935703	0.0226064	4.53491e-05	0.0125883	0.0514741	0.000368512	0.01286	0.0010351	0.00215078	0.00141104	5.08919e-07	9.52546e-18	2.72375e-06	5.19308e-06	3.50254e-06	3.37267e-08	0	2.83483e-05	4.13604e-09	-8.41065e-06	0.000580289	-0.171746	-0.0329269	0.100945	-0.0847359	-0.0679673	0.0129397	-0.1	-0.45927	0
2179	11.5602	0	0.130187	11.43	11.6889	11.6707	11.4054	9.68562	1.03292	0.686876	0.26532	0.0181275	0.0171373	0.00579038	0.000190178	0.00324363	0.00504301	0.0033378	0.0501392	0.0934929	0.0226071	4.49291e-05	0.0125774	0.0517161	0.000354135	0.0126058	0.00101108	0.00213652	0.00140939	4.71295e-07	7.79813e-18	2.50574e-06	4.91981e-06	3.31209e-06	3.10873e-08	0	2.7491e-05	3.85436e-09	-8.46007e-06	0.000580289	-0.171746	-0.0329269	0.100945	-0.0847359	-0.0679673	0.0129397	-0.1	-0.45927	0
2180	11.5403	0	0.0860781	11.4543	11.7133	11.6955	11.43	9.70951	1.03228	0.688181	0.26551	0.0178236	0.0171876	0.00581043	0.000190669	0.00323491	0.00503912	0.00333543	0.0501179	0.0934197	0.0226078	4.45233e-05	0.0125674	0.0519547	0.000340322	0.0123566	0.000987602	0.00212235	0.00140773	4.36436e-07	6.38356e-18	2.30511e-06	4.66411e-06	3.13193e-06	2.8654e-08	0	2.66592e-05	3.59179e-09	-8.4835e-06	0.000580289	-0.171746	-0.0329269	0.100945	-0.0847359	-0.0679673	0.0129397	-0.1	-0.45927	0
2181	11.5375	0	0.0592681	11.4782	11.7375	11.7199	11.4542	9.73308	1.0317	0.68946	0.265704	0.0175258	0.0172371	0.0058302	0.000191153	0.00322634	0.00503579	0.0033332	0.0500975	0.0933512	0.0226086	4.41313e-05	0.0125585	0.0521898	0.000327054	0.0121122	0.000964663	0.00210826	0.00140608	4.04147e-07	5.22534e-18	2.12049e-06	4.42424e-06	2.96152e-06	2.64108e-08	0	2.58523e-05	3.34707e-09	-8.4966e-06	0.000580289	-0.171746	-0.0329269	0.100945	-0.0847359	-0.0679673	0.0129397	-0.1	-0.45927	0
2182	11.545	0	0.0431769	11.5018	11.7613	11.744	11.4781	9.75627	1.03116	0.690713	0.265898	0.0172339	0.017286	0.00584967	0.00019163	0.0032179	0.00503283	0.00333107	0.0500777	0.0932863	0.0226093	4.37527e-05	0.0125503	0.0524214	0.000314301	0.0118725	0.000942244	0.00209426	0.00140443	3.7423e-07	4.27696e-18	1.95059e-06	4.19519e-06	2.80032e-06	2.43427e-08	0	2.50695e-05	3.11895e-09	-8.51717e-06	0.000580289	-0.171746	-0.0329269	0.100945	-0.0847359	-0.0679673	0.0129397	-0.1	-0.45927	0
2183	11.5573	0	0.0322656	11.5251	11.7847	11.7678	11.5017	9.77907	1.03066	0.69194	0.266091	0.0169477	0.0173341	0.00586886	0.0001921	0.00320961	0.00503005	0.00332902	0.0500582	0.093224	0.0226099	4.3387e-05	0.0125426	0.0526496	0.000302045	0.0116374	0.000920328	0.00208035	0.00140278	3.46505e-07	3.5004e-18	1.79423e-06	3.97918e-06	2.64782e-06	2.24358e-08	0	2.43096e-05	2.90627e-09	-8.547e-06	0.000580289	-0.171746	-0.0329269	0.100945	-0.0847359	-0.0679673	0.0129397	-0.1	-0.45927	0
2184	11.5736	0	0.025655	11.5479	11.8077	11.791	11.5248	9.80145	1.03017	0.693143	0.266284	0.016667	0.0173815	0.00588775	0.000192563	0.00320146	0.00502738	0.00332702	0.0500391	0.0931639	0.0226105	4.30337e-05	0.0125352	0.0528743	0.000290262	0.0114067	0.0008989	0.00206651	0.00140112	3.20809e-07	2.86455e-18	1.65032e-06	3.7749e-06	2.50354e-06	2.06775e-08	0	2.35721e-05	2.70799e-09	-8.58198e-06	0.000580289	-0.171746	-0.0329269	0.100945	-0.0847359	-0.0679673	0.0129397	-0.1	-0.45927	0
2185	11.6427	0	0.0725288	11.5702	11.8302	11.8138	11.5473	9.8233	1.0297	0.69432	0.266474	0.0163917	0.0174281	0.00590636	0.000193019	0.00319344	0.00502477	0.00332508	0.0500202	0.0931056	0.0226109	4.26924e-05	0.012528	0.0530955	0.000278931	0.0111803	0.000877948	0.00205274	0.00139947	2.96994e-07	2.34396e-18	1.51789e-06	3.58116e-06	2.36704e-06	1.90562e-08	0	2.28562e-05	2.52312e-09	-8.62018e-06	0.000580289	-0.171746	-0.0329269	0.100945	-0.0847359	-0.0679673	0.0129397	-0.1	-0.45927	0
2186	11.7382	0	0.146252	11.592	11.8521	11.836	11.5693	9.84468	1.0292	0.695472	0.266656	0.0161213	0.0174741	0.00592468	0.000193468	0.00318556	0.00502177	0.00332309	0.0500008	0.0930459	0.022611	4.23622e-05	0.0125204	0.0533132	0.000268026	0.0109579	0.00085744	0.00203904	0.00139782	2.749e-07	1.91764e-18	1.39595e-06	3.39673e-06	2.23786e-06	1.75605e-08	0	2.21605e-05	2.35065e-09	-8.69145e-06	0.000580289	-0.171746	-0.0329269	0.100945	-0.0847359	-0.0679673	0.0129397	-0.1	-0.45927	0
2187	11.7943	0	0.181191	11.6131	11.8735	11.8576	11.5908	9.86554	1.02863	0.6966	0.266827	0.0158556	0.0175193	0.00594271	0.000193909	0.00317781	0.00501808	0.00332098	0.0499801	0.0929824	0.0226107	4.20424e-05	0.0125116	0.0535276	0.000257521	0.0107393	0.000837348	0.00202539	0.00139616	2.54387e-07	1.56845e-18	1.28366e-06	3.22056e-06	2.11555e-06	1.61803e-08	0	2.14839e-05	2.18969e-09	-8.79332e-06	0.000580289	-0.171746	-0.0329269	0.100945	-0.0847359	-0.0679673	0.0129397	-0.1	-0.45927	0
2188	11.8242	0	0.190562	11.6336	11.8942	11.8786	11.6116	9.88587	1.02804	0.697704	0.26699	0.0155946	0.0175638	0.00596045	0.000194343	0.00317018	0.00501408	0.0033188	0.0499587	0.092917	0.02261	4.17329e-05	0.0125023	0.0537384	0.000247406	0.0105245	0.000817679	0.0020118	0.00139451	2.3536e-07	1.28257e-18	1.18027e-06	3.05532e-06	1.99979e-06	1.49072e-08	0	2.08264e-05	2.03954e-09	-8.88105e-06	0.000580289	-0.171746	-0.0329269	0.100945	-0.0847359	-0.0679673	0.0129397	-0.1	-0.45927	0
2189	11.8279	0	0.174151	11.6538	11.9145	11.8992	11.6321	9.90583	1.02745	0.698784	0.267148	0.0153385	0.0176075	0.0059779	0.000194771	0.00316269	0.00501011	0.00331663	0.0499372	0.0928519	0.0226091	4.14339e-05	0.012493	0.0539458	0.000237675	0.0103136	0.00079844	0.00199827	0.00139285	2.17727e-07	1.04863e-18	1.08514e-06	2.89664e-06	1.89027e-06	1.37333e-08	0	2.01879e-05	1.89955e-09	-8.94441e-06	0.000580289	-0.171746	-0.0329269	0.100945	-0.0847359	-0.0679673	0.0129397	-0.1	-0.45927	0
2190	11.8038	0	0.130187	11.6737	11.9346	11.9195	11.6522	9.92551	1.02688	0.69984	0.267305	0.0150874	0.0176506	0.00599506	0.000195191	0.00315533	0.00500645	0.00331452	0.0499159	0.092789	0.0226081	4.11455e-05	0.0124842	0.0541497	0.000228326	0.0101068	0.000779635	0.00198482	0.00139119	2.01398e-07	8.57266e-19	9.97617e-07	2.74397e-06	1.78669e-06	1.26514e-08	0	1.95684e-05	1.7691e-09	-8.98389e-06	0.000580289	-0.171746	-0.0329269	0.100945	-0.0847359	-0.0679673	0.0129397	-0.1	-0.45927	0
2191	11.7794	0	0.0860781	11.6933	11.9545	11.9396	11.6722	9.94492	1.02638	0.700872	0.267465	0.0148413	0.0176929	0.00601193	0.000195604	0.00314812	0.00500335	0.00331253	0.0498956	0.0927304	0.0226072	4.08677e-05	0.0124764	0.0543502	0.00021935	0.00990403	0.000761268	0.00197146	0.00138953	1.86291e-07	7.00793e-19	9.17137e-07	2.60018e-06	1.68876e-06	1.16545e-08	0	1.89677e-05	1.64758e-09	-8.99784e-06	0.000580289	-0.171746	-0.0329269	0.100945	-0.0847359	-0.0679673	0.0129397	-0.1	-0.45927	0
2192	11.772	0	0.0592681	11.7128	11.9741	11.9595	11.6919	9.96405	1.02593	0.701881	0.267628	0.0146002	0.0177345	0.00602851	0.00019601	0.00314104	0.00500082	0.00331069	0.0498763	0.0926763	0.0226064	4.06003e-05	0.0124695	0.0545472	0.000210733	0.00970535	0.000743334	0.00195819	0.00138788	1.72317e-07	5.72866e-19	8.43139e-07	2.46438e-06	1.59619e-06	1.07363e-08	0	1.83855e-05	1.53441e-09	-9.00177e-06	0.000580289	-0.171746	-0.0329269	0.100945	-0.0847359	-0.0679673	0.0129397	-0.1	-0.45927	0
2193	11.7751	0	0.0431769	11.7319	11.9934	11.979	11.7112	9.98284	1.02552	0.702868	0.267792	0.014364	0.0177754	0.00604481	0.000196408	0.0031341	0.00499863	0.00330897	0.0498579	0.0926258	0.0226057	4.0343e-05	0.0124633	0.0547408	0.000202461	0.0095106	0.000725817	0.001945	0.00138622	1.59387e-07	4.68271e-19	7.75095e-07	2.33574e-06	1.50866e-06	9.89022e-09	0	1.7821e-05	1.429e-09	-9.01328e-06	0.000580289	-0.171746	-0.0329269	0.100945	-0.0847359	-0.0679673	0.0129397	-0.1	-0.45927	0
2194	11.783	0	0.0322656	11.7507	12.0123	11.9982	11.7302	10.0013	1.02514	0.703831	0.267956	0.0141324	0.0178155	0.00606081	0.0001968	0.0031273	0.00499662	0.00330732	0.04984	0.0925779	0.022605	4.00953e-05	0.0124576	0.0549309	0.000194517	0.00931964	0.000708702	0.0019319	0.00138457	1.4742e-07	3.82748e-19	7.1252e-07	2.21349e-06	1.42591e-06	9.11062e-09	0	1.72734e-05	1.33079e-09	-9.03417e-06	0.000580289	-0.171746	-0.0329269	0.100945	-0.0847359	-0.0679673	0.0129397	-0.1	-0.45927	0
2195	11.7947	0	0.025655	11.7691	12.0308	12.0169	11.7488	10.0192	1.02478	0.704772	0.268118	0.0139052	0.0178549	0.00607653	0.000197184	0.00312064	0.0049947	0.00330573	0.0498226	0.092532	0.0226042	3.98569e-05	0.0124521	0.0551176	0.00018688	0.00913237	0.000691978	0.00191887	0.00138292	1.36344e-07	3.1282e-19	6.54973e-07	2.09698e-06	1.34766e-06	8.39223e-09	0	1.67423e-05	1.2393e-09	-9.0603e-06	0.000580289	-0.171746	-0.0329269	0.100945	-0.0847359	-0.0679673	0.0129397	-0.1	-0.45927	0
2196	11.8596	0	0.0725288	11.7871	12.0489	12.0352	11.767	10.0368	1.02443	0.705691	0.268279	0.0136825	0.0178936	0.00609195	0.000197562	0.00311411	0.00499283	0.0033042	0.0498057	0.0924878	0.0226035	3.96274e-05	0.0124469	0.0553008	0.000179543	0.00894871	0.000675635	0.00190592	0.00138127	1.26092e-07	2.55648e-19	6.0205e-07	1.989e-06	1.27368e-06	7.73024e-09	0	1.62271e-05	1.15405e-09	-9.08973e-06	0.000580289	-0.171746	-0.0329269	0.100945	-0.0847359	-0.0679673	0.0129397	-0.1	-0.45927	0
2197	11.9508	0	0.146252	11.8045	12.0665	12.053	11.7846	10.054	1.02405	0.706587	0.268432	0.0134638	0.0179316	0.00610709	0.000197932	0.00310771	0.00499055	0.00330263	0.0497883	0.0924422	0.0226025	3.94061e-05	0.0124411	0.0554805	0.000172488	0.0087684	0.000659647	0.00189303	0.00137961	1.16592e-07	2.08891e-19	5.53361e-07	1.88858e-06	1.20369e-06	7.11992e-09	0	1.57268e-05	1.07458e-09	-9.15193e-06	0.000580289	-0.171746	-0.0329269	0.100945	-0.0847359	-0.0679673	0.0129397	-0.1	-0.45927	0
2198	12.0025	0	0.181191	11.8213	12.0834	12.0702	11.8016	10.0705	1.02361	0.707462	0.268573	0.0132489	0.0179689	0.00612194	0.000198295	0.00310143	0.00498759	0.00330093	0.0497699	0.0923926	0.0226011	3.91923e-05	0.0124342	0.0556568	0.000165692	0.00859121	0.000643993	0.0018802	0.00137796	1.07784e-07	1.70646e-19	5.08553e-07	1.79151e-06	1.13746e-06	6.55706e-09	0	1.52405e-05	1.00046e-09	-9.24433e-06	0.000580289	-0.171746	-0.0329269	0.100945	-0.0847359	-0.0679673	0.0129397	-0.1	-0.45927	0
2199	12.0282	0	0.190562	11.8376	12.0999	12.0869	11.8182	10.0867	1.02313	0.708315	0.268706	0.0130378	0.0180054	0.0061365	0.000198651	0.00309528	0.00498429	0.00329917	0.0497509	0.0923411	0.0225994	3.89861e-05	0.0124268	0.0558297	0.000159151	0.00841722	0.000628676	0.00186742	0.0013763	9.96238e-08	1.39376e-19	4.6733e-07	1.69751e-06	1.07482e-06	6.03817e-09	0	1.47682e-05	9.31367e-10	-9.32274e-06	0.000580289	-0.171746	-0.0329269	0.100945	-0.0847359	-0.0679673	0.0129397	-0.1	-0.45927	0
2200	12.0277	0	0.174151	11.8536	12.116	12.1032	11.8344	10.1026	1.02266	0.709146	0.268835	0.0128308	0.0180412	0.00615077	0.000199	0.00308925	0.00498103	0.00329741	0.0497319	0.0922898	0.0225976	3.87876e-05	0.0124193	0.0559991	0.000152864	0.0082465	0.000613702	0.00185471	0.00137464	9.20706e-08	1.13821e-19	4.29421e-07	1.60972e-06	1.01557e-06	5.56002e-09	0	1.43099e-05	8.66989e-10	-9.37725e-06	0.000580289	-0.171746	-0.0329269	0.100945	-0.0847359	-0.0679673	0.0129397	-0.1	-0.45927	0
2201	11.9994	0	0.130187	11.8692	12.1319	12.1192	11.8503	10.1181	1.02221	0.709957	0.268963	0.0126278	0.0180763	0.00616475	0.000199342	0.00308336	0.00497807	0.00329572	0.0497133	0.0922406	0.0225958	3.85969e-05	0.0124123	0.0561651	0.000146826	0.00807912	0.000599073	0.00184207	0.00137298	8.50847e-08	9.29432e-20	3.94572e-07	1.52756e-06	9.59572e-07	5.11957e-09	0	1.38655e-05	8.07035e-10	-9.40835e-06	0.000580289	-0.171746	-0.0329269	0.100945	-0.0847359	-0.0679673	0.0129397	-0.1	-0.45927	0
2202	11.9708	0	0.0860781	11.8847	12.1475	12.135	11.8659	10.1334	1.02182	0.710746	0.269094	0.0124289	0.0181107	0.00617844	0.000199677	0.00307761	0.00497566	0.00329416	0.0496957	0.0921954	0.0225942	3.84143e-05	0.0124063	0.0563276	0.000141031	0.00791513	0.000584793	0.00182952	0.00137133	7.86287e-08	7.58931e-20	3.62547e-07	1.45051e-06	9.06652e-07	4.71401e-09	0	1.34349e-05	7.51226e-10	-9.41449e-06	0.000580289	-0.171746	-0.0329269	0.100945	-0.0847359	-0.0679673	0.0129397	-0.1	-0.45927	0
2203	11.9592	0	0.0592681	11.8999	12.1628	12.1506	11.8814	10.1484	1.02148	0.711515	0.269228	0.0122341	0.0181443	0.00619185	0.000200005	0.00307199	0.00497379	0.00329274	0.0496794	0.0921547	0.0225927	3.82395e-05	0.0124011	0.0564867	0.00013547	0.0077545	0.000570856	0.00181706	0.00136968	7.26637e-08	6.19706e-20	3.3312e-07	1.37805e-06	8.56649e-07	4.34061e-09	0	1.30177e-05	6.99282e-10	-9.41103e-06	0.000580289	-0.171746	-0.0329269	0.100945	-0.0847359	-0.0679673	0.0129397	-0.1	-0.45927	0
2204	11.9582	0	0.0431769	11.915	12.178	12.1659	11.8966	10.1631	1.02118	0.712263	0.269362	0.0120432	0.0181772	0.00620496	0.000200325	0.00306651	0.00497226	0.00329143	0.0496639	0.0921174	0.0225913	3.80722e-05	0.0123967	0.0566423	0.000130129	0.00759711	0.000557249	0.00180469	0.00136803	6.71506e-08	5.06009e-20	3.06078e-07	1.30632e-06	8.09397e-07	3.99677e-09	0	1.26134e-05	6.50926e-10	-9.41529e-06	0.000580289	-0.171746	-0.0329269	0.100945	-0.0847359	-0.0679673	0.0129397	-0.1	-0.45927	0
2205	11.9619	0	0.0322656	11.9297	12.1928	12.1809	11.9114	10.1775	1.02091	0.712991	0.269497	0.011856	0.0182094	0.00621779	0.000200639	0.00306116	0.00497089	0.0032902	0.0496492	0.0920825	0.0225901	3.79121e-05	0.0123926	0.0567945	0.000125003	0.00744285	0.000543962	0.00179239	0.00136638	6.20538e-08	4.13153e-20	2.81225e-07	1.2386e-06	7.64741e-07	3.6801e-09	0	1.22215e-05	6.05904e-10	-9.42896e-06	0.000580289	-0.171746	-0.0329269	0.100945	-0.0847359	-0.0679673	0.0129397	-0.1	-0.45927	0
2206	11.9697	0	0.025655	11.944	12.2072	12.1955	11.9259	10.1915	1.02066	0.713698	0.26963	0.0116725	0.0182408	0.00623033	0.000200945	0.00305594	0.0049696	0.00328903	0.049635	0.0920495	0.0225888	3.77589e-05	0.0123888	0.0569433	0.000120082	0.00729164	0.000530983	0.00178017	0.00136473	5.73412e-08	3.37318e-20	2.58383e-07	1.17447e-06	7.22535e-07	3.38846e-09	0	1.18416e-05	5.63982e-10	-9.44794e-06	0.000580289	-0.171746	-0.0329269	0.100945	-0.0847359	-0.0679673	0.0129397	-0.1	-0.45927	0
2207	12.0304	0	0.0725288	11.9579	12.2212	12.2097	11.9399	10.2051	1.02041	0.714386	0.269761	0.0114926	0.0182716	0.00624257	0.000201245	0.00305085	0.00496834	0.00328791	0.0496213	0.092018	0.0225876	3.76124e-05	0.0123852	0.0570886	0.000115357	0.00714341	0.000518307	0.00176802	0.00136308	5.29838e-08	2.75385e-20	2.3739e-07	1.11357e-06	6.82645e-07	3.11984e-09	0	1.14733e-05	5.24946e-10	-9.47032e-06	0.000580289	-0.171746	-0.0329269	0.100945	-0.0847359	-0.0679673	0.0129397	-0.1	-0.45927	0
2208	12.1176	0	0.146252	11.9713	12.2347	12.2234	11.9535	10.2183	1.02014	0.715054	0.269884	0.0113159	0.0183016	0.00625453	0.000201537	0.00304589	0.00496667	0.00328674	0.0496073	0.0919849	0.0225862	3.74718e-05	0.012381	0.0572305	0.000110812	0.00699793	0.000505911	0.00175594	0.00136143	4.89508e-08	2.24792e-20	2.18087e-07	1.05551e-06	6.44928e-07	2.87232e-09	0	1.11158e-05	4.88576e-10	-9.52518e-06	0.000580289	-0.171746	-0.0329269	0.100945	-0.0847359	-0.0679673	0.0129397	-0.1	-0.45927	0
2209	12.1653	0	0.181191	11.9841	12.2476	12.2365	11.9665	10.231	1.0198	0.715702	0.269996	0.0111422	0.0183309	0.00626621	0.000201822	0.00304105	0.00496431	0.00328545	0.0495923	0.0919477	0.0225845	3.73365e-05	0.0123757	0.0573689	0.000106437	0.00685504	0.00049378	0.0017439	0.00135978	4.52152e-08	1.83455e-20	2.00333e-07	9.99969e-07	6.09252e-07	2.64417e-09	0	1.07685e-05	4.54675e-10	-9.60993e-06	0.000580289	-0.171746	-0.0329269	0.100945	-0.0847359	-0.0679673	0.0129397	-0.1	-0.45927	0
2210	12.1871	0	0.190562	11.9965	12.2601	12.2492	11.9791	10.2433	1.01942	0.716331	0.2701	0.0109718	0.0183595	0.00627759	0.0002021	0.00303633	0.00496161	0.00328409	0.0495767	0.0919085	0.0225826	3.72067e-05	0.0123698	0.0575039	0.000102228	0.00671479	0.000481916	0.00173193	0.00135813	4.17579e-08	1.49692e-20	1.8401e-07	9.50092e-07	5.75518e-07	2.43394e-09	0	1.04314e-05	4.23088e-10	-9.68076e-06	0.000580289	-0.171746	-0.0329269	0.100945	-0.0847359	-0.0679673	0.0129397	-0.1	-0.45927	0
2211	12.1827	0	0.174151	12.0085	12.2723	12.2615	11.9913	10.2553	1.01905	0.716941	0.270199	0.0108045	0.0183873	0.00628868	0.000202371	0.00303174	0.00495893	0.00328274	0.0495613	0.0918693	0.0225806	3.70827e-05	0.0123639	0.0576355	9.81809e-05	0.00657723	0.000470322	0.00172002	0.00135647	3.85609e-08	1.22129e-20	1.69007e-07	9.01959e-07	5.43632e-07	2.24031e-09	0	1.01044e-05	3.93675e-10	-9.72785e-06	0.000580289	-0.171746	-0.0329269	0.100945	-0.0847359	-0.0679673	0.0129397	-0.1	-0.45927	0
2212	12.1504	0	0.130187	12.0203	12.2841	12.2735	12.0032	10.267	1.0187	0.717532	0.270298	0.0106406	0.0184144	0.00629949	0.000202635	0.00302727	0.00495655	0.00328145	0.0495463	0.091832	0.0225786	3.69644e-05	0.0123584	0.0577637	9.4298e-05	0.00644241	0.000459001	0.00170819	0.00135482	3.56071e-08	9.96347e-21	1.55222e-07	8.55422e-07	5.13503e-07	2.06204e-09	0	9.78756e-06	3.66297e-10	-9.75178e-06	0.000580289	-0.171746	-0.0329269	0.100945	-0.0847359	-0.0679673	0.0129397	-0.1	-0.45927	0
2213	12.1179	0	0.0860781	12.0318	12.2958	12.2853	12.0149	10.2784	1.0184	0.718104	0.270399	0.01048	0.0184408	0.00631	0.000202892	0.00302294	0.00495471	0.00328028	0.0495325	0.0917988	0.0225768	3.68521e-05	0.0123538	0.0578884	9.0575e-05	0.00631038	0.000447954	0.00169644	0.00135317	3.288e-08	8.12829e-21	1.42562e-07	8.13723e-07	4.85042e-07	1.89796e-09	0	9.48066e-06	3.40826e-10	-9.75109e-06	0.000580289	-0.171746	-0.0329269	0.100945	-0.0847359	-0.0679673	0.0129397	-0.1	-0.45927	0
2214	12.1025	0	0.0592681	12.0433	12.3073	12.297	12.0265	10.2897	1.01816	0.718657	0.270503	0.0103227	0.0184665	0.00632023	0.000203142	0.00301873	0.00495342	0.00327926	0.0495198	0.0917698	0.0225752	3.67458e-05	0.0123502	0.0580096	8.70002e-05	0.00618111	0.000437177	0.00168477	0.00135153	3.03626e-08	6.63123e-21	1.30935e-07	7.72991e-07	4.58161e-07	1.74697e-09	0	9.18349e-06	3.17131e-10	-9.74108e-06	0.000580289	-0.171746	-0.0329269	0.100945	-0.0847359	-0.0679673	0.0129397	-0.1	-0.45927	0
2215	12.0976	0	0.0431769	12.0544	12.3186	12.3084	12.0378	10.3006	1.01796	0.719192	0.270608	0.0101686	0.0184915	0.00633017	0.000203385	0.00301466	0.00495244	0.00327834	0.0495082	0.0917441	0.0225738	3.66452e-05	0.0123472	0.0581275	8.35708e-05	0.00605449	0.00042666	0.00167319	0.00134988	2.80382e-08	5.40987e-21	1.20256e-07	7.33115e-07	4.32769e-07	1.60799e-09	0	8.89566e-06	2.95084e-10	-9.73887e-06	0.000580289	-0.171746	-0.0329269	0.100945	-0.0847359	-0.0679673	0.0129397	-0.1	-0.45927	0
2216	12.0975	0	0.0322656	12.0653	12.3295	12.3195	12.0487	10.3113	1.01778	0.719709	0.270713	0.0100174	0.0185157	0.00633983	0.00020362	0.00301072	0.00495163	0.0032775	0.0494973	0.0917207	0.0225726	3.65499e-05	0.0123445	0.0582419	8.02792e-05	0.00593043	0.000416394	0.00166168	0.00134824	2.58912e-08	4.41334e-21	1.10446e-07	6.97375e-07	4.0878e-07	1.48006e-09	0	8.61678e-06	2.74567e-10	-9.74607e-06	0.000580289	-0.171746	-0.0329269	0.100945	-0.0847359	-0.0679673	0.0129397	-0.1	-0.45927	0
2217	12.1014	0	0.025655	12.0757	12.34	12.3301	12.0593	10.3215	1.01762	0.720208	0.270816	0.00986927	0.0185392	0.00634919	0.000203849	0.00300691	0.00495088	0.00327671	0.049487	0.091699	0.0225714	3.64597e-05	0.0123422	0.0583529	7.71187e-05	0.00580887	0.000406371	0.00165025	0.0013466	2.39079e-08	3.60025e-21	1.01435e-07	6.61962e-07	3.86117e-07	1.36229e-09	0	8.34655e-06	2.55473e-10	-9.75857e-06	0.000580289	-0.171746	-0.0329269	0.100945	-0.0847359	-0.0679673	0.0129397	-0.1	-0.45927	0
2218	12.1584	0	0.0725288	12.0859	12.3502	12.3405	12.0696	10.3314	1.01747	0.720688	0.270917	0.00972398	0.018562	0.00635826	0.00020407	0.00300322	0.00495016	0.00327598	0.0494772	0.0916787	0.0225703	3.63745e-05	0.0123399	0.0584604	7.40832e-05	0.00568975	0.000396585	0.00163889	0.00134496	2.20757e-08	2.93682e-21	9.31573e-08	6.26839e-07	3.64705e-07	1.25386e-09	0	8.08466e-06	2.37701e-10	-9.77447e-06	0.000580289	-0.171746	-0.0329269	0.100945	-0.0847359	-0.0679673	0.0129397	-0.1	-0.45927	0
2219	12.2418	0	0.146252	12.0955	12.3599	12.3504	12.0793	10.3409	1.01728	0.721152	0.27101	0.00958133	0.0185841	0.00636705	0.000204285	0.00299965	0.00494903	0.00327519	0.0494672	0.0916567	0.0225691	3.62935e-05	0.0123371	0.0585646	7.11637e-05	0.00557289	0.000387019	0.0016276	0.00134332	2.03814e-08	2.39536e-21	8.55499e-08	5.95327e-07	3.44466e-07	1.15399e-09	0	7.8306e-06	2.21152e-10	-9.82258e-06	0.000580289	-0.171746	-0.0329269	0.100945	-0.0847359	-0.0679673	0.0129397	-0.1	-0.45927	0
2220	12.2857	0	0.181191	12.1045	12.369	12.3596	12.0885	10.3499	1.01703	0.721597	0.271092	0.00944115	0.0186054	0.00637555	0.000204492	0.0029962	0.0049472	0.00327428	0.0494562	0.0916305	0.0225675	3.62164e-05	0.0123332	0.0586653	6.83576e-05	0.00545815	0.000377661	0.00161635	0.00134167	1.88134e-08	1.95334e-21	7.85562e-08	5.67029e-07	3.2533e-07	1.06197e-09	0	7.58393e-06	2.05732e-10	-9.90018e-06	0.000580289	-0.171746	-0.0329269	0.100945	-0.0847359	-0.0679673	0.0129397	-0.1	-0.45927	0
2221	12.3037	0	0.190562	12.1131	12.3777	12.3684	12.0972	10.3585	1.01675	0.722025	0.271166	0.00930353	0.018626	0.00638376	0.000204693	0.00299287	0.00494503	0.0032733	0.0494447	0.0916022	0.0225658	3.61432e-05	0.0123286	0.0587626	6.56572e-05	0.00534556	0.000368513	0.00160516	0.00134003	1.73634e-08	1.59263e-21	7.2129e-08	5.38255e-07	3.07242e-07	9.77222e-10	0	7.3446e-06	1.91373e-10	-9.96381e-06	0.000580289	-0.171746	-0.0329269	0.100945	-0.0847359	-0.0679673	0.0129397	-0.1	-0.45927	0
2222	12.2956	0	0.174151	12.1214	12.3861	12.3769	12.1057	10.3668	1.01646	0.722436	0.271235	0.00916852	0.0186459	0.00639168	0.000204886	0.00298966	0.00494288	0.00327232	0.0494333	0.0915738	0.0225641	3.60741e-05	0.0123241	0.0588564	6.30604e-05	0.00523518	0.000359577	0.00159403	0.00133839	1.60238e-08	1.2984e-21	6.62245e-08	5.09078e-07	2.9015e-07	8.99195e-10	0	7.11257e-06	1.78007e-10	-1.00039e-05	0.000580289	-0.171746	-0.0329269	0.100945	-0.0847359	-0.0679673	0.0129397	-0.1	-0.45927	0
2223	12.2597	0	0.130187	12.1295	12.3943	12.3852	12.1139	10.3749	1.0162	0.72283	0.271304	0.00903618	0.0186651	0.00639931	0.000205072	0.00298657	0.00494103	0.0032714	0.0494225	0.0915473	0.0225624	3.60093e-05	0.0123199	0.0589469	6.05697e-05	0.00512704	0.000350855	0.00158298	0.00133674	1.47871e-08	1.05849e-21	6.08021e-08	4.82933e-07	2.74006e-07	8.27385e-10	0	6.88778e-06	1.65572e-10	-1.00212e-05	0.000580289	-0.171746	-0.0329269	0.100945	-0.0847359	-0.0679673	0.0129397	-0.1	-0.45927	0
2224	12.2235	0	0.0860781	12.1374	12.4022	12.3933	12.1219	10.3828	1.01599	0.723208	0.271374	0.00890655	0.0186835	0.00640666	0.000205252	0.00298361	0.00493972	0.00327061	0.0494129	0.0915247	0.0225609	3.59491e-05	0.0123167	0.0590339	5.81825e-05	0.00502117	0.000342347	0.00157201	0.0013351	1.36462e-08	8.62908e-22	5.5824e-08	4.59522e-07	2.58761e-07	7.6132e-10	0	6.67018e-06	1.54008e-10	-1.00143e-05	0.000580289	-0.171746	-0.0329269	0.100945	-0.0847359	-0.0679673	0.0129397	-0.1	-0.45927	0
2225	12.2044	0	0.0592681	12.1451	12.41	12.4012	12.1298	10.3904	1.01584	0.723568	0.271448	0.00877957	0.0187012	0.00641371	0.000205424	0.00298078	0.00493894	0.00326995	0.0494044	0.0915063	0.0225598	3.58935e-05	0.0123144	0.0591175	5.58945e-05	0.00491754	0.000334049	0.00156112	0.00133347	1.25939e-08	7.03491e-22	5.12542e-08	4.38564e-07	2.44366e-07	7.00546e-10	0	6.45956e-06	1.43256e-10	-9.99835e-06	0.000580289	-0.171746	-0.0329269	0.100945	-0.0847359	-0.0679673	0.0129397	-0.1	-0.45927	0
2226	12.1958	0	0.0431769	12.1526	12.4175	12.4089	12.1374	10.3977	1.01572	0.723912	0.271523	0.00865513	0.0187182	0.00642048	0.000205589	0.00297808	0.00493848	0.0032694	0.049397	0.091491	0.0225588	3.58421e-05	0.0123127	0.0591977	5.37004e-05	0.00481607	0.000325955	0.00155031	0.00133183	1.16229e-08	5.73532e-22	4.70588e-08	4.16419e-07	2.30773e-07	6.44629e-10	0	6.25564e-06	1.33255e-10	-9.99027e-06	0.000580289	-0.171746	-0.0329269	0.100945	-0.0847359	-0.0679673	0.0129397	-0.1	-0.45927	0
2227	12.192	0	0.0322656	12.1598	12.4248	12.4162	12.1446	10.4048	1.01563	0.72424	0.271597	0.00853314	0.0187345	0.00642696	0.000205747	0.0029755	0.00493817	0.00326891	0.0493903	0.0914778	0.022558	3.57947e-05	0.0123114	0.0592744	5.15951e-05	0.00471669	0.000318056	0.00153957	0.0013302	1.07268e-08	4.67576e-22	4.32066e-08	3.93208e-07	2.17936e-07	5.93174e-10	0	6.05814e-06	1.23952e-10	-9.99158e-06	0.000580289	-0.171746	-0.0329269	0.100945	-0.0847359	-0.0679673	0.0129397	-0.1	-0.45927	0
2228	12.1923	0	0.025655	12.1666	12.4316	12.4232	12.1515	10.4114	1.01555	0.724551	0.27167	0.00841353	0.01875	0.00643315	0.000205898	0.00297305	0.00493792	0.00326849	0.0493842	0.0914663	0.0225573	3.57511e-05	0.0123103	0.0593478	4.95743e-05	0.00461934	0.000310347	0.00152891	0.00132857	9.89955e-09	3.81186e-22	3.96693e-08	3.72414e-07	2.05811e-07	5.45821e-10	0	5.86684e-06	1.15297e-10	-9.99821e-06	0.000580289	-0.171746	-0.0329269	0.100945	-0.0847359	-0.0679673	0.0129397	-0.1	-0.45927	0
2229	12.2456	0	0.0725288	12.1731	12.4382	12.4299	12.1581	10.4178	1.01548	0.724846	0.271741	0.00829624	0.0187649	0.00643906	0.000206042	0.00297072	0.00493769	0.00326811	0.0493787	0.0914561	0.0225567	3.57112e-05	0.0123093	0.0594177	4.7634e-05	0.00452397	0.000302823	0.00151831	0.00132694	9.13589e-09	3.1075e-22	3.64211e-08	3.53786e-07	1.94359e-07	5.02242e-10	0	5.68152e-06	1.07245e-10	-1.00083e-05	0.000580289	-0.171746	-0.0329269	0.100945	-0.0847359	-0.0679673	0.0129397	-0.1	-0.45927	0
2230	12.3254	0	0.146252	12.1791	12.4442	12.436	12.1642	10.4237	1.01538	0.725126	0.271804	0.00818107	0.018779	0.00644467	0.000206179	0.0029685	0.00493704	0.00326767	0.049373	0.091444	0.022556	3.56745e-05	0.0123077	0.0594842	4.57683e-05	0.00443044	0.000295471	0.00150778	0.00132531	8.43021e-09	2.53302e-22	3.34372e-08	3.37081e-07	1.83538e-07	4.62118e-10	0	5.50181e-06	9.97501e-11	-1.00503e-05	0.000580289	-0.171746	-0.0329269	0.100945	-0.0847359	-0.0679673	0.0129397	-0.1	-0.45927	0
2231	12.3658	0	0.181191	12.1846	12.4497	12.4417	12.1698	10.4292	1.01521	0.725389	0.271855	0.00806789	0.0187924	0.00645	0.000206309	0.0029664	0.00493569	0.00326711	0.0493663	0.0914278	0.0225551	3.56403e-05	0.012305	0.0595473	4.39722e-05	0.00433863	0.000288281	0.00149729	0.00132368	7.77761e-09	2.06437e-22	3.06951e-08	3.22086e-07	1.73309e-07	4.2516e-10	0	5.32739e-06	9.27694e-11	-1.01214e-05	0.000580289	-0.171746	-0.0329269	0.100945	-0.0847359	-0.0679673	0.0129397	-0.1	-0.45927	0
2232	12.3802	0	0.190562	12.1897	12.4549	12.4469	12.175	10.4344	1.015	0.725637	0.271898	0.00795676	0.018805	0.00645504	0.000206432	0.00296441	0.00493401	0.00326648	0.0493591	0.0914092	0.022554	3.56088e-05	0.0123017	0.059607	4.22441e-05	0.00424858	0.000281255	0.00148686	0.00132205	7.17456e-09	1.68219e-22	2.8176e-08	3.05258e-07	1.63643e-07	3.91132e-10	0	5.15823e-06	8.62711e-11	-1.01788e-05	0.000580289	-0.171746	-0.0329269	0.100945	-0.0847359	-0.0679673	0.0129397	-0.1	-0.45927	0
2233	12.3685	0	0.174151	12.1943	12.4596	12.4518	12.1798	10.4392	1.0148	0.72587	0.271937	0.00784775	0.018817	0.00645979	0.000206548	0.00296254	0.00493234	0.00326584	0.049352	0.0913906	0.0225528	3.55804e-05	0.0122984	0.0596633	4.05826e-05	0.00416032	0.000274393	0.00147649	0.00132042	6.61777e-09	1.37066e-22	2.58626e-08	2.86802e-07	1.54512e-07	3.59814e-10	0	4.99429e-06	8.02247e-11	-1.02127e-05	0.000580289	-0.171746	-0.0329269	0.100945	-0.0847359	-0.0679673	0.0129397	-0.1	-0.45927	0
2234	12.329	0	0.130187	12.1988	12.4642	12.4564	12.1844	10.4437	1.01461	0.726087	0.271974	0.00774089	0.0188282	0.00646426	0.000206657	0.00296079	0.00493097	0.00326527	0.0493456	0.0913738	0.0225518	3.55553e-05	0.0122955	0.0597162	3.89862e-05	0.00407388	0.000267698	0.00146619	0.00131879	6.10408e-09	1.11678e-22	2.37389e-08	2.70273e-07	1.4589e-07	3.31001e-10	0	4.83552e-06	7.46014e-11	-1.02242e-05	0.000580289	-0.171746	-0.0329269	0.100945	-0.0847359	-0.0679673	0.0129397	-0.1	-0.45927	0
2235	12.2892	0	0.0860781	12.2031	12.4685	12.4608	12.1888	10.4481	1.01448	0.726289	0.272015	0.0076362	0.0188387	0.00646844	0.000206759	0.00295916	0.00493013	0.00326482	0.0493402	0.0913607	0.0225511	3.55336e-05	0.0122935	0.0597656	3.7453e-05	0.00398927	0.000261169	0.00145597	0.00131716	5.63049e-09	9.09953e-23	2.17898e-08	2.5548e-07	1.3775e-07	3.04501e-10	0	4.68188e-06	6.93737e-11	-1.02116e-05	0.000580289	-0.171746	-0.0329269	0.100945	-0.0847359	-0.0679673	0.0129397	-0.1	-0.45927	0
2236	12.2665	0	0.0592681	12.2072	12.4727	12.4651	12.1931	10.4522	1.01441	0.726477	0.272058	0.00753366	0.0188484	0.00647232	0.000206854	0.00295766	0.00492982	0.0032645	0.0493361	0.0913517	0.0225506	3.55154e-05	0.0122923	0.0598117	3.59857e-05	0.00390648	0.000254804	0.00144583	0.00131554	5.19394e-09	7.41467e-23	2.00013e-08	2.42242e-07	1.30066e-07	2.8013e-10	0	4.53322e-06	6.45143e-11	-1.01903e-05	0.000580289	-0.171746	-0.0329269	0.100945	-0.0847359	-0.0679673	0.0129397	-0.1	-0.45927	0
2237	12.2544	0	0.0431769	12.2112	12.4766	12.4692	12.1971	10.4561	1.01437	0.726649	0.272102	0.00743316	0.0188575	0.00647592	0.000206942	0.00295628	0.00492982	0.00326428	0.049333	0.0913458	0.0225504	3.55004e-05	0.0122918	0.0598543	3.45806e-05	0.00382543	0.000248596	0.00143576	0.00131391	4.79139e-09	6.04193e-23	1.83598e-08	2.30394e-07	1.22811e-07	2.57714e-10	0	4.38934e-06	5.99964e-11	-1.01768e-05	0.000580289	-0.171746	-0.0329269	0.100945	-0.0847359	-0.0679673	0.0129397	-0.1	-0.45927	0
2238	12.2472	0	0.0322656	12.2149	12.4804	12.473	12.2009	10.4597	1.01435	0.726806	0.272145	0.00733463	0.0188658	0.00647924	0.000207022	0.00295502	0.00492996	0.00326413	0.0493307	0.0913419	0.0225504	3.54885e-05	0.0122917	0.0598936	3.32293e-05	0.00374608	0.00024254	0.00142576	0.0013123	4.42007e-09	4.92337e-23	1.6853e-08	2.19786e-07	1.15962e-07	2.37093e-10	0	4.25004e-06	5.5795e-11	-1.01728e-05	0.000580289	-0.171746	-0.0329269	0.100945	-0.0847359	-0.0679673	0.0129397	-0.1	-0.45927	0
2239	12.2439	0	0.025655	12.2183	12.4837	12.4765	12.2043	10.463	1.01435	0.726949	0.272186	0.00723801	0.0188734	0.00648226	0.000207096	0.00295388	0.00493016	0.00326403	0.049329	0.0913396	0.0225505	3.54795e-05	0.0122917	0.0599294	3.19291e-05	0.00366836	0.000236632	0.00141584	0.00131068	4.07751e-09	4.01187e-23	1.54699e-08	2.10288e-07	1.09494e-07	2.18121e-10	0	4.11515e-06	5.18877e-11	-1.01741e-05	0.000580289	-0.171746	-0.0329269	0.100945	-0.0847359	-0.0679673	0.0129397	-0.1	-0.45927	0
2240	12.2937	0	0.0725288	12.2212	12.4866	12.4795	12.2072	10.4658	1.01436	0.727078	0.272226	0.00714326	0.0188803	0.006485	0.000207163	0.00295286	0.00493038	0.00326397	0.0493278	0.0913385	0.0225507	3.54732e-05	0.0122919	0.0599618	3.06826e-05	0.00359225	0.000230866	0.00140597	0.00130906	3.76145e-09	3.26909e-23	1.42002e-08	2.01782e-07	1.03387e-07	2.00666e-10	0	3.98452e-06	4.82537e-11	-1.01788e-05	0.000580289	-0.171746	-0.0329269	0.100945	-0.0847359	-0.0679673	0.0129397	-0.1	-0.45927	0
2241	12.37	0	0.146252	12.2237	12.4892	12.4821	12.2099	10.4684	1.01433	0.727192	0.272257	0.0070502	0.0188864	0.00648745	0.000207223	0.00295196	0.00493018	0.00326386	0.0493263	0.0913354	0.0225508	3.54691e-05	0.0122915	0.0599909	2.9486e-05	0.00351763	0.000225234	0.00139617	0.00130745	3.46954e-09	2.66359e-23	1.30341e-08	1.94155e-07	9.76173e-08	1.84599e-10	0	3.85788e-06	4.48719e-11	-1.02151e-05	0.000580289	-0.171746	-0.0329269	0.100945	-0.0847359	-0.0679673	0.0129397	-0.1	-0.45927	0
2242	12.4069	0	0.181191	12.2257	12.4912	12.4843	12.212	10.4704	1.01424	0.727292	0.272277	0.00695874	0.0188918	0.00648961	0.000207276	0.00295116	0.00492927	0.00326362	0.049324	0.0913281	0.0225507	3.54668e-05	0.0122899	0.0600165	2.83308e-05	0.0034444	0.000219728	0.00138641	0.00130583	3.19975e-09	2.16988e-23	1.19628e-08	1.83933e-07	9.21648e-08	1.69804e-10	0	3.73501e-06	4.17232e-11	-1.02805e-05	0.000580289	-0.171746	-0.0329269	0.100945	-0.0847359	-0.0679673	0.0129397	-0.1	-0.45927	0
2243	12.4177	0	0.190562	12.2271	12.4927	12.4858	12.2135	10.472	1.01411	0.727378	0.272289	0.00686893	0.0188966	0.00649148	0.000207321	0.00295047	0.00492803	0.00326331	0.0493212	0.0913185	0.0225505	3.54663e-05	0.0122877	0.0600387	2.72213e-05	0.00337259	0.000214348	0.00137671	0.00130421	2.95057e-09	1.76746e-23	1.0979e-08	1.71395e-07	8.70134e-08	1.56185e-10	0	3.61588e-06	3.8793e-11	-1.03319e-05	0.000580289	-0.171746	-0.0329269	0.100945	-0.0847359	-0.0679673	0.0129397	-0.1	-0.45927	0
2244	12.4025	0	0.174151	12.2284	12.4939	12.4872	12.2149	10.4734	1.01397	0.72745	0.272297	0.00678083	0.0189005	0.00649307	0.00020736	0.0029499	0.00492681	0.00326299	0.0493184	0.0913087	0.0225503	3.54681e-05	0.0122855	0.0600575	2.61565e-05	0.00330222	0.000209097	0.00136707	0.0013026	2.72063e-09	1.43958e-23	1.00757e-08	1.60165e-07	8.21483e-08	1.43654e-10	0	3.50047e-06	3.60673e-11	-1.03601e-05	0.000580289	-0.171746	-0.0329269	0.100945	-0.0847359	-0.0679673	0.0129397	-0.1	-0.45927	0
2245	12.3596	0	0.130187	12.2294	12.495	12.4883	12.216	10.4747	1.01386	0.727508	0.272303	0.00669446	0.0189038	0.00649437	0.000207392	0.00294944	0.00492588	0.00326273	0.0493163	0.0913006	0.0225502	3.54723e-05	0.0122837	0.060073	2.51351e-05	0.00323332	0.000203973	0.0013575	0.00130098	2.50859e-09	1.17251e-23	9.24671e-09	1.50113e-07	7.7555e-08	1.32128e-10	0	3.38873e-06	3.35331e-11	-1.0366e-05	0.000580289	-0.171746	-0.0329269	0.100945	-0.0847359	-0.0679673	0.0129397	-0.1	-0.45927	0
2246	12.3163	0	0.0860781	12.2302	12.4959	12.4892	12.2169	10.4756	1.01381	0.727553	0.272312	0.00660985	0.0189063	0.00649538	0.000207417	0.0029491	0.00492548	0.00326259	0.0493153	0.0912963	0.0225504	3.54792e-05	0.0122828	0.060085	2.41561e-05	0.0031659	0.000198979	0.00134799	0.00129937	2.3132e-09	9.55024e-24	8.4861e-09	1.41118e-07	7.32195e-08	1.2153e-10	0	3.28063e-06	3.11778e-11	-1.03482e-05	0.000580289	-0.171746	-0.0329269	0.100945	-0.0847359	-0.0679673	0.0129397	-0.1	-0.45927	0
2247	12.2901	0	0.0592681	12.2309	12.4965	12.49	12.2176	10.4763	1.0138	0.727584	0.272323	0.00652696	0.0189081	0.0064961	0.000207435	0.00294889	0.0049256	0.00326258	0.0493155	0.091296	0.0225509	3.54888e-05	0.0122828	0.0600936	2.32176e-05	0.00309994	0.000194111	0.00133857	0.00129776	2.13317e-09	7.7793e-24	7.7883e-09	1.33073e-07	6.91277e-08	1.11786e-10	0	3.17606e-06	2.8989e-11	-1.03218e-05	0.000580289	-0.171746	-0.0329269	0.100945	-0.0847359	-0.0679673	0.0129397	-0.1	-0.45927	0
2248	12.2745	0	0.0431769	12.2313	12.497	12.4905	12.2182	10.4767	1.01384	0.727602	0.272336	0.0064457	0.0189092	0.00649654	0.000207445	0.00294879	0.00492603	0.00326267	0.0493167	0.0912987	0.0225517	3.5501e-05	0.0122834	0.0600989	2.23174e-05	0.00303539	0.000189364	0.00132921	0.00129616	1.96725e-09	6.33702e-24	7.14801e-09	1.25873e-07	6.52655e-08	1.02826e-10	0	3.07488e-06	2.69545e-11	-1.03033e-05	0.000580289	-0.171746	-0.0329269	0.100945	-0.0847359	-0.0679673	0.0129397	-0.1	-0.45927	0
2249	12.3022	0	0.0706117	12.2315	12.4972	12.4908	12.2184	10.4769	1.01389	0.727606	0.272347	0.00636603	0.0189096	0.00649669	0.000207449	0.0029488	0.00492659	0.00326283	0.0493187	0.0913033	0.0225526	3.55154e-05	0.0122843	0.0601007	2.14533e-05	0.0029722	0.000184735	0.00131992	0.00129455	1.81426e-09	5.16224e-24	6.56043e-09	1.1943e-07	6.16195e-08	9.45843e-11	0	2.97695e-06	2.5063e-11	-1.02941e-05	0.000580289	-0.171746	-0.0329269	0.100945	-0.0847359	-0.0679673	0.0129397	-0.1	-0.45927	0
2250	12.3353	0	0.103756	12.2316	12.4972	12.4908	12.2185	10.477	1.01392	0.727605	0.272353	0.00632658	0.0189096	0.00649669	0.000207449	0.00294884	0.0049269	0.00326292	0.0493198	0.091306	0.0225531	3.55232e-05	0.0122848	0.0601008	2.10314e-05	0.00294094	0.000182449	0.0013153	0.00129375	1.74087e-09	4.63488e-24	6.27924e-09	1.16387e-07	5.98489e-08	9.06357e-11	0	2.92877e-06	2.41517e-11	-1.02916e-05	0.000580289	-0.171746	-0.0329269	0.100945	-0.0847359	-0.0679673	0.0129397	-0.1	-0.45927	0
2251	12.3353	0	0.103756	12.2316	12.4972	12.4908	12.2185	10.477	1.01392	0.727605	0.272353	0.00632658	0.0189096	0.00649669	0.000207449	0.00294884	0.0049269	0.00326292	0.0493198	0.091306	0.0225531	3.55232e-05	0.0122848	0.0601008	2.10314e-05	0.00294094	0.000182449	0.0013153	0.00129375	1.74087e-09	4.63488e-24	6.27924e-09	1.16387e-07	5.98489e-08	9.06357e-11	0	2.92877e-06	2.41517e-11	-1.02916e-05	0.000580289	-0.171746	-0.0329269	0.100945	-0.0847359	-0.0679673	0.0129397	-0.1	-0.45927	0
2252	12.3353	0	0.103756	12.2316	12.4972	12.4908	12.2185	10.477	1.01392	0.727605	0.272353	0.00632658	0.0189096	0.00649669	0.000207449	0.00294884	0.0049269	0.00326292	0.0493198	0.091306	0.0225531	3.55232e-05	0.0122848	0.0601008	2.10314e-05	0.00294094	0.000182449	0.0013153	0.00129375	1.74087e-09	4.63488e-24	6.27924e-09	1.16387e-07	5.98489e-08	9.06357e-11	0	2.92877e-06	2.41517e-11	-1.02916e-05	0.000580289	-0.171746	-0.0329269	0.100945	-0.0847359	-0.0679673	0.0129397	-0.1	-0.45927	0
2253	12.3353	0	0.103756	12.2316	12.4972	12.4908	12.2185	10.477	1.01392	0.727605	0.272353	0.00632658	0.0189096	0.00649669	0.000207449	0.00294884	0.0049269	0.00326292	0.0493198	0.091306	0.0225531	3.55232e-05	0.0122848	0.0601008	2.10314e-05	0.00294094	0.000182449	0.0013153	0.00129375	1.74087e-09	4.63488e-24	6.27924e-09	1.16387e-07	5.98489e-08	9.06357e-11	0	2.92877e-06	2.41517e-11	-1.02916e-05	0.000580289	-0.171746	-0.0329269	0.100945	-0.0847359	-0.0679673	0.0129397	-0.1	-0.45927	0
2254	12.3353	0	0.103756	12.2316	12.4972	12.4908	12.2185	10.477	1.01392	0.727605	0.272353	0.00632658	0.0189096	0.00649669	0.000207449	0.00294884	0.0049269	0.00326292	0.0493198	0.091306	0.0225531	3.55232e-05	0.0122848	0.0601008	2.10314e-05	0.00294094	0.000182449	0.0013153	0.00129375	1.74087e-09	4.63488e-24	6.27924e-09	1.16387e-07	5.98489e-08	9.06357e-11	0	2.92877e-06	2.41517e-11	-1.02916e-05	0.000580289	-0.171746	-0.0329269	0.100945	-0.0847359	-0.0679673	0.0129397	-0.1	-0.45927	0
2255	12.3353	0	0.103756	12.2316	12.4972	12.4908	12.2185	10.477	1.01392	0.727605	0.272353	0.00632658	0.0189096	0.00649669	0.000207449	0.00294884	0.0049269	0.00326292	0.0493198	0.091306	0.0225531	3.55232e-05	0.0122848	0.0601008	2.10314e-05	0.00294094	0.000182449	0.0013153	0.00129375	1.74087e-09	4.63488e-24	6.27924e-09	1.16387e-07	5.98489e-08	9.06357e-11	0	2.92877e-06	2.41517e-11	-1.02916e-05	0.000580289	-0.171746	-0.0329269	0.100945	-0.0847359	-0.0679673	0.0129397	-0.1	-0.45927	0
2256	12.3353	0	0.103756	12.2316	12.4972	12.4908	12.2185	10.477	1.01392	0.727605	0.272353	0.00632658	0.0189096	0.00649669	0.000207449	0.00294884	0.0049269	0.00326292	0.0493198	0.091306	0.0225531	3.55232e-05	0.0122848	0.0601008	2.10314e-05	0.00294094	0.000182449	0.0013153	0.00129375	1.74087e-09	4.63488e-24	6.27924e-09	1.16387e-07	5.98489e-08	9.06357e-11	0	2.92877e-06	2.41517e-11	-1.02916e-05	0.000580289	-0.171746	-0.0329269	0.100945	-0.0847359	-0.0679673	0.0129397	-0.1	-0.45927	0
2257	12.3353	0	0.103756	12.2316	12.4972	12.4908	12.2185	10.477	1.01392	0.727605	0.272353	0.00632658	0.0189096	0.00649669	0.000207449	0.00294884	0.0049269	0.00326292	0.0493198	0.091306	0.0225531	3.55232e-05	0.0122848	0.0601008	2.10314e-05	0.00294094	0.000182449	0.0013153	0.00129375	1.74087e-09	4.63488e-24	6.27924e-09	1.16387e-07	5.98489e-08	9.06357e-11	0	2.92877e-06	2.41517e-11	-1.02916e-05	0.000580289	-0.171746	-0.0329269	0.100945	-0.0847359	-0.0679673	0.0129397	-0.1	-0.45927	0
2258	12.3353	0	0.103756	12.2316	12.4972	12.4908	12.2185	10.477	1.01392	0.727605	0.272353	0.00632658	0.0189096	0.00649669	0.000207449	0.00294884	0.0049269	0.00326292	0.0493198	0.091306	0.0225531	3.55232e-05	0.0122848	0.0601008	2.10314e-05	0.00294094	0.000182449	0.0013153	0.00129375	1.74087e-09	4.63488e-24	6.27924e-09	1.16387e-07	5.98489e-08	9.06357e-11	0	2.92877e-06	2.41517e-11	-1.02916e-05	0.000580289	-0.171746	-0.0329269	0.100945	-0.0847359	-0.0679673	0.0129397	-0.1	-0.45927	0
2259	12.3353	0	0.103756	12.2316	12.4972	12.4908	12.2185	10.477	1.01392	0.727605	0.272353	0.00632658	0.0189096	0.00649669	0.000207449	0.00294884	0.0049269	0.00326292	0.0493198	0.091306	0.0225531	3.55232e-05	0.0122848	0.0601008	2.10314e-05	0.00294094	0.000182449	0.0013153	0.00129375	1.74087e-09	4.63488e-24	6.27924e-09	1.16387e-07	5.98489e-08	9.06357e-11	0	2.92877e-06	2.41517e-11	-1.02916e-05	0.000580289	-0.171746	-0.0329269	0.100945	-0.0847359	-0.0679673	0.0129397	-0.1	-0.45927	0
2260	12.3353	0	0.103756	12.2316	12.4972	12.4908	12.2185	10.477	1.01392	0.727605	0.272353	0.00632658	0.0189096	0.00649669	0.000207449	0.00294884	0.0049269	0.00326292	0.0493198	0.091306	0.0225531	3.55232e-05	0.0122848	0.0601008	2.10314e-05	0.00294094	0.000182449	0.0013153	0.00129375	1.74087e-09	4.63488e-24	6.27924e-09	1.16387e-07	5.98489e-08	9.06357e-11	0	2.92877e-06	2.41517e-11	-1.02916e-05	0.000580289	-0.171746	-0.0329269	0.100945	-0.0847359	-0.0679673	0.0129397	-0.1	-0.45927	0
2261	12.3353	0	0.103756	12.2316	12.4972	12.4908	12.2185	10.477	1.01392	0.727605	0.272353	0.00632658	0.0189096	0.00649669	0.000207449	0.00294884	0.0049269	0.00326292	0.0493198	0.091306	0.0225531	3.55232e-05	0.0122848	0.0601008	2.10314e-05	0.00294094	0.000182449	0.0013153	0.00129375	1.74087e-09	4.63488e-24	6.27924e-09	1.16387e-07	5.98489e-08	9.06357e-11	0	2.92877e-06	2.41517e-11	-1.02916e-05	0.000580289	-0.171746	-0.0329269	0.100945	-0.0847359	-0.0679673	0.0129397	-0.1	-0.45927	0
2262	12.3353	0	0.103756	12.2316	12.4972	12.4908	12.2185	10.477	1.01392	0.727605	0.272353	0.00632658	0.0189096	0.00649669	0.000207449	0.00294884	0.0049269	0.00326292	0.0493198	0.091306	0.0225531	3.55232e-05	0.0122848	0.0601008	2.10314e-05	0.00294094	0.000182449	0.0013153	0.00129375	1.74087e-09	4.63488e-24	6.27924e-09	1.16387e-07	5.98489e-08	9.06357e-11	0	2.92877e-06	2.41517e-11	-1.02916e-05	0.000580289	-0.171746	-0.0329269	0.100945	-0.0847359	-0.0679673	0.0129397	-0.1	-0.45927	0
2263	12.3353	0	0.103756	12.2316	12.4972	12.4908	12.2185	10.477	1.01392	0.727605	0.272353	0.00632658	0.0189096	0.00649669	0.000207449	0.00294884	0.0049269	0.00326292	0.0493198	0.091306	0.0225531	3.55232e-05	0.0122848	0.0601008	2.10314e-05	0.00294094	0.000182449	0.0013153	0.00129375	1.74087e-09	4.63488e-24	6.27924e-09	1.16387e-07	5.98489e-08	9.06357e-11	0	2.92877e-06	2.41517e-11	-1.02916e-05	0.000580289	-0.171746	-0.0329269	0.100945	-0.0847359	-0.0679673	0.0129397	-0.1	-0.45927	0
2264	12.3353	0	0.103756	12.2316	12.4972	12.4908	12.2185	10.477	1.01392	0.727605	0.272353	0.00632658	0.0189096	0.00649669	0.000207449	0.00294884	0.0049269	0.00326292	0.0493198	0.091306	0.0225531	3.55232e-05	0.0122848	0.0601008	2.10314e-05	0.00294094	0.000182449	0.0013153	0.00129375	1.74087e-09	4.63488e-24	6.27924e-09	1.16387e-07	5.98489e-08	9.06357e-11	0	2.92877e-06	2.41517e-11	-1.02916e-05	0.000580289	-0.171746	-0.0329269	0.100945	-0.0847359	-0.0679673	0.0129397	-0.1	-0.45927	0
2265	12.3353	0	0.103756	12.2316	12.4972	12.4908	12.2185	10.477	1.01392	0.727605	0.272353	0.00632658	0.0189096	0.00649669	0.000207449	0.00294884	0.0049269	0.00326292	0.0493198	0.091306	0.0225531	3.55232e-05	0.0122848	0.0601008	2.10314e-05	0.00294094	0.000182449	0.0013153	0.00129375	1.74087e-09	4.63488e-24	6.27924e-09	1.16387e-07	5.98489e-08	9.06357e-11	0	2.92877e-06	2.41517e-11	-1.02916e-05	0.000580289	-0.171746	-0.0329269	0.100945	-0.0847359	-0.0679673	0.0129397	-0.1	-0.45927	0
2266	12.3353	0	0.103756	12.2316	12.4972	12.4908	12.2185	10.477	1.01392	0.727605	0.272353	0.00632658	0.0189096	0.00649669	0.000207449	0.00294884	0.0049269	0.00326292	0.0493198	0.091306	0.0225531	3.55232e-05	0.0122848	0.0601008	2.10314e-05	0.00294094	0.000182449	0.0013153	0.00129375	1.74087e-09	4.63488e-24	6.27924e-09	1.16387e-07	5.98489e-08	9.06357e-11	0	2.92877e-06	2.41517e-11	-1.02916e-05	0.000580289	-0.171746	-0.0329269	0.100945	-0.0847359	-0.0679673	0.0129397	-0.1	-0.45927	0
2267	12.3353	0	0.103756	12.2316	12.4972	12.4908	12.2185	10.477	1.01392	0.727605	0.272353	0.00632658	0.0189096	0.00649669	0.000207449	0.00294884	0.0049269	0.00326292	0.0493198	0.091306	0.0225531	3.55232e-05	0.0122848	0.0601008	2.10314e-05	0.00294094	0.000182449	0.0013153	0.00129375	1.74087e-09	4.63488e-24	6.27924e-09	1.16387e-07	5.98489e-08	9.06357e-11	0	2.92877e-06	2.41517e-11	-1.02916e-05	0.000580289	-0.171746	-0.0329269	0.100945	-0.0847359	-0.0679673	0.0129397	-0.1	-0.45927	0
2268	12.3353	0	0.103756	12.2316	12.4972	12.4908	12.2185	10.477	1.01392	0.727605	0.272353	0.00632658	0.0189096	0.00649669	0.000207449	0.00294884	0.0049269	0.00326292	0.0493198	0.091306	0.0225531	3.55232e-05	0.0122848	0.0601008	2.10314e-05	0.00294094	0.000182449	0.0013153	0.00129375	1.74087e-09	4.63488e-24	6.27924e-09	1.16387e-07	5.98489e-08	9.06357e-11	0	2.92877e-06	2.41517e-11	-1.02916e-05	0.000580289	-0.171746	-0.0329269	0.100945	-0.0847359	-0.0679673	0.0129397	-0.1	-0.45927	0
2269	12.3353	0	0.103756	12.2316	12.4972	12.4908	12.2185	10.477	1.01392	0.727605	0.272353	0.00632658	0.0189096	0.00649669	0.000207449	0.00294884	0.0049269	0.00326292	0.0493198	0.091306	0.0225531	3.55232e-05	0.0122848	0.0601008	2.10314e-05	0.00294094	0.000182449	0.0013153	0.00129375	1.74087e-09	4.63488e-24	6.27924e-09	1.16387e-07	5.98489e-08	9.06357e-11	0	2.92877e-06	2.41517e-11	-1.02916e-05	0.000580289	-0.171746	-0.0329269	0.100945	-0.0847359	-0.0679673	0.0129397	-0.1	-0.45927	0
2270	12.3353	0	0.103756	12.2316	12.4972	12.4908	12.2185	10.477	1.01392	0.727605	0.272353	0.00632658	0.0189096	0.00649669	0.000207449	0.00294884	0.0049269	0.00326292	0.0493198	0.091306	0.0225531	3.55232e-05	0.0122848	0.0601008	2.10314e-05	0.00294094	0.000182449	0.0013153	0.00129375	1.74087e-09	4.63488e-24	6.27924e-09	1.16387e-07	5.98489e-08	9.06357e-11	0	2.92877e-06	2.41517e-11	-1.02916e-05	0.000580289	-0.171746	-0.0329269	0.100945	-0.0847359	-0.0679673	0.0129397	-0.1	-0.45927	0
2271	12.3353	0	0.103756	12.2316	12.4972	12.4908	12.2185	10.477	1.01392	0.727605	0.272353	0.00632658	0.0189096	0.00649669	0.000207449	0.00294884	0.0049269	0.00326292	0.0493198	0.091306	0.0225531	3.55232e-05	0.0122848	0.0601008	2.10314e-05	0.00294094	0.000182449	0.0013153	0.00129375	1.74087e-09	4.63488e-24	6.27924e-09	1.16387e-07	5.98489e-08	9.06357e-11	0	2.92877e-06	2.41517e-11	-1.02916e-05	0.000580289	-0.171746	-0.0329269	0.100945	-0.0847359	-0.0679673	0.0129397	-0.1	-0.45927	0
2272	12.3353	0	0.103756	12.2316	12.4972	12.4908	12.2185	10.477	1.01392	0.727605	0.272353	0.00632658	0.0189096	0.00649669	0.000207449	0.00294884	0.0049269	0.00326292	0.0493198	0.091306	0.0225531	3.55232e-05	0.0122848	0.0601008	2.10314e-05	0.00294094	0.000182449	0.0013153	0.00129375	1.74087e-09	4.63488e-24	6.27924e-09	1.16387e-07	5.98489e-08	9.06357e-11	0	2.92877e-06	2.41517e-11	-1.02916e-05	0.000580289	-0.171746	-0.0329269	0.100945	-0.0847359	-0.0679673	0.0129397	-0.1	-0.45927	0
2273	12.3353	0	0.103756	12.2316	12.4972	12.4908	12.2185	10.477	1.01392	0.727605	0.272353	0.00632658	0.0189096	0.00649669	0.000207449	0.00294884	0.0049269	0.00326292	0.0493198	0.091306	0.0225531	3.55232e-05	0.0122848	0.0601008	2.10314e-05	0.00294094	0.000182449	0.0013153	0.00129375	1.74087e-09	4.63488e-24	6.27924e-09	1.16387e-07	5.98489e-08	9.06357e-11	0	2.92877e-06	2.41517e-11	-1.02916e-05	0.000580289	-0.171746	-0.0329269	0.100945	-0.0847359	-0.0679673	0.0129397	-0.1	-0.45927	0
2274	12.3353	0	0.103756	12.2316	12.4972	12.4908	12.2185	10.477	1.01392	0.727605	0.272353	0.00632658	0.0189096	0.00649669	0.000207449	0.00294884	0.0049269	0.00326292	0.0493198	0.091306	0.0225531	3.55232e-05	0.0122848	0.0601008	2.10314e-05	0.00294094	0.000182449	0.0013153	0.00129375	1.74087e-09	4.63488e-24	6.27924e-09	1.16387e-07	5.98489e-08	9.06357e-11	0	2.92877e-06	2.41517e-11	-1.02916e-05	0.000580289	-0.171746	-0.0329269	0.100945	-0.0847359	-0.0679673	0.0129397	-0.1	-0.45927	0
2275	12.3353	0	0.103756	12.2316	12.4972	12.4908	12.2185	10.477	1.01392	0.727605	0.272353	0.00632658	0.0189096	0.00649669	0.000207449	0.00294884	0.0049269	0.00326292	0.0493198	0.091306	0.0225531	3.55232e-05	0.0122848	0.0601008	2.10314e-05	0.00294094	0.000182449	0.0013153	0.00129375	1.74087e-09	4.63488e-24	6.27924e-09	1.16387e-07	5.98489e-08	9.06357e-11	0	2.92877e-06	2.41517e-11	-1.02916e-05	0.000580289	-0.171746	-0.0329269	0.100945	-0.0847359	-0.0679673	0.0129397	-0.1	-0.45927	0
2276	12.3353	0	0.103756	12.2316	12.4972	12.4908	12.2185	10.477	1.01392	0.727605	0.272353	0.00632658	0.0189096	0.00649669	0.000207449	0.00294884	0.0049269	0.00326292	0.0493198	0.091306	0.0225531	3.55232e-05	0.0122848	0.0601008	2.10314e-05	0.00294094	0.000182449	0.0013153	0.00129375	1.74087e-09	4.63488e-24	6.27924e-09	1.16387e-07	5.98489e-08	9.06357e-11	0	2.92877e-06	2.41517e-11	-1.02916e-05	0.000580289	-0.171746	-0.0329269	0.100945	-0.0847359	-0.0679673	0.0129397	-0.1	-0.45927	0
2277	12.3353	0	0.103756	12.2316	12.4972	12.4908	12.2185	10.477	1.01392	0.727605	0.272353	0.00632658	0.0189096	0.00649669	0.000207449	0.00294884	0.0049269	0.00326292	0.0493198	0.091306	0.0225531	3.55232e-05	0.0122848	0.0601008	2.10314e-05	0.00294094	0.000182449	0.0013153	0.00129375	1.74087e-09	4.63488e-24	6.27924e-09	1.16387e-07	5.98489e-08	9.06357e-11	0	2.92877e-06	2.41517e-11	-1.02916e-05	0.000580289	-0.171746	-0.0329269	0.100945	-0.0847359	-0.0679673	0.0129397	-0.1	-0.45927	0
2278	12.3353	0	0.103756	12.2316	12.4972	12.4908	12.2185	10.477	1.01392	0.727605	0.272353	0.00632658	0.0189096	0.00649669	0.000207449	0.00294884	0.0049269	0.00326292	0.0493198	0.091306	0.0225531	3.55232e-05	0.0122848	0.0601008	2.10314e-05	0.00294094	0.000182449	0.0013153	0.00129375	1.74087e-09	4.63488e-24	6.27924e-09	1.16387e-07	5.98489e-08	9.06357e-11	0	2.92877e-06	2.41517e-11	-1.02916e-05	0.000580289	-0.171746	-0.0329269	0.100945	-0.0847359	-0.0679673	0.0129397	-0.1	-0.45927	0
2279	12.3353	0	0.103756	12.2316	12.4972	12.4908	12.2185	10.477	1.01392	0.727605	0.272353	0.00632658	0.0189096	0.00649669	0.000207449	0.00294884	0.0049269	0.00326292	0.0493198	0.091306	0.0225531	3.55232e-05	0.0122848	0.0601008	2.10314e-05	0.00294094	0.000182449	0.0013153	0.00129375	1.74087e-09	4.63488e-24	6.27924e-09	1.16387e-07	5.98489e-08	9.06357e-11	0	2.92877e-06	2.41517e-11	-1.02916e-05	0.000580289	-0.171746	-0.0329269	0.100945	-0.0847359	-0.0679673	0.0129397	-0.1	-0.45927	0
2280	12.3353	0	0.103756	12.2316	12.4972	12.4908	12.2185	10.477	1.01392	0.727605	0.272353	0.00632658	0.0189096	0.00649669	0.000207449	0.00294884	0.0049269	0.00326292	0.0493198	0.091306	0.0225531	3.55232e-05	0.0122848	0.0601008	2.10314e-05	0.00294094	0.000182449	0.0013153	0.00129375	1.74087e-09	4.63488e-24	6.27924e-09	1.16387e-07	5.98489e-08	9.06357e-11	0	2.92877e-06	2.41517e-11	-1.02916e-05	0.000580289	-0.171746	-0.0329269	0.100945	-0.0847359	-0.0679673	0.0129397	-0.1	-0.45927	0
2281	12.3353	0	0.103756	12.2316	12.4972	12.4908	12.2185	10.477	1.01392	0.727605	0.272353	0.00632658	0.0189096	0.00649669	0.000207449	0.00294884	0.0049269	0.00326292	0.0493198	0.091306	0.0225531	3.55232e-05	0.0122848	0.0601008	2.10314e-05	0.00294094	0.000182449	0.0013153	0.00129375	1.74087e-09	4.63488e-24	6.27924e-09	1.16387e-07	5.98489e-08	9.06357e-11	0	2.92877e-06	2.41517e-11	-1.02916e-05	0.000580289	-0.171746	-0.0329269	0.100945	-0.0847359	-0.0679673	0.0129397	-0.1	-0.45927	0
2282	12.3353	0	0.103756	12.2316	12.4972	12.4908	12.2185	10.477	1.01392	0.727605	0.272353	0.00632658	0.0189096	0.00649669	0.000207449	0.00294884	0.0049269	0.00326292	0.0493198	0.091306	0.0225531	3.55232e-05	0.0122848	0.0601008	2.10314e-05	0.00294094	0.000182449	0.0013153	0.00129375	1.74087e-09	4.63488e-24	6.27924e-09	1.16387e-07	5.98489e-08	9.06357e-11	0	2.92877e-06	2.41517e-11	-1.02916e-05	0.000580289	-0.171746	-0.0329269	0.100945	-0.0847359	-0.0679673	0.0129397	-0.1	-0.45927	0
2283	12.3353	0	0.103756	12.2316	12.4972	12.4908	12.2185	10.477	1.01392	0.727605	0.272353	0.00632658	0.0189096	0.00649669	0.000207449	0.00294884	0.0049269	0.00326292	0.0493198	0.091306	0.0225531	3.55232e-05	0.0122848	0.0601008	2.10314e-05	0.00294094	0.000182449	0.0013153	0.00129375	1.74087e-09	4.63488e-24	6.27924e-09	1.16387e-07	5.98489e-08	9.06357e-11	0	2.92877e-06	2.41517e-11	-1.02916e-05	0.000580289	-0.171746	-0.0329269	0.100945	-0.0847359	-0.0679673	0.0129397	-0.1	-0.45927	0
2284	12.3353	0	0.103756	12.2316	12.4972	12.4908	12.2185	10.477	1.01392	0.727605	0.272353	0.00632658	0.0189096	0.00649669	0.000207449	0.00294884	0.0049269	0.00326292	0.0493198	0.091306	0.0225531	3.55232e-05	0.0122848	0.0601008	2.10314e-05	0.00294094	0.000182449	0.0013153	0.00129375	1.74087e-09	4.63488e-24	6.27924e-09	1.16387e-07	5.98489e-08	9.06357e-11	0	2.92877e-06	2.41517e-11	-1.02916e-05	0.000580289	-0.171746	-0.0329269	0.100945	-0.0847359	-0.0679673	0.0129397	-0.1	-0.45927	0
2285	12.3353	0	0.103756	12.2316	12.4972	12.4908	12.2185	10.477	1.01392	0.727605	0.272353	0.00632658	0.0189096	0.00649669	0.000207449	0.00294884	0.0049269	0.00326292	0.0493198	0.091306	0.0225531	3.55232e-05	0.0122848	0.0601008	2.10314e-05	0.00294094	0.000182449	0.0013153	0.00129375	1.74087e-09	4.63488e-24	6.27924e-09	1.16387e-07	5.98489e-08	9.06357e-11	0	2.92877e-06	2.41517e-11	-1.02916e-05	0.000580289	-0.171746	-0.0329269	0.100945	-0.0847359	-0.0679673	0.0129397	-0.1	-0.45927	0
2286	12.3353	0	0.103756	12.2316	12.4972	12.4908	12.2185	10.477	1.01392	0.727605	0.272353	0.00632658	0.0189096	0.00649669	0.000207449	0.00294884	0.0049269	0.00326292	0.0493198	0.091306	0.0225531	3.55232e-05	0.0122848	0.0601008	2.10314e-05	0.00294094	0.000182449	0.0013153	0.00129375	1.74087e-09	4.63488e-24	6.27924e-09	1.16387e-07	5.98489e-08	9.06357e-11	0	2.92877e-06	2.41517e-11	-1.02916e-05	0.000580289	-0.171746	-0.0329269	0.100945	-0.0847359	-0.0679673	0.0129397	-0.1	-0.45927	0
2287	12.3353	0	0.103756	12.2316	12.4972	12.4908	12.2185	10.477	1.01392	0.727605	0.272353	0.00632658	0.0189096	0.00649669	0.000207449	0.00294884	0.0049269	0.00326292	0.0493198	0.091306	0.0225531	3.55232e-05	0.0122848	0.0601008	2.10314e-05	0.00294094	0.000182449	0.0013153	0.00129375	1.74087e-09	4.63488e-24	6.27924e-09	1.16387e-07	5.98489e-08	9.06357e-11	0	2.92877e-06	2.41517e-11	-1.02916e-05	0.000580289	-0.171746	-0.0329269	0.100945	-0.0847359	-0.0679673	0.0129397	-0.1	-0.45927	0
2288	12.3353	0	0.103756	12.2316	12.4972	12.4908	12.2185	10.477	1.01392	0.727605	0.272353	0.00632658	0.0189096	0.00649669	0.000207449	0.00294884	0.0049269	0.00326292	0.0493198	0.091306	0.0225531	3.55232e-05	0.0122848	0.0601008	2.10314e-05	0.00294094	0.000182449	0.0013153	0.00129375	1.74087e-09	4.63488e-24	6.27924e-09	1.16387e-07	5.98489e-08	9.06357e-11	0	2.92877e-06	2.41517e-11	-1.02916e-05	0.000580289	-0.171746	-0.0329269	0.100945	-0.0847359	-0.0679673	0.0129397	-0.1	-0.45927	0
2289	12.3353	0	0.103756	12.2316	12.4972	12.4908	12.2185	10.477	1.01392	0.727605	0.272353	0.00632658	0.0189096	0.00649669	0.000207449	0.00294884	0.0049269	0.00326292	0.0493198	0.091306	0.0225531	3.55232e-05	0.0122848	0.0601008	2.10314e-05	0.00294094	0.000182449	0.0013153	0.00129375	1.74087e-09	4.63488e-24	6.27924e-09	1.16387e-07	5.98489e-08	9.06357e-11	0	2.92877e-06	2.41517e-11	-1.02916e-05	0.000580289	-0.171746	-0.0329269	0.100945	-0.0847359	-0.0679673	0.0129397	-0.1	-0.45927	0
2290	12.3353	0	0.103756	12.2316	12.4972	12.4908	12.2185	10.477	1.01392	0.727605	0.272353	0.00632658	0.0189096	0.00649669	0.000207449	0.00294884	0.0049269	0.00326292	0.0493198	0.091306	0.0225531	3.55232e-05	0.0122848	0.0601008	2.10314e-05	0.00294094	0.000182449	0.0013153	0.00129375	1.74087e-09	4.63488e-24	6.27924e-09	1.16387e-07	5.98489e-08	9.06357e-11	0	2.92877e-06	2.41517e-11	-1.02916e-05	0.000580289	-0.171746	-0.0329269	0.100945	-0.0847359	-0.0679673	0.0129397	-0.1	-0.45927	0
2291	12.3353	0	0.103756	12.2316	12.4972	12.4908	12.2185	10.477	1.01392	0.727605	0.272353	0.00632658	0.0189096	0.00649669	0.000207449	0.00294884	0.0049269	0.00326292	0.0493198	0.091306	0.0225531	3.55232e-05	0.0122848	0.0601008	2.10314e-05	0.00294094	0.000182449	0.0013153	0.00129375	1.74087e-09	4.63488e-24	6.27924e-09	1.16387e-07	5.98489e-08	9.06357e-11	0	2.92877e-06	2.41517e-11	-1.02916e-05	0.000580289	-0.171746	-0.0329269	0.100945	-0.0847359	-0.0679673	0.0129397	-0.1	-0.45927	0
2292	12.3353	0	0.103756	12.2316	12.4972	12.4908	12.2185	10.477	1.01392	0.727605	0.272353	0.00632658	0.0189096	0.00649669	0.000207449	0.00294884	0.0049269	0.00326292	0.0493198	0.091306	0.0225531	3.55232e-05	0.0122848	0.0601008	2.10314e-05	0.00294094	0.000182449	0.0013153	0.00129375	1.74087e-09	4.63488e-24	6.27924e-09	1.16387e-07	5.98489e-08	9.06357e-11	0	2.92877e-06	2.41517e-11	-1.02916e-05	0.000580289	-0.171746	-0.0329269	0.100945	-0.0847359	-0.0679673	0.0129397	-0.1	-0.45927	0
2293	12.3353	0	0.103756	12.2316	12.4972	12.4908	12.2185	10.477	1.01392	0.727605	0.272353	0.00632658	0.0189096	0.00649669	0.000207449	0.00294884	0.0049269	0.00326292	0.0493198	0.091306	0.0225531	3.55232e-05	0.0122848	0.0601008	2.10314e-05	0.00294094	0.000182449	0.0013153	0.00129375	1.74087e-09	4.63488e-24	6.27924e-09	1.16387e-07	5.98489e-08	9.06357e-11	0	2.92877e-06	2.41517e-11	-1.02916e-05	0.000580289	-0.171746	-0.0329269	0.100945	-0.0847359	-0.0679673	0.0129397	-0.1	-0.45927	0
2294	12.3353	0	0.103756	12.2316	12.4972	12.4908	12.2185	10.477	1.01392	0.727605	0.272353	0.00632658	0.0189096	0.00649669	0.000207449	0.00294884	0.0049269	0.00326292	0.0493198	0.091306	0.0225531	3.55232e-05	0.0122848	0.0601008	2.10314e-05	0.00294094	0.000182449	0.0013153	0.00129375	1.74087e-09	4.63488e-24	6.27924e-09	1.16387e-07	5.98489e-08	9.06357e-11	0	2.92877e-06	2.41517e-11	-1.02916e-05	0.000580289	-0.171746	-0.0329269	0.100945	-0.0847359	-0.0679673	0.0129397	-0.1	-0.45927	0
2295	12.3353	0	0.103756	12.2316	12.4972	12.4908	12.2185	10.477	1.01392	0.727605	0.272353	0.00632658	0.0189096	0.00649669	0.000207449	0.00294884	0.0049269	0.00326292	0.0493198	0.091306	0.0225531	3.55232e-05	0.0122848	0.0601008	2.10314e-05	0.00294094	0.000182449	0.0013153	0.00129375	1.74087e-09	4.63488e-24	6.27924e-09	1.16387e-07	5.98489e-08	9.06357e-11	0	2.92877e-06	2.41517e-11	-1.02916e-05	0.000580289	-0.171746	-0.0329269	0.100945	-0.0847359	-0.0679673	0.0129397	-0.1	-0.45927	0
2296	12.3353	0	0.103756	12.2316	12.4972	12.4908	12.2185	10.477	1.01392	0.727605	0.272353	0.00632658	0.0189096	0.00649669	0.000207449	0.00294884	0.0049269	0.00326292	0.0493198	0.091306	0.0225531	3.55232e-05	0.0122848	0.0601008	2.10314e-05	0.00294094	0.000182449	0.0013153	0.00129375	1.74087e-09	4.63488e-24	6.27924e-09	1.16387e-07	5.98489e-08	9.06357e-11	0	2.92877e-06	2.41517e-11	-1.02916e-05	0.000580289	-0.171746	-0.0329269	0.100945	-0.0847359	-0.0679673	0.0129397	-0.1	-0.45927	0
2297	12.3353	0	0.103756	12.2316	12.4972	12.4908	12.2185	10.477	1.01392	0.727605	0.272353	0.00632658	0.0189096	0.00649669	0.000207449	0.00294884	0.0049269	0.00326292	0.0493198	0.091306	0.0225531	3.55232e-05	0.0122848	0.0601008	2.10314e-05	0.00294094	0.000182449	0.0013153	0.00129375	1.74087e-09	4.63488e-24	6.27924e-09	1.16387e-07	5.98489e-08	9.06357e-11	0	2.92877e-06	2.41517e-11	-1.02916e-05	0.000580289	-0.171746	-0.0329269	0.100945	-0.0847359	-0.0679673	0.0129397	-0.1	-0.45927	0
2298	12.3353	0	0.103756	12.2316	12.4972	12.4908	12.2185	10.477	1.01392	0.727605	0.272353	0.00632658	0.0189096	0.00649669	0.000207449	0.00294884	0.0049269	0.00326292	0.0493198	0.091306	0.0225531	3.55232e-05	0.0122848	0.0601008	2.10314e-05	0.00294094	0.000182449	0.0013153	0.00129375	1.74087e-09	4.63488e-24	6.27924e-09	1.16387e-07	5.98489e-08	9.06357e-11	0	2.92877e-06	2.41517e-11	-1.02916e-05	0.000580289	-0.171746	-0.0329269	0.100945	-0.0847359	-0.0679673	0.0129397	-0.1	-0.45927	0
2299	12.3353	0	0.103756	12.2316	12.4972	12.4908	12.2185	10.477	1.01392	0.727605	0.272353	0.00632658	0.0189096	0.00649669	0.000207449	0.00294884	0.0049269	0.00326292	0.0493198	0.091306	0.0225531	3.55232e-05	0.0122848	0.0601008	2.10314e-05	0.00294094	0.000182449	0.0013153	0.00129375	1.74087e-09	4.63488e-24	6.27924e-09	1.16387e-07	5.98489e-08	9.06357e-11	0	2.92877e-06	2.41517e-11	-1.02916e-05	0.000580289	-0.171746	-0.0329269	0.100945	-0.0847359	-0.0679673	0.0129397	-0.1	-0.45927	0
2300	12.3353	0	0.103756	12.2316	12.4972	12.4908	12.2185	10.477	1.01392	0.727605	0.272353	0.00632658	0.0189096	0.00649669	0.000207449	0.00294884	0.0049269	0.00326292	0.0493198	0.091306	0.0225531	3.55232e-05	0.0122848	0.0601008	2.10314e-05	0.00294094	0.000182449	0.0013153	0.00129375	1.74087e-09	4.63488e-24	6.27924e-09	1.16387e-07	5.98489e-08	9.06357e-11	0	2.92877e-06	2.41517e-11	-1.02916e-05	0.000580289	-0.171746	-0.0329269	0.100945	-0.0847359	-0.0679673	0.0129397	-0.1	-0.45927	0
2301	12.3353	0	0.103756	12.2316	12.4972	12.4908	12.2185	10.477	1.01392	0.727605	0.272353	0.00632658	0.0189096	0.00649669	0.000207449	0.00294884	0.0049269	0.00326292	0.0493198	0.091306	0.0225531	3.55232e-05	0.0122848	0.0601008	2.10314e-05	0.00294094	0.000182449	0.0013153	0.00129375	1.74087e-09	4.63488e-24	6.27924e-09	1.16387e-07	5.98489e-08	9.06357e-11	0	2.92877e-06	2.41517e-11	-1.02916e-05	0.000580289	-0.171746	-0.0329269	0.100945	-0.0847359	-0.0679673	0.0129397	-0.1	-0.45927	0
2302	12.3353	0	0.103756	12.2316	12.4972	12.4908	12.2185	10.477	1.01392	0.727605	0.272353	0.00632658	0.0189096	0.00649669	0.000207449	0.00294884	0.0049269	0.00326292	0.0493198	0.091306	0.0225531	3.55232e-05	0.0122848	0.0601008	2.10314e-05	0.00294094	0.000182449	0.0013153	0.00129375	1.74087e-09	4.63488e-24	6.27924e-09	1.16387e-07	5.98489e-08	9.06357e-11	0	2.92877e-06	2.41517e-11	-1.02916e-05	0.000580289	-0.171746	-0.0329269	0.100945	-0.0847359	-0.0679673	0.0129397	-0.1	-0.45927	0
2303	12.3353	0	0.103756	12.2316	12.4972	12.4908	12.2185	10.477	1.01392	0.727605	0.272353	0.00632658	0.0189096	0.00649669	0.000207449	0.00294884	0.0049269	0.00326292	0.0493198	0.091306	0.0225531	3.55232e-05	0.0122848	0.0601008	2.10314e-05	0.00294094	0.000182449	0.0013153	0.00129375	1.74087e-09	4.63488e-24	6.27924e-09	1.16387e-07	5.98489e-08	9.06357e-11	0	2.92877e-06	2.41517e-11	-1.02916e-05	0.000580289	-0.171746	-0.0329269	0.100945	-0.0847359	-0.0679673	0.0129397	-0.1	-0.45927	0
2304	12.3353	0	0.103756	12.2316	12.4972	12.4908	12.2185	10.477	1.01392	0.727605	0.272353	0.00632658	0.0189096	0.00649669	0.000207449	0.00294884	0.0049269	0.00326292	0.0493198	0.091306	0.0225531	3.55232e-05	0.0122848	0.0601008	2.10314e-05	0.00294094	0.000182449	0.0013153	0.00129375	1.74087e-09	4.63488e-24	6.27924e-09	1.16387e-07	5.98489e-08	9.06357e-11	0	2.92877e-06	2.41517e-11	-1.02916e-05	0.000580289	-0.171746	-0.0329269	0.100945	-0.0847359	-0.0679673	0.0129397	-0.1	-0.45927	0
2305	12.3353	0	0.103756	12.2316	12.4972	12.4908	12.2185	10.477	1.01392	0.727605	0.272353	0.00632658	0.0189096	0.00649669	0.000207449	0.00294884	0.0049269	0.00326292	0.0493198	0.091306	0.0225531	3.55232e-05	0.0122848	0.0601008	2.10314e-05	0.00294094	0.000182449	0.0013153	0.00129375	1.74087e-09	4.63488e-24	6.27924e-09	1.16387e-07	5.98489e-08	9.06357e-11	0	2.92877e-06	2.41517e-11	-1.02916e-05	0.000580289	-0.171746	-0.0329269	0.100945	-0.0847359	-0.0679673	0.0129397	-0.1	-0.45927	0
2306	12.3353	0	0.103756	12.2316	12.4972	12.4908	12.2185	10.477	1.01392	0.727605	0.272353	0.00632658	0.0189096	0.00649669	0.000207449	0.00294884	0.0049269	0.00326292	0.0493198	0.091306	0.0225531	3.55232e-05	0.0122848	0.0601008	2.10314e-05	0.00294094	0.000182449	0.0013153	0.00129375	1.74087e-09	4.63488e-24	6.27924e-09	1.16387e-07	5.98489e-08	9.06357e-11	0	2.92877e-06	2.41517e-11	-1.02916e-05	0.000580289	-0.171746	-0.0329269	0.100945	-0.0847359	-0.0679673	0.0129397	-0.1	-0.45927	0
2307	12.3353	0	0.103756	12.2316	12.4972	12.4908	12.2185	10.477	1.01392	0.727605	0.272353	0.00632658	0.0189096	0.00649669	0.000207449	0.00294884	0.0049269	0.00326292	0.0493198	0.091306	0.0225531	3.55232e-05	0.0122848	0.0601008	2.10314e-05	0.00294094	0.000182449	0.0013153	0.00129375	1.74087e-09	4.63488e-24	6.27924e-09	1.16387e-07	5.98489e-08	9.06357e-11	0	2.92877e-06	2.41517e-11	-1.02916e-05	0.000580289	-0.171746	-0.0329269	0.100945	-0.0847359	-0.0679673	0.0129397	-0.1	-0.45927	0
2308	12.3353	0	0.103756	12.2316	12.4972	12.4908	12.2185	10.477	1.01392	0.727605	0.272353	0.00632658	0.0189096	0.00649669	0.000207449	0.00294884	0.0049269	0.00326292	0.0493198	0.091306	0.0225531	3.55232e-05	0.0122848	0.0601008	2.10314e-05	0.00294094	0.000182449	0.0013153	0.00129375	1.74087e-09	4.63488e-24	6.27924e-09	1.16387e-07	5.98489e-08	9.06357e-11	0	2.92877e-06	2.41517e-11	-1.02916e-05	0.000580289	-0.171746	-0.0329269	0.100945	-0.0847359	-0.0679673	0.0129397	-0.1	-0.45927	0
2309	12.3353	0	0.103756	12.2316	12.4972	12.4908	12.2185	10.477	1.01392	0.727605	0.272353	0.00632658	0.0189096	0.00649669	0.000207449	0.00294884	0.0049269	0.00326292	0.0493198	0.091306	0.0225531	3.55232e-05	0.0122848	0.0601008	2.10314e-05	0.00294094	0.000182449	0.0013153	0.00129375	1.74087e-09	4.63488e-24	6.27924e-09	1.16387e-07	5.98489e-08	9.06357e-11	0	2.92877e-06	2.41517e-11	-1.02916e-05	0.000580289	-0.171746	-0.0329269	0.100945	-0.0847359	-0.0679673	0.0129397	-0.1	-0.45927	0
2310	12.3353	0	0.103756	12.2316	12.4972	12.4908	12.2185	10.477	1.01392	0.727605	0.272353	0.00632658	0.0189096	0.00649669	0.000207449	0.00294884	0.0049269	0.00326292	0.0493198	0.091306	0.0225531	3.55232e-05	0.0122848	0.0601008	2.10314e-05	0.00294094	0.000182449	0.0013153	0.00129375	1.74087e-09	4.63488e-24	6.27924e-09	1.16387e-07	5.98489e-08	9.06357e-11	0	2.92877e-06	2.41517e-11	-1.02916e-05	0.000580289	-0.171746	-0.0329269	0.100945	-0.0847359	-0.0679673	0.0129397	-0.1	-0.45927	0
2311	12.3353	0	0.103756	12.2316	12.4972	12.4908	12.2185	10.477	1.01392	0.727605	0.272353	0.00632658	0.0189096	0.00649669	0.000207449	0.00294884	0.0049269	0.00326292	0.0493198	0.091306	0.0225531	3.55232e-05	0.0122848	0.0601008	2.10314e-05	0.00294094	0.000182449	0.0013153	0.00129375	1.74087e-09	4.63488e-24	6.27924e-09	1.16387e-07	5.98489e-08	9.06357e-11	0	2.92877e-06	2.41517e-11	-1.02916e-05	0.000580289	-0.171746	-0.0329269	0.100945	-0.0847359	-0.0679673	0.0129397	-0.1	-0.45927	0
2312	12.3353	0	0.103756	12.2316	12.4972	12.4908	12.2185	10.477	1.01392	0.727605	0.272353	0.00632658	0.0189096	0.00649669	0.000207449	0.00294884	0.0049269	0.00326292	0.0493198	0.091306	0.0225531	3.55232e-05	0.0122848	0.0601008	2.10314e-05	0.00294094	0.000182449	0.0013153	0.00129375	1.74087e-09	4.63488e-24	6.27924e-09	1.16387e-07	5.98489e-08	9.06357e-11	0	2.92877e-06	2.41517e-11	-1.02916e-05	0.000580289	-0.171746	-0.0329269	0.100945	-0.0847359	-0.0679673	0.0129397	-0.1	-0.45927	0
2313	12.3353	0	0.103756	12.2316	12.4972	12.4908	12.2185	10.477	1.01392	0.727605	0.272353	0.00632658	0.0189096	0.00649669	0.000207449	0.00294884	0.0049269	0.00326292	0.0493198	0.091306	0.0225531	3.55232e-05	0.0122848	0.0601008	2.10314e-05	0.00294094	0.000182449	0.0013153	0.00129375	1.74087e-09	4.63488e-24	6.27924e-09	1.16387e-07	5.98489e-08	9.06357e-11	0	2.92877e-06	2.41517e-11	-1.02916e-05	0.000580289	-0.171746	-0.0329269	0.100945	-0.0847359	-0.0679673	0.0129397	-0.1	-0.45927	0
2314	12.3353	0	0.103756	12.2316	12.4972	12.4908	12.2185	10.477	1.01392	0.727605	0.272353	0.00632658	0.0189096	0.00649669	0.000207449	0.00294884	0.0049269	0.00326292	0.0493198	0.091306	0.0225531	3.55232e-05	0.0122848	0.0601008	2.10314e-05	0.00294094	0.000182449	0.0013153	0.00129375	1.74087e-09	4.63488e-24	6.27924e-09	1.16387e-07	5.98489e-08	9.06357e-11	0	2.92877e-06	2.41517e-11	-1.02916e-05	0.000580289	-0.171746	-0.0329269	0.100945	-0.0847359	-0.0679673	0.0129397	-0.1	-0.45927	0
2315	12.3353	0	0.103756	12.2316	12.4972	12.4908	12.2185	10.477	1.01392	0.727605	0.272353	0.00632658	0.0189096	0.00649669	0.000207449	0.00294884	0.0049269	0.00326292	0.0493198	0.091306	0.0225531	3.55232e-05	0.0122848	0.0601008	2.10314e-05	0.00294094	0.000182449	0.0013153	0.00129375	1.74087e-09	4.63488e-24	6.27924e-09	1.16387e-07	5.98489e-08	9.06357e-11	0	2.92877e-06	2.41517e-11	-1.02916e-05	0.000580289	-0.171746	-0.0329269	0.100945	-0.0847359	-0.0679673	0.0129397	-0.1	-0.45927	0
2316	12.3353	0	0.103756	12.2316	12.4972	12.4908	12.2185	10.477	1.01392	0.727605	0.272353	0.00632658	0.0189096	0.00649669	0.000207449	0.00294884	0.0049269	0.00326292	0.0493198	0.091306	0.0225531	3.55232e-05	0.0122848	0.0601008	2.10314e-05	0.00294094	0.000182449	0.0013153	0.00129375	1.74087e-09	4.63488e-24	6.27924e-09	1.16387e-07	5.98489e-08	9.06357e-11	0	2.92877e-06	2.41517e-11	-1.02916e-05	0.000580289	-0.171746	-0.0329269	0.100945	-0.0847359	-0.0679673	0.0129397	-0.1	-0.45927	0
2317	12.3353	0	0.103756	12.2316	12.4972	12.4908	12.2185	10.477	1.01392	0.727605	0.272353	0.00632658	0.0189096	0.00649669	0.000207449	0.00294884	0.0049269	0.00326292	0.0493198	0.091306	0.0225531	3.55232e-05	0.0122848	0.0601008	2.10314e-05	0.00294094	0.000182449	0.0013153	0.00129375	1.74087e-09	4.63488e-24	6.27924e-09	1.16387e-07	5.98489e-08	9.06357e-11	0	2.92877e-06	2.41517e-11	-1.02916e-05	0.000580289	-0.171746	-0.0329269	0.100945	-0.0847359	-0.0679673	0.0129397	-0.1	-0.45927	0
2318	12.3353	0	0.103756	12.2316	12.4972	12.4908	12.2185	10.477	1.01392	0.727605	0.272353	0.00632658	0.0189096	0.00649669	0.000207449	0.00294884	0.0049269	0.00326292	0.0493198	0.091306	0.0225531	3.55232e-05	0.0122848	0.0601008	2.10314e-05	0.00294094	0.000182449	0.0013153	0.00129375	1.74087e-09	4.63488e-24	6.27924e-09	1.16387e-07	5.98489e-08	9.06357e-11	0	2.92877e-06	2.41517e-11	-1.02916e-05	0.000580289	-0.171746	-0.0329269	0.100945	-0.0847359	-0.0679673	0.0129397	-0.1	-0.45927	0
2319	12.3353	0	0.103756	12.2316	12.4972	12.4908	12.2185	10.477	1.01392	0.727605	0.272353	0.00632658	0.0189096	0.00649669	0.000207449	0.00294884	0.0049269	0.00326292	0.0493198	0.091306	0.0225531	3.55232e-05	0.0122848	0.0601008	2.10314e-05	0.00294094	0.000182449	0.0013153	0.00129375	1.74087e-09	4.63488e-24	6.27924e-09	1.16387e-07	5.98489e-08	9.06357e-11	0	2.92877e-06	2.41517e-11	-1.02916e-05	0.000580289	-0.171746	-0.0329269	0.100945	-0.0847359	-0.0679673	0.0129397	-0.1	-0.45927	0
2320	12.3353	0	0.103756	12.2316	12.4972	12.4908	12.2185	10.477	1.01392	0.727605	0.272353	0.00632658	0.0189096	0.00649669	0.000207449	0.00294884	0.0049269	0.00326292	0.0493198	0.091306	0.0225531	3.55232e-05	0.0122848	0.0601008	2.10314e-05	0.00294094	0.000182449	0.0013153	0.00129375	1.74087e-09	4.63488e-24	6.27924e-09	1.16387e-07	5.98489e-08	9.06357e-11	0	2.92877e-06	2.41517e-11	-1.02916e-05	0.000580289	-0.171746	-0.0329269	0.100945	-0.0847359	-0.0679673	0.0129397	-0.1	-0.45927	0
2321	12.3353	0	0.103756	12.2316	12.4972	12.4908	12.2185	10.477	1.01392	0.727605	0.272353	0.00632658	0.0189096	0.00649669	0.000207449	0.00294884	0.0049269	0.00326292	0.0493198	0.091306	0.0225531	3.55232e-05	0.0122848	0.0601008	2.10314e-05	0.00294094	0.000182449	0.0013153	0.00129375	1.74087e-09	4.63488e-24	6.27924e-09	1.16387e-07	5.98489e-08	9.06357e-11	0	2.92877e-06	2.41517e-11	-1.02916e-05	0.000580289	-0.171746	-0.0329269	0.100945	-0.0847359	-0.0679673	0.0129397	-0.1	-0.45927	0
2322	12.3353	0	0.103756	12.2316	12.4972	12.4908	12.2185	10.477	1.01392	0.727605	0.272353	0.00632658	0.0189096	0.00649669	0.000207449	0.00294884	0.0049269	0.00326292	0.0493198	0.091306	0.0225531	3.55232e-05	0.0122848	0.0601008	2.10314e-05	0.00294094	0.000182449	0.0013153	0.00129375	1.74087e-09	4.63488e-24	6.27924e-09	1.16387e-07	5.98489e-08	9.06357e-11	0	2.92877e-06	2.41517e-11	-1.02916e-05	0.000580289	-0.171746	-0.0329269	0.100945	-0.0847359	-0.0679673	0.0129397	-0.1	-0.45927	0
2323	12.3353	0	0.103756	12.2316	12.4972	12.4908	12.2185	10.477	1.01392	0.727605	0.272353	0.00632658	0.0189096	0.00649669	0.000207449	0.00294884	0.0049269	0.00326292	0.0493198	0.091306	0.0225531	3.55232e-05	0.0122848	0.0601008	2.10314e-05	0.00294094	0.000182449	0.0013153	0.00129375	1.74087e-09	4.63488e-24	6.27924e-09	1.16387e-07	5.98489e-08	9.06357e-11	0	2.92877e-06	2.41517e-11	-1.02916e-05	0.000580289	-0.171746	-0.0329269	0.100945	-0.0847359	-0.0679673	0.0129397	-0.1	-0.45927	0
2324	12.3353	0	0.103756	12.2316	12.4972	12.4908	12.2185	10.477	1.01392	0.727605	0.272353	0.00632658	0.0189096	0.00649669	0.000207449	0.00294884	0.0049269	0.00326292	0.0493198	0.091306	0.0225531	3.55232e-05	0.0122848	0.0601008	2.10314e-05	0.00294094	0.000182449	0.0013153	0.00129375	1.74087e-09	4.63488e-24	6.27924e-09	1.16387e-07	5.98489e-08	9.06357e-11	0	2.92877e-06	2.41517e-11	-1.02916e-05	0.000580289	-0.171746	-0.0329269	0.100945	-0.0847359	-0.0679673	0.0129397	-0.1	-0.45927	0
2325	12.3353	0	0.103756	12.2316	12.4972	12.4908	12.2185	10.477	1.01392	0.727605	0.272353	0.00632658	0.0189096	0.00649669	0.000207449	0.00294884	0.0049269	0.00326292	0.0493198	0.091306	0.0225531	3.55232e-05	0.0122848	0.0601008	2.10314e-05	0.00294094	0.000182449	0.0013153	0.00129375	1.74087e-09	4.63488e-24	6.27924e-09	1.16387e-07	5.98489e-08	9.06357e-11	0	2.92877e-06	2.41517e-11	-1.02916e-05	0.000580289	-0.171746	-0.0329269	0.100945	-0.0847359	-0.0679673	0.0129397	-0.1	-0.45927	0
2326	12.3353	0	0.103756	12.2316	12.4972	12.4908	12.2185	10.477	1.01392	0.727605	0.272353	0.00632658	0.0189096	0.00649669	0.000207449	0.00294884	0.0049269	0.00326292	0.0493198	0.091306	0.0225531	3.55232e-05	0.0122848	0.0601008	2.10314e-05	0.00294094	0.000182449	0.0013153	0.00129375	1.74087e-09	4.63488e-24	6.27924e-09	1.16387e-07	5.98489e-08	9.06357e-11	0	2.92877e-06	2.41517e-11	-1.02916e-05	0.000580289	-0.171746	-0.0329269	0.100945	-0.0847359	-0.0679673	0.0129397	-0.1	-0.45927	0
2327	12.3353	0	0.103756	12.2316	12.4972	12.4908	12.2185	10.477	1.01392	0.727605	0.272353	0.00632658	0.0189096	0.00649669	0.000207449	0.00294884	0.0049269	0.00326292	0.0493198	0.091306	0.0225531	3.55232e-05	0.0122848	0.0601008	2.10314e-05	0.00294094	0.000182449	0.0013153	0.00129375	1.74087e-09	4.63488e-24	6.27924e-09	1.16387e-07	5.98489e-08	9.06357e-11	0	2.92877e-06	2.41517e-11	-1.02916e-05	0.000580289	-0.171746	-0.0329269	0.100945	-0.0847359	-0.0679673	0.0129397	-0.1	-0.45927	0
2328	12.3353	0	0.103756	12.2316	12.4972	12.4908	12.2185	10.477	1.01392	0.727605	0.272353	0.00632658	0.0189096	0.00649669	0.000207449	0.00294884	0.0049269	0.00326292	0.0493198	0.091306	0.0225531	3.55232e-05	0.0122848	0.0601008	2.10314e-05	0.00294094	0.000182449	0.0013153	0.00129375	1.74087e-09	4.63488e-24	6.27924e-09	1.16387e-07	5.98489e-08	9.06357e-11	0	2.92877e-06	2.41517e-11	-1.02916e-05	0.000580289	-0.171746	-0.0329269	0.100945	-0.0847359	-0.0679673	0.0129397	-0.1	-0.45927	0
2329	12.3353	0	0.103756	12.2316	12.4972	12.4908	12.2185	10.477	1.01392	0.727605	0.272353	0.00632658	0.0189096	0.00649669	0.000207449	0.00294884	0.0049269	0.00326292	0.0493198	0.091306	0.0225531	3.55232e-05	0.0122848	0.0601008	2.10314e-05	0.00294094	0.000182449	0.0013153	0.00129375	1.74087e-09	4.63488e-24	6.27924e-09	1.16387e-07	5.98489e-08	9.06357e-11	0	2.92877e-06	2.41517e-11	-1.02916e-05	0.000580289	-0.171746	-0.0329269	0.100945	-0.0847359	-0.0679673	0.0129397	-0.1	-0.45927	0
2330	12.3353	0	0.103756	12.2316	12.4972	12.4908	12.2185	10.477	1.01392	0.727605	0.272353	0.00632658	0.0189096	0.00649669	0.000207449	0.00294884	0.0049269	0.00326292	0.0493198	0.091306	0.0225531	3.55232e-05	0.0122848	0.0601008	2.10314e-05	0.00294094	0.000182449	0.0013153	0.00129375	1.74087e-09	4.63488e-24	6.27924e-09	1.16387e-07	5.98489e-08	9.06357e-11	0	2.92877e-06	2.41517e-11	-1.02916e-05	0.000580289	-0.171746	-0.0329269	0.100945	-0.0847359	-0.0679673	0.0129397	-0.1	-0.45927	0
2331	12.3353	0	0.103756	12.2316	12.4972	12.4908	12.2185	10.477	1.01392	0.727605	0.272353	0.00632658	0.0189096	0.00649669	0.000207449	0.00294884	0.0049269	0.00326292	0.0493198	0.091306	0.0225531	3.55232e-05	0.0122848	0.0601008	2.10314e-05	0.00294094	0.000182449	0.0013153	0.00129375	1.74087e-09	4.63488e-24	6.27924e-09	1.16387e-07	5.98489e-08	9.06357e-11	0	2.92877e-06	2.41517e-11	-1.02916e-05	0.000580289	-0.171746	-0.0329269	0.100945	-0.0847359	-0.0679673	0.0129397	-0.1	-0.45927	0
2332	12.3353	0	0.103756	12.2316	12.4972	12.4908	12.2185	10.477	1.01392	0.727605	0.272353	0.00632658	0.0189096	0.00649669	0.000207449	0.00294884	0.0049269	0.00326292	0.0493198	0.091306	0.0225531	3.55232e-05	0.0122848	0.0601008	2.10314e-05	0.00294094	0.000182449	0.0013153	0.00129375	1.74087e-09	4.63488e-24	6.27924e-09	1.16387e-07	5.98489e-08	9.06357e-11	0	2.92877e-06	2.41517e-11	-1.02916e-05	0.000580289	-0.171746	-0.0329269	0.100945	-0.0847359	-0.0679673	0.0129397	-0.1	-0.45927	0
2333	12.3353	0	0.103756	12.2316	12.4972	12.4908	12.2185	10.477	1.01392	0.727605	0.272353	0.00632658	0.0189096	0.00649669	0.000207449	0.00294884	0.0049269	0.00326292	0.0493198	0.091306	0.0225531	3.55232e-05	0.0122848	0.0601008	2.10314e-05	0.00294094	0.000182449	0.0013153	0.00129375	1.74087e-09	4.63488e-24	6.27924e-09	1.16387e-07	5.98489e-08	9.06357e-11	0	2.92877e-06	2.41517e-11	-1.02916e-05	0.000580289	-0.171746	-0.0329269	0.100945	-0.0847359	-0.0679673	0.0129397	-0.1	-0.45927	0
2334	12.3353	0	0.103756	12.2316	12.4972	12.4908	12.2185	10.477	1.01392	0.727605	0.272353	0.00632658	0.0189096	0.00649669	0.000207449	0.00294884	0.0049269	0.00326292	0.0493198	0.091306	0.0225531	3.55232e-05	0.0122848	0.0601008	2.10314e-05	0.00294094	0.000182449	0.0013153	0.00129375	1.74087e-09	4.63488e-24	6.27924e-09	1.16387e-07	5.98489e-08	9.06357e-11	0	2.92877e-06	2.41517e-11	-1.02916e-05	0.000580289	-0.171746	-0.0329269	0.100945	-0.0847359	-0.0679673	0.0129397	-0.1	-0.45927	0
2335	12.3353	0	0.103756	12.2316	12.4972	12.4908	12.2185	10.477	1.01392	0.727605	0.272353	0.00632658	0.0189096	0.00649669	0.000207449	0.00294884	0.0049269	0.00326292	0.0493198	0.091306	0.0225531	3.55232e-05	0.0122848	0.0601008	2.10314e-05	0.00294094	0.000182449	0.0013153	0.00129375	1.74087e-09	4.63488e-24	6.27924e-09	1.16387e-07	5.98489e-08	9.06357e-11	0	2.92877e-06	2.41517e-11	-1.02916e-05	0.000580289	-0.171746	-0.0329269	0.100945	-0.0847359	-0.0679673	0.0129397	-0.1	-0.45927	0
2336	12.3353	0	0.103756	12.2316	12.4972	12.4908	12.2185	10.477	1.01392	0.727605	0.272353	0.00632658	0.0189096	0.00649669	0.000207449	0.00294884	0.0049269	0.00326292	0.0493198	0.091306	0.0225531	3.55232e-05	0.0122848	0.0601008	2.10314e-05	0.00294094	0.000182449	0.0013153	0.00129375	1.74087e-09	4.63488e-24	6.27924e-09	1.16387e-07	5.98489e-08	9.06357e-11	0	2.92877e-06	2.41517e-11	-1.02916e-05	0.000580289	-0.171746	-0.0329269	0.100945	-0.0847359	-0.0679673	0.0129397	-0.1	-0.45927	0
2337	12.3353	0	0.103756	12.2316	12.4972	12.4908	12.2185	10.477	1.01392	0.727605	0.272353	0.00632658	0.0189096	0.00649669	0.000207449	0.00294884	0.0049269	0.00326292	0.0493198	0.091306	0.0225531	3.55232e-05	0.0122848	0.0601008	2.10314e-05	0.00294094	0.000182449	0.0013153	0.00129375	1.74087e-09	4.63488e-24	6.27924e-09	1.16387e-07	5.98489e-08	9.06357e-11	0	2.92877e-06	2.41517e-11	-1.02916e-05	0.000580289	-0.171746	-0.0329269	0.100945	-0.0847359	-0.0679673	0.0129397	-0.1	-0.45927	0
2338	12.3353	0	0.103756	12.2316	12.4972	12.4908	12.2185	10.477	1.01392	0.727605	0.272353	0.00632658	0.0189096	0.00649669	0.000207449	0.00294884	0.0049269	0.00326292	0.0493198	0.091306	0.0225531	3.55232e-05	0.0122848	0.0601008	2.10314e-05	0.00294094	0.000182449	0.0013153	0.00129375	1.74087e-09	4.63488e-24	6.27924e-09	1.16387e-07	5.98489e-08	9.06357e-11	0	2.92877e-06	2.41517e-11	-1.02916e-05	0.000580289	-0.171746	-0.0329269	0.100945	-0.0847359	-0.0679673	0.0129397	-0.1	-0.45927	0
2339	12.3353	0	0.103756	12.2316	12.4972	12.4908	12.2185	10.477	1.01392	0.727605	0.272353	0.00632658	0.0189096	0.00649669	0.000207449	0.00294884	0.0049269	0.00326292	0.0493198	0.091306	0.0225531	3.55232e-05	0.0122848	0.0601008	2.10314e-05	0.00294094	0.000182449	0.0013153	0.00129375	1.74087e-09	4.63488e-24	6.27924e-09	1.16387e-07	5.98489e-08	9.06357e-11	0	2.92877e-06	2.41517e-11	-1.02916e-05	0.000580289	-0.171746	-0.0329269	0.100945	-0.0847359	-0.0679673	0.0129397	-0.1	-0.45927	0
2340	12.3353	0	0.103756	12.2316	12.4972	12.4908	12.2185	10.477	1.01392	0.727605	0.272353	0.00632658	0.0189096	0.00649669	0.000207449	0.00294884	0.0049269	0.00326292	0.0493198	0.091306	0.0225531	3.55232e-05	0.0122848	0.0601008	2.10314e-05	0.00294094	0.000182449	0.0013153	0.00129375	1.74087e-09	4.63488e-24	6.27924e-09	1.16387e-07	5.98489e-08	9.06357e-11	0	2.92877e-06	2.41517e-11	-1.02916e-05	0.000580289	-0.171746	-0.0329269	0.100945	-0.0847359	-0.0679673	0.0129397	-0.1	-0.45927	0
2341	12.3353	0	0.103756	12.2316	12.4972	12.4908	12.2185	10.477	1.01392	0.727605	0.272353	0.00632658	0.0189096	0.00649669	0.000207449	0.00294884	0.0049269	0.00326292	0.0493198	0.091306	0.0225531	3.55232e-05	0.0122848	0.0601008	2.10314e-05	0.00294094	0.000182449	0.0013153	0.00129375	1.74087e-09	4.63488e-24	6.27924e-09	1.16387e-07	5.98489e-08	9.06357e-11	0	2.92877e-06	2.41517e-11	-1.02916e-05	0.000580289	-0.171746	-0.0329269	0.100945	-0.0847359	-0.0679673	0.0129397	-0.1	-0.45927	0
2342	12.3353	0	0.103756	12.2316	12.4972	12.4908	12.2185	10.477	1.01392	0.727605	0.272353	0.00632658	0.0189096	0.00649669	0.000207449	0.00294884	0.0049269	0.00326292	0.0493198	0.091306	0.0225531	3.55232e-05	0.0122848	0.0601008	2.10314e-05	0.00294094	0.000182449	0.0013153	0.00129375	1.74087e-09	4.63488e-24	6.27924e-09	1.16387e-07	5.98489e-08	9.06357e-11	0	2.92877e-06	2.41517e-11	-1.02916e-05	0.000580289	-0.171746	-0.0329269	0.100945	-0.0847359	-0.0679673	0.0129397	-0.1	-0.45927	0
2343	12.3353	0	0.103756	12.2316	12.4972	12.4908	12.2185	10.477	1.01392	0.727605	0.272353	0.00632658	0.0189096	0.00649669	0.000207449	0.00294884	0.0049269	0.00326292	0.0493198	0.091306	0.0225531	3.55232e-05	0.0122848	0.0601008	2.10314e-05	0.00294094	0.000182449	0.0013153	0.00129375	1.74087e-09	4.63488e-24	6.27924e-09	1.16387e-07	5.98489e-08	9.06357e-11	0	2.92877e-06	2.41517e-11	-1.02916e-05	0.000580289	-0.171746	-0.0329269	0.100945	-0.0847359	-0.0679673	0.0129397	-0.1	-0.45927	0
2344	12.3353	0	0.103756	12.2316	12.4972	12.4908	12.2185	10.477	1.01392	0.727605	0.272353	0.00632658	0.0189096	0.00649669	0.000207449	0.00294884	0.0049269	0.00326292	0.0493198	0.091306	0.0225531	3.55232e-05	0.0122848	0.0601008	2.10314e-05	0.00294094	0.000182449	0.0013153	0.00129375	1.74087e-09	4.63488e-24	6.27924e-09	1.16387e-07	5.98489e-08	9.06357e-11	0	2.92877e-06	2.41517e-11	-1.02916e-05	0.000580289	-0.171746	-0.0329269	0.100945	-0.0847359	-0.0679673	0.0129397	-0.1	-0.45927	0
2345	12.3353	0	0.103756	12.2316	12.4972	12.4908	12.2185	10.477	1.01392	0.727605	0.272353	0.00632658	0.0189096	0.00649669	0.000207449	0.00294884	0.0049269	0.00326292	0.0493198	0.091306	0.0225531	3.55232e-05	0.0122848	0.0601008	2.10314e-05	0.00294094	0.000182449	0.0013153	0.00129375	1.74087e-09	4.63488e-24	6.27924e-09	1.16387e-07	5.98489e-08	9.06357e-11	0	2.92877e-06	2.41517e-11	-1.02916e-05	0.000580289	-0.171746	-0.0329269	0.100945	-0.0847359	-0.0679673	0.0129397	-0.1	-0.45927	0
2346	12.3353	0	0.103756	12.2316	12.4972	12.4908	12.2185	10.477	1.01392	0.727605	0.272353	0.00632658	0.0189096	0.00649669	0.000207449	0.00294884	0.0049269	0.00326292	0.0493198	0.091306	0.0225531	3.55232e-05	0.0122848	0.0601008	2.10314e-05	0.00294094	0.000182449	0.0013153	0.00129375	1.74087e-09	4.63488e-24	6.27924e-09	1.16387e-07	5.98489e-08	9.06357e-11	0	2.92877e-06	2.41517e-11	-1.02916e-05	0.000580289	-0.171746	-0.0329269	0.100945	-0.0847359	-0.0679673	0.0129397	-0.1	-0.45927	0
2347	12.3353	0	0.103756	12.2316	12.4972	12.4908	12.2185	10.477	1.01392	0.727605	0.272353	0.00632658	0.0189096	0.00649669	0.000207449	0.00294884	0.0049269	0.00326292	0.0493198	0.091306	0.0225531	3.55232e-05	0.0122848	0.0601008	2.10314e-05	0.00294094	0.000182449	0.0013153	0.00129375	1.74087e-09	4.63488e-24	6.27924e-09	1.16387e-07	5.98489e-08	9.06357e-11	0	2.92877e-06	2.41517e-11	-1.02916e-05	0.000580289	-0.171746	-0.0329269	0.100945	-0.0847359	-0.0679673	0.0129397	-0.1	-0.45927	0
2348	12.3353	0	0.103756	12.2316	12.4972	12.4908	12.2185	10.477	1.01392	0.727605	0.272353	0.00632658	0.0189096	0.00649669	0.000207449	0.00294884	0.0049269	0.00326292	0.0493198	0.091306	0.0225531	3.55232e-05	0.0122848	0.0601008	2.10314e-05	0.00294094	0.000182449	0.0013153	0.00129375	1.74087e-09	4.63488e-24	6.27924e-09	1.16387e-07	5.98489e-08	9.06357e-11	0	2.92877e-06	2.41517e-11	-1.02916e-05	0.000580289	-0.171746	-0.0329269	0.100945	-0.0847359	-0.0679673	0.0129397	-0.1	-0.45927	0
2349	12.3353	0	0.103756	12.2316	12.4972	12.4908	12.2185	10.477	1.01392	0.727605	0.272353	0.00632658	0.0189096	0.00649669	0.000207449	0.00294884	0.0049269	0.00326292	0.0493198	0.091306	0.0225531	3.55232e-05	0.0122848	0.0601008	2.10314e-05	0.00294094	0.000182449	0.0013153	0.00129375	1.74087e-09	4.63488e-24	6.27924e-09	1.16387e-07	5.98489e-08	9.06357e-11	0	2.92877e-06	2.41517e-11	-1.02916e-05	0.000580289	-0.171746	-0.0329269	0.100945	-0.0847359	-0.0679673	0.0129397	-0.1	-0.45927	0
2350	12.3353	0	0.103756	12.2316	12.4972	12.4908	12.2185	10.477	1.01392	0.727605	0.272353	0.00632658	0.0189096	0.00649669	0.000207449	0.00294884	0.0049269	0.00326292	0.0493198	0.091306	0.0225531	3.55232e-05	0.0122848	0.0601008	2.10314e-05	0.00294094	0.000182449	0.0013153	0.00129375	1.74087e-09	4.63488e-24	6.27924e-09	1.16387e-07	5.98489e-08	9.06357e-11	0	2.92877e-06	2.41517e-11	-1.02916e-05	0.000580289	-0.171746	-0.0329269	0.100945	-0.0847359	-0.0679673	0.0129397	-0.1	-0.45927	0
2351	12.3353	0	0.103756	12.2316	12.4972	12.4908	12.2185	10.477	1.01392	0.727605	0.272353	0.00632658	0.0189096	0.00649669	0.000207449	0.00294884	0.0049269	0.00326292	0.0493198	0.091306	0.0225531	3.55232e-05	0.0122848	0.0601008	2.10314e-05	0.00294094	0.000182449	0.0013153	0.00129375	1.74087e-09	4.63488e-24	6.27924e-09	1.16387e-07	5.98489e-08	9.06357e-11	0	2.92877e-06	2.41517e-11	-1.02916e-05	0.000580289	-0.171746	-0.0329269	0.100945	-0.0847359	-0.0679673	0.0129397	-0.1	-0.45927	0
2352	12.3353	0	0.103756	12.2316	12.4972	12.4908	12.2185	10.477	1.01392	0.727605	0.272353	0.00632658	0.0189096	0.00649669	0.000207449	0.00294884	0.0049269	0.00326292	0.0493198	0.091306	0.0225531	3.55232e-05	0.0122848	0.0601008	2.10314e-05	0.00294094	0.000182449	0.0013153	0.00129375	1.74087e-09	4.63488e-24	6.27924e-09	1.16387e-07	5.98489e-08	9.06357e-11	0	2.92877e-06	2.41517e-11	-1.02916e-05	0.000580289	-0.171746	-0.0329269	0.100945	-0.0847359	-0.0679673	0.0129397	-0.1	-0.45927	0
2353	12.3353	0	0.103756	12.2316	12.4972	12.4908	12.2185	10.477	1.01392	0.727605	0.272353	0.00632658	0.0189096	0.00649669	0.000207449	0.00294884	0.0049269	0.00326292	0.0493198	0.091306	0.0225531	3.55232e-05	0.0122848	0.0601008	2.10314e-05	0.00294094	0.000182449	0.0013153	0.00129375	1.74087e-09	4.63488e-24	6.27924e-09	1.16387e-07	5.98489e-08	9.06357e-11	0	2.92877e-06	2.41517e-11	-1.02916e-05	0.000580289	-0.171746	-0.0329269	0.100945	-0.0847359	-0.0679673	0.0129397	-0.1	-0.45927	0
2354	12.3353	0	0.103756	12.2316	12.4972	12.4908	12.2185	10.477	1.01392	0.727605	0.272353	0.00632658	0.0189096	0.00649669	0.000207449	0.00294884	0.0049269	0.00326292	0.0493198	0.091306	0.0225531	3.55232e-05	0.0122848	0.0601008	2.10314e-05	0.00294094	0.000182449	0.0013153	0.00129375	1.74087e-09	4.63488e-24	6.27924e-09	1.16387e-07	5.98489e-08	9.06357e-11	0	2.92877e-06	2.41517e-11	-1.02916e-05	0.000580289	-0.171746	-0.0329269	0.100945	-0.0847359	-0.0679673	0.0129397	-0.1	-0.45927	0
2355	12.3353	0	0.103756	12.2316	12.4972	12.4908	12.2185	10.477	1.01392	0.727605	0.272353	0.00632658	0.0189096	0.00649669	0.000207449	0.00294884	0.0049269	0.00326292	0.0493198	0.091306	0.0225531	3.55232e-05	0.0122848	0.0601008	2.10314e-05	0.00294094	0.000182449	0.0013153	0.00129375	1.74087e-09	4.63488e-24	6.27924e-09	1.16387e-07	5.98489e-08	9.06357e-11	0	2.92877e-06	2.41517e-11	-1.02916e-05	0.000580289	-0.171746	-0.0329269	0.100945	-0.0847359	-0.0679673	0.0129397	-0.1	-0.45927	0
2356	12.3353	0	0.103756	12.2316	12.4972	12.4908	12.2185	10.477	1.01392	0.727605	0.272353	0.00632658	0.0189096	0.00649669	0.000207449	0.00294884	0.0049269	0.00326292	0.0493198	0.091306	0.0225531	3.55232e-05	0.0122848	0.0601008	2.10314e-05	0.00294094	0.000182449	0.0013153	0.00129375	1.74087e-09	4.63488e-24	6.27924e-09	1.16387e-07	5.98489e-08	9.06357e-11	0	2.92877e-06	2.41517e-11	-1.02916e-05	0.000580289	-0.171746	-0.0329269	0.100945	-0.0847359	-0.0679673	0.0129397	-0.1	-0.45927	0
2357	12.3353	0	0.103756	12.2316	12.4972	12.4908	12.2185	10.477	1.01392	0.727605	0.272353	0.00632658	0.0189096	0.00649669	0.000207449	0.00294884	0.0049269	0.00326292	0.0493198	0.091306	0.0225531	3.55232e-05	0.0122848	0.0601008	2.10314e-05	0.00294094	0.000182449	0.0013153	0.00129375	1.74087e-09	4.63488e-24	6.27924e-09	1.16387e-07	5.98489e-08	9.06357e-11	0	2.92877e-06	2.41517e-11	-1.02916e-05	0.000580289	-0.171746	-0.0329269	0.100945	-0.0847359	-0.0679673	0.0129397	-0.1	-0.45927	0
2358	12.3353	0	0.103756	12.2316	12.4972	12.4908	12.2185	10.477	1.01392	0.727605	0.272353	0.00632658	0.0189096	0.00649669	0.000207449	0.00294884	0.0049269	0.00326292	0.0493198	0.091306	0.0225531	3.55232e-05	0.0122848	0.0601008	2.10314e-05	0.00294094	0.000182449	0.0013153	0.00129375	1.74087e-09	4.63488e-24	6.27924e-09	1.16387e-07	5.98489e-08	9.06357e-11	0	2.92877e-06	2.41517e-11	-1.02916e-05	0.000580289	-0.171746	-0.0329269	0.100945	-0.0847359	-0.0679673	0.0129397	-0.1	-0.45927	0
2359	12.3353	0	0.103756	12.2316	12.4972	12.4908	12.2185	10.477	1.01392	0.727605	0.272353	0.00632658	0.0189096	0.00649669	0.000207449	0.00294884	0.0049269	0.00326292	0.0493198	0.091306	0.0225531	3.55232e-05	0.0122848	0.0601008	2.10314e-05	0.00294094	0.000182449	0.0013153	0.00129375	1.74087e-09	4.63488e-24	6.27924e-09	1.16387e-07	5.98489e-08	9.06357e-11	0	2.92877e-06	2.41517e-11	-1.02916e-05	0.000580289	-0.171746	-0.0329269	0.100945	-0.0847359	-0.0679673	0.0129397	-0.1	-0.45927	0
2360	12.3353	0	0.103756	12.2316	12.4972	12.4908	12.2185	10.477	1.01392	0.727605	0.272353	0.00632658	0.0189096	0.00649669	0.000207449	0.00294884	0.0049269	0.00326292	0.0493198	0.091306	0.0225531	3.55232e-05	0.0122848	0.0601008	2.10314e-05	0.00294094	0.000182449	0.0013153	0.00129375	1.74087e-09	4.63488e-24	6.27924e-09	1.16387e-07	5.98489e-08	9.06357e-11	0	2.92877e-06	2.41517e-11	-1.02916e-05	0.000580289	-0.171746	-0.0329269	0.100945	-0.0847359	-0.0679673	0.0129397	-0.1	-0.45927	0
2361	12.3353	0	0.103756	12.2316	12.4972	12.4908	12.2185	10.477	1.01392	0.727605	0.272353	0.00632658	0.0189096	0.00649669	0.000207449	0.00294884	0.0049269	0.00326292	0.0493198	0.091306	0.0225531	3.55232e-05	0.0122848	0.0601008	2.10314e-05	0.00294094	0.000182449	0.0013153	0.00129375	1.74087e-09	4.63488e-24	6.27924e-09	1.16387e-07	5.98489e-08	9.06357e-11	0	2.92877e-06	2.41517e-11	-1.02916e-05	0.000580289	-0.171746	-0.0329269	0.100945	-0.0847359	-0.0679673	0.0129397	-0.1	-0.45927	0
2362	12.3353	0	0.103756	12.2316	12.4972	12.4908	12.2185	10.477	1.01392	0.727605	0.272353	0.00632658	0.0189096	0.00649669	0.000207449	0.00294884	0.0049269	0.00326292	0.0493198	0.091306	0.0225531	3.55232e-05	0.0122848	0.0601008	2.10314e-05	0.00294094	0.000182449	0.0013153	0.00129375	1.74087e-09	4.63488e-24	6.27924e-09	1.16387e-07	5.98489e-08	9.06357e-11	0	2.92877e-06	2.41517e-11	-1.02916e-05	0.000580289	-0.171746	-0.0329269	0.100945	-0.0847359	-0.0679673	0.0129397	-0.1	-0.45927	0
2363	12.3353	0	0.103756	12.2316	12.4972	12.4908	12.2185	10.477	1.01392	0.727605	0.272353	0.00632658	0.0189096	0.00649669	0.000207449	0.00294884	0.0049269	0.00326292	0.0493198	0.091306	0.0225531	3.55232e-05	0.0122848	0.0601008	2.10314e-05	0.00294094	0.000182449	0.0013153	0.00129375	1.74087e-09	4.63488e-24	6.27924e-09	1.16387e-07	5.98489e-08	9.06357e-11	0	2.92877e-06	2.41517e-11	-1.02916e-05	0.000580289	-0.171746	-0.0329269	0.100945	-0.0847359	-0.0679673	0.0129397	-0.1	-0.45927	0
2364	12.3353	0	0.103756	12.2316	12.4972	12.4908	12.2185	10.477	1.01392	0.727605	0.272353	0.00632658	0.0189096	0.00649669	0.000207449	0.00294884	0.0049269	0.00326292	0.0493198	0.091306	0.0225531	3.55232e-05	0.0122848	0.0601008	2.10314e-05	0.00294094	0.000182449	0.0013153	0.00129375	1.74087e-09	4.63488e-24	6.27924e-09	1.16387e-07	5.98489e-08	9.06357e-11	0	2.92877e-06	2.41517e-11	-1.02916e-05	0.000580289	-0.171746	-0.0329269	0.100945	-0.0847359	-0.0679673	0.0129397	-0.1	-0.45927	0
2365	12.3353	0	0.103756	12.2316	12.4972	12.4908	12.2185	10.477	1.01392	0.727605	0.272353	0.00632658	0.0189096	0.00649669	0.000207449	0.00294884	0.0049269	0.00326292	0.0493198	0.091306	0.0225531	3.55232e-05	0.0122848	0.0601008	2.10314e-05	0.00294094	0.000182449	0.0013153	0.00129375	1.74087e-09	4.63488e-24	6.27924e-09	1.16387e-07	5.98489e-08	9.06357e-11	0	2.92877e-06	2.41517e-11	-1.02916e-05	0.000580289	-0.171746	-0.0329269	0.100945	-0.0847359	-0.0679673	0.0129397	-0.1	-0.45927	0
2366	12.3353	0	0.103756	12.2316	12.4972	12.4908	12.2185	10.477	1.01392	0.727605	0.272353	0.00632658	0.0189096	0.00649669	0.000207449	0.00294884	0.0049269	0.00326292	0.0493198	0.091306	0.0225531	3.55232e-05	0.0122848	0.0601008	2.10314e-05	0.00294094	0.000182449	0.0013153	0.00129375	1.74087e-09	4.63488e-24	6.27924e-09	1.16387e-07	5.98489e-08	9.06357e-11	0	2.92877e-06	2.41517e-11	-1.02916e-05	0.000580289	-0.171746	-0.0329269	0.100945	-0.0847359	-0.0679673	0.0129397	-0.1	-0.45927	0
2367	12.3353	0	0.103756	12.2316	12.4972	12.4908	12.2185	10.477	1.01392	0.727605	0.272353	0.00632658	0.0189096	0.00649669	0.000207449	0.00294884	0.0049269	0.00326292	0.0493198	0.091306	0.0225531	3.55232e-05	0.0122848	0.0601008	2.10314e-05	0.00294094	0.000182449	0.0013153	0.00129375	1.74087e-09	4.63488e-24	6.27924e-09	1.16387e-07	5.98489e-08	9.06357e-11	0	2.92877e-06	2.41517e-11	-1.02916e-05	0.000580289	-0.171746	-0.0329269	0.100945	-0.0847359	-0.0679673	0.0129397	-0.1	-0.45927	0
2368	12.3353	0	0.103756	12.2316	12.4972	12.4908	12.2185	10.477	1.01392	0.727605	0.272353	0.00632658	0.0189096	0.00649669	0.000207449	0.00294884	0.0049269	0.00326292	0.0493198	0.091306	0.0225531	3.55232e-05	0.0122848	0.0601008	2.10314e-05	0.00294094	0.000182449	0.0013153	0.00129375	1.74087e-09	4.63488e-24	6.27924e-09	1.16387e-07	5.98489e-08	9.06357e-11	0	2.92877e-06	2.41517e-11	-1.02916e-05	0.000580289	-0.171746	-0.0329269	0.100945	-0.0847359	-0.0679673	0.0129397	-0.1	-0.45927	0
2369	12.3353	0	0.103756	12.2316	12.4972	12.4908	12.2185	10.477	1.01392	0.727605	0.272353	0.00632658	0.0189096	0.00649669	0.000207449	0.00294884	0.0049269	0.00326292	0.0493198	0.091306	0.0225531	3.55232e-05	0.0122848	0.0601008	2.10314e-05	0.00294094	0.000182449	0.0013153	0.00129375	1.74087e-09	4.63488e-24	6.27924e-09	1.16387e-07	5.98489e-08	9.06357e-11	0	2.92877e-06	2.41517e-11	-1.02916e-05	0.000580289	-0.171746	-0.0329269	0.100945	-0.0847359	-0.0679673	0.0129397	-0.1	-0.45927	0
2370	12.3353	0	0.103756	12.2316	12.4972	12.4908	12.2185	10.477	1.01392	0.727605	0.272353	0.00632658	0.0189096	0.00649669	0.000207449	0.00294884	0.0049269	0.00326292	0.0493198	0.091306	0.0225531	3.55232e-05	0.0122848	0.0601008	2.10314e-05	0.00294094	0.000182449	0.0013153	0.00129375	1.74087e-09	4.63488e-24	6.27924e-09	1.16387e-07	5.98489e-08	9.06357e-11	0	2.92877e-06	2.41517e-11	-1.02916e-05	0.000580289	-0.171746	-0.0329269	0.100945	-0.0847359	-0.0679673	0.0129397	-0.1	-0.45927	0
2371	12.3353	0	0.103756	12.2316	12.4972	12.4908	12.2185	10.477	1.01392	0.727605	0.272353	0.00632658	0.0189096	0.00649669	0.000207449	0.00294884	0.0049269	0.00326292	0.0493198	0.091306	0.0225531	3.55232e-05	0.0122848	0.0601008	2.10314e-05	0.00294094	0.000182449	0.0013153	0.00129375	1.74087e-09	4.63488e-24	6.27924e-09	1.16387e-07	5.98489e-08	9.06357e-11	0	2.92877e-06	2.41517e-11	-1.02916e-05	0.000580289	-0.171746	-0.0329269	0.100945	-0.0847359	-0.0679673	0.0129397	-0.1	-0.45927	0
2372	12.3353	0	0.103756	12.2316	12.4972	12.4908	12.2185	10.477	1.01392	0.727605	0.272353	0.00632658	0.0189096	0.00649669	0.000207449	0.00294884	0.0049269	0.00326292	0.0493198	0.091306	0.0225531	3.55232e-05	0.0122848	0.0601008	2.10314e-05	0.00294094	0.000182449	0.0013153	0.00129375	1.74087e-09	4.63488e-24	6.27924e-09	1.16387e-07	5.98489e-08	9.06357e-11	0	2.92877e-06	2.41517e-11	-1.02916e-05	0.000580289	-0.171746	-0.0329269	0.100945	-0.0847359	-0.0679673	0.0129397	-0.1	-0.45927	0
2373	12.3353	0	0.103756	12.2316	12.4972	12.4908	12.2185	10.477	1.01392	0.727605	0.272353	0.00632658	0.0189096	0.00649669	0.000207449	0.00294884	0.0049269	0.00326292	0.0493198	0.091306	0.0225531	3.55232e-05	0.0122848	0.0601008	2.10314e-05	0.00294094	0.000182449	0.0013153	0.00129375	1.74087e-09	4.63488e-24	6.27924e-09	1.16387e-07	5.98489e-08	9.06357e-11	0	2.92877e-06	2.41517e-11	-1.02916e-05	0.000580289	-0.171746	-0.0329269	0.100945	-0.0847359	-0.0679673	0.0129397	-0.1	-0.45927	0
2374	12.3353	0	0.103756	12.2316	12.4972	12.4908	12.2185	10.477	1.01392	0.727605	0.272353	0.00632658	0.0189096	0.00649669	0.000207449	0.00294884	0.0049269	0.00326292	0.0493198	0.091306	0.0225531	3.55232e-05	0.0122848	0.0601008	2.10314e-05	0.00294094	0.000182449	0.0013153	0.00129375	1.74087e-09	4.63488e-24	6.27924e-09	1.16387e-07	5.98489e-08	9.06357e-11	0	2.92877e-06	2.41517e-11	-1.02916e-05	0.000580289	-0.171746	-0.0329269	0.100945	-0.0847359	-0.0679673	0.0129397	-0.1	-0.45927	0
2375	12.3353	0	0.103756	12.2316	12.4972	12.4908	12.2185	10.477	1.01392	0.727605	0.272353	0.00632658	0.0189096	0.00649669	0.000207449	0.00294884	0.0049269	0.00326292	0.0493198	0.091306	0.0225531	3.55232e-05	0.0122848	0.0601008	2.10314e-05	0.00294094	0.000182449	0.0013153	0.00129375	1.74087e-09	4.63488e-24	6.27924e-09	1.16387e-07	5.98489e-08	9.06357e-11	0	2.92877e-06	2.41517e-11	-1.02916e-05	0.000580289	-0.171746	-0.0329269	0.100945	-0.0847359	-0.0679673	0.0129397	-0.1	-0.45927	0
2376	12.3353	0	0.103756	12.2316	12.4972	12.4908	12.2185	10.477	1.01392	0.727605	0.272353	0.00632658	0.0189096	0.00649669	0.000207449	0.00294884	0.0049269	0.00326292	0.0493198	0.091306	0.0225531	3.55232e-05	0.0122848	0.0601008	2.10314e-05	0.00294094	0.000182449	0.0013153	0.00129375	1.74087e-09	4.63488e-24	6.27924e-09	1.16387e-07	5.98489e-08	9.06357e-11	0	2.92877e-06	2.41517e-11	-1.02916e-05	0.000580289	-0.171746	-0.0329269	0.100945	-0.0847359	-0.0679673	0.0129397	-0.1	-0.45927	0
2377	12.3353	0	0.103756	12.2316	12.4972	12.4908	12.2185	10.477	1.01392	0.727605	0.272353	0.00632658	0.0189096	0.00649669	0.000207449	0.00294884	0.0049269	0.00326292	0.0493198	0.091306	0.0225531	3.55232e-05	0.0122848	0.0601008	2.10314e-05	0.00294094	0.000182449	0.0013153	0.00129375	1.74087e-09	4.63488e-24	6.27924e-09	1.16387e-07	5.98489e-08	9.06357e-11	0	2.92877e-06	2.41517e-11	-1.02916e-05	0.000580289	-0.171746	-0.0329269	0.100945	-0.0847359	-0.0679673	0.0129397	-0.1	-0.45927	0
2378	12.3353	0	0.103756	12.2316	12.4972	12.4908	12.2185	10.477	1.01392	0.727605	0.272353	0.00632658	0.0189096	0.00649669	0.000207449	0.00294884	0.0049269	0.00326292	0.0493198	0.091306	0.0225531	3.55232e-05	0.0122848	0.0601008	2.10314e-05	0.00294094	0.000182449	0.0013153	0.00129375	1.74087e-09	4.63488e-24	6.27924e-09	1.16387e-07	5.98489e-08	9.06357e-11	0	2.92877e-06	2.41517e-11	-1.02916e-05	0.000580289	-0.171746	-0.0329269	0.100945	-0.0847359	-0.0679673	0.0129397	-0.1	-0.45927	0
2379	12.3353	0	0.103756	12.2316	12.4972	12.4908	12.2185	10.477	1.01392	0.727605	0.272353	0.00632658	0.0189096	0.00649669	0.000207449	0.00294884	0.0049269	0.00326292	0.0493198	0.091306	0.0225531	3.55232e-05	0.0122848	0.0601008	2.10314e-05	0.00294094	0.000182449	0.0013153	0.00129375	1.74087e-09	4.63488e-24	6.27924e-09	1.16387e-07	5.98489e-08	9.06357e-11	0	2.92877e-06	2.41517e-11	-1.02916e-05	0.000580289	-0.171746	-0.0329269	0.100945	-0.0847359	-0.0679673	0.0129397	-0.1	-0.45927	0
2380	12.3353	0	0.103756	12.2316	12.4972	12.4908	12.2185	10.477	1.01392	0.727605	0.272353	0.00632658	0.0189096	0.00649669	0.000207449	0.00294884	0.0049269	0.00326292	0.0493198	0.091306	0.0225531	3.55232e-05	0.0122848	0.0601008	2.10314e-05	0.00294094	0.000182449	0.0013153	0.00129375	1.74087e-09	4.63488e-24	6.27924e-09	1.16387e-07	5.98489e-08	9.06357e-11	0	2.92877e-06	2.41517e-11	-1.02916e-05	0.000580289	-0.171746	-0.0329269	0.100945	-0.0847359	-0.0679673	0.0129397	-0.1	-0.45927	0
2381	12.3353	0	0.103756	12.2316	12.4972	12.4908	12.2185	10.477	1.01392	0.727605	0.272353	0.00632658	0.0189096	0.00649669	0.000207449	0.00294884	0.0049269	0.00326292	0.0493198	0.091306	0.0225531	3.55232e-05	0.0122848	0.0601008	2.10314e-05	0.00294094	0.000182449	0.0013153	0.00129375	1.74087e-09	4.63488e-24	6.27924e-09	1.16387e-07	5.98489e-08	9.06357e-11	0	2.92877e-06	2.41517e-11	-1.02916e-05	0.000580289	-0.171746	-0.0329269	0.100945	-0.0847359	-0.0679673	0.0129397	-0.1	-0.45927	0
2382	12.3353	0	0.103756	12.2316	12.4972	12.4908	12.2185	10.477	1.01392	0.727605	0.272353	0.00632658	0.0189096	0.00649669	0.000207449	0.00294884	0.0049269	0.00326292	0.0493198	0.091306	0.0225531	3.55232e-05	0.0122848	0.0601008	2.10314e-05	0.00294094	0.000182449	0.0013153	0.00129375	1.74087e-09	4.63488e-24	6.27924e-09	1.16387e-07	5.98489e-08	9.06357e-11	0	2.92877e-06	2.41517e-11	-1.02916e-05	0.000580289	-0.171746	-0.0329269	0.100945	-0.0847359	-0.0679673	0.0129397	-0.1	-0.45927	0
2383	12.3353	0	0.103756	12.2316	12.4972	12.4908	12.2185	10.477	1.01392	0.727605	0.272353	0.00632658	0.0189096	0.00649669	0.000207449	0.00294884	0.0049269	0.00326292	0.0493198	0.091306	0.0225531	3.55232e-05	0.0122848	0.0601008	2.10314e-05	0.00294094	0.000182449	0.0013153	0.00129375	1.74087e-09	4.63488e-24	6.27924e-09	1.16387e-07	5.98489e-08	9.06357e-11	0	2.92877e-06	2.41517e-11	-1.02916e-05	0.000580289	-0.171746	-0.0329269	0.100945	-0.0847359	-0.0679673	0.0129397	-0.1	-0.45927	0
2384	12.3353	0	0.103756	12.2316	12.4972	12.4908	12.2185	10.477	1.01392	0.727605	0.272353	0.00632658	0.0189096	0.00649669	0.000207449	0.00294884	0.0049269	0.00326292	0.0493198	0.091306	0.0225531	3.55232e-05	0.0122848	0.0601008	2.10314e-05	0.00294094	0.000182449	0.0013153	0.00129375	1.74087e-09	4.63488e-24	6.27924e-09	1.16387e-07	5.98489e-08	9.06357e-11	0	2.92877e-06	2.41517e-11	-1.02916e-05	0.000580289	-0.171746	-0.0329269	0.100945	-0.0847359	-0.0679673	0.0129397	-0.1	-0.45927	0
2385	12.3353	0	0.103756	12.2316	12.4972	12.4908	12.2185	10.477	1.01392	0.727605	0.272353	0.00632658	0.0189096	0.00649669	0.000207449	0.00294884	0.0049269	0.00326292	0.0493198	0.091306	0.0225531	3.55232e-05	0.0122848	0.0601008	2.10314e-05	0.00294094	0.000182449	0.0013153	0.00129375	1.74087e-09	4.63488e-24	6.27924e-09	1.16387e-07	5.98489e-08	9.06357e-11	0	2.92877e-06	2.41517e-11	-1.02916e-05	0.000580289	-0.171746	-0.0329269	0.100945	-0.0847359	-0.0679673	0.0129397	-0.1	-0.45927	0
2386	12.3353	0	0.103756	12.2316	12.4972	12.4908	12.2185	10.477	1.01392	0.727605	0.272353	0.00632658	0.0189096	0.00649669	0.000207449	0.00294884	0.0049269	0.00326292	0.0493198	0.091306	0.0225531	3.55232e-05	0.0122848	0.0601008	2.10314e-05	0.00294094	0.000182449	0.0013153	0.00129375	1.74087e-09	4.63488e-24	6.27924e-09	1.16387e-07	5.98489e-08	9.06357e-11	0	2.92877e-06	2.41517e-11	-1.02916e-05	0.000580289	-0.171746	-0.0329269	0.100945	-0.0847359	-0.0679673	0.0129397	-0.1	-0.45927	0
2387	12.3353	0	0.103756	12.2316	12.4972	12.4908	12.2185	10.477	1.01392	0.727605	0.272353	0.00632658	0.0189096	0.00649669	0.000207449	0.00294884	0.0049269	0.00326292	0.0493198	0.091306	0.0225531	3.55232e-05	0.0122848	0.0601008	2.10314e-05	0.00294094	0.000182449	0.0013153	0.00129375	1.74087e-09	4.63488e-24	6.27924e-09	1.16387e-07	5.98489e-08	9.06357e-11	0	2.92877e-06	2.41517e-11	-1.02916e-05	0.000580289	-0.171746	-0.0329269	0.100945	-0.0847359	-0.0679673	0.0129397	-0.1	-0.45927	0
2388	12.3353	0	0.103756	12.2316	12.4972	12.4908	12.2185	10.477	1.01392	0.727605	0.272353	0.00632658	0.0189096	0.00649669	0.000207449	0.00294884	0.0049269	0.00326292	0.0493198	0.091306	0.0225531	3.55232e-05	0.0122848	0.0601008	2.10314e-05	0.00294094	0.000182449	0.0013153	0.00129375	1.74087e-09	4.63488e-24	6.27924e-09	1.16387e-07	5.98489e-08	9.06357e-11	0	2.92877e-06	2.41517e-11	-1.02916e-05	0.000580289	-0.171746	-0.0329269	0.100945	-0.0847359	-0.0679673	0.0129397	-0.1	-0.45927	0
2389	12.3353	0	0.103756	12.2316	12.4972	12.4908	12.2185	10.477	1.01392	0.727605	0.272353	0.00632658	0.0189096	0.00649669	0.000207449	0.00294884	0.0049269	0.00326292	0.0493198	0.091306	0.0225531	3.55232e-05	0.0122848	0.0601008	2.10314e-05	0.00294094	0.000182449	0.0013153	0.00129375	1.74087e-09	4.63488e-24	6.27924e-09	1.16387e-07	5.98489e-08	9.06357e-11	0	2.92877e-06	2.41517e-11	-1.02916e-05	0.000580289	-0.171746	-0.0329269	0.100945	-0.0847359	-0.0679673	0.0129397	-0.1	-0.45927	0
2390	12.3353	0	0.103756	12.2316	12.4972	12.4908	12.2185	10.477	1.01392	0.727605	0.272353	0.00632658	0.0189096	0.00649669	0.000207449	0.00294884	0.0049269	0.00326292	0.0493198	0.091306	0.0225531	3.55232e-05	0.0122848	0.0601008	2.10314e-05	0.00294094	0.000182449	0.0013153	0.00129375	1.74087e-09	4.63488e-24	6.27924e-09	1.16387e-07	5.98489e-08	9.06357e-11	0	2.92877e-06	2.41517e-11	-1.02916e-05	0.000580289	-0.171746	-0.0329269	0.100945	-0.0847359	-0.0679673	0.0129397	-0.1	-0.45927	0
2391	12.3353	0	0.103756	12.2316	12.4972	12.4908	12.2185	10.477	1.01392	0.727605	0.272353	0.00632658	0.0189096	0.00649669	0.000207449	0.00294884	0.0049269	0.00326292	0.0493198	0.091306	0.0225531	3.55232e-05	0.0122848	0.0601008	2.10314e-05	0.00294094	0.000182449	0.0013153	0.00129375	1.74087e-09	4.63488e-24	6.27924e-09	1.16387e-07	5.98489e-08	9.06357e-11	0	2.92877e-06	2.41517e-11	-1.02916e-05	0.000580289	-0.171746	-0.0329269	0.100945	-0.0847359	-0.0679673	0.0129397	-0.1	-0.45927	0
2392	12.3353	0	0.103756	12.2316	12.4972	12.4908	12.2185	10.477	1.01392	0.727605	0.272353	0.00632658	0.0189096	0.00649669	0.000207449	0.00294884	0.0049269	0.00326292	0.0493198	0.091306	0.0225531	3.55232e-05	0.0122848	0.0601008	2.10314e-05	0.00294094	0.000182449	0.0013153	0.00129375	1.74087e-09	4.63488e-24	6.27924e-09	1.16387e-07	5.98489e-08	9.06357e-11	0	2.92877e-06	2.41517e-11	-1.02916e-05	0.000580289	-0.171746	-0.0329269	0.100945	-0.0847359	-0.0679673	0.0129397	-0.1	-0.45927	0
2393	12.3353	0	0.103756	12.2316	12.4972	12.4908	12.2185	10.477	1.01392	0.727605	0.272353	0.00632658	0.0189096	0.00649669	0.000207449	0.00294884	0.0049269	0.00326292	0.0493198	0.091306	0.0225531	3.55232e-05	0.0122848	0.0601008	2.10314e-05	0.00294094	0.000182449	0.0013153	0.00129375	1.74087e-09	4.63488e-24	6.27924e-09	1.16387e-07	5.98489e-08	9.06357e-11	0	2.92877e-06	2.41517e-11	-1.02916e-05	0.000580289	-0.171746	-0.0329269	0.100945	-0.0847359	-0.0679673	0.0129397	-0.1	-0.45927	0
2394	12.3353	0	0.103756	12.2316	12.4972	12.4908	12.2185	10.477	1.01392	0.727605	0.272353	0.00632658	0.0189096	0.00649669	0.000207449	0.00294884	0.0049269	0.00326292	0.0493198	0.091306	0.0225531	3.55232e-05	0.0122848	0.0601008	2.10314e-05	0.00294094	0.000182449	0.0013153	0.00129375	1.74087e-09	4.63488e-24	6.27924e-09	1.16387e-07	5.98489e-08	9.06357e-11	0	2.92877e-06	2.41517e-11	-1.02916e-05	0.000580289	-0.171746	-0.0329269	0.100945	-0.0847359	-0.0679673	0.0129397	-0.1	-0.45927	0
2395	12.3353	0	0.103756	12.2316	12.4972	12.4908	12.2185	10.477	1.01392	0.727605	0.272353	0.00632658	0.0189096	0.00649669	0.000207449	0.00294884	0.0049269	0.00326292	0.0493198	0.091306	0.0225531	3.55232e-05	0.0122848	0.0601008	2.10314e-05	0.00294094	0.000182449	0.0013153	0.00129375	1.74087e-09	4.63488e-24	6.27924e-09	1.16387e-07	5.98489e-08	9.06357e-11	0	2.92877e-06	2.41517e-11	-1.02916e-05	0.000580289	-0.171746	-0.0329269	0.100945	-0.0847359	-0.0679673	0.0129397	-0.1	-0.45927	0
2396	12.3353	0	0.103756	12.2316	12.4972	12.4908	12.2185	10.477	1.01392	0.727605	0.272353	0.00632658	0.0189096	0.00649669	0.000207449	0.00294884	0.0049269	0.00326292	0.0493198	0.091306	0.0225531	3.55232e-05	0.0122848	0.0601008	2.10314e-05	0.00294094	0.000182449	0.0013153	0.00129375	1.74087e-09	4.63488e-24	6.27924e-09	1.16387e-07	5.98489e-08	9.06357e-11	0	2.92877e-06	2.41517e-11	-1.02916e-05	0.000580289	-0.171746	-0.0329269	0.100945	-0.0847359	-0.0679673	0.0129397	-0.1	-0.45927	0
2397	12.3353	0	0.103756	12.2316	12.4972	12.4908	12.2185	10.477	1.01392	0.727605	0.272353	0.00632658	0.0189096	0.00649669	0.000207449	0.00294884	0.0049269	0.00326292	0.0493198	0.091306	0.0225531	3.55232e-05	0.0122848	0.0601008	2.10314e-05	0.00294094	0.000182449	0.0013153	0.00129375	1.74087e-09	4.63488e-24	6.27924e-09	1.16387e-07	5.98489e-08	9.06357e-11	0	2.92877e-06	2.41517e-11	-1.02916e-05	0.000580289	-0.171746	-0.0329269	0.100945	-0.0847359	-0.0679673	0.0129397	-0.1	-0.45927	0
2398	12.3353	0	0.103756	12.2316	12.4972	12.4908	12.2185	10.477	1.01392	0.727605	0.272353	0.00632658	0.0189096	0.00649669	0.000207449	0.00294884	0.0049269	0.00326292	0.0493198	0.091306	0.0225531	3.55232e-05	0.0122848	0.0601008	2.10314e-05	0.00294094	0.000182449	0.0013153	0.00129375	1.74087e-09	4.63488e-24	6.27924e-09	1.16387e-07	5.98489e-08	9.06357e-11	0	2.92877e-06	2.41517e-11	-1.02916e-05	0.000580289	-0.171746	-0.0329269	0.100945	-0.0847359	-0.0679673	0.0129397	-0.1	-0.45927	0
2399	12.3353	0	0.103756	12.2316	12.4972	12.4908	12.2185	10.477	1.01392	0.727605	0.272353	0.00632658	0.0189096	0.00649669	0.000207449	0.00294884	0.0049269	0.00326292	0.0493198	0.091306	0.0225531	3.55232e-05	0.0122848	0.0601008	2.10314e-05	0.00294094	0.000182449	0.0013153	0.00129375	1.74087e-09	4.63488e-24	6.27924e-09	1.16387e-07	5.98489e-08	9.06357e-11	0	2.92877e-06	2.41517e-11	-1.02916e-05	0.000580289	-0.171746	-0.0329269	0.100945	-0.0847359	-0.0679673	0.0129397	-0.1	-0.45927	0
2400	12.3353	0	0.103756	12.2316	12.4972	12.4908	12.2185	10.477	1.01392	0.727605	0.272353	0.00632658	0.0189096	0.00649669	0.000207449	0.00294884	0.0049269	0.00326292	0.0493198	0.091306	0.0225531	3.55232e-05	0.0122848	0.0601008	2.10314e-05	0.00294094	0.000182449	0.0013153	0.00129375	1.74087e-09	4.63488e-24	6.27924e-09	1.16387e-07	5.98489e-08	9.06357e-11	0	2.92877e-06	2.41517e-11	-1.02916e-05	0.000580289	-0.171746	-0.0329269	0.100945	-0.0847359	-0.0679673	0.0129397	-0.1	-0.45927	0
2401	12.3353	0	0.103756	12.2316	12.4972	12.4908	12.2185	10.477	1.01392	0.727605	0.272353	0.00632658	0.0189096	0.00649669	0.000207449	0.00294884	0.0049269	0.00326292	0.0493198	0.091306	0.0225531	3.55232e-05	0.0122848	0.0601008	2.10314e-05	0.00294094	0.000182449	0.0013153	0.00129375	1.74087e-09	4.63488e-24	6.27924e-09	1.16387e-07	5.98489e-08	9.06357e-11	0	2.92877e-06	2.41517e-11	-1.02916e-05	0.000580289	-0.171746	-0.0329269	0.100945	-0.0847359	-0.0679673	0.0129397	-0.1	-0.45927	0
2402	12.3353	0	0.103756	12.2316	12.4972	12.4908	12.2185	10.477	1.01392	0.727605	0.272353	0.00632658	0.0189096	0.00649669	0.000207449	0.00294884	0.0049269	0.00326292	0.0493198	0.091306	0.0225531	3.55232e-05	0.0122848	0.0601008	2.10314e-05	0.00294094	0.000182449	0.0013153	0.00129375	1.74087e-09	4.63488e-24	6.27924e-09	1.16387e-07	5.98489e-08	9.06357e-11	0	2.92877e-06	2.41517e-11	-1.02916e-05	0.000580289	-0.171746	-0.0329269	0.100945	-0.0847359	-0.0679673	0.0129397	-0.1	-0.45927	0
2403	12.3353	0	0.103756	12.2316	12.4972	12.4908	12.2185	10.477	1.01392	0.727605	0.272353	0.00632658	0.0189096	0.00649669	0.000207449	0.00294884	0.0049269	0.00326292	0.0493198	0.091306	0.0225531	3.55232e-05	0.0122848	0.0601008	2.10314e-05	0.00294094	0.000182449	0.0013153	0.00129375	1.74087e-09	4.63488e-24	6.27924e-09	1.16387e-07	5.98489e-08	9.06357e-11	0	2.92877e-06	2.41517e-11	-1.02916e-05	0.000580289	-0.171746	-0.0329269	0.100945	-0.0847359	-0.0679673	0.0129397	-0.1	-0.45927	0
2404	12.3353	0	0.103756	12.2316	12.4972	12.4908	12.2185	10.477	1.01392	0.727605	0.272353	0.00632658	0.0189096	0.00649669	0.000207449	0.00294884	0.0049269	0.00326292	0.0493198	0.091306	0.0225531	3.55232e-05	0.0122848	0.0601008	2.10314e-05	0.00294094	0.000182449	0.0013153	0.00129375	1.74087e-09	4.63488e-24	6.27924e-09	1.16387e-07	5.98489e-08	9.06357e-11	0	2.92877e-06	2.41517e-11	-1.02916e-05	0.000580289	-0.171746	-0.0329269	0.100945	-0.0847359	-0.0679673	0.0129397	-0.1	-0.45927	0
2405	12.3353	0	0.103756	12.2316	12.4972	12.4908	12.2185	10.477	1.01392	0.727605	0.272353	0.00632658	0.0189096	0.00649669	0.000207449	0.00294884	0.0049269	0.00326292	0.0493198	0.091306	0.0225531	3.55232e-05	0.0122848	0.0601008	2.10314e-05	0.00294094	0.000182449	0.0013153	0.00129375	1.74087e-09	4.63488e-24	6.27924e-09	1.16387e-07	5.98489e-08	9.06357e-11	0	2.92877e-06	2.41517e-11	-1.02916e-05	0.000580289	-0.171746	-0.0329269	0.100945	-0.0847359	-0.0679673	0.0129397	-0.1	-0.45927	0
2406	12.3353	0	0.103756	12.2316	12.4972	12.4908	12.2185	10.477	1.01392	0.727605	0.272353	0.00632658	0.0189096	0.00649669	0.000207449	0.00294884	0.0049269	0.00326292	0.0493198	0.091306	0.0225531	3.55232e-05	0.0122848	0.0601008	2.10314e-05	0.00294094	0.000182449	0.0013153	0.00129375	1.74087e-09	4.63488e-24	6.27924e-09	1.16387e-07	5.98489e-08	9.06357e-11	0	2.92877e-06	2.41517e-11	-1.02916e-05	0.000580289	-0.171746	-0.0329269	0.100945	-0.0847359	-0.0679673	0.0129397	-0.1	-0.45927	0
2407	12.3353	0	0.103756	12.2316	12.4972	12.4908	12.2185	10.477	1.01392	0.727605	0.272353	0.00632658	0.0189096	0.00649669	0.000207449	0.00294884	0.0049269	0.00326292	0.0493198	0.091306	0.0225531	3.55232e-05	0.0122848	0.0601008	2.10314e-05	0.00294094	0.000182449	0.0013153	0.00129375	1.74087e-09	4.63488e-24	6.27924e-09	1.16387e-07	5.98489e-08	9.06357e-11	0	2.92877e-06	2.41517e-11	-1.02916e-05	0.000580289	-0.171746	-0.0329269	0.100945	-0.0847359	-0.0679673	0.0129397	-0.1	-0.45927	0
2408	12.3353	0	0.103756	12.2316	12.4972	12.4908	12.2185	10.477	1.01392	0.727605	0.272353	0.00632658	0.0189096	0.00649669	0.000207449	0.00294884	0.0049269	0.00326292	0.0493198	0.091306	0.0225531	3.55232e-05	0.0122848	0.0601008	2.10314e-05	0.00294094	0.000182449	0.0013153	0.00129375	1.74087e-09	4.63488e-24	6.27924e-09	1.16387e-07	5.98489e-08	9.06357e-11	0	2.92877e-06	2.41517e-11	-1.02916e-05	0.000580289	-0.171746	-0.0329269	0.100945	-0.0847359	-0.0679673	0.0129397	-0.1	-0.45927	0
2409	12.3353	0	0.103756	12.2316	12.4972	12.4908	12.2185	10.477	1.01392	0.727605	0.272353	0.00632658	0.0189096	0.00649669	0.000207449	0.00294884	0.0049269	0.00326292	0.0493198	0.091306	0.0225531	3.55232e-05	0.0122848	0.0601008	2.10314e-05	0.00294094	0.000182449	0.0013153	0.00129375	1.74087e-09	4.63488e-24	6.27924e-09	1.16387e-07	5.98489e-08	9.06357e-11	0	2.92877e-06	2.41517e-11	-1.02916e-05	0.000580289	-0.171746	-0.0329269	0.100945	-0.0847359	-0.0679673	0.0129397	-0.1	-0.45927	0
2410	12.3353	0	0.103756	12.2316	12.4972	12.4908	12.2185	10.477	1.01392	0.727605	0.272353	0.00632658	0.0189096	0.00649669	0.000207449	0.00294884	0.0049269	0.00326292	0.0493198	0.091306	0.0225531	3.55232e-05	0.0122848	0.0601008	2.10314e-05	0.00294094	0.000182449	0.0013153	0.00129375	1.74087e-09	4.63488e-24	6.27924e-09	1.16387e-07	5.98489e-08	9.06357e-11	0	2.92877e-06	2.41517e-11	-1.02916e-05	0.000580289	-0.171746	-0.0329269	0.100945	-0.0847359	-0.0679673	0.0129397	-0.1	-0.45927	0
2411	12.3353	0	0.103756	12.2316	12.4972	12.4908	12.2185	10.477	1.01392	0.727605	0.272353	0.00632658	0.0189096	0.00649669	0.000207449	0.00294884	0.0049269	0.00326292	0.0493198	0.091306	0.0225531	3.55232e-05	0.0122848	0.0601008	2.10314e-05	0.00294094	0.000182449	0.0013153	0.00129375	1.74087e-09	4.63488e-24	6.27924e-09	1.16387e-07	5.98489e-08	9.06357e-11	0	2.92877e-06	2.41517e-11	-1.02916e-05	0.000580289	-0.171746	-0.0329269	0.100945	-0.0847359	-0.0679673	0.0129397	-0.1	-0.45927	0
2412	12.3353	0	0.103756	12.2316	12.4972	12.4908	12.2185	10.477	1.01392	0.727605	0.272353	0.00632658	0.0189096	0.00649669	0.000207449	0.00294884	0.0049269	0.00326292	0.0493198	0.091306	0.0225531	3.55232e-05	0.0122848	0.0601008	2.10314e-05	0.00294094	0.000182449	0.0013153	0.00129375	1.74087e-09	4.63488e-24	6.27924e-09	1.16387e-07	5.98489e-08	9.06357e-11	0	2.92877e-06	2.41517e-11	-1.02916e-05	0.000580289	-0.171746	-0.0329269	0.100945	-0.0847359	-0.0679673	0.0129397	-0.1	-0.45927	0
2413	12.3353	0	0.103756	12.2316	12.4972	12.4908	12.2185	10.477	1.01392	0.727605	0.272353	0.00632658	0.0189096	0.00649669	0.000207449	0.00294884	0.0049269	0.00326292	0.0493198	0.091306	0.0225531	3.55232e-05	0.0122848	0.0601008	2.10314e-05	0.00294094	0.000182449	0.0013153	0.00129375	1.74087e-09	4.63488e-24	6.27924e-09	1.16387e-07	5.98489e-08	9.06357e-11	0	2.92877e-06	2.41517e-11	-1.02916e-05	0.000580289	-0.171746	-0.0329269	0.100945	-0.0847359	-0.0679673	0.0129397	-0.1	-0.45927	0
2414	12.3353	0	0.103756	12.2316	12.4972	12.4908	12.2185	10.477	1.01392	0.727605	0.272353	0.00632658	0.0189096	0.00649669	0.000207449	0.00294884	0.0049269	0.00326292	0.0493198	0.091306	0.0225531	3.55232e-05	0.0122848	0.0601008	2.10314e-05	0.00294094	0.000182449	0.0013153	0.00129375	1.74087e-09	4.63488e-24	6.27924e-09	1.16387e-07	5.98489e-08	9.06357e-11	0	2.92877e-06	2.41517e-11	-1.02916e-05	0.000580289	-0.171746	-0.0329269	0.100945	-0.0847359	-0.0679673	0.0129397	-0.1	-0.45927	0
2415	12.3353	0	0.103756	12.2316	12.4972	12.4908	12.2185	10.477	1.01392	0.727605	0.272353	0.00632658	0.0189096	0.00649669	0.000207449	0.00294884	0.0049269	0.00326292	0.0493198	0.091306	0.0225531	3.55232e-05	0.0122848	0.0601008	2.10314e-05	0.00294094	0.000182449	0.0013153	0.00129375	1.74087e-09	4.63488e-24	6.27924e-09	1.16387e-07	5.98489e-08	9.06357e-11	0	2.92877e-06	2.41517e-11	-1.02916e-05	0.000580289	-0.171746	-0.0329269	0.100945	-0.0847359	-0.0679673	0.0129397	-0.1	-0.45927	0
2416	12.3353	0	0.103756	12.2316	12.4972	12.4908	12.2185	10.477	1.01392	0.727605	0.272353	0.00632658	0.0189096	0.00649669	0.000207449	0.00294884	0.0049269	0.00326292	0.0493198	0.091306	0.0225531	3.55232e-05	0.0122848	0.0601008	2.10314e-05	0.00294094	0.000182449	0.0013153	0.00129375	1.74087e-09	4.63488e-24	6.27924e-09	1.16387e-07	5.98489e-08	9.06357e-11	0	2.92877e-06	2.41517e-11	-1.02916e-05	0.000580289	-0.171746	-0.0329269	0.100945	-0.0847359	-0.0679673	0.0129397	-0.1	-0.45927	0
2417	12.3353	0	0.103756	12.2316	12.4972	12.4908	12.2185	10.477	1.01392	0.727605	0.272353	0.00632658	0.0189096	0.00649669	0.000207449	0.00294884	0.0049269	0.00326292	0.0493198	0.091306	0.0225531	3.55232e-05	0.0122848	0.0601008	2.10314e-05	0.00294094	0.000182449	0.0013153	0.00129375	1.74087e-09	4.63488e-24	6.27924e-09	1.16387e-07	5.98489e-08	9.06357e-11	0	2.92877e-06	2.41517e-11	-1.02916e-05	0.000580289	-0.171746	-0.0329269	0.100945	-0.0847359	-0.0679673	0.0129397	-0.1	-0.45927	0
2418	12.3353	0	0.103756	12.2316	12.4972	12.4908	12.2185	10.477	1.01392	0.727605	0.272353	0.00632658	0.0189096	0.00649669	0.000207449	0.00294884	0.0049269	0.00326292	0.0493198	0.091306	0.0225531	3.55232e-05	0.0122848	0.0601008	2.10314e-05	0.00294094	0.000182449	0.0013153	0.00129375	1.74087e-09	4.63488e-24	6.27924e-09	1.16387e-07	5.98489e-08	9.06357e-11	0	2.92877e-06	2.41517e-11	-1.02916e-05	0.000580289	-0.171746	-0.0329269	0.100945	-0.0847359	-0.0679673	0.0129397	-0.1	-0.45927	0
2419	12.3353	0	0.103756	12.2316	12.4972	12.4908	12.2185	10.477	1.01392	0.727605	0.272353	0.00632658	0.0189096	0.00649669	0.000207449	0.00294884	0.0049269	0.00326292	0.0493198	0.091306	0.0225531	3.55232e-05	0.0122848	0.0601008	2.10314e-05	0.00294094	0.000182449	0.0013153	0.00129375	1.74087e-09	4.63488e-24	6.27924e-09	1.16387e-07	5.98489e-08	9.06357e-11	0	2.92877e-06	2.41517e-11	-1.02916e-05	0.000580289	-0.171746	-0.0329269	0.100945	-0.0847359	-0.0679673	0.0129397	-0.1	-0.45927	0
2420	12.3353	0	0.103756	12.2316	12.4972	12.4908	12.2185	10.477	1.01392	0.727605	0.272353	0.00632658	0.0189096	0.00649669	0.000207449	0.00294884	0.0049269	0.00326292	0.0493198	0.091306	0.0225531	3.55232e-05	0.0122848	0.0601008	2.10314e-05	0.00294094	0.000182449	0.0013153	0.00129375	1.74087e-09	4.63488e-24	6.27924e-09	1.16387e-07	5.98489e-08	9.06357e-11	0	2.92877e-06	2.41517e-11	-1.02916e-05	0.000580289	-0.171746	-0.0329269	0.100945	-0.0847359	-0.0679673	0.0129397	-0.1	-0.45927	0
2421	12.3353	0	0.103756	12.2316	12.4972	12.4908	12.2185	10.477	1.01392	0.727605	0.272353	0.00632658	0.0189096	0.00649669	0.000207449	0.00294884	0.0049269	0.00326292	0.0493198	0.091306	0.0225531	3.55232e-05	0.0122848	0.0601008	2.10314e-05	0.00294094	0.000182449	0.0013153	0.00129375	1.74087e-09	4.63488e-24	6.27924e-09	1.16387e-07	5.98489e-08	9.06357e-11	0	2.92877e-06	2.41517e-11	-1.02916e-05	0.000580289	-0.171746	-0.0329269	0.100945	-0.0847359	-0.0679673	0.0129397	-0.1	-0.45927	0
2422	12.3353	0	0.103756	12.2316	12.4972	12.4908	12.2185	10.477	1.01392	0.727605	0.272353	0.00632658	0.0189096	0.00649669	0.000207449	0.00294884	0.0049269	0.00326292	0.0493198	0.091306	0.0225531	3.55232e-05	0.0122848	0.0601008	2.10314e-05	0.00294094	0.000182449	0.0013153	0.00129375	1.74087e-09	4.63488e-24	6.27924e-09	1.16387e-07	5.98489e-08	9.06357e-11	0	2.92877e-06	2.41517e-11	-1.02916e-05	0.000580289	-0.171746	-0.0329269	0.100945	-0.0847359	-0.0679673	0.0129397	-0.1	-0.45927	0
2423	12.3353	0	0.103756	12.2316	12.4972	12.4908	12.2185	10.477	1.01392	0.727605	0.272353	0.00632658	0.0189096	0.00649669	0.000207449	0.00294884	0.0049269	0.00326292	0.0493198	0.091306	0.0225531	3.55232e-05	0.0122848	0.0601008	2.10314e-05	0.00294094	0.000182449	0.0013153	0.00129375	1.74087e-09	4.63488e-24	6.27924e-09	1.16387e-07	5.98489e-08	9.06357e-11	0	2.92877e-06	2.41517e-11	-1.02916e-05	0.000580289	-0.171746	-0.0329269	0.100945	-0.0847359	-0.0679673	0.0129397	-0.1	-0.45927	0
2424	12.3353	0	0.103756	12.2316	12.4972	12.4908	12.2185	10.477	1.01392	0.727605	0.272353	0.00632658	0.0189096	0.00649669	0.000207449	0.00294884	0.0049269	0.00326292	0.0493198	0.091306	0.0225531	3.55232e-05	0.0122848	0.0601008	2.10314e-05	0.00294094	0.000182449	0.0013153	0.00129375	1.74087e-09	4.63488e-24	6.27924e-09	1.16387e-07	5.98489e-08	9.06357e-11	0	2.92877e-06	2.41517e-11	-1.02916e-05	0.000580289	-0.171746	-0.0329269	0.100945	-0.0847359	-0.0679673	0.0129397	-0.1	-0.45927	0
2425	12.3353	0	0.103756	12.2316	12.4972	12.4908	12.2185	10.477	1.01392	0.727605	0.272353	0.00632658	0.0189096	0.00649669	0.000207449	0.00294884	0.0049269	0.00326292	0.0493198	0.091306	0.0225531	3.55232e-05	0.0122848	0.0601008	2.10314e-05	0.00294094	0.000182449	0.0013153	0.00129375	1.74087e-09	4.63488e-24	6.27924e-09	1.16387e-07	5.98489e-08	9.06357e-11	0	2.92877e-06	2.41517e-11	-1.02916e-05	0.000580289	-0.171746	-0.0329269	0.100945	-0.0847359	-0.0679673	0.0129397	-0.1	-0.45927	0
2426	12.3353	0	0.103756	12.2316	12.4972	12.4908	12.2185	10.477	1.01392	0.727605	0.272353	0.00632658	0.0189096	0.00649669	0.000207449	0.00294884	0.0049269	0.00326292	0.0493198	0.091306	0.0225531	3.55232e-05	0.0122848	0.0601008	2.10314e-05	0.00294094	0.000182449	0.0013153	0.00129375	1.74087e-09	4.63488e-24	6.27924e-09	1.16387e-07	5.98489e-08	9.06357e-11	0	2.92877e-06	2.41517e-11	-1.02916e-05	0.000580289	-0.171746	-0.0329269	0.100945	-0.0847359	-0.0679673	0.0129397	-0.1	-0.45927	0
2427	12.3353	0	0.103756	12.2316	12.4972	12.4908	12.2185	10.477	1.01392	0.727605	0.272353	0.00632658	0.0189096	0.00649669	0.000207449	0.00294884	0.0049269	0.00326292	0.0493198	0.091306	0.0225531	3.55232e-05	0.0122848	0.0601008	2.10314e-05	0.00294094	0.000182449	0.0013153	0.00129375	1.74087e-09	4.63488e-24	6.27924e-09	1.16387e-07	5.98489e-08	9.06357e-11	0	2.92877e-06	2.41517e-11	-1.02916e-05	0.000580289	-0.171746	-0.0329269	0.100945	-0.0847359	-0.0679673	0.0129397	-0.1	-0.45927	0
2428	12.3353	0	0.103756	12.2316	12.4972	12.4908	12.2185	10.477	1.01392	0.727605	0.272353	0.00632658	0.0189096	0.00649669	0.000207449	0.00294884	0.0049269	0.00326292	0.0493198	0.091306	0.0225531	3.55232e-05	0.0122848	0.0601008	2.10314e-05	0.00294094	0.000182449	0.0013153	0.00129375	1.74087e-09	4.63488e-24	6.27924e-09	1.16387e-07	5.98489e-08	9.06357e-11	0	2.92877e-06	2.41517e-11	-1.02916e-05	0.000580289	-0.171746	-0.0329269	0.100945	-0.0847359	-0.0679673	0.0129397	-0.1	-0.45927	0
2429	12.3353	0	0.103756	12.2316	12.4972	12.4908	12.2185	10.477	1.01392	0.727605	0.272353	0.00632658	0.0189096	0.00649669	0.000207449	0.00294884	0.0049269	0.00326292	0.0493198	0.091306	0.0225531	3.55232e-05	0.0122848	0.0601008	2.10314e-05	0.00294094	0.000182449	0.0013153	0.00129375	1.74087e-09	4.63488e-24	6.27924e-09	1.16387e-07	5.98489e-08	9.06357e-11	0	2.92877e-06	2.41517e-11	-1.02916e-05	0.000580289	-0.171746	-0.0329269	0.100945	-0.0847359	-0.0679673	0.0129397	-0.1	-0.45927	0
2430	12.3353	0	0.103756	12.2316	12.4972	12.4908	12.2185	10.477	1.01392	0.727605	0.272353	0.00632658	0.0189096	0.00649669	0.000207449	0.00294884	0.0049269	0.00326292	0.0493198	0.091306	0.0225531	3.55232e-05	0.0122848	0.0601008	2.10314e-05	0.00294094	0.000182449	0.0013153	0.00129375	1.74087e-09	4.63488e-24	6.27924e-09	1.16387e-07	5.98489e-08	9.06357e-11	0	2.92877e-06	2.41517e-11	-1.02916e-05	0.000580289	-0.171746	-0.0329269	0.100945	-0.0847359	-0.0679673	0.0129397	-0.1	-0.45927	0
2431	12.3353	0	0.103756	12.2316	12.4972	12.4908	12.2185	10.477	1.01392	0.727605	0.272353	0.00632658	0.0189096	0.00649669	0.000207449	0.00294884	0.0049269	0.00326292	0.0493198	0.091306	0.0225531	3.55232e-05	0.0122848	0.0601008	2.10314e-05	0.00294094	0.000182449	0.0013153	0.00129375	1.74087e-09	4.63488e-24	6.27924e-09	1.16387e-07	5.98489e-08	9.06357e-11	0	2.92877e-06	2.41517e-11	-1.02916e-05	0.000580289	-0.171746	-0.0329269	0.100945	-0.0847359	-0.0679673	0.0129397	-0.1	-0.45927	0
2432	12.3353	0	0.103756	12.2316	12.4972	12.4908	12.2185	10.477	1.01392	0.727605	0.272353	0.00632658	0.0189096	0.00649669	0.000207449	0.00294884	0.0049269	0.00326292	0.0493198	0.091306	0.0225531	3.55232e-05	0.0122848	0.0601008	2.10314e-05	0.00294094	0.000182449	0.0013153	0.00129375	1.74087e-09	4.63488e-24	6.27924e-09	1.16387e-07	5.98489e-08	9.06357e-11	0	2.92877e-06	2.41517e-11	-1.02916e-05	0.000580289	-0.171746	-0.0329269	0.100945	-0.0847359	-0.0679673	0.0129397	-0.1	-0.45927	0
2433	12.3353	0	0.103756	12.2316	12.4972	12.4908	12.2185	10.477	1.01392	0.727605	0.272353	0.00632658	0.0189096	0.00649669	0.000207449	0.00294884	0.0049269	0.00326292	0.0493198	0.091306	0.0225531	3.55232e-05	0.0122848	0.0601008	2.10314e-05	0.00294094	0.000182449	0.0013153	0.00129375	1.74087e-09	4.63488e-24	6.27924e-09	1.16387e-07	5.98489e-08	9.06357e-11	0	2.92877e-06	2.41517e-11	-1.02916e-05	0.000580289	-0.171746	-0.0329269	0.100945	-0.0847359	-0.0679673	0.0129397	-0.1	-0.45927	0
2434	12.3353	0	0.103756	12.2316	12.4972	12.4908	12.2185	10.477	1.01392	0.727605	0.272353	0.00632658	0.0189096	0.00649669	0.000207449	0.00294884	0.0049269	0.00326292	0.0493198	0.091306	0.0225531	3.55232e-05	0.0122848	0.0601008	2.10314e-05	0.00294094	0.000182449	0.0013153	0.00129375	1.74087e-09	4.63488e-24	6.27924e-09	1.16387e-07	5.98489e-08	9.06357e-11	0	2.92877e-06	2.41517e-11	-1.02916e-05	0.000580289	-0.171746	-0.0329269	0.100945	-0.0847359	-0.0679673	0.0129397	-0.1	-0.45927	0
2435	12.3353	0	0.103756	12.2316	12.4972	12.4908	12.2185	10.477	1.01392	0.727605	0.272353	0.00632658	0.0189096	0.00649669	0.000207449	0.00294884	0.0049269	0.00326292	0.0493198	0.091306	0.0225531	3.55232e-05	0.0122848	0.0601008	2.10314e-05	0.00294094	0.000182449	0.0013153	0.00129375	1.74087e-09	4.63488e-24	6.27924e-09	1.16387e-07	5.98489e-08	9.06357e-11	0	2.92877e-06	2.41517e-11	-1.02916e-05	0.000580289	-0.171746	-0.0329269	0.100945	-0.0847359	-0.0679673	0.0129397	-0.1	-0.45927	0
2436	12.3353	0	0.103756	12.2316	12.4972	12.4908	12.2185	10.477	1.01392	0.727605	0.272353	0.00632658	0.0189096	0.00649669	0.000207449	0.00294884	0.0049269	0.00326292	0.0493198	0.091306	0.0225531	3.55232e-05	0.0122848	0.0601008	2.10314e-05	0.00294094	0.000182449	0.0013153	0.00129375	1.74087e-09	4.63488e-24	6.27924e-09	1.16387e-07	5.98489e-08	9.06357e-11	0	2.92877e-06	2.41517e-11	-1.02916e-05	0.000580289	-0.171746	-0.0329269	0.100945	-0.0847359	-0.0679673	0.0129397	-0.1	-0.45927	0
2437	12.3353	0	0.103756	12.2316	12.4972	12.4908	12.2185	10.477	1.01392	0.727605	0.272353	0.00632658	0.0189096	0.00649669	0.000207449	0.00294884	0.0049269	0.00326292	0.0493198	0.091306	0.0225531	3.55232e-05	0.0122848	0.0601008	2.10314e-05	0.00294094	0.000182449	0.0013153	0.00129375	1.74087e-09	4.63488e-24	6.27924e-09	1.16387e-07	5.98489e-08	9.06357e-11	0	2.92877e-06	2.41517e-11	-1.02916e-05	0.000580289	-0.171746	-0.0329269	0.100945	-0.0847359	-0.0679673	0.0129397	-0.1	-0.45927	0
2438	12.3353	0	0.103756	12.2316	12.4972	12.4908	12.2185	10.477	1.01392	0.727605	0.272353	0.00632658	0.0189096	0.00649669	0.000207449	0.00294884	0.0049269	0.00326292	0.0493198	0.091306	0.0225531	3.55232e-05	0.0122848	0.0601008	2.10314e-05	0.00294094	0.000182449	0.0013153	0.00129375	1.74087e-09	4.63488e-24	6.27924e-09	1.16387e-07	5.98489e-08	9.06357e-11	0	2.92877e-06	2.41517e-11	-1.02916e-05	0.000580289	-0.171746	-0.0329269	0.100945	-0.0847359	-0.0679673	0.0129397	-0.1	-0.45927	0
2439	12.3353	0	0.103756	12.2316	12.4972	12.4908	12.2185	10.477	1.01392	0.727605	0.272353	0.00632658	0.0189096	0.00649669	0.000207449	0.00294884	0.0049269	0.00326292	0.0493198	0.091306	0.0225531	3.55232e-05	0.0122848	0.0601008	2.10314e-05	0.00294094	0.000182449	0.0013153	0.00129375	1.74087e-09	4.63488e-24	6.27924e-09	1.16387e-07	5.98489e-08	9.06357e-11	0	2.92877e-06	2.41517e-11	-1.02916e-05	0.000580289	-0.171746	-0.0329269	0.100945	-0.0847359	-0.0679673	0.0129397	-0.1	-0.45927	0
2440	12.3353	0	0.103756	12.2316	12.4972	12.4908	12.2185	10.477	1.01392	0.727605	0.272353	0.00632658	0.0189096	0.00649669	0.000207449	0.00294884	0.0049269	0.00326292	0.0493198	0.091306	0.0225531	3.55232e-05	0.0122848	0.0601008	2.10314e-05	0.00294094	0.000182449	0.0013153	0.00129375	1.74087e-09	4.63488e-24	6.27924e-09	1.16387e-07	5.98489e-08	9.06357e-11	0	2.92877e-06	2.41517e-11	-1.02916e-05	0.000580289	-0.171746	-0.0329269	0.100945	-0.0847359	-0.0679673	0.0129397	-0.1	-0.45927	0
2441	12.3353	0	0.103756	12.2316	12.4972	12.4908	12.2185	10.477	1.01392	0.727605	0.272353	0.00632658	0.0189096	0.00649669	0.000207449	0.00294884	0.0049269	0.00326292	0.0493198	0.091306	0.0225531	3.55232e-05	0.0122848	0.0601008	2.10314e-05	0.00294094	0.000182449	0.0013153	0.00129375	1.74087e-09	4.63488e-24	6.27924e-09	1.16387e-07	5.98489e-08	9.06357e-11	0	2.92877e-06	2.41517e-11	-1.02916e-05	0.000580289	-0.171746	-0.0329269	0.100945	-0.0847359	-0.0679673	0.0129397	-0.1	-0.45927	0
2442	12.3353	0	0.103756	12.2316	12.4972	12.4908	12.2185	10.477	1.01392	0.727605	0.272353	0.00632658	0.0189096	0.00649669	0.000207449	0.00294884	0.0049269	0.00326292	0.0493198	0.091306	0.0225531	3.55232e-05	0.0122848	0.0601008	2.10314e-05	0.00294094	0.000182449	0.0013153	0.00129375	1.74087e-09	4.63488e-24	6.27924e-09	1.16387e-07	5.98489e-08	9.06357e-11	0	2.92877e-06	2.41517e-11	-1.02916e-05	0.000580289	-0.171746	-0.0329269	0.100945	-0.0847359	-0.0679673	0.0129397	-0.1	-0.45927	0
2443	12.3353	0	0.103756	12.2316	12.4972	12.4908	12.2185	10.477	1.01392	0.727605	0.272353	0.00632658	0.0189096	0.00649669	0.000207449	0.00294884	0.0049269	0.00326292	0.0493198	0.091306	0.0225531	3.55232e-05	0.0122848	0.0601008	2.10314e-05	0.00294094	0.000182449	0.0013153	0.00129375	1.74087e-09	4.63488e-24	6.27924e-09	1.16387e-07	5.98489e-08	9.06357e-11	0	2.92877e-06	2.41517e-11	-1.02916e-05	0.000580289	-0.171746	-0.0329269	0.100945	-0.0847359	-0.0679673	0.0129397	-0.1	-0.45927	0
2444	12.3353	0	0.103756	12.2316	12.4972	12.4908	12.2185	10.477	1.01392	0.727605	0.272353	0.00632658	0.0189096	0.00649669	0.000207449	0.00294884	0.0049269	0.00326292	0.0493198	0.091306	0.0225531	3.55232e-05	0.0122848	0.0601008	2.10314e-05	0.00294094	0.000182449	0.0013153	0.00129375	1.74087e-09	4.63488e-24	6.27924e-09	1.16387e-07	5.98489e-08	9.06357e-11	0	2.92877e-06	2.41517e-11	-1.02916e-05	0.000580289	-0.171746	-0.0329269	0.100945	-0.0847359	-0.0679673	0.0129397	-0.1	-0.45927	0
2445	12.3353	0	0.103756	12.2316	12.4972	12.4908	12.2185	10.477	1.01392	0.727605	0.272353	0.00632658	0.0189096	0.00649669	0.000207449	0.00294884	0.0049269	0.00326292	0.0493198	0.091306	0.0225531	3.55232e-05	0.0122848	0.0601008	2.10314e-05	0.00294094	0.000182449	0.0013153	0.00129375	1.74087e-09	4.63488e-24	6.27924e-09	1.16387e-07	5.98489e-08	9.06357e-11	0	2.92877e-06	2.41517e-11	-1.02916e-05	0.000580289	-0.171746	-0.0329269	0.100945	-0.0847359	-0.0679673	0.0129397	-0.1	-0.45927	0
2446	12.3353	0	0.103756	12.2316	12.4972	12.4908	12.2185	10.477	1.01392	0.727605	0.272353	0.00632658	0.0189096	0.00649669	0.000207449	0.00294884	0.0049269	0.00326292	0.0493198	0.091306	0.0225531	3.55232e-05	0.0122848	0.0601008	2.10314e-05	0.00294094	0.000182449	0.0013153	0.00129375	1.74087e-09	4.63488e-24	6.27924e-09	1.16387e-07	5.98489e-08	9.06357e-11	0	2.92877e-06	2.41517e-11	-1.02916e-05	0.000580289	-0.171746	-0.0329269	0.100945	-0.0847359	-0.0679673	0.0129397	-0.1	-0.45927	0
2447	12.3353	0	0.103756	12.2316	12.4972	12.4908	12.2185	10.477	1.01392	0.727605	0.272353	0.00632658	0.0189096	0.00649669	0.000207449	0.00294884	0.0049269	0.00326292	0.0493198	0.091306	0.0225531	3.55232e-05	0.0122848	0.0601008	2.10314e-05	0.00294094	0.000182449	0.0013153	0.00129375	1.74087e-09	4.63488e-24	6.27924e-09	1.16387e-07	5.98489e-08	9.06357e-11	0	2.92877e-06	2.41517e-11	-1.02916e-05	0.000580289	-0.171746	-0.0329269	0.100945	-0.0847359	-0.0679673	0.0129397	-0.1	-0.45927	0
2448	12.3353	0	0.103756	12.2316	12.4972	12.4908	12.2185	10.477	1.01392	0.727605	0.272353	0.00632658	0.0189096	0.00649669	0.000207449	0.00294884	0.0049269	0.00326292	0.0493198	0.091306	0.0225531	3.55232e-05	0.0122848	0.0601008	2.10314e-05	0.00294094	0.000182449	0.0013153	0.00129375	1.74087e-09	4.63488e-24	6.27924e-09	1.16387e-07	5.98489e-08	9.06357e-11	0	2.92877e-06	2.41517e-11	-1.02916e-05	0.000580289	-0.171746	-0.0329269	0.100945	-0.0847359	-0.0679673	0.0129397	-0.1	-0.45927	0
2449	12.3353	0	0.103756	12.2316	12.4972	12.4908	12.2185	10.477	1.01392	0.727605	0.272353	0.00632658	0.0189096	0.00649669	0.000207449	0.00294884	0.0049269	0.00326292	0.0493198	0.091306	0.0225531	3.55232e-05	0.0122848	0.0601008	2.10314e-05	0.00294094	0.000182449	0.0013153	0.00129375	1.74087e-09	4.63488e-24	6.27924e-09	1.16387e-07	5.98489e-08	9.06357e-11	0	2.92877e-06	2.41517e-11	-1.02916e-05	0.000580289	-0.171746	-0.0329269	0.100945	-0.0847359	-0.0679673	0.0129397	-0.1	-0.45927	0
2450	12.3353	0	0.103756	12.2316	12.4972	12.4908	12.2185	10.477	1.01392	0.727605	0.272353	0.00632658	0.0189096	0.00649669	0.000207449	0.00294884	0.0049269	0.00326292	0.0493198	0.091306	0.0225531	3.55232e-05	0.0122848	0.0601008	2.10314e-05	0.00294094	0.000182449	0.0013153	0.00129375	1.74087e-09	4.63488e-24	6.27924e-09	1.16387e-07	5.98489e-08	9.06357e-11	0	2.92877e-06	2.41517e-11	-1.02916e-05	0.000580289	-0.171746	-0.0329269	0.100945	-0.0847359	-0.0679673	0.0129397	-0.1	-0.45927	0
2451	12.3353	0	0.103756	12.2316	12.4972	12.4908	12.2185	10.477	1.01392	0.727605	0.272353	0.00632658	0.0189096	0.00649669	0.000207449	0.00294884	0.0049269	0.00326292	0.0493198	0.091306	0.0225531	3.55232e-05	0.0122848	0.0601008	2.10314e-05	0.00294094	0.000182449	0.0013153	0.00129375	1.74087e-09	4.63488e-24	6.27924e-09	1.16387e-07	5.98489e-08	9.06357e-11	0	2.92877e-06	2.41517e-11	-1.02916e-05	0.000580289	-0.171746	-0.0329269	0.100945	-0.0847359	-0.0679673	0.0129397	-0.1	-0.45927	0
2452	12.3353	0	0.103756	12.2316	12.4972	12.4908	12.2185	10.477	1.01392	0.727605	0.272353	0.00632658	0.0189096	0.00649669	0.000207449	0.00294884	0.0049269	0.00326292	0.0493198	0.091306	0.0225531	3.55232e-05	0.0122848	0.0601008	2.10314e-05	0.00294094	0.000182449	0.0013153	0.00129375	1.74087e-09	4.63488e-24	6.27924e-09	1.16387e-07	5.98489e-08	9.06357e-11	0	2.92877e-06	2.41517e-11	-1.02916e-05	0.000580289	-0.171746	-0.0329269	0.100945	-0.0847359	-0.0679673	0.0129397	-0.1	-0.45927	0
2453	12.3353	0	0.103756	12.2316	12.4972	12.4908	12.2185	10.477	1.01392	0.727605	0.272353	0.00632658	0.0189096	0.00649669	0.000207449	0.00294884	0.0049269	0.00326292	0.0493198	0.091306	0.0225531	3.55232e-05	0.0122848	0.0601008	2.10314e-05	0.00294094	0.000182449	0.0013153	0.00129375	1.74087e-09	4.63488e-24	6.27924e-09	1.16387e-07	5.98489e-08	9.06357e-11	0	2.92877e-06	2.41517e-11	-1.02916e-05	0.000580289	-0.171746	-0.0329269	0.100945	-0.0847359	-0.0679673	0.0129397	-0.1	-0.45927	0
2454	12.3353	0	0.103756	12.2316	12.4972	12.4908	12.2185	10.477	1.01392	0.727605	0.272353	0.00632658	0.0189096	0.00649669	0.000207449	0.00294884	0.0049269	0.00326292	0.0493198	0.091306	0.0225531	3.55232e-05	0.0122848	0.0601008	2.10314e-05	0.00294094	0.000182449	0.0013153	0.00129375	1.74087e-09	4.63488e-24	6.27924e-09	1.16387e-07	5.98489e-08	9.06357e-11	0	2.92877e-06	2.41517e-11	-1.02916e-05	0.000580289	-0.171746	-0.0329269	0.100945	-0.0847359	-0.0679673	0.0129397	-0.1	-0.45927	0
2455	12.3353	0	0.103756	12.2316	12.4972	12.4908	12.2185	10.477	1.01392	0.727605	0.272353	0.00632658	0.0189096	0.00649669	0.000207449	0.00294884	0.0049269	0.00326292	0.0493198	0.091306	0.0225531	3.55232e-05	0.0122848	0.0601008	2.10314e-05	0.00294094	0.000182449	0.0013153	0.00129375	1.74087e-09	4.63488e-24	6.27924e-09	1.16387e-07	5.98489e-08	9.06357e-11	0	2.92877e-06	2.41517e-11	-1.02916e-05	0.000580289	-0.171746	-0.0329269	0.100945	-0.0847359	-0.0679673	0.0129397	-0.1	-0.45927	0
2456	12.3353	0	0.103756	12.2316	12.4972	12.4908	12.2185	10.477	1.01392	0.727605	0.272353	0.00632658	0.0189096	0.00649669	0.000207449	0.00294884	0.0049269	0.00326292	0.0493198	0.091306	0.0225531	3.55232e-05	0.0122848	0.0601008	2.10314e-05	0.00294094	0.000182449	0.0013153	0.00129375	1.74087e-09	4.63488e-24	6.27924e-09	1.16387e-07	5.98489e-08	9.06357e-11	0	2.92877e-06	2.41517e-11	-1.02916e-05	0.000580289	-0.171746	-0.0329269	0.100945	-0.0847359	-0.0679673	0.0129397	-0.1	-0.45927	0
2457	12.3353	0	0.103756	12.2316	12.4972	12.4908	12.2185	10.477	1.01392	0.727605	0.272353	0.00632658	0.0189096	0.00649669	0.000207449	0.00294884	0.0049269	0.00326292	0.0493198	0.091306	0.0225531	3.55232e-05	0.0122848	0.0601008	2.10314e-05	0.00294094	0.000182449	0.0013153	0.00129375	1.74087e-09	4.63488e-24	6.27924e-09	1.16387e-07	5.98489e-08	9.06357e-11	0	2.92877e-06	2.41517e-11	-1.02916e-05	0.000580289	-0.171746	-0.0329269	0.100945	-0.0847359	-0.0679673	0.0129397	-0.1	-0.45927	0
2458	12.3353	0	0.103756	12.2316	12.4972	12.4908	12.2185	10.477	1.01392	0.727605	0.272353	0.00632658	0.0189096	0.00649669	0.000207449	0.00294884	0.0049269	0.00326292	0.0493198	0.091306	0.0225531	3.55232e-05	0.0122848	0.0601008	2.10314e-05	0.00294094	0.000182449	0.0013153	0.00129375	1.74087e-09	4.63488e-24	6.27924e-09	1.16387e-07	5.98489e-08	9.06357e-11	0	2.92877e-06	2.41517e-11	-1.02916e-05	0.000580289	-0.171746	-0.0329269	0.100945	-0.0847359	-0.0679673	0.0129397	-0.1	-0.45927	0
2459	12.3353	0	0.103756	12.2316	12.4972	12.4908	12.2185	10.477	1.01392	0.727605	0.272353	0.00632658	0.0189096	0.00649669	0.000207449	0.00294884	0.0049269	0.00326292	0.0493198	0.091306	0.0225531	3.55232e-05	0.0122848	0.0601008	2.10314e-05	0.00294094	0.000182449	0.0013153	0.00129375	1.74087e-09	4.63488e-24	6.27924e-09	1.16387e-07	5.98489e-08	9.06357e-11	0	2.92877e-06	2.41517e-11	-1.02916e-05	0.000580289	-0.171746	-0.0329269	0.100945	-0.0847359	-0.0679673	0.0129397	-0.1	-0.45927	0
2460	12.3353	0	0.103756	12.2316	12.4972	12.4908	12.2185	10.477	1.01392	0.727605	0.272353	0.00632658	0.0189096	0.00649669	0.000207449	0.00294884	0.0049269	0.00326292	0.0493198	0.091306	0.0225531	3.55232e-05	0.0122848	0.0601008	2.10314e-05	0.00294094	0.000182449	0.0013153	0.00129375	1.74087e-09	4.63488e-24	6.27924e-09	1.16387e-07	5.98489e-08	9.06357e-11	0	2.92877e-06	2.41517e-11	-1.02916e-05	0.000580289	-0.171746	-0.0329269	0.100945	-0.0847359	-0.0679673	0.0129397	-0.1	-0.45927	0
2461	12.3353	0	0.103756	12.2316	12.4972	12.4908	12.2185	10.477	1.01392	0.727605	0.272353	0.00632658	0.0189096	0.00649669	0.000207449	0.00294884	0.0049269	0.00326292	0.0493198	0.091306	0.0225531	3.55232e-05	0.0122848	0.0601008	2.10314e-05	0.00294094	0.000182449	0.0013153	0.00129375	1.74087e-09	4.63488e-24	6.27924e-09	1.16387e-07	5.98489e-08	9.06357e-11	0	2.92877e-06	2.41517e-11	-1.02916e-05	0.000580289	-0.171746	-0.0329269	0.100945	-0.0847359	-0.0679673	0.0129397	-0.1	-0.45927	0
2462	12.3353	0	0.103756	12.2316	12.4972	12.4908	12.2185	10.477	1.01392	0.727605	0.272353	0.00632658	0.0189096	0.00649669	0.000207449	0.00294884	0.0049269	0.00326292	0.0493198	0.091306	0.0225531	3.55232e-05	0.0122848	0.0601008	2.10314e-05	0.00294094	0.000182449	0.0013153	0.00129375	1.74087e-09	4.63488e-24	6.27924e-09	1.16387e-07	5.98489e-08	9.06357e-11	0	2.92877e-06	2.41517e-11	-1.02916e-05	0.000580289	-0.171746	-0.0329269	0.100945	-0.0847359	-0.0679673	0.0129397	-0.1	-0.45927	0
2463	12.3353	0	0.103756	12.2316	12.4972	12.4908	12.2185	10.477	1.01392	0.727605	0.272353	0.00632658	0.0189096	0.00649669	0.000207449	0.00294884	0.0049269	0.00326292	0.0493198	0.091306	0.0225531	3.55232e-05	0.0122848	0.0601008	2.10314e-05	0.00294094	0.000182449	0.0013153	0.00129375	1.74087e-09	4.63488e-24	6.27924e-09	1.16387e-07	5.98489e-08	9.06357e-11	0	2.92877e-06	2.41517e-11	-1.02916e-05	0.000580289	-0.171746	-0.0329269	0.100945	-0.0847359	-0.0679673	0.0129397	-0.1	-0.45927	0
2464	12.3353	0	0.103756	12.2316	12.4972	12.4908	12.2185	10.477	1.01392	0.727605	0.272353	0.00632658	0.0189096	0.00649669	0.000207449	0.00294884	0.0049269	0.00326292	0.0493198	0.091306	0.0225531	3.55232e-05	0.0122848	0.0601008	2.10314e-05	0.00294094	0.000182449	0.0013153	0.00129375	1.74087e-09	4.63488e-24	6.27924e-09	1.16387e-07	5.98489e-08	9.06357e-11	0	2.92877e-06	2.41517e-11	-1.02916e-05	0.000580289	-0.171746	-0.0329269	0.100945	-0.0847359	-0.0679673	0.0129397	-0.1	-0.45927	0
2465	12.3353	0	0.103756	12.2316	12.4972	12.4908	12.2185	10.477	1.01392	0.727605	0.272353	0.00632658	0.0189096	0.00649669	0.000207449	0.00294884	0.0049269	0.00326292	0.0493198	0.091306	0.0225531	3.55232e-05	0.0122848	0.0601008	2.10314e-05	0.00294094	0.000182449	0.0013153	0.00129375	1.74087e-09	4.63488e-24	6.27924e-09	1.16387e-07	5.98489e-08	9.06357e-11	0	2.92877e-06	2.41517e-11	-1.02916e-05	0.000580289	-0.171746	-0.0329269	0.100945	-0.0847359	-0.0679673	0.0129397	-0.1	-0.45927	0
2466	12.3353	0	0.103756	12.2316	12.4972	12.4908	12.2185	10.477	1.01392	0.727605	0.272353	0.00632658	0.0189096	0.00649669	0.000207449	0.00294884	0.0049269	0.00326292	0.0493198	0.091306	0.0225531	3.55232e-05	0.0122848	0.0601008	2.10314e-05	0.00294094	0.000182449	0.0013153	0.00129375	1.74087e-09	4.63488e-24	6.27924e-09	1.16387e-07	5.98489e-08	9.06357e-11	0	2.92877e-06	2.41517e-11	-1.02916e-05	0.000580289	-0.171746	-0.0329269	0.100945	-0.0847359	-0.0679673	0.0129397	-0.1	-0.45927	0
2467	12.3353	0	0.103756	12.2316	12.4972	12.4908	12.2185	10.477	1.01392	0.727605	0.272353	0.00632658	0.0189096	0.00649669	0.000207449	0.00294884	0.0049269	0.00326292	0.0493198	0.091306	0.0225531	3.55232e-05	0.0122848	0.0601008	2.10314e-05	0.00294094	0.000182449	0.0013153	0.00129375	1.74087e-09	4.63488e-24	6.27924e-09	1.16387e-07	5.98489e-08	9.06357e-11	0	2.92877e-06	2.41517e-11	-1.02916e-05	0.000580289	-0.171746	-0.0329269	0.100945	-0.0847359	-0.0679673	0.0129397	-0.1	-0.45927	0
2468	12.3353	0	0.103756	12.2316	12.4972	12.4908	12.2185	10.477	1.01392	0.727605	0.272353	0.00632658	0.0189096	0.00649669	0.000207449	0.00294884	0.0049269	0.00326292	0.0493198	0.091306	0.0225531	3.55232e-05	0.0122848	0.0601008	2.10314e-05	0.00294094	0.000182449	0.0013153	0.00129375	1.74087e-09	4.63488e-24	6.27924e-09	1.16387e-07	5.98489e-08	9.06357e-11	0	2.92877e-06	2.41517e-11	-1.02916e-05	0.000580289	-0.171746	-0.0329269	0.100945	-0.0847359	-0.0679673	0.0129397	-0.1	-0.45927	0
2469	12.3353	0	0.103756	12.2316	12.4972	12.4908	12.2185	10.477	1.01392	0.727605	0.272353	0.00632658	0.0189096	0.00649669	0.000207449	0.00294884	0.0049269	0.00326292	0.0493198	0.091306	0.0225531	3.55232e-05	0.0122848	0.0601008	2.10314e-05	0.00294094	0.000182449	0.0013153	0.00129375	1.74087e-09	4.63488e-24	6.27924e-09	1.16387e-07	5.98489e-08	9.06357e-11	0	2.92877e-06	2.41517e-11	-1.02916e-05	0.000580289	-0.171746	-0.0329269	0.100945	-0.0847359	-0.0679673	0.0129397	-0.1	-0.45927	0
2470	12.3353	0	0.103756	12.2316	12.4972	12.4908	12.2185	10.477	1.01392	0.727605	0.272353	0.00632658	0.0189096	0.00649669	0.000207449	0.00294884	0.0049269	0.00326292	0.0493198	0.091306	0.0225531	3.55232e-05	0.0122848	0.0601008	2.10314e-05	0.00294094	0.000182449	0.0013153	0.00129375	1.74087e-09	4.63488e-24	6.27924e-09	1.16387e-07	5.98489e-08	9.06357e-11	0	2.92877e-06	2.41517e-11	-1.02916e-05	0.000580289	-0.171746	-0.0329269	0.100945	-0.0847359	-0.0679673	0.0129397	-0.1	-0.45927	0
2471	12.3353	0	0.103756	12.2316	12.4972	12.4908	12.2185	10.477	1.01392	0.727605	0.272353	0.00632658	0.0189096	0.00649669	0.000207449	0.00294884	0.0049269	0.00326292	0.0493198	0.091306	0.0225531	3.55232e-05	0.0122848	0.0601008	2.10314e-05	0.00294094	0.000182449	0.0013153	0.00129375	1.74087e-09	4.63488e-24	6.27924e-09	1.16387e-07	5.98489e-08	9.06357e-11	0	2.92877e-06	2.41517e-11	-1.02916e-05	0.000580289	-0.171746	-0.0329269	0.100945	-0.0847359	-0.0679673	0.0129397	-0.1	-0.45927	0
2472	12.3353	0	0.103756	12.2316	12.4972	12.4908	12.2185	10.477	1.01392	0.727605	0.272353	0.00632658	0.0189096	0.00649669	0.000207449	0.00294884	0.0049269	0.00326292	0.0493198	0.091306	0.0225531	3.55232e-05	0.0122848	0.0601008	2.10314e-05	0.00294094	0.000182449	0.0013153	0.00129375	1.74087e-09	4.63488e-24	6.27924e-09	1.16387e-07	5.98489e-08	9.06357e-11	0	2.92877e-06	2.41517e-11	-1.02916e-05	0.000580289	-0.171746	-0.0329269	0.100945	-0.0847359	-0.0679673	0.0129397	-0.1	-0.45927	0
2473	12.3353	0	0.103756	12.2316	12.4972	12.4908	12.2185	10.477	1.01392	0.727605	0.272353	0.00632658	0.0189096	0.00649669	0.000207449	0.00294884	0.0049269	0.00326292	0.0493198	0.091306	0.0225531	3.55232e-05	0.0122848	0.0601008	2.10314e-05	0.00294094	0.000182449	0.0013153	0.00129375	1.74087e-09	4.63488e-24	6.27924e-09	1.16387e-07	5.98489e-08	9.06357e-11	0	2.92877e-06	2.41517e-11	-1.02916e-05	0.000580289	-0.171746	-0.0329269	0.100945	-0.0847359	-0.0679673	0.0129397	-0.1	-0.45927	0
2474	12.3353	0	0.103756	12.2316	12.4972	12.4908	12.2185	10.477	1.01392	0.727605	0.272353	0.00632658	0.0189096	0.00649669	0.000207449	0.00294884	0.0049269	0.00326292	0.0493198	0.091306	0.0225531	3.55232e-05	0.0122848	0.0601008	2.10314e-05	0.00294094	0.000182449	0.0013153	0.00129375	1.74087e-09	4.63488e-24	6.27924e-09	1.16387e-07	5.98489e-08	9.06357e-11	0	2.92877e-06	2.41517e-11	-1.02916e-05	0.000580289	-0.171746	-0.0329269	0.100945	-0.0847359	-0.0679673	0.0129397	-0.1	-0.45927	0
2475	12.3353	0	0.103756	12.2316	12.4972	12.4908	12.2185	10.477	1.01392	0.727605	0.272353	0.00632658	0.0189096	0.00649669	0.000207449	0.00294884	0.0049269	0.00326292	0.0493198	0.091306	0.0225531	3.55232e-05	0.0122848	0.0601008	2.10314e-05	0.00294094	0.000182449	0.0013153	0.00129375	1.74087e-09	4.63488e-24	6.27924e-09	1.16387e-07	5.98489e-08	9.06357e-11	0	2.92877e-06	2.41517e-11	-1.02916e-05	0.000580289	-0.171746	-0.0329269	0.100945	-0.0847359	-0.0679673	0.0129397	-0.1	-0.45927	0
2476	12.3353	0	0.103756	12.2316	12.4972	12.4908	12.2185	10.477	1.01392	0.727605	0.272353	0.00632658	0.0189096	0.00649669	0.000207449	0.00294884	0.0049269	0.00326292	0.0493198	0.091306	0.0225531	3.55232e-05	0.0122848	0.0601008	2.10314e-05	0.00294094	0.000182449	0.0013153	0.00129375	1.74087e-09	4.63488e-24	6.27924e-09	1.16387e-07	5.98489e-08	9.06357e-11	0	2.92877e-06	2.41517e-11	-1.02916e-05	0.000580289	-0.171746	-0.0329269	0.100945	-0.0847359	-0.0679673	0.0129397	-0.1	-0.45927	0
2477	12.3353	0	0.103756	12.2316	12.4972	12.4908	12.2185	10.477	1.01392	0.727605	0.272353	0.00632658	0.0189096	0.00649669	0.000207449	0.00294884	0.0049269	0.00326292	0.0493198	0.091306	0.0225531	3.55232e-05	0.0122848	0.0601008	2.10314e-05	0.00294094	0.000182449	0.0013153	0.00129375	1.74087e-09	4.63488e-24	6.27924e-09	1.16387e-07	5.98489e-08	9.06357e-11	0	2.92877e-06	2.41517e-11	-1.02916e-05	0.000580289	-0.171746	-0.0329269	0.100945	-0.0847359	-0.0679673	0.0129397	-0.1	-0.45927	0
2478	12.3353	0	0.103756	12.2316	12.4972	12.4908	12.2185	10.477	1.01392	0.727605	0.272353	0.00632658	0.0189096	0.00649669	0.000207449	0.00294884	0.0049269	0.00326292	0.0493198	0.091306	0.0225531	3.55232e-05	0.0122848	0.0601008	2.10314e-05	0.00294094	0.000182449	0.0013153	0.00129375	1.74087e-09	4.63488e-24	6.27924e-09	1.16387e-07	5.98489e-08	9.06357e-11	0	2.92877e-06	2.41517e-11	-1.02916e-05	0.000580289	-0.171746	-0.0329269	0.100945	-0.0847359	-0.0679673	0.0129397	-0.1	-0.45927	0
2479	12.3353	0	0.103756	12.2316	12.4972	12.4908	12.2185	10.477	1.01392	0.727605	0.272353	0.00632658	0.0189096	0.00649669	0.000207449	0.00294884	0.0049269	0.00326292	0.0493198	0.091306	0.0225531	3.55232e-05	0.0122848	0.0601008	2.10314e-05	0.00294094	0.000182449	0.0013153	0.00129375	1.74087e-09	4.63488e-24	6.27924e-09	1.16387e-07	5.98489e-08	9.06357e-11	0	2.92877e-06	2.41517e-11	-1.02916e-05	0.000580289	-0.171746	-0.0329269	0.100945	-0.0847359	-0.0679673	0.0129397	-0.1	-0.45927	0
2480	12.3353	0	0.103756	12.2316	12.4972	12.4908	12.2185	10.477	1.01392	0.727605	0.272353	0.00632658	0.0189096	0.00649669	0.000207449	0.00294884	0.0049269	0.00326292	0.0493198	0.091306	0.0225531	3.55232e-05	0.0122848	0.0601008	2.10314e-05	0.00294094	0.000182449	0.0013153	0.00129375	1.74087e-09	4.63488e-24	6.27924e-09	1.16387e-07	5.98489e-08	9.06357e-11	0	2.92877e-06	2.41517e-11	-1.02916e-05	0.000580289	-0.171746	-0.0329269	0.100945	-0.0847359	-0.0679673	0.0129397	-0.1	-0.45927	0
2481	12.3353	0	0.103756	12.2316	12.4972	12.4908	12.2185	10.477	1.01392	0.727605	0.272353	0.00632658	0.0189096	0.00649669	0.000207449	0.00294884	0.0049269	0.00326292	0.0493198	0.091306	0.0225531	3.55232e-05	0.0122848	0.0601008	2.10314e-05	0.00294094	0.000182449	0.0013153	0.00129375	1.74087e-09	4.63488e-24	6.27924e-09	1.16387e-07	5.98489e-08	9.06357e-11	0	2.92877e-06	2.41517e-11	-1.02916e-05	0.000580289	-0.171746	-0.0329269	0.100945	-0.0847359	-0.0679673	0.0129397	-0.1	-0.45927	0
2482	12.3353	0	0.103756	12.2316	12.4972	12.4908	12.2185	10.477	1.01392	0.727605	0.272353	0.00632658	0.0189096	0.00649669	0.000207449	0.00294884	0.0049269	0.00326292	0.0493198	0.091306	0.0225531	3.55232e-05	0.0122848	0.0601008	2.10314e-05	0.00294094	0.000182449	0.0013153	0.00129375	1.74087e-09	4.63488e-24	6.27924e-09	1.16387e-07	5.98489e-08	9.06357e-11	0	2.92877e-06	2.41517e-11	-1.02916e-05	0.000580289	-0.171746	-0.0329269	0.100945	-0.0847359	-0.0679673	0.0129397	-0.1	-0.45927	0
2483	12.3353	0	0.103756	12.2316	12.4972	12.4908	12.2185	10.477	1.01392	0.727605	0.272353	0.00632658	0.0189096	0.00649669	0.000207449	0.00294884	0.0049269	0.00326292	0.0493198	0.091306	0.0225531	3.55232e-05	0.0122848	0.0601008	2.10314e-05	0.00294094	0.000182449	0.0013153	0.00129375	1.74087e-09	4.63488e-24	6.27924e-09	1.16387e-07	5.98489e-08	9.06357e-11	0	2.92877e-06	2.41517e-11	-1.02916e-05	0.000580289	-0.171746	-0.0329269	0.100945	-0.0847359	-0.0679673	0.0129397	-0.1	-0.45927	0
2484	12.3353	0	0.103756	12.2316	12.4972	12.4908	12.2185	10.477	1.01392	0.727605	0.272353	0.00632658	0.0189096	0.00649669	0.000207449	0.00294884	0.0049269	0.00326292	0.0493198	0.091306	0.0225531	3.55232e-05	0.0122848	0.0601008	2.10314e-05	0.00294094	0.000182449	0.0013153	0.00129375	1.74087e-09	4.63488e-24	6.27924e-09	1.16387e-07	5.98489e-08	9.06357e-11	0	2.92877e-06	2.41517e-11	-1.02916e-05	0.000580289	-0.171746	-0.0329269	0.100945	-0.0847359	-0.0679673	0.0129397	-0.1	-0.45927	0
2485	12.3353	0	0.103756	12.2316	12.4972	12.4908	12.2185	10.477	1.01392	0.727605	0.272353	0.00632658	0.0189096	0.00649669	0.000207449	0.00294884	0.0049269	0.00326292	0.0493198	0.091306	0.0225531	3.55232e-05	0.0122848	0.0601008	2.10314e-05	0.00294094	0.000182449	0.0013153	0.00129375	1.74087e-09	4.63488e-24	6.27924e-09	1.16387e-07	5.98489e-08	9.06357e-11	0	2.92877e-06	2.41517e-11	-1.02916e-05	0.000580289	-0.171746	-0.0329269	0.100945	-0.0847359	-0.0679673	0.0129397	-0.1	-0.45927	0
2486	12.3353	0	0.103756	12.2316	12.4972	12.4908	12.2185	10.477	1.01392	0.727605	0.272353	0.00632658	0.0189096	0.00649669	0.000207449	0.00294884	0.0049269	0.00326292	0.0493198	0.091306	0.0225531	3.55232e-05	0.0122848	0.0601008	2.10314e-05	0.00294094	0.000182449	0.0013153	0.00129375	1.74087e-09	4.63488e-24	6.27924e-09	1.16387e-07	5.98489e-08	9.06357e-11	0	2.92877e-06	2.41517e-11	-1.02916e-05	0.000580289	-0.171746	-0.0329269	0.100945	-0.0847359	-0.0679673	0.0129397	-0.1	-0.45927	0
2487	12.3353	0	0.103756	12.2316	12.4972	12.4908	12.2185	10.477	1.01392	0.727605	0.272353	0.00632658	0.0189096	0.00649669	0.000207449	0.00294884	0.0049269	0.00326292	0.0493198	0.091306	0.0225531	3.55232e-05	0.0122848	0.0601008	2.10314e-05	0.00294094	0.000182449	0.0013153	0.00129375	1.74087e-09	4.63488e-24	6.27924e-09	1.16387e-07	5.98489e-08	9.06357e-11	0	2.92877e-06	2.41517e-11	-1.02916e-05	0.000580289	-0.171746	-0.0329269	0.100945	-0.0847359	-0.0679673	0.0129397	-0.1	-0.45927	0
2488	12.3353	0	0.103756	12.2316	12.4972	12.4908	12.2185	10.477	1.01392	0.727605	0.272353	0.00632658	0.0189096	0.00649669	0.000207449	0.00294884	0.0049269	0.00326292	0.0493198	0.091306	0.0225531	3.55232e-05	0.0122848	0.0601008	2.10314e-05	0.00294094	0.000182449	0.0013153	0.00129375	1.74087e-09	4.63488e-24	6.27924e-09	1.16387e-07	5.98489e-08	9.06357e-11	0	2.92877e-06	2.41517e-11	-1.02916e-05	0.000580289	-0.171746	-0.0329269	0.100945	-0.0847359	-0.0679673	0.0129397	-0.1	-0.45927	0
2489	12.3353	0	0.103756	12.2316	12.4972	12.4908	12.2185	10.477	1.01392	0.727605	0.272353	0.00632658	0.0189096	0.00649669	0.000207449	0.00294884	0.0049269	0.00326292	0.0493198	0.091306	0.0225531	3.55232e-05	0.0122848	0.0601008	2.10314e-05	0.00294094	0.000182449	0.0013153	0.00129375	1.74087e-09	4.63488e-24	6.27924e-09	1.16387e-07	5.98489e-08	9.06357e-11	0	2.92877e-06	2.41517e-11	-1.02916e-05	0.000580289	-0.171746	-0.0329269	0.100945	-0.0847359	-0.0679673	0.0129397	-0.1	-0.45927	0
2490	12.3353	0	0.103756	12.2316	12.4972	12.4908	12.2185	10.477	1.01392	0.727605	0.272353	0.00632658	0.0189096	0.00649669	0.000207449	0.00294884	0.0049269	0.00326292	0.0493198	0.091306	0.0225531	3.55232e-05	0.0122848	0.0601008	2.10314e-05	0.00294094	0.000182449	0.0013153	0.00129375	1.74087e-09	4.63488e-24	6.27924e-09	1.16387e-07	5.98489e-08	9.06357e-11	0	2.92877e-06	2.41517e-11	-1.02916e-05	0.000580289	-0.171746	-0.0329269	0.100945	-0.0847359	-0.0679673	0.0129397	-0.1	-0.45927	0
2491	12.3353	0	0.103756	12.2316	12.4972	12.4908	12.2185	10.477	1.01392	0.727605	0.272353	0.00632658	0.0189096	0.00649669	0.000207449	0.00294884	0.0049269	0.00326292	0.0493198	0.091306	0.0225531	3.55232e-05	0.0122848	0.0601008	2.10314e-05	0.00294094	0.000182449	0.0013153	0.00129375	1.74087e-09	4.63488e-24	6.27924e-09	1.16387e-07	5.98489e-08	9.06357e-11	0	2.92877e-06	2.41517e-11	-1.02916e-05	0.000580289	-0.171746	-0.0329269	0.100945	-0.0847359	-0.0679673	0.0129397	-0.1	-0.45927	0
2492	12.3353	0	0.103756	12.2316	12.4972	12.4908	12.2185	10.477	1.01392	0.727605	0.272353	0.00632658	0.0189096	0.00649669	0.000207449	0.00294884	0.0049269	0.00326292	0.0493198	0.091306	0.0225531	3.55232e-05	0.0122848	0.0601008	2.10314e-05	0.00294094	0.000182449	0.0013153	0.00129375	1.74087e-09	4.63488e-24	6.27924e-09	1.16387e-07	5.98489e-08	9.06357e-11	0	2.92877e-06	2.41517e-11	-1.02916e-05	0.000580289	-0.171746	-0.0329269	0.100945	-0.0847359	-0.0679673	0.0129397	-0.1	-0.45927	0
2493	12.3353	0	0.103756	12.2316	12.4972	12.4908	12.2185	10.477	1.01392	0.727605	0.272353	0.00632658	0.0189096	0.00649669	0.000207449	0.00294884	0.0049269	0.00326292	0.0493198	0.091306	0.0225531	3.55232e-05	0.0122848	0.0601008	2.10314e-05	0.00294094	0.000182449	0.0013153	0.00129375	1.74087e-09	4.63488e-24	6.27924e-09	1.16387e-07	5.98489e-08	9.06357e-11	0	2.92877e-06	2.41517e-11	-1.02916e-05	0.000580289	-0.171746	-0.0329269	0.100945	-0.0847359	-0.0679673	0.0129397	-0.1	-0.45927	0
2494	12.3353	0	0.103756	12.2316	12.4972	12.4908	12.2185	10.477	1.01392	0.727605	0.272353	0.00632658	0.0189096	0.00649669	0.000207449	0.00294884	0.0049269	0.00326292	0.0493198	0.091306	0.0225531	3.55232e-05	0.0122848	0.0601008	2.10314e-05	0.00294094	0.000182449	0.0013153	0.00129375	1.74087e-09	4.63488e-24	6.27924e-09	1.16387e-07	5.98489e-08	9.06357e-11	0	2.92877e-06	2.41517e-11	-1.02916e-05	0.000580289	-0.171746	-0.0329269	0.100945	-0.0847359	-0.0679673	0.0129397	-0.1	-0.45927	0
2495	12.3353	0	0.103756	12.2316	12.4972	12.4908	12.2185	10.477	1.01392	0.727605	0.272353	0.00632658	0.0189096	0.00649669	0.000207449	0.00294884	0.0049269	0.00326292	0.0493198	0.091306	0.0225531	3.55232e-05	0.0122848	0.0601008	2.10314e-05	0.00294094	0.000182449	0.0013153	0.00129375	1.74087e-09	4.63488e-24	6.27924e-09	1.16387e-07	5.98489e-08	9.06357e-11	0	2.92877e-06	2.41517e-11	-1.02916e-05	0.000580289	-0.171746	-0.0329269	0.100945	-0.0847359	-0.0679673	0.0129397	-0.1	-0.45927	0
2496	12.3353	0	0.103756	12.2316	12.4972	12.4908	12.2185	10.477	1.01392	0.727605	0.272353	0.00632658	0.0189096	0.00649669	0.000207449	0.00294884	0.0049269	0.00326292	0.0493198	0.091306	0.0225531	3.55232e-05	0.0122848	0.0601008	2.10314e-05	0.00294094	0.000182449	0.0013153	0.00129375	1.74087e-09	4.63488e-24	6.27924e-09	1.16387e-07	5.98489e-08	9.06357e-11	0	2.92877e-06	2.41517e-11	-1.02916e-05	0.000580289	-0.171746	-0.0329269	0.100945	-0.0847359	-0.0679673	0.0129397	-0.1	-0.45927	0
2497	12.3353	0	0.103756	12.2316	12.4972	12.4908	12.2185	10.477	1.01392	0.727605	0.272353	0.00632658	0.0189096	0.00649669	0.000207449	0.00294884	0.0049269	0.00326292	0.0493198	0.091306	0.0225531	3.55232e-05	0.0122848	0.0601008	2.10314e-05	0.00294094	0.000182449	0.0013153	0.00129375	1.74087e-09	4.63488e-24	6.27924e-09	1.16387e-07	5.98489e-08	9.06357e-11	0	2.92877e-06	2.41517e-11	-1.02916e-05	0.000580289	-0.171746	-0.0329269	0.100945	-0.0847359	-0.0679673	0.0129397	-0.1	-0.45927	0
2498	12.3353	0	0.103756	12.2316	12.4972	12.4908	12.2185	10.477	1.01392	0.727605	0.272353	0.00632658	0.0189096	0.00649669	0.000207449	0.00294884	0.0049269	0.00326292	0.0493198	0.091306	0.0225531	3.55232e-05	0.0122848	0.0601008	2.10314e-05	0.00294094	0.000182449	0.0013153	0.00129375	1.74087e-09	4.63488e-24	6.27924e-09	1.16387e-07	5.98489e-08	9.06357e-11	0	2.92877e-06	2.41517e-11	-1.02916e-05	0.000580289	-0.171746	-0.0329269	0.100945	-0.0847359	-0.0679673	0.0129397	-0.1	-0.45927	0
2499	12.3353	0	0.103756	12.2316	12.4972	12.4908	12.2185	10.477	1.01392	0.727605	0.272353	0.00632658	0.0189096	0.00649669	0.000207449	0.00294884	0.0049269	0.00326292	0.0493198	0.091306	0.0225531	3.55232e-05	0.0122848	0.0601008	2.10314e-05	0.00294094	0.000182449	0.0013153	0.00129375	1.74087e-09	4.63488e-24	6.27924e-09	1.16387e-07	5.98489e-08	9.06357e-11	0	2.92877e-06	2.41517e-11	-1.02916e-05	0.000580289	-0.171746	-0.0329269	0.100945	-0.0847359	-0.0679673	0.0129397	-0.1	-0.45927	0
2500	12.3353	0	0.103756	12.2316	12.4972	12.4908	12.2185	10.477	1.01392	0.727605	0.272353	0.00632658	0.0189096	0.00649669	0.000207449	0.00294884	0.0049269	0.00326292	0.0493198	0.091306	0.0225531	3.55232e-05	0.0122848	0.0601008	2.10314e-05	0.00294094	0.000182449	0.0013153	0.00129375	1.74087e-09	4.63488e-24	6.27924e-09	1.16387e-07	5.98489e-08	9.06357e-11	0	2.92877e-06	2.41517e-11	-1.02916e-05	0.000580289	-0.171746	-0.0329269	0.100945	-0.0847359	-0.0679673	0.0129397	-0.1	-0.45927	0
[truncated: 4 more columns]
