# Supplementary material for: The Social Cost of Fossil and Industrial CO2 Emissions from 1950 to 2018
Source: Research Square preprint supplement (doi:10.21203/rs.3.rs-2244259/v1), 2022-11-17
Supplement: Supplementary file 31 [file Global_Carbon_Budget_2020v1.0.xlsx]

## Sheet: Summary
The Global Carbon Budget 2020 is a collaborative effort of the global carbon cycle science community coordinated by the Global Carbon Project.
DATA SOURCES & TERMS OF USE: The use of data is conditional on citing the original data sources. Full details on how to cite the data are given at the top of each page. For research projects, if the data are essential to the work, or if an important result or conclusion depends on the data, co-authorship may need to be considered. The Global Carbon Project facilitates access to data to encourage …
Reference of the full global carbon budget 2020: Pierre Friedlingstein, Michael O’Sullivan, Matthew W. Jones, Robbie M. Andrew, Judith Hauck, Are Olsen, Glen P. Peters, Wouter Peters, Julia Pongratz, Stephen Sitch, Corinne Le Quéré, Josep G. Canadell, Philippe Ciais, Rob Jackson,Simone Alin, Luiz E.O.C. Aragão, Almut Arneth, Vivek Arora, Nicholas R. Bates, Meike Becker, Alice Benoit-Cattin, Henry…
Further information is available on: http://www.globalcarbonproject.org/carbonbudget
References to previous updates of the Global Carbon Budget by the Global Carbon Project:
2019: Friedlingstein Pierre, Matthew W. Jones, Michael O’Sullivan, Robbie M. Andrew, Judith Hauck, Glen P. Peters, Wouter Peters, Julia Pongratz, Stephen Sitch, Corinne Le Quéré, Dorothee C. E. Bakker, Josep G. Canadell, Philippe Ciais, Rob Jackson, Peter Anthoni, Leticia Barbero, Ana Bastos, Vladislav Bastrikov, Meike Becker, Laurent Bopp, Erik Buitenhuis, Naveen Chandra, Frédéric Chevallier, Lo…
2018b: Le Quéré Corinne, Robbie M. Andrew, Pierre Friedlingstein, Stephen Sitch, Judith Hauck, Julia Pongratz, Penelope A. Pickers, Jan Ivar Korsbakken, Glen P. Peters, Josep G. Canadell, Almut Arneth, Vivek K. Arora, Leticia Barbero, Ana Bastos, Laurent Bopp, Frédéric Chevallier, Louise P. Chini, Philippe Ciais, Scott C. Doney, Thanos Gkritzalis, Daniel S. Goll, Ian Harris, Vanessa Haverd, Forre…
2018a: Le Quéré, Corinne, Robbie M. Andrew, Pierre Friedlingstein, Stephen Sitch, Julia Pongratz, Andrew C. Manning, Jan Ivar Korsbakken, Glen P. Peters, Josep G. Canadell, Robert B. Jackson, Thomas A. Boden, Pieter P. Tans, Oliver D. Andrews, Vivek Arora, Dorothee C. E. Bakker, Leticia Barbero, Meike Becker, Richard A. Betts, Laurent Bopp, Frédéric Chevallier, Louise P. Chini, Philippe Ciais, Ca…
2017: Peters, G.P., C. Le Quéré, R.M. Andrew, J.G. Canadell, P. Friedlingstein, T. Ilyina, R. Jackson, J.I. Korsbakken, G.A. McKinley, S. Sitch, P. Tans: Towards real-time verification of carbon dioxide emissions, Nature Climate Change, 7, 848-850, 2018. https://doi.org/10.1038/s41558-017-0013-9
2016: Le Quéré, C., Andrew, R. M., Canadell, J. G., Sitch, S., Korsbakken, J. I., Peters, G. P., Manning, A. C., Boden, T. A., Tans, P. P., Houghton, R. A., Keeling, R. F., Alin, S., Andrews, O. D., Anthoni, P., Barbero, L., Bopp, L., Chevallier, F., Chini, L. P., Ciais, P., Currie, K., Delire, C., Doney, S. C., Friedlingstein, P., Gkritzalis, T., Harris, I., Hauck, J., Haverd, V., Hoppema, M., K…
2015: Le Quéré, C, R Moriarty, RM Andrew, JG Canadell, S Sitch, JI Korsbakken, P Friedlingstein, GP Peters, RJ Andres, TA Boden, RA Houghton, JI House, RF Keeling, P Tans, A Arneth, DCE Bakker, L Barbero, L Bopp, J Chang, F Chevallier, LP Chini, P Ciais, M Fader, RA Feely, T Gkritzalis, I Harris, J Hauck, T Ilyina, AK Jain, E Kato, V Kitidis, K Klein Goldewijk, C Koven, P Landschützer, SK Lauvset…
2015: Jackson, R. B., Canadell, J. G., Le Quéré, C., Andrew, R. M., Korsbakken, J. I., Peters, G. P., and Nakicenovic, N.: Reaching peak emissions, Nature Climate Change, 6, 7-10, 2016.
2014: Le Quéré, C, R Moriarty, R M Andrew, G P Peters, P Ciais, P Friedlingstein, S D Jones, S Sitch, P Tans, A Arneth, T A Boden, L Bopp, Y Bozec, J G Canadell, Chini, L P, F Chevallier, C E Cosca, I Harris, M Hoppema, R A Houghton, J I House, A K Jain, T Johannessen, E Kato, R F Keeling, V Kitidis, K Klein Goldewijk, C Koven, C S Landa, P Landschützer, A Lenton, I D Lima, G Marland, J T Mathis,…
2014: Friedlingstein, P., Andrew, R. M., Rogelj, J., Peters, G. P., Canadell, J. G., Knutti, R., Luderer, G., Raupach, M. R., Schaeffer, M., van Vuuren, D. P., and Le Quéré, C.: Persistent growth of CO2 emissions and implications for reaching climate targets, Nature Geoscience, 2014. 2014.
2013: Le Quéré, C, G P Peters, R J Andres, R M Andrew, T A Boden, P Ciais, P Friedlingstein, R A Houghton, G Marland, R Moriarty, S Sitch, P Tans, A Arneth, A Arvanitis, D C E Bakker, L Bopp, J G Canadell, L P Chini, S C Doney, A Harper, I Harris, J I House, A K Jain, S D Jones, E Kato, R F Keeling, K Klein Goldewijk, A Körtzinger, C Koven, N Lefèvre, F Maignan, A Omar, T Ono, G-H Park, B Pfeil, …
2012: Le Quéré, C, R J Andres, T Boden, T Conway, R A Houghton, J I House, G Marland, G P Peters, G R van der Werf, A Ahlström, R M Andrew, L Bopp, J G Canadell, P Ciais, S C Doney, P Friedlingstein, C Huntingford, A K Jain, C Jourdain, E Kato, R Keeling, K Klein Goldewijk, S Levis, P Levy, M Lomas, B Poulter, M Raupach, J Schwinger, S Sitch, B D Stocker, N Viovy, S Zaehle and N Zeng 2012. The Gl…
2012: Peters, G, RM Andrews, T Boden, JG Canadell, P Ciais, C Le Quéré, G Marland, MR Raupach and C Wilson, 2013. The challenge to keep global warming below 2C Nature Climate Change, 3, 4-6
2011: Peters, G, Marland, G, Le Quéré, C, Boden, T, Canadell, JG, and Raupach, MR, 2012. Rapid growth in CO2 emissions after the 2008–2009 global financial crisis Nature Climate Change, 2: pp 2-4
2010: Friedlingstein, P, Houghton, RA, Marland, G, Hackler, J, Boden, TA, Conway, TJ, Canadell, JG, Raupach, MR, Ciais, P, and Le Quéré, C, 2010. Update on CO2 emissions Nature Geoscience, 3, 811-812
2009: Le Quéré, C, Raupach, MR, Canadell, JG, Marland, G, Bopp, L, Ciais, P, Conway, TJ, Doney, SC, Feely, R, Foster, P, Friedlingstein, P, Gurney, K, Houghton, RA, House, JI, Huntingford, C, Levy, PE, Lomas, MR, Majkut, J, Metzl, N, Ometto, JP, Peters, GP, Prentice, IC, Randerson, JT, Running, SW, Sarmiento, JL, Schuster, U, Sitch, S, Takahashi, T, Viovy, N, van der Werf, GR, Woodward, FI, 2009.…
2007: Canadell, JC, Le Quéré, C, Raupach, MR, Fields, C, Buitenhuis, ET, Ciais, P, Conway, TJ, Gillett, N, Houghton, RA, and Marland, G, 2007. Contributions to accelerating atmospheric CO2 growth from economic activity, carbon intensity, and efficiency of natural sinks PNAS, 104, 18866-18870
2006: Raupach, MR, Marland, G, Ciais, P, Le Quéré, C, Canadell, JG, Klepper, G, and CB Field, CB, 2007. Global and Regional Drivers of Accelerating CO2 Emissions PNAS, 104, 10288-10293
Feedbacks and questions on this database should be sent to: p.friedlingstein@exeter.ac.uk

## Sheet: Global Carbon Budget
	All values in billion tonnes of carbon per year (GtC/yr), for the globe. For values in billion tonnes of carbon dioxide per year (GtCO2/yr) , multiply the numbers below by 3.664.
	Note: 1 billion tonnes C = 1 petagram of carbon (10^15 gC) = 1 gigatonne C = 3.664 billion tonnes of CO2
	All uncertainties represent ± 1 sigma error (68 % chance of being in the range provided)
	Emissions from fossil fuel combustion and industrial processes (uncertainty of ±5% for a ± 1 sigma confidence level):
		Cite as: Friedlingstein et al. 2020 (see Summary tab).
	Emissions from land-use change (uncertainty of ±0.7 GtC/yr):
		Cite as: average of three bookkeeping models: Houghton, R. A. and Nassikas, A. A.: Global and regional fluxes of carbon from land use and land cover change 1850-2015, Global Biogeochemical Cycles, 31, 456-472, 2017; Hansis, E., Davis, S. J., and Pongratz, J.: Relevance of methodological choices for accounting of land use change carbon fluxes, Global Biogeochemical Cycles, 29, 1230-1246, 2015; Gas…
	The atmospheric CO2 growth rate (variable uncertainty around 0.2 GtC/yr from 1980) is estimated directly from atmospheric CO2 concentration measurements, and provided by the US National Oceanic and Atmospheric Administration Earth System Research Laboratory (NOAA/ESRL). http://www.esrl.noaa.gov/gmd/ccgg/trends/global.html
		Cite as: Dlugokencky, E. and Tans, P.: Trends in atmospheric carbon dioxide, National Oceanic & Atmospheric Administration, Earth System Research Laboratory (NOAA/ESRL), available at http://www.esrl.noaa.gov/gmd/ccgg/trends/global.html, 2020.
		1959-1980 are based on Mauna Loa and South Pole stations as observed by the CO2 Program at Scripps Institution of Oceanography. http://scrippsco2.ucsd.edu/data/atmospheric_co2/
		1980 onwards are global averages estimated from multiple stations run by NOAA/ESRL.
	The ocean sink (uncertainty of ±0.4 GtC/yr on average) is estimated from the average of several global ocean biogeochemistry models that reproduce the observed mean ocean sink of the 1990s.
		Cite as: Friedlingstein et al. 2020 (see Summary tab).
	The land sink (uncertainty of ±0.9 GtC/yr on average) was estimated from the average of several dynamic global vegetation models that reproduce the observed mean total land sink of the 1990s.
		Cite as: Friedlingstein et al. 2020 (see Summary tab).
	The cement carbonation sink:
		Cite as: Friedlingstein et al. 2020 (see Summary tab).
	The budget imbalance is the sum of emissions (fossil fuel and industry + land-use change) minus (atmospheric growth + ocean sink + land sink + cement carbonation sink); it is a measure of our imperfect data and understanding of the contemporary carbon cycle.
		Cite as: Friedlingstein et al. 2020 (see Summary tab).
Year	fossil emissions excluding carbonation	land-use change emissions	atmospheric growth	ocean sink	land sink	cement carbonation sink	budget imbalance
1959	2.415	1.8042	2.0448	0.861368	0.677445	0.0126837	0.622904
1960	2.548	1.65944	1.5123	0.839096	1.2584	0.0138388	0.583806
1961	2.553	1.59364	1.6614	0.716516	0.660306	0.0147265	1.09369
1962	2.644	1.55592	1.1928	0.768402	1.40822	0.015871	0.814628
1963	2.794	1.51124	1.2141	0.917365	1.02382	0.0168627	1.13309
1964	2.939	1.46747	1.0437	1.11133	1.52952	0.0184512	0.703467
1965	3.076	1.42218	2.343	1.23095	0.480777	0.019486	0.423966
1966	3.219	1.39185	2.343	1.18813	1.43433	0.0209148	-0.375525
1967	3.322	1.37337	1.2993	0.994842	1.64082	0.0219525	0.73845
1968	3.503	1.36684	2.1087	1.0676	2.3674	0.0235326	-0.697399
1969	3.737	1.3727	2.8116	1.1084	0.748211	0.0249665	0.41653
1970	4.047	1.35838	2.4069	1.03279	0.723909	0.0264898	1.21529
1971	4.21	1.33589	1.5549	1.09728	2.28513	0.0279915	0.580587
1972	4.406	1.30633	3.1311	1.3336	1.32176	0.0304855	-0.104619
1973	4.64	1.29784	3.1098	1.30081	1.79561	0.0326104	-0.300992
1974	4.62	1.26857	1.4484	1.21392	3.54796	0.0333958	-0.355109
1975	4.613	1.25312	2.6199	1.17596	2.40702	0.0341044	-0.370869
1976	4.858	1.23498	2.0661	1.28204	2.86945	0.036067	-0.160671
1977	4.991	1.22052	4.0896	1.39038	1.58222	0.0384653	-0.889147
1978	5.174	1.19278	2.7477	1.44676	2.55168	0.0411113	-0.420464
1979	5.312	1.16302	4.5582	1.32153	1.61846	0.0425989	-1.06577
1980	5.286	1.19715	3.621	1.63358	0.780913	0.0438607	0.403796
1981	5.142	1.21241	2.41074	1.61695	2.25869	0.0447408	0.023283
1982	5.104	1.2137	2.1771	1.70934	1.78639	0.0455862	0.59929
1983	5.152	1.24457	3.89754	1.86545	0.673824	0.0471071	-0.0873555
1984	5.302	1.27848	2.75058	1.73113	2.8359	0.0485571	-0.785687
1985	5.49	1.29535	3.4515	1.62853	2.7068	0.0499606	-1.05144
1986	5.568	1.31905	2.27268	1.70076	2.34857	0.0523364	0.512704
1987	5.749	1.34012	5.75604	1.80722	0.824022	0.054798	-1.35296
1988	5.968	1.36962	4.78962	1.70761	2.19689	0.0580766	-1.41458
1989	6.057	1.39144	2.89926	1.66538	3.51183	0.0580365	-0.686064
1990	6.195	1.35896	2.64438	1.79268	2.622	0.0575039	0.437397
1991	6.324	1.34743	1.63548	1.90428	2.21356	0.0610532	1.85706
1992	6.126	1.34953	1.51866	2.13101	2.29057	0.0619162	1.47338
1993	6.191	1.3511	2.4957	2.06932	3.10157	0.0661676	-0.190651
1994	6.235	1.34476	3.56832	1.92966	1.78983	0.0698137	0.222139
1995	6.368	1.33515	4.33296	1.9241	2.02137	0.0736643	-0.648948
1996	6.564	1.3182	2.25144	1.87902	3.07455	0.076578	0.600609
1997	6.602	1.78844	4.1949	1.98571	3.2637	0.0794866	-1.13336
1998	6.581	1.24643	6.04278	2.1	1.94149	0.0804619	-2.3373
1999	6.668	1.23021	2.8674	1.90835	3.53872	0.0834296	-0.499701
2000	6.856	1.37815	2.66562	1.86653	3.75666	0.0867728	-0.141437
2001	6.914	1.33332	3.89754	1.77103	2.67594	0.089617	-0.186816
2002	7.072	1.50089	5.00202	2.15916	1.61361	0.0943944	-0.296287
2003	7.417	1.54599	4.81086	2.23533	2.55666	0.101384	-0.741248
2004	7.77	1.51361	3.3984	2.1368	3.60167	0.108449	0.0382922
2005	8.027	1.41749	5.22504	2.20787	2.20095	0.116055	-0.305431
2006	8.29	1.49564	3.72762	2.26216	3.21796	0.126381	0.451512
2007	8.541	1.31168	4.4604	2.29954	2.99458	0.136211	-0.0380505
2008	8.719	1.35733	3.84444	2.21529	3.63227	0.140967	0.243363
2009	8.587	1.60075	3.41964	2.28335	3.03452	0.148334	1.30191
2010	9.043	1.45666	5.16132	2.27345	3.29978	0.157597	-0.392481
2011	9.337	1.38141	3.60018	2.38595	4.07673	0.170529	0.485028
2012	9.487	1.48566	5.06574	2.4405	2.82443	0.177551	0.464434
2013	9.549	1.53338	5.17194	2.47787	3.64491	0.185996	-0.398329
2014	9.619	1.64903	4.21614	2.564	3.83412	0.194189	0.459578
2015	9.61	1.70492	6.27642	2.60782	2.6415	0.196215	-0.407042
2016	9.613	1.5552	6.07464	2.68351	3.18323	0.199106	-0.97228
2017	9.742	1.52111	4.57722	2.51999	3.83003	0.203694	0.132171
2018	9.94	1.55364	5.08698	2.56109	3.77639	0.210856	-0.141683
2019	9.94562	1.80264	5.42682	2.62599	3.13674	0.215298	0.343408
2020*	~9.3	~1.6	~5.3
*2020 values are based on proxies and on projections for the most recent months, not based on actual emission data. See Friedlingstein et al. 2020 for methodology

## Sheet: Fossil Emissions by Category
	Fossil fuel and cement production emissions by fuel type
	All values in million tonnes of carbon per year (MtC/yr), except the per capita emissions which are in tonnes of carbon per person per year (tC/person/yr). For values in million tonnes of CO2 per year, multiply the values below by 3.664
	1MtC = 1 million tonne of carbon = 3.664 million tonnes of CO2
	Methods: Full details of the method are described in Friedlingstein et al (2020).
	The uncertainty for the global estimates is about ±5 % for a ± 1 sigma confidence level.
	Cite as: Friedlingstein et al (2020; see summary tab)
MtC/yr
Year	fossil emissions excluding carbonation	Coal	Oil	Gas	Cement emission	Flaring	Other	Per Capita
1959	2415	1349	794	207	40	25	0	0.81
1960	2548	1400	852	228	43	24	0	0.84
1961	2553	1342	902	241	45	24	0	0.83
1962	2644	1338	970	264	48	23	0	0.84
1963	2794	1392	1039	286	51	25	0	0.87
1964	2939	1418	1119	315	56	31	0	0.9
1965	3076	1441	1204	337	59	36	0	0.92
1966	3219	1454	1296	366	63	39	0	0.94
1967	3322	1431	1382	392	65	52	0	0.95
1968	3503	1447	1505	427	70	56	0	0.99
1969	3737	1502	1628	467	73	67	0	1.03
1970	4047	1550	1854	490	77	76	0	1.09
1971	4210	1551	1961	529	82	88	0	1.12
1972	4406	1549	2115	561	87	95	0	1.14
1973	4640	1593	2262	583	92	110	0	1.18
1974	4620	1596	2230	595	92	107	0	1.15
1975	4613	1631	2201	599	91	92	0	1.13
1976	4858	1704	2315	634	97	108	0	1.17
1977	4991	1740	2400	646	102	104	0	1.18
1978	5174	1793	2488	680	108	106	0	1.2
1979	5312	1860	2526	718	110	98	0	1.21
1980	5286	1915	2435	739	110	86	0	1.19
1981	5142	1903	2316	748	110	65	0	1.13
1982	5104	1938	2261	732	110	64	0	1.11
1983	5152	1996	2242	744	112	58	0	1.1
1984	5302	2081	2253	803	114	51	0	1.11
1985	5490	2232	2257	836	115	50	0	1.13
1986	5568	2257	2325	820	120	46	0	1.12
1987	5749	2338	2352	889	125	45	0	1.14
1988	5968	2418	2435	932	133	51	0	1.16
1989	6057	2424	2475	981	136	41	0	1.16
1990	6195	2380	2516	1054	136	68	41	1.16
1991	6324	2358	2641	1075	140	72	38	1.17
1992	6126	2299	2500	1083	146	63	35	1.11
1993	6191	2326	2507	1112	152	62	32	1.11
1994	6235	2340	2517	1122	162	63	31	1.1
1995	6368	2408	2542	1152	171	63	32	1.11
1996	6564	2466	2626	1203	174	64	31	1.13
1997	6602	2453	2667	1207	180	65	31	1.12
1998	6581	2388	2694	1227	179	62	31	1.1
1999	6668	2369	2758	1263	187	60	31	1.1
2000	6856	2456	2806	1295	195	72	31	1.12
2001	6914	2470	2830	1308	204	73	30	1.11
2002	7072	2576	2827	1347	215	76	31	1.12
2003	7417	2787	2899	1394	231	76	31	1.16
2004	7770	2969	3000	1439	247	82	33	1.2
2005	8027	3149	3022	1474	261	88	34	1.23
2006	8290	3328	3046	1508	285	88	35	1.25
2007	8541	3487	3063	1559	306	92	35	1.27
2008	8719	3619	3057	1603	310	96	34	1.28
2009	8587	3574	2999	1573	319	94	28	1.25
2010	9043	3802	3081	1694	339	96	31	1.3
2011	9337	4025	3083	1739	364	94	32	1.33
2012	9487	4067	3145	1773	374	95	32	1.33
2013	9549	4072	3174	1785	390	95	33	1.32
2014	9619	4079	3205	1799	405	98	33	1.32
2015	9610	3991	3252	1846	390	99	32	1.3
2016	9613	3920	3267	1894	399	101	31	1.29
2017	9742	3934	3323	1942	403	110	31	1.29
2018	9940	3990	3344	2044	413	117	31	1.3
2019	9945.62	3919.91	3371.76	2078.52	426.791	117.22	31.4195	1.28938

## Sheet: Land-Use Change Emissions
	Land-use change emissions
	All values in billion tonnes of carbon per year (GtC/yr), for the globe. For values in billion tonnes of carbon dioxide per year (GtCO2/yr), multiply the numbers below by 3.664.
	1 billion tonnes C = 1 petagram of carbon (10^15 gC) = 1 gigatonne C = 3.664 billion tonnes of CO2
	Methods: The GCB estimate is the average of three bookkeeping models (uncertainty of ±0.7 GtC/yr). Individual results from dynamic global vegetation models are also provided. Cite as: Friedlingstein et al (2020; see summary tab)
		Data below represents the net flux of land-use change, based on the net balance between deforestation and forest regrowth along with other land-use changes
	Cite individual estimates as:
	H&N	Houghton, R. A. and Nassikas, A. A.: Global and regional fluxes of carbon from land use and land cover change 1850-2015, Global Biogeochemical Cycles, 31, 456-472, 2017.
	BLUE	Hansis, E., Davis, S. J., and Pongratz, J.: Relevance of methodological choices for accounting of land use change carbon fluxes, Global Biogeochemical Cycles, 29, 1230-1246, 2015.
	OSCAR	Gasser, T., Crepin, L., Quilcaille, Y., Houghton, R. A., Ciais, P. and Obersteiner, M.: Historical CO 2 emissions from land use and land cover change and their uncertainty, Biogeosciences , 4075–4101, 2020.
	CABLE-POP	Haverd, V., Smith, B., Nieradzik, L., Briggs, P. R., Woodgate, W., Trudinger, C. M., Canadell, J. G., and Cuntz, M.: A new version of the CABLE land surface model (Subversion revision r4601) incorporating land use and land cover change, woody vegetation demography, and a novel optimisation-based approach to plant coordination of photosynthesis, Geosci. Model Dev., 11, 2995-3026, 2018.
	CLASSIC	Melton, J. R., Arora, V. K., Wisernig-cojoc, E., Seiler, C., Fortier, M. and Chan, E.: CLASSIC v1 . 0 : the open-source community successor to the Canadian Land Surface Scheme ( CLASS ) and the Canadian Terrestrial Ecosystem Model ( CTEM ) – Part 1 : Model framework and site-level performance, , 2825–2850, 2020.
	CLM5.0	Lawrence, D., Fisher, R., Koven, C., Oleson, K., Swenson, S., et al.: The Community Land Model version 5: Description of new features, benchmarking, and impact of forcing uncertainty, JAMES, accepted, 2019
	DLEM	Tian, H., G. Chen, C. Lu, X. Xu, D. J. Hayes, W. Ren, S. Pan, D.N. Huntzinger, S.C. Wofsy: North American terrestrial CO2 uptake largely offset by CH4 and N2O emissions: Toward a full accounting of the greenhouse gas budget, Climatic Change, 129:423-426, 2015
	IBIS	Yuan WP, Liu D, Dong WJ, Liu SG, Zhou GS, Yu GR, Zhao TB, Feng JM, Ma ZG, Chen JQ, Chen Y, Chen SP, Han SJ, Huang JP, Li LH, Liu HZ, Liu SM, Ma MG, Wang YF, Xia JZ, Xu WF, Zhang Q, Zhao XQ, Zhao L. 2014. Multiyear precipitation reduction strongly decreases carbon uptake over northern China. Journal of Geophysical Research: Biogeosciences, 119, 881-896.
	ISAM	Meiyappan, P., Jain, A. K., and House, J. I.: Increased influence of nitrogen limitation on CO2 emissions from future land use and land use change, Global Biogeochemical Cycles, 29, 1524-1548, 2015.
	ISBA-CTRIP	Delire, C., Séférian, R., Decharme, B., Alkama, R., Calvet, J., Carrer, D., Gibelin, A., Joetzjer, E., Morel, X., Rocher, M. and Tzanos, D.: The Global Land Carbon Cycle Simulated With ISBA‐CTRIP: Improvements Over the Last Decade, J. Adv. Model. Earth Syst., 12(9), doi:10.1029/2019MS001886, 2020.
	JSBACH	Mauritsen, T., Bader, J., Becker, T., Behrens, J., Bittner, M., Brokopf, R., Brovkin, V., Claussen, M., Crueger, T., Esch, M., Fast, I., Fiedler, S., Popke, D., Gayler, V., Giorgetta, M., Goll, D., Haak, H., Hagemann, S., Hedemann, C., Hohenegger, C., Ilyina, T., Jahns, T., Jimenez Cuesta de la Otero, D., Jungclaus, J., Kleinen, T., Kloster, S., Kracher, D., Kinne, S., Kleberg, D., Lasslop, G., K…
	JULES-ES	Sellar, A. A., Jones, C. G., Mulcahy, J., Tang, Y., Yool, A., Wiltshire, A., O’Connor, F. M., Stringer, M., Hill, R., Palmieri, J., Woodward, S., Mora, L., Kuhlbrodt, T., Rumbold, S., Kelley, D. I., Ellis, R., Johnson, C. E., Walton, J., Abraham, N. L., Andrews, M. B., Andrews, T., Archibald, A. T., Berthou, S., Burke, E., Blockley, E., Carslaw, K., Dalvi, M., Edwards, J., Folberth, G. A., Gedney…
	LPJ-GUESS	Smith, B., Warlind, D., Arneth, A., Hickler, T., Leadley, P., Siltberg, J., and Zaehle, S.: Implications of incorporating N cycling and N limitations on primary production in an individual-based dynamic vegetation model, Biogeosciences, 11, 2027-2054, 2014.
	LPJ	Poulter, B., Frank, D. C., Hodson, E. L., and Zimmermann, N. E.: Impacts of land cover and climate data selection on understanding terrestrial carbon dynamics and the CO2 airborne fraction, Biogeosciences, 8, 2027-2036, 2011.
	LPX-Bern	Lienert, S. and Joos, F.: A Bayesian ensemble data assimilation to constrain model parameters and land-use carbon emissions, Biogeosciences, 15, 2909-2930, 2018.
	OCNv2	Zaehle, S. and Friend, A. D.: Carbon and nitrogen cycle dynamics in the O-CN land surface model: 1. Model description, site-scale evaluation, and sensitivity to parameter estimates, Global Biogeochemical Cycles, 24, GB1005, 2010
	ORCHIDEEv3	Vuichard, N., Messina, P., Luyssaert, S., Guenet, B., Zaehle, S., Ghattas, J., Ipsl, L. and Paris-saclay, U.: Accounting for carbon and nitrogen interactions in the global terrestrial ecosystem model ORCHIDEE ( trunk version , rev 4999 ): multi-scale evaluation of gross primary production, , 4751–4779, 2019.
	SDGVM	Walker, A. P., Quaife, T., van Bodegom, P. M., De Kauwe, M. G., Keenan, T. F., Joiner, J., Lomas, M. R., MacBean, N., Xu, C. G., Yang, X. J., and Woodward, F. I.: The impact of alternative trait-scaling hypotheses for the maximum photosynthetic carboxylation rate (V-cmax) on global gross primary production, New Phytologist, 215, 1370-1386, 2017.
	VISIT	Kato, E., Kinoshita, T., Ito, A., Kawamiya, M. and Yamagata, Y.: Evaluation of spatially explicit emission scenario of land-use change and biomass burning using a process-based biogeochemical model, J. Land Use Sci., 8(1), 104–122, doi:10.1080/1747423x.2011.628705, 2013.
	YIBs	Yue, X. and Unger, N.: The Yale Interactive terrestrial Biosphere model version 1 . 0 : description , evaluation and implementation into NASA GISS, , 2399–2417, doi:10.5194/gmd-8-2399-2015, 2015.
			Bookkeeping methods				Individual models
Year	GCB		H&N	BLUE	OSCAR		CABLE-POP	CLASSIC	CLM5.0	DLEM	IBIS	ISAM	ISBA-CTRIP	JSBACH	JULES-ES	LPJ-GUESS	LPJ	LPX-Bern	OCNv2	ORCHIDEE-v3	SDGVM	VISIT	YIBs		MMM (multi-model mean)	Model Spread (sd)
1959	1.8042		0.997975	2.71303	1.70159		1.88	1.58	2.32	2.60386	1.85	1.6	1.56	1.22	1.66	1.83	1.5	1.22	2.28	1.189	2.38	1.89	2.26		1.81311	0.420901
1960	1.65944		1.02378	2.37073	1.5838		1.64	0.35	2.14	2.73477	1.38	1.66	1.4	1.1	1.63	2.08	1.11	1.23	2.39	1.312	2.81	1.66	2.13		1.69157	0.613898
1961	1.59364		1.05456	2.18473	1.54162		1.61	1.23	1.96	2.19146	1.29	1.01	1.27	1.04	1.8	1.64	1.09	0.82	1.81	1.177	2.32	1.61	2.06		1.5252	0.437321
1962	1.55592		1.06233	2.08043	1.525		1.49	0.22	2.05	1.84146	1.52	1.02	0.89	1.12	1.92	1.75	1.07	0.82	2.03	1.182	1.81	1.78	2.09		1.44726	0.517258
1963	1.51124		1.01852	2.00643	1.50878		1.83	0.44	1.96	1.90442	1.58	0.82	0.86	1.24	1.87	1.09	0.93	0.36	1.74	0.885	2.82	1.56	2.11		1.41173	0.637302
1964	1.46747		0.965118	1.95343	1.48385		1.67	0.17	1.96	1.87519	1.69	1.07	0.84	1.21	1.77	1.62	0.99	0.77	1.76	0.997	1.68	1.51	2.1		1.39307	0.502341
1965	1.42218		0.907569	1.90803	1.45094		1.23	0.63	1.55	1.72401	1.48	1.35	0.96	1.3	1.94	1.68	0.7	0.81	1.81	0.928	0.63	1.62	2.02		1.31541	0.451457
1966	1.39185		0.848678	1.87803	1.44882		1.63	1.32	1.7	1.46004	1.35	1.01	0.83	1.28	1.83	1.42	1	0.62	1.6	0.916	2.14	1.57	2.06		1.39624	0.412069
1967	1.37337		0.830951	1.84923	1.43991		2.09	0.61	1.9	1.75545	1.68	1.07	0.78	1.17	1.83	1.81	1.04	0.92	1.71	0.889	2.23	1.64	2.3		1.49556	0.518632
1968	1.36684		0.845613	1.82433	1.43056		2.15	1.14	1.85	1.92178	1.46	0.97	0.79	1.26	1.88	1.85	0.99	0.79	1.61	0.866	2.62	1.47	2.26		1.52222	0.540499
1969	1.3727		0.884097	1.79713	1.43688		1.36	-0.09	1.57	2.00034	1.13	0.96	0.69	1.25	1.66	1.72	1.08	0.72	1.62	0.824	1.41	1.5	2.05		1.26202	0.521764
1970	1.35838		0.909405	1.72363	1.44209		1.73	1.25	1.58	1.54743	1.74	1.2	0.92	1.25	1.74	1.38	1.1	0.79	1.63	0.847	1.1	1.6	2.1		1.38261	0.355272
1971	1.33589		0.896517	1.68723	1.42392		1.94	0.94	1.76	1.90849	1.58	0.71	0.61	1.15	1.83	2.08	1.21	0.96	1.42	0.755	2.64	1.59	2.1		1.48138	0.559989
1972	1.30633		0.860486	1.66233	1.39617		1.54	1.38	1.59	1.37042	1.46	0.8	0.59	1.18	1.68	1.96	1.08	0.83	1.53	0.611	1.25	1.41	2.07		1.31361	0.415043
1973	1.29784		0.843094	1.63243	1.41798		1.68	1.69	1.65	1.92831	1.09	0.81	0.64	1.13	1.47	1.78	1.07	0.68	1.28	0.813	2.95	1.51	2.2		1.43361	0.582579
1974	1.26857		0.801912	1.60523	1.39855		2	0.92	1.85	2.1208	1.58	0.42	0.61	1.2	1.75	2.37	1.31	0.94	1.69	0.953	3.14	1.5	2.39		1.57316	0.687891
1975	1.25312		0.781548	1.58013	1.39767		1.54	0.78	1.81	1.58736	2.05	0.63	0.84	1.24	1.78	1.49	1.11	0.51	2.05	0.653	2.23	1.57	2.29		1.4212	0.567413
1976	1.23498		0.767067	1.56503	1.37285		1.61	0.72	1.81	2.15213	1.38	0.73	0.56	1.07	1.83	1.62	1.32	0.74	1.83	0.627	2.34	1.67	2.3		1.42995	0.57971
1977	1.22052		0.743179	1.55263	1.36576		1.94	0.81	1.82	1.62966	1.42	0.97	0.55	1.18	1.55	0.91	1.04	0.27	1.51	0.242	1.35	1.56	2.25		1.23539	0.549715
1978	1.19278		0.689666	1.53183	1.35685		2.13	1.09	1.9	1.82157	1.45	0.89	0.56	0.88	1.67	2.15	1.22	0.95	1.63	0.724	2.82	1.59	2.21		1.51092	0.602688
1979	1.16302		0.656621	1.51033	1.32209		1.98	0.66	1.65	1.77723	1.72	0.97	0.72	1.62	1.75	1.34	0.86	0.77	1.78	0.567	0.99	1.64	2.31		1.35907	0.518205
1980	1.19715		0.624067	1.63543	1.33196		1.63	0.74	1.77	1.21878	1.69	0.95	0.67	1.26	1.58	0.79	0.91	0.77	1.66	0.366	0.93	1.85	2.31		1.24087	0.514302
1981	1.21241		0.604954	1.68396	1.3483		1.73	1.28	2.01	1.68453	1.53	0.82	0.71	1.57	1.7	1.62	1.13	0.78	1.51	0.707	2.6	1.63	2.49		1.50009	0.544135
1982	1.2137		0.594842	1.72209	1.32418		1.75	0.47	1.99	1.83987	1.63	1.23	0.82	1.58	1.88	1.88	1.21	0.82	1.88	0.763	0.75	1.78	2.4		1.45135	0.540759
1983	1.24457		0.650522	1.74941	1.33378		2.11	1.04	2.17	1.81688	1.42	1.1	0.96	1.76	1.71	0.84	1.06	1	1.44	0.462	1.96	1.77	2.39		1.47111	0.527222
1984	1.27848		0.693843	1.78084	1.36077		1.86	1.03	1.86	2.38764	2.19	0.8	0.96	1.59	1.7	1.97	1.2	1.01	1.79	0.687	1.69	1.78	2.52		1.58968	0.53622
1985	1.29535		0.715118	1.79786	1.37308		1.31	0.85	1.92	2.25098	1.6	1.04	0.95	1.54	1.76	2.39	1.18	0.96	1.74	0.643	1.79	1.88	2.59		1.55259	0.549867
1986	1.31905		0.758946	1.82449	1.37372		1.82	1.18	2.4	1.70173	1.85	1.02	1.02	1.71	1.88	1.79	1.22	0.94	1.74	0.63	1.55	1.68	2.61		1.57304	0.502593
1987	1.34012		0.802824	1.85531	1.36222		2.33	0.75	2.2	2.1408	1.68	1.1	0.92	1.73	1.71	1.02	1.04	0.88	1.62	0.354	1.31	1.62	2.54		1.46734	0.596357
1988	1.36962		0.807384	1.88494	1.41654		2.37	0.3	2.23	1.91929	1.92	0.98	0.88	1.78	1.8	0.93	1	0.74	1.58	0.646	2.32	1.9	2.61		1.52384	0.679457
1989	1.39144		0.841312	1.90596	1.42705		1.54	1.38	2.21	2.37768	2.13	1.03	0.77	2.06	2.05	1.94	1.03	0.69	2	0.954	2.42	1.87	2.81		1.72128	0.620388
1990	1.35896		1.04675	1.65039	1.37975		1.98	1.83	2.16	1.96581	1.41	1.32	1.19	1.69	1.75	2.14	1.07	0.9	1.81	0.503	1.62	1.51	2.75		1.62346	0.519591
1991	1.34743		1.16022	1.5276	1.35447		2.13	1.19	1.88	1.83397	1.59	0.99	1.07	1.32	1.8	1.27	0.95	0.61	1.71	0.684	1.15	1.52	2.62		1.43047	0.51318
1992	1.34953		1.26723	1.4316	1.34976		1.51	1.07	1.73	1.64573	1.49	1.07	0.76	1.34	1.97	1.38	0.89	0.73	1.53	0.403	1	1.53	2.46		1.32404	0.489184
1993	1.3511		1.32566	1.36261	1.36504		1.63	0.89	1.74	1.97698	1.1	0.85	0.58	1.2	1.75	2.15	0.98	0.83	1.24	0.581	1.32	1.44	2.33		1.3287	0.516524
1994	1.34476		1.36793	1.30203	1.36432		1.96	0.38	1.92	1.1067	1.44	0.97	0.94	0.99	1.84	0.8	0.76	0.14	1.78	0.523	0.48	1.48	2.42		1.17234	0.630267
1995	1.33515		1.38258	1.25333	1.36953		1.43	1.34	1.66	1.33348	1.51	0.83	0.63	1.27	1.92	1.09	0.65	0.33	1.34	0.458	1.68	1.44	2.47		1.25773	0.535175
1996	1.3182		1.37886	1.19862	1.3771		1.52	0.99	1.47	1.67817	1.71	0.84	0.65	1.15	1.9	2.38	0.82	0.78	1.43	0.544	1.77	1.52	2.28		1.37836	0.535892
1997	1.78844		1.87561	1.64124	1.84846		1.77	1.7	1.56	1.64937	1.01	0.84	0.65	1.37	2.03	1.7	0.87	0.77	1.44	0.372	2.36	1.44	2.32		1.40302	0.560268
1998	1.24643		1.33259	1.07744	1.32927		2.05	1.09	1.72	0.784284	1.29	0.95	0.94	1.66	1.65	1	0.75	0.28	1.45	0.443	1.7	1.27	2.43		1.26219	0.550754
1999	1.23021		1.30553	1.04827	1.33682		1.78	0.51	1.71	1.70723	2.12	0.76	0.83	1.45	2.11	1.13	0.8	0.42	1.63	0.647	1.61	1.55	2.57		1.3726	0.609843
2000	1.37815		1.2382	1.47057	1.42566		1.45	0.97	1.66	1.85839	1.58	0.81	0.55	1.46	2	1.45	1.06	0.5	1.64	0.604	1.82	1.69	2.85		1.40896	0.589749
2001	1.33332		1.22942	1.33618	1.43435		1.66	1.35	2.17	1.73832	1.77	1.55	1.15	1.52	1.94	1.6	0.91	0.45	1.97	0.672	1.69	1.41	2.86		1.55355	0.550819
2002	1.50089		1.30568	1.63322	1.56377		1.77	1.79	1.92	1.2791	1.8	1.13	1.28	1.62	1.82	1.06	0.87	0.46	1.52	0.325	-0.22	1.48	2.75		1.33259	0.680497
2003	1.54599		1.22248	1.83034	1.58514		2.29	1.27	2.24	2.10037	1.72	1.32	1.04	2.03	1.74	1.37	1.24	1.15	1.75	0.671	2.07	1.78	3.06		1.69655	0.561135
2004	1.51361		1.25502	1.71229	1.57351		2.01	2.11	2.71	2.32049	1.74	1.59	1.41	1.74	1.85	2.68	1.38	1.31	1.84	0.847	2.97	1.58	3.12		1.95338	0.609029
2005	1.41749		1.2362	1.5069	1.50936		1.39	0.88	2.5	2.07753	1.8	2.07	1.72	1.47	1.68	1.62	1	0.72	1.87	0.534	2.23	1.43	3.01		1.64715	0.623996
2006	1.49564		1.33004	1.51056	1.64632		1.89	1.99	1.92	1.7397	2.06	1.18	1.35	1.63	1.86	1.39	1.06	0.62	1.77	0.489	2.22	1.66	2.66		1.61698	0.539233
2007	1.31168		1.08294	1.39194	1.46017		2.3	1.5	1.85	1.70329	1.65	1.21	1.29	1.86	1.87	1.42	0.99	0.45	1.57	0.537	1.4	1.66	2.74		1.52943	0.546689
2008	1.35733		1.0937	1.5043	1.47398		2.43	1.16	2.11	2.09715	2.48	1.1	1.35	2.03	2.09	2.01	1.25	1.07	1.96	0.714	1.67	1.73	2.85		1.77066	0.567604
2009	1.60075		1.18141	1.82467	1.79617		1.7	1.31	1.87	2.03296	1.83	1.25	1.24	1.96	1.8	1.8	1.61	0.82	1.9	0.493	1.11	1.99	2.89		1.62388	0.533557
2010	1.45666		1.11574	1.65088	1.60337		2.35	2.64	2.69	2.02617	2.05	2.46	2.08	2.25	1.35	2.55	1.46	1.34	2.09	0.98	4.18	1.76	3.13		2.19919	0.735847
2011	1.38141		1.07581	1.60485	1.46357		2.53	2.29	1.87	2.63651	2.28	1.63	1.94	2	2.02	2.43	1.5	0.69	1.99	0.642	1.94	1.74	2.93		1.94462	0.588396
2012	1.48566		1.06159	1.87015	1.52524		1.87	0.8	1.88	1.58677	2.42	1.33	1.64	1.92	1.98	0.68	1.33	0.45	2.01	0.548	1.15	1.77	3.15		1.55969	0.682041
2013	1.53338		1.00069	2.03132	1.56814		2.3	2.69	2.54	2.16371	1.82	2.58	1.59	2.18	1.91	2.6	1.78	1.1	2.19	1.109	2.1	1.88	3.24		2.10428	0.536186
2014	1.64903		1.05947	2.25381	1.6338		2.54	3.14	2.59	2.54772	2.06	2.05	2.26	2.41	2.04	2.97	1.84	1.4	2.1	1.043	2.19	1.85	3.31		2.25534	0.563675
2015	1.70492		1.14552	2.25555	1.71368		2.15	1.62	2.8	2.1594	2.09	2.23	2.42	2.42	2.06	1.89	1.6	1.2	2.27	0.645	2.08	1.55	3.23		2.02438	0.578153
2016	1.5552		0.812602	2.26023	1.59278		2.32	3.32	2.82	2.17243	2	1.69	2.19	2.44	1.97	1.88	1.75	1.19	1.98	1.058	3.09	2.04	3.39		2.19414	0.640562
2017	1.52111		0.748012	2.20274	1.61258		2.66	2.84	2.69	2.44633	2.14	2.05	2.62	2.23	2.23	2.93	1.84	1.57	2.7	1.216	2.15	1.89	3.62		2.34249	0.55167
2018	1.55364		0.739992	2.30762	1.6133		3.04	2.75	2.51	2.35485	2.31	2.54	2.6	2.4	2.39	2.38	1.54	1.41	2.8	1.374	1.77	2.2	3.3		2.33346	0.526836
2019	1.80264		0.988992	2.55662	1.8623		2.55	3.29	2.97	2.45428	2.21	0.9	2.38	2.23	2.3	2.5	1.63	1.36	2.32	1.092	1.54	1.67	3.32		2.15978	0.686317

## Sheet: Ocean Sink
	Ocean CO2 sink (positive values represent a flux from the atmosphere to the ocean)
	All values in billion tonnes of carbon per year (GtC/yr), for the globe. For values in billion tonnes of carbon dioxide per year (GtCO2/yr), multiply the numbers below by 3.664.
	1 billion tonnes C = 1 petagram of carbon (10^15 gC) = 1 gigatonne C = 3.664 billion tonnes of CO2
	Methods: The ocean sink (uncertainty of ±0.4 GtC/yr on average) is estimated from the average of several global ocean biogeochemistry models that reproduce the observed mean ocean sink of the 1990s. Cite as: Friedlingstein et al (2020; see summary tab)
	Note: the data products include a pre-industrial steady state source of CO2 from rivers (of about 0.61 GtC/yr) and therefore are not directly comparable with the ocean model results
	Cite individual estimates as:
	Model results used to compute the annual values:
	CESM_ETH	Doney, S. C., Lima, I., Feely, R. A., Glover, D. M., Lindsay, K., Mahowald, N., Moore, J. K., and Wanninkhof, R.: Mech- anisms governing interannual variability in upper-ocean inor- ganic carbon system and air–sea CO2 fluxes: Physical cli- mate and atmospheric dust, Deep-Sea Res. Pt. II, 56, 640–655, https://doi.org/10.1016/j.dsr2.2008.12.006, 2009.
	CSIRO	Law, R. M., Ziehn, T., Matear, R. J., Lenton, A., Chamberlain, M. A., Stevens, L. E., Wang, Y.-P., Srbinovsky, J., Bi, D., Yan, H., and Vohralik, P. F.: The carbon cycle in the Australian Commu- nity Climate and Earth System Simulator (ACCESS-ESM1) – Part 1: Model description and pre-industrial simulation, Geosci. Model Dev., 10, 2567–2590, https://doi.org/10.5194/gmd-10- 2567-2017, 2017
	FESOM-1.4-REcoM2	Hauck, J., Zeising, M., Le Quéré, C., Gruber, N., Bakker, D. C. E., Bopp, L., et al. (2020). Consistency and Challenges in the Ocean Carbon Sink Estimate for the Global Carbon Budget. Frontiers in Marine Science, 7. https://doi.org/10.3389/fmars.2020.571720
	MPIOM-HAMOCC6	Paulsen, H., Ilyina, T., Six, K. D. and Stemmler, I.: Incorporating a prognostic representation of marine nitrogen fixers into the global ocean biogeochemical model HAMOCC, J. Adv. Model. Earth Syst., 9(1), 438–464, doi:10.1002/2016MS000737, 2017.
	NEMO3.6-PISCESv2-gas (CNRM)	Berthet, S., Séférian, R., Bricaud, C., Chevallier, M., Voldoire, A., & Ethé, C. ( 2019). Evaluation of an online grid‐coarsening algorithm in a global eddy‐admitting ocean biogeochemical model. Journal of Advances in Modeling Earth Systems, 11, 1759– 1783. https://doi.org/10.1029/2019MS001644
	NEMO-PlankTOM5	Buitenhuis, E. T., Hashioka, T., Le Quéré, C. (2013) Combined constraints on global ocean primary production using observations and models Global Biogeochemical Cycles 27. pp. 847-858 doi:10.1002/gbc.20074
	MICOM-HAMOCC (NorESM-OCv1.2)	Schwinger, J., Goris, N., Tjiputra, J. F., Kriest, I., Bentsen, M., Bethke, I., Ilicak, M., Assmann, K. M., and Heinze, C.: Evaluation of NorESM-OC (versions 1 and 1.2), the ocean carbon-cycle stand-alone configuration of the Norwegian Earth System Model (NorESM1), Geosci. Model Dev., 9, 2589-2622, 2016.
	MOM6-COBALT (Princeton)	Liao, E., Resplandy, L., Liu, J. and Bowman, K. W.: Amplification of the Ocean Carbon Sink During El Niños: Role of Poleward Ekman Transport and Influence on Atmospheric CO 2, Global Biogeochem. Cycles, 34(9), doi:10.1029/2020GB006574, 2020.
	NEMO-PISCES (IPSL)	Aumont, O., Ethé, Tagliabue, A., Bopp, L., & Gehlen, M. (2015). PISCES-v2: an ocean biogeochemical model for carbon and ecosystem studies.
	Data products used to evaluate the results:
	Landschützer	Landschützer, P., Gruber, N., and Bakker, D. C. E.: Decadal variations and trends of the global ocean carbon sink, Global Biogeochem. Cy., 30, 1396–1417, https://doi.org/10.1002/2015GB005359, 2016
	Rödenbeck	Rödenbeck, C., Bakker, D. C. E., Metzl, N., Olsen, A., Sabine, C., Cassar, N., Reum, F., Keeling, R. F., and Heimann, M.: Interannual sea–air CO2 flux variability from an observation-driven ocean mixed-layer scheme, Biogeosciences, 11, 4599-4613, 2014.
	CMEMS	Denvil-Sommer, A., Gehlen, M., Vrac, M., and Mejia, C.: LSCE-FFNN-v1: a two-step neural network model for the reconstruction of surface ocean pCO2 over the global ocean, Geosci. Model Dev., 12, 2091–2105, https://doi.org/10.5194/gmd-12-2091-2019, 2019.
	CSIR-ML6	Gregor, L., Lebehot, A. D., Kok, S. and Scheel Monteiro, P. M.: A comparative assessment of the uncertainties of global surface ocean CO2 estimates using a machine-learning ensemble (CSIR-ML6 version 2019a)-Have we hit the wall?, Geosci. Model Dev., 12(12), 5113–5136, doi:10.5194/gmd-12-5113-2019, 2019.
	Watson et al.	Watson, A. J., Schuster, U., Shutler, J. D., Holding, T., Ashton, I. G. C., Landschützer, P., Woolf, D. K. and Goddijn-Murphy, L.: Revised estimates of ocean-atmosphere CO2 flux are consistent with ocean carbon inventory, Nat. Commun., 11(1), 1–6, doi:10.1038/s41467-020-18203-3, 2020.
				Individual models													Data-based products
year	GCB	1 sigma uncertainty		CESM-ETH	CSIRO	FESOM	MPI	CNRM	PlankTOM	NorESM	Princeton	IPSL		MMM (multi-model mean)	Model Spread (sd)		MPI-SOMFFN	Jena-MLS	CMEMS	CSIR	Watson	mean data-products (excl. Watson.)	sd data-products (excl. Watson.)
1959	0.861368	0.27		0.945789	1.0316	1.01314	0.80097	0.788258	0.890707	1.10301	0.347769	0.831071		0.861368	0.208722
1960	0.839096	0.24		0.886618	1.0316	1.03301	0.73175	0.768302	0.836543	1.07416	0.482066	0.707826		0.839096	0.18056
1961	0.716516	0.24		0.620557	0.891379	0.903881	0.721862	0.498897	0.79943	1.01014	0.416922	0.585579		0.716516	0.189228
1962	0.768402	0.28		0.724697	1.00155	0.844284	0.652642	0.43903	0.939857	1.18744	0.510128	0.615994		0.768402	0.230659
1963	0.917365	0.3		0.89647	1.18183	0.933679	0.721862	0.62861	1.06423	1.35408	0.664469	0.811045		0.917365	0.230892
1964	1.11133	0.28		0.989085	1.19184	1.22173	0.899855	1.04768	1.28691	1.46163	0.922038	0.981151		1.11133	0.179104
1965	1.23095	0.34		1.13037	1.44223	1.1224	1.01852	1.31709	1.47248	1.65109	0.866916	1.05746		1.23095	0.239574
1966	1.18813	0.33		1.05361	1.28198	1.1224	0.978963	1.15744	1.53065	1.65481	0.953107	0.960162		1.18813	0.239963
1967	0.994842	0.29		0.865353	1.05163	1.00321	0.80097	0.957883	1.22272	1.46032	0.733622	0.85787		0.994842	0.214635
1968	1.0676	0.3		1.0313	1.28198	0.86415	0.919632	0.977838	1.2187	1.52777	0.83685	0.950149		1.0676	0.216089
1969	1.1084	0.35		1.05783	1.4222	0.943612	0.721862	0.878059	1.34208	1.62426	0.979164	1.00651		1.1084	0.274561
1970	1.03279	0.29		0.880332	1.18183	1.00321	0.919632	0.917971	1.14648	1.50927	0.901994	0.834369		1.03279	0.202419
1971	1.09728	0.31		1.03101	1.36211	0.913814	0.969075	0.957883	1.23475	1.5539	0.994198	0.858798		1.09728	0.220845
1972	1.3336	0.39		1.40167	1.66257	1.01314	1.07785	1.04768	1.62293	1.81352	1.14653	1.21649		1.3336	0.283912
1973	1.30081	0.39		1.07472	1.46226	1.10254	1.00863	1.22729	1.69616	1.86167	1.2227	1.05134		1.30081	0.287994
1974	1.21392	0.36		0.990173	1.45225	1.08267	1.00863	1.05766	1.43737	1.80126	1.07939	1.0159		1.21392	0.267261
1975	1.17596	0.39		0.88281	1.33206	0.933679	1.12729	1.07762	1.61591	1.74939	0.987182	0.877685		1.17596	0.303321
1976	1.28204	0.43		1.19946	1.62251	0.923746	0.959186	1.15744	1.67509	1.91574	1.06034	1.02484		1.28204	0.3403
1977	1.39038	0.4		1.2629	1.62251	1.0926	1.15696	1.25722	1.69214	1.98941	1.24575	1.19395		1.39038	0.286827
1978	1.44676	0.37		1.32362	1.70263	1.24159	1.30528	1.24724	1.7122	1.93413	1.29186	1.26228		1.44676	0.246886
1979	1.32153	0.41		1.32568	1.79277	0.963477	0.880078	1.23726	1.55773	1.79744	1.12449	1.21487		1.32153	0.313538
1980	1.63358	0.39		1.57811	1.96304	1.46012	1.40417	1.43682	1.77038	2.09163	1.48528	1.51269		1.63358	0.235274
1981	1.61695	0.39		1.55824	1.98307	1.49985	1.42395	1.31709	1.68512	2.09857	1.53139	1.4553		1.61695	0.246853
1982	1.70934	0.45		1.75963	2.23346	1.53958	1.25584	1.43682	1.86166	2.15717	1.55043	1.58949		1.70934	0.307199		1.38416	1.43762		0.679959		1.16725	0.422849
1983	1.86545	0.47		1.90593	2.29355	1.70843	1.40417	1.47674	2.13248	2.33236	1.75588	1.77955		1.86545	0.313073		1.39418	1.58737		0.895819		1.29246	0.356821
1984	1.73113	0.41		1.54703	1.89293	1.68857	1.47339	1.55656	1.93388	2.28462	1.66468	1.53856		1.73113	0.246698		1.45724	1.45758		0.97137		1.2954	0.280616
1985	1.62853	0.47		1.47972	2.0031	1.41045	1.28551	1.34702	2.02415	2.25145	1.41914	1.43627		1.62853	0.338668		1.43945	1.40767	0.833248	0.982163		1.16563	0.304245
1986	1.70076	0.44		1.51376	2.05318	1.43032	1.5525	1.49669	1.92987	2.30482	1.47125	1.55449		1.70076	0.29578		1.47582	1.49752	0.889549	1.10089		1.24094	0.296699
1987	1.80722	0.46		1.70854	2.29355	1.42038	1.4635	1.7661	2.06628	2.2425	1.57849	1.7256		1.80722	0.303917		1.61938	1.57738	1.08097	1.30595		1.39592	0.251761
1988	1.70761	0.4		1.6221	2.0031	1.65877	1.59205	1.29713	1.8426	2.11475	1.64163	1.59637		1.70761	0.230837		1.37425	1.24793	1.12601	1.16564	2.08673	1.22846	0.109661
1989	1.66538	0.48		1.47739	2.18338	1.41045	1.40417	1.42685	2.01512	2.25185	1.36301	1.45616		1.66538	0.348847		1.28035	1.19801	1.08097	1.14406	2.00519	1.17585	0.084506
1990	1.79268	0.46		1.65866	2.28353	1.47998	1.58216	1.63638	2.09838	2.27647	1.48528	1.63325		1.79268	0.311421		1.40961	1.3877	1.18231	1.33833	2.02935	1.32949	0.102546
1991	1.90428	0.47		1.81878	2.44378	1.59917	1.63161	1.79603	2.15054	2.32934	1.66167	1.70757		1.90428	0.301184		1.52243	1.807	1.30617	1.44626	1.95468	1.52047	0.210978
1992	2.13101	0.5		2.03332	2.59401	1.81769	1.85904	2.15524	2.32306	2.60293	1.88316	1.9106		2.13101	0.291784		1.52221	2.20634	1.30617	1.57578	2.09225	1.65262	0.387103
1993	2.06932	0.49		1.94571	2.44378	1.84749	1.64149	2.08539	2.29698	2.58695	1.82804	1.948		2.06932	0.294526		1.59078	1.92681	1.43003	1.59736	2.09298	1.63625	0.208588
1994	1.92966	0.45		1.68774	2.25349	1.7283	1.79971	1.93572	2.09336	2.43518	1.63161	1.80181		1.92966	0.259998		1.49395	1.64727	1.46381	1.5434	1.96926	1.53711	0.0804362
1995	1.9241	0.44		1.70864	2.37367	1.74817	1.71071	1.86588	2.01111	2.32985	1.70377	1.86515		1.9241	0.247799		1.2406	1.61732	1.43003	1.42468	1.95811	1.42816	0.153813
1996	1.87902	0.42		1.70123	2.3236	1.73823	1.77004	1.71621	1.87269	2.2426	1.73483	1.81175		1.87902	0.222363		1.18655	1.55742	1.39625	1.44626	1.86803	1.39662	0.155401
1997	1.98571	0.51		1.9963	2.7142	1.58924	1.53272	1.89581	2.02215	2.32834	1.75789	2.03474		1.98571	0.345496		1.33428	1.92681	1.52012	1.59736	2.08694	1.59464	0.247441
1998	2.1	0.51		1.95282	2.69417	1.90709	1.50305	2.0355	2.34112	2.36181	1.99942	2.10506		2.1	0.317847		1.02874	2.29619	1.49759	1.60816	2.02029	1.60767	0.523241
1999	1.90835	0.47		1.5987	2.36366	1.77796	1.68105	1.79603	2.15254	2.40583	1.74385	1.65554		1.90835	0.294875		0.76161	1.8669	1.29491	1.28437	1.72681	1.30195	0.451479
2000	1.86653	0.47		1.59063	2.3236	1.58924	1.79971	1.77607	2.08133	2.40282	1.5394	1.69593		1.86653	0.306308		0.794815	1.6273	1.30617	1.33833	1.73941	1.26666	0.346121
2001	1.77103	0.48		1.55359	2.29355	1.34092	1.64149	1.67629	1.96497	2.32381	1.45421	1.69043		1.77103	0.330169		0.80022	1.29785	1.29491	1.28437	1.694	1.16934	0.246146
2002	2.15916	0.51		2.00385	2.7142	1.82763	2.08648	1.75612	2.38023	2.5576	1.97236	2.13393		2.15916	0.307859		1.12256	2.13646	1.52012	1.68371	1.94853	1.61571	0.419576
2003	2.23533	0.52		2.12545	2.81435	1.86736	1.92826	2.1253	2.32306	2.68887	2.15577	2.08951		2.23533	0.303705		1.41738	2.35609	1.56516	1.75926	2.01019	1.77447	0.412248
2004	2.1368	0.53		2.05899	2.82437	1.7879	1.85904	1.8559	2.24081	2.60072	1.96835	2.03511		2.1368	0.336874		1.43742	2.34611	1.54264	1.77005	2.04736	1.77405	0.405849
2005	2.20787	0.52		2.12253	2.85442	1.92695	1.93815	1.87585	2.29698	2.63399	2.0826	2.13936		2.20787	0.315719		1.60148	2.07656	1.63272	1.82402	2.09735	1.78369	0.218626
2006	2.26216	0.55		2.15019	2.94456	1.97662	1.94804	1.92574	2.32707	2.7537	2.16479	2.16878		2.26216	0.339217		1.74357	2.20634	1.80162	1.98591	2.27034	1.93436	0.208688
2007	2.29954	0.51		2.05787	2.85442	2.07595	2.14581	2.02552	2.47352	2.66686	2.17381	2.22215		2.29954	0.279284		1.8269	1.92681	1.80162	2.03988	2.21639	1.8988	0.108476
2008	2.21529	0.56		2.00478	2.91451	1.80776	1.90848	1.96565	2.38625	2.76456	2.09864	2.08693		2.21529	0.367689		1.93341	2.07656	1.79036	2.03988	2.32074	1.96005	0.128389
2009	2.28335	0.54		2.15303	2.93454	1.74817	2.14581	2.18517	2.44744	2.65218	2.08561	2.19816		2.28335	0.327505		2.15681	2.48588	1.98178	2.33129	2.58693	2.23894	0.217856
2010	2.27345	0.53		2.12723	2.87445	1.85743	1.87882	2.19515	2.46549	2.62897	2.21891	2.21461		2.27345	0.313976		2.10332	2.43596	1.97052	2.29891	2.61359	2.20218	0.206114
2011	2.38595	0.54		2.0824	2.96459	2.11568	2.40291	2.08539	2.51464	2.77782	2.28505	2.24502		2.38595	0.296423		2.16852	2.38604	1.93674	2.32049	2.69212	2.20295	0.199494
2012	2.4405	0.6		2.2511	3.11482	1.96669	2.14581	2.17519	2.79449	2.93522	2.22893	2.35227		2.4405	0.379315		2.25533	2.38604	1.98178	2.35287	2.79262	2.24401	0.18341
2013	2.47787	0.57		2.27592	3.09479	2.10574	2.16559	2.3049	2.72829	2.92567	2.33316	2.36672		2.47787	0.330626		2.09049	2.57573	2.07186	2.41763	2.88229	2.28893	0.24854
2014	2.564	0.58		2.3296	3.20496	2.22494	2.28425	2.33484	2.75337	3.00287	2.41233	2.52884		2.564	0.327315		2.12843	2.74545	2.18446	2.55794	2.92259	2.40407	0.296883
2015	2.60782	0.61		2.49	3.27507	2.16534	2.22492	2.45457	2.78145	3.12057	2.37726	2.58121		2.60782	0.36085		2.2872	2.41599	2.43218	2.6227	2.98601	2.43952	0.13828
2016	2.68351	0.55		2.5452	3.1649	2.50305	2.40291	2.52442	2.69018	3.07775	2.56667	2.67648		2.68351	0.248695		2.31681	2.7754	2.54479	2.87094	3.20159	2.62698	0.247996
2017	2.51999	0.58		2.26915	3.14487	2.26467	2.30402	2.22508	2.72328	3.01242	2.49351	2.24292		2.51999	0.33557		2.28483	2.7754	2.56731	2.78459	3.43185	2.60303	0.234665
2018	2.56109	0.61		2.45542	3.2951	2.3044	2.37324	2.23506	2.79851	2.99191	2.48149	2.11469		2.56109	0.365907		2.2944	2.87523	2.64613	2.97887	3.49882	2.69866	0.303248
2019	2.62599	0.6		2.60585	3.26505	2.2746	2.35	2.5344	2.80553	3.05594	2.53059	2.21196		2.62599	0.335733		2.45508	2.70551	2.93889	2.95728	3.51298	2.76419	0.235794

## Sheet: Terrestrial Sink
	Terrestrial CO2 sink (positive values represent a flux from the atmosphere to the land)
	All values in billion tonnes of carbon per year (GtC/yr), for the globe. For values in billion tonnes of carbon dioxide per year (GtCO2/yr), multiply the numbers below by 3.664.
	1 billion tonnes C = 1 petagram of carbon (10^15 gC) = 1 gigatonne C = 3.664 billion tonnes of CO2
	Methods: The terrestrial sink (uncertainty of ±0.9 GtC/yr on average) is estimated from the average of several Dynamic Global Vegetation Models (DGVMs) that reproduce the observed mean total land uptake of the 1990s. Cite as: Friedlingstein et al (2020; see summary tab)
	Cite individual estimates as:
	CABLE-POP	Haverd, V., Smith, B., Nieradzik, L., Briggs, P. R., Woodgate, W., Trudinger, C. M., Canadell, J. G., and Cuntz, M.: A new version of the CABLE land surface model (Subversion revision r4601) incorporating land use and land cover change, woody vegetation demography, and a novel optimisation-based approach to plant coordination of photosynthesis, Geosci. Model Dev., 11, 2995-3026, 2018.
	CLASSIC	Melton, J. R., Arora, V. K., Wisernig-cojoc, E., Seiler, C., Fortier, M. and Chan, E.: CLASSIC v1 . 0 : the open-source community successor to the Canadian Land Surface Scheme ( CLASS ) and the Canadian Terrestrial Ecosystem Model ( CTEM ) – Part 1 : Model framework and site-level performance, , 2825–2850, 2020.
	CLM5.0	Lawrence, D., Fisher, R., Koven, C., Oleson, K., Swenson, S., et al.: The Community Land Model version 5: Description of new features, benchmarking, and impact of forcing uncertainty, JAMES, accepted, 2019
	DLEM	Tian, H., G. Chen, C. Lu, X. Xu, D. J. Hayes, W. Ren, S. Pan, D.N. Huntzinger, S.C. Wofsy: North American terrestrial CO2 uptake largely offset by CH4 and N2O emissions: Toward a full accounting of the greenhouse gas budget, Climatic Change, 129:423-426, 2015
	IBIS	Yuan WP, Liu D, Dong WJ, Liu SG, Zhou GS, Yu GR, Zhao TB, Feng JM, Ma ZG, Chen JQ, Chen Y, Chen SP, Han SJ, Huang JP, Li LH, Liu HZ, Liu SM, Ma MG, Wang YF, Xia JZ, Xu WF, Zhang Q, Zhao XQ, Zhao L. 2014. Multiyear precipitation reduction strongly decreases carbon uptake over northern China. Journal of Geophysical Research: Biogeosciences, 119, 881-896.
	ISAM	Meiyappan, P., Jain, A. K., and House, J. I.: Increased influence of nitrogen limitation on CO2 emissions from future land use and land use change, Global Biogeochemical Cycles, 29, 1524-1548, 2015.
	ISBA-CTRIP	Delire, C., Séférian, R., Decharme, B., Alkama, R., Calvet, J., Carrer, D., Gibelin, A., Joetzjer, E., Morel, X., Rocher, M. and Tzanos, D.: The Global Land Carbon Cycle Simulated With ISBA‐CTRIP: Improvements Over the Last Decade, J. Adv. Model. Earth Syst., 12(9), doi:10.1029/2019MS001886, 2020.
	JSBACH	Mauritsen, T., Bader, J., Becker, T., Behrens, J., Bittner, M., Brokopf, R., Brovkin, V., Claussen, M., Crueger, T., Esch, M., Fast, I., Fiedler, S., Popke, D., Gayler, V., Giorgetta, M., Goll, D., Haak, H., Hagemann, S., Hedemann, C., Hohenegger, C., Ilyina, T., Jahns, T., Jimenez Cuesta de la Otero, D., Jungclaus, J., Kleinen, T., Kloster, S., Kracher, D., Kinne, S., Kleberg, D., Lasslop, G., K…
	JULES-ES	Sellar, A. A., Jones, C. G., Mulcahy, J., Tang, Y., Yool, A., Wiltshire, A., O’Connor, F. M., Stringer, M., Hill, R., Palmieri, J., Woodward, S., Mora, L., Kuhlbrodt, T., Rumbold, S., Kelley, D. I., Ellis, R., Johnson, C. E., Walton, J., Abraham, N. L., Andrews, M. B., Andrews, T., Archibald, A. T., Berthou, S., Burke, E., Blockley, E., Carslaw, K., Dalvi, M., Edwards, J., Folberth, G. A., Gedney…
	LPJ-GUESS	Smith, B., Warlind, D., Arneth, A., Hickler, T., Leadley, P., Siltberg, J., and Zaehle, S.: Implications of incorporating N cycling and N limitations on primary production in an individual-based dynamic vegetation model, Biogeosciences, 11, 2027-2054, 2014.
	LPJ	Poulter, B., Frank, D. C., Hodson, E. L., and Zimmermann, N. E.: Impacts of land cover and climate data selection on understanding terrestrial carbon dynamics and the CO2 airborne fraction, Biogeosciences, 8, 2027-2036, 2011.
	LPX-Bern	Lienert, S. and Joos, F.: A Bayesian ensemble data assimilation to constrain model parameters and land-use carbon emissions, Biogeosciences, 15, 2909-2930, 2018.
	OCNv2	Zaehle, S. and Friend, A. D.: Carbon and nitrogen cycle dynamics in the O-CN land surface model: 1. Model description, site-scale evaluation, and sensitivity to parameter estimates, Global Biogeochemical Cycles, 24, GB1005, 2010
	ORCHIDEEv3	Vuichard, N., Messina, P., Luyssaert, S., Guenet, B., Zaehle, S., Ghattas, J., Ipsl, L. and Paris-saclay, U.: Accounting for carbon and nitrogen interactions in the global terrestrial ecosystem model ORCHIDEE ( trunk version , rev 4999 ): multi-scale evaluation of gross primary production, , 4751–4779, 2019.
	SDGVM	Walker, A. P., Quaife, T., van Bodegom, P. M., De Kauwe, M. G., Keenan, T. F., Joiner, J., Lomas, M. R., MacBean, N., Xu, C. G., Yang, X. J., and Woodward, F. I.: The impact of alternative trait-scaling hypotheses for the maximum photosynthetic carboxylation rate (V-cmax) on global gross primary production, New Phytologist, 215, 1370-1386, 2017.
	VISIT	Kato, E., Kinoshita, T., Ito, A., Kawamiya, M. and Yamagata, Y.: Evaluation of spatially explicit emission scenario of land-use change and biomass burning using a process-based biogeochemical model, J. Land Use Sci., 8(1), 104–122, doi:10.1080/1747423x.2011.628705, 2013.
	YIBs	Yue, X. and Unger, N.: The Yale Interactive terrestrial Biosphere model version 1 . 0 : description , evaluation and implementation into NASA GISS, , 2399–2417, doi:10.5194/gmd-8-2399-2015, 2015.
			Individual models
Year	GCB		CABLE-POP	CLASSIC	CLM5.0	DLEM	IBIS	ISAM	ISBA-CTRIP	JSBACH	JULES-ES	LPJ-GUESS	LPJ	LPX-Bern	OCNv2	ORCHIDEE-v3	SDGVM	VISIT	YIBs		MMM (multi-model mean)	Model Spread (sd)
1959	0.677445		0.7	0.29	1.23	0.942562	0.98	1.24	0.9	0.55	1.15	-0.94	-0.43	0.26	1.15	0.634	0.2	1.33	1.33		0.677445	0.620481
1960	1.2584		1.77	0.9	1.42	1.71278	1.05	1.41	1.63	1.83	1.48	0.86	0.41	0.86	1.08	0.99	0.55	1.78	1.66		1.2584	0.439208
1961	0.660306		0.35	0.8	0.56	0.695206	0.43	1	0.53	1.66	0.69	0.72	-0.46	-0.02	1.34	0.93	-0.85	1.48	1.37		0.660306	0.642858
1962	1.40822		2.86	1.36	1.24	0.944756	1.13	1.38	1.47	2.14	1.89	1.7	0.26	-0.09	1.73	1.545	-0.17	2.36	2.19		1.40822	0.803706
1963	1.02382		1.17	-0.13	0.82	1.31098	0.81	1.18	1.57	1.68	1.83	0.29	-0.33	0.21	1.74	0.624	0.78	2.34	1.51		1.02382	0.713737
1964	1.52952		2.86	1.41	2	1.6599	1.29	2.07	0	1.63	2.16	2.25	0.9	1.12	1.85	1.212	0.3	1.61	1.68		1.52952	0.683709
1965	0.480777		1.67	-0.91	1.08	0.427211	0.57	1.21	1.35	0.41	1.39	-0.02	-0.56	-1.11	0.7	0.966	-1.51	1.32	1.19		0.480777	0.944207
1966	1.43433		1.8	2.35	1.56	1.7786	1.28	1.35	1.14	2.16	0.82	1.45	0.18	0.92	1.59	1.215	1.88	1.34	1.57		1.43433	0.500848
1967	1.64082		2.09	0.75	1.8	1.64698	0.7	1.89	1.53	1.93	2.6	1.63	1.07	1.11	2.66	1.247	1.2	1.93	2.11		1.64082	0.557488
1968	2.3674		2.63	3.25	2.16	2.53887	1.39	2.5	1.77	1.85	2.6	3.45	2.5	2.14	2.78	1.607	2.18	2.86	2.04		2.3674	0.539426
1969	0.748211		2.21	-0.25	1.21	0.531589	1.05	0.39	0.65	1.33	0	0.46	0.3	0.38	0.69	0.918	0.56	0.7	1.59		0.748211	0.580004
1970	0.723909		1.81	0.52	1.28	0.835458	1.83	0.73	0.42	1.32	0.46	-0.01	-0.82	0.11	0.68	0.971	-0.65	0.8	2.02		0.723909	0.77532
1971	2.28513		1.32	2.83	1.81	2.7262	2.08	2.48	1.78	1.56	2.89	3.18	2.16	2.03	2.87	1.851	1.84	3	2.44		2.28513	0.543452
1972	1.32176		1.85	1.7	0.77	1.24697	1.8	0.76	2.02	-0.68	0.74	2.33	1.53	1.4	1.7	0.683	1.09	1.97	1.56		1.32176	0.696937
1973	1.79561		3.73	3.01	1.97	2.80935	2.25	1.84	-0.55	1.64	-0.61	3.16	0.79	0.56	2.16	1.846	2.26	0.92	2.74		1.79561	1.19325
1974	3.54796		2.14	4.27	2.82	4.11128	2	3.35	4.02	4.48	3.58	4.56	3.67	3.6	4.3	2.874	3.05	4.52	2.97		3.54796	0.784682
1975	2.40702		2.16	3.41	2.42	2.09139	2.59	2.15	1.42	1.99	2.26	3.02	2.03	2.14	3.25	1.598	1.92	3.65	2.82		2.40702	0.610839
1976	2.86945		2.33	2.91	3.3	2.90158	2.04	2.81	2.7	1.45	3.52	3.18	4.34	2.32	3.74	1.689	2.59	4.36	2.6		2.86945	0.794168
1977	1.58222		2.32	2.34	1.93	1.13077	1.28	1.15	1.4	0.93	1.42	0.23	1.71	1.69	2.56	0.727	1.13	2.5	2.45		1.58222	0.666428
1978	2.55168		3.5	3.17	2.41	2.31948	0.95	2.56	1.86	3.11	2.13	3.33	2.66	1.84	2.72	2.109	3.11	2.97	2.63		2.55168	0.6292
1979	1.61846		2.06	0.58	2.12	1.70578	1.72	1.59	1.82	2.57	1.44	0.6	1.14	0.73	2.06	1.418	1.05	2.36	2.55		1.61846	0.620864
1980	0.780913		3.13	-0.34	1.41	0.613523	1.37	1.09	0.73	1.42	0.71	-0.9	-0.66	-1.02	1.11	1.262	-0.57	1.33	2.59		0.780913	1.13607
1981	2.25869		2.12	2.43	2.38	3.11873	1.67	2.26	2.23	2.82	1.99	1.56	1.05	0.96	3.52	2.219	2.29	2.47	3.31		2.25869	0.682412
1982	1.78639		4.1	0.38	1.85	1.8836	1.39	2.05	1.91	0.85	1.85	2.27	1.77	0.82	2.05	1.775	0.21	2.36	2.85		1.78639	0.896069
1983	0.673824		2.59	-0.64	1.24	1.136	1.2	0.78	0.19	1.57	-0.17	-0.48	-0.67	-1.46	1.24	0.869	0.45	0.39	3.22		0.673824	1.15382
1984	2.8359		4.47	4.1	2.49	3.53927	1.93	2.68	2.29	2.78	1.4	3.18	2.45	2.11	3.15	3.121	1.42	3.7	3.4		2.8359	0.844858
1985	2.7068		3.21	3.24	2.51	2.4306	1.83	2.77	3.05	3.47	1.97	3.18	2.4	1.49	3.42	2.415	2.08	2.91	3.64		2.7068	0.611936
1986	2.34857		3.26	2.24	3.2	2.11167	2.51	2.23	2.02	2.22	2.51	2.41	2.11	0	3.17	1.524	2.12	2.8	3.49		2.34857	0.778545
1987	0.824022		3.67	-1.64	1.49	0.96438	1.35	0.8	1.35	0.88	-0.13	-0.67	0.37	-0.68	1.53	0.754	-0.25	1.25	2.97		0.824022	1.26596
1988	2.19689		4.34	1.32	2.3	3.38015	1.92	2.25	1.23	3.47	2.49	0.65	0.24	0.87	3.04	2.137	2.07	1.79	3.85		2.19689	1.11422
1989	3.51183		3.77	4.5	2.99	3.98615	3.63	3.17	3.16	3	3.69	3.57	3.19	2.94	4.09	2.745	2.62	4.1	4.55		3.51183	0.577219
1990	2.622		3.35	3.23	2.99	1.81001	3.21	1.97	2.69	2.34	1.58	3.03	2.5	2.05	2.97	1.984	1.73	2.79	4.35		2.622	0.706346
1991	2.21356		2.57	1.31	3.04	2.25251	1.74	2.45	2.15	2.73	2.68	0.92	1.62	0.51	3.23	1.938	1.32	2.8	4.37		2.21356	0.914777
1992	2.29057		3.41	0.87	2.75	3.10063	2.63	3.41	1.26	0.95	2.05	3.15	3.14	0.63	2.8	1.599	1.65	1.4	4.14		2.29057	1.02908
1993	3.10157		4.93	2.88	3.2	3.10471	2.84	2.98	3.1	2.24	2.2	3.95	3.71	1.93	3.89	2.622	1.75	2.76	4.64		3.10157	0.863122
1994	1.78983		3.41	0.46	2.05	1.31112	2.62	1.28	2.21	1.75	2.19	-0.22	0.91	0.35	2.51	1.536	0.62	2.71	4.73		1.78983	1.19576
1995	2.02137		3.54	0.82	2.47	1.99028	2.45	1.58	2.1	1.67	1.81	1.02	0.98	0.36	2.71	2.023	2.02	1.96	4.86		2.02137	1.02578
1996	3.07455		3.79	3.86	2.52	2.92033	1.94	2.73	2.44	2.42	1.97	4.77	2.98	2.96	3.42	2.937	2.8	3.7	4.11		3.07455	0.74718
1997	3.2637		3.58	4.03	2.92	3.55292	1.41	2.52	3.21	3.62	2.74	3.59	3.78	3.1	3.83	1.95	4.11	3.47	4.07		3.2637	0.733151
1998	1.94149		4.91	2.35	2.35	1.03331	1.91	0.72	1.38	3.99	0.11	0.57	0.56	1.22	1.92	1.612	2.03	2.19	4.15		1.94149	1.29923
1999	3.53872		3.43	3.31	3.53	3.81832	4.1	3.47	3.36	4.65	3.43	2.42	3.32	2.69	3.98	2.92	2.22	4.8	4.71		3.53872	0.729215
2000	3.75666		4.22	5.76	3.28	3.82928	2.77	3.19	3.6	4.5	3.67	3.09	3.86	3.19	4.41	2.864	2.29	4.77	4.57		3.75666	0.846415
2001	2.67594		3.22	3.8	2.83	2.29204	2.84	2.44	2.67	2.68	2.47	1.54	2.14	1.01	3.23	1.669	2.36	3.88	4.42		2.67594	0.844388
2002	1.61361		5.46	0.56	2.28	1.09031	2.97	1.47	2.15	1.15	0.99	-0.23	0.67	-0.37	2.02	1.401	0.17	1.62	4.03		1.61361	1.44979
2003	2.55666		3.82	2.74	2.69	2.74525	2.59	2.28	2.33	3.62	1.77	1.7	1.51	0.51	3.32	1.908	3	2.69	4.24		2.55666	0.89545
2004	3.60167		5.77	4	3.22	3.64333	2.83	3.34	3.15	3.66	3	4.34	3.56	2.37	4.33	2.255	2.9	4.36	4.5		3.60167	0.858294
2005	2.20095		4.47	1.33	2.81	2.2092	2.82	1.59	2.31	1.76	2.06	1.06	1.71	0.44	2.73	1.587	1.76	2.25	4.52		2.20095	1.03288
2006	3.21796		4.62	3.06	2.88	3.45832	3.3	2.68	3.25	2.88	3.01	2.5	2.69	2.17	3.86	1.997	3.91	3.77	4.67		3.21796	0.739823
2007	2.99458		4.94	2.8	3.05	2.94981	3.53	2.48	2.8	3.95	2.88	1.81	1.95	0.87	3.49	2.508	1.61	4.24	5.05		2.99458	1.09883
2008	3.63227		5.54	3.89	2.71	3.6176	3.48	3.46	3.06	4.37	3.58	3.91	3.21	2.24	4.32	2.851	2.1	4.72	4.69		3.63227	0.888191
2009	3.03452		4.84	3.02	2.73	2.93388	3.45	2.4	2.78	3.5	2.36	2.13	3.5	1.84	3.64	1.873	2.41	3.83	4.35		3.03452	0.826233
2010	3.29978		4.68	4.09	3.55	3.1832	2.73	2.19	2.53	4.96	1.12	3.37	2.9	1.9	3.71	2.433	4.13	4.2	4.42		3.29978	1.03072
2011	4.07673		4.09	3.85	4.14	4.53138	3.2	3.75	3.87	4.66	4.33	4.14	4.52	2.73	5.11	2.803	2.78	5.77	5.03		4.07673	0.831242
2012	2.82443		4.64	2.01	3.01	2.22238	3.52	2.42	3.58	2.62	3.13	1.04	2.16	1.23	3.65	1.923	1.78	4.04	5.04		2.82443	1.10744
2013	3.64491		6.6	4.82	3.16	3.27147	3.69	3.02	2.83	4.65	2.26	3.5	3.64	2.5	3.78	2.612	2.43	3.93	5.27		3.64491	1.11376
2014	3.83412		4.9	4.32	3.7	3.96803	3.19	3.28	3.88	3.13	2.91	4.2	4.56	2.66	4.75	2.492	3	4.99	5.25		3.83412	0.847068
2015	2.6415		5	1.42	3.07	2.10653	2.8	2.4	3.69	1.87	2.31	0.73	2.68	0.29	3.79	1.499	2.75	3.27	5.23		2.6415	1.29089
2016	3.18323		5.5	3.6	3.35	3.49295	3.52	2.53	2.32	3.55	1.11	1.85	2.73	1.77	4.23	2.512	3.71	2.35	5.99		3.18323	1.23095
2017	3.83003		5.24	5.59	3.26	3.47557	3.61	3.27	4.38	3.9	2.55	3.47	3.43	2.4	4.3	2.965	3.11	4.53	5.63		3.83003	0.951656
2018	3.77639		6.46	2.82	3.11	3.3807	4.28	2.84	3.49	4.45	2.93	3.64	3.46	2.35	4.36	2.788	3.46	4.75	5.63		3.77639	1.0587
2019	3.13674		4.95	1.72	3.74	2.20863	4.4	2.25	3.12	4.11	2.54	2.94	3.11	0.99	3.94	1.746	2.21	3.5	5.85		3.13674	1.23159

## Sheet: Cement Carbonation Sink
	Cement Carbonation sink (positive values represent a flux from the atmosphere to the land)
	All values in million tonnes of carbon per year (MtC/yr). For values in million tonnes of CO2 per year, multiply the values below by 3.664
	1MtC = 1 million tonne of carbon = 3.664 million tonnes of CO2
	Methods: Full details of the method are described in Friedlingstein et al (2020).
	Cite individual estimates as:
	Cao	Cao, Z., Myers, R. J., Lupton, R. C., Duan, H., Sacchi, R., Zhou, N., Reed Miller, T., Cullen, J. M., Ge, Q., and Liu, G.: The sponge effect and carbon emission mitigation potentials of the global cement cycle, Nature Communications, 11 (1), 3777, DOI: 10.1038/s41467-020-17583-w, 2020.
	Guo	Guo, R., Wang, J., Bing, L., Tong, D., Ciais, P., Davis, S. J., Andrew, R. M., Xi, F., and Liu, Z.: Global CO2 uptake of cement in 1930-2019, in review.
MtC/yr
Year	GCB		Cao	Guo
1959	12.6837		10.2074	15.1601
1960	13.8388		11.1408	16.5368
1961	14.7265		11.8374	17.6156
1962	15.871		12.7534	18.9886
1963	16.8627		13.5482	20.1773
1964	18.4512		14.8212	22.0813
1965	19.486		15.6291	23.3428
1966	20.9148		16.7849	25.0447
1967	21.9525		17.6221	26.2828
1968	23.5326		18.8849	28.1804
1969	24.9665		20.0171	29.916
1970	26.4898		21.229	31.7506
1971	27.9915		22.9428	33.0402
1972	30.4855		24.4783	36.4926
1973	32.6104		26.1904	39.0305
1974	33.3958		26.7624	40.0292
1975	34.1044		27.3045	40.9044
1976	36.067		29.2893	42.8446
1977	38.4653		30.9126	46.018
1978	41.1113		33.0293	49.1933
1979	42.5989		34.1507	51.047
1980	43.8607		35.1724	52.5491
1981	44.7408		35.8927	53.589
1982	45.5862		36.6216	54.5508
1983	47.1071		37.8409	56.3733
1984	48.5571		39.0003	58.1139
1985	49.9606		40.133	59.7883
1986	52.3364		42.0238	62.6491
1987	54.798		43.9633	65.6328
1988	58.0766		46.5972	69.556
1989	58.0365		48.3205	67.7525
1990	57.5039		49.3161	65.6916
1991	61.0532		50.4519	71.6545
1992	61.9162		52.7371	71.0953
1993	66.1676		55.3394	76.9958
1994	69.8137		58.5488	81.0786
1995	73.6643		61.8334	85.4952
1996	76.578		64.5201	88.6358
1997	79.4866		66.7713	92.2018
1998	80.4619		67.7007	93.223
1999	83.4296		70.3092	96.55
2000	86.7728		73.2003	100.345
2001	89.617		74.2205	105.014
2002	94.3944		78.6322	110.157
2003	101.384		85.3377	117.431
2004	108.449		91.6497	125.247
2005	116.055		98.2402	133.869
2006	126.381		107.115	145.647
2007	136.211		113.833	158.589
2008	140.967		115.715	166.22
2009	148.334		124.016	172.651
2010	157.597		131.957	183.237
2011	170.529		144.123	196.936
2012	177.551		151.326	203.777
2013	185.996		161.393	210.598
2014	194.189		167.7	220.679
2015	196.215		167.435	224.995
2016	199.106		169.902	228.31
2017	203.694		173.817	233.571
2018	210.856		179.928	241.783
2019	215.298		183.719	246.876

## Sheet: Historical Budget
	Historical CO2 budget
	All values in billion tonnes of carbon per year (GtC/yr), for the globe. For values in billion tonnes of carbon dioxide (CO2) per year, multiply the numbers below by 3.664.
	1 billion tonnes C = 1 petagram of carbon (10^15 gC) = 1 gigatonne C = 3.664 billion tonnes of CO2
	Please note: The methods used to estimate the historical fluxes presented below differ from the carbon budget presented from 1959 onwards. For example, the atmospheric growth and ocean sink do not account for year-to-year variability before 1958.
	Uncertainties: see the original papers for uncertainties
	Cite as: Friedlingstein et al (2020; see summary tab)
	Fossil fuel combustion and cement production emissions: Friedlingstein et al. (2020)
	Land-use change emissions as average of three bookkeeping models: Houghton, R. A. and Nassikas, A. A.: Global and regional fluxes of carbon from land use and land cover change 1850-2015, Global Biogeochemical Cycles, 31, 456-472, 2017; Hansis, E., Davis, S. J., and Pongratz, J.: Relevance of methodological choices for accounting of land use change carbon fluxes, Global Biogeochemical Cycles, 29, …
	Atmospheric CO2 growth rate: Joos, F. and Spahni, R.: Rates of change in natural and anthropogenic radiative forcing over the past 20,000 years, Proceedings of the National Academy of Science, 105, 1425-1430, 2008.
	The ocean CO2 sink (1781-1958) is the average of the two diagnostic ocean models: DeVries, T.: The oceanic anthropogenic CO2 sink: Storage, air-sea fluxes, and transports over the industrial era, Global Biogeochemical Cycles, 28, 631-647, 2014; and Khatiwala, S., Tanhua, T., Mikaloff Fletcher, S. E., Gerber, M., Doney, S. C., Graven, H. D., Gruber, N., McKinley, G. A., Murata, A., Rios, A. F., an…
	The land sink is the average of several dynamic global vegetation models that reproduce the observed mean total land sink of the 1990s.
	Cement carbonation is the average of two estimates: Friedlingstein et al. (2020)
	The budget imbalance is the sum of emissions (fossil fuel and industry + land-use change) minus (atmospheric growth + ocean sink + land sink + cement carbonation sink); it is a measure of our imperfect data and understanding of the contemporary carbon cycle.
Year	fossil emissions excluding carbonation	land-use change emissions	atmospheric growth	ocean sink	land sink	cement carbonation sink	budget imbalance
1750	0.002552		-0.077592		0.173773
1751	0.002552		-0.073988		-0.45264
1752	0.002553		-0.070596		-0.280658
1753	0.002553		-0.067628		-0.0233576
1754	0.002554		-0.064024		-0.13687
1755	0.002555		-0.058088		-0.196533
1756	0.002731		-0.050244		0.28175
1757	0.002732		-0.04028		0.556513
1758	0.002733		-0.028408		-0.0973899
1759	0.002734		-0.014204		-0.622394
1760	0.002734		0.001908		0.193156
1761	0.002995		0.02014		-0.581737
1762	0.002996		0.040492		-0.63012
1763	0.002997		0.062752		0.330147
1764	0.002998		0.087344		0.428976
1765	0.002999		0.11236		-0.181953
1766	0.003346		0.135256		0.225611
1767	0.003347		0.156032		0.297279
1768	0.003348		0.174476		0.36271
1769	0.003349		0.190588		-0.026063
1770	0.00335		0.20458		0.0911322
1771	0.003715		0.216452		-0.22711
1772	0.003716		0.225992		-0.238658
1773	0.003717		0.2332		0.121506
1774	0.003718		0.238288		-0.040488
1775	0.003719		0.242528		0.0527774
1776	0.004104		0.248464		0.419617
1777	0.004105		0.256308		0.584857
1778	0.004106		0.26606		0.0483798
1779	0.004107		0.27772		-0.397222
1780	0.004109		0.2915		0.389021
1781	0.004597		0.31482	0.07433	-0.389331
1782	0.004598		0.348316	0.082155	-0.394966
1783	0.0046		0.378844	0.08952	0.593369
1784	0.004601		0.40598	0.10207	0.77562
1785	0.004604		0.429512	0.104205	0.0713405
1786	0.005227		0.44944	0.11673	0.445086
1787	0.005229		0.465764	0.12393	0.478633
1788	0.00523		0.478696	0.131105	0.556923
1789	0.005232		0.488024	0.13301	0.211435
1790	0.005234		0.493748	0.14019	0.427552
1791	0.005846		0.495868	0.147095	-0.107034
1792	0.005976		0.494384	0.14901	0.0967587
1793	0.005981		0.489296	0.15568	0.298992
1794	0.005972		0.480816	0.15749	0.301291
1795	0.005975		0.468732	0.163805	0.297053
1796	0.006264		0.45474	0.164995	0.651791
1797	0.006576		0.439476	0.1658	0.970243
1798	0.006849		0.42188	0.16673	0.382632
1799	0.007213		0.401952	0.167235	-0.0810223
1800	0.007667		0.38054	0.17277	0.585415
1801	0.007631		0.361672	0.173235	-0.0516073
1802	0.010039		0.34238	0.173365	-0.0717901
1803	0.008594		0.321816	0.17367	0.753319
1804	0.009364		0.300192	0.17359	0.929824
1805	0.009121		0.277296	0.17356	0.185161
1806	0.009565		0.25334	0.173505	0.534039
1807	0.010064		0.228112	0.173135	0.601631
1808	0.00957		0.201824	0.17295	0.698694
1809	0.009577		0.174264	0.17259	0.356622
1810	0.010202		0.145644	0.17252	0.511073
1811	0.010803		0.115752	0.16692	-0.0133697
1812	0.011192		0.0848	0.16627	0.0572652
1813	0.01125		0.052576	0.165735	0.316542
1814	0.011498		0.019292	0.16021	0.279051
1815	0.011869		-0.014628	0.15963	0.31013
1816	0.013009		-0.044308	0.15875	0.595565
1817	0.013491		-0.067628	0.15806	0.881466
1818	0.013549		-0.0848	0.15751	0.226941
1819	0.013632		-0.095612	0.15205	-0.345702
1820	0.013834		-0.099852	0.15117	0.458021
1821	0.014038		-0.098156	0.15066	-0.278908
1822	0.014592		-0.089888	0.149595	-0.263494
1823	0.015434		-0.07526	0.144045	0.520641
1824	0.015973		-0.054484	0.14338	0.654336
1825	0.016582		-0.027348	0.14237	0.111563
1826	0.016763		0.006148	0.14153	0.404674
1827	0.01799		0.043248	0.1408	0.510535
1828	0.018187		0.068264	0.140145	0.517551
1829	0.018121		0.088192	0.13505	0.131646
1830	0.024324		0.106424	0.13455	0.358792
1831	0.02307		0.122324	0.134	-0.13197
1832	0.023229		0.136528	0.13352	-0.0459466
1833	0.023692		0.148612	0.13358	0.180855
1834	0.02415		0.160484	0.1337	0.0082708
1835	0.024685		0.179352	0.133975	0.195649
1836	0.028596		0.205428	0.13412	0.497488
1837	0.028573		0.237016	0.134745	0.724898
1838	0.029488		0.274116	0.13561	0.168873
1839	0.030462		0.316092	0.136535	-0.246572
1840	0.032459		0.361248	0.132865	0.493869
1841	0.033466		0.408948	0.13897	-0.364947
1842	0.035345		0.454528	0.140425	-0.264659
1843	0.036259		0.479544	0.14147	0.693764
1844	0.038598		0.479332	0.14274	0.816003
1845	0.042361		0.456436	0.14418	0.129449
1846	0.043066		0.421456	0.150135	0.485763
1847	0.047053		0.376936	0.15123	0.642232
1848	0.047439		0.323088	0.1572	0.701696
1849	0.050085		0.259276	0.15831	0.319471
1850	0.053738	0.674496	0.18868	0.164195	0.452833		-0.0774742
1851	0.054242	0.679293	0.125504	0.165485	0.00446172		0.438084
1852	0.056631	0.684155	0.069536	0.171645	0.070586		0.429019
1853	0.059252	0.68902	0.00954	0.172905	0.273882		0.291945
1854	0.069599	0.692164	-0.038796	0.17432	0.194524		0.431715
1855	0.07097	0.694795	-0.063388	0.18083	0.219566		0.428757
1856	0.07563	0.69879	-0.063176	0.18227	0.516421		0.138905
1857	0.076332	0.704625	-0.052788	0.18896	0.854393		-0.209608
1858	0.077502	0.70959	-0.036252	0.19561	0.291845		0.335889
1859	0.082151	0.712656	-0.01378	0.1976	-0.27149		0.882476
1860	0.090259	0.691599	0.01484	0.19967	0.461043		0.106305
1861	0.09492	0.683423	0.05088	0.206965	-0.316957		0.837455
1862	0.096647	0.679564	0.094552	0.219015	-0.306137		0.768781
1863	0.103145	0.677324	0.146068	0.22639	0.480887		-0.0728765
1864	0.111122	0.675416	0.2067	0.228825	0.735053		-0.38404
1865	0.118004	0.675272	0.273692	0.236465	0.0715532		0.211566
1866	0.121735	0.672301	0.334324	0.244015	0.420717		-0.20502
1867	0.130408	0.670593	0.385204	0.25209	0.608431		-0.444724
1868	0.133939	0.669303	0.426544	0.259695	0.637548		-0.520545
1869	0.14223	0.669208	0.458344	0.26803	0.31435		-0.229286
1870	0.145343	0.724502	0.480816	0.271125	0.532793		-0.414889
1871	0.154515	0.751961	0.494596	0.27913	-0.096484		0.229234
1872	0.170953	0.769965	0.496504	0.287825	0.104879		0.0517094
1873	0.18161	0.78721	0.485692	0.295945	0.335743		-0.14856
1874	0.170032	0.801089	0.46216	0.30465	0.357451		-0.15314
1875	0.184443	0.814642	0.430572	0.313115	0.356116		-0.100718
1876	0.187105	0.826351	0.409584	0.3218	0.692224		-0.410152
1877	0.190802	0.836392	0.404072	0.33546	1.02221		-0.734553
1878	0.192294	0.845416	0.413824	0.34427	0.34924		-0.0696238
1879	0.206069	0.852152	0.437144	0.35277	-0.0736608		0.341968
1880	0.233049	0.855364	0.467672	0.36152	0.771913		-0.512692
1881	0.240881	0.868278	0.5035	0.370275	0.0154181		0.219966
1882	0.254402	0.877395	0.544628	0.37901	-0.0976443		0.305803
1883	0.270544	0.88765	0.591268	0.38723	0.805783		-0.626087
1884	0.273589	0.896442	0.646176	0.395745	0.996989		-0.868879
1885	0.27563	0.904573	0.718468	0.404035	0.348613		-0.290913
1886	0.279948	0.90957	0.782068	0.40716	0.724108		-0.723818
1887	0.293953	0.914864	0.820652	0.415325	0.847993		-0.875152
1888	0.325487	0.920554	0.838036	0.418595	0.982658		-0.993248
1889	0.32537	0.927392	0.851392	0.426245	0.65912		-0.683996
1890	0.354491	0.960137	0.862204	0.433865	0.775839		-0.75728
1891	0.370988	0.987522	0.860084	0.43643	0.205127		-0.14313
1892	0.374056	1.00434	0.842912	0.44394	0.371803		-0.280256
1893	0.369579	1.01707	0.811324	0.45139	0.636781		-0.512845
1894	0.382471	1.03008	0.772104	0.45927	0.536942		-0.355769
1895	0.405546	1.04202	0.726312	0.46162	0.629531		-0.369896
1896	0.418779	1.05228	0.663984	0.46931	1.08437		-0.746605
1897	0.438604	1.06367	0.589572	0.47716	1.24197		-0.80643
1898	0.462639	1.07093	0.53106	0.479805	0.728768		-0.206069
1899	0.505411	1.07723	0.495656	0.487715	0.160425		0.438843
1900	0.533486	1.10744	0.481664	0.491055	0.966625		-0.298414
1901	0.551208	1.13239	0.483148	0.499255	0.227001		0.474196
1902	0.565295	1.14534	0.497988	0.502425	-0.0567472		0.766973
1903	0.616758	1.15964	0.524912	0.51101	1.12509		-0.384612
1904	0.623351	1.17239	0.563496	0.519745	1.41668		-0.704172
1905	0.663799	1.18405	0.608228	0.52319	0.387778		0.328656
1906	0.697417	1.19391	0.641088	0.531915	1.05074		-0.332422
1907	0.788554	1.20058	0.668012	0.540975	1.15816		-0.378007
1908	0.759252	1.20845	0.687728	0.549505	1.0688		-0.338335
1909	0.789493	1.21807	0.699388	0.55817	0.734462		0.0155399
1910	0.828242	1.21077	0.706596	0.56192	0.999521		-0.229021
1911	0.843404	1.20436	0.72398	0.570295	0.372423		0.381067
1912	0.883308	1.19905	0.754508	0.57396	0.483374		0.270519
1913	0.955864	1.19666	0.787792	0.582225	0.765116		0.0173931
1914	0.867329	1.18389	0.813868	0.58512	0.799648		-0.14742
1915	0.855609	1.18018	0.834432	0.593875	0.628821		-0.021338
1916	0.923281	1.17346	0.846092	0.596995	1.03035		-0.376692
1917	0.965776	1.1714	0.84694	0.6049	1.55666		-0.871318
1918	0.952128	1.16838	0.834432	0.612745	0.792512		-0.119183
1919	0.825731	1.17142	0.807932	0.61601	0.071233		0.501981
1920	0.960261	1.21164	0.774224	0.62373	1.18518		-0.411237
1921	0.842829	1.24223	0.747936	0.63178	1.02946		-0.324121
1922	0.884269	1.25933	0.731824	0.634325	0.60152		0.175929
1923	1.00344	1.26946	0.725464	0.642225	0.975709		-0.0704925
1924	1.00692	1.27987	0.72716	0.644645	0.574162		0.340828
1925	1.01429	1.28778	0.732248	0.65195	0.81781		0.100071
1926	0.995892	1.29278	0.744544	0.654085	0.344852		0.545187
1927	1.0877	1.29727	0.760444	0.655995	0.981202		-0.0126717
1928	1.08256	1.30012	0.778464	0.662745	0.475898		0.465575
1929	1.16262	1.29855	0.789488	0.66403	0.595949		0.4117
1930	1.07188	1.35313	0.790548	0.665485	0.63095	0.0023538	0.335676
1931	0.955815	1.39604	0.789912	0.666855	0.0235329	0.00216612	0.869393
1932	0.861811	1.41456	0.788428	0.67242	0.579494	0.00183576	0.234196
1933	0.907238	1.43851	0.786096	0.67314	0.66431	0.00186648	0.220336
1934	0.985864	1.45871	0.782068	0.673565	0.846258	0.00220576	0.140481
1935	1.0342	1.47199	0.773588	0.673935	0.568226	0.00253855	0.487901
1936	1.13615	1.4899	0.757688	0.673925	0.398016	0.00266901	0.793746
1937	1.21438	1.50109	0.73776	0.673775	0.571541	0.00318972	0.729202
1938	1.14248	1.51238	0.71338	0.673425	0.667713	0.00343878	0.596905
1939	1.20835	1.51682	0.67098	0.673255	1.14658	0.00365171	0.230704
1940	1.32094	1.54198	0.606108	0.673305	0.985498	0.00340279	0.594599
1941	1.35032	1.55767	0.52258	0.66803	0.395867	0.00360529	1.3179
1942	1.34514	1.55516	0.4293	0.66835	0.896481	0.00337257	0.902802
1943	1.36783	1.54872	0.3339	0.668845	0.986195	0.00320072	0.924407
1944	1.39077	1.54263	0.259276	0.66985	0.142044	0.00272162	1.85951
1945	1.15636	1.53142	0.214332	0.671235	0.634514	0.0025028	1.1652
1946	1.26188	1.52339	0.203096	0.678325	0.490783	0.00309251	1.40998
1947	1.39688	1.5203	0.214968	0.681085	1.17085	0.00357029	0.846707
1948	1.46912	1.50524	0.249948	0.68902	0.954503	0.00417315	1.07672
1949	1.42672	1.48534	0.302948	0.69308	0.576962	0.00474487	1.33433
1950	1.6087	1.56766	0.362096	0.702545	1.78647	0.00546048	0.319789
1951	1.73496	1.61771	0.418488	0.71233	0.65587	0.00614846	1.55983
1952	1.75806	1.641	0.479332	0.7284	-0.00166367	0.00672684	2.18626
1953	1.80691	1.6654	0.547384	0.74464	1.02287	0.00747337	1.14994
1954	1.84527	1.69102	0.622008	0.756845	0.902606	0.00822873	1.2466
1955	2.02245	1.71259	0.699176	0.76967	1.66464	0.00910985	0.59244
1956	2.1529	1.73928	0.774436	0.78329	2.19972	0.00994372	0.124787
1957	2.22377	1.75893	0.869836	0.792965	0.872135	0.0106408	1.43713
1958	2.28662	1.78166	1.01972	0.807815	0.137357	0.0113989	2.09199
1959	2.415	1.8042	2.0448	0.861368	0.67665	0.0126837	0.623698
1960	2.548	1.65944	1.5123	0.839096	1.25895	0.0138388	0.583255
1961	2.553	1.59364	1.6614	0.716516	0.659997	0.0147265	1.094
1962	2.644	1.55592	1.1928	0.768402	1.40881	0.015871	0.814035
1963	2.794	1.51124	1.2141	0.917365	1.02273	0.0168627	1.13419
1964	2.939	1.46747	1.0437	1.11133	1.53036	0.0184512	0.702629
1965	3.076	1.42218	2.343	1.23095	0.481126	0.019486	0.423617
1966	3.219	1.39185	2.343	1.18813	1.43433	0.0209148	-0.375521
1967	3.322	1.37337	1.2993	0.994842	1.64036	0.0219525	0.738915
1968	3.503	1.36684	2.1087	1.0676	2.36792	0.0235326	-0.69792
1969	3.737	1.3727	2.8116	1.1084	0.747425	0.0249665	0.417316
1970	4.047	1.35838	2.4069	1.03279	0.7244	0.0264898	1.2148
1971	4.21	1.33589	1.5549	1.09728	2.28485	0.0279915	0.580861
1972	4.406	1.30633	3.1311	1.3336	1.32041	0.0304855	-0.103268
1973	4.64	1.29784	3.1098	1.30081	1.79557	0.0326104	-0.300955
1974	4.62	1.26857	1.4484	1.21392	3.54673	0.0333958	-0.353882
1975	4.613	1.25312	2.6199	1.17596	2.40695	0.0341044	-0.370792
1976	4.858	1.23498	2.0661	1.28204	2.86866	0.036067	-0.15989
1977	4.991	1.22052	4.0896	1.39038	1.58171	0.0384653	-0.888634
1978	5.174	1.19278	2.7477	1.44676	2.55178	0.0411113	-0.420564
1979	5.312	1.16302	4.5582	1.32153	1.61907	0.0425989	-1.06638
1980	5.286	1.19715	3.621	1.63358	0.781741	0.0438607	0.402968
1981	5.142	1.21241	2.41074	1.61695	2.25925	0.0447408	0.022721
1982	5.104	1.2137	2.1771	1.70934	1.78628	0.0455862	0.599395
1983	5.152	1.24457	3.89754	1.86545	0.673792	0.0471071	-0.0873237
1984	5.302	1.27848	2.75058	1.73113	2.83626	0.0485571	-0.786052
1985	5.49	1.29535	3.4515	1.62853	2.70711	0.0499606	-1.05175
1986	5.568	1.31905	2.27268	1.70076	2.34926	0.0523364	0.512012
1987	5.749	1.34012	5.75604	1.80722	0.823985	0.054798	-1.35292
1988	5.968	1.36962	4.78962	1.70761	2.19667	0.0580766	-1.41436
1989	6.057	1.39144	2.89926	1.66538	3.51231	0.0580365	-0.686545
1990	6.195	1.35896	2.64438	1.79268	2.62153	0.0575039	0.437863
1991	6.324	1.34743	1.63548	1.90428	2.21481	0.0610532	1.85581
1992	6.126	1.34953	1.51866	2.13101	2.29011	0.0619162	1.47384
1993	6.191	1.3511	2.4957	2.06932	3.10161	0.0661676	-0.190692
1994	6.235	1.34476	3.56832	1.92966	1.79054	0.0698137	0.221431
1995	6.368	1.33515	4.33296	1.9241	2.02042	0.0736643	-0.648004
1996	6.564	1.3182	2.25144	1.87902	3.07376	0.076578	0.601398
1997	6.602	1.78844	4.1949	1.98571	3.26362	0.0794866	-1.13328
1998	6.581	1.24643	6.04278	2.1	1.94182	0.0804619	-2.33764
1999	6.668	1.23021	2.8674	1.90835	3.53765	0.0834296	-0.498631
2000	6.856	1.37815	2.66562	1.86653	3.757	0.0867728	-0.141772
2001	6.914	1.33332	3.89754	1.77103	2.67619	0.089617	-0.187067
2002	7.072	1.50089	5.00202	2.15916	1.61305	0.0943944	-0.295726
2003	7.417	1.54599	4.81086	2.23533	2.55651	0.101384	-0.7411
2004	7.77	1.51361	3.3984	2.1368	3.60163	0.108449	0.0383241
2005	8.027	1.41749	5.22504	2.20787	2.20105	0.116055	-0.305533
2006	8.29	1.49564	3.72762	2.26216	3.21777	0.126381	0.451699
2007	8.541	1.31168	4.4604	2.29954	2.99477	0.136211	-0.0382432
2008	8.719	1.35733	3.84444	2.21529	3.63172	0.140967	0.243917
2009	8.587	1.60075	3.41964	2.28335	3.03489	0.148334	1.30154
2010	9.043	1.45666	5.16132	2.27345	3.29937	0.157597	-0.392071
2011	9.337	1.38141	3.60018	2.38595	4.07585	0.170529	0.485905
2012	9.487	1.48566	5.06574	2.4405	2.82446	0.177551	0.464409
2013	9.549	1.53338	5.17194	2.47787	3.64438	0.185996	-0.397797
2014	9.619	1.64903	4.21614	2.564	3.83395	0.194189	0.459752
2015	9.61	1.70492	6.27642	2.60782	2.64086	0.196215	-0.406403
2016	9.613	1.5552	6.07464	2.68351	3.18343	0.199106	-0.972483
2017	9.742	1.52111	4.57722	2.51999	3.82941	0.203694	0.132791
2018	9.94	1.55364	5.08698	2.56109	3.77651	0.210856	-0.141803
2019	9.94562	1.80264	5.42682	2.62599	3.13698	0.215298	0.343171
2020*	~9.3	~1.6	~5.3
*2020 values are based on proxies and on projections for the most recent months, not based on actual emission data. See Friedlingstein et al. 2020 for methodology
	659.17		283.146	170.469	232.172
			0.429549	0.258611	0.352219
