# Supplementary material for: The Social Cost of Fossil and Industrial CO2 Emissions from 1950 to 2018
Source: Research Square preprint supplement (doi:10.21203/rs.3.rs-2244259/v1), 2022-11-17
Supplement: Supplementary file 32 [file National_Carbon_Emissions_2020v1.0.xlsx]

## Sheet: Summary
The Global Carbon Budget 2020 is a collaborative effort of the global carbon cycle science community coordinated by the Global Carbon Project.
DATA SOURCES & TERMS OF USE: The use of data is conditional on citing the original data sources. Full details on how to cite the data are given at the top of each page. For research projects, if the data are essential to the work, or if an important result or conclusion depends on the data, co-authorship may need to be considered. The Global Carbon Project facilitates access to data to encourage …
Reference of the full global carbon budget 2020: Pierre Friedlingstein, Michael O’Sullivan, Matthew W. Jones, Robbie M. Andrew, Judith Hauck, Are Olsen, Glen P. Peters, Wouter Peters, Julia Pongratz, Stephen Sitch, Corinne Le Quéré, Josep G. Canadell, Philippe Ciais, Rob Jackson,Simone Alin, Luiz E.O.C. Aragão, Almut Arneth, Vivek Arora, Nicholas R. Bates, Meike Becker, Alice Benoit-Cattin, Henry…
Further information is available on: http://www.globalcarbonproject.org/carbonbudget
References to previous updates of the Global Carbon Budget by the Global Carbon Project:
2019: Friedlingstein Pierre, Matthew W. Jones, Michael O’Sullivan, Robbie M. Andrew, Judith Hauck, Glen P. Peters, Wouter Peters, Julia Pongratz, Stephen Sitch, Corinne Le Quéré, Dorothee C. E. Bakker, Josep G. Canadell, Philippe Ciais, Rob Jackson, Peter Anthoni, Leticia Barbero, Ana Bastos, Vladislav Bastrikov, Meike Becker, Laurent Bopp, Erik Buitenhuis, Naveen Chandra, Frédéric Chevallier, Lo…
2018: Le Quéré, Corinne, Robbie M. Andrew, Pierre Friedlingstein, Stephen Sitch, Julia Pongratz, Andrew C. Manning, Jan Ivar Korsbakken, Glen P. Peters, Josep G. Canadell, Robert B. Jackson, Thomas A. Boden, Pieter P. Tans, Oliver D. Andrews, Vivek Arora, Dorothee C. E. Bakker, Leticia Barbero, Meike Becker, Richard A. Betts, Laurent Bopp, Frédéric Chevallier, Louise P. Chini, Philippe Ciais, Cat…
2017: Peters, G.P., C. Le Quéré, R.M. Andrew, J.G. Canadell, P. Friedlingstein, T. Ilyina, R. Jackson, J.I. Korsbakken, G.A. McKinley, S. Sitch, P. Tans: Towards real-time verification of carbon dioxide emissions, Nature Climate Change, 7, 848-850, 2018. https://doi.org/10.1038/s41558-017-0013-9
2016: Le Quéré, C., Andrew, R. M., Canadell, J. G., Sitch, S., Korsbakken, J. I., Peters, G. P., Manning, A. C., Boden, T. A., Tans, P. P., Houghton, R. A., Keeling, R. F., Alin, S., Andrews, O. D., Anthoni, P., Barbero, L., Bopp, L., Chevallier, F., Chini, L. P., Ciais, P., Currie, K., Delire, C., Doney, S. C., Friedlingstein, P., Gkritzalis, T., Harris, I., Hauck, J., Haverd, V., Hoppema, M., K…
2015: Le Quéré, C, R Moriarty, RM Andrew, JG Canadell, S Sitch, JI Korsbakken, P Friedlingstein, GP Peters, RJ Andres, TA Boden, RA Houghton, JI House, RF Keeling, P Tans, A Arneth, DCE Bakker, L Barbero, L Bopp, J Chang, F Chevallier, LP Chini, P Ciais, M Fader, RA Feely, T Gkritzalis, I Harris, J Hauck, T Ilyina, AK Jain, E Kato, V Kitidis, K Klein Goldewijk, C Koven, P Landschützer, SK Lauvset…
2015: Jackson, R. B., Canadell, J. G., Le Quéré, C., Andrew, R. M., Korsbakken, J. I., Peters, G. P., and Nakicenovic, N.: Reaching peak emissions, Nature Climate Change, 6, 7-10, 2016.
2014: Le Quéré, C, R Moriarty, R M Andrew, G P Peters, P Ciais, P Friedlingstein, S D Jones, S Sitch, P Tans, A Arneth, T A Boden, L Bopp, Y Bozec, J G Canadell, Chini, L P, F Chevallier, C E Cosca, I Harris, M Hoppema, R A Houghton, J I House, A K Jain, T Johannessen, E Kato, R F Keeling, V Kitidis, K Klein Goldewijk, C Koven, C S Landa, P Landschützer, A Lenton, I D Lima, G Marland, J T Mathis,…
2014: Friedlingstein, P., Andrew, R. M., Rogelj, J., Peters, G. P., Canadell, J. G., Knutti, R., Luderer, G., Raupach, M. R., Schaeffer, M., van Vuuren, D. P., and Le Quéré, C.: Persistent growth of CO2 emissions and implications for reaching climate targets, Nature Geoscience, 2014. 2014.
2013: Le Quéré, C, G P Peters, R J Andres, R M Andrew, T A Boden, P Ciais, P Friedlingstein, R A Houghton, G Marland, R Moriarty, S Sitch, P Tans, A Arneth, A Arvanitis, D C E Bakker, L Bopp, J G Canadell, L P Chini, S C Doney, A Harper, I Harris, J I House, A K Jain, S D Jones, E Kato, R F Keeling, K Klein Goldewijk, A Körtzinger, C Koven, N Lefèvre, F Maignan, A Omar, T Ono, G-H Park, B Pfeil, …
2012: Le Quéré, C, R J Andres, T Boden, T Conway, R A Houghton, J I House, G Marland, G P Peters, G R van der Werf, A Ahlström, R M Andrew, L Bopp, J G Canadell, P Ciais, S C Doney, P Friedlingstein, C Huntingford, A K Jain, C Jourdain, E Kato, R Keeling, K Klein Goldewijk, S Levis, P Levy, M Lomas, B Poulter, M Raupach, J Schwinger, S Sitch, B D Stocker, N Viovy, S Zaehle and N Zeng 2012. The Gl…
2012: Peters, G, RM Andrews, T Boden, JG Canadell, P Ciais, C Le Quéré, G Marland, MR Raupach and C Wilson, 2013. The challenge to keep global warming below 2C Nature Climate Change, 3, 4-6
2011: Peters, G, Marland, G, Le Quéré, C, Boden, T, Canadell, JG, and Raupach, MR, 2012. Rapid growth in CO2 emissions after the 2008–2009 global financial crisis Nature Climate Change, 2: pp 2-4
2010: Friedlingstein, P, Houghton, RA, Marland, G, Hackler, J, Boden, TA, Conway, TJ, Canadell, JG, Raupach, MR, Ciais, P, and Le Quéré, C, 2010. Update on CO2 emissions Nature Geoscience, 3, 811-812
2009: Le Quéré, C, Raupach, MR, Canadell, JG, Marland, G, Bopp, L, Ciais, P, Conway, TJ, Doney, SC, Feely, R, Foster, P, Friedlingstein, P, Gurney, K, Houghton, RA, House, JI, Huntingford, C, Levy, PE, Lomas, MR, Majkut, J, Metzl, N, Ometto, JP, Peters, GP, Prentice, IC, Randerson, JT, Running, SW, Sarmiento, JL, Schuster, U, Sitch, S, Takahashi, T, Viovy, N, van der Werf, GR, Woodward, FI, 2009.…
2007: Canadell, JC, Le Quéré, C, Raupach, MR, Fields, C, Buitenhuis, ET, Ciais, P, Conway, TJ, Gillett, N, Houghton, RA, and Marland, G, 2007. Contributions to accelerating atmospheric CO2 growth from economic activity, carbon intensity, and efficiency of natural sinks PNAS, 104, 18866-18870
2006: Raupach, MR, Marland, G, Ciais, P, Le Quéré, C, Canadell, JG, Klepper, G, and CB Field, CB, 2007. Global and Regional Drivers of Accelerating CO2 Emissions PNAS, 104, 10288-10293
Feedback and questions on this database should be sent to: p.friedlingstein@exeter.ac.uk

## Sheet: Territorial Emissions
	Fossil CO2 emissions by country (territorial)
	All values in million tonnes of carbon per year. For values in million tonnes of CO2 per year, multiply the values below by 3.664
	1MtC = 1 million tonne of carbon = 3.664 million tonnes of CO2
	Cite as: Friedlingstein et al. 2020
	Methods: Full details of the method are described in Friedlingstein et al (2020).
	(1) National estimates include emissions from fossil fuel combustion and oxidation and cement production and excludes emissions from bunker fuels. World totals include emissions from bunker fuels.
	(2) Bunker fuels: Emissions from fuels used for international aviation and maritime transport
	(3) The disaggregations of regions (e.g. the former Soviet Union prior to 1992) are based on the shares of emissions in the first year after the countries are disaggregated (e.g., 1992 for the Former Soviet Union).
	(4) The statistical difference presented on column HX is the difference between the world emissions and the sum of the emissions for each countries and for the bunker fuels.
MtC/yr
	AFGHANISTAN	ALBANIA	ALGERIA	ANDORRA	ANGOLA	ANGUILLA	ANTIGUA & BARBUDA	ARGENTINA	ARMENIA	ARUBA	AUSTRALIA	AUSTRIA	AZERBAIJAN	BAHAMAS	BAHRAIN	BANGLADESH	BARBADOS	BELARUS	BELGIUM	BELIZE	BENIN	BERMUDA	BHUTAN	BONAIRE, SAINT EUSTATIUS, AND SABA	BOSNIA & HERZEGOVINA	BOTSWANA	BRAZIL	BRITISH VIRGIN ISLANDS	BRUNEI (DARUSSALAM)	BULGARIA	BURKINA FASO	BURUNDI	CAMBODIA	CANADA	CAPE VERDE	CENTRAL AFRICAN REPUBLIC	CHAD	CHILE	CHINA (MAINLAND)	COLOMBIA	COMOROS	CONGO	COOK ISLANDS	COSTA RICA	COTE D IVOIRE	CROATIA	CUBA	CURACAO	CYPRUS
	Afghanistan	Albania	Algeria	Andorra	Angola	Anguilla	Antigua and Barbuda	Argentina	Armenia	Aruba	Australia	Austria	Azerbaijan	Bahamas	Bahrain	Bangladesh	Barbados	Belarus	Belgium	Belize	Benin	Bermuda	Bhutan	Bonaire, Saint Eustatius and Saba	Bosnia and Herzegovina	Botswana	Brazil	British Virgin Islands	Brunei Darussalam	Bulgaria	Burkina Faso	Burundi	Cambodia	Canada	Cape Verde	Central African Republic	Chad	Chile	China	Colombia	Comoros	Congo	Cook Islands	Costa Rica	Côte d'Ivoire	Croatia	Cuba	Curaçao	Cyprus
1959	0.104959	0.394	1.54395	NaN	0.16883	NaN	0.008	13.3594	1.91203	0.196335	22.8461	7.61733	5.47732	0.071	0.358	0.502185	0.041	11.9763	24.1021	0.011	0.028	0.037	NaN	0.149387	1.31482	NaN	10.6488	NaN	0.089	5.35542	0.002	0.0106286	0.058	50.3497	0.00499189	0.027	0.017	3.46708	196.548	4.3905	0.003	0.051	NaN	0.105	0.149	1.41735	4.27531	2.83835	0.226911
1960	0.11296	0.552	1.67883	NaN	0.149823	NaN	0.01	13.3091	1.99076	0.168821	24.0499	8.40188	5.70284	0.112	0.157	0.603686	0.047	12.4696	24.8112	0.012	0.044	0.043	NaN	0.128452	1.43621	NaN	12.7871	NaN	0.091	6.07825	0.012	0.00994286	0.064	52.5972	0.00599189	0.024	0.015	3.67808	212.604	4.47339	0.003	0.061	NaN	0.134	0.126	1.54883	3.73556	2.4406	0.241903
1961	0.133951	0.622	1.65282	NaN	0.123828	NaN	0.013	13.9538	2.05302	0.176188	24.7008	8.6856	5.88107	0.149	0.483	0.625112	0.053	12.8597	25.2998	0.01	0.035	0.048	NaN	0.134058	1.50539	NaN	13.4128	NaN	0.083	7.08107	0.025	0.0130286	0.078	52.9478	0.00599189	0.024	0.014	3.94603	150.371	4.96624	0.003	0.073	NaN	0.134	0.151	1.62402	3.32104	2.5471	0.235895
1962	0.187935	0.672	1.54504	NaN	0.321814	NaN	0.028	14.6398	2.15475	0.193489	25.8798	9.24263	6.17236	0.198	0.434	0.686888	0.071	13.497	26.7517	0.019	0.037	0.043	NaN	0.147221	1.54481	NaN	14.6374	0.001	0.101	8.37992	0.023	0.012	0.084	56.4931	0.00499189	0.02	0.023	4.55987	119.908	5.30008	0.003	0.065	NaN	0.15	0.16	1.66655	3.86314	2.79721	0.246895
1963	0.192886	0.568	1.47903	NaN	0.313789	NaN	0.023	13.6552	2.31081	0.185341	27.5476	10.0844	6.61922	0.193	0.326	0.78964	0.052	14.4745	28.8418	0.017	0.033	0.041	NaN	0.141022	1.71855	NaN	15.1613	0.001	0.097	9.38157	0.024	0.013	0.106	57.563	0.00399189	0.02	0.025	4.73171	118.864	5.79497	0.003	0.064	NaN	0.164	0.17	1.85419	3.55511	2.67941	0.268895
1964	0.228862	0.55	1.54013	NaN	0.333765	NaN	0.025	15.1938	2.45754	0.180206	29.715	10.6158	7.03935	0.296	0.436	0.811848	0.049	15.3936	28.2626	0.023	0.039	0.055	NaN	0.137115	1.94703	NaN	15.4658	0.002	0.093	11.6862	0.03	0.013	0.092992	64.8411	0.00798378	0.02	0.027	4.77761	118.915	5.91783	0.003	0.073	NaN	0.183968	0.208	2.102	3.89711	2.60519	0.272919
1965	0.274813	0.593	1.79818	NaN	0.323732	NaN	0.041	16.0494	2.60699	0.161678	32.9838	10.4095	7.46744	0.359	0.335	0.851885	0.056	16.33	28.7475	0.023	0.041	0.049	NaN	0.123017	2.00329	NaN	15.3738	0.002	0.091	12.628	0.028	0.01	0.109943	68.7546	0.00698378	0.024	0.029	4.84369	129.553	6.23874	0.004	0.067	NaN	0.23087	0.32	2.16457	3.98312	2.33733	0.313895
1966	0.297805	0.696	2.29827	NaN	0.423708	NaN	0.095	17.2142	2.75314	0.151186	32.8109	10.701	7.88609	0.298	0.177	0.866898	0.073	17.2456	28.6836	0.022	0.031	0.055	NaN	0.115034	1.9851	NaN	17.525	0.003	0.134	13.2959	0.028	0.013	0.127935	70.7081	0.006	0.023	0.023	5.12349	142.32	6.40671	0.005	0.084	NaN	0.27087	0.338	2.14557	4.14012	2.18565	0.338895
1967	0.349854	0.731	2.3012	NaN	0.270692	NaN	0.154	17.8701	2.87882	0.186233	35.2468	10.894	8.24597	0.464246	0.274	0.920072	0.092	18.0328	29.3016	0.033	0.039	0.058	NaN	0.141701	2.00512	NaN	18.0348	0.001	0.12	15.0403	0.028	0.013	0.113935	76.866	0.005	0.025	0.032	5.25064	117.965	6.73767	0.005	0.088	NaN	0.238878	0.371	2.16896	4.295	2.69232	0.371797
1968	0.333895	0.838	2.47004	NaN	0.45566	NaN	0.27	18.8344	2.95969	0.173174	36.7077	11.544	8.47749	0.444246	0.301	1.05504	0.12	18.5393	32.3247	0.028	0.042	0.061	NaN	0.131765	2.14459	NaN	21.0893	0.004	0.117	16.2291	0.028	0.015	0.133935	82.7678	0.00799189	0.05	0.034	5.78664	127.676	7.25239	0.005	0.123	NaN	0.282854	0.436	2.32015	4.37214	2.50353	0.44274
1969	0.256886	0.885	3.07395	NaN	0.759578	NaN	0.343	21.0832	3.08231	0.226639	38.7892	12.183	8.8286	0.4751	0.347	1.02329	0.131	19.3073	33.7041	0.037	0.055	0.054	NaN	0.172445	2.22357	NaN	22.962	0.005	0.133	18.0971	0.033	0.02	0.366935	83.8207	0.00998378	0.051	0.044	6.14942	157.19	7.64636	0.005	0.137	0.003	0.312822	0.516	2.40603	4.70614	3.27645	0.455732
1970	0.455894	1.021	4.10998	NaN	0.976506	NaN	0.126	22.5568	3.24203	0.253483	40.251	13.8187	9.2862	0.701084	0.707	1.03799	0.117	20.3076	34.2496	0.033	0.077	0.062	0.001	0.19287	2.90569	NaN	25.5269	0.005	2.239	16.696	0.039	0.017	0.319959	93.1161	0.00998378	0.057	0.034	6.72375	210.198	7.74292	0.008	0.156	0.003	0.340797	0.612	3.14634	5.09118	3.66453	0.464708
1971	0.516807	1.187	5.08994	NaN	0.929417	NaN	0.116	24.2487	3.44154	0.220612	41.6565	14.211	9.85534	1.83508	0.829	0.984124	0.132	21.5487	33.1252	0.039	0.08	0.063	0.001	0.167859	3.13149	NaN	27.9361	0.006	2.05	17.5277	0.041	0.02	0.0679351	96.1477	0.00999189	0.05	0.041	7.384	238.542	8.26458	0.008	0.187	0.003	0.416765	0.67	3.38933	5.34617	3.18932	0.51406
1972	0.417688	1.539	7.72998	NaN	1.22831	NaN	0.102	24.5815	3.62215	0.213915	42.9409	15.3033	10.3703	1.76891	1.004	0.956856	0.137	22.6709	35.6544	0.043	0.106	0.069	0.001	0.162763	2.93492	0.006	31.1174	0.006	2.58	18.0346	0.044	0.02	0.0319432	103.926	0.0139919	0.046	0.033	7.67941	253.519	8.57674	0.008	0.181	0.003	0.480708	0.74	3.17311	5.67038	3.0925	0.656629
1973	0.446394	1.443	10.4469	NaN	1.33015	NaN	0.09	25.6485	3.77638	0.237298	46.6232	16.3799	10.8096	2.14595	1.506	1.24173	0.131	23.6275	37.8383	0.04	0.104	0.116	0.001	0.180555	3.50582	0.014	36.0316	0.007	2.722	18.7547	0.046	0.02	0.0349108	104.057	0.0169838	0.044	0.044	7.52894	263.55	9.1787	0.008	0.333	0.003	0.5577	0.785	3.79457	6.10635	3.43055	0.683256
1974	0.5222	1.185	8.69996	NaN	1.32817	NaN	0.117	26.0591	3.92151	0.215087	46.9949	15.6372	11.2227	2.01412	1.474	1.26995	0.134	24.5265	36.8315	0.042	0.111	0.121	0.001	0.163655	3.52094	0.024	39.0085	0.007	2.232	19.415	0.056	0.025	0.0199432	106.333	0.018	0.031	0.041	7.06184	268.855	9.93298	0.008	0.443	0.003	0.519676	0.885	3.8096	6.246	3.10944	0.526388
1975	0.579044	1.253	8.73395	NaN	1.20328	NaN	0.193	25.8859	4.12345	0.155762	47.9569	14.7964	11.7982	2.25058	1.569	1.32552	0.155	25.78	33.2488	0.048	0.121	0.125	0.001	0.118516	3.67366	0.051	41.0791	0.007	1.931	19.9023	0.06	0.021	0.0199432	108.29	0.021	0.028	0.05	6.26192	311.709	9.77321	0.009	0.3	0.004	0.555635	1.088	3.97341	7.3787	2.2518	0.543298
1976	0.540715	1.35	10.6799	NaN	0.895208	NaN	0.11	27.2106	4.28305	0.332731	47.5095	15.8855	12.2525	1.76239	1.793	1.51632	0.145	26.7688	35.3925	0.048	0.071	0.128	0.001	0.253168	3.79142	0.162	42.1392	0.007	1.643	19.914	0.057	0.024	0.0198619	108.883	0.02	0.035	0.05	6.55716	325.045	10.3656	0.011	0.337	0.004	0.568192	1.081	4.10011	7.41839	4.8102	0.678853
1977	0.650787	1.56	11.4206	NaN	0.962749	NaN	0.127	27.4853	4.42962	0.173788	51.2022	15.2823	12.6696	2.64975	2.037	1.57881	0.161	27.6759	34.4432	0.054	0.081	0.124	0.002	0.132232	3.68671	0.213	44.2354	0.008	1.744	20.6866	0.068	0.027	0.0197806	111.291	0.022	0.035	0.054	6.28063	356.005	10.7099	0.011	0.131	0.008	0.711632	1.106	3.98555	8.00902	2.5124	0.736607
1978	0.587778	1.771	17.0457	NaN	1.47375	NaN	0.134	27.9902	4.5823	0.148005	55.0819	15.6188	13.1047	1.8005	2.118	1.6333	0.172	28.624	36.9681	0.059	0.099	0.116	0.003	0.112614	4.11957	0.227	48.0162	0.008	2.602	22.1635	0.095	0.028	0.013957	113.402	0.0569165	0.04	0.053	6.23265	397.177	11.3358	0.008	0.088	0.008	0.794772	1.314	4.45525	8.35673	2.13966	0.776334
1979	0.609485	2.069	12.4306	NaN	1.49814	NaN	0.111	30.1902	4.62077	0.15526	55.9142	16.7364	13.2131	1.88746	2.218	1.80476	0.164	28.858	38.1516	0.057	0.1	0.126	0.006	0.118134	4.48057	0.257	51.0794	0.008	2.029	21.5415	0.111	0.03	0.008	120.537	0.068	0.028	0.055	6.74738	405.871	12.0816	0.006	0.095	0.007	0.759002	1.479	4.84685	8.63321	2.24454	0.831013
1980	0.479385	1.41	18.1268	NaN	1.45588	NaN	0.039	29.6553	4.80344	0.15978	60.1886	14.1992	13.7333	2.1758	2.151	2.07347	0.184	29.9902	36.8004	0.052	0.138499	0.119	0.006	0.121573	4.40542	0.269	50.6982	0.008	1.877	21.0837	0.118	0.04	0.078	120.856	0.033	0.029	0.057	6.84785	398.168	12.0563	0.013	0.110679	0.008	0.668248	1.52	4.76439	8.54374	2.30989	0.889713
1981	0.540043	2.002	12.6479	NaN	1.43744	NaN	0.029	27.8301	4.71327	0.15219	62.8091	15.2385	13.4733	0.763766	2.325	2.15233	0.187	29.4176	33.7267	0.05	0.113986	0.106	0.007	0.115798	4.79454	0.275	46.5251	0.012	0.401	21.8578	0.152	0.043	0.082	117.248	0.009	0.037	0.057	6.64164	393.772	12.0798	0.013	0.128473	0.018	0.61032	1.055	5.1787	8.90484	2.20017	0.844698
1982	0.571757	1.993	10.6913	NaN	1.26506	NaN	0.08	28.2074	4.80262	0.170161	63.8342	14.6196	13.7275	0.616399	2.683	2.33414	0.176	29.9703	31.9604	0.047	0.130278	0.108	0.009	0.129472	4.40413	0.3	46.6128	0.01	0.571	24.5208	0.157	0.043	0.092	113.108	0.01	0.039	0.056	5.58602	428.621	12.4671	0.013	0.366567	0.014	0.565126	1.516	4.75659	9.39428	2.45996	0.861474
1983	0.687777	2.081	14.3297	NaN	1.39207	NaN	0.023	28.6962	4.87218	0.0874522	61.3496	14.1019	13.9236	0.549774	2.244	2.23479	0.187	30.3925	27.6208	0.047	0.119992	0.123	0.008	0.0665405	4.74253	0.281	45.1493	0.011	0.738	24.58	0.162	0.056	0.1	111.438	0.01	0.04	0.056	5.63983	451.913	13.4306	0.013	0.311804	0.014	0.570091	1.233	5.12205	8.378	1.26427	0.859884
1984	0.770205	2.134	19.3631	NaN	1.36077	NaN	0.04	29.0536	4.91667	0.218379	64.5091	14.7967	14.0483	0.506	2.511	2.47739	0.203991	30.6585	28.6483	0.047	0.132533	0.121	0.014	0.16616	5.0014	0.285	45.7439	0.011	0.523	23.7568	0.127	0.06	0.112	116.048	0.023	0.041	0.059	6.00247	491.899	13.2919	0.013	0.311	0.006	0.540652	1.401	5.40196	8.85298	3.15704	0.882599
1985	0.955724	2.149	19.8169	NaN	1.27623	NaN	0.068	27.4378	5.30273	0.255604	65.7718	14.8382	15.1503	0.412	2.78	2.78088	0.231003	33.0602	28.3858	0.052	0.198073	0.123	0.017	0.194483	5.10171	0.316	49.1094	0.013	0.708	24.3508	0.13	0.063	0.114	115.086	0.023	0.044	0.049	5.80773	532.689	13.1221	0.013	0.348041	0.006	0.612024	1.906	5.5108	8.84419	3.69519	0.858188
1986	0.855375	2.197	20.7643	NaN	1.26469	NaN	0.068	28.4255	5.31831	0.049	65.4264	14.6642	15.1907	0.385	3.003	3.11294	0.250017	33.1408	27.9388	0.056	0.181614	0.115	0.015	0.0372831	5.32785	0.291	53.8281	0.015	0.627	24.8833	0.131	0.064	0.118	110.442	0.016	0.044	0.051	6.00677	560.11	13.3063	0.012	0.289949	0.006	0.703475	1.522	5.75662	9.10895	0.708378	0.983964
1987	0.849995	2.03	22.894	NaN	1.57916	NaN	0.075	31.3533	5.29839	0.122	69.8281	15.6591	15.1299	0.388	3.117	3.22045	0.257033	32.9944	27.9994	0.062	0.141154	0.156	0.028	0.0331455	5.2013	0.338	56.165	0.017	0.905	24.9108	0.141	0.068	0.119	117.61	0.022	0.071	0.054	6.11191	597.995	13.6801	0.013	0.360287	0.006	0.743412	2.006	5.61914	9.20672	0.629765	1.14194
1988	0.779881	1.998	22.8461	NaN	1.37809	NaN	0.078	33.1348	5.44092	0.167	71.2005	14.4483	15.5348	0.42	3.31402	3.67861	0.258044	33.871	27.2227	0.068	0.146848	0.176	0.03	0.0326508	5.36693	0.355	56.6493	0.018	1.559	23.7209	0.151	0.062	0.123	124.347	0.02	0.063	0.018	7.25432	640.765	14.1969	0.014	0.407462	0.006	0.793101	2.403	5.7998	9.66121	0.620365	1.14537
1989	0.754769	2.45	21.7817	NaN	1.34355	NaN	0.078	31.9381	5.32098	0.177	75.733	14.6555	15.189	0.531	3.1978	3.65239	0.270066	33.1091	29.1467	0.082	0.16639	0.213	0.017	0.0621534	5.35044	0.39	57.8913	0.018	1.731	23.6032	0.224	0.073	0.123	126.315	0.022	0.068	0.028	8.7323	651.442	14.4085	0.014	0.408195	0.006	0.800585	2.256	5.78161	9.69242	1.18092	1.20866
1990	0.710491	1.486	20.9434	0.111	1.38884	0.014	0.06	30.5893	4.97051	0.133	75.9893	16.9554	14.1777	0.502	3.38575	3.84332	0.292077	28.2996	32.8355	0.085	0.185776	0.137	0.035	0.0665608	5.2985	0.737	56.4741	0.018	1.689	20.9331	0.159	0.057	0.344	126.124	0.026	0.054	0.103	8.9744	660.696	15.5289	0.017	0.274886	0.01	0.794756	1.305	6.36715	8.93439	1.26466	1.27099
1991	0.662491	1.154	21.508	0.111	1.38179	0.014	0.058	32.0703	5.16377	0.145	76.3845	17.9382	13.9644	0.503	3.23562	4.02323	0.328091	26.3775	33.6741	0.111	0.216192	0.147	0.0480673	0.0531138	3.74865	0.719	59.287	0.02	1.448	16.712	0.171	0.065	0.356	123.497	0.027	0.056	0.105	8.49798	692.694	15.4624	0.018	0.295516	0.01	0.897179	1.176	4.68949	7.88729	1.00916	1.40464
1992	0.376491	0.681	21.8018	0.111	1.40967	0.015	0.057	33.0869	1.5993	0.147	77.7599	16.4312	15.3338	0.505	2.96775	4.1975	0.266094	24.1981	33.4355	0.097	0.236065	0.126	0.0560529	0.0437593	4.10141	0.758	59.6024	0.023	1.422	15.5596	0.172	0.059	0.368	127.467	0.029	0.059	0.111	8.78885	724.124	16.7835	0.018	0.352141	0.01	1.02108	1.049	4.50493	5.73699	0.831426	1.50734
1993	0.363825	0.632	22.3642	0.112	1.56888	0.018	0.059	32.1445	0.70241	0.177	78.9397	16.549	13.2132	0.48	3.98739	4.38376	0.300039	20.8461	33.1453	0.103	0.296584	0.147	0.0472236	0.0675503	3.43325	0.872	62.318	0.024	1.355	15.7412	0.171	0.062	0.378	127.567	0.03	0.061	0.11	9.35029	773.962	17.2865	0.019	0.317121	0.011	1.06195	1.39	4.62876	5.40039	1.28346	1.57396
1994	0.349782	0.522	23.5116	0.111	1.05502	0.018	0.059	33.3594	0.740925	0.18	80.2443	16.6491	11.4492	0.477	4.02719	4.78653	0.202055	17.0218	34.0657	0.102	0.333585	0.145	0.0549848	0.0647619	0.87456	0.827	65.3577	0.027	1.28	15.3066	0.176	0.064	0.400396	131.669	0.031	0.064	0.111	10.3002	821.573	18.2289	0.019	0.482826	0.011	1.41931	1.128	4.42528	5.80968	1.23048	1.64059
1995	0.335825	0.564	25.923	0.116	2.98807	0.018	0.061	34.8703	0.936757	0.193	83.3543	17.4851	9.09177	0.475	4.03578	5.74278	0.220056	15.6592	34.3768	0.103	0.347587	0.145	0.0644491	0.0640873	0.928709	0.831	69.7553	0.03	1.306	15.7523	0.17027	0.065	0.420384	135.076	0.033	0.064	0.115	11.2145	891.118	16.0413	0.02	0.323653	0.011	1.31056	1.66907	4.61963	6.98313	1.21766	1.60542
1996	0.317937	0.544	26.4154	0.124	2.8452	0.019	0.065	36.78	0.707626	0.198	85.2515	18.4011	8.52692	0.472	4.25481	5.86574	0.225092	15.8883	35.343	0.084	0.335999	0.144	0.077836	0.0599497	1.15678	0.752	76.7453	0.032	1.29402	15.8592	0.192265	0.066	0.43593	139.393	0.039	0.064	0.119	12.999	930.226	16.313	0.021	0.365714	0.013	1.27913	2.002	4.78037	7.33419	1.13904	1.70121
1997	0.295886	0.418	23.7457	0.127	2.00542	0.019	0.07	37.5659	0.891441	0.207	87.5532	18.3496	8.13454	0.417	4.71827	6.31172	0.24316	16.0264	33.8433	0.106	0.327007	0.143	0.102825	0.0627381	2.2831	0.764	80.9458	0.032	1.346	15.246	0.219075	0.068	0.416226	143.228	0.04	0.067	0.123	15.1338	931.918	17.6028	0.022	0.524441	0.013	1.34188	1.91393	5.06984	6.68917	1.19202	1.72517
1998	0.280883	0.476	29.0996	0.134	1.98406	0.021	0.074	38.06	0.927031	0.22	91.344	18.252	8.64233	0.521	5.01243	6.33142	0.300253	15.6584	35.5423	0.101	0.325973	0.142	0.100208	0.00346296	2.87972	0.912	84.1445	0.033	1.408	14.5402	0.234069	0.068	0.528208	145.644	0.043	0.068	0.126	15.5042	891.349	17.7832	0.024	0.097	0.013	1.42889	1.797	5.26171	6.64777	0.0657963	1.80531
1999	0.220937	0.812	25.0185	0.14	2.49175	0.022	0.077	40.1979	0.831911	0.221	93.9039	17.8938	7.79761	0.533	4.90942	6.84375	0.317264	15.0067	34.039	0.095	0.420939	0.14	0.10119	0.0259497	2.8204	0.862	86.3216	0.033	1.038	12.6556	0.249501	0.069	0.517	149.987	0.05	0.072	0.13	16.6232	889.229	14.9458	0.025	0.099	0.013	1.48444	1.62105	5.49003	6.87308	0.493045	1.8784
2000	0.206788	0.82	23.8654	0.143	2.59691	0.024	0.08	38.8533	0.952895	0.649	95.5772	18.0576	8.05303	0.532	5.12931	7.23923	0.314299	14.9774	34.5893	0.108	0.429584	0.141	0.104172	0.0688545	3.73944	1.031	88.4896	0.034	1.253	12.3649	0.281358	0.074	0.539	156.158	0.059	0.073	0.133	15.8607	914.109	15.3545	0.028	0.154434	0.013	1.47229	1.764	5.37512	7.08085	1.30824	1.95029
2001	0.217784	0.879	22.8659	0.143	2.63961	0.026	0.081	36.5731	0.964165	0.657	97.6171	19.1328	7.85826	0.51	3.84212	8.47025	0.323752	15.0021	34.4118	0.122	0.488475	0.144	0.100738	0.0701138	3.62003	1.05	90.8808	0.035	1.198	13.3772	0.270657	0.056	0.614	154.188	0.064	0.067	0.137	14.3495	935.083	15.2672	0.028	0.209	0.009	1.54638	2.019	5.67869	6.91381	1.33216	1.91632
2002	0.287011	1.023	24.4014	0.145	3.43819	0.026	0.09	33.9499	0.839736	0.665	98.8563	19.6285	8.09003	0.526	4.33071	8.72838	0.327393	15.0321	34.6284	0.118	0.560366	0.152	0.109637	0.0675952	3.86807	1.085	89.3654	0.037	1.161	12.6252	0.273219	0.058	0.602	155.798	0.075	0.067	0.139	14.8718	1032.33	15.1284	0.028	0.157	0.006	1.70435	1.899	5.98055	7.08668	1.28431	1.96801
2003	0.323677	1.155	24.8494	0.146	2.45316	0.028	0.096	36.7443	0.943111	0.699	100.908	21.1666	8.35882	0.536	4.57714	9.1318	0.339865	15.4162	35.0096	0.118	0.635256	0.153	0.0985607	0.0676402	3.91654	1.044	86.6562	0.04	1.22002	13.7854	0.293207	0.044	0.649	160.256	0.084	0.064	0.203	14.9793	1215.15	15.5824	0.036	0.25	0.008	1.79674	1.40095	6.35049	6.92006	1.28516	2.07575
2004	0.242677	1.12	23.9774	0.153	5.10424	0.033	0.1	42.8612	1.00742	0.714	104.587	21.1993	8.75495	0.538	4.88058	9.8103	0.346485	16.3964	35.1543	0.107	0.677147	0.159	0.0792792	0.0709683	4.2201	1.063	91.0685	0.044	1.33	13.5291	0.300194	0.054	0.667	159.853	0.09	0.064	0.204	16.1156	1398.99	14.8934	0.039	0.259	0.013	1.86726	2.002	6.25459	6.78656	1.3484	2.13999
2005	0.355695	1.146	29.0593	0.157	5.18734	0.035	0.102	44.0596	1.19437	0.742	105.489	21.6137	9.35765	0.499	5.40475	10.2829	0.360031	16.7487	34.2963	0.115	0.646037	0.159	0.1032	0.0703386	4.37936	1.117	93.3642	0.049	1.329	13.8254	0.306181	0.042	0.757	157.324	0.12	0.064	0.209	16.634	1575.1	16.3918	0.038	0.272177	0.015	1.83498	2.046	6.36738	7.05449	1.33643	2.19195
2006	0.446337	1.049	27.3475	0.149	6.03232	0.039	0.105	47.6553	1.20131	0.741	107.173	20.9875	10.6737	0.485	5.30025	11.378	0.366485	17.5101	33.8171	0.121	1.01292	0.178	0.101803	0.0733069	4.74531	1.128	93.326	0.05	1.293	14.1635	0.370151	0.05	0.818	155.827	0.129	0.068	0.216	17.4595	1740.65	16.9226	0.044	0.308029	0.013	1.912	1.859	6.42179	7.18527	1.39283	2.24432
2007	0.619161	1.045	29.5851	0.147	6.81662	0.041	0.111	47.5562	1.39198	0.77	109.127	20.2682	8.31287	0.49	7.30624	11.6381	0.371939	17.3499	32.8865	0.13	1.17894	0.199	0.101536	0.0825265	4.7692	1.154	97.4123	0.051	2.268	15.2131	0.434108	0.055	0.942268	162.178	0.138	0.069	0.233	19.2977	1872.75	16.4244	0.028	0.330877	0.013	2.17284	1.784	6.78052	7.03113	1.568	2.33049
2008	1.14616	1.166	29.7576	0.147	6.95579	0.041	0.114	51.339	1.5215	0.725	110.376	20.0842	9.67538	0.644	8.1011	12.3638	0.440028	17.9298	32.8065	0.119	1.16125	0.177	0.109367	0.0793783	5.44723	1.229	103.806	0.052	2.454	14.7597	0.473398	0.057	1.03848	157.092	0.128	0.069	0.253	19.3282	2012.88	18.1905	0.029	0.362773	0.013	2.18097	1.799	6.44885	7.57293	1.50819	2.37643
2009	1.83951	1.161	32.8018	0.141	7.52334	0.04	0.121	48.8398	1.19087	0.717	111.207	18.4208	8.6945	0.439	7.66854	13.4138	0.435903	16.7584	29.4059	0.141	1.23033	0.13	0.100382	0.0812222	5.6051	1.05227	98.2781	0.052	2.11401	12.4928	0.499506	0.046	1.24627	148.076	0.142	0.069	0.257	17.9912	2117.58	19.8026	0.036	0.470592	0.012	2.11487	1.505	5.9601	7.64631	1.54322	2.30726
2010	2.29197	1.214	32.1545	0.141	7.87786	0.041	0.124	50.9643	1.16069	0.684	110.672	19.6539	8.3605	0.652	7.93527	14.7357	0.399566	17.237	31.2667	0.147	1.34797	0.166	0.126681	0.0559471	5.77121	1.23808	112.238	0.054	2.2	13.063	0.555905	0.081	1.37296	151.624	0.152	0.072	0.272	19.4677	2320.02	20.8183	0.044	0.535512	0.014	2.04523	1.655	5.74532	9.25617	1.06299	2.2077
2011	3.30398	1.373	32.6984	0.134	8.27776	0.039	0.121	51.9306	1.35613	0.682	110.309	19.077	8.99992	0.492	7.81569	15.4357	0.413668	16.9505	28.6698	0.152	1.33373	0.121	0.182168	0.071373	6.48507	1.09953	117.347	0.055	2.605	14.5137	0.581399	0.0968374	1.39336	154.678	0.168	0.076	0.305	21.3111	2562.28	20.7641	0.037	0.611675	0.016	1.99491	1.731	5.64477	7.96106	1.35609	2.11776
2012	2.7889	1.274	34.9645	0.133	9.22504	0.039	0.125	52.3239	1.56885	0.368	110.946	18.3431	9.5656	0.521	7.4584	16.5642	0.398333	17.1966	27.9554	0.123	1.26601	0.1	0.210767	0.085	6.04155	1.38553	125.573	0.055	2.59101	13.1957	0.715054	0.103677	1.45566	155.496	0.137	0.08	0.167578	21.7532	2629.34	21.7596	0.039	0.803343	0.017	1.98114	2.276	5.21692	8.05737	1.615	1.97459
2013	2.3037	1.345	36.1448	0.13	9.06891	0.032	0.126	51.8973	1.51065	0.235	108.609	18.4895	9.61099	0.787	8.5117	16.8618	0.392563	17.3972	28.0225	0.13	1.33275	0.146	0.232873	0.088	5.95007	1.54556	135.111	0.055	2.082	11.6401	0.781706	0.108935	1.49448	157.294	0.135	0.078	0.178746	22.2957	2673.72	24.5603	0.048	0.875557	0.017	2.08317	2.6	5.03674	7.57323	1.392	1.78885
2014	2.12182	1.534	39.0886	0.126	12.0766	0.038	0.126	51.5004	1.51744	0.238	107.565	17.4903	10.0915	0.645	8.50105	18.0073	0.34457	17.2172	26.4223	0.128	1.42375	0.183	0.25873	0.088	5.27046	1.86956	142.984	0.058	2.436	12.3279	0.794767	0.102772	1.7785	157.189	0.133	0.079	0.269995	21.1307	2680.23	24.8232	0.042	0.84699	0.018	2.11478	2.658	4.83215	7.48526	1.571	1.89263
2015	2.15724	1.237	41.162	0.127	9.27375	0.042	0.131	52.5015	1.38438	0.245	109.595	18.0904	10.1524	0.557	8.91705	19.8784	0.344563	16.0025	27.5604	0.175	1.65839	0.147	0.263704	0.089	5.0384	1.48056	135.157	0.058	1.898	13.1535	0.899993	0.10689	2.30521	157.18	0.134	0.08	0.189995	22.2798	2642.79	23.491	0.046	0.94187	0.017	2.0216	2.567	4.8692	7.92926	1.706	1.8996
2016	1.84078	1.227	40.622	0.128	9.30976	0.042	0.134	52.1096	1.40796	0.241	112.181	18.3167	10.1742	0.49	8.56918	20.7034	0.350619	16.4533	27.2399	0.166	1.83951	0.169	0.314699	0.09	5.93146	1.72856	130.579	0.058	2.05899	12.3782	0.922881	0.120886	2.65394	153.939	0.147	0.081	0.270995	22.9677	2607.13	27.5111	0.055	1.01031	0.017	2.1626	3.22	4.94133	7.64191	1.471	2.01098
2017	1.87222	1.475	41.88	0.127	10.2268	0.039	0.134	51.1506	1.49696	0.25	113.291	19.0035	9.96123	0.538	8.94415	21.9224	0.319563	16.5783	27.1442	0.168	2.02643	0.172	0.34302	0.091	5.94746	1.92656	132.257	0.046	2.607	12.9654	1.07488	0.149886	3.05294	156.341	0.158	0.081	0.271995	22.9427	2661.22	25.0191	0.065	0.962308	0.019	2.2476	3.237	5.114	6.85895	1.39	2.05122
2018	2.8528	1.47462	44.8442	0.126695	10.2835	0.0401595	0.137984	50.4994	1.71851	0.257433	113.525	18.2095	10.2315	0.554042	8.62295	23.3949	0.329458	16.8864	27.3493	0.167087	2.11784	0.177114	0.453649	0.0937056	6.02787	1.8601	127.361	0.0473677	2.60928	11.8864	1.13001	0.155029	4.22463	160.072	0.166351	0.0820081	0.275119	23.425	2717.4	25.1715	0.0671199	0.960237	0.0198433	2.2514	3.41541	4.83587	7.11912	1.43816	2.0013
2019	2.92585	1.52266	46.8633	0.12841	10.3767	0.0391084	0.134372	48.8372	1.63917	0.250695	112.177	18.6941	10.8679	0.540161	9.37618	27.8826	0.323854	17.0535	27.2131	0.172707	2.1829	0.172478	0.465836	0.0912529	7.26558	1.72391	127.106	0.0461278	2.48054	11.4646	1.17393	0.158238	4.37417	157.383	0.173005	0.0839663	0.281187	22.9985	2776.93	27.8937	0.0690814	0.943499	0.0211409	2.32192	3.53342	4.88051	7.09292	1.41807	1.99665
	49.1051	73.4523	1200.3	3.96911	193.087	0.902268	5.74736	2023.62	161.432	18.0149	4448.57	972.101	633.657	44.4834	227.936	399.976	14.3743	1264.19	1922.33	4.97579	30.4187	7.51559	4.71764	6.17	236.84	38.8992	3990.95	1.4695	85.3349	976.187	16.4177	3.30975	39.0959	7433.79	3.39513	3.27397	6.84261	690.249	59062.3	866.872	1.3072	20.5769	0.544984	66.3854	89.5448	276.356	419.537	115.628	77.0593
[truncated: 184 more columns]

## Sheet: Tabelle1
		361423
	Country	Emissions
1	USA	81013.1	F	81013.1	0.22415
2	China	59062.3	F	140075	0.387566
3	Russian Federation	27921.1	N	167996	0.464819
4	Japan	16171.9	F	184168	0.509564
5	Germany	15637.4	F	199806	0.55283
6	India	13458.6	F	213264	0.590068
7	United Kingdom	9342.68	M	222607	0.615918
8	Canada	7433.79	M	230041	0.636486
9	Ukraine	7111.2	N	237152	0.656162
10	France	6662.96	M	243815	0.674597
11	Italy	6041.63	M	249857	0.691313
12	Poland	5671.94	M	255529	0.707007
13	South Africa	5074.32	F	260603	0.721046
14	Mexico	4962.51	M	265565	0.734777
15	Iran	4699.26	F	270265	0.747779
16	South Korea	4642.5	M	274907	0.760624
17	Australia	4448.57	M	279356	0.772933
18	Saudi Arabia	4030.72	M	283387	0.784085
19	Brazil	3990.95	M	287377	0.795127
20	Spain	3585.96	M	290963	0.805049
21	Indonesia	3487.37	M	294451	0.814698
22	Kazakhstan	3304.43	M	297755	0.823841
23	Turkey	2773.38	M	300529	0.831514
24	Netherlands	2530.26	M	303059	0.838515
25	Czech Republic	2327.27	M	305386	0.844954
	Taiwan	2266.77
	Romania	2045.24
	Argentina	2023.62
	Thailand	1946.9
	Belgium	1922.33
	Venezuela	1902.64
	Uzbekistan	1645
	Egypt	1631.49
	Malaysia	1533.35
	Pakistan	1329.93
	North Korea	1320.62
	United Arab Emirates	1274.19
	Belarus	1264.19
	Algeria	1200.3
	Iraq	1168.03
	Hungary	1073.88
	Greece	1068.44
	Nigeria	1029.31
	Sweden	1013.61
	Bulgaria	976.187
	Austria	972.101
	Viet Nam	948.022
	Philippines	873.048
	Colombia	866.872
	Denmark	863.245
	Finland	804.582
	Kuwait	772.048
	Slovakia	762.698
	Serbia	694.306
	Chile	690.249
	Turkmenistan	675.236
	Switzerland	656.966
	Azerbaijan	633.657
	Portugal	630.399
	Israel	627.807
	Singapore	572.32
	Norway	572.139
	Qatar	555.654
	Libya	552.037
	Ireland	511.687
	Syria	493.51
	Morocco	457.288
	Peru	450.353
	Hong Kong	428.943
	Cuba	419.537
	New Zealand	414.846
	Bangladesh	399.976
	Estonia	365.355
	Trinidad and Tobago	358.61
	Lithuania	334.475
	Oman	329.733
	Ecuador	312.191
	Croatia	276.356
	Georgia	244.416
	Moldova	241.377
	Bosnia and Herzegovina	236.84
	Tunisia	235.084
	Bahrain	227.936
	Slovenia	213.604
	Kyrgyzstan	202.939
	Dominican Republic	196.576
	Angola	193.087
	Lebanon	189.494
	Mongolia	187.719
	Jordan	183.468
	Latvia	182.875
	Luxembourg	180.513
	Zimbabwe	172.629
	Yemen	164.048
	Armenia	161.432
	North Macedonia	158.118
	Myanmar	136.144
	Bolivia	135.517
	Sri Lanka	127.403
	Jamaica	119.353
	Kenya	118.288
	Curaçao	115.628
	Sudan	115.216
	Guatemala	113.661
	Tajikistan	98.725
	Ghana	93.3158
	Uruguay	90.4294
	Côte d'Ivoire	89.5448
	Brunei Darussalam	85.3349
	Panama	80.3952
	Cyprus	77.0593
	Albania	73.4523
	Gabon	69.4307
	Honduras	67.1301
	Costa Rica	66.3854
	Ethiopia	66.1604
	Senegal	62.1489
	Tanzania	61.7168
	El Salvador	60.2428
	Zambia	55.3894
	Cameroon	55.0471
	Afghanistan	49.1051
	Nicaragua	45.9725
	Paraguay	45.9185
	Bahamas	44.4834
	Papua New Guinea	44.4783
	Democratic Republic of the Congo	43.9621
	Mozambique	43.9095
	Laos	41.8779
	New Caledonia	39.5526
	Cambodia	39.0959
	Nepal	38.9196
	Botswana	38.8992
	Iceland	38.5
	Equatorial Guinea	35.7214
	Benin	30.4187
	Mauritius	30.2419
	Suriname	30.1731
	Malta	27.3704
	Kosovo	26.8645
	Uganda	26.8442
	Guyana	25.7323
	Montenegro	25.7062
	Madagascar	24.7277
	Guinea	22.1342
	Congo	20.5769
	Haiti	20.2332
	Mauritania	19.9987
	Namibia	19.7486
	Togo	18.8441
	Aruba	18.0149
	Lesotho	16.5008
	Burkina Faso	16.4177
	Macao	15.6764
	Occupied Palestinian Territory	15.5893
	Mali	14.4759
	Barbados	14.3743
	Liberia	13.9875
	Fiji	13.9433
	Sint Maarten (Dutch part)	13.8121
	Malawi	12.5264
	Niger	12.3681
	Swaziland	10.9874
	South Sudan	10.0998
	Sierra Leone	9.43774
	Somalia	8.68514
	Faeroe Islands	7.97468
	Greenland	7.54022
	French Polynesia	7.53904
	Bermuda	7.51559
	Rwanda	7.46166
	Chad	6.84261
	Maldives	6.22124
	Bonaire, Saint Eustatius and Saba	6.17
	Antigua and Barbuda	5.74736
	Djibouti	5.02793
	Belize	4.97579
	Bhutan	4.71764
	Eritrea	4.59214
	Seychelles	4.34126
	Andorra	3.96911
	Gambia	3.65158
	Cape Verde	3.39513
	Burundi	3.30975
	Central African Republic	3.27397
	Saint Lucia	3.20412
	Solomon Islands	2.75925
	Guinea-Bissau	2.65883
	Grenada	2.12763
	Samoa	1.90999
	Saint Vincent and the Grenadines	1.85828
	Saint Kitts and Nevis	1.67415
	Palau	1.64089
	Liechtenstein	1.62957
	Timor-Leste	1.57336
	British Virgin Islands	1.4695
	Comoros	1.3072
	Nauru	1.30404
	Dominica	1.26643
	Vanuatu	1.23197
	Tonga	1.15475
	Turks and Caicos Islands	1.01905
	Micronesia (Federated States of)	0.978125
	Réunion	0.945905
	Saint Pierre and Miquelon	0.943683
	Martinique	0.903721
	Anguilla	0.902268
	Marshall Islands	0.896283
	Sao Tome and Principe	0.866668
	Kiribati	0.557827
	Cook Islands	0.544984
	Montserrat	0.42726
	French Guiana	0.207263
	Wallis and Futuna Islands	0.132099
	Saint Helena	0.100098
	Tuvalu	0.0754712
	Niue	0.0743141

## Sheet: Tabelle2
		USA	China	Russian Federation	Japan	Germany	India	United Kingdom	Canada	Ukraine	France	Italy	Poland	South Africa	Mexico	Iran	South Korea	Australia	Saudi Arabia	Brazil	Spain	Indonesia	Kazakhstan	Turkey	Netherlands	Czech Republic
	1950								42.07									14.941		5.367
	1951								44.402									16.112		5.913
	1952								43.51									16.432		6.807
	1953								43.838									16.223		6.885
	1954								44.482									18.517		8.102
	1955								46.258									19.291		9.289
	1956								51.807									19.934		9.995
	1957								49.9									20.34		9.822
	1958								49.721									21.184		10.663
	1959	770.471	196.548	232.231	52.571	206.276	27.7282	149.183	50.3497	70.0978	71.5856	25.6781	51.7631	25.7841	15.908	6.97836	3.0626	22.8461	0.505919	10.6488	14.2137	6.51262	24.0829	4.69209	18.3182	25.355
	1960	788.161	212.604	241.774	63.4551	222.148	30.4284	159.394	52.5972	72.9887	74.0614	29.8043	54.4697	26.704	17.2086	10.1961	3.42252	24.0499	0.729903	12.7871	13.3367	5.83657	25.0748	4.58475	20.043	27.0419
	1961	785.308	150.371	249.325	77.1798	227.849	32.9099	160.648	52.9478	75.276	76.794	33.9451	56.5599	27.8711	17.8057	9.96418	3.94342	24.7008	0.973886	13.4128	14.6307	7.09651	25.8595	4.73276	20.6929	29.3504
	1962	814.411	119.908	261.669	79.9302	241.039	36.2377	161.826	56.4931	79.0113	81.5684	39.9168	59.1177	28.8401	17.3973	10.2152	4.71113	25.8798	1.7058	14.6374	16.369	6.27044	27.1415	5.89644	22.7298	31.2776
	1963	850.443	118.864	280.627	88.656	258.051	38.9331	164.679	57.563	84.735	91.219	44.9116	63.0455	29.9468	18.0928	11.2732	5.75414	27.5476	1.89378	15.1613	16.0325	6.21264	29.1077	6.17902	24.8757	32.9024
	1964	887.761	118.915	298.45	97.9506	264.443	38.124	165.902	64.8411	90.1169	94.3062	47.9588	66.2883	32.6272	20.2511	12.9692	6.05763	29.715	1.92172	15.4658	17.5556	6.10651	30.9563	7.17876	26.4128	34.2422
	1965	924.725	129.553	316.59	105.478	262.037	42.0087	169.79	68.7546	95.6016	96.1003	51.7272	67.4074	34.9727	20.5153	14.6611	6.81722	32.9838	1.15072	15.3738	19.3833	6.73259	32.8394	7.46533	27.4027	33.365
	1966	971.392	142.32	334.328	114.423	259.668	43.5569	168.689	70.7081	100.965	94.8703	58.4013	68.8949	34.9986	22.0646	17.4955	8.18292	32.8109	1.74872	17.525	21.1837	6.37963	34.6809	8.59873	28.2635	33.1766
	1967	1008	117.965	349.59	133.545	255.521	43.6077	161.588	76.866	105.577	101.658	63.9	70.6947	36.5066	24.5648	18.5265	9.58331	35.2468	6.95564	18.0348	23.5791	6.69761	36.2645	9.13731	29.1163	33.1073
	1968	1044.84	127.676	359.414	153.36	268.775	47.5713	165.526	82.7678	108.546	105.104	68.0055	75.2732	37.6511	25.6242	22.4699	10.1521	36.7077	7.93644	21.0893	26.4785	7.52255	37.2839	9.89779	30.9622	34.6384
	1969	1097.57	157.19	374.313	178.279	287.118	48.4837	171.502	83.8207	113.043	112.926	73.5974	80.067	39.0674	27.8865	22.6634	11.5907	38.7892	9.62635	22.962	26.402	9.10541	38.8289	10.5766	31.6054	36.7726
	1970	1180.54	210.198	393.704	209.597	280.028	49.6599	178.105	93.1161	118.9	119.985	80.8855	83.0086	40.8347	31.1001	25.0512	14.6606	40.251	12.3503	25.5269	31.8686	9.76839	40.8405	11.621	38.7018	42.1604
	1971	1187.58	238.542	417.819	217.397	283.088	52.4567	180.237	96.1477	126.163	126.4	84.8933	85.3932	45.9621	34.4405	27.7369	15.9797	41.6565	16.3091	27.9361	35.0596	10.6319	43.3221	13.0017	38.3914	44.2222
	1972	1244.12	253.519	439.628	232.579	284.247	55.4824	176.863	103.926	132.728	131.438	89.5845	89.9308	46.8223	36.1024	28.9343	16.4512	42.9409	19.1817	31.1174	39.4968	11.8194	45.5624	14.6621	42.9846	44.6243
	1973	1299.8	263.55	458.219	249.527	296.325	57.1378	180.016	104.057	138.323	141.251	96.4381	91.5911	47.3138	39.3209	35.3371	19.9323	46.6232	25.9426	36.0316	42.2918	13.4001	47.4665	16.1872	45.1037	44.8011
	1974	1253.54	268.855	475.692	249.538	290.045	58.9863	168.445	106.333	143.578	136.454	97.7765	94.4969	48.1857	42.2343	39.24	20.6422	46.9949	26.9383	39.0085	47.1249	13.981	49.2513	16.629	43.6641	45.3136
	1975	1201.09	311.709	500.042	237.039	273.593	64.0041	164.642	108.29	150.906	122.202	93.0821	102.287	50.4943	44.805	37.9951	22.321	47.9569	22.724	41.0791	49.4141	14.7196	51.7454	17.8546	41.6281	47.4074
	1976	1257.41	325.045	519.277	247.583	297.717	66.8847	163.353	108.883	156.684	138.268	99.8351	108.657	52.6519	50.1566	42.7017	25.456	47.5095	27.6909	42.1392	53.9699	16.8636	53.7101	20.0217	46.1602	49.2487
	1977	1292.4	356.005	536.92	254.705	287.283	70.768	164.946	111.291	161.982	131.525	96.7298	114.071	54.5161	52.5208	44.6867	28.846	51.2022	32.2244	44.2354	53.1738	22.4936	55.5072	22.14	44.6522	50.7182
	1978	1332.69	397.177	555.351	246.068	294.522	71.9095	165.042	113.402	167.513	138.303	101.33	117.596	55.1012	60.6352	44.2423	30.9503	55.0819	31.3931	48.0162	54.4524	25.6382	57.3857	20.9372	46.3409	51.1718
	1979	1335.71	405.871	559.939	260.118	305.099	75.4975	175.904	120.537	168.871	144.727	105.146	120.444	59.6845	65.5897	44.6706	36.3589	55.9142	37.6649	51.0794	55.3347	25.9654	57.8374	20.4798	51.0391	49.8297
	1980	1287.31	398.168	581.96	257.879	300.235	79.7163	158.034	120.856	175.489	138.123	105.468	126.454	62.2864	73.0943	32.9052	36.8146	60.1886	46.1899	50.6982	58.382	25.8933	60.0907	20.5274	48.2074	50.4068
	1981	1236.45	393.772	570.866	252.958	286.167	86.0698	152.99	117.248	172.114	124.315	102.429	111.626	70.1691	77.4556	30.7119	38.1489	62.8091	47.8448	46.5251	56.2488	27.3737	58.8949	21.6119	44.7898	49.8516
	1982	1174.12	428.621	581.642	244.926	277.218	88.9135	149.629	113.108	175.339	119.511	100.131	114.894	76.5446	82.9722	37.5314	38.7509	63.8342	43.0926	46.6128	56.9318	28.8166	59.9883	23.529	36.4321	49.3613
	1983	1183.38	451.913	589.885	240.423	276.091	96.2429	148.877	111.438	177.796	115.673	97.8192	114.908	79.6753	75.7823	40.7242	41.2221	61.3496	43.8959	45.1493	55.5225	28.7074	60.7963	24.5121	37.4884	49.4229
	1984	1219.5	491.899	595.113	255.751	281.997	98.7971	144.407	116.048	179.345	111.129	99.5092	118.031	86.142	75.5365	40.9232	44.7731	64.5091	42.4428	45.7439	53.9483	30.6934	61.296	25.9024	39.3212	51.088
	1985	1223.89	532.689	641.833	249.018	284.965	108.643	152.737	115.086	193.413	109.804	100.705	121.318	88.398	78.4692	43.6537	48.7131	65.7718	47.0575	49.1094	54.5663	33.1872	66.1159	28.8381	40.1147	50.3879
	1986	1224.85	560.11	643.461	248.98	285.88	116.49	155.173	110.442	193.877	105.697	99.1234	123.321	90.2092	80.1189	40.2664	49.8558	65.4264	55.8408	53.8281	51.6136	33.3424	66.2487	31.5552	39.3053	50.7306
	1987	1277.52	597.995	640.806	246.324	281.778	124.424	156.023	117.61	193.052	103.585	103.739	126.565	89.7096	83.5683	43.288	52.6583	69.8281	51.977	56.165	51.7215	33.8098	65.9264	35.0553	41.3429	50.125
	1988	1333.4	640.765	657.922	268.959	280.845	134.358	155.648	124.347	198.182	102.205	105.339	121.242	93.5307	83.4742	47.7914	60.6735	71.2005	55.1986	56.6493	53.8912	36.2232	67.6531	34.0415	39.7388	49.2935
	1989	1350.44	651.442	643.185	278.844	275.322	147.731	158.727	126.315	193.706	107.189	110.465	115.222	93.0002	98.4048	51.8826	64.4782	75.733	55.5183	57.8913	61.3768	35.9373	66.0778	37.5465	44.1224	47.0285
	1990	1399.65	660.696	689.218	316.155	287.213	157.937	163.886	126.124	192.639	109.382	119.544	102.769	85.4182	86.529	57.1065	67.5323	75.9893	50.6237	56.4741	63.1041	41.0169	76.7505	41.3506	44.3191	44.8156
	1991	1386.16	692.694	653.924	319.341	276.801	168.15	166.097	123.497	172.636	116.346	119.416	102.018	88.9926	90.1018	61.6687	71.517	76.3845	72.9766	59.287	65.7623	49.2964	74.1651	43.1174	46.6147	40.637
	1992	1414.49	724.124	534.296	321.981	263.616	179.099	161.87	127.467	160.77	113.402	119.495	99.53	82.2511	90.8243	61.9424	77.0181	77.7599	77.8041	59.6024	68.1805	55.5615	67.3421	44.7386	46.5694	39.4703
	1993	1441.99	773.962	507.494	320.046	260.981	185.074	157.981	127.567	139.247	107.746	117.407	99.7191	87.4427	92.2673	64.2949	87.8378	78.9397	85.5151	62.318	65.8284	59.9788	59.8772	46.6734	46.6205	37.8377
	1994	1467.53	821.573	447.98	335.035	256.449	195.721	156.962	131.669	114.429	106.57	115.879	98.367	92.4194	95.9411	71.9215	93.9584	80.2443	83.9174	65.3577	69.2307	60.8227	50.7192	45.6968	46.7798	36.1289
	1995	1484.42	891.118	440.21	338.408	256.326	208.06	154.697	135.076	106.404	108.381	122.362	99.0069	98.7013	90.5013	74.0031	102.072	83.3543	64.0589	69.7553	72.9849	61.83	48.6374	49.3731	47.2069	35.9193
	1996	1535.73	930.226	431.267	341.667	261.77	225.476	160.602	139.393	95.9085	112.68	120.709	103.004	99.2558	94.3685	74.7838	109.588	85.2515	70.4868	76.7453	69.5402	69.6149	44.6353	54.4547	49.713	36.8348
	1997	1556.69	931.918	402.608	339.823	254.157	234.695	153.537	143.228	92.861	110.767	122.283	100.269	105.202	100.613	72.8983	116.754	87.5532	58.8965	80.9458	72.9548	76.6202	42.4597	57.8618	47.7674	35.6804
	1998	1569.61	891.349	397.969	328.989	251.986	239.61	154.971	145.644	89.6777	116.015	125.559	92.5581	102.978	105.993	83.517	99.2217	91.344	56.5585	84.1445	75.3334	58.9438	41.0866	57.8713	48.0723	34.2024
	1999	1591.24	889.229	405.592	338.978	244.444	259.734	153.098	149.987	81.3875	114.989	126.787	89.8382	102.301	106.582	103.61	108.713	93.9039	61.6748	86.3216	81.7409	66.5808	34.1027	56.7151	46.5959	31.8295
	2000	1637.03	914.109	401.488	345.209	245.573	267.036	154.886	156.158	77.8759	113.496	127.85	86.6097	103.235	108.097	100.782	121.572	95.5772	80.8825	88.4896	84.9528	72.5446	40.5994	62.7158	46.9125	34.6797
	2001	1610.38	935.083	411.436	341.215	250.1	270.885	157.259	154.188	82.8491	114.751	127.905	85.6025	101.396	112.09	107.787	122.421	97.6171	80.9429	90.8808	85.4585	81.2037	39.0076	58.2659	48.2529	34.65
	2002	1621.9	1032.33	408.156	349.196	245.584	279.16	152.92	155.798	80.6969	113.393	129.981	83.6254	97.2591	112.437	108.569	126.536	98.8563	88.8868	89.3654	90.9879	83.8869	43.8876	60.3105	48.0658	33.8143
	2003	1635.36	1215.15	416.318	351.431	245.87	289.14	156.051	160.256	83.793	115.25	134.875	87.1741	110.309	119.475	112.989	126.203	100.908	89.1149	86.6562	92.1367	86.4232	48.7922	64.5425	49.0079	34.766
	2004	1666.93	1398.99	417.706	350.129	242.076	307.111	156.445	159.853	84.706	115.521	136.359	88.4679	122.565	119.775	120.658	130.624	104.587	107.692	91.0685	96.7482	92.7533	51.4399	66.7206	49.5038	34.9656
	2005	1673.55	1575.1	422.319	352.09	236.46	323.622	155.548	157.324	85.458	116.379	136.464	88.199	113.517	126.636	126.509	125.367	105.489	108.039	93.3642	100.844	93.7054	55.22	72.1072	48.4331	34.2991
	2006	1651.49	1740.65	438.404	345.75	239.628	343.753	154.893	155.827	90.7943	113.439	135.132	91.9862	121.895	130.067	137.497	127.076	107.173	117.711	93.326	98.4112	94.5533	60.4938	76.8693	47.1306	34.5113
	2007	1672.61	1872.75	437.861	355.492	232.364	370.607	152.633	162.178	91.8024	110.49	133.104	91.8036	126.856	130.946	140.097	134.649	109.127	105.488	97.4123	100.555	102.856	62.2165	85.3539	47.1035	35.0066
	2008	1618.6	2012.88	446.696	336.22	233.271	399.171	148.693	157.092	88.8463	108.453	129.975	90.1051	135.001	134.547	145.991	138.041	110.376	117.996	103.806	91.8734	113.963	62.5263	84.4217	47.8934	33.5539
	2009	1498.65	2117.58	417.239	317.317	215.665	440.093	134.906	148.076	75.6805	104.053	115.345	86.4104	137.08	129.886	149.259	138.309	111.207	127.141	98.2781	81.1248	122.025	61.1751	86.0698	46.4432	31.4393
	2010	1555.15	2320.02	440.198	331.351	227.257	458.099	139.744	151.624	80.2616	106.184	118.365	91.3228	127.437	126.578	153.94	154.465	110.672	141.298	112.238	77.4359	116.86	68.4762	85.8024	49.7047	32.069
	2011	1518.91	2562.28	454.409	345.021	220.913	482.008	128.222	154.678	84.0483	98.8533	115.185	91.1441	129.353	132.141	158.035	160.591	110.309	135.824	117.347	77.6593	138.666	65.6799	92.6535	46.1424	31.4029
	2012	1464.95	2629.34	458.479	356.286	222.132	529.832	133.132	155.496	82.9565	99.1976	109.595	89.0688	125.857	135.453	163.942	159.288	110.946	153.706	125.573	76.1055	143.664	67.3446	96.5246	45.2585	30.2825
	2013	1504.92	2673.72	441.914	358.816	226.888	554.967	130.431	157.294	81.1393	99.7448	100.319	87.9436	124.418	133.769	166.133	161.446	108.609	147.6	135.111	68.9858	112.225	69.4726	94.2196	45.2287	29.0468
	2014	1517.94	2680.23	442.781	344.719	216.344	596.19	119.83	157.189	70.3015	91.0416	94.9402	84.5854	131.519	131.312	175.196	160.084	107.565	164.273	142.984	69.6234	113.762	76.085	98.7106	43.3319	28.3979
	2015	1477.19	2642.79	442.921	333.729	217.199	615.019	115.309	157.18	61.1113	92.3037	98.2773	85.4528	123.251	131.543	174.894	162.498	109.595	176.149	135.157	74.1505	138.377	78.7604	104.075	45.4057	28.6068
	2016	1444.4	2607.13	441.677	328.375	218.48	652.937	108.927	153.939	63.9193	92.9929	97.3134	88.431	125.558	132.268	176.872	168.657	112.181	154.408	130.579	71.168	155.075	78.7176	109.509	45.3827	29.1018
	2017	1433.84	2661.22	449.285	324.143	214.698	670.537	105.919	156.341	60.9258	94.3609	95.9263	92.0689	127.212	125.884	197.756	169.38	113.291	158.138	132.257	74.9649	144.927	84.0411	116.083	44.8812	28.8323
	2018	1480.59	2717.4	461.616	309.959	206.158	707.239	103.75	160.072	63.2353	90.4865	95.0014	92.1686	128.821	123.112	206.169	173.29	113.525	157.412	127.361	73.5956	157.365	87.24	114.409	43.7146	28.4965
	2019	1442.33	2776.93	458.07	302.037	191.582	713.925	100.949	157.383	60.9251	88.309	91.9995	88.0531	130.624	119.677	212.753	166.829	112.177	158.884	127.106	68.9638	168.535	85.6435	110.569	42.2562	27.5682

## Sheet: Tabelle3
			1950	1951	1952	1953	1954	1955	1956	1957	1958	1959	1960	1961	1962	1963	1964	1965	1966	1967	1968	1969	1970	1971	1972	1973	1974	1975	1976	1977	1978	1979	1980	1981	1982	1983	1984	1985	1986	1987	1988	1989	1990	1991	1992	1993	1994	1995	1996
AFGHANISTAN	Afghanistan		0.023	0.025	0.025	0.029	0.029	0.042	0.05	0.08	0.09	0.104959	0.11296	0.133951	0.187935	0.192886	0.228862	0.274813	0.297805	0.349854	0.333895	0.256886	0.455894	0.516807	0.417688	0.446394	0.5222	0.579044	0.540715	0.650787	0.587778	0.609485	0.479385	0.540043	0.571757	0.687777	0.770205	0.955724	0.855375	0.849995	0.779881	0.754769	0.710491	0.662491	0.376491	0.363825	0.349782	0.335825	0.317937
ALBANIA	Albania		0.081	0.11	0.102	0.113	0.137	0.181	0.229	0.411	0.328	0.394	0.552	0.622	0.672	0.568	0.55	0.593	0.696	0.731	0.838	0.885	1.021	1.187	1.539	1.443	1.185	1.253	1.35	1.56	1.771	2.069	1.41	2.002	1.993	2.081	2.134	2.149	2.197	2.03	1.998	2.45	1.486	1.154	0.681	0.632	0.522	0.564	0.544
ALGERIA	Algeria		1.033	1.128	1.062	1.092	1.134	1.258	1.364	1.512	1.424	1.54395	1.67883	1.65282	1.54504	1.47903	1.54013	1.79818	2.29827	2.3012	2.47004	3.07395	4.10998	5.08994	7.72998	10.4469	8.69996	8.73395	10.6799	11.4206	17.0457	12.4306	18.1268	12.6479	10.6913	14.3297	19.3631	19.8169	20.7643	22.894	22.8461	21.7817	20.9434	21.508	21.8018	22.3642	23.5116	25.923	26.4154
ANDORRA	Andorra		0	0	0	0	0	0	0	0	0	NaN	NaN	NaN	NaN	NaN	NaN	NaN	NaN	NaN	NaN	NaN	NaN	NaN	NaN	NaN	NaN	NaN	NaN	NaN	NaN	NaN	NaN	NaN	NaN	NaN	NaN	NaN	NaN	NaN	NaN	NaN	0.111	0.111	0.111	0.112	0.111	0.116	0.124
ANGOLA	Angola		0.051	0.068	0.085	0.075	0.095	0.113	0.137	0.169	0.162	0.16883	0.149823	0.123828	0.321814	0.313789	0.333765	0.323732	0.423708	0.270692	0.45566	0.759578	0.976506	0.929417	1.22831	1.33015	1.32817	1.20328	0.895208	0.962749	1.47375	1.49814	1.45588	1.43744	1.26506	1.39207	1.36077	1.27623	1.26469	1.57916	1.37809	1.34355	1.38884	1.38179	1.40967	1.56888	1.05502	2.98807	2.8452
ANGUILLA	Anguilla		0	0	0	0	0	0	0	0	0	NaN	NaN	NaN	NaN	NaN	NaN	NaN	NaN	NaN	NaN	NaN	NaN	NaN	NaN	NaN	NaN	NaN	NaN	NaN	NaN	NaN	NaN	NaN	NaN	NaN	NaN	NaN	NaN	NaN	NaN	NaN	0.014	0.014	0.015	0.018	0.018	0.018	0.019
ANTIGUA & BARBUDA	Antigua and Barbuda		0	0	0	0	0	0	0	0.006	0.008	0.008	0.01	0.013	0.028	0.023	0.025	0.041	0.095	0.154	0.27	0.343	0.126	0.116	0.102	0.09	0.117	0.193	0.11	0.127	0.134	0.111	0.039	0.029	0.08	0.023	0.04	0.068	0.068	0.075	0.078	0.078	0.06	0.058	0.057	0.059	0.059	0.061	0.065
ARGENTINA	Argentina		8.168	9.544	9.853	9.591	10.032	10.799	12.092	12.996	12.064	13.3594	13.3091	13.9538	14.6398	13.6552	15.1938	16.0494	17.2142	17.8701	18.8344	21.0832	22.5568	24.2487	24.5815	25.6485	26.0591	25.8859	27.2106	27.4853	27.9902	30.1902	29.6553	27.8301	28.2074	28.6962	29.0536	27.4378	28.4255	31.3533	33.1348	31.9381	30.5893	32.0703	33.0869	32.1445	33.3594	34.8703	36.78
ARMENIA	Armenia		0	0	0	0	0	0	0	0	0	1.91203	1.99076	2.05302	2.15475	2.31081	2.45754	2.60699	2.75314	2.87882	2.95969	3.08231	3.24203	3.44154	3.62215	3.77638	3.92151	4.12345	4.28305	4.42962	4.5823	4.62077	4.80344	4.71327	4.80262	4.87218	4.91667	5.30273	5.31831	5.29839	5.44092	5.32098	4.97051	5.16377	1.5993	0.70241	0.740925	0.936757	0.707626
ARUBA	Aruba		0	0	0	0	0	0	0	0	0	0.196335	0.168821	0.176188	0.193489	0.185341	0.180206	0.161678	0.151186	0.186233	0.173174	0.226639	0.253483	0.220612	0.213915	0.237298	0.215087	0.155762	0.332731	0.173788	0.148005	0.15526	0.15978	0.15219	0.170161	0.0874522	0.218379	0.255604	0.049	0.122	0.167	0.177	0.133	0.145	0.147	0.177	0.18	0.193	0.198
AUSTRALIA	Australia		14.941	16.112	16.432	16.223	18.517	19.291	19.934	20.34	21.184	22.8461	24.0499	24.7008	25.8798	27.5476	29.715	32.9838	32.8109	35.2468	36.7077	38.7892	40.251	41.6565	42.9409	46.6232	46.9949	47.9569	47.5095	51.2022	55.0819	55.9142	60.1886	62.8091	63.8342	61.3496	64.5091	65.7718	65.4264	69.8281	71.2005	75.733	75.9893	76.3845	77.7599	78.9397	80.2443	83.3543	85.2515
AUSTRIA	Austria		5.704	6.351	6.025	5.928	6.69	7.936	7.7	7.966	7.668	7.61733	8.40188	8.6856	9.24263	10.0844	10.6158	10.4095	10.701	10.894	11.544	12.183	13.8187	14.211	15.3033	16.3799	15.6372	14.7964	15.8855	15.2823	15.6188	16.7364	14.1992	15.2385	14.6196	14.1019	14.7967	14.8382	14.6642	15.6591	14.4483	14.6555	16.9554	17.9382	16.4312	16.549	16.6491	17.4851	18.4011
AZERBAIJAN	Azerbaijan		0	0	0	0	0	0	0	0	0	5.47732	5.70284	5.88107	6.17236	6.61922	7.03935	7.46744	7.88609	8.24597	8.47749	8.8286	9.2862	9.85534	10.3703	10.8096	11.2227	11.7982	12.2525	12.6696	13.1047	13.2131	13.7333	13.4733	13.7275	13.9236	14.0483	15.1503	15.1907	15.1299	15.5348	15.189	14.1777	13.9644	15.3338	13.2132	11.4492	9.09177	8.52692
BAHAMAS	Bahamas		0.015	0.018	0.021	0.022	0.023	0.035	0.038	0.048	0.049	0.071	0.112	0.149	0.198	0.193	0.296	0.359	0.298	0.464246	0.444246	0.4751	0.701084	1.83508	1.76891	2.14595	2.01412	2.25058	1.76239	2.64975	1.8005	1.88746	2.1758	0.763766	0.616399	0.549774	0.506	0.412	0.385	0.388	0.42	0.531	0.502	0.503	0.505	0.48	0.477	0.475	0.472
BAHRAIN	Bahrain		0.377	0.321	0.351	0.272	0.285	0.383	0.288	0.206	0.352	0.358	0.157	0.483	0.434	0.326	0.436	0.335	0.177	0.274	0.301	0.347	0.707	0.829	1.004	1.506	1.474	1.569	1.793	2.037	2.118	2.218	2.151	2.325	2.683	2.244	2.511	2.78	3.003	3.117	3.31402	3.1978	3.38575	3.23562	2.96775	3.98739	4.02719	4.03578	4.25481
BANGLADESH	Bangladesh		0	0	0	0	0	0	0	0	0	0.502185	0.603686	0.625112	0.686888	0.78964	0.811848	0.851885	0.866898	0.920072	1.05504	1.02329	1.03799	0.984124	0.956856	1.24173	1.26995	1.32552	1.51632	1.57881	1.6333	1.80476	2.07347	2.15233	2.33414	2.23479	2.47739	2.78088	3.11294	3.22045	3.67861	3.65239	3.84332	4.02323	4.1975	4.38376	4.78653	5.74278	5.86574
BARBADOS	Barbados		0.02	0.03	0.024	0.03	0.031	0.035	0.035	0.037	0.041	0.041	0.047	0.053	0.071	0.052	0.049	0.056	0.073	0.092	0.12	0.131	0.117	0.132	0.137	0.131	0.134	0.155	0.145	0.161	0.172	0.164	0.184	0.187	0.176	0.187	0.203991	0.231003	0.250017	0.257033	0.258044	0.270066	0.292077	0.328091	0.266094	0.300039	0.202055	0.220056	0.225092
BELARUS	Belarus		0	0	0	0	0	0	0	0	0	11.9763	12.4696	12.8597	13.497	14.4745	15.3936	16.33	17.2456	18.0328	18.5393	19.3073	20.3076	21.5487	22.6709	23.6275	24.5265	25.78	26.7688	27.6759	28.624	28.858	29.9902	29.4176	29.9703	30.3925	30.6585	33.0602	33.1408	32.9944	33.871	33.1091	28.2996	26.3775	24.1981	20.8461	17.0218	15.6592	15.8883
BELGIUM	Belgium		20.801	24.418	22.784	22.487	23.404	25.119	26.419	26.339	23.936	24.1021	24.8112	25.2998	26.7517	28.8418	28.2626	28.7475	28.6836	29.3016	32.3247	33.7041	34.2496	33.1252	35.6544	37.8383	36.8315	33.2488	35.3925	34.4432	36.9681	38.1516	36.8004	33.7267	31.9604	27.6208	28.6483	28.3858	27.9388	27.9994	27.2227	29.1467	32.8355	33.6741	33.4355	33.1453	34.0657	34.3768	35.343
BELIZE	Belize		0.005	0.007	0.007	0.008	0.008	0.008	0.008	0.008	0.011	0.011	0.012	0.01	0.019	0.017	0.023	0.023	0.022	0.033	0.028	0.037	0.033	0.039	0.043	0.04	0.042	0.048	0.048	0.054	0.059	0.057	0.052	0.05	0.047	0.047	0.047	0.052	0.056	0.062	0.068	0.082	0.085	0.111	0.097	0.103	0.102	0.103	0.084
BENIN	Benin		0	0	0	0	0	0	0	0	0.034	0.028	0.044	0.035	0.037	0.033	0.039	0.041	0.031	0.039	0.042	0.055	0.077	0.08	0.106	0.104	0.111	0.121	0.071	0.081	0.099	0.1	0.138499	0.113986	0.130278	0.119992	0.132533	0.198073	0.181614	0.141154	0.146848	0.16639	0.185776	0.216192	0.236065	0.296584	0.333585	0.347587	0.335999
BERMUDA	Bermuda		0.012	0.016	0.029	0.025	0.023	0.03	0.037	0.038	0.04	0.037	0.043	0.048	0.043	0.041	0.055	0.049	0.055	0.058	0.061	0.054	0.062	0.063	0.069	0.116	0.121	0.125	0.128	0.124	0.116	0.126	0.119	0.106	0.108	0.123	0.121	0.123	0.115	0.156	0.176	0.213	0.137	0.147	0.126	0.147	0.145	0.145	0.144
BHUTAN	Bhutan		0	0	0	0	0	0	0	0	0	NaN	NaN	NaN	NaN	NaN	NaN	NaN	NaN	NaN	NaN	NaN	0.001	0.001	0.001	0.001	0.001	0.001	0.001	0.002	0.003	0.006	0.006	0.007	0.009	0.008	0.014	0.017	0.015	0.028	0.03	0.017	0.035	0.0480673	0.0560529	0.0472236	0.0549848	0.0644491	0.077836
BONAIRE, SAINT EUSTATIUS, AND SABA	Bonaire, Saint Eustatius and Saba		0	0	0	0	0	0	0	0	0	0.149387	0.128452	0.134058	0.147221	0.141022	0.137115	0.123017	0.115034	0.141701	0.131765	0.172445	0.19287	0.167859	0.162763	0.180555	0.163655	0.118516	0.253168	0.132232	0.112614	0.118134	0.121573	0.115798	0.129472	0.0665405	0.16616	0.194483	0.0372831	0.0331455	0.0326508	0.0621534	0.0665608	0.0531138	0.0437593	0.0675503	0.0647619	0.0640873	0.0599497
BOSNIA & HERZEGOVINA	Bosnia and Herzegovina		0	0	0	0	0	0	0	0	0	1.31482	1.43621	1.50539	1.54481	1.71855	1.94703	2.00329	1.9851	2.00512	2.14459	2.22357	2.90569	3.13149	2.93492	3.50582	3.52094	3.67366	3.79142	3.68671	4.11957	4.48057	4.40542	4.79454	4.40413	4.74253	5.0014	5.10171	5.32785	5.2013	5.36693	5.35044	5.2985	3.74865	4.10141	3.43325	0.87456	0.928709	1.15678
BOTSWANA	Botswana		0	0	0	0	0	0	0	0	0	NaN	NaN	NaN	NaN	NaN	NaN	NaN	NaN	NaN	NaN	NaN	NaN	NaN	0.006	0.014	0.024	0.051	0.162	0.213	0.227	0.257	0.269	0.275	0.3	0.281	0.285	0.316	0.291	0.338	0.355	0.39	0.737	0.719	0.758	0.872	0.827	0.831	0.752
BRAZIL	Brazil		5.367	5.913	6.807	6.885	8.102	9.289	9.995	9.822	10.663	10.6488	12.7871	13.4128	14.6374	15.1613	15.4658	15.3738	17.525	18.0348	21.0893	22.962	25.5269	27.9361	31.1174	36.0316	39.0085	41.0791	42.1392	44.2354	48.0162	51.0794	50.6982	46.5251	46.6128	45.1493	45.7439	49.1094	53.8281	56.165	56.6493	57.8913	56.4741	59.287	59.6024	62.318	65.3577	69.7553	76.7453
BRITISH VIRGIN ISLANDS	British Virgin Islands		0	0	0	0	0	0	0	0	0	NaN	NaN	NaN	0.001	0.001	0.002	0.002	0.003	0.001	0.004	0.005	0.005	0.006	0.006	0.007	0.007	0.007	0.007	0.008	0.008	0.008	0.008	0.012	0.01	0.011	0.011	0.013	0.015	0.017	0.018	0.018	0.018	0.02	0.023	0.024	0.027	0.03	0.032
BRUNEI (DARUSSALAM)	Brunei Darussalam		0.113	0.082	0.088	0.094	0.098	0.082	0.081	0.08	0.087	0.089	0.091	0.083	0.101	0.097	0.093	0.091	0.134	0.12	0.117	0.133	2.239	2.05	2.58	2.722	2.232	1.931	1.643	1.744	2.602	2.029	1.877	0.401	0.571	0.738	0.523	0.708	0.627	0.905	1.559	1.731	1.689	1.448	1.422	1.355	1.28	1.306	1.29402
BULGARIA	Bulgaria		2.047	2.229	2.574	2.89	3.11	3.301	3.54	3.928	4.266	5.35542	6.07825	7.08107	8.37992	9.38157	11.6862	12.628	13.2959	15.0403	16.2291	18.0971	16.696	17.5277	18.0346	18.7547	19.415	19.9023	19.914	20.6866	22.1635	21.5415	21.0837	21.8578	24.5208	24.58	23.7568	24.3508	24.8833	24.9108	23.7209	23.6032	20.9331	16.712	15.5596	15.7412	15.3066	15.7523	15.8592
BURKINA FASO	Burkina Faso		0	0	0	0	0	0	0	0	0.001	0.002	0.012	0.025	0.023	0.024	0.03	0.028	0.028	0.028	0.028	0.033	0.039	0.041	0.044	0.046	0.056	0.06	0.057	0.068	0.095	0.111	0.118	0.152	0.157	0.162	0.127	0.13	0.131	0.141	0.151	0.224	0.159	0.171	0.172	0.171	0.176	0.17027	0.192265
BURUNDI	Burundi		0	0	0	0	0	0	0	0	0	0.0106286	0.00994286	0.0130286	0.012	0.013	0.013	0.01	0.013	0.013	0.015	0.02	0.017	0.02	0.02	0.02	0.025	0.021	0.024	0.027	0.028	0.03	0.04	0.043	0.043	0.056	0.06	0.063	0.064	0.068	0.062	0.073	0.057	0.065	0.059	0.062	0.064	0.065	0.066
CAMBODIA	Cambodia		0	0	0	0	0	0.028	0.036	0.044	0.054	0.058	0.064	0.078	0.084	0.106	0.092992	0.109943	0.127935	0.113935	0.133935	0.366935	0.319959	0.0679351	0.0319432	0.0349108	0.0199432	0.0199432	0.0198619	0.0197806	0.013957	0.008	0.078	0.082	0.092	0.1	0.112	0.114	0.118	0.119	0.123	0.123	0.344	0.356	0.368	0.378	0.400396	0.420384	0.43593
CANADA	Canada		42.07	44.402	43.51	43.838	44.482	46.258	51.807	49.9	49.721	50.3497	52.5972	52.9478	56.4931	57.563	64.8411	68.7546	70.7081	76.866	82.7678	83.8207	93.1161	96.1477	103.926	104.057	106.333	108.29	108.883	111.291	113.402	120.537	120.856	117.248	113.108	111.438	116.048	115.086	110.442	117.61	124.347	126.315	126.124	123.497	127.467	127.567	131.669	135.076	139.393
CAPE VERDE	Cape Verde		0.028	0.021	0.01	0.005	0.006	0.006	0.008	0.005	0.004	0.00499189	0.00599189	0.00599189	0.00499189	0.00399189	0.00798378	0.00698378	0.006	0.005	0.00799189	0.00998378	0.00998378	0.00999189	0.0139919	0.0169838	0.018	0.021	0.02	0.022	0.0569165	0.068	0.033	0.009	0.01	0.01	0.023	0.023	0.016	0.022	0.02	0.022	0.026	0.027	0.029	0.03	0.031	0.033	0.039
CENTRAL AFRICAN REPUBLIC	Central African Republic		0	0	0	0	0	0	0	0	0	0.027	0.024	0.024	0.02	0.02	0.02	0.024	0.023	0.025	0.05	0.051	0.057	0.05	0.046	0.044	0.031	0.028	0.035	0.035	0.04	0.028	0.029	0.037	0.039	0.04	0.041	0.044	0.044	0.071	0.063	0.068	0.054	0.056	0.059	0.061	0.064	0.064	0.064
CHAD	Chad		0	0	0	0	0	0	0	0	0	0.017	0.015	0.014	0.023	0.025	0.027	0.029	0.023	0.032	0.034	0.044	0.034	0.041	0.033	0.044	0.041	0.05	0.05	0.054	0.053	0.055	0.057	0.057	0.056	0.056	0.059	0.049	0.051	0.054	0.018	0.028	0.103	0.105	0.111	0.11	0.111	0.115	0.119
CHILE	Chile		2.307	2.725	2.895	2.84	3.025	3.166	3.23	3.201	3.399	3.46708	3.67808	3.94603	4.55987	4.73171	4.77761	4.84369	5.12349	5.25064	5.78664	6.14942	6.72375	7.384	7.67941	7.52894	7.06184	6.26192	6.55716	6.28063	6.23265	6.74738	6.84785	6.64164	5.58602	5.63983	6.00247	5.80773	6.00677	6.11191	7.25432	8.7323	8.9744	8.49798	8.78885	9.35029	10.3002	11.2145	12.999
CHINA (MAINLAND)	China		21.465	27.763	34.995	36.6	44.011	52.099	59.047	69.964	143.39	196.548	212.604	150.371	119.908	118.864	118.915	129.553	142.32	117.965	127.676	157.19	210.198	238.542	253.519	263.55	268.855	311.709	325.045	356.005	397.177	405.871	398.168	393.772	428.621	451.913	491.899	532.689	560.11	597.995	640.765	651.442	660.696	692.694	724.124	773.962	821.573	891.118	930.226
COLOMBIA	Colombia		2.047	2.229	2.357	2.938	2.627	3.261	3.44	3.727	3.816	4.3905	4.47339	4.96624	5.30008	5.79497	5.91783	6.23874	6.40671	6.73767	7.25239	7.64636	7.74292	8.26458	8.57674	9.1787	9.93298	9.77321	10.3656	10.7099	11.3358	12.0816	12.0563	12.0798	12.4671	13.4306	13.2919	13.1221	13.3063	13.6801	14.1969	14.4085	15.5289	15.4624	16.7835	17.2865	18.2289	16.0413	16.313
COMOROS	Comoros		0	0	0	0	0	0	0	0	0	0.003	0.003	0.003	0.003	0.003	0.003	0.004	0.005	0.005	0.005	0.005	0.008	0.008	0.008	0.008	0.008	0.009	0.011	0.011	0.008	0.006	0.013	0.013	0.013	0.013	0.013	0.013	0.012	0.013	0.014	0.014	0.017	0.018	0.018	0.019	0.019	0.02	0.021
CONGO	Congo		0	0	0	0	0	0	0	0	0	0.051	0.061	0.073	0.065	0.064	0.073	0.067	0.084	0.088	0.123	0.137	0.156	0.187	0.181	0.333	0.443	0.3	0.337	0.131	0.088	0.095	0.110679	0.128473	0.366567	0.311804	0.311	0.348041	0.289949	0.360287	0.407462	0.408195	0.274886	0.295516	0.352141	0.317121	0.482826	0.323653	0.365714
COOK ISLANDS	Cook Islands		0	0	0	0	0	0	0	0	0	NaN	NaN	NaN	NaN	NaN	NaN	NaN	NaN	NaN	NaN	0.003	0.003	0.003	0.003	0.003	0.003	0.004	0.004	0.008	0.008	0.007	0.008	0.018	0.014	0.014	0.006	0.006	0.006	0.006	0.006	0.006	0.01	0.01	0.01	0.011	0.011	0.011	0.013
COSTA RICA	Costa Rica		0.078	0.085	0.106	0.118	0.111	0.095	0.132	0.126	0.122	0.105	0.134	0.134	0.15	0.164	0.183968	0.23087	0.27087	0.238878	0.282854	0.312822	0.340797	0.416765	0.480708	0.5577	0.519676	0.555635	0.568192	0.711632	0.794772	0.759002	0.668248	0.61032	0.565126	0.570091	0.540652	0.612024	0.703475	0.743412	0.793101	0.800585	0.794756	0.897179	1.02108	1.06195	1.41931	1.31056	1.27913
COTE D IVOIRE	Côte d'Ivoire		0	0	0	0	0	0	0	0	0.136	0.149	0.126	0.151	0.16	0.17	0.208	0.32	0.338	0.371	0.436	0.516	0.612	0.67	0.74	0.785	0.885	1.088	1.081	1.106	1.314	1.479	1.52	1.055	1.516	1.233	1.401	1.906	1.522	2.006	2.403	2.256	1.305	1.176	1.049	1.39	1.128	1.66907	2.002
CROATIA	Croatia		0	0	0	0	0	0	0	0	0	1.41735	1.54883	1.62402	1.66655	1.85419	2.102	2.16457	2.14557	2.16896	2.32015	2.40603	3.14634	3.38933	3.17311	3.79457	3.8096	3.97341	4.10011	3.98555	4.45525	4.84685	4.76439	5.1787	4.75659	5.12205	5.40196	5.5108	5.75662	5.61914	5.7998	5.78161	6.36715	4.68949	4.50493	4.62876	4.42528	4.61963	4.78037
CUBA	Cuba		1.53	1.766	1.715	1.69	1.624	1.85	1.595	3.785	4.912	4.27531	3.73556	3.32104	3.86314	3.55511	3.89711	3.98312	4.14012	4.295	4.37214	4.70614	5.09118	5.34617	5.67038	6.10635	6.246	7.3787	7.41839	8.00902	8.35673	8.63321	8.54374	8.90484	9.39428	8.378	8.85298	8.84419	9.10895	9.20672	9.66121	9.69242	8.93439	7.88729	5.73699	5.40039	5.80968	6.98313	7.33419
CURACAO	Curaçao		0	0	0	0	0	0	0	0	0	2.83835	2.4406	2.5471	2.79721	2.67941	2.60519	2.33733	2.18565	2.69232	2.50353	3.27645	3.66453	3.18932	3.0925	3.43055	3.10944	2.2518	4.8102	2.5124	2.13966	2.24454	2.30989	2.20017	2.45996	1.26427	3.15704	3.69519	0.708378	0.629765	0.620365	1.18092	1.26466	1.00916	0.831426	1.28346	1.23048	1.21766	1.13904
CYPRUS	Cyprus		0.073	0.077	0.086	0.1	0.121	0.123	0.184	0.223	0.209	0.226911	0.241903	0.235895	0.246895	0.268895	0.272919	0.313895	0.338895	0.371797	0.44274	0.455732	0.464708	0.51406	0.656629	0.683256	0.526388	0.543298	0.678853	0.736607	0.776334	0.831013	0.889713	0.844698	0.861474	0.859884	0.882599	0.858188	0.983964	1.14194	1.14537	1.20866	1.27099	1.40464	1.50734	1.57396	1.64059	1.60542	1.70121
CZECH REPUBLIC	Czech Republic		0	0	0	0	0	0	0	0	0	25.355	27.0419	29.3504	31.2776	32.9024	34.2422	33.365	33.1766	33.1073	34.6384	36.7726	42.1604	44.2222	44.6243	44.8011	45.3136	47.4074	49.2487	50.7182	51.1718	49.8297	50.4068	49.8516	49.3613	49.4229	51.088	50.3879	50.7306	50.125	49.2935	47.0285	44.8156	40.637	39.4703	37.8377	36.1289	35.9193	36.8348
DEMOCRATIC PEOPLE S REPUBLIC OF KOREA	North Korea		0.213	0.272	0.243	0.474	1.307	2.005	2.447	3.082	4.268	5.42187	6.49248	7.2125	8.37538	8.95921	9.72112	12.0694	12.9912	14.2991	16.176	17.4889	20.0536	29.3267	24.4282	26.5626	27.7324	29.3733	30.0303	31.0222	29.5341	30.0936	31.136	31.2213	31.9029	34.1602	36.7526	39.379	42.8044	47.9309	54.8057	58.1527	33.4061	31.9942	28.1011	25.8921	23.668	22.1779	19.5518
DEMOCRATIC REPUBLIC OF THE CONGO (FORMERLY ZAIRE)	Democratic Republic of the Congo		0.404	0.477	0.569	0.625	0.769	0.925	0.867	0.909	0.799	0.736619	0.632781	0.642846	0.592781	0.625732	0.538748	0.673725	0.655708	0.624676	0.918676	0.995643	0.739538	0.807497	0.823473	0.870408	0.918311	0.882311	0.929281	0.948955	0.962329	1.02077	0.951152	1.02495	0.831595	1.09116	1.07305	0.985783	0.913118	1.04145	1.0857	1.18777	1.1599	0.854967	0.766711	0.726401	0.463833	0.574162	0.630938
DENMARK	Denmark		6.002	5.984	6.251	6.32	6.982	7.388	7.199	6.797	7.313	7.10547	8.11941	8.65226	10.0682	11.0993	11.7759	12.0888	13.6677	13.3806	14.5395	16.1961	16.9321	15.5594	16.2647	16.1632	15.0222	15.2141	16.4035	16.8715	16.6746	17.1882	16.4705	14.1301	14.6517	13.6919	13.8799	16.3932	16.077	15.924	15.0413	13.3209	14.6159	17.5135	15.9283	16.5414	17.65	16.8072	20.423
DJIBOUTI	Djibouti		0.003	0.007	0.007	0.008	0.009	0.01	0.008	0.012	0.013	0.01	0.011	0.012	0.013	0.018	0.023	0.033	0.038	0.024	0.033	0.023	0.038	0.044	0.052	0.049	0.053	0.054	0.054	0.054	0.055	0.099	0.095	0.082	0.095	0.095	0.096	0.098	0.103	0.106	0.095	0.106	0.088	0.092	0.092	0.092	0.09	0.09	0.091
DOMINICA	Dominica		0	0.001	0.002	0.001	0.001	0.001	0.001	0.001	0.002	0.003	0.003	0.003	0.003	0.004	0.004	0.004	0.004	0.006	0.006	0.005	0.007	0.007	0.007	0.007	0.008	0.008	0.008	0.007	0.007	0.009	0.01	0.01	0.011	0.011	0.012	0.013	0.013	0.013	0.015	0.016	0.016	0.016	0.016	0.017	0.018	0.022	0.02
DOMINICAN REPUBLIC	Dominican Republic		0.095	0.098	0.162	0.169	0.171	0.25	0.269	0.282	0.291	0.303789	0.283813	0.280741	0.338732	0.340749	0.476667	0.421765	0.455692	0.427659	0.640643	0.723571	0.847457	0.960343	1.27425	1.62636	1.74933	1.72835	1.72553	1.52809	1.48208	1.85196	1.7541	1.67447	1.72038	2.14672	2.01705	1.9764	2.21645	2.64391	2.65823	2.79965	2.49773	2.71633	2.9537	3.18427	3.37795	4.30441	4.69368
ECUADOR	Ecuador		0.202	0.192	0.244	0.224	0.263	0.327	0.354	0.309	0.361	0.35283	0.480781	0.448757	0.426765	0.489716	0.584684	0.620643	0.659586	0.70657	0.849521	0.979497	1.16764	1.15159	1.25246	1.43446	1.66036	2.00734	2.21086	2.03936	2.84018	3.31345	3.65916	4.54498	5.24976	5.32276	5.78316	5.28184	4.14685	4.09996	4.68575	5.50047	4.49175	4.40988	5.99335	6.57407	3.69501	6.19484	6.55717
EGYPT	Egypt		2.794	2.883	2.974	2.943	3.185	2.906	2.715	3.254	3.736	3.46803	4.37575	4.65773	5.06853	5.87523	6.95722	7.53533	7.24131	5.36297	6.24253	5.36702	5.90994	6.28068	6.95278	6.48501	7.1204	8.47705	9.40242	10.3207	10.7153	11.7057	12.3297	13.8927	15.4015	15.5514	17.3865	17.4146	20.3037	20.364	20.281	19.6246	20.5292	21.0957	21.8175	25.1849	23.0776	25.8975	25.537
EL SALVADOR	El Salvador		0.073	0.088	0.106	0.114	0.128	0.126	0.144	0.163	0.163	0.164911	0.168903	0.158919	0.176927	0.306911	0.335903	0.283911	0.355846	0.315846	0.34383	0.324846	0.389822	0.411797	0.457757	0.536732	0.537676	0.574635	0.602274	0.622731	0.649938	0.648669	0.578448	0.496379	0.478193	0.514565	0.433488	0.536391	0.53698	0.658977	0.664047	0.695209	0.675354	0.860584	0.905245	1.08495	1.23196	1.36414	1.20488
EQUATORIAL GUINEA	Equatorial Guinea		0.003	0.003	0.003	0.003	0.008	0.01	0.01	0.009	0.013	0.013	0.006	0.006	0.006	0.007	0.007	0.008	0.007	0.007	0.008	0.012	0.01	0.018	0.024	0.008	0.014	0.017	0.017	0.017	0.019	0.017	0.016	0.019	0.02	0.017	0.022	0.018	0.022	0.027	0.029	0.032	0.017	0.018	0.018	0.019	0.021	0.023	0.035
ERITREA	Eritrea		0	0	0	0	0	0	0	0	0	NaN	NaN	NaN	NaN	NaN	NaN	NaN	NaN	NaN	NaN	NaN	NaN	NaN	NaN	NaN	NaN	NaN	NaN	NaN	NaN	NaN	NaN	NaN	NaN	NaN	NaN	NaN	NaN	NaN	NaN	NaN	NaN	NaN	NaN	NaN	0.192913	0.215723	0.234898
ESTONIA	Estonia		0	0	0	0	0	0	0	0	0	3.45263	3.59307	3.70271	3.88216	4.16127	4.4238	4.6911	4.95205	5.17399	5.31542	5.53309	5.81898	6.17448	6.49579	6.76837	7.0237	7.383	7.66938	7.93074	8.20073	8.27103	8.60099	8.42946	8.59234	8.71426	8.79368	9.49745	9.52587	9.49781	9.7552	9.53536	10.0729	9.25267	6.65133	5.16112	5.38593	4.92599	5.11996
ETHIOPIA	Ethiopia		0.024	0.017	0.027	0.05	0.074	0.062	0.066	0.088	0.087	0.0919757	0.0959676	0.0929676	0.107951	0.11496	0.110951	0.175895	0.224886	0.292838	0.470805	0.454813	0.450797	0.504765	0.383789	0.477862	0.47387	0.329838	0.320614	0.285695	0.373499	0.503312	0.496038	0.507644	0.402269	0.500752	0.450404	0.490914	0.599139	0.697156	0.720542	0.762586	0.814895	0.80708	0.801674	0.817363	0.599585	0.683857	0.762733
FAEROE ISLANDS	Faeroe Islands		0.011	0.011	0.015	0.023	0.021	0.027	0.031	0.026	0.032	0.027	0.016	0.031	0.032	0.034	0.033	0.037	0.038	0.046	0.05	0.058	0.07	0.071	0.064	0.069	0.082	0.095	0.09	0.111	0.109	0.131	0.115	0.12	0.125	0.133	0.136	0.141	0.134	0.136	0.144	0.158	0.192	0.179	0.177	0.159	0.157	0.156	0.164
FEDERATED STATES OF MICRONESIA	Micronesia (Federated States of)		0	0	0	0	0	0	0	0	0	NaN	NaN	NaN	NaN	NaN	NaN	NaN	NaN	NaN	NaN	NaN	NaN	NaN	NaN	NaN	NaN	NaN	NaN	NaN	NaN	NaN	NaN	NaN	NaN	NaN	NaN	NaN	NaN	NaN	NaN	NaN	NaN	NaN	0.028	0.028	0.029	0.031	0.031
FIJI	Fiji		0.033	0.036	0.043	0.046	0.043	0.047	0.053	0.045	0.048	0.054	0.053	0.046	0.063	0.066	0.115968	0.0939594	0.0879508	0.0969508	0.107943	0.117944	0.141935	0.14991	0.157903	0.171903	0.182911	0.169918	0.131822	0.208687	0.193527	0.22829	0.216272	0.293988	0.227927	0.193484	0.157535	0.156384	0.163233	0.12882	0.150045	0.170634	0.219989	0.180984	0.201964	0.202959	0.201582	0.205757	0.221934
FINLAND	Finland		1.787	2.178	2.363	2.066	2.499	2.983	3.322	3.342	2.896	3.69971	4.11761	4.07252	4.5825	5.27743	6.23026	6.90505	8.04826	7.80233	9.08337	10.343	11.0139	11.0635	12.0377	13.4608	12.7207	12.5616	13.9734	13.6837	14.1444	14.8027	15.8678	14.0293	11.7295	11.3165	11.5031	13.5233	14.5236	15.7024	14.2081	14.3145	15.5491	15.0738	14.8159	15.3801	16.8439	15.8694	17.4843
FRANCE (INCLUDING MONACO)	France		55.215	62.435	61.96	58.566	61.788	65.236	73.293	75.75	72.655	71.5856	74.0614	76.794	81.5684	91.219	94.3062	96.1003	94.8703	101.658	105.104	112.926	119.985	126.4	131.438	141.251	136.454	122.202	138.268	131.525	138.303	144.727	138.123	124.315	119.511	115.673	111.129	109.804	105.697	103.585	102.205	107.189	109.382	116.346	113.402	107.746	106.57	108.381	112.68
FRENCH GUIANA	French Guiana		0.002	0.003	0.003	0.003	0.004	0.004	0.004	0.004	0.005	0	0	0	0	0	0	0	0	0	0	0	0	0	0	0	0	0	0	0	0	0	0	0	0	0	0	0	0	0	0	0	0	0	0	0	0.00452391	0.00723247	0.00632334
FRENCH POLYNESIA	French Polynesia		0	0	0	0	0	0.012	0.012	0.014	0.014	0.008	0.01	0.016	0.013	0.018	0.018	0.023	0.033	0.038	0.042	0.044	0.053	0.062	0.059	0.057	0.059	0.058	0.072	0.075	0.085	0.077	0.08	0.09	0.092	0.115	0.126	0.161	0.166	0.167	0.157	0.148	0.12	0.119	0.114	0.117	0.121	0.118	0.119
GABON	Gabon		0	0	0	0	0	0	0	0	0	0.006	0.036	0.045	0.024	0.02	0.052	0.059	0.104	0.276	0.535	0.391	0.568	0.776	0.747	1.449	1.487	1.464	1.55671	1.72121	2.06192	1.84136	1.80804	1.79149	1.78592	1.50344	1.63195	1.71903	1.35119	1.09429	1.17923	1.57136	1.22418	1.23416	1.34214	1.35776	1.19392	1.25717	1.29741
GAMBIA	Gambia		0.004	0.004	0.003	0.003	0.004	0.004	0.005	0.006	0.007	0.005	0.005	0.006	0.007	0.008	0.008	0.008	0.009	0.009	0.01	0.013	0.013	0.015	0.018	0.017	0.017	0.027	0.027	0.031	0.038	0.04	0.043	0.043	0.044	0.044	0.047	0.047	0.044	0.049	0.05	0.049	0.054	0.054	0.054	0.057	0.057	0.059	0.06
GEORGIA	Georgia		0	0	0	0	0	0	0	0	0	2.91519	3.03527	3.13025	3.2854	3.52335	3.74707	3.975	4.19788	4.38951	4.51281	4.69976	4.94328	5.24664	5.52112	5.75536	5.97567	6.28247	6.52381	6.74523	6.97627	7.03342	7.30973	7.17069	7.30549	7.40919	7.47484	8.06065	8.08134	8.04781	8.26241	8.0776	7.54067	5.85999	4.16947	2.70641	1.6564	0.625385	1.10675
GERMANY	Germany		139.392	157.457	166.769	170.187	180.079	197.485	209.138	212.336	206.461	206.276	222.148	227.849	241.039	258.051	264.443	262.037	259.668	255.521	268.775	287.118	280.028	283.088	284.247	296.325	290.045	273.593	297.717	287.283	294.522	305.099	300.235	286.167	277.218	276.091	281.997	284.965	285.88	281.778	280.845	275.322	287.213	276.801	263.616	260.981	256.449	256.326	261.77
GHANA	Ghana		0.174	0.239	0.237	0.278	0.274	0.324	0.294	0.353	0.372	0.361	0.399	0.367	0.391	0.47	0.45	0.465	0.393	0.408	0.480749	0.460555	0.715513	0.625416	0.660546	0.674521	0.800424	0.748262	0.662281	0.816464	0.807159	0.723042	0.695431	0.826927	0.826538	0.993184	0.700617	0.901112	0.827059	0.890725	0.931004	0.899296	1.03479	1.14889	0.999162	1.17649	1.38884	1.40671	1.49253
GREECE	Greece		1.127	1.249	1.31	1.334	1.388	1.626	1.717	1.861	2.034	2.21641	2.56319	2.67697	2.76988	3.34047	3.60306	4.63946	5.08204	5.3232	6.0825	6.94166	6.58466	7.57355	8.59096	10.134	9.84216	10.5539	11.6417	12.7339	13.0125	13.8696	13.8887	13.6804	14.0579	14.9533	15.3614	16.3131	15.9044	17.0785	18.3	19.9863	22.769	22.7623	23.194	23.0067	23.5923	23.7388	24.3264
GREENLAND	Greenland		0.027	0.027	0.029	0.033	0.028	0.057	0.039	0.044	0.062	0.064	0.061	0.08	0.072	0.09	0.086	0.094	0.106	0.114	0.148	0.111	0.104	0.128	0.151	0.152	0.152	0.138	0.06	0.197	0.107	0.156	0.154	0.144	0.141	0.099	0.155	0.139	0.089	0.064	0.149	0.129	0.095	0.095	0.089	0.088	0.081	0.088	0.099
GRENADA	Grenada		0.002	0.003	0.003	0.003	0.003	0.003	0.003	0.003	0.004	0.004	0.006	0.005	0.007	0.004	0.006	0.006	0.008	0.01	0.011	0.013	0.012	0.013	0.013	0.015	0.01	0.013	0.013	0.013	0.014	0.013	0.013	0.016	0.017	0.017	0.017	0.017	0.018	0.02	0.026	0.028	0.029	0.03	0.032	0.033	0.039	0.041	0.042
GUATEMALA	Guatemala		0.169	0.174	0.176	0.186	0.203	0.25	0.267	0.269	0.308	0.33787	0.366878	0.383862	0.37687	0.41483	0.482797	0.53874	0.474781	0.540757	0.583805	0.621757	0.626757	0.665749	0.738708	0.800659	0.836659	0.96057	0.901994	1.03833	1.12367	1.27675	1.22615	1.07791	0.984387	0.86242	0.928237	0.95438	1.00016	1.06943	1.11225	1.14306	1.35649	1.35154	1.61515	1.52215	1.84246	1.93212	1.79322
GUINEA	Guinea		0	0	0	0	0	0	0	0	0.045	0.043	0.112	0.168	0.18	0.19	0.191	0.19	0.196	0.198	0.204	0.204	0.216	0.222	0.227	0.219	0.229	0.23	0.242	0.246	0.246	0.258	0.263	0.27	0.268	0.26	0.267	0.271	0.272	0.271	0.28	0.285	0.274	0.28	0.289	0.297	0.307	0.318	0.337
GUINEA BISSAU	Guinea-Bissau		0.002	0.001	0.003	0.002	0.002	0.003	0.003	0.003	0.003	0.004	0.005	0.008	0.011	0.013	0.016	0.018	0.018	0.013	0.017	0.016	0.019	0.02	0.018	0.03	0.028	0.031	0.026	0.028	0.028	0.03	0.04	0.039	0.039	0.039	0.044	0.047	0.05	0.053	0.059	0.063	0.047	0.048	0.049	0.05	0.05	0.05	0.05
GUYANA	Guyana		0.071	0.078	0.092	0.123	0.129	0.141	0.15	0.146	0.125	0.151	0.18	0.201	0.185	0.168	0.177	0.294	0.322	0.361	0.363	0.373	0.431	0.409	0.426	0.492	0.424	0.498	0.478	0.518	0.561	0.415	0.488	0.491	0.383	0.34	0.383	0.387	0.285	0.357	0.383	0.323	0.308	0.302	0.284	0.285	0.398	0.429	0.452
HAITI	Haiti		0.031	0.036	0.04	0.043	0.059	0.073	0.072	0.069	0.075	0.0689594	0.0779432	0.0809513	0.0829351	0.0679432	0.0819351	0.0829513	0.0829594	0.0709594	0.0719513	0.0859432	0.104935	0.109919	0.106911	0.114878	0.128846	0.13183	0.183456	0.192179	0.204869	0.204667	0.203349	0.207131	0.223063	0.24182	0.246493	0.25369	0.226589	0.245304	0.275019	0.279236	0.271386	0.266412	0.242327	0.18708	0.05	0.239	0.278
HONDURAS	Honduras		0.082	0.095	0.098	0.091	0.103	0.119	0.124	0.157	0.16	0.159992	0.167959	0.200951	0.190935	0.193935	0.196919	0.204895	0.219886	0.238878	0.333854	0.320854	0.37883	0.362822	0.418789	0.41174	0.424765	0.454676	0.484423	0.545154	0.557769	0.525709	0.557948	0.494547	0.478462	0.541038	0.5359	0.515679	0.499084	0.586369	0.674101	0.732958	0.661204	0.667314	0.735028	0.77356	0.866472	1.03234	1.04788
HONG KONG SPECIAL ADMINSTRATIVE REGION OF CHINA	Hong Kong		0.36	0.425	0.419	0.472	0.491	0.513	0.579	0.645	0.648	0.737846	0.805838	0.919797	1.00476	1.15876	1.15176	1.31073	1.40872	1.65176	1.69159	2.11559	2.29053	2.49743	2.53155	2.53451	2.91137	3.00437	3.40895	3.87661	4.28878	4.3225	4.53063	5.08097	5.35556	5.70745	6.06572	6.24493	6.96668	7.6653	7.99257	8.2263	7.40914	7.76821	8.98393	9.49188	8.48227	8.53341	7.89017
HUNGARY	Hungary		5.02	6.056	7.427	8.671	9.283	9.746	9.052	10.494	10.712	11.4364	12.3713	13.3542	13.7861	15.346	17.0145	16.7124	16.8321	16.0401	16.6739	17.0192	19.0869	18.889	18.9286	19.9186	20.1993	20.5481	21.806	22.6733	24.0301	23.4939	23.6651	23.5976	23.6664	24.2835	24.7506	23.4571	22.7186	22.963	21.3032	20.7198	20.0505	19.046	17.0349	17.367	16.9142	16.837	17.2646
ICELAND	Iceland		0.202	0.176	0.212	0.25	0.213	0.249	0.259	0.263	0.298	0.337911	0.330919	0.297919	0.326895	0.355894	0.356878	0.380878	0.40787	0.39387	0.434887	0.344895	0.378903	0.401779	0.40465	0.477547	0.474351	0.440195	0.464154	0.519088	0.524033	0.54099	0.507893	0.476796	0.4347	0.420688	0.493594	0.442502	0.485514	0.50311	0.502008	0.517141	0.613483	0.580898	0.620706	0.6638	0.647734	0.675955	0.69106
INDIA	India		18.178	19.029	20.058	20.436	21.49	23.319	24.142	27.084	28.309	27.7282	30.4284	32.9099	36.2377	38.9331	38.124	42.0087	43.5569	43.6077	47.5713	48.4837	49.6599	52.4567	55.4824	57.1378	58.9863	64.0041	66.8847	70.768	71.9095	75.4975	79.7163	86.0698	88.9135	96.2429	98.7971	108.643	116.49	124.424	134.358	147.731	157.937	168.15	179.099	185.074	195.721	208.06	225.476
INDONESIA	Indonesia		2.683	2.563	3.472	3.57	4.025	5.689	5.953	6.117	6.061	6.51262	5.83657	7.09651	6.27044	6.21264	6.10651	6.73259	6.37963	6.69761	7.52255	9.10541	9.76839	10.6319	11.8194	13.4001	13.981	14.7196	16.8636	22.4936	25.6382	25.9654	25.8933	27.3737	28.8166	28.7074	30.6934	33.1872	33.3424	33.8098	36.2232	35.9373	41.0169	49.2964	55.5615	59.9788	60.8227	61.83	69.6149
IRAQ	Iraq		0.45	0.663	0.535	0.69	0.832	1.119	1.746	1.63	1.82	1.99627	2.25332	2.37697	2.46202	2.56096	2.47379	5.26558	7.55352	5.01446	5.37546	6.16848	6.5185	7.86896	8.0569	8.355	8.436	9.03937	13.3012	11.9076	11.5156	14.4168	12.3794	8.70674	8.28997	10.4981	10.8545	12.0623	12.8902	14.2423	18.3208	19.7167	13.3889	12.3322	16.0724	17.2297	19.4021	20.2195	18.9095
IRELAND	Ireland		2.655	2.868	2.626	2.603	2.482	3.198	2.982	2.653	2.445	3.36031	3.04818	3.37134	3.57716	3.67012	3.87993	3.74384	4.11978	4.47457	4.85851	5.0476	5.29305	6.13431	6.01428	6.23531	6.35727	6.01731	6.08434	6.4324	6.43534	7.47872	7.16999	7.11264	6.9775	7.02182	6.97291	7.30049	7.79188	8.24929	8.1557	8.20413	8.99136	9.1905	9.14163	9.20201	9.50823	9.78512	10.2263
ISLAMIC REPUBLIC OF IRAN	Iran		-1.473	1.887	1.117	1.045	0.285	4.316	6.225	5.95	6.886	6.97836	10.1961	9.96418	10.2152	11.2732	12.9692	14.6611	17.4955	18.5265	22.4699	22.6634	25.0512	27.7369	28.9343	35.3371	39.24	37.9951	42.7017	44.6867	44.2423	44.6706	32.9052	30.7119	37.5314	40.7242	40.9232	43.6537	40.2664	43.288	47.7914	51.8826	57.1065	61.6687	61.9424	64.2949	71.9215	74.0031	74.7838
ISRAEL	Israel		0.456	0.797	0.999	1.103	1.181	1.315	1.309	1.412	1.512	1.52914	1.76311	1.92707	2.16495	2.23787	2.49379	3.52861	3.70671	3.69212	3.76478	4.03956	4.51947	4.42657	4.60995	5.25686	5.28628	5.33308	5.32115	5.39461	5.74006	5.6944	5.72722	5.73621	6.51057	6.47076	6.4133	6.71748	7.19107	7.38775	8.10654	8.56824	9.77704	9.86589	11.4855	12.0727	12.957	13.6095	14.1746
ITALY (INCLUDING SAN MARINO)	Italy		11.313	13.331	13.823	15.291	17.733	20.008	22.795	23.779	23.922	25.6781	29.8043	33.9451	39.9168	44.9116	47.9588	51.7272	58.4013	63.9	68.0055	73.5974	80.8855	84.8933	89.5845	96.4381	97.7765	93.0821	99.8351	96.7298	101.33	105.146	105.468	102.429	100.131	97.8192	99.5092	100.705	99.1234	103.739	105.339	110.465	119.544	119.416	119.495	117.407	115.879	122.362	120.709
JAMAICA	Jamaica		0.074	0.142	0.154	0.168	0.216	0.269	0.344	0.438	0.37	0.501781	0.400765	0.580765	0.577781	0.653781	1.10869	0.81566	0.959611	1.05463	1.05855	1.16455	1.36151	1.56857	1.71462	2.26267	2.07271	2.23275	1.9858	2.03085	2.4869	2.32794	2.30498	2.02199	1.69601	1.75904	1.40306	1.37608	1.2411	1.46816	1.23522	1.8353	2.05434	2.11534	2.10447	2.18348	2.23552	2.50366	2.644
JAPAN	Japan		27.991	33.702	35.599	39.794	38.913	38.733	43.856	51.345	49.46	52.571	63.4551	77.1798	79.9302	88.656	97.9506	105.478	114.423	133.545	153.36	178.279	209.597	217.397	232.579	249.527	249.538	237.039	247.583	254.705	246.068	260.118	257.879	252.958	244.926	240.423	255.751	249.018	248.98	246.324	268.959	278.844	316.155	319.341	321.981	320.046	335.035	338.408	341.667
JORDAN	Jordan		0.047	0.044	0.053	0.058	0.069	0.104	0.123	0.135	0.143	0.178878	0.202822	0.266757	0.28574	0.332684	0.338659	0.387667	0.431586	0.385643	0.410473	0.479473	0.424586	0.451538	0.52227	0.600319	0.607343	0.679367	0.803656	0.860789	0.989996	1.03081	1.28161	1.58984	1.70734	1.99234	2.25078	2.29845	2.50138	2.59444	2.50464	2.4781	2.85968	2.70277	3.27049	3.21345	3.61613	3.60473	3.77359
KAZAKHSTAN	Kazakhstan		0	0	0	0	0	0	0	0	0	24.0829	25.0748	25.8595	27.1415	29.1077	30.9563	32.8394	34.6809	36.2645	37.2839	38.8289	40.8405	43.3221	45.5624	47.4665	49.2513	51.7454	53.7101	55.5072	57.3857	57.8374	60.0907	58.8949	59.9883	60.7963	61.296	66.1159	66.2487	65.9264	67.6531	66.0778	76.7505	74.1651	67.3421	59.8772	50.7192	48.6374	44.6353
KENYA	Kenya		0.248	0.38	0.434	0.413	0.464	0.542	0.606	0.623	0.57	0.602651	0.661611	0.654636	0.715618	0.778619	0.770538	0.672466	0.731464	0.736473	0.768401	0.853294	0.840124	1.00412	1.05512	1.06812	1.34906	1.35601	1.25441	1.37424	1.44562	1.36786	1.67891	1.76666	1.26468	1.254	1.16078	1.01418	1.11162	1.38535	1.28001	1.38878	1.55188	1.28558	1.47437	1.69628	1.7523	2.02115	2.49863
KIRIBATI	Kiribati		0	0	0	0	0	0	0	0	0	NaN	NaN	0.002	0.003	0.005	0.005	0.003	0.003	0.006	0.009	0.003	0.006	0.008	0.007	0.01	0.009	0.009	0.009	0.006	0.006	0.007	0.008	0.008	0.007	0.006	0.006	0.006	0.005	0.006	0.006	0.006	0.006	0.006	0.007	0.008	0.008	0.008	0.008
KUWAIT	Kosovo		0.105	0.032	-0.119	-0.014	0.383	0.504	0.284	0.6	1.007	NaN	NaN	NaN	NaN	NaN	NaN	NaN	NaN	NaN	NaN	NaN	NaN	NaN	NaN	NaN	NaN	NaN	NaN	NaN	NaN	NaN	NaN	NaN	NaN	NaN	NaN	NaN	NaN	NaN	NaN	NaN	NaN	NaN	NaN	NaN	NaN	NaN	NaN
KUWAITI OIL FIRES	Kuwait		0	0	0	0	0	0	0	0	0	1.037	2.128	2.722	3.897	4.643	6.909	9.659	9.586	6.938	6.12	7.317	6.829	7.401	7.536	6.611	5.27075	4.58868	5.03717	4.69471	5.72368	4.81105	6.71839	6.86125	5.75608	5.87915	7.71977	7.934	9.61525	8.56383	8.95882	9.763	10.3182	4.07081	8.0914	13.4087	15.0725	14.8987	13.6227
KYRGYZSTAN	Kyrgyzstan		0	0	0	0	0	0	0	0	0	2.2191	2.31062	2.38304	2.5013	2.68251	2.8529	3.02654	3.19635	3.34236	3.43635	3.57875	3.76415	3.99516	4.2042	4.38266	4.55055	4.78426	4.96813	5.13687	5.31288	5.35643	5.56686	5.46124	5.5638	5.64292	5.69301	6.13898	6.15498	6.12968	6.29314	6.15252	5.76073	5.04763	3.02459	2.3203	1.67736	1.23118	1.54591
LAO PEOPLE S DEMOCRATIC REPUBLIC	Laos		0	0	0	0	0	0.007	0.016	0.016	0.02	0.021	0.022	0.031	0.036	0.04	0.047	0.049	0.064	0.087	0.046	0.087	0.156	0.115	0.133	0.141	0.08	0.069	0.061	0.063	0.063	0.061	0.051	0.041	0.043	0.049	0.05	0.056	0.057	0.058	0.058	0.063	0.14	0.149	0.161815	0.165816	0.172814	0.182813	0.20494
LATVIA	Latvia		0	0	0	0	0	0	0	0	0	1.7653	1.83793	1.89539	1.98931	2.13343	2.26891	2.40687	2.54178	2.65783	2.73253	2.84578	2.99323	3.17787	3.34508	3.48796	3.62247	3.80951	3.95745	4.09338	4.23489	4.27084	4.4401	4.35742	4.44036	4.50534	4.54713	4.90436	4.91949	4.9022	5.0347	4.92462	5.32318	4.85347	3.84275	3.22561	2.81025	2.48098	2.5028
LEBANON	Lebanon		0.413	0.398	0.321	0.341	0.357	0.443	0.515	0.564	0.541	0.668181	0.703058	0.731035	0.778051	0.825011	0.890027	0.903929	0.988792	0.972881	1.008	1.18562	1.07553	1.44668	1.54295	1.9287	1.93446	1.70991	1.61682	1.46985	1.49997	1.57894	1.60747	1.59506	1.56099	1.89471	1.83221	2.11926	2.04107	2.09345	2.00482	2.1072	2.14734	2.21476	2.65474	2.82614	3.03243	3.34459	3.48053
LESOTHO	Lesotho		0	0	0	0	0	0	0	0	0	NaN	NaN	NaN	NaN	NaN	NaN	NaN	NaN	NaN	NaN	NaN	NaN	NaN	NaN	NaN	NaN	NaN	NaN	NaN	NaN	NaN	NaN	NaN	NaN	NaN	NaN	NaN	NaN	NaN	NaN	NaN	0.402	0.417	0.433	0.446	0.457	0.466	0.474
LIBERIA	Liberia		0.013	0.012	0.015	0.016	0.028	0.016	0.013	0.023	0.044	0.039	0.045	0.044	0.069	0.097	0.132	0.152	0.167	0.167	0.240943	0.346919	0.395903	0.415903	0.410903	0.403903	0.469903	0.404903	0.40273	0.401573	0.410249	0.529994	0.556102	0.528096	0.163048	0.192827	0.189801	0.195438	0.197292	0.207004	0.220847	0.18002	0.127767	0.101	0.105821	0.11582	0.115	0.115818	0.118633
LIBYAN ARAB JAMAHIRIYAH	Libya		0.039	0.046	0.045	0.068	0.082	0.117	0.09	0.085	0.096	0.118	0.189	0.326	0.286	0.399	0.181	0.277	0.717	5.047	8.219	9.69493	8.81689	5.90292	4.15394	3.97791	2.54846	3.15732	4.88206	5.47262	5.77385	7.07598	7.3091	7.82423	8.342	8.22762	7.71731	8.46129	9.25095	8.82867	9.86909	10.117	9.96534	11.6319	10.1051	10.5647	11.9413	12.4703	11.9533
LIECHTENSTEIN	Liechtenstein		0	0	0	0	0	0	0	0	0	NaN	NaN	NaN	NaN	NaN	NaN	NaN	NaN	NaN	NaN	NaN	NaN	NaN	NaN	NaN	NaN	NaN	NaN	NaN	NaN	NaN	NaN	NaN	NaN	NaN	NaN	NaN	NaN	NaN	NaN	NaN	0.0543035	0.0563118	0.0564815	0.0586879	0.0548879	0.0557314	0.0562115
LITHUANIA	Lithuania		0	0	0	0	0	0	0	0	0	3.29759	3.43383	3.54148	3.71718	3.98623	4.23924	4.49735	4.74976	4.96649	5.10586	5.31713	5.59267	5.94281	6.26082	6.53387	6.79169	7.14878	7.432	7.69297	7.96192	8.03367	8.3576	8.20865	8.36755	8.49825	8.58488	9.26215	9.3025	9.28488	9.54162	9.34336	9.76305	10.3307	5.78618	4.4618	4.30902	4.11694	4.30066
LUXEMBOURG	Luxembourg		2.025	2.459	2.566	2.362	2.397	2.698	2.83	2.958	2.753	2.84379	3.14076	3.16075	3.14975	3.12177	3.35577	3.32776	3.16876	3.0978	3.34579	3.59777	3.74873	3.60118	3.68309	3.8696	3.93775	3.23921	3.2387	2.9911	3.24437	3.32144	3.0246	2.5917	2.43863	2.28607	2.4609	2.52416	2.49117	2.41132	2.4909	2.69537	3.23352	3.40223	3.33847	3.37686	3.15609	2.50281	2.51635
MACAU SPECIAL ADMINSTRATIVE REGION OF CHINA	Macao		0	0	0	0	0.006	0.006	0.007	0.008	0.008	0.01	0.014	0.019	0.026	0.029	0.035	0.036	0.041	0.045	0.046	0.046	0.056	0.062	0.063	0.061	0.073	0.081	0.069	0.084	0.113	0.113	0.144	0.146	0.132	0.186	0.165	0.2	0.239	0.265	0.263	0.281	0.282	0.298	0.295	0.322	0.347	0.336	0.384
MACEDONIA	North Macedonia		0	0	0	0	0	0	0	0	0	0.960859	1.04957	1.10014	1.12894	1.2559	1.42288	1.46399	1.45069	1.46531	1.56721	1.62492	2.12343	2.28854	2.14498	2.56236	2.57358	2.68537	2.77166	2.69537	3.01207	3.27622	3.22159	3.50608	3.22104	3.46848	3.65777	3.7312	3.89675	3.80441	3.92566	3.91368	3.87158	2.73902	2.998	2.763	2.797	2.903	3.189
MADAGASCAR	Madagascar		0.083	0.067	0.084	0.069	0.079	0.083	0.087	0.086	0.102	0.102	0.109	0.097	0.107984	0.125951	0.131951	0.151959	0.157943	0.229935	0.248927	0.231919	0.264919	0.279919	0.350927	0.292919	0.323935	0.461935	0.270806	0.230786	0.277624	0.308471	0.440486	0.279623	0.276566	0.177508	0.236455	0.287399	0.310343	0.350005	0.350927	0.252675	0.25359	0.27558	0.26757	0.27456	0.340094	0.351088	0.365898
MALAWI	Malawi		0	0	0	0	0	0	0	0	0	0.125475	0.119636	0.101888	0.0984208	0.0946248	0.0899676	0.0949676	0.116951	0.0999513	0.105936	0.103918	0.123927	0.136927	0.148918	0.155903	0.149903	0.157886	0.158768	0.173603	0.182413	0.173263	0.19323	0.164176	0.161394	0.156022	0.15091	0.151045	0.149686	0.147574	0.146616	0.15235	0.201698	0.21417	0.21432	0.239941	0.246915	0.247534	0.246796
MALAYSIA	Malaysia		0	0	0	0	0	0	0	0	0	0.868789	1.14668	1.27864	1.30364	1.5906	2.01949	2.28718	2.68406	2.76408	2.87397	2.49393	3.98086	4.54765	4.88554	4.77759	5.19777	5.30707	6.52226	6.17378	6.34834	7.45245	7.65077	8.42724	8.3629	10.3843	9.49619	9.91523	10.9447	11.1565	11.7	13.669	15.0866	18.2125	19.9129	23.6678	24.6245	31.0954	30.8132
MALDIVES	Maldives		0	0	0	0	0	0	0	0	0	NaN	NaN	NaN	NaN	NaN	NaN	NaN	NaN	NaN	NaN	NaN	NaN	0.001	0.001	0.001	0.001	0.002	0.003	0.004	0.006	0.008	0.012	0.013	0.013	0.014	0.016	0.018	0.022	0.022	0.026	0.034	0.047	0.042	0.063	0.054	0.054	0.068	0.079
MALI	Mali		0	0	0	0	0	0	0	0	0	0.013	0.033	0.032	0.038	0.048	0.048	0.054	0.052	0.061	0.054	0.044	0.055	0.062	0.067	0.0729513	0.0829513	0.0929432	0.0928648	0.112847	0.107791	0.116788	0.106808	0.107774	0.0996538	0.113707	0.118673	0.11064	0.103606	0.0975723	0.104539	0.113505	0.115471	0.118468	0.122464	0.12546	0.127638	0.128635	0.134633
MALTA	Malta		0.067	0.07	0.066	0.063	0.084	0.093	0.081	0.085	0.09	0.106	0.093	0.08	0.09	0.112	0.136	0.129	0.113	0.142	0.174	0.178	0.181	0.18	0.229	0.22	0.203	0.182	0.208	0.219	0.255	0.247	0.279	0.312	0.358	0.272	0.372	0.327	0.405	0.506	0.549	0.592	0.657332	0.615554	0.631796	0.789063	0.728636	0.671471	0.703724
MARSHALL ISLANDS	Marshall Islands		0	0	0	0	0	0	0	0	0	NaN	NaN	NaN	NaN	NaN	NaN	NaN	NaN	NaN	NaN	NaN	NaN	NaN	NaN	NaN	NaN	NaN	NaN	NaN	NaN	NaN	NaN	NaN	NaN	NaN	NaN	NaN	NaN	NaN	NaN	NaN	NaN	NaN	0.021	0.023	0.023	0.024	0.024
MARTINIQUE	Martinique		0.015	0.022	0.025	0.025	0.025	0.031	0.032	0.044	0.039	0	0	0	0	0	0	0	0	0	0	0	0	0	0	0	0	0	0	0	0	0	0.0227994	0.0225982	0.0251966	0.0258951	0.0238274	0.0245175	0.0242912	0.0240648	0.0238385	0.0236121	0.0294488	0.0285465	0.0285103	0.0258856	0.0258528	0.0258199	0.025787
MAURITANIA	Mauritania		0	0	0	0	0	0	0	0	0	0.009	0.01	0.013	0.017	0.024	0.032	0.044	0.049	0.054	0.064	0.075	0.117	0.109	0.122	0.128	0.132	0.139	0.141	0.152	0.159	0.165	0.172	0.172956	0.241	0.256	0.238	0.179	0.102	0.885	0.869	0.765	0.233	0.237	0.247	0.253	0.261	0.277	0.29
MAURITIUS	Mauritius		0.055	0.038	0.048	0.051	0.051	0.035	0.06	0.06	0.057	0.061	0.049	0.051	0.069	0.057	0.084	0.083	0.075	0.136	0.174	0.156	0.136	0.108	0.188	0.185	0.189	0.161	0.169	0.175	0.172	0.18	0.161	0.148	0.137	0.163	0.171	0.193	0.218	0.254	0.233	0.287	0.399	0.415	0.466	0.484	0.443	0.499	0.532
MEXICO	Mexico		8.328	9.524	10.158	10.02	9.901	10.827	11.502	13.452	14.743	15.908	17.2086	17.8057	17.3973	18.0928	20.2511	20.5153	22.0646	24.5648	25.6242	27.8865	31.1001	34.4405	36.1024	39.3209	42.2343	44.805	50.1566	52.5208	60.6352	65.5897	73.0943	77.4556	82.9722	75.7823	75.5365	78.4692	80.1189	83.5683	83.4742	98.4048	86.529	90.1018	90.8243	92.2673	95.9411	90.5013	94.3685
MONGOLIA	Mongolia		0.078	0.08	0.082	0.083	0.133	0.161	0.188	0.208	0.31	0.367	0.353	0.38	0.538	0.437	0.558	0.534	0.533	0.58	0.676919	0.731919	0.776895	0.827631	0.894077	0.947624	1.02095	1.1066	1.19815	1.3539	1.57309	1.71324	1.87095	1.80531	1.83196	1.90203	1.75347	2.45577	2.61875	2.86094	3.13669	2.85452	2.69923	3.30813	3.00052	2.52801	2.1635	2.15594	2.18977
MONTENEGRO	Montenegro		0	0	0	0	0	0	0	0	0	0.129746	0.141725	0.148553	0.152442	0.169586	0.192133	0.197684	0.195888	0.197862	0.211622	0.219415	0.28673	0.309024	0.289639	0.345999	0.347513	0.362609	0.374261	0.36396	0.406724	0.442392	0.435015	0.47343	0.434941	0.468353	0.493914	0.503829	0.526183	0.513715	0.530087	0.528469	0.522784	0.369853	0.404824	0.353062	0.342973	0.362264	0.423852
MONTSERRAT	Montserrat		0	0	0	0	0	0	0	0	0	NaN	NaN	NaN	0.001	0.001	0.002	0.001	0.002	0.002	0.002	0.002	0.004	0.004	0.004	0.004	0.004	0.003	0.003	0.007	0.007	0.007	0.004	0.005	0.005	0.006	0.006	0.007	0.008	0.008	0.008	0.008	0.008	0.008	0.008	0.008	0.009	0.009	0.01
MOROCCO	Morocco		0.699	0.799	0.973	1.139	0.979	0.971	0.961	0.834	0.892	0.919449	0.992359	1.0293	0.839229	1.07916	1.20498	1.16113	1.49005	1.47605	1.53391	1.58772	1.98745	2.23535	2.19326	2.62716	3.0348	3.02764	3.14627	3.4606	3.56263	4.34803	4.34366	4.31956	4.64734	4.84817	4.85345	4.86727	5.14416	5.48103	5.76944	6.24442	6.14837	6.5562	6.85535	7.41825	7.79008	7.95769	8.16769
MOZAMBIQUE	Mozambique		0.246	0.254	0.293	0.295	0.312	0.375	0.424	0.483	0.496	0.489765	0.513757	0.717765	0.541805	0.452813	0.583797	0.546757	0.579749	0.510724	0.757684	0.883667	0.813562	0.985538	0.899481	0.971327	0.858489	0.786692	0.697439	0.738657	0.782164	0.719042	0.87295	0.676593	0.688846	0.533428	0.412353	0.309756	0.266686	0.26658	0.274616	0.28235	0.277062	0.277048	0.273285	0.29346	0.28855	0.30254	0.297591
MYANMAR (FORMERLY BURMA)	Myanmar		0.219	0.25	0.309	0.356	0.399	0.388	0.452	0.573	0.658	0.757959	0.740951	0.706959	0.785943	0.718862	0.779854	0.743854	0.765846	0.986854	0.798805	0.876797	1.25881	1.39178	1.33578	1.12079	1.27481	1.2508	1.33537	1.40984	1.4045	1.38811	1.50349	1.53466	1.52279	1.57035	1.78727	1.82192	1.84398	1.34918	1.11535	1.20778	1.15579	1.129	1.3214	1.447	1.6911	1.88492	1.96604
NAMIBIA	Namibia		0	0	0	0	0	0	0	0	0	NaN	NaN	NaN	NaN	NaN	NaN	NaN	NaN	NaN	NaN	NaN	NaN	NaN	NaN	NaN	NaN	NaN	NaN	NaN	NaN	NaN	NaN	NaN	NaN	NaN	NaN	NaN	NaN	NaN	NaN	NaN	NaN	0.288	0.314	0.379	0.429	0.442	0.47
NAURU	Nauru		0	0	0	0	0	0	0	0	0	NaN	NaN	NaN	NaN	NaN	0.008	0.009	0.009	0.013	0.013	0.018	0.018	0.024	0.021	0.023	0.027	0.028	0.028	0.031	0.031	0.031	0.034	0.034	0.034	0.034	0.034	0.034	0.044	0.043	0.043	0.043	0.034	0.034	0.033	0.031	0.03	0.029	0.028
NEPAL	Nepal		0.007	0.008	0.008	0.01	0.011	0.012	0.013	0.015	0.016	0.018	0.022	0.022	0.024	0.027	0.041	0.049	0.052	0.058	0.069	0.109	0.062	0.054	0.073	0.115	0.115959	0.0959919	0.0769211	0.0918119	0.0897875	0.139836	0.147733	0.123686	0.120732	0.134394	0.191437	0.184503	0.190233	0.234902	0.266367	0.243877	0.209264	0.292701	0.35212	0.401152	0.464002	0.656777	0.670122
NETHERLANDS	Netherlands		13.998	15.003	14.934	15.084	15.938	16.646	17.763	17.58	18.203	18.3182	20.043	20.6929	22.7298	24.8757	26.4128	27.4027	28.2635	29.1163	30.9622	31.6054	38.7018	38.3914	42.9846	45.1037	43.6641	41.6281	46.1602	44.6522	46.3409	51.0391	48.2074	44.7898	36.4321	37.4884	39.3212	40.1147	39.3053	41.3429	39.7388	44.1224	44.3191	46.6147	46.5694	46.6205	46.7798	47.2069	49.713
NEW CALEDONIA	New Caledonia		0.06	0.077	0.129	0.109	0.142	0.191	0.318	0.291	0.202	0.161	0.235	0.242	0.154	0.169	0.3	0.336	0.412	0.402	0.502	0.425	0.653	0.66	0.465	0.708943	0.758927	0.689935	0.651862	0.583781	0.420656	0.447563	0.54547	0.379455	0.344374	0.314192	0.328099	0.396003	0.38232	0.396967	0.409727	0.447466	0.430358	0.479796	0.42979	0.498779	0.537772	0.563386	0.596371
NEW ZEALAND	New Zealand		2.339	2.23	2.544	2.334	2.475	2.564	2.641	2.813	2.779	2.81638	3.14732	3.20828	3.0563	3.33421	3.57313	3.73507	3.82103	3.7191	3.67716	3.89112	3.87008	4.10726	4.41856	4.96735	5.12009	4.98645	5.25343	5.54407	4.91924	4.50178	4.77046	4.51994	4.98645	4.91217	5.27749	5.96564	6.26259	6.59537	6.94582	6.94688	6.94495	7.1262	7.6706	7.5599	7.60926	7.64241	7.99538
NICARAGUA	Nicaragua		0.052	0.055	0.075	0.078	0.086	0.107	0.103	0.114	0.164	0.130959	0.144968	0.152959	0.179951	0.229943	0.258935	0.212927	0.261911	0.294895	0.335886	0.350878	0.382862	0.41087	0.43787	0.498789	0.53174	0.525805	0.606489	0.773229	0.717102	0.4665	0.551949	0.582657	0.576065	0.544948	0.50383	0.541713	0.615595	0.663478	0.611361	0.400741	0.53362	0.542546	0.64783	0.6232	0.687194	0.751869	0.777119
NIGER	Niger		0	0	0	0	0	0	0	0	0.007	0.006	0.008	0.015	0.018	0.024	0.026	0.025	0.0369838	0.0359757	0.0439757	0.0519757	0.0589676	0.0629676	0.0689676	0.0899189	0.0789757	0.0909838	0.0909034	0.0998474	0.11375	0.130735	0.155615	0.186625	0.203569	0.262511	0.270455	0.271397	0.245346	0.272287	0.269385	0.28334	0.164471	0.155468	0.144285	0.164285	0.158275	0.153275	0.175265
NIGERIA	Nigeria		0.616	0.46	0.595	0.665	0.702	0.736	0.822	0.869	1.016	0.972862	0.928814	1.1216	1.13946	1.45842	1.98327	3.20691	3.5189	3.50013	1.80837	3.30238	5.87335	8.80227	11.2957	13.5187	16.9857	12.9235	15.0627	13.784	13.1613	19.1555	18.5686	17.9614	17.8476	16.2951	18.9427	19.0054	19.976	16.1093	19.2198	11.4955	10.6051	11.4435	12.6269	12.2307	9.53432	9.12041	10.0404
NIUE	Niue		0	0	0	0	0	0	0	0	0	NaN	NaN	NaN	NaN	NaN	NaN	NaN	NaN	NaN	NaN	NaN	0.001	0.001	0.001	0.001	0.001	0.001	0.001	0.001	0.001	0.001	0.001	0.001	0.001	0.001	0.001	0.001	0.001	0.001	0.001	0.001	0.002	0.002	0.002	0.002	0.002	0.002	0.002
NORWAY	Norway		2.302	2.587	2.644	2.671	2.698	3.116	3.263	3.101	3.054	3.22275	3.57173	3.6396	3.83744	4.08441	4.4133	4.47323	5.33299	5.26862	5.76247	6.05725	7.63612	7.41436	8.02275	8.32213	7.5616	8.3613	9.11214	9.11083	8.92832	9.48088	8.70572	8.71792	8.4778	8.76634	9.28246	8.86862	9.56037	9.13142	9.79227	9.40001	9.6401	9.22938	9.48001	9.88652	10.3955	10.5643	11.4166
OCCUPIED PALESTINIAN TERRITORY	Occupied Palestinian Territory		0	0	0	0	0	0	0	0	0	NaN	NaN	NaN	NaN	NaN	NaN	NaN	NaN	NaN	NaN	NaN	NaN	NaN	NaN	NaN	NaN	NaN	NaN	NaN	NaN	NaN	NaN	NaN	NaN	NaN	NaN	NaN	NaN	NaN	NaN	NaN	0.235	0.241	0.25	0.255	0.264	0.258	0.283
OMAN	Oman		0	0	0	0	0	0	0	0	0	NaN	NaN	NaN	NaN	NaN	0.003	0.007	0.008	0.037	0.044	0.064	0.064	0.571	0.57	0.576	0.637	1.979	2.271	2.32	2.126	2.106	1.649	1.641	1.564	2.054	2.198	2.35222	2.68146	2.56599	2.87024	2.72535	3.06289	3.16422	3.24591	3.60937	4.10847	4.29005	4.06187
PAKISTAN	Pakistan		0	0	0	0	0	0	0	0	0	2.70771	3.25503	3.37052	3.70357	4.2577	4.37745	4.59323	4.67406	4.96067	5.68826	5.51676	5.59618	5.30587	5.15913	5.46083	5.83717	6.32856	6.21958	6.63752	7.10987	7.67862	8.71494	9.34302	10.15	10.9231	11.615	12.7766	13.3894	14.4619	15.7225	16.462	18.5121	18.4164	19.6548	21.0635	22.931	22.8207	25.5288
PALAU	Palau		0	0	0	0	0	0	0	0	0	NaN	NaN	NaN	NaN	NaN	NaN	NaN	NaN	NaN	NaN	NaN	NaN	NaN	NaN	NaN	NaN	NaN	NaN	NaN	NaN	NaN	NaN	NaN	NaN	NaN	NaN	NaN	NaN	NaN	NaN	NaN	NaN	NaN	0.054	0.054	0.054	0.054	0.054
PANAMA	Panama		0.141	0.151	0.196	0.195	0.173	0.194	0.173	0.208	0.253	0.270895	0.271878	0.300878	0.324862	0.322846	0.338862	0.416813	0.451837	0.462797	0.550821	0.559805	0.600732	0.709692	0.7637	0.883521	0.823562	0.998692	0.984373	0.94308	0.773636	0.868127	0.848148	0.906853	0.894794	0.949692	0.782574	0.71323	0.746385	0.867782	0.795487	0.685118	0.718559	0.847507	1.12237	1.0333	1.14039	0.997296	1.21364
PAPUA NEW GUINEA	Papua New Guinea		0.015	0.017	0.023	0.026	0.026	0.035	0.035	0.04	0.04	0.044	0.049	0.055	0.054	0.07	0.073	0.083	0.093	0.119	0.137	0.152	0.189	0.225	0.346	0.367	0.433	0.418	0.429	0.431	0.457	0.49	0.499	0.527	0.531	0.548	0.558	0.58	0.563	0.637	0.6	0.555	0.588	0.592	0.598	0.598	0.595	0.562	0.597
PARAGUAY	Paraguay		0.017	0.013	0.028	0.033	0.05	0.052	0.054	0.058	0.066	0.0829838	0.0829838	0.0989838	0.106984	0.111984	0.117976	0.149968	0.139968	0.132984	0.160976	0.141959	0.202903	0.172892	0.19481	0.236756	0.259583	0.228331	0.281146	0.314756	0.396816	0.361805	0.405504	0.377577	0.371902	0.384349	0.40674	0.422463	0.451723	0.512389	0.585348	0.60711	0.582871	0.574084	0.704132	0.795333	0.929117	1.07455	1.01496
PENINSULAR MALAYSIA	Peru		0	0	0	0	0	0	0	0.812	0.884	1.96936	2.22834	2.35634	2.71823	2.79016	3.3441	3.26188	3.61382	3.7228	3.95378	4.17174	4.84875	5.0744	4.95421	5.3854	5.8229	5.9879	6.11634	6.35993	6.11814	6.06404	6.56733	6.55549	6.43831	5.56284	5.62746	5.30565	5.93704	7.00443	6.81927	5.9312	5.83149	5.65617	5.71942	6.50982	6.47387	6.7215	6.60044
PERU	Philippines		1.24	1.303	1.416	1.505	1.702	1.672	1.723	1.822	2.013	1.9722	2.27212	2.37787	2.82094	3.13095	3.49968	3.81131	4.39522	4.96967	6.06517	6.23075	6.7553	7.51956	7.2078	8.59752	8.32214	8.8653	9.57048	10.0099	10.202	10.3796	10.0624	9.42364	9.50833	9.61765	8.41465	7.61439	7.9216	8.86893	10.2305	10.6186	11.2853	11.8644	13.1806	13.354	14.7717	16.3616	16.7177
PHILIPPINES	Bolivia		0.984	0.97	1.106	1.101	1.455	1.806	1.707	1.837	2.064	0.258968	0.273959	0.283951	0.299943	0.330935	0.403927	0.411935	0.460927	0.515935	0.593919	0.694911	0.67787	0.834862	0.973838	0.942813	0.958773	1.10671	1.24859	1.2213	1.37013	1.29096	1.27155	1.30487	1.18392	1.16761	1.09971	1.12166	1.02721	1.09492	1.16997	1.35602	1.56298	1.63046	1.80731	2.12659	2.3451	2.67439	2.66772
POLAND	Poland		30.604	33.336	34.949	37.993	40.279	42.09	45.424	48.772	48.241	51.7631	54.4697	56.5599	59.1177	63.0455	66.2883	67.4074	68.8949	70.6947	75.2732	80.067	83.0086	85.3932	89.9308	91.5911	94.4969	102.287	108.657	114.071	117.596	120.444	126.454	111.626	114.894	114.908	118.031	121.318	123.321	126.565	121.242	115.222	102.769	102.018	99.53	99.7191	98.367	99.0069	103.004
PORTUGAL	Portugal		1.534	1.473	1.461	1.619	1.581	1.764	1.956	2.125	2.063	2.17786	2.24168	2.47763	2.53545	2.73242	3.00421	3.16115	3.2301	3.38199	3.54595	3.98275	4.15843	4.46935	4.99654	5.44353	5.63454	5.80657	6.0933	6.1695	6.164	6.78377	7.30722	7.36918	7.91487	8.16099	7.85863	7.40445	8.2482	8.51491	8.88861	11.1415	12.3043	12.8167	13.889	13.4803	13.7136	14.861	14.1111
QATAR	Qatar		0.096	0.106	0.053	0.1	0.166	0.114	0.138	0.085	0.046	0.05	0.048	0.044	0.052	1.674	1.711	1.716	1.712	1.824	1.931	1.95594	2.06372	2.49572	2.94089	3.39989	2.85986	2.98782	2.83158	2.70634	2.87091	3.91442	3.57033	3.50455	3.36651	3.06838	3.35645	3.37822	3.6209	3.1306	3.24718	3.90076	3.20515	4.81585	7.36806	8.4566	8.38001	8.65643	8.78924
REPUBLIC OF CAMEROON	Cameroon		0.038	0.05	0.077	0.055	0.063	0.064	0.065	0.07	0.076	0.0759919	0.074	0.077	0.079	0.082	0.092	0.085	0.094	0.125	0.138	0.156	0.173968	0.220846	0.234813	0.24479	0.265765	0.31674	0.297208	0.425504	0.543997	0.495454	1.06057	1.45173	1.72377	1.78889	1.652	1.766	0.544	0.503	0.587871	2.06815	0.171024	0.0154015	0.74399	0.785896	0.775232	0.874317	0.980469
REPUBLIC OF KOREA	South Korea		0.596	0.798	0.945	1.281	1.408	1.759	2.062	2.242	2.459	3.0626	3.42252	3.94342	4.71113	5.75414	6.05763	6.81722	8.18292	9.58331	10.1521	11.5907	14.6606	15.9797	16.4512	19.9323	20.6422	22.321	25.456	28.846	30.9503	36.3589	36.8146	38.1489	38.7509	41.2221	44.7731	48.7131	49.8558	52.6583	60.6735	64.4782	67.5323	71.517	77.0181	87.8378	93.9584	102.072	109.588
REPUBLIC OF MOLDOVA	Moldova		0	0	0	0	0	0	0	0	0	2.86822	2.98635	3.0798	3.23247	3.46663	3.68678	3.91104	4.13033	4.31892	4.44029	4.62428	4.86387	5.16178	5.43123	5.66102	5.87705	6.17806	6.41566	6.63366	6.86126	6.91779	7.18979	7.05309	7.18597	7.28803	7.35269	7.92932	7.94981	7.91686	8.12816	7.94639	7.58162	6.10608	5.72545	4.32473	3.39164	3.11283	3.18971
REPUBLIC OF SOUTH SUDAN	South Sudan		0	0	0	0	0	0	0	0	0	0.0310619	0.0308954	0.0314783	0.0337268	0.0381404	0.0422209	0.0551287	0.060042	0.0723668	0.0705348	0.0950179	0.110257	0.113172	0.122166	0.123248	0.129078	0.096267	0.0852746	0.0864405	0.0781129	0.0811108	0.0851081	0.082693	0.0869401	0.0887722	0.0796118	0.0925196	0.0965169	0.0761142	0.110091	0.0853579	0.118418	0.110924	0.0991817	0.0683696	0.0940186	0.0971831	0.100264
REPUBLIC OF SUDAN	Sudan		0	0	0	0	0	0	0	0	0	0.341851	0.340007	0.346454	0.371188	0.419761	0.464706	0.606805	0.660874	0.796524	0.776344	1.04584	1.21362	1.24567	1.3447	1.35658	1.42067	1.05956	0.938413	0.950986	0.858848	0.891608	0.935328	0.908829	0.95493	0.974623	0.873801	1.01538	1.05987	0.835476	1.209	0.936355	1.30155	1.21902	1.08878	0.749544	1.03302	1.0652	1.09923
REUNION	Réunion		0.007	0.008	0.009	0.006	0.01	0.011	0.013	0.016	0.017	0	0	0	0	0	0	0	0	0	0	0	0	0	0	0	0	0	0	0	0	0	0	0	0	0	0	0	0	0	0	0	0	0	0	0	0.0360275	0.0351549	0.0334686
ROMANIA	Romania		5.3	6.143	7.27	8.361	9.146	10.041	11.132	12.538	13.593	13.8219	14.5726	15.2064	17.4162	18.9562	19.6608	21.462	22.9505	25.117	27.3142	30.4387	32.746	34.3017	36.0956	39.5101	41.1355	44.2157	47.6179	48.6017	52.8219	53.4051	53.5478	53.9657	53.3104	54.6169	51.5329	52.9222	55.0331	57.7597	57.9207	58.2968	46.2025	38.0377	35.773	33.5241	33.2864	34.6705	35.5065
RUSSIAN FEDERATION	Russian Federation		0	0	0	0	0	0	0	0	0	232.231	241.774	249.325	261.669	280.627	298.45	316.59	334.328	349.59	359.414	374.313	393.704	417.819	439.628	458.219	475.692	500.042	519.277	536.92	555.351	559.939	581.96	570.866	581.642	589.885	595.113	641.833	643.461	640.806	657.922	643.185	689.218	653.924	534.296	507.494	447.98	440.21	431.267
RWANDA	Rwanda		0	0	0	0	0	0	0	0	0	0.0203714	0.0190571	0.0249714	0.023	0.023	0.01	0.013	0.012	0.011	0.015	0.016	0.016	0.017	0.018	0.019	0.02	0.048	0.073	0.073	0.079	0.081	0.135	0.164	0.166	0.19	0.173	0.168	0.163	0.166861	0.188939	0.186737	0.142828	0.128763	0.130717	0.131662	0.125826	0.123819	0.126872
SAINT HELENA	Saint Helena		0	0	0	0	0	0	0	0	0	NaN	NaN	NaN	NaN	NaN	NaN	NaN	NaN	NaN	0.001	NaN	NaN	NaN	NaN	NaN	NaN	NaN	NaN	NaN	NaN	NaN	NaN	0.002	0.001	0.001	0.001	0.001	0.001	0.001	0.002	0.002	0.002	0.002	0.002	0.003	0.003	0.003	0.003
SAINT LUCIA	Saint Lucia		0.001	0.003	0.002	0.003	0.002	0.003	0.003	0.003	0.003	0.003	0.004	0.005	0.005	0.006	0.006	0.007	0.008	0.009	0.01	0.017	0.018	0.019	0.021	0.022	0.02	0.021	0.023	0.019	0.027	0.041	0.031	0.026	0.031	0.028	0.031	0.035	0.036	0.04	0.045	0.045	0.044	0.046	0.041	0.063	0.07	0.084	0.088
SAINT MARTIN (DUTCH PORTION)	Sint Maarten (Dutch part)		0	0	0	0	0	0	0	0	0	0.333924	0.287129	0.299658	0.329083	0.315225	0.306493	0.274979	0.257135	0.316744	0.294533	0.385465	0.431121	0.375214	0.363823	0.403594	0.365817	0.264918	0.565905	0.295577	0.251724	0.264064	0.271752	0.258843	0.289407	0.148738	0.371417	0.434728	0.0833386	0.0740899	0.0729841	0.138931	0.148783	0.118725	0.0978148	0.150995	0.144762	0.143254	0.134005
SAMOA	Samoa		0.001	0.001	0.002	0.002	0.003	0.003	0.003	0.004	0.003	0.004	0.004	0.005	0.005	0.006	0.007	0.008	0.007	0.007	0.008	0.008	0.008	0.01	0.01	0.01	0.009	0.016	0.013	0.022	0.029	0.026	0.027	0.028	0.031	0.031	0.031	0.031	0.031	0.031	0.031	0.033	0.028	0.029	0.03	0.03	0.031	0.032	0.034
SAO TOME & PRINCIPE	Sao Tome and Principe		0	0.001	0.001	0.001	0.001	0.001	0.002	0.003	0.002	0.002	0.003	0.003	0.003	0.002	0.003	0.003	0.003	0.003	0.004	0.004	0.004	0.003	0.003	0.004	0.005	0.005	0.008	0.008	0.009	0.009	0.011	0.012	0.013	0.015	0.014	0.015	0.014	0.014	0.013	0.013	0.013	0.013	0.013	0.013	0.013	0.013	0.013
SAUDI ARABIA	Saudi Arabia		1.403	-0.095	-0.047	0.13	0.338	0.577	0.445	0.573	0.917	0.505919	0.729903	0.973886	1.7058	1.89378	1.92172	1.15072	1.74872	6.95564	7.93644	9.62635	12.3503	16.3091	19.1817	25.9426	26.9383	22.724	27.6909	32.2244	31.3931	37.6649	46.1899	47.8448	43.0926	43.8959	42.4428	47.0575	55.8408	51.977	55.1986	55.5183	50.6237	72.9766	77.8041	85.5151	83.9174	64.0589	70.4868
SENEGAL	Senegal		0	0	0	0	0	0	0	0	0.097	0.105813	0.225813	0.221797	0.221797	0.234789	0.251773	0.461797	0.468789	0.190813	0	0.133773	0.356732	0.368732	0.396627	0.422676	0.504635	0.703603	0.482996	0.610627	0.714955	0.788248	0.910601	0.895157	0.828759	0.712721	0.896334	0.723391	0.719554	0.661729	0.73985	0.999421	0.856724	0.921934	0.934347	0.965605	1.04714	0.93585	0.999794
SERBIA	Serbia		0	0	0	0	0	0	0	0	0	3.82348	4.17645	4.37724	4.49214	4.99749	5.66153	5.82525	5.77289	5.83157	6.23796	6.46802	8.45032	9.10549	8.53403	10.1916	10.2332	10.6743	11.0137	10.7064	11.9599	13.0043	12.7819	13.9089	12.771	13.7508	14.5003	14.7892	15.4419	15.0718	15.5496	15.5001	15.4062	10.9126	11.9226	10.3973	10.1092	10.6825	12.5067
SEYCHELLES	Seychelles		0	0	0	0	0	0	0	0	0	NaN	NaN	NaN	NaN	0.002	0.002	0.002	0.002	0.002	0.002	0.002	0.008	0.009	0.012	0.013	0.015	0.016	0.022	0.023	0.021	0.033	0.026	0.027	0.023	0.027	0.027	0.041	0.045	0.055	0.054	0.064	0.041	0.047	0.047	0.05	0.055	0.054	0.064
SIERRA LEONE	Sierra Leone		0.043	0.026	0.049	0.046	0.034	0.05	0.049	0.106	0.057	0.064	0.195	0.079	0.089	0.101	0.083	0.077	0.082	0.069	0.099	0.296	0.234	0.219	0.185	0.147	0.142	0.143	0.123	0.14	0.194	0.185	0.166	0.189	0.151	0.188	0.168	0.181	0.184	0.136	0.125	0.102	0.147	0.164	0.123	0.124	0.131	0.068	0.08
SINGAPORE	Singapore		0	0	0	0	0	0	0	0.472	0.627	0.491	0.38	0.571	0.702862	0.926789	1.00978	0.689773	0.183568	0.833481	1.47738	1.96431	4.9652	4.52433	6.06389	5.78586	5.98984	6.69154	8.18737	7.71423	9.03609	9.84096	8.55439	7.29819	8.08018	9.50064	9.06574	9.07931	9.5187	8.85931	9.81146	11.3834	12.088	12.2951	13.1585	13.884	16.7425	11.4197	13.4687
SLOVAKIA	Slovakia		0	0	0	0	0	0	0	0	0	8.09709	8.63581	9.373	9.98844	10.5071	10.935	10.655	10.5949	10.5729	11.0618	11.7433	13.4638	14.1248	14.2558	14.3154	14.4827	15.1548	15.7464	16.2195	16.3688	15.944	16.133	15.9593	15.805	15.8288	16.3643	16.1429	16.2561	16.0667	15.8084	15.0889	16.8214	14.5846	13.3813	12.6867	11.9756	12.0967	12.0595
SLOVENIA	Slovenia		0	0	0	0	0	0	0	0	0	1.08451	1.18472	1.24207	1.27444	1.41772	1.60656	1.65318	1.63805	1.65476	1.76967	1.83485	2.39891	2.5837	2.41815	2.88905	2.8994	3.02306	3.1177	3.02846	3.3837	3.67979	3.61476	3.92937	3.60527	3.88273	4.09498	4.177	4.36216	4.25197	4.40692	4.38509	4.1195	3.8213	3.8228	3.90379	3.99636	4.16328	4.34405
SOLOMON ISLANDS	Solomon Islands		0	0	0.001	0.001	0.001	0.003	0.003	0.003	0.003	0.003	0.003	0.004	0.004	0.004	0.005	0.007	0.007	0.009	0.01	0.01	0.011	0.013	0.015	0.018	0.018	0.016	0.017	0.022	0.017	0.03	0.028	0.037	0.033	0.039	0.039	0.041	0.042	0.044	0.043	0.044	0.04	0.043	0.044	0.047	0.05	0.052	0.054
SOMALIA	Somalia		0.013	0.013	0.013	0.013	0.013	0.018	0.019	0.02	0.023	0.024	0.023	0.024	0.029	0.028	0.037	0.036	0.038	0.062	0.042	0.044	0.059	0.051	0.064	0.072	0.09	0.137	0.131	0.218	0.152	0.133	0.222	0.075	0.196	0.255	0.195	0.234	0.252	0.271	0.273924	0.259845	0.199119	0.192823	0.185464	0.17446	0.171456	0.160453	0.155
SOUTH AFRICA	South Africa		16.659	17.781	19.348	19.379	20.171	22.638	23.819	24.471	26.273	25.7841	26.704	27.8711	28.8401	29.9468	32.6272	34.9727	34.9986	36.5066	37.6511	39.0674	40.8347	45.9621	46.8223	47.3138	48.1857	50.4943	52.6519	54.5161	55.1012	59.6845	62.2864	70.1691	76.5446	79.6753	86.142	88.398	90.2092	89.7096	93.5307	93.0002	85.4182	88.9926	82.2511	87.4427	92.4194	98.7013	99.2558
SPAIN	Spain		9.019	9.041	10.266	10.629	10.846	10.996	11.559	13.71	15.255	14.2137	13.3367	14.6307	16.369	16.0325	17.5556	19.3833	21.1837	23.5791	26.4785	26.402	31.8686	35.0596	39.4968	42.2918	47.1249	49.4141	53.9699	53.1738	54.4524	55.3347	58.382	56.2488	56.9318	55.5225	53.9483	54.5663	51.6136	51.7215	53.8912	61.3768	63.1041	65.7623	68.1805	65.8284	69.2307	72.9849	69.5402
SRI LANKA	Sri Lanka		0.444	0.422	0.529	0.564	0.487	0.454	0.387	0.633	0.532	0.560894	0.615903	0.636911	0.698903	0.690919	0.619919	0.724903	0.725911	0.803789	0.883757	1.17769	0.980643	0.871578	0.965578	1.00554	0.799482	0.78957	0.763856	0.794497	0.937649	1.03958	0.924836	1.09322	1.21913	1.32503	1.05134	1.06893	0.998991	1.09905	0.943406	0.940778	1.04516	1.1291	1.39355	1.35797	1.48356	1.5872	1.90233
ST. KITTS-NEVIS	Saint Kitts and Nevis		0	0	0	0	0	0	0	0	0	NaN	NaN	NaN	NaN	NaN	NaN	NaN	NaN	NaN	NaN	NaN	NaN	NaN	NaN	NaN	NaN	NaN	NaN	NaN	NaN	NaN	NaN	0.015	0.018	0.014	0.014	0.014	0.016	0.015	0.018	0.018	0.029	0.029	0.03	0.031	0.033	0.035	0.036
ST. PIERRE & MIQUELON	Saint Pierre and Miquelon		0.004	0.006	0.009	0.008	0.009	0.01	0.009	0.011	0.011	0.009	0.01	0.013	0.009	0.01	0.013	0.011	0.012	0.014	0.011	0.009	0.01	0.013	0.019	0.011	0.012	0.009	0.013	0.01	0.009	0.01	0.01	0.011	0.011	0.009	0.01	0.009	0.013	0.014	0.018	0.028	0.025	0.028	0.026	0.02	0.019	0.019	0.019
ST. VINCENT & THE GRENADINES	Saint Vincent and the Grenadines		0.001	0.001	0.003	0.002	0.002	0.002	0.002	0.002	0.003	0.003	0.003	0.003	0.003	0.004	0.005	0.004	0.005	0.005	0.006	0.008	0.008	0.008	0.01	0.011	0.009	0.009	0.009	0.009	0.01	0.008	0.01	0.01	0.011	0.013	0.018	0.018	0.018	0.021	0.018	0.021	0.022	0.023	0.023	0.028	0.033	0.035	0.036
SURINAME	Suriname		0.058	0.064	0.073	0.085	0.092	0.085	0.093	0.102	0.087	0.1	0.118	0.117	0.135	0.145	0.165	0.217	0.299	0.364	0.396	0.415	0.439	0.467943	0.475935	0.574935	0.436951	0.550968	0.544904	0.517884	0.6528	0.625755	0.646675	0.553581	0.510526	0.37447	0.42359	0.43555	0.479511	0.479472	0.511432	0.505393	0.474354	0.552349	0.554344	0.556339	0.557238	0.562232	0.568227
SWAZILAND	Swaziland		0.001	0.001	0.001	0.001	0.001	0.001	0.001	0.001	0.001	0.001	0.009	0.001	NaN	NaN	0.003	0.022	0.055	0.062	0.076	0.083	0.1	0.109	0.104	0.101	0.085	0.092	0.091	0.093	0.12	0.122	0.127	0.119	0.119	0.074	0.091	0.12	0.125	0.119	0.119	0.119	0.263	0.239	0.228	0.194	0.295	0.29	0.216
SWEDEN	Sweden		7.823	9.128	9.424	8.886	9.417	10.673	11.841	10.604	11.485	11.5689	13.4199	13.3186	13.9936	15.0964	16.476	17.0748	19.7919	18.8127	21.1807	23.5756	25.1875	23.0647	23.1177	23.8236	21.7858	22.0416	24.0833	23.4009	21.6913	23.163	19.5727	18.9381	16.9916	15.9031	15.6411	17.0209	16.9243	16.2925	15.673	15.1533	15.652	15.7498	15.68	15.6914	16.3629	16.2026	17.277
SWITZERLAND	Switzerland		2.794	3.358	3.065	2.822	3.439	3.718	4.658	4.831	4.446	4.53004	5.32065	5.55603	6.58289	7.93305	7.67623	8.27755	8.59323	8.87539	9.82023	10.384	10.9837	11.4323	11.7128	12.6098	11.3064	10.658	11.0363	11.2003	11.5092	10.88	11.0508	10.5927	9.985	10.9231	10.679	10.857	11.5299	10.9727	11.0975	10.7581	12.0509	12.5911	12.5572	11.8998	11.6474	11.8485	12.0357
SYRIAN ARAB REPUBLIC	Syria		0.113	0.104	0.13	0.14	0.158	0.449	0.547	0.541	0.592	0.607504	0.878465	0.835408	0.873328	0.984246	1.1903	1.00225	1.34032	1.25633	1.62499	1.97397	1.81494	2.42199	2.11689	2.15207	2.63494	3.04891	3.74922	3.99355	4.14339	6.13663	5.65685	7.24198	6.64968	7.58038	8.96534	8.02112	8.48069	9.80973	10.0107	9.35352	10.1106	11.5177	11.616	12.3422	12.6064	11.2446	11.5508
TAIWAN	Taiwan		1.033	1.34	1.745	1.767	1.771	1.965	2.098	2.234	2.613	2.99982	3.24069	3.41934	3.86594	4.12353	4.6144	4.87031	5.31157	5.99616	6.5886	7.17549	7.84226	8.59044	9.79053	10.9843	10.7292	11.8605	15.2985	16.6529	19.333	20.6057	22.6854	20.3513	20.4296	22.5075	22.9639	22.9032	25.4943	26.5075	30.518	33.2129	32.8711	35.6485	37.9737	41.5316	43.0883	45.2097	47.415
TAJIKISTAN	Tajikistan		0	0	0	0	0	0	0	0	0	1.06634	1.11026	1.145	1.20177	1.28882	1.37067	1.45405	1.53558	1.6057	1.65083	1.71924	1.80831	1.9193	2.01973	2.10544	2.18605	2.2983	2.3867	2.46782	2.55247	2.57348	2.67468	2.62392	2.67332	2.71137	2.7355	2.94994	2.95766	2.94554	3.0242	2.95669	2.76558	2.48975	1.99089	1.40868	0.640679	0.666727	0.770329
THAILAND	Thailand		0.261	0.298	0.349	0.449	0.56	0.648	0.715	0.798	0.824	0.90644	1.01242	1.13011	1.37194	1.51791	2.03883	2.03062	2.58336	3.31609	4.66039	3.96835	4.1901	5.24593	5.95128	6.66491	6.60768	6.65161	7.83739	8.75134	9.53793	9.98539	10.9051	10.3212	10.2717	11.4949	12.4333	13.1633	13.4343	15.3674	18.0685	21.2293	23.9949	26.4045	28.9559	33.0823	36.7103	42.75	47.415
TIMOR-LESTE (FORMERLY EAST TIMOR)	Timor-Leste		0	0	0	0	0	0	0	0	0	NaN	NaN	NaN	NaN	NaN	NaN	NaN	NaN	NaN	NaN	NaN	NaN	NaN	NaN	NaN	NaN	NaN	NaN	NaN	NaN	NaN	NaN	NaN	NaN	NaN	NaN	NaN	NaN	NaN	NaN	NaN	NaN	NaN	NaN	NaN	NaN	NaN	NaN
TOGO	Togo		0.007	0.007	0.012	0.008	0.009	0.011	0.011	0.013	0.013	0.015	0.018	0.025	0.024	0.029	0.036	0.036	0.049	0.054	0.053	0.066	0.075	0.086	0.110497	0.11231	0.106514	0.085	0.088	0.126	0.097	0.377	0.216511	0.192493	0.222874	0.169889	0.18922	0.179424	0.230849	0.251807	0.262256	0.278765	0.265468	0.286154	0.281296	0.291737	0.274269	0.320617	0.345298
TONGA	Tonga		0.002	0.002	0.002	0.002	0.002	0.002	0.002	0.002	0.002	0.002	0.003	0.003	0.003	0.003	0.003	0.003	0.003	0.004	0.004	0.003	0.007	0.005	0.006	0.007	0.006	0.009	0.008	0.008	0.01	0.011	0.011	0.013	0.012	0.013	0.013	0.013	0.013	0.015	0.019	0.019	0.021	0.026	0.019	0.023	0.025	0.026	0.021
TRINIDAD AND TOBAGO	Trinidad and Tobago		0.642	0.686	0.763	0.801	0.774	0.743	0.786	0.7	0.949	0.843805	0.703805	1.25489	1.97382	0.356822	1.03481	1.41679	1.10576	1.26479	1.10176	1.06473	2.4537	2.20972	2.24768	2.56272	2.74073	2.62372	4.34247	4.41028	4.179	4.55979	4.61775	4.70589	5.02326	4.44202	4.7774	5.65586	4.73658	4.77322	4.32126	4.39548	4.63497	4.63109	5.21402	4.75213	4.64608	4.49241	5.6682
TUNISIA	Tunisia		0.333	0.376	0.394	0.376	0.384	0.436	0.426	0.43	0.395	0.433515	0.470553	0.481635	0.489602	0.530603	0.751497	0.671496	0.786473	0.841481	0.980441	1.05134	1.0204	1.14836	1.29131	1.31642	1.47141	1.51232	1.59427	1.84189	2.04092	2.38817	2.58333	2.67472	2.59085	3.07035	3.13551	3.23988	3.27302	3.18323	3.37796	3.58637	3.58273	4.19292	4.06436	4.46341	4.30571	4.24367	4.52534
TURKEY	Turkey		2.59	2.78	2.859	3.539	3.667	3.718	3.92	4.36	4.378	4.69209	4.58475	4.73276	5.89644	6.17902	7.17876	7.46533	8.59873	9.13731	9.89779	10.5766	11.621	13.0017	14.6621	16.1872	16.629	17.8546	20.0217	22.14	20.9372	20.4798	20.5274	21.6119	23.529	24.5121	25.9024	28.8381	31.5552	35.0553	34.0415	37.5465	41.3506	43.1174	44.7386	46.6734	45.6968	49.3731	54.4547
TURKMENISTAN	Turkmenistan		0	0	0	0	0	0	0	0	0	4.346	4.52505	4.66648	4.89763	5.25209	5.58534	5.92503	6.25725	6.54277	6.72642	7.00494	7.36816	7.82003	8.22907	8.57813	8.90643	9.36361	9.72189	10.0505	10.3936	10.4776	10.8882	10.6801	10.8801	11.0336	11.1307	12.0024	12.0317	11.9817	12.3008	12.0249	11.2342	9.72071	8.73237	7.51024	9.12733	9.26097	8.35254
TURKS AND CAICOS ISLANDS	Turks and Caicos Islands		0	0	0	0	0	0	0	0	0	NaN	NaN	NaN	NaN	NaN	NaN	NaN	NaN	NaN	NaN	NaN	NaN	NaN	NaN	NaN	NaN	NaN	NaN	NaN	NaN	NaN	NaN	NaN	NaN	NaN	NaN	NaN	NaN	NaN	NaN	NaN	0.008	0.008	0.009	0.011	0.012	0.013	0.013
TUVALU	Tuvalu		0	0	0	0	0	0	0	0	0	NaN	NaN	NaN	NaN	NaN	NaN	NaN	NaN	NaN	NaN	NaN	NaN	NaN	NaN	NaN	NaN	NaN	NaN	NaN	NaN	NaN	NaN	NaN	NaN	NaN	NaN	NaN	NaN	NaN	NaN	NaN	0.002	0.002	0.002	0.002	0.002	0.002	0.002
UGANDA	Uganda		0.029	0.038	0.039	0.057	0.06	0.072	0.072	0.076	0.08	0.112911	0.114919	0.110927	0.116935	0.117943	0.133919	0.170854	0.19987	0.220846	0.26783	0.320805	0.393789	0.392396	0.376194	0.321078	0.324698	0.308019	0.268933	0.218873	0.189725	0.183094	0.170857	0.143844	0.14866	0.16745	0.15841	0.168369	0.191553	0.209763	0.235499	0.218472	0.20789	0.212963	0.217868	0.217774	0.193343	0.252861	0.277814
UKRAINE	Ukraine		0	0	0	0	0	0	0	0	0	70.0978	72.9887	75.276	79.0113	84.735	90.1169	95.6016	100.965	105.577	108.546	113.043	118.9	126.163	132.728	138.323	143.578	150.906	156.684	161.982	167.513	168.871	175.489	172.114	175.339	177.796	179.345	193.413	193.877	193.052	198.182	193.706	192.639	172.636	160.77	139.247	114.429	106.404	95.9085
UNITED ARAB EMIRATES	United Arab Emirates		0	0	0	0	0	0	0	0	0	0.003	0.003	0.003	0.005	0.006	0.005	0.006	0.007	0.25	0.339	5.597	4.158	5.777	6.396	8.353	8.543	8.473	10.8125	10.5762	12.2144	9.97447	10.0501	10.0346	10.0308	9.61257	12.5971	13.5515	12.8357	12.9504	13.1265	14.7888	14.111	15.4673	15.7636	17.8945	19.8157	19.1083	19.8621
UNITED KINGDOM	United Kingdom		136.583	148.7	144.221	147.404	150.849	157.381	156.662	155.676	151.729	149.183	159.394	160.648	161.826	164.679	165.902	169.79	168.689	161.588	165.526	171.502	178.105	180.237	176.863	180.016	168.445	164.642	163.353	164.946	165.042	175.904	158.034	152.99	149.629	148.877	144.407	152.737	155.173	156.023	155.648	158.727	163.886	166.097	161.87	157.981	156.962	154.697	160.602
UNITED REPUBLIC OF TANZANIA	Tanzania		0	0	0	0	0	0	0	0	0	0.188	0.226	0.192	0.209	0.219	0.282	0.317	0.373943	0.479838	0.45083	0.489813	0.481813	0.671805	0.59074	0.868651	0.628676	0.622708	0.760363	0.547932	0.599709	0.562989	0.511365	0.575007	0.586326	0.599428	0.640552	0.638073	0.621614	0.646154	0.620002	0.589956	0.576138	0.61506	0.593955	0.661853	0.563209	0.664222	0.689814
UNITED STATES OF AMERICA	USA		692.124	712.983	694.618	711.175	677.689	742.828	778.631	772.001	748.069	770.471	788.161	785.308	814.411	850.443	887.761	924.725	971.392	1008	1044.84	1097.57	1180.54	1187.58	1244.12	1299.8	1253.54	1201.09	1257.41	1292.4	1332.69	1335.71	1287.31	1236.45	1174.12	1183.38	1219.5	1223.89	1224.85	1277.52	1333.4	1350.44	1399.65	1386.16	1414.49	1441.99	1467.53	1484.42	1535.73
URUGUAY	Uruguay		0.67	0.716	0.861	0.957	1.02	1.07	1.098	1.21	1.086	1.19754	1.17755	1.12357	1.09359	1.17763	1.24255	1.50554	1.47348	1.33154	1.33143	1.52549	1.56545	1.5835	1.65649	1.57443	1.5494	1.62729	1.60674	1.5392	1.56368	1.70916	1.58802	1.46178	1.32473	1.03808	0.938361	0.89624	0.86379	0.966849	1.30622	1.32441	1.08272	1.23567	1.40362	1.21157	1.09986	1.24413	1.475
UZBEKISTAN	Uzbekistan		0	0	0	0	0	0	0	0	0	11.6743	12.1561	12.5369	13.1587	14.1114	15.0071	15.9202	16.8132	17.5808	18.0746	18.8231	19.7994	20.9962	22.0775	22.9963	23.8582	25.0638	26.0136	26.8829	27.7934	28.0122	29.0999	28.5324	29.0637	29.4618	29.7122	32.0405	32.0968	31.9573	32.8044	32.053	30.0051	30.7739	30.2905	31.5549	29.4705	28.0196	28.8062
VANUATU	Vanuatu		0	0	0	0	0	0	0	0	0	NaN	NaN	NaN	0.011	0.009	0.017	0.013	0.021	0.023	0.017	0.012	0.011	0.016	0.017	0.015	0.017	0.015	0.012	0.014	0.016	0.017	0.017	0.014	0.014	0.015	0.015	0.033	0.016	0.013	0.018	0.017	0.018	0.018	0.017	0.017	0.017	0.018	0.023
VENEZUELA	Venezuela		10.447	12.932	13.85	13.062	13.975	16.309	17.744	18.993	14.864	17.7809	15.5614	14.1593	14.7533	15.3253	15.434	16.5747	15.5497	17.9455	17.8963	18.8136	20.3301	17.0579	17.0617	18.1312	20.4851	17.3991	15.6314	17.3717	18.7204	20.8645	24.7382	25.0523	25.437	25.357	25.3829	27.5727	29.8144	30.2023	31.5916	29.6318	33.2484	31.4008	28.815	33.834	35.3523	36.2649	33.3896
VIET NAM	Viet Nam		0	0	0	0	0	0	0	0	0	1.80258	2.04255	2.1775	2.54849	2.48646	3.21721	3.58895	5.23503	6.26697	6.44129	7.38418	7.68913	6.68816	6.28745	6.84316	5.20323	5.94423	3.79501	4.16239	4.20006	4.4346	4.58124	4.82824	5.00325	5.25527	4.76921	5.75012	5.66358	6.57641	6.27966	4.72872	5.78599	5.80321	5.8198	6.19831	7.10115	7.78479	9.28574
WALLIS AND FUTUNA ISLANDS	Wallis and Futuna Islands		0	0	0	0	0	0	0	0	0	NaN	NaN	NaN	NaN	NaN	NaN	NaN	NaN	NaN	NaN	NaN	NaN	NaN	NaN	NaN	NaN	NaN	NaN	NaN	NaN	NaN	NaN	NaN	NaN	NaN	NaN	NaN	NaN	NaN	NaN	NaN	NaN	NaN	NaN	NaN	NaN	NaN	NaN
YEMEN	Yemen		0	0	0	0	0	0	0	0	0	0.71	0.991	0.727	1.06	0.796	0.991	1.072	0.945	0.833	3.176	1.276	0.685	0.538	0.408	0.744984	0.612935	0.591935	0.699853	0.81277	0.846649	0.878408	0.904344	1.15323	1.61943	1.7155	1.93695	2.33989	2.23582	2.35444	2.6065	2.71153	2.59863	2.49142	2.69493	2.35426	2.45159	2.82537	2.87305
ZAMBIA	Zambia		0	0	0	0	0	0	0	0	0	1.24667	1.18866	1.01227	0.977809	0.94009	0.89383	1.06776	0.954757	1.30667	1.24663	1.16564	1.02781	1.03348	1.10846	1.25155	1.14551	1.11251	1.097	1.01935	0.947291	0.981569	0.961589	0.916493	0.958182	0.889947	0.765404	0.745833	0.782088	0.729738	0.848532	0.701421	0.656605	0.650128	0.661601	0.673363	0.653115	0.584337	0.501366
ZIMBABWE	Zimbabwe		0	0	0	0	0	0	0	0	0	1.70119	1.62203	1.38135	1.33432	1.28285	1.21972	1.42172	1.64872	1.445	1.74063	1.84058	2.22547	2.38338	2.24231	2.53025	2.46916	2.26826	2.96259	2.53396	2.53266	2.57414	2.6239	2.56697	2.39625	2.84528	2.69641	2.78758	3.5666	4.14031	4.37485	4.39783	4.24926	4.33006	4.6172	4.43753	4.82655	4.10192	4.06402
[truncated: 23 more columns]

## Sheet: Tabelle4
		GCP	PWT
	AFGHANISTAN	Afghanistan	AFG
	ALBANIA	Albania	ALB
	ALGERIA	Algeria	DZA
	ANDORRA	Andorra	AND
	ANGOLA	Angola	AGO
	ANGUILLA	Anguilla	AIA
	ANTIGUA & BARBUDA	Antigua and Barbuda	#N/A
	ARGENTINA	Argentina	ARG
	ARMENIA	Armenia	ARM
	ARUBA	Aruba	ABW
	AUSTRALIA	Australia	AUS
	AUSTRIA	Austria	AUT
	AZERBAIJAN	Azerbaijan	AZE
	BAHAMAS	Bahamas	BHS
	BAHRAIN	Bahrain	BHR
	BANGLADESH	Bangladesh	BGD
	BARBADOS	Barbados	BRB
	BELARUS	Belarus	BLR
	BELGIUM	Belgium	BEL
	BELIZE	Belize	BLZ
	BENIN	Benin	BEN
	BERMUDA	Bermuda	BMU
	BHUTAN	Bhutan	BTN
	BONAIRE, SAINT EUSTATIUS, AND SABA	Bonaire, Saint Eustatius and Saba	#N/A
	BOSNIA & HERZEGOVINA	Bosnia and Herzegovina	BIH
	BOTSWANA	Botswana	BWA
	BRAZIL	Brazil	BRA
	BRITISH VIRGIN ISLANDS	British Virgin Islands	#N/A
	BRUNEI (DARUSSALAM)	Brunei Darussalam	BRN
	BULGARIA	Bulgaria	BGR
	BURKINA FASO	Burkina Faso	BFA
	BURUNDI	Burundi	BDI
	CAMBODIA	Cambodia	KHM
	CANADA	Canada	CAN
	CAPE VERDE	Cape Verde	CPV
	CENTRAL AFRICAN REPUBLIC	Central African Republic	CAF
	CHAD	Chad	TCD
	CHILE	Chile	CHL
	CHINA (MAINLAND)	China	CHN
	COLOMBIA	Colombia	COL
	COMOROS	Comoros	COM
	CONGO	Congo	COG
	COOK ISLANDS	Cook Islands	COK
	COSTA RICA	Costa Rica	CRI
	COTE D IVOIRE	Côte d'Ivoire	CIV
	CROATIA	Croatia	HRV
	CUBA	Cuba	CUB
	CURACAO	Curaçao	#N/A
	CYPRUS	Cyprus	CYP
	CZECH REPUBLIC	Czech Republic	CZE
	DEMOCRATIC PEOPLE S REPUBLIC OF KOREA	North Korea	#N/A
	DEMOCRATIC REPUBLIC OF THE CONGO (FORMERLY ZAIRE)	Democratic Republic of the Congo	COD
	DENMARK	Denmark	DNK
	DJIBOUTI	Djibouti	DJI
	DOMINICA	Dominica	DMA
	DOMINICAN REPUBLIC	Dominican Republic	DOM
	ECUADOR	Ecuador	ECU
	EGYPT	Egypt	EGY
	EL SALVADOR	El Salvador	SLV
	EQUATORIAL GUINEA	Equatorial Guinea	GNQ
	ERITREA	Eritrea	ERI
	ESTONIA	Estonia	EST
	ETHIOPIA	Ethiopia	ETH
	FAEROE ISLANDS	Faeroe Islands	#N/A
	FEDERATED STATES OF MICRONESIA	Micronesia (Federated States of)	#N/A
	FIJI	Fiji	FJI
	FINLAND	Finland	FIN
	FRANCE (INCLUDING MONACO)	France	FRA
	FRENCH GUIANA	French Guiana	GUF
	FRENCH POLYNESIA	French Polynesia	#N/A
	GABON	Gabon	GAB
	GAMBIA	Gambia	GMB
	GEORGIA	Georgia	GEO
	GERMANY	Germany	DEU
	GHANA	Ghana	GHA
	GREECE	Greece	GRC
	GREENLAND	Greenland	GRL
	GRENADA	Grenada	GRD
	GUATEMALA	Guatemala	GTM
	GUINEA	Guinea	GIN
	GUINEA BISSAU	Guinea-Bissau	GNB
	GUYANA	Guyana	GUY
	HAITI	Haiti	HTI
	HONDURAS	Honduras	HND
	HONG KONG SPECIAL ADMINSTRATIVE REGION OF CHINA	Hong Kong	HKG
	HUNGARY	Hungary	HUN
	ICELAND	Iceland	ISL
	INDIA	India	IND
	INDONESIA	Indonesia	IDN
	IRAQ	Iraq	IRQ
	IRELAND	Ireland	IRL
	ISLAMIC REPUBLIC OF IRAN	Iran	IRN
	ISRAEL	Israel	ISR
	ITALY (INCLUDING SAN MARINO)	Italy	ITA
	JAMAICA	Jamaica	JAM
	JAPAN	Japan	JPN
	JORDAN	Jordan	JOR
	KAZAKHSTAN	Kazakhstan	KAZ
	KENYA	Kenya	KEN
	KIRIBATI	Kiribati	KIR
	KUWAIT	Kosovo	#N/A
	KUWAITI OIL FIRES	Kuwait	KWT
	KYRGYZSTAN	Kyrgyzstan	KGZ
	LAO PEOPLE S DEMOCRATIC REPUBLIC	Laos	LAO
	LATVIA	Latvia	LVA
	LEBANON	Lebanon	LBN
	LESOTHO	Lesotho	LSO
	LIBERIA	Liberia	LBR
	LIBYAN ARAB JAMAHIRIYAH	Libya	LBY
	LIECHTENSTEIN	Liechtenstein	LIE
	LITHUANIA	Lithuania	LTU
	LUXEMBOURG	Luxembourg	LUX
	MACAU SPECIAL ADMINSTRATIVE REGION OF CHINA	Macao	MAC
	MACEDONIA	North Macedonia	MKD
	MADAGASCAR	Madagascar	MDG
	MALAWI	Malawi	MWI
	MALAYSIA	Malaysia	MYS
	MALDIVES	Maldives	MDV
	MALI	Mali	MLI
	MALTA	Malta	MLT
	MARSHALL ISLANDS	Marshall Islands	#N/A
	MARTINIQUE	Martinique	MTQ
	MAURITANIA	Mauritania	MRT
	MAURITIUS	Mauritius	MUS
	MEXICO	Mexico	MEX
	MONGOLIA	Mongolia	MNG
	MONTENEGRO	Montenegro	MNE
	MONTSERRAT	Montserrat	MSR
	MOROCCO	Morocco	MAR
	MOZAMBIQUE	Mozambique	MOZ
	MYANMAR (FORMERLY BURMA)	Myanmar	MMR
	NAMIBIA	Namibia	NAM
	NAURU	Nauru	NRU
	NEPAL	Nepal	NPL
	NETHERLANDS	Netherlands	ANT
	NEW CALEDONIA	New Caledonia	NCL
	NEW ZEALAND	New Zealand	NZL
	NICARAGUA	Nicaragua	NIC
	NIGER	Niger	NER
	NIGERIA	Nigeria	NGA
	NIUE	Niue	NIU
	NORWAY	Norway	NOR
	OCCUPIED PALESTINIAN TERRITORY	Occupied Palestinian Territory	#N/A
	OMAN	Oman	OMN
	PAKISTAN	Pakistan	PAK
	PALAU	Palau	PLW
	PANAMA	Panama	PAN
	PAPUA NEW GUINEA	Papua New Guinea	PNG
	PARAGUAY	Paraguay	PRY
	PENINSULAR MALAYSIA	Peru	PER
	PERU	Philippines	PHL
	PHILIPPINES	Bolivia	BOL
	POLAND	Poland	POL
	PORTUGAL	Portugal	PRT
	QATAR	Qatar	QAT
	REPUBLIC OF CAMEROON	Cameroon	CMR
	REPUBLIC OF KOREA	South Korea	KOR
	REPUBLIC OF MOLDOVA	Moldova	MDA
	REPUBLIC OF SOUTH SUDAN	South Sudan	#N/A
	REPUBLIC OF SUDAN	Sudan	SDN
	REUNION	Réunion	REU
	ROMANIA	Romania	ROU
	RUSSIAN FEDERATION	Russian Federation	RUS
	RWANDA	Rwanda	RWA
	SAINT HELENA	Saint Helena	#N/A
	SAINT LUCIA	Saint Lucia	LCA
	SAINT MARTIN (DUTCH PORTION)	Sint Maarten (Dutch part)	#N/A
	SAMOA	Samoa	WSM
	SAO TOME & PRINCIPE	Sao Tome and Principe	STP
	SAUDI ARABIA	Saudi Arabia	SAU
	SENEGAL	Senegal	SEN
	SERBIA	Serbia	SRB
	SEYCHELLES	Seychelles	SYC
	SIERRA LEONE	Sierra Leone	SLE
	SINGAPORE	Singapore	SGP
	SLOVAKIA	Slovakia	SVK
	SLOVENIA	Slovenia	SVN
	SOLOMON ISLANDS	Solomon Islands	SLB
	SOMALIA	Somalia	SOM
	SOUTH AFRICA	South Africa	ZAF
	SPAIN	Spain	ESP
	SRI LANKA	Sri Lanka	LKA
	ST. KITTS-NEVIS	Saint Kitts and Nevis	#N/A
	ST. PIERRE & MIQUELON	Saint Pierre and Miquelon	#N/A
	ST. VINCENT & THE GRENADINES	Saint Vincent and the Grenadines	VCT
	SURINAME	Suriname	SUR
	SWAZILAND	Swaziland	SWZ
	SWEDEN	Sweden	SWE
	SWITZERLAND	Switzerland	CHE
	SYRIAN ARAB REPUBLIC	Syria	#N/A
	TAIWAN	Taiwan	TWN
	TAJIKISTAN	Tajikistan	TJK
	THAILAND	Thailand	THA
	TIMOR-LESTE (FORMERLY EAST TIMOR)	Timor-Leste	TLS
	TOGO	Togo	TGO
	TONGA	Tonga	TON
	TRINIDAD AND TOBAGO	Trinidad and Tobago	TTO
	TUNISIA	Tunisia	TUN
	TURKEY	Turkey	TUR
	TURKMENISTAN	Turkmenistan	TKM
	TURKS AND CAICOS ISLANDS	Turks and Caicos Islands	#N/A
	TUVALU	Tuvalu	TUV
	UGANDA	Uganda	UGA
	UKRAINE	Ukraine	UKR
	UNITED ARAB EMIRATES	United Arab Emirates	ARE
	UNITED KINGDOM	United Kingdom	GBR
	UNITED REPUBLIC OF TANZANIA	Tanzania	TZA
	UNITED STATES OF AMERICA	USA	USA
	URUGUAY	Uruguay	URY
	UZBEKISTAN	Uzbekistan	UZB
	VANUATU	Vanuatu	VUT
	VENEZUELA	Venezuela	VEN
	VIET NAM	Viet Nam	VNM
	WALLIS AND FUTUNA ISLANDS	Wallis and Futuna Islands	#N/A
	YEMEN	Yemen	YEM
	ZAMBIA	Zambia	ZMB
	ZIMBABWE	Zimbabwe	ZWE

## Sheet: Tabelle5
			Aruba	Aruba	ABW
			Afghanistan	Afghanistan	AFG
			Angola	Angola	AGO
			Anguilla	Anguilla	AIA
			Åland	Åland	ALA
			Albania	Albania	ALB
			Andorra	Andorra	AND
			Netherlands	Netherlands	ANT
			United Arab Emirates	United Arab Emirates	ARE
			Argentina	Argentina	ARG
			Armenia	Armenia	ARM
			American	American	ASM
			Antarctica	Antarctica	ATA
			French	French	ATF
			Antigua	Antigua	ATG
			Australia	Australia	AUS
			Austria	Austria	AUT
			Azerbaijan	Azerbaijan	AZE
			Burundi	Burundi	BDI
			Belgium	Belgium	BEL
			Benin	Benin	BEN
			Burkina Faso	Burkina Faso	BFA
			Bangladesh	Bangladesh	BGD
			Bulgaria	Bulgaria	BGR
			Bahrain	Bahrain	BHR
			Bahamas	Bahamas	BHS
			Bosnia and Herzegovina	Bosnia and Herzegovina	BIH
			Saint	Saint	BLM
			Belarus	Belarus	BLR
			Belize	Belize	BLZ
			Bermuda	Bermuda	BMU
			Bolivia	Bolivia	BOL
			Brazil	Brazil	BRA
			Barbados	Barbados	BRB
			Brunei Darussalam	Brunei Darussalam	BRN
			Bhutan	Bhutan	BTN
			Bouvet	Bouvet	BVT
			Botswana	Botswana	BWA
			Central African Republic	Central African Republic	CAF
			Canada	Canada	CAN
			Cocos	Cocos	CCK
			Switzerland	Switzerland	CHE
			Chile	Chile	CHL
			China	China	CHN
			Côte d'Ivoire	Côte d'Ivoire	CIV
			Cameroon	Cameroon	CMR
			Democratic Republic of the Congo	Democratic Republic of the Congo	COD
			Congo	Congo	COG
			Cook Islands	Cook Islands	COK
			Colombia	Colombia	COL
			Comoros	Comoros	COM
			Cape Verde	Cape Verde	CPV
			Costa Rica	Costa Rica	CRI
			Cuba	Cuba	CUB
			Christmas	Christmas	CXR
			Cayman	Cayman	CYM
			Cyprus	Cyprus	CYP
			Czech Republic	Czech Republic	CZE
			Germany	Germany	DEU
			Djibouti	Djibouti	DJI
			Dominica	Dominica	DMA
			Denmark	Denmark	DNK
			Dominican Republic	Dominican Republic	DOM
			Algeria	Algeria	DZA
			Ecuador	Ecuador	ECU
			Egypt	Egypt	EGY
			Eritrea	Eritrea	ERI
			Western	Western	ESH
			Spain	Spain	ESP
			Estonia	Estonia	EST
			Ethiopia	Ethiopia	ETH
			Finland	Finland	FIN
			Fiji	Fiji	FJI
			Falkland	Falkland	FLK
			France	France	FRA
			Faroe	Faroe	FRO
			Micronesia	Micronesia	FSM
			Gabon	Gabon	GAB
			United Kingdom	United Kingdom	GBR
			Georgia	Georgia	GEO
			Guernsey	Guernsey	GGY
			Ghana	Ghana	GHA
			Gibraltar	Gibraltar	GIB
			Guinea	Guinea	GIN
			Guadeloupe	Guadeloupe	GLP
			Gambia	Gambia	GMB
			Guinea-Bissau	Guinea-Bissau	GNB
			Equatorial Guinea	Equatorial Guinea	GNQ
			Greece	Greece	GRC
			Grenada	Grenada	GRD
			Greenland	Greenland	GRL
			Guatemala	Guatemala	GTM
			French Guiana	French Guiana	GUF
			Guam	Guam	GUM
			Guyana	Guyana	GUY
			HongKong	Hong Kong	HKG
			Heard	Heard	HMD
			Honduras	Honduras	HND
			Croatia	Croatia	HRV
			Haiti	Haiti	HTI
			Hungary	Hungary	HUN
			Indonesia	Indonesia	IDN
			Isle	Isle	IMN
			India	India	IND
			British	British	IOT
			Ireland	Ireland	IRL
			Iran	Iran	IRN
			Iraq	Iraq	IRQ
			Iceland	Iceland	ISL
			Israel	Israel	ISR
			Italy	Italy	ITA
			Jamaica	Jamaica	JAM
			Jersey	Jersey	JEY
			Jordan	Jordan	JOR
			Japan	Japan	JPN
			Kazakhstan	Kazakhstan	KAZ
			Kenya	Kenya	KEN
			Kyrgyzstan	Kyrgyzstan	KGZ
			Cambodia	Cambodia	KHM
			Kiribati	Kiribati	KIR
			Saint	Saint	KNA
			South Korea	South Korea	KOR
			Kuwait	Kuwait	KWT
			Laos	Laos	LAO
			Lebanon	Lebanon	LBN
			Liberia	Liberia	LBR
			Libya	Libya	LBY
			Saint Lucia	Saint Lucia	LCA
			Liechtenstein	Liechtenstein	LIE
			Sri Lanka	Sri Lanka	LKA
			Lesotho	Lesotho	LSO
			Lithuania	Lithuania	LTU
			Luxembourg	Luxembourg	LUX
			Latvia	Latvia	LVA
			Macao	Macao	MAC
			Saint	Saint	MAF
			Morocco	Morocco	MAR
			Monaco	Monaco	MCO
			Moldova	Moldova	MDA
			Madagascar	Madagascar	MDG
			Maldives	Maldives	MDV
			Mexico	Mexico	MEX
			Marshall	Marshall	MHL
			North Macedonia	North Macedonia	MKD
			Mali	Mali	MLI
			Malta	Malta	MLT
			Myanmar	Myanmar	MMR
			Montenegro	Montenegro	MNE
			Mongolia	Mongolia	MNG
			Northern	Northern	MNP
			Mozambique	Mozambique	MOZ
			Mauritania	Mauritania	MRT
			Montserrat	Montserrat	MSR
			Martinique	Martinique	MTQ
			Mauritius	Mauritius	MUS
			Malawi	Malawi	MWI
			Malaysia	Malaysia	MYS
			Mayotte	Mayotte	MYT
			Namibia	Namibia	NAM
			New Caledonia	New Caledonia	NCL
			Niger	Niger	NER
			Norfolk	Norfolk	NFK
			Nigeria	Nigeria	NGA
			Nicaragua	Nicaragua	NIC
			Niue	Niue	NIU
			Netherlands	Netherlands	NLD
			Norway	Norway	NOR
			Nepal	Nepal	NPL
			Nauru	Nauru	NRU
			New Zealand	New Zealand	NZL
			Oman	Oman	OMN
			Pakistan	Pakistan	PAK
			Panama	Panama	PAN
			Pitcairn	Pitcairn	PCN
			Peru	Peru	PER
			Philippines	Philippines	PHL
			Palau	Palau	PLW
			Papua New Guinea	Papua New Guinea	PNG
			Poland	Poland	POL
			Puerto Rico	Puerto Rico	PRI
			Korea	Korea	PRK
			Portugal	Portugal	PRT
			Paraguay	Paraguay	PRY
			Palestinian	Palestinian	PSE
			French	French	PYF
			Qatar	Qatar	QAT
			Réunion	Réunion	REU
			Romania	Romania	ROU
			Russian Federation	Russian Federation	RUS
			Rwanda	Rwanda	RWA
			Saudi Arabia	Saudi Arabia	SAU
			Sudan	Sudan	SDN
			Senegal	Senegal	SEN
			Singapore	Singapore	SGP
			South	South	SGS
			Saint	Saint	SHN
			Svalbard and Jan Mayen	Svalbard and Jan Mayen	SJM
			Solomon Islands	Solomon Islands	SLB
			Sierra Leone	Sierra Leone	SLE
			El Salvador	El Salvador	SLV
			San Marino	San Marino	SMR
			Somalia	Somalia	SOM
			Saint Piere and Miquelon	Saint Piere and Miquelon	SPM
			Serbia	Serbia	SRB
			Sao Tome and Principe	Sao Tome and Principe	STP
			Suriname	Suriname	SUR
			Slovakia	Slovakia	SVK
			Slovenia	Slovenia	SVN
			Sweden	Sweden	SWE
			Swaziland	Swaziland	SWZ
			Seychelles	Seychelles	SYC
			Syrian Arab Republic	Syrian Arab Republic	SYR
			Turks	Turks	TCA
			Chad	Chad	TCD
			Togo	Togo	TGO
			Thailand	Thailand	THA
			Tajikistan	Tajikistan	TJK
			Tokelau	Tokelau	TKL
			Turkmenistan	Turkmenistan	TKM
			Timor-Leste	Timor-Leste	TLS
			Tonga	Tonga	TON
			Trinidad and Tobago	Trinidad and Tobago	TTO
			Tunisia	Tunisia	TUN
			Turkey	Turkey	TUR
			Tuvalu	Tuvalu	TUV
			Taiwan	Taiwan	TWN
			Tanzania	Tanzania	TZA
			Uganda	Uganda	UGA
			Ukraine	Ukraine	UKR
			United	United	UMI
			Uruguay	Uruguay	URY
			USA	USA	USA
			Uzbekistan	Uzbekistan	UZB
			Holy	Holy	VAT
			Saint Vincent and the Grenadines	Saint Vincent and the Grenadines	VCT
			Venezuela	Venezuela	VEN
			Virgin	Virgin	VGB
			Virgin	Virgin	VIR
			Viet	Viet Nam	VNM
			Vanuatu	Vanuatu	VUT
			Wallis	Wallis	WLF
			Samoa	Samoa	WSM
			Yemen	Yemen	YEM
			South Africa	South Africa	ZAF
			Zambia	Zambia	ZMB
			Zimbabwe	Zimbabwe	ZWE

## Sheet: Consumption Emissions
	Consumption emissions
	All values in million tonnes of carbon per year. For values in million tonnes of CO2 per year, multiply the values below by 3.664
	1MtC = 1 million tonne of carbon = 3.664 million tonnes of CO2
	CIte as: Updated from Peters, GP, Minx, JC, Weber, CL and Edenhofer, O 2011. Growth in emission transfers via international trade from 1990 to 2008. Proceedings of the National Academy of Sciences 108, 8903-8908. http://www.pnas.org/content/108/21/8903.abstract
	For an explanation of issues around consumption emissions, see: Peters, GP, Davis, SJ and Andrew, R 2012. A synthesis of carbon in international trade. Biogeosciences, 9, 3247-3276. http://www.biogeosciences.net/9/3247/2012/bg-9-3247-2012.html
	Consumption emissions are computed as in Peters et al. (2011), using 'Territorial Emissions' as reference
MtC/yr
	AFGHANISTAN	ALBANIA	ALGERIA	ANDORRA	ANGOLA	ANGUILLA	ANTIGUA & BARBUDA	ARGENTINA	ARMENIA	ARUBA	AUSTRALIA	AUSTRIA	AZERBAIJAN	BAHAMAS	BAHRAIN	BANGLADESH	BARBADOS	BELARUS	BELGIUM	BELIZE	BENIN	BERMUDA	BHUTAN	BONAIRE, SAINT EUSTATIUS, AND SABA	BOSNIA & HERZEGOVINA	BOTSWANA	BRAZIL	BRITISH VIRGIN ISLANDS	BRUNEI (DARUSSALAM)	BULGARIA	BURKINA FASO	BURUNDI	CAMBODIA	CANADA	CAPE VERDE	CENTRAL AFRICAN REPUBLIC	CHAD	CHILE	CHINA (MAINLAND)	COLOMBIA	COMOROS	CONGO	COOK ISLANDS	COSTA RICA	COTE D IVOIRE	CROATIA	CUBA	CURACAO	CYPRUS
	Afghanistan	Albania	Algeria	Andorra	Angola	Anguilla	Antigua and Barbuda	Argentina	Armenia	Aruba	Australia	Austria	Azerbaijan	Bahamas	Bahrain	Bangladesh	Barbados	Belarus	Belgium	Belize	Benin	Bermuda	Bhutan	Bonaire, Saint Eustatius and Saba	Bosnia and Herzegovina	Botswana	Brazil	British Virgin Islands	Brunei Darussalam	Bulgaria	Burkina Faso	Burundi	Cambodia	Canada	Cape Verde	Central African Republic	Chad	Chile	China	Colombia	Comoros	Congo	Cook Islands	Costa Rica	Côte d'Ivoire	Croatia	Cuba	Curaçao	Cyprus
1959	NaN	NaN	NaN	NaN	NaN	NaN	NaN	NaN	NaN	NaN	NaN	NaN	NaN	NaN	NaN	NaN	NaN	NaN	NaN	NaN	NaN	NaN	NaN	NaN	NaN	NaN	NaN	NaN	NaN	NaN	NaN	NaN	NaN	NaN	NaN	NaN	NaN	NaN	NaN	NaN	NaN	NaN	NaN	NaN	NaN	NaN	NaN	NaN	NaN
1960	NaN	NaN	NaN	NaN	NaN	NaN	NaN	NaN	NaN	NaN	NaN	NaN	NaN	NaN	NaN	NaN	NaN	NaN	NaN	NaN	NaN	NaN	NaN	NaN	NaN	NaN	NaN	NaN	NaN	NaN	NaN	NaN	NaN	NaN	NaN	NaN	NaN	NaN	NaN	NaN	NaN	NaN	NaN	NaN	NaN	NaN	NaN	NaN	NaN
1961	NaN	NaN	NaN	NaN	NaN	NaN	NaN	NaN	NaN	NaN	NaN	NaN	NaN	NaN	NaN	NaN	NaN	NaN	NaN	NaN	NaN	NaN	NaN	NaN	NaN	NaN	NaN	NaN	NaN	NaN	NaN	NaN	NaN	NaN	NaN	NaN	NaN	NaN	NaN	NaN	NaN	NaN	NaN	NaN	NaN	NaN	NaN	NaN	NaN
1962	NaN	NaN	NaN	NaN	NaN	NaN	NaN	NaN	NaN	NaN	NaN	NaN	NaN	NaN	NaN	NaN	NaN	NaN	NaN	NaN	NaN	NaN	NaN	NaN	NaN	NaN	NaN	NaN	NaN	NaN	NaN	NaN	NaN	NaN	NaN	NaN	NaN	NaN	NaN	NaN	NaN	NaN	NaN	NaN	NaN	NaN	NaN	NaN	NaN
1963	NaN	NaN	NaN	NaN	NaN	NaN	NaN	NaN	NaN	NaN	NaN	NaN	NaN	NaN	NaN	NaN	NaN	NaN	NaN	NaN	NaN	NaN	NaN	NaN	NaN	NaN	NaN	NaN	NaN	NaN	NaN	NaN	NaN	NaN	NaN	NaN	NaN	NaN	NaN	NaN	NaN	NaN	NaN	NaN	NaN	NaN	NaN	NaN	NaN
1964	NaN	NaN	NaN	NaN	NaN	NaN	NaN	NaN	NaN	NaN	NaN	NaN	NaN	NaN	NaN	NaN	NaN	NaN	NaN	NaN	NaN	NaN	NaN	NaN	NaN	NaN	NaN	NaN	NaN	NaN	NaN	NaN	NaN	NaN	NaN	NaN	NaN	NaN	NaN	NaN	NaN	NaN	NaN	NaN	NaN	NaN	NaN	NaN	NaN
1965	NaN	NaN	NaN	NaN	NaN	NaN	NaN	NaN	NaN	NaN	NaN	NaN	NaN	NaN	NaN	NaN	NaN	NaN	NaN	NaN	NaN	NaN	NaN	NaN	NaN	NaN	NaN	NaN	NaN	NaN	NaN	NaN	NaN	NaN	NaN	NaN	NaN	NaN	NaN	NaN	NaN	NaN	NaN	NaN	NaN	NaN	NaN	NaN	NaN
1966	NaN	NaN	NaN	NaN	NaN	NaN	NaN	NaN	NaN	NaN	NaN	NaN	NaN	NaN	NaN	NaN	NaN	NaN	NaN	NaN	NaN	NaN	NaN	NaN	NaN	NaN	NaN	NaN	NaN	NaN	NaN	NaN	NaN	NaN	NaN	NaN	NaN	NaN	NaN	NaN	NaN	NaN	NaN	NaN	NaN	NaN	NaN	NaN	NaN
1967	NaN	NaN	NaN	NaN	NaN	NaN	NaN	NaN	NaN	NaN	NaN	NaN	NaN	NaN	NaN	NaN	NaN	NaN	NaN	NaN	NaN	NaN	NaN	NaN	NaN	NaN	NaN	NaN	NaN	NaN	NaN	NaN	NaN	NaN	NaN	NaN	NaN	NaN	NaN	NaN	NaN	NaN	NaN	NaN	NaN	NaN	NaN	NaN	NaN
1968	NaN	NaN	NaN	NaN	NaN	NaN	NaN	NaN	NaN	NaN	NaN	NaN	NaN	NaN	NaN	NaN	NaN	NaN	NaN	NaN	NaN	NaN	NaN	NaN	NaN	NaN	NaN	NaN	NaN	NaN	NaN	NaN	NaN	NaN	NaN	NaN	NaN	NaN	NaN	NaN	NaN	NaN	NaN	NaN	NaN	NaN	NaN	NaN	NaN
1969	NaN	NaN	NaN	NaN	NaN	NaN	NaN	NaN	NaN	NaN	NaN	NaN	NaN	NaN	NaN	NaN	NaN	NaN	NaN	NaN	NaN	NaN	NaN	NaN	NaN	NaN	NaN	NaN	NaN	NaN	NaN	NaN	NaN	NaN	NaN	NaN	NaN	NaN	NaN	NaN	NaN	NaN	NaN	NaN	NaN	NaN	NaN	NaN	NaN
1970	NaN	NaN	NaN	NaN	NaN	NaN	NaN	NaN	NaN	NaN	NaN	NaN	NaN	NaN	NaN	NaN	NaN	NaN	NaN	NaN	NaN	NaN	NaN	NaN	NaN	NaN	NaN	NaN	NaN	NaN	NaN	NaN	NaN	NaN	NaN	NaN	NaN	NaN	NaN	NaN	NaN	NaN	NaN	NaN	NaN	NaN	NaN	NaN	NaN
1971	NaN	NaN	NaN	NaN	NaN	NaN	NaN	NaN	NaN	NaN	NaN	NaN	NaN	NaN	NaN	NaN	NaN	NaN	NaN	NaN	NaN	NaN	NaN	NaN	NaN	NaN	NaN	NaN	NaN	NaN	NaN	NaN	NaN	NaN	NaN	NaN	NaN	NaN	NaN	NaN	NaN	NaN	NaN	NaN	NaN	NaN	NaN	NaN	NaN
1972	NaN	NaN	NaN	NaN	NaN	NaN	NaN	NaN	NaN	NaN	NaN	NaN	NaN	NaN	NaN	NaN	NaN	NaN	NaN	NaN	NaN	NaN	NaN	NaN	NaN	NaN	NaN	NaN	NaN	NaN	NaN	NaN	NaN	NaN	NaN	NaN	NaN	NaN	NaN	NaN	NaN	NaN	NaN	NaN	NaN	NaN	NaN	NaN	NaN
1973	NaN	NaN	NaN	NaN	NaN	NaN	NaN	NaN	NaN	NaN	NaN	NaN	NaN	NaN	NaN	NaN	NaN	NaN	NaN	NaN	NaN	NaN	NaN	NaN	NaN	NaN	NaN	NaN	NaN	NaN	NaN	NaN	NaN	NaN	NaN	NaN	NaN	NaN	NaN	NaN	NaN	NaN	NaN	NaN	NaN	NaN	NaN	NaN	NaN
1974	NaN	NaN	NaN	NaN	NaN	NaN	NaN	NaN	NaN	NaN	NaN	NaN	NaN	NaN	NaN	NaN	NaN	NaN	NaN	NaN	NaN	NaN	NaN	NaN	NaN	NaN	NaN	NaN	NaN	NaN	NaN	NaN	NaN	NaN	NaN	NaN	NaN	NaN	NaN	NaN	NaN	NaN	NaN	NaN	NaN	NaN	NaN	NaN	NaN
1975	NaN	NaN	NaN	NaN	NaN	NaN	NaN	NaN	NaN	NaN	NaN	NaN	NaN	NaN	NaN	NaN	NaN	NaN	NaN	NaN	NaN	NaN	NaN	NaN	NaN	NaN	NaN	NaN	NaN	NaN	NaN	NaN	NaN	NaN	NaN	NaN	NaN	NaN	NaN	NaN	NaN	NaN	NaN	NaN	NaN	NaN	NaN	NaN	NaN
1976	NaN	NaN	NaN	NaN	NaN	NaN	NaN	NaN	NaN	NaN	NaN	NaN	NaN	NaN	NaN	NaN	NaN	NaN	NaN	NaN	NaN	NaN	NaN	NaN	NaN	NaN	NaN	NaN	NaN	NaN	NaN	NaN	NaN	NaN	NaN	NaN	NaN	NaN	NaN	NaN	NaN	NaN	NaN	NaN	NaN	NaN	NaN	NaN	NaN
1977	NaN	NaN	NaN	NaN	NaN	NaN	NaN	NaN	NaN	NaN	NaN	NaN	NaN	NaN	NaN	NaN	NaN	NaN	NaN	NaN	NaN	NaN	NaN	NaN	NaN	NaN	NaN	NaN	NaN	NaN	NaN	NaN	NaN	NaN	NaN	NaN	NaN	NaN	NaN	NaN	NaN	NaN	NaN	NaN	NaN	NaN	NaN	NaN	NaN
1978	NaN	NaN	NaN	NaN	NaN	NaN	NaN	NaN	NaN	NaN	NaN	NaN	NaN	NaN	NaN	NaN	NaN	NaN	NaN	NaN	NaN	NaN	NaN	NaN	NaN	NaN	NaN	NaN	NaN	NaN	NaN	NaN	NaN	NaN	NaN	NaN	NaN	NaN	NaN	NaN	NaN	NaN	NaN	NaN	NaN	NaN	NaN	NaN	NaN
1979	NaN	NaN	NaN	NaN	NaN	NaN	NaN	NaN	NaN	NaN	NaN	NaN	NaN	NaN	NaN	NaN	NaN	NaN	NaN	NaN	NaN	NaN	NaN	NaN	NaN	NaN	NaN	NaN	NaN	NaN	NaN	NaN	NaN	NaN	NaN	NaN	NaN	NaN	NaN	NaN	NaN	NaN	NaN	NaN	NaN	NaN	NaN	NaN	NaN
1980	NaN	NaN	NaN	NaN	NaN	NaN	NaN	NaN	NaN	NaN	NaN	NaN	NaN	NaN	NaN	NaN	NaN	NaN	NaN	NaN	NaN	NaN	NaN	NaN	NaN	NaN	NaN	NaN	NaN	NaN	NaN	NaN	NaN	NaN	NaN	NaN	NaN	NaN	NaN	NaN	NaN	NaN	NaN	NaN	NaN	NaN	NaN	NaN	NaN
1981	NaN	NaN	NaN	NaN	NaN	NaN	NaN	NaN	NaN	NaN	NaN	NaN	NaN	NaN	NaN	NaN	NaN	NaN	NaN	NaN	NaN	NaN	NaN	NaN	NaN	NaN	NaN	NaN	NaN	NaN	NaN	NaN	NaN	NaN	NaN	NaN	NaN	NaN	NaN	NaN	NaN	NaN	NaN	NaN	NaN	NaN	NaN	NaN	NaN
1982	NaN	NaN	NaN	NaN	NaN	NaN	NaN	NaN	NaN	NaN	NaN	NaN	NaN	NaN	NaN	NaN	NaN	NaN	NaN	NaN	NaN	NaN	NaN	NaN	NaN	NaN	NaN	NaN	NaN	NaN	NaN	NaN	NaN	NaN	NaN	NaN	NaN	NaN	NaN	NaN	NaN	NaN	NaN	NaN	NaN	NaN	NaN	NaN	NaN
1983	NaN	NaN	NaN	NaN	NaN	NaN	NaN	NaN	NaN	NaN	NaN	NaN	NaN	NaN	NaN	NaN	NaN	NaN	NaN	NaN	NaN	NaN	NaN	NaN	NaN	NaN	NaN	NaN	NaN	NaN	NaN	NaN	NaN	NaN	NaN	NaN	NaN	NaN	NaN	NaN	NaN	NaN	NaN	NaN	NaN	NaN	NaN	NaN	NaN
1984	NaN	NaN	NaN	NaN	NaN	NaN	NaN	NaN	NaN	NaN	NaN	NaN	NaN	NaN	NaN	NaN	NaN	NaN	NaN	NaN	NaN	NaN	NaN	NaN	NaN	NaN	NaN	NaN	NaN	NaN	NaN	NaN	NaN	NaN	NaN	NaN	NaN	NaN	NaN	NaN	NaN	NaN	NaN	NaN	NaN	NaN	NaN	NaN	NaN
1985	NaN	NaN	NaN	NaN	NaN	NaN	NaN	NaN	NaN	NaN	NaN	NaN	NaN	NaN	NaN	NaN	NaN	NaN	NaN	NaN	NaN	NaN	NaN	NaN	NaN	NaN	NaN	NaN	NaN	NaN	NaN	NaN	NaN	NaN	NaN	NaN	NaN	NaN	NaN	NaN	NaN	NaN	NaN	NaN	NaN	NaN	NaN	NaN	NaN
1986	NaN	NaN	NaN	NaN	NaN	NaN	NaN	NaN	NaN	NaN	NaN	NaN	NaN	NaN	NaN	NaN	NaN	NaN	NaN	NaN	NaN	NaN	NaN	NaN	NaN	NaN	NaN	NaN	NaN	NaN	NaN	NaN	NaN	NaN	NaN	NaN	NaN	NaN	NaN	NaN	NaN	NaN	NaN	NaN	NaN	NaN	NaN	NaN	NaN
1987	NaN	NaN	NaN	NaN	NaN	NaN	NaN	NaN	NaN	NaN	NaN	NaN	NaN	NaN	NaN	NaN	NaN	NaN	NaN	NaN	NaN	NaN	NaN	NaN	NaN	NaN	NaN	NaN	NaN	NaN	NaN	NaN	NaN	NaN	NaN	NaN	NaN	NaN	NaN	NaN	NaN	NaN	NaN	NaN	NaN	NaN	NaN	NaN	NaN
1988	NaN	NaN	NaN	NaN	NaN	NaN	NaN	NaN	NaN	NaN	NaN	NaN	NaN	NaN	NaN	NaN	NaN	NaN	NaN	NaN	NaN	NaN	NaN	NaN	NaN	NaN	NaN	NaN	NaN	NaN	NaN	NaN	NaN	NaN	NaN	NaN	NaN	NaN	NaN	NaN	NaN	NaN	NaN	NaN	NaN	NaN	NaN	NaN	NaN
1989	NaN	NaN	NaN	NaN	NaN	NaN	NaN	NaN	NaN	NaN	NaN	NaN	NaN	NaN	NaN	NaN	NaN	NaN	NaN	NaN	NaN	NaN	NaN	NaN	NaN	NaN	NaN	NaN	NaN	NaN	NaN	NaN	NaN	NaN	NaN	NaN	NaN	NaN	NaN	NaN	NaN	NaN	NaN	NaN	NaN	NaN	NaN	NaN	NaN
1990	NaN	1.4828	NaN	NaN	NaN	NaN	NaN	30.5456	3.28912	NaN	66.8859	24.022	7.84768	NaN	3.14581	4.94758	NaN	16.3575	42.5395	NaN	0.271413	NaN	NaN	NaN	NaN	0.737	64.0109	NaN	1.21701	16.7057	0.221657	NaN	0.510154	133.498	NaN	NaN	NaN	8.78064	617.823	17.2627	NaN	NaN	NaN	1.39979	1.62029	5.80915	NaN	NaN	1.81558
1991	NaN	1.22979	NaN	NaN	NaN	NaN	NaN	32.8584	3.15962	NaN	67.1179	24.497	6.10529	NaN	3.23471	5.24477	NaN	17.2248	42.9421	NaN	0.303542	NaN	NaN	NaN	NaN	0.719	65.7238	NaN	1.10605	12.1344	0.233641	NaN	0.532263	132.971	NaN	NaN	NaN	8.49786	638.716	16.7442	NaN	NaN	NaN	1.41966	1.5159	4.30104	NaN	NaN	1.8501
1992	NaN	0.77564	NaN	NaN	NaN	NaN	NaN	34.8208	1.01215	NaN	67.8478	25.0021	3.79558	NaN	3.0942	5.60729	NaN	12.0434	46.9605	NaN	0.322412	NaN	NaN	NaN	NaN	0.758	65.5618	NaN	1.19108	11.4401	0.237659	NaN	0.557997	136.732	NaN	NaN	NaN	9.12485	684.531	18.5393	NaN	NaN	NaN	1.55532	1.58809	4.94642	NaN	NaN	2.22105
1993	NaN	0.710272	NaN	NaN	NaN	NaN	NaN	33.5743	0.501149	NaN	68.1757	23.9541	6.65503	NaN	3.80444	5.6958	NaN	10.1573	44.3241	NaN	0.376488	NaN	NaN	NaN	NaN	0.872	67.7546	NaN	1.27009	12.2572	0.238187	NaN	0.547612	133.309	NaN	NaN	NaN	9.7563	731.494	19.0774	NaN	NaN	NaN	1.56336	1.79104	4.95715	NaN	NaN	2.03096
1994	NaN	0.631363	NaN	NaN	NaN	NaN	NaN	34.6168	0.488526	NaN	70.4545	23.8923	5.26304	NaN	3.92169	6.28048	NaN	7.8466	44.1407	NaN	0.430943	NaN	NaN	NaN	NaN	0.827	71.5461	NaN	1.33121	11.2854	0.245313	NaN	0.581187	134.914	NaN	NaN	NaN	10.4094	728.876	20.1005	NaN	NaN	NaN	1.87231	1.45127	4.81854	NaN	NaN	2.0414
1995	NaN	0.674586	NaN	NaN	NaN	NaN	NaN	35.3824	0.74262	NaN	72.0174	24.9978	6.3779	NaN	3.88498	7.14266	NaN	9.16913	45.3175	NaN	0.457912	NaN	NaN	NaN	NaN	0.831	77.8517	NaN	1.29919	12.648	0.252003	NaN	0.568884	137.169	NaN	NaN	NaN	11.2317	794.514	18.3484	NaN	NaN	NaN	1.82907	1.9331	5.24903	NaN	NaN	2.09658
1996	NaN	0.784151	NaN	NaN	NaN	NaN	NaN	37.2908	0.792284	NaN	73.7572	27.0635	7.79544	NaN	3.98239	7.39293	NaN	12.8042	44.9798	NaN	0.473735	NaN	NaN	NaN	NaN	0.752	85.6997	NaN	1.5088	13.1699	0.266598	NaN	0.640552	139.765	NaN	NaN	NaN	13.1739	829.523	18.3992	NaN	NaN	NaN	1.78621	1.81853	5.4626	NaN	NaN	2.47253
1997	NaN	0.586664	NaN	NaN	NaN	NaN	NaN	39.1879	1.07691	NaN	75.8738	25.5843	7.04165	NaN	3.90692	7.89917	NaN	12.1622	46.3548	NaN	0.514254	NaN	NaN	NaN	NaN	0.764	90.7053	NaN	1.03124	12.6237	0.304989	NaN	0.624786	148.482	NaN	NaN	NaN	14.9178	811.487	19.8567	NaN	NaN	NaN	1.93848	1.75945	5.77439	NaN	NaN	2.2466
1998	NaN	0.673518	NaN	NaN	NaN	NaN	NaN	40.065	1.08276	NaN	81.0315	26.537	8.23589	NaN	4.40616	7.87753	NaN	19.2797	49.3396	NaN	0.563457	NaN	NaN	NaN	NaN	0.912	92.8981	NaN	1.42208	12.4782	0.45911	NaN	0.775219	149.749	NaN	NaN	NaN	15.3235	784.814	19.8797	NaN	NaN	NaN	2.24093	2.30613	5.74047	NaN	NaN	2.67408
1999	NaN	1.00099	NaN	NaN	NaN	NaN	NaN	40.6555	1.39907	NaN	80.8144	26.103	7.29567	NaN	2.66715	8.17967	NaN	18.1932	50.5148	NaN	0.572825	NaN	NaN	NaN	NaN	0.862	88.1744	NaN	0.846151	11.2367	0.544843	NaN	0.737157	149.44	NaN	NaN	NaN	16.4103	795.325	15.8539	NaN	NaN	NaN	2.96288	1.70324	6.02688	NaN	NaN	2.24608
2000	NaN	1.03833	NaN	NaN	NaN	NaN	NaN	38.1797	1.09577	NaN	79.1501	26.3687	7.00813	NaN	3.44162	8.955	NaN	17.8436	51.5568	NaN	0.696291	NaN	NaN	NaN	NaN	2.09689	91.9225	NaN	0.850698	12.1331	0.403433	NaN	0.758684	154.956	NaN	NaN	NaN	16.3796	809.617	16.0918	NaN	NaN	NaN	2.64805	1.53504	5.89883	NaN	NaN	2.69038
2001	NaN	1.1142	NaN	NaN	NaN	NaN	NaN	35.1905	1.12427	NaN	80.7902	27.0323	7.11251	NaN	3.04082	11.0383	NaN	16.7439	51.012	NaN	0.777535	NaN	NaN	NaN	NaN	1.90514	90.767	NaN	0.828711	12.5013	0.451256	NaN	0.914601	149.364	NaN	NaN	NaN	14.9025	849.147	16.1146	NaN	NaN	NaN	2.81597	1.73041	6.62013	NaN	NaN	2.60312
2002	NaN	1.37954	NaN	NaN	NaN	NaN	NaN	22.4339	1.01245	NaN	86.5119	27.127	8.06591	NaN	3.3143	10.2516	NaN	17.4616	54.1045	NaN	0.882495	NaN	NaN	NaN	NaN	0.880936	86.2345	NaN	0.839859	11.8498	0.45845	NaN	0.707616	155.601	NaN	NaN	NaN	16.1956	914.174	17.2204	NaN	NaN	NaN	4.19188	1.39418	7.0134	NaN	NaN	3.12251
2003	NaN	1.47616	NaN	NaN	NaN	NaN	NaN	29.4083	1.15694	NaN	90.366	27.5209	9.14999	NaN	3.07774	12.5893	NaN	16.8421	53.5654	NaN	1.03644	NaN	NaN	NaN	NaN	3.34098	83.0371	NaN	1.22304	12.6512	0.522039	NaN	1.27765	149.673	NaN	NaN	NaN	15.1529	1025.24	16.2504	NaN	NaN	NaN	3.1615	1.87728	7.52709	NaN	NaN	2.75154
2004	NaN	1.42432	NaN	NaN	NaN	NaN	NaN	34.4694	1.17858	NaN	93.9993	28.3051	9.8416	NaN	3.01481	13.0103	NaN	17.4962	59.5115	NaN	0.971096	NaN	NaN	NaN	NaN	2.47181	86.3885	NaN	1.15461	12.4381	0.631979	NaN	1.32194	154.263	NaN	NaN	NaN	15.879	1159.18	15.8074	NaN	NaN	NaN	3.30401	2.03653	7.42862	NaN	NaN	2.50687
2005	NaN	1.55759	NaN	NaN	NaN	NaN	NaN	36.6419	1.46965	NaN	93.1429	28.9783	9.43082	NaN	3.51183	13.3605	NaN	16.4621	58.4285	NaN	1.26856	NaN	NaN	NaN	NaN	2.05644	91.2731	NaN	1.14279	12.9339	0.442688	NaN	1.64589	157.388	NaN	NaN	NaN	17.109	1275.08	17.7695	NaN	NaN	NaN	3.60102	2.26479	7.80462	NaN	NaN	2.64343
2006	NaN	1.47463	NaN	NaN	NaN	NaN	NaN	40.7497	1.45589	NaN	97.599	29.5461	10.8479	NaN	3.01455	14.2419	NaN	18.4298	60.9936	NaN	1.73275	NaN	NaN	NaN	NaN	2.06325	93.8324	NaN	1.2346	13.8367	0.492317	NaN	1.82718	154.508	NaN	NaN	NaN	18.0276	1355.43	19.0095	NaN	NaN	NaN	3.12838	2.2561	8.76059	NaN	NaN	2.57721
2007	NaN	1.47324	NaN	NaN	NaN	NaN	NaN	42.3268	2.02386	NaN	101.108	28.0731	8.51339	NaN	4.0386	15.2701	NaN	19.2903	61.7477	NaN	1.78926	NaN	NaN	NaN	NaN	2.66746	100.994	NaN	1.85332	14.2812	0.600818	NaN	1.99282	163.505	NaN	NaN	NaN	19.1555	1472.32	19.2595	NaN	NaN	NaN	3.55745	2.11418	8.54184	NaN	NaN	2.94487
2008	NaN	1.65251	NaN	NaN	NaN	NaN	NaN	46.4456	1.82116	NaN	99.3616	27.6513	9.58221	NaN	4.55874	15.5761	NaN	20.9702	57.124	NaN	2.00663	NaN	NaN	NaN	NaN	3.26382	113.544	NaN	1.89599	14.5333	0.670062	NaN	2.18187	158.768	NaN	NaN	NaN	21.3259	1607	20.9306	NaN	NaN	NaN	3.64057	2.31883	8.42774	NaN	NaN	3.34139
2009	NaN	1.68572	NaN	NaN	NaN	NaN	NaN	43.6781	1.5906	NaN	105.907	25.3358	8.59485	NaN	5.02811	16.9245	NaN	14.861	48.4846	NaN	1.8978	NaN	NaN	NaN	NaN	1.44256	104.116	NaN	1.75256	12.0151	0.758556	NaN	2.22406	152.497	NaN	NaN	NaN	17.7876	1807.83	21.1468	NaN	NaN	NaN	3.09887	2.06212	7.2899	NaN	NaN	3.57172
2010	NaN	1.65333	NaN	NaN	NaN	NaN	NaN	47.6388	1.49288	NaN	104.59	26.8793	8.21637	NaN	5.28646	19.195	NaN	16.5702	52.499	NaN	1.99333	NaN	NaN	NaN	NaN	1.84942	125.405	NaN	1.77409	11.6943	0.77644	NaN	2.69488	162.411	NaN	NaN	NaN	20.2049	1965.67	22.9615	NaN	NaN	NaN	3.37724	2.18494	6.87025	NaN	NaN	3.64115
2011	NaN	1.71665	NaN	NaN	NaN	NaN	NaN	49.8299	1.55749	NaN	106.695	27.655	8.87678	NaN	3.92398	20.4731	NaN	13.833	55.8077	NaN	2.43292	NaN	NaN	NaN	NaN	1.36581	132.327	NaN	2.1005	12.4382	0.742332	NaN	2.95707	153.795	NaN	NaN	NaN	22.6568	2170.72	23.4163	NaN	NaN	NaN	3.69971	2.18543	7.47458	NaN	NaN	3.20352
2012	NaN	1.62866	NaN	NaN	NaN	NaN	NaN	51.3395	1.72309	NaN	112.442	26.2033	9.71985	NaN	3.41945	21.2998	NaN	17.3536	50.2914	NaN	2.03018	NaN	NaN	NaN	NaN	1.61578	139.122	NaN	2.26776	11.9032	0.816859	NaN	2.90881	164.741	NaN	NaN	NaN	24.5561	2252.74	25.0897	NaN	NaN	NaN	3.80526	2.7124	6.20539	NaN	NaN	2.63123
2013	NaN	1.63092	NaN	NaN	NaN	NaN	NaN	52.8044	1.70351	NaN	106.291	25.6868	10.1394	NaN	3.67565	23.1202	NaN	18.1193	49.6662	NaN	2.14611	NaN	NaN	NaN	NaN	4.39259	147.801	NaN	2.30047	10.3437	1.12104	NaN	3.43891	166.009	NaN	NaN	NaN	24.9013	2310.82	27.7466	NaN	NaN	NaN	3.63839	3.98066	6.02081	NaN	NaN	2.14079
2014	NaN	1.76708	NaN	NaN	NaN	NaN	NaN	52.5144	1.69069	NaN	107.068	24.8357	10.7952	NaN	3.99481	24.1997	NaN	18.3473	48.3633	NaN	2.05451	NaN	NaN	NaN	NaN	4.79685	155.351	NaN	2.47146	10.7569	1.14065	NaN	3.67423	163.757	NaN	NaN	NaN	23.791	2323.79	28.2615	NaN	NaN	NaN	3.62739	4.05601	5.68331	NaN	NaN	2.13168
2015	NaN	1.5405	NaN	NaN	NaN	NaN	NaN	55.0191	1.56457	NaN	108.043	25.0616	11.1077	NaN	4.71944	25.6241	NaN	17.3203	48.0291	NaN	2.23059	NaN	NaN	NaN	NaN	4.37967	142.068	NaN	2.2296	11.1964	1.22314	NaN	4.02126	158.636	NaN	NaN	NaN	24.5678	2321.86	26.8303	NaN	NaN	NaN	3.42287	3.77813	5.66716	NaN	NaN	2.04444
2016	NaN	1.492	NaN	NaN	NaN	NaN	NaN	53.1668	1.5074	NaN	105.15	25.1981	10.7364	NaN	4.95528	26.2211	NaN	16.765	46.5268	NaN	2.39398	NaN	NaN	NaN	NaN	4.63313	137.253	NaN	2.29871	10.5316	1.25544	NaN	4.17372	154.063	NaN	NaN	NaN	24.7914	2335.03	30.0226	NaN	NaN	NaN	3.42022	4.22345	5.71728	NaN	NaN	2.00955
2017	NaN	1.68832	NaN	NaN	NaN	NaN	NaN	53.164	1.55123	NaN	106.068	25.9341	10.6388	NaN	5.09509	27.6557	NaN	16.7678	46.9661	NaN	2.46894	NaN	NaN	NaN	NaN	4.85577	139.468	NaN	2.72882	10.873	1.40016	NaN	4.5019	157.038	NaN	NaN	NaN	24.8516	2381.17	27.9319	NaN	NaN	NaN	3.50801	4.30641	5.87869	NaN	NaN	2.0894
2018	NaN	1.69982	NaN	NaN	NaN	NaN	NaN	51.1911	1.73758	NaN	103.418	25.4216	10.7649	NaN	4.81463	29.4859	NaN	17.6766	48.3725	NaN	2.50266	NaN	NaN	NaN	NaN	4.90401	133.425	NaN	2.7117	10.6839	1.46969	NaN	5.38636	160.591	NaN	NaN	NaN	25.5011	2445.4	28.0675	NaN	NaN	NaN	3.54709	4.6596	5.79165	NaN	NaN	2.12398
2019	NaN	NaN	NaN	NaN	NaN	NaN	NaN	NaN	NaN	NaN	NaN	NaN	NaN	NaN	NaN	NaN	NaN	NaN	NaN	NaN	NaN	NaN	NaN	NaN	NaN	NaN	NaN	NaN	NaN	NaN	NaN	NaN	NaN	NaN	NaN	NaN	NaN	NaN	NaN	NaN	NaN	NaN	NaN	NaN	NaN	NaN	NaN	NaN	NaN
[truncated: 184 more columns]

## Sheet: Emissions Transfers
	Emissions transfers
	All values in million tonnes of carbon per year. For values in million tonnes of CO2 per year, multiply the values below by 3.664
	1MtC = 1 million tonne of carbon = 3.664 million tonnes of CO2
	CIte as: Updated from Peters, GP, Minx, JC, Weber, CL and Edenhofer, O 2011. Growth in emission transfers via international trade from 1990 to 2008. Proceedings of the National Academy of Sciences 108, 8903-8908. http://www.pnas.org/content/108/21/8903.abstract
	For an explanation of issues around consumption emissions, see: Peters, GP, Davis, SJ and Andrew, R 2012. A synthesis of carbon in international trade. Biogeosciences, 9, 3247-3276. http://www.biogeosciences.net/9/3247/2012/bg-9-3247-2012.html
MtC/yr
	AFGHANISTAN	ALBANIA	ALGERIA	ANDORRA	ANGOLA	ANGUILLA	ANTIGUA & BARBUDA	ARGENTINA	ARMENIA	ARUBA	AUSTRALIA	AUSTRIA	AZERBAIJAN	BAHAMAS	BAHRAIN	BANGLADESH	BARBADOS	BELARUS	BELGIUM	BELIZE	BENIN	BERMUDA	BHUTAN	BONAIRE, SAINT EUSTATIUS, AND SABA	BOSNIA & HERZEGOVINA	BOTSWANA	BRAZIL	BRITISH VIRGIN ISLANDS	BRUNEI (DARUSSALAM)	BULGARIA	BURKINA FASO	BURUNDI	CAMBODIA	CANADA	CAPE VERDE	CENTRAL AFRICAN REPUBLIC	CHAD	CHILE	CHINA (MAINLAND)	COLOMBIA	COMOROS	CONGO	COOK ISLANDS	COSTA RICA	COTE D IVOIRE	CROATIA	CUBA	CURACAO	CYPRUS
	Afghanistan	Albania	Algeria	Andorra	Angola	Anguilla	Antigua and Barbuda	Argentina	Armenia	Aruba	Australia	Austria	Azerbaijan	Bahamas	Bahrain	Bangladesh	Barbados	Belarus	Belgium	Belize	Benin	Bermuda	Bhutan	Bonaire, Saint Eustatius and Saba	Bosnia and Herzegovina	Botswana	Brazil	British Virgin Islands	Brunei Darussalam	Bulgaria	Burkina Faso	Burundi	Cambodia	Canada	Cape Verde	Central African Republic	Chad	Chile	China	Colombia	Comoros	Congo	Cook Islands	Costa Rica	Côte d'Ivoire	Croatia	Cuba	Curaçao	Cyprus
1959	NaN	NaN	NaN	NaN	NaN	NaN	NaN	NaN	NaN	NaN	NaN	NaN	NaN	NaN	NaN	NaN	NaN	NaN	NaN	NaN	NaN	NaN	NaN	NaN	NaN	NaN	NaN	NaN	NaN	NaN	NaN	NaN	NaN	NaN	NaN	NaN	NaN	NaN	NaN	NaN	NaN	NaN	NaN	NaN	NaN	NaN	NaN	NaN	NaN
1960	NaN	NaN	NaN	NaN	NaN	NaN	NaN	NaN	NaN	NaN	NaN	NaN	NaN	NaN	NaN	NaN	NaN	NaN	NaN	NaN	NaN	NaN	NaN	NaN	NaN	NaN	NaN	NaN	NaN	NaN	NaN	NaN	NaN	NaN	NaN	NaN	NaN	NaN	NaN	NaN	NaN	NaN	NaN	NaN	NaN	NaN	NaN	NaN	NaN
1961	NaN	NaN	NaN	NaN	NaN	NaN	NaN	NaN	NaN	NaN	NaN	NaN	NaN	NaN	NaN	NaN	NaN	NaN	NaN	NaN	NaN	NaN	NaN	NaN	NaN	NaN	NaN	NaN	NaN	NaN	NaN	NaN	NaN	NaN	NaN	NaN	NaN	NaN	NaN	NaN	NaN	NaN	NaN	NaN	NaN	NaN	NaN	NaN	NaN
1962	NaN	NaN	NaN	NaN	NaN	NaN	NaN	NaN	NaN	NaN	NaN	NaN	NaN	NaN	NaN	NaN	NaN	NaN	NaN	NaN	NaN	NaN	NaN	NaN	NaN	NaN	NaN	NaN	NaN	NaN	NaN	NaN	NaN	NaN	NaN	NaN	NaN	NaN	NaN	NaN	NaN	NaN	NaN	NaN	NaN	NaN	NaN	NaN	NaN
1963	NaN	NaN	NaN	NaN	NaN	NaN	NaN	NaN	NaN	NaN	NaN	NaN	NaN	NaN	NaN	NaN	NaN	NaN	NaN	NaN	NaN	NaN	NaN	NaN	NaN	NaN	NaN	NaN	NaN	NaN	NaN	NaN	NaN	NaN	NaN	NaN	NaN	NaN	NaN	NaN	NaN	NaN	NaN	NaN	NaN	NaN	NaN	NaN	NaN
1964	NaN	NaN	NaN	NaN	NaN	NaN	NaN	NaN	NaN	NaN	NaN	NaN	NaN	NaN	NaN	NaN	NaN	NaN	NaN	NaN	NaN	NaN	NaN	NaN	NaN	NaN	NaN	NaN	NaN	NaN	NaN	NaN	NaN	NaN	NaN	NaN	NaN	NaN	NaN	NaN	NaN	NaN	NaN	NaN	NaN	NaN	NaN	NaN	NaN
1965	NaN	NaN	NaN	NaN	NaN	NaN	NaN	NaN	NaN	NaN	NaN	NaN	NaN	NaN	NaN	NaN	NaN	NaN	NaN	NaN	NaN	NaN	NaN	NaN	NaN	NaN	NaN	NaN	NaN	NaN	NaN	NaN	NaN	NaN	NaN	NaN	NaN	NaN	NaN	NaN	NaN	NaN	NaN	NaN	NaN	NaN	NaN	NaN	NaN
1966	NaN	NaN	NaN	NaN	NaN	NaN	NaN	NaN	NaN	NaN	NaN	NaN	NaN	NaN	NaN	NaN	NaN	NaN	NaN	NaN	NaN	NaN	NaN	NaN	NaN	NaN	NaN	NaN	NaN	NaN	NaN	NaN	NaN	NaN	NaN	NaN	NaN	NaN	NaN	NaN	NaN	NaN	NaN	NaN	NaN	NaN	NaN	NaN	NaN
1967	NaN	NaN	NaN	NaN	NaN	NaN	NaN	NaN	NaN	NaN	NaN	NaN	NaN	NaN	NaN	NaN	NaN	NaN	NaN	NaN	NaN	NaN	NaN	NaN	NaN	NaN	NaN	NaN	NaN	NaN	NaN	NaN	NaN	NaN	NaN	NaN	NaN	NaN	NaN	NaN	NaN	NaN	NaN	NaN	NaN	NaN	NaN	NaN	NaN
1968	NaN	NaN	NaN	NaN	NaN	NaN	NaN	NaN	NaN	NaN	NaN	NaN	NaN	NaN	NaN	NaN	NaN	NaN	NaN	NaN	NaN	NaN	NaN	NaN	NaN	NaN	NaN	NaN	NaN	NaN	NaN	NaN	NaN	NaN	NaN	NaN	NaN	NaN	NaN	NaN	NaN	NaN	NaN	NaN	NaN	NaN	NaN	NaN	NaN
1969	NaN	NaN	NaN	NaN	NaN	NaN	NaN	NaN	NaN	NaN	NaN	NaN	NaN	NaN	NaN	NaN	NaN	NaN	NaN	NaN	NaN	NaN	NaN	NaN	NaN	NaN	NaN	NaN	NaN	NaN	NaN	NaN	NaN	NaN	NaN	NaN	NaN	NaN	NaN	NaN	NaN	NaN	NaN	NaN	NaN	NaN	NaN	NaN	NaN
1970	NaN	NaN	NaN	NaN	NaN	NaN	NaN	NaN	NaN	NaN	NaN	NaN	NaN	NaN	NaN	NaN	NaN	NaN	NaN	NaN	NaN	NaN	NaN	NaN	NaN	NaN	NaN	NaN	NaN	NaN	NaN	NaN	NaN	NaN	NaN	NaN	NaN	NaN	NaN	NaN	NaN	NaN	NaN	NaN	NaN	NaN	NaN	NaN	NaN
1971	NaN	NaN	NaN	NaN	NaN	NaN	NaN	NaN	NaN	NaN	NaN	NaN	NaN	NaN	NaN	NaN	NaN	NaN	NaN	NaN	NaN	NaN	NaN	NaN	NaN	NaN	NaN	NaN	NaN	NaN	NaN	NaN	NaN	NaN	NaN	NaN	NaN	NaN	NaN	NaN	NaN	NaN	NaN	NaN	NaN	NaN	NaN	NaN	NaN
1972	NaN	NaN	NaN	NaN	NaN	NaN	NaN	NaN	NaN	NaN	NaN	NaN	NaN	NaN	NaN	NaN	NaN	NaN	NaN	NaN	NaN	NaN	NaN	NaN	NaN	NaN	NaN	NaN	NaN	NaN	NaN	NaN	NaN	NaN	NaN	NaN	NaN	NaN	NaN	NaN	NaN	NaN	NaN	NaN	NaN	NaN	NaN	NaN	NaN
1973	NaN	NaN	NaN	NaN	NaN	NaN	NaN	NaN	NaN	NaN	NaN	NaN	NaN	NaN	NaN	NaN	NaN	NaN	NaN	NaN	NaN	NaN	NaN	NaN	NaN	NaN	NaN	NaN	NaN	NaN	NaN	NaN	NaN	NaN	NaN	NaN	NaN	NaN	NaN	NaN	NaN	NaN	NaN	NaN	NaN	NaN	NaN	NaN	NaN
1974	NaN	NaN	NaN	NaN	NaN	NaN	NaN	NaN	NaN	NaN	NaN	NaN	NaN	NaN	NaN	NaN	NaN	NaN	NaN	NaN	NaN	NaN	NaN	NaN	NaN	NaN	NaN	NaN	NaN	NaN	NaN	NaN	NaN	NaN	NaN	NaN	NaN	NaN	NaN	NaN	NaN	NaN	NaN	NaN	NaN	NaN	NaN	NaN	NaN
1975	NaN	NaN	NaN	NaN	NaN	NaN	NaN	NaN	NaN	NaN	NaN	NaN	NaN	NaN	NaN	NaN	NaN	NaN	NaN	NaN	NaN	NaN	NaN	NaN	NaN	NaN	NaN	NaN	NaN	NaN	NaN	NaN	NaN	NaN	NaN	NaN	NaN	NaN	NaN	NaN	NaN	NaN	NaN	NaN	NaN	NaN	NaN	NaN	NaN
1976	NaN	NaN	NaN	NaN	NaN	NaN	NaN	NaN	NaN	NaN	NaN	NaN	NaN	NaN	NaN	NaN	NaN	NaN	NaN	NaN	NaN	NaN	NaN	NaN	NaN	NaN	NaN	NaN	NaN	NaN	NaN	NaN	NaN	NaN	NaN	NaN	NaN	NaN	NaN	NaN	NaN	NaN	NaN	NaN	NaN	NaN	NaN	NaN	NaN
1977	NaN	NaN	NaN	NaN	NaN	NaN	NaN	NaN	NaN	NaN	NaN	NaN	NaN	NaN	NaN	NaN	NaN	NaN	NaN	NaN	NaN	NaN	NaN	NaN	NaN	NaN	NaN	NaN	NaN	NaN	NaN	NaN	NaN	NaN	NaN	NaN	NaN	NaN	NaN	NaN	NaN	NaN	NaN	NaN	NaN	NaN	NaN	NaN	NaN
1978	NaN	NaN	NaN	NaN	NaN	NaN	NaN	NaN	NaN	NaN	NaN	NaN	NaN	NaN	NaN	NaN	NaN	NaN	NaN	NaN	NaN	NaN	NaN	NaN	NaN	NaN	NaN	NaN	NaN	NaN	NaN	NaN	NaN	NaN	NaN	NaN	NaN	NaN	NaN	NaN	NaN	NaN	NaN	NaN	NaN	NaN	NaN	NaN	NaN
1979	NaN	NaN	NaN	NaN	NaN	NaN	NaN	NaN	NaN	NaN	NaN	NaN	NaN	NaN	NaN	NaN	NaN	NaN	NaN	NaN	NaN	NaN	NaN	NaN	NaN	NaN	NaN	NaN	NaN	NaN	NaN	NaN	NaN	NaN	NaN	NaN	NaN	NaN	NaN	NaN	NaN	NaN	NaN	NaN	NaN	NaN	NaN	NaN	NaN
1980	NaN	NaN	NaN	NaN	NaN	NaN	NaN	NaN	NaN	NaN	NaN	NaN	NaN	NaN	NaN	NaN	NaN	NaN	NaN	NaN	NaN	NaN	NaN	NaN	NaN	NaN	NaN	NaN	NaN	NaN	NaN	NaN	NaN	NaN	NaN	NaN	NaN	NaN	NaN	NaN	NaN	NaN	NaN	NaN	NaN	NaN	NaN	NaN	NaN
1981	NaN	NaN	NaN	NaN	NaN	NaN	NaN	NaN	NaN	NaN	NaN	NaN	NaN	NaN	NaN	NaN	NaN	NaN	NaN	NaN	NaN	NaN	NaN	NaN	NaN	NaN	NaN	NaN	NaN	NaN	NaN	NaN	NaN	NaN	NaN	NaN	NaN	NaN	NaN	NaN	NaN	NaN	NaN	NaN	NaN	NaN	NaN	NaN	NaN
1982	NaN	NaN	NaN	NaN	NaN	NaN	NaN	NaN	NaN	NaN	NaN	NaN	NaN	NaN	NaN	NaN	NaN	NaN	NaN	NaN	NaN	NaN	NaN	NaN	NaN	NaN	NaN	NaN	NaN	NaN	NaN	NaN	NaN	NaN	NaN	NaN	NaN	NaN	NaN	NaN	NaN	NaN	NaN	NaN	NaN	NaN	NaN	NaN	NaN
1983	NaN	NaN	NaN	NaN	NaN	NaN	NaN	NaN	NaN	NaN	NaN	NaN	NaN	NaN	NaN	NaN	NaN	NaN	NaN	NaN	NaN	NaN	NaN	NaN	NaN	NaN	NaN	NaN	NaN	NaN	NaN	NaN	NaN	NaN	NaN	NaN	NaN	NaN	NaN	NaN	NaN	NaN	NaN	NaN	NaN	NaN	NaN	NaN	NaN
1984	NaN	NaN	NaN	NaN	NaN	NaN	NaN	NaN	NaN	NaN	NaN	NaN	NaN	NaN	NaN	NaN	NaN	NaN	NaN	NaN	NaN	NaN	NaN	NaN	NaN	NaN	NaN	NaN	NaN	NaN	NaN	NaN	NaN	NaN	NaN	NaN	NaN	NaN	NaN	NaN	NaN	NaN	NaN	NaN	NaN	NaN	NaN	NaN	NaN
1985	NaN	NaN	NaN	NaN	NaN	NaN	NaN	NaN	NaN	NaN	NaN	NaN	NaN	NaN	NaN	NaN	NaN	NaN	NaN	NaN	NaN	NaN	NaN	NaN	NaN	NaN	NaN	NaN	NaN	NaN	NaN	NaN	NaN	NaN	NaN	NaN	NaN	NaN	NaN	NaN	NaN	NaN	NaN	NaN	NaN	NaN	NaN	NaN	NaN
1986	NaN	NaN	NaN	NaN	NaN	NaN	NaN	NaN	NaN	NaN	NaN	NaN	NaN	NaN	NaN	NaN	NaN	NaN	NaN	NaN	NaN	NaN	NaN	NaN	NaN	NaN	NaN	NaN	NaN	NaN	NaN	NaN	NaN	NaN	NaN	NaN	NaN	NaN	NaN	NaN	NaN	NaN	NaN	NaN	NaN	NaN	NaN	NaN	NaN
1987	NaN	NaN	NaN	NaN	NaN	NaN	NaN	NaN	NaN	NaN	NaN	NaN	NaN	NaN	NaN	NaN	NaN	NaN	NaN	NaN	NaN	NaN	NaN	NaN	NaN	NaN	NaN	NaN	NaN	NaN	NaN	NaN	NaN	NaN	NaN	NaN	NaN	NaN	NaN	NaN	NaN	NaN	NaN	NaN	NaN	NaN	NaN	NaN	NaN
1988	NaN	NaN	NaN	NaN	NaN	NaN	NaN	NaN	NaN	NaN	NaN	NaN	NaN	NaN	NaN	NaN	NaN	NaN	NaN	NaN	NaN	NaN	NaN	NaN	NaN	NaN	NaN	NaN	NaN	NaN	NaN	NaN	NaN	NaN	NaN	NaN	NaN	NaN	NaN	NaN	NaN	NaN	NaN	NaN	NaN	NaN	NaN	NaN	NaN
1989	NaN	NaN	NaN	NaN	NaN	NaN	NaN	NaN	NaN	NaN	NaN	NaN	NaN	NaN	NaN	NaN	NaN	NaN	NaN	NaN	NaN	NaN	NaN	NaN	NaN	NaN	NaN	NaN	NaN	NaN	NaN	NaN	NaN	NaN	NaN	NaN	NaN	NaN	NaN	NaN	NaN	NaN	NaN	NaN	NaN	NaN	NaN	NaN	NaN
1990	NaN	0.00319688	NaN	NaN	NaN	NaN	NaN	0.0436693	1.68139	NaN	9.10332	-7.06653	6.33004	NaN	0.239935	-1.10426	NaN	11.9421	-9.70401	NaN	-0.0856368	NaN	NaN	NaN	NaN	0	-7.5368	NaN	0.471985	4.22746	-0.062657	NaN	-0.166154	-7.37465	NaN	NaN	NaN	0.193768	42.8732	-1.73384	NaN	NaN	NaN	-0.605034	-0.315287	0.557999	NaN	NaN	-0.54459
1991	NaN	-0.0757899	NaN	NaN	NaN	NaN	NaN	-0.788008	2.00414	NaN	9.26655	-6.55884	7.85914	NaN	0.000916961	-1.22154	NaN	9.15271	-9.26792	NaN	-0.0873495	NaN	NaN	NaN	NaN	0	-6.43677	NaN	0.341953	4.57752	-0.0626411	NaN	-0.176263	-9.47328	NaN	NaN	NaN	0.000118388	53.9779	-1.28181	NaN	NaN	NaN	-0.522478	-0.339904	0.388451	NaN	NaN	-0.445458
1992	NaN	-0.0946396	NaN	NaN	NaN	NaN	NaN	-1.73385	0.587156	NaN	9.91216	-8.57091	11.5382	NaN	-0.126446	-1.40979	NaN	12.1547	-13.5249	NaN	-0.0863471	NaN	NaN	NaN	NaN	0	-5.95937	NaN	0.230923	4.1195	-0.0656591	NaN	-0.189997	-9.26541	NaN	NaN	NaN	-0.336001	39.5937	-1.75581	NaN	NaN	NaN	-0.534241	-0.539094	-0.441487	NaN	NaN	-0.71371
1993	NaN	-0.0782718	NaN	NaN	NaN	NaN	NaN	-1.42976	0.201261	NaN	10.764	-7.4051	6.55817	NaN	0.182947	-1.31204	NaN	10.6888	-11.1789	NaN	-0.0799039	NaN	NaN	NaN	NaN	0	-5.43662	NaN	0.0849073	3.48401	-0.0671875	NaN	-0.169612	-5.74195	NaN	NaN	NaN	-0.406012	42.4675	-1.79083	NaN	NaN	NaN	-0.501407	-0.401042	-0.328389	NaN	NaN	-0.457
1994	NaN	-0.109363	NaN	NaN	NaN	NaN	NaN	-1.25731	0.252399	NaN	9.78979	-7.24315	6.18613	NaN	0.105509	-1.49395	NaN	9.17521	-10.075	NaN	-0.0973586	NaN	NaN	NaN	NaN	0	-6.18846	NaN	-0.0512051	4.02127	-0.0693126	NaN	-0.180791	-3.24454	NaN	NaN	NaN	-0.109183	92.6963	-1.87166	NaN	NaN	NaN	-0.453009	-0.32327	-0.393261	NaN	NaN	-0.400811
1995	NaN	-0.110586	NaN	NaN	NaN	NaN	NaN	-0.512116	0.194136	NaN	11.3369	-7.51278	2.71387	NaN	0.150797	-1.39988	NaN	6.49011	-10.9408	NaN	-0.110325	NaN	NaN	NaN	NaN	0	-8.09642	NaN	0.0068131	3.10425	-0.0817329	NaN	-0.148501	-2.09277	NaN	NaN	NaN	-0.017229	96.6038	-2.30707	NaN	NaN	NaN	-0.518513	-0.264029	-0.629393	NaN	NaN	-0.491162
1996	NaN	-0.240151	NaN	NaN	NaN	NaN	NaN	-0.510758	-0.0846581	NaN	11.4943	-8.66244	0.731477	NaN	0.27242	-1.52719	NaN	3.08411	-9.63687	NaN	-0.137736	NaN	NaN	NaN	NaN	0	-8.9544	NaN	-0.214775	2.68923	-0.0743323	NaN	-0.204623	-0.371313	NaN	NaN	NaN	-0.17488	100.703	-2.08622	NaN	NaN	NaN	-0.507079	0.183466	-0.682234	NaN	NaN	-0.771317
1997	NaN	-0.168664	NaN	NaN	NaN	NaN	NaN	-1.622	-0.185469	NaN	11.6794	-7.23473	1.09289	NaN	0.811343	-1.58745	NaN	3.86417	-12.5116	NaN	-0.187247	NaN	NaN	NaN	NaN	0	-9.75946	NaN	0.314765	2.62223	-0.0859138	NaN	-0.20856	-5.25385	NaN	NaN	NaN	0.216048	120.431	-2.25389	NaN	NaN	NaN	-0.596595	0.154486	-0.704556	NaN	NaN	-0.521431
1998	NaN	-0.197518	NaN	NaN	NaN	NaN	NaN	-2.00497	-0.155728	NaN	10.3125	-8.285	0.406441	NaN	0.606268	-1.54611	NaN	-3.62126	-13.7973	NaN	-0.237484	NaN	NaN	NaN	NaN	0	-8.75356	NaN	-0.0140819	2.06193	-0.225041	NaN	-0.247011	-4.1045	NaN	NaN	NaN	0.180621	106.535	-2.09646	NaN	NaN	NaN	-0.81204	-0.509132	-0.478763	NaN	NaN	-0.868771
1999	NaN	-0.188986	NaN	NaN	NaN	NaN	NaN	-0.457576	-0.56716	NaN	13.0895	-8.20925	0.501932	NaN	2.24227	-1.33592	NaN	-3.18654	-16.4758	NaN	-0.151886	NaN	NaN	NaN	NaN	0	-1.85274	NaN	0.191849	1.41884	-0.295342	NaN	-0.220157	0.547417	NaN	NaN	NaN	0.212888	93.9042	-0.908107	NaN	NaN	NaN	-1.47844	-0.0821905	-0.536859	NaN	NaN	-0.367681
2000	NaN	-0.218334	NaN	NaN	NaN	NaN	NaN	0.673578	-0.142877	NaN	16.4272	-8.31119	1.04491	NaN	1.68769	-1.71577	NaN	-2.86613	-16.9674	NaN	-0.266706	NaN	NaN	NaN	NaN	-1.06589	-3.43285	NaN	0.402302	0.231796	-0.122075	NaN	-0.219684	1.20202	NaN	NaN	NaN	-0.518916	104.492	-0.737264	NaN	NaN	NaN	-1.17576	0.228959	-0.523705	NaN	NaN	-0.74009
2001	NaN	-0.2352	NaN	NaN	NaN	NaN	NaN	1.38263	-0.160107	NaN	16.827	-7.89952	0.745753	NaN	0.801309	-2.5681	NaN	-1.74175	-16.6003	NaN	-0.28906	NaN	NaN	NaN	NaN	-0.855139	0.113853	NaN	0.369289	0.875942	-0.180599	NaN	-0.300601	4.82399	NaN	NaN	NaN	-0.553046	85.9357	-0.847408	NaN	NaN	NaN	-1.26959	0.28859	-0.941438	NaN	NaN	-0.686797
2002	NaN	-0.356537	NaN	NaN	NaN	NaN	NaN	11.516	-0.172713	NaN	12.3445	-7.49854	0.0241205	NaN	1.01641	-1.52319	NaN	-2.42949	-19.4761	NaN	-0.322129	NaN	NaN	NaN	NaN	0.204064	3.13094	NaN	0.321141	0.775401	-0.185231	NaN	-0.105616	0.197279	NaN	NaN	NaN	-1.32379	118.152	-2.09199	NaN	NaN	NaN	-2.48752	0.50482	-1.03285	NaN	NaN	-1.1545
2003	NaN	-0.321162	NaN	NaN	NaN	NaN	NaN	7.33594	-0.213829	NaN	10.5418	-6.35431	-0.791167	NaN	1.4994	-3.45752	NaN	-1.42592	-18.5558	NaN	-0.401183	NaN	NaN	NaN	NaN	-2.29698	3.6191	NaN	-0.00301859	1.13423	-0.228832	NaN	-0.628654	10.5834	NaN	NaN	NaN	-0.173592	189.906	-0.66798	NaN	NaN	NaN	-1.36477	-0.476334	-1.17659	NaN	NaN	-0.675791
2004	NaN	-0.304319	NaN	NaN	NaN	NaN	NaN	8.39182	-0.171154	NaN	10.5873	-7.10577	-1.08665	NaN	1.86578	-3.19999	NaN	-1.09975	-24.3572	NaN	-0.293949	NaN	NaN	NaN	NaN	-1.40881	4.68001	NaN	0.175389	1.09098	-0.331785	NaN	-0.654936	5.59054	NaN	NaN	NaN	0.236536	239.812	-0.914021	NaN	NaN	NaN	-1.43675	-0.0345339	-1.17403	NaN	NaN	-0.366877
2005	NaN	-0.411589	NaN	NaN	NaN	NaN	NaN	7.41764	-0.27528	NaN	12.3466	-7.36461	-0.0731749	NaN	1.89293	-3.07759	NaN	0.286592	-24.1322	NaN	-0.622519	NaN	NaN	NaN	NaN	-0.93944	2.09112	NaN	0.186206	0.891539	-0.136507	NaN	-0.888891	-0.0643473	NaN	NaN	NaN	-0.474998	300.025	-1.37768	NaN	NaN	NaN	-1.76604	-0.21879	-1.43724	NaN	NaN	-0.45148
2006	NaN	-0.425633	NaN	NaN	NaN	NaN	NaN	6.9056	-0.254585	NaN	9.57366	-8.55857	-0.174152	NaN	2.28569	-2.86382	NaN	-0.919619	-27.1765	NaN	-0.719834	NaN	NaN	NaN	NaN	-0.935252	-0.506391	NaN	0.0583991	0.32684	-0.122166	NaN	-1.00918	1.31902	NaN	NaN	NaN	-0.568109	385.217	-2.0869	NaN	NaN	NaN	-1.21638	-0.397104	-2.3388	NaN	NaN	-0.332894
2007	NaN	-0.428235	NaN	NaN	NaN	NaN	NaN	5.22938	-0.631881	NaN	8.01977	-7.80494	-0.200522	NaN	3.26763	-3.63194	NaN	-1.94038	-28.8612	NaN	-0.610325	NaN	NaN	NaN	NaN	-1.51346	-3.58139	NaN	0.414676	0.931897	-0.16671	NaN	-1.05055	-1.32651	NaN	NaN	NaN	0.142248	400.425	-2.83518	NaN	NaN	NaN	-1.38461	-0.330176	-1.76133	NaN	NaN	-0.614377
2008	NaN	-0.486508	NaN	NaN	NaN	NaN	NaN	4.89341	-0.299657	NaN	11.0144	-7.56712	0.0931763	NaN	3.54237	-3.21233	NaN	-3.04038	-24.3176	NaN	-0.845384	NaN	NaN	NaN	NaN	-2.03482	-9.73847	NaN	0.558007	0.226355	-0.196664	NaN	-1.1434	-1.67546	NaN	NaN	NaN	-1.99763	405.883	-2.74006	NaN	NaN	NaN	-1.4596	-0.519832	-1.97889	NaN	NaN	-0.964959
2009	NaN	-0.524722	NaN	NaN	NaN	NaN	NaN	5.16176	-0.399738	NaN	5.30037	-6.91494	0.0996491	NaN	2.64043	-3.5107	NaN	1.89737	-19.0786	NaN	-0.667471	NaN	NaN	NaN	NaN	-0.390288	-5.83835	NaN	0.361448	0.47773	-0.25905	NaN	-0.97779	-4.42172	NaN	NaN	NaN	0.203659	309.746	-1.34417	NaN	NaN	NaN	-0.984007	-0.557119	-1.3298	NaN	NaN	-1.26446
2010	NaN	-0.439332	NaN	NaN	NaN	NaN	NaN	3.32552	-0.3322	NaN	6.08264	-7.22543	0.144133	NaN	2.64881	-4.45934	NaN	0.666772	-21.2324	NaN	-0.645364	NaN	NaN	NaN	NaN	-0.611342	-13.1665	NaN	0.425905	1.36877	-0.220535	NaN	-1.32193	-10.7874	NaN	NaN	NaN	-0.737129	354.348	-2.14315	NaN	NaN	NaN	-1.33201	-0.529938	-1.12493	NaN	NaN	-1.43345
2011	NaN	-0.343652	NaN	NaN	NaN	NaN	NaN	2.10072	-0.201358	NaN	3.61423	-8.57796	0.123137	NaN	3.89171	-5.03743	NaN	3.11752	-27.1379	NaN	-1.09919	NaN	NaN	NaN	NaN	-0.266272	-14.9796	NaN	0.504497	2.07548	-0.160933	NaN	-1.56371	0.88292	NaN	NaN	NaN	-1.34568	391.557	-2.65218	NaN	NaN	NaN	-1.70479	-0.454425	-1.82981	NaN	NaN	-1.08576
2012	NaN	-0.354662	NaN	NaN	NaN	NaN	NaN	0.984398	-0.154248	NaN	-1.49588	-7.86022	-0.154253	NaN	4.03895	-4.73557	NaN	-0.156972	-22.3359	NaN	-0.764166	NaN	NaN	NaN	NaN	-0.230242	-13.5497	NaN	0.323252	1.29248	-0.101805	NaN	-1.45316	-9.24526	NaN	NaN	NaN	-2.80284	376.599	-3.3301	NaN	NaN	NaN	-1.82412	-0.436402	-0.98847	NaN	NaN	-0.656638
2013	NaN	-0.28592	NaN	NaN	NaN	NaN	NaN	-0.90711	-0.192862	NaN	2.31747	-7.19728	-0.528401	NaN	4.83605	-6.25841	NaN	-0.722121	-21.6437	NaN	-0.813355	NaN	NaN	NaN	NaN	-2.84703	-12.6898	NaN	-0.218468	1.29645	-0.339337	NaN	-1.94442	-8.71485	NaN	NaN	NaN	-2.60553	362.909	-3.18635	NaN	NaN	NaN	-1.55521	-1.38066	-0.984072	NaN	NaN	-0.351931
2014	NaN	-0.233081	NaN	NaN	NaN	NaN	NaN	-1.014	-0.173251	NaN	0.496652	-7.3454	-0.703695	NaN	4.50624	-6.19243	NaN	-1.13013	-21.941	NaN	-0.630768	NaN	NaN	NaN	NaN	-2.92729	-12.3668	NaN	-0.035455	1.57097	-0.345886	NaN	-1.89573	-6.56772	NaN	NaN	NaN	-2.66029	356.439	-3.43831	NaN	NaN	NaN	-1.51261	-1.39801	-0.851168	NaN	NaN	-0.239051
2015	NaN	-0.303504	NaN	NaN	NaN	NaN	NaN	-2.51751	-0.180191	NaN	1.55166	-6.97115	-0.955226	NaN	4.19762	-5.74569	NaN	-1.31778	-20.4687	NaN	-0.572199	NaN	NaN	NaN	NaN	-2.89912	-6.91124	NaN	-0.331598	1.9571	-0.323143	NaN	-1.71606	-1.45603	NaN	NaN	NaN	-2.28799	320.931	-3.33929	NaN	NaN	NaN	-1.40127	-1.21113	-0.797964	NaN	NaN	-0.144844
2016	NaN	-0.265005	NaN	NaN	NaN	NaN	NaN	-1.05719	-0.0994435	NaN	7.03122	-6.88147	-0.562149	NaN	3.6139	-5.51763	NaN	-0.31167	-19.287	NaN	-0.554474	NaN	NaN	NaN	NaN	-2.90458	-6.6732	NaN	-0.239726	1.84665	-0.332564	NaN	-1.51978	-0.123953	NaN	NaN	NaN	-1.82366	272.101	-2.51157	NaN	NaN	NaN	-1.25763	-1.00345	-0.775944	NaN	NaN	0.00142635
2017	NaN	-0.21332	NaN	NaN	NaN	NaN	NaN	-2.01335	-0.0542741	NaN	7.22251	-6.93057	-0.677577	NaN	3.84906	-5.7333	NaN	-0.189507	-19.8219	NaN	-0.44251	NaN	NaN	NaN	NaN	-2.92922	-7.21125	NaN	-0.12182	2.09235	-0.325279	NaN	-1.44896	-0.697068	NaN	NaN	NaN	-1.90883	280.058	-2.91285	NaN	NaN	NaN	-1.26041	-1.06941	-0.764696	NaN	NaN	-0.0381776
2018	NaN	-0.225206	NaN	NaN	NaN	NaN	NaN	-0.691703	-0.0190719	NaN	10.1068	-7.21212	-0.533369	NaN	3.80832	-6.09107	NaN	-0.790198	-21.0232	NaN	-0.384823	NaN	NaN	NaN	NaN	-3.04391	-6.0648	NaN	-0.102426	1.20242	-0.339681	NaN	-1.16174	-0.519022	NaN	NaN	NaN	-2.07617	272	-2.89601	NaN	NaN	NaN	-1.29569	-1.24419	-0.955774	NaN	NaN	-0.12268
2019	NaN	NaN	NaN	NaN	NaN	NaN	NaN	NaN	NaN	NaN	NaN	NaN	NaN	NaN	NaN	NaN	NaN	NaN	NaN	NaN	NaN	NaN	NaN	NaN	NaN	NaN	NaN	NaN	NaN	NaN	NaN	NaN	NaN	NaN	NaN	NaN	NaN	NaN	NaN	NaN	NaN	NaN	NaN	NaN	NaN	NaN	NaN	NaN	NaN
[truncated: 184 more columns]

## Sheet: Country Definitions
Details of the geographical information corresponding to countries and regions used in this database for Consumption and Transfer emissions
Number	Code	Name	Description
1	AUS	Australia	- Australia - Christmas Island - Cocos (Keeling) Islands - Heard Island and McDonald Islands - Norfolk Island
2	NZL	New Zealand
3	XOC	Rest of Oceania	- American Samoa - Cook Islands - Fiji - French Polynesia - Guam - Kiribati - Marshall Islands - Micronesia Federated States of - Nauru - New Caledonia - Niue - Northern Mariana Islands - Palau - Papua New Guinea - Pitcairn - Samoa - Solomon Islands - Tokelau - Tonga - Tuvalu - United States Minor Outlying Islands - Vanuatu - Wallis and Futuna
4	CHN	China
5	HKG	Hong Kong
6	JPN	Japan
7	KOR	Korea Republic of
8	MNG	Mongolia
9	TWN	Taiwan
10	XEA	Rest of East Asia	- Korea Democratic Peoples Republic of - Macao
11	BRN	Brunei Darussalam
12	KHM	Cambodia
13	IDN	Indonesia
14	LAO	Lao People's Democratic Republic
15	MYS	Malaysia
16	PHL	Philippines
17	SGP	Singapore
18	THA	Thailand
19	VNM	Viet Nam
20	XSE	Rest of Southeast Asia	- Myanmar - Timor Leste
21	BGD	Bangladesh
22	IND	India
23	NPL	Nepal
24	PAK	Pakistan
25	LKA	Sri Lanka
26	XSA	Rest of South Asia	- Afghanistan - Bhutan - Maldives
27	CAN	Canada
28	USA	United States of America
29	MEX	Mexico
30	XNA	Rest of North America	- Bermuda - Greenland - Saint Pierre and Miquelon
31	ARG	Argentina
32	BOL	Bolivia
33	BRA	Brazil
34	CHL	Chile
35	COL	Colombia
36	ECU	Ecuador
37	PRY	Paraguay
38	PER	Peru
39	URY	Uruguay
40	VEN	Venezuela
41	XSM	Rest of South America	- Falkland Islands (Malvinas) - French Guiana - Guyana - South Georgia and the South Sandwich Islands - Suriname
42	CRI	Costa Rica
43	GTM	Guatemala
44	HND	Honduras
45	NIC	Nicaragua
46	PAN	Panama
47	SLV	El Salvador
48	XCA	Rest of Central America	- Belize
49	DOM	Dominican Republic
50	JAM	Jamaica
51	PRI	Puerto Rico
52	TTO	Trinidad and Tobago
53	XCB	Caribbean	- Anguilla - Antigua & Barbuda - Aruba - Bahamas - Barbados - Cayman Islands - Cuba - Dominica - Grenada - Haiti - Montserrat - Netherlands Antilles - Saint Kitts and Nevis - Saint Lucia - Saint Vincent and the Grenadines - Turks and Caicos Islands - Virgin Islands British - Virgin Islands U.S.
54	AUT	Austria
55	BEL	Belgium
56	CYP	Cyprus
57	CZE	Czech Republic
58	DNK	Denmark
59	EST	Estonia
60	FIN	Finland	- Aland Islands - Finland
61	FRA	France	- France - Guadeloupe - Martinique - Reunion
62	DEU	Germany
63	GRC	Greece
64	HUN	Hungary
65	IRL	Ireland
66	ITA	Italy
67	KOS	Kosovo
68	LVA	Latvia
69	LTU	Lithuania
70	LUX	Luxembourg
71	MLT	Malta
72	NLD	Netherlands
73	POL	Poland
74	PRT	Portugal
75	SVK	Slovakia
76	SVN	Slovenia
77	ESP	Spain
78	SWE	Sweden
79	GBR	United Kingdom
80	CHE	Switzerland
81	NOR	Norway	- Norway - Svalbard and Jan Mayen
82	XEF	Rest of EFTA	- Iceland - Liechtenstein
83	ALB	Albania
84	BGR	Bulgaria
85	BLR	Belarus
86	HRV	Croatia
87	ROU	Romania
88	RUS	Russian Federation
89	UKR	Ukraine
90	XEE	Rest of Eastern Europe	- Moldova Republic of
91	XER	Rest of Europe	- Andorra - Bosnia and Herzegovina - Faroe Islands - Gibraltar - Guernsey - Holy See (Vatican City State) - Isle of Man - Jersey - Macedonia the former Yugoslav Republic of - Monaco - Montenegro - San Marino - Serbia
92	KAZ	Kazakhstan
93	KGZ	Kyrgyzstan
94	XSU	Rest of Former Soviet Union	- Tajikistan - Turkmenistan - Uzbekistan
95	ARM	Armenia
96	AZE	Azerbaijan
97	GEO	Georgia
98	BHR	Bahrain
99	IRN	Iran Islamic Republic of
100	ISR	Israel
101	JOR	Jordan
102	KWT	Kuwait
103	OMN	Oman
104	QAT	Qatar
105	SAU	Saudi Arabia
106	TUR	Turkey
107	ARE	United Arab Emirates
108	XWS	Rest of Western Asia	- Iraq - Lebanon - Palestinian Territory Occupied - Syrian Arab Republic - Yemen
109	EGY	Egypt
110	MAR	Morocco
111	TUN	Tunisia
112	XNF	Rest of North Africa	- Algeria - Libyan Arab Jamahiriya - Western Sahara
113	BEN	Benin
114	BFA	Burkina Faso
115	CMR	Cameroon
116	CIV	Cote d'Ivoire
117	GHA	Ghana
118	GIN	Guinea
119	NGA	Nigeria
120	SEN	Senegal
121	TGO	Togo
122	XWF	Rest of Western Africa	- Cape Verde - Gambia - Guinea-Bissau - Liberia - Mali - Mauritania - Niger - Saint Helena, ASCENSION AND TRISTAN DA CUNHA - Sierra Leone
123	XCF	Central Africa	- Central African Republic - Chad - Congo - Equatorial Guinea - Gabon - Sao Tome and Principe
124	XAC	South Central Africa	- Angola - Congo the Democratic Republic of the
125	ETH	Ethiopia
126	KEN	Kenya
127	MDG	Madagascar
128	MWI	Malawi
129	MUS	Mauritius
130	MOZ	Mozambique
131	RWA	Rwanda
132	TZA	Tanzania United Republic of
133	UGA	Uganda
134	ZMB	Zambia
135	ZWE	Zimbabwe
136	XEC	Rest of Eastern Africa	- Burundi - Comoros - Djibouti - Eritrea - Mayotte - Seychelles - Somalia - Sudan
137	BWA	Botswana
138	NAM	Namibia
139	ZAF	South Africa
140	XSC	Rest of South African Customs Union	- Lesotho - Swaziland
141	XTW	Rest of the World	- Antarctica - Bouvet Island - British Indian Ocean Territory - French Southern Territories

[truncated: 2 more sheets: Disaggregation, Aggregation]
