# Supplementary material for: The Social Cost of Fossil and Industrial CO2 Emissions from 1950 to 2018
Source: Research Square preprint supplement (doi:10.21203/rs.3.rs-2244259/v1), 2022-11-17
Supplement: Supplementary file 35 [file temperature_data_EEA.xlsx]

## Sheet: temperature_data_EEA
Year:number	HadCRUT4 (mean):number	HadCRUT4 (upper):number	HadCRUT4 (lower):number	ERA-Interim:number	GISTEMP v4:number	NOAA GlobalTemp v5:number	Type:text
1850	-0.05	0.16	-0.27				Global annual
1851	0.11	0.31	-0.1				Global annual
1852	0.1	0.29	-0.11				Global annual
1853	0.06	0.25	-0.15				Global annual
1854	0.08	0.25	-0.11				Global annual
1855	0.05	0.23	-0.13				Global annual
1856	-0.03	0.14	-0.22				Global annual
1857	-0.14	0.03	-0.31				Global annual
1858	-0.14	0.03	-0.32				Global annual
1859	0.04	0.22	-0.15				Global annual
1860	-0.02	0.16	-0.21				Global annual
1861	-0.08	0.12	-0.29				Global annual
1862	-0.2	0.01	-0.41				Global annual
1863	0.05	0.26	-0.17				Global annual
1864	-0.17	0.03	-0.38				Global annual
1865	0.05	0.26	-0.19				Global annual
1866	0.07	0.28	-0.15				Global annual
1867	0	0.21	-0.21				Global annual
1868	0.09	0.29	-0.12				Global annual
1869	0.06	0.24	-0.13				Global annual
1870	0.05	0.21	-0.12				Global annual
1871	-0.01	0.17	-0.19				Global annual
1872	0.1	0.26	-0.07				Global annual
1873	0.02	0.18	-0.14				Global annual
1874	-0.04	0.12	-0.21				Global annual
1875	-0.07	0.09	-0.23				Global annual
1876	-0.06	0.1	-0.22				Global annual
1877	0.25	0.41	0.09				Global annual
1878	0.36	0.52	0.2				Global annual
1879	0.1	0.24	-0.06				Global annual
1880	0.1	0.25	-0.06		0.07	0.06	Global annual
1881	0.13	0.28	-0.03		0.15	0.1	Global annual
1882	0.11	0.26	-0.04		0.13	0.09	Global annual
1883	0.03	0.16	-0.11		0.06	0	Global annual
1884	-0.08	0.05	-0.22		-0.05	-0.08	Global annual
1885	-0.06	0.07	-0.2		-0.09	-0.07	Global annual
1886	-0.04	0.09	-0.18		-0.07	-0.06	Global annual
1887	-0.09	0.04	-0.23		-0.12	-0.1	Global annual
1888	0.02	0.15	-0.12		0.07	0.05	Global annual
1889	0.15	0.29	0.01		0.13	0.1	Global annual
1890	-0.09	0.04	-0.23		-0.12	-0.16	Global annual
1891	0	0.13	-0.15		0.01	-0.07	Global annual
1892	-0.13	0.01	-0.28		-0.04	-0.12	Global annual
1893	-0.15	-0.01	-0.29		-0.08	-0.14	Global annual
1894	-0.08	0.05	-0.23		-0.07	-0.12	Global annual
1895	-0.06	0.07	-0.21		0.01	-0.05	Global annual
1896	0.14	0.27	0		0.13	0.09	Global annual
1897	0.12	0.25	-0.02		0.13	0.09	Global annual
1898	-0.09	0.05	-0.23		-0.03	-0.08	Global annual
1899	0.04	0.17	-0.1		0.06	0.03	Global annual
1900	0.12	0.26	-0.02		0.16	0.11	Global annual
1901	0.07	0.21	-0.08		0.08	0.04	Global annual
1902	-0.08	0.05	-0.21		-0.05	-0.06	Global annual
1903	-0.15	-0.02	-0.29		-0.14	-0.18	Global annual
1904	-0.19	-0.06	-0.33		-0.23	-0.27	Global annual
1905	-0.05	0.08	-0.19		-0.03	-0.09	Global annual
1906	0.04	0.17	-0.09		0.01	-0.02	Global annual
1907	-0.14	-0.01	-0.27		-0.15	-0.19	Global annual
1908	-0.19	-0.06	-0.32		-0.2	-0.24	Global annual
1909	-0.2	-0.08	-0.32		-0.25	-0.25	Global annual
1910	-0.16	-0.04	-0.29		-0.2	-0.21	Global annual
1911	-0.22	-0.1	-0.34		-0.21	-0.25	Global annual
1912	-0.11	0	-0.24		-0.13	-0.15	Global annual
1913	-0.1	0.02	-0.22		-0.11	-0.13	Global annual
1914	0.08	0.2	-0.05		0.08	0.05	Global annual
1915	0.18	0.32	0.04		0.09	0.1	Global annual
1916	-0.06	0.07	-0.19		-0.13	-0.14	Global annual
1917	-0.14	-0.01	-0.29		-0.23	-0.21	Global annual
1918	-0.01	0.14	-0.16		-0.07	-0.12	Global annual
1919	0.05	0.19	-0.09		-0.05	-0.06	Global annual
1920	0.08	0.21	-0.06		-0.04	-0.04	Global annual
1921	0.14	0.26	0.01		0.04	0.03	Global annual
1922	0.02	0.14	-0.1		-0.05	-0.05	Global annual
1923	0.05	0.16	-0.07		-0.04	-0.06	Global annual
1924	0.03	0.15	-0.09		-0.04	-0.05	Global annual
1925	0.11	0.22	-0.01		0.01	0.01	Global annual
1926	0.22	0.33	0.09		0.12	0.11	Global annual
1927	0.12	0.23	0		0.01	0.01	Global annual
1928	0.12	0.23	0		0.03	0.01	Global annual
1929	-0.02	0.09	-0.14		-0.13	-0.14	Global annual
1930	0.19	0.3	0.07		0.07	0.08	Global annual
1931	0.24	0.35	0.12		0.14	0.13	Global annual
1932	0.19	0.3	0.07		0.07	0.06	Global annual
1933	0.05	0.16	-0.06		-0.06	-0.07	Global annual
1934	0.19	0.3	0.08		0.1	0.08	Global annual
1935	0.15	0.25	0.04		0.03	0.03	Global annual
1936	0.18	0.28	0.07		0.08	0.07	Global annual
1937	0.3	0.4	0.2		0.2	0.18	Global annual
1938	0.32	0.42	0.21		0.22	0.17	Global annual
1939	0.27	0.38	0.16		0.21	0.2	Global annual
1940	0.34	0.46	0.21		0.36	0.35	Global annual
1941	0.35	0.46	0.23		0.42	0.46	Global annual
1942	0.3	0.42	0.17		0.3	0.29	Global annual
1943	0.32	0.44	0.19		0.32	0.29	Global annual
1944	0.47	0.59	0.34		0.43	0.46	Global annual
1945	0.35	0.47	0.22		0.32	0.36	Global annual
1946	0.25	0.36	0.14		0.15	0.18	Global annual
1947	0.29	0.4	0.17		0.2	0.15	Global annual
1948	0.29	0.39	0.17		0.12	0.13	Global annual
1949	0.25	0.35	0.14		0.12	0.11	Global annual
1950	0.15	0.25	0.05		0.05	0.03	Global annual
1951	0.27	0.37	0.17		0.16	0.19	Global annual
1952	0.35	0.45	0.25		0.24	0.23	Global annual
1953	0.42	0.52	0.32		0.31	0.32	Global annual
1954	0.2	0.29	0.1		0.1	0.09	Global annual
1955	0.14	0.23	0.04		0.09	0.06	Global annual
1956	0.06	0.15	-0.03		0.04	0	Global annual
1957	0.32	0.41	0.23		0.28	0.26	Global annual
1958	0.37	0.46	0.28		0.29	0.31	Global annual
1959	0.34	0.43	0.26		0.26	0.27	Global annual
1960	0.28	0.36	0.19		0.21	0.24	Global annual
1961	0.36	0.45	0.28		0.29	0.28	Global annual
1962	0.34	0.42	0.25		0.27	0.29	Global annual
1963	0.37	0.46	0.28		0.28	0.31	Global annual
1964	0.1	0.19	0.02		0.03	0.05	Global annual
1965	0.19	0.27	0.1		0.12	0.12	Global annual
1966	0.26	0.34	0.17		0.17	0.18	Global annual
1967	0.25	0.34	0.17		0.21	0.19	Global annual
1968	0.21	0.29	0.13		0.15	0.16	Global annual
1969	0.36	0.44	0.27		0.29	0.29	Global annual
1970	0.3	0.38	0.22		0.25	0.25	Global annual
1971	0.14	0.22	0.06		0.15	0.12	Global annual
1972	0.26	0.34	0.18		0.24	0.23	Global annual
1973	0.39	0.47	0.31		0.39	0.38	Global annual
1974	0.11	0.19	0.03		0.16	0.13	Global annual
1975	0.18	0.26	0.09		0.22	0.2	Global annual
1976	0.08	0.16	0		0.13	0.12	Global annual
1977	0.37	0.45	0.29		0.41	0.4	Global annual
1978	0.26	0.35	0.18		0.3	0.31	Global annual
1979	0.38	0.46	0.3		0.39	0.42	Global annual
1980	0.42	0.5	0.33		0.49	0.47	Global annual
1981	0.47	0.55	0.38		0.55	0.51	Global annual
1982	0.34	0.42	0.25		0.37	0.38	Global annual
1983	0.52	0.6	0.43		0.54	0.55	Global annual
1984	0.31	0.39	0.23		0.39	0.36	Global annual
1985	0.3	0.37	0.21		0.35	0.35	Global annual
1986	0.37	0.45	0.29		0.41	0.43	Global annual
1987	0.52	0.6	0.43		0.55	0.57	Global annual
1988	0.52	0.61	0.44		0.61	0.58	Global annual
1989	0.44	0.53	0.36		0.5	0.48	Global annual
1990	0.62	0.71	0.54		0.68	0.64	Global annual
1991	0.58	0.67	0.49		0.63	0.58	Global annual
1992	0.43	0.52	0.34		0.45	0.43	Global annual
1993	0.47	0.56	0.39		0.46	0.47	Global annual
1994	0.53	0.62	0.44		0.55	0.53	Global annual
1995	0.65	0.74	0.56		0.68	0.66	Global annual
1996	0.51	0.59	0.42		0.56	0.51	Global annual
1997	0.72	0.8	0.63		0.7	0.7	Global annual
1998	0.86	0.95	0.77		0.84	0.84	Global annual
1999	0.63	0.72	0.54		0.62	0.63	Global annual
2000	0.62	0.71	0.53		0.63	0.62	Global annual
2001	0.77	0.86	0.68		0.77	0.76	Global annual
2002	0.82	0.91	0.73		0.86	0.81	Global annual
2003	0.83	0.92	0.74		0.85	0.83	Global annual
2004	0.77	0.86	0.68		0.77	0.77	Global annual
2005	0.87	0.96	0.78		0.91	0.86	Global annual
2006	0.83	0.92	0.74		0.87	0.83	Global annual
2007	0.82	0.91	0.73		0.89	0.81	Global annual
2008	0.72	0.81	0.63		0.77	0.73	Global annual
2009	0.83	0.92	0.74		0.89	0.84	Global annual
2010	0.89	0.98	0.79		0.96	0.92	Global annual
2011	0.75	0.84	0.66		0.84	0.77	Global annual
2012	0.8	0.89	0.71		0.87	0.83	Global annual
2013	0.84	0.93	0.75		0.92	0.86	Global annual
2014	0.9	0.99	0.82		0.98	0.93	Global annual
2015	1.09	1.18	1		1.13	1.12	Global annual
2016	1.12	1.21	1.03		1.25	1.18	Global annual
2017	1	1.09	0.91		1.15	1.1	Global annual
2018	0.92	1.01	0.84		1.08	1.02	Global annual
2019	1.06	1.15	0.97		1.21	1.14	Global annual
1850							Global decadal
1855	0.01	0.08	-0.08				Global decadal
1865	-0.02	0.05	-0.1				Global decadal
1875	0.07	0.13	0				Global decadal
1885	0.03	0.09	-0.04		0.02	0.01	Global decadal
1895	-0.03	0.03	-0.1		0	-0.05	Global decadal
1905	-0.08	-0.02	-0.14		-0.08	-0.12	Global decadal
1915	-0.05	0.01	-0.11		-0.1	-0.11	Global decadal
1925	0.09	0.14	0.03		-0.01	-0.02	Global decadal
1935	0.21	0.25	0.16		0.1	0.09	Global decadal
1945	0.32	0.37	0.27		0.27	0.28	Global decadal
1955	0.26	0.31	0.22		0.18	0.18	Global decadal
1965	0.27	0.31	0.23		0.2	0.21	Global decadal
1975	0.25	0.28	0.21		0.26	0.26	Global decadal
1985	0.42	0.46	0.38		0.47	0.47	Global decadal
1995	0.6	0.65	0.55		0.61	0.6	Global decadal
2005	0.79	0.84	0.74		0.82	0.79	Global decadal
2015	0.94	0.99	0.89		1.03	0.99	Global decadal
2020							Global decadal
1850	-0.22	0.23	-0.69				European annual
1851	0.14	0.58	-0.33				European annual
1852	0.46	0.88	0.01				European annual
1853	-0.17	0.25	-0.63				European annual
1854	0.12	0.59	-0.38				European annual
1855	-0.71	-0.23	-1.21				European annual
1856	-0.15	0.32	-0.65				European annual
1857	0.37	0.82	-0.11				European annual
1858	-0.04	0.37	-0.47				European annual
1859	0.63	1.04	0.19				European annual
1860	-0.36	0.04	-0.8				European annual
1861	0.27	0.68	-0.18				European annual
1862	0.1	0.53	-0.35				European annual
1863	0.94	1.37	0.48				European annual
1864	-0.58	-0.16	-1.04				European annual
1865	0.19	0.61	-0.26				European annual
1866	0.42	0.8	0				European annual
1867	-0.21	0.17	-0.64				European annual
1868	0.74	1.12	0.32				European annual
1869	0.27	0.64	-0.14				European annual
1870	-0.23	0.14	-0.63				European annual
1871	-0.57	-0.21	-0.96				European annual
1872	0.83	1.16	0.45				European annual
1873	0.47	0.81	0.09				European annual
1874	0.14	0.48	-0.24				European annual
1875	-0.4	-0.07	-0.78				European annual
1876	0.06	0.42	-0.33				European annual
1877	-0.05	0.29	-0.44				European annual
1878	0.45	0.79	0.07				European annual
1879	-0.4	-0.07	-0.78				European annual
1880	0.2	0.53	-0.18		0	0.05	European annual
1881	-0.36	-0.03	-0.74		-0.6	-0.44	European annual
1882	0.42	0.75	0.05		0.26	0.25	European annual
1883	0.15	0.49	-0.24		-0.01	-0.09	European annual
1884	0.26	0.6	-0.12		0.1	0.02	European annual
1885	-0.14	0.18	-0.51		-0.23	-0.2	European annual
1886	-0.02	0.29	-0.38		-0.09	-0.05	European annual
1887	-0.16	0.16	-0.52		-0.28	-0.17	European annual
1888	-0.63	-0.35	-0.96		-0.83	-0.74	European annual
1889	0.01	0.3	-0.33		-0.03	-0.12	European annual
1890	0.12	0.39	-0.2		0.02	-0.03	European annual
1891	0	0.26	-0.32		-0.11	-0.14	European annual
1892	-0.16	0.1	-0.48		-0.28	-0.23	European annual
1893	-0.03	0.21	-0.34		-0.13	-0.19	European annual
1894	0.35	0.59	0.04		0.27	0.22	European annual
1895	0.07	0.32	-0.23		0.06	0.02	European annual
1896	0.14	0.39	-0.16		0.04	0	European annual
1897	0.36	0.61	0.06		0.4	0.29	European annual
1898	0.47	0.72	0.17		0.47	0.39	European annual
1899	0.33	0.56	0.03		0.28	0.3	European annual
1900	0.29	0.53	-0.01		0.2	0.25	European annual
1901	0.36	0.59	0.06		0.26	0.29	European annual
1902	-0.26	-0.04	-0.55		-0.33	-0.31	European annual
1903	0.26	0.48	-0.01		0.18	0.21	European annual
1904	0.16	0.37	-0.11		0.1	0.09	European annual
1905	0.14	0.35	-0.12		0.07	0.08	European annual
1906	0.3	0.5	0.04		0.19	0.26	European annual
1907	-0.15	0.05	-0.4		-0.2	-0.22	European annual
1908	0.11	0.3	-0.14		0.08	0.04	European annual
1909	-0.02	0.18	-0.26		-0.14	-0.12	European annual
1910	0.43	0.62	0.2		0.22	0.33	European annual
1911	0.49	0.67	0.27		0.25	0.29	European annual
1912	0.03	0.21	-0.18		-0.12	-0.08	European annual
1913	0.47	0.64	0.26		0.22	0.3	European annual
1914	0.39	0.56	0.18		0.24	0.25	European annual
1915	-0.08	0.1	-0.3		-0.12	-0.12	European annual
1916	0.51	0.69	0.3		0.37	0.45	European annual
1917	-0.23	-0.06	-0.43		-0.35	-0.28	European annual
1918	0.37	0.52	0.19		0.29	0.27	European annual
1919	-0.12	0.04	-0.31		-0.19	-0.2	European annual
1920	0.61	0.76	0.44		0.49	0.5	European annual
1921	0.57	0.72	0.4		0.41	0.41	European annual
1922	0.12	0.26	-0.04		0.09	-0.04	European annual
1923	0.34	0.46	0.19		0.26	0.19	European annual
1924	0.35	0.46	0.21		0.28	0.19	European annual
1925	0.4	0.51	0.27		0.31	0.22	European annual
1926	0.65	0.75	0.52		0.59	0.5	European annual
1927	0.52	0.63	0.4		0.4	0.36	European annual
1928	0.5	0.6	0.39		0.39	0.37	European annual
1929	0.12	0.21	0.02		0.09	-0.04	European annual
1930	1	1.08	0.91		0.9	0.86	European annual
1931	0.19	0.28	0.1		0.2	0.08	European annual
1932	0.53	0.61	0.44		0.46	0.39	European annual
1933	0.23	0.31	0.14		0.26	0.08	European annual
1934	1.17	1.25	1.08		1.01	1	European annual
1935	0.67	0.75	0.58		0.54	0.53	European annual
1936	0.77	0.85	0.69		0.64	0.67	European annual
1937	1.07	1.15	0.99		1	0.97	European annual
1938	0.97	1.05	0.89		0.9	0.86	European annual
1939	0.77	0.85	0.69		0.66	0.61	European annual
1940	-0.12	-0.04	-0.2		-0.14	-0.28	European annual
1941	-0.12	-0.04	-0.2		-0.15	-0.31	European annual
1942	-0.04	0.04	-0.12		-0.09	-0.19	European annual
1943	0.9	0.99	0.82		0.74	0.77	European annual
1944	0.6	0.69	0.52		0.53	0.45	European annual
1945	0.8	0.88	0.72		0.77	0.67	European annual
1946	0.78	0.86	0.71		0.73	0.65	European annual
1947	0.79	0.87	0.72		0.73	0.67	European annual
1948	0.74	0.81	0.66		0.72	0.64	European annual
1949	0.86	0.94	0.79		0.88	0.81	European annual
1950	0.83	0.9	0.76		0.8	0.73	European annual
1951	0.65	0.71	0.59		0.49	0.56	European annual
1952	0.57	0.63	0.51		0.5	0.46	European annual
1953	0.8	0.87	0.75		0.75	0.67	European annual
1954	0.4	0.46	0.34		0.37	0.32	European annual
1955	0.57	0.63	0.52		0.56	0.49	European annual
1956	-0.22	-0.16	-0.28		-0.16	-0.35	European annual
1957	0.77	0.83	0.71		0.74	0.7	European annual
1958	0.61	0.67	0.56		0.6	0.54	European annual
1959	0.85	0.91	0.8		0.79	0.75	European annual
1960	0.91	0.96	0.86		0.84	0.86	European annual
1961	1.11	1.17	1.07		1.03	1.08	European annual
1962	0.41	0.46	0.37		0.34	0.35	European annual
1963	0.22	0.28	0.18		0.14	0.18	European annual
1964	0.48	0.54	0.44		0.47	0.42	European annual
1965	0.07	0.12	0.03		0.13	0.03	European annual
1966	0.6	0.65	0.55		0.53	0.58	European annual
1967	0.48	0.53	0.44		0.42	0.46	European annual
1968	0.33	0.38	0.29		0.23	0.3	European annual
1969	0.11	0.17	0.07		0.08	0.08	European annual
1970	0.36	0.41	0.32		0.36	0.35	European annual
1971	0.41	0.46	0.37		0.42	0.41	European annual
1972	0.46	0.51	0.42		0.47	0.47	European annual
1973	0.36	0.41	0.32		0.37	0.37	European annual
1974	0.76	0.81	0.72		0.7	0.75	European annual
1975	0.77	0.82	0.73		0.7	0.79	European annual
1976	0.16	0.21	0.12		0.25	0.15	European annual
1977	0.47	0.52	0.44		0.47	0.49	European annual
1978	0.13	0.18	0.09		0.16	0.14	European annual
1979	0.31	0.36	0.27		0.32	0.35	European annual
1980	0.11	0.16	0.07		0.2	0.13	European annual
1981	0.39	0.45	0.35		0.42	0.43	European annual
1982	0.65	0.7	0.6		0.66	0.67	European annual
1983	0.7	0.76	0.66		0.7	0.72	European annual
1984	0.59	0.65	0.55		0.67	0.6	European annual
1985	0.07	0.13	0.03		0.13	0.09	European annual
1986	0.41	0.47	0.37		0.41	0.41	European annual
1987	0.27	0.32	0.22		0.34	0.26	European annual
1988	0.75	0.81	0.71		0.76	0.8	European annual
1989	1.31	1.37	1.27		1.33	1.37	European annual
1990	1.4	1.46	1.36		1.48	1.45	European annual
1991	0.75	0.81	0.71		0.85	0.79	European annual
1992	0.8	0.86	0.76		0.85	0.83	European annual
1993	0.52	0.58	0.47		0.57	0.58	European annual
1994	1.29	1.35	1.25		1.28	1.35	European annual
1995	0.96	1.02	0.92		1.1	1.06	European annual
1996	0.53	0.59	0.48		0.62	0.58	European annual
1997	1.06	1.12	1.01		1.14	1.12	European annual
1998	1.1	1.16	1.06		1.2	1.18	European annual
1999	1.45	1.52	1.4		1.56	1.58	European annual
2000	1.54	1.61	1.48		1.54	1.63	European annual
2001	1.3	1.37	1.24		1.38	1.4	European annual
2002	1.54	1.61	1.49		1.61	1.6	European annual
2003	1.48	1.55	1.43		1.54	1.55	European annual
2004	1.32	1.39	1.26		1.43	1.39	European annual
2005	1.19	1.26	1.13		1.37	1.31	European annual
2006	1.58	1.66	1.53		1.72	1.68	European annual
2007	1.66	1.73	1.6		1.75	1.79	European annual
2008	1.57	1.64	1.51		1.64	1.66	European annual
2009	1.5	1.58	1.44		1.6	1.59	European annual
2010	1.08	1.15	1.02		1.21	1.2	European annual
2011	1.57	1.65	1.52		1.73	1.68	European annual
2012	1.39	1.47	1.34		1.48	1.5	European annual
2013	1.42	1.5	1.36		1.53	1.53	European annual
2014	2.22	2.3	2.16		2.27	2.3	European annual
2015	1.89	1.98	1.83		1.99	1.98	European annual
2016	1.87	1.96	1.81		2.09	2.04	European annual
2017	1.74	1.84	1.66		1.98	1.93	European annual
2018	2.12	2.22	2.04		2.23	2.3	European annual
2019	2.02	2.13	1.94		2.12	2.18	European annual
1850							European decadel
1855	-0.04	0.23	-0.37				European decadel
1865	0.21	0.47	-0.11				European decadel
1875	0.1	0.34	-0.21				European decadel
1885	-0.07	0.17	-0.38		-0.17	-0.15	European decadel
1895	0.13	0.36	-0.16		0.1	0.06	European decadel
1905	0.15	0.35	-0.12		0.04	0.06	European decadel
1915	0.24	0.38	0.04		0.08	0.12	European decadel
1925	0.39	0.5	0.26		0.33	0.26	European decadel
1935	0.67	0.75	0.58		0.66	0.61	European decadel
1945	0.51	0.58	0.43		0.47	0.39	European decadel
1955	0.58	0.64	0.52		0.54	0.49	European decadel
1965	0.55	0.59	0.5		0.42	0.43	European decadel
1975	0.4	0.44	0.35		0.42	0.43	European decadel
1985	0.43	0.48	0.38		0.56	0.55	European decadel
1995	0.97	1.03	0.92		1.07	1.05	European decadel
2005	1.46	1.52	1.41		1.56	1.56	European decadel
2015	1.68	1.75	1.62		1.86	1.86	European decadel
2020							European decadel

## Sheet: Tabelle1
	Year	HadRCUt4 Mean	Upper	Lower	GISTemp v4	Noaa Glob V5			https://www.eea.europa.eu/data-and-maps/daviz/global-average-air-temperature-anomalies-6/#tab-chart_1
1	1850	-0.05	0.16	-0.27			Global annual		Temperature anomalies are presented relative to a ‘pre-industrial’ period between 1850 and 1899.
2	1851	0.11	0.31	-0.1			Global annual
3	1852	0.1	0.29	-0.11			Global annual
4	1853	0.06	0.25	-0.15			Global annual
5	1854	0.08	0.25	-0.11			Global annual
6	1855	0.05	0.23	-0.13			Global annual
7	1856	-0.03	0.14	-0.22			Global annual
8	1857	-0.14	0.03	-0.31			Global annual
9	1858	-0.14	0.03	-0.32			Global annual
10	1859	0.04	0.22	-0.15			Global annual
11	1860	-0.02	0.16	-0.21			Global annual
12	1861	-0.08	0.12	-0.29			Global annual
13	1862	-0.2	0.01	-0.41			Global annual
14	1863	0.05	0.26	-0.17			Global annual
15	1864	-0.17	0.03	-0.38			Global annual
16	1865	0.05	0.26	-0.19			Global annual
17	1866	0.07	0.28	-0.15			Global annual
18	1867	0	0.21	-0.21			Global annual
19	1868	0.09	0.29	-0.12			Global annual
20	1869	0.06	0.24	-0.13			Global annual
21	1870	0.05	0.21	-0.12			Global annual
22	1871	-0.01	0.17	-0.19			Global annual
23	1872	0.1	0.26	-0.07			Global annual
24	1873	0.02	0.18	-0.14			Global annual
25	1874	-0.04	0.12	-0.21			Global annual
26	1875	-0.07	0.09	-0.23			Global annual
27	1876	-0.06	0.1	-0.22			Global annual
28	1877	0.25	0.41	0.09			Global annual
29	1878	0.36	0.52	0.2			Global annual
30	1879	0.1	0.24	-0.06			Global annual
31	1880	0.1	0.25	-0.06	0.07	0.06	Global annual	0.0766667	0.0208167
32	1881	0.13	0.28	-0.03	0.15	0.1	Global annual	0.126667	0.0251661
33	1882	0.11	0.26	-0.04	0.13	0.09	Global annual	0.11	0.02
34	1883	0.03	0.16	-0.11	0.06	0	Global annual	0.03	0.03
35	1884	-0.08	0.05	-0.22	-0.05	-0.08	Global annual	-0.07	0.0173205
36	1885	-0.06	0.07	-0.2	-0.09	-0.07	Global annual	-0.0733333	0.0152753
37	1886	-0.04	0.09	-0.18	-0.07	-0.06	Global annual	-0.0566667	0.0152753
38	1887	-0.09	0.04	-0.23	-0.12	-0.1	Global annual	-0.103333	0.0152753
39	1888	0.02	0.15	-0.12	0.07	0.05	Global annual	0.0466667	0.0251661
40	1889	0.15	0.29	0.01	0.13	0.1	Global annual	0.126667	0.0251661
41	1890	-0.09	0.04	-0.23	-0.12	-0.16	Global annual	-0.123333	0.0351188
42	1891	0	0.13	-0.15	0.01	-0.07	Global annual	-0.02	0.043589
43	1892	-0.13	0.01	-0.28	-0.04	-0.12	Global annual	-0.0966667	0.0493288
44	1893	-0.15	-0.01	-0.29	-0.08	-0.14	Global annual	-0.123333	0.0378594
45	1894	-0.08	0.05	-0.23	-0.07	-0.12	Global annual	-0.09	0.0264575
46	1895	-0.06	0.07	-0.21	0.01	-0.05	Global annual	-0.0333333	0.0378594
47	1896	0.14	0.27	0	0.13	0.09	Global annual	0.12	0.0264575
48	1897	0.12	0.25	-0.02	0.13	0.09	Global annual	0.113333	0.0208167
49	1898	-0.09	0.05	-0.23	-0.03	-0.08	Global annual	-0.0666667	0.0321455
50	1899	0.04	0.17	-0.1	0.06	0.03	Global annual	0.0433333	0.0152753
51	1900	0.12	0.26	-0.02	0.16	0.11	Global annual	0.13	0.0264575
52	1901	0.07	0.21	-0.08	0.08	0.04	Global annual	0.0633333	0.0208167
53	1902	-0.08	0.05	-0.21	-0.05	-0.06	Global annual	-0.0633333	0.0152753
54	1903	-0.15	-0.02	-0.29	-0.14	-0.18	Global annual	-0.156667	0.0208167
55	1904	-0.19	-0.06	-0.33	-0.23	-0.27	Global annual	-0.23	0.04
56	1905	-0.05	0.08	-0.19	-0.03	-0.09	Global annual	-0.0566667	0.0305505
57	1906	0.04	0.17	-0.09	0.01	-0.02	Global annual	0.01	0.03
58	1907	-0.14	-0.01	-0.27	-0.15	-0.19	Global annual	-0.16	0.0264575
59	1908	-0.19	-0.06	-0.32	-0.2	-0.24	Global annual	-0.21	0.0264575
60	1909	-0.2	-0.08	-0.32	-0.25	-0.25	Global annual	-0.233333	0.0288675
61	1910	-0.16	-0.04	-0.29	-0.2	-0.21	Global annual	-0.19	0.0264575
62	1911	-0.22	-0.1	-0.34	-0.21	-0.25	Global annual	-0.226667	0.0208167
63	1912	-0.11	0	-0.24	-0.13	-0.15	Global annual	-0.13	0.02
64	1913	-0.1	0.02	-0.22	-0.11	-0.13	Global annual	-0.113333	0.0152753
65	1914	0.08	0.2	-0.05	0.08	0.05	Global annual	0.07	0.0173205
66	1915	0.18	0.32	0.04	0.09	0.1	Global annual	0.123333	0.0493288
67	1916	-0.06	0.07	-0.19	-0.13	-0.14	Global annual	-0.11	0.043589
68	1917	-0.14	-0.01	-0.29	-0.23	-0.21	Global annual	-0.193333	0.0472582
69	1918	-0.01	0.14	-0.16	-0.07	-0.12	Global annual	-0.0666667	0.0550757
70	1919	0.05	0.19	-0.09	-0.05	-0.06	Global annual	-0.02	0.0608276
71	1920	0.08	0.21	-0.06	-0.04	-0.04	Global annual	0	0.069282
72	1921	0.14	0.26	0.01	0.04	0.03	Global annual	0.07	0.0608276
73	1922	0.02	0.14	-0.1	-0.05	-0.05	Global annual	-0.0266667	0.0404145
74	1923	0.05	0.16	-0.07	-0.04	-0.06	Global annual	-0.0166667	0.0585947
75	1924	0.03	0.15	-0.09	-0.04	-0.05	Global annual	-0.02	0.043589
76	1925	0.11	0.22	-0.01	0.01	0.01	Global annual	0.0433333	0.057735
77	1926	0.22	0.33	0.09	0.12	0.11	Global annual	0.15	0.0608276
78	1927	0.12	0.23	0	0.01	0.01	Global annual	0.0466667	0.0635085
79	1928	0.12	0.23	0	0.03	0.01	Global annual	0.0533333	0.0585947
80	1929	-0.02	0.09	-0.14	-0.13	-0.14	Global annual	-0.0966667	0.0665833
81	1930	0.19	0.3	0.07	0.07	0.08	Global annual	0.113333	0.0665833
82	1931	0.24	0.35	0.12	0.14	0.13	Global annual	0.17	0.0608276
83	1932	0.19	0.3	0.07	0.07	0.06	Global annual	0.106667	0.0723418
84	1933	0.05	0.16	-0.06	-0.06	-0.07	Global annual	-0.0266667	0.0665833
85	1934	0.19	0.3	0.08	0.1	0.08	Global annual	0.123333	0.0585947
86	1935	0.15	0.25	0.04	0.03	0.03	Global annual	0.07	0.069282
87	1936	0.18	0.28	0.07	0.08	0.07	Global annual	0.11	0.0608276
88	1937	0.3	0.4	0.2	0.2	0.18	Global annual	0.226667	0.064291
89	1938	0.32	0.42	0.21	0.22	0.17	Global annual	0.236667	0.0763763
90	1939	0.27	0.38	0.16	0.21	0.2	Global annual	0.226667	0.0378594
91	1940	0.34	0.46	0.21	0.36	0.35	Global annual	0.35	0.01
92	1941	0.35	0.46	0.23	0.42	0.46	Global annual	0.41	0.0556776
93	1942	0.3	0.42	0.17	0.3	0.29	Global annual	0.296667	0.0057735
94	1943	0.32	0.44	0.19	0.32	0.29	Global annual	0.31	0.0173205
95	1944	0.47	0.59	0.34	0.43	0.46	Global annual	0.453333	0.0208167
96	1945	0.35	0.47	0.22	0.32	0.36	Global annual	0.343333	0.0208167
97	1946	0.25	0.36	0.14	0.15	0.18	Global annual	0.193333	0.051316
98	1947	0.29	0.4	0.17	0.2	0.15	Global annual	0.213333	0.070946
99	1948	0.29	0.39	0.17	0.12	0.13	Global annual	0.18	0.0953939
100	1949	0.25	0.35	0.14	0.12	0.11	Global annual	0.16	0.0781025
101	1950	0.15	0.25	0.05	0.05	0.03	Global annual	0.0766667	0.064291
102	1951	0.27	0.37	0.17	0.16	0.19	Global annual	0.206667	0.0568624
103	1952	0.35	0.45	0.25	0.24	0.23	Global annual	0.273333	0.0665833
104	1953	0.42	0.52	0.32	0.31	0.32	Global annual	0.35	0.0608276
105	1954	0.2	0.29	0.1	0.1	0.09	Global annual	0.13	0.0608276
106	1955	0.14	0.23	0.04	0.09	0.06	Global annual	0.0966667	0.0404145
107	1956	0.06	0.15	-0.03	0.04	0	Global annual	0.0333333	0.0305505
108	1957	0.32	0.41	0.23	0.28	0.26	Global annual	0.286667	0.0305505
109	1958	0.37	0.46	0.28	0.29	0.31	Global annual	0.323333	0.0416333
110	1959	0.34	0.43	0.26	0.26	0.27	Global annual	0.29	0.043589
111	1960	0.28	0.36	0.19	0.21	0.24	Global annual	0.243333	0.0351188
112	1961	0.36	0.45	0.28	0.29	0.28	Global annual	0.31	0.043589
113	1962	0.34	0.42	0.25	0.27	0.29	Global annual	0.3	0.0360555
114	1963	0.37	0.46	0.28	0.28	0.31	Global annual	0.32	0.0458258
115	1964	0.1	0.19	0.02	0.03	0.05	Global annual	0.06	0.0360555
116	1965	0.19	0.27	0.1	0.12	0.12	Global annual	0.143333	0.0404145
117	1966	0.26	0.34	0.17	0.17	0.18	Global annual	0.203333	0.0493288
118	1967	0.25	0.34	0.17	0.21	0.19	Global annual	0.216667	0.0305505
119	1968	0.21	0.29	0.13	0.15	0.16	Global annual	0.173333	0.0321455
120	1969	0.36	0.44	0.27	0.29	0.29	Global annual	0.313333	0.0404145
121	1970	0.3	0.38	0.22	0.25	0.25	Global annual	0.266667	0.0288675
122	1971	0.14	0.22	0.06	0.15	0.12	Global annual	0.136667	0.0152753
123	1972	0.26	0.34	0.18	0.24	0.23	Global annual	0.243333	0.0152753
124	1973	0.39	0.47	0.31	0.39	0.38	Global annual	0.386667	0.0057735
125	1974	0.11	0.19	0.03	0.16	0.13	Global annual	0.133333	0.0251661
126	1975	0.18	0.26	0.09	0.22	0.2	Global annual	0.2	0.02
127	1976	0.08	0.16	0	0.13	0.12	Global annual	0.11	0.0264575
128	1977	0.37	0.45	0.29	0.41	0.4	Global annual	0.393333	0.0208167
129	1978	0.26	0.35	0.18	0.3	0.31	Global annual	0.29	0.0264575
130	1979	0.38	0.46	0.3	0.39	0.42	Global annual	0.396667	0.0208167
131	1980	0.42	0.5	0.33	0.49	0.47	Global annual	0.46	0.0360555
132	1981	0.47	0.55	0.38	0.55	0.51	Global annual	0.51	0.04
133	1982	0.34	0.42	0.25	0.37	0.38	Global annual	0.363333	0.0208167
134	1983	0.52	0.6	0.43	0.54	0.55	Global annual	0.536667	0.0152753
135	1984	0.31	0.39	0.23	0.39	0.36	Global annual	0.353333	0.0404145
136	1985	0.3	0.37	0.21	0.35	0.35	Global annual	0.333333	0.0288675
137	1986	0.37	0.45	0.29	0.41	0.43	Global annual	0.403333	0.0305505
138	1987	0.52	0.6	0.43	0.55	0.57	Global annual	0.546667	0.0251661
139	1988	0.52	0.61	0.44	0.61	0.58	Global annual	0.57	0.0458258
140	1989	0.44	0.53	0.36	0.5	0.48	Global annual	0.473333	0.0305505
141	1990	0.62	0.71	0.54	0.68	0.64	Global annual	0.646667	0.0305505
142	1991	0.58	0.67	0.49	0.63	0.58	Global annual	0.596667	0.0288675
143	1992	0.43	0.52	0.34	0.45	0.43	Global annual	0.436667	0.011547
144	1993	0.47	0.56	0.39	0.46	0.47	Global annual	0.466667	0.0057735
145	1994	0.53	0.62	0.44	0.55	0.53	Global annual	0.536667	0.011547
146	1995	0.65	0.74	0.56	0.68	0.66	Global annual	0.663333	0.0152753
147	1996	0.51	0.59	0.42	0.56	0.51	Global annual	0.526667	0.0288675
148	1997	0.72	0.8	0.63	0.7	0.7	Global annual	0.706667	0.011547
149	1998	0.86	0.95	0.77	0.84	0.84	Global annual	0.846667	0.011547
150	1999	0.63	0.72	0.54	0.62	0.63	Global annual	0.626667	0.0057735
151	2000	0.62	0.71	0.53	0.63	0.62	Global annual	0.623333	0.0057735
152	2001	0.77	0.86	0.68	0.77	0.76	Global annual	0.766667	0.0057735
153	2002	0.82	0.91	0.73	0.86	0.81	Global annual	0.83	0.0264575
154	2003	0.83	0.92	0.74	0.85	0.83	Global annual	0.836667	0.011547
155	2004	0.77	0.86	0.68	0.77	0.77	Global annual	0.77	0
156	2005	0.87	0.96	0.78	0.91	0.86	Global annual	0.88	0.0264575
157	2006	0.83	0.92	0.74	0.87	0.83	Global annual	0.843333	0.023094
158	2007	0.82	0.91	0.73	0.89	0.81	Global annual	0.84	0.043589
159	2008	0.72	0.81	0.63	0.77	0.73	Global annual	0.74	0.0264575
160	2009	0.83	0.92	0.74	0.89	0.84	Global annual	0.853333	0.0321455
161	2010	0.89	0.98	0.79	0.96	0.92	Global annual	0.923333	0.0351188
162	2011	0.75	0.84	0.66	0.84	0.77	Global annual	0.786667	0.0472582
163	2012	0.8	0.89	0.71	0.87	0.83	Global annual	0.833333	0.0351188
164	2013	0.84	0.93	0.75	0.92	0.86	Global annual	0.873333	0.0416333
165	2014	0.9	0.99	0.82	0.98	0.93	Global annual	0.936667	0.0404145
166	2015	1.09	1.18	1	1.13	1.12	Global annual	1.11333	0.0208167
167	2016	1.12	1.21	1.03	1.25	1.18	Global annual	1.18333	0.0650641
168	2017	1	1.09	0.91	1.15	1.1	Global annual	1.08333	0.0763763
169	2018	0.92	1.01	0.84	1.08	1.02	Global annual	1.00667	0.080829
170	2019	1.06	1.15	0.97	1.21	1.14	Global annual	1.13667	0.0750555
