# Supplementary material for: The Social Cost of Fossil and Industrial CO2 Emissions from 1950 to 2018
Source: Research Square preprint supplement (doi:10.21203/rs.3.rs-2244259/v1), 2022-11-17
Supplement: Supplementary file 38 [file CO2_concentration_GCP.xlsx]

## Sheet: Tabelle2
Column2	Column3
1700.04	276.58
1700.12	276.58
1700.21	276.59
1700.29	276.59
1700.38	276.59
1700.46	276.59
1700.54	276.6
1700.62	276.6
1700.71	276.6
1700.79	276.6
1700.88	276.6
1700.96	276.61
1701.04	276.61
1701.12	276.61
1701.21	276.61
1701.29	276.62
1701.38	276.62
1701.46	276.62
1701.54	276.62
1701.62	276.62
1701.71	276.63
1701.79	276.63
1701.88	276.63
1701.96	276.63
1702.04	276.63
1702.12	276.64
1702.21	276.64
1702.29	276.64
1702.38	276.64
1702.46	276.65
1702.54	276.65
1702.62	276.65
1702.71	276.65
1702.79	276.65
1702.88	276.66
1702.96	276.66
1703.04	276.66
1703.12	276.66
1703.21	276.67
1703.29	276.67
1703.38	276.67
1703.46	276.67
1703.54	276.67
1703.62	276.68
1703.71	276.68
1703.79	276.68
1703.88	276.68
1703.96	276.68
1704.04	276.69
1704.12	276.69
1704.21	276.69
1704.29	276.69
1704.38	276.7
1704.46	276.7
1704.54	276.7
1704.62	276.7
1704.71	276.7
1704.79	276.71
1704.88	276.71
1704.96	276.71
1705.04	276.71
1705.12	276.71
1705.21	276.72
1705.29	276.72
1705.38	276.72
1705.46	276.72
1705.54	276.73
1705.62	276.73
1705.71	276.73
1705.79	276.73
1705.88	276.73
1705.96	276.74
1706.04	276.74
1706.12	276.74
1706.21	276.74
1706.29	276.75
1706.38	276.75
1706.46	276.75
1706.54	276.75
1706.62	276.75
1706.71	276.76
1706.79	276.76
1706.88	276.76
1706.96	276.76
1707.04	276.76
1707.12	276.77
1707.21	276.77
1707.29	276.77
1707.38	276.77
1707.46	276.78
1707.54	276.78
1707.62	276.78
1707.71	276.78
1707.79	276.78
1707.88	276.79
1707.96	276.79
1708.04	276.79
1708.12	276.79
1708.21	276.8
1708.29	276.8
1708.38	276.8
1708.46	276.8
1708.54	276.81
1708.62	276.81
1708.71	276.81
1708.79	276.81
1708.88	276.81
1708.96	276.82
1709.04	276.82
1709.12	276.82
1709.21	276.82
1709.29	276.83
1709.38	276.83
1709.46	276.83
1709.54	276.83
1709.62	276.83
1709.71	276.84
1709.79	276.84
1709.88	276.84
1709.96	276.84
1710.04	276.85
1710.12	276.85
1710.21	276.85
1710.29	276.85
1710.38	276.86
1710.46	276.86
1710.54	276.86
1710.62	276.86
1710.71	276.87
1710.79	276.87
1710.88	276.87
1710.96	276.87
1711.04	276.87
1711.12	276.88
1711.21	276.88
1711.29	276.88
1711.38	276.88
1711.46	276.89
1711.54	276.89
1711.62	276.89
1711.71	276.89
1711.79	276.9
1711.88	276.9
1711.96	276.9
1712.04	276.9
1712.12	276.91
1712.21	276.91
1712.29	276.91
1712.38	276.91
1712.46	276.92
1712.54	276.92
1712.62	276.92
1712.71	276.92
1712.79	276.93
1712.88	276.93
1712.96	276.93
1713.04	276.93
1713.12	276.94
1713.21	276.94
1713.29	276.94
1713.38	276.95
1713.46	276.95
1713.54	276.95
1713.62	276.95
1713.71	276.96
1713.79	276.96
1713.88	276.96
1713.96	276.96
1714.04	276.97
1714.12	276.97
1714.21	276.97
1714.29	276.97
1714.38	276.98
1714.46	276.98
1714.54	276.98
1714.62	276.99
1714.71	276.99
1714.79	276.99
1714.88	276.99
1714.96	277
1715.04	277
1715.12	277
1715.21	277.01
1715.29	277.01
1715.38	277.01
1715.46	277.01
1715.54	277.02
1715.62	277.02
1715.71	277.02
1715.79	277.03
1715.88	277.03
1715.96	277.03
1716.04	277.03
1716.12	277.04
1716.21	277.04
1716.29	277.04
1716.38	277.05
1716.46	277.05
1716.54	277.05
1716.62	277.05
1716.71	277.06
1716.79	277.06
1716.88	277.06
1716.96	277.07
1717.04	277.07
1717.12	277.07
1717.21	277.08
1717.29	277.08
1717.38	277.08
1717.46	277.09
1717.54	277.09
1717.62	277.09
1717.71	277.09
1717.79	277.1
1717.88	277.1
1717.96	277.1
1718.04	277.11
1718.12	277.11
1718.21	277.11
1718.29	277.12
1718.38	277.12
1718.46	277.12
1718.54	277.13
1718.62	277.13
1718.71	277.13
1718.79	277.14
1718.88	277.14
1718.96	277.14
1719.04	277.15
1719.12	277.15
1719.21	277.15
1719.29	277.16
1719.38	277.16
1719.46	277.16
1719.54	277.17
1719.62	277.17
1719.71	277.17
1719.79	277.18
1719.88	277.18
1719.96	277.18
1720.04	277.19
1720.12	277.19
1720.21	277.2
1720.29	277.2
1720.38	277.2
1720.46	277.21
1720.54	277.21
1720.62	277.21
1720.71	277.22
1720.79	277.22
1720.88	277.22
1720.96	277.23
1721.04	277.23
1721.12	277.24
1721.21	277.24
1721.29	277.24
1721.38	277.25
1721.46	277.25
1721.54	277.25
1721.62	277.26
1721.71	277.26
1721.79	277.27
1721.88	277.27
1721.96	277.27
1722.04	277.28
1722.12	277.28
1722.21	277.29
1722.29	277.29
1722.38	277.29
1722.46	277.3
1722.54	277.3
1722.62	277.31
1722.71	277.31
1722.79	277.31
1722.88	277.32
1722.96	277.32
1723.04	277.33
1723.12	277.33
1723.21	277.33
1723.29	277.34
1723.38	277.34
1723.46	277.35
1723.54	277.35
1723.62	277.36
1723.71	277.36
1723.79	277.36
1723.88	277.37
1723.96	277.37
1724.04	277.38
1724.12	277.38
1724.21	277.38
1724.29	277.39
1724.38	277.39
1724.46	277.4
1724.54	277.4
1724.62	277.41
1724.71	277.41
1724.79	277.41
1724.88	277.42
1724.96	277.42
1725.04	277.43
1725.12	277.43
1725.21	277.43
1725.29	277.44
1725.38	277.44
1725.46	277.45
1725.54	277.45
1725.62	277.46
1725.71	277.46
1725.79	277.46
1725.88	277.47
1725.96	277.47
1726.04	277.48
1726.12	277.48
1726.21	277.48
1726.29	277.49
1726.38	277.49
1726.46	277.5
1726.54	277.5
1726.62	277.5
1726.71	277.51
1726.79	277.51
1726.88	277.51
1726.96	277.52
1727.04	277.52
1727.12	277.53
1727.21	277.53
1727.29	277.53
1727.38	277.54
1727.46	277.54
1727.54	277.54
1727.62	277.55
1727.71	277.55
1727.79	277.55
1727.88	277.56
1727.96	277.56
1728.04	277.56
1728.12	277.57
1728.21	277.57
1728.29	277.57
1728.38	277.58
1728.46	277.58
1728.54	277.58
1728.62	277.59
1728.71	277.59
1728.79	277.59
1728.88	277.6
1728.96	277.6
1729.04	277.6
1729.12	277.6
1729.21	277.61
1729.29	277.61
1729.38	277.61
1729.46	277.61
1729.54	277.62
1729.62	277.62
1729.71	277.62
1729.79	277.62
1729.88	277.63
1729.96	277.63
1730.04	277.63
1730.12	277.63
1730.21	277.63
1730.29	277.64
1730.38	277.64
1730.46	277.64
1730.54	277.64
1730.62	277.64
1730.71	277.64
1730.79	277.65
1730.88	277.65
1730.96	277.65
1731.04	277.65
1731.12	277.65
1731.21	277.65
1731.29	277.65
1731.38	277.65
1731.46	277.66
1731.54	277.66
1731.62	277.66
1731.71	277.66
1731.79	277.66
1731.88	277.66
1731.96	277.66
1732.04	277.66
1732.12	277.66
1732.21	277.66
1732.29	277.66
1732.38	277.66
1732.46	277.66
1732.54	277.66
1732.62	277.66
1732.71	277.66
1732.79	277.66
1732.88	277.66
1732.96	277.66
1733.04	277.66
1733.12	277.66
1733.21	277.66
1733.29	277.65
1733.38	277.65
1733.46	277.65
1733.54	277.65
1733.62	277.65
1733.71	277.65
1733.79	277.65
1733.88	277.65
1733.96	277.64
1734.04	277.64
1734.12	277.64
1734.21	277.64
1734.29	277.64
1734.38	277.63
1734.46	277.63
1734.54	277.63
1734.62	277.63
1734.71	277.62
1734.79	277.62
1734.88	277.62
1734.96	277.62
1735.04	277.61
1735.12	277.61
1735.21	277.61
1735.29	277.6
1735.38	277.6
1735.46	277.59
1735.54	277.59
1735.62	277.59
1735.71	277.58
1735.79	277.58
1735.88	277.58
1735.96	277.57
1736.04	277.57
1736.12	277.56
1736.21	277.56
1736.29	277.56
1736.38	277.55
1736.46	277.55
1736.54	277.54
1736.62	277.54
1736.71	277.53
1736.79	277.53
1736.88	277.52
1736.96	277.52
1737.04	277.52
1737.12	277.51
1737.21	277.51
1737.29	277.5
1737.38	277.5
1737.46	277.49
1737.54	277.48
1737.62	277.48
1737.71	277.47
1737.79	277.47
1737.88	277.46
1737.96	277.46
1738.04	277.45
1738.12	277.45
1738.21	277.44
1738.29	277.44
1738.38	277.43
1738.46	277.43
1738.54	277.42
1738.62	277.41
1738.71	277.41
1738.79	277.4
1738.88	277.4
1738.96	277.39
1739.04	277.39
1739.12	277.38
1739.21	277.38
1739.29	277.37
1739.38	277.36
1739.46	277.36
1739.54	277.35
1739.62	277.35
1739.71	277.34
1739.79	277.33
1739.88	277.33
1739.96	277.32
1740.04	277.32
1740.12	277.31
1740.21	277.31
1740.29	277.3
1740.38	277.29
1740.46	277.29
1740.54	277.28
1740.62	277.28
1740.71	277.27
1740.79	277.26
1740.88	277.26
1740.96	277.25
1741.04	277.25
1741.12	277.24
1741.21	277.24
1741.29	277.23
1741.38	277.22
1741.46	277.22
1741.54	277.21
1741.62	277.21
1741.71	277.2
1741.79	277.2
1741.88	277.19
1741.96	277.18
1742.04	277.18
1742.12	277.17
1742.21	277.17
1742.29	277.16
1742.38	277.16
1742.46	277.15
1742.54	277.15
1742.62	277.14
1742.71	277.14
1742.79	277.13
1742.88	277.12
1742.96	277.12
1743.04	277.11
1743.12	277.11
1743.21	277.1
1743.29	277.1
1743.38	277.09
1743.46	277.09
1743.54	277.09
1743.62	277.08
1743.71	277.08
1743.79	277.07
1743.88	277.07
1743.96	277.06
1744.04	277.06
1744.12	277.05
1744.21	277.05
1744.29	277.04
1744.38	277.04
1744.46	277.03
1744.54	277.03
1744.62	277.03
1744.71	277.02
1744.79	277.02
1744.88	277.01
1744.96	277.01
1745.04	277
1745.12	277
1745.21	277
1745.29	276.99
1745.38	276.99
1745.46	276.98
1745.54	276.98
1745.62	276.97
1745.71	276.97
1745.79	276.97
1745.88	276.96
1745.96	276.96
1746.04	276.95
1746.12	276.95
1746.21	276.95
1746.29	276.94
1746.38	276.94
1746.46	276.94
1746.54	276.93
1746.62	276.93
1746.71	276.93
1746.79	276.92
1746.88	276.92
1746.96	276.91
1747.04	276.91
1747.12	276.91
1747.21	276.9
1747.29	276.9
1747.38	276.9
1747.46	276.89
1747.54	276.89
1747.62	276.89
1747.71	276.88
1747.79	276.88
1747.88	276.88
1747.96	276.87
1748.04	276.87
1748.12	276.87
1748.21	276.86
1748.29	276.86
1748.38	276.86
1748.46	276.85
1748.54	276.85
1748.62	276.85
1748.71	276.84
1748.79	276.84
1748.88	276.84
1748.96	276.83
1749.04	276.83
1749.12	276.83
1749.21	276.82
1749.29	276.82
1749.38	276.82
1749.46	276.82
1749.54	276.81
1749.62	276.81
1749.71	276.81
1749.79	276.8
1749.88	276.8
1749.96	276.8
1750.04	276.79
1750.12	276.79
1750.21	276.79
1750.29	276.79
1750.38	276.78
1750.46	276.78
1750.54	276.78
1750.62	276.77
1750.71	276.77
1750.79	276.77
1750.88	276.77
1750.96	276.76
1751.04	276.76
1751.12	276.76
1751.21	276.75
1751.29	276.75
1751.38	276.75
1751.46	276.75
1751.54	276.74
1751.62	276.74
1751.71	276.74
1751.79	276.73
1751.88	276.73
1751.96	276.73
1752.04	276.73
1752.12	276.72
1752.21	276.72
1752.29	276.72
1752.38	276.72
1752.46	276.71
1752.54	276.71
1752.62	276.71
1752.71	276.7
1752.79	276.7
1752.88	276.7
1752.96	276.7
1753.04	276.69
1753.12	276.69
1753.21	276.69
1753.29	276.69
1753.38	276.68
1753.46	276.68
1753.54	276.68
1753.62	276.68
1753.71	276.67
1753.79	276.67
1753.88	276.67
1753.96	276.67
1754.04	276.66
1754.12	276.66
1754.21	276.66
1754.29	276.66
1754.38	276.65
1754.46	276.65
1754.54	276.65
1754.62	276.65
1754.71	276.65
1754.79	276.64
1754.88	276.64
1754.96	276.64
1755.04	276.64
1755.12	276.63
1755.21	276.63
1755.29	276.63
1755.38	276.63
1755.46	276.63
1755.54	276.62
1755.62	276.62
1755.71	276.62
1755.79	276.62
1755.88	276.62
1755.96	276.62
1756.04	276.61
1756.12	276.61
1756.21	276.61
1756.29	276.61
1756.38	276.61
1756.46	276.61
1756.54	276.6
1756.62	276.6
1756.71	276.6
1756.79	276.6
1756.88	276.6
1756.96	276.6
1757.04	276.59
1757.12	276.59
1757.21	276.59
1757.29	276.59
1757.38	276.59
1757.46	276.59
1757.54	276.59
1757.62	276.59
1757.71	276.59
1757.79	276.58
1757.88	276.58
1757.96	276.58
1758.04	276.58
1758.12	276.58
1758.21	276.58
1758.29	276.58
1758.38	276.58
1758.46	276.58
1758.54	276.58
1758.62	276.58
1758.71	276.58
1758.79	276.58
1758.88	276.58
1758.96	276.58
1759.04	276.57
1759.12	276.58
1759.21	276.58
1759.29	276.58
1759.38	276.58
1759.46	276.58
1759.54	276.58
1759.62	276.58
1759.71	276.58
1759.79	276.58
1759.88	276.58
1759.96	276.58
1760.04	276.58
1760.12	276.58
1760.21	276.58
1760.29	276.58
1760.38	276.58
1760.46	276.58
1760.54	276.58
1760.62	276.58
1760.71	276.58
1760.79	276.58
1760.88	276.58
1760.96	276.58
1761.04	276.59
1761.12	276.59
1761.21	276.59
1761.29	276.59
1761.38	276.59
1761.46	276.59
1761.54	276.6
1761.62	276.6
1761.71	276.6
1761.79	276.6
1761.88	276.6
1761.96	276.6
1762.04	276.61
1762.12	276.61
1762.21	276.61
1762.29	276.61
1762.38	276.62
1762.46	276.62
1762.54	276.62
1762.62	276.62
1762.71	276.63
1762.79	276.63
1762.88	276.63
1762.96	276.63
1763.04	276.64
1763.12	276.64
1763.21	276.64
1763.29	276.65
1763.38	276.65
1763.46	276.65
1763.54	276.66
1763.62	276.66
1763.71	276.66
1763.79	276.67
1763.88	276.67
1763.96	276.67
1764.04	276.68
1764.12	276.68
1764.21	276.69
1764.29	276.69
1764.38	276.7
1764.46	276.7
1764.54	276.7
1764.62	276.71
1764.71	276.71
1764.79	276.72
1764.88	276.72
1764.96	276.73
1765.04	276.73
1765.12	276.74
1765.21	276.74
1765.29	276.75
1765.38	276.75
1765.46	276.76
1765.54	276.76
1765.62	276.77
1765.71	276.77
1765.79	276.78
1765.88	276.78
1765.96	276.79
1766.04	276.8
1766.12	276.8
1766.21	276.81
1766.29	276.81
1766.38	276.82
1766.46	276.83
1766.54	276.83
1766.62	276.84
1766.71	276.84
1766.79	276.85
1766.88	276.86
1766.96	276.86
1767.04	276.87
1767.12	276.88
1767.21	276.88
1767.29	276.89
1767.38	276.9
1767.46	276.9
1767.54	276.91
1767.62	276.92
1767.71	276.92
1767.79	276.93
1767.88	276.94
1767.96	276.94
1768.04	276.95
1768.12	276.96
1768.21	276.97
1768.29	276.97
1768.38	276.98
1768.46	276.99
1768.54	277
1768.62	277
1768.71	277.01
1768.79	277.02
1768.88	277.03
1768.96	277.03
1769.04	277.04
1769.12	277.05
1769.21	277.06
1769.29	277.07
1769.38	277.07
1769.46	277.08
1769.54	277.09
1769.62	277.1
1769.71	277.11
1769.79	277.11
1769.88	277.12
1769.96	277.13
1770.04	277.14
1770.12	277.15
1770.21	277.16
1770.29	277.16
1770.38	277.17
1770.46	277.18
1770.54	277.19
1770.62	277.2
1770.71	277.21
1770.79	277.22
1770.88	277.22
1770.96	277.23
1771.04	277.24
1771.12	277.25
1771.21	277.26
1771.29	277.27
1771.38	277.28
1771.46	277.29
1771.54	277.29
1771.62	277.3
1771.71	277.31
1771.79	277.32
1771.88	277.33
1771.96	277.34
1772.04	277.35
1772.12	277.36
1772.21	277.37
1772.29	277.38
1772.38	277.38
1772.46	277.39
1772.54	277.4
1772.62	277.41
1772.71	277.42
1772.79	277.43
1772.88	277.44
1772.96	277.45
1773.04	277.46
1773.12	277.47
1773.21	277.48
1773.29	277.49
1773.38	277.5
1773.46	277.5
1773.54	277.51
1773.62	277.52
1773.71	277.53
1773.79	277.54
1773.88	277.55
1773.96	277.56
1774.04	277.57
1774.12	277.58
1774.21	277.59
1774.29	277.6
1774.38	277.61
1774.46	277.62
1774.54	277.63
1774.62	277.64
1774.71	277.65
1774.79	277.66
1774.88	277.67
1774.96	277.68
1775.04	277.68
1775.12	277.69
1775.21	277.7
1775.29	277.71
1775.38	277.72
1775.46	277.73
1775.54	277.74
1775.62	277.75
1775.71	277.76
1775.79	277.77
1775.88	277.78
1775.96	277.79
1776.04	277.8
1776.12	277.81
1776.21	277.82
1776.29	277.83
1776.38	277.84
1776.46	277.85
1776.54	277.86
1776.62	277.87
1776.71	277.88
1776.79	277.89
1776.88	277.9
1776.96	277.91
1777.04	277.92
1777.12	277.93
1777.21	277.94
1777.29	277.95
1777.38	277.97
1777.46	277.98
1777.54	277.99
1777.62	278
1777.71	278.01
1777.79	278.02
1777.88	278.03
1777.96	278.04
1778.04	278.05
1778.12	278.06
1778.21	278.07
1778.29	278.08
1778.38	278.09
1778.46	278.1
1778.54	278.11
1778.62	278.13
1778.71	278.14
1778.79	278.15
1778.88	278.16
1778.96	278.17
1779.04	278.18
1779.12	278.19
1779.21	278.2
1779.29	278.21
1779.38	278.23
1779.46	278.24
1779.54	278.25
1779.62	278.26
1779.71	278.27
1779.79	278.28
1779.88	278.29
1779.96	278.31
1780.04	278.32
1780.12	278.33
1780.21	278.34
1780.29	278.36
1780.38	278.37
1780.46	278.38
1780.54	278.39
1780.62	278.4
1780.71	278.42
1780.79	278.43
1780.88	278.44
1780.96	278.45
1781.04	278.47
1781.12	278.48
1781.21	278.49
1781.29	278.51
1781.38	278.52
1781.46	278.54
1781.54	278.55
1781.62	278.56
1781.71	278.58
1781.79	278.59
1781.88	278.6
1781.96	278.62
1782.04	278.63
1782.12	278.65
1782.21	278.66
1782.29	278.68
1782.38	278.69
1782.46	278.71
1782.54	278.72
1782.62	278.74
1782.71	278.75
1782.79	278.77
1782.88	278.78
1782.96	278.8
1783.04	278.81
1783.12	278.83
1783.21	278.84
1783.29	278.86
1783.38	278.88
1783.46	278.89
1783.54	278.91
1783.62	278.92
1783.71	278.94
1783.79	278.96
1783.88	278.97
1783.96	278.99
1784.04	279
1784.12	279.02
1784.21	279.04
1784.29	279.05
1784.38	279.07
1784.46	279.09
1784.54	279.1
1784.62	279.12
1784.71	279.14
1784.79	279.16
1784.88	279.17
1784.96	279.19
1785.04	279.21
1785.12	279.22
1785.21	279.24
1785.29	279.26
1785.38	279.28
1785.46	279.29
1785.54	279.31
1785.62	279.33
1785.71	279.35
1785.79	279.37
1785.88	279.38
1785.96	279.4
1786.04	279.42
1786.12	279.44
1786.21	279.46
1786.29	279.47
1786.38	279.49
1786.46	279.51
1786.54	279.53
1786.62	279.55
1786.71	279.57
1786.79	279.58
1786.88	279.6
1786.96	279.62
1787.04	279.64
1787.12	279.66
1787.21	279.68
1787.29	279.7
1787.38	279.71
1787.46	279.73
1787.54	279.75
1787.62	279.77
1787.71	279.79
1787.79	279.81
1787.88	279.83
1787.96	279.85
1788.04	279.86
1788.12	279.88
1788.21	279.9
1788.29	279.92
1788.38	279.94
1788.46	279.96
1788.54	279.98
1788.62	280
1788.71	280.02
1788.79	280.04
1788.88	280.06
1788.96	280.08
1789.04	280.1
1789.12	280.11
1789.21	280.13
1789.29	280.15
1789.38	280.17
1789.46	280.19
1789.54	280.21
1789.62	280.23
1789.71	280.25
1789.79	280.27
1789.88	280.29
1789.96	280.31
1790.04	280.33
1790.12	280.35
1790.21	280.37
1790.29	280.39
1790.38	280.41
1790.46	280.43
1790.54	280.44
1790.62	280.46
1790.71	280.48
1790.79	280.5
1790.88	280.52
1790.96	280.54
1791.04	280.56
1791.12	280.58
1791.21	280.6
1791.29	280.62
1791.38	280.64
1791.46	280.66
1791.54	280.68
1791.62	280.7
1791.71	280.72
1791.79	280.74
1791.88	280.76
1791.96	280.78
1792.04	280.79
1792.12	280.81
1792.21	280.83
1792.29	280.85
1792.38	280.87
1792.46	280.89
1792.54	280.91
1792.62	280.93
1792.71	280.95
1792.79	280.97
1792.88	280.99
1792.96	281.01
1793.04	281.03
1793.12	281.04
1793.21	281.06
1793.29	281.08
1793.38	281.1
1793.46	281.12
1793.54	281.14
1793.62	281.16
1793.71	281.18
1793.79	281.2
1793.88	281.21
1793.96	281.23
1794.04	281.25
1794.12	281.27
1794.21	281.29
1794.29	281.31
1794.38	281.33
1794.46	281.34
1794.54	281.36
1794.62	281.38
1794.71	281.4
1794.79	281.42
1794.88	281.44
1794.96	281.45
1795.04	281.47
1795.12	281.49
1795.21	281.51
1795.29	281.53
1795.38	281.54
1795.46	281.56
1795.54	281.58
1795.62	281.6
1795.71	281.62
1795.79	281.63
1795.88	281.65
1795.96	281.67
1796.04	281.69
1796.12	281.7
1796.21	281.72
1796.29	281.74
1796.38	281.76
1796.46	281.77
1796.54	281.79
1796.62	281.81
1796.71	281.83
1796.79	281.84
1796.88	281.86
1796.96	281.88
1797.04	281.89
1797.12	281.91
1797.21	281.93
1797.29	281.94
1797.38	281.96
1797.46	281.98
1797.54	281.99
1797.62	282.01
1797.71	282.03
1797.79	282.04
1797.88	282.06
1797.96	282.08
1798.04	282.09
1798.12	282.11
1798.21	282.12
1798.29	282.14
1798.38	282.16
1798.46	282.17
1798.54	282.19
1798.62	282.2
1798.71	282.22
1798.79	282.23
1798.88	282.25
1798.96	282.27
1799.04	282.28
1799.12	282.3
1799.21	282.31
1799.29	282.33
1799.38	282.34
1799.46	282.36
1799.54	282.37
1799.62	282.39
1799.71	282.4
1799.79	282.42
1799.88	282.43
1799.96	282.45
1800.04	282.46
1800.12	282.48
1800.21	282.49
1800.29	282.5
1800.38	282.52
1800.46	282.53
1800.54	282.55
1800.62	282.56
1800.71	282.57
1800.79	282.59
1800.88	282.6
1800.96	282.62
1801.04	282.63
1801.12	282.64
1801.21	282.66
1801.29	282.67
1801.38	282.69
1801.46	282.7
1801.54	282.71
1801.62	282.73
1801.71	282.74
1801.79	282.75
1801.88	282.77
1801.96	282.78
1802.04	282.79
1802.12	282.81
1802.21	282.82
1802.29	282.83
1802.38	282.84
1802.46	282.86
1802.54	282.87
1802.62	282.88
1802.71	282.89
1802.79	282.91
1802.88	282.92
1802.96	282.93
1803.04	282.94
1803.12	282.96
1803.21	282.97
1803.29	282.98
1803.38	282.99
1803.46	283
1803.54	283.01
1803.62	283.03
1803.71	283.04
1803.79	283.05
1803.88	283.06
1803.96	283.07
1804.04	283.08
1804.12	283.1
1804.21	283.11
1804.29	283.12
1804.38	283.13
1804.46	283.14
1804.54	283.15
1804.62	283.16
1804.71	283.17
1804.79	283.18
1804.88	283.19
1804.96	283.2
1805.04	283.22
1805.12	283.23
1805.21	283.24
1805.29	283.25
1805.38	283.26
1805.46	283.27
1805.54	283.28
1805.62	283.29
1805.71	283.29
1805.79	283.3
1805.88	283.31
1805.96	283.32
1806.04	283.33
1806.12	283.34
1806.21	283.35
1806.29	283.36
1806.38	283.37
1806.46	283.38
1806.54	283.39
1806.62	283.4
1806.71	283.41
1806.79	283.42
1806.88	283.42
1806.96	283.43
1807.04	283.44
1807.12	283.45
1807.21	283.46
1807.29	283.47
1807.38	283.47
1807.46	283.48
1807.54	283.49
1807.62	283.5
1807.71	283.5
1807.79	283.51
1807.88	283.52
1807.96	283.53
1808.04	283.54
1808.12	283.54
1808.21	283.55
1808.29	283.56
1808.38	283.56
1808.46	283.57
1808.54	283.58
1808.62	283.58
1808.71	283.59
1808.79	283.6
1808.88	283.6
1808.96	283.61
1809.04	283.62
1809.12	283.62
1809.21	283.63
1809.29	283.64
1809.38	283.64
1809.46	283.65
1809.54	283.65
1809.62	283.66
1809.71	283.66
1809.79	283.67
1809.88	283.68
1809.96	283.68
1810.04	283.69
1810.12	283.69
1810.21	283.7
1810.29	283.7
1810.38	283.7
1810.46	283.71
1810.54	283.71
1810.62	283.72
1810.71	283.72
1810.79	283.73
1810.88	283.73
1810.96	283.74
1811.04	283.74
1811.12	283.74
1811.21	283.75
1811.29	283.75
1811.38	283.75
1811.46	283.76
1811.54	283.76
1811.62	283.76
1811.71	283.77
1811.79	283.77
1811.88	283.77
1811.96	283.78
1812.04	283.78
1812.12	283.78
1812.21	283.78
1812.29	283.79
1812.38	283.79
1812.46	283.79
1812.54	283.79
1812.62	283.79
1812.71	283.8
1812.79	283.8
1812.88	283.8
1812.96	283.8
1813.04	283.8
1813.12	283.8
1813.21	283.8
1813.29	283.81
1813.38	283.81
1813.46	283.81
1813.54	283.81
1813.62	283.81
1813.71	283.81
1813.79	283.81
1813.88	283.81
1813.96	283.81
1814.04	283.81
1814.12	283.81
1814.21	283.81
1814.29	283.81
1814.38	283.81
1814.46	283.81
1814.54	283.81
1814.62	283.81
1814.71	283.81
1814.79	283.81
1814.88	283.81
1814.96	283.81
1815.04	283.8
1815.12	283.8
1815.21	283.8
1815.29	283.8
1815.38	283.8
1815.46	283.8
1815.54	283.79
1815.62	283.79
1815.71	283.79
1815.79	283.79
1815.88	283.79
1815.96	283.79
1816.04	283.78
1816.12	283.78
1816.21	283.78
1816.29	283.78
1816.38	283.77
1816.46	283.77
1816.54	283.77
1816.62	283.76
1816.71	283.76
1816.79	283.76
1816.88	283.76
1816.96	283.75
1817.04	283.75
1817.12	283.75
1817.21	283.74
1817.29	283.74
1817.38	283.74
1817.46	283.73
1817.54	283.73
1817.62	283.73
1817.71	283.72
1817.79	283.72
1817.88	283.72
1817.96	283.71
1818.04	283.71
1818.12	283.71
1818.21	283.7
1818.29	283.7
1818.38	283.7
1818.46	283.69
1818.54	283.69
1818.62	283.68
1818.71	283.68
1818.79	283.68
1818.88	283.67
1818.96	283.67
1819.04	283.67
1819.12	283.66
1819.21	283.66
1819.29	283.65
1819.38	283.65
1819.46	283.65
1819.54	283.64
1819.62	283.64
1819.71	283.63
1819.79	283.63
1819.88	283.63
1819.96	283.62
1820.04	283.62
1820.12	283.61
1820.21	283.61
1820.29	283.61
1820.38	283.6
1820.46	283.6
1820.54	283.6
1820.62	283.59
1820.71	283.59
1820.79	283.58
1820.88	283.58
1820.96	283.58
1821.04	283.57
1821.12	283.57
1821.21	283.57
1821.29	283.56
1821.38	283.56
1821.46	283.55
1821.54	283.55
1821.62	283.55
1821.71	283.54
1821.79	283.54
1821.88	283.54
1821.96	283.53
1822.04	283.53
1822.12	283.53
1822.21	283.52
1822.29	283.52
1822.38	283.52
1822.46	283.52
1822.54	283.51
1822.62	283.51
1822.71	283.51
1822.79	283.5
1822.88	283.5
1822.96	283.5
1823.04	283.5
1823.12	283.49
1823.21	283.49
1823.29	283.49
1823.38	283.49
1823.46	283.48
1823.54	283.48
1823.62	283.48
1823.71	283.48
1823.79	283.48
1823.88	283.47
1823.96	283.47
1824.04	283.47
1824.12	283.47
1824.21	283.47
1824.29	283.47
1824.38	283.47
1824.46	283.46
1824.54	283.46
1824.62	283.46
1824.71	283.46
1824.79	283.46
1824.88	283.46
1824.96	283.46
1825.04	283.46
1825.12	283.46
1825.21	283.46
1825.29	283.46
1825.38	283.46
1825.46	283.46
1825.54	283.46
1825.62	283.46
1825.71	283.46
1825.79	283.46
1825.88	283.46
1825.96	283.46
1826.04	283.46
1826.12	283.46
1826.21	283.46
1826.29	283.47
1826.38	283.47
1826.46	283.47
1826.54	283.47
1826.62	283.47
1826.71	283.47
1826.79	283.48
1826.88	283.48
1826.96	283.48
1827.04	283.48
1827.12	283.48
1827.21	283.49
1827.29	283.49
1827.38	283.49
1827.46	283.5
1827.54	283.5
1827.62	283.5
1827.71	283.5
1827.79	283.51
1827.88	283.51
1827.96	283.51
1828.04	283.51
1828.12	283.52
1828.21	283.52
1828.29	283.53
1828.38	283.53
1828.46	283.53
1828.54	283.54
1828.62	283.54
1828.71	283.54
1828.79	283.55
1828.88	283.55
1828.96	283.55
1829.04	283.56
1829.12	283.56
1829.21	283.57
1829.29	283.57
1829.38	283.57
1829.46	283.58
1829.54	283.58
1829.62	283.59
1829.71	283.59
1829.79	283.59
1829.88	283.6
1829.96	283.6
1830.04	283.61
1830.12	283.61
1830.21	283.62
1830.29	283.62
1830.38	283.63
1830.46	283.63
1830.54	283.64
1830.62	283.64
1830.71	283.65
1830.79	283.65
1830.88	283.66
1830.96	283.66
1831.04	283.67
1831.12	283.67
1831.21	283.68
1831.29	283.68
1831.38	283.69
1831.46	283.69
1831.54	283.7
1831.62	283.7
1831.71	283.71
1831.79	283.71
1831.88	283.72
1831.96	283.72
1832.04	283.73
1832.12	283.74
1832.21	283.74
1832.29	283.75
1832.38	283.75
1832.46	283.76
1832.54	283.76
1832.62	283.77
1832.71	283.78
1832.79	283.78
1832.88	283.79
1832.96	283.79
1833.04	283.8
1833.12	283.81
1833.21	283.81
1833.29	283.82
1833.38	283.83
1833.46	283.83
1833.54	283.84
1833.62	283.84
1833.71	283.85
1833.79	283.86
1833.88	283.86
1833.96	283.87
1834.04	283.88
1834.12	283.88
1834.21	283.89
1834.29	283.9
1834.38	283.9
1834.46	283.91
1834.54	283.92
1834.62	283.93
1834.71	283.93
1834.79	283.94
1834.88	283.95
1834.96	283.95
1835.04	283.96
1835.12	283.97
1835.21	283.98
1835.29	283.99
1835.38	283.99
1835.46	284
1835.54	284.01
1835.62	284.02
1835.71	284.03
1835.79	284.03
1835.88	284.04
1835.96	284.05
1836.04	284.06
1836.12	284.07
1836.21	284.08
1836.29	284.09
1836.38	284.1
1836.46	284.11
1836.54	284.11
1836.62	284.12
1836.71	284.13
1836.79	284.14
1836.88	284.15
1836.96	284.16
1837.04	284.17
1837.12	284.18
1837.21	284.19
1837.29	284.2
1837.38	284.21
1837.46	284.23
1837.54	284.24
1837.62	284.25
1837.71	284.26
1837.79	284.27
1837.88	284.28
1837.96	284.29
1838.04	284.3
1838.12	284.31
1838.21	284.33
1838.29	284.34
1838.38	284.35
1838.46	284.36
1838.54	284.38
1838.62	284.39
1838.71	284.4
1838.79	284.41
1838.88	284.43
1838.96	284.44
1839.04	284.45
1839.12	284.47
1839.21	284.48
1839.29	284.49
1839.38	284.51
1839.46	284.52
1839.54	284.54
1839.62	284.55
1839.71	284.57
1839.79	284.58
1839.88	284.59
1839.96	284.61
1840.04	284.62
1840.12	284.64
1840.21	284.66
1840.29	284.67
1840.38	284.69
1840.46	284.7
1840.54	284.72
1840.62	284.74
1840.71	284.75
1840.79	284.77
1840.88	284.78
1840.96	284.8
1841.04	284.82
1841.12	284.83
1841.21	284.85
1841.29	284.87
1841.38	284.89
1841.46	284.91
1841.54	284.92
1841.62	284.94
1841.71	284.96
1841.79	284.98
1841.88	285
1841.96	285.01
1842.04	285.03
1842.12	285.05
1842.21	285.07
1842.29	285.09
1842.38	285.11
1842.46	285.13
1842.54	285.14
1842.62	285.16
1842.71	285.18
1842.79	285.2
1842.88	285.22
1842.96	285.24
1843.04	285.26
1843.12	285.28
1843.21	285.3
1843.29	285.31
1843.38	285.33
1843.46	285.35
1843.54	285.37
1843.62	285.39
1843.71	285.41
1843.79	285.43
1843.88	285.45
1843.96	285.47
1844.04	285.48
1844.12	285.5
1844.21	285.52
1844.29	285.54
1844.38	285.56
1844.46	285.57
1844.54	285.59
1844.62	285.61
1844.71	285.63
1844.79	285.64
1844.88	285.66
1844.96	285.68
1845.04	285.7
1845.12	285.71
1845.21	285.73
1845.29	285.75
1845.38	285.76
1845.46	285.78
1845.54	285.8
1845.62	285.81
1845.71	285.83
1845.79	285.85
1845.88	285.86
1845.96	285.88
1846.04	285.9
1846.12	285.91
1846.21	285.93
1846.29	285.94
1846.38	285.96
1846.46	285.97
1846.54	285.98
1846.62	286
1846.71	286.01
1846.79	286.03
1846.88	286.04
1846.96	286.06
1847.04	286.07
1847.12	286.09
1847.21	286.1
1847.29	286.11
1847.38	286.12
1847.46	286.14
1847.54	286.15
1847.62	286.16
1847.71	286.17
1847.79	286.19
1847.88	286.2
1847.96	286.21
1848.04	286.22
1848.12	286.23
1848.21	286.24
1848.29	286.25
1848.38	286.26
1848.46	286.27
1848.54	286.28
1848.62	286.3
1848.71	286.31
1848.79	286.32
1848.88	286.33
1848.96	286.34
1849.04	286.34
1849.12	286.35
1849.21	286.36
1849.29	286.37
1849.38	286.37
1849.46	286.38
1849.54	286.39
1849.62	286.4
1849.71	286.4
1849.79	286.41
1849.88	286.42
1849.96	286.43
1850.04	286.43
1850.12	286.44
1850.21	286.44
1850.29	286.45
1850.38	286.45
1850.46	286.46
1850.54	286.46
1850.62	286.47
1850.71	286.47
1850.79	286.48
1850.88	286.48
1850.96	286.49
1851.04	286.49
1851.12	286.49
1851.21	286.5
1851.29	286.5
1851.38	286.5
1851.46	286.5
1851.54	286.51
1851.62	286.51
1851.71	286.51
1851.79	286.52
1851.88	286.52
1851.96	286.52
1852.04	286.52
1852.12	286.52
1852.21	286.52
1852.29	286.52
1852.38	286.52
1852.46	286.52
1852.54	286.52
1852.62	286.52
1852.71	286.53
1852.79	286.53
1852.88	286.53
1852.96	286.53
1853.04	286.53
1853.12	286.52
1853.21	286.52
1853.29	286.52
1853.38	286.52
1853.46	286.52
1853.54	286.52
1853.62	286.52
1853.71	286.51
1853.79	286.51
1853.88	286.51
1853.96	286.51
1854.04	286.51
1854.12	286.5
1854.21	286.5
1854.29	286.5
1854.38	286.5
1854.46	286.49
1854.54	286.49
1854.62	286.49
1854.71	286.49
1854.79	286.48
1854.88	286.48
1854.96	286.48
1855.04	286.48
1855.12	286.47
1855.21	286.47
1855.29	286.47
1855.38	286.47
1855.46	286.46
1855.54	286.46
1855.62	286.46
1855.71	286.46
1855.79	286.45
1855.88	286.45
1855.96	286.45
1856.04	286.45
1856.12	286.45
1856.21	286.44
1856.29	286.44
1856.38	286.44
1856.46	286.44
1856.54	286.44
1856.62	286.43
1856.71	286.43
1856.79	286.43
1856.88	286.43
1856.96	286.42
1857.04	286.42
1857.12	286.42
1857.21	286.42
1857.29	286.42
1857.38	286.42
1857.46	286.42
1857.54	286.41
1857.62	286.41
1857.71	286.41
1857.79	286.41
1857.88	286.41
1857.96	286.41
1858.04	286.41
1858.12	286.41
1858.21	286.41
1858.29	286.4
1858.38	286.4
1858.46	286.4
1858.54	286.4
1858.62	286.4
1858.71	286.4
1858.79	286.4
1858.88	286.4
1858.96	286.4
1859.04	286.4
1859.12	286.4
1859.21	286.4
1859.29	286.4
1859.38	286.4
1859.46	286.4
1859.54	286.4
1859.62	286.4
1859.71	286.4
1859.79	286.41
1859.88	286.41
1859.96	286.41
1860.04	286.41
1860.12	286.41
1860.21	286.41
1860.29	286.41
1860.38	286.42
1860.46	286.42
1860.54	286.42
1860.62	286.42
1860.71	286.42
1860.79	286.43
1860.88	286.43
1860.96	286.43
1861.04	286.43
1861.12	286.44
1861.21	286.44
1861.29	286.44
1861.38	286.45
1861.46	286.45
1861.54	286.46
1861.62	286.46
1861.71	286.46
1861.79	286.47
1861.88	286.47
1861.96	286.47
1862.04	286.48
1862.12	286.48
1862.21	286.49
1862.29	286.5
1862.38	286.5
1862.46	286.51
1862.54	286.51
1862.62	286.52
1862.71	286.52
1862.79	286.53
1862.88	286.54
1862.96	286.54
1863.04	286.55
1863.12	286.56
1863.21	286.56
1863.29	286.57
1863.38	286.58
1863.46	286.59
1863.54	286.6
1863.62	286.61
1863.71	286.61
1863.79	286.62
1863.88	286.63
1863.96	286.64
1864.04	286.65
1864.12	286.66
1864.21	286.67
1864.29	286.68
1864.38	286.69
1864.46	286.7
1864.54	286.71
1864.62	286.72
1864.71	286.73
1864.79	286.74
1864.88	286.76
1864.96	286.77
1865.04	286.78
1865.12	286.79
1865.21	286.8
1865.29	286.82
1865.38	286.83
1865.46	286.84
1865.54	286.86
1865.62	286.87
1865.71	286.88
1865.79	286.9
1865.88	286.91
1865.96	286.92
1866.04	286.94
1866.12	286.95
1866.21	286.97
1866.29	286.98
1866.38	287
1866.46	287.01
1866.54	287.03
[truncated: 1,856 more rows]

## Sheet: Tabelle1
			Mean	dev^2
1700.04	1700	276.58	276.594	0.000200694
1700.12	1700	276.58	276.594	0.000200694
1700.21	1700	276.59	276.594	1.73611e-05
1700.29	1700	276.59	276.594	1.73611e-05
1700.38	1700	276.59	276.594	1.73611e-05
1700.46	1700	276.59	276.594	1.73611e-05
1700.54	1700	276.6	276.594	3.40278e-05
1700.62	1700	276.6	276.594	3.40278e-05
1700.71	1700	276.6	276.594	3.40278e-05
1700.79	1700	276.6	276.594	3.40278e-05
1700.88	1700	276.6	276.594	3.40278e-05
1700.96	1700	276.61	276.594	0.000250694
1701.04	1701	276.61	276.621	0.000117361
1701.12	1701	276.61	276.621	0.000117361
1701.21	1701	276.61	276.621	0.000117361
1701.29	1701	276.62	276.621	6.94444e-07
1701.38	1701	276.62	276.621	6.94444e-07
1701.46	1701	276.62	276.621	6.94444e-07
1701.54	1701	276.62	276.621	6.94444e-07
1701.62	1701	276.62	276.621	6.94444e-07
1701.71	1701	276.63	276.621	8.40278e-05
1701.79	1701	276.63	276.621	8.40278e-05
1701.88	1701	276.63	276.621	8.40278e-05
1701.96	1701	276.63	276.621	8.40278e-05
1702.04	1702	276.63	276.647	0.000277778
1702.12	1702	276.64	276.647	4.44444e-05
1702.21	1702	276.64	276.647	4.44444e-05
1702.29	1702	276.64	276.647	4.44444e-05
1702.38	1702	276.64	276.647	4.44444e-05
1702.46	1702	276.65	276.647	1.11111e-05
1702.54	1702	276.65	276.647	1.11111e-05
1702.62	1702	276.65	276.647	1.11111e-05
1702.71	1702	276.65	276.647	1.11111e-05
1702.79	1702	276.65	276.647	1.11111e-05
1702.88	1702	276.66	276.647	0.000177778
1702.96	1702	276.66	276.647	0.000177778
1703.04	1703	276.66	276.672	0.00015625
1703.12	1703	276.66	276.672	0.00015625
1703.21	1703	276.67	276.672	6.25e-06
1703.29	1703	276.67	276.672	6.25e-06
1703.38	1703	276.67	276.672	6.25e-06
1703.46	1703	276.67	276.672	6.25e-06
1703.54	1703	276.67	276.672	6.25e-06
1703.62	1703	276.68	276.672	5.625e-05
1703.71	1703	276.68	276.672	5.625e-05
1703.79	1703	276.68	276.672	5.625e-05
1703.88	1703	276.68	276.672	5.625e-05
1703.96	1703	276.68	276.672	5.625e-05
1704.04	1704	276.69	276.699	8.40278e-05
1704.12	1704	276.69	276.699	8.40278e-05
1704.21	1704	276.69	276.699	8.40278e-05
1704.29	1704	276.69	276.699	8.40278e-05
1704.38	1704	276.7	276.699	6.94444e-07
1704.46	1704	276.7	276.699	6.94444e-07
1704.54	1704	276.7	276.699	6.94444e-07
1704.62	1704	276.7	276.699	6.94444e-07
1704.71	1704	276.7	276.699	6.94444e-07
1704.79	1704	276.71	276.699	0.000117361
1704.88	1704	276.71	276.699	0.000117361
1704.96	1704	276.71	276.699	0.000117361
1705.04	1705	276.71	276.724	0.000200694
1705.12	1705	276.71	276.724	0.000200694
1705.21	1705	276.72	276.724	1.73611e-05
1705.29	1705	276.72	276.724	1.73611e-05
1705.38	1705	276.72	276.724	1.73611e-05
1705.46	1705	276.72	276.724	1.73611e-05
1705.54	1705	276.73	276.724	3.40278e-05
1705.62	1705	276.73	276.724	3.40278e-05
1705.71	1705	276.73	276.724	3.40278e-05
1705.79	1705	276.73	276.724	3.40278e-05
1705.88	1705	276.73	276.724	3.40278e-05
1705.96	1705	276.74	276.724	0.000250694
1706.04	1706	276.74	276.751	0.000117361
1706.12	1706	276.74	276.751	0.000117361
1706.21	1706	276.74	276.751	0.000117361
1706.29	1706	276.75	276.751	6.94444e-07
1706.38	1706	276.75	276.751	6.94444e-07
1706.46	1706	276.75	276.751	6.94444e-07
1706.54	1706	276.75	276.751	6.94444e-07
1706.62	1706	276.75	276.751	6.94444e-07
1706.71	1706	276.76	276.751	8.40278e-05
1706.79	1706	276.76	276.751	8.40278e-05
1706.88	1706	276.76	276.751	8.40278e-05
1706.96	1706	276.76	276.751	8.40278e-05
1707.04	1707	276.76	276.777	0.000277778
1707.12	1707	276.77	276.777	4.44444e-05
1707.21	1707	276.77	276.777	4.44444e-05
1707.29	1707	276.77	276.777	4.44444e-05
1707.38	1707	276.77	276.777	4.44444e-05
1707.46	1707	276.78	276.777	1.11111e-05
1707.54	1707	276.78	276.777	1.11111e-05
1707.62	1707	276.78	276.777	1.11111e-05
1707.71	1707	276.78	276.777	1.11111e-05
1707.79	1707	276.78	276.777	1.11111e-05
1707.88	1707	276.79	276.777	0.000177778
1707.96	1707	276.79	276.777	0.000177778
1708.04	1708	276.79	276.804	0.000200694
1708.12	1708	276.79	276.804	0.000200694
1708.21	1708	276.8	276.804	1.73611e-05
1708.29	1708	276.8	276.804	1.73611e-05
1708.38	1708	276.8	276.804	1.73611e-05
1708.46	1708	276.8	276.804	1.73611e-05
1708.54	1708	276.81	276.804	3.40278e-05
1708.62	1708	276.81	276.804	3.40278e-05
1708.71	1708	276.81	276.804	3.40278e-05
1708.79	1708	276.81	276.804	3.40278e-05
1708.88	1708	276.81	276.804	3.40278e-05
1708.96	1708	276.82	276.804	0.000250694
1709.04	1709	276.82	276.831	0.000117361
1709.12	1709	276.82	276.831	0.000117361
1709.21	1709	276.82	276.831	0.000117361
1709.29	1709	276.83	276.831	6.94444e-07
1709.38	1709	276.83	276.831	6.94444e-07
1709.46	1709	276.83	276.831	6.94444e-07
1709.54	1709	276.83	276.831	6.94444e-07
1709.62	1709	276.83	276.831	6.94444e-07
1709.71	1709	276.84	276.831	8.40278e-05
1709.79	1709	276.84	276.831	8.40278e-05
1709.88	1709	276.84	276.831	8.40278e-05
1709.96	1709	276.84	276.831	8.40278e-05
1710.04	1710	276.85	276.86	0.0001
1710.12	1710	276.85	276.86	0.0001
1710.21	1710	276.85	276.86	0.0001
1710.29	1710	276.85	276.86	0.0001
1710.38	1710	276.86	276.86	0
1710.46	1710	276.86	276.86	0
1710.54	1710	276.86	276.86	0
1710.62	1710	276.86	276.86	0
1710.71	1710	276.87	276.86	0.0001
1710.79	1710	276.87	276.86	0.0001
1710.88	1710	276.87	276.86	0.0001
1710.96	1710	276.87	276.86	0.0001
1711.04	1711	276.87	276.887	0.00030625
1711.12	1711	276.88	276.887	5.625e-05
1711.21	1711	276.88	276.887	5.625e-05
1711.29	1711	276.88	276.887	5.625e-05
1711.38	1711	276.88	276.887	5.625e-05
1711.46	1711	276.89	276.887	6.25e-06
1711.54	1711	276.89	276.887	6.25e-06
1711.62	1711	276.89	276.887	6.25e-06
1711.71	1711	276.89	276.887	6.25e-06
1711.79	1711	276.9	276.887	0.00015625
1711.88	1711	276.9	276.887	0.00015625
1711.96	1711	276.9	276.887	0.00015625
1712.04	1712	276.9	276.917	0.00030625
1712.12	1712	276.91	276.917	5.625e-05
1712.21	1712	276.91	276.917	5.625e-05
1712.29	1712	276.91	276.917	5.625e-05
1712.38	1712	276.91	276.917	5.625e-05
1712.46	1712	276.92	276.917	6.25e-06
1712.54	1712	276.92	276.917	6.25e-06
1712.62	1712	276.92	276.917	6.25e-06
1712.71	1712	276.92	276.917	6.25e-06
1712.79	1712	276.93	276.917	0.00015625
1712.88	1712	276.93	276.917	0.00015625
1712.96	1712	276.93	276.917	0.00015625
1713.04	1713	276.93	276.949	0.000367361
1713.12	1713	276.94	276.949	8.40278e-05
1713.21	1713	276.94	276.949	8.40278e-05
1713.29	1713	276.94	276.949	8.40278e-05
1713.38	1713	276.95	276.949	6.94444e-07
1713.46	1713	276.95	276.949	6.94444e-07
1713.54	1713	276.95	276.949	6.94444e-07
1713.62	1713	276.95	276.949	6.94444e-07
1713.71	1713	276.96	276.949	0.000117361
1713.79	1713	276.96	276.949	0.000117361
1713.88	1713	276.96	276.949	0.000117361
1713.96	1713	276.96	276.949	0.000117361
1714.04	1714	276.97	276.982	0.000136111
1714.12	1714	276.97	276.982	0.000136111
1714.21	1714	276.97	276.982	0.000136111
1714.29	1714	276.97	276.982	0.000136111
1714.38	1714	276.98	276.982	2.77778e-06
1714.46	1714	276.98	276.982	2.77778e-06
1714.54	1714	276.98	276.982	2.77778e-06
1714.62	1714	276.99	276.982	6.94444e-05
1714.71	1714	276.99	276.982	6.94444e-05
1714.79	1714	276.99	276.982	6.94444e-05
1714.88	1714	276.99	276.982	6.94444e-05
1714.96	1714	277	276.982	0.000336111
1715.04	1715	277	277.016	0.000250694
1715.12	1715	277	277.016	0.000250694
1715.21	1715	277.01	277.016	3.40278e-05
1715.29	1715	277.01	277.016	3.40278e-05
1715.38	1715	277.01	277.016	3.40278e-05
1715.46	1715	277.01	277.016	3.40278e-05
1715.54	1715	277.02	277.016	1.73611e-05
1715.62	1715	277.02	277.016	1.73611e-05
1715.71	1715	277.02	277.016	1.73611e-05
1715.79	1715	277.03	277.016	0.000200694
1715.88	1715	277.03	277.016	0.000200694
1715.96	1715	277.03	277.016	0.000200694
1716.04	1716	277.03	277.05	0.0004
1716.12	1716	277.04	277.05	0.0001
1716.21	1716	277.04	277.05	0.0001
1716.29	1716	277.04	277.05	0.0001
1716.38	1716	277.05	277.05	0
1716.46	1716	277.05	277.05	0
1716.54	1716	277.05	277.05	0
1716.62	1716	277.05	277.05	0
1716.71	1716	277.06	277.05	0.0001
1716.79	1716	277.06	277.05	0.0001
1716.88	1716	277.06	277.05	0.0001
1716.96	1716	277.07	277.05	0.0004
1717.04	1717	277.07	277.087	0.000277778
1717.12	1717	277.07	277.087	0.000277778
1717.21	1717	277.08	277.087	4.44444e-05
1717.29	1717	277.08	277.087	4.44444e-05
1717.38	1717	277.08	277.087	4.44444e-05
1717.46	1717	277.09	277.087	1.11111e-05
1717.54	1717	277.09	277.087	1.11111e-05
1717.62	1717	277.09	277.087	1.11111e-05
1717.71	1717	277.09	277.087	1.11111e-05
1717.79	1717	277.1	277.087	0.000177778
1717.88	1717	277.1	277.087	0.000177778
1717.96	1717	277.1	277.087	0.000177778
1718.04	1718	277.11	277.125	0.000225
1718.12	1718	277.11	277.125	0.000225
1718.21	1718	277.11	277.125	0.000225
1718.29	1718	277.12	277.125	2.5e-05
1718.38	1718	277.12	277.125	2.5e-05
1718.46	1718	277.12	277.125	2.5e-05
1718.54	1718	277.13	277.125	2.5e-05
1718.62	1718	277.13	277.125	2.5e-05
1718.71	1718	277.13	277.125	2.5e-05
1718.79	1718	277.14	277.125	0.000225
1718.88	1718	277.14	277.125	0.000225
1718.96	1718	277.14	277.125	0.000225
1719.04	1719	277.15	277.165	0.000225
1719.12	1719	277.15	277.165	0.000225
1719.21	1719	277.15	277.165	0.000225
1719.29	1719	277.16	277.165	2.5e-05
1719.38	1719	277.16	277.165	2.5e-05
1719.46	1719	277.16	277.165	2.5e-05
1719.54	1719	277.17	277.165	2.5e-05
1719.62	1719	277.17	277.165	2.5e-05
1719.71	1719	277.17	277.165	2.5e-05
1719.79	1719	277.18	277.165	0.000225
1719.88	1719	277.18	277.165	0.000225
1719.96	1719	277.18	277.165	0.000225
1720.04	1720	277.19	277.208	0.000336111
1720.12	1720	277.19	277.208	0.000336111
1720.21	1720	277.2	277.208	6.94444e-05
1720.29	1720	277.2	277.208	6.94444e-05
1720.38	1720	277.2	277.208	6.94444e-05
1720.46	1720	277.21	277.208	2.77778e-06
1720.54	1720	277.21	277.208	2.77778e-06
1720.62	1720	277.21	277.208	2.77778e-06
1720.71	1720	277.22	277.208	0.000136111
1720.79	1720	277.22	277.208	0.000136111
1720.88	1720	277.22	277.208	0.000136111
1720.96	1720	277.23	277.208	0.000469444
1721.04	1721	277.23	277.252	0.00050625
1721.12	1721	277.24	277.252	0.00015625
1721.21	1721	277.24	277.252	0.00015625
1721.29	1721	277.24	277.252	0.00015625
1721.38	1721	277.25	277.252	6.25e-06
1721.46	1721	277.25	277.252	6.25e-06
1721.54	1721	277.25	277.252	6.25e-06
1721.62	1721	277.26	277.252	5.625e-05
1721.71	1721	277.26	277.252	5.625e-05
1721.79	1721	277.27	277.252	0.00030625
1721.88	1721	277.27	277.252	0.00030625
1721.96	1721	277.27	277.252	0.00030625
1722.04	1722	277.28	277.3	0.0004
1722.12	1722	277.28	277.3	0.0004
1722.21	1722	277.29	277.3	0.0001
1722.29	1722	277.29	277.3	0.0001
1722.38	1722	277.29	277.3	0.0001
1722.46	1722	277.3	277.3	0
1722.54	1722	277.3	277.3	0
1722.62	1722	277.31	277.3	0.0001
1722.71	1722	277.31	277.3	0.0001
1722.79	1722	277.31	277.3	0.0001
1722.88	1722	277.32	277.3	0.0004
1722.96	1722	277.32	277.3	0.0004
1723.04	1723	277.33	277.349	0.000367361
1723.12	1723	277.33	277.349	0.000367361
1723.21	1723	277.33	277.349	0.000367361
1723.29	1723	277.34	277.349	8.40278e-05
1723.38	1723	277.34	277.349	8.40278e-05
1723.46	1723	277.35	277.349	6.94444e-07
1723.54	1723	277.35	277.349	6.94444e-07
1723.62	1723	277.36	277.349	0.000117361
1723.71	1723	277.36	277.349	0.000117361
1723.79	1723	277.36	277.349	0.000117361
1723.88	1723	277.37	277.349	0.000434028
1723.96	1723	277.37	277.349	0.000434028
1724.04	1724	277.38	277.399	0.000367361
1724.12	1724	277.38	277.399	0.000367361
1724.21	1724	277.38	277.399	0.000367361
1724.29	1724	277.39	277.399	8.40278e-05
1724.38	1724	277.39	277.399	8.40278e-05
1724.46	1724	277.4	277.399	6.94444e-07
1724.54	1724	277.4	277.399	6.94444e-07
1724.62	1724	277.41	277.399	0.000117361
1724.71	1724	277.41	277.399	0.000117361
1724.79	1724	277.41	277.399	0.000117361
1724.88	1724	277.42	277.399	0.000434028
1724.96	1724	277.42	277.399	0.000434028
1725.04	1725	277.43	277.449	0.000367361
1725.12	1725	277.43	277.449	0.000367361
1725.21	1725	277.43	277.449	0.000367361
1725.29	1725	277.44	277.449	8.40278e-05
1725.38	1725	277.44	277.449	8.40278e-05
1725.46	1725	277.45	277.449	6.94444e-07
1725.54	1725	277.45	277.449	6.94444e-07
1725.62	1725	277.46	277.449	0.000117361
1725.71	1725	277.46	277.449	0.000117361
1725.79	1725	277.46	277.449	0.000117361
1725.88	1725	277.47	277.449	0.000434028
1725.96	1725	277.47	277.449	0.000434028
1726.04	1726	277.48	277.498	0.00030625
1726.12	1726	277.48	277.498	0.00030625
1726.21	1726	277.48	277.498	0.00030625
1726.29	1726	277.49	277.498	5.625e-05
1726.38	1726	277.49	277.498	5.625e-05
1726.46	1726	277.5	277.498	6.25e-06
1726.54	1726	277.5	277.498	6.25e-06
1726.62	1726	277.5	277.498	6.25e-06
1726.71	1726	277.51	277.498	0.00015625
1726.79	1726	277.51	277.498	0.00015625
1726.88	1726	277.51	277.498	0.00015625
1726.96	1726	277.52	277.498	0.00050625
1727.04	1727	277.52	277.542	0.000469444
1727.12	1727	277.53	277.542	0.000136111
1727.21	1727	277.53	277.542	0.000136111
1727.29	1727	277.53	277.542	0.000136111
1727.38	1727	277.54	277.542	2.77778e-06
1727.46	1727	277.54	277.542	2.77778e-06
1727.54	1727	277.54	277.542	2.77778e-06
1727.62	1727	277.55	277.542	6.94444e-05
1727.71	1727	277.55	277.542	6.94444e-05
1727.79	1727	277.55	277.542	6.94444e-05
1727.88	1727	277.56	277.542	0.000336111
1727.96	1727	277.56	277.542	0.000336111
1728.04	1728	277.56	277.582	0.000469444
1728.12	1728	277.57	277.582	0.000136111
1728.21	1728	277.57	277.582	0.000136111
1728.29	1728	277.57	277.582	0.000136111
1728.38	1728	277.58	277.582	2.77778e-06
1728.46	1728	277.58	277.582	2.77778e-06
1728.54	1728	277.58	277.582	2.77778e-06
1728.62	1728	277.59	277.582	6.94444e-05
1728.71	1728	277.59	277.582	6.94444e-05
1728.79	1728	277.59	277.582	6.94444e-05
1728.88	1728	277.6	277.582	0.000336111
1728.96	1728	277.6	277.582	0.000336111
1729.04	1729	277.6	277.615	0.000225
1729.12	1729	277.6	277.615	0.000225
1729.21	1729	277.61	277.615	2.5e-05
1729.29	1729	277.61	277.615	2.5e-05
1729.38	1729	277.61	277.615	2.5e-05
1729.46	1729	277.61	277.615	2.5e-05
1729.54	1729	277.62	277.615	2.5e-05
1729.62	1729	277.62	277.615	2.5e-05
1729.71	1729	277.62	277.615	2.5e-05
1729.79	1729	277.62	277.615	2.5e-05
1729.88	1729	277.63	277.615	0.000225
1729.96	1729	277.63	277.615	0.000225
1730.04	1730	277.63	277.64	0.0001
1730.12	1730	277.63	277.64	0.0001
1730.21	1730	277.63	277.64	0.0001
1730.29	1730	277.64	277.64	0
1730.38	1730	277.64	277.64	0
1730.46	1730	277.64	277.64	0
1730.54	1730	277.64	277.64	0
1730.62	1730	277.64	277.64	0
1730.71	1730	277.64	277.64	0
1730.79	1730	277.65	277.64	0.0001
1730.88	1730	277.65	277.64	0.0001
1730.96	1730	277.65	277.64	0.0001
1731.04	1731	277.65	277.656	3.40278e-05
1731.12	1731	277.65	277.656	3.40278e-05
1731.21	1731	277.65	277.656	3.40278e-05
1731.29	1731	277.65	277.656	3.40278e-05
1731.38	1731	277.65	277.656	3.40278e-05
1731.46	1731	277.66	277.656	1.73611e-05
1731.54	1731	277.66	277.656	1.73611e-05
1731.62	1731	277.66	277.656	1.73611e-05
1731.71	1731	277.66	277.656	1.73611e-05
1731.79	1731	277.66	277.656	1.73611e-05
1731.88	1731	277.66	277.656	1.73611e-05
1731.96	1731	277.66	277.656	1.73611e-05
1732.04	1732	277.66	277.66	3.23117e-27
1732.12	1732	277.66	277.66	3.23117e-27
1732.21	1732	277.66	277.66	3.23117e-27
1732.29	1732	277.66	277.66	3.23117e-27
1732.38	1732	277.66	277.66	3.23117e-27
1732.46	1732	277.66	277.66	3.23117e-27
1732.54	1732	277.66	277.66	3.23117e-27
1732.62	1732	277.66	277.66	3.23117e-27
1732.71	1732	277.66	277.66	3.23117e-27
1732.79	1732	277.66	277.66	3.23117e-27
1732.88	1732	277.66	277.66	3.23117e-27
1732.96	1732	277.66	277.66	3.23117e-27
1733.04	1733	277.66	277.652	6.94444e-05
1733.12	1733	277.66	277.652	6.94444e-05
1733.21	1733	277.66	277.652	6.94444e-05
1733.29	1733	277.65	277.652	2.77778e-06
1733.38	1733	277.65	277.652	2.77778e-06
1733.46	1733	277.65	277.652	2.77778e-06
1733.54	1733	277.65	277.652	2.77778e-06
1733.62	1733	277.65	277.652	2.77778e-06
1733.71	1733	277.65	277.652	2.77778e-06
1733.79	1733	277.65	277.652	2.77778e-06
1733.88	1733	277.65	277.652	2.77778e-06
1733.96	1733	277.64	277.652	0.000136111
1734.04	1734	277.64	277.63	0.0001
1734.12	1734	277.64	277.63	0.0001
1734.21	1734	277.64	277.63	0.0001
1734.29	1734	277.64	277.63	0.0001
1734.38	1734	277.63	277.63	0
1734.46	1734	277.63	277.63	0
1734.54	1734	277.63	277.63	0
1734.62	1734	277.63	277.63	0
1734.71	1734	277.62	277.63	0.0001
1734.79	1734	277.62	277.63	0.0001
1734.88	1734	277.62	277.63	0.0001
1734.96	1734	277.62	277.63	0.0001
1735.04	1735	277.61	277.593	0.00030625
1735.12	1735	277.61	277.593	0.00030625
1735.21	1735	277.61	277.593	0.00030625
1735.29	1735	277.6	277.593	5.625e-05
1735.38	1735	277.6	277.593	5.625e-05
1735.46	1735	277.59	277.593	6.25e-06
1735.54	1735	277.59	277.593	6.25e-06
1735.62	1735	277.59	277.593	6.25e-06
1735.71	1735	277.58	277.593	0.00015625
1735.79	1735	277.58	277.593	0.00015625
1735.88	1735	277.58	277.593	0.00015625
1735.96	1735	277.57	277.593	0.00050625
1736.04	1736	277.57	277.544	0.000667361
1736.12	1736	277.56	277.544	0.000250694
1736.21	1736	277.56	277.544	0.000250694
1736.29	1736	277.56	277.544	0.000250694
1736.38	1736	277.55	277.544	3.40278e-05
1736.46	1736	277.55	277.544	3.40278e-05
1736.54	1736	277.54	277.544	1.73611e-05
1736.62	1736	277.54	277.544	1.73611e-05
1736.71	1736	277.53	277.544	0.000200694
1736.79	1736	277.53	277.544	0.000200694
1736.88	1736	277.52	277.544	0.000584028
1736.96	1736	277.52	277.544	0.000584028
1737.04	1737	277.52	277.488	0.00105625
1737.12	1737	277.51	277.488	0.00050625
1737.21	1737	277.51	277.488	0.00050625
1737.29	1737	277.5	277.488	0.00015625
1737.38	1737	277.5	277.488	0.00015625
1737.46	1737	277.49	277.488	6.25e-06
1737.54	1737	277.48	277.488	5.625e-05
1737.62	1737	277.48	277.488	5.625e-05
1737.71	1737	277.47	277.488	0.00030625
1737.79	1737	277.47	277.488	0.00030625
1737.88	1737	277.46	277.488	0.00075625
1737.96	1737	277.46	277.488	0.00075625
1738.04	1738	277.45	277.423	0.00075625
1738.12	1738	277.45	277.423	0.00075625
1738.21	1738	277.44	277.423	0.00030625
1738.29	1738	277.44	277.423	0.00030625
1738.38	1738	277.43	277.423	5.625e-05
1738.46	1738	277.43	277.423	5.625e-05
1738.54	1738	277.42	277.423	6.25e-06
1738.62	1738	277.41	277.423	0.00015625
1738.71	1738	277.41	277.423	0.00015625
1738.79	1738	277.4	277.423	0.00050625
1738.88	1738	277.4	277.423	0.00050625
1738.96	1738	277.39	277.423	0.00105625
1739.04	1739	277.39	277.355	0.001225
1739.12	1739	277.38	277.355	0.000625
1739.21	1739	277.38	277.355	0.000625
1739.29	1739	277.37	277.355	0.000225
1739.38	1739	277.36	277.355	2.5e-05
1739.46	1739	277.36	277.355	2.5e-05
1739.54	1739	277.35	277.355	2.5e-05
1739.62	1739	277.35	277.355	2.5e-05
1739.71	1739	277.34	277.355	0.000225
1739.79	1739	277.33	277.355	0.000625
1739.88	1739	277.33	277.355	0.000625
1739.96	1739	277.32	277.355	0.001225
1740.04	1740	277.32	277.285	0.001225
1740.12	1740	277.31	277.285	0.000625
1740.21	1740	277.31	277.285	0.000625
1740.29	1740	277.3	277.285	0.000225
1740.38	1740	277.29	277.285	2.5e-05
1740.46	1740	277.29	277.285	2.5e-05
1740.54	1740	277.28	277.285	2.5e-05
1740.62	1740	277.28	277.285	2.5e-05
1740.71	1740	277.27	277.285	0.000225
1740.79	1740	277.26	277.285	0.000625
1740.88	1740	277.26	277.285	0.000625
1740.96	1740	277.25	277.285	0.001225
1741.04	1741	277.25	277.216	0.00116736
1741.12	1741	277.24	277.216	0.000584028
1741.21	1741	277.24	277.216	0.000584028
1741.29	1741	277.23	277.216	0.000200694
1741.38	1741	277.22	277.216	1.73611e-05
1741.46	1741	277.22	277.216	1.73611e-05
1741.54	1741	277.21	277.216	3.40278e-05
1741.62	1741	277.21	277.216	3.40278e-05
1741.71	1741	277.2	277.216	0.000250694
1741.79	1741	277.2	277.216	0.000250694
1741.88	1741	277.19	277.216	0.000667361
1741.96	1741	277.18	277.216	0.00128403
1742.04	1742	277.18	277.149	0.000950694
1742.12	1742	277.17	277.149	0.000434028
1742.21	1742	277.17	277.149	0.000434028
1742.29	1742	277.16	277.149	0.000117361
1742.38	1742	277.16	277.149	0.000117361
1742.46	1742	277.15	277.149	6.94444e-07
1742.54	1742	277.15	277.149	6.94444e-07
1742.62	1742	277.14	277.149	8.40278e-05
1742.71	1742	277.14	277.149	8.40278e-05
1742.79	1742	277.13	277.149	0.000367361
1742.88	1742	277.12	277.149	0.000850694
1742.96	1742	277.12	277.149	0.000850694
1743.04	1743	277.11	277.088	0.00050625
1743.12	1743	277.11	277.088	0.00050625
1743.21	1743	277.1	277.088	0.00015625
1743.29	1743	277.1	277.088	0.00015625
1743.38	1743	277.09	277.088	6.25e-06
1743.46	1743	277.09	277.088	6.25e-06
1743.54	1743	277.09	277.088	6.25e-06
1743.62	1743	277.08	277.088	5.625e-05
1743.71	1743	277.08	277.088	5.625e-05
1743.79	1743	277.07	277.088	0.00030625
1743.88	1743	277.07	277.088	0.00030625
1743.96	1743	277.06	277.088	0.00075625
1744.04	1744	277.06	277.033	0.00075625
1744.12	1744	277.05	277.033	0.00030625
1744.21	1744	277.05	277.033	0.00030625
1744.29	1744	277.04	277.033	5.625e-05
1744.38	1744	277.04	277.033	5.625e-05
1744.46	1744	277.03	277.033	6.25e-06
1744.54	1744	277.03	277.033	6.25e-06
1744.62	1744	277.03	277.033	6.25e-06
1744.71	1744	277.02	277.033	0.00015625
1744.79	1744	277.02	277.033	0.00015625
1744.88	1744	277.01	277.033	0.00050625
1744.96	1744	277.01	277.033	0.00050625
1745.04	1745	277	276.981	0.000367361
1745.12	1745	277	276.981	0.000367361
1745.21	1745	277	276.981	0.000367361
1745.29	1745	276.99	276.981	8.40278e-05
1745.38	1745	276.99	276.981	8.40278e-05
1745.46	1745	276.98	276.981	6.94444e-07
1745.54	1745	276.98	276.981	6.94444e-07
1745.62	1745	276.97	276.981	0.000117361
1745.71	1745	276.97	276.981	0.000117361
1745.79	1745	276.97	276.981	0.000117361
1745.88	1745	276.96	276.981	0.000434028
1745.96	1745	276.96	276.981	0.000434028
1746.04	1746	276.95	276.934	0.000250694
1746.12	1746	276.95	276.934	0.000250694
1746.21	1746	276.95	276.934	0.000250694
1746.29	1746	276.94	276.934	3.40278e-05
1746.38	1746	276.94	276.934	3.40278e-05
1746.46	1746	276.94	276.934	3.40278e-05
1746.54	1746	276.93	276.934	1.73611e-05
1746.62	1746	276.93	276.934	1.73611e-05
1746.71	1746	276.93	276.934	1.73611e-05
1746.79	1746	276.92	276.934	0.000200694
1746.88	1746	276.92	276.934	0.000200694
1746.96	1746	276.91	276.934	0.000584028
1747.04	1747	276.91	276.892	0.000336111
1747.12	1747	276.91	276.892	0.000336111
1747.21	1747	276.9	276.892	6.94444e-05
1747.29	1747	276.9	276.892	6.94444e-05
1747.38	1747	276.9	276.892	6.94444e-05
1747.46	1747	276.89	276.892	2.77778e-06
1747.54	1747	276.89	276.892	2.77778e-06
1747.62	1747	276.89	276.892	2.77778e-06
1747.71	1747	276.88	276.892	0.000136111
1747.79	1747	276.88	276.892	0.000136111
1747.88	1747	276.88	276.892	0.000136111
1747.96	1747	276.87	276.892	0.000469444
1748.04	1748	276.87	276.852	0.000336111
1748.12	1748	276.87	276.852	0.000336111
1748.21	1748	276.86	276.852	6.94444e-05
1748.29	1748	276.86	276.852	6.94444e-05
1748.38	1748	276.86	276.852	6.94444e-05
1748.46	1748	276.85	276.852	2.77778e-06
1748.54	1748	276.85	276.852	2.77778e-06
1748.62	1748	276.85	276.852	2.77778e-06
1748.71	1748	276.84	276.852	0.000136111
1748.79	1748	276.84	276.852	0.000136111
1748.88	1748	276.84	276.852	0.000136111
1748.96	1748	276.83	276.852	0.000469444
1749.04	1749	276.83	276.814	0.000250694
1749.12	1749	276.83	276.814	0.000250694
1749.21	1749	276.82	276.814	3.40278e-05
1749.29	1749	276.82	276.814	3.40278e-05
1749.38	1749	276.82	276.814	3.40278e-05
1749.46	1749	276.82	276.814	3.40278e-05
1749.54	1749	276.81	276.814	1.73611e-05
1749.62	1749	276.81	276.814	1.73611e-05
1749.71	1749	276.81	276.814	1.73611e-05
1749.79	1749	276.8	276.814	0.000200694
1749.88	1749	276.8	276.814	0.000200694
1749.96	1749	276.8	276.814	0.000200694
1750.04	1750	276.79	276.778	0.000136111
1750.12	1750	276.79	276.778	0.000136111
1750.21	1750	276.79	276.778	0.000136111
1750.29	1750	276.79	276.778	0.000136111
1750.38	1750	276.78	276.778	2.77778e-06
1750.46	1750	276.78	276.778	2.77778e-06
1750.54	1750	276.78	276.778	2.77778e-06
1750.62	1750	276.77	276.778	6.94444e-05
1750.71	1750	276.77	276.778	6.94444e-05
1750.79	1750	276.77	276.778	6.94444e-05
1750.88	1750	276.77	276.778	6.94444e-05
1750.96	1750	276.76	276.778	0.000336111
1751.04	1751	276.76	276.744	0.000250694
1751.12	1751	276.76	276.744	0.000250694
1751.21	1751	276.75	276.744	3.40278e-05
1751.29	1751	276.75	276.744	3.40278e-05
1751.38	1751	276.75	276.744	3.40278e-05
1751.46	1751	276.75	276.744	3.40278e-05
1751.54	1751	276.74	276.744	1.73611e-05
1751.62	1751	276.74	276.744	1.73611e-05
1751.71	1751	276.74	276.744	1.73611e-05
1751.79	1751	276.73	276.744	0.000200694
1751.88	1751	276.73	276.744	0.000200694
1751.96	1751	276.73	276.744	0.000200694
1752.04	1752	276.73	276.712	0.000336111
1752.12	1752	276.72	276.712	6.94444e-05
1752.21	1752	276.72	276.712	6.94444e-05
1752.29	1752	276.72	276.712	6.94444e-05
1752.38	1752	276.72	276.712	6.94444e-05
1752.46	1752	276.71	276.712	2.77778e-06
1752.54	1752	276.71	276.712	2.77778e-06
1752.62	1752	276.71	276.712	2.77778e-06
1752.71	1752	276.7	276.712	0.000136111
1752.79	1752	276.7	276.712	0.000136111
1752.88	1752	276.7	276.712	0.000136111
1752.96	1752	276.7	276.712	0.000136111
1753.04	1753	276.69	276.68	0.0001
1753.12	1753	276.69	276.68	0.0001
1753.21	1753	276.69	276.68	0.0001
1753.29	1753	276.69	276.68	0.0001
1753.38	1753	276.68	276.68	0
1753.46	1753	276.68	276.68	0
1753.54	1753	276.68	276.68	0
1753.62	1753	276.68	276.68	0
1753.71	1753	276.67	276.68	0.0001
1753.79	1753	276.67	276.68	0.0001
1753.88	1753	276.67	276.68	0.0001
1753.96	1753	276.67	276.68	0.0001
1754.04	1754	276.66	276.651	8.40278e-05
1754.12	1754	276.66	276.651	8.40278e-05
1754.21	1754	276.66	276.651	8.40278e-05
1754.29	1754	276.66	276.651	8.40278e-05
1754.38	1754	276.65	276.651	6.94444e-07
1754.46	1754	276.65	276.651	6.94444e-07
1754.54	1754	276.65	276.651	6.94444e-07
1754.62	1754	276.65	276.651	6.94444e-07
1754.71	1754	276.65	276.651	6.94444e-07
1754.79	1754	276.64	276.651	0.000117361
1754.88	1754	276.64	276.651	0.000117361
1754.96	1754	276.64	276.651	0.000117361
1755.04	1755	276.64	276.626	0.000200694
1755.12	1755	276.63	276.626	1.73611e-05
1755.21	1755	276.63	276.626	1.73611e-05
1755.29	1755	276.63	276.626	1.73611e-05
1755.38	1755	276.63	276.626	1.73611e-05
1755.46	1755	276.63	276.626	1.73611e-05
1755.54	1755	276.62	276.626	3.40278e-05
1755.62	1755	276.62	276.626	3.40278e-05
1755.71	1755	276.62	276.626	3.40278e-05
1755.79	1755	276.62	276.626	3.40278e-05
1755.88	1755	276.62	276.626	3.40278e-05
1755.96	1755	276.62	276.626	3.40278e-05
1756.04	1756	276.61	276.605	2.5e-05
1756.12	1756	276.61	276.605	2.5e-05
1756.21	1756	276.61	276.605	2.5e-05
1756.29	1756	276.61	276.605	2.5e-05
1756.38	1756	276.61	276.605	2.5e-05
1756.46	1756	276.61	276.605	2.5e-05
1756.54	1756	276.6	276.605	2.5e-05
1756.62	1756	276.6	276.605	2.5e-05
1756.71	1756	276.6	276.605	2.5e-05
1756.79	1756	276.6	276.605	2.5e-05
1756.88	1756	276.6	276.605	2.5e-05
1756.96	1756	276.6	276.605	2.5e-05
1757.04	1757	276.59	276.587	6.25e-06
1757.12	1757	276.59	276.587	6.25e-06
1757.21	1757	276.59	276.587	6.25e-06
1757.29	1757	276.59	276.587	6.25e-06
1757.38	1757	276.59	276.587	6.25e-06
1757.46	1757	276.59	276.587	6.25e-06
1757.54	1757	276.59	276.587	6.25e-06
1757.62	1757	276.59	276.587	6.25e-06
1757.71	1757	276.59	276.587	6.25e-06
1757.79	1757	276.58	276.587	5.625e-05
1757.88	1757	276.58	276.587	5.625e-05
1757.96	1757	276.58	276.587	5.625e-05
1758.04	1758	276.58	276.58	0
1758.12	1758	276.58	276.58	0
1758.21	1758	276.58	276.58	0
1758.29	1758	276.58	276.58	0
1758.38	1758	276.58	276.58	0
1758.46	1758	276.58	276.58	0
1758.54	1758	276.58	276.58	0
1758.62	1758	276.58	276.58	0
1758.71	1758	276.58	276.58	0
1758.79	1758	276.58	276.58	0
1758.88	1758	276.58	276.58	0
1758.96	1758	276.58	276.58	0
1759.04	1759	276.57	276.579	8.40278e-05
1759.12	1759	276.58	276.579	6.94444e-07
1759.21	1759	276.58	276.579	6.94444e-07
1759.29	1759	276.58	276.579	6.94444e-07
1759.38	1759	276.58	276.579	6.94444e-07
1759.46	1759	276.58	276.579	6.94444e-07
1759.54	1759	276.58	276.579	6.94444e-07
1759.62	1759	276.58	276.579	6.94444e-07
1759.71	1759	276.58	276.579	6.94444e-07
1759.79	1759	276.58	276.579	6.94444e-07
1759.88	1759	276.58	276.579	6.94444e-07
1759.96	1759	276.58	276.579	6.94444e-07
1760.04	1760	276.58	276.58	0
1760.12	1760	276.58	276.58	0
1760.21	1760	276.58	276.58	0
1760.29	1760	276.58	276.58	0
1760.38	1760	276.58	276.58	0
1760.46	1760	276.58	276.58	0
1760.54	1760	276.58	276.58	0
1760.62	1760	276.58	276.58	0
1760.71	1760	276.58	276.58	0
1760.79	1760	276.58	276.58	0
1760.88	1760	276.58	276.58	0
1760.96	1760	276.58	276.58	0
1761.04	1761	276.59	276.595	2.5e-05
1761.12	1761	276.59	276.595	2.5e-05
1761.21	1761	276.59	276.595	2.5e-05
1761.29	1761	276.59	276.595	2.5e-05
1761.38	1761	276.59	276.595	2.5e-05
1761.46	1761	276.59	276.595	2.5e-05
1761.54	1761	276.6	276.595	2.5e-05
1761.62	1761	276.6	276.595	2.5e-05
1761.71	1761	276.6	276.595	2.5e-05
1761.79	1761	276.6	276.595	2.5e-05
1761.88	1761	276.6	276.595	2.5e-05
1761.96	1761	276.6	276.595	2.5e-05
1762.04	1762	276.61	276.62	0.0001
1762.12	1762	276.61	276.62	0.0001
1762.21	1762	276.61	276.62	0.0001
1762.29	1762	276.61	276.62	0.0001
1762.38	1762	276.62	276.62	0
1762.46	1762	276.62	276.62	0
1762.54	1762	276.62	276.62	0
1762.62	1762	276.62	276.62	0
1762.71	1762	276.63	276.62	0.0001
1762.79	1762	276.63	276.62	0.0001
1762.88	1762	276.63	276.62	0.0001
1762.96	1762	276.63	276.62	0.0001
1763.04	1763	276.64	276.655	0.000225
1763.12	1763	276.64	276.655	0.000225
1763.21	1763	276.64	276.655	0.000225
1763.29	1763	276.65	276.655	2.5e-05
1763.38	1763	276.65	276.655	2.5e-05
1763.46	1763	276.65	276.655	2.5e-05
1763.54	1763	276.66	276.655	2.5e-05
1763.62	1763	276.66	276.655	2.5e-05
1763.71	1763	276.66	276.655	2.5e-05
1763.79	1763	276.67	276.655	0.000225
1763.88	1763	276.67	276.655	0.000225
1763.96	1763	276.67	276.655	0.000225
1764.04	1764	276.68	276.703	0.00050625
1764.12	1764	276.68	276.703	0.00050625
1764.21	1764	276.69	276.703	0.00015625
1764.29	1764	276.69	276.703	0.00015625
1764.38	1764	276.7	276.703	6.25e-06
1764.46	1764	276.7	276.703	6.25e-06
1764.54	1764	276.7	276.703	6.25e-06
1764.62	1764	276.71	276.703	5.625e-05
1764.71	1764	276.71	276.703	5.625e-05
1764.79	1764	276.72	276.703	0.00030625
1764.88	1764	276.72	276.703	0.00030625
1764.96	1764	276.73	276.703	0.00075625
1765.04	1765	276.73	276.76	0.0009
1765.12	1765	276.74	276.76	0.0004
1765.21	1765	276.74	276.76	0.0004
1765.29	1765	276.75	276.76	0.0001
1765.38	1765	276.75	276.76	0.0001
1765.46	1765	276.76	276.76	0
1765.54	1765	276.76	276.76	0
1765.62	1765	276.77	276.76	0.0001
1765.71	1765	276.77	276.76	0.0001
1765.79	1765	276.78	276.76	0.0004
1765.88	1765	276.78	276.76	0.0004
1765.96	1765	276.79	276.76	0.0009
1766.04	1766	276.8	276.829	0.000850694
1766.12	1766	276.8	276.829	0.000850694
1766.21	1766	276.81	276.829	0.000367361
1766.29	1766	276.81	276.829	0.000367361
1766.38	1766	276.82	276.829	8.40278e-05
1766.46	1766	276.83	276.829	6.94444e-07
1766.54	1766	276.83	276.829	6.94444e-07
1766.62	1766	276.84	276.829	0.000117361
1766.71	1766	276.84	276.829	0.000117361
1766.79	1766	276.85	276.829	0.000434028
1766.88	1766	276.86	276.829	0.000950694
1766.96	1766	276.86	276.829	0.000950694
1767.04	1767	276.87	276.907	0.00134444
1767.12	1767	276.88	276.907	0.000711111
1767.21	1767	276.88	276.907	0.000711111
1767.29	1767	276.89	276.907	0.000277778
1767.38	1767	276.9	276.907	4.44444e-05
1767.46	1767	276.9	276.907	4.44444e-05
1767.54	1767	276.91	276.907	1.11111e-05
1767.62	1767	276.92	276.907	0.000177778
1767.71	1767	276.92	276.907	0.000177778
1767.79	1767	276.93	276.907	0.000544444
1767.88	1767	276.94	276.907	0.00111111
1767.96	1767	276.94	276.907	0.00111111
1768.04	1768	276.95	276.993	0.00180625
1768.12	1768	276.96	276.993	0.00105625
1768.21	1768	276.97	276.993	0.00050625
1768.29	1768	276.97	276.993	0.00050625
1768.38	1768	276.98	276.993	0.00015625
1768.46	1768	276.99	276.993	6.25e-06
1768.54	1768	277	276.993	5.625e-05
1768.62	1768	277	276.993	5.625e-05
1768.71	1768	277.01	276.993	0.00030625
1768.79	1768	277.02	276.993	0.00075625
1768.88	1768	277.03	276.993	0.00140625
1768.96	1768	277.03	276.993	0.00140625
1769.04	1769	277.04	277.086	0.00210069
1769.12	1769	277.05	277.086	0.00128403
1769.21	1769	277.06	277.086	0.000667361
1769.29	1769	277.07	277.086	0.000250694
1769.38	1769	277.07	277.086	0.000250694
1769.46	1769	277.08	277.086	3.40278e-05
1769.54	1769	277.09	277.086	1.73611e-05
1769.62	1769	277.1	277.086	0.000200694
1769.71	1769	277.11	277.086	0.000584028
1769.79	1769	277.11	277.086	0.000584028
1769.88	1769	277.12	277.086	0.00116736
1769.96	1769	277.13	277.086	0.00195069
1770.04	1770	277.14	277.186	0.00210069
1770.12	1770	277.15	277.186	0.00128403
1770.21	1770	277.16	277.186	0.000667361
1770.29	1770	277.16	277.186	0.000667361
1770.38	1770	277.17	277.186	0.000250694
1770.46	1770	277.18	277.186	3.40278e-05
1770.54	1770	277.19	277.186	1.73611e-05
1770.62	1770	277.2	277.186	0.000200694
1770.71	1770	277.21	277.186	0.000584028
1770.79	1770	277.22	277.186	0.00116736
1770.88	1770	277.22	277.186	0.00116736
1770.96	1770	277.23	277.186	0.00195069
1771.04	1771	277.24	277.29	0.0025
1771.12	1771	277.25	277.29	0.0016
1771.21	1771	277.26	277.29	0.0009
1771.29	1771	277.27	277.29	0.0004
1771.38	1771	277.28	277.29	0.0001
1771.46	1771	277.29	277.29	0
1771.54	1771	277.29	277.29	0
1771.62	1771	277.3	277.29	0.0001
1771.71	1771	277.31	277.29	0.0004
1771.79	1771	277.32	277.29	0.0009
1771.88	1771	277.33	277.29	0.0016
1771.96	1771	277.34	277.29	0.0025
1772.04	1772	277.35	277.398	0.00233611
1772.12	1772	277.36	277.398	0.00146944
1772.21	1772	277.37	277.398	0.000802778
1772.29	1772	277.38	277.398	0.000336111
1772.38	1772	277.38	277.398	0.000336111
1772.46	1772	277.39	277.398	6.94444e-05
1772.54	1772	277.4	277.398	2.77778e-06
1772.62	1772	277.41	277.398	0.000136111
1772.71	1772	277.42	277.398	0.000469444
1772.79	1772	277.43	277.398	0.00100278
1772.88	1772	277.44	277.398	0.00173611
1772.96	1772	277.45	277.398	0.00266944
1773.04	1773	277.46	277.509	0.00241736
1773.12	1773	277.47	277.509	0.00153403
1773.21	1773	277.48	277.509	0.000850694
1773.29	1773	277.49	277.509	0.000367361
1773.38	1773	277.5	277.509	8.40278e-05
1773.46	1773	277.5	277.509	8.40278e-05
1773.54	1773	277.51	277.509	6.94444e-07
1773.62	1773	277.52	277.509	0.000117361
1773.71	1773	277.53	277.509	0.000434028
1773.79	1773	277.54	277.509	0.000950694
1773.88	1773	277.55	277.509	0.00166736
1773.96	1773	277.56	277.509	0.00258403
1774.04	1774	277.57	277.625	0.003025
1774.12	1774	277.58	277.625	0.002025
1774.21	1774	277.59	277.625	0.001225
1774.29	1774	277.6	277.625	0.000625
1774.38	1774	277.61	277.625	0.000225
1774.46	1774	277.62	277.625	2.5e-05
1774.54	1774	277.63	277.625	2.5e-05
1774.62	1774	277.64	277.625	0.000225
1774.71	1774	277.65	277.625	0.000625
1774.79	1774	277.66	277.625	0.001225
1774.88	1774	277.67	277.625	0.002025
1774.96	1774	277.68	277.625	0.003025
1775.04	1775	277.68	277.735	0.003025
1775.12	1775	277.69	277.735	0.002025
1775.21	1775	277.7	277.735	0.001225
1775.29	1775	277.71	277.735	0.000625
1775.38	1775	277.72	277.735	0.000225
1775.46	1775	277.73	277.735	2.5e-05
1775.54	1775	277.74	277.735	2.5e-05
1775.62	1775	277.75	277.735	0.000225
1775.71	1775	277.76	277.735	0.000625
1775.79	1775	277.77	277.735	0.001225
1775.88	1775	277.78	277.735	0.002025
1775.96	1775	277.79	277.735	0.003025
1776.04	1776	277.8	277.855	0.003025
1776.12	1776	277.81	277.855	0.002025
1776.21	1776	277.82	277.855	0.001225
1776.29	1776	277.83	277.855	0.000625
1776.38	1776	277.84	277.855	0.000225
1776.46	1776	277.85	277.855	2.5e-05
1776.54	1776	277.86	277.855	2.5e-05
1776.62	1776	277.87	277.855	0.000225
1776.71	1776	277.88	277.855	0.000625
1776.79	1776	277.89	277.855	0.001225
1776.88	1776	277.9	277.855	0.002025
1776.96	1776	277.91	277.855	0.003025
1777.04	1777	277.92	277.982	0.00380278
1777.12	1777	277.93	277.982	0.00266944
1777.21	1777	277.94	277.982	0.00173611
1777.29	1777	277.95	277.982	0.00100278
1777.38	1777	277.97	277.982	0.000136111
1777.46	1777	277.98	277.982	2.77778e-06
1777.54	1777	277.99	277.982	6.94444e-05
1777.62	1777	278	277.982	0.000336111
1777.71	1777	278.01	277.982	0.000802778
1777.79	1777	278.02	277.982	0.00146944
1777.88	1777	278.03	277.982	0.00233611
1777.96	1777	278.04	277.982	0.00340278
1778.04	1778	278.05	278.109	0.00350069
1778.12	1778	278.06	278.109	0.00241736
1778.21	1778	278.07	278.109	0.00153403
1778.29	1778	278.08	278.109	0.000850694
1778.38	1778	278.09	278.109	0.000367361
1778.46	1778	278.1	278.109	8.40278e-05
1778.54	1778	278.11	278.109	6.94444e-07
1778.62	1778	278.13	278.109	0.000434028
1778.71	1778	278.14	278.109	0.000950694
1778.79	1778	278.15	278.109	0.00166736
1778.88	1778	278.16	278.109	0.00258403
1778.96	1778	278.17	278.109	0.00370069
1779.04	1779	278.18	278.243	0.00390625
1779.12	1779	278.19	278.243	0.00275625
1779.21	1779	278.2	278.243	0.00180625
1779.29	1779	278.21	278.243	0.00105625
1779.38	1779	278.23	278.243	0.00015625
1779.46	1779	278.24	278.243	6.25e-06
1779.54	1779	278.25	278.243	5.625e-05
1779.62	1779	278.26	278.243	0.00030625
1779.71	1779	278.27	278.243	0.00075625
1779.79	1779	278.28	278.243	0.00140625
1779.88	1779	278.29	278.243	0.00225625
1779.96	1779	278.31	278.243	0.00455625
1780.04	1780	278.32	278.386	0.00433403
1780.12	1780	278.33	278.386	0.00311736
1780.21	1780	278.34	278.386	0.00210069
1780.29	1780	278.36	278.386	0.000667361
1780.38	1780	278.37	278.386	0.000250694
1780.46	1780	278.38	278.386	3.40278e-05
1780.54	1780	278.39	278.386	1.73611e-05
1780.62	1780	278.4	278.386	0.000200694
1780.71	1780	278.42	278.386	0.00116736
1780.79	1780	278.43	278.386	0.00195069
1780.88	1780	278.44	278.386	0.00293403
1780.96	1780	278.45	278.386	0.00411736
1781.04	1781	278.47	278.542	0.00525625
1781.12	1781	278.48	278.542	0.00390625
1781.21	1781	278.49	278.542	0.00275625
1781.29	1781	278.51	278.542	0.00105625
1781.38	1781	278.52	278.542	0.00050625
1781.46	1781	278.54	278.542	6.25e-06
1781.54	1781	278.55	278.542	5.625e-05
1781.62	1781	278.56	278.542	0.00030625
1781.71	1781	278.58	278.542	0.00140625
1781.79	1781	278.59	278.542	0.00225625
1781.88	1781	278.6	278.542	0.00330625
1781.96	1781	278.62	278.542	0.00600625
1782.04	1782	278.63	278.715	0.007225
1782.12	1782	278.65	278.715	0.004225
1782.21	1782	278.66	278.715	0.003025
1782.29	1782	278.68	278.715	0.001225
1782.38	1782	278.69	278.715	0.000625
1782.46	1782	278.71	278.715	2.5e-05
1782.54	1782	278.72	278.715	2.5e-05
1782.62	1782	278.74	278.715	0.000625
1782.71	1782	278.75	278.715	0.001225
1782.79	1782	278.77	278.715	0.003025
1782.88	1782	278.78	278.715	0.004225
1782.96	1782	278.8	278.715	0.007225
1783.04	1783	278.81	278.9	0.0081
1783.12	1783	278.83	278.9	0.0049
1783.21	1783	278.84	278.9	0.0036
1783.29	1783	278.86	278.9	0.0016
1783.38	1783	278.88	278.9	0.0004
1783.46	1783	278.89	278.9	0.0001
1783.54	1783	278.91	278.9	0.0001
1783.62	1783	278.92	278.9	0.0004
1783.71	1783	278.94	278.9	0.0016
1783.79	1783	278.96	278.9	0.0036
1783.88	1783	278.97	278.9	0.0049
1783.96	1783	278.99	278.9	0.0081
1784.04	1784	279	279.096	0.00918403
1784.12	1784	279.02	279.096	0.00575069
1784.21	1784	279.04	279.096	0.00311736
1784.29	1784	279.05	279.096	0.00210069
1784.38	1784	279.07	279.096	0.000667361
1784.46	1784	279.09	279.096	3.40278e-05
1784.54	1784	279.1	279.096	1.73611e-05
1784.62	1784	279.12	279.096	0.000584028
1784.71	1784	279.14	279.096	0.00195069
1784.79	1784	279.16	279.096	0.00411736
1784.88	1784	279.17	279.096	0.00550069
1784.96	1784	279.19	279.096	0.00886736
1785.04	1785	279.21	279.303	0.00871111
1785.12	1785	279.22	279.303	0.00694444
1785.21	1785	279.24	279.303	0.00401111
1785.29	1785	279.26	279.303	0.00187778
1785.38	1785	279.28	279.303	0.000544444
1785.46	1785	279.29	279.303	0.000177778
1785.54	1785	279.31	279.303	4.44444e-05
1785.62	1785	279.33	279.303	0.000711111
1785.71	1785	279.35	279.303	0.00217778
1785.79	1785	279.37	279.303	0.00444444
1785.88	1785	279.38	279.303	0.00587778
1785.96	1785	279.4	279.303	0.00934444
1786.04	1786	279.42	279.52	0.01
1786.12	1786	279.44	279.52	0.0064
1786.21	1786	279.46	279.52	0.0036
1786.29	1786	279.47	279.52	0.0025
1786.38	1786	279.49	279.52	0.0009
1786.46	1786	279.51	279.52	0.0001
1786.54	1786	279.53	279.52	0.0001
1786.62	1786	279.55	279.52	0.0009
1786.71	1786	279.57	279.52	0.0025
1786.79	1786	279.58	279.52	0.0036
1786.88	1786	279.6	279.52	0.0064
1786.96	1786	279.62	279.52	0.01
1787.04	1787	279.64	279.743	0.0106778
1787.12	1787	279.66	279.743	0.00694444
1787.21	1787	279.68	279.743	0.00401111
1787.29	1787	279.7	279.743	0.00187778
1787.38	1787	279.71	279.743	0.00111111
1787.46	1787	279.73	279.743	0.000177778
1787.54	1787	279.75	279.743	4.44444e-05
1787.62	1787	279.77	279.743	0.000711111
1787.71	1787	279.79	279.743	0.00217778
1787.79	1787	279.81	279.743	0.00444444
1787.88	1787	279.83	279.743	0.00751111
1787.96	1787	279.85	279.743	0.0113778
1788.04	1788	279.86	279.97	0.0121
1788.12	1788	279.88	279.97	0.0081
1788.21	1788	279.9	279.97	0.0049
1788.29	1788	279.92	279.97	0.0025
1788.38	1788	279.94	279.97	0.0009
1788.46	1788	279.96	279.97	0.0001
1788.54	1788	279.98	279.97	0.0001
1788.62	1788	280	279.97	0.0009
1788.71	1788	280.02	279.97	0.0025
1788.79	1788	280.04	279.97	0.0049
1788.88	1788	280.06	279.97	0.0081
1788.96	1788	280.08	279.97	0.0121
1789.04	1789	280.1	280.201	0.0101674
1789.12	1789	280.11	280.201	0.00825069
1789.21	1789	280.13	280.201	0.00501736
1789.29	1789	280.15	280.201	0.00258403
1789.38	1789	280.17	280.201	0.000950694
1789.46	1789	280.19	280.201	0.000117361
1789.54	1789	280.21	280.201	8.40278e-05
1789.62	1789	280.23	280.201	0.000850694
1789.71	1789	280.25	280.201	0.00241736
1789.79	1789	280.27	280.201	0.00478403
1789.88	1789	280.29	280.201	0.00795069
1789.96	1789	280.31	280.201	0.0119174
1790.04	1790	280.33	280.435	0.011025
1790.12	1790	280.35	280.435	0.007225
1790.21	1790	280.37	280.435	0.004225
1790.29	1790	280.39	280.435	0.002025
1790.38	1790	280.41	280.435	0.000625
1790.46	1790	280.43	280.435	2.5e-05
1790.54	1790	280.44	280.435	2.5e-05
1790.62	1790	280.46	280.435	0.000625
1790.71	1790	280.48	280.435	0.002025
1790.79	1790	280.5	280.435	0.004225
1790.88	1790	280.52	280.435	0.007225
1790.96	1790	280.54	280.435	0.011025
1791.04	1791	280.56	280.67	0.0121
1791.12	1791	280.58	280.67	0.0081
1791.21	1791	280.6	280.67	0.0049
1791.29	1791	280.62	280.67	0.0025
1791.38	1791	280.64	280.67	0.0009
1791.46	1791	280.66	280.67	0.0001
1791.54	1791	280.68	280.67	0.0001
1791.62	1791	280.7	280.67	0.0009
1791.71	1791	280.72	280.67	0.0025
1791.79	1791	280.74	280.67	0.0049
1791.88	1791	280.76	280.67	0.0081
1791.96	1791	280.78	280.67	0.0121
1792.04	1792	280.79	280.9	0.0121
1792.12	1792	280.81	280.9	0.0081
1792.21	1792	280.83	280.9	0.0049
1792.29	1792	280.85	280.9	0.0025
1792.38	1792	280.87	280.9	0.0009
1792.46	1792	280.89	280.9	0.0001
1792.54	1792	280.91	280.9	0.0001
1792.62	1792	280.93	280.9	0.0009
1792.71	1792	280.95	280.9	0.0025
1792.79	1792	280.97	280.9	0.0049
1792.88	1792	280.99	280.9	0.0081
1792.96	1792	281.01	280.9	0.0121
1793.04	1793	281.03	281.129	0.00983403
1793.12	1793	281.04	281.129	0.00795069
1793.21	1793	281.06	281.129	0.00478403
1793.29	1793	281.08	281.129	0.00241736
1793.38	1793	281.1	281.129	0.000850694
1793.46	1793	281.12	281.129	8.40278e-05
1793.54	1793	281.14	281.129	0.000117361
1793.62	1793	281.16	281.129	0.000950694
1793.71	1793	281.18	281.129	0.00258403
1793.79	1793	281.2	281.129	0.00501736
1793.88	1793	281.21	281.129	0.00653403
1793.96	1793	281.23	281.129	0.0101674
1794.04	1794	281.25	281.353	0.0106778
1794.12	1794	281.27	281.353	0.00694444
1794.21	1794	281.29	281.353	0.00401111
1794.29	1794	281.31	281.353	0.00187778
1794.38	1794	281.33	281.353	0.000544444
1794.46	1794	281.34	281.353	0.000177778
1794.54	1794	281.36	281.353	4.44444e-05
1794.62	1794	281.38	281.353	0.000711111
1794.71	1794	281.4	281.353	0.00217778
1794.79	1794	281.42	281.353	0.00444444
1794.88	1794	281.44	281.353	0.00751111
1794.96	1794	281.45	281.353	0.00934444
1795.04	1795	281.47	281.571	0.0101674
1795.12	1795	281.49	281.571	0.00653403
1795.21	1795	281.51	281.571	0.00370069
1795.29	1795	281.53	281.571	0.00166736
1795.38	1795	281.54	281.571	0.000950694
1795.46	1795	281.56	281.571	0.000117361
1795.54	1795	281.58	281.571	8.40278e-05
1795.62	1795	281.6	281.571	0.000850694
1795.71	1795	281.62	281.571	0.00241736
1795.79	1795	281.63	281.571	0.00350069
1795.88	1795	281.65	281.571	0.00626736
1795.96	1795	281.67	281.571	0.00983403
1796.04	1796	281.69	281.783	0.00855625
1796.12	1796	281.7	281.783	0.00680625
1796.21	1796	281.72	281.783	0.00390625
1796.29	1796	281.74	281.783	0.00180625
1796.38	1796	281.76	281.783	0.00050625
1796.46	1796	281.77	281.783	0.00015625
1796.54	1796	281.79	281.783	5.625e-05
1796.62	1796	281.81	281.783	0.00075625
1796.71	1796	281.83	281.783	0.00225625
1796.79	1796	281.84	281.783	0.00330625
1796.88	1796	281.86	281.783	0.00600625
1796.96	1796	281.88	281.783	0.00950625
1797.04	1797	281.89	281.985	0.009025
1797.12	1797	281.91	281.985	0.005625
1797.21	1797	281.93	281.985	0.003025
1797.29	1797	281.94	281.985	0.002025
1797.38	1797	281.96	281.985	0.000625
1797.46	1797	281.98	281.985	2.5e-05
1797.54	1797	281.99	281.985	2.5e-05
1797.62	1797	282.01	281.985	0.000625
1797.71	1797	282.03	281.985	0.002025
1797.79	1797	282.04	281.985	0.003025
1797.88	1797	282.06	281.985	0.005625
1797.96	1797	282.08	281.985	0.009025
1798.04	1798	282.09	282.179	0.00795069
1798.12	1798	282.11	282.179	0.00478403
1798.21	1798	282.12	282.179	0.00350069
1798.29	1798	282.14	282.179	0.00153403
1798.38	1798	282.16	282.179	0.000367361
1798.46	1798	282.17	282.179	8.40278e-05
1798.54	1798	282.19	282.179	0.000117361
1798.62	1798	282.2	282.179	0.000434028
1798.71	1798	282.22	282.179	0.00166736
1798.79	1798	282.23	282.179	0.00258403
1798.88	1798	282.25	282.179	0.00501736
1798.96	1798	282.27	282.179	0.00825069
1799.04	1799	282.28	282.365	0.007225
1799.12	1799	282.3	282.365	0.004225
1799.21	1799	282.31	282.365	0.003025
1799.29	1799	282.33	282.365	0.001225
1799.38	1799	282.34	282.365	0.000625
1799.46	1799	282.36	282.365	2.5e-05
1799.54	1799	282.37	282.365	2.5e-05
1799.62	1799	282.39	282.365	0.000625
1799.71	1799	282.4	282.365	0.001225
1799.79	1799	282.42	282.365	0.003025
1799.88	1799	282.43	282.365	0.004225
1799.96	1799	282.45	282.365	0.007225
1800.04	1800	282.46	282.539	0.00626736
1800.12	1800	282.48	282.539	0.00350069
1800.21	1800	282.49	282.539	0.00241736
1800.29	1800	282.5	282.539	0.00153403
1800.38	1800	282.52	282.539	0.000367361
1800.46	1800	282.53	282.539	8.40278e-05
1800.54	1800	282.55	282.539	0.000117361
1800.62	1800	282.56	282.539	0.000434028
1800.71	1800	282.57	282.539	0.000950694
1800.79	1800	282.59	282.539	0.00258403
1800.88	1800	282.6	282.539	0.00370069
1800.96	1800	282.62	282.539	0.00653403
1801.04	1801	282.63	282.706	0.00575069
1801.12	1801	282.64	282.706	0.00433403
1801.21	1801	282.66	282.706	0.00210069
1801.29	1801	282.67	282.706	0.00128403
1801.38	1801	282.69	282.706	0.000250694
1801.46	1801	282.7	282.706	3.40278e-05
1801.54	1801	282.71	282.706	1.73611e-05
1801.62	1801	282.73	282.706	0.000584028
1801.71	1801	282.74	282.706	0.00116736
1801.79	1801	282.75	282.706	0.00195069
1801.88	1801	282.77	282.706	0.00411736
1801.96	1801	282.78	282.706	0.00550069
1802.04	1802	282.79	282.862	0.00525625
1802.12	1802	282.81	282.862	0.00275625
1802.21	1802	282.82	282.862	0.00180625
1802.29	1802	282.83	282.862	0.00105625
1802.38	1802	282.84	282.862	0.00050625
1802.46	1802	282.86	282.862	6.25e-06
1802.54	1802	282.87	282.862	5.625e-05
1802.62	1802	282.88	282.862	0.00030625
1802.71	1802	282.89	282.862	0.00075625
1802.79	1802	282.91	282.862	0.00225625
1802.88	1802	282.92	282.862	0.00330625
1802.96	1802	282.93	282.862	0.00455625
1803.04	1803	282.94	283.008	0.00466944
1803.12	1803	282.96	283.008	0.00233611
1803.21	1803	282.97	283.008	0.00146944
1803.29	1803	282.98	283.008	0.000802778
1803.38	1803	282.99	283.008	0.000336111
1803.46	1803	283	283.008	6.94444e-05
1803.54	1803	283.01	283.008	2.77778e-06
1803.62	1803	283.03	283.008	0.000469444
1803.71	1803	283.04	283.008	0.00100278
1803.79	1803	283.05	283.008	0.00173611
1803.88	1803	283.06	283.008	0.00266944
1803.96	1803	283.07	283.008	0.00380278
1804.04	1804	283.08	283.144	0.00411736
1804.12	1804	283.1	283.144	0.00195069
1804.21	1804	283.11	283.144	0.00116736
1804.29	1804	283.12	283.144	0.000584028
1804.38	1804	283.13	283.144	0.000200694
1804.46	1804	283.14	283.144	1.73611e-05
1804.54	1804	283.15	283.144	3.40278e-05
1804.62	1804	283.16	283.144	0.000250694
1804.71	1804	283.17	283.144	0.000667361
1804.79	1804	283.18	283.144	0.00128403
1804.88	1804	283.19	283.144	0.00210069
1804.96	1804	283.2	283.144	0.00311736
1805.04	1805	283.22	283.272	0.00266944
1805.12	1805	283.23	283.272	0.00173611
1805.21	1805	283.24	283.272	0.00100278
1805.29	1805	283.25	283.272	0.000469444
1805.38	1805	283.26	283.272	0.000136111
1805.46	1805	283.27	283.272	2.77778e-06
1805.54	1805	283.28	283.272	6.94444e-05
1805.62	1805	283.29	283.272	0.000336111
1805.71	1805	283.29	283.272	0.000336111
1805.79	1805	283.3	283.272	0.000802778
1805.88	1805	283.31	283.272	0.00146944
1805.96	1805	283.32	283.272	0.00233611
1806.04	1806	283.33	283.383	0.00284444
1806.12	1806	283.34	283.383	0.00187778
1806.21	1806	283.35	283.383	0.00111111
1806.29	1806	283.36	283.383	0.000544444
1806.38	1806	283.37	283.383	0.000177778
1806.46	1806	283.38	283.383	1.11111e-05
1806.54	1806	283.39	283.383	4.44444e-05
1806.62	1806	283.4	283.383	0.000277778
1806.71	1806	283.41	283.383	0.000711111
1806.79	1806	283.42	283.383	0.00134444
1806.88	1806	283.42	283.383	0.00134444
1806.96	1806	283.43	283.383	0.00217778
1807.04	1807	283.44	283.485	0.002025
1807.12	1807	283.45	283.485	0.001225
1807.21	1807	283.46	283.485	0.000625
1807.29	1807	283.47	283.485	0.000225
1807.38	1807	283.47	283.485	0.000225
1807.46	1807	283.48	283.485	2.5e-05
1807.54	1807	283.49	283.485	2.5e-05
1807.62	1807	283.5	283.485	0.000225
1807.71	1807	283.5	283.485	0.000225
1807.79	1807	283.51	283.485	0.000625
1807.88	1807	283.52	283.485	0.001225
1807.96	1807	283.53	283.485	0.002025
1808.04	1808	283.54	283.573	0.00111111
1808.12	1808	283.54	283.573	0.00111111
1808.21	1808	283.55	283.573	0.000544444
1808.29	1808	283.56	283.573	0.000177778
1808.38	1808	283.56	283.573	0.000177778
1808.46	1808	283.57	283.573	1.11111e-05
1808.54	1808	283.58	283.573	4.44444e-05
1808.62	1808	283.58	283.573	4.44444e-05
1808.71	1808	283.59	283.573	0.000277778
1808.79	1808	283.6	283.573	0.000711111
1808.88	1808	283.6	283.573	0.000711111
1808.96	1808	283.61	283.573	0.00134444
1809.04	1809	283.62	283.65	0.0009
1809.12	1809	283.62	283.65	0.0009
1809.21	1809	283.63	283.65	0.0004
1809.29	1809	283.64	283.65	0.0001
1809.38	1809	283.64	283.65	0.0001
1809.46	1809	283.65	283.65	0
1809.54	1809	283.65	283.65	0
1809.62	1809	283.66	283.65	0.0001
1809.71	1809	283.66	283.65	0.0001
1809.79	1809	283.67	283.65	0.0004
1809.88	1809	283.68	283.65	0.0009
1809.96	1809	283.68	283.65	0.0009
1810.04	1810	283.69	283.712	0.000469444
1810.12	1810	283.69	283.712	0.000469444
1810.21	1810	283.7	283.712	0.000136111
1810.29	1810	283.7	283.712	0.000136111
1810.38	1810	283.7	283.712	0.000136111
1810.46	1810	283.71	283.712	2.77778e-06
1810.54	1810	283.71	283.712	2.77778e-06
1810.62	1810	283.72	283.712	6.94444e-05
1810.71	1810	283.72	283.712	6.94444e-05
1810.79	1810	283.73	283.712	0.000336111
1810.88	1810	283.73	283.712	0.000336111
1810.96	1810	283.74	283.712	0.000802778
1811.04	1811	283.74	283.758	0.000336111
1811.12	1811	283.74	283.758	0.000336111
1811.21	1811	283.75	283.758	6.94444e-05
1811.29	1811	283.75	283.758	6.94444e-05
1811.38	1811	283.75	283.758	6.94444e-05
1811.46	1811	283.76	283.758	2.77778e-06
1811.54	1811	283.76	283.758	2.77778e-06
1811.62	1811	283.76	283.758	2.77778e-06
1811.71	1811	283.77	283.758	0.000136111
1811.79	1811	283.77	283.758	0.000136111
1811.88	1811	283.77	283.758	0.000136111
1811.96	1811	283.78	283.758	0.000469444
1812.04	1812	283.78	283.791	0.000117361
1812.12	1812	283.78	283.791	0.000117361
1812.21	1812	283.78	283.791	0.000117361
1812.29	1812	283.79	283.791	6.94444e-07
1812.38	1812	283.79	283.791	6.94444e-07
1812.46	1812	283.79	283.791	6.94444e-07
1812.54	1812	283.79	283.791	6.94444e-07
1812.62	1812	283.79	283.791	6.94444e-07
1812.71	1812	283.8	283.791	8.40278e-05
1812.79	1812	283.8	283.791	8.40278e-05
1812.88	1812	283.8	283.791	8.40278e-05
1812.96	1812	283.8	283.791	8.40278e-05
1813.04	1813	283.8	283.807	5.625e-05
1813.12	1813	283.8	283.807	5.625e-05
1813.21	1813	283.8	283.807	5.625e-05
1813.29	1813	283.81	283.807	6.25e-06
1813.38	1813	283.81	283.807	6.25e-06
1813.46	1813	283.81	283.807	6.25e-06
1813.54	1813	283.81	283.807	6.25e-06
1813.62	1813	283.81	283.807	6.25e-06
1813.71	1813	283.81	283.807	6.25e-06
1813.79	1813	283.81	283.807	6.25e-06
1813.88	1813	283.81	283.807	6.25e-06
1813.96	1813	283.81	283.807	6.25e-06
1814.04	1814	283.81	283.81	0
1814.12	1814	283.81	283.81	0
1814.21	1814	283.81	283.81	0
1814.29	1814	283.81	283.81	0
1814.38	1814	283.81	283.81	0
1814.46	1814	283.81	283.81	0
1814.54	1814	283.81	283.81	0
1814.62	1814	283.81	283.81	0
1814.71	1814	283.81	283.81	0
1814.79	1814	283.81	283.81	0
1814.88	1814	283.81	283.81	0
1814.96	1814	283.81	283.81	0
1815.04	1815	283.8	283.795	2.5e-05
1815.12	1815	283.8	283.795	2.5e-05
1815.21	1815	283.8	283.795	2.5e-05
1815.29	1815	283.8	283.795	2.5e-05
1815.38	1815	283.8	283.795	2.5e-05
1815.46	1815	283.8	283.795	2.5e-05
1815.54	1815	283.79	283.795	2.5e-05
1815.62	1815	283.79	283.795	2.5e-05
1815.71	1815	283.79	283.795	2.5e-05
1815.79	1815	283.79	283.795	2.5e-05
1815.88	1815	283.79	283.795	2.5e-05
1815.96	1815	283.79	283.795	2.5e-05
1816.04	1816	283.78	283.768	0.000136111
1816.12	1816	283.78	283.768	0.000136111
1816.21	1816	283.78	283.768	0.000136111
1816.29	1816	283.78	283.768	0.000136111
1816.38	1816	283.77	283.768	2.77778e-06
1816.46	1816	283.77	283.768	2.77778e-06
1816.54	1816	283.77	283.768	2.77778e-06
1816.62	1816	283.76	283.768	6.94444e-05
1816.71	1816	283.76	283.768	6.94444e-05
1816.79	1816	283.76	283.768	6.94444e-05
1816.88	1816	283.76	283.768	6.94444e-05
1816.96	1816	283.75	283.768	0.000336111
1817.04	1817	283.75	283.732	0.000336111
1817.12	1817	283.75	283.732	0.000336111
1817.21	1817	283.74	283.732	6.94444e-05
1817.29	1817	283.74	283.732	6.94444e-05
1817.38	1817	283.74	283.732	6.94444e-05
1817.46	1817	283.73	283.732	2.77778e-06
1817.54	1817	283.73	283.732	2.77778e-06
1817.62	1817	283.73	283.732	2.77778e-06
1817.71	1817	283.72	283.732	0.000136111
1817.79	1817	283.72	283.732	0.000136111
1817.88	1817	283.72	283.732	0.000136111
1817.96	1817	283.71	283.732	0.000469444
1818.04	1818	283.71	283.69	0.0004
1818.12	1818	283.71	283.69	0.0004
1818.21	1818	283.7	283.69	0.0001
1818.29	1818	283.7	283.69	0.0001
1818.38	1818	283.7	283.69	0.0001
1818.46	1818	283.69	283.69	0
1818.54	1818	283.69	283.69	0
1818.62	1818	283.68	283.69	0.0001
1818.71	1818	283.68	283.69	0.0001
1818.79	1818	283.68	283.69	0.0001
1818.88	1818	283.67	283.69	0.0004
1818.96	1818	283.67	283.69	0.0004
1819.04	1819	283.67	283.644	0.000667361
1819.12	1819	283.66	283.644	0.000250694
1819.21	1819	283.66	283.644	0.000250694
1819.29	1819	283.65	283.644	3.40278e-05
1819.38	1819	283.65	283.644	3.40278e-05
1819.46	1819	283.65	283.644	3.40278e-05
1819.54	1819	283.64	283.644	1.73611e-05
1819.62	1819	283.64	283.644	1.73611e-05
1819.71	1819	283.63	283.644	0.000200694
1819.79	1819	283.63	283.644	0.000200694
1819.88	1819	283.63	283.644	0.000200694
1819.96	1819	283.62	283.644	0.000584028
1820.04	1820	283.62	283.598	0.00050625
1820.12	1820	283.61	283.598	0.00015625
1820.21	1820	283.61	283.598	0.00015625
1820.29	1820	283.61	283.598	0.00015625
1820.38	1820	283.6	283.598	6.25e-06
1820.46	1820	283.6	283.598	6.25e-06
1820.54	1820	283.6	283.598	6.25e-06
1820.62	1820	283.59	283.598	5.625e-05
1820.71	1820	283.59	283.598	5.625e-05
1820.79	1820	283.58	283.598	0.00030625
1820.88	1820	283.58	283.598	0.00030625
1820.96	1820	283.58	283.598	0.00030625
1821.04	1821	283.57	283.553	0.00030625
1821.12	1821	283.57	283.553	0.00030625
1821.21	1821	283.57	283.553	0.00030625
1821.29	1821	283.56	283.553	5.625e-05
1821.38	1821	283.56	283.553	5.625e-05
1821.46	1821	283.55	283.553	6.25e-06
1821.54	1821	283.55	283.553	6.25e-06
1821.62	1821	283.55	283.553	6.25e-06
1821.71	1821	283.54	283.553	0.00015625
1821.79	1821	283.54	283.553	0.00015625
1821.88	1821	283.54	283.553	0.00015625
1821.96	1821	283.53	283.553	0.00050625
1822.04	1822	283.53	283.514	0.000250694
1822.12	1822	283.53	283.514	0.000250694
1822.21	1822	283.52	283.514	3.40278e-05
1822.29	1822	283.52	283.514	3.40278e-05
1822.38	1822	283.52	283.514	3.40278e-05
1822.46	1822	283.52	283.514	3.40278e-05
1822.54	1822	283.51	283.514	1.73611e-05
1822.62	1822	283.51	283.514	1.73611e-05
1822.71	1822	283.51	283.514	1.73611e-05
1822.79	1822	283.5	283.514	0.000200694
1822.88	1822	283.5	283.514	0.000200694
1822.96	1822	283.5	283.514	0.000200694
1823.04	1823	283.5	283.483	0.000277778
1823.12	1823	283.49	283.483	4.44444e-05
1823.21	1823	283.49	283.483	4.44444e-05
1823.29	1823	283.49	283.483	4.44444e-05
1823.38	1823	283.49	283.483	4.44444e-05
1823.46	1823	283.48	283.483	1.11111e-05
1823.54	1823	283.48	283.483	1.11111e-05
1823.62	1823	283.48	283.483	1.11111e-05
1823.71	1823	283.48	283.483	1.11111e-05
1823.79	1823	283.48	283.483	1.11111e-05
1823.88	1823	283.47	283.483	0.000177778
1823.96	1823	283.47	283.483	0.000177778
1824.04	1824	283.47	283.464	3.40278e-05
1824.12	1824	283.47	283.464	3.40278e-05
1824.21	1824	283.47	283.464	3.40278e-05
1824.29	1824	283.47	283.464	3.40278e-05
1824.38	1824	283.47	283.464	3.40278e-05
1824.46	1824	283.46	283.464	1.73611e-05
1824.54	1824	283.46	283.464	1.73611e-05
1824.62	1824	283.46	283.464	1.73611e-05
1824.71	1824	283.46	283.464	1.73611e-05
1824.79	1824	283.46	283.464	1.73611e-05
1824.88	1824	283.46	283.464	1.73611e-05
1824.96	1824	283.46	283.464	1.73611e-05
1825.04	1825	283.46	283.46	0
1825.12	1825	283.46	283.46	0
1825.21	1825	283.46	283.46	0
1825.29	1825	283.46	283.46	0
1825.38	1825	283.46	283.46	0
1825.46	1825	283.46	283.46	0
1825.54	1825	283.46	283.46	0
1825.62	1825	283.46	283.46	0
1825.71	1825	283.46	283.46	0
1825.79	1825	283.46	283.46	0
1825.88	1825	283.46	283.46	0
1825.96	1825	283.46	283.46	0
1826.04	1826	283.46	283.47	0.0001
1826.12	1826	283.46	283.47	0.0001
1826.21	1826	283.46	283.47	0.0001
1826.29	1826	283.47	283.47	3.23117e-27
1826.38	1826	283.47	283.47	3.23117e-27
1826.46	1826	283.47	283.47	3.23117e-27
1826.54	1826	283.47	283.47	3.23117e-27
1826.62	1826	283.47	283.47	3.23117e-27
1826.71	1826	283.47	283.47	3.23117e-27
1826.79	1826	283.48	283.47	0.0001
1826.88	1826	283.48	283.47	0.0001
1826.96	1826	283.48	283.47	0.0001
1827.04	1827	283.48	283.497	0.000277778
1827.12	1827	283.48	283.497	0.000277778
1827.21	1827	283.49	283.497	4.44444e-05
1827.29	1827	283.49	283.497	4.44444e-05
1827.38	1827	283.49	283.497	4.44444e-05
1827.46	1827	283.5	283.497	1.11111e-05
1827.54	1827	283.5	283.497	1.11111e-05
1827.62	1827	283.5	283.497	1.11111e-05
1827.71	1827	283.5	283.497	1.11111e-05
1827.79	1827	283.51	283.497	0.000177778
1827.88	1827	283.51	283.497	0.000177778
1827.96	1827	283.51	283.497	0.000177778
1828.04	1828	283.51	283.534	0.000584028
1828.12	1828	283.52	283.534	0.000200694
1828.21	1828	283.52	283.534	0.000200694
1828.29	1828	283.53	283.534	1.73611e-05
1828.38	1828	283.53	283.534	1.73611e-05
1828.46	1828	283.53	283.534	1.73611e-05
1828.54	1828	283.54	283.534	3.40278e-05
1828.62	1828	283.54	283.534	3.40278e-05
1828.71	1828	283.54	283.534	3.40278e-05
1828.79	1828	283.55	283.534	0.000250694
1828.88	1828	283.55	283.534	0.000250694
1828.96	1828	283.55	283.534	0.000250694
1829.04	1829	283.56	283.58	0.0004
1829.12	1829	283.56	283.58	0.0004
1829.21	1829	283.57	283.58	0.0001
1829.29	1829	283.57	283.58	0.0001
1829.38	1829	283.57	283.58	0.0001
1829.46	1829	283.58	283.58	0
1829.54	1829	283.58	283.58	0
1829.62	1829	283.59	283.58	0.0001
1829.71	1829	283.59	283.58	0.0001
1829.79	1829	283.59	283.58	0.0001
1829.88	1829	283.6	283.58	0.0004
1829.96	1829	283.6	283.58	0.0004
1830.04	1830	283.61	283.635	0.000625
1830.12	1830	283.61	283.635	0.000625
1830.21	1830	283.62	283.635	0.000225
1830.29	1830	283.62	283.635	0.000225
1830.38	1830	283.63	283.635	2.5e-05
1830.46	1830	283.63	283.635	2.5e-05
1830.54	1830	283.64	283.635	2.5e-05
1830.62	1830	283.64	283.635	2.5e-05
1830.71	1830	283.65	283.635	0.000225
1830.79	1830	283.65	283.635	0.000225
1830.88	1830	283.66	283.635	0.000625
1830.96	1830	283.66	283.635	0.000625
1831.04	1831	283.67	283.695	0.000625
1831.12	1831	283.67	283.695	0.000625
1831.21	1831	283.68	283.695	0.000225
1831.29	1831	283.68	283.695	0.000225
1831.38	1831	283.69	283.695	2.5e-05
1831.46	1831	283.69	283.695	2.5e-05
1831.54	1831	283.7	283.695	2.5e-05
1831.62	1831	283.7	283.695	2.5e-05
1831.71	1831	283.71	283.695	0.000225
1831.79	1831	283.71	283.695	0.000225
1831.88	1831	283.72	283.695	0.000625
1831.96	1831	283.72	283.695	0.000625
1832.04	1832	283.73	283.762	0.00100278
1832.12	1832	283.74	283.762	0.000469444
1832.21	1832	283.74	283.762	0.000469444
1832.29	1832	283.75	283.762	0.000136111
1832.38	1832	283.75	283.762	0.000136111
1832.46	1832	283.76	283.762	2.77778e-06
1832.54	1832	283.76	283.762	2.77778e-06
1832.62	1832	283.77	283.762	6.94444e-05
1832.71	1832	283.78	283.762	0.000336111
1832.79	1832	283.78	283.762	0.000336111
1832.88	1832	283.79	283.762	0.000802778
1832.96	1832	283.79	283.762	0.000802778
1833.04	1833	283.8	283.835	0.001225
1833.12	1833	283.81	283.835	0.000625
1833.21	1833	283.81	283.835	0.000625
1833.29	1833	283.82	283.835	0.000225
1833.38	1833	283.83	283.835	2.5e-05
1833.46	1833	283.83	283.835	2.5e-05
1833.54	1833	283.84	283.835	2.5e-05
1833.62	1833	283.84	283.835	2.5e-05
1833.71	1833	283.85	283.835	0.000225
1833.79	1833	283.86	283.835	0.000625
1833.88	1833	283.86	283.835	0.000625
1833.96	1833	283.87	283.835	0.001225
1834.04	1834	283.88	283.915	0.001225
1834.12	1834	283.88	283.915	0.001225
1834.21	1834	283.89	283.915	0.000625
1834.29	1834	283.9	283.915	0.000225
1834.38	1834	283.9	283.915	0.000225
1834.46	1834	283.91	283.915	2.5e-05
1834.54	1834	283.92	283.915	2.5e-05
1834.62	1834	283.93	283.915	0.000225
1834.71	1834	283.93	283.915	0.000225
1834.79	1834	283.94	283.915	0.000625
1834.88	1834	283.95	283.915	0.001225
1834.96	1834	283.95	283.915	0.001225
1835.04	1835	283.96	284.006	0.00210069
1835.12	1835	283.97	284.006	0.00128403
1835.21	1835	283.98	284.006	0.000667361
1835.29	1835	283.99	284.006	0.000250694
1835.38	1835	283.99	284.006	0.000250694
1835.46	1835	284	284.006	3.40278e-05
1835.54	1835	284.01	284.006	1.73611e-05
1835.62	1835	284.02	284.006	0.000200694
1835.71	1835	284.03	284.006	0.000584028
1835.79	1835	284.03	284.006	0.000584028
1835.88	1835	284.04	284.006	0.00116736
1835.96	1835	284.05	284.006	0.00195069
1836.04	1836	284.06	284.11	0.0025
1836.12	1836	284.07	284.11	0.0016
1836.21	1836	284.08	284.11	0.0009
1836.29	1836	284.09	284.11	0.0004
1836.38	1836	284.1	284.11	0.0001
1836.46	1836	284.11	284.11	0
1836.54	1836	284.11	284.11	0
1836.62	1836	284.12	284.11	0.0001
1836.71	1836	284.13	284.11	0.0004
1836.79	1836	284.14	284.11	0.0009
1836.88	1836	284.15	284.11	0.0016
1836.96	1836	284.16	284.11	0.0025
1837.04	1837	284.17	284.231	0.00370069
1837.12	1837	284.18	284.231	0.00258403
1837.21	1837	284.19	284.231	0.00166736
1837.29	1837	284.2	284.231	0.000950694
1837.38	1837	284.21	284.231	0.000434028
1837.46	1837	284.23	284.231	6.94444e-07
1837.54	1837	284.24	284.231	8.40278e-05
1837.62	1837	284.25	284.231	0.000367361
1837.71	1837	284.26	284.231	0.000850694
1837.79	1837	284.27	284.231	0.00153403
1837.88	1837	284.28	284.231	0.00241736
1837.96	1837	284.29	284.231	0.00350069
1838.04	1838	284.3	284.37	0.0049
1838.12	1838	284.31	284.37	0.0036
1838.21	1838	284.33	284.37	0.0016
1838.29	1838	284.34	284.37	0.0009
1838.38	1838	284.35	284.37	0.0004
1838.46	1838	284.36	284.37	0.0001
1838.54	1838	284.38	284.37	0.0001
1838.62	1838	284.39	284.37	0.0004
1838.71	1838	284.4	284.37	0.0009
1838.79	1838	284.41	284.37	0.0016
1838.88	1838	284.43	284.37	0.0036
1838.96	1838	284.44	284.37	0.0049
1839.04	1839	284.45	284.53	0.0064
1839.12	1839	284.47	284.53	0.0036
1839.21	1839	284.48	284.53	0.0025
1839.29	1839	284.49	284.53	0.0016
1839.38	1839	284.51	284.53	0.0004
1839.46	1839	284.52	284.53	0.0001
1839.54	1839	284.54	284.53	0.0001
1839.62	1839	284.55	284.53	0.0004
1839.71	1839	284.57	284.53	0.0016
1839.79	1839	284.58	284.53	0.0025
1839.88	1839	284.59	284.53	0.0036
1839.96	1839	284.61	284.53	0.0064
1840.04	1840	284.62	284.712	0.00840278
1840.12	1840	284.64	284.712	0.00513611
1840.21	1840	284.66	284.712	0.00266944
1840.29	1840	284.67	284.712	0.00173611
1840.38	1840	284.69	284.712	0.000469444
1840.46	1840	284.7	284.712	0.000136111
1840.54	1840	284.72	284.712	6.94444e-05
1840.62	1840	284.74	284.712	0.000802778
1840.71	1840	284.75	284.712	0.00146944
1840.79	1840	284.77	284.712	0.00340278
1840.88	1840	284.78	284.712	0.00466944
1840.96	1840	284.8	284.712	0.00780278
1841.04	1841	284.82	284.915	0.009025
1841.12	1841	284.83	284.915	0.007225
1841.21	1841	284.85	284.915	0.004225
1841.29	1841	284.87	284.915	0.002025
1841.38	1841	284.89	284.915	0.000625
1841.46	1841	284.91	284.915	2.5e-05
1841.54	1841	284.92	284.915	2.5e-05
1841.62	1841	284.94	284.915	0.000625
1841.71	1841	284.96	284.915	0.002025
1841.79	1841	284.98	284.915	0.004225
1841.88	1841	285	284.915	0.007225
1841.96	1841	285.01	284.915	0.009025
1842.04	1842	285.03	285.135	0.011025
1842.12	1842	285.05	285.135	0.007225
1842.21	1842	285.07	285.135	0.004225
1842.29	1842	285.09	285.135	0.002025
1842.38	1842	285.11	285.135	0.000625
1842.46	1842	285.13	285.135	2.5e-05
1842.54	1842	285.14	285.135	2.5e-05
1842.62	1842	285.16	285.135	0.000625
1842.71	1842	285.18	285.135	0.002025
1842.79	1842	285.2	285.135	0.004225
1842.88	1842	285.22	285.135	0.007225
1842.96	1842	285.24	285.135	0.011025
1843.04	1843	285.26	285.362	0.0105062
1843.12	1843	285.28	285.362	0.00680625
1843.21	1843	285.3	285.362	0.00390625
1843.29	1843	285.31	285.362	0.00275625
1843.38	1843	285.33	285.362	0.00105625
1843.46	1843	285.35	285.362	0.00015625
1843.54	1843	285.37	285.362	5.625e-05
1843.62	1843	285.39	285.362	0.00075625
1843.71	1843	285.41	285.362	0.00225625
1843.79	1843	285.43	285.362	0.00455625
1843.88	1843	285.45	285.362	0.00765625
1843.96	1843	285.47	285.362	0.0115563
1844.04	1844	285.48	285.582	0.0103361
1844.12	1844	285.5	285.582	0.00666944
1844.21	1844	285.52	285.582	0.00380278
1844.29	1844	285.54	285.582	0.00173611
1844.38	1844	285.56	285.582	0.000469444
1844.46	1844	285.57	285.582	0.000136111
1844.54	1844	285.59	285.582	6.94444e-05
1844.62	1844	285.61	285.582	0.000802778
1844.71	1844	285.63	285.582	0.00233611
1844.79	1844	285.64	285.582	0.00340278
1844.88	1844	285.66	285.582	0.00613611
1844.96	1844	285.68	285.582	0.00966944
1845.04	1845	285.7	285.788	0.00780278
1845.12	1845	285.71	285.788	0.00613611
1845.21	1845	285.73	285.788	0.00340278
1845.29	1845	285.75	285.788	0.00146944
1845.38	1845	285.76	285.788	0.000802778
1845.46	1845	285.78	285.788	6.94444e-05
1845.54	1845	285.8	285.788	0.000136111
1845.62	1845	285.81	285.788	0.000469444
1845.71	1845	285.83	285.788	0.00173611
1845.79	1845	285.85	285.788	0.00380278
1845.88	1845	285.86	285.788	0.00513611
1845.96	1845	285.88	285.788	0.00840278
1846.04	1846	285.9	285.978	0.00600625
1846.12	1846	285.91	285.978	0.00455625
1846.21	1846	285.93	285.978	0.00225625
1846.29	1846	285.94	285.978	0.00140625
1846.38	1846	285.96	285.978	0.00030625
1846.46	1846	285.97	285.978	5.625e-05
1846.54	1846	285.98	285.978	6.25e-06
1846.62	1846	286	285.978	0.00050625
1846.71	1846	286.01	285.978	0.00105625
1846.79	1846	286.03	285.978	0.00275625
1846.88	1846	286.04	285.978	0.00390625
1846.96	1846	286.06	285.978	0.00680625
1847.04	1847	286.07	286.142	0.00525625
1847.12	1847	286.09	286.142	0.00275625
1847.21	1847	286.1	286.142	0.00180625
1847.29	1847	286.11	286.142	0.00105625
1847.38	1847	286.12	286.142	0.00050625
1847.46	1847	286.14	286.142	6.25e-06
1847.54	1847	286.15	286.142	5.625e-05
1847.62	1847	286.16	286.142	0.00030625
1847.71	1847	286.17	286.142	0.00075625
1847.79	1847	286.19	286.142	0.00225625
1847.88	1847	286.2	286.142	0.00330625
1847.96	1847	286.21	286.142	0.00455625
1848.04	1848	286.22	286.279	0.00350069
1848.12	1848	286.23	286.279	0.00241736
1848.21	1848	286.24	286.279	0.00153403
1848.29	1848	286.25	286.279	0.000850694
1848.38	1848	286.26	286.279	0.000367361
1848.46	1848	286.27	286.279	8.40278e-05
1848.54	1848	286.28	286.279	6.94444e-07
1848.62	1848	286.3	286.279	0.000434028
1848.71	1848	286.31	286.279	0.000950694
1848.79	1848	286.32	286.279	0.00166736
1848.88	1848	286.33	286.279	0.00258403
1848.96	1848	286.34	286.279	0.00370069
1849.04	1849	286.34	286.385	0.002025
1849.12	1849	286.35	286.385	0.001225
1849.21	1849	286.36	286.385	0.000625
1849.29	1849	286.37	286.385	0.000225
1849.38	1849	286.37	286.385	0.000225
1849.46	1849	286.38	286.385	2.5e-05
1849.54	1849	286.39	286.385	2.5e-05
1849.62	1849	286.4	286.385	0.000225
1849.71	1849	286.4	286.385	0.000225
1849.79	1849	286.41	286.385	0.000625
1849.88	1849	286.42	286.385	0.001225
1849.96	1849	286.43	286.385	0.002025
1850.04	1850	286.43	286.46	0.0009
1850.12	1850	286.44	286.46	0.0004
1850.21	1850	286.44	286.46	0.0004
1850.29	1850	286.45	286.46	0.0001
1850.38	1850	286.45	286.46	0.0001
1850.46	1850	286.46	286.46	3.23117e-27
1850.54	1850	286.46	286.46	3.23117e-27
1850.62	1850	286.47	286.46	0.0001
1850.71	1850	286.47	286.46	0.0001
1850.79	1850	286.48	286.46	0.0004
1850.88	1850	286.48	286.46	0.0004
1850.96	1850	286.49	286.46	0.0009
1851.04	1851	286.49	286.506	0.000250694
1851.12	1851	286.49	286.506	0.000250694
1851.21	1851	286.5	286.506	3.40278e-05
1851.29	1851	286.5	286.506	3.40278e-05
1851.38	1851	286.5	286.506	3.40278e-05
1851.46	1851	286.5	286.506	3.40278e-05
1851.54	1851	286.51	286.506	1.73611e-05
1851.62	1851	286.51	286.506	1.73611e-05
1851.71	1851	286.51	286.506	1.73611e-05
1851.79	1851	286.52	286.506	0.000200694
1851.88	1851	286.52	286.506	0.000200694
1851.96	1851	286.52	286.506	0.000200694
1852.04	1852	286.52	286.523	1.11111e-05
1852.12	1852	286.52	286.523	1.11111e-05
1852.21	1852	286.52	286.523	1.11111e-05
1852.29	1852	286.52	286.523	1.11111e-05
1852.38	1852	286.52	286.523	1.11111e-05
1852.46	1852	286.52	286.523	1.11111e-05
1852.54	1852	286.52	286.523	1.11111e-05
1852.62	1852	286.52	286.523	1.11111e-05
1852.71	1852	286.53	286.523	4.44444e-05
1852.79	1852	286.53	286.523	4.44444e-05
1852.88	1852	286.53	286.523	4.44444e-05
1852.96	1852	286.53	286.523	4.44444e-05
1853.04	1853	286.53	286.518	0.00015625
1853.12	1853	286.52	286.518	6.25e-06
1853.21	1853	286.52	286.518	6.25e-06
1853.29	1853	286.52	286.518	6.25e-06
1853.38	1853	286.52	286.518	6.25e-06
1853.46	1853	286.52	286.518	6.25e-06
1853.54	1853	286.52	286.518	6.25e-06
1853.62	1853	286.52	286.518	6.25e-06
1853.71	1853	286.51	286.518	5.625e-05
1853.79	1853	286.51	286.518	5.625e-05
1853.88	1853	286.51	286.518	5.625e-05
1853.96	1853	286.51	286.518	5.625e-05
1854.04	1854	286.51	286.493	0.00030625
1854.12	1854	286.5	286.493	5.625e-05
1854.21	1854	286.5	286.493	5.625e-05
1854.29	1854	286.5	286.493	5.625e-05
1854.38	1854	286.5	286.493	5.625e-05
1854.46	1854	286.49	286.493	6.25e-06
1854.54	1854	286.49	286.493	6.25e-06
1854.62	1854	286.49	286.493	6.25e-06
1854.71	1854	286.49	286.493	6.25e-06
1854.79	1854	286.48	286.493	0.00015625
1854.88	1854	286.48	286.493	0.00015625
1854.96	1854	286.48	286.493	0.00015625
1855.04	1855	286.48	286.462	0.00030625
1855.12	1855	286.47	286.462	5.625e-05
1855.21	1855	286.47	286.462	5.625e-05
1855.29	1855	286.47	286.462	5.625e-05
1855.38	1855	286.47	286.462	5.625e-05
1855.46	1855	286.46	286.462	6.25e-06
1855.54	1855	286.46	286.462	6.25e-06
1855.62	1855	286.46	286.462	6.25e-06
1855.71	1855	286.46	286.462	6.25e-06
1855.79	1855	286.45	286.462	0.00015625
1855.88	1855	286.45	286.462	0.00015625
1855.96	1855	286.45	286.462	0.00015625
1856.04	1856	286.45	286.437	0.000177778
1856.12	1856	286.45	286.437	0.000177778
1856.21	1856	286.44	286.437	1.11111e-05
1856.29	1856	286.44	286.437	1.11111e-05
1856.38	1856	286.44	286.437	1.11111e-05
1856.46	1856	286.44	286.437	1.11111e-05
1856.54	1856	286.44	286.437	1.11111e-05
1856.62	1856	286.43	286.437	4.44444e-05
1856.71	1856	286.43	286.437	4.44444e-05
1856.79	1856	286.43	286.437	4.44444e-05
1856.88	1856	286.43	286.437	4.44444e-05
1856.96	1856	286.42	286.437	0.000277778
1857.04	1857	286.42	286.415	2.5e-05
1857.12	1857	286.42	286.415	2.5e-05
1857.21	1857	286.42	286.415	2.5e-05
1857.29	1857	286.42	286.415	2.5e-05
1857.38	1857	286.42	286.415	2.5e-05
1857.46	1857	286.42	286.415	2.5e-05
1857.54	1857	286.41	286.415	2.5e-05
1857.62	1857	286.41	286.415	2.5e-05
1857.71	1857	286.41	286.415	2.5e-05
1857.79	1857	286.41	286.415	2.5e-05
1857.88	1857	286.41	286.415	2.5e-05
1857.96	1857	286.41	286.415	2.5e-05
1858.04	1858	286.41	286.403	5.625e-05
1858.12	1858	286.41	286.403	5.625e-05
1858.21	1858	286.41	286.403	5.625e-05
1858.29	1858	286.4	286.403	6.25e-06
1858.38	1858	286.4	286.403	6.25e-06
1858.46	1858	286.4	286.403	6.25e-06
1858.54	1858	286.4	286.403	6.25e-06
1858.62	1858	286.4	286.403	6.25e-06
1858.71	1858	286.4	286.403	6.25e-06
1858.79	1858	286.4	286.403	6.25e-06
1858.88	1858	286.4	286.403	6.25e-06
1858.96	1858	286.4	286.403	6.25e-06
1859.04	1859	286.4	286.402	6.25e-06
1859.12	1859	286.4	286.402	6.25e-06
1859.21	1859	286.4	286.402	6.25e-06
1859.29	1859	286.4	286.402	6.25e-06
1859.38	1859	286.4	286.402	6.25e-06
1859.46	1859	286.4	286.402	6.25e-06
1859.54	1859	286.4	286.402	6.25e-06
1859.62	1859	286.4	286.402	6.25e-06
1859.71	1859	286.4	286.402	6.25e-06
1859.79	1859	286.41	286.402	5.625e-05
1859.88	1859	286.41	286.402	5.625e-05
1859.96	1859	286.41	286.402	5.625e-05
1860.04	1860	286.41	286.419	8.40278e-05
1860.12	1860	286.41	286.419	8.40278e-05
1860.21	1860	286.41	286.419	8.40278e-05
1860.29	1860	286.41	286.419	8.40278e-05
1860.38	1860	286.42	286.419	6.94444e-07
1860.46	1860	286.42	286.419	6.94444e-07
1860.54	1860	286.42	286.419	6.94444e-07
1860.62	1860	286.42	286.419	6.94444e-07
1860.71	1860	286.42	286.419	6.94444e-07
1860.79	1860	286.43	286.419	0.000117361
1860.88	1860	286.43	286.419	0.000117361
1860.96	1860	286.43	286.419	0.000117361
1861.04	1861	286.43	286.453	0.000544444
1861.12	1861	286.44	286.453	0.000177778
1861.21	1861	286.44	286.453	0.000177778
1861.29	1861	286.44	286.453	0.000177778
1861.38	1861	286.45	286.453	1.11111e-05
1861.46	1861	286.45	286.453	1.11111e-05
1861.54	1861	286.46	286.453	4.44444e-05
1861.62	1861	286.46	286.453	4.44444e-05
1861.71	1861	286.46	286.453	4.44444e-05
1861.79	1861	286.47	286.453	0.000277778
1861.88	1861	286.47	286.453	0.000277778
1861.96	1861	286.47	286.453	0.000277778
1862.04	1862	286.48	286.51	0.0009
1862.12	1862	286.48	286.51	0.0009
1862.21	1862	286.49	286.51	0.0004
1862.29	1862	286.5	286.51	0.0001
1862.38	1862	286.5	286.51	0.0001
1862.46	1862	286.51	286.51	0
1862.54	1862	286.51	286.51	0
1862.62	1862	286.52	286.51	0.0001
1862.71	1862	286.52	286.51	0.0001
1862.79	1862	286.53	286.51	0.0004
1862.88	1862	286.54	286.51	0.0009
1862.96	1862	286.54	286.51	0.0009
1863.04	1863	286.55	286.593	0.00187778
1863.12	1863	286.56	286.593	0.00111111
1863.21	1863	286.56	286.593	0.00111111
1863.29	1863	286.57	286.593	0.000544444
1863.38	1863	286.58	286.593	0.000177778
1863.46	1863	286.59	286.593	1.11111e-05
1863.54	1863	286.6	286.593	4.44444e-05
1863.62	1863	286.61	286.593	0.000277778
1863.71	1863	286.61	286.593	0.000277778
1863.79	1863	286.62	286.593	0.000711111
1863.88	1863	286.63	286.593	0.00134444
1863.96	1863	286.64	286.593	0.00217778
1864.04	1864	286.65	286.707	0.00321111
1864.12	1864	286.66	286.707	0.00217778
1864.21	1864	286.67	286.707	0.00134444
1864.29	1864	286.68	286.707	0.000711111
1864.38	1864	286.69	286.707	0.000277778
1864.46	1864	286.7	286.707	4.44444e-05
1864.54	1864	286.71	286.707	1.11111e-05
1864.62	1864	286.72	286.707	0.000177778
1864.71	1864	286.73	286.707	0.000544444
1864.79	1864	286.74	286.707	0.00111111
1864.88	1864	286.76	286.707	0.00284444
1864.96	1864	286.77	286.707	0.00401111
1865.04	1865	286.78	286.85	0.0049
1865.12	1865	286.79	286.85	0.0036
1865.21	1865	286.8	286.85	0.0025
1865.29	1865	286.82	286.85	0.0009
1865.38	1865	286.83	286.85	0.0004
1865.46	1865	286.84	286.85	0.0001
1865.54	1865	286.86	286.85	0.0001
1865.62	1865	286.87	286.85	0.0004
1865.71	1865	286.88	286.85	0.0009
1865.79	1865	286.9	286.85	0.0025
1865.88	1865	286.91	286.85	0.0036
1865.96	1865	286.92	286.85	0.0049
1866.04	1866	286.94	287.02	0.0064
1866.12	1866	286.95	287.02	0.0049
1866.21	1866	286.97	287.02	0.0025
1866.29	1866	286.98	287.02	0.0016
1866.38	1866	287	287.02	0.0004
1866.46	1866	287.01	287.02	0.0001
1866.54	1866	287.03	287.02	0.0001
[truncated: 1,856 more rows]

## Sheet: Tabelle3
Year	Counts	Sum	ppm	Sum_dev	Std
1700	12	3319.13	276.594	0.000891667	8.10606e-05
1701	12	3319.45	276.621	0.000691667	6.28788e-05
1702	12	3319.76	276.647	0.000866667	7.87879e-05
1703	12	3320.07	276.672	0.000625	5.68182e-05
1704	12	3320.39	276.699	0.000691667	6.28788e-05
1705	12	3320.69	276.724	0.000891667	8.10606e-05
1706	12	3321.01	276.751	0.000691667	6.28788e-05
1707	12	3321.32	276.777	0.000866667	7.87879e-05
1708	12	3321.65	276.804	0.000891667	8.10606e-05
1709	12	3321.97	276.831	0.000691667	6.28788e-05
1710	12	3322.32	276.86	0.0008	7.27273e-05
1711	12	3322.65	276.887	0.001025	9.31818e-05
1712	12	3323.01	276.917	0.001025	9.31818e-05
1713	12	3323.39	276.949	0.00109167	9.92424e-05
1714	12	3323.78	276.982	0.00116667	0.000106061
1715	12	3324.19	277.016	0.00129167	0.000117424
1716	12	3324.6	277.05	0.0014	0.000127273
1717	12	3325.04	277.087	0.00126667	0.000115152
1718	12	3325.5	277.125	0.0015	0.000136364
1719	12	3325.98	277.165	0.0015	0.000136364
1720	12	3326.5	277.208	0.00176667	0.000160606
1721	12	3327.03	277.252	0.002025	0.000184091
1722	12	3327.6	277.3	0.0022	0.0002
1723	12	3328.19	277.349	0.00249167	0.000226515
1724	12	3328.79	277.399	0.00249167	0.000226515
1725	12	3329.39	277.449	0.00249167	0.000226515
1726	12	3329.97	277.498	0.002025	0.000184091
1727	12	3330.5	277.542	0.00176667	0.000160606
1728	12	3330.98	277.582	0.00176667	0.000160606
1729	12	3331.38	277.615	0.0011	0.0001
1730	12	3331.68	277.64	0.0006	5.45455e-05
1731	12	3331.87	277.656	0.000291667	2.65152e-05
1732	12	3331.92	277.66	3.87741e-26	3.52492e-27
1733	12	3331.82	277.652	0.000366667	3.33333e-05
1734	12	3331.56	277.63	0.0008	7.27273e-05
1735	12	3331.11	277.593	0.002025	0.000184091
1736	12	3330.53	277.544	0.00309167	0.000281061
1737	12	3329.85	277.488	0.004625	0.000420455
1738	12	3329.07	277.423	0.004625	0.000420455
1739	12	3328.26	277.355	0.0055	0.0005
1740	12	3327.42	277.285	0.0055	0.0005
1741	12	3326.59	277.216	0.00509167	0.000462879
1742	12	3325.79	277.149	0.00429167	0.000390152
1743	12	3325.05	277.088	0.002825	0.000256818
1744	12	3324.39	277.033	0.002825	0.000256818
1745	12	3323.77	276.981	0.00249167	0.000226515
1746	12	3323.21	276.934	0.00189167	0.00017197
1747	12	3322.7	276.892	0.00176667	0.000160606
1748	12	3322.22	276.852	0.00176667	0.000160606
1749	12	3321.77	276.814	0.00129167	0.000117424
1750	12	3321.34	276.778	0.00116667	0.000106061
1751	12	3320.93	276.744	0.00129167	0.000117424
1752	12	3320.54	276.712	0.00116667	0.000106061
1753	12	3320.16	276.68	0.0008	7.27273e-05
1754	12	3319.81	276.651	0.000691667	6.28788e-05
1755	12	3319.51	276.626	0.000491667	4.4697e-05
1756	12	3319.26	276.605	0.0003	2.72727e-05
1757	12	3319.05	276.587	0.000225	2.04545e-05
1758	12	3318.96	276.58	0	0
1759	12	3318.95	276.579	9.16667e-05	8.33333e-06
1760	12	3318.96	276.58	0	0
1761	12	3319.14	276.595	0.0003	2.72727e-05
1762	12	3319.44	276.62	0.0008	7.27273e-05
1763	12	3319.86	276.655	0.0015	0.000136364
1764	12	3320.43	276.703	0.002825	0.000256818
1765	12	3321.12	276.76	0.0038	0.000345455
1766	12	3321.95	276.829	0.00509167	0.000462879
1767	12	3322.88	276.907	0.00626667	0.000569697
1768	12	3323.91	276.993	0.008025	0.000729545
1769	12	3325.03	277.086	0.00909167	0.000826515
1770	12	3326.23	277.186	0.0100917	0.000917424
1771	12	3327.48	277.29	0.011	0.001
1772	12	3328.78	277.398	0.0113667	0.00103333
1773	12	3330.11	277.509	0.0110917	0.00100833
1774	12	3331.5	277.625	0.0143	0.0013
1775	12	3332.82	277.735	0.0143	0.0013
1776	12	3334.26	277.855	0.0143	0.0013
1777	12	3335.78	277.982	0.0177667	0.00161515
1778	12	3337.31	278.109	0.0180917	0.0016447
1779	12	3338.91	278.243	0.019025	0.00172955
1780	12	3340.63	278.386	0.0208917	0.00189924
1781	12	3342.51	278.542	0.026825	0.00243864
1782	12	3344.58	278.715	0.0327	0.00297273
1783	12	3346.8	278.9	0.0374	0.0034
1784	12	3349.15	279.096	0.0418917	0.00380833
1785	12	3351.64	279.303	0.0448667	0.00407879
1786	12	3354.24	279.52	0.047	0.00427273
1787	12	3356.92	279.743	0.0510667	0.00464242
1788	12	3359.64	279.97	0.0572	0.0052
1789	12	3362.41	280.201	0.0550917	0.00500833
1790	12	3365.22	280.435	0.0503	0.00457273
1791	12	3368.04	280.67	0.0572	0.0052
1792	12	3370.8	280.9	0.0572	0.0052
1793	12	3373.55	281.129	0.0512917	0.00466288
1794	12	3376.24	281.353	0.0484667	0.00440606
1795	12	3378.85	281.571	0.0460917	0.00419015
1796	12	3381.39	281.783	0.043625	0.00396591
1797	12	3383.82	281.985	0.0407	0.0037
1798	12	3386.15	282.179	0.0362917	0.00329924
1799	12	3388.38	282.365	0.0327	0.00297273
1800	12	3390.47	282.539	0.0284917	0.00259015
1801	12	3392.47	282.706	0.0270917	0.00246288
1802	12	3394.35	282.862	0.022625	0.00205682
1803	12	3396.1	283.008	0.0193667	0.00176061
1804	12	3397.73	283.144	0.0154917	0.00140833
1805	12	3399.26	283.272	0.0113667	0.00103333
1806	12	3400.6	283.383	0.0124667	0.00113333
1807	12	3401.82	283.485	0.0087	0.000790909
1808	12	3402.88	283.573	0.00626667	0.000569697
1809	12	3403.8	283.65	0.0048	0.000436364
1810	12	3404.54	283.712	0.00296667	0.000269697
1811	12	3405.1	283.758	0.00176667	0.000160606
1812	12	3405.49	283.791	0.000691667	6.28788e-05
1813	12	3405.69	283.807	0.000225	2.04545e-05
1814	12	3405.72	283.81	0	0
1815	12	3405.54	283.795	0.0003	2.72727e-05
1816	12	3405.22	283.768	0.00116667	0.000106061
1817	12	3404.78	283.732	0.00176667	0.000160606
1818	12	3404.28	283.69	0.0022	0.0002
1819	12	3403.73	283.644	0.00249167	0.000226515
1820	12	3403.17	283.598	0.002025	0.000184091
1821	12	3402.63	283.553	0.002025	0.000184091
1822	12	3402.17	283.514	0.00129167	0.000117424
1823	12	3401.8	283.483	0.000866667	7.87879e-05
1824	12	3401.57	283.464	0.000291667	2.65152e-05
1825	12	3401.52	283.46	0	0
1826	12	3401.64	283.47	0.0006	5.45455e-05
1827	12	3401.96	283.497	0.00126667	0.000115152
1828	12	3402.41	283.534	0.00189167	0.00017197
1829	12	3402.96	283.58	0.0022	0.0002
1830	12	3403.62	283.635	0.0035	0.000318182
1831	12	3404.34	283.695	0.0035	0.000318182
1832	12	3405.14	283.762	0.00456667	0.000415152
1833	12	3406.02	283.835	0.0055	0.0005
1834	12	3406.98	283.915	0.0071	0.000645455
1835	12	3408.07	284.006	0.00909167	0.000826515
1836	12	3409.32	284.11	0.011	0.001
1837	12	3410.77	284.231	0.0180917	0.0016447
1838	12	3412.44	284.37	0.023	0.00209091
1839	12	3414.36	284.53	0.0292	0.00265455
1840	12	3416.54	284.712	0.0367667	0.00334242
1841	12	3418.98	284.915	0.0463	0.00420909
1842	12	3421.62	285.135	0.0503	0.00457273
1843	12	3424.35	285.362	0.052025	0.00472955
1844	12	3426.98	285.582	0.0455667	0.00414242
1845	12	3429.46	285.788	0.0393667	0.00357879
1846	12	3431.73	285.978	0.029625	0.00269318
1847	12	3433.71	286.142	0.022625	0.00205682
1848	12	3435.35	286.279	0.0180917	0.0016447
1849	12	3436.62	286.385	0.0087	0.000790909
1850	12	3437.52	286.46	0.0038	0.000345455
1851	12	3438.07	286.506	0.00129167	0.000117424
1852	12	3438.28	286.523	0.000266667	2.42424e-05
1853	12	3438.21	286.518	0.000425	3.86364e-05
1854	12	3437.91	286.493	0.001025	9.31818e-05
1855	12	3437.55	286.462	0.001025	9.31818e-05
1856	12	3437.24	286.437	0.000866667	7.87879e-05
1857	12	3436.98	286.415	0.0003	2.72727e-05
1858	12	3436.83	286.403	0.000225	2.04545e-05
1859	12	3436.83	286.402	0.000225	2.04545e-05
1860	12	3437.03	286.419	0.000691667	6.28788e-05
1861	12	3437.44	286.453	0.00206667	0.000187879
1862	12	3438.12	286.51	0.0048	0.000436364
1863	12	3439.12	286.593	0.00966667	0.000878788
1864	12	3440.48	286.707	0.0164667	0.00149697
1865	12	3442.2	286.85	0.0248	0.00225455
1866	12	3444.24	287.02	0.0318	0.00289091
1867	12	3446.54	287.212	0.0393667	0.00357879
1868	12	3449.04	287.42	0.047	0.00427273
1869	12	3451.71	287.643	0.052025	0.00472955
1870	12	3454.44	287.87	0.0572	0.0052
1871	12	3457.27	288.106	0.0504917	0.00459015
1872	12	3460.04	288.337	0.0510667	0.00464242
1873	12	3462.73	288.561	0.0460917	0.00419015
1874	12	3465.25	288.771	0.0408917	0.00371742
1875	12	3467.64	288.97	0.0374	0.0034
1876	12	3469.94	289.162	0.0367667	0.00334242
1877	12	3472.24	289.353	0.0380667	0.00346061
1878	12	3474.66	289.555	0.0431	0.00391818
1879	12	3477.22	289.768	0.0473667	0.00430606
1880	12	3480	290	0.0572	0.0052
1881	12	3482.94	290.245	0.0647	0.00588182
1882	12	3486.14	290.512	0.0785667	0.00714242
1883	12	3489.65	290.804	0.0914917	0.00831742
1884	12	3493.52	291.127	0.113667	0.0103333
1885	12	3497.76	291.48	0.1398	0.0127091
1886	12	3502.3	291.858	0.149367	0.0135788
1887	12	3506.99	292.249	0.154892	0.0140811
1888	12	3511.76	292.647	0.159867	0.0145333
1889	12	3516.62	293.052	0.162567	0.0147788
1890	12	3521.49	293.457	0.162225	0.0147477
1891	12	3526.32	293.86	0.1572	0.0142909
1892	12	3531	294.25	0.1468	0.0133455
1893	12	3535.5	294.625	0.1287	0.0117
1894	12	3539.73	294.978	0.116225	0.0105659
1895	12	3543.66	295.305	0.0979	0.0089
1896	12	3547.2	295.6	0.0758	0.00689091
1897	12	3550.37	295.864	0.0644917	0.00586288
1898	12	3553.29	296.107	0.052025	0.00472955
1899	12	3556.04	296.337	0.0510667	0.00464242
1900	12	3558.78	296.565	0.0503	0.00457273
1901	12	3561.56	296.797	0.0510667	0.00464242
1902	12	3564.45	297.038	0.062825	0.00571136
1903	12	3567.52	297.293	0.0712667	0.00647879
1904	12	3570.84	297.57	0.0814	0.0074
1905	12	3574.38	297.865	0.0887	0.00806364
1906	12	3578.09	298.174	0.0986917	0.00897197
1907	12	3581.92	298.493	0.106467	0.00967879
1908	12	3585.84	298.82	0.107	0.00972727
1909	12	3589.82	299.152	0.109767	0.00997879
1910	12	3593.88	299.49	0.1182	0.0107455
1911	12	3598.03	299.836	0.125492	0.0114083
1912	12	3602.42	300.202	0.138567	0.012597
1913	12	3606.96	300.58	0.1468	0.0133455
1914	12	3611.62	300.968	0.154567	0.0140515
1915	12	3616.37	301.364	0.156892	0.0142629
1916	12	3621.16	301.763	0.159867	0.0145333
1917	12	3625.93	302.161	0.154892	0.0140811
1918	12	3630.58	302.548	0.142967	0.012997
1919	12	3635.07	302.923	0.137025	0.0124568
1920	12	3639.36	303.28	0.1182	0.0107455
1921	12	3643.55	303.629	0.118492	0.010772
1922	12	3647.67	303.973	0.116225	0.0105659
1923	12	3651.79	304.316	0.115092	0.0104629
1924	12	3655.92	304.66	0.1182	0.0107455
1925	12	3660.09	305.007	0.120825	0.0109841
1926	12	3664.38	305.365	0.1287	0.0117
1927	12	3668.7	305.725	0.1287	0.0117
1928	12	3673.15	306.096	0.138292	0.012572
1929	12	3677.62	306.468	0.138567	0.012597
1930	12	3682.09	306.841	0.139492	0.0126811
1931	12	3686.55	307.213	0.137025	0.0124568
1932	12	3691.01	307.584	0.132092	0.0120083
1933	12	3695.46	307.955	0.1287	0.0117
1934	12	3699.88	308.323	0.134867	0.0122606
1935	12	3704.22	308.685	0.1287	0.0117
1936	12	3708.42	309.035	0.1223	0.0111182
1937	12	3712.53	309.377	0.112825	0.0102568
1938	12	3716.45	309.704	0.0986917	0.00897197
1939	12	3720.06	310.005	0.0819	0.00744545
1940	12	3723.24	310.27	0.0572	0.0052
1941	12	3725.94	310.495	0.0407	0.0037
1942	12	3728.11	310.676	0.0246917	0.0022447
1943	12	3729.78	310.815	0.0143	0.0013
1944	12	3731.13	310.928	0.010425	0.000947727
1945	12	3732.31	311.026	0.00909167	0.000826515
1946	12	3733.49	311.124	0.0100917	0.000917424
1947	12	3734.82	311.235	0.0143	0.0013
1948	12	3736.37	311.364	0.0208917	0.00189924
1949	12	3738.26	311.522	0.0297667	0.00270606
1950	12	3740.47	311.706	0.0388917	0.00353561
1951	12	3743	311.917	0.0510667	0.00464242
1952	12	3745.91	312.159	0.0670917	0.00609924
1953	12	3749.23	312.436	0.0864917	0.00786288
1954	12	3752.97	312.748	0.107825	0.00980227
1955	12	3757.14	313.095	0.1287	0.0117
1956	12	3761.79	313.483	0.169025	0.0153659
1957	12	3767.16	313.93	0.2288	0.0208
1958	12	3776.3	314.692	3.32177	0.301979
1959	12	3785.73	315.478	2.40083	0.218257
1960	12	3796.62	316.385	7.8635	0.714864
1961	12	3805.16	317.097	4.18067	0.380061
1962	12	3814.63	317.886	4.42069	0.401881
1963	12	3820.81	318.401	7.62629	0.693299
1964	12	3828.06	319.005	4.9743	0.452209
1965	12	3832.83	319.402	2.74663	0.249693
1966	12	3848.58	320.715	6.6515	0.604682
1967	12	3858.05	321.504	4.83309	0.439372
1968	12	3868.21	322.351	4.64509	0.422281
1969	12	3886.84	323.903	4.70087	0.427352
1970	12	3899.28	324.94	3.6652	0.3332
1971	12	3906.68	325.557	4.24767	0.386152
1972	12	3920.07	326.673	4.07903	0.37082
1973	12	3946.44	328.87	5.6156	0.510509
1974	12	3952.36	329.363	6.52007	0.592733
1975	12	3962.92	330.243	4.96947	0.45177
1976	12	3973.55	331.129	5.66969	0.515427
1977	12	3992.74	332.728	4.94597	0.449633
1978	12	4014.9	334.575	5.9725	0.542955
1979	12	4029.78	335.815	5.2097	0.473609
1980	12	4053.65	337.804	5.89449	0.535863
1981	12	4071.7	339.308	6.75217	0.613833
1982	12	4086.43	340.536	8.09309	0.735736
1983	12	4105.26	342.105	8.5743	0.779482
1984	12	4123.55	343.629	6.52329	0.593027
1985	12	4141.74	345.145	6.2929	0.572082
1986	12	4157.11	346.426	5.53549	0.503227
1987	12	4179.05	348.254	5.65869	0.514427
1988	12	4205.35	350.446	5.77249	0.524772
1989	12	4224.9	352.075	6.0781	0.552555
1990	12	4239.26	353.272	5.77537	0.525033
1991	12	4254.76	354.563	10.2941	0.935824
1992	12	4265.97	355.497	8.17083	0.742802
1993	12	4275.26	356.272	6.73137	0.611942
1994	12	4293.36	357.78	5.6104	0.510036
1995	12	4316.56	359.713	6.85127	0.622842
1996	12	4336.74	361.395	6.2765	0.570591
1997	12	4352.44	362.703	7.58467	0.689515
1998	12	4385.33	365.444	8.23469	0.748608
1999	12	4407.12	367.26	7.1002	0.645473
2000	12	4421.02	368.418	4.39397	0.399452
2001	12	4440.22	370.018	4.51157	0.410142
2002	12	4465.76	372.147	5.27007	0.479097
2003	12	4495.38	374.615	6.4899	0.589991
2004	12	4516.01	376.334	6.99669	0.636063
2005	12	4541.42	378.452	7.59537	0.690488
2006	12	4566.15	380.513	7.20203	0.65473
2007	12	4590.34	382.528	7.00377	0.636706
2008	12	4613.03	384.419	4.63929	0.421754
2009	12	4632.63	386.052	5.43283	0.493893
2010	12	4658.78	388.232	5.59397	0.508542
2011	12	4680.35	390.029	4.39289	0.399354
2012	12	4705.56	392.13	5.8336	0.530327
2013	12	4738.54	394.878	7.17497	0.65227
2014	12	4763.67	396.973	7.43122	0.675566
2015	12	4790.89	399.241	8.36249	0.760227
2016	12	4830.28	402.523	11.1769	1.01608
2017	12	4856.5	404.708	6.39617	0.58147
2018	12	4883.33	406.944	6.34809	0.577099
2019	12	4915.95	409.663	6.67342	0.606675
2020	12	4945.27	412.106	6.29009	0.571827
2021	3	1242.3	414.1	0.6944	0.3472
