# Supplementary material for: The Social Cost of Fossil and Industrial CO2 Emissions from 1950 to 2018
Source: Research Square preprint supplement (doi:10.21203/rs.3.rs-2244259/v1), 2022-11-17
Supplement: Supplementary file 39 [file CountryCarbon.xlsx]

## Sheet: Tabelle1
1	2	3
ID	Year	total	USA	China	Russian Federation	Germany	Japan	India	United Kingdom	Canada	Ukraine	France	Italy	Poland	South Africa	Mexico	Iran	Australia	South Korea	Brazil	Saudi Arabia	Spain	Indonesia	Kazakhstan	Turkey	Netherlands	Czech Republic	Taiwan	Belgium	Romania	Argentina	Venezuela	Thailand	Uzbekistan	Egypt	Malaysia	North Korea	Pakistan	Belarus	United Arab Emirates	Algeria	Hungary	Iraq	Sweden	Greece	Austria	Nigeria	Bulgaria	Denmark
186	1950	2.50103	1.80891	2.47957	2.41375	2.36164	2.47304	2.48285	2.36445	2.45896	2.47446	2.44582	2.48972	2.47043	2.48437	2.4927	2.49968	2.48609	2.50043	2.49566	2.49963	2.49201	2.49835	2.4919	2.49844	2.48703	2.48615	2.5	2.48023	2.49573	2.49286	2.49058	2.50077	2.4966	2.49824	2.50103	2.50082	2.50067	2.50103	2.50103	2.5	2.49601	2.50058	2.49321	2.4999	2.49533	2.50041	2.49898	2.49503
187	1951	2.82348	2.1105	2.79572	2.721	2.66602	2.78978	2.80445	2.67478	2.77908	2.79234	2.76104	2.81015	2.79014	2.8057	2.81396	2.82159	2.80737	2.82268	2.81757	2.82357	2.81444	2.82092	2.81278	2.8207	2.80848	2.80735	2.82214	2.79906	2.81734	2.81394	2.81055	2.82318	2.81829	2.8206	2.82348	2.82321	2.82284	2.82348	2.82348	2.82235	2.81742	2.82282	2.81435	2.82223	2.81713	2.82302	2.82125	2.8175
188	1952	2.86769	2.17308	2.8327	2.75002	2.70092	2.83209	2.84764	2.72347	2.82418	2.83198	2.80573	2.85387	2.83274	2.84835	2.85754	2.86658	2.85126	2.86675	2.86089	2.86774	2.85743	2.86422	2.85542	2.86483	2.85276	2.85031	2.86595	2.84491	2.86042	2.85784	2.85384	2.86734	2.86174	2.86472	2.86769	2.86745	2.86677	2.86769	2.86769	2.86663	2.86027	2.86716	2.85827	2.86638	2.86167	2.8671	2.86512	2.86144
189	1953	2.91142	2.20025	2.87482	2.77856	2.74124	2.87163	2.89099	2.76402	2.86759	2.87115	2.85286	2.89613	2.87343	2.89205	2.9014	2.91038	2.8952	2.91014	2.90454	2.91129	2.9008	2.90785	2.89758	2.90789	2.89634	2.89279	2.90966	2.88894	2.90306	2.90183	2.89836	2.91098	2.90471	2.90848	2.91142	2.91095	2.91022	2.91142	2.91142	2.91033	2.90275	2.91073	2.90254	2.91009	2.9055	2.91076	2.90853	2.9051
190	1954	2.99741	2.31972	2.9534	2.84935	2.81733	2.9585	2.97592	2.84656	2.95293	2.95256	2.93562	2.97968	2.95713	2.97724	2.98751	2.99712	2.97889	2.996	2.98931	2.99707	2.98656	2.99338	2.982	2.99374	2.98147	2.97752	2.99564	2.974	2.98826	2.98738	2.98343	2.99685	2.98994	2.99422	2.99741	2.9961	2.99593	2.99741	2.99741	2.99627	2.98813	2.99658	2.98799	2.99602	2.99072	2.99671	2.9943	2.99043
191	1955	3.21363	2.4708	3.16153	3.05038	3.01615	3.1749	3.19031	3.05625	3.16737	3.16422	3.1484	3.19362	3.17154	3.19099	3.20281	3.20932	3.19434	3.21187	3.20434	3.21306	3.20264	3.20794	3.19665	3.20991	3.19699	3.19249	3.21167	3.18851	3.20359	3.20283	3.19732	3.21298	3.2054	3.21073	3.21363	3.21163	3.21187	3.21363	3.21363	3.21237	3.20389	3.21251	3.20296	3.21201	3.2057	3.2129	3.21033	3.20624
192	1956	3.39758	2.61895	3.33854	3.21914	3.18845	3.35373	3.37344	3.24092	3.34578	3.3436	3.32429	3.37479	3.35216	3.37377	3.38608	3.39136	3.37765	3.39552	3.38759	3.39714	3.38603	3.39163	3.37904	3.39366	3.37982	3.37519	3.39549	3.37117	3.38645	3.38549	3.37984	3.39687	3.38859	3.39487	3.39758	3.39514	3.39554	3.39758	3.39758	3.39622	3.38853	3.39584	3.38574	3.39587	3.38988	3.39676	3.39404	3.39039
193	1957	3.49564	2.72364	3.42567	3.302	3.2833	3.44429	3.46855	3.33996	3.44574	3.43708	3.41989	3.47186	3.44687	3.47117	3.48219	3.48969	3.4753	3.4934	3.48582	3.49507	3.48193	3.48952	3.47552	3.49128	3.47806	3.47199	3.4934	3.4693	3.4831	3.48264	3.47665	3.49484	3.48589	3.49238	3.49564	3.49256	3.49332	3.49564	3.49564	3.49413	3.48514	3.49401	3.48503	3.49378	3.48767	3.49477	3.49171	3.48884
194	1958	3.6062	2.85814	3.46281	3.39737	3.39974	3.55674	3.5779	3.45448	3.55648	3.54308	3.53355	3.58228	3.55796	3.57993	3.59146	3.59932	3.58502	3.60375	3.59554	3.60529	3.59095	3.60014	3.58452	3.60183	3.588	3.58131	3.60359	3.58227	3.59261	3.59414	3.59134	3.60538	3.59569	3.60247	3.6062	3.60194	3.6036	3.6062	3.6062	3.60478	3.59549	3.60438	3.59472	3.60417	3.59854	3.60519	3.60194	3.59889
195	1959	3.6186	2.84812	3.42205	3.38636	3.41232	3.56602	3.59087	3.46941	3.56825	3.5485	3.54701	3.59292	3.56683	3.59281	3.60269	3.61162	3.59575	3.61553	3.60795	3.61809	3.60438	3.61208	3.59451	3.6139	3.60028	3.59324	3.6156	3.59449	3.60477	3.60524	3.60081	3.61769	3.60692	3.61513	3.61773	3.61317	3.61589	3.60662	3.61859	3.61705	3.60716	3.6166	3.60703	3.61638	3.61098	3.61762	3.61324	3.61149
196	1960	3.74028	2.95212	3.52768	3.49851	3.51814	3.67683	3.70985	3.58089	3.68769	3.66729	3.66622	3.71048	3.68581	3.71358	3.72307	3.73009	3.71623	3.73686	3.7275	3.73955	3.72695	3.73445	3.71521	3.7357	3.72024	3.71324	3.73704	3.71547	3.72571	3.72697	3.72472	3.73927	3.72813	3.73591	3.73914	3.73379	3.73703	3.72781	3.74028	3.7386	3.72791	3.73803	3.72686	3.73772	3.73188	3.73935	3.73421	3.73216
197	1961	3.79732	3.01201	3.64695	3.548	3.56947	3.72014	3.76441	3.63667	3.74437	3.72205	3.72053	3.76338	3.74076	3.76945	3.77952	3.78736	3.77262	3.79338	3.78391	3.79635	3.78269	3.79023	3.77146	3.79259	3.77663	3.76797	3.7939	3.77202	3.78212	3.78337	3.78316	3.79619	3.78478	3.79266	3.79604	3.79011	3.79395	3.78446	3.79732	3.79567	3.78397	3.79494	3.784	3.79464	3.78864	3.7962	3.79024	3.78867
198	1962	3.87957	3.06516	3.75966	3.6179	3.63853	3.79964	3.84333	3.71775	3.82308	3.80056	3.798	3.83965	3.82045	3.85073	3.86217	3.86936	3.85369	3.87486	3.86493	3.87787	3.8632	3.8733	3.85243	3.87368	3.85684	3.84829	3.87571	3.85282	3.86216	3.86493	3.86482	3.8782	3.86641	3.8745	3.87827	3.8712	3.87587	3.86607	3.87957	3.87803	3.86579	3.87711	3.86558	3.8768	3.87033	3.87843	3.87119	3.8695
199	1963	4.03829	3.18785	3.91943	3.75767	3.78024	3.94964	3.99936	3.87362	3.98073	3.95356	3.94708	3.99338	3.97525	4.00835	4.0202	4.02702	4.01075	4.03254	4.02313	4.0364	4.02226	4.03208	4.00919	4.03212	4.01342	4.00539	4.03417	4.00945	4.01934	4.02464	4.02297	4.03678	4.02418	4.03242	4.0367	4.02934	4.03404	4.02382	4.03829	4.03682	4.02295	4.03573	4.0232	4.03495	4.02821	4.03684	4.02891	4.0272
200	1964	4.19059	3.30283	4.07167	3.89214	3.92615	4.09264	4.15246	4.02469	4.12575	4.10047	4.09628	4.14263	4.1243	4.15796	4.17034	4.17762	4.16087	4.18453	4.17512	4.18867	4.17303	4.18448	4.15963	4.18341	4.16418	4.15635	4.18597	4.16233	4.17093	4.17539	4.17515	4.18855	4.17558	4.18363	4.18857	4.18087	4.18621	4.17519	4.19058	4.18905	4.17357	4.18811	4.17411	4.18698	4.17997	4.1886	4.1789	4.17881
201	1965	4.34026	3.41553	4.2107	4.02367	4.07822	4.23478	4.29825	4.17047	4.2715	4.24465	4.24416	4.28853	4.27285	4.30528	4.31974	4.32559	4.30727	4.33344	4.32488	4.33911	4.32087	4.33352	4.30742	4.33279	4.31285	4.30689	4.33539	4.31151	4.31879	4.32421	4.32368	4.33823	4.32434	4.33272	4.33797	4.32819	4.33566	4.32393	4.34025	4.33846	4.32354	4.33499	4.32318	4.33562	4.32985	4.33705	4.32763	4.32817
202	1966	4.5127	3.54131	4.37038	4.17837	4.25303	4.39827	4.46914	4.34401	4.44199	4.41173	4.41783	4.4543	4.4438	4.4777	4.49063	4.4952	4.47989	4.50451	4.49517	4.51095	4.49151	4.50632	4.47802	4.5041	4.48443	4.47952	4.50739	4.48401	4.48975	4.49548	4.49715	4.51011	4.49588	4.50546	4.51001	4.49971	4.50802	4.49545	4.51269	4.5104	4.49586	4.50514	4.4929	4.50761	4.502	4.50918	4.4994	4.49903
203	1967	4.61963	3.61163	4.50166	4.27004	4.3641	4.48608	4.57602	4.45804	4.54276	4.51405	4.51797	4.55573	4.54893	4.58312	4.59506	4.6011	4.58438	4.61004	4.60159	4.61267	4.59605	4.61293	4.58336	4.61049	4.59051	4.58652	4.61363	4.59032	4.59451	4.60176	4.60168	4.61631	4.60204	4.61426	4.61686	4.60533	4.61466	4.60159	4.61938	4.61732	4.60359	4.61461	4.60081	4.6143	4.60873	4.61613	4.60459	4.60624
204	1968	4.7382	3.69336	4.61053	4.37879	4.46943	4.58484	4.69063	4.57268	4.65543	4.62966	4.6331	4.6702	4.66293	4.70055	4.71258	4.71573	4.7015	4.72805	4.71711	4.73027	4.71172	4.73068	4.70092	4.72831	4.70724	4.70356	4.73161	4.70588	4.71089	4.71937	4.72031	4.73354	4.72013	4.73196	4.73533	4.72203	4.73251	4.71966	4.73786	4.73573	4.72153	4.73283	4.71702	4.73212	4.72666	4.73639	4.72197	4.72366
205	1969	4.97539	3.87782	4.8182	4.60107	4.68827	4.79711	4.9269	4.80389	4.89157	4.86234	4.86246	4.90179	4.89532	4.93632	4.9475	4.95272	4.9366	4.9638	4.95243	4.96576	4.94899	4.96628	4.93656	4.96481	4.94378	4.93862	4.96821	4.94168	4.94495	4.9543	4.95657	4.97142	4.95656	4.97002	4.97289	4.9579	4.96987	4.95608	4.96979	4.97231	4.95837	4.96922	4.95181	4.96845	4.9632	4.97209	4.95729	4.95919
206	1970	5.24411	4.06357	5.03391	4.85041	4.96408	5.03452	5.19445	5.06601	5.151	5.12521	5.12413	5.16323	5.1611	5.20328	5.21301	5.21906	5.20386	5.22945	5.21859	5.23176	5.21224	5.23434	5.20327	5.23249	5.20541	5.20195	5.23627	5.20986	5.21137	5.22156	5.22378	5.23992	5.22431	5.2382	5.24013	5.22406	5.23852	5.22381	5.23995	5.24	5.22503	5.23759	5.21893	5.23753	5.23029	5.23824	5.22742	5.22718
207	1971	5.28089	4.09331	5.04235	4.86307	4.9978	5.06349	5.22843	5.10065	5.18474	5.15473	5.15449	5.196	5.1955	5.23493	5.24645	5.25315	5.23923	5.26491	5.25296	5.26458	5.24583	5.27026	5.23757	5.26789	5.2425	5.23667	5.2723	5.24777	5.24659	5.25664	5.26383	5.27565	5.2599	5.27461	5.27634	5.25156	5.27559	5.25934	5.27511	5.2758	5.262	5.27302	5.25783	5.27332	5.26668	5.27209	5.26336	5.26533
208	1972	5.45306	4.20894	5.19954	5.01343	5.16882	5.22048	5.39758	5.2762	5.34914	5.32033	5.32162	5.36348	5.36313	5.40624	5.41696	5.42413	5.41012	5.43661	5.42194	5.43388	5.41357	5.44124	5.4075	5.4384	5.41008	5.40844	5.44327	5.41741	5.41697	5.42848	5.436	5.44711	5.43098	5.44611	5.44818	5.42863	5.4479	5.43039	5.44667	5.44533	5.43413	5.44501	5.42994	5.44447	5.43776	5.44177	5.43503	5.4368
209	1973	5.6731	4.3733	5.40955	5.21488	5.37677	5.42357	5.61596	5.49308	5.56904	5.53478	5.53185	5.57666	5.58151	5.62578	5.63378	5.63776	5.62648	5.65317	5.63707	5.64716	5.63081	5.6597	5.62563	5.65691	5.628	5.6283	5.66211	5.63526	5.63359	5.64745	5.65497	5.66643	5.6501	5.66661	5.66832	5.64654	5.66764	5.64947	5.66475	5.66265	5.65318	5.66474	5.64928	5.66296	5.65672	5.65958	5.65434	5.65694
210	1974	5.65874	4.4052	5.38988	5.18305	5.36869	5.4092	5.59975	5.49029	5.5524	5.51516	5.52228	5.56096	5.56424	5.61055	5.6165	5.6195	5.61174	5.63809	5.61973	5.6318	5.61161	5.64476	5.60949	5.64211	5.61507	5.61342	5.64801	5.62191	5.6176	5.63268	5.63825	5.65213	5.63488	5.65162	5.65354	5.631	5.6529	5.63421	5.65019	5.65004	5.63854	5.6503	5.63695	5.64889	5.6431	5.64175	5.63932	5.64371
211	1975	5.64459	4.4435	5.33288	5.14455	5.37099	5.40755	5.58058	5.47995	5.5363	5.49368	5.52239	5.55151	5.5423	5.59409	5.59978	5.60659	5.59663	5.62227	5.60351	5.62186	5.59517	5.62987	5.59284	5.62673	5.60296	5.59718	5.63273	5.61134	5.60037	5.6187	5.62719	5.63794	5.61952	5.63611	5.63928	5.61521	5.63826	5.61881	5.63611	5.63585	5.62404	5.63555	5.62255	5.63403	5.62979	5.63166	5.62469	5.62937
212	1976	5.94861	4.69119	5.62356	5.42933	5.65089	5.70102	5.88172	5.78525	5.83973	5.79192	5.81034	5.84877	5.83995	5.89596	5.89845	5.90591	5.9011	5.92315	5.90647	5.92092	5.89464	5.93174	5.8949	5.92859	5.90245	5.89936	5.93331	5.91322	5.90099	5.9214	5.93298	5.94077	5.92259	5.93921	5.94209	5.91858	5.94239	5.92184	5.9378	5.93793	5.9268	5.93531	5.92452	5.93697	5.93272	5.93355	5.92869	5.9322
213	1977	6.08499	4.79258	5.72898	5.54807	5.7977	5.83028	6.01422	5.92004	5.9737	5.92301	5.95346	5.98826	5.97092	6.03047	6.03247	6.0403	6.03379	6.05614	6.04075	6.05276	6.03181	6.06249	6.02948	6.06285	6.04034	6.03427	6.06833	6.05054	6.03639	6.0575	6.06762	6.07624	6.0581	6.07467	6.07881	6.05397	6.07835	6.05731	6.07441	6.07357	6.06231	6.07308	6.06159	6.07225	6.06971	6.0712	6.0643	6.06812
214	1978	6.26437	4.93168	5.86719	5.70902	5.96985	6.0183	6.19246	6.09933	6.15097	6.09686	6.12607	6.16304	6.14677	6.20927	6.20373	6.22013	6.20929	6.23342	6.21635	6.23298	6.20992	6.23873	6.20698	6.24343	6.21803	6.2132	6.24504	6.2274	6.21155	6.23638	6.24565	6.25483	6.23658	6.25365	6.25802	6.23484	6.25726	6.23575	6.25216	6.24732	6.24034	6.25285	6.24268	6.25136	6.24875	6.25121	6.24221	6.2477
215	1979	6.37671	5.041	5.97084	5.81677	6.07161	6.11659	6.30122	6.20081	6.25618	6.20784	6.23199	6.27157	6.25627	6.31703	6.31112	6.33204	6.3208	6.34035	6.32563	6.33905	6.32138	6.35075	6.31888	6.35623	6.32567	6.32688	6.35611	6.33856	6.32331	6.34652	6.35585	6.36673	6.3487	6.36501	6.36926	6.34662	6.36903	6.34785	6.36674	6.36428	6.35322	6.3623	6.35355	6.36284	6.35998	6.35756	6.35517	6.35952
216	1980	6.31121	5.0239	5.91304	5.72925	6.01098	6.05333	6.23149	6.15318	6.19035	6.13572	6.17309	6.20574	6.18476	6.24892	6.23812	6.2783	6.25102	6.2744	6.26051	6.26502	6.25283	6.28532	6.25112	6.29068	6.263	6.2608	6.28852	6.27441	6.25766	6.28155	6.28647	6.3003	6.28211	6.29888	6.30356	6.28007	6.30249	6.28122	6.30116	6.29308	6.28754	6.29883	6.29164	6.29732	6.29701	6.29264	6.29013	6.29474
217	1981	6.18686	4.95041	5.79309	5.616	5.90069	5.9339	6.10079	6.03387	6.06961	6.01475	6.06255	6.08443	6.07524	6.11669	6.10941	6.15615	6.12405	6.14871	6.14034	6.13902	6.13061	6.15949	6.12797	6.16525	6.14207	6.13701	6.16651	6.15314	6.1329	6.15903	6.16181	6.17654	6.15833	6.17297	6.17843	6.15564	6.17752	6.15744	6.17683	6.17421	6.16326	6.17816	6.16792	6.17318	6.17162	6.1689	6.165	6.17273
218	1982	6.29441	5.12029	5.86578	5.71276	6.01719	6.04948	6.20549	6.14478	6.1813	6.11907	6.17489	6.19427	6.17951	6.21786	6.21143	6.25687	6.23057	6.25565	6.24779	6.25131	6.23747	6.26559	6.23442	6.27088	6.25797	6.24504	6.27398	6.26245	6.2411	6.2662	6.26897	6.28413	6.26534	6.279	6.28604	6.2625	6.28426	6.26444	6.28437	6.28371	6.27074	6.28612	6.27741	6.28035	6.27979	6.27656	6.26988	6.27975
219	1983	6.37752	5.19414	5.92561	5.78764	6.10143	6.1371	6.28128	6.22864	6.26608	6.19972	6.26185	6.2797	6.26261	6.29784	6.30174	6.3368	6.31617	6.3363	6.33237	6.33362	6.322	6.34881	6.31672	6.35301	6.34003	6.3281	6.35501	6.3499	6.3229	6.34882	6.35216	6.36603	6.34806	6.36197	6.36714	6.34336	6.3666	6.34713	6.36791	6.36319	6.35324	6.36702	6.36162	6.36257	6.36342	6.36122	6.35294	6.36383
220	1984	6.56208	5.34258	6.07018	5.96697	6.28009	6.30633	6.46329	6.41768	6.44604	6.38274	6.45095	6.46257	6.44405	6.47594	6.48655	6.52116	6.49757	6.51731	6.51634	6.51964	6.50813	6.53139	6.50079	6.53618	6.52276	6.511	6.53912	6.53343	6.51055	6.53303	6.5367	6.54965	6.53237	6.5447	6.55259	6.52533	6.55047	6.53142	6.54949	6.54272	6.53733	6.55123	6.54644	6.54672	6.54729	6.54314	6.53833	6.5482
221	1985	6.76534	5.54145	6.23266	6.12351	6.48038	6.51633	6.6567	6.61261	6.65026	6.57193	6.65554	6.66464	6.64403	6.67695	6.68688	6.72169	6.69957	6.71663	6.71624	6.71829	6.71078	6.73216	6.69923	6.73651	6.72523	6.71496	6.74244	6.73696	6.71242	6.73791	6.73777	6.75218	6.7333	6.74793	6.75543	6.72597	6.75257	6.73228	6.75179	6.74553	6.74189	6.75328	6.74832	6.74903	6.75051	6.74634	6.74099	6.74895
222	1986	6.8552	5.63035	6.29509	6.21174	6.56932	6.60622	6.73871	6.70003	6.74476	6.66132	6.74951	6.75608	6.73188	6.76499	6.77508	6.81494	6.78978	6.80535	6.80137	6.79936	6.80359	6.82186	6.78895	6.82365	6.8159	6.80447	6.82971	6.82726	6.80017	6.82678	6.82539	6.84177	6.82311	6.8349	6.84426	6.8124	6.84181	6.82206	6.84237	6.83444	6.83248	6.84231	6.83828	6.8393	6.84054	6.83523	6.83032	6.83913
223	1987	7.04301	5.76549	6.44501	6.4022	6.76123	6.79668	6.91858	6.88699	6.9254	6.84996	6.93942	6.93927	6.91644	6.9533	6.95944	6.99972	6.97318	6.99035	6.98684	6.99103	6.99129	7.0092	6.97708	7.00795	7.00167	6.99288	7.0165	7.01501	6.98525	7.01166	7.01281	7.02764	7.01105	7.02264	7.03185	6.99508	7.02855	7.01001	7.03006	7.02011	7.02005	7.02877	7.02672	7.02593	7.02735	7.0269	7.0181	7.02708
224	1988	7.28472	5.95132	6.64396	6.6268	7.00388	7.01577	7.15037	7.12908	7.16038	7.08654	7.18252	7.17939	7.16348	7.19119	7.20125	7.23693	7.21352	7.22405	7.22808	7.22953	7.23083	7.2485	7.21707	7.25068	7.24499	7.23543	7.25421	7.2575	7.2268	7.25159	7.25313	7.26666	7.25192	7.26444	7.27302	7.22992	7.269	7.25085	7.2716	7.26188	7.26342	7.2664	7.26905	7.26642	7.27028	7.26551	7.261	7.26968
225	1989	7.38064	6.0302	6.7292	6.73746	7.10532	7.1018	7.23291	7.22192	7.25433	7.18694	7.27345	7.27018	7.26542	7.28764	7.28224	7.32876	7.30491	7.31617	7.32275	7.32513	7.31927	7.34471	7.31457	7.3431	7.33652	7.33362	7.34743	7.3515	7.32235	7.34871	7.35101	7.35941	7.34859	7.36102	7.36697	7.32249	7.36418	7.34753	7.36585	7.35886	7.35992	7.36093	7.36549	7.36066	7.36599	7.36915	7.35704	7.36732
226	1990	7.51448	6.11484	6.85379	6.82527	7.22727	7.19833	7.35655	7.3506	7.38836	7.32184	7.4051	7.39494	7.41171	7.42907	7.42795	7.45738	7.43849	7.44695	7.45801	7.46386	7.45138	7.47347	7.43773	7.47313	7.47016	7.46967	7.48161	7.48165	7.46828	7.48389	7.48123	7.49049	7.48448	7.49395	7.4994	7.48108	7.49597	7.48618	7.50037	7.49354	7.49443	7.50109	7.49883	7.49171	7.49753	7.50388	7.49355	7.49987
227	1991	7.70498	6.31882	7.01229	7.05106	7.42818	7.38564	7.53683	7.53888	7.58148	7.53234	7.58863	7.58556	7.60296	7.61599	7.61488	7.64331	7.6286	7.63346	7.64569	7.632	7.63922	7.65568	7.63081	7.66186	7.65837	7.66434	7.66933	7.67131	7.66694	7.67291	7.67358	7.67858	7.67421	7.68388	7.68677	7.67299	7.68656	7.6786	7.68951	7.68347	7.68593	7.69265	7.68923	7.68222	7.68704	7.69354	7.68827	7.68747
228	1992	7.42953	6.01504	6.70541	6.89523	7.16591	7.10755	7.25043	7.26766	7.30206	7.26876	7.31613	7.31004	7.33	7.34728	7.33871	7.36759	7.35177	7.35251	7.36993	7.35173	7.36135	7.37397	7.36219	7.38479	7.38296	7.39006	7.39156	7.39609	7.39376	7.39644	7.40072	7.40057	7.39924	7.40771	7.40962	7.40143	7.40988	7.40533	7.41377	7.40773	7.4125	7.41346	7.41385	7.40634	7.4131	7.4169	7.41397	7.4136
229	1993	7.4891	6.04711	6.71514	6.98161	7.22812	7.16905	7.30403	7.33112	7.36153	7.34985	7.38136	7.37169	7.38938	7.40166	7.39683	7.42481	7.41016	7.40126	7.42678	7.40359	7.42327	7.42912	7.42922	7.44243	7.44248	7.45126	7.44757	7.45596	7.45558	7.45696	7.45527	7.45602	7.45755	7.46392	7.46543	7.46321	7.46804	7.46825	7.47121	7.46674	7.47173	7.47187	7.47341	7.46609	7.47255	7.47687	7.47336	7.47256
230	1994	7.5246	6.05706	6.70302	7.07662	7.26815	7.18956	7.32887	7.36763	7.39293	7.41017	7.41803	7.40872	7.42623	7.43218	7.42865	7.45267	7.44435	7.43064	7.45924	7.44068	7.45536	7.46377	7.47388	7.4789	7.47782	7.48847	7.48151	7.49053	7.49131	7.49124	7.48924	7.48789	7.49513	7.50152	7.49997	7.50093	7.50166	7.50757	7.50478	7.50108	7.50768	7.50519	7.50823	7.501	7.50795	7.51506	7.50929	7.50695
231	1995	7.64301	6.15859	6.75189	7.2028	7.38668	7.3046	7.43495	7.48831	7.50793	7.53661	7.53463	7.52065	7.544	7.54431	7.55251	7.56901	7.55966	7.54094	7.57326	7.57895	7.57003	7.58118	7.59437	7.59364	7.5958	7.60709	7.5978	7.60863	7.60834	7.60814	7.60675	7.60026	7.61499	7.61711	7.61191	7.62083	7.62019	7.62735	7.6239	7.61709	7.62617	7.62279	7.62681	7.61927	7.62553	7.63389	7.62726	7.6262
232	1996	7.8151	6.27937	6.88488	7.38384	7.55333	7.47344	7.58963	7.6545	7.67571	7.71919	7.70242	7.69439	7.7121	7.71585	7.72073	7.74032	7.72985	7.70551	7.73836	7.74462	7.74556	7.74549	7.77047	7.76065	7.76539	7.77827	7.76769	7.77976	7.7796	7.77832	7.78171	7.76769	7.7863	7.78957	7.78429	7.79555	7.78957	7.79921	7.79524	7.78869	7.79784	7.79619	7.79783	7.79078	7.7967	7.80506	7.79924	7.79468
233	1997	7.82014	6.26345	6.88822	7.41753	7.56598	7.48032	7.58544	7.6666	7.67691	7.72728	7.70937	7.69786	7.71987	7.71494	7.71953	7.74724	7.73259	7.70339	7.73919	7.76124	7.74718	7.74352	7.77768	7.76228	7.77237	7.78446	7.76912	7.7863	7.7871	7.78257	7.78371	7.77127	7.79104	7.7908	7.78717	7.80236	7.79454	7.80411	7.80019	7.79639	7.80327	7.80156	7.80425	7.79453	7.80179	7.80895	7.80489	7.80228
234	1998	7.79584	6.22623	6.90449	7.39787	7.54386	7.46685	7.55623	7.64087	7.6502	7.70617	7.67983	7.67028	7.70328	7.69286	7.68985	7.71233	7.7045	7.69662	7.7117	7.73928	7.72051	7.7369	7.75476	7.73797	7.74777	7.76164	7.7419	7.7603	7.76649	7.75778	7.75032	7.75238	7.7635	7.76269	7.76466	7.7798	7.76944	7.78018	7.77382	7.76674	7.77908	7.77616	7.77982	7.76892	7.77759	7.78554	7.7813	7.77914
235	1999	7.85079	6.25955	6.96156	7.4452	7.60635	7.51181	7.59106	7.69769	7.7008	7.7694	7.7358	7.724	7.76095	7.74849	7.74421	7.74718	7.75689	7.74208	7.76447	7.78911	7.76905	7.78421	7.81669	7.79407	7.80419	7.81896	7.79475	7.81675	7.82601	7.81059	7.80369	7.80544	7.81756	7.81681	7.82123	7.83329	7.82366	7.83578	7.82963	7.82577	7.83389	7.83123	7.83555	7.82405	7.8329	7.83998	7.83813	7.83479
236	2000	8.0048	6.36777	7.09069	7.60331	7.75923	7.65959	7.73776	7.84991	7.84864	7.92692	7.8913	7.87695	7.91819	7.90156	7.8967	7.90402	7.90922	7.88323	7.91631	7.92392	7.91985	7.93226	7.9642	7.94208	7.95789	7.97012	7.94423	7.97021	7.97875	7.96595	7.96335	7.95821	7.97178	7.9665	7.97027	7.98592	7.97603	7.98982	7.97429	7.98093	7.9888	7.98523	7.98988	7.97669	7.98674	7.98329	7.99244	7.98999
237	2001	8.046	6.43562	7.11092	7.63456	7.7959	7.70479	7.77512	7.88874	7.89181	7.96315	7.93125	7.9181	7.9604	7.9446	7.93391	7.93821	7.94838	7.92358	7.95512	7.96506	7.96054	7.9648	8.00699	7.98773	7.99775	8.01135	7.98486	8.01159	8.01861	8.00943	7.99906	7.9962	8.01254	8.01208	8.00917	8.02644	8.01676	8.031	8.01855	8.02313	8.02956	8.02292	8.03082	8.01724	8.02687	8.02233	8.03262	8.03075
238	2002	8.3037	6.6818	7.27137	7.89554	8.05812	7.9545	8.02454	8.15078	8.1479	8.223	8.19031	8.17372	8.22007	8.20644	8.19126	8.19513	8.20484	8.17716	8.21433	8.21481	8.21271	8.21981	8.25981	8.24339	8.25563	8.26989	8.23946	8.26907	8.27593	8.26975	8.25109	8.25128	8.2689	8.26937	8.26649	8.28497	8.27289	8.28867	8.28086	8.2793	8.28754	8.28014	8.28826	8.27504	8.28407	8.27796	8.29107	8.28855
239	2003	8.6427	7.00734	7.42755	8.22638	8.39683	8.29127	8.35356	8.48665	8.48244	8.55891	8.52745	8.50782	8.55553	8.53239	8.52322	8.52971	8.54179	8.5165	8.55604	8.55359	8.55056	8.55628	8.59391	8.57816	8.59369	8.60793	8.57675	8.60769	8.61396	8.60596	8.59045	8.58723	8.60833	8.60273	8.59978	8.62356	8.61063	8.62728	8.61387	8.61785	8.62578	8.61792	8.6271	8.61293	8.62153	8.61541	8.62891	8.62616
240	2004	9.0129	7.34597	7.61391	8.59519	8.77082	8.66277	8.70579	8.85645	8.85305	8.92819	8.89738	8.87654	8.92443	8.89033	8.89312	8.89224	8.90831	8.88228	8.92183	8.90521	8.91615	8.92015	8.96146	8.94618	8.9634	8.97793	8.9446	8.97775	8.98444	8.97004	8.97162	8.95326	8.97875	8.97219	8.96604	8.99333	8.97743	8.9965	8.98239	8.98892	8.99639	8.98189	8.99749	8.983	8.9917	8.98597	8.99937	8.99787
241	2005	9.2225	7.54895	7.6474	8.80018	8.98604	8.87041	8.89888	9.06695	9.06518	9.13704	9.10612	9.08604	9.1343	9.10898	9.09586	9.09599	9.11701	9.09713	9.12914	9.11446	9.12166	9.12879	9.16728	9.15039	9.17407	9.1882	9.15268	9.1882	9.19447	9.17844	9.17779	9.16127	9.19068	9.17746	9.17289	9.20205	9.18572	9.20575	9.19126	9.19344	9.20596	9.19166	9.2078	9.19141	9.20089	9.19364	9.20867	9.20845
242	2006	9.455	7.80351	7.71435	9.0166	9.21537	9.10925	9.11125	9.30011	9.29917	9.36421	9.34156	9.31987	9.36301	9.33311	9.32493	9.3175	9.34783	9.32792	9.36167	9.33729	9.35659	9.36045	9.39451	9.37813	9.40787	9.42049	9.38705	9.42118	9.42632	9.40734	9.41129	9.39285	9.42242	9.40696	9.40617	9.43421	9.41577	9.43749	9.42177	9.42765	9.43865	9.4282	9.44035	9.4243	9.43401	9.42831	9.44084	9.43878
243	2007	9.6759	8.00329	7.80315	9.23804	9.44354	9.32041	9.30529	9.52327	9.51372	9.5841	9.56541	9.5428	9.5841	9.54904	9.54495	9.5358	9.56677	9.54125	9.57849	9.57041	9.57535	9.57304	9.61368	9.59055	9.6288	9.64089	9.60119	9.64301	9.6463	9.62834	9.63498	9.61292	9.64339	9.62516	9.626	9.65857	9.63337	9.65855	9.63953	9.64631	9.65988	9.65912	9.66145	9.64462	9.65563	9.65017	9.66069	9.66099
244	2008	9.8235	8.2049	7.81062	9.3768	9.59023	9.48728	9.42433	9.67481	9.66641	9.73465	9.71505	9.69352	9.73339	9.6885	9.68895	9.67751	9.71312	9.68546	9.71969	9.7055	9.73163	9.70954	9.76097	9.73908	9.77561	9.78995	9.75252	9.79069	9.7947	9.77216	9.77746	9.76124	9.78992	9.7702	9.76823	9.80431	9.7811	9.80557	9.78148	9.79374	9.8078	9.79835	9.80962	9.79317	9.80342	9.79763	9.80874	9.80952
245	2009	9.6611	8.16245	7.54352	9.24386	9.44544	9.34378	9.22101	9.52619	9.51302	9.58542	9.55705	9.54575	9.57469	9.52402	9.53121	9.51184	9.54989	9.52279	9.56282	9.53396	9.57998	9.53908	9.59992	9.57503	9.61466	9.62966	9.59371	9.63169	9.63762	9.61226	9.61482	9.5947	9.6321	9.60578	9.60735	9.64648	9.61874	9.64434	9.61593	9.6283	9.64697	9.63286	9.64821	9.63262	9.64268	9.64066	9.64861	9.64778
246	2010	10.0867	8.53155	7.76668	9.6465	9.85944	9.75535	9.6286	9.94696	9.93508	10.0064	9.98052	9.96834	9.99538	9.95926	9.96012	9.93276	9.97603	9.93223	9.97446	9.9454	10.0093	9.96984	10.0182	10.0009	10.037	10.0546	10.0144	10.0554	10.0637	10.0357	10.0365	10.0167	10.0585	10.0324	10.0276	10.073	10.0446	10.0695	10.0441	10.0545	10.0725	10.0564	10.0722	10.0601	10.067	10.056	10.0736	10.0733
247	2011	10.367	8.84807	7.8047	9.91257	10.1461	10.022	9.88497	10.2388	10.2123	10.2829	10.2681	10.2518	10.2758	10.2376	10.2348	10.2089	10.2567	10.2064	10.2496	10.2312	10.2893	10.2283	10.3013	10.2743	10.3208	10.3356	10.2942	10.3383	10.3425	10.315	10.3205	10.2977	10.3362	10.3094	10.3076	10.3571	10.3248	10.35	10.3208	10.3343	10.3532	10.3301	10.3536	10.3412	10.3479	10.3316	10.3525	10.3549
248	2012	10.5033	9.03831	7.87392	10.0448	10.2811	10.147	9.97343	10.3701	10.3478	10.4203	10.4041	10.3937	10.4142	10.3774	10.3678	10.3393	10.3923	10.344	10.3777	10.3496	10.4272	10.3596	10.4359	10.4067	10.458	10.473	10.4335	10.4753	10.4797	10.4509	10.4511	10.4295	10.4719	10.4458	10.4444	10.493	10.4613	10.4861	10.4439	10.4683	10.4905	10.4616	10.4905	10.4783	10.4849	10.4715	10.4901	10.4924
249	2013	10.5515	9.04662	7.87782	10.1096	10.3247	10.1927	9.99657	10.4211	10.3942	10.4704	10.4518	10.4512	10.4636	10.4271	10.4178	10.3854	10.4429	10.3901	10.4164	10.4039	10.4826	10.4393	10.4821	10.4573	10.5063	10.5225	10.4812	10.5235	10.5306	10.4996	10.5016	10.4735	10.5217	10.4951	10.4876	10.5442	10.5105	10.5341	10.491	10.5154	10.5396	10.5069	10.5392	10.5292	10.5331	10.5182	10.5399	10.5402
250	2014	10.6078	9.08988	7.92759	10.165	10.3915	10.2631	10.0116	10.488	10.4506	10.5375	10.5168	10.5129	10.5232	10.4763	10.4765	10.4326	10.5003	10.4477	10.4648	10.4435	10.5382	10.4941	10.5317	10.5091	10.5645	10.5794	10.5365	10.5814	10.5867	10.5563	10.5576	10.5314	10.5796	10.5472	10.542	10.5995	10.5657	10.5906	10.5489	10.5687	10.5958	10.5627	10.596	10.5864	10.5903	10.5729	10.5955	10.5976
251	2015	10.5851	9.10791	7.94231	10.1422	10.3679	10.2514	9.97008	10.4698	10.4279	10.524	10.4928	10.4868	10.4996	10.4618	10.4536	10.4102	10.4755	10.4226	10.4499	10.409	10.5109	10.4467	10.5063	10.481	10.5397	10.5565	10.5149	10.5575	10.5639	10.5326	10.5385	10.5078	10.5573	10.5252	10.5214	10.5784	10.5387	10.5691	10.5197	10.5439	10.5724	10.5399	10.5733	10.5646	10.567	10.5541	10.5719	10.5755
252	2016	10.5744	9.12998	7.96725	10.1327	10.3559	10.246	9.92144	10.4655	10.4204	10.5105	10.4814	10.4771	10.4859	10.4488	10.4421	10.3975	10.4622	10.4057	10.4438	10.42	10.5032	10.4193	10.4957	10.4649	10.529	10.5453	10.502	10.5471	10.5537	10.5223	10.5298	10.4975	10.5457	10.5106	10.507	10.5669	10.5189	10.5579	10.512	10.5338	10.5614	10.5213	10.5627	10.5549	10.5561	10.5425	10.562	10.5643
253	2017	10.6897	9.25582	8.02844	10.2404	10.475	10.3655	10.0191	10.5837	10.5333	10.6287	10.5953	10.5937	10.5976	10.5624	10.5638	10.4919	10.5764	10.5203	10.5574	10.5315	10.6147	10.5447	10.6056	10.5736	10.6448	10.6608	10.6153	10.6625	10.6684	10.6385	10.6496	10.6115	10.6598	10.6214	10.6217	10.6837	10.6262	10.6731	10.6387	10.6478	10.6761	10.6327	10.6781	10.6692	10.6707	10.6541	10.6767	10.6802
254	2018	10.8739	9.39335	8.15654	10.4123	10.6678	10.564	10.1667	10.7702	10.7139	10.8107	10.7835	10.7789	10.7818	10.7451	10.7508	10.6678	10.7604	10.7007	10.7466	10.7165	10.8003	10.7166	10.7867	10.7595	10.8302	10.8454	10.7994	10.8466	10.8529	10.8234	10.8386	10.7941	10.8428	10.8053	10.8059	10.8635	10.8064	10.8571	10.8225	10.8291	10.8604	10.8163	10.8625	10.8543	10.8557	10.8368	10.8621	10.8645
255	2019	10.8739	10.8739	10.8739	10.8739	10.8739	10.8739	10.8739	10.8739	10.8739	10.8739	10.8739	10.8739	10.8739	10.8739	10.8739	10.8739	10.8739	10.8739	10.8739	10.8739	10.8739	10.8739	10.8739	10.8739	10.8739	10.8739	10.8739	10.8739	10.8739	10.8739	10.8739	10.8739	10.8739	10.8739	10.8739	10.8739	10.8739	10.8739	10.8739	10.8739	10.8739	10.8739	10.8739	10.8739	10.8739	10.8739	10.8739	10.8739
[truncated: 170 more columns]

## Sheet: Tabelle2
Country	Country	MtC	1950	1951	1952	1953	1954	1955	1956	1957	1958	1959	1960	1961	1962	1963	1964	1965	1966	1967	1968	1969	1970	1971	1972	1973	1974	1975	1976	1977	1978	1979	1980	1981	1982	1983	1984	1985	1986	1987	1988	1989	1990	1991	1992	1993	1994	1995	1996
UNITED STATES OF AMERICA	USA		692.124	712.983	694.618	711.175	677.689	742.828	778.631	772.001	748.069	770.471	788.161	785.308	814.411	850.443	887.761	924.725	971.392	1008	1044.84	1097.57	1180.54	1187.58	1244.12	1299.8	1253.54	1201.09	1257.41	1292.4	1332.69	1335.71	1287.31	1236.45	1174.12	1183.38	1219.5	1223.89	1224.85	1277.52	1333.4	1350.44	1399.65	1386.16	1414.49	1441.99	1467.53	1484.42	1535.73
CHINA (MAINLAND)	China		21.465	27.763	34.995	36.6	44.011	52.099	59.047	69.964	143.39	196.548	212.604	150.371	119.908	118.864	118.915	129.553	142.32	117.965	127.676	157.19	210.198	238.542	253.519	263.55	268.855	311.709	325.045	356.005	397.177	405.871	398.168	393.772	428.621	451.913	491.899	532.689	560.11	597.995	640.765	651.442	660.696	692.694	724.124	773.962	821.573	891.118	930.226
RUSSIAN FEDERATION	Russian Federation		87.2854	102.479	117.673	132.866	148.06	163.254	178.447	193.641	208.835	232.231	241.774	249.325	261.669	280.627	298.45	316.59	334.328	349.59	359.414	374.313	393.704	417.819	439.628	458.219	475.692	500.042	519.277	536.92	555.351	559.939	581.96	570.866	581.642	589.885	595.113	641.833	643.461	640.806	657.922	643.185	689.218	653.924	534.296	507.494	447.98	440.21	431.267
GERMANY	Germany		139.392	157.457	166.769	170.187	180.079	197.485	209.138	212.336	206.461	206.276	222.148	227.849	241.039	258.051	264.443	262.037	259.668	255.521	268.775	287.118	280.028	283.088	284.247	296.325	290.045	273.593	297.717	287.283	294.522	305.099	300.235	286.167	277.218	276.091	281.997	284.965	285.88	281.778	280.845	275.322	287.213	276.801	263.616	260.981	256.449	256.326	261.77
JAPAN	Japan		27.991	33.702	35.599	39.794	38.913	38.733	43.856	51.345	49.46	52.571	63.4551	77.1798	79.9302	88.656	97.9506	105.478	114.423	133.545	153.36	178.279	209.597	217.397	232.579	249.527	249.538	237.039	247.583	254.705	246.068	260.118	257.879	252.958	244.926	240.423	255.751	249.018	248.98	246.324	268.959	278.844	316.155	319.341	321.981	320.046	335.035	338.408	341.667
INDIA	India		18.178	19.029	20.058	20.436	21.49	23.319	24.142	27.084	28.309	27.7282	30.4284	32.9099	36.2377	38.9331	38.124	42.0087	43.5569	43.6077	47.5713	48.4837	49.6599	52.4567	55.4824	57.1378	58.9863	64.0041	66.8847	70.768	71.9095	75.4975	79.7163	86.0698	88.9135	96.2429	98.7971	108.643	116.49	124.424	134.358	147.731	157.937	168.15	179.099	185.074	195.721	208.06	225.476
UNITED KINGDOM	United Kingdom		136.583	148.7	144.221	147.404	150.849	157.381	156.662	155.676	151.729	149.183	159.394	160.648	161.826	164.679	165.902	169.79	168.689	161.588	165.526	171.502	178.105	180.237	176.863	180.016	168.445	164.642	163.353	164.946	165.042	175.904	158.034	152.99	149.629	148.877	144.407	152.737	155.173	156.023	155.648	158.727	163.886	166.097	161.87	157.981	156.962	154.697	160.602
CANADA	Canada		42.07	44.402	43.51	43.838	44.482	46.258	51.807	49.9	49.721	50.3497	52.5972	52.9478	56.4931	57.563	64.8411	68.7546	70.7081	76.866	82.7678	83.8207	93.1161	96.1477	103.926	104.057	106.333	108.29	108.883	111.291	113.402	120.537	120.856	117.248	113.108	111.438	116.048	115.086	110.442	117.61	124.347	126.315	126.124	123.497	127.467	127.567	131.669	135.076	139.393
UKRAINE	Ukraine		26.5703	31.1397	35.7091	40.2785	44.8479	49.4172	53.9866	58.556	63.1254	70.0978	72.9887	75.276	79.0113	84.735	90.1169	95.6016	100.965	105.577	108.546	113.043	118.9	126.163	132.728	138.323	143.578	150.906	156.684	161.982	167.513	168.871	175.489	172.114	175.339	177.796	179.345	193.413	193.877	193.052	198.182	193.706	192.639	172.636	160.77	139.247	114.429	106.404	95.9085
FRANCE (INCLUDING MONACO)	France		55.215	62.435	61.96	58.566	61.788	65.236	73.293	75.75	72.655	71.5856	74.0614	76.794	81.5684	91.219	94.3062	96.1003	94.8703	101.658	105.104	112.926	119.985	126.4	131.438	141.251	136.454	122.202	138.268	131.525	138.303	144.727	138.123	124.315	119.511	115.673	111.129	109.804	105.697	103.585	102.205	107.189	109.382	116.346	113.402	107.746	106.57	108.381	112.68
ITALY (INCLUDING SAN MARINO)	Italy		11.313	13.331	13.823	15.291	17.733	20.008	22.795	23.779	23.922	25.6781	29.8043	33.9451	39.9168	44.9116	47.9588	51.7272	58.4013	63.9	68.0055	73.5974	80.8855	84.8933	89.5845	96.4381	97.7765	93.0821	99.8351	96.7298	101.33	105.146	105.468	102.429	100.131	97.8192	99.5092	100.705	99.1234	103.739	105.339	110.465	119.544	119.416	119.495	117.407	115.879	122.362	120.709
POLAND	Poland		30.604	33.336	34.949	37.993	40.279	42.09	45.424	48.772	48.241	51.7631	54.4697	56.5599	59.1177	63.0455	66.2883	67.4074	68.8949	70.6947	75.2732	80.067	83.0086	85.3932	89.9308	91.5911	94.4969	102.287	108.657	114.071	117.596	120.444	126.454	111.626	114.894	114.908	118.031	121.318	123.321	126.565	121.242	115.222	102.769	102.018	99.53	99.7191	98.367	99.0069	103.004
SOUTH AFRICA	South Africa		16.659	17.781	19.348	19.379	20.171	22.638	23.819	24.471	26.273	25.7841	26.704	27.8711	28.8401	29.9468	32.6272	34.9727	34.9986	36.5066	37.6511	39.0674	40.8347	45.9621	46.8223	47.3138	48.1857	50.4943	52.6519	54.5161	55.1012	59.6845	62.2864	70.1691	76.5446	79.6753	86.142	88.398	90.2092	89.7096	93.5307	93.0002	85.4182	88.9926	82.2511	87.4427	92.4194	98.7013	99.2558
MEXICO	Mexico		8.328	9.524	10.158	10.02	9.901	10.827	11.502	13.452	14.743	15.908	17.2086	17.8057	17.3973	18.0928	20.2511	20.5153	22.0646	24.5648	25.6242	27.8865	31.1001	34.4405	36.1024	39.3209	42.2343	44.805	50.1566	52.5208	60.6352	65.5897	73.0943	77.4556	82.9722	75.7823	75.5365	78.4692	80.1189	83.5683	83.4742	98.4048	86.529	90.1018	90.8243	92.2673	95.9411	90.5013	94.3685
ISLAMIC REPUBLIC OF IRAN	Iran		1.34967	1.887	1.117	1.045	0.285	4.316	6.225	5.95	6.886	6.97836	10.1961	9.96418	10.2152	11.2732	12.9692	14.6611	17.4955	18.5265	22.4699	22.6634	25.0512	27.7369	28.9343	35.3371	39.24	37.9951	42.7017	44.6867	44.2423	44.6706	32.9052	30.7119	37.5314	40.7242	40.9232	43.6537	40.2664	43.288	47.7914	51.8826	57.1065	61.6687	61.9424	64.2949	71.9215	74.0031	74.7838
AUSTRALIA	Australia		14.941	16.112	16.432	16.223	18.517	19.291	19.934	20.34	21.184	22.8461	24.0499	24.7008	25.8798	27.5476	29.715	32.9838	32.8109	35.2468	36.7077	38.7892	40.251	41.6565	42.9409	46.6232	46.9949	47.9569	47.5095	51.2022	55.0819	55.9142	60.1886	62.8091	63.8342	61.3496	64.5091	65.7718	65.4264	69.8281	71.2005	75.733	75.9893	76.3845	77.7599	78.9397	80.2443	83.3543	85.2515
REPUBLIC OF KOREA	South Korea		0.596	0.798	0.945	1.281	1.408	1.759	2.062	2.242	2.459	3.0626	3.42252	3.94342	4.71113	5.75414	6.05763	6.81722	8.18292	9.58331	10.1521	11.5907	14.6606	15.9797	16.4512	19.9323	20.6422	22.321	25.456	28.846	30.9503	36.3589	36.8146	38.1489	38.7509	41.2221	44.7731	48.7131	49.8558	52.6583	60.6735	64.4782	67.5323	71.517	77.0181	87.8378	93.9584	102.072	109.588
BRAZIL	Brazil		5.367	5.913	6.807	6.885	8.102	9.289	9.995	9.822	10.663	10.6488	12.7871	13.4128	14.6374	15.1613	15.4658	15.3738	17.525	18.0348	21.0893	22.962	25.5269	27.9361	31.1174	36.0316	39.0085	41.0791	42.1392	44.2354	48.0162	51.0794	50.6982	46.5251	46.6128	45.1493	45.7439	49.1094	53.8281	56.165	56.6493	57.8913	56.4741	59.287	59.6024	62.318	65.3577	69.7553	76.7453
SAUDI ARABIA	Saudi Arabia		1.403	-0.095	-0.047	0.13	0.338	0.577	0.445	0.573	0.917	0.505919	0.729903	0.973886	1.7058	1.89378	1.92172	1.15072	1.74872	6.95564	7.93644	9.62635	12.3503	16.3091	19.1817	25.9426	26.9383	22.724	27.6909	32.2244	31.3931	37.6649	46.1899	47.8448	43.0926	43.8959	42.4428	47.0575	55.8408	51.977	55.1986	55.5183	50.6237	72.9766	77.8041	85.5151	83.9174	64.0589	70.4868
SPAIN	Spain		9.019	9.041	10.266	10.629	10.846	10.996	11.559	13.71	15.255	14.2137	13.3367	14.6307	16.369	16.0325	17.5556	19.3833	21.1837	23.5791	26.4785	26.402	31.8686	35.0596	39.4968	42.2918	47.1249	49.4141	53.9699	53.1738	54.4524	55.3347	58.382	56.2488	56.9318	55.5225	53.9483	54.5663	51.6136	51.7215	53.8912	61.3768	63.1041	65.7623	68.1805	65.8284	69.2307	72.9849	69.5402
INDONESIA	Indonesia		2.683	2.563	3.472	3.57	4.025	5.689	5.953	6.117	6.061	6.51262	5.83657	7.09651	6.27044	6.21264	6.10651	6.73259	6.37963	6.69761	7.52255	9.10541	9.76839	10.6319	11.8194	13.4001	13.981	14.7196	16.8636	22.4936	25.6382	25.9654	25.8933	27.3737	28.8166	28.7074	30.6934	33.1872	33.3424	33.8098	36.2232	35.9373	41.0169	49.2964	55.5615	59.9788	60.8227	61.83	69.6149
KAZAKHSTAN	Kazakhstan		9.13558	10.7046	12.2736	13.8426	15.4117	16.9807	18.5497	20.1187	21.6877	24.0829	25.0748	25.8595	27.1415	29.1077	30.9563	32.8394	34.6809	36.2645	37.2839	38.8289	40.8405	43.3221	45.5624	47.4665	49.2513	51.7454	53.7101	55.5072	57.3857	57.8374	60.0907	58.8949	59.9883	60.7963	61.296	66.1159	66.2487	65.9264	67.6531	66.0778	76.7505	74.1651	67.3421	59.8772	50.7192	48.6374	44.6353
TURKEY	Turkey		2.59	2.78	2.859	3.539	3.667	3.718	3.92	4.36	4.378	4.69209	4.58475	4.73276	5.89644	6.17902	7.17876	7.46533	8.59873	9.13731	9.89779	10.5766	11.621	13.0017	14.6621	16.1872	16.629	17.8546	20.0217	22.14	20.9372	20.4798	20.5274	21.6119	23.529	24.5121	25.9024	28.8381	31.5552	35.0553	34.0415	37.5465	41.3506	43.1174	44.7386	46.6734	45.6968	49.3731	54.4547
NETHERLANDS	Netherlands		13.998	15.003	14.934	15.084	15.938	16.646	17.763	17.58	18.203	18.3182	20.043	20.6929	22.7298	24.8757	26.4128	27.4027	28.2635	29.1163	30.9622	31.6054	38.7018	38.3914	42.9846	45.1037	43.6641	41.6281	46.1602	44.6522	46.3409	51.0391	48.2074	44.7898	36.4321	37.4884	39.3212	40.1147	39.3053	41.3429	39.7388	44.1224	44.3191	46.6147	46.5694	46.6205	46.7798	47.2069	49.713
CZECH REPUBLIC	Czech Republic		14.8786	16.1308	17.3831	18.6354	19.8876	21.1399	22.3921	23.6444	24.8966	25.355	27.0419	29.3504	31.2776	32.9024	34.2422	33.365	33.1766	33.1073	34.6384	36.7726	42.1604	44.2222	44.6243	44.8011	45.3136	47.4074	49.2487	50.7182	51.1718	49.8297	50.4068	49.8516	49.3613	49.4229	51.088	50.3879	50.7306	50.125	49.2935	47.0285	44.8156	40.637	39.4703	37.8377	36.1289	35.9193	36.8348
TAIWAN	Taiwan		1.033	1.34	1.745	1.767	1.771	1.965	2.098	2.234	2.613	2.99982	3.24069	3.41934	3.86594	4.12353	4.6144	4.87031	5.31157	5.99616	6.5886	7.17549	7.84226	8.59044	9.79053	10.9843	10.7292	11.8605	15.2985	16.6529	19.333	20.6057	22.6854	20.3513	20.4296	22.5075	22.9639	22.9032	25.4943	26.5075	30.518	33.2129	32.8711	35.6485	37.9737	41.5316	43.0883	45.2097	47.415
BELGIUM	Belgium		20.801	24.418	22.784	22.487	23.404	25.119	26.419	26.339	23.936	24.1021	24.8112	25.2998	26.7517	28.8418	28.2626	28.7475	28.6836	29.3016	32.3247	33.7041	34.2496	33.1252	35.6544	37.8383	36.8315	33.2488	35.3925	34.4432	36.9681	38.1516	36.8004	33.7267	31.9604	27.6208	28.6483	28.3858	27.9388	27.9994	27.2227	29.1467	32.8355	33.6741	33.4355	33.1453	34.0657	34.3768	35.343
ROMANIA	Romania		5.3	6.143	7.27	8.361	9.146	10.041	11.132	12.538	13.593	13.8219	14.5726	15.2064	17.4162	18.9562	19.6608	21.462	22.9505	25.117	27.3142	30.4387	32.746	34.3017	36.0956	39.5101	41.1355	44.2157	47.6179	48.6017	52.8219	53.4051	53.5478	53.9657	53.3104	54.6169	51.5329	52.9222	55.0331	57.7597	57.9207	58.2968	46.2025	38.0377	35.773	33.5241	33.2864	34.6705	35.5065
ARGENTINA	Argentina		8.168	9.544	9.853	9.591	10.032	10.799	12.092	12.996	12.064	13.3594	13.3091	13.9538	14.6398	13.6552	15.1938	16.0494	17.2142	17.8701	18.8344	21.0832	22.5568	24.2487	24.5815	25.6485	26.0591	25.8859	27.2106	27.4853	27.9902	30.1902	29.6553	27.8301	28.2074	28.6962	29.0536	27.4378	28.4255	31.3533	33.1348	31.9381	30.5893	32.0703	33.0869	32.1445	33.3594	34.8703	36.78
VENEZUELA	Venezuela		10.447	12.932	13.85	13.062	13.975	16.309	17.744	18.993	14.864	17.7809	15.5614	14.1593	14.7533	15.3253	15.434	16.5747	15.5497	17.9455	17.8963	18.8136	20.3301	17.0579	17.0617	18.1312	20.4851	17.3991	15.6314	17.3717	18.7204	20.8645	24.7382	25.0523	25.437	25.357	25.3829	27.5727	29.8144	30.2023	31.5916	29.6318	33.2484	31.4008	28.815	33.834	35.3523	36.2649	33.3896
THAILAND	Thailand		0.261	0.298	0.349	0.449	0.56	0.648	0.715	0.798	0.824	0.90644	1.01242	1.13011	1.37194	1.51791	2.03883	2.03062	2.58336	3.31609	4.66039	3.96835	4.1901	5.24593	5.95128	6.66491	6.60768	6.65161	7.83739	8.75134	9.53793	9.98539	10.9051	10.3212	10.2717	11.4949	12.4333	13.1633	13.4343	15.3674	18.0685	21.2293	23.9949	26.4045	28.9559	33.0823	36.7103	42.75	47.415
UZBEKISTAN	Uzbekistan		4.42926	5.18988	5.95049	6.7111	7.47172	8.23233	8.99294	9.75356	10.5142	11.6743	12.1561	12.5369	13.1587	14.1114	15.0071	15.9202	16.8132	17.5808	18.0746	18.8231	19.7994	20.9962	22.0775	22.9963	23.8582	25.0638	26.0136	26.8829	27.7934	28.0122	29.0999	28.5324	29.0637	29.4618	29.7122	32.0405	32.0968	31.9573	32.8044	32.053	30.0051	30.7739	30.2905	31.5549	29.4705	28.0196	28.8062
EGYPT	Egypt		2.794	2.883	2.974	2.943	3.185	2.906	2.715	3.254	3.736	3.46803	4.37575	4.65773	5.06853	5.87523	6.95722	7.53533	7.24131	5.36297	6.24253	5.36702	5.90994	6.28068	6.95278	6.48501	7.1204	8.47705	9.40242	10.3207	10.7153	11.7057	12.3297	13.8927	15.4015	15.5514	17.3865	17.4146	20.3037	20.364	20.281	19.6246	20.5292	21.0957	21.8175	25.1849	23.0776	25.8975	25.537
MALAYSIA	Malaysia		0	0	0	0	0	0	0	0	0	0.868789	1.14668	1.27864	1.30364	1.5906	2.01949	2.28718	2.68406	2.76408	2.87397	2.49393	3.98086	4.54765	4.88554	4.77759	5.19777	5.30707	6.52226	6.17378	6.34834	7.45245	7.65077	8.42724	8.3629	10.3843	9.49619	9.91523	10.9447	11.1565	11.7	13.669	15.0866	18.2125	19.9129	23.6678	24.6245	31.0954	30.8132
DEMOCRATIC PEOPLE S REPUBLIC OF KOREA	North Korea		0.213	0.272	0.243	0.474	1.307	2.005	2.447	3.082	4.268	5.42187	6.49248	7.2125	8.37538	8.95921	9.72112	12.0694	12.9912	14.2991	16.176	17.4889	20.0536	29.3267	24.4282	26.5626	27.7324	29.3733	30.0303	31.0222	29.5341	30.0936	31.136	31.2213	31.9029	34.1602	36.7526	39.379	42.8044	47.9309	54.8057	58.1527	33.4061	31.9942	28.1011	25.8921	23.668	22.1779	19.5518
PAKISTAN	Pakistan		0.359066	0.639294	0.919523	1.19975	1.47998	1.76021	2.04044	2.32067	2.6009	2.70771	3.25503	3.37052	3.70357	4.2577	4.37745	4.59323	4.67406	4.96067	5.68826	5.51676	5.59618	5.30587	5.15913	5.46083	5.83717	6.32856	6.21958	6.63752	7.10987	7.67862	8.71494	9.34302	10.15	10.9231	11.615	12.7766	13.3894	14.4619	15.7225	16.462	18.5121	18.4164	19.6548	21.0635	22.931	22.8207	25.5288
BELARUS	Belarus		0	0	0	0	0	0	0	0	0	11.9763	12.4696	12.8597	13.497	14.4745	15.3936	16.33	17.2456	18.0328	18.5393	19.3073	20.3076	21.5487	22.6709	23.6275	24.5265	25.78	26.7688	27.6759	28.624	28.858	29.9902	29.4176	29.9703	30.3925	30.6585	33.0602	33.1408	32.9944	33.871	33.1091	28.2996	26.3775	24.1981	20.8461	17.0218	15.6592	15.8883
UNITED ARAB EMIRATES	United Arab Emirates		0	0	0	0	0	0	0	0	0	0.003	0.003	0.003	0.005	0.006	0.005	0.006	0.007	0.25	0.339	5.597	4.158	5.777	6.396	8.353	8.543	8.473	10.8125	10.5762	12.2144	9.97447	10.0501	10.0346	10.0308	9.61257	12.5971	13.5515	12.8357	12.9504	13.1265	14.7888	14.111	15.4673	15.7636	17.8945	19.8157	19.1083	19.8621
ALGERIA	Algeria		1.033	1.128	1.062	1.092	1.134	1.258	1.364	1.512	1.424	1.54395	1.67883	1.65282	1.54504	1.47903	1.54013	1.79818	2.29827	2.3012	2.47004	3.07395	4.10998	5.08994	7.72998	10.4469	8.69996	8.73395	10.6799	11.4206	17.0457	12.4306	18.1268	12.6479	10.6913	14.3297	19.3631	19.8169	20.7643	22.894	22.8461	21.7817	20.9434	21.508	21.8018	22.3642	23.5116	25.923	26.4154
HUNGARY	Hungary		5.02	6.056	7.427	8.671	9.283	9.746	9.052	10.494	10.712	11.4364	12.3713	13.3542	13.7861	15.346	17.0145	16.7124	16.8321	16.0401	16.6739	17.0192	19.0869	18.889	18.9286	19.9186	20.1993	20.5481	21.806	22.6733	24.0301	23.4939	23.6651	23.5976	23.6664	24.2835	24.7506	23.4571	22.7186	22.963	21.3032	20.7198	20.0505	19.046	17.0349	17.367	16.9142	16.837	17.2646
IRAQ	Iraq		0.45	0.663	0.535	0.69	0.832	1.119	1.746	1.63	1.82	1.99627	2.25332	2.37697	2.46202	2.56096	2.47379	5.26558	7.55352	5.01446	5.37546	6.16848	6.5185	7.86896	8.0569	8.355	8.436	9.03937	13.3012	11.9076	11.5156	14.4168	12.3794	8.70674	8.28997	10.4981	10.8545	12.0623	12.8902	14.2423	18.3208	19.7167	13.3889	12.3322	16.0724	17.2297	19.4021	20.2195	18.9095
SWEDEN	Sweden		7.823	9.128	9.424	8.886	9.417	10.673	11.841	10.604	11.485	11.5689	13.4199	13.3186	13.9936	15.0964	16.476	17.0748	19.7919	18.8127	21.1807	23.5756	25.1875	23.0647	23.1177	23.8236	21.7858	22.0416	24.0833	23.4009	21.6913	23.163	19.5727	18.9381	16.9916	15.9031	15.6411	17.0209	16.9243	16.2925	15.673	15.1533	15.652	15.7498	15.68	15.6914	16.3629	16.2026	17.277
GREECE	Greece		1.127	1.249	1.31	1.334	1.388	1.626	1.717	1.861	2.034	2.21641	2.56319	2.67697	2.76988	3.34047	3.60306	4.63946	5.08204	5.3232	6.0825	6.94166	6.58466	7.57355	8.59096	10.134	9.84216	10.5539	11.6417	12.7339	13.0125	13.8696	13.8887	13.6804	14.0579	14.9533	15.3614	16.3131	15.9044	17.0785	18.3	19.9863	22.769	22.7623	23.194	23.0067	23.5923	23.7388	24.3264
AUSTRIA	Austria		5.704	6.351	6.025	5.928	6.69	7.936	7.7	7.966	7.668	7.61733	8.40188	8.6856	9.24263	10.0844	10.6158	10.4095	10.701	10.894	11.544	12.183	13.8187	14.211	15.3033	16.3799	15.6372	14.7964	15.8855	15.2823	15.6188	16.7364	14.1992	15.2385	14.6196	14.1019	14.7967	14.8382	14.6642	15.6591	14.4483	14.6555	16.9554	17.9382	16.4312	16.549	16.6491	17.4851	18.4011
NIGERIA	Nigeria		0.616	0.46	0.595	0.665	0.702	0.736	0.822	0.869	1.016	0.972862	0.928814	1.1216	1.13946	1.45842	1.98327	3.20691	3.5189	3.50013	1.80837	3.30238	5.87335	8.80227	11.2957	13.5187	16.9857	12.9235	15.0627	13.784	13.1613	19.1555	18.5686	17.9614	17.8476	16.2951	18.9427	19.0054	19.976	16.1093	19.2198	11.4955	10.6051	11.4435	12.6269	12.2307	9.53432	9.12041	10.0404
BULGARIA	Bulgaria		2.047	2.229	2.574	2.89	3.11	3.301	3.54	3.928	4.266	5.35542	6.07825	7.08107	8.37992	9.38157	11.6862	12.628	13.2959	15.0403	16.2291	18.0971	16.696	17.5277	18.0346	18.7547	19.415	19.9023	19.914	20.6866	22.1635	21.5415	21.0837	21.8578	24.5208	24.58	23.7568	24.3508	24.8833	24.9108	23.7209	23.6032	20.9331	16.712	15.5596	15.7412	15.3066	15.7523	15.8592
DENMARK	Denmark		6.002	5.984	6.251	6.32	6.982	7.388	7.199	6.797	7.313	7.10547	8.11941	8.65226	10.0682	11.0993	11.7759	12.0888	13.6677	13.3806	14.5395	16.1961	16.9321	15.5594	16.2647	16.1632	15.0222	15.2141	16.4035	16.8715	16.6746	17.1882	16.4705	14.1301	14.6517	13.6919	13.8799	16.3932	16.077	15.924	15.0413	13.3209	14.6159	17.5135	15.9283	16.5414	17.65	16.8072	20.423
VIET NAM	Viet Nam		0	0	0	0	0	0	0	0	0	1.80258	2.04255	2.1775	2.54849	2.48646	3.21721	3.58895	5.23503	6.26697	6.44129	7.38418	7.68913	6.68816	6.28745	6.84316	5.20323	5.94423	3.79501	4.16239	4.20006	4.4346	4.58124	4.82824	5.00325	5.25527	4.76921	5.75012	5.66358	6.57641	6.27966	4.72872	5.78599	5.80321	5.8198	6.19831	7.10115	7.78479	9.28574
COLOMBIA	Colombia		2.047	2.229	2.357	2.938	2.627	3.261	3.44	3.727	3.816	4.3905	4.47339	4.96624	5.30008	5.79497	5.91783	6.23874	6.40671	6.73767	7.25239	7.64636	7.74292	8.26458	8.57674	9.1787	9.93298	9.77321	10.3656	10.7099	11.3358	12.0816	12.0563	12.0798	12.4671	13.4306	13.2919	13.1221	13.3063	13.6801	14.1969	14.4085	15.5289	15.4624	16.7835	17.2865	18.2289	16.0413	16.313
PERU	Philippines		1.24	1.303	1.416	1.505	1.702	1.672	1.723	1.822	2.013	1.9722	2.27212	2.37787	2.82094	3.13095	3.49968	3.81131	4.39522	4.96967	6.06517	6.23075	6.7553	7.51956	7.2078	8.59752	8.32214	8.8653	9.57048	10.0099	10.202	10.3796	10.0624	9.42364	9.50833	9.61765	8.41465	7.61439	7.9216	8.86893	10.2305	10.6186	11.2853	11.8644	13.1806	13.354	14.7717	16.3616	16.7177
SLOVAKIA	Slovakia		6.01007	6.30912	6.60817	6.90722	7.20627	7.50532	7.80436	8.10341	8.40246	8.09709	8.63581	9.373	9.98844	10.5071	10.935	10.655	10.5949	10.5729	11.0618	11.7433	13.4638	14.1248	14.2558	14.3154	14.4827	15.1548	15.7464	16.2195	16.3688	15.944	16.133	15.9593	15.805	15.8288	16.3643	16.1429	16.2561	16.0667	15.8084	15.0889	16.8214	14.5846	13.3813	12.6867	11.9756	12.0967	12.0595
FINLAND	Finland		1.787	2.178	2.363	2.066	2.499	2.983	3.322	3.342	2.896	3.69971	4.11761	4.07252	4.5825	5.27743	6.23026	6.90505	8.04826	7.80233	9.08337	10.343	11.0139	11.0635	12.0377	13.4608	12.7207	12.5616	13.9734	13.6837	14.1444	14.8027	15.8678	14.0293	11.7295	11.3165	11.5031	13.5233	14.5236	15.7024	14.2081	14.3145	15.5491	15.0738	14.8159	15.3801	16.8439	15.8694	17.4843
KUWAIT	Kuwait		0.105	0.105	0.105	0.105	0.105	0.105	0.105	0.105	0.105	1.037	2.128	2.722	3.897	4.643	6.909	9.659	9.586	6.938	6.12	7.317	6.829	7.401	7.536	6.611	5.27075	4.58868	5.03717	4.69471	5.72368	4.81105	6.71839	6.86125	5.75608	5.87915	7.71977	7.934	9.61525	8.56383	8.95882	9.763	10.3182	4.07081	8.0914	13.4087	15.0725	14.8987	13.6227
SERBIA	Serbia		1.52315	1.7888	2.05444	2.32009	2.58573	2.85138	3.11702	3.38267	3.64831	3.82348	4.17645	4.37724	4.49214	4.99749	5.66153	5.82525	5.77289	5.83157	6.23796	6.46802	8.45032	9.10549	8.53403	10.1916	10.2332	10.6743	11.0137	10.7064	11.9599	13.0043	12.7819	13.9089	12.771	13.7508	14.5003	14.7892	15.4419	15.0718	15.5496	15.5001	15.4062	10.9126	11.9226	10.3973	10.1092	10.6825	12.5067
CHILE	Chile		2.307	2.725	2.895	2.84	3.025	3.166	3.23	3.201	3.399	3.46708	3.67808	3.94603	4.55987	4.73171	4.77761	4.84369	5.12349	5.25064	5.78664	6.14942	6.72375	7.384	7.67941	7.52894	7.06184	6.26192	6.55716	6.28063	6.23265	6.74738	6.84785	6.64164	5.58602	5.63983	6.00247	5.80773	6.00677	6.11191	7.25432	8.7323	8.9744	8.49798	8.78885	9.35029	10.3002	11.2145	12.999
SWITZERLAND	Switzerland		2.794	3.358	3.065	2.822	3.439	3.718	4.658	4.831	4.446	4.53004	5.32065	5.55603	6.58289	7.93305	7.67623	8.27755	8.59323	8.87539	9.82023	10.384	10.9837	11.4323	11.7128	12.6098	11.3064	10.658	11.0363	11.2003	11.5092	10.88	11.0508	10.5927	9.985	10.9231	10.679	10.857	11.5299	10.9727	11.0975	10.7581	12.0509	12.5911	12.5572	11.8998	11.6474	11.8485	12.0357
TURKMENISTAN	Turkmenistan		1.65084	1.93377	2.21669	2.49961	2.78253	3.06545	3.34837	3.63129	3.91421	4.346	4.52505	4.66648	4.89763	5.25209	5.58534	5.92503	6.25725	6.54277	6.72642	7.00494	7.36816	7.82003	8.22907	8.57813	8.90643	9.36361	9.72189	10.0505	10.3936	10.4776	10.8882	10.6801	10.8801	11.0336	11.1307	12.0024	12.0317	11.9817	12.3008	12.0249	11.2342	9.72071	8.73237	7.51024	9.12733	9.26097	8.35254
PORTUGAL	Portugal		1.534	1.473	1.461	1.619	1.581	1.764	1.956	2.125	2.063	2.17786	2.24168	2.47763	2.53545	2.73242	3.00421	3.16115	3.2301	3.38199	3.54595	3.98275	4.15843	4.46935	4.99654	5.44353	5.63454	5.80657	6.0933	6.1695	6.164	6.78377	7.30722	7.36918	7.91487	8.16099	7.85863	7.40445	8.2482	8.51491	8.88861	11.1415	12.3043	12.8167	13.889	13.4803	13.7136	14.861	14.1111
AZERBAIJAN	Azerbaijan		0	0	0	0	0	0	0	0	0	5.47732	5.70284	5.88107	6.17236	6.61922	7.03935	7.46744	7.88609	8.24597	8.47749	8.8286	9.2862	9.85534	10.3703	10.8096	11.2227	11.7982	12.2525	12.6696	13.1047	13.2131	13.7333	13.4733	13.7275	13.9236	14.0483	15.1503	15.1907	15.1299	15.5348	15.189	14.1777	13.9644	15.3338	13.2132	11.4492	9.09177	8.52692
ISRAEL	Israel		0.456	0.797	0.999	1.103	1.181	1.315	1.309	1.412	1.512	1.52914	1.76311	1.92707	2.16495	2.23787	2.49379	3.52861	3.70671	3.69212	3.76478	4.03956	4.51947	4.42657	4.60995	5.25686	5.28628	5.33308	5.32115	5.39461	5.74006	5.6944	5.72722	5.73621	6.51057	6.47076	6.4133	6.71748	7.19107	7.38775	8.10654	8.56824	9.77704	9.86589	11.4855	12.0727	12.957	13.6095	14.1746
NORWAY	Norway		2.302	2.587	2.644	2.671	2.698	3.116	3.263	3.101	3.054	3.22275	3.57173	3.6396	3.83744	4.08441	4.4133	4.47323	5.33299	5.26862	5.76247	6.05725	7.63612	7.41436	8.02275	8.32213	7.5616	8.3613	9.11214	9.11083	8.92832	9.48088	8.70572	8.71792	8.4778	8.76634	9.28246	8.86862	9.56037	9.13142	9.79227	9.40001	9.6401	9.22938	9.48001	9.88652	10.3955	10.5643	11.4166
SINGAPORE	Singapore		0.472	0.472	0.472	0.472	0.472	0.472	0.472	0.472	0.627	0.491	0.38	0.571	0.702862	0.926789	1.00978	0.689773	0.183568	0.833481	1.47738	1.96431	4.9652	4.52433	6.06389	5.78586	5.98984	6.69154	8.18737	7.71423	9.03609	9.84096	8.55439	7.29819	8.08018	9.50064	9.06574	9.07931	9.5187	8.85931	9.81146	11.3834	12.088	12.2951	13.1585	13.884	16.7425	11.4197	13.4687
LIBYAN ARAB JAMAHIRIYAH	Libya		0.039	0.046	0.045	0.068	0.082	0.117	0.09	0.085	0.096	0.118	0.189	0.326	0.286	0.399	0.181	0.277	0.717	5.047	8.219	9.69493	8.81689	5.90292	4.15394	3.97791	2.54846	3.15732	4.88206	5.47262	5.77385	7.07598	7.3091	7.82423	8.342	8.22762	7.71731	8.46129	9.25095	8.82867	9.86909	10.117	9.96534	11.6319	10.1051	10.5647	11.9413	12.4703	11.9533
QATAR	Qatar		0.096	0.106	0.053	0.1	0.166	0.114	0.138	0.085	0.046	0.05	0.048	0.044	0.052	1.674	1.711	1.716	1.712	1.824	1.931	1.95594	2.06372	2.49572	2.94089	3.39989	2.85986	2.98782	2.83158	2.70634	2.87091	3.91442	3.57033	3.50455	3.36651	3.06838	3.35645	3.37822	3.6209	3.1306	3.24718	3.90076	3.20515	4.81585	7.36806	8.4566	8.38001	8.65643	8.78924
IRELAND	Ireland		2.655	2.868	2.626	2.603	2.482	3.198	2.982	2.653	2.445	3.36031	3.04818	3.37134	3.57716	3.67012	3.87993	3.74384	4.11978	4.47457	4.85851	5.0476	5.29305	6.13431	6.01428	6.23531	6.35727	6.01731	6.08434	6.4324	6.43534	7.47872	7.16999	7.11264	6.9775	7.02182	6.97291	7.30049	7.79188	8.24929	8.1557	8.20413	8.99136	9.1905	9.14163	9.20201	9.50823	9.78512	10.2263
SYRIAN ARAB REPUBLIC	Syria		0.113	0.104	0.13	0.14	0.158	0.449	0.547	0.541	0.592	0.607504	0.878465	0.835408	0.873328	0.984246	1.1903	1.00225	1.34032	1.25633	1.62499	1.97397	1.81494	2.42199	2.11689	2.15207	2.63494	3.04891	3.74922	3.99355	4.14339	6.13663	5.65685	7.24198	6.64968	7.58038	8.96534	8.02112	8.48069	9.80973	10.0107	9.35352	10.1106	11.5177	11.616	12.3422	12.6064	11.2446	11.5508
MOROCCO	Morocco		0.699	0.799	0.973	1.139	0.979	0.971	0.961	0.834	0.892	0.919449	0.992359	1.0293	0.839229	1.07916	1.20498	1.16113	1.49005	1.47605	1.53391	1.58772	1.98745	2.23535	2.19326	2.62716	3.0348	3.02764	3.14627	3.4606	3.56263	4.34803	4.34366	4.31956	4.64734	4.84817	4.85345	4.86727	5.14416	5.48103	5.76944	6.24442	6.14837	6.5562	6.85535	7.41825	7.79008	7.95769	8.16769
PENINSULAR MALAYSIA	Peru		0.0131107	0.233801	0.454492	0.675182	0.895873	1.11656	1.33725	1.55794	1.77863	1.96936	2.22834	2.35634	2.71823	2.79016	3.3441	3.26188	3.61382	3.7228	3.95378	4.17174	4.84875	5.0744	4.95421	5.3854	5.8229	5.9879	6.11634	6.35993	6.11814	6.06404	6.56733	6.55549	6.43831	5.56284	5.62746	5.30565	5.93704	7.00443	6.81927	5.9312	5.83149	5.65617	5.71942	6.50982	6.47387	6.7215	6.60044
CUBA	Cuba		1.53	1.766	1.715	1.69	1.624	1.85	1.595	3.785	4.912	4.27531	3.73556	3.32104	3.86314	3.55511	3.89711	3.98312	4.14012	4.295	4.37214	4.70614	5.09118	5.34617	5.67038	6.10635	6.246	7.3787	7.41839	8.00902	8.35673	8.63321	8.54374	8.90484	9.39428	8.378	8.85298	8.84419	9.10895	9.20672	9.66121	9.69242	8.93439	7.88729	5.73699	5.40039	5.80968	6.98313	7.33419
NEW ZEALAND	New Zealand		2.339	2.23	2.544	2.334	2.475	2.564	2.641	2.813	2.779	2.81638	3.14732	3.20828	3.0563	3.33421	3.57313	3.73507	3.82103	3.7191	3.67716	3.89112	3.87008	4.10726	4.41856	4.96735	5.12009	4.98645	5.25343	5.54407	4.91924	4.50178	4.77046	4.51994	4.98645	4.91217	5.27749	5.96564	6.26259	6.59537	6.94582	6.94688	6.94495	7.1262	7.6706	7.5599	7.60926	7.64241	7.99538
HONG KONG SPECIAL ADMINSTRATIVE REGION OF CHINA	Hong Kong		0.36	0.425	0.419	0.472	0.491	0.513	0.579	0.645	0.648	0.737846	0.805838	0.919797	1.00476	1.15876	1.15176	1.31073	1.40872	1.65176	1.69159	2.11559	2.29053	2.49743	2.53155	2.53451	2.91137	3.00437	3.40895	3.87661	4.28878	4.3225	4.53063	5.08097	5.35556	5.70745	6.06572	6.24493	6.96668	7.6653	7.99257	8.2263	7.40914	7.76821	8.98393	9.49188	8.48227	8.53341	7.89017
ESTONIA	Estonia		1.34146	1.56305	1.78465	2.00624	2.22783	2.44942	2.67102	2.89261	3.1142	3.45263	3.59307	3.70271	3.88216	4.16127	4.4238	4.6911	4.95205	5.17399	5.31542	5.53309	5.81898	6.17448	6.49579	6.76837	7.0237	7.383	7.66938	7.93074	8.20073	8.27103	8.60099	8.42946	8.59234	8.71426	8.79368	9.49745	9.52587	9.49781	9.7552	9.53536	10.0729	9.25267	6.65133	5.16112	5.38593	4.92599	5.11996
BANGLADESH	Bangladesh		0	0	0	0	0	0	0	0	0	0.502185	0.603686	0.625112	0.686888	0.78964	0.811848	0.851885	0.866898	0.920072	1.05504	1.02329	1.03799	0.984124	0.956856	1.24173	1.26995	1.32552	1.51632	1.57881	1.6333	1.80476	2.07347	2.15233	2.33414	2.23479	2.47739	2.78088	3.11294	3.22045	3.67861	3.65239	3.84332	4.02323	4.1975	4.38376	4.78653	5.74278	5.86574
TRINIDAD AND TOBAGO	Trinidad and Tobago		0.642	0.686	0.763	0.801	0.774	0.743	0.786	0.7	0.949	0.843805	0.703805	1.25489	1.97382	0.356822	1.03481	1.41679	1.10576	1.26479	1.10176	1.06473	2.4537	2.20972	2.24768	2.56272	2.74073	2.62372	4.34247	4.41028	4.179	4.55979	4.61775	4.70589	5.02326	4.44202	4.7774	5.65586	4.73658	4.77322	4.32126	4.39548	4.63497	4.63109	5.21402	4.75213	4.64608	4.49241	5.6682
LITHUANIA	Lithuania		1.25092	1.46581	1.68069	1.89557	2.11046	2.32534	2.54022	2.7551	2.96999	3.29759	3.43383	3.54148	3.71718	3.98623	4.23924	4.49735	4.74976	4.96649	5.10586	5.31713	5.59267	5.94281	6.26082	6.53387	6.79169	7.14878	7.432	7.69297	7.96192	8.03367	8.3576	8.20865	8.36755	8.49825	8.58488	9.26215	9.3025	9.28488	9.54162	9.34336	9.76305	10.3307	5.78618	4.4618	4.30902	4.11694	4.30066
OMAN	Oman		0	0	0	0	0	0	0	0	0	0	0	0	0	0	0.003	0.007	0.008	0.037	0.044	0.064	0.064	0.571	0.57	0.576	0.637	1.979	2.271	2.32	2.126	2.106	1.649	1.641	1.564	2.054	2.198	2.35222	2.68146	2.56599	2.87024	2.72535	3.06289	3.16422	3.24591	3.60937	4.10847	4.29005	4.06187
ECUADOR	Ecuador		0.202	0.192	0.244	0.224	0.263	0.327	0.354	0.309	0.361	0.35283	0.480781	0.448757	0.426765	0.489716	0.584684	0.620643	0.659586	0.70657	0.849521	0.979497	1.16764	1.15159	1.25246	1.43446	1.66036	2.00734	2.21086	2.03936	2.84018	3.31345	3.65916	4.54498	5.24976	5.32276	5.78316	5.28184	4.14685	4.09996	4.68575	5.50047	4.49175	4.40988	5.99335	6.57407	3.69501	6.19484	6.55717
CROATIA	Croatia		0.555778	0.655159	0.75454	0.853921	0.953302	1.05268	1.15206	1.25145	1.35083	1.41735	1.54883	1.62402	1.66655	1.85419	2.102	2.16457	2.14557	2.16896	2.32015	2.40603	3.14634	3.38933	3.17311	3.79457	3.8096	3.97341	4.10011	3.98555	4.45525	4.84685	4.76439	5.1787	4.75659	5.12205	5.40196	5.5108	5.75662	5.61914	5.7998	5.78161	6.36715	4.68949	4.50493	4.62876	4.42528	4.61963	4.78037
GEORGIA	Georgia		1.10628	1.29617	1.48606	1.67594	1.86583	2.05571	2.2456	2.43548	2.62537	2.91519	3.03527	3.13025	3.2854	3.52335	3.74707	3.975	4.19788	4.38951	4.51281	4.69976	4.94328	5.24664	5.52112	5.75536	5.97567	6.28247	6.52381	6.74523	6.97627	7.03342	7.30973	7.17069	7.30549	7.40919	7.47484	8.06065	8.08134	8.04781	8.26241	8.0776	7.54067	5.85999	4.16947	2.70641	1.6564	0.625385	1.10675
REPUBLIC OF MOLDOVA	Moldova		0	0	0	0	0	0	0	0	0	2.86822	2.98635	3.0798	3.23247	3.46663	3.68678	3.91104	4.13033	4.31892	4.44029	4.62428	4.86387	5.16178	5.43123	5.66102	5.87705	6.17806	6.41566	6.63366	6.86126	6.91779	7.18979	7.05309	7.18597	7.28803	7.35269	7.92932	7.94981	7.91686	8.12816	7.94639	7.58162	6.10608	5.72545	4.32473	3.39164	3.11283	3.18971
TUNISIA	Tunisia		0.333	0.376	0.394	0.376	0.384	0.436	0.426	0.43	0.395	0.433515	0.470553	0.481635	0.489602	0.530603	0.751497	0.671496	0.786473	0.841481	0.980441	1.05134	1.0204	1.14836	1.29131	1.31642	1.47141	1.51232	1.59427	1.84189	2.04092	2.38817	2.58333	2.67472	2.59085	3.07035	3.13551	3.23988	3.27302	3.18323	3.37796	3.58637	3.58273	4.19292	4.06436	4.46341	4.30571	4.24367	4.52534
BOSNIA & HERZEGOVINA	Bosnia and Herzegovina		0	0	0	0	0	0	0	0	0	1.31482	1.43621	1.50539	1.54481	1.71855	1.94703	2.00329	1.9851	2.00512	2.14459	2.22357	2.90569	3.13149	2.93492	3.50582	3.52094	3.67366	3.79142	3.68671	4.11957	4.48057	4.40542	4.79454	4.40413	4.74253	5.0014	5.10171	5.32785	5.2013	5.36693	5.35044	5.2985	3.74865	4.10141	3.43325	0.87456	0.928709	1.15678
BAHRAIN	Bahrain		0.377	0.321	0.351	0.272	0.285	0.383	0.288	0.206	0.352	0.358	0.157	0.483	0.434	0.326	0.436	0.335	0.177	0.274	0.301	0.347	0.707	0.829	1.004	1.506	1.474	1.569	1.793	2.037	2.118	2.218	2.151	2.325	2.683	2.244	2.511	2.78	3.003	3.117	3.31402	3.1978	3.38575	3.23562	2.96775	3.98739	4.02719	4.03578	4.25481
SLOVENIA	Slovenia		0.43194	0.507325	0.582709	0.658093	0.733477	0.808862	0.884246	0.95963	1.03501	1.08451	1.18472	1.24207	1.27444	1.41772	1.60656	1.65318	1.63805	1.65476	1.76967	1.83485	2.39891	2.5837	2.41815	2.88905	2.8994	3.02306	3.1177	3.02846	3.3837	3.67979	3.61476	3.92937	3.60527	3.88273	4.09498	4.177	4.36216	4.25197	4.40692	4.38509	4.1195	3.8213	3.8228	3.90379	3.99636	4.16328	4.34405
LUXEMBOURG	Luxembourg		2.025	2.459	2.566	2.362	2.397	2.698	2.83	2.958	2.753	2.84379	3.14076	3.16075	3.14975	3.12177	3.35577	3.32776	3.16876	3.0978	3.34579	3.59777	3.74873	3.60118	3.68309	3.8696	3.93775	3.23921	3.2387	2.9911	3.24437	3.32144	3.0246	2.5917	2.43863	2.28607	2.4609	2.52416	2.49117	2.41132	2.4909	2.69537	3.23352	3.40223	3.33847	3.37686	3.15609	2.50281	2.51635
KYRGYZSTAN	Kyrgyzstan		0	0	0	0	0	0	0	0	0	2.2191	2.31062	2.38304	2.5013	2.68251	2.8529	3.02654	3.19635	3.34236	3.43635	3.57875	3.76415	3.99516	4.2042	4.38266	4.55055	4.78426	4.96813	5.13687	5.31288	5.35643	5.56686	5.46124	5.5638	5.64292	5.69301	6.13898	6.15498	6.12968	6.29314	6.15252	5.76073	5.04763	3.02459	2.3203	1.67736	1.23118	1.54591
DOMINICAN REPUBLIC	Dominican Republic		0.095	0.098	0.162	0.169	0.171	0.25	0.269	0.282	0.291	0.303789	0.283813	0.280741	0.338732	0.340749	0.476667	0.421765	0.455692	0.427659	0.640643	0.723571	0.847457	0.960343	1.27425	1.62636	1.74933	1.72835	1.72553	1.52809	1.48208	1.85196	1.7541	1.67447	1.72038	2.14672	2.01705	1.9764	2.21645	2.64391	2.65823	2.79965	2.49773	2.71633	2.9537	3.18427	3.37795	4.30441	4.69368
LATVIA	Latvia		0.669998	0.784966	0.899934	1.0149	1.12987	1.24484	1.35981	1.47477	1.58974	1.7653	1.83793	1.89539	1.98931	2.13343	2.26891	2.40687	2.54178	2.65783	2.73253	2.84578	2.99323	3.17787	3.34508	3.48796	3.62247	3.80951	3.95745	4.09338	4.23489	4.27084	4.4401	4.35742	4.44036	4.50534	4.54713	4.90436	4.91949	4.9022	5.0347	4.92462	5.32318	4.85347	3.84275	3.22561	2.81025	2.48098	2.5028
LEBANON	Lebanon		0.413	0.398	0.321	0.341	0.357	0.443	0.515	0.564	0.541	0.668181	0.703058	0.731035	0.778051	0.825011	0.890027	0.903929	0.988792	0.972881	1.008	1.18562	1.07553	1.44668	1.54295	1.9287	1.93446	1.70991	1.61682	1.46985	1.49997	1.57894	1.60747	1.59506	1.56099	1.89471	1.83221	2.11926	2.04107	2.09345	2.00482	2.1072	2.14734	2.21476	2.65474	2.82614	3.03243	3.34459	3.48053
ANGOLA	Angola		0.051	0.068	0.085	0.075	0.095	0.113	0.137	0.169	0.162	0.16883	0.149823	0.123828	0.321814	0.313789	0.333765	0.323732	0.423708	0.270692	0.45566	0.759578	0.976506	0.929417	1.22831	1.33015	1.32817	1.20328	0.895208	0.962749	1.47375	1.49814	1.45588	1.43744	1.26506	1.39207	1.36077	1.27623	1.26469	1.57916	1.37809	1.34355	1.38884	1.38179	1.40967	1.56888	1.05502	2.98807	2.8452
ZIMBABWE	Zimbabwe		1.24147	1.26084	1.2802	1.29956	1.31893	1.33829	1.35765	1.37702	1.39638	1.70119	1.62203	1.38135	1.33432	1.28285	1.21972	1.42172	1.64872	1.445	1.74063	1.84058	2.22547	2.38338	2.24231	2.53025	2.46916	2.26826	2.96259	2.53396	2.53266	2.57414	2.6239	2.56697	2.39625	2.84528	2.69641	2.78758	3.5666	4.14031	4.37485	4.39783	4.24926	4.33006	4.6172	4.43753	4.82655	4.10192	4.06402
JORDAN	Jordan		0.047	0.044	0.053	0.058	0.069	0.104	0.123	0.135	0.143	0.178878	0.202822	0.266757	0.28574	0.332684	0.338659	0.387667	0.431586	0.385643	0.410473	0.479473	0.424586	0.451538	0.52227	0.600319	0.607343	0.679367	0.803656	0.860789	0.989996	1.03081	1.28161	1.58984	1.70734	1.99234	2.25078	2.29845	2.50138	2.59444	2.50464	2.4781	2.85968	2.70277	3.27049	3.21345	3.61613	3.60473	3.77359
MONGOLIA	Mongolia		0.078	0.08	0.082	0.083	0.133	0.161	0.188	0.208	0.31	0.367	0.353	0.38	0.538	0.437	0.558	0.534	0.533	0.58	0.676919	0.731919	0.776895	0.827631	0.894077	0.947624	1.02095	1.1066	1.19815	1.3539	1.57309	1.71324	1.87095	1.80531	1.83196	1.90203	1.75347	2.45577	2.61875	2.86094	3.13669	2.85452	2.69923	3.30813	3.00052	2.52801	2.1635	2.15594	2.18977
ARMENIA	Armenia		0.72576	0.850283	0.974806	1.09933	1.22385	1.34837	1.4729	1.59742	1.72194	1.91203	1.99076	2.05302	2.15475	2.31081	2.45754	2.60699	2.75314	2.87882	2.95969	3.08231	3.24203	3.44154	3.62215	3.77638	3.92151	4.12345	4.28305	4.42962	4.5823	4.62077	4.80344	4.71327	4.80262	4.87218	4.91667	5.30273	5.31831	5.29839	5.44092	5.32098	4.97051	5.16377	1.5993	0.70241	0.740925	0.936757	0.707626
YEMEN	Yemen		0.71	0.71	0.71	0.71	0.71	0.71	0.71	0.71	0.71	0.71	0.991	0.727	1.06	0.796	0.991	1.072	0.945	0.833	3.176	1.276	0.685	0.538	0.408	0.744984	0.612935	0.591935	0.699853	0.81277	0.846649	0.878408	0.904344	1.15323	1.61943	1.7155	1.93695	2.33989	2.23582	2.35444	2.6065	2.71153	2.59863	2.49142	2.69493	2.35426	2.45159	2.82537	2.87305
MACEDONIA	North Macedonia		0	0	0	0	0	0	0	0	0	0.960859	1.04957	1.10014	1.12894	1.2559	1.42288	1.46399	1.45069	1.46531	1.56721	1.62492	2.12343	2.28854	2.14498	2.56236	2.57358	2.68537	2.77166	2.69537	3.01207	3.27622	3.22159	3.50608	3.22104	3.46848	3.65777	3.7312	3.89675	3.80441	3.92566	3.91368	3.87158	2.73902	2.998	2.763	2.797	2.903	3.189
PHILIPPINES	Bolivia		0.984	0.97	1.106	1.101	1.455	1.806	1.707	1.837	2.064	0.258968	0.273959	0.283951	0.299943	0.330935	0.403927	0.411935	0.460927	0.515935	0.593919	0.694911	0.67787	0.834862	0.973838	0.942813	0.958773	1.10671	1.24859	1.2213	1.37013	1.29096	1.27155	1.30487	1.18392	1.16761	1.09971	1.12166	1.02721	1.09492	1.16997	1.35602	1.56298	1.63046	1.80731	2.12659	2.3451	2.67439	2.66772
MYANMAR (FORMERLY BURMA)	Myanmar		0.219	0.25	0.309	0.356	0.399	0.388	0.452	0.573	0.658	0.757959	0.740951	0.706959	0.785943	0.718862	0.779854	0.743854	0.765846	0.986854	0.798805	0.876797	1.25881	1.39178	1.33578	1.12079	1.27481	1.2508	1.33537	1.40984	1.4045	1.38811	1.50349	1.53466	1.52279	1.57035	1.78727	1.82192	1.84398	1.34918	1.11535	1.20778	1.15579	1.129	1.3214	1.447	1.6911	1.88492	1.96604
SRI LANKA	Sri Lanka		0.444	0.422	0.529	0.564	0.487	0.454	0.387	0.633	0.532	0.560894	0.615903	0.636911	0.698903	0.690919	0.619919	0.724903	0.725911	0.803789	0.883757	1.17769	0.980643	0.871578	0.965578	1.00554	0.799482	0.78957	0.763856	0.794497	0.937649	1.03958	0.924836	1.09322	1.21913	1.32503	1.05134	1.06893	0.998991	1.09905	0.943406	0.940778	1.04516	1.1291	1.39355	1.35797	1.48356	1.5872	1.90233
JAMAICA	Jamaica		0.074	0.142	0.154	0.168	0.216	0.269	0.344	0.438	0.37	0.501781	0.400765	0.580765	0.577781	0.653781	1.10869	0.81566	0.959611	1.05463	1.05855	1.16455	1.36151	1.56857	1.71462	2.26267	2.07271	2.23275	1.9858	2.03085	2.4869	2.32794	2.30498	2.02199	1.69601	1.75904	1.40306	1.37608	1.2411	1.46816	1.23522	1.8353	2.05434	2.11534	2.10447	2.18348	2.23552	2.50366	2.644
KENYA	Kenya		0.248	0.38	0.434	0.413	0.464	0.542	0.606	0.623	0.57	0.602651	0.661611	0.654636	0.715618	0.778619	0.770538	0.672466	0.731464	0.736473	0.768401	0.853294	0.840124	1.00412	1.05512	1.06812	1.34906	1.35601	1.25441	1.37424	1.44562	1.36786	1.67891	1.76666	1.26468	1.254	1.16078	1.01418	1.11162	1.38535	1.28001	1.38878	1.55188	1.28558	1.47437	1.69628	1.7523	2.02115	2.49863
CURACAO	Curaçao		0	0	0	0	0	0	0	0	0	2.83835	2.4406	2.5471	2.79721	2.67941	2.60519	2.33733	2.18565	2.69232	2.50353	3.27645	3.66453	3.18932	3.0925	3.43055	3.10944	2.2518	4.8102	2.5124	2.13966	2.24454	2.30989	2.20017	2.45996	1.26427	3.15704	3.69519	0.708378	0.629765	0.620365	1.18092	1.26466	1.00916	0.831426	1.28346	1.23048	1.21766	1.13904
GUATEMALA	Guatemala		0.169	0.174	0.176	0.186	0.203	0.25	0.267	0.269	0.308	0.33787	0.366878	0.383862	0.37687	0.41483	0.482797	0.53874	0.474781	0.540757	0.583805	0.621757	0.626757	0.665749	0.738708	0.800659	0.836659	0.96057	0.901994	1.03833	1.12367	1.27675	1.22615	1.07791	0.984387	0.86242	0.928237	0.95438	1.00016	1.06943	1.11225	1.14306	1.35649	1.35154	1.61515	1.52215	1.84246	1.93212	1.79322
REPUBLIC OF SUDAN	Sudan		0	0	0	0	0	0	0	0	0	0.341851	0.340007	0.346454	0.371188	0.419761	0.464706	0.606805	0.660874	0.796524	0.776344	1.04584	1.21362	1.24567	1.3447	1.35658	1.42067	1.05956	0.938413	0.950986	0.858848	0.891608	0.935328	0.908829	0.95493	0.974623	0.873801	1.01538	1.05987	0.835476	1.209	0.936355	1.30155	1.21902	1.08878	0.749544	1.03302	1.0652	1.09923
TAJIKISTAN	Tajikistan		0.404532	0.474002	0.543472	0.612942	0.682412	0.751882	0.821352	0.890822	0.960292	1.06634	1.11026	1.145	1.20177	1.28882	1.37067	1.45405	1.53558	1.6057	1.65083	1.71924	1.80831	1.9193	2.01973	2.10544	2.18605	2.2983	2.3867	2.46782	2.55247	2.57348	2.67468	2.62392	2.67332	2.71137	2.7355	2.94994	2.95766	2.94554	3.0242	2.95669	2.76558	2.48975	1.99089	1.40868	0.640679	0.666727	0.770329
URUGUAY	Uruguay		0.67	0.716	0.861	0.957	1.02	1.07	1.098	1.21	1.086	1.19754	1.17755	1.12357	1.09359	1.17763	1.24255	1.50554	1.47348	1.33154	1.33143	1.52549	1.56545	1.5835	1.65649	1.57443	1.5494	1.62729	1.60674	1.5392	1.56368	1.70916	1.58802	1.46178	1.32473	1.03808	0.938361	0.89624	0.86379	0.966849	1.30622	1.32441	1.08272	1.23567	1.40362	1.21157	1.09986	1.24413	1.475
GHANA	Ghana		0.174	0.239	0.237	0.278	0.274	0.324	0.294	0.353	0.372	0.361	0.399	0.367	0.391	0.47	0.45	0.465	0.393	0.408	0.480749	0.460555	0.715513	0.625416	0.660546	0.674521	0.800424	0.748262	0.662281	0.816464	0.807159	0.723042	0.695431	0.826927	0.826538	0.993184	0.700617	0.901112	0.827059	0.890725	0.931004	0.899296	1.03479	1.14889	0.999162	1.17649	1.38884	1.40671	1.49253
COTE D IVOIRE	Côte d'Ivoire		0	0	0	0	0	0	0	0	0.136	0.149	0.126	0.151	0.16	0.17	0.208	0.32	0.338	0.371	0.436	0.516	0.612	0.67	0.74	0.785	0.885	1.088	1.081	1.106	1.314	1.479	1.52	1.055	1.516	1.233	1.401	1.906	1.522	2.006	2.403	2.256	1.305	1.176	1.049	1.39	1.128	1.66907	2.002
BRUNEI (DARUSSALAM)	Brunei Darussalam		0.113	0.082	0.088	0.094	0.098	0.082	0.081	0.08	0.087	0.089	0.091	0.083	0.101	0.097	0.093	0.091	0.134	0.12	0.117	0.133	2.239	2.05	2.58	2.722	2.232	1.931	1.643	1.744	2.602	2.029	1.877	0.401	0.571	0.738	0.523	0.708	0.627	0.905	1.559	1.731	1.689	1.448	1.422	1.355	1.28	1.306	1.29402
PANAMA	Panama		0.141	0.151	0.196	0.195	0.173	0.194	0.173	0.208	0.253	0.270895	0.271878	0.300878	0.324862	0.322846	0.338862	0.416813	0.451837	0.462797	0.550821	0.559805	0.600732	0.709692	0.7637	0.883521	0.823562	0.998692	0.984373	0.94308	0.773636	0.868127	0.848148	0.906853	0.894794	0.949692	0.782574	0.71323	0.746385	0.867782	0.795487	0.685118	0.718559	0.847507	1.12237	1.0333	1.14039	0.997296	1.21364
CYPRUS	Cyprus		0.073	0.077	0.086	0.1	0.121	0.123	0.184	0.223	0.209	0.226911	0.241903	0.235895	0.246895	0.268895	0.272919	0.313895	0.338895	0.371797	0.44274	0.455732	0.464708	0.51406	0.656629	0.683256	0.526388	0.543298	0.678853	0.736607	0.776334	0.831013	0.889713	0.844698	0.861474	0.859884	0.882599	0.858188	0.983964	1.14194	1.14537	1.20866	1.27099	1.40464	1.50734	1.57396	1.64059	1.60542	1.70121
ALBANIA	Albania		0.081	0.11	0.102	0.113	0.137	0.181	0.229	0.411	0.328	0.394	0.552	0.622	0.672	0.568	0.55	0.593	0.696	0.731	0.838	0.885	1.021	1.187	1.539	1.443	1.185	1.253	1.35	1.56	1.771	2.069	1.41	2.002	1.993	2.081	2.134	2.149	2.197	2.03	1.998	2.45	1.486	1.154	0.681	0.632	0.522	0.564	0.544
GABON	Gabon		0	0	0	0	0	0	0	0	0	0.006	0.036	0.045	0.024	0.02	0.052	0.059	0.104	0.276	0.535	0.391	0.568	0.776	0.747	1.449	1.487	1.464	1.55671	1.72121	2.06192	1.84136	1.80804	1.79149	1.78592	1.50344	1.63195	1.71903	1.35119	1.09429	1.17923	1.57136	1.22418	1.23416	1.34214	1.35776	1.19392	1.25717	1.29741
HONDURAS	Honduras		0.082	0.095	0.098	0.091	0.103	0.119	0.124	0.157	0.16	0.159992	0.167959	0.200951	0.190935	0.193935	0.196919	0.204895	0.219886	0.238878	0.333854	0.320854	0.37883	0.362822	0.418789	0.41174	0.424765	0.454676	0.484423	0.545154	0.557769	0.525709	0.557948	0.494547	0.478462	0.541038	0.5359	0.515679	0.499084	0.586369	0.674101	0.732958	0.661204	0.667314	0.735028	0.77356	0.866472	1.03234	1.04788
COSTA RICA	Costa Rica		0.078	0.085	0.106	0.118	0.111	0.095	0.132	0.126	0.122	0.105	0.134	0.134	0.15	0.164	0.183968	0.23087	0.27087	0.238878	0.282854	0.312822	0.340797	0.416765	0.480708	0.5577	0.519676	0.555635	0.568192	0.711632	0.794772	0.759002	0.668248	0.61032	0.565126	0.570091	0.540652	0.612024	0.703475	0.743412	0.793101	0.800585	0.794756	0.897179	1.02108	1.06195	1.41931	1.31056	1.27913
ZAMBIA	Zambia		0.990253	0.997448	1.00464	1.01184	1.01903	1.02623	1.03342	1.04062	1.04781	1.24667	1.18866	1.01227	0.977809	0.94009	0.89383	1.06776	0.954757	1.30667	1.24663	1.16564	1.02781	1.03348	1.10846	1.25155	1.14551	1.11251	1.097	1.01935	0.947291	0.981569	0.961589	0.916493	0.958182	0.889947	0.765404	0.745833	0.782088	0.729738	0.848532	0.701421	0.656605	0.650128	0.661601	0.673363	0.653115	0.584337	0.501366
ETHIOPIA	Ethiopia		0.024	0.017	0.027	0.05	0.074	0.062	0.066	0.088	0.087	0.0919757	0.0959676	0.0929676	0.107951	0.11496	0.110951	0.175895	0.224886	0.292838	0.470805	0.454813	0.450797	0.504765	0.383789	0.477862	0.47387	0.329838	0.320614	0.285695	0.373499	0.503312	0.496038	0.507644	0.402269	0.500752	0.450404	0.490914	0.599139	0.697156	0.720542	0.762586	0.814895	0.80708	0.801674	0.817363	0.599585	0.683857	0.762733
SENEGAL	Senegal		0.097	0.097	0.097	0.097	0.097	0.097	0.097	0.097	0.097	0.105813	0.225813	0.221797	0.221797	0.234789	0.251773	0.461797	0.468789	0.190813	0	0.133773	0.356732	0.368732	0.396627	0.422676	0.504635	0.703603	0.482996	0.610627	0.714955	0.788248	0.910601	0.895157	0.828759	0.712721	0.896334	0.723391	0.719554	0.661729	0.73985	0.999421	0.856724	0.921934	0.934347	0.965605	1.04714	0.93585	0.999794
EL SALVADOR	El Salvador		0.073	0.088	0.106	0.114	0.128	0.126	0.144	0.163	0.163	0.164911	0.168903	0.158919	0.176927	0.306911	0.335903	0.283911	0.355846	0.315846	0.34383	0.324846	0.389822	0.411797	0.457757	0.536732	0.537676	0.574635	0.602274	0.622731	0.649938	0.648669	0.578448	0.496379	0.478193	0.514565	0.433488	0.536391	0.53698	0.658977	0.664047	0.695209	0.675354	0.860584	0.905245	1.08495	1.23196	1.36414	1.20488
UNITED REPUBLIC OF TANZANIA	Tanzania		0	0	0	0	0	0	0	0	0	0.188	0.226	0.192	0.209	0.219	0.282	0.317	0.373943	0.479838	0.45083	0.489813	0.481813	0.671805	0.59074	0.868651	0.628676	0.622708	0.760363	0.547932	0.599709	0.562989	0.511365	0.575007	0.586326	0.599428	0.640552	0.638073	0.621614	0.646154	0.620002	0.589956	0.576138	0.61506	0.593955	0.661853	0.563209	0.664222	0.689814
REPUBLIC OF CAMEROON	Cameroon		0.038	0.05	0.077	0.055	0.063	0.064	0.065	0.07	0.076	0.0759919	0.074	0.077	0.079	0.082	0.092	0.085	0.094	0.125	0.138	0.156	0.173968	0.220846	0.234813	0.24479	0.265765	0.31674	0.297208	0.425504	0.543997	0.495454	1.06057	1.45173	1.72377	1.78889	1.652	1.766	0.544	0.503	0.587871	2.06815	0.171024	0.0154015	0.74399	0.785896	0.775232	0.874317	0.980469
DEMOCRATIC REPUBLIC OF THE CONGO (FORMERLY ZAIRE)	Democratic Republic of the Congo		0.404	0.477	0.569	0.625	0.769	0.925	0.867	0.909	0.799	0.736619	0.632781	0.642846	0.592781	0.625732	0.538748	0.673725	0.655708	0.624676	0.918676	0.995643	0.739538	0.807497	0.823473	0.870408	0.918311	0.882311	0.929281	0.948955	0.962329	1.02077	0.951152	1.02495	0.831595	1.09116	1.07305	0.985783	0.913118	1.04145	1.0857	1.18777	1.1599	0.854967	0.766711	0.726401	0.463833	0.574162	0.630938
AFGHANISTAN	Afghanistan		0.023	0.025	0.025	0.029	0.029	0.042	0.05	0.08	0.09	0.104959	0.11296	0.133951	0.187935	0.192886	0.228862	0.274813	0.297805	0.349854	0.333895	0.256886	0.455894	0.516807	0.417688	0.446394	0.5222	0.579044	0.540715	0.650787	0.587778	0.609485	0.479385	0.540043	0.571757	0.687777	0.770205	0.955724	0.855375	0.849995	0.779881	0.754769	0.710491	0.662491	0.376491	0.363825	0.349782	0.335825	0.317937
NICARAGUA	Nicaragua		0.052	0.055	0.075	0.078	0.086	0.107	0.103	0.114	0.164	0.130959	0.144968	0.152959	0.179951	0.229943	0.258935	0.212927	0.261911	0.294895	0.335886	0.350878	0.382862	0.41087	0.43787	0.498789	0.53174	0.525805	0.606489	0.773229	0.717102	0.4665	0.551949	0.582657	0.576065	0.544948	0.50383	0.541713	0.615595	0.663478	0.611361	0.400741	0.53362	0.542546	0.64783	0.6232	0.687194	0.751869	0.777119
MOZAMBIQUE	Mozambique		0.246	0.254	0.293	0.295	0.312	0.375	0.424	0.483	0.496	0.489765	0.513757	0.717765	0.541805	0.452813	0.583797	0.546757	0.579749	0.510724	0.757684	0.883667	0.813562	0.985538	0.899481	0.971327	0.858489	0.786692	0.697439	0.738657	0.782164	0.719042	0.87295	0.676593	0.688846	0.533428	0.412353	0.309756	0.266686	0.26658	0.274616	0.28235	0.277062	0.277048	0.273285	0.29346	0.28855	0.30254	0.297591
BAHAMAS	Bahamas		0.015	0.018	0.021	0.022	0.023	0.035	0.038	0.048	0.049	0.071	0.112	0.149	0.198	0.193	0.296	0.359	0.298	0.464246	0.444246	0.4751	0.701084	1.83508	1.76891	2.14595	2.01412	2.25058	1.76239	2.64975	1.8005	1.88746	2.1758	0.763766	0.616399	0.549774	0.506	0.412	0.385	0.388	0.42	0.531	0.502	0.503	0.505	0.48	0.477	0.475	0.472
PARAGUAY	Paraguay		0.017	0.013	0.028	0.033	0.05	0.052	0.054	0.058	0.066	0.0829838	0.0829838	0.0989838	0.106984	0.111984	0.117976	0.149968	0.139968	0.132984	0.160976	0.141959	0.202903	0.172892	0.19481	0.236756	0.259583	0.228331	0.281146	0.314756	0.396816	0.361805	0.405504	0.377577	0.371902	0.384349	0.40674	0.422463	0.451723	0.512389	0.585348	0.60711	0.582871	0.574084	0.704132	0.795333	0.929117	1.07455	1.01496
PAPUA NEW GUINEA	Papua New Guinea		0.015	0.017	0.023	0.026	0.026	0.035	0.035	0.04	0.04	0.044	0.049	0.055	0.054	0.07	0.073	0.083	0.093	0.119	0.137	0.152	0.189	0.225	0.346	0.367	0.433	0.418	0.429	0.431	0.457	0.49	0.499	0.527	0.531	0.548	0.558	0.58	0.563	0.637	0.6	0.555	0.588	0.592	0.598	0.598	0.595	0.562	0.597
ICELAND	Iceland		0.202	0.176	0.212	0.25	0.213	0.249	0.259	0.263	0.298	0.337911	0.330919	0.297919	0.326895	0.355894	0.356878	0.380878	0.40787	0.39387	0.434887	0.344895	0.378903	0.401779	0.40465	0.477547	0.474351	0.440195	0.464154	0.519088	0.524033	0.54099	0.507893	0.476796	0.4347	0.420688	0.493594	0.442502	0.485514	0.50311	0.502008	0.517141	0.613483	0.580898	0.620706	0.6638	0.647734	0.675955	0.69106
NEW CALEDONIA	New Caledonia		0.06	0.077	0.129	0.109	0.142	0.191	0.318	0.291	0.202	0.161	0.235	0.242	0.154	0.169	0.3	0.336	0.412	0.402	0.502	0.425	0.653	0.66	0.465	0.708943	0.758927	0.689935	0.651862	0.583781	0.420656	0.447563	0.54547	0.379455	0.344374	0.314192	0.328099	0.396003	0.38232	0.396967	0.409727	0.447466	0.430358	0.479796	0.42979	0.498779	0.537772	0.563386	0.596371
BOTSWANA	Botswana		0	0	0	0	0	0	0	0	0	0	0	0	0	0	0	0	0	0	0	0	0	0	0.006	0.014	0.024	0.051	0.162	0.213	0.227	0.257	0.269	0.275	0.3	0.281	0.285	0.316	0.291	0.338	0.355	0.39	0.737	0.719	0.758	0.872	0.827	0.831	0.752
NEPAL	Nepal		0.007	0.008	0.008	0.01	0.011	0.012	0.013	0.015	0.016	0.018	0.022	0.022	0.024	0.027	0.041	0.049	0.052	0.058	0.069	0.109	0.062	0.054	0.073	0.115	0.115959	0.0959919	0.0769211	0.0918119	0.0897875	0.139836	0.147733	0.123686	0.120732	0.134394	0.191437	0.184503	0.190233	0.234902	0.266367	0.243877	0.209264	0.292701	0.35212	0.401152	0.464002	0.656777	0.670122
CAMBODIA	Cambodia		0	0	0	0	0	0.028	0.036	0.044	0.054	0.058	0.064	0.078	0.084	0.106	0.092992	0.109943	0.127935	0.113935	0.133935	0.366935	0.319959	0.0679351	0.0319432	0.0349108	0.0199432	0.0199432	0.0198619	0.0197806	0.013957	0.008	0.078	0.082	0.092	0.1	0.112	0.114	0.118	0.119	0.123	0.123	0.344	0.356	0.368	0.378	0.400396	0.420384	0.43593
EQUATORIAL GUINEA	Equatorial Guinea		0.003	0.003	0.003	0.003	0.008	0.01	0.01	0.009	0.013	0.013	0.006	0.006	0.006	0.007	0.007	0.008	0.007	0.007	0.008	0.012	0.01	0.018	0.024	0.008	0.014	0.017	0.017	0.017	0.019	0.017	0.016	0.019	0.02	0.017	0.022	0.018	0.022	0.027	0.029	0.032	0.017	0.018	0.018	0.019	0.021	0.023	0.035
LAO PEOPLE S DEMOCRATIC REPUBLIC	Laos		0	0	0	0	0	0.007	0.016	0.016	0.02	0.021	0.022	0.031	0.036	0.04	0.047	0.049	0.064	0.087	0.046	0.087	0.156	0.115	0.133	0.141	0.08	0.069	0.061	0.063	0.063	0.061	0.051	0.041	0.043	0.049	0.05	0.056	0.057	0.058	0.058	0.063	0.14	0.149	0.161815	0.165816	0.172814	0.182813	0.20494
SURINAME	Suriname		0.058	0.064	0.073	0.085	0.092	0.085	0.093	0.102	0.087	0.1	0.118	0.117	0.135	0.145	0.165	0.217	0.299	0.364	0.396	0.415	0.439	0.467943	0.475935	0.574935	0.436951	0.550968	0.544904	0.517884	0.6528	0.625755	0.646675	0.553581	0.510526	0.37447	0.42359	0.43555	0.479511	0.479472	0.511432	0.505393	0.474354	0.552349	0.554344	0.556339	0.557238	0.562232	0.568227
MAURITIUS	Mauritius		0.055	0.038	0.048	0.051	0.051	0.035	0.06	0.06	0.057	0.061	0.049	0.051	0.069	0.057	0.084	0.083	0.075	0.136	0.174	0.156	0.136	0.108	0.188	0.185	0.189	0.161	0.169	0.175	0.172	0.18	0.161	0.148	0.137	0.163	0.171	0.193	0.218	0.254	0.233	0.287	0.399	0.415	0.466	0.484	0.443	0.499	0.532
BENIN	Benin		0	0	0	0	0	0	0	0	0.034	0.028	0.044	0.035	0.037	0.033	0.039	0.041	0.031	0.039	0.042	0.055	0.077	0.08	0.106	0.104	0.111	0.121	0.071	0.081	0.099	0.1	0.138499	0.113986	0.130278	0.119992	0.132533	0.198073	0.181614	0.141154	0.146848	0.16639	0.185776	0.216192	0.236065	0.296584	0.333585	0.347587	0.335999
MALTA	Malta		0.067	0.07	0.066	0.063	0.084	0.093	0.081	0.085	0.09	0.106	0.093	0.08	0.09	0.112	0.136	0.129	0.113	0.142	0.174	0.178	0.181	0.18	0.229	0.22	0.203	0.182	0.208	0.219	0.255	0.247	0.279	0.312	0.358	0.272	0.372	0.327	0.405	0.506	0.549	0.592	0.657332	0.615554	0.631796	0.789063	0.728636	0.671471	0.703724
GUYANA	Guyana		0.071	0.078	0.092	0.123	0.129	0.141	0.15	0.146	0.125	0.151	0.18	0.201	0.185	0.168	0.177	0.294	0.322	0.361	0.363	0.373	0.431	0.409	0.426	0.492	0.424	0.498	0.478	0.518	0.561	0.415	0.488	0.491	0.383	0.34	0.383	0.387	0.285	0.357	0.383	0.323	0.308	0.302	0.284	0.285	0.398	0.429	0.452
UGANDA	Uganda		0.029	0.038	0.039	0.057	0.06	0.072	0.072	0.076	0.08	0.112911	0.114919	0.110927	0.116935	0.117943	0.133919	0.170854	0.19987	0.220846	0.26783	0.320805	0.393789	0.392396	0.376194	0.321078	0.324698	0.308019	0.268933	0.218873	0.189725	0.183094	0.170857	0.143844	0.14866	0.16745	0.15841	0.168369	0.191553	0.209763	0.235499	0.218472	0.20789	0.212963	0.217868	0.217774	0.193343	0.252861	0.277814
MONTENEGRO	Montenegro		0	0	0	0	0	0	0	0	0	0.129746	0.141725	0.148553	0.152442	0.169586	0.192133	0.197684	0.195888	0.197862	0.211622	0.219415	0.28673	0.309024	0.289639	0.345999	0.347513	0.362609	0.374261	0.36396	0.406724	0.442392	0.435015	0.47343	0.434941	0.468353	0.493914	0.503829	0.526183	0.513715	0.530087	0.528469	0.522784	0.369853	0.404824	0.353062	0.342973	0.362264	0.423852
MADAGASCAR	Madagascar		0.083	0.067	0.084	0.069	0.079	0.083	0.087	0.086	0.102	0.102	0.109	0.097	0.107984	0.125951	0.131951	0.151959	0.157943	0.229935	0.248927	0.231919	0.264919	0.279919	0.350927	0.292919	0.323935	0.461935	0.270806	0.230786	0.277624	0.308471	0.440486	0.279623	0.276566	0.177508	0.236455	0.287399	0.310343	0.350005	0.350927	0.252675	0.25359	0.27558	0.26757	0.27456	0.340094	0.351088	0.365898
	Kosovo		0	0	0	0	0	0	0	0	0	0	0	0	0	0	0	0	0	0	0	0	0	0	0	0	0	0	0	0	0	0	0	0	0	0	0	0	0	0	0	0	0	0	0	0	0	0	0
GUINEA	Guinea		0	0	0	0	0	0	0	0	0.045	0.043	0.112	0.168	0.18	0.19	0.191	0.19	0.196	0.198	0.204	0.204	0.216	0.222	0.227	0.219	0.229	0.23	0.242	0.246	0.246	0.258	0.263	0.27	0.268	0.26	0.267	0.271	0.272	0.271	0.28	0.285	0.274	0.28	0.289	0.297	0.307	0.318	0.337
HAITI	Haiti		0.031	0.036	0.04	0.043	0.059	0.073	0.072	0.069	0.075	0.0689594	0.0779432	0.0809513	0.0829351	0.0679432	0.0819351	0.0829513	0.0829594	0.0709594	0.0719513	0.0859432	0.104935	0.109919	0.106911	0.114878	0.128846	0.13183	0.183456	0.192179	0.204869	0.204667	0.203349	0.207131	0.223063	0.24182	0.246493	0.25369	0.226589	0.245304	0.275019	0.279236	0.271386	0.266412	0.242327	0.18708	0.05	0.239	0.278
CONGO	Congo		0	0	0	0	0	0	0	0	0	0.051	0.061	0.073	0.065	0.064	0.073	0.067	0.084	0.088	0.123	0.137	0.156	0.187	0.181	0.333	0.443	0.3	0.337	0.131	0.088	0.095	0.110679	0.128473	0.366567	0.311804	0.311	0.348041	0.289949	0.360287	0.407462	0.408195	0.274886	0.295516	0.352141	0.317121	0.482826	0.323653	0.365714
MAURITANIA	Mauritania		0	0	0	0	0	0	0	0	0	0.009	0.01	0.013	0.017	0.024	0.032	0.044	0.049	0.054	0.064	0.075	0.117	0.109	0.122	0.128	0.132	0.139	0.141	0.152	0.159	0.165	0.172	0.172956	0.241	0.256	0.238	0.179	0.102	0.885	0.869	0.765	0.233	0.237	0.247	0.253	0.261	0.277	0.29
NAMIBIA	Namibia		0	0	0	0	0	0	0	0	0	0	0	0	0	0	0	0	0	0	0	0	0	0	0	0	0	0	0	0	0	0	0	0	0	0	0	0	0	0	0	0	0	0.288	0.314	0.379	0.429	0.442	0.47
TOGO	Togo		0.007	0.007	0.012	0.008	0.009	0.011	0.011	0.013	0.013	0.015	0.018	0.025	0.024	0.029	0.036	0.036	0.049	0.054	0.053	0.066	0.075	0.086	0.110497	0.11231	0.106514	0.085	0.088	0.126	0.097	0.377	0.216511	0.192493	0.222874	0.169889	0.18922	0.179424	0.230849	0.251807	0.262256	0.278765	0.265468	0.286154	0.281296	0.291737	0.274269	0.320617	0.345298
ARUBA	Aruba		0	0	0	0	0	0	0	0	0	0.196335	0.168821	0.176188	0.193489	0.185341	0.180206	0.161678	0.151186	0.186233	0.173174	0.226639	0.253483	0.220612	0.213915	0.237298	0.215087	0.155762	0.332731	0.173788	0.148005	0.15526	0.15978	0.15219	0.170161	0.0874522	0.218379	0.255604	0.049	0.122	0.167	0.177	0.133	0.145	0.147	0.177	0.18	0.193	0.198
LESOTHO	Lesotho		0	0	0	0	0	0	0	0	0	0	0	0	0	0	0	0	0	0	0	0	0	0	0	0	0	0	0	0	0	0	0	0	0	0	0	0	0	0	0	0	0.402	0.417	0.433	0.446	0.457	0.466	0.474
BURKINA FASO	Burkina Faso		0	0	0	0	0	0	0	0	0.001	0.002	0.012	0.025	0.023	0.024	0.03	0.028	0.028	0.028	0.028	0.033	0.039	0.041	0.044	0.046	0.056	0.06	0.057	0.068	0.095	0.111	0.118	0.152	0.157	0.162	0.127	0.13	0.131	0.141	0.151	0.224	0.159	0.171	0.172	0.171	0.176	0.17027	0.192265
MACAU SPECIAL ADMINSTRATIVE REGION OF CHINA	Macao		0	0	0	0	0.006	0.006	0.007	0.008	0.008	0.01	0.014	0.019	0.026	0.029	0.035	0.036	0.041	0.045	0.046	0.046	0.056	0.062	0.063	0.061	0.073	0.081	0.069	0.084	0.113	0.113	0.144	0.146	0.132	0.186	0.165	0.2	0.239	0.265	0.263	0.281	0.282	0.298	0.295	0.322	0.347	0.336	0.384
OCCUPIED PALESTINIAN TERRITORY	Occupied Palestinian Territory		0	0	0	0	0	0	0	0	0	0	0	0	0	0	0	0	0	0	0	0	0	0	0	0	0	0	0	0	0	0	0	0	0	0	0	0	0	0	0	0	0.235	0.241	0.25	0.255	0.264	0.258	0.283
BARBADOS	Barbados		0.02	0.03	0.024	0.03	0.031	0.035	0.035	0.037	0.041	0.041	0.047	0.053	0.071	0.052	0.049	0.056	0.073	0.092	0.12	0.131	0.117	0.132	0.137	0.131	0.134	0.155	0.145	0.161	0.172	0.164	0.184	0.187	0.176	0.187	0.203991	0.231003	0.250017	0.257033	0.258044	0.270066	0.292077	0.328091	0.266094	0.300039	0.202055	0.220056	0.225092
LIBERIA	Liberia		0.013	0.012	0.015	0.016	0.028	0.016	0.013	0.023	0.044	0.039	0.045	0.044	0.069	0.097	0.132	0.152	0.167	0.167	0.240943	0.346919	0.395903	0.415903	0.410903	0.403903	0.469903	0.404903	0.40273	0.401573	0.410249	0.529994	0.556102	0.528096	0.163048	0.192827	0.189801	0.195438	0.197292	0.207004	0.220847	0.18002	0.127767	0.101	0.105821	0.11582	0.115	0.115818	0.118633
FIJI	Fiji		0.033	0.036	0.043	0.046	0.043	0.047	0.053	0.045	0.048	0.054	0.053	0.046	0.063	0.066	0.115968	0.0939594	0.0879508	0.0969508	0.107943	0.117944	0.141935	0.14991	0.157903	0.171903	0.182911	0.169918	0.131822	0.208687	0.193527	0.22829	0.216272	0.293988	0.227927	0.193484	0.157535	0.156384	0.163233	0.12882	0.150045	0.170634	0.219989	0.180984	0.201964	0.202959	0.201582	0.205757	0.221934
SAINT MARTIN (DUTCH PORTION)	Sint Maarten (Dutch part)		0	0	0	0	0	0	0	0	0	0.333924	0.287129	0.299658	0.329083	0.315225	0.306493	0.274979	0.257135	0.316744	0.294533	0.385465	0.431121	0.375214	0.363823	0.403594	0.365817	0.264918	0.565905	0.295577	0.251724	0.264064	0.271752	0.258843	0.289407	0.148738	0.371417	0.434728	0.0833386	0.0740899	0.0729841	0.138931	0.148783	0.118725	0.0978148	0.150995	0.144762	0.143254	0.134005
MALI	Mali		0	0	0	0	0	0	0	0	0	0.013	0.033	0.032	0.038	0.048	0.048	0.054	0.052	0.061	0.054	0.044	0.055	0.062	0.067	0.0729513	0.0829513	0.0929432	0.0928648	0.112847	0.107791	0.116788	0.106808	0.107774	0.0996538	0.113707	0.118673	0.11064	0.103606	0.0975723	0.104539	0.113505	0.115471	0.118468	0.122464	0.12546	0.127638	0.128635	0.134633
MALAWI	Malawi		0	0	0	0	0	0	0	0	0	0.125475	0.119636	0.101888	0.0984208	0.0946248	0.0899676	0.0949676	0.116951	0.0999513	0.105936	0.103918	0.123927	0.136927	0.148918	0.155903	0.149903	0.157886	0.158768	0.173603	0.182413	0.173263	0.19323	0.164176	0.161394	0.156022	0.15091	0.151045	0.149686	0.147574	0.146616	0.15235	0.201698	0.21417	0.21432	0.239941	0.246915	0.247534	0.246796
NIGER	Niger		0	0	0	0	0	0	0	0	0.007	0.006	0.008	0.015	0.018	0.024	0.026	0.025	0.0369838	0.0359757	0.0439757	0.0519757	0.0589676	0.0629676	0.0689676	0.0899189	0.0789757	0.0909838	0.0909034	0.0998474	0.11375	0.130735	0.155615	0.186625	0.203569	0.262511	0.270455	0.271397	0.245346	0.272287	0.269385	0.28334	0.164471	0.155468	0.144285	0.164285	0.158275	0.153275	0.175265
SWAZILAND	Swaziland		0.001	0.001	0.001	0.001	0.001	0.001	0.001	0.001	0.001	0.001	0.009	0.001	NaN	NaN	0.003	0.022	0.055	0.062	0.076	0.083	0.1	0.109	0.104	0.101	0.085	0.092	0.091	0.093	0.12	0.122	0.127	0.119	0.119	0.074	0.091	0.12	0.125	0.119	0.119	0.119	0.263	0.239	0.228	0.194	0.295	0.29	0.216
REPUBLIC OF SOUTH SUDAN	South Sudan		0	0	0	0	0	0	0	0	0	0.0310619	0.0308954	0.0314783	0.0337268	0.0381404	0.0422209	0.0551287	0.060042	0.0723668	0.0705348	0.0950179	0.110257	0.113172	0.122166	0.123248	0.129078	0.096267	0.0852746	0.0864405	0.0781129	0.0811108	0.0851081	0.082693	0.0869401	0.0887722	0.0796118	0.0925196	0.0965169	0.0761142	0.110091	0.0853579	0.118418	0.110924	0.0991817	0.0683696	0.0940186	0.0971831	0.100264
SIERRA LEONE	Sierra Leone		0.043	0.026	0.049	0.046	0.034	0.05	0.049	0.106	0.057	0.064	0.195	0.079	0.089	0.101	0.083	0.077	0.082	0.069	0.099	0.296	0.234	0.219	0.185	0.147	0.142	0.143	0.123	0.14	0.194	0.185	0.166	0.189	0.151	0.188	0.168	0.181	0.184	0.136	0.125	0.102	0.147	0.164	0.123	0.124	0.131	0.068	0.08
SOMALIA	Somalia		0.013	0.013	0.013	0.013	0.013	0.018	0.019	0.02	0.023	0.024	0.023	0.024	0.029	0.028	0.037	0.036	0.038	0.062	0.042	0.044	0.059	0.051	0.064	0.072	0.09	0.137	0.131	0.218	0.152	0.133	0.222	0.075	0.196	0.255	0.195	0.234	0.252	0.271	0.273924	0.259845	0.199119	0.192823	0.185464	0.17446	0.171456	0.160453	0.155
FAEROE ISLANDS	Faeroe Islands		0.011	0.011	0.015	0.023	0.021	0.027	0.031	0.026	0.032	0.027	0.016	0.031	0.032	0.034	0.033	0.037	0.038	0.046	0.05	0.058	0.07	0.071	0.064	0.069	0.082	0.095	0.09	0.111	0.109	0.131	0.115	0.12	0.125	0.133	0.136	0.141	0.134	0.136	0.144	0.158	0.192	0.179	0.177	0.159	0.157	0.156	0.164
GREENLAND	Greenland		0.027	0.027	0.029	0.033	0.028	0.057	0.039	0.044	0.062	0.064	0.061	0.08	0.072	0.09	0.086	0.094	0.106	0.114	0.148	0.111	0.104	0.128	0.151	0.152	0.152	0.138	0.06	0.197	0.107	0.156	0.154	0.144	0.141	0.099	0.155	0.139	0.089	0.064	0.149	0.129	0.095	0.095	0.089	0.088	0.081	0.088	0.099
BERMUDA	Bermuda		0.012	0.016	0.029	0.025	0.023	0.03	0.037	0.038	0.04	0.037	0.043	0.048	0.043	0.041	0.055	0.049	0.055	0.058	0.061	0.054	0.062	0.063	0.069	0.116	0.121	0.125	0.128	0.124	0.116	0.126	0.119	0.106	0.108	0.123	0.121	0.123	0.115	0.156	0.176	0.213	0.137	0.147	0.126	0.147	0.145	0.145	0.144
FRENCH POLYNESIA	French Polynesia		0	0	0	0	0	0.012	0.012	0.014	0.014	0.008	0.01	0.016	0.013	0.018	0.018	0.023	0.033	0.038	0.042	0.044	0.053	0.062	0.059	0.057	0.059	0.058	0.072	0.075	0.085	0.077	0.08	0.09	0.092	0.115	0.126	0.161	0.166	0.167	0.157	0.148	0.12	0.119	0.114	0.117	0.121	0.118	0.119
RWANDA	Rwanda		0	0	0	0	0	0	0	0	0	0.0203714	0.0190571	0.0249714	0.023	0.023	0.01	0.013	0.012	0.011	0.015	0.016	0.016	0.017	0.018	0.019	0.02	0.048	0.073	0.073	0.079	0.081	0.135	0.164	0.166	0.19	0.173	0.168	0.163	0.166861	0.188939	0.186737	0.142828	0.128763	0.130717	0.131662	0.125826	0.123819	0.126872
CHAD	Chad		0	0	0	0	0	0	0	0	0	0.017	0.015	0.014	0.023	0.025	0.027	0.029	0.023	0.032	0.034	0.044	0.034	0.041	0.033	0.044	0.041	0.05	0.05	0.054	0.053	0.055	0.057	0.057	0.056	0.056	0.059	0.049	0.051	0.054	0.018	0.028	0.103	0.105	0.111	0.11	0.111	0.115	0.119
BONAIRE, SAINT EUSTATIUS, AND SABA	Bonaire, Saint Eustatius and Saba		0	0	0	0	0	0	0	0	0	0.149387	0.128452	0.134058	0.147221	0.141022	0.137115	0.123017	0.115034	0.141701	0.131765	0.172445	0.19287	0.167859	0.162763	0.180555	0.163655	0.118516	0.253168	0.132232	0.112614	0.118134	0.121573	0.115798	0.129472	0.0665405	0.16616	0.194483	0.0372831	0.0331455	0.0326508	0.0621534	0.0665608	0.0531138	0.0437593	0.0675503	0.0647619	0.0640873	0.0599497
MALDIVES	Maldives		0	0	0	0	0	0	0	0	0	0	0	0	0	0	0	0	0	0	0	0	0	0.001	0.001	0.001	0.001	0.002	0.003	0.004	0.006	0.008	0.012	0.013	0.013	0.014	0.016	0.018	0.022	0.022	0.026	0.034	0.047	0.042	0.063	0.054	0.054	0.068	0.079
ANTIGUA & BARBUDA	Antigua and Barbuda		0	0	0	0	0	0	0	0.006	0.008	0.008	0.01	0.013	0.028	0.023	0.025	0.041	0.095	0.154	0.27	0.343	0.126	0.116	0.102	0.09	0.117	0.193	0.11	0.127	0.134	0.111	0.039	0.029	0.08	0.023	0.04	0.068	0.068	0.075	0.078	0.078	0.06	0.058	0.057	0.059	0.059	0.061	0.065
DJIBOUTI	Djibouti		0.003	0.007	0.007	0.008	0.009	0.01	0.008	0.012	0.013	0.01	0.011	0.012	0.013	0.018	0.023	0.033	0.038	0.024	0.033	0.023	0.038	0.044	0.052	0.049	0.053	0.054	0.054	0.054	0.055	0.099	0.095	0.082	0.095	0.095	0.096	0.098	0.103	0.106	0.095	0.106	0.088	0.092	0.092	0.092	0.09	0.09	0.091
BELIZE	Belize		0.005	0.007	0.007	0.008	0.008	0.008	0.008	0.008	0.011	0.011	0.012	0.01	0.019	0.017	0.023	0.023	0.022	0.033	0.028	0.037	0.033	0.039	0.043	0.04	0.042	0.048	0.048	0.054	0.059	0.057	0.052	0.05	0.047	0.047	0.047	0.052	0.056	0.062	0.068	0.082	0.085	0.111	0.097	0.103	0.102	0.103	0.084
ERITREA	Eritrea		0	0	0	0	0	0	0	0	0	0	0	0	0	0	0	0	0	0	0	0	0	0	0	0	0	0	0	0	0	0	0	0	0	0	0	0	0	0	0	0	0	0	0	0	0.192913	0.215723	0.234898
BHUTAN	Bhutan		0	0	0	0	0	0	0	0	0	0	0	0	0	0	0	0	0	0	0	0	0.001	0.001	0.001	0.001	0.001	0.001	0.001	0.002	0.003	0.006	0.006	0.007	0.009	0.008	0.014	0.017	0.015	0.028	0.03	0.017	0.035	0.0480673	0.0560529	0.0472236	0.0549848	0.0644491	0.077836
SEYCHELLES	Seychelles		0	0	0	0	0	0	0	0	0	NaN	NaN	NaN	NaN	0.002	0.002	0.002	0.002	0.002	0.002	0.002	0.008	0.009	0.012	0.013	0.015	0.016	0.022	0.023	0.021	0.033	0.026	0.027	0.023	0.027	0.027	0.041	0.045	0.055	0.054	0.064	0.041	0.047	0.047	0.05	0.055	0.054	0.064
ANDORRA	Andorra		0	0	0	0	0	0	0	0	0	0	0	0	0	0	0	0	0	0	0	0	0	0	0	0	0	0	0	0	0	0	0	0	0	0	0	0	0	0	0	0	0.111	0.111	0.111	0.112	0.111	0.116	0.124
GAMBIA	Gambia		0.004	0.004	0.003	0.003	0.004	0.004	0.005	0.006	0.007	0.005	0.005	0.006	0.007	0.008	0.008	0.008	0.009	0.009	0.01	0.013	0.013	0.015	0.018	0.017	0.017	0.027	0.027	0.031	0.038	0.04	0.043	0.043	0.044	0.044	0.047	0.047	0.044	0.049	0.05	0.049	0.054	0.054	0.054	0.057	0.057	0.059	0.06
CAPE VERDE	Cape Verde		0.028	0.021	0.01	0.005	0.006	0.006	0.008	0.005	0.004	0.00499189	0.00599189	0.00599189	0.00499189	0.00399189	0.00798378	0.00698378	0.006	0.005	0.00799189	0.00998378	0.00998378	0.00999189	0.0139919	0.0169838	0.018	0.021	0.02	0.022	0.0569165	0.068	0.033	0.009	0.01	0.01	0.023	0.023	0.016	0.022	0.02	0.022	0.026	0.027	0.029	0.03	0.031	0.033	0.039
CENTRAL AFRICAN REPUBLIC	Central African Republic		0	0	0	0	0	0	0	0	0	0.027	0.024	0.024	0.02	0.02	0.02	0.024	0.023	0.025	0.05	0.051	0.057	0.05	0.046	0.044	0.031	0.028	0.035	0.035	0.04	0.028	0.029	0.037	0.039	0.04	0.041	0.044	0.044	0.071	0.063	0.068	0.054	0.056	0.059	0.061	0.064	0.064	0.064
BURUNDI	Burundi		0	0	0	0	0	0	0	0	0	0.0106286	0.00994286	0.0130286	0.012	0.013	0.013	0.01	0.013	0.013	0.015	0.02	0.017	0.02	0.02	0.02	0.025	0.021	0.024	0.027	0.028	0.03	0.04	0.043	0.043	0.056	0.06	0.063	0.064	0.068	0.062	0.073	0.057	0.065	0.059	0.062	0.064	0.065	0.066
SAINT LUCIA	Saint Lucia		0.001	0.003	0.002	0.003	0.002	0.003	0.003	0.003	0.003	0.003	0.004	0.005	0.005	0.006	0.006	0.007	0.008	0.009	0.01	0.017	0.018	0.019	0.021	0.022	0.02	0.021	0.023	0.019	0.027	0.041	0.031	0.026	0.031	0.028	0.031	0.035	0.036	0.04	0.045	0.045	0.044	0.046	0.041	0.063	0.07	0.084	0.088
SOLOMON ISLANDS	Solomon Islands		0	0	0.001	0.001	0.001	0.003	0.003	0.003	0.003	0.003	0.003	0.004	0.004	0.004	0.005	0.007	0.007	0.009	0.01	0.01	0.011	0.013	0.015	0.018	0.018	0.016	0.017	0.022	0.017	0.03	0.028	0.037	0.033	0.039	0.039	0.041	0.042	0.044	0.043	0.044	0.04	0.043	0.044	0.047	0.05	0.052	0.054
GUINEA BISSAU	Guinea-Bissau		0.002	0.001	0.003	0.002	0.002	0.003	0.003	0.003	0.003	0.004	0.005	0.008	0.011	0.013	0.016	0.018	0.018	0.013	0.017	0.016	0.019	0.02	0.018	0.03	0.028	0.031	0.026	0.028	0.028	0.03	0.04	0.039	0.039	0.039	0.044	0.047	0.05	0.053	0.059	0.063	0.047	0.048	0.049	0.05	0.05	0.05	0.05
GRENADA	Grenada		0.002	0.003	0.003	0.003	0.003	0.003	0.003	0.003	0.004	0.004	0.006	0.005	0.007	0.004	0.006	0.006	0.008	0.01	0.011	0.013	0.012	0.013	0.013	0.015	0.01	0.013	0.013	0.013	0.014	0.013	0.013	0.016	0.017	0.017	0.017	0.017	0.018	0.02	0.026	0.028	0.029	0.03	0.032	0.033	0.039	0.041	0.042
SAMOA	Samoa		0.001	0.001	0.002	0.002	0.003	0.003	0.003	0.004	0.003	0.004	0.004	0.005	0.005	0.006	0.007	0.008	0.007	0.007	0.008	0.008	0.008	0.01	0.01	0.01	0.009	0.016	0.013	0.022	0.029	0.026	0.027	0.028	0.031	0.031	0.031	0.031	0.031	0.031	0.031	0.033	0.028	0.029	0.03	0.03	0.031	0.032	0.034
ST. VINCENT & THE GRENADINES	Saint Vincent and the Grenadines		0.001	0.001	0.003	0.002	0.002	0.002	0.002	0.002	0.003	0.003	0.003	0.003	0.003	0.004	0.005	0.004	0.005	0.005	0.006	0.008	0.008	0.008	0.01	0.011	0.009	0.009	0.009	0.009	0.01	0.008	0.01	0.01	0.011	0.013	0.018	0.018	0.018	0.021	0.018	0.021	0.022	0.023	0.023	0.028	0.033	0.035	0.036
ST. KITTS-NEVIS	Saint Kitts and Nevis		0	0	0	0	0	0	0	0	0	0	0	0	0	0	0	0	0	0	0	0	0	0	0	0	0	0	0	0	0	0	0	0.015	0.018	0.014	0.014	0.014	0.016	0.015	0.018	0.018	0.029	0.029	0.03	0.031	0.033	0.035	0.036
LIECHTENSTEIN	Liechtenstein		0	0	0	0	0	0	0	0	0	0	0	0	0	0	0	0	0	0	0	0	0	0	0	0	0	0	0	0	0	0	0	0	0	0	0	0	0	0	0	0	0.0543035	0.0563118	0.0564815	0.0586879	0.0548879	0.0557314	0.0562115
PALAU	Palau		0	0	0	0	0	0	0	0	0	0	0	0	0	0	0	0	0	0	0	0	0	0	0	0	0	0	0	0	0	0	0	0	0	0	0	0	0	0	0	0	0	0	0.054	0.054	0.054	0.054	0.054
BRITISH VIRGIN ISLANDS	British Virgin Islands		0	0	0	0	0	0	0	0	0	0	0	0	0.001	0.001	0.002	0.002	0.003	0.001	0.004	0.005	0.005	0.006	0.006	0.007	0.007	0.007	0.007	0.008	0.008	0.008	0.008	0.012	0.01	0.011	0.011	0.013	0.015	0.017	0.018	0.018	0.018	0.02	0.023	0.024	0.027	0.03	0.032
TIMOR-LESTE (FORMERLY EAST TIMOR)	Timor-Leste		0	0	0	0	0	0	0	0	0	0	0	0	0	0	0	0	0	0	0	0	0	0	0	0	0	0	0	0	0	0	0	0	0	0	0	0	0	0	0	0	0	0	0	0	0	0	0
NAURU	Nauru		0	0	0	0	0	0	0	0	0	0	0	0	0	0	0.008	0.009	0.009	0.013	0.013	0.018	0.018	0.024	0.021	0.023	0.027	0.028	0.028	0.031	0.031	0.031	0.034	0.034	0.034	0.034	0.034	0.034	0.044	0.043	0.043	0.043	0.034	0.034	0.033	0.031	0.03	0.029	0.028
COMOROS	Comoros		0	0	0	0	0	0	0	0	0	0.003	0.003	0.003	0.003	0.003	0.003	0.004	0.005	0.005	0.005	0.005	0.008	0.008	0.008	0.008	0.008	0.009	0.011	0.011	0.008	0.006	0.013	0.013	0.013	0.013	0.013	0.013	0.012	0.013	0.014	0.014	0.017	0.018	0.018	0.019	0.019	0.02	0.021
DOMINICA	Dominica		0	0.001	0.002	0.001	0.001	0.001	0.001	0.001	0.002	0.003	0.003	0.003	0.003	0.004	0.004	0.004	0.004	0.006	0.006	0.005	0.007	0.007	0.007	0.007	0.008	0.008	0.008	0.007	0.007	0.009	0.01	0.01	0.011	0.011	0.012	0.013	0.013	0.013	0.015	0.016	0.016	0.016	0.016	0.017	0.018	0.022	0.02
VANUATU	Vanuatu		0	0	0	0	0	0	0	0	0	0	0	0	0.011	0.009	0.017	0.013	0.021	0.023	0.017	0.012	0.011	0.016	0.017	0.015	0.017	0.015	0.012	0.014	0.016	0.017	0.017	0.014	0.014	0.015	0.015	0.033	0.016	0.013	0.018	0.017	0.018	0.018	0.017	0.017	0.017	0.018	0.023
MARTINIQUE	Martinique		0.015	0.022	0.025	0.025	0.025	0.031	0.032	0.044	0.039	0	0	0	0	0	0	0	0	0	0	0	0	0	0	0	0	0	0	0	0	0	0.0227994	0.0225982	0.0251966	0.0258951	0.0238274	0.0245175	0.0242912	0.0240648	0.0238385	0.0236121	0.0294488	0.0285465	0.0285103	0.0258856	0.0258528	0.0258199	0.025787
TONGA	Tonga		0.002	0.002	0.002	0.002	0.002	0.002	0.002	0.002	0.002	0.002	0.003	0.003	0.003	0.003	0.003	0.003	0.003	0.004	0.004	0.003	0.007	0.005	0.006	0.007	0.006	0.009	0.008	0.008	0.01	0.011	0.011	0.013	0.012	0.013	0.013	0.013	0.013	0.015	0.019	0.019	0.021	0.026	0.019	0.023	0.025	0.026	0.021
REUNION	Réunion		0.007	0.008	0.009	0.006	0.01	0.011	0.013	0.016	0.017	0	0	0	0	0	0	0	0	0	0	0	0	0	0	0	0	0	0	0	0	0	0	0	0	0	0	0	0	0	0	0	0	0	0	0	0.0360275	0.0351549	0.0334686
ST. PIERRE & MIQUELON	Saint Pierre and Miquelon		0.004	0.006	0.009	0.008	0.009	0.01	0.009	0.011	0.011	0.009	0.01	0.013	0.009	0.01	0.013	0.011	0.012	0.014	0.011	0.009	0.01	0.013	0.019	0.011	0.012	0.009	0.013	0.01	0.009	0.01	0.01	0.011	0.011	0.009	0.01	0.009	0.013	0.014	0.018	0.028	0.025	0.028	0.026	0.02	0.019	0.019	0.019
TURKS AND CAICOS ISLANDS	Turks and Caicos Islands		0	0	0	0	0	0	0	0	0	0	0	0	0	0	0	0	0	0	0	0	0	0	0	0	0	0	0	0	0	0	0	0	0	0	0	0	0	0	0	0	0.008	0.008	0.009	0.011	0.012	0.013	0.013
FEDERATED STATES OF MICRONESIA	Micronesia (Federated States of)		0	0	0	0	0	0	0	0	0	0	0	0	0	0	0	0	0	0	0	0	0	0	0	0	0	0	0	0	0	0	0	0	0	0	0	0	0	0	0	0	0	0	0.028	0.028	0.029	0.031	0.031
ANGUILLA	Anguilla		0	0	0	0	0	0	0	0	0	0	0	0	0	0	0	0	0	0	0	0	0	0	0	0	0	0	0	0	0	0	0	0	0	0	0	0	0	0	0	0	0.014	0.014	0.015	0.018	0.018	0.018	0.019
MARSHALL ISLANDS	Marshall Islands		0	0	0	0	0	0	0	0	0	0	0	0	0	0	0	0	0	0	0	0	0	0	0	0	0	0	0	0	0	0	0	0	0	0	0	0	0	0	0	0	0	0	0.021	0.023	0.023	0.024	0.024
SAO TOME & PRINCIPE	Sao Tome and Principe		0	0.001	0.001	0.001	0.001	0.001	0.002	0.003	0.002	0.002	0.003	0.003	0.003	0.002	0.003	0.003	0.003	0.003	0.004	0.004	0.004	0.003	0.003	0.004	0.005	0.005	0.008	0.008	0.009	0.009	0.011	0.012	0.013	0.015	0.014	0.015	0.014	0.014	0.013	0.013	0.013	0.013	0.013	0.013	0.013	0.013	0.013
KIRIBATI	Kiribati		0	0	0	0	0	0	0	0	0	0	0	0.002	0.003	0.005	0.005	0.003	0.003	0.006	0.009	0.003	0.006	0.008	0.007	0.01	0.009	0.009	0.009	0.006	0.006	0.007	0.008	0.008	0.007	0.006	0.006	0.006	0.005	0.006	0.006	0.006	0.006	0.006	0.007	0.008	0.008	0.008	0.008
COOK ISLANDS	Cook Islands		0	0	0	0	0	0	0	0	0	0	0	0	0	0	0	0	0	0	0	0.003	0.003	0.003	0.003	0.003	0.003	0.004	0.004	0.008	0.008	0.007	0.008	0.018	0.014	0.014	0.006	0.006	0.006	0.006	0.006	0.006	0.01	0.01	0.01	0.011	0.011	0.011	0.013
MONTSERRAT	Montserrat		0	0	0	0	0	0	0	0	0	NaN	NaN	NaN	0.001	0.001	0.002	0.001	0.002	0.002	0.002	0.002	0.004	0.004	0.004	0.004	0.004	0.003	0.003	0.007	0.007	0.007	0.004	0.005	0.005	0.006	0.006	0.007	0.008	0.008	0.008	0.008	0.008	0.008	0.008	0.008	0.009	0.009	0.01
FRENCH GUIANA	French Guiana		0.002	0.003	0.003	0.003	0.004	0.004	0.004	0.004	0.005	0	0	0	0	0	0	0	0	0	0	0	0	0	0	0	0	0	0	0	0	0	0	0	0	0	0	0	0	0	0	0	0	0	0	0	0.00452391	0.00723247	0.00632334
WALLIS AND FUTUNA ISLANDS	Wallis and Futuna Islands		0	0	0	0	0	0	0	0	0	0	0	0	0	0	0	0	0	0	0	0	0	0	0	0	0	0	0	0	0	0	0	0	0	0	0	0	0	0	0	0	0	0	0	0	0	0	0
SAINT HELENA	Saint Helena		0	0	0	0	0	0	0	0	0	0	0	0	0	0	0	0	0	0	0	0	0	0	0	0	0	0	0	0	0	0	0	0.002	0.001	0.001	0.001	0.001	0.001	0.001	0.002	0.002	0.002	0.002	0.002	0.003	0.003	0.003	0.003
TUVALU	Tuvalu		0	0	0	0	0	0	0	0	0	0	0	0	0	0	0	0	0	0	0	0	0	0	0	0	0	0	0	0	0	0	0	0	0	0	0	0	0	0	0	0	0.002	0.002	0.002	0.002	0.002	0.002	0.002
NIUE	Niue		0	0	0	0	0	0	0	0	0	0	0	0	0	0	0	0	0	0	0	0	0.001	0.001	0.001	0.001	0.001	0.001	0.001	0.001	0.001	0.001	0.001	0.001	0.001	0.001	0.001	0.001	0.001	0.001	0.001	0.001	0.002	0.002	0.002	0.002	0.002	0.002	0.002
[truncated: 23 more columns]

## Sheet: Tabelle3
	UNITED STATES OF AMERICA	CHINA (MAINLAND)	RUSSIAN FEDERATION	GERMANY	JAPAN	INDIA	UNITED KINGDOM	CANADA	UKRAINE	FRANCE (INCLUDING MONACO)	ITALY (INCLUDING SAN MARINO)	POLAND	SOUTH AFRICA	MEXICO	ISLAMIC REPUBLIC OF IRAN	AUSTRALIA	REPUBLIC OF KOREA	BRAZIL	SAUDI ARABIA	SPAIN	INDONESIA	KAZAKHSTAN	TURKEY	NETHERLANDS	CZECH REPUBLIC	TAIWAN	BELGIUM	ROMANIA	ARGENTINA	VENEZUELA	THAILAND	UZBEKISTAN	EGYPT	MALAYSIA	DEMOCRATIC PEOPLE S REPUBLIC OF KOREA	PAKISTAN	BELARUS	UNITED ARAB EMIRATES	ALGERIA	HUNGARY	IRAQ	SWEDEN	GREECE	AUSTRIA	NIGERIA	BULGARIA	DENMARK	VIET NAM	COLOMBIA
	USA	China	Russian Federation	Germany	Japan	India	United Kingdom	Canada	Ukraine	France	Italy	Poland	South Africa	Mexico	Iran	Australia	South Korea	Brazil	Saudi Arabia	Spain	Indonesia	Kazakhstan	Turkey	Netherlands	Czech Republic	Taiwan	Belgium	Romania	Argentina	Venezuela	Thailand	Uzbekistan	Egypt	Malaysia	North Korea	Pakistan	Belarus	United Arab Emirates	Algeria	Hungary	Iraq	Sweden	Greece	Austria	Nigeria	Bulgaria	Denmark	Viet Nam	Colombia
1950	692.124	21.465	87.2854	139.392	27.991	18.178	136.583	42.07	26.5703	55.215	11.313	30.604	16.659	8.328	1.34967	14.941	0.596	5.367	1.403	9.019	2.683	9.13558	2.59	13.998	14.8786	1.033	20.801	5.3	8.168	10.447	0.261	4.42926	2.794	0	0.213	0.359066	0	0	1.033	5.02	0.45	7.823	1.127	5.704	0.616	2.047	6.002	0	2.047
1951	712.983	27.763	102.479	157.457	33.702	19.029	148.7	44.402	31.1397	62.435	13.331	33.336	17.781	9.524	1.887	16.112	0.798	5.913	-0.095	9.041	2.563	10.7046	2.78	15.003	16.1308	1.34	24.418	6.143	9.544	12.932	0.298	5.18988	2.883	0	0.272	0.639294	0	0	1.128	6.056	0.663	9.128	1.249	6.351	0.46	2.229	5.984	0	2.229
1952	694.618	34.995	117.673	166.769	35.599	20.058	144.221	43.51	35.7091	61.96	13.823	34.949	19.348	10.158	1.117	16.432	0.945	6.807	-0.047	10.266	3.472	12.2736	2.859	14.934	17.3831	1.745	22.784	7.27	9.853	13.85	0.349	5.95049	2.974	0	0.243	0.919523	0	0	1.062	7.427	0.535	9.424	1.31	6.025	0.595	2.574	6.251	0	2.357
1953	711.175	36.6	132.866	170.187	39.794	20.436	147.404	43.838	40.2785	58.566	15.291	37.993	19.379	10.02	1.045	16.223	1.281	6.885	0.13	10.629	3.57	13.8426	3.539	15.084	18.6354	1.767	22.487	8.361	9.591	13.062	0.449	6.7111	2.943	0	0.474	1.19975	0	0	1.092	8.671	0.69	8.886	1.334	5.928	0.665	2.89	6.32	0	2.938
1954	677.689	44.011	148.06	180.079	38.913	21.49	150.849	44.482	44.8479	61.788	17.733	40.279	20.171	9.901	0.285	18.517	1.408	8.102	0.338	10.846	4.025	15.4117	3.667	15.938	19.8876	1.771	23.404	9.146	10.032	13.975	0.56	7.47172	3.185	0	1.307	1.47998	0	0	1.134	9.283	0.832	9.417	1.388	6.69	0.702	3.11	6.982	0	2.627
1955	742.828	52.099	163.254	197.485	38.733	23.319	157.381	46.258	49.4172	65.236	20.008	42.09	22.638	10.827	4.316	19.291	1.759	9.289	0.577	10.996	5.689	16.9807	3.718	16.646	21.1399	1.965	25.119	10.041	10.799	16.309	0.648	8.23233	2.906	0	2.005	1.76021	0	0	1.258	9.746	1.119	10.673	1.626	7.936	0.736	3.301	7.388	0	3.261
1956	778.631	59.047	178.447	209.138	43.856	24.142	156.662	51.807	53.9866	73.293	22.795	45.424	23.819	11.502	6.225	19.934	2.062	9.995	0.445	11.559	5.953	18.5497	3.92	17.763	22.3921	2.098	26.419	11.132	12.092	17.744	0.715	8.99294	2.715	0	2.447	2.04044	0	0	1.364	9.052	1.746	11.841	1.717	7.7	0.822	3.54	7.199	0	3.44
1957	772.001	69.964	193.641	212.336	51.345	27.084	155.676	49.9	58.556	75.75	23.779	48.772	24.471	13.452	5.95	20.34	2.242	9.822	0.573	13.71	6.117	20.1187	4.36	17.58	23.6444	2.234	26.339	12.538	12.996	18.993	0.798	9.75356	3.254	0	3.082	2.32067	0	0	1.512	10.494	1.63	10.604	1.861	7.966	0.869	3.928	6.797	0	3.727
1958	748.069	143.39	208.835	206.461	49.46	28.309	151.729	49.721	63.1254	72.655	23.922	48.241	26.273	14.743	6.886	21.184	2.459	10.663	0.917	15.255	6.061	21.6877	4.378	18.203	24.8966	2.613	23.936	13.593	12.064	14.864	0.824	10.5142	3.736	0	4.268	2.6009	0	0	1.424	10.712	1.82	11.485	2.034	7.668	1.016	4.266	7.313	0	3.816
1959	770.471	196.548	232.231	206.276	52.571	27.7282	149.183	50.3497	70.0978	71.5856	25.6781	51.7631	25.7841	15.908	6.97836	22.8461	3.0626	10.6488	0.505919	14.2137	6.51262	24.0829	4.69209	18.3182	25.355	2.99982	24.1021	13.8219	13.3594	17.7809	0.90644	11.6743	3.46803	0.868789	5.42187	2.70771	11.9763	0.003	1.54395	11.4364	1.99627	11.5689	2.21641	7.61733	0.972862	5.35542	7.10547	1.80258	4.3905
1960	788.161	212.604	241.774	222.148	63.4551	30.4284	159.394	52.5972	72.9887	74.0614	29.8043	54.4697	26.704	17.2086	10.1961	24.0499	3.42252	12.7871	0.729903	13.3367	5.83657	25.0748	4.58475	20.043	27.0419	3.24069	24.8112	14.5726	13.3091	15.5614	1.01242	12.1561	4.37575	1.14668	6.49248	3.25503	12.4696	0.003	1.67883	12.3713	2.25332	13.4199	2.56319	8.40188	0.928814	6.07825	8.11941	2.04255	4.47339
1961	785.308	150.371	249.325	227.849	77.1798	32.9099	160.648	52.9478	75.276	76.794	33.9451	56.5599	27.8711	17.8057	9.96418	24.7008	3.94342	13.4128	0.973886	14.6307	7.09651	25.8595	4.73276	20.6929	29.3504	3.41934	25.2998	15.2064	13.9538	14.1593	1.13011	12.5369	4.65773	1.27864	7.2125	3.37052	12.8597	0.003	1.65282	13.3542	2.37697	13.3186	2.67697	8.6856	1.1216	7.08107	8.65226	2.1775	4.96624
1962	814.411	119.908	261.669	241.039	79.9302	36.2377	161.826	56.4931	79.0113	81.5684	39.9168	59.1177	28.8401	17.3973	10.2152	25.8798	4.71113	14.6374	1.7058	16.369	6.27044	27.1415	5.89644	22.7298	31.2776	3.86594	26.7517	17.4162	14.6398	14.7533	1.37194	13.1587	5.06853	1.30364	8.37538	3.70357	13.497	0.005	1.54504	13.7861	2.46202	13.9936	2.76988	9.24263	1.13946	8.37992	10.0682	2.54849	5.30008
1963	850.443	118.864	280.627	258.051	88.656	38.9331	164.679	57.563	84.735	91.219	44.9116	63.0455	29.9468	18.0928	11.2732	27.5476	5.75414	15.1613	1.89378	16.0325	6.21264	29.1077	6.17902	24.8757	32.9024	4.12353	28.8418	18.9562	13.6552	15.3253	1.51791	14.1114	5.87523	1.5906	8.95921	4.2577	14.4745	0.006	1.47903	15.346	2.56096	15.0964	3.34047	10.0844	1.45842	9.38157	11.0993	2.48646	5.79497
1964	887.761	118.915	298.45	264.443	97.9506	38.124	165.902	64.8411	90.1169	94.3062	47.9588	66.2883	32.6272	20.2511	12.9692	29.715	6.05763	15.4658	1.92172	17.5556	6.10651	30.9563	7.17876	26.4128	34.2422	4.6144	28.2626	19.6608	15.1938	15.434	2.03883	15.0071	6.95722	2.01949	9.72112	4.37745	15.3936	0.005	1.54013	17.0145	2.47379	16.476	3.60306	10.6158	1.98327	11.6862	11.7759	3.21721	5.91783
1965	924.725	129.553	316.59	262.037	105.478	42.0087	169.79	68.7546	95.6016	96.1003	51.7272	67.4074	34.9727	20.5153	14.6611	32.9838	6.81722	15.3738	1.15072	19.3833	6.73259	32.8394	7.46533	27.4027	33.365	4.87031	28.7475	21.462	16.0494	16.5747	2.03062	15.9202	7.53533	2.28718	12.0694	4.59323	16.33	0.006	1.79818	16.7124	5.26558	17.0748	4.63946	10.4095	3.20691	12.628	12.0888	3.58895	6.23874
1966	971.392	142.32	334.328	259.668	114.423	43.5569	168.689	70.7081	100.965	94.8703	58.4013	68.8949	34.9986	22.0646	17.4955	32.8109	8.18292	17.525	1.74872	21.1837	6.37963	34.6809	8.59873	28.2635	33.1766	5.31157	28.6836	22.9505	17.2142	15.5497	2.58336	16.8132	7.24131	2.68406	12.9912	4.67406	17.2456	0.007	2.29827	16.8321	7.55352	19.7919	5.08204	10.701	3.5189	13.2959	13.6677	5.23503	6.40671
1967	1008	117.965	349.59	255.521	133.545	43.6077	161.588	76.866	105.577	101.658	63.9	70.6947	36.5066	24.5648	18.5265	35.2468	9.58331	18.0348	6.95564	23.5791	6.69761	36.2645	9.13731	29.1163	33.1073	5.99616	29.3016	25.117	17.8701	17.9455	3.31609	17.5808	5.36297	2.76408	14.2991	4.96067	18.0328	0.25	2.3012	16.0401	5.01446	18.8127	5.3232	10.894	3.50013	15.0403	13.3806	6.26697	6.73767
1968	1044.84	127.676	359.414	268.775	153.36	47.5713	165.526	82.7678	108.546	105.104	68.0055	75.2732	37.6511	25.6242	22.4699	36.7077	10.1521	21.0893	7.93644	26.4785	7.52255	37.2839	9.89779	30.9622	34.6384	6.5886	32.3247	27.3142	18.8344	17.8963	4.66039	18.0746	6.24253	2.87397	16.176	5.68826	18.5393	0.339	2.47004	16.6739	5.37546	21.1807	6.0825	11.544	1.80837	16.2291	14.5395	6.44129	7.25239
1969	1097.57	157.19	374.313	287.118	178.279	48.4837	171.502	83.8207	113.043	112.926	73.5974	80.067	39.0674	27.8865	22.6634	38.7892	11.5907	22.962	9.62635	26.402	9.10541	38.8289	10.5766	31.6054	36.7726	7.17549	33.7041	30.4387	21.0832	18.8136	3.96835	18.8231	5.36702	2.49393	17.4889	5.51676	19.3073	5.597	3.07395	17.0192	6.16848	23.5756	6.94166	12.183	3.30238	18.0971	16.1961	7.38418	7.64636
1970	1180.54	210.198	393.704	280.028	209.597	49.6599	178.105	93.1161	118.9	119.985	80.8855	83.0086	40.8347	31.1001	25.0512	40.251	14.6606	25.5269	12.3503	31.8686	9.76839	40.8405	11.621	38.7018	42.1604	7.84226	34.2496	32.746	22.5568	20.3301	4.1901	19.7994	5.90994	3.98086	20.0536	5.59618	20.3076	4.158	4.10998	19.0869	6.5185	25.1875	6.58466	13.8187	5.87335	16.696	16.9321	7.68913	7.74292
1971	1187.58	238.542	417.819	283.088	217.397	52.4567	180.237	96.1477	126.163	126.4	84.8933	85.3932	45.9621	34.4405	27.7369	41.6565	15.9797	27.9361	16.3091	35.0596	10.6319	43.3221	13.0017	38.3914	44.2222	8.59044	33.1252	34.3017	24.2487	17.0579	5.24593	20.9962	6.28068	4.54765	29.3267	5.30587	21.5487	5.777	5.08994	18.889	7.86896	23.0647	7.57355	14.211	8.80227	17.5277	15.5594	6.68816	8.26458
1972	1244.12	253.519	439.628	284.247	232.579	55.4824	176.863	103.926	132.728	131.438	89.5845	89.9308	46.8223	36.1024	28.9343	42.9409	16.4512	31.1174	19.1817	39.4968	11.8194	45.5624	14.6621	42.9846	44.6243	9.79053	35.6544	36.0956	24.5815	17.0617	5.95128	22.0775	6.95278	4.88554	24.4282	5.15913	22.6709	6.396	7.72998	18.9286	8.0569	23.1177	8.59096	15.3033	11.2957	18.0346	16.2647	6.28745	8.57674
1973	1299.8	263.55	458.219	296.325	249.527	57.1378	180.016	104.057	138.323	141.251	96.4381	91.5911	47.3138	39.3209	35.3371	46.6232	19.9323	36.0316	25.9426	42.2918	13.4001	47.4665	16.1872	45.1037	44.8011	10.9843	37.8383	39.5101	25.6485	18.1312	6.66491	22.9963	6.48501	4.77759	26.5626	5.46083	23.6275	8.353	10.4469	19.9186	8.355	23.8236	10.134	16.3799	13.5187	18.7547	16.1632	6.84316	9.1787
1974	1253.54	268.855	475.692	290.045	249.538	58.9863	168.445	106.333	143.578	136.454	97.7765	94.4969	48.1857	42.2343	39.24	46.9949	20.6422	39.0085	26.9383	47.1249	13.981	49.2513	16.629	43.6641	45.3136	10.7292	36.8315	41.1355	26.0591	20.4851	6.60768	23.8582	7.1204	5.19777	27.7324	5.83717	24.5265	8.543	8.69996	20.1993	8.436	21.7858	9.84216	15.6372	16.9857	19.415	15.0222	5.20323	9.93298
1975	1201.09	311.709	500.042	273.593	237.039	64.0041	164.642	108.29	150.906	122.202	93.0821	102.287	50.4943	44.805	37.9951	47.9569	22.321	41.0791	22.724	49.4141	14.7196	51.7454	17.8546	41.6281	47.4074	11.8605	33.2488	44.2157	25.8859	17.3991	6.65161	25.0638	8.47705	5.30707	29.3733	6.32856	25.78	8.473	8.73395	20.5481	9.03937	22.0416	10.5539	14.7964	12.9235	19.9023	15.2141	5.94423	9.77321
1976	1257.41	325.045	519.277	297.717	247.583	66.8847	163.353	108.883	156.684	138.268	99.8351	108.657	52.6519	50.1566	42.7017	47.5095	25.456	42.1392	27.6909	53.9699	16.8636	53.7101	20.0217	46.1602	49.2487	15.2985	35.3925	47.6179	27.2106	15.6314	7.83739	26.0136	9.40242	6.52226	30.0303	6.21958	26.7688	10.8125	10.6799	21.806	13.3012	24.0833	11.6417	15.8855	15.0627	19.914	16.4035	3.79501	10.3656
1977	1292.4	356.005	536.92	287.283	254.705	70.768	164.946	111.291	161.982	131.525	96.7298	114.071	54.5161	52.5208	44.6867	51.2022	28.846	44.2354	32.2244	53.1738	22.4936	55.5072	22.14	44.6522	50.7182	16.6529	34.4432	48.6017	27.4853	17.3717	8.75134	26.8829	10.3207	6.17378	31.0222	6.63752	27.6759	10.5762	11.4206	22.6733	11.9076	23.4009	12.7339	15.2823	13.784	20.6866	16.8715	4.16239	10.7099
1978	1332.69	397.177	555.351	294.522	246.068	71.9095	165.042	113.402	167.513	138.303	101.33	117.596	55.1012	60.6352	44.2423	55.0819	30.9503	48.0162	31.3931	54.4524	25.6382	57.3857	20.9372	46.3409	51.1718	19.333	36.9681	52.8219	27.9902	18.7204	9.53793	27.7934	10.7153	6.34834	29.5341	7.10987	28.624	12.2144	17.0457	24.0301	11.5156	21.6913	13.0125	15.6188	13.1613	22.1635	16.6746	4.20006	11.3358
1979	1335.71	405.871	559.939	305.099	260.118	75.4975	175.904	120.537	168.871	144.727	105.146	120.444	59.6845	65.5897	44.6706	55.9142	36.3589	51.0794	37.6649	55.3347	25.9654	57.8374	20.4798	51.0391	49.8297	20.6057	38.1516	53.4051	30.1902	20.8645	9.98539	28.0122	11.7057	7.45245	30.0936	7.67862	28.858	9.97447	12.4306	23.4939	14.4168	23.163	13.8696	16.7364	19.1555	21.5415	17.1882	4.4346	12.0816
1980	1287.31	398.168	581.96	300.235	257.879	79.7163	158.034	120.856	175.489	138.123	105.468	126.454	62.2864	73.0943	32.9052	60.1886	36.8146	50.6982	46.1899	58.382	25.8933	60.0907	20.5274	48.2074	50.4068	22.6854	36.8004	53.5478	29.6553	24.7382	10.9051	29.0999	12.3297	7.65077	31.136	8.71494	29.9902	10.0501	18.1268	23.6651	12.3794	19.5727	13.8887	14.1992	18.5686	21.0837	16.4705	4.58124	12.0563
1981	1236.45	393.772	570.866	286.167	252.958	86.0698	152.99	117.248	172.114	124.315	102.429	111.626	70.1691	77.4556	30.7119	62.8091	38.1489	46.5251	47.8448	56.2488	27.3737	58.8949	21.6119	44.7898	49.8516	20.3513	33.7267	53.9657	27.8301	25.0523	10.3212	28.5324	13.8927	8.42724	31.2213	9.34302	29.4176	10.0346	12.6479	23.5976	8.70674	18.9381	13.6804	15.2385	17.9614	21.8578	14.1301	4.82824	12.0798
1982	1174.12	428.621	581.642	277.218	244.926	88.9135	149.629	113.108	175.339	119.511	100.131	114.894	76.5446	82.9722	37.5314	63.8342	38.7509	46.6128	43.0926	56.9318	28.8166	59.9883	23.529	36.4321	49.3613	20.4296	31.9604	53.3104	28.2074	25.437	10.2717	29.0637	15.4015	8.3629	31.9029	10.15	29.9703	10.0308	10.6913	23.6664	8.28997	16.9916	14.0579	14.6196	17.8476	24.5208	14.6517	5.00325	12.4671
1983	1183.38	451.913	589.885	276.091	240.423	96.2429	148.877	111.438	177.796	115.673	97.8192	114.908	79.6753	75.7823	40.7242	61.3496	41.2221	45.1493	43.8959	55.5225	28.7074	60.7963	24.5121	37.4884	49.4229	22.5075	27.6208	54.6169	28.6962	25.357	11.4949	29.4618	15.5514	10.3843	34.1602	10.9231	30.3925	9.61257	14.3297	24.2835	10.4981	15.9031	14.9533	14.1019	16.2951	24.58	13.6919	5.25527	13.4306
1984	1219.5	491.899	595.113	281.997	255.751	98.7971	144.407	116.048	179.345	111.129	99.5092	118.031	86.142	75.5365	40.9232	64.5091	44.7731	45.7439	42.4428	53.9483	30.6934	61.296	25.9024	39.3212	51.088	22.9639	28.6483	51.5329	29.0536	25.3829	12.4333	29.7122	17.3865	9.49619	36.7526	11.615	30.6585	12.5971	19.3631	24.7506	10.8545	15.6411	15.3614	14.7967	18.9427	23.7568	13.8799	4.76921	13.2919
1985	1223.89	532.689	641.833	284.965	249.018	108.643	152.737	115.086	193.413	109.804	100.705	121.318	88.398	78.4692	43.6537	65.7718	48.7131	49.1094	47.0575	54.5663	33.1872	66.1159	28.8381	40.1147	50.3879	22.9032	28.3858	52.9222	27.4378	27.5727	13.1633	32.0405	17.4146	9.91523	39.379	12.7766	33.0602	13.5515	19.8169	23.4571	12.0623	17.0209	16.3131	14.8382	19.0054	24.3508	16.3932	5.75012	13.1221
1986	1224.85	560.11	643.461	285.88	248.98	116.49	155.173	110.442	193.877	105.697	99.1234	123.321	90.2092	80.1189	40.2664	65.4264	49.8558	53.8281	55.8408	51.6136	33.3424	66.2487	31.5552	39.3053	50.7306	25.4943	27.9388	55.0331	28.4255	29.8144	13.4343	32.0968	20.3037	10.9447	42.8044	13.3894	33.1408	12.8357	20.7643	22.7186	12.8902	16.9243	15.9044	14.6642	19.976	24.8833	16.077	5.66358	13.3063
1987	1277.52	597.995	640.806	281.778	246.324	124.424	156.023	117.61	193.052	103.585	103.739	126.565	89.7096	83.5683	43.288	69.8281	52.6583	56.165	51.977	51.7215	33.8098	65.9264	35.0553	41.3429	50.125	26.5075	27.9994	57.7597	31.3533	30.2023	15.3674	31.9573	20.364	11.1565	47.9309	14.4619	32.9944	12.9504	22.894	22.963	14.2423	16.2925	17.0785	15.6591	16.1093	24.9108	15.924	6.57641	13.6801
1988	1333.4	640.765	657.922	280.845	268.959	134.358	155.648	124.347	198.182	102.205	105.339	121.242	93.5307	83.4742	47.7914	71.2005	60.6735	56.6493	55.1986	53.8912	36.2232	67.6531	34.0415	39.7388	49.2935	30.518	27.2227	57.9207	33.1348	31.5916	18.0685	32.8044	20.281	11.7	54.8057	15.7225	33.871	13.1265	22.8461	21.3032	18.3208	15.673	18.3	14.4483	19.2198	23.7209	15.0413	6.27966	14.1969
1989	1350.44	651.442	643.185	275.322	278.844	147.731	158.727	126.315	193.706	107.189	110.465	115.222	93.0002	98.4048	51.8826	75.733	64.4782	57.8913	55.5183	61.3768	35.9373	66.0778	37.5465	44.1224	47.0285	33.2129	29.1467	58.2968	31.9381	29.6318	21.2293	32.053	19.6246	13.669	58.1527	16.462	33.1091	14.7888	21.7817	20.7198	19.7167	15.1533	19.9863	14.6555	11.4955	23.6032	13.3209	4.72872	14.4085
1990	1399.65	660.696	689.218	287.213	316.155	157.937	163.886	126.124	192.639	109.382	119.544	102.769	85.4182	86.529	57.1065	75.9893	67.5323	56.4741	50.6237	63.1041	41.0169	76.7505	41.3506	44.3191	44.8156	32.8711	32.8355	46.2025	30.5893	33.2484	23.9949	30.0051	20.5292	15.0866	33.4061	18.5121	28.2996	14.111	20.9434	20.0505	13.3889	15.652	22.769	16.9554	10.6051	20.9331	14.6159	5.78599	15.5289
1991	1386.16	692.694	653.924	276.801	319.341	168.15	166.097	123.497	172.636	116.346	119.416	102.018	88.9926	90.1018	61.6687	76.3845	71.517	59.287	72.9766	65.7623	49.2964	74.1651	43.1174	46.6147	40.637	35.6485	33.6741	38.0377	32.0703	31.4008	26.4045	30.7739	21.0957	18.2125	31.9942	18.4164	26.3775	15.4673	21.508	19.046	12.3322	15.7498	22.7623	17.9382	11.4435	16.712	17.5135	5.80321	15.4624
1992	1414.49	724.124	534.296	263.616	321.981	179.099	161.87	127.467	160.77	113.402	119.495	99.53	82.2511	90.8243	61.9424	77.7599	77.0181	59.6024	77.8041	68.1805	55.5615	67.3421	44.7386	46.5694	39.4703	37.9737	33.4355	35.773	33.0869	28.815	28.9559	30.2905	21.8175	19.9129	28.1011	19.6548	24.1981	15.7636	21.8018	17.0349	16.0724	15.68	23.194	16.4312	12.6269	15.5596	15.9283	5.8198	16.7835
1993	1441.99	773.962	507.494	260.981	320.046	185.074	157.981	127.567	139.247	107.746	117.407	99.7191	87.4427	92.2673	64.2949	78.9397	87.8378	62.318	85.5151	65.8284	59.9788	59.8772	46.6734	46.6205	37.8377	41.5316	33.1453	33.5241	32.1445	33.834	33.0823	31.5549	25.1849	23.6678	25.8921	21.0635	20.8461	17.8945	22.3642	17.367	17.2297	15.6914	23.0067	16.549	12.2307	15.7412	16.5414	6.19831	17.2865
1994	1467.53	821.573	447.98	256.449	335.035	195.721	156.962	131.669	114.429	106.57	115.879	98.367	92.4194	95.9411	71.9215	80.2443	93.9584	65.3577	83.9174	69.2307	60.8227	50.7192	45.6968	46.7798	36.1289	43.0883	34.0657	33.2864	33.3594	35.3523	36.7103	29.4705	23.0776	24.6245	23.668	22.931	17.0218	19.8157	23.5116	16.9142	19.4021	16.3629	23.5923	16.6491	9.53432	15.3066	17.65	7.10115	18.2289
1995	1484.42	891.118	440.21	256.326	338.408	208.06	154.697	135.076	106.404	108.381	122.362	99.0069	98.7013	90.5013	74.0031	83.3543	102.072	69.7553	64.0589	72.9849	61.83	48.6374	49.3731	47.2069	35.9193	45.2097	34.3768	34.6705	34.8703	36.2649	42.75	28.0196	25.8975	31.0954	22.1779	22.8207	15.6592	19.1083	25.923	16.837	20.2195	16.2026	23.7388	17.4851	9.12041	15.7523	16.8072	7.78479	16.0413
1996	1535.73	930.226	431.267	261.77	341.667	225.476	160.602	139.393	95.9085	112.68	120.709	103.004	99.2558	94.3685	74.7838	85.2515	109.588	76.7453	70.4868	69.5402	69.6149	44.6353	54.4547	49.713	36.8348	47.415	35.343	35.5065	36.78	33.3896	47.415	28.8062	25.537	30.8132	19.5518	25.5288	15.8883	19.8621	26.4154	17.2646	18.9095	17.277	24.3264	18.4011	10.0404	15.8592	20.423	9.28574	16.313
1997	1556.69	931.918	402.608	254.157	339.823	234.695	153.537	143.228	92.861	110.767	122.283	100.269	105.202	100.613	72.8983	87.5532	116.754	80.9458	58.8965	72.9548	76.6202	42.4597	57.8618	47.7674	35.6804	51.0197	33.8433	33.0444	37.5659	36.4311	48.87	29.102	29.3428	32.9741	17.7834	25.597	16.0264	19.9511	23.7457	16.8704	18.5805	15.8877	25.6061	18.3496	11.1926	15.246	17.8574	12.0931	17.6028
1998	1569.61	891.349	397.969	251.986	328.989	239.61	154.971	145.644	89.6777	116.015	125.559	92.5581	102.978	105.993	83.517	91.344	99.2217	84.1445	56.5585	75.3334	58.9438	41.0866	57.8713	48.0723	34.2024	53.9442	35.5423	29.3563	38.06	45.5246	43.4605	32.3414	33.151	31.1784	16.0395	26.4034	15.6584	22.0203	29.0996	16.7617	19.6784	16.0198	26.9218	18.252	10.3017	14.5402	16.7029	12.706	17.7832
1999	1591.24	889.229	405.592	244.444	338.978	259.734	153.098	149.987	81.3875	114.989	126.787	89.8382	102.301	106.582	103.61	93.9039	108.713	86.3216	61.6748	81.7409	66.5808	34.1027	56.7151	46.5959	31.8295	56.0354	34.039	24.7757	40.1979	47.0967	45.3448	33.2258	33.9786	29.5555	17.4944	27.1262	15.0067	21.1634	25.0185	16.8973	19.5637	15.2348	26.7354	17.8938	10.8043	12.6556	15.9987	12.7342	14.9458
2000	1637.03	914.109	401.488	245.573	345.209	267.036	154.886	156.158	77.8759	113.496	127.85	86.6097	103.235	108.097	100.782	95.5772	121.572	88.4896	80.8825	84.9528	72.5446	40.5994	62.7158	46.9125	34.6797	60.5676	34.5893	26.0523	38.8533	41.4495	46.5878	33.0224	38.3045	34.529	18.8772	28.7714	14.9774	30.5098	23.8654	15.9957	19.573	14.9248	28.1111	18.0576	21.5128	12.3649	14.8135	14.2828	15.3545
2001	1610.38	935.083	411.436	250.1	341.215	270.885	157.259	154.188	82.8491	114.751	127.905	85.6025	101.396	112.09	107.787	97.6171	122.421	90.8808	80.9429	85.4585	81.2037	39.0076	58.2659	48.2529	34.65	61.1437	34.4118	27.39	36.5731	46.9362	49.8047	33.457	33.9227	36.8308	19.5592	29.2375	15.0021	27.4541	22.8659	16.4407	23.0775	15.1793	28.7625	19.1328	23.6674	13.3772	15.2471	16.247	15.2672
2002	1621.9	1032.33	408.156	245.584	349.196	279.16	152.92	155.798	80.6969	113.393	129.981	83.6254	97.2591	112.437	108.569	98.8563	126.536	89.3654	88.8868	90.9879	83.8869	43.8876	60.3105	48.0658	33.8143	64.2358	34.6284	27.7662	33.9499	52.6055	52.4166	34.803	34.329	37.2102	18.7344	30.8143	15.0321	22.8433	24.4014	16.1564	23.5592	15.4401	28.6629	19.6285	25.7382	12.6252	15.1548	18.7394	15.1284
2003	1635.36	1215.15	416.318	245.87	351.431	289.14	156.051	160.256	83.793	115.25	134.875	87.1741	110.309	119.475	112.989	100.908	126.203	86.6562	89.1149	92.1367	86.4232	48.7922	64.5425	49.0079	34.766	65.9471	35.0096	28.7378	36.7443	52.2535	55.4687	34.3712	39.9733	42.922	19.1421	32.0662	15.4162	28.826	24.8494	16.9163	24.778	15.6006	29.7734	21.1666	27.2949	13.7854	16.543	20.818	15.5824
2004	1666.93	1398.99	417.706	242.076	350.129	307.111	156.445	159.853	84.706	115.521	136.359	88.4679	122.565	119.775	120.658	104.587	130.624	91.0685	107.692	96.7482	92.7533	51.4399	66.7206	49.5038	34.9656	68.3022	35.1543	28.4579	42.8612	41.2849	59.6381	34.148	40.7052	46.8599	19.5748	35.4693	16.3964	30.5135	23.9774	16.5093	31.0139	15.4137	29.8981	21.1993	26.9339	13.5291	15.0288	23.9629	14.8934
2005	1673.55	1575.1	422.319	236.46	352.09	323.622	155.548	157.324	85.458	116.379	136.464	88.199	113.517	126.636	126.509	105.489	125.367	93.3642	108.039	100.844	93.7054	55.22	72.1072	48.4331	34.2991	69.8154	34.2963	28.028	44.0596	44.7117	61.2298	31.8166	45.0441	49.6056	20.4472	36.7784	16.7487	31.2439	29.0593	16.5411	30.8353	14.6978	31.0947	21.6137	28.8638	13.8254	14.0544	25.8895	16.3918
2006	1651.49	1740.65	438.404	239.628	345.75	343.753	154.893	155.827	90.7943	113.439	135.132	91.9862	121.895	130.067	137.497	107.173	127.076	93.326	117.711	98.4112	94.5533	60.4938	76.8693	47.1306	34.5113	67.9488	33.8171	28.6798	47.6553	43.7118	62.1498	32.5778	48.0403	48.8345	20.7895	39.2267	17.5101	33.2252	27.3475	16.3525	26.7961	14.6491	30.6966	20.9875	26.6947	14.1635	16.2164	27.0552	16.9226
2007	1672.61	1872.75	437.861	232.364	355.492	370.607	152.633	162.178	91.8024	110.49	133.104	91.8036	126.856	130.946	140.097	109.127	134.649	97.4123	105.488	100.555	102.856	62.2165	85.3539	47.1035	35.0066	74.709	32.8865	29.5962	47.5562	40.9181	62.9808	32.509	50.7383	49.8996	17.3251	42.5339	17.3499	36.3711	29.5851	16.0176	16.7827	14.4489	31.2752	20.2682	25.7285	15.2131	14.9134	27.4501	16.4244
2008	1618.6	2012.88	446.696	233.271	336.22	399.171	148.693	157.092	88.8463	108.453	129.975	90.1051	135.001	134.547	145.991	110.376	138.041	103.806	117.996	91.8734	113.963	62.5263	84.4217	47.8934	33.5539	70.9806	32.8065	28.8031	51.339	46.0398	62.2588	33.5805	53.2984	55.2669	19.1944	42.4007	17.9298	42.022	29.7576	15.7016	25.1548	13.8799	30.3289	20.0842	25.8657	14.7597	13.9801	30.9073	18.1905
2009	1498.65	2117.58	417.239	215.665	317.317	440.093	134.906	148.076	75.6805	104.053	115.345	86.4104	137.08	129.886	149.259	111.207	138.309	98.2781	127.141	81.1248	122.025	61.1751	86.0698	46.4432	31.4393	67.3872	29.4059	23.4782	48.8398	46.2804	66.3972	28.9988	55.3247	53.7523	14.6194	42.3633	16.7584	45.1693	32.8018	14.1307	28.2448	12.8906	28.4811	18.4208	20.438	12.4928	13.3244	33.5243	19.8026
2010	1555.15	2320.02	440.198	227.257	331.351	458.099	139.744	151.624	80.2616	106.184	118.365	91.3228	127.437	126.578	153.94	110.672	154.465	112.238	141.298	77.4359	116.86	68.4762	85.8024	49.7047	32.069	72.2761	31.2667	23.0048	50.9643	50.241	69.9842	28.2051	54.2597	59.0986	13.6527	42.0701	17.237	42.5702	32.1545	14.2259	30.2908	14.4766	26.5725	19.6539	30.6534	13.063	13.4149	37.1488	20.8183
2011	1518.91	2562.28	454.409	220.913	345.021	482.008	128.222	154.678	84.0483	98.8533	115.185	91.1441	129.353	132.141	158.035	110.309	160.591	117.347	135.824	77.6593	138.666	65.6799	92.6535	46.1424	31.4029	72.7307	28.6698	24.4318	51.9306	46.5066	69.2687	30.792	57.5976	59.3416	9.87567	42.2103	16.9505	46.1722	32.6984	13.7342	36.9197	13.4189	25.805	19.077	35.3625	14.5137	12.0625	39.5873	20.7641
2012	1464.95	2629.34	458.479	222.132	356.286	529.832	133.132	155.496	82.9565	99.1976	109.595	89.0688	125.857	135.453	163.942	110.946	159.288	125.573	153.706	76.1055	143.664	67.3446	96.5246	45.2585	30.2825	69.7261	27.9554	23.5414	52.3239	52.1218	73.7376	31.3657	57.4113	58.9008	10.2527	41.9967	17.1966	59.3236	34.9645	12.7666	41.7071	12.7435	24.9536	18.3431	31.7496	13.1957	10.8689	37.0322	21.7596
2013	1504.92	2673.72	441.914	226.888	358.816	554.967	130.431	157.294	81.1393	99.7448	100.319	87.9436	124.418	133.769	166.133	108.609	161.446	135.111	147.6	68.9858	112.225	69.4726	94.2196	45.2287	29.0468	70.3351	28.0225	20.9814	51.8973	49.9045	78.0755	29.8372	56.4595	63.9789	7.37299	41.062	17.3972	60.5448	36.1448	11.9282	44.6716	12.3052	22.3076	18.4895	33.3236	11.6401	11.3891	38.4534	24.5603
2014	1517.94	2680.23	442.781	216.344	344.719	596.19	119.83	157.189	70.3015	91.0416	94.9402	84.5854	131.519	131.312	175.196	107.565	160.084	142.984	164.273	69.6234	113.762	76.085	98.7106	43.3319	28.3979	71.3001	26.4223	21.1333	51.5004	50.2556	76.4177	28.2465	60.5738	65.81	8.33632	42.1099	17.2172	58.9264	39.0886	11.9713	45.0739	11.8279	21.4683	17.4903	34.8861	12.3279	10.2422	43.5543	24.8232
2015	1477.19	2642.79	442.921	217.199	333.729	615.019	115.309	157.18	61.1113	92.3037	98.2773	85.4528	123.251	131.543	174.894	109.595	162.498	135.157	176.149	74.1505	138.377	78.7604	104.075	45.4057	28.6068	70.1846	27.5604	21.2133	52.5015	46.6429	77.318	27.7815	59.8537	63.6649	6.71963	46.4452	16.0025	65.4123	41.162	12.7259	45.2092	11.8277	20.4579	18.0904	30.9879	13.1535	9.60193	50.3372	23.491
2016	1444.4	2607.13	441.677	218.48	328.375	652.937	108.927	153.939	63.9193	92.9929	97.3134	88.431	125.558	132.268	176.872	112.181	168.657	130.579	154.408	71.168	155.075	78.7176	109.509	45.3827	29.1018	72.4028	27.2399	20.6913	52.1096	44.5389	76.8845	28.7178	63.7324	67.3369	7.49635	55.4437	16.4533	62.3863	40.622	12.9355	53.0462	11.7283	19.4783	18.3167	31.8705	12.3782	10.0952	50.6092	27.5111
2017	1433.84	2661.22	449.285	214.698	324.143	670.537	105.919	156.341	60.9258	94.3609	95.9263	92.0689	127.212	125.884	197.756	113.291	169.38	132.257	158.138	74.9649	144.927	84.0411	116.083	44.8812	28.8323	74.3588	27.1442	21.3094	51.1506	40.0309	78.1485	29.8257	68.297	67.9229	5.93722	63.4347	16.5783	50.9343	41.88	13.5603	56.9632	11.5466	20.4293	19.0035	35.5555	12.9654	9.47657	49.8319	25.0191
2018	1480.59	2717.4	461.616	206.158	309.959	707.239	103.75	160.072	63.2353	90.4865	95.0014	92.1686	128.821	123.112	206.169	113.525	173.29	127.361	157.412	73.5956	157.365	87.24	114.409	43.7146	28.4965	74.5373	27.3493	21.002	50.4994	35.3702	79.818	31.0967	68.6302	67.998	10.4156	67.5288	16.8864	51.4578	44.8442	13.5449	57.6611	11.3991	19.5955	18.2095	37.1393	11.8864	9.45727	57.7986	25.1715
[truncated: 168 more columns]
