# Supplementary material for: The Social Cost of Fossil and Industrial CO2 Emissions from 1950 to 2018
Source: Research Square preprint supplement (doi:10.21203/rs.3.rs-2244259/v1), 2022-11-17
Supplement: Supplementary file 40 [file SSPs_19_CO2Forcing.xlsx]

## Sheet: data
Model	Scenario	Region	Variable	Unit	2005	2010	2020	2030	2040	2050	2060	2070	2080	2090	2100	Notes
IMAGE	SSP1-19	World	Diagnostics|MAGICC6|Forcing|CO2	W/m2	1.68978	1.83786	2.12649	2.28691	2.29756	2.23364	2.14897	2.05645	1.94806	1.81797	1.66219
MESSAGE-GLOBIOM	SSP2-19	World	Diagnostics|MAGICC6|Forcing|CO2	W/m2	1.68978	1.83786	2.15147	2.35158	2.39693	2.36417	2.2857	2.16902	2.02029	1.85826	1.70156
REMIND-MAGPIE	SSP5-19	World	Diagnostics|MAGICC6|Forcing|CO2	W/m2	1.68978	1.83786	2.16229	2.46726	2.65481	2.64112	2.46025	2.22103	1.99206	1.77162	1.55135
© SSP Public Database (Version 2.0) https://tntcat.iiasa.ac.at/SspDb generated: 2021-08-27 08:31:11
For recommended citation please follow this link: https://tntcat.iiasa.ac.at/SspDb/dsd?Action=htmlpage&page=citation

## Sheet: Recommended Citation
Recommended Citation
For recommended citation please follow this link: https://tntcat.iiasa.ac.at/SspDb/dsd?Action=htmlpage&page=citation
© SSP Public Database (Version 2.0) https://tntcat.iiasa.ac.at/SspDb generated: 2021-08-27 08:31:11
