# Supplementary material for: The Social Cost of Fossil and Industrial CO2 Emissions from 1950 to 2018
Source: Research Square preprint supplement (doi:10.21203/rs.3.rs-2244259/v1), 2022-11-17
Supplement: Supplementary file 41 [file SSPs_19_TotalForcing.xlsx]

## Sheet: data
Model	Scenario	Region	Variable	Unit	2005	2010	2020	2030	2040	2050	2060	2070	2080	2090	2100	Notes
IMAGE	SSP1-19	World	Diagnostics|MAGICC6|Forcing	W/m2	1.87092	2.13946	2.58215	2.8439	2.79111	2.63488	2.46928	2.3362	2.20799	2.06887	1.90519
MESSAGE-GLOBIOM	SSP2-19	World	Diagnostics|MAGICC6|Forcing	W/m2	1.87092	2.13767	2.62303	2.99778	3.00105	2.84701	2.67274	2.48777	2.28199	2.07251	1.8822
REMIND-MAGPIE	SSP5-19	World	Diagnostics|MAGICC6|Forcing	W/m2	1.87092	2.13891	2.67953	3.09688	3.24235	3.16171	2.91258	2.62936	2.37113	2.13111	1.89053
© SSP Public Database (Version 2.0) https://tntcat.iiasa.ac.at/SspDb generated: 2021-08-27 08:29:47
For recommended citation please follow this link: https://tntcat.iiasa.ac.at/SspDb/dsd?Action=htmlpage&page=citation

## Sheet: Recommended Citation
Recommended Citation
For recommended citation please follow this link: https://tntcat.iiasa.ac.at/SspDb/dsd?Action=htmlpage&page=citation
© SSP Public Database (Version 2.0) https://tntcat.iiasa.ac.at/SspDb generated: 2021-08-27 08:29:47
