# Supplementary material for: The Social Cost of Fossil and Industrial CO2 Emissions from 1950 to 2018
Source: Research Square preprint supplement (doi:10.21203/rs.3.rs-2244259/v1), 2022-11-17
Supplement: Supplementary file 42 [file hist_emissions_2.xlsx]

## Sheet: Tabelle1
1	2	3	4	5	6
ID	Year	fossil	landuse	total	Fex
1	1765			0.003	0
2	1766			0.0083383	0.00526973
3	1767			0.0136766	0.0103018
4	1768			0.0190149	0.00956434
5	1769			0.0243532	0.00856399
6	1770			0.0296915	0.00756917
7	1771			0.0360298	0.00621005
8	1772			0.0413681	0.00487083
9	1773			0.0467064	0.00394137
10	1774			0.0520447	0.00305068
11	1775			0.057383	0.00219831
12	1776			0.0627213	0.00138325
13	1777			0.0680596	0.000604151
14	1778			0.0733979	-0.000140347
15	1779			0.0787361	-0.000851637
16	1780			0.0840744	-0.00153354
17	1781			0.0904127	-0.00262969
18	1782			0.095751	-0.00370841
19	1783			0.101089	-0.00432769
20	1784			0.106428	-0.00491366
21	1785			0.111766	-0.00545821
22	1786			0.117104	-0.00595347
23	1787			0.122443	-0.00639162
24	1788			0.127781	-0.00676471
25	1789			0.133119	-0.00706466
26	1790			0.138457	-0.00728515
27	1791			0.144796	-0.00787204
28	1792			0.150134	-0.00838286
29	1793			0.155472	-0.00837508
30	1794			0.160811	-0.00829846
31	1795			0.166149	-0.00815635
32	1796			0.171487	-0.00795227
33	1797			0.177825	-0.0081358
34	1798			0.183164	-0.00826401
35	1799			0.188502	-0.00789411
36	1800			0.19484	-0.0079155
37	1801			0.200179	-0.00787298
38	1802			0.207517	-0.0082
39	1803			0.211855	-0.00801451
40	1804			0.217194	-0.00688103
41	1805			0.222532	-0.00613713
42	1806			0.22887	-0.00578778
43	1807			0.234208	-0.00539979
44	1808			0.239547	-0.00454075
45	1809			0.244885	-0.00365928
46	1810			0.250223	-0.00275949
47	1811			0.256562	-0.0022728
48	1812			0.2619	-0.00175624
49	1813			0.267238	-0.00077279
50	1814			0.272577	0.00023968
51	1815			0.278915	0.00084872
52	1816			0.285253	0.00105541
53	1817			0.291591	0.00129188
54	1818			0.29693	0.00198372
55	1819			0.302268	0.00312697
56	1820			0.307606	0.00429099
57	1821			0.312945	0.00547538
58	1822			0.319283	0.00625845
59	1823			0.325621	0.00664294
60	1824			0.330959	0.00747197
61	1825			0.337298	0.00832499
62	1826			0.342636	0.00919889
63	1827			0.348974	0.0100965
64	1828			0.354313	0.0110146
65	1829			0.359651	0.0123671
66	1830			0.370989	0.0112809
67	1831			0.375328	0.0106224
68	1832			0.380666	0.0124352
69	1833			0.387004	0.0134455
70	1834			0.392342	0.0144718
71	1835			0.398681	0.0155214
72	1836			0.408019	0.0150003
73	1837			0.413357	0.0149147
74	1838			0.419696	0.016066
75	1839			0.426034	0.0168606
76	1840			0.433372	0.017313
77	1841			0.439711	0.0178369
78	1842			0.447049	0.0184538
79	1843			0.453387	0.0191387
80	1844			0.460725	0.0198423
81	1845			0.470064	0.0193602
82	1846			0.475402	0.0195737
83	1847			0.48374	0.0201297
84	1848			0.490079	0.0202872
85	1849			0.498417	0.0204351
86	1850			0.507755	0.0196335
87	1851			0.500786	0.0208191
88	1852			0.555623	0.0161828
89	1853			0.556354	0.0105557
90	1854			0.564817	0.00922609
91	1855			0.564679	0.00783604
92	1856			0.574935	0.00742165
93	1857			0.581232	0.00668489
94	1858			0.587233	0.00731801
95	1859			0.597254	0.00666178
96	1860			0.609967	-0.00044288
97	1861			0.623224	-0.0119476
98	1862			0.570717	-0.00804954
99	1863			0.577749	-0.00030669
100	1864			0.586138	-0.00098311
101	1865			0.593795	-0.0029952
102	1866			0.596912	-0.00933409
103	1867			0.603606	-0.0162792
104	1868			0.607235	-0.0174681
105	1869			0.612766	-0.0142037
106	1870			0.616645	-0.0123158
107	1871			0.643665	-0.0204485
108	1872			0.740333	-0.0423676
109	1873			0.7613	-0.060576
110	1874			0.757712	-0.0630841
111	1875			0.778426	-0.0619007
112	1876			0.787878	-0.060064
113	1877			0.797139	-0.0544509
114	1878			0.805051	-0.0509696
115	1879			0.825348	-0.0534895
116	1880			0.857243	-0.0643707
117	1881			0.891873	-0.0715792
118	1882			0.860664	-0.0683778
119	1883			0.880518	-0.067171
120	1884			0.887128	-0.0675671
121	1885			0.892236	-0.0641582
122	1886			0.898144	-0.0613567
123	1887			0.911163	-0.0623375
124	1888			0.941734	-0.069931
125	1889			0.9402	-0.0724786
126	1890			0.967754	-0.0732758
127	1891			0.982249	-0.0784243
128	1892			0.997191	-0.0814191
129	1893			0.994403	-0.0833062
130	1894			1.02337	-0.0856866
131	1895			1.05042	-0.0896222
132	1896			1.06528	-0.0909038
133	1897			1.08956	-0.0900543
134	1898			1.116	-0.0899996
135	1899			1.1592	-0.0915741
136	1900			1.18721	-0.0932703
137	1901			1.25494	-0.0973246
138	1902			1.26897	-0.101725
139	1903			1.34367	-0.106202
140	1904			1.37229	-0.110582
141	1905			1.43282	-0.113803
142	1906			1.50353	-0.119122
143	1907			1.58776	-0.124283
144	1908			1.56141	-0.121751
145	1909			1.60238	-0.116453
146	1910			1.64098	-0.11691
147	1911			1.61489	-0.113643
148	1912			1.62685	-0.106382
149	1913			1.66598	-0.101986
150	1914			1.56479	-0.0947706
151	1915			1.54375	-0.0857878
152	1916			1.60912	-0.0832586
153	1917			1.6662	-0.0829626
154	1918			1.6503	-0.0801971
155	1919			1.52565	-0.0713741
156	1920			1.65328	-0.0663275
157	1921			1.56042	-0.0611077
158	1922			1.59294	-0.0542606
159	1923			1.72329	-0.0610025
160	1924			1.71986	-0.0653313
161	1925			1.73309	-0.0616042
162	1926			1.74448	-0.0583994
163	1927			1.85918	-0.0589091
164	1928			1.86467	-0.0600124
165	1929			1.96923	-0.0594953
166	1930			1.94888	-0.0558448
167	1931			1.84334	-0.0466439
168	1932			1.65923	-0.0367513
169	1933			1.70159	-0.0309782
170	1934			1.76986	-0.0300509
171	1935			1.82172	-0.0288055
172	1936			1.9313	-0.0285781
173	1937			1.9887	-0.0264925
174	1938			1.92388	-0.0156189
175	1939			1.97144	-0.00756791
176	1940			2.06583	-0.00821566
177	1941			2.08436	-0.0110247
178	1942			2.11105	-0.0130202
179	1943			2.15477	-0.0126084
180	1944			2.1514	-0.0130819
181	1945			1.92915	-0.01361
182	1946			2.08015	-0.0177541
183	1947			2.26218	-0.0266502
184	1948			2.34413	-0.0351565
185	1949			2.30113	-0.0379019
186	1950			2.52233	-0.0410404
187	1951			2.85652	-0.0594258
188	1952			2.90564	-0.0779556
189	1953			2.94552	-0.0852044
190	1954			3.01714	-0.0918651
191	1955			3.23419	-0.0985601
192	1956			3.42269	-0.105033
193	1957			3.54187	-0.111324
194	1958			3.64958	-0.113011
195	1959			3.6656	-0.105876
196	1960	2.48022	1.19228	3.67251	-0.0967086
197	1961	2.47914	1.24432	3.72346	-0.104385
198	1962	2.56693	1.23557	3.8025	-0.115335
199	1963	2.71303	1.24429	3.95732	-0.115062
200	1964	2.85112	1.25159	4.10271	-0.113291
201	1965	2.9846	1.26426	4.24886	-0.109114
202	1966	3.1205	1.2937	4.4142	-0.103892
203	1967	3.21667	1.29763	4.5143	-0.100381
204	1968	3.3921	1.2352	4.6273	-0.0948973
205	1969	3.62033	1.23839	4.85872	-0.0829352
206	1970	3.92295	1.19711	5.12006	-0.0603903
207	1971	4.0795	1.07089	5.15039	-0.033735
208	1972	4.2648	1.04706	5.31186	-0.0181687
209	1973	4.4916	1.0331	5.5247	-0.0101221
210	1974	4.4816	1.03874	5.52034	-0.00168982
211	1975	4.48653	1.03159	5.51811	0.00662207
212	1976	4.73319	1.09061	5.82379	0.0105612
213	1977	4.8637	1.09399	5.95769	0.0150762
214	1978	5.045	1.09037	6.13537	0.0292492
215	1979	5.1823	1.06471	6.24701	0.0465308
216	1980	5.1598	1.02521	6.18501	0.0541693
217	1981	5.02516	1.04486	6.07002	0.0560188
218	1982	4.99741	1.19041	6.18782	0.0548529
219	1983	5.04952	1.22552	6.27504	0.0541226
220	1984	5.19892	1.26008	6.459	0.0614846
221	1985	5.385	1.27534	6.66034	0.0727784
222	1986	5.456	1.2872	6.7432	0.0831827
223	1987	5.59915	1.29401	6.89316	0.0908859
224	1988	5.81336	1.31672	7.13008	0.10257
225	1989	5.8978	1.32364	7.22144	0.119012
226	1990	6.0361	1.31948	7.35558	0.1343
227	1991	6.0388	1.38098	7.41978	0.139103
228	1992	5.969	1.30353	7.27253	0.136582
229	1993	6.03318	1.2981	7.33128	0.13964
230	1994	6.0706	1.2896	7.3602	0.145195
231	1995	6.19489	1.27501	7.4699	0.156397
232	1996	6.37627	1.2511	7.62737	0.170156
233	1997	6.40488	1.21814	7.62302	0.170277
234	1998	6.37186	1.21484	7.58671	0.163047
235	1999	6.45215	1.18279	7.63494	0.159997
236	2000	6.63698	1.1488	7.78578	0.15362
237	2001	6.69613	1.132	7.82813	0.149074
238	2002	6.84909	1.2317	8.08079	0.153265
239	2003	7.18456	1.2257	8.41026	0.157713
240	2004	7.518	1.2429	8.7609	0.160502
241	2005	7.76441	1.1955	8.95991	0.166283
242	2006	8.01293	1.1676	9.18053	0.179783
243	2007	8.24773	1.14	9.38773	0.197598
244	2008	8.42156	1.11217	9.53373	0.216677
245	2009	8.30251	1.08433	9.38685	0.236971
246	2010	8.74027	1.0565	9.79677	0.25476
247	2011	9.02631	1.04813	10.0744	0.266387
248	2012	9.1787	1.03976	10.2185	0.276213
249	2013	9.23618	1.03139	10.2676	0.287416
250	2014	9.30375	1.02302	10.3268	0.299051
251	2015	9.28351	1.01465	10.2982	0.311306
252	2016	9.28109	1.00628	10.2874	0.324143
253	2017	9.39378	0.99791	10.3917	0.337511
254	2018	9.58583	0.98954	10.5754	0.351364
