# Supplementary material for: The Social Cost of Fossil and Industrial CO2 Emissions from 1950 to 2018
Source: Research Square preprint supplement (doi:10.21203/rs.3.rs-2244259/v1), 2022-11-17
Supplement: Supplementary file 43 [file spinupcheck.xlsx]

## Sheet: spinup2
1-Y	2-E	3-R1	4-R2	5-R3	6-R4	7-C	8-CCA	9-F	10-Fex	11-TF	12-TMF	13-TMS	14-TDF	15-TDS	16-TM	17-TD	18-Î±	19-Î±check	20-atmosGt
1765	0.00140885	0	0	0	0	278.001	0	2.71314e-05	0	2.71314e-05	0	0	0	0	0	0	0.16377	0.16377	589.363
1766	0.0039158	0.000306143	0.000315582	0.000397859	0.000389265	278.003	-1.00477e-14	2.71247e-05	0.00526973	0.00529685	0.000295793	3.43687e-06	-7.42217e-06	8.05001e-06	0.00029923	6.27838e-07	0.163794	0.163794	589.366
1767	0.00642275	0.00115704	0.00118784	0.00143721	0.000919027	278.006	0.0013219	9.05104e-05	0.0103018	0.0103923	0.0010785	1.35489e-05	-2.70623e-05	3.17349e-05	0.00109205	4.67261e-06	0.163858	0.163858	589.373
1768	0.00892971	0.0025527	0.00260815	0.00301095	0.0013905	278.011	0.00463241	0.000184101	0.00956434	0.00974844	0.00191209	2.64952e-05	-4.79792e-05	6.20585e-05	0.00193859	1.40793e-05	0.163927	0.163927	589.383
1769	0.0114367	0.00449311	0.00456807	0.00503003	0.00188695	278.017	0.00996179	0.000307621	0.00856399	0.00887161	0.00247892	3.84148e-05	-6.22023e-05	8.99772e-05	0.00251734	2.77748e-05	0.163975	0.163975	589.397
1770	0.0139436	0.00697827	0.00705924	0.00742023	0.00237321	278.025	0.0175596	0.000458801	0.00756917	0.00802797	0.00282817	4.91825e-05	-7.09657e-05	0.000115198	0.00287735	4.42321e-05	0.164007	0.164007	589.414
1771	0.0169202	0.0100082	0.0100735	0.0101197	0.00286379	278.034	0.0275435	0.00063657	0.00621005	0.00684662	0.00299106	5.86057e-05	-7.50533e-05	0.000137269	0.00304967	6.22162e-05	0.164024	0.164024	589.433
1772	0.0194271	0.0136849	0.0137079	0.0132095	0.00348224	278.045	0.0400533	0.000848698	0.00487083	0.00571953	0.00299475	6.65065e-05	-7.51458e-05	0.000155775	0.00306126	8.06293e-05	0.16403	0.16403	589.456
1773	0.0219341	0.0179063	0.0178477	0.0164918	0.00391749	278.058	0.0556318	0.00108121	0.00394137	0.00502258	0.00290127	7.32029e-05	-7.28001e-05	0.00017146	0.00297447	9.86596e-05	0.164028	0.164028	589.482
1774	0.024441	0.0226725	0.022485	0.0199344	0.00442885	278.071	0.0738142	0.00133833	0.00305068	0.004389	0.0027577	7.90173e-05	-6.91976e-05	0.000185078	0.00283672	0.000115881	0.164024	0.164024	589.51
1775	0.026948	0.0279834	0.0276122	0.0235105	0.00490839	278.085	0.0949024	0.0016173	0.00219831	0.0038156	0.00258176	8.40326e-05	-6.47827e-05	0.000196826	0.00266579	0.000132043	0.164018	0.164018	589.541
1776	0.0294549	0.033839	0.0332217	0.0271978	0.00540107	278.101	0.118865	0.00191842	0.00138325	0.00330166	0.002387	8.83288e-05	-5.98958e-05	0.000206888	0.00247533	0.000146992	0.164011	0.164011	589.574
1777	0.0319619	0.0402393	0.0393061	0.0309776	0.0058882	278.118	0.145796	0.00224081	0.000604151	0.00284496	0.00218384	9.19836e-05	-5.4798e-05	0.000215449	0.00227583	0.000160651	0.164005	0.164005	589.61
1778	0.0344688	0.0471844	0.0458579	0.0348345	0.00637761	278.136	0.175727	0.00258419	-0.000140347	0.00244385	0.00198015	9.50722e-05	-4.9687e-05	0.000222683	0.00207523	0.000172996	0.164	0.164	589.648
1779	0.0369758	0.0546742	0.0528699	0.0387555	0.00686608	278.155	0.208709	0.00294811	-0.000851637	0.00209647	0.00178189	9.7667e-05	-4.4712e-05	0.000228761	0.00187955	0.000184049	0.163997	0.163997	589.688
1780	0.0394827	0.0627087	0.0603351	0.0427301	0.00735498	278.175	0.244776	0.00333224	-0.00153354	0.0017987	0.00159334	9.98365e-05	-3.99808e-05	0.000233842	0.00169317	0.000193862	0.163995	0.163995	589.73
1781	-0.0552804	0.0712879	0.0682464	0.0467493	0.00784379	278.196	0.283963	0.00373626	-0.00262969	0.00110656	0.00139297	0.00010136	-3.4953e-05	0.00023741	0.00149433	0.000202457	0.163993	0.163993	589.775
1782	-0.0173508	0.0592751	0.0548084	0.0233365	-0.0185431	278.12	0.326299	0.00228826	-0.00370841	-0.00142015	0.00106127	0.0001008	-2.663e-05	0.000236099	0.00116207	0.000209469	0.163982	0.163982	589.615
1783	0.523898	0.0555044	0.0500744	0.014542	0.00293611	278.124	0.280654	0.00236871	-0.00432769	-0.00195898	0.000644121	9.82652e-05	-1.61626e-05	0.000230162	0.000742386	0.000213999	0.163932	0.163932	589.624
1784	0.598064	0.169347	0.166653	0.160063	0.143528	278.641	0.296265	0.0123	-0.00491366	0.00738634	0.000811482	0.000101425	-2.03621e-05	0.000237562	0.000912907	0.0002172	0.163951	0.163951	590.719
1785	0.275068	0.299306	0.298042	0.302238	0.105374	279.006	0.789581	0.0193137	-0.00545821	0.0138555	0.00177898	0.000114775	-4.4639e-05	0.000268832	0.00189375	0.000224193	0.16421	0.16421	591.494
1786	0.45362	0.359076	0.355056	0.329547	0.0322812	279.077	1.22221	0.0206756	-0.00595347	0.0147221	0.0029105	0.000132809	-7.30317e-05	0.000311073	0.00304331	0.000238041	0.164461	0.164461	591.644
1787	0.519909	0.457645	0.451193	0.40281	0.112011	279.425	1.44676	0.02734	-0.00639162	0.0209484	0.00418112	0.000155358	-0.000104915	0.000363888	0.00433647	0.000258973	0.164647	0.164647	592.381
1788	0.536195	0.570619	0.560704	0.482679	0.0975974	279.713	1.93853	0.0328526	-0.00676471	0.0260879	0.00577352	0.00018516	-0.000144872	0.000433692	0.00595868	0.00028882	0.164958	0.164958	592.992
1789	0.389581	0.687131	0.672193	0.554022	0.108283	280.023	2.418	0.0387819	-0.00706466	0.0317172	0.00758793	0.000221805	-0.0001904	0.000519524	0.00780973	0.000329124	0.165284	0.165283	593.649
1790	0.494351	0.771782	0.749148	0.572306	0.0637094	280.158	2.95704	0.0413677	-0.00728515	0.0340825	0.00941866	0.000263478	-0.000236337	0.000617133	0.00968213	0.000380795	0.165634	0.165633	593.936
1791	0.250078	0.8792	0.848415	0.61735	0.110931	280.457	3.37129	0.0470761	-0.00787204	0.039204	0.0112484	0.000309836	-0.000282251	0.000725714	0.0115583	0.000443463	0.165939	0.165937	594.569
1792	0.363369	0.933537	0.891469	0.586156	0.0247055	280.437	3.94392	0.0466938	-0.00838286	0.038311	0.012884	0.000358756	-0.000323292	0.000840298	0.0132428	0.000517006	0.166287	0.166285	594.527
1793	0.417633	1.01249	0.959271	0.592303	0.090585	280.656	4.25044	0.0508678	-0.00837508	0.0424928	0.0143432	0.000409629	-0.000359907	0.000959454	0.0147528	0.000599547	0.166523	0.166521	594.991
1794	0.455383	1.10324	1.03821	0.6129	0.0795877	280.835	4.75573	0.054286	-0.00829846	0.0459875	0.0158864	0.000465274	-0.000398628	0.00108979	0.0163516	0.000691161	0.16684	0.166838	595.371
1795	0.426835	1.20219	1.12444	0.640965	0.0945762	281.064	5.2373	0.058634	-0.00815635	0.0504777	0.0175151	0.000525876	-0.000439497	0.00123174	0.0180409	0.000792239	0.167157	0.167154	595.855
1796	0.582529	1.29493	1.203	0.656563	0.0810532	281.237	5.77463	0.0619346	-0.00795227	0.0539824	0.0192064	0.000591423	-0.000481937	0.00138526	0.0197978	0.000903325	0.1675	0.167497	596.222
1797	0.757461	1.42151	1.31527	0.713796	0.129576	281.582	6.27903	0.068489	-0.0081358	0.0603532	0.0210555	0.000663112	-0.000528334	0.00155317	0.0217186	0.00102484	0.167845	0.167842	596.953
1798	0.512652	1.58609	1.46508	0.811317	0.159495	282.023	6.94816	0.0768809	-0.00826401	0.0686169	0.0232789	0.000743991	-0.000584125	0.00174261	0.0240229	0.00115849	0.168284	0.16828	597.89
1799	0.268834	1.69748	1.55784	0.824149	0.0809327	282.162	7.74153	0.0795073	-0.00789411	0.0716132	0.0255975	0.000831848	-0.000642305	0.0019484	0.0264294	0.00130609	0.168778	0.168774	598.183
1800	0.459663	1.75589	1.59465	0.766433	0.0437986	282.162	8.31067	0.0795144	-0.0079155	0.0715989	0.0275536	0.000921319	-0.000691389	0.00215796	0.028475	0.00146657	0.16916	0.169155	598.184
1801	0.164306	1.85576	1.67371	0.772245	0.110646	282.414	8.75177	0.0842849	-0.00787298	0.0764119	0.0293422	0.00101357	-0.000736268	0.00237404	0.0303557	0.00163778	0.169481	0.169476	598.717
1802	0.188246	1.89146	1.68548	0.693946	0.00435885	282.277	9.39081	0.0816853	-0.0082	0.0734853	0.0308169	0.00110672	-0.000773273	0.00259221	0.0319236	0.00181894	0.169851	0.169846	598.427
1803	0.638935	1.93235	1.70249	0.635294	0.0504087	282.322	9.69386	0.0825442	-0.00801451	0.0745297	0.0318726	0.00119832	-0.000799762	0.00280677	0.0330709	0.00200701	0.17006	0.170055	598.523
1804	0.670319	2.07118	1.82023	0.713494	0.158076	282.764	10.1104	0.0909255	-0.00688103	0.0840445	0.0332761	0.00129642	-0.00083498	0.00303654	0.0345725	0.00220156	0.170342	0.170336	599.46
1805	0.290503	2.21683	1.94328	0.788161	0.127673	283.077	10.868	0.0968464	-0.00613713	0.0907093	0.0352247	0.00140461	-0.000883876	0.00328994	0.0366293	0.00240607	0.170799	0.170793	600.124
1806	0.452477	2.27994	1.97951	0.743912	0.0342625	283.039	11.5651	0.0961218	-0.00578778	0.090334	0.0370605	0.00151647	-0.000929941	0.00355196	0.038577	0.00262202	0.171226	0.171219	600.043
1807	0.496222	2.37825	2.05155	0.752791	0.11279	283.297	11.9779	0.100994	-0.00539979	0.0955941	0.0387618	0.0016311	-0.00097263	0.00382044	0.0403929	0.00284781	0.171534	0.171527	600.589
1808	0.454517	2.48607	2.13238	0.77282	0.0971224	283.49	12.6207	0.104639	-0.00454075	0.100098	0.0406046	0.00175162	-0.00101887	0.00410273	0.0423562	0.00308386	0.171942	0.171935	600.998
1809	0.337495	2.58482	2.20275	0.77817	0.091466	283.659	13.2264	0.107825	-0.00365928	0.104166	0.0424945	0.00187725	-0.00106629	0.00439698	0.0443717	0.00333069	0.172342	0.172334	601.356
1810	0.400549	2.65814	2.24594	0.749908	0.0614064	283.717	13.8186	0.108923	-0.00275949	0.106164	0.0442837	0.00200634	-0.00111119	0.00469936	0.04629	0.00358818	0.172729	0.172721	601.48
1811	0.0731071	2.74517	2.30269	0.744207	0.089479	283.883	14.3155	0.112057	-0.0022728	0.109784	0.0459789	0.00213861	-0.00115372	0.00500917	0.0481175	0.00385545	0.173073	0.173064	601.832
1812	0.136674	2.76104	2.28534	0.647174	-0.0104429	283.685	14.8912	0.108314	-0.00175624	0.106558	0.0473034	0.00227067	-0.00118696	0.00531848	0.0495741	0.00413152	0.173416	0.173407	601.411
1813	0.286372	2.79072	2.28254	0.583638	0.0413113	283.7	15.1489	0.108599	-0.00077279	0.107826	0.0482394	0.002401	-0.00121045	0.00562375	0.0506404	0.0044133	0.173605	0.173596	601.443
1814	0.197896	2.85293	2.31335	0.572504	0.0651473	283.805	15.5319	0.110593	0.00023968	0.110833	0.0491995	0.00253363	-0.00123454	0.0059344	0.0517331	0.00469987	0.173844	0.173835	601.667
1815	0.231281	2.89592	2.32394	0.538264	0.0327568	283.792	15.9791	0.110347	0.00084872	0.111196	0.0501202	0.00266797	-0.00125764	0.00624905	0.0527882	0.00499141	0.174106	0.174096	601.64
1816	0.354799	2.94616	2.3419	0.518969	0.0529461	283.861	16.3229	0.11165	0.00105541	0.112706	0.050939	0.00280304	-0.00127818	0.00656543	0.053742	0.00528725	0.174319	0.174309	601.786
1817	0.450338	3.02324	2.38731	0.537689	0.0804073	284.03	16.7175	0.11483	0.00129188	0.116122	0.0518429	0.00294082	-0.00130087	0.00688814	0.0547837	0.00558727	0.174559	0.17455	602.144
1818	0.189184	3.12108	2.45351	0.580566	0.097812	284.254	17.1967	0.119055	0.00198372	0.121039	0.0529941	0.00308349	-0.00132975	0.00722231	0.0560776	0.00589255	0.174854	0.174844	602.619
1819	-0.0759794	3.16217	2.46031	0.543124	0.0201132	284.187	17.7403	0.117789	0.00312697	0.120916	0.0541342	0.00322875	-0.00135836	0.00756254	0.0573629	0.00620418	0.175174	0.175163	602.477
1820	0.180866	3.14565	2.40768	0.436816	-0.0275571	283.964	18.0523	0.113585	0.00429099	0.117876	0.0548458	0.00337145	-0.00137622	0.0078968	0.0582173	0.00652058	0.175367	0.175357	602.004
1821	-0.184763	3.18493	2.41338	0.419724	0.0589262	284.078	18.1932	0.11574	0.00547538	0.121216	0.0554296	0.00351386	-0.00139087	0.00823034	0.0589435	0.00683947	0.175484	0.175473	602.246
1822	-0.0960227	3.14476	2.33713	0.302089	-0.0701427	283.715	18.5714	0.108894	0.00625845	0.115152	0.0557175	0.00365399	-0.00139809	0.00855858	0.0593715	0.00716049	0.175667	0.175656	601.476
1823	0.279992	3.12388	2.28188	0.22791	-0.003901	283.631	18.546	0.107308	0.00664294	0.113951	0.0555648	0.00378896	-0.00139426	0.00887469	0.0593537	0.00748043	0.175655	0.175645	601.298
1824	0.386774	3.1847	2.31166	0.271471	0.0786208	283.848	18.6802	0.111395	0.00747197	0.118867	0.0556578	0.00392584	-0.00139659	0.00919531	0.0595836	0.00779872	0.175727	0.175717	601.757
1825	0.109312	3.26873	2.36495	0.338418	0.0815359	284.055	19.061	0.115301	0.00832499	0.123626	0.0562459	0.00406849	-0.00141135	0.00952943	0.0603144	0.00811808	0.175937	0.175927	602.197
1826	0.267419	3.29247	2.35535	0.316646	0.00406296	283.97	19.4731	0.113697	0.00919889	0.122896	0.0569061	0.00421323	-0.00142792	0.00986845	0.0611194	0.00844053	0.176166	0.176156	602.016
1827	0.34007	3.35056	2.38135	0.342975	0.0725922	284.149	19.6607	0.117069	0.0100965	0.127165	0.0576197	0.00435975	-0.00144582	0.0102116	0.0619795	0.00876581	0.176313	0.176302	602.396
1828	0.340457	3.42444	2.42328	0.385774	0.0708929	284.306	20.049	0.120023	0.0110146	0.131038	0.0586084	0.004511	-0.00147063	0.0105659	0.0631194	0.00909528	0.176562	0.176551	602.728
1829	0.195848	3.4984	2.46475	0.422124	0.0716714	284.458	20.4473	0.122895	0.0123671	0.135262	0.0598102	0.00466695	-0.00150079	0.0109312	0.0644772	0.00943039	0.176834	0.176822	603.052
1830	0.287026	3.54094	2.47328	0.412102	0.0316151	284.459	20.8604	0.122913	0.0112809	0.134194	0.0609018	0.00482439	-0.00152818	0.0112999	0.0657261	0.00977175	0.177102	0.177091	603.054
1831	0.0762052	3.60329	2.50216	0.429477	0.0694443	284.606	21.1585	0.125668	0.0106224	0.13629	0.0618128	0.00498193	-0.00155104	0.0116689	0.0667948	0.0101179	0.177311	0.177299	603.364
1832	0.139793	3.61983	2.48345	0.384709	-0.000497806	284.489	21.5678	0.123469	0.0124352	0.135905	0.0626073	0.00514002	-0.00157097	0.0120392	0.0677473	0.0104683	0.177553	0.177541	603.116
1833	0.249916	3.65018	2.4793	0.364889	0.0387785	284.535	21.7674	0.124328	0.0134455	0.137774	0.0633096	0.00529852	-0.00158859	0.0124105	0.0686081	0.0108219	0.177705	0.177693	603.213
1834	0.141572	3.70447	2.49991	0.379271	0.0571291	284.642	22.069	0.126353	0.0144718	0.140824	0.064121	0.00545963	-0.00160895	0.0127878	0.0695806	0.0111789	0.177907	0.177895	603.441
1835	0.280995	3.73521	2.49599	0.360908	0.0216365	284.615	22.4265	0.125844	0.0155214	0.141366	0.0649382	0.0056225	-0.00162946	0.0131693	0.0705607	0.0115398	0.178132	0.17812	603.384
1836	0.445311	3.79625	2.52341	0.384813	0.0710544	284.777	22.6792	0.128886	0.0150003	0.143886	0.0657417	0.00578676	-0.00164962	0.0135541	0.0715285	0.0119044	0.178315	0.178303	603.727
1837	0.550311	3.893	2.58728	0.451509	0.101511	285.035	23.0768	0.133728	0.0149147	0.148643	0.0667601	0.00595515	-0.00167518	0.0139485	0.0727152	0.0122733	0.178574	0.178562	604.274
1838	0.323186	4.01256	2.67381	0.537721	0.121486	285.347	23.5814	0.139589	0.016066	0.155655	0.0681852	0.00613053	-0.00171094	0.0143593	0.0743157	0.0126483	0.178912	0.178899	604.936
1839	0.140181	4.08276	2.70831	0.546736	0.0530156	285.392	24.1706	0.140438	0.0168606	0.157298	0.0697436	0.00631089	-0.00175004	0.0147817	0.0760545	0.0130316	0.179295	0.179282	605.032
1840	0.402985	4.1132	2.70141	0.502871	0.0230467	285.342	24.5745	0.139495	0.017313	0.156808	0.0710127	0.00649135	-0.00178189	0.0152044	0.0775041	0.0134225	0.179581	0.179568	604.925
1841	0.0860206	4.20075	2.75354	0.540038	0.104573	285.6	24.881	0.144339	0.0178369	0.162176	0.0722732	0.00667432	-0.00181352	0.0156329	0.0789476	0.0138194	0.179828	0.179814	605.473
1842	0.100523	4.21942	2.73398	0.482144	-0.00677067	285.43	25.4241	0.14115	0.0184538	0.159603	0.0733853	0.00685845	-0.00184142	0.0160642	0.0802438	0.0142228	0.180156	0.180142	605.112
1843	0.661844	4.24124	2.71802	0.43729	0.0297358	285.428	25.6425	0.141103	0.0191387	0.160242	0.0741544	0.00704069	-0.00186072	0.0164911	0.0811951	0.0146304	0.180326	0.180312	605.107
1844	0.697682	4.38503	2.82806	0.557829	0.17429	285.947	25.9454	0.150825	0.0198423	0.170667	0.0753648	0.00722943	-0.00189109	0.0169332	0.0825942	0.0150421	0.180568	0.180554	606.207
1845	0.35698	4.53661	2.94463	0.670309	0.142796	286.296	26.6844	0.157356	0.0193602	0.176717	0.0771756	0.00742813	-0.00193653	0.0173986	0.0846037	0.015462	0.181038	0.181024	606.947
1846	0.463665	4.61416	2.98335	0.66979	0.0581671	286.327	27.3752	0.157938	0.0195737	0.177512	0.0789377	0.00763055	-0.00198074	0.0178727	0.0865683	0.0158919	0.181486	0.181471	607.013
1847	0.536288	4.71489	3.04553	0.699728	0.111811	286.573	27.8356	0.162544	0.0201297	0.182674	0.0806361	0.0078361	-0.00202336	0.0183541	0.0884722	0.0163308	0.181838	0.181822	607.536
1848	0.526044	4.8314	3.1232	0.745864	0.117121	286.819	28.4518	0.167129	0.0202872	0.187417	0.0824848	0.00804732	-0.00206975	0.0188489	0.0905321	0.0167791	0.182266	0.18225	608.056
1849	0.32379	4.94568	3.19758	0.782427	0.113168	287.04	29.0979	0.171257	0.0204351	0.191692	0.0844031	0.00826362	-0.00211788	0.0193555	0.0926667	0.0172376	0.182714	0.182697	608.525
1850	0.23845	5.01601	3.22574	0.756672	0.0587248	287.059	29.7456	0.171598	0.0196335	0.191232	0.0860884	0.00848161	-0.00216017	0.0198661	0.09457	0.0177059	0.183142	0.183126	608.564
1851	0.235177	5.0678	3.23449	0.710939	0.0501079	287.065	30.238	0.171714	0.0208191	0.192533	0.0874482	0.00869938	-0.00219429	0.0203761	0.0961476	0.0181818	0.183481	0.183464	608.577
1852	0.26093	5.11888	3.24248	0.671312	0.0516356	287.086	30.6921	0.172104	0.0161828	0.188287	0.0883366	0.00891448	-0.00221658	0.02088	0.0972511	0.0186634	0.183762	0.183745	608.622
1853	0.261273	5.17555	3.25619	0.645022	0.0584443	287.137	31.1374	0.173053	0.0105557	0.183609	0.0885506	0.00912307	-0.00222196	0.0213685	0.0976737	0.0191466	0.18398	0.183962	608.73
1854	0.265247	5.2323	3.26984	0.622857	0.0568267	287.183	31.5924	0.173922	0.00922609	0.183148	0.0884524	0.00932761	-0.00221949	0.0218476	0.09778	0.0196281	0.184173	0.184156	608.828
1855	0.265183	5.28991	3.28424	0.60521	0.0584254	287.239	32.0361	0.174965	0.00783604	0.182801	0.0883331	0.00953091	-0.0022165	0.0223238	0.097864	0.0201073	0.184361	0.184343	608.947
1856	0.269999	5.3475	3.29847	0.590257	0.0580643	287.296	32.4785	0.176018	0.00742165	0.18344	0.0882581	0.00973368	-0.00221461	0.0227987	0.0979918	0.0205841	0.184552	0.184534	609.067
1857	0.272956	5.40614	3.31363	0.578975	0.0595647	287.36	32.9152	0.177211	0.00668489	0.183896	0.0882577	0.00993645	-0.0022146	0.0232737	0.0981941	0.0210591	0.184747	0.184729	609.203
1858	0.275774	5.46543	3.3293	0.570292	0.0600726	287.426	33.3523	0.178454	0.00731801	0.185772	0.088385	0.01014	-0.0022178	0.0237505	0.098525	0.0215327	0.184954	0.184936	609.344
1859	0.28048	5.52532	3.34543	0.563786	0.060805	287.497	33.788	0.179762	0.00666178	0.186424	0.0886162	0.0103445	-0.0022236	0.0242294	0.0989607	0.0220058	0.18517	0.185152	609.493
1860	0.286451	5.58624	3.36245	0.559669	0.0620068	287.572	34.2235	0.181159	-0.00044288	0.180716	0.0885121	0.010545	-0.00222099	0.024699	0.0990571	0.022478	0.185356	0.185338	609.652
1861	0.292676	5.64846	3.38062	0.557929	0.0634283	287.652	34.6611	0.182649	-0.0119476	0.170701	0.0875827	0.0107346	-0.00219767	0.0251432	0.0983174	0.0229455	0.185469	0.18545	609.822
1862	0.268018	5.71203	3.39996	0.558254	0.0648362	287.736	35.1021	0.184224	-0.00804954	0.176174	0.086652	0.0109207	-0.00217431	0.025579	0.0975726	0.0234046	0.185582	0.185564	610.001
1863	0.271321	5.77024	3.41355	0.551619	0.057717	287.795	35.5473	0.185303	-0.00030669	0.184997	0.086698	0.0111153	-0.00217547	0.0260348	0.0978133	0.0238593	0.185785	0.185767	610.124
1864	0.27526	5.82916	3.42774	0.546983	0.0605023	287.866	35.9714	0.186628	-0.00098311	0.185645	0.0872209	0.0113153	-0.00218859	0.0265034	0.0985362	0.0243148	0.186023	0.186005	610.275
1865	0.278856	5.88894	3.44268	0.544246	0.0609897	287.938	36.4013	0.187976	-0.0029952	0.184981	0.0876239	0.0115147	-0.0021987	0.0269702	0.0991386	0.0247715	0.186253	0.186235	610.429
1866	0.28032	5.94951	3.45827	0.543025	0.0619559	288.014	36.8315	0.189387	-0.00933409	0.180053	0.0876295	0.0117097	-0.00219884	0.027427	0.0993392	0.0252282	0.186448	0.186429	610.59
1867	0.283463	6.01039	3.47404	0.542481	0.0622018	288.091	37.264	0.190805	-0.0162792	0.174526	0.0870748	0.0118973	-0.00218492	0.0278664	0.098972	0.0256815	0.186592	0.186573	610.752
1868	0.285167	6.07195	3.49033	0.542966	0.0630698	288.17	37.697	0.192277	-0.0174681	0.174809	0.0863764	0.0120808	-0.0021674	0.0282963	0.0984572	0.0261289	0.186723	0.186704	610.92
1869	0.287765	6.13389	3.50681	0.543917	0.063383	288.249	38.1326	0.193756	-0.0142037	0.179553	0.0861113	0.012267	-0.00216075	0.0287323	0.0983782	0.0265716	0.186895	0.186876	611.089
1870	0.289586	6.19639	3.52369	0.545535	0.0640967	288.331	38.5694	0.195274	-0.0123158	0.182958	0.0863368	0.0124577	-0.0021664	0.0291791	0.0987945	0.0270127	0.187112	0.187093	611.262
1871	0.302276	6.25928	3.54081	0.547524	0.0645187	288.414	39.0086	0.196803	-0.0204485	0.176355	0.0863193	0.0126457	-0.00216597	0.0296194	0.098965	0.0274535	0.187308	0.187288	611.437
1872	0.347673	6.32493	3.56059	0.552888	0.0680066	288.508	39.4496	0.198553	-0.0423676	0.156185	0.0848471	0.0128158	-0.00212902	0.0300178	0.0976629	0.0278888	0.187372	0.187352	611.637
1873	0.357519	6.40045	3.59029	0.570317	0.07974	288.642	39.9018	0.201045	-0.060576	0.140469	0.0817972	0.0129621	-0.00205249	0.0303605	0.0947593	0.028308	0.187296	0.187277	611.921
1874	0.355834	6.4781	3.62177	0.587947	0.0796044	288.769	40.3912	0.203393	-0.0630841	0.140309	0.0786123	0.0130977	-0.00197258	0.0306781	0.0917099	0.0287055	0.187222	0.187203	612.19
1875	0.365562	6.55539	3.65243	0.602491	0.0791326	288.891	40.8869	0.205654	-0.0619007	0.143753	0.0763178	0.0132349	-0.001915	0.0309994	0.0895527	0.0290844	0.187232	0.187212	612.449
1876	0.370001	6.63479	3.68485	0.617661	0.0819391	289.021	41.3867	0.208058	-0.060064	0.147994	0.0749447	0.0133766	-0.00188055	0.0313313	0.0883213	0.0294508	0.187326	0.187307	612.724
1877	0.374349	6.71516	3.71786	0.631912	0.0825406	289.149	41.8993	0.210432	-0.0544509	0.155981	0.0745373	0.0135257	-0.00187033	0.0316805	0.0880629	0.0298102	0.187514	0.187495	612.996
1878	0.378065	6.79647	3.75144	0.645402	0.0837002	289.278	42.4183	0.21283	-0.0509696	0.16186	0.0749554	0.0136832	-0.00188082	0.0320494	0.0886385	0.0301686	0.18778	0.18776	613.27
1879	0.387597	6.87859	3.78547	0.658106	0.0845965	289.408	42.9447	0.21523	-0.0534895	0.16174	0.0755745	0.0138438	-0.00189635	0.0324257	0.0894183	0.0305294	0.188068	0.188048	613.545
1880	0.402576	6.96277	3.82126	0.671797	0.0871775	289.544	43.4776	0.217749	-0.0643707	0.153378	0.0755852	0.0139985	-0.00189662	0.0327879	0.0895837	0.0308913	0.188303	0.188283	613.834
1881	0.418838	7.05022	3.85998	0.687848	0.090843	289.69	44.0218	0.220445	-0.0715792	0.148866	0.0749153	0.0141442	-0.00187981	0.0331293	0.0890595	0.0312495	0.18848	0.18846	614.143
1882	0.404182	7.14119	3.90188	0.706253	0.0945848	289.845	44.5811	0.223309	-0.0683778	0.154931	0.0745005	0.0142905	-0.0018694	0.0334719	0.088791	0.0316025	0.188688	0.188667	614.472
1883	0.413506	7.22898	3.93998	0.717959	0.0897925	289.978	45.1564	0.22576	-0.067171	0.158589	0.0746913	0.0144425	-0.00187419	0.033828	0.0891338	0.0319538	0.188957	0.188937	614.754
1884	0.41661	7.3188	3.97974	0.730748	0.0936351	290.124	45.7231	0.228458	-0.0675671	0.160891	0.0751546	0.0145979	-0.00188582	0.0341919	0.0897525	0.032306	0.189249	0.189228	615.064
1885	0.419009	7.40929	4.01974	0.742725	0.0937879	290.267	46.3039	0.231089	-0.0641582	0.166931	0.0759685	0.014758	-0.00190624	0.034567	0.0907265	0.0326608	0.189579	0.189558	615.366
1886	0.421783	7.5003	4.05984	0.753835	0.0946165	290.41	46.889	0.233726	-0.0613567	0.172369	0.0772126	0.014925	-0.00193746	0.0349582	0.0921376	0.0330208	0.189951	0.18993	615.669
1887	0.427897	7.59192	4.10013	0.764338	0.0954235	290.553	47.4795	0.236365	-0.0623375	0.174027	0.0785506	0.015096	-0.00197103	0.0353588	0.0936467	0.0333877	0.190336	0.190314	615.973
1888	0.442254	7.68486	4.14136	0.775276	0.0971684	290.7	48.0753	0.239069	-0.069931	0.169138	0.0794045	0.0152644	-0.00199246	0.035753	0.0946689	0.0337605	0.190678	0.190656	616.284
1889	0.441534	7.78092	4.18535	0.788896	0.100963	290.858	48.6791	0.241968	-0.0724786	0.16949	0.0798384	0.0154292	-0.00200334	0.036139	0.0952676	0.0341356	0.190986	0.190963	616.618
1890	0.454473	7.87682	4.22869	0.800541	0.100133	291.008	49.297	0.244729	-0.0732758	0.171453	0.080303	0.0155949	-0.002015	0.0365271	0.0958979	0.0345121	0.191303	0.19128	616.936
1891	0.46128	7.97554	4.27445	0.814361	0.10409	291.17	49.9165	0.247712	-0.0784243	0.169288	0.0806445	0.0157599	-0.00202357	0.0369136	0.0964044	0.03489	0.191609	0.191586	617.28
1892	0.468297	8.07574	4.32121	0.828312	0.105324	291.332	50.5507	0.250692	-0.0814191	0.169273	0.0807986	0.0159229	-0.00202744	0.0372954	0.0967215	0.035268	0.191905	0.191882	617.624
1893	0.466988	8.17745	4.36902	0.842435	0.107197	291.498	51.1926	0.253732	-0.0833062	0.170426	0.0809818	0.0160861	-0.00203204	0.0376776	0.0970679	0.0356456	0.192207	0.192184	617.975
1894	0.48059	8.27889	4.41599	0.854363	0.106645	291.657	51.8439	0.256665	-0.0856866	0.170978	0.081214	0.0162498	-0.00203786	0.038061	0.0974638	0.0360232	0.192518	0.192495	618.313
1895	0.493294	8.38328	4.46548	0.868631	0.110727	291.83	52.4976	0.259825	-0.0896222	0.170203	0.0813798	0.0164127	-0.00204202	0.0384428	0.0977925	0.0364008	0.192825	0.192801	618.679
1896	0.500272	8.49043	4.51726	0.884654	0.113605	292.007	53.1664	0.263085	-0.0909038	0.172182	0.0815791	0.0165759	-0.00204702	0.038825	0.098155	0.036778	0.193141	0.193117	619.056
1897	0.511677	8.59909	4.57002	0.900579	0.115167	292.186	53.8476	0.266364	-0.0900543	0.17631	0.0820647	0.0167425	-0.00205921	0.0392151	0.0988072	0.0371559	0.19349	0.193466	619.435
1898	0.524092	8.71023	4.62475	0.917699	0.118251	292.372	54.5379	0.269771	-0.0899996	0.179772	0.0828459	0.0169133	-0.00207881	0.0396153	0.0997593	0.0375365	0.193872	0.193847	619.829
1899	0.544382	8.82408	4.68166	0.936158	0.121342	292.565	55.2413	0.273291	-0.0915741	0.181717	0.0837388	0.0170871	-0.00210121	0.0400223	0.100826	0.0379211	0.19427	0.194245	620.237
1900	0.557532	8.94232	4.7425	0.958013	0.126633	292.771	55.9582	0.277062	-0.0932703	0.183792	0.0846481	0.0172628	-0.00212403	0.0404339	0.101911	0.0383099	0.194676	0.194651	620.674
1901	0.589342	9.06343	4.80562	0.980784	0.129545	292.981	56.6951	0.280899	-0.0973246	0.183574	0.0854495	0.0174391	-0.00214414	0.0408469	0.102889	0.0387027	0.195082	0.195056	621.119
1902	0.595931	9.19145	4.87518	1.00962	0.138093	293.216	57.4464	0.285189	-0.101725	0.183464	0.0860557	0.0176146	-0.00215935	0.0412579	0.10367	0.0390985	0.195477	0.19545	621.617
1903	0.63101	9.3209	4.94543	1.03656	0.138612	293.443	58.2282	0.289334	-0.106202	0.183133	0.0865032	0.0177892	-0.00217058	0.0416668	0.104292	0.0394962	0.19587	0.195843	622.099
1904	0.644452	9.45797	5.02276	1.06993	0.148537	293.701	59.0197	0.294032	-0.110582	0.183451	0.0868521	0.0179632	-0.00217933	0.0420742	0.104815	0.0398949	0.196258	0.196231	622.645
1905	0.672874	9.59796	5.10223	1.10273	0.150752	293.955	59.8464	0.298668	-0.113803	0.184865	0.0872184	0.0181376	-0.00218853	0.0424829	0.105356	0.0402943	0.196665	0.196637	623.185
1906	0.706084	9.74412	5.18717	1.13929	0.158567	294.231	60.6889	0.303682	-0.119122	0.18456	0.0875587	0.0183122	-0.00219706	0.0428917	0.105871	0.0406947	0.197076	0.197048	623.769
1907	0.74564	9.89751	5.2786	1.18048	0.166716	294.525	61.5622	0.30903	-0.124283	0.184747	0.0878182	0.0184861	-0.00220358	0.043299	0.106304	0.0410954	0.197494	0.197465	624.392
1908	0.733265	10.0595	5.37785	1.22747	0.176603	294.843	62.4685	0.314808	-0.121751	0.193057	0.0884916	0.0186648	-0.00222047	0.0437177	0.107156	0.0414972	0.197966	0.197937	625.067
1909	0.752503	10.2188	5.47322	1.26485	0.171935	295.13	63.4138	0.320022	-0.116453	0.203569	0.0900244	0.0188551	-0.00225894	0.0441633	0.10888	0.0419044	0.19854	0.19851	625.676
1910	0.770632	10.3822	5.57189	1.30301	0.178644	295.437	64.3583	0.325587	-0.11691	0.208677	0.0920382	0.0190547	-0.00230947	0.044631	0.111093	0.0423215	0.199161	0.19913	626.327
1911	0.758381	10.5496	5.67357	1.34159	0.183163	295.749	65.3302	0.33124	-0.113643	0.217597	0.0943617	0.0192628	-0.00236777	0.0451182	0.113624	0.0427505	0.199826	0.199794	626.989
1912	0.763995	10.7144	5.77146	1.37202	0.179737	296.039	66.3239	0.336479	-0.106382	0.230097	0.09732	0.0194839	-0.002442	0.0456361	0.116804	0.0431941	0.200566	0.200532	627.603
1913	0.782372	10.8804	5.86964	1.40056	0.182616	296.335	67.317	0.34182	-0.101986	0.239834	0.100802	0.0197185	-0.00252936	0.0461858	0.12052	0.0436564	0.201359	0.201324	628.229
1914	0.734852	11.0503	5.97098	1.43114	0.18807	296.642	68.3241	0.347368	-0.0947706	0.252598	0.104717	0.0199669	-0.00262761	0.0467676	0.124684	0.0441399	0.202205	0.202168	628.881
1915	0.72497	11.2099	6.06071	1.44497	0.175009	296.892	69.3517	0.351879	-0.0857878	0.266092	0.109166	0.0202314	-0.00273924	0.0473869	0.129397	0.0446477	0.203116	0.203077	629.411
1916	0.755668	11.3674	6.14745	1.45501	0.175127	297.146	70.3494	0.356463	-0.0832586	0.273205	0.113712	0.0205082	-0.00285331	0.0480353	0.13422	0.045182	0.204028	0.203987	629.95
1917	0.782473	11.5316	6.24032	1.47324	0.184488	297.431	71.348	0.361588	-0.0829626	0.278625	0.117913	0.0207921	-0.00295873	0.0487003	0.138705	0.0457415	0.204912	0.204869	630.554
1918	0.77501	11.7015	6.33838	1.49745	0.191501	297.73	72.3724	0.36697	-0.0801971	0.286773	0.121911	0.0210837	-0.00305905	0.0493834	0.142995	0.0463244	0.205792	0.205747	631.188
1919	0.716472	11.8699	6.43389	1.51718	0.189429	298.012	73.4186	0.372029	-0.0713741	0.300655	0.12621	0.0213886	-0.00316691	0.0500975	0.147598	0.0469306	0.206715	0.206668	631.785
1920	0.776409	12.0255	6.51547	1.51865	0.174478	298.236	74.4633	0.376045	-0.0663275	0.309718	0.130767	0.0217072	-0.00328127	0.0508437	0.152474	0.0475624	0.207669	0.20762	632.259
1921	0.732797	12.1942	6.60983	1.53777	0.193793	298.537	75.4701	0.381453	-0.0611077	0.320345	0.135366	0.0220374	-0.00339668	0.0516171	0.157404	0.0482204	0.208616	0.208564	632.898
1922	0.748071	12.3534	6.69364	1.54298	0.180431	298.772	76.5258	0.385662	-0.0542606	0.331401	0.140102	0.0223804	-0.00351551	0.0524205	0.162482	0.0489049	0.209603	0.209549	633.396
1923	0.809285	12.5159	6.78024	1.55277	0.187118	299.037	77.5487	0.390417	-0.0610025	0.329415	0.144241	0.022728	-0.00361936	0.0532347	0.166969	0.0496154	0.21052	0.210464	633.959
1924	0.807675	12.6917	6.87986	1.57946	0.204209	299.357	78.5877	0.396127	-0.0653313	0.330796	0.147436	0.023074	-0.00369953	0.0540452	0.17051	0.0503457	0.211353	0.211296	634.636
1925	0.813887	12.8671	6.97824	1.60303	0.202881	299.653	79.6723	0.401418	-0.0616042	0.339814	0.150493	0.0234256	-0.00377625	0.0548686	0.173919	0.0510923	0.212197	0.212138	635.264
1926	0.819238	13.0439	7.07717	1.62613	0.205616	299.954	80.7584	0.406802	-0.0583994	0.348403	0.15381	0.0237872	-0.00385947	0.0557156	0.177597	0.0518562	0.213072	0.213011	635.903
1927	0.873103	13.2219	7.17647	1.64862	0.20776	300.256	81.8552	0.412186	-0.0589091	0.353277	0.1571	0.0241563	-0.00394203	0.0565801	0.181256	0.052638	0.213953	0.21389	636.543
1928	0.87568	13.4115	7.287	1.6843	0.223382	300.608	82.961	0.418448	-0.0600124	0.358436	0.160196	0.0245305	-0.00401971	0.0574566	0.184726	0.0534369	0.214823	0.214758	637.288
1929	0.924781	13.6017	7.39714	1.71702	0.223733	300.941	84.1106	0.424382	-0.0594953	0.364887	0.163226	0.0249109	-0.00409575	0.0583477	0.188137	0.0542519	0.21571	0.215643	637.995
1930	0.915226	13.8026	7.51734	1.76034	0.238266	301.32	85.2677	0.431118	-0.0558448	0.375273	0.166491	0.0253009	-0.00417766	0.059261	0.191791	0.0550833	0.216629	0.21656	638.798
1931	0.865663	14.0015	7.63437	1.79641	0.235595	301.669	86.4676	0.437318	-0.0466439	0.390674	0.170417	0.0257061	-0.00427619	0.0602101	0.196123	0.0559339	0.217643	0.217571	639.539
1932	0.7792	14.1895	7.73934	1.81499	0.223271	301.969	87.6684	0.442625	-0.0367513	0.405874	0.175104	0.0261296	-0.00439379	0.0612021	0.201233	0.0568083	0.218742	0.218667	640.173
1933	0.799094	14.3588	7.82417	1.80796	0.201411	302.194	88.8429	0.446615	-0.0309782	0.415637	0.180069	0.0265677	-0.00451839	0.0622283	0.206637	0.0577099	0.219864	0.219787	640.651
1934	0.831157	14.5323	7.91294	1.80858	0.209359	302.465	89.9626	0.451411	-0.0300509	0.42136	0.184749	0.0270143	-0.00463582	0.0632743	0.211764	0.0586385	0.220937	0.220857	641.225
1935	0.855508	14.7129	8.00831	1.81927	0.218841	302.761	91.097	0.456648	-0.0288055	0.427843	0.189043	0.0274672	-0.00474356	0.0643351	0.21651	0.0595916	0.221981	0.221898	641.853
1936	0.90697	14.8987	8.10847	1.83657	0.226163	303.071	92.2521	0.462137	-0.0285781	0.433559	0.193032	0.0279264	-0.00484366	0.0654106	0.220959	0.0605669	0.223009	0.222923	642.511
1937	0.933926	15.0957	8.21944	1.86732	0.24113	303.425	93.425	0.46838	-0.0264925	0.441887	0.196891	0.028393	-0.00494049	0.0665035	0.225284	0.0615631	0.224036	0.223948	643.261
1938	0.903487	15.2986	8.33562	1.90296	0.249104	303.788	94.6361	0.474773	-0.0156189	0.459154	0.201278	0.0288745	-0.00505057	0.0676313	0.230153	0.0625808	0.225144	0.225053	644.03
1939	0.925823	15.4949	8.44413	1.92679	0.24167	304.109	95.8706	0.480429	-0.00756791	0.472861	0.206336	0.0293743	-0.00517748	0.0688019	0.23571	0.0636245	0.226343	0.226249	644.711
1940	0.970149	15.696	8.55692	1.95527	0.2494	304.459	97.0911	0.486588	-0.00821566	0.478372	0.211277	0.0298847	-0.00530147	0.0699975	0.241162	0.064696	0.22753	0.227432	645.453
1941	0.978852	15.9067	8.67888	1.99406	0.262778	304.844	98.3319	0.493349	-0.0110247	0.482325	0.215623	0.0303994	-0.00541051	0.0712031	0.246022	0.0657926	0.228668	0.228568	646.269
1942	0.991384	16.1194	8.80191	2.03184	0.266235	305.221	99.6081	0.499963	-0.0130202	0.486943	0.219462	0.0309179	-0.00550684	0.0724174	0.25038	0.0669106	0.229775	0.229671	647.068
1943	1.01191	16.3347	8.92685	2.0698	0.270945	305.604	100.898	0.506674	-0.0126084	0.494066	0.22308	0.0314421	-0.00559764	0.0736453	0.254523	0.0680476	0.23087	0.230763	647.88
1944	1.01033	16.5545	9.05548	2.11021	0.277864	306	102.204	0.513602	-0.0130819	0.50052	0.226618	0.0319732	-0.00568642	0.0748893	0.258592	0.0692029	0.23197	0.23186	648.719
1945	0.905959	16.774	9.18282	2.14657	0.278709	306.384	103.532	0.520314	-0.01361	0.506705	0.230044	0.0325106	-0.00577239	0.076148	0.262555	0.0703756	0.233073	0.232961	649.533
1946	0.976872	16.9708	9.28586	2.15037	0.251191	306.66	104.867	0.525136	-0.0177541	0.507382	0.233063	0.0330505	-0.00584814	0.0774127	0.266114	0.0715645	0.234141	0.234026	650.118
1947	1.06236	17.183	9.40412	2.17489	0.27184	307.035	106.142	0.531688	-0.0266502	0.505038	0.235316	0.0335875	-0.00590467	0.0786704	0.268904	0.0727657	0.235097	0.234979	650.915
1948	1.10084	17.4138	9.54067	2.22173	0.296715	307.474	107.463	0.539336	-0.0351565	0.50418	0.236901	0.0341205	-0.00594445	0.0799188	0.271022	0.0739744	0.236005	0.235886	651.846
1949	1.08065	17.6529	9.68476	2.27497	0.308769	307.923	108.846	0.547138	-0.0379019	0.509236	0.238372	0.0346544	-0.00598134	0.0811693	0.273026	0.0751879	0.236936	0.236814	652.796
1950	1.18453	17.8877	9.82318	2.31738	0.304569	308.334	110.265	0.554284	-0.0410404	0.513244	0.239997	0.0351922	-0.00602212	0.082429	0.275189	0.0764069	0.237906	0.237782	653.669
1951	1.34147	18.145	9.98383	2.38531	0.334408	308.85	111.683	0.56323	-0.0594258	0.503804	0.240941	0.0357246	-0.00604581	0.083676	0.276666	0.0776302	0.238802	0.238675	654.762
1952	1.36454	18.4364	10.1783	2.49078	0.379694	309.487	113.177	0.574252	-0.0779556	0.496296	0.240776	0.0362442	-0.00604167	0.0848931	0.27702	0.0788514	0.239613	0.239485	656.112
1953	1.38326	18.7329	10.3763	2.59164	0.388542	310.091	114.789	0.584689	-0.0852044	0.499485	0.240441	0.0367592	-0.00603326	0.0860994	0.2772	0.0800661	0.240468	0.240338	657.392
1954	1.4169	19.0334	10.5767	2.68732	0.395325	310.694	116.442	0.595094	-0.0918651	0.503229	0.240551	0.0372769	-0.00603603	0.0873119	0.277828	0.0812758	0.241398	0.241266	658.672
1955	1.51883	19.3412	10.783	2.7828	0.40632	311.315	118.131	0.605774	-0.0985601	0.507214	0.24105	0.0377977	-0.00604854	0.0885318	0.278848	0.0824832	0.242395	0.242261	659.987
1956	1.60735	19.6711	11.0104	2.89752	0.436504	312.017	119.862	0.617835	-0.105033	0.512803	0.241952	0.0383229	-0.00607119	0.0897619	0.280275	0.0836907	0.243465	0.243328	661.476
1957	1.66332	20.0203	11.2558	3.02574	0.464054	312.767	121.679	0.630691	-0.111324	0.519367	0.243305	0.0388541	-0.00610513	0.091006	0.282159	0.0849009	0.244638	0.244498	663.067
1958	1.7139	20.3817	11.5117	3.15697	0.4829	313.535	123.578	0.643807	-0.113011	0.530796	0.245328	0.039395	-0.00615589	0.092273	0.284723	0.0861171	0.245938	0.245794	664.694
1959	1.72142	20.754	11.777	3.28968	0.500248	314.322	125.542	0.657236	-0.105876	0.55136	0.248629	0.0399546	-0.00623872	0.0935838	0.288584	0.0873451	0.247431	0.247281	666.363
1960	1.72467	21.128	12.0419	3.41195	0.506135	315.089	127.565	0.670282	-0.0967086	0.573574	0.253483	0.0405399	-0.00636051	0.0949547	0.294023	0.0885942	0.249149	0.248993	667.99
1961	1.7486	21.5027	12.3057	3.52422	0.510669	315.845	129.62	0.683096	-0.104385	0.578712	0.25868	0.0411408	-0.00649092	0.0963621	0.299821	0.0898712	0.250938	0.250775	669.591
1962	1.78572	21.8826	12.573	3.63368	0.520981	316.612	131.701	0.696078	-0.115335	0.580743	0.263099	0.0417442	-0.0066018	0.0977754	0.304843	0.0911736	0.252661	0.252491	671.217
1963	1.85842	22.2705	12.8468	3.74438	0.535291	317.398	133.819	0.709363	-0.115062	0.594301	0.267393	0.0423555	-0.00670956	0.0992073	0.309749	0.0924977	0.254401	0.254225	672.885
1964	1.9267	22.6743	13.1351	3.86639	0.559897	318.237	135.981	0.723486	-0.113291	0.610195	0.272311	0.0429837	-0.00683296	0.100679	0.315295	0.0938457	0.256253	0.25607	674.663
1965	1.99533	23.0929	13.4367	3.99757	0.584592	319.113	138.208	0.7382	-0.109114	0.629086	0.277999	0.0436321	-0.00697568	0.102197	0.321631	0.0952217	0.258251	0.258059	676.52
1966	2.07298	23.5264	13.7517	4.13742	0.609959	320.027	140.501	0.753505	-0.103892	0.649613	0.28453	0.0443037	-0.00713958	0.10377	0.328834	0.0966308	0.260406	0.260204	678.457
1967	2.11999	23.9767	14.0822	4.28801	0.638499	320.987	142.861	0.769536	-0.100381	0.669155	0.291747	0.0449987	-0.00732066	0.105398	0.336746	0.0980777	0.262702	0.262489	680.492
1968	2.17306	24.4373	14.4212	4.43999	0.659543	321.959	145.293	0.785728	-0.0948973	0.690831	0.299565	0.0457179	-0.00751683	0.107083	0.345283	0.099566	0.265137	0.264912	682.554
1969	2.28174	24.9094	14.77	4.59537	0.681995	322.958	147.783	0.802307	-0.0829352	0.719372	0.308341	0.046467	-0.00773704	0.108837	0.354808	0.1011	0.267749	0.26751	684.671
1970	2.40446	25.4052	15.1413	4.77003	0.720631	324.038	150.33	0.820181	-0.0603903	0.75979	0.318874	0.0472579	-0.00800134	0.11069	0.366132	0.102689	0.270647	0.270391	686.962
1971	2.41871	25.9276	15.538	4.96671	0.766345	325.2	152.965	0.839332	-0.033735	0.805597	0.33168	0.0481017	-0.00832268	0.112666	0.379782	0.104344	0.273924	0.273647	689.424
1972	2.49454	26.453	15.936	5.15354	0.784621	326.329	155.7	0.857875	-0.0181687	0.839706	0.34588	0.0489941	-0.00867898	0.114756	0.394874	0.106077	0.277484	0.277182	691.817
1973	2.59449	26.995	16.3491	5.34972	0.816885	327.512	158.479	0.877253	-0.0101221	0.867131	0.360194	0.049923	-0.00903817	0.116932	0.410117	0.107894	0.281133	0.280806	694.326
1974	2.59244	27.5587	16.7828	5.56163	0.858629	328.763	161.327	0.897659	-0.00168982	0.89597	0.374335	0.050885	-0.00939299	0.119185	0.42522	0.109792	0.28485	0.284496	696.978
1975	2.5914	28.1219	17.2142	5.75939	0.874567	329.971	164.262	0.917294	0.00662207	0.923916	0.388363	0.0518802	-0.00974499	0.121516	0.440243	0.111771	0.288654	0.288273	699.54
1976	2.73495	28.685	17.6434	5.94516	0.886617	331.162	167.232	0.936564	0.0105612	0.947125	0.401994	0.0529049	-0.010087	0.123917	0.454899	0.11383	0.292477	0.292068	702.063
1977	2.79783	29.2792	18.1031	6.16122	0.937961	332.483	170.229	0.957877	0.0150762	0.972953	0.415221	0.0539577	-0.0104189	0.126382	0.469178	0.115964	0.296312	0.295875	704.864
1978	2.88127	29.887	18.5749	6.38227	0.975533	333.821	173.324	0.979378	0.0292492	1.00863	0.428813	0.0550464	-0.01076	0.128933	0.483859	0.118173	0.30031	0.299843	707.701
1979	2.9337	30.513	19.0635	6.61433	1.01688	335.209	176.489	1.00159	0.0465308	1.04812	0.443406	0.0561798	-0.0111262	0.131587	0.499585	0.120461	0.304551	0.304052	710.643
1980	2.90458	31.1504	19.5619	6.84843	1.05168	336.614	179.731	1.02397	0.0541693	1.07814	0.458445	0.0573541	-0.0115035	0.134338	0.515799	0.122834	0.308966	0.308431	713.621
1981	2.85058	31.7815	20.052	7.06207	1.06336	337.96	183.034	1.04534	0.0560188	1.10136	0.47297	0.0585585	-0.011868	0.137159	0.531529	0.125291	0.31341	0.312839	716.476
1982	2.9059	32.4008	20.5283	7.25041	1.06267	339.244	186.357	1.06562	0.0548529	1.12047	0.486519	0.0597861	-0.012208	0.140034	0.546305	0.127826	0.317784	0.317179	719.197
1983	2.94686	33.0322	21.0155	7.44664	1.08862	340.584	189.675	1.08673	0.0541226	1.14085	0.499169	0.0610348	-0.0125254	0.142959	0.560204	0.130434	0.322079	0.321441	722.039
1984	3.03326	33.6724	21.5101	7.64609	1.11753	341.948	193.032	1.10811	0.0614846	1.1696	0.51165	0.0623108	-0.0128386	0.145948	0.573961	0.133109	0.326432	0.32576	724.929
1985	3.12781	34.3314	22.0225	7.86165	1.1602	343.377	196.432	1.13044	0.0727784	1.20322	0.524697	0.0636226	-0.013166	0.14902	0.58832	0.135854	0.330959	0.330251	727.96
1986	3.16672	35.011	22.5544	8.09486	1.20992	344.872	199.895	1.15369	0.0831827	1.23687	0.538436	0.0649732	-0.0135107	0.152184	0.603409	0.138673	0.335698	0.334951	731.128
1987	3.23714	35.699	23.0934	8.32922	1.24748	346.371	203.43	1.1769	0.0908859	1.26779	0.552563	0.0663607	-0.0138652	0.155433	0.618923	0.141568	0.340616	0.339828	734.306
1988	3.3484	36.4024	23.6466	8.57416	1.29097	347.916	207.018	1.20072	0.10257	1.30329	0.567106	0.0677861	-0.0142301	0.158772	0.634892	0.144542	0.345707	0.344876	737.581
1989	3.39131	37.1299	24.2232	8.84099	1.3485	349.544	210.664	1.22572	0.119012	1.34473	0.582538	0.0692562	-0.0146173	0.162216	0.651794	0.147598	0.351057	0.350179	741.033
1990	3.4543	37.8667	24.8079	9.10949	1.39303	351.179	214.388	1.25069	0.1343	1.38499	0.598899	0.0707738	-0.0150279	0.16577	0.669673	0.150742	0.356697	0.355767	744.499
1991	3.48445	38.6172	25.4054	9.38606	1.44008	352.85	218.168	1.2761	0.139103	1.41521	0.615365	0.0723316	-0.015441	0.169419	0.687696	0.153978	0.362481	0.361498	748.042
1992	3.4153	39.3743	26.0082	9.66143	1.47977	354.525	222.004	1.30145	0.136582	1.43803	0.630987	0.0739181	-0.015833	0.173135	0.704905	0.157302	0.368252	0.367216	751.593
1993	3.44289	40.1163	26.5941	9.9079	1.48979	356.11	225.885	1.32532	0.13964	1.46496	0.645804	0.0755311	-0.0162048	0.176913	0.721335	0.160708	0.374006	0.372918	754.952
1994	3.45647	40.8643	27.185	10.1552	1.51556	357.722	229.767	1.34949	0.145195	1.49469	0.660359	0.077175	-0.0165701	0.180763	0.737534	0.164193	0.379796	0.378656	758.37
1995	3.50799	41.6153	27.7778	10.3995	1.54343	359.337	233.669	1.37362	0.156397	1.53001	0.675166	0.0788551	-0.0169416	0.184698	0.754021	0.167757	0.385729	0.384534	761.795
1996	3.58194	42.3775	28.381	10.6523	1.58301	360.995	237.591	1.39825	0.170156	1.56841	0.690624	0.0805768	-0.0173295	0.188731	0.771201	0.171402	0.391879	0.390627	765.31
1997	3.5799	43.1557	28.9997	10.92	1.63414	362.711	241.547	1.42363	0.170277	1.59391	0.70603	0.0823337	-0.017716	0.192846	0.788363	0.17513	0.398135	0.396826	768.947
1998	3.56284	43.9336	29.6169	11.1803	1.66962	364.402	245.552	1.44853	0.163047	1.61157	0.720299	0.0841123	-0.0180741	0.197012	0.804412	0.178938	0.404313	0.402947	772.532
1999	3.58549	44.7076	30.2293	11.4297	1.69457	366.063	249.585	1.47286	0.159997	1.63286	0.733487	0.0859098	-0.018405	0.201222	0.819396	0.182817	0.410399	0.408978	776.053
2000	3.65633	45.4867	30.8457	11.68	1.72588	367.74	253.63	1.49733	0.15362	1.65095	0.745839	0.0877263	-0.018715	0.205477	0.833565	0.186762	0.41642	0.414946	779.608
2001	3.67622	46.2811	31.4769	11.945	1.77317	369.478	257.698	1.52256	0.149074	1.67164	0.757523	0.0895615	-0.0190081	0.209776	0.847084	0.190767	0.42241	0.420883	783.292
2002	3.79487	47.0798	32.1114	12.2092	1.81359	371.215	261.807	1.54768	0.153265	1.70095	0.769299	0.0914224	-0.0193036	0.214134	0.860721	0.194831	0.428528	0.426948	786.977
2003	3.9496	47.9043	32.7715	12.5012	1.87881	373.057	265.947	1.57417	0.157713	1.73188	0.781678	0.0933157	-0.0196142	0.218569	0.874993	0.198955	0.434869	0.433232	790.881
2004	4.11426	48.7625	33.4651	12.8298	1.96627	375.025	270.149	1.60233	0.160502	1.76283	0.794609	0.0952423	-0.0199387	0.223082	0.889851	0.203143	0.441453	0.439756	795.053
2005	4.20772	49.6564	34.1945	13.1963	2.06817	377.117	274.436	1.6321	0.166283	1.79838	0.808227	0.097205	-0.0202804	0.227679	0.905432	0.207398	0.448337	0.446577	799.488
2006	4.31133	50.5706	34.9437	13.5791	2.15898	379.254	278.827	1.66234	0.179783	1.84213	0.82307	0.099212	-0.0206529	0.232379	0.922282	0.211727	0.455654	0.453823	804.018
2007	4.40863	51.5073	35.7149	13.981	2.24931	381.454	283.302	1.69331	0.197598	1.8909	0.839564	0.101272	-0.0210667	0.237204	0.940835	0.216137	0.463489	0.46158	808.683
2008	4.4772	52.4652	36.5071	14.4005	2.33986	383.714	287.857	1.72493	0.216677	1.9416	0.857706	0.103388	-0.021522	0.242161	0.961094	0.220639	0.471854	0.46986	813.474
2009	4.40822	53.438	37.3138	14.8296	2.42476	386.008	292.486	1.75682	0.236971	1.99379	0.877313	0.105564	-0.022014	0.247257	0.982876	0.225243	0.480726	0.478637	818.336
2010	4.60072	54.3958	38.1045	15.2303	2.47083	388.203	297.178	1.78717	0.25476	2.04193	0.897909	0.107796	-0.0225308	0.252486	1.0057	0.229955	0.490009	0.48782	822.99
2011	4.73112	55.3954	38.9379	15.6789	2.57044	390.584	301.883	1.81991	0.266387	2.08629	0.918858	0.110081	-0.0230564	0.257836	1.02894	0.23478	0.499532	0.497238	828.038
2012	4.79876	56.4234	39.8	16.156	2.68209	393.063	306.658	1.85377	0.276213	2.12998	0.939851	0.112414	-0.0235832	0.263301	1.05226	0.239718	0.509285	0.506885	833.293
2013	4.82182	57.4661	40.6768	16.643	2.78439	395.572	311.513	1.88782	0.287416	2.17524	0.96093	0.114796	-0.0241121	0.268881	1.07573	0.244769	0.519296	0.516785	838.612
2014	4.84962	58.5137	41.5582	17.1276	2.87087	398.072	316.435	1.92154	0.299051	2.2206	0.982164	0.117228	-0.0246449	0.274579	1.09939	0.249934	0.52957	0.526945	843.912
2015	4.83618	59.5674	42.4456	17.612	2.95126	400.578	321.403	1.95513	0.311306	2.26644	1.00355	0.119711	-0.0251815	0.280394	1.12326	0.255212	0.540094	0.53735	849.225
2016	4.83112	60.6182	43.3296	18.0853	3.0179	403.052	326.41	1.9881	0.324143	2.31224	1.02507	0.122244	-0.0257216	0.286327	1.14732	0.260605	0.550858	0.547993	854.471
2017	4.88011	61.6679	44.2124	18.5511	3.07984	405.513	331.436	2.02067	0.337511	2.35818	1.04671	0.124828	-0.0262646	0.292378	1.17154	0.266113	0.561844	0.558855	859.687
2018	4.96637	62.7283	45.106	19.0256	3.1546	408.016	336.475	2.05361	0.351364	2.40497	1.0685	0.127462	-0.0268113	0.298548	1.19596	0.271736	0.573054	0.569937	864.994

## Sheet: temperature
		16-TM	0.115	0.0958248
	1765	0	-0.115	-0.0958248
	1766	0.00029923	-0.114701	-0.0955255
	1767	0.00109205	-0.113908	-0.0947327
	1768	0.00193859	-0.113061	-0.0938862
	1769	0.00251734	-0.112483	-0.0933074
	1770	0.00287735	-0.112123	-0.0929474
	1771	0.00304967	-0.11195	-0.0927751
	1772	0.00306126	-0.111939	-0.0927635
	1773	0.00297447	-0.112026	-0.0928503
	1774	0.00283672	-0.112163	-0.092988
	1775	0.00266579	-0.112334	-0.093159
	1776	0.00247533	-0.112525	-0.0933494
	1777	0.00227583	-0.112724	-0.0935489
	1778	0.00207523	-0.112925	-0.0937495
	1779	0.00187955	-0.11312	-0.0939452
	1780	0.00169317	-0.113307	-0.0941316
	1781	0.00149433	-0.113506	-0.0943304
	1782	0.00116207	-0.113838	-0.0946627
	1783	0.000742386	-0.114258	-0.0950824
	1784	0.000912907	-0.114087	-0.0949119
	1785	0.00189375	-0.113106	-0.093931
	1786	0.00304331	-0.111957	-0.0927815
	1787	0.00433647	-0.110664	-0.0914883
	1788	0.00595868	-0.109041	-0.0898661
	1789	0.00780973	-0.10719	-0.088015
	1790	0.00968213	-0.105318	-0.0861426
	1791	0.0115583	-0.103442	-0.0842665
	1792	0.0132428	-0.101757	-0.082582
	1793	0.0147528	-0.100247	-0.0810719
	1794	0.0163516	-0.0986484	-0.0794731
	1795	0.0180409	-0.0969591	-0.0777838
	1796	0.0197978	-0.0952022	-0.0760269
	1797	0.0217186	-0.0932814	-0.0741062
	1798	0.0240229	-0.0909771	-0.0718019
	1799	0.0264294	-0.0885706	-0.0693954
	1800	0.028475	-0.086525	-0.0673498
	1801	0.0303557	-0.0846443	-0.065469
	1802	0.0319236	-0.0830764	-0.0639011
	1803	0.0330709	-0.0819291	-0.0627539
	1804	0.0345725	-0.0804275	-0.0612523
	1805	0.0366293	-0.0783707	-0.0591954
	1806	0.038577	-0.076423	-0.0572478
	1807	0.0403929	-0.0746071	-0.0554319
	1808	0.0423562	-0.0726438	-0.0534686
	1809	0.0443717	-0.0706283	-0.0514531
	1810	0.04629	-0.06871	-0.0495348
	1811	0.0481175	-0.0668825	-0.0477073
	1812	0.0495741	-0.0654259	-0.0462507
	1813	0.0506404	-0.0643596	-0.0451844
	1814	0.0517331	-0.0632669	-0.0440917
	1815	0.0527882	-0.0622118	-0.0430366
	1816	0.053742	-0.061258	-0.0420828
	1817	0.0547837	-0.0602163	-0.041041
	1818	0.0560776	-0.0589224	-0.0397472
	1819	0.0573629	-0.0576371	-0.0384618
	1820	0.0582173	-0.0567827	-0.0376075
	1821	0.0589435	-0.0560565	-0.0368813
	1822	0.0593715	-0.0556285	-0.0364532
	1823	0.0593537	-0.0556463	-0.036471
	1824	0.0595836	-0.0554164	-0.0362411
	1825	0.0603144	-0.0546856	-0.0355103
	1826	0.0611194	-0.0538806	-0.0347054
	1827	0.0619795	-0.0530205	-0.0338453
	1828	0.0631194	-0.0518806	-0.0327054
	1829	0.0644772	-0.0505228	-0.0313476
	1830	0.0657261	-0.0492739	-0.0300986
	1831	0.0667948	-0.0482052	-0.02903
	1832	0.0677473	-0.0472527	-0.0280774
	1833	0.0686081	-0.0463919	-0.0272167
	1834	0.0695806	-0.0454194	-0.0262442
	1835	0.0705607	-0.0444393	-0.0252641
	1836	0.0715285	-0.0434715	-0.0242963
	1837	0.0727152	-0.0422848	-0.0231096
	1838	0.0743157	-0.0406843	-0.0215091
	1839	0.0760545	-0.0389455	-0.0197703
	1840	0.0775041	-0.0374959	-0.0183207
	1841	0.0789476	-0.0360524	-0.0168772
	1842	0.0802438	-0.0347562	-0.015581
	1843	0.0811951	-0.0338049	-0.0146297
	1844	0.0825942	-0.0324058	-0.0132305
	1845	0.0846037	-0.0303963	-0.011221
	1846	0.0865683	-0.0284317	-0.00925648
	1847	0.0884722	-0.0265278	-0.00735256
	1848	0.0905321	-0.0244679	-0.00529263
	1849	0.0926667	-0.0223333	-0.00315804
	1850	0.09457	-0.02043	-0.00125476
	1851	0.0961476	-0.0188524	0.000322821
	1852	0.0972511	-0.0177489	0.00142631
	1853	0.0976737	-0.0173263	0.00184894
	1854	0.09778	-0.01722	0.00195524
	1855	0.097864	-0.017136	0.00203927
	1856	0.0979918	-0.0170082	0.002167
	1857	0.0981941	-0.0168059	0.00236938
	1858	0.098525	-0.016475	0.00270024
	1859	0.0989607	-0.0160393	0.00313593
	1860	0.0990571	-0.0159429	0.00323235
	1861	0.0983174	-0.0166826	0.0024926
	1862	0.0975726	-0.0174274	0.00174787
	1863	0.0978133	-0.0171867	0.00198854
	1864	0.0985362	-0.0164638	0.00271147
	1865	0.0991386	-0.0158614	0.00331379
	1866	0.0993392	-0.0156608	0.00351442
	1867	0.098972	-0.016028	0.00314727
	1868	0.0984572	-0.0165428	0.00263246
	1869	0.0983782	-0.0166218	0.00255346
	1870	0.0987945	-0.0162055	0.00296971
	1871	0.098965	-0.016035	0.00314023
	1872	0.0976629	-0.0173371	0.00183809
	1873	0.0947593	-0.0202407	-0.00106547
	1874	0.0917099	-0.0232901	-0.00411484
	1875	0.0895527	-0.0254473	-0.00627205
	1876	0.0883213	-0.0266787	-0.00750346
	1877	0.0880629	-0.0269371	-0.00776182
	1878	0.0886385	-0.0263615	-0.00718623
	1879	0.0894183	-0.0255817	-0.00640645
	1880	0.0895837	-0.0254163	-0.00624109
	1881	0.0890595	-0.0259405	-0.00676525
	1882	0.088791	-0.026209	-0.00703373
	1883	0.0891338	-0.0258662	-0.00669096
	1884	0.0897525	-0.0252475	-0.00607226
	1885	0.0907265	-0.0242735	-0.00509827
	1886	0.0921376	-0.0228624	-0.00368713
	1887	0.0936467	-0.0213533	-0.00217811
	1888	0.0946689	-0.0203311	-0.00115588
	1889	0.0952676	-0.0197324	-0.000557197
	1890	0.0958979	-0.0191021	7.3126e-05
	1891	0.0964044	-0.0185956	0.000579593
	1892	0.0967215	-0.0182785	0.000896728
	1893	0.0970679	-0.0179321	0.00124311
	1894	0.0974638	-0.0175362	0.001639
	1895	0.0977925	-0.0172075	0.00196774
	1896	0.098155	-0.016845	0.00233021
	1897	0.0988072	-0.0161928	0.0029824
	1898	0.0997593	-0.0152407	0.0039345
	1899	0.100826	-0.0141741	0.0050011
	1900	0.101911	-0.0130891	0.00608618
	1901	0.102889	-0.0121113	0.00706389	0.0633333
	1902	0.10367	-0.0113297	0.00784553	-0.0633333
	1903	0.104292	-0.0107076	0.00846763	-0.156667
	1904	0.104815	-0.0101848	0.00899048	-0.23
	1905	0.105356	-0.00964401	0.00953123	-0.0566667
	1906	0.105871	-0.00912915	0.0100461	0.01
	1907	0.106304	-0.00869573	0.0104795	-0.16
	1908	0.107156	-0.00784365	0.0113316	-0.21
	1909	0.10888	-0.00612049	0.0130547	-0.233333
	1910	0.111093	-0.00390707	0.0152682	-0.19
	1911	0.113624	-0.00137559	0.0177996	-0.226667
	1912	0.116804	0.00180383	0.0209791	-0.13
	1913	0.12052	0.00552009	0.0246953	-0.113333
	1914	0.124684	0.00968405	0.0288593	0.07
	1915	0.129397	0.014397	0.0335723	0.123333
	1916	0.13422	0.0192197	0.0383949	-0.11
	1917	0.138705	0.0237049	0.0428801	-0.193333
	1918	0.142995	0.0279949	0.0471701	-0.0666667
	1919	0.147598	0.0325982	0.0517735	-0.02
	1920	0.152474	0.0374741	0.0566494	0
	1921	0.157404	0.0424036	0.0615788	0.07
	1922	0.162482	0.0474823	0.0666576	-0.0266667
	1923	0.166969	0.0519688	0.0711441	-0.0166667
	1924	0.17051	0.0555098	0.0746851	-0.02
	1925	0.173919	0.0589187	0.078094	0.0433333
	1926	0.177597	0.0625972	0.0817724	0.15
	1927	0.181256	0.0662565	0.0854317	0.0466667
	1928	0.184726	0.0697262	0.0889014	0.0533333
	1929	0.188137	0.073137	0.0923122	-0.0966667
	1930	0.191791	0.0767914	0.0959666	0.113333
	1931	0.196123	0.0811231	0.100298	0.17
	1932	0.201233	0.0862333	0.105409	0.106667
	1933	0.206637	0.091637	0.110812	-0.0266667
	1934	0.211764	0.0967637	0.115939	0.123333
	1935	0.21651	0.10151	0.120686	0.07
	1936	0.220959	0.105959	0.125134	0.11
	1937	0.225284	0.110284	0.129459	0.226667
	1938	0.230153	0.115153	0.134328	0.236667
	1939	0.23571	0.12071	0.139885	0.226667
	1940	0.241162	0.126162	0.145337	0.35
	1941	0.246022	0.131022	0.150197	0.41
	1942	0.25038	0.13538	0.154555	0.296667
	1943	0.254523	0.139523	0.158698	0.31
	1944	0.258592	0.143592	0.162767	0.453333
	1945	0.262555	0.147555	0.16673	0.343333
	1946	0.266114	0.151114	0.170289	0.193333
	1947	0.268904	0.153904	0.173079	0.213333
	1948	0.271022	0.156022	0.175197	0.18
	1949	0.273026	0.158026	0.177201	0.16
	1950	0.275189	0.160189	0.179364	0.0766667
	1951	0.276666	0.161666	0.180841	0.206667
	1952	0.27702	0.16202	0.181195	0.273333
	1953	0.2772	0.1622	0.181375	0.35
	1954	0.277828	0.162828	0.182003	0.13
	1955	0.278848	0.163848	0.183023	0.0966667
	1956	0.280275	0.165275	0.184451	0.0333333
	1957	0.282159	0.167159	0.186334	0.286667
	1958	0.284723	0.169723	0.188898	0.323333
	1959	0.288584	0.173584	0.192759	0.29
	1960	0.294023	0.179023	0.198198	0.243333
	1961	0.299821	0.184821	0.203996	0.31
	1962	0.304843	0.189843	0.209018	0.3
	1963	0.309749	0.194749	0.213924	0.32
	1964	0.315295	0.200295	0.21947	0.06
	1965	0.321631	0.206631	0.225806	0.143333
	1966	0.328834	0.213834	0.233009	0.203333
	1967	0.336746	0.221746	0.240921	0.216667
	1968	0.345283	0.230283	0.249458	0.173333
	1969	0.354808	0.239808	0.258983	0.313333
	1970	0.366132	0.251132	0.270307	0.266667
	1971	0.379782	0.264782	0.283957	0.136667
	1972	0.394874	0.279874	0.299049	0.243333
	1973	0.410117	0.295117	0.314292	0.386667
	1974	0.42522	0.31022	0.329395	0.133333
	1975	0.440243	0.325243	0.344418	0.2
	1976	0.454899	0.339899	0.359074	0.11
	1977	0.469178	0.354178	0.373354	0.393333
	1978	0.483859	0.368859	0.388035	0.29
	1979	0.499585	0.384585	0.403761	0.396667
	1980	0.515799	0.400799	0.419974	0.46
	1981	0.531529	0.416529	0.435704	0.51
	1982	0.546305	0.431305	0.45048	0.363333
	1983	0.560204	0.445204	0.464379	0.536667
	1984	0.573961	0.458961	0.478136	0.353333
	1985	0.58832	0.47332	0.492495	0.333333
	1986	0.603409	0.488409	0.507585	0.403333
	1987	0.618923	0.503923	0.523099	0.546667
	1988	0.634892	0.519892	0.539068	0.57
	1989	0.651794	0.536794	0.55597	0.473333
	1990	0.669673	0.554673	0.573848	0.646667
	1991	0.687696	0.572696	0.591871	0.596667
	1992	0.704905	0.589905	0.60908	0.436667
	1993	0.721335	0.606335	0.62551	0.466667
	1994	0.737534	0.622534	0.641709	0.536667
	1995	0.754021	0.639021	0.658196	0.663333
	1996	0.771201	0.656201	0.675376	0.526667
	1997	0.788363	0.673363	0.692539	0.706667
	1998	0.804412	0.689412	0.708587	0.846667
	1999	0.819396	0.704396	0.723572	0.626667
	2000	0.833565	0.718565	0.737741	0.623333
	2001	0.847084	0.732084	0.75126	0.766667
	2002	0.860721	0.745721	0.764897	0.83
	2003	0.874993	0.759993	0.779169	0.836667
	2004	0.889851	0.774851	0.794027	0.77
	2005	0.905432	0.790432	0.809607	0.88
	2006	0.922282	0.807282	0.826457	0.843333
	2007	0.940835	0.825835	0.845011	0.84
	2008	0.961094	0.846094	0.86527	0.74
	2009	0.982876	0.867876	0.887051	0.853333
	2010	1.0057	0.890705	0.90988	0.923333
	2011	1.02894	0.913938	0.933114	0.786667
	2012	1.05226	0.937264	0.956439	0.833333
	2013	1.07573	0.960726	0.979901	0.873333
	2014	1.09939	0.984392	1.00357	0.936667
	2015	1.12326	1.00826	1.02743	1.11333
	2016	1.14732	1.03232	1.05149	1.18333
	2017	1.17154	1.05654	1.07572	1.08333
	2018	1.19596	1.08096	1.10013	1.00667
			-0.115		1.13667
