# Supplementary material for: The Social Cost of Fossil and Industrial CO2 Emissions from 1950 to 2018
Source: Research Square preprint supplement (doi:10.21203/rs.3.rs-2244259/v1), 2022-11-17
Supplement: Supplementary file 44 [file Country_Mapping.xlsx]

## Sheet: Tabelle1
	Output	Capital	depreciation	output_PPP	labor_share				cap_PPP	out_PPP
	MAR	MAR	MAR	MAR	MAR		MAR	MAR	MAR	MAR
	ABW	ABW	ABW	ABW	ABW		ABW	ABW	ABW	ABW
	AGO	AGO	AGO	AGO	AGO		AGO	AGO	AGO	AGO
	AIA	AIA	AIA	AIA	ARG		AIA	AIA	AIA	AIA
	ALB	ALB	ALB	ALB	ARM		ALB	ALB	ALB	ALB
	ARE	ARE	ARE	ARE	AUS		ARE	ARE	ARE	ARE
	ARG	ARG	ARG	ARG	AUT		ARG	ARG	ARG	ARG
	ARM	ARM	ARM	ARM	AZE		ARM	ARM	ARM	ARM
	ATG	ATG	ATG	ATG	BDI		ATG	ATG	ATG	ATG
	AUS	AUS	AUS	AUS	BEL		AUS	AUS	AUS	AUS
	AUT	AUT	AUT	AUT	BEN		AUT	AUT	AUT	AUT
	AZE	AZE	AZE	AZE	BFA		AZE	AZE	AZE	AZE
	BDI	BDI	BDI	BDI	BGR		BDI	BDI	BDI	BDI
	BEL	BEL	BEL	BEL	BHR		BEL	BEL	BEL	BEL
	BEN	BEN	BEN	BEN	BHS		BEN	BEN	BEN	BEN
	BFA	BFA	BFA	BFA	BIH		BFA	BFA	BFA	BFA
	BGD	BGD	BGD	BGD	BLR		BGD	BGD	BGD	BGD
	BGR	BGR	BGR	BGR	BMU		BGR	BGR	BGR	BGR
	BHR	BHR	BHR	BHR	BOL		BHR	BHR	BHR	BHR
	BHS	BHS	BHS	BHS	BRA		BHS	BHS	BHS	BHS
	BIH	BIH	BIH	BIH	BRB		BIH	BIH	BIH	BIH
	BLR	BLR	BLR	BLR	BWA		BLR	BLR	BLR	BLR
	BLZ	BLZ	BLZ	BLZ	CAF		BLZ	BLZ	BLZ	BLZ
	BMU	BMU	BMU	BMU	CAN		BMU	BMU	BMU	BMU
	BOL	BOL	BOL	BOL	CHE		BOL	BOL	BOL	BOL
	BRA	BRA	BRA	BRA	CHL		BRA	BRA	BRA	BRA
	BRB	BRB	BRB	BRB	CHN		BRB	BRB	BRB	BRB
	BRN	BRN	BRN	BRN	CIV		BRN	BRN	BRN	BRN
	BTN	BTN	BTN	BTN	CMR		BTN	BTN	BTN	BTN
	BWA	BWA	BWA	BWA	COL		BWA	BWA	BWA	BWA
	CAF	CAF	CAF	CAF	CPV		CAF	CAF	CAF	CAF
	CAN	CAN	CAN	CAN	CRI		CAN	CAN	CAN	CAN
	CHE	CHE	CHE	CHE	CUW		CHE	CHE	CHE	CHE
	CHL	CHL	CHL	CHL	CYM		CHL	CHL	CHL	CHL
	CHN	CHN	CHN	CHN	CYP		CHN	CHN	CHN	CHN
	CIV	CIV	CIV	CIV	CZE		CIV	CIV	CIV	CIV
	CMR	CMR	CMR	CMR	DEU		CMR	CMR	CMR	CMR
	COD	COD	COD	COD	DJI		COD	COD	COD	COD
	COG	COG	COG	COG	DNK		COG	COG	COG	COG
	COL	COL	COL	COL	DOM		COL	COL	COL	COL
	COM	COM	COM	COM	ECU		COM	COM	COM	COM
	CPV	CPV	CPV	CPV	EGY		CPV	CPV	CPV	CPV
	CRI	CRI	CRI	CRI	ESP		CRI	CRI	CRI	CRI
	CUW			CUW	EST		CYM	CYM	CYM	CYM
	CYM	CYM	CYM	CYM	FIN		CYP	CYP	CYP	CYP
	CYP	CYP	CYP	CYP	FJI		CZE	CZE	CZE	CZE
	CZE	CZE	CZE	CZE	FRA		DEU	DEU	DEU	DEU
	DEU	DEU	DEU	DEU	GAB		DJI	DJI	DJI	DJI
	DJI	DJI	DJI	DJI	GBR		DMA	DMA	DMA	DMA
	DMA	DMA	DMA	DMA	GEO		DNK	DNK	DNK	DNK
	DNK	DNK	DNK	DNK	GIN		DOM	DOM	DOM	DOM
	DOM	DOM	DOM	DOM	GRC		DZA	DZA	DZA	DZA
	DZA	DZA	DZA	DZA	GTM		ECU	ECU	ECU	ECU
	ECU	ECU	ECU	ECU	HKG		EGY	EGY	EGY	EGY
	EGY	EGY	EGY	EGY	HND		ESP	ESP	ESP	ESP
	ESP	ESP	ESP	ESP	HRV		EST	EST	EST	EST
	EST	EST	EST	EST	HUN		ETH	ETH	ETH	ETH
	ETH	ETH	ETH	ETH	IDN		FIN	FIN	FIN	FIN
	FIN	FIN	FIN	FIN	IND		FJI	FJI	FJI	FJI
	FJI	FJI	FJI	FJI	IRL		FRA	FRA	FRA	FRA
	FRA	FRA	FRA	FRA	IRN		GAB	GAB	GAB	GAB
	GAB	GAB	GAB	GAB	IRQ		GBR	GBR	GBR	GBR
	GBR	GBR	GBR	GBR	ISL		GEO	GEO	GEO	GEO
	GEO	GEO	GEO	GEO	ISR		GHA	GHA	GHA	GHA
	GHA	GHA	GHA	GHA	ITA		GIN	GIN	GIN	GIN
	GIN	GIN	GIN	GIN	JAM		GMB	GMB	GMB	GMB
	GMB	GMB	GMB	GMB	JOR		GNB	GNB	GNB	GNB
	GNB	GNB	GNB	GNB	JPN		GNQ	GNQ	GNQ	GNQ
	GNQ	GNQ	GNQ	GNQ	KAZ		GRC	GRC	GRC	GRC
	GRC	GRC	GRC	GRC	KEN		GRD	GRD	GRD	GRD
	GRD	GRD	GRD	GRD	KGZ		GTM	GTM	GTM	GTM
	GTM	GTM	GTM	GTM	KOR		HKG	HKG	HKG	HKG
	GUY			GUY	KWT		HND	HND	HND	HND
	HKG	HKG	HKG	HKG	LAO		HRV	HRV	HRV	HRV
	HND	HND	HND	HND	LBN		HTI	HTI	HTI	HTI
	HRV	HRV	HRV	HRV	LKA		HUN	HUN	HUN	HUN
	HTI	HTI	HTI	HTI	LSO		IDN	IDN	IDN	IDN
	HUN	HUN	HUN	HUN	LTU		IND	IND	IND	IND
	IDN	IDN	IDN	IDN	LUX		IRL	IRL	IRL	IRL
	IND	IND	IND	IND	LVA		IRN	IRN	IRN	IRN
	IRL	IRL	IRL	IRL	MAC		IRQ	IRQ	IRQ	IRQ
	IRN	IRN	IRN	IRN	MDA		ISL	ISL	ISL	ISL
	IRQ	IRQ	IRQ	IRQ	MEX		ISR	ISR	ISR	ISR
	ISL	ISL	ISL	ISL	MKD		ITA	ITA	ITA	ITA
	ISR	ISR	ISR	ISR	MLT		JAM	JAM	JAM	JAM
	ITA	ITA	ITA	ITA	MNG		JOR	JOR	JOR	JOR
	JAM	JAM	JAM	JAM	MOZ		JPN	JPN	JPN	JPN
	JOR	JOR	JOR	JOR	MRT		KAZ	KAZ	KAZ	KAZ
	JPN	JPN	JPN	JPN	MUS		KEN	KEN	KEN	KEN
	KAZ	KAZ	KAZ	KAZ	MYS		KGZ	KGZ	KGZ	KGZ
	KEN	KEN	KEN	KEN	NAM		KHM	KHM	KHM	KHM
	KGZ	KGZ	KGZ	KGZ	NER		KNA	KNA	KNA	KNA
	KHM	KHM	KHM	KHM	NGA		KOR	KOR	KOR	KOR
	KNA	KNA	KNA	KNA	NIC		KWT	KWT	KWT	KWT
	KOR	KOR	KOR	KOR	NLD		LAO	LAO	LAO	LAO
	KWT	KWT	KWT	KWT	NOR		LBN	LBN	LBN	LBN
	LAO	LAO	LAO	LAO	NZL		LBR	LBR	LBR	LBR
	LBN	LBN	LBN	LBN	OMN		LCA	LCA	LCA	LCA
	LBR	LBR	LBR	LBR	PAN		LKA	LKA	LKA	LKA
	LCA	LCA	LCA	LCA	PER		LSO	LSO	LSO	LSO
	LKA	LKA	LKA	LKA	PHL		LTU	LTU	LTU	LTU
	LSO	LSO	LSO	LSO	POL		LUX	LUX	LUX	LUX
	LTU	LTU	LTU	LTU	PRT		LVA	LVA	LVA	LVA
	LUX	LUX	LUX	LUX	PRY		MAC	MAC	MAC	MAC
	LVA	LVA	LVA	LVA	QAT		MDA	MDA	MDA	MDA
	MAC	MAC	MAC	MAC	ROU		MDG	MDG	MDG	MDG
	MDA	MDA	MDA	MDA	RUS		MDV	MDV	MDV	MDV
	MDG	MDG	MDG	MDG	RWA		MEX	MEX	MEX	MEX
	MDV	MDV	MDV	MDV	SAU		MKD	MKD	MKD	MKD
	MEX	MEX	MEX	MEX	SDN		MLI	MLI	MLI	MLI
	MKD	MKD	MKD	MKD	SEN		MLT	MLT	MLT	MLT
	MLI	MLI	MLI	MLI	SGP		MMR	MMR	MMR	MMR
	MLT	MLT	MLT	MLT	SLE		MNE	MNE	MNE	MNE
	MMR	MMR	MMR	MMR	SRB		MNG	MNG	MNG	MNG
	MNE	MNE	MNE	MNE	STP		MOZ	MOZ	MOZ	MOZ
	MNG	MNG	MNG	MNG	SUR		MRT	MRT	MRT	MRT
	MOZ	MOZ	MOZ	MOZ	SVK		MSR	MSR	MSR	MSR
	MRT	MRT	MRT	MRT	SVN		MUS	MUS	MUS	MUS
	MSR	MSR	MSR	MSR	SWE		MWI	MWI	MWI	MWI
	MUS	MUS	MUS	MUS	SWZ		MYS	MYS	MYS	MYS
	MWI	MWI	MWI	MWI	TCD		NAM	NAM	NAM	NAM
	MYS	MYS	MYS	MYS	TGO		NER	NER	NER	NER
	NAM	NAM	NAM	NAM	THA		NGA	NGA	NGA	NGA
	NER	NER	NER	NER	TJK		NIC	NIC	NIC	NIC
	NGA	NGA	NGA	NGA	TTO		NLD	NLD	NLD	NLD
	NIC	NIC	NIC	NIC	TUN		NOR	NOR	NOR	NOR
	NLD	NLD	NLD	NLD	TUR		NPL	NPL	NPL	NPL
	NOR	NOR	NOR	NOR	TWN		NZL	NZL	NZL	NZL
	NPL	NPL	NPL	NPL	TZA		OMN	OMN	OMN	OMN
	NZL	NZL	NZL	NZL	UKR		PAK	PAK	PAK	PAK
	OMN	OMN	OMN	OMN	URY		PAN	PAN	PAN	PAN
	PAK	PAK	PAK	PAK	USA		PER	PER	PER	PER
	PAN	PAN	PAN	PAN	UZB		PHL	PHL	PHL	PHL
	PER	PER	PER	PER	VEN		POL	POL	POL	POL
	PHL	PHL	PHL	PHL	VGB		PRT	PRT	PRT	PRT
	POL	POL	POL	POL	ZAF		PRY	PRY	PRY	PRY
	PRT	PRT	PRT	PRT	ZMB		PSE	PSE	PSE	PSE
	PRY	PRY	PRY	PRY	ZWE		QAT	QAT	QAT	QAT
	PSE	PSE	PSE	PSE			ROU	ROU	ROU	ROU
	QAT	QAT	QAT	QAT			RUS	RUS	RUS	RUS
	ROU	ROU	ROU	ROU			RWA	RWA	RWA	RWA
	RUS	RUS	RUS	RUS			SAU	SAU	SAU	SAU
	RWA	RWA	RWA	RWA			SDN	SDN	SDN	SDN
	SAU	SAU	SAU	SAU			SEN	SEN	SEN	SEN
	SDN	SDN	SDN	SDN			SGP	SGP	SGP	SGP
	SEN	SEN	SEN	SEN			SLE	SLE	SLE	SLE
	SGP	SGP	SGP	SGP			SLV	SLV	SLV	SLV
	SLE	SLE	SLE	SLE			SRB	SRB	SRB	SRB
	SLV	SLV	SLV	SLV			STP	STP	STP	STP
	SRB	SRB	SRB	SRB			SUR	SUR	SUR	SUR
	STP	STP	STP	STP			SVK	SVK	SVK	SVK
	SUR	SUR	SUR	SUR			SVN	SVN	SVN	SVN
	SVK	SVK	SVK	SVK			SWE	SWE	SWE	SWE
	SVN	SVN	SVN	SVN			SWZ	SWZ	SWZ	SWZ
	SWE	SWE	SWE	SWE			SYC	SYC	SYC	SYC
	SWZ	SWZ	SWZ	SWZ			SYR	SYR	SYR	SYR
	SXM			SXM			TCA	TCA	TCA	TCA
	SYC	SYC	SYC	SYC			TCD	TCD	TCD	TCD
	SYR	SYR	SYR	SYR			TGO	TGO	TGO	TGO
	TCA	TCA	TCA	TCA			THA	THA	THA	THA
	TCD	TCD	TCD	TCD			TJK	TJK	TJK	TJK
	TGO	TGO	TGO	TGO			TKM	TKM	TKM	TKM
	THA	THA	THA	THA			TTO	TTO	TTO	TTO
	TJK	TJK	TJK	TJK			TUN	TUN	TUN	TUN
	TKM	TKM	TKM	TKM			TUR	TUR	TUR	TUR
	TTO	TTO	TTO	TTO			TWN	TWN	TWN	TWN
	TUN	TUN	TUN	TUN			TZA	TZA	TZA	TZA
	TUR	TUR	TUR	TUR			UGA	UGA	UGA	UGA
	TWN	TWN	TWN	TWN			UKR	UKR	UKR	UKR
	TZA	TZA	TZA	TZA			URY	URY	URY	URY
	UGA	UGA	UGA	UGA			USA	USA	USA	USA
	UKR	UKR	UKR	UKR			UZB	UZB	UZB	UZB
	URY	URY	URY	URY			VCT	VCT	VCT	VCT
	USA	USA	USA	USA			VEN	VEN	VEN	VEN
	UZB	UZB	UZB	UZB			VGB	VGB	VGB	VGB
	VCT	VCT	VCT	VCT			VNM	VNM	VNM	VNM
	VEN	VEN	VEN	VEN			YEM	YEM	YEM	YEM
	VGB	VGB	VGB	VGB			ZAF	ZAF	ZAF	ZAF
	VNM	VNM	VNM	VNM			ZMB	ZMB	ZMB	ZMB
	YEM	YEM	YEM	YEM			ZWE	ZWE	ZWE	ZWE
	ZAF	ZAF	ZAF	ZAF
	ZMB	ZMB	ZMB	ZMB
	ZWE	ZWE	ZWE	ZWE
