# Supplementary material for: The Social Cost of Fossil and Industrial CO2 Emissions from 1950 to 2018
Source: Research Square preprint supplement (doi:10.21203/rs.3.rs-2244259/v1), 2022-11-17
Supplement: Supplementary file 45 [file Population_data_transposed.xlsx]

## Sheet: FebPwtExport9152021
VariableCode	RegionCode	YearCode	AggValue
pop	ABW	1970	0.059063
pop	ABW	1971	0.05944
pop	ABW	1972	0.05984
pop	ABW	1973	0.060243
pop	ABW	1974	0.060528
pop	ABW	1975	0.060657
pop	ABW	1976	0.060586
pop	ABW	1977	0.060366
pop	ABW	1978	0.060103
pop	ABW	1979	0.05998
pop	ABW	1980	0.060096
pop	ABW	1981	0.060567
pop	ABW	1982	0.061345
pop	ABW	1983	0.062201
pop	ABW	1984	0.062836
pop	ABW	1985	0.063026
pop	ABW	1986	0.062644
pop	ABW	1987	0.061833
pop	ABW	1988	0.061079
pop	ABW	1989	0.061032
pop	ABW	1990	0.062149
pop	ABW	1991	0.064622
pop	ABW	1992	0.068235
pop	ABW	1993	0.072504
pop	ABW	1994	0.0767
pop	ABW	1995	0.080324
pop	ABW	1996	0.0832
pop	ABW	1997	0.085451
pop	ABW	1998	0.087277
pop	ABW	1999	0.089005
pop	ABW	2000	0.090853
pop	ABW	2001	0.092898
pop	ABW	2002	0.094992
pop	ABW	2003	0.097017
pop	ABW	2004	0.098737
pop	ABW	2005	0.100031
pop	ABW	2006	0.100834
pop	ABW	2007	0.101222
pop	ABW	2008	0.101358
pop	ABW	2009	0.101455
pop	ABW	2010	0.101669
pop	ABW	2011	0.102046
pop	ABW	2012	0.10256
pop	ABW	2013	0.103159
pop	ABW	2014	0.103774
pop	ABW	2015	0.104341
pop	ABW	2016	0.104872
pop	ABW	2017	0.105366
pop	ABW	2018	0.105845
pop	ABW	2019	0.106314
pop	AGO	1970	5.89037
pop	AGO	1971	6.04078
pop	AGO	1972	6.24855
pop	AGO	1973	6.49696
pop	AGO	1974	6.76138
pop	AGO	1975	7.024
pop	AGO	1976	7.27951
pop	AGO	1977	7.53374
pop	AGO	1978	7.79071
pop	AGO	1979	8.05807
pop	AGO	1980	8.34129
pop	AGO	1981	8.64045
pop	AGO	1982	8.95295
pop	AGO	1983	9.2781
pop	AGO	1984	9.61475
pop	AGO	1985	9.962
pop	AGO	1986	10.3201
pop	AGO	1987	10.6892
pop	AGO	1988	11.068
pop	AGO	1989	11.4548
pop	AGO	1990	11.8484
pop	AGO	1991	12.2489
pop	AGO	1992	12.6574
pop	AGO	1993	13.075
pop	AGO	1994	13.5037
pop	AGO	1995	13.9452
pop	AGO	1996	14.4007
pop	AGO	1997	14.8716
pop	AGO	1998	15.3596
pop	AGO	1999	15.8669
pop	AGO	2000	16.3955
pop	AGO	2001	16.9458
pop	AGO	2002	17.5194
pop	AGO	2003	18.1215
pop	AGO	2004	18.7581
pop	AGO	2005	19.4336
pop	AGO	2006	20.1499
pop	AGO	2007	20.9054
pop	AGO	2008	21.6956
pop	AGO	2009	22.5143
pop	AGO	2010	23.3562
pop	AGO	2011	24.2207
pop	AGO	2012	25.1079
pop	AGO	2013	26.0158
pop	AGO	2014	26.9418
pop	AGO	2015	27.8844
pop	AGO	2016	28.8425
pop	AGO	2017	29.8168
pop	AGO	2018	30.8098
pop	AGO	2019	31.8253
pop	AIA	1970	0.006771
pop	AIA	1971	0.006858
pop	AIA	1972	0.006948
pop	AIA	1973	0.007028
pop	AIA	1974	0.007102
pop	AIA	1975	0.007159
pop	AIA	1976	0.007206
pop	AIA	1977	0.007255
pop	AIA	1978	0.007284
pop	AIA	1979	0.007292
pop	AIA	1980	0.007285
pop	AIA	1981	0.007247
pop	AIA	1982	0.00719
pop	AIA	1983	0.007153
pop	AIA	1984	0.007173
pop	AIA	1985	0.007293
pop	AIA	1986	0.007518
pop	AIA	1987	0.007842
pop	AIA	1988	0.008213
pop	AIA	1989	0.008582
pop	AIA	1990	0.008899
pop	AIA	1991	0.009135
pop	AIA	1992	0.009332
pop	AIA	1993	0.009493
pop	AIA	1994	0.009664
pop	AIA	1995	0.009866
pop	AIA	1996	0.010117
pop	AIA	1997	0.010388
pop	AIA	1998	0.010684
pop	AIA	1999	0.010971
pop	AIA	2000	0.011252
pop	AIA	2001	0.011515
pop	AIA	2002	0.011761
pop	AIA	2003	0.012001
pop	AIA	2004	0.012233
pop	AIA	2005	0.012453
pop	AIA	2006	0.012661
pop	AIA	2007	0.012868
pop	AIA	2008	0.013063
pop	AIA	2009	0.013258
pop	AIA	2010	0.013438
pop	AIA	2011	0.01362
pop	AIA	2012	0.013795
pop	AIA	2013	0.013954
pop	AIA	2014	0.014112
pop	AIA	2015	0.014279
pop	AIA	2016	0.014429
pop	AIA	2017	0.014584
pop	AIA	2018	0.014731
pop	AIA	2019	0.014869
pop	ALB	1970	2.15071
pop	ALB	1971	2.20219
pop	ALB	1972	2.25406
pop	ALB	1973	2.30629
pop	ALB	1974	2.35885
pop	ALB	1975	2.41173
pop	ALB	1976	2.46498
pop	ALB	1977	2.51869
pop	ALB	1978	2.57285
pop	ALB	1979	2.62751
pop	ALB	1980	2.68269
pop	ALB	1981	2.73703
pop	ALB	1982	2.79027
pop	ALB	1983	2.84487
pop	ALB	1984	2.90414
pop	ALB	1985	2.96967
pop	ALB	1986	3.04421
pop	ALB	1987	3.12489
pop	ALB	1988	3.20098
pop	ALB	1989	3.25793
pop	ALB	1990	3.28607
pop	ALB	1991	3.28039
pop	ALB	1992	3.24589
pop	ALB	1993	3.1952
pop	ALB	1994	3.14652
pop	ALB	1995	3.11294
pop	ALB	1996	3.0987
pop	ALB	1997	3.09975
pop	ALB	1998	3.11068
pop	ALB	1999	3.1227
pop	ALB	2000	3.12924
pop	ALB	2001	3.1297
pop	ALB	2002	3.12619
pop	ALB	2003	3.11802
pop	ALB	2004	3.10489
pop	ALB	2005	3.08681
pop	ALB	2006	3.06302
pop	ALB	2007	3.034
pop	ALB	2008	3.00268
pop	ALB	2009	2.97305
pop	ALB	2010	2.94802
pop	ALB	2011	2.92859
pop	ALB	2012	2.9141
pop	ALB	2013	2.90379
pop	ALB	2014	2.8963
pop	ALB	2015	2.89051
pop	ALB	2016	2.88644
pop	ALB	2017	2.88417
pop	ALB	2018	2.88274
pop	ALB	2019	2.88092
pop	ARE	1970	0.234514
pop	ARE	1971	0.277471
pop	ARE	1972	0.330974
pop	ARE	1973	0.394624
pop	ARE	1974	0.467451
pop	ARE	1975	0.548301
pop	ARE	1976	0.637922
pop	ARE	1977	0.735344
pop	ARE	1978	0.835508
pop	ARE	1979	0.931749
pop	ARE	1980	1.01951
pop	ARE	1981	1.09661
pop	ARE	1982	1.16481
pop	ARE	1983	1.22846
pop	ARE	1984	1.29397
pop	ARE	1985	1.36616
pop	ARE	1986	1.44638
pop	ARE	1987	1.53354
pop	ARE	1988	1.62707
pop	ARE	1989	1.72568
pop	ARE	1990	1.82843
pop	ARE	1991	1.93715
pop	ARE	1992	2.05289
pop	ARE	1993	2.17314
pop	ARE	1994	2.29439
pop	ARE	1995	2.41509
pop	ARE	1996	2.53913
pop	ARE	1997	2.67136
pop	ARE	1998	2.81321
pop	ARE	1999	2.96603
pop	ARE	2000	3.13406
pop	ARE	2001	3.30272
pop	ARE	2002	3.47878
pop	ARE	2003	3.71193
pop	ARE	2004	4.06857
pop	ARE	2005	4.58823
pop	ARE	2006	5.30017
pop	ARE	2007	6.16884
pop	ARE	2008	7.08949
pop	ARE	2009	7.91737
pop	ARE	2010	8.54999
pop	ARE	2011	8.94678
pop	ARE	2012	9.1416
pop	ARE	2013	9.19791
pop	ARE	2014	9.21417
pop	ARE	2015	9.2629
pop	ARE	2016	9.36098
pop	ARE	2017	9.4872
pop	ARE	2018	9.63096
pop	ARE	2019	9.77053
pop	ARG	1950	17.0918
pop	ARG	1951	17.4576
pop	ARG	1952	17.816
pop	ARG	1953	18.1686
pop	ARG	1954	18.5172
pop	ARG	1955	18.8632
pop	ARG	1956	19.2058
pop	ARG	1957	19.5436
pop	ARG	1958	19.8785
pop	ARG	1959	20.212
pop	ARG	1960	20.5457
pop	ARG	1961	20.8791
pop	ARG	1962	21.2112
pop	ARG	1963	21.5427
pop	ARG	1964	21.8744
pop	ARG	1965	22.2071
pop	ARG	1966	22.5345
pop	ARG	1967	22.856
pop	ARG	1968	23.1812
pop	ARG	1969	23.5195
pop	ARG	1970	23.8806
pop	ARG	1971	24.2596
pop	ARG	1972	24.6532
pop	ARG	1973	25.0565
pop	ARG	1974	25.4623
pop	ARG	1975	25.8658
pop	ARG	1976	26.2647
pop	ARG	1977	26.6614
pop	ARG	1978	27.061
pop	ARG	1979	27.471
pop	ARG	1980	27.8965
pop	ARG	1981	28.3385
pop	ARG	1982	28.7945
pop	ARG	1983	29.262
pop	ARG	1984	29.7371
pop	ARG	1985	30.2163
pop	ARG	1986	30.699
pop	ARG	1987	31.1844
pop	ARG	1988	31.6689
pop	ARG	1989	32.1481
pop	ARG	1990	32.6187
pop	ARG	1991	33.079
pop	ARG	1992	33.5293
pop	ARG	1993	33.9701
pop	ARG	1994	34.4027
pop	ARG	1995	34.8282
pop	ARG	1996	35.2464
pop	ARG	1997	35.6574
pop	ARG	1998	36.0635
pop	ARG	1999	36.4672
pop	ARG	2000	36.8708
pop	ARG	2001	37.2757
pop	ARG	2002	37.6817
pop	ARG	2003	38.0879
pop	ARG	2004	38.492
pop	ARG	2005	38.8929
pop	ARG	2006	39.2899
pop	ARG	2007	39.6843
pop	ARG	2008	40.0802
pop	ARG	2009	40.4828
pop	ARG	2010	40.8958
pop	ARG	2011	41.3205
pop	ARG	2012	41.7552
pop	ARG	2013	42.196
pop	ARG	2014	42.6375
pop	ARG	2015	43.0754
pop	ARG	2016	43.5085
pop	ARG	2017	43.9371
pop	ARG	2018	44.3612
pop	ARG	2019	44.7807
pop	ARM	1990	3.53817
pop	ARM	1991	3.50526
pop	ARM	1992	3.44282
pop	ARM	1993	3.36311
pop	ARM	1994	3.28367
pop	ARM	1995	3.21735
pop	ARM	1996	3.16822
pop	ARM	1997	3.13309
pop	ARM	1998	3.10869
pop	ARM	1999	3.08902
pop	ARM	2000	3.06959
pop	ARM	2001	3.05069
pop	ARM	2002	3.03398
pop	ARM	2003	3.01793
pop	ARM	2004	3.00072
pop	ARM	2005	2.98127
pop	ARM	2006	2.95831
pop	ARM	2007	2.93262
pop	ARM	2008	2.90762
pop	ARM	2009	2.88809
pop	ARM	2010	2.87732
pop	ARM	2011	2.87654
pop	ARM	2012	2.88423
pop	ARM	2013	2.89759
pop	ARM	2014	2.91241
pop	ARM	2015	2.92555
pop	ARM	2016	2.93614
pop	ARM	2017	2.94479
pop	ARM	2018	2.95174
pop	ARM	2019	2.95773
pop	ATG	1970	0.064177
pop	ATG	1971	0.064357
pop	ATG	1972	0.064133
pop	ATG	1973	0.06365
pop	ATG	1974	0.06312
pop	ATG	1975	0.062675
pop	ATG	1976	0.062367
pop	ATG	1977	0.062159
pop	ATG	1978	0.062036
pop	ATG	1979	0.061952
pop	ATG	1980	0.061865
pop	ATG	1981	0.0618
pop	ATG	1982	0.061779
pop	ATG	1983	0.061787
pop	ATG	1984	0.061786
pop	ATG	1985	0.061786
pop	ATG	1986	0.061754
pop	ATG	1987	0.061717
pop	ATG	1988	0.061771
pop	ATG	1989	0.062008
pop	ATG	1990	0.062528
pop	ATG	1991	0.063367
pop	ATG	1992	0.064471
pop	ATG	1993	0.065777
pop	ATG	1994	0.067204
pop	ATG	1995	0.06867
pop	ATG	1996	0.070173
pop	ATG	1997	0.071704
pop	ATG	1998	0.073224
pop	ATG	1999	0.074674
pop	ATG	2000	0.076016
pop	ATG	2001	0.077212
pop	ATG	2002	0.078295
pop	ATG	2003	0.0793
pop	ATG	2004	0.080336
pop	ATG	2005	0.081465
pop	ATG	2006	0.082704
pop	ATG	2007	0.084026
pop	ATG	2008	0.085397
pop	ATG	2009	0.086746
pop	ATG	2010	0.088028
pop	ATG	2011	0.089253
pop	ATG	2012	0.090409
pop	ATG	2013	0.091516
pop	ATG	2014	0.092562
pop	ATG	2015	0.093566
pop	ATG	2016	0.094527
pop	ATG	2017	0.095426
pop	ATG	2018	0.096286
pop	ATG	2019	0.097118
pop	AUS	1950	8.35411
pop	AUS	1951	8.59992
pop	AUS	1952	8.78243
pop	AUS	1953	8.95089
pop	AUS	1954	9.15915
pop	AUS	1955	9.37445
pop	AUS	1956	9.60032
pop	AUS	1957	9.81451
pop	AUS	1958	10.0193
pop	AUS	1959	10.2381
pop	AUS	1960	10.47
pop	AUS	1961	10.7101
pop	AUS	1962	10.9083
pop	AUS	1963	11.1169
pop	AUS	1964	11.336
pop	AUS	1965	11.5594
pop	AUS	1966	11.7774
pop	AUS	1967	11.9969
pop	AUS	1968	12.2287
pop	AUS	1969	12.5093
pop	AUS	1970	12.793
pop	AUS	1971	13.0331
pop	AUS	1972	13.2442
pop	AUS	1973	13.4318
pop	AUS	1974	13.6056
pop	AUS	1975	13.7733
pop	AUS	1976	13.9357
pop	AUS	1977	14.0925
pop	AUS	1978	14.2494
pop	AUS	1979	14.413
pop	AUS	1980	14.5884
pop	AUS	1981	14.7772
pop	AUS	1982	14.9792
pop	AUS	1983	15.1946
pop	AUS	1984	15.4232
pop	AUS	1985	15.6637
pop	AUS	1986	15.9176
pop	AUS	1987	16.1832
pop	AUS	1988	16.4523
pop	AUS	1989	16.714
pop	AUS	1990	16.9606
pop	AUS	1991	17.1892
pop	AUS	1992	17.4022
pop	AUS	1993	17.6032
pop	AUS	1994	17.7985
pop	AUS	1995	17.9931
pop	AUS	1996	18.1893
pop	AUS	1997	18.3872
pop	AUS	1998	18.587
pop	AUS	1999	18.7882
pop	AUS	2000	18.9914
pop	AUS	2001	19.1947
pop	AUS	2002	19.4014
pop	AUS	2003	19.6242
pop	AUS	2004	19.8796
pop	AUS	2005	20.1785
pop	AUS	2006	20.5263
pop	AUS	2007	20.9163
pop	AUS	2008	21.3323
pop	AUS	2009	21.7509
pop	AUS	2010	22.1547
pop	AUS	2011	22.538
pop	AUS	2012	22.9039
pop	AUS	2013	23.2549
pop	AUS	2014	23.5964
pop	AUS	2015	23.9325
pop	AUS	2016	24.2627
pop	AUS	2017	24.5846
pop	AUS	2018	24.8982
pop	AUS	2019	25.2032
pop	AUT	1950	6.98075
pop	AUT	1951	6.9811
pop	AUT	1952	6.97338
pop	AUT	1953	6.97812
pop	AUT	1954	6.98589
pop	AUT	1955	6.99261
pop	AUT	1956	6.99812
pop	AUT	1957	7.01171
pop	AUT	1958	7.03335
pop	AUT	1959	7.0605
pop	AUT	1960	7.09383
pop	AUT	1961	7.13295
pop	AUT	1962	7.1768
pop	AUT	1963	7.22305
pop	AUT	1964	7.27135
pop	AUT	1965	7.31875
pop	AUT	1966	7.37026
pop	AUT	1967	7.42556
pop	AUT	1968	7.46422
pop	AUT	1969	7.49004
pop	AUT	1970	7.51624
pop	AUT	1971	7.55034
pop	AUT	1972	7.58112
pop	AUT	1973	7.60707
pop	AUT	1974	7.62629
pop	AUT	1975	7.63769
pop	AUT	1976	7.64075
pop	AUT	1977	7.63658
pop	AUT	1978	7.62776
pop	AUT	1979	7.61788
pop	AUT	1980	7.60975
pop	AUT	1981	7.60451
pop	AUT	1982	7.60218
pop	AUT	1983	7.6031
pop	AUT	1984	7.60729
pop	AUT	1985	7.61487
pop	AUT	1986	7.62539
pop	AUT	1987	7.63935
pop	AUT	1988	7.65884
pop	AUT	1989	7.68657
pop	AUT	1990	7.72395
pop	AUT	1991	7.7727
pop	AUT	1992	7.83093
pop	AUT	1993	7.89209
pop	AUT	1994	7.94721
pop	AUT	1995	7.99012
pop	AUT	1996	8.01786
pop	AUT	1997	8.03288
pop	AUT	1998	8.04105
pop	AUT	1999	8.05111
pop	AUT	2000	8.06928
pop	AUT	2001	8.09775
pop	AUT	2002	8.13441
pop	AUT	2003	8.17585
pop	AUT	2004	8.21681
pop	AUT	2005	8.25365
pop	AUT	2006	8.28534
pop	AUT	2007	8.31374
pop	AUT	2008	8.34153
pop	AUT	2009	8.37266
pop	AUT	2010	8.40995
pop	AUT	2011	8.4535
pop	AUT	2012	8.50223
pop	AUT	2013	8.55619
pop	AUT	2014	8.61521
pop	AUT	2015	8.67866
pop	AUT	2016	8.7473
pop	AUT	2017	8.8199
pop	AUT	2018	8.89139
pop	AUT	2019	8.9551
pop	AZE	1990	7.24276
pop	AZE	1991	7.35795
pop	AZE	1992	7.47193
pop	AZE	1993	7.58175
pop	AZE	1994	7.68371
pop	AZE	1995	7.77542
pop	AZE	1996	7.85555
pop	AZE	1997	7.92567
pop	AZE	1998	7.98991
pop	AZE	1999	8.05413
pop	AZE	2000	8.12274
pop	AZE	2001	8.1973
pop	AZE	2002	8.27706
pop	AZE	2003	8.36143
pop	AZE	2004	8.44895
pop	AZE	2005	8.53861
pop	AZE	2006	8.63015
pop	AZE	2007	8.72424
pop	AZE	2008	8.82187
pop	AZE	2009	8.92439
pop	AZE	2010	9.03246
pop	AZE	2011	9.14627
pop	AZE	2012	9.26469
pop	AZE	2013	9.38547
pop	AZE	2014	9.50562
pop	AZE	2015	9.62275
pop	AZE	2016	9.73604
pop	AZE	2017	9.84532
pop	AZE	2018	9.94954
pop	AZE	2019	10.0477
pop	BDI	1960	2.78116
pop	BDI	1961	2.85895
pop	BDI	1962	2.92589
pop	BDI	1963	2.97186
pop	BDI	1964	3.05126
pop	BDI	1965	3.13209
pop	BDI	1966	3.21403
pop	BDI	1967	3.29047
pop	BDI	1968	3.35941
pop	BDI	1969	3.41806
pop	BDI	1970	3.47907
pop	BDI	1971	3.53
pop	BDI	1972	3.56967
pop	BDI	1973	3.60513
pop	BDI	1974	3.64643
pop	BDI	1975	3.70088
pop	BDI	1976	3.77087
pop	BDI	1977	3.85445
pop	BDI	1978	3.94927
pop	BDI	1979	4.05123
pop	BDI	1980	4.1573
pop	BDI	1981	4.26652
pop	BDI	1982	4.37972
pop	BDI	1983	4.49753
pop	BDI	1984	4.6211
pop	BDI	1985	4.75084
pop	BDI	1986	4.88674
pop	BDI	1987	5.02714
pop	BDI	1988	5.1687
pop	BDI	1989	5.30707
pop	BDI	1990	5.43896
pop	BDI	1991	5.56493
pop	BDI	1992	5.68557
pop	BDI	1993	5.79805
pop	BDI	1994	5.89897
pop	BDI	1995	5.98704
pop	BDI	1996	6.06011
pop	BDI	1997	6.12213
pop	BDI	1998	6.18556
pop	BDI	1999	6.26712
pop	BDI	2000	6.37887
pop	BDI	2001	6.52555
pop	BDI	2002	6.70411
pop	BDI	2003	6.90915
pop	BDI	2004	7.13169
pop	BDI	2005	7.36486
pop	BDI	2006	7.60785
pop	BDI	2007	7.86221
pop	BDI	2008	8.1261
pop	BDI	2009	8.39767
pop	BDI	2010	8.6756
pop	BDI	2011	8.95841
pop	BDI	2012	9.24599
pop	BDI	2013	9.54029
pop	BDI	2014	9.8443
pop	BDI	2015	10.16
pop	BDI	2016	10.488
pop	BDI	2017	10.827
pop	BDI	2018	11.1754
pop	BDI	2019	11.5306
pop	BEL	1950	8.63433
pop	BEL	1951	8.67332
pop	BEL	1952	8.72531
pop	BEL	1953	8.77275
pop	BEL	1954	8.81424
pop	BEL	1955	8.8633
pop	BEL	1956	8.91864
pop	BEL	1957	8.98387
pop	BEL	1958	9.04743
pop	BEL	1959	9.09842
pop	BEL	1960	9.11338
pop	BEL	1961	9.16046
pop	BEL	1962	9.21302
pop	BEL	1963	9.27769
pop	BEL	1964	9.36154
pop	BEL	1965	9.44259
pop	BEL	1966	9.50226
pop	BEL	1967	9.55093
pop	BEL	1968	9.58421
pop	BEL	1969	9.60709
pop	BEL	1970	9.63218
pop	BEL	1971	9.66332
pop	BEL	1972	9.69285
pop	BEL	1973	9.72076
pop	BEL	1974	9.74702
pop	BEL	1975	9.77159
pop	BEL	1976	9.79478
pop	BEL	1977	9.8167
pop	BEL	1978	9.83681
pop	BEL	1979	9.85438
pop	BEL	1980	9.86899
pop	BEL	1981	9.88059
pop	BEL	1982	9.88982
pop	BEL	1983	9.89788
pop	BEL	1984	9.90637
pop	BEL	1985	9.91658
pop	BEL	1986	9.92854
pop	BEL	1987	9.94229
pop	BEL	1988	9.95902
pop	BEL	1989	9.98018
pop	BEL	1990	10.0065
pop	BEL	1991	10.0394
pop	BEL	1992	10.0781
pop	BEL	1993	10.1187
pop	BEL	1994	10.1559
pop	BEL	1995	10.1863
pop	BEL	1996	10.2083
pop	BEL	1997	10.2238
pop	BEL	1998	10.2373
pop	BEL	1999	10.2552
pop	BEL	2000	10.282
pop	BEL	2001	10.319
pop	BEL	2002	10.3649
pop	BEL	2003	10.419
pop	BEL	2004	10.4801
pop	BEL	2005	10.5469
pop	BEL	2006	10.6195
pop	BEL	2007	10.6976
pop	BEL	2008	10.7788
pop	BEL	2009	10.8599
pop	BEL	2010	10.9387
pop	BEL	2011	11.0139
pop	BEL	2012	11.0854
pop	BEL	2013	11.154
pop	BEL	2014	11.2212
pop	BEL	2015	11.2879
pop	BEL	2016	11.3544
pop	BEL	2017	11.4197
pop	BEL	2018	11.4822
pop	BEL	2019	11.5393
pop	BEN	1959	2.23462
pop	BEN	1960	2.28456
pop	BEN	1961	2.33654
pop	BEN	1962	2.39218
pop	BEN	1963	2.44874
pop	BEN	1964	2.50764
pop	BEN	1965	2.56873
pop	BEN	1966	2.63236
pop	BEN	1967	2.69837
pop	BEN	1968	2.76688
pop	BEN	1969	2.83825
pop	BEN	1970	2.91234
pop	BEN	1971	2.97657
pop	BEN	1972	3.04357
pop	BEN	1973	3.11368
pop	BEN	1974	3.18741
pop	BEN	1975	3.26517
pop	BEN	1976	3.34717
pop	BEN	1977	3.43344
pop	BEN	1978	3.52394
pop	BEN	1979	3.61853
pop	BEN	1980	3.71717
pop	BEN	1981	3.82013
pop	BEN	1982	3.92771
pop	BEN	1983	4.03995
pop	BEN	1984	4.15682
pop	BEN	1985	4.2785
pop	BEN	1986	4.40451
pop	BEN	1987	4.53526
pop	BEN	1988	4.67285
pop	BEN	1989	4.82002
pop	BEN	1990	4.9785
pop	BEN	1991	5.1495
pop	BEN	1992	5.3318
pop	BEN	1993	5.52176
pop	BEN	1994	5.71422
pop	BEN	1995	5.90556
pop	BEN	1996	6.09426
pop	BEN	1997	6.28164
pop	BEN	1998	6.47027
pop	BEN	1999	6.6641
pop	BEN	2000	6.86595
pop	BEN	2001	7.07673
pop	BEN	2002	7.29539
pop	BEN	2003	7.52055
pop	BEN	2004	7.75
pop	BEN	2005	7.98222
pop	BEN	2006	8.2169
pop	BEN	2007	8.45479
pop	BEN	2008	8.69692
pop	BEN	2009	8.94471
pop	BEN	2010	9.19926
pop	BEN	2011	9.46083
pop	BEN	2012	9.72925
pop	BEN	2013	10.0046
pop	BEN	2014	10.2868
pop	BEN	2015	10.576
pop	BEN	2016	10.8721
pop	BEN	2017	11.1752
pop	BEN	2018	11.485
pop	BEN	2019	11.8012
pop	BFA	1959	5.10569
pop	BFA	1960	5.16013
pop	BFA	1961	5.18652
pop	BFA	1962	5.21722
pop	BFA	1963	5.25228
pop	BFA	1964	5.2918
pop	BFA	1965	5.33587
pop	BFA	1966	5.38461
pop	BFA	1967	5.43812
pop	BFA	1968	5.49655
pop	BFA	1969	5.56004
pop	BFA	1970	5.6246
pop	BFA	1971	5.72338
pop	BFA	1972	5.82517
pop	BFA	1973	5.93048
pop	BFA	1974	6.04004
pop	BFA	1975	6.15454
pop	BFA	1976	6.27404
pop	BFA	1977	6.39893
pop	BFA	1978	6.53082
pop	BFA	1979	6.67166
pop	BFA	1980	6.82284
pop	BFA	1981	6.98516
pop	BFA	1982	7.15825
pop	BFA	1983	7.34091
pop	BFA	1984	7.53124
pop	BFA	1985	7.72791
pop	BFA	1986	7.93069
pop	BFA	1987	8.14007
pop	BFA	1988	8.35631
pop	BFA	1989	8.57982
pop	BFA	1990	8.81103
pop	BFA	1991	9.05008
pop	BFA	1992	9.29711
pop	BFA	1993	9.55248
pop	BFA	1994	9.81659
pop	BFA	1995	10.0899
pop	BFA	1996	10.3727
pop	BFA	1997	10.6655
pop	BFA	1998	10.9687
pop	BFA	1999	11.2827
pop	BFA	2000	11.6079
pop	BFA	2001	11.9446
pop	BFA	2002	12.2931
pop	BFA	2003	12.6546
pop	BFA	2004	13.0306
pop	BFA	2005	13.4219
pop	BFA	2006	13.8292
pop	BFA	2007	14.252
pop	BFA	2008	14.6897
pop	BFA	2009	15.1411
pop	BFA	2010	15.6052
pop	BFA	2011	16.0819
pop	BFA	2012	16.5713
pop	BFA	2013	17.0728
pop	BFA	2014	17.586
pop	BFA	2015	18.1106
pop	BFA	2016	18.6464
pop	BFA	2017	19.1932
pop	BFA	2018	19.7515
pop	BFA	2019	20.3214
pop	BGD	1959	50.9987
pop	BGD	1960	52.0801
pop	BGD	1961	53.1449
pop	BGD	1962	54.1889
pop	BGD	1963	55.5081
pop	BGD	1964	56.6266
pop	BGD	1965	57.5097
pop	BGD	1966	58.6657
pop	BGD	1967	59.8767
pop	BGD	1968	61.1231
pop	BGD	1969	62.406
pop	BGD	1970	64.2325
pop	BGD	1971	65.5316
pop	BGD	1972	66.6257
pop	BGD	1973	67.6375
pop	BGD	1974	68.7422
pop	BGD	1975	70.0663
pop	BGD	1976	71.6524
pop	BGD	1977	73.4636
pop	BGD	1978	75.45
pop	BGD	1979	77.529
pop	BGD	1980	79.6395
pop	BGD	1981	81.7675
pop	BGD	1982	83.9321
pop	BGD	1983	86.1425
pop	BGD	1984	88.4165
pop	BGD	1985	90.7642
pop	BGD	1986	93.1876
pop	BGD	1987	95.6712
pop	BGD	1988	98.1864
pop	BGD	1989	100.695
pop	BGD	1990	103.172
pop	BGD	1991	105.599
pop	BGD	1992	107.984
pop	BGD	1993	110.351
pop	BGD	1994	112.738
pop	BGD	1995	115.17
pop	BGD	1996	117.65
pop	BGD	1997	120.161
pop	BGD	1998	122.683
pop	BGD	1999	125.19
pop	BGD	2000	127.658
pop	BGD	2001	130.089
pop	BGD	2002	132.478
pop	BGD	2003	134.792
pop	BGD	2004	136.986
pop	BGD	2005	139.036
pop	BGD	2006	140.921
pop	BGD	2007	142.66
pop	BGD	2008	144.304
pop	BGD	2009	145.925
pop	BGD	2010	147.575
pop	BGD	2011	149.273
pop	BGD	2012	151.006
pop	BGD	2013	152.761
pop	BGD	2014	154.517
pop	BGD	2015	156.256
pop	BGD	2016	157.977
pop	BGD	2017	159.685
pop	BGD	2018	161.377
pop	BGD	2019	163.046
pop	BGR	1970	8.50755
pop	BGR	1971	8.55903
pop	BGR	1972	8.60866
pop	BGR	1973	8.65571
pop	BGR	1974	8.69918
pop	BGR	1975	8.73839
pop	BGR	1976	8.77256
pop	BGR	1977	8.8019
pop	BGR	1978	8.82803
pop	BGR	1979	8.8532
pop	BGR	1980	8.87879
pop	BGR	1981	8.90509
pop	BGR	1982	8.93071
pop	BGR	1983	8.95312
pop	BGR	1984	8.96892
pop	BGR	1985	8.97536
pop	BGR	1986	8.97255
pop	BGR	1987	8.96056
pop	BGR	1988	8.93666
pop	BGR	1989	8.89754
pop	BGR	1990	8.84146
pop	BGR	1991	8.767
pop	BGR	1992	8.67638
pop	BGR	1993	8.57604
pop	BGR	1994	8.47483
pop	BGR	1995	8.37931
pop	BGR	1996	8.29197
pop	BGR	1997	8.21181
pop	BGR	1998	8.13767
pop	BGR	1999	8.067
pop	BGR	2000	7.99796
pop	BGR	2001	7.9307
pop	BGR	2002	7.86624
pop	BGR	2003	7.80431
pop	BGR	2004	7.74463
pop	BGR	2005	7.68696
pop	BGR	2006	7.63101
pop	BGR	2007	7.57667
pop	BGR	2008	7.52409
pop	BGR	2009	7.47351
pop	BGR	2010	7.42501
pop	BGR	2011	7.37865
pop	BGR	2012	7.334
pop	BGR	2013	7.29009
pop	BGR	2014	7.24565
pop	BGR	2015	7.19974
pop	BGR	2016	7.15195
pop	BGR	2017	7.10244
pop	BGR	2018	7.05161
pop	BGR	2019	7.00012
pop	BHR	1970	0.212605
pop	BHR	1971	0.220312
pop	BHR	1972	0.229155
pop	BHR	1973	0.239527
pop	BHR	1974	0.251911
pop	BHR	1975	0.266543
pop	BHR	1976	0.283752
pop	BHR	1977	0.303175
pop	BHR	1978	0.323473
pop	BHR	1979	0.342799
pop	BHR	1980	0.359888
pop	BHR	1981	0.37412
pop	BHR	1982	0.38595
pop	BHR	1983	0.396454
pop	BHR	1984	0.407225
pop	BHR	1985	0.419428
pop	BHR	1986	0.43348
pop	BHR	1987	0.448971
pop	BHR	1988	0.465198
pop	BHR	1989	0.481087
pop	BHR	1990	0.495931
pop	BHR	1991	0.50976
pop	BHR	1992	0.523086
pop	BHR	1993	0.53621
pop	BHR	1994	0.549583
pop	BHR	1995	0.563697
pop	BHR	1996	0.578666
pop	BHR	1997	0.594931
pop	BHR	1998	0.6137
pop	BHR	1999	0.636541
pop	BHR	2000	0.664611
pop	BHR	2001	0.697545
pop	BHR	2002	0.735146
pop	BHR	2003	0.778708
pop	BHR	2004	0.829844
pop	BHR	2005	0.889164
pop	BHR	2006	0.958418
pop	BHR	2007	1.03592
pop	BHR	2008	1.11464
pop	BHR	2009	1.18508
pop	BHR	2010	1.24086
pop	BHR	2011	1.27815
pop	BHR	2012	1.29994
pop	BHR	2013	1.31503
pop	BHR	2014	1.33607
pop	BHR	2015	1.37185
pop	BHR	2016	1.42579
pop	BHR	2017	1.49408
pop	BHR	2018	1.56945
pop	BHR	2019	1.64117
pop	BHS	1970	0.169377
pop	BHS	1971	0.173889
pop	BHS	1972	0.177866
pop	BHS	1973	0.181517
pop	BHS	1974	0.18512
pop	BHS	1975	0.188896
pop	BHS	1976	0.192909
pop	BHS	1977	0.197101
pop	BHS	1978	0.201478
pop	BHS	1979	0.205984
pop	BHS	1980	0.210591
pop	BHS	1981	0.215326
pop	BHS	1982	0.220184
pop	BHS	1983	0.225084
pop	BHS	1984	0.229923
pop	BHS	1985	0.234578
pop	BHS	1986	0.239017
pop	BHS	1987	0.243271
pop	BHS	1988	0.247451
pop	BHS	1989	0.251733
pop	BHS	1990	0.256223
pop	BHS	1991	0.261008
pop	BHS	1992	0.266029
pop	BHS	1993	0.271069
pop	BHS	1994	0.275846
pop	BHS	1995	0.280184
pop	BHS	1996	0.283978
pop	BHS	1997	0.287358
pop	BHS	1998	0.290597
pop	BHS	1999	0.294062
pop	BHS	2000	0.298051
pop	BHS	2001	0.302618
pop	BHS	2002	0.30766
pop	BHS	2003	0.313129
pop	BHS	2004	0.318894
pop	BHS	2005	0.324859
pop	BHS	2006	0.331033
pop	BHS	2007	0.337389
pop	BHS	2008	0.343681
pop	BHS	2009	0.349604
pop	BHS	2010	0.354942
pop	BHS	2011	0.359578
pop	BHS	2012	0.363584
pop	BHS	2013	0.367169
pop	BHS	2014	0.370633
pop	BHS	2015	0.374206
pop	BHS	2016	0.37793
pop	BHS	2017	0.381755
pop	BHS	2018	0.385637
pop	BHS	2019	0.389482
pop	BIH	1990	4.46342
pop	BIH	1991	4.36932
pop	BIH	1992	4.23368
pop	BIH	1993	4.07894
pop	BIH	1994	3.93652
pop	BIH	1995	3.82905
pop	BIH	1996	3.76443
pop	BIH	1997	3.73607
pop	BIH	1998	3.73434
pop	BIH	1999	3.74335
pop	BIH	2000	3.75118
pop	BIH	2001	3.75551
pop	BIH	2002	3.75939
pop	BIH	2003	3.76217
pop	BIH	2004	3.76419
pop	BIH	2005	3.76533
pop	BIH	2006	3.76542
pop	BIH	2007	3.76279
pop	BIH	2008	3.75427
pop	BIH	2009	3.73594
pop	BIH	2010	3.70547
pop	BIH	2011	3.66118
pop	BIH	2012	3.60497
pop	BIH	2013	3.54261
pop	BIH	2014	3.4821
pop	BIH	2015	3.42936
pop	BIH	2016	3.38627
pop	BIH	2017	3.35153
pop	BIH	2018	3.32393
pop	BIH	2019	3.301
pop	BLR	1990	10.1511
pop	BLR	1991	10.1608
pop	BLR	1992	10.1543
pop	BLR	1993	10.1351
pop	BLR	1994	10.1083
pop	BLR	1995	10.0776
pop	BLR	1996	10.0449
pop	BLR	1997	10.0094
pop	BLR	1998	9.96999
pop	BLR	1999	9.92444
pop	BLR	2000	9.87163
pop	BLR	2001	9.8114
pop	BLR	2002	9.74592
pop	BLR	2003	9.67924
pop	BLR	2004	9.61663
pop	BLR	2005	9.56209
pop	BLR	2006	9.51688
pop	BLR	2007	9.48052
pop	BLR	2008	9.45285
pop	BLR	2009	9.43315
pop	BLR	2010	9.42057
pop	BLR	2011	9.41532
pop	BLR	2012	9.41705
pop	BLR	2013	9.42351
pop	BLR	2014	9.43173
pop	BLR	2015	9.43942
pop	BLR	2016	9.44564
pop	BLR	2017	9.45023
pop	BLR	2018	9.45262
pop	BLR	2019	9.45241
pop	BLZ	1970	0.122182
pop	BLZ	1971	0.124793
pop	BLZ	1972	0.12715
pop	BLZ	1973	0.129294
pop	BLZ	1974	0.131307
pop	BLZ	1975	0.13326
pop	BLZ	1976	0.135147
pop	BLZ	1977	0.136989
pop	BLZ	1978	0.138965
pop	BLZ	1979	0.141305
pop	BLZ	1980	0.144155
pop	BLZ	1981	0.147566
pop	BLZ	1982	0.1515
pop	BLZ	1983	0.155822
pop	BLZ	1984	0.160347
pop	BLZ	1985	0.164921
pop	BLZ	1986	0.169568
pop	BLZ	1987	0.17432
pop	BLZ	1988	0.179028
pop	BLZ	1989	0.183469
pop	BLZ	1990	0.187552
pop	BLZ	1991	0.191128
pop	BLZ	1992	0.194324
pop	BLZ	1993	0.197622
pop	BLZ	1994	0.20168
pop	BLZ	1995	0.206963
pop	BLZ	1996	0.213664
pop	BLZ	1997	0.22158
pop	BLZ	1998	0.230244
pop	BLZ	1999	0.238988
pop	BLZ	2000	0.247315
pop	BLZ	2001	0.255063
pop	BLZ	2002	0.262378
pop	BLZ	2003	0.269425
pop	BLZ	2004	0.276504
pop	BLZ	2005	0.2838
pop	BLZ	2006	0.291329
pop	BLZ	2007	0.299025
pop	BLZ	2008	0.306823
pop	BLZ	2009	0.314655
pop	BLZ	2010	0.322464
pop	BLZ	2011	0.330237
pop	BLZ	2012	0.338
pop	BLZ	2013	0.345715
pop	BLZ	2014	0.353366
pop	BLZ	2015	0.360933
pop	BLZ	2016	0.3684
pop	BLZ	2017	0.375769
pop	BLZ	2018	0.383071
pop	BLZ	2019	0.390353
pop	BMU	1970	0.052565
pop	BMU	1971	0.053162
pop	BMU	1972	0.053752
pop	BMU	1973	0.054329
pop	BMU	1974	0.054883
pop	BMU	1975	0.0554
pop	BMU	1976	0.055884
pop	BMU	1977	0.05633
pop	BMU	1978	0.05676
pop	BMU	1979	0.057178
pop	BMU	1980	0.057573
pop	BMU	1981	0.057986
pop	BMU	1982	0.058387
pop	BMU	1983	0.05879
pop	BMU	1984	0.05919
pop	BMU	1985	0.059602
pop	BMU	1986	0.06001
pop	BMU	1987	0.060419
pop	BMU	1988	0.060839
pop	BMU	1989	0.061243
pop	BMU	1990	0.061634
pop	BMU	1991	0.06202
pop	BMU	1992	0.062389
pop	BMU	1993	0.06275
pop	BMU	1994	0.063101
pop	BMU	1995	0.063442
pop	BMU	1996	0.063774
pop	BMU	1997	0.06408
pop	BMU	1998	0.064393
pop	BMU	1999	0.0647
pop	BMU	2000	0.065012
pop	BMU	2001	0.065329
pop	BMU	2002	0.065656
pop	BMU	2003	0.065943
pop	BMU	2004	0.06615
pop	BMU	2005	0.066257
pop	BMU	2006	0.066248
pop	BMU	2007	0.066129
pop	BMU	2008	0.065931
pop	BMU	2009	0.065674
pop	BMU	2010	0.065389
pop	BMU	2011	0.065078
pop	BMU	2012	0.064737
pop	BMU	2013	0.064386
pop	BMU	2014	0.064033
pop	BMU	2015	0.063692
pop	BMU	2016	0.063362
pop	BMU	2017	0.063049
pop	BMU	2018	0.062756
pop	BMU	2019	0.062506
pop	BOL	1950	2.85372
pop	BOL	1951	2.91318
pop	BOL	1952	2.97472
pop	BOL	1953	3.03833
pop	BOL	1954	3.10402
pop	BOL	1955	3.17177
pop	BOL	1956	3.24161
pop	BOL	1957	3.31356
pop	BOL	1958	3.38771
pop	BOL	1959	3.46415
pop	BOL	1960	3.54294
pop	BOL	1961	3.62415
pop	BOL	1962	3.70785
pop	BOL	1963	3.79423
pop	BOL	1964	3.8834
pop	BOL	1965	3.97547
pop	BOL	1966	4.07056
pop	BOL	1967	4.16876
pop	BOL	1968	4.27029
pop	BOL	1969	4.37532
pop	BOL	1970	4.484
pop	BOL	1971	4.58174
pop	BOL	1972	4.68239
pop	BOL	1973	4.78592
pop	BOL	1974	4.89229
pop	BOL	1975	5.00142
pop	BOL	1976	5.11346
pop	BOL	1977	5.22825
pop	BOL	1978	5.34494
pop	BOL	1979	5.46242
pop	BOL	1980	5.57993
pop	BOL	1981	5.6971
pop	BOL	1982	5.81435
pop	BOL	1983	5.93281
pop	BOL	1984	6.05412
pop	BOL	1985	6.17946
pop	BOL	1986	6.30913
pop	BOL	1987	6.44283
pop	BOL	1988	6.58031
pop	BOL	1989	6.72112
pop	BOL	1990	6.86484
pop	BOL	1991	7.01145
pop	BOL	1992	7.16092
pop	BOL	1993	7.31285
pop	BOL	1994	7.46679
pop	BOL	1995	7.62234
pop	BOL	1996	7.77927
pop	BOL	1997	7.93746
pop	BOL	1998	8.09676
pop	BOL	1999	8.25707
pop	BOL	2000	8.41826
pop	BOL	2001	8.58024
pop	BOL	2002	8.74281
pop	BOL	2003	8.90582
pop	BOL	2004	9.06904
pop	BOL	2005	9.23231
pop	BOL	2006	9.39545
pop	BOL	2007	9.55844
pop	BOL	2008	9.72145
pop	BOL	2009	9.88478
pop	BOL	2010	10.0486
pop	BOL	2011	10.213
pop	BOL	2012	10.3777
pop	BOL	2013	10.5424
pop	BOL	2014	10.7065
pop	BOL	2015	10.8697
pop	BOL	2016	11.0318
pop	BOL	2017	11.1929
pop	BOL	2018	11.3531
pop	BOL	2019	11.5131
pop	BRA	1950	53.1241
pop	BRA	1951	54.6673
pop	BRA	1952	56.2648
pop	BRA	1953	57.9186
pop	BRA	1954	59.6312
pop	BRA	1955	61.4049
pop	BRA	1956	63.2522
pop	BRA	1957	65.16
pop	BRA	1958	67.1302
pop	BRA	1959	69.1651
pop	BRA	1960	71.2669
pop	BRA	1961	73.3923
pop	BRA	1962	75.5856
pop	BRA	1963	77.8492
pop	BRA	1964	80.1855
pop	BRA	1965	82.597
pop	BRA	1966	85.0468
pop	BRA	1967	87.5244
pop	BRA	1968	90.0286
pop	BRA	1969	92.5585
pop	BRA	1970	95.1133
pop	BRA	1971	97.4829
pop	BRA	1972	99.8594
pop	BRA	1973	102.259
pop	BRA	1974	104.706
pop	BRA	1975	107.216
pop	BRA	1976	109.791
pop	BRA	1977	112.425
pop	BRA	1978	115.121
pop	BRA	1979	117.878
pop	BRA	1980	120.694
pop	BRA	1981	123.57
pop	BRA	1982	126.498
pop	BRA	1983	129.449
pop	BRA	1984	132.384
pop	BRA	1985	135.274
pop	BRA	1986	138.109
pop	BRA	1987	140.892
pop	BRA	1988	143.628
pop	BRA	1989	146.328
pop	BRA	1990	149.003
pop	BRA	1991	151.648
pop	BRA	1992	154.259
pop	BRA	1993	156.849
pop	BRA	1994	159.433
pop	BRA	1995	162.02
pop	BRA	1996	164.615
pop	BRA	1997	167.209
pop	BRA	1998	169.785
pop	BRA	1999	172.319
pop	BRA	2000	174.79
pop	BRA	2001	177.196
pop	BRA	2002	179.538
pop	BRA	2003	181.809
pop	BRA	2004	184.006
pop	BRA	2005	186.127
pop	BRA	2006	188.167
pop	BRA	2007	190.13
pop	BRA	2008	192.03
pop	BRA	2009	193.887
pop	BRA	2010	195.714
pop	BRA	2011	197.515
pop	BRA	2012	199.287
pop	BRA	2013	201.036
pop	BRA	2014	202.764
pop	BRA	2015	204.472
pop	BRA	2016	206.163
pop	BRA	2017	207.834
pop	BRA	2018	209.469
pop	BRA	2019	211.05
pop	BRB	1960	0.232475
pop	BRB	1961	0.229732
pop	BRB	1962	0.228881
pop	BRB	1963	0.230873
pop	BRB	1964	0.233406
pop	BRB	1965	0.235118
pop	BRB	1966	0.236366
pop	BRB	1967	0.238364
pop	BRB	1968	0.240009
pop	BRB	1969	0.239461
pop	BRB	1970	0.238896
pop	BRB	1971	0.240094
pop	BRB	1972	0.241515
pop	BRB	1973	0.243069
pop	BRB	1974	0.244644
pop	BRB	1975	0.246154
pop	BRB	1976	0.247583
pop	BRB	1977	0.248937
pop	BRB	1978	0.250203
pop	BRB	1979	0.251351
pop	BRB	1980	0.252394
pop	BRB	1981	0.253298
pop	BRB	1982	0.254082
pop	BRB	1983	0.254788
pop	BRB	1984	0.255497
pop	BRB	1985	0.256263
pop	BRB	1986	0.257107
pop	BRB	1987	0.258019
pop	BRB	1988	0.258977
pop	BRB	1989	0.259957
pop	BRB	1990	0.260936
pop	BRB	1991	0.261905
pop	BRB	1992	0.262886
pop	BRB	1993	0.263874
pop	BRB	1994	0.264893
pop	BRB	1995	0.265955
pop	BRB	1996	0.267049
pop	BRB	1997	0.268187
pop	BRB	1998	0.269336
pop	BRB	1999	0.270451
pop	BRB	2000	0.271515
pop	BRB	2001	0.2725
pop	BRB	2002	0.273425
pop	BRB	2003	0.274329
pop	BRB	2004	0.275284
pop	BRB	2005	0.276323
pop	BRB	2006	0.277477
pop	BRB	2007	0.2787
pop	BRB	2008	0.279946
pop	BRB	2009	0.281104
pop	BRB	2010	0.282131
pop	BRB	2011	0.282987
pop	BRB	2012	0.283701
pop	BRB	2013	0.284296
pop	BRB	2014	0.284826
pop	BRB	2015	0.285324
pop	BRB	2016	0.285796
pop	BRB	2017	0.286232
pop	BRB	2018	0.286641
pop	BRB	2019	0.287025
pop	BRN	1970	0.129529
pop	BRN	1971	0.135671
pop	BRN	1972	0.142022
pop	BRN	1973	0.148512
pop	BRN	1974	0.155072
pop	BRN	1975	0.161626
pop	BRN	1976	0.168181
pop	BRN	1977	0.174714
pop	BRN	1978	0.181205
pop	BRN	1979	0.187604
pop	BRN	1980	0.193879
pop	BRN	1981	0.200021
pop	BRN	1982	0.206065
pop	BRN	1983	0.212076
pop	BRN	1984	0.218175
pop	BRN	1985	0.224449
pop	BRN	1986	0.230915
pop	BRN	1987	0.237563
pop	BRN	1988	0.244404
pop	BRN	1989	0.251458
pop	BRN	1990	0.258721
pop	BRN	1991	0.26621
pop	BRN	1992	0.273892
pop	BRN	1993	0.281681
pop	BRN	1994	0.289454
pop	BRN	1995	0.297114
pop	BRN	1996	0.304622
pop	BRN	1997	0.311958
pop	BRN	1998	0.319144
pop	BRN	1999	0.32621
pop	BRN	2000	0.333165
pop	BRN	2001	0.340034
pop	BRN	2002	0.346782
pop	BRN	2003	0.353293
pop	BRN	2004	0.359433
pop	BRN	2005	0.365114
pop	BRN	2006	0.370263
pop	BRN	2007	0.374965
pop	BRN	2008	0.379421
pop	BRN	2009	0.383906
pop	BRN	2010	0.388646
pop	BRN	2011	0.393688
pop	BRN	2012	0.398989
pop	BRN	2013	0.404421
pop	BRN	2014	0.409769
pop	BRN	2015	0.414907
pop	BRN	2016	0.4198
pop	BRN	2017	0.424473
pop	BRN	2018	0.428963
pop	BRN	2019	0.433285
pop	BTN	1970	0.297316
pop	BTN	1971	0.306955
pop	BTN	1972	0.316828
pop	BTN	1973	0.326982
pop	BTN	1974	0.337485
pop	BTN	1975	0.348396
pop	BTN	1976	0.359725
pop	BTN	1977	0.371428
pop	BTN	1978	0.383326
pop	BTN	1979	0.395195
pop	BTN	1980	0.406875
pop	BTN	1981	0.418111
pop	BTN	1982	0.428934
pop	BTN	1983	0.439822
pop	BTN	1984	0.451476
pop	BTN	1985	0.464266
pop	BTN	1986	0.478692
pop	BTN	1987	0.494312
pop	BTN	1988	0.50954
pop	BTN	1989	0.522179
pop	BTN	1990	0.530804
pop	BTN	1991	0.534632
pop	BTN	1992	0.534516
pop	BTN	1993	0.532596
pop	BTN	1994	0.531897
pop	BTN	1995	0.53462
pop	BTN	1996	0.541465
pop	BTN	1997	0.551709
pop	BTN	1998	0.564377
pop	BTN	1999	0.577881
pop	BTN	2000	0.591021
pop	BTN	2001	0.60364
pop	BTN	2002	0.616018
pop	BTN	2003	0.627839
pop	BTN	2004	0.638815
pop	BTN	2005	0.648739
pop	BTN	2006	0.65741
pop	BTN	2007	0.664876
pop	BTN	2008	0.671613
pop	BTN	2009	0.678323
pop	BTN	2010	0.685503
pop	BTN	2011	0.693298
pop	BTN	2012	0.701581
pop	BTN	2013	0.710237
pop	BTN	2014	0.719055
pop	BTN	2015	0.727876
pop	BTN	2016	0.736708
pop	BTN	2017	0.745563
pop	BTN	2018	0.754388
pop	BTN	2019	0.763092
pop	BWA	1960	0.533876
pop	BWA	1961	0.542356
pop	BWA	1962	0.551148
pop	BWA	1963	0.560255
pop	BWA	1964	0.569637
pop	BWA	1965	0.57838
pop	BWA	1966	0.586834
pop	BWA	1967	0.594977
pop	BWA	1968	0.604006
pop	BWA	1969	0.614682
pop	BWA	1970	0.627715
pop	BWA	1971	0.646347
pop	BWA	1972	0.667092
pop	BWA	1973	0.689912
pop	BWA	1974	0.714712
pop	BWA	1975	0.741355
pop	BWA	1976	0.769979
pop	BWA	1977	0.800529
pop	BWA	1978	0.832467
pop	BWA	1979	0.865075
pop	BWA	1980	0.897868
pop	BWA	1981	0.930408
pop	BWA	1982	0.962875
pop	BWA	1983	0.99613
pop	BWA	1984	1.03144
pop	BWA	1985	1.06958
pop	BWA	1986	1.11094
pop	BWA	1987	1.15491
pop	BWA	1988	1.20007
pop	BWA	1989	1.24448
pop	BWA	1990	1.28676
pop	BWA	1991	1.32632
pop	BWA	1992	1.36355
pop	BWA	1993	1.39911
pop	BWA	1994	1.43406
pop	BWA	1995	1.46917
pop	BWA	1996	1.50473
pop	BWA	1997	1.54042
pop	BWA	1998	1.57582
pop	BWA	1999	1.61026
pop	BWA	2000	1.64333
pop	BWA	2001	1.67468
pop	BWA	2002	1.70464
pop	BWA	2003	1.7344
pop	BWA	2004	1.76553
pop	BWA	2005	1.79908
pop	BWA	2006	1.83591
pop	BWA	2007	1.87546
pop	BWA	2008	1.91564
pop	BWA	2009	1.9535
pop	BWA	2010	1.9871
pop	BWA	2011	2.0154
pop	BWA	2012	2.03956
pop	BWA	2013	2.06255
pop	BWA	2014	2.08862
pop	BWA	2015	2.12072
pop	BWA	2016	2.15993
pop	BWA	2017	2.20508
pop	BWA	2018	2.25407
pop	BWA	2019	2.3037
pop	CAF	1960	1.44503
pop	CAF	1961	1.47201
pop	CAF	1962	1.5002
pop	CAF	1963	1.52963
pop	CAF	1964	1.5604
pop	CAF	1965	1.60267
pop	CAF	1966	1.65936
pop	CAF	1967	1.70715
pop	CAF	1968	1.73613
pop	CAF	1969	1.76725
pop	CAF	1970	1.81114
pop	CAF	1971	1.84052
pop	CAF	1972	1.86778
pop	CAF	1973	1.89485
pop	CAF	1974	1.92439
pop	CAF	1975	1.95837
pop	CAF	1976	1.99701
pop	CAF	1977	2.03992
pop	CAF	1978	2.08766
pop	CAF	1979	2.14078
pop	CAF	1980	2.19936
pop	CAF	1981	2.26444
pop	CAF	1982	2.33533
pop	CAF	1983	2.40832
pop	CAF	1984	2.47838
pop	CAF	1985	2.54217
pop	CAF	1986	2.59776
pop	CAF	1987	2.64684
pop	CAF	1988	2.69397
pop	CAF	1989	2.74573
pop	CAF	1990	2.80673
pop	CAF	1991	2.87851
pop	CAF	1992	2.95924
pop	CAF	1993	3.04615
pop	CAF	1994	3.13502
pop	CAF	1995	3.22266
pop	CAF	1996	3.30823
pop	CAF	1997	3.39244
pop	CAF	1998	3.47549
pop	CAF	1999	3.55801
pop	CAF	2000	3.64043
pop	CAF	2001	3.72202
pop	CAF	2002	3.80213
pop	CAF	2003	3.88118
pop	CAF	2004	3.95987
pop	CAF	2005	4.03838
pop	CAF	2006	4.11807
pop	CAF	2007	4.19801
pop	CAF	2008	4.27337
pop	CAF	2009	4.33763
pop	CAF	2010	4.38677
pop	CAF	2011	4.41864
pop	CAF	2012	4.43642
pop	CAF	2013	4.44794
pop	CAF	2014	4.46418
pop	CAF	2015	4.49317
pop	CAF	2016	4.53769
pop	CAF	2017	4.59602
pop	CAF	2018	4.66637
pop	CAF	2019	4.74519
pop	CAN	1950	13.7694
pop	CAN	1951	14.0832
pop	CAN	1952	14.5302
pop	CAN	1953	14.9211
pop	CAN	1954	15.3662
pop	CAN	1955	15.7731
pop	CAN	1956	16.1611
pop	CAN	1957	16.7164
pop	CAN	1958	17.1604
pop	CAN	1959	17.5634
pop	CAN	1960	17.9513
pop	CAN	1961	18.3131
pop	CAN	1962	18.6579
pop	CAN	1963	19.0088
pop	CAN	1964	19.3706
pop	CAN	1965	19.7244
pop	CAN	1966	20.0953
pop	CAN	1967	20.4602
pop	CAN	1968	20.7779
pop	CAN	1969	21.0776
pop	CAN	1970	21.3743
pop	CAN	1971	21.7235
pop	CAN	1972	22.0722
pop	CAN	1973	22.4153
pop	CAN	1974	22.7459
pop	CAN	1975	23.0593
pop	CAN	1976	23.3546
pop	CAN	1977	23.6344
pop	CAN	1978	23.9017
pop	CAN	1979	24.1611
pop	CAN	1980	24.4169
pop	CAN	1981	24.6682
pop	CAN	1982	24.9165
pop	CAN	1983	25.1714
pop	CAN	1984	25.4449
pop	CAN	1985	25.7448
pop	CAN	1986	26.0755
pop	CAN	1987	26.4329
pop	CAN	1988	26.8061
pop	CAN	1989	27.1795
pop	CAN	1990	27.5413
pop	CAN	1991	27.8888
pop	CAN	1992	28.2244
pop	CAN	1993	28.548
pop	CAN	1994	28.8607
pop	CAN	1995	29.1642
pop	CAN	1996	29.4578
pop	CAN	1997	29.7424
pop	CAN	1998	30.0221
pop	CAN	1999	30.3025
pop	CAN	2000	30.5884
pop	CAN	2001	30.8801
pop	CAN	2002	31.1783
pop	CAN	2003	31.488
pop	CAN	2004	31.8155
pop	CAN	2005	32.1643
pop	CAN	2006	32.537
pop	CAN	2007	32.9308
pop	CAN	2008	33.3376
pop	CAN	2009	33.7461
pop	CAN	2010	34.1476
pop	CAN	2011	34.5392
pop	CAN	2012	34.922
pop	CAN	2013	35.2965
pop	CAN	2014	35.6643
pop	CAN	2015	36.0267
pop	CAN	2016	36.3829
pop	CAN	2017	36.7321
pop	CAN	2018	37.0746
pop	CAN	2019	37.411
pop	CHE	1950	4.607
pop	CHE	1951	4.66099
pop	CHE	1952	4.72576
pop	CHE	1953	4.78759
pop	CHE	1954	4.83765
pop	CHE	1955	4.8877
pop	CHE	1956	4.9515
pop	CHE	1957	5.031
pop	CHE	1958	5.10265
pop	CHE	1959	5.16153
pop	CHE	1960	5.26262
pop	CHE	1961	5.40984
pop	CHE	1962	5.56099
pop	CHE	1963	5.68171
pop	CHE	1964	5.77789
pop	CHE	1965	5.83286
pop	CHE	1966	5.88487
pop	CHE	1967	5.95063
pop	CHE	1968	6.01835
pop	CHE	1969	6.09687
pop	CHE	1970	6.15085
pop	CHE	1971	6.20295
pop	CHE	1972	6.25129
pop	CHE	1973	6.29253
pop	CHE	1974	6.32201
pop	CHE	1975	6.33702
pop	CHE	1976	6.33597
pop	CHE	1977	6.32181
pop	CHE	1978	6.30204
pop	CHE	1979	6.28691
pop	CHE	1980	6.28383
pop	CHE	1981	6.29593
pop	CHE	1982	6.32141
pop	CHE	1983	6.35675
pop	CHE	1984	6.39613
pop	CHE	1985	6.43542
pop	CHE	1986	6.47304
pop	CHE	1987	6.5106
pop	CHE	1988	6.55072
pop	CHE	1989	6.59737
pop	CHE	1990	6.65287
pop	CHE	1991	6.71883
pop	CHE	1992	6.79291
pop	CHE	1993	6.86893
pop	CHE	1994	6.93841
pop	CHE	1995	6.99552
pop	CHE	1996	7.03803
pop	CHE	1997	7.06851
pop	CHE	1998	7.09177
pop	CHE	1999	7.11503
pop	CHE	2000	7.14376
pop	CHE	2001	7.17917
pop	CHE	2002	7.22038
pop	CHE	2003	7.26836
pop	CHE	2004	7.32374
pop	CHE	2005	7.38682
pop	CHE	2006	7.45796
pop	CHE	2007	7.53698
pop	CHE	2008	7.62282
pop	CHE	2009	7.7139
pop	CHE	2010	7.80868
pop	CHE	2011	7.90699
pop	CHE	2012	8.00801
pop	CHE	2013	8.10888
pop	CHE	2014	8.206
pop	CHE	2015	8.29678
pop	CHE	2016	8.37992
pop	CHE	2017	8.4558
pop	CHE	2018	8.52561
pop	CHE	2019	8.59136
pop	CHL	1951	6.52859
pop	CHL	1952	6.65984
pop	CHL	1953	6.78009
pop	CHL	1954	6.90474
pop	CHL	1955	7.04167
pop	CHL	1956	7.19369
pop	CHL	1957	7.36033
pop	CHL	1958	7.53927
pop	CHL	1959	7.7273
pop	CHL	1960	7.92101
pop	CHL	1961	8.1173
pop	CHL	1962	8.31356
pop	CHL	1963	8.50788
pop	CHL	1964	8.69906
pop	CHL	1965	8.88653
pop	CHL	1966	9.07032
pop	CHL	1967	9.25093
pop	CHL	1968	9.4292
pop	CHL	1969	9.6062
pop	CHL	1970	9.78313
pop	CHL	1971	9.94273
pop	CHL	1972	10.1037
pop	CHL	1973	10.2658
pop	CHL	1974	10.4288
pop	CHL	1975	10.5923
pop	CHL	1976	10.7569
pop	CHL	1977	10.9228
pop	CHL	1978	11.0892
pop	CHL	1979	11.2549
pop	CHL	1980	11.4193
pop	CHL	1981	11.582
pop	CHL	1982	11.7439
pop	CHL	1983	11.908
pop	CHL	1984	12.0781
pop	CHL	1985	12.2572
pop	CHL	1986	12.4458
pop	CHL	1987	12.6429
pop	CHL	1988	12.8477
pop	CHL	1989	13.0588
pop	CHL	1990	13.2746
pop	CHL	1991	13.4953
pop	CHL	1992	13.7198
pop	CHL	1993	13.9449
pop	CHL	1994	14.1663
pop	CHL	1995	14.3809
pop	CHL	1996	14.5874
pop	CHL	1997	14.7862
pop	CHL	1998	14.9777
pop	CHL	1999	15.1628
pop	CHL	2000	15.3424
pop	CHL	2001	15.5161
pop	CHL	2002	15.6844
pop	CHL	2003	15.8497
pop	CHL	2004	16.015
pop	CHL	2005	16.1827
pop	CHL	2006	16.3545
pop	CHL	2007	16.5302
pop	CHL	2008	16.7083
pop	CHL	2009	16.8862
pop	CHL	2010	17.0625
pop	CHL	2011	17.2336
pop	CHL	2012	17.4003
pop	CHL	2013	17.5715
pop	CHL	2014	17.759
pop	CHL	2015	17.9694
pop	CHL	2016	18.2091
pop	CHL	2017	18.4704
pop	CHL	2018	18.7292
pop	CHL	2019	18.952
pop	CHN	1952	579.577
pop	CHN	1953	589.317
pop	CHN	1954	599.943
pop	CHN	1955	612.053
pop	CHN	1956	624.568
pop	CHN	1957	638.77
pop	CHN	1958	652.377
pop	CHN	1959	660.091
pop	CHN	1960	656.369
pop	CHN	1961	650.326
pop	CHN	1962	659.034
pop	CHN	1963	680.165
pop	CHN	1964	702.172
pop	CHN	1965	721.825
pop	CHN	1966	742.361
pop	CHN	1967	761.947
pop	CHN	1968	782.963
pop	CHN	1969	805.648
pop	CHN	1970	827.601
pop	CHN	1971	848.76
pop	CHN	1972	869.486
pop	CHN	1973	889.485
pop	CHN	1974	908.464
pop	CHN	1975	926.241
pop	CHN	1976	942.685
pop	CHN	1977	957.891
pop	CHN	1978	972.205
pop	CHN	1979	986.132
pop	CHN	1980	1000.09
pop	CHN	1981	1014.02
pop	CHN	1982	1027.95
pop	CHN	1983	1042.43
pop	CHN	1984	1058.17
pop	CHN	1985	1075.59
pop	CHN	1986	1095.01
pop	CHN	1987	1116.1
pop	CHN	1988	1137.72
pop	CHN	1989	1158.36
pop	CHN	1990	1176.88
pop	CHN	1991	1192.9
pop	CHN	1992	1206.71
pop	CHN	1993	1218.82
pop	CHN	1994	1230.02
pop	CHN	1995	1240.92
pop	CHN	1996	1251.64
pop	CHN	1997	1262
pop	CHN	1998	1271.98
pop	CHN	1999	1281.51
pop	CHN	2000	1290.55
pop	CHN	2001	1299.13
pop	CHN	2002	1307.35
pop	CHN	2003	1315.3
pop	CHN	2004	1323.08
pop	CHN	2005	1330.78
pop	CHN	2006	1338.41
pop	CHN	2007	1345.99
pop	CHN	2008	1353.57
pop	CHN	2009	1361.17
pop	CHN	2010	1368.81
pop	CHN	2011	1376.5
pop	CHN	2012	1384.21
pop	CHN	2013	1391.88
pop	CHN	2014	1399.45
pop	CHN	2015	1406.85
pop	CHN	2016	1414.05
pop	CHN	2017	1421.02
pop	CHN	2018	1427.65
pop	CHN	2019	1433.78
pop	CIV	1960	3.27036
pop	CIV	1961	3.38845
pop	CIV	1962	3.51432
pop	CIV	1963	3.65948
pop	CIV	1964	3.81446
pop	CIV	1965	3.98394
pop	CIV	1966	4.17346
pop	CIV	1967	4.38075
pop	CIV	1968	4.60755
pop	CIV	1969	4.84609
pop	CIV	1970	5.10206
pop	CIV	1971	5.32874
pop	CIV	1972	5.57604
pop	CIV	1973	5.84151
pop	CIV	1974	6.12129
pop	CIV	1975	6.4124
pop	CIV	1976	6.71395
pop	CIV	1977	7.0265
pop	CIV	1978	7.35027
pop	CIV	1979	7.68592
pop	CIV	1980	8.03365
pop	CIV	1981	8.39369
pop	CIV	1982	8.76499
pop	CIV	1983	9.14493
pop	CIV	1984	9.53011
pop	CIV	1985	9.9182
pop	CIV	1986	10.3073
pop	CIV	1987	10.6982
pop	CIV	1988	11.0947
pop	CIV	1989	11.5024
pop	CIV	1990	11.9249
pop	CIV	1991	12.3624
pop	CIV	1992	12.8124
pop	CIV	1993	13.2716
pop	CIV	1994	13.7354
pop	CIV	1995	14.1998
pop	CIV	1996	14.6651
pop	CIV	1997	15.1307
pop	CIV	1998	15.5894
pop	CIV	1999	16.0326
pop	CIV	2000	16.4547
pop	CIV	2001	16.853
pop	CIV	2002	17.2315
pop	CIV	2003	17.5996
pop	CIV	2004	17.9705
pop	CIV	2005	18.3545
pop	CIV	2006	18.7549
pop	CIV	2007	19.1712
pop	CIV	2008	19.6056
pop	CIV	2009	20.0591
pop	CIV	2010	20.5329
pop	CIV	2011	21.0287
pop	CIV	2012	21.5472
pop	CIV	2013	22.0875
pop	CIV	2014	22.6477
pop	CIV	2015	23.2261
pop	CIV	2016	23.8227
pop	CIV	2017	24.4375
pop	CIV	2018	25.0692
pop	CIV	2019	25.7165
pop	CMR	1960	5.43619
pop	CMR	1961	5.52381
pop	CMR	1962	5.61537
pop	CMR	1963	5.71108
pop	CMR	1964	5.8112
pop	CMR	1965	5.91598
pop	CMR	1966	6.02566
pop	CMR	1967	6.14057
pop	CMR	1968	6.26099
pop	CMR	1969	6.38728
pop	CMR	1970	6.51976
pop	CMR	1971	6.68966
pop	CMR	1972	6.86718
pop	CMR	1973	7.05285
pop	CMR	1974	7.24729
pop	CMR	1975	7.45105
pop	CMR	1976	7.66441
pop	CMR	1977	7.88756
pop	CMR	1978	8.12108
pop	CMR	1979	8.36557
pop	CMR	1980	8.62141
pop	CMR	1981	8.88853
pop	CMR	1982	9.16682
pop	CMR	1983	9.45649
pop	CMR	1984	9.75784
pop	CMR	1985	10.0708
pop	CMR	1986	10.3955
pop	CMR	1987	10.7311
pop	CMR	1988	11.0754
pop	CMR	1989	11.4258
pop	CMR	1990	11.7801
pop	CMR	1991	12.1379
pop	CMR	1992	12.4995
pop	CMR	1993	12.8641
pop	CMR	1994	13.231
pop	CMR	1995	13.6
pop	CMR	1996	13.9708
pop	CMR	1997	14.3444
pop	CMR	1998	14.7238
pop	CMR	1999	15.1126
pop	CMR	2000	15.5139
pop	CMR	2001	15.9289
pop	CMR	2002	16.3576
pop	CMR	2003	16.8009
pop	CMR	2004	17.2593
pop	CMR	2005	17.7334
pop	CMR	2006	18.2237
pop	CMR	2007	18.7303
pop	CMR	2008	19.2527
[truncated: 8,400 more rows]

## Sheet: Tabelle1
Summe von AggValue	Spaltenbeschriftungen
Zeilenbeschriftungen	1950	1951	1952	1953	1954	1955	1956	1957	1958	1959	1960	1961	1962	1963	1964	1965	1966	1967	1968	1969	1970	1971	1972	1973	1974	1975	1976	1977	1978	1979	1980	1981	1982	1983	1984	1985	1986	1987	1988	1989	1990	1991	1992	1993	1994	1995	1996	1997	1998
MAR	9.39944	9.69142	9.99885	10.267	10.5494	10.8464	11.155	11.4748	11.8053	12.1468	12.498	12.8128	13.1349	13.4657	13.8048	14.1506	14.5011	14.8589	15.2281	15.6103	16.0047	16.3509	16.6969	17.0485	17.4131	17.7962	18.1988	18.6201	19.0598	19.5169	19.99	20.4797	20.984	21.4951	22.0026	22.4991	22.9803	23.4473	23.9036	24.3556	24.8075	25.2604	25.7114	26.1552	26.5845	26.9943	27.3835	27.7546	28.1104
ABW																					0.059063	0.05944	0.05984	0.060243	0.060528	0.060657	0.060586	0.060366	0.060103	0.05998	0.060096	0.060567	0.061345	0.062201	0.062836	0.063026	0.062644	0.061833	0.061079	0.061032	0.062149	0.064622	0.068235	0.072504	0.0767	0.080324	0.0832	0.085451	0.087277
AGO																					5.89037	6.04078	6.24855	6.49696	6.76138	7.024	7.27951	7.53374	7.79071	8.05807	8.34129	8.64045	8.95295	9.2781	9.61475	9.962	10.3201	10.6892	11.068	11.4548	11.8484	12.2489	12.6574	13.075	13.5037	13.9452	14.4007	14.8716	15.3596
AIA																					0.006771	0.006858	0.006948	0.007028	0.007102	0.007159	0.007206	0.007255	0.007284	0.007292	0.007285	0.007247	0.00719	0.007153	0.007173	0.007293	0.007518	0.007842	0.008213	0.008582	0.008899	0.009135	0.009332	0.009493	0.009664	0.009866	0.010117	0.010388	0.010684
ALB																					2.15071	2.20219	2.25406	2.30629	2.35885	2.41173	2.46498	2.51869	2.57285	2.62751	2.68269	2.73703	2.79027	2.84487	2.90414	2.96967	3.04421	3.12489	3.20098	3.25793	3.28607	3.28039	3.24589	3.1952	3.14652	3.11294	3.0987	3.09975	3.11068
ARE																					0.234514	0.277471	0.330974	0.394624	0.467451	0.548301	0.637922	0.735344	0.835508	0.931749	1.01951	1.09661	1.16481	1.22846	1.29397	1.36616	1.44638	1.53354	1.62707	1.72568	1.82843	1.93715	2.05289	2.17314	2.29439	2.41509	2.53913	2.67136	2.81321
ARG	17.0918	17.4576	17.816	18.1686	18.5172	18.8632	19.2058	19.5436	19.8785	20.212	20.5457	20.8791	21.2112	21.5427	21.8744	22.2071	22.5345	22.856	23.1812	23.5195	23.8806	24.2596	24.6532	25.0565	25.4623	25.8658	26.2647	26.6614	27.061	27.471	27.8965	28.3385	28.7945	29.262	29.7371	30.2163	30.699	31.1844	31.6689	32.1481	32.6187	33.079	33.5293	33.9701	34.4027	34.8282	35.2464	35.6574	36.0635
ARM																																									3.53817	3.50526	3.44282	3.36311	3.28367	3.21735	3.16822	3.13309	3.10869
ATG																					0.064177	0.064357	0.064133	0.06365	0.06312	0.062675	0.062367	0.062159	0.062036	0.061952	0.061865	0.0618	0.061779	0.061787	0.061786	0.061786	0.061754	0.061717	0.061771	0.062008	0.062528	0.063367	0.064471	0.065777	0.067204	0.06867	0.070173	0.071704	0.073224
AUS	8.35411	8.59992	8.78243	8.95089	9.15915	9.37445	9.60032	9.81451	10.0193	10.2381	10.47	10.7101	10.9083	11.1169	11.336	11.5594	11.7774	11.9969	12.2287	12.5093	12.793	13.0331	13.2442	13.4318	13.6056	13.7733	13.9357	14.0925	14.2494	14.413	14.5884	14.7772	14.9792	15.1946	15.4232	15.6637	15.9176	16.1832	16.4523	16.714	16.9606	17.1892	17.4022	17.6032	17.7985	17.9931	18.1893	18.3872	18.587
AUT	6.98075	6.9811	6.97338	6.97812	6.98589	6.99261	6.99812	7.01171	7.03335	7.0605	7.09383	7.13295	7.1768	7.22305	7.27135	7.31875	7.37026	7.42556	7.46422	7.49004	7.51624	7.55034	7.58112	7.60707	7.62629	7.63769	7.64075	7.63658	7.62776	7.61788	7.60975	7.60451	7.60218	7.6031	7.60729	7.61487	7.62539	7.63935	7.65884	7.68657	7.72395	7.7727	7.83093	7.89209	7.94721	7.99012	8.01786	8.03288	8.04105
AZE																																									7.24276	7.35795	7.47193	7.58175	7.68371	7.77542	7.85555	7.92567	7.98991
BDI											2.78116	2.85895	2.92589	2.97186	3.05126	3.13209	3.21403	3.29047	3.35941	3.41806	3.47907	3.53	3.56967	3.60513	3.64643	3.70088	3.77087	3.85445	3.94927	4.05123	4.1573	4.26652	4.37972	4.49753	4.6211	4.75084	4.88674	5.02714	5.1687	5.30707	5.43896	5.56493	5.68557	5.79805	5.89897	5.98704	6.06011	6.12213	6.18556
BEL	8.63433	8.67332	8.72531	8.77275	8.81424	8.8633	8.91864	8.98387	9.04743	9.09842	9.11338	9.16046	9.21302	9.27769	9.36154	9.44259	9.50226	9.55093	9.58421	9.60709	9.63218	9.66332	9.69285	9.72076	9.74702	9.77159	9.79478	9.8167	9.83681	9.85438	9.86899	9.88059	9.88982	9.89788	9.90637	9.91658	9.92854	9.94229	9.95902	9.98018	10.0065	10.0394	10.0781	10.1187	10.1559	10.1863	10.2083	10.2238	10.2373
BEN										2.23462	2.28456	2.33654	2.39218	2.44874	2.50764	2.56873	2.63236	2.69837	2.76688	2.83825	2.91234	2.97657	3.04357	3.11368	3.18741	3.26517	3.34717	3.43344	3.52394	3.61853	3.71717	3.82013	3.92771	4.03995	4.15682	4.2785	4.40451	4.53526	4.67285	4.82002	4.9785	5.1495	5.3318	5.52176	5.71422	5.90556	6.09426	6.28164	6.47027
BFA										5.10569	5.16013	5.18652	5.21722	5.25228	5.2918	5.33587	5.38461	5.43812	5.49655	5.56004	5.6246	5.72338	5.82517	5.93048	6.04004	6.15454	6.27404	6.39893	6.53082	6.67166	6.82284	6.98516	7.15825	7.34091	7.53124	7.72791	7.93069	8.14007	8.35631	8.57982	8.81103	9.05008	9.29711	9.55248	9.81659	10.0899	10.3727	10.6655	10.9687
BGD										50.9987	52.0801	53.1449	54.1889	55.5081	56.6266	57.5097	58.6657	59.8767	61.1231	62.406	64.2325	65.5316	66.6257	67.6375	68.7422	70.0663	71.6524	73.4636	75.45	77.529	79.6395	81.7675	83.9321	86.1425	88.4165	90.7642	93.1876	95.6712	98.1864	100.695	103.172	105.599	107.984	110.351	112.738	115.17	117.65	120.161	122.683
BGR																					8.50755	8.55903	8.60866	8.65571	8.69918	8.73839	8.77256	8.8019	8.82803	8.8532	8.87879	8.90509	8.93071	8.95312	8.96892	8.97536	8.97255	8.96056	8.93666	8.89754	8.84146	8.767	8.67638	8.57604	8.47483	8.37931	8.29197	8.21181	8.13767
BHR																					0.212605	0.220312	0.229155	0.239527	0.251911	0.266543	0.283752	0.303175	0.323473	0.342799	0.359888	0.37412	0.38595	0.396454	0.407225	0.419428	0.43348	0.448971	0.465198	0.481087	0.495931	0.50976	0.523086	0.53621	0.549583	0.563697	0.578666	0.594931	0.6137
BHS																					0.169377	0.173889	0.177866	0.181517	0.18512	0.188896	0.192909	0.197101	0.201478	0.205984	0.210591	0.215326	0.220184	0.225084	0.229923	0.234578	0.239017	0.243271	0.247451	0.251733	0.256223	0.261008	0.266029	0.271069	0.275846	0.280184	0.283978	0.287358	0.290597
BIH																																									4.46342	4.36932	4.23368	4.07894	3.93652	3.82905	3.76443	3.73607	3.73434
BLR																																									10.1511	10.1608	10.1543	10.1351	10.1083	10.0776	10.0449	10.0094	9.96999
BLZ																					0.122182	0.124793	0.12715	0.129294	0.131307	0.13326	0.135147	0.136989	0.138965	0.141305	0.144155	0.147566	0.1515	0.155822	0.160347	0.164921	0.169568	0.17432	0.179028	0.183469	0.187552	0.191128	0.194324	0.197622	0.20168	0.206963	0.213664	0.22158	0.230244
BMU																					0.052565	0.053162	0.053752	0.054329	0.054883	0.0554	0.055884	0.05633	0.05676	0.057178	0.057573	0.057986	0.058387	0.05879	0.05919	0.059602	0.06001	0.060419	0.060839	0.061243	0.061634	0.06202	0.062389	0.06275	0.063101	0.063442	0.063774	0.06408	0.064393
BOL	2.85372	2.91318	2.97472	3.03833	3.10402	3.17177	3.24161	3.31356	3.38771	3.46415	3.54294	3.62415	3.70785	3.79423	3.8834	3.97547	4.07056	4.16876	4.27029	4.37532	4.484	4.58174	4.68239	4.78592	4.89229	5.00142	5.11346	5.22825	5.34494	5.46242	5.57993	5.6971	5.81435	5.93281	6.05412	6.17946	6.30913	6.44283	6.58031	6.72112	6.86484	7.01145	7.16092	7.31285	7.46679	7.62234	7.77927	7.93746	8.09676
BRA	53.1241	54.6673	56.2648	57.9186	59.6312	61.4049	63.2522	65.16	67.1302	69.1651	71.2669	73.3923	75.5856	77.8492	80.1855	82.597	85.0468	87.5244	90.0286	92.5585	95.1133	97.4829	99.8594	102.259	104.706	107.216	109.791	112.425	115.121	117.878	120.694	123.57	126.498	129.449	132.384	135.274	138.109	140.892	143.628	146.328	149.003	151.648	154.259	156.849	159.433	162.02	164.615	167.209	169.785
BRB											0.232475	0.229732	0.228881	0.230873	0.233406	0.235118	0.236366	0.238364	0.240009	0.239461	0.238896	0.240094	0.241515	0.243069	0.244644	0.246154	0.247583	0.248937	0.250203	0.251351	0.252394	0.253298	0.254082	0.254788	0.255497	0.256263	0.257107	0.258019	0.258977	0.259957	0.260936	0.261905	0.262886	0.263874	0.264893	0.265955	0.267049	0.268187	0.269336
BRN																					0.129529	0.135671	0.142022	0.148512	0.155072	0.161626	0.168181	0.174714	0.181205	0.187604	0.193879	0.200021	0.206065	0.212076	0.218175	0.224449	0.230915	0.237563	0.244404	0.251458	0.258721	0.26621	0.273892	0.281681	0.289454	0.297114	0.304622	0.311958	0.319144
BTN																					0.297316	0.306955	0.316828	0.326982	0.337485	0.348396	0.359725	0.371428	0.383326	0.395195	0.406875	0.418111	0.428934	0.439822	0.451476	0.464266	0.478692	0.494312	0.50954	0.522179	0.530804	0.534632	0.534516	0.532596	0.531897	0.53462	0.541465	0.551709	0.564377
BWA											0.533876	0.542356	0.551148	0.560255	0.569637	0.57838	0.586834	0.594977	0.604006	0.614682	0.627715	0.646347	0.667092	0.689912	0.714712	0.741355	0.769979	0.800529	0.832467	0.865075	0.897868	0.930408	0.962875	0.99613	1.03144	1.06958	1.11094	1.15491	1.20007	1.24448	1.28676	1.32632	1.36355	1.39911	1.43406	1.46917	1.50473	1.54042	1.57582
CAF											1.44503	1.47201	1.5002	1.52963	1.5604	1.60267	1.65936	1.70715	1.73613	1.76725	1.81114	1.84052	1.86778	1.89485	1.92439	1.95837	1.99701	2.03992	2.08766	2.14078	2.19936	2.26444	2.33533	2.40832	2.47838	2.54217	2.59776	2.64684	2.69397	2.74573	2.80673	2.87851	2.95924	3.04615	3.13502	3.22266	3.30823	3.39244	3.47549
CAN	13.7694	14.0832	14.5302	14.9211	15.3662	15.7731	16.1611	16.7164	17.1604	17.5634	17.9513	18.3131	18.6579	19.0088	19.3706	19.7244	20.0953	20.4602	20.7779	21.0776	21.3743	21.7235	22.0722	22.4153	22.7459	23.0593	23.3546	23.6344	23.9017	24.1611	24.4169	24.6682	24.9165	25.1714	25.4449	25.7448	26.0755	26.4329	26.8061	27.1795	27.5413	27.8888	28.2244	28.548	28.8607	29.1642	29.4578	29.7424	30.0221
CHE	4.607	4.66099	4.72576	4.78759	4.83765	4.8877	4.9515	5.031	5.10265	5.16153	5.26262	5.40984	5.56099	5.68171	5.77789	5.83286	5.88487	5.95063	6.01835	6.09687	6.15085	6.20295	6.25129	6.29253	6.32201	6.33702	6.33597	6.32181	6.30204	6.28691	6.28383	6.29593	6.32141	6.35675	6.39613	6.43542	6.47304	6.5106	6.55072	6.59737	6.65287	6.71883	6.79291	6.86893	6.93841	6.99552	7.03803	7.06851	7.09177
CHL		6.52859	6.65984	6.78009	6.90474	7.04167	7.19369	7.36033	7.53927	7.7273	7.92101	8.1173	8.31356	8.50788	8.69906	8.88653	9.07032	9.25093	9.4292	9.6062	9.78313	9.94273	10.1037	10.2658	10.4288	10.5923	10.7569	10.9228	11.0892	11.2549	11.4193	11.582	11.7439	11.908	12.0781	12.2572	12.4458	12.6429	12.8477	13.0588	13.2746	13.4953	13.7198	13.9449	14.1663	14.3809	14.5874	14.7862	14.9777
CHN			579.577	589.317	599.943	612.053	624.568	638.77	652.377	660.091	656.369	650.326	659.034	680.165	702.172	721.825	742.361	761.947	782.963	805.648	827.601	848.76	869.486	889.485	908.464	926.241	942.685	957.891	972.205	986.132	1000.09	1014.02	1027.95	1042.43	1058.17	1075.59	1095.01	1116.1	1137.72	1158.36	1176.88	1192.9	1206.71	1218.82	1230.02	1240.92	1251.64	1262	1271.98
CIV											3.27036	3.38845	3.51432	3.65948	3.81446	3.98394	4.17346	4.38075	4.60755	4.84609	5.10206	5.32874	5.57604	5.84151	6.12129	6.4124	6.71395	7.0265	7.35027	7.68592	8.03365	8.39369	8.76499	9.14493	9.53011	9.9182	10.3073	10.6982	11.0947	11.5024	11.9249	12.3624	12.8124	13.2716	13.7354	14.1998	14.6651	15.1307	15.5894
CMR											5.43619	5.52381	5.61537	5.71108	5.8112	5.91598	6.02566	6.14057	6.26099	6.38728	6.51976	6.68966	6.86718	7.05285	7.24729	7.45105	7.66441	7.88756	8.12108	8.36557	8.62141	8.88853	9.16682	9.45649	9.75784	10.0708	10.3955	10.7311	11.0754	11.4258	11.7801	12.1379	12.4995	12.8641	13.231	13.6	13.9708	14.3444	14.7238
COD	12.4662	12.7078	12.9542	13.2055	13.4664	13.7375	14.0193	14.3121	14.6162	14.9323	15.2607	15.5857	16.0655	16.5623	16.9348	17.3233	17.7715	18.3207	18.8991	19.4578	20.011	20.5641	21.1214	21.6904	22.2821	22.9036	23.5605	24.2491	24.9564	25.6636	26.3589	27.0403	27.7173	28.4039	29.1197	29.8812	30.6839	31.5287	32.4438	33.4648	34.612	35.9082	37.3339	38.8158	40.253	41.5762	42.7572	43.8272	44.85
COG											1.04512	1.06848	1.09279	1.1181	1.14446	1.17191	1.20049	1.23027	1.26129	1.29348	1.32689	1.3659	1.40652	1.44864	1.49205	1.53665	1.58236	1.62921	1.67733	1.72687	1.77793	1.83063	1.88488	1.94044	1.997	2.05431	2.11236	2.17132	2.23147	2.29317	2.35674	2.42231	2.48995	2.55987	2.63234	2.70754	2.78581	2.86728	2.95165
COL	11.6189	11.9931	12.3798	12.7796	13.193	13.6204	14.0623	14.5201	14.9935	15.4831	15.9903	16.5149	17.0499	17.5873	18.1326	18.69	19.2469	19.8105	20.3695	20.9182	21.4801	22.004	22.5164	23.0245	23.5384	24.0655	24.6081	25.1645	25.7337	26.313	26.9005	27.4966	28.1018	28.7142	29.3312	29.9512	30.5725	31.1954	31.8225	32.4575	33.1026	33.7583	34.4226	35.0913	35.759	36.4214	37.0764	37.7238	38.3643
COM											0.178101	0.182298	0.18666	0.191197	0.195929	0.200867	0.20602	0.211675	0.217581	0.223705	0.230054	0.234644	0.239235	0.244208	0.250104	0.25729	0.265953	0.2759	0.286634	0.297447	0.307829	0.317606	0.326946	0.336096	0.345466	0.355337	0.36576	0.376654	0.387963	0.399632	0.411594	0.423872	0.436448	0.449274	0.462277	0.475394	0.488627	0.501953	0.515385
CPV											0.196592	0.202965	0.209691	0.216725	0.224064	0.231512	0.239016	0.246567	0.254076	0.261369	0.268627	0.271309	0.271843	0.271068	0.27023	0.270247	0.271342	0.273335	0.276174	0.27973	0.283847	0.288677	0.294254	0.30023	0.306136	0.311678	0.316616	0.321135	0.325746	0.331179	0.33795	0.34623	0.355757	0.366053	0.376407	0.386284	0.395533	0.404259	0.412514
CRI	0.922867	0.953049	0.986027	1.0207	1.05784	1.09829	1.14073	1.184	1.22882	1.27751	1.32847	1.38016	1.4319	1.48326	1.53302	1.5835	1.63761	1.69112	1.74409	1.79585	1.84739	1.89608	1.94417	1.99251	2.04224	2.09419	2.14868	2.20561	2.26495	2.32646	2.38998	2.45559	2.52335	2.59302	2.66422	2.73671	2.81024	2.88485	2.96093	3.03901	3.11943	3.20208	3.28652	3.3723	3.45883	3.54553	3.63236	3.71895	3.80389
CUW
CYM																					0.009144	0.00958	0.010133	0.010782	0.011491	0.012244	0.013025	0.013853	0.014683	0.01548	0.016212	0.01686	0.017439	0.018011	0.01867	0.019467	0.02043	0.021544	0.022761	0.024039	0.025312	0.026544	0.02778	0.029069	0.030514	0.032166	0.034065	0.036156	0.038329
CYP	0.493211	0.501198	0.507188	0.514177	0.522164	0.529153	0.535144	0.545128	0.557108	0.566094	0.572084	0.577775	0.57508	0.58137	0.585563	0.589856	0.594049	0.598442	0.603334	0.608426	0.613618	0.620859	0.627998	0.635107	0.5205	0.5022	0.4979	0.4975	0.4996	0.5032	0.5086	0.515	0.5208	0.5276	0.5348	0.5411	0.5475	0.5535	0.5593	0.5675	0.5794	0.5949	0.6106	0.6258	0.639	0.6507	0.6609	0.6704	0.6789
CZE																																									10.3409	10.3465	10.353	10.3587	10.361	10.3582	10.3503	10.3383	10.3232
DEU	68.7341	69.0739	69.4488	69.8469	70.2641	70.6943	71.1396	71.6051	72.0976	72.6254	73.1963	73.8095	74.4569	75.1153	75.7577	76.3618	76.9197	77.4304	77.8838	78.2688	78.5784	78.7899	78.9018	78.9325	78.9098	78.856	78.7817	78.6873	78.5736	78.4382	78.2831	78.1079	77.926	77.7702	77.6823	77.6916	77.8061	78.0157	78.3075	78.6603	79.054	79.4908	79.9632	80.4286	80.8329	81.1387	81.3237	81.3993	81.4027
DJI																					0.159659	0.169372	0.179224	0.190568	0.205181	0.224183	0.248556	0.277479	0.308008	0.336085	0.35896	0.374937	0.385271	0.393802	0.406017	0.425613	0.454361	0.49033	0.528999	0.563864	0.590398	0.606844	0.615054	0.618495	0.622366	0.630388	0.643654	0.660863	0.680463
DMA																					0.071073	0.071568	0.071731	0.071738	0.071802	0.072094	0.072654	0.07344	0.074284	0.074955	0.075314	0.075309	0.075003	0.074483	0.073851	0.073201	0.072533	0.071842	0.071208	0.070723	0.070419	0.070374	0.070544	0.070831	0.071043	0.071098	0.070936	0.070599	0.070185
DNK	4.27315	4.30579	4.33618	4.37148	4.40822	4.44124	4.46872	4.49009	4.51741	4.54893	4.58331	4.61214	4.64924	4.68594	4.72255	4.7605	4.79992	4.84124	4.86975	4.89315	4.93124	4.96176	4.99055	5.01725	5.04142	5.06273	5.08127	5.09704	5.10969	5.11871	5.12394	5.1253	5.12335	5.11961	5.11606	5.11424	5.11466	5.11728	5.12244	5.13036	5.14112	5.15491	5.17165	5.19074	5.21133	5.2327	5.25486	5.27771	5.30038
DOM		2.46122	2.5347	2.61362	2.69726	2.78489	2.87699	2.97406	3.07535	3.18015	3.28772	3.39869	3.51353	3.63133	3.75116	3.87211	3.99472	4.11961	4.24595	4.37293	4.49972	4.62721	4.75546	4.88446	5.01419	5.14464	5.27577	5.4075	5.53959	5.6718	5.80393	5.93591	6.06777	6.19966	6.33176	6.46423	6.59696	6.72993	6.86344	6.99789	7.13349	7.27041	7.40834	7.54646	7.68371	7.81925	7.95276	8.08441	8.21443
DZA											11.3268	11.5472	11.4219	11.7043	12.0573	12.4209	12.8113	13.2488	13.6493	14.046	14.465	14.8722	15.286	15.7098	16.149	16.6077	17.0858	17.5829	18.1023	18.6478	19.2217	19.8243	20.4529	21.1019	21.7636	22.4315	23.1024	23.7743	24.4435	25.1062	25.7589	26.4005	27.0283	27.6355	28.2138	28.7578	29.2664	29.743	30.1928
ECU	3.44338	3.53386	3.62651	3.7224	3.82221	3.92659	4.0351	4.1473	4.26386	4.38544	4.51271	4.6458	4.78428	4.92794	5.07655	5.22991	5.38816	5.55145	5.71955	5.89227	6.06938	6.24742	6.42938	6.61484	6.80328	6.99433	7.18779	7.38372	7.58235	7.78407	7.98919	8.19765	8.4094	8.62459	8.84346	9.06611	9.29247	9.52236	9.75558	9.99187	10.2309	10.4725	10.7161	10.9615	11.208	11.4552	11.7032	11.9515	12.1984
EGY	21.7911	22.312	22.8454	23.3915	23.9507	24.5233	25.1096	25.7098	26.3244	26.9538	27.5981	28.2933	28.962	29.6274	30.3598	31.1123	31.8538	32.568	33.2431	33.8891	34.5138	35.3119	36.1027	36.8966	37.7081	38.5491	39.4227	40.3296	41.2757	42.2674	43.3091	44.4001	45.5393	46.7283	47.9686	49.2587	50.6024	51.9917	53.3992	54.7887	56.1345	57.4245	58.6668	59.8807	61.0958	62.334	63.6016	64.8923	66.2003
ESP	28.069	28.3041	28.556	28.8103	29.0666	29.325	29.5855	29.848	30.1126	30.3794	30.6478	30.9105	31.1647	31.4366	31.7477	32.0914	32.4589	32.8573	33.2464	33.5733	33.8837	34.2675	34.6642	35.0694	35.4764	35.8792	36.2768	36.6668	37.0404	37.3868	37.6982	37.972	38.2097	38.4133	38.5867	38.7339	38.8556	38.9545	39.0387	39.1186	39.2025	39.2991	39.4109	39.5337	39.6601	39.7874	39.909	40.0353	40.2016
EST																																									1.56525	1.54822	1.52081	1.48806	1.45709	1.43302	1.41774	1.40967	1.40635
ETH	19.4534	19.7782	20.1152	20.4649	20.8278	21.2042	21.5948	22	22.4204	22.8551	23.3047	23.7677	24.2465	24.7424	25.256	25.7844	26.3316	26.8644	27.4342	27.9269	28.4151	29.2486	30.1408	31.0367	31.8614	32.5669	33.1281	33.5772	33.9933	34.4878	35.1417	35.9845	36.9952	38.1427	39.3743	40.6521	41.9657	43.3292	44.7572	46.2723	47.8879	49.61	51.4236	53.2956	55.181	57.0479	58.8835	60.6974	62.5077
FIN	4.01417	4.05262	4.09588	4.14484	4.19241	4.24047	4.28733	4.32969	4.36553	4.40048	4.43543	4.46687	4.49735	4.52926	4.55453	4.56974	4.58689	4.6118	4.63255	4.62987	4.61237	4.62938	4.65117	4.67546	4.69878	4.71875	4.73444	4.74693	4.75825	4.77135	4.78824	4.80981	4.8351	4.86218	4.8882	4.91122	4.93034	4.94637	4.96109	4.97712	4.99622	5.01912	5.04493	5.07179	5.0971	5.119	5.13698	5.15175	5.16424
FJI											0.393017	0.407017	0.421514	0.436088	0.450268	0.463054	0.473601	0.484592	0.494584	0.505575	0.520562	0.531635	0.542844	0.554138	0.565415	0.576626	0.587557	0.598296	0.609383	0.621585	0.635307	0.651021	0.66828	0.685497	0.700483	0.711775	0.718639	0.721783	0.72293	0.724594	0.728573	0.735401	0.744469	0.754963	0.765609	0.775425	0.784386	0.792736	0.800157
FRA	42.5499	42.8943	43.2163	43.528	43.8548	44.2514	44.6912	45.1865	45.6884	46.1636	46.6193	47.1637	48.1251	48.836	49.3943	49.8396	50.2931	50.6888	51.0731	51.5093	51.9577	52.3713	52.7931	53.2077	53.5922	53.9314	54.22	54.4677	54.6919	54.9171	55.1615	55.4303	55.7189	56.0238	56.3377	56.6547	56.9761	57.3027	57.6271	57.9402	58.2357	58.5124	58.7734	59.0225	59.2657	59.5085	59.7488	59.9889	60.2443
GAB											0.510778	0.515911	0.521839	0.528362	0.535503	0.543284	0.551453	0.560025	0.569014	0.576927	0.589314	0.600613	0.611704	0.62292	0.634742	0.647536	0.661402	0.676255	0.692077	0.708788	0.726328	0.744696	0.76393	0.784061	0.805115	0.827108	0.850048	0.873867	0.898469	0.923711	0.949488	0.975783	1.00258	1.02978	1.05726	1.08495	1.11295	1.14134	1.17006
GBR	50.0742	50.2371	50.3769	50.5398	50.7116	50.8924	51.1301	51.3759	51.5976	51.9013	52.3169	52.7514	53.2359	53.5686	53.9342	54.2928	54.5855	54.9012	55.1559	55.4026	55.5735	55.7485	55.8924	56.0063	56.0921	56.1523	56.1883	56.2036	56.2059	56.2051	56.2092	56.2207	56.2414	56.2768	56.3329	56.4136	56.5225	56.6583	56.8128	56.9743	57.1344	57.2908	57.446	57.6023	57.7634	57.9325	58.1136	58.3073	58.51
GEO																																									5.4104	5.37299	5.30393	5.20896	5.09713	4.97626	4.84663	4.70961	4.5754
GHA						6.01182	6.17887	6.35242	6.53275	6.72016	6.91597	7.11	7.31052	7.51784	7.73449	7.96089	8.19534	8.43858	8.69112	8.95426	8.7355	8.97324	9.22963	9.49356	9.7491	9.98595	10.1992	10.3955	10.5903	10.8053	11.0561	11.3483	11.6768	12.0336	12.4057	12.7836	13.1648	13.552	13.947	14.3534	14.7733	15.2074	15.6533	16.1068	16.5617	17.0141	17.4625	17.909	18.3572
GIN										3.39141	3.45072	3.51242	3.57621	3.64181	3.70931	3.77869	3.84997	3.92312	3.99822	4.07535	4.15461	4.22305	4.29053	4.35736	4.42403	4.49125	4.55924	4.62888	4.70238	4.78249	4.87143	4.96959	5.07708	5.19545	5.32636	5.4707	5.62942	5.80133	5.98249	6.16747	6.35228	6.53494	6.71604	6.89717	7.08112	7.26962	7.46378	7.66207	7.86078
GMB											0.337303	0.347577	0.358452	0.369972	0.382184	0.3948	0.407833	0.421296	0.435203	0.44957	0.46441	0.478116	0.492426	0.507432	0.523251	0.539979	0.557805	0.576757	0.596536	0.616768	0.637246	0.657579	0.678113	0.700199	0.725694	0.755787	0.791147	0.831023	0.873444	0.915635	0.955593	0.992673	1.02747	1.06086	1.09421	1.12858	1.16409	1.20053	1.23812
GNB											0.701144	0.70727	0.713807	0.720764	0.69387	0.686475	0.680029	0.68364	0.694866	0.700083	0.704939	0.718364	0.732523	0.746173	0.757674	0.765989	0.770421	0.771737	0.772142	0.774726	0.781677	0.793806	0.810405	0.830207	0.851276	0.872163	0.892522	0.912754	0.933045	0.95379	0.975261	0.997522	1.02035	1.04342	1.06635	1.08885	1.11083	1.13251	1.15437
GNQ											0.274118	0.278795	0.280135	0.281483	0.282836	0.284197	0.288149	0.2921	0.296048	0.300006	0.303982	0.298846	0.289501	0.277646	0.265771	0.2558	0.247962	0.242156	0.239678	0.24198	0.249929	0.264374	0.28463	0.308206	0.331552	0.352118	0.369023	0.382981	0.394961	0.40662	0.419188	0.432853	0.447266	0.462637	0.479098	0.496768	0.515853	0.53646	0.558492
GRC		7.53402	7.61959	7.7022	7.7774	7.84846	7.91297	7.97722	8.053	8.13678	8.20501	8.27462	8.32406	8.35499	8.38535	8.42466	8.48705	8.58833	8.61229	8.64382	8.66357	8.71687	8.77451	8.84032	8.91924	9.01408	9.12705	9.25498	9.38873	9.51575	9.627	9.71984	9.79683	9.86074	9.91648	9.96824	10.0151	10.0573	10.1014	10.1557	10.226	10.3151	10.4202	10.5338	10.6449	10.7455	10.8321	10.9063	10.9701
GRD																					0.094475	0.094221	0.093983	0.093669	0.093191	0.092494	0.091475	0.090227	0.089101	0.0886	0.089032	0.090607	0.093122	0.096019	0.098477	0.099946	0.100191	0.099436	0.09812	0.096924	0.096331	0.09646	0.097165	0.09823	0.099352	0.100288	0.101001	0.101567	0.102021
GTM	3.17065	3.27404	3.38081	3.4913	3.60564	3.7239	3.84621	3.9727	4.10363	4.23924	4.3782	4.51915	4.66352	4.81249	4.96602	5.068	5.17173	5.27793	5.38758	5.50109	5.62179	5.78048	5.94157	6.10453	6.26871	6.43373	6.59921	6.76552	6.93391	7.10614	7.28346	7.46649	7.65482	7.84747	8.0429	8.24006	8.4386	8.63911	8.84258	9.05047	9.26381	9.48327	9.70854	9.93869	10.1723	10.4085	10.6467	10.8876	11.1335
GUY																					0.704934	0.713684	0.721948	0.729916	0.737847	0.745841	0.754101	0.762424	0.770125	0.776254	0.780153	0.781732	0.781246	0.778948	0.775219	0.770435	0.764446	0.757448	0.750639	0.745585	0.743309	0.744474	0.748602	0.754144	0.758896	0.761291	0.760795	0.75797	0.753778
HKG											2.98979	3.08001	3.2133	3.32579	3.40716	3.49786	3.52897	3.61929	3.69697	3.75647	3.84892	3.9136	3.9742	4.03779	4.11399	4.20895	4.32634	4.4624	4.60703	4.74588	4.86874	4.97169	5.05804	5.13371	5.20784	5.28702	5.37345	5.46471	5.55739	5.64627	5.72794	5.80004	5.86474	5.92833	5.99962	6.08423	6.18558	6.29992	6.41699
HND	1.40863	1.45069	1.49326	1.53731	1.58528	1.63572	1.68768	1.74217	1.79958	1.8586	1.92053	1.98651	2.05684	2.1314	2.21029	2.29203	2.37516	2.46082	2.5498	2.64251	2.71665	2.79812	2.88211	2.96899	3.05924	3.15325	3.25115	3.35283	3.4581	3.56665	3.67828	3.79292	3.91064	4.03132	4.15486	4.28116	4.41027	4.54221	4.67702	4.8147	4.9553	5.09859	5.24468	5.39441	5.54896	5.70901	5.87481	6.0457	6.22041
HRV																																									4.77637	4.76	4.73286	4.69754	4.6578	4.61677	4.57489	4.5324	4.49191
HTI											3.80709	3.88362	3.96246	4.04532	4.12992	4.21629	4.30426	4.39427	4.48617	4.57998	4.67623	4.75718	4.83733	4.91862	5.00371	5.09458	5.19163	5.29462	5.40402	5.52019	5.64317	5.77337	5.91023	6.05162	6.19469	6.33727	6.47854	6.61874	6.75822	6.89776	7.03792	7.17861	7.31949	7.46069	7.60232	7.7445	7.8873	8.03073	8.17468
HUN																					10.3661	10.3982	10.4261	10.4537	10.4862	10.5268	10.578	10.6366	10.6933	10.7355	10.7543	10.7465	10.7158	10.6692	10.6167	10.5663	10.5193	10.4745	10.4345	10.4016	10.3771	10.363	10.3586	10.3591	10.3576	10.3493	10.3325	10.3085	10.2796
IDN											94.473	96.5827	98.4913	100.443	102.44	104.48	106.566	108.697	110.873	113.096	115.365	118.465	121.618	124.814	128.047	131.31	134.594	137.898	141.232	144.612	148.048	151.542	155.081	158.636	162.165	165.64	169.046	172.389	175.678	178.928	182.151	185.351	188.523	191.658	194.745	197.779	200.757	203.688	206.591
IND	370.749	377.066	383.69	390.607	397.783	405.217	412.914	420.887	429.135	437.653	446.439	455.493	464.909	474.726	485.187	496.126	507.312	518.802	530.605	542.731	555.19	567.868	581.087	594.77	608.803	623.103	637.63	652.409	667.5	682.995	698.953	715.385	732.24	749.429	766.833	784.36	801.975	819.682	837.469	855.335	873.278	891.273	909.307	927.404	945.602	963.923	982.365	1000.9	1019.48
IRL	2.92116	2.9175	2.91045	2.90567	2.89528	2.87493	2.85435	2.83756	2.81124	2.80287	2.79199	2.77848	2.79002	2.80974	2.82354	2.83537	2.84325	2.85913	2.87135	2.88427	2.90842	2.94409	2.98657	3.03432	3.08516	3.13718	3.18987	3.24277	3.29416	3.342	3.38476	3.42202	3.45379	3.47946	3.49853	3.51098	3.51642	3.51583	3.51219	3.50952	3.51089	3.51771	3.52985	3.54693	3.56791	3.59219	3.61964	3.6511	3.68782
IRN						18.4955	19.0064	19.5399	20.0999	20.6854	21.2934	21.9191	22.5673	23.235	23.9321	24.6546	25.4046	26.1643	26.9326	27.7154	28.5139	29.2816	30.0753	30.9057	31.7865	32.7298	33.734	34.803	35.9608	37.2371	38.6502	40.1999	41.8692	43.6368	45.4728	47.3472	49.2603	51.1938	53.0773	54.822	56.3662	57.679	58.7804	59.7238	60.5906	61.4427	62.2949	63.1363	63.9718
IRQ																					9.91798	10.2559	10.5997	10.9509	11.3121	11.6846	12.0687	12.4621	12.8607	13.2591	13.6534	14.0441	14.4325	14.8157	15.1904	15.5558	15.9098	16.2571	16.6123	16.9949	17.4191	17.8895	18.4027	18.9551	19.5393	20.1493	20.7831	21.4396	22.1143
ISL	0.143164	0.145834	0.148195	0.151274	0.154807	0.158293	0.161613	0.16537	0.169037	0.172586	0.176137	0.179187	0.18234	0.185774	0.189145	0.192591	0.195919	0.198989	0.201562	0.20324	0.204426	0.207088	0.209929	0.212814	0.215563	0.21807	0.220291	0.222266	0.22415	0.226103	0.228262	0.230664	0.233269	0.236019	0.238808	0.241582	0.244331	0.247056	0.249756	0.252413	0.255043	0.257624	0.260151	0.262656	0.265138	0.267629	0.27015	0.272709	0.275296
ISR	1.2464	1.44397	1.57085	1.6156	1.65878	1.7173	1.79291	1.88434	1.96223	2.01729	2.07535	2.14857	2.23952	2.33232	2.42103	2.49855	2.55954	2.61038	2.66213	2.73003	2.81375	2.90002	2.99648	3.09879	3.20053	3.29693	3.38705	3.47212	3.5523	3.62831	3.70092	3.77069	3.83811	3.90395	3.96917	4.03507	4.10054	4.16713	4.24178	4.33359	4.44835	4.5893	4.75282	4.92941	5.10558	5.27137	5.42425	5.56655	5.69927
ITA	46.9802	47.2924	47.5397	47.83	48.1711	48.5042	48.7914	49.0517	49.345	49.7	50.0646	50.3894	50.7085	51.0627	51.4635	51.8494	52.193	52.5276	52.8463	53.1758	53.519	53.8889	54.2587	54.6192	54.9578	55.2653	55.538	55.7779	55.989	56.1779	56.3493	56.5055	56.6449	56.7653	56.8631	56.9368	56.9839	57.0077	57.0182	57.0287	57.0482	57.0881	57.1453	57.1976	57.2135	57.1744	57.0652	56.9036	56.7428
JAM				1.39572	1.41613	1.43661	1.45704	1.48127	1.51086	1.54305	1.57458	1.59015	1.60675	1.63832	1.67803	1.71509	1.75627	1.79585	1.8271	1.85232	1.87564	1.90428	1.9351	1.96697	1.99831	2.02802	2.05537	2.08083	2.10591	2.13279	2.16285	2.19692	2.23406	2.27174	2.30637	2.33551	2.35816	2.37539	2.38941	2.40346	2.41991	2.43933	2.46105	2.48458	2.50904	2.53371	2.55864	2.58392	2.60887
JOR					0.755061	0.786762	0.820017	0.855026	0.891817	0.930598	0.971795	1.01564	1.0692	1.11614	1.16497	1.21568	1.26828	1.4374	1.58341	1.66473	1.72132	1.80918	1.88393	1.94844	2.00773	2.06591	2.12318	2.17936	2.23794	2.30312	2.37799	2.46487	2.56353	2.67141	2.78446	2.90005	3.0153	3.1318	3.25656	3.39933	3.56589	3.7605	3.97767	4.20155	4.41036	4.58884	4.73285	4.84854	4.94398
JPN	84.2743	85.6407	86.9432	88.146	89.2509	90.318	91.2745	92.0757	92.9061	93.819	94.6185	95.4749	96.3684	97.354	98.374	99.4362	100.349	101.39	102.532	103.75	104.929	106.427	107.976	109.529	111.023	112.413	113.679	114.828	115.879	116.867	117.817	118.733	119.605	120.428	121.189	121.883	122.509	123.073	123.585	124.059	124.505	124.93	125.331	125.707	126.053	126.365	126.644	126.893	127.117
KAZ																																									16.3839	16.3733	16.3028	16.1812	16.0222	15.8394	15.6319	15.406	15.1902
KEN	6.15069	6.31965	6.4952	6.6783	6.86931	7.0679	7.27515	7.49071	7.71575	7.95073	8.19614	8.45251	8.72039	9.00035	9.29209	9.59521	9.91118	10.2406	10.5832	10.9404	11.3014	11.713	12.1461	12.6008	13.0773	13.5759	14.0963	14.6389	15.2054	15.7978	16.4172	17.0639	17.7363	18.4318	19.1464	19.8771	20.6226	21.3821	22.1537	22.9351	23.7246	24.5217	25.3261	26.1362	26.9505	27.7683	28.5895	29.4157	30.2505
KGZ																																									4.37289	4.41963	4.45419	4.48384	4.51881	4.5661	4.6294	4.70564	4.78678
KHM																					6.99658	7.13965	7.30211	7.44924	7.53334	7.52445	7.40468	7.19604	6.95726	6.7704	6.69376	6.74985	6.9198	7.17	7.44785	7.71488	7.96095	8.19808	8.43591	8.69133	8.9756	9.2893	9.62389	9.97073	10.3179	10.6561	10.9829	11.2986	11.6005
KNA																					0.044883	0.04449	0.04432	0.044311	0.044328	0.044272	0.044143	0.043942	0.043708	0.043455	0.043205	0.04296	0.042728	0.042482	0.042199	0.041866	0.041479	0.041041	0.040641	0.040354	0.040259	0.040379	0.040697	0.041135	0.041617	0.042074	0.042475	0.042854	0.043221
KOR				21.0309	21.229	21.5215	22.0003	22.5798	23.2209	23.9476	24.7493	25.5778	26.3832	27.1731	27.9447	28.6647	29.3946	30.0886	30.7947	31.4997	32.1957	32.8507	33.5065	34.1541	34.7809	35.3787	35.942	36.4754	36.9922	37.5113	38.0456	38.6023	39.1752	39.7478	40.2962	40.8044	41.2651	41.6866	42.0867	42.4912	42.9184	43.3732	43.8482	44.335	44.8201	45.2925	45.751	46.1961	46.6207
KWT																					0.74445	0.798642	0.851916	0.905635	0.96177	1.02172	1.08586	1.15358	1.22407	1.29608	1.36868	1.43933	1.50764	1.57697	1.65215	1.73527	1.83231	1.93891	2.03486	2.09278	2.09534	2.0313	1.91243	1.77261	1.65931	1.6059	1.62686	1.71026	1.83112
LAO																					2.68843	2.76227	2.84084	2.91929	2.99097	3.05158	3.09897	3.13584	3.16884	3.20733	3.25814	3.32337	3.40119	3.4899	3.58632	3.6879	3.7942	3.90553	4.02081	4.13884	4.25847	4.37924	4.50035	4.61994	4.73585	4.84648	4.9512	5.05032	5.1446
LBN																					2.29743	2.35405	2.41784	2.48194	2.53678	2.57575	2.59641	2.60174	2.59721	2.5909	2.58893	2.5943	2.60614	2.62207	2.63805	2.65199	2.66087	2.66796	2.68467	2.72644	2.80304	2.92171	3.07613	3.24613	3.40336	3.52838	3.61067	3.65842	3.69352
LBR															1.17152	1.20776	1.24498	1.28319	1.32237	1.36155	1.40073	1.43674	1.47457	1.51437	1.55629	1.60045	1.64584	1.69214	1.74091	1.79425	1.853	1.91883	1.98948	2.05723	2.11167	2.14575	2.15843	2.15332	2.1341	2.10643	2.07591	2.04014	2.00162	1.9767	1.98649	2.04466	2.16048	2.3262	2.51748
LCA																					0.104015	0.105247	0.10631	0.10732	0.108391	0.109627	0.111067	0.112685	0.1144	0.116136	0.117822	0.11943	0.120988	0.122564	0.124292	0.126244	0.128449	0.130856	0.133367	0.135788	0.13802	0.139995	0.14176	0.143409	0.145083	0.14687	0.148834	0.150913	0.153021
LKA	7.45371	7.67334	7.9037	8.14312	8.37971	8.60216	8.82304	9.05429	9.28883	9.538	9.80902	10.0832	10.3551	10.6221	10.8797	11.142	11.4119	11.6824	11.9579	12.2262	12.4857	12.7478	13.0022	13.252	13.5019	13.7551	14.0129	14.2735	14.5337	14.7889	15.0358	15.2728	15.5012	15.7247	15.9485	16.1763	16.4089	16.644	16.8782	17.1068	17.3258	17.5357	17.7368	17.9248	18.0945	18.2429	18.3673	18.4709	18.5646
LSO											0.82781	0.843941	0.861163	0.879351	0.898461	0.918355	0.939108	0.960703	0.982893	1.0057	1.02893	1.05261	1.07709	1.10288	1.13064	1.16079	1.19352	1.22854	1.2652	1.30267	1.34025	1.3778	1.41537	1.45273	1.48969	1.52613	1.56169	1.59639	1.631	1.66656	1.70375	1.74254	1.78228	1.82224	1.86132	1.8986	1.93429	1.96804	1.99752
LTU																																									3.69604	3.69746	3.68811	3.67065	3.64914	3.62661	3.60376	3.57991	3.55514
LUX	0.296018	0.297858	0.299699	0.30154	0.30338	0.305221	0.307062	0.308902	0.310743	0.312584	0.314426	0.317306	0.321217	0.324572	0.328227	0.331983	0.334381	0.3355	0.336356	0.337992	0.339668	0.342226	0.345103	0.348173	0.351189	0.353983	0.356564	0.358968	0.361073	0.362789	0.364038	0.364781	0.365098	0.365305	0.365795	0.366884	0.368666	0.371078	0.374118	0.377706	0.381791	0.386352	0.391394	0.39681	0.402433	0.408149	0.413999	0.419974	0.425833
LVA																																									2.66444	2.64916	2.62025	2.58266	2.54363	2.50848	2.47883	2.45331	2.43055
MAC																					0.246194	0.248738	0.248767	0.246947	0.244285	0.241628	0.239075	0.236678	0.235171	0.23544	0.238071	0.243373	0.251158	0.260931	0.271918	0.283503	0.295591	0.30818	0.320773	0.332783	0.343808	0.353626	0.362311	0.370199	0.377798	0.385513	0.393373	0.401352	0.409616
MDA																																									4.36556	4.37505	4.37679	4.37115	4.35879	4.3406	4.31622	4.28647	4.25484
MDG											5.32831	5.43367	5.54371	5.65825	5.77741	5.90013	6.02649	6.15728	6.29202	6.43073	6.5763	6.75785	6.94662	7.14263	7.34578	7.55603	7.77345	7.99816	8.23022	8.46967	8.71655	8.97134	9.23413	9.50428	9.78087	10.0635	10.3521	10.6478	10.9524	11.2687	11.5986	11.9428	12.3013	12.6755	13.0665	13.4754	13.9027	14.3479	14.8088
MDV																					0.115691	0.119302	0.123354	0.127701	0.132104	0.136417	0.140563	0.144631	0.14878	0.153276	0.158272	0.163824	0.169851	0.176244	0.18285	0.189537	0.196264	0.203028	0.209785	0.21651	0.223158	0.229751	0.236265	0.242605	0.248588	0.254139	0.259183	0.263842	0.268455
MEX	27.7934	28.5848	29.4123	30.2777	31.183	32.1302	33.1215	34.1652	35.2643	36.422	37.6417	38.8688	40.1229	41.4038	42.7116	44.0462	45.4077	46.83	48.3163	49.8697	51.4936	53.0764	54.6899	56.3243	57.9668	59.608	61.2422	62.8699	64.4949	66.1239	67.7614	69.4076	71.0587	72.7093	74.3526	75.9835	77.5991	79.2001	80.7887	82.3689	83.9431	85.5126	87.0751	88.6254	90.1564	91.6633	93.147	94.611	96.0563
MKD																																									1.99623	1.9933	1.98866	1.98403	1.9817	1.98325	1.98944	1.9996	2.01206
MLI											4.82133	4.91831	5.01847	5.12193	5.2288	5.33921	5.45328	5.57116	5.69298	5.81889	5.94904	6.04453	6.14746	6.25619	6.36835	6.48228	6.59673	6.71227	6.83108	6.9564	7.09013	7.23473	7.38867	7.54517	7.69485	7.83189	7.95287	8.06222	8.17152	8.29692	8.44991	8.63553	8.85033	9.08718	9.33488	9.58565	9.83757	10.0944	10.3606
MLT					0.332182	0.332182	0.332182	0.332182	0.331124	0.331124	0.330066	0.329008	0.326892	0.325835	0.323719	0.322661	0.321603	0.321603	0.320545	0.320545	0.320545	0.320355	0.320436	0.320786	0.321437	0.322356	0.32358	0.325127	0.326982	0.329115	0.331497	0.334124	0.336965	0.339986	0.3431	0.34625	0.34943	0.352623	0.355799	0.358933	0.362015	0.365002	0.367891	0.370775	0.37375	0.376896	0.380253	0.38376	0.38729
MMR													22.7268	23.2256	23.741	24.276	24.8296	25.4028	25.9977	26.6194	27.2691	27.9138	28.5701	29.2382	29.9185	30.6111	31.3143	32.0267	32.7488	33.4814	34.2243	34.9765	35.7343	36.4918	37.2415	37.9771	38.6985	39.4043	40.0857	40.7314	41.3352	41.8902	42.4017	42.89	43.3834	43.9016	44.4522	45.0272	45.6112
MNE																																									0.615002	0.615744	0.617173	0.618853	0.620087	0.620418	0.619707	0.618219	0.616339
MNG																					1.27883	1.31705	1.35667	1.3973	1.43843	1.47965	1.52086	1.56221	1.60391	1.64629	1.68962	1.73348	1.77773	1.82322	1.87109	1.92188	1.97631	2.03334	2.08971	2.14101	2.18415	2.21792	2.24349	2.26319	2.28048	2.29802	2.31657	2.33573	2.35566
MOZ											7.24605	7.39676	7.55318	7.71616	7.88124	8.05017	8.22951	8.41815	8.61473	8.81757	9.02274	9.23265	9.44624	9.66866	9.90696	10.1652	10.444	10.7385	11.0412	11.3414	11.6302	11.9131	12.1898	12.4398	12.6361	12.7644	12.8086	12.7863	12.758	12.8059	12.9873	13.328	13.806	14.3709	14.948	15.4833	15.9604	16.3972	16.8139
MRT											0.993768	1.00662	1.0199	1.03363	1.04793	1.06282	1.0783	1.09442	1.11117	1.12862	1.14678	1.18167	1.21745	1.25416	1.29185	1.3306	1.37036	1.41114	1.45303	1.49619	1.54064	1.58649	1.63365	1.68186	1.73074	1.78003	1.82967	1.87976	1.93043	1.9819	2.03435	2.08791	2.14264	2.19853	2.25552	2.31363	2.3729	2.43356	2.49622
MSR																					0.011534	0.011517	0.011522	0.011533	0.011559	0.01158	0.011611	0.011648	0.011676	0.011669	0.011607	0.011481	0.011307	0.011107	0.010932	0.010792	0.010704	0.010659	0.010638	0.010632	0.010615	0.010632	0.010661	0.010601	0.010362	0.009848	0.009015	0.00793	0.006741
MUS	0.479489	0.496748	0.514644	0.534073	0.551927	0.569553	0.589574	0.607559	0.625337	0.642925	0.660774	0.678763	0.698422	0.712493	0.733457	0.752732	0.771295	0.786388	0.801201	0.813007	0.826441	0.839598	0.8524	0.865169	0.878355	0.892211	0.906929	0.92232	0.937821	0.952588	0.966031	0.978069	0.988892	0.998631	1.0075	1.01576	1.02328	1.03018	1.03726	1.04559	1.05587	1.06844	1.08296	1.09859	1.11414	1.12867	1.14195	1.15414	1.16528
MWI					3.16018	3.22223	3.28875	3.36109	3.43774	3.51637	3.60025	3.6854	3.78615	3.88818	3.98188	4.08403	4.19766	4.33182	4.45821	4.5837	4.70378	4.82909	4.95855	5.09336	5.23507	5.3848	5.54565	5.71795	5.89687	6.0755	6.25044	6.41238	6.56599	6.73792	6.96461	7.26827	7.66639	8.14115	8.63669	9.07557	9.4045	9.60036	9.68597	9.71033	9.74569	9.84441	10.0228	10.2649	10.5523
MYS						7.24062	7.44655	7.66398	7.88847	8.11602	8.34654	8.57916	8.81978	9.0595	9.30609	9.55384	9.80354	10.0561	10.3081	10.5586	10.8041	11.0624	11.3243	11.5926	11.8711	12.1622	12.4687	12.7903	13.1228	13.46	13.7981	14.1341	14.4712	14.8194	15.1923	15.5989	16.0437	16.522	17.0225	17.529	18.0298	18.5199	19.0027	19.4849	19.9775	20.4876	21.0176	21.5628	22.1147
NAM											0.631509	0.647651	0.664287	0.68143	0.699092	0.717299	0.736069	0.755419	0.775372	0.796019	0.817469	0.842354	0.868958	0.896266	0.922903	0.947921	0.971121	0.992956	1.01406	1.03538	1.05773	1.08094	1.1051	1.13163	1.16228	1.19815	1.23993	1.2868	1.33654	1.38601	1.43291	1.47639	1.51696	1.5551	1.59182	1.62786	1.66338	1.69803	1.73164
NER											3.64603	3.72043	3.79825	3.87924	3.96236	4.04766	4.13522	4.22509	4.31734	4.41249	4.51064	4.63799	4.76823	4.90215	5.0408	5.18494	5.33509	5.49115	5.65265	5.81876	5.989	6.16371	6.34352	6.52864	6.71931	6.916	7.11888	7.32894	7.54843	7.78024	8.02659	8.28874	8.56677	8.86029	9.16831	9.49029	9.8266	10.1782	10.5457
NGA	32.0238	32.7239	33.4446	34.1867	35.1826	36.2098	37.2692	38.3615	39.4875	40.6479	41.8438	43.0766	44.3473	45.6566	47.0084	48.4069	49.8442	51.312	52.8192	54.3752	55.9821	57.297	58.6658	60.1146	61.6772	63.3743	65.2214	67.2031	69.2719	71.3611	73.4236	75.4405	77.4275	79.4148	81.4488	83.5628	85.7664	88.048	90.3953	92.788	95.2125	97.6676	100.162	102.701	105.294	107.948	110.669	113.458	116.32
NIC	1.28726	1.32641	1.36683	1.40872	1.45224	1.49756	1.54458	1.59316	1.6435	1.69576	1.75012	1.80654	1.8649	1.92527	1.9877	2.05225	2.11877	2.1872	2.2578	2.33082	2.40651	2.48134	2.5587	2.6387	2.72141	2.80686	2.89497	2.98549	3.07787	3.17141	3.26552	3.36014	3.45512	3.54971	3.64298	3.73434	3.82313	3.90967	3.99553	4.08296	4.17343	4.26757	4.36451	4.4625	4.55901	4.65219	4.74158	4.82766	4.91065
NLD	10.0899	10.2404	10.3578	10.4687	10.5906	10.7258	10.864	11.0007	11.1608	11.3212	11.4592	11.6116	11.7782	11.9381	12.0988	12.2633	12.4258	12.5674	12.695	12.843	13.0019	13.1479	13.2919	13.4312	13.5624	13.6833	13.7931	13.8929	13.9841	14.0686	14.1484	14.2238	14.2952	14.3654	14.4375	14.5139	14.5958	14.6826	14.774	14.8687	14.9654	15.0645	15.1659	15.268	15.3691	15.4679	15.5633	15.6555	15.7456
NOR	3.26401	3.29474	3.32659	3.35974	3.39309	3.42624	3.45881	3.49074	3.52179	3.55164	3.58001	3.60857	3.63767	3.66529	3.69308	3.72188	3.75234	3.78472	3.81768	3.84966	3.87606	3.90527	3.93372	3.9608	3.98574	4.00803	4.02747	4.04433	4.05918	4.07287	4.08608	4.09897	4.11166	4.12458	4.13827	4.15311	4.16932	4.18697	4.20597	4.22612	4.24728	4.26947	4.29268	4.31679	4.34162	4.367	4.39321	4.42026	4.44749
NPL											10.166	10.3093	10.4672	10.6377	10.8169	11.0045	11.2022	11.409	11.6232	11.845	12.0746	12.324	12.5831	12.8522	13.1313	13.4204	13.7195	14.0285	14.3476	14.6769	15.0164	15.3672	15.7294	16.1006	16.4775	16.8583	17.2397	17.6237	18.0208	18.445	18.9055	19.4055	19.9383	20.49	21.0409	21.5761	22.0904	22.5848	23.0579
NZL	1.90179	1.94074	1.98798	2.0404	2.08563	2.12887	2.17085	2.22179	2.27374	2.32316	2.36364	2.42414	2.48005	2.53267	2.58309	2.63138	2.67837	2.71883	2.74957	2.77897	2.81839	2.87082	2.92969	2.98941	3.04218	3.08263	3.10857	3.12241	3.12896	3.1353	3.14662	3.16483	3.18854	3.21573	3.24304	3.26824	3.2903	3.31074	3.33279	3.36096	3.39817	3.44617	3.50318	3.56446	3.62328	3.67494	3.71735	3.75236	3.78397
OMN																					0.723851	0.748968	0.77638	0.806986	0.84195	0.882047	0.927436	0.977804	1.0328	1.09185	1.15438	1.22059	1.29011	1.36109	1.43107	1.49842	1.56119	1.61986	1.67811	1.74116	1.81216	1.89377	1.98327	2.0721	2.14842	2.20428	2.23665	2.24976	2.25186
PAK	34.9071	35.7335	36.5869	37.4681	38.3792	39.3193	40.2938	41.3063	42.3584	43.4514	44.5865	45.7649	46.9879	48.2478	49.5431	50.8763	52.249	53.661	55.1127	56.6059	58.1421	59.7345	61.382	63.0994	64.906	66.8169	68.8343	70.9582	73.1973	75.5611	78.0543	80.6805	83.4316	86.2859	89.2137	92.1915	95.2154	98.2858	101.39	104.513	107.648	110.779	113.911	117.087	120.363	123.777	127.349	131.057	134.843
PAN	0.885651	0.908532	0.932863	0.954802	0.977504	1.0029	1.02859	1.05534	1.07691	1.10659	1.1388	1.17211	1.20639	1.24167	1.27811	1.3158	1.35469	1.3947	1.43565	1.47737	1.51928	1.56309	1.6078	1.65321	1.69905	1.74514	1.79138	1.8378	1.88442	1.9313	1.97849	2.02597	2.07376	2.12186	2.17033	2.2192	2.2685	2.31826	2.36855	2.41943	2.47095	2.52312	2.57595	2.62958	2.68412	2.73967	2.79629	2.85391	2.91232
PER	7.78697	7.98459	8.18812	8.3987	8.61795	8.84699	9.08512	9.3312	9.58687	9.85325	10.132	10.4243	10.7293	11.0449	11.369	11.6994	12.0351	12.3777	12.7285	13.0887	13.4598	13.8364	14.222	14.6158	15.0171	15.4247	15.8386	16.2583	16.6835	17.1134	17.5476	17.9854	18.4264	18.871	19.3197	19.7729	20.2304	20.6913	21.1535	21.6142	22.0714	22.5224	22.9668	23.4081	23.8514	24.2992	24.7538	25.211	25.6581
PHL	19.5985	20.1957	20.8111	21.4453	22.0987	22.7721	23.466	24.1811	24.9179	25.6772	26.4596	27.2772	28.1256	29.0048	29.9148	30.8545	31.816	32.792	33.7824	34.7862	35.8036	36.8497	37.9234	39.0228	40.1442	41.2857	42.4467	43.6294	44.8385	46.0799	47.3577	48.6728	50.0236	51.4089	52.827	54.2758	55.7554	57.2638	58.795	60.3408	61.8952	63.4548	65.0201	66.5939	68.1809	69.7841	71.4017	73.0309	74.672
POL																					32.6393	32.8904	33.1471	33.4116	33.6858	33.9707	34.2661	34.5712	34.8858	35.2092	35.5397	35.8785	36.2215	36.5558	36.8639	37.1339	37.3595	37.5443	37.6974	37.8326	37.9602	38.0829	38.1976	38.3013	38.3895	38.4586	38.5097	38.5448	38.5642
PRT	8.07602	8.12145	8.1557	8.2063	8.25714	8.31501	8.37566	8.43463	8.50245	8.57228	8.64417	8.63891	8.628	8.68712	8.72624	8.73231	8.71313	8.70759	8.71911	8.70204	8.65134	8.7	8.7891	8.90793	9.03998	9.17224	9.3023	9.43104	9.5526	9.66075	9.75096	9.82087	9.87082	9.903	9.92124	9.92918	9.92642	9.91407	9.8992	9.89082	9.89536	9.91605	9.9513	9.99664	10.045	10.0913	10.134	10.1746	10.2141
PRY		1.51406	1.55461	1.59611	1.63861	1.6821	1.72529	1.76946	1.81461	1.86078	1.90798	1.95743	2.00817	2.06022	2.11363	2.16841	2.22649	2.28612	2.34734	2.41021	2.47476	2.53587	2.59715	2.65942	2.72381	2.79124	2.86187	2.93571	3.01328	3.09515	3.18162	3.27291	3.36877	3.46854	3.57127	3.67621	3.78307	3.89173	4.00168	4.11239	4.22342	4.33434	4.44502	4.55552	4.66609	4.77684	4.88763	4.9981	5.10784
PSE																					1.12663	1.14631	1.18243	1.22937	1.27856	1.3238	1.36362	1.40012	1.435	1.47114	1.51071	1.55418	1.60095	1.65092	1.70381	1.75953	1.81798	1.87975	1.94638	2.01983	2.10145	2.191	2.28766	2.3914	2.50198	2.61867	2.74253	2.87201	3.00062
QAT																					0.109514	0.119414	0.1305	0.142186	0.153621	0.16432	0.173721	0.182318	0.191951	0.205171	0.223632	0.247988	0.277226	0.309306	0.341272	0.37089	0.39774	0.422148	0.443605	0.46169	0.476278	0.487353	0.495395	0.501479	0.507041	0.513442	0.522531	0.535321	0.551562
ROU											18.6727	18.8386	18.9541	19.0884	19.2041	19.3058	19.4209	19.567	20.0096	20.303	20.5489	20.7835	21.0111	21.2326	21.4504	21.6656	21.8791	22.0879	22.2855	22.4633	22.6156	22.7372	22.8306	22.9073	22.984	23.0713	23.1751	23.2884	23.3937	23.4664	23.4892	23.4566	23.3758	23.257	23.1158	22.9648	22.8057	22.6376	22.4663
RUS																																									147.532	147.996	148.269	148.374	148.349	148.227	148.021	147.73	147.361
RWA											3.0223	3.03636	3.04168	3.1192	3.17401	3.25441	3.34768	3.44026	3.53681	3.64534	3.75736	3.87144	3.98722	4.10641	4.23158	4.36471	4.50611	4.65538	4.81287	4.97882	5.15331	5.32925	5.50484	5.69098	5.90284	6.14689	6.44375	6.77998	7.08819	7.27698	7.28888	7.08394	6.70224	6.26376	5.93626	5.8365	6.01311	6.4199	6.9628
SAU																					5.83639	6.10063	6.39297	6.71192	7.05453	7.41949	7.80293	8.2077	8.64685	9.13793	9.69148	10.3118	10.9889	11.7011	12.4188	13.119	13.7942	14.4457	15.0701	15.6663	16.2338	16.7727	17.2827	17.7633	18.2145	18.6388	19.0338	19.4071	19.7833
SDN																					10.2817	10.6215	10.9746	11.3439	11.733	12.1441	12.5784	13.0346	13.5104	14.0023	14.5075	15.0272	15.5621	16.1076	16.658	17.2102	17.7575	18.3034	18.8676	19.4766	20.1476	20.8914	21.6962	22.5278	23.3385	24.0947	24.7824	25.4139	26.0155
SEN											3.22408	3.3014	3.38227	3.46685	3.58529	3.69161	3.80259	3.91038	4.01685	4.13409	4.25751	4.38754	4.52289	4.66073	4.79719	4.92985	5.05738	5.18151	5.30668	5.43907	5.58317	5.74044	5.90974	6.08957	6.27742	6.47133	6.67066	6.87575	7.08663	7.30352	7.52631	7.7555	7.9901	8.22676	8.46107	8.69016	8.91286	9.13088	9.34777
SGP											1.64463	1.70057	1.74832	1.79308	1.83963	1.88488	1.93233	1.97548	2.00984	2.04031	2.07228	2.11096	2.1505	2.18961	2.22638	2.25972	2.28886	2.31499	2.3414	2.3726	2.41169	2.4605	2.51798	2.58091	2.6445	2.70553	2.76244	2.81697	2.87328	2.93728	3.01297	3.10115	3.19964	3.30581	3.4157	3.52597	3.63819	3.75214	3.86071
SLE												2.39291	2.4286	2.46523	2.50264	2.54087	2.57991	2.6198	2.66055	2.70224	2.74489	2.79872	2.85487	2.91334	2.9741	3.03715	3.10259	3.17051	3.24084	3.3135	3.38849	3.46411	3.54017	3.61985	3.70751	3.80531	3.91669	4.03814	4.15663	4.25444	4.31976	4.34866	4.34772	4.32896	4.30978	4.30396	4.31267	4.3353	4.38148
SLV	1.97703	2.02794	2.08207	2.13941	2.19998	2.26376	2.33078	2.40101	2.47448	2.55119	2.63112	2.71598	2.80042	2.89052	2.97998	3.07577	3.18824	3.29497	3.41156	3.53575	3.67307	3.77006	3.86731	3.96427	4.06026	4.15469	4.2475	4.33846	4.42668	4.51113	4.59113	4.66636	4.73726	4.80494	4.87104	4.93681	5.00234	5.06754	5.13327	5.2006	5.27008	5.3422	5.41632	5.49048	5.56192	5.6286	5.68994	5.74628	5.79777
SRB																																									9.51768	9.60289	9.70115	9.79526	9.86163	9.88415	9.85606	9.7847	9.68541
STP																					0.074564	0.076347	0.077934	0.079464	0.081152	0.083138	0.085481	0.08811	0.090843	0.093461	0.095794	0.09777	0.099473	0.101066	0.102829	0.104924	0.107429	0.110254	0.113285	0.11632	0.119209	0.121956	0.124576	0.127062	0.129427	0.131678	0.133806	0.135832	0.137848
SUR																					0.367931	0.369236	0.367907	0.364915	0.361667	0.359226	0.357953	0.357659	0.358099	0.358818	0.359519	0.360143	0.36092	0.362276	0.364733	0.368638	0.37414	0.381037	0.388881	0.397085	0.405168	0.413005	0.420655	0.42803	0.435105	0.441851	0.448213	0.454161	0.459831
SVK																																									5.28845	5.30924	5.32903	5.34721	5.3629	5.37547	5.38479	5.3912	5.39525
SVN																																									2.0064	2.00777	2.00535	2.00056	1.99534	1.99113	1.98856	1.98745	1.98738
SWE	7.02457	7.08348	7.1354	7.18226	7.22435	7.27333	7.32557	7.37489	7.4203	7.45746	7.49166	7.53132	7.57298	7.61578	7.67289	7.7455	7.81956	7.87978	7.92413	7.98002	8.05492	8.09579	8.12703	8.1516	8.17397	8.19734	8.22325	8.2507	8.27741	8.3	8.31634	8.32549	8.32943	8.33244	8.34044	8.35765	8.38499	8.42106	8.46479	8.51421	8.56738	8.62514	8.68674	8.74678	8.79823	8.83642	8.85919	8.86885	8.87085
SWZ																					0.431253	0.443977	0.457039	0.470559	0.484749	0.499763	0.515599	0.53226	0.549796	0.568315	0.587858	0.60838	0.629811	0.652115	0.675239	0.69908	0.723595	0.748632	0.773768	0.798507	0.82242	0.845266	0.866993	0.887706	0.90762	0.926841	0.945508	0.963426	0.979918
SXM
SYC											0.0403237	0.0416197	0.0424714	0.0438003	0.0452531	0.04625	0.0472286	0.0482855	0.0494837	0.0508213	0.052368	0.05371	0.055127	0.056606	0.0581	0.059585	0.061043	0.062477	0.063848	0.065111	0.066244	0.067247	0.068122	0.068844	0.069396	0.069775	0.069939	0.069946	0.069932	0.070089	0.07057	0.071436	0.072655	0.074065	0.07544	0.076649	0.077594	0.078355	0.079064
SYR											4.59954	4.75034	4.90607	5.06691	5.23303	5.40459	5.58178	5.76477	5.95376	6.14895	6.35054	6.57086	6.80014	7.03785	7.28318	7.53571	7.79466	8.06065	8.33642	8.62569	8.93077	9.25285	9.59023	9.93885	10.293	10.6486	11.0043	11.3609	11.7191	12.0804	12.4462	12.8154	13.1877	13.5651	13.9505	14.3455	14.7541	15.1753	15.5996
TCA																					0.005841	0.005971	0.006157	0.006381	0.006606	0.006827	0.007015	0.007198	0.007385	0.007613	0.007888	0.008235	0.008654	0.009104	0.009556	0.00997	0.010357	0.010724	0.011093	0.011548	0.012111	0.012811	0.013632	0.014526	0.015407	0.016216	0.016926	0.017567	0.018232
TCD											2.97404	3.02588	3.07973	3.13566	3.19795	3.26947	3.34264	3.4172	3.49207	3.56745	3.6436	3.72619	3.81526	3.90789	3.99992	4.08856	4.17314	4.25525	4.33729	4.42274	4.51443	4.61285	4.71816	4.83232	4.95756	5.0954	5.24728	5.41285	5.58963	5.77392	5.96325	6.15708	6.35675	6.56392	6.78105	7.01014	7.25098	7.50349	7.77005
TGO											1.56812	1.60621	1.64588	1.68721	1.7301	1.77478	1.82117	1.86933	1.91933	1.97147	2.11552	2.18566	2.24758	2.30335	2.35662	2.41045	2.46442	2.51846	2.57629	2.6427	2.72084	2.81231	2.91562	3.02697	3.14085	3.25299	3.36304	3.47174	3.57747	3.67857	3.77431	3.86299	3.94591	4.02905	4.12062	4.22629	4.3488	4.48595	4.63245
THA	19.9301	20.5384	21.171	21.842	22.5588	23.3209	24.1096	24.9026	25.7017	26.5189	27.3597	28.2182	29.1006	30.0059	30.9336	31.8836	32.852	33.835	34.8336	35.8494	36.8845	37.9633	39.0586	40.1596	41.2523	42.3263	43.3773	44.4059	45.4131	46.4018	47.3745	48.3263	49.2559	50.1739	51.0949	52.0269	52.9801	53.9459	54.8915	55.7722	56.5582	57.2325	57.811	58.3378	58.8753	59.4673	60.1302	60.8466	61.5851
TJK																																									5.28381	5.40063	5.50249	5.59331	5.67917	5.76481	5.85135	5.93841	6.02739
TKM																																									3.68397	3.78918	3.89984	4.01079	4.1151	4.20784	4.28735	4.35512	4.41348
TTO	0.62562	0.642152	0.656159	0.671453	0.690459	0.713524	0.735005	0.757179	0.78064	0.808802	0.832659	0.852692	0.878539	0.895251	0.914561	0.929774	0.94292	0.950463	0.953364	0.953207	0.94536	0.955741	0.968136	0.98201	0.996493	1.01094	1.02511	1.03921	1.05356	1.06864	1.08474	1.10198	1.12002	1.13807	1.15507	1.17029	1.18338	1.19454	1.20415	1.21286	1.22112	1.2291	1.23668	1.24362	1.24952	1.2542	1.25755	1.25985	1.2617
TUN											4.11318	4.18724	4.25728	4.3446	4.43788	4.53457	4.64408	4.7543	4.86076	4.96218	5.06381	5.17629	5.29134	5.40934	5.53097	5.65691	5.78648	5.91997	6.06015	6.21076	6.37404	6.55123	6.74053	6.93733	7.13527	7.32959	7.51786	7.70074	7.88033	8.06021	8.2425	8.42786	8.61386	8.79593	8.96792	9.1254	9.26734	9.39512	9.50986
TUR	20.6006	21.1348	21.6872	22.2673	22.885	23.549	24.2637	25.0377	25.8519	26.681	27.5211	28.3139	29.0539	29.7566	30.4571	31.1626	31.8717	32.5871	33.322	34.0901	34.8763	35.7206	36.5873	37.4723	38.3703	39.2773	40.1896	41.1083	42.04	42.994	43.976	44.9884	46.0254	47.0735	48.1142	49.1339	50.1285	51.1009	52.0538	52.9925	53.9218	54.8406	55.7489	56.6538	57.5642	58.4865	59.4233	60.3726	61.3297
TWN		7.7582	8.04692	8.33301	8.64526	8.967	9.28955	9.59769	9.92023	10.2883	10.6677	11.0304	11.3925	11.7621	12.1371	12.5119	12.8742	13.2103	13.5485	14.069	14.5829	14.9136	15.2205	15.5051	15.7848	16.0751	16.4014	16.7309	17.0423	17.3728	17.7045	18.03	18.3549	18.6531	18.9299	19.1915	19.4115	19.617	19.8397	20.0555	20.2789	20.5036	20.7042	20.899	21.0866	21.2677	21.4414	21.6341	21.8357
TZA											10.058	10.3479	10.6504	10.9654	11.2952	11.6371	11.991	12.3595	12.7328	13.1264	13.5355	13.9717	14.4283	14.9023	15.3889	15.8852	16.3902	16.9052	17.4328	17.9762	18.5383	19.1207	19.7233	20.3445	20.9818	21.6338	22.2963	22.9712	23.6708	24.4117	24.5236	25.3556	26.2392	27.1432	28.0256	28.8591	29.6305	30.5569	31.0602
UGA	5.33058	5.47462	5.62312	5.77623	5.93469	6.09872	6.26854	6.44437	6.62646	6.81506	7.01043	7.21284	7.42258	7.63995	7.86526	8.09883	8.341	8.59214	8.8526	9.12279	9.4056	9.67186	9.92964	10.1865	10.453	10.7374	11.043	11.3686	11.7125	12.0711	12.4423	12.8251	13.222	13.6387	14.0829	14.5594	15.0703	15.6128	16.1801	16.763	17.3544	17.9535	18.5617	19.176	19.7935	20.4132	21.0328	21.6554	22.2908
UKR																																									51.4631	51.4613	51.416	51.316	51.1478	50.9038	50.5805	50.1873	49.7465
URY	2.1835	2.21214	2.2419	2.2727	2.30517	2.34158	2.37756	2.41305	2.44833	2.48277	2.51854	2.5512	2.58571	2.61919	2.65053	2.67991	2.70784	2.73508	2.76297	2.7881	2.80979	2.81828	2.82146	2.82212	2.82409	2.83018	2.84137	2.85696	2.87573	2.89569	2.91539	2.93461	2.95385	2.97304	2.99225	3.01152	3.03065	3.04958	3.06871	3.0886	3.1096	3.13166	3.15446	3.17774	3.20115	3.22428	3.24738	3.27016	3.29105
USA	155.584	158.248	160.981	163.669	166.573	169.541	172.578	175.726	178.687	181.699	184.602	187.688	190.597	193.359	196.064	198.53	200.837	203.035	205.073	207.087	209.513	211.384	213.27	215.179	217.115	219.081	221.086	223.136	225.223	227.339	229.476	231.636	233.822	236.03	238.257	240.5	242.763	245.053	247.372	249.726	252.12	254.539	256.991	259.532	262.241	265.164	268.335	271.714	275.175
UZB																																									20.3983	20.8849	21.3751	21.862	22.3362	22.791	23.2253	23.6405	24.036
VCT																					0.090509	0.091491	0.092513	0.093571	0.094614	0.095662	0.096692	0.097701	0.098697	0.099649	0.100566	0.101437	0.102256	0.103032	0.103779	0.104506	0.105217	0.105906	0.106532	0.107071	0.107484	0.107776	0.10795	0.108033	0.108053	0.108035	0.107976	0.107895	0.107801
VEN	5.30624	5.5266	5.76235	6.01097	6.26992	6.53665	6.8129	7.1004	7.3966	7.69895	8.00488	8.31352	8.6266	8.94545	9.2714	9.60581	9.94421	10.2857	10.6371	11.005	11.3964	11.7459	12.0977	12.4537	12.817	13.1895	13.5722	13.9644	14.3647	14.7713	15.1826	15.5979	16.0176	16.4431	16.8767	17.3195	17.772	18.2327	18.6988	19.1665	19.6327	20.0963	20.5577	21.0169	21.4745	21.9311	22.3856	22.8377	23.2886
VGB																					0.009827	0.010017	0.010208	0.010392	0.010562	0.010699	0.010821	0.010928	0.011045	0.011218	0.011478	0.011826	0.012249	0.012752	0.013322	0.013956	0.014649	0.015407	0.016154	0.016862	0.017489	0.018006	0.018438	0.018786	0.019074	0.019313	0.019502	0.019665	0.019821
VNM																					43.4048	44.484	45.5485	46.6035	47.6576	48.7182	49.7853	50.8612	51.959	53.0954	54.2818	55.5228	56.8143	58.1484	59.5126	60.8967	62.2939	63.702	65.1204	66.5502	67.9889	69.437	70.8835	72.3003	73.6512	74.9105	76.0687	77.1332	78.1157
YEM																																								11.1892	11.71	12.3021	12.9542	13.6341	14.2976	14.9133	15.4693	15.9757	16.4503
ZAF	13.1952	13.5159	13.8445	14.1927	14.5498	14.9156	15.2909	15.6756	16.0701	16.4747	16.9034	17.3434	17.8157	18.301	18.7997	19.3118	19.8381	20.3785	20.9338	21.5044	22.0698	22.6653	23.2815	23.9131	24.5525	25.1952	25.8369	26.4809	27.139	27.8273	28.5568	29.3331	30.1504	30.9938	31.8416	32.6789	33.496	34.2977	35.1009	35.9301	36.8005	37.7189	38.6726	39.6337	40.5641	41.4358	42.241	42.9875	43.6823
ZMB						2.82005	2.89082	2.96454	3.04121	3.11886	3.19848	3.28006	3.36263	3.44814	3.53759	3.63097	3.72926	3.83345	3.94059	4.05265	4.17907	4.31922	4.46617	4.61955	4.77872	4.94328	5.11282	5.28755	5.46826	5.65614	5.85182	6.05537	6.26586	6.48192	6.70154	6.92315	7.14697	7.37284	7.59828	7.8202	8.03684	8.24666	8.45135	8.65649	8.86974	9.09661	9.33973	9.59761	9.86648
ZWE					3.17219	3.26978	3.38557	3.49741	3.61042	3.72819	3.84711	3.97102	4.10302	4.2322	4.35195	4.49391	4.63818	4.7914	4.96058	5.13417	5.2893	5.47698	5.67391	5.87773	6.08507	6.29387	6.50257	6.71283	6.92966	7.16002	7.40862	7.67559	7.95824	8.25475	8.56225	8.87749	9.20015	9.5272	9.84913	10.1539	10.4324	10.681	10.9005	11.0928	11.2617	11.4107	11.5412	11.6532	11.7471
Gesamtergebnis	1297.36	1345.65	1948.87	2005.09	2048.59	2121.8	2162.75	2206.43	2250.12	2350.75	2593.7	2628.5	2699.07	2761.12	2826.05	2887.87	2951.21	3014.65	3080.18	3148.08	3365.28	3436.79	3508.84	3581.07	3653.01	3724.65	3795.73	3866.39	3937.21	4009.11	4082.71	4158.02	4234.92	4313.69	4394.65	4477.92	4563.72	4651.71	4740.65	4840.01	5252.79	5338.29	5421.14	5501.92	5581.6	5660.89	5739.96	5818.86	5896.99
[truncated: 22 more columns]

## Sheet: Tabelle2
Summe von AggValue	Spaltenbeschriftungen
Zeilenbeschriftungen	1950	1951	1952	1953	1954	1955	1956	1957	1958	1959	1960	1961	1962	1963	1964	1965	1966	1967	1968	1969	1970	1971	1972	1973	1974	1975	1976	1977	1978	1979	1980	1981	1982	1983	1984	1985	1986	1987	1988	1989	1990	1991	1992	1993	1994	1995	1996	1997	1998
MAR	9.39944	9.69142	9.99885	10.267	10.5494	10.8464	11.155	11.4748	11.8053	12.1468	12.498	12.8128	13.1349	13.4657	13.8048	14.1506	14.5011	14.8589	15.2281	15.6103	16.0047	16.3509	16.6969	17.0485	17.4131	17.7962	18.1988	18.6201	19.0598	19.5169	19.99	20.4797	20.984	21.4951	22.0026	22.4991	22.9803	23.4473	23.9036	24.3556	24.8075	25.2604	25.7114	26.1552	26.5845	26.9943	27.3835	27.7546	28.1104
ABW																					0.059063	0.05944	0.05984	0.060243	0.060528	0.060657	0.060586	0.060366	0.060103	0.05998	0.060096	0.060567	0.061345	0.062201	0.062836	0.063026	0.062644	0.061833	0.061079	0.061032	0.062149	0.064622	0.068235	0.072504	0.0767	0.080324	0.0832	0.085451	0.087277
AGO																					5.89037	6.04078	6.24855	6.49696	6.76138	7.024	7.27951	7.53374	7.79071	8.05807	8.34129	8.64045	8.95295	9.2781	9.61475	9.962	10.3201	10.6892	11.068	11.4548	11.8484	12.2489	12.6574	13.075	13.5037	13.9452	14.4007	14.8716	15.3596
AIA																					0.006771	0.006858	0.006948	0.007028	0.007102	0.007159	0.007206	0.007255	0.007284	0.007292	0.007285	0.007247	0.00719	0.007153	0.007173	0.007293	0.007518	0.007842	0.008213	0.008582	0.008899	0.009135	0.009332	0.009493	0.009664	0.009866	0.010117	0.010388	0.010684
ALB																					2.15071	2.20219	2.25406	2.30629	2.35885	2.41173	2.46498	2.51869	2.57285	2.62751	2.68269	2.73703	2.79027	2.84487	2.90414	2.96967	3.04421	3.12489	3.20098	3.25793	3.28607	3.28039	3.24589	3.1952	3.14652	3.11294	3.0987	3.09975	3.11068
ARE																					0.234514	0.277471	0.330974	0.394624	0.467451	0.548301	0.637922	0.735344	0.835508	0.931749	1.01951	1.09661	1.16481	1.22846	1.29397	1.36616	1.44638	1.53354	1.62707	1.72568	1.82843	1.93715	2.05289	2.17314	2.29439	2.41509	2.53913	2.67136	2.81321
ARG	17.0918	17.4576	17.816	18.1686	18.5172	18.8632	19.2058	19.5436	19.8785	20.212	20.5457	20.8791	21.2112	21.5427	21.8744	22.2071	22.5345	22.856	23.1812	23.5195	23.8806	24.2596	24.6532	25.0565	25.4623	25.8658	26.2647	26.6614	27.061	27.471	27.8965	28.3385	28.7945	29.262	29.7371	30.2163	30.699	31.1844	31.6689	32.1481	32.6187	33.079	33.5293	33.9701	34.4027	34.8282	35.2464	35.6574	36.0635
ARM																																									3.53817	3.50526	3.44282	3.36311	3.28367	3.21735	3.16822	3.13309	3.10869
ATG																					0.064177	0.064357	0.064133	0.06365	0.06312	0.062675	0.062367	0.062159	0.062036	0.061952	0.061865	0.0618	0.061779	0.061787	0.061786	0.061786	0.061754	0.061717	0.061771	0.062008	0.062528	0.063367	0.064471	0.065777	0.067204	0.06867	0.070173	0.071704	0.073224
AUS	8.35411	8.59992	8.78243	8.95089	9.15915	9.37445	9.60032	9.81451	10.0193	10.2381	10.47	10.7101	10.9083	11.1169	11.336	11.5594	11.7774	11.9969	12.2287	12.5093	12.793	13.0331	13.2442	13.4318	13.6056	13.7733	13.9357	14.0925	14.2494	14.413	14.5884	14.7772	14.9792	15.1946	15.4232	15.6637	15.9176	16.1832	16.4523	16.714	16.9606	17.1892	17.4022	17.6032	17.7985	17.9931	18.1893	18.3872	18.587
AUT	6.98075	6.9811	6.97338	6.97812	6.98589	6.99261	6.99812	7.01171	7.03335	7.0605	7.09383	7.13295	7.1768	7.22305	7.27135	7.31875	7.37026	7.42556	7.46422	7.49004	7.51624	7.55034	7.58112	7.60707	7.62629	7.63769	7.64075	7.63658	7.62776	7.61788	7.60975	7.60451	7.60218	7.6031	7.60729	7.61487	7.62539	7.63935	7.65884	7.68657	7.72395	7.7727	7.83093	7.89209	7.94721	7.99012	8.01786	8.03288	8.04105
AZE																																									7.24276	7.35795	7.47193	7.58175	7.68371	7.77542	7.85555	7.92567	7.98991
BDI											2.78116	2.85895	2.92589	2.97186	3.05126	3.13209	3.21403	3.29047	3.35941	3.41806	3.47907	3.53	3.56967	3.60513	3.64643	3.70088	3.77087	3.85445	3.94927	4.05123	4.1573	4.26652	4.37972	4.49753	4.6211	4.75084	4.88674	5.02714	5.1687	5.30707	5.43896	5.56493	5.68557	5.79805	5.89897	5.98704	6.06011	6.12213	6.18556
BEL	8.63433	8.67332	8.72531	8.77275	8.81424	8.8633	8.91864	8.98387	9.04743	9.09842	9.11338	9.16046	9.21302	9.27769	9.36154	9.44259	9.50226	9.55093	9.58421	9.60709	9.63218	9.66332	9.69285	9.72076	9.74702	9.77159	9.79478	9.8167	9.83681	9.85438	9.86899	9.88059	9.88982	9.89788	9.90637	9.91658	9.92854	9.94229	9.95902	9.98018	10.0065	10.0394	10.0781	10.1187	10.1559	10.1863	10.2083	10.2238	10.2373
BEN										2.23462	2.28456	2.33654	2.39218	2.44874	2.50764	2.56873	2.63236	2.69837	2.76688	2.83825	2.91234	2.97657	3.04357	3.11368	3.18741	3.26517	3.34717	3.43344	3.52394	3.61853	3.71717	3.82013	3.92771	4.03995	4.15682	4.2785	4.40451	4.53526	4.67285	4.82002	4.9785	5.1495	5.3318	5.52176	5.71422	5.90556	6.09426	6.28164	6.47027
BFA										5.10569	5.16013	5.18652	5.21722	5.25228	5.2918	5.33587	5.38461	5.43812	5.49655	5.56004	5.6246	5.72338	5.82517	5.93048	6.04004	6.15454	6.27404	6.39893	6.53082	6.67166	6.82284	6.98516	7.15825	7.34091	7.53124	7.72791	7.93069	8.14007	8.35631	8.57982	8.81103	9.05008	9.29711	9.55248	9.81659	10.0899	10.3727	10.6655	10.9687
BGD										50.9987	52.0801	53.1449	54.1889	55.5081	56.6266	57.5097	58.6657	59.8767	61.1231	62.406	64.2325	65.5316	66.6257	67.6375	68.7422	70.0663	71.6524	73.4636	75.45	77.529	79.6395	81.7675	83.9321	86.1425	88.4165	90.7642	93.1876	95.6712	98.1864	100.695	103.172	105.599	107.984	110.351	112.738	115.17	117.65	120.161	122.683
BGR																					8.50755	8.55903	8.60866	8.65571	8.69918	8.73839	8.77256	8.8019	8.82803	8.8532	8.87879	8.90509	8.93071	8.95312	8.96892	8.97536	8.97255	8.96056	8.93666	8.89754	8.84146	8.767	8.67638	8.57604	8.47483	8.37931	8.29197	8.21181	8.13767
BHR																					0.212605	0.220312	0.229155	0.239527	0.251911	0.266543	0.283752	0.303175	0.323473	0.342799	0.359888	0.37412	0.38595	0.396454	0.407225	0.419428	0.43348	0.448971	0.465198	0.481087	0.495931	0.50976	0.523086	0.53621	0.549583	0.563697	0.578666	0.594931	0.6137
BHS																					0.169377	0.173889	0.177866	0.181517	0.18512	0.188896	0.192909	0.197101	0.201478	0.205984	0.210591	0.215326	0.220184	0.225084	0.229923	0.234578	0.239017	0.243271	0.247451	0.251733	0.256223	0.261008	0.266029	0.271069	0.275846	0.280184	0.283978	0.287358	0.290597
BIH																																									4.46342	4.36932	4.23368	4.07894	3.93652	3.82905	3.76443	3.73607	3.73434
BLR																																									10.1511	10.1608	10.1543	10.1351	10.1083	10.0776	10.0449	10.0094	9.96999
BLZ																					0.122182	0.124793	0.12715	0.129294	0.131307	0.13326	0.135147	0.136989	0.138965	0.141305	0.144155	0.147566	0.1515	0.155822	0.160347	0.164921	0.169568	0.17432	0.179028	0.183469	0.187552	0.191128	0.194324	0.197622	0.20168	0.206963	0.213664	0.22158	0.230244
BMU																					0.052565	0.053162	0.053752	0.054329	0.054883	0.0554	0.055884	0.05633	0.05676	0.057178	0.057573	0.057986	0.058387	0.05879	0.05919	0.059602	0.06001	0.060419	0.060839	0.061243	0.061634	0.06202	0.062389	0.06275	0.063101	0.063442	0.063774	0.06408	0.064393
BOL	2.85372	2.91318	2.97472	3.03833	3.10402	3.17177	3.24161	3.31356	3.38771	3.46415	3.54294	3.62415	3.70785	3.79423	3.8834	3.97547	4.07056	4.16876	4.27029	4.37532	4.484	4.58174	4.68239	4.78592	4.89229	5.00142	5.11346	5.22825	5.34494	5.46242	5.57993	5.6971	5.81435	5.93281	6.05412	6.17946	6.30913	6.44283	6.58031	6.72112	6.86484	7.01145	7.16092	7.31285	7.46679	7.62234	7.77927	7.93746	8.09676
BRA	53.1241	54.6673	56.2648	57.9186	59.6312	61.4049	63.2522	65.16	67.1302	69.1651	71.2669	73.3923	75.5856	77.8492	80.1855	82.597	85.0468	87.5244	90.0286	92.5585	95.1133	97.4829	99.8594	102.259	104.706	107.216	109.791	112.425	115.121	117.878	120.694	123.57	126.498	129.449	132.384	135.274	138.109	140.892	143.628	146.328	149.003	151.648	154.259	156.849	159.433	162.02	164.615	167.209	169.785
BRB											0.232475	0.229732	0.228881	0.230873	0.233406	0.235118	0.236366	0.238364	0.240009	0.239461	0.238896	0.240094	0.241515	0.243069	0.244644	0.246154	0.247583	0.248937	0.250203	0.251351	0.252394	0.253298	0.254082	0.254788	0.255497	0.256263	0.257107	0.258019	0.258977	0.259957	0.260936	0.261905	0.262886	0.263874	0.264893	0.265955	0.267049	0.268187	0.269336
BRN																					0.129529	0.135671	0.142022	0.148512	0.155072	0.161626	0.168181	0.174714	0.181205	0.187604	0.193879	0.200021	0.206065	0.212076	0.218175	0.224449	0.230915	0.237563	0.244404	0.251458	0.258721	0.26621	0.273892	0.281681	0.289454	0.297114	0.304622	0.311958	0.319144
BTN																					0.297316	0.306955	0.316828	0.326982	0.337485	0.348396	0.359725	0.371428	0.383326	0.395195	0.406875	0.418111	0.428934	0.439822	0.451476	0.464266	0.478692	0.494312	0.50954	0.522179	0.530804	0.534632	0.534516	0.532596	0.531897	0.53462	0.541465	0.551709	0.564377
BWA											0.533876	0.542356	0.551148	0.560255	0.569637	0.57838	0.586834	0.594977	0.604006	0.614682	0.627715	0.646347	0.667092	0.689912	0.714712	0.741355	0.769979	0.800529	0.832467	0.865075	0.897868	0.930408	0.962875	0.99613	1.03144	1.06958	1.11094	1.15491	1.20007	1.24448	1.28676	1.32632	1.36355	1.39911	1.43406	1.46917	1.50473	1.54042	1.57582
CAF											1.44503	1.47201	1.5002	1.52963	1.5604	1.60267	1.65936	1.70715	1.73613	1.76725	1.81114	1.84052	1.86778	1.89485	1.92439	1.95837	1.99701	2.03992	2.08766	2.14078	2.19936	2.26444	2.33533	2.40832	2.47838	2.54217	2.59776	2.64684	2.69397	2.74573	2.80673	2.87851	2.95924	3.04615	3.13502	3.22266	3.30823	3.39244	3.47549
CAN	13.7694	14.0832	14.5302	14.9211	15.3662	15.7731	16.1611	16.7164	17.1604	17.5634	17.9513	18.3131	18.6579	19.0088	19.3706	19.7244	20.0953	20.4602	20.7779	21.0776	21.3743	21.7235	22.0722	22.4153	22.7459	23.0593	23.3546	23.6344	23.9017	24.1611	24.4169	24.6682	24.9165	25.1714	25.4449	25.7448	26.0755	26.4329	26.8061	27.1795	27.5413	27.8888	28.2244	28.548	28.8607	29.1642	29.4578	29.7424	30.0221
CHE	4.607	4.66099	4.72576	4.78759	4.83765	4.8877	4.9515	5.031	5.10265	5.16153	5.26262	5.40984	5.56099	5.68171	5.77789	5.83286	5.88487	5.95063	6.01835	6.09687	6.15085	6.20295	6.25129	6.29253	6.32201	6.33702	6.33597	6.32181	6.30204	6.28691	6.28383	6.29593	6.32141	6.35675	6.39613	6.43542	6.47304	6.5106	6.55072	6.59737	6.65287	6.71883	6.79291	6.86893	6.93841	6.99552	7.03803	7.06851	7.09177
CHL		6.52859	6.65984	6.78009	6.90474	7.04167	7.19369	7.36033	7.53927	7.7273	7.92101	8.1173	8.31356	8.50788	8.69906	8.88653	9.07032	9.25093	9.4292	9.6062	9.78313	9.94273	10.1037	10.2658	10.4288	10.5923	10.7569	10.9228	11.0892	11.2549	11.4193	11.582	11.7439	11.908	12.0781	12.2572	12.4458	12.6429	12.8477	13.0588	13.2746	13.4953	13.7198	13.9449	14.1663	14.3809	14.5874	14.7862	14.9777
CHN			579.577	589.317	599.943	612.053	624.568	638.77	652.377	660.091	656.369	650.326	659.034	680.165	702.172	721.825	742.361	761.947	782.963	805.648	827.601	848.76	869.486	889.485	908.464	926.241	942.685	957.891	972.205	986.132	1000.09	1014.02	1027.95	1042.43	1058.17	1075.59	1095.01	1116.1	1137.72	1158.36	1176.88	1192.9	1206.71	1218.82	1230.02	1240.92	1251.64	1262	1271.98
CIV											3.27036	3.38845	3.51432	3.65948	3.81446	3.98394	4.17346	4.38075	4.60755	4.84609	5.10206	5.32874	5.57604	5.84151	6.12129	6.4124	6.71395	7.0265	7.35027	7.68592	8.03365	8.39369	8.76499	9.14493	9.53011	9.9182	10.3073	10.6982	11.0947	11.5024	11.9249	12.3624	12.8124	13.2716	13.7354	14.1998	14.6651	15.1307	15.5894
CMR											5.43619	5.52381	5.61537	5.71108	5.8112	5.91598	6.02566	6.14057	6.26099	6.38728	6.51976	6.68966	6.86718	7.05285	7.24729	7.45105	7.66441	7.88756	8.12108	8.36557	8.62141	8.88853	9.16682	9.45649	9.75784	10.0708	10.3955	10.7311	11.0754	11.4258	11.7801	12.1379	12.4995	12.8641	13.231	13.6	13.9708	14.3444	14.7238
COD	12.4662	12.7078	12.9542	13.2055	13.4664	13.7375	14.0193	14.3121	14.6162	14.9323	15.2607	15.5857	16.0655	16.5623	16.9348	17.3233	17.7715	18.3207	18.8991	19.4578	20.011	20.5641	21.1214	21.6904	22.2821	22.9036	23.5605	24.2491	24.9564	25.6636	26.3589	27.0403	27.7173	28.4039	29.1197	29.8812	30.6839	31.5287	32.4438	33.4648	34.612	35.9082	37.3339	38.8158	40.253	41.5762	42.7572	43.8272	44.85
COG											1.04512	1.06848	1.09279	1.1181	1.14446	1.17191	1.20049	1.23027	1.26129	1.29348	1.32689	1.3659	1.40652	1.44864	1.49205	1.53665	1.58236	1.62921	1.67733	1.72687	1.77793	1.83063	1.88488	1.94044	1.997	2.05431	2.11236	2.17132	2.23147	2.29317	2.35674	2.42231	2.48995	2.55987	2.63234	2.70754	2.78581	2.86728	2.95165
COL	11.6189	11.9931	12.3798	12.7796	13.193	13.6204	14.0623	14.5201	14.9935	15.4831	15.9903	16.5149	17.0499	17.5873	18.1326	18.69	19.2469	19.8105	20.3695	20.9182	21.4801	22.004	22.5164	23.0245	23.5384	24.0655	24.6081	25.1645	25.7337	26.313	26.9005	27.4966	28.1018	28.7142	29.3312	29.9512	30.5725	31.1954	31.8225	32.4575	33.1026	33.7583	34.4226	35.0913	35.759	36.4214	37.0764	37.7238	38.3643
COM											0.178101	0.182298	0.18666	0.191197	0.195929	0.200867	0.20602	0.211675	0.217581	0.223705	0.230054	0.234644	0.239235	0.244208	0.250104	0.25729	0.265953	0.2759	0.286634	0.297447	0.307829	0.317606	0.326946	0.336096	0.345466	0.355337	0.36576	0.376654	0.387963	0.399632	0.411594	0.423872	0.436448	0.449274	0.462277	0.475394	0.488627	0.501953	0.515385
CPV											0.196592	0.202965	0.209691	0.216725	0.224064	0.231512	0.239016	0.246567	0.254076	0.261369	0.268627	0.271309	0.271843	0.271068	0.27023	0.270247	0.271342	0.273335	0.276174	0.27973	0.283847	0.288677	0.294254	0.30023	0.306136	0.311678	0.316616	0.321135	0.325746	0.331179	0.33795	0.34623	0.355757	0.366053	0.376407	0.386284	0.395533	0.404259	0.412514
CRI	0.922867	0.953049	0.986027	1.0207	1.05784	1.09829	1.14073	1.184	1.22882	1.27751	1.32847	1.38016	1.4319	1.48326	1.53302	1.5835	1.63761	1.69112	1.74409	1.79585	1.84739	1.89608	1.94417	1.99251	2.04224	2.09419	2.14868	2.20561	2.26495	2.32646	2.38998	2.45559	2.52335	2.59302	2.66422	2.73671	2.81024	2.88485	2.96093	3.03901	3.11943	3.20208	3.28652	3.3723	3.45883	3.54553	3.63236	3.71895	3.80389
CUW
CYM																					0.009144	0.00958	0.010133	0.010782	0.011491	0.012244	0.013025	0.013853	0.014683	0.01548	0.016212	0.01686	0.017439	0.018011	0.01867	0.019467	0.02043	0.021544	0.022761	0.024039	0.025312	0.026544	0.02778	0.029069	0.030514	0.032166	0.034065	0.036156	0.038329
CYP	0.493211	0.501198	0.507188	0.514177	0.522164	0.529153	0.535144	0.545128	0.557108	0.566094	0.572084	0.577775	0.57508	0.58137	0.585563	0.589856	0.594049	0.598442	0.603334	0.608426	0.613618	0.620859	0.627998	0.635107	0.5205	0.5022	0.4979	0.4975	0.4996	0.5032	0.5086	0.515	0.5208	0.5276	0.5348	0.5411	0.5475	0.5535	0.5593	0.5675	0.5794	0.5949	0.6106	0.6258	0.639	0.6507	0.6609	0.6704	0.6789
CZE																																									10.3409	10.3465	10.353	10.3587	10.361	10.3582	10.3503	10.3383	10.3232
DEU	68.7341	69.0739	69.4488	69.8469	70.2641	70.6943	71.1396	71.6051	72.0976	72.6254	73.1963	73.8095	74.4569	75.1153	75.7577	76.3618	76.9197	77.4304	77.8838	78.2688	78.5784	78.7899	78.9018	78.9325	78.9098	78.856	78.7817	78.6873	78.5736	78.4382	78.2831	78.1079	77.926	77.7702	77.6823	77.6916	77.8061	78.0157	78.3075	78.6603	79.054	79.4908	79.9632	80.4286	80.8329	81.1387	81.3237	81.3993	81.4027
DJI																					0.159659	0.169372	0.179224	0.190568	0.205181	0.224183	0.248556	0.277479	0.308008	0.336085	0.35896	0.374937	0.385271	0.393802	0.406017	0.425613	0.454361	0.49033	0.528999	0.563864	0.590398	0.606844	0.615054	0.618495	0.622366	0.630388	0.643654	0.660863	0.680463
DMA																					0.071073	0.071568	0.071731	0.071738	0.071802	0.072094	0.072654	0.07344	0.074284	0.074955	0.075314	0.075309	0.075003	0.074483	0.073851	0.073201	0.072533	0.071842	0.071208	0.070723	0.070419	0.070374	0.070544	0.070831	0.071043	0.071098	0.070936	0.070599	0.070185
DNK	4.27315	4.30579	4.33618	4.37148	4.40822	4.44124	4.46872	4.49009	4.51741	4.54893	4.58331	4.61214	4.64924	4.68594	4.72255	4.7605	4.79992	4.84124	4.86975	4.89315	4.93124	4.96176	4.99055	5.01725	5.04142	5.06273	5.08127	5.09704	5.10969	5.11871	5.12394	5.1253	5.12335	5.11961	5.11606	5.11424	5.11466	5.11728	5.12244	5.13036	5.14112	5.15491	5.17165	5.19074	5.21133	5.2327	5.25486	5.27771	5.30038
DOM		2.46122	2.5347	2.61362	2.69726	2.78489	2.87699	2.97406	3.07535	3.18015	3.28772	3.39869	3.51353	3.63133	3.75116	3.87211	3.99472	4.11961	4.24595	4.37293	4.49972	4.62721	4.75546	4.88446	5.01419	5.14464	5.27577	5.4075	5.53959	5.6718	5.80393	5.93591	6.06777	6.19966	6.33176	6.46423	6.59696	6.72993	6.86344	6.99789	7.13349	7.27041	7.40834	7.54646	7.68371	7.81925	7.95276	8.08441	8.21443
DZA											11.3268	11.5472	11.4219	11.7043	12.0573	12.4209	12.8113	13.2488	13.6493	14.046	14.465	14.8722	15.286	15.7098	16.149	16.6077	17.0858	17.5829	18.1023	18.6478	19.2217	19.8243	20.4529	21.1019	21.7636	22.4315	23.1024	23.7743	24.4435	25.1062	25.7589	26.4005	27.0283	27.6355	28.2138	28.7578	29.2664	29.743	30.1928
ECU	3.44338	3.53386	3.62651	3.7224	3.82221	3.92659	4.0351	4.1473	4.26386	4.38544	4.51271	4.6458	4.78428	4.92794	5.07655	5.22991	5.38816	5.55145	5.71955	5.89227	6.06938	6.24742	6.42938	6.61484	6.80328	6.99433	7.18779	7.38372	7.58235	7.78407	7.98919	8.19765	8.4094	8.62459	8.84346	9.06611	9.29247	9.52236	9.75558	9.99187	10.2309	10.4725	10.7161	10.9615	11.208	11.4552	11.7032	11.9515	12.1984
EGY	21.7911	22.312	22.8454	23.3915	23.9507	24.5233	25.1096	25.7098	26.3244	26.9538	27.5981	28.2933	28.962	29.6274	30.3598	31.1123	31.8538	32.568	33.2431	33.8891	34.5138	35.3119	36.1027	36.8966	37.7081	38.5491	39.4227	40.3296	41.2757	42.2674	43.3091	44.4001	45.5393	46.7283	47.9686	49.2587	50.6024	51.9917	53.3992	54.7887	56.1345	57.4245	58.6668	59.8807	61.0958	62.334	63.6016	64.8923	66.2003
ESP	28.069	28.3041	28.556	28.8103	29.0666	29.325	29.5855	29.848	30.1126	30.3794	30.6478	30.9105	31.1647	31.4366	31.7477	32.0914	32.4589	32.8573	33.2464	33.5733	33.8837	34.2675	34.6642	35.0694	35.4764	35.8792	36.2768	36.6668	37.0404	37.3868	37.6982	37.972	38.2097	38.4133	38.5867	38.7339	38.8556	38.9545	39.0387	39.1186	39.2025	39.2991	39.4109	39.5337	39.6601	39.7874	39.909	40.0353	40.2016
EST																																									1.56525	1.54822	1.52081	1.48806	1.45709	1.43302	1.41774	1.40967	1.40635
ETH	19.4534	19.7782	20.1152	20.4649	20.8278	21.2042	21.5948	22	22.4204	22.8551	23.3047	23.7677	24.2465	24.7424	25.256	25.7844	26.3316	26.8644	27.4342	27.9269	28.4151	29.2486	30.1408	31.0367	31.8614	32.5669	33.1281	33.5772	33.9933	34.4878	35.1417	35.9845	36.9952	38.1427	39.3743	40.6521	41.9657	43.3292	44.7572	46.2723	47.8879	49.61	51.4236	53.2956	55.181	57.0479	58.8835	60.6974	62.5077
FIN	4.01417	4.05262	4.09588	4.14484	4.19241	4.24047	4.28733	4.32969	4.36553	4.40048	4.43543	4.46687	4.49735	4.52926	4.55453	4.56974	4.58689	4.6118	4.63255	4.62987	4.61237	4.62938	4.65117	4.67546	4.69878	4.71875	4.73444	4.74693	4.75825	4.77135	4.78824	4.80981	4.8351	4.86218	4.8882	4.91122	4.93034	4.94637	4.96109	4.97712	4.99622	5.01912	5.04493	5.07179	5.0971	5.119	5.13698	5.15175	5.16424
FJI											0.393017	0.407017	0.421514	0.436088	0.450268	0.463054	0.473601	0.484592	0.494584	0.505575	0.520562	0.531635	0.542844	0.554138	0.565415	0.576626	0.587557	0.598296	0.609383	0.621585	0.635307	0.651021	0.66828	0.685497	0.700483	0.711775	0.718639	0.721783	0.72293	0.724594	0.728573	0.735401	0.744469	0.754963	0.765609	0.775425	0.784386	0.792736	0.800157
FRA	42.5499	42.8943	43.2163	43.528	43.8548	44.2514	44.6912	45.1865	45.6884	46.1636	46.6193	47.1637	48.1251	48.836	49.3943	49.8396	50.2931	50.6888	51.0731	51.5093	51.9577	52.3713	52.7931	53.2077	53.5922	53.9314	54.22	54.4677	54.6919	54.9171	55.1615	55.4303	55.7189	56.0238	56.3377	56.6547	56.9761	57.3027	57.6271	57.9402	58.2357	58.5124	58.7734	59.0225	59.2657	59.5085	59.7488	59.9889	60.2443
GAB											0.510778	0.515911	0.521839	0.528362	0.535503	0.543284	0.551453	0.560025	0.569014	0.576927	0.589314	0.600613	0.611704	0.62292	0.634742	0.647536	0.661402	0.676255	0.692077	0.708788	0.726328	0.744696	0.76393	0.784061	0.805115	0.827108	0.850048	0.873867	0.898469	0.923711	0.949488	0.975783	1.00258	1.02978	1.05726	1.08495	1.11295	1.14134	1.17006
GBR	50.0742	50.2371	50.3769	50.5398	50.7116	50.8924	51.1301	51.3759	51.5976	51.9013	52.3169	52.7514	53.2359	53.5686	53.9342	54.2928	54.5855	54.9012	55.1559	55.4026	55.5735	55.7485	55.8924	56.0063	56.0921	56.1523	56.1883	56.2036	56.2059	56.2051	56.2092	56.2207	56.2414	56.2768	56.3329	56.4136	56.5225	56.6583	56.8128	56.9743	57.1344	57.2908	57.446	57.6023	57.7634	57.9325	58.1136	58.3073	58.51
GEO																																									5.4104	5.37299	5.30393	5.20896	5.09713	4.97626	4.84663	4.70961	4.5754
GHA						6.01182	6.17887	6.35242	6.53275	6.72016	6.91597	7.11	7.31052	7.51784	7.73449	7.96089	8.19534	8.43858	8.69112	8.95426	8.7355	8.97324	9.22963	9.49356	9.7491	9.98595	10.1992	10.3955	10.5903	10.8053	11.0561	11.3483	11.6768	12.0336	12.4057	12.7836	13.1648	13.552	13.947	14.3534	14.7733	15.2074	15.6533	16.1068	16.5617	17.0141	17.4625	17.909	18.3572
GIN										3.39141	3.45072	3.51242	3.57621	3.64181	3.70931	3.77869	3.84997	3.92312	3.99822	4.07535	4.15461	4.22305	4.29053	4.35736	4.42403	4.49125	4.55924	4.62888	4.70238	4.78249	4.87143	4.96959	5.07708	5.19545	5.32636	5.4707	5.62942	5.80133	5.98249	6.16747	6.35228	6.53494	6.71604	6.89717	7.08112	7.26962	7.46378	7.66207	7.86078
GMB											0.337303	0.347577	0.358452	0.369972	0.382184	0.3948	0.407833	0.421296	0.435203	0.44957	0.46441	0.478116	0.492426	0.507432	0.523251	0.539979	0.557805	0.576757	0.596536	0.616768	0.637246	0.657579	0.678113	0.700199	0.725694	0.755787	0.791147	0.831023	0.873444	0.915635	0.955593	0.992673	1.02747	1.06086	1.09421	1.12858	1.16409	1.20053	1.23812
GNB											0.701144	0.70727	0.713807	0.720764	0.69387	0.686475	0.680029	0.68364	0.694866	0.700083	0.704939	0.718364	0.732523	0.746173	0.757674	0.765989	0.770421	0.771737	0.772142	0.774726	0.781677	0.793806	0.810405	0.830207	0.851276	0.872163	0.892522	0.912754	0.933045	0.95379	0.975261	0.997522	1.02035	1.04342	1.06635	1.08885	1.11083	1.13251	1.15437
GNQ											0.274118	0.278795	0.280135	0.281483	0.282836	0.284197	0.288149	0.2921	0.296048	0.300006	0.303982	0.298846	0.289501	0.277646	0.265771	0.2558	0.247962	0.242156	0.239678	0.24198	0.249929	0.264374	0.28463	0.308206	0.331552	0.352118	0.369023	0.382981	0.394961	0.40662	0.419188	0.432853	0.447266	0.462637	0.479098	0.496768	0.515853	0.53646	0.558492
GRC		7.53402	7.61959	7.7022	7.7774	7.84846	7.91297	7.97722	8.053	8.13678	8.20501	8.27462	8.32406	8.35499	8.38535	8.42466	8.48705	8.58833	8.61229	8.64382	8.66357	8.71687	8.77451	8.84032	8.91924	9.01408	9.12705	9.25498	9.38873	9.51575	9.627	9.71984	9.79683	9.86074	9.91648	9.96824	10.0151	10.0573	10.1014	10.1557	10.226	10.3151	10.4202	10.5338	10.6449	10.7455	10.8321	10.9063	10.9701
GRD																					0.094475	0.094221	0.093983	0.093669	0.093191	0.092494	0.091475	0.090227	0.089101	0.0886	0.089032	0.090607	0.093122	0.096019	0.098477	0.099946	0.100191	0.099436	0.09812	0.096924	0.096331	0.09646	0.097165	0.09823	0.099352	0.100288	0.101001	0.101567	0.102021
GTM	3.17065	3.27404	3.38081	3.4913	3.60564	3.7239	3.84621	3.9727	4.10363	4.23924	4.3782	4.51915	4.66352	4.81249	4.96602	5.068	5.17173	5.27793	5.38758	5.50109	5.62179	5.78048	5.94157	6.10453	6.26871	6.43373	6.59921	6.76552	6.93391	7.10614	7.28346	7.46649	7.65482	7.84747	8.0429	8.24006	8.4386	8.63911	8.84258	9.05047	9.26381	9.48327	9.70854	9.93869	10.1723	10.4085	10.6467	10.8876	11.1335
GUY																					0.704934	0.713684	0.721948	0.729916	0.737847	0.745841	0.754101	0.762424	0.770125	0.776254	0.780153	0.781732	0.781246	0.778948	0.775219	0.770435	0.764446	0.757448	0.750639	0.745585	0.743309	0.744474	0.748602	0.754144	0.758896	0.761291	0.760795	0.75797	0.753778
HKG											2.98979	3.08001	3.2133	3.32579	3.40716	3.49786	3.52897	3.61929	3.69697	3.75647	3.84892	3.9136	3.9742	4.03779	4.11399	4.20895	4.32634	4.4624	4.60703	4.74588	4.86874	4.97169	5.05804	5.13371	5.20784	5.28702	5.37345	5.46471	5.55739	5.64627	5.72794	5.80004	5.86474	5.92833	5.99962	6.08423	6.18558	6.29992	6.41699
HND	1.40863	1.45069	1.49326	1.53731	1.58528	1.63572	1.68768	1.74217	1.79958	1.8586	1.92053	1.98651	2.05684	2.1314	2.21029	2.29203	2.37516	2.46082	2.5498	2.64251	2.71665	2.79812	2.88211	2.96899	3.05924	3.15325	3.25115	3.35283	3.4581	3.56665	3.67828	3.79292	3.91064	4.03132	4.15486	4.28116	4.41027	4.54221	4.67702	4.8147	4.9553	5.09859	5.24468	5.39441	5.54896	5.70901	5.87481	6.0457	6.22041
HRV																																									4.77637	4.76	4.73286	4.69754	4.6578	4.61677	4.57489	4.5324	4.49191
HTI											3.80709	3.88362	3.96246	4.04532	4.12992	4.21629	4.30426	4.39427	4.48617	4.57998	4.67623	4.75718	4.83733	4.91862	5.00371	5.09458	5.19163	5.29462	5.40402	5.52019	5.64317	5.77337	5.91023	6.05162	6.19469	6.33727	6.47854	6.61874	6.75822	6.89776	7.03792	7.17861	7.31949	7.46069	7.60232	7.7445	7.8873	8.03073	8.17468
HUN																					10.3661	10.3982	10.4261	10.4537	10.4862	10.5268	10.578	10.6366	10.6933	10.7355	10.7543	10.7465	10.7158	10.6692	10.6167	10.5663	10.5193	10.4745	10.4345	10.4016	10.3771	10.363	10.3586	10.3591	10.3576	10.3493	10.3325	10.3085	10.2796
IDN	57.0706	60.1596	63.2487	66.3377	69.4268	72.5158	75.6049	78.6939	81.783	84.8721	94.473	96.5827	98.4913	100.443	102.44	104.48	106.566	108.697	110.873	113.096	115.365	118.465	121.618	124.814	128.047	131.31	134.594	137.898	141.232	144.612	148.048	151.542	155.081	158.636	162.165	165.64	169.046	172.389	175.678	178.928	182.151	185.351	188.523	191.658	194.745	197.779	200.757	203.688	206.591
IND	370.749	377.066	383.69	390.607	397.783	405.217	412.914	420.887	429.135	437.653	446.439	455.493	464.909	474.726	485.187	496.126	507.312	518.802	530.605	542.731	555.19	567.868	581.087	594.77	608.803	623.103	637.63	652.409	667.5	682.995	698.953	715.385	732.24	749.429	766.833	784.36	801.975	819.682	837.469	855.335	873.278	891.273	909.307	927.404	945.602	963.923	982.365	1000.9	1019.48
IRL	2.92116	2.9175	2.91045	2.90567	2.89528	2.87493	2.85435	2.83756	2.81124	2.80287	2.79199	2.77848	2.79002	2.80974	2.82354	2.83537	2.84325	2.85913	2.87135	2.88427	2.90842	2.94409	2.98657	3.03432	3.08516	3.13718	3.18987	3.24277	3.29416	3.342	3.38476	3.42202	3.45379	3.47946	3.49853	3.51098	3.51642	3.51583	3.51219	3.50952	3.51089	3.51771	3.52985	3.54693	3.56791	3.59219	3.61964	3.6511	3.68782
IRN						18.4955	19.0064	19.5399	20.0999	20.6854	21.2934	21.9191	22.5673	23.235	23.9321	24.6546	25.4046	26.1643	26.9326	27.7154	28.5139	29.2816	30.0753	30.9057	31.7865	32.7298	33.734	34.803	35.9608	37.2371	38.6502	40.1999	41.8692	43.6368	45.4728	47.3472	49.2603	51.1938	53.0773	54.822	56.3662	57.679	58.7804	59.7238	60.5906	61.4427	62.2949	63.1363	63.9718
IRQ																					9.91798	10.2559	10.5997	10.9509	11.3121	11.6846	12.0687	12.4621	12.8607	13.2591	13.6534	14.0441	14.4325	14.8157	15.1904	15.5558	15.9098	16.2571	16.6123	16.9949	17.4191	17.8895	18.4027	18.9551	19.5393	20.1493	20.7831	21.4396	22.1143
ISL	0.143164	0.145834	0.148195	0.151274	0.154807	0.158293	0.161613	0.16537	0.169037	0.172586	0.176137	0.179187	0.18234	0.185774	0.189145	0.192591	0.195919	0.198989	0.201562	0.20324	0.204426	0.207088	0.209929	0.212814	0.215563	0.21807	0.220291	0.222266	0.22415	0.226103	0.228262	0.230664	0.233269	0.236019	0.238808	0.241582	0.244331	0.247056	0.249756	0.252413	0.255043	0.257624	0.260151	0.262656	0.265138	0.267629	0.27015	0.272709	0.275296
ISR	1.2464	1.44397	1.57085	1.6156	1.65878	1.7173	1.79291	1.88434	1.96223	2.01729	2.07535	2.14857	2.23952	2.33232	2.42103	2.49855	2.55954	2.61038	2.66213	2.73003	2.81375	2.90002	2.99648	3.09879	3.20053	3.29693	3.38705	3.47212	3.5523	3.62831	3.70092	3.77069	3.83811	3.90395	3.96917	4.03507	4.10054	4.16713	4.24178	4.33359	4.44835	4.5893	4.75282	4.92941	5.10558	5.27137	5.42425	5.56655	5.69927
ITA	46.9802	47.2924	47.5397	47.83	48.1711	48.5042	48.7914	49.0517	49.345	49.7	50.0646	50.3894	50.7085	51.0627	51.4635	51.8494	52.193	52.5276	52.8463	53.1758	53.519	53.8889	54.2587	54.6192	54.9578	55.2653	55.538	55.7779	55.989	56.1779	56.3493	56.5055	56.6449	56.7653	56.8631	56.9368	56.9839	57.0077	57.0182	57.0287	57.0482	57.0881	57.1453	57.1976	57.2135	57.1744	57.0652	56.9036	56.7428
JAM				1.39572	1.41613	1.43661	1.45704	1.48127	1.51086	1.54305	1.57458	1.59015	1.60675	1.63832	1.67803	1.71509	1.75627	1.79585	1.8271	1.85232	1.87564	1.90428	1.9351	1.96697	1.99831	2.02802	2.05537	2.08083	2.10591	2.13279	2.16285	2.19692	2.23406	2.27174	2.30637	2.33551	2.35816	2.37539	2.38941	2.40346	2.41991	2.43933	2.46105	2.48458	2.50904	2.53371	2.55864	2.58392	2.60887
JOR					0.755061	0.786762	0.820017	0.855026	0.891817	0.930598	0.971795	1.01564	1.0692	1.11614	1.16497	1.21568	1.26828	1.4374	1.58341	1.66473	1.72132	1.80918	1.88393	1.94844	2.00773	2.06591	2.12318	2.17936	2.23794	2.30312	2.37799	2.46487	2.56353	2.67141	2.78446	2.90005	3.0153	3.1318	3.25656	3.39933	3.56589	3.7605	3.97767	4.20155	4.41036	4.58884	4.73285	4.84854	4.94398
JPN	84.2743	85.6407	86.9432	88.146	89.2509	90.318	91.2745	92.0757	92.9061	93.819	94.6185	95.4749	96.3684	97.354	98.374	99.4362	100.349	101.39	102.532	103.75	104.929	106.427	107.976	109.529	111.023	112.413	113.679	114.828	115.879	116.867	117.817	118.733	119.605	120.428	121.189	121.883	122.509	123.073	123.585	124.059	124.505	124.93	125.331	125.707	126.053	126.365	126.644	126.893	127.117
KAZ																																									16.3839	16.3733	16.3028	16.1812	16.0222	15.8394	15.6319	15.406	15.1902
KEN	6.15069	6.31965	6.4952	6.6783	6.86931	7.0679	7.27515	7.49071	7.71575	7.95073	8.19614	8.45251	8.72039	9.00035	9.29209	9.59521	9.91118	10.2406	10.5832	10.9404	11.3014	11.713	12.1461	12.6008	13.0773	13.5759	14.0963	14.6389	15.2054	15.7978	16.4172	17.0639	17.7363	18.4318	19.1464	19.8771	20.6226	21.3821	22.1537	22.9351	23.7246	24.5217	25.3261	26.1362	26.9505	27.7683	28.5895	29.4157	30.2505
KGZ																																									4.37289	4.41963	4.45419	4.48384	4.51881	4.5661	4.6294	4.70564	4.78678
KHM																					6.99658	7.13965	7.30211	7.44924	7.53334	7.52445	7.40468	7.19604	6.95726	6.7704	6.69376	6.74985	6.9198	7.17	7.44785	7.71488	7.96095	8.19808	8.43591	8.69133	8.9756	9.2893	9.62389	9.97073	10.3179	10.6561	10.9829	11.2986	11.6005
KNA																					0.044883	0.04449	0.04432	0.044311	0.044328	0.044272	0.044143	0.043942	0.043708	0.043455	0.043205	0.04296	0.042728	0.042482	0.042199	0.041866	0.041479	0.041041	0.040641	0.040354	0.040259	0.040379	0.040697	0.041135	0.041617	0.042074	0.042475	0.042854	0.043221
KOR				21.0309	21.229	21.5215	22.0003	22.5798	23.2209	23.9476	24.7493	25.5778	26.3832	27.1731	27.9447	28.6647	29.3946	30.0886	30.7947	31.4997	32.1957	32.8507	33.5065	34.1541	34.7809	35.3787	35.942	36.4754	36.9922	37.5113	38.0456	38.6023	39.1752	39.7478	40.2962	40.8044	41.2651	41.6866	42.0867	42.4912	42.9184	43.3732	43.8482	44.335	44.8201	45.2925	45.751	46.1961	46.6207
KWT																					0.74445	0.798642	0.851916	0.905635	0.96177	1.02172	1.08586	1.15358	1.22407	1.29608	1.36868	1.43933	1.50764	1.57697	1.65215	1.73527	1.83231	1.93891	2.03486	2.09278	2.09534	2.0313	1.91243	1.77261	1.65931	1.6059	1.62686	1.71026	1.83112
LAO																					2.68843	2.76227	2.84084	2.91929	2.99097	3.05158	3.09897	3.13584	3.16884	3.20733	3.25814	3.32337	3.40119	3.4899	3.58632	3.6879	3.7942	3.90553	4.02081	4.13884	4.25847	4.37924	4.50035	4.61994	4.73585	4.84648	4.9512	5.05032	5.1446
LBN																					2.29743	2.35405	2.41784	2.48194	2.53678	2.57575	2.59641	2.60174	2.59721	2.5909	2.58893	2.5943	2.60614	2.62207	2.63805	2.65199	2.66087	2.66796	2.68467	2.72644	2.80304	2.92171	3.07613	3.24613	3.40336	3.52838	3.61067	3.65842	3.69352
LBR															1.17152	1.20776	1.24498	1.28319	1.32237	1.36155	1.40073	1.43674	1.47457	1.51437	1.55629	1.60045	1.64584	1.69214	1.74091	1.79425	1.853	1.91883	1.98948	2.05723	2.11167	2.14575	2.15843	2.15332	2.1341	2.10643	2.07591	2.04014	2.00162	1.9767	1.98649	2.04466	2.16048	2.3262	2.51748
LCA																					0.104015	0.105247	0.10631	0.10732	0.108391	0.109627	0.111067	0.112685	0.1144	0.116136	0.117822	0.11943	0.120988	0.122564	0.124292	0.126244	0.128449	0.130856	0.133367	0.135788	0.13802	0.139995	0.14176	0.143409	0.145083	0.14687	0.148834	0.150913	0.153021
LKA	7.45371	7.67334	7.9037	8.14312	8.37971	8.60216	8.82304	9.05429	9.28883	9.538	9.80902	10.0832	10.3551	10.6221	10.8797	11.142	11.4119	11.6824	11.9579	12.2262	12.4857	12.7478	13.0022	13.252	13.5019	13.7551	14.0129	14.2735	14.5337	14.7889	15.0358	15.2728	15.5012	15.7247	15.9485	16.1763	16.4089	16.644	16.8782	17.1068	17.3258	17.5357	17.7368	17.9248	18.0945	18.2429	18.3673	18.4709	18.5646
LSO											0.82781	0.843941	0.861163	0.879351	0.898461	0.918355	0.939108	0.960703	0.982893	1.0057	1.02893	1.05261	1.07709	1.10288	1.13064	1.16079	1.19352	1.22854	1.2652	1.30267	1.34025	1.3778	1.41537	1.45273	1.48969	1.52613	1.56169	1.59639	1.631	1.66656	1.70375	1.74254	1.78228	1.82224	1.86132	1.8986	1.93429	1.96804	1.99752
LTU																																									3.69604	3.69746	3.68811	3.67065	3.64914	3.62661	3.60376	3.57991	3.55514
LUX	0.296018	0.297858	0.299699	0.30154	0.30338	0.305221	0.307062	0.308902	0.310743	0.312584	0.314426	0.317306	0.321217	0.324572	0.328227	0.331983	0.334381	0.3355	0.336356	0.337992	0.339668	0.342226	0.345103	0.348173	0.351189	0.353983	0.356564	0.358968	0.361073	0.362789	0.364038	0.364781	0.365098	0.365305	0.365795	0.366884	0.368666	0.371078	0.374118	0.377706	0.381791	0.386352	0.391394	0.39681	0.402433	0.408149	0.413999	0.419974	0.425833
LVA																																									2.66444	2.64916	2.62025	2.58266	2.54363	2.50848	2.47883	2.45331	2.43055
MAC																					0.246194	0.248738	0.248767	0.246947	0.244285	0.241628	0.239075	0.236678	0.235171	0.23544	0.238071	0.243373	0.251158	0.260931	0.271918	0.283503	0.295591	0.30818	0.320773	0.332783	0.343808	0.353626	0.362311	0.370199	0.377798	0.385513	0.393373	0.401352	0.409616
MDA																																									4.36556	4.37505	4.37679	4.37115	4.35879	4.3406	4.31622	4.28647	4.25484
MDG											5.32831	5.43367	5.54371	5.65825	5.77741	5.90013	6.02649	6.15728	6.29202	6.43073	6.5763	6.75785	6.94662	7.14263	7.34578	7.55603	7.77345	7.99816	8.23022	8.46967	8.71655	8.97134	9.23413	9.50428	9.78087	10.0635	10.3521	10.6478	10.9524	11.2687	11.5986	11.9428	12.3013	12.6755	13.0665	13.4754	13.9027	14.3479	14.8088
MDV																					0.115691	0.119302	0.123354	0.127701	0.132104	0.136417	0.140563	0.144631	0.14878	0.153276	0.158272	0.163824	0.169851	0.176244	0.18285	0.189537	0.196264	0.203028	0.209785	0.21651	0.223158	0.229751	0.236265	0.242605	0.248588	0.254139	0.259183	0.263842	0.268455
MEX	27.7934	28.5848	29.4123	30.2777	31.183	32.1302	33.1215	34.1652	35.2643	36.422	37.6417	38.8688	40.1229	41.4038	42.7116	44.0462	45.4077	46.83	48.3163	49.8697	51.4936	53.0764	54.6899	56.3243	57.9668	59.608	61.2422	62.8699	64.4949	66.1239	67.7614	69.4076	71.0587	72.7093	74.3526	75.9835	77.5991	79.2001	80.7887	82.3689	83.9431	85.5126	87.0751	88.6254	90.1564	91.6633	93.147	94.611	96.0563
MKD																																									1.99623	1.9933	1.98866	1.98403	1.9817	1.98325	1.98944	1.9996	2.01206
MLI											4.82133	4.91831	5.01847	5.12193	5.2288	5.33921	5.45328	5.57116	5.69298	5.81889	5.94904	6.04453	6.14746	6.25619	6.36835	6.48228	6.59673	6.71227	6.83108	6.9564	7.09013	7.23473	7.38867	7.54517	7.69485	7.83189	7.95287	8.06222	8.17152	8.29692	8.44991	8.63553	8.85033	9.08718	9.33488	9.58565	9.83757	10.0944	10.3606
MLT					0.332182	0.332182	0.332182	0.332182	0.331124	0.331124	0.330066	0.329008	0.326892	0.325835	0.323719	0.322661	0.321603	0.321603	0.320545	0.320545	0.320545	0.320355	0.320436	0.320786	0.321437	0.322356	0.32358	0.325127	0.326982	0.329115	0.331497	0.334124	0.336965	0.339986	0.3431	0.34625	0.34943	0.352623	0.355799	0.358933	0.362015	0.365002	0.367891	0.370775	0.37375	0.376896	0.380253	0.38376	0.38729
MMR													22.7268	23.2256	23.741	24.276	24.8296	25.4028	25.9977	26.6194	27.2691	27.9138	28.5701	29.2382	29.9185	30.6111	31.3143	32.0267	32.7488	33.4814	34.2243	34.9765	35.7343	36.4918	37.2415	37.9771	38.6985	39.4043	40.0857	40.7314	41.3352	41.8902	42.4017	42.89	43.3834	43.9016	44.4522	45.0272	45.6112
MNE																																									0.615002	0.615744	0.617173	0.618853	0.620087	0.620418	0.619707	0.618219	0.616339
MNG																					1.27883	1.31705	1.35667	1.3973	1.43843	1.47965	1.52086	1.56221	1.60391	1.64629	1.68962	1.73348	1.77773	1.82322	1.87109	1.92188	1.97631	2.03334	2.08971	2.14101	2.18415	2.21792	2.24349	2.26319	2.28048	2.29802	2.31657	2.33573	2.35566
MOZ											7.24605	7.39676	7.55318	7.71616	7.88124	8.05017	8.22951	8.41815	8.61473	8.81757	9.02274	9.23265	9.44624	9.66866	9.90696	10.1652	10.444	10.7385	11.0412	11.3414	11.6302	11.9131	12.1898	12.4398	12.6361	12.7644	12.8086	12.7863	12.758	12.8059	12.9873	13.328	13.806	14.3709	14.948	15.4833	15.9604	16.3972	16.8139
MRT											0.993768	1.00662	1.0199	1.03363	1.04793	1.06282	1.0783	1.09442	1.11117	1.12862	1.14678	1.18167	1.21745	1.25416	1.29185	1.3306	1.37036	1.41114	1.45303	1.49619	1.54064	1.58649	1.63365	1.68186	1.73074	1.78003	1.82967	1.87976	1.93043	1.9819	2.03435	2.08791	2.14264	2.19853	2.25552	2.31363	2.3729	2.43356	2.49622
MSR																					0.011534	0.011517	0.011522	0.011533	0.011559	0.01158	0.011611	0.011648	0.011676	0.011669	0.011607	0.011481	0.011307	0.011107	0.010932	0.010792	0.010704	0.010659	0.010638	0.010632	0.010615	0.010632	0.010661	0.010601	0.010362	0.009848	0.009015	0.00793	0.006741
MUS	0.479489	0.496748	0.514644	0.534073	0.551927	0.569553	0.589574	0.607559	0.625337	0.642925	0.660774	0.678763	0.698422	0.712493	0.733457	0.752732	0.771295	0.786388	0.801201	0.813007	0.826441	0.839598	0.8524	0.865169	0.878355	0.892211	0.906929	0.92232	0.937821	0.952588	0.966031	0.978069	0.988892	0.998631	1.0075	1.01576	1.02328	1.03018	1.03726	1.04559	1.05587	1.06844	1.08296	1.09859	1.11414	1.12867	1.14195	1.15414	1.16528
MWI					3.16018	3.22223	3.28875	3.36109	3.43774	3.51637	3.60025	3.6854	3.78615	3.88818	3.98188	4.08403	4.19766	4.33182	4.45821	4.5837	4.70378	4.82909	4.95855	5.09336	5.23507	5.3848	5.54565	5.71795	5.89687	6.0755	6.25044	6.41238	6.56599	6.73792	6.96461	7.26827	7.66639	8.14115	8.63669	9.07557	9.4045	9.60036	9.68597	9.71033	9.74569	9.84441	10.0228	10.2649	10.5523
MYS						7.24062	7.44655	7.66398	7.88847	8.11602	8.34654	8.57916	8.81978	9.0595	9.30609	9.55384	9.80354	10.0561	10.3081	10.5586	10.8041	11.0624	11.3243	11.5926	11.8711	12.1622	12.4687	12.7903	13.1228	13.46	13.7981	14.1341	14.4712	14.8194	15.1923	15.5989	16.0437	16.522	17.0225	17.529	18.0298	18.5199	19.0027	19.4849	19.9775	20.4876	21.0176	21.5628	22.1147
NAM											0.631509	0.647651	0.664287	0.68143	0.699092	0.717299	0.736069	0.755419	0.775372	0.796019	0.817469	0.842354	0.868958	0.896266	0.922903	0.947921	0.971121	0.992956	1.01406	1.03538	1.05773	1.08094	1.1051	1.13163	1.16228	1.19815	1.23993	1.2868	1.33654	1.38601	1.43291	1.47639	1.51696	1.5551	1.59182	1.62786	1.66338	1.69803	1.73164
NER											3.64603	3.72043	3.79825	3.87924	3.96236	4.04766	4.13522	4.22509	4.31734	4.41249	4.51064	4.63799	4.76823	4.90215	5.0408	5.18494	5.33509	5.49115	5.65265	5.81876	5.989	6.16371	6.34352	6.52864	6.71931	6.916	7.11888	7.32894	7.54843	7.78024	8.02659	8.28874	8.56677	8.86029	9.16831	9.49029	9.8266	10.1782	10.5457
NGA	32.0238	32.7239	33.4446	34.1867	35.1826	36.2098	37.2692	38.3615	39.4875	40.6479	41.8438	43.0766	44.3473	45.6566	47.0084	48.4069	49.8442	51.312	52.8192	54.3752	55.9821	57.297	58.6658	60.1146	61.6772	63.3743	65.2214	67.2031	69.2719	71.3611	73.4236	75.4405	77.4275	79.4148	81.4488	83.5628	85.7664	88.048	90.3953	92.788	95.2125	97.6676	100.162	102.701	105.294	107.948	110.669	113.458	116.32
NIC	1.28726	1.32641	1.36683	1.40872	1.45224	1.49756	1.54458	1.59316	1.6435	1.69576	1.75012	1.80654	1.8649	1.92527	1.9877	2.05225	2.11877	2.1872	2.2578	2.33082	2.40651	2.48134	2.5587	2.6387	2.72141	2.80686	2.89497	2.98549	3.07787	3.17141	3.26552	3.36014	3.45512	3.54971	3.64298	3.73434	3.82313	3.90967	3.99553	4.08296	4.17343	4.26757	4.36451	4.4625	4.55901	4.65219	4.74158	4.82766	4.91065
NLD	10.0899	10.2404	10.3578	10.4687	10.5906	10.7258	10.864	11.0007	11.1608	11.3212	11.4592	11.6116	11.7782	11.9381	12.0988	12.2633	12.4258	12.5674	12.695	12.843	13.0019	13.1479	13.2919	13.4312	13.5624	13.6833	13.7931	13.8929	13.9841	14.0686	14.1484	14.2238	14.2952	14.3654	14.4375	14.5139	14.5958	14.6826	14.774	14.8687	14.9654	15.0645	15.1659	15.268	15.3691	15.4679	15.5633	15.6555	15.7456
NOR	3.26401	3.29474	3.32659	3.35974	3.39309	3.42624	3.45881	3.49074	3.52179	3.55164	3.58001	3.60857	3.63767	3.66529	3.69308	3.72188	3.75234	3.78472	3.81768	3.84966	3.87606	3.90527	3.93372	3.9608	3.98574	4.00803	4.02747	4.04433	4.05918	4.07287	4.08608	4.09897	4.11166	4.12458	4.13827	4.15311	4.16932	4.18697	4.20597	4.22612	4.24728	4.26947	4.29268	4.31679	4.34162	4.367	4.39321	4.42026	4.44749
NPL											10.166	10.3093	10.4672	10.6377	10.8169	11.0045	11.2022	11.409	11.6232	11.845	12.0746	12.324	12.5831	12.8522	13.1313	13.4204	13.7195	14.0285	14.3476	14.6769	15.0164	15.3672	15.7294	16.1006	16.4775	16.8583	17.2397	17.6237	18.0208	18.445	18.9055	19.4055	19.9383	20.49	21.0409	21.5761	22.0904	22.5848	23.0579
NZL	1.90179	1.94074	1.98798	2.0404	2.08563	2.12887	2.17085	2.22179	2.27374	2.32316	2.36364	2.42414	2.48005	2.53267	2.58309	2.63138	2.67837	2.71883	2.74957	2.77897	2.81839	2.87082	2.92969	2.98941	3.04218	3.08263	3.10857	3.12241	3.12896	3.1353	3.14662	3.16483	3.18854	3.21573	3.24304	3.26824	3.2903	3.31074	3.33279	3.36096	3.39817	3.44617	3.50318	3.56446	3.62328	3.67494	3.71735	3.75236	3.78397
OMN																					0.723851	0.748968	0.77638	0.806986	0.84195	0.882047	0.927436	0.977804	1.0328	1.09185	1.15438	1.22059	1.29011	1.36109	1.43107	1.49842	1.56119	1.61986	1.67811	1.74116	1.81216	1.89377	1.98327	2.0721	2.14842	2.20428	2.23665	2.24976	2.25186
PAK	34.9071	35.7335	36.5869	37.4681	38.3792	39.3193	40.2938	41.3063	42.3584	43.4514	44.5865	45.7649	46.9879	48.2478	49.5431	50.8763	52.249	53.661	55.1127	56.6059	58.1421	59.7345	61.382	63.0994	64.906	66.8169	68.8343	70.9582	73.1973	75.5611	78.0543	80.6805	83.4316	86.2859	89.2137	92.1915	95.2154	98.2858	101.39	104.513	107.648	110.779	113.911	117.087	120.363	123.777	127.349	131.057	134.843
PAN	0.885651	0.908532	0.932863	0.954802	0.977504	1.0029	1.02859	1.05534	1.07691	1.10659	1.1388	1.17211	1.20639	1.24167	1.27811	1.3158	1.35469	1.3947	1.43565	1.47737	1.51928	1.56309	1.6078	1.65321	1.69905	1.74514	1.79138	1.8378	1.88442	1.9313	1.97849	2.02597	2.07376	2.12186	2.17033	2.2192	2.2685	2.31826	2.36855	2.41943	2.47095	2.52312	2.57595	2.62958	2.68412	2.73967	2.79629	2.85391	2.91232
PER	7.78697	7.98459	8.18812	8.3987	8.61795	8.84699	9.08512	9.3312	9.58687	9.85325	10.132	10.4243	10.7293	11.0449	11.369	11.6994	12.0351	12.3777	12.7285	13.0887	13.4598	13.8364	14.222	14.6158	15.0171	15.4247	15.8386	16.2583	16.6835	17.1134	17.5476	17.9854	18.4264	18.871	19.3197	19.7729	20.2304	20.6913	21.1535	21.6142	22.0714	22.5224	22.9668	23.4081	23.8514	24.2992	24.7538	25.211	25.6581
PHL	19.5985	20.1957	20.8111	21.4453	22.0987	22.7721	23.466	24.1811	24.9179	25.6772	26.4596	27.2772	28.1256	29.0048	29.9148	30.8545	31.816	32.792	33.7824	34.7862	35.8036	36.8497	37.9234	39.0228	40.1442	41.2857	42.4467	43.6294	44.8385	46.0799	47.3577	48.6728	50.0236	51.4089	52.827	54.2758	55.7554	57.2638	58.795	60.3408	61.8952	63.4548	65.0201	66.5939	68.1809	69.7841	71.4017	73.0309	74.672
POL	26.8954	27.1818	27.4683	27.7547	28.0412	28.3276	28.614	28.9005	29.1869	29.4734	29.7598	30.0463	30.3327	30.6192	30.9056	31.1921	31.4785	31.765	32.0514	32.3379	32.6393	32.8904	33.1471	33.4116	33.6858	33.9707	34.2661	34.5712	34.8858	35.2092	35.5397	35.8785	36.2215	36.5558	36.8639	37.1339	37.3595	37.5443	37.6974	37.8326	37.9602	38.0829	38.1976	38.3013	38.3895	38.4586	38.5097	38.5448	38.5642
PRT	8.07602	8.12145	8.1557	8.2063	8.25714	8.31501	8.37566	8.43463	8.50245	8.57228	8.64417	8.63891	8.628	8.68712	8.72624	8.73231	8.71313	8.70759	8.71911	8.70204	8.65134	8.7	8.7891	8.90793	9.03998	9.17224	9.3023	9.43104	9.5526	9.66075	9.75096	9.82087	9.87082	9.903	9.92124	9.92918	9.92642	9.91407	9.8992	9.89082	9.89536	9.91605	9.9513	9.99664	10.045	10.0913	10.134	10.1746	10.2141
PRY		1.51406	1.55461	1.59611	1.63861	1.6821	1.72529	1.76946	1.81461	1.86078	1.90798	1.95743	2.00817	2.06022	2.11363	2.16841	2.22649	2.28612	2.34734	2.41021	2.47476	2.53587	2.59715	2.65942	2.72381	2.79124	2.86187	2.93571	3.01328	3.09515	3.18162	3.27291	3.36877	3.46854	3.57127	3.67621	3.78307	3.89173	4.00168	4.11239	4.22342	4.33434	4.44502	4.55552	4.66609	4.77684	4.88763	4.9981	5.10784
PSE																					1.12663	1.14631	1.18243	1.22937	1.27856	1.3238	1.36362	1.40012	1.435	1.47114	1.51071	1.55418	1.60095	1.65092	1.70381	1.75953	1.81798	1.87975	1.94638	2.01983	2.10145	2.191	2.28766	2.3914	2.50198	2.61867	2.74253	2.87201	3.00062
QAT																					0.109514	0.119414	0.1305	0.142186	0.153621	0.16432	0.173721	0.182318	0.191951	0.205171	0.223632	0.247988	0.277226	0.309306	0.341272	0.37089	0.39774	0.422148	0.443605	0.46169	0.476278	0.487353	0.495395	0.501479	0.507041	0.513442	0.522531	0.535321	0.551562
ROU											18.6727	18.8386	18.9541	19.0884	19.2041	19.3058	19.4209	19.567	20.0096	20.303	20.5489	20.7835	21.0111	21.2326	21.4504	21.6656	21.8791	22.0879	22.2855	22.4633	22.6156	22.7372	22.8306	22.9073	22.984	23.0713	23.1751	23.2884	23.3937	23.4664	23.4892	23.4566	23.3758	23.257	23.1158	22.9648	22.8057	22.6376	22.4663
RUS																																									147.532	147.996	148.269	148.374	148.349	148.227	148.021	147.73	147.361
RWA											3.0223	3.03636	3.04168	3.1192	3.17401	3.25441	3.34768	3.44026	3.53681	3.64534	3.75736	3.87144	3.98722	4.10641	4.23158	4.36471	4.50611	4.65538	4.81287	4.97882	5.15331	5.32925	5.50484	5.69098	5.90284	6.14689	6.44375	6.77998	7.08819	7.27698	7.28888	7.08394	6.70224	6.26376	5.93626	5.8365	6.01311	6.4199	6.9628
SAU																					5.83639	6.10063	6.39297	6.71192	7.05453	7.41949	7.80293	8.2077	8.64685	9.13793	9.69148	10.3118	10.9889	11.7011	12.4188	13.119	13.7942	14.4457	15.0701	15.6663	16.2338	16.7727	17.2827	17.7633	18.2145	18.6388	19.0338	19.4071	19.7833
SDN																					10.2817	10.6215	10.9746	11.3439	11.733	12.1441	12.5784	13.0346	13.5104	14.0023	14.5075	15.0272	15.5621	16.1076	16.658	17.2102	17.7575	18.3034	18.8676	19.4766	20.1476	20.8914	21.6962	22.5278	23.3385	24.0947	24.7824	25.4139	26.0155
SEN											3.22408	3.3014	3.38227	3.46685	3.58529	3.69161	3.80259	3.91038	4.01685	4.13409	4.25751	4.38754	4.52289	4.66073	4.79719	4.92985	5.05738	5.18151	5.30668	5.43907	5.58317	5.74044	5.90974	6.08957	6.27742	6.47133	6.67066	6.87575	7.08663	7.30352	7.52631	7.7555	7.9901	8.22676	8.46107	8.69016	8.91286	9.13088	9.34777
SGP											1.64463	1.70057	1.74832	1.79308	1.83963	1.88488	1.93233	1.97548	2.00984	2.04031	2.07228	2.11096	2.1505	2.18961	2.22638	2.25972	2.28886	2.31499	2.3414	2.3726	2.41169	2.4605	2.51798	2.58091	2.6445	2.70553	2.76244	2.81697	2.87328	2.93728	3.01297	3.10115	3.19964	3.30581	3.4157	3.52597	3.63819	3.75214	3.86071
SLE												2.39291	2.4286	2.46523	2.50264	2.54087	2.57991	2.6198	2.66055	2.70224	2.74489	2.79872	2.85487	2.91334	2.9741	3.03715	3.10259	3.17051	3.24084	3.3135	3.38849	3.46411	3.54017	3.61985	3.70751	3.80531	3.91669	4.03814	4.15663	4.25444	4.31976	4.34866	4.34772	4.32896	4.30978	4.30396	4.31267	4.3353	4.38148
SLV	1.97703	2.02794	2.08207	2.13941	2.19998	2.26376	2.33078	2.40101	2.47448	2.55119	2.63112	2.71598	2.80042	2.89052	2.97998	3.07577	3.18824	3.29497	3.41156	3.53575	3.67307	3.77006	3.86731	3.96427	4.06026	4.15469	4.2475	4.33846	4.42668	4.51113	4.59113	4.66636	4.73726	4.80494	4.87104	4.93681	5.00234	5.06754	5.13327	5.2006	5.27008	5.3422	5.41632	5.49048	5.56192	5.6286	5.68994	5.74628	5.79777
SRB																																									9.51768	9.60289	9.70115	9.79526	9.86163	9.88415	9.85606	9.7847	9.68541
STP																					0.074564	0.076347	0.077934	0.079464	0.081152	0.083138	0.085481	0.08811	0.090843	0.093461	0.095794	0.09777	0.099473	0.101066	0.102829	0.104924	0.107429	0.110254	0.113285	0.11632	0.119209	0.121956	0.124576	0.127062	0.129427	0.131678	0.133806	0.135832	0.137848
SUR																					0.367931	0.369236	0.367907	0.364915	0.361667	0.359226	0.357953	0.357659	0.358099	0.358818	0.359519	0.360143	0.36092	0.362276	0.364733	0.368638	0.37414	0.381037	0.388881	0.397085	0.405168	0.413005	0.420655	0.42803	0.435105	0.441851	0.448213	0.454161	0.459831
SVK																																									5.28845	5.30924	5.32903	5.34721	5.3629	5.37547	5.38479	5.3912	5.39525
SVN																																									2.0064	2.00777	2.00535	2.00056	1.99534	1.99113	1.98856	1.98745	1.98738
SWE	7.02457	7.08348	7.1354	7.18226	7.22435	7.27333	7.32557	7.37489	7.4203	7.45746	7.49166	7.53132	7.57298	7.61578	7.67289	7.7455	7.81956	7.87978	7.92413	7.98002	8.05492	8.09579	8.12703	8.1516	8.17397	8.19734	8.22325	8.2507	8.27741	8.3	8.31634	8.32549	8.32943	8.33244	8.34044	8.35765	8.38499	8.42106	8.46479	8.51421	8.56738	8.62514	8.68674	8.74678	8.79823	8.83642	8.85919	8.86885	8.87085
SWZ																					0.431253	0.443977	0.457039	0.470559	0.484749	0.499763	0.515599	0.53226	0.549796	0.568315	0.587858	0.60838	0.629811	0.652115	0.675239	0.69908	0.723595	0.748632	0.773768	0.798507	0.82242	0.845266	0.866993	0.887706	0.90762	0.926841	0.945508	0.963426	0.979918
SXM
SYC											0.0403237	0.0416197	0.0424714	0.0438003	0.0452531	0.04625	0.0472286	0.0482855	0.0494837	0.0508213	0.052368	0.05371	0.055127	0.056606	0.0581	0.059585	0.061043	0.062477	0.063848	0.065111	0.066244	0.067247	0.068122	0.068844	0.069396	0.069775	0.069939	0.069946	0.069932	0.070089	0.07057	0.071436	0.072655	0.074065	0.07544	0.076649	0.077594	0.078355	0.079064
SYR											4.59954	4.75034	4.90607	5.06691	5.23303	5.40459	5.58178	5.76477	5.95376	6.14895	6.35054	6.57086	6.80014	7.03785	7.28318	7.53571	7.79466	8.06065	8.33642	8.62569	8.93077	9.25285	9.59023	9.93885	10.293	10.6486	11.0043	11.3609	11.7191	12.0804	12.4462	12.8154	13.1877	13.5651	13.9505	14.3455	14.7541	15.1753	15.5996
TCA																					0.005841	0.005971	0.006157	0.006381	0.006606	0.006827	0.007015	0.007198	0.007385	0.007613	0.007888	0.008235	0.008654	0.009104	0.009556	0.00997	0.010357	0.010724	0.011093	0.011548	0.012111	0.012811	0.013632	0.014526	0.015407	0.016216	0.016926	0.017567	0.018232
TCD											2.97404	3.02588	3.07973	3.13566	3.19795	3.26947	3.34264	3.4172	3.49207	3.56745	3.6436	3.72619	3.81526	3.90789	3.99992	4.08856	4.17314	4.25525	4.33729	4.42274	4.51443	4.61285	4.71816	4.83232	4.95756	5.0954	5.24728	5.41285	5.58963	5.77392	5.96325	6.15708	6.35675	6.56392	6.78105	7.01014	7.25098	7.50349	7.77005
TGO											1.56812	1.60621	1.64588	1.68721	1.7301	1.77478	1.82117	1.86933	1.91933	1.97147	2.11552	2.18566	2.24758	2.30335	2.35662	2.41045	2.46442	2.51846	2.57629	2.6427	2.72084	2.81231	2.91562	3.02697	3.14085	3.25299	3.36304	3.47174	3.57747	3.67857	3.77431	3.86299	3.94591	4.02905	4.12062	4.22629	4.3488	4.48595	4.63245
THA	19.9301	20.5384	21.171	21.842	22.5588	23.3209	24.1096	24.9026	25.7017	26.5189	27.3597	28.2182	29.1006	30.0059	30.9336	31.8836	32.852	33.835	34.8336	35.8494	36.8845	37.9633	39.0586	40.1596	41.2523	42.3263	43.3773	44.4059	45.4131	46.4018	47.3745	48.3263	49.2559	50.1739	51.0949	52.0269	52.9801	53.9459	54.8915	55.7722	56.5582	57.2325	57.811	58.3378	58.8753	59.4673	60.1302	60.8466	61.5851
TJK																																									5.28381	5.40063	5.50249	5.59331	5.67917	5.76481	5.85135	5.93841	6.02739
TKM																																									3.68397	3.78918	3.89984	4.01079	4.1151	4.20784	4.28735	4.35512	4.41348
TTO	0.62562	0.642152	0.656159	0.671453	0.690459	0.713524	0.735005	0.757179	0.78064	0.808802	0.832659	0.852692	0.878539	0.895251	0.914561	0.929774	0.94292	0.950463	0.953364	0.953207	0.94536	0.955741	0.968136	0.98201	0.996493	1.01094	1.02511	1.03921	1.05356	1.06864	1.08474	1.10198	1.12002	1.13807	1.15507	1.17029	1.18338	1.19454	1.20415	1.21286	1.22112	1.2291	1.23668	1.24362	1.24952	1.2542	1.25755	1.25985	1.2617
TUN											4.11318	4.18724	4.25728	4.3446	4.43788	4.53457	4.64408	4.7543	4.86076	4.96218	5.06381	5.17629	5.29134	5.40934	5.53097	5.65691	5.78648	5.91997	6.06015	6.21076	6.37404	6.55123	6.74053	6.93733	7.13527	7.32959	7.51786	7.70074	7.88033	8.06021	8.2425	8.42786	8.61386	8.79593	8.96792	9.1254	9.26734	9.39512	9.50986
TUR	20.6006	21.1348	21.6872	22.2673	22.885	23.549	24.2637	25.0377	25.8519	26.681	27.5211	28.3139	29.0539	29.7566	30.4571	31.1626	31.8717	32.5871	33.322	34.0901	34.8763	35.7206	36.5873	37.4723	38.3703	39.2773	40.1896	41.1083	42.04	42.994	43.976	44.9884	46.0254	47.0735	48.1142	49.1339	50.1285	51.1009	52.0538	52.9925	53.9218	54.8406	55.7489	56.6538	57.5642	58.4865	59.4233	60.3726	61.3297
TWN		7.7582	8.04692	8.33301	8.64526	8.967	9.28955	9.59769	9.92023	10.2883	10.6677	11.0304	11.3925	11.7621	12.1371	12.5119	12.8742	13.2103	13.5485	14.069	14.5829	14.9136	15.2205	15.5051	15.7848	16.0751	16.4014	16.7309	17.0423	17.3728	17.7045	18.03	18.3549	18.6531	18.9299	19.1915	19.4115	19.617	19.8397	20.0555	20.2789	20.5036	20.7042	20.899	21.0866	21.2677	21.4414	21.6341	21.8357
TZA											10.058	10.3479	10.6504	10.9654	11.2952	11.6371	11.991	12.3595	12.7328	13.1264	13.5355	13.9717	14.4283	14.9023	15.3889	15.8852	16.3902	16.9052	17.4328	17.9762	18.5383	19.1207	19.7233	20.3445	20.9818	21.6338	22.2963	22.9712	23.6708	24.4117	24.5236	25.3556	26.2392	27.1432	28.0256	28.8591	29.6305	30.5569	31.0602
UGA	5.33058	5.47462	5.62312	5.77623	5.93469	6.09872	6.26854	6.44437	6.62646	6.81506	7.01043	7.21284	7.42258	7.63995	7.86526	8.09883	8.341	8.59214	8.8526	9.12279	9.4056	9.67186	9.92964	10.1865	10.453	10.7374	11.043	11.3686	11.7125	12.0711	12.4423	12.8251	13.222	13.6387	14.0829	14.5594	15.0703	15.6128	16.1801	16.763	17.3544	17.9535	18.5617	19.176	19.7935	20.4132	21.0328	21.6554	22.2908
UKR																																									51.4631	51.4613	51.416	51.316	51.1478	50.9038	50.5805	50.1873	49.7465
URY	2.1835	2.21214	2.2419	2.2727	2.30517	2.34158	2.37756	2.41305	2.44833	2.48277	2.51854	2.5512	2.58571	2.61919	2.65053	2.67991	2.70784	2.73508	2.76297	2.7881	2.80979	2.81828	2.82146	2.82212	2.82409	2.83018	2.84137	2.85696	2.87573	2.89569	2.91539	2.93461	2.95385	2.97304	2.99225	3.01152	3.03065	3.04958	3.06871	3.0886	3.1096	3.13166	3.15446	3.17774	3.20115	3.22428	3.24738	3.27016	3.29105
USA	155.584	158.248	160.981	163.669	166.573	169.541	172.578	175.726	178.687	181.699	184.602	187.688	190.597	193.359	196.064	198.53	200.837	203.035	205.073	207.087	209.513	211.384	213.27	215.179	217.115	219.081	221.086	223.136	225.223	227.339	229.476	231.636	233.822	236.03	238.257	240.5	242.763	245.053	247.372	249.726	252.12	254.539	256.991	259.532	262.241	265.164	268.335	271.714	275.175
UZB																																									20.3983	20.8849	21.3751	21.862	22.3362	22.791	23.2253	23.6405	24.036
VCT																					0.090509	0.091491	0.092513	0.093571	0.094614	0.095662	0.096692	0.097701	0.098697	0.099649	0.100566	0.101437	0.102256	0.103032	0.103779	0.104506	0.105217	0.105906	0.106532	0.107071	0.107484	0.107776	0.10795	0.108033	0.108053	0.108035	0.107976	0.107895	0.107801
VEN	5.30624	5.5266	5.76235	6.01097	6.26992	6.53665	6.8129	7.1004	7.3966	7.69895	8.00488	8.31352	8.6266	8.94545	9.2714	9.60581	9.94421	10.2857	10.6371	11.005	11.3964	11.7459	12.0977	12.4537	12.817	13.1895	13.5722	13.9644	14.3647	14.7713	15.1826	15.5979	16.0176	16.4431	16.8767	17.3195	17.772	18.2327	18.6988	19.1665	19.6327	20.0963	20.5577	21.0169	21.4745	21.9311	22.3856	22.8377	23.2886
VGB																					0.009827	0.010017	0.010208	0.010392	0.010562	0.010699	0.010821	0.010928	0.011045	0.011218	0.011478	0.011826	0.012249	0.012752	0.013322	0.013956	0.014649	0.015407	0.016154	0.016862	0.017489	0.018006	0.018438	0.018786	0.019074	0.019313	0.019502	0.019665	0.019821
VNM																					43.4048	44.484	45.5485	46.6035	47.6576	48.7182	49.7853	50.8612	51.959	53.0954	54.2818	55.5228	56.8143	58.1484	59.5126	60.8967	62.2939	63.702	65.1204	66.5502	67.9889	69.437	70.8835	72.3003	73.6512	74.9105	76.0687	77.1332	78.1157
YEM																																								11.1892	11.71	12.3021	12.9542	13.6341	14.2976	14.9133	15.4693	15.9757	16.4503
ZAF	13.1952	13.5159	13.8445	14.1927	14.5498	14.9156	15.2909	15.6756	16.0701	16.4747	16.9034	17.3434	17.8157	18.301	18.7997	19.3118	19.8381	20.3785	20.9338	21.5044	22.0698	22.6653	23.2815	23.9131	24.5525	25.1952	25.8369	26.4809	27.139	27.8273	28.5568	29.3331	30.1504	30.9938	31.8416	32.6789	33.496	34.2977	35.1009	35.9301	36.8005	37.7189	38.6726	39.6337	40.5641	41.4358	42.241	42.9875	43.6823
ZMB						2.82005	2.89082	2.96454	3.04121	3.11886	3.19848	3.28006	3.36263	3.44814	3.53759	3.63097	3.72926	3.83345	3.94059	4.05265	4.17907	4.31922	4.46617	4.61955	4.77872	4.94328	5.11282	5.28755	5.46826	5.65614	5.85182	6.05537	6.26586	6.48192	6.70154	6.92315	7.14697	7.37284	7.59828	7.8202	8.03684	8.24666	8.45135	8.65649	8.86974	9.09661	9.33973	9.59761	9.86648
ZWE					3.17219	3.26978	3.38557	3.49741	3.61042	3.72819	3.84711	3.97102	4.10302	4.2322	4.35195	4.49391	4.63818	4.7914	4.96058	5.13417	5.2893	5.47698	5.67391	5.87773	6.08507	6.29387	6.50257	6.71283	6.92966	7.16002	7.40862	7.67559	7.95824	8.25475	8.56225	8.87749	9.20015	9.5272	9.84913	10.1539	10.4324	10.681	10.9005	11.0928	11.2617	11.4107	11.5412	11.6532	11.7471
[truncated: 23 more columns]
