# Supplementary material for: The Social Cost of Fossil and Industrial CO2 Emissions from 1950 to 2018
Source: Research Square preprint supplement (doi:10.21203/rs.3.rs-2244259/v1), 2022-11-17
Supplement: Supplementary file 46 [file UN_POPULATION_Data.xlsx]

## Sheet: ESTIMATES
United Nations
Population Division
Department of Economic and Social Affairs
World Population Prospects 2019
File POP/1-1: Total population (both sexes combined) by region, subregion and country, annually for 1950-2100 (thousands)
Estimates, 1950 - 2020
POP/DB/WPP/Rev.2019/POP/F01-1
© August 2019 by United Nations, made available under a Creative Commons license CC BY 3.0 IGO: http://creativecommons.org/licenses/by/3.0/igo/
Suggested citation: United Nations, Department of Economic and Social Affairs, Population Division (2019). World Population Prospects 2019, Online Edition. Rev. 1.
							Total population, both sexes combined, as of 1 July (thousands)
Index	Variant	Region, subregion, country or area *	Notes	Country code	Type	Parent code	1950	1951	1952	1953	1954	1955	1956	1957	1958	1959	1960	1961	1962	1963	1964	1965	1966	1967	1968	1969	1970	1971	1972	1973	1974	1975	1976	1977	1978	1979	1980	1981	1982	1983	1984	1985	1986	1987	1988	1989	1990	1991	1992
1	Estimates	WORLD		900	World	0	2.53643e+06	2.58403e+06	2.63086e+06	2.67761e+06	2.72485e+06	2.77302e+06	2.82244e+06	2.87331e+06	2.92569e+06	2.97958e+06	3.03495e+06	3.09184e+06	3.15042e+06	3.211e+06	3.27398e+06	3.33958e+06	3.40792e+06	3.47877e+06	3.5516e+06	3.62568e+06	3.70044e+06	3.77576e+06	3.85165e+06	3.92778e+06	4.00379e+06	4.07948e+06	4.15467e+06	4.22951e+06	4.30453e+06	4.38051e+06	4.458e+06	4.537e+06	4.61739e+06	4.69957e+06	4.78401e+06	4.87092e+06	4960568	5.05252e+06	5.14543e+06	5.23744e+06	5.32723e+06	5.41429e+06	5.49892e+06
2	Estimates	UN development groups	a	1803	Label/Separator	900	...	...	...	...	...	...	...	...	...	...	...	...	...	...	...	...	...	...	...	...	...	...	...	...	...	...	...	...	...	...	...	...	...	...	...	...	...	...	...	...	...	...	...
3	Estimates	More developed regions	b	901	Development Group	1803	814819	824004	833720	843788	854060	864430	874824	885207	895576	905949	916344	926752	937111	947303	957175	966624	975585	984097	992293	1.00037e+06	1.00845e+06	1.0166e+06	1.02476e+06	1.03286e+06	1.04077e+06	1.04842e+06	1.05577e+06	1.06288e+06	1.06978e+06	1.07651e+06	1.08313e+06	1.08961e+06	1.09596e+06	1.10223e+06	1.10848e+06	1.11476e+06	1.1211e+06	1.12745e+06	1.13373e+06	1.13978e+06	1.14551e+06	1.15089e+06	1.15597e+06
4	Estimates	Less developed regions	c	902	Development Group	1803	1.72161e+06	1.76003e+06	1.79714e+06	1.83382e+06	1.87079e+06	1.90859e+06	1.94762e+06	1.9881e+06	2.03011e+06	2.07363e+06	2.11861e+06	2.16509e+06	2.21331e+06	2.2637e+06	2.3168e+06	2.37296e+06	2.43234e+06	2.49467e+06	2.55931e+06	2.62532e+06	2.69199e+06	2.75916e+06	2.82689e+06	2.89492e+06	2.96302e+06	3.03106e+06	3.09889e+06	3.16662e+06	3.23475e+06	3.30399e+06	3.37488e+06	3.44739e+06	3.52143e+06	3.59734e+06	3.67553e+06	3.75616e+06	3.83947e+06	3.92507e+06	4.0117e+06	4.09766e+06	4.18172e+06	4.2634e+06	4.34295e+06
5	Estimates	Least developed countries	d	941	Development Group	902	195428	199180	203015	206986	211133	215486	220061	224862	229882	235106	240518	246114	251901	257908	264174	270721	277573	284709	292046	299474	306917	314345	321798	329358	337143	345243	353691	362475	371577	380963	390613	400529	410741	421279	432185	443491	455194	467290	479814	492803	506276	520262	534731
6	Estimates	Less developed regions, excluding least developed countries	e	934	Development Group	902	1.52618e+06	1.56085e+06	1.59413e+06	1.62684e+06	1.65965e+06	1.6931e+06	1.72756e+06	1.76324e+06	1.80023e+06	1.83852e+06	1.87809e+06	1.91898e+06	1.96141e+06	2.00579e+06	2.05263e+06	2.10224e+06	2.15476e+06	2.20996e+06	2.26726e+06	2.32584e+06	2.38507e+06	2.44481e+06	2.50509e+06	2.56556e+06	2.62588e+06	2.68582e+06	2.7452e+06	2.80415e+06	2.86318e+06	2.92303e+06	2.98427e+06	3.04686e+06	3.11069e+06	3.17606e+06	3.24334e+06	3.31267e+06	3.38428e+06	3.45778e+06	3.53189e+06	3.60486e+06	3.67545e+06	3.74313e+06	3.80822e+06
7	Estimates	Less developed regions, excluding China		948	Development Group	1803	1.15742e+06	1.17993e+06	1.20396e+06	1.22944e+06	1.2563e+06	1.2845e+06	1.31398e+06	1.34471e+06	1.37665e+06	1.40979e+06	1.44411e+06	1.47957e+06	1.51614e+06	1.5538e+06	1.59248e+06	1.63217e+06	1.67284e+06	1.7145e+06	1.75714e+06	1.80076e+06	1.84536e+06	1.89097e+06	1.93759e+06	1.98526e+06	2.03402e+06	2.08391e+06	2.13489e+06	2.18699e+06	2.24037e+06	2.29526e+06	2.35178e+06	2.40996e+06	2.46969e+06	2.53076e+06	2.59284e+06	2.6557e+06	2.71923e+06	2.78339e+06	2.84805e+06	2.91306e+06	2.97829e+06	3.04367e+06	3.10915e+06
8	Estimates	Land-locked Developing Countries (LLDC)	f	1636	Special other	1803	103803	105870	108079	110423	112894	115488	118201	121030	123975	127035	130210	133497	136891	140384	143966	147628	151360	155161	159037	163000	167055	171216	175472	179770	184044	188251	192375	196450	200540	204737	209113	213677	218428	223409	228669	234235	240137	246351	252786	259317	265852	272366	278882
9	Estimates	Small Island Developing States (SIDS)	g	1637	Special other	1803	23771.1	24209.1	24684.6	25187.4	25710.4	26248.8	26800.7	27366.9	27950.6	28556.3	29188	29846.6	30527.7	31221.3	31913.9	32595.5	33261.2	33913.4	34558.8	35207.9	35868	36542.2	37226.9	37914.8	38594.8	39260.2	39907.8	40542.2	41172.8	41812.6	42471.2	43152.2	43853	44570.2	45297.8	46031.7	46770.1	47514.4	48266.8	49030.7	49807.7	50597.7	51398
10	Estimates	World Bank income groups		1802	Label/Separator	900	...	...	...	...	...	...	...	...	...	...	...	...	...	...	...	...	...	...	...	...	...	...	...	...	...	...	...	...	...	...	...	...	...	...	...	...	...	...	...	...	...	...	...
11	Estimates	High-income countries	h	1503	Income Group	1802	694989	703004	711534	720436	729596	738929	748379	757921	767554	777295	787158	797135	807172	817168	826989	836545	845779	854716	863452	872129	880846	889639	898465	907249	915880	924283	932436	940375	948144	955812	963431	971015	978559	986073	993567	1.00105e+06	1.00852e+06	1.01599e+06	1.02347e+06	1.03095e+06	1.03846e+06	1.04599e+06	1.05354e+06
12	Estimates	Middle-income countries	h	1517	Income Group	1802	1.7036e+06	1.74109e+06	1.77713e+06	1.81254e+06	1.84797e+06	1.88396e+06	1.92088e+06	1.95896e+06	1.9983e+06	2.03891e+06	2.08078e+06	2.12397e+06	2.16868e+06	2.2153e+06	2.2643e+06	2.31597e+06	2.37045e+06	2.42751e+06	2.48655e+06	2.54675e+06	2.60746e+06	2.66854e+06	2.73004e+06	2.79169e+06	2.85324e+06	2.91456e+06	2.97547e+06	3.03611e+06	3.09697e+06	3.15875e+06	3.22199e+06	3.28664e+06	3.35259e+06	3.42016e+06	3.48973e+06	3.56145e+06	3.63556e+06	3.71163e+06	3.78827e+06	3.86358e+06	3.9362e+06	4.00557e+06	4.07203e+06
13	Estimates	Upper-middle-income countries	h	1502	Income Group	1517	938931	962816	984350	1.00441e+06	1.0237e+06	1.0428e+06	1.06208e+06	1.08179e+06	1.10204e+06	1.1228e+06	1.14406e+06	1.16587e+06	1.18846e+06	1.21228e+06	1.23786e+06	1.26554e+06	1.29547e+06	1.3274e+06	1.36073e+06	1.39459e+06	1.4283e+06	1.46172e+06	1.49487e+06	1.52745e+06	1.55917e+06	1.58986e+06	1.61936e+06	1.64778e+06	1.67553e+06	1.7032e+06	1.73125e+06	1.75963e+06	1.7883e+06	1.81774e+06	1.84858e+06	1.88115e+06	1.91577e+06	1.95204e+06	1.98864e+06	2.0238e+06	2.05624e+06	2.08547e+06	2.11184e+06
14	Estimates	Lower-middle-income countries	h	1501	Income Group	1517	764666	778270	792779	808129	824269	841166	858799	877162	896262	916112	936726	958102	980218	1.00302e+06	1.02644e+06	1.05043e+06	1.07498e+06	1.1001e+06	1.12582e+06	1.15216e+06	1.17916e+06	1.20683e+06	1.23517e+06	1.26424e+06	1.29407e+06	1.3247e+06	1.35612e+06	1.38833e+06	1.42143e+06	1.45555e+06	1.49073e+06	1.52701e+06	1.5643e+06	1.60242e+06	1.64115e+06	1.68029e+06	1.71978e+06	1.7596e+06	1.79963e+06	1.83978e+06	1.87996e+06	1.92011e+06	1.96019e+06
15	Estimates	Low-income countries	h	1500	Income Group	1802	137042	139119	141352	143769	146387	149214	152243	155459	158837	162344	165954	169654	173454	177390	181517	185871	190464	195281	200297	205472	210778	216209	221772	227464	233287	239242	245339	251580	257954	264447	271058	277785	284657	291730	299079	306762	314787	323154	331902	341077	350701	360816	371393
16	Estimates	No income group available		1518	Income Group	1802	803.551	825.618	846.915	868.472	891.182	915.467	941.557	969.198	997.963	1027.14	1056.11	1084.49	1112.37	1140.39	1169.38	1199.97	1232.85	1267.23	1300.78	1329.89	1352.52	1367.28	1375.76	1381.03	1388.05	1400.09	1418.54	1442.48	1470.13	1498.79	1526.54	1552.71	1578.24	1604.48	1633.57	1666.82	1704.84	1746.81	1790.85	1834.42	1875.68	1913.92	1949.88
17	Estimates	Geographic regions	i	1840	Label/Separator	900	...	...	...	...	...	...	...	...	...	...	...	...	...	...	...	...	...	...	...	...	...	...	...	...	...	...	...	...	...	...	...	...	...	...	...	...	...	...	...	...	...	...	...
18	Estimates	Africa	j	903	Region	1840	227794	232328	237097	242092	247311	252749	258408	264292	270407	276761	283361	290214	297323	304683	312292	320147	328257	336631	345280	354215	363448	372984	382838	393044	403646	414675	426144	438055	450404	463184	476386	490004	504034	518480	533345	548626	564327	580424	596849	613512	630350	647344	664512
19	Estimates	Asia	k	935	Region	1840	1.40491e+06	1.43582e+06	1.46483e+06	1.49289e+06	1.52077e+06	1.54904e+06	1.57812e+06	1.60824e+06	1.63946e+06	1.67175e+06	1.70504e+06	1.73939e+06	1.77503e+06	1.81247e+06	1.85232e+06	1.89497e+06	1.9406e+06	1.98892e+06	2.03927e+06	2.0907e+06	2.14248e+06	2.19445e+06	2.24664e+06	2.2987e+06	2.35028e+06	2.40117e+06	2.45118e+06	2.50044e+06	2.54947e+06	2.59899e+06	2.64958e+06	2.70122e+06	2.75384e+06	2.80779e+06	2.8635e+06	2.92117e+06	2.98106e+06	3.04281e+06	3.10522e+06	3.16671e+06	3.2261e+06	3.28295e+06	3.33751e+06
20	Estimates	Europe	l	908	Region	1840	549329	554325	559694	565282	570970	576679	582371	588048	593743	599513	605407	611434	617536	623575	629367	634783	639762	644345	648636	652790	656919	661056	665164	669208	673132	676895	680498	683960	687286	690485	693567	696513	699330	702070	704807	707584	710422	713279	716057	718617	720858	722776	724390
21	Estimates	Latin America and the Caribbean	m	904	Region	1840	168821	173280	177916	182709	187648	192727	197949	203320	208854	214566	220470	226568	232849	239283	245829	252456	259154	265926	272768	279684	286676	293738	300869	308079	315378	322777	330272	337860	345548	353345	361253	369275	377396	385587	393806	402024	410223	418404	426565	434710	442840	450947	459019
22	Estimates	Northern America	n	905	Region	1840	172603	175017	177778	180813	184052	187430	190893	194388	197870	201301	204649	207887	210996	213963	216783	219454	221966	224327	226581	228787	230992	233214	235450	237703	239971	242251	244553	246882	249238	251614	254007	256419	258854	261318	263819	266363	268959	271607	274300	277028	279785	282552	285340
23	Estimates	Oceania	o	909	Region	1840	12975.9	13265.7	13542.6	13817.6	14099.2	14392.7	14700.2	15021	15351.5	15686.7	16021.6	16354	16686.2	17026	17384.6	17768.7	18181.5	18617.5	19063.9	19503.1	19922.2	20318.2	20694.1	21050.1	21388	21710.3	22015.4	22305.4	22592	22890.5	23212.1	23561	23934.6	24328.8	24736.2	25151	25572.7	26001.7	26434.9	26868.2	27298.7	27725.2	28148
24	Estimates	Sustainable Development Goal (SDG) regions	p	1828	Label/Separator	900	...	...	...	...	...	...	...	...	...	...	...	...	...	...	...	...	...	...	...	...	...	...	...	...	...	...	...	...	...	...	...	...	...	...	...	...	...	...	...	...	...	...	...
25	Estimates	SUB-SAHARAN AFRICA		947	SDG region	1828	179007	182373	185912	189614	193474	197490	201664	206004	210521	215228	220138	225260	230596	236142	241888	247831	253972	260325	266914	273767	280908	288346	296085	304135	312505	321201	330232	339601	349297	359305	369614	380212	391107	402322	413893	425841	438184	450902	463932	477186	490605	504171	517913
26	Estimates	Eastern Africa		910	Subregion	947	66144.6	67602.8	69108.6	70668.6	72289	73975.4	75732.8	77566	79478.9	81475.2	83558.2	85730.8	87996	90356.4	92814.7	95372.7	98034.5	100801	103669	106630	109682	112824	116061	119404	122868	126465	130200	134072	138081	142221	146488	150873	155377	160026	164857	169887	175148	180614	186187	191735	197168	202443	207612
27	Estimates	Burundi		108	Country/Area	910	2308.93	2360.44	2406.03	2449.09	2492.19	2537.15	2584.91	2635.62	2688.75	2743.2	2797.93	2852.44	2907.32	2964.42	3026.29	3094.38	3170.5	3253.22	3336.93	3413.91	3479.07	3530	3569.66	3605.12	3646.43	3700.88	3770.87	3854.45	3949.26	4051.24	4157.3	4266.52	4379.73	4497.54	4621.1	4750.83	4886.74	5027.14	5168.7	5307.07	5438.96	5564.92	5685.57
28	Estimates	Comoros		174	Country/Area	910	159.459	163.146	166.538	169.748	172.853	175.906	178.946	181.99	185.046	188.088	191.122	194.149	197.202	200.371	203.762	207.429	211.477	215.9	220.574	225.324	230.055	234.645	239.229	244.207	250.107	257.285	265.958	275.903	286.628	297.451	307.831	317.617	326.944	336.088	345.455	355.337	365.765	376.647	387.964	399.638	411.598	423.873	436.454
29	Estimates	Djibouti		262	Country/Area	910	62	63.313	64.744	66.273	67.884	69.593	71.494	73.699	76.352	79.615	83.634	88.503	94.203	100.618	107.582	114.976	122.876	131.405	140.462	149.889	159.662	169.372	179.237	190.569	205.18	224.177	248.556	277.472	308.008	336.08	358.96	374.934	385.268	393.8	406.018	425.608	454.359	490.337	528.993	563.855	590.393	606.843	615.05
30	Estimates	Eritrea		232	Country/Area	910	822.347	835	849.258	864.893	881.761	899.746	918.849	939.085	960.538	983.337	1007.59	1033.32	1060.49	1088.86	1118.15	1148.19	1178.88	1210.3	1242.63	1276.12	1310.95	1347.18	1384.79	1423.75	1463.99	1505.44	1547.98	1591.62	1636.77	1683.93	1733.42	1784.56	1836.83	1890.56	1946.3	2003.94	2064.8	2127.42	2185.61	2231.14	2258.65	2266.36	2257.59
31	Estimates	Ethiopia		231	Country/Area	910	18128	18467	18819.7	19184.3	19560	19947.3	20347.8	20764.5	21201	21662	22151.3	22671.2	23221.4	23798.4	24397	25013.6	25641	26280.1	26944.4	27652.7	28415.1	29248.7	30140.8	31036.7	31861.4	32566.9	33128.2	33577.2	33993.3	34487.8	35141.7	35984.5	36995.2	38142.7	39374.3	40652.1	41965.7	43329.2	44757.2	46272.3	47887.9	49610	51423.6
32	Estimates	Kenya		404	Country/Area	910	6076.76	6242.11	6415.95	6598.17	6788.7	6987.66	7195.22	7411.77	7637.73	7873.62	8120.08	8377.69	8647	8928.51	9222.69	9530.16	9851.45	10187.5	10539.9	10910.7	11301.4	11713	12146.1	12600.8	13077.3	13575.9	14096.3	14638.9	15205.4	15797.8	16417.2	17063.9	17736.3	18431.8	19146.4	19877.1	20622.6	21382.1	22153.7	22935.1	23724.6	24521.7	25326.1
33	Estimates	Madagascar		450	Country/Area	910	4083.55	4168.39	4256.76	4348.72	4444.29	4543.54	4646.58	4753.53	4864.52	4979.75	5099.37	5223.56	5352.5	5486.32	5625.16	5769.22	5918.59	6073.53	6234.47	6401.92	6576.31	6757.85	6946.62	7142.63	7345.77	7556.03	7773.45	7998.16	8230.21	8469.68	8716.55	8971.34	9234.14	9504.28	9780.87	10063.5	10352.1	10647.8	10952.4	11268.7	11598.6	11942.8	12301.3
34	Estimates	Malawi		454	Country/Area	910	2953.87	3011.79	3072.39	3135.69	3201.72	3270.55	3342.25	3416.93	3494.69	3575.66	3659.98	3747.76	3839.05	3933.91	4032.36	4134.46	4240.43	4350.46	4464.43	4582.2	4703.78	4829.09	4958.56	5093.37	5235.07	5384.8	5545.65	5717.95	5896.86	6075.48	6250.43	6412.38	6565.98	6737.92	6964.61	7268.27	7666.39	8141.14	8636.69	9075.57	9404.5	9600.36	9685.97
35	Estimates	Mauritius	1	480	Country/Area	910	493.258	506.428	521.191	537.05	553.622	570.65	587.952	605.487	623.274	641.423	660.025	679.05	698.31	717.407	735.86	753.283	769.56	784.774	799.143	812.941	826.451	839.594	852.394	865.17	878.356	892.219	906.918	922.329	937.818	952.581	966.039	978.071	988.889	998.62	1007.5	1015.76	1023.28	1030.18	1037.25	1045.59	1055.87	1068.43	1082.95
36	Estimates	Mayotte	2	175	Country/Area	910	15.138	15.732	16.444	17.244	18.101	18.994	19.897	20.839	21.833	22.889	24.016	25.24	26.537	27.887	29.22	30.52	31.783	33.009	34.251	35.553	36.964	38.518	40.199	41.961	43.733	45.48	47.188	48.888	50.697	52.747	55.136	57.913	61.044	64.494	68.205	72.108	76.187	80.445	84.941	89.709	94.779	100.164	105.826
37	Estimates	Mozambique		508	Country/Area	910	5958.98	6059.45	6165.05	6275.23	6389.68	6508.4	6631.67	6760.11	6894.49	7035.8	7184.87	7342.12	7507.31	7679.47	7857.11	8039.22	8225.92	8417.7	8614.44	8816.06	9022.75	9232.66	9446.24	9668.66	9906.96	10165.2	10444	10738.5	11041.2	11341.4	11630.2	11913.1	12189.8	12439.8	12636.1	12764.4	12808.6	12786.4	12758	12806	12987.3	13328	13806
38	Estimates	Réunion	2	638	Country/Area	910	248.114	259.294	268.481	276.524	284.083	291.663	299.575	307.982	316.882	326.165	335.694	345.407	355.425	366.085	377.797	390.773	405.286	420.996	436.688	450.742	462.029	470.116	475.476	478.91	481.689	484.785	488.348	492.289	496.906	502.499	509.264	517.415	526.95	537.401	548.141	558.704	568.913	578.938	588.985	599.447	610.584	622.413	634.793
39	Estimates	Rwanda		646	Country/Area	910	2186.18	2251.12	2314.18	2379.69	2450.36	2527.29	2609.86	2695.82	2781.61	2862.8	2935.57	2998.33	3052.94	3105.42	3164.26	3235.54	3321.67	3420.9	3529.84	3643.24	3757.35	3871.43	3987.22	4106.41	4231.58	4364.71	4506.11	4655.39	4812.87	4978.81	5153.31	5329.25	5504.85	5690.99	5902.85	6146.88	6443.75	6779.98	7088.19	7276.98	7288.88	7083.93	6702.24
40	Estimates	Seychelles		690	Country/Area	910	36.325	36.904	37.475	38.003	38.505	38.963	39.394	39.837	40.32	40.904	41.611	42.46	43.461	44.546	45.678	46.787	47.866	48.916	49.998	51.132	52.371	53.714	55.127	56.609	58.096	59.584	61.044	62.483	63.85	65.114	66.237	67.242	68.12	68.837	69.402	69.772	69.941	69.946	69.925	70.089	70.572	71.446	72.661
41	Estimates	Somalia		706	Country/Area	910	2264.08	2307.68	2351.94	2397.19	2443.65	2491.54	2541.02	2592.15	2645.03	2699.62	2755.97	2814.12	2874.22	2936.48	3001.16	3068.47	3143.65	3227.84	3312.74	3386.74	3444.57	3472.36	3479.79	3512.63	3632.99	3880.28	4278.97	4802.13	5375.02	5892.76	6281.14	6511.11	6608.04	6618.59	6614.71	6648.63	6736.75	6862.27	7005.23	7133.26	7225.09	7274.03	7295.38
42	Estimates	South Sudan		728	Country/Area	910	2482.31	2501.57	2525.2	2552.93	2584.51	2619.72	2658.3	2700.07	2744.85	2792.44	2842.72	2895.61	2951.04	3009.06	3069.74	3133.16	3199.35	3268.39	3340.43	3415.57	3494.01	3575.9	3661.44	3750.78	3844.09	3941.61	4041.79	4144.55	4253.09	4371.71	4502.6	4646.48	4799.44	4953.15	5096.48	5220.75	5328.17	5419.81	5485.29	5511.58	5492.62	5420.18	5305.45
43	Estimates	Uganda		800	Country/Area	910	5158.19	5307.72	5452.86	5596.32	5740.77	5888.79	6042.93	6205.62	6379.22	6565.84	6767.09	6983.82	7215.8	7461.64	7719.11	7986.06	8263.43	8550.44	8841.16	9127.85	9405.61	9671.86	9929.64	10186.5	10453	10737.4	11043	11368.6	11712.5	12071.1	12442.3	12825.1	13222	13638.7	14082.9	14559.4	15070.3	15612.8	16180.1	16763	17354.4	17953.5	18561.7
44	Estimates	United Republic of Tanzania	3	834	Country/Area	910	7649.77	7844.89	8050.98	8267.42	8493.75	8729.67	8974.99	9229.73	9493.99	9768.03	10052.2	10346.7	10652	10968.2	11295.7	11634.8	11985.4	12348.2	12725.5	13120.6	13535.5	13971.7	14428.3	14902.3	15388.9	15885.2	16390.2	16905.2	17432.8	17976.2	18538.3	19120.7	19723.3	20344.5	20981.8	21633.8	22296.3	22971.2	23670.8	24411.7	25203.8	26056.6	26961.2
45	Estimates	Zambia		894	Country/Area	910	2310.44	2368.61	2431.34	2498.46	2569.75	2644.98	2723.87	2806.16	2891.58	2979.84	3070.78	3164.33	3260.64	3360.1	3463.21	3570.47	3681.95	3797.88	3918.87	4045.74	4179.06	4319.23	4466.17	4619.55	4778.72	4943.28	5112.82	5287.54	5468.26	5656.15	5851.82	6055.36	6265.87	6481.91	6701.55	6923.15	7146.97	7372.84	7598.27	7820.2	8036.85	8246.66	8451.35
46	Estimates	Zimbabwe		716	Country/Area	910	2746.85	2832.25	2922.04	3015.66	3112.78	3213.29	3317.28	3425.07	3537.17	3654.17	3776.68	3905.04	4039.21	4178.73	4322.85	4471.18	4623.34	4779.82	4941.9	5111.33	5289.31	5476.98	5673.91	5877.73	6085.08	6293.88	6502.57	6712.82	6929.66	7160.02	7408.63	7675.58	7958.24	8254.75	8562.26	8877.49	9200.15	9527.2	9849.13	10153.9	10432.4	10681	10900.5
47	Estimates	Middle Africa		911	Subregion	947	26453.8	26924	27431.1	27966.5	28523.7	29098.3	29688.2	30293.2	30915.1	31556.9	32222.2	32912.9	33628.8	34366.7	35122.1	35893.2	36678	37482	38320	39211.5	40170.7	41203.4	42306.2	43472	44689	45948.7	47251.8	48601.4	49993.1	51421.9	52885.4	54384.1	55923.5	57512.9	59164.7	60890	62683.4	64547.1	66509.1	68604.8	70855.1	73283.5	75871.1
48	Estimates	Angola		24	Country/Area	911	4548.02	4616.55	4713.16	4823.33	4935.96	5043.25	5140.91	5228.01	5306.54	5380.72	5454.94	5531.45	5608.5	5679.41	5734.99	5770.57	5781.31	5774.44	5771.97	5803.68	5890.36	6041.24	6248.97	6497.28	6761.62	7023.99	7279.63	7533.81	7790.77	8058.11	8341.29	8640.48	8952.97	9278.1	9614.76	9961.99	10320.1	10689.2	11068.1	11454.8	11848.4	12248.9	12657.4
49	Estimates	Cameroon		120	Country/Area	911	4307.02	4383.96	4462.13	4541.79	4623.28	4707	4793.39	4883.01	4976.41	5074.2	5176.92	5285.02	5398.73	5518.1	5643.04	5773.54	5909.87	6052.42	6201.41	6357.1	6519.75	6689.66	6867.17	7052.85	7247.28	7451.06	7664.4	7887.57	8121.08	8365.56	8621.41	8888.53	9166.81	9456.5	9757.85	10070.8	10395.5	10731.1	11075.4	11425.8	11780.1	12137.9	12499.5
50	Estimates	Central African Republic		140	Country/Area	911	1326.66	1341.72	1356.12	1370.52	1385.45	1401.34	1418.48	1437.06	1457.12	1478.68	1501.67	1526.06	1551.91	1579.38	1608.62	1639.71	1673.02	1708.31	1744.2	1778.87	1811.16	1840.52	1867.79	1894.85	1924.39	1958.37	1997.02	2039.91	2087.66	2140.78	2199.36	2264.44	2335.34	2408.32	2478.38	2542.17	2597.76	2646.84	2693.97	2745.74	2806.74	2878.51	2959.24
51	Estimates	Chad		148	Country/Area	911	2502.32	2543.88	2588.87	2636.25	2685.19	2735.2	2786.05	2837.77	2890.64	2945.1	3001.6	3060.36	3121.23	3183.58	3246.53	3309.58	3372.18	3434.82	3499.37	3568.4	3643.61	3726.19	3815.25	3907.89	3999.92	4088.57	4173.13	4255.24	4337.29	4422.74	4514.43	4612.86	4718.16	4832.32	4957.56	5095.4	5247.28	5412.84	5589.62	5773.93	5963.25	6157.09	6356.74
52	Estimates	Congo		178	Country/Area	911	827.246	842.483	858.407	875.106	892.633	911.033	930.381	950.719	972.1	994.599	1018.25	1043.12	1069.24	1096.64	1125.35	1155.39	1186.78	1219.55	1253.76	1289.52	1326.89	1365.89	1406.51	1448.63	1492.06	1536.66	1582.36	1629.22	1677.33	1726.87	1777.93	1830.63	1884.87	1940.45	1996.99	2054.31	2112.36	2171.32	2231.46	2293.16	2356.74	2422.31	2489.95
53	Estimates	Democratic Republic of the Congo		180	Country/Area	911	12183.7	12428.9	12681	12944.5	13222.5	13517.5	13830.4	14161.2	14508.9	14871.8	15248.3	15637.7	16041.2	16461.8	16903.8	17369.9	17862.1	18378.6	18913.9	19459.8	20011	20564.1	21121.4	21690.4	22282.1	22903.6	23560.5	24249.1	24956.4	25663.6	26358.9	27040.3	27717.3	28403.9	29119.7	29881.2	30683.9	31528.7	32443.8	33464.8	34612	35908.2	37333.9
54	Estimates	Equatorial Guinea		226	Country/Area	911	225.53	230.914	234.185	236.322	238.033	239.866	242.139	244.958	248.246	251.77	255.338	258.786	262.219	266.005	270.616	276.296	283.506	291.786	299.416	304	303.986	298.852	289.508	277.656	265.762	255.808	247.969	242.16	239.681	241.977	249.931	264.37	284.638	308.208	331.554	352.116	369.024	382.977	394.973	406.62	419.188	432.844	447.269
55	Estimates	Gabon		266	Country/Area	911	473.296	476.381	478.655	480.536	482.332	484.308	486.64	489.439	492.758	496.591	500.922	505.793	511.285	517.573	524.891	533.357	543.119	554.054	565.763	577.644	589.317	600.608	611.705	622.914	634.739	647.538	661.398	676.264	692.078	708.788	726.335	744.695	763.932	784.056	805.117	827.107	850.052	873.871	898.472	923.714	949.493	975.785	1002.57
56	Estimates	Sao Tome and Principe		678	Country/Area	911	59.998	59.219	58.554	58.184	58.261	58.807	59.774	61.027	62.347	63.509	64.294	64.597	64.478	64.237	64.278	64.884	66.172	68.039	70.258	72.501	74.57	76.344	77.93	79.463	81.148	83.134	85.475	88.102	90.846	93.458	95.788	97.767	99.478	101.064	102.826	104.926	107.429	110.259	113.288	116.313	119.211	121.949	124.574
57	Estimates	Southern Africa		913	Subregion	947	15533	15866.1	16209.7	16564.2	16929.9	17307.5	17697.8	18102	18521.3	18957.1	19410.5	19882.7	20373.9	20883.8	21411.8	21957.7	22520.7	23101.7	23702.7	24326.6	24975.2	25650.6	26351.7	27072.7	27805.5	28545	29287.1	30035.2	30800.5	31598.8	32440.5	33330.6	34263.6	35226.3	36200.2	37171.8	38132.1	39084.5	40042.3	41025.6	42046.3	43109.5	44202.4
58	Estimates	Botswana		72	Country/Area	913	412.541	424.002	435.031	445.334	454.78	463.353	471.234	478.664	486.08	493.96	502.733	512.688	523.777	535.692	547.87	559.996	571.957	584.098	596.946	611.297	627.714	646.35	667.096	689.906	714.701	741.346	769.982	800.532	832.467	865.073	897.86	930.412	962.859	996.124	1031.44	1069.59	1110.95	1154.9	1200.07	1244.48	1286.76	1326.32	1363.54
59	Estimates	Eswatini		748	Country/Area	913	272.997	279.357	285.286	291.082	296.943	303.027	309.405	316.037	322.86	329.744	336.578	343.346	350.155	357.279	365.12	373.925	383.82	394.76	406.508	418.739	431.251	443.979	457.039	470.561	484.747	499.759	515.602	532.253	549.787	568.316	587.852	608.374	629.812	652.112	675.24	699.077	723.599	748.634	773.774	798.498	822.423	845.267	866.995
60	Estimates	Lesotho		426	Country/Area	913	704.686	716.81	729	741.338	753.899	766.763	779.974	793.594	807.664	822.214	837.264	852.892	869.132	886.061	903.757	922.307	941.798	962.279	983.683	1005.91	1028.93	1052.62	1077.1	1102.88	1130.63	1160.8	1193.52	1228.53	1265.21	1302.67	1340.26	1377.81	1415.36	1452.73	1489.68	1526.13	1561.69	1596.39	1630.99	1666.56	1703.76	1742.53	1782.28
61	Estimates	Namibia		516	Country/Area	913	514.378	523.963	534.163	544.9	556.141	567.846	580.024	592.702	605.902	619.695	634.138	649.274	665.119	681.633	698.797	716.588	734.866	753.683	773.428	794.588	817.474	842.353	868.954	896.264	922.9	947.925	971.117	992.955	1014.05	1035.38	1057.72	1080.94	1105.1	1131.62	1162.28	1198.15	1239.92	1286.8	1336.55	1386.01	1432.9	1476.4	1516.95
62	Estimates	South Africa		710	Country/Area	913	13628.4	13921.9	14226.3	14541.6	14868.2	15206.5	15557.2	15921	16298.8	16691.5	17099.8	17524.5	17965.7	18423.2	18896.3	19384.8	19888.3	20406.9	20942.1	21496.1	22069.8	22665.3	23281.5	23913.1	24552.5	25195.2	25836.9	26480.9	27139	27827.3	28556.8	29333.1	30150.4	30993.8	31841.6	32678.9	33496	34297.7	35100.9	35930.1	36800.5	37719	38672.6
63	Estimates	Western Africa		914	Subregion	947	70875.2	71979.8	73162.5	74414.9	75731.3	77108.3	78545	80043	81605.9	83239	84947.1	86733.4	88597.7	90535.4	92539.7	94607.3	96738.7	98940.4	101223	103599	106080	108668	111366	114186	117142	120242	123493	126892	130422	134064	137799	141625	145543	149556	153671	157891	162220	166656	171193	175821	180535	185334	190228
64	Estimates	Benin		204	Country/Area	914	2255.22	2258.47	2264.86	2274.48	2287.38	2303.59	2323.05	2345.71	2371.45	2400.13	2431.62	2465.86	2502.9	2542.86	2585.96	2632.36	2682.16	2735.31	2791.59	2850.66	2912.34	2976.57	3043.56	3113.68	3187.41	3265.17	3347.17	3433.45	3523.93	3618.52	3717.16	3820.13	3927.72	4039.94	4156.82	4278.5	4404.5	4535.26	4672.84	4820.02	4978.49	5149.5	5331.81
65	Estimates	Burkina Faso		854	Country/Area	914	4284.45	4324.49	4367.14	4413.2	4463.16	4517.15	4574.94	4635.95	4699.35	4764.09	4829.29	4894.58	4960.33	5027.81	5098.89	5174.87	5256.36	5343.02	5434.05	5528.17	5624.59	5723.38	5825.17	5930.49	6040.05	6154.55	6274.03	6398.93	6530.82	6671.66	6822.84	6985.17	7158.26	7340.91	7531.24	7727.91	7930.69	8140.08	8356.31	8579.82	8811.03	9050.09	9297.11
66	Estimates	Cabo Verde		132	Country/Area	914	178.064	186.083	191.447	194.722	196.462	197.193	197.417	197.593	198.129	199.434	201.77	205.321	210.141	216.087	222.949	230.421	238.655	247.522	256.169	263.461	268.633	271.315	271.841	271.068	270.228	270.24	271.345	273.335	276.182	279.729	283.848	288.678	294.244	300.226	306.14	311.668	316.613	321.137	325.744	331.18	337.953	346.229	355.763
67	Estimates	Côte d'Ivoire		384	Country/Area	914	2630.13	2690.62	2761.08	2838.19	2919.71	3004.42	3092.2	3183.96	3281.51	3387.29	3503.56	3631.55	3770.76	3918.63	4071.41	4226.84	4383.72	4544.17	4713.13	4897.47	5102.07	5328.73	5576.03	5841.51	6121.3	6412.41	6713.95	7026.5	7350.27	7685.93	8033.65	8393.69	8764.99	9144.94	9530.1	9918.2	10307.3	10698.2	11094.7	11502.5	11924.9	12362.4	12812.4
68	Estimates	Gambia		270	Country/Area	914	304.895	309.083	313.525	318.382	323.755	329.662	336.117	343.013	350.228	357.63	365.049	372.436	379.886	387.635	396.012	405.258	415.478	426.622	438.59	451.228	464.404	478.106	492.424	507.428	523.25	539.985	557.81	576.755	596.54	616.77	637.252	657.581	678.111	700.198	725.688	755.791	791.141	831.011	873.44	915.631	955.595	992.671	1027.48
69	Estimates	Ghana		288	Country/Area	914	5036.15	5140.32	5268.65	5413.37	5568.65	5730.59	5897.35	6069	6247.3	6435.16	6635.23	6848.29	7071.97	7300.12	7524.47	7739.46	7941.42	8132.8	8321.77	8520.02	8735.49	8973.25	9229.64	9493.55	9749.1	9985.95	10199.2	10395.5	10590.3	10805.3	11056.1	11348.3	11676.8	12033.6	12405.7	12783.6	13164.8	13552	13947	14353.4	14773.3	15207.4	15653.3
70	Estimates	Guinea		324	Country/Area	914	3012.94	3054	3095.61	3138.45	3183.01	3229.64	3278.49	3329.56	3382.71	3437.67	3494.16	3552.07	3611.43	3672.56	3735.91	3801.71	3870.2	3941.05	4013.05	4084.6	4154.61	4223.06	4290.54	4357.36	4424.03	4491.25	4559.24	4628.88	4702.37	4782.49	4871.45	4969.6	5077.07	5195.44	5326.37	5470.72	5629.42	5801.32	5982.48	6167.48	6352.28	6534.94	6716.03
71	Estimates	Guinea-Bissau		624	Country/Area	914	535.438	544.412	552.569	560.362	568.163	576.131	584.335	592.669	600.925	608.835	616.14	622.754	628.877	635.008	641.821	649.795	658.998	669.243	680.431	692.407	704.937	718.359	732.516	746.178	757.668	765.985	770.415	771.732	772.137	774.726	781.678	793.804	810.402	830.212	851.276	872.163	892.53	912.755	933.046	953.782	975.265	997.522	1020.35
72	Estimates	Liberia		430	Country/Area	914	930.022	943.659	958.7	975.056	992.646	1011.37	1031.13	1051.83	1073.38	1095.67	1118.65	1142.3	1166.65	1191.8	1217.9	1245.1	1273.46	1303.03	1333.98	1366.5	1400.73	1436.74	1474.57	1514.36	1556.29	1600.45	1645.83	1692.15	1740.92	1794.25	1852.99	1918.83	1989.48	2057.23	2111.67	2145.76	2158.43	2153.31	2134.11	2106.43	2075.92	2040.14	2001.61
73	Estimates	Mali		466	Country/Area	914	4708.43	4759.04	4811.2	4864.75	4919.55	4975.4	5032.12	5089.51	5147.34	5205.45	5263.73	5322.27	5381.37	5441.62	5503.75	5568.49	5635.86	5706.19	5780.84	5861.42	5949.04	6044.52	6147.46	6256.19	6368.35	6482.28	6596.72	6712.27	6831.09	6956.41	7090.12	7234.73	7388.67	7545.16	7694.86	7831.89	7952.86	8062.22	8171.52	8296.92	8449.92	8635.53	8850.33
74	Estimates	Mauritania		478	Country/Area	914	651.434	666.806	683.139	700.494	718.871	738.295	758.751	780.219	802.673	826.069	850.377	875.586	901.69	928.742	956.794	985.907	1016.09	1047.35	1079.58	1112.75	1146.78	1181.66	1217.44	1254.16	1291.86	1330.59	1370.36	1411.14	1453.03	1496.17	1540.64	1586.5	1633.65	1681.86	1730.74	1780.03	1829.68	1879.76	1930.43	1981.9	2034.35	2087.91	2142.64
75	Estimates	Niger		562	Country/Area	914	2559.71	2638.13	2716.82	2795.8	2875.27	2955.54	3037.05	3120.42	3206.34	3295.57	3388.77	3486.32	3588.23	3693.99	3802.8	3914.12	4027.97	4144.59	4263.93	4385.93	4510.65	4637.98	4768.23	4902.15	5040.8	5184.94	5335.08	5491.16	5652.65	5818.76	5989	6163.71	6343.53	6528.65	6719.31	6915.99	7118.89	7328.93	7548.43	7780.24	8026.59	8288.74	8566.77
76	Estimates	Nigeria		566	Country/Area	914	37859.8	38424.1	39035.4	39686.2	40370.9	41086.1	41830.6	42605.1	43412.1	44255.3	45138.5	46063.6	47029.8	48032.9	49066.8	50127.9	51218	52342.2	53506.2	54717	55982.1	57297	58665.8	60114.6	61677.2	63374.3	65221.4	67203.1	69271.9	71361.1	73423.6	75440.5	77427.5	79414.8	81448.8	83562.8	85766.4	88048	90395.3	92788	95212.5	97667.6	100162
77	Estimates	Saint Helena	4	654	Country/Area	914	5.249	5.285	5.317	5.331	5.34	5.346	5.352	5.363	5.374	5.375	5.363	5.342	5.333	5.325	5.31	5.325	5.365	5.424	5.505	5.6	5.696	5.798	5.914	6.028	6.139	6.231	6.323	6.397	6.458	6.522	6.584	6.646	6.702	6.759	6.8	6.818	6.82	6.8	6.759	6.715	6.654	6.573	6.487
78	Estimates	Senegal		686	Country/Area	914	2486.64	2545.34	2606.62	2670.73	2737.91	2808.24	2881.77	2958.48	3038.29	3121.09	3206.76	3295.28	3386.8	3481.65	3580.24	3682.88	3789.38	3899.65	4014.11	4133.32	4257.51	4387.53	4522.89	4660.73	4797.19	4929.85	5057.38	5181.51	5306.69	5439.07	5583.16	5740.44	5909.73	6089.57	6277.42	6471.33	6670.66	6875.75	7086.62	7303.51	7526.31	7755.5	7990.09
79	Estimates	Sierra Leone		694	Country/Area	914	2041.2	2064.47	2088.48	2113.34	2139.09	2165.82	2193.62	2222.6	2252.84	2284.49	2317.64	2352.37	2388.76	2426.86	2466.67	2508.23	2551.58	2596.8	2644.01	2693.34	2744.89	2798.73	2854.87	2913.35	2974.11	3037.16	3102.59	3170.5	3240.84	3313.51	3388.49	3464.11	3540.16	3619.85	3707.51	3805.3	3916.68	4038.15	4156.64	4254.43	4319.76	4348.66	4347.73
80	Estimates	Togo		768	Country/Area	914	1395.45	1425.48	1441.91	1452.09	1461.52	1473.84	1490.72	1512.02	1535.97	1559.68	1580.51	1597.52	1612.76	1631.76	1662.07	1708.63	1774.02	1855.45	1945.78	2034.9	2115.52	2185.67	2247.58	2303.34	2356.62	2410.45	2464.42	2518.45	2576.29	2642.69	2720.84	2812.31	2915.62	3026.98	3140.84	3253	3363.04	3471.74	3577.47	3678.57	3774.31	3863	3945.9
81	Estimates	NORTHERN AFRICA AND WESTERN ASIA		1833	SDG region	1828	100239	102644	105171	107813	110566	113425	116389	119457	122631	125912	129302	132802	136409	140119	143925	147822	151812	155899	160081	164358	168730	173201	177780	182484	187335	192351	197531	202877	208419	214195	220224	226521	233061	239783	246607	253469	260338	267216	274114	281058	288060	295135	302256
82	Estimates	Northern Africa		912	Subregion	1833	48787.6	49955.1	51184.6	52478.2	53836.7	55259.4	56744.3	58288	59885.8	61532.6	63223.2	64954.6	66726.2	68541	70403.4	72316.4	74284.7	76305.7	78366.2	80447.6	82539.5	84637.3	86752.5	88909.3	91141.3	93474.1	95912.6	98454	101107	103879	106773	109791	112927	116158	119452	122785	126144	129523	132917	136326	139745	143173	146599
83	Estimates	Algeria		12	Country/Area	912	8872.25	9023.26	9186.15	9364.38	9560.15	9774.28	10006.1	10253.8	10514.1	10783.2	11057.9	11336.3	11619.8	11912.8	12221.7	12550.9	12902.6	13275	13663.6	14061.7	14465	14872.3	15286	15709.8	16149	16607.7	17085.8	17582.9	18102.3	18647.8	19221.7	19824.3	20452.9	21101.9	21763.6	22431.5	23102.4	23774.3	24443.5	25106.2	25758.9	26400.5	27028.3
84	Estimates	Egypt		818	Country/Area	912	20452	20948.6	21473.8	22028.1	22611.5	23223.1	23861.5	24524.5	25209.5	25913.2	26632.9	27366.2	28112.3	28871.4	29644.9	30433	31237.6	32056.5	32881.9	33703.1	34513.9	35311.9	36102.7	36896.6	37708.1	38549.1	39422.7	40329.6	41275.7	42267.4	43309.1	44400.1	45539.3	46728.3	47968.6	49258.7	50602.4	51991.7	53399.2	54788.7	56134.5	57424.6	58666.8
85	Estimates	Libya		434	Country/Area	912	1124.52	1142.97	1163.89	1187.74	1214.82	1245.36	1279.4	1316.91	1357.73	1401.63	1448.42	1498.08	1550.82	1607.17	1667.82	1733.31	1803.69	1878.87	1958.91	2043.82	2133.53	2228.14	2327.49	2430.75	2536.89	2645.14	2754.7	2865.64	2979.1	3096.72	3219.46	3347.78	3480.44	3614.68	3746.71	3873.78	3994.6	4109.72	4220.45	4328.94	4436.66	4544.24	4650.9
86	Estimates	Morocco		504	Country/Area	912	8985.99	9243.41	9528.98	9837.08	10162.9	10502.7	10853.2	11212.2	11578.4	11950.7	12328.5	12710.6	13094.9	13478.4	13857.7	14230.2	14595.4	14954	15307.3	15656.8	16004.7	16350.9	16696.9	17048.5	17413.1	17796.2	18198.8	18620.1	19059.8	19516.9	19990	20479.7	20984	21495.1	22002.6	22499.1	22980.3	23447.3	23903.6	24355.6	24807.5	25260.4	25711.4
87	Estimates	Sudan		729	Country/Area	912	5733.79	5884.65	6041.33	6204.1	6373.31	6549.29	6732.44	6923.11	7121.74	7328.73	7544.5	7769.48	8004.12	8248.82	8503.99	8770.09	9047.8	9337.66	9639.85	9954.41	10281.7	10621.5	10974.6	11343.9	11733	12144.1	12578.4	13034.6	13510.4	14002.3	14507.5	15027.3	15562.1	16107.6	16658	17210.2	17757.5	18303.4	18867.6	19476.7	20147.6	20891.4	21696.2
88	Estimates	Tunisia		788	Country/Area	912	3605.31	3696.16	3772.93	3838.09	3894.12	3943.54	3988.86	4032.59	4077.21	4125.08	4178.23	4238.14	4305.48	4380.07	4461.11	4547.94	4640.99	4740.53	4845.22	4953.38	5063.81	5176.29	5291.34	5409.34	5530.98	5656.91	5786.48	5919.96	6060.16	6210.76	6374.04	6551.23	6740.52	6937.33	7135.27	7329.59	7517.85	7700.73	7880.33	8060.21	8242.51	8427.85	8613.85
89	Estimates	Western Sahara		732	Country/Area	912	13.763	16.054	17.575	18.727	19.829	21.149	22.802	24.841	27.24	29.913	32.757	35.725	38.854	42.31	46.31	50.967	56.63	63.119	69.479	74.338	76.88	76.371	73.477	70.399	70.205	74.953	85.607	101.182	119.326	136.703	150.86	161.059	168.057	172.902	177.269	182.419	188.6	195.439	202.717	210.071	217.258	224.391	231.731
90	Estimates	Western Asia		922	Subregion	1833	51451.5	52688.5	53986	55335	56729.3	58165.9	59644.9	61169.4	62745	64379.1	66078.5	67846.9	69682.7	71578	73521.3	75505.4	77527.4	79593.1	81715	83910	86190.7	88563.9	91027.5	93574.4	96193.4	98877.3	101619	104423	107312	110316	113452	116729	120133	123626	127155	130684	134194	137693	141196	144731	148316	151961	155657
91	Estimates	Armenia		51	Country/Area	922	1353.5	1381.87	1418.28	1461.42	1510.18	1563.51	1620.59	1680.71	1743.31	1807.91	1874.12	1941.5	2009.52	2077.58	2145	2211.32	2276.04	2339.13	2401.14	2462.94	2525.07	2587.72	2650.48	2712.78	2773.75	2832.75	2889.58	2944.38	2997.42	3049.11	3099.76	3148.1	3193.7	3238.59	3285.59	3335.93	3392.26	3451.95	3504.67	3536.47	3538.16	3505.25	3442.82
92	Estimates	Azerbaijan	5	31	Country/Area	922	2927.93	2987.26	3060.01	3142.81	3233.17	3329.37	3430.67	3537.02	3649.19	3768.34	3895.4	4030.32	4171.43	4315.13	4456.69	4592.6	4721.53	4843.87	4960.24	5071.93	5180.03	5284.52	5385.27	5483.09	5579.07	5674.13	5768.73	5863.14	5957.93	6053.64	6150.73	6249.31	6349.56	6452.07	6557.58	6666.45	6778.63	6893.49	7010.03	7126.88	7242.76	7357.94	7471.92
93	Estimates	Bahrain		48	Country/Area	922	115.612	116.828	119.59	123.496	128.25	133.58	139.261	145.107	150.981	156.78	162.429	167.899	173.14	178.142	182.888	187.432	191.785	196.06	200.652	206.037	212.607	220.311	229.151	239.527	251.908	266.54	283.746	303.169	323.468	342.804	359.897	374.12	385.953	396.451	407.233	419.428	433.478	448.981	465.198	481.081	495.927	509.762	523.082
94	Estimates	Cyprus	6	196	Country/Area	922	494.018	500.384	506.63	513.429	521.186	529.97	539.568	549.465	558.897	566.969	572.933	576.402	577.696	577.918	578.628	580.972	585.313	591.301	598.495	606.121	613.618	620.86	628.002	635.105	642.322	649.753	657.524	665.521	673.253	680.01	685.408	689.17	691.716	694.076	697.715	703.694	712.335	723.384	736.476	751.043	766.616	783.121	800.61
95	Estimates	Georgia	7	268	Country/Area	922	3527.01	3555.88	3588.63	3625.61	3667.08	3713.13	3763.77	3818.86	3878.13	3941.25	4007.72	4077.08	4148.73	4222.16	4296.67	4371.53	4446.84	4521.72	4593.31	4658.01	4713.34	4758.16	4793.56	4822.17	4847.87	4873.64	4900.19	4927.25	4955.52	4985.59	5017.83	5051.12	5085.14	5121.8	5163.64	5211.45	5267.23	5327.5	5380.82	5411.98	5410.4	5373	5303.93
96	Estimates	Iraq		368	Country/Area	922	5719.18	5901.51	6065.01	6216.13	6360.44	6502.66	6646.64	6795.4	6951.16	7115.51	7289.75	7475.35	7674.22	7888.91	8122.2	8375.8	8651.16	8947.4	9260.69	9585.58	9917.98	10255.9	10599.7	10950.9	11312.1	11684.6	12068.7	12462.1	12860.7	13259.1	13653.3	14044.1	14432.5	14815.7	15190.4	15555.8	15909.8	16257.1	16612.3	16994.9	17419.1	17889.5	18402.7
97	Estimates	Israel		376	Country/Area	922	1257.97	1345.34	1435.83	1525.36	1611.17	1691.87	1767.49	1839.37	1910.04	1982.76	2060.48	2144.65	2234.2	2325.15	2411.78	2490.32	2558.72	2619.1	2676.97	2740.07	2813.75	2900.02	2996.47	3098.78	3200.53	3296.93	3387.05	3472.12	3552.3	3628.31	3700.92	3770.69	3838.11	3903.95	3969.18	4035.06	4100.54	4167.13	4241.79	4333.58	4448.35	4589.31	4752.83
98	Estimates	Jordan		400	Country/Area	922	481.319	536.398	576.275	609.98	644.124	682.975	728.205	779.111	832.979	885.586	933.102	973.983	1010.65	1050.21	1102.4	1173.6	1267.06	1378.99	1500.17	1617.43	1721.32	1809.19	1883.92	1948.44	2007.73	2065.92	2123.18	2179.36	2237.94	2303.12	2378	2464.87	2563.53	2671.41	2784.46	2900.05	3015.29	3131.8	3256.55	3399.33	3565.89	3760.49	3977.67
99	Estimates	Kuwait		414	Country/Area	922	153.103	158.01	162.804	167.991	174.148	181.893	191.888	204.89	221.615	242.796	269.026	300.581	337.346	378.756	423.9	472.032	523.169	577.164	632.911	688.972	744.444	798.639	851.918	905.639	961.773	1021.73	1085.87	1153.57	1224.06	1296.08	1368.68	1439.33	1507.64	1576.97	1652.15	1735.28	1832.3	1938.92	2034.85	2092.79	2095.35	2031.3	1912.42
100	Estimates	Lebanon		422	Country/Area	922	1334.62	1358.23	1392.73	1434.85	1481.97	1532.12	1584.04	1637.13	1691.38	1747.17	1804.93	1864.61	1925.3	1985	2041.23	2092.37	2136.62	2174.73	2210.77	2250.45	2297.44	2354.05	2417.84	2481.94	2536.77	2575.75	2596.41	2601.73	2597.2	2590.91	2588.93	2594.3	2606.15	2622.07	2638.06	2651.99	2660.87	2667.96	2684.68	2726.44	2803.03	2921.7	3076.13
101	Estimates	Oman		512	Country/Area	922	456.41	462.255	469.346	477.443	486.315	495.825	505.888	516.468	527.591	539.32	551.735	564.891	578.827	593.498	608.89	625.006	642.007	660.117	679.592	700.725	723.842	748.968	776.385	806.985	841.952	882.038	927.434	977.804	1032.8	1091.86	1154.37	1220.58	1290.12	1361.09	1431.07	1498.41	1561.18	1619.87	1678.12	1741.15	1812.16	1893.76	1983.27
102	Estimates	Qatar		634	Country/Area	922	25.006	27.497	29.872	32.062	34.051	35.863	37.616	39.451	41.542	44.118	47.383	51.427	56.266	61.721	67.562	73.631	79.85	86.298	93.206	100.88	109.521	119.413	130.505	142.181	153.624	164.314	173.716	182.319	191.947	205.172	223.622	247.984	277.229	309.299	341.272	370.886	397.739	422.154	443.611	461.688	476.275	487.354	495.403
103	Estimates	Saudi Arabia		682	Country/Area	922	3121.34	3198.81	3283.59	3372.84	3464.66	3558.16	3653.51	3751.8	3855.03	3965.8	4086.53	4218.85	4362.79	4516.54	4677.3	4843.63	5015.35	5195.12	5387.82	5599.91	5836.39	6100.63	6392.97	6711.92	7054.53	7419.49	7802.93	8207.69	8646.84	9137.93	9691.47	10311.8	10988.9	11701.1	12418.8	13119	13794.2	14445.7	15070.1	15666.3	16233.8	16772.7	17282.7
104	Estimates	State of Palestine	8	275	Country/Area	922	931.925	923.891	932.068	948.892	968.699	987.751	1004.29	1018.48	1032.1	1048.13	1069.32	1096.75	1128.58	1159.4	1181.89	1191.38	1184.97	1165.75	1142.22	1126.37	1126.63	1146.32	1182.43	1229.37	1278.56	1323.81	1363.62	1400.12	1434.99	1471.14	1510.72	1554.19	1600.96	1650.93	1703.81	1759.53	1817.98	1879.75	1946.38	2019.83	2101.45	2191	2287.68
105	Estimates	Syrian Arab Republic		760	Country/Area	922	3413.32	3498.53	3591	3690.73	3797.64	3911.5	4032.07	4158.98	4291.81	4430.1	4573.51	4721.89	4875.43	5034.64	5200.34	5373.14	5553.25	5740.7	5935.85	6139.05	6350.54	6570.86	6800.15	7037.86	7283.18	7535.72	7794.66	8060.65	8336.42	8625.69	8930.78	9252.85	9590.23	9938.85	10293	10648.6	11004.3	11360.8	11719.1	12080.4	12446.2	12815.4	13187.7
106	Estimates	Turkey		792	Country/Area	922	21408.4	21951.2	22509	23081.6	23668.9	24270.6	24886.1	25514.8	26155.9	26808.6	27472.3	28146.9	28832.8	29531.4	30244.3	30973	31717.5	32478	33256.5	34055.4	34876.3	35720.6	36587.3	37472.3	38370.3	39277.2	40189.6	41108.3	42040	42994	43976	44988.4	46025.4	47073.5	48114.2	49133.9	50128.5	51100.9	52053.8	52992.5	53921.8	54840.6	55748.9
107	Estimates	United Arab Emirates		784	Country/Area	922	69.594	67.466	69.235	72.771	76.523	79.579	81.624	82.963	84.42	87.188	92.417	100.801	112.112	125.13	138.049	149.855	159.979	169.768	182.62	203.103	234.512	277.463	330.968	394.625	467.457	548.295	637.926	735.347	835.498	931.752	1019.51	1096.6	1164.82	1228.46	1293.97	1366.16	1446.39	1533.53	1627.07	1725.68	1828.44	1937.16	2052.89
108	Estimates	Yemen		887	Country/Area	922	4661.28	4717.14	4776.18	4837.61	4900.84	4965.57	5031.69	5099.35	5168.87	5240.72	5315.35	5393.03	5473.67	5556.77	5641.6	5727.74	5816.24	5907.87	6001.86	6097.04	6193.38	6290.37	6390.57	6500.81	6630	6784.7	6967.94	7178.67	7414.17	7669.7	7941.9	8231.91	8541.6	8869.36	9213.08	9572.17	9941.1	10322	10730.9	11189.2	11710	12302.1	12954.2
109	Estimates	CENTRAL AND SOUTHERN ASIA		921	SDG region	1828	510788	519324	528392	537978	548072	558666	569754	581337	593415	605991	619068	632642	646708	661249	676247	691687	707574	723912	740681	757859	775437	793405	811789	830656	850097	870180	890916	912292	934320	957011	980359	1.00436e+06	1.02898e+06	1.05415e+06	1.07978e+06	1.10579e+06	1.13215e+06	1.15883e+06	1.18574e+06	1.21282e+06	1.23998e+06	1.2672e+06	1.29445e+06
110	Estimates	Central Asia		5500	Subregion	921	17449.6	17864	18366	18942.2	19581	20273	21010.4	21787.4	22600.2	23445.8	24321.3	25222.3	26142	27070.3	27995.6	28908.8	29805.7	30685.3	31546.1	32388.1	33211.6	34015.8	34801.8	35575.4	36344.2	37115.1	37889.5	38668.6	39457.7	40262.8	41088.2	41931.8	42792	43671.9	44575.2	45501.8	46455	47425.6	48384.2	49292.6	50122.9	50867.6	51534.4
111	Estimates	Kazakhstan		398	Country/Area	5500	6703	6811.56	7006.64	7269.05	7582.3	7932.52	8308.59	8702.08	9106.9	9518.91	9934.56	10349.4	10756.9	11147.9	11511.9	11841.9	12132.6	12385.7	12611.4	12824.6	13036.1	13250.2	13464	13673	13870	14050.2	14212.1	14359.6	14500	14643.1	14796.2	14958.9	15128.1	15303.3	15483.4	15665.6	15852.5	16039.3	16206	16326.8	16383.9	16373.3	16302.8
112	Estimates	Kyrgyzstan		417	Country/Area	5500	1740.01	1765.56	1795.14	1828.2	1864.5	1904.07	1947.22	1994.56	2046.91	2105.19	2170.09	2241.76	2319.45	2401.46	2485.43	2569.45	2653.05	2736.07	2817.32	2895.54	2969.86	3039.76	3105.53	3168.29	3229.68	3291.07	3352.61	3414.33	3477.22	3542.51	3610.97	3682.66	3757.17	3834.14	3913.02	3993.08	4075.14	4158.58	4239.28	4311.86	4372.89	4419.63	4454.19
113	Estimates	Tajikistan		762	Country/Area	5500	1531.51	1584.99	1637.95	1690.34	1742.35	1794.42	1847.25	1901.78	1959.14	2020.56	2087.05	2159.13	2236.56	2318.25	2402.47	2487.97	2574.51	2662.26	2750.93	2840.26	2930.11	3020.42	3111.28	3203.03	3296.09	3390.94	3487.66	3586.52	3688.41	3794.46	3905.44	4020.82	4140.3	4265.28	4397.56	4537.82	4687.33	4844	5001.17	5149.87	5283.81	5400.64	5502.49
114	Estimates	Turkmenistan		795	Country/Area	5500	1211	1231.83	1258.38	1289.83	1325.43	1364.64	1406.99	1452.18	1500.01	1550.42	1603.25	1658.36	1715.41	1773.85	1833.07	1892.6	1952.14	2011.76	2071.79	2132.8	2195.16	2258.97	2324.02	2390.21	2457.38	2525.37	2594.32	2664.26	2734.9	2805.82	2876.81	2947.78	3019.06	3091.51	3166.22	3244.02	3324.46	3407.31	3493.89	3585.87	3683.98	3789.19	3899.84
115	Estimates	Uzbekistan		860	Country/Area	5500	6264.06	6470.06	6667.89	6864.76	7066.45	7277.34	7500.31	7736.86	7987.25	8250.72	8526.3	8813.62	9113.63	9428.91	9762.82	10116.9	10493.4	10889.5	11294.7	11694.8	12080.3	12446.4	12797	13140.8	13491.1	13857.5	14242.8	14643.9	15057.2	15476.9	15898.8	16321.7	16747.4	17177.7	17615	18061.3	18515.6	18976.4	19443.9	19918.1	20398.3	20884.9	21375.1
116	Estimates	Southern Asia		5501	Subregion	921	493339	501460	510026	519036	528491	538393	548744	559550	570815	582546	594746	607420	620566	634179	648251	662778	677769	693226	709135	725471	742225	759389	776987	795081	813753	833065	853027	873623	894863	916748	939271	962427	986184	1.01047e+06	1.0352e+06	1.06029e+06	1.0857e+06	1.1114e+06	1.13736e+06	1.16352e+06	1.18986e+06	1.21633e+06	1.24291e+06
117	Estimates	Afghanistan		4	Country/Area	5501	7752.12	7840.15	7936	8039.68	8151.32	8270.99	8398.87	8535.16	8680.1	8833.95	8996.97	9169.41	9351.44	9543.2	9744.77	9956.32	10174.8	10399.9	10637.1	10893.8	11173.7	11475.5	11791.2	12109	12413	12689.2	12943.1	13171.3	13341.2	13411.1	13356.5	13171.7	12882.5	12537.7	12204.3	11938.2	11736.2	11604.5	11618	11868.9	12412.3	13299	14485.5
118	Estimates	Bangladesh		50	Country/Area	5501	37894.7	38706.4	39489.9	40292.4	41149.8	42086.3	43113.9	44233.2	45434.5	46700.6	48013.5	49362.8	50752.2	52202	53741.7	55385.1	57157.7	59034.2	60918.5	62679.8	64232.5	65531.6	66625.7	67637.5	68742.2	70066.3	71652.4	73463.6	75450	77529	79639.5	81767.5	83932.1	86142.5	88416.5	90764.2	93187.6	95671.2	98186.4	100695	103172	105599	107984
119	Estimates	Bhutan		64	Country/Area	5501	176.796	180.813	184.759	188.783	193.006	197.458	202.194	207.197	212.424	217.808	223.284	228.849	234.552	240.529	246.961	253.993	261.664	269.944	278.731	287.886	297.307	306.957	316.822	326.986	337.491	348.395	359.721	371.424	383.324	395.192	406.883	418.107	428.938	439.823	451.471	464.264	478.683	494.313	509.532	522.173	530.801	534.637	534.525
120	Estimates	India		356	Country/Area	5501	376325	382377	388799	395544	402579	409881	417443	425271	433381	441799	450548	459642	469077	478826	488848	499123	509632	520401	531514	543084	555190	567868	581087	594770	608803	623103	637630	652409	667500	682995	698953	715385	732239	749429	766833	784360	801975	819682	837469	855335	873278	891273	909307
121	Estimates	Iran (Islamic Republic of)		364	Country/Area	5501	17119.3	17516.7	17933.5	18369.1	18822.8	19294.1	19782.8	20288.5	20811.1	21350.6	21906.9	22480.4	23071.3	23680.2	24307.9	24954.9	25624.4	26317.8	27032.6	27764.9	28513.9	29281.6	30075.3	30905.7	31786.5	32729.8	33734	34803	35960.8	37237.1	38650.2	40199.9	41869.2	43636.8	45472.8	47347.2	49260.3	51193.8	53077.3	54822	56366.2	57679	58780.4
122	Estimates	Maldives		462	Country/Area	5501	73.716	74.22	75.19	76.485	78.015	79.704	81.511	83.418	85.431	87.587	89.873	92.328	94.902	97.54	100.177	102.71	105.129	107.481	109.893	112.582	115.688	119.303	123.347	127.7	132.102	136.418	140.563	144.625	148.774	153.276	158.271	163.821	169.849	176.255	182.848	189.54	196.262	203.024	209.787	216.502	223.159	229.743	236.271
123	Estimates	Nepal		524	Country/Area	5501	8483.32	8663.6	8834.7	8999.19	9159.32	9316.92	9473.41	9629.86	9786.98	9945.21	10105.1	10267.3	10433.1	10604.6	10784	10972.9	11172.5	11383	11603.9	11834.7	12074.6	12324	12583.1	12852.2	13131.3	13420.4	13719.5	14028.5	14347.7	14676.9	15016.4	15367.2	15729.4	16100.6	16477.5	16858.3	17239.7	17623.7	18020.8	18445	18905.5	19405.5	19938.3
124	Estimates	Pakistan		586	Country/Area	5501	37542.4	37992.9	38516.5	39109.1	39767.2	40488	41269.7	42111	43011.3	43970.6	44988.7	46065.2	47198.9	48387.3	49627.6	50918	52260.2	53655.8	55102.7	56598.1	58142.1	59734.5	61382	63099.4	64906	66816.9	68834.3	70958.2	73197.3	75561.1	78054.3	80680.5	83431.6	86285.9	89213.7	92191.5	95215.4	98285.8	101390	104513	107648	110779	113911
125	Estimates	Sri Lanka		144	Country/Area	5501	7971.1	8108.43	8256.56	8417.11	8591.02	8778.44	8978.76	9190.65	9412.14	9640.82	9874.48	10111.6	10352.2	10597.5	10850	11110.8	11380.7	11657.6	11937.6	12214.9	12485.7	12747.8	13002.2	13252	13501.9	13755.1	14012.9	14273.5	14533.7	14788.9	15035.8	15272.8	15501.2	15724.6	15948.5	16176.3	16408.9	16644	16878.2	17106.8	17325.8	17535.7	17736.8
126	Estimates	EASTERN AND SOUTH-EASTERN ASIA		1832	SDG region	1828	842669	863806	882456	899582	915967	932210	948723	965730	983301	1.00138e+06	1.01989e+06	1.0389e+06	1.05864e+06	1.07964e+06	1.10256e+06	1.12778e+06	1.1555e+06	1.18542e+06	1.21687e+06	1.24893e+06	1.28085e+06	1.31248e+06	1.34382e+06	1.37447e+06	1.40399e+06	1.43211e+06	1.45865e+06	1.48373e+06	1.50783e+06	1.53166e+06	1.55577e+06	1.58014e+06	1.60473e+06	1.63001e+06	1.65657e+06	1.6847e+06	1.71472e+06	1.74629e+06	1.77828e+06	1.80916e+06	1.8378e+06	1.86378e+06	1.88741e+06
127	Estimates	Eastern Asia		906	Subregion	1832	677535	694909	709513	722325	734139	745569	757033	768769	780856	793245	805881	818816	832318	846915	863266	881788	902670	925628	950001	974850	999435	1.02359e+06	1.04734e+06	1.07033e+06	1.09219e+06	1.1127e+06	1.1317e+06	1.1493e+06	1.16587e+06	1.18199e+06	1.19813e+06	1.21423e+06	1.2303e+06	1.24688e+06	1.26463e+06	1.28395e+06	1.30515e+06	1.3279e+06	1.35111e+06	1.37329e+06	1.39333e+06	1.41086e+06	1.42617e+06
128	Estimates	China	9	156	Country/Area	906	554419	569909	582576	593366	603052	612242	621363	630678	640296	650213	660408	670953	682103	694339	708255	724219	742415	762581	784075	805986	827601	848760	869486	889485	908464	926241	942685	957891	972205	986132	1.00009e+06	1.01402e+06	1.02795e+06	1.04243e+06	1.05817e+06	1.07559e+06	1.09501e+06	1.1161e+06	1.13772e+06	1.15836e+06	1.17688e+06	1.1929e+06	1.20671e+06
129	Estimates	China, Hong Kong SAR	10	344	Country/Area	906	1974	2057.74	2150.09	2250.71	2358.71	2472.66	2590.56	2709.84	2827.56	2940.53	3046.05	3142.57	3230.3	3311.46	3389.56	3467.22	3545.85	3624.97	3703.18	3778.18	3848.92	3913.6	3974.19	4037.79	4113.99	4208.96	4326.33	4462.4	4607.03	4745.88	4868.74	4971.69	5058.05	5133.7	5207.84	5287.02	5373.44	5464.7	5557.38	5646.28	5727.94	5800.04	5864.74
130	Estimates	China, Macao SAR	11	446	Country/Area	906	196.473	200.49	201.268	199.292	195.133	189.458	183.034	176.752	171.525	168.283	167.795	170.466	176.188	184.245	193.556	203.224	213.189	223.416	233.002	240.837	246.193	248.745	248.77	246.945	244.289	241.631	239.074	236.669	235.175	235.44	238.085	243.373	251.154	260.921	271.914	283.49	295.597	308.181	320.774	332.783	343.816	353.623	362.308
131	Estimates	China, Taiwan Province of China	12	158	Country/Area	906	7602.35	7930.65	8250.8	8565.44	8877.42	9189.97	9506.26	9829.71	10163.8	10511.8	10876.1	11257.8	11655.4	12065.3	12482.2	12901.2	13322	13743.2	14156.8	14552.8	14924.5	15268.2	15586.1	15885.2	16175.6	16464.9	16754.7	17043.4	17331.5	17618.9	17905.5	18191.7	18477.5	18760.2	19036.5	19303.4	19560.2	19806.7	20042.4	20266.4	20478.5	20679.1	20868.1
132	Estimates	Dem. People's Republic of Korea		408	Country/Area	906	10549.5	10248.5	10049	9957.24	9972.43	10087	10285.9	10547.4	10844	11145.2	11424.2	11665.6	11871.7	12065.5	12282.4	12547.5	12864.9	13222.7	13610	14010.3	14410.4	14809.5	15207.8	15593.4	15952.1	16274.7	16554.7	16796.6	17016	17235.7	17472.1	17731.2	18008.6	18298.2	18590.1	18877.2	19156.8	19432	19708.3	19993.8	20293.1	20609.2	20937.4
133	Estimates	Japan		392	Country/Area	906	82802.1	84316.3	85659.4	86870	87980.6	89018.3	90004.2	90953.8	91877.6	92782.2	93673.6	94560.7	95458.5	96389.4	97379.4	98447	99596.1	100822	102124	103496	104929	106427	107976	109529	111023	112413	113679	114828	115879	116867	117817	118733	119605	120428	121189	121883	122509	123073	123585	124059	124505	124930	125331
134	Estimates	Mongolia		496	Country/Area	906	780.199	793.537	807.922	823.068	838.787	855.099	872.163	890.281	909.886	931.487	955.514	982.181	1011.33	1042.39	1074.52	1107.12	1139.96	1173.19	1207.1	1242.21	1278.82	1317.04	1356.67	1397.31	1438.42	1479.65	1520.87	1562.21	1603.91	1646.29	1689.62	1733.47	1777.73	1823.21	1871.09	1921.89	1976.31	2033.35	2089.71	2141.01	2184.14	2217.92	2243.49
135	Estimates	Republic of Korea		410	Country/Area	906	19211.4	19452.6	19817.8	20293.2	20864.1	21514.6	22227.3	22984	23765.5	24552.8	25329.5	26084	26812.1	27517.5	28209.7	28895.6	29572.6	30236.7	30892	31543.8	32195.7	32850.7	33506.5	34154.1	34780.9	35378.7	35942	36475.4	36992.2	37511.3	38045.6	38602.3	39175.2	39747.8	40296.2	40804.4	41265.1	41686.6	42086.7	42491.2	42918.4	43373.1	43848.2
136	Estimates	South-Eastern Asia		920	Subregion	1832	165134	168898	172943	177257	181827	186642	191690	196961	202445	208132	214014	220081	226322	232729	239289	245994	252831	259791	266874	274083	281418	288887	296478	304137	311796	319411	326947	334433	341963	349669	357642	365908	374426	383131	391930	400748	409566	418385	427167	435870	444464	452922	461240
137	Estimates	Brunei Darussalam		96	Country/Area	920	48.009	50.933	53.885	56.918	60.058	63.367	66.807	70.394	74.095	77.88	81.707	85.56	89.484	93.54	97.819	102.39	107.274	112.446	117.897	123.596	129.53	135.672	142.015	148.516	155.069	161.635	168.173	174.717	181.201	187.596	193.88	200.027	206.064	212.073	218.176	224.44	230.917	237.565	244.405	251.456	258.714	266.208	273.888
138	Estimates	Cambodia		116	Country/Area	920	4432.72	4537.66	4656.43	4783.2	4913.75	5045.28	5176.64	5308.13	5441.32	5578.69	5722.37	5872.97	6028.43	6183.59	6331.44	6467.19	6585.03	6685.96	6779.78	6880.62	6996.58	7139.64	7302.11	7449.23	7533.33	7524.46	7404.69	7196.04	6957.27	6770.39	6693.76	6749.85	6919.8	7170	7447.84	7714.89	7960.95	8198.08	8435.91	8691.33	8975.6	9289.3	9623.9
139	Estimates	Indonesia		360	Country/Area	920	69543.3	70849.4	72274.6	73820.8	75487.9	77273.4	79172.8	81179.2	83284.1	85477.6	87751.1	90098.4	92518.4	95015.3	97596.7	100267	103025	105866	108780	111759	114793	117880	121017	124200	127422	130681	133967	137278	140622	144010	147448	150938	154468	158009	161523	164982	168374	171703	174976	178209	181413	184592	187740
140	Estimates	Lao People's Democratic Republic		418	Country/Area	920	1682.91	1723.22	1764.04	1805.54	1847.79	1890.85	1934.82	1979.73	2025.67	2072.71	2120.89	2170.34	2221.12	2273.35	2327.14	2382.59	2439.2	2496.93	2556.84	2620.45	2688.43	2762.26	2840.84	2919.29	2990.96	3051.58	3098.96	3135.84	3168.84	3207.33	3258.15	3323.35	3401.19	3489.91	3586.32	3687.89	3794.2	3905.53	4020.82	4138.85	4258.47	4379.23	4500.35
141	Estimates	Malaysia	13	458	Country/Area	920	6109.9	6271.23	6449.61	6639.42	6836.64	7038.91	7245.68	7458.02	7678.38	7910.19	8156.34	8417.82	8692.34	8973.79	9253.83	9526.56	9790.08	10046.3	10298	10549.4	10804.1	11062.4	11324.3	11592.6	11871.1	12162.2	12468.7	12790.3	13122.8	13460	13798.1	14134.1	14471.2	14819.4	15192.3	15598.9	16043.7	16522	17022.5	17529	18029.8	18519.9	19002.7
142	Estimates	Myanmar		104	Country/Area	920	17779.6	18104	18440.7	18792.7	19162.2	19550.1	19956.4	20380.2	20819.8	21272.7	21736.9	22211.6	22697.7	23198.2	23717.8	24259.4	24823.9	25410.1	26015.2	26635.9	27269.1	27913.7	28570.1	29238.2	29918.5	30611.1	31314.3	32026.7	32748.8	33481.4	34224.3	34976.5	35734.3	36491.8	37241.5	37977.1	38698.5	39404.3	40085.7	40731.4	41335.2	41890.2	42401.7
143	Estimates	Philippines		608	Country/Area	920	18580.5	19246.6	19945.3	20669.6	21414.6	22177.1	22955.9	23751.9	24567.3	25405.5	26269.7	27161.1	28077.3	29012.6	29958.7	30910	31864.2	32824	33795.2	34786.3	35803.6	36849.7	37923.4	39022.8	40144.2	41285.7	42446.7	43629.4	44838.5	46079.8	47357.7	48672.8	50023.6	51408.9	52827	54275.8	55755.3	57263.8	58795	60340.8	61895.2	63454.8	65020.1
144	Estimates	Singapore		702	Country/Area	920	1022.1	1067.8	1119.93	1177.58	1239.69	1305.1	1372.52	1440.49	1507.54	1572.17	1633.13	1689.6	1741.46	1789.37	1834.52	1877.83	1919.27	1958.73	1996.87	2034.51	2072.28	2110.96	2150.5	2189.61	2226.38	2259.72	2288.86	2314.99	2341.4	2372.59	2411.69	2460.5	2517.98	2580.91	2644.49	2705.54	2762.44	2816.97	2873.28	2937.28	3012.97	3101.14	3199.64
145	Estimates	Thailand		764	Country/Area	920	20710.4	21263.5	21838.3	22436.8	23060.6	23711.1	24389.5	25096.8	25833.6	26600.3	27397.2	28224.2	29080.9	29966.9	30881.1	31822.7	32789.1	33778.8	34791.4	35827.1	36884.5	37963.3	39058.6	40159.6	41252.3	42326.3	43377.3	44405.9	45413.1	46401.8	47374.5	48326.3	49255.9	50173.9	51094.9	52026.9	52980.1	53945.9	54891.5	55772.2	56558.2	57232.5	57811
146	Estimates	Timor-Leste		626	Country/Area	920	414.754	418.684	423.12	428.047	433.416	439.223	445.444	452.083	459.15	466.62	474.535	482.852	491.575	500.652	510.035	519.676	529.328	538.906	548.817	559.62	571.565	585.25	600.185	614.264	624.561	629.227	627.255	619.817	610.048	602.363	599.907	603.837	613.233	626.677	641.845	657.061	671.747	686.475	701.812	718.736	737.814	759.526	783.204
147	Estimates	Viet Nam		704	Country/Area	920	24809.9	25364.5	25976.9	26646.1	27370.5	28147.4	28973.4	29844.1	30754.1	31697.9	32670	33666.1	34683.4	35721.2	36780	37858.9	38958	40073	41193.6	42307.1	43404.8	44484	45548.5	46603.5	47657.6	48718.2	49785.3	50861.2	51959	53095.4	54281.8	55522.8	56814.3	58148.4	59512.6	60896.7	62293.9	63702	65120.4	66550.2	67988.9	69437	70883.5
148	Estimates	LATIN AMERICA AND THE CARIBBEAN		1830	SDG region	1828	168821	173280	177916	182709	187648	192727	197949	203320	208854	214566	220470	226568	232849	239283	245829	252456	259154	265926	272768	279684	286676	293738	300869	308079	315378	322777	330272	337860	345548	353345	361253	369275	377396	385587	393806	402024	410223	418404	426565	434710	442840	450947	459019
149	Estimates	Caribbean		915	Subregion	1830	17079.8	17381.5	17706.6	18046.2	18394.3	18747.7	19106.1	19472	19850.2	20246.9	20667.5	21114.1	21583	22064	22543	23009.9	23459.9	23895.9	24325	24757.6	25201.3	25658.3	26124.9	26595.1	27060	27513.7	27954.3	28384.5	28806.9	29226.1	29645.6	30065.1	30484.4	30906.7	31336.1	31775.1	32225.3	32684.9	33148.3	33608	34058.2	34496.5	34923.9
150	Estimates	Anguilla	14	660	Country/Area	915	5.122	5.317	5.477	5.598	5.705	5.781	5.846	5.901	5.939	5.987	6.02	6.09	6.141	6.207	6.283	6.36	6.434	6.52	6.608	6.69	6.773	6.854	6.949	7.023	7.101	7.161	7.202	7.252	7.285	7.296	7.284	7.249	7.194	7.145	7.182	7.292	7.512	7.842	8.222	8.582	8.894	9.138	9.333
151	Estimates	Antigua and Barbuda		28	Country/Area	915	45.515	46.541	47.385	48.135	48.876	49.648	50.464	51.36	52.28	53.214	54.132	55.005	55.849	56.701	57.641	58.699	59.912	61.24	62.523	63.553	64.184	64.354	64.134	63.649	63.108	62.671	62.353	62.162	62.038	61.948	61.861	61.789	61.78	61.779	61.784	61.785	61.754	61.713	61.758	62.007	62.533	63.363	64.459
152	Estimates	Aruba	15	533	Country/Area	915	38.052	38.268	38.962	40.151	41.761	43.721	45.932	48.239	50.5	52.532	54.208	55.434	56.234	56.699	57.029	57.357	57.702	58.044	58.377	58.734	59.07	59.442	59.849	60.236	60.527	60.653	60.586	60.366	60.102	59.972	60.097	60.561	61.341	62.213	62.826	63.024	62.645	61.838	61.072	61.033	62.152	64.623	68.24
153	Estimates	Bahamas		44	Country/Area	915	79.09	79.989	81.434	83.373	85.783	88.628	91.897	95.617	99.776	104.415	109.532	115.119	121.092	127.34	133.705	140.06	146.381	152.621	158.648	164.265	169.376	173.894	177.863	181.519	185.105	188.895	192.903	197.1	201.482	205.991	210.589	215.321	220.182	225.095	229.913	234.579	239.02	243.265	247.451	251.738	256.227	261.007	266.028
154	Estimates	Barbados		52	Country/Area	915	210.99	215.724	219.669	222.854	225.324	227.132	228.406	229.27	229.883	230.402	230.985	231.718	232.623	233.632	234.588	235.415	236.084	236.661	237.241	237.963	238.895	240.093	241.523	243.076	244.643	246.158	247.584	248.931	250.2	251.347	252.388	253.296	254.078	254.791	255.493	256.26	257.117	258.012	258.97	259.961	260.933	261.912	262.89
155	Estimates	Bonaire, Sint Eustatius and Saba	15	535	Country/Area	915	7.129	7.29	7.425	7.524	7.61	7.668	7.722	7.782	7.855	7.949	8.078	8.231	8.429	8.647	8.888	9.126	9.389	9.638	9.91	10.148	10.359	10.542	10.716	10.841	10.956	11.026	11.076	11.094	11.105	11.135	11.209	11.318	11.473	11.646	11.843	12.024	12.185	12.332	12.485	12.709	13.01	13.43	13.936
156	Estimates	British Virgin Islands	14	92	Country/Area	915	7.437	7.5	7.547	7.597	7.628	7.68	7.725	7.78	7.855	7.944	8.053	8.164	8.319	8.469	8.644	8.836	9.022	9.213	9.427	9.621	9.83	10.012	10.21	10.391	10.551	10.697	10.821	10.923	11.041	11.226	11.471	11.821	12.25	12.755	13.317	13.951	14.646	15.39	16.155	16.867	17.489	18.007	18.443
157	Estimates	Cayman Islands	14	136	Country/Area	915	6.416	6.271	6.247	6.318	6.458	6.668	6.912	7.177	7.427	7.659	7.87	8.024	8.141	8.219	8.299	8.37	8.444	8.518	8.638	8.833	9.143	9.588	10.135	10.778	11.488	12.234	13.023	13.848	14.681	15.485	16.207	16.857	17.436	18.005	18.662	19.46	20.426	21.539	22.775	24.028	25.307	26.54	27.784
158	Estimates	Cuba		192	Country/Area	915	5919.99	6050.14	6178.81	6303.73	6423.87	6539.46	6652.07	6764.55	6880.73	7005.03	7141.24	7291.2	7453.53	7623.3	7793.26	7958.17	8115.49	8266.37	8413.55	8561.39	8712.53	8868.09	9025.35	9178.81	9320.94	9446.44	9554.19	9646.14	9724.04	9790.85	9849.46	9898.89	9940.31	9981.3	10031.7	10097.9	10183.9	10286.6	10397.5	10504	10597	10673.5	10736.4
159	Estimates	Curaçao	15	531	Country/Area	915	100.181	104.566	108.286	111.508	114.349	116.922	119.282	121.464	123.481	125.307	126.941	128.384	129.685	130.955	132.316	133.879	135.65	137.619	139.677	141.719	143.639	145.451	147.148	148.615	149.686	150.261	150.24	149.711	148.942	148.275	147.997	148.205	148.808	149.587	150.185	150.375	150.065	149.328	148.353	147.415	146.679	146.243	146.018
160	Estimates	Dominica		212	Country/Area	915	51.099	51.703	52.293	52.941	53.683	54.557	55.544	56.628	57.775	58.919	60.02	61.036	61.978	62.917	63.921	65.044	66.3	67.687	69.034	70.214	71.084	71.569	71.731	71.739	71.814	72.088	72.662	73.443	74.28	74.96	75.318	75.314	75.012	74.484	73.846	73.207	72.531	71.842	71.212	70.722	70.422	70.377	70.546
161	Estimates	Dominican Republic		214	Country/Area	915	2364.65	2438.64	2517.65	2601.34	2689.33	2781.34	2877.1	2976.42	3079.14	3185.11	3294.22	3406.28	3521.02	3638.11	3757.12	3877.77	3999.8	4123.1	4247.56	4373.13	4499.72	4627.2	4755.46	4884.46	5014.19	5144.63	5275.77	5407.5	5539.6	5671.8	5803.93	5935.9	6067.77	6199.66	6331.76	6464.23	6596.97	6729.93	6863.44	6997.88	7133.49	7270.41	7408.34
162	Estimates	Grenada		308	Country/Area	915	76.681	76.647	77.184	78.167	79.501	81.102	82.876	84.726	86.572	88.334	89.927	91.324	92.481	93.409	94.122	94.634	94.936	95.012	94.929	94.723	94.476	94.212	93.984	93.661	93.19	92.494	91.469	90.219	89.104	88.603	89.032	90.61	93.132	96.02	98.472	99.953	100.183	99.425	98.126	96.932	96.328	96.462	97.161
163	Estimates	Guadeloupe	2	312	Country/Area	915	209.999	213.342	217.579	222.796	228.99	236.054	243.84	252.03	260.249	268.078	275.173	281.312	286.538	291.106	295.509	300.058	304.867	309.772	314.498	318.63	321.887	324.17	325.635	326.577	327.426	328.489	330.007	331.915	333.919	335.587	336.683	336.932	336.612	336.677	338.43	342.737	350.061	359.911	370.913	381.139	389.251	394.615	397.692
164	Estimates	Haiti		332	Country/Area	915	3221.27	3274.41	3330.33	3388.96	3450.25	3514.07	3580.31	3648.82	3719.43	3791.93	3866.16	3941.96	4019.17	4097.76	4177.63	4258.73	4341.32	4425.32	4509.81	4593.67	4676.24	4757.18	4837.33	4918.62	5003.71	5094.57	5191.64	5294.62	5404.02	5520.19	5643.18	5773.37	5910.22	6051.62	6194.69	6337.27	6478.54	6618.74	6758.22	6897.76	7037.91	7178.61	7319.49
165	Estimates	Jamaica		388	Country/Area	915	1402.9	1437.07	1468.23	1495.93	1520.09	1540.96	1559.14	1575.68	1591.82	1609.02	1628.52	1651.07	1676.5	1703.66	1730.74	1756.51	1780.52	1803.32	1825.87	1849.66	1875.64	1904.28	1935.09	1966.98	1998.31	2028.02	2055.37	2080.82	2105.9	2132.78	2162.84	2196.92	2234.06	2271.74	2306.37	2335.51	2358.16	2375.4	2389.41	2403.46	2419.9	2439.33	2461.05
166	Estimates	Martinique	2	474	Country/Area	915	222.003	224.412	228.268	233.26	239.15	245.682	252.652	259.879	267.209	274.493	281.626	288.478	294.957	300.951	306.361	311.122	315.172	318.501	321.174	323.317	325.014	326.328	327.301	327.883	328.073	327.837	327.176	326.2	325.296	324.929	325.448	326.987	329.451	332.601	336.166	339.881	343.744	347.754	351.708	355.34	358.457	360.892	362.756
167	Estimates	Montserrat	14	500	Country/Area	915	13.524	14.127	14.476	14.601	14.509	14.231	13.817	13.32	12.799	12.323	11.957	11.729	11.653	11.673	11.711	11.721	11.696	11.647	11.604	11.553	11.538	11.519	11.53	11.539	11.55	11.576	11.612	11.654	11.675	11.665	11.607	11.482	11.299	11.106	10.925	10.787	10.704	10.666	10.632	10.623	10.616	10.627	10.659
168	Estimates	Puerto Rico	16	630	Country/Area	915	2218.01	2193.62	2183.07	2181.91	2186.79	2195.52	2207.05	2221.48	2239.83	2263.83	2294.97	2333.66	2378.38	2425.35	2469.57	2507.54	2537.57	2561.03	2581.39	2603.71	2631.7	2666.16	2705.84	2749.86	2796.66	2844.93	2894.67	2945.85	2996.84	3045.6	3090.69	3131.51	3168.34	3201.86	3233.17	3263.17	3291.75	3318.84	3345.57	3373.37	3403.17	3435.26	3469.07
169	Estimates	Saint Barthélemy	2	652	Country/Area	915	1.996	2.059	2.115	2.169	2.214	2.246	2.272	2.281	2.291	2.3	2.306	2.322	2.342	2.365	2.376	2.384	2.368	2.357	2.337	2.332	2.345	2.366	2.406	2.458	2.518	2.596	2.689	2.811	2.919	3.017	3.085	3.099	3.109	3.11	3.188	3.37	3.669	4.072	4.533	4.972	5.345	5.635	5.849
170	Estimates	Saint Kitts and Nevis		659	Country/Area	915	46.053	46.131	46.488	47.044	47.731	48.488	49.253	49.949	50.545	50.975	51.199	51.196	50.961	50.529	49.928	49.209	48.351	47.388	46.399	45.529	44.878	44.489	44.318	44.304	44.322	44.271	44.14	43.944	43.703	43.452	43.201	42.963	42.733	42.477	42.198	41.874	41.479	41.041	40.633	40.354	40.26	40.381	40.691
171	Estimates	Saint Lucia		662	Country/Area	915	82.783	83.813	84.658	85.352	85.945	86.47	86.989	87.519	88.123	88.841	89.698	90.718	91.892	93.214	94.637	96.138	97.721	99.37	101.028	102.599	104.016	105.244	106.303	107.311	108.389	109.634	111.074	112.685	114.398	116.148	117.828	119.435	120.987	122.571	124.296	126.246	128.448	130.868	133.364	135.787	138.019	140.001	141.758
172	Estimates	Saint Martin (French part)	2	663	Country/Area	915	2.999	3.113	3.192	3.263	3.332	3.408	3.489	3.592	3.693	3.798	3.898	3.996	4.078	4.179	4.302	4.471	4.675	4.922	5.194	5.461	5.707	5.945	6.156	6.37	6.601	6.882	7.25	7.713	8.191	8.557	8.777	8.675	8.372	8.296	9.067	11.066	14.561	19.274	24.374	28.723	31.522	32.441	31.816
173	Estimates	Saint Vincent and the Grenadines		670	Country/Area	915	66.997	68.075	69.289	70.612	72.05	73.55	75.108	76.67	78.196	79.632	80.97	82.168	83.239	84.2	85.117	86.009	86.907	87.779	88.663	89.565	90.501	91.49	92.511	93.559	94.618	95.665	96.694	97.708	98.688	99.649	100.566	101.439	102.255	103.035	103.776	104.503	105.217	105.905	106.533	107.071	107.489	107.772	107.941
174	Estimates	Sint Maarten (Dutch part)	15	534	Country/Area	915	1.49	1.662	1.797	1.913	2.007	2.112	2.21	2.321	2.46	2.624	2.833	3.077	3.367	3.703	4.063	4.46	4.895	5.362	5.857	6.354	6.854	7.372	7.892	8.429	8.977	9.556	10.147	10.791	11.481	12.244	13.097	14.03	15.032	16.175	17.517	19.127	21.028	23.157	25.334	27.28	28.814	29.852	30.458
175	Estimates	Trinidad and Tobago		780	Country/Area	915	645.626	658.754	675.583	695.247	716.879	739.703	762.977	786.024	808.219	829.025	847.973	864.814	879.436	891.948	902.62	911.742	919.218	925.233	930.792	937.184	945.357	955.753	968.136	982.006	996.479	1010.93	1025.1	1039.21	1053.56	1068.64	1084.74	1101.98	1120.02	1138.07	1155.08	1170.3	1183.38	1194.53	1204.15	1212.86	1221.12	1229.11	1236.68
176	Estimates	Turks and Caicos Islands	14	796	Country/Area	915	5.044	5.001	4.982	5.037	5.131	5.247	5.38	5.504	5.641	5.748	5.825	5.867	5.884	5.87	5.851	5.814	5.783	5.766	5.746	5.765	5.837	5.973	6.156	6.38	6.61	6.832	7.02	7.193	7.38	7.607	7.894	8.243	8.654	9.096	9.556	9.974	10.365	10.717	11.091	11.55	12.115	12.815	13.639
177	Estimates	United States Virgin Islands	16	850	Country/Area	915	26.792	27.371	28.119	28.812	29.351	29.669	29.862	30.06	30.488	31.433	33.137	35.718	39.07	42.891	46.732	50.226	53.249	55.917	58.467	61.324	64.723	68.766	73.28	77.981	82.476	86.47	89.849	92.688	95.067	97.171	99.089	100.87	102.474	103.818	104.779	105.279	105.293	104.889	104.315	103.856	103.755	104.088	104.795
178	Estimates	Central America		916	Subregion	1830	37975.5	39045.3	40166.2	41341	42571.7	43859.3	45203.6	46603.7	48057.5	49562.6	51116.6	52718	54367	56065.7	57817	59622.9	61481.9	63391.2	65349	67353.1	69400.5	71490.3	73618.7	75775.8	77949	80129.1	82310.2	84492.6	86679.8	88878.3	91092.4	93322.7	95565.1	97813.5	100059	102297	104522	106736	108946	111160	113384	115621	117866
179	Estimates	Belize		84	Country/Area	916	68.915	71.239	73.43	75.551	77.688	79.867	82.134	84.508	86.952	89.486	92.068	94.7	97.392	100.165	103.069	106.12	109.348	112.707	116.065	119.269	122.184	124.795	127.152	129.294	131.305	133.264	135.143	136.99	138.975	141.302	144.142	147.572	151.486	155.82	160.341	164.918	169.569	174.333	179.023	183.471	187.554	191.136	194.324
180	Estimates	Costa Rica		188	Country/Area	916	945.683	972.151	1002.44	1035.86	1071.88	1110.09	1150.27	1192.36	1236.39	1282.5	1330.79	1381.19	1433.35	1486.56	1539.94	1592.83	1645.08	1696.74	1747.69	1797.89	1847.39	1896.07	1944.17	1992.52	2042.24	2094.19	2148.68	2205.62	2264.94	2326.46	2389.97	2455.59	2523.36	2593.01	2664.22	2736.72	2810.24	2884.86	2960.93	3039.01	3119.44	3202.08	3286.53
181	Estimates	El Salvador		222	Country/Area	916	2199.9	2237.78	2280.44	2327.37	2378.24	2432.88	2491.25	2553.51	2619.9	2690.75	2766.32	2846.6	2931.19	3019.22	3109.57	3201.31	3293.95	3387.38	3481.62	3576.83	3673.07	3770.06	3867.31	3964.27	4060.26	4154.69	4247.51	4338.45	4426.68	4511.13	4591.14	4666.36	4737.26	4804.94	4871.04	4936.8	5002.34	5067.53	5133.27	5200.61	5270.07	5342.19	5416.33
182	Estimates	Guatemala		320	Country/Area	916	3114.96	3212.33	3311.53	3413.16	3517.65	3625.3	3736.23	3850.43	3967.74	4087.92	4210.75	4336.13	4464.25	4595.51	4730.53	4869.71	5013.17	5160.62	5311.61	5465.52	5621.79	5780.48	5941.57	6104.53	6268.71	6433.72	6599.21	6765.52	6933.91	7106.14	7283.46	7466.48	7654.82	7847.47	8042.9	8240.06	8438.6	8639.1	8842.57	9050.46	9263.82	9483.27	9708.55
183	Estimates	Honduras		340	Country/Area	916	1546.72	1588.56	1631.73	1676.51	1723.01	1771.36	1821.54	1873.49	1927.1	1982.19	2038.64	2096.41	2155.65	2216.71	2280.04	2346.01	2414.8	2486.42	2560.72	2637.51	2716.65	2798.12	2882.1	2968.98	3059.24	3153.25	3251.14	3352.82	3458.1	3566.66	3678.27	3792.92	3910.64	4031.33	4154.86	4281.17	4410.27	4542.22	4677.02	4814.7	4955.3	5098.59	5244.68
184	Estimates	Mexico		484	Country/Area	916	27944.7	28749.8	29590.1	30468.8	31388.6	32350.6	33355.2	34401.5	35488	36612.1	37771.9	38966	40195.3	41462.4	42771.1	44123.9	45519.7	46956.2	48432	49945.3	51493.6	53076.4	54689.9	56324.3	57966.8	59607.9	61242.2	62869.9	64494.9	66123.9	67761.4	69407.6	71058.6	72709.3	74352.6	75983.5	77599.1	79200.1	80788.7	82368.9	83943.1	85512.6	87075.1
185	Estimates	Nicaragua		558	Country/Area	916	1294.99	1332.05	1372.1	1414.94	1460.35	1508.1	1557.96	1609.65	1662.9	1717.47	1773.13	1829.77	1887.43	1946.24	2006.48	2068.38	2131.97	2197.3	2264.62	2334.28	2406.52	2481.34	2558.7	2638.7	2721.42	2806.86	2894.97	2985.48	3077.86	3171.4	3265.52	3360.14	3455.13	3549.71	3642.98	3734.34	3823.13	3909.67	3995.53	4082.96	4173.44	4267.57	4364.51
186	Estimates	Panama		591	Country/Area	916	859.658	881.345	904.406	928.745	954.313	981.083	1009.04	1038.18	1068.54	1100.14	1133.01	1167.12	1202.45	1238.89	1276.33	1314.68	1353.85	1393.82	1434.68	1476.48	1519.29	1563.09	1607.8	1653.21	1699.06	1745.14	1791.39	1837.8	1884.43	1931.3	1978.49	2025.96	2073.75	2121.86	2170.33	2219.2	2268.5	2318.26	2368.56	2419.42	2470.95	2523.11	2575.95
187	Estimates	South America		931	Subregion	1830	113765	116854	120043	123322	126682	130120	133639	137244	140946	144757	148686	152736	156899	161153	165469	169823	174212	178638	183094	187574	192074	196589	201126	205708	210369	215134	220008	224983	230062	235241	240515	245887	251346	256866	262411	267952	273476	278983	284471	289942	295398	300829	306229
188	Estimates	Argentina		32	Country/Area	931	17037.9	17390.4	17743	18094.3	18443.3	18789.4	19132.4	19472.5	19810.2	20146.3	20481.8	20817.3	21153	21488.9	21824.4	22159.6	22494	22828.9	23168.3	23517.6	23880.6	24259.6	24653.2	25056.5	25462.3	25865.8	26264.7	26661.4	27061	27471	27896.5	28338.5	28794.5	29262	29737.1	30216.3	30699	31184.4	31668.9	32148.1	32618.6	33079	33529.3
189	Estimates	Bolivia (Plurinational State of)		68	Country/Area	931	3081.84	3124.34	3170.68	3220.68	3274.2	3331.04	3390.97	3453.78	3519.19	3587	3656.96	3728.95	3803	3879.19	3957.76	4038.86	4122.52	4208.68	4297.52	4389.25	4484	4581.75	4682.39	4785.92	4892.29	5001.41	5113.46	5228.25	5344.95	5462.41	5579.93	5697.1	5814.34	5932.81	6054.13	6179.46	6309.13	6442.82	6580.32	6721.12	6864.84	7011.46	7160.92
190	Estimates	Brazil		76	Country/Area	931	53974.7	55606.4	57283.7	58999.3	60749.5	62533.9	64355.7	66221.5	68140.4	70123.4	72179.2	74311.3	76514.3	78772.6	81064.6	83373.5	85696.5	88035.8	90387.1	92746.6	95113.3	97482.9	99859.4	102259	104706	107216	109791	112425	115121	117878	120694	123570	126498	129449	132384	135274	138109	140892	143628	146328	149003	151648	154259
191	Estimates	Chile		152	Country/Area	931	6598.52	6729.58	6869.71	7016.47	7167.91	7322.65	7479.85	7639.21	7800.87	7965.32	8132.99	8303.8	8476.9	8650.39	8821.85	8989.61	9152.85	9312.09	9468.85	9625.3	9783.13	9942.72	10103.7	10265.8	10428.8	10592.3	10756.9	10922.8	11089.2	11254.9	11419.4	11582	11743.9	11908	12078.1	12257.2	12445.8	12642.9	12847.7	13058.8	13274.6	13495.3	13719.8
192	Estimates	Colombia		170	Country/Area	931	11981.6	12296	12633.9	12993.8	13374.5	13775	14194.6	14632.8	15089.5	15564.6	16057.7	16567.8	17092.9	17630	18175.2	18725.2	19279.7	19837.5	20393.7	20942.5	21480.1	22004	22516.4	23024.5	23538.4	24065.5	24608.1	25164.5	25733.7	26313	26900.5	27496.6	28101.8	28714.2	29331.2	29951.2	30572.5	31195.4	31822.5	32457.5	33102.6	33758.3	34422.6
193	Estimates	Ecuador		218	Country/Area	931	3470.16	3561.08	3654.72	3751.6	3852.13	3956.62	4065.33	4178.34	4295.75	4417.54	4543.66	4674.18	4809.19	4948.99	5093.85	5243.98	5399.42	5560.01	5725.46	5895.37	6069.38	6247.42	6429.38	6614.84	6803.27	6994.33	7187.79	7383.71	7582.36	7784.07	7989.18	8197.65	8409.4	8624.59	8843.46	9066.1	9292.48	9522.36	9755.58	9991.87	10230.9	10472.5	10716.1
194	Estimates	Falkland Islands (Malvinas)	17	238	Country/Area	931	2.254	2.245	2.231	2.217	2.212	2.203	2.189	2.175	2.169	2.157	2.144	2.131	2.119	2.103	2.086	2.074	2.055	2.035	2.026	1.997	1.989	1.964	1.941	1.931	1.912	1.909	1.898	1.877	1.865	1.861	1.853	1.85	1.845	1.838	1.833	1.841	1.853	1.866	1.885	1.925	1.98	2.061	2.169
195	Estimates	French Guiana	2	254	Country/Area	931	25.484	26.241	26.897	27.465	27.981	28.493	29.029	29.62	30.306	31.093	32.032	33.115	34.379	35.77	37.284	38.893	40.624	42.43	44.309	46.15	47.932	49.619	51.272	52.882	54.521	56.224	58	59.868	61.936	64.275	66.973	70.022	73.414	77.232	81.566	86.435	91.95	97.972	104.222	110.261	115.784	120.689	125.075
196	Estimates	Guyana		328	Country/Area	931	406.559	418.68	432.815	448.462	465.165	482.562	500.315	518.251	536.22	554.094	571.813	589.274	606.286	622.58	637.835	651.865	664.518	675.861	686.144	695.743	704.93	713.684	721.949	729.909	737.846	745.847	754.101	762.424	770.128	776.257	780.153	781.734	781.249	778.953	775.217	770.439	764.447	757.451	750.641	745.581	743.306	744.477	748.596
197	Estimates	Paraguay		600	Country/Area	931	1473.24	1511.85	1550.98	1590.87	1631.71	1673.67	1716.88	1761.45	1807.46	1854.97	1903.99	1954.55	2006.67	2060.34	2115.57	2172.31	2230.73	2290.8	2351.93	2413.4	2474.76	2535.88	2597.15	2659.42	2723.82	2791.24	2861.87	2935.71	3013.28	3095.15	3181.63	3272.92	3368.76	3468.53	3571.28	3676.21	3783.07	3891.72	4001.68	4112.4	4223.41	4334.35	4445.02
198	Estimates	Peru		604	Country/Area	931	7777.45	7976.48	8184.73	8401.37	8625.98	8858.39	9098.83	9347.83	9606.24	9875.02	10155	10446.6	10749.5	11062.3	11383.4	11711.4	12045.8	12386.9	12735.5	13092.8	13459.8	13836.4	14222	14615.8	15017.1	15424.7	15838.6	16258.3	16683.5	17113.4	17547.6	17985.4	18426.4	18871	19319.7	19772.9	20230.4	20691.3	21153.5	21614.2	22071.4	22522.4	22966.8
199	Estimates	Suriname		740	Country/Area	931	214.996	222.451	229.211	235.693	242.211	249.002	256.18	263.756	271.673	279.761	287.87	295.913	303.894	311.945	320.267	328.939	338.155	347.673	356.551	363.574	367.926	369.23	367.907	364.907	361.665	359.234	357.949	357.649	358.103	358.826	359.531	360.144	360.927	362.282	364.722	368.636	374.133	381.033	388.877	397.082	405.169	413.009	420.658
200	Estimates	Uruguay		858	Country/Area	931	2238.5	2261.34	2286.26	2313.21	2342.04	2372.56	2404.49	2437.5	2471.14	2505.01	2538.65	2571.68	2603.88	2635.12	2665.38	2694.54	2722.87	2750.09	2774.76	2795.04	2809.8	2818.28	2821.46	2822.11	2824.09	2830.17	2841.37	2856.96	2875.72	2895.68	2915.39	2934.62	2953.85	2973.05	2992.25	3011.52	3030.65	3049.58	3068.71	3088.6	3109.6	3131.66	3154.46
201	Estimates	Venezuela (Bolivarian Republic of)		862	Country/Area	931	5481.98	5726.61	5974.44	6226.29	6482.86	6744.7	7012.18	7285.57	7564.99	7850.42	8141.84	8439.26	8742.78	9052.63	9369.1	9692.28	10022.6	10359.7	10702.3	11048.3	11396.4	11746	12097.7	12453.7	12817	13189.5	13572.2	13964.4	14364.7	14771.3	15182.6	15597.9	16017.6	16443.1	16876.7	17319.5	17772	18232.7	18698.8	19166.5	19632.7	20096.3	20557.7
202	Estimates	AUSTRALIA/NEW ZEALAND		927	SDG region	1828	10085.4	10346.2	10587.9	10822.4	11058.6	11302.1	11555.2	11817.3	12084.7	12352.2	12614.7	12869.9	13120.6	13375.4	13646	13939.8	14260.5	14602.3	14952.5	15293.3	15611.4	15903.9	16173.9	16421.2	16647.7	16855.9	17044.3	17215	17378.4	17548.3	17735	17942.1	18167.7	18410.4	18666.2	18931.9	19207.9	19493.9	19785	20074.9	20358.8	20635.4	20905.4
203	Estimates	Australia	18	36	Country/Area	927	8177.35	8398.22	8595.06	8782.18	8970.12	9165.7	9371.78	9587.46	9808.59	10028.8	10242.1	10445.8	10643.4	10845.2	11065.4	11313.2	11593.4	11899.6	12215.7	12518.9	12793	13033.1	13244.2	13431.8	13605.6	13773.3	13935.7	14092.5	14249.4	14413	14588.4	14777.2	14979.2	15194.6	15423.2	15663.7	15917.6	16183.2	16452.3	16714	16960.6	17189.2	17402.2
204	Estimates	New Zealand	19	554	Country/Area	927	1908.01	1947.93	1992.81	2040.24	2088.49	2136.39	2183.46	2229.83	2276.13	2323.4	2372.6	2424.06	2477.19	2530.19	2580.54	2626.65	2667.09	2702.68	2736.82	2774.36	2818.39	2870.82	2929.69	2989.41	3042.18	3082.62	3108.57	3122.41	3128.96	3135.3	3146.61	3164.82	3188.54	3215.73	3243.03	3268.23	3290.3	3310.75	3332.79	3360.96	3398.18	3446.17	3503.19
205	Estimates	OCEANIA (EXCLUDING AUSTRALIA AND NEW ZEALAND)		1835	SDG region	1828	2890.54	2919.57	2954.71	2995.2	3040.59	3090.6	3145	3203.7	3266.79	3334.52	3406.96	3484.09	3565.54	3650.68	3738.67	3828.86	3921.01	4015.14	4111.35	4209.85	4310.8	4414.25	4520.25	4628.88	4740.22	4854.36	4971.07	5090.45	5213.66	5342.2	5477.07	5618.92	5766.89	5918.47	6070.03	6219.14	6364.77	6507.81	6649.84	6793.27	6939.92	7089.84	7242.58
206	Estimates	Melanesia		928	Subregion	1835	2493.45	2512.43	2537.8	2568.91	2605.12	2646.01	2691.11	2740.14	2792.88	2849.19	2908.93	2971.96	3038.07	3106.93	3178.21	3251.67	3327.16	3404.69	3484.73	3567.89	3654.63	3745.14	3839.32	3936.82	4037.19	4140.1	4245.16	4352.49	4462.97	4577.83	4697.81	4823.5	4954.15	5087.39	5219.93	5349.55	5475.31	5598.17	5720.19	5844.45	5973.2	6106.78	6244.62
207	Estimates	Fiji		242	Country/Area	928	288.994	296.25	304.883	314.452	324.583	335.096	345.869	356.939	368.426	380.564	393.48	407.244	421.673	436.303	450.538	463.96	476.399	487.973	498.944	509.708	520.561	531.622	542.843	554.143	565.418	576.626	587.561	598.299	609.383	621.584	635.312	651.032	668.281	685.497	700.478	711.77	718.642	721.776	722.924	724.602	728.575	735.398	744.47
208	Estimates	New Caledonia	2	540	Country/Area	928	64.823	64.259	64.409	65.128	66.273	67.743	69.469	71.374	73.442	75.672	78.059	80.581	83.214	85.901	88.572	91.194	93.688	96.072	98.609	101.628	105.323	109.823	114.984	120.426	125.648	130.269	134.169	137.463	140.262	142.77	145.141	147.4	149.535	151.625	153.752	155.985	158.35	160.873	163.655	166.782	170.335	174.336	178.759
209	Estimates	Papua New Guinea		598	Country/Area	928	2002.15	2011.22	2024.16	2041.02	2061.76	2086.25	2114.28	2145.6	2179.87	2216.72	2255.86	2297.05	2340.35	2385.94	2434.22	2485.43	2539.68	2596.82	2656.64	2718.8	2783.13	2849.52	2918.14	2989.2	3063.05	3139.94	3219.82	3302.64	3388.63	3478.09	3571.21	3668.1	3768.49	3871.49	3975.95	4081.02	4186.5	4292.57	4399.32	4507	4615.84	4725.54	4836.22
210	Estimates	Solomon Islands		90	Country/Area	928	89.793	91.79	94.059	96.539	99.191	102.001	104.935	107.986	111.157	114.436	117.847	121.385	125.04	128.838	132.766	136.815	140.995	145.319	149.887	154.83	160.24	166.163	172.55	179.306	186.297	193.401	200.602	207.885	215.299	222.841	230.55	238.423	246.451	254.566	262.691	270.787	278.834	286.871	294.976	303.272	311.869	320.781	330.004
211	Estimates	Vanuatu		548	Country/Area	928	47.696	48.919	50.291	51.766	53.312	54.921	56.557	58.242	59.98	61.792	63.689	65.7	67.793	69.944	72.116	74.268	76.392	78.505	80.653	82.92	85.374	88.012	90.802	93.749	96.773	99.863	103.002	106.206	109.397	112.543	115.598	118.546	121.398	124.213	127.058	129.989	132.988	136.075	139.319	142.801	146.575	150.718	155.176
212	Estimates	Micronesia		954	Subregion	1835	155.57	158.535	161.556	164.619	167.806	171.104	174.602	178.343	182.319	186.625	191.239	196.21	201.516	207.025	212.787	218.65	224.65	230.779	236.856	242.709	248.182	253.245	257.989	262.601	267.255	272.159	277.353	282.885	288.919	295.735	303.502	312.208	321.831	332.277	343.471	355.291	367.739	380.68	393.589	405.784	416.764	426.297	434.45
213	Estimates	Guam	16	316	Country/Area	954	59.653	60.258	60.87	61.47	62.058	62.647	63.256	63.926	64.698	65.623	66.733	68.065	69.605	71.289	73.047	74.828	76.611	78.412	80.212	82.04	83.875	85.729	87.58	89.459	91.378	93.351	95.38	97.477	99.629	101.837	104.134	106.482	108.901	111.403	113.953	116.576	119.228	121.923	124.674	127.525	130.48	133.553	136.693
214	Estimates	Kiribati		296	Country/Area	954	33.05	33.615	34.27	34.976	35.75	36.566	37.428	38.317	39.241	40.206	41.196	42.234	43.283	44.342	45.392	46.429	47.429	48.403	49.354	50.267	51.142	51.979	52.775	53.558	54.334	55.114	55.922	56.759	57.613	58.469	59.296	60.101	60.887	61.736	62.745	63.989	65.504	67.244	69.087	70.849	72.394	73.692	74.767
215	Estimates	Marshall Islands		584	Country/Area	954	13.005	13.226	13.441	13.628	13.792	13.897	13.996	14.085	14.208	14.394	14.674	15.056	15.547	16.111	16.71	17.282	17.834	18.383	18.966	19.617	20.394	21.305	22.335	23.44	24.53	25.579	26.548	27.479	28.4	29.417	30.574	31.883	33.33	34.881	36.564	38.331	40.212	42.168	44.092	45.827	47.265	48.403	49.242
216	Estimates	Micronesia (Fed. States of)		583	Country/Area	954	32.004	33.399	34.586	35.675	36.757	37.88	39.066	40.351	41.695	43.096	44.51	45.939	47.372	48.856	50.476	52.224	54.192	56.308	58.386	60.146	61.415	62.089	62.275	62.268	62.456	63.122	64.36	66.079	68.196	70.515	72.936	75.422	78.015	80.63	83.192	85.641	87.904	89.985	91.984	94.062	96.304	98.779	101.386
217	Estimates	Nauru		520	Country/Area	954	3.43	3.466	3.555	3.655	3.738	3.819	3.888	3.959	4.051	4.186	4.377	4.627	4.942	5.27	5.59	5.859	6.065	6.221	6.343	6.445	6.553	6.669	6.798	6.929	7.062	7.178	7.284	7.396	7.505	7.626	7.751	7.871	8.016	8.163	8.331	8.501	8.679	8.868	9.058	9.275	9.506	9.766	10.03
218	Estimates	Northern Mariana Islands	16	580	Country/Area	954	6.997	7.078	7.204	7.394	7.66	7.98	8.376	8.81	9.238	9.64	9.98	10.243	10.438	10.591	10.78	11.023	11.341	11.723	12.135	12.577	13	13.423	13.884	14.322	14.672	14.917	15.024	15.049	15.167	15.64	16.633	18.168	20.163	22.622	25.496	28.719	32.377	36.371	40.294	43.542	45.752	46.662	46.473
219	Estimates	Palau		585	Country/Area	954	7.431	7.493	7.63	7.821	8.051	8.315	8.592	8.895	9.188	9.48	9.769	10.046	10.329	10.566	10.792	11.005	11.178	11.329	11.46	11.617	11.803	12.051	12.342	12.625	12.823	12.898	12.835	12.646	12.409	12.231	12.178	12.281	12.519	12.842	13.19	13.534	13.835	14.121	14.4	14.704	15.063	15.442	15.859
220	Estimates	Polynesia	20	957	Subregion	1835	241.513	248.596	255.351	261.67	267.663	273.484	279.284	285.215	291.595	298.71	306.791	315.923	325.956	336.722	347.675	358.539	369.207	379.667	389.762	399.249	407.992	415.864	422.94	429.451	435.775	442.101	448.559	455.072	461.772	468.639	475.762	483.212	490.903	498.801	506.629	514.291	521.723	528.963	536.059	543.038	549.958	556.764	563.506
221	Estimates	American Samoa	16	16	Country/Area	957	18.941	19.287	19.546	19.699	19.758	19.748	19.712	19.671	19.69	19.827	20.127	20.605	21.246	22.029	22.85	23.675	24.473	25.235	25.98	26.698	27.362	27.982	28.564	29.103	29.595	30.045	30.455	30.834	31.262	31.842	32.648	33.697	34.969	36.413	37.946	39.521	41.114	42.741	44.346	45.894	47.351	48.682	49.9
222	Estimates	Cook Islands	21	184	Country/Area	957	15.071	15.411	15.634	15.83	16.056	16.35	16.712	17.12	17.539	17.92	18.213	18.38	18.452	18.507	18.628	18.894	19.329	19.89	20.496	20.985	21.301	21.399	21.309	21.056	20.691	20.225	19.689	19.068	18.44	17.902	17.519	17.306	17.271	17.343	17.473	17.592	17.702	17.794	17.898	18.026	18.195	18.419	18.678
223	Estimates	French Polynesia	2	258	Country/Area	957	60.27	62.066	63.848	65.585	67.237	68.847	70.436	72.062	73.83	75.803	78.08	80.705	83.652	86.847	90.132	93.442	96.719	99.99	103.329	106.814	110.49	114.385	118.438	122.641	126.919	131.229	135.559	139.893	144.273	148.734	153.298	157.954	162.679	167.456	172.249	177.024	181.807	186.588	191.26	195.728	199.906	203.716	207.238
224	Estimates	Niue	21	570	Country/Area	957	4.666	4.676	4.692	4.681	4.683	4.69	4.697	4.722	4.749	4.783	4.83	4.877	4.93	4.987	5.04	5.097	5.152	5.206	5.242	5.215	5.127	4.956	4.722	4.45	4.194	3.974	3.796	3.684	3.603	3.502	3.401	3.268	3.123	2.974	2.837	2.713	2.607	2.52	2.446	2.382	2.332	2.292	2.261
225	Estimates	Samoa		882	Country/Area	957	82.106	84.421	86.805	89.209	91.666	94.186	96.778	99.48	102.328	105.367	108.627	112.112	115.768	119.552	123.346	127.055	130.672	134.181	137.484	140.495	143.146	145.407	147.295	148.858	150.191	151.353	152.362	153.218	153.986	154.74	155.522	156.41	157.365	158.345	159.243	159.995	160.552	160.962	161.369	161.935	162.797	164	165.49
226	Estimates	Tokelau	21	772	Country/Area	957	1.572	1.509	1.499	1.52	1.553	1.602	1.668	1.723	1.776	1.82	1.871	1.916	1.936	1.953	1.949	1.927	1.883	1.816	1.74	1.674	1.623	1.587	1.575	1.571	1.573	1.57	1.564	1.548	1.542	1.539	1.543	1.583	1.611	1.655	1.689	1.714	1.709	1.686	1.663	1.63	1.604	1.575	1.558
227	Estimates	Tonga		776	Country/Area	957	47.217	49.31	51.181	52.789	54.151	55.323	56.365	57.372	58.485	59.846	61.574	63.721	66.233	68.975	71.744	74.348	76.774	79.034	81.076	82.861	84.344	85.492	86.327	86.958	87.584	88.321	89.228	90.259	91.336	92.271	92.966	93.415	93.636	93.736	93.793	93.896	94.081	94.318	94.592	94.848	95.069	95.243	95.398
228	Estimates	Tuvalu		798	Country/Area	957	4.676	4.784	4.872	4.94	5.013	5.072	5.139	5.194	5.236	5.285	5.321	5.33	5.34	5.341	5.354	5.388	5.435	5.51	5.598	5.671	5.74	5.77	5.786	5.819	5.903	6.064	6.319	6.65	7.018	7.357	7.631	7.825	7.951	8.041	8.11	8.211	8.341	8.481	8.637	8.787	8.91	9.014	9.11
229	Estimates	Wallis and Futuna Islands	2	876	Country/Area	957	6.994	7.132	7.274	7.417	7.546	7.666	7.777	7.871	7.962	8.059	8.148	8.277	8.399	8.531	8.632	8.713	8.77	8.805	8.817	8.836	8.859	8.886	8.924	8.995	9.125	9.32	9.587	9.918	10.312	10.752	11.234	11.754	12.298	12.838	13.289	13.625	13.81	13.873	13.848	13.808	13.794	13.823	13.873
230	Estimates	EUROPE AND NORTHERN AMERICA		1829	SDG region	1828	721931	729341	737473	746095	755021	764109	773264	782436	791614	800815	810056	819321	828532	837539	846150	854237	861728	868673	875217	881576	887911	894270	900613	906911	913103	919147	925050	930842	936524	942099	947574	952932	958184	963389	968627	973948	979381	984886	990357	995645	1.00064e+06	1.00533e+06	1.00973e+06
231	Estimates	EUROPE		917	SDG subregion	1829	549329	554325	559694	565282	570970	576679	582371	588048	593743	599513	605407	611434	617536	623575	629367	634783	639762	644345	648636	652790	656919	661056	665164	669208	673132	676895	680498	683960	687286	690485	693567	696513	699330	702070	704807	707584	710422	713279	716057	718617	720858	722776	724390
232	Estimates	Eastern Europe		923	Subregion	917	220171	223305	226633	230078	233575	237070	240523	243907	247205	250408	253511	256506	259375	262090	264617	266938	269038	270937	272702	274422	276165	277953	279778	281633	283504	285377	287255	289142	291027	292895	294734	296526	298264	299954	301612	303239	304841	306385	307793	308959	309809	310318	310506
233	Estimates	Belarus		112	Country/Area	923	7745	7698.81	7677.43	7679.69	7703.78	7747.22	7806.81	7878.77	7958.73	8042.11	8124.88	8204.34	8279.89	8353.29	8427.84	8505.72	8587.17	8670.57	8754.2	8835.74	8913.55	8987.03	9056.73	9123.45	9188.46	9252.78	9316.32	9378.92	9441.42	9504.86	9569.85	9636.15	9703.09	9770.12	9836.58	9901.49	9965.18	10026.5	10081.2	10124	10151.1	10160.8	10154.3
234	Estimates	Bulgaria		100	Country/Area	923	7251	7310.53	7372.02	7434.69	7497.95	7561.49	7625.19	7689.14	7753.61	7819	7885.61	7953.47	8022.16	8090.7	8157.83	8222.59	8284.45	8343.49	8400.01	8454.58	8507.54	8559.03	8608.66	8655.71	8699.17	8738.39	8772.56	8801.9	8828.03	8853.21	8878.79	8905.1	8930.71	8953.12	8968.91	8975.35	8972.56	8960.55	8936.65	8897.54	8841.47	8767	8676.38
235	Estimates	Czechia		203	Country/Area	923	8902.62	9007	9110.14	9205.97	9290.49	9361.78	9420.04	9467.56	9508.36	9547.67	9590.18	9638.39	9691.06	9742.45	9784.34	9811.38	9821.06	9817.11	9807.94	9805.32	9817.67	9847.22	9891.1	9946.19	10007.3	10070	10134.5	10200.7	10262.9	10314	10349.1	10365.5	10365.3	10354.1	10340.6	10331.1	10327.3	10327.5	10330.9	10335.9	10340.9	10346.5	10353
236	Estimates	Hungary		348	Country/Area	923	9337.72	9480.61	9597.94	9692.9	9768.68	9828.5	9875.6	9913.25	9944.7	9973.06	10001	10030.5	10062.5	10097	10133	10169.8	10208.2	10248.7	10289.8	10329.4	10366.1	10398.2	10426.1	10453.7	10486.2	10526.8	10577.9	10636.6	10693.3	10735.5	10754.3	10746.5	10715.9	10669.2	10616.7	10566.3	10519.3	10474.5	10434.5	10401.6	10377.1	10363	10358.6
237	Estimates	Poland		616	Country/Area	923	24824	25283	25764.3	26260.5	26764.5	27269.7	27770	28259.6	28733.1	29185.9	29614.2	30015.6	30389.4	30736.5	31059.4	31360.9	31641	31901.7	32149.5	32393.1	32639.3	32890.4	33147.1	33411.6	33685.8	33970.7	34266.1	34571.2	34885.8	35209.2	35539.7	35878.4	36221.5	36555.8	36863.9	37133.9	37359.5	37544.3	37697.4	37832.6	37960.2	38082.9	38197.6
238	Estimates	Republic of Moldova	22	498	Country/Area	923	2341.01	2381.3	2431.89	2490.86	2556.46	2627.01	2700.98	2776.93	2853.57	2929.74	3004.45	3076.89	3146.55	3213.08	3276.43	3336.59	3393.05	3445.84	3496.13	3545.65	3595.55	3646.57	3698.23	3749.01	3796.77	3840.05	3878.1	3911.81	3943.33	3975.72	4011.09	4049.87	4091.13	4133.73	4175.93	4216.24	4254.53	4290.48	4322.34	4347.87	4365.56	4375.05	4376.8
239	Estimates	Romania		642	Country/Area	923	16236.3	16512.7	16764.9	17005.7	17243.8	17483.9	17726.6	17968.5	18202.7	18420.5	18613.9	18780.2	18924.2	19059.9	19207.1	19379.6	19582.3	19810.6	20056	20305.3	20548.9	20783.6	21011.1	21232.6	21450.4	21665.6	21879.1	22087.9	22285.5	22463.3	22615.6	22737.2	22830.5	22907.3	22984	23071.3	23175.1	23288.4	23393.7	23466.4	23489.2	23456.6	23375.8
240	Estimates	Russian Federation		643	Country/Area	923	102799	104305	105967	107727	109537	111355	113154	114914	116622	118276	119872	121404	122858	124210	125431	126504	127417	128187	128860	129498	130149	130831	131540	132276	133032	133805	134596	135413	136260	137139	138053	138994	139955	140936	141938	142957	143995	145033	146013	146864	147532	147996	148269
241	Estimates	Slovakia		703	Country/Area	923	3436.58	3510.92	3587.66	3664.91	3741.21	3815.4	3886.74	3954.86	4019.64	4081.31	4140.13	4196.17	4249.21	4298.59	4343.46	4383.45	4418.2	4448.55	4476.83	4506.15	4538.84	4575.56	4615.83	4659.28	4705.1	4752.54	4801.74	4852.49	4903.21	4951.79	4996.73	5037.34	5073.88	5106.98	5137.69	5166.79	5194.3	5219.97	5244.04	5266.81	5288.45	5309.23	5329.03
242	Estimates	Ukraine	23	804	Country/Area	923	37297.6	37815.5	38360.1	38915.8	39471.4	40019.5	40557	41085	41607.9	42132.4	42664.6	43206.4	43752.2	44288.6	44797	45264.6	45685	46063.2	46411.8	46749.3	47088.9	47435	47783	48125.8	48452.6	48755.7	49032.7	49287.1	49523.3	49748	49965.9	50176.4	50377.1	50568	50749.2	50919.3	51077.5	51219.9	51338.4	51422.3	51463.1	51461.3	51416
243	Estimates	Northern Europe		924	Subregion	917	78007.1	78199.4	78452.2	78750.8	79084.6	79447	79835.8	80252.6	80702.4	81192	81727.1	82307.4	82924.2	83558.1	84183.7	84781.5	85343.4	85870	86361.3	86821	87251.3	87651.9	88020.1	88353.9	88651.4	88912	89136.5	89329.2	89497.5	89651.1	89798.4	89940.5	90080	90229.3	90403.2	90611.3	90861.1	91147.8	91454.5	91756.5	92036.3	92289.1	92521.2
244	Estimates	Channel Islands	24	830	Country/Area	924	102.235	102.969	103.664	104.32	104.956	105.608	106.267	106.966	107.711	108.526	109.419	110.398	111.464	112.591	113.777	114.989	116.229	117.469	118.725	119.975	121.2	122.405	123.611	124.722	125.68	126.42	126.908	127.186	127.395	127.691	128.204	128.986	129.976	131.153	132.445	133.8	135.242	136.762	138.25	139.58	140.677	141.469	142.006
245	Estimates	Denmark	25	208	Country/Area	924	4268.28	4308.92	4346.19	4380.31	4411.66	4440.78	4468.35	4495.22	4522.34	4550.68	4581.1	4614.03	4649.34	4686.27	4723.62	4760.46	4796.48	4831.75	4866.07	4899.29	4931.24	4961.76	4990.55	5017.25	5041.41	5062.73	5081.26	5097.05	5109.69	5118.71	5123.94	5125.3	5123.35	5119.61	5116.06	5114.25	5114.65	5117.28	5122.44	5130.36	5141.12	5154.91	5171.65
246	Estimates	Estonia		233	Country/Area	924	1101	1113.24	1125.24	1136.91	1148.21	1159.23	1170.09	1181.02	1192.26	1204.11	1216.82	1230.5	1245.08	1260.21	1275.44	1290.41	1304.98	1319.25	1333.17	1346.82	1360.21	1373.3	1386.07	1398.47	1410.47	1422.05	1433.17	1443.89	1454.27	1464.42	1474.44	1483.88	1492.64	1501.42	1511.19	1522.4	1536.03	1551.21	1564.2	1569.97	1565.25	1548.22	1520.81
247	Estimates	Faroe Islands	26	234	Country/Area	924	31.502	31.539	31.669	31.867	32.144	32.478	32.86	33.268	33.706	34.161	34.624	35.074	35.521	35.965	36.409	36.843	37.283	37.705	38.131	38.56	39.008	39.456	39.915	40.395	40.847	41.292	41.724	42.133	42.539	42.941	43.339	43.725	44.101	44.483	44.895	45.328	45.812	46.34	46.833	47.159	47.276	47.123	46.746
248	Estimates	Finland	27	246	Country/Area	924	4008.29	4050.49	4096.56	4144.31	4191.97	4238.27	4282.38	4323.92	4362.91	4399.67	4434.59	4467.76	4498.82	4526.74	4550.25	4568.6	4581.11	4588.66	4594.02	4601.03	4612.36	4629.37	4651.17	4675.45	4698.78	4718.74	4734.43	4746.93	4758.26	4771.34	4788.25	4809.81	4835.1	4862.17	4888.2	4911.22	4930.34	4946.37	4961.1	4977.12	4996.22	5019.13	5044.93
249	Estimates	Iceland		352	Country/Area	924	142.657	144.942	147.713	150.813	154.163	157.641	161.198	164.786	168.396	171.992	175.584	179.183	182.711	186.13	189.345	192.315	194.991	197.405	199.669	201.971	204.423	207.095	209.928	212.803	215.568	218.079	220.276	222.267	224.146	226.104	228.256	230.665	233.273	236.021	238.818	241.587	244.335	247.057	249.755	252.424	255.044	257.616	260.155
250	Estimates	Ireland		372	Country/Area	924	2912.68	2912.61	2909.05	2901.31	2889.28	2873.41	2854.78	2835.06	2816.35	2801.09	2791.39	2788.53	2792.38	2801.18	2812.23	2823.64	2834.68	2846.35	2860.73	2880.76	2908.43	2944.09	2986.57	3034.33	3085.16	3137.18	3189.87	3242.77	3294.16	3342.01	3384.76	3422.03	3453.78	3479.46	3498.54	3510.98	3516.42	3515.83	3512.18	3509.51	3510.88	3517.7	3529.85
251	Estimates	Isle of Man	14	833	Country/Area	924	55.253	55.224	54.848	54.212	53.374	52.411	51.403	50.433	49.569	48.877	48.444	48.286	48.421	48.8	49.396	50.145	51.051	52.117	53.252	54.378	55.431	56.352	57.166	57.919	58.673	59.482	60.374	61.335	62.26	63.026	63.546	63.778	63.765	63.697	63.812	64.277	65.2	66.476	67.927	69.263	70.292	70.928	71.262
252	Estimates	Latvia		428	Country/Area	924	1926.57	1933.99	1945.96	1961.66	1980.4	2001.57	2024.68	2049.31	2075.18	2102.01	2129.58	2157.66	2185.87	2213.8	2240.95	2266.94	2291.47	2314.51	2336.32	2357.39	2378.02	2398.38	2418.28	2437.18	2454.4	2469.44	2482.2	2492.98	2502.52	2511.74	2521.38	2531.02	2540.44	2550.93	2564.12	2580.76	2602.15	2626.91	2649.84	2663.94	2664.45	2649.16	2620.25
253	Estimates	Lithuania		440	Country/Area	924	2567.41	2569.62	2578.05	2591.37	2608.53	2628.75	2651.63	2677.01	2704.99	2735.87	2769.88	2806.92	2846.39	2887.07	2927.39	2966.16	3002.79	3037.46	3070.7	3103.51	3136.59	3170.08	3203.63	3236.74	3268.65	3298.88	3327.26	3354.07	3379.79	3405.17	3430.76	3456.14	3481.13	3506.55	3533.49	3562.4	3594.06	3627.33	3658.5	3682.56	3696.03	3697.45	3688.1
254	Estimates	Norway	28	578	Country/Area	924	3265.27	3300.75	3334.48	3367.05	3398.91	3430.34	3461.52	3492.45	3523.05	3553.13	3582.51	3611.14	3639.21	3667.11	3695.42	3724.46	3754.35	3784.87	3815.64	3846.18	3876.05	3905.27	3933.73	3960.8	3985.74	4008.03	4027.47	4044.34	4059.19	4072.88	4086.07	4098.97	4111.65	4124.59	4138.27	4153.11	4169.32	4186.97	4205.96	4226.12	4247.29	4269.47	4292.69
255	Estimates	Sweden		752	Country/Area	924	7009.91	7073.23	7127.52	7175.67	7220.06	7262.62	7304.77	7347.48	7391.24	7436.26	7482.54	7530.18	7579.57	7631.45	7686.73	7745.68	7809.09	7875.9	7942.31	8003.19	8054.91	8095.8	8127.05	8151.6	8173.96	8197.34	8223.25	8250.69	8277.42	8300	8316.33	8325.49	8329.43	8332.44	8340.44	8357.65	8384.99	8421.06	8464.79	8514.2	8567.38	8625.14	8686.74
256	Estimates	United Kingdom	29	826	Country/Area	924	50616	50601.9	50651.3	50751	50890.9	51063.9	51265.9	51495.7	51754.7	52045.7	52370.6	52727.8	53109.4	53500.7	53882.8	54240.9	54568.9	54866.5	55132.6	55367.9	55573.5	55748.5	55892.4	56006.3	56092.1	56152.3	56188.3	56203.6	56205.9	56205.1	56209.2	56220.7	56241.4	56276.8	56332.9	56413.6	56522.5	56658.3	56812.8	56974.3	57134.4	57290.8	57446
257	Estimates	Southern Europe		925	Subregion	917	108737	109657	110602	111545	112469	113366	114236	115091	115948	116831	117761	118748	119785	120844	121883	122876	123809	124696	125571	126486	127475	128546	129682	130862	132053	133229	134384	135515	136602	137621	138555	139395	140141	140798	141376	141884	142321	142690	143001	143269	143504	143724	143934
258	Estimates	Albania		8	Country/Area	925	1263.16	1287.5	1316.09	1348.11	1382.9	1419.99	1459.12	1500.18	1543.26	1588.51	1636.09	1685.93	1737.67	1790.57	1843.65	1896.17	1947.84	1998.74	2049.21	2099.74	2150.7	2202.19	2254.06	2306.28	2358.85	2411.73	2464.98	2518.68	2572.85	2627.51	2682.7	2737.02	2790.28	2844.87	2904.14	2969.67	3044.2	3124.89	3200.97	3257.91	3286.07	3280.4	3245.89
259	Estimates	Andorra		20	Country/Area	925	6.198	6.693	7.251	7.859	8.533	9.231	9.984	10.778	11.614	12.495	13.41	14.378	15.379	16.407	17.466	18.542	19.646	20.76	21.886	23.053	24.275	25.571	26.885	28.232	29.515	30.705	31.782	32.769	33.744	34.825	36.063	37.498	39.115	40.854	42.706	44.593	46.52	48.459	50.433	52.452	54.508	56.666	58.882
260	Estimates	Bosnia and Herzegovina		70	Country/Area	925	2661.3	2710.65	2764.71	2821.31	2878.84	2936.3	2993.28	3049.93	3106.9	3165.19	3225.66	3288.6	3353.23	3417.57	3479	3535.63	3586.63	3632.68	3675.45	3717.48	3760.54	3805.29	3851.15	3897.26	3942.22	3985.11	4025.27	4063.19	4100.35	4138.82	4179.85	4222.48	4265.18	4307.91	4350.57	4392.14	4435.93	4479.52	4509.46	4507.82	4463.42	4369.32	4233.67
261	Estimates	Croatia		191	Country/Area	925	3850.29	3886.22	3922.67	3959.12	3995.14	4030.42	4064.77	4098.13	4130.49	4161.96	4192.64	4222.5	4251.42	4279.06	4304.99	4328.93	4350.82	4370.86	4389.32	4406.61	4423.07	4438.82	4453.98	4469.03	4484.52	4500.87	4518.1	4536.19	4555.41	4576.03	4598.12	4621.42	4645.4	4669.62	4693.42	4716.12	4737.95	4758.15	4773.68	4780.63	4776.37	4760	4732.87
262	Estimates	Gibraltar	14	292	Country/Area	925	22.032	22.287	22.489	22.632	22.729	22.784	22.826	22.881	22.977	23.145	23.42	23.808	24.307	24.889	25.478	26.079	26.631	27.172	27.693	28.165	28.601	29.007	29.353	29.657	29.886	30.062	30.179	30.228	30.224	30.172	30.068	29.902	29.698	29.481	29.284	29.151	29.096	29.114	29.164	29.187	29.149	29.021	28.844
263	Estimates	Greece		300	Country/Area	925	7668.79	7742.94	7814.17	7882.6	7948.28	8011.13	8070.96	8127.48	8180.31	8229.11	8273.63	8314.01	8350.88	8385.44	8419.3	8453.82	8489.87	8528.03	8569.14	8614.03	8663.57	8716.87	8774.51	8840.31	8919.25	9014.09	9127.06	9254.98	9388.72	9515.74	9627	9719.84	9796.83	9860.73	9916.48	9968.23	10015.1	10057.3	10101.3	10155.7	10226	10315.1	10420.2
264	Estimates	Holy See	30	336	Country/Area	925	0.906	0.883	0.883	0.89	0.899	0.9	0.909	0.908	0.905	0.905	0.904	0.904	0.901	0.898	0.877	0.853	0.814	0.766	0.711	0.67	0.649	0.645	0.661	0.685	0.708	0.724	0.73	0.73	0.725	0.722	0.725	0.723	0.725	0.73	0.733	0.74	0.747	0.751	0.754	0.759	0.762	0.762	0.773
265	Estimates	Italy		380	Country/Area	925	46598.6	47010	47390.6	47737.4	48051	48335.6	48598.9	48852.4	49110.4	49388.4	49699.9	50052.2	50442.3	50856.4	51273.2	51677.2	52062.7	52433.5	52794.5	53154.6	53519	53888.9	54258.7	54619.2	54957.8	55265.3	55538	55777.9	55989	56177.8	56349.4	56505.5	56644.9	56765.2	56863.1	56936.8	56983.9	57007.7	57018.2	57028.7	57048.2	57088.1	57145.3
266	Estimates	Malta		470	Country/Area	925	311.998	312.215	312.746	313.266	313.562	313.523	313.195	312.702	312.303	312.316	312.973	314.414	316.52	318.888	320.927	322.238	322.696	322.457	321.762	321.031	320.548	320.364	320.437	320.801	321.436	322.358	323.579	325.126	326.984	329.117	331.494	334.115	336.964	339.984	343.096	346.254	349.431	352.617	355.796	358.935	362.017	364.991	367.89
267	Estimates	Montenegro		499	Country/Area	925	394.739	400.872	410.508	421.731	433.14	443.796	453.322	461.813	469.782	478.07	487.416	498.129	509.707	520.712	529.176	533.821	533.915	530.234	524.845	520.645	519.702	522.782	529.214	537.766	546.565	554.259	560.423	565.512	570.06	574.953	580.757	587.689	595.351	602.965	609.438	614.011	616.356	616.794	616.054	615.205	615.004	615.736	617.181
268	Estimates	North Macedonia		807	Country/Area	925	1254.44	1290.42	1320.98	1347.47	1370.98	1392.46	1412.61	1432.02	1451.02	1469.85	1488.67	1507.65	1527.11	1547.45	1569.14	1592.44	1617.8	1644.95	1672.4	1698.15	1720.81	1739.53	1754.95	1769	1784.4	1803.01	1825.56	1851.07	1877.69	1902.72	1924.2	1941.53	1955.25	1965.89	1974.41	1981.54	1987.54	1992.28	1995.51	1996.86	1996.22	1993.3	1988.66
269	Estimates	Portugal		620	Country/Area	925	8416.97	8418.74	8451.55	8503.17	8563.7	8625.54	8683.42	8734.42	8777.7	8814.02	8844.64	8869.99	8888.51	8896.27	8888.23	8862.28	8814.77	8750.86	8687.87	8649.25	8651.33	8700	8789.11	8907.93	9039.98	9172.24	9302.3	9431.04	9552.61	9660.75	9750.97	9820.87	9870.82	9902.99	9921.24	9929.18	9926.43	9914.07	9899.2	9890.82	9895.36	9916.05	9951.31
270	Estimates	San Marino		674	Country/Area	925	12.774	12.924	13.095	13.297	13.532	13.789	14.072	14.379	14.707	15.061	15.44	15.836	16.255	16.669	17.101	17.508	17.919	18.309	18.668	18.98	19.224	19.393	19.49	19.561	19.661	19.829	20.086	20.397	20.764	21.122	21.453	21.761	22.043	22.295	22.546	22.794	23.046	23.297	23.548	23.833	24.124	24.454	24.83
271	Estimates	Serbia	31	688	Country/Area	925	6732.25	6853.29	6963.39	7063.17	7153.36	7234.92	7308.93	7376.69	7439.61	7499.17	7556.73	7613.36	7669.61	7725.5	7780.69	7835.09	7888.8	7942.64	7998	8056.66	8119.86	8187.99	8260.63	8337.07	8416.25	8497.17	8579.63	8663.33	8746.98	8829.04	8908.3	8984.6	9057.97	9127.67	9192.92	9253.4	9306.35	9352.15	9397.31	9450.77	9517.68	9602.88	9701.15
272	Estimates	Slovenia		705	Country/Area	925	1473.09	1481.63	1491.68	1502.84	1514.79	1527.21	1539.79	1552.26	1564.36	1575.87	1586.63	1596.55	1605.64	1614.02	1621.89	1629.44	1636.66	1643.69	1651.09	1659.56	1669.58	1681.43	1694.98	1709.98	1725.97	1742.62	1759.72	1777.32	1795.64	1815.11	1835.84	1857.85	1880.71	1903.55	1925.31	1945.13	1962.87	1978.5	1991.39	2000.83	2006.4	2007.78	2005.35
273	Estimates	Spain	32	724	Country/Area	925	28069.7	28219.6	28399	28600.4	28818	29048.4	29290.1	29543.6	29811.3	30096.6	30402.4	30729.7	31075.5	31432.8	31791.9	32146.3	32491.6	32830.2	33168.8	33517.7	33883.7	34267.5	34664.2	35069.4	35476.4	35879.2	36276.7	36666.8	37040.4	37386.8	37698.2	37972	38209.7	38413.3	38586.7	38733.9	38855.6	38954.5	39038.7	39118.6	39202.5	39299.1	39410.9
274	Estimates	Western Europe		926	Subregion	917	142414	143163	144007	144908	145841	146796	147776	148798	149889	151083	152409	153873	155452	157083	158683	160187	161572	162843	164001	165060	166028	166905	167684	168359	168923	169377	169722	169973	170160	170318	170479	170652	170845	171089	171416	171850	172399	173056	173808	174633	175510	176445	177429
275	Estimates	Austria		40	Country/Area	926	6936.44	6931.35	6931.19	6935.15	6942.62	6953.4	6967.62	6985.72	7008.41	7036.55	7070.77	7111.14	7156.84	7205.99	7256.09	7305.15	7352.24	7397.17	7439.58	7479.34	7516.24	7550.34	7581.12	7607.07	7626.29	7637.69	7640.76	7636.57	7627.76	7617.88	7609.75	7604.51	7602.18	7603.1	7607.3	7614.87	7625.4	7639.35	7658.86	7686.56	7723.95	7772.7	7830.94
276	Estimates	Belgium		56	Country/Area	926	8637.52	8680.18	8727.99	8779.27	8832.7	8887.27	8942.41	8997.84	9053.64	9110.07	9167.36	9225.41	9283.55	9340.42	9394.3	9443.95	9488.76	9529.05	9565.59	9599.65	9632.18	9663.32	9692.84	9720.75	9747.02	9771.58	9794.77	9816.69	9836.81	9854.37	9869	9880.59	9889.82	9897.88	9906.37	9916.58	9928.54	9942.28	9959.01	9980.17	10006.5	10039.5	10078.1
277	Estimates	France	33	250	Country/Area	926	41833.9	42031.2	42315.6	42654.7	43024.8	43411.4	43809	44221.2	44659.1	45138.4	45673.1	46267	46907	47560.8	48184.4	48746.7	49232.5	49651.1	50024.6	50387.4	50763.9	51162.6	51573.3	51979.5	52356.8	52688.6	52969.3	53208.5	53423.1	53637.1	53868	54121	54391.5	54675.4	54965.2	55254.8	55545.3	55837.6	56126.3	56404.3	56666.9	56913.6	57147.2
278	Estimates	Germany		276	Country/Area	926	69966.3	70300	70620.3	70929.8	71233.4	71537.5	71850.6	72183.5	72547.6	72954.9	73414.2	73928.1	74489.4	75080.7	75677.3	76258	76819.6	77357.3	77847.2	78260.8	78578.4	78789.9	78901.8	78932.5	78909.8	78856	78781.7	78687.3	78573.6	78438.2	78283.1	78107.9	77926	77770.2	77682.3	77691.6	77806.1	78015.7	78307.5	78660.3	79054	79490.8	79963.2
279	Estimates	Liechtenstein		438	Country/Area	926	13.752	13.945	14.135	14.344	14.568	14.824	15.119	15.429	15.767	16.12	16.501	16.894	17.3	17.724	18.17	18.642	19.16	19.688	20.237	20.766	21.268	21.729	22.161	22.56	22.985	23.436	23.933	24.451	24.968	25.463	25.881	26.229	26.533	26.79	27.028	27.286	27.552	27.835	28.135	28.449	28.79	29.166	29.552
280	Estimates	Luxembourg		442	Country/Area	926	296.005	297.593	299.5	301.507	303.449	305.262	306.938	308.562	310.258	312.219	314.585	317.438	320.699	324.129	327.36	330.16	332.423	334.234	335.829	337.568	339.672	342.232	345.104	348.178	351.19	353.984	356.566	358.963	361.08	362.797	364.048	364.778	365.099	365.301	365.797	366.882	368.662	371.076	374.118	377.712	381.78	386.356	391.397
281	Estimates	Monaco		492	Country/Area	926	20	19.384	19.082	19.049	19.261	19.653	20.186	20.788	21.405	21.978	22.461	22.813	23.043	23.165	23.236	23.289	23.302	23.292	23.295	23.348	23.487	23.721	24.049	24.445	24.829	25.203	25.523	25.811	26.09	26.391	26.752	27.162	27.633	28.091	28.511	28.836	29.05	29.156	29.232	29.309	29.433	29.629	29.859
282	Estimates	Netherlands	34	528	Country/Area	926	10042.1	10167.5	10298	10432.3	10569.7	10709.6	10851.9	10996.6	11144.1	11294.7	11448.8	11606.4	11766.7	11928.4	12089.4	12248.3	12404.2	12556.8	12706.8	12855	13001.9	13147.9	13291.9	13431.2	13562.4	13683.3	13793.1	13892.9	13984	14068.6	14148.4	14223.8	14295.2	14365.4	14437.5	14513.9	14595.7	14682.7	14774	14868.7	14965.4	15064.5	15165.9
283	Estimates	Switzerland		756	Country/Area	926	4668.09	4721.92	4781.12	4841.51	4900.46	4957.07	5012.09	5067.97	5128.44	5198.06	5280.68	5377.76	5487.05	5601.81	5712.71	5812.84	5899.48	5973.94	6038.33	6096.43	6150.85	6202.95	6251.29	6292.54	6322.01	6337.03	6335.98	6321.82	6302.04	6286.91	6283.83	6295.92	6321.41	6356.74	6396.14	6435.42	6473.05	6510.59	6550.73	6597.36	6652.87	6718.82	6792.91
284	Estimates	NORTHERN AMERICA		918	SDG subregion	1829	172603	175017	177778	180813	184052	187430	190893	194388	197870	201301	204649	207887	210996	213963	216783	219454	221966	224327	226581	228787	230992	233214	235450	237703	239971	242251	244553	246882	249238	251614	254007	256419	258854	261318	263819	266363	268959	271607	274300	277028	279785	282552	285340
285	Estimates	Bermuda	14	60	Country/Area	918	37.256	37.8	38.437	39.142	39.914	40.709	41.535	42.37	43.227	44.091	44.986	45.899	46.815	47.723	48.592	49.382	50.118	50.785	51.387	51.979	52.565	53.154	53.75	54.327	54.882	55.399	55.877	56.318	56.751	57.17	57.58	57.987	58.39	58.785	59.181	59.594	60.011	60.422	60.839	61.243	61.63	62.012	62.391
286	Estimates	Canada		124	Country/Area	918	13733.4	14078.4	14445.5	14834.9	15245.4	15673.8	16114.7	16561.3	17004.8	17436.2	17847.4	18234	18596.8	18943.2	19284.2	19628	19975.7	20324.8	20675	21025.3	21374.3	21723.5	22072.2	22415.3	22745.9	23059.3	23354.6	23634.4	23901.7	24161.1	24416.9	24668.2	24916.5	25171.4	25444.9	25744.8	26075.5	26432.9	26806.1	27179.5	27541.3	27888.8	28224.4
287	Estimates	Greenland	26	304	Country/Area	918	22.993	23.466	23.936	24.465	25.092	25.846	26.727	27.733	28.842	30.019	31.23	32.476	33.731	35.037	36.438	37.965	39.605	41.362	43.098	44.702	46.077	47.195	48.066	48.736	49.232	49.575	49.781	49.846	49.865	49.942	50.179	50.584	51.155	51.834	52.528	53.187	53.789	54.371	54.88	55.288	55.604	55.783	55.857
288	Estimates	Saint Pierre and Miquelon	2	666	Country/Area	918	4.567	4.609	4.648	4.678	4.721	4.749	4.801	4.841	4.886	4.929	4.975	5.014	5.041	5.081	5.12	5.162	5.229	5.297	5.38	5.464	5.551	5.642	5.753	5.845	5.932	6.005	6.051	6.103	6.122	6.138	6.129	6.109	6.067	6.03	6.003	6.017	6.068	6.148	6.236	6.327	6.385	6.425	6.435
289	Estimates	United States of America	35	840	Country/Area	918	158804	160872	163266	165910	168736	171685	174705	177751	180788	183786	186721	189570	192314	194932	197408	199734	201896	203905	205806	207659	209513	211384	213270	215179	217115	219081	221086	223136	225223	227339	229476	231636	233822	236030	238257	240500	242763	245053	247372	249726	252120	254539	256991
[truncated: 28 more columns]

## Sheet: MEDIUM VARIANT
United Nations
Population Division
Department of Economic and Social Affairs
World Population Prospects 2019
File POP/1-1: Total population (both sexes combined) by region, subregion and country, annually for 1950-2100 (thousands)
Medium fertility variant, 2020 - 2100
POP/DB/WPP/Rev.2019/POP/F01-1
© August 2019 by United Nations, made available under a Creative Commons license CC BY 3.0 IGO: http://creativecommons.org/licenses/by/3.0/igo/
Suggested citation: United Nations, Department of Economic and Social Affairs, Population Division (2019). World Population Prospects 2019, Online Edition. Rev. 1.
							Total population, both sexes combined, as of 1 July (thousands)
Index	Variant	Region, subregion, country or area *	Notes	Country code	Type	Parent code	2020	2021	2022	2023	2024	2025	2026	2027	2028	2029	2030	2031	2032	2033	2034	2035	2036	2037	2038	2039	2040	2041	2042	2043	2044	2045	2046	2047	2048	2049	2050	2051	2052	2053	2054	2055	2056	2057	2058	2059	2060	2061	2062
1	Medium variant	WORLD		900	World	0	7.7948e+06	7.87497e+06	7.95395e+06	8.0318e+06	8.10861e+06	8.18444e+06	8.25928e+06	8.33308e+06	8.40586e+06	8.47766e+06	8.54849e+06	8.61835e+06	8.68723e+06	8.75508e+06	8.82186e+06	8.88752e+06	8.95205e+06	9.01544e+06	9.07769e+06	9.13883e+06	9.19885e+06	9.25775e+06	9.31551e+06	9.37212e+06	9.42756e+06	9.4818e+06	9.53485e+06	9.58671e+06	9.63736e+06	9.6868e+06	9.73503e+06	9.78206e+06	9.82789e+06	9.8725e+06	9.91591e+06	9.9581e+06	9.99909e+06	1.00389e+07	1.00775e+07	1.0115e+07	1.01515e+07	1.01868e+07	1.02211e+07
2	Medium variant	UN development groups	a	1803	Label/Separator	900	...	...	...	...	...	...	...	...	...	...	...	...	...	...	...	...	...	...	...	...	...	...	...	...	...	...	...	...	...	...	...	...	...	...	...	...	...	...	...	...	...	...	...
3	Medium variant	More developed regions	b	901	Development Group	1803	1.2733e+06	1.27555e+06	1.27741e+06	1.27896e+06	1.28029e+06	1.2815e+06	1.28262e+06	1.28362e+06	1.28452e+06	1.28532e+06	1.28601e+06	1.28661e+06	1.28712e+06	1.28754e+06	1.28785e+06	1.28804e+06	1.28811e+06	1.28807e+06	1.28792e+06	1.28768e+06	1.28735e+06	1.28694e+06	1.28644e+06	1.28587e+06	1.28522e+06	1.2845e+06	1.28371e+06	1.28285e+06	1.28193e+06	1.28095e+06	1.27991e+06	1.27882e+06	1.27768e+06	1.27649e+06	1.27525e+06	1.27397e+06	1.27266e+06	1.27132e+06	1.26995e+06	1.26856e+06	1.26717e+06	1.26578e+06	1.26439e+06
4	Medium variant	Less developed regions	c	902	Development Group	1803	6.52149e+06	6.59941e+06	6.67654e+06	6.75284e+06	6.82831e+06	6.90293e+06	6.97666e+06	7.04946e+06	7.12134e+06	7.19234e+06	7.26248e+06	7.33174e+06	7.40011e+06	7.46754e+06	7.53401e+06	7.59948e+06	7.66393e+06	7.72737e+06	7.78977e+06	7.85115e+06	7.9115e+06	7.97081e+06	8.02907e+06	8.08625e+06	8.14233e+06	8.1973e+06	8.25115e+06	8.30386e+06	8.35542e+06	8.40585e+06	8.45512e+06	8.50324e+06	8.55021e+06	8.59602e+06	8.64065e+06	8.68412e+06	8.72642e+06	8.76756e+06	8.80757e+06	8.84647e+06	8.8843e+06	8.92106e+06	8.95676e+06
5	Medium variant	Least developed countries	d	941	Development Group	902	1.05744e+06	1.08182e+06	1.10652e+06	1.13153e+06	1.15682e+06	1.18238e+06	1.20819e+06	1.23424e+06	1.26052e+06	1.28703e+06	1.31376e+06	1.34071e+06	1.36785e+06	1.39518e+06	1.42269e+06	1.45036e+06	1.47818e+06	1.50613e+06	1.53422e+06	1.56242e+06	1.59072e+06	1.61913e+06	1.64761e+06	1.67616e+06	1.70477e+06	1.73341e+06	1.76208e+06	1.79077e+06	1.81946e+06	1.84814e+06	1.8768e+06	1.90542e+06	1.934e+06	1.96251e+06	1.99096e+06	2.01934e+06	2.04762e+06	2.0758e+06	2.10387e+06	2.13182e+06	2.15963e+06	2.18729e+06	2.2148e+06
6	Medium variant	Less developed regions, excluding least developed countries	e	934	Development Group	902	5.46406e+06	5.51759e+06	5.57002e+06	5.62132e+06	5.67149e+06	5.72056e+06	5.76847e+06	5.81522e+06	5.86083e+06	5.90532e+06	5.94872e+06	5.99104e+06	6.03226e+06	6.07236e+06	6.11132e+06	6.14912e+06	6.18576e+06	6.22123e+06	6.25556e+06	6.28873e+06	6.32077e+06	6.35168e+06	6.38146e+06	6.41009e+06	6.43757e+06	6.46389e+06	6.48906e+06	6.51308e+06	6.53596e+06	6.55771e+06	6.57832e+06	6.59782e+06	6.61621e+06	6.6335e+06	6.64969e+06	6.66479e+06	6.6788e+06	6.69176e+06	6.7037e+06	6.71465e+06	6.72467e+06	6.73376e+06	6.74196e+06
7	Medium variant	Less developed regions, excluding China		948	Development Group	1803	5.05021e+06	5.12313e+06	5.19591e+06	5.26847e+06	5.34073e+06	5.41261e+06	5.48407e+06	5.55508e+06	5.62564e+06	5.69574e+06	5.76538e+06	5.83453e+06	5.90316e+06	5.97124e+06	6.03873e+06	6.10561e+06	6.17183e+06	6.2374e+06	6.30228e+06	6.36646e+06	6.42994e+06	6.49269e+06	6.55469e+06	6.61592e+06	6.67637e+06	6.736e+06	6.79481e+06	6.85277e+06	6.90987e+06	6.9661e+06	7.02142e+06	7.07584e+06	7.12933e+06	7.18188e+06	7.23344e+06	7.284e+06	7.33355e+06	7.38207e+06	7.42957e+06	7.47605e+06	7.52151e+06	7.56595e+06	7.60936e+06
8	Medium variant	Land-locked Developing Countries (LLDC)	f	1636	Special other	1803	533143	545397	557731	570142	582636	595213	607867	620588	633378	646242	659183	672196	685278	698427	711642	724922	738262	751656	765096	778571	792073	805594	819127	832659	846177	859667	873121	886533	899896	913205	926457	939644	952760	965798	978753	991619	1.00439e+06	1.01706e+06	1.02962e+06	1.04208e+06	1.05443e+06	1.06667e+06	1.07878e+06
9	Medium variant	Small Island Developing States (SIDS)	g	1637	Special other	1803	72076.1	72737.3	73409.7	74086.7	74758.1	75416.4	76059.7	76689.3	77304.2	77904	78488.2	79055.9	79606.5	80141.4	80662.3	81171	81667.7	82151.8	82622.9	83080.3	83523.4	83952.2	84366.7	84767	85152.7	85523.8	85880.4	86222.2	86549.5	86861.6	87158.7	87440.7	87707.9	87960.8	88199.8	88425.7	88638.7	88838.9	89026.6	89201.9	89365	89516.1	89655.4
10	Medium variant	World Bank income groups		1802	Label/Separator	900	...	...	...	...	...	...	...	...	...	...	...	...	...	...	...	...	...	...	...	...	...	...	...	...	...	...	...	...	...	...	...	...	...	...	...	...	...	...	...	...	...	...	...
11	Medium variant	High-income countries	h	1503	Income Group	1802	1.26309e+06	1.26768e+06	1.27183e+06	1.27566e+06	1.27927e+06	1.28277e+06	1.28619e+06	1.28951e+06	1.29273e+06	1.29583e+06	1.29877e+06	1.30157e+06	1.30425e+06	1.30677e+06	1.30913e+06	1.31129e+06	1.31326e+06	1.31504e+06	1.31664e+06	1.31806e+06	1.31933e+06	1.32045e+06	1.32141e+06	1.32222e+06	1.32289e+06	1.32341e+06	1.32381e+06	1.32407e+06	1.32422e+06	1.32426e+06	1.3242e+06	1.32404e+06	1.3238e+06	1.32348e+06	1.32308e+06	1.32261e+06	1.32207e+06	1.32148e+06	1.32084e+06	1.32016e+06	1.31946e+06	1.31872e+06	1.31797e+06
12	Medium variant	Middle-income countries	h	1517	Income Group	1802	5.75305e+06	5.80812e+06	5.86185e+06	5.91432e+06	5.96568e+06	6.01603e+06	6.06539e+06	6.11371e+06	6.16101e+06	6.20729e+06	6.25258e+06	6.29687e+06	6.34017e+06	6.38244e+06	6.42363e+06	6.46372e+06	6.50269e+06	6.54055e+06	6.57729e+06	6.61294e+06	6.64751e+06	6.68099e+06	6.71337e+06	6.74466e+06	6.77484e+06	6.80391e+06	6.83186e+06	6.8587e+06	6.88444e+06	6.90906e+06	6.93257e+06	6.95498e+06	6.9763e+06	6.99652e+06	7.01565e+06	7.03371e+06	7.05069e+06	7.06661e+06	7.08152e+06	7.09545e+06	7.10843e+06	7.1205e+06	7.13166e+06
13	Medium variant	Upper-middle-income countries	h	1502	Income Group	1517	2.65482e+06	2.66955e+06	2.68316e+06	2.69575e+06	2.70748e+06	2.71849e+06	2.72879e+06	2.73838e+06	2.74728e+06	2.75553e+06	2.76314e+06	2.77015e+06	2.77657e+06	2.78241e+06	2.78767e+06	2.79234e+06	2.79645e+06	2.8e+06	2.803e+06	2.80548e+06	2.80746e+06	2.80893e+06	2.80991e+06	2.81039e+06	2.81036e+06	2.80983e+06	2.80879e+06	2.80726e+06	2.80523e+06	2.80271e+06	2.79969e+06	2.79618e+06	2.7922e+06	2.78776e+06	2.78287e+06	2.77755e+06	2.77181e+06	2.76568e+06	2.75918e+06	2.75235e+06	2.74521e+06	2.73779e+06	2.7301e+06
14	Medium variant	Lower-middle-income countries	h	1501	Income Group	1517	3.09824e+06	3.13857e+06	3.17869e+06	3.21857e+06	3.2582e+06	3.29754e+06	3.3366e+06	3.37533e+06	3.41372e+06	3.45177e+06	3.48944e+06	3.52673e+06	3.5636e+06	3.60003e+06	3.63597e+06	3.67138e+06	3.70624e+06	3.74055e+06	3.77429e+06	3.80746e+06	3.84005e+06	3.87206e+06	3.90347e+06	3.93427e+06	3.96448e+06	3.99408e+06	4.02307e+06	4.05145e+06	4.0792e+06	4.10635e+06	4.13288e+06	4.1588e+06	4.1841e+06	4.20876e+06	4.23279e+06	4.25616e+06	4.27887e+06	4.30093e+06	4.32234e+06	4.3431e+06	4.36323e+06	4.38271e+06	4.40156e+06
15	Medium variant	Low-income countries	h	1500	Income Group	1802	775711	796190	817257	838779	860577	882519	904546	926670	948904	971289	993853	1.01658e+06	1.03946e+06	1.06248e+06	1.08568e+06	1.10906e+06	1.13262e+06	1.15634e+06	1.18022e+06	1.20425e+06	1.2284e+06	1.25268e+06	1.27707e+06	1.30155e+06	1.32612e+06	1.35074e+06	1.37542e+06	1.40014e+06	1.42489e+06	1.44964e+06	1.47441e+06	1.49916e+06	1.52388e+06	1.54858e+06	1.57323e+06	1.59782e+06	1.62234e+06	1.64678e+06	1.67113e+06	1.69538e+06	1.71951e+06	1.74353e+06	1.76741e+06
16	Medium variant	No income group available		1518	Income Group	1802	2943.57	2978.59	3013.07	3047.23	3081.22	3115.48	3149.85	3184.18	3218.46	3252.61	3286.59	3320.34	3353.87	3387.05	3419.76	3451.93	3483.54	3514.56	3544.91	3574.63	3603.6	3631.9	3659.51	3686.42	3712.7	3738.38	3763.47	3787.98	3811.94	3835.36	3858.26	3880.64	3902.57	3924.11	3945.22	3966	3986.47	4006.67	4026.6	4046.32	4065.78	4085.02	4104.07
17	Medium variant	Geographic regions	i	1840	Label/Separator	900	...	...	...	...	...	...	...	...	...	...	...	...	...	...	...	...	...	...	...	...	...	...	...	...	...	...	...	...	...	...	...	...	...	...	...	...	...	...	...	...	...	...	...
18	Medium variant	Africa	j	903	Region	1840	1.3406e+06	1.37349e+06	1.40673e+06	1.44035e+06	1.47441e+06	1.50894e+06	1.54393e+06	1.57936e+06	1.61525e+06	1.65157e+06	1.68832e+06	1.7255e+06	1.76309e+06	1.80108e+06	1.83945e+06	1.87819e+06	1.91728e+06	1.9567e+06	1.99643e+06	2.03646e+06	2.07675e+06	2.11729e+06	2.15806e+06	2.19903e+06	2.24017e+06	2.28145e+06	2.32285e+06	2.36435e+06	2.40593e+06	2.44758e+06	2.48928e+06	2.531e+06	2.57274e+06	2.61447e+06	2.65618e+06	2.69784e+06	2.73944e+06	2.78097e+06	2.8224e+06	2.86374e+06	2.90498e+06	2.94609e+06	2.98706e+06
19	Medium variant	Asia	k	935	Region	1840	4.64105e+06	4.67966e+06	4.71716e+06	4.7535e+06	4.78867e+06	4.82263e+06	4.85536e+06	4.88683e+06	4.91709e+06	4.94616e+06	4.97409e+06	5.00089e+06	5.02653e+06	5.051e+06	5.07428e+06	5.09636e+06	5.11723e+06	5.13691e+06	5.1554e+06	5.17274e+06	5.18895e+06	5.20403e+06	5.21798e+06	5.23083e+06	5.24256e+06	5.2532e+06	5.26274e+06	5.27121e+06	5.27861e+06	5.28496e+06	5.29026e+06	5.29455e+06	5.29782e+06	5.30009e+06	5.30137e+06	5.30166e+06	5.30098e+06	5.29937e+06	5.29684e+06	5.29344e+06	5.28922e+06	5.28418e+06	5.27836e+06
20	Medium variant	Europe	l	908	Region	1840	747636	747747	747544	747090	746481	745791	745041	744219	743327	742356	741303	740175	738985	737739	736443	735101	733717	732293	730833	729338	727811	726252	724661	723037	721374	719669	717922	716133	714299	712417	710486	708507	706480	704406	702286	700121	697913	695669	693394	691099	688790	686475	684158
21	Medium variant	Latin America and the Caribbean	m	904	Region	1840	653962	659744	665451	671063	676552	681896	687086	692122	696997	701709	706254	710627	714825	718851	722707	726395	729917	733272	736460	739485	742348	745050	747592	749976	752207	754287	756217	757998	759629	761107	762432	763605	764625	765496	766218	766792	767221	767504	767643	767640	767495	767210	766789
22	Medium variant	Northern America	n	905	Region	1840	368870	371108	373318	375508	377684	379851	382011	384164	386312	388458	390599	392738	394869	396979	399044	401051	402994	404874	406695	408461	410177	411844	413462	415036	416570	418070	419540	420982	422402	423807	425200	426587	427970	429354	430745	432148	433565	434996	436443	437904	439379	440867	442367
23	Medium variant	Oceania	o	909	Region	1840	42677.8	43220	43755.2	44284.9	44810.9	45334.5	45856.3	46376	46893.5	47407.9	47919	48426.8	48931.4	49432.4	49929	50420.9	50907.7	51389.8	51867.7	52342.1	52813.6	53282.4	53748.2	54211.4	54671.9	55129.6	55584.8	56037.3	56486.9	56933.4	57376.3	57815.8	58251.7	58684.1	59113	59538.4	59960.2	60378.5	60793.3	61204.3	61611.5	62015	62414.7
24	Medium variant	Sustainable Development Goal (SDG) regions	p	1828	Label/Separator	900	...	...	...	...	...	...	...	...	...	...	...	...	...	...	...	...	...	...	...	...	...	...	...	...	...	...	...	...	...	...	...	...	...	...	...	...	...	...	...	...	...	...	...
25	Medium variant	SUB-SAHARAN AFRICA		947	SDG region	1828	1.09437e+06	1.12285e+06	1.15174e+06	1.18107e+06	1.21087e+06	1.24117e+06	1.27198e+06	1.30327e+06	1.33504e+06	1.36725e+06	1.39989e+06	1.43295e+06	1.46641e+06	1.50026e+06	1.53448e+06	1.56905e+06	1.60394e+06	1.63914e+06	1.67465e+06	1.71044e+06	1.7465e+06	1.78281e+06	1.81936e+06	1.85612e+06	1.89307e+06	1.93019e+06	1.96746e+06	2.00486e+06	2.04238e+06	2.08e+06	2.11773e+06	2.15554e+06	2.19341e+06	2.23133e+06	2.26928e+06	2.30723e+06	2.34517e+06	2.38309e+06	2.42097e+06	2.45881e+06	2.49658e+06	2.53429e+06	2.5719e+06
26	Medium variant	Eastern Africa		910	Subregion	947	445406	457053	468849	480808	492951	505292	517833	530561	543462	556515	569705	583023	596466	610023	623683	637437	651276	665194	679188	693255	707393	721595	735856	750167	764523	778916	793339	807788	822255	836734	851218	865700	880174	894634	909073	923483	937858	952192	966479	980713	994888	1.009e+06	1.02304e+06
27	Medium variant	Burundi		108	Country/Area	910	11890.8	12255.4	12624.8	12999.1	13378.7	13763.9	14154.6	14550.6	14952.2	15359.5	15772.8	16192.2	16617.6	17049.3	17487.4	17932.1	18383.3	18841	19305.2	19775.9	20252.9	20736.3	21225.7	21720.9	22221.7	22727.7	23238.7	23754.4	24274.4	24798	25324.8	25854.3	26386.5	26920.8	27457.1	27995.1	28534.6	29075.2	29616.6	30158.5	30700.5	31242.5	31784.3
28	Medium variant	Comoros		174	Country/Area	910	869.595	888.456	907.411	926.492	945.693	965.002	984.415	1003.92	1023.55	1043.28	1063.11	1083.06	1103.11	1123.25	1143.49	1163.81	1184.19	1204.64	1225.17	1245.73	1266.33	1286.98	1307.64	1328.31	1348.96	1369.59	1390.17	1410.71	1431.15	1451.52	1471.74	1491.82	1511.77	1531.56	1551.22	1570.74	1590.12	1609.34	1628.41	1647.26	1665.91	1684.36	1702.57
29	Medium variant	Djibouti		262	Country/Area	910	988.002	1002.2	1016.1	1029.7	1043.02	1056.06	1068.8	1081.24	1093.38	1105.2	1116.71	1127.94	1138.87	1149.51	1159.87	1169.98	1179.84	1189.44	1198.82	1207.98	1216.93	1225.67	1234.21	1242.55	1250.71	1258.68	1266.47	1274.05	1281.42	1288.54	1295.37	1301.91	1308.17	1314.1	1319.7	1324.94	1329.83	1334.35	1338.52	1342.35	1345.83	1348.97	1351.8
30	Medium variant	Eritrea		232	Country/Area	910	3546.43	3601.46	3662.25	3727.66	3795.98	3865.96	3937.2	4009.96	4084.47	4161.13	4240.22	4321.62	4405.04	4490.19	4576.72	4664.37	4752.92	4842.28	4932.28	5022.76	5113.55	5204.54	5295.59	5386.45	5476.92	5566.81	5656.01	5744.47	5832.19	5919.18	6005.49	6091.07	6175.89	6260.06	6343.71	6426.91	6509.69	6592.01	6673.88	6755.26	6836.13	6916.48	6996.25
31	Medium variant	Ethiopia		231	Country/Area	910	114964	117876	120813	123771	126751	129749	132766	135797	138839	141890	144944	148001	151059	154117	157175	160231	163284	166333	169379	172423	175466	178508	181546	184578	187601	190611	193605	196584	199546	202488	205411	208311	211188	214037	216855	219639	222387	225097	227769	230401	232994	235546	238056
32	Medium variant	Kenya		404	Country/Area	910	53771.3	54985.7	56215.2	57458.9	58714.8	59981.3	61257.8	62544	63838.9	65141.2	66449.7	67763.3	69080.7	70399.1	71715.2	73026.3	74330.9	75628.1	76917.3	78198	79469.7	80731.5	81982.7	83222.9	84451.8	85669.3	86874.6	88067.6	89248.3	90417.5	91575.1	92721.1	93854.8	94975.5	96082.5	97174.8	98251.9	99313.4	100359	101387	102398	103391	104366
33	Medium variant	Madagascar		450	Country/Area	910	27691	28427.3	29178.1	29942.6	30720.1	31509.8	32311.4	33124.4	33948	34780.9	35622.3	36471.8	37329	38194.1	39067.2	39948.6	40838	41735.1	42639.7	43551.9	44471.4	45397.9	46331.4	47271.9	48219.8	49175	50137.3	51106.3	52081.6	53062.4	54048.1	55038.4	56032.8	57030.6	58031	59033.4	60037.1	61041.9	62047.3	63053	64058.8	65064.2	66068.8
34	Medium variant	Malawi		454	Country/Area	910	19130	19647.7	20180.8	20728.2	21287.6	21857.5	22437.4	23027.4	23626.6	24234.2	24849.4	25471.8	26100.7	26735.8	27376.4	28022.3	28672.8	29327.7	29986.7	30650	31317.3	31988.5	32663.2	33340.9	34021.2	34703.8	35388.2	36074.2	36761.9	37451.5	38143	38836.2	39530.6	40225.6	40920.5	41614.4	42307.1	42998.1	43687.3	44374.6	45059.7	45742.3	46422
35	Medium variant	Mauritius	1	480	Country/Area	910	1271.77	1273.43	1274.72	1275.66	1276.28	1276.64	1276.72	1276.49	1275.97	1275.14	1274.04	1272.64	1270.92	1268.9	1266.54	1263.81	1260.73	1257.3	1253.5	1249.35	1244.87	1240.05	1234.91	1229.48	1223.78	1217.85	1211.7	1205.39	1198.88	1192.26	1185.53	1178.72	1171.84	1164.92	1157.98	1151.01	1144.05	1137.09	1130.14	1123.18	1116.23	1109.26	1102.3
36	Medium variant	Mayotte	2	175	Country/Area	910	272.813	279.507	286.254	293.064	299.934	306.884	313.926	321.038	328.227	335.522	342.899	350.344	357.874	365.477	373.112	380.801	388.506	396.227	403.955	411.696	419.426	427.138	434.838	442.503	450.132	457.721	465.251	472.732	480.166	487.536	494.851	502.094	509.267	516.393	523.45	530.425	537.344	544.191	550.978	557.684	564.326	570.886	577.384
37	Medium variant	Mozambique		508	Country/Area	910	31255.4	32163	33089.5	34034.8	34999.8	35984.6	36988.9	38011.8	39052.6	40110.5	41184.8	42275	43380.5	44501.1	45636.5	46786.3	47950	49127	50316.5	51517.5	52729.2	53950.9	55182.2	56422.5	57671.3	58928.3	60192.9	61464.4	62742.2	64025.2	65312.9	66604.5	67899.7	69198.2	70500.1	71805.2	73113.2	74423.3	75734.7	77046.6	78358.1	79668.8	80977.9
38	Medium variant	Réunion	2	638	Country/Area	910	895.308	901.696	908.063	914.382	920.614	926.707	932.636	938.416	944.038	949.497	954.814	959.954	964.923	969.688	974.226	978.514	982.543	986.295	989.776	992.976	995.89	998.53	1000.88	1002.94	1004.72	1006.23	1007.46	1008.43	1009.14	1009.62	1009.88	1009.9	1009.72	1009.37	1008.84	1008.17	1007.37	1006.44	1005.41	1004.3	1003.08	1001.8	1000.45
39	Medium variant	Rwanda		646	Country/Area	910	12952.2	13276.5	13600.5	13924.5	14249.7	14577	14906	15236.3	15567.7	15900.4	16234.4	16569.5	16905.8	17243.2	17581.8	17921.5	18262.2	18603.8	18946.3	19289.7	19633.9	19978.7	20324	20669.2	21013.8	21357.2	21699.2	22039.4	22377.8	22714.1	23048	23379.4	23707.8	24033	24354.5	24672	24985.1	25293.8	25597.9	25897.3	26191.9	26481.7	26766.4
40	Medium variant	Seychelles		690	Country/Area	910	98.34	98.91	99.433	99.912	100.357	100.783	101.175	101.548	101.889	102.229	102.538	102.836	103.107	103.384	103.622	103.866	104.082	104.27	104.451	104.601	104.728	104.833	104.912	104.967	104.99	104.986	104.949	104.9	104.814	104.699	104.561	104.397	104.211	103.993	103.772	103.527	103.272	103.002	102.726	102.429	102.132	101.83	101.536
41	Medium variant	Somalia		706	Country/Area	910	15893.2	16359.5	16841.8	17339.4	17851.3	18376.5	18914.8	19466	20029.5	20604.7	21191	21788.3	22396	23013.8	23641.1	24277.4	24922.5	25576.4	26239.1	26910.5	27591	28280.3	28978.4	29685.9	30403.3	31131.1	31869.3	32617.6	33376.1	34144.4	34922.4	35709.9	36506.5	37311.5	38124.2	38944	39770.3	40602.6	41440.3	42282.5	43128.4	43977.4	44829.2
42	Medium variant	South Sudan		728	Country/Area	910	11193.7	11381.4	11618.5	11891	12176.5	12458.3	12733	13005.7	13278.4	13555.2	13839.3	14130.1	14425.4	14724.4	15025.7	15328.3	15631.9	15936.4	16241.9	16548.5	16856.4	17165.5	17475.5	17786.1	18097.1	18408.3	18719.6	19030.8	19341.8	19652.5	19962.7	20272.4	20581.3	20889.5	21196.7	21502.8	21807.6	22111.2	22413.1	22713.4	23011.8	23308.3	23602.5
43	Medium variant	Uganda		800	Country/Area	910	45741	47123.5	48432.9	49700.8	50976	52294.3	53663.6	55072.4	56513	57971.6	59437.9	60910.9	62394.1	63885.7	65384.4	66888.9	68397.6	69909.3	71423.1	72938.4	74454.6	75970.7	77485.4	78998	80507.4	82012.7	83513.1	85007.6	86495.3	87975.3	89446.9	90909	92360.8	93801.7	95231.1	96648.5	98053.1	99443.9	100820	102179	103520	104843	106146
44	Medium variant	United Republic of Tanzania	3	834	Country/Area	910	59734.2	61498.4	63298.5	65136.2	67014.1	68934.2	70896.5	72900.3	74946	77033.5	79162.7	81333.6	83545.7	85797.8	88088.2	90415.6	92779.3	95178.8	97613.6	100083	102587	105123	107692	110294	112929	115596	118296	121027	123787	126574	129387	132223	135084	137969	140880	143817	146779	149767	152779	155813	158869	161946	165044
45	Medium variant	Zambia		894	Country/Area	910	18384	18920.7	19470.2	20032.8	20608.4	21196.8	21798.2	22412.3	23038.7	23676.7	24325.5	24985	25654.8	26334.6	27023.7	27721.9	28428.7	29143.8	29867.2	30598.8	31338.5	32086.1	32841.3	33603.8	34373.2	35149	35931.1	36719.3	37513.6	38314.1	39120.9	39933.8	40752.6	41577	42406.8	43241.6	44081	44925.1	45773.9	46627.3	47485.6	48348.5	49215.5
46	Medium variant	Zimbabwe		716	Country/Area	910	14862.9	15092.2	15331.4	15581	15840.8	16110.5	16390.4	16680.4	16979.3	17285.2	17596.4	17912.4	18232.7	18556.5	18883.2	19212.1	19542.4	19873.5	20204.5	20534.8	20863.6	21190.3	21514.4	21835.3	22152.2	22464.7	22772.4	23074.9	23371.9	23663	23947.9	24226.5	24498.6	24764.7	25025	25279.9	25529.3	25773.5	26012.6	26247.1	26477.3	26703.4	26925.2
47	Medium variant	Middle Africa		911	Subregion	947	179595	184980	190464	196049	201741	207543	213455	219475	225603	231840	238186	244640	251199	257860	264616	271462	278396	285414	292514	299692	306945	314270	321662	329116	336627	344188	351795	359447	367139	374871	382640	390444	398278	406140	414030	421944	429879	437833	445802	453783	461774	469770	477769
48	Medium variant	Angola		24	Country/Area	911	32866.3	33933.6	35027.3	36148.6	37298.6	38478.2	39688.1	40928.6	42199.9	43502	44834.7	46198.2	47592.6	49017	50470.6	51952.5	53462.5	55000.3	56566	58160	59782.2	61432.4	63110.2	64814.4	66543.9	68297.8	70075.4	71876.6	73701.2	75549.2	77420.4	79314.4	81231	83169.9	85130.9	87113.7	89118	91143.4	93189.5	95256.3	97343.4	99450.6	101577
49	Medium variant	Cameroon		120	Country/Area	911	26545.9	27224.3	27911.5	28608.1	29314.7	30031.7	30759.1	31496.6	32243.9	33000.5	33766.1	34540.5	35323.4	36114.8	36914.6	37722.5	38538.4	39361.9	40192.6	41029.9	41873.5	42722.8	43577.5	44437.5	45302.4	46172.1	47046.3	47924.4	48805.6	49688.7	50573	51457.9	52343.2	53228.8	54114.8	55001.1	55887.5	56773.5	57659	58543.4	59426.5	60308.1	61187.8
50	Medium variant	Central African Republic		140	Country/Area	911	4829.76	4919.99	5016.68	5119.14	5226.57	5338.27	5453.69	5572.38	5693.74	5817.2	5942.21	6068.36	6195.29	6322.64	6450.11	6577.42	6704.28	6830.55	6956.13	7081	7205.17	7328.52	7450.95	7572.51	7693.28	7813.31	7932.57	8050.99	8168.56	8285.23	8400.95	8515.69	8629.42	8742.06	8853.59	8963.95	9073.06	9180.86	9287.27	9392.25	9495.69	9597.52	9697.66
51	Medium variant	Chad		148	Country/Area	911	16425.9	16915	17413.6	17921.2	18437	18960.5	19491.5	20030	20576	21129.5	21690.4	22258.6	22833.7	23415.5	24003.4	24596.9	25195.9	25800	26409.2	27023.6	27642.9	28266.9	28895.4	29527.9	30163.7	30802.5	31443.9	32087.7	32733.7	33381.6	34031.3	34682.5	35334.9	35988.2	36642.1	37296.5	37950.9	38605.2	39258.9	39911.5	40562.7	41212.1	41859.5
52	Medium variant	Congo		178	Country/Area	911	5518.09	5657.02	5797.8	5940.75	6086.28	6234.72	6386.13	6540.37	6697.44	6857.28	7019.84	7185.08	7352.97	7523.4	7696.2	7871.21	8048.36	8227.58	8408.77	8591.82	8776.66	8963.18	9151.31	9340.92	9531.88	9724.09	9917.45	10111.9	10307.5	10504.2	10702	10900.9	11100.8	11301.7	11503.7	11706.8	11910.8	12115.8	12321.9	12529.1	12737.5	12947.1	13157.8
53	Medium variant	Democratic Republic of the Congo		180	Country/Area	911	89561.4	92378	95240.8	98152	101115	104134	107206	110332	113514	116751	120047	123400	126808	130270	133780	137337	140936	144577	148257	151974	155725	159508	163320	167158	171018	174895	178788	182695	186614	190546	194489	198441	202400	206365	210335	214307	218280	222253	226223	230188	234146	238094	242032
54	Medium variant	Equatorial Guinea		226	Country/Area	911	1402.98	1449.89	1496.67	1543.39	1590.2	1637.21	1684.46	1731.87	1779.31	1826.58	1873.55	1920.13	1966.43	2012.64	2059.08	2105.96	2153.35	2201.14	2249.25	2297.47	2345.65	2393.78	2441.86	2489.84	2537.7	2585.38	2632.87	2680.12	2727.18	2774.1	2820.92	2867.64	2914.2	2960.59	3006.73	3052.59	3098.15	3143.37	3188.21	3232.61	3276.55	3319.97	3362.86
55	Medium variant	Gabon		266	Country/Area	911	2225.73	2278.83	2331.53	2383.91	2435.95	2487.67	2539.2	2590.62	2641.95	2693.23	2744.46	2795.68	2846.96	2898.35	2949.95	3001.79	3053.91	3106.29	3159	3212.03	3265.42	3319.14	3373.18	3427.48	3481.96	3536.54	3591.21	3645.88	3700.49	3754.9	3809.05	3862.87	3916.32	3969.33	4021.8	4073.68	4124.94	4175.55	4225.51	4274.81	4323.45	4371.43	4418.78
56	Medium variant	Sao Tome and Principe		678	Country/Area	911	219.161	223.364	227.679	232.132	236.76	241.576	246.586	251.792	257.157	262.653	268.242	273.911	279.66	285.492	291.403	297.384	303.449	309.561	315.733	321.975	328.275	334.644	341.051	347.51	354.043	360.613	367.244	373.919	380.643	387.387	394.163	400.939	407.751	414.575	421.384	428.23	435.06	441.895	448.733	455.583	462.424	469.273	476.119
57	Medium variant	Southern Africa		913	Subregion	947	67503.6	68358	69191.7	70006.9	70807.3	71595.9	72372.9	73137.5	73890.4	74632.5	75364.3	76086.2	76798.2	77499.4	78188.8	78865.5	79529.2	80180	80817.7	81442.7	82054.9	82654.1	83239.8	83811.4	84368.5	84910.4	85436.8	85947.4	86441.7	86918.9	87378.5	87820.4	88244.4	88650.5	89038.4	89408.3	89760.2	90094.4	90411.1	90711.1	90994.8	91262.7	91515.1
58	Medium variant	Botswana		72	Country/Area	913	2351.62	2397.24	2441.15	2483.75	2525.76	2567.78	2609.71	2651.31	2692.57	2733.58	2774.34	2814.89	2855.19	2895.28	2935.13	2974.72	3014.05	3053.08	3091.76	3130.02	3167.79	3205.03	3241.73	3277.8	3313.23	3347.92	3381.85	3415.03	3447.39	3479	3509.81	3539.84	3569.06	3597.47	3625.02	3651.7	3677.53	3702.5	3726.63	3749.96	3772.52	3794.3	3815.33
59	Medium variant	Eswatini		748	Country/Area	913	1160.16	1172.37	1184.82	1197.51	1210.45	1223.69	1237.13	1250.84	1265.21	1280.76	1297.84	1316.59	1336.81	1358.08	1379.77	1401.42	1422.86	1444.14	1465.26	1486.33	1507.37	1528.34	1549.14	1569.73	1590.04	1610.02	1629.65	1648.92	1667.8	1686.3	1704.43	1722.17	1739.51	1756.46	1773.03	1789.23	1805.05	1820.5	1835.58	1850.28	1864.6	1878.55	1892.12
60	Medium variant	Lesotho		426	Country/Area	913	2142.25	2159.07	2175.7	2192.4	2209.6	2227.57	2246.37	2265.85	2285.74	2305.6	2325.17	2344.32	2363.09	2381.58	2399.91	2418.18	2436.35	2454.39	2472.27	2489.96	2507.46	2524.74	2541.78	2558.55	2574.99	2591.08	2606.77	2622.06	2636.93	2651.34	2665.26	2678.71	2691.65	2704.06	2715.93	2727.26	2738.02	2748.24	2757.88	2766.94	2775.45	2783.39	2790.75
61	Medium variant	Namibia		516	Country/Area	913	2540.92	2587.34	2633.87	2680.5	2727.26	2774.2	2821.27	2868.43	2915.72	2963.19	3010.87	3058.78	3106.87	3155.16	3203.62	3252.23	3300.98	3349.86	3398.84	3447.87	3496.97	3546.08	3595.15	3644.16	3693.07	3741.83	3790.41	3838.74	3886.72	3934.22	3981.12	4027.41	4073.01	4117.9	4162.04	4205.4	4247.94	4289.64	4330.56	4370.74	4410.22	4449.02	4487.13
62	Medium variant	South Africa		710	Country/Area	913	59308.7	60042	60756.1	61452.7	62134.2	62802.7	63458.4	64101	64731.2	65349.4	65956.1	66551.7	67136.2	67709.3	68270.4	68819	69355	69878.5	70389.6	70888.5	71375.3	71849.9	72311.9	72761.2	73197.2	73619.5	74028.1	74422.7	74802.9	75168.1	75517.9	75852.3	76171.2	76474.6	76762.4	77034.7	77291.7	77533.5	77760.5	77973.2	78172	78357.5	78529.8
63	Medium variant	Western Africa		914	Subregion	947	401861	412460	423239	434205	445371	456742	468321	480101	492083	504261	516633	529196	541946	554880	567993	581280	594736	608355	622128	636047	650103	664290	678601	693026	707555	722177	736885	751674	766539	781480	796494	811576	826717	841908	857137	872395	887675	902970	918278	933598	948926	964257	979583
64	Medium variant	Benin		204	Country/Area	914	12123.2	12451	12784.7	13124.3	13470.1	13822.1	14180.2	14544.4	14914.6	15290.6	15672.3	16059.7	16452.5	16850.8	17254.2	17662.7	18076.1	18494.3	18917	19344	19775	20209.9	20648.6	21090.9	21536.8	21986.2	22439	22894.9	23353.9	23815.8	24280.5	24747.8	25217.6	25689.8	26164.5	26641.6	27120.9	27602.4	28085.6	28570.1	29055.6	29541.8	30028.6
65	Medium variant	Burkina Faso		854	Country/Area	914	20903.3	21497.1	22102.8	22720.8	23351.5	23995.1	24651.8	25321.2	26003.2	26697.6	27404	28122.3	28852	29592.9	30344.5	31106.1	31877.6	32658.4	33448.1	34245.8	35051	35863.2	36682.1	37507.3	38338.5	39175.6	40018.2	40865.9	41718	42573.6	43432.2	44293.2	45156.6	46022.4	46891	47762.4	48636.3	49512.4	50390.5	51270.3	52151.6	53034	53917.1
66	Medium variant	Cabo Verde		132	Country/Area	914	555.988	561.901	567.676	573.322	578.868	584.315	589.668	594.931	600.086	605.125	610.062	614.871	619.556	624.133	628.585	632.889	637.075	641.116	645.018	648.773	652.383	655.824	659.117	662.249	665.208	668.016	670.645	673.104	675.392	677.488	679.399	681.115	682.64	683.967	685.11	686.075	686.841	687.439	687.858	688.086	688.12	687.973	687.647
67	Medium variant	Côte d'Ivoire		384	Country/Area	914	26378.3	27053.6	27742.3	28444.2	29159.5	29888.2	30629.9	31384.2	32150	32926.4	33712.6	34508.1	35312.7	36126.6	36949.9	37782.8	38625.1	39476.4	40336.7	41205.6	42083	42968.7	43862.3	44763.7	45672.5	46588.5	47511.3	48440.6	49376	50317.2	51263.7	52215.2	53171.3	54131.5	55095.1	56061.6	57030.6	58001.7	58974.5	59948.6	60923.6	61899.1	62874.7
68	Medium variant	Gambia		270	Country/Area	914	2416.66	2486.94	2558.49	2631.25	2705.19	2780.26	2856.4	2933.57	3011.72	3090.78	3170.69	3251.4	3332.86	3415.05	3497.96	3581.57	3665.8	3750.64	3836.02	3921.85	4008.1	4094.7	4181.6	4268.76	4356.16	4443.73	4531.43	4619.21	4706.97	4794.62	4882.1	4969.33	5056.27	5142.88	5229.11	5314.95	5400.32	5485.2	5569.53	5653.33	5736.54	5819.13	5901.09
69	Medium variant	Ghana		288	Country/Area	914	31072.9	31732.1	32395.5	33062.7	33733.9	34408.8	35087.2	35768.9	36453.9	37142.1	37833.4	38527.7	39224.9	39924.7	40626.9	41331.5	42038.3	42746.8	43457.2	44169.2	44882.7	45597.4	46313.1	47029.1	47745.1	48460.6	49175.1	49888.4	50600	51309.4	52016.1	52719.9	53420.5	54117.5	54810.8	55500.2	56185.3	56866	57542	58213.4	58880	59541.6	60198.1
70	Medium variant	Guinea		324	Country/Area	914	13132.8	13497.2	13865.7	14238.7	14617.8	15003.8	15396.6	15795	16198.8	16607.5	17020.9	17438.7	17860.7	18286.7	18716.5	19149.9	19586.7	20026.7	20469.8	20915.8	21364.5	21815.8	22269.5	22725.4	23183.7	23644.2	24106.6	24570.9	25036.7	25503.7	25971.8	26440.7	26910.1	27379.6	27848.8	28317.3	28784.7	29250.8	29715.5	30178.6	30639.9	31099.3	31556.4
71	Medium variant	Guinea-Bissau		624	Country/Area	914	1968	2015.49	2063.36	2111.61	2160.28	2209.38	2258.89	2308.81	2359.16	2409.96	2461.21	2512.92	2565.08	2617.67	2670.65	2724	2777.71	2831.75	2886.14	2940.9	2996.06	3051.57	3107.4	3163.49	3219.71	3276.01	3332.32	3388.62	3444.9	3501.1	3557.2	3613.17	3668.98	3724.57	3779.89	3834.9	3889.59	3943.89	3997.85	4051.47	4104.76	4157.71	4210.3
72	Medium variant	Liberia		430	Country/Area	914	5057.68	5180.21	5305.12	5432.27	5561.38	5692.19	5824.73	5959.02	6095	6232.54	6371.56	6511.97	6653.71	6796.69	6940.81	7086	7232.15	7379.19	7527.09	7675.75	7825.12	7975.17	8125.78	8276.85	8428.26	8579.91	8731.7	8883.59	9035.58	9187.64	9339.75	9491.86	9643.9	9795.82	9947.54	10099	10250.2	10400.9	10551.2	10701.1	10850.4	10999.1	11147.1
73	Medium variant	Mali		466	Country/Area	914	20250.8	20855.7	21473.8	22105.7	22752.8	23415.9	24094.9	24789.3	25498.4	26221.4	26957.4	27706	28466.8	29239.5	30023.8	30819.2	31625.4	32441.7	33266.8	34099.5	34938.6	35783.4	36633.5	37488.6	38348.4	39212.6	40080.8	40952.5	41827.2	42705	43585.5	44468.4	45353.2	46239.2	47125.7	48012.2	48898.1	49783	50666.8	51549.2	52430.2	53309.1	54185.5
74	Medium variant	Mauritania		478	Country/Area	914	4649.66	4775.11	4901.98	5030.23	5159.89	5290.96	5423.38	5557.16	5692.35	5829.01	5967.18	6106.86	6248.04	6390.77	6535.01	6680.82	6828.16	6977.03	7127.35	7279.05	7432.09	7586.36	7741.89	7898.59	8056.47	8215.47	8375.55	8536.64	8698.62	8861.41	9024.89	9189	9353.7	9518.88	9684.5	9850.48	10016.7	10183.3	10350	10517	10684.1	10851.3	11018.6
75	Medium variant	Niger		562	Country/Area	914	24206.6	25130.8	26083.7	27066.2	28079.8	29125.5	30203.7	31314.6	32458.5	33635.6	34846	36089.9	37367.3	38677.7	40020.9	41396.4	42803.8	44242.9	45713.3	47214.5	48745.9	50307	51897.3	53516.2	55163.1	56837.1	58537.7	60264.1	62015.9	63792.4	65593	67417.1	69263.8	71131.9	73020.3	74927.9	76853.6	78796.8	80756.9	82733.4	84725.7	86732.9	88754.1
76	Medium variant	Nigeria		566	Country/Area	914	206140	211401	216747	222182	227713	233343	239073	244902	250830	256855	262977	269195	275508	281912	288406	294986	301650	308394	315215	322107	329067	336090	343173	350309	357491	364712	371967	379254	386573	393926	401315	408737	416187	423660	431146	438639	446135	453633	461130	468630	476130	483630	491123
77	Medium variant	Saint Helena	4	654	Country/Area	914	6.071	6.095	6.108	6.125	6.135	6.147	6.158	6.158	6.169	6.169	6.174	6.175	6.173	6.166	6.162	6.15	6.135	6.122	6.103	6.08	6.058	6.036	6.01	5.982	5.959	5.935	5.902	5.873	5.845	5.81	5.781	5.748	5.72	5.694	5.665	5.632	5.61	5.581	5.553	5.523	5.492	5.468	5.442
78	Medium variant	Senegal		686	Country/Area	914	16743.9	17196.3	17653.7	18116.5	18585.8	19062.2	19545.8	20036.3	20533.9	21038.9	21551.5	22071.5	22599.1	23134.3	23677.2	24227.9	24786.1	25351.8	25924.4	26503.3	27088	27678.1	28273.3	28873.6	29478.4	30087.5	30700.8	31317.8	31938.2	32561.3	33186.8	33814.5	34444	35075.5	35709	36344.7	36982.5	37622.1	38263	38904.9	39547.4	40190.1	40833.1
79	Medium variant	Sierra Leone		694	Country/Area	914	7976.98	8141.34	8306.44	8472.21	8638.68	8805.82	8973.54	9141.7	9310.31	9479.31	9648.68	9818.35	9988.22	10158.2	10328	10497.6	10666.8	10835.5	11003.8	11171.5	11338.7	11505.1	11670.8	11835.4	11998.8	12160.7	12321.1	12479.8	12636.7	12791.8	12944.9	13095.9	13244.7	13391.2	13535.4	13677.1	13816.2	13952.8	14086.6	14217.6	14345.8	14471.1	14593.4
80	Medium variant	Togo		768	Country/Area	914	8278.74	8478.24	8680.83	8886.64	9095.78	9308.39	9524.45	9743.96	9966.8	10192.8	10421.9	10654	10888.9	11126.5	11366.5	11608.9	11853.4	12100	12348.3	12598.3	12849.6	13102.2	13356	13610.9	13866.6	14123.2	14380.4	14638.3	14896.7	15155.8	15415.5	15675.7	15936.4	16197.4	16458.7	16720.2	16981.6	17243.1	17504.5	17765.8	18027	18287.9	18548.4
81	Medium variant	NORTHERN AFRICA AND WESTERN ASIA		1833	SDG region	1828	525869	534624	543345	551999	560538	568928	577159	585244	593206	601076	608881	616626	624308	631941	639537	647105	654651	662173	669663	677109	684500	691834	699107	706310	713431	720461	727393	734224	740946	747556	754047	760415	766658	772772	778755	784604	790317	795894	801335	806640	811810	816846	821748
82	Medium variant	Northern Africa		912	Subregion	1833	246233	250635	254985	259284	263541	267761	271945	276090	280210	284320	288433	292552	296679	300818	304974	309148	313343	317558	321787	326021	330253	334482	338703	342911	347099	351262	355395	359495	363557	367575	371545	375462	379327	383139	386900	390610	394270	397878	401434	404939	408395	411800	415155
83	Medium variant	Algeria		12	Country/Area	912	43851	44616.6	45350.1	46053.5	46731.4	47387.6	48022.2	48634.2	49225.9	49800.5	50360.7	50907.9	51443.6	51971.1	52494.1	53015.6	53537	54059	54582.8	55109.6	55639.8	56173.7	56710.9	57250	57788.9	58325.6	58859.1	59388.4	59910.9	60423.4	60923.4	61409.5	61880.8	62335.7	62772.5	63189.9	63587.2	63964.3	64321.5	64659.6	64979.4	65281.2	65565.5
84	Medium variant	Egypt		818	Country/Area	912	102334	104258	106157	108032	109887	111728	113554	115367	117176	118995	120832	122689	124568	126469	128393	130340	132312	134305	136315	138332	140350	142366	144379	146383	148377	150355	152316	154259	156181	158081	159957	161808	163634	165437	167220	168984	170730	172458	174168	175861	177538	179199	180844
85	Medium variant	Libya		434	Country/Area	912	6871.29	6958.54	7040.75	7118.66	7193.92	7267.72	7339.91	7409.79	7477.41	7542.93	7606.41	7667.92	7727.51	7785.34	7841.65	7896.59	7950.23	8002.53	8053.46	8102.97	8150.99	8197.49	8242.41	8285.57	8326.78	8365.86	8402.72	8437.3	8469.42	8498.84	8525.41	8549.08	8569.85	8587.72	8602.73	8614.93	8624.33	8631.07	8635.26	8637.16	8636.94	8634.75	8630.7
86	Medium variant	Morocco		504	Country/Area	912	36910.6	37344.8	37772.8	38193.6	38606.2	39009.8	39403.9	39788.5	40163.7	40529.8	40887.3	41235.9	41575.6	41906.3	42228.2	42541.2	42845.4	43140.7	43427.1	43704.6	43973.2	44232.8	44483.4	44725	44957.8	45181.5	45396.4	45602.2	45799	45986.8	46165.5	46335.2	46495.7	46647	46788.9	46921.3	47044.3	47157.7	47261.5	47355.7	47440.3	47515.2	47580.5
87	Medium variant	Sudan		729	Country/Area	912	43849.3	44909.4	45992	47095.3	48216.4	49353.5	50505.2	51671.3	52851.4	54045.6	55253.5	56474.7	57708	58952.8	60208.1	61473	62747	64029.4	65319.4	66616.3	67919.3	69227.8	70541.3	71859.6	73182.2	74509	75839.5	77173.5	78510.6	79850.4	81192.8	82537.3	83883.8	85232.6	86584.5	87939.8	89298.4	90659.6	92022.6	93386.1	94749.1	96110.9	97471.1
88	Medium variant	Tunisia		788	Country/Area	912	11818.6	11935.8	12046.7	12151.6	12251.4	12346.7	12437.5	12523.5	12604.9	12682.1	12755.8	12825.9	12892.7	12956.6	13018.2	13077.9	13135.8	13192.1	13247	13300.6	13353.2	13404.7	13455.1	13504.3	13552	13598	13642.1	13684.4	13724.5	13762	13796.6	13828.3	13856.9	13882.3	13904.3	13922.8	13937.9	13949.5	13957.6	13962.5	13964.3	13963	13958.7
89	Medium variant	Western Sahara		732	Country/Area	912	597.33	611.872	626.168	640.261	654.267	668.29	682.298	696.217	710.04	723.748	737.349	750.834	764.182	777.412	790.526	803.511	816.394	829.15	841.788	854.309	866.711	878.994	891.162	903.203	915.13	926.933	938.619	950.183	961.607	972.887	984.024	994.991	1005.8	1016.46	1026.94	1037.25	1047.38	1057.36	1067.16	1076.8	1086.27	1095.59	1104.76
90	Medium variant	Western Asia		922	Subregion	1833	279637	283988	288360	292715	296997	301167	305214	309154	312996	316756	320448	324073	327629	331122	334563	337957	341308	344615	347876	351088	354247	357352	360404	363399	366332	369199	371998	374729	377389	379981	382502	384953	387331	389633	391855	393993	396047	398017	399901	401701	403416	405046	406592
91	Medium variant	Armenia		51	Country/Area	922	2963.23	2968.13	2971.97	2974.77	2976.51	2977.28	2977.01	2975.75	2973.59	2970.64	2967.01	2962.74	2957.86	2952.45	2946.62	2940.41	2933.89	2927.06	2919.96	2912.65	2905.15	2897.47	2889.62	2881.55	2873.2	2864.55	2855.56	2846.26	2836.58	2826.55	2816.11	2805.26	2794.01	2782.33	2770.22	2757.7	2744.75	2731.36	2717.56	2703.36	2688.76	2673.77	2658.43
92	Medium variant	Azerbaijan	5	31	Country/Area	922	10139.2	10223.3	10300.2	10370.5	10435.3	10495.7	10551.7	10603.4	10651.4	10696.7	10739.7	10780.9	10820.2	10857.5	10892.9	10926	10956.9	10985.8	11012.1	11035.3	11055.1	11071.3	11084	11093.3	11099	11101.3	11100.2	11095.7	11088.1	11077.8	11065	11049.9	11032.5	11013.1	10991.8	10968.9	10944.4	10918.4	10891.1	10862.3	10832.1	10800.7	10768
93	Medium variant	Bahrain		48	Country/Area	922	1701.58	1748.3	1783.98	1812	1837.73	1865.09	1894.88	1925.73	1956.74	1986.34	2013.42	2037.89	2060.33	2081.02	2100.46	2118.99	2136.71	2153.58	2169.65	2185.02	2199.71	2213.81	2227.37	2240.38	2252.82	2264.66	2275.95	2286.71	2296.96	2306.74	2316.05	2324.91	2333.33	2341.34	2348.92	2356.11	2362.91	2369.32	2375.32	2380.92	2386.1	2390.87	2395.22
94	Medium variant	Cyprus	6	196	Country/Area	922	1207.36	1215.59	1223.39	1230.79	1237.87	1244.67	1251.21	1257.47	1263.5	1269.32	1274.97	1280.47	1285.82	1291.03	1296.11	1301.06	1305.88	1310.58	1315.13	1319.55	1323.77	1327.81	1331.67	1335.35	1338.79	1342.01	1345.01	1347.77	1350.29	1352.56	1354.59	1356.36	1357.89	1359.18	1360.24	1361.06	1361.66	1362.06	1362.27	1362.28	1362.13	1361.83	1361.39
95	Medium variant	Georgia	7	268	Country/Area	922	3989.18	3979.77	3968.73	3956.34	3943.05	3929.29	3915.05	3900.21	3884.89	3869.22	3853.3	3837.22	3820.98	3804.63	3788.23	3771.78	3755.3	3738.83	3722.36	3705.86	3689.31	3672.72	3656.08	3639.35	3622.47	3605.42	3588.16	3570.72	3553.03	3535.08	3516.87	3498.37	3479.59	3460.53	3441.24	3421.69	3401.93	3381.95	3361.79	3341.48	3321.03	3300.48	3279.85
96	Medium variant	Iraq		368	Country/Area	922	40222.5	41179.4	42165	43170.8	44181.8	45187.3	46186	47183	48180.9	49183.5	50193.8	51211.8	52236.5	53267.1	54302.8	55342.6	56386.3	57433.5	58483	59533.5	60583.7	61633	62680.7	63726.4	64769.3	65809	66844.9	67876.4	68903.1	69924.5	70940.1	71949.6	72952.4	73948.5	74937.7	75919.8	76894.7	77861.8	78820.7	79770.8	80711.6	81642.8	82564
97	Medium variant	Israel		376	Country/Area	922	8655.54	8789.78	8922.89	9055.15	9187.04	9318.96	9450.93	9582.85	9714.85	9847.1	9979.69	10112.7	10246.3	10380.3	10514.8	10649.8	10785.3	10921.3	11057.9	11195.1	11332.9	11471.3	11610.1	11749.3	11888.6	12027.9	12167.2	12306.2	12444.9	12583	12720.4	12857	12992.7	13127.4	13261	13393.2	13524.1	13653.7	13781.9	13908.7	14034.3	14158.6	14281.6
98	Medium variant	Jordan		400	Country/Area	922	10203.1	10269	10300.9	10312.3	10320.9	10339.8	10375	10426	10491.8	10569.1	10655.2	10750.9	10857.7	10973.7	11096.4	11223.7	11354.7	11488.9	11623.9	11757.2	11886.7	12011.3	12130.7	12245.2	12355.3	12461.7	12564.2	12662.4	12756.3	12846.3	12932.4	13014.8	13093.5	13168.8	13240.9	13310.1	13376.5	13440.1	13501	13559.2	13614.9	13668	13718.5
99	Medium variant	Kuwait		414	Country/Area	922	4270.56	4328.55	4380.33	4427.85	4473.16	4517.86	4563.14	4609.35	4656.03	4702.18	4747.08	4790.79	4833.72	4875.97	4917.68	4958.91	4999.6	5039.62	5078.69	5116.43	5152.53	5186.89	5219.48	5249.98	5278.09	5303.57	5326.36	5346.54	5364.28	5379.85	5393.47	5405.28	5415.44	5424.19	5431.86	5438.76	5445.07	5451.03	5456.94	5463.15	5469.95	5477.54	5486.05
100	Medium variant	Lebanon		422	Country/Area	922	6825.44	6769.15	6684.85	6585.12	6485.34	6397.24	6326.66	6273.64	6236.67	6211.49	6194.84	6187.33	6190.35	6202.04	6219.81	6241.51	6266.37	6293.9	6322.51	6350.45	6376.4	6399.44	6419.41	6436.85	6452.76	6467.87	6482.18	6495.32	6507.34	6518.28	6528.16	6537	6544.77	6551.46	6556.98	6561.27	6564.33	6566.13	6566.58	6565.61	6563.14	6559.14	6553.63
101	Medium variant	Oman		512	Country/Area	922	5106.62	5223.38	5324	5412.49	5494.16	5573	5650.94	5727.61	5801.98	5871.93	5936.08	5994.53	6048.51	6099.22	6148.2	6196.68	6245.18	6293.67	6342.07	6390.04	6437.41	6484.21	6530.68	6577.19	6624.18	6671.9	6720.5	6769.72	6819.06	6867.82	6915.45	6961.71	7006.6	7049.91	7091.49	7131.22	7168.96	7204.6	7238.03	7269.19	7298.04	7324.51	7348.59
102	Medium variant	Qatar		634	Country/Area	922	2881.06	2930.52	2979.91	3028.94	3076.46	3121.71	3165.1	3207.42	3248.61	3288.49	3326.89	3363.93	3399.7	3434.03	3466.63	3497.4	3526.25	3553.36	3579.12	3604.09	3628.69	3653.05	3677.13	3700.86	3724.1	3746.73	3768.78	3790.26	3811.19	3831.48	3851.12	3870.09	3888.39	3905.97	3922.79	3938.85	3954.1	3968.56	3982.25	3995.15	4007.28	4018.65	4029.28
103	Medium variant	Saudi Arabia		682	Country/Area	922	34813.9	35340.7	35844.9	36329.4	36796.7	37248.9	37688.1	38115.3	38530.7	38933.2	39322.3	39698.9	40063.5	40415.1	40752	41073.4	41378.7	41669	41946.3	42213.6	42473	42725.3	42969.7	43205.8	43432.5	43648.8	43854.8	44050.2	44234.1	44405.2	44562.5	44705.6	44834.5	44949	45049	45134.3	45205.2	45261.7	45304.3	45333.1	45348.8	45351.7	45342.5
104	Medium variant	State of Palestine	8	275	Country/Area	922	5101.42	5222.76	5345.55	5469.36	5593.76	5718.41	5843	5967.46	6091.9	6216.59	6341.72	6467.26	6593.04	6718.99	6845.03	6971.08	7097.07	7222.95	7348.66	7474.11	7599.23	7723.93	7848.16	7971.83	8094.89	8217.27	8338.9	8459.7	8579.52	8698.26	8815.78	8931.99	9046.84	9160.31	9272.42	9383.12	9492.38	9600.12	9706.29	9810.76	9913.48	10014.4	10113.4
105	Medium variant	Syrian Arab Republic		760	Country/Area	922	17500.7	18275.7	19364.8	20638.3	21915.5	23062	24032.6	24851.1	25536.7	26133.8	26676.6	27160.4	27572	27930.4	28260	28579.6	28897.5	29213.9	29529.9	29843.5	30153.3	30461.8	30771.9	31082	31389.9	31693.5	31992.5	32286.9	32575.6	32856.8	33129.3	33392.3	33645.4	33887.7	34118.3	34336.6	34542.3	34735	34914.7	35081.2	35234.6	35374.9	35502.3
106	Medium variant	Turkey		792	Country/Area	922	84339.1	85042.7	85562	85957.3	86316.5	86705.2	87141.8	87613	88114.6	88633.2	89157.8	89692.6	90242.4	90796.6	91340.9	91864.2	92362.5	92836.7	93287.9	93718.9	94131.6	94525.1	94897.6	95249.3	95580.7	95892.3	96183.9	96455.1	96705.2	96933.6	97139.6	97323	97483.9	97621.9	97736.8	97828.3	97896.7	97941.9	97964.2	97963.7	97940.7	97895.6	97828.8
107	Medium variant	United Arab Emirates		784	Country/Area	922	9890.4	9991.08	10081.8	10165.1	10245	10323.9	10403.1	10481.3	10554	10615.3	10661.1	10690	10703.9	10706.5	10703	10697.4	10690.9	10682.8	10673.3	10661.9	10648.3	10633.6	10618.3	10601.5	10581.5	10557.6	10529.3	10498	10467.3	10441.9	10425.3	10418.8	10421.6	10432.4	10449	10469.6	10494	10522.4	10554.2	10588.8	10625.5	10664	10704.1
108	Medium variant	Yemen		887	Country/Area	922	29826	30490.6	31154.9	31818.2	32480.2	33140.3	33798.2	34453.8	35107.1	35758.1	36406.9	37053.1	37696.2	38335.9	38971.5	39602.7	40228.9	40849.5	41463.8	42070.9	42670	43260.4	43841.6	44412.9	44973.5	45522.7	46060	46584.6	47096.4	47595	48080	48551.1	49007.8	49449.2	49874.4	50282.6	50673.4	51046.6	51402.4	51741.2	52063.2	52368.4	52656.7
109	Medium variant	CENTRAL AND SOUTHERN ASIA		921	SDG region	1828	2.01471e+06	2.0377e+06	2.06039e+06	2.08274e+06	2.1047e+06	2.12624e+06	2.14732e+06	2.16794e+06	2.18808e+06	2.20776e+06	2.22697e+06	2.2457e+06	2.26394e+06	2.28165e+06	2.29882e+06	2.31543e+06	2.33145e+06	2.3469e+06	2.36178e+06	2.37607e+06	2.3898e+06	2.40295e+06	2.41554e+06	2.42755e+06	2.43901e+06	2.44993e+06	2.46031e+06	2.47015e+06	2.47944e+06	2.4882e+06	2.49642e+06	2.5041e+06	2.51125e+06	2.51785e+06	2.5239e+06	2.52938e+06	2.53429e+06	2.53864e+06	2.54242e+06	2.54565e+06	2.54833e+06	2.55046e+06	2.55205e+06
110	Medium variant	Central Asia		5500	Subregion	921	74338.9	75426.6	76474.8	77485.7	78464.6	79416	80339.9	81237	82114.2	82980.6	83843.3	84704.7	85565.2	86427.2	87292.4	88162	89036.9	89916.2	90796.4	91672.6	92540.3	93398.4	94245.8	95078.2	95890.8	96680.2	97444.3	98182.9	98896.2	99585	100250	100891	101509	102105	102682	103242	103785	104314	104827	105328	105816	106292	106757
111	Medium variant	Kazakhstan		398	Country/Area	5500	18776.7	18995	19205	19407	19601.1	19787.7	19967	20139.6	20307.5	20473.3	20639	20805.4	20972.5	21141	21311.2	21483.5	21658	21834.7	22013	22191.8	22370.4	22548.4	22725.6	22901	23073.8	23243	23408.2	23569.3	23725.8	23877.5	24024	24165.3	24301.4	24432.6	24559.2	24681.9	24800.7	24915.7	25027.5	25136.6	25243.4	25348.4	25451.4
112	Medium variant	Kyrgyzstan		417	Country/Area	5500	6524.19	6628.35	6728.27	6824.52	6918.1	7009.83	7099.81	7187.97	7274.74	7360.65	7446.11	7531.31	7616.39	7701.55	7786.99	7872.85	7959.21	8046.04	8133.16	8220.28	8307.14	8393.64	8479.73	8565.13	8649.55	8732.75	8814.57	8894.95	8973.73	9050.82	9126.1	9199.51	9271.02	9340.59	9408.24	9473.99	9537.83	9599.79	9659.96	9718.45	9775.37	9830.77	9884.69
113	Medium variant	Tajikistan		762	Country/Area	5500	9537.64	9749.62	9957.47	10161.6	10363.2	10563.2	10761.5	10958.2	11155.1	11354.3	11557.4	11764.8	11976.6	12193.3	12415.3	12642.7	12875.7	13113.8	13356	13600.5	13845.9	14091.8	14338	14583.1	14825.7	15064.8	15299.8	15531	15758.8	15984.3	16208.2	16430.8	16652.1	16872.6	17093.3	17314.9	17537.4	17760.9	17985.4	18210.8	18437.1	18664.3	18892
114	Medium variant	Turkmenistan		795	Country/Area	5500	6031.19	6117.93	6201.95	6283.19	6361.72	6437.59	6510.79	6581.39	6649.84	6716.67	6782.36	6847.03	6910.77	6973.84	7036.52	7099.01	7161.38	7223.64	7285.68	7347.37	7408.52	7469.1	7529	7587.9	7645.36	7701.11	7754.96	7806.84	7856.62	7904.14	7949.28	7991.98	8032.25	8070.12	8105.72	8139.14	8170.42	8199.64	8226.97	8252.64	8276.88	8299.76	8321.36
115	Medium variant	Uzbekistan		860	Country/Area	5500	33469.2	33935.8	34382.1	34809.4	35220.5	35617.7	36000.9	36369.8	36727	37075.7	37418.4	37756.2	38088.9	38417.5	38742.4	39064.1	39382.7	39698	40008.6	40312.6	40608.4	40895.5	41173.5	41441.1	41696.5	41938.6	42166.7	42380.9	42581.3	42768.4	42942.5	43103.7	43252.2	43388.8	43515	43631.6	43739.1	43837.6	43927.6	44009.4	44083.2	44149.3	44207.9
116	Medium variant	Southern Asia		5501	Subregion	921	1.94037e+06	1.96227e+06	1.98391e+06	2.00525e+06	2.02623e+06	2.04682e+06	2.06698e+06	2.0867e+06	2.10597e+06	2.12478e+06	2.14313e+06	2.161e+06	2.17837e+06	2.19523e+06	2.21153e+06	2.22726e+06	2.24242e+06	2.25699e+06	2.27098e+06	2.2844e+06	2.29726e+06	2.30956e+06	2.32129e+06	2.33247e+06	2.34312e+06	2.35325e+06	2.36287e+06	2.37196e+06	2.38054e+06	2.38861e+06	2.39617e+06	2.40321e+06	2.40974e+06	2.41575e+06	2.42121e+06	2.42613e+06	2.4305e+06	2.43432e+06	2.4376e+06	2.44033e+06	2.44252e+06	2.44417e+06	2.44529e+06
117	Medium variant	Afghanistan		4	Country/Area	5501	38928.3	39835.4	40754.4	41681.2	42608.7	43531.5	44449.1	45363.6	46275.3	47185.2	48093.6	49000.2	49904	50804	51698.8	52587.4	53468.9	54342.9	55208.5	56065.2	56912	57748.5	58573.8	59387.2	60187.6	60974.1	61746.1	62503.2	63245	63971.7	64683	65378.5	66057.7	66720.1	67365.1	67992.2	68601.1	69191.3	69762.3	70313.6	70844.7	71355.3	71844.9
118	Medium variant	Bangladesh		50	Country/Area	5501	164689	166303	167886	169432	170937	172399	173814	175180	176498	177769	178994	180171	181300	182377	183403	184374	185291	186152	186960	187715	188417	189066	189663	190208	190701	191142	191532	191871	192157	192390	192568	192691	192760	192775	192738	192649	192508	192316	192074	191783	191443	191055	190621
119	Medium variant	Bhutan		64	Country/Area	5501	771.612	779.9	787.944	795.731	803.268	810.544	817.551	824.276	830.696	836.838	842.668	848.204	853.432	858.375	863.008	867.377	871.453	875.249	878.781	882.074	885.158	888.017	890.663	893.101	895.339	897.388	899.234	900.905	902.355	903.593	904.614	905.416	905.983	906.306	906.368	906.153	905.674	904.917	903.873	902.558	900.936	899.042	896.867
120	Medium variant	India		356	Country/Area	5501	1.38e+06	1.39341e+06	1.40663e+06	1.41966e+06	1.43246e+06	1.44501e+06	1.45731e+06	1.46934e+06	1.48108e+06	1.49252e+06	1.50364e+06	1.51443e+06	1.52486e+06	1.53491e+06	1.54454e+06	1.55372e+06	1.56244e+06	1.57069e+06	1.57848e+06	1.58581e+06	1.59269e+06	1.59912e+06	1.60511e+06	1.61067e+06	1.61583e+06	1.62062e+06	1.62504e+06	1.6291e+06	1.6328e+06	1.63616e+06	1.63918e+06	1.64186e+06	1.64422e+06	1.64625e+06	1.64794e+06	1.6493e+06	1.65031e+06	1.651e+06	1.65134e+06	1.65135e+06	1.65102e+06	1.65035e+06	1.64935e+06
121	Medium variant	Iran (Islamic Republic of)		364	Country/Area	5501	83993	85028.8	86022.8	86975.8	87892	88774.8	89622.5	90432.9	91207.9	91950.6	92663.7	93348.2	94005.2	94637.8	95249.7	95844	96422.2	96985.1	97533.9	98069.8	98593.6	99105.6	99606	100094	100570	101032	101480	101913	102329	102725	103098	103448	103774	104072	104339	104572	104771	104935	105064	105156	105213	105234	105220
122	Medium variant	Maldives		462	Country/Area	5501	540.542	543.62	540.985	534.669	527.652	522.123	518.721	517.003	516.829	517.722	519.348	521.822	525.331	529.525	533.925	538.161	542.116	545.802	549.308	552.782	556.282	559.805	563.291	566.692	569.987	573.13	576.113	578.926	581.537	583.939	586.102	588.001	589.652	591.038	592.148	593.001	593.586	593.892	593.946	593.745	593.31	592.66	591.799
123	Medium variant	Nepal		524	Country/Area	5501	29136.8	29674.9	30225.6	30769.7	31285.7	31757.4	32175.3	32539.2	32855.4	33135.7	33389.5	33617.1	33816.6	33993.1	34152.5	34299.6	34437.1	34565.5	34684.5	34792.7	34889.3	34974.7	35050.2	35116.1	35172.9	35220.6	35259.7	35289.9	35311	35322.5	35323.9	35315.3	35296.6	35267.2	35226.6	35174.3	35110.1	35034.2	34946.6	34847.6	34737.7	34616.7	34484.7
124	Medium variant	Pakistan		586	Country/Area	5501	220892	225200	229489	233757	238006	242234	246439	250617	254764	258878	262959	267003	271012	274989	278938	282863	286765	290640	294492	298321	302129	305915	309676	313404	317089	320724	324303	327826	331287	334684	338013	341272	344457	347562	350581	353511	356346	359089	361741	364308	366792	369196	371516
125	Medium variant	Sri Lanka		144	Country/Area	5501	21413.2	21497.3	21575.8	21649	21716.9	21779.7	21837.4	21890.2	21938.4	21982.6	22023	22059.9	22093.1	22122.2	22146.8	22166.3	22180.7	22190	22194.1	22192.9	22186.2	22174.2	22156.7	22133.6	22104.8	22070.2	22029.8	21983.8	21932.3	21875.6	21814	21747.5	21676.4	21600.9	21521.4	21438.2	21351.4	21261.3	21167.9	21071.5	20972.3	20870.3	20765.7
126	Medium variant	EASTERN AND SOUTH-EASTERN ASIA		1832	SDG region	1828	2.34671e+06	2.35797e+06	2.36841e+06	2.37805e+06	2.38697e+06	2.39523e+06	2.40282e+06	2.40974e+06	2.41601e+06	2.42164e+06	2.42667e+06	2.43111e+06	2.43496e+06	2.43823e+06	2.4409e+06	2.44298e+06	2.44447e+06	2.44539e+06	2.44575e+06	2.44558e+06	2.4449e+06	2.44372e+06	2.44204e+06	2.43988e+06	2.43722e+06	2.43406e+06	2.43043e+06	2.42633e+06	2.42178e+06	2.41678e+06	2.41134e+06	2.40549e+06	2.39924e+06	2.39261e+06	2.38562e+06	2.37829e+06	2.37065e+06	2.36271e+06	2.35452e+06	2.34609e+06	2.33747e+06	2.32867e+06	2.31972e+06
127	Medium variant	Eastern Asia		906	Subregion	1832	1.67809e+06	1.68285e+06	1.68692e+06	1.69032e+06	1.69313e+06	1.69543e+06	1.69721e+06	1.69846e+06	1.69922e+06	1.69952e+06	1.69938e+06	1.69882e+06	1.69785e+06	1.69647e+06	1.69468e+06	1.69247e+06	1.68986e+06	1.68685e+06	1.68347e+06	1.67973e+06	1.67564e+06	1.67123e+06	1.66649e+06	1.66142e+06	1.65604e+06	1.65033e+06	1.64431e+06	1.638e+06	1.63139e+06	1.6245e+06	1.61734e+06	1.60993e+06	1.60227e+06	1.59439e+06	1.58631e+06	1.57803e+06	1.56959e+06	1.56099e+06	1.55227e+06	1.54345e+06	1.53457e+06	1.52563e+06	1.51666e+06
128	Medium variant	China	9	156	Country/Area	906	1.43932e+06	1.44422e+06	1.44847e+06	1.45213e+06	1.45525e+06	1.45791e+06	1.46009e+06	1.4618e+06	1.46305e+06	1.46389e+06	1.46434e+06	1.46442e+06	1.46413e+06	1.46348e+06	1.46247e+06	1.46108e+06	1.45934e+06	1.45725e+06	1.45483e+06	1.45208e+06	1.44903e+06	1.44568e+06	1.44204e+06	1.43809e+06	1.43385e+06	1.42931e+06	1.42448e+06	1.41936e+06	1.41397e+06	1.40831e+06	1.40241e+06	1.39626e+06	1.38988e+06	1.3833e+06	1.37653e+06	1.36959e+06	1.3625e+06	1.35527e+06	1.34793e+06	1.34051e+06	1.33303e+06	1.32551e+06	1.31795e+06
129	Medium variant	China, Hong Kong SAR	10	344	Country/Area	906	7496.99	7552.8	7604.31	7653.42	7703.19	7755.54	7811.2	7868.72	7925.07	7976.06	8018.67	8051.86	8076.55	8094.38	8107.89	8118.97	8128.11	8134.88	8139.27	8141.1	8140.3	8137.08	8131.81	8124.69	8115.96	8105.79	8094.35	8081.85	8068.59	8054.88	8041.04	8027.23	8013.49	7999.95	7986.62	7973.54	7960.79	7948.37	7936.23	7924.31	7912.48	7900.78	7889.12
130	Medium variant	China, Macao SAR	11	446	Country/Area	906	649.342	658.391	667.492	676.537	685.379	693.895	702.067	709.945	717.53	724.843	731.876	738.638	745.137	751.399	757.453	763.343	769.089	774.675	780.128	785.474	790.725	795.878	800.949	805.935	810.849	815.662	820.393	825.049	829.611	834.047	838.377	842.567	846.642	850.596	854.424	858.13	861.724	865.199	868.574	871.853	875.044	878.143	881.15
131	Medium variant	China, Taiwan Province of China	12	158	Country/Area	906	23816.8	23855	23888.6	23917.9	23943.3	23965.2	23983.4	23997.6	24007.4	24012.1	24011.3	24004.6	23991.9	23972.2	23944.6	23908.3	23863.2	23809.2	23746.2	23674.2	23593.3	23503.5	23405.2	23299.3	23186.8	23068.8	22945.7	22818	22686.2	22551	22413	22272.6	22130.4	21986.6	21841.9	21696.4	21550.6	21404.7	21258.7	21112.9	20967.2	20821.7	20676.7
132	Medium variant	Dem. People's Republic of Korea		408	Country/Area	906	25778.8	25887	25990.7	26089.8	26184.7	26275.5	26362	26443.9	26520.1	26589.6	26651.3	26705.2	26751.2	26789.5	26820.1	26843.4	26859.4	26868.3	26870.6	26866.9	26858	26844.1	26825.4	26802.6	26776.3	26746.9	26714.9	26680.5	26643.5	26603.9	26561.6	26516.7	26469.4	26419.8	26368	26314	26258.1	26200.2	26140.3	26078.7	26015.2	25950	25883.2
133	Medium variant	Japan		392	Country/Area	906	126476	126051	125585	125081	124544	123976	123379	122755	122107	121441	120758	120063	119355	118637	117907	117166	116416	115657	114893	114125	113356	112587	111818	111052	110288	109529	108775	108026	107281	106541	105804	105071	104340	103610	102875	102135	101387	100633	99871.7	99102.5	98325.8	97541.8	96751.6
134	Medium variant	Mongolia		496	Country/Area	906	3278.29	3329.28	3378.08	3424.88	3470.04	3513.91	3556.5	3597.81	3638.04	3677.43	3716.2	3754.45	3792.26	3829.75	3867	3904.13	3941.2	3978.24	4015.26	4052.27	4089.2	4126.11	4162.93	4199.66	4236.24	4272.64	4308.78	4344.64	4380.06	4414.87	4448.93	4482.18	4514.59	4546.09	4576.58	4606.03	4634.4	4661.7	4687.97	4713.27	4737.64	4761.12	4783.74
135	Medium variant	Republic of Korea		410	Country/Area	906	51269.2	51305.2	51329.9	51344	51347.2	51339.4	51321.2	51293.5	51256.3	51209.3	51152.1	51084.9	51007.3	50916.7	50810	50685	50540.7	50377.6	50196.3	49998	49783.7	49553.5	49307.3	49045.8	48769.7	48479.7	48176.6	47860.6	47531.2	47187.8	46829.9	46458.2	46073.7	45677.6	45271.5	44856.8	44434.3	44005.2	43571.8	43136.5	42701.6	42268.3	41837.2
136	Medium variant	South-Eastern Asia		920	Subregion	1832	668620	675118	681492	687734	693838	699798	705612	711275	716781	722123	727294	732291	737112	741755	746220	750506	754612	758536	762283	765856	769258	772492	775556	778452	781177	783732	786118	788337	790390	792278	794002	795564	796967	798214	799309	800257	801060	801721	802246	802639	802904	803045	803066
137	Medium variant	Brunei Darussalam		96	Country/Area	920	437.483	441.532	445.429	449.169	452.767	456.182	459.465	462.584	465.548	468.352	470.987	473.462	475.784	477.936	479.927	481.782	483.482	485.029	486.435	487.69	488.817	489.799	490.658	491.373	491.954	492.384	492.676	492.827	492.83	492.692	492.391	491.936	491.33	490.579	489.674	488.649	487.478	486.196	484.773	483.248	481.607	479.868	478.025
138	Medium variant	Cambodia		116	Country/Area	920	16719	16946.4	17168.6	17385.7	17597.9	17805.6	18008.7	18207.1	18401.5	18592.6	18781	18966.8	19150	19330.8	19509.3	19685.5	19859.6	20031.4	20200.3	20365.5	20526.5	20683.1	20835	20982.2	21124.2	21261	21392.4	21518.2	21638.2	21752.5	21860.9	21963.3	22059.8	22150.5	22235.8	22315.9	22391	22460.8	22525.5	22585.2	22639.6	22689.1	22733.4
139	Medium variant	Indonesia		360	Country/Area	920	273524	276362	279135	281844	284495	287090	289628	292109	294533	296896	299198	301439	303618	305733	307783	309765	311679	313525	315300	317005	318638	320199	321688	323103	324442	325705	326892	328004	329042	330008	330905	331733	332494	333191	333825	334399	334915	335375	335782	336137	336444	336704	336920
140	Medium variant	Lao People's Democratic Republic		418	Country/Area	920	7275.56	7379.36	7481.03	7580.61	7678.4	7774.53	7868.91	7961.31	8051.68	8140.01	8226.28	8310.42	8392.4	8472.24	8550.01	8625.71	8699.34	8770.83	8840.14	8907.19	8971.94	9034.34	9094.33	9151.85	9206.83	9259.16	9308.82	9355.78	9399.97	9441.31	9479.75	9515.24	9547.82	9577.47	9604.29	9628.27	9649.45	9667.83	9683.42	9696.23	9706.27	9713.57	9718.16
141	Medium variant	Malaysia	13	458	Country/Area	920	32366	32776.2	33181.1	33579.3	33969.3	34349.9	34720.3	35080.1	35429.1	35767.4	36095.1	36412	36717.9	37012.5	37295.3	37566.2	37825.1	38072.5	38309.2	38536.3	38754.6	38964.5	39166.4	39360.8	39548.4	39729.7	39905.1	40074.6	40238.6	40397.2	40550.4	40698.3	40840.8	40977.4	41107.6	41230.8	41346.7	41455.2	41555.9	41648.3	41731.9	41806.6	41872.4
142	Medium variant	Myanmar		104	Country/Area	920	54409.8	54806	55227.2	55663.7	56101.1	56528.5	56942.8	57345.6	57735.9	58113.6	58478.5	58829.2	59163.9	59481.9	59782.4	60064.9	60328.9	60574.2	60801	61010	61201.6	61376	61533.4	61674.4	61799.7	61909.8	62005.2	62086.4	62154.3	62209.7	62253.4	62285.9	62307.7	62319.3	62321.6	62314.9	62299.8	62276.5	62245	62205.2	62157.3	62101.2	62037.1
143	Medium variant	Philippines		608	Country/Area	920	109581	111047	112509	113964	115407	116833	118241	119633	121006	122361	123698	125015	126312	127584	128827	130040	131219	132366	133481	134564	135619	136644	137638	138602	139535	140438	141311	142153	142964	143742	144488	145201	145881	146529	147145	147732	148289	148815	149313	149781	150220	150631	151013
144	Medium variant	Singapore		702	Country/Area	920	5850.34	5896.68	5943.55	5990.29	6035.68	6078.76	6119.59	6158.53	6195.44	6230.13	6262.47	6292.36	6319.77	6344.63	6366.87	6386.45	6403.39	6417.69	6429.41	6438.65	6445.49	6450	6452.27	6452.43	6450.68	6447.18	6442.02	6435.32	6427.25	6417.93	6407.53	6396.14	6383.87	6370.81	6357.1	6342.83	6328.08	6312.9	6297.34	6281.39	6265.08	6248.41	6231.47
145	Medium variant	Thailand		764	Country/Area	920	69800	69950.8	70078.2	70182.8	70266.1	70328.9	70371.6	70394.1	70396.9	70380.5	70345.5	70292.3	70220.9	70131.5	70024.2	69899.1	69756.4	69596.4	69418.5	69222.6	69008.3	68775.8	68525.5	68257.8	67973.2	67672.1	67355.1	67022.7	66675.6	66314.6	65940.5	65554.1	65156.3	64748	64330.5	63904.8	63471.9	63032.7	62588.6	62141.1	61691.6	61241	60790.1
146	Medium variant	Timor-Leste		626	Country/Area	920	1318.44	1343.88	1369.43	1395.06	1420.76	1446.51	1472.25	1497.93	1523.49	1548.88	1574.06	1598.99	1623.64	1648.01	1672.06	1695.76	1719.12	1742.13	1764.81	1787.18	1809.28	1831.08	1852.61	1873.92	1895.07	1916.11	1937.05	1957.87	1978.55	1999.03	2019.3	2039.3	2059.05	2078.49	2097.58	2116.29	2134.56	2152.39	2169.73	2186.54	2202.77	2218.42	2233.45
147	Medium variant	Viet Nam		704	Country/Area	920	97338.6	98168.8	98953.5	99698.6	100414	101107	101779	102426	103043	103624	104164	104660	105118	105539	105930	106296	106638	106955	107252	107531	107795	108045	108281	108503	108710	108901	109077	109237	109379	109503	109605	109686	109745	109782	109795	109783	109747	109686	109601	109494	109363	109211	109038
148	Medium variant	LATIN AMERICA AND THE CARIBBEAN		1830	SDG region	1828	653962	659744	665451	671063	676552	681896	687086	692122	696997	701709	706254	710627	714825	718851	722707	726395	729917	733272	736460	739485	742348	745050	747592	749976	752207	754287	756217	757998	759629	761107	762432	763605	764625	765496	766218	766792	767221	767504	767643	767640	767495	767210	766789
149	Medium variant	Caribbean		915	Subregion	1830	43532.4	43762	44017.3	44287.1	44554.2	44805.9	45039.1	45257	45459.9	45650	45828.8	45995.7	46149.5	46291.8	46425.2	46551.3	46670.7	46783	46887.6	46983.4	47069.5	47146	47213	47270.4	47318	47355.8	47383.6	47401.4	47409.2	47406.6	47393.6	47370.3	47336.8	47293.6	47241.1	47179.9	47110.2	47032.3	46946.3	46852.9	46752.2	46644.5	46530.1
150	Medium variant	Anguilla	14	660	Country/Area	915	15.002	15.125	15.225	15.325	15.414	15.511	15.596	15.683	15.763	15.839	15.917	15.984	16.055	16.12	16.177	16.227	16.269	16.328	16.364	16.406	16.446	16.48	16.497	16.518	16.532	16.546	16.546	16.551	16.541	16.539	16.522	16.5	16.478	16.454	16.423	16.384	16.349	16.306	16.264	16.221	16.175	16.124	16.071
151	Medium variant	Antigua and Barbuda		28	Country/Area	915	97.928	98.728	99.505	100.272	101.016	101.719	102.402	103.067	103.691	104.302	104.859	105.411	105.925	106.408	106.865	107.298	107.695	108.093	108.446	108.781	109.083	109.367	109.634	109.862	110.073	110.276	110.439	110.582	110.713	110.819	110.901	110.959	110.993	111.018	111.01	110.992	110.956	110.907	110.83	110.755	110.666	110.564	110.449
152	Medium variant	Aruba	15	533	Country/Area	915	106.766	107.195	107.612	108.012	108.384	108.75	109.087	109.419	109.717	109.997	110.244	110.471	110.678	110.84	110.969	111.058	111.118	111.118	111.092	111.036	110.937	110.795	110.624	110.446	110.227	109.987	109.746	109.49	109.225	108.959	108.709	108.477	108.243	108.042	107.847	107.662	107.499	107.363	107.222	107.133	107.032	106.956	106.888
153	Medium variant	Bahamas		44	Country/Area	915	393.248	396.914	400.515	404.048	407.522	410.933	414.274	417.547	420.734	423.828	426.81	429.699	432.471	435.131	437.669	440.098	442.39	444.575	446.643	448.603	450.46	452.198	453.841	455.374	456.798	458.134	459.363	460.498	461.539	462.472	463.329	464.096	464.772	465.381	465.931	466.431	466.877	467.289	467.65	467.989	468.29	468.566	468.811
154	Medium variant	Barbados		52	Country/Area	915	287.371	287.708	288.023	288.314	288.567	288.801	288.999	289.167	289.306	289.395	289.447	289.451	289.401	289.311	289.157	288.92	288.618	288.243	287.779	287.259	286.64	285.967	285.207	284.377	283.481	282.522	281.517	280.454	279.344	278.192	277.019	275.811	274.587	273.35	272.1	270.845	269.587	268.34	267.083	265.841	264.599	263.363	262.117
155	Medium variant	Bonaire, Sint Eustatius and Saba	15	535	Country/Area	915	26.221	26.445	26.643	26.842	27.013	27.175	27.335	27.499	27.664	27.805	27.945	28.083	28.211	28.335	28.451	28.57	28.674	28.774	28.876	28.974	29.047	29.128	29.212	29.279	29.35	29.425	29.49	29.537	29.6	29.642	29.699	29.753	29.797	29.835	29.878	29.929	29.955	30.001	30.041	30.087	30.121	30.16	30.202
156	Medium variant	British Virgin Islands	14	92	Country/Area	915	30.237	30.423	30.606	30.781	30.937	31.091	31.244	31.393	31.523	31.65	31.767	31.864	31.96	32.039	32.096	32.151	32.207	32.228	32.241	32.248	32.232	32.212	32.182	32.133	32.083	32.004	31.931	31.832	31.753	31.644	31.54	31.427	31.312	31.186	31.058	30.926	30.783	30.652	30.513	30.358	30.217	30.069	29.922
157	Medium variant	Cayman Islands	14	136	Country/Area	915	65.72	66.498	67.28	68.054	68.838	69.607	70.36	71.112	71.859	72.606	73.335	74.046	74.757	75.456	76.147	76.808	77.477	78.125	78.767	79.371	79.974	80.537	81.098	81.63	82.135	82.622	83.071	83.506	83.909	84.289	84.657	85.002	85.327	85.639	85.934	86.212	86.503	86.776	87.046	87.324	87.594	87.857	88.134
158	Medium variant	Cuba		192	Country/Area	915	11326.6	11317.5	11305.6	11291.4	11275.1	11257	11237.4	11216.2	11193.4	11168.8	11142.3	11114	11083.8	11051.7	11017.4	10981	10942.3	10901.3	10858	10812.5	10764.8	10714.7	10662.5	10607.9	10551.1	10491.8	10430.4	10366.7	10300.7	10232.6	10162.4	10090.1	10015.9	9940.1	9862.86	9784.51	9705.21	9625.12	9544.48	9463.52	9382.47	9301.47	9220.67
159	Medium variant	Curaçao	15	531	Country/Area	915	164.1	164.796	165.531	166.277	166.999	167.691	168.336	168.964	169.58	170.145	170.703	171.229	171.728	172.208	172.641	173.056	173.43	173.782	174.11	174.392	174.64	174.868	175.068	175.228	175.371	175.482	175.575	175.637	175.682	175.718	175.723	175.731	175.729	175.724	175.708	175.699	175.7	175.712	175.723	175.737	175.767	175.813	175.876
160	Medium variant	Dominica		212	Country/Area	915	71.991	72.172	72.337	72.514	72.683	72.819	72.954	73.052	73.137	73.201	73.244	73.264	73.255	73.226	73.174	73.106	73.019	72.922	72.808	72.682	72.548	72.403	72.259	72.1	71.935	71.771	71.607	71.432	71.26	71.073	70.872	70.68	70.462	70.242	70.01	69.772	69.511	69.252	68.959	68.671	68.383	68.063	67.739
161	Medium variant	Dominican Republic		214	Country/Area	915	10847.9	10953.7	11056.4	11155.9	11252.5	11346.2	11436.8	11524.5	11609.2	11691.1	11770.3	11846.8	11920.6	11991.7	12060.2	12126.1	12189.3	12250	12308	12363.5	12416.5	12466.9	12514.7	12559.8	12602.2	12641.7	12678.4	12712.2	12743.1	12771	12795.8	12817.6	12836.3	12852.1	12865.1	12875.2	12882.7	12887.4	12889.5	12888.8	12885.5	12879.5	12870.9
162	Medium variant	Grenada		308	Country/Area	915	112.519	113.015	113.477	113.903	114.289	114.624	114.929	115.193	115.422	115.621	115.781	115.932	116.064	116.171	116.251	116.342	116.384	116.429	116.456	116.475	116.474	116.456	116.437	116.392	116.338	116.264	116.161	116.047	115.913	115.747	115.561	115.347	115.114	114.846	114.553	114.233	113.889	113.527	113.131	112.722	112.28	111.816	111.333
163	Medium variant	Guadeloupe	2	312	Country/Area	915	400.127	400.013	399.802	399.536	399.321	399.247	399.316	399.488	399.731	400.006	400.244	400.457	400.628	400.749	400.769	400.666	400.451	400.111	399.635	399.046	398.339	397.521	396.611	395.597	394.508	393.357	392.155	390.91	389.623	388.296	386.919	385.515	384.084	382.657	381.239	379.835	378.485	377.177	375.91	374.69	373.529	372.427	371.367
164	Medium variant	Haiti		332	Country/Area	915	11402.5	11541.7	11680.3	11818	11954.2	12088.6	12221	12351.5	12480.3	12607.5	12733.2	12857.5	12980.1	13101.4	13221.6	13340.7	13458.9	13575.9	13691.4	13804.9	13915.9	14024.3	14130	14233	14333.5	14431.5	14526.9	14619.5	14709	14795.2	14877.8	14956.6	15031.6	15102.8	15170.1	15233.5	15293	15348.5	15400	15447.5	15491.1	15530.7	15566.5
165	Medium variant	Jamaica		388	Country/Area	915	2961.16	2973.46	2985.09	2996	3006.09	3015.32	3023.67	3031.1	3037.62	3043.25	3047.97	3051.79	3054.71	3056.69	3057.75	3057.89	3057.12	3055.44	3052.87	3049.44	3045.16	3040.06	3034.16	3027.47	3020.01	3011.81	3002.91	2993.3	2983	2972	2960.32	2947.96	2934.96	2921.31	2906.99	2892.03	2876.43	2860.19	2843.34	2825.9	2807.87	2789.26	2770.09
166	Medium variant	Martinique	2	474	Country/Area	915	375.265	374.743	374.083	373.318	372.532	371.76	370.999	370.204	369.396	368.564	367.713	366.851	365.963	365.021	363.991	362.883	361.667	360.344	358.902	357.325	355.592	353.738	351.709	349.574	347.307	344.945	342.488	339.94	337.324	334.657	331.959	329.239	326.518	323.787	321.078	318.406	315.763	313.164	310.627	308.15	305.735	303.389	301.131
167	Medium variant	Montserrat	14	500	Country/Area	915	4.999	4.981	4.968	4.946	4.923	4.897	4.865	4.843	4.816	4.792	4.763	4.728	4.704	4.677	4.649	4.615	4.586	4.557	4.537	4.507	4.481	4.447	4.42	4.391	4.361	4.324	4.29	4.256	4.222	4.187	4.144	4.115	4.073	4.049	4.006	3.971	3.94	3.903	3.87	3.838	3.812	3.772	3.735
168	Medium variant	Puerto Rico	16	630	Country/Area	915	2860.84	2828.25	2829.81	2854.17	2884.07	2906.65	2918.92	2923.98	2922.18	2915.46	2905.36	2890.94	2871.32	2848.09	2823.64	2799.68	2776.79	2754.66	2733.04	2711.36	2689.21	2666.66	2643.96	2620.96	2597.51	2573.47	2548.81	2523.58	2497.85	2471.76	2445.39	2418.78	2391.93	2364.91	2337.84	2310.76	2283.7	2256.7	2229.8	2203.04	2176.47	2150.08	2123.91
169	Medium variant	Saint Barthélemy	2	652	Country/Area	915	9.885	9.909	9.946	9.988	10.023	10.058	10.091	10.126	10.161	10.19	10.224	10.25	10.295	10.328	10.357	10.387	10.416	10.455	10.488	10.53	10.554	10.589	10.61	10.647	10.675	10.697	10.727	10.753	10.781	10.805	10.828	10.844	10.864	10.875	10.887	10.893	10.904	10.913	10.908	10.917	10.924	10.919	10.921
170	Medium variant	Saint Kitts and Nevis		659	Country/Area	915	53.192	53.546	53.864	54.175	54.465	54.739	54.985	55.227	55.444	55.656	55.831	55.999	56.15	56.288	56.397	56.49	56.571	56.638	56.688	56.72	56.728	56.733	56.723	56.701	56.667	56.621	56.553	56.475	56.381	56.274	56.156	56.026	55.88	55.737	55.573	55.39	55.207	55.005	54.793	54.581	54.359	54.119	53.884
171	Medium variant	Saint Lucia		662	Country/Area	915	183.629	184.401	185.112	185.771	186.379	186.917	187.409	187.823	188.192	188.49	188.742	188.92	189.038	189.106	189.112	189.049	188.94	188.764	188.542	188.271	187.937	187.573	187.138	186.677	186.155	185.584	184.985	184.331	183.637	182.905	182.127	181.328	180.475	179.588	178.662	177.712	176.735	175.716	174.667	173.612	172.517	171.407	170.271
172	Medium variant	Saint Martin (French part)	2	663	Country/Area	915	38.659	39.239	39.732	40.182	40.624	41.068	41.517	41.959	42.396	42.835	43.261	43.703	44.133	44.567	45.001	45.426	45.848	46.259	46.655	47.056	47.445	47.828	48.196	48.557	48.917	49.259	49.592	49.912	50.229	50.532	50.821	51.104	51.374	51.633	51.878	52.12	52.346	52.572	52.781	52.989	53.199	53.409	53.612
173	Medium variant	Saint Vincent and the Grenadines		670	Country/Area	915	110.947	111.269	111.552	111.806	112.044	112.265	112.472	112.637	112.803	112.935	113.041	113.107	113.166	113.186	113.174	113.14	113.068	112.963	112.829	112.675	112.487	112.252	112.009	111.725	111.43	111.104	110.747	110.369	109.969	109.549	109.118	108.655	108.178	107.689	107.176	106.66	106.138	105.594	105.031	104.465	103.882	103.294	102.693
174	Medium variant	Sint Maarten (Dutch part)	15	534	Country/Area	915	42.882	43.421	43.97	44.54	45.091	45.632	46.145	46.656	47.149	47.614	48.074	48.515	48.949	49.366	49.769	50.156	50.529	50.89	51.246	51.594	51.933	52.267	52.594	52.913	53.236	53.545	53.853	54.147	54.44	54.734	55.024	55.307	55.582	55.859	56.126	56.41	56.667	56.926	57.2	57.459	57.711	57.981	58.229
175	Medium variant	Trinidad and Tobago		780	Country/Area	915	1399.49	1403.37	1406.59	1409.17	1411.18	1412.7	1413.71	1414.23	1414.33	1414.05	1413.41	1412.48	1411.24	1409.72	1407.93	1405.89	1403.6	1401.07	1398.29	1395.25	1391.94	1388.36	1384.52	1380.4	1376	1371.31	1366.35	1361.09	1355.57	1349.8	1343.78	1337.53	1331.06	1324.37	1317.5	1310.46	1303.26	1295.91	1288.41	1280.8	1273.06	1265.21	1257.26
176	Medium variant	Turks and Caicos Islands	14	796	Country/Area	915	38.718	39.226	39.744	40.25	40.746	41.235	41.721	42.204	42.674	43.144	43.604	44.06	44.509	44.946	45.368	45.781	46.18	46.567	46.947	47.302	47.643	47.978	48.29	48.584	48.873	49.141	49.394	49.639	49.861	50.068	50.27	50.453	50.62	50.789	50.933	51.068	51.199	51.315	51.431	51.526	51.623	51.706	51.78
177	Medium variant	United States Virgin Islands	16	850	Country/Area	915	104.423	104.218	103.969	103.671	103.326	102.957	102.555	102.138	101.679	101.192	100.687	100.157	99.613	99.045	98.448	97.836	97.196	96.521	95.834	95.128	94.39	93.64	92.86	92.077	91.267	90.449	89.622	88.786	87.937	87.081	86.214	85.346	84.467	83.581	82.696	81.814	80.921	80.035	79.147	78.259	77.38	76.505	75.638
178	Medium variant	Central America		916	Subregion	1830	179670	181722	183739	185722	187669	189581	191454	193290	195087	196848	198571	200258	201905	203511	205073	206588	208055	209473	210843	212166	213441	214669	215849	216981	218065	219102	220091	221033	221927	222771	223567	224313	225010	225658	226259	226814	227321	227782	228198	228569	228895	229178	229418
179	Medium variant	Belize		84	Country/Area	916	397.621	404.915	412.201	419.429	426.622	433.725	440.711	447.615	454.394	461.066	467.64	474.074	480.385	486.567	492.632	498.558	504.346	509.996	515.518	520.905	526.156	531.272	536.257	541.087	545.796	550.348	554.753	559.022	563.15	567.16	571.048	574.823	578.502	582.041	585.472	588.769	591.943	594.998	597.919	600.723	603.41	605.969	608.422
180	Medium variant	Costa Rica		188	Country/Area	916	5094.11	5139.05	5182.35	5223.97	5263.9	5302.11	5338.56	5373.26	5406.32	5437.87	5468.04	5496.85	5524.26	5550.3	5574.89	5598.03	5619.72	5639.98	5658.78	5676.13	5691.99	5706.36	5719.27	5730.73	5740.78	5749.47	5756.79	5762.77	5767.4	5770.7	5772.69	5773.36	5772.76	5770.88	5767.74	5763.37	5757.76	5750.98	5743.05	5734.07	5724.05	5713.06	5701.1
181	Medium variant	El Salvador		222	Country/Area	916	6486.2	6518.5	6550.4	6581.79	6612.66	6642.93	6672.55	6701.35	6728.92	6754.78	6778.59	6800.11	6819.43	6836.97	6853.29	6868.8	6883.65	6897.64	6910.51	6921.89	6931.5	6939.25	6945.23	6949.52	6952.23	6953.44	6953.19	6951.4	6948.08	6943.2	6936.79	6928.81	6919.28	6908.19	6895.51	6881.22	6865.33	6847.85	6828.75	6808.01	6785.67	6761.71	6736.11
182	Medium variant	Guatemala		320	Country/Area	916	17915.6	18249.9	18584	18917.7	19250.5	19582	19911.9	20240.1	20566.3	20890.5	21212.6	21532.3	21849.4	22163.7	22474.6	22782	23085.5	23385.1	23680.9	23973	24261.4	24546.2	24827.2	25104.1	25377	25645.5	25909.5	26169.1	26424.2	26674.7	26920.7	27162.1	27398.6	27630.1	27856.3	28077	28292.1	28501.4	28704.8	28902	29093	29277.7	29455.8
183	Medium variant	Honduras		340	Country/Area	916	9904.61	10063	10221.3	10379.1	10536.2	10692.2	10847	11000.4	11152.1	11301.8	11449.2	11594.2	11736.7	11876.6	12013.8	12148.5	12280.5	12409.7	12536.1	12659.7	12780.4	12898.2	13013	13125	13234.2	13340.7	13444.5	13545.5	13643.7	13738.8	13830.8	13919.5	14005	14087.3	14166.4	14242.5	14315.4	14385.2	14451.7	14514.9	14574.5	14630.6	14683.2
184	Medium variant	Mexico		484	Country/Area	916	128933	130262	131563	132834	134074	135284	136462	137609	138725	139814	140876	141912	142921	143900	144845	145755	146628	147464	148264	149029	149759	150454	151115	151740	152331	152887	153409	153897	154350	154768	155151	155498	155811	156090	156336	156550	156732	156882	157003	157094	157156	157191	157198
185	Medium variant	Nicaragua		558	Country/Area	916	6624.55	6702.38	6779.1	6855.18	6931.32	7008.01	7085.36	7163.1	7240.6	7317.07	7391.88	7464.81	7535.95	7605.36	7673.25	7739.73	7804.76	7868.22	7930.05	7990.25	8048.75	8105.52	8160.55	8213.76	8265.08	8314.45	8361.85	8407.25	8450.61	8491.88	8531.05	8568.06	8602.94	8635.68	8666.35	8694.97	8721.55	8746.09	8768.54	8788.91	8807.15	8823.28	8837.31
186	Medium variant	Panama		591	Country/Area	916	4314.77	4381.58	4446.96	4510.97	4573.77	4635.5	4696.09	4755.48	4813.77	4871.1	4927.61	4983.33	5038.19	5092.19	5145.23	5197.28	5248.31	5298.34	5347.34	5395.32	5442.24	5488.11	5532.92	5576.65	5619.33	5660.97	5701.58	5741.11	5779.55	5816.84	5852.94	5887.85	5921.57	5954.13	5985.56	6015.89	6045.15	6073.32	6100.4	6126.38	6151.26	6175.04	6197.75
187	Medium variant	South America		931	Subregion	1830	430760	434260	437694	441054	444329	447510	450592	453575	456450	459211	461854	464374	466771	469048	471208	473256	475192	477016	478729	480336	481837	483234	484529	485725	486824	487829	488742	489564	490293	490929	491472	491921	492279	492544	492717	492799	492789	492689	492499	492218	491847	491388	490841
188	Medium variant	Argentina		32	Country/Area	931	45195.8	45605.8	46010.2	46409.2	46803.1	47192.1	47576.3	47955.2	48328.5	48695.6	49056.2	49409.9	49756.8	50097.1	50430.8	50758.2	51079.2	51393.6	51701.5	52002.6	52296.8	52584.1	52864.4	53137.9	53404.8	53665.2	53919.1	54166.4	54407	54640.6	54867.2	55086.8	55299	55503.8	55700.7	55889.6	56070.2	56242.5	56406.4	56561.9	56708.8	56847.3	56977.1
189	Medium variant	Bolivia (Plurinational State of)		68	Country/Area	931	11673	11832.9	11992.6	12152	12310.7	12468.5	12625.3	12781.2	12935.8	13088.9	13240.4	13390.1	13537.9	13683.9	13828.1	13970.5	14111.1	14249.9	14386.5	14521	14653.1	14782.8	14910	15034.8	15157.2	15277.2	15394.8	15510	15622.6	15732.5	15839.6	15943.7	16044.9	16143.2	16238.9	16331.9	16422.3	16510	16595	16676.9	16755.6	16831.2	16903.6
190	Medium variant	Brazil		76	Country/Area	931	212559	213993	215354	216642	217863	219021	220115	221143	222107	223009	223852	224636	225362	226029	226636	227184	227672	228103	228477	228795	229059	229269	229427	229534	229593	229605	229570	229491	229366	229196	228980	228720	228415	228067	227674	227237	226756	226233	225668	225060	224412	223723	222994
191	Medium variant	Chile		152	Country/Area	931	19116.2	19212.4	19250.2	19249.3	19239	19241	19260.5	19292.8	19338	19393.8	19458.1	19532.7	19618.4	19709.5	19798.5	19879.4	19950.4	20012.2	20065.9	20113.5	20156.6	20195.1	20228.2	20255.9	20278.7	20296.7	20310	20318.7	20323.1	20323.2	20319.3	20311.5	20299.9	20284.5	20265.2	20242.2	20215.5	20185.3	20151.7	20114.9	20075.3	20032.8	19987.6
192	Medium variant	Colombia		170	Country/Area	931	50882.9	51265.8	51512.8	51672.8	51819.8	52007.1	52249.4	52530.2	52834.6	53136.4	53416.8	53673.6	53914.4	54139.4	54350.5	54549.2	54734.6	54905.5	55062.3	55205.6	55336	55453.5	55558	55650	55729.6	55797.2	55853.1	55897.3	55929.7	55949.9	55957.8	55953.5	55937.1	55909	55869.7	55819.5	55758.7	55687.2	55605	55511.9	55407.9	55292.9	55167.3
193	Medium variant	Ecuador		218	Country/Area	931	17643.1	17888.5	18113.4	18324.2	18530.8	18740.5	18955.1	19172	19390	19606.2	19818.8	20027.5	20233.2	20435.9	20635.4	20831.9	21025.2	21215	21401.2	21583.8	21762.4	21937	22107.5	22273.8	22435.9	22593.8	22747.3	22896.4	23041	23181.1	23316.5	23447.1	23573	23694.2	23810.9	23923.2	24031	24134.3	24233	24326.8	24415.7	24499.4	24578.2
194	Medium variant	Falkland Islands (Malvinas)	17	238	Country/Area	931	3.483	3.528	3.534	3.519	3.489	3.468	3.452	3.444	3.443	3.446	3.439	3.425	3.422	3.409	3.402	3.393	3.387	3.375	3.366	3.355	3.348	3.338	3.326	3.316	3.304	3.288	3.283	3.27	3.26	3.247	3.233	3.225	3.217	3.203	3.192	3.181	3.172	3.156	3.144	3.131	3.117	3.106	3.093
195	Medium variant	French Guiana	2	254	Country/Area	931	298.682	306.45	314.169	321.896	329.645	337.49	345.401	353.365	361.384	369.469	377.608	385.81	394.053	402.348	410.677	419.021	427.374	435.753	444.139	452.518	460.905	469.268	477.633	485.986	494.356	502.734	511.127	519.528	527.944	536.378	544.809	553.258	561.712	570.179	578.631	587.09	595.526	603.964	612.377	620.771	629.147	637.494	645.808
196	Medium variant	Guyana		328	Country/Area	931	786.559	790.329	794.039	797.711	801.343	804.95	808.538	812.058	815.463	818.648	821.585	824.224	826.556	828.606	830.375	831.875	833.098	834.048	834.723	835.14	835.334	835.273	834.998	834.493	833.762	832.813	831.646	830.275	828.693	826.934	824.958	822.802	820.467	817.945	815.229	812.317	809.23	805.962	802.512	798.88	795.101	791.156	787.058
197	Medium variant	Paraguay		600	Country/Area	931	7132.53	7219.64	7305.84	7391.01	7475.02	7557.75	7639.09	7718.99	7797.42	7874.41	7949.97	8024.08	8096.65	8167.61	8236.83	8304.25	8369.78	8433.47	8495.32	8555.42	8613.8	8670.49	8725.43	8778.63	8830.09	8879.81	8927.75	8973.93	9018.31	9060.88	9101.63	9140.54	9177.59	9212.69	9245.78	9276.82	9305.73	9332.51	9357.15	9379.63	9399.92	9418.05	9433.97
198	Medium variant	Peru		604	Country/Area	931	32971.8	33359.4	33684.2	33966	34236.2	34517.5	34814.7	35120	35429.2	35734.7	36030.6	36316.9	36596.1	36867.7	37131.7	37388	37636	37875.8	38107.9	38333.1	38552.1	38765	38971.6	39171.7	39365	39551.3	39730.5	39902.5	40067.3	40224.5	40374	40515.6	40649.3	40774.8	40891.8	41000.2	41099.8	41190.6	41272.6	41345.9	41410.5	41466.5	41514
199	Medium variant	Suriname		740	Country/Area	931	586.634	591.798	596.838	601.75	606.533	611.19	615.703	620.092	624.34	628.44	632.399	636.218	639.885	643.41	646.771	649.992	653.06	655.965	658.716	661.32	663.766	666.061	668.211	670.212	672.066	673.777	675.333	676.752	678.044	679.203	680.234	681.164	681.972	682.672	683.236	683.712	684.062	684.301	684.442	684.485	684.43	684.287	684.061
200	Medium variant	Uruguay		858	Country/Area	931	3473.73	3485.15	3496.01	3506.37	3516.36	3526.08	3535.51	3544.57	3553.26	3561.58	3569.47	3576.94	3584	3590.63	3596.81	3602.53	3607.8	3612.59	3616.97	3620.91	3624.47	3627.62	3630.39	3632.76	3634.78	3636.42	3637.71	3638.66	3639.22	3639.38	3639.11	3638.41	3637.28	3635.72	3633.73	3631.31	3628.44	3625.16	3621.43	3617.27	3612.64	3607.59	3602.08
201	Medium variant	Venezuela (Bolivarian Republic of)		862	Country/Area	931	28435.9	28704.9	29267	30016.6	30794	31481.1	32048.8	32528.1	32931.8	33290.4	33626.5	33936.1	34207.9	34449.7	34672.5	34884.3	35088.7	35285.5	35474.1	35652.5	35819.3	35975.4	36122.6	36261.2	36391.7	36514.7	36630.4	36739	36840.7	36935.4	37023.1	37103.9	37178.1	37245.6	37306.6	37361.1	37409.2	37451	37486.4	37515.3	37537.5	37553.2	37562.4
202	Medium variant	AUSTRALIA/NEW ZEALAND		927	SDG region	1828	30322.1	30648.9	30967	31278	31584	31886.2	32185.5	32481.7	32774.9	33064.6	33350.4	33632.7	33911.8	34187.2	34458.6	34725.7	34988.4	35247.1	35502.4	35755	36005.5	36254.1	36500.9	36746	36989.6	37231.7	37472.5	37712.1	37950.4	38187	38421.9	38655.1	38886.6	39116.4	39344.5	39570.8	39795.4	40018.3	40239.6	40459.2	40677.4	40894.2	41109.4
203	Medium variant	Australia	18	36	Country/Area	927	25499.9	25788.2	26068.8	26343.1	26612.9	26879.8	27144.2	27406.3	27666.1	27923.2	28177.5	28429.2	28678.8	28925.7	29169.6	29410.2	29647.6	29881.9	30113.7	30343.7	30572.5	30800.2	31026.9	31252.7	31477.8	31702.1	31926	32149.3	32371.8	32593.5	32814.1	33033.6	33251.9	33469	33684.9	33899.3	34112.4	34324	34534.2	34742.9	34950.2	35156	35360.4
204	Medium variant	New Zealand	19	554	Country/Area	927	4822.23	4860.64	4898.2	4934.98	4971.05	5006.45	5041.24	5075.41	5108.86	5141.41	5172.96	5203.48	5232.99	5261.49	5288.96	5315.42	5340.85	5365.27	5388.73	5411.29	5433	5453.9	5473.99	5493.29	5511.82	5529.57	5546.57	5562.88	5578.51	5593.46	5607.79	5621.52	5634.7	5647.38	5659.63	5671.53	5683.08	5694.34	5705.41	5716.35	5727.27	5738.18	5749.1
205	Medium variant	OCEANIA (EXCLUDING AUSTRALIA AND NEW ZEALAND)		1835	SDG region	1828	12355.7	12571.1	12788.2	13006.9	13226.9	13448.3	13670.8	13894.3	14118.5	14343.3	14568.5	14794	15019.7	15245.2	15470.4	15695.2	15919.3	16142.7	16365.3	16587.1	16808.1	17028.3	17247.4	17465.4	17682.3	17897.9	18112.2	18325.1	18536.6	18746.4	18954.4	19160.7	19365.1	19567.7	19768.5	19967.5	20164.8	20360.2	20553.7	20745	20934.1	21120.8	21305.2
206	Medium variant	Melanesia		928	Subregion	1835	11123	11328.6	11535.6	11743.8	11953.4	12164.4	12376.6	12589.9	12804.1	13018.9	13234.4	13450.2	13666.4	13882.7	14098.9	14314.8	14530.2	14745.2	14959.6	15173.5	15386.7	15599.3	15811.1	16022.1	16232.2	16441.2	16649.2	16856.1	17061.7	17266	17468.8	17670.1	17869.7	18067.9	18264.5	18459.6	18653.1	18845	19035.2	19223.5	19409.7	19593.9	19775.9
207	Medium variant	Fiji		242	Country/Area	928	896.444	902.899	909.457	916.131	922.955	929.977	937.162	944.456	951.763	958.971	966.019	972.866	979.496	985.937	992.226	998.387	1004.41	1010.27	1015.98	1021.52	1026.89	1032.08	1037.09	1041.94	1046.62	1051.13	1055.48	1059.66	1063.68	1067.54	1071.25	1074.8	1078.2	1081.44	1084.5	1087.39	1090.12	1092.67	1095.05	1097.25	1099.29	1101.16	1102.85
208	Medium variant	New Caledonia	2	540	Country/Area	928	285.491	288.217	290.924	293.581	296.21	298.786	301.316	303.797	306.25	308.658	311.027	313.351	315.642	317.886	320.071	322.218	324.297	326.32	328.294	330.204	332.036	333.821	335.518	337.14	338.702	340.19	341.601	342.931	344.187	345.384	346.495	347.56	348.556	349.472	350.336	351.15	351.91	352.609	353.268	353.894	354.479	355.037	355.554
209	Medium variant	Papua New Guinea		598	Country/Area	928	8947.03	9119	9292.17	9466.43	9641.71	9817.92	9994.97	10172.8	10351.2	10530.1	10709.4	10889	11068.7	11248.5	11428	11607	11785.4	11963.1	12140.2	12316.7	12492.6	12667.9	12842.4	13016.1	13189	13360.9	13531.8	13701.7	13870.5	14038	14204.1	14368.7	14531.9	14693.6	14853.9	15013	15170.6	15326.8	15481.4	15634.3	15785.3	15934.3	16081.3
210	Medium variant	Solomon Islands		90	Country/Area	928	686.878	703.995	721.164	738.416	755.823	773.422	791.21	809.198	827.409	845.872	864.603	883.632	902.93	922.535	942.429	962.628	983.122	1003.91	1024.95	1046.22	1067.65	1089.27	1111.05	1132.98	1155.07	1177.28	1199.62	1222.09	1244.66	1267.37	1290.21	1313.19	1336.28	1359.48	1382.75	1406.08	1429.45	1452.87	1476.34	1499.86	1523.44	1547.11	1570.82
211	Medium variant	Vanuatu		548	Country/Area	928	307.15	314.464	321.834	329.249	336.739	344.3	351.945	359.678	367.5	375.389	383.377	391.449	399.602	407.831	416.148	424.538	433.006	441.539	450.145	458.803	467.521	476.286	485.075	493.935	502.811	511.741	520.695	529.675	538.696	547.711	556.75	565.793	574.827	583.883	592.933	601.986	611.044	620.087	629.146	638.2	647.247	656.31	665.346
212	Medium variant	Micronesia		954	Subregion	1835	548.927	554.402	559.873	565.374	570.849	576.3	581.71	587.067	592.344	597.501	602.53	607.438	612.193	616.828	621.275	625.591	629.747	633.754	637.62	641.369	644.916	648.397	651.729	654.928	658.021	660.995	663.847	666.604	669.281	671.847	674.333	676.691	678.963	681.15	683.252	685.221	687.106	688.908	690.615	692.177	693.62	694.946	696.165
213	Medium variant	Guam	16	316	Country/Area	954	168.783	170.184	171.528	172.819	174.07	175.329	176.559	177.754	178.924	180.047	181.143	182.188	183.201	184.153	185.061	185.913	186.714	187.452	188.144	188.788	189.375	189.912	190.391	190.829	191.227	191.582	191.891	192.167	192.409	192.608	192.785	192.927	193.037	193.125	193.189	193.229	193.235	193.236	193.2	193.151	193.066	192.965	192.842
214	Medium variant	Kiribati		296	Country/Area	954	119.446	121.388	123.416	125.501	127.58	129.619	131.607	133.539	135.445	137.324	139.178	141.019	142.844	144.661	146.472	148.277	150.098	151.927	153.759	155.629	157.493	159.389	161.295	163.227	165.164	167.104	169.036	170.967	172.897	174.81	176.718	178.588	180.438	182.276	184.082	185.843	187.591	189.31	191.002	192.645	194.264	195.846	197.386
215	Medium variant	Marshall Islands		584	Country/Area	954	59.194	59.618	60.051	60.52	61.041	61.597	62.226	62.895	63.583	64.299	64.998	65.687	66.362	67.028	67.686	68.328	68.948	69.568	70.156	70.727	71.264	71.783	72.284	72.747	73.185	73.611	73.998	74.362	74.718	75.053	75.363	75.661	75.939	76.197	76.44	76.669	76.886	77.086	77.272	77.435	77.582	77.715	77.829
216	Medium variant	Micronesia (Fed. States of)		583	Country/Area	954	115.021	116.255	117.486	118.708	119.921	121.113	122.295	123.44	124.565	125.644	126.699	127.698	128.652	129.567	130.42	131.222	131.983	132.695	133.347	133.979	134.565	135.116	135.636	136.133	136.587	137.033	137.439	137.846	138.22	138.578	138.915	139.241	139.541	139.825	140.082	140.317	140.506	140.677	140.817	140.907	140.943	140.95	140.899
217	Medium variant	Nauru		520	Country/Area	954	10.834	10.873	10.894	10.918	10.932	10.942	10.943	10.968	10.975	10.987	10.992	11.006	11	11.013	11.016	11.012	11.026	11.019	11.024	11.018	11.003	11.011	11.001	10.987	10.966	10.941	10.927	10.894	10.871	10.832	10.804	10.753	10.717	10.66	10.627	10.561	10.512	10.454	10.391	10.329	10.268	10.202	10.133
218	Medium variant	Northern Mariana Islands	16	580	Country/Area	954	57.557	57.91	58.271	58.627	58.983	59.343	59.684	60.053	60.404	60.738	61.052	61.361	61.647	61.916	62.147	62.368	62.533	62.67	62.785	62.858	62.889	62.9	62.888	62.829	62.763	62.661	62.558	62.438	62.309	62.17	62.035	61.885	61.736	61.587	61.439	61.297	61.142	61.001	60.867	60.732	60.602	60.454	60.339
219	Medium variant	Palau		585	Country/Area	954	18.092	18.174	18.227	18.281	18.322	18.357	18.396	18.418	18.448	18.462	18.468	18.479	18.487	18.49	18.473	18.471	18.445	18.423	18.405	18.37	18.327	18.286	18.234	18.176	18.129	18.063	17.998	17.93	17.857	17.796	17.713	17.636	17.555	17.48	17.393	17.305	17.234	17.144	17.066	16.978	16.895	16.814	16.737
220	Medium variant	Polynesia	20	957	Subregion	1835	683.778	688.113	692.778	697.681	702.63	707.601	712.485	717.327	722.107	726.861	731.603	736.35	741.052	745.706	750.283	754.825	759.309	763.727	768.054	772.303	776.473	780.545	784.501	788.353	792.093	795.673	799.138	802.424	805.592	808.567	811.331	813.95	816.401	818.659	820.757	822.725	824.567	826.274	827.868	829.373	830.725	831.993	833.158
221	Medium variant	American Samoa	16	16	Country/Area	957	55.197	55.103	55.032	54.982	54.93	54.896	54.85	54.82	54.793	54.759	54.734	54.689	54.651	54.609	54.565	54.517	54.463	54.426	54.371	54.314	54.262	54.189	54.122	54.046	53.988	53.916	53.857	53.793	53.732	53.672	53.585	53.496	53.39	53.27	53.143	53.015	52.881	52.731	52.582	52.429	52.249	52.082	51.897
222	Medium variant	Cook Islands	21	184	Country/Area	957	17.564	17.572	17.564	17.566	17.542	17.548	17.544	17.547	17.536	17.534	17.53	17.522	17.514	17.505	17.494	17.476	17.469	17.461	17.43	17.417	17.402	17.368	17.345	17.318	17.285	17.254	17.228	17.195	17.151	17.118	17.074	17.032	16.996	16.944	16.891	16.847	16.79	16.741	16.691	16.634	16.583	16.531	16.469
223	Medium variant	French Polynesia	2	258	Country/Area	957	280.904	282.534	284.16	285.792	287.417	289.034	290.631	292.212	293.759	295.262	296.695	298.095	299.431	300.696	301.898	303.019	304.085	305.049	305.961	306.775	307.521	308.186	308.765	309.263	309.692	310.035	310.318	310.506	310.636	310.681	310.651	310.564	310.407	310.182	309.897	309.554	309.164	308.711	308.215	307.678	307.077	306.44	305.764
224	Medium variant	Niue	21	570	Country/Area	957	1.618	1.614	1.616	1.619	1.612	1.619	1.631	1.639	1.646	1.653	1.662	1.674	1.675	1.684	1.696	1.703	1.707	1.713	1.717	1.725	1.732	1.738	1.739	1.741	1.748	1.752	1.756	1.761	1.768	1.772	1.771	1.779	1.779	1.781	1.788	1.79	1.794	1.801	1.803	1.806	1.809	1.814	1.809
225	Medium variant	Samoa		882	Country/Area	957	198.41	200.144	202.241	204.568	206.972	209.323	211.573	213.79	215.968	218.152	220.368	222.625	224.907	227.199	229.509	231.865	234.224	236.616	239.022	241.447	243.889	246.357	248.812	251.274	253.706	256.102	258.466	260.783	263.051	265.245	267.39	269.454	271.464	273.4	275.278	277.098	278.858	280.579	282.24	283.875	285.469	287.021	288.563
226	Medium variant	Tokelau	21	772	Country/Area	957	1.35	1.368	1.378	1.384	1.397	1.41	1.424	1.423	1.427	1.44	1.448	1.46	1.467	1.473	1.476	1.481	1.486	1.492	1.496	1.501	1.503	1.514	1.517	1.526	1.528	1.535	1.539	1.548	1.557	1.563	1.569	1.576	1.58	1.589	1.589	1.591	1.598	1.602	1.604	1.611	1.614	1.622	1.618
227	Medium variant	Tonga		776	Country/Area	957	105.697	106.759	107.748	108.663	109.594	110.555	111.551	112.555	113.571	114.591	115.616	116.654	117.691	118.739	119.771	120.802	121.825	122.837	123.837	124.823	125.784	126.731	127.661	128.566	129.456	130.308	131.135	131.93	132.714	133.466	134.173	134.878	135.555	136.198	136.831	137.447	138.045	138.63	139.203	139.766	140.307	140.836	141.349
228	Medium variant	Tuvalu		798	Country/Area	957	11.792	11.925	12.06	12.211	12.341	12.477	12.615	12.75	12.882	13.023	13.164	13.299	13.438	13.584	13.72	13.858	14.001	14.142	14.285	14.421	14.57	14.716	14.854	14.995	15.136	15.283	15.421	15.562	15.702	15.841	15.98	16.115	16.25	16.386	16.514	16.635	16.773	16.895	17.02	17.145	17.266	17.383	17.501
229	Medium variant	Wallis and Futuna Islands	2	876	Country/Area	957	11.246	11.094	10.979	10.896	10.825	10.739	10.666	10.591	10.525	10.447	10.386	10.332	10.278	10.217	10.154	10.104	10.049	9.991	9.935	9.88	9.81	9.746	9.686	9.624	9.554	9.488	9.418	9.346	9.281	9.209	9.138	9.056	8.98	8.909	8.826	8.748	8.664	8.584	8.51	8.429	8.351	8.264	8.188
230	Medium variant	EUROPE AND NORTHERN AMERICA		1829	SDG region	1828	1.11651e+06	1.11886e+06	1.12086e+06	1.1226e+06	1.12417e+06	1.12564e+06	1.12705e+06	1.12838e+06	1.12964e+06	1.13081e+06	1.1319e+06	1.13291e+06	1.13385e+06	1.13472e+06	1.13549e+06	1.13615e+06	1.13671e+06	1.13717e+06	1.13753e+06	1.1378e+06	1.13799e+06	1.1381e+06	1.13812e+06	1.13807e+06	1.13794e+06	1.13774e+06	1.13746e+06	1.13711e+06	1.1367e+06	1.13622e+06	1.13569e+06	1.13509e+06	1.13445e+06	1.13376e+06	1.13303e+06	1.13227e+06	1.13148e+06	1.13067e+06	1.12984e+06	1.129e+06	1.12817e+06	1.12734e+06	1.12653e+06
231	Medium variant	EUROPE		917	SDG subregion	1829	747636	747747	747544	747090	746481	745791	745041	744219	743327	742356	741303	740175	738985	737739	736443	735101	733717	732293	730833	729338	727811	726252	724661	723037	721374	719669	717922	716133	714299	712417	710486	708507	706480	704406	702286	700121	697913	695669	693394	691099	688790	686475	684158
232	Medium variant	Eastern Europe		923	Subregion	917	293013	292487	291863	291152	290369	289526	288627	287674	286670	285622	284535	283412	282261	281088	279902	278712	277522	276333	275152	273981	272824	271683	270558	269449	268354	267270	266198	265136	264081	263030	261977	260923	259865	258801	257727	256640	255540	254426	253300	252160	251009	249848	248677
233	Medium variant	Belarus		112	Country/Area	923	9449.32	9442.87	9432.8	9419.49	9403.53	9385.44	9365.3	9343.09	9318.85	9292.72	9264.78	9235.18	9204.13	9171.94	9138.99	9105.6	9071.92	9038.1	9004.34	8970.85	8937.82	8905.35	8873.48	8842.2	8811.41	8781.03	8751.08	8721.53	8692.29	8663.24	8634.22	8605.23	8576.19	8547.02	8517.58	8487.78	8457.59	8427.02	8395.99	8364.52	8332.61	8300.26	8267.53
234	Medium variant	Bulgaria		100	Country/Area	923	6948.44	6896.65	6844.59	6792.23	6739.54	6686.47	6633.11	6579.5	6525.61	6471.37	6416.75	6361.79	6306.57	6251.26	6196.05	6141.14	6086.55	6032.36	5978.69	5925.63	5873.29	5821.74	5770.96	5720.91	5671.49	5622.64	5574.32	5526.54	5479.2	5432.19	5385.44	5338.92	5292.6	5246.38	5200.23	5154.07	5107.91	5061.73	5015.57	4969.48	4923.49	4877.64	4831.95
235	Medium variant	Czechia		203	Country/Area	923	10709	10724.6	10736.8	10745.9	10752.4	10756.7	10758.8	10758.6	10756.2	10751.5	10744.8	10736.2	10725.9	10714.3	10701.8	10688.9	10675.8	10662.7	10649.7	10637.2	10625.5	10614.7	10604.7	10595.6	10587.2	10579.4	10572.1	10565.4	10558.9	10552.3	10545.6	10538.5	10530.9	10522.6	10513.3	10502.8	10491	10477.9	10463.4	10447.4	10430	10411.2	10391
236	Medium variant	Hungary		348	Country/Area	923	9660.35	9634.16	9606.25	9576.77	9546.04	9514.33	9481.62	9447.73	9412.62	9376.2	9338.45	9299.37	9259.05	9217.61	9175.16	9131.84	9087.74	9042.95	8997.69	8952.17	8906.61	8861.08	8815.7	8770.6	8725.93	8681.8	8638.29	8595.39	8553.12	8511.41	8470.23	8429.57	8389.39	8349.56	8309.93	8270.34	8230.76	8191.17	8151.44	8111.43	8071.04	8030.25	7989.11
237	Medium variant	Poland		616	Country/Area	923	37846.6	37797	37739.8	37674	37599.1	37514.7	37420.1	37315	37200.1	37076.3	36944.6	36805	36657.8	36503.7	36343.4	36177.7	36007.1	35831.8	35652.4	35469.2	35282.5	35092.9	34900.5	34705.7	34508.8	34310	34109.5	33907.4	33704.1	33499.8	33294.6	33088.6	32881.9	32674.1	32464.8	32253.8	32040.9	31826.2	31609.3	31389.9	31168	30943.4	30716.2
238	Medium variant	Republic of Moldova	22	498	Country/Area	923	4033.96	4024.03	4013.18	4001.34	3988.41	3974.26	3958.89	3942.34	3924.63	3905.8	3885.9	3864.95	3842.99	3820.11	3796.4	3771.97	3746.86	3721.11	3694.85	3668.19	3641.19	3613.94	3586.46	3558.77	3530.88	3502.82	3474.59	3446.22	3417.7	3389.02	3360.18	3331.16	3301.96	3272.58	3242.94	3213.03	3182.84	3152.38	3121.6	3090.5	3059.03	3027.22	2995.07
239	Medium variant	Romania		642	Country/Area	923	19237.7	19127.8	19031.3	18944.1	18859.6	18772.9	18682.9	18590.7	18496.7	18401.6	18306.1	18209.9	18112.4	18013.9	17914.6	17814.7	17714.2	17613.1	17511.5	17409.3	17306.6	17203.3	17099.6	16995.5	16891.1	16786.5	16681.7	16576.7	16471.4	16365.8	16259.8	16153.3	16046.5	15939.1	15831.2	15722.8	15613.7	15504.2	15394.4	15284.5	15174.8	15065.3	14956.2
240	Medium variant	Russian Federation		643	Country/Area	923	145934	145912	145806	145629	145399	145133	144834	144503	144142	143756	143348	142921	142480	142032	141581	141133	140691	140257	139835	139425	139031	138654	138294	137949	137618	137299	136990	136691	136400	136112	135824	135536	135246	134952	134653	134346	134030	133707	133376	133037	132692	132341	131984
241	Medium variant	Slovakia		703	Country/Area	923	5459.64	5460.73	5460.19	5458.1	5454.54	5449.6	5443.29	5435.54	5426.33	5415.61	5403.41	5389.7	5374.6	5358.18	5340.62	5322	5302.43	5281.96	5260.76	5238.98	5216.74	5194.14	5171.23	5148.09	5124.8	5101.39	5077.93	5054.41	5030.86	5007.28	4983.65	4959.96	4936.21	4912.31	4888.17	4863.73	4838.95	4813.8	4788.22	4762.12	4735.44	4708.17	4680.36
242	Medium variant	Ukraine	23	804	Country/Area	923	43733.8	43466.8	43192.1	42911.3	42626.3	42338.6	42049.2	41758.6	41467.2	41175.1	40882.3	40589.4	40296.9	40005.1	39714.4	39425.2	39137.6	38851.7	38567.4	38284.4	38002.5	37721.6	37441.7	37162.7	36884.3	36606.4	36328.7	36051.3	35774	35496.6	35219	34941.2	34663.2	34384.8	34105.7	33826.1	33545.8	33265.1	32984.2	32703.5	32423.3	32143.8	31865.3
243	Medium variant	Northern Europe		924	Subregion	917	106261	106713	107128	107515	107887	108253	108615	108972	109323	109663	109990	110305	110610	110904	111190	111467	111736	111997	112252	112502	112749	112993	113233	113470	113701	113928	114148	114363	114571	114770	114960	115140	115310	115471	115623	115766	115901	116028	116149	116265	116377	116487	116594
244	Medium variant	Channel Islands	24	830	Country/Area	924	173.859	175.244	176.461	177.559	178.606	179.667	180.738	181.83	182.909	183.973	184.992	185.977	186.935	187.856	188.765	189.633	190.478	191.289	192.065	192.822	193.542	194.252	194.914	195.571	196.191	196.8	197.369	197.925	198.44	198.943	199.427	199.879	200.325	200.758	201.162	201.56	201.929	202.309	202.66	203.019	203.37	203.719	204.068
245	Medium variant	Denmark	25	208	Country/Area	924	5792.2	5813.3	5834.95	5856.94	5878.88	5900.5	5921.75	5942.67	5963.11	5982.9	6001.87	6019.97	6037.21	6053.58	6069.11	6083.85	6097.79	6110.97	6123.43	6135.28	6146.59	6157.4	6167.79	6177.83	6187.63	6197.29	6206.86	6216.39	6225.95	6235.6	6245.37	6255.34	6265.51	6275.9	6286.5	6297.29	6308.29	6319.51	6330.98	6342.73	6354.81	6367.2	6379.87
246	Medium variant	Estonia		233	Country/Area	924	1326.54	1325.19	1321.9	1317.22	1311.93	1306.64	1301.51	1296.35	1291.09	1285.66	1279.96	1274.03	1267.95	1261.79	1255.56	1249.34	1243.15	1236.97	1230.84	1224.75	1218.7	1212.69	1206.73	1200.81	1194.87	1188.92	1182.92	1176.89	1170.79	1164.64	1158.41	1152.1	1145.71	1139.22	1132.65	1126.02	1119.29	1112.48	1105.59	1098.6	1091.52	1084.36	1077.12
247	Medium variant	Faroe Islands	26	234	Country/Area	924	48.865	49.053	49.23	49.419	49.613	49.815	50.036	50.246	50.47	50.697	50.913	51.129	51.341	51.546	51.744	51.934	52.103	52.265	52.411	52.553	52.672	52.784	52.882	52.981	53.065	53.142	53.206	53.273	53.339	53.396	53.465	53.523	53.587	53.648	53.713	53.783	53.849	53.917	53.997	54.074	54.142	54.225	54.315
248	Medium variant	Finland	27	246	Country/Area	924	5540.72	5548.36	5554.96	5560.63	5565.47	5569.57	5573.02	5575.9	5578.14	5579.71	5580.53	5580.67	5580.16	5578.95	5577.05	5574.39	5571	5566.95	5562.32	5557.22	5551.77	5546	5539.96	5533.68	5527.19	5520.56	5513.81	5506.98	5500.1	5493.15	5486.15	5479.13	5472.14	5465.19	5458.36	5451.67	5445.14	5438.8	5432.73	5427.01	5421.72	5416.88	5412.46
249	Medium variant	Iceland		352	Country/Area	924	341.25	343.36	345.4	347.38	349.314	351.18	353.008	354.778	356.482	358.129	359.709	361.219	362.673	364.051	365.353	366.595	367.766	368.871	369.905	370.857	371.752	372.563	373.297	373.969	374.558	375.08	375.533	375.921	376.229	376.489	376.683	376.833	376.926	376.968	376.983	376.958	376.906	376.824	376.713	376.588	376.446	376.289	376.107
250	Medium variant	Ireland		372	Country/Area	924	4937.8	4982.9	5020.2	5051.61	5080.5	5109.29	5138.31	5166.75	5194.61	5221.75	5248.04	5273.64	5298.77	5323.53	5347.96	5372.14	5396.06	5419.76	5443.19	5466.31	5489.09	5511.47	5533.42	5554.78	5575.39	5595.14	5613.92	5631.7	5648.33	5663.67	5677.62	5690.1	5701.12	5710.65	5718.74	5725.38	5730.59	5734.44	5736.99	5738.39	5738.74	5738.11	5736.61
251	Medium variant	Isle of Man	14	833	Country/Area	924	85.032	85.41	85.737	86.028	86.313	86.598	86.892	87.18	87.449	87.728	87.995	88.252	88.5	88.753	88.978	89.194	89.401	89.599	89.777	89.941	90.102	90.243	90.372	90.492	90.579	90.66	90.708	90.736	90.741	90.748	90.747	90.754	90.752	90.76	90.764	90.779	90.797	90.807	90.836	90.875	90.927	90.982	91.048
252	Medium variant	Latvia		428	Country/Area	924	1886.2	1866.93	1848.83	1831.65	1815	1798.63	1782.47	1766.56	1750.87	1735.4	1720.16	1705.09	1690.19	1675.55	1661.24	1647.33	1633.86	1620.79	1608.1	1595.76	1583.72	1571.99	1560.55	1549.42	1538.61	1528.09	1517.88	1507.94	1498.22	1488.65	1479.18	1469.77	1460.43	1451.11	1441.76	1432.36	1422.89	1413.35	1403.75	1394.08	1384.39	1374.66	1364.93
253	Medium variant	Lithuania		440	Country/Area	924	2722.29	2689.86	2661.7	2636.85	2613.77	2591.27	2569.14	2547.56	2526.39	2505.49	2484.8	2464.16	2443.44	2422.75	2402.19	2381.87	2361.78	2341.88	2322.27	2303.05	2284.3	2266.03	2248.24	2230.92	2214.1	2197.74	2181.87	2166.43	2151.29	2136.32	2121.39	2106.44	2091.48	2076.47	2061.38	2046.22	2030.96	2015.6	2000.16	1984.66	1969.13	1953.58	1938.03
254	Medium variant	Norway	28	578	Country/Area	924	5421.24	5465.63	5511.37	5558.03	5604.8	5651.1	5696.88	5742.4	5787.49	5832.03	5875.92	5919.07	5961.45	6003.03	6043.82	6083.78	6122.92	6161.21	6198.7	6235.45	6271.49	6306.83	6341.52	6375.57	6409.07	6442.05	6474.58	6506.65	6538.3	6569.52	6600.34	6630.79	6660.89	6690.68	6720.15	6749.34	6778.28	6807	6835.52	6863.91	6892.21	6920.42	6948.57
255	Medium variant	Sweden		752	Country/Area	924	10099.3	10160.2	10219	10275.9	10331.1	10384.8	10437.2	10488.2	10537.6	10584.9	10630	10672.8	10713.6	10752.8	10790.8	10828	10864.6	10900.6	10936.4	10972.3	11008.4	11045	11082.1	11119.6	11157.5	11195.7	11234.2	11273.1	11312	11350.8	11389.2	11427.1	11464.6	11501.5	11537.7	11573.1	11607.7	11641.6	11674.7	11707.2	11739.3	11771	11802.3
256	Medium variant	United Kingdom	29	826	Country/Area	924	67886	68207.1	68497.9	68765.9	69021.8	69273.6	69524.1	69772	70016.3	70254.6	70485.5	70709.3	70927.5	71140.1	71347.1	71548.8	71744.9	71935.9	72122.6	72306	72486.9	72665.4	72841.4	73014.1	73182.7	73346.4	73505.3	73659.1	73807.1	73948.3	74082	74208	74326.6	74438.1	74542.9	74641.5	74734.3	74821.5	74904.2	74983.5	75060.5	75135.4	75208.7
257	Medium variant	Southern Europe		925	Subregion	917	152215	151945	151645	151316	150963	150588	150193	149778	149348	148908	148460	148006	147545	147078	146602	146115	145617	145108	144585	144047	143490	142914	142318	141700	141057	140389	139694	138973	138225	137449	136648	135820	134967	134091	133192	132271	131332	130376	129405	128424	127437	126445	125451
258	Medium variant	Albania		8	Country/Area	925	2877.8	2872.93	2866.38	2858.42	2849.66	2840.47	2830.86	2820.62	2809.86	2798.63	2786.97	2774.95	2762.55	2749.56	2735.8	2721.09	2705.37	2688.72	2671.24	2653.08	2634.39	2615.17	2595.44	2575.26	2554.63	2533.64	2512.3	2490.63	2468.69	2446.49	2424.05	2401.4	2378.56	2355.55	2332.4	2309.1	2285.68	2262.16	2238.52	2214.76	2190.9	2166.92	2142.8
259	Medium variant	Andorra		20	Country/Area	925	77.265	77.354	77.46	77.576	77.685	77.773	77.851	77.887	77.9	77.918	77.927	77.948	77.959	77.965	77.977	77.974	77.966	77.961	77.944	77.909	77.86	77.799	77.705	77.599	77.468	77.318	77.132	76.923	76.687	76.416	76.123	75.792	75.434	75.05	74.648	74.207	73.767	73.289	72.791	72.296	71.784	71.281	70.762
260	Medium variant	Bosnia and Herzegovina		70	Country/Area	925	3280.82	3263.46	3249.31	3237.05	3225.03	3211.96	3197.24	3180.89	3163.27	3145.03	3126.64	3108.11	3089.16	3069.8	3050.02	3029.82	3009.22	2988.24	2966.89	2945.16	2923.08	2900.64	2877.89	2854.8	2831.39	2807.63	2783.58	2759.24	2734.67	2709.92	2685.04	2660.05	2635	2609.93	2584.95	2560.08	2535.39	2510.88	2486.59	2462.5	2438.64	2415.04	2391.67
261	Medium variant	Croatia		191	Country/Area	925	4105.27	4081.66	4059.28	4037.69	4016.14	3994.08	3971.4	3948.25	3924.76	3901.05	3877.27	3853.4	3829.38	3805.18	3780.74	3756.07	3731.13	3705.97	3680.57	3654.97	3629.19	3603.24	3577.12	3550.86	3524.48	3498.03	3471.51	3444.94	3418.3	3391.59	3364.8	3337.94	3311.03	3284.08	3257.09	3230.1	3203.09	3176.08	3149.1	3122.14	3095.22	3068.38	3041.6
262	Medium variant	Gibraltar	14	292	Country/Area	925	33.691	33.691	33.714	33.711	33.737	33.753	33.786	33.82	33.844	33.889	33.906	33.951	33.978	34.004	34.031	34.049	34.082	34.096	34.12	34.119	34.133	34.137	34.144	34.126	34.112	34.1	34.077	34.051	34.013	33.969	33.918	33.864	33.808	33.74	33.67	33.591	33.512	33.427	33.312	33.21	33.103	32.991	32.877
263	Medium variant	Greece		300	Country/Area	925	10423.1	10370.7	10316.6	10261.7	10207.4	10154.7	10103.9	10054.8	10007.4	9961.66	9917.25	9874.29	9832.72	9792.17	9752.15	9712.26	9672.3	9632.15	9591.68	9550.77	9509.27	9467.06	9423.96	9379.79	9334.36	9287.5	9239.11	9189.18	9137.6	9084.3	9029.25	8972.45	8913.95	8853.84	8792.27	8729.37	8665.26	8600.09	8534.03	8467.31	8400.19	8332.81	8265.37
264	Medium variant	Holy See	30	336	Country/Area	925	0.809	0.812	0.808	0.808	0.803	0.799	0.795	0.793	0.803	0.797	0.799	0.794	0.795	0.789	0.801	0.801	0.805	0.807	0.806	0.8	0.797	0.795	0.8	0.798	0.794	0.796	0.802	0.811	0.811	0.807	0.806	0.804	0.806	0.803	0.805	0.803	0.805	0.805	0.804	0.819	0.822	0.816	0.817
265	Medium variant	Italy		380	Country/Area	925	60461.8	60367.5	60262.8	60147.5	60019.2	59876.6	59721	59555.9	59384.1	59208.5	59031.5	58854.1	58676.4	58497.9	58318	58135.6	57950.9	57763.2	57570.6	57370.3	57160.4	56939.9	56708.7	56465.4	56209.1	55938.8	55654	55355.1	55042.6	54717.7	54381.7	54035	53678.2	53311.9	52936.5	52553	52162.3	51765.5	51364.5	50961	50556.9	50153.2	49751.2
266	Medium variant	Malta		470	Country/Area	925	441.539	442.79	444.03	445.228	446.303	447.186	447.885	448.413	448.763	448.933	448.894	448.651	448.223	447.624	446.886	446.02	445.049	443.974	442.826	441.595	440.314	438.982	437.619	436.23	434.841	433.457	432.075	430.714	429.38	428.064	426.793	425.541	424.323	423.132	421.956	420.772	419.612	418.437	417.253	416.054	414.83	413.57	412.265
267	Medium variant	Montenegro		499	Country/Area	925	628.062	628.051	627.951	627.766	627.489	627.148	626.708	626.192	625.578	624.865	624.058	623.144	622.119	620.991	619.765	618.423	616.985	615.428	613.796	612.071	610.249	608.361	606.409	604.389	602.328	600.226	598.098	595.926	593.742	591.555	589.336	587.105	584.87	582.625	580.355	578.081	575.762	573.438	571.088	568.7	566.26	563.796	561.282
268	Medium variant	North Macedonia		807	Country/Area	925	2083.38	2082.66	2081.3	2079.34	2076.82	2073.81	2070.28	2066.22	2061.61	2056.46	2050.74	2044.47	2037.68	2030.37	2022.57	2014.29	2005.57	1996.43	1986.91	1977.07	1966.97	1956.62	1946.05	1935.29	1924.4	1913.37	1902.25	1891.04	1879.71	1868.29	1856.78	1845.15	1833.41	1821.55	1809.54	1797.37	1785.03	1772.51	1759.83	1746.98	1733.96	1720.78	1707.42
269	Medium variant	Portugal		620	Country/Area	925	10196.7	10167.9	10140.6	10114	10087.5	10060.4	10032.5	10003.6	9973.88	9943.54	9912.68	9881.25	9849.07	9816.09	9782.26	9747.51	9711.82	9675.11	9637.35	9598.42	9558.28	9516.87	9474.21	9430.22	9384.87	9338.11	9289.98	9240.47	9189.68	9137.69	9084.58	9030.42	8975.31	8919.33	8862.64	8805.34	8747.55	8689.4	8631	8572.52	8514.1	8455.86	8397.94
270	Medium variant	San Marino		674	Country/Area	925	33.938	34.01	34.076	34.153	34.203	34.252	34.298	34.341	34.365	34.395	34.412	34.418	34.437	34.436	34.445	34.433	34.433	34.419	34.395	34.378	34.341	34.3	34.262	34.21	34.154	34.078	33.998	33.925	33.826	33.734	33.635	33.526	33.413	33.303	33.176	33.059	32.939	32.805	32.685	32.568	32.447	32.325	32.2
271	Medium variant	Serbia	31	688	Country/Area	925	8737.37	8697.55	8653.02	8605	8555.3	8505.25	8455.29	8405.11	8354.5	8303.05	8250.43	8196.72	8142.14	8086.72	8030.52	7973.56	7915.89	7857.61	7798.78	7739.56	7680.06	7620.34	7560.45	7500.48	7440.56	7380.77	7321.16	7261.73	7202.41	7143.15	7083.83	7024.48	6965.07	6905.55	6845.86	6785.91	6725.71	6665.25	6604.54	6543.56	6482.35	6420.91	6359.24
272	Medium variant	Slovenia		705	Country/Area	925	2078.93	2078.72	2078.03	2076.87	2075.22	2073.07	2070.44	2067.4	2063.97	2060.22	2056.2	2051.91	2047.4	2042.68	2037.79	2032.74	2027.57	2022.25	2016.81	2011.23	2005.52	1999.66	1993.66	1987.53	1981.22	1974.74	1968.05	1961.2	1954.15	1946.96	1939.6	1932.08	1924.42	1916.62	1908.71	1900.67	1892.53	1884.31	1876.02	1867.7	1859.34	1850.99	1842.65
273	Medium variant	Spain	32	724	Country/Area	925	46754.8	46745.2	46719.1	46679.3	46630.7	46577.1	46518.6	46454	46383.8	46309	46230.1	46147.6	46061.5	45971.7	45878	45780.2	45678	45571.5	45460.5	45345	45224.9	45099.8	44969.3	44832.6	44688.6	44536.6	44376.2	44207.1	44028.3	43838.7	43637.4	43424.4	43199.7	42963.8	42717	42460	42193.1	41917.1	41633	41342.2	41046	40745.4	40441.3
274	Medium variant	Western Europe		926	Subregion	917	196146	196603	196909	197107	197262	197425	197606	197795	197985	198163	198318	198451	198569	198669	198749	198807	198843	198855	198844	198808	198748	198662	198552	198418	198261	198082	197881	197660	197422	197168	196902	196624	196337	196044	195745	195443	195141	194839	194541	194249	193967	193695	193435
275	Medium variant	Austria		40	Country/Area	926	9006.4	9043.07	9066.71	9081.18	9092.31	9104.43	9118.66	9133.8	9149.23	9163.51	9175.69	9185.83	9194.5	9201.7	9207.39	9211.62	9214.34	9215.6	9215.51	9214.2	9211.79	9208.34	9203.86	9198.32	9191.72	9184.03	9175.33	9165.63	9154.97	9143.31	9130.7	9117.17	9102.8	9087.77	9072.26	9056.45	9040.42	9024.24	9008.07	8992.11	8976.49	8961.28	8946.51
276	Medium variant	Belgium		56	Country/Area	926	11589.6	11632.3	11668.3	11699.4	11728.5	11757.5	11787.2	11817.1	11846.9	11876	11903.8	11930.3	11955.9	11980.5	12004.1	12026.5	12047.7	12067.7	12086.6	12104.4	12121.1	12136.7	12151.3	12164.6	12176.7	12187.3	12196.5	12204.4	12211	12216.5	12220.8	12224	12226.3	12227.8	12228.8	12229.3	12229.6	12229.7	12229.7	12229.6	12229.6	12229.8	12230.2
277	Medium variant	France	33	250	Country/Area	926	65273.5	65426.2	65584.5	65745.2	65902	66050.6	66190.5	66323.9	66451.7	66575.4	66695.7	66812.9	66926	67034.1	67135.7	67229.5	67315.2	67392.7	67461.6	67521.1	67570.9	67610.8	67641	67661.7	67673.7	67677.4	67673.2	67661.3	67642.4	67617.3	67586.7	67551.1	67511	67466.8	67418.9	67367.7	67313.8	67257.6	67199.9	67141.6	67083.1	67024.9	66967.5
278	Medium variant	Germany		276	Country/Area	926	83783.9	83900.5	83883.6	83774.5	83636.2	83515	83422.5	83346.3	83280.9	83213.7	83135.6	83048.1	82956.5	82860.1	82758.2	82650.1	82535.5	82414.2	82285.6	82148.9	82003.6	81849.7	81687.2	81516.1	81336.4	81148.1	80951.5	80747.3	80537	80322	80104	79883.8	79662.2	79440.3	79219	78999.4	78782.2	78568.2	78359.1	78156.5	77961.7	77775.3	77597.4
279	Medium variant	Liechtenstein		438	Country/Area	926	38.137	38.254	38.389	38.525	38.663	38.794	38.923	39.045	39.17	39.291	39.405	39.518	39.625	39.728	39.821	39.909	39.976	40.059	40.106	40.149	40.199	40.23	40.261	40.291	40.307	40.322	40.331	40.335	40.342	40.351	40.355	40.363	40.379	40.392	40.414	40.442	40.47	40.514	40.557	40.61	40.668	40.731	40.801
280	Medium variant	Luxembourg		442	Country/Area	926	625.976	634.814	642.367	648.973	655.111	661.119	667.125	673.033	678.889	684.654	690.344	695.983	701.624	707.237	712.779	718.224	723.58	728.851	734.042	739.151	744.183	749.128	753.983	758.757	763.444	768.06	772.598	777.053	781.433	785.732	789.943	794.079	798.139	802.117	806.026	809.866	813.636	817.357	821.018	824.647	828.253	831.823	835.39
281	Medium variant	Monaco		492	Country/Area	926	39.244	39.52	39.778	40.042	40.303	40.553	40.807	41.049	41.301	41.54	41.771	42.015	42.248	42.476	42.712	42.941	43.159	43.371	43.57	43.771	43.973	44.175	44.361	44.558	44.745	44.946	45.145	45.354	45.561	45.78	45.999	46.236	46.476	46.736	47.002	47.273	47.557	47.841	48.142	48.45	48.758	49.073	49.397
282	Medium variant	Netherlands	34	528	Country/Area	926	17134.9	17173.1	17211.4	17249.3	17285.6	17319.6	17351.1	17380.1	17406.4	17429.8	17450.3	17467.7	17481.8	17492.4	17499.3	17502.4	17501.5	17496.8	17488.3	17476.2	17460.8	17442	17420.1	17395.3	17368	17338.4	17306.9	17273.6	17238.8	17202.6	17165.4	17127.2	17088.4	17049.2	17010	16971.1	16932.7	16894.9	16857.9	16821.9	16787	16753.3	16720.9
283	Medium variant	Switzerland		756	Country/Area	926	8654.62	8715.49	8773.64	8829.56	8883.85	8936.93	8989.15	9040.49	9090.62	9138.97	9185.11	9229.05	9270.95	9311	9349.39	9386.28	9421.79	9455.9	9488.75	9520.52	9551.35	9581.29	9610.39	9638.71	9666.31	9693.23	9719.54	9745.25	9770.27	9794.45	9817.72	9840.08	9861.63	9882.37	9902.37	9921.7	9940.39	9958.54	9976.32	9993.92	10011.5	10029.2	10046.9
284	Medium variant	NORTHERN AMERICA		918	SDG subregion	1829	368870	371108	373318	375508	377684	379851	382011	384164	386312	388458	390599	392738	394869	396979	399044	401051	402994	404874	406695	408461	410177	411844	413462	415036	416570	418070	419540	420982	422402	423807	425200	426587	427970	429354	430745	432148	433565	434996	436443	437904	439379	440867	442367
285	Medium variant	Bermuda	14	60	Country/Area	918	62.273	62.092	61.942	61.806	61.674	61.518	61.338	61.156	60.938	60.719	60.487	60.253	60.001	59.732	59.445	59.167	58.862	58.545	58.215	57.873	57.506	57.135	56.75	56.346	55.932	55.518	55.078	54.63	54.185	53.738	53.278	52.827	52.374	51.92	51.48	51.038	50.611	50.189	49.784	49.375	49.002	48.611	48.246
286	Medium variant	Canada		124	Country/Area	918	37742.2	38067.9	38388.4	38704.5	39017.1	39327	39634.3	39939	40240.8	40539.2	40833.7	41124.5	41411.4	41693.5	41969.5	42238.7	42500.8	42756.1	43005	43248.2	43486.3	43719.5	43948.1	44172.5	44393.4	44611.4	44826.8	45040.2	45251.6	45461.3	45669.5	45876.4	46082.7	46289	46496	46704.6	46914.8	47126.9	47341.5	47558.9	47779.5	48003.4	48230.6
287	Medium variant	Greenland	26	304	Country/Area	918	56.772	56.868	56.975	57.064	57.137	57.186	57.208	57.217	57.197	57.161	57.092	57.021	56.924	56.805	56.683	56.541	56.379	56.207	56.026	55.824	55.625	55.413	55.195	54.96	54.746	54.511	54.269	54.022	53.774	53.536	53.298	53.058	52.823	52.591	52.356	52.135	51.9	51.67	51.458	51.23	51.004	50.787	50.559
288	Medium variant	Saint Pierre and Miquelon	2	666	Country/Area	918	5.795	5.771	5.757	5.751	5.732	5.728	5.714	5.703	5.695	5.687	5.675	5.666	5.656	5.652	5.635	5.63	5.619	5.608	5.596	5.582	5.562	5.532	5.511	5.484	5.453	5.426	5.392	5.358	5.322	5.288	5.257	5.213	5.178	5.136	5.096	5.054	5.013	4.98	4.94	4.903	4.871	4.837	4.803
289	Medium variant	United States of America	35	840	Country/Area	918	331003	332915	334805	336679	338543	340400	342252	344101	345948	347795	349642	351490	353335	355163	356953	358691	360372	361998	363570	365094	366572	368006	369397	370746	372060	373343	374598	375828	377037	378233	379419	380599	381776	382955	384140	385335	386542	387763	388995	390240	391495	392760	394033
[truncated: 38 more columns]

## Sheet: HIGH VARIANT
United Nations
Population Division
Department of Economic and Social Affairs
World Population Prospects 2019
File POP/1-1: Total population (both sexes combined) by region, subregion and country, annually for 1950-2100 (thousands)
High fertility variant, 2020 - 2100
POP/DB/WPP/Rev.2019/POP/F01-1
© August 2019 by United Nations, made available under a Creative Commons license CC BY 3.0 IGO: http://creativecommons.org/licenses/by/3.0/igo/
Suggested citation: United Nations, Department of Economic and Social Affairs, Population Division (2019). World Population Prospects 2019, Online Edition. Rev. 1.
							Total population, both sexes combined, as of 1 July (thousands)
Index	Variant	Region, subregion, country or area *	Notes	Country code	Type	Parent code	2020	2021	2022	2023	2024	2025	2026	2027	2028	2029	2030	2031	2032	2033	2034	2035	2036	2037	2038	2039	2040	2041	2042	2043	2044	2045	2046	2047	2048	2049	2050	2051	2052	2053	2054	2055	2056	2057	2058	2059	2060	2061	2062
1	High variant	WORLD		900	World	0	7.7948e+06	7.8838e+06	7.9748e+06	8.06725e+06	8.16074e+06	8.25496e+06	8.34971e+06	8.44491e+06	8.54056e+06	8.63674e+06	8.73352e+06	8.83085e+06	8.92851e+06	9.02606e+06	9.12295e+06	9.21877e+06	9.31335e+06	9.40679e+06	9.49925e+06	9.59102e+06	9.68233e+06	9.77324e+06	9.86373e+06	9.95395e+06	1.00441e+07	1.01342e+07	1.02244e+07	1.03147e+07	1.04053e+07	1.04963e+07	1.05878e+07	1.06797e+07	1.07722e+07	1.08653e+07	1.09588e+07	1.10528e+07	1.11473e+07	1.12422e+07	1.13376e+07	1.14332e+07	1.15292e+07	1.16255e+07	1.17219e+07
2	High variant	UN development groups	a	1803	Label/Separator	900	...	...	...	...	...	...	...	...	...	...	...	...	...	...	...	...	...	...	...	...	...	...	...	...	...	...	...	...	...	...	...	...	...	...	...	...	...	...	...	...	...	...	...
3	High variant	More developed regions	b	901	Development Group	1803	1.2733e+06	1.27662e+06	1.28013e+06	1.28377e+06	1.28751e+06	1.2913e+06	1.29513e+06	1.29899e+06	1.3029e+06	1.30687e+06	1.31092e+06	1.31504e+06	1.31921e+06	1.32338e+06	1.32746e+06	1.33141e+06	1.33521e+06	1.33885e+06	1.34238e+06	1.34582e+06	1.3492e+06	1.35252e+06	1.3558e+06	1.35904e+06	1.36226e+06	1.36547e+06	1.36869e+06	1.37192e+06	1.3752e+06	1.37855e+06	1.382e+06	1.38556e+06	1.38923e+06	1.39305e+06	1.39701e+06	1.40115e+06	1.40545e+06	1.40994e+06	1.4146e+06	1.41942e+06	1.42441e+06	1.42957e+06	1.43488e+06
4	High variant	Less developed regions	c	902	Development Group	1803	6.52149e+06	6.60718e+06	6.69467e+06	6.78348e+06	6.87324e+06	6.96366e+06	7.05458e+06	7.14592e+06	7.23766e+06	7.32987e+06	7.42261e+06	7.51581e+06	7.6093e+06	7.70268e+06	7.79548e+06	7.88735e+06	7.97815e+06	8.06794e+06	8.15687e+06	8.2452e+06	8.33314e+06	8.42071e+06	8.50793e+06	8.59491e+06	8.68179e+06	8.76869e+06	8.85568e+06	8.9428e+06	9.03014e+06	9.11777e+06	9.20577e+06	9.29418e+06	9.38299e+06	9.4722e+06	9.56176e+06	9.65163e+06	9.7418e+06	9.83226e+06	9.92295e+06	1.00138e+07	1.01048e+07	1.01959e+07	1.0287e+07
5	High variant	Least developed countries	d	941	Development Group	902	1.05744e+06	1.08309e+06	1.10955e+06	1.13673e+06	1.16455e+06	1.19297e+06	1.22194e+06	1.25146e+06	1.28151e+06	1.31211e+06	1.34328e+06	1.37499e+06	1.40721e+06	1.43986e+06	1.47284e+06	1.50608e+06	1.53955e+06	1.57326e+06	1.60723e+06	1.6415e+06	1.67612e+06	1.71109e+06	1.74639e+06	1.78205e+06	1.81808e+06	1.8545e+06	1.8913e+06	1.9285e+06	1.9661e+06	2.00409e+06	2.04247e+06	2.08126e+06	2.12043e+06	2.15997e+06	2.19988e+06	2.24014e+06	2.28073e+06	2.32165e+06	2.36288e+06	2.40439e+06	2.44617e+06	2.48821e+06	2.53048e+06
6	High variant	Less developed regions, excluding least developed countries	e	934	Development Group	902	5.46406e+06	5.5241e+06	5.58512e+06	5.64675e+06	5.70868e+06	5.77069e+06	5.83264e+06	5.89446e+06	5.95615e+06	6.01776e+06	6.07933e+06	6.14082e+06	6.20209e+06	6.26282e+06	6.32264e+06	6.38127e+06	6.43859e+06	6.49468e+06	6.54964e+06	6.6037e+06	6.65701e+06	6.70962e+06	6.76153e+06	6.81286e+06	6.86371e+06	6.9142e+06	6.96438e+06	7.0143e+06	7.06404e+06	7.11369e+06	7.1633e+06	7.21292e+06	7.26257e+06	7.31223e+06	7.36188e+06	7.41149e+06	7.46107e+06	7.51061e+06	7.56007e+06	7.60943e+06	7.65864e+06	7.70768e+06	7.75656e+06
7	High variant	Less developed regions, excluding China		948	Development Group	1803	5.05021e+06	5.12939e+06	5.21051e+06	5.29317e+06	5.37703e+06	5.46185e+06	5.54747e+06	5.6338e+06	5.72082e+06	5.80856e+06	5.89705e+06	5.98624e+06	6.07595e+06	6.16585e+06	6.25554e+06	6.34471e+06	6.43324e+06	6.52118e+06	6.60863e+06	6.6958e+06	6.78284e+06	6.86977e+06	6.95659e+06	7.0434e+06	7.13031e+06	7.21742e+06	7.30478e+06	7.39241e+06	7.48037e+06	7.56873e+06	7.65754e+06	7.74681e+06	7.83653e+06	7.92669e+06	8.01721e+06	8.10806e+06	8.1992e+06	8.29062e+06	8.38225e+06	8.474e+06	8.56579e+06	8.6576e+06	8.7494e+06
8	High variant	Land-locked Developing Countries (LLDC)	f	1636	Special other	1803	533143	546051	559276	572783	586546	600548	614776	629230	643914	658835	674001	689411	705047	720875	736851	752942	769134	785430	801839	818379	835063	851890	868856	885960	903204	920588	938112	955775	973578	991523	1.00961e+06	1.02783e+06	1.04619e+06	1.06468e+06	1.08329e+06	1.10201e+06	1.12083e+06	1.13976e+06	1.15877e+06	1.17787e+06	1.19704e+06	1.21628e+06	1.23559e+06
9	High variant	Small Island Developing States (SIDS)	g	1637	Special other	1803	72076.1	72843.9	73631.9	74435.5	75250.3	76072.8	76900	77729.6	78559.9	79389.3	80216.6	81040.6	81859.3	82670.4	83471	84259.6	85034.9	85797	86547.2	87287.8	88020.2	88745	89462.3	90173.2	90879.1	91580.8	92279.2	92974.9	93668.3	94360.1	95050.7	95740.6	96430	97119.5	97809.3	98500	99191.7	99884.4	100577	101270	101962	102653	103343
10	High variant	World Bank income groups		1802	Label/Separator	900	...	...	...	...	...	...	...	...	...	...	...	...	...	...	...	...	...	...	...	...	...	...	...	...	...	...	...	...	...	...	...	...	...	...	...	...	...	...	...	...	...	...	...
11	High variant	High-income countries	h	1503	Income Group	1802	1.26309e+06	1.26862e+06	1.27443e+06	1.28043e+06	1.28655e+06	1.29275e+06	1.299e+06	1.30529e+06	1.31161e+06	1.31798e+06	1.3244e+06	1.33087e+06	1.33735e+06	1.34377e+06	1.35005e+06	1.35611e+06	1.36194e+06	1.36754e+06	1.37293e+06	1.37815e+06	1.38324e+06	1.3882e+06	1.39304e+06	1.39777e+06	1.4024e+06	1.40696e+06	1.41146e+06	1.41591e+06	1.42035e+06	1.42482e+06	1.42934e+06	1.43393e+06	1.43861e+06	1.4434e+06	1.44832e+06	1.45338e+06	1.45861e+06	1.464e+06	1.46956e+06	1.47527e+06	1.48115e+06	1.48718e+06	1.49337e+06
12	High variant	Middle-income countries	h	1517	Income Group	1802	5.75305e+06	5.81461e+06	5.87733e+06	5.94081e+06	6.00474e+06	6.06888e+06	6.13308e+06	6.19728e+06	6.26149e+06	6.32578e+06	6.39018e+06	6.45468e+06	6.5191e+06	6.58312e+06	6.64631e+06	6.70838e+06	6.76921e+06	6.82885e+06	6.88745e+06	6.94522e+06	7.00235e+06	7.05886e+06	7.11478e+06	7.1702e+06	7.22525e+06	7.28005e+06	7.33465e+06	7.3891e+06	7.44348e+06	7.49787e+06	7.5523e+06	7.60684e+06	7.66149e+06	7.71624e+06	7.77104e+06	7.82589e+06	7.88076e+06	7.93566e+06	7.99056e+06	8.0454e+06	8.10014e+06	8.15477e+06	8.20929e+06
13	High variant	Upper-middle-income countries	h	1502	Income Group	1517	2.65482e+06	2.67235e+06	2.68985e+06	2.7072e+06	2.7243e+06	2.74109e+06	2.75753e+06	2.77363e+06	2.78941e+06	2.80491e+06	2.82017e+06	2.83519e+06	2.84994e+06	2.86431e+06	2.87815e+06	2.89138e+06	2.90395e+06	2.91591e+06	2.92732e+06	2.93829e+06	2.94889e+06	2.95915e+06	2.96907e+06	2.97869e+06	2.98804e+06	2.99716e+06	3.00607e+06	3.0148e+06	3.02336e+06	3.03178e+06	3.04007e+06	3.04825e+06	3.05635e+06	3.06436e+06	3.07229e+06	3.08015e+06	3.08795e+06	3.0957e+06	3.10342e+06	3.1111e+06	3.11876e+06	3.12642e+06	3.13407e+06
14	High variant	Lower-middle-income countries	h	1501	Income Group	1517	3.09824e+06	3.14226e+06	3.18748e+06	3.23361e+06	3.28044e+06	3.32779e+06	3.37554e+06	3.42365e+06	3.47208e+06	3.52087e+06	3.57002e+06	3.61949e+06	3.66916e+06	3.71881e+06	3.76816e+06	3.81701e+06	3.86526e+06	3.91294e+06	3.96013e+06	4.00693e+06	4.05346e+06	4.09972e+06	4.14571e+06	4.19151e+06	4.23721e+06	4.28289e+06	4.32858e+06	4.37431e+06	4.42013e+06	4.46609e+06	4.51224e+06	4.55859e+06	4.60514e+06	4.65188e+06	4.69875e+06	4.74573e+06	4.79281e+06	4.83996e+06	4.88714e+06	4.9343e+06	4.98138e+06	5.02836e+06	5.07523e+06
15	High variant	Low-income countries	h	1500	Income Group	1802	775711	797590	820021	842956	866356	890194	914450	939115	964189	989678	1.01558e+06	1.0419e+06	1.06861e+06	1.09568e+06	1.12305e+06	1.15069e+06	1.17859e+06	1.20674e+06	1.23517e+06	1.2639e+06	1.29296e+06	1.32234e+06	1.35204e+06	1.38208e+06	1.41245e+06	1.44317e+06	1.47423e+06	1.50564e+06	1.53739e+06	1.5695e+06	1.60195e+06	1.63474e+06	1.66786e+06	1.70131e+06	1.73507e+06	1.76912e+06	1.80345e+06	1.83806e+06	1.87292e+06	1.90802e+06	1.94334e+06	1.97887e+06	2.01458e+06
16	High variant	No income group available		1518	Income Group	1802	2943.57	2980.7	3019.25	3058.95	3099.52	3140.79	3182.66	3225.03	3267.96	3311.41	3355.39	3399.84	3444.67	3489.56	3534.19	3578.34	3621.89	3664.8	3707.16	3749	3790.28	3831.09	3871.43	3911.34	3950.95	3990.28	4029.47	4068.51	4107.5	4146.52	4185.62	4224.89	4264.38	4304.15	4344.19	4384.67	4425.58	4466.94	4508.73	4550.98	4593.62	4636.65	4680.06
17	High variant	Geographic regions	i	1840	Label/Separator	900	...	...	...	...	...	...	...	...	...	...	...	...	...	...	...	...	...	...	...	...	...	...	...	...	...	...	...	...	...	...	...	...	...	...	...	...	...	...	...	...	...	...	...
18	High variant	Africa	j	903	Region	1840	1.3406e+06	1.3749e+06	1.41025e+06	1.44657e+06	1.48377e+06	1.52182e+06	1.56069e+06	1.60037e+06	1.64087e+06	1.68223e+06	1.72446e+06	1.76756e+06	1.81149e+06	1.85614e+06	1.90141e+06	1.94719e+06	1.99345e+06	2.04019e+06	2.08745e+06	2.13526e+06	2.18367e+06	2.23266e+06	2.28223e+06	2.33239e+06	2.38314e+06	2.43449e+06	2.48645e+06	2.53901e+06	2.59217e+06	2.64594e+06	2.70032e+06	2.75531e+06	2.8109e+06	2.86707e+06	2.92381e+06	2.98109e+06	3.03891e+06	3.09724e+06	3.15609e+06	3.21541e+06	3.2752e+06	3.33544e+06	3.39611e+06
19	High variant	Asia	k	935	Region	1840	4.64105e+06	4.68524e+06	4.73e+06	4.775e+06	4.81997e+06	4.86474e+06	4.90916e+06	4.9532e+06	4.99684e+06	5.04012e+06	5.08309e+06	5.12572e+06	5.16787e+06	5.20928e+06	5.24964e+06	5.28872e+06	5.32641e+06	5.36278e+06	5.39793e+06	5.43206e+06	5.4653e+06	5.4977e+06	5.52928e+06	5.56012e+06	5.59036e+06	5.62009e+06	5.64937e+06	5.67825e+06	5.70681e+06	5.73511e+06	5.76323e+06	5.79119e+06	5.81903e+06	5.84673e+06	5.87426e+06	5.9016e+06	5.92875e+06	5.95572e+06	5.98248e+06	6.00898e+06	6.03519e+06	6.06112e+06	6.08675e+06
20	High variant	Europe	l	908	Region	1840	747636	748325	749062	749828	750606	751386	752162	752934	753707	754488	755282	756090	756905	757709	758476	759189	759843	760442	760996	761523	762034	762535	763024	763505	763977	764442	764905	765372	765851	766350	766878	767440	768040	768686	769385	770142	770964	771853	772812	773843	774949	776132	777395
21	High variant	Latin America and the Caribbean	m	904	Region	1840	653962	660622	667435	674349	681321	688314	695302	702266	709196	716085	722928	729715	736426	743029	749486	755771	761869	767786	773540	779159	784666	790065	795357	800553	805667	810708	815684	820599	825459	830265	835022	839730	844394	849014	853593	858129	862625	867078	871484	875838	880134	884371	888548
22	High variant	Northern America	n	905	Region	1840	368870	371454	374190	377042	379981	382988	386049	389161	392325	395549	398838	402187	405582	408987	412359	415667	418899	422057	425149	428188	431184	434142	437060	439949	442820	445684	448547	451418	454312	457246	460234	463283	466399	469592	472872	476247	479720	483290	486954	490703	494530	498432	502405
23	High variant	Oceania	o	909	Region	1840	42677.8	43261.2	43859.5	44469.4	45088.2	45713.8	46345.2	46981.7	47623.3	48270.6	48923.8	49582.7	50245.9	50911.2	51574.7	52234.5	52889.5	53540.1	54187.8	54834.7	55482.3	56131.2	56781.2	57433	58087.2	58744.3	59404.9	60069.4	60738.2	61411.8	62090.3	62774.3	63463.8	64159.4	64861.5	65570.4	66286.3	67009.2	67738.5	68473.8	69214.6	69960.9	70712.3
24	High variant	Sustainable Development Goal (SDG) regions	p	1828	Label/Separator	900	...	...	...	...	...	...	...	...	...	...	...	...	...	...	...	...	...	...	...	...	...	...	...	...	...	...	...	...	...	...	...	...	...	...	...	...	...	...	...	...	...	...	...
25	High variant	SUB-SAHARAN AFRICA		947	SDG region	1828	1.09437e+06	1.12392e+06	1.15451e+06	1.18605e+06	1.21847e+06	1.25171e+06	1.28574e+06	1.32056e+06	1.35615e+06	1.39255e+06	1.42976e+06	1.46777e+06	1.50655e+06	1.54599e+06	1.58601e+06	1.6265e+06	1.66744e+06	1.70883e+06	1.7507e+06	1.79308e+06	1.83603e+06	1.87952e+06	1.92356e+06	1.96815e+06	2.01331e+06	2.05904e+06	2.10534e+06	2.15221e+06	2.19966e+06	2.2477e+06	2.29634e+06	2.34556e+06	2.39536e+06	2.44573e+06	2.49664e+06	2.54808e+06	2.60004e+06	2.65249e+06	2.70543e+06	2.75883e+06	2.81269e+06	2.86697e+06	2.92167e+06
26	High variant	Eastern Africa		910	Subregion	947	445406	457459	469971	482891	496180	509807	523750	537999	552549	567403	582561	598017	613747	629712	645860	662156	678581	695139	711842	728712	745768	763009	780431	798042	815850	833864	852083	870510	889146	907993	927051	946319	965793	985467	1.00533e+06	1.02538e+06	1.0456e+06	1.066e+06	1.08655e+06	1.10726e+06	1.1281e+06	1.14907e+06	1.17016e+06
27	High variant	Burundi		108	Country/Area	910	11890.8	12268.6	12656.3	13053.3	13459.4	13874.2	14298	14730.7	15172.7	15624.4	16086	16557.8	17039.6	17530.8	18030.6	18538.6	19054.6	19578.7	20111.4	20653.1	21204.5	21765.4	22335.9	22915.9	23505.7	24105.3	24714.7	25333.7	25962.1	26599.7	27246.1	27901.1	28564.7	29236.6	29916.7	30604.8	31300.8	32004.4	32715.4	33433.2	34157.7	34888.7	35626
28	High variant	Comoros		174	Country/Area	910	869.595	889.458	909.795	930.577	951.746	973.26	995.114	1017.32	1039.87	1062.77	1086.04	1109.7	1133.68	1157.97	1182.46	1207.12	1231.89	1256.8	1281.87	1307.13	1332.59	1358.28	1384.17	1410.25	1436.55	1463.09	1489.83	1516.78	1543.96	1571.35	1598.94	1626.72	1654.71	1682.88	1711.28	1739.89	1768.7	1797.71	1826.9	1856.22	1885.62	1915.12	1944.68
29	High variant	Djibouti		262	Country/Area	910	988.002	1003.41	1018.93	1034.49	1050.05	1065.57	1081.01	1096.35	1111.61	1126.77	1141.83	1156.81	1171.65	1186.33	1200.8	1215.04	1229	1242.71	1256.22	1269.55	1282.75	1295.83	1308.77	1321.62	1334.37	1347.06	1359.7	1372.27	1384.78	1397.19	1409.51	1421.71	1433.81	1445.79	1457.63	1469.32	1480.87	1492.25	1503.48	1514.56	1525.48	1536.24	1546.84
30	High variant	Eritrea		232	Country/Area	910	3546.43	3609.75	3677.02	3747.89	3822.11	3899.54	3980.1	4063.79	4150.74	4241.05	4334.83	4432.03	4532.39	4635.4	4740.4	4846.89	4954.59	5063.44	5173.35	5284.27	5396.15	5508.88	5622.33	5736.39	5850.86	5965.71	6080.84	6196.28	6312.13	6428.51	6545.58	6663.32	6781.73	6900.98	7021.21	7142.57	7265.07	7388.67	7513.32	7638.91	7765.37	7892.66	8020.69
31	High variant	Ethiopia		231	Country/Area	910	114964	118000	121125	124326	127593	130917	134292	137715	141184	144699	148260	151863	155504	159174	162862	166558	170259	173966	177683	181417	185175	188956	192759	196585	200433	204304	208198	212114	216053	220016	224003	228014	232046	236096	240160	244233	248313	252399	256488	260577	264665	268748	272825
32	High variant	Kenya		404	Country/Area	910	53771.3	55047.5	56371	57734.2	59131.3	60557.6	62010.2	63487.7	64989.8	66517.2	68070.1	69647.5	71245.5	72857.5	74474.9	76091.4	77704.1	79313.1	80919.5	82525.6	84133.1	85741.8	87351.3	88962.9	90578.3	92199.2	93825.9	95458.6	97098.7	98747.8	100407	102076	103755	105443	107138	108838	110544	112254	113967	115680	117393	119104	120813
33	High variant	Madagascar		450	Country/Area	910	27691	28460	29258.4	30083.3	30932.2	31803.1	32694.5	33605.5	34535.5	35484.3	36451.6	37437.1	38439.7	39457.4	40488.1	41530.4	42583.4	43647.7	44724.2	45814.6	46920.2	48041.3	49178	50331.7	51503.9	52695.8	53907.8	55140	56392.5	57665.2	58958.2	60271.2	61604.1	62955.9	64325.4	65711.6	67113.9	68531.9	69964.9	71412.1	72872.6	74346.1	75832.1
34	High variant	Malawi		454	Country/Area	910	19130	19671.8	20238.6	20827.8	21437.1	22064.7	22709.4	23370.4	24047	24739.2	25446.6	26169	26905	27652.9	28410.5	29176.2	29949.2	30729.6	31518.3	32316.7	33125.9	33946	34776.8	35618.5	36471.3	37335.2	38210.3	39096.7	39994.7	40904.7	41826.9	42761.3	43707.7	44665.2	45632.9	46609.9	47595.8	48590.4	49593.3	50604.2	51622.9	52649	53681.9
35	High variant	Mauritius	1	480	Country/Area	910	1271.77	1274.78	1278.02	1281.41	1284.83	1288.22	1291.54	1294.73	1297.83	1300.82	1303.68	1306.43	1308.98	1311.29	1313.21	1314.71	1315.74	1316.32	1316.43	1316.16	1315.51	1314.49	1313.13	1311.48	1309.58	1307.47	1305.23	1302.84	1300.39	1297.95	1295.57	1293.3	1291.14	1289.13	1287.29	1285.66	1284.24	1283.03	1282.02	1281.17	1280.44	1279.83	1279.35
36	High variant	Mayotte	2	175	Country/Area	910	272.813	279.786	286.976	294.369	301.922	309.643	317.521	325.57	333.77	342.166	350.734	359.477	368.392	377.45	386.589	395.809	405.058	414.346	423.686	433.071	442.503	451.962	461.476	471.015	480.575	490.174	499.805	509.47	519.158	528.866	538.627	548.422	558.235	568.104	578.005	587.945	597.918	607.927	617.98	628.059	638.174	648.308	658.473
37	High variant	Mozambique		508	Country/Area	910	31255.4	32196.2	33173.4	34184.4	35227	36299.6	37401.2	38531.2	39689.5	40876.1	42091.1	43334.1	44603.9	45898.3	47214.5	48550.5	49905.1	51278.7	52671.6	54085	55519.8	56975.7	58452.6	59950.8	61470.7	63012.7	64576.9	66163.2	67771.2	69400.5	71050.7	72721.6	74412.9	76124.8	77857.3	79610.4	81383.8	83177	84989.2	86819.4	88667	90531.4	92411.9
38	High variant	Réunion	2	638	Country/Area	910	895.308	902.68	910.313	918.124	926.081	934.084	942.126	950.186	958.264	966.342	974.446	982.54	990.603	998.547	1006.3	1013.81	1021.04	1027.97	1034.66	1041.09	1047.29	1053.28	1059.05	1064.61	1069.98	1075.17	1080.22	1085.12	1089.91	1094.6	1099.21	1103.77	1108.27	1112.76	1117.22	1121.7	1126.2	1130.74	1135.31	1139.91	1144.53	1149.21	1153.92
39	High variant	Rwanda		646	Country/Area	910	12952.2	13290.2	13635.5	13987.3	14345	14708.1	15076.2	15449.4	15827.8	16211.6	16601	16995.9	17395.9	17800.2	18207.8	18617.8	19029.8	19443.9	19860.5	20280.2	20703.3	21129.9	21559.8	21992.8	22428.7	22867.3	23308.5	23752.1	24198.3	24647.1	25098.5	25552.3	26008.2	26466	26925.2	27385.4	27846.4	28308	28769.8	29231.7	29693.3	30154.4	30614.8
40	High variant	Seychelles		690	Country/Area	910	98.34	99.015	99.669	100.317	100.944	101.575	102.186	102.785	103.384	103.989	104.583	105.183	105.779	106.37	106.942	107.52	108.068	108.604	109.121	109.615	110.105	110.572	111.033	111.47	111.894	112.306	112.695	113.077	113.437	113.796	114.14	114.475	114.807	115.113	115.443	115.762	116.078	116.415	116.742	117.06	117.4	117.74	118.099
41	High variant	Somalia		706	Country/Area	910	15893.2	16374.6	16879.7	17406.6	17953.3	18518.6	19101.6	19701.8	20318.9	20953	21604.3	22272.4	22956.4	23655	24366	25088.2	25821.2	26565.2	27320.8	28088.8	28870.1	29664.9	30473.5	31297.2	32137.5	32995.7	33872.1	34767.1	35681.1	36614.7	37568.2	38541.8	39535.2	40547.8	41578.8	42627.4	43693.2	44775.8	45873.9	46986.4	48112	49250.3	50400.8
42	High variant	South Sudan		728	Country/Area	910	11193.7	11448.1	11713.5	11988.6	12272.1	12563.3	12861.9	13167.9	13481.6	13803.5	14134	14473.2	14820.2	15173.5	15530.7	15890.3	16251.6	16614.8	16980.1	17348.2	17719.5	18094.1	18471.6	18852.4	19236.8	19624.9	20016.9	20412.9	20813	21217.7	21627.1	22041.4	22460.2	22883.7	23311.4	23743.1	24178.8	24618.1	25060.6	25505.9	25953.3	26402.8	26854
43	High variant	Uganda		800	Country/Area	910	45741	47040.5	48397.7	49806.4	51261.3	52757.8	54292.7	55863.4	57468.4	59106.5	60776.8	62477.5	64205.5	65956	67723.6	69504	71294.7	73095.4	74906.8	76731	78569.2	80421	82285.4	84162.7	86053.1	87957.1	89874.2	91804.2	93746.7	95701.4	97667.7	99645.1	101633	103630	105637	107651	109672	111700	113732	115767	117802	119838	121872
44	High variant	United Republic of Tanzania	3	834	Country/Area	910	59734.2	61556.7	63451.1	65412.2	67436.2	69520.6	71664.4	73867.7	76131.8	78458.9	80850.5	83307.2	85826.6	88403.9	91032.5	93707.6	96427.7	99193.9	102008	104874	107794	110768	113797	116883	120028	123236	126507	129841	133238	136697	140216	143796	147438	151143	154911	158745	162644	166607	170634	174724	178874	183086	187358
45	High variant	Zambia		894	Country/Area	910	18384	18939.2	19518.9	20120.8	20743.3	21385.1	22045.3	22723.5	23419.6	24133.7	24866.1	25616.3	26383.6	27166.3	27962.1	28769.7	29588.2	30417.9	31259.5	32114	32982.5	33865.1	34761.5	35672.2	36597.3	37537.2	38492	39462	40447.4	41448.7	42466.2	43500.1	44550.5	45617.1	46699.8	47798.6	48913.1	50043.5	51189.9	52352.4	53531.2	54726.1	55936.9
46	High variant	Zimbabwe		716	Country/Area	910	14862.9	15107	15371.1	15653.3	15951.9	16265.6	16593.1	16933.7	17286.5	17651.2	18027.1	18413.5	18809	19212	19620.4	20032.5	20447.3	20864.1	21282.7	21702.7	22124.1	22546.2	22968.4	23390.5	23811.8	24232.2	24651.5	25069.4	25485.7	25900.5	26313.6	26725	27134.8	27543.3	27951.1	28358.6	28765.8	29172.9	29579.9	29987.3	30395.1	30803.3	31211.9
47	High variant	Middle Africa		911	Subregion	947	179595	185157	190909	196839	202938	209199	215620	222202	228948	235865	242955	250220	257653	265239	272960	280799	288752	296819	305004	313315	321755	330325	339022	347846	356797	365875	375078	384408	393865	403450	413163	423004	432971	443063	453278	463616	474074	484650	495341	506144	517056	528075	539197
48	High variant	Angola		24	Country/Area	911	32866.3	33964.4	35108.1	36294.9	37522.9	38791.1	40099.1	41447.2	42836.6	44268.4	45744.1	47263.9	48826.9	50430.4	52071	53746.1	55454.8	57198	58977.2	60794.6	62652	64550.1	66488.5	68467.4	70487	72547.2	74648.5	76791.3	78976.5	81204.9	83477.1	85793.6	88154.5	90560.2	93010.9	95506.7	98047.8	100634	103266	105942	108664	111431	114243
49	High variant	Cameroon		120	Country/Area	911	26545.9	27252.3	27981.5	28731.6	29501	30288.7	31093.9	31916.4	32756.2	33613.7	34489.1	35382.3	36292.3	37217.3	38155.2	39104.3	40063.8	41034	42015.3	43008.8	44015.2	45034.4	46066.1	47110.8	48168.9	49240.7	50326.5	51425.9	52538.5	53663.3	54799.7	55947.5	57106.8	58277.8	59460.9	60656.5	61864.4	63084.3	64316.1	65559.5	66814	68079.6	69356
50	High variant	Central African Republic		140	Country/Area	911	4829.76	4924.98	5029.07	5140.93	5259.54	5384.04	5513.7	5647.89	5786.15	5928.02	6073.18	6221.17	6371.5	6523.45	6676.34	6829.58	6982.79	7135.89	7288.97	7442.26	7595.97	7750.03	7904.34	8059.06	8214.36	8370.39	8527.19	8684.72	8843.02	9002.07	9161.87	9322.39	9483.65	9645.53	9808	9971	10134.4	10298.2	10462.3	10626.6	10790.9	10955.2	11119.4
51	High variant	Chad		148	Country/Area	911	16425.9	16933.3	17456.9	17995.3	18547.3	19112.1	19689.3	20278.9	20880.9	21495.7	22123.5	22764.3	23417.5	24081.7	24755.2	25436.7	26125.6	26822.2	27527	28240.8	28964.3	29697.6	30440.4	31192.5	31953.9	32724.4	33504	34292.6	35090	35896.4	36711.5	37535.3	38367.5	39208	40056.6	40912.9	41776.8	42648.1	43526.3	44411.3	45302.6	46199.9	47103
52	High variant	Congo		178	Country/Area	911	5518.09	5661.94	5811.16	5965.36	6124.19	6287.44	6455.04	6626.95	6803.3	6984.22	7169.82	7360.12	7554.9	7753.69	7955.94	8161.14	8369.16	8580.01	8793.83	9010.8	9231.09	9454.71	9681.59	9911.79	10145.3	10382.2	10622.4	10866	11113.2	11364	11618.5	11876.7	12138.7	12404.5	12674.2	12947.8	13225.2	13506.5	13791.8	14081.2	14374.8	14672.6	14974.5
53	High variant	Democratic Republic of the Congo		180	Country/Area	911	89561.4	92463.4	95456	98533.9	101693	104932	108251	111650	115133	118704	122366	126118	129959	133880	137869	141920	146028	150195	154420	158706	163054	167463	171932	176461	181047	185692	190393	195151	199966	204839	209771	214760	219806	224907	230061	235266	240522	245826	251177	256572	262008	267484	272998
54	High variant	Equatorial Guinea		226	Country/Area	911	1402.98	1451.27	1500.11	1549.6	1599.75	1650.59	1702.05	1754.06	1806.51	1859.27	1912.26	1965.39	2018.7	2072.34	2126.47	2181.27	2236.75	2292.89	2349.6	2406.8	2464.41	2522.42	2580.87	2639.73	2698.99	2758.65	2818.68	2879.1	2939.93	3001.27	3063.12	3125.55	3188.46	3251.86	3315.66	3379.83	3444.34	3509.17	3574.26	3639.56	3705	3770.56	3836.21
55	High variant	Gabon		266	Country/Area	911	2225.73	2281.66	2338.02	2394.76	2451.86	2509.3	2567.14	2625.38	2684.09	2743.32	2803.16	2863.61	2924.69	2986.34	3048.51	3111.18	3174.28	3237.91	3302.12	3367.06	3432.81	3499.39	3566.77	3634.94	3703.88	3773.54	3843.93	3914.99	3986.68	4058.91	4131.6	4204.72	4278.23	4352.07	4426.15	4500.41	4574.82	4649.36	4724.03	4798.81	4873.71	4948.71	5023.83
56	High variant	Sao Tome and Principe		678	Country/Area	911	219.161	223.436	228.055	232.984	238.186	243.657	249.339	255.246	261.351	267.644	274.117	280.762	287.549	294.48	301.515	308.655	315.882	323.19	330.598	338.106	345.739	353.496	361.342	369.322	377.434	385.663	394.033	402.534	411.168	419.916	428.773	437.726	446.815	455.991	465.258	474.649	484.108	493.673	503.332	513.09	522.954	532.914	542.967
57	High variant	Southern Africa		913	Subregion	947	67503.6	68439.6	69390.6	70352	71320.1	72292.5	73268	74246.2	75228.1	76214.9	77207.9	78207.1	79210.5	80213.8	81211.2	82198.6	83174.4	84139.3	85095.5	86046.1	86993.7	87938.4	88879.9	89818.8	90755.5	91690.4	92624	93556.3	94487.2	95416.4	96343.7	97269	98192.4	99113.3	100031	100946	101856	102763	103667	104566	105462	106354	107242
58	High variant	Botswana		72	Country/Area	913	2351.62	2399.03	2446.88	2495.13	2543.68	2592.49	2641.53	2690.88	2740.54	2790.6	2841.1	2892.06	2943.39	2994.97	3046.56	3098.04	3149.31	3200.41	3251.32	3302.06	3352.64	3403.06	3453.28	3503.31	3553.15	3602.8	3652.26	3701.52	3750.62	3799.59	3848.45	3897.22	3945.86	3994.37	4042.69	4090.77	4138.64	4186.27	4233.65	4280.79	4327.68	4374.31	4420.68
59	High variant	Eswatini		748	Country/Area	913	1160.16	1174.13	1188.87	1204.15	1219.86	1236.04	1252.78	1270.34	1289.03	1309.25	1331.31	1355.36	1381.22	1408.39	1436.16	1463.98	1491.69	1519.34	1546.97	1574.72	1602.68	1630.81	1659	1687.24	1715.48	1743.71	1771.89	1800.05	1828.16	1856.24	1884.31	1912.35	1940.35	1968.32	1996.28	2024.19	2052.07	2079.92	2107.73	2135.45	2163.08	2190.62	2218.05
60	High variant	Lesotho		426	Country/Area	913	2142.25	2160.27	2180.2	2201.79	2224.85	2249.12	2274.41	2300.51	2327.22	2354.37	2381.8	2409.37	2437.01	2464.66	2492.37	2520.08	2547.77	2575.41	2603.07	2630.85	2658.81	2686.98	2715.31	2743.82	2772.48	2801.27	2830.18	2859.21	2888.34	2917.53	2946.75	2975.98	3005.23	3034.43	3063.59	3092.65	3121.61	3150.44	3179.14	3207.7	3236.09	3264.33	3292.38
61	High variant	Namibia		516	Country/Area	913	2540.92	2590.71	2641.77	2693.93	2747.03	2801.02	2855.84	2911.46	2967.97	3025.4	3083.78	3143.13	3203.36	3264.3	3325.74	3387.49	3449.5	3511.78	3574.4	3637.44	3701	3765.06	3829.58	3894.61	3960.17	4026.28	4092.95	4160.14	4227.77	4295.74	4363.97	4432.4	4501.06	4569.85	4638.76	4707.74	4776.73	4845.74	4914.77	4983.86	5053.03	5122.26	5191.52
62	High variant	South Africa		710	Country/Area	913	59308.7	60115.5	60932.9	61757	62584.7	63413.9	64243.4	65073	65903.3	66735.3	67569.9	68407.2	69245.6	70081.5	70910.4	71729	72536.1	73332.4	74119.7	74901	75678.5	76452.5	77222.8	77989.8	78754.2	79516.4	80276.7	81035.4	81792.3	82547.3	83300.2	84051.1	84799.9	85546.4	86289.9	87030.3	87767.3	88501.1	89231.5	89958.5	90682.1	91402.3	92119.4
63	High variant	Western Africa		914	Subregion	947	401861	412860	424238	435968	448030	460411	473104	486108	499426	513066	527034	541328	555936	570830	585975	601346	616931	632731	648754	665010	681509	698250	715229	732447	749906	767607	785550	803733	822163	840843	859777	878966	898405	918086	938002	958142	978502	999079	1.01987e+06	1.04087e+06	1.06207e+06	1.08348e+06	1.10508e+06
64	High variant	Benin		204	Country/Area	914	12123.2	12463.7	12816.1	13179.6	13553.4	13937.1	14330.2	14732.8	15145	15566.9	15998.7	16440.4	16891.5	17351.2	17818.2	18291.6	18771.2	19257	19749.2	20248.1	20754	21266.9	21786.8	22314.2	22849.4	23392.9	23944.9	24505.5	25074.9	25653.3	26241.2	26838.3	27444.8	28060.7	28685.8	29320.1	29963.7	30616.1	31277	31945.5	32621	33303.4	33992.4
65	High variant	Burkina Faso		854	Country/Area	914	20903.3	21517.9	22155.5	22814.4	23493.5	24191.8	24909.1	25645.2	26400.3	27174.9	27969.4	28783.5	29616.5	30466.6	31331.6	32209.8	33100.5	34003.7	34919.7	35848.6	36790.9	37746.3	38714.7	39696.5	40692.4	41702.6	42727.6	43767	44820.9	45888.9	46971	48067.1	49177	50301.3	51440.1	52593.6	53761.8	54944.3	56140.6	57350.3	58572.8	59807.9	61055.1
66	High variant	Cabo Verde		132	Country/Area	914	555.988	562.602	569.356	576.2	583.118	590.057	597.017	603.977	610.952	617.911	624.873	631.821	638.747	645.61	652.381	659.019	665.526	671.891	678.141	684.274	690.32	696.278	702.13	707.887	713.573	719.194	724.732	730.194	735.581	740.886	746.129	751.261	756.307	761.277	766.148	770.924	775.602	780.188	784.654	789.027	793.262	797.383	801.384
67	High variant	Côte d'Ivoire		384	Country/Area	914	26378.3	27081.4	27811.9	28567.2	29345.6	30145.4	30965.5	31805	32663.6	33541	34437.1	35351.4	36283	37230.5	38192.1	39166.4	40153	41151.9	42164.1	43190.9	44233.4	45291.7	46365.8	47456	48562.9	49686.8	50827.9	51986.2	53161.9	54354.9	55565.4	56793.3	58038.4	59300.2	60578.4	61872.4	63182	64506.8	65846.5	67200.6	68568.5	69950.1	71344.8
68	High variant	Gambia		270	Country/Area	914	2416.66	2489.64	2564.95	2642.41	2721.85	2803.16	2886.24	2971.07	3057.58	3145.79	3235.7	3327.25	3420.34	3514.8	3610.39	3707	3804.51	3902.9	4002.2	4102.44	4203.65	4305.8	4408.85	4512.84	4617.77	4723.68	4830.55	4938.35	5047.06	5156.59	5266.94	5378.08	5489.96	5602.59	5715.96	5830.05	5944.83	6060.27	6176.31	6292.95	6410.13	6527.84	6646.01
69	High variant	Ghana		288	Country/Area	914	31072.9	31768.4	32481.6	33210.4	33953	34708.2	35475.3	36253.9	37044.1	37846.4	38661.1	39487.9	40325.8	41173	42027	42885.8	43748.7	44616	45488.2	46366.7	47252.2	48145	49044.7	49951.5	50865.5	51786.6	52715.2	53651.2	54595	55547	56507.3	57475.9	58452.9	59438.4	60432.6	61435.5	62447	63466.8	64494.5	65529.3	66570.8	67618.7	68672.5
70	High variant	Guinea		324	Country/Area	914	13132.8	13508.5	13897.7	14299.2	14711.9	15135	15567.9	16010.3	16462	16923.1	17393.4	17872.9	18360.9	18856.4	19358.3	19865.6	20378	20895.4	21418.3	21947.1	22482.4	23024.2	23572.2	24126.8	24688.2	25256.7	25832.2	26414.6	27004.1	27600.6	28204	28814.2	29431.1	30054.4	30683.6	31318.4	31958.6	32603.8	33254	33909	34568.6	35232.5	35900.4
71	High variant	Guinea-Bissau		624	Country/Area	914	1968	2017.76	2068.8	2121.05	2174.35	2228.65	2283.91	2340.14	2397.38	2455.67	2515.04	2575.51	2637.02	2699.44	2762.58	2826.32	2890.6	2955.44	3020.92	3087.18	3154.27	3222.21	3290.98	3360.51	3430.77	3501.68	3573.27	3645.49	3718.36	3791.86	3865.99	3940.76	4016.1	4092.01	4168.45	4245.39	4322.79	4400.66	4478.99	4557.81	4637.13	4716.94	4797.21
72	High variant	Liberia		430	Country/Area	914	5057.68	5186.18	5319.28	5456.51	5597.51	5741.99	5889.77	6040.72	6194.84	6352.14	6512.65	6676.28	6842.86	7012	7183.23	7356.23	7530.82	7707.02	7885	8065.02	8247.27	8431.79	8618.48	8807.34	8998.31	9191.38	9386.52	9583.79	9783.19	9984.8	10188.6	10394.7	10603	10813.4	11026	11240.7	11457.4	11676.1	11896.7	12119.3	12343.7	12569.8	12797.6
73	High variant	Mali		466	Country/Area	914	20250.8	20872.8	21519.8	22190.5	22883.8	23598.9	24335.1	25092.3	25870.2	26668.8	27488.1	28327.6	29186.4	30063.3	30956.3	31864.2	32786.1	33721.8	34671	35633.4	36608.9	37597	38597.5	39610.7	40636.7	41675.9	42728.2	43793.2	44871.3	45962.5	47067	48184.7	49315.2	50457.9	51612.2	52777.2	53952.7	55138.3	56333.8	57538.9	58753.3	59976.6	61208.3
74	High variant	Mauritania		478	Country/Area	914	4649.66	4780.48	4914.55	5051.61	5191.49	5334.1	5479.37	5627.33	5778.06	5931.66	6088.22	6247.76	6410.18	6575.23	6742.55	6911.93	7083.26	7256.61	7432.05	7609.72	7789.74	7972.1	8156.82	8343.97	8533.65	8725.91	8920.8	9118.35	9318.53	9521.33	9726.74	9934.76	10145.4	10358.7	10574.5	10793	11014	11237.6	11463.7	11692.3	11923.4	12156.8	12392.7
75	High variant	Niger		562	Country/Area	914	24206.6	25151.9	26138.8	27166.1	28233.2	29339.7	30485.8	31672.1	32899.6	34169.5	35482.8	36839.9	38240.4	39682.7	41164.5	42684.3	44241.5	45836.7	47470.7	49144.5	50859.3	52615.1	54411.7	56249.6	58129	60050.3	62013.3	64018.2	66065	68153.7	70284.3	72456.6	74670.4	76924.8	79218.9	81552	83923.3	86332.5	88779.3	91263.3	93784.2	96341.4	98934
76	High variant	Nigeria		566	Country/Area	914	206140	211601	217244	223056	229029	235155	241433	247863	254447	261190	268096	275165	282389	289756	297247	304849	312556	320369	328291	336327	344482	352756	361145	369649	378266	386995	395834	404784	413849	423032	432337	441764	451310	460970	470737	480605	490570	500632	510790	521046	531398	541846	552385
77	High variant	Saint Helena	4	654	Country/Area	914	6.071	6.098	6.117	6.144	6.169	6.193	6.22	6.235	6.262	6.278	6.296	6.313	6.331	6.344	6.355	6.363	6.365	6.367	6.363	6.355	6.35	6.342	6.33	6.317	6.309	6.303	6.286	6.271	6.26	6.246	6.236	6.223	6.218	6.214	6.207	6.2	6.2	6.2	6.198	6.194	6.194	6.201	6.204
78	High variant	Senegal		686	Country/Area	914	16743.9	17214.9	17698.8	18195.1	18703.3	19223.4	19755.2	20299.1	20855.3	21424.5	22006.8	22602.5	23211.1	23831.7	24463	25104.1	25754.6	26414.5	27083.8	27762.7	28451.1	29148.9	29856.1	30572.7	31299.1	32035.3	32781.6	33537.7	34303.8	35079.6	35865.1	36660.3	37465.2	38280	39105	39940.4	40786.4	41642.7	42508.8	43384.2	44268.5	45161.5	46063
79	High variant	Sierra Leone		694	Country/Area	914	7976.98	8150.22	8328.1	8509.97	8695.26	8883.56	9074.67	9268.47	9465	9664.36	9866.66	10071.8	10279.5	10489.1	10699.8	10910.9	11122.2	11333.8	11545.8	11758.6	11972.5	12187.3	12403.1	12619.9	12837.5	13056	13275.3	13495.5	13716.5	13938.4	14161	14384.4	14608.4	14832.9	15057.8	15282.8	15508	15733.1	15958	16182.6	16406.6	16629.9	16852.4
80	High variant	Togo		768	Country/Area	914	8278.74	8486.77	8702.49	8925.15	9154.21	9389.25	9630.05	9876.48	10128.6	10386.6	10650.6	10920.4	11195.8	11476	11760.1	12047.4	12337.7	12631	12927.4	13227.2	13530.5	13837.3	14147.6	14461.6	14779.4	15101.3	15427.2	15757.3	16091.6	16430.4	16773.7	17121.7	17474.3	17831.4	18192.8	18558.4	18928.1	19301.8	19679.5	20060.9	20446.1	20834.9	21227.1
81	High variant	NORTHERN AFRICA AND WESTERN ASIA		1833	SDG region	1828	525869	535486	545109	554731	564349	573964	583581	593208	602858	612544	622278	632065	641901	651771	661654	671533	681403	691269	701134	711006	720891	730788	740695	750612	760539	770475	780420	790374	800337	810311	820294	830287	840288	850296	860310	870327	880347	890368	900385	910393	920388	930368	940332
82	High variant	Northern Africa		912	Subregion	1833	246233	250981	255743	260516	265305	270113	274946	279812	284720	289681	294702	299789	304941	310149	315401	320688	326009	331363	336753	342178	347641	353139	358671	364235	369831	375458	381114	386798	392508	398240	403989	409756	415540	421341	427163	433006	438870	444754	450657	456577	462514	468467	474435
83	High variant	Algeria		12	Country/Area	912	43851	44677.3	45483.3	46270.8	47041.8	47797.8	48540.6	49271.8	49992.7	50705	51410.1	52109.4	52804.6	53497.2	54188.9	54881.3	55575.2	56271.7	56973.2	57682.3	58400.8	59129.4	59867.7	60614.6	61368.7	62128.4	62893.2	63662	64432.5	65201.7	65967	66727.3	67481.5	68228	68964.7	69690.4	70404	71105.5	71795	72473.1	73140.3	73797	74443.5
84	High variant	Egypt		818	Country/Area	912	102334	104419	106494	108566	110641	112723	114820	116939	119089	121276	123508	125788	128116	130490	132901	135345	137821	140329	142865	145427	148010	150614	153236	155876	158533	161205	163893	166595	169310	172036	174771	177515	180267	183031	185807	188598	191404	194224	197059	199907	202769	205644	208532
85	High variant	Libya		434	Country/Area	912	6871.29	6965.43	7059.19	7152.44	7245.04	7336.9	7428.01	7518.33	7607.89	7696.72	7784.85	7872.29	7958.93	8044.63	8129.19	8212.45	8294.34	8374.85	8454.05	8532.08	8608.98	8684.8	8759.39	8832.7	8904.54	8974.81	9043.48	9110.55	9175.92	9239.5	9301.2	9361.05	9419.06	9475.37	9530.03	9583.22	9634.95	9685.33	9734.52	9782.65	9829.87	9876.31	9922.05
86	High variant	Morocco		504	Country/Area	912	36910.6	37393.7	37882.3	38374.1	38867.1	39359.9	39851.5	40341.5	40829.7	41316.4	41801.6	42285	42765.7	43241.9	43711.2	44172.1	44623.6	45066.3	45500.8	45928.2	46349.8	46765.5	47175.4	47580	47979.9	48375.7	48767.5	49155.7	49540.5	49922.4	50301.5	50678.1	51052.1	51423.6	51792.4	52158.4	52521.6	52881.8	53238.8	53592.1	53941.5	54286.9	54628
87	High variant	Sudan		729	Country/Area	912	43849.3	44962.7	46114.2	47300.1	48517.6	49764.4	51039.2	52341.3	53670.7	55027.8	56412.9	57825.2	59262.9	60722.3	62198.6	63688.5	65190.3	66703.9	68229.4	69767.4	71318.3	72881.8	74457.9	76047	77650	79267.8	80900.9	82549.6	84214.8	85897.6	87598.9	89318.9	91058.2	92818.3	94601	96407.6	98238.5	100093	101970	103869	105788	107727	109684
88	High variant	Tunisia		788	Country/Area	912	11818.6	11951.4	12081.6	12209.2	12334.1	12456.4	12576	12693	12807.7	12920.1	13030.5	13138.9	13245.5	13350.2	13453	13554.1	13653.3	13751	13847.6	13943.4	14039	14134.5	14229.8	14324.9	14419.9	14514.6	14609.1	14703.4	14797.1	14890.1	14982	15072.9	15162.7	15251.1	15338.1	15423.3	15506.8	15588.6	15668.7	15747	15823.8	15899	15972.7
89	High variant	Western Sahara		732	Country/Area	912	597.33	612.392	627.699	643.194	658.829	674.592	690.445	706.359	722.341	738.395	754.485	770.63	786.801	802.962	819.066	835.068	850.975	866.768	882.479	898.124	913.714	929.265	944.753	960.222	975.655	991.062	1006.47	1021.87	1037.26	1052.64	1068.01	1083.39	1098.76	1114.13	1129.5	1144.87	1160.26	1175.64	1191.03	1206.42	1221.81	1237.21	1252.61
90	High variant	Western Asia		922	Subregion	1833	279637	284505	289367	294215	299044	303851	308635	313396	318138	322863	327575	332275	336960	341622	346253	350845	355395	359906	364382	368828	373250	377649	382024	386377	390707	395017	399306	403575	407829	412071	416305	420531	424749	428955	433147	437321	441477	445614	449728	453816	457874	461901	465898
91	High variant	Armenia		51	Country/Area	922	2963.23	2972.41	2980.97	2988.93	2996.27	3003.01	3009.18	3014.82	3019.93	3024.62	3028.89	3032.79	3036.34	3039.54	3042.4	3044.88	3047.02	3048.85	3050.45	3051.92	3053.34	3054.74	3056.13	3057.48	3058.78	3060	3061.16	3062.27	3063.34	3064.38	3065.39	3066.39	3067.37	3068.31	3069.18	3070.01	3070.75	3071.42	3072	3072.45	3072.76	3072.93	3072.97
92	High variant	Azerbaijan	5	31	Country/Area	922	10139.2	10236.1	10328.8	10417.5	10502.5	10584.1	10662.9	10739.3	10814	10887.7	10960.8	11033.8	11106.5	11178.6	11249.4	11318.4	11385.5	11450.7	11514	11575.1	11633.9	11690.3	11744.4	11796.2	11845.8	11893.3	11938.9	11982.5	12024.5	12065.1	12104.6	12143.1	12180.8	12217.8	12254.2	12290.3	12326.1	12361.6	12396.9	12432	12466.8	12501.3	12535.6
93	High variant	Bahrain		48	Country/Area	922	1701.58	1735.93	1771.13	1806.98	1843.27	1879.7	1916	1951.82	1986.79	2020.56	2052.81	2083.37	2112.19	2139.5	2165.59	2190.74	2214.95	2238.23	2260.66	2282.36	2303.46	2324.02	2344.06	2363.64	2382.8	2401.52	2419.87	2437.88	2455.6	2473.12	2490.45	2507.62	2524.66	2541.58	2558.42	2575.17	2591.84	2608.46	2624.97	2641.34	2657.53	2673.55	2689.35
94	High variant	Cyprus	6	196	Country/Area	922	1207.36	1217.12	1226.87	1236.57	1246.19	1255.77	1265.29	1274.73	1284.14	1293.55	1302.96	1312.38	1321.82	1331.19	1340.45	1349.56	1358.49	1367.26	1375.84	1384.26	1392.5	1400.57	1408.47	1416.19	1423.76	1431.13	1438.36	1445.43	1452.38	1459.22	1465.98	1472.68	1479.31	1485.9	1492.46	1499	1505.56	1512.1	1518.64	1525.17	1531.68	1538.18	1544.68
95	High variant	Georgia	7	268	Country/Area	922	3989.18	3983.42	3977.57	3971.53	3965.33	3958.99	3952.54	3946.06	3939.62	3933.35	3927.32	3921.59	3916.13	3910.88	3905.7	3900.52	3895.29	3890.08	3884.93	3879.92	3875.11	3870.51	3866.11	3861.9	3857.89	3854.04	3850.36	3846.88	3843.58	3840.44	3837.47	3834.66	3832.02	3829.56	3827.31	3825.25	3823.42	3821.8	3820.4	3819.24	3818.31	3817.61	3817.15
96	High variant	Iraq		368	Country/Area	922	40222.5	41267.5	42329.8	43407.2	44498.5	45603.2	46721.5	47854.2	49002.9	50169.4	51355.3	52560.9	53785.3	55025.2	56276.3	57535.3	58801.4	60074.7	61355.7	62645.2	63943.8	65251.2	66567.3	67892.7	69228.4	70575	71932.6	73301.2	74680.9	76071.9	77474.1	78887.4	80311.7	81746.4	83190.9	84644.7	86107.4	87578.6	89057.3	90542.4	92032.9	93528.3	95028.3
97	High variant	Israel		376	Country/Area	922	8655.54	8798.4	8943.7	9091.12	9240.4	9391.44	9544.21	9698.76	9855.31	10014.1	10175.2	10338.8	10504.6	10672.4	10841.4	11011.4	11182.1	11353.7	11526.3	11700.1	11875.4	12052.2	12230.4	12410	12590.9	12773.1	12956.5	13141.2	13327.2	13514.4	13702.8	13892.4	14083.2	14275.2	14468.4	14662.8	14858.3	15055	15252.7	15451.6	15651.5	15852.4	16054.4
98	High variant	Jordan		400	Country/Area	922	10203.1	10234.9	10274.6	10322.1	10377.6	10441.6	10514.8	10598.4	10693.5	10801.7	10923.7	11059.9	11209.2	11369.3	11536.8	11709.1	11885.3	12064.6	12245	12424.3	12600.5	12772.6	12940.4	13104	13264.5	13422.4	13577.7	13730.1	13879.9	14027.6	14173.6	14318.1	14461.1	14603	14744.2	14885	15025.6	15165.9	15305.9	15445.4	15584.3	15722.5	15859.9
99	High variant	Kuwait		414	Country/Area	922	4270.56	4326.38	4381.96	4437.4	4492.82	4548.33	4603.98	4659.84	4715.95	4772.3	4828.9	4885.7	4942.65	4999.67	5056.58	5113.29	5169.68	5225.6	5280.78	5334.85	5387.52	5438.69	5488.27	5536.03	5581.65	5624.95	5665.86	5704.52	5741.15	5776.12	5809.73	5842.16	5873.58	5904.34	5934.81	5965.37	5996.24	6027.65	6059.94	6093.44	6128.48	6165.22	6203.81
100	High variant	Lebanon		422	Country/Area	922	6825.44	6732.61	6650.71	6578.93	6516.79	6464.08	6420.95	6387.84	6365.44	6354.53	6355.67	6368.79	6392.84	6425.65	6464.36	6506.63	6551.58	6598.81	6646.84	6694.15	6739.63	6782.41	6822.4	6860.25	6897.16	6934.04	6970.91	7007.52	7044.06	7080.74	7117.67	7154.94	7192.53	7230.36	7268.27	7306.13	7343.88	7381.49	7418.65	7455.07	7490.48	7524.8	7557.97
101	High variant	Oman		512	Country/Area	922	5106.62	5215.08	5319.48	5420.43	5518.34	5613.42	5705.66	5794.87	5880.69	5962.66	6040.44	6113.98	6183.7	6250.63	6316.11	6381.19	6446.33	6511.55	6576.89	6642.2	6707.43	6772.65	6838.1	6904.19	6971.4	7040.07	7110.31	7181.93	7254.44	7327.14	7399.51	7471.31	7542.53	7612.99	7682.52	7750.95	7818.19	7884.07	7948.48	8011.32	8072.5	8131.96	8189.68
102	High variant	Qatar		634	Country/Area	922	2881.06	2933.49	2986.05	3038.26	3089.74	3140.23	3189.59	3237.79	3284.87	3330.97	3376.21	3420.63	3464.13	3506.42	3547.1	3585.94	3622.82	3657.94	3691.76	3724.91	3757.87	3790.79	3823.63	3856.37	3888.89	3921.11	3953.07	3984.83	4016.37	4047.63	4078.59	4109.26	4139.6	4169.61	4199.23	4228.47	4257.27	4285.67	4313.63	4341.13	4368.19	4394.79	4420.93
103	High variant	Saudi Arabia		682	Country/Area	922	34813.9	35371.6	35929.3	36483.5	37031.7	37572.2	38104.1	38627.2	39142.2	39649.9	40151.6	40647.3	41136	41615.2	42081.7	42533	42968.2	43388.5	43796.3	44195.5	44588.8	44977.1	45359.8	45736.6	46107.1	46470.8	46827.8	47178.3	47521.7	47857.4	48184.6	48503.4	48813.6	49115.2	49408.2	49692.4	49968.1	50235.3	50494	50744.3	50986.3	51220.2	51446.7
104	High variant	State of Palestine	8	275	Country/Area	922	5101.42	5230.71	5362.79	5497.26	5633.81	5772.23	5912.4	6054.29	6197.99	6343.59	6491.2	6640.77	6792.14	6944.84	7098.35	7252.25	7406.37	7560.73	7715.42	7870.63	8026.48	8182.94	8339.94	8497.59	8655.94	8815.12	8975.09	9135.84	9297.32	9459.47	9622.22	9785.52	9949.36	10113.7	10278.5	10443.8	10609.4	10775.4	10941.6	11107.7	11273.7	11439.4	11604.9
105	High variant	Syrian Arab Republic		760	Country/Area	922	17500.7	18826.7	20054.1	21196.5	22264.1	23263.6	24198	25066.9	25866.9	26593.2	27241.9	27814.3	28319	28774	29202.3	29622	30040.7	30459.1	30878.7	31298.7	31718.5	32140.9	32568.6	33000.4	33434.5	33869	34303.9	34739.3	35174	35606.5	36035.3	36459.8	36879.5	37293.4	37700.5	38099.9	38491.2	38874	39248.1	39613	39968.6	40314.8	40652
106	High variant	Turkey		792	Country/Area	922	84339.1	84904.6	85513.3	86153.5	86816.3	87496.8	88193	88906.9	89642.7	90406.7	91203.9	92034.9	92893.2	93764	94627.3	95468.3	96281.2	97067.3	97828.9	98570.9	99297.1	100007	100698	101373	102032	102678	103310	103930	104539	105137	105727	106307	106880	107445	108003	108554	109100	109639	110171	110693	111206	111709	112201
107	High variant	United Arab Emirates		784	Country/Area	922	9890.4	9989.4	10091.7	10197.3	10305.9	10416	10525.8	10632.5	10732.9	10823.6	10901.6	10965.5	11015.8	11055.6	11089.6	11121.4	11151.8	11180.3	11207.2	11232.3	11255.6	11278.1	11300.4	11321.5	11339.7	11354.5	11365.2	11373.5	11383	11398.5	11423.6	11459.7	11506	11561.6	11624.4	11692.9	11766.9	11846.7	11931.8	12021.6	12115.6	12213.4	12314.8
108	High variant	Yemen		887	Country/Area	922	29826	30528.5	31243.8	31969.7	32704.2	33446.3	34195.1	34950.3	35712.1	36480.9	37256.9	38039.8	38828.3	39619.9	40411.4	41200.6	41986.1	42767.8	43545.9	44320.9	45093.1	45862.2	46627.4	47388.7	48146	48899.2	49647.8	50391.7	51130.5	51864.2	52592.5	53315.2	54031.8	54741.4	55442.7	56134.9	56817.3	57489.8	58152.4	58805.1	59448.1	60081.1	60703.9
109	High variant	CENTRAL AND SOUTHERN ASIA		921	SDG region	1828	2.01471e+06	2.04026e+06	2.06637e+06	2.09284e+06	2.11952e+06	2.1463e+06	2.1731e+06	2.19986e+06	2.22658e+06	2.25327e+06	2.27993e+06	2.30654e+06	2.33301e+06	2.3592e+06	2.38493e+06	2.41004e+06	2.4345e+06	2.45832e+06	2.48155e+06	2.50426e+06	2.52653e+06	2.54837e+06	2.56978e+06	2.59084e+06	2.61161e+06	2.63217e+06	2.65254e+06	2.67274e+06	2.69281e+06	2.7128e+06	2.73273e+06	2.75262e+06	2.77246e+06	2.79224e+06	2.8119e+06	2.83142e+06	2.85078e+06	2.86997e+06	2.88894e+06	2.90766e+06	2.92606e+06	2.94415e+06	2.96191e+06
110	High variant	Central Asia		5500	Subregion	921	74338.9	75547.7	76727.2	77882.3	79017.8	80138.9	81250.7	82358.8	83468.8	84586	85715	86858.9	88018.9	89193.5	90379.9	91575.8	92780.9	93995.5	95218.2	96447	97680.3	98917.4	100157	101397	102633	103863	105085	106301	107510	108713	109910	111102	112288	113471	114653	115836	117020	118205	119393	120584	121779	122977	124179
111	High variant	Kazakhstan		398	Country/Area	5500	18776.7	19025.7	19266.2	19499.5	19727.1	19950.5	20171.3	20391.1	20611.4	20833.7	21059.4	21289.4	21524.1	21763.2	22006.3	22252.6	22502.4	22755.7	23012.1	23271.4	23533	23796.8	24062.4	24329.2	24596.3	24863.1	25129.3	25394.7	25659	25921.9	26183.1	26442.7	26700.6	26957.2	27213.1	27468.7	27724.3	27979.8	28235.9	28493.1	28751.7	29012.1	29274.2
112	High variant	Kyrgyzstan		417	Country/Area	5500	6524.19	6636.87	6747.85	6857.41	6965.85	7073.49	7180.69	7287.82	7395.31	7503.53	7612.85	7723.49	7835.53	7948.85	8063.23	8178.47	8294.53	8411.49	8529.34	8648.07	8767.64	8887.98	9009.03	9130.69	9252.79	9375.22	9497.89	9620.78	9743.73	9866.65	9989.41	10112	10234.3	10356.4	10478.3	10599.9	10721.3	10842.4	10963.4	11084.3	11205.2	11326	11446.8
113	High variant	Tajikistan		762	Country/Area	5500	9537.64	9768.27	9994.23	10217.2	10438.7	10660.3	10883.5	11109.7	11340.2	11576.1	11818.5	12068.1	12325.3	12590	12861.9	13140.8	13426.6	13719.2	14017.8	14321.3	14628.7	14939.9	15254.5	15571.7	15890.3	16209.3	16528.6	16848.3	17169.1	17492	17817.8	18146.7	18478.8	18814.7	19155.3	19501.2	19852.4	20209.1	20571.1	20938.3	21310.7	21688.1	22070.3
114	High variant	Turkmenistan		795	Country/Area	5500	6031.19	6128.13	6222.87	6315.71	6406.88	6496.68	6585.39	6673.29	6760.67	6847.81	6934.98	7022.32	7109.96	7197.89	7286.04	7374.38	7462.88	7551.61	7640.61	7729.92	7819.58	7909.57	7999.78	8089.97	8179.78	8268.97	8357.43	8445.15	8531.99	8617.84	8702.64	8786.34	8868.94	8950.5	9031.12	9110.91	9189.86	9268.09	9345.67	9422.79	9499.59	9576.14	9652.52
115	High variant	Uzbekistan		860	Country/Area	5500	33469.2	33988.7	34496.1	34992.6	35479.4	35957.9	36429.8	36897	37361.4	37824.9	38289.3	38755.7	39224	39693.5	40162.4	40629.5	41094.5	41557.5	42018.3	42476.4	42931.5	43383.2	43831.3	44275	44713.5	45145.9	45572.2	45992.4	46406.5	46814.7	47217.3	47614.3	48005.9	48392.7	48775.6	49155.3	49532.1	49906.1	50277.3	50645.8	51011.5	51374.6	51735.3
116	High variant	Southern Asia		5501	Subregion	921	1.94037e+06	1.96471e+06	1.98964e+06	2.01496e+06	2.04051e+06	2.06616e+06	2.09185e+06	2.1175e+06	2.14311e+06	2.16868e+06	2.19421e+06	2.21968e+06	2.24499e+06	2.27001e+06	2.29455e+06	2.31847e+06	2.34172e+06	2.36433e+06	2.38633e+06	2.40781e+06	2.42885e+06	2.44945e+06	2.46963e+06	2.48944e+06	2.50898e+06	2.5283e+06	2.54745e+06	2.56644e+06	2.5853e+06	2.60409e+06	2.62282e+06	2.64152e+06	2.66018e+06	2.67877e+06	2.69725e+06	2.71558e+06	2.73376e+06	2.75176e+06	2.76955e+06	2.78707e+06	2.80429e+06	2.82117e+06	2.83773e+06
117	High variant	Afghanistan		4	Country/Area	5501	38928.3	39892.6	40875.8	41874.6	42886.3	43909.2	44942.2	45985.3	47039.1	48104.5	49182.3	50272.1	51372	52477.9	53584.6	54688	55786.4	56879.9	57968.3	59052.6	60133.4	61210.1	62282.1	63349.4	64412.2	65470.7	66524.7	67574	68619.3	69661.2	70700.2	71736.2	72768.7	73797.3	74821.2	75839.8	76852.7	77859.2	78858.1	79848	80827.5	81796.1	82753.1
118	High variant	Bangladesh		50	Country/Area	5501	164689	166539	168428	170340	172262	174184	176099	178001	179889	181762	183620	185460	187277	189060	190796	192477	194099	195662	197175	198647	200085	201492	202866	204212	205532	206830	208107	209363	210597	211807	212990	214147	215278	216380	217453	218493	219501	220477	221419	222328	223201	224040	224844
119	High variant	Bhutan		64	Country/Area	5501	771.612	780.937	790.382	799.863	809.33	818.724	828.016	837.154	846.149	854.978	863.642	872.124	880.393	888.432	896.161	903.564	910.603	917.314	923.726	929.867	935.819	941.55	947.082	952.447	957.668	962.765	967.757	972.655	977.458	982.166	986.796	991.359	995.836	1000.21	1004.47	1008.57	1012.54	1016.33	1019.94	1023.35	1026.53	1029.47	1032.18
120	High variant	India		356	Country/Area	5501	1.38e+06	1.39501e+06	1.41052e+06	1.42637e+06	1.44243e+06	1.45859e+06	1.4748e+06	1.491e+06	1.50719e+06	1.52336e+06	1.53951e+06	1.55562e+06	1.57162e+06	1.58738e+06	1.60274e+06	1.61761e+06	1.63192e+06	1.64569e+06	1.65895e+06	1.67175e+06	1.68415e+06	1.69614e+06	1.70774e+06	1.71902e+06	1.73004e+06	1.74089e+06	1.75158e+06	1.76214e+06	1.77261e+06	1.78303e+06	1.79344e+06	1.80385e+06	1.81427e+06	1.82468e+06	1.83506e+06	1.84538e+06	1.85565e+06	1.86583e+06	1.87591e+06	1.88583e+06	1.89556e+06	1.90508e+06	1.91438e+06
121	High variant	Iran (Islamic Republic of)		364	Country/Area	5501	83993	85152.6	86295.1	87419.3	88524.2	89609.3	90674.1	91718.6	92743	93747.9	94733.8	95701.2	96650.9	97583.2	98498.4	99397.4	100280	101149	102007	102857	103705	104550	105393	106233	107071	107905	108736	109562	110383	111197	112001	112795	113578	114347	115099	115833	116548	117242	117915	118565	119191	119793	120373
122	High variant	Maldives		462	Country/Area	5501	540.542	536.104	532.686	530.063	528.066	526.62	525.729	525.479	526.043	527.611	530.352	534.31	539.355	545.138	551.128	556.972	562.521	567.83	572.951	578.059	583.245	588.483	593.711	598.889	604.014	609.032	613.947	618.723	623.377	627.871	632.2	636.344	640.298	644.053	647.616	650.963	654.113	657.045	659.791	662.319	664.667	666.833	668.821
123	High variant	Nepal		524	Country/Area	5501	29136.8	29808.2	30441.5	31039.3	31603.7	32136.6	32639.2	33112.6	33557.5	33974.3	34363.8	34727.1	35066.2	35384.1	35684.4	35970.2	36243.4	36504.9	36756.3	36998.4	37232.6	37459.5	37680.4	37896.7	38109.9	38321	38530.6	38738.6	38944.3	39146.5	39344.3	39537.4	39725.5	39907.2	40080.7	40244.6	40398.4	40541.9	40675	40797.7	40910.1	41012.1	41103.7
124	High variant	Pakistan		586	Country/Area	5501	220892	225468	230123	234842	239612	244423	249267	254139	259038	263963	268914	273888	278881	283881	288877	293860	298825	303775	308717	313664	318627	323605	328598	333604	338619	343644	348675	353712	358757	363808	368865	373927	378990	384046	389085	394100	399085	404040	408964	413854	418711	423534	428320
125	High variant	Sri Lanka		144	Country/Area	5501	21413.2	21521.8	21632.1	21742.9	21853.4	21963	22071.3	22178.6	22285	22391.1	22497.4	22603.9	22709.8	22813.7	22913.9	23008.8	23098	23181.6	23259.7	23332.7	23400.9	23464.3	23523	23577.3	23627.4	23673.9	23716.8	23756.5	23793.7	23829.2	23863.6	23897.2	23930.3	23963	23995.6	24028.2	24061.1	24094.1	24127.2	24159.8	24191.8	24223	24253.5
126	High variant	EASTERN AND SOUTH-EASTERN ASIA		1832	SDG region	1828	2.34671e+06	2.36048e+06	2.37427e+06	2.38794e+06	2.40141e+06	2.41458e+06	2.42743e+06	2.43994e+06	2.45212e+06	2.46399e+06	2.47559e+06	2.4869e+06	2.49789e+06	2.50846e+06	2.51847e+06	2.52783e+06	2.53651e+06	2.54455e+06	2.552e+06	2.55897e+06	2.56552e+06	2.57168e+06	2.57747e+06	2.58291e+06	2.58804e+06	2.59291e+06	2.59753e+06	2.60194e+06	2.60617e+06	2.61024e+06	2.61419e+06	2.61804e+06	2.62182e+06	2.62553e+06	2.62921e+06	2.63286e+06	2.6365e+06	2.64014e+06	2.6438e+06	2.64751e+06	2.65126e+06	2.65507e+06	2.65895e+06
127	High variant	Eastern Asia		906	Subregion	1832	1.67809e+06	1.68456e+06	1.69088e+06	1.697e+06	1.70284e+06	1.70838e+06	1.7136e+06	1.7185e+06	1.72311e+06	1.72744e+06	1.73154e+06	1.73541e+06	1.73902e+06	1.74231e+06	1.7452e+06	1.74762e+06	1.74957e+06	1.75105e+06	1.75213e+06	1.75285e+06	1.75329e+06	1.75344e+06	1.75333e+06	1.75298e+06	1.75241e+06	1.75165e+06	1.75072e+06	1.74965e+06	1.74845e+06	1.74716e+06	1.74578e+06	1.74435e+06	1.74287e+06	1.74137e+06	1.73985e+06	1.73833e+06	1.73683e+06	1.73535e+06	1.73392e+06	1.73255e+06	1.73127e+06	1.73008e+06	1.729e+06
128	High variant	China	9	156	Country/Area	906	1.43932e+06	1.44571e+06	1.45193e+06	1.45794e+06	1.46367e+06	1.46911e+06	1.47425e+06	1.4791e+06	1.48367e+06	1.48799e+06	1.49209e+06	1.49599e+06	1.49966e+06	1.50304e+06	1.50607e+06	1.50869e+06	1.5109e+06	1.51271e+06	1.51416e+06	1.51531e+06	1.51621e+06	1.51686e+06	1.51728e+06	1.51748e+06	1.51749e+06	1.51733e+06	1.51702e+06	1.51657e+06	1.51601e+06	1.51535e+06	1.51461e+06	1.5138e+06	1.51295e+06	1.51207e+06	1.51115e+06	1.51022e+06	1.50929e+06	1.50836e+06	1.50746e+06	1.50661e+06	1.50582e+06	1.5051e+06	1.50446e+06
129	High variant	China, Hong Kong SAR	10	344	Country/Area	906	7496.99	7550.61	7611.58	7679.04	7751.75	7828.24	7906.66	7984.9	8060.63	8131.42	8195.23	8250.78	8298.02	8338.27	8373.7	8406.01	8435.53	8461.87	8485.2	8505.63	8523.27	8538.47	8551.6	8562.95	8572.85	8581.59	8589.43	8596.72	8603.96	8611.68	8620.38	8630.3	8641.59	8654.5	8669.27	8686.05	8704.95	8725.93	8748.81	8773.35	8799.3	8826.58	8855.01
130	High variant	China, Macao SAR	11	446	Country/Area	906	649.342	659.78	670.143	680.389	690.501	700.464	710.246	719.84	729.223	738.381	747.314	755.999	764.457	772.702	780.747	788.605	796.305	803.849	811.271	818.611	825.922	833.194	840.469	847.73	855.006	862.301	869.618	876.968	884.341	891.72	899.099	906.454	913.809	921.169	928.497	935.82	943.115	950.396	957.662	964.879	972.085	979.266	986.427
131	High variant	China, Taiwan Province of China	12	158	Country/Area	906	23816.8	23877.8	23945.7	24018	24092.4	24167.1	24241	24313	24382.8	24450.2	24514.9	24576.3	24633.3	24683.9	24725.6	24756.6	24776.2	24784.5	24781.7	24768.2	24744.7	24711.2	24668.1	24616.5	24557.8	24493.2	24423.5	24349.3	24271.9	24192.4	24112	24031.4	23951.4	23872.9	23797.1	23725	23656.9	23593.1	23533.6	23478.4	23427.5	23380.7	23337.9
132	High variant	Dem. People's Republic of Korea		408	Country/Area	906	25778.8	25912.8	26055.4	26203.8	26355.6	26508.8	26661.8	26813.4	26962.6	27108.8	27251.5	27390	27523.4	27650.4	27769.4	27879.7	27980.7	28072.8	28156.8	28234.2	28305.9	28372.6	28434.7	28493.5	28550.3	28606.4	28662.6	28719.3	28777.6	28838.5	28902.8	28971	29043.1	29119.2	29199.2	29282.9	29370.1	29460.7	29553.8	29648.1	29742.6	29837	29931.1
133	High variant	Japan		392	Country/Area	906	126476	126162	125837	125499	125146	124777	124394	123999	123593	123181	122766	122348	121929	121503	121068	120618	120154	119678	119193	118702	118209	117716	117222	116730	116241	115757	115278	114805	114340	113885	113440	113005	112582	112169	111765	111368	110978	110596	110222	109853	109491	109135	108785
134	High variant	Mongolia		496	Country/Area	906	3278.29	3333.63	3387.92	3441.23	3493.66	3545.32	3596.34	3646.9	3697.16	3747.29	3797.47	3847.8	3898.36	3949.1	3999.97	4050.91	4101.96	4153.17	4204.67	4256.59	4309.01	4361.98	4415.44	4469.42	4523.9	4578.85	4634.27	4690.09	4746.17	4802.32	4858.39	4914.31	4970.06	5025.59	5080.81	5135.71	5190.23	5244.39	5298.25	5351.82	5405.22	5458.43	5511.51
135	High variant	Republic of Korea		410	Country/Area	906	51269.2	51349.8	51442.7	51541.9	51643	51742.3	51837.9	51928.6	52014.7	52097	52175.9	52250.9	52319.5	52376.4	52415.2	52431.2	52422.2	52388.8	52332.6	52256.6	52162.7	52051.5	51922.5	51776.4	51614.1	51436.3	51244.3	51038.8	50820	50587.4	50341.4	50082.9	49813.7	49536.8	49256	48974.4	48693.3	48414	48139	47871.1	47612.3	47364	47126.4
136	High variant	South-Eastern Asia		920	Subregion	1832	668620	675922	683382	690944	698563	706200	713832	721438	729012	736549	744046	751495	758873	766145	773265	780204	786945	793496	799874	806111	812230	818239	824137	829933	835638	841261	846810	852291	857714	863085	868411	873698	878949	884168	889360	894526	899670	904791	909887	914954	919987	924987	929954
137	High variant	Brunei Darussalam		96	Country/Area	920	437.483	442.09	446.713	451.304	455.887	460.385	464.83	469.193	473.464	477.641	481.742	485.749	489.668	493.441	497.074	500.55	503.846	506.969	509.951	512.778	515.471	518.033	520.476	522.785	524.978	527.047	529.001	530.845	532.58	534.214	535.766	537.226	538.592	539.889	541.119	542.302	543.418	544.499	545.518	546.499	547.417	548.284	549.106
138	High variant	Cambodia		116	Country/Area	920	16719	16972	17225.5	17479.2	17732.6	17985.7	18238.4	18491.1	18744.1	18997.9	19252.8	19509	19766.1	20023.5	20280	20534.9	20787.8	21039	21288.4	21536.3	21782.8	22027.9	22271.5	22513.7	22755	22995.3	23234.8	23473.4	23710.9	23947.2	24182	24415.3	24647	24877	25105.3	25331.8	25556.5	25779.1	25999.6	26217.6	26433	26645.7	26855.7
139	High variant	Indonesia		360	Country/Area	920	273524	276681	279895	283145	286416	289695	292974	296249	299518	302783	306046	309302	312545	315758	318919	322016	325040	327994	330884	333720	336509	339253	341951	344608	347226	349810	352362	354885	357383	359861	362321	364766	367198	369618	372028	374428	376820	379204	381581	383948	386307	388657	390999
140	High variant	Lao People's Democratic Republic		418	Country/Area	920	7275.56	7388.77	7503.66	7619.64	7736.25	7853.09	7969.9	8086.52	8202.87	8318.93	8434.7	8550.07	8664.81	8778.5	8890.65	9000.88	9108.99	9215.06	9319.29	9421.98	9523.4	9623.57	9722.43	9820.09	9916.64	10012.1	10106.7	10200.2	10292.6	10383.8	10473.9	10562.7	10650.2	10736.3	10821	10904.3	10985.9	11066	11144.5	11221.2	11296	11369	11440.2
141	High variant	Malaysia	13	458	Country/Area	920	32366	32821.2	33284.7	33752.9	34222.9	34692.1	35158.8	35622	36081	36535.7	36986	37431.2	37870.1	38300.4	38719.5	39125.4	39517.4	39896.1	40262.8	40619.6	40968.2	41309.3	41643.1	41970.9	42293.9	42613.3	42929.7	43243.8	43556.7	43869.8	44183.8	44499.2	44816.2	45134.5	45454	45774.2	46095.2	46416.4	46736.8	47055.2	47370.2	47681.6	47988.7
142	High variant	Myanmar		104	Country/Area	920	54409.8	54901	55419	55956.8	56508.7	57069.8	57636.2	58205.1	58774.7	59343.6	59910.7	60474.2	61031.4	61577.8	62108.6	62620.2	63110.7	63580.4	64030.7	64464.1	64882.9	65287.4	65677.8	66055.9	66423.6	66782.6	67133.9	67478.6	67818.4	68155.2	68490.5	68825.1	69159.7	69495.1	69832	70170.8	70512	70855.5	71200.6	71546.2	71891.5	72236.1	72580
143	High variant	Philippines		608	Country/Area	920	109581	111184	112832	114513	116218	117939	119669	121408	123154	124908	126671	128441	130212	131976	133720	135434	137115	138764	140384	141985	143570	145141	146696	148237	149763	151277	152779	154269	155746	157210	158660	160096	161517	162927	164326	165716	167097	168468	169831	171185	172531	173867	175195
144	High variant	Singapore		702	Country/Area	920	5850.34	5905.07	5960.82	6017.04	6073.12	6128.63	6183.21	6236.56	6288.47	6338.8	6387.41	6434.15	6478.77	6520.99	6560.4	6596.8	6630.06	6660.23	6687.48	6712.05	6734.18	6753.98	6771.54	6787.13	6801.01	6813.49	6824.71	6834.86	6844.21	6853.07	6861.7	6870.25	6878.82	6887.56	6896.6	6905.99	6915.85	6926.19	6936.92	6947.91	6959.05	6970.32	6981.74
145	High variant	Thailand		764	Country/Area	920	69800	70024.7	70249.8	70471.9	70688.1	70896.4	71095.2	71283.7	71461.9	71629.8	71787.7	71935	72070.5	72191.6	72294.8	72378.1	72440.3	72482.1	72504.4	72508.9	72497.3	72470	72427.3	72370	72299.1	72215.6	72120.4	72014.6	71899.5	71776.8	71648	71514	71375.9	71235	71092.6	70949.9	70807.8	70667.1	70528.6	70392.9	70260.5	70132.3	70008.6
146	High variant	Timor-Leste		626	Country/Area	920	1318.44	1345.16	1372.79	1401.15	1430.08	1459.46	1489.17	1519.15	1549.37	1579.8	1610.44	1641.24	1672.12	1702.94	1733.61	1763.96	1793.96	1823.64	1853.06	1882.26	1911.33	1940.26	1969.08	1997.88	2026.8	2055.91	2085.25	2114.84	2144.66	2174.73	2205.05	2235.6	2266.38	2297.33	2328.4	2359.55	2390.72	2421.89	2452.98	2483.88	2514.53	2544.87	2574.88
147	High variant	Viet Nam		704	Country/Area	920	97338.6	98258.3	99192.9	100136	101081	102021	102952	103868	104764	105635	106479	107291	108072	108822	109542	110234	110897	111534	112149	112748	113336	113915	114486	115050	115607	116159	116705	117246	117784	118319	118850	119377	119901	120420	120935	121443	121946	122442	122930	123409	123877	124334	124782
148	High variant	LATIN AMERICA AND THE CARIBBEAN		1830	SDG region	1828	653962	660622	667435	674349	681321	688314	695302	702266	709196	716085	722928	729715	736426	743029	749486	755771	761869	767786	773540	779159	784666	790065	795357	800553	805667	810708	815684	820599	825459	830265	835022	839730	844394	849014	853593	858129	862625	867078	871484	875838	880134	884371	888548
149	High variant	Caribbean		915	Subregion	1830	43532.4	43857.6	44188.3	44522.9	44859.5	45196.8	45533.3	45867.7	46198.7	46525.2	46846.2	47161	47468.9	47769.6	48062.8	48348.4	48626.1	48895.9	49158.1	49413.5	49662.4	49905.2	50141.8	50373	50599.1	50820.7	51038.1	51251.5	51461	51666.8	51868.8	52067.5	52262.8	52455.2	52644.8	52832	53017	53199.9	53380.4	53558.8	53734.7	53908.3	54079.6
150	High variant	Anguilla	14	660	Country/Area	915	15.002	15.135	15.259	15.386	15.516	15.644	15.764	15.89	16.008	16.127	16.247	16.363	16.478	16.596	16.704	16.808	16.899	17.003	17.093	17.182	17.271	17.357	17.423	17.496	17.564	17.629	17.686	17.748	17.798	17.853	17.896	17.944	17.986	18.032	18.072	18.104	18.145	18.177	18.217	18.257	18.299	18.336	18.369
151	High variant	Antigua and Barbuda		28	Country/Area	915	97.928	98.852	99.798	100.741	101.687	102.627	103.565	104.487	105.409	106.313	107.194	108.075	108.934	109.774	110.585	111.378	112.13	112.867	113.581	114.271	114.931	115.587	116.223	116.843	117.448	118.061	118.651	119.24	119.814	120.399	120.972	121.546	122.109	122.685	123.241	123.81	124.375	124.935	125.49	126.055	126.619	127.181	127.748
152	High variant	Aruba	15	533	Country/Area	915	106.766	107.282	107.828	108.412	109	109.596	110.183	110.767	111.346	111.932	112.499	113.069	113.62	114.153	114.641	115.087	115.498	115.842	116.151	116.43	116.659	116.861	117.022	117.163	117.279	117.379	117.483	117.586	117.699	117.815	117.961	118.151	118.376	118.629	118.919	119.253	119.627	120.045	120.49	120.989	121.511	122.055	122.634
153	High variant	Bahamas		44	Country/Area	915	393.248	397.363	401.615	405.982	410.415	414.891	419.379	423.865	428.338	432.792	437.22	441.63	445.982	450.268	454.436	458.484	462.369	466.122	469.746	473.269	476.726	480.09	483.385	486.605	489.772	492.885	495.942	498.967	501.933	504.869	507.75	510.588	513.404	516.183	518.972	521.744	524.52	527.316	530.11	532.938	535.792	538.682	541.602
154	High variant	Barbados		52	Country/Area	915	287.371	287.994	288.695	289.47	290.27	291.093	291.937	292.791	293.641	294.502	295.357	296.205	297.028	297.836	298.568	299.212	299.776	300.244	300.621	300.924	301.123	301.263	301.312	301.298	301.225	301.103	300.94	300.731	300.503	300.281	300.055	299.866	299.683	299.536	299.428	299.374	299.361	299.411	299.504	299.644	299.819	300.032	300.28
155	High variant	Bonaire, Sint Eustatius and Saba	15	535	Country/Area	915	26.221	26.461	26.692	26.924	27.158	27.377	27.605	27.828	28.051	28.263	28.482	28.693	28.904	29.115	29.312	29.515	29.706	29.887	30.063	30.254	30.412	30.583	30.766	30.919	31.088	31.251	31.414	31.567	31.741	31.909	32.076	32.249	32.419	32.596	32.767	32.959	33.137	33.327	33.516	33.719	33.921	34.125	34.336
156	High variant	British Virgin Islands	14	92	Country/Area	915	30.237	30.45	30.668	30.902	31.127	31.357	31.59	31.806	32.033	32.246	32.45	32.654	32.85	33.027	33.187	33.339	33.488	33.603	33.71	33.806	33.879	33.953	34.008	34.046	34.079	34.092	34.112	34.122	34.137	34.13	34.139	34.142	34.142	34.143	34.155	34.151	34.156	34.167	34.173	34.179	34.189	34.209	34.219
157	High variant	Cayman Islands	14	136	Country/Area	915	65.72	66.57	67.451	68.337	69.24	70.142	71.052	71.97	72.893	73.834	74.77	75.692	76.635	77.574	78.498	79.403	80.307	81.197	82.071	82.921	83.764	84.577	85.386	86.165	86.929	87.667	88.386	89.089	89.76	90.429	91.08	91.733	92.374	93.007	93.646	94.291	94.944	95.607	96.279	96.972	97.673	98.387	99.119
158	High variant	Cuba		192	Country/Area	915	11326.6	11327.6	11330.1	11333.6	11337.4	11341.1	11344.5	11347.4	11349.8	11351.5	11352.8	11353.4	11353.1	11351.4	11347.7	11341.6	11332.9	11321.6	11308	11292.4	11275.1	11256.2	11235.6	11213.5	11189.9	11164.8	11138.5	11111	11082.4	11052.7	11021.9	10990.2	10957.8	10924.7	10891.3	10857.8	10824.3	10790.9	10757.8	10725.2	10693.1	10661.9	10631.4
159	High variant	Curaçao	15	531	Country/Area	915	164.1	165.003	165.966	166.947	167.948	168.956	169.977	170.98	172.009	173.023	174.041	175.07	176.077	177.085	178.056	178.996	179.901	180.775	181.607	182.412	183.193	183.95	184.67	185.381	186.072	186.752	187.418	188.068	188.728	189.393	190.061	190.747	191.454	192.182	192.932	193.71	194.529	195.375	196.257	197.165	198.106	199.087	200.092
160	High variant	Dominica		212	Country/Area	915	71.991	72.279	72.581	72.906	73.234	73.563	73.888	74.212	74.515	74.8	75.08	75.333	75.563	75.769	75.963	76.122	76.262	76.383	76.48	76.565	76.654	76.729	76.799	76.869	76.94	77.025	77.119	77.211	77.312	77.43	77.529	77.653	77.778	77.903	78.016	78.139	78.257	78.37	78.468	78.578	78.665	78.744	78.819
161	High variant	Dominican Republic		214	Country/Area	915	10847.9	10967.9	11089.2	11211.2	11333.3	11455.2	11576.4	11697	11816.8	11936	12054.5	12172.5	12289.6	12405.2	12518.9	12630.1	12738.7	12844.8	12948.7	13051.1	13152.2	13252.3	13351.3	13449.1	13546	13641.9	13736.9	13831	13924.1	14016.3	14107.4	14197.4	14286.4	14374.3	14461.1	14546.7	14631.3	14714.7	14796.9	14877.7	14957	15034.9	15111.2
162	High variant	Grenada		308	Country/Area	915	112.519	113.19	113.847	114.479	115.099	115.686	116.278	116.834	117.392	117.93	118.445	118.968	119.476	119.971	120.447	120.924	121.363	121.797	122.213	122.625	123.024	123.416	123.799	124.199	124.566	124.947	125.316	125.683	126.036	126.384	126.737	127.078	127.406	127.736	128.044	128.346	128.634	128.918	129.185	129.441	129.677	129.906	130.113
163	High variant	Guadeloupe	2	312	Country/Area	915	400.127	399.928	400.078	400.501	401.141	401.946	402.889	403.932	405.086	406.318	407.633	409.004	410.406	411.789	413.093	414.264	415.3	416.175	416.909	417.509	417.988	418.348	418.588	418.726	418.807	418.834	418.832	418.808	418.775	418.751	418.749	418.784	418.868	419.022	419.261	419.621	420.106	420.722	421.459	422.311	423.299	424.384	425.591
164	High variant	Haiti		332	Country/Area	915	11402.5	11558.5	11716.9	11877.3	12039.4	12202.8	12367.5	12533.3	12700.1	12868	13037	13207	13377.6	13548.5	13719	13888.6	14057.3	14224.8	14391.2	14556.4	14720.2	14882.6	15043.6	15203.4	15362.2	15520.4	15677.9	15834.6	15990.4	16145.2	16298.7	16451	16601.9	16751.4	16899.5	17046.1	17191.1	17334.4	17476.1	17615.8	17753.6	17889.3	18023
165	High variant	Jamaica		388	Country/Area	915	2961.16	2977.46	2994.15	3011	3027.82	3044.45	3060.76	3076.69	3092.2	3107.24	3121.84	3135.95	3149.46	3162.24	3174.11	3184.95	3194.72	3203.41	3211.15	3218.05	3224.22	3229.7	3234.49	3238.71	3242.43	3245.72	3248.68	3251.28	3253.6	3255.62	3257.39	3258.93	3260.24	3261.33	3262.16	3262.74	3263.07	3263.12	3262.9	3262.38	3261.56	3260.41	3258.93
166	High variant	Martinique	2	474	Country/Area	915	375.265	374.882	374.607	374.419	374.281	374.191	374.131	374.109	374.112	374.162	374.255	374.402	374.571	374.709	374.78	374.745	374.593	374.294	373.872	373.279	372.518	371.595	370.526	369.304	367.968	366.518	364.983	363.368	361.71	360.044	358.397	356.771	355.205	353.689	352.267	350.938	349.723	348.627	347.655	346.81	346.075	345.47	344.98
167	High variant	Montserrat	14	500	Country/Area	915	4.999	4.981	4.973	4.962	4.95	4.929	4.908	4.891	4.876	4.862	4.849	4.829	4.816	4.801	4.786	4.767	4.751	4.735	4.726	4.715	4.699	4.676	4.661	4.645	4.632	4.61	4.591	4.574	4.555	4.536	4.507	4.493	4.469	4.456	4.432	4.413	4.4	4.38	4.366	4.352	4.341	4.327	4.312
168	High variant	Puerto Rico	16	630	Country/Area	915	2860.84	2874.93	2888.14	2901.05	2913.92	2926.63	2938.71	2949.36	2957.49	2961.87	2961.49	2955.8	2945.28	2931.34	2916.03	2900.94	2886.53	2872.52	2858.72	2844.66	2830.05	2814.95	2799.6	2783.93	2767.85	2751.3	2734.29	2716.9	2699.2	2681.36	2663.49	2645.64	2627.83	2610.15	2592.67	2575.48	2558.61	2542.09	2525.93	2510.12	2494.7	2479.66	2465
169	High variant	Saint Barthélemy	2	652	Country/Area	915	9.885	9.923	9.976	10.033	10.089	10.146	10.205	10.264	10.324	10.384	10.45	10.513	10.588	10.655	10.716	10.781	10.84	10.913	10.978	11.056	11.115	11.182	11.242	11.316	11.382	11.443	11.509	11.574	11.639	11.704	11.774	11.831	11.894	11.956	12.011	12.071	12.133	12.195	12.247	12.316	12.373	12.432	12.496
170	High variant	Saint Kitts and Nevis		659	Country/Area	915	53.192	53.608	54.014	54.435	54.844	55.243	55.632	56.024	56.395	56.77	57.121	57.466	57.804	58.128	58.44	58.721	58.994	59.248	59.466	59.674	59.876	60.059	60.223	60.391	60.551	60.686	60.803	60.932	61.045	61.151	61.247	61.352	61.448	61.554	61.643	61.733	61.825	61.912	61.995	62.089	62.174	62.242	62.32
171	High variant	Saint Lucia		662	Country/Area	915	183.629	184.647	185.677	186.718	187.753	188.758	189.745	190.694	191.624	192.493	193.33	194.119	194.873	195.57	196.213	196.771	197.268	197.69	198.047	198.35	198.606	198.824	199.002	199.147	199.249	199.319	199.378	199.408	199.409	199.403	199.375	199.338	199.288	199.216	199.145	199.063	198.963	198.847	198.722	198.597	198.446	198.283	198.121
172	High variant	Saint Martin (French part)	2	663	Country/Area	915	38.659	39.211	39.752	40.292	40.829	41.372	41.909	42.444	42.984	43.534	44.078	44.648	45.219	45.786	46.368	46.934	47.502	48.061	48.616	49.164	49.71	50.248	50.777	51.309	51.835	52.343	52.85	53.357	53.859	54.358	54.859	55.349	55.84	56.328	56.808	57.296	57.784	58.272	58.759	59.266	59.764	60.276	60.796
173	High variant	Saint Vincent and the Grenadines		670	Country/Area	915	110.947	111.377	111.833	112.318	112.8	113.298	113.79	114.278	114.76	115.241	115.708	116.16	116.606	117.031	117.422	117.783	118.101	118.389	118.654	118.871	119.077	119.246	119.402	119.536	119.653	119.768	119.854	119.94	120.016	120.093	120.161	120.23	120.296	120.373	120.439	120.509	120.594	120.671	120.742	120.82	120.888	120.959	121.017
174	High variant	Sint Maarten (Dutch part)	15	534	Country/Area	915	42.882	43.502	44.134	44.765	45.407	46.046	46.679	47.313	47.942	48.548	49.154	49.758	50.345	50.935	51.495	52.048	52.586	53.113	53.633	54.145	54.652	55.154	55.661	56.167	56.672	57.175	57.68	58.188	58.705	59.224	59.745	60.283	60.818	61.359	61.908	62.478	63.039	63.605	64.188	64.77	65.344	65.949	66.535
175	High variant	Trinidad and Tobago		780	Country/Area	915	1399.49	1405.07	1410.37	1415.38	1420.09	1424.5	1428.64	1432.52	1436.19	1439.67	1443.02	1446.25	1449.34	1452.28	1454.98	1457.41	1459.55	1461.43	1463.04	1464.41	1465.57	1466.48	1467.18	1467.68	1467.98	1468.1	1468.06	1467.86	1467.53	1467.11	1466.64	1466.11	1465.55	1464.96	1464.38	1463.78	1463.2	1462.65	1462.11	1461.56	1461.04	1460.51	1460.01
176	High variant	Turks and Caicos Islands	14	796	Country/Area	915	38.718	39.268	39.846	40.426	41.004	41.598	42.188	42.781	43.37	43.972	44.567	45.173	45.769	46.365	46.942	47.515	48.065	48.605	49.135	49.649	50.136	50.623	51.088	51.546	51.985	52.411	52.829	53.252	53.647	54.045	54.431	54.821	55.199	55.586	55.952	56.332	56.694	57.073	57.432	57.8	58.167	58.526	58.878
177	High variant	United States Virgin Islands	16	850	Country/Area	915	104.423	104.303	104.174	104.031	103.869	103.684	103.492	103.276	103.056	102.814	102.568	102.305	102.044	101.76	101.459	101.134	100.777	100.386	99.966	99.537	99.07	98.594	98.082	97.571	97.024	96.494	95.954	95.408	94.859	94.308	93.754	93.216	92.662	92.122	91.581	91.059	90.529	90.014	89.512	89.021	88.538	88.082	87.634
178	High variant	Central America		916	Subregion	1830	179670	181953	184286	186652	189039	191437	193838	196240	198642	201045	203449	205854	208252	210631	212974	215270	217514	219708	221856	223968	226050	228103	230127	232124	234099	236055	237994	239916	241823	243715	245593	247456	249306	251141	252962	254769	256559	258334	260092	261832	263550	265248	266925
179	High variant	Belize		84	Country/Area	916	397.621	405.53	413.588	421.758	430.008	438.314	446.622	454.959	463.282	471.592	479.905	488.181	496.406	504.589	512.667	520.613	528.424	536.1	543.661	551.121	558.513	565.821	573.056	580.222	587.332	594.369	601.342	608.267	615.154	622.003	628.818	635.615	642.406	649.158	655.867	662.547	669.169	675.757	682.298	688.788	695.236	701.628	707.962
180	High variant	Costa Rica		188	Country/Area	916	5094.11	5145.84	5197.65	5249.23	5300.34	5350.82	5400.57	5449.55	5497.79	5545.37	5592.31	5638.61	5684.16	5728.69	5771.89	5813.52	5853.48	5891.84	5928.7	5964.25	5998.63	6031.86	6063.98	6095.03	6125.15	6154.4	6182.83	6210.51	6237.46	6263.7	6289.28	6314.24	6338.6	6362.38	6385.62	6408.33	6430.52	6452.22	6473.45	6494.2	6514.49	6534.34	6553.72
181	High variant	El Salvador		222	Country/Area	916	6486.2	6527.95	6571.93	6617.82	6665.29	6713.92	6763.35	6813.1	6862.77	6911.89	6960.07	7007.02	7052.62	7096.95	7140.16	7182.38	7223.62	7263.74	7302.7	7340.46	7376.97	7412.22	7446.3	7479.34	7511.59	7543.22	7574.3	7604.8	7634.75	7664.16	7693.03	7721.36	7749.16	7776.36	7802.88	7828.65	7853.66	7877.85	7901.14	7923.41	7944.59	7964.64	7983.5
182	High variant	Guatemala		320	Country/Area	916	17915.6	18273.5	18640.6	19014.9	19394.9	19779.2	20167.1	20558	20951.7	21348.3	21747.9	22150	22554	22958.2	23360.8	23760.4	24156.4	24548.9	24938.6	25326.4	25713.4	26099.4	26484.4	26868.6	27252.2	27635.3	28018	28400.5	28782.8	29165.1	29547.5	29929.8	30312.2	30694.1	31075.4	31455.6	31834.7	32212.3	32588.2	32962	33333.4	33702.2	34068.1
183	High variant	Honduras		340	Country/Area	916	9904.61	10076.5	10253.3	10434	10617.5	10803.1	10990.2	11178.2	11366.9	11556.1	11745.6	11935	12124	12311.8	12497.6	12681	12861.5	13039.2	13214.5	13387.7	13559.3	13729.3	13897.7	14064.7	14230.6	14395.6	14559.9	14723.4	14886.1	15047.9	15208.5	15368	15526.4	15683.7	15840	15995.2	16149.3	16302.1	16453.6	16603.4	16751.4	16897.4	17041.3
184	High variant	Mexico		484	Country/Area	916	128933	130429	131954	133496	135046	136597	138146	139691	141232	142772	144312	145851	147385	148904	150396	151850	153264	154640	155980	157292	158580	159846	161088	162310	163514	164704	165879	167041	168192	169330	170457	171573	172679	173775	174860	175935	176999	178052	179094	180124	181141	182145	183136
185	High variant	Nicaragua		558	Country/Area	916	6624.55	6708.19	6795.94	6887.08	6980.97	7077.02	7174.69	7273.5	7373.06	7473.01	7573.01	7672.76	7771.98	7870.38	7967.72	8063.79	8158.41	8251.51	8343.27	8433.94	8523.7	8612.58	8700.54	8787.61	8873.85	8959.28	9043.94	9127.83	9210.95	9293.28	9374.8	9455.52	9535.42	9614.48	9692.73	9770.12	9846.67	9922.31	9996.98	10070.5	10142.9	10214.1	10284.1
186	High variant	Panama		591	Country/Area	916	4314.77	4386.66	4459.1	4531.79	4604.53	4677.17	4749.65	4821.98	4894.23	4966.49	5038.86	5111.36	5183.86	5256.1	5327.73	5398.47	5468.23	5537.1	5605.17	5672.64	5739.67	5806.27	5872.44	5938.26	6003.82	6069.21	6134.45	6199.56	6264.51	6329.27	6393.83	6458.16	6522.27	6586.2	6649.92	6713.46	6776.79	6839.93	6902.79	6965.34	7027.52	7089.32	7150.75
187	High variant	South America		931	Subregion	1830	430760	434811	438961	443174	447422	451680	455931	460159	464356	468515	472633	476700	480705	484629	488449	492152	495728	499182	502526	505777	508953	512056	515088	518056	520968	523832	526652	529432	532175	534883	537560	540207	542825	545418	547985	550529	553048	555543	558011	560447	562849	565214	567543
188	High variant	Argentina		32	Country/Area	931	45195.8	45657.9	46133.4	46619.4	47113.2	47612.8	48116.7	48623.9	49133.9	49646.6	50161.7	50678.7	51196.4	51712.7	52225.2	52732	53232.2	53726.2	54215	54700.4	55183.7	55665.1	56144.5	56622.4	57099.2	57575.4	58051.3	58527	59002.5	59478	59953.2	60428.3	60903.4	61378.4	61853.6	62328.8	62804	63279	63753.8	64228.2	64702	65175.1	65647.2
189	High variant	Bolivia (Plurinational State of)		68	Country/Area	931	11673	11847.4	12026.8	12210	12396.4	12585.2	12776	12968.5	13162.5	13357.8	13554.4	13752	13950.2	14148.3	14345.5	14541.2	14735.1	14927.1	15117.6	15306.7	15494.9	15682	15868.2	16053.4	16238	16422.2	16606	16789.5	16972.7	17155.6	17338.1	17520.3	17702.2	17884	18065.9	18248	18430.3	18612.8	18795.1	18976.8	19157.8	19337.8	19516.8
190	High variant	Brazil		76	Country/Area	931	212559	214259	215971	217684	219385	221067	222723	224351	225950	227522	229067	230585	232070	233511	234897	236218	237470	238656	239782	240855	241883	242867	243809	244712	245580	246416	247224	248006	248763	249498	250213	250910	251589	252253	252902	253537	254159	254768	255363	255942	256504	257048	257575
191	High variant	Chile		152	Country/Area	931	19116.2	19155.2	19208.5	19271.4	19340.7	19414.7	19493.3	19577.9	19671.1	19776.4	19896.5	20032.3	20181.2	20336.9	20490.7	20636.2	20770.9	20895.8	21012.3	21123	21230	21333.3	21431.8	21526	21616.2	21702.8	21785.9	21866	21943.1	22017.7	22089.9	22160	22228.3	22294.9	22360.3	22424.6	22488	22550.7	22612.8	22674.4	22735.8	22796.9	22857.9
192	High variant	Colombia		170	Country/Area	931	50882.9	51120.2	51410.1	51744.1	52114.6	52513.8	52934.8	53370.8	53815.4	54262.9	54708.1	55146.8	55575.8	55993.2	56397.7	56788.8	57164.6	57524.2	57869.2	58202	58524.7	58837.7	59140.8	59434.9	59721.2	60000.5	60273.5	60540.6	60802	61057.8	61308.2	61553.5	61793.9	62029.7	62261.2	62488.8	62712.5	62932.2	63147.4	63357.4	63561.6	63759.9	63952.2
193	High variant	Ecuador		218	Country/Area	931	17643.1	17884.3	18134.1	18390.7	18652.8	18919.1	19188.9	19461.3	19735.8	20012	20289.7	20568.4	20847.4	21125.7	21402.2	21676.2	21947.1	22215	22480.2	22743.5	23005.4	23266	23525.2	23783.1	24040	24296	24551.2	24805.7	25059.4	25312.1	25563.9	25814.6	26064.3	26312.9	26560.5	26806.9	27052.3	27296.4	27538.9	27779.5	28017.8	28253.7	28487.3
194	High variant	Falkland Islands (Malvinas)	17	238	Country/Area	931	3.483	3.481	3.481	3.481	3.49	3.49	3.49	3.488	3.495	3.499	3.499	3.494	3.498	3.496	3.498	3.498	3.501	3.496	3.499	3.497	3.499	3.496	3.495	3.492	3.492	3.486	3.491	3.485	3.485	3.485	3.482	3.486	3.49	3.488	3.491	3.495	3.499	3.498	3.502	3.505	3.506	3.512	3.515
195	High variant	French Guiana	2	254	Country/Area	931	298.682	306.675	314.872	323.236	331.761	340.418	349.216	358.128	367.189	376.401	385.764	395.278	404.933	414.692	424.524	434.398	444.299	454.24	464.213	474.215	484.258	494.334	504.446	514.603	524.833	535.132	545.511	555.979	566.538	577.21	587.988	598.883	609.896	621.038	632.297	643.687	655.184	666.809	678.54	690.38	702.319	714.333	726.446
196	High variant	Guyana		328	Country/Area	931	786.559	791.083	796.059	801.372	806.927	812.641	818.464	824.281	830.073	835.805	841.419	846.897	852.185	857.256	862.064	866.585	870.802	874.714	878.362	881.784	885.062	888.178	891.15	893.972	896.695	899.319	901.86	904.33	906.725	909.066	911.333	913.558	915.721	917.826	919.867	921.812	923.69	925.486	927.188	928.802	930.322	931.751	933.064
197	High variant	Paraguay		600	Country/Area	931	7132.53	7229.22	7328.21	7428.82	7530.52	7632.86	7735.56	7838.42	7941.41	8044.52	8147.75	8251.04	8354.09	8456.46	8557.54	8656.93	8754.42	8850.08	8944.22	9037.24	9129.46	9220.96	9311.68	9401.76	9491.32	9580.44	9669.18	9757.58	9845.65	9933.41	10020.9	10108.1	10194.9	10281.3	10367.1	10452.1	10536.4	10619.9	10702.4	10783.9	10864.4	10943.7	11021.8
198	High variant	Peru		604	Country/Area	931	32971.8	33317.8	33681.6	34059.4	34447.9	34844.1	35245.8	35651.2	36058.8	36467.8	36877.2	37286	37692.7	38095.4	38491.8	38880.5	39260.3	39631.4	39995.4	40354.1	40709.5	41061.7	41410.6	41756.4	42099.3	42439.7	42777.7	43113.5	43447.2	43779.1	44109.1	44437.4	44763.8	45088.2	45410.1	45729.2	46045.4	46358.5	46668.2	46974.1	47276	47573.7	47867
199	High variant	Suriname		740	Country/Area	931	586.634	592.499	598.478	604.545	610.646	616.748	622.842	628.921	634.973	641.011	647.014	652.99	658.909	664.769	670.488	676.059	681.485	686.737	691.847	696.829	701.714	706.509	711.197	715.808	720.323	724.789	729.182	733.518	737.83	742.095	746.364	750.627	754.888	759.15	763.402	767.652	771.9	776.149	780.382	784.62	788.848	793.068	797.288
200	High variant	Uruguay		858	Country/Area	931	3473.73	3488.69	3504.62	3521.27	3538.47	3556.03	3573.84	3591.84	3609.99	3628.26	3646.68	3665.2	3683.71	3702.07	3720.09	3737.6	3754.56	3770.99	3786.98	3802.7	3818.24	3833.66	3848.91	3864.08	3879.21	3894.35	3909.54	3924.78	3940.06	3955.44	3970.86	3986.36	4001.94	4017.59	4033.34	4049.18	4065.11	4081.1	4097.13	4113.15	4129.12	4145.03	4160.87
201	High variant	Venezuela (Bolivarian Republic of)		862	Country/Area	931	28435.9	29158.2	29849.1	30512.1	31149.3	31761.6	32348.8	32909.4	33440.9	33940.3	34405.4	34835.7	35233.9	35606.1	35960.6	36304	36639.1	36965.9	37285.2	37596.4	37899.7	38196.1	38487.3	38774.6	39059	39341.7	39623.3	39904.2	40184.6	40464.2	40743.1	41021.4	41299.3	41576.5	41852.7	42127.4	42400.8	42672.6	42942.6	43210.2	43475.2	43737.4	43996.7
202	High variant	AUSTRALIA/NEW ZEALAND		927	SDG region	1828	30322.1	30676.5	31038.2	31405	31775.3	32147.7	32521.7	32896.9	33273.5	33651.7	34032	34414.3	34797.8	35180.9	35561.5	35938	36310	36677.8	37042.5	37405.7	37768.6	38131.5	38494.6	38858	39222.4	39588	39955.3	40324.5	40696.1	41070.5	41447.9	41828.5	42212.7	42600.8	42993.2	43390.2	43791.9	44198.4	44609.5	45024.9	45444.5	45868.1	46295.7
203	High variant	Australia	18	36	Country/Area	927	25499.9	25811.3	26128.7	26450.3	26774.7	27100.9	27428.4	27757.1	28087.2	28419	28753	29089.2	29426.9	29764.8	30101	30434.2	30764	31090.8	31415.6	31739.5	32063.9	32388.9	32714.6	33041.3	33369.3	33699	34030.7	34364.5	34700.9	35040	35382.1	35727.3	36075.7	36427.7	36783.6	37143.5	37507.5	37875.6	38247.6	38623.2	39002.2	39384.6	39770.2
204	High variant	New Zealand	19	554	Country/Area	927	4822.23	4865.18	4909.46	4954.73	5000.61	5046.88	5093.33	5139.84	5186.32	5232.73	5279.03	5325.15	5370.93	5416.15	5460.51	5503.81	5545.94	5586.95	5626.97	5666.16	5704.69	5742.61	5779.95	5816.74	5853.08	5889.01	5924.62	5960	5995.24	6030.47	6065.79	6101.28	6137	6173.09	6209.62	6246.74	6284.46	6322.85	6361.92	6401.71	6442.23	6483.5	6525.49
205	High variant	OCEANIA (EXCLUDING AUSTRALIA AND NEW ZEALAND)		1835	SDG region	1828	12355.7	12584.7	12821.3	13064.4	13312.9	13566.1	13823.5	14084.7	14349.8	14618.8	14891.7	15168.3	15448.1	15730.2	16013.2	16296.5	16579.5	16862.3	17145.3	17429	17713.7	17999.7	18286.7	18574.9	18864.8	19156.3	19449.6	19744.9	20042.1	20341.3	20642.5	20945.8	21251.1	21558.6	21868.3	22180.2	22494.4	22810.8	23129	23448.9	23770.2	24092.8	24416.6
206	High variant	Melanesia		928	Subregion	1835	11123	11340.5	11565.1	11795.6	12031.1	12271.1	12515.1	12762.8	13014.2	13269.3	13528.2	13790.8	14056.5	14324.5	14593.6	14863.1	15132.6	15402.2	15672.1	15943	16215	16488.4	16763	17039	17316.7	17596.1	17877.5	18160.9	18446.2	18733.6	19023.1	19314.6	19608.2	19903.9	20201.7	20501.7	20804	21108.3	21414.4	21722.2	22031.4	22341.9	22653.6
207	High variant	Fiji		242	Country/Area	928	896.444	903.709	911.617	920.078	928.983	938.269	947.862	957.667	967.628	977.7	987.803	997.916	1007.99	1018	1027.9	1037.71	1047.38	1056.92	1066.32	1075.64	1084.89	1094.05	1103.16	1112.21	1121.22	1130.21	1139.19	1148.15	1157.12	1166.08	1175.03	1184	1192.97	1201.93	1210.87	1219.79	1228.69	1237.56	1246.41	1255.23	1264.03	1272.81	1281.57
208	High variant	New Caledonia	2	540	Country/Area	928	285.491	288.568	291.713	294.899	298.114	301.361	304.616	307.899	311.192	314.499	317.837	321.19	324.546	327.897	331.21	334.472	337.665	340.795	343.857	346.868	349.82	352.72	355.556	358.324	361.046	363.718	366.328	368.907	371.435	373.928	376.389	378.837	381.254	383.654	386.046	388.441	390.838	393.235	395.637	398.068	400.516	402.981	405.466
209	High variant	Papua New Guinea		598	Country/Area	928	8947.03	9128.66	9316.04	9508.24	9704.48	9904.2	10107	10312.8	10521.4	10733.1	10947.8	11165.4	11385.5	11607.3	11829.9	12052.6	12274.9	12497	12719.2	12941.9	13165.5	13390	13615.4	13841.7	14069.3	14298.2	14528.5	14760.3	14993.5	15228.2	15464.5	15702.1	15941.3	16182.1	16424.5	16668.5	16914.3	17161.6	17410.3	17660.1	17910.7	18162.1	18414.1
210	High variant	Solomon Islands		90	Country/Area	928	686.878	704.769	723.026	741.635	760.609	779.95	799.671	819.786	840.356	861.387	882.908	904.948	927.492	950.504	973.939	997.766	1021.98	1046.57	1071.53	1096.91	1122.66	1148.81	1175.33	1202.26	1229.6	1257.36	1285.53	1314.14	1343.19	1372.68	1402.62	1433.01	1463.86	1495.14	1526.83	1558.9	1591.35	1624.2	1657.42	1691.06	1725.11	1759.61	1794.5
211	High variant	Vanuatu		548	Country/Area	928	307.15	314.797	322.676	330.727	338.96	347.358	355.924	364.649	373.548	382.617	391.884	401.328	410.951	420.735	430.635	440.64	450.737	460.94	471.251	481.656	492.19	502.833	513.59	524.478	535.499	546.657	557.958	569.407	580.997	592.72	604.597	616.61	628.757	641.064	653.5	666.072	678.802	691.651	704.657	717.79	731.051	744.455	757.974
212	High variant	Micronesia		954	Subregion	1835	548.927	554.973	561.317	567.868	574.587	581.387	588.275	595.214	602.164	609.166	616.136	623.099	629.996	636.883	643.555	650.123	656.517	662.735	668.824	674.776	680.593	686.32	691.975	697.504	703.032	708.445	713.851	719.229	724.621	730.017	735.452	740.912	746.414	751.99	757.611	763.264	768.967	774.737	780.524	786.306	792.037	797.789	803.508
213	High variant	Guam	16	316	Country/Area	954	168.783	170.318	171.9	173.53	175.193	176.862	178.527	180.198	181.864	183.524	185.184	186.821	188.446	190.045	191.583	193.075	194.503	195.869	197.177	198.445	199.654	200.82	201.947	203.031	204.095	205.126	206.133	207.123	208.104	209.074	210.045	211.014	211.984	212.978	213.966	214.974	215.986	217.017	218.063	219.11	220.141	221.192	222.244
214	High variant	Kiribati		296	Country/Area	954	119.446	121.689	123.941	126.207	128.479	130.751	133.028	135.31	137.591	139.888	142.177	144.476	146.777	149.084	151.398	153.717	156.061	158.401	160.764	163.164	165.585	168.048	170.539	173.059	175.619	178.19	180.78	183.392	186.024	188.677	191.355	194.042	196.747	199.474	202.225	204.971	207.754	210.545	213.348	216.157	218.946	221.755	224.541
215	High variant	Marshall Islands		584	Country/Area	954	59.194	59.611	60.139	60.757	61.446	62.202	63.029	63.888	64.782	65.721	66.668	67.622	68.577	69.548	70.505	71.442	72.37	73.283	74.172	75.05	75.894	76.719	77.521	78.307	79.077	79.822	80.552	81.268	81.987	82.683	83.381	84.074	84.763	85.447	86.136	86.826	87.509	88.194	88.88	89.559	90.22	90.899	91.555
216	High variant	Micronesia (Fed. States of)		583	Country/Area	954	115.021	116.372	117.788	119.246	120.731	122.234	123.747	125.253	126.749	128.232	129.714	131.163	132.593	134.004	135.343	136.633	137.874	139.058	140.189	141.281	142.343	143.358	144.364	145.327	146.29	147.228	148.151	149.091	150.005	150.939	151.882	152.848	153.814	154.811	155.809	156.813	157.831	158.848	159.859	160.856	161.826	162.786	163.706
217	High variant	Nauru		520	Country/Area	954	10.834	10.866	10.91	10.954	10.999	11.038	11.075	11.128	11.166	11.212	11.25	11.303	11.345	11.398	11.439	11.479	11.532	11.569	11.615	11.65	11.683	11.727	11.771	11.801	11.832	11.856	11.892	11.92	11.943	11.97	11.993	12.007	12.033	12.057	12.081	12.098	12.111	12.14	12.145	12.167	12.193	12.197	12.223
218	High variant	Northern Mariana Islands	16	580	Country/Area	954	57.557	57.941	58.379	58.832	59.321	59.813	60.307	60.809	61.32	61.834	62.337	62.843	63.329	63.821	64.27	64.699	65.073	65.419	65.739	66.003	66.236	66.435	66.617	66.76	66.887	67	67.123	67.22	67.348	67.461	67.591	67.72	67.873	68.022	68.199	68.385	68.576	68.787	69.012	69.237	69.48	69.709	69.969
219	High variant	Palau		585	Country/Area	954	18.092	18.176	18.26	18.342	18.418	18.487	18.562	18.628	18.692	18.755	18.806	18.871	18.929	18.983	19.017	19.078	19.104	19.136	19.168	19.183	19.198	19.213	19.216	19.219	19.232	19.223	19.22	19.215	19.21	19.213	19.205	19.207	19.2	19.201	19.195	19.197	19.2	19.206	19.217	19.22	19.231	19.251	19.27
220	High variant	Polynesia	20	957	Subregion	1835	683.778	689.216	694.96	700.976	707.17	713.565	720.077	726.726	733.477	740.39	747.379	754.49	761.652	768.893	776.073	783.244	790.331	797.359	804.316	811.243	818.099	824.926	831.701	838.437	845.121	851.715	858.262	864.776	871.233	877.635	883.937	890.257	896.511	902.749	908.955	915.186	921.458	927.752	934.034	940.376	946.705	953.086	959.489
221	High variant	American Samoa	16	16	Country/Area	957	55.197	55.181	55.194	55.246	55.317	55.417	55.519	55.647	55.791	55.93	56.094	56.244	56.413	56.578	56.739	56.895	57.053	57.202	57.343	57.485	57.625	57.757	57.891	58.023	58.175	58.324	58.485	58.648	58.838	59.018	59.195	59.365	59.54	59.699	59.865	60.035	60.216	60.382	60.549	60.725	60.883	61.056	61.209
222	High variant	Cook Islands	21	184	Country/Area	957	17.564	17.58	17.599	17.622	17.643	17.692	17.73	17.767	17.797	17.848	17.891	17.932	17.981	18.028	18.072	18.116	18.161	18.203	18.236	18.276	18.311	18.341	18.37	18.409	18.435	18.466	18.504	18.534	18.56	18.595	18.619	18.655	18.693	18.724	18.759	18.792	18.82	18.861	18.894	18.932	18.979	19.023	19.069
223	High variant	French Polynesia	2	258	Country/Area	957	280.904	282.842	284.909	287.07	289.31	291.588	293.905	296.239	298.59	300.948	303.291	305.64	307.96	310.233	312.453	314.599	316.661	318.637	320.554	322.383	324.153	325.859	327.502	329.077	330.61	332.078	333.49	334.87	336.194	337.484	338.723	339.955	341.144	342.318	343.474	344.612	345.74	346.856	347.954	349.06	350.139	351.216	352.298
224	High variant	Niue	21	570	Country/Area	957	1.618	1.612	1.618	1.619	1.62	1.633	1.649	1.663	1.673	1.686	1.701	1.718	1.725	1.737	1.755	1.767	1.776	1.79	1.804	1.817	1.829	1.844	1.852	1.862	1.876	1.888	1.9	1.912	1.926	1.938	1.946	1.962	1.971	1.982	1.998	2.009	2.023	2.04	2.052	2.066	2.08	2.096	2.102
225	High variant	Samoa		882	Country/Area	957	198.41	200.811	203.26	205.766	208.324	210.924	213.572	216.283	219.038	221.862	224.744	227.691	230.702	233.77	236.878	240.04	243.215	246.436	249.672	252.959	256.277	259.646	263.036	266.445	269.863	273.275	276.686	280.087	283.479	286.849	290.212	293.548	296.863	300.179	303.48	306.783	310.09	313.408	316.733	320.071	323.426	326.812	330.226
226	High variant	Tokelau	21	772	Country/Area	957	1.35	1.365	1.373	1.385	1.405	1.422	1.439	1.444	1.456	1.471	1.484	1.501	1.508	1.519	1.531	1.539	1.548	1.56	1.569	1.581	1.592	1.604	1.611	1.626	1.635	1.645	1.655	1.668	1.685	1.697	1.71	1.724	1.734	1.75	1.761	1.772	1.789	1.805	1.82	1.835	1.85	1.866	1.869
227	High variant	Tonga		776	Country/Area	957	105.697	106.757	107.879	109.038	110.23	111.471	112.731	114.029	115.353	116.724	118.107	119.538	120.982	122.473	123.94	125.413	126.875	128.329	129.774	131.208	132.62	134.026	135.417	136.809	138.179	139.522	140.856	142.194	143.506	144.835	146.134	147.465	148.79	150.127	151.477	152.846	154.244	155.656	157.088	158.538	160.005	161.479	162.965
228	High variant	Tuvalu		798	Country/Area	957	11.792	11.939	12.094	12.261	12.422	12.59	12.761	12.93	13.1	13.284	13.472	13.652	13.84	14.043	14.228	14.421	14.616	14.813	15.007	15.207	15.409	15.607	15.816	16.018	16.228	16.438	16.647	16.864	17.086	17.302	17.521	17.754	17.98	18.214	18.439	18.668	18.91	19.154	19.386	19.631	19.867	20.106	20.356
229	High variant	Wallis and Futuna Islands	2	876	Country/Area	957	11.246	11.129	11.034	10.969	10.899	10.828	10.771	10.724	10.679	10.637	10.595	10.574	10.541	10.512	10.477	10.454	10.426	10.389	10.357	10.327	10.283	10.242	10.206	10.168	10.12	10.079	10.039	9.999	9.959	9.917	9.877	9.829	9.796	9.756	9.702	9.669	9.626	9.59	9.558	9.518	9.476	9.432	9.395
230	High variant	EUROPE AND NORTHERN AMERICA		1829	SDG region	1828	1.11651e+06	1.11978e+06	1.12325e+06	1.12687e+06	1.13059e+06	1.13437e+06	1.13821e+06	1.1421e+06	1.14603e+06	1.15004e+06	1.15412e+06	1.15828e+06	1.16249e+06	1.1667e+06	1.17083e+06	1.17486e+06	1.17874e+06	1.1825e+06	1.18615e+06	1.18971e+06	1.19322e+06	1.19668e+06	1.20008e+06	1.20345e+06	1.2068e+06	1.21013e+06	1.21345e+06	1.21679e+06	1.22016e+06	1.2236e+06	1.22711e+06	1.23072e+06	1.23444e+06	1.23828e+06	1.24226e+06	1.24639e+06	1.25068e+06	1.25514e+06	1.25977e+06	1.26455e+06	1.26948e+06	1.27456e+06	1.2798e+06
231	High variant	EUROPE		917	SDG subregion	1829	747636	748325	749062	749828	750606	751386	752162	752934	753707	754488	755282	756090	756905	757709	758476	759189	759843	760442	760996	761523	762034	762535	763024	763505	763977	764442	764905	765372	765851	766350	766878	767440	768040	768686	769385	770142	770964	771853	772812	773843	774949	776132	777395
232	High variant	Eastern Europe		923	Subregion	917	293013	292806	292577	292324	292046	291743	291417	291070	290706	290327	289938	289541	289139	288731	288317	287898	287475	287051	286636	286239	285867	285524	285212	284930	284679	284459	284271	284115	283992	283899	283836	283802	283797	283819	283864	283930	284017	284125	284251	284393	284552	284727	284918
233	High variant	Belarus		112	Country/Area	923	9449.32	9453.22	9456.24	9458.26	9459.24	9459.11	9457.88	9455.52	9452.08	9447.58	9442.08	9435.67	9428.42	9420.47	9411.9	9402.91	9393.52	9383.95	9374.51	9365.7	9357.82	9351.07	9345.46	9341.05	9337.79	9335.69	9334.77	9335.07	9336.57	9339.25	9343.03	9347.91	9353.86	9360.77	9368.56	9377.12	9386.43	9396.44	9407.05	9418.14	9429.61	9441.46	9453.71
234	High variant	Bulgaria		100	Country/Area	923	6948.44	6903.3	6859.25	6816.12	6773.73	6731.95	6690.68	6649.81	6609.27	6569.04	6529.07	6489.33	6449.82	6410.48	6371.34	6332.39	6293.6	6255.05	6216.95	6179.55	6143.04	6107.52	6072.98	6039.37	6006.63	5974.74	5943.66	5913.45	5884.07	5855.43	5827.54	5800.35	5773.87	5748.08	5722.94	5698.44	5674.59	5651.37	5628.79	5606.91	5585.73	5565.27	5545.55
235	High variant	Czechia		203	Country/Area	923	10709	10735.4	10761.2	10786.3	10810.6	10834	10856.4	10877.9	10898.3	10917.9	10936.4	10954.2	10971.1	10987.4	11003.3	11018.7	11034	11049.1	11064.5	11080.8	11098.3	11117.3	11137.6	11159.3	11182.3	11206.4	11231.6	11257.9	11285.4	11313.8	11343	11373	11403.7	11435.1	11466.9	11499	11531.4	11564.1	11597	11629.8	11662.4	11694.9	11727.4
236	High variant	Hungary		348	Country/Area	923	9660.35	9643.09	9627.54	9613.17	9599.55	9586.29	9573.13	9559.88	9546.39	9532.62	9518.53	9504.05	9489.04	9473.32	9456.62	9438.79	9419.8	9399.77	9379.06	9358.13	9337.41	9317	9297	9277.59	9258.93	9241.2	9224.51	9208.96	9194.63	9181.62	9169.98	9159.75	9150.95	9143.56	9137.54	9132.85	9129.5	9127.42	9126.45	9126.39	9127.08	9128.45	9130.51
237	High variant	Poland		616	Country/Area	923	37846.6	37844.9	37841.2	37834.2	37823.3	37807.8	37787.2	37761.3	37729.9	37693.1	37651	37603.5	37550.6	37491.9	37426.9	37355.6	37278	37194.6	37106.1	37013.7	36918.4	36820.7	36721	36619.9	36518	36416.1	36314.5	36213.6	36114.3	36017.6	35924	35833.9	35747.3	35664.1	35584	35506.5	35431.8	35359.5	35289	35219.5	35150.3	35081.1	35011.9
238	High variant	Republic of Moldova	22	498	Country/Area	923	4033.96	4029.72	4025.31	4020.57	4015.38	4009.6	4003.14	3995.96	3988.03	3979.32	3969.81	3959.52	3948.43	3936.51	3923.7	3910.02	3895.48	3880.13	3864.16	3847.78	3831.15	3814.36	3797.47	3780.52	3763.59	3746.75	3730.05	3713.51	3697.17	3681.07	3665.2	3649.58	3634.21	3619.05	3604.03	3589.12	3574.28	3559.51	3544.75	3529.91	3514.92	3499.8	3484.54
239	High variant	Romania		642	Country/Area	923	19237.7	19162.4	19092.5	19027	18965	18906.1	18849.5	18794.9	18741.8	18690.1	18639.4	18589.5	18540	18490.5	18440.6	18389.8	18338	18285.1	18231.5	18177.5	18123.4	18069.2	18015	17961	17907.4	17854.4	17802.1	17750.7	17700.4	17651.3	17603.6	17557.6	17513.1	17470.4	17429.3	17389.8	17352.2	17316.3	17282.3	17250.2	17220	17191.8	17165.6
240	High variant	Russian Federation		643	Country/Area	923	145934	146056	146147	146209	146244	146256	146247	146222	146182	146132	146076	146017	145956	145897	145840	145788	145742	145706	145683	145680	145701	145748	145820	145919	146042	146189	146359	146553	146768	147002	147253	147521	147804	148101	148409	148728	149056	149393	149739	150093	150455	150825	151205
241	High variant	Slovakia		703	Country/Area	923	5459.64	5466.61	5473.61	5480.41	5486.77	5492.52	5497.51	5501.64	5504.84	5507.04	5508.22	5508.34	5507.41	5505.35	5502.15	5497.81	5492.33	5485.82	5478.5	5470.68	5462.61	5454.4	5446.1	5437.8	5429.57	5421.5	5413.64	5406.05	5398.82	5392.05	5385.74	5379.96	5374.69	5369.92	5365.6	5361.71	5358.23	5355.12	5352.25	5349.49	5346.67	5343.79	5340.83
242	High variant	Ukraine	23	804	Country/Area	923	43733.8	43511	43292.9	43078.6	42867.6	42659.5	42454.3	42252	42053.1	41858	41667.2	41480.7	41298.1	41118.6	40940.9	40764	40587.6	40412	40237.5	40064.7	39893.9	39725.4	39558.9	39394.7	39232.9	39073.8	38917.3	38763.7	38612.9	38465.2	38320.7	38179.5	38041.6	37907.1	37775.8	37647.8	37523	37401.7	37284	37170.2	37060.4	36954.7	36853.4
243	High variant	Northern Europe		924	Subregion	917	106261	106793	107348	107921	108507	109103	109706	110314	110926	111543	112164	112788	113414	114038	114655	115264	115862	116450	117032	117611	118190	118771	119352	119935	120519	121106	121695	122288	122885	123488	124096	124712	125334	125965	126606	127258	127920	128595	129281	129978	130687	131407	132138
244	High variant	Channel Islands	24	830	Country/Area	924	173.859	175.229	176.648	178.09	179.574	181.066	182.565	184.078	185.587	187.1	188.61	190.113	191.62	193.102	194.557	195.984	197.373	198.724	200.042	201.334	202.604	203.852	205.079	206.285	207.475	208.657	209.816	210.977	212.126	213.275	214.44	215.602	216.787	217.977	219.188	220.421	221.673	222.94	224.242	225.566	226.906	228.283	229.67
245	High variant	Denmark	25	208	Country/Area	924	5792.2	5819.18	5848.56	5879.84	5912.56	5946.37	5980.93	6016.06	6051.56	6087.34	6123.3	6159.3	6195.14	6230.54	6265.2	6298.9	6331.52	6363.13	6393.83	6423.82	6453.29	6482.31	6510.95	6539.4	6567.91	6596.64	6625.73	6655.31	6685.62	6716.94	6749.43	6783.25	6818.45	6855.07	6893.19	6932.8	6973.93	7016.59	7060.68	7106.11	7152.8	7200.66	7249.67
246	High variant	Estonia		233	Country/Area	924	1326.54	1324.78	1322.9	1320.91	1318.81	1316.59	1314.27	1311.85	1309.35	1306.73	1304.03	1301.26	1298.4	1295.5	1292.55	1289.59	1286.63	1283.65	1280.69	1277.79	1274.95	1272.2	1269.52	1266.92	1264.36	1261.81	1259.26	1256.78	1254.29	1251.84	1249.45	1247.1	1244.81	1242.54	1240.38	1238.27	1236.24	1234.3	1232.41	1230.58	1228.77	1227.01	1225.26
247	High variant	Faroe Islands	26	234	Country/Area	924	48.865	49.066	49.298	49.573	49.859	50.152	50.478	50.802	51.147	51.499	51.857	52.217	52.586	52.953	53.308	53.655	53.979	54.296	54.597	54.893	55.17	55.444	55.695	55.949	56.201	56.451	56.691	56.935	57.194	57.451	57.728	58.003	58.297	58.6	58.914	59.236	59.577	59.926	60.306	60.682	61.062	61.466	61.878
248	High variant	Finland	27	246	Country/Area	924	5540.72	5553.33	5567.02	5581.46	5596.36	5611.5	5626.78	5642.1	5657.48	5672.9	5688.4	5703.98	5719.49	5734.71	5749.32	5763.12	5776.03	5788.13	5799.53	5810.47	5821.11	5831.56	5841.79	5851.91	5861.99	5872.12	5882.39	5892.85	5903.66	5914.91	5926.75	5939.21	5952.37	5966.34	5981.23	5997.15	6014.11	6032.14	6051.27	6071.54	6092.96	6115.51	6139.16
249	High variant	Iceland		352	Country/Area	924	341.25	343.72	346.258	348.837	351.453	354.082	356.724	359.348	361.981	364.592	367.213	369.814	372.397	374.926	377.403	379.814	382.145	384.384	386.551	388.645	390.68	392.628	394.52	396.348	398.1	399.806	401.461	403.068	404.623	406.159	407.687	409.206	410.707	412.229	413.752	415.311	416.895	418.522	420.166	421.858	423.583	425.332	427.129
250	High variant	Ireland		372	Country/Area	924	4937.8	4981.66	5024.65	5066.82	5108.25	5149.06	5189.4	5229.44	5269.34	5309.3	5349.47	5389.94	5430.72	5471.69	5512.68	5553.58	5594.31	5634.88	5675.32	5715.66	5755.88	5795.96	5835.83	5875.31	5914.23	5952.45	5989.9	6026.56	6062.34	6097.15	6130.94	6163.66	6195.35	6226.12	6256.05	6285.26	6313.82	6341.77	6369.23	6396.34	6423.21	6449.92	6476.58
251	High variant	Isle of Man	14	833	Country/Area	924	85.032	85.431	85.856	86.298	86.741	87.207	87.679	88.162	88.637	89.13	89.633	90.134	90.647	91.167	91.661	92.144	92.617	93.075	93.517	93.933	94.343	94.739	95.131	95.504	95.861	96.201	96.518	96.821	97.103	97.4	97.706	98.029	98.366	98.716	99.09	99.475	99.889	100.324	100.779	101.256	101.76	102.29	102.843
252	High variant	Latvia		428	Country/Area	924	1886.2	1869.9	1854.32	1839.41	1825.17	1811.54	1798.49	1785.93	1773.79	1762.02	1750.52	1739.29	1728.29	1717.6	1707.26	1697.34	1687.83	1678.72	1670.02	1661.72	1653.84	1646.35	1639.27	1632.61	1626.38	1620.56	1615.17	1610.19	1605.58	1601.29	1597.25	1593.46	1589.9	1586.55	1583.34	1580.24	1577.24	1574.34	1571.52	1568.77	1566.1	1563.49	1560.98
253	High variant	Lithuania		440	Country/Area	924	2722.29	2695.7	2671.5	2649.41	2629.14	2610.4	2592.93	2576.42	2560.64	2545.29	2530.19	2515.17	2500.16	2485.16	2470.25	2455.52	2440.92	2426.44	2412.23	2398.46	2385.27	2372.7	2360.74	2349.43	2338.74	2328.71	2319.35	2310.62	2302.44	2294.68	2287.24	2280.06	2273.16	2266.49	2260.04	2253.8	2247.75	2241.87	2236.14	2230.54	2225.05	2219.67	2214.4
254	High variant	Norway	28	578	Country/Area	924	5421.24	5472.6	5526.23	5581.66	5638.49	5696.41	5755.15	5814.51	5874.36	5934.65	5995.27	6056.1	6116.97	6177.59	6237.58	6296.72	6354.88	6412.08	6468.42	6524.04	6579.11	6633.65	6687.68	6741.35	6794.77	6848.1	6901.4	6954.8	7008.42	7062.44	7117.03	7172.26	7228.19	7284.91	7342.52	7401.06	7460.6	7521.15	7582.66	7645.09	7708.42	7772.59	7837.62
255	High variant	Sweden		752	Country/Area	924	10099.3	10170.2	10242.7	10316.5	10391.1	10466.2	10541.3	10616.3	10690.9	10764.9	10838.1	10910.4	10981.9	11052.5	11122.2	11191.2	11259.4	11327	11394.3	11462.1	11530.5	11599.9	11670.3	11741.8	11814.5	11888.3	11963.5	12040	12117.8	12197.1	12277.6	12359.5	12442.7	12527.2	12612.9	12699.8	12787.9	12877.1	12967.5	13058.9	13151.3	13244.7	13339.1
256	High variant	United Kingdom	29	826	Country/Area	924	67886	68252.1	68631.8	69021.9	69419.4	69822.2	70228.9	70638.8	71051.7	71467.9	71887.7	72310.7	72735.7	73160.2	73581	73996	74404.1	74805.9	75203.2	75598.4	75993.7	76389.5	76785.6	77182.2	77579	77976.1	78373.8	78772.9	79173.8	79577	79983.1	80392.3	80805.2	81222.6	81645.5	82074.8	82510.8	82953.8	83403.7	83860.7	84324.7	84795.8	85274
257	High variant	Southern Europe		925	Subregion	917	152215	152100	151989	151879	151769	151658	151546	151435	151328	151227	151135	151052	150976	150901	150819	150724	150612	150485	150340	150178	149998	149799	149581	149340	149075	148785	148470	148131	147769	147387	146986	146568	146136	145692	145240	144785	144327	143871	143418	142972	142537	142114	141706
258	High variant	Albania		8	Country/Area	925	2877.8	2874.95	2872.59	2870.43	2868.18	2865.67	2862.81	2859.57	2855.99	2852.16	2848.14	2843.96	2839.5	2834.49	2828.59	2821.57	2813.34	2803.99	2793.7	2782.74	2771.32	2759.49	2747.28	2734.76	2722.05	2709.2	2696.3	2683.37	2670.46	2657.6	2644.78	2632.05	2619.43	2606.9	2594.46	2582.09	2569.8	2557.57	2545.38	2533.17	2520.91	2508.6	2496.19
259	High variant	Andorra		20	Country/Area	925	77.265	77.491	77.715	77.916	78.116	78.3	78.496	78.683	78.86	79.051	79.245	79.448	79.67	79.89	80.107	80.312	80.519	80.73	80.914	81.094	81.256	81.413	81.537	81.634	81.715	81.774	81.792	81.784	81.749	81.684	81.591	81.475	81.331	81.163	80.983	80.78	80.582	80.349	80.137	79.912	79.679	79.468	79.264
260	High variant	Bosnia and Herzegovina		70	Country/Area	925	3280.82	3271.98	3263.24	3254.47	3245.62	3236.59	3227.37	3217.96	3208.37	3198.66	3188.83	3178.92	3168.85	3158.48	3147.7	3136.38	3124.48	3112.01	3099.01	3085.52	3071.58	3057.22	3042.44	3027.28	3011.71	2995.77	2979.52	2963	2946.34	2929.7	2913.18	2896.84	2880.75	2865.03	2849.77	2835.09	2821.05	2807.64	2794.85	2782.67	2771.05	2759.98	2749.45
261	High variant	Croatia		191	Country/Area	925	4105.27	4087.59	4070.81	4054.71	4039.11	4023.89	4008.95	3994.26	3979.79	3965.58	3951.59	3937.85	3924.22	3910.57	3896.67	3882.36	3867.6	3852.39	3836.8	3820.91	3804.81	3788.52	3772.06	3755.44	3738.71	3721.91	3705.08	3688.27	3671.54	3654.95	3638.57	3622.43	3606.55	3591.04	3575.98	3561.43	3547.41	3533.94	3521	3508.56	3496.59	3485.11	3474.1
262	High variant	Gibraltar	14	292	Country/Area	925	33.691	33.723	33.79	33.839	33.936	34.01	34.114	34.22	34.336	34.463	34.577	34.715	34.842	34.978	35.118	35.241	35.376	35.496	35.625	35.728	35.839	35.952	36.051	36.147	36.245	36.34	36.421	36.507	36.591	36.666	36.743	36.822	36.898	36.977	37.039	37.121	37.188	37.26	37.32	37.388	37.457	37.521	37.589
263	High variant	Greece		300	Country/Area	925	10423.1	10377.1	10334.8	10295.6	10259.1	10225	10193.4	10164.2	10137.6	10113.6	10092.4	10073.9	10057.8	10043.3	10029.7	10016.1	10002.2	9987.89	9973.08	9957.73	9941.76	9925.05	9907.39	9888.55	9868.33	9846.54	9823.13	9798.15	9771.61	9743.63	9714.32	9683.73	9652	9619.39	9586.25	9552.87	9519.44	9486.11	9453.07	9420.53	9388.72	9357.8	9327.9
264	High variant	Holy See	30	336	Country/Area	925	0.809	0.812	0.808	0.808	0.803	0.799	0.795	0.794	0.808	0.808	0.81	0.806	0.811	0.813	0.828	0.832	0.834	0.837	0.834	0.831	0.828	0.826	0.828	0.826	0.825	0.828	0.834	0.844	0.846	0.842	0.841	0.839	0.847	0.857	0.859	0.858	0.865	0.867	0.87	0.887	0.89	0.884	0.885
265	High variant	Italy		380	Country/Area	925	60461.8	60437	60406.1	60369.8	60328.7	60284	60237.1	60189.8	60143.9	60101.6	60064.3	60032.8	60006.3	59982.5	59958	59930.3	59898.1	59861.3	59817.9	59766.3	59704.9	59633	59550.1	59455	59346.6	59224.3	59087.8	58937.7	58775.5	58603.3	58422.8	58235.2	58041.2	57842.4	57640.3	57436.4	57232.2	57028.9	56828.1	56631.7	56441.3	56257.9	56082.7
266	High variant	Malta		470	Country/Area	925	441.539	443.428	445.313	447.179	449	450.747	452.394	453.948	455.359	456.635	457.744	458.689	459.467	460.083	460.551	460.876	461.065	461.117	461.082	460.955	460.782	460.557	460.316	460.046	459.789	459.55	459.347	459.17	459.055	459.01	459.041	459.173	459.377	459.671	460.056	460.51	461.066	461.674	462.354	463.075	463.822	464.598	465.375
267	High variant	Montenegro		499	Country/Area	925	628.062	628.706	629.471	630.343	631.271	632.23	633.188	634.141	635.085	636.016	636.911	637.802	638.632	639.396	640.064	640.598	641.001	641.274	641.424	641.482	641.44	641.338	641.15	640.904	640.654	640.378	640.103	639.847	639.616	639.438	639.337	639.301	639.353	639.49	639.701	640.001	640.368	640.831	641.35	641.918	642.512	643.143	643.796
268	High variant	North Macedonia		807	Country/Area	925	2083.38	2084.92	2086.61	2088.34	2089.97	2091.44	2092.64	2093.56	2094.17	2094.44	2094.36	2093.93	2093.11	2091.84	2090.03	2087.67	2084.73	2081.22	2077.26	2072.93	2068.32	2063.49	2058.44	2053.22	2047.88	2042.49	2037.06	2031.64	2026.26	2020.94	2015.72	2010.62	2005.64	2000.8	1996.09	1991.55	1987.13	1982.86	1978.71	1974.64	1970.61	1966.63	1962.69
269	High variant	Portugal		620	Country/Area	925	10196.7	10180	10165.6	10153.1	10142.1	10132.1	10123.1	10114.8	10107.2	10100.2	10093.8	10087.8	10082.1	10076	10069.2	10061.2	10051.7	10040.8	10028.4	10014.7	9999.48	9982.9	9964.88	9945.41	9924.46	9902.05	9878.25	9853.23	9827.18	9800.43	9773.23	9745.75	9718.15	9690.74	9663.86	9637.82	9612.78	9588.88	9566.18	9544.84	9524.87	9506.4	9489.49
270	High variant	San Marino		674	Country/Area	925	33.938	34.046	34.16	34.266	34.388	34.493	34.601	34.71	34.809	34.911	35.012	35.105	35.204	35.287	35.391	35.458	35.538	35.618	35.682	35.742	35.793	35.835	35.885	35.917	35.936	35.96	35.982	35.99	35.995	36.005	36.008	36.006	36.006	36.015	36.015	36.015	36.024	36.026	36.043	36.063	36.088	36.106	36.147
271	High variant	Serbia	31	688	Country/Area	925	8737.37	8702.04	8668.45	8636.1	8604.61	8573.63	8542.98	8512.44	8481.98	8451.55	8421.15	8390.69	8360	8328.79	8296.71	8263.5	8229.07	8193.48	8156.93	8119.69	8081.98	8043.91	8005.52	7966.92	7928.35	7889.94	7851.81	7814.02	7776.74	7740.05	7704.08	7668.89	7634.52	7601.04	7568.5	7536.92	7506.34	7476.73	7447.99	7420.01	7392.7	7366.02	7339.92
272	High variant	Slovenia		705	Country/Area	925	2078.93	2081.02	2082.88	2084.54	2085.97	2087.2	2088.22	2089.08	2089.8	2090.42	2090.97	2091.44	2091.86	2092.2	2092.44	2092.52	2092.44	2092.24	2091.91	2091.46	2090.94	2090.34	2089.69	2088.94	2088.12	2087.21	2086.21	2085.15	2084.07	2082.99	2081.96	2080.98	2080.07	2079.26	2078.57	2078.02	2077.62	2077.4	2077.35	2077.5	2077.84	2078.39	2079.16
273	High variant	Spain	32	724	Country/Area	925	46754.8	46785.3	46816.7	46847.8	46878.2	46907.5	46935.6	46962.8	46989.6	47016.9	47045.1	47074.3	47104	47132.5	47158	47178.9	47194.5	47204.6	47209.8	47210.5	47207.1	47199.5	47187	47168.8	47143.8	47111.1	47070.6	47022.3	46965.4	46899.3	46823.6	46738.2	46643.8	46541.2	46431.9	46317.1	46197.4	46073.6	45947.1	45819.3	45691.8	45565.5	45441.3
274	High variant	Western Europe		926	Subregion	917	196146	196626	197149	197705	198285	198882	199493	200115	200747	201390	202044	202708	203376	204039	204684	205304	205894	206455	206988	207495	207979	208440	208880	209300	209702	210091	210469	210838	211205	211577	211960	212358	212773	213210	213674	214170	214699	215263	215863	216500	217174	217885	218633
275	High variant	Austria		40	Country/Area	926	9006.4	9037.01	9069.87	9104.33	9139.82	9175.91	9212.25	9248.56	9284.68	9320.52	9355.97	9390.92	9425.1	9458.18	9489.7	9519.38	9547.03	9572.77	9596.79	9619.47	9641.09	9661.76	9681.52	9700.44	9718.59	9736.1	9753.1	9769.75	9786.2	9802.65	9819.29	9836.24	9853.62	9871.75	9890.93	9911.41	9933.31	9956.67	9981.56	10008	10036	10065.6	10096.8
276	High variant	Belgium		56	Country/Area	926	11589.6	11636.8	11686.7	11738.6	11792.1	11846.7	11902.2	11958.5	12015.5	12073.3	12131.7	12190.8	12250.3	12309.7	12368.2	12425.6	12481.6	12536.2	12589.5	12641.8	12693.4	12744.2	12794.2	12843.5	12892.1	12939.9	12987.1	13033.8	13080.4	13127.3	13174.6	13222.7	13271.6	13321.6	13373.1	13426.2	13481.2	13538.1	13596.8	13657.3	13719.4	13783.3	13848.8
277	High variant	France	33	250	Country/Area	926	65273.5	65504.8	65749.5	66004.2	66266.2	66533.8	66806	67082.5	67363.7	67650.5	67943.5	68242.4	68545.2	68848.4	69147.1	69437.8	69719.1	69991.1	70253.8	70507.4	70752.5	70989	71217.1	71437.8	71652.3	71862	72067.6	72270	72471.3	72673.8	72879.6	73089.7	73304.9	73526.4	73755.3	73992.6	74238.9	74494.6	74760	75034.8	75318.9	75612.4	75915.2
278	High variant	Germany		276	Country/Area	926	83783.9	83821.2	83877.3	83948.2	84030.4	84121.5	84219.6	84323.7	84433.6	84549.4	84671	84797.7	84927.5	85056.6	85180.5	85295.8	85400.9	85496.1	85581.3	85657.4	85725.2	85785	85836.9	85881.3	85919	85950.7	85977.4	86000.7	86023.3	86048.4	86078.9	86116.4	86162.3	86218.8	86288.3	86373	86473.9	86591.6	86727.5	86882.2	87056.5	87250.5	87463.9
279	High variant	Liechtenstein		438	Country/Area	926	38.137	38.298	38.487	38.684	38.894	39.105	39.319	39.536	39.77	40.002	40.232	40.466	40.705	40.933	41.152	41.375	41.577	41.776	41.946	42.118	42.285	42.444	42.599	42.744	42.884	43.023	43.16	43.289	43.42	43.569	43.714	43.861	44.034	44.205	44.391	44.593	44.81	45.043	45.282	45.538	45.809	46.087	46.395
280	High variant	Luxembourg		442	Country/Area	926	625.976	634.462	642.807	651.021	659.045	666.931	674.696	682.371	690.012	697.671	705.39	713.191	721.076	728.995	736.861	744.613	752.252	759.789	767.237	774.6	781.903	789.15	796.329	803.464	810.558	817.618	824.659	831.694	838.702	845.74	852.793	859.889	867.024	874.205	881.454	888.78	896.178	903.658	911.223	918.88	926.628	934.464	942.412
281	High variant	Monaco		492	Country/Area	926	39.244	39.541	39.846	40.162	40.482	40.798	41.131	41.448	41.774	42.101	42.431	42.775	43.111	43.454	43.789	44.139	44.459	44.788	45.1	45.406	45.718	46.029	46.329	46.638	46.948	47.268	47.59	47.916	48.252	48.597	48.952	49.335	49.725	50.132	50.565	51.004	51.469	51.935	52.43	52.938	53.458	53.994	54.54
282	High variant	Netherlands	34	528	Country/Area	926	17134.9	17191	17251.9	17316	17382.3	17449.8	17517.8	17585.7	17653.4	17720.7	17787.5	17853.4	17917.9	17980	18038.6	18092.7	18142.1	18186.9	18227.2	18263.5	18296.3	18325.6	18351.6	18375	18396.2	18415.9	18434.5	18452.3	18470.1	18488.7	18508.9	18530.9	18555.1	18582	18612.1	18645.8	18683.4	18724.8	18770	18818.9	18871.1	18926.7	18985.5
283	High variant	Switzerland		756	Country/Area	926	8654.62	8722.45	8792.23	8863.39	8935.43	9007.9	9080.48	9152.86	9224.8	9296.14	9366.73	9436.42	9505.03	9572.35	9638.15	9702.29	9764.68	9825.39	9884.66	9942.85	10000.3	10057	10113.1	10168.7	10223.9	10278.9	10333.7	10388.5	10443.4	10498.4	10553.5	10608.9	10664.7	10721.1	10778.3	10836.5	10895.8	10956.2	11018	11081.1	11145.6	11211.7	11279.3
284	High variant	NORTHERN AMERICA		918	SDG subregion	1829	368870	371454	374190	377042	379981	382988	386049	389161	392325	395549	398838	402187	405582	408987	412359	415667	418899	422057	425149	428188	431184	434142	437060	439949	442820	445684	448547	451418	454312	457246	460234	463283	466399	469592	472872	476247	479720	483290	486954	490703	494530	498432	502405
285	High variant	Bermuda	14	60	Country/Area	918	62.273	62.195	62.136	62.071	62.016	61.95	61.89	61.83	61.762	61.683	61.613	61.542	61.463	61.364	61.252	61.146	61.002	60.849	60.675	60.489	60.277	60.056	59.821	59.568	59.3	59.031	58.746	58.444	58.149	57.857	57.559	57.277	56.994	56.723	56.477	56.236	56.023	55.823	55.645	55.472	55.339	55.215	55.109
286	High variant	Canada		124	Country/Area	918	37742.2	38103.7	38478.6	38863.4	39255.4	39652.5	40053.2	40456.8	40863.1	41272.4	41684.9	42099.9	42516.3	42931.1	43341.2	43744.1	44138.8	44525.6	44905.6	45280.3	45651	46018.2	46382	46743.1	47102.6	47461.3	47819.9	48179.3	48540.5	48904.5	49272.4	49644.8	50022.4	50406.7	50799.1	51200.8	51612.4	52033.8	52465.4	52907.4	53359.6	53822.2	54294.6
287	High variant	Greenland	26	304	Country/Area	918	56.772	56.962	57.159	57.334	57.515	57.679	57.84	57.993	58.117	58.25	58.353	58.461	58.546	58.61	58.676	58.722	58.744	58.75	58.742	58.722	58.698	58.669	58.629	58.585	58.552	58.504	58.464	58.424	58.39	58.367	58.348	58.345	58.36	58.381	58.412	58.457	58.503	58.565	58.643	58.724	58.811	58.901	59.003
288	High variant	Saint Pierre and Miquelon	2	666	Country/Area	918	5.795	5.78	5.775	5.77	5.76	5.761	5.758	5.758	5.765	5.766	5.769	5.775	5.784	5.795	5.795	5.806	5.811	5.822	5.824	5.826	5.819	5.81	5.802	5.791	5.773	5.761	5.744	5.724	5.703	5.685	5.668	5.642	5.626	5.604	5.583	5.564	5.546	5.534	5.521	5.508	5.501	5.494	5.488
289	High variant	United States of America	35	840	Country/Area	918	331003	333225	335586	338053	340601	343210	345871	348579	351337	354151	357027	359962	362940	365930	368892	371798	374634	377406	380118	382783	385409	387999	390554	393082	395594	398099	400604	403116	405649	408219	410840	413517	416255	419064	421952	424925	427987	431137	434369	437676	441050	444490	447991
[truncated: 38 more columns]

## Sheet: LOW VARIANT
United Nations
Population Division
Department of Economic and Social Affairs
World Population Prospects 2019
File POP/1-1: Total population (both sexes combined) by region, subregion and country, annually for 1950-2100 (thousands)
Low fertility variant, 2020 - 2100
POP/DB/WPP/Rev.2019/POP/F01-1
© August 2019 by United Nations, made available under a Creative Commons license CC BY 3.0 IGO: http://creativecommons.org/licenses/by/3.0/igo/
Suggested citation: United Nations, Department of Economic and Social Affairs, Population Division (2019). World Population Prospects 2019, Online Edition. Rev. 1.
							Total population, both sexes combined, as of 1 July (thousands)
Index	Variant	Region, subregion, country or area *	Notes	Country code	Type	Parent code	2020	2021	2022	2023	2024	2025	2026	2027	2028	2029	2030	2031	2032	2033	2034	2035	2036	2037	2038	2039	2040	2041	2042	2043	2044	2045	2046	2047	2048	2049	2050	2051	2052	2053	2054	2055	2056	2057	2058	2059	2060	2061	2062
1	Low variant	WORLD		900	World	0	7.7948e+06	7.86562e+06	7.93254e+06	7.99599e+06	8.05636e+06	8.11391e+06	8.16885e+06	8.22126e+06	8.27119e+06	8.31859e+06	8.36345e+06	8.40584e+06	8.44593e+06	8.4841e+06	8.52077e+06	8.55628e+06	8.59077e+06	8.62418e+06	8.65638e+06	8.68715e+06	8.71631e+06	8.74382e+06	8.7697e+06	8.79383e+06	8.81611e+06	8.83643e+06	8.85473e+06	8.87098e+06	8.88512e+06	8.89707e+06	8.9068e+06	8.91428e+06	8.9195e+06	8.92248e+06	8.92323e+06	8.92177e+06	8.91811e+06	8.9123e+06	8.90442e+06	8.89458e+06	8.88288e+06	8.86937e+06	8.85408e+06
2	Low variant	UN development groups	a	1803	Label/Separator	900	...	...	...	...	...	...	...	...	...	...	...	...	...	...	...	...	...	...	...	...	...	...	...	...	...	...	...	...	...	...	...	...	...	...	...	...	...	...	...	...	...	...	...
3	Low variant	More developed regions	b	901	Development Group	1803	1.2733e+06	1.27394e+06	1.27405e+06	1.27368e+06	1.27289e+06	1.27171e+06	1.27019e+06	1.26835e+06	1.26621e+06	1.26379e+06	1.2611e+06	1.25817e+06	1.25503e+06	1.2517e+06	1.24824e+06	1.24468e+06	1.24102e+06	1.23729e+06	1.23348e+06	1.22957e+06	1.22555e+06	1.22142e+06	1.2172e+06	1.21288e+06	1.20845e+06	1.20392e+06	1.19928e+06	1.19453e+06	1.18967e+06	1.18467e+06	1.17954e+06	1.17427e+06	1.16886e+06	1.16332e+06	1.15762e+06	1.15178e+06	1.14579e+06	1.13966e+06	1.13341e+06	1.12704e+06	1.12058e+06	1.11403e+06	1.1074e+06
4	Low variant	Less developed regions	c	902	Development Group	1803	6.52149e+06	6.59168e+06	6.65849e+06	6.72231e+06	6.78347e+06	6.8422e+06	6.89866e+06	6.95292e+06	7.00498e+06	7.0548e+06	7.10235e+06	7147661	7.1909e+06	7.23239e+06	7.27253e+06	7.31161e+06	7.34974e+06	7.38688e+06	7.4229e+06	7.45759e+06	7.49076e+06	7.5224e+06	7.55249e+06	7.58095e+06	7.60766e+06	7.63251e+06	7.65545e+06	7.67645e+06	7.69545e+06	7.7124e+06	7.72726e+06	7.74001e+06	7.75064e+06	7.75917e+06	7.76561e+06	7.76999e+06	7.77232e+06	7.77264e+06	7.77101e+06	7.76754e+06	7.7623e+06	7.75534e+06	7.74669e+06
5	Low variant	Least developed countries	d	941	Development Group	902	1.05744e+06	1.0806e+06	1.10356e+06	1.12638e+06	1.14911e+06	1.17178e+06	1.19441e+06	1.217e+06	1.23951e+06	1.26194e+06	1.28424e+06	1.30642e+06	1.32849e+06	1.3505e+06	1.37253e+06	1.39463e+06	1.41681e+06	1.43905e+06	1.46129e+06	1.4835e+06	1.50561e+06	1.5276e+06	1.54948e+06	1.57119e+06	1.59271e+06	1.61401e+06	1.63505e+06	1.65583e+06	1.67631e+06	1.69648e+06	1.71632e+06	1.73582e+06	1.75494e+06	1.7737e+06	1.79208e+06	1.81008e+06	1.82769e+06	1.84489e+06	1.86169e+06	1.87808e+06	1.89406e+06	1.90963e+06	1.92478e+06
6	Low variant	Less developed regions, excluding least developed countries	e	934	Development Group	902	5.46406e+06	5.51108e+06	5.55493e+06	5.59593e+06	5.63436e+06	5.67042e+06	5.70425e+06	5.73592e+06	5.76547e+06	5.79286e+06	5.81811e+06	5.84124e+06	5.86242e+06	5.88189e+06	5.9e+06	5.91697e+06	5.93293e+06	5.94784e+06	5.96161e+06	5.97409e+06	5.98515e+06	5.99479e+06	6.00302e+06	6.00976e+06	6.01495e+06	6.0185e+06	6.0204e+06	6.02062e+06	6.01914e+06	6.01592e+06	6.01093e+06	6.00419e+06	5.9957e+06	5.98546e+06	5.97352e+06	5.95991e+06	5.94463e+06	5.92775e+06	5.90933e+06	5.88946e+06	5.86824e+06	5.84571e+06	5.82191e+06
7	Low variant	Less developed regions, excluding China		948	Development Group	1803	5.05021e+06	5.11713e+06	5.18163e+06	5.24402e+06	5.30454e+06	5.36337e+06	5.42061e+06	5.4763e+06	5.53042e+06	5.58291e+06	5.6337e+06	5.68281e+06	5.73036e+06	5.77662e+06	5.82192e+06	5.8665e+06	5.91045e+06	5.95371e+06	5.99616e+06	6.03761e+06	6.07789e+06	6.11697e+06	6.15485e+06	6.19143e+06	6.22662e+06	6.26031e+06	6.29247e+06	6.32304e+06	6.35197e+06	6.3792e+06	6.40467e+06	6.42836e+06	6.45026e+06	6.47034e+06	6.48861e+06	6.50506e+06	6.51969e+06	6.53251e+06	6.54357e+06	6.55292e+06	6.56062e+06	6.5667e+06	6.57117e+06
8	Low variant	Land-locked Developing Countries (LLDC)	f	1636	Special other	1803	533143	544775	556228	567543	578753	589879	600934	611918	622826	633646	644364	654980	665507	675976	686432	696902	707395	717898	728388	738832	749202	759490	769688	779776	789730	799530	809163	818619	827888	836964	845837	854502	862949	871175	879177	886950	894490	901794	908863	915699	922305	928677	934813
9	Low variant	Small Island Developing States (SIDS)	g	1637	Special other	1803	72076.1	72677.6	73242.6	73775.9	74281	74760.1	75214.2	75642.8	76044.6	76417.6	76759.8	77070.9	77353.2	77611.8	77853.2	78082.4	78301.4	78509.1	78703.6	78882.1	79042.1	79183.4	79306.3	79410	79493.6	79556.1	79597.4	79616.9	79614.3	79588.8	79540.1	79468	79372.8	79254.9	79115.2	78954.3	78772.8	78570.9	78349.4	78109.1	77850.5	77574.4	77281.2
10	Low variant	World Bank income groups		1802	Label/Separator	900	...	...	...	...	...	...	...	...	...	...	...	...	...	...	...	...	...	...	...	...	...	...	...	...	...	...	...	...	...	...	...	...	...	...	...	...	...	...	...	...	...	...	...
11	Low variant	High-income countries	h	1503	Income Group	1802	1.26309e+06	1.26596e+06	1.26832e+06	1.27022e+06	1.2717e+06	1.27279e+06	1.27352e+06	1.27391e+06	1.27397e+06	1.27371e+06	1.27314e+06	1.27228e+06	1.27114e+06	1.26977e+06	1.2682e+06	1.26647e+06	1.26458e+06	1.26255e+06	1.26036e+06	1.25801e+06	1.25548e+06	1.25278e+06	1.24991e+06	1.24687e+06	1.24367e+06	1.24029e+06	1.23674e+06	1.23302e+06	1.22913e+06	1.22506e+06	1.2208e+06	1.21637e+06	1.21177e+06	1.20698e+06	1.20201e+06	1.19685e+06	1.19151e+06	1.186e+06	1.18032e+06	1.1745e+06	1.16856e+06	1.1625e+06	1.15632e+06
12	Low variant	Middle-income countries	h	1517	Income Group	1802	5.75305e+06	5.80086e+06	5.84547e+06	5.88722e+06	5.92639e+06	5.96319e+06	5.99777e+06	6.03023e+06	6.06058e+06	6.08883e+06	6.11497e+06	6.13906e+06	6.16123e+06	6.18176e+06	6.20095e+06	6.21906e+06	6.23619e+06	6.2523e+06	6.26731e+06	6.28105e+06	6.29339e+06	6.30431e+06	6.31384e+06	6.32189e+06	6.32838e+06	6.33324e+06	6.33644e+06	6.33796e+06	6.33777e+06	6.33581e+06	6.33206e+06	6.32652e+06	6.31919e+06	6.31009e+06	6.29925e+06	6.28671e+06	6.27247e+06	6.25659e+06	6.23914e+06	6.22021e+06	6.19988e+06	6.1782e+06	6.15522e+06
13	Low variant	Upper-middle-income countries	h	1502	Income Group	1517	2.65482e+06	2.66613e+06	2.67574e+06	2.68382e+06	2.69049e+06	2.69589e+06	2.70009e+06	2.70318e+06	2.70519e+06	2.70616e+06	2.70611e+06	2.7051e+06	2.70319e+06	2.70051e+06	2.69718e+06	2.69331e+06	2.68896e+06	2.68411e+06	2.67877e+06	2.67286e+06	2.66635e+06	2.65925e+06	2.65157e+06	2.64328e+06	2.63437e+06	2.62481e+06	2.61459e+06	2.60372e+06	2.59218e+06	2.57997e+06	2.56708e+06	2.5535e+06	2.53927e+06	2.52438e+06	2.50887e+06	2.49275e+06	2.47605e+06	2.45878e+06	2.441e+06	2.42274e+06	2.40404e+06	2.38494e+06	2.36546e+06
14	Low variant	Lower-middle-income countries	h	1501	Income Group	1517	3.09824e+06	3.13473e+06	3.16973e+06	3.2034e+06	3.23589e+06	3.2673e+06	3.29768e+06	3.32705e+06	3.35539e+06	3.38268e+06	3.40886e+06	3.43396e+06	3.45804e+06	3.48125e+06	3.50377e+06	3.52575e+06	3.54723e+06	3.56819e+06	3.58854e+06	3.60819e+06	3.62704e+06	3.64506e+06	3.66227e+06	3.6786e+06	3.69401e+06	3.70843e+06	3.72185e+06	3.73425e+06	3.74558e+06	3.75584e+06	3.76498e+06	3.77302e+06	3.77993e+06	3.78571e+06	3.79039e+06	3.79396e+06	3.79643e+06	3.79781e+06	3.79814e+06	3.79747e+06	3.79584e+06	3.79326e+06	3.78976e+06
15	Low variant	Low-income countries	h	1500	Income Group	1802	775711	795825	815738	835516	855207	874843	894438	913986	933468	952855	972122	991260	1.01029e+06	1.02928e+06	1.04831e+06	1.06743e+06	1.08665e+06	1.10596e+06	1.12533e+06	1.1447e+06	1.16402e+06	1.18329e+06	1.2025e+06	1.22161e+06	1.24059e+06	1.25941e+06	1.27804e+06	1.29648e+06	1.3147e+06	1.33268e+06	1.35039e+06	1.36784e+06	1.38499e+06	1.40185e+06	1.4184e+06	1.43464e+06	1.45055e+06	1.46614e+06	1.48139e+06	1.4963e+06	1.51087e+06	1.52509e+06	1.53896e+06
16	Low variant	No income group available		1518	Income Group	1802	2943.57	2974.52	3004.63	3033.89	3062.34	3090.13	3117.17	3143.48	3169.09	3193.82	3217.78	3240.82	3263.04	3284.49	3305.3	3325.52	3345.17	3364.29	3382.73	3400.41	3417.27	3433.25	3448.42	3462.74	3476.22	3488.85	3500.65	3511.58	3521.67	3530.86	3539.11	3546.5	3552.99	3558.63	3563.41	3567.44	3570.71	3573.25	3575.11	3576.36	3576.96	3577.05	3576.54
17	Low variant	Geographic regions	i	1840	Label/Separator	900	...	...	...	...	...	...	...	...	...	...	...	...	...	...	...	...	...	...	...	...	...	...	...	...	...	...	...	...	...	...	...	...	...	...	...	...	...	...	...	...	...	...	...
18	Low variant	Africa	j	903	Region	1840	1.3406e+06	1.37185e+06	1.40294e+06	1.43396e+06	1.46498e+06	1.49605e+06	1.52718e+06	1.55839e+06	1.58964e+06	1.62092e+06	1.65218e+06	1.68343e+06	1.71469e+06	1.74601e+06	1.7775e+06	1.8092e+06	1.84113e+06	1.87325e+06	1.90551e+06	1.93782e+06	1.97011e+06	2.00236e+06	2.03455e+06	2.06661e+06	2.0985e+06	2.13016e+06	2.16155e+06	2.19264e+06	2.22341e+06	2.25382e+06	2.28386e+06	2.31348e+06	2.34268e+06	2.37143e+06	2.39971e+06	2.42751e+06	2.45482e+06	2.48162e+06	2.5079e+06	2.53368e+06	2.55894e+06	2.58368e+06	2.60789e+06
19	Low variant	Asia	k	935	Region	1840	4.64105e+06	4.67425e+06	4.70454e+06	4.73221e+06	4.75748e+06	4.78052e+06	4.80146e+06	4.82037e+06	4.83728e+06	4.85218e+06	4.86509e+06	4.87605e+06	4.88519e+06	4.89273e+06	4.89893e+06	4.90401e+06	4.90805e+06	4.91105e+06	4.91295e+06	4.91364e+06	4.91302e+06	4.9111e+06	4.9079e+06	4.90337e+06	4.89746e+06	4.89012e+06	4.88135e+06	4.87113e+06	4.85944e+06	4.84626e+06	4.83159e+06	4.81542e+06	4.79777e+06	4.77867e+06	4.75814e+06	4.73622e+06	4.71294e+06	4.68833e+06	4.66247e+06	4.63544e+06	4.60733e+06	4.57818e+06	4.54804e+06
20	Low variant	Europe	l	908	Region	1840	747636	746744	745514	743991	742208	740197	737980	735574	732991	730238	727323	724259	721064	717770	714411	711013	707592	704149	700679	697171	693616	690015	686370	682677	678930	675124	671256	667324	663320	659236	655065	650806	646460	642023	637492	632867	628148	623342	618457	613506	608501	603447	598352
21	Low variant	Latin America and the Caribbean	m	904	Region	1840	653962	658963	663582	667855	671814	675478	678862	681968	684795	687334	689580	691535	693218	694665	695921	697020	697978	698792	699450	699933	700228	700334	700255	699990	699536	698892	698057	697029	695805	694379	692751	690918	688882	686645	684209	681576	678748	675729	672523	669135	665571	661835	657931
22	Low variant	Northern America	n	905	Region	1840	368870	370654	372323	373885	375346	376714	377994	379194	380317	381371	382360	383288	384157	384971	385730	386435	387089	387692	388244	388742	389184	389570	389902	390182	390411	390591	390724	390809	390848	390839	390783	390679	390532	390342	390113	389848	389548	389215	388852	388463	388050	387615	387159
23	Low variant	Oceania	o	909	Region	1840	42677.8	43164.1	43633.4	44087.5	44527.7	44955.2	45370.5	45774	46165.9	46546	46914.2	47270.8	47616.8	47953.6	48283.2	48607.1	48926	49239.9	49548.4	49851.3	50148.1	50438.8	50723.5	51002	51274	51539.2	51797.5	52048.5	52291.9	52526.7	52752.6	52969.2	53176.5	53374.3	53562.4	53740.6	53908.9	54067.4	54216.1	54355.4	54485.4	54606.2	54718
24	Low variant	Sustainable Development Goal (SDG) regions	p	1828	Label/Separator	900	...	...	...	...	...	...	...	...	...	...	...	...	...	...	...	...	...	...	...	...	...	...	...	...	...	...	...	...	...	...	...	...	...	...	...	...	...	...	...	...	...	...	...
25	Low variant	SUB-SAHARAN AFRICA		947	SDG region	1828	1.09437e+06	1.12148e+06	1.14861e+06	1.17582e+06	1.20316e+06	1.23064e+06	1.25828e+06	1.28606e+06	1.31397e+06	1.34197e+06	1.37002e+06	1.39812e+06	1.42627e+06	1.45452e+06	1.48295e+06	1.51159e+06	1.54045e+06	1.5695e+06	1.59868e+06	1.62794e+06	1.65722e+06	1.68649e+06	1.71573e+06	1.74491e+06	1.77396e+06	1.80285e+06	1.83155e+06	1.86003e+06	1.88826e+06	1.91623e+06	1.94391e+06	1.97129e+06	1.99833e+06	2.02502e+06	2.05135e+06	2.07729e+06	2.10284e+06	2.12798e+06	2.1527e+06	2.177e+06	2.20088e+06	2.22433e+06	2.24734e+06
26	Low variant	Eastern Africa		910	Subregion	947	445406	456434	467470	478532	489633	500777	511962	523178	534411	545640	556849	568029	579183	590332	601504	612719	623977	635265	646567	657860	669124	680349	691529	702646	713684	724626	735461	746180	756770	767219	777519	787658	797632	807433	817057	826501	835758	844824	853698	862378	870865	879154	887242
27	Low variant	Burundi		108	Country/Area	910	11890.8	12242.8	12594.2	12945.9	13298.9	13653.6	14010.5	14369.7	14731.1	15094.5	15459.6	15826.5	16195.7	16567.8	16944.2	17325.5	17712	18103.4	18499.4	18899.3	19302.7	19709.3	20118.8	20530.8	20944.7	21359.9	21776	22192.6	22609.1	23024.7	23438.8	23850.9	24260.8	24668	25072.1	25473	25870.2	26263.5	26652.6	27037.2	27417	27791.8	28161.5
28	Low variant	Comoros		174	Country/Area	910	869.595	887.482	905.085	922.459	939.671	956.745	973.687	990.524	1007.22	1023.78	1040.18	1056.43	1072.54	1088.54	1104.51	1120.49	1136.5	1152.51	1168.49	1184.4	1200.21	1215.9	1231.44	1246.84	1262.04	1277.02	1291.75	1306.2	1320.37	1334.19	1347.65	1360.71	1373.39	1385.67	1397.54	1409.03	1420.13	1430.82	1441.1	1450.97	1460.43	1469.47	1478.08
29	Low variant	Djibouti		262	Country/Area	910	988.002	1000.98	1013.26	1024.92	1036	1046.55	1056.58	1066.11	1075.12	1083.63	1091.61	1099.08	1106.09	1112.67	1118.94	1124.92	1130.67	1136.18	1141.44	1146.45	1151.18	1155.64	1159.84	1163.75	1167.41	1170.8	1173.92	1176.74	1179.24	1181.39	1183.15	1184.51	1185.47	1186	1186.09	1185.71	1184.88	1183.58	1181.82	1179.62	1177	1173.97	1170.53
30	Low variant	Eritrea		232	Country/Area	910	3546.43	3601.64	3657.75	3714.88	3773.07	3832.39	3892.86	3954.45	4017.16	4080.89	4145.6	4211.22	4277.69	4344.98	4413.05	4481.84	4551.25	4621.13	4691.27	4761.4	4831.3	4900.81	4969.82	5038.02	5105.19	5171.05	5235.48	5298.41	5359.76	5419.47	5477.52	5533.82	5588.38	5641.22	5692.45	5742.15	5790.32	5836.94	5882.06	5925.71	5967.9	6008.65	6047.94
31	Low variant	Ethiopia		231	Country/Area	910	114964	117736	120480	123201	125901	128582	131244	133884	136498	139081	141629	144139	146614	149060	151488	153904	156310	158702	161080	163439	165777	168092	170382	172644	174870	177056	179199	181297	183348	185349	187299	189194	191034	192815	194535	196192	197783	199309	200770	202167	203500	204771	205977
32	Low variant	Kenya		404	Country/Area	910	53771.3	54915.9	56050.3	57176	58294.1	59405.1	60508.7	61604.3	62690.7	63766.1	64829.2	65879	66915.6	67940.3	68955.1	69961.2	70958.3	71945.2	72919.7	73879	74820.7	75743.9	76647.8	77530.9	78391.6	79228.5	80040.7	80827.3	81588.1	82322.8	83031.2	83713	84367.5	84994.5	85593.6	86164.7	86707.6	87222	87708.2	88166.7	88597.6	89001.1	89376.9
33	Low variant	Madagascar		450	Country/Area	910	27691	28393.7	29096.2	29800.2	30506.8	31216.6	31929.4	32644.7	33361.3	34077.8	34793	35506.2	36218.1	36930.5	37646.1	38366.8	39092.9	39823.7	40558	41294.2	42030.9	42767.5	43503.8	44239	44972.5	45703.6	46431.5	47155.6	47875	48588.6	49295.5	49995.1	50687	51370.7	52045.8	52712	53368.8	54016	54653.5	55281.6	55900.3	56509.5	57108.7
34	Low variant	Malawi		454	Country/Area	910	19130	19626.6	20126.4	20630.1	21138.1	21650.2	22166.2	22685.5	23206.9	23729.5	24252.2	24774.5	25296.2	25818.3	26342.1	26868.3	27396.9	27927.2	28458.3	28988.9	29517.9	30044.9	30569.6	31091	31608.5	32121.1	32628.4	33130	33625.7	34115.6	34599.6	35077.5	35548.8	36013.1	36469.7	36918.2	37358.1	37789.4	38211.9	38625.8	39031	39427.3	39814.3
35	Low variant	Mauritius	1	480	Country/Area	910	1271.77	1271.79	1271.07	1269.67	1267.66	1265.06	1261.92	1258.28	1254.13	1249.49	1244.39	1238.83	1232.86	1226.52	1219.86	1212.92	1205.74	1198.32	1190.64	1182.68	1174.43	1165.9	1157.09	1148.04	1138.74	1129.23	1119.51	1109.6	1099.47	1089.19	1078.72	1068.12	1057.36	1046.46	1035.44	1024.31	1013.09	1001.76	990.349	978.849	967.303	955.682	944.005
36	Low variant	Mayotte	2	175	Country/Area	910	272.813	279.148	285.445	291.685	297.91	304.124	310.323	316.516	322.708	328.886	335.062	341.207	347.353	353.498	359.628	365.788	371.944	378.096	384.232	390.344	396.399	402.38	408.32	414.16	419.921	425.586	431.13	436.575	441.898	447.099	452.176	457.124	461.911	466.595	471.13	475.523	479.786	483.899	487.88	491.723	495.435	499.008	502.46
37	Low variant	Mozambique		508	Country/Area	910	31255.4	32125.1	32999.7	33881.3	34771	35669.6	36577.2	37493.1	38416.3	39345.2	40278.6	41215.7	42156.8	43103.5	44058.2	45022.1	45995.6	46977.2	47965.1	48956.5	49949.3	50942.3	51935.2	52926.7	53915.9	54901.6	55883	56859.2	57829.1	58791.6	59745.9	60691.1	61626.6	62552.2	63468.2	64374.2	65270	66154.7	67027.9	67888.8	68736.8	69571.3	70392
38	Low variant	Réunion	2	638	Country/Area	910	895.308	900.858	905.993	910.784	915.207	919.33	923.131	926.619	929.791	932.642	935.179	937.364	939.249	940.825	942.143	943.215	944.051	944.637	944.966	944.988	944.702	944.1	943.172	941.921	940.345	938.436	936.196	933.63	930.742	927.547	924.026	920.211	916.108	911.729	907.104	902.258	897.199	891.941	886.502	880.91	875.176	869.339	863.367
39	Low variant	Rwanda		646	Country/Area	910	12952.2	13259.1	13561	13859	14153.8	14445.9	14735.6	15022.8	15307.5	15589.2	15867.8	16143.2	16415.7	16686.2	16955.8	17225.3	17494.7	17764	18032.6	18300.2	18566.2	18830.5	19092.8	19352.4	19608.6	19860.6	20108	20350.6	20588	20819.9	21045.8	21265.7	21479	21685.6	21885	22076.9	22261.1	22437.5	22606.2	22767.2	22920.6	23066.3	23204.4
40	Low variant	Seychelles		690	Country/Area	910	98.34	98.799	99.183	99.503	99.768	99.996	100.176	100.312	100.402	100.47	100.497	100.496	100.461	100.4	100.314	100.213	100.09	99.953	99.789	99.587	99.371	99.121	98.838	98.529	98.175	97.798	97.377	96.926	96.434	95.91	95.352	94.752	94.133	93.464	92.796	92.088	91.361	90.63	89.864	89.086	88.291	87.494	86.698
41	Low variant	Somalia		706	Country/Area	910	15893.2	16343.6	16802.9	17271.1	17748.3	18234.4	18728.9	19231.3	19740.7	20256.5	20777.8	21304.2	21835.6	22372.7	22916.1	23466.5	24024	24587.9	25158	25733.5	26313.9	26898.9	27488.3	28081.9	28679.6	29281.2	29886.4	30494.7	31105.5	31718.1	32331.9	32946.4	33561.1	34175.5	34789	35400.9	36010.9	36618.4	37223.1	37824.5	38422.3	39015.9	39604.9
42	Low variant	South Sudan		728	Country/Area	910	11193.7	11423.3	11654	11885.9	12119	12353.2	12588.8	12825.7	13063.9	13303.5	13544.5	13787	14030.6	14275.2	14520.6	14766.3	15012.2	15258.1	15503.8	15749.2	15994.1	16238.4	16481.6	16723.2	16962.7	17199.5	17433.2	17663.7	17890.6	18113.4	18331.8	18545.7	18754.7	18958.9	19158.3	19352.9	19542.5	19727.1	19906.7	20081.5	20251.6	20416.8	20577.1
43	Low variant	Uganda		800	Country/Area	910	45741	46935.5	48141.9	49360.3	50590.3	51830.7	53079.6	54334.2	55591.3	56847.3	58099	59344.2	60582.3	61815	63044.9	64273.8	65501.1	66725	67943.2	69153.2	70352.5	71539.9	72714.3	73874.3	75017.9	76143.7	77250.4	78336.9	79402	80444.7	81464	82458.9	83428.6	84372.7	85291.1	86183.5	87049.4	87888	88698.5	89479.9	90231.6	90952.8	91643.4
44	Low variant	United Republic of Tanzania	3	834	Country/Area	910	59734.2	61425.3	63128.7	64848.5	66587.5	68347.7	70130.2	71935.1	73761.7	75608.7	77474.9	79359.9	81264.5	83191.2	85143.5	87123.6	89131.7	91166.1	93224	95301.5	97395.2	99503.3	101625	103758	105902	108053	110211	112374	114539	116703	118863	121018	123166	125309	127448	129581	131710	133833	135950	138059	140160	142252	144335
45	Low variant	Zambia		894	Country/Area	910	18384	18897.1	19415.5	19939.9	20470.8	21008.5	21552.7	22103.1	22659.2	23220	23784.9	24353.5	24925.8	25502.7	26085.2	26674.1	27269.5	27870.6	28476.7	29086.7	29699.7	30315.3	30933.1	31552.3	32172	32791.3	33409.7	34026.9	34642.6	35256.8	35869.2	36479.5	37087.4	37692.6	38294.6	38893.1	39487.7	40078.3	40665	41247.8	41826.8	42401.9	42972.6
46	Low variant	Zimbabwe		716	Country/Area	910	14862.9	15068.5	15280.7	15499.4	15724.5	15955.4	16191.4	16431.6	16674.9	16920	17165.8	17411.3	17656.2	17900.9	18146	18391.7	18637.7	18883.3	19127.3	19368.6	19606.2	19839.3	20067.5	20290.3	20506.7	20716.2	20918.3	21112.7	21298.9	21476.2	21644.5	21803.4	21952.9	22093.2	22224.6	22347.3	22461.5	22567.1	22664.5	22754.5	22837.2	22912.9	22981.7
47	Low variant	Middle Africa		911	Subregion	947	179595	184779	189991	195241	200538	205888	211291	216750	222259	227817	233417	239059	244744	250479	256271	262126	268043	274017	280038	286095	292177	298279	304396	310519	316638	322743	328828	334889	340920	346919	352880	358801	364677	370504	376282	382009	387680	393294	398847	404337	409761	415118	420403
48	Low variant	Angola		24	Country/Area	911	32866.3	33894.4	34936.6	35994.9	37070.8	38165.3	39279.2	40412.5	41565	42736.1	43925.3	45132.4	46358	47603.3	48869.9	50159	51470.7	52804	54157.9	55530.7	56921.1	58328.3	59751.4	61188.7	62638	64097.5	65565.9	67042.6	68526.7	70017.4	71514.2	73016.1	74522.3	76032.4	77545.9	79062.4	80581	82101.2	83622.8	85145.5	86669	88192.9	89716.2
49	Low variant	Cameroon		120	Country/Area	911	26545.9	27192.2	27836.7	28481.1	29126.8	29774.7	30425	31077.7	31732.1	32387.5	33043.1	33698.5	34354.4	35012.1	35673.8	36340.7	37013.2	37690.6	38371.6	39054.3	39737.3	40420	41102	41782.7	42461.3	43137.4	43810.3	44479.1	45143	45800.7	46451.2	47094	47728.5	48354.5	48971.8	49580.3	50179.6	50769.3	51349.1	51918.8	52478	53026.5	53564.1
50	Low variant	Central African Republic		140	Country/Area	911	4829.76	4914.69	5003.88	5096.89	5193.26	5292.48	5394.01	5497.26	5601.61	5706.46	5811.23	5915.5	6019.03	6121.77	6223.83	6325.24	6425.86	6525.41	6623.72	6720.54	6815.69	6909.03	7000.5	7090.07	7177.77	7263.56	7347.41	7429.23	7508.96	7586.56	7661.98	7735.16	7806.06	7874.67	7940.95	8004.88	8066.41	8125.5	8182.11	8236.2	8287.75	8336.7	8383.01
51	Low variant	Chad		148	Country/Area	911	16425.9	16898.6	17372.7	17848.7	18327.4	18809	19293.6	19781	20271.1	20763.3	21257.2	21752.7	22249.8	22749.1	23251.4	23757.2	24266.3	24778.5	25293	25808.9	26325.6	26842.6	27359.6	27875.9	28390.6	28903.1	29412.8	29919.4	30422.5	30922	31417.6	31909	32395.6	32877.4	33354	33825.3	34290.9	34750.5	35203.7	35650.1	36089.4	36521.2	36945.3
52	Low variant	Congo		178	Country/Area	911	5518.09	5649.76	5781.69	5914.21	6047.58	6181.99	6317.52	6454.15	6591.84	6730.43	6869.85	7010.01	7151.02	7293.06	7436.43	7581.28	7727.66	7875.41	8024.24	8173.8	8323.76	8474.02	8624.47	8774.89	8925.01	9074.65	9223.64	9371.9	9519.34	9665.89	9811.48	9956.07	10099.6	10242	10383.2	10523.3	10662.2	10799.9	10936.5	11072	11206.5	11340	11472.4
53	Low variant	Democratic Republic of the Congo		180	Country/Area	911	89561.4	92281.6	95014	97764.3	100537	103335	106160	109013	111893	114798	117728	120681	123657	126660	129691	132753	135845	138963	142102	145255	148417	151583	154752	157918	161074	164214	167335	170434	173509	176559	179582	182576	185538	188466	191361	194221	197044	199829	202574	205278	207938	210554	213124
54	Low variant	Equatorial Guinea		226	Country/Area	911	1402.98	1448.32	1492.84	1536.82	1580.46	1623.84	1666.97	1709.82	1752.18	1793.92	1834.84	1874.87	1914.14	1952.94	1991.67	2030.64	2069.96	2109.49	2149.07	2188.45	2227.43	2265.94	2304.01	2341.58	2378.58	2414.97	2450.7	2485.73	2520.08	2553.84	2587	2619.57	2651.52	2682.79	2713.36	2743.19	2772.25	2800.52	2827.97	2854.57	2880.27	2905.06	2928.93
55	Low variant	Gabon		266	Country/Area	911	2225.73	2276.19	2325.25	2373.14	2420.02	2466.05	2511.34	2555.94	2599.88	2643.14	2685.76	2727.75	2769.23	2810.35	2851.37	2892.41	2933.55	2974.76	3016.02	3057.28	3098.48	3139.58	3180.58	3221.38	3261.89	3302	3341.67	3380.82	3419.36	3457.17	3494.16	3530.25	3565.41	3599.55	3632.62	3664.56	3695.32	3724.9	3753.29	3780.5	3806.55	3831.43	3855.16
56	Low variant	Sao Tome and Principe		678	Country/Area	911	219.161	222.962	226.898	230.976	235.179	239.5	243.929	248.458	253.047	257.687	262.367	267.055	271.773	276.511	281.285	286.118	291.002	295.935	300.885	305.87	310.861	315.865	320.881	325.885	330.886	335.887	340.865	345.838	350.78	355.676	360.529	365.333	370.089	374.781	379.402	383.981	388.476	392.918	397.293	401.601	405.838	410.02	414.117
57	Low variant	Southern Africa		913	Subregion	947	67503.6	68260.6	68974.5	69649.9	70290.5	70899.3	71478.6	72029.7	72553.7	73050.6	73520.7	73964.9	74385	74784.1	75165.7	75532.5	75885.7	76224.9	76548.6	76854.6	77140.9	77407.1	77653.3	77878.3	78080.9	78260.1	78415.3	78546.1	78651.7	78731.3	78784.3	78810.5	78809.8	78782.6	78729	78649.6	78544.5	78414.3	78259.8	78082.1	77882.2	77660.9	77418.7
58	Low variant	Botswana		72	Country/Area	913	2351.62	2392.81	2432.34	2470.44	2507.3	2543.07	2577.83	2611.65	2644.57	2676.55	2707.59	2737.71	2767	2795.59	2823.7	2851.41	2878.79	2905.8	2932.34	2958.24	2983.38	3007.73	3031.28	3053.93	3075.59	3096.18	3115.65	3134	3151.17	3167.16	3181.96	3195.56	3207.92	3219.07	3228.99	3237.67	3245.11	3251.36	3256.43	3260.4	3263.3	3265.17	3266.02
59	Low variant	Eswatini		748	Country/Area	913	1160.16	1170.96	1181.51	1191.75	1201.67	1211.35	1220.97	1230.76	1241.04	1252.16	1264.36	1277.81	1292.41	1307.78	1323.39	1338.86	1354.05	1368.98	1383.66	1398.12	1412.39	1426.41	1440.1	1453.38	1466.19	1478.49	1490.23	1501.39	1511.96	1521.94	1531.32	1540.1	1548.24	1555.79	1562.76	1569.14	1574.95	1580.19	1584.88	1589.02	1592.63	1595.73	1598.31
60	Low variant	Lesotho		426	Country/Area	913	2142.25	2154.7	2167.27	2180.01	2192.95	2206.01	2219.13	2232.13	2244.84	2257.04	2268.54	2279.23	2289.15	2298.46	2307.45	2316.28	2324.99	2333.51	2341.75	2349.6	2356.96	2363.8	2370.13	2375.87	2380.97	2385.38	2389.06	2392.01	2394.18	2395.56	2396.17	2395.97	2394.94	2393.1	2390.45	2386.98	2382.71	2377.64	2371.78	2365.14	2357.73	2349.58	2340.68
61	Low variant	Namibia		516	Country/Area	913	2540.92	2584.1	2626.15	2667.29	2707.65	2747.38	2786.56	2825.22	2863.36	2900.95	2937.97	2974.42	3010.39	3046.02	3081.51	3116.98	3152.49	3187.99	3223.38	3258.54	3293.36	3327.79	3361.78	3395.29	3428.19	3460.45	3491.98	3522.69	3552.51	3581.26	3608.86	3635.21	3660.34	3684.16	3706.69	3727.87	3747.69	3766.15	3783.31	3799.24	3814.01	3827.64	3840.12
62	Low variant	South Africa		710	Country/Area	913	59308.7	59958.1	60567.3	61140.4	61680.9	62191.5	62674.1	63130	63559.8	63963.9	64342.2	64695.7	65026.1	65336.2	65629.6	65908.9	66175.4	66428.6	66667.5	66890	67094.8	67281.4	67450	67599.8	67729.9	67839.6	67928.4	67996	68041.9	68065.4	68066	68043.6	67998.4	67930.4	67840.2	67727.9	67594.1	67439	67263.4	67068.3	66854.6	66622.8	66373.6
63	Low variant	Western Africa		914	Subregion	947	401861	412007	422177	432399	442694	453073	463543	474103	484745	495458	506232	517062	527955	538929	550010	561215	572546	583991	595528	607132	618778	630455	642157	653865	665560	677225	688846	700414	711922	723363	734730	746016	757210	768302	779281	790135	800858	811444	821891	832201	842372	852400	862277
64	Low variant	Benin		204	Country/Area	914	12123.2	12437.2	12751.9	13068.1	13386.3	13707.1	14030.4	14356.2	14684.4	15014.4	15345.9	15678.9	16013.5	16350.3	16690.2	17033.8	17381.1	17731.8	18085.3	18440.9	18797.8	19155.9	19514.8	19874.1	20233.4	20592.2	20950	21306.8	21661.9	22015	22365.6	22713.5	23058.6	23400.7	23739.9	24076.2	24409.6	24739.7	25066.5	25389.8	25709.5	26025.5	26337.6
65	Low variant	Burkina Faso		854	Country/Area	914	20903.3	21473.1	22046.4	22624.5	23208.3	23798.5	24395.1	24998	25606.7	26220.5	26838.7	27461	28087.5	28719.2	29357.3	30002.5	30654.9	31313.7	31977.7	32645.3	33315	33986.3	34658.6	35331	36002.9	36673.3	37341.7	38007.3	38669.2	39326	39977	40621.4	41258.9	41889.7	42513.9	43131.7	43742.9	44347.1	44944.2	45534.3	46117.3	46693.1	47261.2
66	Low variant	Cabo Verde		132	Country/Area	914	555.988	561.083	565.853	570.351	574.581	578.575	582.342	585.899	589.234	592.349	595.245	597.913	600.369	602.664	604.78	606.771	608.643	610.383	611.984	613.408	614.647	615.693	616.545	617.199	617.633	617.873	617.886	617.673	617.234	616.548	615.64	614.467	613.069	611.413	609.53	607.431	605.099	602.551	599.794	596.81	593.628	590.226	586.64
67	Low variant	Côte d'Ivoire		384	Country/Area	914	26378.3	27021.8	27667.6	28317.1	28971.4	29630.9	30295.5	30964.7	31637.3	32312.2	32988.1	33664.7	34342.2	35022.4	35707.5	36399.2	37097.6	37802.1	38511.6	39224.6	39939.8	40656.6	41374.7	42093.5	42812.1	43529.6	44245.5	44959	45669.6	46376.7	47079.4	47777.4	48470.1	49156.8	49837	50510.2	51175.8	51833.6	52483.2	53124.3	53756.8	54380.2	54994.2
68	Low variant	Gambia		270	Country/Area	914	2416.66	2484.27	2552.05	2620.11	2688.53	2757.35	2826.56	2896.09	2965.88	3035.76	3105.67	3175.54	3245.38	3315.31	3385.52	3456.13	3527.12	3598.42	3669.91	3741.42	3812.83	3884.03	3954.99	4025.64	4095.87	4165.6	4234.76	4303.27	4371	4437.86	4503.73	4568.54	4632.24	4694.76	4756.06	4816.08	4874.8	4932.14	4988.09	5042.66	5095.83	5147.59	5197.9
69	Low variant	Ghana		288	Country/Area	914	31072.9	31696.2	32309.7	32915.5	33515.1	34109.3	34698.9	35283.7	35863.6	36437.8	37005.8	37567.5	38123.8	38676.1	39226.8	39777.3	40328.1	40878.7	41428.2	41975.3	42519	43058.8	43594.4	44125.1	44649.8	45167.7	45678.3	46180.9	46674.5	47158.2	47631.1	48092.7	48542.6	48980.2	49405.2	49817.2	50216	50601.3	50973.3	51332.5	51679	52012.8	52334
70	Low variant	Guinea		324	Country/Area	914	13132.8	13478.3	13824.6	14172.2	14521.5	14872.7	15225.7	15580.3	15935.9	16292.1	16648.4	17004.4	17360.4	17716.8	18074.5	18434.1	18795.7	19158.8	19522.9	19887.1	20250.9	20613.9	20975.9	21336.7	21696	22053.6	22409.1	22762.2	23112.5	23459.6	23803.1	24142.6	24478	24808.7	25134.4	25454.6	25769	26077.5	26379.8	26676	26965.9	27249.4	27526.3
71	Low variant	Guinea-Bissau		624	Country/Area	914	1968	2013.14	2057.82	2102.14	2146.22	2190.1	2233.85	2277.46	2320.94	2364.26	2407.38	2450.32	2493.13	2535.88	2578.71	2621.68	2664.84	2708.13	2751.51	2794.94	2838.34	2881.67	2924.92	2967.97	3010.7	3053	3094.82	3136.11	3176.82	3216.92	3256.36	3295.11	3333.1	3370.31	3406.67	3442.12	3476.65	3510.23	3542.87	3574.58	3605.39	3635.29	3664.24
72	Low variant	Liberia		430	Country/Area	914	5057.68	5174.73	5291.51	5408.28	5525.21	5642.4	5759.85	5877.54	5995.31	6113.01	6230.47	6347.61	6464.48	6581.29	6698.32	6815.76	6933.63	7051.76	7169.93	7287.81	7405.12	7521.77	7637.68	7752.66	7866.57	7979.23	8090.53	8200.38	8308.72	8415.5	8520.69	8624.19	8725.93	8825.86	8923.89	9019.96	9114.01	9206	9295.9	9383.67	9469.32	9552.77	9633.99
73	Low variant	Mali		466	Country/Area	914	20250.8	20831.3	21418.8	22014.4	22619	23232.9	23856.1	24487.9	25127.7	25774.3	26426.7	27084.3	27746.9	28415.4	29091	29774.3	30465.2	31162.6	31864.7	32569.2	33274.2	33978.7	34682.2	35384.1	36083.7	36780.4	37473.3	38161.9	38845.5	39523.8	40196.2	40862.4	41521.6	42173.4	42817.2	43452.4	44078.5	44695.3	45302.6	45900.4	46488.7	47067.1	47635.2
74	Low variant	Mauritania		478	Country/Area	914	4649.66	4770.29	4890.09	5009.42	5128.59	5247.81	5367.18	5486.75	5606.49	5726.32	5846.13	5965.94	6085.9	6206.28	6327.46	6449.7	6573.1	6697.54	6822.85	6948.76	7075.06	7201.64	7328.47	7455.42	7582.38	7709.23	7835.85	7962.12	8087.89	8212.97	8337.2	8460.48	8582.72	8703.8	8823.6	8942.01	9058.97	9174.41	9288.31	9400.67	9511.48	9620.69	9728.26
75	Low variant	Niger		562	Country/Area	914	24206.6	25105.2	26023.2	26962.7	27925	28911.3	29922.2	30957.8	32017.8	33101.8	34209.2	35339.8	36493.9	37672.6	38877.1	40108.4	41366.4	42650.1	43958	45288	46638.4	48008.2	49396.6	50802.1	52223.3	53658.8	55107.3	56567.7	58039	59520.1	61010.1	62507.8	64012.2	65521.9	67035.5	68551.9	70069.7	71588.2	73106.7	74624.8	76141.9	77656.9	79168.9
76	Low variant	Nigeria		566	Country/Area	914	206140	211177	216222	221290	226390	231531	236716	241945	247215	252521	257859	263226	268626	274067	279564	285123	290745	296424	302150	307908	313686	319479	325283	331086	336878	342648	348388	354094	359765	365401	371001	376564	382082	387549	392957	398298	403569	408767	413893	418947	423931	428842	433676
77	Low variant	Saint Helena	4	654	Country/Area	914	6.071	6.084	6.089	6.099	6.1	6.098	6.101	6.087	6.078	6.063	6.049	6.034	6.011	5.986	5.964	5.937	5.906	5.873	5.84	5.801	5.768	5.732	5.686	5.648	5.607	5.566	5.516	5.473	5.431	5.378	5.335	5.283	5.236	5.191	5.143	5.091	5.042	4.994	4.944	4.888	4.839	4.791	4.742
78	Low variant	Senegal		686	Country/Area	914	16743.9	17176.8	17607.6	18037.8	18468.6	18901.1	19335.8	19772.8	20212.1	20653.3	21096.1	21540.6	21987.1	22436.9	22891.4	23351.6	23817.8	24289.4	24765.7	25245.3	25727.1	26210.8	26696	27182.2	27668.6	28154.8	28640.1	29124.2	29606.2	30085.5	30561.3	31033.2	31500.9	31964.4	32423.6	32878.5	33329.1	33774.9	34215.7	34651.1	35080.9	35504.7	35922.6
79	Low variant	Sierra Leone		694	Country/Area	914	7976.98	8132.07	8284.34	8434.22	8582.06	8728.08	8872.38	9014.93	9155.63	9294.27	9430.7	9564.86	9696.89	9827.13	9956.13	10084.2	10211.4	10337.6	10462.5	10585.7	10707	10826.2	10943.2	11057.7	11169.3	11277.8	11382.9	11484.5	11582.5	11676.8	11767.1	11853.4	11935.6	12013.7	12087.6	12157.2	12222.6	12283.7	12340.6	12393.2	12441.6	12485.8	12525.8
80	Low variant	Togo		768	Country/Area	914	8278.74	8468.16	8657.31	8846.7	9036.69	9227.52	9419.28	9611.93	9805.31	9999.13	10193.2	10387.4	10581.9	10776.9	10973	11170.4	11369.3	11569.2	11769.9	11970.6	12170.9	12370.6	12569.4	12767.2	12963.5	13158	13350.6	13541	13729.2	13915	14098.4	14279.1	14457.2	14632.5	14805	14974.7	15141.5	15305.2	15466	15623.9	15778.9	15930.9	16080
81	Low variant	NORTHERN AFRICA AND WESTERN ASIA		1833	SDG region	1828	525869	534189	542097	549654	556906	563892	570640	577166	583481	589586	595484	601186	606715	612110	617419	622678	627901	633084	638208	643246	648174	652987	657684	662249	666668	670923	675007	678913	682632	686157	689481	692599	695506	698199	700677	702937	704978	706800	708408	709804	710995	711982	712768
82	Low variant	Northern Africa		912	Subregion	1833	246233	250368	254327	258138	261826	265410	268907	272325	275672	278950	282163	285315	288418	291488	294547	297608	300679	303755	306827	309878	312895	315874	318813	321704	324537	327303	329997	332614	335148	337593	339944	342198	344352	346406	348361	350220	351981	353643	355209	356681	358061	359349	360547
83	Low variant	Algeria		12	Country/Area	912	43851	44563.3	45226.3	45846.2	46428.5	46977.4	47496.4	47988	48453.6	48894.4	49311.4	49706.4	50082.8	50445.2	50799.4	51149.8	51498.6	51846.1	52192.5	52537.4	52880.1	53220.9	53559.5	53894.2	54222.7	54543.1	54854.2	55155	55442.9	55715.3	55969.6	56204.8	56419.9	56613.6	56784.6	56932	57055.1	57153.9	57228.9	57281	57311	57319.4	57306.7
84	Low variant	Egypt		818	Country/Area	912	102334	104159	105895	107560	109169	110733	112262	113765	115246	116708	118155	119590	121019	122448	123885	125336	126803	128283	129768	131247	132709	134151	135572	136967	138329	139655	140941	142186	143386	144542	145651	146713	147728	148696	149622	150507	151352	152157	152923	153653	154348	155009	155635
85	Low variant	Libya		434	Country/Area	912	6871.29	6946.7	7016.54	7081.45	7141.99	7198.53	7251.4	7300.75	7346.62	7389.03	7427.97	7463.56	7496.08	7526.06	7554.12	7580.74	7606.11	7630.23	7652.93	7673.99	7693.22	7710.61	7726.09	7739.52	7750.69	7759.38	7765.51	7769	7769.6	7767.07	7761.24	7752	7739.36	7723.3	7703.78	7680.85	7654.52	7624.89	7592.13	7556.48	7518.16	7477.3	7434.06
86	Low variant	Morocco		504	Country/Area	912	36910.6	37302.2	37670.8	38018.9	38348	38659.7	38954.8	39233.7	39496.6	39743	39973	40186.8	40385.4	40570.7	40745.1	40910.4	41067.3	41215.7	41354.9	41483.9	41601.7	41708.3	41803.8	41888.1	41960.8	42021.7	42070.7	42107.6	42132.2	42144.5	42144.2	42131.3	42105.8	42067.5	42016.4	41952.4	41875.5	41785.7	41683.3	41568.3	41440.8	41301.1	41149.3
87	Low variant	Sudan		729	Country/Area	912	43849.3	44866.2	45882.2	46899.5	47919.3	48942.6	49969.3	50999.1	52030.8	53062.9	54094.2	55124.1	56153.1	57183.3	58217.5	59257.5	60303.8	61355.2	62410.3	63466.9	64523.3	65578.5	66632.3	67683.4	68730.9	69773.4	70810.3	71840.6	72863.1	73876.7	74880.2	75872.7	76853.7	77822.8	78780	79724.9	80657.2	81576.3	82481.2	83371.1	84245.1	85102.7	85943.7
88	Low variant	Tunisia		788	Country/Area	912	11818.6	11920.4	12012.1	12094.9	12169.7	12237.1	12298	12352.5	12401.1	12443.9	12481	12512.8	12539.9	12563.1	12583.4	12601.7	12618.2	12633.2	12646.5	12658.2	12667.9	12675.9	12682	12686.1	12687.8	12686.9	12683.2	12676.5	12666.7	12653.4	12636.2	12615.1	12589.9	12560.7	12527.2	12489.4	12447.4	12401.1	12350.7	12296.4	12238.2	12176.4	12111
89	Low variant	Western Sahara		732	Country/Area	912	597.33	610.843	624.045	636.944	649.586	661.985	674.148	686.064	697.734	709.116	720.219	731.028	741.561	751.867	761.998	771.962	781.803	791.536	801.111	810.524	819.757	828.805	837.69	846.387	854.906	863.219	871.35	879.259	886.954	894.431	901.64	908.608	915.308	921.74	927.909	933.809	939.425	944.776	949.856	954.664	959.222	963.548	967.61
90	Low variant	Western Asia		922	Subregion	1833	279637	283820	287770	291516	295081	298482	301733	304841	307809	310635	313321	315871	318297	320622	322873	325070	327223	329329	331382	333369	335279	337113	338870	340545	342131	343620	345011	346299	347484	348564	349537	350401	351154	351794	352315	352717	352997	353157	353198	353123	352934	352633	352221
91	Low variant	Armenia		51	Country/Area	922	2963.23	2964.56	2963.85	2961.32	2957.16	2951.54	2944.58	2936.39	2927.05	2916.61	2905.12	2892.67	2879.37	2865.36	2850.84	2835.95	2820.76	2805.28	2789.55	2773.51	2757.17	2740.53	2723.61	2706.35	2688.72	2670.64	2652.12	2633.14	2613.68	2593.69	2573.15	2552.04	2530.37	2508.13	2485.33	2461.94	2437.99	2413.49	2388.47	2362.89	2336.86	2310.33	2283.34
92	Low variant	Azerbaijan	5	31	Country/Area	922	10139.2	10210	10271.2	10323.9	10369	10407.3	10439.5	10466.3	10488.2	10505.5	10518.6	10527.9	10533.7	10536.3	10536.2	10533.6	10528.6	10521.3	10511.2	10497.5	10479.8	10457.9	10431.9	10401.8	10367.7	10329.5	10287.3	10241.1	10191.2	10137.9	10081.6	10022.4	9960.27	9895.55	9828.41	9759	9687.5	9613.99	9538.55	9461.25	9382.17	9301.37	9218.98
93	Low variant	Bahrain		48	Country/Area	922	1701.58	1732.4	1762.68	1792.5	1821.79	1850.46	1878.28	1904.91	1930.02	1953.17	1974.02	1992.42	2008.45	2022.54	2035.32	2047.25	2058.47	2068.91	2078.66	2087.7	2096.07	2103.84	2111.06	2117.69	2123.71	2129.08	2133.8	2137.9	2141.37	2144.25	2146.51	2148.17	2149.24	2149.72	2149.62	2148.95	2147.72	2145.94	2143.6	2140.71	2137.3	2133.36	2128.89
94	Low variant	Cyprus	6	196	Country/Area	922	1207.36	1214.03	1219.9	1225.05	1229.59	1233.58	1237.08	1240.15	1242.81	1245.08	1246.99	1248.56	1249.83	1250.88	1251.77	1252.55	1253.26	1253.9	1254.44	1254.85	1255.08	1255.12	1254.98	1254.64	1254.09	1253.31	1252.26	1250.98	1249.41	1247.53	1245.35	1242.84	1240.01	1236.85	1233.37	1229.57	1225.46	1221.04	1216.34	1211.36	1206.14	1200.7	1195.06
95	Low variant	Georgia	7	268	Country/Area	922	3989.18	3974.86	3958.49	3940.32	3920.62	3899.59	3877.39	3854.18	3830.05	3805.06	3779.29	3752.84	3725.82	3698.39	3670.75	3643.04	3615.35	3587.66	3559.95	3532.09	3504.03	3475.74	3447.27	3418.51	3389.47	3360.06	3330.26	3300.08	3269.45	3238.4	3206.87	3174.87	3142.38	3109.44	3076.05	3042.24	3008.01	2973.39	2938.41	2903.12	2867.55	2831.72	2795.7
96	Low variant	Iraq		368	Country/Area	922	40222.5	41170.5	42095.5	43001.7	43892.7	44771.3	45639.7	46499.3	47351.1	48195.3	49032.3	49862.5	50687.3	51508.7	52329	53149.8	53971.9	54794	55614.1	56428.8	57235.4	58033	58821.1	59598.1	60362.6	61113.1	61848.6	62568.5	63271.7	63957.6	64625.5	65274.7	65904.9	66516.1	67108.8	67683.1	68238.9	68775.9	69294.2	69793.6	70274.2	70735.9	71178.6
97	Low variant	Israel		376	Country/Area	922	8655.54	8779.92	8900.68	9018.39	9133.53	9246.48	9357.5	9466.75	9574.27	9680.09	9784.2	9886.72	9987.9	10088.2	10188.1	10288.2	10388.5	10489	10589.6	10690.2	10790.5	10890.6	10990.4	11089.7	11188.2	11285.7	11382	11477	11570.5	11662.2	11751.7	11839.1	11924.1	12006.6	12086.3	12163.1	12237	12307.8	12375.6	12440.5	12502.6	12561.8	12618.3
98	Low variant	Jordan		400	Country/Area	922	10203.1	10208.3	10213.3	10219.1	10227	10238.1	10253.8	10275.4	10304	10340.8	10386.6	10441.9	10506.1	10578.1	10656	10738.2	10824.2	10913.3	11003.2	11090.9	11174.3	11252.3	11324.5	11391.2	11453	11510.4	11563.2	11610.8	11653.4	11691	11723.6	11751.2	11773.9	11791.8	11805.2	11814.3	11819.1	11819.7	11816.3	11809.1	11798.3	11783.8	11765.9
99	Low variant	Kuwait		414	Country/Area	922	4270.56	4317.94	4362.99	4406.06	4447.46	4487.39	4525.93	4563.1	4598.79	4632.89	4665.27	4695.86	4724.77	4752.29	4778.78	4804.51	4829.51	4853.63	4876.62	4898.06	4917.61	4935.23	4950.89	4964.3	4975.16	4983.26	4988.52	4991.01	4990.86	4988.29	4983.52	4976.65	4967.79	4957.15	4945.02	4931.62	4917.15	4901.82	4885.89	4869.69	4853.52	4837.56	4821.95
100	Low variant	Lebanon		422	Country/Area	922	6825.44	6713.35	6607.66	6508.45	6415.89	6330.41	6252.59	6183.16	6123.05	6073.11	6034.01	6005.85	5987.88	5978.44	5975.26	5976.39	5981.15	5989.02	5998.29	6006.98	6013.6	6017.2	6017.59	6015.23	6010.98	6005.52	5998.76	5990.3	5980.13	5968.17	5954.37	5938.73	5921.26	5901.96	5880.81	5857.8	5832.94	5806.27	5777.81	5747.63	5715.74	5682.2	5647.05
101	Low variant	Oman		512	Country/Area	922	5106.62	5204.32	5294.81	5379.19	5458.27	5532.59	5602.36	5667.53	5727.77	5782.62	5831.72	5875.08	5913.31	5947.81	5980.31	6012.17	6044.01	6075.77	6107.25	6137.96	6167.59	6196.15	6223.9	6251.2	6278.45	6305.93	6333.72	6361.59	6389.04	6415.38	6440.06	6462.87	6483.79	6502.67	6519.41	6533.87	6545.98	6555.6	6562.7	6567.21	6569.14	6568.42	6565.1
102	Low variant	Qatar		634	Country/Area	922	2881.06	2928.92	2975.24	3019.8	3062.49	3103.18	3141.86	3178.56	3213.32	3246.3	3277.57	3307.22	3335.27	3361.63	3386.16	3408.85	3429.64	3448.72	3466.43	3483.26	3499.59	3515.53	3531.07	3546.1	3560.47	3574.05	3586.86	3598.93	3610.22	3620.7	3630.32	3639.11	3646.99	3653.96	3660	3665.07	3669.14	3672.25	3674.39	3675.59	3675.87	3675.22	3673.67
103	Low variant	Saudi Arabia		682	Country/Area	922	34813.9	35283.5	35729.1	36151	36549.6	36925.6	37279.6	37612.4	37924.9	38218.2	38493.1	38750.5	38991	39214.9	39422.4	39613.8	39789.2	39949.7	40096.6	40232.3	40358.1	40474.7	40581.7	40678.2	40763.2	40835.4	40894.7	40941	40973.1	40989.6	40989.6	40972.5	40938.5	40887.2	40818.6	40733	40630.2	40510.8	40375	40223.4	40056.6	39875.2	39679.9
104	Low variant	State of Palestine	8	275	Country/Area	922	5101.42	5217.98	5332.22	5444.55	5555.27	5664.6	5772.66	5879.5	5985.11	6089.39	6192.26	6293.73	6393.93	6493.15	6591.72	6689.92	6787.81	6885.29	6982.14	7078.09	7172.89	7266.44	7358.67	7449.44	7538.6	7625.96	7711.43	7794.91	7876.21	7955.18	8031.68	8105.58	8176.86	8245.48	8311.48	8374.87	8435.61	8493.66	8549	8601.59	8651.44	8698.52	8742.82
105	Low variant	Syrian Arab Republic		760	Country/Area	922	17500.7	18782.3	19944.4	21003.6	21972.7	22860.3	23671	24405	25059.5	25629.4	26111.2	26506.4	26825	27086.8	27317.6	27537.2	27754.4	27969.2	28182	28390	28591.1	28787.7	28982.8	29174.7	29361	29539.6	29710	29872.4	30025.6	30168.2	30298.9	30417.2	30522.5	30614.3	30692	30755.1	30803.4	30836.7	30855	30858.4	30847	30820.9	30780.6
106	Low variant	Turkey		792	Country/Area	922	84339.1	84695.4	85031.8	85346.9	85640.4	85913.7	86169.5	86411.9	86646.1	86877.7	87111.7	87350.1	87591.4	87829.2	88054.4	88260.1	88444.1	88607	88749	88870.7	88972.6	89053.7	89112.5	89148.7	89162.2	89152.7	89119.8	89062.5	88979.3	88868.6	88728.8	88559.6	88360.7	88131.3	87870.8	87578.7	87254.9	86900	86514.7	86100.1	85657.3	85187	84690.2
107	Low variant	United Arab Emirates		784	Country/Area	922	9890.4	9965.76	10036.6	10104.4	10169.5	10231.7	10289.4	10340.3	10381.3	10409	10420.5	10414.4	10392	10357.4	10316.4	10273.4	10230	10185.3	10139.4	10091.5	10041.1	9989.24	9936.57	9882.06	9824.14	9762.03	9695.19	9625.03	9555.1	9490.14	9433.63	9386.8	9348.82	9318.3	9292.87	9270.69	9251.43	9235.39	9221.86	9210.11	9199.51	9189.71	9180.46
108	Low variant	Yemen		887	Country/Area	922	29826	30456.1	31070	31669.9	32257.6	32834.3	33400.5	33956.4	34501.5	35035.2	35556.9	36066.3	36564	37051.8	37531.5	38004.8	38471.8	38931.9	39383.3	39824.1	40252.5	40667.8	41069.7	41457.1	41828.9	42184.1	42522.1	42842.2	43144	43427.2	43691.6	43936.7	44162.1	44367.2	44551.2	44713.7	44854.3	44973.2	45070.6	45147.1	45203.2	45239	45254.7
109	Low variant	CENTRAL AND SOUTHERN ASIA		921	SDG region	1828	2.01471e+06	2.03523e+06	2.05453e+06	2.07273e+06	2.08992e+06	2.10617e+06	2.12152e+06	2.13599e+06	2.14957e+06	2.16225e+06	2.17401e+06	2.18487e+06	2.19486e+06	2.20411e+06	2.21272e+06	2.22081e+06	2.2284e+06	2.23549e+06	2.24203e+06	2.24797e+06	2.25325e+06	2.25788e+06	2.26185e+06	2.26514e+06	2.26772e+06	2.26957e+06	2.27069e+06	2.27105e+06	2.27064e+06	2.26944e+06	2.26743e+06	2.26462e+06	2.261e+06	2.25657e+06	2.25135e+06	2.24535e+06	2.23856e+06	2.23101e+06	2.22273e+06	2.21374e+06	2.20409e+06	2.19379e+06	2.18287e+06
110	Low variant	Central Asia		5500	Subregion	921	74338.9	75345.5	76272.6	77132.7	77936.5	78693.2	79410.1	80092.8	80745.5	81370.9	81971.6	82550.4	83111.6	83661	84205.1	84748.3	85292.8	85837.1	86376.4	86903.5	87412.3	87901.4	88370	88813.7	89227.2	89606.6	89949.8	90256.4	90526.8	90761.8	90962.5	91128.7	91260.7	91360.5	91430.8	91473.9	91490.7	91481.8	91448.7	91393.1	91316.2	91219	91101.8
111	Low variant	Kazakhstan		398	Country/Area	5500	18776.7	18979.2	19162.5	19329.5	19482.9	19625	19757.5	19882.1	19999.8	20111.8	20218.7	20321.3	20420.9	20518.8	20616.2	20714.3	20813.5	20913.8	21014.1	21113.2	21209.8	21303.6	21394.5	21481.5	21563.7	21640.3	21710.8	21775	21832.6	21883.2	21926.8	21963.1	21992.1	22014.2	22029.8	22039.2	22042.6	22040.2	22032.4	22019.8	22002.8	21981.9	21957
112	Low variant	Kyrgyzstan		417	Country/Area	5500	6524.19	6619.5	6708.42	6791.98	6870.99	6946.16	7018.07	7087.1	7153.53	7217.58	7279.36	7339.13	7397.25	7454.23	7510.76	7567.24	7623.88	7680.6	7737.08	7792.85	7847.48	7900.87	7952.96	8003.44	8051.93	8098.16	8141.92	8183.12	8221.66	8257.43	8290.39	8320.43	8347.52	8371.65	8392.84	8411.11	8426.47	8438.95	8448.69	8455.82	8460.49	8462.77	8462.72
113	Low variant	Tajikistan		762	Country/Area	5500	9537.64	9741.95	9934.4	10117.7	10294.3	10466	10634.6	10801.1	10966.5	11131.4	11296.2	11461.5	11628	11796.7	11968.6	12144.5	12324.7	12508.5	12694.6	12880.8	13065.5	13248.1	13428.5	13605.1	13776.5	13941.6	14099.6	14250.8	14395.6	14535	14669.8	14800.1	14925.8	15047.7	15166.7	15283.2	15397.6	15509.9	15620.1	15728.4	15834.7	15939.2	16041.6
114	Low variant	Turkmenistan		795	Country/Area	5500	6031.19	6111.68	6185.85	6254.57	6318.58	6378.52	6434.85	6487.93	6538.01	6585.23	6629.75	6671.75	6711.59	6749.82	6787.01	6823.63	6859.88	6895.7	6930.88	6965.12	6998.11	7029.78	7060.09	7088.68	7115.14	7139.14	7160.49	7179.16	7194.95	7207.74	7217.44	7223.98	7227.34	7227.59	7224.85	7219.21	7210.72	7199.49	7185.69	7169.62	7151.47	7131.4	7109.45
115	Low variant	Uzbekistan		860	Country/Area	5500	33469.2	33893.2	34281.5	34638.9	34969.7	35277.5	35565.1	35834.6	36087.5	36324.9	36547.6	36756.7	36953.9	37141.6	37322.5	37498.6	37670.8	37838.5	37999.7	38151.5	38291.4	38419	38534.1	38634.9	38719.9	38787.4	38836.9	38868.4	38882	38878.4	38858.1	38821.2	38767.9	38699.3	38616.7	38521.1	38413.2	38293.3	38161.9	38019.5	37866.6	37703.7	37531.1
116	Low variant	Southern Asia		5501	Subregion	921	1.94037e+06	1.95989e+06	1.97826e+06	1.9956e+06	2.01199e+06	2.02748e+06	2.04211e+06	2.0559e+06	2.06883e+06	2.08088e+06	2.09204e+06	2.10232e+06	2.11175e+06	2.12045e+06	2.12852e+06	2.13606e+06	2.14311e+06	2.14965e+06	2.15565e+06	2.16106e+06	2.16584e+06	2.16997e+06	2.17348e+06	2.17632e+06	2.17849e+06	2.17997e+06	2.18074e+06	2.18079e+06	2.18011e+06	2.17868e+06	2.17647e+06	2.17349e+06	2.16974e+06	2.16521e+06	2.15992e+06	2.15387e+06	2.14707e+06	2.13953e+06	2.13128e+06	2.12235e+06	2.11277e+06	2.10258e+06	2.09177e+06
117	Low variant	Afghanistan		4	Country/Area	5501	38928.3	39809.1	40669.9	41513.2	42340.8	43153.9	43953.1	44738.5	45509.5	46265.2	47004.9	47728.2	48436	49130.2	49813.2	50486.8	51151.4	51806.1	52449.4	53079.4	53694.4	54293.5	54876.5	55441.8	55987.9	56513.3	57017.2	57498.9	57957.9	58393.9	58806.3	59194.7	59558.7	59897.8	60211.6	60499.9	60762.5	60999.2	61210	61395.2	61554.7	61688.7	61797
118	Low variant	Bangladesh		50	Country/Area	5501	164689	166081	167360	168537	169619	170614	171525	172355	173106	173777	174368	174881	175319	175691	176006	176271	176488	176657	176775	176835	176834	176770	176645	176458	176207	175892	175512	175067	174557	173981	173337	172628	171853	171014	170114	169155	168139	167066	165938	164757	163525	162244	160914
119	Low variant	Bhutan		64	Country/Area	5501	771.612	778.825	785.456	791.567	797.2	802.359	807.091	811.387	815.252	818.695	821.7	824.285	826.474	828.312	829.871	831.195	832.289	833.175	833.842	834.291	834.538	834.551	834.366	833.968	833.338	832.481	831.407	830.096	828.52	826.7	824.569	822.161	819.461	816.456	813.146	809.498	805.542	801.259	796.664	791.766	786.57	781.084	775.322
120	Low variant	India		356	Country/Area	5501	1.38e+06	1.39164e+06	1.40255e+06	1.41279e+06	1.42241e+06	1.43143e+06	1.43987e+06	1.44774e+06	1.45502e+06	1.46171e+06	1.46778e+06	1.47324e+06	1.47811e+06	1.48246e+06	1.48635e+06	1.48984e+06	1.49295e+06	1.49567e+06	1.49798e+06	1.49985e+06	1.50125e+06	1.50218e+06	1.50264e+06	1.50264e+06	1.50216e+06	1.5012e+06	1.49976e+06	1.49784e+06	1.49542e+06	1.49249e+06	1.48906e+06	1.4851e+06	1.48064e+06	1.47568e+06	1.47022e+06	1.46427e+06	1.45785e+06	1.45096e+06	1.44363e+06	1.43587e+06	1.42771e+06	1.41916e+06	1.41024e+06
121	Low variant	Iran (Islamic Republic of)		364	Country/Area	5501	83993	84914	85762.1	86545.1	87269.4	87940.3	88561.7	89136.3	89665.9	90151.4	90593.6	90994.8	91358.7	91691.4	92000.2	92290.5	92565.3	92824.9	93068.8	93295.3	93503	93692	93862.6	94014.5	94147	94259.2	94350.2	94418.7	94462.6	94479	94465.7	94421.5	94345.2	94233.8	94083.8	93892.8	93659.8	93384.9	93068	92709.2	92309.2	91868.6	91388.6
122	Low variant	Maldives		462	Country/Area	5501	540.542	534.749	529.737	525.284	521.263	517.62	514.388	511.667	509.625	508.45	508.338	509.337	511.298	513.923	516.721	519.352	521.697	523.775	525.669	527.491	529.33	531.158	532.928	534.581	536.117	537.473	538.648	539.621	540.394	540.903	541.168	541.138	540.834	540.249	539.37	538.183	536.721	534.968	532.929	530.628	528.076	525.285	522.249
123	Low variant	Nepal		524	Country/Area	5501	29136.8	29714.3	30218.7	30659.4	31043.8	31378.3	31667.4	31914.2	32120.5	32287.2	32415.3	32506.9	32566.7	32601.6	32620.2	32629	32631.5	32628	32617	32595.3	32560.7	32513.4	32454.9	32384.9	32303.3	32209.9	32104.6	31987.5	31858.4	31717.3	31564.2	31398.9	31221.8	31032.6	30831.7	30619	30394.6	30158.7	29911.7	29654.1	29386.3	29108.4	28820.6
124	Low variant	Pakistan		586	Country/Area	5501	220892	224937	228860	232678	236403	240045	243607	247089	250486	253793	257004	260119	263144	266097	268999	271867	274704	277507	280272	282991	285659	288273	290830	293320	295728	298043	300259	302374	304380	306274	308052	309709	311244	312653	313934	315083	316101	316987	317748	318393	318927	319354	319673
125	Low variant	Sri Lanka		144	Country/Area	5501	21413.2	21472.9	21519.9	21555.5	21580.8	21596.4	21603.1	21601.4	21591.6	21573.9	21548.6	21515.9	21476.4	21430.7	21379.7	21323.8	21263.5	21198.7	21129	21054.1	20973.5	20887.3	20795.3	20697.4	20593.1	20482.1	20364.3	20239.8	20108.5	19970.3	19825.3	19673.5	19515.1	19350.4	19179.7	19003.5	18821.9	18635.1	18443.6	18247.9	18048.4	17845.3	17638.9
126	Low variant	EASTERN AND SOUTH-EASTERN ASIA		1832	SDG region	1828	2.34671e+06	2.3552e+06	2.36224e+06	2.36796e+06	2.37248e+06	2.37587e+06	2.37821e+06	2.37954e+06	2.3799e+06	2.3793e+06	2.37776e+06	2.37531e+06	2.37203e+06	2.368e+06	2.36333e+06	2.35813e+06	2.35243e+06	2.34624e+06	2.33954e+06	2.3323e+06	2.32449e+06	2.31611e+06	2.30718e+06	2.29769e+06	2.28761e+06	2.27693e+06	2.26565e+06	2.25378e+06	2.24132e+06	2.22826e+06	2.21462e+06	2.2004e+06	2.18562e+06	2.1703e+06	2.15447e+06	2.13816e+06	2.12138e+06	2.10416e+06	2.08654e+06	2.06858e+06	2.05031e+06	2.03175e+06	2.01295e+06
127	Low variant	Eastern Asia		906	Subregion	1832	1.67809e+06	1.68091e+06	1.68267e+06	1.68347e+06	1.68338e+06	1.68247e+06	1.6808e+06	1.67841e+06	1.67534e+06	1.6716e+06	1.66722e+06	1.66223e+06	1.65668e+06	1.65063e+06	1.64416e+06	1.63732e+06	1.63014e+06	1.62264e+06	1.61481e+06	1.60662e+06	1.59806e+06	1.58915e+06	1.57988e+06	1.57026e+06	1.56027e+06	1.5499e+06	1.53915e+06	1.52803e+06	1.51654e+06	1.50469e+06	1.49248e+06	1.47992e+06	1.46702e+06	1.45381e+06	1.4403e+06	1.42651e+06	1.41247e+06	1.39819e+06	1.38371e+06	1.36905e+06	1.35426e+06	1.33936e+06	1.32435e+06
128	Low variant	China	9	156	Country/Area	906	1.43932e+06	1.44254e+06	1.4448e+06	1.44621e+06	1.44682e+06	1.4467e+06	1.44591e+06	1.44447e+06	1.44242e+06	1.43979e+06	1.43659e+06	1.43285e+06	1.42861e+06	1.42393e+06	1.41887e+06	1.41347e+06	1.40778e+06	1.40178e+06	1.39549e+06	1.38887e+06	1.38192e+06	1.37463e+06	1.36702e+06	1.35909e+06	1.3508e+06	1.34215e+06	1.33314e+06	1.32377e+06	1.31406e+06	1.30401e+06	1.29362e+06	1.2829e+06	1.27188e+06	1.26056e+06	1.24898e+06	1.23715e+06	1.22511e+06	1.21286e+06	1.20043e+06	1.18786e+06	1.17518e+06	1.1624e+06	1.14955e+06
129	Low variant	China, Hong Kong SAR	10	344	Country/Area	906	7496.99	7530.73	7566.22	7603.65	7642.76	7682.83	7722.64	7760.53	7794.49	7822.3	7842.12	7852.93	7855.09	7850.51	7842.06	7831.93	7820.7	7807.91	7793.39	7776.66	7757.43	7735.85	7712.27	7686.83	7659.65	7630.82	7600.45	7568.66	7535.61	7501.51	7466.52	7430.78	7394.3	7357.1	7319.11	7280.31	7240.78	7200.52	7159.63	7118.11	7076.01	7033.36	6990.18
130	Low variant	China, Macao SAR	11	446	Country/Area	906	649.342	657.778	665.764	673.33	680.505	687.326	693.824	699.967	705.781	711.265	716.43	721.271	725.811	730.093	734.173	738.082	741.856	745.497	748.982	752.319	755.523	758.569	761.487	764.261	766.881	769.343	771.645	773.796	775.772	777.567	779.178	780.583	781.809	782.854	783.724	784.422	784.959	785.335	785.571	785.661	785.638	785.495	785.244
131	Low variant	China, Taiwan Province of China	12	158	Country/Area	906	23816.8	23823.5	23821.1	23810	23790.6	23763.2	23727.8	23684.6	23633.5	23574.5	23507.6	23432.9	23350.4	23260.5	23163.7	23060.2	22950.3	22834	22710.8	22580.4	22442.2	22296.2	22143	21983	21817.2	21646.2	21470.4	21289.9	21105.1	20916.2	20723.7	20527.6	20328.4	20126.2	19920.9	19712.9	19502.2	19289.1	19073.7	18856.3	18637	18416	18193.5
132	Low variant	Dem. People's Republic of Korea		408	Country/Area	906	25778.8	25853.3	25916.2	25968.2	26010.1	26042.2	26064.6	26077.1	26079.3	26070.8	26051.1	26020.3	25979	25928.6	25870.9	25807.2	25738.2	25663.8	25584.4	25499.8	25410.2	25315.6	25216.3	25112.4	25004.2	24891.5	24774.6	24653.5	24527.5	24395.9	24258.2	24114.5	23964.8	23809.5	23648.8	23483	23312.4	23137.1	22957.8	22775.4	22590.4	22403.3	22214.2
133	Low variant	Japan		392	Country/Area	906	126476	125938	125332	124665	123944	123175	122361	121508	120620	119699	118751	117777	116782	115770	114746	113714	112677	111636	110594	109550	108505	107461	106419	105380	104345	103317	102295	101278	100266	99256.6	98249.4	97243.7	96238.2	95229.1	94211.5	93181.9	92139.1	91083.3	90013.9	88930.5	87833.2	86722.3	85599.1
134	Low variant	Mongolia		496	Country/Area	906	3278.29	3324.96	3368.33	3408.81	3446.76	3482.49	3516.26	3548.25	3578.63	3607.5	3634.94	3661.1	3686.16	3710.38	3734.03	3757.36	3780.48	3803.4	3826.03	3848.29	3870.02	3891.23	3911.93	3932.05	3951.54	3970.36	3988.41	4005.68	4022.03	4037.33	4051.45	4064.35	4075.98	4086.29	4095.19	4102.66	4108.66	4113.2	4116.33	4118.1	4118.55	4117.73	4115.69
135	Low variant	Republic of Korea		410	Country/Area	906	51269.2	51246.6	51200.9	51133.3	51044.8	50936.4	50809.1	50663.8	50501.3	50322.5	50128.2	49918.9	49695	49456.9	49204.8	48938.8	48659.3	48366.4	48060	47739.6	47405.1	47056.3	46693.5	46317.2	45928.1	45526.5	45112.8	44687.1	44248.8	43797.1	43331.8	42853.2	42361.9	41858.1	41342.1	40814.6	40276	39727.5	39170.8	38608.2	38041.7	37472.3	36901
136	Low variant	South-Eastern Asia		920	Subregion	1832	668620	674287	679567	684494	689097	693396	697405	701128	704562	707702	710541	713084	715346	717362	719172	720809	722285	723598	724737	725685	726427	726964	727299	727426	727338	727030	726501	725750	724773	723570	722139	720480	718597	716493	714173	711643	708906	705968	702838	699527	696045	692400	688596
137	Low variant	Brunei Darussalam		96	Country/Area	920	437.483	440.969	444.134	447	449.636	451.981	454.111	455.993	457.643	459.053	460.227	461.17	461.904	462.428	462.785	463.021	463.117	463.086	462.917	462.621	462.177	461.595	460.875	460.012	459.004	457.841	456.542	455.084	453.456	451.658	449.693	447.534	445.208	442.693	440.015	437.16	434.142	430.968	427.629	424.16	420.555	416.827	412.976
138	Low variant	Cambodia		116	Country/Area	920	16719	16925	17116.8	17296.5	17465.6	17625.4	17777	17921	18057.6	18187	18309.3	18424.7	18533.9	18638	18738.4	18836.2	18931.7	19024.5	19113.8	19198	19276	19347.6	19412.7	19470.8	19521.5	19564.4	19599.2	19625.8	19644.1	19654.2	19655.9	19649.3	19634.4	19611.7	19581.6	19544.6	19500.9	19450.5	19393.6	19330.4	19261.2	19185.9	19104.8
139	Low variant	Indonesia		360	Country/Area	920	273524	276013	278338	280517	282562	284484	286288	287978	289552	291011	292351	293575	294689	295707	296645	297514	298321	299063	299734	300325	300827	301240	301565	301798	301934	301971	301906	301740	301473	301106	300642	300080	299422	298671	297830	296903	295893	294801	293633	292393	291086	289715	288283
140	Low variant	Lao People's Democratic Republic		418	Country/Area	920	7275.56	7369.08	7457.38	7541.03	7620.44	7695.97	7767.79	7835.96	7900.43	7961.1	8017.85	8070.71	8119.91	8165.9	8209.31	8250.55	8289.79	8326.93	8361.74	8393.83	8422.92	8448.95	8471.92	8491.69	8508.08	8520.94	8530.21	8535.86	8537.82	8536.06	8530.53	8521.23	8508.17	8491.45	8471.19	8447.51	8420.46	8390.08	8356.46	8319.67	8279.78	8236.88	8191.03
141	Low variant	Malaysia	13	458	Country/Area	920	32366	32734.4	33081.5	33408.7	33717.2	34007.8	34281.1	34537.3	34776.6	34998.9	35204.1	35392.8	35565.6	35724.4	35870.9	36006.9	36133	36249.6	36357	36455.1	36544.2	36624.5	36696.4	36760.1	36815.8	36863.8	36904	36936.4	36960.6	36976.2	36982.9	36980.6	36969	36947.6	36915.7	36872.7	36818.3	36752.6	36675.6	36587.2	36487.6	36376.7	36254.9
142	Low variant	Myanmar		104	Country/Area	920	54409.8	54766.4	55101.2	55415.9	55711.2	55987.2	56243.6	56479.3	56692.9	56882.4	57046.3	57184	57296.4	57385.9	57456.1	57509.6	57547.4	57568.9	57573.5	57560.2	57528.2	57477.5	57408.6	57321.6	57216.2	57092.5	56950.7	56791	56613.6	56418.8	56207	55978.6	55733.9	55473.4	55197.8	54907.7	54603.6	54285.9	53955.2	53612	53256.8	52890.1	52512.4
[truncated: 147 more rows]
[truncated: 38 more columns]

## Sheet: CONSTANT-FERTILITY
United Nations
Population Division
Department of Economic and Social Affairs
[truncated: 297 more rows]
[truncated: 38 more columns]

## Sheet: INSTANT-REPLACEMENT
United Nations
[truncated: 299 more rows]
[truncated: 38 more columns]

## Sheet: MOMENTUM
United Nations
[truncated: 299 more rows]
[truncated: 38 more columns]

[truncated: 4 more sheets: ZERO-MIGRATION, CONSTANT-MORTALITY, NO CHANGE, NOTES]
