# Supplementary material for: The Social Cost of Fossil and Industrial CO2 Emissions from 1950 to 2018
Source: Research Square preprint supplement (doi:10.21203/rs.3.rs-2244259/v1), 2022-11-17
Supplement: Supplementary file 47 [file World_Bank_Data_Population.xls]

## Sheet: Data
Data Source	World Development Indicators
Last Updated Date	2021-09-15
Country Name	Country Code	Indicator Name	Indicator Code	1960	1961	1962	1963	1964	1965	1966	1967	1968	1969	1970	1971	1972	1973	1974	1975	1976	1977	1978	1979	1980	1981	1982	1983	1984	1985	1986	1987	1988	1989	1990	1991	1992	1993	1994	1995	1996	1997	1998	1999	2000	2001	2002	2003	2004	2005
Aruba	ABW	Population, total	SP.POP.TOTL	54208	55434	56234	56699	57029	57357	57702	58044	58377	58734	59070	59442	59849	60236	60527	60653	60586	60366	60102	59972	60097	60561	61341	62213	62826	63024	62645	61838	61072	61033	62152	64623	68240	72495	76705	80324	83211	85450	87280	89009	90866	92892	94992	97016	98744	100028
Africa Eastern and Southern	AFE	Population, total	SP.POP.TOTL	130836765	134159786	137614644	141202036	144920186	148769974	152752671	156876454	161156430	165611760	170257189	175100167	180141148	185376550	190800796	196409937	202205766	208193045	214368393	220740384	227305945	234058404	240999134	248146290	255530063	263161451	271050065	279184536	287524258	296024639	304648010	313394693	322270073	331265579	340379934	349605660	358953595	368440591	378098393	387977990	398113044	408522129	419223717	430246635	441630149	453404076
Afghanistan	AFG	Population, total	SP.POP.TOTL	8996967	9169406	9351442	9543200	9744772	9956318	10174840	10399936	10637064	10893772	11173654	11475450	11791222	12108963	12412960	12689164	12943093	13171294	13341199	13411060	13356500	13171679	12882518	12537732	12204306	11938204	11736177	11604538	11618008	11868873	12412311	13299016	14485543	15816601	17075728	18110662	18853444	19357126	19737770	20170847	20779957	21606992	22600774	23680871	24726689	25654274
Africa Western and Central	AFW	Population, total	SP.POP.TOTL	96396419	98407221	100506960	102691339	104953470	107289875	109701811	112195950	114781116	117468741	120269044	123184308	126218502	129384954	132699537	136173544	139813171	143615715	147571063	151663853	155882270	160223588	164689764	169279422	173991851	178826553	183785612	188868567	194070079	199382783	204803865	210332267	215976366	221754806	227692136	233807627	240114179	246613750	253302310	260170348	267214544	274433894	281842480	289469530	297353098	305520588
Angola	AGO	Population, total	SP.POP.TOTL	5454938	5531451	5608499	5679409	5734995	5770573	5781305	5774440	5771973	5803677	5890360	6041239	6248965	6497283	6761623	7023994	7279630	7533814	7790774	8058112	8341290	8640478	8952971	9278104	9614756	9961993	10320116	10689247	11068051	11454784	11848385	12248901	12657361	13075044	13503753	13945205	14400722	14871572	15359600	15866871	16395477	16945753	17519418	18121477	18758138	19433604
Albania	ALB	Population, total	SP.POP.TOTL	1608800	1659800	1711319	1762621	1814135	1864791	1914573	1965598	2022272	2081695	2135479	2187853	2243126	2296752	2350124	2404831	2458526	2513546	2566266	2617832	2671997	2726056	2784278	2843960	2904429	2964762	3022635	3083605	3142336	3227943	3286542	3266790	3247039	3227287	3207536	3187784	3168033	3148281	3128530	3108778	3089027	3060173	3051010	3039616	3026939	3011487
Andorra	AND	Population, total	SP.POP.TOTL	13410	14378	15379	16407	17466	18542	19646	20760	21886	23053	24275	25571	26885	28232	29515	30705	31782	32769	33744	34825	36063	37498	39115	40854	42706	44593	46520	48459	50433	52452	54508	56666	58882	60974	62676	63860	64363	64318	64140	64368	65390	67344	70048	73180	76250	78871
Arab World	ARB	Population, total	SP.POP.TOTL	92197715	94724540	97334438	100034191	102832792	105736428	108758634	111899335	115136161	118437193	121785630	125164720	128598743	132161302	135952270	140040580	144453278	149161836	154111160	159218539	164420771	169698978	175061794	180505967	186035280	191650328	197338140	203084958	208889669	214753965	222653371	228731671	232956364	239243294	245449429	253107302	259000937	264822167	270575777	276393809	282344141	288432153	294665202	301113869	307862846	314965776
United Arab Emirates	ARE	Population, total	SP.POP.TOTL	92417	100801	112112	125130	138049	149855	159979	169768	182620	203103	234512	277463	330968	394625	467457	548295	637926	735347	835498	931752	1019507	1096602	1164816	1228457	1293970	1366165	1446386	1533526	1627068	1725676	1828437	1937159	2052892	2173135	2294377	2415099	2539121	2671361	2813214	2966029	3134067	3302722	3478769	3711931	4068577	4588222
Argentina	ARG	Population, total	SP.POP.TOTL	20481781	20817270	21153042	21488916	21824427	22159644	22494031	22828872	23168268	23517613	23880564	24259564	24653172	25056475	25462305	25865775	26264681	26661397	27061041	27471046	27896532	28338514	28794550	29262049	29737097	30216284	30698964	31184411	31668939	32148137	32618648	33079002	33529320	33970103	34402669	34828168	35246376	35657438	36063451	36467218	36870796	37275644	37681743	38087866	38491970	38892924
Armenia	ARM	Population, total	SP.POP.TOTL	1874119	1941498	2009524	2077584	2145004	2211316	2276038	2339133	2401142	2462938	2525067	2587716	2650484	2712780	2773750	2832752	2889583	2944375	2997419	3049107	3099759	3148096	3193696	3238592	3285593	3335935	3392264	3451947	3504667	3536473	3538164	3505249	3442820	3363111	3283664	3217349	3168213	3133081	3108691	3089020	3069597	3050686	3033976	3017938	3000715	2981262
American Samoa	ASM	Population, total	SP.POP.TOTL	20127	20605	21246	22029	22850	23675	24473	25235	25980	26698	27362	27982	28564	29103	29595	30045	30455	30834	31262	31842	32648	33697	34969	36413	37946	39521	41114	42741	44346	45894	47351	48682	49900	51025	52099	53158	54209	55227	56180	57049	57816	58496	59077	59495	59684	59557
Antigua and Barbuda	ATG	Population, total	SP.POP.TOTL	54132	55005	55849	56701	57641	58699	59912	61240	62523	63553	64184	64354	64134	63649	63108	62671	62353	62162	62038	61948	61861	61789	61780	61779	61784	61785	61754	61713	61758	62007	62533	63363	64459	65777	67201	68672	70176	71707	73219	74674	76007	77212	78298	79311	80347	81462
Australia	AUS	Population, total	SP.POP.TOTL	10276477	10483000	10742000	10950000	11167000	11388000	11651000	11799000	12009000	12263000	12507000	12937000	13177000	13380000	13723000	13893000	14033000	14192000	14358000	14514000	14692000	14927000	15178000	15369000	15544000	15758000	16018400	16263900	16532200	16814400	17065100	17284000	17495000	17667000	17855000	18072000	18311000	18517000	18711000	18926000	19153000	19413000	19651400	19895400	20127400	20394800
Austria	AUT	Population, total	SP.POP.TOTL	7047539	7086299	7129864	7175811	7223801	7270889	7322066	7376998	7415403	7441055	7467086	7500482	7544201	7586115	7599038	7578903	7565525	7568430	7562305	7549425	7549433	7568710	7574140	7561910	7561434	7564985	7569794	7574586	7585317	7619567	7677850	7754891	7840709	7905633	7936118	7948278	7959017	7968041	7976789	7992324	8011566	8042293	8081957	8121423	8171966	8227829
Azerbaijan	AZE	Population, total	SP.POP.TOTL	3895398	4030325	4171428	4315127	4456691	4592601	4721528	4843872	4960237	5071930	5180032	5284518	5385266	5483088	5579071	5674129	5768730	5863138	5957927	6053635	6150735	6249312	6349555	6452067	6557581	6666447	6778631	6893486	7010027	7126877	7159000	7271000	7382000	7495000	7597000	7685000	7763000	7838250	7913000	7982750	8048600	8111200	8171950	8234100	8306500	8391850
Burundi	BDI	Population, total	SP.POP.TOTL	2797925	2852438	2907320	2964416	3026292	3094378	3170496	3253215	3336930	3413909	3479070	3530000	3569655	3605120	3646428	3700879	3770870	3854446	3949264	4051239	4157296	4266520	4379727	4497544	4621096	4750832	4886745	5027143	5168703	5307069	5438959	5564923	5685569	5798054	5898964	5987044	6060110	6122130	6185564	6267132	6378871	6525546	6704118	6909161	7131688	7364857
Belgium	BEL	Population, total	SP.POP.TOTL	9153489	9183948	9220578	9289770	9378113	9463667	9527807	9580991	9618756	9646032	9655549	9673162	9711115	9741720	9772419	9800700	9818227	9830358	9839534	9848382	9859242	9858982	9856303	9855520	9855372	9858308	9861823	9870234	9901664	9937697	9967379	10004486	10045158	10084475	10115603	10136811	10156637	10181245	10203008	10226419	10251250	10286570	10332785	10376133	10421137	10478617
Benin	BEN	Population, total	SP.POP.TOTL	2431617	2465865	2502897	2542864	2585961	2632361	2682159	2735308	2791588	2850657	2912338	2976575	3043563	3113681	3187413	3265167	3347169	3433445	3523933	3618519	3717161	3820126	3927717	4039940	4156819	4278502	4404504	4535262	4672844	4820020	4978489	5149496	5331805	5521761	5714215	5905552	6094272	6281644	6470275	6664102	6865946	7076728	7295400	7520556	7750003	7982223
Burkina Faso	BFA	Population, total	SP.POP.TOTL	4829289	4894580	4960328	5027811	5098891	5174874	5256360	5343025	5434046	5528172	5624592	5723378	5825174	5930493	6040045	6154554	6274032	6398933	6530820	6671656	6822837	6985166	7158259	7340910	7531239	7727908	7930689	8140080	8356313	8579818	8811033	9050086	9297110	9552473	9816584	10089880	10372734	10665552	10968722	11282696	11607951	11944589	12293097	12654624	13030576	13421935
Bangladesh	BGD	Population, total	SP.POP.TOTL	48013505	49362834	50752150	52202008	53741721	55385114	57157651	59034250	60918452	62679765	64232486	65531635	66625706	67637541	68742222	70066310	71652386	73463593	75450033	77529040	79639498	81767516	83932132	86142490	88416529	90764180	93187593	95671159	98186350	100695496	103171957	105599125	107983708	110350641	112737684	115169933	117649927	120160571	122682818	125189655	127657862	130088709	132478077	134791598	136986429	139035505
Bulgaria	BGR	Population, total	SP.POP.TOTL	7867374	7943118	8012946	8078145	8144340	8204168	8258057	8310226	8369603	8434172	8489574	8536395	8576200	8620967	8678745	8720742	8758599	8804183	8814032	8825940	8861535	8891117	8917457	8939738	8960679	8960547	8958171	8971359	8981446	8876972	8718289	8632367	8540164	8472313	8443591	8406067	8362826	8312068	8256786	8210624	8170172	8009142	7837161	7775327	7716860	7658972
Bahrain	BHR	Population, total	SP.POP.TOTL	162429	167899	173140	178142	182888	187432	191785	196060	200652	206037	212607	220311	229151	239527	251908	266540	283746	303169	323468	342804	359897	374120	385953	396451	407233	419428	433478	448981	465198	481081	495927	509762	523082	536212	549590	563698	578661	594927	613697	636540	664610	697550	735140	778708	829846	889157
Bahamas, The	BHS	Population, total	SP.POP.TOTL	109532	115119	121092	127340	133705	140060	146381	152621	158648	164265	169376	173894	177863	181519	185105	188895	192903	197100	201482	205991	210589	215321	220182	225095	229913	234579	239020	243265	247451	251738	256227	261007	266028	271065	275849	280179	283980	287363	290600	294063	298045	302618	307657	313123	318893	324848
Bosnia and Herzegovina	BIH	Population, total	SP.POP.TOTL	3225664	3288604	3353228	3417573	3478999	3535632	3586630	3632678	3675448	3717476	3760536	3805286	3851153	3897259	3942221	3985107	4025271	4063188	4100355	4138816	4179850	4222479	4265183	4307907	4350566	4392135	4435925	4479516	4509462	4507819	4463422	4369320	4233673	4078940	3936527	3829049	3764419	3736070	3734338	3743353	3751176	3755514	3759389	3762179	3764194	3765332
Belarus	BLR	Population, total	SP.POP.TOTL	8198000	8271216	8351928	8437232	8524224	8610000	8696496	8785648	8874552	8960304	9040000	9115576	9188968	9257272	9317584	9367000	9411000	9463000	9525000	9584000	9643000	9710000	9776000	9843000	9910000	9975000	10043000	10111000	10140000	10170000	10189000	10194000	10216000	10239000	10227000	10194000	10160000	10117000	10069000	10026738	9979610	9928549	9865548	9796749	9730146	9663915
Belize	BLZ	Population, total	SP.POP.TOTL	92068	94700	97392	100165	103069	106120	109348	112707	116065	119269	122184	124795	127152	129294	131305	133264	135143	136990	138975	141302	144142	147572	151486	155820	160341	164918	169569	174333	179023	183471	187554	191136	194324	197625	201679	206962	213660	221575	230248	238979	247310	255068	262387	269428	276516	283798
Bermuda	BMU	Population, total	SP.POP.TOTL	44400	45500	46600	47700	48900	50100	51000	52000	53000	54000	55000	54600	54200	53800	53400	53000	53200	53400	53600	53800	54670	55050	55449	55930	56423	56898	57382	57849	58347	58841	59326	59021	58595	58910	59320	59746	60129	60497	60943	61285	61833	62504	62912	63325	63740	64154
Bolivia	BOL	Population, total	SP.POP.TOTL	3656961	3728954	3802996	3879191	3957759	4038865	4122517	4208683	4297522	4389248	4484004	4581752	4682392	4785916	4892294	5001413	5113458	5228253	5344946	5462413	5579932	5697098	5814344	5932812	6054126	6179460	6309129	6442824	6580318	6721117	6864839	7011456	7160917	7312857	7466792	7622334	7779268	7937453	8096761	8257066	8418270	8580244	8742822	8905820	9069044	9232301
Brazil	BRA	Population, total	SP.POP.TOTL	72179235	74311338	76514329	78772647	81064572	83373533	85696502	88035815	90387079	92746607	95113265	97482928	99859388	102259497	104706193	107216209	109790943	112425392	115121158	117878412	120694012	123570327	126498322	129448815	132383569	135274083	138108915	140891606	143627505	146328305	149003225	151648007	154259382	156849086	159432717	162019889	164614682	167209046	169785253	172318674	174790339	177196051	179537523	181809244	184006479	186127108
Barbados	BRB	Population, total	SP.POP.TOTL	230985	231718	232623	233632	234588	235415	236084	236661	237241	237963	238895	240093	241523	243076	244643	246158	247584	248931	250200	251347	252388	253296	254078	254791	255493	256260	257117	258012	258970	259961	260933	261912	262890	263869	264893	265955	267047	268183	269334	270455	271511	272494	273423	274331	275283	276320
Brunei Darussalam	BRN	Population, total	SP.POP.TOTL	81707	85560	89484	93540	97819	102390	107274	112446	117897	123596	129530	135672	142015	148516	155069	161635	168173	174717	181201	187596	193880	200027	206064	212073	218176	224440	230917	237565	244405	251456	258714	266208	273888	281684	289452	297112	304620	311962	319135	326214	333166	340037	346777	353295	359434	365112
Bhutan	BTN	Population, total	SP.POP.TOTL	223284	228849	234552	240529	246961	253993	261664	269944	278731	287886	297307	306957	316822	326986	337491	348395	359721	371424	383324	395192	406883	418107	428938	439823	451471	464264	478683	494313	509532	522173	530801	534637	534525	532590	531905	534629	541471	551713	564378	577886	591014	603643	616025	627840	638809	648744
Botswana	BWA	Population, total	SP.POP.TOTL	502733	512688	523777	535692	547870	559996	571957	584098	596946	611297	627714	646350	667096	689906	714701	741346	769982	800532	832467	865073	897860	930412	962859	996124	1031439	1069585	1110948	1154904	1200073	1244484	1286756	1326321	1363541	1399110	1434061	1469173	1504724	1540424	1575827	1610260	1643333	1674674	1704637	1734387	1765533	1799077
Central African Republic	CAF	Population, total	SP.POP.TOTL	1501668	1526057	1551908	1579375	1608618	1639706	1673019	1708306	1744198	1778870	1811157	1840517	1867786	1894850	1924386	1958367	1997017	2039914	2087662	2140778	2199359	2264441	2335339	2408322	2478382	2542170	2597765	2646836	2693974	2745735	2806740	2878507	2959236	3046148	3135017	3222662	3308235	3392432	3475485	3558019	3640421	3722016	3802129	3881185	3959883	4038380
Canada	CAN	Population, total	SP.POP.TOTL	17909009	18271000	18614000	18964000	19325000	19678000	20048000	20412000	20744000	21028000	21324000	21962032	22218463	22491777	22807969	23143275	23449808	23725843	23963203	24201544	24515667	24819915	25116942	25366451	25607053	25842116	26100278	26446601	26791747	27276781	27691138	28037420	28371264	28684764	29000663	29302311	29610218	29905948	30155173	30401286	30685730	31020902	31360079	31644028	31940655	32243753
Central Europe and the Baltics	CEB	Population, total	SP.POP.TOTL	91401764	92232738	93009498	93840016	94715795	95440988	96146336	97043270	97884022	98606630	99134548	99635258	100357161	101112680	101939916	102860571	103776068	104616884	105329397	105948616	106541316	107129392	107730380	108297837	108838073	109338285	109824166	110296425	110686740	110801640	110743128	110469467	110111454	110041924	110021594	109864246	109626194	109422013	109238340	109060951	108447824	107660041	106959751	106624167	106331716	106041911
Switzerland	CHE	Population, total	SP.POP.TOTL	5327827	5434294	5573815	5694247	5789228	5856472	5918002	5991785	6067714	6136387	6180877	6213399	6260956	6307347	6341405	6338632	6302504	6281174	6281738	6294365	6319408	6354074	6391309	6418773	6441865	6470365	6504124	6545106	6593386	6646912	6715519	6799978	6875364	6938265	6993795	7040687	7071850	7088906	7110001	7143991	7184250	7229854	7284753	7339001	7389625	7437115
Channel Islands	CHI	Population, total	SP.POP.TOTL	109419	110398	111464	112591	113777	114989	116229	117469	118725	119975	121200	122405	123611	124722	125680	126420	126908	127186	127395	127691	128204	128986	129976	131153	132445	133800	135242	136762	138250	139580	140677	141469	142006	142407	142867	143480	144348	145387	146500	147553	148439	149097	149591	150070	150722	151674
Chile	CHL	Population, total	SP.POP.TOTL	8132988	8303804	8476895	8650390	8821855	8989607	9152848	9312091	9468851	9625304	9783134	9942716	10103675	10265827	10428803	10592310	10756876	10922777	11089165	11254877	11419350	11582020	11743909	11907955	12078137	12257238	12445833	12642917	12847712	13058758	13274617	13495255	13719818	13944934	14166346	14380864	14587367	14786227	14977736	15162801	15342350	15516112	15684413	15849649	16014972	16182713
China	CHN	Population, total	SP.POP.TOTL	667070000	660330000	665770000	682335000	698355000	715185000	735400000	754550000	774510000	796025000	818315000	841105000	862030000	881940000	900350000	916395000	930685000	943455000	956165000	969005000	981235000	993885000	1008630000	1023310000	1036825000	1051040000	1066790000	1084035000	1101630000	1118650000	1135185000	1150780000	1164970000	1178440000	1191835000	1204855000	1217550000	1230075000	1241935000	1252735000	1262645000	1271850000	1280400000	1288400000	1296075000	1303720000
Cote d'Ivoire	CIV	Population, total	SP.POP.TOTL	3503559	3631547	3770756	3918630	4071411	4226843	4383723	4544168	4713134	4897470	5102070	5328735	5576026	5841513	6121295	6412409	6713949	7026497	7350269	7685927	8033652	8393689	8764991	9144940	9530103	9918204	10307268	10698188	11094740	11502453	11924873	12362404	12812428	13271638	13735438	14199759	14665125	15130674	15589407	16032573	16454660	16853027	17231539	17599613	17970493	18354513
Cameroon	CMR	Population, total	SP.POP.TOTL	5176920	5285015	5398730	5518104	5643039	5773538	5909874	6052419	6201410	6357096	6519754	6689659	6867170	7052847	7247284	7451057	7664398	7887571	8121081	8365560	8621409	8888534	9166813	9456496	9757849	10070806	10395481	10731058	11075423	11425807	11780086	12137912	12499499	12864091	13230978	13599984	13970812	14344444	14723772	15112598	15513944	15928910	16357605	16800869	17259322	17733408
Congo, Dem. Rep.	COD	Population, total	SP.POP.TOTL	15248256	15637700	16041187	16461828	16903830	17369882	17862052	18378620	18913874	19459818	20011033	20564062	21121360	21690448	22282127	22903587	23560470	24249127	24956387	25663598	26358905	27040329	27717293	28403858	29119663	29881222	30683877	31528702	32443784	33464767	34612023	35908240	37333917	38815835	40252973	41576239	42757239	43827191	44849968	45919615	47105830	48428534	49871670	51425583	53068869	54785894
Congo, Rep.	COG	Population, total	SP.POP.TOTL	1018254	1043119	1069236	1096638	1125354	1155389	1186782	1219547	1253761	1289519	1326894	1365891	1406510	1448632	1492055	1536658	1582361	1629218	1677326	1726865	1777932	1830629	1884873	1940454	1996994	2054308	2112359	2171319	2231462	2293161	2356740	2422312	2489945	2559880	2632345	2707532	2785815	2867283	2951651	3038432	3127420	3217930	3310376	3406915	3510468	3622775
Colombia	COL	Population, total	SP.POP.TOTL	16057714	16567817	17092919	17629978	18175187	18725242	19279734	19837508	20393704	20942453	21480064	22003983	22516429	23024512	23538390	24065502	24608102	25164544	25733669	26312996	26900508	27496608	28101824	28714183	29331230	29951194	30572479	31195417	31822527	32457497	33102569	33758328	34422568	35091272	35758978	36421438	37076387	37723803	38364307	38999468	39629965	40255956	40875363	41483872	42075953	42647731
Comoros	COM	Population, total	SP.POP.TOTL	191122	194149	197202	200371	203762	207429	211477	215900	220574	225324	230055	234645	239229	244207	250107	257285	265958	275903	286628	297451	307831	317617	326944	336088	345455	355337	365765	376647	387964	399638	411598	423873	436454	449270	462280	475394	488625	501955	515382	528853	542358	555895	569480	583213	597230	611625
Cabo Verde	CPV	Population, total	SP.POP.TOTL	201770	205321	210141	216087	222949	230421	238655	247522	256169	263461	268633	271315	271841	271068	270228	270240	271345	273335	276182	279729	283848	288678	294244	300226	306140	311668	316613	321137	325744	331180	337953	346229	355763	366057	376409	386288	395533	404248	412513	420456	428178	435701	442955	449925	456619	463034
Costa Rica	CRI	Population, total	SP.POP.TOTL	1330787	1381187	1433346	1486555	1539942	1592834	1645076	1696742	1747690	1797891	1847394	1896074	1944170	1992522	2042242	2094186	2148681	2205618	2264942	2326460	2389973	2455593	2523358	2593015	2664220	2736719	2810245	2884856	2960932	3039015	3119436	3202083	3286525	3372298	3458829	3545524	3632361	3718952	3803893	3885428	3962369	4034074	4100922	4164053	4225156	4285504
Caribbean small states	CSS	Population, total	SP.POP.TOTL	4194711	4274052	4353623	4432240	4508189	4580382	4648353	4712556	4773890	4833839	4893444	4953088	5012600	5071912	5130797	5189174	5246547	5303289	5360562	5419911	5482191	5548521	5617902	5687113	5751508	5808206	5855445	5894820	5930153	5967028	6009262	6058334	6112784	6170324	6227332	6281204	6331277	6378551	6423851	6468461	6513486	6559097	6604966	6650981	6696985	6742657
Cuba	CUB	Population, total	SP.POP.TOTL	7141241	7291201	7453535	7623300	7793258	7958171	8115487	8266373	8413549	8561391	8712535	8868087	9025347	9178809	9320943	9446441	9554186	9646142	9724044	9790850	9849457	9898891	9940314	9981303	10031651	10097910	10183894	10286645	10397519	10503967	10596986	10673534	10736386	10789312	10838461	10888246	10939285	10989730	11038706	11084673	11126423	11164676	11199664	11229185	11250369	11261586
Curacao	CUW	Population, total	SP.POP.TOTL	124826	126125	128414	130860	133148	135266	136682	138140	140298	142581	144739	147389	147710	146912	148351	149129	149399	149459	148341	147851	148041	148629	150101	151159	151940	152711	152662	151456	149254	146937	145400	144403	143912	144299	144630	145139	146306	146956	144472	139428	133860	129047	129205	131897	134192	137658
Cayman Islands	CYM	Population, total	SP.POP.TOTL	7870	8024	8141	8219	8299	8370	8444	8518	8638	8833	9143	9588	10135	10778	11488	12234	13023	13848	14681	15485	16207	16857	17436	18005	18662	19460	20426	21539	22775	24028	25307	26540	27784	29068	30521	32161	34065	36155	38330	40423	42305	43934	45347	46624	47899	49261
Cyprus	CYP	Population, total	SP.POP.TOTL	572933	576402	577696	577918	578628	580972	585313	591301	598495	606121	613618	620860	628002	635105	642322	649753	657524	665521	673253	680010	685408	689170	691716	694076	697715	703694	712335	723384	736476	751043	766616	783121	800610	818750	837104	855391	873426	891190	908710	926049	943288	960274	976968	993562	1010410	1027657
Czech Republic	CZE	Population, total	SP.POP.TOTL	9602006	9586651	9624660	9670685	9727804	9779358	9821040	9852899	9876346	9896580	9858071	9826815	9867632	9922266	9988459	10058620	10125939	10186755	10242098	10292341	10304193	10300591	10314826	10323856	10330213	10337118	10342227	10347318	10355276	10361068	10333355	10308578	10319123	10329855	10333587	10327253	10315241	10304131	10294373	10283860	10255063	10216605	10196916	10193998	10197101	10211216
Germany	DEU	Population, total	SP.POP.TOTL	72814900	73377632	74025784	74714353	75318337	75963695	76600311	76951336	77294314	77909682	78169289	78312842	78688452	78936666	78967433	78673554	78336950	78159814	78091820	78126350	78288576	78407907	78333366	78128282	77858685	77684873	77720436	77839920	78144619	78751283	79433029	80013896	80624598	81156363	81438348	81678051	81914831	82034771	82047195	82100243	82211508	82349925	82488495	82534176	82516260	82469422
Djibouti	DJI	Population, total	SP.POP.TOTL	83634	88503	94203	100618	107582	114976	122876	131405	140462	149889	159662	169372	179237	190569	205180	224177	248556	277472	308008	336080	358960	374934	385268	393800	406018	425608	454359	490337	528993	563855	590393	606843	615050	618504	622364	630385	643649	660858	680465	699973	717577	733019	746947	759639	771599	783248
Dominica	DMA	Population, total	SP.POP.TOTL	60020	61036	61978	62917	63921	65044	66300	67687	69034	70214	71084	71569	71731	71739	71814	72088	72662	73443	74280	74960	75318	75314	75012	74484	73846	73207	72531	71842	71212	70722	70422	70377	70546	70818	71044	71105	70933	70592	70183	69828	69650	69671	69840	70102	70387	70580
Denmark	DNK	Population, total	SP.POP.TOTL	4579603	4611687	4647727	4684483	4722072	4759012	4797381	4835354	4864883	4891860	4928757	4963126	4991596	5021861	5045297	5059862	5072596	5088419	5104248	5116801	5123027	5121572	5117810	5114297	5111619	5113691	5120534	5127024	5129516	5132594	5140939	5154298	5171370	5188628	5206180	5233373	5263074	5284991	5304219	5321799	5339616	5358783	5375931	5390574	5404523	5419432
Dominican Republic	DOM	Population, total	SP.POP.TOTL	3294222	3406282	3521018	3638110	3757123	3877768	3999796	4123100	4247559	4373127	4499722	4627202	4755464	4884460	5014187	5144632	5275767	5407496	5539596	5671801	5803929	5935895	6067769	6199657	6331760	6464229	6596967	6729930	6863438	6997877	7133491	7270413	7408339	7546467	7683707	7819239	7952766	8084407	8214427	8343288	8471317	8598599	8724974	8850317	8974444	9097262
Algeria	DZA	Population, total	SP.POP.TOTL	11057864	11336336	11619828	11912800	12221675	12550880	12902626	13275020	13663581	14061724	14464992	14872253	15285992	15709831	16149018	16607706	17085799	17582899	18102266	18647801	19221659	19824297	20452901	21101875	21763578	22431507	23102386	23774287	24443472	25106192	25758872	26400468	27028330	27635517	28213777	28757788	29266415	29742980	30192750	30623406	31042238	31451513	31855110	32264159	32692153	33149720
East Asia & Pacific (excluding high income)	EAP	Population, total	SP.POP.TOTL	894875757	894479503	906413903	929634719	952494226	976360559	1003799539	1030341030	1057848841	1087054621	1117162921	1147907376	1176909425	1204956207	1231481379	1255568332	1277786882	1298403379	1318985502	1339874993	1360437112	1381732250	1405388781	1429179263	1451901724	1475340043	1500310495	1526774417	1553548236	1579666262	1605187660	1629631622	1652528279	1674580221	1696464118	1717901663	1738949771	1759750554	1779788454	1798639494	1816455800	1833422980	1849607527	1865132738	1880248912	1895275475
Early-demographic dividend	EAR	Population, total	SP.POP.TOTL	980003345	1003194972	1027204700	1051972834	1077531237	1103859981	1130947721	1158861175	1187474694	1216839339	1246947673	1277799456	1309397210	1341779503	1374824941	1408534717	1442862522	1477869964	1513819992	1551093148	1589897378	1630293423	1672134835	1715134126	1758863284	1803032659	1847526576	1892336352	1937278919	1982160339	2028993568	2073591177	2117785781	2161761687	2205758867	2249993925	2294576653	2339379359	2384127937	2428606122	2472852816	2516662185	2560101448	2603300762	2646483605	2689792006
East Asia & Pacific	EAS	Population, total	SP.POP.TOTL	1041673567	1043656626	1058119847	1083884354	1109291332	1135760430	1165660993	1194423916	1224481196	1256501888	1289442011	1324084663	1355934840	1386816705	1416257332	1442992143	1467572978	1490458433	1513242365	1536454977	1559219642	1582802675	1608709544	1634587947	1659196213	1684377898	1710979840	1739049562	1767394678	1795112149	1822134188	1848265154	1872676768	1896190507	1919576721	1942464423	1965146473	1987315524	2008705487	2028650228	2047640091	2065912033	2083186086	2099602481	2115458625	2131146847
Europe & Central Asia (excluding high income)	ECA	Population, total	SP.POP.TOTL	274647228	278931566	283238943	287564681	291878870	296127062	299713085	303366987	306934517	310433036	313941308	317445710	320945150	324422297	327916784	331431777	335100864	338710487	342280107	345827999	349436199	353122612	356678273	360204222	363975241	367739486	371479741	375227253	378837514	382076660	384377493	386437795	388125580	389516909	390276284	390572206	390932358	391289640	391526555	391495413	391586634	391315286	391008840	391172281	391535458	391952218
Europe & Central Asia	ECS	Population, total	SP.POP.TOTL	666753356	674450666	682397828	690411692	698355574	706070460	712830312	719406020	725725300	731903738	737524825	743140589	749283635	755259488	761029417	766625562	772129341	777422111	782653852	787910910	793299463	798559755	803342746	807903880	812662217	817497806	822470047	827505281	832553390	837438555	841520451	845399308	848877909	851974036	854082582	855491301	856857233	858165406	859298084	860319121	861278544	862347956	863936837	866215697	868808153	871456632
Ecuador	ECU	Population, total	SP.POP.TOTL	4543658	4674176	4809194	4948991	5093848	5243980	5399423	5560013	5725462	5895368	6069375	6247421	6429377	6614840	6803271	6994331	7187794	7383713	7582357	7784074	7989178	8197648	8409396	8624594	8843463	9066100	9292481	9522362	9755576	9991870	10230931	10472476	10716131	10961460	11207999	11455205	11703169	11951457	12198449	12442109	12681123	12914660	13143465	13369678	13596390	13825839
Egypt, Arab Rep.	EGY	Population, total	SP.POP.TOTL	26632891	27366239	28112258	28871383	29644875	30433024	31237597	32056506	32881852	33703127	34513851	35311905	36102670	36896551	37708144	38549133	39422731	40329589	41275728	42267429	43309063	44400113	45539295	46728284	47968643	49258726	50602360	51991696	53399243	54788680	56134478	57424552	58666812	59880656	61095804	62334025	63601632	64892269	66200259	67515591	68831561	70152662	71485044	72826102	74172073	75523576
Euro area	EMU	Population, total	SP.POP.TOTL	265203956	267621091	270110063	272655396	275163380	277650954	279969050	281974870	283866408	285778639	287338854	288923399	290874612	292728242	294399217	295923529	297251532	298441848	299652841	300886487	302184216	303343114	304174261	304787497	305299144	305877743	306640636	307488377	308516476	309837575	311262608	312708132	314162056	315449093	316366781	317181461	318003013	318761752	319433985	320258891	321310789	322547874	324125339	325885957	327682513	329380417
Eritrea	ERI	Population, total	SP.POP.TOTL	1007586	1033320	1060489	1088859	1118152	1148188	1178875	1210304	1242633	1276122	1310947	1347180	1384789	1423749	1463986	1505438	1547978	1591622	1636771	1683932	1733423	1784557	1836825	1890556	1946299	2003942	2064803	2127421	2185607	2231144	2258649	2266356	2257593	2238631	2218436	2204227	2196467	2195192	2206439	2237412	2292413	2374721	2481059	2600972	2719809	2826653
Spain	ESP	Population, total	SP.POP.TOTL	30455000	30739250	31023366	31296651	31609195	31954292	32283194	32682947	33113134	33441054	33814531	34224490	34604469	34988947	35373335	35757900	36137812	36511638	36864898	37191330	37491165	37758631	37986012	38171525	38330364	38469512	38584624	38684815	38766939	38827764	38867322	38966376	39157685	39361262	39549108	39724050	39889852	40057389	40223509	40386875	40567864	40850412	41431558	42187645	42921895	43653155
Estonia	EST	Population, total	SP.POP.TOTL	1211537	1225077	1241623	1258857	1277086	1294566	1308597	1318946	1331214	1345249	1360076	1376955	1392518	1405951	1418169	1429352	1439576	1450211	1460188	1468333	1477219	1487666	1498414	1508745	1518617	1528781	1540190	1552221	1561900	1568131	1569174	1561314	1533091	1494128	1462514	1436634	1415594	1399535	1386156	1390244	1396985	1388115	1379350	1370720	1362550	1354775
Ethiopia	ETH	Population, total	SP.POP.TOTL	22151284	22671193	23221385	23798418	24397010	25013634	25641040	26280135	26944386	27652715	28415080	29248650	30140799	31036670	31861353	32566855	33128151	33577240	33993301	34487806	35141703	35984531	36995246	38142679	39374346	40652146	41965696	43329238	44757205	46272308	47887864	49609976	51423591	53295556	55180993	57047906	58883531	60697443	62507724	64343008	66224809	68159422	70142090	72170581	74239508	76346310
European Union	EUU	Population, total	SP.POP.TOTL	356906098	359998408	363200480	366516509	369850237	373032729	376039129	378917964	381605442	384216977	386322917	388391948	390995000	393524745	395949381	398316579	400473497	402425493	404271789	406051882	407875838	409551911	410895608	411974424	412931321	413924499	415076367	416301843	417653046	419073139	420477999	421730520	422963890	424341124	425399126	426203356	426896861	427538048	428109867	428815486	429328622	429895628	430881947	432415932	434040244	435581949
Fragile and conflict affected situations	FCS	Population, total	SP.POP.TOTL	208280083	213082100	218087139	223284589	228670583	234243249	240005133	245962230	252116419	258473157	265037231	271800288	278767597	285961194	293417700	301154406	309196463	317520801	326050578	334679714	343334222	352006783	360736356	369569548	378570396	387802210	397235010	406892515	416947257	427617018	440937023	453319269	466482751	480128168	493815711	507247502	520303326	533112558	545728172	558627550	572303917	586760366	601848734	617468591	633460044	649704454
Finland	FIN	Population, total	SP.POP.TOTL	4429634	4461005	4491443	4523309	4548543	4563732	4580869	4605744	4626469	4623785	4606307	4612124	4639657	4666081	4690574	4711440	4725664	4738902	4752528	4764690	4779535	4799964	4826933	4855787	4881803	4902206	4918154	4932123	4946481	4964371	4986431	5013740	5041992	5066447	5088333	5107790	5124573	5139835	5153498	5165474	5176209	5188008	5200598	5213014	5228172	5246096
Fiji	FJI	Population, total	SP.POP.TOTL	393480	407244	421673	436303	450538	463960	476399	487973	498944	509708	520561	531622	542843	554143	565418	576626	587561	598299	609383	621584	635312	651032	668281	685497	700478	711770	718642	721776	722924	724602	728575	735398	744470	754962	765607	775428	784389	792736	800148	806302	811011	813923	815257	816078	817864	821606
France	FRA	Population, total	SP.POP.TOTL	46621688	47240526	47904879	48582624	49230585	49818019	50330268	50775788	51175507	51561833	51957747	52371320	52793151	53207744	53592235	53931390	54220033	54467709	54691866	54917110	55161510	55430278	55718940	56023775	56337675	56654703	56976126	57302642	57627106	57940199	58235716	58559309	58851216	59106758	59327200	59541904	59753095	59964841	60186284	60496708	60912500	61357432	61805266	62244880	62704901	63179356
Faroe Islands	FRO	Population, total	SP.POP.TOTL	34624	35074	35521	35965	36409	36843	37283	37705	38131	38560	39008	39456	39915	40395	40847	41292	41724	42133	42539	42941	43339	43725	44101	44483	44895	45328	45812	46340	46833	47159	47276	47123	46746	46277	45848	45625	45624	45789	46094	46428	46738	46999	47235	47439	47600	47731
Micronesia, Fed. Sts.	FSM	Population, total	SP.POP.TOTL	44510	45939	47372	48856	50476	52224	54192	56308	58386	60146	61415	62089	62275	62268	62456	63122	64360	66079	68196	70515	72936	75422	78015	80630	83192	85641	87904	89985	91984	94062	96304	98779	101386	103901	106030	107535	108311	108473	108206	107769	107405	107170	107027	106902	106624	106135
Gabon	GAB	Population, total	SP.POP.TOTL	500922	505793	511285	517573	524891	533357	543119	554054	565763	577644	589317	600608	611705	622914	634739	647538	661398	676264	692078	708788	726335	744695	763932	784056	805117	827107	850052	873871	898472	923714	949493	975785	1002573	1029769	1057252	1084951	1112944	1141332	1170061	1199058	1228359	1258008	1288310	1319946	1353788	1390550
United Kingdom	GBR	Population, total	SP.POP.TOTL	52400000	52800000	53250000	53650000	54000000	54348050	54648500	54943600	55211700	55441750	55663250	55896223	56086065	56194527	56229974	56225800	56211968	56193492	56196504	56246951	56314216	56333829	56313641	56332848	56422072	56550268	56681396	56802050	56928327	57076711	57247586	57424897	57580402	57718614	57865745	58019030	58166950	58316954	58487141	58682466	58892514	59119673	59370479	59647577	59987905	60401206
Georgia	GEO	Population, total	SP.POP.TOTL	3645600	3703600	3760300	3816100	3870300	3921600	3966700	4005800	4042300	4080300	4119900	4163000	4205300	4242500	4279500	4311200	4342400	4372100	4397700	4430200	4467700	4504500	4542800	4582900	4622200	4662900	4704500	4743500	4790700	4803300	4802000	4835900	4873500	4911100	4836076	4657722	4491699	4349913	4243607	4157192	4077131	4014373	3978515	3951736	3927340	3902469
Ghana	GHA	Population, total	SP.POP.TOTL	6635229	6848291	7071966	7300124	7524470	7739463	7941418	8132803	8321773	8520018	8735493	8973247	9229640	9493552	9749098	9985946	10199164	10395453	10590265	10805318	11056112	11348287	11676828	12033559	12405659	12783617	13164839	13552021	13947047	14353409	14773274	15207360	15653345	16106756	16561677	17014058	17462504	17908977	18357159	18812369	19278850	19756929	20246376	20750308	21272328	21814648
Gibraltar	GIB	Population, total	SP.POP.TOTL	23420	23808	24307	24889	25478	26079	26631	27172	27693	28165	28601	29007	29353	29657	29886	30062	30179	30228	30224	30172	30068	29902	29698	29481	29284	29151	29096	29114	29164	29187	29149	29021	28844	28680	28605	28688	28970	29404	29945	30526	31081	31604	32097	32556	32930	33222
Guinea	GIN	Population, total	SP.POP.TOTL	3494164	3552068	3611428	3672560	3735912	3801711	3870204	3941046	4013050	4084601	4154606	4223056	4290544	4357357	4424030	4491248	4559239	4628881	4702371	4782491	4871446	4969595	5077073	5195443	5326369	5470716	5629420	5801323	5982484	6167480	6352282	6534936	6716032	6897171	7081119	7269631	7463782	7662071	7860772	8054745	8240735	8417082	8586077	8753097	8925729	9109585
Gambia, The	GMB	Population, total	SP.POP.TOTL	365049	372436	379886	387635	396012	405258	415478	426622	438590	451228	464404	478106	492424	507428	523250	539985	557810	576755	596540	616770	637252	657581	678111	700198	725688	755791	791141	831011	873440	915631	955595	992671	1027476	1060861	1094219	1128577	1164091	1200522	1238124	1277118	1317708	1360070	1404263	1449925	1496524	1543745
Guinea-Bissau	GNB	Population, total	SP.POP.TOTL	616140	622754	628877	635008	641821	649795	658998	669243	680431	692407	704937	718359	732516	746178	757668	765985	770415	771732	772137	774726	781678	793804	810402	830212	851276	872163	892530	912755	933046	953782	975265	997522	1020353	1043421	1066345	1088850	1110835	1132505	1154372	1177133	1201305	1227105	1254454	1283297	1313492	1344931
Equatorial Guinea	GNQ	Population, total	SP.POP.TOTL	255338	258786	262219	266005	270616	276296	283506	291786	299416	304000	303986	298852	289508	277656	265762	255808	247969	242160	239681	241977	249931	264370	284638	308208	331554	352116	369024	382977	394973	406620	419188	432844	447269	462637	479099	496768	515844	536459	558496	581765	606180	631662	658388	686670	716949	749527
Greece	GRC	Population, total	SP.POP.TOTL	8331725	8398050	8448233	8479625	8510429	8550333	8613651	8684088	8740765	8772764	8792806	8831036	8888628	8929086	8962022	9046541	9188150	9308479	9429959	9548258	9642505	9729350	9789513	9846627	9895801	9934300	9967213	10000595	10036983	10089498	10196792	10319927	10399061	10460415	10512922	10562153	10608800	10661259	10720509	10761698	10805808	10862132	10902022	10928070	10955141	10987314
Grenada	GRD	Population, total	SP.POP.TOTL	89927	91324	92481	93409	94122	94634	94936	95012	94929	94723	94476	94212	93984	93661	93190	92494	91469	90219	89104	88603	89032	90610	93132	96020	98472	99953	100183	99425	98126	96932	96328	96462	97161	98234	99345	100286	101003	101567	102023	102429	102837	103242	103636	104003	104346	104658
Greenland	GRL	Population, total	SP.POP.TOTL	32500	33700	35000	36400	37600	39200	40500	41900	43400	44900	46400	47200	48300	49000	49500	49600	49700	49400	49200	49600	50200	51000	51500	52100	52700	53200	53500	54100	54800	55300	55600	55500	55300	55200	55500	55800	55900	56000	56100	56100	56200	56350	56609	56765	56911	56935
Guatemala	GTM	Population, total	SP.POP.TOTL	4128880	4251911	4378604	4508444	4640795	4774984	4910790	5047435	5184095	5320100	5455197	5589563	5723759	5858466	5994300	6131151	6269983	6412667	6561919	6720582	6890346	7071186	7262658	7462585	7669863	7884034	8104921	8332446	8566331	8805995	9050115	9296814	9544055	9790619	10037522	10286786	10536942	10788362	11046215	11311078	11589761	11871565	12147518	12415334	12682108	12948292
Guam	GUM	Population, total	SP.POP.TOTL	66733	68065	69605	71289	73047	74828	76611	78412	80212	82040	83875	85729	87580	89459	91378	93351	95380	97477	99629	101837	104134	106482	108901	111403	113953	116576	119228	121923	124674	127525	130480	133553	136693	139813	142806	145559	148061	150303	152274	153955	155323	156395	157173	157723	158094	158406
Guyana	GUY	Population, total	SP.POP.TOTL	571813	589274	606286	622580	637835	651865	664518	675861	686144	695743	704930	713684	721949	729909	737846	745847	754101	762424	770128	776257	780153	781734	781249	778953	775217	770439	764447	757451	750641	745581	743306	744477	748596	754141	758896	761298	760801	757975	753778	749676	746718	745206	744789	745142	745737	746156
High income	HIC	Population, total	SP.POP.TOTL	759783611	769499360	779465348	789358853	799159797	808596600	817426786	825698975	833895491	842260894	850563450	860560048	869313732	877805133	886141034	894227661	901732072	909139852	916611800	924450013	932075328	939681156	946904804	953688382	960111311	966563677	973188301	979874901	986702713	993966356	1001677611	1010166079	1016513603	1024551207	1032035681	1040719622	1047818942	1054747601	1061501831	1068197515	1074819578	1081809509	1089036403	1096166107	1103693618	1111423301
Hong Kong SAR, China	HKG	Population, total	SP.POP.TOTL	3075605	3168100	3305200	3420900	3504600	3597900	3629900	3722800	3802700	3863900	3959000	4045300	4123600	4241600	4377800	4461600	4518000	4583700	4667500	4929700	5063100	5183400	5264500	5345100	5397900	5456200	5524600	5580500	5627600	5686200	5704500	5752000	5800500	5901000	6035400	6156100	6435500	6489300	6543700	6606500	6665000	6714300	6744100	6730800	6783500	6813200
Honduras	HND	Population, total	SP.POP.TOTL	2038636	2096407	2155648	2216712	2280044	2346005	2414805	2486418	2560723	2637515	2716652	2798125	2882102	2968978	3059245	3153252	3251145	3352825	3458102	3566661	3678274	3792922	3910642	4031333	4154864	4281167	4410270	4542218	4677023	4814696	4955302	5098594	5244677	5394416	5548969	5709010	5874814	6045704	6220405	6397140	6574510	6751912	6929267	7106323	7282953	7458982
Heavily indebted poor countries (HIPC)	HPC	Population, total	SP.POP.TOTL	161734348	165573136	169567052	173722891	178048131	182548798	187227553	192084675	197119416	202329958	207714326	213272593	219004306	224905337	230970270	237195030	243590882	250160343	256880818	263721632	270668519	277719154	284905161	292290400	299959455	307980326	316358167	325095129	334249174	343887503	354047283	364782214	376055877	387705086	399503994	411298637	423019239	434736157	446608371	458867418	471680803	485112670	499113608	513601222	528444638	543555314
Croatia	HRV	Population, total	SP.POP.TOTL	4140181	4167292	4196712	4225675	4252876	4280923	4310701	4338683	4365628	4391490	4412252	4431275	4450564	4470161	4490660	4512082	4535934	4559571	4581085	4594778	4599782	4611509	4634234	4658254	4680285	4701417	4721446	4739745	4755207	4767260	4777368	4689022	4575818	4600463	4652024	4620030	4557097	4534920	4532135	4512597	4468302	4299642	4302174	4303399	4304600	4310145
Haiti	HTI	Population, total	SP.POP.TOTL	3866162	3941956	4019171	4097755	4177631	4258734	4341325	4425318	4509811	4593666	4676237	4757175	4837334	4918625	5003708	5094570	5191637	5294625	5404020	5520187	5643175	5773367	5910223	6051617	6194686	6337275	6478537	6618742	6758222	6897755	7037915	7178611	7319491	7460684	7602318	7744509	7887312	8030721	8174680	8319070	8463802	8608810	8754148	8900108	9047082	9195289
Hungary	HUN	Population, total	SP.POP.TOTL	9983967	10029321	10061734	10087947	10119835	10147935	10178653	10216604	10255815	10298723	10337910	10367537	10398489	10432055	10478720	10540525	10598677	10648031	10684822	10704152	10711122	10711848	10705535	10689463	10668095	10648713	10630564	10612741	10596487	10481719	10373988	10373400	10369341	10357523	10343355	10328965	10311238	10290486	10266570	10237530	10210971	10187576	10158608	10129552	10107146	10087065
IBRD only	IBD	Population, total	SP.POP.TOTL	1919643259	1940356959	1974018983	2019553695	2065153294	2111931236	2161881347	2211446261	2262350288	2315407668	2369907013	2425733326	2480636089	2535259156	2589035943	2641036429	2691929607	2741759767	2792102883	2843436775	2895270850	2948643246	3004914790	3061809639	3118212761	3175484847	3234352999	3294789920	3355391546	3414926034	3472779184	3529273044	3583653536	3636953664	3689444601	3740821661	3791695832	3842266104	3892059002	3940459628	3987195302	4032822479	4077663917	4122166290	4166322561	4210325668
IDA & IBRD total	IBT	Population, total	SP.POP.TOTL	2299245319	2329154652	2372380699	2427869417	2483839827	2541414856	2602626879	2663895780	2726850543	2792171255	2859058030	2927364907	2994908497	3062459678	3129647875	3195675150	3261263509	3326428526	3392709227	3460519136	3529315742	3600136821	3674370514	3749764704	3825225748	3902131693	3981206664	4062409031	4144329655	4225751603	4306143198	4385563803	4463427809	4540599387	4617237223	4693044112	4768632853	4844173689	4919046237	4992708011	5065364303	5137401800	5209100179	5280932681	5352930991	5425296669
IDA total	IDA	Population, total	SP.POP.TOTL	379602060	388797693	398361716	408315722	418686533	429483620	440745532	452449519	464500255	476763587	489151017	501631581	514272408	527200522	540611932	554638721	569333902	584668759	600606344	617082361	634044892	651493575	669455724	687955065	707012987	726646846	746853665	767619111	788938109	810825569	833364014	856290759	879774273	903645723	927792622	952222451	976937021	1001907585	1026987235	1052248383	1078169001	1104579321	1131436262	1158766391	1186608430	1214971001
IDA blend	IDB	Population, total	SP.POP.TOTL	120391642	123270998	126289838	129443834	132726682	136134348	139672971	143347860	147154758	151087339	155145837	159323709	163635977	168129765	172867304	177892039	183221937	188841826	194720560	200810543	207074946	213499720	220088448	226841896	233765810	240860675	248127780	255551895	263097505	270718966	278496624	286142541	293874928	301679823	309568084	317616125	325908669	334399195	342980973	351519915	360173395	368820674	377512139	386309887	395320129	404615733
Indonesia	IDN	Population, total	SP.POP.TOTL	87751066	90098396	92518373	95015295	97596728	100267070	103025423	105865576	108779926	111758566	114793179	117880146	121017316	124199693	127422198	130680730	133966940	137278057	140621731	144009844	147447834	150938222	154468235	158009248	161523353	164982452	168374287	171702756	174975953	178209147	181413398	184591897	187739786	190851184	193917458	196934257	199901231	202826444	205724597	208615171	211513822	214427419	217357790	220309473	223285666	226289468
IDA only	IDX	Population, total	SP.POP.TOTL	259210418	265526695	272071878	278871888	285959851	293349272	301072561	309101659	317345497	325676248	334005180	342307872	350636431	359070757	367744628	376746682	386111965	395826933	405885784	416271818	426969946	437993855	449367276	461113169	473247177	485786171	498725885	512067216	525840604	540106603	554867390	570148218	585899345	601965900	618224538	634606326	651028352	667508390	684006262	700728468	717995606	735758647	753924123	772456504	791288301	810355268
Isle of Man	IMN	Population, total	SP.POP.TOTL	48444	48286	48421	48800	49396	50145	51051	52117	53252	54378	55431	56352	57166	57919	58673	59482	60374	61335	62260	63026	63546	63778	63765	63697	63812	64277	65200	66476	67927	69263	70292	70928	71262	71431	71662	72133	72884	73851	74936	75996	76942	77707	78318	78878	79515	80293
India	IND	Population, total	SP.POP.TOTL	450547675	459642166	469077191	478825602	488848139	499123328	509631509	520400577	531513834	543084333	555189797	567868021	581087255	594770136	608802595	623102900	637630085	652408766	667499815	682995348	698952837	715384997	732239498	749428958	766833411	784360012	801975250	819682095	837468938	855334675	873277799	891273202	909307018	927403866	945601828	963922586	982365248	1000900028	1019483586	1038058154	1056575548	1075000094	1093317187	1111523146	1129623466	1147609924
Not classified	INX	Population, total	SP.POP.TOTL
Ireland	IRL	Population, total	SP.POP.TOTL	2828600	2824400	2836050	2852650	2866550	2877300	2888800	2902450	2915550	2932650	2957250	2992050	3036850	3085950	3137500	3189550	3238050	3282200	3329100	3373750	3412800	3453000	3485800	3510600	3532423	3538082	3539690	3540057	3524949	3511009	3513974	3534235	3558430	3576261	3590386	3608841	3637510	3674171	3712696	3754786	3805174	3866243	3931947	3996521	4070262	4159914
Iran, Islamic Rep.	IRN	Population, total	SP.POP.TOTL	21906909	22480371	23071309	23680246	24307855	24954865	25624380	26317776	27032576	27764928	28513872	29281583	30075295	30905721	31786481	32729772	33733975	34803041	35960811	37237145	38650244	40199911	41869231	43636838	45472792	47347197	49260263	51193782	53077312	54822005	56366212	57679025	58780376	59723761	60590608	61442658	62294919	63136309	63971836	64800875	65623397	66449111	67284801	68122947	68951279	69762345
Iraq	IRQ	Population, total	SP.POP.TOTL	7289753	7475349	7674217	7888910	8122199	8375795	8651162	8947397	9260687	9585585	9917978	10255853	10599661	10950888	11312062	11684579	12068675	12462059	12860678	13259107	13653348	14044115	14432466	14815653	15190396	15555807	15909764	16257072	16612319	16994942	17419113	17889457	18402740	18955087	19539348	20149342	20783073	21439579	22114330	22802061	23497589	24208178	24931922	25644503	26313838	26922279
Iceland	ISL	Population, total	SP.POP.TOTL	175574	179029	182378	185653	188983	192286	195570	198751	201488	203369	204438	206098	209137	212317	215209	217979	220154	221799	223537	225735	228138	230755	233860	236977	239511	241405	243180	245859	249740	252852	254826	257797	261057	263725	266021	267468	268916	271128	274047	277381	281205	284968	287523	289521	292074	296734
Israel	ISR	Population, total	SP.POP.TOTL	2114020	2185000	2293000	2379000	2475000	2563000	2629000	2745000	2803000	2877000	2974000	3069000	3148000	3278000	3377000	3455000	3533000	3613000	3690000	3786000	3878000	3956000	4031000	4105000	4159000	4233000	4299000	4369000	4442000	4518000	4660000	4949000	5123000	5261000	5399000	5545000	5692000	5836000	5971000	6125000	6289000	6439000	6570000	6689700	6809000	6930100
Italy	ITA	Population, total	SP.POP.TOTL	50199700	50536350	50879450	51252000	51675350	52112350	52519000	52900500	53235750	53537950	53821850	54073490	54381345	54751406	55110868	55441001	55718260	55955411	56155143	56317749	56433883	56501675	56543548	56564074	56576718	56593071	56596155	56601931	56629288	56671781	56719240	56758521	56797087	56831821	56843400	56844303	56860281	56890372	56906744	56916317	56942108	56974100	57059007	57313203	57685327	57969484
Jamaica	JAM	Population, total	SP.POP.TOTL	1628524	1651067	1676500	1703660	1730739	1756508	1780522	1803324	1825873	1849658	1875637	1904281	1935089	1966978	1998313	2028019	2055371	2080824	2105903	2132784	2162839	2196921	2234062	2271735	2306367	2335510	2358165	2375400	2389415	2403464	2419901	2439329	2461047	2484583	2509042	2533705	2558631	2583914	2608874	2632677	2654698	2674706	2692843	2709438	2725017	2740000
Jordan	JOR	Population, total	SP.POP.TOTL	933102	973983	1010647	1050212	1102404	1173603	1267063	1378995	1500168	1617427	1721315	1809193	1883923	1948443	2007735	2065916	2123180	2179361	2237936	2303116	2377997	2464870	2563525	2671413	2784457	2900055	3015294	3131800	3256552	3399333	3565888	3760493	3977667	4201559	4410357	4588842	4732848	4848536	4943975	5031754	5122495	5217328	5317514	5434036	5580241	5765639
Japan	JPN	Population, total	SP.POP.TOTL	93216000	94055000	94933000	95900000	96903000	97952000	98851000	99879000	101011000	102219000	103403000	105697000	107188000	108707000	110162000	111573000	112775000	113872000	114913000	115890000	116807000	117661000	118480000	119307000	120083000	120837000	121482000	122069000	122578000	123069000	123478000	123964000	124425000	124829000	125178000	125472000	125757000	126057000	126400000	126631000	126843000	127149000	127445000	127718000	127761000	127773000
Kazakhstan	KAZ	Population, total	SP.POP.TOTL	9934564	10349422	10756931	11147860	11511856	11841926	12132560	12385706	12611432	12824614	13036140	13250211	13463985	13673014	13869975	14050227	14212145	14359629	14499957	14643133	14796175	14958897	15128090	15303316	15483411	15665594	15852524	16039253	16205998	16249500	16348000	16451711	16439095	16380672	16145766	15816243	15578227	15334405	15071640	14928374	14883626	14858335	14858948	14909019	15012984	15147029
Kenya	KEN	Population, total	SP.POP.TOTL	8120082	8377693	8647002	8928510	9222692	9530163	9851453	10187487	10539909	10910677	11301394	11713046	12146070	12600799	13077341	13575898	14096258	14638887	15205381	15797771	16417203	17063870	17736326	18431760	19146403	19877078	20622560	21382111	22153685	22935088	23724574	24521714	25326080	26136217	26950508	27768297	28589456	29415660	30250488	31098763	31964557	32848569	33751746	34678781	35635267	36624897
Kyrgyz Republic	KGZ	Population, total	SP.POP.TOTL	2172300	2255900	2333400	2413700	2495300	2573300	2655300	2736500	2818300	2894800	2959900	3022300	3088200	3153800	3223900	3292400	3358700	3423900	3487100	3552000	3617400	3685800	3759300	3838300	3916400	3990300	4066500	4144600	4218400	4307500	4391200	4463600	4515400	4516700	4515100	4560400	4628400	4696400	4769000	4840400	4898400	4945100	4990700	5043300	5104700	5162600
Cambodia	KHM	Population, total	SP.POP.TOTL	5722372	5872968	6028434	6183586	6331443	6467191	6585034	6685961	6779778	6880623	6996576	7139640	7302114	7449233	7533332	7524457	7404687	7196042	6957267	6770393	6693759	6749849	6919803	7170004	7447844	7714894	7960952	8198082	8435909	8691331	8975597	9289298	9623899	9970727	10317901	10656145	10982919	11298594	11600510	11886464	12155241	12405411	12637719	12856171	13066475	13273355
Kiribati	KIR	Population, total	SP.POP.TOTL	41196	42234	43283	44342	45392	46429	47429	48403	49354	50267	51142	51979	52775	53558	54334	55114	55922	56759	57613	58469	59296	60101	60887	61736	62745	63989	65504	67244	69087	70849	72394	73692	74767	75711	76668	77716	78904	80188	81558	82969	84405	85844	87308	88840	90498	92319
St. Kitts and Nevis	KNA	Population, total	SP.POP.TOTL	51199	51196	50961	50529	49928	49209	48351	47388	46399	45529	44878	44489	44318	44304	44322	44271	44140	43944	43703	43452	43201	42963	42733	42477	42198	41874	41479	41041	40633	40354	40260	40381	40691	41141	41618	42077	42472	42857	43225	43622	44083	44602	45168	45749	46323	46852
Korea, Rep.	KOR	Population, total	SP.POP.TOTL	25012374	25765673	26513030	27261747	27984155	28704674	29435571	30130983	30838302	31544266	32240827	32882704	33505406	34103149	34692266	35280725	35848523	36411795	36969185	37534236	38123775	38723248	39326352	39910403	40405956	40805744	41213674	41621690	42031247	42449038	42869283	43295704	43747962	44194628	44641540	45092991	45524681	45953580	46286503	46616677	47008111	47370164	47644736	47892330	48082519	48184561
Kuwait	KWT	Population, total	SP.POP.TOTL	269026	300581	337346	378756	423900	472032	523169	577164	632911	688972	744444	798639	851918	905639	961773	1021725	1085866	1153573	1224063	1296077	1368680	1439334	1507636	1576975	1652150	1735278	1832302	1938916	2034850	2092786	2095350	2031297				1605907	1626858	1710257	1831121	1951642	2045123	2103273	2136991	2161626	2200498	2270196
Latin America & Caribbean (excluding high income)	LAC	Population, total	SP.POP.TOTL	197123485	202635411	208319980	214152054	220096687	226126959	232233929	238418074	244674060	250999444	257392749	263849485	270368419	276956213	283622634	290374325	297207329	304120290	311125944	318240296	325470475	332819629	340272476	347792200	355331567	362854776	370346031	377806267	385236744	392644850	400034081	407394108	414713589	421995092	429246145	436470219	443669730	450833590	457935268	464933468	471805920	478530627	485108963	491558169	497915775	504205968
Lao PDR	LAO	Population, total	SP.POP.TOTL	2120892	2170340	2221123	2273352	2327137	2382586	2439197	2496927	2556845	2620448	2688429	2762264	2840842	2919288	2990963	3051583	3098962	3135839	3168838	3207331	3258149	3323353	3401193	3489910	3586315	3687889	3794204	3905530	4020817	4138845	4258471	4379234	4500346	4619946	4735837	4846477	4951189	5050308	5144601	5235339	5323701	5409584	5493247	5576640	5662199	5751675
Lebanon	LBN	Population, total	SP.POP.TOTL	1804935	1864613	1925295	1984999	2041231	2092374	2136617	2174732	2210769	2250454	2297436	2354046	2417837	2481943	2536772	2575746	2596409	2601734	2597202	2590911	2588928	2594299	2606148	2622072	2638056	2651992	2660873	2667957	2684682	2726438	2803032	2921700	3076133	3246129	3403359	3528379	3610663	3658425	3693514	3747762	3842774	3990999	4182205	4388378	4569377	4698761
Liberia	LBR	Population, total	SP.POP.TOTL	1118655	1142304	1166651	1191796	1217905	1245104	1273458	1303032	1333980	1366500	1400730	1436740	1474567	1514364	1556288	1600454	1645833	1692155	1740919	1794251	1852991	1918832	1989477	2057232	2111667	2145756	2158434	2153312	2134105	2106429	2075917	2040141	2001612	1976701	1986491	2044657	2160480	2326210	2517472	2699708	2848447	2953928	3024727	3077055	3135654	3218114
Libya	LBY	Population, total	SP.POP.TOTL	1448416	1498076	1550815	1607168	1667822	1733307	1803689	1878869	1958909	2043820	2133527	2228142	2327487	2430754	2536895	2645136	2754698	2865639	2979102	3096724	3219462	3347779	3480443	3614682	3746712	3873781	3994601	4109717	4220451	4328935	4436663	4544245	4650896	4755134	4854871	4948796	5036173	5118008	5196774	5275921	5357893	5443249	5531097	5620545	5710163	5798615
St. Lucia	LCA	Population, total	SP.POP.TOTL	89698	90718	91892	93214	94637	96138	97721	99370	101028	102599	104016	105244	106303	107311	108389	109634	111074	112685	114398	116148	117828	119435	120987	122571	124296	126246	128448	130868	133364	135787	138019	140001	141758	143402	145080	146871	148837	150920	153023	154988	156737	158184	159392	160530	161821	163408
Latin America & Caribbean	LCN	Population, total	SP.POP.TOTL	219828794	225912719	232183258	238612680	245147710	251760583	258440584	265187879	272006857	278898334	285867424	292913867	300028905	307224818	314508488	321883714	329348136	336897935	344553109	352320721	360211832	368220724	376337306	384527729	392750803	400974913	409183996	417376183	425549887	433708712	441855797	449968703	458041493	466082322	474089591	482060085	490002410	497889881	505687097	513366691	520903474	528283130	535509387	542599527	549590680	556504216
Least developed countries: UN classification	LDC	Population, total	SP.POP.TOTL	240518397	246113624	251900655	257908038	264174076	270720935	277573103	284708606	292046003	299473694	306916898	314345051	321797948	329357734	337142875	345242741	353691447	362475157	371577357	380963357	390612544	400528973	410740623	421279177	432185306	443491299	455193679	467290486	479814027	492803041	506275626	520262436	534731004	549559275	564581120	579681702	594801271	609983284	625342129	641046832	657215854	673903088	691061433	708587940	726331171	744190509
Low income	LIC	Population, total	SP.POP.TOTL	137782356	140848427	143991035	147246689	150668279	154292515	158131724	162169520	166378127	170716523	175154298	179681941	184306845	189035415	193880021	198849250	203955515	209195581	214544342	219966776	225445124	230976727	236593189	242355131	248343146	254622410	261201749	268084615	275322077	282972202	291068697	299656373	308709029	318101755	327660123	337265010	346863261	356508832	366320517	376471932	387088076	398196096	409752737	421725011	434055590	446695034
Liechtenstein	LIE	Population, total	SP.POP.TOTL	16501	16894	17300	17724	18170	18642	19160	19688	20237	20766	21268	21729	22161	22560	22985	23436	23933	24451	24968	25463	25881	26229	26533	26790	27028	27286	27552	27835	28135	28449	28790	29166	29552	29987	30415	30884	31354	31830	32306	32765	33184	33543	33885	34172	34444	34718
Sri Lanka	LKA	Population, total	SP.POP.TOTL	9874476	10111639	10352180	10597516	10849977	11110825	11380665	11657650	11937607	12214948	12485736	12747831	13002234	13252033	13501931	13755141	14012894	14273495	14533691	14788866	15035840	15272822	15501210	15724641	15948501	16176282	16408861	16643956	16878186	17106752	17325769	17535732	17736827	17924827	18094474	18242917	18367290	18470897	18564595	18663293	18777606	18911727	19062476	19224036	19387153	19544988
Lower middle income	LMC	Population, total	SP.POP.TOTL	989984004	1012695283	1036174880	1060393357	1085299211	1110852757	1137057458	1163922580	1191458095	1219673698	1248583279	1278208964	1308581612	1339744791	1371761160	1404677295	1438471529	1473161514	1508876331	1545785670	1583984211	1623540865	1664223803	1705941229	1748404026	1791342151	1834732208	1878529520	1922581048	1966720233	2012725416	2056479735	2100111594	2143451976	2186469992	2229481699	2272648448	2315905969	2359112024	2402132069	2445096607	2487900839	2530679514	2573512638	2616457516	2659559236
Low & middle income	LMY	Population, total	SP.POP.TOTL	2264230620	2293657434	2336352877	2391244202	2446616794	2503757914	2564648351	2625561008	2688185221	2753244603	2820016062	2888210757	2955489373	3022725529	3089529348	3155089855	3220127983	3284682193	3350362852	3417557084	3485705709	3555885098	3629464839	3704198772	3779008675	3855293544	3933787633	4014448614	4095886112	4176844232	4258735820	4337877075	4415505150	4492317445	4568575554	4644103191	4719451017	4794701339	4869215508	4942554270	5015320490	5087215714	5158616199	5230164654	5301861509	5373892527
Lesotho	LSO	Population, total	SP.POP.TOTL	837264	852892	869132	886061	903757	922307	941798	962279	983683	1005911	1028930	1052619	1077102	1102885	1130634	1160795	1193517	1228527	1265211	1302670	1340258	1377808	1415362	1452727	1489685	1526132	1561687	1596395	1630993	1666564	1703757	1742534	1782284	1822237	1861323	1898598	1934294	1968054	1997524	2019732	2032805	2035738	2029832	2018355	2005953	1996115
Late-demographic dividend	LTE	Population, total	SP.POP.TOTL	1096903448	1099284940	1113927919	1139889997	1165421495	1191679434	1220687497	1248850553	1277803242	1308225875	1339320296	1370950386	1400911434	1429901917	1457475769	1482809855	1506611986	1528866928	1551073484	1573488423	1595481006	1618039026	1642764734	1667457285	1691255626	1715762768	1741726104	1769123601	1796650131	1823252483	1848477086	1872532928	1892668367	1913822185	1934464875	1955853174	1975201502	1994265140	2012571686	2029613463	2045125929	2059873472	2073757388	2087310573	2100746553	2114307472
Lithuania	LTU	Population, total	SP.POP.TOTL	2778550	2823550	2863350	2898950	2935200	2971450	3008050	3044400	3078850	3107321	3139689	3179041	3213622	3244438	3273894	3301652	3328664	3355036	3379514	3397842	3413202	3432947	3457179	3485192	3514205	3544543	3578914	3616367	3655049	3684255	3697838	3704134	3700114	3682613	3657144	3629102	3601613	3575137	3549331	3524238	3499536	3470818	3443067	3415213	3377075	3322528
Luxembourg	LUX	Population, total	SP.POP.TOTL	313970	316845	320750	324100	327750	331500	333895	334995	335850	337500	339171	342421	346600	350450	355050	358950	360731	361358	362007	362856	364150	365225	365525	365622	365998	366706	368355	370750	373450	377100	381850	387000	392175	397475	402925	408625	414225	419450	424700	430475	436300	441525	446175	451630	458095	465158
Latvia	LVA	Population, total	SP.POP.TOTL	2120979	2152681	2181586	2210919	2240623	2265919	2283217	2301220	2323619	2343173	2359164	2376389	2395674	2415819	2437186	2456130	2470989	2485073	2497921	2505953	2511701	2519421	2531080	2546011	2562047	2578873	2599892	2626583	2653434	2666955	2663151	2650581	2614338	2563290	2520742	2485056	2457222	2432851	2410019	2390482	2367550	2337170	2310173	2287955	2263122	2238799
Macao SAR, China	MAC	Population, total	SP.POP.TOTL	167795	170466	176188	184245	193556	203224	213189	223416	233002	240837	246193	248745	248770	246945	244289	241631	239074	236669	235175	235440	238085	243373	251154	260921	271914	283490	295597	308181	320774	332783	343816	353623	362308	370195	377805	385517	393376	401353	409620	418388	427772	437928	448813	460157	471600	482863
St. Martin (French part)	MAF	Population, total	SP.POP.TOTL	3898	3996	4078	4179	4302	4471	4675	4922	5194	5461	5707	5945	6156	6370	6601	6882	7250	7713	8191	8557	8777	8675	8372	8296	9067	11066	14561	19274	24374	28723	31522	32441	31816	30194	28482	27320	26854	26910	27388	28122	28935	29847	30913	32055	33187	34252
Morocco	MAR	Population, total	SP.POP.TOTL	12328532	12710587	13094890	13478425	13857656	14230163	14595351	14954037	15307267	15656846	16004732	16350883	16696890	17048525	17413149	17796171	18198836	18620087	19059773	19516942	19990006	20479709	20984023	21495088	22002641	22499111	22980334	23447256	23903592	24355624	24807461	25260407	25711410	26155204	26584473	26994255	27383472	27754573	28110447	28455504	28793672	29126323	29454765	29782884	30115196	30455563
Monaco	MCO	Population, total	SP.POP.TOTL	22461	22813	23043	23165	23236	23289	23302	23292	23295	23348	23487	23721	24049	24445	24829	25203	25523	25811	26090	26391	26752	27162	27633	28091	28511	28836	29050	29156	29232	29309	29433	29629	29859	30145	30436	30731	31001	31268	31554	31836	32148	32474	32804	33144	33499	33842
Moldova	MDA	Population, total	SP.POP.TOTL	2043664	2092667	2140063	2185050	2228429	2269399	2307959	2344108	2377848	2411588	2445328	2479871	2515217	2549760	2582697	2611616	2638126	2660619	2682309	2703999	2728099	2754609	2782725	2811645	2840565	2867878	2893584	2918487	2940177	2957047	2969097	2975523	2977130	2973114	2964277	2952307	2946401	2935524	2934339	2929735	2923783	2917252	2910504	2902320	2895147	2888111
Madagascar	MDG	Population, total	SP.POP.TOTL	5099368	5223561	5352497	5486319	5625164	5769215	5918592	6073529	6234468	6401920	6576305	6757853	6946619	7142634	7345773	7556032	7773452	7998157	8230214	8469677	8716549	8971339	9234137	9504283	9780869	10063493	10352117	10647753	10952396	11268653	11598647	11942809	12301338	12675469	13066544	13475403	13902697	14347860	14808791	15282524	15766806	16260933	16765122	17279139	17802992	18336722
Maldives	MDV	Population, total	SP.POP.TOTL	89873	92328	94902	97540	100177	102710	105129	107481	109893	112582	115688	119303	123347	127700	132102	136418	140563	144625	148774	153276	158271	163821	169849	176255	182848	189540	196262	203024	209787	216502	223159	229743	236271	242596	248582	254144	259178	263836	268445	273522	279396	286309	294185	302681	311265	319604
Middle East & North Africa	MEA	Population, total	SP.POP.TOTL	105203230	108061826	111045418	114101578	117271192	120541198	123908187	127444919	131026902	134704201	138473057	142307871	146213398	150292311	154509840	158917282	163532333	168361040	173447050	178866336	184628581	190731389	197157155	203834175	210648804	217572797	224549836	231570125	238565130	245453236	254215127	261046286	265656639	272107854	278384977	286096967	292041169	297891711	303641719	309436718	315326781	321297196	327362274	333608806	340143477	347029862
Mexico	MEX	Population, total	SP.POP.TOTL	37771861	38966049	40195318	41462373	42771077	44123863	45519746	46956208	48431971	49945278	51493565	53076366	54689944	56324310	57966812	59607947	61242189	62869908	64494872	66123908	67761367	69407623	71058650	72709306	74352631	75983486	77599105	79200081	80788725	82368930	83943135	85512621	87075136	88625440	90156396	91663290	93147045	94611008	96056313	97484823	98899845	100298152	101684764	103081020	104514934	106005199
Marshall Islands	MHL	Population, total	SP.POP.TOTL	14674	15056	15547	16111	16710	17282	17834	18383	18966	19617	20394	21305	22335	23440	24530	25579	26548	27479	28400	29417	30574	31883	33330	34881	36564	38331	40212	42168	44092	45827	47265	48403	49242	49828	50214	50454	50523	50453	50356	50418	50754	51411	52368	53465	54476	55257
Middle income	MIC	Population, total	SP.POP.TOTL	2126448264	2152809007	2192361842	2243997513	2295948515	2349465399	2406516627	2463391488	2521807094	2582528080	2644861764	2708528816	2771182528	2833690114	2895649327	2956240605	3016172468	3075486612	3135818510	3197590308	3260260585	3324908371	3392871650	3461843641	3530665529	3600671134	3672585884	3746363999	3820564035	3893872030	3967667123	4038220702	4106796121	4174215690	4240915431	4306838181	4372587756	4438192507	4502894991	4566082338	4628232414	4689019618	4748863462	4808439643	4867805919	4927197493
North Macedonia	MKD	Population, total	SP.POP.TOTL	1488670	1507647	1527109	1547449	1569139	1592437	1617797	1644949	1672399	1698150	1720805	1739529	1754951	1769002	1784400	1803008	1825559	1851070	1877690	1902718	1924203	1941527	1955247	1965892	1974413	1981536	1987538	1992278	1995508	1996863	1996218	1993304	1988659	1984024	1981713	1983259	1989441	1999588	2012052	2024393	2034823	2042844	2048930	2053426	2057044	2060280
Mali	MLI	Population, total	SP.POP.TOTL	5263727	5322269	5381367	5441618	5503750	5568495	5635864	5706192	5780836	5861417	5949042	6044524	6147464	6256191	6368346	6482282	6596721	6712267	6831090	6956409	7090124	7234725	7388670	7545163	7694857	7831888	7952863	8062216	8171525	8296919	8449915	8635528	8850334	9087173	9334893	9585660	9837575	10094363	10360564	10642937	10946448	11271603	11616890	11982692	12369078	12775509
Malta	MLT	Population, total	SP.POP.TOTL	326550	325250	323900	322550	321250	318800	315200	311550	307900	304300	302650	302700	302450	302200	301996	304222	305774	306970	310182	313342	316645	318982	325898	330524	330593	336452	342121	344485	347325	350722	354170	363845	367618	371308	374797	377419	379905	382791	385287	387578	390087	393028	395969	398582	401268	403834
Myanmar	MMR	Population, total	SP.POP.TOTL	21736947	22211626	22697664	23198238	23717785	24259356	24823937	25410054	26015239	26635852	27269063	27913749	28570093	29238168	29918469	30611093	31314347	32026748	32748782	33481397	34224316	34976465	35734273	36491804	37241530	37977087	38698484	39404350	40085653	40731439	41335188	41890192	42401686	42889992	43383421	43901598	44452203	45027223	45611220	46181075	46719698	47225119	47702163	48148907	48564489	48949931
Middle East & North Africa (excluding high income)	MNA	Population, total	SP.POP.TOTL	97553136	100147125	102808039	105546241	108376349	111307810	114351844	117503838	120739199	124023275	127335093	130670746	134051048	137511232	141099598	144855662	148781943	152881163	157192250	161761403	166616386	171766018	177185651	182825252	188614684	194494177	200443463	206447529	212456877	218415839	226259024	232101413	237828686	243429317	248897278	254233340	259431598	264504158	269440674	274350014	279279614	284249005	289264351	294343659	299502746	304755514
Montenegro	MNE	Population, total	SP.POP.TOTL	480579	491140	502558	513409	521753	526327	526419	522796	517481	513340	512407	515449	521785	530220	538902	546487	552562	557576	562065	566888	572608	579445	587001	594506	600884	605398	607711	608144	607413	606571	606372	607105	608516	610170	611389	611712	611003	609520	607662	606001	604950	607389	609828	612267	613353	614261
Mongolia	MNG	Population, total	SP.POP.TOTL	955514	982181	1011327	1042387	1074518	1107121	1139962	1173186	1207104	1242213	1278819	1317042	1356673	1397305	1438421	1479646	1520868	1562207	1603910	1646290	1689622	1733475	1777727	1823214	1871089	1921889	1976313	2033351	2089709	2141005	2184139	2217918	2243495	2263196	2280475	2298017	2316571	2335744	2355667	2376228	2397417	2419594	2443261	2468765	2496394	2526429
Northern Mariana Islands	MNP	Population, total	SP.POP.TOTL	9980	10243	10438	10591	10780	11023	11341	11723	12135	12577	13000	13423	13884	14322	14672	14917	15024	15049	15167	15640	16633	18168	20163	22622	25496	28719	32377	36371	40294	43542	45752	46662	46473	45763	45361	45872	47518	50052	52999	55633	57453	58319	58412	57954	57240	56547
Mozambique	MOZ	Population, total	SP.POP.TOTL	7184870	7342117	7507309	7679465	7857107	8039217	8225919	8417698	8614445	8816056	9022747	9232655	9446235	9668655	9906963	10165216	10443954	10738534	11041206	11341405	11630194	11913085	12189817	12439773	12636120	12764385	12808566	12786353	12758003	12805950	12987292	13328029	13805999	14370950	14948050	15483277	15960445	16397175	16813946	17244176	17711925	18221884	18764147	19331097	19910549	20493927
Mauritania	MRT	Population, total	SP.POP.TOTL	850377	875586	901690	928742	956794	985907	1016093	1047345	1079580	1112749	1146776	1181659	1217443	1254156	1291857	1330594	1370364	1411139	1453028	1496174	1540644	1586496	1633655	1681859	1730737	1780033	1829678	1879756	1930427	1981902	2034347	2087914	2142645	2198538	2255520	2313630	2372900	2433567	2496217	2561584	2630217	2702405	2778097	2857150	2939246	3024198
Mauritius	MUS	Population, total	SP.POP.TOTL	659351	680757	700349	718861	736381	753000	768813	783917	798413	812405	826000	839230	852053	864819	878042	892000	906507	921379	933499	949888	966039	980462	992521	1001691	1012221	1020528	1028360	1036082	1043239	1051260	1058775	1070266	1084441	1097374	1112846	1122457	1133996	1148284	1160421	1175267	1186873	1196287	1204621	1213370	1221003	1228254
Malawi	MWI	Population, total	SP.POP.TOTL	3659980	3747758	3839047	3933914	4032364	4134464	4240430	4350456	4464427	4582197	4703783	4829092	4958556	5093368	5235074	5384798	5545653	5717954	5896864	6075485	6250434	6412380	6565985	6737924	6964613	7268271	7666390	8141140	8636686	9075568	9404499	9600361	9685974	9710335	9745695	9844418	10022783	10264906	10552345	10854325	11148751	11432001	11713663	12000183	12301837	12625950
Malaysia	MYS	Population, total	SP.POP.TOTL	8156342	8417821	8692337	8973791	9253827	9526558	9790083	10046321	10297983	10549395	10804131	11062434	11324277	11592638	11871102	12162189	12468688	12790313	13122833	13460035	13798094	14134060	14471215	14819430	15192300	15598924	16043736	16522004	17022470	17528961	18029824	18519941	19002660	19484901	19977508	20487604	21017619	21562790	22114647	22661293	23194252	23709115	24208391	24698821	25190647	25690615
North America	NAC	Population, total	SP.POP.TOTL	198624409	202007500	205198600	208253700	211262900	214031100	216659000	219176000	221503000	223759000	226431000	229677632	232168663	234454577	236715369	239169275	241538008	244018243	246601803	249310344	251795337	254340965	256836391	259214381	261488476	263823014	266290660	268793450	271349094	274154622	277373464	281077441	284943859	288662674	292185983	295640057	299064347	302623445	306070116	309502571	312909974	316052361	319048184	321815286	324809693	327824506
Namibia	NAM	Population, total	SP.POP.TOTL	634138	649274	665119	681633	698797	716588	734866	753683	773428	794588	817474	842353	868954	896264	922900	947925	971117	992955	1014055	1035379	1057723	1080938	1105103	1131624	1162282	1198149	1239923	1286796	1336545	1386011	1432899	1476399	1516951	1555098	1591826	1627866	1663378	1698029	1731635	1763861	1794583	1823667	1851519	1879113	1907737	1938316
New Caledonia	NCL	Population, total	SP.POP.TOTL	79000	81200	83400	85700	88100	90500	93500	96500	99500	104000	112000	120000	125500	128500	131000	132500	134000	136000	137500	138500	140050	142650	145700	148700	151650	154450	157350	160500	163650	166898	170899	175362	179799	184496	189482	193816	197564	201418	205279	209214	213230	217324	221490	225296	228750	232250
Niger	NER	Population, total	SP.POP.TOTL	3388774	3486322	3588228	3693985	3802802	3914118	4027969	4144588	4263925	4385925	4510645	4637984	4768225	4902151	5040795	5184940	5335083	5491158	5652655	5818763	5989000	6163711	6343530	6528646	6719310	6915994	7118885	7328934	7548429	7780242	8026592	8288739	8566773	8860297	9168316	9490289	9826600	10178196	10545720	10929922	11331561	11751364	12189988	12647983	13125914	13624474
Nigeria	NGA	Population, total	SP.POP.TOTL	45138460	46063570	47029818	48032932	49066762	50127920	51217969	52342231	53506201	54717035	55982142	57296988	58665813	60114615	61677167	63374289	65221379	67203134	69271915	71361141	73423646	75440505	77427539	79414841	81448757	83562776	85766396	88048029	90395278	92788039	95212454	97667632	100161708	102700751	105293701	107948339	110668784	113457661	116319763	119260055	122283853	125394046	128596079	131900634	135320420	138865014
Nicaragua	NIC	Population, total	SP.POP.TOTL	1773132	1829772	1887426	1946240	2006478	2068379	2131973	2197303	2264623	2334285	2406523	2481345	2558705	2638699	2721417	2806859	2894967	2985480	3077861	3171404	3265520	3360142	3455129	3549711	3642978	3734343	3823133	3909672	3995529	4082958	4173435	4267570	4364514	4462496	4559010	4652185	4741571	4827658	4910642	4991041	5069310	5145367	5219324	5292115	5364930	5438692
Netherlands	NLD	Population, total	SP.POP.TOTL	11486631	11638712	11805689	11965966	12127120	12294732	12456251	12598201	12729721	12877984	13038526	13194497	13328593	13439322	13545056	13666335	13774037	13856185	13941700	14038270	14149800	14247208	14312690	14367070	14424211	14491632	14572278	14665037	14760094	14848907	14951510	15069798	15184166	15290368	15382838	15459006	15530498	15610650	15707209	15812088	15925513	16046180	16148929	16225302	16281779	16319868
Norway	NOR	Population, total	SP.POP.TOTL	3581239	3609800	3638918	3666537	3694339	3723168	3753012	3784539	3816486	3847707	3875763	3903039	3933004	3960612	3985258	4007313	4026152	4043205	4058671	4072517	4085620	4099702	4114787	4128432	4140099	4152516	4167354	4186905	4209488	4226901	4241473	4261732	4286401	4311991	4336613	4359184	4381336	4405157	4431464	4461913	4490967	4513751	4538159	4564855	4591910	4623291
Nepal	NPL	Population, total	SP.POP.TOTL	10105060	10267260	10433147	10604620	10783958	10972912	11172530	11382965	11603921	11834657	12074628	12323984	12583142	12852205	13131260	13420367	13719466	14028535	14347653	14676932	15016408	15367229	15729431	16100623	16477488	16858315	17239677	17623697	18020755	18445021	18905480	19405506	19938322	20489973	21040899	21576074	22090352	22584772	23057875	23509971	23941099	24347113	24725625	25080880	25419337	25744500
Nauru	NRU	Population, total	SP.POP.TOTL	4377	4627	4942	5270	5590	5859	6065	6221	6343	6445	6553	6669	6798	6929	7062	7178	7284	7396	7505	7626	7751	7871	8016	8163	8331	8501	8679	8868	9058	9275	9506	9766	10030	10287	10496	10626	10677	10643	10567	10449	10335	10219	10102	9990	9906	9848
New Zealand	NZL	Population, total	SP.POP.TOTL	2371800	2419700	2482000	2531800	2585400	2628400	2675900	2724100	2748100	2772800	2810700	2853000	2903900	2961300	3023700	3083100	3110500	3120200	3121200	3109000	3112900	3124900	3156100	3199300	3227100	3247100	3246300	3274400	3283400	3299200	3329800	3495100	3531700	3572200	3620000	3673400	3732000	3781300	3815000	3835100	3857700	3880500	3948500	4027200	4087500	4133900
OECD members	OED	Population, total	SP.POP.TOTL	809413164	820690358	832204126	843700013	855187441	866357882	877034871	887433263	897619456	907848349	917970733	929959388	940747243	951245160	961564535	971664215	981155050	990517797	999924442	1009488956	1018954080	1028314741	1037309705	1045955467	1054256534	1062613469	1071150369	1079711152	1088387125	1097531158	1107196961	1117820520	1128349539	1138362949	1147748534	1156879819	1165880992	1174865635	1183546848	1192267323	1200836415	1209787876	1218855820	1227854277	1236872189	1245821323
Oman	OMN	Population, total	SP.POP.TOTL	551735	564891	578827	593498	608890	625006	642007	660117	679592	700725	723842	748968	776385	806985	841952	882038	927434	977804	1032797	1091858	1154373	1220578	1290121	1361085	1431066	1498413	1561180	1619871	1678119	1741155	1812158	1893761	1983272	2072106	2148416	2204267	2236652	2249759	2251859	2254898	2267973	2294959	2334860	2386164	2445524	2511254
Other small states	OSS	Population, total	SP.POP.TOTL	9151857	9315834	9485194	9659416	9840401	10026023	10214282	10406007	10606217	10813719	11029164	11255188	11488070	11725338	11968057	12219420	12475005	12737700	13008020	13294824	13598547	13917150	14253285	14600166	14962369	15347574	15754491	16180206	16610046	17031505	17430785	17813808	18156582	18476080	18801091	19125038	19460551	19809591	20163900	20540135	20917080	21276754	21639144	22018460	22442097	22929069
Pakistan	PAK	Population, total	SP.POP.TOTL	44988690	46065229	47198886	48387293	49627623	50917975	52260183	53655783	55102690	56598148	58142062	59734479	61381982	63099404	64905996	66816875	68834324	70958168	73197254	75561128	78054346	80680461	83431597	86285936	89213708	92191505	95215375	98285762	101389603	104512874	107647918	110778655	113911126	117086680	120362764	123776835	127349293	131057432	134843233	138624625	142343583	145978408	149549695	153093371	156664698	160304007
Panama	PAN	Population, total	SP.POP.TOTL	1133005	1167120	1202447	1238893	1276331	1314679	1353847	1393824	1434676	1476481	1519286	1563093	1607797	1653208	1699056	1745142	1791389	1837804	1884427	1931302	1978489	2025965	2073748	2121863	2170330	2219200	2268500	2318259	2368556	2419424	2470946	2523115	2575949	2629584	2684117	2739667	2796291	2853907	2912318	2971197	3030333	3089641	3149195	3209056	3269356	3330222
Peru	PER	Population, total	SP.POP.TOTL	10155011	10446618	10749463	11062295	11383364	11711402	12045783	12386868	12735491	13092846	13459789	13836365	14221954	14615847	15017060	15424745	15838568	16258323	16683451	17113393	17547612	17985398	18426420	18870988	19319746	19772871	20230385	20691285	21153462	21614193	22071433	22522383	22966822	23408135	23851405	24299168	24753825	25210957	25658070	26078295	26459944	26799289	27100964	27372217	27624226	27866140
Philippines	PHL	Population, total	SP.POP.TOTL	26269741	27161052	28077345	29012630	29958687	30909997	31864175	32823970	33795203	34786309	35803591	36849678	37923400	39022759	40144250	41285741	42446659	43629415	44838485	46079844	47357741	48672831	50023564	51408910	52827047	54275836	55755346	57263835	58794999	60340768	61895169	63454785	65020124	66593904	68180846	69784087	71401743	73030879	74672009	76325927	77991757	79672869	81365260	83051970	84710544	86326251
Palau	PLW	Population, total	SP.POP.TOTL	9769	10046	10329	10566	10792	11005	11178	11329	11460	11617	11803	12051	12342	12625	12823	12898	12835	12646	12409	12231	12178	12281	12519	12842	13190	13534	13835	14121	14400	14704	15063	15442	15859	16285	16735	17158	17599	18016	18409	18773	19104	19390	19642	19812	19861	19784
Papua New Guinea	PNG	Population, total	SP.POP.TOTL	2255858	2297052	2340349	2385943	2434220	2485433	2539683	2596820	2656636	2718805	2783132	2849522	2918138	2989201	3063051	3139944	3219825	3302636	3388631	3478093	3571209	3668102	3768489	3871490	3975950	4081022	4186499	4292575	4399320	4506996	4615843	4725543	4836216	4949053	5065664	5187063	5314258	5446633	5581767	5716166	5847590	5974627	6098621	6223378	6354247	6494902
Poland	POL	Population, total	SP.POP.TOTL	29637450	29964000	30308500	30712000	31139450	31444950	31681000	31987155	32294655	32548300	32664300	32783500	33055650	33357200	33678899	34015199	34356300	34689050	34965600	35247217	35574150	35898587	36230481	36571808	36904134	37201885	37456119	37668045	37824487	37961529	38110782	38246193	38363667	38461408	38542652	38594998	38624370	38649660	38663481	38660271	38258629	38248076	38230364	38204570	38182222	38165445
Pre-demographic dividend	PRE	Population, total	SP.POP.TOTL	187617086	191889668	196349130	200997696	205835402	210865011	216096182	221539857	227201766	233087196	239204922	245537967	252097876	258953399	266195192	273877853	282049633	290664978	299570039	308551498	317462476	326257709	335003783	343806080	352822095	362177648	371878713	381918442	392393113	403416174	415057402	427398546	440397744	453849671	467465268	481049536	494517689	507968951	521617701	535773383	550660000	566366083	582828758	599938100	617518659	635451626
Puerto Rico	PRI	Population, total	SP.POP.TOTL	2358000	2399722	2450322	2504530	2554066	2594000	2624995	2645674	2662064	2684150	2718000	2762190	2817256	2878786	2939299	2994000	3043854	3088690	3129421	3168088	3206000	3242552	3277453	3311138	3344190	3377000	3409554	3441850	3473898	3505650	3537000	3562110	3585176	3615497	3649237	3683103	3724655	3759430	3781101	3800081	3810605	3818774	3823701	3826095	3826878	3821362
Korea, Dem. People's Rep.	PRK	Population, total	SP.POP.TOTL	11424189	11665592	11871726	12065468	12282417	12547524	12864947	13222703	13609976	14010339	14410391	14809518	15207765	15593353	15952077	16274737	16554744	16796568	17015984	17235668	17472144	17731229	18008568	18298212	18590142	18877226	19156791	19431992	19708316	19993757	20293057	20609151	20937407	21265832	21577979	21862300	22113428	22335263	22536754	22731470	22929078	23132982	23339453	23542434	23732740	23904167
Portugal	PRT	Population, total	SP.POP.TOTL	8857716	8929316	8993985	9030355	9035365	8998595	8930990	8874520	8836650	8757705	8680431	8643756	8630430	8633100	8754365	9093470	9355810	9455675	9558250	9661265	9766312	9851362	9911771	9957865	9996232	10023613	10032734	10030031	10019610	10005000	9983218	9960235	9952494	9964675	9991525	10026176	10063945	10108977	10160196	10217828	10289898	10362722	10419631	10458821	10483861	10503330
Paraguay	PRY	Population, total	SP.POP.TOTL	1903990	1954552	2006675	2060340	2115573	2172309	2230733	2290797	2351926	2413396	2474757	2535877	2597149	2659418	2723816	2791236	2861868	2935710	3013281	3095151	3181627	3272922	3368763	3468533	3571275	3676206	3783074	3891725	4001678	4112396	4223413	4334348	4445019	4555518	4666096	4776838	4887638	4998096	5107840	5216346	5323202	5428442	5531958	5632983	5730556	5824095
West Bank and Gaza	PSE	Population, total	SP.POP.TOTL																															1978248	2068845	2163591	2262676	2366298	2474666	2587997	2706518	2776568	2848431	2922153	2997784	3075373	3154969	3236626	3320396
Pacific island small states	PSS	Population, total	SP.POP.TOTL	865064	893394	923320	954098	984824	1014633	1043365	1071166	1098151	1124577	1150712	1176559	1202128	1227653	1253371	1279519	1306023	1332876	1360542	1389594	1420314	1453209	1487849	1522650	1555395	1584644	1609572	1630869	1650438	1670962	1694327	1721236	1750932	1782085	1812838	1841674	1868390	1893438	1917140	1939956	1962451	1984469	2006091	2027859	2050583	2074776
Post-demographic dividend	PST	Population, total	SP.POP.TOTL	755229793	764423461	773856028	783141819	792263980	801098720	809363152	817179925	824733296	832280859	839822017	849163924	857079422	864609745	871928836	878890622	885145869	891251760	897391855	903788370	909890607	915971623	921511883	926614804	931410415	936241263	941376248	946671291	952173528	958081653	964173901	970997793	977878861	984374928	990074277	995310615	1000603716	1005700198	1010590857	1015421531	1020504874	1025401797	1030561691	1035711715	1041075191	1046366703
French Polynesia	PYF	Population, total	SP.POP.TOTL	78080	80705	83652	86847	90132	93442	96719	99990	103329	106814	110490	114385	118438	122641	126919	131229	135559	139893	144273	148734	153298	157954	162679	167456	172249	177024	181807	186588	191260	195728	199906	203716	207238	210644	214196	218064	222323	226854	231562	236217	240681	244929	248976	252707	255995	258780
Qatar	QAT	Population, total	SP.POP.TOTL	47383	51427	56266	61721	67562	73631	79850	86298	93206	100880	109521	119413	130505	142181	153624	164314	173716	182319	191947	205172	223622	247984	277229	309299	341272	370886	397739	422154	443611	461688	476275	487354	495403	501479	507044	513447	522531	535320	551566	570486	592467	615013	640872	681791	753332	865410
Romania	ROU	Population, total	SP.POP.TOTL	18406905	18555250	18676550	18797850	18919126	19031576	19215450	19534242	19799831	20009141	20250398	20461567	20657957	20835681	21029429	21293583	21551634	21756096	21951464	22090488	22207282	22353070	22475741	22560478	22640547	22732999	22836841	22949430	23057662	23161458	23201835	23001155	22794284	22763280	22730211	22684270	22619004	22553978	22507344	22472040	22442971	22131970	21730496	21574326	21451748	21319685
Russian Federation	RUS	Population, total	SP.POP.TOTL	119897000	121236000	122591000	123960000	125345000	126745000	127468000	128196000	128928000	129664000	130404000	131155000	131909000	132669000	133432000	134200000	135147000	136100000	137060000	138027000	139010000	139941000	140823000	141668000	142745000	143858000	144894000	145908000	146857000	147721000	147969407	148394216	148538197	148458777	148407912	148375787	148160129	147915361	147670784	147214776	146596869	145976482	145306497	144648618	144067316	143518814
Rwanda	RWA	Population, total	SP.POP.TOTL	2935575	2998334	3052937	3105417	3164258	3235536	3321674	3420897	3529839	3643237	3757351	3871428	3987223	4106411	4231579	4364709	4506109	4655386	4812872	4978812	5153314	5329250	5504847	5690989	5902847	6146884	6443748	6779981	7088194	7276983	7288883	7083928	6702239	6263758	5936253	5836490	6013112	6419898	6962800	7501238	7933688	8231150	8427061	8557160	8680516	8840220
South Asia	SAS	Population, total	SP.POP.TOTL	572839530	584939711	597494450	610498308	623943328	637823175	652144171	666908586	682102192	697706091	713711358	730107660	746911710	764174968	781966557	800335570	819292532	838819900	858901743	879510842	900620583	922226632	944315173	966836458	989728262	1012942302	1036437878	1060208544	1084281159	1108702366	1133495194	1158655616	1184133340	1209847774	1235693864	1261587780	1287476203	1313346375	1339202700	1365067953	1390946065	1416822995	1442644044	1468324423	1493757846	1518861546
Saudi Arabia	SAU	Population, total	SP.POP.TOTL	4086534	4218852	4362788	4516540	4677304	4843632	5015353	5195124	5387822	5599909	5836388	6100631	6392973	6711922	7054532	7419486	7802928	8207695	8646845	9137928	9691471	10311771	10988851	11701132	12418836	13118998	13794167	14445663	15070082	15666289	16233786	16772695	17282686	17763297	18214475	18638790	19033843	19407138	19783301	20194531	20663840	21202646	21805322	22456645	23132686	23816175
Sudan	SDN	Population, total	SP.POP.TOTL	7544498	7769475	8004122	8248818	8503989	8770094	9047803	9337662	9639846	9954411	10281695	10621471	10974626	11343923	11732957	12144128	12578398	13034631	13510429	14002302	14507466	15027254	15562129	16107613	16657956	17210182	17757494	18303430	18867559	19476653	20147592	20891442	21696240	22527837	23338465	24094741	24782384	25413912	26015518	26626512	27275019	27971077	28704786	29460517	30214189	30949514
Senegal	SEN	Population, total	SP.POP.TOTL	3206757	3295280	3386803	3481654	3580241	3682879	3789381	3899648	4014107	4133324	4257508	4387532	4522886	4660726	4797188	4929846	5057375	5181505	5306685	5439069	5583157	5740441	5909734	6089567	6277420	6471329	6670665	6875746	7086624	7303511	7526306	7755503	7990090	8226749	8461066	8690155	8912872	9130876	9347777	9568717	9797731	10036102	10283694	10541470	10810086	11090123
Singapore	SGP	Population, total	SP.POP.TOTL	1646400	1702400	1750200	1795000	1841600	1886900	1934400	1977600	2012000	2042500	2074507	2112900	2152400	2193000	2229800	2262600	2293300	2325300	2353600	2383500	2413945	2532835	2646466	2681061	2732221	2735957	2733373	2774789	2846108	2930901	3047132	3135083	3230698	3313471	3419048	3524506	3670704	3796038	3927213	3958723	4027887	4138012	4175950	4114826	4166664	4265762
Solomon Islands	SLB	Population, total	SP.POP.TOTL	117847	121385	125040	128838	132766	136815	140995	145319	149887	154830	160240	166163	172550	179306	186297	193401	200602	207885	215299	222841	230550	238423	246451	254566	262691	270787	278834	286871	294976	303272	311869	320781	330004	339501	349273	359276	369517	379998	390702	401592	412665	423949	435434	447016	458549	469918
Sierra Leone	SLE	Population, total	SP.POP.TOTL	2317638	2352370	2388759	2426864	2466671	2508226	2551580	2596798	2644011	2693344	2744890	2798727	2854866	2913347	2974105	3037158	3102595	3170503	3240841	3313506	3388494	3464113	3540164	3619854	3707513	3805304	3916685	4038154	4156636	4254434	4319763	4348663	4347727	4328965	4309780	4303953	4312660	4335295	4381484	4462374	4584570	4754069	4965770	5201074	5433995	5645629
El Salvador	SLV	Population, total	SP.POP.TOTL	2766319	2846601	2931187	3019224	3109571	3201310	3293954	3387384	3481624	3576834	3673066	3770060	3867310	3964273	4060255	4154689	4247508	4338451	4426679	4511127	4591135	4666361	4737256	4804936	4871041	4936803	5002339	5067531	5133273	5200608	5270074	5342190	5416327	5490478	5561916	5628602	5689943	5746288	5797764	5844834	5887930	5927001	5962139	5994075	6023801	6052124
San Marino	SMR	Population, total	SP.POP.TOTL	15440	15836	16255	16669	17101	17508	17919	18309	18668	18980	19224	19393	19490	19561	19661	19829	20086	20397	20764	21122	21453	21761	22043	22295	22546	22794	23046	23297	23548	23833	24124	24454	24830	25208	25588	25925	26253	26563	26851	27141	27460	27818	28175	28561	28942	29324
Somalia	SOM	Population, total	SP.POP.TOTL	2755967	2814125	2874215	2936478	3001160	3068465	3143654	3227835	3312735	3386736	3444569	3472357	3479792	3512626	3632986	3880285	4278974	4802134	5375018	5892763	6281138	6511115	6608040	6618594	6614713	6648628	6736751	6862267	7005226	7133263	7225089	7274026	7295380	7315864	7372592	7491647	7682683	7936122	8235064	8553595	8872250	9186719	9501335	9815412	10130251	10446856
Serbia	SRB	Population, total	SP.POP.TOTL	6608000	6655000	6696000	6732000	6765000	6794000	6841000	6880000	6915000	6945000	6972000	7013000	7053000	7091000	7128000	7163000	7214000	7258000	7297000	7332000	7362000	7405000	7440000	7468000	7489000	7504000	7536000	7558000	7572000	7581000	7586000	7595636	7646424	7699307	7734639	7625357	7617794	7596501	7567745	7540401	7516346	7503433	7496522	7480591	7463157	7440769
Sub-Saharan Africa (excluding high income)	SSA	Population, total	SP.POP.TOTL	227191484	232524118	238077562	243848199	249827334	256012349	262405783	269022493	275886412	283028136	290472633	298229780	306303621	314704612	323442396	332524189	341958433	351746974	361877306	372341551	383124954	394217957	405624485	417361377	429457197	441922760	454770025	467984604	481525582	495338255	509382368	523656521	538175676	552948132	567997865	583337983	598991357	614977022	631321857	648067928	665246457	682874821	700982474	719633384	738900772	758841806
South Sudan	SSD	Population, total	SP.POP.TOTL	2842718	2895609	2951041	3009061	3069735	3133155	3199348	3268392	3340426	3415572	3494011	3575896	3661442	3750780	3844094	3941613	4041792	4144552	4253085	4371711	4502603	4646478	4799435	4953154	5096478	5220748	5328167	5419808	5485288	5511582	5492620	5420179	5305449	5185712	5111371	5118084	5221925	5411653	5661934	5933884	6199396	6447791	6688225	6935665	7213354	7535931
Sub-Saharan Africa	SSF	Population, total	SP.POP.TOTL	227233184	232567007	238121604	243893375	249873656	256059849	262454482	269072404	275937546	283080501	290526233	298284475	306359650	314761504	323500333	332583481	342018937	351808760	361939456	372404237	383188215	394281992	405688898	417425712	429521914	441988004	454835677	468053103	481594337	495407422	509451875	523726960	538246439	553020385	568072070	583413287	599067774	615054341	631400703	648148338	665327588	682956023	701066197	719716165	738983247	758924664
Small states	SST	Population, total	SP.POP.TOTL	14211632	14483280	14762137	15045754	15333414	15621038	15906000	16189729	16478258	16772135	17073320	17384835	17702798	18024903	18352225	18688113	19027575	19373865	19729124	20104329	20501052	20918880	21359036	21809929	22269272	22740424	23219508	23705895	24190637	24669495	25134374	25593378	26020298	26428489	26841261	27247916	27660218	28081580	28504891	28948552	29393017	29820320	30250201	30697300	31189665	31746502
Sao Tome and Principe	STP	Population, total	SP.POP.TOTL	64294	64597	64478	64237	64278	64884	66172	68039	70258	72501	74570	76344	77930	79463	81148	83134	85475	88102	90846	93458	95788	97767	99478	101064	102826	104926	107429	110259	113288	116313	119211	121949	124574	127066	129426	131679	133799	135831	137855	139964	142264	144760	147450	150405	153736	157472
Suriname	SUR	Population, total	SP.POP.TOTL	287870	295913	303894	311945	320267	328939	338155	347673	356551	363574	367926	369230	367907	364907	361665	359234	357949	357649	358103	358826	359531	360144	360927	362282	364722	368636	374133	381033	388877	397082	405169	413009	420658	428028	435099	441851	448207	454165	459838	465380	470944	476574	482228	487938	493680	499461
Slovak Republic	SVK	Population, total	SP.POP.TOTL	4068095	4191667	4238188	4282017	4327341	4370983	4411666	4449367	4483915	4518607	4538223	4557449	4596622	4641445	4689623	4739105	4789507	4840501	4890125	4938973	4979815	5016105	5055099	5091971	5127097	5161768	5193838	5222840	5250596	5275942	5299187	5303294	5305016	5325305	5346331	5361999	5373361	5383291	5390516	5396020	5388720	5378867	5376912	5373374	5372280	5372807
Slovenia	SVN	Population, total	SP.POP.TOTL	1584720	1594131	1603649	1616971	1632114	1649160	1669905	1689528	1704546	1713874	1724891	1738335	1752233	1766697	1776132	1793581	1820249	1842377	1862548	1882599	1901315	1906531	1910334	1922321	1932154	1941641	1965964	1989776	1995196	1996351	1998161	1999429	1996498	1991746	1989443	1989872	1988628	1985956	1981629	1983045	1988925	1992060	1994530	1995733	1997012	2000474
Sweden	SWE	Population, total	SP.POP.TOTL	7484656	7519998	7561588	7604328	7661354	7733853	7807797	7867931	7912273	7968072	8042801	8098334	8122300	8136312	8159955	8192437	8222286	8251540	8275599	8293678	8310531	8320503	8325263	8329033	8336605	8350386	8369829	8397804	8436489	8492964	8558835	8617375	8668067	8718561	8780745	8826939	8840998	8846062	8850974	8857874	8872109	8895960	8924958	8958229	8993531	9029572
Eswatini	SWZ	Population, total	SP.POP.TOTL	336578	343346	350155	357279	365120	373925	383820	394760	406508	418739	431251	443979	457039	470561	484747	499759	515602	532253	549787	568316	587852	608374	629812	652112	675240	699077	723599	748634	773774	798498	822423	845267	866995	887706	907622	926836	945506	963416	979922	994105	1005432	1013608	1019054	1022796	1026287	1030575
Sint Maarten (Dutch part)	SXM	Population, total	SP.POP.TOTL	2833	3077	3367	3703	4063	4460	4895	5362	5857	6354	6854	7372	7892	8429	8977	9556	10147	10791	11481	12244	13097	14030	15032	16175	17517	19127	21028	23157	25334	27280	28814	29852	30458	30765	30950	31164	31434	31731	31240	31084	30519	30600	30777	31472	32488	33011
Seychelles	SYC	Population, total	SP.POP.TOTL	41700	42889	44042	45176	46322	47500	48699	49911	51134	52365	53600	54695	56029	56892	57937	59292	60504	61786	62150	62686	63261	64035	64413	64335	64717	65244	65652	68499	68755	69167	69507	70439	70763	72253	74205	75304	76417	77319	78846	80410	81131	81202	83723	82781	82475	82858
Syrian Arab Republic	SYR	Population, total	SP.POP.TOTL	4573514	4721893	4875429	5034639	5200341	5373137	5553247	5740702	5935850	6139054	6350544	6570859	6800148	7037860	7283181	7535715	7794658	8060652	8336421	8625693	8930776	9252854	9590226	9938852	10293048	10648633	11004273	11360848	11719064	12080439	12446168	12815400	13187669	13565074	13950486	14345491	14754148	15175308	15599588	16013992	16410847	16766555	17084628	17415214	17827827	18361178
Turks and Caicos Islands	TCA	Population, total	SP.POP.TOTL	5825	5867	5884	5870	5851	5814	5783	5766	5746	5765	5837	5973	6156	6380	6610	6832	7020	7193	7380	7607	7894	8243	8654	9096	9556	9974	10365	10717	11091	11550	12115	12815	13639	14526	15399	16221	16930	17566	18228	19069	20171	21578	23230	25008	26709	28181
Chad	TCD	Population, total	SP.POP.TOTL	3001604	3060365	3121226	3183576	3246527	3309583	3372182	3434817	3499370	3568402	3643608	3726189	3815253	3907891	3999918	4088568	4173131	4255242	4337292	4422743	4514427	4612858	4718157	4832316	4957561	5095400	5247281	5412844	5589624	5773930	5963250	6157085	6356741	6563925	6781057	7010159	7250974	7503494	7770053	8053532	8355654	8678049	9019226	9373913	9734761	10096630
East Asia & Pacific (IDA & IBRD countries)	TEA	Population, total	SP.POP.TOTL	883445587	882807979	894536202	917563058	940205341	963806224	990927362	1017110642	1044230688	1073035646	1102743524	1133088596	1161692236	1189353305	1215519592	1239283626	1261221802	1281596019	1301958170	1322627340	1342952249	1363987476	1387365779	1410865643	1433295157	1456445331	1481135104	1507322673	1533819032	1559650590	1584871821	1608998997	1631566861	1653289936	1674861271	1696013989	1716810410	1737388723	1757224496	1775880197	1793498345	1810261111	1826238741	1841560611	1856486255	1871341383
Europe & Central Asia (IDA & IBRD countries)	TEC	Population, total	SP.POP.TOTL	308424859	313062858	317744155	322502356	327271196	331852935	335704786	339692825	343594800	347372826	351017860	354660485	358451364	362249658	366086343	369959058	373993098	377959108	381826792	385669994	389610131	393632708	397542988	401434284	405559660	409642788	413657306	417635043	421417208	424805449	427265643	429373010	431065065	432578780	433470960	433787234	434113825	434474220	434722171	434668281	434313565	433863004	433541378	433680250	434022280	434427808
Togo	TGO	Population, total	SP.POP.TOTL	1580508	1597523	1612761	1631758	1662073	1708631	1774020	1855450	1945777	2034902	2115522	2185667	2247578	2303344	2356620	2410451	2464424	2518454	2576293	2642693	2720835	2812312	2915618	3026980	3140840	3252997	3363040	3471738	3577469	3678567	3774310	3862998	3945902	4029044	4120615	4226293	4348808	4485945	4632451	4780455	4924406	5062571	5197040	5330629	5467770	5611643
Thailand	THA	Population, total	SP.POP.TOTL	27397208	28224186	29080945	29966873	30881136	31822656	32789129	33778804	34791418	35827089	36884525	37963280	39058594	40159581	41252320	42326307	43377270	44405903	45413082	46401750	47374463	48326269	49255889	50173922	51094870	52026901	52980105	53945872	54891520	55772169	56558196	57232471	57811025	58337773	58875275	59467272	60130190	60846588	61585103	62298569	62952639	63539190	64069093	64549867	64995303	65416189
Tajikistan	TJK	Population, total	SP.POP.TOTL	2087053	2159134	2236564	2318252	2402473	2487975	2574506	2662257	2750932	2840265	2930108	3020419	3111284	3203035	3296092	3390941	3487658	3586516	3688411	3794457	3905443	4020818	4140297	4265278	4397563	4537820	4687328	4843997	5001172	5149872	5283811	5400636	5502490	5593317	5679169	5764806	5851354	5938404	6027395	6119664	6216329	6318510	6426861	6541550	6662391	6789318
Turkmenistan	TKM	Population, total	SP.POP.TOTL	1603254	1658364	1715408	1773854	1833065	1892596	1952144	2011762	2071793	2132800	2195165	2258965	2324019	2390212	2457379	2525374	2594315	2664262	2734899	2805817	2876809	2947783	3019064	3091510	3166215	3244024	3324462	3407310	3493892	3585867	3683978	3789188	3899843	4010789	4115105	4207841	4287337	4355125	4413477	4466133	4516128	4564087	4610018	4655752	4703396	4754652
Latin America & the Caribbean (IDA & IBRD countries)	TLA	Population, total	SP.POP.TOTL	209749023	215629972	221676249	227866079	234169957	240564863	247044234	253607485	260246118	266952916	273723962	280552945	287442489	294409011	301475452	308657753	315955197	323363576	330890816	338545320	346328178	354241995	362272025	370377355	378506071	386619091	394697236	402742139	410761042	418769937	426777889	434776652	442751009	450695871	458608078	466483148	474321040	482112390	489832061	497441659	504921279	512247446	519420841	526462542	533415243	540306150
Timor-Leste	TLS	Population, total	SP.POP.TOTL	474535	482852	491575	500652	510035	519676	529328	538906	548817	559620	571565	585250	600185	614264	624561	629227	627255	619817	610048	602363	599907	603837	613233	626677	641845	657061	671747	686475	701812	718736	737814	759526	783204	806867	827828	844333	855358	861870	866523	873138	884366	901214	922699	947110	971889	995130
Middle East & North Africa (IDA & IBRD countries)	TMN	Population, total	SP.POP.TOTL	97553136	100147125	102808039	105546241	108376349	111307810	114351844	117503838	120739199	124023275	127335093	130670746	134051048	137511232	141099598	144855662	148781943	152881163	157192250	161761403	166616386	171766018	177185651	182825252	188614684	194494177	200443463	206447529	212456877	218415839	224280776	230032568	235665095	241166641	246530980	251758674	256843601	261797640	266664106	271501583	276357461	281251221	286188978	291188690	296266120	301435118
Tonga	TON	Population, total	SP.POP.TOTL	61574	63721	66233	68975	71744	74348	76774	79034	81076	82861	84344	85492	86327	86958	87584	88321	89228	90259	91336	92271	92966	93415	93636	93736	93793	93896	94081	94318	94592	94848	95069	95243	95398	95556	95739	95972	96267	96621	97036	97475	97962	98482	99023	99591	100214	100908
South Asia (IDA & IBRD)	TSA	Population, total	SP.POP.TOTL	572839530	584939711	597494450	610498308	623943328	637823175	652144171	666908586	682102192	697706091	713711358	730107660	746911710	764174968	781966557	800335570	819292532	838819900	858901743	879510842	900620583	922226632	944315173	966836458	989728262	1012942302	1036437878	1060208544	1084281159	1108702366	1133495194	1158655616	1184133340	1209847774	1235693864	1261587780	1287476203	1313346375	1339202700	1365067953	1390946065	1416822995	1442644044	1468324423	1493757846	1518861546
Sub-Saharan Africa (IDA & IBRD countries)	TSS	Population, total	SP.POP.TOTL	227233184	232567007	238121604	243893375	249873656	256059849	262454482	269072404	275937546	283080501	290526233	298284475	306359650	314761504	323500333	332583481	342018937	351808760	361939456	372404237	383188215	394281992	405688898	417425712	429521914	441988004	454835677	468053103	481594337	495407422	509451875	523726960	538246439	553020385	568072070	583413287	599067774	615054341	631400703	648148338	665327588	682956023	701066197	719716165	738983247	758924664
Trinidad and Tobago	TTO	Population, total	SP.POP.TOTL	847973	864814	879436	891948	902620	911742	919218	925233	930792	937184	945357	955753	968136	982006	996479	1010934	1025104	1039210	1053560	1068644	1084743	1101983	1120019	1138071	1155083	1170296	1183382	1194532	1204150	1212858	1221121	1229108	1236685	1243605	1249527	1254200	1257547	1259838	1261699	1263927	1267159	1271627	1277210	1283564	1290115	1296497
Tunisia	TUN	Population, total	SP.POP.TOTL	4178235	4238141	4305477	4380074	4461111	4547941	4640995	4740526	4845220	4953379	5063805	5176290	5291335	5409338	5530978	5656912	5786482	5919958	6060158	6210756	6374040	6551232	6740520	6937332	7135265	7329590	7517854	7700733	7880333	8060211	8242509	8427851	8613855	8795934	8967916	9125400	9267335	9395119	9509862	9613587	9708347	9793915	9871261	9945282	10022278	10106778
Turkey	TUR	Population, total	SP.POP.TOTL	27472339	28146909	28832831	29531362	30244258	30972996	31717504	32477994	33256465	34055391	34876296	35720603	36587267	37472329	38370278	39277249	40189561	41108290	42039983	42994043	43975972	44988411	46025411	47073470	48114158	49133928	50128548	51100930	52053764	52992479	53921758	54840595	55748946	56653808	57564209	58486453	59423278	60372571	61329665	62287391	63240196	64192243	65145357	66089402	67010930	67903461
Tuvalu	TUV	Population, total	SP.POP.TOTL	5321	5330	5340	5341	5354	5388	5435	5510	5598	5671	5740	5770	5786	5819	5903	6064	6319	6650	7018	7357	7631	7825	7951	8041	8110	8211	8341	8481	8637	8787	8910	9014	9110	9194	9259	9298	9317	9328	9332	9344	9392	9478	9593	9724	9871	9997
Tanzania	TZA	Population, total	SP.POP.TOTL	10052151	10346695	10651954	10968196	11295675	11634837	11985442	12348188	12725519	13120587	13535487	13971698	14428340	14902271	15388933	15885228	16390161	16905222	17432756	17976219	18538263	19120683	19723317	20344550	20981775	21633799	22296282	22971208	23670807	24411744	25203848	26056605	26961204	27887204	28792649	29649128	30444523	31192853	31924201	32682240	33499177	34385849	35334790	36337778	37379766	38450323
Uganda	UGA	Population, total	SP.POP.TOTL	6767092	6983824	7215799	7461636	7719108	7986062	8263434	8550444	8841156	9127855	9405606	9671856	9929644	10186452	10453029	10737403	11042975	11368618	11712540	12071140	12442333	12825084	13221991	13638729	14082870	14559357	15070319	15612754	16180129	16763041	17354395	17953534	18561668	19175986	19793541	20413157	21032817	21655392	22290787	22952406	23650159	24388974	25167261	25980547	26821300	27684590
Ukraine	UKR	Population, total	SP.POP.TOTL	42664646	43206353	43752227	44288607	44796959	45264552	45684983	46063219	46411816	46749289	47088862	47435008	47783006	48125829	48452623	48755662	49032729	49287118	49523304	49747998	49965872	50221000	50384000	50564000	50754000	50917000	51097000	51293000	51521000	51773000	51891400	52000500	52150400	52179200	51921400	51512800	51057800	50594600	50144500	49674000	49176500	48662400	48202470	47812949	47451626	47105171
Upper middle income	UMC	Population, total	SP.POP.TOTL	1136464260	1140113724	1156186962	1183604156	1210649304	1238612642	1269459169	1299468908	1330348999	1362854382	1396278485	1430319852	1462600916	1493945323	1523888167	1551563310	1577700939	1602325098	1626942179	1651804638	1676276374	1701367506	1728647847	1755902412	1782261503	1809328983	1837853676	1867834479	1897982987	1927151797	1954941707	1981740967	2006684527	2030763714	2054445439	2077356482	2099939308	2122286538	2143782967	2163950269	2183135807	2201118779	2218183948	2234927005	2251348403	2267638257
Uruguay	URY	Population, total	SP.POP.TOTL	2538648	2571682	2603883	2635125	2665383	2694537	2722871	2750091	2774761	2795037	2809799	2818283	2821458	2822112	2824095	2830172	2841371	2856958	2875724	2895683	2915389	2934624	2953852	2973048	2992250	3011519	3030651	3049581	3068714	3088603	3109598	3131657	3154459	3177734	3201149	3224275	3247383	3270158	3291053	3308005	3319734	3325471	3326046	3323661	3321486	3321799
United States	USA	Population, total	SP.POP.TOTL	180671000	183691000	186538000	189242000	191889000	194303000	196560000	198712000	200706000	202677000	205052000	207661000	209896000	211909000	213854000	215973000	218035000	220239000	222585000	225055000	227225000	229466000	231664000	233792000	235825000	237924000	240133000	242289000	244499000	246819000	249623000	252981000	256514000	259919000	263126000	266278000	269394000	272657000	275854000	279040000	282162411	284968955	287625193	290107933	292805298	295516599
Uzbekistan	UZB	Population, total	SP.POP.TOTL	8526299	8813619	9113629	9428906	9762819	10116870	10493441	10889499	11294666	11694843	12080311	12446444	12796982	13140797	13491114	13857469	14242766	14643881	15057226	15476928	15898760	16321692	16747428	17177663	17615037	18061283	18515579	18976411	19443890	19918119	20510000	20952000	21449000	21942000	22377000	22785000	23225000	23667000	24051000	24311650	24650400	24964450	25271850	25567650	25864350	26167000
St. Vincent and the Grenadines	VCT	Population, total	SP.POP.TOTL	80970	82168	83239	84200	85117	86009	86907	87779	88663	89565	90501	91490	92511	93559	94618	95665	96694	97708	98688	99649	100566	101439	102255	103035	103776	104503	105217	105905	106533	107071	107489	107772	107941	108036	108059	108043	107983	107895	107807	107763	107787	107893	108095	108322	108520	108617
Venezuela, RB	VEN	Population, total	SP.POP.TOTL	8141839	8439261	8742780	9052632	9369101	9692281	10022592	10359741	10702281	11048256	11396396	11745952	12097696	12453709	12816954	13189511	13572210	13964377	14364726	14771270	15182616	15597878	16017570	16443128	16876703	17319513	17772000	18232733	18698850	19166474	19632665	20096314	20557694	21016900	21474553	21931087	22385650	22837743	23288567	23739835	24192449	24646471	25100407	25551624	25996594	26432445
British Virgin Islands	VGB	Population, total	SP.POP.TOTL	8053	8164	8319	8469	8644	8836	9022	9213	9427	9621	9830	10012	10210	10391	10551	10697	10821	10923	11041	11226	11471	11821	12250	12755	13317	13951	14646	15390	16155	16867	17489	18007	18443	18783	19068	19307	19508	19660	19820	20026	20313	20675	21128	21674	22329	23106
Virgin Islands (U.S.)	VIR	Population, total	SP.POP.TOTL	32500	34300	35000	39800	40800	43500	46200	49100	55700	60300	63476	70937	76319	84121	89941	94484	96166	93203	95929	96183	99636	99853	100068	100348	100600	100760	100842	100901	100952	101041	103963	104807	105712	106578	107318	107818	108095	108357	108537	108599	108642	108549	108509	108505	108466	108453
Vietnam	VNM	Population, total	SP.POP.TOTL	32670048	33666111	34683410	35721213	36780001	37858947	38958046	40072951	41193588	42307149	43404802	44484032	45548476	46603522	47657554	48718190	49785278	50861166	51959021	53095406	54281841	55522804	56814309	58148384	59512619	60896732	62293859	63701974	65120432	66550231	67988855	69436956	70883488	72300308	73651220	74910462	76068739	77133212	78115712	79035871	79910411	80742500	81534406	82301650	83062819	83832662
Vanuatu	VUT	Population, total	SP.POP.TOTL	63689	65700	67793	69944	72116	74268	76392	78505	80653	82920	85374	88012	90802	93749	96773	99863	103002	106206	109397	112543	115598	118546	121398	124213	127058	129989	132988	136075	139319	142801	146575	150718	155176	159743	164128	168161	171721	174917	177987	181259	184964	189209	193927	198960	204123	209282
World	WLD	Population, total	SP.POP.TOTL	3032156070	3071596055	3124561005	3189655687	3255145692	3322046795	3392097729	3461619724	3532782993	3606553753	3681975908	3760516757	3836900801	3912984371	3988487336	4062507027	4135432265	4207786422	4281339378	4356778367	4432963653	4511164132	4592387213	4674330282	4755996689	4839176734	4924747934	5012556248	5101287675	5189977062	5280046096	5368139468	5452576447	5537885552	5622085788	5706753900	5789655609	5872286683	5954005906	6034491620	6114332517	6193671694	6272753009	6351882385	6431551721	6511748273
Samoa	WSM	Population, total	SP.POP.TOTL	108627	112112	115768	119552	123346	127055	130672	134181	137484	140495	143146	145407	147295	148858	150191	151353	152362	153218	153986	154740	155522	156410	157365	158345	159243	159995	160552	160962	161369	161935	162797	164000	165490	167117	168689	170050	171165	172065	172839	173606	174454	175394	176410	177481	178597	179722
Kosovo	XKX	Population, total	SP.POP.TOTL	947000	966000	994000	1022000	1050000	1078000	1106000	1135000	1163000	1191000	1219000	1247000	1278000	1308000	1339000	1369000	1400000	1430000	1460000	1491000	1521000	1552000	1582000	1614000	1647000	1682000	1717000	1753000	1791000	1827000	1862000	1898000	1932000	1965000	1997000	2029000	2059000	2086000	1966000	1762000	1700000	1701154	1702310	1703466	1704622	1705780
Yemen, Rep.	YEM	Population, total	SP.POP.TOTL	5315351	5393034	5473671	5556767	5641598	5727745	5816241	5907873	6001858	6097042	6193379	6290367	6390573	6500809	6630003	6784699	6967944	7178672	7414167	7669699	7941903	8231905	8541605	8869363	9213078	9572170	9941102	10322044	10730864	11189185	11709987	12302127	12954157	13634082	14297617	14913313	15469274	15975676	16450306	16921157	17409071	17918369	18443684	18985001	19540096	20107416
South Africa	ZAF	Population, total	SP.POP.TOTL	17099836	17524533	17965733	18423157	18896303	19384838	19888259	20406863	20942147	21496075	22069783	22665265	23281517	23913090	24552540	25195184	25836890	26480915	27138966	27827325	28556771	29333095	30150448	30993762	31841588	32678876	33495956	34297727	35100905	35930056	36800507	37718952	38672611	39633754	40564061	41435761	42241007	42987456	43682259	44338551	44967713	45571272	46150913	46719203	47291610	47880595
Zambia	ZMB	Population, total	SP.POP.TOTL	3070780	3164330	3260645	3360099	3463211	3570466	3681953	3797877	3918872	4045740	4179062	4319226	4466170	4619549	4778716	4943279	5112823	5287544	5468259	5656145	5851818	6055361	6265869	6481907	6701547	6923148	7146965	7372835	7598270	7820199	8036849	8246662	8451346	8656484	8869745	9096608	9339740	9597610	9866474	10140564	10415942	10692197	10971704	11256740	11550641	11856244
Zimbabwe	ZWE	Population, total	SP.POP.TOTL	3776679	3905038	4039209	4178726	4322854	4471178	4623340	4779825	4941901	5111326	5289312	5476978	5673914	5877725	6085078	6293875	6502566	6712825	6929663	7160021	7408630	7675582	7958239	8254746	8562259	8877489	9200150	9527202	9849129	10153852	10432409	10681008	10900511	11092775	11261752	11410721	11541215	11653254	11747079	11822722	11881482	11923906	11954293	11982219	12019911	12076697
				9602006	9586651	9624660	9670685	9727804	9779358	9821040	9852899	9876346	9896580	9858071	9826815	9867632	9922266	9988459	10058620	10125939	10186755	10242098	10292341	10304193	10300591	10314826	10323856	10330213	10337118	10342227	10347318	10355276	10361068	10333355	10308578	10319123	10329855	10333587	10327253	10315241	10304131	10294373	10283860	10255063	10216605	10196916	10193998	10197101	10211216
				9.60201	9.58665	9.62466	9.67069	9.7278	9.77936	9.82104	9.8529	9.87635	9.89658	9.85807	9.82681	9.86763	9.92227	9.98846	10.0586	10.1259	10.1868	10.2421	10.2923	10.3042	10.3006	10.3148	10.3239	10.3302	10.3371	10.3422	10.3473	10.3553	10.3611	10.3334	10.3086	10.3191	10.3299	10.3336	10.3273	10.3152	10.3041	10.2944	10.2839	10.2551	10.2166	10.1969	10.194	10.1971	10.2112
[truncated: 15 more columns]

## Sheet: Metadata - Countries
Country Code	Region	IncomeGroup	SpecialNotes	TableName
ABW	Latin America & Caribbean	High income		Aruba
AFE			26 countries, stretching from the Red Sea in the North to the Cape of Good Hope in the South (https://www.worldbank.org/en/region/afr/eastern-and-southern-africa)	Africa Eastern and Southern
AFG	South Asia	Low income	Fiscal year end: March 20; reporting period for national accounts data: FY.	Afghanistan
AFW			22 countries, stretching from the westernmost point of Africa, across the equator, and partly along the Atlantic Ocean till the Republic of Congo in the South (https://www.worldbank.org/en/region/afr/western-and-central-africa)	Africa Western and Central
AGO	Sub-Saharan Africa	Lower middle income		Angola
ALB	Europe & Central Asia	Upper middle income		Albania
AND	Europe & Central Asia	High income		Andorra
ARB			Arab World aggregate. Arab World is composed of members of the League of Arab States.	Arab World
ARE	Middle East & North Africa	High income		United Arab Emirates
ARG	Latin America & Caribbean	Upper middle income		Argentina
ARM	Europe & Central Asia	Upper middle income		Armenia
ASM	East Asia & Pacific	Upper middle income		American Samoa
ATG	Latin America & Caribbean	High income		Antigua and Barbuda
AUS	East Asia & Pacific	High income	Fiscal year end: June 30; reporting period for national accounts data: FY.	Australia
AUT	Europe & Central Asia	High income	A simple multiplier is used to convert the national currencies of EMU members to euros. The following irrevocable euro conversion rate was adopted by the EU Council on January 1, 1999: 1 euro = 13.7603 Austrian schilling. Please note that historical data before 1999 are not actual euros and are not comparable or suitable for aggregation across countries.	Austria
AZE	Europe & Central Asia	Upper middle income		Azerbaijan
BDI	Sub-Saharan Africa	Low income		Burundi
BEL	Europe & Central Asia	High income	A simple multiplier is used to convert the national currencies of EMU members to euros. The following irrevocable euro conversion rate was adopted by the EU Council on January 1, 1999: 1 euro = 40.3399 Belgian franc. Please note that historical data before 1999 are not actual euros and are not comparable or suitable for aggregation across countries.	Belgium
BEN	Sub-Saharan Africa	Lower middle income		Benin
BFA	Sub-Saharan Africa	Low income		Burkina Faso
BGD	South Asia	Lower middle income	Fiscal year end: June 30; reporting period for national accounts data: FY.	Bangladesh
BGR	Europe & Central Asia	Upper middle income		Bulgaria
BHR	Middle East & North Africa	High income		Bahrain
BHS	Latin America & Caribbean	High income		Bahamas, The
BIH	Europe & Central Asia	Upper middle income		Bosnia and Herzegovina
BLR	Europe & Central Asia	Upper middle income	Data before 2015 were adjusted to reflect the new denomination effective from July 1, 2016 (BYN), a decrease of 10,000 times (1 BYN = 10,000 BYR)	Belarus
BLZ	Latin America & Caribbean	Lower middle income		Belize
BMU	North America	High income		Bermuda
BOL	Latin America & Caribbean	Lower middle income		Bolivia
BRA	Latin America & Caribbean	Upper middle income		Brazil
BRB	Latin America & Caribbean	High income		Barbados
BRN	East Asia & Pacific	High income		Brunei Darussalam
BTN	South Asia	Lower middle income		Bhutan
BWA	Sub-Saharan Africa	Upper middle income		Botswana
CAF	Sub-Saharan Africa	Low income		Central African Republic
CAN	North America	High income	Fiscal year end: March 31; reporting period for national accounts data: CY.	Canada
CEB			Central Europe and the Baltics aggregate.	Central Europe and the Baltics
CHE	Europe & Central Asia	High income		Switzerland
CHI	Europe & Central Asia	High income		Channel Islands
CHL	Latin America & Caribbean	High income		Chile
CHN	East Asia & Pacific	Upper middle income	On 1 July 1997 China resumed its exercise of sovereignty over Hong Kong; and on 20 December 1999 China resumed its exercise of sovereignty over Macao. Unless otherwise noted, data for China do not include data for Hong Kong SAR, China; Macao SAR, China; or Taiwan, China.	China
CIV	Sub-Saharan Africa	Lower middle income		Côte d'Ivoire
CMR	Sub-Saharan Africa	Lower middle income		Cameroon
COD	Sub-Saharan Africa	Low income		Congo, Dem. Rep.
COG	Sub-Saharan Africa	Lower middle income		Congo, Rep.
COL	Latin America & Caribbean	Upper middle income		Colombia
COM	Sub-Saharan Africa	Lower middle income		Comoros
CPV	Sub-Saharan Africa	Lower middle income		Cabo Verde
CRI	Latin America & Caribbean	Upper middle income		Costa Rica
CSS				Caribbean small states
CUB	Latin America & Caribbean	Upper middle income		Cuba
CUW	Latin America & Caribbean	High income		Curaçao
CYM	Latin America & Caribbean	High income		Cayman Islands
CYP	Europe & Central Asia	High income	A simple multiplier is used to convert the national currencies of EMU members to euros. The following irrevocable euro conversion rate entered into force on January 1, 2008: 1 euro = 0.585274 Cyprus pounds. Please note that historical data are not actual euros and are not comparable or suitable for aggregation across countries.	Cyprus
CZE	Europe & Central Asia	High income		Czech Republic
DEU	Europe & Central Asia	High income		Germany
DJI	Middle East & North Africa	Lower middle income		Djibouti
DMA	Latin America & Caribbean	Upper middle income		Dominica
DNK	Europe & Central Asia	High income		Denmark
DOM	Latin America & Caribbean	Upper middle income		Dominican Republic
DZA	Middle East & North Africa	Lower middle income		Algeria
EAP				East Asia & Pacific (excluding high income)
EAR			Early-dividend countries are mostly lower-middle-income countries further along the fertility transition. Fertility rates have fallen below four births per woman and the working-age share of the population is likely rising considerably.	Early-demographic dividend
EAS			East Asia and Pacific regional aggregate (includes all income levels).	East Asia & Pacific
ECA				Europe & Central Asia (excluding high income)
ECS			Europe and Central Asia regional aggregate (includes all income levels).	Europe & Central Asia
ECU	Latin America & Caribbean	Upper middle income		Ecuador
EGY	Middle East & North Africa	Lower middle income	Fiscal year end: June 30; reporting period for national accounts data: FY for years 1980 and after. The data from 1973 to 1979 are calendar year data.	Egypt, Arab Rep.
EMU			Euro area aggregate.	Euro area
ERI	Sub-Saharan Africa	Low income		Eritrea
ESP	Europe & Central Asia	High income	A simple multiplier is used to convert the national currencies of EMU members to euros. The following irrevocable euro conversion rate was adopted by the EU Council on January 1, 1999: 1 euro = 166.386 Spanish peseta. Please note that historical data before 1999 are not actual euros and are not comparable or suitable for aggregation across countries.	Spain
EST	Europe & Central Asia	High income	The following irrevocable euro conversion rate entered into force on January 1, 2011: 1 euro = 15.6466 Estonian kroon. Please note that historical data are not actual euros and are not comparable or suitable for aggregation across countries.	Estonia
ETH	Sub-Saharan Africa	Low income	Fiscal year end: July 7; reporting period for national accounts data: FY.	Ethiopia
EUU			European Union aggregate.	European Union
FCS			Fragile and conflict-affected situations aggregate. Countries are distinguished based on the nature and severity of issues they face. The classification uses the following categories: - Countries with high levels of institutional and social fragility, identified based on publicly available indicators that measure the quality of policy and institutions and manifestations of fragility. - Countries …	Fragile and conflict affected situations
FIN	Europe & Central Asia	High income	A simple multiplier is used to convert the national currencies of EMU members to euros. The following irrevocable euro conversion rate was adopted by the EU Council on January 1, 1999: 1 euro = 5.94573 Finnish markka. Please note that historical data before 1999 are not actual euros and are not comparable or suitable for aggregation across countries.	Finland
FJI	East Asia & Pacific	Upper middle income		Fiji
FRA	Europe & Central Asia	High income	The following irrevocable euro conversion rate was adopted by the EU Council on January 1, 1999: 1 euro = 6.55957 French franc. Please note that historical data before 1999 are not actual euros and are not comparable or suitable for aggregation across countries.	France
FRO	Europe & Central Asia	High income		Faroe Islands
FSM	East Asia & Pacific	Lower middle income	Fiscal year ends on September 30; reporting period for national accounts data: FY. Based on the Pacific and Virgin Islands Training Initiative, national accounts data have been revised.	Micronesia, Fed. Sts.
GAB	Sub-Saharan Africa	Upper middle income		Gabon
GBR	Europe & Central Asia	High income		United Kingdom
GEO	Europe & Central Asia	Upper middle income	Includes self-governed areas only, which mostly exclude Abkhazia and South Ossetia, but small areas in Abkhazia and South Ossetia are included before 2008 or 2009 because of the changes in self-governed areas.	Georgia
GHA	Sub-Saharan Africa	Lower middle income		Ghana
GIB	Europe & Central Asia	High income		Gibraltar
GIN	Sub-Saharan Africa	Low income		Guinea
GMB	Sub-Saharan Africa	Low income		Gambia, The
GNB	Sub-Saharan Africa	Low income		Guinea-Bissau
GNQ	Sub-Saharan Africa	Upper middle income		Equatorial Guinea
GRC	Europe & Central Asia	High income	A simple multiplier is used to convert the national currencies of EMU members to euros. The following irrevocable euro conversion rate was adopted by the EU Council on January 1, 1999: 1 euro = 340.75 Greek drachma. Please note that historical data before 1999 are not actual euros and are not comparable or suitable for aggregation across countries.	Greece
GRD	Latin America & Caribbean	Upper middle income		Grenada
GRL	Europe & Central Asia	High income		Greenland
GTM	Latin America & Caribbean	Upper middle income		Guatemala
GUM	East Asia & Pacific	High income		Guam
GUY	Latin America & Caribbean	Upper middle income		Guyana
HIC			High income group aggregate. High-income economies are those in which 2020 GNI per capita was $12,696 or more.	High income
HKG	East Asia & Pacific	High income	On 1 July 1997 China resumed its exercise of sovereignty over Hong Kong. Unless otherwise noted, data for China do not include data for Hong Kong SAR, China; Macao SAR, China; or Taiwan, China. Agriculture value added includes mining and quarrying.	Hong Kong SAR, China
HND	Latin America & Caribbean	Lower middle income		Honduras
HPC			Heavily indebted poor countries aggregate.	Heavily indebted poor countries (HIPC)
HRV	Europe & Central Asia	High income		Croatia
HTI	Latin America & Caribbean	Lower middle income	Fiscal year end: September 30; reporting period for national accounts data: FY.	Haiti
HUN	Europe & Central Asia	High income		Hungary
IBD			IBRD only group aggregate.	IBRD only
IBT			IDA and IBRD total group aggregate (includes IDA only, IDA blend, and IBRD only).	IDA & IBRD total
IDA			IDA total group aggregate (includes IDA only and IDA blend).	IDA total
IDB			IDA blend group aggregate.	IDA blend
IDN	East Asia & Pacific	Lower middle income	Fiscal year end: March 31; reporting period for national accounts data: CY. Data for Indonesia include Timor-Leste through 1999 unless otherwise noted.	Indonesia
IDX			IDA only group aggregate.	IDA only
IMN	Europe & Central Asia	High income	Fiscal year end: March 31; reporting period for national account data: FY. Classification for years after 2012 was adjusted and figures were re-estimated by the World Bank, based on the detailed data published by the Cabinet Office, and are not consistent with data for 2011 and before.	Isle of Man
IND	South Asia	Lower middle income	Fiscal year end: March 31; reporting period for national accounts data: FY.	India
IRL	Europe & Central Asia	High income	A simple multiplier is used to convert the national currencies of EMU members to euros. The following irrevocable euro conversion rate was adopted by the EU Council on January 1, 1999: 1 euro = 0.787564 Irish pound. Please note that historical data before 1999 are not actual euros and are not comparable or suitable for aggregation across countries.	Ireland
IRN	Middle East & North Africa	Lower middle income	Fiscal year end: March 20; reporting period for national accounts data: FY.	Iran, Islamic Rep.
IRQ	Middle East & North Africa	Upper middle income		Iraq
ISL	Europe & Central Asia	High income		Iceland
ISR	Middle East & North Africa	High income		Israel
ITA	Europe & Central Asia	High income	A simple multiplier is used to convert the national currencies of EMU members to euros. The following irrevocable euro conversion rate was adopted by the EU Council on January 1, 1999: 1 euro = 1936.27 Italian lira. Please note that historical data before 1999 are not actual euros and are not comparable or suitable for aggregation across countries.	Italy
JAM	Latin America & Caribbean	Upper middle income		Jamaica
JOR	Middle East & North Africa	Upper middle income		Jordan
JPN	East Asia & Pacific	High income	Fiscal year end: March 31; reporting period for national accounts data: CY.	Japan
KAZ	Europe & Central Asia	Upper middle income		Kazakhstan
KEN	Sub-Saharan Africa	Lower middle income	Fiscal year end: June 30; reporting period for national accounts data: CY.	Kenya
KGZ	Europe & Central Asia	Lower middle income		Kyrgyz Republic
KHM	East Asia & Pacific	Lower middle income		Cambodia
KIR	East Asia & Pacific	Lower middle income		Kiribati
KNA	Latin America & Caribbean	High income		St. Kitts and Nevis
KOR	East Asia & Pacific	High income		Korea, Rep.
KWT	Middle East & North Africa	High income		Kuwait
LAC				Latin America & Caribbean (excluding high income)
LAO	East Asia & Pacific	Lower middle income		Lao PDR
LBN	Middle East & North Africa	Upper middle income		Lebanon
LBR	Sub-Saharan Africa	Low income	Pre-2000 data will be revised further for consistency and quality purpose.	Liberia
LBY	Middle East & North Africa	Upper middle income		Libya
LCA	Latin America & Caribbean	Upper middle income		St. Lucia
LCN				Latin America & Caribbean
LDC				Least developed countries: UN classification
LIC			Low income group aggregate. Low-income economies are those in which 2020 GNI per capita was $1,045 or less.	Low income
LIE	Europe & Central Asia	High income		Liechtenstein
LKA	South Asia	Lower middle income		Sri Lanka
LMC			Lower middle income group aggregate. Lower-middle-income economies are those in which 2020 GNI per capita was between $1,046 and $4,095.	Lower middle income
LMY				Low & middle income
LSO	Sub-Saharan Africa	Lower middle income	Fiscal year end: March 31; reporting period for national accounts data: CY.	Lesotho
LTE				Late-demographic dividend
LTU	Europe & Central Asia	High income	A simple multiplier is used to convert the national currencies of EMU members to euros. The following irrevocable euro conversion rate entered into force on January 1, 2015: 1 euro = 3.45280 Lithuanian litas. Please note that historical data are not actual euros and are not comparable or suitable for aggregation across countries. Based on data from EUROSTAT, the new reference year is 2010.	Lithuania
LUX	Europe & Central Asia	High income	A simple multiplier is used to convert the national currencies of EMU members to euros. The following irrevocable euro conversion rate was adopted by the EU Council on January 1, 1999: 1 euro = 40.3399 Luxembourg franc. Please note that historical data before 1999 are not actual euros and are not comparable or suitable for aggregation across countries.	Luxembourg
LVA	Europe & Central Asia	High income	A simple multiplier is used to convert the national currencies of EMU members to euros. The following irrevocable euro conversion rate entered into force on January 1, 2014: 1 euro = 0.702804 Latvian lats. Please note that historical data are not actual euros and are not comparable or suitable for aggregation across countries. Based on data from EUROSTAT, the new reference year is 2010.	Latvia
MAC	East Asia & Pacific	High income	On 20 December 1999 China resumed its exercise of sovereignty over Macao. Unless otherwise noted, data for China do not include data for Hong Kong SAR, China; Macao SAR, China; or Taiwan, China.	Macao SAR, China
MAF	Latin America & Caribbean	High income		St. Martin (French part)
MAR	Middle East & North Africa	Lower middle income		Morocco
MCO	Europe & Central Asia	High income		Monaco
MDA	Europe & Central Asia	Upper middle income	Excluding Transnistria. For 1950-94, World Bank estimates using UN World Population Prospects' growth rates of whole Moldova.	Moldova
MDG	Sub-Saharan Africa	Low income		Madagascar
MDV	South Asia	Upper middle income		Maldives
MEA			Middle East and North Africa regional aggregate (includes all income levels).	Middle East & North Africa
MEX	Latin America & Caribbean	Upper middle income		Mexico
MHL	East Asia & Pacific	Upper middle income	Fiscal year ends on September 30; reporting period for national accounts data: FY.	Marshall Islands
MIC			Middle income group aggregate. Middle-income economies are those in which 2020 GNI per capita was between $1,046 and $12,695.	Middle income
MKD	Europe & Central Asia	Upper middle income		North Macedonia
MLI	Sub-Saharan Africa	Low income		Mali
MLT	Middle East & North Africa	High income	A simple multiplier is used to convert the national currencies of EMU members to euros. The following irrevocable euro conversion rate entered into force on January 1, 2008: 1 euro = 0.4293 Maltese lira. Please note that historical data are not actual euros and are not comparable or suitable for aggregation across countries. National accounts data source from 1995 to 2015 is Eurostat; prior to 19…	Malta
MMR	East Asia & Pacific	Lower middle income	Fiscal year end: September 30; reporting period for national accounts data: FY.	Myanmar
MNA				Middle East & North Africa (excluding high income)
MNE	Europe & Central Asia	Upper middle income	Montenegro declared independence from Serbia and Montenegro on June 3, 2006. Where available, data for each country are shown separately. However, for Serbia, some indicators continue to include data for Montenegro through 2005.	Montenegro
MNG	East Asia & Pacific	Lower middle income		Mongolia
MNP	East Asia & Pacific	High income		Northern Mariana Islands
MOZ	Sub-Saharan Africa	Low income		Mozambique
MRT	Sub-Saharan Africa	Lower middle income	National account data were adjusted to reflect the new banknote (1 new ouguiya = 10 old ouguiya)	Mauritania
MUS	Sub-Saharan Africa	Upper middle income		Mauritius
MWI	Sub-Saharan Africa	Low income		Malawi
MYS	East Asia & Pacific	Upper middle income		Malaysia
NAC			North America regional aggregate. There are no economies in North America classified as low or middle income.	North America
NAM	Sub-Saharan Africa	Upper middle income	Fiscal year end: March 31; reporting period for national accounts data: CY.	Namibia
NCL	East Asia & Pacific	High income		New Caledonia
NER	Sub-Saharan Africa	Low income		Niger
NGA	Sub-Saharan Africa	Lower middle income		Nigeria
NIC	Latin America & Caribbean	Lower middle income		Nicaragua
NLD	Europe & Central Asia	High income	A simple multiplier is used to convert the national currencies of EMU members to euros. The following irrevocable euro conversion rate was adopted by the EU Council on January 1, 1999: 1 euro = 2.20371 Netherlands guilder. Please note that historical data before 1999 are not actual euros and are not comparable or suitable for aggregation across countries.	Netherlands
NOR	Europe & Central Asia	High income		Norway
NPL	South Asia	Lower middle income	Fiscal year end: July 14; reporting period for national accounts data: FY.	Nepal
NRU	East Asia & Pacific	High income	Fiscal year end: June 30; reporting period for national accounts data: FY.	Nauru
NZL	East Asia & Pacific	High income	Fiscal year end: March 31; reporting period for national accounts data: CY.	New Zealand
OED				OECD members
OMN	Middle East & North Africa	High income		Oman
OSS				Other small states
PAK	South Asia	Lower middle income	Fiscal year end: June 30; reporting period for national accounts data: FY.	Pakistan
PAN	Latin America & Caribbean	Upper middle income		Panama
PER	Latin America & Caribbean	Upper middle income		Peru
PHL	East Asia & Pacific	Lower middle income		Philippines
PLW	East Asia & Pacific	High income	Fiscal year ends on September 30; reporting period for national accounts data: FY.	Palau
PNG	East Asia & Pacific	Lower middle income		Papua New Guinea
POL	Europe & Central Asia	High income		Poland
PRE			Pre-dividend countries are mostly low-income countries, lagging in key human development indicators and with current fertility levels above four births per woman. They face very rapid population growth.	Pre-demographic dividend
PRI	Latin America & Caribbean	High income	Fiscal year end: June 30; reporting period for national accounts data: FY.	Puerto Rico
PRK	East Asia & Pacific	Low income		Korea, Dem. People's Rep.
PRT	Europe & Central Asia	High income	A simple multiplier is used to convert the national currencies of EMU members to euros. The following irrevocable euro conversion rate was adopted by the EU Council on January 1, 1999: 1 euro = 200.482 Portuguese escudo. Please note that historical data before 1999 are not actual euros and are not comparable or suitable for aggregation across countries.	Portugal
PRY	Latin America & Caribbean	Upper middle income		Paraguay
PSE	Middle East & North Africa	Lower middle income		West Bank and Gaza
PSS			Pacific island small states aggregate.	Pacific island small states
PST			Post-dividend countries are mostly high-income countries where fertility has transitioned below replacement levels.	Post-demographic dividend
PYF	East Asia & Pacific	High income		French Polynesia
QAT	Middle East & North Africa	High income		Qatar
ROU	Europe & Central Asia	Upper middle income		Romania
RUS	Europe & Central Asia	Upper middle income		Russian Federation
RWA	Sub-Saharan Africa	Low income		Rwanda
SAS				South Asia
SAU	Middle East & North Africa	High income		Saudi Arabia
SDN	Sub-Saharan Africa	Low income		Sudan
SEN	Sub-Saharan Africa	Lower middle income		Senegal
SGP	East Asia & Pacific	High income	Fiscal year end: March 31; reporting period for national accounts data: CY.	Singapore
SLB	East Asia & Pacific	Lower middle income		Solomon Islands
SLE	Sub-Saharan Africa	Low income		Sierra Leone
SLV	Latin America & Caribbean	Lower middle income		El Salvador
SMR	Europe & Central Asia	High income		San Marino
SOM	Sub-Saharan Africa	Low income		Somalia
SRB	Europe & Central Asia	Upper middle income	Montenegro declared independence from Serbia and Montenegro on June 3, 2006. Where available, data for each country are shown separately. However, for Serbia, some indicators, such as those series for which data appear only for Serbia and not Montenegro--e.g., aid, environment, external debt, balance of payments, various social indicators excluding population--continue to include data for Montene…	Serbia
SSA				Sub-Saharan Africa (excluding high income)
SSD	Sub-Saharan Africa	Low income	Fiscal year end: June 30; reporting period for national accounts data: FY.	South Sudan
SSF			Sub-Saharan Africa regional aggregate (includes all income levels).	Sub-Saharan Africa
SST			Small states (members of the Small States Forum) aggregate.	Small states
STP	Sub-Saharan Africa	Lower middle income	National account data were adjusted to reflect the new banknote (1 new Dobra STN = 1000 old Dobra STD)	São Tomé and Principe
SUR	Latin America & Caribbean	Upper middle income		Suriname
SVK	Europe & Central Asia	High income	A simple multiplier is used to convert the national currencies of EMU members to euros. The following irrevocable euro conversion rate entered into force on January 1, 2009: 1 euro = 30.126 Slovak koruna. Please note that historical data are not actual euros and are not comparable or suitable for aggregation across countries.	Slovak Republic
SVN	Europe & Central Asia	High income	A simple multiplier is used to convert the national currencies of EMU members to euros. The following irrevocable euro conversion rate entered into force on January 1, 2007: 1 euro = 239.64 Slovenian tolar. Please note that historical data are not actual euros and are not comparable or suitable for aggregation across countries.	Slovenia
SWE	Europe & Central Asia	High income	Fiscal year end: June 30; reporting period for national accounts data: CY.	Sweden
SWZ	Sub-Saharan Africa	Lower middle income	Fiscal year end: March 31; reporting period for national accounts data: CY. Authorities revised national accounts from 1999 to 2015.	Eswatini
SXM	Latin America & Caribbean	High income		Sint Maarten (Dutch part)
SYC	Sub-Saharan Africa	High income		Seychelles
SYR	Middle East & North Africa	Low income		Syrian Arab Republic
TCA	Latin America & Caribbean	High income		Turks and Caicos Islands
TCD	Sub-Saharan Africa	Low income		Chad
TEA			East Asia & Pacific (IDA & IBRD countries) aggregate.	East Asia & Pacific (IDA & IBRD)
TEC			Europe & Central Asia (IDA & IBRD countries) aggregate.	Europe & Central Asia (IDA & IBRD)
TGO	Sub-Saharan Africa	Low income		Togo
THA	East Asia & Pacific	Upper middle income	Fiscal year end: September 30; reporting period for national accounts data: CY.	Thailand
TJK	Europe & Central Asia	Lower middle income		Tajikistan
TKM	Europe & Central Asia	Upper middle income		Turkmenistan
TLA			Latin America & the Caribbean (IDA & IBRD countries) aggregate.	Latin America & Caribbean (IDA & IBRD)
TLS	East Asia & Pacific	Lower middle income		Timor-Leste
TMN			Middle East & North Africa (IDA & IBRD countries) aggregate.	Middle East & North Africa (IDA & IBRD)
TON	East Asia & Pacific	Upper middle income	Fiscal year end: June 30; reporting period for national accounts data: FY.	Tonga
TSA			South Asia (IDA & IBRD countries) aggregate.	South Asia (IDA & IBRD)
TSS			Sub-Saharan Africa (IDA & IBRD countries) aggregate.	Sub-Saharan Africa (IDA & IBRD)
TTO	Latin America & Caribbean	High income		Trinidad and Tobago
TUN	Middle East & North Africa	Lower middle income		Tunisia
TUR	Europe & Central Asia	Upper middle income		Turkey
TUV	East Asia & Pacific	Upper middle income		Tuvalu
TZA	Sub-Saharan Africa	Lower middle income		Tanzania
UGA	Sub-Saharan Africa	Low income	Fiscal year end: June 30; reporting period for national accounts data: FY.	Uganda
UKR	Europe & Central Asia	Lower middle income		Ukraine
UMC			Upper middle income group aggregate. Upper-middle-income economies are those in which 2020 GNI per capita was between $4,096 and $12,695.	Upper middle income
URY	Latin America & Caribbean	High income		Uruguay
USA	North America	High income		United States
UZB	Europe & Central Asia	Lower middle income		Uzbekistan
VCT	Latin America & Caribbean	Upper middle income		St. Vincent and the Grenadines
VEN	Latin America & Caribbean			Venezuela, RB
VGB	Latin America & Caribbean	High income		British Virgin Islands
VIR	Latin America & Caribbean	High income		Virgin Islands (U.S.)
VNM	East Asia & Pacific	Lower middle income		Vietnam
VUT	East Asia & Pacific	Lower middle income		Vanuatu
WLD			World aggregate.	World
WSM	East Asia & Pacific	Lower middle income	Fiscal year ends on June 30; reporting period for national accounts data: FY.	Samoa
XKX	Europe & Central Asia	Upper middle income		Kosovo
YEM	Middle East & North Africa	Low income		Yemen, Rep.
ZAF	Sub-Saharan Africa	Upper middle income	Fiscal year end: March 31; reporting period for national accounts data: CY.	South Africa
ZMB	Sub-Saharan Africa	Lower middle income	National accounts data were rebased to reflect the January 1, 2013, introduction of the new Zambian kwacha at a rate of 1,000 old kwacha = 1 new kwacha.	Zambia
ZWE	Sub-Saharan Africa	Lower middle income		Zimbabwe

## Sheet: Metadata - Indicators
INDICATOR_CODE	INDICATOR_NAME	SOURCE_NOTE	SOURCE_ORGANIZATION
SP.POP.TOTL	Population, total	Total population is based on the de facto definition of population, which counts all residents regardless of legal status or citizenship. The values shown are midyear estimates.	(1) United Nations Population Division. World Population Prospects: 2019 Revision. (2) Census reports and other statistical publications from national statistical offices, (3) Eurostat: Demographic Statistics, (4) United Nations Statistical Division. Population and Vital Statistics Reprot (various years), (5) U.S. Census Bureau: International Database, and (6) Secretariat of the Pacific Community…
