# Supplementary material for: The Social Cost of Fossil and Industrial CO2 Emissions from 1950 to 2018
Source: Research Square preprint supplement (doi:10.21203/rs.3.rs-2244259/v1), 2022-11-17
Supplement: Supplementary file 49 [file cgdpo_Transposed_adj.xlsx]

## Sheet: output_PPP_data_PWT_Transposed_
Summe von AggValue	Spaltenbeschriftungen
Zeilenbeschriftungen	MAR	ABW	AGO	AIA	ALB	ARE	ARG	ARM	ATG	AUS	AUT	AZE	BDI	BEL	BEN	BFA	BGD	BGR	BHR	BHS	BIH	BLR	BLZ	BMU	BOL	BRA	BRB	BRN	BTN	BWA	CAF	CAN	CHE	CHL	CHN	CIV	CMR	COD	COG	COL	COM	CPV	CRI	CYM	CYP	CZE	DEU	DJI	DMA
1950	12662.2						50511.8			114696	41518.5			73079.5											6707.47	85323.5						176410	80791.9					25129.2		40698			3239.7		1532.69		357998
1951	12504						51700.1			110977	43585.2			75181.2											7382.92	87631.3						182326	88299.2	29986.1				29593.2		41317.5			3337.62		1623.07		399758
1952	13571.1						47280.3			110427	45118.8			77680.4											7341.84	97869.2						199436	88759.7	32608.3	576916			31835		44301.8			3786.8		1826.83		439733
1953	14089.2						50378.7			124582	47730.4			81065.6											6044.53	101674						209611	92451.4	33544.9	650394			36095.2		48209			4564.07		2067.77		478234
1954	14881.3						52633.1			133413	51001.2			84604.7											6272.42	110126						208321	98463	35848.5	602422			37282.2		52677.4			4757.44		2308.15		517335
1955	14721.4						56270.6			138950	55802.5			87987.4											6663.81	118163						224663	105341	34937.6	661626			39765.8		54317			5171.39		2361.24		586749
1956	15012.7						57369.8			140938	59770.5			90628.1											6262.17	122162						242715	113188	34199.2	705843			41089.2		55409.1			4995.19		2656.02		633720
1957	14832.2						60171.9			141741	62839.9			91899.8											6120.52	132738						248109	117480	37692.7	729378			40721.9		55192.7			5338.41		2705.03		670471
1958	15969.2						64713.6			153544	65802			92133.7											5868.08	141162						255517	113751	39324.7	745099			40695.8		55247			6036.64		2411.56		697558
1959	16668.8						60581.8			163422	67823.2			95047	3371.14	4883.57	77824.4								6224.9	147250						265259	122554	38755	709001			40627.3		58292.3			6043.13		2571.73		756829
1960	16707.8						65001			163815	71811		1920.34	94902.8	3686.55	4866.01	84070.7								6355.06	160815	1877.9			267.986	2040.33	268950	130308	41185.1	668069	5806.91	7993.6	43226.1	1149.99	61454.4	330.556	242.838	6489.64		2364.41		814019
1961	21747.3						67339.9			167788	76145.3		1679.25	100462	3786.1	4645.18	84746.8								6546.19	183701	1973.79			294.495	2213.85	280359	140496	40270	569135	6167.35	8281.43	36698.5	1118.54	65321.6	360.352	287.029	6458.21		2639.73		840633
1962	25322.8						68889.1			176919	79228.7		1854.45	109010	3711.92	5024.63	90983.2								6721.62	198407	2110.07			328.601	2214.99	300346	148575	50875.8	616336	6618.01	8346.21	45353.8	1538.05	68612.1	443.225	246.21	6985.57		3126.14		875999
1963	29653.5						66452.4			190073	82431.6		1907.5	113975	3921.79	4852.58	96370.5								7235.58	211860	2083.99			345.298	2089.89	317077	155651	52632.9	691066	7545.35	8895.99	43680.7	1727.79	70565.2	483.519	206.404	7404.75		3186.46		897609
1964	31584.8						69475.6			199226	86282.3		1938.9	121865	4141.38	5028.68	95270								7652.9	220949	2080.61			368.411	2186.83	338550	164851	54260.8	778862	8746.91	9204	39646.4	1844.76	76194.4	548.91	223.352	7778.96		2737.62		964675
1965	31295.1						77955.9			201510	89255		2006.34	126370	4512.79	5008.78	93674.2								8066.38	235125	2191.83			356.149	2218.95	358851	168636	52509.6	861736	8363.17	9721.76	45398.5	1830.55	76241.9	577.817	235.864	8620.23		3521.87		1.01453e+06
1966	30465.7						79723.9			216166	94214.1		2083.69	131137	4668.05	5055.86	94547.8								8781.9	247165	2334.28			392.667	2230.48	384658	172957	59015.4	887917	9434.42	10227.1	48721.3	1734.33	80481.3	645.828	296.404	9160.84		3701.95		1046369
1967	31695.9						82712.8			226230	97729.8		2354.72	136990	4895.7	5592.56	92003.2								9463.27	269569	2623			462.521	2223.85	396580	179029	62846.4	916765	9992.79	9361.22	44894.5	1781.75	83766.6	720.759	333.253	9672.72		4124.14		1.04114e+06
1968	34054.4						85226.8			243945	102357		2377.42	143709	5315.81	5747.74	95141.9								8409.67	298504	2749.46			517.774	2538.01	419136	185830	64667	891928	11434.2	9789.19	48745.5	2046.44	89227.1	691.436	371.114	10328.8		4281.1		1.10464e+06
1969	38094.7						93200.6			262454	107561		2281.88	153087	5538.37	5845.37	98735.7								8637.51	303392	3169.52			499.763	2550.44	440170	196519	69119.9	978136	12540	10425.5	54485.9	2257.91	94971.4	680.739	407.13	10891.7		4901.81		1.19058e+06
1970	36175	392.982	28822.8	64.7675	6225.11	67417	95677		305.217	273622	114422		2733.64	162640	6089.27	5598.34	105278	35703	3704.49	3289.97			500.689	591.351	8463.65	345911	3487.46	6327.25	569.104	576.433	2673.15	453304	210305	69343.4	1.09889e+06	13937.9	10849	56346.8	2567.3	102591	786.552	463.497	11835.2	288.536	5120.4		1.25385e+06	1099.71	285.983
1971	38592.2	446.115	30987.2	63.5279	6456.32	77599.5	98180.8		329.615	284739	120624		2841.53	169562	6237.21	5180.99	103526	38233.9	3815.29	3587.21			539.328	1171.56	9019.53	387937	3611.23	7202.83	586.434	742.551	2577.74	477615	219287	78507.7	1.20492e+06	14839.3	11028	56148.5	2901.49	113405	825.901	490.301	12392.8	304.624	5654.86		1.29687e+06	1176.11	311.805
1972	39486	488.222	30737	71.3986	6704.36	73025	99528.6		357.469	293663	127842		2542.36	180456	6530.55	6391.44	98314	41334.6	4075.72	3416.85			487.933	939.73	9170.65	434292	3686.9	8015.49	595.838	941.474	2476.34	504325	226387	78520	1.16838e+06	15527	11576.1	54297.7	2907.72	124293	849.213	503.638	13217	329.805	5960.04		1.36029e+06	1227.28	336.106
1973	40279.2	559.189	33386	74.0796	6939.36	84735.5	104678		379.916	306832	133109		2753.43	192112	6960.01	5965.5	82861.2	44659.7	4757.82	4001.53			544.783	908.29	10048.4	490723	3498.04	9289.48	601.263	1141.72	2759.59	541708	231912	75862.5	1.2692e+06	16378.5	12009.8	59747.5	3439.2	137262	903.332	509.167	14038.9	392.09	5850.48		1.42726e+06	1280.02	358.634
1974	42640.5	649.133	34559.4	72.2926	7271.99	88221.3	110070		338.134	297450	135194		2764.99	193779	7471.45	6406.24	84047.3	48551.5	6188.19	3790.4			591.128	724.376	11104.1	532545	2880.44	11734.6	623.659	1194.66	2506.22	555182	234041	71841.6	1.30051e+06	17550	12233.1	63807.2	4211.35	149354	915.876	517.143	14317.5	446.998	4356.6		1.43927e+06	1217.8	324.084
1975	45060.5	700.742	32458.8	75.9023	7567.77	112466	108461		314.848	304034	136563		2731.14	192319	6372.1	6304.74	80794.1	53686.7	5476.74	2792.47			582.938	784.78	11676.3	557324	3432.31	12111.7	608.636	1346.66	2478	563524	213621	60991.6	1.36355e+06	18256.3	12692.1	52158	3974.06	158509	987.892	435.541	14787.2	481.435	3506.18		1.44584e+06	1384.11	342.186
1976	49967.3	766.635	31391.5	76.8971	7818.53	135036	108489		287.909	316928	139917		3015.19	205448	6838.22	6362.79	91523.6	56779.6	7090.15	3121.16			545.525	990.063	12168	603285	2727.33	13306	663.459	1524	2458.89	596033	210603	63465.3	1.30768e+06	20515	12074.5	47051.4	4192.29	168651	985.339	440.945	15979	533.883	4402.32		1.52127e+06	1449.88	359.193
1977	51660.5	789.871	32863.5	76.4999	8156.31	170992	115876		321.76	321379	145612		3444.19	207103	7084.7	7066.72	98522.4	59793.9	7144.2	3058.51			590.907	916.111	12644.3	617499	2770.12	13171.3	709.474	1723.75	2586.95	612469	214215	69322.2	1.40256e+06	22013.1	13638.6	49160.7	4240.91	176841	1030.48	419.298	17850.4	557.476	5523.24		1.57432e+06	1264.09	358.786
1978	54833.2	906.767	29550	82.023	8501.09	167346	113831		325.56	336176	144919		3481.2	215356	6878.22	7769.74	101227	63106.8	8016.77	3939.43			613.046	933.812	12656	641877	2663.84	14468.4	765.333	1927.78	2642.45	637107	217320	74456.9	1614265	24126.3	17030	48255.1	4181.51	189846	1049.51	459.19	18714.6	635.492	6144.21		1.62475e+06	1325.51	402.888
1979	57708.8	1045.75	30551.4	88.7704	8729.45	204455	121297		398.945	347887	149722		3534.16	220391	7162.33	7874.65	107398	67796.5	6967.44	4512.21			643.196	916.995	13088.8	684854	2737.68	19474.6	803.477	2152.6	2590.25	664773	224135	80128.8	1.69456e+06	24388.6	17911.2	55169.6	4833.08	196735	1130.88	476.051	19464.5	734.138	6973.9		1.68969e+06	1316.19	340.486
1980	58014.7	1158.85	31178.5	90.3599	9260.68	322842	122182		324.038	360796	149389		3639.09	228897	7671.22	7908.83	107735	69228.7	8403.47	5636.07			711.412	699.802	13134.9	687080	2564.73	20006.2	800.382	2330.93	2400.73	674517	232879	84871.9	1.73079e+06	21669.9	19953.2	57488	4758.43	207269	1248.87	510.255	19463.4	806.614	7320.14		1.6975e+06	1365.89	364.408
1981	59142.4	1247.07	30805.7	93.6413	9632.57	310733	123074		348.506	376394	148456		3887.02	215931	9738.04	8468.41	110135	74765.3	7654.07	4645.75			667.07	702.982	13512	711346	2537.8	18998.8	948.363	2644.54	2811.52	694193	231542	89147.5	1.74758e+06	22778.4	22548.6	55202	3866.57	208585	1223.43	548.589	19295.2	871.166	7354.34		1.65687e+06	1383.36	417.501
1982	66768.1	1353.78	31218	94.9915	9687.84	286307	129375		375.495	368876	150490		3848.73	211064	7084.71	8501.69	110377	78017.3	6471.32	4934.54			697.018	715.15	13273	730613	2645.68	17907.6	1000.94	2860.14	2843.73	678507	231994	78338.1	1.87772e+06	23479.6	25696.9	56492.9	4350.61	210564	1328.65	596.764	18082.9	952.403	8037.5		1.63039e+06	1495.34	442.132
1983	71635.4	1482.41	31163.6	93.7371	10018.1	262076	140820		462.699	391281	154210		3945.35	207055	6976.86	8019.26	112764	82738.8	6780.76	5500.88			701.88	775.003	13177.5	716090	2782.86	17528.6	1130	3396.59	2690.38	703206	234492	76019.8	2.01927e+06	23925.5	29388.1	57911.8	7296.46	209927	1361.76	642.403	18408	1095.14	8490.45		1.63123e+06	1515.52	457.568
1984	77479.9	1601.07	33838.4	96.9374	10085	263888	149841		431.612	404926	153026		4024.71	206883	7381.58	7783.56	123460	84002.6	7329.38	6652.99			719.104	840.402	13689.9	740773	2878.29	17100.6	1147.66	4275.3	2884.96	749879	236620	78356.8	2.28315e+06	24622.2	33034.9	66242.7	8555.01	213512	1572.45	613.201	19775.8	1189.42	9479.24		1.63994e+06	1498.17	470.759
1985	85749	1879.26	35776	109.225	10212.9	248581	146998		388.446	420608	157509		4376.4	201763	8242.54	8355.86	129514	88902.6	4185.8	7608.55			767.591	726.542	14556.2	781453	2582.96	16928.1	1207.36	5002.49	3227.96	782137	243797	78833.8	2.59923e+06	27757.1	35038.6	63984.8	8714.47	214395	1605.08	636.49	20317.4	1108.59	9501.75		1.65219e+06	1450.6	450.425
1986	95356.7	1984.82	31471.4	133.069	10697.5	208218	161987		552.6	429661	164320		4627.17	212104	7283.28	9230.86	133312	90769.4	5332.27	7294.63			893.837	1169.25	14606.7	889045	3140.59	11981.6	1302.17	5379	3184.52	786099	255715	82323.4	2680800	28785.4	33998.5	60079.9	5809.36	227804	1795.17	728.238	22545	1201.89	9909.79		1.76694e+06	1459.38	492.78
1987	98064.4	2354.67	35511.8	142.326	10873.8	180626	171734		607.114	464407	170613		4644.06	221271	6768.03	9027.28	133954	98736.4	5733.4	8268.08			987.681	1861.67	15271	915525	3472.93	13114.8	1353.18	5864.08	2958.72	838529	258957	88219.3	2.81914e+06	28032.2	33640.4	58594.2	5784.25	229374	1799.94	756.105	22519.3	1386.69	10757.5		1.8326e+06	1495.43	527.115
1988	109356	2784.64	33438.1	151.909	10672.3	203610	183153		632.274	492095	182175		5037.68	238527	6986.55	9585.36	140098	102334	7070.37	8050.5			1065.03	1270.14	13735	923199	3648.79	11856.1	1428.89	6518.42	3119.5	879471	264832	96949.6	2997361	28706.4	32987.1	62968.7	5405.84	236961	1751.99	768.56	23158.6	1492.85	11379.9		1.93258e+06	1518.53	550.171
1989	111863	2835.81	35471.6	175.92	11567.5	235481	176769		677.936	508774	193097		4895.87	245841	6346.55	9675.19	156472	99857.1	7191.75	8403.52			1180.29	1332.78	14478.5	943240	3965.81	13206.6	1466.13	8315.36	3311.07	916149	278009	106137	2.99521e+06	31672.2	32023.2	64602.1	5497.77	242597	1663.11	814.677	24720.8	1665.79	12660.7		2.0241e+06	1450.04	547.44
1990	113853	3110.76	37988	221.496	11354.7	276105	199903	23834.2	699.202	507317	203458	72585.4	5186.32	252589	6598.59	9673.89	165010	98880.7	8276.57	7496.4	3936.63	136763	1288.62	1228.11	15430.9	923620	3782.74	14807.7	1504	8905.01	3266.68	916713	291500	108251	2.926e+06	29325.8	30936.8	50509.2	6391.18	253494	1611.37	776.006	25622.7	2167.12	13102.1	235157	2.16111e+06	1366.39	572.182
1991	127609	2809.17	33017	175.411	10167.3	256077	233581	21639.3	729.991	501759	215694	105537	5445.18	260084	6989.37	10333.8	171660	102724	8197.7	6829.51	4269.63	132458	1286.92	1395.42	16465.6	1.00701e+06	4119.07	12908.3	1552.48	9615.33	3207.61	886165	290980	116360	3.07815e+06	29958.1	29146.6	41150.4	6584.56	253153	1566.47	808.062	26289.4	2059.08	13212	198304	2307449	1357.09	568.149
1992	127907	4018.36	42753.7	219.927	9041.97	266765	276399	12519.5	694.477	534908	222626	76113.5	5314.69	271752	7156.03	10413	176197	104788	8723.62	7863.72	3389.22	120836	1226.99	1070.07	17325.2	1.03898e+06	3017.17	17817.3	1720.86	10183.9	3105.98	914977	291118	131699	3.36857e+06	31431.2	30058.8	53841.5	5671.37	267655	1628.96	849.647	28763.8	1961.32	13583.2	198276	2.36579e+06	1609.51	591.955
1993	129596	3900.73	35172.2	231.991	10469	215265	316010	11996.4	716.043	547497	226246	42272	4976.08	269716	7365.03	10824.8	180718	77478.1	9548.56	7077.7	4443.21	127194	1317.73	1092.58	18410	1.11802e+06	3204.09	16242.8	1614.8	10454.1	3035.94	922623	294833	139511	3.67316e+06	30968.1	30926.8	42064	5511.09	284546	1579.11	909.315	30744.3	2219.03	13465.2	199971	2.38608e+06	2072.83	601.649
1994	145215	4363.71	36822.8	240.098	11897.8	226226	368028	9321.52	806.589	570466	238086	33166.3	5060.63	281016	6900.55	9791.6	189256	76641.3	9852.92	7004.37	6141.63	83734	1443.85	1149.36	20023	1.25609e+06	5358.69	14851	1611.21	10815.3	3700.17	966037	303238	151614	3932516	30511	29735.7	30943.4	5292.59	299125	1447.55	1071.47	32417.6	2142.37	14328.8	210738	2.48564e+06	1452.01	590.573
1995	143503	4252.33	32026.2	235.707	12922.3	246747	412710	9693.26	751.982	596964	246853	20607.9	4639.66	288263	7652.8	11236.9	198531	80629.1	10061.9	6857.95	8815.14	80275.5	1559.88	1206.14	22416.2	1.45925e+06	5916.38	13838	1622.28	11716	3820.66	1.00731e+06	305797	172775	4310805	35083.3	32912.1	32198.5	5087.6	312182	1712.57	992.058	33771.1	2198.93	15231.6	217060	2559321	1766.37	629.342
1996	167404	3990.85	39732.6	225.852	14240.4	259840	531039	10589.2	804.164	625794	251125	19445	4307.91	285126	8045.03	12503.1	203890	76149.5	9579.71	8323.29	16942.1	82940	1357.15	1006.59	24927.8	1735859	6352.43	17598.3	1722.34	13237.3	3248.13	1.02712e+06	308437	179230	4.58998e+06	38009.1	34954.4	28766.5	5738.33	312702	1651.35	1189.65	33174.9	2216.19	15065.6	224107	2586794	1517.23	668.024
1997	155038	4193.39	40691.1	226.413	13343.1	276841	549191	11071.6	821.86	657848	266785	18134.3	4205.74	306847	8866.66	13613.7	203096	58517.9	11694.6	8231.54	21000.6	88797.9	1322.07	1626.07	25424.4	1.69677e+06	5913.99	15303.2	1973.04	14315.5	3402.73	1.07691e+06	324616	183434	4769033	38036.9	36324.7	29605.4	5443.98	318689	1711.3	1153.61	34659.1	2616.35	15564.6	218850	2.70243e+06	1666.92	613.213
1998	156128	4807.51	43199.8	268.796	14821.5	268252	548851	10115.5	576.522	684062	282405	18319.1	4634.31	323949	9292.73	14519.3	200702	69235	11237	9041.2	21812.6	87693.8	1356.19	1870.58	26133.8	1.63246e+06	6230.15	13687.3	2062.24	15006.4	3569.58	1.10892e+06	340305	182243	4.79125e+06	39143.3	38009.4	26837.7	4575.76	310948	1577.07	1312.76	38501.1	3083.74	15592	213332	2.8394e+06	1680.18	546.222
1999	149820	5244.01	42868.4	293.797	15896.9	291834	518102	11174.8	868.123	722422	293144	19634.4	4671.06	340208	10196.6	15790.2	194641	69242.8	13977.1	10249.7	24169.1	86954.6	1412.76	2115.1	26298.4	1.58556e+06	6195.22	16073.5	2391.91	16602.6	3539.96	1194051	351568	174954	5090989	38691.2	39710.8	27913.2	6141.03	295168	1595.89	1543.53	38814.4	3139.29	16844	213250	2957202	1795.42	552.237
2000	144336	4519.51	37817.1	273.918	15942.6	357051	514539	11371.4	1113.37	744585	309128	22342.1	4491.1	364391	11353.1	16332.1	201182	75373.4	19715.8	11088.1	23068.6	94981.7	1595.54	2359.61	26625.3	1.61459e+06	5975.3	19275.1	2487.4	17975.5	3657.74	1.27429e+06	357293	182183	5517329	38126.9	41318.9	25223.9	8971.41	304057	1547.84	1655.17	40297.9	3432.65	19038.2	220586	3026260	1805.58	610.631
2001	147612	4979.93	39914.7	270.368	16646.4	365178	484168	12032.2	901.431	768421	302952	25158.7	4570.44	365118	12194	16959.4	207362	77281.9	19424.2	10467.8	23743.9	92638	1556.35	2604.12	27842.1	1.61289e+06	5808.11	18230.5	2662.74	17985.3	3722.42	1.26567e+06	356670	181650	6.04216e+06	38267.2	42153.5	25224.1	8227.47	305290	1720.93	1737.79	42044.6	3431.82	19436.6	231908	3.07744e+06	1813.41	494.038
2002	146317	3924.57	46788.3	243.034	17106.9	372775	416046	13082.2	923.768	793477	310776	26823.7	4808.72	376775	13535.3	17770.9	218986	80570.1	18981.4	12565.9	24524.4	94347.9	1745.93	2848.64	29351.2	1.63004e+06	5796.32	19342.9	3098.68	21331.6	3734.04	1.27985e+06	360320	183400	6.65962e+06	37770.2	43786.6	26253	8763.03	311239	1770.19	1828.72	42550.6	3366.84	18905.9	229168	3.07367e+06	1778.25	482.342
2003	151853	4053.2	50810.6	286.561	17991.4	403820	448489	14889.5	1039.55	825010	315681	28214.7	5081.61	384173	14464.2	18678.8	225003	83615.2	23357.1	12061	24523.3	99476.8	1935.73	2848.64	30859.6	1.62493e+06	5453.46	21922.5	3425.54	20929	3568.39	1.32915e+06	363793	190325	7292070	41759.8	46424	28494.4	9135.62	321699	1764.97	1954.09	44016.2	3349.66	18433.2	239724	3.11804e+06	1948.71	503.762
2004	151338	4531.3	62210.6	326.715	18591.7	438193	489746	15876.4	841.757	855562	328548	30054.6	5370.25	393030	15496.3	19737.5	230185	87839.6	26296.9	11539.7	25112	107026	2022.71	2848.64	32890.5	1.7118e+06	5699.41	24706.6	4028.6	21941.6	3677.7	1.38929e+06	376796	211264	8149844	39515.3	47681.1	31464	11271.1	337619	1756.64	2134.36	46216.9	3235.14	18795.4	247737	3.2077e+06	2034.72	502.286
2005	149326	4559.96	82367.3	368.567	19931.9	505686	536324	17664.3	1160.15	912796	350025	46293.6	5368.89	413964	16429.3	21651.4	242147	96767.9	34898.3	12367.8	28251.3	112592	2057.55	2736.47	35446.4	1.79039e+06	5663.02	29409	4043.2	24929.5	3795.41	1.47505e+06	401114	235471	9151640	39194.8	49742.4	34629.8	15225.4	362732	2005.3	2142.19	48908.5	3611.8	20796.8	264352	3.32803e+06	2171.88	527.896
2006	162307	4704.29	107026	408.057	21642.2	589832	585043	20131.8	1364.95	931948	363750	67311.8	5595.05	416269	16847.1	22487.7	263244	103376	40090.9	11505.9	30890.1	126670	2234.59	2945.73	37482.9	1.95266e+06	5433.9	33668.4	4063.36	26021.4	3983.8	1.49487e+06	433362	275870	9971915	40940.6	51292.5	37729.1	16624.4	395723	1988.21	2287.42	50764.2	4069.36	21711.5	276696	3453487	2648.68	553.742
2007	171309	4543.62	119522	490.513	23265.1	637630	647640	22887.4	1756.42	954916	375681	91720.6	5736.66	426688	17952.5	22563.7	292450	112145	45166.6	12612.2	33543.1	139578	2300.59	3038.19	39813.9	2.17047e+06	5869.89	33080.9	4335.25	26927.2	4218.06	1.52206e+06	473979	296941	10874190	43142.1	53926.1	40223.2	13525	435136	1611.79	2646.28	54126.7	4276.56	23620.8	301574	3.63057e+06	2803.36	611.764
2008	191400	4608.04	145000	475.162	25638.4	690638	700604	24782.7	1773.64	1.00165e+06	379209	101474	6075.9	435307	18483.8	23116.6	326605	118710	61262.5	11759.1	35573.6	161563	2167.57	3874.46	44905.3	2.42131e+06	5339.53	35222.8	4805.64	27082.7	4343.05	1.57043e+06	495168	287520	11516746	45659.7	56957.5	39864.3	18349	477655	1736.08	2884.17	56655	4163.46	25081.5	309210	3.63669e+06	3125.95	686.85
2009	210945	4148.98	115162	356.854	27827	589839	669053	23117.1	1738.83	1.01032e+06	372226	106110	6172.02	444295	18595.9	23156.6	353220	116702	52939.5	12103.4	36241.4	158884	2141.76	4015.82	47127.4	2519892	4867.85	27653.4	5243.38	25388.8	4673.67	1.43773e+06	492925	295534	12460865	50381.8	57218.5	40940.1	15366.7	487635	1772.04	3013.31	60991.9	3844.5	26025.4	306901	3.46608e+06	2653.44	623.749
2010	223078	3775.29	153241	335.113	30864.4	596480	768478	25331.4	1721.56	1.09791e+06	379240	125899	6555.86	469020	19150.6	25277.4	401207	120376	57575.8	11493.3	36874.1	174417	2364.47	4351.34	52044.7	2920199	4617.71	29383.1	6076.53	28091.1	4892.48	1.52026e+06	505388	339607	14093089	57398.1	59450	45815.8	23256	534431	1718.73	3197.14	61792.9	3481.44	26271.7	307695	3.61295e+06	2294.74	692.68
2011	248554	3779.25	199033	325.927	31103.8	702652	868765	27900.1	1790.7	1.16243e+06	390618	163603	7184.73	456544	20475	26437.3	462460	118724	60624	11803.8	37767.8	196152	2517.32	4463.91	58866.6	3266644	4156.71	37782.8	6293.45	30998.5	4992.82	1608678	550140	375560	15149280	61031.7	63415	49814.5	29486.4	599757	1915.51	3466.16	65146.8	3524.25	25795.9	313085	3.76447e+06	2971.54	655.018
2012	254962	3658.76	221672	295.869	31867	740764	882439	32366.1	1781.44	1.15187e+06	397384	173004	7358.64	459694	23050.5	28609.3	479085	121002	72460.8	12599.7	38231.9	186956	2495.71	3541.82	65050.4	3.25112e+06	3824.79	39496.6	6646.34	29245.1	5477.18	1.60934e+06	570088	397503	16314193	71601.4	67465.1	52962.1	31664.2	619334	2101.37	3339.99	68363.7	3393.02	26249.2	311801	3734986	3214.45	694.157
2013	256110	4376.83	228185	263.166	30496.8	727748	885113	32282.1	1623.72	1.19764e+06	392753	157670	8171.55	460706	25575.1	29972.7	503646	115790	71635.9	11051.8	38154.5	183506	2336.45	3202.06	72011.1	3.27202e+06	3595.66	37116.2	6065.29	29674.9	3620.29	1.66233e+06	562271	409340	16716764	80165.7	70340.7	58419.6	29418.3	629133	2183.39	3211.36	67955.3	3406.13	23751.9	309189	3.7431e+06	3288.05	685.459
2014	244631	3819.87	243642	253.699	31698.9	762556	864304	30983.4	811.069	1.19718e+06	410363	173664	8592.77	458586	28954.4	29740	537657	119489	69537.6	12125.2	38326.1	186122	2400.96	3201.78	75865.2	3.26441e+06	3601.36	34049	6280.19	32722	3486.32	1.72392e+06	572521	414932	17440318	91759.3	74465.7	65085.9	28522.9	649882	2248.38	3186.85	71974.2	3527.84	22204.6	323371	3.85341e+06	3489.52	720.353
2015	262846	3963.46	224334	240.854	33465.5	697860	904271	32382.5	1507.43	1160150	428540	139453	8605.07	482211	32397.9	30926.8	583865	126401	66299.1	11533.7	40074.4	184775	2349.56	3078.53	79589.8	3.0686e+06	3577.63	28222.2	7075.93	31862.5	3893.54	1.68211e+06	595405	415056	18058634	105591	78205.2	71937.2	22507.7	651871	2308.16	3388.22	78430	3973.43	23731.8	344465	3920028	4308.78	709.61
2016	264057	3387.83	214634	228.379	33650.6	666253	902697	33158.4	1527.75	1240311	437948	132069	8992.67	501003	34327.7	34301.6	607812	133703	66525.9	11711.1	41590.6	175431	2332.03	3068.92	83540.8	2918882	3615.73	25732.2	7731.17	33644	4115.97	1.70189e+06	611732	410438	18619490	108116	83063.3	83444	19394.3	648851	2450.14	3562.53	84274.8	3429.7	26273.8	356663	4.06641e+06	4317.71	771.355
2017	270102	3062.58	230151	195.635	34974.9	629800	1.02251e+06	38221.7	1367.49	1.29158e+06	458232	138734	8945.59	515604	34319.4	36842.7	656739	139065	73566.2	12216.8	42397.5	191910	2329.45	3178.48	91522.5	2.96883e+06	3378.03	27329.1	8342.89	35740.5	4265.27	1.7963e+06	622558	422309	19687162	111163	86504.8	81936.2	20824.4	656701	2552.9	3703.39	89731.8	4269.59	26716	378600	4.23652e+06	4091.95	722.859
2018	279464	3466.73	233298	154.141	35406.6	630553	1.02224e+06	40192.4	1568.3	1.35034e+06	470542	154556	9048.21	510223	35864.9	40638.7	712720	144051	77392.2	12512.9	44127.1	200776	2238.64	3144.66	96407.1	3.04395e+06	3467.41	29993.8	8637.46	36430.3	4444.06	1.83488e+06	633633	436824	19634244	120859	90957.3	84815.5	25870.4	684662	2656.9	3729.89	91243.8	3993.44	26989.1	391277	4256178	5806.93	709.781
2019	289744	3466.24	223289	241.385	36288.3	635333	978559	43795.7	1631.65	1.35514e+06	478329	157517	9166.32	523689	38398	43177.3	757205	150325	77180.3	12962.3	45816.3	205916	2218.95	3188.01	98644.5	3.07972e+06	3577.58	31061.2	8979.65	38095.6	4653.58	1862070	644662	441291	20118076	129437	94377.7	88514.1	24495.8	706174	2746.73	4044.04	93967.2	4036.46	28377	401744	4.27417e+06	6095.72	753.608
[truncated: 134 more columns]
