# Supplementary material for: The Social Cost of Fossil and Industrial CO2 Emissions from 1950 to 2018
Source: Research Square preprint supplement (doi:10.21203/rs.3.rs-2244259/v1), 2022-11-17
Supplement: Supplementary file 50 [file check_entries.xlsx]

## Sheet: Tabelle1
output	MAR	ABW	AGO	AIA	ALB	ARE	ARG	ARM	ATG	AUS	AUT	AZE	BDI	BEL	BEN	BFA	BGD	BGR	BHR	BHS	BIH	BLR	BLZ	BMU	BOL	BRA	BRB	BRN	BTN	BWA	CAF	CAN	CHE	CHL	CHN	CIV	CMR	COD	COG	COL	COM	CPV	CRI	CYM	CYP	CZE	DEU	DJI	DMA
p_output	MAR	ABW	AGO	AIA	ALB	ARE	ARG	ARM	ATG	AUS	AUT	AZE	BDI	BEL	BEN	BFA	BGD	BGR	BHR	BHS	BIH	BLR	BLZ	BMU	BOL	BRA	BRB	BRN	BTN	BWA	CAF	CAN	CHE	CHL	CHN	CIV	CMR	COD	COG	COL	COM	CPV	CRI	CYM	CYP	CZE	DEU	DJI	DMA
capital	MAR	ABW	AGO	AIA	ALB	ARE	ARG	ARM	ATG	AUS	AUT	AZE	BDI	BEL	BEN	BFA	BGD	BGR	BHR	BHS	BIH	BLR	BLZ	BMU	BOL	BRA	BRB	BRN	BTN	BWA	CAF	CAN	CHE	CHL	CHN	CIV	CMR	COD	COG	COL	COM	CPV	CRI	CYM	CYP	CZE	DEU	DJI	DMA
p_capital	MAR	ABW	AGO	AIA	ALB	ARE	ARG	ARM	ATG	AUS	AUT	AZE	BDI	BEL	BEN	BFA	BGD	BGR	BHR	BHS	BIH	BLR	BLZ	BMU	BOL	BRA	BRB	BRN	BTN	BWA	CAF	CAN	CHE	CHL	CHN	CIV	CMR	COD	COG	COL	COM	CPV	CRI	CYM	CYP	CZE	DEU	DJI	DMA
rgdpo	MAR	ABW	AGO	AIA	ALB	ARE	ARG	ARM	ATG	AUS	AUT	AZE	BDI	BEL	BEN	BFA	BGD	BGR	BHR	BHS	BIH	BLR	BLZ	BMU	BOL	BRA	BRB	BRN	BTN	BWA	CAF	CAN	CHE	CHL	CHN	CIV	CMR	COD	COG	COL	COM	CPV	CRI	CUW	CYM	CYP	CZE	DEU	DJI
rgdpo.csv	MAR	ABW	AGO	AIA	ALB	ARE	ARG	ARM	ATG	AUS	AUT	AZE	BDI	BEL	BEN	BFA	BGD	BGR	BHR	BHS	BIH	BLR	BLZ	BMU	BOL	BRA	BRB	BRN	BTN	BWA	CAF	CAN	CHE	CHL	CHN	CIV	CMR	COD	COG	COL	COM	CPV	CRI	CYM	CYP	CZE	DEU	DJI	DMA
csh_i	MAR	ABW	AGO	AIA	ALB	ARE	ARG	ARM	ATG	AUS	AUT	AZE	BDI	BEL	BEN	BFA	BGD	BGR	BHR	BHS	BIH	BLR	BLZ	BMU	BOL	BRA	BRB	BRN	BTN	BWA	CAF	CAN	CHE	CHL	CHN	CIV	CMR	COD	COG	COL	COM	CPV	CRI	CUW	CYM	CYP	CZE	DEU	DJI
csh_i.csv	MAR	ABW	AGO	AIA	ALB	ARE	ARG	ARM	ATG	AUS	AUT	AZE	BDI	BEL	BEN	BFA	BGD	BGR	BHR	BHS	BIH	BLR	BLZ	BMU	BOL	BRA	BRB	BRN	BTN	BWA	CAF	CAN	CHE	CHL	CHN	CIV	CMR	COD	COG	COL	COM	CPV	CRI	CYM	CYP	CZE	DEU	DJI	DMA
pl_i	MAR	ABW	AGO	AIA	ALB	ARE	ARG	ARM	ATG	AUS	AUT	AZE	BDI	BEL	BEN	BFA	BGD	BGR	BHR	BHS	BIH	BLR	BLZ	BMU	BOL	BRA	BRB	BRN	BTN	BWA	CAF	CAN	CHE	CHL	CHN	CIV	CMR	COD	COG	COL	COM	CPV	CRI	CUW	CYM	CYP	CZE	DEU	DJI
pl_i_csv	MAR	ABW	AGO	AIA	ALB	ARE	ARG	ARM	ATG	AUS	AUT	AZE	BDI	BEL	BEN	BFA	BGD	BGR	BHR	BHS	BIH	BLR	BLZ	BMU	BOL	BRA	BRB	BRN	BTN	BWA	CAF	CAN	CHE	CHL	CHN	CIV	CMR	COD	COG	COL	COM	CPV	CRI	CYM	CYP	CZE	DEU	DJI	DMA
q_gdp	MAR	ABW	AGO	AIA	ALB	ARE	ARG	ARM	ATG	AUS	AUT	AZE	BDI	BEL	BEN	BFA	BGD	BGR	BHR	BHS	BIH	BLR	BLZ	BMU	BOL	BRA	BRB	BRN	BTN	BWA	CAF	CAN	CHE	CHL	CHN	CIV	CMR	COD	COG	COL	COM	CPV	CRI	CYM	CYP	CZE	DEU	DJI	DMA
	MAR	ABW	AGO	AIA	ALB	ARE	ARG	ARM	ATG	AUS	AUT	AZE	BDI	BEL	BEN	BFA	BGD	BGR	BHR	BHS	BIH	BLR	BLZ	BMU	BOL	BRA	BRB	BRN	BTN	BWA	CAF	CAN	CHE	CHL	CHN	CIV	CMR	COD	COG	COK	COM	CPV	CRI	CYM	CYP	CZE	DEU	DJI	DMA
[truncated: 134 more columns]
