# Supplementary material for: The Social Cost of Fossil and Industrial CO2 Emissions from 1950 to 2018
Source: Research Square preprint supplement (doi:10.21203/rs.3.rs-2244259/v1), 2022-11-17
Supplement: Supplementary file 51 [file cn_Transposed.xlsx]

## Sheet: capital_stock_PPP
VariableCode	RegionCode	YearCode	AggValue
cn	ABW	1970	1313.09
cn	ABW	1971	1440.54
cn	ABW	1972	1580.74
cn	ABW	1973	1732.01
cn	ABW	1974	1902.45
cn	ABW	1975	2084.92
cn	ABW	1976	2278.65
cn	ABW	1977	2494.07
cn	ABW	1978	2724.65
cn	ABW	1979	2983.34
cn	ABW	1980	3263.03
cn	ABW	1981	3584.27
cn	ABW	1982	3928.57
cn	ABW	1983	4278.74
cn	ABW	1984	4671.88
cn	ABW	1985	5117.11
cn	ABW	1986	5592.88
cn	ABW	1987	6155.54
cn	ABW	1988	6851.08
cn	ABW	1989	7645.86
cn	ABW	1990	8407.94
cn	ABW	1991	9223.22
cn	ABW	1992	10109.3
cn	ABW	1993	11047.2
cn	ABW	1994	12078.3
cn	ABW	1995	13159.7
cn	ABW	1996	14112.4
cn	ABW	1997	15278.2
cn	ABW	1998	16680.5
cn	ABW	1999	17997.3
cn	ABW	2000	18856.4
cn	ABW	2001	19783.6
cn	ABW	2002	20915.6
cn	ABW	2003	22329.8
cn	ABW	2004	23898.2
cn	ABW	2005	25921.6
cn	ABW	2006	28037.5
cn	ABW	2007	30025.5
cn	ABW	2008	32061.7
cn	ABW	2009	33504
cn	ABW	2010	34614.2
cn	ABW	2011	35535
cn	ABW	2012	32822.9
cn	ABW	2013	28567.6
cn	ABW	2014	26377.2
cn	ABW	2015	23630
cn	ABW	2016	20386.9
cn	ABW	2017	18128.2
cn	ABW	2018	18285
cn	ABW	2019	18458.1
cn	AGO	1970	117665
cn	AGO	1971	124876
cn	AGO	1972	131892
cn	AGO	1973	139472
cn	AGO	1974	147592
cn	AGO	1975	154500
cn	AGO	1976	160159
cn	AGO	1977	166378
cn	AGO	1978	171251
cn	AGO	1979	176410
cn	AGO	1980	180757
cn	AGO	1981	186040
cn	AGO	1982	192321
cn	AGO	1983	195526
cn	AGO	1984	199769
cn	AGO	1985	202318
cn	AGO	1986	203324
cn	AGO	1987	205179
cn	AGO	1988	205934
cn	AGO	1989	205977
cn	AGO	1990	205150
cn	AGO	1991	211975
cn	AGO	1992	228046
cn	AGO	1993	238813
cn	AGO	1994	248751
cn	AGO	1995	262873
cn	AGO	1996	286898
cn	AGO	1997	301460
cn	AGO	1998	325978
cn	AGO	1999	342109
cn	AGO	2000	343558
cn	AGO	2001	345280
cn	AGO	2002	348802
cn	AGO	2003	356889
cn	AGO	2004	368676
cn	AGO	2005	383939
cn	AGO	2006	413600
cn	AGO	2007	475124
cn	AGO	2008	581049
cn	AGO	2009	731489
cn	AGO	2010	906813
cn	AGO	2011	1046118
cn	AGO	2012	1.10774e+06
cn	AGO	2013	1.10382e+06
cn	AGO	2014	1.21978e+06
cn	AGO	2015	1.2041e+06
cn	AGO	2016	1.14959e+06
cn	AGO	2017	1.35166e+06
cn	AGO	2018	1.36082e+06
cn	AGO	2019	1.37132e+06
cn	AIA	1970	377.788
cn	AIA	1971	409.141
cn	AIA	1972	445.272
cn	AIA	1973	482.341
cn	AIA	1974	519.497
cn	AIA	1975	556.336
cn	AIA	1976	592.39
cn	AIA	1977	629.318
cn	AIA	1978	668.539
cn	AIA	1979	713.735
cn	AIA	1980	759.033
cn	AIA	1981	810.066
cn	AIA	1982	859.592
cn	AIA	1983	899.639
cn	AIA	1984	938.996
cn	AIA	1985	985.318
cn	AIA	1986	1059.72
cn	AIA	1987	1152.94
cn	AIA	1988	1218.35
cn	AIA	1989	1298.61
cn	AIA	1990	1395.84
cn	AIA	1991	1447.73
cn	AIA	1992	1531.17
cn	AIA	1993	1593.2
cn	AIA	1994	1659.42
cn	AIA	1995	1730.01
cn	AIA	1996	1803.9
cn	AIA	1997	1874.59
cn	AIA	1998	2000.18
cn	AIA	1999	2174.02
cn	AIA	2000	2330.96
cn	AIA	2001	2437.19
cn	AIA	2002	2495.15
cn	AIA	2003	2567.63
cn	AIA	2004	2702.89
cn	AIA	2005	2890.05
cn	AIA	2006	3147.7
cn	AIA	2007	3543.59
cn	AIA	2008	3978.47
cn	AIA	2009	4073.15
cn	AIA	2010	4100.59
cn	AIA	2011	4075.67
cn	AIA	2012	3655.84
cn	AIA	2013	3300.05
cn	AIA	2014	3035.81
cn	AIA	2015	2850.43
cn	AIA	2016	2621.86
cn	AIA	2017	2237.24
cn	AIA	2018	2370.39
cn	AIA	2019	2385.74
cn	ALB	1970	24195.7
cn	ALB	1971	25478.5
cn	ALB	1972	26842
cn	ALB	1973	28242.5
cn	ALB	1974	29784.9
cn	ALB	1975	31313.8
cn	ALB	1976	32858.2
cn	ALB	1977	34542.1
cn	ALB	1978	36206.1
cn	ALB	1979	38115.3
cn	ALB	1980	39936
cn	ALB	1981	42014.7
cn	ALB	1982	44387.8
cn	ALB	1983	46400.1
cn	ALB	1984	48571.4
cn	ALB	1985	50552.8
cn	ALB	1986	52593.1
cn	ALB	1987	54594.5
cn	ALB	1988	56584.9
cn	ALB	1989	58894.5
cn	ALB	1990	61056.9
cn	ALB	1991	59704.4
cn	ALB	1992	58528.2
cn	ALB	1993	58332.2
cn	ALB	1994	58954.9
cn	ALB	1995	59727.9
cn	ALB	1996	60936
cn	ALB	1997	61219.6
cn	ALB	1998	62256.1
cn	ALB	1999	62443
cn	ALB	2000	64886.5
cn	ALB	2001	67135.8
cn	ALB	2002	69969.5
cn	ALB	2003	73819.3
cn	ALB	2004	78298.5
cn	ALB	2005	83766.8
cn	ALB	2006	108180
cn	ALB	2007	118847
cn	ALB	2008	132815
cn	ALB	2009	147523
cn	ALB	2010	163120
cn	ALB	2011	173394
cn	ALB	2012	163361
cn	ALB	2013	170891
cn	ALB	2014	211204
cn	ALB	2015	209133
cn	ALB	2016	219219
cn	ALB	2017	217176
cn	ALB	2018	224225
cn	ALB	2019	229818
cn	ARE	1970	292894
cn	ARE	1971	305164
cn	ARE	1972	323810
cn	ARE	1973	336189
cn	ARE	1974	345186
cn	ARE	1975	381531
cn	ARE	1976	425213
cn	ARE	1977	488763
cn	ARE	1978	563040
cn	ARE	1979	637316
cn	ARE	1980	706334
cn	ARE	1981	772732
cn	ARE	1982	835798
cn	ARE	1983	893719
cn	ARE	1984	950096
cn	ARE	1985	995126
cn	ARE	1986	1.03599e+06
cn	ARE	1987	1065331
cn	ARE	1988	1.0962e+06
cn	ARE	1989	1.13094e+06
cn	ARE	1990	1.16344e+06
cn	ARE	1991	1.19771e+06
cn	ARE	1992	1.2467e+06
cn	ARE	1993	1.26919e+06
cn	ARE	1994	1.30025e+06
cn	ARE	1995	1.33523e+06
cn	ARE	1996	1373823
cn	ARE	1997	1.41847e+06
cn	ARE	1998	1.46851e+06
cn	ARE	1999	1.51608e+06
cn	ARE	2000	1.56304e+06
cn	ARE	2001	1.61437e+06
cn	ARE	2002	1.67189e+06
cn	ARE	2003	1.74185e+06
cn	ARE	2004	1.81587e+06
cn	ARE	2005	1.90951e+06
cn	ARE	2006	2.01416e+06
cn	ARE	2007	2.17495e+06
cn	ARE	2008	2.33229e+06
cn	ARE	2009	2.49389e+06
cn	ARE	2010	2619715
cn	ARE	2011	2.7415e+06
cn	ARE	2012	2.61214e+06
cn	ARE	2013	2.56419e+06
cn	ARE	2014	3.56726e+06
cn	ARE	2015	4.08871e+06
cn	ARE	2016	4.157e+06
cn	ARE	2017	4.28727e+06
cn	ARE	2018	4.39641e+06
cn	ARE	2019	4.51036e+06
cn	ARG	1950	59449.4
cn	ARG	1951	65330.9
cn	ARG	1952	69985.6
cn	ARG	1953	74549.8
cn	ARG	1954	78962.3
cn	ARG	1955	83983.2
cn	ARG	1956	88196
cn	ARG	1957	91419.4
cn	ARG	1958	96986
cn	ARG	1959	100411
cn	ARG	1960	107963
cn	ARG	1961	116128
cn	ARG	1962	122320
cn	ARG	1963	126200
cn	ARG	1964	132450
cn	ARG	1965	138598
cn	ARG	1966	144098
cn	ARG	1967	149583
cn	ARG	1968	155984
cn	ARG	1969	165282
cn	ARG	1970	175525
cn	ARG	1971	186537
cn	ARG	1972	196171
cn	ARG	1973	204491
cn	ARG	1974	213877
cn	ARG	1975	222503
cn	ARG	1976	229548
cn	ARG	1977	242400
cn	ARG	1978	251840
cn	ARG	1979	264545
cn	ARG	1980	277379
cn	ARG	1981	288232
cn	ARG	1982	300059
cn	ARG	1983	315382
cn	ARG	1984	336801
cn	ARG	1985	363684
cn	ARG	1986	400195
cn	ARG	1987	450025
cn	ARG	1988	514489
cn	ARG	1989	593163
cn	ARG	1990	688642
cn	ARG	1991	820001
cn	ARG	1992	1.0055e+06
cn	ARG	1993	1.24633e+06
cn	ARG	1994	1.52954e+06
cn	ARG	1995	1.78551e+06
cn	ARG	1996	1.9279e+06
cn	ARG	1997	1.98009e+06
cn	ARG	1998	2011836
cn	ARG	1999	1.99868e+06
cn	ARG	2000	1.95892e+06
cn	ARG	2001	1.9089e+06
cn	ARG	2002	1.80463e+06
cn	ARG	2003	1.78405e+06
cn	ARG	2004	1.79772e+06
cn	ARG	2005	1847660
cn	ARG	2006	1.9436e+06
cn	ARG	2007	2.12292e+06
cn	ARG	2008	2.3769e+06
cn	ARG	2009	2.614e+06
cn	ARG	2010	2.87621e+06
cn	ARG	2011	3.09923e+06
cn	ARG	2012	3.15603e+06
cn	ARG	2013	3.1666e+06
cn	ARG	2014	3.20458e+06
cn	ARG	2015	3.23496e+06
cn	ARG	2016	3.18368e+06
cn	ARG	2017	3.31664e+06
cn	ARG	2018	3.36109e+06
cn	ARG	2019	3.37482e+06
cn	ARM	1990	58440.3
cn	ARM	1991	60260
cn	ARM	1992	59635.8
cn	ARM	1993	58694.6
cn	ARM	1994	58529
cn	ARM	1995	58139.2
cn	ARM	1996	57963.2
cn	ARM	1997	57377.8
cn	ARM	1998	56175.7
cn	ARM	1999	54096.9
cn	ARM	2000	51764.7
cn	ARM	2001	49574
cn	ARM	2002	48076.3
cn	ARM	2003	47382.8
cn	ARM	2004	47319.3
cn	ARM	2005	48414
cn	ARM	2006	50119.4
cn	ARM	2007	51722.7
cn	ARM	2008	53598.3
cn	ARM	2009	53848.5
cn	ARM	2010	54532.5
cn	ARM	2011	55731.4
cn	ARM	2012	61172
cn	ARM	2013	66889.4
cn	ARM	2014	94606.4
cn	ARM	2015	80520.2
cn	ARM	2016	87297.3
cn	ARM	2017	95323.9
cn	ARM	2018	97055.1
cn	ARM	2019	98945.9
cn	ATG	1970	683.2
cn	ATG	1971	700.214
cn	ATG	1972	716.509
cn	ATG	1973	729.03
cn	ATG	1974	746.876
cn	ATG	1975	763.99
cn	ATG	1976	773.088
cn	ATG	1977	762.255
cn	ATG	1978	751.33
cn	ATG	1979	778.038
cn	ATG	1980	795.16
cn	ATG	1981	820.996
cn	ATG	1982	821.179
cn	ATG	1983	815.627
cn	ATG	1984	823.379
cn	ATG	1985	841.741
cn	ATG	1986	876.283
cn	ATG	1987	932.044
cn	ATG	1988	998.7
cn	ATG	1989	1074.61
cn	ATG	1990	1138.7
cn	ATG	1991	1198.19
cn	ATG	1992	1247.68
cn	ATG	1993	1288.42
cn	ATG	1994	1331.74
cn	ATG	1995	1386.86
cn	ATG	1996	1453.81
cn	ATG	1997	1526.63
cn	ATG	1998	1639.6
cn	ATG	1999	1803.8
cn	ATG	2000	2014.59
cn	ATG	2001	2176.9
cn	ATG	2002	2406.19
cn	ATG	2003	2712.43
cn	ATG	2004	3138.09
cn	ATG	2005	3794.27
cn	ATG	2006	4862.89
cn	ATG	2007	6320.83
cn	ATG	2008	8258.07
cn	ATG	2009	10563.5
cn	ATG	2010	12565.8
cn	ATG	2011	13455.8
cn	ATG	2012	12685.4
cn	ATG	2013	11986.8
cn	ATG	2014	11352.9
cn	ATG	2015	10892.7
cn	ATG	2016	10399.9
cn	ATG	2017	9718.63
cn	ATG	2018	10382.6
cn	ATG	2019	10975.7
cn	AUS	1950	488582
cn	AUS	1951	525234
cn	AUS	1952	536687
cn	AUS	1953	557550
cn	AUS	1954	586375
cn	AUS	1955	615938
cn	AUS	1956	637357
cn	AUS	1957	658735
cn	AUS	1958	687579
cn	AUS	1959	718960
cn	AUS	1960	744406
cn	AUS	1961	760937
cn	AUS	1962	788224
cn	AUS	1963	821049
cn	AUS	1964	863141
cn	AUS	1965	896798
cn	AUS	1966	931356
cn	AUS	1967	970226
cn	AUS	1968	1.01257e+06
cn	AUS	1969	1064786
cn	AUS	1970	1116206
cn	AUS	1971	1.16189e+06
cn	AUS	1972	1.20834e+06
cn	AUS	1973	1.25567e+06
cn	AUS	1974	1.28488e+06
cn	AUS	1975	1.31205e+06
cn	AUS	1976	1.3468e+06
cn	AUS	1977	1.38554e+06
cn	AUS	1978	1431094
cn	AUS	1979	1.48459e+06
cn	AUS	1980	1.53587e+06
cn	AUS	1981	1.60221e+06
cn	AUS	1982	1.64804e+06
cn	AUS	1983	1.68957e+06
cn	AUS	1984	1742347
cn	AUS	1985	1.79577e+06
cn	AUS	1986	1849092
cn	AUS	1987	1.92307e+06
cn	AUS	1988	2.02591e+06
cn	AUS	1989	2.14152e+06
cn	AUS	1990	2.24738e+06
cn	AUS	1991	2.3683e+06
cn	AUS	1992	2.51518e+06
cn	AUS	1993	2.68093e+06
cn	AUS	1994	2.86222e+06
cn	AUS	1995	3020165
cn	AUS	1996	3139764
cn	AUS	1997	3.23654e+06
cn	AUS	1998	3337077
cn	AUS	1999	3.4432e+06
cn	AUS	2000	3.388e+06
cn	AUS	2001	3346541
cn	AUS	2002	3318803
cn	AUS	2003	3.45722e+06
cn	AUS	2004	3.61336e+06
cn	AUS	2005	3796032
cn	AUS	2006	3.90456e+06
cn	AUS	2007	4.0112e+06
cn	AUS	2008	4.10328e+06
cn	AUS	2009	4165241
cn	AUS	2010	4241993
cn	AUS	2011	4348664
cn	AUS	2012	4862428
cn	AUS	2013	5.40277e+06
cn	AUS	2014	6.0041e+06
cn	AUS	2015	5.89791e+06
cn	AUS	2016	6.00613e+06
cn	AUS	2017	5.69332e+06
cn	AUS	2018	5.79548e+06
cn	AUS	2019	5899094
cn	AUT	1950	124694
cn	AUT	1951	131126
cn	AUT	1952	134162
cn	AUT	1953	134721
cn	AUT	1954	137733
cn	AUT	1955	144769
cn	AUT	1956	150144
cn	AUT	1957	155975
cn	AUT	1958	161176
cn	AUT	1959	166653
cn	AUT	1960	176052
cn	AUT	1961	185865
cn	AUT	1962	194056
cn	AUT	1963	201936
cn	AUT	1964	213113
cn	AUT	1965	222431
cn	AUT	1966	235491
cn	AUT	1967	247181
cn	AUT	1968	258694
cn	AUT	1969	272342
cn	AUT	1970	289522
cn	AUT	1971	310010
cn	AUT	1972	331518
cn	AUT	1973	353166
cn	AUT	1974	373989
cn	AUT	1975	392269
cn	AUT	1976	409228
cn	AUT	1977	426834
cn	AUT	1978	439898
cn	AUT	1979	456839
cn	AUT	1980	476009
cn	AUT	1981	508275
cn	AUT	1982	554123
cn	AUT	1983	613217
cn	AUT	1984	680576
cn	AUT	1985	734954
cn	AUT	1986	771044
cn	AUT	1987	813302
cn	AUT	1988	865317
cn	AUT	1989	925881
cn	AUT	1990	992590
cn	AUT	1991	1067434
cn	AUT	1992	1140226
cn	AUT	1993	1.20646e+06
cn	AUT	1994	1.26628e+06
cn	AUT	1995	1308685
cn	AUT	1996	1335529
cn	AUT	1997	1.32489e+06
cn	AUT	1998	1.31404e+06
cn	AUT	1999	1.29563e+06
cn	AUT	2000	1.28177e+06
cn	AUT	2001	1.24843e+06
cn	AUT	2002	1.20451e+06
cn	AUT	2003	1.23256e+06
cn	AUT	2004	1267787
cn	AUT	2005	1.30356e+06
cn	AUT	2006	1.42307e+06
cn	AUT	2007	1.52761e+06
cn	AUT	2008	1.68093e+06
cn	AUT	2009	1866903
cn	AUT	2010	1.97496e+06
cn	AUT	2011	2.108e+06
cn	AUT	2012	2.36632e+06
cn	AUT	2013	2448908
cn	AUT	2014	2.55044e+06
cn	AUT	2015	2.69699e+06
cn	AUT	2016	2.79734e+06
cn	AUT	2017	2.80226e+06
cn	AUT	2018	2835065
cn	AUT	2019	2.87546e+06
cn	AZE	1990	111656
cn	AZE	1991	110437
cn	AZE	1992	111840
cn	AZE	1993	112248
cn	AZE	1994	112705
cn	AZE	1995	111123
cn	AZE	1996	111772
cn	AZE	1997	113940
cn	AZE	1998	117199
cn	AZE	1999	119307
cn	AZE	2000	120376
cn	AZE	2001	122492
cn	AZE	2002	126434
cn	AZE	2003	133085
cn	AZE	2004	139187
cn	AZE	2005	145437
cn	AZE	2006	145676
cn	AZE	2007	136571
cn	AZE	2008	129617
cn	AZE	2009	123719
cn	AZE	2010	122582
cn	AZE	2011	131371
cn	AZE	2012	150966
cn	AZE	2013	158834
cn	AZE	2014	223600
cn	AZE	2015	211148
cn	AZE	2016	226274
cn	AZE	2017	253676
cn	AZE	2018	263343
cn	AZE	2019	273639
cn	BDI	1960	5961.86
cn	BDI	1961	5860.96
cn	BDI	1962	5811.22
cn	BDI	1963	5734.49
cn	BDI	1964	5654.89
cn	BDI	1965	5589.01
cn	BDI	1966	5570.95
cn	BDI	1967	5564.77
cn	BDI	1968	5592.73
cn	BDI	1969	5622.85
cn	BDI	1970	5587.79
cn	BDI	1971	5687.39
cn	BDI	1972	5603.1
cn	BDI	1973	5606.94
cn	BDI	1974	5740.17
cn	BDI	1975	5780.41
cn	BDI	1976	5912.58
cn	BDI	1977	6211.8
cn	BDI	1978	6564.95
cn	BDI	1979	6950.44
cn	BDI	1980	7289.99
cn	BDI	1981	7765.29
cn	BDI	1982	8234.66
cn	BDI	1983	8729.03
cn	BDI	1984	9289.73
cn	BDI	1985	9790.79
cn	BDI	1986	10280.3
cn	BDI	1987	10721.6
cn	BDI	1988	10883.7
cn	BDI	1989	11110.6
cn	BDI	1990	11077.4
cn	BDI	1991	10978.9
cn	BDI	1992	10993.1
cn	BDI	1993	11089.4
cn	BDI	1994	11001.1
cn	BDI	1995	10889.9
cn	BDI	1996	10873.5
cn	BDI	1997	10877.1
cn	BDI	1998	10953.5
cn	BDI	1999	11386.3
cn	BDI	2000	11405.5
cn	BDI	2001	11534.1
cn	BDI	2002	11698.9
cn	BDI	2003	12211.4
cn	BDI	2004	12891.7
cn	BDI	2005	13416.5
cn	BDI	2006	13718.3
cn	BDI	2007	13726.4
cn	BDI	2008	13707.2
cn	BDI	2009	13892.5
cn	BDI	2010	14188.5
cn	BDI	2011	14417.9
cn	BDI	2012	13180.7
cn	BDI	2013	12689.8
cn	BDI	2014	13674
cn	BDI	2015	14103.9
cn	BDI	2016	16072
cn	BDI	2017	17445.5
cn	BDI	2018	18111.2
cn	BDI	2019	18806.6
cn	BEL	1950	388744
cn	BEL	1951	396413
cn	BEL	1952	404938
cn	BEL	1953	413282
cn	BEL	1954	424546
cn	BEL	1955	434798
cn	BEL	1956	448949
cn	BEL	1957	461302
cn	BEL	1958	468426
cn	BEL	1959	480002
cn	BEL	1960	493083
cn	BEL	1961	510327
cn	BEL	1962	528789
cn	BEL	1963	546130
cn	BEL	1964	570719
cn	BEL	1965	593425
cn	BEL	1966	618952
cn	BEL	1967	643156
cn	BEL	1968	666524
cn	BEL	1969	694188
cn	BEL	1970	726826
cn	BEL	1971	760295
cn	BEL	1972	793678
cn	BEL	1973	835806
cn	BEL	1974	880167
cn	BEL	1975	917487
cn	BEL	1976	943648
cn	BEL	1977	956756
cn	BEL	1978	966578
cn	BEL	1979	981311
cn	BEL	1980	1.00199e+06
cn	BEL	1981	999610
cn	BEL	1982	989099
cn	BEL	1983	965414
cn	BEL	1984	952543
cn	BEL	1985	953832
cn	BEL	1986	962985
cn	BEL	1987	982614
cn	BEL	1988	1.02491e+06
cn	BEL	1989	1.08158e+06
cn	BEL	1990	1.15054e+06
cn	BEL	1991	1.22181e+06
cn	BEL	1992	1291906
cn	BEL	1993	1.35755e+06
cn	BEL	1994	1.41308e+06
cn	BEL	1995	1.46167e+06
cn	BEL	1996	1.47764e+06
cn	BEL	1997	1.46555e+06
cn	BEL	1998	1.46796e+06
cn	BEL	1999	1.49819e+06
cn	BEL	2000	1.49508e+06
cn	BEL	2001	1.51163e+06
cn	BEL	2002	1.46741e+06
cn	BEL	2003	1.52031e+06
cn	BEL	2004	1.58722e+06
cn	BEL	2005	1.68454e+06
cn	BEL	2006	1.8953e+06
cn	BEL	2007	2.07211e+06
cn	BEL	2008	2.32168e+06
cn	BEL	2009	2.54266e+06
cn	BEL	2010	2.83739e+06
cn	BEL	2011	2.88189e+06
cn	BEL	2012	3198966
cn	BEL	2013	3.24403e+06
cn	BEL	2014	3.20862e+06
cn	BEL	2015	3.29015e+06
cn	BEL	2016	3.40054e+06
cn	BEL	2017	3.38357e+06
cn	BEL	2018	3.43616e+06
cn	BEL	2019	3496175
cn	BEN	1959	2721.79
cn	BEN	1960	3038.91
cn	BEN	1961	3335.51
cn	BEN	1962	3616
cn	BEN	1963	3921.02
cn	BEN	1964	4164.58
cn	BEN	1965	4371.03
cn	BEN	1966	4588.28
cn	BEN	1967	4941.5
cn	BEN	1968	5327.88
cn	BEN	1969	5722.77
cn	BEN	1970	6074.75
cn	BEN	1971	6421.93
cn	BEN	1972	6961.51
cn	BEN	1973	7367.6
cn	BEN	1974	7832.96
cn	BEN	1975	8252.97
cn	BEN	1976	8476.72
cn	BEN	1977	8669.6
cn	BEN	1978	8806.41
cn	BEN	1979	9253.65
cn	BEN	1980	9740.75
cn	BEN	1981	10212.3
cn	BEN	1982	11095.2
cn	BEN	1983	11308.2
cn	BEN	1984	11377.8
cn	BEN	1985	11309.8
cn	BEN	1986	11528.4
cn	BEN	1987	12105.8
cn	BEN	1988	12885.7
cn	BEN	1989	13998.3
cn	BEN	1990	15630.4
cn	BEN	1991	17748.6
cn	BEN	1992	20493.3
cn	BEN	1993	23885.5
cn	BEN	1994	27595.5
cn	BEN	1995	31169
cn	BEN	1996	33368.4
cn	BEN	1997	34640.8
cn	BEN	1998	35963.2
cn	BEN	1999	37280.3
cn	BEN	2000	38568.1
cn	BEN	2001	40374
cn	BEN	2002	42118.2
cn	BEN	2003	44047.4
cn	BEN	2004	45823
cn	BEN	2005	47611.1
cn	BEN	2006	49375.3
cn	BEN	2007	51840.2
cn	BEN	2008	54668.8
cn	BEN	2009	57746.6
cn	BEN	2010	60880.2
cn	BEN	2011	63203.6
cn	BEN	2012	62226.2
cn	BEN	2013	66340.6
cn	BEN	2014	67093.8
cn	BEN	2015	69432.9
cn	BEN	2016	72821.1
cn	BEN	2017	74870.3
cn	BEN	2018	81024.5
cn	BEN	2019	88006.9
cn	BFA	1959	2529.82
cn	BFA	1960	2532.53
cn	BFA	1961	2556.69
cn	BFA	1962	2599.71
cn	BFA	1963	2631.88
cn	BFA	1964	2667.36
cn	BFA	1965	2761.05
cn	BFA	1966	2851.43
cn	BFA	1967	2921.62
cn	BFA	1968	2999.35
cn	BFA	1969	3114.1
cn	BFA	1970	3240.48
cn	BFA	1971	3767
cn	BFA	1972	4048.79
cn	BFA	1973	4396.44
cn	BFA	1974	4815.56
cn	BFA	1975	5142.05
cn	BFA	1976	5436.18
cn	BFA	1977	5719.86
cn	BFA	1978	6020.98
cn	BFA	1979	6914.11
cn	BFA	1980	7656.79
cn	BFA	1981	8464.37
cn	BFA	1982	9289.81
cn	BFA	1983	9909.41
cn	BFA	1984	10482.4
cn	BFA	1985	11456.8
cn	BFA	1986	12381
cn	BFA	1987	13338.6
cn	BFA	1988	14292.1
cn	BFA	1989	15405.9
cn	BFA	1990	16330.1
cn	BFA	1991	17398
cn	BFA	1992	18417.1
cn	BFA	1993	19373.5
cn	BFA	1994	20675.9
cn	BFA	1995	21738
cn	BFA	1996	22885.5
cn	BFA	1997	24256.1
cn	BFA	1998	25568.4
cn	BFA	1999	26640.4
cn	BFA	2000	27605.4
cn	BFA	2001	28587.2
cn	BFA	2002	29659.1
cn	BFA	2003	31014.8
cn	BFA	2004	32687.4
cn	BFA	2005	34687.7
cn	BFA	2006	37246.1
cn	BFA	2007	40863.2
cn	BFA	2008	45267.1
cn	BFA	2009	50590.2
cn	BFA	2010	56276.9
cn	BFA	2011	61479.9
cn	BFA	2012	61112.6
cn	BFA	2013	65543.5
cn	BFA	2014	62999.3
cn	BFA	2015	60657.2
cn	BFA	2016	66440.3
cn	BFA	2017	72456.4
cn	BFA	2018	78750.6
cn	BFA	2019	86375.1
cn	BGD	1959	57841.2
cn	BGD	1960	56732.1
cn	BGD	1961	56247.4
cn	BGD	1962	57066.7
cn	BGD	1963	57206.4
cn	BGD	1964	57981.3
cn	BGD	1965	59041.7
cn	BGD	1966	60235.9
cn	BGD	1967	61813.4
cn	BGD	1968	64692.2
cn	BGD	1969	67055.7
cn	BGD	1970	69561.5
cn	BGD	1971	70545.8
cn	BGD	1972	69622.7
cn	BGD	1973	70139.5
cn	BGD	1974	75181.8
cn	BGD	1975	78044.6
cn	BGD	1976	81504
cn	BGD	1977	86479.3
cn	BGD	1978	93218.9
cn	BGD	1979	100775
cn	BGD	1980	110155
cn	BGD	1981	120277
cn	BGD	1982	128070
cn	BGD	1983	134913
cn	BGD	1984	142521
cn	BGD	1985	150364
cn	BGD	1986	165502
cn	BGD	1987	176794
cn	BGD	1988	188448
cn	BGD	1989	202099
cn	BGD	1990	218145
cn	BGD	1991	234139
cn	BGD	1992	253637
cn	BGD	1993	276495
cn	BGD	1994	302032
cn	BGD	1995	328840
cn	BGD	1996	356918
cn	BGD	1997	380210
cn	BGD	1998	397800
cn	BGD	1999	413358
cn	BGD	2000	430244
cn	BGD	2001	451194
cn	BGD	2002	478491
cn	BGD	2003	511922
cn	BGD	2004	556421
cn	BGD	2005	616223
cn	BGD	2006	693605
cn	BGD	2007	793782
cn	BGD	2008	923265
cn	BGD	2009	1.07322e+06
cn	BGD	2010	1.23424e+06
cn	BGD	2011	1.39027e+06
cn	BGD	2012	1.52266e+06
cn	BGD	2013	1.65825e+06
cn	BGD	2014	1.82839e+06
cn	BGD	2015	1999870
cn	BGD	2016	2.18887e+06
cn	BGD	2017	2399446
cn	BGD	2018	2.61149e+06
cn	BGD	2019	2.84331e+06
cn	BGR	1970	26409.5
cn	BGR	1971	28976.4
cn	BGR	1972	31567.6
cn	BGR	1973	34168.5
cn	BGR	1974	36911
cn	BGR	1975	39780
cn	BGR	1976	42567.8
cn	BGR	1977	45434.3
cn	BGR	1978	48268.5
cn	BGR	1979	51055.4
cn	BGR	1980	54398.7
cn	BGR	1981	58063.9
cn	BGR	1982	61651
cn	BGR	1983	64733.6
cn	BGR	1984	67646
cn	BGR	1985	70876.2
cn	BGR	1986	74119
cn	BGR	1987	77455.5
cn	BGR	1988	81678.4
cn	BGR	1989	85668.8
cn	BGR	1990	86723.5
cn	BGR	1991	86288.6
cn	BGR	1992	85811.2
cn	BGR	1993	84878.4
cn	BGR	1994	84108.8
cn	BGR	1995	86227.1
cn	BGR	1996	84092.5
cn	BGR	1997	87086.9
cn	BGR	1998	100707
cn	BGR	1999	113577
cn	BGR	2000	117474
cn	BGR	2001	131735
cn	BGR	2002	142012
cn	BGR	2003	126256
cn	BGR	2004	138487
cn	BGR	2005	162755
cn	BGR	2006	187327
cn	BGR	2007	213526
cn	BGR	2008	255547
cn	BGR	2009	288617
cn	BGR	2010	358050
cn	BGR	2011	360971
cn	BGR	2012	387243
cn	BGR	2013	381212
cn	BGR	2014	397034
cn	BGR	2015	407638
cn	BGR	2016	412716
cn	BGR	2017	433697
cn	BGR	2018	445620
cn	BGR	2019	458279
cn	BHR	1970	7387.42
cn	BHR	1971	7996.89
cn	BHR	1972	8603.61
cn	BHR	1973	9421.28
cn	BHR	1974	10412
cn	BHR	1975	10792.1
cn	BHR	1976	12302.7
cn	BHR	1977	13977.5
cn	BHR	1978	14940.1
cn	BHR	1979	16365
cn	BHR	1980	17677.7
cn	BHR	1981	18935.8
cn	BHR	1982	20552.8
cn	BHR	1983	22961.9
cn	BHR	1984	25512.8
cn	BHR	1985	26212.7
cn	BHR	1986	26842.1
cn	BHR	1987	27307.1
cn	BHR	1988	28063.3
cn	BHR	1989	29109.5
cn	BHR	1990	30086
cn	BHR	1991	31526.4
cn	BHR	1992	33150.1
cn	BHR	1993	34918.2
cn	BHR	1994	36345
cn	BHR	1995	37267.1
cn	BHR	1996	38240
cn	BHR	1997	40445.7
cn	BHR	1998	44456.4
cn	BHR	1999	49856
cn	BHR	2000	58856.8
cn	BHR	2001	71359.4
cn	BHR	2002	90912.5
cn	BHR	2003	118090
cn	BHR	2004	148647
cn	BHR	2005	172715
cn	BHR	2006	185542
cn	BHR	2007	200826
cn	BHR	2008	217742
cn	BHR	2009	224246
cn	BHR	2010	233892
cn	BHR	2011	244150
cn	BHR	2012	314083
cn	BHR	2013	279038
cn	BHR	2014	288766
cn	BHR	2015	297086
cn	BHR	2016	318826
cn	BHR	2017	384923
cn	BHR	2018	407006
cn	BHR	2019	428702
cn	BHS	1970	3782.17
cn	BHS	1971	4006.51
cn	BHS	1972	4198.37
cn	BHS	1973	4401.98
cn	BHS	1974	4538.38
cn	BHS	1975	4615.98
cn	BHS	1976	4703.87
cn	BHS	1977	4838.03
cn	BHS	1978	4950.95
cn	BHS	1979	5206.28
cn	BHS	1980	5633.72
cn	BHS	1981	6059.99
cn	BHS	1982	6602.99
cn	BHS	1983	7076.54
cn	BHS	1984	7553.58
cn	BHS	1985	8189.94
cn	BHS	1986	8544.32
cn	BHS	1987	8640.79
cn	BHS	1988	8464.08
cn	BHS	1989	8715.22
cn	BHS	1990	8794.9
cn	BHS	1991	8832.66
cn	BHS	1992	8919.73
cn	BHS	1993	8882.96
cn	BHS	1994	9215.96
cn	BHS	1995	9815.37
cn	BHS	1996	10485.1
cn	BHS	1997	11771.8
cn	BHS	1998	13565.8
cn	BHS	1999	15034.5
cn	BHS	2000	17014.5
cn	BHS	2001	19117.1
cn	BHS	2002	21386.9
cn	BHS	2003	23767.8
cn	BHS	2004	26489.3
cn	BHS	2005	30743.2
cn	BHS	2006	36667.1
cn	BHS	2007	43699.7
cn	BHS	2008	51356
cn	BHS	2009	59120.9
cn	BHS	2010	65629.8
cn	BHS	2011	69530
cn	BHS	2012	66475.5
cn	BHS	2013	67769.9
cn	BHS	2014	69575.3
cn	BHS	2015	70277.7
cn	BHS	2016	71015.7
cn	BHS	2017	72809.6
cn	BHS	2018	74514.4
cn	BHS	2019	76626.1
cn	BIH	1990	16957.9
cn	BIH	1991	17312.5
cn	BIH	1992	17515.9
cn	BIH	1993	17849.4
cn	BIH	1994	18391.5
cn	BIH	1995	18284.8
cn	BIH	1996	21120.4
cn	BIH	1997	24977.9
cn	BIH	1998	29056.4
cn	BIH	1999	32240
cn	BIH	2000	35326.1
cn	BIH	2001	38365.4
cn	BIH	2002	42101.7
cn	BIH	2003	45994.9
cn	BIH	2004	49591.5
cn	BIH	2005	54585.1
cn	BIH	2006	72964.5
cn	BIH	2007	71534.1
cn	BIH	2008	80373.4
cn	BIH	2009	88784.1
cn	BIH	2010	100618
cn	BIH	2011	114522
cn	BIH	2012	114323
cn	BIH	2013	123106
cn	BIH	2014	127401
cn	BIH	2015	127162
cn	BIH	2016	122302
cn	BIH	2017	128191
cn	BIH	2018	133064
cn	BIH	2019	138298
cn	BLR	1990	712583
cn	BLR	1991	734251
cn	BLR	1992	751020
cn	BLR	1993	766223
cn	BLR	1994	775335
cn	BLR	1995	772862
cn	BLR	1996	769292
cn	BLR	1997	752569
cn	BLR	1998	709440
cn	BLR	1999	648761
cn	BLR	2000	586333
cn	BLR	2001	531366
cn	BLR	2002	486591
cn	BLR	2003	454342
cn	BLR	2004	433110
cn	BLR	2005	423224
cn	BLR	2006	422243
cn	BLR	2007	423755
cn	BLR	2008	431282
cn	BLR	2009	436931
cn	BLR	2010	446344
cn	BLR	2011	458665
cn	BLR	2012	446907
cn	BLR	2013	491410
cn	BLR	2014	629746
cn	BLR	2015	574859
cn	BLR	2016	598473
cn	BLR	2017	634667
cn	BLR	2018	643405
cn	BLR	2019	656323
cn	BLZ	1970	553.078
cn	BLZ	1971	604.127
cn	BLZ	1972	650.499
cn	BLZ	1973	690.097
cn	BLZ	1974	728.585
cn	BLZ	1975	768.822
cn	BLZ	1976	804.548
cn	BLZ	1977	835.513
cn	BLZ	1978	869.268
cn	BLZ	1979	910.991
cn	BLZ	1980	925.783
cn	BLZ	1981	949.985
cn	BLZ	1982	953.123
cn	BLZ	1983	943.21
cn	BLZ	1984	947.978
cn	BLZ	1985	941.47
cn	BLZ	1986	941.703
cn	BLZ	1987	974.12
cn	BLZ	1988	1037.85
cn	BLZ	1989	1119.45
cn	BLZ	1990	1203.56
cn	BLZ	1991	1299.58
cn	BLZ	1992	1397.71
cn	BLZ	1993	1512.93
cn	BLZ	1994	1568.26
cn	BLZ	1995	1635.31
cn	BLZ	1996	1677.99
cn	BLZ	1997	1727.94
cn	BLZ	1998	1777.17
cn	BLZ	1999	1889.73
cn	BLZ	2000	2111.91
cn	BLZ	2001	2316
cn	BLZ	2002	2502.84
cn	BLZ	2003	2652.56
cn	BLZ	2004	2817.89
cn	BLZ	2005	3067.08
cn	BLZ	2006	3371.86
cn	BLZ	2007	3739.06
cn	BLZ	2008	4289.45
cn	BLZ	2009	4805.67
cn	BLZ	2010	5264.35
cn	BLZ	2011	5685.93
cn	BLZ	2012	5937.81
cn	BLZ	2013	6425.1
cn	BLZ	2014	6864.7
cn	BLZ	2015	7731.26
cn	BLZ	2016	8597.59
cn	BLZ	2017	9398.06
cn	BLZ	2018	9674.08
cn	BLZ	2019	9956.21
cn	BMU	1970	1896.74
cn	BMU	1971	1938.36
cn	BMU	1972	1954.46
cn	BMU	1973	1973.76
cn	BMU	1974	1981.06
cn	BMU	1975	2025.25
cn	BMU	1976	2013.41
cn	BMU	1977	2022.82
cn	BMU	1978	2043.65
cn	BMU	1979	2089.67
cn	BMU	1980	2189.59
cn	BMU	1981	2277.34
cn	BMU	1982	2416.66
cn	BMU	1983	2542.3
cn	BMU	1984	2688.64
cn	BMU	1985	2795.52
cn	BMU	1986	2840.25
cn	BMU	1987	2897.09
cn	BMU	1988	3008.93
cn	BMU	1989	3062.02
cn	BMU	1990	3088.88
cn	BMU	1991	3048.12
cn	BMU	1992	3014.11
cn	BMU	1993	2986.68
cn	BMU	1994	2943.09
cn	BMU	1995	2903.05
cn	BMU	1996	2889.58
cn	BMU	1997	2953.86
cn	BMU	1998	3152.26
cn	BMU	1999	3416.29
cn	BMU	2000	3770.68
cn	BMU	2001	4226.36
cn	BMU	2002	4664.29
cn	BMU	2003	5109.2
cn	BMU	2004	5858.19
cn	BMU	2005	6826.98
cn	BMU	2006	8043.32
cn	BMU	2007	9566.43
cn	BMU	2008	11667
cn	BMU	2009	13849.9
cn	BMU	2010	15635.6
cn	BMU	2011	16148.2
cn	BMU	2012	14889
cn	BMU	2013	13792
cn	BMU	2014	12840.7
cn	BMU	2015	12102.4
cn	BMU	2016	11500.2
cn	BMU	2017	11038.2
cn	BMU	2018	11113.2
cn	BMU	2019	11334.5
cn	BOL	1950	9437.64
cn	BOL	1951	10190.7
cn	BOL	1952	10960.3
cn	BOL	1953	11220.2
cn	BOL	1954	11709.1
cn	BOL	1955	12719.6
cn	BOL	1956	13564.6
cn	BOL	1957	14223.7
cn	BOL	1958	14844.7
cn	BOL	1959	15252.5
cn	BOL	1960	15974.7
cn	BOL	1961	16390.8
cn	BOL	1962	17562.8
cn	BOL	1963	18504.5
cn	BOL	1964	19555.1
cn	BOL	1965	20358.4
cn	BOL	1966	21190.5
cn	BOL	1967	21823.7
cn	BOL	1968	22477.7
cn	BOL	1969	23122.7
cn	BOL	1970	23934.1
cn	BOL	1971	24708.9
cn	BOL	1972	25506.9
cn	BOL	1973	26073
cn	BOL	1974	26818.4
cn	BOL	1975	27748.5
cn	BOL	1976	28625.7
cn	BOL	1977	29656.3
cn	BOL	1978	30595.3
cn	BOL	1979	31392.6
cn	BOL	1980	31464.9
cn	BOL	1981	31754.4
cn	BOL	1982	31638.1
cn	BOL	1983	31244.1
cn	BOL	1984	31117.6
cn	BOL	1985	31400.6
cn	BOL	1986	31730.6
cn	BOL	1987	32157
cn	BOL	1988	32727.9
cn	BOL	1989	33249.2
cn	BOL	1990	34102.2
cn	BOL	1991	35279.8
cn	BOL	1992	36765.5
cn	BOL	1993	38491.3
cn	BOL	1994	39969.5
cn	BOL	1995	41865.5
cn	BOL	1996	43867.3
cn	BOL	1997	46759.9
cn	BOL	1998	50909.5
cn	BOL	1999	54463
cn	BOL	2000	58579.6
cn	BOL	2001	63148.4
cn	BOL	2002	70032.5
cn	BOL	2003	77632.9
cn	BOL	2004	84485.7
cn	BOL	2005	88987.8
cn	BOL	2006	92398.8
cn	BOL	2007	95842.4
cn	BOL	2008	103050
cn	BOL	2009	111138
cn	BOL	2010	119857
cn	BOL	2011	129147
cn	BOL	2012	135575
cn	BOL	2013	144313
cn	BOL	2014	156673
cn	BOL	2015	170340
cn	BOL	2016	181133
cn	BOL	2017	198068
cn	BOL	2018	207563
cn	BOL	2019	215586
cn	BRA	1950	227373
cn	BRA	1951	242814
cn	BRA	1952	261085
cn	BRA	1953	272078
cn	BRA	1954	287037
cn	BRA	1955	301169
cn	BRA	1956	313178
cn	BRA	1957	332711
cn	BRA	1958	350683
cn	BRA	1959	376789
cn	BRA	1960	398822
cn	BRA	1961	423114
cn	BRA	1962	448708
cn	BRA	1963	468471
cn	BRA	1964	491717
cn	BRA	1965	518771
cn	BRA	1966	548365
cn	BRA	1967	572880
cn	BRA	1968	606678
cn	BRA	1969	663457
cn	BRA	1970	724634
cn	BRA	1971	788792
cn	BRA	1972	864798
cn	BRA	1973	957868
cn	BRA	1974	1.06586e+06
cn	BRA	1975	1.18121e+06
cn	BRA	1976	1.2817e+06
cn	BRA	1977	1.35789e+06
cn	BRA	1978	1.43302e+06
cn	BRA	1979	1.52587e+06
cn	BRA	1980	1.65424e+06
cn	BRA	1981	1780763
cn	BRA	1982	1.9036e+06
cn	BRA	1983	1.99471e+06
cn	BRA	1984	2100100
cn	BRA	1985	2234206
cn	BRA	1986	2416278
cn	BRA	1987	2.60711e+06
cn	BRA	1988	2.80516e+06
cn	BRA	1989	3.0251e+06
cn	BRA	1990	3.2262e+06
cn	BRA	1991	3.44939e+06
cn	BRA	1992	3.67254e+06
cn	BRA	1993	3.91683e+06
cn	BRA	1994	4.19095e+06
cn	BRA	1995	4.47175e+06
cn	BRA	1996	4711221
cn	BRA	1997	4934583
cn	BRA	1998	5.12828e+06
cn	BRA	1999	5.25031e+06
cn	BRA	2000	5364543
cn	BRA	2001	5504505
cn	BRA	2002	5.64394e+06
cn	BRA	2003	5813930
cn	BRA	2004	6.04582e+06
cn	BRA	2005	6.34101e+06
cn	BRA	2006	6865377
cn	BRA	2007	7.80477e+06
cn	BRA	2008	9228336
cn	BRA	2009	10984343
cn	BRA	2010	12942057
cn	BRA	2011	14173476
cn	BRA	2012	14178964
cn	BRA	2013	14193204
cn	BRA	2014	14292413
cn	BRA	2015	13952505
cn	BRA	2016	13505046
cn	BRA	2017	13467872
cn	BRA	2018	13554706
cn	BRA	2019	13677290
cn	BRB	1960	2609.62
cn	BRB	1961	2683.72
cn	BRB	1962	2752.31
cn	BRB	1963	2833.74
cn	BRB	1964	2907.72
cn	BRB	1965	2995.43
cn	BRB	1966	3081.1
cn	BRB	1967	3191.98
cn	BRB	1968	3366.1
cn	BRB	1969	3538.68
cn	BRB	1970	3802.22
cn	BRB	1971	3975.1
cn	BRB	1972	4146.73
cn	BRB	1973	4300.53
cn	BRB	1974	4495.42
cn	BRB	1975	4681.85
cn	BRB	1976	4982.49
cn	BRB	1977	5192.52
cn	BRB	1978	5466.79
cn	BRB	1979	5722.42
cn	BRB	1980	5990.14
cn	BRB	1981	6355.09
cn	BRB	1982	6578.95
cn	BRB	1983	6698.45
cn	BRB	1984	6779.76
cn	BRB	1985	6843.9
cn	BRB	1986	6794.5
cn	BRB	1987	6529.95
cn	BRB	1988	6196.52
cn	BRB	1989	5881.72
cn	BRB	1990	5551.32
cn	BRB	1991	5292.76
cn	BRB	1992	4976.73
cn	BRB	1993	4810.08
cn	BRB	1994	4808.05
cn	BRB	1995	4860.85
cn	BRB	1996	4994.05
cn	BRB	1997	5347.18
cn	BRB	1998	5809.1
cn	BRB	1999	6246.81
cn	BRB	2000	6705.88
cn	BRB	2001	7236.99
cn	BRB	2002	8025.04
cn	BRB	2003	8689.9
cn	BRB	2004	9575.01
cn	BRB	2005	10727.1
cn	BRB	2006	12416.9
cn	BRB	2007	14322.7
cn	BRB	2008	16659.8
cn	BRB	2009	19223.5
cn	BRB	2010	22018
cn	BRB	2011	24239.5
cn	BRB	2012	25046
cn	BRB	2013	24763.5
cn	BRB	2014	25140.4
cn	BRB	2015	24904.5
cn	BRB	2016	25698.3
cn	BRB	2017	34193.3
cn	BRB	2018	34017.1
cn	BRB	2019	33888.2
cn	BRN	1970	38352
cn	BRN	1971	37606.2
cn	BRN	1972	37074.7
cn	BRN	1973	36702
cn	BRN	1974	36168.9
cn	BRN	1975	36207.2
cn	BRN	1976	36525.2
cn	BRN	1977	36761.8
cn	BRN	1978	37153.9
cn	BRN	1979	38106
cn	BRN	1980	39051.9
cn	BRN	1981	40180.6
cn	BRN	1982	41174.7
cn	BRN	1983	42052.7
cn	BRN	1984	43253.5
cn	BRN	1985	44496.9
cn	BRN	1986	45831.4
cn	BRN	1987	46971.4
cn	BRN	1988	48350.7
cn	BRN	1989	50131.1
cn	BRN	1990	52063
cn	BRN	1991	53965.7
cn	BRN	1992	56621.8
cn	BRN	1993	60234
cn	BRN	1994	62840.2
cn	BRN	1995	65876.2
cn	BRN	1996	74395.5
cn	BRN	1997	77906.3
cn	BRN	1998	80528.9
cn	BRN	1999	81729.2
cn	BRN	2000	81377.3
cn	BRN	2001	81857.5
cn	BRN	2002	84221
cn	BRN	2003	85495
cn	BRN	2004	87091.1
cn	BRN	2005	89080.3
cn	BRN	2006	91713.4
cn	BRN	2007	96623.1
cn	BRN	2008	103340
cn	BRN	2009	110339
cn	BRN	2010	117019
cn	BRN	2011	125626
cn	BRN	2012	138809
cn	BRN	2013	157855
cn	BRN	2014	162192
cn	BRN	2015	159175
cn	BRN	2016	166943
cn	BRN	2017	185221
cn	BRN	2018	193136
cn	BRN	2019	200160
cn	BTN	1970	2119.47
cn	BTN	1971	2223.21
cn	BTN	1972	2328.44
cn	BTN	1973	2430.69
cn	BTN	1974	2544.86
cn	BTN	1975	2641.36
cn	BTN	1976	2748.75
cn	BTN	1977	2872.41
cn	BTN	1978	3002.98
cn	BTN	1979	3157.23
cn	BTN	1980	3287.83
cn	BTN	1981	3484.05
cn	BTN	1982	3703.79
cn	BTN	1983	3973.76
cn	BTN	1984	4219.45
cn	BTN	1985	4542.19
cn	BTN	1986	4870.92
cn	BTN	1987	5192.54
cn	BTN	1988	5492.01
cn	BTN	1989	5747.43
cn	BTN	1990	5987.85
cn	BTN	1991	6198.26
cn	BTN	1992	6556.18
cn	BTN	1993	7034.71
cn	BTN	1994	7602.6
cn	BTN	1995	8161.31
cn	BTN	1996	8728.81
cn	BTN	1997	9326.89
cn	BTN	1998	10019.8
cn	BTN	1999	10991.6
cn	BTN	2000	12177.8
cn	BTN	2001	13780.9
cn	BTN	2002	15713.1
cn	BTN	2003	17717.2
cn	BTN	2004	19989.8
cn	BTN	2005	21850.5
cn	BTN	2006	23502.8
cn	BTN	2007	24579.8
cn	BTN	2008	26220.4
cn	BTN	2009	28188.9
cn	BTN	2010	31289.7
cn	BTN	2011	34588.5
cn	BTN	2012	38247
cn	BTN	2013	39330.8
cn	BTN	2014	43194.9
cn	BTN	2015	47105.1
cn	BTN	2016	51245.8
cn	BTN	2017	56321.7
cn	BTN	2018	58780.9
cn	BTN	2019	61204.9
cn	BWA	1960	655.434
cn	BWA	1961	663.834
cn	BWA	1962	682.832
cn	BWA	1963	709.253
cn	BWA	1964	751.75
cn	BWA	1965	740.968
cn	BWA	1966	805.015
cn	BWA	1967	900.683
cn	BWA	1968	1065.43
cn	BWA	1969	1139.01
cn	BWA	1970	1417.23
cn	BWA	1971	1901.08
cn	BWA	1972	2496.18
cn	BWA	1973	3120.59
cn	BWA	1974	3515.82
cn	BWA	1975	3805.16
cn	BWA	1976	4002.28
cn	BWA	1977	4162.11
cn	BWA	1978	4353.08
cn	BWA	1979	4686.06
cn	BWA	1980	5198.8
cn	BWA	1981	5820.57
cn	BWA	1982	6462.46
cn	BWA	1983	7064.28
cn	BWA	1984	7686.5
cn	BWA	1985	8445.14
cn	BWA	1986	9183.16
cn	BWA	1987	9943.52
cn	BWA	1988	11092.8
cn	BWA	1989	13288.3
cn	BWA	1990	15728.3
cn	BWA	1991	18056
cn	BWA	1992	20304.3
cn	BWA	1993	22553.5
cn	BWA	1994	24788.3
cn	BWA	1995	27150.5
cn	BWA	1996	29321.7
cn	BWA	1997	32011
cn	BWA	1998	35119.6
cn	BWA	1999	38737.6
cn	BWA	2000	42511
cn	BWA	2001	46819.7
cn	BWA	2002	51516.9
cn	BWA	2003	56179.7
cn	BWA	2004	61367.1
cn	BWA	2005	66886
cn	BWA	2006	74642.5
cn	BWA	2007	86271.4
cn	BWA	2008	101651
cn	BWA	2009	120738
cn	BWA	2010	141059
cn	BWA	2011	155429
cn	BWA	2012	157598
cn	BWA	2013	157500
cn	BWA	2014	161217
cn	BWA	2015	163060
cn	BWA	2016	163885
cn	BWA	2017	166636
cn	BWA	2018	176226
cn	BWA	2019	186375
cn	CAF	1960	5884.21
cn	CAF	1961	6146.94
cn	CAF	1962	6426.08
cn	CAF	1963	6658.72
cn	CAF	1964	6899.79
cn	CAF	1965	7110.15
cn	CAF	1966	7313.98
cn	CAF	1967	7411
cn	CAF	1968	7556.56
cn	CAF	1969	7706.19
cn	CAF	1970	7866.52
cn	CAF	1971	8069.01
cn	CAF	1972	8240.01
cn	CAF	1973	8481.04
cn	CAF	1974	8549.64
cn	CAF	1975	8571.28
cn	CAF	1976	8547.67
cn	CAF	1977	8564.01
cn	CAF	1978	8500.48
cn	CAF	1979	8534.95
cn	CAF	1980	8405.99
cn	CAF	1981	8388.42
cn	CAF	1982	8244.33
cn	CAF	1983	8195.29
cn	CAF	1984	8150.63
cn	CAF	1985	8297.71
cn	CAF	1986	8422.57
cn	CAF	1987	8504.64
cn	CAF	1988	8512.22
cn	CAF	1989	8564.05
cn	CAF	1990	8709.43
cn	CAF	1991	8809.85
cn	CAF	1992	8921.67
cn	CAF	1993	8947.59
cn	CAF	1994	9078.25
cn	CAF	1995	9261.65
cn	CAF	1996	9100.71
cn	CAF	1997	9018.12
cn	CAF	1998	9000.86
cn	CAF	1999	9144.06
cn	CAF	2000	9240.62
cn	CAF	2001	9360.2
cn	CAF	2002	9472.65
cn	CAF	2003	9453.44
cn	CAF	2004	9452.18
cn	CAF	2005	9586.22
cn	CAF	2006	10080.4
cn	CAF	2007	11215.8
cn	CAF	2008	13190.5
cn	CAF	2009	16104.5
cn	CAF	2010	19797
cn	CAF	2011	22662.5
cn	CAF	2012	23253.9
cn	CAF	2013	25260.3
cn	CAF	2014	27053.4
cn	CAF	2015	27770
cn	CAF	2016	28443.8
cn	CAF	2017	31075.3
cn	CAF	2018	31512.1
cn	CAF	2019	31822.4
cn	CAN	1950	578151
cn	CAN	1951	608856
cn	CAN	1952	636389
cn	CAN	1953	670567
cn	CAN	1954	693625
cn	CAN	1955	727580
cn	CAN	1956	780056
cn	CAN	1957	824864
cn	CAN	1958	860105
cn	CAN	1959	900412
cn	CAN	1960	935614
cn	CAN	1961	970473
cn	CAN	1962	1.01302e+06
cn	CAN	1963	1.05799e+06
cn	CAN	1964	1.10854e+06
cn	CAN	1965	1.17488e+06
cn	CAN	1966	1.24591e+06
cn	CAN	1967	1.30281e+06
cn	CAN	1968	1.36135e+06
cn	CAN	1969	1.42823e+06
cn	CAN	1970	1.4935e+06
cn	CAN	1971	1.55668e+06
cn	CAN	1972	1.61894e+06
cn	CAN	1973	1.68596e+06
cn	CAN	1974	1.76705e+06
cn	CAN	1975	1.85295e+06
cn	CAN	1976	1.93444e+06
cn	CAN	1977	2.01694e+06
cn	CAN	1978	2.09381e+06
cn	CAN	1979	2180661
cn	CAN	1980	2271029
cn	CAN	1981	2.41419e+06
cn	CAN	1982	2.55689e+06
cn	CAN	1983	2.69573e+06
cn	CAN	1984	2.85152e+06
cn	CAN	1985	3.00224e+06
cn	CAN	1986	3.12782e+06
cn	CAN	1987	3.27901e+06
cn	CAN	1988	3464695
cn	CAN	1989	3.66276e+06
cn	CAN	1990	3.83814e+06
cn	CAN	1991	3.99793e+06
cn	CAN	1992	4.14032e+06
cn	CAN	1993	4.26843e+06
cn	CAN	1994	4399555
cn	CAN	1995	4.5016e+06
cn	CAN	1996	4590814
cn	CAN	1997	4613069
cn	CAN	1998	4.63898e+06
cn	CAN	1999	4.65904e+06
cn	CAN	2000	4508144
cn	CAN	2001	4378532
cn	CAN	2002	4.24848e+06
cn	CAN	2003	4.37396e+06
cn	CAN	2004	4522782
cn	CAN	2005	4.70391e+06
cn	CAN	2006	4.96197e+06
cn	CAN	2007	5.20121e+06
cn	CAN	2008	5423415
cn	CAN	2009	5.77222e+06
cn	CAN	2010	6160862
cn	CAN	2011	6584164
cn	CAN	2012	7.02382e+06
cn	CAN	2013	7443675
cn	CAN	2014	7889559
cn	CAN	2015	8.33382e+06
cn	CAN	2016	8527152
cn	CAN	2017	8399451
cn	CAN	2018	8555011
cn	CAN	2019	8721109
cn	CHE	1950	440773
cn	CHE	1951	447765
cn	CHE	1952	450833
cn	CHE	1953	455737
cn	CHE	1954	464521
cn	CHE	1955	479601
cn	CHE	1956	500989
cn	CHE	1957	526168
cn	CHE	1958	539550
cn	CHE	1959	553948
cn	CHE	1960	575924
cn	CHE	1961	608052
cn	CHE	1962	639280
cn	CHE	1963	668335
cn	CHE	1964	700818
cn	CHE	1965	727991
cn	CHE	1966	751526
cn	CHE	1967	778869
cn	CHE	1968	804397
cn	CHE	1969	829766
cn	CHE	1970	866890
cn	CHE	1971	908685
cn	CHE	1972	950715
cn	CHE	1973	987311
cn	CHE	1974	1.02179e+06
cn	CHE	1975	1.04753e+06
cn	CHE	1976	1.05698e+06
cn	CHE	1977	1.06556e+06
cn	CHE	1978	1074942
cn	CHE	1979	1.08737e+06
cn	CHE	1980	1.12533e+06
cn	CHE	1981	1171371
cn	CHE	1982	1.19323e+06
cn	CHE	1983	1212381
cn	CHE	1984	1.23538e+06
cn	CHE	1985	1.26113e+06
cn	CHE	1986	1.28602e+06
cn	CHE	1987	1.31288e+06
cn	CHE	1988	1.34956e+06
cn	CHE	1989	1388953
cn	CHE	1990	1.42887e+06
cn	CHE	1991	1.46395e+06
cn	CHE	1992	1.48696e+06
cn	CHE	1993	1.50624e+06
cn	CHE	1994	1.52412e+06
cn	CHE	1995	1.54483e+06
cn	CHE	1996	1.60871e+06
cn	CHE	1997	1.57267e+06
cn	CHE	1998	1.58968e+06
cn	CHE	1999	1574604
cn	CHE	2000	1.50875e+06
cn	CHE	2001	1.45508e+06
cn	CHE	2002	1.39341e+06
cn	CHE	2003	1.38694e+06
cn	CHE	2004	1.34973e+06
cn	CHE	2005	1.5237e+06
cn	CHE	2006	1.82912e+06
cn	CHE	2007	2.03034e+06
cn	CHE	2008	2.20097e+06
cn	CHE	2009	2.43603e+06
cn	CHE	2010	2.32314e+06
cn	CHE	2011	2.66306e+06
cn	CHE	2012	2795723
cn	CHE	2013	2.6153e+06
cn	CHE	2014	2.80796e+06
cn	CHE	2015	2.96007e+06
cn	CHE	2016	3.0649e+06
cn	CHE	2017	3.14394e+06
cn	CHE	2018	3.18796e+06
cn	CHE	2019	3225664
cn	CHL	1951	64809.4
cn	CHL	1952	66226.5
cn	CHL	1953	68599.2
cn	CHL	1954	69946.2
cn	CHL	1955	71676.5
cn	CHL	1956	73116
cn	CHL	1957	73817.4
cn	CHL	1958	75943.9
cn	CHL	1959	78598.3
cn	CHL	1960	81192.9
cn	CHL	1961	85708.7
cn	CHL	1962	88507.4
cn	CHL	1963	91630.4
cn	CHL	1964	98855.2
cn	CHL	1965	104703
cn	CHL	1966	115158
cn	CHL	1967	121732
cn	CHL	1968	130409
cn	CHL	1969	139540
cn	CHL	1970	150597
cn	CHL	1971	163515
cn	CHL	1972	173164
cn	CHL	1973	180975
cn	CHL	1974	189577
cn	CHL	1975	188693
cn	CHL	1976	192206
cn	CHL	1977	199732
cn	CHL	1978	203297
cn	CHL	1979	211130
cn	CHL	1980	222999
cn	CHL	1981	236008
cn	CHL	1982	239334
cn	CHL	1983	239075
cn	CHL	1984	245510
cn	CHL	1985	250599
cn	CHL	1986	257144
cn	CHL	1987	269518
cn	CHL	1988	287195
cn	CHL	1989	312867
cn	CHL	1990	340116
cn	CHL	1991	372183
cn	CHL	1992	405484
cn	CHL	1993	438776
cn	CHL	1994	484569
cn	CHL	1995	528477
cn	CHL	1996	571286
cn	CHL	1997	606523
cn	CHL	1998	628920
cn	CHL	1999	646148
cn	CHL	2000	652358
cn	CHL	2001	658726
cn	CHL	2002	671025
cn	CHL	2003	689215
cn	CHL	2004	717469
cn	CHL	2005	753944
cn	CHL	2006	807562
cn	CHL	2007	879533
cn	CHL	2008	972023
cn	CHL	2009	1.07118e+06
cn	CHL	2010	1.18112e+06
cn	CHL	2011	1.29203e+06
cn	CHL	2012	1.38379e+06
cn	CHL	2013	1.56583e+06
cn	CHL	2014	1.51072e+06
cn	CHL	2015	1747526
cn	CHL	2016	1.8008e+06
cn	CHL	2017	1.94916e+06
cn	CHL	2018	2.00963e+06
cn	CHL	2019	2075795
cn	CHN	1952	421054
cn	CHN	1953	449551
cn	CHN	1954	481827
cn	CHN	1955	510359
cn	CHN	1956	544700
cn	CHN	1957	580563
cn	CHN	1958	646697
cn	CHN	1959	745592
cn	CHN	1960	823733
cn	CHN	1961	834143
cn	CHN	1962	826976
cn	CHN	1963	838191
cn	CHN	1964	866296
cn	CHN	1965	914539
cn	CHN	1966	981605
cn	CHN	1967	1015467
cn	CHN	1968	1.04806e+06
cn	CHN	1969	1.09104e+06
cn	CHN	1970	1.18378e+06
cn	CHN	1971	1.28602e+06
cn	CHN	1972	1.38587e+06
cn	CHN	1973	1.48869e+06
cn	CHN	1974	1.6114e+06
cn	CHN	1975	1.75743e+06
cn	CHN	1976	1.88755e+06
cn	CHN	1977	2.02121e+06
cn	CHN	1978	2179063
cn	CHN	1979	2.34025e+06
cn	CHN	1980	2.52892e+06
cn	CHN	1981	2.71869e+06
cn	CHN	1982	2.9288e+06
cn	CHN	1983	3.14249e+06
cn	CHN	1984	3.39424e+06
cn	CHN	1985	3.71296e+06
cn	CHN	1986	4.04806e+06
cn	CHN	1987	4400505
cn	CHN	1988	4813216
cn	CHN	1989	5117349
cn	CHN	1990	5.40439e+06
cn	CHN	1991	5721315
cn	CHN	1992	6.21155e+06
cn	CHN	1993	6.92974e+06
cn	CHN	1994	7724839
cn	CHN	1995	8583782
cn	CHN	1996	9525697
cn	CHN	1997	10529900
cn	CHN	1998	11740840
cn	CHN	1999	12966384
cn	CHN	2000	14236407
cn	CHN	2001	15759915
cn	CHN	2002	17536190
cn	CHN	2003	19703782
cn	CHN	2004	22163566
cn	CHN	2005	25002166
cn	CHN	2006	28461476
cn	CHN	2007	32760308
cn	CHN	2008	37980100
cn	CHN	2009	44643404
cn	CHN	2010	51907732
cn	CHN	2011	58610932
cn	CHN	2012	63397776
cn	CHN	2013	68379848
cn	CHN	2014	73028176
cn	CHN	2015	75872464
cn	CHN	2016	80571544
cn	CHN	2017	85568768
cn	CHN	2018	93338152
cn	CHN	2019	101544168
cn	CIV	1960	2360.62
cn	CIV	1961	2880.3
cn	CIV	1962	3166.84
cn	CIV	1963	3633.45
cn	CIV	1964	4370.61
cn	CIV	1965	5022.89
cn	CIV	1966	5700.82
cn	CIV	1967	6291.54
cn	CIV	1968	6862.44
cn	CIV	1969	7599.05
cn	CIV	1970	8578.77
cn	CIV	1971	9564.8
cn	CIV	1972	10437.7
cn	CIV	1973	11574
cn	CIV	1974	12501.8
cn	CIV	1975	13606.2
cn	CIV	1976	15046.4
cn	CIV	1977	17390.8
cn	CIV	1978	20221.3
cn	CIV	1979	22445.6
cn	CIV	1980	24110.3
cn	CIV	1981	25959.9
cn	CIV	1982	28943.3
cn	CIV	1983	33020.5
cn	CIV	1984	37868.1
cn	CIV	1985	42309.8
cn	CIV	1986	45160.1
cn	CIV	1987	48340.9
cn	CIV	1988	52009.6
cn	CIV	1989	56259.3
cn	CIV	1990	60608.5
cn	CIV	1991	65272.5
cn	CIV	1992	70343.2
cn	CIV	1993	75403.3
cn	CIV	1994	80219.1
cn	CIV	1995	84216.5
cn	CIV	1996	87086.8
cn	CIV	1997	84079.4
cn	CIV	1998	75696.3
cn	CIV	1999	66536.1
cn	CIV	2000	57416.3
cn	CIV	2001	50463
cn	CIV	2002	46022.3
cn	CIV	2003	42756.7
cn	CIV	2004	41229.5
cn	CIV	2005	41110.2
cn	CIV	2006	43821.3
cn	CIV	2007	51276.1
cn	CIV	2008	65174.3
cn	CIV	2009	89613.2
cn	CIV	2010	131729
cn	CIV	2011	166423
cn	CIV	2012	175984
cn	CIV	2013	179448
cn	CIV	2014	200063
cn	CIV	2015	217907
cn	CIV	2016	214803
cn	CIV	2017	212095
cn	CIV	2018	232406
cn	CIV	2019	255209
cn	CMR	1960	12699.3
cn	CMR	1961	13109.6
cn	CMR	1962	13545.3
cn	CMR	1963	14002.2
cn	CMR	1964	14528.5
cn	CMR	1965	15572.6
cn	CMR	1966	16863.2
cn	CMR	1967	17839.8
cn	CMR	1968	18755.9
cn	CMR	1969	19481.3
cn	CMR	1970	20824.8
cn	CMR	1971	21841.4
cn	CMR	1972	22507.7
cn	CMR	1973	23354.8
cn	CMR	1974	24541.5
cn	CMR	1975	25663.8
cn	CMR	1976	26906.4
cn	CMR	1977	28867.8
cn	CMR	1978	31894.9
cn	CMR	1979	33977.4
cn	CMR	1980	36564.6
cn	CMR	1981	37206.7
cn	CMR	1982	36879.5
cn	CMR	1983	37443.5
cn	CMR	1984	39565.5
cn	CMR	1985	42829.9
cn	CMR	1986	46348.1
cn	CMR	1987	49717
cn	CMR	1988	53502.9
cn	CMR	1989	57110.8
cn	CMR	1990	60925.5
cn	CMR	1991	64739.4
cn	CMR	1992	68280.3
cn	CMR	1993	73207.5
cn	CMR	1994	77738.1
cn	CMR	1995	81666.5
cn	CMR	1996	84550.1
cn	CMR	1997	86879.6
cn	CMR	1998	89286
cn	CMR	1999	91371.7
cn	CMR	2000	93426
cn	CMR	2001	97257
cn	CMR	2002	101329
cn	CMR	2003	104816
cn	CMR	2004	109526
cn	CMR	2005	115089
cn	CMR	2006	122379
cn	CMR	2007	131762
cn	CMR	2008	145420
[truncated: 8,315 more rows]

## Sheet: Tabelle2
Summe von AggValue	Spaltenbeschriftungen
Zeilenbeschriftungen	MAR	ABW	AGO	AIA	ALB	ARE	ARG	ARM	ATG	AUS	AUT	AZE	BDI	BEL	BEN	BFA	BGD	BGR	BHR	BHS	BIH	BLR	BLZ	BMU	BOL	BRA	BRB	BRN	BTN	BWA	CAF	CAN	CHE	CHL	CHN	CIV	CMR	COD	COG	COL	COM	CPV	CRI	CYM	CYP	CZE	DEU	DJI	DMA
1950	20354.1						59449.4			488582	124694			388744											9437.64	227373						578151	440773					23000.2		202583			7505.13		17701		1584358
1951	21317.9						65330.9			525234	131126			396413											10190.7	242814						608856	447765	64809.4				25556.1		210150			7723.54		18201.7		1.69253e+06
1952	22058.7						69985.6			536687	134162			404938											10960.3	261085						636389	450833	66226.5	421054			29216.7		222522			8125.77		18806.8		1.82486e+06
1953	23105.8						74549.8			557550	134721			413282											11220.2	272078						670567	455737	68599.2	449551			33400.7		236846			8549.47		19599.7		1953948
1954	23933.4						78962.3			586375	137733			424546											11709.1	287037						693625	464521	69946.2	481827			37436.6		256982			8905.72		20978.9		2106541
1955	24069.8						83983.2			615938	144769			434798											12719.6	301169						727580	479601	71676.5	510359			41531.3		276640			9341.43		22503.6		2319426
1956	24035.6						88196			637357	150144			448949											13564.6	313178						780056	500989	73116	544700			45722.3		296358			9841.98		24003.6		2.53204e+06
1957	23638.7						91419.4			658735	155975			461302											14223.7	332711						824864	526168	73817.4	580563			49407.6		302227			10408.2		25337.9		2.73604e+06
1958	23952.1						96986			687579	161176			468426											14844.7	350683						860105	539550	75943.9	646697			52316.1		304814			10811.1		25722.6		2934807
1959	23683.2						100411			718960	166653			480002	2721.79	2529.82	57841.2								15252.5	376789						900412	553948	78598.3	745592			54560		321612			11461.3		26293.4		3175653
1960	23754.4						107963			744406	176052		5961.86	493083	3038.91	2532.53	56732.1								15974.7	398822	2609.62			655.434	5884.21	935614	575924	81192.9	823733	2360.62	12699.3	55621.6	2412.68	342671	2342.71	1068.14	11994.9		26407.2		3.47194e+06
1961	23826.3						116128			760937	185865		5860.96	510327	3335.51	2556.69	56247.4								16390.8	423114	2683.72			663.834	6146.94	970473	608052	85708.7	834143	2880.3	13109.6	56113.4	2992.39	364124	2394.01	1178.04	12573		27019.1		3.76184e+06
1962	24375.5						122320			788224	194056		5811.22	528789	3616	2599.71	57066.7								17562.8	448708	2752.31			682.832	6426.08	1.01302e+06	639280	88507.4	826976	3166.84	13545.3	56208.1	3236.52	384378	2541.08	1241.36	13270.2		28420.6		4.05428e+06
1963	25221.5						126200			821049	201936		5734.49	546130	3921.02	2631.88	57206.4								18504.5	468471	2833.74			709.253	6658.72	1.05799e+06	668335	91630.4	838191	3633.45	14002.2	58694.9	3319.39	398937	2678.1	1262.61	13933.8		29519.7		4.32604e+06
1964	25763.4						132450			863141	213113		5654.89	570719	4164.58	2667.36	57981.3								19555.1	491717	2907.72			751.75	6899.79	1.10854e+06	700818	98855.2	866296	4370.61	14528.5	61471.7	3375.2	421797	2873.34	1287.3	14398		29953.1		4642467
1965	26410.8						138598			896798	222431		5589.01	593425	4371.03	2761.05	59041.7								20358.4	518771	2995.43			740.968	7110.15	1.17488e+06	727991	104703	914539	5022.89	15572.6	64066.2	3462.33	435953	3115.18	1326.76	15193.4		30989.5		4.97059e+06
1966	26886.6						144098			931356	235491		5570.95	618952	4588.28	2851.43	60235.9								21190.5	548365	3081.1			805.015	7313.98	1.24591e+06	751526	115158	981605	5700.82	16863.2	66436.9	3693.38	449999	3405.02	1392.26	15979.7		32052.8		5269195
1967	28066.3						149583			970226	247181		5564.77	643156	4941.5	2921.62	61813.4								21823.7	572880	3191.98			900.683	7411	1.30281e+06	778869	121732	1015467	6291.54	17839.8	68235.5	4079.76	470385	3675.27	1436.1	16801.3		33358.7		5.49296e+06
1968	29115.3						155984			1.01257e+06	258694		5592.73	666524	5327.88	2999.35	64692.2								22477.7	606678	3366.1			1065.43	7556.56	1.36135e+06	804397	130409	1.04806e+06	6862.44	18755.9	70181.9	4414.42	495218	3868.71	1505.11	17530.8		34646.2		5758372
1969	30265.3						165282			1064786	272342		5622.85	694188	5722.77	3114.1	67055.7								23122.7	663457	3538.68			1139.01	7706.19	1.42823e+06	829766	139540	1.09104e+06	7599.05	19481.3	73534.4	4696.52	518483	4046.83	1616.97	18470		36513.6		6.07936e+06
1970	32474.2	1313.09	117665	377.788	24195.7	292894	175525		683.2	1116206	289522		5587.79	726826	6074.75	3240.48	69561.5	26409.5	7387.42	3782.17			553.078	1896.74	23934.1	724634	3802.22	38352	2119.47	1417.23	7866.52	1.4935e+06	866890	150597	1.18378e+06	8578.77	20824.8	76757.2	4956.36	547307	4383.29	1770.24	19656.7	579.778	38208.2		6464985	642.106	158.644
1971	34449.9	1440.54	124876	409.141	25478.5	305164	186537		700.214	1.16189e+06	310010		5687.39	760295	6421.93	3767	70545.8	28976.4	7996.89	4006.51			604.127	1938.36	24708.9	788792	3975.1	37606.2	2223.21	1901.08	8069.01	1.55668e+06	908685	163515	1.28602e+06	9564.8	21841.4	82004.2	5289.11	575688	4721.67	1915.55	20976.6	640.004	40038.1		6672266	658.194	187.43
1972	35885.2	1580.74	131892	445.272	26842	323810	196171		716.509	1.20834e+06	331518		5603.1	793678	6961.51	4048.79	69622.7	31567.6	8603.61	4198.37			650.499	1954.46	25506.9	864798	4146.73	37074.7	2328.44	2496.18	8240.01	1.61894e+06	950715	173164	1.38587e+06	10437.7	22507.7	88279.7	5627.19	585988	5059.11	2061.07	22293.9	705.915	41932.3		6640179	674.236	203.55
1973	37123.3	1732.01	139472	482.341	28242.5	336189	204491		729.03	1.25567e+06	353166		5606.94	835806	7367.6	4396.44	70139.5	34168.5	9421.28	4401.98			690.097	1973.76	26073	957868	4300.53	36702	2430.69	3120.59	8481.04	1.68596e+06	987311	180975	1.48869e+06	11574	23354.8	93847	5925.49	588945	5415.06	2202.41	23608.9	781.83	43861		6526419	693.28	208.535
1974	38129.1	1902.45	147592	519.497	29784.9	345186	213877		746.876	1.28488e+06	373989		5740.17	880167	7832.96	4815.56	75181.8	36911	10412	4538.38			728.585	1981.06	26818.4	1.06586e+06	4495.42	36168.9	2544.86	3515.82	8549.64	1.76705e+06	1.02179e+06	189577	1.6114e+06	12501.8	24541.5	101693	6249.2	595282	5789.73	2350.23	25051.1	868.202	44463.9		6.44015e+06	710.367	203.216
1975	43141.6	2084.92	154500	556.336	31313.8	381531	222503		763.99	1.31205e+06	392269		5780.41	917487	8252.97	5142.05	78044.6	39780	10792.1	4615.98			768.822	2025.25	27748.5	1.18121e+06	4681.85	36207.2	2641.36	3805.16	8571.28	1.85295e+06	1.04753e+06	188693	1.75743e+06	13606.2	25663.8	107433	6594.01	601894	6177.87	2448.62	26387.9	961.401	44106.6		6.49848e+06	729.527	209.481
1976	49214.8	2278.65	160159	592.39	32858.2	425213	229548		773.088	1.3468e+06	409228		5912.58	943648	8476.72	5436.18	81504	42567.8	12302.7	4703.87			804.548	2013.41	28625.7	1.2817e+06	4982.49	36525.2	2748.75	4002.28	8547.67	1.93444e+06	1.05698e+06	192206	1.88755e+06	15046.4	26906.4	111225	6911.04	602770	6549.44	2543.15	28141.3	1061.85	43993.1		6.70203e+06	762.889	212.919
1977	56233	2494.07	166378	629.318	34542.1	488763	242400		762.255	1.38554e+06	426834		6211.8	956756	8669.6	5719.86	86479.3	45434.3	13977.5	4838.03			835.513	2022.82	29656.3	1.35789e+06	5192.52	36761.8	2872.41	4162.11	8564.01	2.01694e+06	1.06556e+06	199732	2.02121e+06	17390.8	28867.8	120817	7081.11	600736	6953.87	2636.96	30215.8	1171.73	45393.4		6.98161e+06	776.88	216.791
1978	59511.3	2724.65	171251	668.539	36206.1	563040	251840		751.33	1431094	439898		6564.95	966578	8806.41	6020.98	93218.9	48268.5	14940.1	4950.95			869.268	2043.65	30595.3	1.43302e+06	5466.79	37153.9	3002.98	4353.08	8500.48	2.09381e+06	1074942	203297	2179063	20221.3	31894.9	124125	7330.13	601478	7346.02	2741.71	32237.7	1291.51	47404.9		7281340	785.327	223.676
1979	62621.1	2983.34	176410	713.735	38115.3	637316	264545		778.038	1.48459e+06	456839		6950.44	981311	9253.65	6914.11	100775	51055.4	16365	5206.28			910.991	2089.67	31392.6	1.52587e+06	5722.42	38106	3157.23	4686.06	8534.95	2180661	1.08737e+06	211130	2.34025e+06	22445.6	33977.4	129842	7716.79	608370	7813.43	2855.13	34675.8	1429.02	50145.9		7.60424e+06	813.677	229.315
1980	65678.6	3263.03	180757	759.033	39936	706334	277379		795.16	1.53587e+06	476009		7289.99	1.00199e+06	9740.75	7656.79	110155	54398.7	17677.7	5633.72			925.783	2189.59	31464.9	1.65424e+06	5990.14	39051.9	3287.83	5198.8	8405.99	2271029	1.12533e+06	222999	2.52892e+06	24110.3	36564.6	140748	8526.96	625403	8338.34	2947.17	36409.8	1575.12	52916.8		7.8564e+06	847.867	255.368
1981	70481.9	3584.27	186040	810.066	42014.7	772732	288232		820.996	1.60221e+06	508275		7765.29	999610	10212.3	8464.37	120277	58063.9	18935.8	6059.99			949.985	2277.34	31754.4	1780763	6355.09	40180.6	3484.05	5820.57	8388.42	2.41419e+06	1171371	236008	2.71869e+06	25959.9	37206.7	152895	10323.5	658162	8827.17	3094.81	37562.3	1742.87	55465		7978559	886.306	271.387
1982	81987.8	3928.57	192321	859.592	44387.8	835798	300059		821.179	1.64804e+06	554123		8234.66	989099	11095.2	9289.81	128070	61651	20552.8	6602.99			953.123	2416.66	31638.1	1.9036e+06	6578.95	41174.7	3703.79	6462.46	8244.33	2.55689e+06	1.19323e+06	239334	2.9288e+06	28943.3	36879.5	163635	13163.3	690451	9404.79	3261.37	37834.1	1921.29	57970.1		7945443	988.068	284.709
1983	101676	4278.74	195526	899.639	46400.1	893719	315382		815.627	1.68957e+06	613217		8729.03	965414	11308.2	9909.41	134913	64733.6	22961.9	7076.54			943.21	2542.3	31244.1	1.99471e+06	6698.45	42052.7	3973.76	7064.28	8195.29	2.69573e+06	1212381	239075	3.14249e+06	33020.5	37443.5	174466	14814.2	715136	9886.87	3403.38	38106.6	2112.23	59786.4		7.85283e+06	1086.88	294.214
1984	132692	4671.88	199769	938.996	48571.4	950096	336801		823.379	1742347	680576		9289.73	952543	11377.8	10482.4	142521	67646	25512.8	7553.58			947.978	2688.64	31117.6	2100100	6779.76	43253.5	4219.45	7686.5	8150.63	2.85152e+06	1.23538e+06	245510	3.39424e+06	37868.1	39565.5	185255	15993	742848	10432.6	3544.77	39123.8	2353.01	62610.7		7.81046e+06	1184.45	313.601
1985	166861	5117.11	202318	985.318	50552.8	995126	363684		841.741	1.79577e+06	734954		9790.79	953832	11309.8	11456.8	150364	70876.2	26212.7	8189.94			941.47	2795.52	31400.6	2234206	6843.9	44496.9	4542.19	8445.14	8297.71	3.00224e+06	1.26113e+06	250599	3.71296e+06	42309.8	42829.9	196502	17088.8	766954	11018.1	3704.44	40353.6	2539.57	64758.7		7886088	1265.35	323.427
1986	189347	5592.88	203324	1059.72	52593.1	1.03599e+06	400195		876.283	1849092	771044		10280.3	962985	11528.4	12381	165502	74119	26842.1	8544.32			941.703	2840.25	31730.6	2416278	6794.5	45831.4	4870.92	9183.16	8422.57	3.12782e+06	1.28602e+06	257144	4.04806e+06	45160.1	46348.1	207080	17388.7	793040	11748.2	3852.21	41879.5	2777.55	66364		8074205	1300.38	327.227
1987	216330	6155.54	205179	1152.94	54594.5	1065331	450025		932.044	1.92307e+06	813302		10721.6	982614	12105.8	13338.6	176794	77455.5	27307.1	8640.79			974.12	2897.09	32157	2.60711e+06	6529.95	46971.4	5192.54	9943.52	8504.64	3.27901e+06	1.31288e+06	269518	4400505	48340.9	49717	217569	17194.7	816996	12279.6	4001.39	43669.9	3022.11	68134.9		8340673	1350.66	331.468
1988	251047	6851.08	205934	1218.35	56584.9	1.0962e+06	514489		998.7	2.02591e+06	865317		10883.7	1.02491e+06	12885.7	14292.1	188448	81678.4	28063.3	8464.08			1037.85	3008.93	32727.9	2.80516e+06	6196.52	48350.7	5492.01	11092.8	8512.22	3464695	1.34956e+06	287195	4813216	52009.6	53502.9	229125	16800.3	854181	12784.3	4157.48	45367.4	3366.64	70581.6		8712518	1412.94	352.36
1989	295985	7645.86	205977	1298.61	58894.5	1.13094e+06	593163		1074.61	2.14152e+06	925881		11110.6	1.08158e+06	13998.3	15405.9	202099	85668.8	29109.5	8715.22			1119.45	3062.02	33249.2	3.0251e+06	5881.72	50131.1	5747.43	13288.3	8564.05	3.66276e+06	1388953	312867	5117349	56259.3	57110.8	239404	16335.4	884967	13110.5	4318.94	47611	3705.14	73966.8		9188050	1460.6	386.427
1990	351583	8407.94	205150	1395.84	61056.9	1.16344e+06	688642	58440.3	1138.7	2.24738e+06	992590	111656	11077.4	1.15054e+06	15630.4	16330.1	218145	86723.5	30086	8794.9	16957.9	712583	1203.56	3088.88	34102.2	3.2262e+06	5551.32	52063	5987.85	15728.3	8709.43	3.83814e+06	1.42887e+06	340116	5.40439e+06	60608.5	60925.5	245831	16020.7	908843	13296.2	4476.06	50398	4030.12	76673.8	1.18461e+06	9745840	1511.94	426.054
1991	416465	9223.22	211975	1447.73	59704.4	1.19771e+06	820001	60260	1198.19	2.3683e+06	1067434	110437	10978.9	1.22181e+06	17748.6	17398	234139	86288.6	31526.4	8832.66	17312.5	734251	1299.58	3048.12	35279.8	3.44939e+06	5292.76	53965.7	6198.26	18056	8809.85	3.99793e+06	1.46395e+06	372183	5721315	65272.5	64739.4	248698	15756.4	936742	13446.4	4619.37	52283.4	4373.02	78864.4	1.18015e+06	10379337	1602.48	450.833
1992	492032	10109.3	228046	1531.17	58528.2	1.2467e+06	1.0055e+06	59635.8	1247.68	2.51518e+06	1140226	111840	10993.1	1291906	20493.3	18417.1	253637	85811.2	33150.1	8919.73	17515.9	751020	1397.71	3014.11	36765.5	3.67254e+06	4976.73	56621.8	6556.18	20304.3	8921.67	4.14032e+06	1.48696e+06	405484	6.21155e+06	70343.2	68280.3	249134	15534.5	970186	13680.1	4778.33	55269.9	4721.46	82358.6	1263623	11035179	1707.44	454.211
1993	574686	11047.2	238813	1593.2	58332.2	1.26919e+06	1.24633e+06	58694.6	1288.42	2.68093e+06	1.20646e+06	112248	11089.4	1.35755e+06	23885.5	19373.5	276495	84878.4	34918.2	8882.96	17849.4	766223	1512.93	2986.68	38491.3	3.91683e+06	4810.08	60234	7034.71	22553.5	8947.59	4.26843e+06	1.50624e+06	438776	6.92974e+06	75403.3	73207.5	248022	15655	1.02563e+06	13748.3	4992.82	59021.3	5082.5	84641.4	1.38406e+06	11610346	1828.02	455.269
1994	656804	12078.3	248751	1659.42	58954.9	1.30025e+06	1.52954e+06	58529	1331.74	2.86222e+06	1.26628e+06	112705	11001.1	1.41308e+06	27595.5	20675.9	302032	84108.8	36345	9215.96	18391.5	775335	1568.26	2943.09	39969.5	4.19095e+06	4808.05	62840.2	7602.6	24788.3	9078.25	4399555	1.52412e+06	484569	7724839	80219.1	77738.1	247174	16575.7	1.08321e+06	13842.2	5296.56	63044.8	5455.78	86578.7	1.50174e+06	12114487	1927.46	457.485
1995	729148	13159.7	262873	1730.01	59727.9	1.33523e+06	1.78551e+06	58139.2	1386.86	3020165	1308685	111123	10889.9	1.46167e+06	31169	21738	328840	86227.1	37267.1	9815.37	18284.8	772862	1635.31	2903.05	41865.5	4.47175e+06	4860.85	65876.2	8161.31	27150.5	9261.65	4.5016e+06	1.54483e+06	528477	8583782	84216.5	81666.5	246203	16792.7	1.13345e+06	14013.9	5551.39	67127.9	5841.44	88420.4	1.52525e+06	12463160	2003.62	474.328
1996	771229	14112.4	286898	1803.9	60936	1373823	1.9279e+06	57963.2	1453.81	3139764	1335529	111772	10873.5	1.47764e+06	33368.4	22885.5	356918	84092.5	38240	10485.1	21120.4	769292	1677.99	2889.58	43867.3	4711221	4994.05	74395.5	8728.81	29321.7	9100.71	4590814	1.60871e+06	571286	9525697	87086.8	84550.1	245060	16704.2	1.17904e+06	14181.9	5883.21	70686.9	6244.11	90021	1555135	12701742	2066.08	485.174
1997	756075	15278.2	301460	1874.59	61219.6	1.41847e+06	1.98009e+06	57377.8	1526.63	3.23654e+06	1.32489e+06	113940	10877.1	1.46555e+06	34640.8	24256.1	380210	87086.9	40445.7	11771.8	24977.9	752569	1727.94	2953.86	46759.9	4934583	5347.18	77906.3	9326.89	32011	9018.12	4613069	1.57267e+06	606523	10529900	84079.4	86879.6	244090	16953.5	1.22432e+06	14264.7	6132.8	75506.1	6677.42	91965.4	1.51286e+06	12565176	2161.62	501.454
1998	694997	16680.5	325978	2000.18	62256.1	1.46851e+06	2011836	56175.7	1639.6	3337077	1.31404e+06	117199	10953.5	1.46796e+06	35963.2	25568.4	397800	100707	44456.4	13565.8	29056.4	709440	1777.17	3152.26	50909.5	5.12828e+06	5809.1	80528.9	10019.8	35119.6	9000.86	4.63898e+06	1.58968e+06	628920	11740840	75696.3	89286	243859	17507.5	1.26286e+06	14432.8	6388.22	82132.3	7288.22	93254.2	1.47972e+06	12452535	2275.56	509.596
1999	623119	17997.3	342109	2174.02	62443	1.51608e+06	1.99868e+06	54096.9	1803.8	3.4432e+06	1.29563e+06	119307	11386.3	1.49819e+06	37280.3	26640.4	413358	113577	49856	15034.5	32240	648761	1889.73	3416.29	54463	5.25031e+06	6246.81	81729.2	10991.6	38737.6	9144.06	4.65904e+06	1574604	646148	12966384	66536.1	91371.7	243310	17906.9	1.26179e+06	14500.5	6723.02	88115.7	7874.25	95122.3	1.44568e+06	12308311	2268.59	529.706
2000	558006	18856.4	343558	2330.96	64886.5	1.56304e+06	1.95892e+06	51764.7	2014.59	3.388e+06	1.28177e+06	120376	11405.5	1.49508e+06	38568.1	27605.4	430244	117474	58856.8	17014.5	35326.1	586333	2111.91	3770.68	58579.6	5364543	6705.88	81377.3	12177.8	42511	9240.62	4508144	1.50875e+06	652358	14236407	57416.3	93426	242364	18572.2	1260394	14475.8	6962.57	93654.1	8414.98	96133.3	1.42119e+06	12156833	2281.15	561.107
2001	507717	19783.6	345280	2437.19	67135.8	1.61437e+06	1.9089e+06	49574	2176.9	3346541	1.24843e+06	122492	11534.1	1.51163e+06	40374	28587.2	451194	131735	71359.4	19117.1	38365.4	531366	2316	4226.36	63148.4	5504505	7236.99	81857.5	13780.9	46819.7	9360.2	4378532	1.45508e+06	658726	15759915	50463	97257	242756	19594.2	1.28082e+06	14558	7267.96	99996.9	8965.93	98540.6	1.42421e+06	11975420	2331.94	590.197
2002	474035	20915.6	348802	2495.15	69969.5	1.67189e+06	1.80463e+06	48076.3	2406.19	3318803	1.20451e+06	126434	11698.9	1.46741e+06	42118.2	29659.1	478491	142012	90912.5	21386.9	42101.7	486591	2502.84	4664.29	70032.5	5.64394e+06	8025.04	84221	15713.1	51516.9	9472.65	4.24848e+06	1.39341e+06	671025	17536190	46022.3	101329	244977	20707.3	1309878	14639.1	7700.28	107085	9530.82	96790.2	1.41203e+06	11717646	2460.45	619.675
2003	454992	22329.8	356889	2567.63	73819.3	1.74185e+06	1.78405e+06	47382.8	2712.43	3.45722e+06	1.23256e+06	133085	12211.4	1.52031e+06	44047.4	31014.8	511922	126256	118090	23767.8	45994.9	454342	2652.56	5109.2	77632.9	5813930	8689.9	85495	17717.2	56179.7	9453.44	4.37396e+06	1.38694e+06	689215	19703782	42756.7	104816	247083	22152.8	1.3477e+06	14609.7	8105.68	115141	10113.4	90538.5	1.48071e+06	12008162	2738.27	671.202
2004	451777	23898.2	368676	2702.89	78298.5	1.81587e+06	1.79772e+06	47319.3	3138.09	3.61336e+06	1267787	139187	12891.7	1.58722e+06	45823	32687.4	556421	138487	148647	26489.3	49591.5	433110	2817.89	5858.19	84485.7	6.04582e+06	9575.01	87091.1	19989.8	61367.1	9452.18	4522782	1.34973e+06	717469	22163566	41229.5	109526	248725	24046.8	1.4023e+06	14639.1	8692.78	123455	10703.9	98337.4	1.49988e+06	12275993	2963.46	750.804
2005	465851	25921.6	383939	2890.05	83766.8	1.90951e+06	1847660	48414	3794.27	3796032	1.30356e+06	145437	13416.5	1.68454e+06	47611.1	34687.7	616223	162755	172715	30743.2	54585.1	423224	3067.08	6826.98	88987.8	6.34101e+06	10727.1	89080.3	21850.5	66886	9586.22	4.70391e+06	1.5237e+06	753944	25002166	41110.2	115089	251615	26885.3	1.46205e+06	14719.1	9211.39	132710	11353.7	107847	1.52961e+06	12559612	3348	870.38
2006	508078	28037.5	413600	3147.7	108180	2.01416e+06	1.9436e+06	50119.4	4862.89	3.90456e+06	1.42307e+06	145676	13718.3	1.8953e+06	49375.3	37246.1	693605	187327	185542	36667.1	72964.5	422243	3371.86	8043.32	92398.8	6865377	12416.9	91713.4	23502.8	74642.5	10080.4	4.96197e+06	1.82912e+06	807562	28461476	43821.3	122379	250908	31186.9	1538829	14649.9	9955.93	142919	11969.5	122184	1.67155e+06	13519404	4189.26	1030.38
2007	590373	30025.5	475124	3543.59	118847	2.17495e+06	2.12292e+06	51722.7	6320.83	4.0112e+06	1.52761e+06	136571	13726.4	2.07211e+06	51840.2	40863.2	793782	213526	200826	43699.7	71534.1	423755	3739.06	9566.43	95842.4	7.80477e+06	14322.7	96623.1	24579.8	86271.4	11215.8	5.20121e+06	2.03034e+06	879533	32760308	51276.1	131762	242469	41233.3	1.63733e+06	14186.5	11188.9	155389	12562.4	135361	1.79311e+06	14432730	5290.03	1251.92
2008	728977	32061.7	581049	3978.47	132815	2.33229e+06	2.3769e+06	53598.3	8258.07	4.10328e+06	1.68093e+06	129617	13707.2	2.32168e+06	54668.8	45267.1	923265	255547	217742	51356	80373.4	431282	4289.45	11667	103050	9228336	16659.8	103340	26220.4	101651	13190.5	5423415	2.20097e+06	972023	37980100	65174.3	145420	227821	55371.2	1.7274e+06	13693.3	12537.8	169920	13137.3	149737	1.95466e+06	15340329	6627.5	1573.86
2009	928108	33504	731489	4073.15	147523	2.49389e+06	2.614e+06	53848.5	10563.5	4165241	1866903	123719	13892.5	2.54266e+06	57746.6	50590.2	1.07322e+06	288617	224246	59120.9	88784.1	436931	4805.67	13849.9	111138	10984343	19223.5	110339	28188.9	120738	16104.5	5.77222e+06	2.43603e+06	1.07118e+06	44643404	89613.2	159650	211246	76124.7	1.80867e+06	13115.5	13768.9	181434	13587.7	158078	2.02468e+06	15955056	8159.6	1968.72
2010	1.17119e+06	34614.2	906813	4100.59	163120	2619715	2.87621e+06	54532.5	12565.8	4241993	1.97496e+06	122582	14188.5	2.83739e+06	60880.2	56276.9	1.23424e+06	358050	233892	65629.8	100618	446344	5264.35	15635.6	119857	12942057	22018	117019	31289.7	141059	19797	6160862	2.32314e+06	1.18112e+06	51907732	131729	173103	191139	103687	1894346	12540.4	15211.6	193023	13979.4	177290	1.94959e+06	16566225	9458.46	2374.65
2011	1.35642e+06	35535	1046118	4075.67	173394	2.7415e+06	3.09923e+06	55731.4	13455.8	4348664	2.108e+06	131371	14417.9	2.88189e+06	63203.6	61479.9	1.39027e+06	360971	244150	69530	114522	458665	5685.93	16148.2	129147	14173476	24239.5	125626	34588.5	155429	22662.5	6584164	2.66306e+06	1.29203e+06	58610932	166423	183662	176630	124077	1.98611e+06	12178.4	16405.7	203608	14323.7	175184	2134181	17233948	10801.7	2580.43
2012	1.41628e+06	32822.9	1.10774e+06	3655.84	163361	2.61214e+06	3.15603e+06	61172	12685.4	4862428	2.36632e+06	150966	13180.7	3198966	62226.2	61112.6	1.52266e+06	387243	314083	66475.5	114323	446907	5937.81	14889	135575	14178964	25046	138809	38247	157598	23253.9	7.02382e+06	2795723	1.38379e+06	63397776	175984	182872	110791	132705	1.97656e+06	11642.5	15899.8	210645	14575.5	188411	2.20398e+06	18135912	11950.1	2538
2013	1.3924e+06	28567.6	1.10382e+06	3300.05	170891	2.56419e+06	3.1666e+06	66889.4	11986.8	5.40277e+06	2448908	158834	12689.8	3.24403e+06	66340.6	65543.5	1.65825e+06	381212	279038	67769.9	123106	491410	6425.1	13792	144313	14193204	24763.5	157855	39330.8	157500	25260.3	7443675	2.6153e+06	1.56583e+06	68379848	179448	189430	198719	127841	1.98858e+06	12635.8	15490.8	214141	14672.7	196146	2.21221e+06	18967338	8222.01	2471.14
2014	1.33708e+06	26377.2	1.21978e+06	3035.81	211204	3.56726e+06	3.20458e+06	94606.4	11352.9	6.0041e+06	2.55044e+06	223600	13674	3.20862e+06	67093.8	62999.3	1.82839e+06	397034	288766	69575.3	127401	629746	6864.7	12840.7	156673	14292413	25140.4	162192	43194.9	161217	27053.4	7889559	2.80796e+06	1.51072e+06	73028176	200063	196693	239121	135386	2.03056e+06	12105.3	15984.1	218222	14820.2	187136	2.25421e+06	19777244	8601.51	2475.25
2015	1.40109e+06	23630	1.2041e+06	2850.43	209133	4.08871e+06	3.23496e+06	80520.2	10892.7	5.89791e+06	2.69699e+06	211148	14103.9	3.29015e+06	69432.9	60657.2	1999870	407638	297086	70277.7	127162	574859	7731.26	12102.4	170340	13952505	24904.5	159175	47105.1	163060	27770	8.33382e+06	2.96007e+06	1747526	75872464	217907	202993	264619	141854	2056294	10680.2	16564.1	221009	15011.6	200723	2255350	19994848	9326.68	2500.74
2016	1424017	20386.9	1.14959e+06	2621.86	219219	4.157e+06	3.18368e+06	87297.3	10399.9	6.00613e+06	2.79734e+06	226274	16072	3.40054e+06	72821.1	66440.3	2.18887e+06	412716	318826	71015.7	122302	598473	8597.59	11500.2	181133	13505046	25698.3	166943	51245.8	163885	28443.8	8527152	3.0649e+06	1.8008e+06	80571544	214803	209306	283186	143572	2056220	11634.6	17551.2	225579	14832.9	204635	2.34861e+06	20227082	9246.37	2497.28
2017	1.43203e+06	18128.2	1.35166e+06	2237.24	217176	4.28727e+06	3.31664e+06	95323.9	9718.63	5.69332e+06	2.80226e+06	253676	17445.5	3.38357e+06	74870.3	72456.4	2399446	433697	384923	72809.6	128191	634667	9398.06	11038.2	198068	13467872	34193.3	185221	56321.7	166636	31075.3	8399451	3.14394e+06	1.94916e+06	85568768	212095	225862	244157	140316	2.05616e+06	12683.9	17652.3	222964	15058.6	209223	2.33054e+06	20453238	9542.21	2560.52
2018	1.4797e+06	18285	1.36082e+06	2370.39	224225	4.39641e+06	3.36109e+06	97055.1	10382.6	5.79548e+06	2835065	263343	18111.2	3.43616e+06	81024.5	78750.6	2.61149e+06	445620	407006	74514.4	133064	643405	9674.08	11113.2	207563	13554706	34017.1	193136	58780.9	176226	31512.1	8555011	3.18796e+06	2.00963e+06	93338152	232406	237284	258777	140610	2.12243e+06	12774.5	18443.6	230247	15511.5	211874	2.3527e+06	20650968	10366.6	2742.36
2019	1.53166e+06	18458.1	1.37132e+06	2385.74	229818	4.51036e+06	3.37482e+06	98945.9	10975.7	5899094	2.87546e+06	273639	18806.6	3496175	88006.9	86375.1	2.84331e+06	458279	428702	76626.1	138298	656323	9956.21	11334.5	215586	13677290	33888.2	200160	61204.9	186375	31822.4	8721109	3225664	2075795	101544168	255209	249906	270621	141415	2.19457e+06	12915.6	19152.6	236105	16056.4	214205	2.37533e+06	20907856	11176.5	2821.07
Gesamtergebnis	2.81906e+07	711857	2.22895e+07	93387.1	4.33205e+06	8.17472e+07	7.53219e+07	1.87321e+06	190884	1.65914e+08	6.61189e+07	4.47025e+06	601718	9.31452e+07	1.69528e+06	1.43593e+06	3.23369e+07	7.78713e+06	5.41707e+06	1.25963e+06	2.02231e+06	1.76023e+07	140050	281030	3.84065e+06	2.92295e+08	581564	3.99559e+06	816222	2.7271e+06	702524	2.35787e+08	9.57513e+07	3.55252e+07	1.16337e+09	3.84765e+06	4.86436e+06	1.10745e+07	2.07974e+06	6.64926e+07	603464	391715	5.07482e+06	351377	5.58641e+06	5.26612e+07	6.62376e+08	177465	45387.5
[truncated: 132 more columns]
