# Supplementary material for: The Social Cost of Fossil and Industrial CO2 Emissions from 1950 to 2018
Source: Research Square preprint supplement (doi:10.21203/rs.3.rs-2244259/v1), 2022-11-17
Supplement: Supplementary file 52 [file csh_i_Transposed.xlsx]

## Sheet: csh_i_gross_capital_formation
VariableCode	RegionCode	YearCode	AggValue
csh_i	ABW	1970	0.445748
csh_i	ABW	1971	0.433276
csh_i	ABW	1972	0.434323
csh_i	ABW	1973	0.416243
csh_i	ABW	1974	0.405143
csh_i	ABW	1975	0.421617
csh_i	ABW	1976	0.414295
csh_i	ABW	1977	0.433246
csh_i	ABW	1978	0.41011
csh_i	ABW	1979	0.387707
csh_i	ABW	1980	0.384474
csh_i	ABW	1981	0.388662
csh_i	ABW	1982	0.39309
csh_i	ABW	1983	0.385909
csh_i	ABW	1984	0.385251
csh_i	ABW	1985	0.357274
csh_i	ABW	1986	0.364344
csh_i	ABW	1987	0.353578
csh_i	ABW	1988	0.351074
csh_i	ABW	1989	0.376601
csh_i	ABW	1990	0.343818
csh_i	ABW	1991	0.411866
csh_i	ABW	1992	0.306889
csh_i	ABW	1993	0.335162
csh_i	ABW	1994	0.315724
csh_i	ABW	1995	0.329352
csh_i	ABW	1996	0.320175
csh_i	ABW	1997	0.351899
csh_i	ABW	1998	0.344937
csh_i	ABW	1999	0.316383
csh_i	ABW	2000	0.299764
csh_i	ABW	2001	0.281268
csh_i	ABW	2002	0.409718
csh_i	ABW	2003	0.435208
csh_i	ABW	2004	0.412306
csh_i	ABW	2005	0.488939
csh_i	ABW	2006	0.493411
csh_i	ABW	2007	0.479468
csh_i	ABW	2008	0.480595
csh_i	ABW	2009	0.436243
csh_i	ABW	2010	0.418701
csh_i	ABW	2011	0.418
csh_i	ABW	2012	0.37152
csh_i	ABW	2013	0.265967
csh_i	ABW	2014	0.279211
csh_i	ABW	2015	0.237861
csh_i	ABW	2016	0.262684
csh_i	ABW	2017	0.283503
csh_i	ABW	2018	0.248685
csh_i	ABW	2019	0.246366
csh_i	AGO	1970	0.37872
csh_i	AGO	1971	0.377376
csh_i	AGO	1972	0.384716
csh_i	AGO	1973	0.385681
csh_i	AGO	1974	0.397583
csh_i	AGO	1975	0.40932
csh_i	AGO	1976	0.396777
csh_i	AGO	1977	0.387024
csh_i	AGO	1978	0.401575
csh_i	AGO	1979	0.385584
csh_i	AGO	1980	0.363888
csh_i	AGO	1981	0.372841
csh_i	AGO	1982	0.42011
csh_i	AGO	1983	0.358704
csh_i	AGO	1984	0.345171
csh_i	AGO	1985	0.25817
csh_i	AGO	1986	0.246006
csh_i	AGO	1987	0.24824
csh_i	AGO	1988	0.196775
csh_i	AGO	1989	0.167627
csh_i	AGO	1990	0.162812
csh_i	AGO	1991	0.421966
csh_i	AGO	1992	0.526537
csh_i	AGO	1993	0.500108
csh_i	AGO	1994	0.454813
csh_i	AGO	1995	0.630909
csh_i	AGO	1996	0.738166
csh_i	AGO	1997	0.555552
csh_i	AGO	1998	0.718285
csh_i	AGO	1999	0.587191
csh_i	AGO	2000	0.380562
csh_i	AGO	2001	0.334792
csh_i	AGO	2002	0.312066
csh_i	AGO	2003	0.323925
csh_i	AGO	2004	0.307023
csh_i	AGO	2005	0.260273
csh_i	AGO	2006	0.223303
csh_i	AGO	2007	0.240752
csh_i	AGO	2008	0.278904
csh_i	AGO	2009	0.403175
csh_i	AGO	2010	0.310117
csh_i	AGO	2011	0.305798
csh_i	AGO	2012	0.291273
csh_i	AGO	2013	0.26632
csh_i	AGO	2014	0.266064
csh_i	AGO	2015	0.308716
csh_i	AGO	2016	0.242255
csh_i	AGO	2017	0.206898
csh_i	AGO	2018	0.190925
csh_i	AGO	2019	0.19171
csh_i	AIA	1970	0.634957
csh_i	AIA	1971	0.638258
csh_i	AIA	1972	0.637623
csh_i	AIA	1973	0.644773
csh_i	AIA	1974	0.682436
csh_i	AIA	1975	0.689765
csh_i	AIA	1976	0.682109
csh_i	AIA	1977	0.683457
csh_i	AIA	1978	0.682449
csh_i	AIA	1979	0.68406
csh_i	AIA	1980	0.69727
csh_i	AIA	1981	0.713447
csh_i	AIA	1982	0.726772
csh_i	AIA	1983	0.701832
csh_i	AIA	1984	0.662623
csh_i	AIA	1985	0.619023
csh_i	AIA	1986	0.715855
csh_i	AIA	1987	0.804833
csh_i	AIA	1988	0.580825
csh_i	AIA	1989	0.566413
csh_i	AIA	1990	0.515634
csh_i	AIA	1991	0.454909
csh_i	AIA	1992	0.472158
csh_i	AIA	1993	0.371573
csh_i	AIA	1994	0.366263
csh_i	AIA	1995	0.385374
csh_i	AIA	1996	0.403987
csh_i	AIA	1997	0.382728
csh_i	AIA	1998	0.467831
csh_i	AIA	1999	0.579249
csh_i	AIA	2000	0.639754
csh_i	AIA	2001	0.51587
csh_i	AIA	2002	0.420743
csh_i	AIA	2003	0.399385
csh_i	AIA	2004	0.515824
csh_i	AIA	2005	0.550491
csh_i	AIA	2006	0.664501
csh_i	AIA	2007	0.796093
csh_i	AIA	2008	0.892785
csh_i	AIA	2009	0.492134
csh_i	AIA	2010	0.397656
csh_i	AIA	2011	0.267674
csh_i	AIA	2012	0.293495
csh_i	AIA	2013	0.32
csh_i	AIA	2014	0.407647
csh_i	AIA	2015	0.425889
csh_i	AIA	2016	0.343677
csh_i	AIA	2017	0.363114
csh_i	AIA	2018	1.05243
csh_i	AIA	2019	0.292376
csh_i	ALB	1970	0.168852
csh_i	ALB	1971	0.171191
csh_i	ALB	1972	0.172382
csh_i	ALB	1973	0.174668
csh_i	ALB	1974	0.178952
csh_i	ALB	1975	0.184254
csh_i	ALB	1976	0.184507
csh_i	ALB	1977	0.178109
csh_i	ALB	1978	0.17915
csh_i	ALB	1979	0.187915
csh_i	ALB	1980	0.166419
csh_i	ALB	1981	0.184969
csh_i	ALB	1982	0.212802
csh_i	ALB	1983	0.183265
csh_i	ALB	1984	0.1571
csh_i	ALB	1985	0.166536
csh_i	ALB	1986	0.162067
csh_i	ALB	1987	0.139664
csh_i	ALB	1988	0.145367
csh_i	ALB	1989	0.155529
csh_i	ALB	1990	0.106055
csh_i	ALB	1991	0.024768
csh_i	ALB	1992	0.0196409
csh_i	ALB	1993	0.054909
csh_i	ALB	1994	0.0774242
csh_i	ALB	1995	0.0768332
csh_i	ALB	1996	0.0907028
csh_i	ALB	1997	0.0714798
csh_i	ALB	1998	0.0806355
csh_i	ALB	1999	0.102274
csh_i	ALB	2000	0.148362
csh_i	ALB	2001	0.189249
csh_i	ALB	2002	0.212634
csh_i	ALB	2003	0.234316
csh_i	ALB	2004	0.27479
csh_i	ALB	2005	0.303053
csh_i	ALB	2006	0.334689
csh_i	ALB	2007	0.32934
csh_i	ALB	2008	0.333942
csh_i	ALB	2009	0.326972
csh_i	ALB	2010	0.269711
csh_i	ALB	2011	0.265054
csh_i	ALB	2012	0.244322
csh_i	ALB	2013	0.242953
csh_i	ALB	2014	0.239927
csh_i	ALB	2015	0.224819
csh_i	ALB	2016	0.224871
csh_i	ALB	2017	0.225709
csh_i	ALB	2018	0.223752
csh_i	ALB	2019	0.205828
csh_i	ARE	1970	0.366573
csh_i	ARE	1971	0.388543
csh_i	ARE	1972	0.490285
csh_i	ARE	1973	0.454277
csh_i	ARE	1974	0.317206
csh_i	ARE	1975	0.536566
csh_i	ARE	1976	0.546087
csh_i	ARE	1977	0.629568
csh_i	ARE	1978	0.60593
csh_i	ARE	1979	0.535467
csh_i	ARE	1980	0.354648
csh_i	ARE	1981	0.355168
csh_i	ARE	1982	0.381542
csh_i	ARE	1983	0.423377
csh_i	ARE	1984	0.40584
csh_i	ARE	1985	0.367714
csh_i	ARE	1986	0.419048
csh_i	ARE	1987	0.40832
csh_i	ARE	1988	0.362791
csh_i	ARE	1989	0.323132
csh_i	ARE	1990	0.284986
csh_i	ARE	1991	0.328
csh_i	ARE	1992	0.356981
csh_i	ARE	1993	0.312696
csh_i	ARE	1994	0.331692
csh_i	ARE	1995	0.314533
csh_i	ARE	1996	0.305589
csh_i	ARE	1997	0.303307
csh_i	ARE	1998	0.317116
csh_i	ARE	1999	0.302405
csh_i	ARE	2000	0.266941
csh_i	ARE	2001	0.267513
csh_i	ARE	2002	0.281109
csh_i	ARE	2003	0.273606
csh_i	ARE	2004	0.257341
csh_i	ARE	2005	0.267045
csh_i	ARE	2006	0.257129
csh_i	ARE	2007	0.320712
csh_i	ARE	2008	0.292914
csh_i	ARE	2009	0.365931
csh_i	ARE	2010	0.321749
csh_i	ARE	2011	0.265
csh_i	ARE	2012	0.224357
csh_i	ARE	2013	0.197561
csh_i	ARE	2014	0.259453
csh_i	ARE	2015	0.312909
csh_i	ARE	2016	0.332127
csh_i	ARE	2017	0.364017
csh_i	ARE	2018	0.318493
csh_i	ARE	2019	0.328729
csh_i	ARG	1950	0.0847203
csh_i	ARG	1951	0.125594
csh_i	ARG	1952	0.118653
csh_i	ARG	1953	0.118317
csh_i	ARG	1954	0.108073
csh_i	ARG	1955	0.112315
csh_i	ARG	1956	0.104864
csh_i	ARG	1957	0.110905
csh_i	ARG	1958	0.112816
csh_i	ARG	1959	0.111062
csh_i	ARG	1960	0.148988
csh_i	ARG	1961	0.151162
csh_i	ARG	1962	0.131594
csh_i	ARG	1963	0.113241
csh_i	ARG	1964	0.139779
csh_i	ARG	1965	0.128806
csh_i	ARG	1966	0.12099
csh_i	ARG	1967	0.119687
csh_i	ARG	1968	0.125976
csh_i	ARG	1969	0.142668
csh_i	ARG	1970	0.144581
csh_i	ARG	1971	0.157996
csh_i	ARG	1972	0.158413
csh_i	ARG	1973	0.144448
csh_i	ARG	1974	0.143846
csh_i	ARG	1975	0.153048
csh_i	ARG	1976	0.161196
csh_i	ARG	1977	0.180236
csh_i	ARG	1978	0.153642
csh_i	ARG	1979	0.158864
csh_i	ARG	1980	0.173423
csh_i	ARG	1981	0.153874
csh_i	ARG	1982	0.124745
csh_i	ARG	1983	0.120258
csh_i	ARG	1984	0.114024
csh_i	ARG	1985	0.106565
csh_i	ARG	1986	0.113869
csh_i	ARG	1987	0.130029
csh_i	ARG	1988	0.126602
csh_i	ARG	1989	0.109649
csh_i	ARG	1990	0.0877986
csh_i	ARG	1991	0.110795
csh_i	ARG	1992	0.141797
csh_i	ARG	1993	0.166596
csh_i	ARG	1994	0.186089
csh_i	ARG	1995	0.170761
csh_i	ARG	1996	0.181635
csh_i	ARG	1997	0.200939
csh_i	ARG	1998	0.207957
csh_i	ARG	1999	0.188651
csh_i	ARG	2000	0.176277
csh_i	ARG	2001	0.156381
csh_i	ARG	2002	0.11522
csh_i	ARG	2003	0.143109
csh_i	ARG	2004	0.171059
csh_i	ARG	2005	0.175893
csh_i	ARG	2006	0.170907
csh_i	ARG	2007	0.183415
csh_i	ARG	2008	0.182933
csh_i	ARG	2009	0.14655
csh_i	ARG	2010	0.168039
csh_i	ARG	2011	0.172578
csh_i	ARG	2012	0.15531
csh_i	ARG	2013	0.155291
csh_i	ARG	2014	0.151393
csh_i	ARG	2015	0.147443
csh_i	ARG	2016	0.148116
csh_i	ARG	2017	0.132341
csh_i	ARG	2018	0.122582
csh_i	ARG	2019	0.105573
csh_i	ARM	1990	0.265123
csh_i	ARM	1991	0.217384
csh_i	ARM	1992	0.0089138
csh_i	ARM	1993	0.0513361
csh_i	ARM	1994	0.161023
csh_i	ARM	1995	0.125619
csh_i	ARM	1996	0.120655
csh_i	ARM	1997	0.118678
csh_i	ARM	1998	0.133604
csh_i	ARM	1999	0.114171
csh_i	ARM	2000	0.118337
csh_i	ARM	2001	0.129603
csh_i	ARM	2002	0.146443
csh_i	ARM	2003	0.164012
csh_i	ARM	2004	0.176508
csh_i	ARM	2005	0.198638
csh_i	ARM	2006	0.220073
csh_i	ARM	2007	0.220403
csh_i	ARM	2008	0.223484
csh_i	ARM	2009	0.158768
csh_i	ARM	2010	0.13954
csh_i	ARM	2011	0.115848
csh_i	ARM	2012	0.107242
csh_i	ARM	2013	0.0996814
csh_i	ARM	2014	0.107138
csh_i	ARM	2015	0.103417
csh_i	ARM	2016	0.0954061
csh_i	ARM	2017	0.0993335
csh_i	ARM	2018	0.120141
csh_i	ARM	2019	0.0942743
csh_i	ATG	1970	0.117258
csh_i	ATG	1971	0.119787
csh_i	ATG	1972	0.115143
csh_i	ATG	1973	0.113663
csh_i	ATG	1974	0.14745
csh_i	ATG	1975	0.159418
csh_i	ATG	1976	0.162264
csh_i	ATG	1977	0.113517
csh_i	ATG	1978	0.108016
csh_i	ATG	1979	0.179828
csh_i	ATG	1980	0.210716
csh_i	ATG	1981	0.215304
csh_i	ATG	1982	0.133123
csh_i	ATG	1983	0.101706
csh_i	ATG	1984	0.138404
csh_i	ATG	1985	0.186352
csh_i	ATG	1986	0.16953
csh_i	ATG	1987	0.203417
csh_i	ATG	1988	0.225565
csh_i	ATG	1989	0.229029
csh_i	ATG	1990	0.189849
csh_i	ATG	1991	0.192424
csh_i	ATG	1992	0.188317
csh_i	ATG	1993	0.170751
csh_i	ATG	1994	0.152007
csh_i	ATG	1995	0.167927
csh_i	ATG	1996	0.16955
csh_i	ATG	1997	0.187173
csh_i	ATG	1998	0.310693
csh_i	ATG	1999	0.23623
csh_i	ATG	2000	0.210613
csh_i	ATG	2001	0.187955
csh_i	ATG	2002	0.216351
csh_i	ATG	2003	0.225794
csh_i	ATG	2004	0.317133
csh_i	ATG	2005	0.302203
csh_i	ATG	2006	0.412651
csh_i	ATG	2007	0.384321
csh_i	ATG	2008	0.418457
csh_i	ATG	2009	0.412597
csh_i	ATG	2010	0.315966
csh_i	ATG	2011	0.247161
csh_i	ATG	2012	0.252983
csh_i	ATG	2013	0.271239
csh_i	ATG	2014	0.55546
csh_i	ATG	2015	0.279923
csh_i	ATG	2016	0.27365
csh_i	ATG	2017	0.293615
csh_i	ATG	2018	0.430931
csh_i	ATG	2019	0.384608
csh_i	AUS	1950	0.34443
csh_i	AUS	1951	0.435704
csh_i	AUS	1952	0.265138
csh_i	AUS	1953	0.308942
csh_i	AUS	1954	0.341384
csh_i	AUS	1955	0.339309
csh_i	AUS	1956	0.304016
csh_i	AUS	1957	0.31713
csh_i	AUS	1958	0.341679
csh_i	AUS	1959	0.34879
csh_i	AUS	1960	0.356183
csh_i	AUS	1961	0.302833
csh_i	AUS	1962	0.320442
csh_i	AUS	1963	0.315644
csh_i	AUS	1964	0.341544
csh_i	AUS	1965	0.32918
csh_i	AUS	1966	0.327278
csh_i	AUS	1967	0.322836
csh_i	AUS	1968	0.333984
csh_i	AUS	1969	0.332711
csh_i	AUS	1970	0.329755
csh_i	AUS	1971	0.315502
csh_i	AUS	1972	0.305455
csh_i	AUS	1973	0.318548
csh_i	AUS	1974	0.272105
csh_i	AUS	1975	0.269843
csh_i	AUS	1976	0.273623
csh_i	AUS	1977	0.26195
csh_i	AUS	1978	0.288815
csh_i	AUS	1979	0.283297
csh_i	AUS	1980	0.306079
csh_i	AUS	1981	0.319217
csh_i	AUS	1982	0.278432
csh_i	AUS	1983	0.289022
csh_i	AUS	1984	0.302398
csh_i	AUS	1985	0.304934
csh_i	AUS	1986	0.287611
csh_i	AUS	1987	0.295105
csh_i	AUS	1988	0.312662
csh_i	AUS	1989	0.302999
csh_i	AUS	1990	0.252877
csh_i	AUS	1991	0.24428
csh_i	AUS	1992	0.252358
csh_i	AUS	1993	0.264447
csh_i	AUS	1994	0.277267
csh_i	AUS	1995	0.260044
csh_i	AUS	1996	0.259642
csh_i	AUS	1997	0.266144
csh_i	AUS	1998	0.270176
csh_i	AUS	1999	0.271565
csh_i	AUS	2000	0.243354
csh_i	AUS	2001	0.255888
csh_i	AUS	2002	0.276907
csh_i	AUS	2003	0.293764
csh_i	AUS	2004	0.300734
csh_i	AUS	2005	0.298287
csh_i	AUS	2006	0.296635
csh_i	AUS	2007	0.302833
csh_i	AUS	2008	0.278304
csh_i	AUS	2009	0.268866
csh_i	AUS	2010	0.250366
csh_i	AUS	2011	0.253104
csh_i	AUS	2012	0.268218
csh_i	AUS	2013	0.286522
csh_i	AUS	2014	0.284825
csh_i	AUS	2015	0.261883
csh_i	AUS	2016	0.243143
csh_i	AUS	2017	0.235675
csh_i	AUS	2018	0.217926
csh_i	AUS	2019	0.206068
csh_i	AUT	1950	0.192313
csh_i	AUT	1951	0.225764
csh_i	AUT	1952	0.178742
csh_i	AUT	1953	0.129674
csh_i	AUT	1954	0.160077
csh_i	AUT	1955	0.200939
csh_i	AUT	1956	0.177393
csh_i	AUT	1957	0.181049
csh_i	AUT	1958	0.175043
csh_i	AUT	1959	0.178053
csh_i	AUT	1960	0.215909
csh_i	AUT	1961	0.205103
csh_i	AUT	1962	0.184987
csh_i	AUT	1963	0.184251
csh_i	AUT	1964	0.208624
csh_i	AUT	1965	0.205955
csh_i	AUT	1966	0.21883
csh_i	AUT	1967	0.205301
csh_i	AUT	1968	0.205058
csh_i	AUT	1969	0.209773
csh_i	AUT	1970	0.22995
csh_i	AUT	1971	0.227338
csh_i	AUT	1972	0.236847
csh_i	AUT	1973	0.250338
csh_i	AUT	1974	0.258082
csh_i	AUT	1975	0.230844
csh_i	AUT	1976	0.250322
csh_i	AUT	1977	0.263568
csh_i	AUT	1978	0.238587
csh_i	AUT	1979	0.269328
csh_i	AUT	1980	0.269594
csh_i	AUT	1981	0.265886
csh_i	AUT	1982	0.257462
csh_i	AUT	1983	0.251916
csh_i	AUT	1984	0.278055
csh_i	AUT	1985	0.30301
csh_i	AUT	1986	0.296254
csh_i	AUT	1987	0.3022
csh_i	AUT	1988	0.31972
csh_i	AUT	1989	0.324571
csh_i	AUT	1990	0.325673
csh_i	AUT	1991	0.334773
csh_i	AUT	1992	0.334336
csh_i	AUT	1993	0.333561
csh_i	AUT	1994	0.338561
csh_i	AUT	1995	0.350699
csh_i	AUT	1996	0.336875
csh_i	AUT	1997	0.31558
csh_i	AUT	1998	0.297469
csh_i	AUT	1999	0.293315
csh_i	AUT	2000	0.278789
csh_i	AUT	2001	0.263856
csh_i	AUT	2002	0.246538
csh_i	AUT	2003	0.259637
csh_i	AUT	2004	0.262693
csh_i	AUT	2005	0.262529
csh_i	AUT	2006	0.260734
csh_i	AUT	2007	0.271802
csh_i	AUT	2008	0.278337
csh_i	AUT	2009	0.269894
csh_i	AUT	2010	0.270728
csh_i	AUT	2011	0.293453
csh_i	AUT	2012	0.303871
csh_i	AUT	2013	0.30306
csh_i	AUT	2014	0.291291
csh_i	AUT	2015	0.295809
csh_i	AUT	2016	0.3049
csh_i	AUT	2017	0.312824
csh_i	AUT	2018	0.317631
csh_i	AUT	2019	0.312186
csh_i	AZE	1990	0.0948294
csh_i	AZE	1991	0.00755511
csh_i	AZE	1992	-0.00181291
csh_i	AZE	1993	0.0792592
csh_i	AZE	1994	0.0551397
csh_i	AZE	1995	0.117378
csh_i	AZE	1996	0.149509
csh_i	AZE	1997	0.202607
csh_i	AZE	1998	0.249116
csh_i	AZE	1999	0.232132
csh_i	AZE	2000	0.216705
csh_i	AZE	2001	0.238822
csh_i	AZE	2002	0.303434
csh_i	AZE	2003	0.393688
csh_i	AZE	2004	0.396852
csh_i	AZE	2005	0.286284
csh_i	AZE	2006	0.221011
csh_i	AZE	2007	0.154684
csh_i	AZE	2008	0.156395
csh_i	AZE	2009	0.12927
csh_i	AZE	2010	0.107591
csh_i	AZE	2011	0.104169
csh_i	AZE	2012	0.111186
csh_i	AZE	2013	0.12972
csh_i	AZE	2014	0.152017
csh_i	AZE	2015	0.149999
csh_i	AZE	2016	0.137549
csh_i	AZE	2017	0.137259
csh_i	AZE	2018	0.120549
csh_i	AZE	2019	0.122014
csh_i	BDI	1960	0.0730481
csh_i	BDI	1961	0.0762407
csh_i	BDI	1962	0.0786986
csh_i	BDI	1963	0.0655334
csh_i	BDI	1964	0.0612884
csh_i	BDI	1965	0.0657056
csh_i	BDI	1966	0.0775375
csh_i	BDI	1967	0.0749099
csh_i	BDI	1968	0.0874109
csh_i	BDI	1969	0.0916658
csh_i	BDI	1970	0.0533392
csh_i	BDI	1971	0.0934922
csh_i	BDI	1972	0.0323238
csh_i	BDI	1973	0.0612486
csh_i	BDI	1974	0.106631
csh_i	BDI	1975	0.0803876
csh_i	BDI	1976	0.107134
csh_i	BDI	1977	0.136073
csh_i	BDI	1978	0.154254
csh_i	BDI	1979	0.157977
csh_i	BDI	1980	0.147804
csh_i	BDI	1981	0.168016
csh_i	BDI	1982	0.176447
csh_i	BDI	1983	0.195327
csh_i	BDI	1984	0.206893
csh_i	BDI	1985	0.172142
csh_i	BDI	1986	0.165912
csh_i	BDI	1987	0.163306
csh_i	BDI	1988	0.0962365
csh_i	BDI	1989	0.108169
csh_i	BDI	1990	0.0516279
csh_i	BDI	1991	0.0498468
csh_i	BDI	1992	0.0587663
csh_i	BDI	1993	0.0739623
csh_i	BDI	1994	0.039775
csh_i	BDI	1995	0.0390827
csh_i	BDI	1996	0.0566003
csh_i	BDI	1997	0.0557703
csh_i	BDI	1998	0.0552324
csh_i	BDI	1999	0.119561
csh_i	BDI	2000	0.0573025
csh_i	BDI	2001	0.0662549
csh_i	BDI	2002	0.0672488
csh_i	BDI	2003	0.115508
csh_i	BDI	2004	0.139367
csh_i	BDI	2005	0.113867
csh_i	BDI	2006	0.111983
csh_i	BDI	2007	0.0967022
csh_i	BDI	2008	0.0885655
csh_i	BDI	2009	0.110829
csh_i	BDI	2010	0.118609
csh_i	BDI	2011	0.109895
csh_i	BDI	2012	0.103786
csh_i	BDI	2013	0.0849376
csh_i	BDI	2014	0.0811065
csh_i	BDI	2015	0.079836
csh_i	BDI	2016	0.0855147
csh_i	BDI	2017	0.0957543
csh_i	BDI	2018	0.117616
csh_i	BDI	2019	0.120426
csh_i	BEL	1950	0.252088
csh_i	BEL	1951	0.253042
csh_i	BEL	1952	0.251467
csh_i	BEL	1953	0.249618
csh_i	BEL	1954	0.266314
csh_i	BEL	1955	0.250981
csh_i	BEL	1956	0.281972
csh_i	BEL	1957	0.280161
csh_i	BEL	1958	0.24175
csh_i	BEL	1959	0.271175
csh_i	BEL	1960	0.290086
csh_i	BEL	1961	0.299679
csh_i	BEL	1962	0.281366
csh_i	BEL	1963	0.272968
csh_i	BEL	1964	0.309144
csh_i	BEL	1965	0.296921
csh_i	BEL	1966	0.309636
csh_i	BEL	1967	0.29532
csh_i	BEL	1968	0.282739
csh_i	BEL	1969	0.294136
csh_i	BEL	1970	0.304479
csh_i	BEL	1971	0.290289
csh_i	BEL	1972	0.274958
csh_i	BEL	1973	0.291577
csh_i	BEL	1974	0.331277
csh_i	BEL	1975	0.298835
csh_i	BEL	1976	0.299578
csh_i	BEL	1977	0.296787
csh_i	BEL	1978	0.291851
csh_i	BEL	1979	0.286963
csh_i	BEL	1980	0.321738
csh_i	BEL	1981	0.275275
csh_i	BEL	1982	0.259706
csh_i	BEL	1983	0.229777
csh_i	BEL	1984	0.253827
csh_i	BEL	1985	0.249281
csh_i	BEL	1986	0.250543
csh_i	BEL	1987	0.263996
csh_i	BEL	1988	0.292317
csh_i	BEL	1989	0.310342
csh_i	BEL	1990	0.318685
csh_i	BEL	1991	0.303333
csh_i	BEL	1992	0.300103
csh_i	BEL	1993	0.298544
csh_i	BEL	1994	0.291894
csh_i	BEL	1995	0.290767
csh_i	BEL	1996	0.284117
csh_i	BEL	1997	0.275385
csh_i	BEL	1998	0.262133
csh_i	BEL	1999	0.264175
csh_i	BEL	2000	0.266005
csh_i	BEL	2001	0.257286
csh_i	BEL	2002	0.23146
csh_i	BEL	2003	0.241029
csh_i	BEL	2004	0.273233
csh_i	BEL	2005	0.291785
csh_i	BEL	2006	0.301425
csh_i	BEL	2007	0.315944
csh_i	BEL	2008	0.339072
csh_i	BEL	2009	0.297943
csh_i	BEL	2010	0.318308
csh_i	BEL	2011	0.340404
csh_i	BEL	2012	0.344723
csh_i	BEL	2013	0.324251
csh_i	BEL	2014	0.332078
csh_i	BEL	2015	0.336818
csh_i	BEL	2016	0.344332
csh_i	BEL	2017	0.35144
csh_i	BEL	2018	0.367608
csh_i	BEL	2019	0.360464
csh_i	BEN	1959	0.047064
csh_i	BEN	1960	0.0419949
csh_i	BEN	1961	0.0388444
csh_i	BEN	1962	0.0380151
csh_i	BEN	1963	0.0395805
csh_i	BEN	1964	0.0339273
csh_i	BEN	1965	0.0293053
csh_i	BEN	1966	0.0293512
csh_i	BEN	1967	0.037492
csh_i	BEN	1968	0.0374971
csh_i	BEN	1969	0.0380807
csh_i	BEN	1970	0.0329106
csh_i	BEN	1971	0.0315203
csh_i	BEN	1972	0.0438528
csh_i	BEN	1973	0.0419368
csh_i	BEN	1974	0.059275
csh_i	BEN	1975	0.0716294
csh_i	BEN	1976	0.0670224
csh_i	BEN	1977	0.0587981
csh_i	BEN	1978	0.0569636
csh_i	BEN	1979	0.0782675
csh_i	BEN	1980	0.100613
csh_i	BEN	1981	0.0899451
csh_i	BEN	1982	0.178057
csh_i	BEN	1983	0.104342
csh_i	BEN	1984	0.0719581
csh_i	BEN	1985	0.0467286
csh_i	BEN	1986	0.0810899
csh_i	BEN	1987	0.0844552
csh_i	BEN	1988	0.0898271
csh_i	BEN	1989	0.0780187
csh_i	BEN	1990	0.112398
csh_i	BEN	1991	0.123812
csh_i	BEN	1992	0.126169
csh_i	BEN	1993	0.139635
csh_i	BEN	1994	0.15679
csh_i	BEN	1995	0.202293
csh_i	BEN	1996	0.167833
csh_i	BEN	1997	0.183216
csh_i	BEN	1998	0.168985
csh_i	BEN	1999	0.18838
csh_i	BEN	2000	0.168412
csh_i	BEN	2001	0.200426
csh_i	BEN	2002	0.170569
csh_i	BEN	2003	0.175665
csh_i	BEN	2004	0.179162
csh_i	BEN	2005	0.140507
csh_i	BEN	2006	0.148798
csh_i	BEN	2007	0.179699
csh_i	BEN	2008	0.162366
csh_i	BEN	2009	0.177552
csh_i	BEN	2010	0.184473
csh_i	BEN	2011	0.185642
csh_i	BEN	2012	0.163423
csh_i	BEN	2013	0.197054
csh_i	BEN	2014	0.165504
csh_i	BEN	2015	0.143709
csh_i	BEN	2016	0.134863
csh_i	BEN	2017	0.162343
csh_i	BEN	2018	0.178327
csh_i	BEN	2019	0.181712
csh_i	BFA	1959	0.0314159
csh_i	BFA	1960	0.0294089
csh_i	BFA	1961	0.0371784
csh_i	BFA	1962	0.0375217
csh_i	BFA	1963	0.0371436
csh_i	BFA	1964	0.037016
csh_i	BFA	1965	0.054019
csh_i	BFA	1966	0.0533731
csh_i	BFA	1967	0.04468
csh_i	BFA	1968	0.0456674
csh_i	BFA	1969	0.0545005
csh_i	BFA	1970	0.0603727
csh_i	BFA	1971	0.154078
csh_i	BFA	1972	0.0909077
csh_i	BFA	1973	0.110725
csh_i	BFA	1974	0.12949
csh_i	BFA	1975	0.118354
csh_i	BFA	1976	0.11417
csh_i	BFA	1977	0.0952771
csh_i	BFA	1978	0.0963652
csh_i	BFA	1979	0.164389
csh_i	BFA	1980	0.151186
csh_i	BFA	1981	0.141469
csh_i	BFA	1982	0.149457
csh_i	BFA	1983	0.132747
csh_i	BFA	1984	0.129116
csh_i	BFA	1985	0.212285
csh_i	BFA	1986	0.167063
csh_i	BFA	1987	0.161114
csh_i	BFA	1988	0.161255
csh_i	BFA	1989	0.163574
csh_i	BFA	1990	0.159689
csh_i	BFA	1991	0.171031
csh_i	BFA	1992	0.152221
csh_i	BFA	1993	0.148139
csh_i	BFA	1994	0.197777
csh_i	BFA	1995	0.153353
csh_i	BFA	1996	0.151649
csh_i	BFA	1997	0.162755
csh_i	BFA	1998	0.14632
csh_i	BFA	1999	0.121087
csh_i	BFA	2000	0.105331
csh_i	BFA	2001	0.109363
csh_i	BFA	2002	0.107937
csh_i	BFA	2003	0.121461
csh_i	BFA	2004	0.119601
csh_i	BFA	2005	0.137314
csh_i	BFA	2006	0.126127
csh_i	BFA	2007	0.138591
csh_i	BFA	2008	0.164434
csh_i	BFA	2009	0.170166
csh_i	BFA	2010	0.187103
csh_i	BFA	2011	0.19742
csh_i	BFA	2012	0.204937
csh_i	BFA	2013	0.184316
csh_i	BFA	2014	0.149469
csh_i	BFA	2015	0.145328
csh_i	BFA	2016	0.151887
csh_i	BFA	2017	0.165374
csh_i	BFA	2018	0.189152
csh_i	BFA	2019	0.210743
csh_i	BGD	1959	0.0147516
csh_i	BGD	1960	0.0159336
csh_i	BGD	1961	0.0179909
csh_i	BGD	1962	0.0266072
csh_i	BGD	1963	0.0193146
csh_i	BGD	1964	0.0246455
csh_i	BGD	1965	0.0279145
csh_i	BGD	1966	0.0287028
csh_i	BGD	1967	0.0330326
csh_i	BGD	1968	0.0428114
csh_i	BGD	1969	0.0383501
csh_i	BGD	1970	0.033958
csh_i	BGD	1971	0.0265173
csh_i	BGD	1972	0.0124556
csh_i	BGD	1973	0.0292177
csh_i	BGD	1974	0.0737924
csh_i	BGD	1975	0.0615899
csh_i	BGD	1976	0.0633585
csh_i	BGD	1977	0.0733768
csh_i	BGD	1978	0.0895042
csh_i	BGD	1979	0.0939077
csh_i	BGD	1980	0.117863
csh_i	BGD	1981	0.120487
csh_i	BGD	1982	0.105919
csh_i	BGD	1983	0.104057
csh_i	BGD	1984	0.10063
csh_i	BGD	1985	0.101265
csh_i	BGD	1986	0.146706
csh_i	BGD	1987	0.120512
csh_i	BGD	1988	0.11164
csh_i	BGD	1989	0.105033
csh_i	BGD	1990	0.102366
csh_i	BGD	1991	0.0973403
csh_i	BGD	1992	0.108375
csh_i	BGD	1993	0.121578
csh_i	BGD	1994	0.128964
csh_i	BGD	1995	0.136542
csh_i	BGD	1996	0.151265
csh_i	BGD	1997	0.164241
csh_i	BGD	1998	0.181031
csh_i	BGD	1999	0.201252
csh_i	BGD	2000	0.20823
csh_i	BGD	2001	0.211734
csh_i	BGD	2002	0.216271
csh_i	BGD	2003	0.220244
csh_i	BGD	2004	0.228425
csh_i	BGD	2005	0.236017
csh_i	BGD	2006	0.239166
csh_i	BGD	2007	0.233923
csh_i	BGD	2008	0.239322
csh_i	BGD	2009	0.24354
csh_i	BGD	2010	0.238812
csh_i	BGD	2011	0.23487
csh_i	BGD	2012	0.249817
csh_i	BGD	2013	0.244716
csh_i	BGD	2014	0.251927
csh_i	BGD	2015	0.243518
csh_i	BGD	2016	0.250807
csh_i	BGD	2017	0.258846
csh_i	BGD	2018	0.261006
csh_i	BGD	2019	0.26417
csh_i	BGR	1970	0.102986
csh_i	BGR	1971	0.103974
csh_i	BGR	1972	0.104231
csh_i	BGR	1973	0.104817
csh_i	BGR	1974	0.107444
csh_i	BGR	1975	0.109365
csh_i	BGR	1976	0.107465
csh_i	BGR	1977	0.107845
csh_i	BGR	1978	0.109231
csh_i	BGR	1979	0.102734
csh_i	BGR	1980	0.113446
csh_i	BGR	1981	0.116697
csh_i	BGR	1982	0.109831
csh_i	BGR	1983	0.101451
csh_i	BGR	1984	0.104515
csh_i	BGR	1985	0.0965551
csh_i	BGR	1986	0.110831
csh_i	BGR	1987	0.0962823
csh_i	BGR	1988	0.110682
csh_i	BGR	1989	0.108304
csh_i	BGR	1990	0.0674703
csh_i	BGR	1991	0.0540726
csh_i	BGR	1992	0.047174
csh_i	BGR	1993	0.050992
csh_i	BGR	1994	0.0447784
csh_i	BGR	1995	0.00529734
csh_i	BGR	1996	0.00448771
csh_i	BGR	1997	0.063254
csh_i	BGR	1998	0.107975
csh_i	BGR	1999	0.13508
csh_i	BGR	2000	0.130386
csh_i	BGR	2001	0.149657
csh_i	BGR	2002	0.1508
csh_i	BGR	2003	0.148511
csh_i	BGR	2004	0.170728
csh_i	BGR	2005	0.2088
csh_i	BGR	2006	0.249649
csh_i	BGR	2007	0.261774
csh_i	BGR	2008	0.304368
csh_i	BGR	2009	0.258228
csh_i	BGR	2010	0.214068
csh_i	BGR	2011	0.199173
csh_i	BGR	2012	0.202254
csh_i	BGR	2013	0.192164
csh_i	BGR	2014	0.201068
csh_i	BGR	2015	0.190581
csh_i	BGR	2016	0.172617
csh_i	BGR	2017	0.192029
csh_i	BGR	2018	0.202737
csh_i	BGR	2019	0.185824
csh_i	BHR	1970	0.358162
csh_i	BHR	1971	0.365132
csh_i	BHR	1972	0.346126
csh_i	BHR	1973	0.386162
csh_i	BHR	1974	0.34438
csh_i	BHR	1975	0.215192
csh_i	BHR	1976	0.477774
csh_i	BHR	1977	0.439783
csh_i	BHR	1978	0.443424
csh_i	BHR	1979	0.635065
csh_i	BHR	1980	0.62948
csh_i	BHR	1981	0.600932
csh_i	BHR	1982	0.505891
csh_i	BHR	1983	0.614559
csh_i	BHR	1984	0.682135
csh_i	BHR	1985	0.635644
csh_i	BHR	1986	0.435731
csh_i	BHR	1987	0.364131
csh_i	BHR	1988	0.332081
csh_i	BHR	1989	0.34545
csh_i	BHR	1990	0.257911
csh_i	BHR	1991	0.426395
csh_i	BHR	1992	0.432922
csh_i	BHR	1993	0.28549
csh_i	BHR	1994	0.263298
csh_i	BHR	1995	0.227587
csh_i	BHR	1996	0.218315
csh_i	BHR	1997	0.237781
csh_i	BHR	1998	0.266214
csh_i	BHR	1999	0.196271
csh_i	BHR	2000	0.193086
csh_i	BHR	2001	0.219736
csh_i	BHR	2002	0.255842
csh_i	BHR	2003	0.279966
csh_i	BHR	2004	0.327034
csh_i	BHR	2005	0.379844
csh_i	BHR	2006	0.393388
csh_i	BHR	2007	0.432273
csh_i	BHR	2008	0.370895
csh_i	BHR	2009	0.292157
csh_i	BHR	2010	0.307385
csh_i	BHR	2011	0.250173
csh_i	BHR	2012	0.271372
csh_i	BHR	2013	0.258032
csh_i	BHR	2014	0.272906
csh_i	BHR	2015	0.254441
csh_i	BHR	2016	0.297565
csh_i	BHR	2017	0.346909
csh_i	BHR	2018	0.365693
csh_i	BHR	2019	0.343203
csh_i	BHS	1970	0.0991176
csh_i	BHS	1971	0.0937603
csh_i	BHS	1972	0.0951167
csh_i	BHS	1973	0.0877828
csh_i	BHS	1974	0.0811714
csh_i	BHS	1975	0.0940605
csh_i	BHS	1976	0.0878688
csh_i	BHS	1977	0.103248
csh_i	BHS	1978	0.0777038
csh_i	BHS	1979	0.0960011
csh_i	BHS	1980	0.117488
csh_i	BHS	1981	0.143586
csh_i	BHS	1982	0.164875
csh_i	BHS	1983	0.146569
csh_i	BHS	1984	0.109663
csh_i	BHS	1985	0.122732
csh_i	BHS	1986	0.123551
csh_i	BHS	1987	0.115332
csh_i	BHS	1988	0.117348
csh_i	BHS	1989	0.179289
csh_i	BHS	1990	0.179058
csh_i	BHS	1991	0.187148
csh_i	BHS	1992	0.161297
csh_i	BHS	1993	0.141342
csh_i	BHS	1994	0.163178
csh_i	BHS	1995	0.176773
csh_i	BHS	1996	0.15995
csh_i	BHS	1997	0.236775
csh_i	BHS	1998	0.27899
csh_i	BHS	1999	0.230396
csh_i	BHS	2000	0.270953
csh_i	BHS	2001	0.264296
csh_i	BHS	2002	0.240547
csh_i	BHS	2003	0.269678
csh_i	BHS	2004	0.266776
csh_i	BHS	2005	0.316146
csh_i	BHS	2006	0.413846
csh_i	BHS	2007	0.37163
csh_i	BHS	2008	0.384695
csh_i	BHS	2009	0.333899
csh_i	BHS	2010	0.335538
csh_i	BHS	2011	0.389888
csh_i	BHS	2012	0.404502
csh_i	BHS	2013	0.394785
csh_i	BHS	2014	0.401938
csh_i	BHS	2015	0.335621
csh_i	BHS	2016	0.338596
csh_i	BHS	2017	0.357675
csh_i	BHS	2018	0.32888
csh_i	BHS	2019	0.332428
csh_i	BIH	1990	0.351169
csh_i	BIH	1991	0.302747
csh_i	BIH	1992	0.323877
csh_i	BIH	1993	0.268353
csh_i	BIH	1994	0.225101
csh_i	BIH	1995	0.102059
csh_i	BIH	1996	0.20129
csh_i	BIH	1997	0.221354
csh_i	BIH	1998	0.22137
csh_i	BIH	1999	0.17912
csh_i	BIH	2000	0.197257
csh_i	BIH	2001	0.191294
csh_i	BIH	2002	0.21733
csh_i	BIH	2003	0.225606
csh_i	BIH	2004	0.238405
csh_i	BIH	2005	0.229179
csh_i	BIH	2006	0.211907
csh_i	BIH	2007	0.247014
csh_i	BIH	2008	0.268102
csh_i	BIH	2009	0.208171
csh_i	BIH	2010	0.17149
csh_i	BIH	2011	0.193663
csh_i	BIH	2012	0.206957
csh_i	BIH	2013	0.198642
csh_i	BIH	2014	0.204369
csh_i	BIH	2015	0.193824
csh_i	BIH	2016	0.19483
csh_i	BIH	2017	0.223451
csh_i	BIH	2018	0.220942
csh_i	BIH	2019	0.220737
csh_i	BLR	1990	0.214271
csh_i	BLR	1991	0.254408
csh_i	BLR	1992	0.233653
csh_i	BLR	1993	0.208466
csh_i	BLR	1994	0.216054
csh_i	BLR	1995	0.155293
csh_i	BLR	1996	0.156865
csh_i	BLR	1997	0.161903
csh_i	BLR	1998	0.166963
csh_i	BLR	1999	0.13613
csh_i	BLR	2000	0.139974
csh_i	BLR	2001	0.142511
csh_i	BLR	2002	0.140943
csh_i	BLR	2003	0.160788
csh_i	BLR	2004	0.184801
csh_i	BLR	2005	0.192772
csh_i	BLR	2006	0.215268
csh_i	BLR	2007	0.215049
csh_i	BLR	2008	0.230689
csh_i	BLR	2009	0.21569
csh_i	BLR	2010	0.222432
csh_i	BLR	2011	0.204034
csh_i	BLR	2012	0.186179
csh_i	BLR	2013	0.203273
csh_i	BLR	2014	0.209279
csh_i	BLR	2015	0.163403
csh_i	BLR	2016	0.15089
csh_i	BLR	2017	0.152917
csh_i	BLR	2018	0.151217
csh_i	BLR	2019	0.162771
csh_i	BLZ	1970	0.133096
csh_i	BLZ	1971	0.134048
csh_i	BLZ	1972	0.15339
csh_i	BLZ	1973	0.1399
csh_i	BLZ	1974	0.147788
csh_i	BLZ	1975	0.143153
csh_i	BLZ	1976	0.169244
csh_i	BLZ	1977	0.160084
csh_i	BLZ	1978	0.109677
csh_i	BLZ	1979	0.221679
csh_i	BLZ	1980	0.154074
csh_i	BLZ	1981	0.165101
csh_i	BLZ	1982	0.110755
csh_i	BLZ	1983	0.108381
csh_i	BLZ	1984	0.134898
csh_i	BLZ	1985	0.117006
csh_i	BLZ	1986	0.102364
csh_i	BLZ	1987	0.118086
csh_i	BLZ	1988	0.139376
csh_i	BLZ	1989	0.16065
csh_i	BLZ	1990	0.133627
csh_i	BLZ	1991	0.159266
csh_i	BLZ	1992	0.175532
csh_i	BLZ	1993	0.181626
csh_i	BLZ	1994	0.124632
csh_i	BLZ	1995	0.109799
csh_i	BLZ	1996	0.122558
csh_i	BLZ	1997	0.128812
csh_i	BLZ	1998	0.12608
csh_i	BLZ	1999	0.167584
csh_i	BLZ	2000	0.224989
csh_i	BLZ	2001	0.200291
csh_i	BLZ	2002	0.187674
csh_i	BLZ	2003	0.153679
csh_i	BLZ	2004	0.148678
csh_i	BLZ	2005	0.166137
csh_i	BLZ	2006	0.143218
csh_i	BLZ	2007	0.143174
csh_i	BLZ	2008	0.209725
csh_i	BLZ	2009	0.16138
csh_i	BLZ	2010	0.0943892
csh_i	BLZ	2011	0.125157
csh_i	BLZ	2012	0.112726
csh_i	BLZ	2013	0.154471
csh_i	BLZ	2014	0.171894
csh_i	BLZ	2015	0.217525
csh_i	BLZ	2016	0.229649
csh_i	BLZ	2017	0.203671
csh_i	BLZ	2018	0.220815
csh_i	BLZ	2019	0.221507
csh_i	BMU	1970	0.210357
csh_i	BMU	1971	0.10875
csh_i	BMU	1972	0.138985
csh_i	BMU	1973	0.148372
csh_i	BMU	1974	0.197227
csh_i	BMU	1975	0.202463
csh_i	BMU	1976	0.143902
csh_i	BMU	1977	0.17552
csh_i	BMU	1978	0.182571
csh_i	BMU	1979	0.207617
csh_i	BMU	1980	0.333046
csh_i	BMU	1981	0.31293
csh_i	BMU	1982	0.371022
csh_i	BMU	1983	0.355851
csh_i	BMU	1984	0.365715
csh_i	BMU	1985	0.407585
csh_i	BMU	1986	0.224336
csh_i	BMU	1987	0.149969
csh_i	BMU	1988	0.258711
csh_i	BMU	1989	0.408584
csh_i	BMU	1990	0.194344
csh_i	BMU	1991	0.154266
csh_i	BMU	1992	0.199792
csh_i	BMU	1993	0.197177
csh_i	BMU	1994	0.405343
csh_i	BMU	1995	0.166215
csh_i	BMU	1996	0.226892
csh_i	BMU	1997	0.165526
csh_i	BMU	1998	2.54694
csh_i	BMU	1999	-2.95296
csh_i	BMU	2000	-0.478532
csh_i	BMU	2001	-0.42576
csh_i	BMU	2002	0.151609
csh_i	BMU	2003	-1.30693
csh_i	BMU	2004	1.65032
csh_i	BMU	2005	0.228066
csh_i	BMU	2006	0.216982
csh_i	BMU	2007	0.238978
csh_i	BMU	2008	0.246525
csh_i	BMU	2009	0.227466
csh_i	BMU	2010	0.209361
csh_i	BMU	2011	0.216143
csh_i	BMU	2012	0.228253
csh_i	BMU	2013	0.225507
csh_i	BMU	2014	0.225864
csh_i	BMU	2015	0.218071
csh_i	BMU	2016	0.226732
csh_i	BMU	2017	0.234762
csh_i	BMU	2018	0.228734
csh_i	BMU	2019	0.25069
csh_i	BOL	1950	0.0872718
csh_i	BOL	1951	0.129879
csh_i	BOL	1952	0.127539
csh_i	BOL	1953	0.0896056
csh_i	BOL	1954	0.114956
csh_i	BOL	1955	0.174904
csh_i	BOL	1956	0.16803
csh_i	BOL	1957	0.160002
csh_i	BOL	1958	0.157239
csh_i	BOL	1959	0.117395
csh_i	BOL	1960	0.155338
csh_i	BOL	1961	0.116987
csh_i	BOL	1962	0.194461
csh_i	BOL	1963	0.165575
csh_i	BOL	1964	0.171541
csh_i	BOL	1965	0.149264
csh_i	BOL	1966	0.142145
csh_i	BOL	1967	0.122403
csh_i	BOL	1968	0.140672
csh_i	BOL	1969	0.135474
csh_i	BOL	1970	0.136902
csh_i	BOL	1971	0.145721
csh_i	BOL	1972	0.192257
csh_i	BOL	1973	0.147466
csh_i	BOL	1974	0.117622
csh_i	BOL	1975	0.188618
csh_i	BOL	1976	0.14443
csh_i	BOL	1977	0.148865
csh_i	BOL	1978	0.192297
csh_i	BOL	1979	0.161818
csh_i	BOL	1980	0.116718
csh_i	BOL	1981	0.132454
csh_i	BOL	1982	0.0809722
csh_i	BOL	1983	0.0778988
csh_i	BOL	1984	0.103068
csh_i	BOL	1985	0.130943
csh_i	BOL	1986	0.114332
csh_i	BOL	1987	0.123083
csh_i	BOL	1988	0.104664
csh_i	BOL	1989	0.0837724
csh_i	BOL	1990	0.0912179
csh_i	BOL	1991	0.113201
csh_i	BOL	1992	0.115866
csh_i	BOL	1993	0.111742
csh_i	BOL	1994	0.090855
csh_i	BOL	1995	0.0901995
csh_i	BOL	1996	0.09613
csh_i	BOL	1997	0.126562
csh_i	BOL	1998	0.163003
csh_i	BOL	1999	0.136959
csh_i	BOL	2000	0.132649
csh_i	BOL	2001	0.1103
csh_i	BOL	2002	0.130939
csh_i	BOL	2003	0.112298
csh_i	BOL	2004	0.0964344
csh_i	BOL	2005	0.119292
csh_i	BOL	2006	0.11065
csh_i	BOL	2007	0.119375
csh_i	BOL	2008	0.145164
csh_i	BOL	2009	0.150439
csh_i	BOL	2010	0.153385
csh_i	BOL	2011	0.181445
csh_i	BOL	2012	0.154224
csh_i	BOL	2013	0.15721
csh_i	BOL	2014	0.167157
csh_i	BOL	2015	0.161203
csh_i	BOL	2016	0.170388
csh_i	BOL	2017	0.187273
csh_i	BOL	2018	0.175267
csh_i	BOL	2019	0.170845
csh_i	BRA	1950	0.197271
csh_i	BRA	1951	0.243967
csh_i	BRA	1952	0.251008
csh_i	BRA	1953	0.192016
csh_i	BRA	1954	0.209098
csh_i	BRA	1955	0.193638
csh_i	BRA	1956	0.18119
csh_i	BRA	1957	0.222858
csh_i	BRA	1958	0.208761
csh_i	BRA	1959	0.248133
csh_i	BRA	1960	0.215145
csh_i	BRA	1961	0.197399
csh_i	BRA	1962	0.187079
csh_i	BRA	1963	0.160045
csh_i	BRA	1964	0.167561
csh_i	BRA	1965	0.172976
csh_i	BRA	1966	0.174979
csh_i	BRA	1967	0.149195
csh_i	BRA	1968	0.160485
csh_i	BRA	1969	0.222612
csh_i	BRA	1970	0.198294
csh_i	BRA	1971	0.206298
csh_i	BRA	1972	0.216291
csh_i	BRA	1973	0.233044
csh_i	BRA	1974	0.251906
csh_i	BRA	1975	0.272011
csh_i	BRA	1976	0.260293
csh_i	BRA	1977	0.243858
csh_i	BRA	1978	0.240557
csh_i	BRA	1979	0.230113
csh_i	BRA	1980	0.257775
csh_i	BRA	1981	0.223923
csh_i	BRA	1982	0.210089
csh_i	BRA	1983	0.181693
csh_i	BRA	1984	0.178298
csh_i	BRA	1985	0.1889
csh_i	BRA	1986	0.207075
csh_i	BRA	1987	0.203019
csh_i	BRA	1988	0.195659
csh_i	BRA	1989	0.194889
csh_i	BRA	1990	0.155043
csh_i	BRA	1991	0.174919
csh_i	BRA	1992	0.164243
csh_i	BRA	1993	0.16894
csh_i	BRA	1994	0.172799
csh_i	BRA	1995	0.185441
csh_i	BRA	1996	0.167542
csh_i	BRA	1997	0.190907
csh_i	BRA	1998	0.1955
csh_i	BRA	1999	0.180657
csh_i	BRA	2000	0.203274
csh_i	BRA	2001	0.204661
csh_i	BRA	2002	0.1871
csh_i	BRA	2003	0.186489
csh_i	BRA	2004	0.195325
csh_i	BRA	2005	0.186409
csh_i	BRA	2006	0.194959
csh_i	BRA	2007	0.213983
csh_i	BRA	2008	0.237745
csh_i	BRA	2009	0.21002
csh_i	BRA	2010	0.253111
csh_i	BRA	2011	0.264103
csh_i	BRA	2012	0.252104
csh_i	BRA	2013	0.249367
csh_i	BRA	2014	0.231378
csh_i	BRA	2015	0.195019
csh_i	BRA	2016	0.169456
csh_i	BRA	2017	0.169694
csh_i	BRA	2018	0.168422
csh_i	BRA	2019	0.171455
csh_i	BRB	1960	0.0975991
csh_i	BRB	1961	0.0807127
csh_i	BRB	1962	0.0732723
csh_i	BRB	1963	0.0792142
csh_i	BRB	1964	0.078267
csh_i	BRB	1965	0.08043
csh_i	BRB	1966	0.0761778
csh_i	BRB	1967	0.0764844
csh_i	BRB	1968	0.0935979
csh_i	BRB	1969	0.0827129
csh_i	BRB	1970	0.0919138
csh_i	BRB	1971	0.0772042
csh_i	BRB	1972	0.077633
csh_i	BRB	1973	0.0811391
csh_i	BRB	1974	0.115586
csh_i	BRB	1975	0.0990067
csh_i	BRB	1976	0.166573
csh_i	BRB	1977	0.136774
csh_i	BRB	1978	0.173693
csh_i	BRB	1979	0.162029
csh_i	BRB	1980	0.18952
csh_i	BRB	1981	0.210586
csh_i	BRB	1982	0.158738
csh_i	BRB	1983	0.131627
csh_i	BRB	1984	0.106084
csh_i	BRB	1985	0.113301
csh_i	BRB	1986	0.101959
csh_i	BRB	1987	0.0976239
csh_i	BRB	1988	0.102782
csh_i	BRB	1989	0.105264
csh_i	BRB	1990	0.104899
csh_i	BRB	1991	0.0993118
csh_i	BRB	1992	0.0632888
csh_i	BRB	1993	0.0906207
csh_i	BRB	1994	0.0691666
csh_i	BRB	1995	0.0585843
csh_i	BRB	1996	0.0550479
csh_i	BRB	1997	0.0944105
csh_i	BRB	1998	0.109606
csh_i	BRB	1999	0.110901
csh_i	BRB	2000	0.113921
csh_i	BRB	2001	0.114153
csh_i	BRB	2002	0.155039
csh_i	BRB	2003	0.12996
csh_i	BRB	2004	0.136572
csh_i	BRB	2005	0.148337
csh_i	BRB	2006	0.199065
csh_i	BRB	2007	0.156719
csh_i	BRB	2008	0.171274
csh_i	BRB	2009	0.164763
csh_i	BRB	2010	0.217924
csh_i	BRB	2011	0.275621
csh_i	BRB	2012	0.275364
csh_i	BRB	2013	0.292161
csh_i	BRB	2014	0.28458
csh_i	BRB	2015	0.28261
csh_i	BRB	2016	0.274007
csh_i	BRB	2017	0.265446
csh_i	BRB	2018	0.242764
csh_i	BRB	2019	0.21655
csh_i	BRN	1970	0.102548
csh_i	BRN	1971	0.092364
csh_i	BRN	1972	0.100315
csh_i	BRN	1973	0.101823
csh_i	BRN	1974	0.0595659
csh_i	BRN	1975	0.109301
csh_i	BRN	1976	0.119417
csh_i	BRN	1977	0.104392
csh_i	BRN	1978	0.107124
csh_i	BRN	1979	0.104444
csh_i	BRN	1980	0.109971
csh_i	BRN	1981	0.124821
csh_i	BRN	1982	0.141425
csh_i	BRN	1983	0.151994
csh_i	BRN	1984	0.166554
csh_i	BRN	1985	0.181011
csh_i	BRN	1986	0.282176
csh_i	BRN	1987	0.248599
csh_i	BRN	1988	0.299839
csh_i	BRN	1989	0.303028
csh_i	BRN	1990	0.276899
csh_i	BRN	1991	0.344986
csh_i	BRN	1992	0.295085
csh_i	BRN	1993	0.394753
csh_i	BRN	1994	0.375358
csh_i	BRN	1995	0.422164
csh_i	BRN	1996	0.601688
csh_i	BRN	1997	0.426925
csh_i	BRN	1998	0.41275
csh_i	BRN	1999	0.282129
csh_i	BRN	2000	0.170876
csh_i	BRN	2001	0.194849
csh_i	BRN	2002	0.272245
csh_i	BRN	2003	0.188037
csh_i	BRN	2004	0.169981
csh_i	BRN	2005	0.143536
csh_i	BRN	2006	0.127721
csh_i	BRN	2007	0.164576
csh_i	BRN	2008	0.179387
csh_i	BRN	2009	0.229803
csh_i	BRN	2010	0.210489
csh_i	BRN	2011	0.227872
csh_i	BRN	2012	0.284413
csh_i	BRN	2013	0.341962
csh_i	BRN	2014	0.24893
csh_i	BRN	2015	0.290816
csh_i	BRN	2016	0.28047
csh_i	BRN	2017	0.303601
csh_i	BRN	2018	0.350826
csh_i	BRN	2019	0.321201
csh_i	BTN	1970	0.27926
csh_i	BTN	1971	0.281322
csh_i	BTN	1972	0.281591
csh_i	BTN	1973	0.285528
csh_i	BTN	1974	0.298807
csh_i	BTN	1975	0.304965
csh_i	BTN	1976	0.303288
csh_i	BTN	1977	0.296222
csh_i	BTN	1978	0.296396
csh_i	BTN	1979	0.30685
csh_i	BTN	1980	0.291468
csh_i	BTN	1981	0.30452
csh_i	BTN	1982	0.330626
csh_i	BTN	1983	0.357862
csh_i	BTN	1984	0.345097
csh_i	BTN	1985	0.383862
csh_i	BTN	1986	0.377684
csh_i	BTN	1987	0.374021
csh_i	BTN	1988	0.352797
csh_i	BTN	1989	0.320766
csh_i	BTN	1990	0.304038
csh_i	BTN	1991	0.256644
csh_i	BTN	1992	0.310491
csh_i	BTN	1993	0.381762
csh_i	BTN	1994	0.456516
csh_i	BTN	1995	0.418678
csh_i	BTN	1996	0.369864
csh_i	BTN	1997	0.281375
csh_i	BTN	1998	0.306734
csh_i	BTN	1999	0.335162
csh_i	BTN	2000	0.420777
csh_i	BTN	2001	0.51834
csh_i	BTN	2002	0.514497
csh_i	BTN	2003	0.468015
csh_i	BTN	2004	0.449322
csh_i	BTN	2005	0.39312
csh_i	BTN	2006	0.373619
csh_i	BTN	2007	0.259962
csh_i	BTN	2008	0.358178
csh_i	BTN	2009	0.372815
csh_i	BTN	2010	0.457785
csh_i	BTN	2011	0.484579
csh_i	BTN	2012	0.472183
csh_i	BTN	2013	0.317421
csh_i	BTN	2014	0.387371
csh_i	BTN	2015	0.395942
csh_i	BTN	2016	0.401897
csh_i	BTN	2017	0.376308
csh_i	BTN	2018	0.340013
csh_i	BTN	2019	0.299457
csh_i	BWA	1960	0.109739
csh_i	BWA	1961	0.126386
csh_i	BWA	1962	0.14389
csh_i	BWA	1963	0.160907
csh_i	BWA	1964	0.200124
csh_i	BWA	1965	0.0685276
csh_i	BWA	1966	0.244171
csh_i	BWA	1967	0.278212
csh_i	BWA	1968	0.385813
csh_i	BWA	1969	0.242037
csh_i	BWA	1970	0.544983
csh_i	BWA	1971	0.599232
csh_i	BWA	1972	0.606573
csh_i	BWA	1973	0.609992
csh_i	BWA	1974	0.557238
csh_i	BWA	1975	0.481833
csh_i	BWA	1976	0.396619
csh_i	BWA	1977	0.296913
csh_i	BWA	1978	0.267206
csh_i	BWA	1979	0.307166
csh_i	BWA	1980	0.360339
csh_i	BWA	1981	0.341441
csh_i	BWA	1982	0.31971
csh_i	BWA	1983	0.224283
csh_i	BWA	1984	0.140347
csh_i	BWA	1985	0.137097
csh_i	BWA	1986	0.123936
csh_i	BWA	1987	0.11007
csh_i	BWA	1988	0.0781896
csh_i	BWA	1989	0.228584
csh_i	BWA	1990	0.237869
csh_i	BWA	1991	0.20862
csh_i	BWA	1992	0.191079
csh_i	BWA	1993	0.201761
csh_i	BWA	1994	0.191521
csh_i	BWA	1995	0.198014
csh_i	BWA	1996	0.182581
csh_i	BWA	1997	0.176861
csh_i	BWA	1998	0.298504
csh_i	BWA	1999	0.214571
csh_i	BWA	2000	0.28306
csh_i	BWA	2001	0.292425
csh_i	BWA	2002	0.270467
csh_i	BWA	2003	0.297125
csh_i	BWA	2004	0.323227
csh_i	BWA	2005	0.299686
csh_i	BWA	2006	0.287909
csh_i	BWA	2007	0.331956
csh_i	BWA	2008	0.383936
csh_i	BWA	2009	0.422378
csh_i	BWA	2010	0.488448
csh_i	BWA	2011	0.451326
csh_i	BWA	2012	0.446718
csh_i	BWA	2013	0.352588
csh_i	BWA	2014	0.325335
csh_i	BWA	2015	0.34123
csh_i	BWA	2016	0.280146
csh_i	BWA	2017	0.26123
csh_i	BWA	2018	0.274764
csh_i	BWA	2019	0.325382
csh_i	CAF	1960	0.238129
csh_i	CAF	1961	0.244786
csh_i	CAF	1962	0.254056
csh_i	CAF	1963	0.263038
csh_i	CAF	1964	0.271652
csh_i	CAF	1965	0.2643
csh_i	CAF	1966	0.266862
csh_i	CAF	1967	0.224336
csh_i	CAF	1968	0.212976
csh_i	CAF	1969	0.218477
csh_i	CAF	1970	0.233629
csh_i	CAF	1971	0.247733
csh_i	CAF	1972	0.249943
csh_i	CAF	1973	0.266776
csh_i	CAF	1974	0.219504
csh_i	CAF	1975	0.207246
csh_i	CAF	1976	0.186379
csh_i	CAF	1977	0.182525
csh_i	CAF	1978	0.169756
csh_i	CAF	1979	0.15187
csh_i	CAF	1980	0.112803
csh_i	CAF	1981	0.123615
csh_i	CAF	1982	0.0750343
csh_i	CAF	1983	0.135205
csh_i	CAF	1984	0.118902
csh_i	CAF	1985	0.166373
csh_i	CAF	1986	0.162327
csh_i	CAF	1987	0.159121
csh_i	CAF	1988	0.129743
csh_i	CAF	1989	0.138973
csh_i	CAF	1990	0.146514
csh_i	CAF	1991	0.147382
csh_i	CAF	1992	0.14353
csh_i	CAF	1993	0.121577
csh_i	CAF	1994	0.12314
csh_i	CAF	1995	0.13634
csh_i	CAF	1996	0.0543597
csh_i	CAF	1997	0.0759407
csh_i	CAF	1998	0.0821222
csh_i	CAF	1999	0.103452
csh_i	CAF	2000	0.0887092
csh_i	CAF	2001	0.0820241
csh_i	CAF	2002	0.0777042
csh_i	CAF	2003	0.0497578
csh_i	CAF	2004	0.0522669
csh_i	CAF	2005	0.0743842
csh_i	CAF	2006	0.0834113
csh_i	CAF	2007	0.0993037
csh_i	CAF	2008	0.0996494
csh_i	CAF	2009	0.0979888
csh_i	CAF	2010	0.136361
csh_i	CAF	2011	0.115986
csh_i	CAF	2012	0.0908407
csh_i	CAF	2013	0.060079
csh_i	CAF	2014	0.183995
csh_i	CAF	2015	0.175798
csh_i	CAF	2016	0.182834
csh_i	CAF	2017	0.222111
csh_i	CAF	2018	0.191441
csh_i	CAF	2019	0.164904
csh_i	CAN	1950	0.228263
csh_i	CAN	1951	0.237433
csh_i	CAN	1952	0.223075
csh_i	CAN	1953	0.242411
csh_i	CAN	1954	0.210124
csh_i	CAN	1955	0.232633
csh_i	CAN	1956	0.27374
csh_i	CAN	1957	0.261449
csh_i	CAN	1958	0.240337
csh_i	CAN	1959	0.252121
csh_i	CAN	1960	0.241658
csh_i	CAN	1961	0.222635
csh_i	CAN	1962	0.22207
csh_i	CAN	1963	0.221048
csh_i	CAN	1964	0.229249
csh_i	CAN	1965	0.250712
csh_i	CAN	1966	0.256005
csh_i	CAN	1967	0.230074
csh_i	CAN	1968	0.225472
csh_i	CAN	1969	0.236702
csh_i	CAN	1970	0.219008
csh_i	CAN	1971	0.228143
csh_i	CAN	1972	0.230292
csh_i	CAN	1973	0.242579
csh_i	CAN	1974	0.272199
csh_i	CAN	1975	0.275631
csh_i	CAN	1976	0.273947
csh_i	CAN	1977	0.264243
csh_i	CAN	1978	0.254122
csh_i	CAN	1979	0.276936
csh_i	CAN	1980	0.265745
csh_i	CAN	1981	0.281183
csh_i	CAN	1982	0.226584
csh_i	CAN	1983	0.235457
csh_i	CAN	1984	0.244892
csh_i	CAN	1985	0.256017
csh_i	CAN	1986	0.260615
csh_i	CAN	1987	0.265136
csh_i	CAN	1988	0.281211
csh_i	CAN	1989	0.278916
csh_i	CAN	1990	0.250291
csh_i	CAN	1991	0.242639
csh_i	CAN	1992	0.229344
csh_i	CAN	1993	0.238724
csh_i	CAN	1994	0.242713
csh_i	CAN	1995	0.234412
csh_i	CAN	1996	0.227586
csh_i	CAN	1997	0.249484
csh_i	CAN	1998	0.243465
csh_i	CAN	1999	0.237798
csh_i	CAN	2000	0.238143
csh_i	CAN	2001	0.227756
csh_i	CAN	2002	0.227619
csh_i	CAN	2003	0.237633
csh_i	CAN	2004	0.245152
csh_i	CAN	2005	0.257081
csh_i	CAN	2006	0.264706
csh_i	CAN	2007	0.263018
csh_i	CAN	2008	0.260981
csh_i	CAN	2009	0.243711
csh_i	CAN	2010	0.256645
csh_i	CAN	2011	0.261247
csh_i	CAN	2012	0.273382
csh_i	CAN	2013	0.283807
csh_i	CAN	2014	0.273363
csh_i	CAN	2015	0.254962
csh_i	CAN	2016	0.238893
csh_i	CAN	2017	0.2433
csh_i	CAN	2018	0.238208
csh_i	CAN	2019	0.234846
csh_i	CHE	1950	0.260381
csh_i	CHE	1951	0.321664
csh_i	CHE	1952	0.286072
csh_i	CHE	1953	0.277409
csh_i	CHE	1954	0.314414
csh_i	CHE	1955	0.347156
csh_i	CHE	1956	0.378706
csh_i	CHE	1957	0.389067
csh_i	CHE	1958	0.33015
csh_i	CHE	1959	0.365334
csh_i	CHE	1960	0.407357
csh_i	CHE	1961	0.425495
csh_i	CHE	1962	0.410081
csh_i	CHE	1963	0.408404
csh_i	CHE	1964	0.423393
csh_i	CHE	1965	0.395173
csh_i	CHE	1966	0.384515
csh_i	CHE	1967	0.383637
csh_i	CHE	1968	0.373299
csh_i	CHE	1969	0.375901
csh_i	CHE	1970	0.417148
csh_i	CHE	1971	0.423833
csh_i	CHE	1972	0.414671
csh_i	CHE	1973	0.418236
csh_i	CHE	1974	0.440665
csh_i	CHE	1975	0.35713
csh_i	CHE	1976	0.338442
csh_i	CHE	1977	0.33161
csh_i	CHE	1978	0.349139
csh_i	CHE	1979	0.386901
csh_i	CHE	1980	0.429127
csh_i	CHE	1981	0.393499
csh_i	CHE	1982	0.401898
csh_i	CHE	1983	0.410167
csh_i	CHE	1984	0.368664
csh_i	CHE	1985	0.366895
csh_i	CHE	1986	0.400634
csh_i	CHE	1987	0.392503
csh_i	CHE	1988	0.390086
csh_i	CHE	1989	0.390747
csh_i	CHE	1990	0.405619
csh_i	CHE	1991	0.372227
csh_i	CHE	1992	0.351866
csh_i	CHE	1993	0.347337
csh_i	CHE	1994	0.343962
csh_i	CHE	1995	0.340414
csh_i	CHE	1996	0.335348
csh_i	CHE	1997	0.307084
csh_i	CHE	1998	0.310494
csh_i	CHE	1999	0.302993
csh_i	CHE	2000	0.301295
csh_i	CHE	2001	0.297994
csh_i	CHE	2002	0.271891
csh_i	CHE	2003	0.270583
csh_i	CHE	2004	0.255517
csh_i	CHE	2005	0.295133
csh_i	CHE	2006	0.309502
csh_i	CHE	2007	0.298258
csh_i	CHE	2008	0.299928
csh_i	CHE	2009	0.310479
csh_i	CHE	2010	0.287912
csh_i	CHE	2011	0.31996
csh_i	CHE	2012	0.307052
csh_i	CHE	2013	0.286348
csh_i	CHE	2014	0.302753
csh_i	CHE	2015	0.297943
csh_i	CHE	2016	0.296957
csh_i	CHE	2017	0.312193
csh_i	CHE	2018	0.309346
csh_i	CHE	2019	0.305986
csh_i	CHL	1951	0.102492
csh_i	CHL	1952	0.0911239
csh_i	CHL	1953	0.114593
csh_i	CHL	1954	0.0740101
csh_i	CHL	1955	0.0971591
csh_i	CHL	1956	0.10757
csh_i	CHL	1957	0.096977
csh_i	CHL	1958	0.0952746
csh_i	CHL	1959	0.0893304
csh_i	CHL	1960	0.110667
csh_i	CHL	1961	0.122947
csh_i	CHL	1962	0.087835
csh_i	CHL	1963	0.102613
csh_i	CHL	1964	0.120399
csh_i	CHL	1965	0.121001
csh_i	CHL	1966	0.15371
csh_i	CHL	1967	0.129368
csh_i	CHL	1968	0.136252
csh_i	CHL	1969	0.137561
csh_i	CHL	1970	0.151135
csh_i	CHL	1971	0.130756
csh_i	CHL	1972	0.0950791
csh_i	CHL	1973	0.0882151
csh_i	CHL	1974	0.175145
csh_i	CHL	1975	0.100656
csh_i	CHL	1976	0.0954803
csh_i	CHL	1977	0.100847
csh_i	CHL	1978	0.115447
csh_i	CHL	1979	0.138456
csh_i	CHL	1980	0.173069
csh_i	CHL	1981	0.19678
csh_i	CHL	1982	0.0999352
csh_i	CHL	1983	0.0815841
csh_i	CHL	1984	0.138506
csh_i	CHL	1985	0.11671
csh_i	CHL	1986	0.121123
csh_i	CHL	1987	0.146238
csh_i	CHL	1988	0.151258
csh_i	CHL	1989	0.175246
csh_i	CHL	1990	0.180169
csh_i	CHL	1991	0.174426
csh_i	CHL	1992	0.193784
csh_i	CHL	1993	0.229449
csh_i	CHL	1994	0.212817
csh_i	CHL	1995	0.250869
csh_i	CHL	1996	0.258529
csh_i	CHL	1997	0.268926
csh_i	CHL	1998	0.26875
csh_i	CHL	1999	0.219355
csh_i	CHL	2000	0.23928
csh_i	CHL	2001	0.239734
csh_i	CHL	2002	0.241964
csh_i	CHL	2003	0.242089
csh_i	CHL	2004	0.229889
csh_i	CHL	2005	0.248758
csh_i	CHL	2006	0.232968
csh_i	CHL	2007	0.230699
csh_i	CHL	2008	0.295486
csh_i	CHL	2009	0.222283
csh_i	CHL	2010	0.24764
csh_i	CHL	2011	0.26137
csh_i	CHL	2012	0.27979
csh_i	CHL	2013	0.261851
csh_i	CHL	2014	0.234384
csh_i	CHL	2015	0.246294
csh_i	CHL	2016	0.23761
csh_i	CHL	2017	0.244291
csh_i	CHL	2018	0.25276
csh_i	CHL	2019	0.25279
csh_i	CHN	1952	0.160902
csh_i	CHN	1953	0.163229
csh_i	CHN	1954	0.168202
csh_i	CHN	1955	0.164101
csh_i	CHN	1956	0.167732
csh_i	CHN	1957	0.173988
csh_i	CHN	1958	0.193644
csh_i	CHN	1959	0.223556
csh_i	CHN	1960	0.201319
csh_i	CHN	1961	0.169241
csh_i	CHN	1962	0.147972
csh_i	CHN	1963	0.159852
csh_i	CHN	1964	0.160123
csh_i	CHN	1965	0.172139
csh_i	CHN	1966	0.181328
csh_i	CHN	1967	0.163463
csh_i	CHN	1968	0.165524
csh_i	CHN	1969	0.169023
csh_i	CHN	1970	0.189144
csh_i	CHN	1971	0.192886
csh_i	CHN	1972	0.159413
csh_i	CHN	1973	0.198283
csh_i	CHN	1974	0.169977
csh_i	CHN	1975	0.175348
csh_i	CHN	1976	0.140737
csh_i	CHN	1977	0.17421
csh_i	CHN	1978	0.220151
csh_i	CHN	1979	0.216535
csh_i	CHN	1980	0.189725
csh_i	CHN	1981	0.191086
csh_i	CHN	1982	0.183027
csh_i	CHN	1983	0.180566
csh_i	CHN	1984	0.201315
csh_i	CHN	1985	0.264024
csh_i	CHN	1986	0.240781
csh_i	CHN	1987	0.242965
csh_i	CHN	1988	0.27248
csh_i	CHN	1989	0.294749
csh_i	CHN	1990	0.261476
csh_i	CHN	1991	0.260646
csh_i	CHN	1992	0.26758
csh_i	CHN	1993	0.244456
csh_i	CHN	1994	0.262789
csh_i	CHN	1995	0.302967
csh_i	CHN	1996	0.304358
csh_i	CHN	1997	0.29036
csh_i	CHN	1998	0.276769
csh_i	CHN	1999	0.269053
csh_i	CHN	2000	0.269803
csh_i	CHN	2001	0.298042
csh_i	CHN	2002	0.300244
csh_i	CHN	2003	0.331531
csh_i	CHN	2004	0.354524
csh_i	CHN	2005	0.341904
csh_i	CHN	2006	0.354197
csh_i	CHN	2007	0.38732
csh_i	CHN	2008	0.420865
csh_i	CHN	2009	0.453718
csh_i	CHN	2010	0.466178
csh_i	CHN	2011	0.468842
csh_i	CHN	2012	0.452707
csh_i	CHN	2013	0.456621
csh_i	CHN	2014	0.452933
csh_i	CHN	2015	0.431055
csh_i	CHN	2016	0.429898
csh_i	CHN	2017	0.424956
csh_i	CHN	2018	0.448935
csh_i	CHN	2019	0.454168
csh_i	CIV	1960	0.104048
csh_i	CIV	1961	0.121896
csh_i	CIV	1962	0.0786383
csh_i	CIV	1963	0.10234
csh_i	CIV	1964	0.127826
csh_i	CIV	1965	0.129134
csh_i	CIV	1966	0.124816
csh_i	CIV	1967	0.110103
csh_i	CIV	1968	0.0983708
csh_i	CIV	1969	0.108512
csh_i	CIV	1970	0.120331
csh_i	CIV	1971	0.0951886
csh_i	CIV	1972	0.0886219
csh_i	CIV	1973	0.101105
csh_i	CIV	1974	0.0856033
csh_i	CIV	1975	0.105692
csh_i	CIV	1976	0.115469
csh_i	CIV	1977	0.151517
csh_i	CIV	1978	0.157758
csh_i	CIV	1979	0.143724
csh_i	CIV	1980	0.158017
csh_i	CIV	1981	0.153519
csh_i	CIV	1982	0.141194
csh_i	CIV	1983	0.113447
csh_i	CIV	1984	0.0829761
csh_i	CIV	1985	0.0634019
csh_i	CIV	1986	0.0597272
csh_i	CIV	1987	0.0499335
csh_i	CIV	1988	0.0451289
csh_i	CIV	1989	0.011977
csh_i	CIV	1990	0.0194089
csh_i	CIV	1991	0.0503488
csh_i	CIV	1992	0.0329028
csh_i	CIV	1993	0.0604801
csh_i	CIV	1994	0.0841899
csh_i	CIV	1995	0.0860295
csh_i	CIV	1996	0.058196
csh_i	CIV	1997	0.0725084
csh_i	CIV	1998	0.085735
csh_i	CIV	1999	0.0539713
csh_i	CIV	2000	0.0613057
csh_i	CIV	2001	0.0612462
csh_i	CIV	2002	0.0231155
csh_i	CIV	2003	0.0612689
csh_i	CIV	2004	0.0474764
csh_i	CIV	2005	0.0659114
csh_i	CIV	2006	0.0438081
csh_i	CIV	2007	0.0585256
csh_i	CIV	2008	0.0815901
csh_i	CIV	2009	0.0630891
csh_i	CIV	2010	0.107276
csh_i	CIV	2011	0.042134
csh_i	CIV	2012	0.154381
csh_i	CIV	2013	0.197156
csh_i	CIV	2014	0.191084
csh_i	CIV	2015	0.195637
csh_i	CIV	2016	0.177284
csh_i	CIV	2017	0.167059
csh_i	CIV	2018	0.17601
csh_i	CIV	2019	0.177266
csh_i	CMR	1960	0.147563
csh_i	CMR	1961	0.140217
csh_i	CMR	1962	0.143096
csh_i	CMR	1963	0.142295
csh_i	CMR	1964	0.15061
csh_i	CMR	1965	0.196633
csh_i	CMR	1966	0.224877
csh_i	CMR	1967	0.218104
csh_i	CMR	1968	0.210143
csh_i	CMR	1969	0.189358
csh_i	CMR	1970	0.245023
csh_i	CMR	1971	0.22554
csh_i	CMR	1972	0.203108
csh_i	CMR	1973	0.231625
csh_i	CMR	1974	0.251231
csh_i	CMR	1975	0.231773
csh_i	CMR	1976	0.222653
csh_i	CMR	1977	0.267261
csh_i	CMR	1978	0.315234
csh_i	CMR	1979	0.237784
csh_i	CMR	1980	0.249908
csh_i	CMR	1981	0.204991
csh_i	CMR	1982	0.1804
csh_i	CMR	1983	0.159103
csh_i	CMR	1984	0.142698
csh_i	CMR	1985	0.126021
csh_i	CMR	1986	0.121157
csh_i	CMR	1987	0.115474
csh_i	CMR	1988	0.119702
csh_i	CMR	1989	0.099031
csh_i	CMR	1990	0.101022
csh_i	CMR	1991	0.101147
csh_i	CMR	1992	0.080448
csh_i	CMR	1993	0.124202
csh_i	CMR	1994	0.12388
csh_i	CMR	1995	0.108577
csh_i	CMR	1996	0.107914
csh_i	CMR	1997	0.115416
csh_i	CMR	1998	0.119707
csh_i	CMR	1999	0.121873
csh_i	CMR	2000	0.132145
csh_i	CMR	2001	0.16657
csh_i	CMR	2002	0.161293
csh_i	CMR	2003	0.154794
csh_i	CMR	2004	0.164914
csh_i	CMR	2005	0.161697
csh_i	CMR	2006	0.158975
csh_i	CMR	2007	0.154407
csh_i	CMR	2008	0.181006
[truncated: 8,400 more rows]

## Sheet: Tabelle2
Summe von AggValue	Spaltenbeschriftungen
Zeilenbeschriftungen	MAR	ABW	AGO	AIA	ALB	ARE	ARG	ARM	ATG	AUS	AUT	AZE	BDI	BEL	BEN	BFA	BGD	BGR	BHR	BHS	BIH	BLR	BLZ	BMU	BOL	BRA	BRB	BRN	BTN	BWA	CAF	CAN	CHE	CHL	CHN	CIV	CMR	COD	COG	COL	COM	CPV	CRI	CUW	CYM	CYP	CZE	DEU	DJI
1950	0.144769						0.0847203			0.34443	0.192313			0.252088											0.0872718	0.197271						0.228263	0.260381					0.189495		0.270811			0.0803449			0.503973		0.353441
1951	0.180401						0.125594			0.435704	0.225764			0.253042											0.129879	0.243967						0.237433	0.321664	0.102492				0.221035		0.263895			0.0900106			0.550187		0.346923
1952	0.161744						0.118653			0.265138	0.178742			0.251467											0.127539	0.251008						0.223075	0.286072	0.0911239	0.160902			0.266985		0.265419			0.105987			0.542535		0.366025
1953	0.179214						0.118317			0.308942	0.129674			0.249618											0.0896056	0.192016						0.242411	0.277409	0.114593	0.163229			0.27115		0.2804			0.0952454			0.572833		0.344275
1954	0.15717						0.108073			0.341384	0.160077			0.266314											0.114956	0.209098						0.210124	0.314414	0.0740101	0.168202			0.253372		0.312424			0.0857216			0.705317		0.358909
1955	0.105618						0.112315			0.339309	0.200939			0.250981											0.174904	0.193638						0.232633	0.347156	0.0971591	0.164101			0.246991		0.316983			0.0886293			0.766082		0.400903
1956	0.0891996						0.104864			0.304016	0.177393			0.281972											0.16803	0.18119						0.27374	0.378706	0.10757	0.167732			0.246098		0.315714			0.102722			0.722555		0.387358
1957	0.0612297						0.110905			0.31713	0.181049			0.280161											0.160002	0.222858						0.261449	0.389067	0.096977	0.173988			0.239833		0.29046			0.108919			0.712331		0.377195
1958	0.107087						0.112816			0.341679	0.175043			0.24175											0.157239	0.208761						0.240337	0.33015	0.0952746	0.193644			0.200832		0.253739			0.0849343			0.557465		0.369599
1959	0.0620326						0.111062			0.34879	0.178053			0.271175	0.047064	0.0314159	0.0147516								0.117395	0.248133						0.252121	0.365334	0.0893304	0.223556			0.169229		0.256113			0.108859			0.577223		0.395221
1960	0.0823816						0.148988			0.356183	0.215909		0.0730481	0.290086	0.0419949	0.0294089	0.0159336								0.155338	0.215145	0.0975991			0.109739	0.238129	0.241658	0.407357	0.110667	0.201319	0.104048	0.147563	0.102408	0.411093	0.278449	0.288464	0.785063	0.0956874			0.546572		0.425859
1961	0.0568646						0.151162			0.302833	0.205103		0.0762407	0.299679	0.0388444	0.0371784	0.0179909								0.116987	0.197399	0.0807127			0.126386	0.244786	0.222635	0.425495	0.122947	0.169241	0.121896	0.140217	0.0960835	0.555532	0.276297	0.250433	0.695947	0.0985808			0.569537		0.403353
1962	0.0662511						0.131594			0.320442	0.184987		0.0786986	0.281366	0.0380151	0.0375217	0.0266072								0.194461	0.187079	0.0732723			0.14389	0.254056	0.22207	0.410081	0.087835	0.147972	0.0786383	0.143096	0.0498357	0.235747	0.239805	0.323723	0.584691	0.0986464			0.631155		0.389531
1963	0.0671406						0.113241			0.315644	0.184251		0.0655334	0.272968	0.0395805	0.0371436	0.0193146								0.165575	0.160045	0.0792142			0.160907	0.263038	0.221048	0.408404	0.102613	0.159852	0.10234	0.142295	0.153337	0.137456	0.227206	0.291912	0.461267	0.0957184			0.60028		0.378611
1964	0.0581686						0.139779			0.341544	0.208624		0.0612884	0.309144	0.0339273	0.037016	0.0246455								0.171541	0.167561	0.078267			0.200124	0.271652	0.229249	0.423393	0.120399	0.160123	0.127826	0.15061	0.182601	0.116364	0.239239	0.32875	0.439662	0.0808514			0.51996		0.400873
1965	0.062368						0.128806			0.32918	0.205955		0.0657056	0.296921	0.0293053	0.054019	0.0279145								0.149264	0.172976	0.08043			0.0685276	0.2643	0.250712	0.395173	0.121001	0.172139	0.129134	0.196633	0.159619	0.129839	0.23063	0.375681	0.490051	0.0970334			0.584336		0.402947
1966	0.0612302						0.12099			0.327278	0.21883		0.0775375	0.309636	0.0293512	0.0533731	0.0287028								0.142145	0.174979	0.0761778			0.244171	0.266862	0.256005	0.384515	0.15371	0.181328	0.124816	0.224877	0.134609	0.209257	0.240223	0.388979	0.497244	0.0961593			0.556164		0.383186
1967	0.0809481						0.119687			0.322836	0.205301		0.0749099	0.29532	0.037492	0.04468	0.0330326								0.122403	0.149195	0.0764844			0.278212	0.224336	0.230074	0.383637	0.129368	0.163463	0.110103	0.218104	0.128899	0.279389	0.233857	0.341487	0.36612	0.0962015			0.543506		0.339124
1968	0.0723482						0.125976			0.333984	0.205058		0.0874109	0.282739	0.0374971	0.0456674	0.0428114								0.140672	0.160485	0.0935979			0.385813	0.212976	0.225472	0.373299	0.136252	0.165524	0.0983708	0.210143	0.12379	0.227683	0.254134	0.292506	0.41354	0.0882415			0.529296		0.351597
1969	0.0711191						0.142668			0.332711	0.209773		0.0916658	0.294136	0.0380807	0.0545005	0.0383501								0.135474	0.222612	0.0827129			0.242037	0.218477	0.236702	0.375901	0.137561	0.169023	0.108512	0.189358	0.157595	0.194865	0.245954	0.288189	0.516883	0.0973384			0.575016		0.369715
1970	0.106021	0.445748	0.37872	0.634957	0.168852	0.366573	0.144581		0.117258	0.329755	0.22995		0.0533392	0.304479	0.0329106	0.0603727	0.033958	0.102986	0.358162	0.0991176			0.133096	0.210357	0.136902	0.198294	0.0919138	0.102548	0.27926	0.544983	0.233629	0.219008	0.417148	0.151135	0.189144	0.120331	0.245023	0.159934	0.163699	0.268809	0.381087	0.53773	0.103853		0.263547	0.573024		0.389809	0.0759007
1971	0.0987353	0.433276	0.377376	0.638258	0.171191	0.388543	0.157996		0.119787	0.315502	0.227338		0.0934922	0.290289	0.0315203	0.154078	0.0265173	0.103974	0.365132	0.0937603			0.134048	0.10875	0.145721	0.206298	0.0772042	0.092364	0.281322	0.599232	0.247733	0.228143	0.423833	0.130756	0.192886	0.0951886	0.22554	0.216883	0.179873	0.258919	0.383134	0.54081	0.123958		0.260475	0.548375		0.370058	0.0758741
1972	0.0748927	0.434323	0.384716	0.637623	0.172382	0.490285	0.158413		0.115143	0.305455	0.236847		0.0323238	0.274958	0.0438528	0.0909077	0.0124556	0.104231	0.346126	0.0951167			0.15339	0.138985	0.192257	0.216291	0.077633	0.100315	0.281591	0.606573	0.249943	0.230292	0.414671	0.0950791	0.159413	0.0886219	0.203108	0.223879	0.184099	0.234	0.382822	0.542983	0.108671		0.261458	0.529963		0.350216	0.0743894
1973	0.0856672	0.416243	0.385681	0.644773	0.174668	0.454277	0.144448		0.113663	0.318548	0.250338		0.0612486	0.291577	0.0419368	0.110725	0.0292177	0.104817	0.386162	0.0877828			0.1399	0.148372	0.147466	0.233044	0.0811391	0.101823	0.285528	0.609992	0.266776	0.242579	0.418236	0.0882151	0.198283	0.101105	0.231625	0.222434	0.167269	0.234834	0.388058	0.550297	0.122234		0.252922	0.554759		0.333543	0.0789116
1974	0.0865317	0.405143	0.397583	0.682436	0.178952	0.317206	0.143846		0.14745	0.272105	0.258082		0.106631	0.331277	0.059275	0.12949	0.0737924	0.107444	0.34438	0.0811714			0.147788	0.197227	0.117622	0.251906	0.115586	0.0595659	0.298807	0.557238	0.219504	0.272199	0.440665	0.175145	0.169977	0.0856033	0.251231	0.232904	0.105023	0.270487	0.410265	0.574689	0.134783		0.253214	0.513901		0.300447	0.0792035
1975	0.185515	0.421617	0.40932	0.689765	0.184254	0.536566	0.153048		0.159418	0.269843	0.230844		0.0803876	0.298835	0.0716294	0.118354	0.0615899	0.109365	0.215192	0.0940605			0.143153	0.202463	0.188618	0.272011	0.0990067	0.109301	0.304965	0.481833	0.207246	0.275631	0.35713	0.100656	0.175348	0.105692	0.231773	0.269845	0.137303	0.217299	0.41569	0.579257	0.122415		0.265646	0.468426		0.279449	0.0759744
1976	0.20072	0.414295	0.396777	0.682109	0.184507	0.546087	0.161196		0.162264	0.273623	0.250322		0.107134	0.299578	0.0670224	0.11417	0.0633585	0.107465	0.477774	0.0878688			0.169244	0.143902	0.14443	0.260293	0.166573	0.119417	0.303288	0.396619	0.186379	0.273947	0.338442	0.0954803	0.140737	0.115469	0.222653	0.229616	0.1341	0.214686	0.409984	0.572159	0.141253		0.259205	0.458593		0.292347	0.0970009
1977	0.224595	0.433246	0.387024	0.683457	0.178109	0.629568	0.180236		0.113517	0.26195	0.263568		0.136073	0.296787	0.0587981	0.0952771	0.0733768	0.107845	0.439783	0.103248			0.160084	0.17552	0.148865	0.243858	0.136774	0.104392	0.296222	0.296913	0.182525	0.264243	0.33161	0.100847	0.17421	0.151517	0.267261	0.397002	0.103027	0.229524	0.411502	0.577871	0.153271		0.269012	0.557029		0.289773	0.0701412
1978	0.144801	0.41011	0.401575	0.682449	0.17915	0.60593	0.153642		0.108016	0.288815	0.238587		0.154254	0.291851	0.0569636	0.0963652	0.0895042	0.109231	0.443424	0.0777038			0.109677	0.182571	0.192297	0.240557	0.173693	0.107124	0.296396	0.267206	0.169756	0.254122	0.349139	0.115447	0.220151	0.157758	0.315234	0.189259	0.12051	0.222461	0.402451	0.577129	0.145014		0.258104	0.569306		0.295584	0.0575531
1979	0.136169	0.387707	0.385584	0.68406	0.187915	0.535467	0.158864		0.179828	0.283297	0.269328		0.157977	0.286963	0.0782675	0.164389	0.0939077	0.102734	0.635065	0.0960011			0.221679	0.207617	0.161818	0.230113	0.162029	0.104444	0.30685	0.307166	0.15187	0.276936	0.386901	0.138456	0.216535	0.143724	0.237784	0.27964	0.12178	0.209058	0.406517	0.569516	0.152249		0.249967	0.58527		0.323235	0.0965536
1980	0.151172	0.384474	0.363888	0.69727	0.166419	0.354648	0.173423		0.210716	0.306079	0.269594		0.147804	0.321738	0.100613	0.151186	0.117863	0.113446	0.62948	0.117488			0.154074	0.333046	0.116718	0.257775	0.18952	0.109971	0.291468	0.360339	0.112803	0.265745	0.429127	0.173069	0.189725	0.158017	0.249908	0.355975	0.202745	0.21675	0.439695	0.535429	0.164107		0.246116	0.586575		0.321603	0.115636
1981	0.145908	0.388662	0.372841	0.713447	0.184969	0.355168	0.153874		0.215304	0.319217	0.265886		0.168016	0.275275	0.0899451	0.141469	0.120487	0.116697	0.600932	0.143586			0.165101	0.31293	0.132454	0.223923	0.210586	0.124821	0.30452	0.341441	0.123615	0.281183	0.393499	0.19678	0.191086	0.153519	0.204991	0.311431	0.446199	0.243067	0.384811	0.541048	0.104196		0.250427	0.528764		0.284936	0.102761
1982	0.149956	0.39309	0.42011	0.726772	0.212802	0.381542	0.124745		0.133123	0.278432	0.257462		0.176447	0.259706	0.178057	0.149457	0.105919	0.109831	0.505891	0.164875			0.110755	0.371022	0.0809722	0.210089	0.158738	0.141425	0.330626	0.31971	0.0750343	0.226584	0.401898	0.0999352	0.183027	0.141194	0.1804	0.236145	0.569299	0.25512	0.407529	0.604807	0.0845068		0.252061	0.50244		0.275683	0.205603
1983	0.122823	0.385909	0.358704	0.701832	0.183265	0.423377	0.120258		0.101706	0.289022	0.251916		0.195327	0.229777	0.104342	0.132747	0.104057	0.101451	0.614559	0.146569			0.108381	0.355851	0.0778988	0.181693	0.131627	0.151994	0.357862	0.224283	0.135205	0.235457	0.410167	0.0815841	0.180566	0.113447	0.159103	0.267276	0.229873	0.246588	0.400335	0.548214	0.110356		0.244899	0.466773		0.290829	0.211689
1984	0.136969	0.385251	0.345171	0.662623	0.1571	0.40584	0.114024		0.138404	0.302398	0.278055		0.206893	0.253827	0.0719581	0.129116	0.10063	0.104515	0.682135	0.109663			0.134898	0.365715	0.103068	0.178298	0.106084	0.166554	0.345097	0.140347	0.118902	0.244892	0.368664	0.138506	0.201315	0.0829761	0.142698	0.249117	0.172352	0.225389	0.440548	0.557182	0.114187		0.267453	0.505656		0.286726	0.213107
1985	0.142745	0.357274	0.25817	0.619023	0.166536	0.367714	0.106565		0.186352	0.304934	0.30301		0.172142	0.249281	0.0467286	0.212285	0.101265	0.0965551	0.635644	0.122732			0.117006	0.407585	0.130943	0.1889	0.113301	0.181011	0.383862	0.137097	0.166373	0.256017	0.366895	0.11671	0.264024	0.0634019	0.126021	0.284752	0.160431	0.202273	0.439307	0.54744	0.121161		0.234291	0.476572		0.279642	0.190848
1986	0.134252	0.364344	0.246006	0.715855	0.162067	0.419048	0.113869		0.16953	0.287611	0.296254		0.165912	0.250543	0.0810899	0.167063	0.146706	0.110831	0.435731	0.123551			0.102364	0.224336	0.114332	0.207075	0.101959	0.282176	0.377684	0.123936	0.162327	0.260615	0.400634	0.121123	0.240781	0.0597272	0.121157	0.283587	0.154158	0.19596	0.457319	0.570634	0.143278		0.264649	0.405688		0.277887	0.117852
1987	0.131751	0.353578	0.24824	0.804833	0.139664	0.40832	0.130029		0.203417	0.295105	0.3022		0.163306	0.263996	0.0844552	0.161114	0.120512	0.0962823	0.364131	0.115332			0.118086	0.149969	0.123083	0.203019	0.0976239	0.248599	0.374021	0.11007	0.159121	0.265136	0.392503	0.146238	0.242965	0.0499335	0.115474	0.276646	0.106299	0.210763	0.46175	0.539409	0.149291		0.237774	0.394625		0.273932	0.136933
1988	0.132067	0.351074	0.196775	0.580825	0.145367	0.362791	0.126602		0.225565	0.312662	0.31972		0.0962365	0.292317	0.0898271	0.161255	0.11164	0.110682	0.332081	0.117348			0.139376	0.258711	0.104664	0.195659	0.102782	0.299839	0.352797	0.0781896	0.129743	0.281211	0.390086	0.151258	0.27248	0.0451289	0.119702	0.249997	0.0966406	0.218001	0.412683	0.455182	0.135534		0.287347	0.419966		0.283544	0.148681
1989	0.159767	0.376601	0.167627	0.566413	0.155529	0.323132	0.109649		0.229029	0.302999	0.324571		0.108169	0.310342	0.0780187	0.163574	0.105033	0.108304	0.34545	0.179289			0.16065	0.408584	0.0837724	0.194889	0.105264	0.303028	0.320766	0.228584	0.138973	0.278916	0.390747	0.175246	0.294749	0.011977	0.099031	0.261737	0.0796866	0.191849	0.357377	0.471705	0.134683		0.250503	0.444381		0.291045	0.127896
1990	0.171824	0.343818	0.162812	0.515634	0.106055	0.284986	0.0877986	0.265123	0.189849	0.252877	0.325673	0.0948294	0.0516279	0.318685	0.112398	0.159689	0.102366	0.0674703	0.257911	0.179058	0.351169	0.214271	0.133627	0.194344	0.0912179	0.155043	0.104899	0.276899	0.304038	0.237869	0.146514	0.250291	0.405619	0.180169	0.261476	0.0194089	0.101022	0.0895579	0.0764001	0.1751	0.372484	0.533093	0.136604		0.191986	0.395171	0.215667	0.291722	0.13894
1991	0.166984	0.411866	0.421966	0.454909	0.024768	0.328	0.110795	0.217384	0.192424	0.24428	0.334773	0.00755511	0.0498468	0.303333	0.123812	0.171031	0.0973403	0.0540726	0.426395	0.187148	0.302747	0.254408	0.159266	0.154266	0.113201	0.174919	0.0993118	0.344986	0.256644	0.20862	0.147382	0.242639	0.372227	0.174426	0.260646	0.0503488	0.101147	0.102606	0.0938471	0.160217	0.311757	0.445838	0.117351		0.208825	0.374738	0.182096	0.298445	0.130298
1992	0.183048	0.306889	0.526537	0.472158	0.0196409	0.356981	0.141797	0.0089138	0.188317	0.252358	0.334336	-0.00181291	0.0587663	0.300103	0.126169	0.152221	0.108375	0.047174	0.432922	0.161297	0.323877	0.233653	0.175532	0.199792	0.115866	0.164243	0.0632888	0.295085	0.310491	0.191079	0.14353	0.229344	0.351866	0.193784	0.26758	0.0329028	0.080448	0.0540548	0.109814	0.216519	0.334686	0.50519	0.140153		0.225947	0.451676	0.197213	0.297755	0.116296
1993	0.187393	0.335162	0.500108	0.371573	0.054909	0.312696	0.166596	0.0513361	0.170751	0.264447	0.333561	0.0792592	0.0739623	0.298544	0.139635	0.148139	0.121578	0.050992	0.28549	0.141342	0.268353	0.208466	0.181626	0.197177	0.111742	0.16894	0.0906207	0.394753	0.381762	0.201761	0.121577	0.238724	0.347337	0.229449	0.244456	0.0604801	0.124202	0.0484433	0.150452	0.263035	0.280522	0.488822	0.153169		0.209655	0.381315	0.201577	0.285834	0.101508
1994	0.181658	0.315724	0.454813	0.366263	0.0774242	0.331692	0.186089	0.161023	0.152007	0.277267	0.338561	0.0551397	0.039775	0.291894	0.15679	0.197777	0.128964	0.0447784	0.263298	0.163178	0.225101	0.216054	0.124632	0.405343	0.090855	0.172799	0.0691666	0.375358	0.456516	0.191521	0.12314	0.242713	0.343962	0.212817	0.262789	0.0841899	0.12388	0.0793725	0.266892	0.272384	0.272385	0.544961	0.147903		0.221012	0.39535	0.221621	0.282326	0.128926
1995	0.207282	0.329352	0.630909	0.385374	0.0768332	0.314533	0.170761	0.125619	0.167927	0.260044	0.350699	0.117378	0.0390827	0.290767	0.202293	0.153353	0.136542	0.00529734	0.227587	0.176773	0.102059	0.155293	0.109799	0.166215	0.0901995	0.185441	0.0585843	0.422164	0.418678	0.198014	0.13634	0.234412	0.340414	0.250869	0.302967	0.0860295	0.108577	0.0686638	0.185121	0.267245	0.269144	0.507134	0.147198		0.217991	0.338167	0.251108	0.274207	0.087331
1996	0.213385	0.320175	0.738166	0.403987	0.0907028	0.305589	0.181635	0.120655	0.16955	0.259642	0.336875	0.149509	0.0566003	0.284117	0.167833	0.151649	0.151265	0.00448771	0.218315	0.15995	0.20129	0.156865	0.122558	0.226892	0.09613	0.167542	0.0550479	0.601688	0.369864	0.182581	0.0543597	0.227586	0.335348	0.258529	0.304358	0.058196	0.107914	0.0671023	0.112909	0.228339	0.278392	0.471201	0.139896		0.221037	0.304622	0.269651	0.256075	0.0878084
1997	0.234498	0.351899	0.555552	0.382728	0.0714798	0.303307	0.200939	0.118678	0.187173	0.266144	0.31558	0.202607	0.0557703	0.275385	0.183216	0.162755	0.164241	0.063254	0.237781	0.236775	0.221354	0.161903	0.128812	0.165526	0.126562	0.190907	0.0944105	0.426925	0.281375	0.176861	0.0759407	0.249484	0.307084	0.268926	0.29036	0.0725084	0.115416	0.0656799	0.1435	0.221431	0.219865	0.473885	0.16048		0.196597	0.298014	0.255763	0.24839	0.103391
1998	0.250987	0.344937	0.718285	0.467831	0.0806355	0.317116	0.207957	0.133604	0.310693	0.270176	0.297469	0.249116	0.0552324	0.262133	0.168985	0.14632	0.181031	0.107975	0.266214	0.27899	0.22137	0.166963	0.12608	2.54694	0.163003	0.1955	0.109606	0.41275	0.306734	0.298504	0.0821222	0.243465	0.310494	0.26875	0.276769	0.085735	0.119707	0.064943	0.197835	0.211048	0.268506	0.400529	0.184209		0.215815	0.247988	0.25587	0.245986	0.111038
1999	0.242409	0.316383	0.587191	0.579249	0.102274	0.302405	0.188651	0.114171	0.23623	0.271565	0.293315	0.232132	0.119561	0.264175	0.18838	0.121087	0.201252	0.13508	0.196271	0.230396	0.17912	0.13613	0.167584	-2.95296	0.136959	0.180657	0.110901	0.282129	0.335162	0.214571	0.103452	0.237798	0.302993	0.219355	0.269053	0.0539713	0.121873	0.0830403	0.114744	0.136638	0.233992	0.453229	0.182665		0.219611	0.25508	0.253376	0.239978	0.0812294
2000	0.249162	0.299764	0.380562	0.639754	0.148362	0.266941	0.176277	0.118337	0.210613	0.243354	0.278789	0.216705	0.0573025	0.266005	0.168412	0.105331	0.20823	0.130386	0.193086	0.270953	0.197257	0.139974	0.224989	-0.478532	0.132649	0.203274	0.113921	0.170876	0.420777	0.28306	0.0887092	0.238143	0.301295	0.23928	0.269803	0.0613057	0.132145	0.0981024	0.0934534	0.151456	0.203505	0.349045	0.174114		0.206396	0.242504	0.261928	0.242488	0.105825
2001	0.258016	0.281268	0.334792	0.51587	0.189249	0.267513	0.156381	0.129603	0.187955	0.255888	0.263856	0.238822	0.0662549	0.257286	0.200426	0.109363	0.211734	0.149657	0.219736	0.264296	0.191294	0.142511	0.200291	-0.42576	0.1103	0.204661	0.114153	0.194849	0.51834	0.292425	0.0820241	0.227756	0.297994	0.239734	0.298042	0.0612462	0.16657	0.106224	0.114833	0.165276	0.206543	0.376288	0.176625		0.209905	0.226466	0.256636	0.226319	0.135977
2002	0.267693	0.409718	0.312066	0.420743	0.212634	0.281109	0.11522	0.146443	0.216351	0.276907	0.246538	0.303434	0.0672488	0.23146	0.170569	0.107937	0.216271	0.1508	0.255842	0.240547	0.21733	0.140943	0.187674	0.151609	0.130939	0.1871	0.155039	0.272245	0.514497	0.270467	0.0777042	0.227619	0.271891	0.241964	0.300244	0.0231155	0.161293	0.153196	0.108226	0.181417	0.197724	0.43087	0.190314		0.221408	0.264877	0.256925	0.204917	0.153842
2003	0.290321	0.435208	0.323925	0.399385	0.234316	0.273606	0.143109	0.164012	0.225794	0.293764	0.259637	0.393688	0.115508	0.241029	0.175665	0.121461	0.220244	0.148511	0.279966	0.269678	0.225606	0.160788	0.153679	-1.30693	0.112298	0.186489	0.12996	0.188037	0.468015	0.297125	0.0497578	0.237633	0.270583	0.242089	0.331531	0.0612689	0.154794	0.144824	0.115554	0.193205	0.151622	0.403304	0.194073		0.224516	0.249325	0.260402	0.206613	0.194904
2004	0.304572	0.412306	0.307023	0.515824	0.27479	0.257341	0.171059	0.176508	0.317133	0.300734	0.262693	0.396852	0.139367	0.273233	0.179162	0.119601	0.228425	0.170728	0.327034	0.266776	0.238405	0.184801	0.148678	1.65032	0.0964344	0.195325	0.136572	0.169981	0.449322	0.323227	0.0522669	0.245152	0.255517	0.229889	0.354524	0.0474764	0.164914	0.121931	0.113163	0.202655	0.172351	0.456796	0.18858		0.232356	0.310419	0.277017	0.206086	0.167071
2005	0.29309	0.488939	0.260273	0.550491	0.303053	0.267045	0.175893	0.198638	0.302203	0.298287	0.262529	0.286284	0.113867	0.291785	0.140507	0.137314	0.236017	0.2088	0.379844	0.316146	0.229179	0.192772	0.166137	0.228066	0.119292	0.186409	0.148337	0.143536	0.39312	0.299686	0.0743842	0.257081	0.295133	0.248758	0.341904	0.0659114	0.161697	0.129177	0.124069	0.212637	0.155418	0.421335	0.190118	0.409014	0.221753	0.320709	0.278854	0.205525	0.235642
2006	0.30157	0.493411	0.223303	0.664501	0.334689	0.257129	0.170907	0.220073	0.412651	0.296635	0.260734	0.221011	0.111983	0.301425	0.148798	0.126127	0.239166	0.249649	0.393388	0.413846	0.211907	0.215268	0.143218	0.216982	0.11065	0.194959	0.199065	0.127721	0.373619	0.287909	0.0834113	0.264706	0.309502	0.232968	0.354197	0.0438081	0.158975	0.123155	0.149992	0.22267	0.177269	0.45023	0.197805	0.395689	0.201301	0.358174	0.297884	0.215513	0.356561
2007	0.331857	0.479468	0.240752	0.796093	0.32934	0.320712	0.183415	0.220403	0.384321	0.302833	0.271802	0.154684	0.0967022	0.315944	0.179699	0.138591	0.233923	0.261774	0.432273	0.37163	0.247014	0.215049	0.143174	0.238978	0.119375	0.213983	0.156719	0.164576	0.259962	0.331956	0.0993037	0.263018	0.298258	0.230699	0.38732	0.0585256	0.154407	0.114234	0.396743	0.228002	0.174405	0.534349	0.219176	0.46138	0.187957	0.352722	0.316728	0.21973	0.423095
2008	0.385121	0.480595	0.278904	0.892785	0.333942	0.292914	0.182933	0.223484	0.418457	0.278304	0.278337	0.156395	0.0885655	0.339072	0.162366	0.164434	0.239322	0.304368	0.370895	0.384695	0.268102	0.230689	0.209725	0.246525	0.145164	0.237745	0.171274	0.179387	0.358178	0.383936	0.0996494	0.260981	0.299928	0.295486	0.420865	0.0815901	0.181006	0.111635	0.298985	0.225624	0.189309	0.509383	0.233572	0.542327	0.196286	0.416495	0.322292	0.225898	0.440789
2009	0.368022	0.436243	0.403175	0.492134	0.326972	0.365931	0.14655	0.158768	0.412597	0.268866	0.269894	0.12927	0.110829	0.297943	0.177552	0.170166	0.24354	0.258228	0.292157	0.333899	0.208171	0.21569	0.16138	0.227466	0.150439	0.21002	0.164763	0.229803	0.372815	0.422378	0.0979888	0.243711	0.310479	0.222283	0.453718	0.0630891	0.186625	0.162698	0.425065	0.202742	0.178687	0.436234	0.187198	0.461912	0.193145	0.333078	0.276287	0.197094	0.576662
2010	0.343291	0.418701	0.310117	0.397656	0.269711	0.321749	0.168039	0.13954	0.315966	0.250366	0.270728	0.107591	0.118609	0.318308	0.184473	0.187103	0.238812	0.214068	0.307385	0.335538	0.17149	0.222432	0.0943892	0.209361	0.153385	0.253111	0.217924	0.210489	0.457785	0.488448	0.136361	0.256645	0.287912	0.24764	0.466178	0.107276	0.186722	0.150081	0.407233	0.198216	0.162965	0.445227	0.195389	0.55643	0.203118	0.364314	0.272849	0.214209	0.559381
2011	0.371882	0.418	0.305798	0.267674	0.265054	0.265	0.172578	0.115848	0.247161	0.253104	0.293453	0.104169	0.109895	0.340404	0.185642	0.19742	0.23487	0.199173	0.250173	0.389888	0.193663	0.204034	0.125157	0.216143	0.181445	0.264103	0.275621	0.227872	0.484579	0.451326	0.115986	0.261247	0.31996	0.26137	0.468842	0.042134	0.200115	0.212818	0.327021	0.205997	0.158175	0.413096	0.201542	0.505766	0.200435	0.279614	0.283581	0.227475	0.673279
2012	0.36047	0.37152	0.291273	0.293495	0.244322	0.224357	0.15531	0.107242	0.252983	0.268218	0.303871	0.111186	0.103786	0.344723	0.163423	0.204937	0.249817	0.202254	0.271372	0.404502	0.206957	0.186179	0.112726	0.228253	0.154224	0.252104	0.275364	0.284413	0.472183	0.446718	0.0908407	0.273382	0.307052	0.27979	0.452707	0.154381	0.181121	0.116491	0.367904	0.194411	0.149077	0.314547	0.211113	0.485395	0.204668	0.251979	0.289096	0.220028	0.77302
2013	0.352342	0.265967	0.26632	0.32	0.242953	0.197561	0.155291	0.0996814	0.271239	0.286522	0.30306	0.12972	0.0849376	0.324251	0.197054	0.184316	0.244716	0.192164	0.258032	0.394785	0.198642	0.203273	0.154471	0.225507	0.15721	0.249367	0.292161	0.341962	0.317421	0.352588	0.060079	0.283807	0.286348	0.261851	0.456621	0.197156	0.178406	0.172872	0.375012	0.186867	0.142524	0.263253	0.198496	0.445267	0.194745	0.202994	0.27569	0.221115	0.925434
2014	0.34495	0.279211	0.266064	0.407647	0.239927	0.259453	0.151393	0.107138	0.55546	0.284825	0.291291	0.152017	0.0811065	0.332078	0.165504	0.149469	0.251927	0.201068	0.272906	0.401938	0.204369	0.209279	0.171894	0.225864	0.167157	0.231378	0.28458	0.24893	0.387371	0.325335	0.183995	0.273363	0.302753	0.234384	0.452933	0.191084	0.182422	0.184986	0.413191	0.197011	0.130309	0.305141	0.190343	0.350658	0.187552	0.194372	0.282802	0.226046	0.243644
2015	0.325016	0.237861	0.308716	0.425889	0.224819	0.312909	0.147443	0.103417	0.279923	0.261883	0.295809	0.149999	0.079836	0.336818	0.143709	0.145328	0.243518	0.190581	0.254441	0.335621	0.193824	0.163403	0.217525	0.218071	0.161203	0.195019	0.28261	0.290816	0.395942	0.34123	0.175798	0.254962	0.297943	0.246294	0.431055	0.195637	0.163362	0.157024	0.580175	0.183219	0.109326	0.230628	0.178312	0.361328	0.161538	0.193841	0.299535	0.219241	0.162444
2016	0.337669	0.262684	0.242255	0.343677	0.224871	0.332127	0.148116	0.0954061	0.27365	0.243143	0.3049	0.137549	0.0855147	0.344332	0.134863	0.151887	0.250807	0.172617	0.297565	0.338596	0.19483	0.15089	0.229649	0.226732	0.170388	0.169456	0.274007	0.28047	0.401897	0.280146	0.182834	0.238893	0.296957	0.23761	0.429898	0.177284	0.159788	0.138041	0.499621	0.174896	0.0978548	0.264905	0.174244	0.366396	0.186601	0.257154	0.278526	0.216932	0.365039
2017	0.335938	0.283503	0.206898	0.363114	0.225709	0.364017	0.132341	0.0993335	0.293615	0.235675	0.312824	0.137259	0.0957543	0.35144	0.162343	0.165374	0.258846	0.192029	0.346909	0.357675	0.223451	0.152917	0.203671	0.234762	0.187273	0.169694	0.265446	0.303601	0.376308	0.26123	0.222111	0.2433	0.312193	0.244291	0.424956	0.167059	0.165554	0.165712	0.246397	0.161962	0.102933	0.277933	0.17473	0.392542	0.160985	0.314086	0.28764	0.228669	0.45948
2018	0.345034	0.248685	0.190925	1.05243	0.223752	0.318493	0.122582	0.120141	0.430931	0.217926	0.317631	0.120549	0.117616	0.367608	0.178327	0.189152	0.261006	0.202737	0.365693	0.32888	0.220942	0.151217	0.220815	0.228734	0.175267	0.168422	0.242764	0.350826	0.340013	0.274764	0.191441	0.238208	0.309346	0.25276	0.448935	0.17601	0.168103	0.172179	0.138301	0.157016	0.121151	0.28282	0.166126	0.407774	0.193672	0.304989	0.296761	0.232017	0.438587
2019	0.333597	0.246366	0.19171	0.292376	0.205828	0.328729	0.105573	0.0942743	0.384608	0.206068	0.312186	0.122014	0.120426	0.360464	0.181712	0.210743	0.26417	0.185824	0.343203	0.332428	0.220737	0.162771	0.221507	0.25069	0.170845	0.171455	0.21655	0.321201	0.299457	0.325382	0.164904	0.234846	0.305986	0.25279	0.454168	0.177266	0.169368	0.142562	0.153779	0.157377	0.125153	0.242827	0.155651	0.356962	0.206175	0.276725	0.290892	0.227068	0.616744
Gesamtergebnis	13.2174	18.5676	17.8231	27.9	9.21271	17.604	9.98295	4.1548	11.508	20.4886	18.0881	4.95491	5.90048	20.3287	6.84808	7.81539	8.15016	6.69468	18.0813	10.9235	6.65961	5.54889	7.74302	9.2199	9.50626	14.2495	8.29017	11.545	17.8558	17.5323	9.35997	17.291	24.434	11.8816	17.9416	5.90641	10.1942	12.3933	13.0318	15.8122	17.311	28.476	9.77198	6.49884	11.2521	31.1134	7.96627	20.7386	11.4467
[truncated: 135 more columns]
