# Supplementary material for: The Social Cost of Fossil and Industrial CO2 Emissions from 1950 to 2018
Source: Research Square preprint supplement (doi:10.21203/rs.3.rs-2244259/v1), 2022-11-17
Supplement: Supplementary file 53 [file depreciation_data_PWT_Transposed.xlsx]

## Sheet: depreciation_rate
VariableCode	RegionCode	YearCode	AggValue
delta	ABW	1970	0.0401202
delta	ABW	1971	0.0391263
delta	ABW	1972	0.0383293
delta	ABW	1973	0.0376955
delta	ABW	1974	0.0371955
delta	ABW	1975	0.0368047
delta	ABW	1976	0.0365023
delta	ABW	1977	0.0362707
delta	ABW	1978	0.0360957
delta	ABW	1979	0.035966
delta	ABW	1980	0.0358724
delta	ABW	1981	0.0358074
delta	ABW	1982	0.0357645
delta	ABW	1983	0.0357389
delta	ABW	1984	0.0357266
delta	ABW	1985	0.0357236
delta	ABW	1986	0.0357284
delta	ABW	1987	0.0357855
delta	ABW	1988	0.0359367
delta	ABW	1989	0.0360492
delta	ABW	1990	0.0365174
delta	ABW	1991	0.036903
delta	ABW	1992	0.0364877
delta	ABW	1993	0.0354783
delta	ABW	1994	0.0340923
delta	ABW	1995	0.0339077
delta	ABW	1996	0.0345725
delta	ABW	1997	0.0347108
delta	ABW	1998	0.0346934
delta	ABW	1999	0.0342694
delta	ABW	2000	0.0338583
delta	ABW	2001	0.0338654
delta	ABW	2002	0.034088
delta	ABW	2003	0.034404
delta	ABW	2004	0.0345879
delta	ABW	2005	0.0347351
delta	ABW	2006	0.0348295
delta	ABW	2007	0.0346734
delta	ABW	2008	0.034442
delta	ABW	2009	0.0343654
delta	ABW	2010	0.0342691
delta	ABW	2011	0.0341448
delta	ABW	2012	0.0340814
delta	ABW	2013	0.0340423
delta	ABW	2014	0.0340538
delta	ABW	2015	0.0341247
delta	ABW	2016	0.0342943
delta	ABW	2017	0.034588
delta	ABW	2018	0.0349215
delta	ABW	2019	0.0352411
delta	AGO	1970	0.0401825
delta	AGO	1971	0.0394635
delta	AGO	1972	0.0389448
delta	AGO	1973	0.0383669
delta	AGO	1974	0.0378022
delta	AGO	1975	0.0374065
delta	AGO	1976	0.0371976
delta	AGO	1977	0.0369207
delta	AGO	1978	0.0364488
delta	AGO	1979	0.0359233
delta	AGO	1980	0.0353339
delta	AGO	1981	0.0347448
delta	AGO	1982	0.0343183
delta	AGO	1983	0.0338969
delta	AGO	1984	0.0334766
delta	AGO	1985	0.0330655
delta	AGO	1986	0.0326053
delta	AGO	1987	0.0321793
delta	AGO	1988	0.0318356
delta	AGO	1989	0.0315572
delta	AGO	1990	0.0313564
delta	AGO	1991	0.0315059
delta	AGO	1992	0.0320327
delta	AGO	1993	0.032518
delta	AGO	1994	0.0328843
delta	AGO	1995	0.0341283
delta	AGO	1996	0.0370282
delta	AGO	1997	0.0389997
delta	AGO	1998	0.0394891
delta	AGO	1999	0.0401203
delta	AGO	2000	0.0402179
delta	AGO	2001	0.0398158
delta	AGO	2002	0.0395866
delta	AGO	2003	0.0396332
delta	AGO	2004	0.0401583
delta	AGO	2005	0.0407836
delta	AGO	2006	0.0411163
delta	AGO	2007	0.0411827
delta	AGO	2008	0.041951
delta	AGO	2009	0.0432583
delta	AGO	2010	0.0442612
delta	AGO	2011	0.0453424
delta	AGO	2012	0.0462187
delta	AGO	2013	0.0465854
delta	AGO	2014	0.0465421
delta	AGO	2015	0.0462944
delta	AGO	2016	0.0456949
delta	AGO	2017	0.0447874
delta	AGO	2018	0.0440739
delta	AGO	2019	0.0433877
delta	AIA	1970	0.0395169
delta	AIA	1971	0.0374535
delta	AIA	1972	0.035751
delta	AIA	1973	0.0343529
delta	AIA	1974	0.0331737
delta	AIA	1975	0.0321667
delta	AIA	1976	0.0313056
delta	AIA	1977	0.0305571
delta	AIA	1978	0.0299209
delta	AIA	1979	0.0294071
delta	AIA	1980	0.0289754
delta	AIA	1981	0.0286028
delta	AIA	1982	0.028282
delta	AIA	1983	0.0279494
delta	AIA	1984	0.0276111
delta	AIA	1985	0.0273107
delta	AIA	1986	0.0272154
delta	AIA	1987	0.0273783
delta	AIA	1988	0.0272926
delta	AIA	1989	0.0269825
delta	AIA	1990	0.0267188
delta	AIA	1991	0.0263009
delta	AIA	1992	0.0258599
delta	AIA	1993	0.02545
delta	AIA	1994	0.0250496
delta	AIA	1995	0.0247711
delta	AIA	1996	0.0245203
delta	AIA	1997	0.0243862
delta	AIA	1998	0.024528
delta	AIA	1999	0.0247031
delta	AIA	2000	0.0267369
delta	AIA	2001	0.0294152
delta	AIA	2002	0.0302908
delta	AIA	2003	0.0305934
delta	AIA	2004	0.0313423
delta	AIA	2005	0.0314801
delta	AIA	2006	0.0323385
delta	AIA	2007	0.0349082
delta	AIA	2008	0.0360814
delta	AIA	2009	0.0351914
delta	AIA	2010	0.0337174
delta	AIA	2011	0.0322635
delta	AIA	2012	0.0305517
delta	AIA	2013	0.0288332
delta	AIA	2014	0.0273934
delta	AIA	2015	0.0262083
delta	AIA	2016	0.0252895
delta	AIA	2017	0.0248509
delta	AIA	2018	0.0255013
delta	AIA	2019	0.0260007
delta	ALB	1970	0.0403417
delta	ALB	1971	0.0384564
delta	ALB	1972	0.0369267
delta	ALB	1973	0.0356869
delta	ALB	1974	0.0346788
delta	ALB	1975	0.033855
delta	ALB	1976	0.0331882
delta	ALB	1977	0.0326353
delta	ALB	1978	0.0321714
delta	ALB	1979	0.0318206
delta	ALB	1980	0.0314867
delta	ALB	1981	0.0311937
delta	ALB	1982	0.03111
delta	ALB	1983	0.0310606
delta	ALB	1984	0.030869
delta	ALB	1985	0.0306233
delta	ALB	1986	0.0303423
delta	ALB	1987	0.0300082
delta	ALB	1988	0.0296871
delta	ALB	1989	0.0293997
delta	ALB	1990	0.0291609
delta	ALB	1991	0.028644
delta	ALB	1992	0.0278287
delta	ALB	1993	0.027229
delta	ALB	1994	0.0269683
delta	ALB	1995	0.0268134
delta	ALB	1996	0.0267784
delta	ALB	1997	0.0266824
delta	ALB	1998	0.0265321
delta	ALB	1999	0.0266101
delta	ALB	2000	0.0267919
delta	ALB	2001	0.0270093
delta	ALB	2002	0.0271038
delta	ALB	2003	0.0271355
delta	ALB	2004	0.027177
delta	ALB	2005	0.0271278
delta	ALB	2006	0.0268488
delta	ALB	2007	0.0266366
delta	ALB	2008	0.0266899
delta	ALB	2009	0.0268312
delta	ALB	2010	0.0269414
delta	ALB	2011	0.0270159
delta	ALB	2012	0.0271439
delta	ALB	2013	0.0273281
delta	ALB	2014	0.0275027
delta	ALB	2015	0.0275529
delta	ALB	2016	0.0275893
delta	ALB	2017	0.0276648
delta	ALB	2018	0.0277322
delta	ALB	2019	0.027732
delta	ARE	1970	0.0393863
delta	ARE	1971	0.0370231
delta	ARE	1972	0.0350964
delta	ARE	1973	0.0334981
delta	ARE	1974	0.0319659
delta	ARE	1975	0.0310549
delta	ARE	1976	0.0309187
delta	ARE	1977	0.0311196
delta	ARE	1978	0.0312638
delta	ARE	1979	0.0311525
delta	ARE	1980	0.031079
delta	ARE	1981	0.0310461
delta	ARE	1982	0.0309948
delta	ARE	1983	0.0308598
delta	ARE	1984	0.0305986
delta	ARE	1985	0.0302837
delta	ARE	1986	0.0299442
delta	ARE	1987	0.0296286
delta	ARE	1988	0.0293692
delta	ARE	1989	0.0291753
delta	ARE	1990	0.0289465
delta	ARE	1991	0.0285039
delta	ARE	1992	0.0280868
delta	ARE	1993	0.0276819
delta	ARE	1994	0.0272829
delta	ARE	1995	0.0270979
delta	ARE	1996	0.0269975
delta	ARE	1997	0.0269494
delta	ARE	1998	0.0269271
delta	ARE	1999	0.0270961
delta	ARE	2000	0.0276691
delta	ARE	2001	0.0283645
delta	ARE	2002	0.0289396
delta	ARE	2003	0.0294933
delta	ARE	2004	0.0300476
delta	ARE	2005	0.0306101
delta	ARE	2006	0.0312485
delta	ARE	2007	0.032277
delta	ARE	2008	0.0336803
delta	ARE	2009	0.0346548
delta	ARE	2010	0.0347847
delta	ARE	2011	0.0350578
delta	ARE	2012	0.0358285
delta	ARE	2013	0.0364246
delta	ARE	2014	0.0368649
delta	ARE	2015	0.0372868
delta	ARE	2016	0.0376768
delta	ARE	2017	0.0378047
delta	ARE	2018	0.0374398
delta	ARE	2019	0.036909
delta	ARG	1950	0.0276286
delta	ARG	1951	0.0280615
delta	ARG	1952	0.0285848
delta	ARG	1953	0.0287676
delta	ARG	1954	0.0288117
delta	ARG	1955	0.0289811
delta	ARG	1956	0.029277
delta	ARG	1957	0.0295236
delta	ARG	1958	0.0296992
delta	ARG	1959	0.0297627
delta	ARG	1960	0.030305
delta	ARG	1961	0.0313823
delta	ARG	1962	0.0322251
delta	ARG	1963	0.0324649
delta	ARG	1964	0.0325685
delta	ARG	1965	0.0328272
delta	ARG	1966	0.0329462
delta	ARG	1967	0.0329188
delta	ARG	1968	0.0328433
delta	ARG	1969	0.0328693
delta	ARG	1970	0.0329367
delta	ARG	1971	0.0329713
delta	ARG	1972	0.0330599
delta	ARG	1973	0.0331344
delta	ARG	1974	0.0331011
delta	ARG	1975	0.0328921
delta	ARG	1976	0.0325909
delta	ARG	1977	0.0326174
delta	ARG	1978	0.0326231
delta	ARG	1979	0.0324991
delta	ARG	1980	0.0326251
delta	ARG	1981	0.0325906
delta	ARG	1982	0.032098
delta	ARG	1983	0.031439
delta	ARG	1984	0.03094
delta	ARG	1985	0.0305104
delta	ARG	1986	0.0300109
delta	ARG	1987	0.0295347
delta	ARG	1988	0.0291299
delta	ARG	1989	0.0287563
delta	ARG	1990	0.0283516
delta	ARG	1991	0.0280105
delta	ARG	1992	0.0280305
delta	ARG	1993	0.0283733
delta	ARG	1994	0.0288966
delta	ARG	1995	0.0292909
delta	ARG	1996	0.0295268
delta	ARG	1997	0.0299477
delta	ARG	1998	0.0304889
delta	ARG	1999	0.0308312
delta	ARG	2000	0.0308552
delta	ARG	2001	0.0305868
delta	ARG	2002	0.0300035
delta	ARG	2003	0.0294282
delta	ARG	2004	0.0292379
delta	ARG	2005	0.0294537
delta	ARG	2006	0.0299174
delta	ARG	2007	0.0306283
delta	ARG	2008	0.0315306
delta	ARG	2009	0.032025
delta	ARG	2010	0.0324429
delta	ARG	2011	0.0333961
delta	ARG	2012	0.0342498
delta	ARG	2013	0.0348167
delta	ARG	2014	0.0351325
delta	ARG	2015	0.0352162
delta	ARG	2016	0.0353776
delta	ARG	2017	0.0356702
delta	ARG	2018	0.0358234
delta	ARG	2019	0.0354922
delta	ARM	1990	0.0400285
delta	ARM	1991	0.0387472
delta	ARM	1992	0.0373409
delta	ARM	1993	0.0358475
delta	ARM	1994	0.0345606
delta	ARM	1995	0.0333902
delta	ARM	1996	0.0322581
delta	ARM	1997	0.0311035
delta	ARM	1998	0.0298975
delta	ARM	1999	0.0290643
delta	ARM	2000	0.028526
delta	ARM	2001	0.0280062
delta	ARM	2002	0.0275249
delta	ARM	2003	0.0271918
delta	ARM	2004	0.0270618
delta	ARM	2005	0.0271067
delta	ARM	2006	0.0272597
delta	ARM	2007	0.027606
delta	ARM	2008	0.0281325
delta	ARM	2009	0.0284398
delta	ARM	2010	0.0286097
delta	ARM	2011	0.028849
delta	ARM	2012	0.029112
delta	ARM	2013	0.029392
delta	ARM	2014	0.0296835
delta	ARM	2015	0.03005
delta	ARM	2016	0.0303918
delta	ARM	2017	0.030778
delta	ARM	2018	0.0315786
delta	ARM	2019	0.032632
delta	ATG	1970	0.0407855
delta	ATG	1971	0.0410918
delta	ATG	1972	0.0414186
delta	ATG	1973	0.041631
delta	ATG	1974	0.0421532
delta	ATG	1975	0.0427933
delta	ATG	1976	0.0431605
delta	ATG	1977	0.0432219
delta	ATG	1978	0.043045
delta	ATG	1979	0.0439711
delta	ATG	1980	0.04562
delta	ATG	1981	0.0469066
delta	ATG	1982	0.0476069
delta	ATG	1983	0.0476764
delta	ATG	1984	0.0478599
delta	ATG	1985	0.0482965
delta	ATG	1986	0.0488303
delta	ATG	1987	0.049274
delta	ATG	1988	0.049226
delta	ATG	1989	0.0487242
delta	ATG	1990	0.0481963
delta	ATG	1991	0.0477069
delta	ATG	1992	0.0472208
delta	ATG	1993	0.0467695
delta	ATG	1994	0.0463065
delta	ATG	1995	0.0462766
delta	ATG	1996	0.0467694
delta	ATG	1997	0.0466573
delta	ATG	1998	0.0461587
delta	ATG	1999	0.0471151
delta	ATG	2000	0.0484967
delta	ATG	2001	0.0479138
delta	ATG	2002	0.0459322
delta	ATG	2003	0.0438217
delta	ATG	2004	0.0424697
delta	ATG	2005	0.0424827
delta	ATG	2006	0.0433425
delta	ATG	2007	0.0437608
delta	ATG	2008	0.042598
delta	ATG	2009	0.0405791
delta	ATG	2010	0.0387708
delta	ATG	2011	0.0369882
delta	ATG	2012	0.0346893
delta	ATG	2013	0.0322605
delta	ATG	2014	0.0303017
delta	ATG	2015	0.0287258
delta	ATG	2016	0.0275247
delta	ATG	2017	0.0270773
delta	ATG	2018	0.0272308
delta	ATG	2019	0.02729
delta	AUS	1950	0.0211655
delta	AUS	1951	0.0216736
delta	AUS	1952	0.0219543
delta	AUS	1953	0.0220787
delta	AUS	1954	0.0223101
delta	AUS	1955	0.0225758
delta	AUS	1956	0.0227803
delta	AUS	1957	0.0229279
delta	AUS	1958	0.0230946
delta	AUS	1959	0.0232805
delta	AUS	1960	0.0234572
delta	AUS	1961	0.0235781
delta	AUS	1962	0.0236916
delta	AUS	1963	0.0238225
delta	AUS	1964	0.0239365
delta	AUS	1965	0.0240205
delta	AUS	1966	0.0240973
delta	AUS	1967	0.0242036
delta	AUS	1968	0.0243349
delta	AUS	1969	0.0244636
delta	AUS	1970	0.024542
delta	AUS	1971	0.0245688
delta	AUS	1972	0.024547
delta	AUS	1973	0.0244956
delta	AUS	1974	0.0244399
delta	AUS	1975	0.0243952
delta	AUS	1976	0.0243374
delta	AUS	1977	0.0242642
delta	AUS	1978	0.0242408
delta	AUS	1979	0.0242607
delta	AUS	1980	0.0243127
delta	AUS	1981	0.0244219
delta	AUS	1982	0.0245225
delta	AUS	1983	0.0246083
delta	AUS	1984	0.0247394
delta	AUS	1985	0.0249009
delta	AUS	1986	0.0250502
delta	AUS	1987	0.0251958
delta	AUS	1988	0.0253706
delta	AUS	1989	0.025557
delta	AUS	1990	0.0256795
delta	AUS	1991	0.0256976
delta	AUS	1992	0.0256995
delta	AUS	1993	0.0257406
delta	AUS	1994	0.0258469
delta	AUS	1995	0.0260341
delta	AUS	1996	0.0262979
delta	AUS	1997	0.0266257
delta	AUS	1998	0.0269281
delta	AUS	1999	0.0272124
delta	AUS	2000	0.0274622
delta	AUS	2001	0.0277272
delta	AUS	2002	0.028071
delta	AUS	2003	0.028455
delta	AUS	2004	0.0289013
delta	AUS	2005	0.0294532
delta	AUS	2006	0.0300545
delta	AUS	2007	0.0306942
delta	AUS	2008	0.0313319
delta	AUS	2009	0.0318463
delta	AUS	2010	0.0322724
delta	AUS	2011	0.0327415
delta	AUS	2012	0.0331839
delta	AUS	2013	0.0333858
delta	AUS	2014	0.0333503
delta	AUS	2015	0.0331979
delta	AUS	2016	0.0330268
delta	AUS	2017	0.0329515
delta	AUS	2018	0.0329742
delta	AUS	2019	0.0330408
delta	AUT	1950	0.0309548
delta	AUT	1951	0.0323629
delta	AUT	1952	0.0333051
delta	AUT	1953	0.0332865
delta	AUT	1954	0.0331167
delta	AUT	1955	0.0336415
delta	AUT	1956	0.034236
delta	AUT	1957	0.0345058
delta	AUT	1958	0.0347148
delta	AUT	1959	0.0348679
delta	AUT	1960	0.0353837
delta	AUT	1961	0.0360695
delta	AUT	1962	0.0363907
delta	AUT	1963	0.0364669
delta	AUT	1964	0.0365426
delta	AUT	1965	0.0366896
delta	AUT	1966	0.0368948
delta	AUT	1967	0.036927
delta	AUT	1968	0.0367536
delta	AUT	1969	0.036637
delta	AUT	1970	0.0367876
delta	AUT	1971	0.0371989
delta	AUT	1972	0.0377758
delta	AUT	1973	0.0379572
delta	AUT	1974	0.0377239
delta	AUT	1975	0.0374494
delta	AUT	1976	0.0372684
delta	AUT	1977	0.0373099
delta	AUT	1978	0.037205
delta	AUT	1979	0.0370324
delta	AUT	1980	0.0370385
delta	AUT	1981	0.0370533
delta	AUT	1982	0.0368736
delta	AUT	1983	0.0365377
delta	AUT	1984	0.0362517
delta	AUT	1985	0.0361064
delta	AUT	1986	0.0360649
delta	AUT	1987	0.0360596
delta	AUT	1988	0.0361212
delta	AUT	1989	0.0362912
delta	AUT	1990	0.0365592
delta	AUT	1991	0.0369012
delta	AUT	1992	0.0371433
delta	AUT	1993	0.037148
delta	AUT	1994	0.0370644
delta	AUT	1995	0.0370031
delta	AUT	1996	0.0369982
delta	AUT	1997	0.0370619
delta	AUT	1998	0.0372028
delta	AUT	1999	0.0374004
delta	AUT	2000	0.0377029
delta	AUT	2001	0.0380903
delta	AUT	2002	0.0384061
delta	AUT	2003	0.0386495
delta	AUT	2004	0.038824
delta	AUT	2005	0.0389404
delta	AUT	2006	0.0390596
delta	AUT	2007	0.0392517
delta	AUT	2008	0.0394896
delta	AUT	2009	0.0396139
delta	AUT	2010	0.0396437
delta	AUT	2011	0.0398217
delta	AUT	2012	0.0400716
delta	AUT	2013	0.0403334
delta	AUT	2014	0.0405962
delta	AUT	2015	0.0408231
delta	AUT	2016	0.041197
delta	AUT	2017	0.0416958
delta	AUT	2018	0.0422168
delta	AUT	2019	0.0427697
delta	AZE	1990	0.0407835
delta	AZE	1991	0.0406232
delta	AZE	1992	0.0402246
delta	AZE	1993	0.0392799
delta	AZE	1994	0.0378754
delta	AZE	1995	0.0366244
delta	AZE	1996	0.0354137
delta	AZE	1997	0.0344728
delta	AZE	1998	0.0340819
delta	AZE	1999	0.0341261
delta	AZE	2000	0.0348197
delta	AZE	2001	0.0365104
delta	AZE	2002	0.0384677
delta	AZE	2003	0.0411201
delta	AZE	2004	0.0444564
delta	AZE	2005	0.0478425
delta	AZE	2006	0.0513763
delta	AZE	2007	0.0542483
delta	AZE	2008	0.0559077
delta	AZE	2009	0.0563741
delta	AZE	2010	0.0563007
delta	AZE	2011	0.0570327
delta	AZE	2012	0.0580432
delta	AZE	2013	0.0584464
delta	AZE	2014	0.0582563
delta	AZE	2015	0.0575501
delta	AZE	2016	0.0565466
delta	AZE	2017	0.055504
delta	AZE	2018	0.055374
delta	AZE	2019	0.0561795
delta	BDI	1960	0.0403207
delta	BDI	1961	0.0395648
delta	BDI	1962	0.0389853
delta	BDI	1963	0.0383901
delta	BDI	1964	0.0375877
delta	BDI	1965	0.0366851
delta	BDI	1966	0.0358877
delta	BDI	1967	0.0353786
delta	BDI	1968	0.0351415
delta	BDI	1969	0.0350709
delta	BDI	1970	0.0344214
delta	BDI	1971	0.0337473
delta	BDI	1972	0.0330212
delta	BDI	1973	0.0320294
delta	BDI	1974	0.0318156
delta	BDI	1975	0.0317406
delta	BDI	1976	0.0317116
delta	BDI	1977	0.0319921
delta	BDI	1978	0.032001
delta	BDI	1979	0.0317139
delta	BDI	1980	0.031396
delta	BDI	1981	0.0311785
delta	BDI	1982	0.0310171
delta	BDI	1983	0.0311945
delta	BDI	1984	0.0317478
delta	BDI	1985	0.032141
delta	BDI	1986	0.0324552
delta	BDI	1987	0.0331597
delta	BDI	1988	0.0336822
delta	BDI	1989	0.0337493
delta	BDI	1990	0.0334221
delta	BDI	1991	0.0327182
delta	BDI	1992	0.0321349
delta	BDI	1993	0.0317161
delta	BDI	1994	0.03117
delta	BDI	1995	0.0305166
delta	BDI	1996	0.0299771
delta	BDI	1997	0.0295118
delta	BDI	1998	0.0292187
delta	BDI	1999	0.0295254
delta	BDI	2000	0.0297453
delta	BDI	2001	0.029521
delta	BDI	2002	0.0294052
delta	BDI	2003	0.0298539
delta	BDI	2004	0.0311274
delta	BDI	2005	0.0326414
delta	BDI	2006	0.0337394
delta	BDI	2007	0.0341938
delta	BDI	2008	0.0341982
delta	BDI	2009	0.0339788
delta	BDI	2010	0.0341626
delta	BDI	2011	0.035046
delta	BDI	2012	0.0360661
delta	BDI	2013	0.0368835
delta	BDI	2014	0.0376342
delta	BDI	2015	0.0381233
delta	BDI	2016	0.0383812
delta	BDI	2017	0.038661
delta	BDI	2018	0.0397086
delta	BDI	2019	0.041114
delta	BEL	1950	0.0367781
delta	BEL	1951	0.0369799
delta	BEL	1952	0.0371417
delta	BEL	1953	0.0373051
delta	BEL	1954	0.0375856
delta	BEL	1955	0.0378486
delta	BEL	1956	0.0381195
delta	BEL	1957	0.0384487
delta	BEL	1958	0.0384632
delta	BEL	1959	0.03841
delta	BEL	1960	0.0385836
delta	BEL	1961	0.0389005
delta	BEL	1962	0.0393488
delta	BEL	1963	0.0397082
delta	BEL	1964	0.0398198
delta	BEL	1965	0.0397404
delta	BEL	1966	0.039747
delta	BEL	1967	0.0397705
delta	BEL	1968	0.0396572
delta	BEL	1969	0.0396514
delta	BEL	1970	0.0398252
delta	BEL	1971	0.0400337
delta	BEL	1972	0.0402281
delta	BEL	1973	0.0406629
delta	BEL	1974	0.0412705
delta	BEL	1975	0.0417502
delta	BEL	1976	0.0422312
delta	BEL	1977	0.0426223
delta	BEL	1978	0.0429117
delta	BEL	1979	0.0430743
delta	BEL	1980	0.042396
delta	BEL	1981	0.0411969
delta	BEL	1982	0.0402331
delta	BEL	1983	0.0394252
delta	BEL	1984	0.0387802
delta	BEL	1985	0.0382242
delta	BEL	1986	0.0377406
delta	BEL	1987	0.0375033
delta	BEL	1988	0.0374889
delta	BEL	1989	0.0377335
delta	BEL	1990	0.0382068
delta	BEL	1991	0.0385156
delta	BEL	1992	0.0385217
delta	BEL	1993	0.0383902
delta	BEL	1994	0.0381718
delta	BEL	1995	0.0379532
delta	BEL	1996	0.037769
delta	BEL	1997	0.0376647
delta	BEL	1998	0.0377043
delta	BEL	1999	0.0378829
delta	BEL	2000	0.0382249
delta	BEL	2001	0.0386526
delta	BEL	2002	0.0389892
delta	BEL	2003	0.0391707
delta	BEL	2004	0.0393987
delta	BEL	2005	0.0397837
delta	BEL	2006	0.0401244
delta	BEL	2007	0.040466
delta	BEL	2008	0.0408586
delta	BEL	2009	0.0409777
delta	BEL	2010	0.0408698
delta	BEL	2011	0.040863
delta	BEL	2012	0.0408497
delta	BEL	2013	0.040733
delta	BEL	2014	0.0407132
delta	BEL	2015	0.0408971
delta	BEL	2016	0.0412436
delta	BEL	2017	0.0416277
delta	BEL	2018	0.0419982
delta	BEL	2019	0.0423788
delta	BEN	1959	0.0414994
delta	BEN	1960	0.0426477
delta	BEN	1961	0.0432802
delta	BEN	1962	0.0436187
delta	BEN	1963	0.0439961
delta	BEN	1964	0.0439729
delta	BEN	1965	0.0433428
delta	BEN	1966	0.0426342
delta	BEN	1967	0.0426527
delta	BEN	1968	0.0432796
delta	BEN	1969	0.0436808
delta	BEN	1970	0.0436016
delta	BEN	1971	0.0433096
delta	BEN	1972	0.0434713
delta	BEN	1973	0.0435674
delta	BEN	1974	0.043312
delta	BEN	1975	0.0432202
delta	BEN	1976	0.0430101
delta	BEN	1977	0.0425636
delta	BEN	1978	0.042027
delta	BEN	1979	0.0419143
delta	BEN	1980	0.0423402
delta	BEN	1981	0.0425258
delta	BEN	1982	0.0432356
delta	BEN	1983	0.0435076
delta	BEN	1984	0.0423811
delta	BEN	1985	0.0410067
delta	BEN	1986	0.0401536
delta	BEN	1987	0.040032
delta	BEN	1988	0.0400555
delta	BEN	1989	0.0399475
delta	BEN	1990	0.0401405
delta	BEN	1991	0.040845
delta	BEN	1992	0.0417331
delta	BEN	1993	0.0426248
delta	BEN	1994	0.043015
delta	BEN	1995	0.0434327
delta	BEN	1996	0.0440777
delta	BEN	1997	0.0444624
delta	BEN	1998	0.0451216
delta	BEN	1999	0.0460997
delta	BEN	2000	0.0465677
delta	BEN	2001	0.0466258
delta	BEN	2002	0.0466351
delta	BEN	2003	0.0465895
delta	BEN	2004	0.0466205
delta	BEN	2005	0.0461032
delta	BEN	2006	0.0450559
delta	BEN	2007	0.044917
delta	BEN	2008	0.0453239
delta	BEN	2009	0.0451373
delta	BEN	2010	0.0443769
delta	BEN	2011	0.0432275
delta	BEN	2012	0.0419669
delta	BEN	2013	0.0417746
delta	BEN	2014	0.0425644
delta	BEN	2015	0.0432388
delta	BEN	2016	0.0437055
delta	BEN	2017	0.0442273
delta	BEN	2018	0.0451137
delta	BEN	2019	0.0458251
delta	BFA	1959	0.0403786
delta	BFA	1960	0.0397271
delta	BFA	1961	0.0392952
delta	BFA	1962	0.0391932
delta	BFA	1963	0.0389718
delta	BFA	1964	0.0385697
delta	BFA	1965	0.0387044
delta	BFA	1966	0.0392556
delta	BFA	1967	0.039524
delta	BFA	1968	0.039637
delta	BFA	1969	0.0399761
delta	BFA	1970	0.0403264
delta	BFA	1971	0.0405808
delta	BFA	1972	0.0406321
delta	BFA	1973	0.0404723
delta	BFA	1974	0.0404706
delta	BFA	1975	0.0411578
delta	BFA	1976	0.0420396
delta	BFA	1977	0.0430932
delta	BFA	1978	0.0444003
delta	BFA	1979	0.044452
delta	BFA	1980	0.0436422
delta	BFA	1981	0.0429517
delta	BFA	1982	0.0422759
delta	BFA	1983	0.0413245
delta	BFA	1984	0.0408997
delta	BFA	1985	0.0419365
delta	BFA	1986	0.0425119
delta	BFA	1987	0.0417895
delta	BFA	1988	0.0409543
delta	BFA	1989	0.0397991
delta	BFA	1990	0.0385835
delta	BFA	1991	0.0376544
delta	BFA	1992	0.036702
delta	BFA	1993	0.0357134
delta	BFA	1994	0.0347869
delta	BFA	1995	0.0350704
delta	BFA	1996	0.0365401
delta	BFA	1997	0.0390627
delta	BFA	1998	0.0422355
delta	BFA	1999	0.0436647
delta	BFA	2000	0.0435522
delta	BFA	2001	0.043459
delta	BFA	2002	0.0431144
delta	BFA	2003	0.0425732
delta	BFA	2004	0.0422289
delta	BFA	2005	0.0421712
delta	BFA	2006	0.042581
delta	BFA	2007	0.0430702
delta	BFA	2008	0.0432389
delta	BFA	2009	0.0437653
delta	BFA	2010	0.0450983
delta	BFA	2011	0.0466185
delta	BFA	2012	0.048064
delta	BFA	2013	0.049405
delta	BFA	2014	0.0504526
delta	BFA	2015	0.0514762
delta	BFA	2016	0.0526483
delta	BFA	2017	0.0540042
delta	BFA	2018	0.0558683
delta	BFA	2019	0.0580531
delta	BGD	1959	0.0381342
delta	BGD	1960	0.0366705
delta	BGD	1961	0.0355069
delta	BGD	1962	0.0347357
delta	BGD	1963	0.0341194
delta	BGD	1964	0.0335495
delta	BGD	1965	0.0332114
delta	BGD	1966	0.0330385
delta	BGD	1967	0.0329618
delta	BGD	1968	0.0330647
delta	BGD	1969	0.0331615
delta	BGD	1970	0.0331717
delta	BGD	1971	0.032934
delta	BGD	1972	0.032081
delta	BGD	1973	0.0311277
delta	BGD	1974	0.0318455
delta	BGD	1975	0.0334995
delta	BGD	1976	0.0351003
delta	BGD	1977	0.0372289
delta	BGD	1978	0.0397631
delta	BGD	1979	0.0420468
delta	BGD	1980	0.044886
delta	BGD	1981	0.0475256
delta	BGD	1982	0.0483614
delta	BGD	1983	0.0483656
delta	BGD	1984	0.0484329
delta	BGD	1985	0.0486167
delta	BGD	1986	0.0490207
delta	BGD	1987	0.0492256
delta	BGD	1988	0.048713
delta	BGD	1989	0.0481948
delta	BGD	1990	0.0480218
delta	BGD	1991	0.0477613
delta	BGD	1992	0.0472815
delta	BGD	1993	0.0469153
delta	BGD	1994	0.04687
delta	BGD	1995	0.0468315
delta	BGD	1996	0.046964
delta	BGD	1997	0.0473282
delta	BGD	1998	0.0475992
delta	BGD	1999	0.0469666
delta	BGD	2000	0.0462855
delta	BGD	2001	0.0463779
delta	BGD	2002	0.0463237
delta	BGD	2003	0.0460416
delta	BGD	2004	0.0454723
delta	BGD	2005	0.0447073
delta	BGD	2006	0.0442484
delta	BGD	2007	0.0439026
delta	BGD	2008	0.0433719
delta	BGD	2009	0.0428398
delta	BGD	2010	0.0426225
delta	BGD	2011	0.0425687
delta	BGD	2012	0.042257
delta	BGD	2013	0.0418691
delta	BGD	2014	0.0414386
delta	BGD	2015	0.0409197
delta	BGD	2016	0.0406314
delta	BGD	2017	0.0406051
delta	BGD	2018	0.0405675
delta	BGD	2019	0.0404873
delta	BGR	1970	0.0371855
delta	BGR	1971	0.0401031
delta	BGR	1972	0.0422842
delta	BGR	1973	0.0439624
delta	BGR	1974	0.0452685
delta	BGR	1975	0.0463205
delta	BGR	1976	0.0471365
delta	BGR	1977	0.0477582
delta	BGR	1978	0.0482402
delta	BGR	1979	0.0484869
delta	BGR	1980	0.0487643
delta	BGR	1981	0.0491166
delta	BGR	1982	0.0492727
delta	BGR	1983	0.0492649
delta	BGR	1984	0.0491639
delta	BGR	1985	0.0490793
delta	BGR	1986	0.0491911
delta	BGR	1987	0.0494478
delta	BGR	1988	0.0499008
delta	BGR	1989	0.0506012
delta	BGR	1990	0.0504744
delta	BGR	1991	0.0494779
delta	BGR	1992	0.048324
delta	BGR	1993	0.0468877
delta	BGR	1994	0.0455101
delta	BGR	1995	0.0448264
delta	BGR	1996	0.0437837
delta	BGR	1997	0.0425253
delta	BGR	1998	0.0428172
delta	BGR	1999	0.0440749
delta	BGR	2000	0.0455166
delta	BGR	2001	0.0476222
delta	BGR	2002	0.0503563
delta	BGR	2003	0.0533438
delta	BGR	2004	0.0556095
delta	BGR	2005	0.0577806
delta	BGR	2006	0.0594346
delta	BGR	2007	0.0605968
delta	BGR	2008	0.0609688
delta	BGR	2009	0.0591082
delta	BGR	2010	0.0567211
delta	BGR	2011	0.0553498
delta	BGR	2012	0.0545192
delta	BGR	2013	0.0537168
delta	BGR	2014	0.0532903
delta	BGR	2015	0.0531832
delta	BGR	2016	0.052984
delta	BGR	2017	0.0528366
delta	BGR	2018	0.0529684
delta	BGR	2019	0.0532354
delta	BHR	1970	0.0395795
delta	BHR	1971	0.0376427
delta	BHR	1972	0.0361144
delta	BHR	1973	0.0349438
delta	BHR	1974	0.0339783
delta	BHR	1975	0.0331591
delta	BHR	1976	0.0326584
delta	BHR	1977	0.0321829
delta	BHR	1978	0.0315418
delta	BHR	1979	0.0311869
delta	BHR	1980	0.0317261
delta	BHR	1981	0.0324593
delta	BHR	1982	0.032602
delta	BHR	1983	0.0329173
delta	BHR	1984	0.0332576
delta	BHR	1985	0.0328285
delta	BHR	1986	0.0320469
delta	BHR	1987	0.0313841
delta	BHR	1988	0.0308066
delta	BHR	1989	0.0305582
delta	BHR	1990	0.0303864
delta	BHR	1991	0.0305469
delta	BHR	1992	0.0311238
delta	BHR	1993	0.0313788
delta	BHR	1994	0.0314091
delta	BHR	1995	0.0313407
delta	BHR	1996	0.0311528
delta	BHR	1997	0.0308393
delta	BHR	1998	0.03041
delta	BHR	1999	0.0300067
delta	BHR	2000	0.0302291
delta	BHR	2001	0.0306669
delta	BHR	2002	0.03119
delta	BHR	2003	0.0320298
delta	BHR	2004	0.0326149
delta	BHR	2005	0.0331671
delta	BHR	2006	0.0333951
delta	BHR	2007	0.0335434
delta	BHR	2008	0.0344504
delta	BHR	2009	0.034817
delta	BHR	2010	0.034498
delta	BHR	2011	0.034089
delta	BHR	2012	0.033511
delta	BHR	2013	0.0331677
delta	BHR	2014	0.0336571
delta	BHR	2015	0.0338994
delta	BHR	2016	0.0333779
delta	BHR	2017	0.0333475
delta	BHR	2018	0.0338611
delta	BHR	2019	0.0342974
delta	BHS	1970	0.0402748
delta	BHS	1971	0.0394722
delta	BHS	1972	0.0386884
delta	BHS	1973	0.0379909
delta	BHS	1974	0.0372504
delta	BHS	1975	0.0362979
delta	BHS	1976	0.0354948
delta	BHS	1977	0.0353242
delta	BHS	1978	0.0355739
delta	BHS	1979	0.0362887
delta	BHS	1980	0.0378425
delta	BHS	1981	0.0388581
delta	BHS	1982	0.03948
delta	BHS	1983	0.0400853
delta	BHS	1984	0.0404175
delta	BHS	1985	0.0413692
delta	BHS	1986	0.0422263
delta	BHS	1987	0.0425039
delta	BHS	1988	0.04237
delta	BHS	1989	0.0426824
delta	BHS	1990	0.0434557
delta	BHS	1991	0.0438928
delta	BHS	1992	0.0441351
delta	BHS	1993	0.0439787
delta	BHS	1994	0.044171
delta	BHS	1995	0.0452759
delta	BHS	1996	0.0463134
delta	BHS	1997	0.0475614
delta	BHS	1998	0.0494895
delta	BHS	1999	0.0506355
delta	BHS	2000	0.0511727
delta	BHS	2001	0.0520325
delta	BHS	2002	0.0523941
delta	BHS	2003	0.0520588
delta	BHS	2004	0.0516755
delta	BHS	2005	0.0515435
delta	BHS	2006	0.0516159
delta	BHS	2007	0.052129
delta	BHS	2008	0.0521524
delta	BHS	2009	0.0510958
delta	BHS	2010	0.0494184
delta	BHS	2011	0.0475905
delta	BHS	2012	0.046341
delta	BHS	2013	0.0453246
delta	BHS	2014	0.0445554
delta	BHS	2015	0.0438723
delta	BHS	2016	0.0429993
delta	BHS	2017	0.0422903
delta	BHS	2018	0.0416867
delta	BHS	2019	0.0411208
delta	BIH	1990	0.0405663
delta	BIH	1991	0.0415935
delta	BIH	1992	0.0420841
delta	BIH	1993	0.0423682
delta	BIH	1994	0.0430353
delta	BIH	1995	0.0431021
delta	BIH	1996	0.0457785
delta	BIH	1997	0.0513392
delta	BIH	1998	0.055203
delta	BIH	1999	0.0574132
delta	BIH	2000	0.058467
delta	BIH	2001	0.0586047
delta	BIH	2002	0.0587294
delta	BIH	2003	0.0590196
delta	BIH	2004	0.0590209
delta	BIH	2005	0.0589378
delta	BIH	2006	0.0585228
delta	BIH	2007	0.0583059
delta	BIH	2008	0.0588787
delta	BIH	2009	0.0588465
delta	BIH	2010	0.0579213
delta	BIH	2011	0.0570228
delta	BIH	2012	0.056704
delta	BIH	2013	0.0562642
delta	BIH	2014	0.0555916
delta	BIH	2015	0.0551631
delta	BIH	2016	0.0548622
delta	BIH	2017	0.0548102
delta	BIH	2018	0.0550862
delta	BIH	2019	0.0554367
delta	BLR	1990	0.0397113
delta	BLR	1991	0.0379724
delta	BLR	1992	0.0365607
delta	BLR	1993	0.0352852
delta	BLR	1994	0.0342083
delta	BLR	1995	0.033289
delta	BLR	1996	0.0324575
delta	BLR	1997	0.0318236
delta	BLR	1998	0.0314471
delta	BLR	1999	0.0312236
delta	BLR	2000	0.0309546
delta	BLR	2001	0.0306943
delta	BLR	2002	0.0306333
delta	BLR	2003	0.0309172
delta	BLR	2004	0.0316302
delta	BLR	2005	0.0327246
delta	BLR	2006	0.0343316
delta	BLR	2007	0.0363579
delta	BLR	2008	0.0385008
delta	BLR	2009	0.0401401
delta	BLR	2010	0.0412608
delta	BLR	2011	0.0428609
delta	BLR	2012	0.044129
delta	BLR	2013	0.0443047
delta	BLR	2014	0.0439928
delta	BLR	2015	0.0434612
delta	BLR	2016	0.0428581
delta	BLR	2017	0.0426052
delta	BLR	2018	0.0428372
delta	BLR	2019	0.0431822
delta	BLZ	1970	0.0423417
delta	BLZ	1971	0.0452637
delta	BLZ	1972	0.0476959
delta	BLZ	1973	0.0497897
delta	BLZ	1974	0.0514286
delta	BLZ	1975	0.0527012
delta	BLZ	1976	0.0535913
delta	BLZ	1977	0.0542763
delta	BLZ	1978	0.0549496
delta	BLZ	1979	0.0558726
delta	BLZ	1980	0.0563276
delta	BLZ	1981	0.0559909
delta	BLZ	1982	0.0553385
delta	BLZ	1983	0.0544598
delta	BLZ	1984	0.0538608
delta	BLZ	1985	0.053247
delta	BLZ	1986	0.0526009
delta	BLZ	1987	0.0526907
delta	BLZ	1988	0.0537579
delta	BLZ	1989	0.0553457
delta	BLZ	1990	0.0565951
delta	BLZ	1991	0.0574456
delta	BLZ	1992	0.0583761
delta	BLZ	1993	0.0593564
delta	BLZ	1994	0.0598679
delta	BLZ	1995	0.0599118
delta	BLZ	1996	0.0597364
delta	BLZ	1997	0.0595229
delta	BLZ	1998	0.0593039
delta	BLZ	1999	0.0587853
delta	BLZ	2000	0.0594075
delta	BLZ	2001	0.0606398
delta	BLZ	2002	0.0608278
delta	BLZ	2003	0.0603473
delta	BLZ	2004	0.059315
delta	BLZ	2005	0.0581551
delta	BLZ	2006	0.0574636
delta	BLZ	2007	0.0572025
delta	BLZ	2008	0.0574073
delta	BLZ	2009	0.0573421
delta	BLZ	2010	0.0561733
delta	BLZ	2011	0.0545558
delta	BLZ	2012	0.0531408
delta	BLZ	2013	0.0520928
delta	BLZ	2014	0.0514244
delta	BLZ	2015	0.0511339
delta	BLZ	2016	0.0511522
delta	BLZ	2017	0.0509445
delta	BLZ	2018	0.0508042
delta	BLZ	2019	0.0507861
delta	BMU	1970	0.0419581
delta	BMU	1971	0.0440858
delta	BMU	1972	0.0454788
delta	BMU	1973	0.0464879
delta	BMU	1974	0.0472393
delta	BMU	1975	0.0477847
delta	BMU	1976	0.0482387
delta	BMU	1977	0.0486694
delta	BMU	1978	0.0493497
delta	BMU	1979	0.0502776
delta	BMU	1980	0.0517809
delta	BMU	1981	0.0534276
delta	BMU	1982	0.0550525
delta	BMU	1983	0.0569622
delta	BMU	1984	0.0591331
delta	BMU	1985	0.061095
delta	BMU	1986	0.0622981
delta	BMU	1987	0.063297
delta	BMU	1988	0.064745
delta	BMU	1989	0.0661281
delta	BMU	1990	0.0667457
delta	BMU	1991	0.0666902
delta	BMU	1992	0.0663548
delta	BMU	1993	0.0661109
delta	BMU	1994	0.0657398
delta	BMU	1995	0.0653563
delta	BMU	1996	0.0648523
delta	BMU	1997	0.0647284
delta	BMU	1998	0.0658091
delta	BMU	1999	0.0671521
delta	BMU	2000	0.0683369
delta	BMU	2001	0.069618
delta	BMU	2002	0.0704452
delta	BMU	2003	0.0703402
delta	BMU	2004	0.0703075
delta	BMU	2005	0.0709957
delta	BMU	2006	0.0716579
delta	BMU	2007	0.0719819
delta	BMU	2008	0.0722788
delta	BMU	2009	0.0723605
delta	BMU	2010	0.0715493
delta	BMU	2011	0.0693604
delta	BMU	2012	0.0666561
delta	BMU	2013	0.064456
delta	BMU	2014	0.0626153
delta	BMU	2015	0.0610218
delta	BMU	2016	0.0597018
delta	BMU	2017	0.058913
delta	BMU	2018	0.0579981
delta	BMU	2019	0.0570562
delta	BOL	1950	0.0460173
delta	BOL	1951	0.043337
delta	BOL	1952	0.0412106
delta	BOL	1953	0.0394094
delta	BOL	1954	0.0378624
delta	BOL	1955	0.0367976
delta	BOL	1956	0.0360354
delta	BOL	1957	0.0353148
delta	BOL	1958	0.0346492
delta	BOL	1959	0.0339812
delta	BOL	1960	0.0334406
delta	BOL	1961	0.0330083
delta	BOL	1962	0.0331541
delta	BOL	1963	0.0338052
delta	BOL	1964	0.0343405
delta	BOL	1965	0.0349898
delta	BOL	1966	0.0359842
delta	BOL	1967	0.0370841
delta	BOL	1968	0.0376603
delta	BOL	1969	0.0374439
delta	BOL	1970	0.0369028
delta	BOL	1971	0.0364185
delta	BOL	1972	0.0374954
delta	BOL	1973	0.0401687
delta	BOL	1974	0.0421265
delta	BOL	1975	0.0436536
delta	BOL	1976	0.0452858
delta	BOL	1977	0.0461498
delta	BOL	1978	0.0477706
delta	BOL	1979	0.0499906
delta	BOL	1980	0.0509352
delta	BOL	1981	0.0512893
delta	BOL	1982	0.0509851
delta	BOL	1983	0.0497219
delta	BOL	1984	0.0481716
delta	BOL	1985	0.0469801
delta	BOL	1986	0.0466394
delta	BOL	1987	0.0466394
delta	BOL	1988	0.0463999
delta	BOL	1989	0.0458605
delta	BOL	1990	0.0455529
delta	BOL	1991	0.0461555
delta	BOL	1992	0.0473891
delta	BOL	1993	0.048659
delta	BOL	1994	0.0493209
delta	BOL	1995	0.0497869
delta	BOL	1996	0.0507309
delta	BOL	1997	0.0527976
delta	BOL	1998	0.0555908
delta	BOL	1999	0.0572547
delta	BOL	2000	0.0578698
delta	BOL	2001	0.057142
delta	BOL	2002	0.0556279
delta	BOL	2003	0.0547787
delta	BOL	2004	0.0542196
delta	BOL	2005	0.0538686
delta	BOL	2006	0.0538937
delta	BOL	2007	0.0540493
delta	BOL	2008	0.0544751
delta	BOL	2009	0.0551826
delta	BOL	2010	0.0559375
delta	BOL	2011	0.0575042
delta	BOL	2012	0.0593503
delta	BOL	2013	0.0608495
delta	BOL	2014	0.0622063
delta	BOL	2015	0.0639452
delta	BOL	2016	0.0657394
delta	BOL	2017	0.0673182
delta	BOL	2018	0.0688811
delta	BOL	2019	0.0696619
delta	BRA	1950	0.0417352
delta	BRA	1951	0.0439677
delta	BRA	1952	0.0460514
delta	BRA	1953	0.0467001
delta	BRA	1954	0.0473299
delta	BRA	1955	0.0484702
delta	BRA	1956	0.0486732
delta	BRA	1957	0.0489339
delta	BRA	1958	0.049501
delta	BRA	1959	0.0504671
delta	BRA	1960	0.0512961
delta	BRA	1961	0.0518128
delta	BRA	1962	0.0520714
delta	BRA	1963	0.0514705
delta	BRA	1964	0.0502551
delta	BRA	1965	0.0489086
delta	BRA	1966	0.0481396
delta	BRA	1967	0.0475076
delta	BRA	1968	0.0469474
delta	BRA	1969	0.0471754
delta	BRA	1970	0.0480474
delta	BRA	1971	0.049238
delta	BRA	1972	0.0504865
delta	BRA	1973	0.0515713
delta	BRA	1974	0.0525092
delta	BRA	1975	0.0533989
delta	BRA	1976	0.0539936
delta	BRA	1977	0.0539767
delta	BRA	1978	0.0537039
delta	BRA	1979	0.0532597
delta	BRA	1980	0.0527378
delta	BRA	1981	0.0520211
delta	BRA	1982	0.0508422
delta	BRA	1983	0.0495058
delta	BRA	1984	0.0482137
delta	BRA	1985	0.0470955
delta	BRA	1986	0.0461491
delta	BRA	1987	0.0452322
delta	BRA	1988	0.0444955
delta	BRA	1989	0.0438312
delta	BRA	1990	0.0432599
delta	BRA	1991	0.0428965
delta	BRA	1992	0.0425089
delta	BRA	1993	0.0420939
delta	BRA	1994	0.041856
delta	BRA	1995	0.0426314
delta	BRA	1996	0.0438092
delta	BRA	1997	0.044584
delta	BRA	1998	0.045164
delta	BRA	1999	0.0454042
delta	BRA	2000	0.0453215
delta	BRA	2001	0.0451798
delta	BRA	2002	0.0449903
delta	BRA	2003	0.0447913
delta	BRA	2004	0.0448063
delta	BRA	2005	0.0449832
delta	BRA	2006	0.0453749
delta	BRA	2007	0.046103
delta	BRA	2008	0.0472415
delta	BRA	2009	0.0481472
delta	BRA	2010	0.0488705
delta	BRA	2011	0.049767
delta	BRA	2012	0.0503324
delta	BRA	2013	0.0506834
delta	BRA	2014	0.0508311
delta	BRA	2015	0.0504117
delta	BRA	2016	0.0494945
delta	BRA	2017	0.0486625
delta	BRA	2018	0.0481848
delta	BRA	2019	0.0478447
delta	BRB	1960	0.0405129
delta	BRB	1961	0.0400438
delta	BRB	1962	0.0393766
delta	BRB	1963	0.0388265
delta	BRB	1964	0.0384509
delta	BRB	1965	0.038058
delta	BRB	1966	0.0376804
delta	BRB	1967	0.0373375
delta	BRB	1968	0.0370737
delta	BRB	1969	0.0369145
delta	BRB	1970	0.0372647
delta	BRB	1971	0.0375764
delta	BRB	1972	0.0374527
delta	BRB	1973	0.0372391
delta	BRB	1974	0.0367082
delta	BRB	1975	0.0361848
delta	BRB	1976	0.0363912
delta	BRB	1977	0.0368622
delta	BRB	1978	0.0369747
delta	BRB	1979	0.0370895
delta	BRB	1980	0.0372413
delta	BRB	1981	0.0372905
delta	BRB	1982	0.0371022
delta	BRB	1983	0.0366927
delta	BRB	1984	0.0363033
delta	BRB	1985	0.0358654
delta	BRB	1986	0.0354837
delta	BRB	1987	0.0351866
delta	BRB	1988	0.0349581
delta	BRB	1989	0.0349408
delta	BRB	1990	0.0349654
delta	BRB	1991	0.0350694
delta	BRB	1992	0.0349516
delta	BRB	1993	0.0347762
delta	BRB	1994	0.0352269
delta	BRB	1995	0.0363477
delta	BRB	1996	0.0378202
delta	BRB	1997	0.0398766
delta	BRB	1998	0.0425821
delta	BRB	1999	0.0449313
delta	BRB	2000	0.0464383
delta	BRB	2001	0.0472969
delta	BRB	2002	0.0481995
delta	BRB	2003	0.0487069
delta	BRB	2004	0.0486726
delta	BRB	2005	0.0489415
delta	BRB	2006	0.0491188
delta	BRB	2007	0.0486728
delta	BRB	2008	0.0478127
delta	BRB	2009	0.0465336
delta	BRB	2010	0.0443847
delta	BRB	2011	0.0419219
delta	BRB	2012	0.040718
delta	BRB	2013	0.040684
delta	BRB	2014	0.0407185
delta	BRB	2015	0.0407769
delta	BRB	2016	0.0409676
delta	BRB	2017	0.0399078
delta	BRB	2018	0.0376828
delta	BRB	2019	0.0357541
delta	BRN	1970	0.0401981
delta	BRN	1971	0.0390366
delta	BRN	1972	0.0377142
delta	BRN	1973	0.0363465
delta	BRN	1974	0.0350184
delta	BRN	1975	0.0340202
delta	BRN	1976	0.033499
delta	BRN	1977	0.0330057
delta	BRN	1978	0.0323449
delta	BRN	1979	0.0319735
delta	BRN	1980	0.0323199
delta	BRN	1981	0.0330652
delta	BRN	1982	0.0341817
delta	BRN	1983	0.0354622
delta	BRN	1984	0.0363831
delta	BRN	1985	0.0379971
delta	BRN	1986	0.0405185
delta	BRN	1987	0.0424229
delta	BRN	1988	0.0438334
delta	BRN	1989	0.0454588
delta	BRN	1990	0.0470653
delta	BRN	1991	0.0488178
delta	BRN	1992	0.0506227
delta	BRN	1993	0.0523477
delta	BRN	1994	0.0537625
delta	BRN	1995	0.0534601
delta	BRN	1996	0.0530814
delta	BRN	1997	0.0533398
delta	BRN	1998	0.0527002
delta	BRN	1999	0.0513652
delta	BRN	2000	0.0499304
delta	BRN	2001	0.0488139
delta	BRN	2002	0.0483974
delta	BRN	2003	0.0480573
delta	BRN	2004	0.0471151
delta	BRN	2005	0.0460811
delta	BRN	2006	0.0454474
delta	BRN	2007	0.0455486
delta	BRN	2008	0.0462436
delta	BRN	2009	0.0468965
delta	BRN	2010	0.0467404
delta	BRN	2011	0.0462593
delta	BRN	2012	0.0462377
delta	BRN	2013	0.0465684
delta	BRN	2014	0.0464464
delta	BRN	2015	0.0458954
delta	BRN	2016	0.0453507
delta	BRN	2017	0.0448296
delta	BRN	2018	0.0447625
delta	BRN	2019	0.0450294
delta	BTN	1970	0.0403824
delta	BTN	1971	0.0398254
delta	BTN	1972	0.0393636
delta	BTN	1973	0.0389642
delta	BTN	1974	0.0386484
delta	BTN	1975	0.0383611
delta	BTN	1976	0.0381117
delta	BTN	1977	0.0380022
delta	BTN	1978	0.037976
delta	BTN	1979	0.0379371
delta	BTN	1980	0.0380393
delta	BTN	1981	0.038147
delta	BTN	1982	0.0380593
delta	BTN	1983	0.0380532
delta	BTN	1984	0.0382729
delta	BTN	1985	0.0390026
delta	BTN	1986	0.0399976
delta	BTN	1987	0.0408111
delta	BTN	1988	0.0417098
delta	BTN	1989	0.0425464
delta	BTN	1990	0.0430725
delta	BTN	1991	0.0433558
delta	BTN	1992	0.0440822
delta	BTN	1993	0.0448296
delta	BTN	1994	0.0433323
delta	BTN	1995	0.0405072
delta	BTN	1996	0.0383058
delta	BTN	1997	0.0365776
delta	BTN	1998	0.0351398
delta	BTN	1999	0.0336958
delta	BTN	2000	0.0322576
delta	BTN	2001	0.031027
delta	BTN	2002	0.0301221
delta	BTN	2003	0.0297254
delta	BTN	2004	0.0299708
delta	BTN	2005	0.0313994
delta	BTN	2006	0.0333707
delta	BTN	2007	0.0348056
delta	BTN	2008	0.0362871
delta	BTN	2009	0.0382106
delta	BTN	2010	0.0406778
delta	BTN	2011	0.0435955
delta	BTN	2012	0.0459349
delta	BTN	2013	0.0465396
delta	BTN	2014	0.046354
delta	BTN	2015	0.0464401
delta	BTN	2016	0.0465146
delta	BTN	2017	0.0463927
delta	BTN	2018	0.0460533
delta	BTN	2019	0.0454072
delta	BWA	1960	0.0332283
delta	BWA	1961	0.0328676
delta	BWA	1962	0.0328277
delta	BWA	1963	0.0329836
delta	BWA	1964	0.0333287
delta	BWA	1965	0.0331253
delta	BWA	1966	0.0330399
delta	BWA	1967	0.0338566
delta	BWA	1968	0.035078
delta	BWA	1969	0.0358914
delta	BWA	1970	0.0373237
delta	BWA	1971	0.0402506
delta	BWA	1972	0.0428865
delta	BWA	1973	0.0445577
delta	BWA	1974	0.045091
delta	BWA	1975	0.0443646
delta	BWA	1976	0.0431273
delta	BWA	1977	0.0419083
delta	BWA	1978	0.0407078
delta	BWA	1979	0.0398395
delta	BWA	1980	0.0395326
delta	BWA	1981	0.0397081
delta	BWA	1982	0.0403509
delta	BWA	1983	0.0411835
delta	BWA	1984	0.0419268
delta	BWA	1985	0.0428463
delta	BWA	1986	0.0439854
delta	BWA	1987	0.0449791
delta	BWA	1988	0.0456271
delta	BWA	1989	0.0477392
delta	BWA	1990	0.0506281
delta	BWA	1991	0.0521786
delta	BWA	1992	0.0528039
delta	BWA	1993	0.0530766
delta	BWA	1994	0.0530575
delta	BWA	1995	0.0531045
delta	BWA	1996	0.0530299
delta	BWA	1997	0.0529588
delta	BWA	1998	0.053587
delta	BWA	1999	0.053965
delta	BWA	2000	0.0540766
delta	BWA	2001	0.0542214
delta	BWA	2002	0.0544593
delta	BWA	2003	0.0550483
delta	BWA	2004	0.0537823
delta	BWA	2005	0.0509016
delta	BWA	2006	0.0484513
delta	BWA	2007	0.0468717
delta	BWA	2008	0.0463353
delta	BWA	2009	0.0461619
delta	BWA	2010	0.0459988
delta	BWA	2011	0.0461117
delta	BWA	2012	0.0465894
delta	BWA	2013	0.0467369
delta	BWA	2014	0.0463471
delta	BWA	2015	0.0461306
delta	BWA	2016	0.0460763
delta	BWA	2017	0.045441
delta	BWA	2018	0.0445973
delta	BWA	2019	0.0442198
delta	CAF	1960	0.0422087
delta	CAF	1961	0.0451755
delta	CAF	1962	0.0480189
delta	CAF	1963	0.0502794
delta	CAF	1964	0.0520199
delta	CAF	1965	0.0533843
delta	CAF	1966	0.0544445
delta	CAF	1967	0.0549593
delta	CAF	1968	0.0550712
delta	CAF	1969	0.0550599
delta	CAF	1970	0.0549192
delta	CAF	1971	0.0548173
delta	CAF	1972	0.0546719
delta	CAF	1973	0.0549647
delta	CAF	1974	0.0549295
delta	CAF	1975	0.054025
delta	CAF	1976	0.0528391
delta	CAF	1977	0.0518406
delta	CAF	1978	0.0506908
delta	CAF	1979	0.0492726
delta	CAF	1980	0.0478206
delta	CAF	1981	0.0465638
delta	CAF	1982	0.0454912
delta	CAF	1983	0.044673
delta	CAF	1984	0.0443259
delta	CAF	1985	0.0446025
delta	CAF	1986	0.0453488
delta	CAF	1987	0.0455296
delta	CAF	1988	0.0450879
delta	CAF	1989	0.0443572
delta	CAF	1990	0.0435367
delta	CAF	1991	0.0425897
delta	CAF	1992	0.041574
delta	CAF	1993	0.0404304
delta	CAF	1994	0.0392995
delta	CAF	1995	0.0391193
delta	CAF	1996	0.0386627
delta	CAF	1997	0.0372868
delta	CAF	1998	0.0362221
delta	CAF	1999	0.0355642
delta	CAF	2000	0.0348649
delta	CAF	2001	0.0338877
delta	CAF	2002	0.0329688
delta	CAF	2003	0.0318094
delta	CAF	2004	0.0307174
delta	CAF	2005	0.0300584
delta	CAF	2006	0.0297462
delta	CAF	2007	0.0296361
delta	CAF	2008	0.0293787
delta	CAF	2009	0.0289074
delta	CAF	2010	0.0288222
delta	CAF	2011	0.0289299
delta	CAF	2012	0.0286845
delta	CAF	2013	0.0278886
delta	CAF	2014	0.0272781
delta	CAF	2015	0.0273493
delta	CAF	2016	0.0277102
delta	CAF	2017	0.0286907
delta	CAF	2018	0.0300114
delta	CAF	2019	0.0310446
delta	CAN	1950	0.0335231
delta	CAN	1951	0.0340112
delta	CAN	1952	0.0344953
delta	CAN	1953	0.0348364
delta	CAN	1954	0.0348363
delta	CAN	1955	0.0345613
delta	CAN	1956	0.0345831
delta	CAN	1957	0.0347358
delta	CAN	1958	0.0345125
delta	CAN	1959	0.0341352
delta	CAN	1960	0.0339372
delta	CAN	1961	0.03375
delta	CAN	1962	0.0335812
delta	CAN	1963	0.0335268
delta	CAN	1964	0.0335823
delta	CAN	1965	0.0338467
delta	CAN	1966	0.0343418
delta	CAN	1967	0.034782
delta	CAN	1968	0.0349509
delta	CAN	1969	0.0350016
delta	CAN	1970	0.0350015
delta	CAN	1971	0.0349218
delta	CAN	1972	0.034818
delta	CAN	1973	0.0348326
delta	CAN	1974	0.0350004
delta	CAN	1975	0.0351878
delta	CAN	1976	0.0353049
delta	CAN	1977	0.035335
delta	CAN	1978	0.0353167
delta	CAN	1979	0.0353596
delta	CAN	1980	0.0355152
delta	CAN	1981	0.0355744
delta	CAN	1982	0.0354005
delta	CAN	1983	0.0350556
delta	CAN	1984	0.0347041
delta	CAN	1985	0.0344464
delta	CAN	1986	0.0342282
delta	CAN	1987	0.0340289
delta	CAN	1988	0.0339646
delta	CAN	1989	0.0339928
delta	CAN	1990	0.033948
delta	CAN	1991	0.0338611
delta	CAN	1992	0.0337093
delta	CAN	1993	0.0335261
delta	CAN	1994	0.0334337
delta	CAN	1995	0.0334462
delta	CAN	1996	0.0335354
delta	CAN	1997	0.0337204
delta	CAN	1998	0.034043
delta	CAN	1999	0.034392
delta	CAN	2000	0.034713
delta	CAN	2001	0.0349973
delta	CAN	2002	0.0350879
delta	CAN	2003	0.035098
delta	CAN	2004	0.0352205
delta	CAN	2005	0.0355138
delta	CAN	2006	0.0359145
delta	CAN	2007	0.036271
delta	CAN	2008	0.0365403
delta	CAN	2009	0.0364836
delta	CAN	2010	0.0362328
delta	CAN	2011	0.036107
delta	CAN	2012	0.0360201
delta	CAN	2013	0.0358838
delta	CAN	2014	0.0357177
delta	CAN	2015	0.0354624
delta	CAN	2016	0.03508
delta	CAN	2017	0.0347488
delta	CAN	2018	0.0345644
delta	CAN	2019	0.0344321
delta	CHE	1950	0.0396042
delta	CHE	1951	0.0392579
delta	CHE	1952	0.0392468
delta	CHE	1953	0.0391392
delta	CHE	1954	0.0391004
delta	CHE	1955	0.0394114
delta	CHE	1956	0.0401533
delta	CHE	1957	0.041114
delta	CHE	1958	0.0416487
delta	CHE	1959	0.0418627
delta	CHE	1960	0.0423433
delta	CHE	1961	0.0431543
delta	CHE	1962	0.0441148
delta	CHE	1963	0.0449089
delta	CHE	1964	0.0454319
delta	CHE	1965	0.045688
delta	CHE	1966	0.0457449
delta	CHE	1967	0.0457733
delta	CHE	1968	0.045807
delta	CHE	1969	0.0458184
delta	CHE	1970	0.04604
delta	CHE	1971	0.0464651
delta	CHE	1972	0.0467863
delta	CHE	1973	0.0468891
delta	CHE	1974	0.0468086
delta	CHE	1975	0.0464067
delta	CHE	1976	0.0456319
delta	CHE	1977	0.0448425
delta	CHE	1978	0.0443358
delta	CHE	1979	0.0440328
delta	CHE	1980	0.0438496
delta	CHE	1981	0.043703
delta	CHE	1982	0.0434296
delta	CHE	1983	0.0431024
delta	CHE	1984	0.0427852
delta	CHE	1985	0.0425234
delta	CHE	1986	0.0424584
delta	CHE	1987	0.0425376
delta	CHE	1988	0.0426863
delta	CHE	1989	0.0428675
delta	CHE	1990	0.0430573
delta	CHE	1991	0.0432367
delta	CHE	1992	0.0431662
delta	CHE	1993	0.0427994
delta	CHE	1994	0.0423924
delta	CHE	1995	0.0421695
delta	CHE	1996	0.0421215
delta	CHE	1997	0.0422031
delta	CHE	1998	0.0425268
delta	CHE	1999	0.0430615
delta	CHE	2000	0.0436182
delta	CHE	2001	0.0440812
delta	CHE	2002	0.0444519
delta	CHE	2003	0.0446943
delta	CHE	2004	0.0449401
delta	CHE	2005	0.0452323
delta	CHE	2006	0.0455892
delta	CHE	2007	0.0462133
delta	CHE	2008	0.0468824
delta	CHE	2009	0.0471264
delta	CHE	2010	0.047183
delta	CHE	2011	0.0473153
delta	CHE	2012	0.047558
delta	CHE	2013	0.0479312
delta	CHE	2014	0.0482261
delta	CHE	2015	0.0484676
delta	CHE	2016	0.0487433
delta	CHE	2017	0.0491632
delta	CHE	2018	0.0496684
delta	CHE	2019	0.0500859
delta	CHL	1951	0.0296916
delta	CHL	1952	0.0282235
delta	CHL	1953	0.0269968
delta	CHL	1954	0.0259882
delta	CHL	1955	0.0251361
delta	CHL	1956	0.0244593
delta	CHL	1957	0.0239306
delta	CHL	1958	0.0235026
delta	CHL	1959	0.0231826
delta	CHL	1960	0.0229309
delta	CHL	1961	0.0227047
delta	CHL	1962	0.0224617
delta	CHL	1963	0.0222065
delta	CHL	1964	0.0220015
delta	CHL	1965	0.0218472
delta	CHL	1966	0.0217548
delta	CHL	1967	0.0216953
delta	CHL	1968	0.0216373
delta	CHL	1969	0.0215897
delta	CHL	1970	0.0215448
delta	CHL	1971	0.0214941
delta	CHL	1972	0.021421
delta	CHL	1973	0.0214794
delta	CHL	1974	0.0218131
delta	CHL	1975	0.022272
delta	CHL	1976	0.0226595
delta	CHL	1977	0.0230503
delta	CHL	1978	0.0235337
delta	CHL	1979	0.024056
delta	CHL	1980	0.0246359
delta	CHL	1981	0.0252331
delta	CHL	1982	0.0253295
delta	CHL	1983	0.0249365
delta	CHL	1984	0.024643
delta	CHL	1985	0.024468
delta	CHL	1986	0.0242794
delta	CHL	1987	0.024194
delta	CHL	1988	0.0242704
delta	CHL	1989	0.0245412
delta	CHL	1990	0.0249192
delta	CHL	1991	0.0252879
delta	CHL	1992	0.0257382
delta	CHL	1993	0.026185
delta	CHL	1994	0.0266589
delta	CHL	1995	0.0273762
delta	CHL	1996	0.0281872
delta	CHL	1997	0.0288662
delta	CHL	1998	0.0292619
delta	CHL	1999	0.0293812
delta	CHL	2000	0.0295228
delta	CHL	2001	0.0297515
delta	CHL	2002	0.0299644
delta	CHL	2003	0.0302262
delta	CHL	2004	0.0307261
delta	CHL	2005	0.0316527
delta	CHL	2006	0.0327081
delta	CHL	2007	0.0338707
delta	CHL	2008	0.0350968
delta	CHL	2009	0.0359023
delta	CHL	2010	0.0368542
delta	CHL	2011	0.0385584
delta	CHL	2012	0.0403947
delta	CHL	2013	0.0416083
delta	CHL	2014	0.0421174
delta	CHL	2015	0.0421674
delta	CHL	2016	0.0420331
delta	CHL	2017	0.0418647
delta	CHL	2018	0.0418078
delta	CHL	2019	0.0418271
delta	CHN	1952	0.0417522
delta	CHN	1953	0.0440752
delta	CHN	1954	0.0465368
delta	CHN	1955	0.0484689
delta	CHN	1956	0.050053
delta	CHN	1957	0.0515837
delta	CHN	1958	0.0537256
delta	CHN	1959	0.0567669
delta	CHN	1960	0.0590528
delta	CHN	1961	0.0591044
delta	CHN	1962	0.0577879
delta	CHN	1963	0.0566053
delta	CHN	1964	0.0558499
delta	CHN	1965	0.0554867
delta	CHN	1966	0.0552709
delta	CHN	1967	0.0549595
delta	CHN	1968	0.0544794
delta	CHN	1969	0.0540524
delta	CHN	1970	0.0538133
delta	CHN	1971	0.0535676
delta	CHN	1972	0.0533059
delta	CHN	1973	0.0531327
delta	CHN	1974	0.0529886
delta	CHN	1975	0.0528261
delta	CHN	1976	0.0524296
delta	CHN	1977	0.0519369
delta	CHN	1978	0.0519045
delta	CHN	1979	0.0522067
delta	CHN	1980	0.0521933
delta	CHN	1981	0.051718
delta	CHN	1982	0.0512385
delta	CHN	1983	0.0510859
delta	CHN	1984	0.0514341
delta	CHN	1985	0.0523626
delta	CHN	1986	0.0532383
delta	CHN	1987	0.0537939
delta	CHN	1988	0.0543349
delta	CHN	1989	0.0542978
delta	CHN	1990	0.0537446
delta	CHN	1991	0.0534796
delta	CHN	1992	0.0538591
delta	CHN	1993	0.0549814
delta	CHN	1994	0.0562012
delta	CHN	1995	0.056543
delta	CHN	1996	0.0561355
delta	CHN	1997	0.0556804
delta	CHN	1998	0.0552216
delta	CHN	1999	0.054578
delta	CHN	2000	0.0538174
delta	CHN	2001	0.0530819
delta	CHN	2002	0.0524524
delta	CHN	2003	0.0523894
delta	CHN	2004	0.0529595
delta	CHN	2005	0.0537135
delta	CHN	2006	0.0541592
delta	CHN	2007	0.0538753
delta	CHN	2008	0.0535224
delta	CHN	2009	0.0538724
delta	CHN	2010	0.0545677
delta	CHN	2011	0.0550152
delta	CHN	2012	0.0552484
delta	CHN	2013	0.0552957
delta	CHN	2014	0.0550672
delta	CHN	2015	0.0546602
delta	CHN	2016	0.05408
delta	CHN	2017	0.0533731
delta	CHN	2018	0.0526356
delta	CHN	2019	0.0518946
delta	CIV	1960	0.0427579
delta	CIV	1961	0.0462693
delta	CIV	1962	0.0480332
delta	CIV	1963	0.0485656
delta	CIV	1964	0.0500192
delta	CIV	1965	0.0514339
delta	CIV	1966	0.0519849
delta	CIV	1967	0.05207
delta	CIV	1968	0.0515938
delta	CIV	1969	0.0510773
delta	CIV	1970	0.0513478
delta	CIV	1971	0.0515826
delta	CIV	1972	0.0513352
delta	CIV	1973	0.0518068
delta	CIV	1974	0.0525394
delta	CIV	1975	0.0524215
delta	CIV	1976	0.0522705
delta	CIV	1977	0.053137
delta	CIV	1978	0.0539228
delta	CIV	1979	0.0535964
delta	CIV	1980	0.0525907
delta	CIV	1981	0.0513217
delta	CIV	1982	0.0502409
delta	CIV	1983	0.0493814
delta	CIV	1984	0.0483948
delta	CIV	1985	0.0474226
delta	CIV	1986	0.04657
delta	CIV	1987	0.0455975
delta	CIV	1988	0.0445193
delta	CIV	1989	0.0435433
delta	CIV	1990	0.0426017
delta	CIV	1991	0.0416665
delta	CIV	1992	0.0408126
delta	CIV	1993	0.0400503
delta	CIV	1994	0.0395205
delta	CIV	1995	0.0398783
delta	CIV	1996	0.0411237
delta	CIV	1997	0.0425579
delta	CIV	1998	0.0436786
delta	CIV	1999	0.0439567
delta	CIV	2000	0.0433803
delta	CIV	2001	0.0424401
delta	CIV	2002	0.0415365
delta	CIV	2003	0.0405478
delta	CIV	2004	0.0396708
delta	CIV	2005	0.0390519
delta	CIV	2006	0.0383315
delta	CIV	2007	0.0381364
delta	CIV	2008	0.0386645
delta	CIV	2009	0.039011
delta	CIV	2010	0.0388631
delta	CIV	2011	0.0382716
delta	CIV	2012	0.0386975
delta	CIV	2013	0.0411715
delta	CIV	2014	0.0445886
delta	CIV	2015	0.0481447
delta	CIV	2016	0.0509103
delta	CIV	2017	0.0526725
delta	CIV	2018	0.0534018
delta	CIV	2019	0.0542665
delta	CMR	1960	0.0406928
delta	CMR	1961	0.0406803
delta	CMR	1962	0.0407551
delta	CMR	1963	0.0407574
delta	CMR	1964	0.0407189
delta	CMR	1965	0.0415964
delta	CMR	1966	0.0433941
delta	CMR	1967	0.0448536
delta	CMR	1968	0.0456897
delta	CMR	1969	0.0458785
delta	CMR	1970	0.0464777
delta	CMR	1971	0.0474793
delta	CMR	1972	0.0477157
delta	CMR	1973	0.0477436
delta	CMR	1974	0.0480262
delta	CMR	1975	0.0483135
delta	CMR	1976	0.0486566
delta	CMR	1977	0.0494778
delta	CMR	1978	0.0509262
delta	CMR	1979	0.0516525
delta	CMR	1980	0.0516962
delta	CMR	1981	0.0517445
delta	CMR	1982	0.0513332
delta	CMR	1983	0.0506366
delta	CMR	1984	0.0499103
delta	CMR	1985	0.0490491
delta	CMR	1986	0.0482203
delta	CMR	1987	0.0477608
delta	CMR	1988	0.047394
delta	CMR	1989	0.0467551
delta	CMR	1990	0.0459615
delta	CMR	1991	0.0451115
delta	CMR	1992	0.0440531
delta	CMR	1993	0.0427754
delta	CMR	1994	0.0417968
delta	CMR	1995	0.0417216
delta	CMR	1996	0.0422553
delta	CMR	1997	0.0432674
delta	CMR	1998	0.0446526
delta	CMR	1999	0.0455884
delta	CMR	2000	0.0462609
delta	CMR	2001	0.0475789
delta	CMR	2002	0.0492525
delta	CMR	2003	0.0503038
delta	CMR	2004	0.0507687
delta	CMR	2005	0.0509255
delta	CMR	2006	0.0507433
delta	CMR	2007	0.0508693
delta	CMR	2008	0.0518275
[truncated: 8,315 more rows]

## Sheet: Tabelle1
Summe von AggValue	Spaltenbeschriftungen
Zeilenbeschriftungen	MAR	ABW	AGO	AIA	ALB	ARE	ARG	ARM	ATG	AUS	AUT	AZE	BDI	BEL	BEN	BFA	BGD	BGR	BHR	BHS	BIH	BLR	BLZ	BMU	BOL	BRA	BRB	BRN	BTN	BWA	CAF	CAN	CHE	CHL	CHN	CIV	CMR	COD	COG	COL	COM	CPV	CRI	CYM	CYP	CZE	DEU	DJI	DMA
1950	0.03407						0.0276286			0.0211655	0.0309548			0.0367781											0.0460173	0.0417352						0.0335231	0.0396042					0.0391751		0.0332491			0.0350814		0.0306645		0.0331158
1951	0.0340145						0.0280615			0.0216736	0.0323629			0.0369799											0.043337	0.0439677						0.0340112	0.0392579	0.0296916				0.0364297		0.0329322			0.0357136		0.0316575		0.03345
1952	0.0339927						0.0285848			0.0219543	0.0333051			0.0371417											0.0412106	0.0460514						0.0344953	0.0392468	0.0282235	0.0417522			0.0341229		0.0327696			0.0366855		0.0326089		0.0337155
1953	0.0339824						0.0287676			0.0220787	0.0332865			0.0373051											0.0394094	0.0467001						0.0348364	0.0391392	0.0269968	0.0440752			0.0322505		0.0329357			0.0378765		0.0336408		0.0339256
1954	0.0339577						0.0288117			0.0223101	0.0331167			0.0375856											0.0378624	0.0473299						0.0348363	0.0391004	0.0259882	0.0465368			0.0307249		0.0333444			0.0387626		0.0351303		0.0340668
1955	0.0335823						0.0289811			0.0225758	0.0336415			0.0378486											0.0367976	0.0484702						0.0345613	0.0394114	0.0251361	0.0484689			0.0294453		0.0336218			0.0394917		0.0368505		0.0343837
1956	0.0329154						0.029277			0.0227803	0.034236			0.0381195											0.0360354	0.0486732						0.0345831	0.0401533	0.0244593	0.050053			0.0283604		0.0336348			0.0402911		0.0382677		0.0346904
1957	0.0321113						0.0295236			0.0229279	0.0345058			0.0384487											0.0353148	0.0489339						0.0347358	0.041114	0.0239306	0.0515837			0.027403		0.0329654			0.0411309		0.0392472		0.0347416
1958	0.031533						0.0296992			0.0230946	0.0347148			0.0384632											0.0346492	0.049501						0.0345125	0.0416487	0.0235026	0.0537256			0.0264951		0.0318997			0.0413653		0.0393641		0.0346509
1959	0.0310666						0.0297627			0.0232805	0.0348679			0.03841	0.0414994	0.0403786	0.0381342								0.0339812	0.0504671						0.0341352	0.0418627	0.0231826	0.0567669			0.0255988		0.0309231			0.0412747		0.0389762		0.0345918
1960	0.0305481						0.030305			0.0234572	0.0353837		0.0403207	0.0385836	0.0426477	0.0397271	0.0366705								0.0334406	0.0512961	0.0405129			0.0332283	0.0422087	0.0339372	0.0423433	0.0229309	0.0590528	0.0427579	0.0406928	0.024686	0.0459121	0.0303489	0.0395421	0.0408226	0.0414373		0.0385426		0.034667
1961	0.0301936						0.0313823			0.0235781	0.0360695		0.0395648	0.0389005	0.0432802	0.0392952	0.0355069								0.0330083	0.0518128	0.0400438			0.0328676	0.0451755	0.03375	0.0431543	0.0227047	0.0591044	0.0462693	0.0406803	0.023774	0.0545606	0.0301683	0.0374114	0.0409726	0.041273		0.0379238		0.0348243
1962	0.0301247						0.0322251			0.0236916	0.0363907		0.0389853	0.0393488	0.0436187	0.0391932	0.0347357								0.0331541	0.0520714	0.0393766			0.0328277	0.0480189	0.0335812	0.0441148	0.0224617	0.0577879	0.0480332	0.0407551	0.022895	0.0578739	0.0298992	0.0359828	0.0404564	0.041098		0.0378915		0.0349624
1963	0.0305149						0.0324649			0.0238225	0.0364669		0.0383901	0.0397082	0.0439961	0.0389718	0.0341194								0.0338052	0.0514705	0.0388265			0.0329836	0.0502794	0.0335268	0.0449089	0.0222065	0.0566053	0.0485656	0.0407574	0.0222847	0.0566543	0.0294881	0.0351126	0.0390569	0.0413233		0.0381691		0.0349578
1964	0.0308361						0.0325685			0.0239365	0.0365426		0.0375877	0.0398198	0.0439729	0.0385697	0.0335495								0.0343405	0.0502551	0.0384509			0.0333287	0.0520199	0.0335823	0.0454319	0.0220015	0.0558499	0.0500192	0.0407189	0.0219829	0.0545122	0.0292003	0.0345612	0.0374329	0.0416589		0.0377677		0.0349202
1965	0.0309486						0.0328272			0.0240205	0.0366896		0.0366851	0.0397404	0.0433428	0.0387044	0.0332114								0.0349898	0.0489086	0.038058			0.0331253	0.0533843	0.0338467	0.045688	0.0218472	0.0554867	0.0514339	0.0415964	0.0217127	0.0526322	0.0289604	0.034666	0.0361845	0.0422379		0.0377529		0.0349275
1966	0.0309758						0.0329462			0.0240973	0.0368948		0.0358877	0.039747	0.0426342	0.0392556	0.0330385								0.0359842	0.0481396	0.0376804			0.0330399	0.0544445	0.0343418	0.0457449	0.0217548	0.0552709	0.0519849	0.0433941	0.0214178	0.0519549	0.0287622	0.0351614	0.0354185	0.0431361		0.0382504		0.0348093
1967	0.0312096						0.0329188			0.0242036	0.036927		0.0353786	0.0397705	0.0426527	0.039524	0.0329618								0.0370841	0.0475076	0.0373375			0.0338566	0.0549593	0.034782	0.0457733	0.0216953	0.0549595	0.05207	0.0448536	0.0210753	0.0523556	0.0285741	0.0354837	0.034818	0.043948		0.038258		0.0343898
1968	0.0317265						0.0328433			0.0243349	0.0367536		0.0351415	0.0396572	0.0432796	0.039637	0.0330647								0.0376603	0.0469474	0.0370737			0.035078	0.0550712	0.0349509	0.045807	0.0216373	0.0544794	0.0515938	0.0456897	0.0207417	0.0523351	0.0284101	0.0353123	0.0343555	0.0442026		0.0379234		0.0338424
1969	0.0321661						0.0328693			0.0244636	0.036637		0.0350709	0.0396514	0.0436808	0.0399761	0.0331615								0.0374439	0.0471754	0.0369145			0.0358914	0.0550599	0.0350016	0.0458184	0.0215897	0.0540524	0.0510773	0.0458785	0.0205634	0.0514069	0.0284114	0.0348624	0.0343248	0.0446582		0.0378912		0.0335763
1970	0.0330824	0.0401202	0.0401825	0.0395169	0.0403417	0.0393863	0.0329367		0.0407855	0.024542	0.0367876		0.0344214	0.0398252	0.0436016	0.0403264	0.0331717	0.0371855	0.0395795	0.0402748			0.0423417	0.0419581	0.0369028	0.0480474	0.0372647	0.0401981	0.0403824	0.0373237	0.0549192	0.0350015	0.04604	0.0215448	0.0538133	0.0513478	0.0464777	0.0205012	0.0500248	0.0286096	0.034963	0.0346131	0.0459241	0.0392143	0.038215		0.0337053	0.0404524	0.042583
1971	0.0341591	0.0391263	0.0394635	0.0374535	0.0384564	0.0370231	0.0329713		0.0410918	0.0245688	0.0371989		0.0337473	0.0400337	0.0433096	0.0405808	0.032934	0.0401031	0.0376427	0.0394722			0.0452637	0.0440858	0.0364185	0.049238	0.0375764	0.0390366	0.0398254	0.0402506	0.0548173	0.0349218	0.0464651	0.0214941	0.0535676	0.0515826	0.0474793	0.0205417	0.0489178	0.0289829	0.0354534	0.0349107	0.0475776	0.0367451	0.0381333		0.0339507	0.0400457	0.0471335
1972	0.0348192	0.0383293	0.0389448	0.035751	0.0369267	0.0350964	0.0330599		0.0414186	0.024547	0.0377758		0.0330212	0.0402281	0.0434713	0.0406321	0.032081	0.0422842	0.0361144	0.0386884			0.0476959	0.0454788	0.0374954	0.0504865	0.0374527	0.0377142	0.0393636	0.0428865	0.0546719	0.034818	0.0467863	0.021421	0.0533059	0.0513352	0.0477157	0.020708	0.0483496	0.0293419	0.0356419	0.0350777	0.0491762	0.034855	0.037684		0.0339995	0.0394897	0.0508238
1973	0.0354645	0.0376955	0.0383669	0.0343529	0.0356869	0.0334981	0.0331344		0.041631	0.0244956	0.0379572		0.0320294	0.0406629	0.0435674	0.0404723	0.0311277	0.0439624	0.0349438	0.0379909			0.0497897	0.0464879	0.0401687	0.0515713	0.0372391	0.0363465	0.0389642	0.0445577	0.0549647	0.0348326	0.0468891	0.0214794	0.0531327	0.0518068	0.0477436	0.0207996	0.0481543	0.0295318	0.0354925	0.0351381	0.0504431	0.033406	0.0371199		0.0338986	0.0384802	0.0518827
1974	0.0360492	0.0371955	0.0378022	0.0331737	0.0346788	0.0319659	0.0331011		0.0421532	0.0244399	0.0377239		0.0318156	0.0412705	0.043312	0.0404706	0.0318455	0.0452685	0.0339783	0.0372504			0.0514286	0.0472393	0.0421265	0.0525092	0.0367082	0.0350184	0.0386484	0.045091	0.0549295	0.0350004	0.0468086	0.0218131	0.0529886	0.0525394	0.0480262	0.0209068	0.0476842	0.0296422	0.0351503	0.0351264	0.0515616	0.0323064	0.0364391		0.033685	0.0370304	0.0509793
1975	0.0374519	0.0368047	0.0374065	0.0321667	0.033855	0.0310549	0.0328921		0.0427933	0.0243952	0.0374494		0.0317406	0.0417502	0.0432202	0.0411578	0.0334995	0.0463205	0.0331591	0.0362979			0.0527012	0.0477847	0.0436536	0.0533989	0.0361848	0.0340202	0.0383611	0.0443646	0.054025	0.0351878	0.0464067	0.022272	0.0528261	0.0524215	0.0483135	0.0209583	0.0475434	0.0298025	0.0346034	0.0348975	0.0523521	0.0314743	0.0354196		0.0334334	0.0353829	0.049978
1976	0.0395886	0.0365023	0.0371976	0.0313056	0.0331882	0.0309187	0.0325909		0.0431605	0.0243374	0.0372684		0.0317116	0.0422312	0.0430101	0.0420396	0.0351003	0.0471365	0.0326584	0.0354948			0.0535913	0.0482387	0.0452858	0.0539936	0.0363912	0.033499	0.0381117	0.0431273	0.0528391	0.0353049	0.0456319	0.0226595	0.0524296	0.0522705	0.0486566	0.0207466	0.0479865	0.0300715	0.0339593	0.0345077	0.0529431	0.0308477	0.0342107		0.0332961	0.0337916	0.0496113
1977	0.0409725	0.0362707	0.0369207	0.0305571	0.0326353	0.0311196	0.0326174		0.0432219	0.0242642	0.0373099		0.0319921	0.0426223	0.0425636	0.0430932	0.0372289	0.0477582	0.0321829	0.0353242			0.0542763	0.0486694	0.0461498	0.0539767	0.0368622	0.0330057	0.0380022	0.0419083	0.0518406	0.035335	0.0448425	0.0230503	0.0519369	0.053137	0.0494778	0.0207042	0.0480176	0.030292	0.033425	0.0341645	0.0540026	0.0303832	0.0337503		0.0332693	0.0324307	0.0493495
1978	0.0410654	0.0360957	0.0364488	0.0299209	0.0321714	0.0312638	0.0326231		0.043045	0.0242408	0.037205		0.032001	0.0429117	0.042027	0.0444003	0.0397631	0.0482402	0.0315418	0.0355739			0.0549496	0.0493497	0.0477706	0.0537039	0.0369747	0.0323449	0.037976	0.0407078	0.0506908	0.0353167	0.0443358	0.0235337	0.0519045	0.0539228	0.0509262	0.0205957	0.0481253	0.0304476	0.0328657	0.0340234	0.0554854	0.0300239	0.0339529		0.0333122	0.0315944	0.0501981
1979	0.0406898	0.035966	0.0359233	0.0294071	0.0318206	0.0311525	0.0324991		0.0439711	0.0242607	0.0370324		0.0317139	0.0430743	0.0419143	0.044452	0.0420468	0.0484869	0.0311869	0.0362887			0.0558726	0.0502776	0.0499906	0.0532597	0.0370895	0.0319735	0.0379371	0.0398395	0.0492726	0.0353596	0.0440328	0.024056	0.0522067	0.0535964	0.0516525	0.0202876	0.0480748	0.0307594	0.0322219	0.034144	0.0567741	0.029761	0.0342518		0.0334058	0.03115	0.0514116
1980	0.0405647	0.0358724	0.0353339	0.0289754	0.0314867	0.031079	0.0326251		0.04562	0.0243127	0.0370385		0.031396	0.042396	0.0423402	0.0436422	0.044886	0.0487643	0.0317261	0.0378425			0.0563276	0.0517809	0.0509352	0.0527378	0.0372413	0.0323199	0.0380393	0.0395326	0.0478206	0.0355152	0.0438496	0.0246359	0.0521933	0.0525907	0.0516962	0.0203467	0.0481028	0.0311812	0.0317159	0.0342029	0.0567204	0.0295747	0.0345758		0.033513	0.0307735	0.0533749
1981	0.0402524	0.0358074	0.0347448	0.0286028	0.0311937	0.0310461	0.0325906		0.0469066	0.0244219	0.0370533		0.0311785	0.0411969	0.0425258	0.0429517	0.0475256	0.0491166	0.0324593	0.0388581			0.0559909	0.0534276	0.0512893	0.0520211	0.0372905	0.0330652	0.038147	0.0397081	0.0465638	0.0355744	0.043703	0.0252331	0.051718	0.0513217	0.0517445	0.0206087	0.0494827	0.0315777	0.0312651	0.0343868	0.0553313	0.0294453	0.0347813		0.0335478	0.0302843	0.0552016
1982	0.0397181	0.0357645	0.0343183	0.028282	0.03111	0.0309948	0.032098		0.0476069	0.0245225	0.0368736		0.0310171	0.0402331	0.0432356	0.0422759	0.0483614	0.0492727	0.032602	0.03948			0.0553385	0.0550525	0.0509851	0.0508422	0.0371022	0.0341817	0.0380593	0.0403509	0.0454912	0.0354005	0.0434296	0.0253295	0.0512385	0.0502409	0.0513332	0.0212566	0.0504267	0.0318805	0.0308039	0.0351855	0.0532042	0.0293764	0.0351285		0.0334699	0.0302995	0.0557422
1983	0.0392073	0.0357389	0.0338969	0.0279494	0.0310606	0.0308598	0.031439		0.0476764	0.0246083	0.0365377		0.0311945	0.0394252	0.0435076	0.0413245	0.0483656	0.0492649	0.0329173	0.0400853			0.0544598	0.0569622	0.0497219	0.0495058	0.0366927	0.0354622	0.0380532	0.0411835	0.044673	0.0350556	0.0431024	0.0249365	0.0510859	0.0493814	0.0506366	0.0224342	0.0503934	0.032007	0.030354	0.0363364	0.0508093	0.0292413	0.0354244		0.0333791	0.0310066	0.0560035
1984	0.0387615	0.0357266	0.0334766	0.0276111	0.030869	0.0305986	0.03094		0.0478599	0.0247394	0.0362517		0.0317478	0.0387802	0.0423811	0.0408997	0.0484329	0.0491639	0.0332576	0.0404175			0.0538608	0.0591331	0.0481716	0.0482137	0.0363033	0.0363831	0.0382729	0.0419268	0.0443259	0.0347041	0.0427852	0.024643	0.0514341	0.0483948	0.0499103	0.0233233	0.0497712	0.0319573	0.0299154	0.0374946	0.0491047	0.0292337	0.0361685		0.0332596	0.0315773	0.0564764
1985	0.0384773	0.0357236	0.0330655	0.0273107	0.0306233	0.0302837	0.0305104		0.0482965	0.0249009	0.0361064		0.032141	0.0382242	0.0410067	0.0419365	0.0486167	0.0490793	0.0328285	0.0413692			0.053247	0.061095	0.0469801	0.0470955	0.0358654	0.0379971	0.0390026	0.0428463	0.0446025	0.0344464	0.0425234	0.024468	0.0523626	0.0474226	0.0490491	0.023752	0.0489413	0.0316931	0.029659	0.0387484	0.0480985	0.0292174	0.0370285		0.0331467	0.0313199	0.0570573
1986	0.0383079	0.0357284	0.0326053	0.0272154	0.0303423	0.0299442	0.0300109		0.0488303	0.0250502	0.0360649		0.0324552	0.0377406	0.0401536	0.0425119	0.0490207	0.0491911	0.0320469	0.0422263			0.0526009	0.0622981	0.0466394	0.0461491	0.0354837	0.0405185	0.0399976	0.0439854	0.0453488	0.0342282	0.0424584	0.0242794	0.0532383	0.04657	0.0482203	0.0243656	0.0483526	0.0313379	0.0293585	0.0395876	0.0475966	0.0291893	0.0367979		0.0331489	0.0302725	0.0569479
1987	0.0382847	0.0357855	0.0321793	0.0273783	0.0300082	0.0296286	0.0295347		0.049274	0.0251958	0.0360596		0.0331597	0.0375033	0.040032	0.0417895	0.0492256	0.0494478	0.0313841	0.0425039			0.0526907	0.063297	0.0466394	0.0452322	0.0351866	0.0424229	0.0408111	0.0449791	0.0455296	0.0340289	0.0425376	0.024194	0.0537939	0.0455975	0.0477608	0.0246577	0.0478428	0.0311743	0.0290816	0.0397924	0.0478103	0.0292856	0.0361008		0.0332066	0.0292261	0.056527
1988	0.0382983	0.0359367	0.0318356	0.0272926	0.0296871	0.0293692	0.0291299		0.049226	0.0253706	0.0361212		0.0336822	0.0374889	0.0400555	0.0409543	0.048713	0.0499008	0.0308066	0.04237			0.0537579	0.064745	0.0463999	0.0444955	0.0349581	0.0438334	0.0417098	0.0456271	0.0450879	0.0339646	0.0426863	0.0242704	0.0543349	0.0445193	0.047394	0.0244637	0.0475185	0.0311886	0.02899	0.0397497	0.0480675	0.0294904	0.0358469		0.0333075	0.0284381	0.0570915
1989	0.0384171	0.0360492	0.0315572	0.0269825	0.0293997	0.0291753	0.0287563		0.0487242	0.025557	0.0362912		0.0337493	0.0377335	0.0399475	0.0397991	0.0481948	0.0506012	0.0305582	0.0426824			0.0553457	0.0661281	0.0458605	0.0438312	0.0349408	0.0454588	0.0425464	0.0477392	0.0443572	0.0339928	0.0428675	0.0245412	0.0542978	0.0435433	0.0467551	0.0241547	0.0473192	0.0311986	0.0289455	0.0396579	0.0482417	0.0296022	0.0366053		0.0335044	0.0276717	0.0591578
1990	0.0388769	0.0365174	0.0313564	0.0267188	0.0291609	0.0289465	0.0283516	0.0400285	0.0481963	0.0256795	0.0365592	0.0407835	0.0334221	0.0382068	0.0401405	0.0385835	0.0480218	0.0504744	0.0303864	0.0434557	0.0405663	0.0397113	0.0565951	0.0667457	0.0455529	0.0432599	0.0349654	0.0470653	0.0430725	0.0506281	0.0435367	0.033948	0.0430573	0.0249192	0.0537446	0.0426017	0.0459615	0.0235686	0.0474122	0.0311685	0.0288389	0.0395857	0.0490963	0.0295293	0.0374771	0.0328918	0.0338582	0.0269933	0.0618513
1991	0.0395608	0.036903	0.0315059	0.0263009	0.028644	0.0285039	0.0280105	0.0387472	0.0477069	0.0256976	0.0369012	0.0406232	0.0327182	0.0385156	0.040845	0.0376544	0.0477613	0.0494779	0.0305469	0.0438928	0.0415935	0.0379724	0.0574456	0.0666902	0.0461555	0.0428965	0.0350694	0.0488178	0.0433558	0.0521786	0.0425897	0.0338611	0.0432367	0.0252879	0.0534796	0.0416665	0.0451115	0.0229288	0.048016	0.0309896	0.0286474	0.0395162	0.0496985	0.0295068	0.0375821	0.0333527	0.0343452	0.0264827	0.0633431
1992	0.0402041	0.0364877	0.0320327	0.0258599	0.0278287	0.0280868	0.0280305	0.0373409	0.0472208	0.0256995	0.0371433	0.0402246	0.0321349	0.0385217	0.0417331	0.036702	0.0472815	0.048324	0.0311238	0.0441351	0.0420841	0.0365607	0.0583761	0.0663548	0.0473891	0.0425089	0.0349516	0.0506227	0.0440822	0.0528039	0.041574	0.0337093	0.0431662	0.0257382	0.0538591	0.0408126	0.0440531	0.0222581	0.0487939	0.0307241	0.0284804	0.039413	0.0501361	0.0295069	0.0380403	0.033674	0.034762	0.0264244	0.062935
1993	0.0406678	0.0354783	0.032518	0.02545	0.027229	0.0276819	0.0283733	0.0358475	0.0467695	0.0257406	0.037148	0.0392799	0.0317161	0.0383902	0.0426248	0.0357134	0.0469153	0.0468877	0.0313788	0.0439787	0.0423682	0.0352852	0.0593564	0.0661109	0.048659	0.0420939	0.0347762	0.0523477	0.0448296	0.0530766	0.0404304	0.0335261	0.0427994	0.026185	0.0549814	0.0400503	0.0427754	0.0214662	0.0499146	0.0309617	0.0281487	0.0393116	0.0510057	0.0294846	0.0384599	0.0340845	0.0348367	0.027033	0.0615367
1994	0.0409332	0.0340923	0.0328843	0.0250496	0.0269683	0.0272829	0.0288966	0.0345606	0.0463065	0.0258469	0.0370644	0.0378754	0.03117	0.0381718	0.043015	0.0347869	0.04687	0.0455101	0.0314091	0.044171	0.0430353	0.0342083	0.0598679	0.0657398	0.0493209	0.041856	0.0352269	0.0537625	0.0433323	0.0530575	0.0392995	0.0334337	0.0423924	0.0266589	0.0562012	0.0395205	0.0417968	0.0207354	0.053214	0.0316181	0.0277641	0.0394374	0.0515504	0.0294243	0.0380158	0.0345747	0.0346509	0.0276741	0.0600215
1995	0.0411499	0.0339077	0.0341283	0.0247711	0.0268134	0.0270979	0.0292909	0.0333902	0.0462766	0.0260341	0.0370031	0.0366244	0.0305166	0.0379532	0.0434327	0.0350704	0.0468315	0.0448264	0.0313407	0.0452759	0.0431021	0.033289	0.0599118	0.0653563	0.0497869	0.0426314	0.0363477	0.0534601	0.0405072	0.0531045	0.0391193	0.0334462	0.0421695	0.0273762	0.056543	0.0398783	0.0417216	0.0200577	0.0563688	0.0321191	0.027718	0.0407267	0.0516445	0.0294821	0.0373158	0.0351851	0.0344438	0.0279322	0.0591095
1996	0.041376	0.0345725	0.0370282	0.0245203	0.0267784	0.0269975	0.0295268	0.0322581	0.0467694	0.0262979	0.0369982	0.0354137	0.0299771	0.037769	0.0440777	0.0365401	0.046964	0.0437837	0.0311528	0.0463134	0.0457785	0.0324575	0.0597364	0.0648523	0.0507309	0.0438092	0.0378202	0.0530814	0.0383058	0.0530299	0.0386627	0.0335354	0.0421215	0.0281872	0.0561355	0.0411237	0.0422553	0.0194173	0.0569369	0.0323775	0.0281645	0.0430535	0.051603	0.0296078	0.0364159	0.0358873	0.0342702	0.0278993	0.0586382
1997	0.0416406	0.0347108	0.0389997	0.0243862	0.0266824	0.0269494	0.0299477	0.0311035	0.0466573	0.0266257	0.0370619	0.0344728	0.0295118	0.0376647	0.0444624	0.0390627	0.0473282	0.0425253	0.0308393	0.0475614	0.0513392	0.0318236	0.0595229	0.0647284	0.0527976	0.044584	0.0398766	0.0533398	0.0365776	0.0529588	0.0372868	0.0337204	0.0422031	0.0288662	0.0556804	0.0425579	0.0432674	0.0190092	0.0566045	0.0325783	0.0286198	0.0444293	0.0518997	0.0297213	0.0356291	0.0365374	0.0341425	0.0279038	0.0582172
1998	0.0421739	0.0346934	0.0394891	0.024528	0.0265321	0.0269271	0.0304889	0.0298975	0.0461587	0.0269281	0.0372028	0.0340819	0.0292187	0.0377043	0.0451216	0.0422355	0.0475992	0.0428172	0.03041	0.0494895	0.055203	0.0314471	0.0593039	0.0658091	0.0555908	0.045164	0.0425821	0.0527002	0.0351398	0.053587	0.0362221	0.034043	0.0425268	0.0292619	0.0552216	0.0436786	0.0446526	0.0187762	0.0567637	0.0326832	0.0290582	0.0449321	0.0528781	0.0299322	0.0346886	0.0370633	0.0341182	0.0282267	0.0572746
1999	0.042939	0.0342694	0.0401203	0.0247031	0.0266101	0.0270961	0.0308312	0.0290643	0.0471151	0.0272124	0.0374004	0.0341261	0.0295254	0.0378829	0.0460997	0.0436647	0.0469666	0.0440749	0.0300067	0.0506355	0.0574132	0.0312236	0.0587853	0.0671521	0.0572547	0.0454042	0.0449313	0.0513652	0.0336958	0.053965	0.0355642	0.034392	0.0430615	0.0293812	0.054578	0.0439567	0.0455884	0.0183915	0.0561473	0.0324788	0.029436	0.0457411	0.0537698	0.0302451	0.0337991	0.037549	0.0342165	0.028169	0.056361
2000	0.0435066	0.0338583	0.0402179	0.0267369	0.0267919	0.0276691	0.0308552	0.028526	0.0484967	0.0274622	0.0377029	0.0348197	0.0297453	0.0382249	0.0465677	0.0435522	0.0462855	0.0455166	0.0302291	0.0511727	0.058467	0.0309546	0.0594075	0.0683369	0.0578698	0.0453215	0.0464383	0.0499304	0.0322576	0.0540766	0.0348649	0.034713	0.0436182	0.0295228	0.0538174	0.0433803	0.0462609	0.0179439	0.0540039	0.0320872	0.0293093	0.0463698	0.0538171	0.0304596	0.0334057	0.0381353	0.0344135	0.0277636	0.0561828
2001	0.0436684	0.0338654	0.0398158	0.0294152	0.0270093	0.0283645	0.0305868	0.0280062	0.0479138	0.0277272	0.0380903	0.0365104	0.029521	0.0386526	0.0466258	0.043459	0.0463779	0.0476222	0.0306669	0.0520325	0.0586047	0.0306943	0.0606398	0.069618	0.057142	0.0451798	0.0472969	0.0488139	0.031027	0.0542214	0.0338877	0.0349973	0.0440812	0.0297515	0.0530819	0.0424401	0.0475789	0.0175792	0.0518891	0.0318039	0.029111	0.047037	0.0531956	0.0307159	0.0329486	0.0388827	0.0345995	0.0276062	0.0555214
2002	0.0437905	0.034088	0.0395866	0.0302908	0.0271038	0.0289396	0.0300035	0.0275249	0.0459322	0.028071	0.0384061	0.0384677	0.0294052	0.0389892	0.0466351	0.0431144	0.0463237	0.0503563	0.03119	0.0523941	0.0587294	0.0306333	0.0608278	0.0704452	0.0556279	0.0449903	0.0481995	0.0483974	0.0301221	0.0544593	0.0329688	0.0350879	0.0444519	0.0299644	0.0524524	0.0415365	0.0492525	0.0172801	0.05003	0.0316466	0.0290071	0.0483957	0.0526062	0.03103	0.032688	0.0396079	0.0346402	0.027957	0.0542782
2003	0.0441107	0.034404	0.0396332	0.0305934	0.0271355	0.0294933	0.0294282	0.0271918	0.0438217	0.028455	0.0386495	0.0411201	0.0298539	0.0391707	0.0465895	0.0425732	0.0460416	0.0533438	0.0320298	0.0520588	0.0590196	0.0309172	0.0603473	0.0703402	0.0547787	0.0447913	0.0487069	0.0480573	0.0297254	0.0550483	0.0318094	0.035098	0.0446943	0.0302262	0.0523894	0.0405478	0.0503038	0.0171361	0.04804	0.031572	0.0288042	0.0493899	0.0522183	0.0311949	0.0324501	0.0401984	0.0345809	0.029834	0.0532006
2004	0.0445673	0.0345879	0.0401583	0.0313423	0.027177	0.0300476	0.0292379	0.0270618	0.0424697	0.0289013	0.038824	0.0444564	0.0311274	0.0393987	0.0466205	0.0422289	0.0454723	0.0556095	0.0326149	0.0516755	0.0590209	0.0316302	0.059315	0.0703075	0.0542196	0.0448063	0.0486726	0.0471151	0.0299708	0.0537823	0.0307174	0.0352205	0.0449401	0.0307261	0.0529595	0.0396708	0.0507687	0.0170421	0.0457942	0.0315563	0.0286145	0.0501559	0.0517054	0.0313512	0.0319758	0.040761	0.0345427	0.0320747	0.0525263
2005	0.0451386	0.0347351	0.0407836	0.0314801	0.0271278	0.0306101	0.0294537	0.0271067	0.0424827	0.0294532	0.0389404	0.0478425	0.0326414	0.0397837	0.0461032	0.0421712	0.0447073	0.0577806	0.0331671	0.0515435	0.0589378	0.0327246	0.0581551	0.0709957	0.0538686	0.0449832	0.0489415	0.0460811	0.0313994	0.0509016	0.0300584	0.0355138	0.0452323	0.0316527	0.0537135	0.0390519	0.0509255	0.0169969	0.0436256	0.0316554	0.0285829	0.0504581	0.0514112	0.0315705	0.0314803	0.0414055	0.0346111	0.0344444	0.0522925
2006	0.045879	0.0348295	0.0411163	0.0323385	0.0268488	0.0312485	0.0299174	0.0272597	0.0433425	0.0300545	0.0390596	0.0513763	0.0337394	0.0401244	0.0450559	0.042581	0.0442484	0.0594346	0.0333951	0.0516159	0.0585228	0.0343316	0.0574636	0.0716579	0.0538937	0.0453749	0.0491188	0.0454474	0.0333707	0.0484513	0.0297462	0.0359145	0.0455892	0.0327081	0.0541592	0.0383315	0.0507433	0.0171848	0.0425453	0.032095	0.0288882	0.0501283	0.0513657	0.0320756	0.0313433	0.0421514	0.0348352	0.0454639	0.0521089
2007	0.046739	0.0346734	0.0411827	0.0349082	0.0266366	0.032277	0.0306283	0.027606	0.0437608	0.0306942	0.0392517	0.0542483	0.0341938	0.040466	0.044917	0.0430702	0.0439026	0.0605968	0.0335434	0.052129	0.0583059	0.0363579	0.0572025	0.0719819	0.0540493	0.046103	0.0486728	0.0455486	0.0348056	0.0468717	0.0296361	0.036271	0.0462133	0.0338707	0.0538753	0.0381364	0.0508693	0.0176415	0.0431066	0.0328261	0.0294035	0.0507431	0.0512397	0.0325183	0.0314016	0.0431007	0.0351813	0.0611728	0.0516625
2008	0.0479004	0.034442	0.041951	0.0360814	0.0266899	0.0336803	0.0315306	0.0281325	0.042598	0.0313319	0.0394896	0.0559077	0.0341982	0.0408586	0.0453239	0.0432389	0.0433719	0.0609688	0.0344504	0.0521524	0.0588787	0.0385008	0.0574073	0.0722788	0.0544751	0.0472415	0.0478127	0.0462436	0.0362871	0.0463353	0.0293787	0.0365403	0.0468824	0.0350968	0.0535224	0.0386645	0.0518275	0.0183043	0.0429242	0.0336415	0.0297909	0.0511848	0.050995	0.0328937	0.0316747	0.0441625	0.0355454	0.0651531	0.0512707
2009	0.0490039	0.0343654	0.0432583	0.0351914	0.0268312	0.0346548	0.032025	0.0284398	0.0405791	0.0318463	0.0396139	0.0563741	0.0339788	0.0409777	0.0451373	0.0437653	0.0428398	0.0591082	0.034817	0.0510958	0.0588465	0.0401401	0.0573421	0.0723605	0.0551826	0.0481472	0.0465336	0.0468965	0.0382106	0.0461619	0.0289074	0.0364836	0.0471264	0.0359023	0.0538724	0.039011	0.0528065	0.0197453	0.0421964	0.0342726	0.0301514	0.050109	0.0503082	0.0333113	0.0320788	0.0448847	0.0356446	0.0611463	0.0509753
2010	0.0494758	0.0342691	0.0442612	0.0337174	0.0269414	0.0347847	0.0324429	0.0286097	0.0387708	0.0322724	0.0396437	0.0563007	0.0341626	0.0408698	0.0443769	0.0450983	0.0426225	0.0567211	0.034498	0.0494184	0.0579213	0.0412608	0.0561733	0.0715493	0.0559375	0.0488705	0.0443847	0.0467404	0.0406778	0.0459988	0.0288222	0.0362328	0.047183	0.0368542	0.0545677	0.0388631	0.0528019	0.0217524	0.0427501	0.0347443	0.0304526	0.048505	0.0496404	0.0336261	0.032335	0.0452493	0.0356026	0.0584094	0.050172
2011	0.0498027	0.0341448	0.0453424	0.0322635	0.0270159	0.0350578	0.0333961	0.028849	0.0369882	0.0327415	0.0398217	0.0570327	0.035046	0.040863	0.0432275	0.0466185	0.0425687	0.0553498	0.034089	0.0475905	0.0570228	0.0428609	0.0545558	0.0693604	0.0575042	0.049767	0.0419219	0.0462593	0.0435955	0.0461117	0.0289299	0.036107	0.0473153	0.0385584	0.0550152	0.0382716	0.0526032	0.0243332	0.0425526	0.0355664	0.0305369	0.0472339	0.0493209	0.0339422	0.0324536	0.0456631	0.0357153	0.0568149	0.0485972
2012	0.0502648	0.0340814	0.0462187	0.0305517	0.0271439	0.0358285	0.0342498	0.029112	0.0346893	0.0331839	0.0400716	0.0580432	0.0360661	0.0408497	0.0419669	0.048064	0.042257	0.0545192	0.033511	0.046341	0.056704	0.044129	0.0531408	0.0666561	0.0593503	0.0503324	0.040718	0.0462377	0.0459349	0.0465894	0.0286845	0.0360201	0.047558	0.0403947	0.0552484	0.0386975	0.0525229	0.0273385	0.0414883	0.0364979	0.0305895	0.0459618	0.048895	0.0341849	0.0322003	0.0460667	0.0358152	0.05622	0.0468255
2013	0.0505945	0.0340423	0.0465854	0.0288332	0.0273281	0.0364246	0.0348167	0.029392	0.0322605	0.0333858	0.0403334	0.0584464	0.0368835	0.040733	0.0417746	0.049405	0.0418691	0.0537168	0.0331677	0.0453246	0.0562642	0.0443047	0.0520928	0.064456	0.0608495	0.0506834	0.040684	0.0465684	0.0465396	0.0467369	0.0278886	0.0358838	0.0479312	0.0416083	0.0552957	0.0411715	0.052017	0.0291825	0.0407582	0.0371828	0.0306204	0.0444853	0.0486449	0.0344009	0.0318032	0.0463549	0.0358286	0.0572503	0.0452287
2014	0.0506394	0.0340538	0.0465421	0.0273934	0.0275027	0.0368649	0.0351325	0.0296835	0.0303017	0.0333503	0.0405962	0.0582563	0.0376342	0.0407132	0.0425644	0.0504526	0.0414386	0.0532903	0.0336571	0.0445554	0.0555916	0.0439928	0.0514244	0.0626153	0.0622063	0.0508311	0.0407185	0.0464464	0.046354	0.0463471	0.0272781	0.0357177	0.0482261	0.0421174	0.0550672	0.0445886	0.0516373	0.0301749	0.040258	0.0377753	0.030541	0.0432099	0.0485865	0.0346204	0.0313748	0.0466555	0.0358663	0.059624	0.0438814
2015	0.0505236	0.0341247	0.0462944	0.0262083	0.0275529	0.0372868	0.0352162	0.03005	0.0287258	0.0331979	0.0408231	0.0575501	0.0381233	0.0408971	0.0432388	0.0514762	0.0409197	0.0531832	0.0338994	0.0438723	0.0551631	0.0434612	0.0511339	0.0610218	0.0639452	0.0504117	0.0407769	0.0458954	0.0464401	0.0461306	0.0273493	0.0354624	0.0484676	0.0421674	0.0546602	0.0481447	0.0513318	0.0304848	0.0399881	0.038151	0.0304524	0.0421553	0.0484571	0.0348327	0.030977	0.0471918	0.0360093	0.0620271	0.0427222
2016	0.0507081	0.0342943	0.0456949	0.0252895	0.0275893	0.0376768	0.0353776	0.0303918	0.0275247	0.0330268	0.041197	0.0565466	0.0383812	0.0412436	0.0437055	0.0526483	0.0406314	0.052984	0.0333779	0.0429993	0.0548622	0.0428581	0.0511522	0.0597018	0.0657394	0.0494945	0.0409676	0.0453507	0.0465146	0.0460763	0.0277102	0.03508	0.0487433	0.0420331	0.05408	0.0509103	0.0507978	0.0301678	0.0397253	0.0381856	0.0302617	0.0412713	0.0485782	0.0350524	0.0315929	0.0478387	0.0362117	0.0639975	0.0417411
2017	0.0509891	0.034588	0.0447874	0.0248509	0.0276648	0.0378047	0.0356702	0.030778	0.0270773	0.0329515	0.0416958	0.055504	0.038661	0.0416277	0.0442273	0.0540042	0.0406051	0.0528366	0.0333475	0.0422903	0.0548102	0.0426052	0.0509445	0.058913	0.0673182	0.0486625	0.0399078	0.0448296	0.0463927	0.045441	0.0286907	0.0347488	0.0491632	0.0418647	0.0533731	0.0526725	0.0499161	0.0301281	0.0391349	0.038076	0.0300092	0.0407045	0.0488248	0.0353065	0.033325	0.0484212	0.0364433	0.0651575	0.0410095
2018	0.0510828	0.0349215	0.0440739	0.0255013	0.0277322	0.0374398	0.0358234	0.0315786	0.0272308	0.0329742	0.0422168	0.055374	0.0397086	0.0419982	0.0451137	0.0558683	0.0405675	0.0529684	0.0338611	0.0416867	0.0550862	0.0428372	0.0508042	0.0579981	0.0688811	0.0481848	0.0376828	0.0447625	0.0460533	0.0445973	0.0300114	0.0345644	0.0496684	0.0418078	0.0526356	0.0534018	0.0488093	0.0298857	0.0387211	0.0380764	0.0304305	0.040092	0.0488321	0.0355085	0.034373	0.0491393	0.0367258	0.0658233	0.0408807
2019	0.0511823	0.0352411	0.0433877	0.0260007	0.027732	0.036909	0.0354922	0.032632	0.02729	0.0330408	0.0427697	0.0561795	0.041114	0.0423788	0.0458251	0.0580531	0.0404873	0.0532354	0.0342974	0.0411208	0.0554367	0.0431822	0.0507861	0.0570562	0.0696619	0.0478447	0.0357541	0.0450294	0.0454072	0.0442198	0.0310446	0.0344321	0.0500859	0.0418271	0.0518946	0.0542665	0.0478271	0.0294	0.0381092	0.0383179	0.0310731	0.0393697	0.0487472	0.035652	0.0342747	0.0498758	0.0370055	0.0664403	0.0405461
Gesamtergebnis	2.77319	1.77148	1.92263	1.46248	1.47234	1.58409	2.19154	0.92017	2.12473	1.8421	2.60553	1.40386	2.02302	2.76694	2.64694	2.5904	2.54437	2.48839	1.63598	2.20247	1.60868	1.11236	2.75075	3.06068	3.33085	3.35395	2.37554	2.18201	1.9662	2.68111	2.49006	2.43122	3.10141	1.92231	3.63553	2.77495	2.85477	1.63356	2.89904	2.24661	1.88347	2.43869	3.35454	1.58336	2.46799	1.23655	2.41011	1.95984	2.62844
[truncated: 132 more columns]

## Sheet: Tabelle2
Summe von AggValue	Spaltenbeschriftungen
Zeilenbeschriftungen	MAR	ABW	AGO	AIA	ALB	ARE	ARG	ARM	ATG	AUS	AUT	AZE	BDI	BEL	BEN	BFA	BGD	BGR	BHR	BHS	BIH	BLR	BLZ	BMU	BOL	BRA	BRB	BRN	BTN	BWA	CAF	CAN	CHE	CHL	CHN	CIV	CMR	COD	COG	COL	COM	CPV	CRI	CYM	CYP	CZE	DEU	DJI	DMA
1950	0.03407						0.0276286			0.0211655	0.0309548			0.0367781											0.0460173	0.0417352						0.0335231	0.0396042					0.0391751		0.0332491			0.0350814		0.0306645		0.0331158
1951	0.0340145						0.0280615			0.0216736	0.0323629			0.0369799											0.043337	0.0439677						0.0340112	0.0392579	0.0296916				0.0364297		0.0329322			0.0357136		0.0316575		0.03345
1952	0.0339927						0.0285848			0.0219543	0.0333051			0.0371417											0.0412106	0.0460514						0.0344953	0.0392468	0.0282235	0.0417522			0.0341229		0.0327696			0.0366855		0.0326089		0.0337155
1953	0.0339824						0.0287676			0.0220787	0.0332865			0.0373051											0.0394094	0.0467001						0.0348364	0.0391392	0.0269968	0.0440752			0.0322505		0.0329357			0.0378765		0.0336408		0.0339256
1954	0.0339577						0.0288117			0.0223101	0.0331167			0.0375856											0.0378624	0.0473299						0.0348363	0.0391004	0.0259882	0.0465368			0.0307249		0.0333444			0.0387626		0.0351303		0.0340668
1955	0.0335823						0.0289811			0.0225758	0.0336415			0.0378486											0.0367976	0.0484702						0.0345613	0.0394114	0.0251361	0.0484689			0.0294453		0.0336218			0.0394917		0.0368505		0.0343837
1956	0.0329154						0.029277			0.0227803	0.034236			0.0381195											0.0360354	0.0486732						0.0345831	0.0401533	0.0244593	0.050053			0.0283604		0.0336348			0.0402911		0.0382677		0.0346904
1957	0.0321113						0.0295236			0.0229279	0.0345058			0.0384487											0.0353148	0.0489339						0.0347358	0.041114	0.0239306	0.0515837			0.027403		0.0329654			0.0411309		0.0392472		0.0347416
1958	0.031533						0.0296992			0.0230946	0.0347148			0.0384632											0.0346492	0.049501						0.0345125	0.0416487	0.0235026	0.0537256			0.0264951		0.0318997			0.0413653		0.0393641		0.0346509
1959	0.0310666						0.0297627			0.0232805	0.0348679			0.03841	0.0414994	0.0403786	0.0381342								0.0339812	0.0504671						0.0341352	0.0418627	0.0231826	0.0567669			0.0255988		0.0309231			0.0412747		0.0389762		0.0345918
1960	0.0305481						0.030305			0.0234572	0.0353837		0.0403207	0.0385836	0.0426477	0.0397271	0.0366705								0.0334406	0.0512961	0.0405129			0.0332283	0.0422087	0.0339372	0.0423433	0.0229309	0.0590528	0.0427579	0.0406928	0.024686	0.0459121	0.0303489	0.0395421	0.0408226	0.0414373		0.0385426		0.034667
1961	0.0301936						0.0313823			0.0235781	0.0360695		0.0395648	0.0389005	0.0432802	0.0392952	0.0355069								0.0330083	0.0518128	0.0400438			0.0328676	0.0451755	0.03375	0.0431543	0.0227047	0.0591044	0.0462693	0.0406803	0.023774	0.0545606	0.0301683	0.0374114	0.0409726	0.041273		0.0379238		0.0348243
1962	0.0301247						0.0322251			0.0236916	0.0363907		0.0389853	0.0393488	0.0436187	0.0391932	0.0347357								0.0331541	0.0520714	0.0393766			0.0328277	0.0480189	0.0335812	0.0441148	0.0224617	0.0577879	0.0480332	0.0407551	0.022895	0.0578739	0.0298992	0.0359828	0.0404564	0.041098		0.0378915		0.0349624
1963	0.0305149						0.0324649			0.0238225	0.0364669		0.0383901	0.0397082	0.0439961	0.0389718	0.0341194								0.0338052	0.0514705	0.0388265			0.0329836	0.0502794	0.0335268	0.0449089	0.0222065	0.0566053	0.0485656	0.0407574	0.0222847	0.0566543	0.0294881	0.0351126	0.0390569	0.0413233		0.0381691		0.0349578
1964	0.0308361						0.0325685			0.0239365	0.0365426		0.0375877	0.0398198	0.0439729	0.0385697	0.0335495								0.0343405	0.0502551	0.0384509			0.0333287	0.0520199	0.0335823	0.0454319	0.0220015	0.0558499	0.0500192	0.0407189	0.0219829	0.0545122	0.0292003	0.0345612	0.0374329	0.0416589		0.0377677		0.0349202
1965	0.0309486						0.0328272			0.0240205	0.0366896		0.0366851	0.0397404	0.0433428	0.0387044	0.0332114								0.0349898	0.0489086	0.038058			0.0331253	0.0533843	0.0338467	0.045688	0.0218472	0.0554867	0.0514339	0.0415964	0.0217127	0.0526322	0.0289604	0.034666	0.0361845	0.0422379		0.0377529		0.0349275
1966	0.0309758						0.0329462			0.0240973	0.0368948		0.0358877	0.039747	0.0426342	0.0392556	0.0330385								0.0359842	0.0481396	0.0376804			0.0330399	0.0544445	0.0343418	0.0457449	0.0217548	0.0552709	0.0519849	0.0433941	0.0214178	0.0519549	0.0287622	0.0351614	0.0354185	0.0431361		0.0382504		0.0348093
1967	0.0312096						0.0329188			0.0242036	0.036927		0.0353786	0.0397705	0.0426527	0.039524	0.0329618								0.0370841	0.0475076	0.0373375			0.0338566	0.0549593	0.034782	0.0457733	0.0216953	0.0549595	0.05207	0.0448536	0.0210753	0.0523556	0.0285741	0.0354837	0.034818	0.043948		0.038258		0.0343898
1968	0.0317265						0.0328433			0.0243349	0.0367536		0.0351415	0.0396572	0.0432796	0.039637	0.0330647								0.0376603	0.0469474	0.0370737			0.035078	0.0550712	0.0349509	0.045807	0.0216373	0.0544794	0.0515938	0.0456897	0.0207417	0.0523351	0.0284101	0.0353123	0.0343555	0.0442026		0.0379234		0.0338424
1969	0.0321661						0.0328693			0.0244636	0.036637		0.0350709	0.0396514	0.0436808	0.0399761	0.0331615								0.0374439	0.0471754	0.0369145			0.0358914	0.0550599	0.0350016	0.0458184	0.0215897	0.0540524	0.0510773	0.0458785	0.0205634	0.0514069	0.0284114	0.0348624	0.0343248	0.0446582		0.0378912		0.0335763
1970	0.0330824	0.0401202	0.0401825	0.0395169	0.0403417	0.0393863	0.0329367		0.0407855	0.024542	0.0367876		0.0344214	0.0398252	0.0436016	0.0403264	0.0331717	0.0371855	0.0395795	0.0402748			0.0423417	0.0419581	0.0369028	0.0480474	0.0372647	0.0401981	0.0403824	0.0373237	0.0549192	0.0350015	0.04604	0.0215448	0.0538133	0.0513478	0.0464777	0.0205012	0.0500248	0.0286096	0.034963	0.0346131	0.0459241	0.0392143	0.038215		0.0337053	0.0404524	0.042583
1971	0.0341591	0.0391263	0.0394635	0.0374535	0.0384564	0.0370231	0.0329713		0.0410918	0.0245688	0.0371989		0.0337473	0.0400337	0.0433096	0.0405808	0.032934	0.0401031	0.0376427	0.0394722			0.0452637	0.0440858	0.0364185	0.049238	0.0375764	0.0390366	0.0398254	0.0402506	0.0548173	0.0349218	0.0464651	0.0214941	0.0535676	0.0515826	0.0474793	0.0205417	0.0489178	0.0289829	0.0354534	0.0349107	0.0475776	0.0367451	0.0381333		0.0339507	0.0400457	0.0471335
1972	0.0348192	0.0383293	0.0389448	0.035751	0.0369267	0.0350964	0.0330599		0.0414186	0.024547	0.0377758		0.0330212	0.0402281	0.0434713	0.0406321	0.032081	0.0422842	0.0361144	0.0386884			0.0476959	0.0454788	0.0374954	0.0504865	0.0374527	0.0377142	0.0393636	0.0428865	0.0546719	0.034818	0.0467863	0.021421	0.0533059	0.0513352	0.0477157	0.020708	0.0483496	0.0293419	0.0356419	0.0350777	0.0491762	0.034855	0.037684		0.0339995	0.0394897	0.0508238
1973	0.0354645	0.0376955	0.0383669	0.0343529	0.0356869	0.0334981	0.0331344		0.041631	0.0244956	0.0379572		0.0320294	0.0406629	0.0435674	0.0404723	0.0311277	0.0439624	0.0349438	0.0379909			0.0497897	0.0464879	0.0401687	0.0515713	0.0372391	0.0363465	0.0389642	0.0445577	0.0549647	0.0348326	0.0468891	0.0214794	0.0531327	0.0518068	0.0477436	0.0207996	0.0481543	0.0295318	0.0354925	0.0351381	0.0504431	0.033406	0.0371199		0.0338986	0.0384802	0.0518827
1974	0.0360492	0.0371955	0.0378022	0.0331737	0.0346788	0.0319659	0.0331011		0.0421532	0.0244399	0.0377239		0.0318156	0.0412705	0.043312	0.0404706	0.0318455	0.0452685	0.0339783	0.0372504			0.0514286	0.0472393	0.0421265	0.0525092	0.0367082	0.0350184	0.0386484	0.045091	0.0549295	0.0350004	0.0468086	0.0218131	0.0529886	0.0525394	0.0480262	0.0209068	0.0476842	0.0296422	0.0351503	0.0351264	0.0515616	0.0323064	0.0364391		0.033685	0.0370304	0.0509793
1975	0.0374519	0.0368047	0.0374065	0.0321667	0.033855	0.0310549	0.0328921		0.0427933	0.0243952	0.0374494		0.0317406	0.0417502	0.0432202	0.0411578	0.0334995	0.0463205	0.0331591	0.0362979			0.0527012	0.0477847	0.0436536	0.0533989	0.0361848	0.0340202	0.0383611	0.0443646	0.054025	0.0351878	0.0464067	0.022272	0.0528261	0.0524215	0.0483135	0.0209583	0.0475434	0.0298025	0.0346034	0.0348975	0.0523521	0.0314743	0.0354196		0.0334334	0.0353829	0.049978
1976	0.0395886	0.0365023	0.0371976	0.0313056	0.0331882	0.0309187	0.0325909		0.0431605	0.0243374	0.0372684		0.0317116	0.0422312	0.0430101	0.0420396	0.0351003	0.0471365	0.0326584	0.0354948			0.0535913	0.0482387	0.0452858	0.0539936	0.0363912	0.033499	0.0381117	0.0431273	0.0528391	0.0353049	0.0456319	0.0226595	0.0524296	0.0522705	0.0486566	0.0207466	0.0479865	0.0300715	0.0339593	0.0345077	0.0529431	0.0308477	0.0342107		0.0332961	0.0337916	0.0496113
1977	0.0409725	0.0362707	0.0369207	0.0305571	0.0326353	0.0311196	0.0326174		0.0432219	0.0242642	0.0373099		0.0319921	0.0426223	0.0425636	0.0430932	0.0372289	0.0477582	0.0321829	0.0353242			0.0542763	0.0486694	0.0461498	0.0539767	0.0368622	0.0330057	0.0380022	0.0419083	0.0518406	0.035335	0.0448425	0.0230503	0.0519369	0.053137	0.0494778	0.0207042	0.0480176	0.030292	0.033425	0.0341645	0.0540026	0.0303832	0.0337503		0.0332693	0.0324307	0.0493495
1978	0.0410654	0.0360957	0.0364488	0.0299209	0.0321714	0.0312638	0.0326231		0.043045	0.0242408	0.037205		0.032001	0.0429117	0.042027	0.0444003	0.0397631	0.0482402	0.0315418	0.0355739			0.0549496	0.0493497	0.0477706	0.0537039	0.0369747	0.0323449	0.037976	0.0407078	0.0506908	0.0353167	0.0443358	0.0235337	0.0519045	0.0539228	0.0509262	0.0205957	0.0481253	0.0304476	0.0328657	0.0340234	0.0554854	0.0300239	0.0339529		0.0333122	0.0315944	0.0501981
1979	0.0406898	0.035966	0.0359233	0.0294071	0.0318206	0.0311525	0.0324991		0.0439711	0.0242607	0.0370324		0.0317139	0.0430743	0.0419143	0.044452	0.0420468	0.0484869	0.0311869	0.0362887			0.0558726	0.0502776	0.0499906	0.0532597	0.0370895	0.0319735	0.0379371	0.0398395	0.0492726	0.0353596	0.0440328	0.024056	0.0522067	0.0535964	0.0516525	0.0202876	0.0480748	0.0307594	0.0322219	0.034144	0.0567741	0.029761	0.0342518		0.0334058	0.03115	0.0514116
1980	0.0405647	0.0358724	0.0353339	0.0289754	0.0314867	0.031079	0.0326251		0.04562	0.0243127	0.0370385		0.031396	0.042396	0.0423402	0.0436422	0.044886	0.0487643	0.0317261	0.0378425			0.0563276	0.0517809	0.0509352	0.0527378	0.0372413	0.0323199	0.0380393	0.0395326	0.0478206	0.0355152	0.0438496	0.0246359	0.0521933	0.0525907	0.0516962	0.0203467	0.0481028	0.0311812	0.0317159	0.0342029	0.0567204	0.0295747	0.0345758		0.033513	0.0307735	0.0533749
1981	0.0402524	0.0358074	0.0347448	0.0286028	0.0311937	0.0310461	0.0325906		0.0469066	0.0244219	0.0370533		0.0311785	0.0411969	0.0425258	0.0429517	0.0475256	0.0491166	0.0324593	0.0388581			0.0559909	0.0534276	0.0512893	0.0520211	0.0372905	0.0330652	0.038147	0.0397081	0.0465638	0.0355744	0.043703	0.0252331	0.051718	0.0513217	0.0517445	0.0206087	0.0494827	0.0315777	0.0312651	0.0343868	0.0553313	0.0294453	0.0347813		0.0335478	0.0302843	0.0552016
1982	0.0397181	0.0357645	0.0343183	0.028282	0.03111	0.0309948	0.032098		0.0476069	0.0245225	0.0368736		0.0310171	0.0402331	0.0432356	0.0422759	0.0483614	0.0492727	0.032602	0.03948			0.0553385	0.0550525	0.0509851	0.0508422	0.0371022	0.0341817	0.0380593	0.0403509	0.0454912	0.0354005	0.0434296	0.0253295	0.0512385	0.0502409	0.0513332	0.0212566	0.0504267	0.0318805	0.0308039	0.0351855	0.0532042	0.0293764	0.0351285		0.0334699	0.0302995	0.0557422
1983	0.0392073	0.0357389	0.0338969	0.0279494	0.0310606	0.0308598	0.031439		0.0476764	0.0246083	0.0365377		0.0311945	0.0394252	0.0435076	0.0413245	0.0483656	0.0492649	0.0329173	0.0400853			0.0544598	0.0569622	0.0497219	0.0495058	0.0366927	0.0354622	0.0380532	0.0411835	0.044673	0.0350556	0.0431024	0.0249365	0.0510859	0.0493814	0.0506366	0.0224342	0.0503934	0.032007	0.030354	0.0363364	0.0508093	0.0292413	0.0354244		0.0333791	0.0310066	0.0560035
1984	0.0387615	0.0357266	0.0334766	0.0276111	0.030869	0.0305986	0.03094		0.0478599	0.0247394	0.0362517		0.0317478	0.0387802	0.0423811	0.0408997	0.0484329	0.0491639	0.0332576	0.0404175			0.0538608	0.0591331	0.0481716	0.0482137	0.0363033	0.0363831	0.0382729	0.0419268	0.0443259	0.0347041	0.0427852	0.024643	0.0514341	0.0483948	0.0499103	0.0233233	0.0497712	0.0319573	0.0299154	0.0374946	0.0491047	0.0292337	0.0361685		0.0332596	0.0315773	0.0564764
1985	0.0384773	0.0357236	0.0330655	0.0273107	0.0306233	0.0302837	0.0305104		0.0482965	0.0249009	0.0361064		0.032141	0.0382242	0.0410067	0.0419365	0.0486167	0.0490793	0.0328285	0.0413692			0.053247	0.061095	0.0469801	0.0470955	0.0358654	0.0379971	0.0390026	0.0428463	0.0446025	0.0344464	0.0425234	0.024468	0.0523626	0.0474226	0.0490491	0.023752	0.0489413	0.0316931	0.029659	0.0387484	0.0480985	0.0292174	0.0370285		0.0331467	0.0313199	0.0570573
1986	0.0383079	0.0357284	0.0326053	0.0272154	0.0303423	0.0299442	0.0300109		0.0488303	0.0250502	0.0360649		0.0324552	0.0377406	0.0401536	0.0425119	0.0490207	0.0491911	0.0320469	0.0422263			0.0526009	0.0622981	0.0466394	0.0461491	0.0354837	0.0405185	0.0399976	0.0439854	0.0453488	0.0342282	0.0424584	0.0242794	0.0532383	0.04657	0.0482203	0.0243656	0.0483526	0.0313379	0.0293585	0.0395876	0.0475966	0.0291893	0.0367979		0.0331489	0.0302725	0.0569479
1987	0.0382847	0.0357855	0.0321793	0.0273783	0.0300082	0.0296286	0.0295347		0.049274	0.0251958	0.0360596		0.0331597	0.0375033	0.040032	0.0417895	0.0492256	0.0494478	0.0313841	0.0425039			0.0526907	0.063297	0.0466394	0.0452322	0.0351866	0.0424229	0.0408111	0.0449791	0.0455296	0.0340289	0.0425376	0.024194	0.0537939	0.0455975	0.0477608	0.0246577	0.0478428	0.0311743	0.0290816	0.0397924	0.0478103	0.0292856	0.0361008		0.0332066	0.0292261	0.056527
1988	0.0382983	0.0359367	0.0318356	0.0272926	0.0296871	0.0293692	0.0291299		0.049226	0.0253706	0.0361212		0.0336822	0.0374889	0.0400555	0.0409543	0.048713	0.0499008	0.0308066	0.04237			0.0537579	0.064745	0.0463999	0.0444955	0.0349581	0.0438334	0.0417098	0.0456271	0.0450879	0.0339646	0.0426863	0.0242704	0.0543349	0.0445193	0.047394	0.0244637	0.0475185	0.0311886	0.02899	0.0397497	0.0480675	0.0294904	0.0358469		0.0333075	0.0284381	0.0570915
1989	0.0384171	0.0360492	0.0315572	0.0269825	0.0293997	0.0291753	0.0287563		0.0487242	0.025557	0.0362912		0.0337493	0.0377335	0.0399475	0.0397991	0.0481948	0.0506012	0.0305582	0.0426824			0.0553457	0.0661281	0.0458605	0.0438312	0.0349408	0.0454588	0.0425464	0.0477392	0.0443572	0.0339928	0.0428675	0.0245412	0.0542978	0.0435433	0.0467551	0.0241547	0.0473192	0.0311986	0.0289455	0.0396579	0.0482417	0.0296022	0.0366053		0.0335044	0.0276717	0.0591578
1990	0.0388769	0.0365174	0.0313564	0.0267188	0.0291609	0.0289465	0.0283516	0.0400285	0.0481963	0.0256795	0.0365592	0.0407835	0.0334221	0.0382068	0.0401405	0.0385835	0.0480218	0.0504744	0.0303864	0.0434557	0.0405663	0.0397113	0.0565951	0.0667457	0.0455529	0.0432599	0.0349654	0.0470653	0.0430725	0.0506281	0.0435367	0.033948	0.0430573	0.0249192	0.0537446	0.0426017	0.0459615	0.0235686	0.0474122	0.0311685	0.0288389	0.0395857	0.0490963	0.0295293	0.0374771	0.0328918	0.0338582	0.0269933	0.0618513
1991	0.0395608	0.036903	0.0315059	0.0263009	0.028644	0.0285039	0.0280105	0.0387472	0.0477069	0.0256976	0.0369012	0.0406232	0.0327182	0.0385156	0.040845	0.0376544	0.0477613	0.0494779	0.0305469	0.0438928	0.0415935	0.0379724	0.0574456	0.0666902	0.0461555	0.0428965	0.0350694	0.0488178	0.0433558	0.0521786	0.0425897	0.0338611	0.0432367	0.0252879	0.0534796	0.0416665	0.0451115	0.0229288	0.048016	0.0309896	0.0286474	0.0395162	0.0496985	0.0295068	0.0375821	0.0333527	0.0343452	0.0264827	0.0633431
1992	0.0402041	0.0364877	0.0320327	0.0258599	0.0278287	0.0280868	0.0280305	0.0373409	0.0472208	0.0256995	0.0371433	0.0402246	0.0321349	0.0385217	0.0417331	0.036702	0.0472815	0.048324	0.0311238	0.0441351	0.0420841	0.0365607	0.0583761	0.0663548	0.0473891	0.0425089	0.0349516	0.0506227	0.0440822	0.0528039	0.041574	0.0337093	0.0431662	0.0257382	0.0538591	0.0408126	0.0440531	0.0222581	0.0487939	0.0307241	0.0284804	0.039413	0.0501361	0.0295069	0.0380403	0.033674	0.034762	0.0264244	0.062935
1993	0.0406678	0.0354783	0.032518	0.02545	0.027229	0.0276819	0.0283733	0.0358475	0.0467695	0.0257406	0.037148	0.0392799	0.0317161	0.0383902	0.0426248	0.0357134	0.0469153	0.0468877	0.0313788	0.0439787	0.0423682	0.0352852	0.0593564	0.0661109	0.048659	0.0420939	0.0347762	0.0523477	0.0448296	0.0530766	0.0404304	0.0335261	0.0427994	0.026185	0.0549814	0.0400503	0.0427754	0.0214662	0.0499146	0.0309617	0.0281487	0.0393116	0.0510057	0.0294846	0.0384599	0.0340845	0.0348367	0.027033	0.0615367
1994	0.0409332	0.0340923	0.0328843	0.0250496	0.0269683	0.0272829	0.0288966	0.0345606	0.0463065	0.0258469	0.0370644	0.0378754	0.03117	0.0381718	0.043015	0.0347869	0.04687	0.0455101	0.0314091	0.044171	0.0430353	0.0342083	0.0598679	0.0657398	0.0493209	0.041856	0.0352269	0.0537625	0.0433323	0.0530575	0.0392995	0.0334337	0.0423924	0.0266589	0.0562012	0.0395205	0.0417968	0.0207354	0.053214	0.0316181	0.0277641	0.0394374	0.0515504	0.0294243	0.0380158	0.0345747	0.0346509	0.0276741	0.0600215
1995	0.0411499	0.0339077	0.0341283	0.0247711	0.0268134	0.0270979	0.0292909	0.0333902	0.0462766	0.0260341	0.0370031	0.0366244	0.0305166	0.0379532	0.0434327	0.0350704	0.0468315	0.0448264	0.0313407	0.0452759	0.0431021	0.033289	0.0599118	0.0653563	0.0497869	0.0426314	0.0363477	0.0534601	0.0405072	0.0531045	0.0391193	0.0334462	0.0421695	0.0273762	0.056543	0.0398783	0.0417216	0.0200577	0.0563688	0.0321191	0.027718	0.0407267	0.0516445	0.0294821	0.0373158	0.0351851	0.0344438	0.0279322	0.0591095
1996	0.041376	0.0345725	0.0370282	0.0245203	0.0267784	0.0269975	0.0295268	0.0322581	0.0467694	0.0262979	0.0369982	0.0354137	0.0299771	0.037769	0.0440777	0.0365401	0.046964	0.0437837	0.0311528	0.0463134	0.0457785	0.0324575	0.0597364	0.0648523	0.0507309	0.0438092	0.0378202	0.0530814	0.0383058	0.0530299	0.0386627	0.0335354	0.0421215	0.0281872	0.0561355	0.0411237	0.0422553	0.0194173	0.0569369	0.0323775	0.0281645	0.0430535	0.051603	0.0296078	0.0364159	0.0358873	0.0342702	0.0278993	0.0586382
1997	0.0416406	0.0347108	0.0389997	0.0243862	0.0266824	0.0269494	0.0299477	0.0311035	0.0466573	0.0266257	0.0370619	0.0344728	0.0295118	0.0376647	0.0444624	0.0390627	0.0473282	0.0425253	0.0308393	0.0475614	0.0513392	0.0318236	0.0595229	0.0647284	0.0527976	0.044584	0.0398766	0.0533398	0.0365776	0.0529588	0.0372868	0.0337204	0.0422031	0.0288662	0.0556804	0.0425579	0.0432674	0.0190092	0.0566045	0.0325783	0.0286198	0.0444293	0.0518997	0.0297213	0.0356291	0.0365374	0.0341425	0.0279038	0.0582172
1998	0.0421739	0.0346934	0.0394891	0.024528	0.0265321	0.0269271	0.0304889	0.0298975	0.0461587	0.0269281	0.0372028	0.0340819	0.0292187	0.0377043	0.0451216	0.0422355	0.0475992	0.0428172	0.03041	0.0494895	0.055203	0.0314471	0.0593039	0.0658091	0.0555908	0.045164	0.0425821	0.0527002	0.0351398	0.053587	0.0362221	0.034043	0.0425268	0.0292619	0.0552216	0.0436786	0.0446526	0.0187762	0.0567637	0.0326832	0.0290582	0.0449321	0.0528781	0.0299322	0.0346886	0.0370633	0.0341182	0.0282267	0.0572746
1999	0.042939	0.0342694	0.0401203	0.0247031	0.0266101	0.0270961	0.0308312	0.0290643	0.0471151	0.0272124	0.0374004	0.0341261	0.0295254	0.0378829	0.0460997	0.0436647	0.0469666	0.0440749	0.0300067	0.0506355	0.0574132	0.0312236	0.0587853	0.0671521	0.0572547	0.0454042	0.0449313	0.0513652	0.0336958	0.053965	0.0355642	0.034392	0.0430615	0.0293812	0.054578	0.0439567	0.0455884	0.0183915	0.0561473	0.0324788	0.029436	0.0457411	0.0537698	0.0302451	0.0337991	0.037549	0.0342165	0.028169	0.056361
2000	0.0435066	0.0338583	0.0402179	0.0267369	0.0267919	0.0276691	0.0308552	0.028526	0.0484967	0.0274622	0.0377029	0.0348197	0.0297453	0.0382249	0.0465677	0.0435522	0.0462855	0.0455166	0.0302291	0.0511727	0.058467	0.0309546	0.0594075	0.0683369	0.0578698	0.0453215	0.0464383	0.0499304	0.0322576	0.0540766	0.0348649	0.034713	0.0436182	0.0295228	0.0538174	0.0433803	0.0462609	0.0179439	0.0540039	0.0320872	0.0293093	0.0463698	0.0538171	0.0304596	0.0334057	0.0381353	0.0344135	0.0277636	0.0561828
2001	0.0436684	0.0338654	0.0398158	0.0294152	0.0270093	0.0283645	0.0305868	0.0280062	0.0479138	0.0277272	0.0380903	0.0365104	0.029521	0.0386526	0.0466258	0.043459	0.0463779	0.0476222	0.0306669	0.0520325	0.0586047	0.0306943	0.0606398	0.069618	0.057142	0.0451798	0.0472969	0.0488139	0.031027	0.0542214	0.0338877	0.0349973	0.0440812	0.0297515	0.0530819	0.0424401	0.0475789	0.0175792	0.0518891	0.0318039	0.029111	0.047037	0.0531956	0.0307159	0.0329486	0.0388827	0.0345995	0.0276062	0.0555214
2002	0.0437905	0.034088	0.0395866	0.0302908	0.0271038	0.0289396	0.0300035	0.0275249	0.0459322	0.028071	0.0384061	0.0384677	0.0294052	0.0389892	0.0466351	0.0431144	0.0463237	0.0503563	0.03119	0.0523941	0.0587294	0.0306333	0.0608278	0.0704452	0.0556279	0.0449903	0.0481995	0.0483974	0.0301221	0.0544593	0.0329688	0.0350879	0.0444519	0.0299644	0.0524524	0.0415365	0.0492525	0.0172801	0.05003	0.0316466	0.0290071	0.0483957	0.0526062	0.03103	0.032688	0.0396079	0.0346402	0.027957	0.0542782
2003	0.0441107	0.034404	0.0396332	0.0305934	0.0271355	0.0294933	0.0294282	0.0271918	0.0438217	0.028455	0.0386495	0.0411201	0.0298539	0.0391707	0.0465895	0.0425732	0.0460416	0.0533438	0.0320298	0.0520588	0.0590196	0.0309172	0.0603473	0.0703402	0.0547787	0.0447913	0.0487069	0.0480573	0.0297254	0.0550483	0.0318094	0.035098	0.0446943	0.0302262	0.0523894	0.0405478	0.0503038	0.0171361	0.04804	0.031572	0.0288042	0.0493899	0.0522183	0.0311949	0.0324501	0.0401984	0.0345809	0.029834	0.0532006
2004	0.0445673	0.0345879	0.0401583	0.0313423	0.027177	0.0300476	0.0292379	0.0270618	0.0424697	0.0289013	0.038824	0.0444564	0.0311274	0.0393987	0.0466205	0.0422289	0.0454723	0.0556095	0.0326149	0.0516755	0.0590209	0.0316302	0.059315	0.0703075	0.0542196	0.0448063	0.0486726	0.0471151	0.0299708	0.0537823	0.0307174	0.0352205	0.0449401	0.0307261	0.0529595	0.0396708	0.0507687	0.0170421	0.0457942	0.0315563	0.0286145	0.0501559	0.0517054	0.0313512	0.0319758	0.040761	0.0345427	0.0320747	0.0525263
2005	0.0451386	0.0347351	0.0407836	0.0314801	0.0271278	0.0306101	0.0294537	0.0271067	0.0424827	0.0294532	0.0389404	0.0478425	0.0326414	0.0397837	0.0461032	0.0421712	0.0447073	0.0577806	0.0331671	0.0515435	0.0589378	0.0327246	0.0581551	0.0709957	0.0538686	0.0449832	0.0489415	0.0460811	0.0313994	0.0509016	0.0300584	0.0355138	0.0452323	0.0316527	0.0537135	0.0390519	0.0509255	0.0169969	0.0436256	0.0316554	0.0285829	0.0504581	0.0514112	0.0315705	0.0314803	0.0414055	0.0346111	0.0344444	0.0522925
2006	0.045879	0.0348295	0.0411163	0.0323385	0.0268488	0.0312485	0.0299174	0.0272597	0.0433425	0.0300545	0.0390596	0.0513763	0.0337394	0.0401244	0.0450559	0.042581	0.0442484	0.0594346	0.0333951	0.0516159	0.0585228	0.0343316	0.0574636	0.0716579	0.0538937	0.0453749	0.0491188	0.0454474	0.0333707	0.0484513	0.0297462	0.0359145	0.0455892	0.0327081	0.0541592	0.0383315	0.0507433	0.0171848	0.0425453	0.032095	0.0288882	0.0501283	0.0513657	0.0320756	0.0313433	0.0421514	0.0348352	0.0454639	0.0521089
2007	0.046739	0.0346734	0.0411827	0.0349082	0.0266366	0.032277	0.0306283	0.027606	0.0437608	0.0306942	0.0392517	0.0542483	0.0341938	0.040466	0.044917	0.0430702	0.0439026	0.0605968	0.0335434	0.052129	0.0583059	0.0363579	0.0572025	0.0719819	0.0540493	0.046103	0.0486728	0.0455486	0.0348056	0.0468717	0.0296361	0.036271	0.0462133	0.0338707	0.0538753	0.0381364	0.0508693	0.0176415	0.0431066	0.0328261	0.0294035	0.0507431	0.0512397	0.0325183	0.0314016	0.0431007	0.0351813	0.0611728	0.0516625
2008	0.0479004	0.034442	0.041951	0.0360814	0.0266899	0.0336803	0.0315306	0.0281325	0.042598	0.0313319	0.0394896	0.0559077	0.0341982	0.0408586	0.0453239	0.0432389	0.0433719	0.0609688	0.0344504	0.0521524	0.0588787	0.0385008	0.0574073	0.0722788	0.0544751	0.0472415	0.0478127	0.0462436	0.0362871	0.0463353	0.0293787	0.0365403	0.0468824	0.0350968	0.0535224	0.0386645	0.0518275	0.0183043	0.0429242	0.0336415	0.0297909	0.0511848	0.050995	0.0328937	0.0316747	0.0441625	0.0355454	0.0651531	0.0512707
2009	0.0490039	0.0343654	0.0432583	0.0351914	0.0268312	0.0346548	0.032025	0.0284398	0.0405791	0.0318463	0.0396139	0.0563741	0.0339788	0.0409777	0.0451373	0.0437653	0.0428398	0.0591082	0.034817	0.0510958	0.0588465	0.0401401	0.0573421	0.0723605	0.0551826	0.0481472	0.0465336	0.0468965	0.0382106	0.0461619	0.0289074	0.0364836	0.0471264	0.0359023	0.0538724	0.039011	0.0528065	0.0197453	0.0421964	0.0342726	0.0301514	0.050109	0.0503082	0.0333113	0.0320788	0.0448847	0.0356446	0.0611463	0.0509753
2010	0.0494758	0.0342691	0.0442612	0.0337174	0.0269414	0.0347847	0.0324429	0.0286097	0.0387708	0.0322724	0.0396437	0.0563007	0.0341626	0.0408698	0.0443769	0.0450983	0.0426225	0.0567211	0.034498	0.0494184	0.0579213	0.0412608	0.0561733	0.0715493	0.0559375	0.0488705	0.0443847	0.0467404	0.0406778	0.0459988	0.0288222	0.0362328	0.047183	0.0368542	0.0545677	0.0388631	0.0528019	0.0217524	0.0427501	0.0347443	0.0304526	0.048505	0.0496404	0.0336261	0.032335	0.0452493	0.0356026	0.0584094	0.050172
2011	0.0498027	0.0341448	0.0453424	0.0322635	0.0270159	0.0350578	0.0333961	0.028849	0.0369882	0.0327415	0.0398217	0.0570327	0.035046	0.040863	0.0432275	0.0466185	0.0425687	0.0553498	0.034089	0.0475905	0.0570228	0.0428609	0.0545558	0.0693604	0.0575042	0.049767	0.0419219	0.0462593	0.0435955	0.0461117	0.0289299	0.036107	0.0473153	0.0385584	0.0550152	0.0382716	0.0526032	0.0243332	0.0425526	0.0355664	0.0305369	0.0472339	0.0493209	0.0339422	0.0324536	0.0456631	0.0357153	0.0568149	0.0485972
2012	0.0502648	0.0340814	0.0462187	0.0305517	0.0271439	0.0358285	0.0342498	0.029112	0.0346893	0.0331839	0.0400716	0.0580432	0.0360661	0.0408497	0.0419669	0.048064	0.042257	0.0545192	0.033511	0.046341	0.056704	0.044129	0.0531408	0.0666561	0.0593503	0.0503324	0.040718	0.0462377	0.0459349	0.0465894	0.0286845	0.0360201	0.047558	0.0403947	0.0552484	0.0386975	0.0525229	0.0273385	0.0414883	0.0364979	0.0305895	0.0459618	0.048895	0.0341849	0.0322003	0.0460667	0.0358152	0.05622	0.0468255
2013	0.0505945	0.0340423	0.0465854	0.0288332	0.0273281	0.0364246	0.0348167	0.029392	0.0322605	0.0333858	0.0403334	0.0584464	0.0368835	0.040733	0.0417746	0.049405	0.0418691	0.0537168	0.0331677	0.0453246	0.0562642	0.0443047	0.0520928	0.064456	0.0608495	0.0506834	0.040684	0.0465684	0.0465396	0.0467369	0.0278886	0.0358838	0.0479312	0.0416083	0.0552957	0.0411715	0.052017	0.0291825	0.0407582	0.0371828	0.0306204	0.0444853	0.0486449	0.0344009	0.0318032	0.0463549	0.0358286	0.0572503	0.0452287
2014	0.0506394	0.0340538	0.0465421	0.0273934	0.0275027	0.0368649	0.0351325	0.0296835	0.0303017	0.0333503	0.0405962	0.0582563	0.0376342	0.0407132	0.0425644	0.0504526	0.0414386	0.0532903	0.0336571	0.0445554	0.0555916	0.0439928	0.0514244	0.0626153	0.0622063	0.0508311	0.0407185	0.0464464	0.046354	0.0463471	0.0272781	0.0357177	0.0482261	0.0421174	0.0550672	0.0445886	0.0516373	0.0301749	0.040258	0.0377753	0.030541	0.0432099	0.0485865	0.0346204	0.0313748	0.0466555	0.0358663	0.059624	0.0438814
2015	0.0505236	0.0341247	0.0462944	0.0262083	0.0275529	0.0372868	0.0352162	0.03005	0.0287258	0.0331979	0.0408231	0.0575501	0.0381233	0.0408971	0.0432388	0.0514762	0.0409197	0.0531832	0.0338994	0.0438723	0.0551631	0.0434612	0.0511339	0.0610218	0.0639452	0.0504117	0.0407769	0.0458954	0.0464401	0.0461306	0.0273493	0.0354624	0.0484676	0.0421674	0.0546602	0.0481447	0.0513318	0.0304848	0.0399881	0.038151	0.0304524	0.0421553	0.0484571	0.0348327	0.030977	0.0471918	0.0360093	0.0620271	0.0427222
2016	0.0507081	0.0342943	0.0456949	0.0252895	0.0275893	0.0376768	0.0353776	0.0303918	0.0275247	0.0330268	0.041197	0.0565466	0.0383812	0.0412436	0.0437055	0.0526483	0.0406314	0.052984	0.0333779	0.0429993	0.0548622	0.0428581	0.0511522	0.0597018	0.0657394	0.0494945	0.0409676	0.0453507	0.0465146	0.0460763	0.0277102	0.03508	0.0487433	0.0420331	0.05408	0.0509103	0.0507978	0.0301678	0.0397253	0.0381856	0.0302617	0.0412713	0.0485782	0.0350524	0.0315929	0.0478387	0.0362117	0.0639975	0.0417411
2017	0.0509891	0.034588	0.0447874	0.0248509	0.0276648	0.0378047	0.0356702	0.030778	0.0270773	0.0329515	0.0416958	0.055504	0.038661	0.0416277	0.0442273	0.0540042	0.0406051	0.0528366	0.0333475	0.0422903	0.0548102	0.0426052	0.0509445	0.058913	0.0673182	0.0486625	0.0399078	0.0448296	0.0463927	0.045441	0.0286907	0.0347488	0.0491632	0.0418647	0.0533731	0.0526725	0.0499161	0.0301281	0.0391349	0.038076	0.0300092	0.0407045	0.0488248	0.0353065	0.033325	0.0484212	0.0364433	0.0651575	0.0410095
2018	0.0510828	0.0349215	0.0440739	0.0255013	0.0277322	0.0374398	0.0358234	0.0315786	0.0272308	0.0329742	0.0422168	0.055374	0.0397086	0.0419982	0.0451137	0.0558683	0.0405675	0.0529684	0.0338611	0.0416867	0.0550862	0.0428372	0.0508042	0.0579981	0.0688811	0.0481848	0.0376828	0.0447625	0.0460533	0.0445973	0.0300114	0.0345644	0.0496684	0.0418078	0.0526356	0.0534018	0.0488093	0.0298857	0.0387211	0.0380764	0.0304305	0.040092	0.0488321	0.0355085	0.034373	0.0491393	0.0367258	0.0658233	0.0408807
2019	0.0511823	0.0352411	0.0433877	0.0260007	0.027732	0.036909	0.0354922	0.032632	0.02729	0.0330408	0.0427697	0.0561795	0.041114	0.0423788	0.0458251	0.0580531	0.0404873	0.0532354	0.0342974	0.0411208	0.0554367	0.0431822	0.0507861	0.0570562	0.0696619	0.0478447	0.0357541	0.0450294	0.0454072	0.0442198	0.0310446	0.0344321	0.0500859	0.0418271	0.0518946	0.0542665	0.0478271	0.0294	0.0381092	0.0383179	0.0310731	0.0393697	0.0487472	0.035652	0.0342747	0.0498758	0.0370055	0.0664403	0.0405461
Gesamtergebnis	2.77319	1.77148	1.92263	1.46248	1.47234	1.58409	2.19154	0.92017	2.12473	1.8421	2.60553	1.40386	2.02302	2.76694	2.64694	2.5904	2.54437	2.48839	1.63598	2.20247	1.60868	1.11236	2.75075	3.06068	3.33085	3.35395	2.37554	2.18201	1.9662	2.68111	2.49006	2.43122	3.10141	1.92231	3.63553	2.77495	2.85477	1.63356	2.89904	2.24661	1.88347	2.43869	3.35454	1.58336	2.46799	1.23655	2.41011	1.95984	2.62844
[truncated: 132 more columns]

## Sheet: Tabelle3
	Zeilenbeschriftungen	1950	1951	1952	1953	1954	1955	1956	1957	1958	1959	1960	1961	1962	1963	1964	1965	1966	1967	1968	1969	1970	1971	1972	1973	1974	1975	1976	1977	1978	1979	1980	1981	1982	1983	1984	1985	1986	1987	1988	1989	1990	1991	1992	1993	1994	1995	1996	1997
	MAR	0.03407	0.0340145	0.0339927	0.0339824	0.0339577	0.0335823	0.0329154	0.0321113	0.031533	0.0310666	0.0305481	0.0301936	0.0301247	0.0305149	0.0308361	0.0309486	0.0309758	0.0312096	0.0317265	0.0321661	0.0330824	0.0341591	0.0348192	0.0354645	0.0360492	0.0374519	0.0395886	0.0409725	0.0410654	0.0406898	0.0405647	0.0402524	0.0397181	0.0392073	0.0387615	0.0384773	0.0383079	0.0382847	0.0382983	0.0384171	0.0388769	0.0395608	0.0402041	0.0406678	0.0409332	0.0411499	0.041376	0.0416406
	ABW																					0.0401202	0.0391263	0.0383293	0.0376955	0.0371955	0.0368047	0.0365023	0.0362707	0.0360957	0.035966	0.0358724	0.0358074	0.0357645	0.0357389	0.0357266	0.0357236	0.0357284	0.0357855	0.0359367	0.0360492	0.0365174	0.036903	0.0364877	0.0354783	0.0340923	0.0339077	0.0345725	0.0347108
	AGO																					0.0401825	0.0394635	0.0389448	0.0383669	0.0378022	0.0374065	0.0371976	0.0369207	0.0364488	0.0359233	0.0353339	0.0347448	0.0343183	0.0338969	0.0334766	0.0330655	0.0326053	0.0321793	0.0318356	0.0315572	0.0313564	0.0315059	0.0320327	0.032518	0.0328843	0.0341283	0.0370282	0.0389997
	AIA																					0.0395169	0.0374535	0.035751	0.0343529	0.0331737	0.0321667	0.0313056	0.0305571	0.0299209	0.0294071	0.0289754	0.0286028	0.028282	0.0279494	0.0276111	0.0273107	0.0272154	0.0273783	0.0272926	0.0269825	0.0267188	0.0263009	0.0258599	0.02545	0.0250496	0.0247711	0.0245203	0.0243862
	ALB																					0.0403417	0.0384564	0.0369267	0.0356869	0.0346788	0.033855	0.0331882	0.0326353	0.0321714	0.0318206	0.0314867	0.0311937	0.03111	0.0310606	0.030869	0.0306233	0.0303423	0.0300082	0.0296871	0.0293997	0.0291609	0.028644	0.0278287	0.027229	0.0269683	0.0268134	0.0267784	0.0266824
	ARE																					0.0393863	0.0370231	0.0350964	0.0334981	0.0319659	0.0310549	0.0309187	0.0311196	0.0312638	0.0311525	0.031079	0.0310461	0.0309948	0.0308598	0.0305986	0.0302837	0.0299442	0.0296286	0.0293692	0.0291753	0.0289465	0.0285039	0.0280868	0.0276819	0.0272829	0.0270979	0.0269975	0.0269494
	ARG	0.0276286	0.0280615	0.0285848	0.0287676	0.0288117	0.0289811	0.029277	0.0295236	0.0296992	0.0297627	0.030305	0.0313823	0.0322251	0.0324649	0.0325685	0.0328272	0.0329462	0.0329188	0.0328433	0.0328693	0.0329367	0.0329713	0.0330599	0.0331344	0.0331011	0.0328921	0.0325909	0.0326174	0.0326231	0.0324991	0.0326251	0.0325906	0.032098	0.031439	0.03094	0.0305104	0.0300109	0.0295347	0.0291299	0.0287563	0.0283516	0.0280105	0.0280305	0.0283733	0.0288966	0.0292909	0.0295268	0.0299477
	ARM																																									0.0400285	0.0387472	0.0373409	0.0358475	0.0345606	0.0333902	0.0322581	0.0311035
	ATG																					0.0407855	0.0410918	0.0414186	0.041631	0.0421532	0.0427933	0.0431605	0.0432219	0.043045	0.0439711	0.04562	0.0469066	0.0476069	0.0476764	0.0478599	0.0482965	0.0488303	0.049274	0.049226	0.0487242	0.0481963	0.0477069	0.0472208	0.0467695	0.0463065	0.0462766	0.0467694	0.0466573
	AUS	0.0211655	0.0216736	0.0219543	0.0220787	0.0223101	0.0225758	0.0227803	0.0229279	0.0230946	0.0232805	0.0234572	0.0235781	0.0236916	0.0238225	0.0239365	0.0240205	0.0240973	0.0242036	0.0243349	0.0244636	0.024542	0.0245688	0.024547	0.0244956	0.0244399	0.0243952	0.0243374	0.0242642	0.0242408	0.0242607	0.0243127	0.0244219	0.0245225	0.0246083	0.0247394	0.0249009	0.0250502	0.0251958	0.0253706	0.025557	0.0256795	0.0256976	0.0256995	0.0257406	0.0258469	0.0260341	0.0262979	0.0266257
	AUT	0.0309548	0.0323629	0.0333051	0.0332865	0.0331167	0.0336415	0.034236	0.0345058	0.0347148	0.0348679	0.0353837	0.0360695	0.0363907	0.0364669	0.0365426	0.0366896	0.0368948	0.036927	0.0367536	0.036637	0.0367876	0.0371989	0.0377758	0.0379572	0.0377239	0.0374494	0.0372684	0.0373099	0.037205	0.0370324	0.0370385	0.0370533	0.0368736	0.0365377	0.0362517	0.0361064	0.0360649	0.0360596	0.0361212	0.0362912	0.0365592	0.0369012	0.0371433	0.037148	0.0370644	0.0370031	0.0369982	0.0370619
	AZE																																									0.0407835	0.0406232	0.0402246	0.0392799	0.0378754	0.0366244	0.0354137	0.0344728
	BDI											0.0403207	0.0395648	0.0389853	0.0383901	0.0375877	0.0366851	0.0358877	0.0353786	0.0351415	0.0350709	0.0344214	0.0337473	0.0330212	0.0320294	0.0318156	0.0317406	0.0317116	0.0319921	0.032001	0.0317139	0.031396	0.0311785	0.0310171	0.0311945	0.0317478	0.032141	0.0324552	0.0331597	0.0336822	0.0337493	0.0334221	0.0327182	0.0321349	0.0317161	0.03117	0.0305166	0.0299771	0.0295118
	BEL	0.0367781	0.0369799	0.0371417	0.0373051	0.0375856	0.0378486	0.0381195	0.0384487	0.0384632	0.03841	0.0385836	0.0389005	0.0393488	0.0397082	0.0398198	0.0397404	0.039747	0.0397705	0.0396572	0.0396514	0.0398252	0.0400337	0.0402281	0.0406629	0.0412705	0.0417502	0.0422312	0.0426223	0.0429117	0.0430743	0.042396	0.0411969	0.0402331	0.0394252	0.0387802	0.0382242	0.0377406	0.0375033	0.0374889	0.0377335	0.0382068	0.0385156	0.0385217	0.0383902	0.0381718	0.0379532	0.037769	0.0376647
	BEN										0.0414994	0.0426477	0.0432802	0.0436187	0.0439961	0.0439729	0.0433428	0.0426342	0.0426527	0.0432796	0.0436808	0.0436016	0.0433096	0.0434713	0.0435674	0.043312	0.0432202	0.0430101	0.0425636	0.042027	0.0419143	0.0423402	0.0425258	0.0432356	0.0435076	0.0423811	0.0410067	0.0401536	0.040032	0.0400555	0.0399475	0.0401405	0.040845	0.0417331	0.0426248	0.043015	0.0434327	0.0440777	0.0444624
	BFA										0.0403786	0.0397271	0.0392952	0.0391932	0.0389718	0.0385697	0.0387044	0.0392556	0.039524	0.039637	0.0399761	0.0403264	0.0405808	0.0406321	0.0404723	0.0404706	0.0411578	0.0420396	0.0430932	0.0444003	0.044452	0.0436422	0.0429517	0.0422759	0.0413245	0.0408997	0.0419365	0.0425119	0.0417895	0.0409543	0.0397991	0.0385835	0.0376544	0.036702	0.0357134	0.0347869	0.0350704	0.0365401	0.0390627
	BGD										0.0381342	0.0366705	0.0355069	0.0347357	0.0341194	0.0335495	0.0332114	0.0330385	0.0329618	0.0330647	0.0331615	0.0331717	0.032934	0.032081	0.0311277	0.0318455	0.0334995	0.0351003	0.0372289	0.0397631	0.0420468	0.044886	0.0475256	0.0483614	0.0483656	0.0484329	0.0486167	0.0490207	0.0492256	0.048713	0.0481948	0.0480218	0.0477613	0.0472815	0.0469153	0.04687	0.0468315	0.046964	0.0473282
	BGR																					0.0371855	0.0401031	0.0422842	0.0439624	0.0452685	0.0463205	0.0471365	0.0477582	0.0482402	0.0484869	0.0487643	0.0491166	0.0492727	0.0492649	0.0491639	0.0490793	0.0491911	0.0494478	0.0499008	0.0506012	0.0504744	0.0494779	0.048324	0.0468877	0.0455101	0.0448264	0.0437837	0.0425253
	BHR																					0.0395795	0.0376427	0.0361144	0.0349438	0.0339783	0.0331591	0.0326584	0.0321829	0.0315418	0.0311869	0.0317261	0.0324593	0.032602	0.0329173	0.0332576	0.0328285	0.0320469	0.0313841	0.0308066	0.0305582	0.0303864	0.0305469	0.0311238	0.0313788	0.0314091	0.0313407	0.0311528	0.0308393
	BHS																					0.0402748	0.0394722	0.0386884	0.0379909	0.0372504	0.0362979	0.0354948	0.0353242	0.0355739	0.0362887	0.0378425	0.0388581	0.03948	0.0400853	0.0404175	0.0413692	0.0422263	0.0425039	0.04237	0.0426824	0.0434557	0.0438928	0.0441351	0.0439787	0.044171	0.0452759	0.0463134	0.0475614
	BIH																																									0.0405663	0.0415935	0.0420841	0.0423682	0.0430353	0.0431021	0.0457785	0.0513392
	BLR																																									0.0397113	0.0379724	0.0365607	0.0352852	0.0342083	0.033289	0.0324575	0.0318236
	BLZ																					0.0423417	0.0452637	0.0476959	0.0497897	0.0514286	0.0527012	0.0535913	0.0542763	0.0549496	0.0558726	0.0563276	0.0559909	0.0553385	0.0544598	0.0538608	0.053247	0.0526009	0.0526907	0.0537579	0.0553457	0.0565951	0.0574456	0.0583761	0.0593564	0.0598679	0.0599118	0.0597364	0.0595229
	BMU																					0.0419581	0.0440858	0.0454788	0.0464879	0.0472393	0.0477847	0.0482387	0.0486694	0.0493497	0.0502776	0.0517809	0.0534276	0.0550525	0.0569622	0.0591331	0.061095	0.0622981	0.063297	0.064745	0.0661281	0.0667457	0.0666902	0.0663548	0.0661109	0.0657398	0.0653563	0.0648523	0.0647284
	BOL	0.0460173	0.043337	0.0412106	0.0394094	0.0378624	0.0367976	0.0360354	0.0353148	0.0346492	0.0339812	0.0334406	0.0330083	0.0331541	0.0338052	0.0343405	0.0349898	0.0359842	0.0370841	0.0376603	0.0374439	0.0369028	0.0364185	0.0374954	0.0401687	0.0421265	0.0436536	0.0452858	0.0461498	0.0477706	0.0499906	0.0509352	0.0512893	0.0509851	0.0497219	0.0481716	0.0469801	0.0466394	0.0466394	0.0463999	0.0458605	0.0455529	0.0461555	0.0473891	0.048659	0.0493209	0.0497869	0.0507309	0.0527976
	BRA	0.0417352	0.0439677	0.0460514	0.0467001	0.0473299	0.0484702	0.0486732	0.0489339	0.049501	0.0504671	0.0512961	0.0518128	0.0520714	0.0514705	0.0502551	0.0489086	0.0481396	0.0475076	0.0469474	0.0471754	0.0480474	0.049238	0.0504865	0.0515713	0.0525092	0.0533989	0.0539936	0.0539767	0.0537039	0.0532597	0.0527378	0.0520211	0.0508422	0.0495058	0.0482137	0.0470955	0.0461491	0.0452322	0.0444955	0.0438312	0.0432599	0.0428965	0.0425089	0.0420939	0.041856	0.0426314	0.0438092	0.044584
	BRB											0.0405129	0.0400438	0.0393766	0.0388265	0.0384509	0.038058	0.0376804	0.0373375	0.0370737	0.0369145	0.0372647	0.0375764	0.0374527	0.0372391	0.0367082	0.0361848	0.0363912	0.0368622	0.0369747	0.0370895	0.0372413	0.0372905	0.0371022	0.0366927	0.0363033	0.0358654	0.0354837	0.0351866	0.0349581	0.0349408	0.0349654	0.0350694	0.0349516	0.0347762	0.0352269	0.0363477	0.0378202	0.0398766
	BRN																					0.0401981	0.0390366	0.0377142	0.0363465	0.0350184	0.0340202	0.033499	0.0330057	0.0323449	0.0319735	0.0323199	0.0330652	0.0341817	0.0354622	0.0363831	0.0379971	0.0405185	0.0424229	0.0438334	0.0454588	0.0470653	0.0488178	0.0506227	0.0523477	0.0537625	0.0534601	0.0530814	0.0533398
	BTN																					0.0403824	0.0398254	0.0393636	0.0389642	0.0386484	0.0383611	0.0381117	0.0380022	0.037976	0.0379371	0.0380393	0.038147	0.0380593	0.0380532	0.0382729	0.0390026	0.0399976	0.0408111	0.0417098	0.0425464	0.0430725	0.0433558	0.0440822	0.0448296	0.0433323	0.0405072	0.0383058	0.0365776
	BWA											0.0332283	0.0328676	0.0328277	0.0329836	0.0333287	0.0331253	0.0330399	0.0338566	0.035078	0.0358914	0.0373237	0.0402506	0.0428865	0.0445577	0.045091	0.0443646	0.0431273	0.0419083	0.0407078	0.0398395	0.0395326	0.0397081	0.0403509	0.0411835	0.0419268	0.0428463	0.0439854	0.0449791	0.0456271	0.0477392	0.0506281	0.0521786	0.0528039	0.0530766	0.0530575	0.0531045	0.0530299	0.0529588
	CAF											0.0422087	0.0451755	0.0480189	0.0502794	0.0520199	0.0533843	0.0544445	0.0549593	0.0550712	0.0550599	0.0549192	0.0548173	0.0546719	0.0549647	0.0549295	0.054025	0.0528391	0.0518406	0.0506908	0.0492726	0.0478206	0.0465638	0.0454912	0.044673	0.0443259	0.0446025	0.0453488	0.0455296	0.0450879	0.0443572	0.0435367	0.0425897	0.041574	0.0404304	0.0392995	0.0391193	0.0386627	0.0372868
	CAN	0.0335231	0.0340112	0.0344953	0.0348364	0.0348363	0.0345613	0.0345831	0.0347358	0.0345125	0.0341352	0.0339372	0.03375	0.0335812	0.0335268	0.0335823	0.0338467	0.0343418	0.034782	0.0349509	0.0350016	0.0350015	0.0349218	0.034818	0.0348326	0.0350004	0.0351878	0.0353049	0.035335	0.0353167	0.0353596	0.0355152	0.0355744	0.0354005	0.0350556	0.0347041	0.0344464	0.0342282	0.0340289	0.0339646	0.0339928	0.033948	0.0338611	0.0337093	0.0335261	0.0334337	0.0334462	0.0335354	0.0337204
	CHE	0.0396042	0.0392579	0.0392468	0.0391392	0.0391004	0.0394114	0.0401533	0.041114	0.0416487	0.0418627	0.0423433	0.0431543	0.0441148	0.0449089	0.0454319	0.045688	0.0457449	0.0457733	0.045807	0.0458184	0.04604	0.0464651	0.0467863	0.0468891	0.0468086	0.0464067	0.0456319	0.0448425	0.0443358	0.0440328	0.0438496	0.043703	0.0434296	0.0431024	0.0427852	0.0425234	0.0424584	0.0425376	0.0426863	0.0428675	0.0430573	0.0432367	0.0431662	0.0427994	0.0423924	0.0421695	0.0421215	0.0422031
	CHL		0.0296916	0.0282235	0.0269968	0.0259882	0.0251361	0.0244593	0.0239306	0.0235026	0.0231826	0.0229309	0.0227047	0.0224617	0.0222065	0.0220015	0.0218472	0.0217548	0.0216953	0.0216373	0.0215897	0.0215448	0.0214941	0.021421	0.0214794	0.0218131	0.022272	0.0226595	0.0230503	0.0235337	0.024056	0.0246359	0.0252331	0.0253295	0.0249365	0.024643	0.024468	0.0242794	0.024194	0.0242704	0.0245412	0.0249192	0.0252879	0.0257382	0.026185	0.0266589	0.0273762	0.0281872	0.0288662
	CHN	0.0417522	0.0417522	0.0417522	0.0440752	0.0465368	0.0484689	0.050053	0.0515837	0.0537256	0.0567669	0.0590528	0.0591044	0.0577879	0.0566053	0.0558499	0.0554867	0.0552709	0.0549595	0.0544794	0.0540524	0.0538133	0.0535676	0.0533059	0.0531327	0.0529886	0.0528261	0.0524296	0.0519369	0.0519045	0.0522067	0.0521933	0.051718	0.0512385	0.0510859	0.0514341	0.0523626	0.0532383	0.0537939	0.0543349	0.0542978	0.0537446	0.0534796	0.0538591	0.0549814	0.0562012	0.056543	0.0561355	0.0556804
	CIV											0.0427579	0.0462693	0.0480332	0.0485656	0.0500192	0.0514339	0.0519849	0.05207	0.0515938	0.0510773	0.0513478	0.0515826	0.0513352	0.0518068	0.0525394	0.0524215	0.0522705	0.053137	0.0539228	0.0535964	0.0525907	0.0513217	0.0502409	0.0493814	0.0483948	0.0474226	0.04657	0.0455975	0.0445193	0.0435433	0.0426017	0.0416665	0.0408126	0.0400503	0.0395205	0.0398783	0.0411237	0.0425579
	CMR											0.0406928	0.0406803	0.0407551	0.0407574	0.0407189	0.0415964	0.0433941	0.0448536	0.0456897	0.0458785	0.0464777	0.0474793	0.0477157	0.0477436	0.0480262	0.0483135	0.0486566	0.0494778	0.0509262	0.0516525	0.0516962	0.0517445	0.0513332	0.0506366	0.0499103	0.0490491	0.0482203	0.0477608	0.047394	0.0467551	0.0459615	0.0451115	0.0440531	0.0427754	0.0417968	0.0417216	0.0422553	0.0432674
	COD	0.0391751	0.0364297	0.0341229	0.0322505	0.0307249	0.0294453	0.0283604	0.027403	0.0264951	0.0255988	0.024686	0.023774	0.022895	0.0222847	0.0219829	0.0217127	0.0214178	0.0210753	0.0207417	0.0205634	0.0205012	0.0205417	0.020708	0.0207996	0.0209068	0.0209583	0.0207466	0.0207042	0.0205957	0.0202876	0.0203467	0.0206087	0.0212566	0.0224342	0.0233233	0.023752	0.0243656	0.0246577	0.0244637	0.0241547	0.0235686	0.0229288	0.0222581	0.0214662	0.0207354	0.0200577	0.0194173	0.0190092
	COG											0.0459121	0.0545606	0.0578739	0.0566543	0.0545122	0.0526322	0.0519549	0.0523556	0.0523351	0.0514069	0.0500248	0.0489178	0.0483496	0.0481543	0.0476842	0.0475434	0.0479865	0.0480176	0.0481253	0.0480748	0.0481028	0.0494827	0.0504267	0.0503934	0.0497712	0.0489413	0.0483526	0.0478428	0.0475185	0.0473192	0.0474122	0.048016	0.0487939	0.0499146	0.053214	0.0563688	0.0569369	0.0566045
	COL	0.0332491	0.0329322	0.0327696	0.0329357	0.0333444	0.0336218	0.0336348	0.0329654	0.0318997	0.0309231	0.0303489	0.0301683	0.0298992	0.0294881	0.0292003	0.0289604	0.0287622	0.0285741	0.0284101	0.0284114	0.0286096	0.0289829	0.0293419	0.0295318	0.0296422	0.0298025	0.0300715	0.030292	0.0304476	0.0307594	0.0311812	0.0315777	0.0318805	0.032007	0.0319573	0.0316931	0.0313379	0.0311743	0.0311886	0.0311986	0.0311685	0.0309896	0.0307241	0.0309617	0.0316181	0.0321191	0.0323775	0.0325783
	COM											0.0395421	0.0374114	0.0359828	0.0351126	0.0345612	0.034666	0.0351614	0.0354837	0.0353123	0.0348624	0.034963	0.0354534	0.0356419	0.0354925	0.0351503	0.0346034	0.0339593	0.033425	0.0328657	0.0322219	0.0317159	0.0312651	0.0308039	0.030354	0.0299154	0.029659	0.0293585	0.0290816	0.02899	0.0289455	0.0288389	0.0286474	0.0284804	0.0281487	0.0277641	0.027718	0.0281645	0.0286198
	CPV											0.0408226	0.0409726	0.0404564	0.0390569	0.0374329	0.0361845	0.0354185	0.034818	0.0343555	0.0343248	0.0346131	0.0349107	0.0350777	0.0351381	0.0351264	0.0348975	0.0345077	0.0341645	0.0340234	0.034144	0.0342029	0.0343868	0.0351855	0.0363364	0.0374946	0.0387484	0.0395876	0.0397924	0.0397497	0.0396579	0.0395857	0.0395162	0.039413	0.0393116	0.0394374	0.0407267	0.0430535	0.0444293
	CRI	0.0350814	0.0357136	0.0366855	0.0378765	0.0387626	0.0394917	0.0402911	0.0411309	0.0413653	0.0412747	0.0414373	0.041273	0.041098	0.0413233	0.0416589	0.0422379	0.0431361	0.043948	0.0442026	0.0446582	0.0459241	0.0475776	0.0491762	0.0504431	0.0515616	0.0523521	0.0529431	0.0540026	0.0554854	0.0567741	0.0567204	0.0553313	0.0532042	0.0508093	0.0491047	0.0480985	0.0475966	0.0478103	0.0480675	0.0482417	0.0490963	0.0496985	0.0501361	0.0510057	0.0515504	0.0516445	0.051603	0.0518997
	CYM																					0.0392143	0.0367451	0.034855	0.033406	0.0323064	0.0314743	0.0308477	0.0303832	0.0300239	0.029761	0.0295747	0.0294453	0.0293764	0.0292413	0.0292337	0.0292174	0.0291893	0.0292856	0.0294904	0.0296022	0.0295293	0.0295068	0.0295069	0.0294846	0.0294243	0.0294821	0.0296078	0.0297213
	CYP	0.0306645	0.0316575	0.0326089	0.0336408	0.0351303	0.0368505	0.0382677	0.0392472	0.0393641	0.0389762	0.0385426	0.0379238	0.0378915	0.0381691	0.0377677	0.0377529	0.0382504	0.038258	0.0379234	0.0378912	0.038215	0.0381333	0.037684	0.0371199	0.0364391	0.0354196	0.0342107	0.0337503	0.0339529	0.0342518	0.0345758	0.0347813	0.0351285	0.0354244	0.0361685	0.0370285	0.0367979	0.0361008	0.0358469	0.0366053	0.0374771	0.0375821	0.0380403	0.0384599	0.0380158	0.0373158	0.0364159	0.0356291
	CZE																																									0.0328918	0.0333527	0.033674	0.0340845	0.0345747	0.0351851	0.0358873	0.0365374
	DEU	0.0331158	0.03345	0.0337155	0.0339256	0.0340668	0.0343837	0.0346904	0.0347416	0.0346509	0.0345918	0.034667	0.0348243	0.0349624	0.0349578	0.0349202	0.0349275	0.0348093	0.0343898	0.0338424	0.0335763	0.0337053	0.0339507	0.0339995	0.0338986	0.033685	0.0334334	0.0332961	0.0332693	0.0333122	0.0334058	0.033513	0.0335478	0.0334699	0.0333791	0.0332596	0.0331467	0.0331489	0.0332066	0.0333075	0.0335044	0.0338582	0.0343452	0.034762	0.0348367	0.0346509	0.0344438	0.0342702	0.0341425
	DJI																					0.0404524	0.0400457	0.0394897	0.0384802	0.0370304	0.0353829	0.0337916	0.0324307	0.0315944	0.03115	0.0307735	0.0302843	0.0302995	0.0310066	0.0315773	0.0313199	0.0302725	0.0292261	0.0284381	0.0276717	0.0269933	0.0264827	0.0264244	0.027033	0.0276741	0.0279322	0.0278993	0.0279038
	DMA																					0.042583	0.0471335	0.0508238	0.0518827	0.0509793	0.049978	0.0496113	0.0493495	0.0501981	0.0514116	0.0533749	0.0552016	0.0557422	0.0560035	0.0564764	0.0570573	0.0569479	0.056527	0.0570915	0.0591578	0.0618513	0.0633431	0.062935	0.0615367	0.0600215	0.0591095	0.0586382	0.0582172
	DNK	0.0341982	0.0337329	0.0330839	0.0326637	0.032447	0.032117	0.0317641	0.0316023	0.0314084	0.0314137	0.0318148	0.0322691	0.0327231	0.0329123	0.0330783	0.0334695	0.0336825	0.0336429	0.0335359	0.0334201	0.0332538	0.0330858	0.032841	0.0325944	0.0325135	0.0324429	0.0324436	0.0325455	0.0325976	0.0326016	0.0325326	0.0323595	0.0322441	0.0322247	0.0322191	0.0323992	0.0328134	0.0332465	0.0335297	0.0338189	0.0341877	0.0345748	0.0349093	0.035119	0.0353452	0.0356933	0.036035	0.0364069
	DOM		0.0336051	0.0339333	0.0350088	0.0354824	0.0358802	0.0364597	0.0370311	0.0375673	0.0381199	0.0381215	0.0371132	0.0365744	0.0375819	0.0397741	0.0404574	0.0403097	0.0410694	0.0414714	0.0424845	0.0447038	0.0480804	0.052457	0.0570083	0.0609611	0.064347	0.0666121	0.0677993	0.0679907	0.0681803	0.0690263	0.0699279	0.0692928	0.0671521	0.0646157	0.0639029	0.0650626	0.0661294	0.0673094	0.0674244	0.0719954	0.0731436	0.0676941	0.0627098	0.0583923	0.0548869	0.0518811	0.0496574
	DZA											0.0411076	0.0417555	0.0416907	0.0412483	0.0408372	0.0403434	0.0397743	0.0393158	0.0392827	0.0396853	0.0406675	0.0413243	0.0414464	0.0418388	0.0427415	0.0442603	0.0456545	0.0472914	0.0492165	0.0498314	0.0493528	0.0488701	0.0481216	0.046978	0.0457551	0.0444761	0.043073	0.0415019	0.0400461	0.0388798	0.0381711	0.0376685	0.0371105	0.0366018	0.0361555	0.035904	0.0357761	0.0356051
	ECU	0.0323941	0.0324241	0.0323977	0.0325267	0.0333073	0.0342646	0.0349779	0.0353619	0.0354819	0.0355212	0.035666	0.035853	0.035855	0.0358032	0.0360552	0.0363067	0.0363419	0.0366078	0.0371256	0.0374469	0.0375303	0.0375585	0.0373826	0.0372941	0.0377688	0.038685	0.0394433	0.0399959	0.0406973	0.0413217	0.0419165	0.0422256	0.0420744	0.0413347	0.0401084	0.0390753	0.0383194	0.0376566	0.037177	0.0369233	0.036789	0.0367721	0.036904	0.0370957	0.0372904	0.0375092	0.0375166	0.0373659
	EGY	0.04179	0.0438594	0.0459225	0.0481707	0.0503651	0.0522538	0.0533837	0.0539833	0.0546848	0.055755	0.0568991	0.0580469	0.0593309	0.060748	0.062248	0.0638121	0.0647636	0.0643842	0.0634136	0.0628355	0.0629725	0.0634116	0.0636236	0.0641996	0.0658807	0.0682435	0.0710104	0.0737485	0.0759481	0.0775964	0.0784813	0.081409	0.0848986	0.0861651	0.0859388	0.0832246	0.0794333	0.0768868	0.075251	0.0733401	0.0713851	0.0698383	0.068406	0.0670757	0.0663773	0.0666582	0.0675613	0.0685138
	ESP	0.0274651	0.0279307	0.0285096	0.0291331	0.0298123	0.0303655	0.0308286	0.0313749	0.0319205	0.0320905	0.0321408	0.0324855	0.0329704	0.0333105	0.033351	0.033382	0.0336141	0.0336501	0.0332785	0.0329842	0.032921	0.0327749	0.0327013	0.0328984	0.0332302	0.0334514	0.0334686	0.0333881	0.0332383	0.0330003	0.0327466	0.0324974	0.03226	0.0320137	0.0316428	0.0313092	0.0311999	0.0313464	0.0317493	0.0323102	0.0328671	0.0332938	0.0335696	0.0335457	0.0333237	0.0332344	0.0332967	0.0334778
	EST																																									0.0351665	0.0353515	0.0349166	0.0340154	0.0332292	0.0327255	0.0324001	0.0323786
	ETH	0.039736	0.0379914	0.0366073	0.0357528	0.0355403	0.0356005	0.0355304	0.0354002	0.0358839	0.0361842	0.0362655	0.0366525	0.0369426	0.0370706	0.036957	0.0366956	0.0364011	0.0361573	0.0359417	0.035717	0.0353452	0.0348649	0.0345443	0.0341871	0.0336429	0.0331388	0.0328582	0.0326248	0.0325454	0.0328742	0.0335062	0.0343373	0.0351688	0.0359603	0.0367343	0.0369784	0.0370431	0.0377463	0.0386714	0.038975	0.0386007	0.0374985	0.0359877	0.0348028	0.0337219	0.0330205	0.032508	0.031944
	FIN	0.031106	0.030863	0.031208	0.031403	0.0313765	0.0317356	0.032374	0.0327524	0.032905	0.0332777	0.0340346	0.0348777	0.0354588	0.0355994	0.0355812	0.0357912	0.0359985	0.0358907	0.035625	0.0355973	0.0358434	0.0361635	0.0364869	0.0366702	0.0367091	0.0368829	0.0370833	0.0370249	0.036634	0.0361965	0.0360739	0.0362169	0.0364166	0.0365723	0.0366984	0.036882	0.0371882	0.0376228	0.038188	0.0388636	0.0394028	0.039416	0.0390431	0.0385262	0.0379621	0.0376307	0.0375653	0.03772
	FJI											0.0540663	0.070397	0.0780159	0.0821377	0.0859848	0.0891879	0.0914052	0.0928909	0.0947747	0.0964368	0.0969517	0.0973213	0.0981504	0.0984885	0.0973914	0.0959488	0.0950113	0.094359	0.0941994	0.0946348	0.095275	0.0960722	0.0958531	0.0946485	0.0936065	0.0928372	0.0924274	0.0917127	0.0910594	0.0912153	0.0925982	0.0941702	0.0948066	0.0953194	0.0959405	0.095854	0.09478	0.0936003
	FRA	0.02565	0.0255627	0.0254573	0.0253396	0.0252316	0.0251288	0.0250427	0.0249987	0.0249777	0.0249204	0.0248963	0.0249193	0.02496	0.0250274	0.0251071	0.025178	0.0252553	0.0253562	0.0254647	0.025654	0.0258806	0.0261005	0.0263248	0.0265749	0.0268006	0.026944	0.0271261	0.0273449	0.0275533	0.0277582	0.0279568	0.0281365	0.0282885	0.0284013	0.028465	0.0285527	0.0286821	0.0288412	0.0290701	0.0293858	0.029775	0.0301321	0.0304071	0.030575	0.0306725	0.0307976	0.0309517	0.0311344
	GAB											0.0407541	0.0410621	0.0413703	0.041105	0.040357	0.0395629	0.0392369	0.0390838	0.0388249	0.0387006	0.0384232	0.0381532	0.038213	0.0383339	0.0392805	0.0402116	0.0400137	0.0406947	0.0416977	0.0422137	0.0427728	0.0437429	0.0449527	0.0459914	0.046965	0.0477467	0.0478248	0.047213	0.0472508	0.0474572	0.046908	0.0463853	0.0459682	0.0454946	0.045339	0.045105	0.0451502	0.0460515
	GBR	0.0269491	0.0286887	0.0300239	0.0307753	0.0314928	0.032268	0.0330717	0.0338643	0.034572	0.0351898	0.0359433	0.0366179	0.0368433	0.0367902	0.0369097	0.0371078	0.0371104	0.0370334	0.0370238	0.0370242	0.0370495	0.0370919	0.0371283	0.0372035	0.0371038	0.036774	0.0364318	0.03626	0.0362701	0.0363079	0.0359859	0.0353059	0.0346802	0.0341844	0.0338691	0.0337478	0.0335988	0.0334071	0.0333617	0.0334845	0.03392	0.0344545	0.0347426	0.0348658	0.0349409	0.0350505	0.0352141	0.0351833
	GEO																																									0.0409269	0.0409577	0.0400298	0.0381932	0.03616	0.0344372	0.0331232	0.0322532
	GHA						0.0422712	0.0479183	0.0517661	0.0543286	0.0575192	0.0613319	0.064022	0.0652112	0.0665397	0.0683882	0.0701269	0.0709741	0.0702084	0.068312	0.0664014	0.0652578	0.0648417	0.0634233	0.061403	0.0612405	0.0617089	0.0611524	0.0608419	0.060732	0.0599427	0.0588382	0.0573794	0.0555303	0.0534535	0.0518946	0.0512385	0.0511796	0.0512672	0.0516768	0.0529479	0.0546839	0.0565717	0.0577893	0.0572062	0.0554078	0.0532571	0.0529941	0.054562
	GIN										0.0402697	0.0395947	0.0393499	0.0400052	0.0400653	0.0393398	0.0392035	0.0395889	0.0397906	0.0394973	0.0390319	0.03864	0.0384425	0.038274	0.0381013	0.0379463	0.0378129	0.037726	0.037627	0.0375099	0.0373739	0.0371913	0.0370327	0.0368931	0.036745	0.0364737	0.0361312	0.0361723	0.0367074	0.0375154	0.0383514	0.039912	0.0417055	0.0428052	0.0437425	0.0443422	0.0451864	0.0462056	0.0471901
	GMB											0.0396983	0.0378333	0.0362662	0.0349116	0.0337264	0.0328479	0.0321347	0.0314044	0.0307451	0.0302952	0.0300412	0.0299193	0.0297108	0.0295025	0.0293716	0.0292395	0.0294679	0.0300622	0.0304712	0.0306299	0.0311283	0.0316078	0.0315653	0.0314079	0.0311495	0.0306831	0.0301884	0.0300612	0.0303572	0.0305627	0.0305229	0.0305324	0.0309562	0.031039	0.0305057	0.0313281	0.0329211	0.0338875
	GNB											0.0368377	0.0321819	0.0293925	0.0275035	0.0261175	0.0250418	0.0241629	0.0234445	0.022849	0.0223579	0.0220792	0.0218424	0.0214245	0.0209029	0.0204268	0.0200315	0.0197368	0.0194763	0.0192177	0.0189715	0.0187502	0.0185418	0.0184019	0.0183641	0.0182975	0.018157	0.0179753	0.0178587	0.0177945	0.0176067	0.0174026	0.0174431	0.0175769	0.0176155	0.0176785	0.0178403	0.0179644	0.018038
	GNQ																0.0412866	0.0422417	0.0416194	0.0399658	0.0389043	0.0390208	0.0392795	0.0396434	0.0399935	0.0398203	0.0395157	0.0384615	0.0371674	0.0367746	0.0368361	0.0368807	0.037265	0.0382928	0.0388655	0.0386605	0.0385857	0.0388696	0.0398977	0.0413353	0.0423747	0.0440701	0.0461326	0.0473384	0.048235	0.0503291	0.0592577	0.0751791	0.0870424
	GRC		0.0269258	0.0262104	0.0255069	0.0248078	0.0241656	0.0236196	0.0231611	0.0227765	0.0224534	0.0221799	0.0219758	0.0218186	0.0218198	0.0220182	0.0222613	0.0224739	0.0226595	0.0227456	0.0228505	0.023156	0.0235049	0.0236622	0.0237525	0.023984	0.0240612	0.023943	0.0237764	0.0234944	0.0232523	0.0231671	0.0231391	0.0231694	0.0231481	0.0230772	0.0230695	0.0229232	0.0226302	0.0224313	0.0224352	0.0225529	0.0227035	0.022924	0.0231612	0.0233542	0.0235915	0.0239379	0.0244149
	GRD																					0.0396746	0.0380069	0.0367246	0.0359578	0.0360714	0.0360742	0.0358791	0.0360425	0.0361525	0.0376058	0.0399527	0.0423736	0.0444963	0.0455643	0.0456292	0.0460513	0.0471586	0.0481224	0.048856	0.049678	0.0511871	0.0526377	0.0533195	0.0537279	0.0543852	0.0548241	0.0554357	0.0568116
	GTM	0.0520796	0.0492816	0.046723	0.0444958	0.0428105	0.0420164	0.0421578	0.0421792	0.0416982	0.0413976	0.0413219	0.0409659	0.0405746	0.0408821	0.0418313	0.0425535	0.0427659	0.0431296	0.0442087	0.0450699	0.0455159	0.0462289	0.0467802	0.0469086	0.0469283	0.0470404	0.0472019	0.0472071	0.0471542	0.0468237	0.045855	0.0445105	0.0431716	0.0418476	0.0407044	0.0398561	0.0391575	0.0386375	0.038276	0.0380318	0.0377597	0.0374973	0.0375198	0.0376903	0.0378541	0.0380288	0.0380339	0.0380597
	HKG											0.0238032	0.0238068	0.0238365	0.0239046	0.0239654	0.024	0.0239966	0.0239795	0.023987	0.0240519	0.0241512	0.0242407	0.0242964	0.0243492	0.0243658	0.0243041	0.0242468	0.0242199	0.0242345	0.0243674	0.0246193	0.0248942	0.0249811	0.0248584	0.0247804	0.0247471	0.0246564	0.0246336	0.0247325	0.0248482	0.0249323	0.0250451	0.025248	0.0254745	0.0257061	0.0260859	0.0265432	0.0269182
	HND	0.040918	0.0415672	0.042541	0.0433727	0.0435237	0.0433574	0.0433174	0.0433546	0.0432224	0.0428562	0.0425796	0.0422973	0.0424317	0.0432503	0.0440066	0.0446431	0.0455315	0.047099	0.0487272	0.0498366	0.0508677	0.0514663	0.051286	0.0513286	0.0521262	0.0528382	0.0534687	0.0544662	0.0557421	0.0568072	0.0572847	0.0568609	0.0552315	0.0530022	0.0512446	0.0501935	0.0493764	0.0488562	0.0488165	0.0488154	0.0490602	0.0494285	0.0497603	0.0507138	0.0522892	0.0537398	0.0547629	0.0562024
	HRV																																									0.0399011	0.0383543	0.03726	0.0365607	0.035871	0.0352599	0.0348251	0.0347458
	HTI											0.0392698	0.0365769	0.0341907	0.0320657	0.0302192	0.0286162	0.0272236	0.0260104	0.0249277	0.0239438	0.0230183	0.0221587	0.0213668	0.0205999	0.0198437	0.0191481	0.0185314	0.0179865	0.017529	0.0171461	0.016896	0.0167936	0.0167165	0.0166068	0.0164726	0.0163194	0.0161384	0.0159478	0.0157406	0.0155338	0.0153282	0.0150587	0.0147933	0.0145407	0.0142747	0.014119	0.0139933	0.0138065
	HUN																					0.0330178	0.0357142	0.0376251	0.0389052	0.0399085	0.040811	0.0414995	0.0420329	0.0424949	0.0427943	0.0428682	0.0427132	0.0424264	0.0420599	0.0416247	0.0411545	0.0407419	0.0404722	0.0401893	0.0398795	0.0395699	0.0391349	0.0386442	0.0381991	0.037889	0.037646	0.0373897	0.037251
	IDN	0.0323888	0.0323888	0.0323888	0.0323888	0.0323888	0.0323888	0.0323888	0.0323888	0.0323888	0.0323888	0.0323888	0.0323972	0.0326965	0.0327221	0.0326977	0.0328048	0.0329724	0.0330078	0.0331964	0.033829	0.0347285	0.0359795	0.037431	0.038934	0.0404431	0.0418617	0.0430401	0.0441082	0.0451952	0.0460893	0.046896	0.0475417	0.0477933	0.047615	0.0469116	0.0458846	0.0451205	0.0448592	0.0450305	0.0456674	0.046752	0.047906	0.0486745	0.0490295	0.0491621	0.0491946	0.0491254	0.0488385
	IND	0.030542	0.0308291	0.0309893	0.0310091	0.0313446	0.0318945	0.032445	0.0328545	0.0330206	0.0330773	0.0332903	0.033593	0.0337769	0.0338319	0.033867	0.0339859	0.034158	0.0343238	0.0344236	0.0345363	0.0346696	0.0347558	0.0348193	0.0348308	0.034789	0.034773	0.0348698	0.0351074	0.0353263	0.0354034	0.0353268	0.0351541	0.0351011	0.0352171	0.0353981	0.0355861	0.035796	0.0361476	0.0364996	0.0368348	0.0373092	0.0377167	0.0379827	0.0381742	0.0383441	0.0385772	0.0388918	0.0393722
	IRL	0.0276717	0.0292787	0.030489	0.0313284	0.0320174	0.0326676	0.033096	0.0330324	0.0327894	0.0328623	0.0331438	0.033413	0.0338408	0.0343656	0.0349504	0.0355741	0.0360203	0.0362747	0.0366303	0.0372375	0.0378223	0.0381697	0.0384343	0.0388663	0.0389028	0.0384592	0.0383202	0.0385002	0.0389053	0.039413	0.0396222	0.0397112	0.0396245	0.0392339	0.0387725	0.0382177	0.037637	0.0371421	0.0368122	0.0367517	0.0369175	0.0368933	0.0365316	0.036127	0.0358352	0.0356346	0.0354884	0.0354751
	IRN						0.0473575	0.0479104	0.0490681	0.0505622	0.0519533	0.0528947	0.0529274	0.0521123	0.0508352	0.0502346	0.0503892	0.0506332	0.0512477	0.0520686	0.052379	0.0518379	0.0512629	0.0514866	0.0520495	0.0524012	0.054057	0.0561393	0.0566071	0.0551067	0.0520782	0.0488524	0.0463696	0.0445892	0.0435701	0.0433021	0.042995	0.0417134	0.0396498	0.0377962	0.0365233	0.035804	0.0361915	0.0370748	0.0371618	0.0365091	0.0355758	0.0348984	0.0347077
	IRQ																					0.04445	0.0502828	0.0543346	0.0593665	0.0657834	0.0735554	0.0806831	0.0845312	0.0865775	0.0872974	0.0859938	0.0840157	0.0812763	0.0769535	0.0717783	0.0666299	0.0618188	0.0574982	0.053748	0.05073	0.0480093	0.0452785	0.0428848	0.0409598	0.0390965	0.037169	0.0353926	0.0339865
	ISL	0.0332347	0.0325669	0.0319595	0.030739	0.0298569	0.0297549	0.0295752	0.0290251	0.0287284	0.0287196	0.0290966	0.0292639	0.0289747	0.0291412	0.0299942	0.0305806	0.0308623	0.0312117	0.0309416	0.0300394	0.0294386	0.0300961	0.0308821	0.0311867	0.0320284	0.032487	0.0319714	0.0317228	0.0315913	0.0312098	0.0310058	0.0309669	0.0307724	0.030177	0.0294407	0.0290448	0.0288061	0.0284881	0.0281788	0.0279543	0.0285588	0.0294779	0.0298388	0.0293472	0.0283654	0.0275273	0.0271065	0.0275918
	ISR	0.0310124	0.0304919	0.0302161	0.0301872	0.0300697	0.0300584	0.0302112	0.0304769	0.0308404	0.0311683	0.0315038	0.032065	0.0324692	0.032558	0.0329883	0.0333793	0.0333026	0.0330569	0.032838	0.0329704	0.033328	0.0338472	0.0341772	0.0343207	0.0344295	0.0342613	0.0338953	0.0334871	0.0332007	0.03318	0.0329915	0.0325101	0.0323061	0.0326255	0.0330037	0.033003	0.0329554	0.0330842	0.0332211	0.0331241	0.0331553	0.033594	0.034099	0.0348064	0.0358732	0.036864	0.037668	0.0382842
	ITA	0.02806	0.0286557	0.0290976	0.0294493	0.0297654	0.0300311	0.0302275	0.0302715	0.0302324	0.0302533	0.0304318	0.030741	0.0309599	0.0309423	0.0306724	0.0302708	0.029895	0.0296096	0.0293683	0.0291319	0.0291917	0.0295567	0.0299657	0.0303575	0.0306755	0.0307986	0.0308805	0.0310545	0.0311919	0.0313812	0.031706	0.0320053	0.0321627	0.0321487	0.0321005	0.0321264	0.0322293	0.0324823	0.0329029	0.0333691	0.0337685	0.0340731	0.0342916	0.0342699	0.0341116	0.0341403	0.034293	0.0344707
	JAM				0.0402198	0.0394178	0.0388288	0.0383981	0.0382551	0.038196	0.0379132	0.0375706	0.0372001	0.0366495	0.0359716	0.0355155	0.0354198	0.0355164	0.0356661	0.0360428	0.0367169	0.0372296	0.03747	0.0376353	0.0377136	0.0374269	0.037221	0.0367925	0.0355335	0.0341889	0.0332656	0.0324445	0.031718	0.0313641	0.0310858	0.030629	0.0302724	0.0299079	0.0295736	0.029534	0.0296087	0.0299747	0.0304908	0.0311217	0.0319195	0.0324938	0.0328797	0.0335095	0.0344356
	JOR					0.0402554	0.0393741	0.0386869	0.0382322	0.0377558	0.0375019	0.0377917	0.0382674	0.0385125	0.038307	0.0381881	0.0377968	0.0370764	0.036466	0.0358634	0.0361483	0.0360132	0.0359368	0.0361577	0.0355604	0.0353762	0.0364696	0.0381873	0.0396944	0.0401952	0.0398409	0.0393524	0.0395526	0.0401991	0.0399142	0.0388888	0.0379114	0.0369514	0.0362449	0.0362813	0.0367095	0.0372916	0.0377034	0.0381966	0.0390346	0.0395116	0.0395573	0.039103	0.0390403
	JPN	0.0278246	0.0279276	0.0281924	0.0283107	0.0284398	0.0286599	0.0290354	0.0296709	0.0302898	0.030869	0.0317623	0.0330115	0.0341629	0.0349371	0.0354411	0.0355069	0.0353933	0.0354722	0.0356743	0.0359388	0.0363747	0.0367272	0.0367921	0.0367711	0.0365668	0.0361555	0.0357274	0.0353835	0.0351826	0.0351688	0.0353083	0.0354739	0.0355827	0.0356681	0.0358294	0.0360715	0.0363322	0.0366133	0.0370542	0.0376895	0.0383488	0.0389508	0.0394138	0.0396038	0.0395732	0.0395354	0.0395959	0.0397417
	KAZ																																									0.0401588	0.0389929	0.0378775	0.0368426	0.0356766	0.0348101	0.0342607	0.0338313
	KEN	0.0498103	0.048143	0.0466395	0.0452956	0.044177	0.04335	0.0426675	0.041946	0.0410683	0.0400953	0.0392195	0.0381796	0.0369428	0.0359247	0.0350402	0.0341389	0.0336446	0.0336241	0.0336783	0.0337397	0.0344383	0.0355647	0.0358624	0.0355869	0.03522	0.0348081	0.034676	0.0351379	0.0364412	0.0375657	0.0380083	0.0382376	0.0378808	0.0369869	0.036107	0.0355844	0.0355725	0.0357656	0.0358806	0.0358247	0.0357645	0.0355648	0.0351155	0.0346507	0.0352609	0.0371628	0.038869	0.0399865
	KGZ																																									0.0413757	0.0428283	0.0438825	0.0433417	0.04171	0.0405267	0.0399083	0.038873
	KHM																					0.0338083	0.0328362	0.0320123	0.031246	0.0305203	0.0298976	0.0293732	0.0288959	0.0284505	0.0280364	0.0276344	0.0272702	0.0269512	0.0266832	0.0264714	0.0263162	0.0262116	0.0264163	0.0266577	0.0265767	0.0264887	0.0265676	0.0266869	0.026944	0.0272942	0.0278588	0.0286446	0.0293722
	KNA																					0.0396778	0.0375714	0.0354973	0.0338465	0.0325808	0.0314605	0.0311115	0.0312487	0.0307727	0.0303704	0.0304829	0.0304266	0.0303805	0.0306637	0.030742	0.0305517	0.0304157	0.0305491	0.0318672	0.0337575	0.0347363	0.0348018	0.0344857	0.0341718	0.0342966	0.0345623	0.0346258	0.0341166
	KOR				0.0296135	0.0289615	0.0283809	0.0279198	0.0276934	0.0275748	0.027327	0.0270219	0.0268645	0.026832	0.0272481	0.0276826	0.0277383	0.0283571	0.0296597	0.0312048	0.0326976	0.0333632	0.0335304	0.0339367	0.034416	0.0349594	0.0355229	0.0363899	0.037617	0.0390761	0.040486	0.0412047	0.04148	0.0415975	0.0414448	0.0413987	0.0415923	0.0420397	0.0427383	0.0434294	0.0440157	0.0444518	0.0447711	0.0450944	0.04522	0.0455815	0.0462868	0.0468631	0.0470336
	KWT																					0.0484318	0.0521772	0.0527359	0.0528296	0.053447	0.0582471	0.0641992	0.069111	0.0711399	0.069234	0.0667518	0.0652004	0.0647087	0.0649344	0.0659674	0.0670269	0.0674513	0.0677492	0.0671729	0.0653403	0.0640215	0.063826	0.0634649	0.062809	0.061656	0.0604003	0.0589279	0.0570923
	LAO																					0.0423991	0.045386	0.0475166	0.0494068	0.0513936	0.0531559	0.0548132	0.0562904	0.0575649	0.0585363	0.0593551	0.0604566	0.0618941	0.0637058	0.0646492	0.0656178	0.0668402	0.0683984	0.0712876	0.0756731	0.0798317	0.0822083	0.0834364	0.0838149	0.0835617	0.0827639	0.0819998	0.0821002
	LBN																					0.0305926	0.0307711	0.0311977	0.0321872	0.0333173	0.0338318	0.0336123	0.0333674	0.0333692	0.0332618	0.0331055	0.0330867	0.0327538	0.0322856	0.0328796	0.0345232	0.0359283	0.0373967	0.038438	0.0381297	0.0376933	0.0374292	0.0369313	0.0361046	0.0351488	0.0343355	0.0338475	0.0335029
	LBR															0.0436394	0.0479008	0.0503416	0.0522551	0.053969	0.0553565	0.0559358	0.0558472	0.0557876	0.05555	0.0554117	0.0559727	0.0570446	0.05797	0.058572	0.0589802	0.0592117	0.0590985	0.0585128	0.0578325	0.0568385	0.0557019	0.0547384	0.0537419	0.0528126	0.0517232	0.0504734	0.0490972	0.0475247	0.0457797	0.0438569	0.0418782	0.0410613	0.0425721
	LCA																					0.0450187	0.0507421	0.054024	0.0559277	0.0563697	0.0561071	0.0557252	0.0558846	0.0576175	0.058801	0.0587517	0.057875	0.0560239	0.0549066	0.054694	0.0544772	0.0545364	0.054752	0.0548608	0.0555655	0.0562187	0.0559608	0.0549006	0.0534418	0.0522582	0.0508041	0.049644	0.0495433
	LKA	0.0650623	0.069355	0.0730199	0.0752453	0.0765152	0.078175	0.0797015	0.0802727	0.0806281	0.081247	0.0817488	0.0822492	0.0825726	0.082842	0.0823935	0.0813116	0.0812077	0.0812932	0.0806049	0.0818177	0.0832082	0.081912	0.0802962	0.0794773	0.0793346	0.0803285	0.0818513	0.0836294	0.0868481	0.0899162	0.0918802	0.0929589	0.0929455	0.0925536	0.0915794	0.089757	0.0872348	0.0847192	0.0824356	0.0799177	0.0774354	0.0753661	0.0740284	0.0733597	0.0729844	0.0713898	0.0687054	0.0664414
	LSO											0.0397013	0.0379184	0.0368197	0.0365635	0.0369981	0.0380479	0.0389507	0.039783	0.0408474	0.0415941	0.0423647	0.0436335	0.0452676	0.0481729	0.0510598	0.0539234	0.0586349	0.0650744	0.0702713	0.0747927	0.0786195	0.08069	0.0820761	0.0812735	0.0794622	0.0791534	0.0788092	0.0776631	0.0768604	0.0763127	0.0754995	0.0742867	0.0728041	0.0702504	0.0666749	0.0639865	0.0620468	0.0606841
	LTU																																									0.0286248	0.0282549	0.0282667	0.0282126	0.0279797	0.0277582	0.0277934	0.0281218
	LUX	0.0329294	0.0332649	0.032887	0.0332167	0.0338552	0.0341203	0.0341052	0.0341822	0.034446	0.0345632	0.0343685	0.0341405	0.0342016	0.034294	0.0343702	0.0343881	0.0341619	0.033602	0.0328318	0.0321882	0.0318651	0.0317953	0.0317419	0.0315175	0.0310761	0.030438	0.0297281	0.0292721	0.0290114	0.0287222	0.0285319	0.0283584	0.0281448	0.0279762	0.0278118	0.0275671	0.0275968	0.0282316	0.0290685	0.0298766	0.0305239	0.0314263	0.0320842	0.0327049	0.033849	0.0344509	0.0344817	0.0346932
	LVA																																									0.0235949	0.0233638	0.0226207	0.0219406	0.0213603	0.0209604	0.0207415	0.0207175
	MAC																					0.04095	0.0413554	0.0416538	0.0418725	0.0419095	0.0417518	0.0415901	0.0411774	0.0406201	0.0409197	0.0423719	0.04412	0.0460176	0.048092	0.0495692	0.0502689	0.0515652	0.0530645	0.0534737	0.0532353	0.0534648	0.0544851	0.0546341	0.0534428	0.0523893	0.051548	0.0505056	0.0496028
	MDA																																									0.0414777	0.0423273	0.0422953	0.0420319	0.0412205	0.0399341	0.038985	0.0382131
	MDG											0.0400873	0.0388767	0.037704	0.0367006	0.0359832	0.035383	0.0347531	0.0342342	0.0340124	0.0340101	0.0338652	0.0337715	0.033631	0.033202	0.0328986	0.0326615	0.0323022	0.0319586	0.0317516	0.0320197	0.032605	0.0327126	0.032341	0.0318804	0.0317043	0.0318272	0.03202	0.0326079	0.0340068	0.0358474	0.0379765	0.0390955	0.0392619	0.0398833	0.0404397	0.0408703	0.0413812	0.0420978
	MDV																					0.0408611	0.0411144	0.0411915	0.0409616	0.040425	0.0397548	0.0394676	0.0393366	0.0386681	0.0376085	0.0374312	0.03861	0.0388718	0.0396493	0.0422161	0.0444601	0.0458705	0.046812	0.0473974	0.0477748	0.0480631	0.0481848	0.0481151	0.0479185	0.0465296	0.044839	0.0447079	0.0454616
	MEX	0.0328147	0.0329595	0.0330523	0.0330759	0.0331831	0.033357	0.0335672	0.0337484	0.0337926	0.0337102	0.0335807	0.0334388	0.0332953	0.0331545	0.0331248	0.033287	0.0334628	0.0335439	0.0336638	0.0337086	0.0336719	0.033612	0.033547	0.0335939	0.0337158	0.0338637	0.0339235	0.0337929	0.0336677	0.0337796	0.0340788	0.0344719	0.0345497	0.0341213	0.0335998	0.0332386	0.0329142	0.0325498	0.0322766	0.0322438	0.0324406	0.0328153	0.0333512	0.0338458	0.0342019	0.0340688	0.0336513	0.0336077
	MKD																																									0.0408691	0.0414803	0.0419661	0.0417855	0.0412043	0.0405916	0.0400878	0.0392829
	MLI											0.0461353	0.0548576	0.0606245	0.064147	0.0671643	0.069317	0.0703444	0.071414	0.0714138	0.0706069	0.0696301	0.0680524	0.0676125	0.0681768	0.0684196	0.0689878	0.0693113	0.069383	0.0694409	0.0697602	0.0695861	0.0681566	0.0671357	0.0655518	0.0627941	0.059957	0.0572076	0.0550029	0.0532258	0.0521652	0.0527055	0.0536896	0.0536258	0.0527253	0.0516631	0.05203	0.0558944	0.0609372
	MLT					0.0483131	0.0473308	0.0472824	0.0478927	0.0484094	0.0486619	0.04876	0.0488477	0.0487287	0.0484203	0.049531	0.052279	0.0544703	0.0551525	0.0555163	0.0564603	0.055885	0.0533581	0.0505783	0.0489819	0.0494311	0.0507594	0.0519343	0.0522616	0.0514648	0.0510837	0.0516842	0.0516324	0.0508054	0.0507872	0.0508835	0.0508152	0.0506643	0.0511439	0.0525086	0.0533065	0.0541052	0.0548786	0.0551464	0.0555187	0.0559217	0.056161	0.0558763	0.0553106
	MMR													0.0438548	0.0490866	0.054026	0.0583118	0.0585348	0.0573454	0.0583247	0.0600994	0.0612465	0.0621565	0.0628763	0.0625173	0.0621336	0.0624233	0.0636445	0.0661771	0.0693044	0.0718455	0.0735748	0.0751375	0.0765077	0.0772102	0.0774728	0.0776378	0.0781316	0.0787667	0.0789364	0.0792373	0.0797748	0.0800788	0.0796032	0.0794337	0.0799347	0.0804267	0.0809886	0.0813733
	MNE																																									0.0403926	0.0397303	0.0388957	0.0377901	0.0366154	0.0356647	0.0350562	0.0346966
	MNG																					0.0400088	0.0388313	0.0378999	0.0371776	0.0366148	0.0361642	0.0358059	0.0355091	0.0352918	0.0351475	0.0349553	0.0348567	0.03493	0.0348832	0.0347341	0.0346002	0.0345557	0.0345217	0.0344255	0.0344212	0.0339608	0.0334297	0.0332363	0.0329711	0.0327351	0.0323239	0.0319503	0.0318356
	MOZ											0.0399182	0.0385674	0.0374828	0.0366173	0.0359581	0.0355079	0.0352904	0.0351619	0.035103	0.0351678	0.035345	0.0355673	0.0357296	0.0358511	0.0359539	0.0360196	0.0360598	0.0360682	0.0360337	0.0359954	0.0359537	0.0359038	0.0358571	0.0355588	0.0350656	0.0346115	0.0343473	0.0346578	0.0350987	0.0353635	0.0358627	0.0367085	0.0373905	0.0378234	0.0380534	0.0381616	0.038118	0.037817
	MRT											0.0409587	0.0423227	0.0447403	0.0452569	0.0433799	0.041095	0.0390917	0.0377671	0.0374084	0.0372935	0.0369639	0.0366835	0.0379988	0.0399998	0.0413394	0.0420988	0.0424518	0.0424127	0.0415654	0.0402713	0.0390504	0.0381569	0.0376099	0.0371956	0.0368126	0.0364735	0.0360267	0.0354561	0.0348209	0.0341449	0.0334979	0.0329323	0.0325562	0.0323195	0.0320948	0.032323	0.0326984	0.0324075
	MSR																					0.0394668	0.0372475	0.0353837	0.0338394	0.0325665	0.0314594	0.0308695	0.0305778	0.0302537	0.0300244	0.0298633	0.0298238	0.029711	0.0295009	0.029341	0.0292652	0.0292547	0.0292546	0.0291375	0.0289396	0.0287724	0.0285274	0.0281842	0.0278356	0.0276083	0.0275034	0.027266	0.0269546
	MUS	0.0486463	0.0497866	0.0503882	0.0510012	0.0514295	0.051516	0.0514496	0.051161	0.0518134	0.0527468	0.0542112	0.0550253	0.0539272	0.0527038	0.0517975	0.0510205	0.0501067	0.0489396	0.0478762	0.0472542	0.0463361	0.0450637	0.0442897	0.0449382	0.0457445	0.046428	0.0478079	0.0485549	0.04823	0.0474067	0.0465447	0.0454969	0.043935	0.0422424	0.0411698	0.0405897	0.0405833	0.0416424	0.04454	0.0468333	0.0482355	0.0492207	0.0491057	0.0488239	0.0488109	0.0483092	0.0475589	0.0480091
	MWI					0.0324314	0.0333332	0.0345537	0.0359409	0.0372626	0.0374194	0.0375323	0.0387645	0.0393841	0.0392178	0.0389268	0.0395327	0.0418083	0.0436638	0.0451503	0.0472343	0.0506507	0.0539422	0.0563139	0.0595711	0.0621546	0.0646121	0.0656027	0.0638024	0.0615375	0.0600427	0.057637	0.0544469	0.0517954	0.0500747	0.0493454	0.0492306	0.0489544	0.0482131	0.0477698	0.0479552	0.048155	0.0488034	0.0495508	0.0496118	0.0496599	0.0498117	0.0496473	0.0493944
	MYS						0.0350053	0.0337809	0.0327177	0.03174	0.0309373	0.0304333	0.030109	0.0300476	0.030246	0.0304155	0.0305783	0.0307694	0.0310017	0.0312272	0.0312168	0.0314806	0.0325632	0.0338341	0.0351846	0.0367267	0.0375511	0.037645	0.0377552	0.0380815	0.0386172	0.0394518	0.0406039	0.0417499	0.0421861	0.042452	0.042686	0.0422927	0.0417394	0.0417003	0.042643	0.0444186	0.0466186	0.0485197	0.0499601	0.0515699	0.0534002	0.0547471	0.0554779
	NAM											0.0339995	0.0351143	0.0359606	0.0366445	0.03713	0.0375661	0.0381921	0.0390316	0.0399574	0.0407984	0.0417327	0.0426288	0.0431703	0.0434509	0.0436265	0.0437091	0.0436354	0.0434714	0.0432648	0.0429617	0.0428656	0.0427692	0.0421743	0.0413083	0.0403567	0.0392645	0.0381181	0.0374769	0.0374249	0.0375316	0.0383941	0.0391228	0.0394084	0.0397778	0.0401884	0.0410006	0.0420303	0.0427934
	NER											0.0399626	0.0385884	0.0376747	0.0372312	0.0369279	0.0366457	0.0362971	0.0360208	0.0359685	0.035652	0.0353828	0.0352866	0.0351286	0.0347975	0.0337666	0.0327542	0.0322991	0.0322427	0.0323093	0.0324274	0.0327958	0.0329164	0.0325019	0.0319833	0.0316231	0.0311755	0.0304998	0.0297068	0.028904	0.0281987	0.0275138	0.0267976	0.026078	0.0254526	0.0250878	0.0249727	0.0247884	0.0244861
	NGA	0.0503939	0.046217	0.0426073	0.0396882	0.0373815	0.0355609	0.0341583	0.0330819	0.032247	0.0315955	0.0310987	0.0307226	0.0304291	0.0301921	0.0300423	0.0300146	0.0300168	0.0299354	0.0297919	0.0296654	0.0297314	0.0299105	0.0300453	0.0301703	0.0302635	0.0306096	0.0313658	0.0321505	0.0325585	0.0324987	0.0323503	0.0325491	0.0326561	0.0323246	0.0318291	0.0313918	0.0310668	0.0308622	0.0307846	0.0307134	0.0308232	0.0311728	0.0317123	0.0324159	0.0328808	0.0330767	0.0334867	0.034185
	NIC	0.0395446	0.0374998	0.0359223	0.0347237	0.0338351	0.0331518	0.0325261	0.0319439	0.0314157	0.030963	0.0305551	0.0301902	0.0298931	0.0296503	0.0295684	0.0299002	0.0308415	0.0325284	0.0343981	0.0359423	0.0371787	0.0381323	0.0386788	0.0389983	0.0389751	0.0387164	0.0385901	0.0388543	0.0392635	0.0389218	0.0383438	0.0384466	0.0386473	0.0384782	0.0381458	0.0376478	0.0374364	0.0375756	0.0373838	0.0369247	0.0363868	0.0359037	0.035636	0.0354275	0.035155	0.0348395	0.0345876	0.0346107
	NLD	0.0300587	0.0305838	0.0308712	0.0311271	0.031517	0.0320092	0.0325437	0.0329882	0.0331634	0.0332007	0.0333312	0.0334732	0.0335442	0.0335398	0.0336195	0.0337865	0.0339351	0.0340805	0.0342219	0.0343156	0.034388	0.034461	0.0343873	0.0342692	0.0341821	0.0340447	0.0338701	0.0337677	0.0337772	0.0338263	0.033681	0.0333099	0.0329893	0.0328366	0.0328243	0.0329645	0.0332321	0.0334937	0.033859	0.0342637	0.0346137	0.0349716	0.0352779	0.0354386	0.0354431	0.035544	0.0358362	0.036231
	NOR	0.0447306	0.0482631	0.0505459	0.0521956	0.0536988	0.0553921	0.0573915	0.0590053	0.0604764	0.0614619	0.0614988	0.0616382	0.0619219	0.0620903	0.0623196	0.062996	0.0640898	0.0652689	0.0656886	0.0643242	0.0631268	0.0638893	0.0637309	0.0624893	0.0611477	0.0595385	0.0586177	0.0573582	0.0550824	0.0526468	0.0505066	0.0490615	0.048363	0.0473416	0.0459425	0.0444172	0.0428542	0.0414743	0.0404831	0.0399075	0.0392665	0.0385162	0.0377791	0.0371041	0.0366289	0.0362478	0.0359998	0.0360575
	NPL											0.0394368	0.0371484	0.0352412	0.0336631	0.0324663	0.0315744	0.0308052	0.0301491	0.029531	0.0289408	0.0284835	0.0284767	0.0287363	0.0290758	0.0293758	0.03079	0.032831	0.0340151	0.0346767	0.0350166	0.0355908	0.0360676	0.0357022	0.0356565	0.0364566	0.0372336	0.037659	0.0377264	0.0377054	0.0376493	0.0370402	0.0362039	0.0355801	0.0349364	0.0341408	0.0331786	0.0322202	0.0315193
	NZL	0.0243859	0.0247357	0.024956	0.025107	0.0254456	0.0258026	0.0259876	0.0261743	0.0263151	0.0264022	0.0264364	0.0264576	0.0264611	0.0264914	0.0266165	0.0268168	0.02706	0.0271298	0.0269478	0.0268101	0.0268173	0.0269135	0.0272349	0.0276257	0.027827	0.0278892	0.0278596	0.0276617	0.0274517	0.0273087	0.0271774	0.0271732	0.0272479	0.0273364	0.0274452	0.0275841	0.0277081	0.0277888	0.027829	0.0279061	0.0280053	0.0279364	0.0278046	0.0278232	0.0280133	0.0283075	0.0286267	0.0288938
	OMN																					0.0428456	0.0405564	0.0390875	0.0379155	0.0374416	0.0380795	0.0393203	0.0408795	0.0426365	0.0441639	0.0453265	0.0465925	0.0479294	0.0486549	0.0489514	0.0493478	0.0497599	0.0497763	0.049548	0.0496396	0.050173	0.0506249	0.0506217	0.0507583	0.0510519	0.0511281	0.0510594	0.0514005
	PAK	0.0406701	0.0410065	0.0419072	0.0430931	0.0442512	0.0452498	0.0459752	0.0466716	0.0474871	0.0483041	0.0498289	0.0517281	0.0535151	0.055761	0.0581696	0.0607446	0.0623683	0.0628182	0.062637	0.0619632	0.0613358	0.0607286	0.0602327	0.0597357	0.0594138	0.0591228	0.0593836	0.0606152	0.0619852	0.0632499	0.0644865	0.0656416	0.0666508	0.0677189	0.068482	0.0689568	0.0695783	0.070245	0.0709568	0.0717968	0.0725935	0.0734039	0.0744433	0.0755391	0.0759223	0.076503	0.0777251	0.0784881
	PAN	0.0403859	0.039643	0.0388445	0.0384556	0.0381993	0.0378821	0.0378362	0.0378983	0.0379846	0.0381741	0.0382473	0.0383436	0.0386555	0.0391104	0.0393972	0.0395799	0.0402979	0.0410596	0.0414857	0.0419335	0.0433915	0.0449958	0.0459667	0.0466588	0.046741	0.0463039	0.0456443	0.0448204	0.0440935	0.0437118	0.0436168	0.0438388	0.0439725	0.0437022	0.0433582	0.043147	0.0430963	0.0433259	0.0430659	0.04217	0.0417048	0.0421327	0.0432742	0.0449363	0.0466394	0.0477119	0.0483465	0.0490972
	PER	0.0369451	0.0431985	0.0489685	0.0533037	0.0556684	0.0566527	0.0583681	0.0609417	0.0623712	0.0625833	0.0631118	0.0640567	0.0652555	0.0667411	0.0678516	0.068742	0.0702251	0.0717292	0.0717597	0.0707772	0.0700111	0.0696965	0.0692611	0.0701106	0.0732157	0.0762415	0.0774437	0.0767874	0.0746918	0.0724491	0.0722798	0.0733589	0.0731692	0.0706818	0.0669077	0.0631378	0.0596557	0.0568518	0.0541073	0.0509318	0.0478949	0.0453599	0.0432051	0.0413439	0.0400504	0.0394284	0.0389644	0.0385912
	PHL	0.0388626	0.0386099	0.0382079	0.038266	0.0391555	0.0405332	0.0416201	0.0424914	0.0433954	0.0444122	0.045144	0.0454273	0.0455942	0.0457456	0.0460253	0.0462323	0.0463266	0.0466709	0.0473684	0.0480304	0.0486014	0.049448	0.0501229	0.0504093	0.0511224	0.0523049	0.0529102	0.052726	0.0525427	0.0526216	0.0527998	0.0529362	0.0528026	0.0526204	0.0517094	0.0498884	0.0481906	0.0468049	0.0457457	0.0452778	0.0453117	0.0454085	0.0455395	0.045885	0.0463471	0.0467819	0.0471435	0.047442
	POL																					0.0345793	0.0349863	0.0353377	0.0356205	0.0358759	0.0361507	0.0364313	0.0367076	0.0369681	0.0370105	0.036968	0.0369219	0.0366569	0.0363136	0.0360578	0.0359033	0.0361283	0.0368694	0.0379045	0.0379673	0.0369785	0.0359671	0.0351571	0.034739	0.0346453	0.0350911	0.0361346	0.0374901
	PRT	0.0261772	0.0258695	0.0255835	0.0253475	0.0251446	0.0249302	0.0247147	0.0246052	0.0245756	0.0244348	0.0243384	0.0244688	0.0244927	0.0246488	0.0250232	0.0253238	0.0255703	0.0256868	0.0258003	0.0258896	0.0261853	0.0266668	0.0269331	0.0270656	0.0271256	0.0271101	0.0271643	0.0272169	0.0271808	0.0268049	0.0265041	0.026589	0.026657	0.0265603	0.0261142	0.0254982	0.0251306	0.025159	0.025426	0.0257012	0.0260383	0.0265114	0.0269441	0.0272381	0.0274658	0.0276476	0.0278324	0.0281778
	PRY		0.0411866	0.0425428	0.0443943	0.0457217	0.0460522	0.0458209	0.0463777	0.0474815	0.0478123	0.0479503	0.0482519	0.0476803	0.0460971	0.0444325	0.0434884	0.0436079	0.0446731	0.0457892	0.046142	0.0456602	0.0447653	0.0441408	0.0443381	0.0451331	0.0453906	0.0451417	0.0456467	0.0460149	0.0458872	0.0451792	0.0447123	0.0437676	0.0416551	0.0399252	0.0387808	0.0377636	0.0367702	0.0357301	0.0351203	0.0355419	0.036549	0.0373989	0.0379105	0.0383452	0.0388011	0.0390286	0.0394058
	PSE																					0.0397578	0.0375945	0.0355765	0.0341433	0.0334027	0.0328856	0.0322982	0.0319235	0.0318017	0.0317895	0.0319766	0.0319934	0.0317688	0.0316159	0.0313168	0.0310628	0.03111	0.0311794	0.0310906	0.0309749	0.030974	0.0310353	0.0311779	0.0315005	0.0317105	0.0318552	0.0319411	0.0321017
	QAT																					0.0425308	0.0453236	0.0473898	0.0488434	0.0497763	0.0508403	0.0514714	0.0516321	0.0518431	0.0518129	0.0515297	0.0513654	0.0518038	0.0519735	0.0512461	0.0503225	0.0495207	0.0488075	0.0484729	0.0486274	0.0492815	0.0500943	0.0510747	0.0519487	0.0521987	0.0537138	0.0562505	0.0570314
	ROU											0.0655322	0.0684026	0.0720761	0.0758312	0.078985	0.0811762	0.0832044	0.085461	0.0876539	0.0893722	0.0908584	0.0925226	0.0943065	0.0940163	0.0914619	0.0898274	0.0889783	0.0884144	0.0889233	0.0885544	0.0863267	0.0818266	0.0762159	0.0718612	0.0689804	0.0669476	0.0663281	0.0667609	0.0665392	0.0648708	0.0631402	0.0621684	0.0612407	0.0601947	0.0594386	0.0587477	0.0578947	0.0575932
	RUS																																									0.035532	0.0360201	0.0358741	0.0351106	0.0339409	0.0327766	0.0317605	0.0308361
	RWA											0.0438692	0.0491765	0.0540717	0.0578959	0.0598562	0.0616799	0.062509	0.0613002	0.0598326	0.0586199	0.057518	0.0580286	0.0605789	0.063716	0.0646977	0.0650891	0.0663184	0.0673333	0.0682813	0.0686403	0.0683742	0.0679911	0.0674057	0.0656265	0.0637362	0.0628241	0.0625758	0.0624356	0.062001	0.0608719	0.0588434	0.056894	0.0555035	0.0543134	0.0522254	0.0496558	0.048838	0.0493865
	SAU																					0.042894	0.0468092	0.0506306	0.0548307	0.056284	0.0548498	0.0546793	0.0557807	0.0572994	0.0582287	0.057926	0.0573974	0.0577202	0.0583335	0.0582	0.057027	0.0552927	0.0536275	0.0519647	0.0503314	0.0491828	0.0486001	0.048184	0.0478874	0.0472422	0.046339	0.0454792	0.0445983
	SDN																					0.0406981	0.0401804	0.0391007	0.0386502	0.0390076	0.0399289	0.0401604	0.039024	0.0377436	0.0366862	0.0353222	0.0336616	0.0331711	0.0327073	0.0310351	0.0294071	0.0282534	0.0275974	0.0270238	0.0263252	0.0259968	0.0261459	0.0263078	0.026268	0.0262296	0.0265027	0.0271524	0.0285917
	SEN											0.0399234	0.0385056	0.0372577	0.0361323	0.0352286	0.0344917	0.033781	0.0330675	0.0324621	0.0320067	0.0318817	0.0320531	0.0323822	0.0328295	0.0333092	0.0337456	0.0342303	0.0345817	0.0345856	0.0345236	0.0344246	0.0341393	0.0337727	0.0334346	0.0333416	0.0334523	0.0335584	0.0337976	0.034062	0.0344161	0.0349574	0.0353349	0.0355628	0.0357686	0.0359632	0.036306	0.0371065	0.0381324
	SGP											0.0268637	0.026916	0.0268604	0.0269238	0.0269913	0.0270177	0.0271028	0.0272612	0.0280171	0.0295662	0.0314874	0.0340925	0.0366564	0.0390695	0.0416692	0.0430238	0.0435518	0.0442628	0.0452753	0.0467207	0.0482983	0.0492105	0.0490649	0.0474558	0.0450152	0.0429865	0.0415078	0.0406847	0.040498	0.0410431	0.0422318	0.0435656	0.0446728	0.045564	0.0460205	0.0462789	0.0470274	0.0476532
	SLE												0.0397286	0.0379602	0.0365953	0.0361105	0.0363235	0.0365501	0.0364085	0.0359177	0.0356124	0.0357935	0.0361272	0.0362752	0.0362207	0.0363114	0.0362197	0.0356386	0.0350229	0.0344592	0.0339501	0.0335143	0.0331595	0.0328637	0.0328695	0.032904	0.0328338	0.0333667	0.0343827	0.0353092	0.0364286	0.0377133	0.0388397	0.0401449	0.0407183	0.0408301	0.0412789	0.0419094	0.0419538
	SLV	0.0430246	0.0473739	0.0510506	0.0538451	0.0557811	0.0570762	0.0589351	0.0612885	0.0625371	0.0622021	0.0628831	0.0643304	0.0646618	0.0648466	0.0664973	0.0684204	0.0702488	0.0717299	0.0708608	0.0689469	0.0679097	0.0677808	0.0688301	0.0700635	0.070738	0.0709085	0.0714281	0.072955	0.0749658	0.075406	0.0726887	0.0689881	0.0655209	0.0622767	0.0597398	0.0575264	0.0562652	0.0563648	0.0567664	0.0569751	0.0564424	0.055612	0.0559081	0.0571978	0.0587268	0.060097	0.0607756	0.0608393
	SRB																																									0.0327894	0.0321711	0.0315138	0.0307866	0.0301027	0.0295131	0.0290297	0.0287575
	STP																					0.0401666	0.0392508	0.0384393	0.037496	0.0365875	0.036072	0.0361003	0.0386826	0.0407908	0.0413631	0.0433625	0.0452759	0.0464579	0.0472672	0.0476438	0.0476838	0.0473262	0.0466114	0.0465368	0.0482803	0.0510785	0.0546064	0.0582075	0.0604126	0.0623378	0.067486	0.0725095	0.0745463
	SUR																					0.040516	0.0400892	0.0400731	0.0405187	0.0409706	0.0421013	0.0436384	0.0437934	0.0431161	0.0423007	0.0413757	0.0409941	0.0408097	0.0400618	0.0387671	0.03764	0.0370322	0.0366208	0.0360734	0.0360479	0.0364579	0.0368244	0.0374312	0.0375158	0.0387524	0.0421468	0.0446842	0.0458455
	SVK																																									0.0367546	0.0378062	0.0381348	0.0382915	0.0383456	0.0384359	0.0389626	0.0399503
	SVN																																									0.030079	0.0303681	0.0304724	0.0305679	0.0308809	0.0314383	0.0320686	0.0326673
	SWE	0.0259553	0.0268102	0.0276071	0.0280136	0.0283948	0.0288097	0.0291458	0.029429	0.0296939	0.0299493	0.0302921	0.0306947	0.0310147	0.0312054	0.0313846	0.0316186	0.0318165	0.0319222	0.0318896	0.031792	0.0317919	0.0318457	0.03187	0.032006	0.0323319	0.0326326	0.0328416	0.032982	0.0327856	0.0324351	0.0322027	0.031934	0.0316915	0.0315788	0.0315933	0.0318104	0.0320961	0.0323911	0.0328101	0.0334423	0.0340848	0.0342976	0.0340931	0.0335912	0.0331039	0.0329453	0.0330077	0.0331983
	SWZ																					0.0451956	0.0522077	0.057245	0.0617178	0.0661769	0.0696542	0.0715649	0.073131	0.0770203	0.0820272	0.0842964	0.084428	0.0839371	0.0836301	0.0840476	0.0834672	0.08156	0.0797971	0.0784497	0.0770366	0.0754693	0.0737626	0.0720798	0.0703583	0.0685014	0.0665815	0.0645733	0.0626057
	SYC											0.041255	0.0425876	0.0442934	0.0461929	0.0480757	0.0498067	0.0511538	0.0519808	0.0523859	0.0538233	0.0578786	0.0622558	0.06511	0.0662404	0.0653081	0.0646946	0.0656333	0.065911	0.0656673	0.0657858	0.0653154	0.0642557	0.0632774	0.0624479	0.0613513	0.0608614	0.0611876	0.0611886	0.0628888	0.065531	0.0662179	0.0650178	0.0626222	0.0608372	0.0590916	0.0572478	0.0570962	0.0570641
	SYR											0.0402812	0.0397019	0.0397926	0.0397079	0.0391517	0.0385041	0.0380216	0.03782	0.0378449	0.0385151	0.0389434	0.0388701	0.0393134	0.0395243	0.0400556	0.0427171	0.0459335	0.0479852	0.0482947	0.0474029	0.0464413	0.0459821	0.0454245	0.0447093	0.0442328	0.0440992	0.0441271	0.0437387	0.0431599	0.0425456	0.0421053	0.0420962	0.0426334	0.0430295	0.0429395	0.0438001	0.0453975	0.0463719
	TCA																					0.0422363	0.044614	0.046208	0.0472836	0.0479983	0.0484655	0.0487705	0.0489538	0.0490416	0.0490708	0.0490768	0.0490808	0.0490865	0.0490947	0.049119	0.0491746	0.0492372	0.0492393	0.0492466	0.0493695	0.049608	0.0497031	0.0494239	0.0494963	0.0501763	0.0509437	0.050359	0.0493951
	TCD											0.0397329	0.0381214	0.0368386	0.035721	0.03478	0.0339751	0.0332983	0.0328076	0.0324127	0.0321025	0.0318904	0.0317563	0.0316758	0.0316195	0.0318449	0.0325656	0.0332902	0.0336178	0.0335797	0.0331638	0.0325284	0.0319004	0.0313399	0.0308078	0.0302975	0.0298763	0.0294767	0.0292072	0.0291639	0.0291028	0.029025	0.0290492	0.0290504	0.0289697	0.0289919	0.0291946	0.0294743	0.029806
	TGO											0.0402965	0.0393789	0.0385996	0.0382051	0.038667	0.0400997	0.0410811	0.0409071	0.0401438	0.0396504	0.0396452	0.0401031	0.040512	0.0405683	0.0407036	0.0412508	0.0418912	0.043666	0.0456279	0.0470095	0.0479004	0.0476355	0.0467777	0.0454659	0.0439595	0.0426393	0.0415255	0.0408194	0.0403183	0.0401511	0.0405748	0.0402917	0.0390573	0.0374712	0.035892	0.0348855	0.0342523	0.0335527
	THA	0.0405877	0.0405506	0.0405159	0.0404868	0.0404685	0.0405607	0.0405544	0.0406985	0.0410942	0.0415993	0.0422827	0.0428339	0.0435578	0.0449593	0.0467326	0.0483592	0.0502185	0.0522983	0.0541125	0.0557214	0.057702	0.0595947	0.0608338	0.0622281	0.0637614	0.0645809	0.0643819	0.064514	0.0650196	0.0647245	0.0639447	0.0631765	0.0619535	0.0605863	0.0593618	0.0578039	0.0560833	0.0548375	0.0546107	0.0548293	0.0557058	0.056765	0.0574563	0.0582697	0.0588401	0.0594255	0.060146	0.0601073
	TJK																																									0.0397578	0.0379994	0.0365299	0.0351658	0.0336803	0.0323068	0.0311457	0.0300901
	TKM																																									0.0408029	0.0409636	0.0408148	0.0396977	0.038148	0.0367675	0.0359157	0.0360518
	TTO	0.0423993	0.0454461	0.0479091	0.0491876	0.0496804	0.050564	0.0515769	0.052992	0.0549962	0.0570463	0.0589552	0.0598167	0.060102	0.0600296	0.0593779	0.0590589	0.0588605	0.057984	0.0567954	0.055708	0.0549944	0.0556592	0.0563217	0.0559415	0.0561959	0.0577545	0.05863	0.0587263	0.0592981	0.0586456	0.0578635	0.0573386	0.0558341	0.0538718	0.0519949	0.0505755	0.0492361	0.0481902	0.0469903	0.0455458	0.0444315	0.0438683	0.0435792	0.042999	0.0426097	0.0427827	0.0434866	0.0450807
	TUN											0.0482496	0.0458931	0.044325	0.0434687	0.042985	0.0423621	0.0414542	0.0404519	0.0394728	0.0386325	0.0379165	0.0377628	0.0383401	0.0391089	0.0398906	0.0407179	0.041368	0.0418826	0.0422874	0.0425107	0.0427254	0.0433529	0.0442132	0.0443526	0.0442207	0.0441144	0.0437549	0.0432433	0.0427113	0.0427333	0.0435249	0.0446502	0.0454113	0.0458103	0.046094	0.0461465	0.0460675	0.0461138
	TUR	0.0416128	0.0418533	0.0424313	0.0433662	0.0442401	0.045013	0.0456545	0.0464081	0.0476307	0.0485309	0.0487618	0.0488017	0.0489089	0.0488273	0.0478141	0.04628	0.0457786	0.0458465	0.0458077	0.0457061	0.0456272	0.0458388	0.0465262	0.0478231	0.0499411	0.0520944	0.053348	0.0530204	0.0511651	0.0495697	0.0479549	0.0461069	0.0450224	0.0443473	0.04382	0.0434567	0.0431076	0.0429194	0.0428286	0.0424192	0.0425441	0.0431472	0.0436473	0.0449613	0.0456039	0.0455183	0.046286	0.0475335
	TWN		0.0265789	0.0268982	0.0274713	0.027939	0.0281987	0.0286184	0.0292721	0.0300868	0.0310543	0.0320671	0.0332049	0.0341721	0.0348807	0.0357042	0.0369276	0.0385928	0.0404072	0.0420018	0.0434841	0.0453064	0.0472566	0.0489582	0.0505197	0.0518089	0.0523513	0.0522253	0.0515007	0.0505785	0.0500195	0.0497996	0.049685	0.0495595	0.0494664	0.0492582	0.0486004	0.0477429	0.0473178	0.0473498	0.0477009	0.0482094	0.0486714	0.049288	0.049807	0.0499941	0.0501314	0.0503338	0.0508773
	TZA											0.0458373	0.0439282	0.0421771	0.0404365	0.0392712	0.0389072	0.038867	0.0391754	0.0397139	0.039843	0.0402924	0.0415015	0.0425279	0.0429401	0.043052	0.0432523	0.0438613	0.0447877	0.0459681	0.0473356	0.047943	0.047421	0.0463401	0.0452661	0.0441408	0.0428157	0.0416356	0.0408414	0.0400947	0.0396522	0.0399146	0.0403819	0.0408724	0.0410306	0.0407606	0.0413618	0.0422845	0.0421972
	UGA	0.0473439	0.0524472	0.0567672	0.0601432	0.0619734	0.063215	0.0640905	0.0641476	0.0637229	0.0630867	0.0622803	0.0617415	0.0615947	0.0621153	0.0634104	0.0644828	0.0649387	0.0656188	0.0664695	0.0674109	0.0671521	0.0659083	0.0670358	0.0691285	0.0704664	0.0716053	0.0722563	0.0723466	0.0718264	0.0708339	0.0694517	0.0680456	0.067049	0.0664972	0.0660937	0.0658121	0.0651991	0.0638438	0.0618089	0.0595965	0.0578704	0.0565858	0.0554283	0.0542537	0.0529616	0.0524384	0.0517815	0.0500905
	UKR																																									0.0301866	0.02996	0.029723	0.0294006	0.0288455	0.0281552	0.027495	0.0269119
	URY	0.0340637	0.0417206	0.0442057	0.0443155	0.0440715	0.0436478	0.042228	0.0409506	0.0391177	0.0367837	0.035556	0.0353715	0.0355645	0.0354984	0.0347733	0.0336265	0.0324577	0.031672	0.0311195	0.0308637	0.0312067	0.0313382	0.0308051	0.0299546	0.0293007	0.0292382	0.0301787	0.0316087	0.0325363	0.03322	0.0339446	0.0341705	0.0336033	0.0326503	0.0315714	0.0305672	0.0300716	0.0300588	0.0302506	0.0303752	0.0304571	0.0307589	0.0311893	0.0312894	0.0310745	0.0308138	0.0306363	0.0306249
	USA	0.0323368	0.0322506	0.0322582	0.0323263	0.0323399	0.0322658	0.0322415	0.0322725	0.0322435	0.0321236	0.0320191	0.0319238	0.0318631	0.0318372	0.0318403	0.0319964	0.0323719	0.0327875	0.0331229	0.0333989	0.0335237	0.0334375	0.0332866	0.0332978	0.03346	0.0335526	0.0335558	0.0335926	0.0337084	0.033909	0.0340705	0.0341706	0.0342371	0.0342275	0.0342747	0.0344125	0.0345	0.0345006	0.034512	0.0345949	0.0347089	0.0348261	0.0349286	0.0350464	0.0352171	0.0354501	0.0357336	0.0360819
	UZB																																									0.0381618	0.034332	0.0316911	0.0304079	0.0302402	0.0308856	0.0324009	0.0339429
	VCT																					0.0399283	0.0385039	0.0373743	0.0363748	0.0353815	0.0344491	0.0334566	0.0327642	0.0323917	0.032146	0.0321584	0.0320485	0.0316431	0.0310844	0.0309599	0.0312627	0.0313879	0.031521	0.0317463	0.0318483	0.0319624	0.032079	0.0317561	0.0311252	0.0304471	0.0299845	0.0299973	0.0299962
	VEN	0.0427816	0.0424604	0.042458	0.0426068	0.0427337	0.0428031	0.0427732	0.0427529	0.0426595	0.0424647	0.041921	0.0410907	0.0403937	0.0398073	0.0391334	0.0384361	0.0377763	0.0371675	0.0367284	0.0364973	0.0365032	0.0367346	0.0370311	0.0373458	0.0377913	0.0386973	0.0401223	0.0419935	0.043576	0.0436826	0.0428371	0.0422689	0.0420924	0.041547	0.0406829	0.0402508	0.040287	0.0403563	0.0403879	0.0401449	0.0393066	0.0386403	0.0387062	0.0389674	0.0387899	0.0384827	0.0381798	0.0381511
	VGB																					0.0400788	0.0390766	0.0378624	0.0367898	0.035999	0.0351183	0.0341666	0.0332742	0.0325254	0.0323819	0.0330163	0.0337967	0.0339971	0.0336631	0.0332653	0.0329759	0.0329535	0.0330667	0.0330739	0.0328496	0.032571	0.032871	0.0331625	0.0330194	0.0323114	0.03123	0.0314871	0.0327046
	VNM																					0.0402232	0.0391889	0.03858	0.0381477	0.0376201	0.0374287	0.03748	0.0377265	0.0380282	0.0383009	0.0384864	0.0389012	0.0395502	0.0398213	0.0395672	0.0393153	0.0391701	0.0389833	0.0390893	0.03887	0.0385399	0.0383291	0.0377251	0.0368606	0.0359989	0.035447	0.035552	0.0367925
	YEM																																								0.0397677	0.0378803	0.0359487	0.034056	0.0324255	0.0310754	0.0308461	0.0316097	0.0320647
	ZAF	0.0302012	0.0317864	0.0327916	0.0334025	0.0343501	0.0351705	0.0356967	0.0361213	0.0365959	0.0366484	0.0364676	0.0364626	0.0364276	0.036707	0.0373906	0.0381981	0.0387096	0.0389817	0.0392858	0.0395494	0.0399741	0.0405635	0.0411162	0.0416055	0.0419658	0.0424539	0.0431304	0.0435728	0.0437711	0.0438656	0.0440526	0.0445667	0.0451113	0.0453404	0.045253	0.0449298	0.044252	0.0433811	0.0427956	0.0425264	0.042275	0.0419114	0.0414839	0.0411011	0.0408889	0.0409495	0.0412523	0.041696
	ZMB						0.0396294	0.0377075	0.0361622	0.0348261	0.0336237	0.032636	0.0318064	0.0310667	0.0303561	0.0298656	0.0300288	0.0307558	0.0315414	0.0327037	0.0339878	0.0358514	0.0379761	0.0397878	0.0417432	0.0435952	0.0450943	0.0457038	0.0455073	0.0449508	0.0442472	0.0436845	0.0432176	0.0427367	0.0421632	0.0413716	0.0405457	0.0397995	0.0390793	0.0383762	0.0375523	0.0367654	0.0360179	0.0351762	0.0344787	0.0338808	0.033409	0.0332422	0.0333145
	ZWE					0.0397947	0.0381552	0.0368772	0.0358408	0.0349514	0.0340853	0.0332412	0.0325265	0.0317973	0.0309993	0.0302579	0.0296784	0.0293078	0.0291655	0.0292894	0.0294529	0.0296365	0.0301358	0.0307641	0.0315192	0.032915	0.0344044	0.0350735	0.0350803	0.0346885	0.0340997	0.033942	0.0344668	0.0350669	0.0350936	0.0345918	0.0339057	0.0332761	0.0328208	0.0325622	0.0324518	0.03263	0.0332581	0.0339726	0.0346428	0.0353832	0.0361275	0.0365068	0.0365247
[truncated: 22 more columns]
