# Supplementary material for: The Social Cost of Fossil and Industrial CO2 Emissions from 1950 to 2018
Source: Research Square preprint supplement (doi:10.21203/rs.3.rs-2244259/v1), 2022-11-17
Supplement: Supplementary file 54 [file labor_share_PWT_Transposed.xlsx]

## Sheet: labor_share_PWT_data
VariableCode	RegionCode	YearCode	AggValue
labsh	ABW	1991	0.648357
labsh	ABW	1992	0.648357
labsh	ABW	1993	0.648357
labsh	ABW	1994	0.648357
labsh	ABW	1995	0.648357
labsh	ABW	1996	0.637259
labsh	ABW	1997	0.634907
labsh	ABW	1998	0.638232
labsh	ABW	1999	0.655211
labsh	ABW	2000	0.645106
labsh	ABW	2001	0.645106
labsh	ABW	2002	0.645106
labsh	ABW	2003	0.645106
labsh	ABW	2004	0.645106
labsh	ABW	2005	0.645106
labsh	ABW	2006	0.645106
labsh	ABW	2007	0.645106
labsh	ABW	2008	0.645106
labsh	ABW	2009	0.645106
labsh	ABW	2010	0.645106
labsh	ABW	2011	0.645106
labsh	ABW	2012	0.645106
labsh	ABW	2013	0.645106
labsh	ABW	2014	0.645106
labsh	ABW	2015	0.645106
labsh	ABW	2016	0.645106
labsh	ABW	2017	0.645106
labsh	ABW	2018	0.645106
labsh	ABW	2019	0.645106
labsh	AGO	1970	0.284385
labsh	AGO	1971	0.284385
labsh	AGO	1972	0.284385
labsh	AGO	1973	0.284385
labsh	AGO	1974	0.284385
labsh	AGO	1975	0.284385
labsh	AGO	1976	0.284385
labsh	AGO	1977	0.284385
labsh	AGO	1978	0.284385
labsh	AGO	1979	0.284385
labsh	AGO	1980	0.284385
labsh	AGO	1981	0.284385
labsh	AGO	1982	0.284385
labsh	AGO	1983	0.284385
labsh	AGO	1984	0.284385
labsh	AGO	1985	0.284385
labsh	AGO	1986	0.284385
labsh	AGO	1987	0.284385
labsh	AGO	1988	0.284385
labsh	AGO	1989	0.284385
labsh	AGO	1990	0.284385
labsh	AGO	1991	0.284385
labsh	AGO	1992	0.284385
labsh	AGO	1993	0.284385
labsh	AGO	1994	0.284385
labsh	AGO	1995	0.284385
labsh	AGO	1996	0.284385
labsh	AGO	1997	0.284385
labsh	AGO	1998	0.284385
labsh	AGO	1999	0.284385
labsh	AGO	2000	0.284385
labsh	AGO	2001	0.284385
labsh	AGO	2002	0.284385
labsh	AGO	2003	0.291653
labsh	AGO	2004	0.275553
labsh	AGO	2005	0.231607
labsh	AGO	2006	0.237114
labsh	AGO	2007	0.242621
labsh	AGO	2008	0.255718
labsh	AGO	2009	0.36001
labsh	AGO	2010	0.300495
labsh	AGO	2011	0.287628
labsh	AGO	2012	0.282355
labsh	AGO	2013	0.280897
labsh	AGO	2014	0.288775
labsh	AGO	2015	0.349128
labsh	AGO	2016	0.343025
labsh	AGO	2017	0.346371
labsh	AGO	2018	0.331142
labsh	AGO	2019	0.331142
labsh	ARG	1950	0.441024
labsh	ARG	1951	0.441024
labsh	ARG	1952	0.441024
labsh	ARG	1953	0.441024
labsh	ARG	1954	0.441024
labsh	ARG	1955	0.441024
labsh	ARG	1956	0.441024
labsh	ARG	1957	0.441024
labsh	ARG	1958	0.441024
labsh	ARG	1959	0.441024
labsh	ARG	1960	0.441024
labsh	ARG	1961	0.441024
labsh	ARG	1962	0.441024
labsh	ARG	1963	0.441024
labsh	ARG	1964	0.441024
labsh	ARG	1965	0.441024
labsh	ARG	1966	0.441024
labsh	ARG	1967	0.441024
labsh	ARG	1968	0.441024
labsh	ARG	1969	0.441024
labsh	ARG	1970	0.441024
labsh	ARG	1971	0.441024
labsh	ARG	1972	0.441024
labsh	ARG	1973	0.441024
labsh	ARG	1974	0.441024
labsh	ARG	1975	0.441024
labsh	ARG	1976	0.441024
labsh	ARG	1977	0.441024
labsh	ARG	1978	0.441024
labsh	ARG	1979	0.441024
labsh	ARG	1980	0.441024
labsh	ARG	1981	0.441024
labsh	ARG	1982	0.441024
labsh	ARG	1983	0.441024
labsh	ARG	1984	0.441024
labsh	ARG	1985	0.441024
labsh	ARG	1986	0.441024
labsh	ARG	1987	0.441024
labsh	ARG	1988	0.441024
labsh	ARG	1989	0.441024
labsh	ARG	1990	0.441024
labsh	ARG	1991	0.441024
labsh	ARG	1992	0.441024
labsh	ARG	1993	0.441024
labsh	ARG	1994	0.431845
labsh	ARG	1995	0.393929
labsh	ARG	1996	0.366973
labsh	ARG	1997	0.356874
labsh	ARG	1998	0.369576
labsh	ARG	1999	0.391514
labsh	ARG	2000	0.391106
labsh	ARG	2001	0.399785
labsh	ARG	2002	0.317553
labsh	ARG	2003	0.310136
labsh	ARG	2004	0.324795
labsh	ARG	2005	0.33895
labsh	ARG	2006	0.355539
labsh	ARG	2007	0.364847
labsh	ARG	2008	0.403679
labsh	ARG	2009	0.443855
labsh	ARG	2010	0.440692
labsh	ARG	2011	0.473124
labsh	ARG	2012	0.520179
labsh	ARG	2013	0.543918
labsh	ARG	2014	0.543918
labsh	ARG	2015	0.543918
labsh	ARG	2016	0.543918
labsh	ARG	2017	0.543918
labsh	ARG	2018	0.543918
labsh	ARG	2019	0.543918
labsh	ARM	1970	0.740376
labsh	ARM	1971	0.740376
labsh	ARM	1972	0.740376
labsh	ARM	1973	0.740376
labsh	ARM	1974	0.740376
labsh	ARM	1975	0.740376
labsh	ARM	1976	0.740376
labsh	ARM	1977	0.740376
labsh	ARM	1978	0.740376
labsh	ARM	1979	0.740376
labsh	ARM	1980	0.740376
labsh	ARM	1981	0.740376
labsh	ARM	1982	0.740376
labsh	ARM	1983	0.740376
labsh	ARM	1984	0.740376
labsh	ARM	1985	0.740376
labsh	ARM	1986	0.740376
labsh	ARM	1987	0.740376
labsh	ARM	1988	0.740376
labsh	ARM	1989	0.740376
labsh	ARM	1990	0.740376
labsh	ARM	1991	0.740376
labsh	ARM	1992	0.719028
labsh	ARM	1993	0.740376
labsh	ARM	1994	0.740376
labsh	ARM	1995	0.740376
labsh	ARM	1996	0.740376
labsh	ARM	1997	0.726957
labsh	ARM	1998	0.745938
labsh	ARM	1999	0.715652
labsh	ARM	2000	0.681093
labsh	ARM	2001	0.698984
labsh	ARM	2002	0.657671
labsh	ARM	2003	0.641331
labsh	ARM	2004	0.637955
labsh	ARM	2005	0.602977
labsh	ARM	2006	0.593883
labsh	ARM	2007	0.587403
labsh	ARM	2008	0.565523
labsh	ARM	2009	0.579102
labsh	ARM	2010	0.568249
labsh	ARM	2011	0.591894
labsh	ARM	2012	0.581523
labsh	ARM	2013	0.585155
labsh	ARM	2014	0.579614
labsh	ARM	2015	0.573068
labsh	ARM	2016	0.564274
labsh	ARM	2017	0.548672
labsh	ARM	2018	0.548672
labsh	ARM	2019	0.548672
labsh	AUS	1950	0.680492
labsh	AUS	1951	0.680492
labsh	AUS	1952	0.680492
labsh	AUS	1953	0.680492
labsh	AUS	1954	0.680492
labsh	AUS	1955	0.680492
labsh	AUS	1956	0.680492
labsh	AUS	1957	0.680492
labsh	AUS	1958	0.680492
labsh	AUS	1959	0.680492
labsh	AUS	1960	0.685819
labsh	AUS	1961	0.680522
labsh	AUS	1962	0.670636
labsh	AUS	1963	0.661701
labsh	AUS	1964	0.668188
labsh	AUS	1965	0.680542
labsh	AUS	1966	0.676057
labsh	AUS	1967	0.670348
labsh	AUS	1968	0.664249
labsh	AUS	1969	0.656886
labsh	AUS	1970	0.671027
labsh	AUS	1971	0.675452
labsh	AUS	1972	0.669935
labsh	AUS	1973	0.692236
labsh	AUS	1974	0.719803
labsh	AUS	1975	0.713883
labsh	AUS	1976	0.700886
labsh	AUS	1977	0.700095
labsh	AUS	1978	0.682669
labsh	AUS	1979	0.671457
labsh	AUS	1980	0.672304
labsh	AUS	1981	0.677483
labsh	AUS	1982	0.675741
labsh	AUS	1983	0.646007
labsh	AUS	1984	0.644595
labsh	AUS	1985	0.641788
labsh	AUS	1986	0.631942
labsh	AUS	1987	0.61319
labsh	AUS	1988	0.609081
labsh	AUS	1989	0.618467
labsh	AUS	1990	0.626009
labsh	AUS	1991	0.617311
labsh	AUS	1992	0.607276
labsh	AUS	1993	0.60134
labsh	AUS	1994	0.604075
labsh	AUS	1995	0.607524
labsh	AUS	1996	0.617958
labsh	AUS	1997	0.611848
labsh	AUS	1998	0.613369
labsh	AUS	1999	0.605032
labsh	AUS	2000	0.606546
labsh	AUS	2001	0.608155
labsh	AUS	2002	0.600817
labsh	AUS	2003	0.601512
labsh	AUS	2004	0.603244
labsh	AUS	2005	0.593035
labsh	AUS	2006	0.58805
labsh	AUS	2007	0.593336
labsh	AUS	2008	0.569114
labsh	AUS	2009	0.577103
labsh	AUS	2010	0.574955
labsh	AUS	2011	0.575421
labsh	AUS	2012	0.582465
labsh	AUS	2013	0.582097
labsh	AUS	2014	0.596026
labsh	AUS	2015	0.604028
labsh	AUS	2016	0.583877
labsh	AUS	2017	0.579756
labsh	AUS	2018	0.571645
labsh	AUS	2019	0.571645
labsh	AUT	1950	0.63296
labsh	AUT	1951	0.63296
labsh	AUT	1952	0.63296
labsh	AUT	1953	0.63296
labsh	AUT	1954	0.63296
labsh	AUT	1955	0.63296
labsh	AUT	1956	0.63296
labsh	AUT	1957	0.63296
labsh	AUT	1958	0.63296
labsh	AUT	1959	0.63296
labsh	AUT	1960	0.63296
labsh	AUT	1961	0.63296
labsh	AUT	1962	0.63296
labsh	AUT	1963	0.63296
labsh	AUT	1964	0.63296
labsh	AUT	1965	0.63296
labsh	AUT	1966	0.63296
labsh	AUT	1967	0.63296
labsh	AUT	1968	0.63296
labsh	AUT	1969	0.63296
labsh	AUT	1970	0.63296
labsh	AUT	1971	0.63296
labsh	AUT	1972	0.63296
labsh	AUT	1973	0.63296
labsh	AUT	1974	0.63296
labsh	AUT	1975	0.63296
labsh	AUT	1976	0.63296
labsh	AUT	1977	0.63296
labsh	AUT	1978	0.63296
labsh	AUT	1979	0.63296
labsh	AUT	1980	0.63296
labsh	AUT	1981	0.63296
labsh	AUT	1982	0.63296
labsh	AUT	1983	0.63296
labsh	AUT	1984	0.63296
labsh	AUT	1985	0.63296
labsh	AUT	1986	0.63296
labsh	AUT	1987	0.63296
labsh	AUT	1988	0.63296
labsh	AUT	1989	0.63296
labsh	AUT	1990	0.63296
labsh	AUT	1991	0.63296
labsh	AUT	1992	0.63296
labsh	AUT	1993	0.63296
labsh	AUT	1994	0.63296
labsh	AUT	1995	0.63296
labsh	AUT	1996	0.621578
labsh	AUT	1997	0.611113
labsh	AUT	1998	0.607895
labsh	AUT	1999	0.607916
labsh	AUT	2000	0.59638
labsh	AUT	2001	0.588483
labsh	AUT	2002	0.584005
labsh	AUT	2003	0.58308
labsh	AUT	2004	0.572629
labsh	AUT	2005	0.563615
labsh	AUT	2006	0.556628
labsh	AUT	2007	0.550687
labsh	AUT	2008	0.562086
labsh	AUT	2009	0.579668
labsh	AUT	2010	0.576476
labsh	AUT	2011	0.57134
labsh	AUT	2012	0.57993
labsh	AUT	2013	0.584708
labsh	AUT	2014	0.581942
labsh	AUT	2015	0.578768
labsh	AUT	2016	0.579817
labsh	AUT	2017	0.580764
labsh	AUT	2018	0.58386
labsh	AUT	2019	0.58386
labsh	AZE	1970	0.569163
labsh	AZE	1971	0.569163
labsh	AZE	1972	0.569163
labsh	AZE	1973	0.569163
labsh	AZE	1974	0.569163
labsh	AZE	1975	0.569163
labsh	AZE	1976	0.569163
labsh	AZE	1977	0.569163
labsh	AZE	1978	0.569163
labsh	AZE	1979	0.569163
labsh	AZE	1980	0.569163
labsh	AZE	1981	0.569163
labsh	AZE	1982	0.569163
labsh	AZE	1983	0.569163
labsh	AZE	1984	0.569163
labsh	AZE	1985	0.569163
labsh	AZE	1986	0.569163
labsh	AZE	1987	0.569163
labsh	AZE	1988	0.569163
labsh	AZE	1989	0.569163
labsh	AZE	1990	0.569163
labsh	AZE	1991	0.569163
labsh	AZE	1992	0.569163
labsh	AZE	1993	0.569163
labsh	AZE	1994	0.569163
labsh	AZE	1995	0.513965
labsh	AZE	1996	0.483231
labsh	AZE	1997	0.428941
labsh	AZE	1998	0.389421
labsh	AZE	1999	0.408845
labsh	AZE	2000	0.401026
labsh	AZE	2001	0.377947
labsh	AZE	2002	0.37709
labsh	AZE	2003	0.379397
labsh	AZE	2004	0.385608
labsh	AZE	2005	0.341989
labsh	AZE	2006	0.255406
labsh	AZE	2007	0.231887
labsh	AZE	2008	0.211646
labsh	AZE	2009	0.254765
labsh	AZE	2010	0.231421
labsh	AZE	2011	0.212007
labsh	AZE	2012	0.229081
labsh	AZE	2013	0.242707
labsh	AZE	2014	0.250553
labsh	AZE	2015	0.288775
labsh	AZE	2016	0.272133
labsh	AZE	2017	0.254187
labsh	AZE	2018	0.254187
labsh	AZE	2019	0.254187
labsh	BDI	1980	0.750309
labsh	BDI	1981	0.750309
labsh	BDI	1982	0.750309
labsh	BDI	1983	0.750309
labsh	BDI	1984	0.750309
labsh	BDI	1985	0.751652
labsh	BDI	1986	0.730289
labsh	BDI	1987	0.724469
labsh	BDI	1988	0.711819
labsh	BDI	1989	0.719201
labsh	BDI	1990	0.726582
labsh	BDI	1991	0.733963
labsh	BDI	1992	0.741344
labsh	BDI	1993	0.748725
labsh	BDI	1994	0.756106
labsh	BDI	1995	0.763487
labsh	BDI	1996	0.770868
labsh	BDI	1997	0.77825
labsh	BDI	1998	0.785631
labsh	BDI	1999	0.793012
labsh	BDI	2000	0.800393
labsh	BDI	2001	0.807774
labsh	BDI	2002	0.815155
labsh	BDI	2003	0.822536
labsh	BDI	2004	0.829918
labsh	BDI	2005	0.837299
labsh	BDI	2006	0.618851
labsh	BDI	2007	0.61492
labsh	BDI	2008	0.606218
labsh	BDI	2009	0.606218
labsh	BDI	2010	0.606218
labsh	BDI	2011	0.606218
labsh	BDI	2012	0.606218
labsh	BDI	2013	0.606218
labsh	BDI	2014	0.606218
labsh	BDI	2015	0.606218
labsh	BDI	2016	0.606218
labsh	BDI	2017	0.606218
labsh	BDI	2018	0.606218
labsh	BDI	2019	0.606218
labsh	BEL	1950	0.644635
labsh	BEL	1951	0.644635
labsh	BEL	1952	0.644635
labsh	BEL	1953	0.644635
labsh	BEL	1954	0.644635
labsh	BEL	1955	0.644635
labsh	BEL	1956	0.644635
labsh	BEL	1957	0.644635
labsh	BEL	1958	0.644635
labsh	BEL	1959	0.644635
labsh	BEL	1960	0.644635
labsh	BEL	1961	0.644635
labsh	BEL	1962	0.644635
labsh	BEL	1963	0.644635
labsh	BEL	1964	0.644635
labsh	BEL	1965	0.644635
labsh	BEL	1966	0.644635
labsh	BEL	1967	0.644635
labsh	BEL	1968	0.644635
labsh	BEL	1969	0.644635
labsh	BEL	1970	0.644635
labsh	BEL	1971	0.644635
labsh	BEL	1972	0.644635
labsh	BEL	1973	0.644635
labsh	BEL	1974	0.644635
labsh	BEL	1975	0.644635
labsh	BEL	1976	0.644635
labsh	BEL	1977	0.644635
labsh	BEL	1978	0.644635
labsh	BEL	1979	0.644635
labsh	BEL	1980	0.644635
labsh	BEL	1981	0.644635
labsh	BEL	1982	0.644635
labsh	BEL	1983	0.644635
labsh	BEL	1984	0.644635
labsh	BEL	1985	0.644635
labsh	BEL	1986	0.636752
labsh	BEL	1987	0.63119
labsh	BEL	1988	0.616175
labsh	BEL	1989	0.611995
labsh	BEL	1990	0.61892
labsh	BEL	1991	0.632271
labsh	BEL	1992	0.629504
labsh	BEL	1993	0.634597
labsh	BEL	1994	0.625397
labsh	BEL	1995	0.617203
labsh	BEL	1996	0.62174
labsh	BEL	1997	0.619153
labsh	BEL	1998	0.616947
labsh	BEL	1999	0.624353
labsh	BEL	2000	0.616644
labsh	BEL	2001	0.627344
labsh	BEL	2002	0.63153
labsh	BEL	2003	0.624384
labsh	BEL	2004	0.609807
labsh	BEL	2005	0.602968
labsh	BEL	2006	0.603291
labsh	BEL	2007	0.600067
labsh	BEL	2008	0.618209
labsh	BEL	2009	0.630932
labsh	BEL	2010	0.613814
labsh	BEL	2011	0.618337
labsh	BEL	2012	0.623317
labsh	BEL	2013	0.624875
labsh	BEL	2014	0.617005
labsh	BEL	2015	0.601801
labsh	BEL	2016	0.593993
labsh	BEL	2017	0.593289
labsh	BEL	2018	0.594811
labsh	BEL	2019	0.594811
labsh	BEN	1980	0.649636
labsh	BEN	1981	0.649636
labsh	BEN	1982	0.649636
labsh	BEN	1983	0.649636
labsh	BEN	1984	0.649636
labsh	BEN	1985	0.649636
labsh	BEN	1986	0.649636
labsh	BEN	1987	0.649636
labsh	BEN	1988	0.649636
labsh	BEN	1989	0.649636
labsh	BEN	1990	0.649636
labsh	BEN	1991	0.649636
labsh	BEN	1992	0.649636
labsh	BEN	1993	0.649636
labsh	BEN	1994	0.649636
labsh	BEN	1995	0.610204
labsh	BEN	1996	0.60326
labsh	BEN	1997	0.606282
labsh	BEN	1998	0.614448
labsh	BEN	1999	0.617155
labsh	BEN	2000	0.617155
labsh	BEN	2001	0.617155
labsh	BEN	2002	0.617155
labsh	BEN	2003	0.617155
labsh	BEN	2004	0.617155
labsh	BEN	2005	0.617155
labsh	BEN	2006	0.617155
labsh	BEN	2007	0.617155
labsh	BEN	2008	0.617155
labsh	BEN	2009	0.617155
labsh	BEN	2010	0.617155
labsh	BEN	2011	0.617155
labsh	BEN	2012	0.617155
labsh	BEN	2013	0.617155
labsh	BEN	2014	0.617155
labsh	BEN	2015	0.617155
labsh	BEN	2016	0.617155
labsh	BEN	2017	0.617155
labsh	BEN	2018	0.617155
labsh	BEN	2019	0.617155
labsh	BFA	1959	0.460463
labsh	BFA	1960	0.460463
labsh	BFA	1961	0.460463
labsh	BFA	1962	0.460463
labsh	BFA	1963	0.460463
labsh	BFA	1964	0.460463
labsh	BFA	1965	0.460463
labsh	BFA	1966	0.460463
labsh	BFA	1967	0.460463
labsh	BFA	1968	0.460463
labsh	BFA	1969	0.460463
labsh	BFA	1970	0.460463
labsh	BFA	1971	0.460463
labsh	BFA	1972	0.460463
labsh	BFA	1973	0.460463
labsh	BFA	1974	0.460463
labsh	BFA	1975	0.460463
labsh	BFA	1976	0.460463
labsh	BFA	1977	0.460463
labsh	BFA	1978	0.460463
labsh	BFA	1979	0.460463
labsh	BFA	1980	0.463515
labsh	BFA	1981	0.486689
labsh	BFA	1982	0.49032
labsh	BFA	1983	0.492375
labsh	BFA	1984	0.499627
labsh	BFA	1985	0.502573
labsh	BFA	1986	0.505519
labsh	BFA	1987	0.508465
labsh	BFA	1988	0.511411
labsh	BFA	1989	0.514357
labsh	BFA	1990	0.517304
labsh	BFA	1991	0.52025
labsh	BFA	1992	0.523196
labsh	BFA	1993	0.526142
labsh	BFA	1994	0.529088
labsh	BFA	1995	0.532034
labsh	BFA	1996	0.53498
labsh	BFA	1997	0.537926
labsh	BFA	1998	0.540872
labsh	BFA	1999	0.543818
labsh	BFA	2000	0.528272
labsh	BFA	2001	0.527125
labsh	BFA	2002	0.542445
labsh	BFA	2003	0.514074
labsh	BFA	2004	0.495178
labsh	BFA	2005	0.534476
labsh	BFA	2006	0.5042
labsh	BFA	2007	0.460065
labsh	BFA	2008	0.509588
labsh	BFA	2009	0.469325
labsh	BFA	2010	0.472821
labsh	BFA	2011	0.457031
labsh	BFA	2012	0.468168
labsh	BFA	2013	0.481261
labsh	BFA	2014	0.484083
labsh	BFA	2015	0.481171
labsh	BFA	2016	0.464039
labsh	BFA	2017	0.460928
labsh	BFA	2018	0.460928
labsh	BFA	2019	0.460928
labsh	BGR	1970	0.409344
labsh	BGR	1971	0.409344
labsh	BGR	1972	0.409344
labsh	BGR	1973	0.409344
labsh	BGR	1974	0.409344
labsh	BGR	1975	0.409344
labsh	BGR	1976	0.409344
labsh	BGR	1977	0.409344
labsh	BGR	1978	0.409344
labsh	BGR	1979	0.409344
labsh	BGR	1980	0.409344
labsh	BGR	1981	0.409344
labsh	BGR	1982	0.409344
labsh	BGR	1983	0.409344
labsh	BGR	1984	0.409344
labsh	BGR	1985	0.409344
labsh	BGR	1986	0.409344
labsh	BGR	1987	0.409344
labsh	BGR	1988	0.409344
labsh	BGR	1989	0.409344
labsh	BGR	1990	0.409344
labsh	BGR	1991	0.409344
labsh	BGR	1992	0.409344
labsh	BGR	1993	0.409344
labsh	BGR	1994	0.409344
labsh	BGR	1995	0.409344
labsh	BGR	1996	0.38635
labsh	BGR	1997	0.500329
labsh	BGR	1998	0.467949
labsh	BGR	1999	0.536036
labsh	BGR	2000	0.504459
labsh	BGR	2001	0.477586
labsh	BGR	2002	0.453595
labsh	BGR	2003	0.467773
labsh	BGR	2004	0.464563
labsh	BGR	2005	0.467454
labsh	BGR	2006	0.463686
labsh	BGR	2007	0.46705
labsh	BGR	2008	0.497731
labsh	BGR	2009	0.472638
labsh	BGR	2010	0.480662
labsh	BGR	2011	0.468075
labsh	BGR	2012	0.480667
labsh	BGR	2013	0.513022
labsh	BGR	2014	0.521066
labsh	BGR	2015	0.512713
labsh	BGR	2016	0.523164
labsh	BGR	2017	0.513985
labsh	BGR	2018	0.527659
labsh	BGR	2019	0.527659
labsh	BHR	1970	0.376267
labsh	BHR	1971	0.376267
labsh	BHR	1972	0.376267
labsh	BHR	1973	0.376267
labsh	BHR	1974	0.376267
labsh	BHR	1975	0.376267
labsh	BHR	1976	0.376267
labsh	BHR	1977	0.376267
labsh	BHR	1978	0.376267
labsh	BHR	1979	0.376267
labsh	BHR	1980	0.376267
labsh	BHR	1981	0.376267
labsh	BHR	1982	0.376267
labsh	BHR	1983	0.376267
labsh	BHR	1984	0.376267
labsh	BHR	1985	0.376267
labsh	BHR	1986	0.376267
labsh	BHR	1987	0.376267
labsh	BHR	1988	0.376267
labsh	BHR	1989	0.376267
labsh	BHR	1990	0.376267
labsh	BHR	1991	0.376267
labsh	BHR	1992	0.376267
labsh	BHR	1993	0.357919
labsh	BHR	1994	0.348361
labsh	BHR	1995	0.336979
labsh	BHR	1996	0.335176
labsh	BHR	1997	0.335176
labsh	BHR	1998	0.362987
labsh	BHR	1999	0.359849
labsh	BHR	2000	0.335176
labsh	BHR	2001	0.335176
labsh	BHR	2002	0.338973
labsh	BHR	2003	0.326704
labsh	BHR	2004	0.322468
labsh	BHR	2005	0.318232
labsh	BHR	2006	0.313996
labsh	BHR	2007	0.309761
labsh	BHR	2008	0.305525
labsh	BHR	2009	0.301289
labsh	BHR	2010	0.297053
labsh	BHR	2011	0.297053
labsh	BHR	2012	0.297053
labsh	BHR	2013	0.297053
labsh	BHR	2014	0.297053
labsh	BHR	2015	0.297053
labsh	BHR	2016	0.297053
labsh	BHR	2017	0.297053
labsh	BHR	2018	0.297053
labsh	BHR	2019	0.297053
labsh	BHS	1973	0.410926
labsh	BHS	1974	0.410926
labsh	BHS	1975	0.410926
labsh	BHS	1976	0.410926
labsh	BHS	1977	0.410926
labsh	BHS	1978	0.410926
labsh	BHS	1979	0.410926
labsh	BHS	1980	0.410926
labsh	BHS	1981	0.410926
labsh	BHS	1982	0.410926
labsh	BHS	1983	0.410926
labsh	BHS	1984	0.410926
labsh	BHS	1985	0.410926
labsh	BHS	1986	0.410926
labsh	BHS	1987	0.410926
labsh	BHS	1988	0.410926
labsh	BHS	1989	0.410926
labsh	BHS	1990	0.418359
labsh	BHS	1991	0.418359
labsh	BHS	1992	0.417976
labsh	BHS	1993	0.413287
labsh	BHS	1994	0.418359
labsh	BHS	1995	0.418359
labsh	BHS	1996	0.409882
labsh	BHS	1997	0.415181
labsh	BHS	1998	0.401689
labsh	BHS	1999	0.408206
labsh	BHS	2000	0.391577
labsh	BHS	2001	0.376865
labsh	BHS	2002	0.381021
labsh	BHS	2003	0.390356
labsh	BHS	2004	0.393156
labsh	BHS	2005	0.378184
labsh	BHS	2006	0.406312
labsh	BHS	2007	0.391525
labsh	BHS	2008	0.373287
labsh	BHS	2009	0.393413
labsh	BHS	2010	0.39721
labsh	BHS	2011	0.39721
labsh	BHS	2012	0.39721
labsh	BHS	2013	0.39721
labsh	BHS	2014	0.39721
labsh	BHS	2015	0.39721
labsh	BHS	2016	0.39721
labsh	BHS	2017	0.39721
labsh	BHS	2018	0.39721
labsh	BHS	2019	0.39721
labsh	BIH	1970	0.638703
labsh	BIH	1971	0.638703
labsh	BIH	1972	0.638703
labsh	BIH	1973	0.638703
labsh	BIH	1974	0.638703
labsh	BIH	1975	0.638703
labsh	BIH	1976	0.638703
labsh	BIH	1977	0.638703
labsh	BIH	1978	0.638703
labsh	BIH	1979	0.638703
labsh	BIH	1980	0.638703
labsh	BIH	1981	0.638703
labsh	BIH	1982	0.638703
labsh	BIH	1983	0.638703
labsh	BIH	1984	0.638703
labsh	BIH	1985	0.638703
labsh	BIH	1986	0.638703
labsh	BIH	1987	0.638703
labsh	BIH	1988	0.638703
labsh	BIH	1989	0.638703
labsh	BIH	1990	0.638703
labsh	BIH	1991	0.638703
labsh	BIH	1992	0.638703
labsh	BIH	1993	0.638703
labsh	BIH	1994	0.638703
labsh	BIH	1995	0.638703
labsh	BIH	1996	0.638703
labsh	BIH	1997	0.638703
labsh	BIH	1998	0.638703
labsh	BIH	1999	0.638703
labsh	BIH	2000	0.638703
labsh	BIH	2001	0.638703
labsh	BIH	2002	0.638703
labsh	BIH	2003	0.638703
labsh	BIH	2004	0.638703
labsh	BIH	2005	0.638703
labsh	BIH	2006	0.648814
labsh	BIH	2007	0.654797
labsh	BIH	2008	0.664813
labsh	BIH	2009	0.680418
labsh	BIH	2010	0.671102
labsh	BIH	2011	0.671102
labsh	BIH	2012	0.671102
labsh	BIH	2013	0.671102
labsh	BIH	2014	0.671102
labsh	BIH	2015	0.671102
labsh	BIH	2016	0.671102
labsh	BIH	2017	0.671102
labsh	BIH	2018	0.671102
labsh	BIH	2019	0.671102
labsh	BLR	1970	0.474997
labsh	BLR	1971	0.474997
labsh	BLR	1972	0.474997
labsh	BLR	1973	0.474997
labsh	BLR	1974	0.474997
labsh	BLR	1975	0.474997
labsh	BLR	1976	0.474997
labsh	BLR	1977	0.474997
labsh	BLR	1978	0.474997
labsh	BLR	1979	0.474997
labsh	BLR	1980	0.474997
labsh	BLR	1981	0.474997
labsh	BLR	1982	0.474997
labsh	BLR	1983	0.474997
labsh	BLR	1984	0.474997
labsh	BLR	1985	0.474997
labsh	BLR	1986	0.474997
labsh	BLR	1987	0.474997
labsh	BLR	1988	0.474997
labsh	BLR	1989	0.474997
labsh	BLR	1990	0.474997
labsh	BLR	1991	0.433642
labsh	BLR	1992	0.461376
labsh	BLR	1993	0.588125
labsh	BLR	1994	0.514965
labsh	BLR	1995	0.510969
labsh	BLR	1996	0.525207
labsh	BLR	1997	0.508747
labsh	BLR	1998	0.552882
labsh	BLR	1999	0.548672
labsh	BLR	2000	0.555989
labsh	BLR	2001	0.59134
labsh	BLR	2002	0.586647
labsh	BLR	2003	0.554403
labsh	BLR	2004	0.55243
labsh	BLR	2005	0.569753
labsh	BLR	2006	0.579198
labsh	BLR	2007	0.567734
labsh	BLR	2008	0.545878
labsh	BLR	2009	0.577008
labsh	BLR	2010	0.597507
labsh	BLR	2011	0.501404
labsh	BLR	2012	0.539316
labsh	BLR	2013	0.625577
labsh	BLR	2014	0.605968
labsh	BLR	2015	0.592541
labsh	BLR	2016	0.592541
labsh	BLR	2017	0.592541
labsh	BLR	2018	0.592541
labsh	BLR	2019	0.592541
labsh	BMU	1986	0.518808
labsh	BMU	1987	0.518808
labsh	BMU	1988	0.518808
labsh	BMU	1989	0.518808
labsh	BMU	1990	0.518808
labsh	BMU	1991	0.518808
labsh	BMU	1992	0.518808
labsh	BMU	1993	0.518808
labsh	BMU	1994	0.518808
labsh	BMU	1995	0.518808
labsh	BMU	1996	0.518808
labsh	BMU	1997	0.514825
labsh	BMU	1998	0.521586
labsh	BMU	1999	0.507897
labsh	BMU	2000	0.548657
labsh	BMU	2001	0.569151
labsh	BMU	2002	0.579604
labsh	BMU	2003	0.575922
labsh	BMU	2004	0.581958
labsh	BMU	2005	0.602794
labsh	BMU	2006	0.585547
labsh	BMU	2007	0.598993
labsh	BMU	2008	0.592197
labsh	BMU	2009	0.607498
labsh	BMU	2010	0.6058
labsh	BMU	2011	0.607019
labsh	BMU	2012	0.61269
labsh	BMU	2013	0.60477
labsh	BMU	2014	0.605438
labsh	BMU	2015	0.611833
labsh	BMU	2016	0.59538
labsh	BMU	2017	0.596985
labsh	BMU	2018	0.588104
labsh	BMU	2019	0.588104
labsh	BOL	1950	0.5132
labsh	BOL	1951	0.5132
labsh	BOL	1952	0.5132
labsh	BOL	1953	0.5132
labsh	BOL	1954	0.5132
labsh	BOL	1955	0.5132
labsh	BOL	1956	0.5132
labsh	BOL	1957	0.5132
labsh	BOL	1958	0.5132
labsh	BOL	1959	0.5132
labsh	BOL	1960	0.5132
labsh	BOL	1961	0.5132
labsh	BOL	1962	0.5132
labsh	BOL	1963	0.5132
labsh	BOL	1964	0.5132
labsh	BOL	1965	0.5132
labsh	BOL	1966	0.5132
labsh	BOL	1967	0.5132
labsh	BOL	1968	0.5132
labsh	BOL	1969	0.5132
labsh	BOL	1970	0.5132
labsh	BOL	1971	0.565073
labsh	BOL	1972	0.539943
labsh	BOL	1973	0.51655
labsh	BOL	1974	0.535919
labsh	BOL	1975	0.545428
labsh	BOL	1976	0.533042
labsh	BOL	1977	0.545704
labsh	BOL	1978	0.519968
labsh	BOL	1979	0.520563
labsh	BOL	1980	0.532829
labsh	BOL	1981	0.516251
labsh	BOL	1982	0.508406
labsh	BOL	1983	0.566782
labsh	BOL	1984	0.715699
labsh	BOL	1985	0.605672
labsh	BOL	1986	0.520215
labsh	BOL	1987	0.533383
labsh	BOL	1988	0.546551
labsh	BOL	1989	0.550017
labsh	BOL	1990	0.53808
labsh	BOL	1991	0.548706
labsh	BOL	1992	0.559897
labsh	BOL	1993	0.560882
labsh	BOL	1994	0.556448
labsh	BOL	1995	0.538922
labsh	BOL	1996	0.554492
labsh	BOL	1997	0.54932
labsh	BOL	1998	0.518672
labsh	BOL	1999	0.537876
labsh	BOL	2000	0.560121
labsh	BOL	2001	0.55859
labsh	BOL	2002	0.547475
labsh	BOL	2003	0.545152
labsh	BOL	2004	0.524886
labsh	BOL	2005	0.514479
labsh	BOL	2006	0.479564
labsh	BOL	2007	0.471115
labsh	BOL	2008	0.451006
labsh	BOL	2009	0.476411
labsh	BOL	2010	0.450485
labsh	BOL	2011	0.455282
labsh	BOL	2012	0.455141
labsh	BOL	2013	0.459842
labsh	BOL	2014	0.47239
labsh	BOL	2015	0.498507
labsh	BOL	2016	0.498507
labsh	BOL	2017	0.498507
labsh	BOL	2018	0.498507
labsh	BOL	2019	0.498507
labsh	BRA	1950	0.514606
labsh	BRA	1951	0.514606
labsh	BRA	1952	0.514606
labsh	BRA	1953	0.514606
labsh	BRA	1954	0.514606
labsh	BRA	1955	0.514606
labsh	BRA	1956	0.514606
labsh	BRA	1957	0.514606
labsh	BRA	1958	0.514606
labsh	BRA	1959	0.514606
labsh	BRA	1960	0.514606
labsh	BRA	1961	0.514606
labsh	BRA	1962	0.514606
labsh	BRA	1963	0.514606
labsh	BRA	1964	0.514606
labsh	BRA	1965	0.514606
labsh	BRA	1966	0.514606
labsh	BRA	1967	0.514606
labsh	BRA	1968	0.514606
labsh	BRA	1969	0.514606
labsh	BRA	1970	0.514606
labsh	BRA	1971	0.514606
labsh	BRA	1972	0.514606
labsh	BRA	1973	0.514606
labsh	BRA	1974	0.514606
labsh	BRA	1975	0.514606
labsh	BRA	1976	0.514606
labsh	BRA	1977	0.514606
labsh	BRA	1978	0.514606
labsh	BRA	1979	0.514606
labsh	BRA	1980	0.514606
labsh	BRA	1981	0.514606
labsh	BRA	1982	0.514606
labsh	BRA	1983	0.514606
labsh	BRA	1984	0.514606
labsh	BRA	1985	0.514606
labsh	BRA	1986	0.514606
labsh	BRA	1987	0.514606
labsh	BRA	1988	0.514606
labsh	BRA	1989	0.514606
labsh	BRA	1990	0.514606
labsh	BRA	1991	0.514606
labsh	BRA	1992	0.514606
labsh	BRA	1993	0.491567
labsh	BRA	1994	0.511684
labsh	BRA	1995	0.573397
labsh	BRA	1996	0.564224
labsh	BRA	1997	0.541116
labsh	BRA	1998	0.547279
labsh	BRA	1999	0.545117
labsh	BRA	2000	0.537807
labsh	BRA	2001	0.545147
labsh	BRA	2002	0.53307
labsh	BRA	2003	0.529578
labsh	BRA	2004	0.525227
labsh	BRA	2005	0.535446
labsh	BRA	2006	0.540471
labsh	BRA	2007	0.541516
labsh	BRA	2008	0.54967
labsh	BRA	2009	0.562467
labsh	BRA	2010	0.552457
labsh	BRA	2011	0.557017
labsh	BRA	2012	0.565821
labsh	BRA	2013	0.570314
labsh	BRA	2014	0.568104
labsh	BRA	2015	0.581198
labsh	BRA	2016	0.580193
labsh	BRA	2017	0.577995
labsh	BRA	2018	0.577995
labsh	BRA	2019	0.577995
labsh	BRB	1960	0.733469
labsh	BRB	1961	0.733469
labsh	BRB	1962	0.733469
labsh	BRB	1963	0.733469
labsh	BRB	1964	0.733469
labsh	BRB	1965	0.733469
labsh	BRB	1966	0.733469
labsh	BRB	1967	0.733469
labsh	BRB	1968	0.733469
labsh	BRB	1969	0.733469
labsh	BRB	1970	0.733469
labsh	BRB	1971	0.733469
labsh	BRB	1972	0.733469
labsh	BRB	1973	0.733469
labsh	BRB	1974	0.733469
labsh	BRB	1975	0.750566
labsh	BRB	1976	0.750566
labsh	BRB	1977	0.750566
labsh	BRB	1978	0.750566
labsh	BRB	1979	0.750566
labsh	BRB	1980	0.750566
labsh	BRB	1981	0.750566
labsh	BRB	1982	0.750566
labsh	BRB	1983	0.750566
labsh	BRB	1984	0.750566
labsh	BRB	1985	0.750566
labsh	BRB	1986	0.750566
labsh	BRB	1987	0.750566
labsh	BRB	1988	0.750566
labsh	BRB	1989	0.750566
labsh	BRB	1990	0.750566
labsh	BRB	1991	0.750566
labsh	BRB	1992	0.750566
labsh	BRB	1993	0.750566
labsh	BRB	1994	0.750566
labsh	BRB	1995	0.750566
labsh	BRB	1996	0.750566
labsh	BRB	1997	0.750566
labsh	BRB	1998	0.750566
labsh	BRB	1999	0.750566
labsh	BRB	2000	0.750566
labsh	BRB	2001	0.750566
labsh	BRB	2002	0.750566
labsh	BRB	2003	0.750566
labsh	BRB	2004	0.750566
labsh	BRB	2005	0.750566
labsh	BRB	2006	0.750566
labsh	BRB	2007	0.750566
labsh	BRB	2008	0.750566
labsh	BRB	2009	0.750566
labsh	BRB	2010	0.750566
labsh	BRB	2011	0.750566
labsh	BRB	2012	0.750566
labsh	BRB	2013	0.750566
labsh	BRB	2014	0.750566
labsh	BRB	2015	0.750566
labsh	BRB	2016	0.750566
labsh	BRB	2017	0.750566
labsh	BRB	2018	0.750566
labsh	BRB	2019	0.750566
labsh	BWA	1960	0.349185
labsh	BWA	1961	0.349185
labsh	BWA	1962	0.349185
labsh	BWA	1963	0.349185
labsh	BWA	1964	0.349185
labsh	BWA	1965	0.349185
labsh	BWA	1966	0.349185
labsh	BWA	1967	0.349185
labsh	BWA	1968	0.349185
labsh	BWA	1969	0.349185
labsh	BWA	1970	0.349185
labsh	BWA	1971	0.349185
labsh	BWA	1972	0.349185
labsh	BWA	1973	0.349185
labsh	BWA	1974	0.349185
labsh	BWA	1975	0.349185
labsh	BWA	1976	0.349185
labsh	BWA	1977	0.349185
labsh	BWA	1978	0.349185
labsh	BWA	1979	0.349185
labsh	BWA	1980	0.349185
labsh	BWA	1981	0.349185
labsh	BWA	1982	0.349185
labsh	BWA	1983	0.349185
labsh	BWA	1984	0.349185
labsh	BWA	1985	0.349185
labsh	BWA	1986	0.349185
labsh	BWA	1987	0.349185
labsh	BWA	1988	0.349185
labsh	BWA	1989	0.349185
labsh	BWA	1990	0.349185
labsh	BWA	1991	0.349185
labsh	BWA	1992	0.349185
labsh	BWA	1993	0.382888
labsh	BWA	1994	0.327378
labsh	BWA	1995	0.33159
labsh	BWA	1996	0.316366
labsh	BWA	1997	0.279383
labsh	BWA	1998	0.29424
labsh	BWA	1999	0.303254
labsh	BWA	2000	0.277961
labsh	BWA	2001	0.277961
labsh	BWA	2002	0.277961
labsh	BWA	2003	0.277961
labsh	BWA	2004	0.277961
labsh	BWA	2005	0.277961
labsh	BWA	2006	0.277961
labsh	BWA	2007	0.277961
labsh	BWA	2008	0.277961
labsh	BWA	2009	0.277961
labsh	BWA	2010	0.277961
labsh	BWA	2011	0.277961
labsh	BWA	2012	0.277961
labsh	BWA	2013	0.277961
labsh	BWA	2014	0.277961
labsh	BWA	2015	0.277961
labsh	BWA	2016	0.277961
labsh	BWA	2017	0.277961
labsh	BWA	2018	0.277961
labsh	BWA	2019	0.277961
labsh	CAF	1980	0.231892
labsh	CAF	1981	0.231892
labsh	CAF	1982	0.231892
labsh	CAF	1983	0.231892
labsh	CAF	1984	0.231892
labsh	CAF	1985	0.231892
labsh	CAF	1986	0.231892
labsh	CAF	1987	0.231892
labsh	CAF	1988	0.231892
labsh	CAF	1989	0.231892
labsh	CAF	1990	0.231892
labsh	CAF	1991	0.231892
labsh	CAF	1992	0.231892
labsh	CAF	1993	0.231892
labsh	CAF	1994	0.231892
labsh	CAF	1995	0.231892
labsh	CAF	1996	0.231892
labsh	CAF	1997	0.231892
labsh	CAF	1998	0.231892
labsh	CAF	1999	0.231892
labsh	CAF	2000	0.231892
labsh	CAF	2001	0.231892
labsh	CAF	2002	0.231892
labsh	CAF	2003	0.231892
labsh	CAF	2004	0.231892
labsh	CAF	2005	0.231892
labsh	CAF	2006	0.164316
labsh	CAF	2007	0.164316
labsh	CAF	2008	0.164316
labsh	CAF	2009	0.164316
labsh	CAF	2010	0.164316
labsh	CAF	2011	0.164316
labsh	CAF	2012	0.164316
labsh	CAF	2013	0.164316
labsh	CAF	2014	0.164316
labsh	CAF	2015	0.164316
labsh	CAF	2016	0.164316
labsh	CAF	2017	0.164316
labsh	CAF	2018	0.164316
labsh	CAF	2019	0.164316
labsh	CAN	1950	0.768659
labsh	CAN	1951	0.768659
labsh	CAN	1952	0.768659
labsh	CAN	1953	0.768659
labsh	CAN	1954	0.768659
labsh	CAN	1955	0.768659
labsh	CAN	1956	0.768659
labsh	CAN	1957	0.768659
labsh	CAN	1958	0.768659
labsh	CAN	1959	0.768659
labsh	CAN	1960	0.768659
labsh	CAN	1961	0.768659
labsh	CAN	1962	0.768659
labsh	CAN	1963	0.768659
labsh	CAN	1964	0.768659
labsh	CAN	1965	0.768659
labsh	CAN	1966	0.768659
labsh	CAN	1967	0.768659
labsh	CAN	1968	0.768659
labsh	CAN	1969	0.768659
labsh	CAN	1970	0.768659
labsh	CAN	1971	0.770101
labsh	CAN	1972	0.770907
labsh	CAN	1973	0.762547
labsh	CAN	1974	0.748153
labsh	CAN	1975	0.731787
labsh	CAN	1976	0.727187
labsh	CAN	1977	0.723388
labsh	CAN	1978	0.70787
labsh	CAN	1979	0.683543
labsh	CAN	1980	0.670415
labsh	CAN	1981	0.692736
labsh	CAN	1982	0.70736
labsh	CAN	1983	0.677225
labsh	CAN	1984	0.661424
labsh	CAN	1985	0.658375
labsh	CAN	1986	0.679513
labsh	CAN	1987	0.673339
labsh	CAN	1988	0.681399
labsh	CAN	1989	0.693053
labsh	CAN	1990	0.710366
labsh	CAN	1991	0.733603
labsh	CAN	1992	0.738517
labsh	CAN	1993	0.722486
labsh	CAN	1994	0.695458
labsh	CAN	1995	0.683057
labsh	CAN	1996	0.676772
labsh	CAN	1997	0.673506
labsh	CAN	1998	0.686227
labsh	CAN	1999	0.669298
labsh	CAN	2000	0.653895
labsh	CAN	2001	0.657381
labsh	CAN	2002	0.657403
labsh	CAN	2003	0.645754
labsh	CAN	2004	0.639334
labsh	CAN	2005	0.629435
labsh	CAN	2006	0.634262
labsh	CAN	2007	0.639495
labsh	CAN	2008	0.631198
labsh	CAN	2009	0.672545
labsh	CAN	2010	0.650952
labsh	CAN	2011	0.639589
labsh	CAN	2012	0.650562
labsh	CAN	2013	0.649688
labsh	CAN	2014	0.641807
labsh	CAN	2015	0.670259
labsh	CAN	2016	0.661178
labsh	CAN	2017	0.651137
labsh	CAN	2018	0.65488
labsh	CAN	2019	0.65488
labsh	CHE	1950	0.683344
labsh	CHE	1951	0.683344
labsh	CHE	1952	0.683344
labsh	CHE	1953	0.683344
labsh	CHE	1954	0.683344
labsh	CHE	1955	0.683344
labsh	CHE	1956	0.683344
labsh	CHE	1957	0.683344
labsh	CHE	1958	0.683344
labsh	CHE	1959	0.683344
labsh	CHE	1960	0.683344
labsh	CHE	1961	0.683344
labsh	CHE	1962	0.683344
labsh	CHE	1963	0.683344
labsh	CHE	1964	0.683344
labsh	CHE	1965	0.683344
labsh	CHE	1966	0.683344
labsh	CHE	1967	0.683344
labsh	CHE	1968	0.683344
labsh	CHE	1969	0.683344
labsh	CHE	1970	0.683344
labsh	CHE	1971	0.683344
labsh	CHE	1972	0.683344
labsh	CHE	1973	0.683344
labsh	CHE	1974	0.683344
labsh	CHE	1975	0.683344
labsh	CHE	1976	0.683344
labsh	CHE	1977	0.683344
labsh	CHE	1978	0.683344
labsh	CHE	1979	0.683344
labsh	CHE	1980	0.683344
labsh	CHE	1981	0.683344
labsh	CHE	1982	0.683344
labsh	CHE	1983	0.683344
labsh	CHE	1984	0.683344
labsh	CHE	1985	0.683344
labsh	CHE	1986	0.683344
labsh	CHE	1987	0.683344
labsh	CHE	1988	0.683344
labsh	CHE	1989	0.683344
labsh	CHE	1990	0.683344
labsh	CHE	1991	0.683344
labsh	CHE	1992	0.683344
labsh	CHE	1993	0.683344
labsh	CHE	1994	0.683344
labsh	CHE	1995	0.683344
labsh	CHE	1996	0.682174
labsh	CHE	1997	0.675233
labsh	CHE	1998	0.668843
labsh	CHE	1999	0.677252
labsh	CHE	2000	0.672166
labsh	CHE	2001	0.691474
labsh	CHE	2002	0.709991
labsh	CHE	2003	0.702004
labsh	CHE	2004	0.685238
labsh	CHE	2005	0.677323
labsh	CHE	2006	0.659281
labsh	CHE	2007	0.648758
labsh	CHE	2008	0.654553
labsh	CHE	2009	0.680613
labsh	CHE	2010	0.662813
labsh	CHE	2011	0.672553
labsh	CHE	2012	0.680962
labsh	CHE	2013	0.684298
labsh	CHE	2014	0.682918
labsh	CHE	2015	0.688674
labsh	CHE	2016	0.688393
labsh	CHE	2017	0.689425
labsh	CHE	2018	0.6841
labsh	CHE	2019	0.6841
labsh	CHL	1951	0.477676
labsh	CHL	1952	0.477676
labsh	CHL	1953	0.477676
labsh	CHL	1954	0.477676
labsh	CHL	1955	0.477676
labsh	CHL	1956	0.477676
labsh	CHL	1957	0.477676
labsh	CHL	1958	0.477676
labsh	CHL	1959	0.477676
labsh	CHL	1960	0.477676
labsh	CHL	1961	0.477676
labsh	CHL	1962	0.477676
labsh	CHL	1963	0.477676
labsh	CHL	1964	0.477676
labsh	CHL	1965	0.477676
labsh	CHL	1966	0.477676
labsh	CHL	1967	0.477676
labsh	CHL	1968	0.477676
labsh	CHL	1969	0.477676
labsh	CHL	1970	0.477676
labsh	CHL	1971	0.477676
labsh	CHL	1972	0.477676
labsh	CHL	1973	0.477676
labsh	CHL	1974	0.477676
labsh	CHL	1975	0.477676
labsh	CHL	1976	0.477676
labsh	CHL	1977	0.477676
labsh	CHL	1978	0.477676
labsh	CHL	1979	0.477676
labsh	CHL	1980	0.477676
labsh	CHL	1981	0.477676
labsh	CHL	1982	0.477676
labsh	CHL	1983	0.477676
labsh	CHL	1984	0.477676
labsh	CHL	1985	0.477676
labsh	CHL	1986	0.477676
labsh	CHL	1987	0.477676
labsh	CHL	1988	0.477676
labsh	CHL	1989	0.477676
labsh	CHL	1990	0.477676
labsh	CHL	1991	0.477676
labsh	CHL	1992	0.477676
labsh	CHL	1993	0.477676
labsh	CHL	1994	0.477676
labsh	CHL	1995	0.477676
labsh	CHL	1996	0.477676
labsh	CHL	1997	0.482842
labsh	CHL	1998	0.503552
labsh	CHL	1999	0.516288
labsh	CHL	2000	0.498518
labsh	CHL	2001	0.494579
labsh	CHL	2002	0.493408
labsh	CHL	2003	0.502191
labsh	CHL	2004	0.456808
labsh	CHL	2005	0.431144
labsh	CHL	2006	0.384864
labsh	CHL	2007	0.384132
labsh	CHL	2008	0.430929
labsh	CHL	2009	0.439614
labsh	CHL	2010	0.439614
labsh	CHL	2011	0.439614
labsh	CHL	2012	0.439614
labsh	CHL	2013	0.439614
labsh	CHL	2014	0.439614
labsh	CHL	2015	0.439614
labsh	CHL	2016	0.439614
labsh	CHL	2017	0.439614
labsh	CHL	2018	0.439614
labsh	CHL	2019	0.439614
labsh	CHN	1952	0.592169
labsh	CHN	1953	0.592169
labsh	CHN	1954	0.592169
labsh	CHN	1955	0.592169
labsh	CHN	1956	0.592169
labsh	CHN	1957	0.592169
labsh	CHN	1958	0.592169
labsh	CHN	1959	0.592169
labsh	CHN	1960	0.592169
labsh	CHN	1961	0.592169
labsh	CHN	1962	0.592169
labsh	CHN	1963	0.592169
labsh	CHN	1964	0.592169
labsh	CHN	1965	0.592169
labsh	CHN	1966	0.592169
labsh	CHN	1967	0.592169
labsh	CHN	1968	0.592169
labsh	CHN	1969	0.592169
labsh	CHN	1970	0.592169
labsh	CHN	1971	0.592169
labsh	CHN	1972	0.592169
labsh	CHN	1973	0.592169
labsh	CHN	1974	0.592169
labsh	CHN	1975	0.592169
labsh	CHN	1976	0.592169
labsh	CHN	1977	0.592169
labsh	CHN	1978	0.592169
labsh	CHN	1979	0.592169
labsh	CHN	1980	0.592169
labsh	CHN	1981	0.592169
labsh	CHN	1982	0.592169
labsh	CHN	1983	0.592169
labsh	CHN	1984	0.592169
labsh	CHN	1985	0.592169
labsh	CHN	1986	0.592169
labsh	CHN	1987	0.592169
labsh	CHN	1988	0.592169
labsh	CHN	1989	0.592169
labsh	CHN	1990	0.592169
labsh	CHN	1991	0.592169
labsh	CHN	1992	0.592169
labsh	CHN	1993	0.566813
labsh	CHN	1994	0.561034
labsh	CHN	1995	0.567351
labsh	CHN	1996	0.588391
labsh	CHN	1997	0.58853
labsh	CHN	1998	0.592413
labsh	CHN	1999	0.606277
labsh	CHN	2000	0.591962
labsh	CHN	2001	0.588033
labsh	CHN	2002	0.603283
labsh	CHN	2003	0.598128
labsh	CHN	2004	0.572884
labsh	CHN	2005	0.568219
labsh	CHN	2006	0.557359
labsh	CHN	2007	0.553082
labsh	CHN	2008	0.552076
labsh	CHN	2009	0.552655
labsh	CHN	2010	0.548255
labsh	CHN	2011	0.549983
labsh	CHN	2012	0.56034
labsh	CHN	2013	0.571144
labsh	CHN	2014	0.578006
labsh	CHN	2015	0.583169
labsh	CHN	2016	0.586253
labsh	CHN	2017	0.586253
labsh	CHN	2018	0.586253
labsh	CHN	2019	0.586253
labsh	CIV	1960	0.569372
labsh	CIV	1961	0.569372
labsh	CIV	1962	0.569372
labsh	CIV	1963	0.569372
labsh	CIV	1964	0.569372
labsh	CIV	1965	0.569372
labsh	CIV	1966	0.569372
labsh	CIV	1967	0.569372
labsh	CIV	1968	0.569372
labsh	CIV	1969	0.569372
labsh	CIV	1970	0.569372
labsh	CIV	1971	0.569372
labsh	CIV	1972	0.569372
labsh	CIV	1973	0.569372
labsh	CIV	1974	0.569372
labsh	CIV	1975	0.569372
labsh	CIV	1976	0.569372
labsh	CIV	1977	0.569372
labsh	CIV	1978	0.569372
labsh	CIV	1979	0.569372
labsh	CIV	1980	0.569372
labsh	CIV	1981	0.569372
labsh	CIV	1982	0.569372
labsh	CIV	1983	0.569372
labsh	CIV	1984	0.569372
labsh	CIV	1985	0.569372
labsh	CIV	1986	0.569372
labsh	CIV	1987	0.569372
labsh	CIV	1988	0.569372
labsh	CIV	1989	0.569372
labsh	CIV	1990	0.558516
labsh	CIV	1991	0.609049
labsh	CIV	1992	0.615021
labsh	CIV	1993	0.604265
labsh	CIV	1994	0.475207
labsh	CIV	1995	0.472567
labsh	CIV	1996	0.493289
labsh	CIV	1997	0.456808
labsh	CIV	1998	0.453772
labsh	CIV	1999	0.457284
labsh	CIV	2000	0.477416
labsh	CIV	2001	0.464204
labsh	CIV	2002	0.450992
labsh	CIV	2003	0.43778
labsh	CIV	2004	0.424569
labsh	CIV	2005	0.411357
labsh	CIV	2006	0.410279
labsh	CIV	2007	0.406883
labsh	CIV	2008	0.369449
labsh	CIV	2009	0.361156
labsh	CIV	2010	0.381847
labsh	CIV	2011	0.349021
labsh	CIV	2012	0.34966
labsh	CIV	2013	0.334099
labsh	CIV	2014	0.334099
labsh	CIV	2015	0.334099
labsh	CIV	2016	0.334099
labsh	CIV	2017	0.334099
labsh	CIV	2018	0.334099
labsh	CIV	2019	0.334099
labsh	CMR	1960	0.555015
labsh	CMR	1961	0.555015
labsh	CMR	1962	0.555015
labsh	CMR	1963	0.555015
labsh	CMR	1964	0.555015
labsh	CMR	1965	0.555015
labsh	CMR	1966	0.555015
labsh	CMR	1967	0.555015
labsh	CMR	1968	0.555015
labsh	CMR	1969	0.555015
labsh	CMR	1970	0.555015
labsh	CMR	1971	0.555015
labsh	CMR	1972	0.555015
labsh	CMR	1973	0.555015
labsh	CMR	1974	0.555015
labsh	CMR	1975	0.555015
labsh	CMR	1976	0.555015
labsh	CMR	1977	0.555015
labsh	CMR	1978	0.555015
labsh	CMR	1979	0.555015
labsh	CMR	1980	0.555015
labsh	CMR	1981	0.555015
labsh	CMR	1982	0.555015
labsh	CMR	1983	0.555015
labsh	CMR	1984	0.555015
labsh	CMR	1985	0.555015
labsh	CMR	1986	0.555015
labsh	CMR	1987	0.555015
labsh	CMR	1988	0.555015
labsh	CMR	1989	0.555015
labsh	CMR	1990	0.555015
labsh	CMR	1991	0.54456
labsh	CMR	1992	0.534106
labsh	CMR	1993	0.523651
labsh	CMR	1994	0.544171
labsh	CMR	1995	0.509391
labsh	CMR	1996	0.503529
labsh	CMR	1997	0.503529
labsh	CMR	1998	0.503529
labsh	CMR	1999	0.503529
labsh	CMR	2000	0.503529
labsh	CMR	2001	0.503529
labsh	CMR	2002	0.503529
labsh	CMR	2003	0.503529
labsh	CMR	2004	0.503529
labsh	CMR	2005	0.503529
labsh	CMR	2006	0.503529
labsh	CMR	2007	0.503529
labsh	CMR	2008	0.503529
labsh	CMR	2009	0.503529
labsh	CMR	2010	0.503529
labsh	CMR	2011	0.503529
labsh	CMR	2012	0.503529
labsh	CMR	2013	0.503529
labsh	CMR	2014	0.503529
labsh	CMR	2015	0.503529
labsh	CMR	2016	0.503529
labsh	CMR	2017	0.503529
labsh	CMR	2018	0.503529
labsh	CMR	2019	0.503529
labsh	COL	1950	0.475737
labsh	COL	1951	0.475737
labsh	COL	1952	0.475737
labsh	COL	1953	0.475737
labsh	COL	1954	0.475737
labsh	COL	1955	0.475737
labsh	COL	1956	0.475737
labsh	COL	1957	0.475737
labsh	COL	1958	0.475737
labsh	COL	1959	0.475737
labsh	COL	1960	0.475737
labsh	COL	1961	0.475737
labsh	COL	1962	0.475737
labsh	COL	1963	0.475737
labsh	COL	1964	0.475737
labsh	COL	1965	0.475737
labsh	COL	1966	0.475737
labsh	COL	1967	0.475737
labsh	COL	1968	0.475737
labsh	COL	1969	0.475737
labsh	COL	1970	0.475737
labsh	COL	1971	0.475737
labsh	COL	1972	0.475737
labsh	COL	1973	0.475737
labsh	COL	1974	0.475737
labsh	COL	1975	0.475737
labsh	COL	1976	0.475737
labsh	COL	1977	0.475737
labsh	COL	1978	0.475737
labsh	COL	1979	0.475737
labsh	COL	1980	0.475737
labsh	COL	1981	0.475737
labsh	COL	1982	0.475737
labsh	COL	1983	0.475737
labsh	COL	1984	0.475737
labsh	COL	1985	0.475737
labsh	COL	1986	0.475737
labsh	COL	1987	0.475737
labsh	COL	1988	0.475737
labsh	COL	1989	0.475737
labsh	COL	1990	0.475737
labsh	COL	1991	0.475737
labsh	COL	1992	0.475737
labsh	COL	1993	0.469647
labsh	COL	1994	0.50499
labsh	COL	1995	0.498516
labsh	COL	1996	0.505111
labsh	COL	1997	0.503685
labsh	COL	1998	0.505347
labsh	COL	1999	0.496112
labsh	COL	2000	0.478871
labsh	COL	2001	0.484831
labsh	COL	2002	0.491315
labsh	COL	2003	0.479896
labsh	COL	2004	0.470782
labsh	COL	2005	0.469287
labsh	COL	2006	0.469307
labsh	COL	2007	0.47263
labsh	COL	2008	0.461115
labsh	COL	2009	0.471205
labsh	COL	2010	0.468265
labsh	COL	2011	0.447501
labsh	COL	2012	0.457664
labsh	COL	2013	0.459551
labsh	COL	2014	0.469603
labsh	COL	2015	0.493405
labsh	COL	2016	0.494809
labsh	COL	2017	0.497038
labsh	COL	2018	0.495211
labsh	COL	2019	0.495211
labsh	CPV	1980	0.563786
labsh	CPV	1981	0.563786
labsh	CPV	1982	0.563786
labsh	CPV	1983	0.563786
labsh	CPV	1984	0.563786
labsh	CPV	1985	0.563786
labsh	CPV	1986	0.563786
labsh	CPV	1987	0.563786
labsh	CPV	1988	0.563786
labsh	CPV	1989	0.563786
labsh	CPV	1990	0.563786
labsh	CPV	1991	0.563786
labsh	CPV	1992	0.563786
labsh	CPV	1993	0.563786
labsh	CPV	1994	0.563786
labsh	CPV	1995	0.563786
labsh	CPV	1996	0.563786
labsh	CPV	1997	0.563786
labsh	CPV	1998	0.563786
labsh	CPV	1999	0.563786
labsh	CPV	2000	0.563786
labsh	CPV	2001	0.563786
labsh	CPV	2002	0.563786
labsh	CPV	2003	0.563786
labsh	CPV	2004	0.563786
labsh	CPV	2005	0.563786
labsh	CPV	2006	0.563786
labsh	CPV	2007	0.563786
labsh	CPV	2008	0.561642
labsh	CPV	2009	0.587684
labsh	CPV	2010	0.602353
labsh	CPV	2011	0.595307
labsh	CPV	2012	0.640123
labsh	CPV	2013	0.615294
labsh	CPV	2014	0.644603
labsh	CPV	2015	0.654509
labsh	CPV	2016	0.62033
labsh	CPV	2017	0.626748
labsh	CPV	2018	0.626748
labsh	CPV	2019	0.626748
labsh	CRI	1950	0.575478
labsh	CRI	1951	0.575478
labsh	CRI	1952	0.575478
labsh	CRI	1953	0.575478
labsh	CRI	1954	0.575478
labsh	CRI	1955	0.575478
labsh	CRI	1956	0.575478
labsh	CRI	1957	0.575478
labsh	CRI	1958	0.575478
labsh	CRI	1959	0.575478
labsh	CRI	1960	0.575478
labsh	CRI	1961	0.575478
labsh	CRI	1962	0.575478
labsh	CRI	1963	0.575478
labsh	CRI	1964	0.575478
labsh	CRI	1965	0.575478
labsh	CRI	1966	0.575478
labsh	CRI	1967	0.575478
labsh	CRI	1968	0.575478
labsh	CRI	1969	0.575478
labsh	CRI	1970	0.575478
labsh	CRI	1971	0.575478
labsh	CRI	1972	0.575478
labsh	CRI	1973	0.575478
labsh	CRI	1974	0.575478
labsh	CRI	1975	0.575478
labsh	CRI	1976	0.575478
labsh	CRI	1977	0.575478
labsh	CRI	1978	0.575478
labsh	CRI	1979	0.575478
labsh	CRI	1980	0.575478
labsh	CRI	1981	0.575478
labsh	CRI	1982	0.575478
labsh	CRI	1983	0.575478
labsh	CRI	1984	0.575478
labsh	CRI	1985	0.575478
labsh	CRI	1986	0.575478
labsh	CRI	1987	0.575478
labsh	CRI	1988	0.575478
labsh	CRI	1989	0.575478
labsh	CRI	1990	0.575478
labsh	CRI	1991	0.575478
labsh	CRI	1992	0.575478
labsh	CRI	1993	0.575478
labsh	CRI	1994	0.575478
labsh	CRI	1995	0.575478
labsh	CRI	1996	0.575478
labsh	CRI	1997	0.575478
labsh	CRI	1998	0.575478
labsh	CRI	1999	0.575478
labsh	CRI	2000	0.575478
labsh	CRI	2001	0.575478
labsh	CRI	2002	0.575478
labsh	CRI	2003	0.575478
labsh	CRI	2004	0.575478
labsh	CRI	2005	0.575478
labsh	CRI	2006	0.575478
labsh	CRI	2007	0.575478
labsh	CRI	2008	0.575478
labsh	CRI	2009	0.575478
labsh	CRI	2010	0.575478
labsh	CRI	2011	0.575478
labsh	CRI	2012	0.575478
labsh	CRI	2013	0.587378
labsh	CRI	2014	0.587744
labsh	CRI	2015	0.588891
labsh	CRI	2016	0.579786
labsh	CRI	2017	0.579786
labsh	CRI	2018	0.579786
labsh	CRI	2019	0.579786
labsh	CUW	2010	0.648437
labsh	CUW	2011	0.647062
labsh	CUW	2012	0.669626
labsh	CUW	2013	0.684483
labsh	CUW	2014	0.665202
labsh	CUW	2015	0.670486
labsh	CUW	2016	0.681031
labsh	CUW	2017	0.681031
labsh	CUW	2018	0.681031
labsh	CUW	2019	0.681031
labsh	CYM	1991	0.470305
labsh	CYM	1992	0.470305
labsh	CYM	1993	0.470305
labsh	CYM	1994	0.470305
labsh	CYM	1995	0.470305
labsh	CYM	1996	0.470305
labsh	CYM	1997	0.470305
labsh	CYM	1998	0.470305
labsh	CYM	1999	0.470305
labsh	CYM	2000	0.470305
labsh	CYM	2001	0.470305
labsh	CYM	2002	0.470305
labsh	CYM	2003	0.470305
labsh	CYM	2004	0.470305
labsh	CYM	2005	0.470305
labsh	CYM	2006	0.470305
labsh	CYM	2007	0.475094
labsh	CYM	2008	0.491017
labsh	CYM	2009	0.494666
labsh	CYM	2010	0.491933
labsh	CYM	2011	0.498873
labsh	CYM	2012	0.501525
labsh	CYM	2013	0.500175
labsh	CYM	2014	0.497472
labsh	CYM	2015	0.499035
labsh	CYM	2016	0.496755
labsh	CYM	2017	0.489534
labsh	CYM	2018	0.480495
labsh	CYM	2019	0.480495
labsh	CYP	1950	0.49921
labsh	CYP	1951	0.49921
labsh	CYP	1952	0.49921
labsh	CYP	1953	0.49921
labsh	CYP	1954	0.49921
labsh	CYP	1955	0.49921
labsh	CYP	1956	0.49921
labsh	CYP	1957	0.49921
labsh	CYP	1958	0.49921
labsh	CYP	1959	0.49921
labsh	CYP	1960	0.49921
labsh	CYP	1961	0.49921
labsh	CYP	1962	0.49921
labsh	CYP	1963	0.49921
labsh	CYP	1964	0.49921
labsh	CYP	1965	0.49921
labsh	CYP	1966	0.49921
labsh	CYP	1967	0.49921
labsh	CYP	1968	0.49921
labsh	CYP	1969	0.49921
labsh	CYP	1970	0.49921
labsh	CYP	1971	0.49921
labsh	CYP	1972	0.49921
labsh	CYP	1973	0.49921
labsh	CYP	1974	0.49921
labsh	CYP	1975	0.49921
labsh	CYP	1976	0.49921
labsh	CYP	1977	0.49921
labsh	CYP	1978	0.49921
labsh	CYP	1979	0.49921
labsh	CYP	1980	0.49921
labsh	CYP	1981	0.49921
labsh	CYP	1982	0.49921
labsh	CYP	1983	0.49921
labsh	CYP	1984	0.49921
labsh	CYP	1985	0.49921
labsh	CYP	1986	0.49921
labsh	CYP	1987	0.49921
labsh	CYP	1988	0.49921
labsh	CYP	1989	0.49921
labsh	CYP	1990	0.49921
labsh	CYP	1991	0.49921
labsh	CYP	1992	0.49921
labsh	CYP	1993	0.49921
labsh	CYP	1994	0.49921
labsh	CYP	1995	0.49921
labsh	CYP	1996	0.506394
labsh	CYP	1997	0.510773
labsh	CYP	1998	0.490657
labsh	CYP	1999	0.48714
labsh	CYP	2000	0.487177
labsh	CYP	2001	0.483941
labsh	CYP	2002	0.504668
labsh	CYP	2003	0.524958
labsh	CYP	2004	0.522323
labsh	CYP	2005	0.546706
labsh	CYP	2006	0.550122
labsh	CYP	2007	0.557584
labsh	CYP	2008	0.563791
labsh	CYP	2009	0.601337
labsh	CYP	2010	0.595915
labsh	CYP	2011	0.596353
labsh	CYP	2012	0.598626
labsh	CYP	2013	0.573446
labsh	CYP	2014	0.565491
labsh	CYP	2015	0.553562
labsh	CYP	2016	0.542981
labsh	CYP	2017	0.549274
labsh	CYP	2018	0.552714
labsh	CYP	2019	0.552714
labsh	CZE	1970	0.513833
labsh	CZE	1971	0.513833
labsh	CZE	1972	0.513833
labsh	CZE	1973	0.513833
labsh	CZE	1974	0.513833
labsh	CZE	1975	0.513833
labsh	CZE	1976	0.513833
labsh	CZE	1977	0.513833
labsh	CZE	1978	0.513833
labsh	CZE	1979	0.513833
labsh	CZE	1980	0.513833
labsh	CZE	1981	0.513833
labsh	CZE	1982	0.513833
labsh	CZE	1983	0.513833
labsh	CZE	1984	0.513833
labsh	CZE	1985	0.513833
labsh	CZE	1986	0.513833
labsh	CZE	1987	0.513833
labsh	CZE	1988	0.513833
labsh	CZE	1989	0.513833
labsh	CZE	1990	0.513833
labsh	CZE	1991	0.513833
labsh	CZE	1992	0.513833
labsh	CZE	1993	0.507951
labsh	CZE	1994	0.521797
labsh	CZE	1995	0.527124
labsh	CZE	1996	0.535291
labsh	CZE	1997	0.54051
labsh	CZE	1998	0.515596
labsh	CZE	1999	0.515881
labsh	CZE	2000	0.514873
labsh	CZE	2001	0.511133
labsh	CZE	2002	0.522495
labsh	CZE	2003	0.523768
labsh	CZE	2004	0.523044
labsh	CZE	2005	0.520359
labsh	CZE	2006	0.514592
labsh	CZE	2007	0.509283
labsh	CZE	2008	0.517451
labsh	CZE	2009	0.520523
labsh	CZE	2010	0.5229
labsh	CZE	2011	0.52362
labsh	CZE	2012	0.532809
labsh	CZE	2013	0.530515
labsh	CZE	2014	0.51691
labsh	CZE	2015	0.512559
labsh	CZE	2016	0.522976
labsh	CZE	2017	0.532784
labsh	CZE	2018	0.54925
labsh	CZE	2019	0.54925
labsh	DEU	1950	0.668121
labsh	DEU	1951	0.668121
labsh	DEU	1952	0.668121
labsh	DEU	1953	0.668121
labsh	DEU	1954	0.668121
labsh	DEU	1955	0.668121
labsh	DEU	1956	0.668121
labsh	DEU	1957	0.668121
labsh	DEU	1958	0.668121
labsh	DEU	1959	0.668121
labsh	DEU	1960	0.668121
labsh	DEU	1961	0.668121
labsh	DEU	1962	0.668121
labsh	DEU	1963	0.668121
labsh	DEU	1964	0.668121
labsh	DEU	1965	0.668121
labsh	DEU	1966	0.668121
labsh	DEU	1967	0.668121
labsh	DEU	1968	0.668121
labsh	DEU	1969	0.668121
labsh	DEU	1970	0.668121
labsh	DEU	1971	0.668121
labsh	DEU	1972	0.668121
labsh	DEU	1973	0.668121
labsh	DEU	1974	0.668121
labsh	DEU	1975	0.668121
labsh	DEU	1976	0.668121
labsh	DEU	1977	0.668121
labsh	DEU	1978	0.668121
labsh	DEU	1979	0.668121
labsh	DEU	1980	0.668121
labsh	DEU	1981	0.668121
labsh	DEU	1982	0.668121
labsh	DEU	1983	0.668121
labsh	DEU	1984	0.668121
labsh	DEU	1985	0.668121
labsh	DEU	1986	0.668121
labsh	DEU	1987	0.668121
labsh	DEU	1988	0.668121
labsh	DEU	1989	0.668121
labsh	DEU	1990	0.668121
labsh	DEU	1991	0.668121
labsh	DEU	1992	0.676294
labsh	DEU	1993	0.677944
labsh	DEU	1994	0.661826
labsh	DEU	1995	0.661148
labsh	DEU	1996	0.658174
labsh	DEU	1997	0.646557
labsh	DEU	1998	0.639817
labsh	DEU	1999	0.645175
labsh	DEU	2000	0.654206
labsh	DEU	2001	0.641213
labsh	DEU	2002	0.635994
labsh	DEU	2003	0.633888
labsh	DEU	2004	0.619629
labsh	DEU	2005	0.612891
labsh	DEU	2006	0.598493
labsh	DEU	2007	0.590179
labsh	DEU	2008	0.604604
labsh	DEU	2009	0.626462
labsh	DEU	2010	0.615998
labsh	DEU	2011	0.616051
labsh	DEU	2012	0.628495
labsh	DEU	2013	0.630767
labsh	DEU	2014	0.627978
labsh	DEU	2015	0.629125
labsh	DEU	2016	0.629603
labsh	DEU	2017	0.633366
labsh	DEU	2018	0.641904
labsh	DEU	2019	0.641904
labsh	DJI	1980	0.580827
labsh	DJI	1981	0.580827
labsh	DJI	1982	0.580827
labsh	DJI	1983	0.580827
labsh	DJI	1984	0.580827
labsh	DJI	1985	0.580827
labsh	DJI	1986	0.580827
labsh	DJI	1987	0.580827
labsh	DJI	1988	0.580827
labsh	DJI	1989	0.580827
labsh	DJI	1990	0.580827
labsh	DJI	1991	0.584104
[truncated: 5,971 more rows]

## Sheet: Tabelle1
Summe von AggValue	Spaltenbeschriftungen
Zeilenbeschriftungen	MAR	ABW	AGO	ARG	ARM	AUS	AUT	AZE	BDI	BEL	BEN	BFA	BGR	BHR	BHS	BIH	BLR	BMU	BOL	BRA	BRB	BWA	CAF	CAN	CHE	CHL	CHN	CIV	CMR	COL	CPV	CRI	CUW	CYM	CYP	CZE	DEU	DJI	DNK	DOM	ECU	EGY	ESP	EST	FIN	FJI	FRA	GAB	GBR
1950	0.507671			0.441024		0.680492	0.63296			0.644635									0.5132	0.514606				0.768659	0.683344					0.475737		0.575478			0.49921		0.668121		0.641629		0.592693	0.392683	0.627182		0.692288		0.668146		0.551432
1951	0.507671			0.441024		0.680492	0.63296			0.644635									0.5132	0.514606				0.768659	0.683344	0.477676				0.475737		0.575478			0.49921		0.668121		0.641629	0.644174	0.592693	0.392683	0.627182		0.692288		0.667879		0.551432
1952	0.507671			0.441024		0.680492	0.63296			0.644635									0.5132	0.514606				0.768659	0.683344	0.477676	0.592169			0.475737		0.575478			0.49921		0.668121		0.641629	0.644174	0.592693	0.392683	0.627182		0.692288		0.687131		0.551432
1953	0.507671			0.441024		0.680492	0.63296			0.644635									0.5132	0.514606				0.768659	0.683344	0.477676	0.592169			0.475737		0.575478			0.49921		0.668121		0.641629	0.644174	0.592693	0.392683	0.627182		0.692288		0.679625		0.551432
1954	0.507671			0.441024		0.680492	0.63296			0.644635									0.5132	0.514606				0.768659	0.683344	0.477676	0.592169			0.475737		0.575478			0.49921		0.668121		0.641629	0.644174	0.592693	0.392683	0.627182		0.692288		0.684442		0.551432
1955	0.507671			0.441024		0.680492	0.63296			0.644635									0.5132	0.514606				0.768659	0.683344	0.477676	0.592169			0.475737		0.575478			0.49921		0.668121		0.641629	0.644174	0.592693	0.392683	0.627182		0.692288		0.679553		0.551432
1956	0.507671			0.441024		0.680492	0.63296			0.644635									0.5132	0.514606				0.768659	0.683344	0.477676	0.592169			0.475737		0.575478			0.49921		0.668121		0.641629	0.644174	0.592693	0.392683	0.627182		0.692288		0.681849		0.551432
1957	0.507671			0.441024		0.680492	0.63296			0.644635									0.5132	0.514606				0.768659	0.683344	0.477676	0.592169			0.475737		0.575478			0.49921		0.668121		0.641629	0.644174	0.592693	0.392683	0.627182		0.692288		0.677023		0.551432
1958	0.507671			0.441024		0.680492	0.63296			0.644635									0.5132	0.514606				0.768659	0.683344	0.477676	0.592169			0.475737		0.575478			0.49921		0.668121		0.641629	0.644174	0.592693	0.392683	0.627182		0.692288		0.672292		0.551432
1959	0.507671			0.441024		0.680492	0.63296			0.644635		0.460463							0.5132	0.514606				0.768659	0.683344	0.477676	0.592169			0.475737		0.575478			0.49921		0.668121		0.641629	0.644174	0.592693	0.392683	0.627182		0.692288		0.669726		0.551432
1960	0.507671			0.441024		0.685819	0.63296			0.644635		0.460463							0.5132	0.514606	0.733469	0.349185		0.768659	0.683344	0.477676	0.592169	0.569372	0.555015	0.475737		0.575478			0.49921		0.668121		0.641629	0.644174	0.592693	0.392683	0.627182		0.692288		0.658456	0.499642	0.551432
1961	0.507671			0.441024		0.680522	0.63296			0.644635		0.460463							0.5132	0.514606	0.733469	0.349185		0.768659	0.683344	0.477676	0.592169	0.569372	0.555015	0.475737		0.575478			0.49921		0.668121		0.641629	0.644174	0.592693	0.392683	0.627182		0.692288		0.665475	0.499642	0.551432
1962	0.507671			0.441024		0.670636	0.63296			0.644635		0.460463							0.5132	0.514606	0.733469	0.349185		0.768659	0.683344	0.477676	0.592169	0.569372	0.555015	0.475737		0.575478			0.49921		0.668121		0.641629	0.644174	0.592693	0.392683	0.627182		0.692288		0.675667	0.499642	0.551432
1963	0.507671			0.441024		0.661701	0.63296			0.644635		0.460463							0.5132	0.514606	0.733469	0.349185		0.768659	0.683344	0.477676	0.592169	0.569372	0.555015	0.475737		0.575478			0.49921		0.668121		0.641629	0.644174	0.592693	0.392683	0.627182		0.692288		0.680622	0.499642	0.551432
1964	0.507671			0.441024		0.668188	0.63296			0.644635		0.460463							0.5132	0.514606	0.733469	0.349185		0.768659	0.683344	0.477676	0.592169	0.569372	0.555015	0.475737		0.575478			0.49921		0.668121		0.641629	0.644174	0.592693	0.392683	0.627182		0.692288		0.677655	0.499642	0.551432
1965	0.507671			0.441024		0.680542	0.63296			0.644635		0.460463							0.5132	0.514606	0.733469	0.349185		0.768659	0.683344	0.477676	0.592169	0.569372	0.555015	0.475737		0.575478			0.49921		0.668121		0.641629	0.644174	0.592693	0.392683	0.627182		0.692288		0.671369	0.499642	0.551432
1966	0.507671			0.441024		0.676057	0.63296			0.644635		0.460463							0.5132	0.514606	0.733469	0.349185		0.768659	0.683344	0.477676	0.592169	0.569372	0.555015	0.475737		0.575478			0.49921		0.668121		0.641629	0.644174	0.592693	0.392683	0.627182		0.692288		0.66694	0.499642	0.551432
1967	0.507671			0.441024		0.670348	0.63296			0.644635		0.460463							0.5132	0.514606	0.733469	0.349185		0.768659	0.683344	0.477676	0.592169	0.569372	0.555015	0.475737		0.575478			0.49921		0.668121		0.641629	0.644174	0.592693	0.392683	0.627182		0.692288		0.662639	0.499642	0.551432
1968	0.507671			0.441024		0.664249	0.63296			0.644635		0.460463							0.5132	0.514606	0.733469	0.349185		0.768659	0.683344	0.477676	0.592169	0.569372	0.555015	0.475737		0.575478			0.49921		0.668121		0.641629	0.644174	0.592693	0.392683	0.627182		0.692288		0.667735	0.499642	0.551432
1969	0.507671			0.441024		0.656886	0.63296			0.644635		0.460463							0.5132	0.514606	0.733469	0.349185		0.768659	0.683344	0.477676	0.592169	0.569372	0.555015	0.475737		0.575478			0.49921		0.668121		0.641629	0.644174	0.592693	0.392683	0.627182		0.692288		0.65532	0.499642	0.551432
1970	0.507671		0.284385	0.441024	0.740376	0.671027	0.63296	0.569163		0.644635		0.460463	0.409344	0.376267		0.638703	0.474997		0.5132	0.514606	0.733469	0.349185		0.768659	0.683344	0.477676	0.592169	0.569372	0.555015	0.475737		0.575478			0.49921	0.513833	0.668121		0.641629	0.644174	0.592693	0.392683	0.627182	0.655423	0.692288		0.655757	0.499642	0.551432
1971	0.507671		0.284385	0.441024	0.740376	0.675452	0.63296	0.569163		0.644635		0.460463	0.409344	0.376267		0.638703	0.474997		0.565073	0.514606	0.733469	0.349185		0.770101	0.683344	0.477676	0.592169	0.569372	0.555015	0.475737		0.575478			0.49921	0.513833	0.668121		0.641629	0.644174	0.592155	0.392683	0.627182	0.655423	0.692288		0.655638	0.499642	0.551432
1972	0.507671		0.284385	0.441024	0.740376	0.669935	0.63296	0.569163		0.644635		0.460463	0.409344	0.376267		0.638703	0.474997		0.539943	0.514606	0.733469	0.349185		0.770907	0.683344	0.477676	0.592169	0.569372	0.555015	0.475737		0.575478			0.49921	0.513833	0.668121		0.641629	0.644174	0.582918	0.392683	0.627182	0.655423	0.692288		0.659165	0.499642	0.551432
1973	0.507671		0.284385	0.441024	0.740376	0.692236	0.63296	0.569163		0.644635		0.460463	0.409344	0.376267	0.410926	0.638703	0.474997		0.51655	0.514606	0.733469	0.349185		0.762547	0.683344	0.477676	0.592169	0.569372	0.555015	0.475737		0.575478			0.49921	0.513833	0.668121		0.641629	0.644174	0.556494	0.392683	0.627182	0.655423	0.692288		0.654007	0.428105	0.551432
1974	0.507671		0.284385	0.441024	0.740376	0.719803	0.63296	0.569163		0.644635		0.460463	0.409344	0.376267	0.410926	0.638703	0.474997		0.535919	0.514606	0.733469	0.349185		0.748153	0.683344	0.477676	0.592169	0.569372	0.555015	0.475737		0.575478			0.49921	0.513833	0.668121		0.641629	0.644174	0.514926	0.392683	0.627182	0.655423	0.692288		0.654235	0.290678	0.551432
1975	0.507671		0.284385	0.441024	0.740376	0.713883	0.63296	0.569163		0.644635		0.460463	0.409344	0.376267	0.410926	0.638703	0.474997		0.545428	0.514606	0.750566	0.349185		0.731787	0.683344	0.477676	0.592169	0.569372	0.555015	0.475737		0.575478			0.49921	0.513833	0.668121		0.641629	0.644174	0.537079	0.392683	0.627182	0.655423	0.692288		0.683621	0.332628	0.551432
1976	0.507671		0.284385	0.441024	0.740376	0.700886	0.63296	0.569163		0.644635		0.460463	0.409344	0.376267	0.410926	0.638703	0.474997		0.533042	0.514606	0.750566	0.349185		0.727187	0.683344	0.477676	0.592169	0.569372	0.555015	0.475737		0.575478			0.49921	0.513833	0.668121		0.641629	0.644174	0.520283	0.392683	0.627182	0.655423	0.702893		0.687006	0.278142	0.551432
1977	0.507671		0.284385	0.441024	0.740376	0.700095	0.63296	0.569163		0.644635		0.460463	0.409344	0.376267	0.410926	0.638703	0.474997		0.545704	0.514606	0.750566	0.349185		0.723388	0.683344	0.477676	0.592169	0.569372	0.555015	0.475737		0.575478			0.49921	0.513833	0.668121		0.641629	0.644174	0.488435	0.392683	0.627182	0.655423	0.696407		0.684334	0.349795	0.551432
1978	0.507671		0.284385	0.441024	0.740376	0.682669	0.63296	0.569163		0.644635		0.460463	0.409344	0.376267	0.410926	0.638703	0.474997		0.519968	0.514606	0.750566	0.349185		0.70787	0.683344	0.477676	0.592169	0.569372	0.555015	0.475737		0.575478			0.49921	0.513833	0.668121		0.641629	0.644174	0.481022	0.392683	0.627182	0.655423	0.664201		0.689823	0.429177	0.551432
1979	0.507671		0.284385	0.441024	0.740376	0.671457	0.63296	0.569163		0.644635		0.460463	0.409344	0.376267	0.410926	0.638703	0.474997		0.520563	0.514606	0.750566	0.349185		0.683543	0.683344	0.477676	0.592169	0.569372	0.555015	0.475737		0.575478			0.49921	0.513833	0.668121		0.641629	0.644174	0.450411	0.392683	0.627182	0.655423	0.649658		0.688371	0.424858	0.551432
1980	0.507671		0.284385	0.441024	0.740376	0.672304	0.63296	0.569163	0.750309	0.644635	0.649636	0.463515	0.409344	0.376267	0.410926	0.638703	0.474997		0.532829	0.514606	0.750566	0.349185	0.231892	0.670415	0.683344	0.477676	0.592169	0.569372	0.555015	0.475737	0.563786	0.575478			0.49921	0.513833	0.668121	0.580827	0.641629	0.644174	0.490092	0.392683	0.627182	0.655423	0.663445	0.657002	0.69127	0.420539	0.551432
1981	0.507671		0.284385	0.441024	0.740376	0.677483	0.63296	0.569163	0.750309	0.644635	0.649636	0.486689	0.409344	0.376267	0.410926	0.638703	0.474997		0.516251	0.514606	0.750566	0.349185	0.231892	0.692736	0.683344	0.477676	0.592169	0.569372	0.555015	0.475737	0.563786	0.575478			0.49921	0.513833	0.668121	0.580827	0.641629	0.644174	0.466587	0.392683	0.627182	0.655423	0.673215	0.661932	0.689041	0.41622	0.551432
1982	0.507671		0.284385	0.441024	0.740376	0.675741	0.63296	0.569163	0.750309	0.644635	0.649636	0.49032	0.409344	0.376267	0.410926	0.638703	0.474997		0.508406	0.514606	0.750566	0.349185	0.231892	0.70736	0.683344	0.477676	0.592169	0.569372	0.555015	0.475737	0.563786	0.575478			0.49921	0.513833	0.668121	0.580827	0.641629	0.644174	0.451732	0.392683	0.627182	0.655423	0.666491	0.675521	0.689971	0.411902	0.551432
1983	0.507671		0.284385	0.441024	0.740376	0.646007	0.63296	0.569163	0.750309	0.644635	0.649636	0.492375	0.409344	0.376267	0.410926	0.638703	0.474997		0.566782	0.514606	0.750566	0.349185	0.231892	0.677225	0.683344	0.477676	0.592169	0.569372	0.555015	0.475737	0.563786	0.575478			0.49921	0.513833	0.668121	0.580827	0.641629	0.644174	0.414725	0.392683	0.627182	0.655423	0.660675	0.679942	0.680786	0.407583	0.551432
1984	0.507671		0.284385	0.441024	0.740376	0.644595	0.63296	0.569163	0.750309	0.644635	0.649636	0.499627	0.409344	0.376267	0.410926	0.638703	0.474997		0.715699	0.514606	0.750566	0.349185	0.231892	0.661424	0.683344	0.477676	0.592169	0.569372	0.555015	0.475737	0.563786	0.575478			0.49921	0.513833	0.668121	0.580827	0.641629	0.644174	0.41656	0.392683	0.627182	0.655423	0.658047	0.679165	0.668137	0.403264	0.551432
1985	0.507671		0.284385	0.441024	0.740376	0.641788	0.63296	0.569163	0.751652	0.644635	0.649636	0.502573	0.409344	0.376267	0.410926	0.638703	0.474997		0.605672	0.514606	0.750566	0.349185	0.231892	0.658375	0.683344	0.477676	0.592169	0.569372	0.555015	0.475737	0.563786	0.575478			0.49921	0.513833	0.668121	0.580827	0.641629	0.644174	0.409387	0.392683	0.627182	0.655423	0.671996	0.650872	0.659426	0.398945	0.551432
1986	0.507671		0.284385	0.441024	0.740376	0.631942	0.63296	0.569163	0.730289	0.636752	0.649636	0.505519	0.409344	0.376267	0.410926	0.638703	0.474997	0.518808	0.520215	0.514606	0.750566	0.349185	0.231892	0.679513	0.683344	0.477676	0.592169	0.569372	0.555015	0.475737	0.563786	0.575478			0.49921	0.513833	0.668121	0.580827	0.641629	0.644174	0.442295	0.392683	0.627182	0.655423	0.670253	0.645809	0.639004	0.394627	0.551432
1987	0.507671		0.284385	0.441024	0.740376	0.61319	0.63296	0.569163	0.724469	0.63119	0.649636	0.508465	0.409344	0.376267	0.410926	0.638703	0.474997	0.518808	0.533383	0.514606	0.750566	0.349185	0.231892	0.673339	0.683344	0.477676	0.592169	0.569372	0.555015	0.475737	0.563786	0.575478			0.49921	0.513833	0.668121	0.580827	0.641629	0.644174	0.450114	0.392683	0.627182	0.655423	0.668411	0.641511	0.633568	0.390308	0.551432
1988	0.507671		0.284385	0.441024	0.740376	0.609081	0.63296	0.569163	0.711819	0.616175	0.649636	0.511411	0.409344	0.376267	0.410926	0.638703	0.474997	0.518808	0.546551	0.514606	0.750566	0.349185	0.231892	0.681399	0.683344	0.477676	0.592169	0.569372	0.555015	0.475737	0.563786	0.575478			0.49921	0.513833	0.668121	0.580827	0.641629	0.644174	0.413851	0.392683	0.627182	0.655423	0.663688	0.611495	0.618517	0.385989	0.550357
1989	0.507671		0.284385	0.441024	0.740376	0.618467	0.63296	0.569163	0.719201	0.611995	0.649636	0.514357	0.409344	0.376267	0.410926	0.638703	0.474997	0.518808	0.550017	0.514606	0.750566	0.349185	0.231892	0.693053	0.683344	0.477676	0.592169	0.569372	0.555015	0.475737	0.563786	0.575478			0.49921	0.513833	0.668121	0.580827	0.641629	0.644174	0.389068	0.392683	0.627182	0.655423	0.663907	0.613488	0.612028	0.38167	0.556725
1990	0.507671		0.284385	0.441024	0.740376	0.626009	0.63296	0.569163	0.726582	0.61892	0.649636	0.517304	0.409344	0.376267	0.418359	0.638703	0.474997	0.518808	0.53808	0.514606	0.750566	0.349185	0.231892	0.710366	0.683344	0.477676	0.592169	0.558516	0.555015	0.475737	0.563786	0.575478			0.49921	0.513833	0.668121	0.580827	0.641629	0.644174	0.355357	0.392683	0.627182	0.655423	0.67934	0.60517	0.617571	0.377351	0.575844
1991	0.507671	0.648357	0.284385	0.441024	0.740376	0.617311	0.63296	0.569163	0.733963	0.632271	0.649636	0.52025	0.409344	0.376267	0.418359	0.638703	0.433642	0.518808	0.548706	0.514606	0.750566	0.349185	0.231892	0.733603	0.683344	0.477676	0.592169	0.609049	0.54456	0.475737	0.563786	0.575478		0.470305	0.49921	0.513833	0.668121	0.584104	0.641629	0.644174	0.348438	0.392683	0.627182	0.655423	0.708111	0.596851	0.618926	0.373033	0.582013
1992	0.507671	0.648357	0.284385	0.441024	0.719028	0.607276	0.63296	0.569163	0.741344	0.629504	0.649636	0.523196	0.409344	0.376267	0.417976	0.638703	0.461376	0.518808	0.559897	0.514606	0.750566	0.349185	0.231892	0.738517	0.683344	0.477676	0.592169	0.615021	0.534106	0.475737	0.563786	0.575478		0.470305	0.49921	0.513833	0.676294	0.61768	0.641629	0.626211	0.35356	0.392683	0.627182	0.655423	0.679911	0.588533	0.617422	0.368714	0.57982
1993	0.507671	0.648357	0.284385	0.441024	0.740376	0.60134	0.63296	0.569163	0.748725	0.634597	0.649636	0.526142	0.409344	0.357919	0.413287	0.638703	0.588125	0.518808	0.560882	0.491567	0.750566	0.382888	0.231892	0.722486	0.683344	0.477676	0.566813	0.604265	0.523651	0.469647	0.563786	0.575478		0.470305	0.49921	0.507951	0.677944	0.619099	0.641629	0.619029	0.358682	0.392683	0.627182	0.655423	0.633537	0.580215	0.619319	0.364395	0.563875
1994	0.507671	0.648357	0.284385	0.431845	0.740376	0.604075	0.63296	0.569163	0.756106	0.625397	0.649636	0.529088	0.409344	0.348361	0.418359	0.638703	0.514965	0.518808	0.556448	0.511684	0.750566	0.327378	0.231892	0.695458	0.683344	0.477676	0.561034	0.475207	0.544171	0.50499	0.563786	0.575478		0.470305	0.49921	0.521797	0.661826	0.662249	0.641629	0.673582	0.363804	0.392683	0.627182	0.655423	0.607375	0.571896	0.617228	0.360076	0.549946
1995	0.507671	0.648357	0.284385	0.393929	0.740376	0.607524	0.63296	0.513965	0.763487	0.617203	0.610204	0.532034	0.409344	0.336979	0.418359	0.638703	0.510969	0.518808	0.538922	0.573397	0.750566	0.33159	0.231892	0.683057	0.683344	0.477676	0.567351	0.472567	0.509391	0.498516	0.563786	0.575478		0.470305	0.49921	0.527124	0.661148	0.638128	0.641629	0.658052	0.368927	0.392683	0.627182	0.646045	0.590622	0.563578	0.620158	0.355758	0.544222
1996	0.507671	0.637259	0.284385	0.366973	0.740376	0.617958	0.621578	0.483231	0.770868	0.62174	0.60326	0.53498	0.38635	0.335176	0.409882	0.638703	0.525207	0.518808	0.554492	0.564224	0.750566	0.316366	0.231892	0.676772	0.682174	0.477676	0.588391	0.493289	0.503529	0.505111	0.563786	0.575478		0.470305	0.506394	0.535291	0.658174	0.654624	0.647052	0.661799	0.374049	0.392683	0.625615	0.651069	0.592692	0.55526	0.623363	0.351439	0.533988
1997	0.507671	0.634907	0.284385	0.356874	0.726957	0.611848	0.611113	0.428941	0.77825	0.619153	0.606282	0.537926	0.500329	0.335176	0.415181	0.638703	0.508747	0.514825	0.54932	0.541116	0.750566	0.279383	0.231892	0.673506	0.675233	0.482842	0.58853	0.456808	0.503529	0.503685	0.563786	0.575478		0.470305	0.510773	0.54051	0.646557	0.64018	0.641905	0.642518	0.379171	0.391856	0.638372	0.629969	0.578601	0.581687	0.61702	0.34712	0.550859
1998	0.507671	0.638232	0.284385	0.369576	0.745938	0.613369	0.607895	0.389421	0.785631	0.616947	0.614448	0.540872	0.467949	0.362987	0.401689	0.638703	0.552882	0.521586	0.518672	0.547279	0.750566	0.29424	0.231892	0.686227	0.668843	0.503552	0.592413	0.453772	0.503529	0.505347	0.563786	0.575478		0.470305	0.490657	0.515596	0.639817	0.633569	0.656605	0.623237	0.388788	0.399597	0.643319	0.614438	0.569103	0.595315	0.61233	0.342801	0.557235
1999	0.49407	0.655211	0.284385	0.391514	0.715652	0.605032	0.607916	0.408845	0.793012	0.624353	0.617155	0.543818	0.536036	0.359849	0.408206	0.638703	0.548672	0.507897	0.537876	0.545117	0.750566	0.303254	0.231892	0.669298	0.677252	0.516288	0.606277	0.457284	0.503529	0.496112	0.563786	0.575478		0.470305	0.48714	0.515881	0.645175	0.633569	0.648662	0.603957	0.409952	0.413919	0.647611	0.590489	0.573309	0.563836	0.618589	0.338483	0.57968
2000	0.484667	0.645106	0.284385	0.391106	0.681093	0.606546	0.59638	0.401026	0.800393	0.616644	0.617155	0.528272	0.504459	0.335176	0.391577	0.638703	0.555989	0.548657	0.560121	0.537807	0.750566	0.277961	0.231892	0.653895	0.672166	0.498518	0.591962	0.477416	0.503529	0.478871	0.563786	0.575478		0.470305	0.487177	0.514873	0.654206	0.633569	0.6222	0.584676	0.431115	0.416549	0.645772	0.586119	0.566256	0.548898	0.615421	0.334164	0.588405
2001	0.505321	0.645106	0.284385	0.399785	0.698984	0.608155	0.588483	0.377947	0.807774	0.627344	0.617155	0.527125	0.477586	0.335176	0.376865	0.638703	0.59134	0.569151	0.55859	0.545147	0.750566	0.277961	0.231892	0.657381	0.691474	0.494579	0.588033	0.464204	0.503529	0.484831	0.563786	0.575478		0.470305	0.483941	0.511133	0.641213	0.633569	0.636456	0.565395	0.452279	0.41183	0.637941	0.56993	0.560389	0.488626	0.617073	0.329845	0.600841
2002	0.504457	0.645106	0.284385	0.317553	0.657671	0.600817	0.584005	0.37709	0.815155	0.63153	0.617155	0.542445	0.453595	0.338973	0.381021	0.638703	0.586647	0.579604	0.547475	0.53307	0.750566	0.277961	0.231892	0.657403	0.709991	0.493408	0.603283	0.450992	0.503529	0.491315	0.563786	0.575478		0.470305	0.504668	0.522495	0.635994	0.633569	0.640946	0.546114	0.473442	0.406574	0.636756	0.559816	0.565241	0.488626	0.621556	0.335843	0.593017
2003	0.500101	0.645106	0.291653	0.310136	0.641331	0.601512	0.58308	0.379397	0.822536	0.624384	0.617155	0.514074	0.467773	0.326704	0.390356	0.638703	0.554403	0.575922	0.545152	0.529578	0.750566	0.277961	0.231892	0.645754	0.702004	0.502191	0.598128	0.43778	0.503529	0.479896	0.563786	0.575478		0.470305	0.524958	0.523768	0.633888	0.633569	0.642334	0.526833	0.494606	0.402968	0.633542	0.554221	0.569267	0.488626	0.621751	0.345666	0.587607
2004	0.494064	0.645106	0.275553	0.324795	0.637955	0.603244	0.572629	0.385608	0.829918	0.609807	0.617155	0.495178	0.464563	0.322468	0.393156	0.638703	0.55243	0.581958	0.524886	0.525227	0.750566	0.277961	0.231892	0.639334	0.685238	0.456808	0.572884	0.424569	0.503529	0.470782	0.563786	0.575478		0.470305	0.522323	0.523044	0.619629	0.633569	0.632363	0.507552	0.515769	0.376297	0.629823	0.552837	0.563991	0.488626	0.616436	0.3182	0.597272
2005	0.488981	0.645106	0.231607	0.33895	0.602977	0.593035	0.563615	0.341989	0.837299	0.602968	0.617155	0.534476	0.467454	0.318232	0.378184	0.638703	0.569753	0.602794	0.514479	0.535446	0.750566	0.277961	0.231892	0.629435	0.677323	0.431144	0.568219	0.411357	0.503529	0.469287	0.563786	0.575478		0.470305	0.546706	0.520359	0.612891	0.633569	0.634598	0.488272	0.536933	0.379698	0.624301	0.545614	0.572832	0.488626	0.615843	0.274865	0.594801
2006	0.497539	0.645106	0.237114	0.355539	0.593883	0.58805	0.556628	0.255406	0.618851	0.603291	0.617155	0.5042	0.463686	0.313996	0.406312	0.648814	0.579198	0.585547	0.479564	0.540471	0.750566	0.277961	0.164316	0.634262	0.659281	0.384864	0.557359	0.410279	0.503529	0.469307	0.563786	0.575478		0.470305	0.550122	0.514592	0.598493	0.633569	0.632629	0.468991	0.558096	0.378494	0.622456	0.547348	0.574866	0.488626	0.615579	0.274865	0.600103
2007	0.475489	0.645106	0.242621	0.364847	0.587403	0.593336	0.550687	0.231887	0.61492	0.600067	0.617155	0.460065	0.46705	0.309761	0.391525	0.654797	0.567734	0.598993	0.471115	0.541516	0.750566	0.277961	0.164316	0.639495	0.648758	0.384132	0.553082	0.406883	0.503529	0.47263	0.563786	0.575478		0.475094	0.557584	0.509283	0.590179	0.633569	0.649296	0.44971	0.57926	0.336146	0.608767	0.562678	0.559153	0.488626	0.607302	0.274865	0.603558
2008	0.474063	0.645106	0.255718	0.403679	0.565523	0.569114	0.562086	0.211646	0.606218	0.618209	0.617155	0.509588	0.497731	0.305525	0.373287	0.664813	0.545878	0.592197	0.451006	0.54967	0.750566	0.277961	0.164316	0.631198	0.654553	0.430929	0.552076	0.369449	0.503529	0.461115	0.561642	0.575478		0.491017	0.563791	0.517451	0.604604	0.633569	0.649351	0.459391	0.600423	0.319902	0.599292	0.606482	0.570323	0.488626	0.607689	0.274865	0.595151
2009	0.499189	0.645106	0.36001	0.443855	0.579102	0.577103	0.579668	0.254765	0.606218	0.630932	0.617155	0.469325	0.472638	0.301289	0.393413	0.680418	0.577008	0.607498	0.476411	0.562467	0.750566	0.277961	0.164316	0.672545	0.680613	0.439614	0.552655	0.361156	0.503529	0.471205	0.587684	0.575478		0.494666	0.601337	0.520523	0.626462	0.633569	0.671794	0.476	0.621587	0.338636	0.59179	0.63674	0.607913	0.488626	0.621326	0.274865	0.600113
2010	0.491144	0.645106	0.300495	0.440692	0.568249	0.574955	0.576476	0.231421	0.606218	0.613814	0.617155	0.472821	0.480662	0.297053	0.39721	0.671102	0.597507	0.6058	0.450485	0.552457	0.750566	0.277961	0.164316	0.650952	0.662813	0.439614	0.548255	0.381847	0.503529	0.468265	0.602353	0.575478	0.648437	0.491933	0.595915	0.5229	0.615998	0.633569	0.641319	0.470922	0.64275	0.350514	0.594257	0.58596	0.596794	0.488626	0.620701	0.274865	0.599281
2011	0.49466	0.645106	0.287628	0.473124	0.591894	0.575421	0.57134	0.212007	0.606218	0.618337	0.617155	0.457031	0.468075	0.297053	0.39721	0.671102	0.501404	0.607019	0.455282	0.557017	0.750566	0.277961	0.164316	0.639589	0.672553	0.439614	0.549983	0.349021	0.503529	0.447501	0.595307	0.575478	0.647062	0.498873	0.596353	0.52362	0.616051	0.633569	0.637184	0.458413	0.663914	0.376622	0.585679	0.556497	0.600069	0.488626	0.61919	0.274865	0.596891
2012	0.49436	0.645106	0.282355	0.520179	0.581523	0.582465	0.57993	0.229081	0.606218	0.623317	0.617155	0.468168	0.480667	0.297053	0.39721	0.671102	0.539316	0.61269	0.455141	0.565821	0.750566	0.277961	0.164316	0.650562	0.680962	0.439614	0.56034	0.34966	0.503529	0.457664	0.640123	0.575478	0.669626	0.501525	0.598626	0.532809	0.628495	0.633569	0.629859	0.454918	0.681181	0.313836	0.566493	0.556662	0.613984	0.488626	0.623384	0.274865	0.59129
2013	0.506102	0.645106	0.280897	0.543918	0.585155	0.582097	0.584708	0.242707	0.606218	0.624875	0.617155	0.481261	0.513022	0.297053	0.39721	0.671102	0.625577	0.60477	0.459842	0.570314	0.750566	0.277961	0.164316	0.649688	0.684298	0.439614	0.571144	0.334099	0.503529	0.459551	0.615294	0.587378	0.684483	0.500175	0.573446	0.530515	0.630767	0.633569	0.628321	0.453679	0.666959	0.343698	0.55827	0.559973	0.610399	0.488626	0.623154	0.274865	0.595529
2014	0.497218	0.645106	0.288775	0.543918	0.579614	0.596026	0.581942	0.250553	0.606218	0.617005	0.617155	0.484083	0.521066	0.297053	0.39721	0.671102	0.605968	0.605438	0.47239	0.568104	0.750566	0.277961	0.164316	0.641807	0.682918	0.439614	0.578006	0.334099	0.503529	0.469603	0.644603	0.587744	0.665202	0.497472	0.565491	0.51691	0.627978	0.633569	0.620647	0.442944	0.666959	0.353351	0.55779	0.566943	0.601297	0.488626	0.623722	0.274865	0.58496
2015	0.500872	0.645106	0.349128	0.543918	0.573068	0.604028	0.578768	0.288775	0.606218	0.601801	0.617155	0.481171	0.512713	0.297053	0.39721	0.671102	0.592541	0.611833	0.498507	0.581198	0.750566	0.277961	0.164316	0.670259	0.688674	0.439614	0.583169	0.334099	0.503529	0.493405	0.654509	0.588891	0.670486	0.499035	0.553562	0.512559	0.629125	0.633569	0.619105	0.435345	0.666959	0.362036	0.558866	0.587249	0.593416	0.488626	0.617956	0.274865	0.585075
2016	0.496144	0.645106	0.343025	0.543918	0.564274	0.583877	0.579817	0.272133	0.606218	0.593993	0.617155	0.464039	0.523164	0.297053	0.39721	0.671102	0.592541	0.59538	0.498507	0.580193	0.750566	0.277961	0.164316	0.661178	0.688393	0.439614	0.586253	0.334099	0.503529	0.494809	0.62033	0.579786	0.681031	0.496755	0.542981	0.522976	0.629603	0.633569	0.618479	0.426877	0.666959	0.362036	0.554149	0.572147	0.588338	0.488626	0.620325	0.274865	0.586205
2017	0.489356	0.645106	0.346371	0.543918	0.548672	0.579756	0.580764	0.254187	0.606218	0.593289	0.617155	0.460928	0.513985	0.297053	0.39721	0.671102	0.592541	0.596985	0.498507	0.577995	0.750566	0.277961	0.164316	0.651137	0.689425	0.439614	0.586253	0.334099	0.503529	0.497038	0.626748	0.579786	0.681031	0.489534	0.549274	0.532784	0.633366	0.633569	0.615561	0.426877	0.666959	0.362036	0.552751	0.585143	0.567806	0.488626	0.623362	0.274865	0.587017
2018	0.485401	0.645106	0.331142	0.543918	0.548672	0.571645	0.58386	0.254187	0.606218	0.594811	0.617155	0.460928	0.527659	0.297053	0.39721	0.671102	0.592541	0.588104	0.498507	0.577995	0.750566	0.277961	0.164316	0.65488	0.6841	0.439614	0.586253	0.334099	0.503529	0.495211	0.626748	0.579786	0.681031	0.480495	0.552714	0.54925	0.641904	0.633569	0.620392	0.426877	0.666959	0.362036	0.555432	0.588353	0.571272	0.488626	0.624132	0.274865	0.589645
2019	0.485401	0.645106	0.331142	0.543918	0.548672	0.571645	0.58386	0.254187	0.606218	0.594811	0.617155	0.460928	0.527659	0.297053	0.39721	0.671102	0.592541	0.588104	0.498507	0.577995	0.750566	0.277961	0.164316	0.65488	0.6841	0.439614	0.586253	0.334099	0.503529	0.495211	0.626748	0.579786	0.681031	0.480495	0.552714	0.54925	0.641904	0.633569	0.620392	0.426877	0.666959	0.362036	0.555432	0.588353	0.571272	0.488626	0.624132	0.274865	0.589645
Gesamtergebnis	35.2345	18.7095	14.4199	30.6074	34.0931	44.7225	43.1034	22.1595	28.4084	44.1843	25.139	29.7263	22.3388	17.2684	18.9732	32.3532	26.1324	19.1096	36.573	37.0119	44.7775	19.3174	8.32962	49.5371	47.737	32.3881	39.8233	29.9102	31.946	33.4676	23.1881	40.3383	6.70942	13.9219	35.9823	25.9534	45.8408	24.7437	44.7724	41.0162	37.1355	26.9768	43.2748	30.9866	45.2102	22.1519	45.3052	22.4056	39.5454
[truncated: 90 more columns]
