# Supplementary material for: The Social Cost of Fossil and Industrial CO2 Emissions from 1950 to 2018
Source: Research Square preprint supplement (doi:10.21203/rs.3.rs-2244259/v1), 2022-11-17
Supplement: Supplementary file 55 [file pl_gdpo_Transposed.xlsx]

## Sheet: price_level_output
VariableCode	RegionCode	YearCode	AggValue
pl_gdpo	ABW	1970	0.502883
pl_gdpo	ABW	1971	0.466604
pl_gdpo	ABW	1972	0.44909
pl_gdpo	ABW	1973	0.412997
pl_gdpo	ABW	1974	0.374738
pl_gdpo	ABW	1975	0.365644
pl_gdpo	ABW	1976	0.352033
pl_gdpo	ABW	1977	0.359892
pl_gdpo	ABW	1978	0.330208
pl_gdpo	ABW	1979	0.301587
pl_gdpo	ABW	1980	0.28666
pl_gdpo	ABW	1981	0.280581
pl_gdpo	ABW	1982	0.272242
pl_gdpo	ABW	1983	0.261873
pl_gdpo	ABW	1984	0.25539
pl_gdpo	ABW	1985	0.229184
pl_gdpo	ABW	1986	0.228563
pl_gdpo	ABW	1987	0.231692
pl_gdpo	ABW	1988	0.239641
pl_gdpo	ABW	1989	0.27433
pl_gdpo	ABW	1990	0.275109
pl_gdpo	ABW	1991	0.347363
pl_gdpo	ABW	1992	0.266871
pl_gdpo	ABW	1993	0.310634
pl_gdpo	ABW	1994	0.319427
pl_gdpo	ABW	1995	0.325453
pl_gdpo	ABW	1996	0.362326
pl_gdpo	ABW	1997	0.382798
pl_gdpo	ABW	1998	0.363002
pl_gdpo	ABW	1999	0.344264
pl_gdpo	ABW	2000	0.434382
pl_gdpo	ABW	2001	0.404072
pl_gdpo	ABW	2002	0.518293
pl_gdpo	ABW	2003	0.522582
pl_gdpo	ABW	2004	0.515308
pl_gdpo	ABW	2005	0.535677
pl_gdpo	ABW	2006	0.539394
pl_gdpo	ABW	2007	0.602348
pl_gdpo	ABW	2008	0.62349
pl_gdpo	ABW	2009	0.63033
pl_gdpo	ABW	2010	0.662679
pl_gdpo	ABW	2011	0.706076
pl_gdpo	ABW	2012	0.725012
pl_gdpo	ABW	2013	0.617287
pl_gdpo	ABW	2014	0.723916
pl_gdpo	ABW	2015	0.736605
pl_gdpo	ABW	2016	0.875446
pl_gdpo	ABW	2017	0.997919
pl_gdpo	ABW	2018	0.923965
pl_gdpo	ABW	2019	0.950033
pl_gdpo	AGO	1970	0.132112
pl_gdpo	AGO	1971	0.129355
pl_gdpo	AGO	1972	0.13349
pl_gdpo	AGO	1973	0.150285
pl_gdpo	AGO	1974	0.162857
pl_gdpo	AGO	1975	0.127804
pl_gdpo	AGO	1976	0.126844
pl_gdpo	AGO	1977	0.13222
pl_gdpo	AGO	1978	0.164013
pl_gdpo	AGO	1979	0.176142
pl_gdpo	AGO	1980	0.229417
pl_gdpo	AGO	1981	0.217003
pl_gdpo	AGO	1982	0.214137
pl_gdpo	AGO	1983	0.224164
pl_gdpo	AGO	1984	0.218298
pl_gdpo	AGO	1985	0.255058
pl_gdpo	AGO	1986	0.271889
pl_gdpo	AGO	1987	0.277662
pl_gdpo	AGO	1988	0.317873
pl_gdpo	AGO	1989	0.348649
pl_gdpo	AGO	1990	0.359869
pl_gdpo	AGO	1991	0.490331
pl_gdpo	AGO	1992	0.434738
pl_gdpo	AGO	1993	0.382915
pl_gdpo	AGO	1994	0.376417
pl_gdpo	AGO	1995	0.2074
pl_gdpo	AGO	1996	0.219613
pl_gdpo	AGO	1997	0.251328
pl_gdpo	AGO	1998	0.199487
pl_gdpo	AGO	1999	0.191917
pl_gdpo	AGO	2000	0.3228
pl_gdpo	AGO	2001	0.299354
pl_gdpo	AGO	2002	0.326697
pl_gdpo	AGO	2003	0.350571
pl_gdpo	AGO	2004	0.378585
pl_gdpo	AGO	2005	0.448854
pl_gdpo	AGO	2006	0.489424
pl_gdpo	AGO	2007	0.546061
pl_gdpo	AGO	2008	0.61061
pl_gdpo	AGO	2009	0.610509
pl_gdpo	AGO	2010	0.546847
pl_gdpo	AGO	2011	0.561664
pl_gdpo	AGO	2012	0.577669
pl_gdpo	AGO	2013	0.59912
pl_gdpo	AGO	2014	0.59806
pl_gdpo	AGO	2015	0.51795
pl_gdpo	AGO	2016	0.471145
pl_gdpo	AGO	2017	0.530624
pl_gdpo	AGO	2018	0.434436
pl_gdpo	AGO	2019	0.380675
pl_gdpo	AIA	1970	0.0602522
pl_gdpo	AIA	1971	0.0722498
pl_gdpo	AIA	1972	0.0758663
pl_gdpo	AIA	1973	0.0827355
pl_gdpo	AIA	1974	0.0933663
pl_gdpo	AIA	1975	0.0971176
pl_gdpo	AIA	1976	0.0917956
pl_gdpo	AIA	1977	0.10313
pl_gdpo	AIA	1978	0.110984
pl_gdpo	AIA	1979	0.11833
pl_gdpo	AIA	1980	0.134158
pl_gdpo	AIA	1981	0.149384
pl_gdpo	AIA	1982	0.169936
pl_gdpo	AIA	1983	0.198738
pl_gdpo	AIA	1984	0.223092
pl_gdpo	AIA	1985	0.248354
pl_gdpo	AIA	1986	0.263506
pl_gdpo	AIA	1987	0.307285
pl_gdpo	AIA	1988	0.360366
pl_gdpo	AIA	1989	0.387255
pl_gdpo	AIA	1990	0.341324
pl_gdpo	AIA	1991	0.443075
pl_gdpo	AIA	1992	0.383993
pl_gdpo	AIA	1993	0.397003
pl_gdpo	AIA	1994	0.428033
pl_gdpo	AIA	1995	0.440107
pl_gdpo	AIA	1996	0.485013
pl_gdpo	AIA	1997	0.541812
pl_gdpo	AIA	1998	0.515771
pl_gdpo	AIA	1999	0.50137
pl_gdpo	AIA	2000	0.548477
pl_gdpo	AIA	2001	0.573027
pl_gdpo	AIA	2002	0.648589
pl_gdpo	AIA	2003	0.595706
pl_gdpo	AIA	2004	0.615536
pl_gdpo	AIA	2005	0.621311
pl_gdpo	AIA	2006	0.694699
pl_gdpo	AIA	2007	0.724303
pl_gdpo	AIA	2008	0.746538
pl_gdpo	AIA	2009	0.791949
pl_gdpo	AIA	2010	0.798929
pl_gdpo	AIA	2011	0.891581
pl_gdpo	AIA	2012	0.946742
pl_gdpo	AIA	2013	1.07081
pl_gdpo	AIA	2014	1.22708
pl_gdpo	AIA	2015	1.37235
pl_gdpo	AIA	2016	1.40252
pl_gdpo	AIA	2017	1.45278
pl_gdpo	AIA	2018	2.07918
pl_gdpo	AIA	2019	1.57253
pl_gdpo	ALB	1970	0.363942
pl_gdpo	ALB	1971	0.360977
pl_gdpo	ALB	1972	0.357607
pl_gdpo	ALB	1973	0.355442
pl_gdpo	ALB	1974	0.348875
pl_gdpo	ALB	1975	0.344898
pl_gdpo	ALB	1976	0.34351
pl_gdpo	ALB	1977	0.33848
pl_gdpo	ALB	1978	0.334343
pl_gdpo	ALB	1979	0.271759
pl_gdpo	ALB	1980	0.231283
pl_gdpo	ALB	1981	0.229998
pl_gdpo	ALB	1982	0.23539
pl_gdpo	ALB	1983	0.230123
pl_gdpo	ALB	1984	0.225655
pl_gdpo	ALB	1985	0.227597
pl_gdpo	ALB	1986	0.224079
pl_gdpo	ALB	1987	0.218709
pl_gdpo	ALB	1988	0.230542
pl_gdpo	ALB	1989	0.254211
pl_gdpo	ALB	1990	0.188978
pl_gdpo	ALB	1991	0.157088
pl_gdpo	ALB	1992	0.167679
pl_gdpo	ALB	1993	0.162426
pl_gdpo	ALB	1994	0.158092
pl_gdpo	ALB	1995	0.185165
pl_gdpo	ALB	1996	0.224688
pl_gdpo	ALB	1997	0.166728
pl_gdpo	ALB	1998	0.172376
pl_gdpo	ALB	1999	0.20266
pl_gdpo	ALB	2000	0.218759
pl_gdpo	ALB	2001	0.2359
pl_gdpo	ALB	2002	0.254626
pl_gdpo	ALB	2003	0.309118
pl_gdpo	ALB	2004	0.386035
pl_gdpo	ALB	2005	0.403979
pl_gdpo	ALB	2006	0.411052
pl_gdpo	ALB	2007	0.458941
pl_gdpo	ALB	2008	0.502425
pl_gdpo	ALB	2009	0.432825
pl_gdpo	ALB	2010	0.386431
pl_gdpo	ALB	2011	0.414447
pl_gdpo	ALB	2012	0.3866
pl_gdpo	ALB	2013	0.418939
pl_gdpo	ALB	2014	0.41731
pl_gdpo	ALB	2015	0.340258
pl_gdpo	ALB	2016	0.352486
pl_gdpo	ALB	2017	0.372259
pl_gdpo	ALB	2018	0.427802
pl_gdpo	ALB	2019	0.421019
pl_gdpo	ARE	1970	0.0158308
pl_gdpo	ARE	1971	0.0188442
pl_gdpo	ARE	1972	0.0301487
pl_gdpo	ARE	1973	0.0503648
pl_gdpo	ARE	1974	0.133403
pl_gdpo	ARE	1975	0.132601
pl_gdpo	ARE	1976	0.144141
pl_gdpo	ARE	1977	0.147358
pl_gdpo	ARE	1978	0.143932
pl_gdpo	ARE	1979	0.154721
pl_gdpo	ARE	1980	0.136813
pl_gdpo	ARE	1981	0.16084
pl_gdpo	ARE	1982	0.16497
pl_gdpo	ARE	1983	0.165459
pl_gdpo	ARE	1984	0.160501
pl_gdpo	ARE	1985	0.165476
pl_gdpo	ARE	1986	0.165149
pl_gdpo	ARE	1987	0.20407
pl_gdpo	ARE	1988	0.180491
pl_gdpo	ARE	1989	0.178387
pl_gdpo	ARE	1990	0.186031
pl_gdpo	ARE	1991	0.203945
pl_gdpo	ARE	1992	0.205979
pl_gdpo	ARE	1993	0.261781
pl_gdpo	ARE	1994	0.265576
pl_gdpo	ARE	1995	0.269923
pl_gdpo	ARE	1996	0.286841
pl_gdpo	ARE	1997	0.288492
pl_gdpo	ARE	1998	0.285789
pl_gdpo	ARE	1999	0.293142
pl_gdpo	ARE	2000	0.296039
pl_gdpo	ARE	2001	0.286605
pl_gdpo	ARE	2002	0.298441
pl_gdpo	ARE	2003	0.311949
pl_gdpo	ARE	2004	0.341758
pl_gdpo	ARE	2005	0.361841
pl_gdpo	ARE	2006	0.381497
pl_gdpo	ARE	2007	0.409778
pl_gdpo	ARE	2008	0.462757
pl_gdpo	ARE	2009	0.435476
pl_gdpo	ARE	2010	0.485829
pl_gdpo	ARE	2011	0.499061
pl_gdpo	ARE	2012	0.505681
pl_gdpo	ARE	2013	0.536048
pl_gdpo	ARE	2014	0.528665
pl_gdpo	ARE	2015	0.513191
pl_gdpo	ARE	2016	0.535901
pl_gdpo	ARE	2017	0.612266
pl_gdpo	ARE	2018	0.669595
pl_gdpo	ARE	2019	0.662869
pl_gdpo	ARG	1950	0.214473
pl_gdpo	ARG	1951	0.23759
pl_gdpo	ARG	1952	0.248557
pl_gdpo	ARG	1953	0.246106
pl_gdpo	ARG	1954	0.245493
pl_gdpo	ARG	1955	0.249911
pl_gdpo	ARG	1956	0.260149
pl_gdpo	ARG	1957	0.266154
pl_gdpo	ARG	1958	0.269747
pl_gdpo	ARG	1959	0.278037
pl_gdpo	ARG	1960	0.291261
pl_gdpo	ARG	1961	0.293483
pl_gdpo	ARG	1962	0.292267
pl_gdpo	ARG	1963	0.295165
pl_gdpo	ARG	1964	0.308936
pl_gdpo	ARG	1965	0.306141
pl_gdpo	ARG	1966	0.308486
pl_gdpo	ARG	1967	0.31451
pl_gdpo	ARG	1968	0.334273
pl_gdpo	ARG	1969	0.363051
pl_gdpo	ARG	1970	0.355201
pl_gdpo	ARG	1971	0.414096
pl_gdpo	ARG	1972	0.384919
pl_gdpo	ARG	1973	0.412126
pl_gdpo	ARG	1974	0.440946
pl_gdpo	ARG	1975	0.476305
pl_gdpo	ARG	1976	0.504178
pl_gdpo	ARG	1977	0.532076
pl_gdpo	ARG	1978	0.560054
pl_gdpo	ARG	1979	0.609385
pl_gdpo	ARG	1980	0.669201
pl_gdpo	ARG	1981	0.687823
pl_gdpo	ARG	1982	0.672783
pl_gdpo	ARG	1983	0.668728
pl_gdpo	ARG	1984	0.6642
pl_gdpo	ARG	1985	0.649872
pl_gdpo	ARG	1986	0.708296
pl_gdpo	ARG	1987	0.686639
pl_gdpo	ARG	1988	0.750803
pl_gdpo	ARG	1989	0.469791
pl_gdpo	ARG	1990	0.7663
pl_gdpo	ARG	1991	0.880164
pl_gdpo	ARG	1992	0.896998
pl_gdpo	ARG	1993	0.811915
pl_gdpo	ARG	1994	0.758819
pl_gdpo	ARG	1995	0.677719
pl_gdpo	ARG	1996	0.555572
pl_gdpo	ARG	1997	0.578182
pl_gdpo	ARG	1998	0.59057
pl_gdpo	ARG	1999	0.593339
pl_gdpo	ARG	2000	0.598882
pl_gdpo	ARG	2001	0.601722
pl_gdpo	ARG	2002	0.265797
pl_gdpo	ARG	2003	0.31315
pl_gdpo	ARG	2004	0.338844
pl_gdpo	ARG	2005	0.374069
pl_gdpo	ARG	2006	0.400639
pl_gdpo	ARG	2007	0.447402
pl_gdpo	ARG	2008	0.521899
pl_gdpo	ARG	2009	0.502739
pl_gdpo	ARG	2010	0.554977
pl_gdpo	ARG	2011	0.610243
pl_gdpo	ARG	2012	0.658891
pl_gdpo	ARG	2013	0.692924
pl_gdpo	ARG	2014	0.656077
pl_gdpo	ARG	2015	0.713174
pl_gdpo	ARG	2016	0.61763
pl_gdpo	ARG	2017	0.628545
pl_gdpo	ARG	2018	0.508563
pl_gdpo	ARG	2019	0.459516
pl_gdpo	ARM	1990	0.0965734
pl_gdpo	ARM	1991	0.0971233
pl_gdpo	ARM	1992	0.100003
pl_gdpo	ARM	1993	0.0974231
pl_gdpo	ARM	1994	0.134879
pl_gdpo	ARM	1995	0.141552
pl_gdpo	ARM	1996	0.160828
pl_gdpo	ARM	1997	0.157838
pl_gdpo	ARM	1998	0.199482
pl_gdpo	ARM	1999	0.176116
pl_gdpo	ARM	2000	0.179269
pl_gdpo	ARM	2001	0.187756
pl_gdpo	ARM	2002	0.193711
pl_gdpo	ARM	2003	0.20105
pl_gdpo	ARM	2004	0.240242
pl_gdpo	ARM	2005	0.29585
pl_gdpo	ARM	2006	0.338198
pl_gdpo	ARM	2007	0.42896
pl_gdpo	ARM	2008	0.501829
pl_gdpo	ARM	2009	0.398941
pl_gdpo	ARM	2010	0.389847
pl_gdpo	ARM	2011	0.387661
pl_gdpo	ARM	2012	0.328101
pl_gdpo	ARM	2013	0.344509
pl_gdpo	ARM	2014	0.374701
pl_gdpo	ARM	2015	0.325896
pl_gdpo	ARM	2016	0.318053
pl_gdpo	ARM	2017	0.301594
pl_gdpo	ARM	2018	0.309958
pl_gdpo	ARM	2019	0.312195
pl_gdpo	ATG	1970	0.110957
pl_gdpo	ATG	1971	0.124861
pl_gdpo	ATG	1972	0.157791
pl_gdpo	ATG	1973	0.206257
pl_gdpo	ATG	1974	0.247031
pl_gdpo	ATG	1975	0.271295
pl_gdpo	ATG	1976	0.246608
pl_gdpo	ATG	1977	0.251192
pl_gdpo	ATG	1978	0.281065
pl_gdpo	ATG	1979	0.282451
pl_gdpo	ATG	1980	0.414919
pl_gdpo	ATG	1981	0.43643
pl_gdpo	ATG	1982	0.448809
pl_gdpo	ATG	1983	0.404715
pl_gdpo	ATG	1984	0.491006
pl_gdpo	ATG	1985	0.63015
pl_gdpo	ATG	1986	0.52559
pl_gdpo	ATG	1987	0.555372
pl_gdpo	ATG	1988	0.630481
pl_gdpo	ATG	1989	0.647253
pl_gdpo	ATG	1990	0.657135
pl_gdpo	ATG	1991	0.659881
pl_gdpo	ATG	1992	0.718931
pl_gdpo	ATG	1993	0.747405
pl_gdpo	ATG	1994	0.730768
pl_gdpo	ATG	1995	0.76768
pl_gdpo	ATG	1996	0.78806
pl_gdpo	ATG	1997	0.828144
pl_gdpo	ATG	1998	1.2625
pl_gdpo	ATG	1999	0.882594
pl_gdpo	ATG	2000	0.742222
pl_gdpo	ATG	2001	0.888012
pl_gdpo	ATG	2002	0.881586
pl_gdpo	ATG	2003	0.823811
pl_gdpo	ATG	2004	1.09263
pl_gdpo	ATG	2005	0.881754
pl_gdpo	ATG	2006	0.848134
pl_gdpo	ATG	2007	0.747405
pl_gdpo	ATG	2008	0.772461
pl_gdpo	ATG	2009	0.706412
pl_gdpo	ATG	2010	0.667244
pl_gdpo	ATG	2011	0.635302
pl_gdpo	ATG	2012	0.673582
pl_gdpo	ATG	2013	0.727619
pl_gdpo	ATG	2014	1.54085
pl_gdpo	ATG	2015	0.886734
pl_gdpo	ATG	2016	0.940327
pl_gdpo	ATG	2017	1.07349
pl_gdpo	ATG	2018	1.02363
pl_gdpo	ATG	2019	1.01858
pl_gdpo	AUS	1950	0.0838372
pl_gdpo	AUS	1951	0.0949733
pl_gdpo	AUS	1952	0.0999815
pl_gdpo	AUS	1953	0.0967005
pl_gdpo	AUS	1954	0.0983122
pl_gdpo	AUS	1955	0.102402
pl_gdpo	AUS	1956	0.108368
pl_gdpo	AUS	1957	0.109396
pl_gdpo	AUS	1958	0.109351
pl_gdpo	AUS	1959	0.113721
pl_gdpo	AUS	1960	0.120005
pl_gdpo	AUS	1961	0.118483
pl_gdpo	AUS	1962	0.12153
pl_gdpo	AUS	1963	0.124963
pl_gdpo	AUS	1964	0.130167
pl_gdpo	AUS	1965	0.13527
pl_gdpo	AUS	1966	0.140514
pl_gdpo	AUS	1967	0.144351
pl_gdpo	AUS	1968	0.150102
pl_gdpo	AUS	1969	0.157221
pl_gdpo	AUS	1970	0.165015
pl_gdpo	AUS	1971	0.176994
pl_gdpo	AUS	1972	0.201982
pl_gdpo	AUS	1973	0.279224
pl_gdpo	AUS	1974	0.343388
pl_gdpo	AUS	1975	0.358393
pl_gdpo	AUS	1976	0.37046
pl_gdpo	AUS	1977	0.362005
pl_gdpo	AUS	1978	0.403764
pl_gdpo	AUS	1979	0.431903
pl_gdpo	AUS	1980	0.480145
pl_gdpo	AUS	1981	0.536155
pl_gdpo	AUS	1982	0.520146
pl_gdpo	AUS	1983	0.491283
pl_gdpo	AUS	1984	0.509236
pl_gdpo	AUS	1985	0.432101
pl_gdpo	AUS	1986	0.444501
pl_gdpo	AUS	1987	0.488333
pl_gdpo	AUS	1988	0.583534
pl_gdpo	AUS	1989	0.627695
pl_gdpo	AUS	1990	0.637755
pl_gdpo	AUS	1991	0.655824
pl_gdpo	AUS	1992	0.608754
pl_gdpo	AUS	1993	0.578489
pl_gdpo	AUS	1994	0.633852
pl_gdpo	AUS	1995	0.655138
pl_gdpo	AUS	1996	0.694392
pl_gdpo	AUS	1997	0.663488
pl_gdpo	AUS	1998	0.569507
pl_gdpo	AUS	1999	0.590469
pl_gdpo	AUS	2000	0.548997
pl_gdpo	AUS	2001	0.507676
pl_gdpo	AUS	2002	0.548436
pl_gdpo	AUS	2003	0.676867
pl_gdpo	AUS	2004	0.792856
pl_gdpo	AUS	2005	0.833636
pl_gdpo	AUS	2006	0.877983
pl_gdpo	AUS	2007	1.03165
pl_gdpo	AUS	2008	1.05527
pl_gdpo	AUS	2009	1.00447
pl_gdpo	AUS	2010	1.18358
pl_gdpo	AUS	2011	1.33056
pl_gdpo	AUS	2012	1.38098
pl_gdpo	AUS	2013	1.28855
pl_gdpo	AUS	2014	1.22324
pl_gdpo	AUS	2015	1.07541
pl_gdpo	AUS	2016	1.05627
pl_gdpo	AUS	2017	1.09694
pl_gdpo	AUS	2018	1.08043
pl_gdpo	AUS	2019	1.0185
pl_gdpo	AUT	1950	0.0676411
pl_gdpo	AUT	1951	0.0798533
pl_gdpo	AUT	1952	0.0894538
pl_gdpo	AUT	1953	0.0761319
pl_gdpo	AUT	1954	0.0750356
pl_gdpo	AUT	1955	0.0786425
pl_gdpo	AUT	1956	0.0816328
pl_gdpo	AUT	1957	0.0859568
pl_gdpo	AUT	1958	0.0852634
pl_gdpo	AUT	1959	0.0879809
pl_gdpo	AUT	1960	0.0927714
pl_gdpo	AUT	1961	0.0970729
pl_gdpo	AUT	1962	0.0991799
pl_gdpo	AUT	1963	0.102744
pl_gdpo	AUT	1964	0.107473
pl_gdpo	AUT	1965	0.112948
pl_gdpo	AUT	1966	0.11657
pl_gdpo	AUT	1967	0.119516
pl_gdpo	AUT	1968	0.1226
pl_gdpo	AUT	1969	0.12738
pl_gdpo	AUT	1970	0.134354
pl_gdpo	AUT	1971	0.148053
pl_gdpo	AUT	1972	0.172559
pl_gdpo	AUT	1973	0.221733
pl_gdpo	AUT	1974	0.26028
pl_gdpo	AUT	1975	0.293332
pl_gdpo	AUT	1976	0.307032
pl_gdpo	AUT	1977	0.354006
pl_gdpo	AUT	1978	0.428173
pl_gdpo	AUT	1979	0.493853
pl_gdpo	AUT	1980	0.549273
pl_gdpo	AUT	1981	0.478466
pl_gdpo	AUT	1982	0.473605
pl_gdpo	AUT	1983	0.467664
pl_gdpo	AUT	1984	0.444269
pl_gdpo	AUT	1985	0.440535
pl_gdpo	AUT	1986	0.602698
pl_gdpo	AUT	1987	0.727805
pl_gdpo	AUT	1988	0.731897
pl_gdpo	AUT	1989	0.689312
pl_gdpo	AUT	1990	0.818193
pl_gdpo	AUT	1991	0.805723
pl_gdpo	AUT	1992	0.876232
pl_gdpo	AUT	1993	0.841427
pl_gdpo	AUT	1994	0.854928
pl_gdpo	AUT	1995	0.97651
pl_gdpo	AUT	1996	0.944809
pl_gdpo	AUT	1997	0.797595
pl_gdpo	AUT	1998	0.772841
pl_gdpo	AUT	1999	0.740863
pl_gdpo	AUT	2000	0.636628
pl_gdpo	AUT	2001	0.651377
pl_gdpo	AUT	2002	0.686627
pl_gdpo	AUT	2003	0.828956
pl_gdpo	AUT	2004	0.9159
pl_gdpo	AUT	2005	0.902697
pl_gdpo	AUT	2006	0.923661
pl_gdpo	AUT	2007	1.03458
pl_gdpo	AUT	2008	1.13476
pl_gdpo	AUT	2009	1.07501
pl_gdpo	AUT	2010	1.03336
pl_gdpo	AUT	2011	1.10369
pl_gdpo	AUT	2012	1.0303
pl_gdpo	AUT	2013	1.09501
pl_gdpo	AUT	2014	1.07709
pl_gdpo	AUT	2015	0.890974
pl_gdpo	AUT	2016	0.903232
pl_gdpo	AUT	2017	0.910539
pl_gdpo	AUT	2018	0.967173
pl_gdpo	AUT	2019	0.930479
pl_gdpo	AZE	1990	0.0897986
pl_gdpo	AZE	1991	0.0634024
pl_gdpo	AZE	1992	0.0695949
pl_gdpo	AZE	1993	0.0986462
pl_gdpo	AZE	1994	0.103174
pl_gdpo	AZE	1995	0.149496
pl_gdpo	AZE	1996	0.163361
pl_gdpo	AZE	1997	0.2185
pl_gdpo	AZE	1998	0.24272
pl_gdpo	AZE	1999	0.233327
pl_gdpo	AZE	2000	0.235995
pl_gdpo	AZE	2001	0.226865
pl_gdpo	AZE	2002	0.232484
pl_gdpo	AZE	2003	0.257894
pl_gdpo	AZE	2004	0.288821
pl_gdpo	AZE	2005	0.286118
pl_gdpo	AZE	2006	0.311713
pl_gdpo	AZE	2007	0.360327
pl_gdpo	AZE	2008	0.481416
pl_gdpo	AZE	2009	0.417421
pl_gdpo	AZE	2010	0.420226
pl_gdpo	AZE	2011	0.403127
pl_gdpo	AZE	2012	0.402764
pl_gdpo	AZE	2013	0.470354
pl_gdpo	AZE	2014	0.433249
pl_gdpo	AZE	2015	0.380604
pl_gdpo	AZE	2016	0.286721
pl_gdpo	AZE	2017	0.294568
pl_gdpo	AZE	2018	0.304825
pl_gdpo	AZE	2019	0.305031
pl_gdpo	BDI	1960	0.103272
pl_gdpo	BDI	1961	0.122321
pl_gdpo	BDI	1962	0.1165
pl_gdpo	BDI	1963	0.123528
pl_gdpo	BDI	1964	0.135993
pl_gdpo	BDI	1965	0.0801581
pl_gdpo	BDI	1966	0.0803017
pl_gdpo	BDI	1967	0.0765658
pl_gdpo	BDI	1968	0.0779211
pl_gdpo	BDI	1969	0.084275
pl_gdpo	BDI	1970	0.0897838
pl_gdpo	BDI	1971	0.0888664
pl_gdpo	BDI	1972	0.0968998
pl_gdpo	BDI	1973	0.110949
pl_gdpo	BDI	1974	0.125272
pl_gdpo	BDI	1975	0.151905
pl_gdpo	BDI	1976	0.151676
pl_gdpo	BDI	1977	0.157727
pl_gdpo	BDI	1978	0.176266
pl_gdpo	BDI	1979	0.224334
pl_gdpo	BDI	1980	0.261381
pl_gdpo	BDI	1981	0.255502
pl_gdpo	BDI	1982	0.271645
pl_gdpo	BDI	1983	0.280579
pl_gdpo	BDI	1984	0.250005
pl_gdpo	BDI	1985	0.267606
pl_gdpo	BDI	1986	0.266601
pl_gdpo	BDI	1987	0.250228
pl_gdpo	BDI	1988	0.216195
pl_gdpo	BDI	1989	0.231135
pl_gdpo	BDI	1990	0.221413
pl_gdpo	BDI	1991	0.214392
pl_gdpo	BDI	1992	0.20449
pl_gdpo	BDI	1993	0.195909
pl_gdpo	BDI	1994	0.211203
pl_gdpo	BDI	1995	0.215626
pl_gdpo	BDI	1996	0.201713
pl_gdpo	BDI	1997	0.231316
pl_gdpo	BDI	1998	0.192843
pl_gdpo	BDI	1999	0.173012
pl_gdpo	BDI	2000	0.157893
pl_gdpo	BDI	2001	0.144919
pl_gdpo	BDI	2002	0.130617
pl_gdpo	BDI	2003	0.117183
pl_gdpo	BDI	2004	0.126602
pl_gdpo	BDI	2005	0.208071
pl_gdpo	BDI	2006	0.22759
pl_gdpo	BDI	2007	0.236409
pl_gdpo	BDI	2008	0.265284
pl_gdpo	BDI	2009	0.287669
pl_gdpo	BDI	2010	0.309973
pl_gdpo	BDI	2011	0.311189
pl_gdpo	BDI	2012	0.316282
pl_gdpo	BDI	2013	0.300019
pl_gdpo	BDI	2014	0.314896
pl_gdpo	BDI	2015	0.326613
pl_gdpo	BDI	2016	0.325831
pl_gdpo	BDI	2017	0.35962
pl_gdpo	BDI	2018	0.340372
pl_gdpo	BDI	2019	0.327541
pl_gdpo	BEL	1950	0.0936148
pl_gdpo	BEL	1951	0.107383
pl_gdpo	BEL	1952	0.109326
pl_gdpo	BEL	1953	0.105414
pl_gdpo	BEL	1954	0.10499
pl_gdpo	BEL	1955	0.107483
pl_gdpo	BEL	1956	0.111425
pl_gdpo	BEL	1957	0.115771
pl_gdpo	BEL	1958	0.116943
pl_gdpo	BEL	1959	0.116708
pl_gdpo	BEL	1960	0.123898
pl_gdpo	BEL	1961	0.124567
pl_gdpo	BEL	1962	0.12292
pl_gdpo	BEL	1963	0.126424
pl_gdpo	BEL	1964	0.132316
pl_gdpo	BEL	1965	0.138944
pl_gdpo	BEL	1966	0.143893
pl_gdpo	BEL	1967	0.147586
pl_gdpo	BEL	1968	0.150524
pl_gdpo	BEL	1969	0.156804
pl_gdpo	BEL	1970	0.164209
pl_gdpo	BEL	1971	0.175876
pl_gdpo	BEL	1972	0.206198
pl_gdpo	BEL	1973	0.24852
pl_gdpo	BEL	1974	0.289165
pl_gdpo	BEL	1975	0.341498
pl_gdpo	BEL	1976	0.346142
pl_gdpo	BEL	1977	0.399986
pl_gdpo	BEL	1978	0.470154
pl_gdpo	BEL	1979	0.527775
pl_gdpo	BEL	1980	0.554102
pl_gdpo	BEL	1981	0.485011
pl_gdpo	BEL	1982	0.436326
pl_gdpo	BEL	1983	0.421061
pl_gdpo	BEL	1984	0.402875
pl_gdpo	BEL	1985	0.42756
pl_gdpo	BEL	1986	0.565855
pl_gdpo	BEL	1987	0.675174
pl_gdpo	BEL	1988	0.680449
pl_gdpo	BEL	1989	0.667998
pl_gdpo	BEL	1990	0.812899
pl_gdpo	BEL	1991	0.809384
pl_gdpo	BEL	1992	0.863992
pl_gdpo	BEL	1993	0.833155
pl_gdpo	BEL	1994	0.87146
pl_gdpo	BEL	1995	0.99919
pl_gdpo	BEL	1996	0.979203
pl_gdpo	BEL	1997	0.823554
pl_gdpo	BEL	1998	0.798035
pl_gdpo	BEL	1999	0.758804
pl_gdpo	BEL	2000	0.648216
pl_gdpo	BEL	2001	0.647843
pl_gdpo	BEL	2002	0.682555
pl_gdpo	BEL	2003	0.82611
pl_gdpo	BEL	2004	0.937723
pl_gdpo	BEL	2005	0.931388
pl_gdpo	BEL	2006	0.979888
pl_gdpo	BEL	2007	1.10221
pl_gdpo	BEL	2008	1.18363
pl_gdpo	BEL	2009	1.08333
pl_gdpo	BEL	2010	1.02544
pl_gdpo	BEL	2011	1.14479
pl_gdpo	BEL	2012	1.07937
pl_gdpo	BEL	2013	1.13227
pl_gdpo	BEL	2014	1.16593
pl_gdpo	BEL	2015	0.958398
pl_gdpo	BEL	2016	0.949574
pl_gdpo	BEL	2017	0.97497
pl_gdpo	BEL	2018	1.06568
pl_gdpo	BEL	2019	1.01797
pl_gdpo	BEN	1959	0.0543568
pl_gdpo	BEN	1960	0.0542235
pl_gdpo	BEN	1961	0.0541029
pl_gdpo	BEN	1962	0.054529
pl_gdpo	BEN	1963	0.0551866
pl_gdpo	BEN	1964	0.0549253
pl_gdpo	BEN	1965	0.0549218
pl_gdpo	BEN	1966	0.054051
pl_gdpo	BEN	1967	0.053597
pl_gdpo	BEN	1968	0.0547587
pl_gdpo	BEN	1969	0.0550646
pl_gdpo	BEN	1970	0.0528891
pl_gdpo	BEN	1971	0.0547981
pl_gdpo	BEN	1972	0.064454
pl_gdpo	BEN	1973	0.0740817
pl_gdpo	BEN	1974	0.074136
pl_gdpo	BEN	1975	0.105767
pl_gdpo	BEN	1976	0.104964
pl_gdpo	BEN	1977	0.110928
pl_gdpo	BEN	1978	0.138677
pl_gdpo	BEN	1979	0.162201
pl_gdpo	BEN	1980	0.193509
pl_gdpo	BEN	1981	0.144205
pl_gdpo	BEN	1982	0.193324
pl_gdpo	BEN	1983	0.169612
pl_gdpo	BEN	1984	0.153841
pl_gdpo	BEN	1985	0.137043
pl_gdpo	BEN	1986	0.198099
pl_gdpo	BEN	1987	0.249373
pl_gdpo	BEN	1988	0.25044
pl_gdpo	BEN	1989	0.255683
pl_gdpo	BEN	1990	0.302027
pl_gdpo	BEN	1991	0.288991
pl_gdpo	BEN	1992	0.319099
pl_gdpo	BEN	1993	0.314029
pl_gdpo	BEN	1994	0.235484
pl_gdpo	BEN	1995	0.3064
pl_gdpo	BEN	1996	0.317176
pl_gdpo	BEN	1997	0.276472
pl_gdpo	BEN	1998	0.285519
pl_gdpo	BEN	1999	0.263791
pl_gdpo	BEN	2000	0.226299
pl_gdpo	BEN	2001	0.2198
pl_gdpo	BEN	2002	0.225676
pl_gdpo	BEN	2003	0.269998
pl_gdpo	BEN	2004	0.291768
pl_gdpo	BEN	2005	0.292384
pl_gdpo	BEN	2006	0.305235
pl_gdpo	BEN	2007	0.332513
pl_gdpo	BEN	2008	0.385899
pl_gdpo	BEN	2009	0.381656
pl_gdpo	BEN	2010	0.363971
pl_gdpo	BEN	2011	0.40501
pl_gdpo	BEN	2012	0.396589
pl_gdpo	BEN	2013	0.425763
pl_gdpo	BEN	2014	0.419448
pl_gdpo	BEN	2015	0.351243
pl_gdpo	BEN	2016	0.344359
pl_gdpo	BEN	2017	0.370101
pl_gdpo	BEN	2018	0.397671
pl_gdpo	BEN	2019	0.375104
pl_gdpo	BFA	1959	0.0627364
pl_gdpo	BFA	1960	0.0750102
pl_gdpo	BFA	1961	0.0831792
pl_gdpo	BFA	1962	0.0833347
pl_gdpo	BFA	1963	0.0895896
pl_gdpo	BFA	1964	0.0897652
pl_gdpo	BFA	1965	0.0934372
pl_gdpo	BFA	1966	0.0952491
pl_gdpo	BFA	1967	0.0896798
pl_gdpo	BFA	1968	0.0887308
pl_gdpo	BFA	1969	0.0905941
pl_gdpo	BFA	1970	0.0904236
pl_gdpo	BFA	1971	0.0997396
pl_gdpo	BFA	1972	0.103237
pl_gdpo	BFA	1973	0.127998
pl_gdpo	BFA	1974	0.131283
pl_gdpo	BFA	1975	0.158688
pl_gdpo	BFA	1976	0.150772
pl_gdpo	BFA	1977	0.164026
pl_gdpo	BFA	1978	0.192259
pl_gdpo	BFA	1979	0.254551
pl_gdpo	BFA	1980	0.274914
pl_gdpo	BFA	1981	0.23793
pl_gdpo	BFA	1982	0.217376
pl_gdpo	BFA	1983	0.210559
pl_gdpo	BFA	1984	0.19393
pl_gdpo	BFA	1985	0.211125
pl_gdpo	BFA	1986	0.250667
pl_gdpo	BFA	1987	0.298287
pl_gdpo	BFA	1988	0.310121
pl_gdpo	BFA	1989	0.307184
pl_gdpo	BFA	1990	0.364286
pl_gdpo	BFA	1991	0.344717
pl_gdpo	BFA	1992	0.366292
pl_gdpo	BFA	1993	0.33586
pl_gdpo	BFA	1994	0.219948
pl_gdpo	BFA	1995	0.240611
pl_gdpo	BFA	1996	0.23506
pl_gdpo	BFA	1997	0.204291
pl_gdpo	BFA	1998	0.219507
pl_gdpo	BFA	1999	0.214585
pl_gdpo	BFA	2000	0.181299
pl_gdpo	BFA	2001	0.187954
pl_gdpo	BFA	2002	0.202878
pl_gdpo	BFA	2003	0.253236
pl_gdpo	BFA	2004	0.275714
pl_gdpo	BFA	2005	0.283765
pl_gdpo	BFA	2006	0.290897
pl_gdpo	BFA	2007	0.337518
pl_gdpo	BFA	2008	0.407211
pl_gdpo	BFA	2009	0.406485
pl_gdpo	BFA	2010	0.399558
pl_gdpo	BFA	2011	0.456344
pl_gdpo	BFA	2012	0.439078
pl_gdpo	BFA	2013	0.448424
pl_gdpo	BFA	2014	0.468207
pl_gdpo	BFA	2015	0.382297
pl_gdpo	BFA	2016	0.374134
pl_gdpo	BFA	2017	0.382896
pl_gdpo	BFA	2018	0.395187
pl_gdpo	BFA	2019	0.370352
pl_gdpo	BGD	1959	0.0380252
pl_gdpo	BGD	1960	0.0398
pl_gdpo	BGD	1961	0.0395764
pl_gdpo	BGD	1962	0.0418542
pl_gdpo	BGD	1963	0.038594
pl_gdpo	BGD	1964	0.0422608
pl_gdpo	BGD	1965	0.0453947
pl_gdpo	BGD	1966	0.05053
pl_gdpo	BGD	1967	0.0518774
pl_gdpo	BGD	1968	0.0515738
pl_gdpo	BGD	1969	0.0532012
pl_gdpo	BGD	1970	0.0588518
pl_gdpo	BGD	1971	0.0538784
pl_gdpo	BGD	1972	0.0631814
pl_gdpo	BGD	1973	0.0817017
pl_gdpo	BGD	1974	0.0962185
pl_gdpo	BGD	1975	0.104893
pl_gdpo	BGD	1976	0.103223
pl_gdpo	BGD	1977	0.100988
pl_gdpo	BGD	1978	0.125965
pl_gdpo	BGD	1979	0.137416
pl_gdpo	BGD	1980	0.155281
pl_gdpo	BGD	1981	0.154064
pl_gdpo	BGD	1982	0.139911
pl_gdpo	BGD	1983	0.139766
pl_gdpo	BGD	1984	0.149636
pl_gdpo	BGD	1985	0.148007
pl_gdpo	BGD	1986	0.151673
pl_gdpo	BGD	1987	0.171509
pl_gdpo	BGD	1988	0.177124
pl_gdpo	BGD	1989	0.172265
pl_gdpo	BGD	1990	0.170514
pl_gdpo	BGD	1991	0.175152
pl_gdpo	BGD	1992	0.174183
pl_gdpo	BGD	1993	0.17533
pl_gdpo	BGD	1994	0.177932
pl_gdpo	BGD	1995	0.190731
pl_gdpo	BGD	1996	0.195183
pl_gdpo	BGD	1997	0.202708
pl_gdpo	BGD	1998	0.212636
pl_gdpo	BGD	1999	0.229952
pl_gdpo	BGD	2000	0.226012
pl_gdpo	BGD	2001	0.219099
pl_gdpo	BGD	2002	0.215515
pl_gdpo	BGD	2003	0.229733
pl_gdpo	BGD	2004	0.243066
pl_gdpo	BGD	2005	0.237988
pl_gdpo	BGD	2006	0.265805
pl_gdpo	BGD	2007	0.272955
pl_gdpo	BGD	2008	0.280605
pl_gdpo	BGD	2009	0.28913
pl_gdpo	BGD	2010	0.285409
pl_gdpo	BGD	2011	0.267063
pl_gdpo	BGD	2012	0.269053
pl_gdpo	BGD	2013	0.304787
pl_gdpo	BGD	2014	0.321881
pl_gdpo	BGD	2015	0.333067
pl_gdpo	BGD	2016	0.362473
pl_gdpo	BGD	2017	0.37402
pl_gdpo	BGD	2018	0.378308
pl_gdpo	BGD	2019	0.397582
pl_gdpo	BGR	1970	0.0792553
pl_gdpo	BGR	1971	0.0831233
pl_gdpo	BGR	1972	0.0863569
pl_gdpo	BGR	1973	0.0911906
pl_gdpo	BGR	1974	0.0983306
pl_gdpo	BGR	1975	0.105733
pl_gdpo	BGR	1976	0.112341
pl_gdpo	BGR	1977	0.120419
pl_gdpo	BGR	1978	0.128953
pl_gdpo	BGR	1979	0.138615
pl_gdpo	BGR	1980	0.156462
pl_gdpo	BGR	1981	0.166354
pl_gdpo	BGR	1982	0.173221
pl_gdpo	BGR	1983	0.175556
pl_gdpo	BGR	1984	0.185238
pl_gdpo	BGR	1985	0.185409
pl_gdpo	BGR	1986	0.193048
pl_gdpo	BGR	1987	0.192869
pl_gdpo	BGR	1988	0.213739
pl_gdpo	BGR	1989	0.220139
pl_gdpo	BGR	1990	0.209606
pl_gdpo	BGR	1991	0.0817933
pl_gdpo	BGR	1992	0.0904282
pl_gdpo	BGR	1993	0.153991
pl_gdpo	BGR	1994	0.139506
pl_gdpo	BGR	1995	0.235546
pl_gdpo	BGR	1996	0.161456
pl_gdpo	BGR	1997	0.193379
pl_gdpo	BGR	1998	0.217102
pl_gdpo	BGR	1999	0.196946
pl_gdpo	BGR	2000	0.175738
pl_gdpo	BGR	2001	0.183529
pl_gdpo	BGR	2002	0.203587
pl_gdpo	BGR	2003	0.252884
pl_gdpo	BGR	2004	0.29779
pl_gdpo	BGR	2005	0.308662
pl_gdpo	BGR	2006	0.332576
pl_gdpo	BGR	2007	0.395949
pl_gdpo	BGR	2008	0.458582
pl_gdpo	BGR	2009	0.445575
pl_gdpo	BGR	2010	0.418386
pl_gdpo	BGR	2011	0.483181
pl_gdpo	BGR	2012	0.446375
pl_gdpo	BGR	2013	0.480115
pl_gdpo	BGR	2014	0.47606
pl_gdpo	BGR	2015	0.400556
pl_gdpo	BGR	2016	0.402264
pl_gdpo	BGR	2017	0.423914
pl_gdpo	BGR	2018	0.459552
pl_gdpo	BGR	2019	0.451857
pl_gdpo	BHR	1970	0.113917
pl_gdpo	BHR	1971	0.119253
pl_gdpo	BHR	1972	0.141222
pl_gdpo	BHR	1973	0.172405
pl_gdpo	BHR	1974	0.1815
pl_gdpo	BHR	1975	0.21628
pl_gdpo	BHR	1976	0.240419
pl_gdpo	BHR	1977	0.300088
pl_gdpo	BHR	1978	0.305433
pl_gdpo	BHR	1979	0.41907
pl_gdpo	BHR	1980	0.447947
pl_gdpo	BHR	1981	0.555194
pl_gdpo	BHR	1982	0.690358
pl_gdpo	BHR	1983	0.675003
pl_gdpo	BHR	1984	0.65298
pl_gdpo	BHR	1985	1.0691
pl_gdpo	BHR	1986	0.701471
pl_gdpo	BHR	1987	0.662853
pl_gdpo	BHR	1988	0.590242
pl_gdpo	BHR	1989	0.622697
pl_gdpo	BHR	1990	0.593136
pl_gdpo	BHR	1991	0.634027
pl_gdpo	BHR	1992	0.622702
pl_gdpo	BHR	1993	0.622763
pl_gdpo	BHR	1994	0.65058
pl_gdpo	BHR	1995	0.674521
pl_gdpo	BHR	1996	0.736874
pl_gdpo	BHR	1997	0.625538
pl_gdpo	BHR	1998	0.622751
pl_gdpo	BHR	1999	0.54249
pl_gdpo	BHR	2000	0.459678
pl_gdpo	BHR	2001	0.462115
pl_gdpo	BHR	2002	0.505416
pl_gdpo	BHR	2003	0.474153
pl_gdpo	BHR	2004	0.500065
pl_gdpo	BHR	2005	0.457579
pl_gdpo	BHR	2006	0.46157
pl_gdpo	BHR	2007	0.481108
pl_gdpo	BHR	2008	0.419684
pl_gdpo	BHR	2009	0.433291
pl_gdpo	BHR	2010	0.446599
pl_gdpo	BHR	2011	0.474674
pl_gdpo	BHR	2012	0.424358
pl_gdpo	BHR	2013	0.454235
pl_gdpo	BHR	2014	0.480138
pl_gdpo	BHR	2015	0.469476
pl_gdpo	BHR	2016	0.485042
pl_gdpo	BHR	2017	0.482202
pl_gdpo	BHR	2018	0.486516
pl_gdpo	BHR	2019	0.499791
pl_gdpo	BHS	1970	0.231907
pl_gdpo	BHS	1971	0.220378
pl_gdpo	BHS	1972	0.248781
pl_gdpo	BHS	1973	0.243024
pl_gdpo	BHS	1974	0.311087
pl_gdpo	BHS	1975	0.394312
pl_gdpo	BHS	1976	0.388624
pl_gdpo	BHS	1977	0.421126
pl_gdpo	BHS	1978	0.38121
pl_gdpo	BHS	1979	0.404375
pl_gdpo	BHS	1980	0.388488
pl_gdpo	BHS	1981	0.488268
pl_gdpo	BHS	1982	0.517614
pl_gdpo	BHS	1983	0.516792
pl_gdpo	BHS	1984	0.456355
pl_gdpo	BHS	1985	0.434556
pl_gdpo	BHS	1986	0.48997
pl_gdpo	BHS	1987	0.475947
pl_gdpo	BHS	1988	0.508225
pl_gdpo	BHS	1989	0.548828
pl_gdpo	BHS	1990	0.635977
pl_gdpo	BHS	1991	0.686052
pl_gdpo	BHS	1992	0.595441
pl_gdpo	BHS	1993	0.657886
pl_gdpo	BHS	1994	0.700641
pl_gdpo	BHS	1995	0.753083
pl_gdpo	BHS	1996	0.704351
pl_gdpo	BHS	1997	0.769285
pl_gdpo	BHS	1998	0.755785
pl_gdpo	BHS	1999	0.749668
pl_gdpo	BHS	2000	0.728392
pl_gdpo	BHS	2001	0.794605
pl_gdpo	BHS	2002	0.706769
pl_gdpo	BHS	2003	0.735435
pl_gdpo	BHS	2004	0.784709
pl_gdpo	BHS	2005	0.795307
pl_gdpo	BHS	2006	0.883663
pl_gdpo	BHS	2007	0.841904
pl_gdpo	BHS	2008	0.895137
pl_gdpo	BHS	2009	0.82473
pl_gdpo	BHS	2010	0.878405
pl_gdpo	BHS	2011	0.85315
pl_gdpo	BHS	2012	0.850855
pl_gdpo	BHS	2013	0.956265
pl_gdpo	BHS	2014	0.916409
pl_gdpo	BHS	2015	1.01536
pl_gdpo	BHS	2016	1.01856
pl_gdpo	BHS	2017	1.02242
pl_gdpo	BHS	2018	1.0407
pl_gdpo	BHS	2019	1.04756
pl_gdpo	BIH	1990	1.9699
pl_gdpo	BIH	1991	1.43237
pl_gdpo	BIH	1992	1.39697
pl_gdpo	BIH	1993	0.817129
pl_gdpo	BIH	1994	0.458875
pl_gdpo	BIH	1995	0.23071
pl_gdpo	BIH	1996	0.166757
pl_gdpo	BIH	1997	0.184719
pl_gdpo	BIH	1998	0.198797
pl_gdpo	BIH	1999	0.198775
pl_gdpo	BIH	2000	0.246791
pl_gdpo	BIH	2001	0.250405
pl_gdpo	BIH	2002	0.281205
pl_gdpo	BIH	2003	0.355286
pl_gdpo	BIH	2004	0.414547
pl_gdpo	BIH	2005	0.397249
pl_gdpo	BIH	2006	0.416471
pl_gdpo	BIH	2007	0.470402
pl_gdpo	BIH	2008	0.537275
pl_gdpo	BIH	2009	0.486018
pl_gdpo	BIH	2010	0.46581
pl_gdpo	BIH	2011	0.493655
pl_gdpo	BIH	2012	0.450585
pl_gdpo	BIH	2013	0.476461
pl_gdpo	BIH	2014	0.484232
pl_gdpo	BIH	2015	0.404538
pl_gdpo	BIH	2016	0.406653
pl_gdpo	BIH	2017	0.426455
pl_gdpo	BIH	2018	0.457399
pl_gdpo	BIH	2019	0.440113
pl_gdpo	BLR	1990	0.142438
pl_gdpo	BLR	1991	0.149934
pl_gdpo	BLR	1992	0.151889
pl_gdpo	BLR	1993	0.136547
pl_gdpo	BLR	1994	0.187096
pl_gdpo	BLR	1995	0.178432
pl_gdpo	BLR	1996	0.180744
pl_gdpo	BLR	1997	0.164132
pl_gdpo	BLR	1998	0.179454
pl_gdpo	BLR	1999	0.144317
pl_gdpo	BLR	2000	0.113392
pl_gdpo	BLR	2001	0.137878
pl_gdpo	BLR	2002	0.159925
pl_gdpo	BLR	2003	0.185253
pl_gdpo	BLR	2004	0.223539
pl_gdpo	BLR	2005	0.277391
pl_gdpo	BLR	2006	0.301665
pl_gdpo	BLR	2007	0.335349
pl_gdpo	BLR	2008	0.388748
pl_gdpo	BLR	2009	0.32019
pl_gdpo	BLR	2010	0.328132
pl_gdpo	BLR	2011	0.314869
pl_gdpo	BLR	2012	0.351343
pl_gdpo	BLR	2013	0.41158
pl_gdpo	BLR	2014	0.423449
pl_gdpo	BLR	2015	0.305533
pl_gdpo	BLR	2016	0.272037
pl_gdpo	BLR	2017	0.285162
pl_gdpo	BLR	2018	0.298995
pl_gdpo	BLR	2019	0.306343
pl_gdpo	BLZ	1970	0.0557588
pl_gdpo	BLZ	1971	0.0656099
pl_gdpo	BLZ	1972	0.0942755
pl_gdpo	BLZ	1973	0.13732
pl_gdpo	BLZ	1974	0.168832
pl_gdpo	BLZ	1975	0.19836
pl_gdpo	BLZ	1976	0.167084
pl_gdpo	BLZ	1977	0.198267
pl_gdpo	BLZ	1978	0.218202
pl_gdpo	BLZ	1979	0.243095
pl_gdpo	BLZ	1980	0.30306
pl_gdpo	BLZ	1981	0.320218
pl_gdpo	BLZ	1982	0.284774
pl_gdpo	BLZ	1983	0.298183
pl_gdpo	BLZ	1984	0.324765
pl_gdpo	BLZ	1985	0.301798
pl_gdpo	BLZ	1986	0.282339
pl_gdpo	BLZ	1987	0.310001
pl_gdpo	BLZ	1988	0.327413
pl_gdpo	BLZ	1989	0.340709
pl_gdpo	BLZ	1990	0.348416
pl_gdpo	BLZ	1991	0.37228
pl_gdpo	BLZ	1992	0.422367
pl_gdpo	BLZ	1993	0.424866
pl_gdpo	BLZ	1994	0.402303
pl_gdpo	BLZ	1995	0.397557
pl_gdpo	BLZ	1996	0.472596
pl_gdpo	BLZ	1997	0.494915
pl_gdpo	BLZ	1998	0.508037
pl_gdpo	BLZ	1999	0.518653
pl_gdpo	BLZ	2000	0.521498
pl_gdpo	BLZ	2001	0.557934
pl_gdpo	BLZ	2002	0.529839
pl_gdpo	BLZ	2003	0.508085
pl_gdpo	BLZ	2004	0.519781
pl_gdpo	BLZ	2005	0.53561
pl_gdpo	BLZ	2006	0.541557
pl_gdpo	BLZ	2007	0.552729
pl_gdpo	BLZ	2008	0.623435
pl_gdpo	BLZ	2009	0.615059
pl_gdpo	BLZ	2010	0.582447
pl_gdpo	BLZ	2011	0.580301
pl_gdpo	BLZ	2012	0.610207
pl_gdpo	BLZ	2013	0.675988
pl_gdpo	BLZ	2014	0.692558
pl_gdpo	BLZ	2015	0.733664
pl_gdpo	BLZ	2016	0.761183
pl_gdpo	BLZ	2017	0.788425
pl_gdpo	BLZ	2018	0.835865
pl_gdpo	BLZ	2019	0.859245
pl_gdpo	BMU	1970	0.449033
pl_gdpo	BMU	1971	0.256822
pl_gdpo	BMU	1972	0.357038
pl_gdpo	BMU	1973	0.422907
pl_gdpo	BMU	1974	0.615086
pl_gdpo	BMU	1975	0.626587
pl_gdpo	BMU	1976	0.556125
pl_gdpo	BMU	1977	0.652371
pl_gdpo	BMU	1978	0.692262
pl_gdpo	BMU	1979	0.819552
pl_gdpo	BMU	1980	1.28955
pl_gdpo	BMU	1981	1.40397
pl_gdpo	BMU	1982	1.53968
pl_gdpo	BMU	1983	1.58243
pl_gdpo	BMU	1984	1.53621
pl_gdpo	BMU	1985	1.96583
pl_gdpo	BMU	1986	1.35626
pl_gdpo	BMU	1987	0.932371
pl_gdpo	BMU	1988	1.46013
pl_gdpo	BMU	1989	2.78745
pl_gdpo	BMU	1990	1.65698
pl_gdpo	BMU	1991	1.5151
pl_gdpo	BMU	1992	2.00942
pl_gdpo	BMU	1993	2.09615
pl_gdpo	BMU	1994	4.82338
pl_gdpo	BMU	1995	2.11979
pl_gdpo	BMU	1996	2.69623
pl_gdpo	BMU	1997	1.80356
pl_gdpo	BMU	1998	23.0138
pl_gdpo	BMU	1999	-24.7077
pl_gdpo	BMU	2000	-3.75159
pl_gdpo	BMU	2001	-3.27405
pl_gdpo	BMU	2002	1.38215
pl_gdpo	BMU	2003	-12.7505
pl_gdpo	BMU	2004	12.7078
pl_gdpo	BMU	2005	1.77898
pl_gdpo	BMU	2006	1.82234
pl_gdpo	BMU	2007	2.00287
pl_gdpo	BMU	2008	1.69786
pl_gdpo	BMU	2009	1.62465
pl_gdpo	BMU	2010	1.52471
pl_gdpo	BMU	2011	1.41416
pl_gdpo	BMU	2012	1.80082
pl_gdpo	BMU	2013	2.01925
pl_gdpo	BMU	2014	2.00326
pl_gdpo	BMU	2015	2.1616
pl_gdpo	BMU	2016	2.24832
pl_gdpo	BMU	2017	2.24709
pl_gdpo	BMU	2018	2.30978
pl_gdpo	BMU	2019	2.30903
pl_gdpo	BOL	1950	0.0717855
pl_gdpo	BOL	1951	0.076217
pl_gdpo	BOL	1952	0.0783146
pl_gdpo	BOL	1953	0.0809144
pl_gdpo	BOL	1954	0.0809061
pl_gdpo	BOL	1955	0.0851511
pl_gdpo	BOL	1956	0.0895188
pl_gdpo	BOL	1957	0.0906667
pl_gdpo	BOL	1958	0.0919687
pl_gdpo	BOL	1959	0.0813812
pl_gdpo	BOL	1960	0.092415
pl_gdpo	BOL	1961	0.0998362
pl_gdpo	BOL	1962	0.103626
pl_gdpo	BOL	1963	0.10375
pl_gdpo	BOL	1964	0.109093
pl_gdpo	BOL	1965	0.113444
pl_gdpo	BOL	1966	0.112428
pl_gdpo	BOL	1967	0.116637
pl_gdpo	BOL	1968	0.108813
pl_gdpo	BOL	1969	0.112076
pl_gdpo	BOL	1970	0.119346
pl_gdpo	BOL	1971	0.121323
pl_gdpo	BOL	1972	0.139431
pl_gdpo	BOL	1973	0.129309
pl_gdpo	BOL	1974	0.193526
pl_gdpo	BOL	1975	0.205441
pl_gdpo	BOL	1976	0.22589
pl_gdpo	BOL	1977	0.218512
pl_gdpo	BOL	1978	0.238462
pl_gdpo	BOL	1979	0.25004
pl_gdpo	BOL	1980	0.267941
pl_gdpo	BOL	1981	0.287746
pl_gdpo	BOL	1982	0.297467
pl_gdpo	BOL	1983	0.297463
pl_gdpo	BOL	1984	0.294876
pl_gdpo	BOL	1985	0.283334
pl_gdpo	BOL	1986	0.280867
pl_gdpo	BOL	1987	0.282453
pl_gdpo	BOL	1988	0.334736
pl_gdpo	BOL	1989	0.325723
pl_gdpo	BOL	1990	0.315445
pl_gdpo	BOL	1991	0.324511
pl_gdpo	BOL	1992	0.325761
pl_gdpo	BOL	1993	0.311499
pl_gdpo	BOL	1994	0.298714
pl_gdpo	BOL	1995	0.299566
pl_gdpo	BOL	1996	0.296734
pl_gdpo	BOL	1997	0.311738
pl_gdpo	BOL	1998	0.325153
pl_gdpo	BOL	1999	0.315041
pl_gdpo	BOL	2000	0.315409
pl_gdpo	BOL	2001	0.292418
pl_gdpo	BOL	2002	0.269341
pl_gdpo	BOL	2003	0.261909
pl_gdpo	BOL	2004	0.266738
pl_gdpo	BOL	2005	0.269396
pl_gdpo	BOL	2006	0.305522
pl_gdpo	BOL	2007	0.329535
pl_gdpo	BOL	2008	0.371322
pl_gdpo	BOL	2009	0.367939
pl_gdpo	BOL	2010	0.377556
pl_gdpo	BOL	2011	0.407076
pl_gdpo	BOL	2012	0.416362
pl_gdpo	BOL	2013	0.425758
pl_gdpo	BOL	2014	0.434932
pl_gdpo	BOL	2015	0.414629
pl_gdpo	BOL	2016	0.406282
pl_gdpo	BOL	2017	0.40983
pl_gdpo	BOL	2018	0.417891
pl_gdpo	BOL	2019	0.414573
pl_gdpo	BRA	1950	0.152019
pl_gdpo	BRA	1951	0.175068
pl_gdpo	BRA	1952	0.193704
pl_gdpo	BRA	1953	0.202947
pl_gdpo	BRA	1954	0.161976
pl_gdpo	BRA	1955	0.139191
pl_gdpo	BRA	1956	0.149573
pl_gdpo	BRA	1957	0.157918
pl_gdpo	BRA	1958	0.139698
pl_gdpo	BRA	1959	0.113432
pl_gdpo	BRA	1960	0.0786563
pl_gdpo	BRA	1961	0.0683958
pl_gdpo	BRA	1962	0.0844296
pl_gdpo	BRA	1963	0.0909559
pl_gdpo	BRA	1964	0.0803067
pl_gdpo	BRA	1965	0.0762382
pl_gdpo	BRA	1966	0.0908363
pl_gdpo	BRA	1967	0.0964981
pl_gdpo	BRA	1968	0.0958841
pl_gdpo	BRA	1969	0.101244
pl_gdpo	BRA	1970	0.1018
pl_gdpo	BRA	1971	0.101387
pl_gdpo	BRA	1972	0.116566
pl_gdpo	BRA	1973	0.146055
pl_gdpo	BRA	1974	0.172545
pl_gdpo	BRA	1975	0.193875
pl_gdpo	BRA	1976	0.211743
pl_gdpo	BRA	1977	0.240764
pl_gdpo	BRA	1978	0.262984
pl_gdpo	BRA	1979	0.27173
pl_gdpo	BRA	1980	0.27817
pl_gdpo	BRA	1981	0.313946
pl_gdpo	BRA	1982	0.334755
pl_gdpo	BRA	1983	0.240464
pl_gdpo	BRA	1984	0.236316
pl_gdpo	BRA	1985	0.239886
pl_gdpo	BRA	1986	0.253522
pl_gdpo	BRA	1987	0.26991
pl_gdpo	BRA	1988	0.299007
pl_gdpo	BRA	1989	0.39808
pl_gdpo	BRA	1990	0.440546
pl_gdpo	BRA	1991	0.375947
pl_gdpo	BRA	1992	0.349042
pl_gdpo	BRA	1993	0.36398
pl_gdpo	BRA	1994	0.462143
pl_gdpo	BRA	1995	0.533188
pl_gdpo	BRA	1996	0.489454
pl_gdpo	BRA	1997	0.519523
pl_gdpo	BRA	1998	0.523023
pl_gdpo	BRA	1999	0.374677
pl_gdpo	BRA	2000	0.404041
pl_gdpo	BRA	2001	0.347667
pl_gdpo	BRA	2002	0.314122
pl_gdpo	BRA	2003	0.343967
pl_gdpo	BRA	2004	0.390987
pl_gdpo	BRA	2005	0.498012
pl_gdpo	BRA	2006	0.567241
pl_gdpo	BRA	2007	0.643693
pl_gdpo	BRA	2008	0.700388
pl_gdpo	BRA	2009	0.661535
pl_gdpo	BRA	2010	0.7564
pl_gdpo	BRA	2011	0.80087
pl_gdpo	BRA	2012	0.758271
pl_gdpo	BRA	2013	0.755747
pl_gdpo	BRA	2014	0.75237
pl_gdpo	BRA	2015	0.587307
pl_gdpo	BRA	2016	0.615199
pl_gdpo	BRA	2017	0.694833
pl_gdpo	BRA	2018	0.619415
pl_gdpo	BRA	2019	0.599987
pl_gdpo	BRB	1960	0.0554466
pl_gdpo	BRB	1961	0.0560884
pl_gdpo	BRB	1962	0.0539736
pl_gdpo	BRB	1963	0.0605934
pl_gdpo	BRB	1964	0.0607309
pl_gdpo	BRB	1965	0.0612616
pl_gdpo	BRB	1966	0.0624391
pl_gdpo	BRB	1967	0.0626682
pl_gdpo	BRB	1968	0.059062
pl_gdpo	BRB	1969	0.0583216
pl_gdpo	BRB	1970	0.0625053
pl_gdpo	BRB	1971	0.0678503
pl_gdpo	BRB	1972	0.0760262
pl_gdpo	BRB	1973	0.0977681
pl_gdpo	BRB	1974	0.141969
pl_gdpo	BRB	1975	0.140046
pl_gdpo	BRB	1976	0.191289
pl_gdpo	BRB	1977	0.214229
pl_gdpo	BRB	1978	0.249322
pl_gdpo	BRB	1979	0.29415
pl_gdpo	BRB	1980	0.402991
pl_gdpo	BRB	1981	0.448241
pl_gdpo	BRB	1982	0.449242
pl_gdpo	BRB	1983	0.453431
pl_gdpo	BRB	1984	0.477844
pl_gdpo	BRB	1985	0.557246
pl_gdpo	BRB	1986	0.503202
pl_gdpo	BRB	1987	0.501088
pl_gdpo	BRB	1988	0.5073
pl_gdpo	BRB	1989	0.51613
pl_gdpo	BRB	1990	0.543178
pl_gdpo	BRB	1991	0.49483
pl_gdpo	BRB	1992	0.652938
pl_gdpo	BRB	1993	0.648522
pl_gdpo	BRB	1994	0.407686
pl_gdpo	BRB	1995	0.388253
pl_gdpo	BRB	1996	0.385566
pl_gdpo	BRB	1997	0.437748
pl_gdpo	BRB	1998	0.468535
pl_gdpo	BRB	1999	0.493735
pl_gdpo	BRB	2000	0.527523
pl_gdpo	BRB	2001	0.541864
pl_gdpo	BRB	2002	0.552191
pl_gdpo	BRB	2003	0.606396
pl_gdpo	BRB	2004	0.622662
pl_gdpo	BRB	2005	0.694949
pl_gdpo	BRB	2006	0.776137
pl_gdpo	BRB	2007	0.796267
pl_gdpo	BRB	2008	0.896137
pl_gdpo	BRB	2009	0.917376
pl_gdpo	BRB	2010	0.980995
pl_gdpo	BRB	2011	1.12053
pl_gdpo	BRB	2012	1.20532
pl_gdpo	BRB	2013	1.3008
pl_gdpo	BRB	2014	1.30405
pl_gdpo	BRB	2015	1.31791
pl_gdpo	BRB	2016	1.33583
pl_gdpo	BRB	2017	1.47369
pl_gdpo	BRB	2018	1.467
pl_gdpo	BRB	2019	1.45607
pl_gdpo	BRN	1970	0.0355478
pl_gdpo	BRN	1971	0.0344432
pl_gdpo	BRN	1972	0.0424364
pl_gdpo	BRN	1973	0.0585566
pl_gdpo	BRN	1974	0.114909
pl_gdpo	BRN	1975	0.121153
pl_gdpo	BRN	1976	0.134323
pl_gdpo	BRN	1977	0.165228
pl_gdpo	BRN	1978	0.16855
pl_gdpo	BRN	1979	0.180828
pl_gdpo	BRN	1980	0.309428
pl_gdpo	BRN	1981	0.288645
pl_gdpo	BRN	1982	0.299078
pl_gdpo	BRN	1983	0.27548
pl_gdpo	BRN	1984	0.277816
pl_gdpo	BRN	1985	0.261428
pl_gdpo	BRN	1986	0.225216
pl_gdpo	BRN	1987	0.236355
pl_gdpo	BRN	1988	0.248768
pl_gdpo	BRN	1989	0.250499
pl_gdpo	BRN	1990	0.263425
pl_gdpo	BRN	1991	0.31771
pl_gdpo	BRN	1992	0.260238
pl_gdpo	BRN	1993	0.280088
pl_gdpo	BRN	1994	0.304965
pl_gdpo	BRN	1995	0.379058
pl_gdpo	BRN	1996	0.322087
pl_gdpo	BRN	1997	0.376269
pl_gdpo	BRN	1998	0.327862
pl_gdpo	BRN	1999	0.317074
pl_gdpo	BRN	2000	0.344989
pl_gdpo	BRN	2001	0.34043
pl_gdpo	BRN	2002	0.334734
pl_gdpo	BRN	2003	0.331437
pl_gdpo	BRN	2004	0.353055
pl_gdpo	BRN	2005	0.359118
pl_gdpo	BRN	2006	0.377501
pl_gdpo	BRN	2007	0.410226
pl_gdpo	BRN	2008	0.452795
pl_gdpo	BRN	2009	0.430048
pl_gdpo	BRN	2010	0.466497
pl_gdpo	BRN	2011	0.490297
pl_gdpo	BRN	2012	0.482281
pl_gdpo	BRN	2013	0.4875
pl_gdpo	BRN	2014	0.502152
pl_gdpo	BRN	2015	0.458161
pl_gdpo	BRN	2016	0.443035
pl_gdpo	BRN	2017	0.443783
pl_gdpo	BRN	2018	0.452324
pl_gdpo	BRN	2019	0.433636
pl_gdpo	BTN	1970	0.108549
pl_gdpo	BTN	1971	0.113105
pl_gdpo	BTN	1972	0.117647
pl_gdpo	BTN	1973	0.131147
pl_gdpo	BTN	1974	0.148875
pl_gdpo	BTN	1975	0.142564
pl_gdpo	BTN	1976	0.133255
pl_gdpo	BTN	1977	0.137886
pl_gdpo	BTN	1978	0.122863
pl_gdpo	BTN	1979	0.131075
pl_gdpo	BTN	1980	0.160665
pl_gdpo	BTN	1981	0.152595
pl_gdpo	BTN	1982	0.152048
pl_gdpo	BTN	1983	0.151168
pl_gdpo	BTN	1984	0.146226
pl_gdpo	BTN	1985	0.142628
pl_gdpo	BTN	1986	0.156481
pl_gdpo	BTN	1987	0.181268
pl_gdpo	BTN	1988	0.185194
pl_gdpo	BTN	1989	0.173392
pl_gdpo	BTN	1990	0.181914
pl_gdpo	BTN	1991	0.150175
pl_gdpo	BTN	1992	0.136387
pl_gdpo	BTN	1993	0.136771
pl_gdpo	BTN	1994	0.161091
pl_gdpo	BTN	1995	0.178228
pl_gdpo	BTN	1996	0.177457
pl_gdpo	BTN	1997	0.180595
pl_gdpo	BTN	1998	0.174749
pl_gdpo	BTN	1999	0.167987
pl_gdpo	BTN	2000	0.176547
pl_gdpo	BTN	2001	0.178912
pl_gdpo	BTN	2002	0.173315
pl_gdpo	BTN	2003	0.181572
pl_gdpo	BTN	2004	0.174437
pl_gdpo	BTN	2005	0.20253
pl_gdpo	BTN	2006	0.220933
pl_gdpo	BTN	2007	0.275899
pl_gdpo	BTN	2008	0.261846
pl_gdpo	BTN	2009	0.241209
pl_gdpo	BTN	2010	0.260916
pl_gdpo	BTN	2011	0.289223
pl_gdpo	BTN	2012	0.27439
pl_gdpo	BTN	2013	0.296495
pl_gdpo	BTN	2014	0.303667
pl_gdpo	BTN	2015	0.283157
pl_gdpo	BTN	2016	0.279256
pl_gdpo	BTN	2017	0.293707
pl_gdpo	BTN	2018	0.283263
pl_gdpo	BTN	2019	0.285586
pl_gdpo	BWA	1960	0.0873452
pl_gdpo	BWA	1961	0.0857269
pl_gdpo	BWA	1962	0.0827058
pl_gdpo	BWA	1963	0.0839663
pl_gdpo	BWA	1964	0.0859539
pl_gdpo	BWA	1965	0.0971993
pl_gdpo	BWA	1966	0.0969057
pl_gdpo	BWA	1967	0.0888967
pl_gdpo	BWA	1968	0.0893759
pl_gdpo	BWA	1969	0.108094
pl_gdpo	BWA	1970	0.11588
pl_gdpo	BWA	1971	0.118662
pl_gdpo	BWA	1972	0.121823
pl_gdpo	BWA	1973	0.148402
pl_gdpo	BWA	1974	0.197138
pl_gdpo	BWA	1975	0.203534
pl_gdpo	BWA	1976	0.194857
pl_gdpo	BWA	1977	0.222092
pl_gdpo	BWA	1978	0.236496
pl_gdpo	BWA	1979	0.276212
pl_gdpo	BWA	1980	0.365701
pl_gdpo	BWA	1981	0.368438
pl_gdpo	BWA	1982	0.2984
pl_gdpo	BWA	1983	0.272742
pl_gdpo	BWA	1984	0.226848
pl_gdpo	BWA	1985	0.167435
pl_gdpo	BWA	1986	0.208079
pl_gdpo	BWA	1987	0.262956
pl_gdpo	BWA	1988	0.274299
pl_gdpo	BWA	1989	0.363206
pl_gdpo	BWA	1990	0.417887
pl_gdpo	BWA	1991	0.402213
pl_gdpo	BWA	1992	0.399568
pl_gdpo	BWA	1993	0.390528
pl_gdpo	BWA	1994	0.393816
pl_gdpo	BWA	1995	0.403773
pl_gdpo	BWA	1996	0.366218
pl_gdpo	BWA	1997	0.350688
pl_gdpo	BWA	1998	0.319228
pl_gdpo	BWA	1999	0.330326
pl_gdpo	BWA	2000	0.322012
pl_gdpo	BWA	2001	0.305229
pl_gdpo	BWA	2002	0.254967
pl_gdpo	BWA	2003	0.358904
pl_gdpo	BWA	2004	0.408243
pl_gdpo	BWA	2005	0.398373
pl_gdpo	BWA	2006	0.389179
pl_gdpo	BWA	2007	0.406245
pl_gdpo	BWA	2008	0.404138
pl_gdpo	BWA	2009	0.404395
pl_gdpo	BWA	2010	0.455183
pl_gdpo	BWA	2011	0.495247
pl_gdpo	BWA	2012	0.493084
pl_gdpo	BWA	2013	0.502165
pl_gdpo	BWA	2014	0.496632
pl_gdpo	BWA	2015	0.452588
pl_gdpo	BWA	2016	0.465057
pl_gdpo	BWA	2017	0.486998
pl_gdpo	BWA	2018	0.512302
pl_gdpo	BWA	2019	0.481435
pl_gdpo	CAF	1960	0.0802172
pl_gdpo	CAF	1961	0.0811669
pl_gdpo	CAF	1962	0.0820134
pl_gdpo	CAF	1963	0.0903417
pl_gdpo	CAF	1964	0.0947756
pl_gdpo	CAF	1965	0.0990263
pl_gdpo	CAF	1966	0.103327
pl_gdpo	CAF	1967	0.1075
pl_gdpo	CAF	1968	0.110263
pl_gdpo	CAF	1969	0.107592
pl_gdpo	CAF	1970	0.103235
pl_gdpo	CAF	1971	0.114045
pl_gdpo	CAF	1972	0.135726
pl_gdpo	CAF	1973	0.143405
pl_gdpo	CAF	1974	0.163851
pl_gdpo	CAF	1975	0.222995
pl_gdpo	CAF	1976	0.267751
pl_gdpo	CAF	1977	0.286168
pl_gdpo	CAF	1978	0.337196
pl_gdpo	CAF	1979	0.3948
pl_gdpo	CAF	1980	0.484494
pl_gdpo	CAF	1981	0.369596
pl_gdpo	CAF	1982	0.343592
pl_gdpo	CAF	1983	0.319659
pl_gdpo	CAF	1984	0.285521
pl_gdpo	CAF	1985	0.280327
pl_gdpo	CAF	1986	0.368726
pl_gdpo	CAF	1987	0.424706
pl_gdpo	CAF	1988	0.42425
pl_gdpo	CAF	1989	0.389918
pl_gdpo	CAF	1990	0.461448
pl_gdpo	CAF	1991	0.449286
pl_gdpo	CAF	1992	0.475623
pl_gdpo	CAF	1993	0.440712
pl_gdpo	CAF	1994	0.240685
pl_gdpo	CAF	1995	0.30545
pl_gdpo	CAF	1996	0.32463
pl_gdpo	CAF	1997	0.288342
pl_gdpo	CAF	1998	0.283539
pl_gdpo	CAF	1999	0.295411
pl_gdpo	CAF	2000	0.261591
pl_gdpo	CAF	2001	0.261918
pl_gdpo	CAF	2002	0.27779
pl_gdpo	CAF	2003	0.334188
pl_gdpo	CAF	2004	0.361332
pl_gdpo	CAF	2005	0.372241
pl_gdpo	CAF	2006	0.385938
pl_gdpo	CAF	2007	0.416051
pl_gdpo	CAF	2008	0.468139
pl_gdpo	CAF	2009	0.440573
pl_gdpo	CAF	2010	0.437508
pl_gdpo	CAF	2011	0.487659
pl_gdpo	CAF	2012	0.458314
pl_gdpo	CAF	2013	0.467107
pl_gdpo	CAF	2014	0.542776
pl_gdpo	CAF	2015	0.435219
pl_gdpo	CAF	2016	0.4434
pl_gdpo	CAF	2017	0.485866
pl_gdpo	CAF	2018	0.499764
pl_gdpo	CAF	2019	0.477118
pl_gdpo	CAN	1950	0.103902
pl_gdpo	CAN	1951	0.12108
pl_gdpo	CAN	1952	0.134598
pl_gdpo	CAN	1953	0.13367
pl_gdpo	CAN	1954	0.136494
pl_gdpo	CAN	1955	0.137769
pl_gdpo	CAN	1956	0.143768
pl_gdpo	CAN	1957	0.151147
pl_gdpo	CAN	1958	0.150055
pl_gdpo	CAN	1959	0.155204
pl_gdpo	CAN	1960	0.157651
pl_gdpo	CAN	1961	0.150043
pl_gdpo	CAN	1962	0.144016
pl_gdpo	CAN	1963	0.145099
pl_gdpo	CAN	1964	0.148857
pl_gdpo	CAN	1965	0.154908
pl_gdpo	CAN	1966	0.161803
pl_gdpo	CAN	1967	0.168406
pl_gdpo	CAN	1968	0.17408
pl_gdpo	CAN	1969	0.182461
pl_gdpo	CAN	1970	0.19684
pl_gdpo	CAN	1971	0.211009
pl_gdpo	CAN	1972	0.22759
pl_gdpo	CAN	1973	0.245647
pl_gdpo	CAN	1974	0.291547
pl_gdpo	CAN	1975	0.31062
pl_gdpo	CAN	1976	0.350529
pl_gdpo	CAN	1977	0.349406
pl_gdpo	CAN	1978	0.346819
pl_gdpo	CAN	1979	0.369284
pl_gdpo	CAN	1980	0.409237
pl_gdpo	CAN	1981	0.442592
pl_gdpo	CAN	1982	0.463723
pl_gdpo	CAN	1983	0.486147
pl_gdpo	CAN	1984	0.475714
pl_gdpo	CAN	1985	0.468192
pl_gdpo	CAN	1986	0.482136
pl_gdpo	CAN	1987	0.516544
pl_gdpo	CAN	1988	0.579185
pl_gdpo	CAN	1989	0.619131
pl_gdpo	CAN	1990	0.650246
pl_gdpo	CAN	1991	0.691202
pl_gdpo	CAN	1992	0.649607
pl_gdpo	CAN	1993	0.627629
pl_gdpo	CAN	1994	0.600317
pl_gdpo	CAN	1995	0.601546
pl_gdpo	CAN	1996	0.613969
pl_gdpo	CAN	1997	0.60822
pl_gdpo	CAN	1998	0.571749
pl_gdpo	CAN	1999	0.568154
pl_gdpo	CAN	2000	0.584462
pl_gdpo	CAN	2001	0.583887
pl_gdpo	CAN	2002	0.594324
pl_gdpo	CAN	2003	0.673796
pl_gdpo	CAN	2004	0.738999
pl_gdpo	CAN	2005	0.795333
pl_gdpo	CAN	2006	0.882571
pl_gdpo	CAN	2007	0.965022
pl_gdpo	CAN	2008	0.988856
pl_gdpo	CAN	2009	0.956108
pl_gdpo	CAN	2010	1.06381
pl_gdpo	CAN	2011	1.11448
pl_gdpo	CAN	2012	1.13629
pl_gdpo	CAN	2013	1.11122
pl_gdpo	CAN	2014	1.04618
pl_gdpo	CAN	2015	0.925103
pl_gdpo	CAN	2016	0.897967
pl_gdpo	CAN	2017	0.918289
pl_gdpo	CAN	2018	0.938432
pl_gdpo	CAN	2019	0.935248
pl_gdpo	CHE	1950	0.0613674
pl_gdpo	CHE	1951	0.0615552
pl_gdpo	CHE	1952	0.0646881
pl_gdpo	CHE	1953	0.0651862
pl_gdpo	CHE	1954	0.0648581
pl_gdpo	CHE	1955	0.0653946
pl_gdpo	CHE	1956	0.0654363
pl_gdpo	CHE	1957	0.0670653
pl_gdpo	CHE	1958	0.0712119
pl_gdpo	CHE	1959	0.0701978
pl_gdpo	CHE	1960	0.0726181
pl_gdpo	CHE	1961	0.075769
pl_gdpo	CHE	1962	0.0794545
pl_gdpo	CHE	1963	0.0833993
pl_gdpo	CHE	1964	0.0872849
pl_gdpo	CHE	1965	0.0913848
pl_gdpo	CHE	1966	0.0956828
pl_gdpo	CHE	1967	0.0995025
pl_gdpo	CHE	1968	0.10236
pl_gdpo	CHE	1969	0.104878
pl_gdpo	CHE	1970	0.115424
pl_gdpo	CHE	1971	0.133024
pl_gdpo	CHE	1972	0.158038
pl_gdpo	CHE	1973	0.207468
pl_gdpo	CHE	1974	0.236925
pl_gdpo	CHE	1975	0.297585
pl_gdpo	CHE	1976	0.315722
pl_gdpo	CHE	1977	0.331522
pl_gdpo	CHE	1978	0.457008
pl_gdpo	CHE	1979	0.498087
pl_gdpo	CHE	1980	0.511028
pl_gdpo	CHE	1981	0.470721
pl_gdpo	CHE	1982	0.481532
pl_gdpo	CHE	1983	0.474695
pl_gdpo	CHE	1984	0.449185
pl_gdpo	CHE	1985	0.442028
pl_gdpo	CHE	1986	0.604114
pl_gdpo	CHE	1987	0.747101
pl_gdpo	CHE	1988	0.790305
pl_gdpo	CHE	1989	0.726867
pl_gdpo	CHE	1990	0.885332
pl_gdpo	CHE	1991	0.897366
pl_gdpo	CHE	1992	0.933681
pl_gdpo	CHE	1993	0.896609
pl_gdpo	CHE	1994	0.965078
pl_gdpo	CHE	1995	1.15483
pl_gdpo	CHE	1996	1.10385
pl_gdpo	CHE	1997	0.909133
pl_gdpo	CHE	1998	0.892963
pl_gdpo	CHE	1999	0.849138
pl_gdpo	CHE	2000	0.783207
pl_gdpo	CHE	2001	0.805293
pl_gdpo	CHE	2002	0.860829
pl_gdpo	CHE	2003	0.998031
pl_gdpo	CHE	2004	1.07627
pl_gdpo	CHE	2005	1.04846
pl_gdpo	CHE	2006	1.02405
pl_gdpo	CHE	2007	1.04129
pl_gdpo	CHE	2008	1.15175
pl_gdpo	CHE	2009	1.13238
pl_gdpo	CHE	2010	1.194
pl_gdpo	CHE	2011	1.31246
pl_gdpo	CHE	2012	1.21404
pl_gdpo	CHE	2013	1.26762
pl_gdpo	CHE	2014	1.28274
pl_gdpo	CHE	2015	1.17928
pl_gdpo	CHE	2016	1.1371
pl_gdpo	CHE	2017	1.13159
pl_gdpo	CHE	2018	1.16138
pl_gdpo	CHE	2019	1.13459
pl_gdpo	CHL	1951	0.107964
pl_gdpo	CHL	1952	0.11861
pl_gdpo	CHL	1953	0.135844
pl_gdpo	CHL	1954	0.159987
pl_gdpo	CHL	1955	0.165619
pl_gdpo	CHL	1956	0.131713
pl_gdpo	CHL	1957	0.105235
pl_gdpo	CHL	1958	0.0981183
pl_gdpo	CHL	1959	0.0993877
pl_gdpo	CHL	1960	0.103138
pl_gdpo	CHL	1961	0.131706
pl_gdpo	CHL	1962	0.124213
pl_gdpo	CHL	1963	0.11745
pl_gdpo	CHL	1964	0.115662
pl_gdpo	CHL	1965	0.120968
pl_gdpo	CHL	1966	0.127433
pl_gdpo	CHL	1967	0.118906
pl_gdpo	CHL	1968	0.117737
pl_gdpo	CHL	1969	0.12904
pl_gdpo	CHL	1970	0.139595
pl_gdpo	CHL	1971	0.1476
pl_gdpo	CHL	1972	0.159331
pl_gdpo	CHL	1973	0.235089
pl_gdpo	CHL	1974	0.240602
pl_gdpo	CHL	1975	0.131842
pl_gdpo	CHL	1976	0.173011
pl_gdpo	CHL	1977	0.214721
pl_gdpo	CHL	1978	0.230401
pl_gdpo	CHL	1979	0.288221
pl_gdpo	CHL	1980	0.361966
pl_gdpo	CHL	1981	0.413191
pl_gdpo	CHL	1982	0.335968
pl_gdpo	CHL	1983	0.28561
pl_gdpo	CHL	1984	0.274676
pl_gdpo	CHL	1985	0.240817
pl_gdpo	CHL	1986	0.247906
pl_gdpo	CHL	1987	0.270135
pl_gdpo	CHL	1988	0.286891
pl_gdpo	CHL	1989	0.298875
pl_gdpo	CHL	1990	0.322569
pl_gdpo	CHL	1991	0.342917
pl_gdpo	CHL	1992	0.366209
pl_gdpo	CHL	1993	0.367099
pl_gdpo	CHL	1994	0.386748
pl_gdpo	CHL	1995	0.434665
pl_gdpo	CHL	1996	0.440551
pl_gdpo	CHL	1997	0.470462
pl_gdpo	CHL	1998	0.453879
pl_gdpo	CHL	1999	0.434797
pl_gdpo	CHL	2000	0.430135
pl_gdpo	CHL	2001	0.39337
pl_gdpo	CHL	2002	0.382213
pl_gdpo	CHL	2003	0.39976
pl_gdpo	CHL	2004	0.469837
pl_gdpo	CHL	2005	0.522208
pl_gdpo	CHL	2006	0.56109
pl_gdpo	CHL	2007	0.584648
pl_gdpo	CHL	2008	0.624785
pl_gdpo	CHL	2009	0.583316
pl_gdpo	CHL	2010	0.643503
pl_gdpo	CHL	2011	0.671669
pl_gdpo	CHL	2012	0.671999
pl_gdpo	CHL	2013	0.68008
pl_gdpo	CHL	2014	0.627914
pl_gdpo	CHL	2015	0.587678
pl_gdpo	CHL	2016	0.610178
pl_gdpo	CHL	2017	0.656024
pl_gdpo	CHL	2018	0.682787
pl_gdpo	CHL	2019	0.639755
pl_gdpo	CHN	1952	0.0491275
pl_gdpo	CHN	1953	0.0526093
pl_gdpo	CHN	1954	0.0595105
pl_gdpo	CHN	1955	0.0574261
pl_gdpo	CHN	1956	0.0607521
pl_gdpo	CHN	1957	0.0610864
pl_gdpo	CHN	1958	0.0727443
pl_gdpo	CHN	1959	0.0827192
pl_gdpo	CHN	1960	0.0878243
pl_gdpo	CHN	1961	0.0890206
pl_gdpo	CHN	1962	0.0792174
pl_gdpo	CHN	1963	0.0745493
pl_gdpo	CHN	1964	0.0777463
pl_gdpo	CHN	1965	0.0821179
pl_gdpo	CHN	1966	0.0862927
pl_gdpo	CHN	1967	0.0811015
pl_gdpo	CHN	1968	0.0808312
pl_gdpo	CHN	1969	0.0823443
pl_gdpo	CHN	1970	0.0842694
pl_gdpo	CHN	1971	0.0828272
pl_gdpo	CHN	1972	0.0973054
pl_gdpo	CHN	1973	0.109158
pl_gdpo	CHN	1974	0.110866
pl_gdpo	CHN	1975	0.119857
pl_gdpo	CHN	1976	0.117721
pl_gdpo	CHN	1977	0.124726
pl_gdpo	CHN	1978	0.135357
pl_gdpo	CHN	1979	0.155615
pl_gdpo	CHN	1980	0.176894
pl_gdpo	CHN	1981	0.165697
pl_gdpo	CHN	1982	0.151208
pl_gdpo	CHN	1983	0.150922
pl_gdpo	CHN	1984	0.137408
pl_gdpo	CHN	1985	0.119204
pl_gdpo	CHN	1986	0.112099
pl_gdpo	CHN	1987	0.116025
pl_gdpo	CHN	1988	0.136068
pl_gdpo	CHN	1989	0.152339
pl_gdpo	CHN	1990	0.134848
pl_gdpo	CHN	1991	0.134293
pl_gdpo	CHN	1992	0.146394
pl_gdpo	CHN	1993	0.168551
pl_gdpo	CHN	1994	0.143502
pl_gdpo	CHN	1995	0.170382
pl_gdpo	CHN	1996	0.188181
pl_gdpo	CHN	1997	0.201634
pl_gdpo	CHN	1998	0.214779
pl_gdpo	CHN	1999	0.21489
pl_gdpo	CHN	2000	0.21955
pl_gdpo	CHN	2001	0.221676
pl_gdpo	CHN	2002	0.220817
pl_gdpo	CHN	2003	0.227683
pl_gdpo	CHN	2004	0.239925
pl_gdpo	CHN	2005	0.249787
pl_gdpo	CHN	2006	0.275987
pl_gdpo	CHN	2007	0.326491
pl_gdpo	CHN	2008	0.398927
pl_gdpo	CHN	2009	0.409417
pl_gdpo	CHN	2010	0.431927
pl_gdpo	CHN	2011	0.498476
pl_gdpo	CHN	2012	0.522992
pl_gdpo	CHN	2013	0.572507
pl_gdpo	CHN	2014	0.600656
pl_gdpo	CHN	2015	0.612537
pl_gdpo	CHN	2016	0.603309
pl_gdpo	CHN	2017	0.625306
pl_gdpo	CHN	2018	0.707687
pl_gdpo	CHN	2019	0.712938
pl_gdpo	CIV	1960	0.0975466
pl_gdpo	CIV	1961	0.103163
pl_gdpo	CIV	1962	0.10141
pl_gdpo	CIV	1963	0.104449
pl_gdpo	CIV	1964	0.109095
pl_gdpo	CIV	1965	0.113144
pl_gdpo	CIV	1966	0.111591
pl_gdpo	CIV	1967	0.111826
pl_gdpo	CIV	1968	0.115817
pl_gdpo	CIV	1969	0.112195
pl_gdpo	CIV	1970	0.107687
pl_gdpo	CIV	1971	0.107628
pl_gdpo	CIV	1972	0.120574
pl_gdpo	CIV	1973	0.155097
pl_gdpo	CIV	1974	0.174942
pl_gdpo	CIV	1975	0.213298
pl_gdpo	CIV	1976	0.227243
pl_gdpo	CIV	1977	0.284618
pl_gdpo	CIV	1978	0.327504
pl_gdpo	CIV	1979	0.374841
pl_gdpo	CIV	1980	0.46957
pl_gdpo	CIV	1981	0.370201
pl_gdpo	CIV	1982	0.322277
pl_gdpo	CIV	1983	0.285824
pl_gdpo	CIV	1984	0.277856
pl_gdpo	CIV	1985	0.251382
pl_gdpo	CIV	1986	0.31817
pl_gdpo	CIV	1987	0.359858
pl_gdpo	CIV	1988	0.357187
pl_gdpo	CIV	1989	0.338292
pl_gdpo	CIV	1990	0.405542
pl_gdpo	CIV	1991	0.384907
pl_gdpo	CIV	1992	0.382832
pl_gdpo	CIV	1993	0.360132
pl_gdpo	CIV	1994	0.272494
pl_gdpo	CIV	1995	0.31653
pl_gdpo	CIV	1996	0.319374
pl_gdpo	CIV	1997	0.308178
pl_gdpo	CIV	1998	0.322938
pl_gdpo	CIV	1999	0.324656
pl_gdpo	CIV	2000	0.280158
pl_gdpo	CIV	2001	0.292485
pl_gdpo	CIV	2002	0.326898
pl_gdpo	CIV	2003	0.366539
pl_gdpo	CIV	2004	0.418939
pl_gdpo	CIV	2005	0.435897
pl_gdpo	CIV	2006	0.434798
pl_gdpo	CIV	2007	0.471508
pl_gdpo	CIV	2008	0.530554
pl_gdpo	CIV	2009	0.481871
pl_gdpo	CIV	2010	0.457577
pl_gdpo	CIV	2011	0.468523
pl_gdpo	CIV	2012	0.439849
pl_gdpo	CIV	2013	0.484046
pl_gdpo	CIV	2014	0.504068
pl_gdpo	CIV	2015	0.433559
pl_gdpo	CIV	2016	0.443635
pl_gdpo	CIV	2017	0.464077
pl_gdpo	CIV	2018	0.479989
pl_gdpo	CIV	2019	0.452264
pl_gdpo	CMR	1960	0.0784927
pl_gdpo	CMR	1961	0.0875272
pl_gdpo	CMR	1962	0.0926782
pl_gdpo	CMR	1963	0.0919227
pl_gdpo	CMR	1964	0.0960555
pl_gdpo	CMR	1965	0.0961298
pl_gdpo	CMR	1966	0.0966591
pl_gdpo	CMR	1967	0.116044
pl_gdpo	CMR	1968	0.122813
pl_gdpo	CMR	1969	0.12132
pl_gdpo	CMR	1970	0.121287
pl_gdpo	CMR	1971	0.133779
pl_gdpo	CMR	1972	0.164407
pl_gdpo	CMR	1973	0.215239
pl_gdpo	CMR	1974	0.225693
pl_gdpo	CMR	1975	0.285704
pl_gdpo	CMR	1976	0.327224
pl_gdpo	CMR	1977	0.338855
pl_gdpo	CMR	1978	0.357226
pl_gdpo	CMR	1979	0.451984
pl_gdpo	CMR	1980	0.505663
pl_gdpo	CMR	1981	0.419938
pl_gdpo	CMR	1982	0.369725
pl_gdpo	CMR	1983	0.337328
pl_gdpo	CMR	1984	0.295608
pl_gdpo	CMR	1985	0.273901
pl_gdpo	CMR	1986	0.345142
pl_gdpo	CMR	1987	0.380217
pl_gdpo	CMR	1988	0.379023
pl_gdpo	CMR	1989	0.359835
pl_gdpo	CMR	1990	0.414206
pl_gdpo	CMR	1991	0.422399
pl_gdpo	CMR	1992	0.417473
pl_gdpo	CMR	1993	0.429076
pl_gdpo	CMR	1994	0.258798
pl_gdpo	CMR	1995	0.292942
pl_gdpo	CMR	1996	0.295461
pl_gdpo	CMR	1997	0.271683
pl_gdpo	CMR	1998	0.279702
pl_gdpo	CMR	1999	0.273012
pl_gdpo	CMR	2000	0.24315
pl_gdpo	CMR	2001	0.247209
pl_gdpo	CMR	2002	0.268788
pl_gdpo	CMR	2003	0.31741
pl_gdpo	CMR	2004	0.357902
pl_gdpo	CMR	2005	0.36074
pl_gdpo	CMR	2006	0.377366
pl_gdpo	CMR	2007	0.414739
pl_gdpo	CMR	2008	0.463675
[truncated: 8,400 more rows]
