# Supplementary material for: The Social Cost of Fossil and Industrial CO2 Emissions from 1950 to 2018
Source: Research Square preprint supplement (doi:10.21203/rs.3.rs-2244259/v1), 2022-11-17
Supplement: Supplementary file 56 [file pl_gdpo_Transposed_adj.xlsx]

## Sheet: price_level_output_Transposed
Summe von AggValue	Spaltenbeschriftungen
Zeilenbeschriftungen	MAR	ABW	AGO	AIA	ALB	ARE	ARG	ARM	ATG	AUS	AUT	AZE	BDI	BEL	BEN	BFA	BGD	BGR	BHR	BHS	BIH	BLR	BLZ	BMU	BOL	BRA	BRB	BRN	BTN	BWA	CAF	CAN	CHE	CHL	CHN	CIV	CMR	COD	COG	COL	COM	CPV	CRI	CYM	CYP	CZE	DEU	DJI	DMA
1950	0.12335						0.214473			0.0838372	0.0676411			0.0936148											0.0717855	0.152019						0.103902	0.0613674					0.0681631		0.140932			0.0983278		0.0858069		0.0802269
1951	0.149763						0.23759			0.0949733	0.0798533			0.107383											0.076217	0.175068						0.12108	0.0615552	0.107964				0.0771619		0.127999			0.103227		0.0983394		0.088199
1952	0.166064						0.248557			0.0999815	0.0894538			0.109326											0.0783146	0.193704						0.134598	0.0646881	0.11861	0.0491275			0.0821528		0.123404			0.10013		0.103039		0.0916825
1953	0.175101						0.246106			0.0967005	0.0761319			0.105414											0.0809144	0.202947						0.13367	0.0651862	0.135844	0.0526093			0.0760529		0.126229			0.0945694		0.0998812		0.0904418
1954	0.172059						0.245493			0.0983122	0.0750356			0.10499											0.0809061	0.161976						0.136494	0.0648581	0.159987	0.0595105			0.0776383		0.137598			0.0990733		0.0953602		0.0897327
1955	0.170425						0.249911			0.102402	0.0786425			0.107483											0.0851511	0.139191						0.137769	0.0653946	0.165619	0.0574261			0.0785044		0.139056			0.0963365		0.0989732		0.0904124
1956	0.178165						0.260149			0.108368	0.0816328			0.111425											0.0895188	0.149573						0.143768	0.0654363	0.131713	0.0607521			0.0809855		0.152793			0.102095		0.105112		0.0925387
1957	0.177956						0.266154			0.109396	0.0859568			0.115771											0.0906667	0.157918						0.151147	0.0670653	0.105235	0.0610864			0.0820154		0.121112			0.105075		0.108049		0.0953362
1958	0.162882						0.269747			0.109351	0.0852634			0.116943											0.0919687	0.139698						0.150055	0.0712119	0.0981183	0.0727443			0.0806881		0.0831626			0.0975429		0.115215		0.0984456
1959	0.134214						0.278037			0.113721	0.0879809			0.116708	0.0543568	0.0627364	0.0380252								0.0813812	0.113432						0.155204	0.0701978	0.0993877	0.0827192			0.0814922		0.0900304			0.101149		0.114484		0.0994013
1960	0.14264						0.291261			0.120005	0.0927714		0.103272	0.123898	0.0542235	0.0750102	0.0398								0.092415	0.0786563	0.0554466			0.0873452	0.0802172	0.157651	0.0726181	0.103138	0.0878243	0.0975466	0.0784927	0.077892	0.132448	0.093937	0.052932	0.128999	0.101336		0.122883		0.103574
1961	0.108983						0.293483			0.118483	0.0970729		0.122321	0.124567	0.0541029	0.0831792	0.0395764								0.0998362	0.0683958	0.0560884			0.0857269	0.0811669	0.150043	0.075769	0.131706	0.0890206	0.103163	0.0875272	0.082622	0.163056	0.0997901	0.0525783	0.131972	0.0970396		0.120641		0.114444
1962	0.109954						0.292267			0.12153	0.0991799		0.1165	0.12292	0.054529	0.0833347	0.0418542								0.103626	0.0844296	0.0539736			0.0827058	0.0820134	0.144016	0.0794545	0.124213	0.0792174	0.10141	0.0926782	0.0787749	0.115984	0.103428	0.048918	0.147243	0.0872055		0.114451		0.120444
1963	0.104859						0.295165			0.124963	0.102744		0.123528	0.126424	0.0551866	0.0895896	0.038594								0.10375	0.0909559	0.0605934			0.0839663	0.0903417	0.145099	0.0833993	0.11745	0.0745493	0.104449	0.0919227	0.0796359	0.101459	0.0979265	0.0524751	0.149079	0.0883628		0.117162		0.124578
1964	0.103677						0.308936			0.130167	0.107473		0.135993	0.132316	0.0549253	0.0897652	0.0422608								0.109093	0.0803067	0.0607309			0.0859539	0.0947756	0.148857	0.0872849	0.115662	0.0777463	0.109095	0.0960555	0.0894551	0.101045	0.112247	0.0533711	0.150213	0.0897343		0.125017		0.12738
1965	0.11025						0.306141			0.13527	0.112948		0.0801581	0.138944	0.0549218	0.0934372	0.0453947								0.113444	0.0762382	0.0612616			0.0971993	0.0990263	0.154908	0.0913848	0.120968	0.0821179	0.113144	0.0961298	0.0778872	0.109326	0.108548	0.0522154	0.150473	0.088275		0.122306		0.13236
1966	0.110497						0.308486			0.140514	0.11657		0.0803017	0.143893	0.054051	0.0952491	0.05053								0.112428	0.0908363	0.0624391			0.0969057	0.103327	0.161803	0.0956828	0.127433	0.0862927	0.111591	0.0966591	0.0791903	0.133267	0.0971361	0.0531452	0.145687	0.089852		0.126723		0.136454
1967	0.112495						0.31451			0.144351	0.119516		0.0765658	0.147586	0.053597	0.0896798	0.0518774								0.116637	0.0964981	0.0626682			0.0888967	0.1075	0.168406	0.0995025	0.118906	0.0811015	0.111826	0.116044	0.0874291	0.14093	0.0976501	0.0534695	0.153963	0.0919635		0.127971		0.138859
1968	0.117869						0.334273			0.150102	0.1226		0.0779211	0.150524	0.0547587	0.0887308	0.0515738								0.108813	0.0958841	0.059062			0.0893759	0.110263	0.17408	0.10236	0.117737	0.0808312	0.115817	0.122813	0.089368	0.129932	0.0951346	0.0567294	0.151857	0.0952842		0.116471		0.141183
1969	0.109566						0.363051			0.157221	0.12738		0.084275	0.156804	0.0550646	0.0905941	0.0532012								0.112076	0.101244	0.0583216			0.108094	0.107592	0.182461	0.104878	0.12904	0.0823443	0.112195	0.12132	0.0905156	0.122608	0.0966315	0.0558902	0.153747	0.0996653		0.116975		0.148738
1970	0.1284	0.502883	0.132112	0.0602522	0.363942	0.0158308	0.355201		0.110957	0.165015	0.134354		0.0897838	0.164209	0.0528891	0.0904236	0.0588518	0.0792553	0.113917	0.231907			0.0557588	0.449033	0.119346	0.1018	0.0625053	0.0355478	0.108549	0.11588	0.103235	0.19684	0.115424	0.139595	0.0842694	0.107687	0.121287	0.084698	0.110497	0.0987125	0.0476472	0.15737	0.105831	0.107696	0.120318		0.172137	0.0648939	0.0805803
1971	0.128802	0.466604	0.129355	0.0722498	0.360977	0.0188442	0.414096		0.124861	0.176994	0.148053		0.0888664	0.175876	0.0547981	0.0997396	0.0538784	0.0831233	0.119253	0.220378			0.0656099	0.256822	0.121323	0.101387	0.0678503	0.0344432	0.113105	0.118662	0.114045	0.211009	0.133024	0.1476	0.0828272	0.107628	0.133779	0.0950217	0.111827	0.0969184	0.0501851	0.167823	0.110535	0.127732	0.127542		0.19276	0.0685766	0.0825903
1972	0.151182	0.44909	0.13349	0.0758663	0.357607	0.0301487	0.384919		0.157791	0.201982	0.172559		0.0968998	0.206198	0.064454	0.103237	0.0631814	0.0863569	0.141222	0.248781			0.0942755	0.357038	0.139431	0.116566	0.0760262	0.0424364	0.117647	0.121823	0.135726	0.22759	0.158038	0.159331	0.0973054	0.120574	0.164407	0.0740177	0.134056	0.0981763	0.0575104	0.184792	0.119146	0.156893	0.147221		0.220391	0.0790193	0.0823632
1973	0.181908	0.412997	0.150285	0.0827355	0.355442	0.0503648	0.412126		0.206257	0.279224	0.221733		0.110949	0.24852	0.0740817	0.127998	0.0817017	0.0911906	0.172405	0.243024			0.13732	0.422907	0.129309	0.146055	0.0977681	0.0585566	0.131147	0.148402	0.143405	0.245647	0.207468	0.235089	0.109158	0.155097	0.215239	0.076726	0.151063	0.105178	0.0721548	0.225581	0.138494	0.172203	0.182535		0.279123	0.0946466	0.0886711
1974	0.211341	0.374738	0.162857	0.0933662	0.348875	0.133403	0.440946		0.247031	0.343388	0.26028		0.125272	0.289165	0.074136	0.131283	0.0962185	0.0983306	0.1815	0.311087			0.168832	0.615086	0.193526	0.172545	0.141969	0.114909	0.148875	0.197138	0.163851	0.291547	0.236925	0.240602	0.110866	0.174942	0.225693	0.080761	0.149039	0.11616	0.0804183	0.222518	0.148032	0.176377	0.217178		0.309397	0.125214	0.123687
1975	0.234102	0.365644	0.127804	0.0971176	0.344898	0.132601	0.476305		0.271295	0.358393	0.293332		0.151905	0.341498	0.105767	0.158688	0.104893	0.105733	0.21628	0.394312			0.19836	0.626587	0.205441	0.193875	0.140046	0.121153	0.142564	0.203534	0.222995	0.31062	0.297585	0.131842	0.119857	0.213298	0.285704	0.102572	0.186098	0.11601	0.115751	0.307584	0.168642	0.195363	0.225084		0.339337	0.122365	0.123436
1976	0.225225	0.352033	0.126844	0.0917956	0.34351	0.144141	0.504178		0.246608	0.37046	0.307032		0.151676	0.346142	0.104964	0.150772	0.103223	0.112341	0.240419	0.388624			0.167084	0.556125	0.22589	0.211743	0.191289	0.134323	0.133255	0.194857	0.267751	0.350529	0.315722	0.173011	0.117721	0.227243	0.327224	0.113593	0.183001	0.127683	0.114411	0.283509	0.192013	0.210166	0.20724		0.341649	0.139428	0.114673
1977	0.251124	0.359892	0.13222	0.10313	0.33848	0.147358	0.532076		0.251192	0.362005	0.354006		0.157727	0.399986	0.110928	0.164026	0.100988	0.120419	0.300088	0.421126			0.198267	0.652371	0.218512	0.240764	0.214229	0.165228	0.137886	0.222092	0.286168	0.349406	0.331522	0.214721	0.124726	0.284618	0.338855	0.116353	0.180425	0.154611	0.121022	0.279693	0.218894	0.240112	0.210527		0.381429	0.172264	0.127859
1978	0.28341	0.330208	0.164013	0.110984	0.334343	0.143932	0.560054		0.281065	0.403764	0.428173		0.176266	0.470154	0.138677	0.192259	0.125965	0.128953	0.305433	0.38121			0.218202	0.692262	0.238462	0.262984	0.249322	0.16855	0.122863	0.236496	0.337196	0.346819	0.457008	0.230401	0.135357	0.327504	0.357226	0.120093	0.227441	0.171991	0.154096	0.293976	0.239415	0.251281	0.247595		0.455747	0.180128	0.1418
1979	0.323716	0.301587	0.176142	0.11833	0.271759	0.154721	0.609385		0.282451	0.431903	0.493853		0.224334	0.527775	0.162201	0.254551	0.137416	0.138615	0.41907	0.404375			0.243095	0.819552	0.25004	0.27173	0.29415	0.180828	0.131075	0.276212	0.3948	0.369284	0.498087	0.288221	0.155615	0.374841	0.451984	0.114245	0.267441	0.199464	0.191161	0.304026	0.26366	0.259491	0.285777		0.52158	0.200587	0.161588
1980	0.380887	0.28666	0.229417	0.134158	0.231283	0.136813	0.669201		0.414919	0.480145	0.549273		0.261381	0.554102	0.193509	0.274914	0.155281	0.156462	0.447947	0.388488			0.30306	1.28955	0.267941	0.27817	0.402991	0.309428	0.160665	0.365701	0.484494	0.409237	0.511028	0.361966	0.176894	0.46957	0.505663	0.122166	0.387947	0.226271	0.207207	0.317045	0.315688	0.281751	0.330014		0.559843	0.220506	0.199786
1981	0.303327	0.280581	0.217003	0.149384	0.229998	0.16084	0.687823		0.43643	0.536155	0.478466		0.255502	0.485011	0.144205	0.23793	0.154064	0.166354	0.555194	0.488268			0.320218	1.40397	0.287746	0.313946	0.448241	0.288645	0.152595	0.368438	0.369596	0.442592	0.470721	0.413191	0.165697	0.370201	0.419938	0.142536	0.55797	0.245008	0.195702	0.289151	0.172933	0.311215	0.317017		0.483114	0.231107	0.196664
1982	0.271228	0.272242	0.214137	0.169936	0.23539	0.16497	0.672783		0.448809	0.520146	0.473605		0.271645	0.436326	0.193324	0.217376	0.139911	0.173221	0.690358	0.517614			0.284774	1.53968	0.297467	0.334755	0.449242	0.299078	0.152048	0.2984	0.343592	0.463723	0.481532	0.335968	0.151208	0.322277	0.369725	0.147207	0.537474	0.259862	0.168877	0.268048	0.183317	0.339603	0.300859		0.476313	0.223451	0.202487
1983	0.228493	0.261873	0.224164	0.198738	0.230123	0.165459	0.668728		0.404715	0.491283	0.467664		0.280579	0.421061	0.169612	0.210559	0.139766	0.175556	0.675003	0.516792			0.298183	1.58243	0.297463	0.240464	0.453431	0.27548	0.151168	0.272742	0.319659	0.486147	0.474695	0.28561	0.150922	0.285824	0.337328	0.151331	0.311086	0.259082	0.171588	0.245208	0.217397	0.41168	0.285134		0.472469	0.222755	0.215633
1984	0.193217	0.25539	0.218298	0.223092	0.225655	0.160501	0.6642		0.491006	0.509236	0.444269		0.250005	0.402875	0.153841	0.19393	0.149636	0.185238	0.65298	0.456355			0.324765	1.53621	0.294876	0.236316	0.477844	0.277816	0.146226	0.226848	0.285521	0.475714	0.449185	0.274676	0.137408	0.277856	0.295608	0.144668	0.277492	0.251626	0.143227	0.244924	0.235396	0.426213	0.268952		0.442156	0.227782	0.231871
1985	0.176226	0.229184	0.255058	0.248354	0.227597	0.165476	0.649872		0.63015	0.432101	0.440535		0.267606	0.42756	0.137043	0.211125	0.148007	0.185409	1.0691	0.434556			0.301798	1.96583	0.283334	0.239886	0.557246	0.261428	0.142628	0.167435	0.280327	0.468192	0.442028	0.240817	0.119204	0.251382	0.273901	0.155232	0.268363	0.228567	0.149454	0.246174	0.245541	0.494772	0.285363		0.443363	0.245008	0.265289
1986	0.208658	0.228563	0.271889	0.263506	0.224079	0.165149	0.708296		0.52559	0.444501	0.602698		0.266601	0.565855	0.198099	0.250667	0.151673	0.193048	0.701471	0.48997			0.282339	1.35626	0.280867	0.253522	0.503202	0.225216	0.156481	0.208079	0.368726	0.482136	0.604114	0.247906	0.112099	0.31817	0.345142	0.176607	0.344493	0.215405	0.189649	0.297848	0.24844	0.501309	0.349637		0.592152	0.263326	0.274286
1987	0.223921	0.231692	0.277662	0.307285	0.218709	0.20407	0.686639		0.555372	0.488333	0.727805		0.250228	0.675174	0.249373	0.298287	0.171509	0.192869	0.662853	0.475947			0.310001	0.932371	0.282453	0.26991	0.501088	0.236355	0.181268	0.262956	0.424706	0.516544	0.747101	0.270135	0.116025	0.359858	0.380217	0.190527	0.429879	0.222679	0.228661	0.355197	0.255963	0.507917	0.38594		0.708387	0.266596	0.288116
1988	0.23705	0.239641	0.317873	0.360366	0.230542	0.180491	0.750803		0.630481	0.583534	0.731897		0.216195	0.680449	0.25044	0.310121	0.177124	0.213739	0.590242	0.508225			0.327413	1.46013	0.334736	0.299007	0.5073	0.248768	0.185194	0.274299	0.42425	0.579185	0.790305	0.286891	0.136068	0.357187	0.379023	0.184408	0.44291	0.232379	0.248126	0.392654	0.253358	0.576177	0.420837		0.725021	0.280462	0.311008
1989	0.239798	0.27433	0.348649	0.387255	0.254211	0.178387	0.469791		0.647253	0.627695	0.689312		0.231135	0.667998	0.255683	0.307184	0.172265	0.220139	0.622697	0.548828			0.340709	2.78745	0.325723	0.39808	0.51613	0.250499	0.173392	0.363206	0.389918	0.619131	0.726867	0.298875	0.152339	0.338292	0.359835	0.184427	0.477307	0.228886	0.250371	0.374628	0.268825	0.591194	0.404104		0.69119	0.301979	0.338187
1990	0.266305	0.275109	0.359869	0.341324	0.188978	0.186031	0.7663	0.0965734	0.657135	0.637755	0.818193	0.0897986	0.221413	0.812899	0.302027	0.364286	0.170514	0.209606	0.593136	0.635977	1.9699	0.142438	0.348416	1.65698	0.315445	0.440546	0.543178	0.263425	0.181914	0.417887	0.461448	0.650246	0.885332	0.322569	0.134848	0.405542	0.414206	0.228642	0.480813	0.22311	0.316973	0.451455	0.283365	0.565642	0.477669	0.173196	0.819784	0.334395	0.352038
1991	0.256116	0.347363	0.490331	0.443075	0.157088	0.203945	0.880164	0.0971233	0.659881	0.655824	0.805723	0.0634024	0.214392	0.809384	0.288991	0.344717	0.175152	0.0817933	0.634027	0.686052	1.43237	0.149934	0.37228	1.5151	0.324511	0.375947	0.49483	0.31771	0.150175	0.402213	0.449286	0.691202	0.897366	0.342917	0.134293	0.384907	0.422399	0.2657	0.478083	0.228771	0.328329	0.451931	0.27269	0.621556	0.488971	0.150574	0.809952	0.343584	0.386805
1992	0.261157	0.266871	0.434738	0.383993	0.167679	0.205979	0.896998	0.100003	0.718931	0.608754	0.876232	0.0695949	0.20449	0.863992	0.319099	0.366292	0.174183	0.0904282	0.622702	0.595441	1.39697	0.151889	0.422367	2.00942	0.325761	0.349042	0.652938	0.260238	0.136387	0.399568	0.475623	0.649607	0.933681	0.366209	0.146394	0.382832	0.417473	0.18589	0.539533	0.231591	0.34051	0.479793	0.296504	0.691731	0.569968	0.176094	0.901045	0.299217	0.3954
1993	0.242815	0.310634	0.382915	0.397003	0.162426	0.261781	0.811915	0.0974231	0.747405	0.578489	0.841427	0.0986462	0.195909	0.833155	0.314029	0.33586	0.17533	0.153991	0.622763	0.657886	0.817129	0.136547	0.424866	2.09615	0.311499	0.36398	0.648522	0.280088	0.136771	0.390528	0.440712	0.627629	0.896609	0.367099	0.168551	0.360132	0.429076	0.210768	0.508111	0.252142	0.347797	0.452181	0.310213	0.656807	0.548451	0.204364	0.868056	0.232611	0.408088
1994	0.245403	0.319427	0.376417	0.428033	0.158092	0.265576	0.758819	0.134879	0.730768	0.633852	0.854928	0.103174	0.211203	0.87146	0.235484	0.219948	0.177932	0.139506	0.65058	0.700641	0.458875	0.187096	0.402303	2.10797	0.298714	0.462143	0.407686	0.304965	0.161091	0.393816	0.240685	0.600317	0.965078	0.386748	0.143502	0.272494	0.258798	0.28122	0.350145	0.316566	0.267405	0.434161	0.32182	0.738593	0.580334	0.227059	0.887103	0.35184	0.447657
1995	0.269874	0.325453	0.2074	0.440107	0.185165	0.269923	0.677719	0.141552	0.76768	0.655138	0.97651	0.149496	0.215626	0.99919	0.3064	0.240611	0.190731	0.235546	0.674521	0.753083	0.23071	0.178432	0.397557	2.11979	0.299566	0.533188	0.388253	0.379058	0.178228	0.403773	0.30545	0.601546	1.15483	0.434665	0.170382	0.31653	0.292942	0.277857	0.433874	0.351013	0.282156	0.56242	0.340738	0.777135	0.652133	0.277093	1.01028	0.288519	0.436205
1996	0.256967	0.362326	0.219613	0.485013	0.224688	0.286841	0.555572	0.160828	0.78806	0.694392	0.944809	0.163361	0.201713	0.979203	0.317176	0.23506	0.195183	0.161456	0.736874	0.704351	0.166757	0.180744	0.472596	2.69623	0.296734	0.489454	0.385566	0.322087	0.177457	0.366218	0.32463	0.613969	1.10385	0.440551	0.188181	0.319374	0.295461	0.318266	0.461879	0.368023	0.290851	0.482634	0.350249	0.836613	0.664773	0.300697	0.965409	0.327222	0.437537
1997	0.253044	0.382798	0.251328	0.541812	0.166728	0.288492	0.578182	0.157838	0.828144	0.663488	0.797595	0.2185	0.231316	0.823554	0.276472	0.204291	0.202708	0.193379	0.625538	0.769285	0.184719	0.164132	0.494915	2.59431	0.311738	0.519523	0.437748	0.376269	0.180595	0.350688	0.288342	0.60822	0.909133	0.470462	0.201634	0.308178	0.271683	0.318154	0.445083	0.39651	0.258233	0.486354	0.362162	0.771789	0.612698	0.284124	0.81851	0.294649	0.4941
1998	0.269348	0.363002	0.199487	0.515771	0.172376	0.285789	0.59057	0.199482	1.2625	0.569507	0.772841	0.24272	0.192843	0.798035	0.285519	0.219507	0.212636	0.217102	0.622751	0.755785	0.198797	0.179454	0.508037	2.4924	0.325153	0.523023	0.468535	0.327862	0.174749	0.319228	0.283539	0.571749	0.892963	0.453879	0.214779	0.322938	0.279702	0.367139	0.43884	0.375301	0.284597	0.455402	0.353634	0.859159	0.65674	0.313163	0.788539	0.29625	0.590256
1999	0.278671	0.344264	0.191917	0.50137	0.20266	0.293142	0.593339	0.176116	0.882594	0.590469	0.740863	0.233327	0.173012	0.758804	0.263791	0.214585	0.229952	0.196946	0.54249	0.749668	0.198775	0.144317	0.518653	2.39048	0.315041	0.374677	0.493735	0.317074	0.167987	0.330326	0.295411	0.568154	0.849138	0.434797	0.21489	0.324656	0.273012	0.314029	0.399861	0.346356	0.290621	0.439745	0.365725	0.915005	0.622787	0.305618	0.741965	0.292451	0.600756
2000	0.269515	0.434382	0.3228	0.548477	0.218759	0.296039	0.598882	0.179269	0.742222	0.548997	0.636628	0.235995	0.157893	0.648216	0.226299	0.181299	0.226012	0.175738	0.459678	0.728392	0.246791	0.113392	0.521498	2.28856	0.315409	0.404041	0.527523	0.344989	0.176547	0.322012	0.261591	0.584462	0.783207	0.430135	0.21955	0.280158	0.24315	0.330729	0.374407	0.326354	0.272601	0.370503	0.370979	0.874575	0.52331	0.280269	0.642094	0.302601	0.546108
2001	0.268538	0.404072	0.299354	0.573027	0.2359	0.286605	0.601722	0.187756	0.888012	0.507676	0.651377	0.226865	0.144919	0.647843	0.2198	0.187954	0.219099	0.183529	0.462115	0.794605	0.250405	0.137878	0.557934	2.18665	0.292418	0.347667	0.541864	0.34043	0.178912	0.305229	0.261918	0.583887	0.805293	0.39337	0.221676	0.292485	0.247209	0.330881	0.354292	0.319621	0.264725	0.368461	0.378487	0.897424	0.534569	0.292394	0.631724	0.314083	0.688619
2002	0.290252	0.518293	0.326697	0.648589	0.254626	0.298441	0.265797	0.193711	0.881586	0.548436	0.686627	0.232484	0.130617	0.682555	0.225676	0.202878	0.215515	0.203587	0.505416	0.706769	0.281205	0.159925	0.529839	2.08473	0.269341	0.314122	0.552191	0.334734	0.173315	0.254967	0.27779	0.594324	0.860829	0.382213	0.220817	0.326898	0.268788	0.332459	0.359511	0.312718	0.288514	0.386179	0.387889	0.954021	0.602102	0.358672	0.673046	0.331799	0.690789
2003	0.344749	0.522582	0.350571	0.595706	0.309118	0.311949	0.31315	0.20105	0.823811	0.676867	0.828956	0.257894	0.117183	0.82611	0.269998	0.253236	0.229733	0.252884	0.474153	0.735435	0.355286	0.185253	0.508085	1.98282	0.261909	0.343967	0.606396	0.331437	0.181572	0.358904	0.334188	0.673796	0.998031	0.39976	0.227683	0.366539	0.31741	0.313663	0.399189	0.292292	0.37243	0.473722	0.390672	0.994424	0.788209	0.417525	0.800513	0.319818	0.681495
2004	0.395395	0.515308	0.378585	0.615536	0.386035	0.341758	0.338844	0.240242	1.09263	0.792856	0.9159	0.288821	0.126602	0.937723	0.291768	0.275714	0.243066	0.29779	0.500065	0.784709	0.414547	0.223539	0.519781	1.8809	0.266738	0.390987	0.622662	0.353055	0.174437	0.408243	0.361332	0.738999	1.07627	0.469837	0.239925	0.418939	0.357902	0.327278	0.430247	0.344545	0.433795	0.49251	0.400909	1.08459	0.920779	0.483636	0.875801	0.326291	0.731057
2005	0.418846	0.535677	0.448854	0.621311	0.403979	0.361841	0.374069	0.29585	0.881754	0.833636	0.902697	0.286118	0.208071	0.931388	0.292384	0.283765	0.237988	0.308662	0.457579	0.795307	0.397249	0.277391	0.53561	1.77898	0.269396	0.498012	0.694949	0.359118	0.20253	0.398373	0.372241	0.795333	1.04846	0.522208	0.249787	0.435897	0.36074	0.345499	0.417053	0.401451	0.392628	0.516012	0.407949	1.11019	0.898864	0.51879	0.855079	0.326276	0.690014
2006	0.424945	0.539394	0.489424	0.694699	0.411052	0.381497	0.400639	0.338198	0.848134	0.877983	0.923661	0.311713	0.22759	0.979888	0.305235	0.290897	0.265805	0.332576	0.46157	0.883663	0.416471	0.301665	0.541557	1.82234	0.305522	0.567241	0.776137	0.377501	0.220933	0.389179	0.385938	0.882571	1.02405	0.56109	0.275987	0.434798	0.377366	0.383043	0.485138	0.408413	0.420571	0.550823	0.445204	1.0389	0.939846	0.56475	0.866383	0.290198	0.704753
2007	0.461394	0.602348	0.546061	0.724303	0.458941	0.409778	0.447402	0.42896	0.747405	1.03165	1.03458	0.360327	0.236409	1.10221	0.332513	0.337518	0.272955	0.395949	0.481108	0.841904	0.470402	0.335349	0.552729	2.00287	0.329535	0.643693	0.796267	0.410226	0.275899	0.406245	0.416051	0.965022	1.04129	0.584648	0.326491	0.471508	0.414739	0.416106	0.64851	0.473833	0.493005	0.5721	0.494098	1.07446	1.01825	0.630639	0.94229	0.302465	0.688785
2008	0.483318	0.62349	0.61061	0.746538	0.502425	0.462757	0.521899	0.501829	0.772461	1.05527	1.13476	0.481416	0.265284	1.18363	0.385899	0.407211	0.280605	0.458582	0.419684	0.895137	0.537275	0.388748	0.623435	1.69786	0.371322	0.700388	0.896137	0.452795	0.261846	0.404138	0.468139	0.988856	1.15175	0.624785	0.398927	0.530554	0.463675	0.496398	0.632344	0.507033	0.525303	0.620397	0.540339	1.13322	1.11021	0.765879	1.0257	0.31229	0.667087
2009	0.440386	0.63033	0.610509	0.791949	0.432825	0.435476	0.502739	0.398941	0.706412	1.00447	1.07501	0.417421	0.287669	1.08333	0.381656	0.406485	0.28913	0.445575	0.433291	0.82473	0.486018	0.32019	0.615059	1.62465	0.367939	0.661535	0.917376	0.430048	0.241209	0.404395	0.440573	0.956108	1.13238	0.583316	0.409417	0.481871	0.454712	0.455504	0.617922	0.476582	0.508854	0.568085	0.501089	1.14579	0.996866	0.6759	0.980239	0.412261	0.784087
2010	0.417868	0.662679	0.546847	0.798929	0.386431	0.485829	0.554977	0.389847	0.667244	1.18358	1.03336	0.420226	0.309973	1.02544	0.363971	0.399558	0.285409	0.418386	0.446599	0.878405	0.46581	0.328132	0.582447	1.52471	0.377556	0.7564	0.980995	0.466497	0.260916	0.455183	0.437508	1.06381	1.194	0.643503	0.431927	0.457577	0.439761	0.470705	0.588149	0.536203	0.527769	0.520562	0.603121	1.22838	0.978509	0.679472	0.94005	0.541958	0.71292
2011	0.407842	0.706076	0.561664	0.891581	0.414447	0.499061	0.610243	0.387661	0.635302	1.33056	1.10369	0.403127	0.311189	1.14479	0.40501	0.456344	0.267063	0.483181	0.474674	0.85315	0.493655	0.314869	0.580301	1.41416	0.407076	0.80087	1.12053	0.490297	0.289223	0.495247	0.487659	1.11448	1.31246	0.671669	0.498476	0.468523	0.462619	0.518719	0.557669	0.558466	0.533409	0.538009	0.64873	1.222	1.06718	0.733228	0.994671	0.489239	0.764904
2012	0.385414	0.725012	0.577669	0.946742	0.3866	0.505681	0.658891	0.328101	0.673582	1.38098	1.0303	0.402764	0.316282	1.07937	0.396589	0.439078	0.269053	0.446375	0.424358	0.850855	0.450585	0.351343	0.610207	1.80082	0.416362	0.758271	1.20532	0.482281	0.27439	0.493084	0.458314	1.13629	1.21404	0.671999	0.522992	0.439849	0.4314	0.553344	0.558799	0.598904	0.483447	0.524518	0.679793	1.29442	0.951599	0.669843	0.944407	0.530476	0.700125
2013	0.417108	0.617287	0.59912	1.07081	0.418939	0.536048	0.692924	0.344509	0.727619	1.28855	1.09501	0.470354	0.300019	1.13227	0.425763	0.448424	0.304787	0.480115	0.454235	0.956265	0.476461	0.41158	0.675988	2.01925	0.425758	0.755747	1.3008	0.4875	0.296495	0.502165	0.467107	1.11122	1.26762	0.68008	0.572507	0.484046	0.459878	0.559259	0.610288	0.607369	0.511088	0.576377	0.732027	1.31452	1.00593	0.684649	0.997233	0.621284	0.726953
2014	0.449986	0.723916	0.59806	1.22708	0.41731	0.528665	0.656077	0.374701	1.54085	1.22324	1.07709	0.433249	0.314896	1.16593	0.419448	0.468207	0.321881	0.47606	0.480138	0.916409	0.484232	0.423449	0.692558	2.00326	0.434932	0.75237	1.30405	0.502152	0.303667	0.496632	0.542776	1.04618	1.28274	0.627914	0.600656	0.504068	0.469249	0.551718	0.62265	0.586432	0.510616	0.583061	0.702721	1.31441	1.04016	0.647427	1.00792	0.635102	0.722157
2015	0.384937	0.736605	0.51795	1.37235	0.340258	0.513191	0.713174	0.325896	0.886734	1.07541	0.890974	0.380604	0.326613	0.958398	0.351243	0.382297	0.333067	0.400556	0.469476	1.01536	0.404538	0.305533	0.733664	2.1616	0.414629	0.587307	1.31791	0.458161	0.283157	0.452588	0.435219	0.925103	1.17928	0.587678	0.612537	0.433559	0.395182	0.527094	0.522072	0.450214	0.41836	0.471089	0.698406	1.20418	0.833112	0.54587	0.856176	0.567558	0.76202
2016	0.391248	0.875446	0.471145	1.40252	0.352486	0.535901	0.61763	0.318053	0.940327	1.05627	0.903232	0.286721	0.325831	0.949574	0.344359	0.374134	0.362473	0.402264	0.485042	1.01856	0.406653	0.272037	0.761183	2.24832	0.406282	0.615199	1.33583	0.443035	0.279256	0.465057	0.4434	0.897967	1.1371	0.610178	0.603309	0.443635	0.392998	0.483408	0.52346	0.435886	0.413098	0.466806	0.678234	1.45468	0.794568	0.550301	0.852718	0.606477	0.747035
2017	0.406079	0.997919	0.530624	1.45278	0.372259	0.612266	0.628545	0.301594	1.07349	1.09694	0.910539	0.294568	0.35962	0.97497	0.370101	0.382896	0.37402	0.423914	0.482202	1.02242	0.426455	0.285162	0.788425	2.24709	0.40983	0.694833	1.47369	0.443783	0.293707	0.486998	0.485866	0.918289	1.13159	0.656024	0.625306	0.464077	0.404709	0.459412	0.528787	0.474925	0.422045	0.477883	0.65174	1.2265	0.847376	0.577467	0.869252	0.676174	0.719135
2018	0.422582	0.923965	0.434436	2.07918	0.427802	0.669595	0.508563	0.309958	1.02363	1.08043	0.967173	0.304825	0.340372	1.06568	0.397671	0.395187	0.378308	0.459552	0.486516	1.0407	0.457399	0.298995	0.835865	2.30978	0.417891	0.619415	1.467	0.452324	0.283263	0.512302	0.499764	0.938432	1.16138	0.682787	0.707687	0.479989	0.42541	0.555865	0.516424	0.487202	0.443574	0.527228	0.66365	1.38156	0.924922	0.636144	0.931297	0.503426	0.775764
2019	0.413125	0.950033	0.380675	1.57253	0.421019	0.662869	0.459516	0.312195	1.01858	1.0185	0.930479	0.305031	0.327541	1.01797	0.375104	0.370352	0.397582	0.451857	0.499791	1.04756	0.440113	0.306343	0.859245	2.30903	0.414573	0.599987	1.45607	0.433636	0.285586	0.481435	0.477118	0.935248	1.13459	0.639755	0.712938	0.452264	0.411764	0.5346	0.506101	0.458531	0.424446	0.490066	0.657399	1.49145	0.865676	0.62398	0.903363	0.519435	0.772816
[truncated: 134 more columns]
