# Supplementary material for: The Social Cost of Fossil and Industrial CO2 Emissions from 1950 to 2018
Source: Research Square preprint supplement (doi:10.21203/rs.3.rs-2244259/v1), 2022-11-17
Supplement: Supplementary file 57 [file pl_i_Transposed.xlsx]

## Sheet: pl_i_raw
VariableCode	RegionCode	YearCode	AggValue
pl_i	ABW	1970	0.334333
pl_i	ABW	1971	0.319142
pl_i	ABW	1972	0.306424
pl_i	ABW	1973	0.294037
pl_i	ABW	1974	0.274107
pl_i	ABW	1975	0.257005
pl_i	ABW	1976	0.251811
pl_i	ABW	1977	0.246172
pl_i	ABW	1978	0.23861
pl_i	ABW	1979	0.230519
pl_i	ABW	1980	0.220955
pl_i	ABW	1981	0.213939
pl_i	ABW	1982	0.205235
pl_i	ABW	1983	0.201105
pl_i	ABW	1984	0.196458
pl_i	ABW	1985	0.190073
pl_i	ABW	1986	0.18595
pl_i	ABW	1987	0.194186
pl_i	ABW	1988	0.202153
pl_i	ABW	1989	0.216167
pl_i	ABW	1990	0.236937
pl_i	ABW	1991	0.249302
pl_i	ABW	1992	0.259626
pl_i	ABW	1993	0.272653
pl_i	ABW	1994	0.297497
pl_i	ABW	1995	0.303802
pl_i	ABW	1996	0.318055
pl_i	ABW	1997	0.325158
pl_i	ABW	1998	0.329436
pl_i	ABW	1999	0.331785
pl_i	ABW	2000	0.364808
pl_i	ABW	2001	0.33624
pl_i	ABW	2002	0.336211
pl_i	ABW	2003	0.346326
pl_i	ABW	2004	0.355328
pl_i	ABW	2005	0.363223
pl_i	ABW	2006	0.380075
pl_i	ABW	2007	0.403897
pl_i	ABW	2008	0.426554
pl_i	ABW	2009	0.432799
pl_i	ABW	2010	0.452776
pl_i	ABW	2011	0.476116
pl_i	ABW	2012	0.514195
pl_i	ABW	2013	0.550759
pl_i	ABW	2014	0.603429
pl_i	ABW	2015	0.667704
pl_i	ABW	2016	0.713214
pl_i	ABW	2017	0.732397
pl_i	ABW	2018	0.789754
pl_i	ABW	2019	0.815759
pl_i	AGO	1970	0.0864097
pl_i	AGO	1971	0.0849353
pl_i	AGO	1972	0.0844014
pl_i	AGO	1973	0.0950394
pl_i	AGO	1974	0.100256
pl_i	AGO	1975	0.0765861
pl_i	AGO	1976	0.0765058
pl_i	AGO	1977	0.0840942
pl_i	AGO	1978	0.101402
pl_i	AGO	1979	0.110658
pl_i	AGO	1980	0.144358
pl_i	AGO	1981	0.145506
pl_i	AGO	1982	0.142721
pl_i	AGO	1983	0.146514
pl_i	AGO	1984	0.145946
pl_i	AGO	1985	0.177324
pl_i	AGO	1986	0.198592
pl_i	AGO	1987	0.204747
pl_i	AGO	1988	0.233676
pl_i	AGO	1989	0.252962
pl_i	AGO	1990	0.259404
pl_i	AGO	1991	0.1446
pl_i	AGO	1992	0.0318035
pl_i	AGO	1993	0.0853992
pl_i	AGO	1994	0.137316
pl_i	AGO	1995	0.091782
pl_i	AGO	1996	0.103236
pl_i	AGO	1997	0.115179
pl_i	AGO	1998	0.0977596
pl_i	AGO	1999	0.090077
pl_i	AGO	2000	0.0993263
pl_i	AGO	2001	0.119816
pl_i	AGO	2002	0.319228
pl_i	AGO	2003	0.32956
pl_i	AGO	2004	0.380945
pl_i	AGO	2005	0.475227
pl_i	AGO	2006	0.510695
pl_i	AGO	2007	0.583607
pl_i	AGO	2008	0.674399
pl_i	AGO	2009	0.648416
pl_i	AGO	2010	0.497219
pl_i	AGO	2011	0.485339
pl_i	AGO	2012	0.528887
pl_i	AGO	2013	0.588119
pl_i	AGO	2014	0.618156
pl_i	AGO	2015	0.573834
pl_i	AGO	2016	0.52928
pl_i	AGO	2017	0.618861
pl_i	AGO	2018	0.406605
pl_i	AGO	2019	0.342872
pl_i	AIA	1970	0.0434406
pl_i	AIA	1971	0.0518066
pl_i	AIA	1972	0.0545078
pl_i	AIA	1973	0.0588346
pl_i	AIA	1974	0.0626823
pl_i	AIA	1975	0.0642758
pl_i	AIA	1976	0.0615035
pl_i	AIA	1977	0.069468
pl_i	AIA	1978	0.074887
pl_i	AIA	1979	0.0789508
pl_i	AIA	1980	0.0862486
pl_i	AIA	1981	0.0962207
pl_i	AIA	1982	0.11157
pl_i	AIA	1983	0.130559
pl_i	AIA	1984	0.146805
pl_i	AIA	1985	0.163505
pl_i	AIA	1986	0.189916
pl_i	AIA	1987	0.215795
pl_i	AIA	1988	0.236127
pl_i	AIA	1989	0.278409
pl_i	AIA	1990	0.254954
pl_i	AIA	1991	0.319687
pl_i	AIA	1992	0.269933
pl_i	AIA	1993	0.273528
pl_i	AIA	1994	0.29239
pl_i	AIA	1995	0.312799
pl_i	AIA	1996	0.331051
pl_i	AIA	1997	0.336517
pl_i	AIA	1998	0.347147
pl_i	AIA	1999	0.355014
pl_i	AIA	2000	0.350674
pl_i	AIA	2001	0.349849
pl_i	AIA	2002	0.363337
pl_i	AIA	2003	0.374943
pl_i	AIA	2004	0.392944
pl_i	AIA	2005	0.395412
pl_i	AIA	2006	0.41709
pl_i	AIA	2007	0.472587
pl_i	AIA	2008	0.479831
pl_i	AIA	2009	0.478487
pl_i	AIA	2010	0.485195
pl_i	AIA	2011	0.516491
pl_i	AIA	2012	0.578066
pl_i	AIA	2013	0.651828
pl_i	AIA	2014	0.742516
pl_i	AIA	2015	0.811803
pl_i	AIA	2016	0.849165
pl_i	AIA	2017	0.864334
pl_i	AIA	2018	0.908172
pl_i	AIA	2019	1.0292
pl_i	ALB	1970	0.784734
pl_i	ALB	1971	0.767523
pl_i	ALB	1972	0.754812
pl_i	ALB	1973	0.741527
pl_i	ALB	1974	0.709121
pl_i	ALB	1975	0.680281
pl_i	ALB	1976	0.681441
pl_i	ALB	1977	0.687513
pl_i	ALB	1978	0.676501
pl_i	ALB	1979	0.540568
pl_i	ALB	1980	0.485072
pl_i	ALB	1981	0.453412
pl_i	ALB	1982	0.45097
pl_i	ALB	1983	0.463985
pl_i	ALB	1984	0.472027
pl_i	ALB	1985	0.476411
pl_i	ALB	1986	0.44957
pl_i	ALB	1987	0.453119
pl_i	ALB	1988	0.480392
pl_i	ALB	1989	0.537341
pl_i	ALB	1990	0.451059
pl_i	ALB	1991	0.465454
pl_i	ALB	1992	0.443936
pl_i	ALB	1993	0.390469
pl_i	ALB	1994	0.365498
pl_i	ALB	1995	0.506092
pl_i	ALB	1996	0.349129
pl_i	ALB	1997	0.397952
pl_i	ALB	1998	0.467835
pl_i	ALB	1999	0.481566
pl_i	ALB	2000	0.470461
pl_i	ALB	2001	0.457833
pl_i	ALB	2002	0.431759
pl_i	ALB	2003	0.473526
pl_i	ALB	2004	0.530968
pl_i	ALB	2005	0.505483
pl_i	ALB	2006	0.467564
pl_i	ALB	2007	0.507028
pl_i	ALB	2008	0.538296
pl_i	ALB	2009	0.457455
pl_i	ALB	2010	0.43425
pl_i	ALB	2011	0.491193
pl_i	ALB	2012	0.448254
pl_i	ALB	2013	0.483726
pl_i	ALB	2014	0.446566
pl_i	ALB	2015	0.390765
pl_i	ALB	2016	0.395384
pl_i	ALB	2017	0.413187
pl_i	ALB	2018	0.4608
pl_i	ALB	2019	0.456882
pl_i	ARE	1970	0.012461
pl_i	ARE	1971	0.0147424
pl_i	ARE	1972	0.019275
pl_i	ARE	1973	0.0324297
pl_i	ARE	1974	0.0754106
pl_i	ARE	1975	0.0873515
pl_i	ARE	1976	0.100596
pl_i	ARE	1977	0.102884
pl_i	ARE	1978	0.104452
pl_i	ARE	1979	0.114584
pl_i	ARE	1980	0.127091
pl_i	ARE	1981	0.135918
pl_i	ARE	1982	0.13888
pl_i	ARE	1983	0.136898
pl_i	ARE	1984	0.129501
pl_i	ARE	1985	0.128663
pl_i	ARE	1986	0.129051
pl_i	ARE	1987	0.134025
pl_i	ARE	1988	0.139014
pl_i	ARE	1989	0.145837
pl_i	ARE	1990	0.151801
pl_i	ARE	1991	0.15275
pl_i	ARE	1992	0.155529
pl_i	ARE	1993	0.209051
pl_i	ARE	1994	0.216493
pl_i	ARE	1995	0.227352
pl_i	ARE	1996	0.236329
pl_i	ARE	1997	0.239307
pl_i	ARE	1998	0.242331
pl_i	ARE	1999	0.241949
pl_i	ARE	2000	0.238606
pl_i	ARE	2001	0.238423
pl_i	ARE	2002	0.236715
pl_i	ARE	2003	0.249527
pl_i	ARE	2004	0.262393
pl_i	ARE	2005	0.27023
pl_i	ARE	2006	0.282743
pl_i	ARE	2007	0.318419
pl_i	ARE	2008	0.392104
pl_i	ARE	2009	0.372286
pl_i	ARE	2010	0.409519
pl_i	ARE	2011	0.436188
pl_i	ARE	2012	0.493265
pl_i	ARE	2013	0.522532
pl_i	ARE	2014	0.451708
pl_i	ARE	2015	0.4205
pl_i	ARE	2016	0.419839
pl_i	ARE	2017	0.425465
pl_i	ARE	2018	0.494303
pl_i	ARE	2019	0.48058
pl_i	ARG	1950	0.42273
pl_i	ARG	1951	0.366893
pl_i	ARG	1952	0.366508
pl_i	ARG	1953	0.370191
pl_i	ARG	1954	0.381629
pl_i	ARG	1955	0.372378
pl_i	ARG	1956	0.396776
pl_i	ARG	1957	0.428065
pl_i	ARG	1958	0.431156
pl_i	ARG	1959	0.411492
pl_i	ARG	1960	0.397345
pl_i	ARG	1961	0.474233
pl_i	ARG	1962	0.420927
pl_i	ARG	1963	0.413887
pl_i	ARG	1964	0.424155
pl_i	ARG	1965	0.474044
pl_i	ARG	1966	0.460011
pl_i	ARG	1967	0.488427
pl_i	ARG	1968	0.506398
pl_i	ARG	1969	0.5347
pl_i	ARG	1970	0.530255
pl_i	ARG	1971	0.585836
pl_i	ARG	1972	0.532417
pl_i	ARG	1973	0.558627
pl_i	ARG	1974	0.612196
pl_i	ARG	1975	0.837004
pl_i	ARG	1976	0.862007
pl_i	ARG	1977	0.815933
pl_i	ARG	1978	0.885236
pl_i	ARG	1979	0.881541
pl_i	ARG	1980	0.893054
pl_i	ARG	1981	0.928777
pl_i	ARG	1982	1.0745
pl_i	ARG	1983	1.0635
pl_i	ARG	1984	1.06489
pl_i	ARG	1985	0.982218
pl_i	ARG	1986	0.994598
pl_i	ARG	1987	0.945573
pl_i	ARG	1988	1.01224
pl_i	ARG	1989	0.608686
pl_i	ARG	1990	1.1187
pl_i	ARG	1991	1.06476
pl_i	ARG	1992	0.967524
pl_i	ARG	1993	0.850425
pl_i	ARG	1994	0.744513
pl_i	ARG	1995	0.651897
pl_i	ARG	1996	0.506458
pl_i	ARG	1997	0.51037
pl_i	ARG	1998	0.5184
pl_i	ARG	1999	0.518807
pl_i	ARG	2000	0.503751
pl_i	ARG	2001	0.499588
pl_i	ARG	2002	0.252656
pl_i	ARG	2003	0.303313
pl_i	ARG	2004	0.347667
pl_i	ARG	2005	0.401726
pl_i	ARG	2006	0.437907
pl_i	ARG	2007	0.490276
pl_i	ARG	2008	0.558401
pl_i	ARG	2009	0.550702
pl_i	ARG	2010	0.584754
pl_i	ARG	2011	0.650579
pl_i	ARG	2012	0.700084
pl_i	ARG	2013	0.772201
pl_i	ARG	2014	0.748106
pl_i	ARG	2015	0.825699
pl_i	ARG	2016	0.736538
pl_i	ARG	2017	0.770372
pl_i	ARG	2018	0.660731
pl_i	ARG	2019	0.61606
pl_i	ARM	1990	0.171793
pl_i	ARM	1991	0.177275
pl_i	ARM	1992	0.181339
pl_i	ARM	1993	0.18529
pl_i	ARM	1994	0.195811
pl_i	ARM	1995	0.206961
pl_i	ARM	1996	0.265836
pl_i	ARM	1997	0.25277
pl_i	ARM	1998	0.284823
pl_i	ARM	1999	0.282207
pl_i	ARM	2000	0.281545
pl_i	ARM	2001	0.285333
pl_i	ARM	2002	0.285707
pl_i	ARM	2003	0.296427
pl_i	ARM	2004	0.337552
pl_i	ARM	2005	0.452337
pl_i	ARM	2006	0.550056
pl_i	ARM	2007	0.733034
pl_i	ARM	2008	0.914871
pl_i	ARM	2009	0.86842
pl_i	ARM	2010	0.915419
pl_i	ARM	2011	0.91002
pl_i	ARM	2012	0.774894
pl_i	ARM	2013	0.769451
pl_i	ARM	2014	0.729964
pl_i	ARM	2015	0.653277
pl_i	ARM	2016	0.600579
pl_i	ARM	2017	0.58567
pl_i	ARM	2018	0.577902
pl_i	ARM	2019	0.577787
pl_i	ATG	1970	0.145093
pl_i	ATG	1971	0.16361
pl_i	ATG	1972	0.206725
pl_i	ATG	1973	0.262081
pl_i	ATG	1974	0.259422
pl_i	ATG	1975	0.271567
pl_i	ATG	1976	0.266129
pl_i	ATG	1977	0.266195
pl_i	ATG	1978	0.292222
pl_i	ATG	1979	0.325042
pl_i	ATG	1980	0.360816
pl_i	ATG	1981	0.512342
pl_i	ATG	1982	0.774338
pl_i	ATG	1983	0.473686
pl_i	ATG	1984	0.487843
pl_i	ATG	1985	0.551825
pl_i	ATG	1986	0.652243
pl_i	ATG	1987	0.715746
pl_i	ATG	1988	0.812498
pl_i	ATG	1989	0.8735
pl_i	ATG	1990	0.919574
pl_i	ATG	1991	0.941802
pl_i	ATG	1992	0.965109
pl_i	ATG	1993	0.980779
pl_i	ATG	1994	1.04773
pl_i	ATG	1995	1.11072
pl_i	ATG	1996	1.17511
pl_i	ATG	1997	1.14739
pl_i	ATG	1998	1.1233
pl_i	ATG	1999	1.08081
pl_i	ATG	2000	1.02151
pl_i	ATG	2001	0.968312
pl_i	ATG	2002	0.90188
pl_i	ATG	2003	0.846223
pl_i	ATG	2004	0.809962
pl_i	ATG	2005	0.785078
pl_i	ATG	2006	0.743675
pl_i	ATG	2007	0.726184
pl_i	ATG	2008	0.690834
pl_i	ATG	2009	0.645318
pl_i	ATG	2010	0.593766
pl_i	ATG	2011	0.533097
pl_i	ATG	2012	0.58887
pl_i	ATG	2013	0.636477
pl_i	ATG	2014	0.694339
pl_i	ATG	2015	0.774594
pl_i	ATG	2016	0.853492
pl_i	ATG	2017	0.912132
pl_i	ATG	2018	0.941799
pl_i	ATG	2019	0.951402
pl_i	AUS	1950	0.0853316
pl_i	AUS	1951	0.0934163
pl_i	AUS	1952	0.0961656
pl_i	AUS	1953	0.0927068
pl_i	AUS	1954	0.0959425
pl_i	AUS	1955	0.101372
pl_i	AUS	1956	0.103522
pl_i	AUS	1957	0.104857
pl_i	AUS	1958	0.104504
pl_i	AUS	1959	0.10596
pl_i	AUS	1960	0.112944
pl_i	AUS	1961	0.109354
pl_i	AUS	1962	0.117269
pl_i	AUS	1963	0.119701
pl_i	AUS	1964	0.126811
pl_i	AUS	1965	0.130926
pl_i	AUS	1966	0.139509
pl_i	AUS	1967	0.143145
pl_i	AUS	1968	0.150042
pl_i	AUS	1969	0.156694
pl_i	AUS	1970	0.160847
pl_i	AUS	1971	0.170931
pl_i	AUS	1972	0.187992
pl_i	AUS	1973	0.268352
pl_i	AUS	1974	0.338751
pl_i	AUS	1975	0.351466
pl_i	AUS	1976	0.36557
pl_i	AUS	1977	0.357256
pl_i	AUS	1978	0.389892
pl_i	AUS	1979	0.413534
pl_i	AUS	1980	0.450497
pl_i	AUS	1981	0.501792
pl_i	AUS	1982	0.473311
pl_i	AUS	1983	0.453325
pl_i	AUS	1984	0.472613
pl_i	AUS	1985	0.404521
pl_i	AUS	1986	0.423719
pl_i	AUS	1987	0.463796
pl_i	AUS	1988	0.553747
pl_i	AUS	1989	0.600823
pl_i	AUS	1990	0.612079
pl_i	AUS	1991	0.601115
pl_i	AUS	1992	0.57042
pl_i	AUS	1993	0.531925
pl_i	AUS	1994	0.595453
pl_i	AUS	1995	0.626087
pl_i	AUS	1996	0.666376
pl_i	AUS	1997	0.640468
pl_i	AUS	1998	0.552575
pl_i	AUS	1999	0.572022
pl_i	AUS	2000	0.529695
pl_i	AUS	2001	0.485939
pl_i	AUS	2002	0.515273
pl_i	AUS	2003	0.626073
pl_i	AUS	2004	0.726561
pl_i	AUS	2005	0.771473
pl_i	AUS	2006	0.816059
pl_i	AUS	2007	0.976505
pl_i	AUS	2008	1.0388
pl_i	AUS	2009	1.00315
pl_i	AUS	2010	1.2531
pl_i	AUS	2011	1.45843
pl_i	AUS	2012	1.43628
pl_i	AUS	2013	1.20281
pl_i	AUS	2014	1.12825
pl_i	AUS	2015	1.04189
pl_i	AUS	2016	1.04509
pl_i	AUS	2017	1.14167
pl_i	AUS	2018	1.15006
pl_i	AUS	2019	1.09998
pl_i	AUT	1950	0.102161
pl_i	AUT	1951	0.115011
pl_i	AUT	1952	0.122788
pl_i	AUT	1953	0.120889
pl_i	AUT	1954	0.115121
pl_i	AUT	1955	0.116433
pl_i	AUT	1956	0.11737
pl_i	AUT	1957	0.121587
pl_i	AUT	1958	0.118688
pl_i	AUT	1959	0.122827
pl_i	AUT	1960	0.126444
pl_i	AUT	1961	0.14041
pl_i	AUT	1962	0.146705
pl_i	AUT	1963	0.150513
pl_i	AUT	1964	0.150658
pl_i	AUT	1965	0.160681
pl_i	AUT	1966	0.165812
pl_i	AUT	1967	0.168018
pl_i	AUT	1968	0.170952
pl_i	AUT	1969	0.171919
pl_i	AUT	1970	0.181348
pl_i	AUT	1971	0.202091
pl_i	AUT	1972	0.23313
pl_i	AUT	1973	0.285599
pl_i	AUT	1974	0.32801
pl_i	AUT	1975	0.345103
pl_i	AUT	1976	0.34971
pl_i	AUT	1977	0.398926
pl_i	AUT	1978	0.476071
pl_i	AUT	1979	0.538076
pl_i	AUT	1980	0.586383
pl_i	AUT	1981	0.484547
pl_i	AUT	1982	0.452155
pl_i	AUT	1983	0.427766
pl_i	AUT	1984	0.37987
pl_i	AUT	1985	0.355458
pl_i	AUT	1986	0.482839
pl_i	AUT	1987	0.579392
pl_i	AUT	1988	0.586126
pl_i	AUT	1989	0.562172
pl_i	AUT	1990	0.67052
pl_i	AUT	1991	0.647363
pl_i	AUT	1992	0.686724
pl_i	AUT	1993	0.636849
pl_i	AUT	1994	0.658621
pl_i	AUT	1995	0.745214
pl_i	AUT	1996	0.738673
pl_i	AUT	1997	0.662523
pl_i	AUT	1998	0.678239
pl_i	AUT	1999	0.659685
pl_i	AUT	2000	0.592055
pl_i	AUT	2001	0.62114
pl_i	AUT	2002	0.658466
pl_i	AUT	2003	0.77931
pl_i	AUT	2004	0.838905
pl_i	AUT	2005	0.819221
pl_i	AUT	2006	0.836405
pl_i	AUT	2007	0.935769
pl_i	AUT	2008	0.997518
pl_i	AUT	2009	0.907164
pl_i	AUT	2010	0.862937
pl_i	AUT	2011	0.907932
pl_i	AUT	2012	0.812965
pl_i	AUT	2013	0.857169
pl_i	AUT	2014	0.870108
pl_i	AUT	2015	0.717019
pl_i	AUT	2016	0.718566
pl_i	AUT	2017	0.722896
pl_i	AUT	2018	0.777785
pl_i	AUT	2019	0.759178
pl_i	AZE	1990	0.2514
pl_i	AZE	1991	0.259423
pl_i	AZE	1992	0.265369
pl_i	AZE	1993	0.271152
pl_i	AZE	1994	0.286547
pl_i	AZE	1995	0.30286
pl_i	AZE	1996	0.31685
pl_i	AZE	1997	0.369205
pl_i	AZE	1998	0.32511
pl_i	AZE	1999	0.266322
pl_i	AZE	2000	0.225143
pl_i	AZE	2001	0.196417
pl_i	AZE	2002	0.264918
pl_i	AZE	2003	0.348312
pl_i	AZE	2004	0.422043
pl_i	AZE	2005	0.415108
pl_i	AZE	2006	0.421135
pl_i	AZE	2007	0.501412
pl_i	AZE	2008	0.575427
pl_i	AZE	2009	0.611863
pl_i	AZE	2010	0.705367
pl_i	AZE	2011	0.78435
pl_i	AZE	2012	0.80841
pl_i	AZE	2013	0.930336
pl_i	AZE	2014	0.784034
pl_i	AZE	2015	0.70827
pl_i	AZE	2016	0.535329
pl_i	AZE	2017	0.523189
pl_i	AZE	2018	0.509001
pl_i	AZE	2019	0.503504
pl_i	BDI	1960	0.0873269
pl_i	BDI	1961	0.109352
pl_i	BDI	1962	0.107919
pl_i	BDI	1963	0.111995
pl_i	BDI	1964	0.117814
pl_i	BDI	1965	0.0695498
pl_i	BDI	1966	0.069301
pl_i	BDI	1967	0.0692549
pl_i	BDI	1968	0.0721968
pl_i	BDI	1969	0.0753725
pl_i	BDI	1970	0.0754248
pl_i	BDI	1971	0.072406
pl_i	BDI	1972	0.0955547
pl_i	BDI	1973	0.0958587
pl_i	BDI	1974	0.104832
pl_i	BDI	1975	0.145348
pl_i	BDI	1976	0.12616
pl_i	BDI	1977	0.130808
pl_i	BDI	1978	0.159513
pl_i	BDI	1979	0.209055
pl_i	BDI	1980	0.245321
pl_i	BDI	1981	0.246301
pl_i	BDI	1982	0.268821
pl_i	BDI	1983	0.257689
pl_i	BDI	1984	0.218439
pl_i	BDI	1985	0.222021
pl_i	BDI	1986	0.25222
pl_i	BDI	1987	0.265454
pl_i	BDI	1988	0.318403
pl_i	BDI	1989	0.349435
pl_i	BDI	1990	0.677306
pl_i	BDI	1991	0.756368
pl_i	BDI	1992	0.749853
pl_i	BDI	1993	0.416269
pl_i	BDI	1994	0.462055
pl_i	BDI	1995	0.512712
pl_i	BDI	1996	0.437723
pl_i	BDI	1997	0.298564
pl_i	BDI	1998	0.237322
pl_i	BDI	1999	0.109025
pl_i	BDI	2000	0.20793
pl_i	BDI	2001	0.159372
pl_i	BDI	2002	0.195315
pl_i	BDI	2003	0.108789
pl_i	BDI	2004	0.10233
pl_i	BDI	2005	0.33382
pl_i	BDI	2006	0.377
pl_i	BDI	2007	0.373459
pl_i	BDI	2008	0.374833
pl_i	BDI	2009	0.408535
pl_i	BDI	2010	0.434611
pl_i	BDI	2011	0.462533
pl_i	BDI	2012	0.497764
pl_i	BDI	2013	0.517673
pl_i	BDI	2014	0.553871
pl_i	BDI	2015	0.555404
pl_i	BDI	2016	0.554693
pl_i	BDI	2017	0.577351
pl_i	BDI	2018	0.560945
pl_i	BDI	2019	0.543323
pl_i	BEL	1950	0.0716571
pl_i	BEL	1951	0.0904867
pl_i	BEL	1952	0.0937236
pl_i	BEL	1953	0.0873862
pl_i	BEL	1954	0.0872657
pl_i	BEL	1955	0.0909241
pl_i	BEL	1956	0.0935349
pl_i	BEL	1957	0.0980426
pl_i	BEL	1958	0.100314
pl_i	BEL	1959	0.0979569
pl_i	BEL	1960	0.100617
pl_i	BEL	1961	0.1076
pl_i	BEL	1962	0.113367
pl_i	BEL	1963	0.118842
pl_i	BEL	1964	0.12478
pl_i	BEL	1965	0.130239
pl_i	BEL	1966	0.135395
pl_i	BEL	1967	0.142363
pl_i	BEL	1968	0.145503
pl_i	BEL	1969	0.150998
pl_i	BEL	1970	0.159942
pl_i	BEL	1971	0.173018
pl_i	BEL	1972	0.199176
pl_i	BEL	1973	0.235188
pl_i	BEL	1974	0.264421
pl_i	BEL	1975	0.304344
pl_i	BEL	1976	0.311685
pl_i	BEL	1977	0.358955
pl_i	BEL	1978	0.425632
pl_i	BEL	1979	0.477405
pl_i	BEL	1980	0.457337
pl_i	BEL	1981	0.397717
pl_i	BEL	1982	0.362877
pl_i	BEL	1983	0.343756
pl_i	BEL	1984	0.314556
pl_i	BEL	1985	0.325493
pl_i	BEL	1986	0.419307
pl_i	BEL	1987	0.50216
pl_i	BEL	1988	0.508875
pl_i	BEL	1989	0.506385
pl_i	BEL	1990	0.621024
pl_i	BEL	1991	0.609448
pl_i	BEL	1992	0.650435
pl_i	BEL	1993	0.61206
pl_i	BEL	1994	0.6572
pl_i	BEL	1995	0.748817
pl_i	BEL	1996	0.745499
pl_i	BEL	1997	0.666903
pl_i	BEL	1998	0.680381
pl_i	BEL	1999	0.651708
pl_i	BEL	2000	0.579557
pl_i	BEL	2001	0.569918
pl_i	BEL	2002	0.611822
pl_i	BEL	2003	0.71855
pl_i	BEL	2004	0.777924
pl_i	BEL	2005	0.755908
pl_i	BEL	2006	0.779247
pl_i	BEL	2007	0.858316
pl_i	BEL	2008	0.905398
pl_i	BEL	2009	0.806225
pl_i	BEL	2010	0.745037
pl_i	BEL	2011	0.824175
pl_i	BEL	2012	0.741764
pl_i	BEL	2013	0.783182
pl_i	BEL	2014	0.812313
pl_i	BEL	2015	0.67232
pl_i	BEL	2016	0.66881
pl_i	BEL	2017	0.678523
pl_i	BEL	2018	0.740022
pl_i	BEL	2019	0.704665
pl_i	BEN	1959	0.212242
pl_i	BEN	1960	0.220668
pl_i	BEN	1961	0.232232
pl_i	BEN	1962	0.24607
pl_i	BEN	1963	0.251218
pl_i	BEN	1964	0.247112
pl_i	BEN	1965	0.254366
pl_i	BEN	1966	0.256568
pl_i	BEN	1967	0.260801
pl_i	BEN	1968	0.267813
pl_i	BEN	1969	0.262526
pl_i	BEN	1970	0.255124
pl_i	BEN	1971	0.264042
pl_i	BEN	1972	0.281865
pl_i	BEN	1973	0.297959
pl_i	BEN	1974	0.249276
pl_i	BEN	1975	0.35091
pl_i	BEN	1976	0.274997
pl_i	BEN	1977	0.322517
pl_i	BEN	1978	0.387024
pl_i	BEN	1979	0.462476
pl_i	BEN	1980	0.422991
pl_i	BEN	1981	0.327332
pl_i	BEN	1982	0.296528
pl_i	BEN	1983	0.278609
pl_i	BEN	1984	0.270709
pl_i	BEN	1985	0.458295
pl_i	BEN	1986	0.355632
pl_i	BEN	1987	0.414024
pl_i	BEN	1988	0.417226
pl_i	BEN	1989	0.382881
pl_i	BEN	1990	0.377819
pl_i	BEN	1991	0.337933
pl_i	BEN	1992	0.344498
pl_i	BEN	1993	0.361137
pl_i	BEN	1994	0.406742
pl_i	BEN	1995	0.476012
pl_i	BEN	1996	0.48661
pl_i	BEN	1997	0.410546
pl_i	BEN	1998	0.450027
pl_i	BEN	1999	0.376746
pl_i	BEN	2000	0.316705
pl_i	BEN	2001	0.285815
pl_i	BEN	2002	0.288375
pl_i	BEN	2003	0.340851
pl_i	BEN	2004	0.36044
pl_i	BEN	2005	0.370637
pl_i	BEN	2006	0.388957
pl_i	BEN	2007	0.445596
pl_i	BEN	2008	0.484278
pl_i	BEN	2009	0.470798
pl_i	BEN	2010	0.456407
pl_i	BEN	2011	0.518086
pl_i	BEN	2012	0.532336
pl_i	BEN	2013	0.586707
pl_i	BEN	2014	0.593293
pl_i	BEN	2015	0.506713
pl_i	BEN	2016	0.517627
pl_i	BEN	2017	0.546237
pl_i	BEN	2018	0.588421
pl_i	BEN	2019	0.528954
pl_i	BFA	1959	0.193319
pl_i	BFA	1960	0.207892
pl_i	BFA	1961	0.185466
pl_i	BFA	1962	0.185253
pl_i	BFA	1963	0.203322
pl_i	BFA	1964	0.22453
pl_i	BFA	1965	0.143896
pl_i	BFA	1966	0.135454
pl_i	BFA	1967	0.15293
pl_i	BFA	1968	0.153301
pl_i	BFA	1969	0.152468
pl_i	BFA	1970	0.14719
pl_i	BFA	1971	0.15838
pl_i	BFA	1972	0.185838
pl_i	BFA	1973	0.223677
pl_i	BFA	1974	0.246026
pl_i	BFA	1975	0.210478
pl_i	BFA	1976	0.217453
pl_i	BFA	1977	0.231569
pl_i	BFA	1978	0.258923
pl_i	BFA	1979	0.408595
pl_i	BFA	1980	0.404424
pl_i	BFA	1981	0.33425
pl_i	BFA	1982	0.310121
pl_i	BFA	1983	0.323279
pl_i	BFA	1984	0.302226
pl_i	BFA	1985	0.228279
pl_i	BFA	1986	0.302129
pl_i	BFA	1987	0.355879
pl_i	BFA	1988	0.361336
pl_i	BFA	1989	0.383288
pl_i	BFA	1990	0.431444
pl_i	BFA	1991	0.42822
pl_i	BFA	1992	0.464473
pl_i	BFA	1993	0.441177
pl_i	BFA	1994	0.302147
pl_i	BFA	1995	0.351023
pl_i	BFA	1996	0.361554
pl_i	BFA	1997	0.321507
pl_i	BFA	1998	0.339124
pl_i	BFA	1999	0.306519
pl_i	BFA	2000	0.250797
pl_i	BFA	2001	0.232804
pl_i	BFA	2002	0.252839
pl_i	BFA	2003	0.322313
pl_i	BFA	2004	0.357737
pl_i	BFA	2005	0.36296
pl_i	BFA	2006	0.371903
pl_i	BFA	2007	0.444477
pl_i	BFA	2008	0.513415
pl_i	BFA	2009	0.477512
pl_i	BFA	2010	0.469604
pl_i	BFA	2011	0.511393
pl_i	BFA	2012	0.52819
pl_i	BFA	2013	0.576841
pl_i	BFA	2014	0.603383
pl_i	BFA	2015	0.51051
pl_i	BFA	2016	0.512243
pl_i	BFA	2017	0.510807
pl_i	BFA	2018	0.474813
pl_i	BFA	2019	0.403361
pl_i	BGD	1959	0.0740664
pl_i	BGD	1960	0.0797831
pl_i	BGD	1961	0.088564
pl_i	BGD	1962	0.0912673
pl_i	BGD	1963	0.102136
pl_i	BGD	1964	0.099613
pl_i	BGD	1965	0.0940046
pl_i	BGD	1966	0.0775896
pl_i	BGD	1967	0.0926832
pl_i	BGD	1968	0.0943072
pl_i	BGD	1969	0.101473
pl_i	BGD	1970	0.097033
pl_i	BGD	1971	0.0825053
pl_i	BGD	1972	0.117603
pl_i	BGD	1973	0.12023
pl_i	BGD	1974	0.132858
pl_i	BGD	1975	0.15257
pl_i	BGD	1976	0.231241
pl_i	BGD	1977	0.217323
pl_i	BGD	1978	0.237666
pl_i	BGD	1979	0.236825
pl_i	BGD	1980	0.287666
pl_i	BGD	1981	0.296102
pl_i	BGD	1982	0.291905
pl_i	BGD	1983	0.257211
pl_i	BGD	1984	0.260352
pl_i	BGD	1985	0.270133
pl_i	BGD	1986	0.18508
pl_i	BGD	1987	0.261921
pl_i	BGD	1988	0.281935
pl_i	BGD	1989	0.286587
pl_i	BGD	1990	0.304536
pl_i	BGD	1991	0.295502
pl_i	BGD	1992	0.278133
pl_i	BGD	1993	0.258813
pl_i	BGD	1994	0.253902
pl_i	BGD	1995	0.267078
pl_i	BGD	1996	0.25798
pl_i	BGD	1997	0.255765
pl_i	BGD	1998	0.254091
pl_i	BGD	1999	0.25358
pl_i	BGD	2000	0.2499
pl_i	BGD	2001	0.238902
pl_i	BGD	2002	0.230666
pl_i	BGD	2003	0.244136
pl_i	BGD	2004	0.255629
pl_i	BGD	2005	0.247321
pl_i	BGD	2006	0.290561
pl_i	BGD	2007	0.305466
pl_i	BGD	2008	0.307221
pl_i	BGD	2009	0.311117
pl_i	BGD	2010	0.313679
pl_i	BGD	2011	0.311795
pl_i	BGD	2012	0.304386
pl_i	BGD	2013	0.353585
pl_i	BGD	2014	0.365133
pl_i	BGD	2015	0.395092
pl_i	BGD	2016	0.428548
pl_i	BGD	2017	0.440862
pl_i	BGD	2018	0.452726
pl_i	BGD	2019	0.475141
pl_i	BGR	1970	0.256232
pl_i	BGR	1971	0.266157
pl_i	BGR	1972	0.276107
pl_i	BGR	1973	0.289435
pl_i	BGR	1974	0.304589
pl_i	BGR	1975	0.32317
pl_i	BGR	1976	0.345982
pl_i	BGR	1977	0.372066
pl_i	BGR	1978	0.399774
pl_i	BGR	1979	0.433183
pl_i	BGR	1980	0.468868
pl_i	BGR	1981	0.505888
pl_i	BGR	1982	0.538276
pl_i	BGR	1983	0.569197
pl_i	BGR	1984	0.588494
pl_i	BGR	1985	0.618283
pl_i	BGR	1986	0.624901
pl_i	BGR	1987	0.659119
pl_i	BGR	1988	0.66464
pl_i	BGR	1989	0.673013
pl_i	BGR	1990	0.94454
pl_i	BGR	1991	0.265299
pl_i	BGR	1992	0.295877
pl_i	BGR	1993	0.358172
pl_i	BGR	1994	0.227117
pl_i	BGR	1995	7.88427
pl_i	BGR	1996	0.416179
pl_i	BGR	1997	0.297391
pl_i	BGR	1998	0.376166
pl_i	BGR	1999	0.289317
pl_i	BGR	2000	0.256709
pl_i	BGR	2001	0.261834
pl_i	BGR	2002	0.277153
pl_i	BGR	2003	0.375877
pl_i	BGR	2004	0.408732
pl_i	BGR	2005	0.410066
pl_i	BGR	2006	0.427047
pl_i	BGR	2007	0.508632
pl_i	BGR	2008	0.556763
pl_i	BGR	2009	0.492661
pl_i	BGR	2010	0.442948
pl_i	BGR	2011	0.520991
pl_i	BGR	2012	0.485596
pl_i	BGR	2013	0.52697
pl_i	BGR	2014	0.510994
pl_i	BGR	2015	0.442546
pl_i	BGR	2016	0.443095
pl_i	BGR	2017	0.439076
pl_i	BGR	2018	0.482055
pl_i	BGR	2019	0.473932
pl_i	BHR	1970	0.0928172
pl_i	BHR	1971	0.0972621
pl_i	BHR	1972	0.114092
pl_i	BHR	1973	0.133063
pl_i	BHR	1974	0.166399
pl_i	BHR	1975	0.226265
pl_i	BHR	1976	0.177767
pl_i	BHR	1977	0.251644
pl_i	BHR	1978	0.270425
pl_i	BHR	1979	0.284135
pl_i	BHR	1980	0.322385
pl_i	BHR	1981	0.386103
pl_i	BHR	1982	0.510561
pl_i	BHR	1983	0.487487
pl_i	BHR	1984	0.389764
pl_i	BHR	1985	0.544885
pl_i	BHR	1986	0.520074
pl_i	BHR	1987	0.470242
pl_i	BHR	1988	0.390426
pl_i	BHR	1989	0.506474
pl_i	BHR	1990	0.464217
pl_i	BHR	1991	0.537191
pl_i	BHR	1992	0.505719
pl_i	BHR	1993	0.477333
pl_i	BHR	1994	0.61726
pl_i	BHR	1995	0.636798
pl_i	BHR	1996	0.746982
pl_i	BHR	1997	0.63602
pl_i	BHR	1998	0.564995
pl_i	BHR	1999	0.429579
pl_i	BHR	2000	0.399341
pl_i	BHR	2001	0.334939
pl_i	BHR	2002	0.46554
pl_i	BHR	2003	0.407215
pl_i	BHR	2004	0.318104
pl_i	BHR	2005	0.326152
pl_i	BHR	2006	0.35956
pl_i	BHR	2007	0.38872
pl_i	BHR	2008	0.397984
pl_i	BHR	2009	0.38774
pl_i	BHR	2010	0.396443
pl_i	BHR	2011	0.425069
pl_i	BHR	2012	0.440138
pl_i	BHR	2013	0.456652
pl_i	BHR	2014	0.47229
pl_i	BHR	2015	0.469939
pl_i	BHR	2016	0.474736
pl_i	BHR	2017	0.457911
pl_i	BHR	2018	0.483702
pl_i	BHR	2019	0.477836
pl_i	BHS	1970	0.483318
pl_i	BHS	1971	0.485533
pl_i	BHS	1972	0.540296
pl_i	BHS	1973	0.571887
pl_i	BHS	1974	0.79168
pl_i	BHS	1975	0.86597
pl_i	BHS	1976	0.91362
pl_i	BHS	1977	0.866164
pl_i	BHS	1978	1.04182
pl_i	BHS	1979	0.894498
pl_i	BHS	1980	0.702189
pl_i	BHS	1981	0.722136
pl_i	BHS	1982	0.666689
pl_i	BHS	1983	0.748762
pl_i	BHS	1984	0.883716
pl_i	BHS	1985	0.7519
pl_i	BHS	1986	0.842162
pl_i	BHS	1987	0.694109
pl_i	BHS	1988	0.718901
pl_i	BHS	1989	0.787409
pl_i	BHS	1990	0.853406
pl_i	BHS	1991	0.878925
pl_i	BHS	1992	0.839991
pl_i	BHS	1993	0.887369
pl_i	BHS	1994	0.906996
pl_i	BHS	1995	0.962157
pl_i	BHS	1996	1.02736
pl_i	BHS	1997	0.944781
pl_i	BHS	1998	0.869925
pl_i	BHS	1999	0.935549
pl_i	BHS	2000	0.811453
pl_i	BHS	2001	0.807955
pl_i	BHS	2002	0.711286
pl_i	BHS	2003	0.661965
pl_i	BHS	2004	0.682147
pl_i	BHS	2005	0.687692
pl_i	BHS	2006	0.715656
pl_i	BHS	2007	0.691197
pl_i	BHS	2008	0.685397
pl_i	BHS	2009	0.69292
pl_i	BHS	2010	0.732642
pl_i	BHS	2011	0.660474
pl_i	BHS	2012	0.659263
pl_i	BHS	2013	0.701915
pl_i	BHS	2014	0.71929
pl_i	BHS	2015	0.753409
pl_i	BHS	2016	0.778498
pl_i	BHS	2017	0.778896
pl_i	BHS	2018	0.79811
pl_i	BHS	2019	0.821484
pl_i	BIH	1990	1.7256
pl_i	BIH	1991	1.49844
pl_i	BIH	1992	1.24003
pl_i	BIH	1993	0.970291
pl_i	BIH	1994	0.701234
pl_i	BIH	1995	0.451733
pl_i	BIH	1996	0.341433
pl_i	BIH	1997	0.350488
pl_i	BIH	1998	0.302901
pl_i	BIH	1999	0.302921
pl_i	BIH	2000	0.343564
pl_i	BIH	2001	0.339856
pl_i	BIH	2002	0.240148
pl_i	BIH	2003	0.296765
pl_i	BIH	2004	0.471039
pl_i	BIH	2005	0.471583
pl_i	BIH	2006	0.425165
pl_i	BIH	2007	0.49095
pl_i	BIH	2008	0.542554
pl_i	BIH	2009	0.461854
pl_i	BIH	2010	0.443711
pl_i	BIH	2011	0.477691
pl_i	BIH	2012	0.418406
pl_i	BIH	2013	0.435729
pl_i	BIH	2014	0.452918
pl_i	BIH	2015	0.397135
pl_i	BIH	2016	0.41974
pl_i	BIH	2017	0.418174
pl_i	BIH	2018	0.44726
pl_i	BIH	2019	0.430881
pl_i	BLR	1990	0.175092
pl_i	BLR	1991	0.169601
pl_i	BLR	1992	0.204376
pl_i	BLR	1993	0.265798
pl_i	BLR	1994	0.282079
pl_i	BLR	1995	0.28125
pl_i	BLR	1996	0.268011
pl_i	BLR	1997	0.269069
pl_i	BLR	1998	0.283945
pl_i	BLR	1999	0.248559
pl_i	BLR	2000	0.203491
pl_i	BLR	2001	0.227353
pl_i	BLR	2002	0.248865
pl_i	BLR	2003	0.284349
pl_i	BLR	2004	0.34295
pl_i	BLR	2005	0.405027
pl_i	BLR	2006	0.446049
pl_i	BLR	2007	0.525781
pl_i	BLR	2008	0.627341
pl_i	BLR	2009	0.547245
pl_i	BLR	2010	0.599763
pl_i	BLR	2011	0.574347
pl_i	BLR	2012	0.662274
pl_i	BLR	2013	0.785569
pl_i	BLR	2014	0.704962
pl_i	BLR	2015	0.542895
pl_i	BLR	2016	0.477358
pl_i	BLR	2017	0.522713
pl_i	BLR	2018	0.555191
pl_i	BLR	2019	0.5454
pl_i	BLZ	1970	0.111798
pl_i	BLZ	1971	0.128632
pl_i	BLZ	1972	0.165976
pl_i	BLZ	1973	0.262787
pl_i	BLZ	1974	0.286346
pl_i	BLZ	1975	0.404296
pl_i	BLZ	1976	0.336756
pl_i	BLZ	1977	0.363656
pl_i	BLZ	1978	0.604576
pl_i	BLZ	1979	0.385389
pl_i	BLZ	1980	0.428337
pl_i	BLZ	1981	0.456263
pl_i	BLZ	1982	0.481877
pl_i	BLZ	1983	0.502167
pl_i	BLZ	1984	0.511826
pl_i	BLZ	1985	0.503271
pl_i	BLZ	1986	0.50712
pl_i	BLZ	1987	0.520016
pl_i	BLZ	1988	0.538268
pl_i	BLZ	1989	0.58013
pl_i	BLZ	1990	0.615296
pl_i	BLZ	1991	0.64158
pl_i	BLZ	1992	0.673241
pl_i	BLZ	1993	0.666162
pl_i	BLZ	1994	0.70659
pl_i	BLZ	1995	0.752601
pl_i	BLZ	1996	0.784887
pl_i	BLZ	1997	0.77511
pl_i	BLZ	1998	0.768475
pl_i	BLZ	1999	0.760909
pl_i	BLZ	2000	0.734934
pl_i	BLZ	2001	0.693342
pl_i	BLZ	2002	0.67828
pl_i	BLZ	2003	0.682258
pl_i	BLZ	2004	0.687774
pl_i	BLZ	2005	0.681872
pl_i	BLZ	2006	0.734503
pl_i	BLZ	2007	0.768273
pl_i	BLZ	2008	0.770513
pl_i	BLZ	2009	0.737857
pl_i	BLZ	2010	0.82801
pl_i	BLZ	2011	0.797447
pl_i	BLZ	2012	0.807534
pl_i	BLZ	2013	0.791639
pl_i	BLZ	2014	0.785638
pl_i	BLZ	2015	0.730558
pl_i	BLZ	2016	0.714658
pl_i	BLZ	2017	0.701339
pl_i	BLZ	2018	0.773968
pl_i	BLZ	2019	0.777432
pl_i	BMU	1970	0.29643
pl_i	BMU	1971	0.321032
pl_i	BMU	1972	0.349644
pl_i	BMU	1973	0.391999
pl_i	BMU	1974	0.435175
pl_i	BMU	1975	0.449444
pl_i	BMU	1976	0.468766
pl_i	BMU	1977	0.508993
pl_i	BMU	1978	0.548433
pl_i	BMU	1979	0.590494
pl_i	BMU	1980	0.672375
pl_i	BMU	1981	0.736359
pl_i	BMU	1982	0.809591
pl_i	BMU	1983	0.866277
pl_i	BMU	1984	0.927293
pl_i	BMU	1985	0.9982
pl_i	BMU	1986	1.03858
pl_i	BMU	1987	1.10621
pl_i	BMU	1988	1.20028
pl_i	BMU	1989	1.31037
pl_i	BMU	1990	1.43695
pl_i	BMU	1991	1.50105
pl_i	BMU	1992	1.5462
pl_i	BMU	1993	1.56732
pl_i	BMU	1994	1.66531
pl_i	BMU	1995	1.78142
pl_i	BMU	1996	1.77781
pl_i	BMU	1997	1.75534
pl_i	BMU	1998	1.72272
pl_i	BMU	1999	1.67095
pl_i	BMU	2000	1.57369
pl_i	BMU	2001	1.44227
pl_i	BMU	2002	1.44041
pl_i	BMU	2003	1.39446
pl_i	BMU	2004	1.36434
pl_i	BMU	2005	1.33994
pl_i	BMU	2006	1.31928
pl_i	BMU	2007	1.26522
pl_i	BMU	2008	1.17212
pl_i	BMU	2009	1.06633
pl_i	BMU	2010	0.949881
pl_i	BMU	2011	0.823239
pl_i	BMU	2012	0.868992
pl_i	BMU	2013	0.975398
pl_i	BMU	2014	1.07271
pl_i	BMU	2015	1.17883
pl_i	BMU	2016	1.26959
pl_i	BMU	2017	1.31742
pl_i	BMU	2018	1.34714
pl_i	BMU	2019	1.36836
pl_i	BOL	1950	0.0849917
pl_i	BOL	1951	0.0904674
pl_i	BOL	1952	0.0917921
pl_i	BOL	1953	0.087584
pl_i	BOL	1954	0.0917836
pl_i	BOL	1955	0.0966863
pl_i	BOL	1956	0.0998705
pl_i	BOL	1957	0.101226
pl_i	BOL	1958	0.0933142
pl_i	BOL	1959	0.0811652
pl_i	BOL	1960	0.0850695
pl_i	BOL	1961	0.0887027
pl_i	BOL	1962	0.0833808
pl_i	BOL	1963	0.0943983
pl_i	BOL	1964	0.0956236
pl_i	BOL	1965	0.125838
pl_i	BOL	1966	0.142115
pl_i	BOL	1967	0.133906
pl_i	BOL	1968	0.128073
pl_i	BOL	1969	0.136803
pl_i	BOL	1970	0.145293
pl_i	BOL	1971	0.128088
pl_i	BOL	1972	0.170643
pl_i	BOL	1973	0.202356
pl_i	BOL	1974	0.267844
pl_i	BOL	1975	0.249607
pl_i	BOL	1976	0.312801
pl_i	BOL	1977	0.270988
pl_i	BOL	1978	0.297617
pl_i	BOL	1979	0.309039
pl_i	BOL	1980	0.354611
pl_i	BOL	1981	0.364405
pl_i	BOL	1982	0.456927
pl_i	BOL	1983	0.430667
pl_i	BOL	1984	0.415647
pl_i	BOL	1985	0.365536
pl_i	BOL	1986	0.328563
pl_i	BOL	1987	0.341359
pl_i	BOL	1988	0.447132
pl_i	BOL	1989	0.450546
pl_i	BOL	1990	0.433372
pl_i	BOL	1991	0.446563
pl_i	BOL	1992	0.46961
pl_i	BOL	1993	0.461706
pl_i	BOL	1994	0.472423
pl_i	BOL	1995	0.506286
pl_i	BOL	1996	0.501211
pl_i	BOL	1997	0.483558
pl_i	BOL	1998	0.470895
pl_i	BOL	1999	0.4318
pl_i	BOL	2000	0.431409
pl_i	BOL	2001	0.378273
pl_i	BOL	2002	0.335181
pl_i	BOL	2003	0.308607
pl_i	BOL	2004	0.304861
pl_i	BOL	2005	0.321889
pl_i	BOL	2006	0.382843
pl_i	BOL	2007	0.419226
pl_i	BOL	2008	0.44899
pl_i	BOL	2009	0.415078
pl_i	BOL	2010	0.418626
pl_i	BOL	2011	0.444566
pl_i	BOL	2012	0.477122
pl_i	BOL	2013	0.51504
pl_i	BOL	2014	0.547287
pl_i	BOL	2015	0.521652
pl_i	BOL	2016	0.502103
pl_i	BOL	2017	0.48627
pl_i	BOL	2018	0.49108
pl_i	BOL	2019	0.482289
pl_i	BRA	1950	0.117806
pl_i	BRA	1951	0.133821
pl_i	BRA	1952	0.137821
pl_i	BRA	1953	0.164786
pl_i	BRA	1954	0.146506
pl_i	BRA	1955	0.116852
pl_i	BRA	1956	0.122116
pl_i	BRA	1957	0.124038
pl_i	BRA	1958	0.125056
pl_i	BRA	1959	0.106579
pl_i	BRA	1960	0.071722
pl_i	BRA	1961	0.0746156
pl_i	BRA	1962	0.0875127
pl_i	BRA	1963	0.108734
pl_i	BRA	1964	0.0886239
pl_i	BRA	1965	0.0893345
pl_i	BRA	1966	0.103609
pl_i	BRA	1967	0.107119
pl_i	BRA	1968	0.111697
pl_i	BRA	1969	0.103228
pl_i	BRA	1970	0.105463
pl_i	BRA	1971	0.104517
pl_i	BRA	1972	0.114295
pl_i	BRA	1973	0.138177
pl_i	BRA	1974	0.166521
pl_i	BRA	1975	0.183157
pl_i	BRA	1976	0.187445
pl_i	BRA	1977	0.217675
pl_i	BRA	1978	0.251807
pl_i	BRA	1979	0.273223
pl_i	BRA	1980	0.269779
pl_i	BRA	1981	0.311562
pl_i	BRA	1982	0.335452
pl_i	BRA	1983	0.215447
pl_i	BRA	1984	0.208277
pl_i	BRA	1985	0.242369
pl_i	BRA	1986	0.233463
pl_i	BRA	1987	0.296637
pl_i	BRA	1988	0.348653
pl_i	BRA	1989	0.50788
pl_i	BRA	1990	0.568284
pl_i	BRA	1991	0.37055
pl_i	BRA	1992	0.350927
pl_i	BRA	1993	0.392932
pl_i	BRA	1994	0.518108
pl_i	BRA	1995	0.560605
pl_i	BRA	1996	0.538401
pl_i	BRA	1997	0.512903
pl_i	BRA	1998	0.492715
pl_i	BRA	1999	0.367348
pl_i	BRA	2000	0.392335
pl_i	BRA	2001	0.331232
pl_i	BRA	2002	0.294093
pl_i	BRA	2003	0.314603
pl_i	BRA	2004	0.358561
pl_i	BRA	2005	0.459647
pl_i	BRA	2006	0.518378
pl_i	BRA	2007	0.596196
pl_i	BRA	2008	0.6369
pl_i	BRA	2009	0.592053
pl_i	BRA	2010	0.651512
pl_i	BRA	2011	0.661864
pl_i	BRA	2012	0.64418
pl_i	BRA	2013	0.657463
pl_i	BRA	2014	0.668171
pl_i	BRA	2015	0.524357
pl_i	BRA	2016	0.54346
pl_i	BRA	2017	0.599058
pl_i	BRA	2018	0.54539
pl_i	BRA	2019	0.528862
pl_i	BRB	1960	0.113913
pl_i	BRB	1961	0.123814
pl_i	BRB	1962	0.11564
pl_i	BRB	1963	0.128219
pl_i	BRB	1964	0.128565
pl_i	BRB	1965	0.113524
pl_i	BRB	1966	0.142062
pl_i	BRB	1967	0.138654
pl_i	BRB	1968	0.125057
pl_i	BRB	1969	0.139919
pl_i	BRB	1970	0.146203
pl_i	BRB	1971	0.167
pl_i	BRB	1972	0.179433
pl_i	BRB	1973	0.220293
pl_i	BRB	1974	0.23069
pl_i	BRB	1975	0.212203
pl_i	BRB	1976	0.241983
pl_i	BRB	1977	0.293473
pl_i	BRB	1978	0.256328
pl_i	BRB	1979	0.33324
pl_i	BRB	1980	0.406794
pl_i	BRB	1981	0.457796
pl_i	BRB	1982	0.499891
pl_i	BRB	1983	0.535859
pl_i	BRB	1984	0.570652
pl_i	BRB	1985	0.592052
pl_i	BRB	1986	0.61677
pl_i	BRB	1987	0.641483
pl_i	BRB	1988	0.675108
pl_i	BRB	1989	0.732635
pl_i	BRB	1990	0.761372
pl_i	BRB	1991	0.664589
pl_i	BRB	1992	0.720636
pl_i	BRB	1993	0.685057
pl_i	BRB	1994	0.646616
pl_i	BRB	1995	0.778158
pl_i	BRB	1996	0.823353
pl_i	BRB	1997	0.693699
pl_i	BRB	1998	0.78483
pl_i	BRB	1999	0.843139
pl_i	BRB	2000	0.813898
pl_i	BRB	2001	0.719937
pl_i	BRB	2002	0.601599
pl_i	BRB	2003	0.82716
pl_i	BRB	2004	0.851303
pl_i	BRB	2005	0.860248
pl_i	BRB	2006	0.829342
pl_i	BRB	2007	0.964102
pl_i	BRB	2008	0.95733
pl_i	BRB	2009	0.943905
pl_i	BRB	2010	0.71484
pl_i	BRB	2011	0.69339
pl_i	BRB	2012	0.708217
pl_i	BRB	2013	0.735641
pl_i	BRB	2014	0.757654
pl_i	BRB	2015	0.789212
pl_i	BRB	2016	0.799254
pl_i	BRB	2017	0.867866
pl_i	BRB	2018	0.863664
pl_i	BRB	2019	1.05502
pl_i	BRN	1970	0.0139594
pl_i	BRN	1971	0.0138391
pl_i	BRN	1972	0.0171302
pl_i	BRN	1973	0.0248462
pl_i	BRN	1974	0.0533117
pl_i	BRN	1975	0.0561342
pl_i	BRN	1976	0.0577432
pl_i	BRN	1977	0.0641825
pl_i	BRN	1978	0.0676019
pl_i	BRN	1979	0.0797082
pl_i	BRN	1980	0.0853161
pl_i	BRN	1981	0.158537
pl_i	BRN	1982	0.260917
pl_i	BRN	1983	0.179506
pl_i	BRN	1984	0.108886
pl_i	BRN	1985	0.172386
pl_i	BRN	1986	0.178078
pl_i	BRN	1987	0.188281
pl_i	BRN	1988	0.207512
pl_i	BRN	1989	0.22918
pl_i	BRN	1990	0.265154
pl_i	BRN	1991	0.283437
pl_i	BRN	1992	0.305945
pl_i	BRN	1993	0.313867
pl_i	BRN	1994	0.347343
pl_i	BRN	1995	0.491145
pl_i	BRN	1996	0.329957
pl_i	BRN	1997	0.46677
pl_i	BRN	1998	0.40075
pl_i	BRN	1999	0.358537
pl_i	BRN	2000	0.393336
pl_i	BRN	2001	0.376112
pl_i	BRN	2002	0.389917
pl_i	BRN	2003	0.395928
pl_i	BRN	2004	0.417923
pl_i	BRN	2005	0.424292
pl_i	BRN	2006	0.460278
pl_i	BRN	2007	0.482901
pl_i	BRN	2008	0.514722
pl_i	BRN	2009	0.490177
pl_i	BRN	2010	0.525036
pl_i	BRN	2011	0.559948
pl_i	BRN	2012	0.557585
pl_i	BRN	2013	0.564442
pl_i	BRN	2014	0.553568
pl_i	BRN	2015	0.555298
pl_i	BRN	2016	0.546866
pl_i	BRN	2017	0.508752
pl_i	BRN	2018	0.529476
pl_i	BRN	2019	0.522167
pl_i	BTN	1970	0.125669
pl_i	BTN	1971	0.129954
pl_i	BTN	1972	0.135017
pl_i	BTN	1973	0.148595
pl_i	BTN	1974	0.160932
pl_i	BTN	1975	0.150984
pl_i	BTN	1976	0.1426
pl_i	BTN	1977	0.149647
pl_i	BTN	1978	0.133842
pl_i	BTN	1979	0.140667
pl_i	BTN	1980	0.172136
pl_i	BTN	1981	0.163893
pl_i	BTN	1982	0.1603
pl_i	BTN	1983	0.158257
pl_i	BTN	1984	0.16098
pl_i	BTN	1985	0.161419
pl_i	BTN	1986	0.169228
pl_i	BTN	1987	0.185034
pl_i	BTN	1988	0.216368
pl_i	BTN	1989	0.203256
pl_i	BTN	1990	0.217038
pl_i	BTN	1991	0.192486
pl_i	BTN	1992	0.187626
pl_i	BTN	1993	0.169387
pl_i	BTN	1994	0.191932
pl_i	BTN	1995	0.207021
pl_i	BTN	1996	0.215435
pl_i	BTN	1997	0.223725
pl_i	BTN	1998	0.213907
pl_i	BTN	1999	0.207472
pl_i	BTN	2000	0.202224
pl_i	BTN	2001	0.208313
pl_i	BTN	2002	0.201686
pl_i	BTN	2003	0.228659
pl_i	BTN	2004	0.244726
pl_i	BTN	2005	0.268148
pl_i	BTN	2006	0.275164
pl_i	BTN	2007	0.311351
pl_i	BTN	2008	0.313746
pl_i	BTN	2009	0.295916
pl_i	BTN	2010	0.351675
pl_i	BTN	2011	0.403778
pl_i	BTN	2012	0.394635
pl_i	BTN	2013	0.429308
pl_i	BTN	2014	0.416335
pl_i	BTN	2015	0.39663
pl_i	BTN	2016	0.396105
pl_i	BTN	2017	0.405464
pl_i	BTN	2018	0.39541
pl_i	BTN	2019	0.425567
pl_i	BWA	1960	0.055736
pl_i	BWA	1961	0.0587181
pl_i	BWA	1962	0.059428
pl_i	BWA	1963	0.0604072
pl_i	BWA	1964	0.062461
pl_i	BWA	1965	0.223867
pl_i	BWA	1966	0.105457
pl_i	BWA	1967	0.104442
pl_i	BWA	1968	0.091798
pl_i	BWA	1969	0.220654
pl_i	BWA	1970	0.124573
pl_i	BWA	1971	0.129115
pl_i	BWA	1972	0.132258
pl_i	BWA	1973	0.160072
pl_i	BWA	1974	0.197448
pl_i	BWA	1975	0.205761
pl_i	BWA	1976	0.204449
pl_i	BWA	1977	0.245924
pl_i	BWA	1978	0.280381
pl_i	BWA	1979	0.312966
pl_i	BWA	1980	0.371078
pl_i	BWA	1981	0.424461
pl_i	BWA	1982	0.394119
pl_i	BWA	1983	0.438904
pl_i	BWA	1984	0.4541
pl_i	BWA	1985	0.350362
pl_i	BWA	1986	0.375622
pl_i	BWA	1987	0.495032
pl_i	BWA	1988	0.513995
pl_i	BWA	1989	0.563806
pl_i	BWA	1990	0.648417
pl_i	BWA	1991	0.629512
pl_i	BWA	1992	0.624525
pl_i	BWA	1993	0.546921
pl_i	BWA	1994	0.534268
pl_i	BWA	1995	0.553216
pl_i	BWA	1996	0.470228
pl_i	BWA	1997	0.476914
pl_i	BWA	1998	0.405705
pl_i	BWA	1999	0.394505
pl_i	BWA	2000	0.336175
pl_i	BWA	2001	0.311968
pl_i	BWA	2002	0.284636
pl_i	BWA	2003	0.364105
pl_i	BWA	2004	0.397595
pl_i	BWA	2005	0.36091
pl_i	BWA	2006	0.350166
pl_i	BWA	2007	0.376834
pl_i	BWA	2008	0.380911
pl_i	BWA	2009	0.372728
pl_i	BWA	2010	0.385918
pl_i	BWA	2011	0.423294
pl_i	BWA	2012	0.428711
pl_i	BWA	2013	0.418852
pl_i	BWA	2014	0.430466
pl_i	BWA	2015	0.43243
pl_i	BWA	2016	0.448743
pl_i	BWA	2017	0.515137
pl_i	BWA	2018	0.548776
pl_i	BWA	2019	0.490528
pl_i	CAF	1960	0.0661479
pl_i	CAF	1961	0.0702692
pl_i	CAF	1962	0.0751475
pl_i	CAF	1963	0.0747583
pl_i	CAF	1964	0.077196
pl_i	CAF	1965	0.0802147
pl_i	CAF	1966	0.081829
pl_i	CAF	1967	0.104638
pl_i	CAF	1968	0.0839699
pl_i	CAF	1969	0.0805951
pl_i	CAF	1970	0.079466
pl_i	CAF	1971	0.08631
pl_i	CAF	1972	0.100099
pl_i	CAF	1973	0.112056
pl_i	CAF	1974	0.115715
pl_i	CAF	1975	0.148501
pl_i	CAF	1976	0.171906
pl_i	CAF	1977	0.181146
pl_i	CAF	1978	0.216253
pl_i	CAF	1979	0.254609
pl_i	CAF	1980	0.300958
pl_i	CAF	1981	0.2613
pl_i	CAF	1982	0.3054
pl_i	CAF	1983	0.279755
pl_i	CAF	1984	0.295532
pl_i	CAF	1985	0.242017
pl_i	CAF	1986	0.338499
pl_i	CAF	1987	0.397464
pl_i	CAF	1988	0.373039
pl_i	CAF	1989	0.34003
pl_i	CAF	1990	0.430965
pl_i	CAF	1991	0.429991
pl_i	CAF	1992	0.465847
pl_i	CAF	1993	0.41401
pl_i	CAF	1994	0.27022
pl_i	CAF	1995	0.338771
pl_i	CAF	1996	0.463208
pl_i	CAF	1997	0.344761
pl_i	CAF	1998	0.329952
pl_i	CAF	1999	0.428753
pl_i	CAF	2000	0.378217
pl_i	CAF	2001	0.378793
pl_i	CAF	2002	0.398582
pl_i	CAF	2003	0.498287
pl_i	CAF	2004	0.545521
pl_i	CAF	2005	0.566368
pl_i	CAF	2006	0.56445
pl_i	CAF	2007	0.516777
pl_i	CAF	2008	0.610236
pl_i	CAF	2009	0.593681
pl_i	CAF	2010	0.540427
pl_i	CAF	2011	0.576369
pl_i	CAF	2012	0.546601
pl_i	CAF	2013	0.584308
pl_i	CAF	2014	0.648718
pl_i	CAF	2015	0.539831
pl_i	CAF	2016	0.544771
pl_i	CAF	2017	0.560025
pl_i	CAF	2018	0.676169
pl_i	CAF	2019	0.669973
pl_i	CAN	1950	0.111011
pl_i	CAN	1951	0.128141
pl_i	CAN	1952	0.141679
pl_i	CAN	1953	0.139654
pl_i	CAN	1954	0.143581
pl_i	CAN	1955	0.144888
pl_i	CAN	1956	0.152012
pl_i	CAN	1957	0.157199
pl_i	CAN	1958	0.152554
pl_i	CAN	1959	0.155583
pl_i	CAN	1960	0.155584
pl_i	CAN	1961	0.148671
pl_i	CAN	1962	0.146887
pl_i	CAN	1963	0.148193
pl_i	CAN	1964	0.153354
pl_i	CAN	1965	0.161357
pl_i	CAN	1966	0.169466
pl_i	CAN	1967	0.175699
pl_i	CAN	1968	0.178537
pl_i	CAN	1969	0.184553
pl_i	CAN	1970	0.196537
pl_i	CAN	1971	0.211131
pl_i	CAN	1972	0.225923
pl_i	CAN	1973	0.243939
pl_i	CAN	1974	0.275318
pl_i	CAN	1975	0.278898
pl_i	CAN	1976	0.318826
pl_i	CAN	1977	0.318657
pl_i	CAN	1978	0.318348
pl_i	CAN	1979	0.333063
pl_i	CAN	1980	0.364259
pl_i	CAN	1981	0.398168
pl_i	CAN	1982	0.407761
pl_i	CAN	1983	0.417511
pl_i	CAN	1984	0.407165
pl_i	CAN	1985	0.393798
pl_i	CAN	1986	0.401085
pl_i	CAN	1987	0.432073
pl_i	CAN	1988	0.484133
pl_i	CAN	1989	0.524089
pl_i	CAN	1990	0.553474
pl_i	CAN	1991	0.550973
pl_i	CAN	1992	0.520532
pl_i	CAN	1993	0.485726
pl_i	CAN	1994	0.482704
pl_i	CAN	1995	0.497337
pl_i	CAN	1996	0.510622
pl_i	CAN	1997	0.517258
pl_i	CAN	1998	0.494219
pl_i	CAN	1999	0.494188
pl_i	CAN	2000	0.505927
pl_i	CAN	2001	0.504303
pl_i	CAN	2002	0.515401
pl_i	CAN	2003	0.580319
pl_i	CAN	2004	0.644572
pl_i	CAN	2005	0.700161
pl_i	CAN	2006	0.786709
pl_i	CAN	2007	0.877189
pl_i	CAN	2008	0.912104
pl_i	CAN	2009	0.861496
pl_i	CAN	2010	0.973342
pl_i	CAN	2011	1.0303
pl_i	CAN	2012	1.0336
pl_i	CAN	2013	0.975235
pl_i	CAN	2014	0.951819
pl_i	CAN	2015	0.864343
pl_i	CAN	2016	0.85556
pl_i	CAN	2017	0.888865
pl_i	CAN	2018	0.913988
pl_i	CAN	2019	0.915485
pl_i	CHE	1950	0.046514
pl_i	CHE	1951	0.0475311
pl_i	CHE	1952	0.0480583
pl_i	CHE	1953	0.0479682
pl_i	CHE	1954	0.0485134
pl_i	CHE	1955	0.0509472
pl_i	CHE	1956	0.0511628
pl_i	CHE	1957	0.0530838
pl_i	CHE	1958	0.0544585
pl_i	CHE	1959	0.0540328
pl_i	CHE	1960	0.0580879
pl_i	CHE	1961	0.0648069
pl_i	CHE	1962	0.0699122
pl_i	CHE	1963	0.0736084
pl_i	CHE	1964	0.0768
pl_i	CHE	1965	0.0790292
pl_i	CHE	1966	0.081971
pl_i	CHE	1967	0.0849011
pl_i	CHE	1968	0.0865599
pl_i	CHE	1969	0.0886401
pl_i	CHE	1970	0.105197
pl_i	CHE	1971	0.120144
pl_i	CHE	1972	0.142774
pl_i	CHE	1973	0.183143
pl_i	CHE	1974	0.197993
pl_i	CHE	1975	0.22564
pl_i	CHE	1976	0.227983
pl_i	CHE	1977	0.244372
pl_i	CHE	1978	0.334904
pl_i	CHE	1979	0.362149
pl_i	CHE	1980	0.381697
pl_i	CHE	1981	0.349598
pl_i	CHE	1982	0.346192
pl_i	CHE	1983	0.339681
pl_i	CHE	1984	0.326924
pl_i	CHE	1985	0.332644
pl_i	CHE	1986	0.448606
pl_i	CHE	1987	0.55779
pl_i	CHE	1988	0.614158
pl_i	CHE	1989	0.577732
pl_i	CHE	1990	0.713247
pl_i	CHE	1991	0.71231
pl_i	CHE	1992	0.706054
pl_i	CHE	1993	0.65615
pl_i	CHE	1994	0.733898
pl_i	CHE	1995	0.949855
pl_i	CHE	1996	0.906559
pl_i	CHE	1997	0.768356
pl_i	CHE	1998	0.782866
pl_i	CHE	1999	0.751222
pl_i	CHE	2000	0.699023
pl_i	CHE	2001	0.73692
pl_i	CHE	2002	0.81267
pl_i	CHE	2003	0.934359
pl_i	CHE	2004	0.999418
pl_i	CHE	2005	0.936705
pl_i	CHE	2006	0.89781
pl_i	CHE	2007	0.908143
pl_i	CHE	2008	1.02395
pl_i	CHE	2009	1.00559
pl_i	CHE	2010	1.04191
pl_i	CHE	2011	1.13709
pl_i	CHE	2012	1.01366
pl_i	CHE	2013	1.07738
pl_i	CHE	2014	1.07579
pl_i	CHE	2015	0.977208
pl_i	CHE	2016	0.947882
pl_i	CHE	2017	0.910614
pl_i	CHE	2018	0.922954
pl_i	CHE	2019	0.909288
pl_i	CHL	1951	0.241783
pl_i	CHL	1952	0.247854
pl_i	CHL	1953	0.326474
pl_i	CHL	1954	0.311522
pl_i	CHL	1955	0.311256
pl_i	CHL	1956	0.271891
pl_i	CHL	1957	0.241021
pl_i	CHL	1958	0.231427
pl_i	CHL	1959	0.24844
pl_i	CHL	1960	0.238713
pl_i	CHL	1961	0.219509
pl_i	CHL	1962	0.241481
pl_i	CHL	1963	0.1303
pl_i	CHL	1964	0.151422
pl_i	CHL	1965	0.170712
pl_i	CHL	1966	0.163347
pl_i	CHL	1967	0.166181
pl_i	CHL	1968	0.150695
pl_i	CHL	1969	0.153217
pl_i	CHL	1970	0.154502
pl_i	CHL	1971	0.163919
pl_i	CHL	1972	0.21278
pl_i	CHL	1973	0.216621
pl_i	CHL	1974	0.297589
pl_i	CHL	1975	0.175855
pl_i	CHL	1976	0.237293
pl_i	CHL	1977	0.31466
pl_i	CHL	1978	0.364209
pl_i	CHL	1979	0.379429
pl_i	CHL	1980	0.450371
pl_i	CHL	1981	0.473703
pl_i	CHL	1982	0.37901
pl_i	CHL	1983	0.399745
pl_i	CHL	1984	0.359763
pl_i	CHL	1985	0.364968
pl_i	CHL	1986	0.39763
pl_i	CHL	1987	0.422705
pl_i	CHL	1988	0.444269
pl_i	CHL	1989	0.441235
pl_i	CHL	1990	0.462518
pl_i	CHL	1991	0.456119
pl_i	CHL	1992	0.462815
pl_i	CHL	1993	0.436238
pl_i	CHL	1994	0.450512
pl_i	CHL	1995	0.45973
pl_i	CHL	1996	0.471214
pl_i	CHL	1997	0.489757
pl_i	CHL	1998	0.458754
pl_i	CHL	1999	0.418402
pl_i	CHL	2000	0.396754
pl_i	CHL	2001	0.365996
pl_i	CHL	2002	0.345462
pl_i	CHL	2003	0.358197
pl_i	CHL	2004	0.411815
pl_i	CHL	2005	0.458482
pl_i	CHL	2006	0.501338
pl_i	CHL	2007	0.528275
pl_i	CHL	2008	0.567041
pl_i	CHL	2009	0.552615
pl_i	CHL	2010	0.601301
pl_i	CHL	2011	0.633271
pl_i	CHL	2012	0.635264
pl_i	CHL	2013	0.665548
pl_i	CHL	2014	0.622634
pl_i	CHL	2015	0.567546
pl_i	CHL	2016	0.570398
pl_i	CHL	2017	0.57083
pl_i	CHL	2018	0.601437
pl_i	CHL	2019	0.576378
pl_i	CHN	1952	0.0690075
pl_i	CHN	1953	0.0778475
pl_i	CHN	1954	0.0933254
pl_i	CHN	1955	0.085025
pl_i	CHN	1956	0.0906817
pl_i	CHN	1957	0.0919568
pl_i	CHN	1958	0.124785
pl_i	CHN	1959	0.163472
pl_i	CHN	1960	0.17818
pl_i	CHN	1961	0.118817
pl_i	CHN	1962	0.0813884
pl_i	CHN	1963	0.100091
pl_i	CHN	1964	0.117064
pl_i	CHN	1965	0.129831
pl_i	CHN	1966	0.147496
pl_i	CHN	1967	0.118392
pl_i	CHN	1968	0.122009
pl_i	CHN	1969	0.12249
pl_i	CHN	1970	0.149365
pl_i	CHN	1971	0.147342
pl_i	CHN	1972	0.194822
pl_i	CHN	1973	0.18506
pl_i	CHN	1974	0.221289
pl_i	CHN	1975	0.244876
pl_i	CHN	1976	0.284466
pl_i	CHN	1977	0.248028
pl_i	CHN	1978	0.236102
pl_i	CHN	1979	0.266382
pl_i	CHN	1980	0.329882
pl_i	CHN	1981	0.292133
pl_i	CHN	1982	0.270539
pl_i	CHN	1983	0.273243
pl_i	CHN	1984	0.240087
pl_i	CHN	1985	0.180103
pl_i	CHN	1986	0.179558
pl_i	CHN	1987	0.182184
pl_i	CHN	1988	0.199357
pl_i	CHN	1989	0.195906
pl_i	CHN	1990	0.179128
pl_i	CHN	1991	0.184792
pl_i	CHN	1992	0.21795
pl_i	CHN	1993	0.305054
pl_i	CHN	1994	0.223608
pl_i	CHN	1995	0.223178
pl_i	CHN	1996	0.237253
pl_i	CHN	1997	0.252336
pl_i	CHN	1998	0.276875
pl_i	CHN	1999	0.27926
pl_i	CHN	2000	0.280168
pl_i	CHN	2001	0.270899
pl_i	CHN	2002	0.27269
pl_i	CHN	2003	0.279042
pl_i	CHN	2004	0.290289
pl_i	CHN	2005	0.302395
pl_i	CHN	2006	0.318948
pl_i	CHN	2007	0.349694
pl_i	CHN	2008	0.410459
pl_i	CHN	2009	0.419745
pl_i	CHN	2010	0.442117
pl_i	CHN	2011	0.496094
pl_i	CHN	2012	0.534019
pl_i	CHN	2013	0.581746
pl_i	CHN	2014	0.607692
pl_i	CHN	2015	0.614375
pl_i	CHN	2016	0.59828
pl_i	CHN	2017	0.632924
pl_i	CHN	2018	0.690347
pl_i	CHN	2019	0.679048
pl_i	CIV	1960	0.152551
pl_i	CIV	1961	0.164631
pl_i	CIV	1962	0.173761
pl_i	CIV	1963	0.176833
pl_i	CIV	1964	0.181565
pl_i	CIV	1965	0.187948
pl_i	CIV	1966	0.191467
pl_i	CIV	1967	0.196455
pl_i	CIV	1968	0.204722
pl_i	CIV	1969	0.197091
pl_i	CIV	1970	0.196973
pl_i	CIV	1971	0.246823
pl_i	CIV	1972	0.280791
pl_i	CIV	1973	0.351466
pl_i	CIV	1974	0.45021
pl_i	CIV	1975	0.453154
pl_i	CIV	1976	0.452445
pl_i	CIV	1977	0.513465
pl_i	CIV	1978	0.618014
pl_i	CIV	1979	0.729023
pl_i	CIV	1980	0.788511
pl_i	CIV	1981	0.625499
pl_i	CIV	1982	0.529218
pl_i	CIV	1983	0.455083
pl_i	CIV	1984	0.390042
pl_i	CIV	1985	0.513636
pl_i	CIV	1986	0.642431
pl_i	CIV	1987	0.887621
pl_i	CIV	1988	1.00296
pl_i	CIV	1989	2.28903
pl_i	CIV	1990	1.27123
pl_i	CIV	1991	0.512318
pl_i	CIV	1992	0.580848
pl_i	CIV	1993	0.494012
pl_i	CIV	1994	0.401777
pl_i	CIV	1995	0.520402
pl_i	CIV	1996	0.600194
pl_i	CIV	1997	0.587226
pl_i	CIV	1998	0.559143
pl_i	CIV	1999	0.796446
pl_i	CIV	2000	0.516174
pl_i	CIV	2001	0.483214
pl_i	CIV	2002	0.804406
pl_i	CIV	2003	0.626141
pl_i	CIV	2004	0.788932
pl_i	CIV	2005	0.749149
pl_i	CIV	2006	0.753322
pl_i	CIV	2007	0.798564
pl_i	CIV	2008	0.784819
pl_i	CIV	2009	0.664261
pl_i	CIV	2010	0.588187
pl_i	CIV	2011	0.473056
pl_i	CIV	2012	0.495534
pl_i	CIV	2013	0.563878
pl_i	CIV	2014	0.592743
pl_i	CIV	2015	0.520465
pl_i	CIV	2016	0.544114
pl_i	CIV	2017	0.558969
pl_i	CIV	2018	0.578555
pl_i	CIV	2019	0.511768
pl_i	CMR	1960	0.0771262
pl_i	CMR	1961	0.0943601
pl_i	CMR	1962	0.104442
pl_i	CMR	1963	0.0860783
pl_i	CMR	1964	0.0889437
pl_i	CMR	1965	0.0974831
pl_i	CMR	1966	0.0901997
pl_i	CMR	1967	0.11529
pl_i	CMR	1968	0.124105
pl_i	CMR	1969	0.108917
pl_i	CMR	1970	0.126793
pl_i	CMR	1971	0.165916
pl_i	CMR	1972	0.216548
pl_i	CMR	1973	0.250501
pl_i	CMR	1974	0.243043
pl_i	CMR	1975	0.357074
pl_i	CMR	1976	0.485516
pl_i	CMR	1977	0.423492
pl_i	CMR	1978	0.34808
pl_i	CMR	1979	0.642106
pl_i	CMR	1980	0.723114
pl_i	CMR	1981	0.719752
pl_i	CMR	1982	0.734752
pl_i	CMR	1983	0.742744
pl_i	CMR	1984	0.72123
pl_i	CMR	1985	0.753893
pl_i	CMR	1986	0.899748
pl_i	CMR	1987	0.865517
pl_i	CMR	1988	0.74533
pl_i	CMR	1989	0.837871
pl_i	CMR	1990	0.907197
pl_i	CMR	1991	1.10703
pl_i	CMR	1992	0.94851
pl_i	CMR	1993	0.596865
pl_i	CMR	1994	0.354375
pl_i	CMR	1995	0.451203
pl_i	CMR	1996	0.449018
pl_i	CMR	1997	0.41018
pl_i	CMR	1998	0.40486
pl_i	CMR	1999	0.38335
pl_i	CMR	2000	0.354331
pl_i	CMR	2001	0.347161
pl_i	CMR	2002	0.379792
pl_i	CMR	2003	0.413182
pl_i	CMR	2004	0.472622
pl_i	CMR	2005	0.489912
pl_i	CMR	2006	0.49727
pl_i	CMR	2007	0.559781
pl_i	CMR	2008	0.617621
[truncated: 8,400 more rows]

## Sheet: Tabelle1
Summe von AggValue	Spaltenbeschriftungen
Zeilenbeschriftungen	MAR	ABW	AGO	AIA	ALB	ARE	ARG	ARM	ATG	AUS	AUT	AZE	BDI	BEL	BEN	BFA	BGD	BGR	BHR	BHS	BIH	BLR	BLZ	BMU	BOL	BRA	BRB	BRN	BTN	BWA	CAF	CAN	CHE	CHL	CHN	CIV	CMR	COD	COG	COL	COM	CPV	CRI	CUW	CYM	CYP	CZE	DEU	DJI
1950	0.170743						0.42273			0.0853316	0.102161			0.0716571											0.0849917	0.117806						0.111011	0.046514					0.0886189		0.113011			0.150193			0.0385537		0.0615015
1951	0.182516						0.366893			0.0934163	0.115011			0.0904867											0.0904674	0.133821						0.128141	0.0475311	0.241783				0.111152		0.0950294			0.142418			0.0389879		0.067748
1952	0.211571						0.366508			0.0961656	0.122788			0.0937236											0.0917921	0.137821						0.141679	0.0480583	0.247854	0.0690075			0.107506		0.0928858			0.126692			0.041949		0.0688239
1953	0.234866						0.370191			0.0927068	0.120889			0.0873862											0.087584	0.164786						0.139654	0.0479682	0.326474	0.0778475			0.0878395		0.0882997			0.13854			0.038849		0.0675841
1954	0.232289						0.381629			0.0959425	0.115121			0.0872657											0.0917836	0.146506						0.143581	0.0485134	0.311522	0.0933254			0.0946501		0.094806			0.15593			0.0431987		0.0684515
1955	0.22878						0.372378			0.101372	0.116433			0.0909241											0.0966863	0.116852						0.144888	0.0509472	0.311256	0.085025			0.0955328		0.101043			0.136546			0.0508632		0.0703273
1956	0.227264						0.396776			0.103522	0.11737			0.0935349											0.0998705	0.122116						0.152012	0.0511628	0.271891	0.0906817			0.0995929		0.112829			0.135048			0.0570037		0.0717348
1957	0.242215						0.428065			0.104857	0.121587			0.0980426											0.101226	0.124038						0.157199	0.0530838	0.241021	0.0919568			0.106134		0.106159			0.133893			0.05856		0.0740152
1958	0.234499						0.431156			0.104504	0.118688			0.100314											0.0933142	0.125056						0.152554	0.0544585	0.231427	0.124785			0.0883578		0.0787927			0.13319			0.0578017		0.0754799
1959	0.196607						0.411492			0.10596	0.122827			0.0979569	0.212242	0.193319	0.0740664								0.0811652	0.106579						0.155583	0.0540328	0.24844	0.163472			0.0878866		0.0842312			0.131097			0.0573179		0.0755032
1960	0.206899						0.397345			0.112944	0.126444		0.0873269	0.100617	0.220668	0.207892	0.0797831								0.0850695	0.071722	0.113913			0.055736	0.0661479	0.155584	0.0580879	0.238713	0.17818	0.152551	0.0771262	0.0989909	0.321642	0.0886656	0.0260149	0.112158	0.135368			0.0517314		0.0788654
1961	0.215889						0.474233			0.109354	0.14041		0.109352	0.1076	0.232232	0.185466	0.088564								0.0887027	0.0746156	0.123814			0.0587181	0.0702692	0.148671	0.0648069	0.219509	0.118817	0.164631	0.0943601	0.117567	0.3425	0.095825	0.0274805	0.117835	0.137605			0.05608		0.091447
1962	0.221025						0.420927			0.117269	0.146705		0.107919	0.113367	0.24607	0.185253	0.0912673								0.0833808	0.0875127	0.11564			0.059428	0.0751475	0.146887	0.0699122	0.241481	0.0813884	0.173761	0.104442	0.120825	0.361788	0.10297	0.0287204	0.133554	0.128028			0.0597806		0.100183
1963	0.219024						0.413887			0.119701	0.150513		0.111995	0.118842	0.251218	0.203322	0.102136								0.0943983	0.108734	0.128219			0.0604072	0.0747583	0.148193	0.0736084	0.1303	0.100091	0.176833	0.0860783	0.171142	0.357919	0.0995618	0.0291956	0.130977	0.128471			0.0601072		0.102356
1964	0.217973						0.424155			0.126811	0.150658		0.117814	0.12478	0.247112	0.22453	0.099613								0.0956236	0.0886239	0.128565			0.062461	0.077196	0.153354	0.0768	0.151422	0.117064	0.181565	0.0889437	0.165069	0.381307	0.107064	0.0305382	0.131012	0.130589			0.0532479		0.105904
1965	0.218857						0.474044			0.130926	0.160681		0.0695498	0.130239	0.254366	0.143896	0.0940046								0.125838	0.0893345	0.113524			0.223867	0.0802147	0.161357	0.0790292	0.170712	0.129831	0.187948	0.0974831	0.152156	0.406141	0.107529	0.0320144	0.133535	0.130367			0.0593841		0.110785
1966	0.219452						0.460011			0.139509	0.165812		0.069301	0.135395	0.256568	0.135454	0.0775896								0.142115	0.103609	0.142062			0.105457	0.081829	0.169466	0.081971	0.163347	0.147496	0.191467	0.0901997	0.0773419	0.399187	0.106236	0.032916	0.130447	0.132045			0.0597707		0.111976
1967	0.221987						0.488427			0.143145	0.168018		0.0692549	0.142363	0.260801	0.15293	0.0926832								0.133906	0.107119	0.138654			0.104442	0.104638	0.175699	0.0849011	0.166181	0.118392	0.196455	0.11529	0.152944	0.32609	0.0994349	0.0335518	0.136223	0.137242			0.0652042		0.111653
1968	0.323883						0.506398			0.150042	0.170952		0.0721968	0.145503	0.267813	0.153301	0.0943072								0.128073	0.111697	0.125057			0.091798	0.0839699	0.178537	0.0865599	0.150695	0.122009	0.204722	0.124105	0.137461	0.346188	0.101797	0.0337707	0.136983	0.144336			0.0599194		0.11651
1969	0.221175						0.5347			0.156694	0.171919		0.0753725	0.150998	0.262526	0.152468	0.101473								0.136803	0.103228	0.139919			0.220654	0.0805951	0.184553	0.0886401	0.153217	0.12249	0.197091	0.108917	0.132964	0.349126	0.103392	0.033155	0.140885	0.152151			0.0640983		0.124825
1970	0.273974	0.334333	0.0864097	0.0434406	0.784734	0.012461	0.530255		0.145093	0.160847	0.181348		0.0754248	0.159942	0.255124	0.14719	0.097033	0.256232	0.0928172	0.483318			0.111798	0.29643	0.145293	0.105463	0.146203	0.0139594	0.125669	0.124573	0.079466	0.196537	0.105197	0.154502	0.149365	0.196973	0.126793	0.13821	0.343767	0.103843	0.0315674	0.142745	0.155216		0.0595504	0.0686658		0.14442	0.0838308
1971	0.248703	0.319142	0.0849353	0.0518066	0.767523	0.0147424	0.585836		0.16361	0.170931	0.202091		0.072406	0.173018	0.264042	0.15838	0.0825053	0.266157	0.0972621	0.485533			0.128632	0.321032	0.128088	0.104517	0.167	0.0138391	0.129954	0.129115	0.08631	0.211131	0.120144	0.163919	0.147342	0.246823	0.165916	0.144075	0.364749	0.100271	0.033099	0.151083	0.160963		0.0714542	0.0737903		0.165693	0.0881774
1972	0.377778	0.306424	0.0844014	0.0545078	0.754812	0.019275	0.532417		0.206725	0.187992	0.23313		0.0955547	0.199176	0.281865	0.185838	0.117603	0.276107	0.114092	0.540296			0.165976	0.349644	0.170643	0.114295	0.179433	0.0171302	0.135017	0.132258	0.100099	0.225923	0.142774	0.21278	0.194822	0.280791	0.216548	0.110317	0.401521	0.104581	0.0379327	0.166178	0.179143		0.0874032	0.0878665		0.192509	0.102002
1973	0.438096	0.294037	0.0950394	0.0588346	0.741527	0.0324297	0.558627		0.262081	0.268352	0.285599		0.0958587	0.235188	0.297959	0.223677	0.12023	0.289435	0.133063	0.571887			0.262787	0.391999	0.202356	0.138177	0.220293	0.0248462	0.148595	0.160072	0.112056	0.243939	0.183143	0.216621	0.18506	0.351466	0.250501	0.103234	0.559268	0.112966	0.0469021	0.200901	0.201608		0.0991109	0.133493		0.245012	0.120615
1974	0.611457	0.274107	0.100256	0.0626823	0.709121	0.0754106	0.612196		0.259422	0.338751	0.32801		0.104832	0.264421	0.249276	0.246026	0.132858	0.304589	0.166399	0.79168			0.286346	0.435175	0.267844	0.166521	0.23069	0.0533117	0.160932	0.197448	0.115715	0.275318	0.197993	0.297589	0.221289	0.45021	0.243043	0.106205	0.574705	0.128186	0.0496563	0.189995	0.217823		0.101672	0.149192		0.27243	0.151917
1975	0.392413	0.257005	0.0765861	0.0642758	0.680281	0.0873515	0.837004		0.271567	0.351466	0.345103		0.145348	0.304344	0.35091	0.210478	0.15257	0.32317	0.226265	0.86597			0.404296	0.449444	0.249607	0.183157	0.212203	0.0561342	0.150984	0.205761	0.148501	0.278898	0.22564	0.175855	0.244876	0.453154	0.357074	0.121264	0.650802	0.126698	0.0701514	0.256385	0.221134		0.107181	0.145329		0.296563	0.147239
1976	0.401085	0.251811	0.0765058	0.0615035	0.681441	0.100596	0.862007		0.266129	0.36557	0.34971		0.12616	0.311685	0.274997	0.217453	0.231241	0.345982	0.177767	0.91362			0.336756	0.468766	0.312801	0.187445	0.241983	0.0577432	0.1426	0.204449	0.171906	0.318826	0.227983	0.237293	0.284466	0.452445	0.485516	0.128311	0.631734	0.144823	0.0701777	0.239039	0.238546		0.118077	0.145336		0.298721	0.164116
1977	0.445024	0.246172	0.0840942	0.069468	0.687513	0.102884	0.815933		0.266195	0.357256	0.398926		0.130808	0.358955	0.322517	0.231569	0.217323	0.372066	0.251644	0.866164			0.363656	0.508993	0.270988	0.217675	0.293473	0.0641825	0.149647	0.245924	0.181146	0.318657	0.244372	0.31466	0.248028	0.513465	0.423492	0.112871	0.707555	0.175606	0.0754588	0.239778	0.257054		0.129754	0.159622		0.331661	0.203077
1978	0.609468	0.23861	0.101402	0.074887	0.676501	0.104452	0.885236		0.292222	0.389892	0.476071		0.159513	0.425632	0.387024	0.258923	0.237666	0.399774	0.270425	1.04182			0.604576	0.548433	0.297617	0.251807	0.256328	0.0676019	0.133842	0.280381	0.216253	0.318348	0.334904	0.364209	0.236102	0.618014	0.34808	0.116548	0.889369	0.196667	0.0948573	0.254238	0.287287		0.1413	0.195913		0.393137	0.256667
1979	0.712473	0.230519	0.110658	0.0789508	0.540568	0.114584	0.881541		0.325042	0.413534	0.538076		0.209055	0.477405	0.462476	0.408595	0.236825	0.433183	0.284135	0.894498			0.385389	0.590494	0.309039	0.273223	0.33324	0.0797082	0.140667	0.312966	0.254609	0.333063	0.362149	0.379429	0.266382	0.729023	0.642106	0.0801407	1.05235	0.241439	0.117615	0.263551	0.325152		0.153584	0.228929		0.442598	0.276944
1980	0.746348	0.220955	0.144358	0.0862486	0.485072	0.127091	0.893054		0.360816	0.450497	0.586383		0.245321	0.457337	0.422991	0.404424	0.287666	0.468868	0.322385	0.702189			0.428337	0.672375	0.354611	0.269779	0.406794	0.0853161	0.172136	0.371078	0.300958	0.364259	0.381697	0.450371	0.329882	0.788511	0.723114	0.0854202	1.17801	0.277199	0.128123	0.262644	0.379137		0.165561	0.257528		0.473592	0.290157
1981	0.664578	0.213939	0.145506	0.0962207	0.453412	0.135918	0.928777		0.512342	0.501792	0.484547		0.246301	0.397717	0.327332	0.33425	0.296102	0.505888	0.386103	0.722136			0.456263	0.736359	0.364405	0.311562	0.457796	0.158537	0.163893	0.424461	0.2613	0.398168	0.349598	0.473703	0.292133	0.625499	0.719752	0.114834	1.03705	0.289595	0.112503	0.256681	0.357303		0.18028	0.245427		0.417202	0.353534
1982	0.624861	0.205235	0.142721	0.11157	0.45097	0.13888	1.0745		0.774338	0.473311	0.452155		0.268821	0.362877	0.296528	0.310121	0.291905	0.538276	0.510561	0.666689			0.481877	0.809591	0.456927	0.335452	0.499891	0.260917	0.1603	0.394119	0.3054	0.407761	0.346192	0.37901	0.270539	0.529218	0.734752	0.15014	0.970767	0.290928	0.106603	0.248345	0.397172		0.194125	0.22995		0.399993	0.361467
1983	0.546202	0.201105	0.146514	0.130559	0.463985	0.136898	1.0635		0.473686	0.453325	0.427766		0.257689	0.343756	0.278609	0.323279	0.257211	0.569197	0.487487	0.748762			0.502167	0.866277	0.430667	0.215447	0.535859	0.179506	0.158257	0.438904	0.279755	0.417511	0.339681	0.399745	0.273243	0.455083	0.742744	0.110031	0.895112	0.291364	0.106326	0.231551	0.353311		0.242004	0.222702		0.388907	0.376452
1984	0.436518	0.196458	0.145946	0.146805	0.472027	0.129501	1.06489		0.487843	0.472613	0.37987		0.218439	0.314556	0.270709	0.302226	0.260352	0.588494	0.389764	0.883716			0.511826	0.927293	0.415647	0.208277	0.570652	0.108886	0.16098	0.4541	0.295532	0.407165	0.326924	0.359763	0.240087	0.390042	0.72123	0.170754	0.842057	0.294731	0.119815	0.205107	0.347071		0.258163	0.216329		0.365503	0.390669
1985	0.409903	0.190073	0.177324	0.163505	0.476411	0.128663	0.982218		0.551825	0.404521	0.355458		0.222021	0.325493	0.458295	0.228279	0.270133	0.618283	0.544885	0.7519			0.503271	0.9982	0.365536	0.242369	0.592052	0.172386	0.161419	0.350362	0.242017	0.393798	0.332644	0.364968	0.180103	0.513636	0.753893	0.160526	0.87188	0.299843	0.0914452	0.215008	0.389133		0.270293	0.220149		0.366485	0.416888
1986	0.43489	0.18595	0.198592	0.189916	0.44957	0.129051	0.994598		0.652243	0.423719	0.482839		0.25222	0.419307	0.355632	0.302129	0.18508	0.624901	0.520074	0.842162			0.50712	1.03858	0.328563	0.233463	0.61677	0.178078	0.169228	0.375622	0.338499	0.401085	0.448606	0.39763	0.179558	0.642431	0.899748	0.194668	1.13279	0.275647	0.0801811	0.253418	0.324212		0.279013	0.270527		0.492996	0.471627
1987	0.43965	0.194186	0.204747	0.215795	0.453119	0.134025	0.945573		0.715746	0.463796	0.579392		0.265454	0.50216	0.414024	0.355879	0.261921	0.659119	0.470242	0.694109			0.520016	1.10621	0.341359	0.296637	0.641483	0.188281	0.185034	0.495032	0.397464	0.432073	0.55779	0.422705	0.182184	0.887621	0.865517	0.0975428	1.37304	0.294374	0.101734	0.301034	0.344886		0.297285	0.302186		0.582974	0.500738
1988	0.463778	0.202153	0.233676	0.236127	0.480392	0.139014	1.01224		0.812498	0.553747	0.586126		0.318403	0.508875	0.417226	0.361336	0.281935	0.66464	0.390426	0.718901			0.538268	1.20028	0.447132	0.348653	0.675108	0.207512	0.216368	0.513995	0.373039	0.484133	0.614158	0.444269	0.199357	1.00296	0.74533	0.106432	1.46818	0.326557	0.10683	0.339238	0.33921		0.324229	0.333675		0.595145	0.544883
1989	0.435116	0.216167	0.252962	0.278409	0.537341	0.145837	0.608686		0.8735	0.600823	0.562172		0.349435	0.506385	0.382881	0.383288	0.286587	0.673013	0.506474	0.787409			0.58013	1.31037	0.450546	0.50788	0.732635	0.22918	0.203256	0.563806	0.34003	0.524089	0.577732	0.441235	0.195906	2.28903	0.837871	0.100781	1.63843	0.33189	0.108161	0.322184	0.393575		0.349176	0.340203		0.57588	0.603356
1990	0.478889	0.236937	0.259404	0.254954	0.451059	0.151801	1.1187	0.171793	0.919574	0.612079	0.67052	0.2514	0.677306	0.621024	0.377819	0.431444	0.304536	0.94454	0.464217	0.853406	1.7256	0.175092	0.615296	1.43695	0.433372	0.568284	0.761372	0.265154	0.217038	0.648417	0.430965	0.553474	0.713247	0.462518	0.179128	1.27123	0.907197	0.231048	0.935353	0.329215	0.139684	0.391739	0.422233		0.401147	0.395736	0.197183	0.697713	0.653161
1991	0.424655	0.249302	0.1446	0.319687	0.465454	0.15275	1.06476	0.177275	0.941802	0.601115	0.647363	0.259423	0.756368	0.609448	0.337933	0.42822	0.295502	0.265299	0.537191	0.878925	1.49844	0.169601	0.64158	1.50105	0.446563	0.37055	0.664589	0.283437	0.192486	0.629512	0.429991	0.550973	0.71231	0.456119	0.184792	0.512318	1.10703	0.144055	0.929487	0.317235	0.139451	0.372633	0.433463		0.412795	0.408184	0.18588	0.699437	0.686941
1992	0.405261	0.259626	0.0318035	0.269933	0.443936	0.155529	0.967524	0.181339	0.965109	0.57042	0.686724	0.265369	0.749853	0.650435	0.344498	0.464473	0.278133	0.295877	0.505719	0.839991	1.24003	0.204376	0.673241	1.5462	0.46961	0.350927	0.720636	0.305945	0.187626	0.624525	0.465847	0.520532	0.706054	0.462815	0.21795	0.580848	0.94851	0.237265	1.04396	0.256207	0.208796	0.382908	0.43713		0.424589	0.438426	0.228806	0.764401	0.663116
1993	0.356257	0.272653	0.0853992	0.273528	0.390469	0.209051	0.850425	0.18529	0.980779	0.531925	0.636849	0.271152	0.416269	0.61206	0.361137	0.441177	0.258813	0.358172	0.477333	0.887369	0.970291	0.265798	0.666162	1.56732	0.461706	0.392932	0.685057	0.313867	0.169387	0.546921	0.41401	0.485726	0.65615	0.436238	0.305054	0.494012	0.596865	0.0759618	0.633281	0.278628	0.239331	0.382421	0.430715		0.43448	0.419401	0.270797	0.726995	0.582352
1994	0.352956	0.297497	0.137316	0.29239	0.365498	0.216493	0.744513	0.195811	1.04773	0.595453	0.658621	0.286547	0.462055	0.6572	0.406742	0.302147	0.253902	0.227117	0.61726	0.906996	0.701234	0.282079	0.70659	1.66531	0.472423	0.518108	0.646616	0.347343	0.191932	0.534268	0.27022	0.482704	0.733898	0.450512	0.223608	0.401777	0.354375	0.279901	0.608303	0.345889	0.203051	0.374663	0.456837		0.463476	0.452924	0.307958	0.764492	0.663974
1995	0.330367	0.303802	0.091782	0.312799	0.506092	0.227352	0.651897	0.206961	1.11072	0.626087	0.745214	0.30286	0.512712	0.748817	0.476012	0.351023	0.267078	7.88427	0.636798	0.962157	0.451733	0.28125	0.752601	1.78142	0.506286	0.560605	0.778158	0.491145	0.207021	0.553216	0.338771	0.497337	0.949855	0.45973	0.223178	0.520402	0.451203	0.379315	0.958004	0.394885	0.203973	0.479494	0.457014		0.49442	0.512781	0.377065	0.896283	0.616642
1996	0.288665	0.318055	0.103236	0.331051	0.349129	0.236329	0.506458	0.265836	1.17511	0.666376	0.738673	0.31685	0.437723	0.745499	0.48661	0.361554	0.25798	0.416179	0.746982	1.02736	0.341433	0.268011	0.784887	1.77781	0.501211	0.538401	0.823353	0.329957	0.215435	0.470228	0.463208	0.510622	0.906559	0.471214	0.237253	0.600194	0.449018	1.32101	1.08712	0.41605	0.202877	0.391067	0.448445		0.524924	0.529415	0.402632	0.876993	0.68475
1997	0.273433	0.325158	0.115179	0.336517	0.397952	0.239307	0.51037	0.25277	1.14739	0.640468	0.662523	0.369205	0.298564	0.666903	0.410546	0.321507	0.255765	0.297391	0.63602	0.944781	0.350488	0.269069	0.77511	1.75534	0.483558	0.512903	0.693699	0.46677	0.223725	0.476914	0.344761	0.517258	0.768356	0.489757	0.252336	0.587226	0.41018	0.1211	0.988843	0.436629	0.186133	0.440687	0.45732		0.54445	0.495214	0.366348	0.770283	0.615626
1998	0.291035	0.329436	0.0977596	0.347147	0.467835	0.242331	0.5184	0.284823	1.1233	0.552575	0.678239	0.32511	0.237322	0.680381	0.450027	0.339124	0.254091	0.376166	0.564995	0.869925	0.302901	0.283945	0.768475	1.72272	0.470895	0.492715	0.78483	0.40075	0.213907	0.405705	0.329952	0.494219	0.782866	0.458754	0.276875	0.559143	0.40486	0.118718	0.995965	0.408829	0.190285	0.375498	0.437821		0.552114	0.505317	0.378687	0.770006	0.625116
1999	0.297433	0.331785	0.090077	0.355014	0.481566	0.241949	0.518807	0.282207	1.08081	0.572022	0.659685	0.266322	0.109025	0.651708	0.376746	0.306519	0.25358	0.289317	0.429579	0.935549	0.302921	0.248559	0.760909	1.67095	0.4318	0.367348	0.843139	0.358537	0.207472	0.394505	0.428753	0.494188	0.751222	0.418402	0.27926	0.796446	0.38335	0.116059	0.952631	0.380478	0.185816	0.38525	0.422275		0.577838	0.486897	0.359756	0.742138	0.637236
2000	0.288092	0.364808	0.0993263	0.350674	0.470461	0.238606	0.503751	0.281545	1.02151	0.529695	0.592055	0.225143	0.20793	0.579557	0.316705	0.250797	0.2499	0.256709	0.399341	0.811453	0.343564	0.203491	0.734934	1.57369	0.431409	0.392335	0.813898	0.393336	0.202224	0.336175	0.378217	0.505927	0.699023	0.396754	0.280168	0.516174	0.354331	0.486582	0.778559	0.34375	0.135216	0.345449	0.44182		0.58767	0.444094	0.341834	0.648399	0.569196
2001	0.283857	0.33624	0.119816	0.349849	0.457833	0.238423	0.499588	0.285333	0.968312	0.485939	0.62114	0.196417	0.159372	0.569918	0.285815	0.232804	0.238902	0.261834	0.334939	0.807955	0.339856	0.227353	0.693342	1.44227	0.378273	0.331232	0.719937	0.376112	0.208313	0.311968	0.378793	0.504303	0.73692	0.365996	0.270899	0.483214	0.347161	0.208835	0.754518	0.332048	0.151027	0.328766	0.43163		0.592939	0.422397	0.365963	0.640895	0.394431
2002	0.293254	0.336211	0.319228	0.363337	0.431759	0.236715	0.252656	0.285707	0.90188	0.515273	0.658466	0.264918	0.195315	0.611822	0.288375	0.252839	0.230666	0.277153	0.46554	0.711286	0.240148	0.248865	0.67828	1.44041	0.335181	0.294093	0.601599	0.389917	0.201686	0.284636	0.398582	0.515401	0.81267	0.345462	0.27269	0.804406	0.379792	0.161368	0.724509	0.318481	0.175015	0.340261	0.406154		0.59759	0.465115	0.427419	0.682397	0.407618
2003	0.338821	0.346326	0.32956	0.374943	0.473526	0.249527	0.303313	0.296427	0.846223	0.626073	0.77931	0.348312	0.108789	0.71855	0.340851	0.322313	0.244136	0.375877	0.407215	0.661965	0.296765	0.284349	0.682258	1.39446	0.308607	0.314603	0.82716	0.395928	0.228659	0.364105	0.498287	0.580319	0.934359	0.358197	0.279042	0.626141	0.413182	0.206283	0.843158	0.302689	0.277289	0.386209	0.38258		0.614277	0.622022	0.476103	0.791813	0.396849
2004	0.394469	0.355328	0.380945	0.392944	0.530968	0.262393	0.347667	0.337552	0.809962	0.726561	0.838905	0.422043	0.10233	0.777924	0.36044	0.357737	0.255629	0.408732	0.318104	0.682147	0.471039	0.34295	0.687774	1.36434	0.304861	0.358561	0.851303	0.417923	0.244726	0.397595	0.545521	0.644572	0.999418	0.411815	0.290289	0.788932	0.472622	0.327307	0.878688	0.353987	0.291959	0.45098	0.403738		0.647344	0.654671	0.524198	0.843097	0.502293
2005	0.429273	0.363223	0.475227	0.395412	0.505483	0.27023	0.401726	0.452337	0.785078	0.771473	0.819221	0.415108	0.33382	0.755908	0.370637	0.36296	0.247321	0.410066	0.326152	0.687692	0.471583	0.405027	0.681872	1.33994	0.321889	0.459647	0.860248	0.424292	0.268148	0.36091	0.566368	0.700161	0.936705	0.458482	0.302395	0.749149	0.489912	0.315051	0.811859	0.408861	0.361577	0.467704	0.408831	0.509704	0.694351	0.629158	0.549781	0.81067	0.368941
2006	0.432559	0.380075	0.510695	0.41709	0.467564	0.282743	0.437907	0.550056	0.743675	0.816059	0.836405	0.421135	0.377	0.779247	0.388957	0.371903	0.290561	0.427047	0.35956	0.715656	0.425165	0.446049	0.734503	1.31928	0.382843	0.518378	0.829342	0.460278	0.275164	0.350166	0.56445	0.786709	0.89781	0.501338	0.318948	0.753322	0.49727	0.455543	0.914807	0.420739	0.392551	0.49332	0.477578	0.537536	0.715767	0.645617	0.576018	0.826962	0.302157
2007	0.471121	0.403897	0.583607	0.472587	0.507028	0.318419	0.490276	0.733034	0.726184	0.976505	0.935769	0.501412	0.373459	0.858316	0.445596	0.444477	0.305466	0.508632	0.38872	0.691197	0.49095	0.525781	0.768273	1.26522	0.419226	0.596196	0.964102	0.482901	0.311351	0.376834	0.516777	0.877189	0.908143	0.528275	0.349694	0.798564	0.559781	0.499456	0.997974	0.487426	0.47737	0.533072	0.528984	0.568883	0.792693	0.703836	0.645006	0.916856	0.31405
2008	0.490559	0.426554	0.674399	0.479831	0.538296	0.392104	0.558401	0.914871	0.690834	1.0388	0.997518	0.575427	0.374833	0.905398	0.484278	0.513415	0.307221	0.556763	0.397984	0.685397	0.542554	0.627341	0.770513	1.17212	0.44899	0.6369	0.95733	0.514722	0.313746	0.380911	0.610236	0.912104	1.02395	0.567041	0.410459	0.784819	0.617621	0.482768	0.889799	0.533068	0.534126	0.59113	0.575185	0.61012	0.800867	0.771851	0.744538	0.973778	0.320707
2009	0.419373	0.432799	0.648416	0.478487	0.457455	0.372286	0.550702	0.86842	0.645318	1.00315	0.907164	0.611863	0.408535	0.806225	0.470798	0.477512	0.311117	0.492661	0.38774	0.69292	0.461854	0.547245	0.737857	1.06633	0.415078	0.592053	0.943905	0.490177	0.295916	0.372728	0.593681	0.861496	1.00559	0.552615	0.419745	0.664261	0.576527	0.407685	0.771182	0.516858	0.512329	0.570248	0.493333	0.633835	0.822711	0.68462	0.655646	0.922896	0.420227
2010	0.414767	0.452776	0.497219	0.485195	0.43425	0.409519	0.584754	0.915419	0.593766	1.2531	0.862937	0.705367	0.434611	0.745037	0.456407	0.469604	0.313679	0.442948	0.396443	0.732642	0.443711	0.599763	0.82801	0.949881	0.418626	0.651512	0.71484	0.525036	0.351675	0.385918	0.540427	0.973342	1.04191	0.601301	0.442117	0.588187	0.546518	0.902677	0.714888	0.592123	0.588603	0.557096	0.608553	0.665498	0.838191	0.645292	0.681338	0.880583	0.637083
2011	0.392365	0.476116	0.485339	0.516491	0.491193	0.436188	0.650579	0.91002	0.533097	1.45843	0.907932	0.78435	0.462533	0.824175	0.518086	0.511393	0.311795	0.520991	0.425069	0.660474	0.477691	0.574347	0.797447	0.823239	0.444566	0.661864	0.69339	0.559948	0.403778	0.423294	0.576369	1.0303	1.13709	0.633271	0.496094	0.473056	0.558154	0.606715	0.673737	0.623419	0.540286	0.618745	0.640204	0.691393	0.84668	0.722347	0.70305	0.946034	0.476557
2012	0.374424	0.514195	0.528887	0.578066	0.448254	0.493265	0.700084	0.774894	0.58887	1.43628	0.812965	0.80841	0.497764	0.741764	0.532336	0.52819	0.304386	0.485596	0.440138	0.659263	0.418406	0.662274	0.807534	0.868992	0.477122	0.64418	0.708217	0.557585	0.394635	0.428711	0.546601	1.0336	1.01366	0.635264	0.534019	0.495534	0.542374	0.68062	0.665521	0.680956	0.523785	0.620215	0.659451	0.721522	0.876446	0.611909	0.610766	0.846252	0.512847
2013	0.410489	0.550759	0.588119	0.651828	0.483726	0.522532	0.772201	0.769451	0.636477	1.20281	0.857169	0.930336	0.517673	0.783182	0.586707	0.576841	0.353585	0.52697	0.456652	0.701915	0.435729	0.785569	0.791639	0.975398	0.51504	0.657463	0.735641	0.564442	0.429308	0.418852	0.584308	0.975235	1.07738	0.665548	0.581746	0.563878	0.594178	0.706625	0.765921	0.720995	0.586529	0.692512	0.699854	0.761416	0.933816	0.640505	0.621179	0.904428	0.571323
2014	0.424457	0.603429	0.618156	0.742516	0.446566	0.451708	0.748106	0.729964	0.694339	1.12825	0.870108	0.784034	0.553871	0.812313	0.593293	0.603383	0.365133	0.510994	0.47229	0.71929	0.452918	0.704962	0.785638	1.07271	0.547287	0.668171	0.757654	0.553568	0.416335	0.430466	0.648718	0.951819	1.07579	0.622634	0.607692	0.592743	0.618816	0.69264	0.802417	0.714494	0.595729	0.707073	0.694315	0.772994	0.979034	0.710036	0.595456	0.908295	0.613848
2015	0.364796	0.667704	0.573834	0.811803	0.390765	0.4205	0.825699	0.653277	0.774594	1.04189	0.717019	0.70827	0.555404	0.67232	0.506713	0.51051	0.395092	0.442546	0.469939	0.753409	0.397135	0.542895	0.730558	1.17883	0.521652	0.524357	0.789212	0.555298	0.39663	0.43243	0.539831	0.864343	0.977208	0.567546	0.614375	0.520465	0.541773	0.656773	0.712437	0.584178	0.52189	0.616601	0.721969	0.777869	1.02645	0.561767	0.509965	0.770999	0.63518
2016	0.375309	0.713214	0.52928	0.849165	0.395384	0.419839	0.736538	0.600579	0.853492	1.04509	0.718566	0.535329	0.554693	0.66881	0.517627	0.512243	0.428548	0.443095	0.474736	0.778498	0.41974	0.477358	0.714658	1.26959	0.502103	0.54346	0.799254	0.546866	0.396105	0.448743	0.544771	0.85556	0.947882	0.570398	0.59828	0.544114	0.556044	0.615479	0.773613	0.577392	0.530254	0.621279	0.715329	0.788004	1.07299	0.526766	0.514171	0.78488	0.684268
2017	0.394356	0.732397	0.618861	0.864334	0.413187	0.425465	0.770372	0.58567	0.912132	1.14167	0.722896	0.523189	0.577351	0.678523	0.546237	0.510807	0.440862	0.439076	0.457911	0.778896	0.418174	0.522713	0.701339	1.31742	0.48627	0.599058	0.867866	0.508752	0.405464	0.515137	0.560025	0.888865	0.910614	0.57083	0.632924	0.558969	0.560538	0.576495	0.789841	0.633363	0.550797	0.657047	0.720673	0.783402	1.09526	0.537368	0.529437	0.792443	0.697659
2018	0.409084	0.789754	0.406605	0.908172	0.4608	0.494303	0.660731	0.577902	0.941799	1.15006	0.777785	0.509001	0.560945	0.740022	0.588421	0.474813	0.452726	0.482055	0.483702	0.79811	0.44726	0.555191	0.773968	1.34714	0.49108	0.54539	0.863664	0.529476	0.39541	0.548776	0.676169	0.913988	0.922954	0.601437	0.690347	0.578555	0.576875	0.671041	0.87567	0.661707	0.548254	0.734589	0.784104	0.811519	1.12965	0.580264	0.583107	0.86618	0.335842
2019	0.39866	0.815759	0.342872	1.0292	0.456882	0.48058	0.61606	0.577787	0.951402	1.09998	0.759178	0.503504	0.543323	0.704665	0.528954	0.403361	0.475141	0.473932	0.477836	0.821484	0.430881	0.5454	0.777432	1.36836	0.482289	0.528862	1.05502	0.522167	0.425567	0.490528	0.669973	0.915485	0.909288	0.576378	0.679048	0.511768	0.560087	0.950114	0.852521	0.649858	0.537744	0.71233	0.755857	0.840133	1.06039	0.597627	0.577423	0.850929	0.392336
Gesamtergebnis	25.4589	17.7642	13.1796	16.8805	25.3267	11.4973	44.074	14.3043	34.7842	35.5085	33.7367	13.6878	17.3059	30.6064	22.6373	19.9663	14.5015	29.2754	20.2984	38.6309	16.3102	12.2767	30.1022	55.0007	21.6523	22.1445	33.0343	15.5487	11.7596	20.7605	20.2494	31.397	34.3348	25.9641	18.003	32.9633	28.3661	18.3805	46.2996	20.4072	12.7282	21.0637	24.5621	10.4738	25.1846	21.9208	14.3075	33.5146	21.8867
[truncated: 135 more columns]
