# Supplementary material for: The Social Cost of Fossil and Industrial CO2 Emissions from 1950 to 2018
Source: Research Square preprint supplement (doi:10.21203/rs.3.rs-2244259/v1), 2022-11-17
Supplement: Supplementary file 58 [file pl_n_Transposed.xlsx]

## Sheet: price_level_capital_stock
VariableCode	RegionCode	YearCode	AggValue
pl_n	ABW	1970	0.33463
pl_n	ABW	1971	0.32447
pl_n	ABW	1972	0.314348
pl_n	ABW	1973	0.304904
pl_n	ABW	1974	0.294761
pl_n	ABW	1975	0.285384
pl_n	ABW	1976	0.27684
pl_n	ABW	1977	0.268244
pl_n	ABW	1978	0.260082
pl_n	ABW	1979	0.251526
pl_n	ABW	1980	0.24329
pl_n	ABW	1981	0.234165
pl_n	ABW	1982	0.225773
pl_n	ABW	1983	0.218939
pl_n	ABW	1984	0.21167
pl_n	ABW	1985	0.204049
pl_n	ABW	1986	0.197039
pl_n	ABW	1987	0.204081
pl_n	ABW	1988	0.210461
pl_n	ABW	1989	0.217981
pl_n	ABW	1990	0.230669
pl_n	ABW	1991	0.246047
pl_n	ABW	1992	0.252883
pl_n	ABW	1993	0.264468
pl_n	ABW	1994	0.292392
pl_n	ABW	1995	0.26653
pl_n	ABW	1996	0.275018
pl_n	ABW	1997	0.282296
pl_n	ABW	1998	0.273033
pl_n	ABW	1999	0.287965
pl_n	ABW	2000	0.32234
pl_n	ABW	2001	0.299762
pl_n	ABW	2002	0.304226
pl_n	ABW	2003	0.303122
pl_n	ABW	2004	0.30769
pl_n	ABW	2005	0.317242
pl_n	ABW	2006	0.321605
pl_n	ABW	2007	0.328988
pl_n	ABW	2008	0.343032
pl_n	ABW	2009	0.339204
pl_n	ABW	2010	0.346565
pl_n	ABW	2011	0.359614
pl_n	ABW	2012	0.404314
pl_n	ABW	2013	0.440788
pl_n	ABW	2014	0.502277
pl_n	ABW	2015	0.585249
pl_n	ABW	2016	0.658334
pl_n	ABW	2017	0.740536
pl_n	ABW	2018	0.793389
pl_n	ABW	2019	0.813961
pl_n	AGO	1970	0.0779308
pl_n	AGO	1971	0.077781
pl_n	AGO	1972	0.077798
pl_n	AGO	1973	0.088795
pl_n	AGO	1974	0.0975756
pl_n	AGO	1975	0.0760893
pl_n	AGO	1976	0.0754109
pl_n	AGO	1977	0.0823968
pl_n	AGO	1978	0.0969061
pl_n	AGO	1979	0.109169
pl_n	AGO	1980	0.141561
pl_n	AGO	1981	0.142064
pl_n	AGO	1982	0.140828
pl_n	AGO	1983	0.142559
pl_n	AGO	1984	0.141074
pl_n	AGO	1985	0.170673
pl_n	AGO	1986	0.19026
pl_n	AGO	1987	0.194799
pl_n	AGO	1988	0.21491
pl_n	AGO	1989	0.236458
pl_n	AGO	1990	0.235817
pl_n	AGO	1991	0.141065
pl_n	AGO	1992	0.031012
pl_n	AGO	1993	0.197088
pl_n	AGO	1994	0.237922
pl_n	AGO	1995	0.0833735
pl_n	AGO	1996	0.0910456
pl_n	AGO	1997	0.101053
pl_n	AGO	1998	0.084953
pl_n	AGO	1999	0.0784232
pl_n	AGO	2000	0.0883399
pl_n	AGO	2001	0.107726
pl_n	AGO	2002	0.289396
pl_n	AGO	2003	0.290291
pl_n	AGO	2004	0.331176
pl_n	AGO	2005	0.414463
pl_n	AGO	2006	0.424128
pl_n	AGO	2007	0.485955
pl_n	AGO	2008	0.523438
pl_n	AGO	2009	0.464362
pl_n	AGO	2010	0.334951
pl_n	AGO	2011	0.34144
pl_n	AGO	2012	0.362675
pl_n	AGO	2013	0.389506
pl_n	AGO	2014	0.397242
pl_n	AGO	2015	0.349132
pl_n	AGO	2016	0.329036
pl_n	AGO	2017	0.38302
pl_n	AGO	2018	0.250046
pl_n	AGO	2019	0.209101
pl_n	AIA	1970	0.0384046
pl_n	AIA	1971	0.0463085
pl_n	AIA	1972	0.0489413
pl_n	AIA	1973	0.0531192
pl_n	AIA	1974	0.0585487
pl_n	AIA	1975	0.0618449
pl_n	AIA	1976	0.0584313
pl_n	AIA	1977	0.0652724
pl_n	AIA	1978	0.0703751
pl_n	AIA	1979	0.0741567
pl_n	AIA	1980	0.0816954
pl_n	AIA	1981	0.0905874
pl_n	AIA	1982	0.105613
pl_n	AIA	1983	0.122474
pl_n	AIA	1984	0.136697
pl_n	AIA	1985	0.151858
pl_n	AIA	1986	0.174309
pl_n	AIA	1987	0.196777
pl_n	AIA	1988	0.212949
pl_n	AIA	1989	0.24393
pl_n	AIA	1990	0.215791
pl_n	AIA	1991	0.271714
pl_n	AIA	1992	0.229316
pl_n	AIA	1993	0.232628
pl_n	AIA	1994	0.240274
pl_n	AIA	1995	0.248618
pl_n	AIA	1996	0.256231
pl_n	AIA	1997	0.258818
pl_n	AIA	1998	0.264409
pl_n	AIA	1999	0.270991
pl_n	AIA	2000	0.273994
pl_n	AIA	2001	0.278154
pl_n	AIA	2002	0.294668
pl_n	AIA	2003	0.303346
pl_n	AIA	2004	0.315939
pl_n	AIA	2005	0.316062
pl_n	AIA	2006	0.325792
pl_n	AIA	2007	0.359693
pl_n	AIA	2008	0.363448
pl_n	AIA	2009	0.355431
pl_n	AIA	2010	0.354686
pl_n	AIA	2011	0.373507
pl_n	AIA	2012	0.426836
pl_n	AIA	2013	0.481345
pl_n	AIA	2014	0.560072
pl_n	AIA	2015	0.62689
pl_n	AIA	2016	0.685962
pl_n	AIA	2017	0.770824
pl_n	AIA	2018	0.800772
pl_n	AIA	2019	0.902942
pl_n	ALB	1970	0.364915
pl_n	ALB	1971	0.360632
pl_n	ALB	1972	0.356102
pl_n	ALB	1973	0.351834
pl_n	ALB	1974	0.347738
pl_n	ALB	1975	0.34354
pl_n	ALB	1976	0.339818
pl_n	ALB	1977	0.338748
pl_n	ALB	1978	0.332968
pl_n	ALB	1979	0.265685
pl_n	ALB	1980	0.240337
pl_n	ALB	1981	0.222736
pl_n	ALB	1982	0.222725
pl_n	ALB	1983	0.227227
pl_n	ALB	1984	0.228714
pl_n	ALB	1985	0.23064
pl_n	ALB	1986	0.214789
pl_n	ALB	1987	0.214905
pl_n	ALB	1988	0.22526
pl_n	ALB	1989	0.244507
pl_n	ALB	1990	0.197977
pl_n	ALB	1991	0.205249
pl_n	ALB	1992	0.195577
pl_n	ALB	1993	0.172273
pl_n	ALB	1994	0.155853
pl_n	ALB	1995	0.20881
pl_n	ALB	1996	0.235244
pl_n	ALB	1997	0.250761
pl_n	ALB	1998	0.28138
pl_n	ALB	1999	0.298238
pl_n	ALB	2000	0.319856
pl_n	ALB	2001	0.337673
pl_n	ALB	2002	0.34688
pl_n	ALB	2003	0.40489
pl_n	ALB	2004	0.486948
pl_n	ALB	2005	0.497847
pl_n	ALB	2006	0.419015
pl_n	ALB	2007	0.442923
pl_n	ALB	2008	0.443039
pl_n	ALB	2009	0.375507
pl_n	ALB	2010	0.329034
pl_n	ALB	2011	0.339197
pl_n	ALB	2012	0.350019
pl_n	ALB	2013	0.355994
pl_n	ALB	2014	0.297553
pl_n	ALB	2015	0.258729
pl_n	ALB	2016	0.256738
pl_n	ALB	2017	0.278675
pl_n	ALB	2018	0.305165
pl_n	ALB	2019	0.299344
pl_n	ARE	1970	0.0141754
pl_n	ARE	1971	0.017036
pl_n	ARE	1972	0.0223258
pl_n	ARE	1973	0.03784
pl_n	ARE	1974	0.0909964
pl_n	ARE	1975	0.108606
pl_n	ARE	1976	0.125486
pl_n	ARE	1977	0.127755
pl_n	ARE	1978	0.124232
pl_n	ARE	1979	0.137868
pl_n	ARE	1980	0.154652
pl_n	ARE	1981	0.164107
pl_n	ARE	1982	0.168819
pl_n	ARE	1983	0.16483
pl_n	ARE	1984	0.154585
pl_n	ARE	1985	0.153145
pl_n	ARE	1986	0.15162
pl_n	ARE	1987	0.15615
pl_n	ARE	1988	0.160128
pl_n	ARE	1989	0.162628
pl_n	ARE	1990	0.163883
pl_n	ARE	1991	0.165795
pl_n	ARE	1992	0.168566
pl_n	ARE	1993	0.233911
pl_n	ARE	1994	0.234195
pl_n	ARE	1995	0.237546
pl_n	ARE	1996	0.239645
pl_n	ARE	1997	0.241004
pl_n	ARE	1998	0.240673
pl_n	ARE	1999	0.239807
pl_n	ARE	2000	0.240371
pl_n	ARE	2001	0.24174
pl_n	ARE	2002	0.242425
pl_n	ARE	2003	0.249262
pl_n	ARE	2004	0.256577
pl_n	ARE	2005	0.264332
pl_n	ARE	2006	0.267825
pl_n	ARE	2007	0.288506
pl_n	ARE	2008	0.330756
pl_n	ARE	2009	0.313455
pl_n	ARE	2010	0.338136
pl_n	ARE	2011	0.354034
pl_n	ARE	2012	0.397008
pl_n	ARE	2013	0.4038
pl_n	ARE	2014	0.301823
pl_n	ARE	2015	0.277929
pl_n	ARE	2016	0.272703
pl_n	ARE	2017	0.274532
pl_n	ARE	2018	0.264987
pl_n	ARE	2019	0.268754
pl_n	ARG	1950	0.29242
pl_n	ARG	1951	0.26483
pl_n	ARG	1952	0.268225
pl_n	ARG	1953	0.267306
pl_n	ARG	1954	0.27375
pl_n	ARG	1955	0.264864
pl_n	ARG	1956	0.285601
pl_n	ARG	1957	0.293576
pl_n	ARG	1958	0.303247
pl_n	ARG	1959	0.282461
pl_n	ARG	1960	0.271675
pl_n	ARG	1961	0.324749
pl_n	ARG	1962	0.281171
pl_n	ARG	1963	0.283136
pl_n	ARG	1964	0.295434
pl_n	ARG	1965	0.332332
pl_n	ARG	1966	0.32758
pl_n	ARG	1967	0.346462
pl_n	ARG	1968	0.360532
pl_n	ARG	1969	0.38707
pl_n	ARG	1970	0.395508
pl_n	ARG	1971	0.441091
pl_n	ARG	1972	0.405576
pl_n	ARG	1973	0.437833
pl_n	ARG	1974	0.511158
pl_n	ARG	1975	0.7386
pl_n	ARG	1976	0.715359
pl_n	ARG	1977	0.676056
pl_n	ARG	1978	0.736065
pl_n	ARG	1979	0.767976
pl_n	ARG	1980	0.815223
pl_n	ARG	1981	0.882002
pl_n	ARG	1982	1.05755
pl_n	ARG	1983	1.05579
pl_n	ARG	1984	1.05502
pl_n	ARG	1985	0.967411
pl_n	ARG	1986	0.954153
pl_n	ARG	1987	0.878769
pl_n	ARG	1988	0.898316
pl_n	ARG	1989	0.501512
pl_n	ARG	1990	0.847552
pl_n	ARG	1991	0.766411
pl_n	ARG	1992	0.658721
pl_n	ARG	1993	0.557954
pl_n	ARG	1994	0.470616
pl_n	ARG	1995	0.434808
pl_n	ARG	1996	0.403288
pl_n	ARG	1997	0.397533
pl_n	ARG	1998	0.401623
pl_n	ARG	1999	0.410636
pl_n	ARG	2000	0.413663
pl_n	ARG	2001	0.420638
pl_n	ARG	2002	0.204199
pl_n	ARG	2003	0.246421
pl_n	ARG	2004	0.281814
pl_n	ARG	2005	0.329192
pl_n	ARG	2006	0.353538
pl_n	ARG	2007	0.376425
pl_n	ARG	2008	0.409533
pl_n	ARG	2009	0.371893
pl_n	ARG	2010	0.38279
pl_n	ARG	2011	0.422549
pl_n	ARG	2012	0.467972
pl_n	ARG	2013	0.511748
pl_n	ARG	2014	0.497917
pl_n	ARG	2015	0.5418
pl_n	ARG	2016	0.467809
pl_n	ARG	2017	0.512517
pl_n	ARG	2018	0.412905
pl_n	ARG	2019	0.377946
pl_n	ARM	1990	0.132183
pl_n	ARM	1991	0.137121
pl_n	ARM	1992	0.139893
pl_n	ARM	1993	0.14279
pl_n	ARM	1994	0.14567
pl_n	ARM	1995	0.148776
pl_n	ARM	1996	0.185518
pl_n	ARM	1997	0.170577
pl_n	ARM	1998	0.180538
pl_n	ARM	1999	0.185764
pl_n	ARM	2000	0.196933
pl_n	ARM	2001	0.21107
pl_n	ARM	2002	0.224322
pl_n	ARM	2003	0.239138
pl_n	ARM	2004	0.278553
pl_n	ARM	2005	0.383242
pl_n	ARM	2006	0.466549
pl_n	ARM	2007	0.627572
pl_n	ARM	2008	0.809751
pl_n	ARM	2009	0.774816
pl_n	ARM	2010	0.81344
pl_n	ARM	2011	0.799295
pl_n	ARM	2012	0.681198
pl_n	ARM	2013	0.648425
pl_n	ARM	2014	0.473621
pl_n	ARM	2015	0.522624
pl_n	ARM	2016	0.466764
pl_n	ARM	2017	0.442477
pl_n	ARM	2018	0.434944
pl_n	ARM	2019	0.432372
pl_n	ATG	1970	0.169406
pl_n	ATG	1971	0.190251
pl_n	ATG	1972	0.238321
pl_n	ATG	1973	0.302917
pl_n	ATG	1974	0.308312
pl_n	ATG	1975	0.328711
pl_n	ATG	1976	0.315316
pl_n	ATG	1977	0.318887
pl_n	ATG	1978	0.353712
pl_n	ATG	1979	0.39385
pl_n	ATG	1980	0.44351
pl_n	ATG	1981	0.626508
pl_n	ATG	1982	0.953904
pl_n	ATG	1983	0.578899
pl_n	ATG	1984	0.591996
pl_n	ATG	1985	0.669393
pl_n	ATG	1986	0.782666
pl_n	ATG	1987	0.85463
pl_n	ATG	1988	0.964026
pl_n	ATG	1989	1.0131
pl_n	ATG	1990	1.02876
pl_n	ATG	1991	1.06213
pl_n	ATG	1992	1.09542
pl_n	ATG	1993	1.12142
pl_n	ATG	1994	1.1637
pl_n	ATG	1995	1.19259
pl_n	ATG	1996	1.22731
pl_n	ATG	1997	1.25083
pl_n	ATG	1998	1.26067
pl_n	ATG	1999	1.23157
pl_n	ATG	2000	1.18123
pl_n	ATG	2001	1.13232
pl_n	ATG	2002	1.05964
pl_n	ATG	2003	0.964946
pl_n	ATG	2004	0.881265
pl_n	ATG	2005	0.804162
pl_n	ATG	2006	0.690952
pl_n	ATG	2007	0.603809
pl_n	ATG	2008	0.522039
pl_n	ATG	2009	0.441542
pl_n	ATG	2010	0.388303
pl_n	ATG	2011	0.372225
pl_n	ATG	2012	0.412482
pl_n	ATG	2013	0.439439
pl_n	ATG	2014	0.486984
pl_n	ATG	2015	0.538127
pl_n	ATG	2016	0.593177
pl_n	ATG	2017	0.650735
pl_n	ATG	2018	0.668683
pl_n	ATG	2019	0.672266
pl_n	AUS	1950	0.0620259
pl_n	AUS	1951	0.0701957
pl_n	AUS	1952	0.07323
pl_n	AUS	1953	0.0703248
pl_n	AUS	1954	0.0718918
pl_n	AUS	1955	0.0749693
pl_n	AUS	1956	0.0776802
pl_n	AUS	1957	0.0793616
pl_n	AUS	1958	0.0796282
pl_n	AUS	1959	0.0815981
pl_n	AUS	1960	0.0871264
pl_n	AUS	1961	0.0840352
pl_n	AUS	1962	0.0898173
pl_n	AUS	1963	0.0934041
pl_n	AUS	1964	0.0993537
pl_n	AUS	1965	0.102973
pl_n	AUS	1966	0.11137
pl_n	AUS	1967	0.114429
pl_n	AUS	1968	0.121659
pl_n	AUS	1969	0.126872
pl_n	AUS	1970	0.131315
pl_n	AUS	1971	0.142201
pl_n	AUS	1972	0.160499
pl_n	AUS	1973	0.222503
pl_n	AUS	1974	0.269571
pl_n	AUS	1975	0.296071
pl_n	AUS	1976	0.310844
pl_n	AUS	1977	0.309347
pl_n	AUS	1978	0.341655
pl_n	AUS	1979	0.367371
pl_n	AUS	1980	0.417403
pl_n	AUS	1981	0.472938
pl_n	AUS	1982	0.463087
pl_n	AUS	1983	0.441249
pl_n	AUS	1984	0.458917
pl_n	AUS	1985	0.40586
pl_n	AUS	1986	0.425973
pl_n	AUS	1987	0.469528
pl_n	AUS	1988	0.559858
pl_n	AUS	1989	0.601869
pl_n	AUS	1990	0.596202
pl_n	AUS	1991	0.569351
pl_n	AUS	1992	0.525587
pl_n	AUS	1993	0.476027
pl_n	AUS	1994	0.500198
pl_n	AUS	1995	0.504489
pl_n	AUS	1996	0.532834
pl_n	AUS	1997	0.523188
pl_n	AUS	1998	0.46111
pl_n	AUS	1999	0.490971
pl_n	AUS	2000	0.485288
pl_n	AUS	2001	0.469616
pl_n	AUS	2002	0.531086
pl_n	AUS	2003	0.661914
pl_n	AUS	2004	0.78573
pl_n	AUS	2005	0.839255
pl_n	AUS	2006	0.867531
pl_n	AUS	2007	1.01636
pl_n	AUS	2008	1.06963
pl_n	AUS	2009	1.01627
pl_n	AUS	2010	1.2457
pl_n	AUS	2011	1.42717
pl_n	AUS	2012	1.34508
pl_n	AUS	2013	1.1967
pl_n	AUS	2014	1.07327
pl_n	AUS	2015	0.961647
pl_n	AUS	2016	0.963806
pl_n	AUS	2017	1.09893
pl_n	AUS	2018	1.10412
pl_n	AUS	2019	1.04348
pl_n	AUT	1950	0.0764494
pl_n	AUT	1951	0.0884408
pl_n	AUT	1952	0.0957355
pl_n	AUT	1953	0.0936885
pl_n	AUT	1954	0.0883579
pl_n	AUT	1955	0.087902
pl_n	AUT	1956	0.0898652
pl_n	AUT	1957	0.0937766
pl_n	AUT	1958	0.0923951
pl_n	AUT	1959	0.0966621
pl_n	AUT	1960	0.0975422
pl_n	AUT	1961	0.103667
pl_n	AUT	1962	0.105631
pl_n	AUT	1963	0.11042
pl_n	AUT	1964	0.109925
pl_n	AUT	1965	0.120662
pl_n	AUT	1966	0.124869
pl_n	AUT	1967	0.125064
pl_n	AUT	1968	0.125808
pl_n	AUT	1969	0.127895
pl_n	AUT	1970	0.137349
pl_n	AUT	1971	0.151178
pl_n	AUT	1972	0.185185
pl_n	AUT	1973	0.230019
pl_n	AUT	1974	0.267496
pl_n	AUT	1975	0.302381
pl_n	AUT	1976	0.312544
pl_n	AUT	1977	0.360788
pl_n	AUT	1978	0.440052
pl_n	AUT	1979	0.503952
pl_n	AUT	1980	0.563242
pl_n	AUT	1981	0.47753
pl_n	AUT	1982	0.446712
pl_n	AUT	1983	0.406387
pl_n	AUT	1984	0.347881
pl_n	AUT	1985	0.326346
pl_n	AUT	1986	0.443945
pl_n	AUT	1987	0.535505
pl_n	AUT	1988	0.539738
pl_n	AUT	1989	0.50604
pl_n	AUT	1990	0.586932
pl_n	AUT	1991	0.57058
pl_n	AUT	1992	0.612353
pl_n	AUT	1993	0.577999
pl_n	AUT	1994	0.594825
pl_n	AUT	1995	0.686347
pl_n	AUT	1996	0.667923
pl_n	AUT	1997	0.609769
pl_n	AUT	1998	0.630623
pl_n	AUT	1999	0.635431
pl_n	AUT	2000	0.58222
pl_n	AUT	2001	0.604572
pl_n	AUT	2002	0.676644
pl_n	AUT	2003	0.824744
pl_n	AUT	2004	0.919782
pl_n	AUT	2005	0.940908
pl_n	AUT	2006	0.908268
pl_n	AUT	2007	0.98966
pl_n	AUT	2008	1.03211
pl_n	AUT	2009	0.920434
pl_n	AUT	2010	0.856327
pl_n	AUT	2011	0.884598
pl_n	AUT	2012	0.755293
pl_n	AUT	2013	0.780684
pl_n	AUT	2014	0.771558
pl_n	AUT	2015	0.633952
pl_n	AUT	2016	0.623547
pl_n	AUT	2017	0.660437
pl_n	AUT	2018	0.710264
pl_n	AUT	2019	0.689652
pl_n	AZE	1990	0.182033
pl_n	AZE	1991	0.189357
pl_n	AZE	1992	0.193695
pl_n	AZE	1993	0.197461
pl_n	AZE	1994	0.20114
pl_n	AZE	1995	0.205069
pl_n	AZE	1996	0.208706
pl_n	AZE	1997	0.246035
pl_n	AZE	1998	0.21606
pl_n	AZE	1999	0.184165
pl_n	AZE	2000	0.170652
pl_n	AZE	2001	0.154365
pl_n	AZE	2002	0.195758
pl_n	AZE	2003	0.267352
pl_n	AZE	2004	0.334649
pl_n	AZE	2005	0.342992
pl_n	AZE	2006	0.338732
pl_n	AZE	2007	0.417494
pl_n	AZE	2008	0.511743
pl_n	AZE	2009	0.560437
pl_n	AZE	2010	0.652707
pl_n	AZE	2011	0.687582
pl_n	AZE	2012	0.686442
pl_n	AZE	2013	0.737983
pl_n	AZE	2014	0.584554
pl_n	AZE	2015	0.525589
pl_n	AZE	2016	0.386434
pl_n	AZE	2017	0.372452
pl_n	AZE	2018	0.382007
pl_n	AZE	2019	0.354582
pl_n	BDI	1960	0.0729394
pl_n	BDI	1961	0.0875847
pl_n	BDI	1962	0.0841813
pl_n	BDI	1963	0.0880238
pl_n	BDI	1964	0.0929468
pl_n	BDI	1965	0.054692
pl_n	BDI	1966	0.0543163
pl_n	BDI	1967	0.053719
pl_n	BDI	1968	0.0558983
pl_n	BDI	1969	0.0588309
pl_n	BDI	1970	0.0599144
pl_n	BDI	1971	0.0439334
pl_n	BDI	1972	0.144408
pl_n	BDI	1973	0.0947273
pl_n	BDI	1974	0.0723773
pl_n	BDI	1975	0.173712
pl_n	BDI	1976	0.121941
pl_n	BDI	1977	0.124894
pl_n	BDI	1978	0.151865
pl_n	BDI	1979	0.198516
pl_n	BDI	1980	0.216398
pl_n	BDI	1981	0.193144
pl_n	BDI	1982	0.268267
pl_n	BDI	1983	0.258311
pl_n	BDI	1984	0.191973
pl_n	BDI	1985	0.207235
pl_n	BDI	1986	0.199186
pl_n	BDI	1987	0.207565
pl_n	BDI	1988	0.344407
pl_n	BDI	1989	0.275677
pl_n	BDI	1990	0.600701
pl_n	BDI	1991	0.668778
pl_n	BDI	1992	0.631624
pl_n	BDI	1993	0.3485
pl_n	BDI	1994	0.382986
pl_n	BDI	1995	0.415245
pl_n	BDI	1996	0.346434
pl_n	BDI	1997	0.206587
pl_n	BDI	1998	0.160981
pl_n	BDI	1999	0.0838524
pl_n	BDI	2000	0.162507
pl_n	BDI	2001	0.125332
pl_n	BDI	2002	0.147276
pl_n	BDI	2003	0.084855
pl_n	BDI	2004	0.078469
pl_n	BDI	2005	0.246134
pl_n	BDI	2006	0.266417
pl_n	BDI	2007	0.255939
pl_n	BDI	2008	0.256906
pl_n	BDI	2009	0.275313
pl_n	BDI	2010	0.288322
pl_n	BDI	2011	0.3037
pl_n	BDI	2012	0.3385
pl_n	BDI	2013	0.340786
pl_n	BDI	2014	0.365516
pl_n	BDI	2015	0.369763
pl_n	BDI	2016	0.362913
pl_n	BDI	2017	0.382643
pl_n	BDI	2018	0.366156
pl_n	BDI	2019	0.354544
pl_n	BEL	1950	0.0470104
pl_n	BEL	1951	0.0616274
pl_n	BEL	1952	0.0647904
pl_n	BEL	1953	0.0600187
pl_n	BEL	1954	0.0593299
pl_n	BEL	1955	0.0610699
pl_n	BEL	1956	0.0637758
pl_n	BEL	1957	0.067475
pl_n	BEL	1958	0.0696607
pl_n	BEL	1959	0.068733
pl_n	BEL	1960	0.0694961
pl_n	BEL	1961	0.0713725
pl_n	BEL	1962	0.0735943
pl_n	BEL	1963	0.0780952
pl_n	BEL	1964	0.0825184
pl_n	BEL	1965	0.0861376
pl_n	BEL	1966	0.0899113
pl_n	BEL	1967	0.0939627
pl_n	BEL	1968	0.096177
pl_n	BEL	1969	0.100936
pl_n	BEL	1970	0.108973
pl_n	BEL	1971	0.123178
pl_n	BEL	1972	0.144354
pl_n	BEL	1973	0.17889
pl_n	BEL	1974	0.209744
pl_n	BEL	1975	0.255259
pl_n	BEL	1976	0.277818
pl_n	BEL	1977	0.320799
pl_n	BEL	1978	0.400576
pl_n	BEL	1979	0.459486
pl_n	BEL	1980	0.419084
pl_n	BEL	1981	0.363821
pl_n	BEL	1982	0.320487
pl_n	BEL	1983	0.30756
pl_n	BEL	1984	0.296331
pl_n	BEL	1985	0.306681
pl_n	BEL	1986	0.417479
pl_n	BEL	1987	0.517742
pl_n	BEL	1988	0.526302
pl_n	BEL	1989	0.50737
pl_n	BEL	1990	0.601651
pl_n	BEL	1991	0.572516
pl_n	BEL	1992	0.60879
pl_n	BEL	1993	0.567121
pl_n	BEL	1994	0.597721
pl_n	BEL	1995	0.67628
pl_n	BEL	1996	0.659424
pl_n	BEL	1997	0.599895
pl_n	BEL	1998	0.617857
pl_n	BEL	1999	0.610518
pl_n	BEL	2000	0.556212
pl_n	BEL	2001	0.558076
pl_n	BEL	2002	0.621456
pl_n	BEL	2003	0.750965
pl_n	BEL	2004	0.830726
pl_n	BEL	2005	0.828995
pl_n	BEL	2006	0.79901
pl_n	BEL	2007	0.847083
pl_n	BEL	2008	0.872503
pl_n	BEL	2009	0.767092
pl_n	BEL	2010	0.679337
pl_n	BEL	2011	0.731156
pl_n	BEL	2012	0.6327
pl_n	BEL	2013	0.658871
pl_n	BEL	2014	0.67913
pl_n	BEL	2015	0.563828
pl_n	BEL	2016	0.556531
pl_n	BEL	2017	0.595322
pl_n	BEL	2018	0.645638
pl_n	BEL	2019	0.626652
pl_n	BEN	1959	0.0738002
pl_n	BEN	1960	0.0752503
pl_n	BEN	1961	0.0758981
pl_n	BEN	1962	0.0784441
pl_n	BEN	1963	0.0807373
pl_n	BEN	1964	0.0797608
pl_n	BEN	1965	0.081872
pl_n	BEN	1966	0.0824584
pl_n	BEN	1967	0.0828964
pl_n	BEN	1968	0.0848166
pl_n	BEN	1969	0.0837429
pl_n	BEN	1970	0.0826153
pl_n	BEN	1971	0.0808012
pl_n	BEN	1972	0.0953924
pl_n	BEN	1973	0.115222
pl_n	BEN	1974	0.14228
pl_n	BEN	1975	0.185288
pl_n	BEN	1976	0.201466
pl_n	BEN	1977	0.210904
pl_n	BEN	1978	0.2589
pl_n	BEN	1979	0.292832
pl_n	BEN	1980	0.342811
pl_n	BEN	1981	0.305468
pl_n	BEN	1982	0.267532
pl_n	BEN	1983	0.249267
pl_n	BEN	1984	0.229136
pl_n	BEN	1985	0.349973
pl_n	BEN	1986	0.367047
pl_n	BEN	1987	0.353074
pl_n	BEN	1988	0.433479
pl_n	BEN	1989	0.322444
pl_n	BEN	1990	0.321733
pl_n	BEN	1991	0.27192
pl_n	BEN	1992	0.262984
pl_n	BEN	1993	0.222579
pl_n	BEN	1994	0.257403
pl_n	BEN	1995	0.297845
pl_n	BEN	1996	0.283909
pl_n	BEN	1997	0.2625
pl_n	BEN	1998	0.27143
pl_n	BEN	1999	0.264387
pl_n	BEN	2000	0.234395
pl_n	BEN	2001	0.212923
pl_n	BEN	2002	0.220266
pl_n	BEN	2003	0.265607
pl_n	BEN	2004	0.286846
pl_n	BEN	2005	0.302935
pl_n	BEN	2006	0.306258
pl_n	BEN	2007	0.336949
pl_n	BEN	2008	0.360882
pl_n	BEN	2009	0.341069
pl_n	BEN	2010	0.323355
pl_n	BEN	2011	0.362714
pl_n	BEN	2012	0.358572
pl_n	BEN	2013	0.376925
pl_n	BEN	2014	0.379663
pl_n	BEN	2015	0.322939
pl_n	BEN	2016	0.324971
pl_n	BEN	2017	0.346898
pl_n	BEN	2018	0.371673
pl_n	BEN	2019	0.330676
pl_n	BFA	1959	0.206458
pl_n	BFA	1960	0.217347
pl_n	BFA	1961	0.185793
pl_n	BFA	1962	0.180885
pl_n	BFA	1963	0.200138
pl_n	BFA	1964	0.221875
pl_n	BFA	1965	0.141605
pl_n	BFA	1966	0.132837
pl_n	BFA	1967	0.148326
pl_n	BFA	1968	0.1482
pl_n	BFA	1969	0.148394
pl_n	BFA	1970	0.14541
pl_n	BFA	1971	0.159319
pl_n	BFA	1972	0.190081
pl_n	BFA	1973	0.229915
pl_n	BFA	1974	0.266529
pl_n	BFA	1975	0.20755
pl_n	BFA	1976	0.212011
pl_n	BFA	1977	0.222437
pl_n	BFA	1978	0.244473
pl_n	BFA	1979	0.401397
pl_n	BFA	1980	0.394097
pl_n	BFA	1981	0.306884
pl_n	BFA	1982	0.289657
pl_n	BFA	1983	0.302361
pl_n	BFA	1984	0.275443
pl_n	BFA	1985	0.23508
pl_n	BFA	1986	0.308249
pl_n	BFA	1987	0.357299
pl_n	BFA	1988	0.363482
pl_n	BFA	1989	0.34494
pl_n	BFA	1990	0.407957
pl_n	BFA	1991	0.406876
pl_n	BFA	1992	0.443277
pl_n	BFA	1993	0.420112
pl_n	BFA	1994	0.277787
pl_n	BFA	1995	0.298312
pl_n	BFA	1996	0.299357
pl_n	BFA	1997	0.264849
pl_n	BFA	1998	0.276878
pl_n	BFA	1999	0.262886
pl_n	BFA	2000	0.225207
pl_n	BFA	2001	0.206504
pl_n	BFA	2002	0.219794
pl_n	BFA	2003	0.276069
pl_n	BFA	2004	0.301894
pl_n	BFA	2005	0.301526
pl_n	BFA	2006	0.299478
pl_n	BFA	2007	0.339174
pl_n	BFA	2008	0.367576
pl_n	BFA	2009	0.324019
pl_n	BFA	2010	0.307312
pl_n	BFA	2011	0.331255
pl_n	BFA	2012	0.348683
pl_n	BFA	2013	0.371144
pl_n	BFA	2014	0.387898
pl_n	BFA	2015	0.324342
pl_n	BFA	2016	0.323061
pl_n	BFA	2017	0.331827
pl_n	BFA	2018	0.294628
pl_n	BFA	2019	0.259644
pl_n	BGD	1959	0.0642801
pl_n	BGD	1960	0.0684692
pl_n	BGD	1961	0.0731145
pl_n	BGD	1962	0.0737342
pl_n	BGD	1963	0.0834031
pl_n	BGD	1964	0.0817952
pl_n	BGD	1965	0.0770175
pl_n	BGD	1966	0.0634847
pl_n	BGD	1967	0.0750363
pl_n	BGD	1968	0.0760354
pl_n	BGD	1969	0.0823704
pl_n	BGD	1970	0.0795042
pl_n	BGD	1971	0.0683188
pl_n	BGD	1972	0.0979955
pl_n	BGD	1973	0.0983933
pl_n	BGD	1974	0.112252
pl_n	BGD	1975	0.132848
pl_n	BGD	1976	0.198873
pl_n	BGD	1977	0.185197
pl_n	BGD	1978	0.202154
pl_n	BGD	1979	0.201096
pl_n	BGD	1980	0.246308
pl_n	BGD	1981	0.251108
pl_n	BGD	1982	0.247134
pl_n	BGD	1983	0.214131
pl_n	BGD	1984	0.213749
pl_n	BGD	1985	0.221192
pl_n	BGD	1986	0.154337
pl_n	BGD	1987	0.222201
pl_n	BGD	1988	0.240912
pl_n	BGD	1989	0.197306
pl_n	BGD	1990	0.28339
pl_n	BGD	1991	0.221696
pl_n	BGD	1992	0.236663
pl_n	BGD	1993	0.221724
pl_n	BGD	1994	0.212275
pl_n	BGD	1995	0.220141
pl_n	BGD	1996	0.213521
pl_n	BGD	1997	0.205966
pl_n	BGD	1998	0.204201
pl_n	BGD	1999	0.207134
pl_n	BGD	2000	0.20991
pl_n	BGD	2001	0.203693
pl_n	BGD	2002	0.198467
pl_n	BGD	2003	0.204616
pl_n	BGD	2004	0.206087
pl_n	BGD	2005	0.190838
pl_n	BGD	2006	0.219106
pl_n	BGD	2007	0.220566
pl_n	BGD	2008	0.215079
pl_n	BGD	2009	0.207986
pl_n	BGD	2010	0.202728
pl_n	BGD	2011	0.200823
pl_n	BGD	2012	0.194153
pl_n	BGD	2013	0.219123
pl_n	BGD	2014	0.224778
pl_n	BGD	2015	0.236524
pl_n	BGD	2016	0.251703
pl_n	BGD	2017	0.260946
pl_n	BGD	2018	0.266215
pl_n	BGD	2019	0.277325
pl_n	BGR	1970	0.191089
pl_n	BGR	1971	0.204323
pl_n	BGR	1972	0.216065
pl_n	BGR	1973	0.230483
pl_n	BGR	1974	0.254472
pl_n	BGR	1975	0.280982
pl_n	BGR	1976	0.300073
pl_n	BGR	1977	0.323927
pl_n	BGR	1978	0.354353
pl_n	BGR	1979	0.389075
pl_n	BGR	1980	0.430723
pl_n	BGR	1981	0.472989
pl_n	BGR	1982	0.502136
pl_n	BGR	1983	0.524429
pl_n	BGR	1984	0.545482
pl_n	BGR	1985	0.563825
pl_n	BGR	1986	0.57875
pl_n	BGR	1987	0.596925
pl_n	BGR	1988	0.601139
pl_n	BGR	1989	0.582226
pl_n	BGR	1990	0.67295
pl_n	BGR	1991	0.220844
pl_n	BGR	1992	0.241288
pl_n	BGR	1993	0.294053
pl_n	BGR	1994	0.277886
pl_n	BGR	1995	0.440652
pl_n	BGR	1996	0.236274
pl_n	BGR	1997	0.165715
pl_n	BGR	1998	0.238702
pl_n	BGR	1999	0.188027
pl_n	BGR	2000	0.168497
pl_n	BGR	2001	0.174391
pl_n	BGR	2002	0.18731
pl_n	BGR	2003	0.275308
pl_n	BGR	2004	0.313044
pl_n	BGR	2005	0.32364
pl_n	BGR	2006	0.337271
pl_n	BGR	2007	0.39466
pl_n	BGR	2008	0.433519
pl_n	BGR	2009	0.398153
pl_n	BGR	2010	0.316227
pl_n	BGR	2011	0.362879
pl_n	BGR	2012	0.331319
pl_n	BGR	2013	0.35905
pl_n	BGR	2014	0.34978
pl_n	BGR	2015	0.305541
pl_n	BGR	2016	0.310624
pl_n	BGR	2017	0.321309
pl_n	BGR	2018	0.351915
pl_n	BGR	2019	0.34414
pl_n	BHR	1970	0.158399
pl_n	BHR	1971	0.170312
pl_n	BHR	1972	0.194254
pl_n	BHR	1973	0.241924
pl_n	BHR	1974	0.316344
pl_n	BHR	1975	0.352019
pl_n	BHR	1976	0.385269
pl_n	BHR	1977	0.486436
pl_n	BHR	1978	0.525134
pl_n	BHR	1979	0.546063
pl_n	BHR	1980	0.599677
pl_n	BHR	1981	0.633781
pl_n	BHR	1982	0.591362
pl_n	BHR	1983	0.539902
pl_n	BHR	1984	0.547832
pl_n	BHR	1985	0.698828
pl_n	BHR	1986	0.771113
pl_n	BHR	1987	0.685792
pl_n	BHR	1988	0.571168
pl_n	BHR	1989	0.568015
pl_n	BHR	1990	0.565676
pl_n	BHR	1991	0.568177
pl_n	BHR	1992	0.579031
pl_n	BHR	1993	0.60838
pl_n	BHR	1994	0.616627
pl_n	BHR	1995	0.636354
pl_n	BHR	1996	0.650543
pl_n	BHR	1997	0.628452
pl_n	BHR	1998	0.563301
pl_n	BHR	1999	0.519621
pl_n	BHR	2000	0.419489
pl_n	BHR	2001	0.402123
pl_n	BHR	2002	0.352065
pl_n	BHR	2003	0.291588
pl_n	BHR	2004	0.28371
pl_n	BHR	2005	0.274002
pl_n	BHR	2006	0.293323
pl_n	BHR	2007	0.28991
pl_n	BHR	2008	0.305536
pl_n	BHR	2009	0.291558
pl_n	BHR	2010	0.300487
pl_n	BHR	2011	0.312372
pl_n	BHR	2012	0.317364
pl_n	BHR	2013	0.31734
pl_n	BHR	2014	0.32735
pl_n	BHR	2015	0.319827
pl_n	BHR	2016	0.315366
pl_n	BHR	2017	0.302917
pl_n	BHR	2018	0.307936
pl_n	BHR	2019	0.316471
pl_n	BHS	1970	0.419078
pl_n	BHS	1971	0.428852
pl_n	BHS	1972	0.483309
pl_n	BHS	1973	0.517432
pl_n	BHS	1974	0.749563
pl_n	BHS	1975	0.850807
pl_n	BHS	1976	0.88858
pl_n	BHS	1977	0.8449
pl_n	BHS	1978	1.02804
pl_n	BHS	1979	0.873177
pl_n	BHS	1980	0.735596
pl_n	BHS	1981	0.740244
pl_n	BHS	1982	0.690884
pl_n	BHS	1983	0.767072
pl_n	BHS	1984	0.807871
pl_n	BHS	1985	0.730409
pl_n	BHS	1986	0.807673
pl_n	BHS	1987	0.648804
pl_n	BHS	1988	0.71871
pl_n	BHS	1989	0.8247
pl_n	BHS	1990	0.885073
pl_n	BHS	1991	0.96087
pl_n	BHS	1992	1.04113
pl_n	BHS	1993	1.10991
pl_n	BHS	1994	1.12602
pl_n	BHS	1995	1.11609
pl_n	BHS	1996	1.20874
pl_n	BHS	1997	1.16533
pl_n	BHS	1998	1.06299
pl_n	BHS	1999	1.16356
pl_n	BHS	2000	1.02385
pl_n	BHS	2001	1.00984
pl_n	BHS	2002	0.884514
pl_n	BHS	2003	0.80738
pl_n	BHS	2004	0.808735
pl_n	BHS	2005	0.77946
pl_n	BHS	2006	0.748325
pl_n	BHS	2007	0.655037
pl_n	BHS	2008	0.604923
pl_n	BHS	2009	0.563593
pl_n	BHS	2010	0.568356
pl_n	BHS	2011	0.517129
pl_n	BHS	2012	0.515988
pl_n	BHS	2013	0.53624
pl_n	BHS	2014	0.553848
pl_n	BHS	2015	0.573605
pl_n	BHS	2016	0.589668
pl_n	BHS	2017	0.600504
pl_n	BHS	2018	0.613554
pl_n	BHS	2019	0.626361
pl_n	BIH	1990	1.43844
pl_n	BIH	1991	1.25731
pl_n	BIH	1992	1.04038
pl_n	BIH	1993	0.814379
pl_n	BIH	1994	0.568141
pl_n	BIH	1995	0.353388
pl_n	BIH	1996	0.25912
pl_n	BIH	1997	0.263947
pl_n	BIH	1998	0.263417
pl_n	BIH	1999	0.26346
pl_n	BIH	2000	0.303829
pl_n	BIH	2001	0.302092
pl_n	BIH	2002	0.215516
pl_n	BIH	2003	0.261541
pl_n	BIH	2004	0.407839
pl_n	BIH	2005	0.401005
pl_n	BIH	2006	0.336922
pl_n	BIH	2007	0.378592
pl_n	BIH	2008	0.413421
pl_n	BIH	2009	0.371127
pl_n	BIH	2010	0.326091
pl_n	BIH	2011	0.325651
pl_n	BIH	2012	0.307282
pl_n	BIH	2013	0.30281
pl_n	BIH	2014	0.302679
pl_n	BIH	2015	0.266602
pl_n	BIH	2016	0.279236
pl_n	BIH	2017	0.29077
pl_n	BIH	2018	0.312913
pl_n	BIH	2019	0.300648
pl_n	BLR	1990	0.0856945
pl_n	BLR	1991	0.0850921
pl_n	BLR	1992	0.110244
pl_n	BLR	1993	0.151343
pl_n	BLR	1994	0.155178
pl_n	BLR	1995	0.15066
pl_n	BLR	1996	0.140522
pl_n	BLR	1997	0.138751
pl_n	BLR	1998	0.153104
pl_n	BLR	1999	0.14697
pl_n	BLR	2000	0.133774
pl_n	BLR	2001	0.165317
pl_n	BLR	2002	0.196705
pl_n	BLR	2003	0.235737
pl_n	BLR	2004	0.293067
pl_n	BLR	2005	0.354386
pl_n	BLR	2006	0.387586
pl_n	BLR	2007	0.452754
pl_n	BLR	2008	0.545373
pl_n	BLR	2009	0.472805
pl_n	BLR	2010	0.512917
pl_n	BLR	2011	0.491472
pl_n	BLR	2012	0.563515
pl_n	BLR	2013	0.632035
pl_n	BLR	2014	0.508745
pl_n	BLR	2015	0.418928
pl_n	BLR	2016	0.359741
pl_n	BLR	2017	0.38658
pl_n	BLR	2018	0.410294
pl_n	BLR	2019	0.403224
pl_n	BLZ	1970	0.120693
pl_n	BLZ	1971	0.138758
pl_n	BLZ	1972	0.173513
pl_n	BLZ	1973	0.263384
pl_n	BLZ	1974	0.328435
pl_n	BLZ	1975	0.417575
pl_n	BLZ	1976	0.364056
pl_n	BLZ	1977	0.437686
pl_n	BLZ	1978	0.511496
pl_n	BLZ	1979	0.540702
pl_n	BLZ	1980	0.602479
pl_n	BLZ	1981	0.636633
pl_n	BLZ	1982	0.667468
pl_n	BLZ	1983	0.701774
pl_n	BLZ	1984	0.710615
pl_n	BLZ	1985	0.702448
pl_n	BLZ	1986	0.702219
pl_n	BLZ	1987	0.714991
pl_n	BLZ	1988	0.727058
pl_n	BLZ	1989	0.753895
pl_n	BLZ	1990	0.762103
pl_n	BLZ	1991	0.788717
pl_n	BLZ	1992	0.822899
pl_n	BLZ	1993	0.809935
pl_n	BLZ	1994	0.826239
pl_n	BLZ	1995	0.848795
pl_n	BLZ	1996	0.881215
pl_n	BLZ	1997	0.886163
pl_n	BLZ	1998	0.889759
pl_n	BLZ	1999	0.891757
pl_n	BLZ	2000	0.869054
pl_n	BLZ	2001	0.824369
pl_n	BLZ	2002	0.811483
pl_n	BLZ	2003	0.81783
pl_n	BLZ	2004	0.832566
pl_n	BLZ	2005	0.809057
pl_n	BLZ	2006	0.814218
pl_n	BLZ	2007	0.786539
pl_n	BLZ	2008	0.755725
pl_n	BLZ	2009	0.669207
pl_n	BLZ	2010	0.652457
pl_n	BLZ	2011	0.652115
pl_n	BLZ	2012	0.636151
pl_n	BLZ	2013	0.594777
pl_n	BLZ	2014	0.575241
pl_n	BLZ	2015	0.508502
pl_n	BLZ	2016	0.477789
pl_n	BLZ	2017	0.462138
pl_n	BLZ	2018	0.480197
pl_n	BLZ	2019	0.484484
pl_n	BMU	1970	0.322748
pl_n	BMU	1971	0.363638
pl_n	BMU	1972	0.411448
pl_n	BMU	1973	0.468322
pl_n	BMU	1974	0.556244
pl_n	BMU	1975	0.594053
pl_n	BMU	1976	0.627246
pl_n	BMU	1977	0.688021
pl_n	BMU	1978	0.766535
pl_n	BMU	1979	0.831741
pl_n	BMU	1980	0.948356
pl_n	BMU	1981	1.01964
pl_n	BMU	1982	1.09637
pl_n	BMU	1983	1.13357
pl_n	BMU	1984	1.1774
pl_n	BMU	1985	1.25025
pl_n	BMU	1986	1.28432
pl_n	BMU	1987	1.35561
pl_n	BMU	1988	1.44111
pl_n	BMU	1989	1.52761
pl_n	BMU	1990	1.60817
pl_n	BMU	1991	1.6978
pl_n	BMU	1992	1.76727
pl_n	BMU	1993	1.8105
pl_n	BMU	1994	1.88452
pl_n	BMU	1995	1.9839
pl_n	BMU	1996	1.97778
pl_n	BMU	1997	2.04205
pl_n	BMU	1998	2.02595
pl_n	BMU	1999	1.98201
pl_n	BMU	2000	1.87634
pl_n	BMU	2001	1.69396
pl_n	BMU	2002	1.6731
pl_n	BMU	2003	1.56985
pl_n	BMU	2004	1.46579
pl_n	BMU	2005	1.37728
pl_n	BMU	2006	1.25962
pl_n	BMU	2007	1.1144
pl_n	BMU	2008	0.972749
pl_n	BMU	2009	0.836039
pl_n	BMU	2010	0.743878
pl_n	BMU	2011	0.722214
pl_n	BMU	2012	0.781196
pl_n	BMU	2013	0.842542
pl_n	BMU	2014	0.914681
pl_n	BMU	2015	0.981643
pl_n	BMU	2016	1.05228
pl_n	BMU	2017	1.12912
pl_n	BMU	2018	1.15838
pl_n	BMU	2019	1.17676
pl_n	BOL	1950	0.0687177
pl_n	BOL	1951	0.0758404
pl_n	BOL	1952	0.0776529
pl_n	BOL	1953	0.0734563
pl_n	BOL	1954	0.0761239
pl_n	BOL	1955	0.0792458
pl_n	BOL	1956	0.0830591
pl_n	BOL	1957	0.0852707
pl_n	BOL	1958	0.0792788
pl_n	BOL	1959	0.06955
pl_n	BOL	1960	0.0713713
pl_n	BOL	1961	0.0714737
pl_n	BOL	1962	0.0654905
pl_n	BOL	1963	0.0748312
pl_n	BOL	1964	0.0760819
pl_n	BOL	1965	0.100067
pl_n	BOL	1966	0.113084
pl_n	BOL	1967	0.105865
pl_n	BOL	1968	0.101227
pl_n	BOL	1969	0.108944
pl_n	BOL	1970	0.116711
pl_n	BOL	1971	0.10587
pl_n	BOL	1972	0.127051
pl_n	BOL	1973	0.145356
pl_n	BOL	1974	0.188644
pl_n	BOL	1975	0.203782
pl_n	BOL	1976	0.240777
pl_n	BOL	1977	0.211837
pl_n	BOL	1978	0.245805
pl_n	BOL	1979	0.256706
pl_n	BOL	1980	0.285594
pl_n	BOL	1981	0.314555
pl_n	BOL	1982	0.407963
pl_n	BOL	1983	0.409074
pl_n	BOL	1984	0.415474
pl_n	BOL	1985	0.336699
pl_n	BOL	1986	0.29028
pl_n	BOL	1987	0.303026
pl_n	BOL	1988	0.352336
pl_n	BOL	1989	0.339928
pl_n	BOL	1990	0.322715
pl_n	BOL	1991	0.341846
pl_n	BOL	1992	0.357263
pl_n	BOL	1993	0.352462
pl_n	BOL	1994	0.343322
pl_n	BOL	1995	0.348058
pl_n	BOL	1996	0.348852
pl_n	BOL	1997	0.352527
pl_n	BOL	1998	0.356949
pl_n	BOL	1999	0.332952
pl_n	BOL	2000	0.32674
pl_n	BOL	2001	0.292894
pl_n	BOL	2002	0.252087
pl_n	BOL	2003	0.218157
pl_n	BOL	2004	0.205336
pl_n	BOL	2005	0.219193
pl_n	BOL	2006	0.254711
pl_n	BOL	2007	0.270979
pl_n	BOL	2008	0.299964
pl_n	BOL	2009	0.282782
pl_n	BOL	2010	0.281587
pl_n	BOL	2011	0.316693
pl_n	BOL	2012	0.337822
pl_n	BOL	2013	0.350578
pl_n	BOL	2014	0.36267
pl_n	BOL	2015	0.348534
pl_n	BOL	2016	0.341849
pl_n	BOL	2017	0.33377
pl_n	BOL	2018	0.332782
pl_n	BOL	2019	0.332457
pl_n	BRA	1950	0.080012
pl_n	BRA	1951	0.0947499
pl_n	BRA	1952	0.0993804
pl_n	BRA	1953	0.118297
pl_n	BRA	1954	0.104388
pl_n	BRA	1955	0.0824144
pl_n	BRA	1956	0.0876411
pl_n	BRA	1957	0.0901237
pl_n	BRA	1958	0.0918998
pl_n	BRA	1959	0.0790989
pl_n	BRA	1960	0.0523454
pl_n	BRA	1961	0.0523284
pl_n	BRA	1962	0.0600585
pl_n	BRA	1963	0.0754893
pl_n	BRA	1964	0.0618635
pl_n	BRA	1965	0.0622362
pl_n	BRA	1966	0.0721706
pl_n	BRA	1967	0.0739866
pl_n	BRA	1968	0.0770874
pl_n	BRA	1969	0.071906
pl_n	BRA	1970	0.0740823
pl_n	BRA	1971	0.0760439
pl_n	BRA	1972	0.0858384
pl_n	BRA	1973	0.100978
pl_n	BRA	1974	0.122836
pl_n	BRA	1975	0.14088
pl_n	BRA	1976	0.152201
pl_n	BRA	1977	0.175298
pl_n	BRA	1978	0.204196
pl_n	BRA	1979	0.230395
pl_n	BRA	1980	0.223813
pl_n	BRA	1981	0.260439
pl_n	BRA	1982	0.283688
pl_n	BRA	1983	0.206939
pl_n	BRA	1984	0.18949
pl_n	BRA	1985	0.178532
pl_n	BRA	1986	0.191715
pl_n	BRA	1987	0.241255
pl_n	BRA	1988	0.279282
pl_n	BRA	1989	0.393088
pl_n	BRA	1990	0.400633
pl_n	BRA	1991	0.262701
pl_n	BRA	1992	0.264473
pl_n	BRA	1993	0.281783
pl_n	BRA	1994	0.366869
pl_n	BRA	1995	0.442281
pl_n	BRA	1996	0.431998
pl_n	BRA	1997	0.422019
pl_n	BRA	1998	0.400142
pl_n	BRA	1999	0.280738
pl_n	BRA	2000	0.316343
pl_n	BRA	2001	0.274482
pl_n	BRA	2002	0.253349
pl_n	BRA	2003	0.267206
pl_n	BRA	2004	0.303065
pl_n	BRA	2005	0.380328
pl_n	BRA	2006	0.423151
pl_n	BRA	2007	0.451542
pl_n	BRA	2008	0.460114
pl_n	BRA	2009	0.393252
pl_n	BRA	2010	0.418567
pl_n	BRA	2011	0.442081
pl_n	BRA	2012	0.430712
pl_n	BRA	2013	0.427106
pl_n	BRA	2014	0.431413
pl_n	BRA	2015	0.344669
pl_n	BRA	2016	0.355176
pl_n	BRA	2017	0.397886
pl_n	BRA	2018	0.368352
pl_n	BRA	2019	0.357599
pl_n	BRB	1960	0.09251
pl_n	BRB	1961	0.096564
pl_n	BRB	1962	0.088379
pl_n	BRB	1963	0.0991002
pl_n	BRB	1964	0.100064
pl_n	BRB	1965	0.0882285
pl_n	BRB	1966	0.110541
pl_n	BRB	1967	0.107021
pl_n	BRB	1968	0.0964856
pl_n	BRB	1969	0.108951
pl_n	BRB	1970	0.114932
pl_n	BRB	1971	0.133046
pl_n	BRB	1972	0.144001
pl_n	BRB	1973	0.178292
pl_n	BRB	1974	0.194105
pl_n	BRB	1975	0.195483
pl_n	BRB	1976	0.222795
pl_n	BRB	1977	0.269774
pl_n	BRB	1978	0.238435
pl_n	BRB	1979	0.295809
pl_n	BRB	1980	0.366214
pl_n	BRB	1981	0.410711
pl_n	BRB	1982	0.451188
pl_n	BRB	1983	0.47883
pl_n	BRB	1984	0.505459
pl_n	BRB	1985	0.524579
pl_n	BRB	1986	0.562152
pl_n	BRB	1987	0.611283
pl_n	BRB	1988	0.699006
pl_n	BRB	1989	0.813423
pl_n	BRB	1990	0.953167
pl_n	BRB	1991	0.861577
pl_n	BRB	1992	1.02797
pl_n	BRB	1993	1.00596
pl_n	BRB	1994	0.904914
pl_n	BRB	1995	1.08707
pl_n	BRB	1996	1.14945
pl_n	BRB	1997	0.959824
pl_n	BRB	1998	1.07868
pl_n	BRB	1999	1.15854
pl_n	BRB	2000	1.13587
pl_n	BRB	2001	1.0155
pl_n	BRB	2002	0.835312
pl_n	BRB	2003	1.11499
pl_n	BRB	2004	1.10296
pl_n	BRB	2005	1.06248
pl_n	BRB	2006	0.937206
pl_n	BRB	2007	0.982236
pl_n	BRB	2008	0.892091
pl_n	BRB	2009	0.790424
pl_n	BRB	2010	0.547199
pl_n	BRB	2011	0.514217
pl_n	BRB	2012	0.53022
pl_n	BRB	2013	0.540645
pl_n	BRB	2014	0.557197
pl_n	BRB	2015	0.567681
pl_n	BRB	2016	0.568651
pl_n	BRB	2017	0.60175
pl_n	BRB	2018	0.594414
pl_n	BRB	2019	0.722721
pl_n	BRN	1970	0.0129767
pl_n	BRN	1971	0.0129978
pl_n	BRN	1972	0.0161625
pl_n	BRN	1973	0.0235911
pl_n	BRN	1974	0.0522828
pl_n	BRN	1975	0.0567104
pl_n	BRN	1976	0.057654
pl_n	BRN	1977	0.0632699
pl_n	BRN	1978	0.0665263
pl_n	BRN	1979	0.0782679
pl_n	BRN	1980	0.0826558
pl_n	BRN	1981	0.152344
pl_n	BRN	1982	0.260515
pl_n	BRN	1983	0.17846
pl_n	BRN	1984	0.106561
pl_n	BRN	1985	0.168762
pl_n	BRN	1986	0.173327
pl_n	BRN	1987	0.18279
pl_n	BRN	1988	0.200271
pl_n	BRN	1989	0.216055
pl_n	BRN	1990	0.241859
pl_n	BRN	1991	0.26032
pl_n	BRN	1992	0.281825
pl_n	BRN	1993	0.290281
pl_n	BRN	1994	0.31143
pl_n	BRN	1995	0.426306
pl_n	BRN	1996	0.279035
pl_n	BRN	1997	0.393001
pl_n	BRN	1998	0.334784
pl_n	BRN	1999	0.3002
pl_n	BRN	2000	0.335297
pl_n	BRN	2001	0.323107
pl_n	BRN	2002	0.339574
pl_n	BRN	2003	0.339926
pl_n	BRN	2004	0.353252
pl_n	BRN	2005	0.355067
pl_n	BRN	2006	0.381266
pl_n	BRN	2007	0.390037
pl_n	BRN	2008	0.411862
pl_n	BRN	2009	0.381685
pl_n	BRN	2010	0.398451
pl_n	BRN	2011	0.421387
pl_n	BRN	2012	0.411531
pl_n	BRN	2013	0.397192
pl_n	BRN	2014	0.379596
pl_n	BRN	2015	0.365089
pl_n	BRN	2016	0.347383
pl_n	BRN	2017	0.318957
pl_n	BRN	2018	0.329924
pl_n	BRN	2019	0.323313
pl_n	BTN	1970	0.108243
pl_n	BTN	1971	0.1134
pl_n	BTN	1972	0.118504
pl_n	BTN	1973	0.131392
pl_n	BTN	1974	0.147256
pl_n	BTN	1975	0.142523
pl_n	BTN	1976	0.133144
pl_n	BTN	1977	0.138119
pl_n	BTN	1978	0.123506
pl_n	BTN	1979	0.129778
pl_n	BTN	1980	0.160098
pl_n	BTN	1981	0.151771
pl_n	BTN	1982	0.149186
pl_n	BTN	1983	0.14616
pl_n	BTN	1984	0.147068
pl_n	BTN	1985	0.147629
pl_n	BTN	1986	0.152909
pl_n	BTN	1987	0.166549
pl_n	BTN	1988	0.194175
pl_n	BTN	1989	0.176385
pl_n	BTN	1990	0.18263
pl_n	BTN	1991	0.159929
pl_n	BTN	1992	0.156345
pl_n	BTN	1993	0.140782
pl_n	BTN	1994	0.152901
pl_n	BTN	1995	0.159562
pl_n	BTN	1996	0.160198
pl_n	BTN	1997	0.162119
pl_n	BTN	1998	0.153899
pl_n	BTN	1999	0.149027
pl_n	BTN	2000	0.14688
pl_n	BTN	2001	0.151328
pl_n	BTN	2002	0.146951
pl_n	BTN	2003	0.162268
pl_n	BTN	2004	0.169915
pl_n	BTN	2005	0.184579
pl_n	BTN	2006	0.18324
pl_n	BTN	2007	0.201354
pl_n	BTN	2008	0.203517
pl_n	BTN	2009	0.188465
pl_n	BTN	2010	0.219447
pl_n	BTN	2011	0.248946
pl_n	BTN	2012	0.241068
pl_n	BTN	2013	0.253307
pl_n	BTN	2014	0.24176
pl_n	BTN	2015	0.224236
pl_n	BTN	2016	0.219354
pl_n	BTN	2017	0.22491
pl_n	BTN	2018	0.219327
pl_n	BTN	2019	0.219302
pl_n	BWA	1960	0.0530339
pl_n	BWA	1961	0.053526
pl_n	BWA	1962	0.0528578
pl_n	BWA	1963	0.0541041
pl_n	BWA	1964	0.0560263
pl_n	BWA	1965	0.201085
pl_n	BWA	1966	0.0940925
pl_n	BWA	1967	0.0914713
pl_n	BWA	1968	0.0792249
pl_n	BWA	1969	0.191138
pl_n	BWA	1970	0.107243
pl_n	BWA	1971	0.109777
pl_n	BWA	1972	0.111444
pl_n	BWA	1973	0.13491
pl_n	BWA	1974	0.172462
pl_n	BWA	1975	0.185828
pl_n	BWA	1976	0.183338
pl_n	BWA	1977	0.224934
pl_n	BWA	1978	0.259023
pl_n	BWA	1979	0.294201
pl_n	BWA	1980	0.35605
pl_n	BWA	1981	0.379223
pl_n	BWA	1982	0.336877
pl_n	BWA	1983	0.353195
pl_n	BWA	1984	0.331247
pl_n	BWA	1985	0.227277
pl_n	BWA	1986	0.239541
pl_n	BWA	1987	0.309209
pl_n	BWA	1988	0.323828
pl_n	BWA	1989	0.357374
pl_n	BWA	1990	0.408139
pl_n	BWA	1991	0.407058
pl_n	BWA	1992	0.408764
pl_n	BWA	1993	0.368234
pl_n	BWA	1994	0.356087
pl_n	BWA	1995	0.376879
pl_n	BWA	1996	0.322094
pl_n	BWA	1997	0.315296
pl_n	BWA	1998	0.287231
pl_n	BWA	1999	0.27198
pl_n	BWA	2000	0.258871
pl_n	BWA	2001	0.23384
pl_n	BWA	2002	0.228539
pl_n	BWA	2003	0.299379
pl_n	BWA	2004	0.31623
pl_n	BWA	2005	0.306887
pl_n	BWA	2006	0.291275
pl_n	BWA	2007	0.286792
pl_n	BWA	2008	0.275639
pl_n	BWA	2009	0.24504
pl_n	BWA	2010	0.250575
pl_n	BWA	2011	0.251521
pl_n	BWA	2012	0.258408
pl_n	BWA	2013	0.262577
pl_n	BWA	2014	0.269969
pl_n	BWA	2015	0.263912
pl_n	BWA	2016	0.273171
pl_n	BWA	2017	0.322853
pl_n	BWA	2018	0.335516
pl_n	BWA	2019	0.32476
pl_n	CAF	1960	0.0647347
pl_n	CAF	1961	0.0662946
pl_n	CAF	1962	0.0694875
pl_n	CAF	1963	0.0699592
pl_n	CAF	1964	0.0728814
pl_n	CAF	1965	0.0757344
pl_n	CAF	1966	0.0773162
pl_n	CAF	1967	0.0980079
pl_n	CAF	1968	0.0784751
pl_n	CAF	1969	0.0759486
pl_n	CAF	1970	0.0766853
pl_n	CAF	1971	0.0842865
pl_n	CAF	1972	0.0983186
pl_n	CAF	1973	0.111159
pl_n	CAF	1974	0.118734
pl_n	CAF	1975	0.156728
pl_n	CAF	1976	0.178783
pl_n	CAF	1977	0.185946
pl_n	CAF	1978	0.220854
pl_n	CAF	1979	0.259264
pl_n	CAF	1980	0.308011
pl_n	CAF	1981	0.246548
pl_n	CAF	1982	0.300186
pl_n	CAF	1983	0.251714
pl_n	CAF	1984	0.293196
pl_n	CAF	1985	0.237434
pl_n	CAF	1986	0.328242
pl_n	CAF	1987	0.378655
pl_n	CAF	1988	0.381502
pl_n	CAF	1989	0.355863
pl_n	CAF	1990	0.41488
pl_n	CAF	1991	0.401101
pl_n	CAF	1992	0.427131
pl_n	CAF	1993	0.398684
pl_n	CAF	1994	0.251381
pl_n	CAF	1995	0.305446
pl_n	CAF	1996	0.407068
pl_n	CAF	1997	0.356936
pl_n	CAF	1998	0.350878
pl_n	CAF	1999	0.341705
pl_n	CAF	2000	0.30584
pl_n	CAF	2001	0.307454
pl_n	CAF	2002	0.326412
pl_n	CAF	2003	0.401236
pl_n	CAF	2004	0.433396
pl_n	CAF	2005	0.447579
pl_n	CAF	2006	0.477417
pl_n	CAF	2007	0.509966
pl_n	CAF	2008	0.527183
pl_n	CAF	2009	0.441064
pl_n	CAF	2010	0.41346
pl_n	CAF	2011	0.39753
pl_n	CAF	2012	0.377033
pl_n	CAF	2013	0.396251
pl_n	CAF	2014	0.421065
pl_n	CAF	2015	0.346032
pl_n	CAF	2016	0.350861
pl_n	CAF	2017	0.359395
pl_n	CAF	2018	0.384048
pl_n	CAF	2019	0.380136
pl_n	CAN	1950	0.0861238
pl_n	CAN	1951	0.103061
pl_n	CAN	1952	0.115672
pl_n	CAN	1953	0.112972
pl_n	CAN	1954	0.11447
pl_n	CAN	1955	0.114406
pl_n	CAN	1956	0.120653
pl_n	CAN	1957	0.125341
pl_n	CAN	1958	0.122574
pl_n	CAN	1959	0.126207
pl_n	CAN	1960	0.125079
pl_n	CAN	1961	0.115611
pl_n	CAN	1962	0.112239
pl_n	CAN	1963	0.114675
pl_n	CAN	1964	0.119976
pl_n	CAN	1965	0.126316
pl_n	CAN	1966	0.134257
pl_n	CAN	1967	0.139299
pl_n	CAN	1968	0.14139
pl_n	CAN	1969	0.147808
pl_n	CAN	1970	0.159465
pl_n	CAN	1971	0.176449
pl_n	CAN	1972	0.192686
pl_n	CAN	1973	0.216368
pl_n	CAN	1974	0.262446
pl_n	CAN	1975	0.278483
pl_n	CAN	1976	0.307342
pl_n	CAN	1977	0.300194
pl_n	CAN	1978	0.300961
pl_n	CAN	1979	0.319645
pl_n	CAN	1980	0.350714
pl_n	CAN	1981	0.36548
pl_n	CAN	1982	0.367522
pl_n	CAN	1983	0.36591
pl_n	CAN	1984	0.35055
pl_n	CAN	1985	0.335224
pl_n	CAN	1986	0.339302
pl_n	CAN	1987	0.370901
pl_n	CAN	1988	0.413787
pl_n	CAN	1989	0.442047
pl_n	CAN	1990	0.450121
pl_n	CAN	1991	0.449955
pl_n	CAN	1992	0.426101
pl_n	CAN	1993	0.404045
pl_n	CAN	1994	0.391855
pl_n	CAN	1995	0.394098
pl_n	CAN	1996	0.403572
pl_n	CAN	1997	0.418126
pl_n	CAN	1998	0.408817
pl_n	CAN	1999	0.425614
pl_n	CAN	2000	0.463148
pl_n	CAN	2001	0.481656
pl_n	CAN	2002	0.518711
pl_n	CAN	2003	0.595386
pl_n	CAN	2004	0.66949
pl_n	CAN	2005	0.745945
pl_n	CAN	2006	0.830616
pl_n	CAN	2007	0.923818
pl_n	CAN	2008	0.965512
pl_n	CAN	2009	0.873059
pl_n	CAN	2010	0.947232
pl_n	CAN	2011	0.976292
pl_n	CAN	2012	0.958909
pl_n	CAN	2013	0.919074
pl_n	CAN	2014	0.860155
pl_n	CAN	2015	0.740722
pl_n	CAN	2016	0.730589
pl_n	CAN	2017	0.794224
pl_n	CAN	2018	0.815103
pl_n	CAN	2019	0.814151
pl_n	CHE	1950	0.0449022
pl_n	CHE	1951	0.0491248
pl_n	CHE	1952	0.0499069
pl_n	CHE	1953	0.0479986
pl_n	CHE	1954	0.0476513
pl_n	CHE	1955	0.0499318
pl_n	CHE	1956	0.0508018
pl_n	CHE	1957	0.0518297
pl_n	CHE	1958	0.0517318
pl_n	CHE	1959	0.0524004
pl_n	CHE	1960	0.0554734
pl_n	CHE	1961	0.0599308
pl_n	CHE	1962	0.0638739
pl_n	CHE	1963	0.0693245
pl_n	CHE	1964	0.0730169
pl_n	CHE	1965	0.0754599
pl_n	CHE	1966	0.0787115
pl_n	CHE	1967	0.0804906
pl_n	CHE	1968	0.0819396
pl_n	CHE	1969	0.0855738
pl_n	CHE	1970	0.104272
pl_n	CHE	1971	0.124079
pl_n	CHE	1972	0.149285
pl_n	CHE	1973	0.197162
pl_n	CHE	1974	0.224939
pl_n	CHE	1975	0.25674
pl_n	CHE	1976	0.258604
pl_n	CHE	1977	0.278042
pl_n	CHE	1978	0.392606
pl_n	CHE	1979	0.443908
pl_n	CHE	1980	0.444889
pl_n	CHE	1981	0.350372
pl_n	CHE	1982	0.383651
pl_n	CHE	1983	0.39725
pl_n	CHE	1984	0.31479
pl_n	CHE	1985	0.317686
pl_n	CHE	1986	0.486582
pl_n	CHE	1987	0.588802
pl_n	CHE	1988	0.606175
pl_n	CHE	1989	0.55702
pl_n	CHE	1990	0.710911
pl_n	CHE	1991	0.69949
pl_n	CHE	1992	0.709388
pl_n	CHE	1993	0.671433
pl_n	CHE	1994	0.717023
pl_n	CHE	1995	0.885291
pl_n	CHE	1996	0.829416
pl_n	CHE	1997	0.714014
pl_n	CHE	1998	0.737739
pl_n	CHE	1999	0.744033
pl_n	CHE	2000	0.705148
pl_n	CHE	2001	0.794986
pl_n	CHE	2002	0.897194
pl_n	CHE	2003	1.05543
pl_n	CHE	2004	1.14517
pl_n	CHE	2005	1.13513
pl_n	CHE	2006	1.00063
pl_n	CHE	2007	0.954781
pl_n	CHE	2008	1.07918
pl_n	CHE	2009	1.06819
pl_n	CHE	2010	1.08248
pl_n	CHE	2011	1.20868
pl_n	CHE	2012	1.03269
pl_n	CHE	2013	1.03692
pl_n	CHE	2014	1.03766
pl_n	CHE	2015	0.970347
pl_n	CHE	2016	0.940075
pl_n	CHE	2017	0.929555
pl_n	CHE	2018	0.924355
pl_n	CHE	2019	0.917412
pl_n	CHL	1951	0.2099
pl_n	CHL	1952	0.215165
pl_n	CHL	1953	0.281173
pl_n	CHL	1954	0.263639
pl_n	CHL	1955	0.263544
pl_n	CHL	1956	0.239488
pl_n	CHL	1957	0.219878
pl_n	CHL	1958	0.213033
pl_n	CHL	1959	0.229181
pl_n	CHL	1960	0.216873
pl_n	CHL	1961	0.189968
pl_n	CHL	1962	0.205336
pl_n	CHL	1963	0.113523
pl_n	CHL	1964	0.130218
pl_n	CHL	1965	0.145644
pl_n	CHL	1966	0.137136
pl_n	CHL	1967	0.139001
pl_n	CHL	1968	0.125333
pl_n	CHL	1969	0.128204
pl_n	CHL	1970	0.130503
pl_n	CHL	1971	0.145239
pl_n	CHL	1972	0.180661
pl_n	CHL	1973	0.263635
pl_n	CHL	1974	0.282695
pl_n	CHL	1975	0.17104
pl_n	CHL	1976	0.208022
pl_n	CHL	1977	0.255034
pl_n	CHL	1978	0.272956
pl_n	CHL	1979	0.323296
pl_n	CHL	1980	0.409984
pl_n	CHL	1981	0.468451
pl_n	CHL	1982	0.40485
pl_n	CHL	1983	0.343402
pl_n	CHL	1984	0.318631
pl_n	CHL	1985	0.266934
pl_n	CHL	1986	0.274362
pl_n	CHL	1987	0.289906
pl_n	CHL	1988	0.302478
pl_n	CHL	1989	0.303295
pl_n	CHL	1990	0.314614
pl_n	CHL	1991	0.318675
pl_n	CHL	1992	0.343167
pl_n	CHL	1993	0.327215
pl_n	CHL	1994	0.338413
pl_n	CHL	1995	0.358751
pl_n	CHL	1996	0.366098
pl_n	CHL	1997	0.372465
pl_n	CHL	1998	0.33668
pl_n	CHL	1999	0.324273
pl_n	CHL	2000	0.316784
pl_n	CHL	2001	0.297677
pl_n	CHL	2002	0.293617
pl_n	CHL	2003	0.310566
pl_n	CHL	2004	0.362427
pl_n	CHL	2005	0.391903
pl_n	CHL	2006	0.429726
pl_n	CHL	2007	0.457868
pl_n	CHL	2008	0.458065
pl_n	CHL	2009	0.445182
pl_n	CHL	2010	0.463569
pl_n	CHL	2011	0.486271
pl_n	CHL	2012	0.485262
pl_n	CHL	2013	0.452399
pl_n	CHL	2014	0.466886
pl_n	CHL	2015	0.391094
pl_n	CHL	2016	0.395079
pl_n	CHL	2017	0.403379
pl_n	CHL	2018	0.425259
pl_n	CHL	2019	0.405795
pl_n	CHN	1952	0.11967
pl_n	CHN	1953	0.120816
pl_n	CHN	1954	0.122813
pl_n	CHN	1955	0.124257
pl_n	CHN	1956	0.125703
pl_n	CHN	1957	0.125647
pl_n	CHN	1958	0.128251
pl_n	CHN	1959	0.133327
pl_n	CHN	1960	0.135617
pl_n	CHN	1961	0.138723
pl_n	CHN	1962	0.135827
pl_n	CHN	1963	0.138982
pl_n	CHN	1964	0.138805
pl_n	CHN	1965	0.140865
pl_n	CHN	1966	0.142686
pl_n	CHN	1967	0.141869
pl_n	CHN	1968	0.144362
pl_n	CHN	1969	0.14322
pl_n	CHN	1970	0.146064
pl_n	CHN	1971	0.148546
pl_n	CHN	1972	0.164889
pl_n	CHN	1973	0.186248
pl_n	CHN	1974	0.188947
pl_n	CHN	1975	0.201971
pl_n	CHN	1976	0.195612
pl_n	CHN	1977	0.208243
pl_n	CHN	1978	0.233754
pl_n	CHN	1979	0.264012
pl_n	CHN	1980	0.273885
pl_n	CHN	1981	0.250059
pl_n	CHN	1982	0.229599
pl_n	CHN	1983	0.225348
pl_n	CHN	1984	0.213962
pl_n	CHN	1985	0.186135
pl_n	CHN	1986	0.169712
pl_n	CHN	1987	0.169913
pl_n	CHN	1988	0.190382
pl_n	CHN	1989	0.205753
pl_n	CHN	1990	0.172107
pl_n	CHN	1991	0.168862
pl_n	CHN	1992	0.184219
pl_n	CHN	1993	0.214708
pl_n	CHN	1994	0.16135
pl_n	CHN	1995	0.179953
pl_n	CHN	1996	0.188558
pl_n	CHN	1997	0.192389
pl_n	CHN	1998	0.190506
pl_n	CHN	1999	0.190357
pl_n	CHN	2000	0.197761
pl_n	CHN	2001	0.199737
pl_n	CHN	2002	0.203144
pl_n	CHN	2003	0.21069
pl_n	CHN	2004	0.225943
pl_n	CHN	2005	0.233107
pl_n	CHN	2006	0.24148
pl_n	CHN	2007	0.26658
pl_n	CHN	2008	0.309174
pl_n	CHN	2009	0.299726
pl_n	CHN	2010	0.310537
pl_n	CHN	2011	0.34328
pl_n	CHN	2012	0.371336
pl_n	CHN	2013	0.396398
pl_n	CHN	2014	0.415502
pl_n	CHN	2015	0.415087
pl_n	CHN	2016	0.402086
pl_n	CHN	2017	0.432576
pl_n	CHN	2018	0.467748
pl_n	CHN	2019	0.45701
pl_n	CIV	1960	0.193623
pl_n	CIV	1961	0.195091
pl_n	CIV	1962	0.19975
pl_n	CIV	1963	0.203807
pl_n	CIV	1964	0.207642
pl_n	CIV	1965	0.212856
pl_n	CIV	1966	0.216038
pl_n	CIV	1967	0.218923
pl_n	CIV	1968	0.227664
pl_n	CIV	1969	0.220685
pl_n	CIV	1970	0.223003
pl_n	CIV	1971	0.234253
pl_n	CIV	1972	0.270052
pl_n	CIV	1973	0.323382
pl_n	CIV	1974	0.384824
pl_n	CIV	1975	0.47687
pl_n	CIV	1976	0.4692
pl_n	CIV	1977	0.512303
pl_n	CIV	1978	0.606672
pl_n	CIV	1979	0.711777
pl_n	CIV	1980	0.811595
pl_n	CIV	1981	0.677656
pl_n	CIV	1982	0.55866
pl_n	CIV	1983	0.471011
pl_n	CIV	1984	0.462522
pl_n	CIV	1985	0.383646
pl_n	CIV	1986	0.458152
pl_n	CIV	1987	0.513399
pl_n	CIV	1988	0.513225
pl_n	CIV	1989	0.425625
pl_n	CIV	1990	0.446325
pl_n	CIV	1991	0.393396
pl_n	CIV	1992	0.388209
pl_n	CIV	1993	0.333973
pl_n	CIV	1994	0.265023
pl_n	CIV	1995	0.318023
pl_n	CIV	1996	0.309605
pl_n	CIV	1997	0.313357
pl_n	CIV	1998	0.371221
pl_n	CIV	1999	0.405461
pl_n	CIV	2000	0.49211
pl_n	CIV	2001	0.474789
pl_n	CIV	2002	0.545037
pl_n	CIV	2003	0.72303
pl_n	CIV	2004	0.827707
pl_n	CIV	2005	0.89181
pl_n	CIV	2006	0.839688
pl_n	CIV	2007	0.820063
pl_n	CIV	2008	0.696395
pl_n	CIV	2009	0.497378
pl_n	CIV	2010	0.332714
pl_n	CIV	2011	0.321517
pl_n	CIV	2012	0.314244
pl_n	CIV	2013	0.346558
pl_n	CIV	2014	0.364098
pl_n	CIV	2015	0.318033
pl_n	CIV	2016	0.330087
pl_n	CIV	2017	0.34885
pl_n	CIV	2018	0.348072
pl_n	CIV	2019	0.336318
pl_n	CMR	1960	0.089899
pl_n	CMR	1961	0.105247
pl_n	CMR	1962	0.113688
pl_n	CMR	1963	0.0945626
pl_n	CMR	1964	0.0981746
pl_n	CMR	1965	0.106286
pl_n	CMR	1966	0.0974478
pl_n	CMR	1967	0.122687
pl_n	CMR	1968	0.13132
pl_n	CMR	1969	0.116204
pl_n	CMR	1970	0.136864
pl_n	CMR	1971	0.187999
pl_n	CMR	1972	0.254049
pl_n	CMR	1973	0.292185
pl_n	CMR	1974	0.293987
pl_n	CMR	1975	0.426058
pl_n	CMR	1976	0.448784
pl_n	CMR	1977	0.421686
pl_n	CMR	1978	0.386916
pl_n	CMR	1979	0.639665
pl_n	CMR	1980	0.732205
pl_n	CMR	1981	0.699071
pl_n	CMR	1982	0.717439
pl_n	CMR	1983	0.705318
pl_n	CMR	1984	0.648345
pl_n	CMR	1985	0.634518
pl_n	CMR	1986	0.763445
pl_n	CMR	1987	0.762239
pl_n	CMR	1988	0.6591
pl_n	CMR	1989	0.653771
pl_n	CMR	1990	0.742457
pl_n	CMR	1991	0.881238
pl_n	CMR	1992	0.706585
pl_n	CMR	1993	0.492899
pl_n	CMR	1994	0.285575
pl_n	CMR	1995	0.343897
pl_n	CMR	1996	0.34491
pl_n	CMR	1997	0.316002
pl_n	CMR	1998	0.3234
pl_n	CMR	1999	0.308117
pl_n	CMR	2000	0.293649
pl_n	CMR	2001	0.308385
pl_n	CMR	2002	0.327218
pl_n	CMR	2003	0.396565
pl_n	CMR	2004	0.414909
pl_n	CMR	2005	0.413768
pl_n	CMR	2006	0.412017
pl_n	CMR	2007	0.449207
pl_n	CMR	2008	0.479736
[truncated: 8,315 more rows]

## Sheet: Tabelle1
Summe von AggValue	Spaltenbeschriftungen
Zeilenbeschriftungen	MAR	ABW	AGO	AIA	ALB	ARE	ARG	ARM	ATG	AUS	AUT	AZE	BDI	BEL	BEN	BFA	BGD	BGR	BHR	BHS	BIH	BLR	BLZ	BMU	BOL	BRA	BRB	BRN	BTN	BWA	CAF	CAN	CHE	CHL	CHN	CIV	CMR	COD	COG	COL	COM	CPV	CRI	CYM	CYP	CZE	DEU	DJI	DMA
1950	0.155203						0.29242			0.0620259	0.0764494			0.0470104											0.0687177	0.080012						0.0861238	0.0449022					0.13868		0.0540458			0.0861356		0.0230857		0.0414772
1951	0.171007						0.26483			0.0701957	0.0884408			0.0616274											0.0758404	0.0947499						0.103061	0.0491248	0.2099				0.179252		0.0470027			0.0848328		0.0242911		0.0473672
1952	0.201332						0.268225			0.07323	0.0957355			0.0647904											0.0776529	0.0993804						0.115672	0.0499069	0.215165	0.11967			0.173979		0.0464629			0.0764398		0.0265505		0.0487507
1953	0.221278						0.267306			0.0703248	0.0936885			0.0600187											0.0734563	0.118297						0.112972	0.0479986	0.281173	0.120816			0.140331		0.0443525			0.0828799		0.024444		0.047524
1954	0.216799						0.27375			0.0718918	0.0883579			0.0593299											0.0761239	0.104388						0.11447	0.0476513	0.263639	0.122813			0.148937		0.0473478			0.0920427		0.0268693		0.047661
1955	0.211913						0.264864			0.0749693	0.087902			0.0610699											0.0792458	0.0824144						0.114406	0.0499318	0.263544	0.124257			0.148391		0.0498879			0.0795775		0.0313034		0.0483741
1956	0.2148						0.285601			0.0776802	0.0898652			0.0637758											0.0830591	0.0876411						0.120653	0.0508018	0.239488	0.125703			0.156676		0.056658			0.0797994		0.0356538		0.0500764
1957	0.232644						0.293576			0.0793616	0.0937766			0.067475											0.0852707	0.0901237						0.125341	0.0518297	0.219878	0.125647			0.1688		0.053125			0.0797917		0.036975		0.0522046
1958	0.227814						0.303247			0.0796282	0.0923951			0.0696607											0.0792788	0.0918998						0.122574	0.0517318	0.213033	0.128251			0.14162		0.0397937			0.0799101		0.0367344		0.0537502
1959	0.194251						0.282461			0.0815981	0.0966621			0.068733	0.0738002	0.206458	0.0642801								0.06955	0.0790989						0.126207	0.0524004	0.229181	0.133327			0.142089		0.0425443			0.0794238		0.036823		0.0543374
1960	0.201347						0.271675			0.0871264	0.0975422		0.0729394	0.0694961	0.0752503	0.217347	0.0684692								0.0713713	0.0523454	0.09251			0.0530339	0.0647347	0.125079	0.0554734	0.216873	0.135617	0.193623	0.089899	0.156654	0.293237	0.044124	0.0227527	0.129913	0.0811083		0.0330749		0.0557029
1961	0.201653						0.324749			0.0840352	0.103667		0.0875847	0.0713725	0.0758981	0.185793	0.0731145								0.0714737	0.0523284	0.096564			0.053526	0.0662946	0.115611	0.0599308	0.189968	0.138723	0.195091	0.105247	0.178575	0.297825	0.0462475	0.0230346	0.131101	0.0797682		0.035167		0.0619499
1962	0.201039						0.281171			0.0898173	0.105631		0.0841813	0.0735943	0.0784441	0.180885	0.0737342								0.0654905	0.0600585	0.088379			0.0528578	0.0694875	0.112239	0.0638739	0.205336	0.135827	0.19975	0.113688	0.178831	0.307342	0.0486208	0.0234528	0.145621	0.073117		0.0362914		0.0663256
1963	0.199724						0.283136			0.0934041	0.11042		0.0880238	0.0780952	0.0807373	0.200138	0.0834031								0.0748312	0.0754893	0.0991002			0.0541041	0.0699592	0.114675	0.0693245	0.113523	0.138982	0.203807	0.0945626	0.255304	0.307311	0.04746	0.0240177	0.144744	0.0749503		0.0376862		0.0685062
1964	0.199518						0.295434			0.0993537	0.109925		0.0929468	0.0825184	0.0797608	0.221875	0.0817952								0.0760819	0.0618635	0.100064			0.0560263	0.0728814	0.119976	0.0730169	0.130218	0.138805	0.207642	0.0981746	0.246959	0.32963	0.0515252	0.0251936	0.146046	0.0770381		0.0321291		0.071315
1965	0.199123						0.332332			0.102973	0.120662		0.054692	0.0861376	0.081872	0.141605	0.0770175								0.100067	0.0622362	0.0882285			0.201085	0.0757344	0.126316	0.0754599	0.145644	0.140865	0.212856	0.106286	0.226893	0.350333	0.0516307	0.0263083	0.148776	0.0772077		0.0392663		0.0745128
1966	0.199469						0.32758			0.11137	0.124869		0.0543163	0.0899113	0.0824584	0.132837	0.0634847								0.113084	0.0721706	0.110541			0.0940925	0.0773162	0.134257	0.0787115	0.137136	0.142686	0.216038	0.0974478	0.114785	0.343785	0.0507042	0.0269582	0.145261	0.0791577		0.0395169		0.0755428
1967	0.198556						0.346462			0.114429	0.125064		0.053719	0.0939627	0.0828964	0.148326	0.0750363								0.105865	0.0739866	0.107021			0.0914713	0.0980079	0.139299	0.0804906	0.139001	0.141869	0.218923	0.122687	0.224489	0.277171	0.0471113	0.0271773	0.150405	0.0823299		0.0421169		0.0748385
1968	0.287449						0.360532			0.121659	0.125808		0.0558983	0.096177	0.0848166	0.1482	0.0760354								0.101227	0.0770874	0.0964856			0.0792249	0.0784751	0.14139	0.0819396	0.125333	0.144362	0.227664	0.13132	0.201117	0.292582	0.048096	0.0272618	0.151052	0.0869875		0.0384068		0.0781732
1969	0.197024						0.38707			0.126872	0.127895		0.0588309	0.100936	0.0837429	0.148394	0.0823704								0.108944	0.071906	0.108951			0.191138	0.0759486	0.147808	0.0855738	0.128204	0.14322	0.220685	0.116204	0.195847	0.296927	0.0492334	0.0269429	0.156615	0.0926535		0.0420154		0.0846276
1970	0.24538	0.33463	0.0779308	0.0384046	0.364915	0.0141754	0.395508		0.169406	0.131315	0.137349		0.0599144	0.108973	0.0826153	0.14541	0.0795042	0.191089	0.158399	0.419078			0.120693	0.322748	0.116711	0.0740823	0.114932	0.0129767	0.108243	0.107243	0.0766853	0.159465	0.104272	0.130503	0.146064	0.223003	0.136864	0.207678	0.296339	0.0506293	0.0260456	0.159908	0.0991585	0.0546902	0.0462798		0.0995362	0.177485	0.351093
1971	0.267264	0.32447	0.077781	0.0463085	0.360632	0.017036	0.441091		0.190251	0.142201	0.151178		0.0439334	0.123178	0.0808012	0.159319	0.0683188	0.204323	0.170312	0.428852			0.138758	0.363638	0.10587	0.0760439	0.133046	0.0129978	0.1134	0.109777	0.0842865	0.176449	0.124079	0.145239	0.148546	0.234253	0.187999	0.223571	0.299579	0.0518407	0.0276085	0.170956	0.10659	0.0665821	0.0501734		0.115956	0.189757	0.340081
1972	0.319965	0.314348	0.077798	0.0489413	0.356102	0.0223258	0.405576		0.238321	0.160499	0.185185		0.144408	0.144354	0.0953924	0.190081	0.0979955	0.216065	0.194254	0.483309			0.173513	0.411448	0.127051	0.0858384	0.144001	0.0161625	0.118504	0.111444	0.0983186	0.192686	0.149285	0.180661	0.164889	0.270052	0.254049	0.163128	0.339072	0.0551271	0.031789	0.188803	0.11354	0.082074	0.0590626		0.141808	0.221247	0.331641
1973	0.393308	0.304904	0.088795	0.0531192	0.351834	0.03784	0.437833		0.302917	0.222503	0.230019		0.0947273	0.17889	0.115222	0.229915	0.0983933	0.230483	0.241924	0.517432			0.263384	0.468322	0.145356	0.100978	0.178292	0.0235911	0.131392	0.13491	0.111159	0.216368	0.197162	0.263635	0.186248	0.323382	0.292185	0.157205	0.490328	0.0618171	0.0395609	0.22968	0.134752	0.0940597	0.0999551		0.192468	0.264056	0.352428
1974	0.565047	0.294761	0.0975756	0.0585487	0.347738	0.0909964	0.511158		0.308312	0.269571	0.267496		0.0723773	0.209744	0.14228	0.266529	0.112252	0.254472	0.316344	0.749563			0.328435	0.556244	0.188644	0.122836	0.194105	0.0522828	0.147256	0.172462	0.118734	0.262446	0.224939	0.282695	0.188947	0.384824	0.293987	0.163795	0.457279	0.074915	0.043333	0.224383	0.151933	0.100035	0.11817		0.228928	0.345447	0.427029
1975	0.452762	0.285384	0.0760893	0.0618449	0.34354	0.108606	0.7386		0.328711	0.296071	0.302381		0.173712	0.255259	0.185288	0.20755	0.132848	0.280982	0.352019	0.850807			0.417575	0.594053	0.203782	0.14088	0.195483	0.0567104	0.142523	0.185828	0.156728	0.278483	0.25674	0.17104	0.201971	0.47687	0.426058	0.192309	0.562569	0.0795081	0.0630526	0.311674	0.166011	0.108853	0.114916		0.249495	0.343313	0.436215
1976	0.447047	0.27684	0.0754109	0.0584313	0.339818	0.125486	0.715359		0.315316	0.310844	0.312544		0.121941	0.277818	0.201466	0.212011	0.198873	0.300073	0.385269	0.88858			0.364056	0.627246	0.240777	0.152201	0.222795	0.057654	0.133144	0.183338	0.178783	0.307342	0.258604	0.208022	0.195612	0.4692	0.448784	0.202701	0.52997	0.0928791	0.062242	0.287317	0.180055	0.118594	0.109078		0.255387	0.381755	0.401189
1977	0.470787	0.268244	0.0823968	0.0652724	0.338748	0.127755	0.676056		0.318887	0.309347	0.360788		0.124894	0.320799	0.210904	0.222437	0.185197	0.323927	0.486436	0.8449			0.437686	0.688021	0.211837	0.175298	0.269774	0.0632699	0.138119	0.224934	0.185946	0.300194	0.278042	0.255034	0.208243	0.512303	0.421686	0.170016	0.574109	0.114496	0.0662272	0.284089	0.19527	0.129558	0.119226		0.285102	0.466926	0.439287
1978	0.648434	0.260082	0.0969061	0.0703751	0.332968	0.124232	0.736065		0.353712	0.341655	0.440052		0.151865	0.400576	0.2589	0.244473	0.202154	0.354353	0.525134	1.02804			0.511496	0.766535	0.245805	0.204196	0.238435	0.0665263	0.123506	0.259023	0.220854	0.300961	0.392606	0.272956	0.233754	0.606672	0.386916	0.179905	0.712968	0.143381	0.0830183	0.300283	0.218718	0.141211	0.151681		0.347522	0.574859	0.498185
1979	0.763056	0.251526	0.109169	0.0741567	0.265685	0.137868	0.767976		0.39385	0.367371	0.503952		0.198516	0.459486	0.292832	0.401397	0.201096	0.389075	0.546063	0.873177			0.540702	0.831741	0.256706	0.230395	0.295809	0.0782679	0.129778	0.294201	0.259264	0.319645	0.443908	0.323296	0.264012	0.711777	0.639665	0.112167	0.845911	0.175374	0.102778	0.310386	0.257479	0.153903	0.184787		0.40735	0.6737	0.590247
1980	0.813042	0.24329	0.141561	0.0816954	0.240337	0.154652	0.815223		0.44351	0.417403	0.563242		0.216398	0.419084	0.342811	0.394097	0.246308	0.430723	0.599677	0.735596			0.602479	0.948356	0.285594	0.223813	0.366214	0.0826558	0.160098	0.35605	0.308011	0.350714	0.444889	0.409984	0.273885	0.811595	0.732205	0.105155	0.970122	0.205061	0.113426	0.310707	0.314297	0.16745	0.219276		0.45366	0.760105	0.679505
1981	0.731337	0.234165	0.142064	0.0905874	0.222736	0.164107	0.882002		0.626508	0.472938	0.47753		0.193144	0.363821	0.305468	0.306884	0.251108	0.472989	0.633781	0.740244			0.636633	1.01964	0.314555	0.260439	0.410711	0.152344	0.151771	0.379223	0.246548	0.36548	0.350372	0.468451	0.250059	0.677656	0.699071	0.105991	0.845003	0.221284	0.098239	0.303809	0.21819	0.181364	0.210491		0.389276	0.80524	0.685879
1982	0.677145	0.225773	0.140828	0.105613	0.222725	0.168819	1.05755		0.953904	0.463087	0.446712		0.268267	0.320487	0.267532	0.289657	0.247134	0.502136	0.591362	0.690884			0.667468	1.09637	0.407963	0.283688	0.451188	0.260515	0.149186	0.336877	0.300186	0.367522	0.383651	0.40485	0.229599	0.55866	0.717439	0.118423	0.771383	0.229452	0.0934842	0.291709	0.248387	0.196497	0.201633		0.383748	0.85086	0.712649
1983	0.501437	0.218939	0.142559	0.122474	0.227227	0.16483	1.05579		0.578899	0.441249	0.406387		0.258311	0.30756	0.249267	0.302361	0.214131	0.524429	0.539902	0.767072			0.701774	1.13357	0.409074	0.206939	0.47883	0.17846	0.14616	0.353195	0.251714	0.36591	0.39725	0.343402	0.225348	0.471011	0.705318	0.0886417	0.711518	0.22386	0.0901556	0.269735	0.246315	0.242704	0.192784		0.387938	0.878318	0.763543
1984	0.368424	0.21167	0.141074	0.136697	0.228714	0.154585	1.05502		0.591996	0.458917	0.347881		0.191973	0.296331	0.229136	0.275443	0.213749	0.545482	0.547832	0.807871			0.710615	1.1774	0.415474	0.18949	0.505459	0.106561	0.147068	0.331247	0.293196	0.35055	0.31479	0.318631	0.213962	0.462522	0.648345	0.124916	0.67442	0.215927	0.101075	0.23528	0.254732	0.256618	0.185703		0.365345	0.903705	0.806304
1985	0.276332	0.204049	0.170673	0.151858	0.23064	0.153145	0.967411		0.669393	0.40586	0.326346		0.207235	0.306681	0.349973	0.23508	0.221192	0.563825	0.698828	0.730409			0.702448	1.25025	0.336699	0.178532	0.524579	0.168762	0.147629	0.227277	0.237434	0.335224	0.317686	0.266934	0.186135	0.383646	0.634518	0.136433	0.682274	0.211502	0.0892026	0.243244	0.251312	0.267635	0.193303		0.362185	0.961843	0.86845
1986	0.311896	0.197039	0.19026	0.174309	0.214789	0.15162	0.954153		0.782666	0.425973	0.443945		0.199186	0.417479	0.367047	0.308249	0.154337	0.57875	0.771113	0.807673			0.702219	1.28432	0.29028	0.191715	0.562152	0.173327	0.152909	0.239541	0.328242	0.339302	0.486582	0.274362	0.169712	0.458152	0.763445	0.156568	0.888977	0.197993	0.0793822	0.291757	0.247513	0.272915	0.23367		0.502618	1.07458	0.920033
1987	0.294448	0.204081	0.194799	0.196777	0.214905	0.15615	0.878769		0.85463	0.469528	0.535505		0.207565	0.517742	0.353074	0.357299	0.222201	0.596925	0.685792	0.648804			0.714991	1.35561	0.303026	0.241255	0.611283	0.18279	0.166549	0.309209	0.378655	0.370901	0.588802	0.289906	0.169913	0.513399	0.762239	0.0989674	1.10474	0.201241	0.0999351	0.340762	0.247407	0.288663	0.259289		0.611438	1.13262	0.981607
1988	0.287135	0.210461	0.21491	0.212949	0.22526	0.160128	0.898316		0.964026	0.559858	0.539738		0.344407	0.526302	0.433479	0.363482	0.240912	0.601139	0.571168	0.71871			0.727058	1.44111	0.352336	0.279282	0.699006	0.200271	0.194175	0.323828	0.381502	0.413787	0.606175	0.302478	0.190382	0.513225	0.6591	0.101837	1.19619	0.219477	0.104878	0.35758	0.2467	0.311617	0.285485		0.625842	1.21869	1.01823
1989	0.257252	0.217981	0.236458	0.24393	0.244507	0.162628	0.501512		1.0131	0.601869	0.50604		0.275677	0.50737	0.322444	0.34494	0.197306	0.582226	0.568015	0.8247			0.753895	1.52761	0.339928	0.393088	0.813423	0.216055	0.176385	0.357374	0.355863	0.442047	0.55702	0.303295	0.205753	0.425625	0.653771	0.10161	1.22465	0.216614	0.103114	0.340829	0.266392	0.325912	0.288307		0.586189	1.31027	1.08052
1990	0.261351	0.230669	0.235817	0.215791	0.197977	0.163883	0.847552	0.132183	1.02876	0.596202	0.586932	0.182033	0.600701	0.601651	0.321733	0.407957	0.28339	0.67295	0.565676	0.885073	1.43844	0.0856945	0.762103	1.60817	0.322715	0.400633	0.953167	0.241859	0.18263	0.408139	0.41488	0.450121	0.710911	0.314614	0.172107	0.446325	0.742457	0.130576	0.604319	0.209311	0.129925	0.396727	0.277631	0.362581	0.330051	0.108632	0.700966	1.32028	1.07975
1991	0.223315	0.246047	0.141065	0.271714	0.205249	0.165795	0.766411	0.137121	1.06213	0.569351	0.57058	0.189357	0.668778	0.572516	0.27192	0.406876	0.221696	0.220844	0.568177	0.96087	1.25731	0.0850921	0.788717	1.6978	0.341846	0.262701	0.861577	0.26032	0.159929	0.407058	0.401101	0.449955	0.69949	0.318675	0.168862	0.393396	0.881238	0.0800958	0.619486	0.20372	0.130733	0.393137	0.270204	0.37345	0.345668	0.102373	0.693111	0.850659	1.16159
1992	0.202944	0.252883	0.031012	0.229316	0.195577	0.168566	0.658721	0.139893	1.09542	0.525587	0.612353	0.193695	0.631624	0.60879	0.262984	0.443277	0.236663	0.241288	0.579031	1.04113	1.04038	0.110244	0.822899	1.76727	0.357263	0.264473	1.02797	0.281825	0.156345	0.408764	0.427131	0.426101	0.709388	0.343167	0.184219	0.388209	0.706585	0.123645	0.715251	0.209488	0.201367	0.414668	0.288968	0.383573	0.375595	0.12548	0.750712	0.825119	1.22547
1993	0.17663	0.264468	0.197088	0.232628	0.172273	0.233911	0.557954	0.14279	1.12142	0.476027	0.577999	0.197461	0.3485	0.567121	0.222579	0.420112	0.221724	0.294053	0.60838	1.10991	0.814379	0.151343	0.809935	1.8105	0.352462	0.281783	1.00596	0.290281	0.140782	0.368234	0.398684	0.404045	0.671433	0.327215	0.214708	0.333973	0.492899	0.0499213	0.440202	0.232001	0.233491	0.38592	0.298879	0.392967	0.359569	0.160001	0.715097	0.729428	1.27343
1994	0.168021	0.292392	0.237922	0.240274	0.155853	0.234195	0.470616	0.14567	1.1637	0.500198	0.594825	0.20114	0.382986	0.597721	0.257403	0.277787	0.212275	0.277886	0.616627	1.12602	0.568141	0.155178	0.826239	1.88452	0.343322	0.366869	0.904914	0.31143	0.152901	0.356087	0.251381	0.391855	0.717023	0.338413	0.16135	0.265023	0.285575	0.161366	0.409656	0.283192	0.193882	0.382578	0.305177	0.405309	0.380162	0.196038	0.72696	0.795549	1.38434
1995	0.160325	0.26653	0.0833735	0.248618	0.20881	0.237546	0.434808	0.148776	1.19259	0.504489	0.686347	0.205069	0.415245	0.67628	0.297845	0.298312	0.220141	0.440652	0.636354	1.11609	0.353388	0.15066	0.848795	1.9839	0.348058	0.442281	1.08707	0.426306	0.159562	0.376879	0.305446	0.394098	0.885291	0.358751	0.179953	0.318023	0.343897	0.216476	0.672859	0.315985	0.160174	0.453459	0.319271	0.418892	0.424618	0.236629	0.83383	0.727487	1.39049
1996	0.155764	0.275018	0.0910456	0.256231	0.235244	0.239645	0.403288	0.185518	1.22731	0.532834	0.667923	0.208706	0.346434	0.659424	0.283909	0.299357	0.213521	0.236274	0.650543	1.20874	0.25912	0.140522	0.881215	1.97778	0.348852	0.431998	1.14945	0.279035	0.160198	0.322094	0.407068	0.403572	0.829416	0.366098	0.188558	0.309605	0.34491	0.692913	0.749971	0.325912	0.155906	0.370348	0.314517	0.433038	0.431782	0.254943	0.796223	0.798332	1.44327
1997	0.147629	0.282296	0.101053	0.258818	0.250761	0.241004	0.397533	0.170577	1.25083	0.523188	0.609769	0.246035	0.206587	0.599895	0.2625	0.264849	0.205966	0.165715	0.628452	1.16533	0.263947	0.138751	0.886163	2.04205	0.352527	0.422019	0.959824	0.393001	0.162119	0.315296	0.356936	0.418126	0.714014	0.372465	0.192389	0.313357	0.316002	0.0743038	0.712646	0.338381	0.142641	0.406682	0.309509	0.445752	0.408527	0.253769	0.715904	0.695655	1.46339
1998	0.168428	0.273033	0.084953	0.264409	0.28138	0.240673	0.401623	0.180538	1.26067	0.46111	0.630623	0.21606	0.160981	0.617857	0.27143	0.276878	0.204201	0.238702	0.563301	1.06299	0.263417	0.153104	0.889759	2.02595	0.356949	0.400142	1.07868	0.334784	0.153899	0.287231	0.350878	0.408817	0.737739	0.33668	0.190506	0.371221	0.3234	0.0654455	0.731678	0.308997	0.144899	0.348031	0.30781	0.449131	0.41847	0.280579	0.727005	0.698959	1.51118
1999	0.191416	0.287965	0.0784232	0.270991	0.298238	0.239807	0.410636	0.185764	1.23157	0.490971	0.635431	0.184165	0.0838524	0.610518	0.264387	0.262886	0.207134	0.188027	0.519621	1.16356	0.26346	0.14697	0.891757	1.98201	0.332952	0.280738	1.15854	0.3002	0.149027	0.27198	0.341705	0.425614	0.744033	0.324273	0.190357	0.405461	0.308117	0.0796157	0.718746	0.281451	0.141955	0.354059	0.310274	0.47363	0.412102	0.283531	0.71722	1.00173	1.53099
2000	0.213664	0.32234	0.0883399	0.273994	0.319856	0.240371	0.413663	0.196933	1.18123	0.485288	0.58222	0.170652	0.162507	0.556212	0.234395	0.225207	0.20991	0.168497	0.419489	1.02385	0.303829	0.133774	0.869054	1.87634	0.32674	0.316343	1.13587	0.335297	0.14688	0.258871	0.30584	0.463148	0.705148	0.316784	0.197761	0.49211	0.293649	0.400792	0.59206	0.257841	0.105252	0.313632	0.312391	0.493399	0.37596	0.271949	0.646678	0.882683	1.45901
2001	0.2377	0.299762	0.107726	0.278154	0.337673	0.24174	0.420638	0.21107	1.13232	0.469616	0.604572	0.154365	0.125332	0.558076	0.212923	0.206504	0.203693	0.174391	0.402123	1.00984	0.302092	0.165317	0.824369	1.69396	0.292894	0.274482	1.0155	0.323107	0.151328	0.23384	0.307454	0.481656	0.794986	0.297677	0.199737	0.474789	0.308385	0.171737	0.635281	0.248937	0.118994	0.312275	0.318991	0.505023	0.375196	0.289246	0.649618	0.539617	1.43201
2002	0.271881	0.304226	0.289396	0.294668	0.34688	0.242425	0.204199	0.224322	1.05964	0.531086	0.676644	0.195758	0.147276	0.621456	0.220266	0.219794	0.198467	0.18731	0.352065	0.884514	0.215516	0.196705	0.811483	1.6731	0.252087	0.253349	0.835312	0.339574	0.146951	0.228539	0.326412	0.518711	0.897194	0.293617	0.203144	0.545037	0.327218	0.134612	0.644432	0.240838	0.140634	0.321534	0.30852	0.518349	0.426019	0.345605	0.706028	0.452653	1.37167
2003	0.343127	0.303122	0.290291	0.303346	0.40489	0.249262	0.246421	0.239138	0.964946	0.661914	0.824744	0.267352	0.084855	0.750965	0.265607	0.276069	0.204616	0.275308	0.291588	0.80738	0.261541	0.235737	0.81783	1.56985	0.218157	0.267206	1.11499	0.339926	0.162268	0.299379	0.401236	0.595386	1.05543	0.310566	0.21069	0.72303	0.396565	0.168395	0.74873	0.225317	0.188373	0.36463	0.296784	0.532209	0.570275	0.395163	0.834478	0.374718	1.25697
2004	0.404682	0.30769	0.331176	0.315939	0.486948	0.256577	0.281814	0.278553	0.881265	0.78573	0.919782	0.334649	0.078469	0.830726	0.286846	0.301894	0.206087	0.313044	0.28371	0.808735	0.407839	0.293067	0.832566	1.46579	0.205336	0.303065	1.10296	0.353252	0.169915	0.31623	0.433396	0.66949	1.14517	0.362427	0.225943	0.827707	0.414909	0.265715	0.790384	0.26389	0.199157	0.413622	0.310872	0.562017	0.621943	0.452842	0.920009	0.45434	1.20486
2005	0.422975	0.317242	0.414463	0.316062	0.497847	0.264332	0.329192	0.383242	0.804162	0.839255	0.940908	0.342992	0.246134	0.828995	0.302935	0.301526	0.190838	0.32364	0.274002	0.77946	0.401005	0.354386	0.809057	1.37728	0.219193	0.380328	1.06248	0.355067	0.184579	0.306887	0.447579	0.745945	1.13513	0.391903	0.233107	0.89181	0.413768	0.252606	0.738219	0.30621	0.282829	0.424711	0.313364	0.605743	0.626676	0.501305	0.919736	0.310886	1.06324
2006	0.415884	0.321605	0.424128	0.325792	0.419015	0.267825	0.353538	0.466549	0.690952	0.867531	0.908268	0.338732	0.266417	0.79901	0.306258	0.299478	0.219106	0.337271	0.293323	0.748325	0.336922	0.387586	0.814218	1.25962	0.254711	0.423151	0.937206	0.381266	0.18324	0.291275	0.477417	0.830616	1.00063	0.429726	0.24148	0.839688	0.412017	0.323674	0.908782	0.310914	0.291332	0.434772	0.326259	0.612874	0.609757	0.506258	0.888645	0.247028	0.949321
2007	0.420248	0.328988	0.485955	0.359693	0.442923	0.288506	0.376425	0.627572	0.603809	1.01636	0.98966	0.417494	0.255939	0.847083	0.336949	0.339174	0.220566	0.39466	0.28991	0.655037	0.378592	0.452754	0.786539	1.1144	0.270979	0.451542	0.982236	0.390037	0.201354	0.286792	0.509966	0.923818	0.954781	0.457868	0.26658	0.820063	0.449207	0.326014	0.875805	0.36015	0.34322	0.446198	0.35416	0.661225	0.648593	0.55166	0.960716	0.240302	0.819496
2008	0.396029	0.343032	0.523438	0.363448	0.443039	0.330756	0.409533	0.809751	0.522039	1.06963	1.03211	0.511743	0.256906	0.872503	0.360882	0.367576	0.215079	0.433519	0.305536	0.604923	0.413421	0.545373	0.755725	0.972749	0.299964	0.460114	0.892091	0.411862	0.203517	0.275639	0.527183	0.965512	1.07918	0.458065	0.309174	0.696395	0.479736	0.30804	0.72813	0.405245	0.385246	0.479517	0.390372	0.670938	0.703653	0.633926	1.00616	0.243653	0.689509
2009	0.305163	0.339204	0.464362	0.355431	0.375507	0.313455	0.371893	0.774816	0.441542	1.01627	0.920434	0.560437	0.275313	0.767092	0.341069	0.324019	0.207986	0.398153	0.291558	0.563593	0.371127	0.472805	0.669207	0.836039	0.282782	0.393252	0.790424	0.381685	0.188465	0.24504	0.441064	0.873059	1.06819	0.445182	0.299726	0.497378	0.435003	0.261675	0.582172	0.385382	0.370173	0.440587	0.386067	0.679794	0.635263	0.559279	0.934984	0.293935	0.612361
2010	0.253618	0.346565	0.334951	0.354686	0.329034	0.338136	0.38279	0.81344	0.388303	1.2457	0.856327	0.652707	0.288322	0.679337	0.323355	0.307312	0.202728	0.316227	0.300487	0.568356	0.326091	0.512917	0.652457	0.743878	0.281587	0.418567	0.547199	0.398451	0.219447	0.250575	0.41346	0.947232	1.08248	0.463569	0.310537	0.332714	0.401545	0.601791	0.555169	0.43233	0.415893	0.413572	0.422644	0.683357	0.558333	0.579011	0.878384	0.411946	0.521479
2011	0.235703	0.359614	0.34144	0.373507	0.339197	0.354034	0.422549	0.799295	0.372225	1.42717	0.884598	0.687582	0.3037	0.731156	0.362714	0.331255	0.200823	0.362879	0.312372	0.517129	0.325651	0.491472	0.652115	0.722214	0.316693	0.442081	0.514217	0.421387	0.248946	0.251521	0.39753	0.976292	1.20868	0.486271	0.34328	0.321517	0.409752	0.427121	0.495159	0.461193	0.382243	0.4542	0.455913	0.685276	0.582668	0.574307	0.920216	0.298961	0.495893
2012	0.230019	0.404314	0.362675	0.426836	0.350019	0.397008	0.467972	0.681198	0.412482	1.34508	0.755293	0.686442	0.3385	0.6327	0.358572	0.348683	0.194153	0.331319	0.317364	0.515988	0.307282	0.563515	0.636151	0.781196	0.337822	0.430712	0.53022	0.411531	0.241068	0.258408	0.377033	0.958909	1.03269	0.485262	0.371336	0.314244	0.391045	0.45621	0.481552	0.51499	0.361265	0.452936	0.484041	0.702236	0.499695	0.509091	0.839017	0.326702	0.499969
2013	0.247024	0.440788	0.389506	0.481345	0.355994	0.4038	0.511748	0.648425	0.439439	1.1967	0.780684	0.737983	0.340786	0.658871	0.376925	0.371144	0.219123	0.35905	0.31734	0.53624	0.30281	0.632035	0.594777	0.842542	0.350578	0.427106	0.540645	0.397192	0.253307	0.262577	0.396251	0.919074	1.03692	0.452399	0.396398	0.346558	0.41292	0.458476	0.536385	0.532548	0.389513	0.494247	0.507455	0.719351	0.501034	0.507354	0.857427	0.366669	0.535569
2014	0.270703	0.502277	0.397242	0.560072	0.297553	0.301823	0.497917	0.473621	0.486984	1.07327	0.771558	0.584554	0.365516	0.67913	0.379663	0.387898	0.224778	0.34978	0.32735	0.553848	0.302679	0.508745	0.575241	0.914681	0.36267	0.431413	0.557197	0.379596	0.24176	0.269969	0.421065	0.860155	1.03766	0.466886	0.415502	0.364098	0.420994	0.443981	0.555429	0.530895	0.398699	0.500927	0.509504	0.741102	0.522162	0.478344	0.846531	0.407513	0.542779
2015	0.231646	0.585249	0.349132	0.62689	0.258729	0.277929	0.5418	0.522624	0.538127	0.961647	0.633952	0.525589	0.369763	0.563828	0.322939	0.324342	0.236524	0.305541	0.319827	0.573605	0.266602	0.418928	0.508502	0.981643	0.348534	0.344669	0.567681	0.365089	0.224236	0.263912	0.346032	0.740722	0.970347	0.391094	0.415087	0.318033	0.359498	0.407587	0.474549	0.423965	0.34122	0.423789	0.527482	0.764202	0.418271	0.416298	0.72215	0.428567	0.578692
2016	0.235372	0.658334	0.329036	0.685962	0.256738	0.272703	0.467809	0.466764	0.593177	0.963806	0.623547	0.386434	0.362913	0.556531	0.324971	0.323061	0.251703	0.310624	0.315366	0.589668	0.279236	0.359741	0.477789	1.05228	0.341849	0.355176	0.568651	0.347383	0.219354	0.273171	0.350861	0.730589	0.940075	0.395079	0.402086	0.330087	0.362597	0.372036	0.504524	0.415342	0.34418	0.416939	0.526113	0.783358	0.404192	0.40804	0.72984	0.469187	0.61263
2017	0.248632	0.740536	0.38302	0.770824	0.278675	0.274532	0.512517	0.442477	0.650735	1.09893	0.660437	0.372452	0.382643	0.595322	0.346898	0.331827	0.260946	0.321309	0.302917	0.600504	0.29077	0.38658	0.462138	1.12912	0.33377	0.397886	0.60175	0.318957	0.22491	0.322853	0.359395	0.794224	0.929555	0.403379	0.432576	0.34885	0.370305	0.384352	0.509905	0.459509	0.356008	0.442645	0.543719	0.817054	0.421436	0.444446	0.771367	0.500796	0.58921
2018	0.261795	0.793389	0.250046	0.800772	0.305165	0.264987	0.412905	0.434944	0.668683	1.10412	0.710264	0.382007	0.366156	0.645638	0.371673	0.294628	0.266215	0.351915	0.307936	0.613554	0.312913	0.410294	0.480197	1.15838	0.332782	0.368352	0.594414	0.329924	0.219327	0.335516	0.384048	0.815103	0.924355	0.425259	0.467748	0.348072	0.379801	0.442558	0.569514	0.48264	0.35265	0.496546	0.556652	0.838904	0.462166	0.496552	0.842312	0.525055	0.612467
2019	0.251078	0.813961	0.209101	0.902942	0.299344	0.268754	0.377946	0.432372	0.672266	1.04348	0.689652	0.354582	0.354544	0.626652	0.330676	0.259644	0.277325	0.34414	0.316471	0.626361	0.300648	0.403224	0.484484	1.17676	0.332457	0.357599	0.722721	0.323313	0.219302	0.32476	0.380136	0.814151	0.917412	0.405795	0.45701	0.336318	0.368429	0.619564	0.549151	0.453163	0.344543	0.478819	0.562825	0.777351	0.459789	0.493389	0.830244	0.565238	0.628595
Gesamtergebnis	20.9762	16.5862	10.6222	13.7514	15.0202	10.411	34.2498	11.4959	35.537	33.4226	31.4775	10.6882	13.4693	27.8407	14.8488	16.8878	11.0411	17.4784	21.8605	38.9763	12.9285	9.24251	32.1374	59.986	16.3726	16.4485	34.1983	12.5851	8.50534	15.0011	16.9795	28.4297	35.4317	20.8208	14.6964	25.297	24.0916	15.3305	36.1237	14.4281	9.51804	19.3341	17.2063	21.053	18.3113	11.416	32.2764	30.3184	42.6238
[truncated: 132 more columns]

## Sheet: Check
	MAR	ABW	AGO	AIA	ALB	ARE	ARG	ARM	ATG	AUS	AUT	AZE	BDI	BEL	BEN	BFA	BGD	BGR	BHR	BHS	BIH	BLR	BLZ	BMU	BOL	BRA	BRB	BRN	BTN	BWA	CAF	CAN	CHE	CHL	CHN	CIV	CMR	COD	COG	COL	COM	CPV	CRI	CYM	CYP	CZE	DEU	DJI	DMA
	MAR	ABW	AGO	AIA	ALB	ARE	ARG	ARM	ATG	AUS	AUT	AZE	BDI	BEL	BEN	BFA	BGD	BGR	BHR	BHS	BIH	BLR	BLZ	BMU	BOL	BRA	BRB	BRN	BTN	BWA	CAF	CAN	CHE	CHL	CHN	CIV	CMR	COD	COG	COL	COM	CPV	CRI	CYM	CYP	CZE	DEU	DJI	DMA
[truncated: 131 more columns]
