# Supplementary material for: The Social Cost of Fossil and Industrial CO2 Emissions from 1950 to 2018
Source: Research Square preprint supplement (doi:10.21203/rs.3.rs-2244259/v1), 2022-11-17
Supplement: Supplementary file 59 [file realreturn_data_PWT_transposed.xlsx]

## Sheet: realreturn_data_PWT
ur	RegionCode	YearCode	AggValue
irr	ABW	1991	0.114419
irr	ABW	1992	0.111404
irr	ABW	1993	0.110878
irr	ABW	1994	0.105223
irr	ABW	1995	0.104266
irr	ABW	1996	0.100389
irr	ABW	1997	0.101205
irr	ABW	1998	0.103945
irr	ABW	1999	0.0862
irr	ABW	2000	0.0806542
irr	ABW	2001	0.0863328
irr	ABW	2002	0.0789072
irr	ABW	2003	0.0763591
irr	ABW	2004	0.0778867
irr	ABW	2005	0.070547
irr	ABW	2006	0.0650137
irr	ABW	2007	0.0637978
irr	ABW	2008	0.0583446
irr	ABW	2009	0.0472642
irr	ABW	2010	0.0397649
irr	ABW	2011	0.0399358
irr	ABW	2012	0.0368835
irr	ABW	2013	0.0421779
irr	ABW	2014	0.0401888
irr	ABW	2015	0.0410842
irr	ABW	2016	0.0444748
irr	ABW	2017	0.046607
irr	ABW	2018	0.0439467
irr	ABW	2019	0.0431633
irr	AGO	1970	0.21378
irr	AGO	1971	0.212562
irr	AGO	1972	0.205272
irr	AGO	1973	0.208967
irr	AGO	1974	0.200753
irr	AGO	1975	0.177894
irr	AGO	1976	0.16394
irr	AGO	1977	0.156547
irr	AGO	1978	0.141933
irr	AGO	1979	0.134701
irr	AGO	1980	0.135414
irr	AGO	1981	0.118486
irr	AGO	1982	0.113712
irr	AGO	1983	0.114543
irr	AGO	1984	0.119158
irr	AGO	1985	0.117779
irr	AGO	1986	0.0905918
irr	AGO	1987	0.100927
irr	AGO	1988	0.093026
irr	AGO	1989	0.0949745
irr	AGO	1990	0.103004
irr	AGO	1991	0.213091
irr	AGO	1992	1.09587
irr	AGO	1993	0.0838086
irr	AGO	1994	0.0576688
irr	AGO	1995	0.0772789
irr	AGO	1996	0.0808571
irr	AGO	1997	0.0777153
irr	AGO	1998	0.0662089
irr	AGO	1999	0.0616945
irr	AGO	2000	0.091971
irr	AGO	2001	0.0644228
irr	AGO	2002	0.01
irr	AGO	2003	0.0134634
irr	AGO	2004	0.021465
irr	AGO	2005	0.0429234
irr	AGO	2006	0.0644685
irr	AGO	2007	0.0579579
irr	AGO	2008	0.0578093
irr	AGO	2009	0.01
irr	AGO	2010	0.0469279
irr	AGO	2011	0.0689972
irr	AGO	2012	0.0805898
irr	AGO	2013	0.0896941
irr	AGO	2014	0.089199
irr	AGO	2015	0.0699295
irr	AGO	2016	0.0760284
irr	AGO	2017	0.0678752
irr	AGO	2018	0.109426
irr	AGO	2019	0.109524
irr	ARG	1950	0.308121
irr	ARG	1951	0.356293
irr	ARG	1952	0.309781
irr	ARG	1953	0.30692
irr	ARG	1954	0.294267
irr	ARG	1955	0.313304
irr	ARG	1956	0.290521
irr	ARG	1957	0.286448
irr	ARG	1958	0.286359
irr	ARG	1959	0.282771
irr	ARG	1960	0.309728
irr	ARG	1961	0.242246
irr	ARG	1962	0.274885
irr	ARG	1963	0.255953
irr	ARG	1964	0.256041
irr	ARG	1965	0.239223
irr	ARG	1966	0.242122
irr	ARG	1967	0.232099
irr	ARG	1968	0.235309
irr	ARG	1969	0.248216
irr	ARG	1970	0.227823
irr	ARG	1971	0.230314
irr	ARG	1972	0.220124
irr	ARG	1973	0.219334
irr	ARG	1974	0.19866
irr	ARG	1975	0.128734
irr	ARG	1976	0.134353
irr	ARG	1977	0.155153
irr	ARG	1978	0.139019
irr	ARG	1979	0.151434
irr	ARG	1980	0.151924
irr	ARG	1981	0.137318
irr	ARG	1982	0.108
irr	ARG	1983	0.113644
irr	ARG	1984	0.113306
irr	ARG	1985	0.110079
irr	ARG	1986	0.126828
irr	ARG	1987	0.126864
irr	ARG	1988	0.127717
irr	ARG	1989	0.118985
irr	ARG	1990	0.111115
irr	ARG	1991	0.146851
irr	ARG	1992	0.172414
irr	ARG	1993	0.169041
irr	ARG	1994	0.181945
irr	ARG	1995	0.180345
irr	ARG	1996	0.200929
irr	ARG	1997	0.218074
irr	ARG	1998	0.209859
irr	ARG	1999	0.184339
irr	ARG	2000	0.186405
irr	ARG	2001	0.172002
irr	ARG	2002	0.15609
irr	ARG	2003	0.171649
irr	ARG	2004	0.17177
irr	ARG	2005	0.168431
irr	ARG	2006	0.169293
irr	ARG	2007	0.178533
irr	ARG	2008	0.172177
irr	ARG	2009	0.142642
irr	ARG	2010	0.166089
irr	ARG	2011	0.163585
irr	ARG	2012	0.140685
irr	ARG	2013	0.126042
irr	ARG	2014	0.116982
irr	ARG	2015	0.123706
irr	ARG	2016	0.127208
irr	ARG	2017	0.131097
irr	ARG	2018	0.129752
irr	ARG	2019	0.119156
irr	ARM	1990	0.038504
irr	ARM	1991	0.0284217
irr	ARM	1992	0.01
irr	ARM	1993	0.01
irr	ARM	1994	0.01
irr	ARM	1995	0.01
irr	ARM	1996	0.01
irr	ARM	1997	0.0180526
irr	ARM	1998	0.0207964
irr	ARM	1999	0.0261676
irr	ARM	2000	0.0344468
irr	ARM	2001	0.0359707
irr	ARM	2002	0.0515156
irr	ARM	2003	0.0655722
irr	ARM	2004	0.0750241
irr	ARM	2005	0.0815807
irr	ARM	2006	0.0870675
irr	ARM	2007	0.0921865
irr	ARM	2008	0.090773
irr	ARM	2009	0.0597422
irr	ARM	2010	0.0617734
irr	ARM	2011	0.0631113
irr	ARM	2012	0.069108
irr	ARM	2013	0.0675665
irr	ARM	2014	0.06874
irr	ARM	2015	0.065836
irr	ARM	2016	0.0698299
irr	ARM	2017	0.077999
irr	ARM	2018	0.0843263
irr	ARM	2019	0.0930982
irr	AUS	1950	0.0529014
irr	AUS	1951	0.0404172
irr	AUS	1952	0.0387219
irr	AUS	1953	0.0457196
irr	AUS	1954	0.0453514
irr	AUS	1955	0.0431636
irr	AUS	1956	0.0426496
irr	AUS	1957	0.0384777
irr	AUS	1958	0.0405972
irr	AUS	1959	0.0428794
irr	AUS	1960	0.0372768
irr	AUS	1961	0.0428628
irr	AUS	1962	0.0440217
irr	AUS	1963	0.0485942
irr	AUS	1964	0.0435622
irr	AUS	1965	0.0376289
irr	AUS	1966	0.0386445
irr	AUS	1967	0.0408512
irr	AUS	1968	0.0439205
irr	AUS	1969	0.0476435
irr	AUS	1970	0.0432989
irr	AUS	1971	0.0407346
irr	AUS	1972	0.0428245
irr	AUS	1973	0.0363603
irr	AUS	1974	0.0268078
irr	AUS	1975	0.0266886
irr	AUS	1976	0.0306218
irr	AUS	1977	0.0285939
irr	AUS	1978	0.0344726
irr	AUS	1979	0.0363291
irr	AUS	1980	0.0348807
irr	AUS	1981	0.0329022
irr	AUS	1982	0.0299728
irr	AUS	1983	0.0397678
irr	AUS	1984	0.0406403
irr	AUS	1985	0.0392955
irr	AUS	1986	0.0398216
irr	AUS	1987	0.0476124
irr	AUS	1988	0.0504915
irr	AUS	1989	0.0482131
irr	AUS	1990	0.045727
irr	AUS	1991	0.0493344
irr	AUS	1992	0.0530433
irr	AUS	1993	0.0554649
irr	AUS	1994	0.0566619
irr	AUS	1995	0.0578341
irr	AUS	1996	0.0565836
irr	AUS	1997	0.0571802
irr	AUS	1998	0.0546801
irr	AUS	1999	0.0562515
irr	AUS	2000	0.0540336
irr	AUS	2001	0.0523987
irr	AUS	2002	0.0528292
irr	AUS	2003	0.0513517
irr	AUS	2004	0.0484476
irr	AUS	2005	0.049247
irr	AUS	2006	0.0497765
irr	AUS	2007	0.0472049
irr	AUS	2008	0.0514317
irr	AUS	2009	0.0483781
irr	AUS	2010	0.0509767
irr	AUS	2011	0.0518124
irr	AUS	2012	0.048037
irr	AUS	2013	0.0471304
irr	AUS	2014	0.0410919
irr	AUS	2015	0.0379138
irr	AUS	2016	0.0453321
irr	AUS	2017	0.0472204
irr	AUS	2018	0.0502264
irr	AUS	2019	0.0488721
irr	AUT	1950	0.0654845
irr	AUT	1951	0.0653442
irr	AUT	1952	0.0698873
irr	AUT	1953	0.0609121
irr	AUT	1954	0.0704168
irr	AUT	1955	0.08017
irr	AUT	1956	0.0859178
irr	AUT	1957	0.0883446
irr	AUT	1958	0.0908611
irr	AUT	1959	0.0883653
irr	AUT	1960	0.0936199
irr	AUT	1961	0.0914223
irr	AUT	1962	0.0909633
irr	AUT	1963	0.0901966
irr	AUT	1964	0.0949223
irr	AUT	1965	0.0895187
irr	AUT	1966	0.0886779
irr	AUT	1967	0.0901337
irr	AUT	1968	0.0921439
irr	AUT	1969	0.0950291
irr	AUT	1970	0.0922788
irr	AUT	1971	0.0895811
irr	AUT	1972	0.0825848
irr	AUT	1973	0.0827543
irr	AUT	1974	0.0799216
irr	AUT	1975	0.0756145
irr	AUT	1976	0.0757127
irr	AUT	1977	0.0755186
irr	AUT	1978	0.0712722
irr	AUT	1979	0.0716677
irr	AUT	1980	0.0668992
irr	AUT	1981	0.0627022
irr	AUT	1982	0.0616557
irr	AUT	1983	0.0625139
irr	AUT	1984	0.0619335
irr	AUT	1985	0.062576
irr	AUT	1986	0.0625784
irr	AUT	1987	0.0614665
irr	AUT	1988	0.0617907
irr	AUT	1989	0.0611552
irr	AUT	1990	0.0617106
irr	AUT	1991	0.0615456
irr	AUT	1992	0.0595037
irr	AUT	1993	0.0576054
irr	AUT	1994	0.0569721
irr	AUT	1995	0.0567071
irr	AUT	1996	0.0590454
irr	AUT	1997	0.060912
irr	AUT	1998	0.0617057
irr	AUT	1999	0.0616319
irr	AUT	2000	0.0642446
irr	AUT	2001	0.0651157
irr	AUT	2002	0.0661677
irr	AUT	2003	0.0646678
irr	AUT	2004	0.0679794
irr	AUT	2005	0.0703539
irr	AUT	2006	0.0734745
irr	AUT	2007	0.0740031
irr	AUT	2008	0.0674272
irr	AUT	2009	0.0570062
irr	AUT	2010	0.0575111
irr	AUT	2011	0.0583969
irr	AUT	2012	0.0556322
irr	AUT	2013	0.0528283
irr	AUT	2014	0.0534652
irr	AUT	2015	0.0536781
irr	AUT	2016	0.0547008
irr	AUT	2017	0.0538196
irr	AUT	2018	0.053295
irr	AUT	2019	0.0526003
irr	AZE	1990	0.0592636
irr	AZE	1991	0.0573771
irr	AZE	1992	0.0330794
irr	AZE	1993	0.0164273
irr	AZE	1994	0.01
irr	AZE	1995	0.01
irr	AZE	1996	0.0124477
irr	AZE	1997	0.0207386
irr	AZE	1998	0.0381184
irr	AZE	1999	0.0435973
irr	AZE	2000	0.0570074
irr	AZE	2001	0.0720555
irr	AZE	2002	0.0474592
irr	AZE	2003	0.0236917
irr	AZE	2004	0.0104667
irr	AZE	2005	0.0387919
irr	AZE	2006	0.12089
irr	AZE	2007	0.192868
irr	AZE	2008	0.274654
irr	AZE	2009	0.207138
irr	AZE	2010	0.238369
irr	AZE	2011	0.291274
irr	AZE	2012	0.262227
irr	AZE	2013	0.245407
irr	AZE	2014	0.224339
irr	AZE	2015	0.167401
irr	AZE	2016	0.16118
irr	AZE	2017	0.175339
irr	AZE	2018	0.19953
irr	AZE	2019	0.213516
irr	BDI	1980	0.0671788
irr	BDI	1981	0.0779128
irr	BDI	1982	0.0475974
irr	BDI	1983	0.0501775
irr	BDI	1984	0.0612449
irr	BDI	1985	0.0609109
irr	BDI	1986	0.0747475
irr	BDI	1987	0.0591843
irr	BDI	1988	0.0193434
irr	BDI	1989	0.0273362
irr	BDI	1990	0.01
irr	BDI	1991	0.01
irr	BDI	1992	0.01
irr	BDI	1993	0.01
irr	BDI	1994	0.01
irr	BDI	1995	0.01
irr	BDI	1996	0.01
irr	BDI	1997	0.01
irr	BDI	1998	0.01
irr	BDI	1999	0.01
irr	BDI	2000	0.01
irr	BDI	2001	0.01
irr	BDI	2002	0.01
irr	BDI	2003	0.01
irr	BDI	2004	0.01
irr	BDI	2005	0.01
irr	BDI	2006	0.01
irr	BDI	2007	0.01
irr	BDI	2008	0.0201352
irr	BDI	2009	0.0251402
irr	BDI	2010	0.0345979
irr	BDI	2011	0.04278
irr	BDI	2012	0.05193
irr	BDI	2013	0.0681596
irr	BDI	2014	0.071711
irr	BDI	2015	0.0799392
irr	BDI	2016	0.0800165
irr	BDI	2017	0.0829725
irr	BDI	2018	0.0847501
irr	BDI	2019	0.0801748
irr	BEL	1950	0.092037
irr	BEL	1951	0.0759098
irr	BEL	1952	0.0730787
irr	BEL	1953	0.0800339
irr	BEL	1954	0.0822369
irr	BEL	1955	0.0831682
irr	BEL	1956	0.0813472
irr	BEL	1957	0.0770602
irr	BEL	1958	0.0732179
irr	BEL	1959	0.0751852
irr	BEL	1960	0.0774096
irr	BEL	1961	0.0770335
irr	BEL	1962	0.0766642
irr	BEL	1963	0.0740558
irr	BEL	1964	0.0755104
irr	BEL	1965	0.0760028
irr	BEL	1966	0.0741813
irr	BEL	1967	0.0726212
irr	BEL	1968	0.0737361
irr	BEL	1969	0.0753126
irr	BEL	1970	0.0729674
irr	BEL	1971	0.0678593
irr	BEL	1972	0.0700915
irr	BEL	1973	0.0699339
irr	BEL	1974	0.0645069
irr	BEL	1975	0.0581474
irr	BEL	1976	0.057775
irr	BEL	1977	0.0565401
irr	BEL	1978	0.0538282
irr	BEL	1979	0.0517739
irr	BEL	1980	0.0597996
irr	BEL	1981	0.0557424
irr	BEL	1982	0.0567693
irr	BEL	1983	0.0586967
irr	BEL	1984	0.0604403
irr	BEL	1985	0.060539
irr	BEL	1986	0.0648105
irr	BEL	1987	0.0660444
irr	BEL	1988	0.0731039
irr	BEL	1989	0.0734296
irr	BEL	1990	0.0701464
irr	BEL	1991	0.0667895
irr	BEL	1992	0.067129
irr	BEL	1993	0.0641146
irr	BEL	1994	0.0670733
irr	BEL	1995	0.0694199
irr	BEL	1996	0.0661614
irr	BEL	1997	0.0672227
irr	BEL	1998	0.0668903
irr	BEL	1999	0.0635065
irr	BEL	2000	0.0658415
irr	BEL	2001	0.061295
irr	BEL	2002	0.0610263
irr	BEL	2003	0.0616135
irr	BEL	2004	0.0667924
irr	BEL	2005	0.0676598
irr	BEL	2006	0.0653467
irr	BEL	2007	0.0658101
irr	BEL	2008	0.05631
irr	BEL	2009	0.0506564
irr	BEL	2010	0.0562092
irr	BEL	2011	0.0544696
irr	BEL	2012	0.0525251
irr	BEL	2013	0.0519902
irr	BEL	2014	0.0544888
irr	BEL	2015	0.0593525
irr	BEL	2016	0.0619761
irr	BEL	2017	0.0613993
irr	BEL	2018	0.0592893
irr	BEL	2019	0.0586394
irr	BEN	1980	0.0736194
irr	BEN	1981	0.0748615
irr	BEN	1982	0.0759754
irr	BEN	1983	0.0661644
irr	BEN	1984	0.072181
irr	BEN	1985	0.034486
irr	BEN	1986	0.0500165
irr	BEN	1987	0.0647806
irr	BEN	1988	0.0435093
irr	BEN	1989	0.0565432
irr	BEN	1990	0.0663361
irr	BEN	1991	0.0719068
irr	BEN	1992	0.0729296
irr	BEN	1993	0.0756314
irr	BEN	1994	0.0192537
irr	BEN	1995	0.0355423
irr	BEN	1996	0.0434731
irr	BEN	1997	0.0434089
irr	BEN	1998	0.0422792
irr	BEN	1999	0.0423877
irr	BEN	2000	0.047483
irr	BEN	2001	0.0579898
irr	BEN	2002	0.0654685
irr	BEN	2003	0.068141
irr	BEN	2004	0.0725567
irr	BEN	2005	0.070439
irr	BEN	2006	0.0743181
irr	BEN	2007	0.0744114
irr	BEN	2008	0.0813274
irr	BEN	2009	0.0812528
irr	BEN	2010	0.0800618
irr	BEN	2011	0.0837734
irr	BEN	2012	0.101598
irr	BEN	2013	0.109561
irr	BEN	2014	0.123134
irr	BEN	2015	0.133181
irr	BEN	2016	0.130236
irr	BEN	2017	0.126123
irr	BEN	2018	0.120051
irr	BEN	2019	0.127126
irr	BFA	1959	0.240003
irr	BFA	1960	0.277037
irr	BFA	1961	0.348722
irr	BFA	1962	0.385367
irr	BFA	1963	0.354834
irr	BFA	1964	0.325411
irr	BFA	1965	0.531345
irr	BFA	1966	0.566256
irr	BFA	1967	0.51197
irr	BFA	1968	0.507063
irr	BFA	1969	0.505913
irr	BFA	1970	0.471667
irr	BFA	1971	0.366734
irr	BFA	1972	0.361969
irr	BFA	1973	0.311574
irr	BFA	1974	0.262656
irr	BFA	1975	0.388814
irr	BFA	1976	0.338112
irr	BFA	1977	0.370982
irr	BFA	1978	0.416206
irr	BFA	1979	0.284498
irr	BFA	1980	0.282522
irr	BFA	1981	0.290685
irr	BFA	1982	0.251665
irr	BFA	1983	0.200117
irr	BFA	1984	0.179582
irr	BFA	1985	0.232485
irr	BFA	1986	0.211315
irr	BFA	1987	0.193503
irr	BFA	1988	0.195084
irr	BFA	1989	0.188728
irr	BFA	1990	0.174459
irr	BFA	1991	0.162065
irr	BFA	1992	0.145905
irr	BFA	1993	0.136325
irr	BFA	1994	0.107819
irr	BFA	1995	0.120821
irr	BFA	1996	0.123012
irr	BFA	1997	0.121306
irr	BFA	1998	0.125629
irr	BFA	1999	0.139352
irr	BFA	2000	0.146326
irr	BFA	2001	0.174135
irr	BFA	2002	0.172596
irr	BFA	2003	0.188408
irr	BFA	2004	0.197486
irr	BFA	2005	0.18727
irr	BFA	2006	0.200333
irr	BFA	2007	0.204457
irr	BFA	2008	0.178367
irr	BFA	2009	0.197854
irr	BFA	2010	0.191974
irr	BFA	2011	0.19716
irr	BFA	2012	0.182359
irr	BFA	2013	0.154846
irr	BFA	2014	0.154553
irr	BFA	2015	0.162507
irr	BFA	2016	0.167166
irr	BFA	2017	0.160589
irr	BFA	2018	0.193735
irr	BFA	2019	0.199277
irr	BGR	1970	0.274193
irr	BGR	1971	0.255832
irr	BGR	1972	0.24485
irr	BGR	1973	0.238806
irr	BGR	1974	0.232115
irr	BGR	1975	0.23044
irr	BGR	1976	0.22464
irr	BGR	1977	0.21824
irr	BGR	1978	0.210306
irr	BGR	1979	0.208783
irr	BGR	1980	0.20202
irr	BGR	1981	0.196418
irr	BGR	1982	0.187145
irr	BGR	1983	0.182463
irr	BGR	1984	0.179328
irr	BGR	1985	0.174244
irr	BGR	1986	0.171733
irr	BGR	1987	0.173427
irr	BGR	1988	0.191872
irr	BGR	1989	0.188378
irr	BGR	1990	0.140897
irr	BGR	1991	0.19185
irr	BGR	1992	0.20372
irr	BGR	1993	0.218072
irr	BGR	1994	0.208375
irr	BGR	1995	0.233996
irr	BGR	1996	0.320168
irr	BGR	1997	0.327248
irr	BGR	1998	0.272092
irr	BGR	1999	0.234715
irr	BGR	2000	0.267911
irr	BGR	2001	0.258937
irr	BGR	2002	0.271406
irr	BGR	2003	0.256194
irr	BGR	2004	0.254515
irr	BGR	2005	0.231019
irr	BGR	2006	0.220464
irr	BGR	2007	0.210251
irr	BGR	2008	0.177529
irr	BGR	2009	0.171714
irr	BGR	2010	0.16668
irr	BGR	2011	0.16906
irr	BGR	2012	0.156882
irr	BGR	2013	0.137726
irr	BGR	2014	0.136762
irr	BGR	2015	0.140504
irr	BGR	2016	0.143357
irr	BGR	2017	0.149397
irr	BGR	2018	0.144019
irr	BGR	2019	0.148053
irr	BHR	1970	0.128946
irr	BHR	1971	0.117904
irr	BHR	1972	0.123708
irr	BHR	1973	0.131578
irr	BHR	1974	0.12358
irr	BHR	1975	0.110808
irr	BHR	1976	0.132948
irr	BHR	1977	0.113066
irr	BHR	1978	0.112346
irr	BHR	1979	0.119156
irr	BHR	1980	0.130913
irr	BHR	1981	0.134519
irr	BHR	1982	0.145459
irr	BHR	1983	0.149557
irr	BHR	1984	0.139626
irr	BHR	1985	0.0929679
irr	BHR	1986	0.0622994
irr	BHR	1987	0.0763362
irr	BHR	1988	0.109375
irr	BHR	1989	0.116618
irr	BHR	1990	0.128162
irr	BHR	1991	0.129725
irr	BHR	1992	0.126362
irr	BHR	1993	0.130826
irr	BHR	1994	0.137946
irr	BHR	1995	0.142248
irr	BHR	1996	0.141945
irr	BHR	1997	0.145179
irr	BHR	1998	0.132795
irr	BHR	1999	0.141814
irr	BHR	2000	0.193424
irr	BHR	2001	0.159698
irr	BHR	2002	0.149131
irr	BHR	2003	0.165042
irr	BHR	2004	0.159304
irr	BHR	2005	0.175183
irr	BHR	2006	0.177664
irr	BHR	2007	0.198688
irr	BHR	2008	0.206634
irr	BHR	2009	0.185954
irr	BHR	2010	0.196838
irr	BHR	2011	0.204768
irr	BHR	2012	0.162217
irr	BHR	2013	0.200629
irr	BHR	2014	0.191886
irr	BHR	2015	0.177797
irr	BHR	2016	0.175722
irr	BHR	2017	0.166327
irr	BHR	2018	0.164979
irr	BHR	2019	0.154327
irr	BHS	1973	0.208896
irr	BHS	1974	0.16327
irr	BHS	1975	0.125885
irr	BHS	1976	0.132386
irr	BHS	1977	0.147037
irr	BHS	1978	0.135416
irr	BHS	1979	0.196757
irr	BHS	1980	0.269372
irr	BHS	1981	0.255765
irr	BHS	1982	0.286514
irr	BHS	1983	0.264988
irr	BHS	1984	0.249192
irr	BHS	1985	0.280322
irr	BHS	1986	0.2596
irr	BHS	1987	0.367941
irr	BHS	1988	0.35113
irr	BHS	1989	0.331295
irr	BHS	1990	0.308824
irr	BHS	1991	0.273358
irr	BHS	1992	0.245711
irr	BHS	1993	0.22993
irr	BHS	1994	0.227381
irr	BHS	1995	0.225313
irr	BHS	1996	0.223627
irr	BHS	1997	0.2181
irr	BHS	1998	0.229125
irr	BHS	1999	0.205493
irr	BHS	2000	0.226618
irr	BHS	2001	0.212067
irr	BHS	2002	0.234661
irr	BHS	2003	0.227067
irr	BHS	2004	0.202713
irr	BHS	2005	0.201909
irr	BHS	2006	0.167042
irr	BHS	2007	0.172244
irr	BHS	2008	0.160193
irr	BHS	2009	0.131133
irr	BHS	2010	0.114804
irr	BHS	2011	0.12224
irr	BHS	2012	0.142917
irr	BHS	2013	0.13107
irr	BHS	2014	0.130213
irr	BHS	2015	0.132601
irr	BHS	2016	0.130116
irr	BHS	2017	0.13131
irr	BHS	2018	0.131463
irr	BHS	2019	0.130925
irr	BIH	1990	0.072471
irr	BIH	1991	0.0584389
irr	BIH	1992	0.0507537
irr	BIH	1993	0.0467451
irr	BIH	1994	0.0529489
irr	BIH	1995	0.0692598
irr	BIH	1996	0.134072
irr	BIH	1997	0.153264
irr	BIH	1998	0.142175
irr	BIH	1999	0.139197
irr	BIH	2000	0.126004
irr	BIH	2001	0.119342
irr	BIH	2002	0.203898
irr	BIH	2003	0.189996
irr	BIH	2004	0.117294
irr	BIH	2005	0.114541
irr	BIH	2006	0.112743
irr	BIH	2007	0.128172
irr	BIH	2008	0.121058
irr	BIH	2009	0.101323
irr	BIH	2010	0.104386
irr	BIH	2011	0.0983174
irr	BIH	2012	0.0953021
irr	BIH	2013	0.0958387
irr	BIH	2014	0.0951117
irr	BIH	2015	0.0958781
irr	BIH	2016	0.102433
irr	BIH	2017	0.100083
irr	BIH	2018	0.10058
irr	BIH	2019	0.100602
irr	BLR	1990	0.12477
irr	BLR	1991	0.138018
irr	BLR	1992	0.0797018
irr	BLR	1993	0.024125
irr	BLR	1994	0.0266421
irr	BLR	1995	0.0244919
irr	BLR	1996	0.0305494
irr	BLR	1997	0.0338545
irr	BLR	1998	0.0293104
irr	BLR	1999	0.0241852
irr	BLR	2000	0.0256844
irr	BLR	2001	0.0245971
irr	BLR	2002	0.0304889
irr	BLR	2003	0.0415453
irr	BLR	2004	0.0482364
irr	BLR	2005	0.0522299
irr	BLR	2006	0.0585748
irr	BLR	2007	0.063765
irr	BLR	2008	0.0773093
irr	BLR	2009	0.0597653
irr	BLR	2010	0.0552003
irr	BLR	2011	0.0890826
irr	BLR	2012	0.0725679
irr	BLR	2013	0.0440684
irr	BLR	2014	0.0505739
irr	BLR	2015	0.0501275
irr	BLR	2016	0.0458628
irr	BLR	2017	0.0465248
irr	BLR	2018	0.0480996
irr	BLR	2019	0.0524562
irr	BMU	1986	0.144884
irr	BMU	1987	0.147356
irr	BMU	1988	0.138528
irr	BMU	1989	0.134102
irr	BMU	1990	0.128967
irr	BMU	1991	0.128963
irr	BMU	1992	0.127113
irr	BMU	1993	0.136884
irr	BMU	1994	0.140176
irr	BMU	1995	0.147213
irr	BMU	1996	0.162458
irr	BMU	1997	0.16995
irr	BMU	1998	0.1673
irr	BMU	1999	0.17357
irr	BMU	2000	0.152792
irr	BMU	2001	0.151264
irr	BMU	2002	0.14178
irr	BMU	2003	0.151834
irr	BMU	2004	0.148408
irr	BMU	2005	0.134633
irr	BMU	2006	0.148104
irr	BMU	2007	0.157346
irr	BMU	2008	0.164653
irr	BMU	2009	0.149859
irr	BMU	2010	0.155088
irr	BMU	2011	0.146001
irr	BMU	2012	0.148172
irr	BMU	2013	0.157719
irr	BMU	2014	0.155074
irr	BMU	2015	0.158621
irr	BMU	2016	0.17318
irr	BMU	2017	0.174072
irr	BMU	2018	0.177069
irr	BMU	2019	0.172739
irr	BOL	1950	0.299417
irr	BOL	1951	0.294406
irr	BOL	1952	0.271804
irr	BOL	1953	0.235737
irr	BOL	1954	0.22569
irr	BOL	1955	0.223189
irr	BOL	1956	0.193965
irr	BOL	1957	0.17623
irr	BOL	1958	0.177118
irr	BOL	1959	0.186224
irr	BOL	1960	0.203517
irr	BOL	1961	0.223254
irr	BOL	1962	0.244264
irr	BOL	1963	0.214845
irr	BOL	1964	0.222924
irr	BOL	1965	0.171185
irr	BOL	1966	0.152941
irr	BOL	1967	0.181453
irr	BOL	1968	0.147098
irr	BOL	1969	0.139918
irr	BOL	1970	0.130301
irr	BOL	1971	0.131778
irr	BOL	1972	0.12622
irr	BOL	1973	0.107508
irr	BOL	1974	0.131069
irr	BOL	1975	0.123777
irr	BOL	1976	0.116101
irr	BOL	1977	0.12597
irr	BOL	1978	0.118015
irr	BOL	1979	0.118354
irr	BOL	1980	0.108461
irr	BOL	1981	0.115145
irr	BOL	1982	0.085164
irr	BOL	1983	0.0705404
irr	BOL	1984	0.0289234
irr	BOL	1985	0.0920512
irr	BOL	1986	0.150536
irr	BOL	1987	0.144577
irr	BOL	1988	0.12202
irr	BOL	1989	0.128593
irr	BOL	1990	0.145313
irr	BOL	1991	0.141337
irr	BOL	1992	0.13078
irr	BOL	1993	0.127014
irr	BOL	1994	0.133717
irr	BOL	1995	0.151805
irr	BOL	1996	0.152289
irr	BOL	1997	0.152415
irr	BOL	1998	0.158831
irr	BOL	1999	0.143046
irr	BOL	2000	0.121301
irr	BOL	2001	0.120385
irr	BOL	2002	0.126704
irr	BOL	2003	0.136534
irr	BOL	2004	0.152853
irr	BOL	2005	0.145387
irr	BOL	2006	0.155653
irr	BOL	2007	0.159582
irr	BOL	2008	0.181759
irr	BOL	2009	0.172346
irr	BOL	2010	0.196621
irr	BOL	2011	0.195364
irr	BOL	2012	0.198196
irr	BOL	2013	0.202784
irr	BOL	2014	0.185465
irr	BOL	2015	0.163624
irr	BOL	2016	0.165695
irr	BOL	2017	0.175636
irr	BOL	2018	0.185929
irr	BOL	2019	0.18087
irr	BRA	1950	0.294121
irr	BRA	1951	0.269804
irr	BRA	1952	0.29801
irr	BRA	1953	0.256169
irr	BRA	1954	0.233012
irr	BRA	1955	0.263991
irr	BRA	1956	0.265762
irr	BRA	1957	0.280704
irr	BRA	1958	0.239328
irr	BRA	1959	0.213713
irr	BRA	1960	0.235041
irr	BRA	1961	0.216099
irr	BRA	1962	0.241832
irr	BRA	1963	0.206576
irr	BRA	1964	0.226061
irr	BRA	1965	0.213903
irr	BRA	1966	0.21992
irr	BRA	1967	0.242641
irr	BRA	1968	0.242029
irr	BRA	1969	0.256297
irr	BRA	1970	0.260855
irr	BRA	1971	0.258793
irr	BRA	1972	0.269184
irr	BRA	1973	0.295065
irr	BRA	1974	0.274994
irr	BRA	1975	0.248775
irr	BRA	1976	0.250106
irr	BRA	1977	0.23556
irr	BRA	1978	0.212747
irr	BRA	1979	0.190674
irr	BRA	1980	0.18427
irr	BRA	1981	0.169039
irr	BRA	1982	0.157073
irr	BRA	1983	0.142095
irr	BRA	1984	0.154155
irr	BRA	1985	0.169368
irr	BRA	1986	0.178275
irr	BRA	1987	0.136464
irr	BRA	1988	0.118709
irr	BRA	1989	0.102979
irr	BRA	1990	0.103284
irr	BRA	1991	0.152071
irr	BRA	1992	0.131977
irr	BRA	1993	0.138896
irr	BRA	1994	0.135775
irr	BRA	1995	0.117101
irr	BRA	1996	0.129564
irr	BRA	1997	0.140486
irr	BRA	1998	0.133652
irr	BRA	1999	0.12782
irr	BRA	2000	0.12157
irr	BRA	2001	0.111917
irr	BRA	2002	0.109958
irr	BRA	2003	0.111059
irr	BRA	2004	0.113985
irr	BRA	2005	0.111055
irr	BRA	2006	0.112763
irr	BRA	2007	0.11725
irr	BRA	2008	0.113671
irr	BRA	2009	0.102899
irr	BRA	2010	0.114825
irr	BRA	2011	0.116466
irr	BRA	2012	0.107726
irr	BRA	2013	0.107843
irr	BRA	2014	0.105884
irr	BRA	2015	0.0932132
irr	BRA	2016	0.0951249
irr	BRA	2017	0.101184
irr	BRA	2018	0.099338
irr	BRA	2019	0.0998844
irr	BRB	1960	0.069874
irr	BRB	1961	0.0693718
irr	BRB	1962	0.0804511
irr	BRB	1963	0.0760453
irr	BRB	1964	0.0724857
irr	BRB	1965	0.0914615
irr	BRB	1966	0.071496
irr	BRB	1967	0.0851856
irr	BRB	1968	0.0900155
irr	BRB	1969	0.0848062
irr	BRB	1970	0.0887872
irr	BRB	1971	0.0799013
irr	BRB	1972	0.0815107
irr	BRB	1973	0.0757599
irr	BRB	1974	0.0820661
irr	BRB	1975	0.0879605
irr	BRB	1976	0.0741838
irr	BRB	1977	0.0632094
irr	BRB	1978	0.0840452
irr	BRB	1979	0.0760388
irr	BRB	1980	0.0751794
irr	BRB	1981	0.0669931
irr	BRB	1982	0.0593472
irr	BRB	1983	0.0584567
irr	BRB	1984	0.0610265
irr	BRB	1985	0.061589
irr	BRB	1986	0.0652058
irr	BRB	1987	0.071216
irr	BRB	1988	0.0693697
irr	BRB	1989	0.0694449
irr	BRB	1990	0.0598401
irr	BRB	1991	0.0740775
irr	BRB	1992	0.0595069
irr	BRB	1993	0.0704428
irr	BRB	1994	0.087598
irr	BRB	1995	0.0695264
irr	BRB	1996	0.0660878
irr	BRB	1997	0.0825008
irr	BRB	1998	0.0702403
irr	BRB	1999	0.0576147
irr	BRB	2000	0.0542032
irr	BRB	2001	0.057127
irr	BRB	2002	0.0680434
irr	BRB	2003	0.0347305
irr	BRB	2004	0.0334922
irr	BRB	2005	0.0354926
irr	BRB	2006	0.0399292
irr	BRB	2007	0.0333794
irr	BRB	2008	0.0320209
irr	BRB	2009	0.0268638
irr	BRB	2010	0.0497814
irr	BRB	2011	0.0515489
irr	BRB	2012	0.045394
irr	BRB	2013	0.0460394
irr	BRB	2014	0.0428883
irr	BRB	2015	0.0426164
irr	BRB	2016	0.0419627
irr	BRB	2017	0.0224658
irr	BRB	2018	0.0270144
irr	BRB	2019	0.0190665
irr	BWA	1960	0.380755
irr	BWA	1961	0.404143
irr	BWA	1962	0.430482
irr	BWA	1963	0.431804
irr	BWA	1964	0.428854
irr	BWA	1965	0.106442
irr	BWA	1966	0.273743
irr	BWA	1967	0.270357
irr	BWA	1968	0.298928
irr	BWA	1969	0.111552
irr	BWA	1970	0.227223
irr	BWA	1971	0.210526
irr	BWA	1972	0.200222
irr	BWA	1973	0.191166
irr	BWA	1974	0.181876
irr	BWA	1975	0.182549
irr	BWA	1976	0.194279
irr	BWA	1977	0.198715
irr	BWA	1978	0.198004
irr	BWA	1979	0.215779
irr	BWA	1980	0.234334
irr	BWA	1981	0.222682
irr	BWA	1982	0.191551
irr	BWA	1983	0.17816
irr	BWA	1984	0.183629
irr	BWA	1985	0.21684
irr	BWA	1986	0.260734
irr	BWA	1987	0.255516
irr	BWA	1988	0.253141
irr	BWA	1989	0.33551
irr	BWA	1990	0.298668
irr	BWA	1991	0.265449
irr	BWA	1992	0.243913
irr	BWA	1993	0.22937
irr	BWA	1994	0.252105
irr	BWA	1995	0.237316
irr	BWA	1996	0.279685
irr	BWA	1997	0.287151
irr	BWA	1998	0.262614
irr	BWA	1999	0.288911
irr	BWA	2000	0.303798
irr	BWA	2001	0.284482
irr	BWA	2002	0.253558
irr	BWA	2003	0.239554
irr	BWA	2004	0.250685
irr	BWA	2005	0.267655
irr	BWA	2006	0.2566
irr	BWA	2007	0.240577
irr	BWA	2008	0.206374
irr	BWA	2009	0.178422
irr	BWA	2010	0.190472
irr	BWA	2011	0.212506
irr	BWA	2012	0.190935
irr	BWA	2013	0.198139
irr	BWA	2014	0.210153
irr	BWA	2015	0.187088
irr	BWA	2016	0.201217
irr	BWA	2017	0.18583
irr	BWA	2018	0.184271
irr	BWA	2019	0.175924
irr	CAF	1980	0.256357
irr	CAF	1981	0.294539
irr	CAF	1982	0.224736
irr	CAF	1983	0.241795
irr	CAF	1984	0.194417
irr	CAF	1985	0.274269
irr	CAF	1986	0.251254
irr	CAF	1987	0.228128
irr	CAF	1988	0.241211
irr	CAF	1989	0.252681
irr	CAF	1990	0.248009
irr	CAF	1991	0.240767
irr	CAF	1992	0.225851
irr	CAF	1993	0.216116
irr	CAF	1994	0.224961
irr	CAF	1995	0.236904
irr	CAF	1996	0.151676
irr	CAF	1997	0.165172
irr	CAF	1998	0.175908
irr	CAF	1999	0.185364
irr	CAF	2000	0.189101
irr	CAF	2001	0.190531
irr	CAF	2002	0.189856
irr	CAF	2003	0.177935
irr	CAF	2004	0.186033
irr	CAF	2005	0.190346
irr	CAF	2006	0.205902
irr	CAF	2007	0.196819
irr	CAF	2008	0.186645
irr	CAF	2009	0.185221
irr	CAF	2010	0.163675
irr	CAF	2011	0.169762
irr	CAF	2012	0.181197
irr	CAF	2013	0.0962055
irr	CAF	2014	0.0936987
irr	CAF	2015	0.100635
irr	CAF	2016	0.104452
irr	CAF	2017	0.104914
irr	CAF	2018	0.102102
irr	CAF	2019	0.101561
irr	CAN	1950	0.0367159
irr	CAN	1951	0.0326606
irr	CAN	1952	0.0349702
irr	CAN	1953	0.0354194
irr	CAN	1954	0.0329885
irr	CAN	1955	0.0363915
irr	CAN	1956	0.0352764
irr	CAN	1957	0.0330427
irr	CAN	1958	0.0335615
irr	CAN	1959	0.0334312
irr	CAN	1960	0.0339489
irr	CAN	1961	0.0371076
irr	CAN	1962	0.0384971
irr	CAN	1963	0.0381671
irr	CAN	1964	0.0380695
irr	CAN	1965	0.0368802
irr	CAN	1966	0.0362099
irr	CAN	1967	0.0353534
irr	CAN	1968	0.0374366
irr	CAN	1969	0.0376879
irr	CAN	1970	0.0364932
irr	CAN	1971	0.0332437
irr	CAN	1972	0.0319543
irr	CAN	1973	0.0338663
irr	CAN	1974	0.0346735
irr	CAN	1975	0.035982
irr	CAN	1976	0.0389333
irr	CAN	1977	0.0393019
irr	CAN	1978	0.0429804
irr	CAN	1979	0.0510129
irr	CAN	1980	0.0537199
irr	CAN	1981	0.0457419
irr	CAN	1982	0.0378951
irr	CAN	1983	0.0523385
irr	CAN	1984	0.0622991
irr	CAN	1985	0.0667739
irr	CAN	1986	0.0591087
irr	CAN	1987	0.0632835
irr	CAN	1988	0.0617814
irr	CAN	1989	0.0573658
irr	CAN	1990	0.0502893
irr	CAN	1991	0.0422624
irr	CAN	1992	0.0399012
irr	CAN	1993	0.045488
irr	CAN	1994	0.0543798
irr	CAN	1995	0.0597117
irr	CAN	1996	0.0611422
irr	CAN	1997	0.0612503
irr	CAN	1998	0.0541268
irr	CAN	1999	0.0614928
irr	CAN	2000	0.0704294
irr	CAN	2001	0.066558
irr	CAN	2002	0.064775
irr	CAN	2003	0.0693565
irr	CAN	2004	0.0705702
irr	CAN	2005	0.0727604
irr	CAN	2006	0.0671639
irr	CAN	2007	0.0620033
irr	CAN	2008	0.0620412
irr	CAN	2009	0.0430257
irr	CAN	2010	0.052007
irr	CAN	2011	0.0569305
irr	CAN	2012	0.0524024
irr	CAN	2013	0.0531292
irr	CAN	2014	0.0545621
irr	CAN	2015	0.0433255
irr	CAN	2016	0.0446514
irr	CAN	2017	0.0489008
irr	CAN	2018	0.0485709
irr	CAN	2019	0.0481639
irr	CHE	1950	0.0400178
irr	CHE	1951	0.0404059
irr	CHE	1952	0.0423294
irr	CHE	1953	0.0476059
irr	CHE	1954	0.051237
irr	CHE	1955	0.0511503
irr	CHE	1956	0.051548
irr	CHE	1957	0.0492611
irr	CHE	1958	0.0479669
irr	CHE	1959	0.0501107
irr	CHE	1960	0.049349
irr	CHE	1961	0.0476737
irr	CHE	1962	0.0461386
irr	CHE	1963	0.0434112
irr	CHE	1964	0.0432423
irr	CHE	1965	0.0430911
irr	CHE	1966	0.0425603
irr	CHE	1967	0.043301
irr	CHE	1968	0.0443532
irr	CHE	1969	0.0452457
irr	CHE	1970	0.0381919
irr	CHE	1971	0.0358298
irr	CHE	1972	0.0340727
irr	CHE	1973	0.0334448
irr	CHE	1974	0.0318464
irr	CHE	1975	0.0297365
irr	CHE	1976	0.032342
irr	CHE	1977	0.0321472
irr	CHE	1978	0.0322484
irr	CHE	1979	0.0325827
irr	CHE	1980	0.0300168
irr	CHE	1981	0.0337454
irr	CHE	1982	0.027056
irr	CHE	1983	0.0226475
irr	CHE	1984	0.0359785
irr	CHE	1985	0.033988
irr	CHE	1986	0.0274864
irr	CHE	1987	0.0289261
irr	CHE	1988	0.0303495
irr	CHE	1989	0.0317257
irr	CHE	1990	0.0303131
irr	CHE	1991	0.030296
irr	CHE	1992	0.0309251
irr	CHE	1993	0.031903
irr	CHE	1994	0.034731
irr	CHE	1995	0.0328957
irr	CHE	1996	0.032161
irr	CHE	1997	0.0359956
irr	CHE	1998	0.0359623
irr	CHE	1999	0.0322171
irr	CHE	2000	0.0364867
irr	CHE	2001	0.0268765
irr	CHE	2002	0.0220098
irr	CHE	2003	0.0238786
irr	CHE	2004	0.033156
irr	CHE	2005	0.0293288
irr	CHE	2006	0.0338198
irr	CHE	2007	0.0408896
irr	CHE	2008	0.0342449
irr	CHE	2009	0.0193855
irr	CHE	2010	0.0325798
irr	CHE	2011	0.0255092
irr	CHE	2012	0.0291338
irr	CHE	2013	0.0361419
irr	CHE	2014	0.0328616
irr	CHE	2015	0.0293777
irr	CHE	2016	0.0283337
irr	CHE	2017	0.0275147
irr	CHE	2018	0.0315642
irr	CHE	2019	0.0306254
irr	CHL	1951	0.0674916
irr	CHL	1952	0.0860339
irr	CHL	1953	0.0729339
irr	CHL	1954	0.108043
irr	CHL	1955	0.106616
irr	CHL	1956	0.0841768
irr	CHL	1957	0.0776057
irr	CHL	1958	0.0760001
irr	CHL	1959	0.0667399
irr	CHL	1960	0.0785646
irr	CHL	1961	0.116712
irr	CHL	1962	0.12652
irr	CHL	1963	0.234357
irr	CHL	1964	0.188819
irr	CHL	1965	0.158327
irr	CHL	1966	0.184982
irr	CHL	1967	0.169813
irr	CHL	1968	0.180603
irr	CHL	1969	0.195093
irr	CHL	1970	0.192615
irr	CHL	1971	0.19051
irr	CHL	1972	0.151916
irr	CHL	1973	0.139664
irr	CHL	1974	0.115979
irr	CHL	1975	0.0817692
irr	CHL	1976	0.0921424
irr	CHL	1977	0.0999764
irr	CHL	1978	0.106073
irr	CHL	1979	0.118441
irr	CHL	1980	0.118146
irr	CHL	1981	0.116694
irr	CHL	1982	0.0893659
irr	CHL	1983	0.0850342
irr	CHL	1984	0.0897027
irr	CHL	1985	0.09133
irr	CHL	1986	0.0920287
irr	CHL	1987	0.0977422
irr	CHL	1988	0.103871
irr	CHL	1989	0.1096
irr	CHL	1990	0.106682
irr	CHL	1991	0.114384
irr	CHL	1992	0.119674
irr	CHL	1993	0.123052
irr	CHL	1994	0.12701
irr	CHL	1995	0.144269
irr	CHL	1996	0.136084
irr	CHL	1997	0.1344
irr	CHL	1998	0.126597
irr	CHL	1999	0.112863
irr	CHL	2000	0.123463
irr	CHL	2001	0.1146
irr	CHL	2002	0.108561
irr	CHL	2003	0.102161
irr	CHL	2004	0.12608
irr	CHL	2005	0.143422
irr	CHL	2006	0.172898
irr	CHL	2007	0.162679
irr	CHL	2008	0.125134
irr	CHL	2009	0.106449
irr	CHL	2010	0.120588
irr	CHL	2011	0.121319
irr	CHL	2012	0.118922
irr	CHL	2013	0.117806
irr	CHL	2014	0.110865
irr	CHL	2015	0.10789
irr	CHL	2016	0.109343
irr	CHL	2017	0.11354
irr	CHL	2018	0.115387
irr	CHL	2019	0.108962
irr	CHN	1952	0.187793
irr	CHN	1953	0.212805
irr	CHN	1954	0.200628
irr	CHN	1955	0.196377
irr	CHN	1956	0.205855
irr	CHN	1957	0.198115
irr	CHN	1958	0.212854
irr	CHN	1959	0.18374
irr	CHN	1960	0.155892
irr	CHN	1961	0.121525
irr	CHN	1962	0.121549
irr	CHN	1963	0.125545
irr	CHN	1964	0.150972
irr	CHN	1965	0.169698
irr	CHN	1966	0.168884
irr	CHN	1967	0.156555
irr	CHN	1968	0.140854
irr	CHN	1969	0.156904
irr	CHN	1970	0.165116
irr	CHN	1971	0.153299
irr	CHN	1972	0.135499
irr	CHN	1973	0.128115
irr	CHN	1974	0.110923
irr	CHN	1975	0.0989958
irr	CHN	1976	0.0788109
irr	CHN	1977	0.0729969
irr	CHN	1978	0.0716009
irr	CHN	1979	0.0667106
irr	CHN	1980	0.0688825
irr	CHN	1981	0.0644662
irr	CHN	1982	0.0648395
irr	CHN	1983	0.0696224
irr	CHN	1984	0.073023
irr	CHN	1985	0.0810074
irr	CHN	1986	0.0816583
irr	CHN	1987	0.0854891
irr	CHN	1988	0.091529
irr	CHN	1989	0.0921514
irr	CHN	1990	0.0930529
irr	CHN	1991	0.0975561
irr	CHN	1992	0.100889
irr	CHN	1993	0.107154
irr	CHN	1994	0.125553
irr	CHN	1995	0.133941
irr	CHN	1996	0.127991
irr	CHN	1997	0.126835
irr	CHN	1998	0.120083
irr	CHN	1999	0.107721
irr	CHN	2000	0.108774
irr	CHN	2001	0.10811
irr	CHN	2002	0.0960502
irr	CHN	2003	0.0915957
irr	CHN	2004	0.0957024
irr	CHN	2005	0.0960192
irr	CHN	2006	0.102231
irr	CHN	2007	0.106257
irr	CHN	2008	0.100512
irr	CHN	2009	0.0960104
irr	CHN	2010	0.0964302
irr	CHN	2011	0.0960138
irr	CHN	2012	0.0887228
irr	CHN	2013	0.0833789
irr	CHN	2014	0.0804931
irr	CHN	2015	0.0837208
irr	CHN	2016	0.0837527
irr	CHN	2017	0.0810046
irr	CHN	2018	0.0780062
irr	CHN	2019	0.075134
irr	CIV	1960	0.411189
irr	CIV	1961	0.368823
irr	CIV	1962	0.342116
irr	CIV	1963	0.342772
irr	CIV	1964	0.335816
irr	CIV	1965	0.273987
irr	CIV	1966	0.26244
irr	CIV	1967	0.246611
irr	CIV	1968	0.260593
irr	CIV	1969	0.257639
irr	CIV	1970	0.236847
irr	CIV	1971	0.211268
irr	CIV	1972	0.194103
irr	CIV	1973	0.198931
irr	CIV	1974	0.184319
irr	CIV	1975	0.17163
irr	CIV	1976	0.19479
irr	CIV	1977	0.210662
irr	CIV	1978	0.189293
irr	CIV	1979	0.163873
irr	CIV	1980	0.145994
irr	CIV	1981	0.132471
irr	CIV	1982	0.129575
irr	CIV	1983	0.120223
irr	CIV	1984	0.103061
irr	CIV	1985	0.119858
irr	CIV	1986	0.126473
irr	CIV	1987	0.114112
irr	CIV	1988	0.106875
irr	CIV	1989	0.13295
irr	CIV	1990	0.135753
irr	CIV	1991	0.117711
irr	CIV	1992	0.112763
irr	CIV	1993	0.118762
irr	CIV	1994	0.150761
irr	CIV	1995	0.162003
irr	CIV	1996	0.168433
irr	CIV	1997	0.180533
irr	CIV	1998	0.183314
irr	CIV	1999	0.189405
irr	CIV	2000	0.138208
irr	CIV	2001	0.187293
irr	CIV	2002	0.205737
irr	CIV	2003	0.213376
irr	CIV	2004	0.213493
irr	CIV	2005	0.208452
irr	CIV	2006	0.217287
irr	CIV	2007	0.216953
irr	CIV	2008	0.261449
irr	CIV	2009	0.271362
irr	CIV	2010	0.290261
irr	CIV	2011	0.273738
irr	CIV	2012	0.293782
irr	CIV	2013	0.334829
irr	CIV	2014	0.341462
irr	CIV	2015	0.357801
irr	CIV	2016	0.370055
irr	CIV	2017	0.386373
irr	CIV	2018	0.403744
irr	CIV	2019	0.3801
irr	CMR	1960	0.187635
irr	CMR	1961	0.177605
irr	CMR	1962	0.167885
irr	CMR	1963	0.215648
irr	CMR	1964	0.216446
irr	CMR	1965	0.191924
irr	CMR	1966	0.205201
irr	CMR	1967	0.160593
irr	CMR	1968	0.156457
irr	CMR	1969	0.185835
irr	CMR	1970	0.144186
irr	CMR	1971	0.0999188
irr	CMR	1972	0.0879432
irr	CMR	1973	0.104895
irr	CMR	1974	0.104491
irr	CMR	1975	0.0825069
irr	CMR	1976	0.0786936
irr	CMR	1977	0.0961186
irr	CMR	1978	0.135843
irr	CMR	1979	0.0884348
irr	CMR	1980	0.088397
irr	CMR	1981	0.0824468
irr	CMR	1982	0.0801192
irr	CMR	1983	0.0857613
irr	CMR	1984	0.0876386
irr	CMR	1985	0.0782728
irr	CMR	1986	0.0710259
irr	CMR	1987	0.0733499
irr	CMR	1988	0.0799563
irr	CMR	1989	0.0643101
irr	CMR	1990	0.0560699
irr	CMR	1991	0.0350441
irr	CMR	1992	0.05577
irr	CMR	1993	0.102695
irr	CMR	1994	0.0882345
irr	CMR	1995	0.0988903
irr	CMR	1996	0.105281
irr	CMR	1997	0.106635
irr	CMR	1998	0.109534
irr	CMR	1999	0.116279
irr	CMR	2000	0.107468
irr	CMR	2001	0.0976788
irr	CMR	2002	0.099031
irr	CMR	2003	0.0976714
irr	CMR	2004	0.105445
irr	CMR	2005	0.105286
irr	CMR	2006	0.107758
irr	CMR	2007	0.104185
irr	CMR	2008	0.102928
irr	CMR	2009	0.100821
irr	CMR	2010	0.102447
irr	CMR	2011	0.108522
irr	CMR	2012	0.116939
irr	CMR	2013	0.121507
irr	CMR	2014	0.1267
irr	CMR	2015	0.12948
irr	CMR	2016	0.134612
irr	CMR	2017	0.132452
irr	CMR	2018	0.139812
irr	CMR	2019	0.137649
irr	COL	1950	0.227317
irr	COL	1951	0.230047
irr	COL	1952	0.226148
irr	COL	1953	0.251201
irr	COL	1954	0.259468
irr	COL	1955	0.234131
irr	COL	1956	0.212686
irr	COL	1957	0.162728
irr	COL	1958	0.139955
irr	COL	1959	0.146478
irr	COL	1960	0.148603
irr	COL	1961	0.153322
irr	COL	1962	0.151477
irr	COL	1963	0.144521
irr	COL	1964	0.1606
irr	COL	1965	0.147541
irr	COL	1966	0.133377
irr	COL	1967	0.148004
irr	COL	1968	0.141446
irr	COL	1969	0.142901
irr	COL	1970	0.145347
irr	COL	1971	0.146259
irr	COL	1972	0.1489
irr	COL	1973	0.156205
irr	COL	1974	0.150255
irr	COL	1975	0.146412
irr	COL	1976	0.144822
irr	COL	1977	0.152015
irr	COL	1978	0.143877
irr	COL	1979	0.138733
irr	COL	1980	0.135928
irr	COL	1981	0.127934
irr	COL	1982	0.125034
irr	COL	1983	0.121989
irr	COL	1984	0.119381
irr	COL	1985	0.102909
irr	COL	1986	0.106843
irr	COL	1987	0.105186
irr	COL	1988	0.0971895
irr	COL	1989	0.0955815
irr	COL	1990	0.0990392
irr	COL	1991	0.104346
irr	COL	1992	0.107104
irr	COL	1993	0.108806
irr	COL	1994	0.101917
irr	COL	1995	0.102945
irr	COL	1996	0.0978588
irr	COL	1997	0.099669
irr	COL	1998	0.0951556
irr	COL	1999	0.0903769
irr	COL	2000	0.101836
irr	COL	2001	0.0993203
irr	COL	2002	0.0976598
irr	COL	2003	0.100624
irr	COL	2004	0.105941
irr	COL	2005	0.110853
irr	COL	2006	0.115331
irr	COL	2007	0.119244
irr	COL	2008	0.121613
irr	COL	2009	0.112196
irr	COL	2010	0.120678
irr	COL	2011	0.136213
irr	COL	2012	0.133815
irr	COL	2013	0.134105
irr	COL	2014	0.127892
irr	COL	2015	0.113302
irr	COL	2016	0.112129
irr	COL	2017	0.11262
irr	COL	2018	0.113157
irr	COL	2019	0.11282
irr	CPV	1980	0.0416303
irr	CPV	1981	0.0379124
irr	CPV	1982	0.0366677
irr	CPV	1983	0.0371206
irr	CPV	1984	0.0397394
irr	CPV	1985	0.0358861
irr	CPV	1986	0.0438196
irr	CPV	1987	0.0455341
irr	CPV	1988	0.0483237
irr	CPV	1989	0.050272
irr	CPV	1990	0.0460741
irr	CPV	1991	0.0477601
irr	CPV	1992	0.0499295
irr	CPV	1993	0.0532346
irr	CPV	1994	0.0598954
irr	CPV	1995	0.0542469
irr	CPV	1996	0.0699097
irr	CPV	1997	0.0527161
irr	CPV	1998	0.070973
irr	CPV	1999	0.0769602
irr	CPV	2000	0.0747086
irr	CPV	2001	0.0742954
irr	CPV	2002	0.0741294
irr	CPV	2003	0.0859504
irr	CPV	2004	0.075906
irr	CPV	2005	0.0721879
irr	CPV	2006	0.0760068
irr	CPV	2007	0.0799026
irr	CPV	2008	0.0785292
irr	CPV	2009	0.066067
irr	CPV	2010	0.0562624
irr	CPV	2011	0.0534114
irr	CPV	2012	0.0412395
irr	CPV	2013	0.0481822
irr	CPV	2014	0.038898
irr	CPV	2015	0.0361925
irr	CPV	2016	0.044786
irr	CPV	2017	0.0436022
irr	CPV	2018	0.0401964
irr	CPV	2019	0.0414707
irr	CRI	1950	0.14778
irr	CRI	1951	0.159467
irr	CRI	1952	0.19025
irr	CRI	1953	0.188364
irr	CRI	1954	0.174485
irr	CRI	1955	0.209993
irr	CRI	1956	0.201126
irr	CRI	1957	0.210092
irr	CRI	1958	0.212935
irr	CRI	1959	0.208986
irr	CRI	1960	0.210942
irr	CRI	1961	0.192259
irr	CRI	1962	0.193445
irr	CRI	1963	0.192633
irr	CRI	1964	0.193274
irr	CRI	1965	0.199628
irr	CRI	1966	0.199298
irr	CRI	1967	0.195702
irr	CRI	1968	0.196652
irr	CRI	1969	0.191082
irr	CRI	1970	0.194523
irr	CRI	1971	0.178464
irr	CRI	1972	0.176351
irr	CRI	1973	0.170187
irr	CRI	1974	0.149954
irr	CRI	1975	0.152239
irr	CRI	1976	0.1644
irr	CRI	1977	0.182208
irr	CRI	1978	0.171268
irr	CRI	1979	0.150837
irr	CRI	1980	0.137993
irr	CRI	1981	0.0879942
irr	CRI	1982	0.0696517
irr	CRI	1983	0.100097
irr	CRI	1984	0.118188
irr	CRI	1985	0.130653
irr	CRI	1986	0.152248
irr	CRI	1987	0.151174
irr	CRI	1988	0.148484
irr	CRI	1989	0.150756
irr	CRI	1990	0.148581
irr	CRI	1991	0.143522
irr	CRI	1992	0.154702
irr	CRI	1993	0.157705
irr	CRI	1994	0.158251
irr	CRI	1995	0.158422
irr	CRI	1996	0.154854
irr	CRI	1997	0.161222
irr	CRI	1998	0.161691
irr	CRI	1999	0.154099
irr	CRI	2000	0.150797
irr	CRI	2001	0.146874
irr	CRI	2002	0.148118
irr	CRI	2003	0.150226
irr	CRI	2004	0.142943
irr	CRI	2005	0.141664
irr	CRI	2006	0.143328
irr	CRI	2007	0.145817
irr	CRI	2008	0.138669
irr	CRI	2009	0.129428
irr	CRI	2010	0.141191
irr	CRI	2011	0.140087
irr	CRI	2012	0.140771
irr	CRI	2013	0.136533
irr	CRI	2014	0.135209
irr	CRI	2015	0.141353
irr	CRI	2016	0.150413
irr	CRI	2017	0.150368
irr	CRI	2018	0.146608
irr	CRI	2019	0.14413
irr	CYM	1991	0.383265
irr	CYM	1992	0.364985
irr	CYM	1993	0.35478
irr	CYM	1994	0.347423
irr	CYM	1995	0.337638
irr	CYM	1996	0.33056
irr	CYM	1997	0.326251
irr	CYM	1998	0.395248
irr	CYM	1999	0.37409
irr	CYM	2000	0.349217
irr	CYM	2001	0.326344
irr	CYM	2002	0.310437
irr	CYM	2003	0.293833
irr	CYM	2004	0.274636
irr	CYM	2005	0.274325
irr	CYM	2006	0.27061
irr	CYM	2007	0.255792
irr	CYM	2008	0.237685
irr	CYM	2009	0.206192
irr	CYM	2010	0.192479
irr	CYM	2011	0.184844
irr	CYM	2012	0.178943
irr	CYM	2013	0.177102
irr	CYM	2014	0.177363
irr	CYM	2015	0.174271
irr	CYM	2016	0.181432
irr	CYM	2017	0.182511
irr	CYM	2018	0.185493
irr	CYM	2019	0.215787
irr	CYP	1950	0.115093
irr	CYP	1951	0.131824
irr	CYP	1952	0.137484
irr	CYP	1953	0.161456
irr	CYP	1954	0.137848
irr	CYP	1955	0.106019
irr	CYP	1956	0.101012
irr	CYP	1957	0.0926015
irr	CYP	1958	0.0845063
irr	CYP	1959	0.0898945
irr	CYP	1960	0.10518
irr	CYP	1961	0.108769
irr	CYP	1962	0.111701
irr	CYP	1963	0.107046
irr	CYP	1964	0.113926
irr	CYP	1965	0.118401
irr	CYP	1966	0.125361
irr	CYP	1967	0.126511
irr	CYP	1968	0.125707
irr	CYP	1969	0.125173
irr	CYP	1970	0.112234
irr	CYP	1971	0.115983
irr	CYP	1972	0.113648
irr	CYP	1973	0.0700747
irr	CYP	1974	0.041977
irr	CYP	1975	0.0298712
irr	CYP	1976	0.0451241
irr	CYP	1977	0.0571271
irr	CYP	1978	0.0567137
irr	CYP	1979	0.0612224
irr	CYP	1980	0.0611804
irr	CYP	1981	0.0580007
irr	CYP	1982	0.062138
irr	CYP	1983	0.0633209
irr	CYP	1984	0.0659513
irr	CYP	1985	0.0654844
irr	CYP	1986	0.0693862
irr	CYP	1987	0.0750698
irr	CYP	1988	0.0765942
irr	CYP	1989	0.0768185
irr	CYP	1990	0.0809807
irr	CYP	1991	0.076862
irr	CYP	1992	0.0827715
irr	CYP	1993	0.0787865
irr	CYP	1994	0.0831492
irr	CYP	1995	0.089191
irr	CYP	1996	0.0857071
irr	CYP	1997	0.0836644
irr	CYP	1998	0.0952007
irr	CYP	1999	0.0998632
irr	CYP	2000	0.104333
irr	CYP	2001	0.109426
irr	CYP	2002	0.101664
irr	CYP	2003	0.0997589
irr	CYP	2004	0.102509
irr	CYP	2005	0.0944079
irr	CYP	2006	0.0924958
irr	CYP	2007	0.0912557
irr	CYP	2008	0.085407
irr	CYP	2009	0.0726199
irr	CYP	2010	0.073959
irr	CYP	2011	0.0770319
irr	CYP	2012	0.0745346
irr	CYP	2013	0.0726449
irr	CYP	2014	0.0721642
irr	CYP	2015	0.0745471
irr	CYP	2016	0.0836565
irr	CYP	2017	0.0826641
irr	CYP	2018	0.0813095
irr	CYP	2019	0.0796632
irr	CZE	1990	0.107168
irr	CZE	1991	0.0713206
irr	CZE	1992	0.0599247
irr	CZE	1993	0.0465026
irr	CZE	1994	0.0362681
irr	CZE	1995	0.0366063
irr	CZE	1996	0.0364509
irr	CZE	1997	0.0322071
irr	CZE	1998	0.0358265
irr	CZE	1999	0.0343461
irr	CZE	2000	0.0344399
irr	CZE	2001	0.0366779
irr	CZE	2002	0.0364909
irr	CZE	2003	0.0370229
irr	CZE	2004	0.039725
irr	CZE	2005	0.0416757
irr	CZE	2006	0.0452644
irr	CZE	2007	0.0492745
irr	CZE	2008	0.047277
irr	CZE	2009	0.0423478
irr	CZE	2010	0.0427679
irr	CZE	2011	0.0434693
irr	CZE	2012	0.0405658
irr	CZE	2013	0.0416763
irr	CZE	2014	0.046586
irr	CZE	2015	0.0497532
irr	CZE	2016	0.0496616
irr	CZE	2017	0.0509944
irr	CZE	2018	0.0485849
irr	CZE	2019	0.0489739
irr	DEU	1950	0.10372
irr	DEU	1951	0.104155
irr	DEU	1952	0.108039
irr	DEU	1953	0.111939
irr	DEU	1954	0.110525
irr	DEU	1955	0.113286
irr	DEU	1956	0.109633
irr	DEU	1957	0.104738
irr	DEU	1958	0.100866
irr	DEU	1959	0.101069
irr	DEU	1960	0.100889
irr	DEU	1961	0.0930385
irr	DEU	1962	0.0860658
irr	DEU	1963	0.0811453
irr	DEU	1964	0.0788907
irr	DEU	1965	0.0758828
irr	DEU	1966	0.0747726
irr	DEU	1967	0.0731267
irr	DEU	1968	0.071832
irr	DEU	1969	0.0709309
irr	DEU	1970	0.0673765
irr	DEU	1971	0.0635148
irr	DEU	1972	0.0622143
irr	DEU	1973	0.0620854
irr	DEU	1974	0.0575112
irr	DEU	1975	0.0571404
irr	DEU	1976	0.0576485
irr	DEU	1977	0.0570526
irr	DEU	1978	0.0544361
irr	DEU	1979	0.052402
irr	DEU	1980	0.0473665
irr	DEU	1981	0.0445147
irr	DEU	1982	0.0435622
irr	DEU	1983	0.0429221
irr	DEU	1984	0.0433782
irr	DEU	1985	0.0438654
irr	DEU	1986	0.0445111
irr	DEU	1987	0.0437003
irr	DEU	1988	0.044442
irr	DEU	1989	0.0455867
irr	DEU	1990	0.045884
irr	DEU	1991	0.046372
irr	DEU	1992	0.0438734
irr	DEU	1993	0.0415861
irr	DEU	1994	0.0465548
irr	DEU	1995	0.0468288
irr	DEU	1996	0.0470959
irr	DEU	1997	0.0497172
irr	DEU	1998	0.0517561
irr	DEU	1999	0.0505988
irr	DEU	2000	0.0474027
irr	DEU	2001	0.051357
irr	DEU	2002	0.0527464
irr	DEU	2003	0.0532332
irr	DEU	2004	0.0569955
irr	DEU	2005	0.057818
irr	DEU	2006	0.0624596
irr	DEU	2007	0.0639411
irr	DEU	2008	0.0584382
irr	DEU	2009	0.0483009
irr	DEU	2010	0.0529025
irr	DEU	2011	0.0540988
irr	DEU	2012	0.0498505
irr	DEU	2013	0.0488831
irr	DEU	2014	0.0506449
irr	DEU	2015	0.0505135
irr	DEU	2016	0.0514034
irr	DEU	2017	0.0501117
irr	DEU	2018	0.0464267
irr	DEU	2019	0.0447361
irr	DJI	1980	0.163179
irr	DJI	1981	0.155984
irr	DJI	1982	0.134324
irr	DJI	1983	0.115481
irr	DJI	1984	0.100728
irr	DJI	1985	0.0904318
irr	DJI	1986	0.0845344
irr	DJI	1987	0.0792776
irr	DJI	1988	0.0744196
irr	DJI	1989	0.0674423
irr	DJI	1990	0.0679961
irr	DJI	1991	0.114093
irr	DJI	1992	0.102084
irr	DJI	1993	0.108029
irr	DJI	1994	0.0825642
irr	DJI	1995	0.0964314
irr	DJI	1996	0.0743465
irr	DJI	1997	0.0876695
irr	DJI	1998	0.0842998
irr	DJI	1999	0.0554168
irr	DJI	2000	0.0702364
irr	DJI	2001	0.135767
irr	DJI	2002	0.162843
irr	DJI	2003	0.187897
irr	DJI	2004	0.144894
irr	DJI	2005	0.209457
irr	DJI	2006	0.215324
irr	DJI	2007	0.174364
irr	DJI	2008	0.156454
irr	DJI	2009	0.10608
irr	DJI	2010	0.0591217
irr	DJI	2011	0.106945
irr	DJI	2012	0.102508
irr	DJI	2013	0.186955
irr	DJI	2014	0.168475
irr	DJI	2015	0.159084
irr	DJI	2016	0.154833
irr	DJI	2017	0.145564
irr	DJI	2018	0.130127
irr	DJI	2019	0.11659
irr	DNK	1950	0.0717306
irr	DNK	1951	0.060824
irr	DNK	1952	0.0606998
irr	DNK	1953	0.0704077
irr	DNK	1954	0.0737068
irr	DNK	1955	0.0734695
irr	DNK	1956	0.0739787
irr	DNK	1957	0.07554
irr	DNK	1958	0.0760539
irr	DNK	1959	0.0849219
irr	DNK	1960	0.0859614
irr	DNK	1961	0.0890812
irr	DNK	1962	0.0900193
irr	DNK	1963	0.0881357
irr	DNK	1964	0.093611
irr	DNK	1965	0.0944418
irr	DNK	1966	0.0940131
irr	DNK	1967	0.0957019
irr	DNK	1968	0.0979139
irr	DNK	1969	0.0982535
irr	DNK	1970	0.0934756
irr	DNK	1971	0.0904226
irr	DNK	1972	0.0895751
irr	DNK	1973	0.0892384
irr	DNK	1974	0.07855
irr	DNK	1975	0.0753345
irr	DNK	1976	0.0788137
irr	DNK	1977	0.0768886
irr	DNK	1978	0.0759291
irr	DNK	1979	0.075247
irr	DNK	1980	0.0703875
irr	DNK	1981	0.0672103
irr	DNK	1982	0.0691451
irr	DNK	1983	0.0692648
irr	DNK	1984	0.0709181
irr	DNK	1985	0.0715393
irr	DNK	1986	0.0747622
irr	DNK	1987	0.0732735
irr	DNK	1988	0.0702929
irr	DNK	1989	0.0682926
irr	DNK	1990	0.0661168
irr	DNK	1991	0.0648367
irr	DNK	1992	0.0652736
irr	DNK	1993	0.0626863
irr	DNK	1994	0.0649424
irr	DNK	1995	0.0656577
irr	DNK	1996	0.0638338
irr	DNK	1997	0.0642994
irr	DNK	1998	0.057417
irr	DNK	1999	0.0580214
irr	DNK	2000	0.0672891
irr	DNK	2001	0.0597594
irr	DNK	2002	0.0562049
irr	DNK	2003	0.0541308
irr	DNK	2004	0.057757
irr	DNK	2005	0.0570548
irr	DNK	2006	0.0565866
irr	DNK	2007	0.0484886
irr	DNK	2008	0.045925
irr	DNK	2009	0.0389688
irr	DNK	2010	0.0500356
irr	DNK	2011	0.0503907
irr	DNK	2012	0.051953
irr	DNK	2013	0.0529795
irr	DNK	2014	0.0564092
irr	DNK	2015	0.057826
irr	DNK	2016	0.057947
irr	DNK	2017	0.0596364
irr	DNK	2018	0.0572438
irr	DNK	2019	0.0581742
irr	DOM	1951	0.0888526
irr	DOM	1952	0.0519252
irr	DOM	1953	0.0478164
irr	DOM	1954	0.0556785
irr	DOM	1955	0.0592189
irr	DOM	1956	0.0593111
irr	DOM	1957	0.0736765
irr	DOM	1958	0.062109
irr	DOM	1959	0.0462597
irr	DOM	1960	0.0699983
irr	DOM	1961	0.0947708
irr	DOM	1962	0.0973385
[truncated: 5,541 more rows]

## Sheet: Tabelle1
Summe von AggValue	Spaltenbeschriftungen
Zeilenbeschriftungen	MAR	ABW	AGO	ARG	ARM	AUS	AUT	AZE	BDI	BEL	BEN	BFA	BGR	BHR	BHS	BIH	BLR	BMU	BOL	BRA	BRB	BWA	CAF	CAN	CHE	CHL	CHN	CIV	CMR	COL	CPV	CRI	CYM	CYP	CZE	DEU	DJI	DNK	DOM	ECU	EGY	ESP	EST	FIN	FJI	FRA	GAB	GBR	GEO
1950	0.194889			0.308121		0.0529014	0.0654845			0.092037									0.299417	0.294121				0.0367159	0.0400178					0.227317		0.14778		0.115093		0.10372		0.0717306		0.329766	0.536667	0.123615		0.0906142		0.065287		0.229749
1951	0.203942			0.356293		0.0404172	0.0653442			0.0759098									0.294406	0.269804				0.0326606	0.0404059	0.0674916				0.230047		0.159467		0.131824		0.104155		0.060824	0.0888526	0.326885	0.473342	0.138517		0.113425		0.0603381		0.191195
1952	0.201123			0.309781		0.0387219	0.0698873			0.0730787									0.271804	0.29801				0.0349702	0.0423294	0.0860339	0.187793			0.226148		0.19025		0.137484		0.108039		0.0606998	0.0519252	0.362804	0.454252	0.138054		0.102302		0.0543601		0.187005
1953	0.189213			0.30692		0.0457196	0.0609121			0.0800339									0.235737	0.256169				0.0354194	0.0476059	0.0729339	0.212805			0.251201		0.188364		0.161456		0.111939		0.0704077	0.0478164	0.318483	0.488509	0.119195		0.0927718		0.0634342		0.18975
1954	0.194562			0.294267		0.0453514	0.0704168			0.0822369									0.22569	0.233012				0.0329885	0.051237	0.108043	0.200628			0.259468		0.174485		0.137848		0.110525		0.0737068	0.0556785	0.328634	0.470722	0.118481		0.0929298		0.0684289		0.191996
1955	0.194652			0.313304		0.0431636	0.08017			0.0831682									0.223189	0.263991				0.0363915	0.0511503	0.106616	0.196377			0.234131		0.209993		0.106019		0.113286		0.0734695	0.0592189	0.308815	0.418274	0.121388		0.0917037		0.0702235		0.183716
1956	0.208015			0.290521		0.0426496	0.0859178			0.0813472									0.193965	0.265762				0.0352764	0.051548	0.0841768	0.205855			0.212686		0.201126		0.101012		0.109633		0.0739787	0.0593111	0.30043	0.392826	0.116182		0.0871624		0.0731083		0.178602
1957	0.191179			0.286448		0.0384777	0.0883446			0.0770602									0.17623	0.280704				0.0330427	0.0492611	0.0776057	0.198115			0.162728		0.210092		0.0926015		0.104738		0.07554	0.0736765	0.289588	0.399932	0.109931		0.0823599		0.0726498		0.174138
1958	0.189955			0.286359		0.0405972	0.0908611			0.0732179									0.177118	0.239328				0.0335615	0.0479669	0.0760001	0.212854			0.139955		0.212935		0.0845063		0.100866		0.0760539	0.062109	0.279656	0.400545	0.11349		0.0741909		0.0733318		0.168523
1959	0.195443			0.282771		0.0428794	0.0883653			0.0751852		0.240003							0.186224	0.213713				0.0334312	0.0501107	0.0667399	0.18374			0.146478		0.208986		0.0898945		0.101069		0.0849219	0.0462597	0.285113	0.555354	0.103577		0.0755731		0.0782332		0.172192
1960	0.201586			0.309728		0.0372768	0.0936199			0.0774096		0.277037							0.203517	0.235041	0.069874	0.380755		0.0339489	0.049349	0.0785646	0.155892	0.411189	0.187635	0.148603		0.210942		0.10518		0.100889		0.0859614	0.0699983	0.282206	0.415423	0.115839		0.0748072		0.0878904	0.0850312	0.16446
1961	0.199721			0.242246		0.0428628	0.0914223			0.0770335		0.348722							0.223254	0.216099	0.0693718	0.404143		0.0371076	0.0476737	0.116712	0.121525	0.368823	0.177605	0.153322		0.192259		0.108769		0.0930385		0.0890812	0.0947708	0.270313	0.414982	0.124273		0.0769904		0.0847652	0.0855145	0.162733
1962	0.234867			0.274885		0.0440217	0.0909633			0.0766642		0.385367							0.244264	0.241832	0.0804511	0.430482		0.0384971	0.0461386	0.12652	0.121549	0.342116	0.167885	0.151477		0.193445		0.111701		0.0860658		0.0900193	0.0973385	0.271747	0.421243	0.123264		0.0713311		0.0806709	0.0808943	0.161584
1963	0.257333			0.255953		0.0485942	0.0901966			0.0740558		0.354834							0.214845	0.206576	0.0760453	0.431804		0.0381671	0.0434112	0.234357	0.125545	0.342772	0.215648	0.144521		0.192633		0.107046		0.0811453		0.0881357	0.0929245	0.264113	0.430862	0.123836		0.0712722		0.0790818	0.0823634	0.155866
1964	0.266527			0.256041		0.0435622	0.0949223			0.0755104		0.325411							0.222924	0.226061	0.0724857	0.428854		0.0380695	0.0432423	0.188819	0.150972	0.335816	0.216446	0.1606		0.193274		0.113926		0.0788907		0.093611	0.0931654	0.269195	0.439785	0.121009		0.0735987		0.0799862	0.0826386	0.15691
1965	0.275321			0.239223		0.0376289	0.0895187			0.0760028		0.531345							0.171185	0.213903	0.0914615	0.106442		0.0368802	0.0430911	0.158327	0.169698	0.273987	0.191924	0.147541		0.199628		0.118401		0.0758828		0.0944418	0.104934	0.265064	0.434135	0.12077		0.0719825		0.0796281	0.0756915	0.154392
1966	0.261941			0.242122		0.0386445	0.0886779			0.0741813		0.566256							0.152941	0.21992	0.071496	0.273743		0.0362099	0.0425603	0.184982	0.168884	0.26244	0.205201	0.133377		0.199298		0.125361		0.0747726		0.0940131	0.0904734	0.230536	0.41558	0.123027		0.0695875		0.0800026	0.0853692	0.148932
1967	0.26688			0.232099		0.0408512	0.0901337			0.0726212		0.51197							0.181453	0.242641	0.0851856	0.270357		0.0353534	0.043301	0.169813	0.156555	0.246611	0.160593	0.148004		0.195702		0.126511		0.0731267		0.0957019	0.106629	0.21996	0.412862	0.119125		0.069435		0.0807004	0.0553919	0.146329
1968	0.190186			0.235309		0.0439205	0.0921439			0.0737361		0.507063							0.147098	0.242029	0.0900155	0.298928		0.0374366	0.0443532	0.180603	0.140854	0.260593	0.156457	0.141446		0.196652		0.125707		0.071832		0.0979139	0.106543	0.20531	0.437192	0.119695		0.0684852		0.0791371	0.0396574	0.143956
1969	0.294022			0.248216		0.0476435	0.0950291			0.0753126		0.505913							0.139918	0.256297	0.0848062	0.111552		0.0376879	0.0452457	0.195093	0.156904	0.257639	0.185835	0.142901		0.191082		0.125173		0.0709309		0.0982535	0.113224	0.187696	0.439314	0.118019		0.0726035		0.0835847	0.0434563	0.140034
1970	0.236517		0.21378	0.227823		0.0432989	0.0922788			0.0729674		0.471667	0.274193	0.128946					0.130301	0.260855	0.0887872	0.227223		0.0364932	0.0381919	0.192615	0.165116	0.236847	0.144186	0.145347		0.194523		0.112234		0.0673765		0.0934756	0.122077	0.179784	0.525349	0.113683		0.0680798		0.0825175	0.0617494	0.136081
1971	0.212358		0.212562	0.230314		0.0407346	0.0895811			0.0678593		0.366734	0.255832	0.117904					0.131778	0.258793	0.0799013	0.210526		0.0332437	0.0358298	0.19051	0.153299	0.211268	0.0999188	0.146259		0.178464		0.115983		0.0635148		0.0904226	0.162225	0.176273	0.477323	0.112482		0.0599461		0.0806861	0.0617894	0.130974
1972	0.199626		0.205272	0.220124		0.0428245	0.0825848			0.0700915		0.361969	0.24485	0.123708					0.12622	0.269184	0.0815107	0.200222		0.0319543	0.0340727	0.151916	0.135499	0.194103	0.0879432	0.1489		0.176351		0.113648		0.0622143		0.0895751	0.128913	0.141497	0.464876	0.114589		0.0586259		0.0776035	0.0441027	0.126339
1973	0.187971		0.208967	0.219334		0.0363603	0.0827543			0.0699339		0.311574	0.238806	0.131578	0.208896				0.107508	0.295065	0.0757599	0.191166		0.0338663	0.0334448	0.139664	0.128115	0.198931	0.104895	0.156205		0.170187		0.0700747		0.0620854		0.0892384	0.147348	0.108	0.485431	0.110919		0.0573081		0.077976	0.10756	0.117859
1974	0.147477		0.200753	0.19866		0.0268078	0.0799216			0.0645069		0.262656	0.232115	0.12358	0.16327				0.131069	0.274994	0.0820661	0.181876		0.0346735	0.0318464	0.115979	0.110923	0.184319	0.104491	0.150255		0.149954		0.041977		0.0575112		0.07855	0.139797	0.221343	0.493568	0.0986812		0.0508989		0.0713622	0.286566	0.0984319
1975	0.198666		0.177894	0.128734		0.0266886	0.0756145			0.0581474		0.388814	0.23044	0.110808	0.125885				0.123777	0.248775	0.0879605	0.182549		0.035982	0.0297365	0.0817692	0.0989958	0.17163	0.0825069	0.146412		0.152239		0.0298712		0.0571404		0.0753345	0.140318	0.178296	0.38737	0.0906023		0.0453354		0.0575214	0.170748	0.0948711
1976	0.182854		0.16394	0.134353		0.0306218	0.0757127			0.057775		0.338112	0.22464	0.132948	0.132386				0.116101	0.250106	0.0741838	0.194279		0.0389333	0.032342	0.0921424	0.0788109	0.19479	0.0786936	0.144822		0.1644		0.0451241		0.0576485		0.0788137	0.141799	0.175051	0.320873	0.0892664		0.0411744		0.0551588	0.19533	0.0945119
1977	0.172663		0.156547	0.155153		0.0285939	0.0755186			0.0565401		0.370982	0.21824	0.113066	0.147037				0.12597	0.23556	0.0632094	0.198715		0.0393019	0.0321472	0.0999764	0.0729969	0.210662	0.0961186	0.152015		0.182208		0.0571271		0.0570526		0.0768886	0.13938	0.18326	0.303349	0.0866383		0.0390623		0.0543004	0.11933	0.0952798
1978	0.13503		0.141933	0.139019		0.0344726	0.0712722			0.0538282		0.416206	0.210306	0.112346	0.135416				0.118015	0.212747	0.0840452	0.198004		0.0429804	0.0322484	0.106073	0.0716009	0.189293	0.135843	0.143877		0.171268		0.0567137		0.0544361		0.0759291	0.121019	0.159479	0.262797	0.0837046		0.0492537		0.0529894	0.0132083	0.0961627
1979	0.131454		0.134701	0.151434		0.0363291	0.0716677			0.0517739		0.284498	0.208783	0.119156	0.196757				0.118354	0.190674	0.0760388	0.215779		0.0510129	0.0325827	0.118441	0.0667106	0.163873	0.0884348	0.138733		0.150837		0.0612224		0.052402		0.075247	0.108661	0.175907	0.253334	0.0787398		0.0571845		0.0525659	0.0457961	0.0942538
1980	0.143462		0.135414	0.151924		0.0348807	0.0668992		0.0671788	0.0597996	0.0736194	0.282522	0.20202	0.130913	0.269372				0.108461	0.18427	0.0751794	0.234334	0.256357	0.0537199	0.0300168	0.118146	0.0688825	0.145994	0.088397	0.135928	0.0416303	0.137993		0.0611804		0.0473665	0.163179	0.0703875	0.109581	0.164498	0.228386	0.0729618		0.0519928	0.0820096	0.04784	0.0602935	0.089165
1981	0.114999		0.118486	0.137318		0.0329022	0.0627022		0.0779128	0.0557424	0.0748615	0.290685	0.196418	0.134519	0.255765				0.115145	0.169039	0.0669931	0.222682	0.294539	0.0457419	0.0337454	0.116694	0.0644662	0.132471	0.0824468	0.127934	0.0379124	0.0879942		0.0580007		0.0445147	0.155984	0.0672103	0.099826	0.151206	0.20309	0.0686401		0.0488141	0.0641302	0.0466381	0.0699635	0.0879528
1982	0.106501		0.113712	0.108		0.0299728	0.0616557		0.0475974	0.0567693	0.0759754	0.251665	0.187145	0.145459	0.286514				0.085164	0.157073	0.0593472	0.191551	0.224736	0.0378951	0.027056	0.0893659	0.0648395	0.129575	0.0801192	0.125034	0.0366677	0.0696517		0.062138		0.0435622	0.134324	0.0691451	0.0882876	0.133569	0.205198	0.0676885		0.0518021	0.0487095	0.0455156	0.0655598	0.0950237
1983	0.105861		0.114543	0.113644		0.0397678	0.0625139		0.0501775	0.0586967	0.0661644	0.200117	0.182463	0.149557	0.264988				0.0705404	0.142095	0.0584567	0.17816	0.241795	0.0523385	0.0226475	0.0850342	0.0696224	0.120223	0.0857613	0.121989	0.0371206	0.100097		0.0633209		0.0429221	0.115481	0.0692648	0.0856431	0.164523	0.172453	0.0669575		0.0523671	0.0427663	0.0481145	0.0594072	0.101288
1984	0.100372		0.119158	0.113306		0.0406403	0.0619335		0.0612449	0.0604403	0.072181	0.179582	0.179328	0.139626	0.249192				0.0289234	0.154155	0.0610265	0.183629	0.194417	0.0622991	0.0359785	0.0897027	0.073023	0.103061	0.0876386	0.119381	0.0397394	0.118188		0.0659513		0.0433782	0.100728	0.0709181	0.0727286	0.158046	0.170964	0.0687556		0.0544706	0.0502719	0.0512152	0.0723962	0.101319
1985	0.111797		0.117779	0.110079		0.0392955	0.062576		0.0609109	0.060539	0.034486	0.232485	0.174244	0.0929679	0.280322				0.0920512	0.169368	0.061589	0.21684	0.274269	0.0667739	0.033988	0.09133	0.0810074	0.119858	0.0782728	0.102909	0.0358861	0.130653		0.0654844		0.0438654	0.0904318	0.0715393	0.0972054	0.164046	0.177716	0.0701627		0.0502789	0.0604393	0.0537518	0.0641554	0.103224
1986	0.117357		0.0905918	0.126828		0.0398216	0.0625784		0.0747475	0.0648105	0.0500165	0.211315	0.171733	0.0622994	0.2596			0.144884	0.150536	0.178275	0.0652058	0.260734	0.251254	0.0591087	0.0274864	0.0920287	0.0816583	0.126473	0.0710259	0.106843	0.0438196	0.152248		0.0693862		0.0445111	0.0845344	0.0747622	0.0826759	0.125052	0.194224	0.0732389		0.0507718	0.0770567	0.0602905	0.0295805	0.103324
1987	0.121989		0.100927	0.126864		0.0476124	0.0614665		0.0591843	0.0660444	0.0647806	0.193503	0.173427	0.0763362	0.367941			0.147356	0.144577	0.136464	0.071216	0.255516	0.228128	0.0632835	0.0289261	0.0977422	0.0854891	0.114112	0.0733499	0.105186	0.0455341	0.151174		0.0750698		0.0437003	0.0792776	0.0732735	0.0789245	0.0999152	0.208475	0.0743397		0.0496673	0.0458841	0.0608717	0.0122863	0.106477
1988	0.129987		0.093026	0.127717		0.0504915	0.0617907		0.0193434	0.0731039	0.0435093	0.195084	0.191872	0.109375	0.35113			0.138528	0.12202	0.118709	0.0693697	0.253141	0.241211	0.0617814	0.0303495	0.103871	0.091529	0.106875	0.0799563	0.0971895	0.0483237	0.148484		0.0765942		0.044442	0.0744196	0.0702929	0.0771356	0.107892	0.150358	0.0735523		0.0515666	0.0885388	0.0663288	0.0408114	0.108174
1989	0.126853		0.0949745	0.118985		0.0482131	0.0611552		0.0273362	0.0734296	0.0565432	0.188728	0.188378	0.116618	0.331295			0.134102	0.128593	0.102979	0.0694449	0.33551	0.252681	0.0573658	0.0317257	0.1096	0.0921514	0.13295	0.0643101	0.0955815	0.050272	0.150756		0.0768185		0.0455867	0.0674423	0.0682926	0.0915726	0.109417	0.195472	0.0737472		0.0491946	0.150514	0.0691959	0.032847	0.100113
1990	0.115993		0.103004	0.111115	0.038504	0.045727	0.0617106	0.0592636	0.01	0.0701464	0.0663361	0.174459	0.140897	0.128162	0.308824	0.072471	0.12477	0.128967	0.145313	0.103284	0.0598401	0.298668	0.248009	0.0502893	0.0303131	0.106682	0.0930529	0.135753	0.0560699	0.0990392	0.0460741	0.148581		0.0809807	0.107168	0.045884	0.0679961	0.0661168	0.101908	0.128903	0.212747	0.0731577	0.0636134	0.0409442	0.160933	0.0672287	0.0420288	0.0893052	0.124965
1991	0.126142	0.114419	0.213091	0.146851	0.0284217	0.0493344	0.0615456	0.0573771	0.01	0.0667895	0.0719068	0.162065	0.19185	0.129725	0.273358	0.0584389	0.138018	0.128963	0.141337	0.152071	0.0740775	0.265449	0.240767	0.0422624	0.030296	0.114384	0.0975561	0.117711	0.0350441	0.104346	0.0477601	0.143522	0.383265	0.076862	0.0713206	0.046372	0.114093	0.0648367	0.01	0.139475	0.240946	0.0728537	0.042388	0.0289438	0.153264	0.063863	0.043799	0.0945788	0.0892693
1992	0.117843	0.111404	1.09587	0.172414	0.01	0.0530433	0.0595037	0.0330794	0.01	0.067129	0.0729296	0.145905	0.20372	0.126362	0.245711	0.0507537	0.0797018	0.127113	0.13078	0.131977	0.0595069	0.243913	0.225851	0.0399012	0.0309251	0.119674	0.100889	0.112763	0.05577	0.107104	0.0499295	0.154702	0.364985	0.0827715	0.0599247	0.0438734	0.102084	0.0652736	0.01	0.139896	0.288673	0.0729793	0.01	0.0357184	0.168726	0.0642384	0.0484096	0.105495	0.0343663
1993	0.105873	0.110878	0.0838086	0.169041	0.01	0.0554649	0.0576054	0.0164273	0.01	0.0641146	0.0756314	0.136325	0.218072	0.130826	0.22993	0.0467451	0.024125	0.136884	0.127014	0.138896	0.0704428	0.22937	0.216116	0.045488	0.031903	0.123052	0.107154	0.118762	0.102695	0.108806	0.0532346	0.157705	0.35478	0.0787865	0.0465026	0.0415861	0.108029	0.0626863	0.01	0.124601	0.304726	0.0692841	0.01	0.0492478	0.171533	0.0622547	0.0487967	0.119825	0.0171584
1994	0.112242	0.105223	0.0576688	0.181945	0.01	0.0566619	0.0569721	0.01	0.01	0.0670733	0.0192537	0.107819	0.208375	0.137946	0.227381	0.0529489	0.0266421	0.140176	0.133717	0.135775	0.087598	0.252105	0.224961	0.0543798	0.034731	0.12701	0.125553	0.150761	0.0882345	0.101917	0.0598954	0.158251	0.347423	0.0831492	0.0362681	0.0465548	0.0825642	0.0649424	0.01	0.13665	0.318169	0.0692998	0.01	0.0586775	0.188916	0.0633731	0.0530444	0.13013	0.0146852
1995	0.116205	0.104266	0.0772789	0.180345	0.01	0.0578341	0.0567071	0.01	0.01	0.0694199	0.0355423	0.120821	0.233996	0.142248	0.225313	0.0692598	0.0244919	0.147213	0.151805	0.117101	0.0695264	0.237316	0.236904	0.0597117	0.0328957	0.144269	0.133941	0.162003	0.0988903	0.102945	0.0542469	0.158422	0.337638	0.089191	0.0366063	0.0468288	0.0964314	0.0656577	0.0313334	0.136474	0.308354	0.0692477	0.01	0.068984	0.199067	0.0634978	0.0497461	0.143639	0.0183062
1996	0.129174	0.100389	0.0808571	0.200929	0.01	0.0565836	0.0590454	0.0124477	0.01	0.0661614	0.0434731	0.123012	0.320168	0.141945	0.223627	0.134072	0.0305494	0.162458	0.152289	0.129564	0.0660878	0.279685	0.151676	0.0611422	0.032161	0.136084	0.127991	0.168433	0.105281	0.0978588	0.0699097	0.154854	0.33056	0.0857071	0.0364509	0.0470959	0.0743465	0.0638338	0.0409515	0.133817	0.326771	0.0693444	0.0148322	0.070289	0.222192	0.0621291	0.0809802	0.144159	0.0255561
1997	0.125457	0.101205	0.0777153	0.218074	0.0180526	0.0571802	0.060912	0.0207386	0.01	0.0672227	0.0434089	0.121306	0.327248	0.145179	0.2181	0.153264	0.0338545	0.16995	0.152415	0.140486	0.0825008	0.287151	0.165172	0.0612503	0.0359956	0.1344	0.126835	0.180533	0.106635	0.099669	0.0527161	0.161222	0.326251	0.0836644	0.0322071	0.0497172	0.0876695	0.0642994	0.0666106	0.13625	0.364136	0.0653737	0.0248505	0.0782396	0.198193	0.0634339	0.069963	0.128116	0.0325809
1998	0.128254	0.103945	0.0662089	0.209859	0.0207964	0.0546801	0.0617057	0.0381184	0.01	0.0668903	0.0422792	0.125629	0.272092	0.132795	0.229125	0.142175	0.0293104	0.1673	0.158831	0.133652	0.0702403	0.262614	0.175908	0.0541268	0.0359623	0.126597	0.120083	0.183314	0.109534	0.0951556	0.070973	0.161691	0.395248	0.0952007	0.0358265	0.0517561	0.0842998	0.057417	0.0825737	0.117996	0.361265	0.0647305	0.0316571	0.0837577	0.180659	0.0658792	0.0517683	0.123433	0.0342035
1999	0.127051	0.0862	0.0616945	0.184339	0.0261676	0.0562515	0.0616319	0.0435973	0.01	0.0635065	0.0423877	0.139352	0.234715	0.141814	0.205493	0.139197	0.0241852	0.17357	0.143046	0.12782	0.0576147	0.288911	0.185364	0.0614928	0.0322171	0.112863	0.107721	0.189405	0.116279	0.0903769	0.0769602	0.154099	0.37409	0.0998632	0.0343461	0.0505988	0.0554168	0.0580214	0.0879626	0.0843931	0.340282	0.0618432	0.0364898	0.0821888	0.219653	0.064237	0.0424442	0.112186	0.0446072
2000	0.118259	0.0806542	0.091971	0.186405	0.0344468	0.0540336	0.0642446	0.0570074	0.01	0.0658415	0.047483	0.146326	0.267911	0.193424	0.226618	0.126004	0.0256844	0.152792	0.121301	0.12157	0.0542032	0.303798	0.189101	0.0704294	0.0364867	0.123463	0.108774	0.138208	0.107468	0.101836	0.0747086	0.150797	0.349217	0.104333	0.0344399	0.0474027	0.0702364	0.0672891	0.104424	0.0747792	0.34689	0.0600945	0.0438177	0.0842935	0.211584	0.0654625	0.0460373	0.107149	0.0424804
2001	0.112459	0.0863328	0.0644228	0.172002	0.0359707	0.0523987	0.0651157	0.0720555	0.01	0.061295	0.0579898	0.174135	0.258937	0.159698	0.212067	0.119342	0.0245971	0.151264	0.120385	0.111917	0.057127	0.284482	0.190531	0.066558	0.0268765	0.1146	0.10811	0.187293	0.0976788	0.0993203	0.0742954	0.146874	0.326344	0.109426	0.0366779	0.051357	0.135767	0.0597594	0.111726	0.0856304	0.342208	0.0619657	0.0514196	0.0852154	0.246372	0.0640295	0.0292453	0.0985751	0.049928
2002	0.113256	0.0789072	0.01	0.15609	0.0515156	0.0528292	0.0661677	0.0474592	0.01	0.0610263	0.0654685	0.172596	0.271406	0.149131	0.234661	0.203898	0.0304889	0.14178	0.126704	0.109958	0.0680434	0.253558	0.189856	0.064775	0.0220098	0.108561	0.0960502	0.205737	0.099031	0.0976598	0.0741294	0.148118	0.310437	0.101664	0.0364909	0.0527464	0.162843	0.0562049	0.117268	0.0843535	0.325761	0.0610394	0.0586697	0.0850919	0.2439	0.0618275	0.0231311	0.100665	0.0635172
2003	0.117706	0.0763591	0.0134634	0.171649	0.0655722	0.0513517	0.0646678	0.0236917	0.01	0.0616135	0.068141	0.188408	0.256194	0.165042	0.227067	0.189996	0.0415453	0.151834	0.136534	0.111059	0.0347305	0.239554	0.177935	0.0693565	0.0238786	0.102161	0.0915957	0.213376	0.0976714	0.100624	0.0859504	0.150226	0.293833	0.0997589	0.0370229	0.0532332	0.187897	0.0541308	0.121033	0.0819324	0.276739	0.0602905	0.0627938	0.083159	0.237293	0.0605064	0.0202756	0.103377	0.0841172
2004	0.115224	0.0778867	0.021465	0.17177	0.0750241	0.0484476	0.0679794	0.0104667	0.01	0.0667924	0.0725567	0.197486	0.254515	0.159304	0.202713	0.117294	0.0482364	0.148408	0.152853	0.113985	0.0334922	0.250685	0.186033	0.0705702	0.033156	0.12608	0.0957024	0.213493	0.105445	0.105941	0.075906	0.142943	0.274636	0.102509	0.039725	0.0569955	0.144894	0.057757	0.126621	0.0717504	0.325585	0.0588755	0.0661336	0.0842396	0.25341	0.0607641	0.0259753	0.0990331	0.0907884
2005	0.110879	0.070547	0.0429234	0.168431	0.0815807	0.049247	0.0703539	0.0387919	0.01	0.0676598	0.070439	0.18727	0.231019	0.175183	0.201909	0.114541	0.0522299	0.134633	0.145387	0.111055	0.0354926	0.267655	0.190346	0.0727604	0.0293288	0.143422	0.0960192	0.208452	0.105286	0.110853	0.0721879	0.141664	0.274325	0.0944079	0.0416757	0.057818	0.209457	0.0570548	0.127684	0.0654778	0.302829	0.0582839	0.0735184	0.0782112	0.247327	0.0592009	0.0403932	0.0988387	0.0975146
2006	0.110117	0.0650137	0.0644685	0.169293	0.0870675	0.0497765	0.0734745	0.12089	0.01	0.0653467	0.0743181	0.200333	0.220464	0.177664	0.167042	0.112743	0.0585748	0.148104	0.155653	0.112763	0.0399292	0.2566	0.205902	0.0671639	0.0338198	0.172898	0.102231	0.217287	0.107758	0.115331	0.0760068	0.143328	0.27061	0.0924958	0.0452644	0.0624596	0.215324	0.0565866	0.141916	0.0559082	0.279489	0.0575415	0.0737299	0.0766973	0.249275	0.0572229	0.0355114	0.0941545	0.108194
2007	0.111281	0.0637978	0.0579579	0.178533	0.0921865	0.0472049	0.0740031	0.192868	0.01	0.0658101	0.0744114	0.204457	0.210251	0.198688	0.172244	0.128172	0.063765	0.157346	0.159582	0.11725	0.0333794	0.240577	0.196819	0.0620033	0.0408896	0.162679	0.106257	0.216953	0.104185	0.119244	0.0799026	0.145817	0.255792	0.0912557	0.0492745	0.0639411	0.174364	0.0484886	0.154016	0.0494507	0.308393	0.0606108	0.072599	0.0811136	0.250732	0.058606	0.0399813	0.0917724	0.115043
2008	0.110515	0.0583446	0.0578093	0.172177	0.090773	0.0514317	0.0674272	0.274654	0.0201352	0.05631	0.0813274	0.178367	0.177529	0.206634	0.160193	0.121058	0.0773093	0.164653	0.181759	0.113671	0.0320209	0.206374	0.186645	0.0620412	0.0342449	0.125134	0.100512	0.261449	0.102928	0.121613	0.0785292	0.138669	0.237685	0.085407	0.047277	0.0584382	0.156454	0.045925	0.145132	0.0446675	0.302036	0.0617393	0.0578218	0.0738407	0.238241	0.0549023	0.0423303	0.0890856	0.105806
2009	0.104804	0.0472642	0.01	0.142642	0.0597422	0.0483781	0.0570062	0.207138	0.0251402	0.0506564	0.0812528	0.197854	0.171714	0.185954	0.131133	0.101323	0.0597653	0.149859	0.172346	0.102899	0.0268638	0.178422	0.185221	0.0430257	0.0193855	0.106449	0.0960104	0.271362	0.100821	0.112196	0.066067	0.129428	0.206192	0.0726199	0.0423478	0.0483009	0.10608	0.0389688	0.136482	0.0316795	0.28793	0.0617501	0.0373542	0.0564921	0.230402	0.0485278	0.0296804	0.079551	0.0875499
2010	0.100033	0.0397649	0.0469279	0.166089	0.0617734	0.0509767	0.0575111	0.238369	0.0345979	0.0562092	0.0800618	0.191974	0.16668	0.196838	0.114804	0.104386	0.0552003	0.155088	0.196621	0.114825	0.0497814	0.190472	0.163675	0.052007	0.0325798	0.120588	0.0964302	0.290261	0.102447	0.120678	0.0562624	0.141191	0.192479	0.073959	0.0427679	0.0529025	0.0591217	0.0500356	0.147061	0.025019	0.277362	0.060432	0.0530285	0.0635018	0.23517	0.0489083	0.0470065	0.0843462	0.102396
2011	0.101152	0.0399358	0.0689972	0.163585	0.0631113	0.0518124	0.0583969	0.291274	0.04278	0.0544696	0.0837734	0.19716	0.16906	0.204768	0.12224	0.0983174	0.0890826	0.146001	0.195364	0.116466	0.0515489	0.212506	0.169762	0.0569305	0.0255092	0.121319	0.0960138	0.273738	0.108522	0.136213	0.0534114	0.140087	0.184844	0.0770319	0.0434693	0.0540988	0.106945	0.0503907	0.143456	0.0225979	0.25782	0.0624359	0.0656932	0.0633344	0.232861	0.0482558	0.0762655	0.0864364	0.105097
2012	0.0931646	0.0368835	0.0805898	0.140685	0.069108	0.048037	0.0556322	0.262227	0.05193	0.0525251	0.101598	0.182359	0.156882	0.162217	0.142917	0.0953021	0.0725679	0.148172	0.198196	0.107726	0.045394	0.190935	0.181197	0.0524024	0.0291338	0.118922	0.0887228	0.293782	0.116939	0.133815	0.0412395	0.140771	0.178943	0.0745346	0.0405658	0.0498505	0.102508	0.051953	0.139902	0.0197593	0.316412	0.0669396	0.0645365	0.0557238	0.233641	0.0460198	0.0949188	0.0875089	0.0941074
2013	0.0944566	0.0421779	0.0896941	0.126042	0.0675665	0.0471304	0.0528283	0.245407	0.0681596	0.0519902	0.109561	0.154846	0.137726	0.200629	0.13107	0.0958387	0.0440684	0.157719	0.202784	0.107843	0.0460394	0.198139	0.0962055	0.0531292	0.0361419	0.117806	0.0833789	0.334829	0.121507	0.134105	0.0481822	0.136533	0.177102	0.0726449	0.0416763	0.0488831	0.186955	0.0529795	0.141075	0.0290598	0.301184	0.0714717	0.0641362	0.0555517	0.220894	0.0458586	0.0931445	0.0848346	0.0958357
2014	0.0949264	0.0401888	0.089199	0.116982	0.06874	0.0410919	0.0534652	0.224339	0.071711	0.0544888	0.123134	0.154553	0.136762	0.191886	0.130213	0.0951117	0.0505739	0.155074	0.185465	0.105884	0.0428883	0.210153	0.0936987	0.0545621	0.0328616	0.110865	0.0804931	0.341462	0.1267	0.127892	0.038898	0.135209	0.177363	0.0721642	0.046586	0.0506449	0.168475	0.0564092	0.149873	0.0315561	0.30007	0.0722741	0.0651441	0.0573217	0.231323	0.0452727	0.0790579	0.0901124	0.105486
2015	0.0978911	0.0410842	0.0699295	0.123706	0.065836	0.0379138	0.0536781	0.167401	0.0799392	0.0593525	0.133181	0.162507	0.140504	0.177797	0.132601	0.0958781	0.0501275	0.158621	0.163624	0.0932132	0.0426164	0.187088	0.100635	0.0433255	0.0293777	0.10789	0.0837208	0.357801	0.12948	0.113302	0.0361925	0.141353	0.174271	0.0745471	0.0497532	0.0505135	0.159084	0.057826	0.173221	0.0297142	0.285781	0.0741353	0.0597019	0.0598707	0.241015	0.0473434	0.0875096	0.0891702	0.102763
2016	0.0982094	0.0444748	0.0760284	0.127208	0.0698299	0.0453321	0.0547008	0.16118	0.0800165	0.0619761	0.130236	0.167166	0.143357	0.175722	0.130116	0.102433	0.0458628	0.17318	0.165695	0.0951249	0.0419627	0.201217	0.104452	0.0446514	0.0283337	0.109343	0.0837527	0.370055	0.134612	0.112129	0.044786	0.150413	0.181432	0.0836565	0.0496616	0.0514034	0.154833	0.057947	0.194091	0.029917	0.275724	0.0765532	0.067478	0.0610614	0.221373	0.0465476	0.106556	0.0885041	0.0881382
2017	0.101201	0.046607	0.0678752	0.131097	0.077999	0.0472204	0.0538196	0.175339	0.0829725	0.0613993	0.126123	0.160589	0.149397	0.166327	0.13131	0.100083	0.0465248	0.174072	0.175636	0.101184	0.0224658	0.18583	0.104914	0.0489008	0.0275147	0.11354	0.0810046	0.386373	0.132452	0.11262	0.0436022	0.150368	0.182511	0.0826641	0.0509944	0.0501117	0.145564	0.0596364	0.173346	0.0341824	0.280669	0.077515	0.0656856	0.0657866	0.242239	0.0454533	0.114245	0.086115	0.0935675
2018	0.100951	0.0439467	0.109426	0.129752	0.0843263	0.0502264	0.053295	0.19953	0.0847501	0.0592893	0.120051	0.193735	0.144019	0.164979	0.131463	0.10058	0.0480996	0.177069	0.185929	0.099338	0.0270144	0.184271	0.102102	0.0485709	0.0315642	0.115387	0.0780062	0.403744	0.139812	0.113157	0.0401964	0.146608	0.185493	0.0813095	0.0485849	0.0464267	0.130127	0.0572438	0.168585	0.0359286	0.28776	0.0761549	0.0663712	0.0633009	0.245404	0.0446407	0.1299	0.0843356	0.093027
2019	0.104136	0.0431633	0.109524	0.119156	0.0930982	0.0488721	0.0526003	0.213516	0.0801748	0.0586394	0.127126	0.199277	0.148053	0.154327	0.130925	0.100602	0.0524562	0.172739	0.18087	0.0998844	0.0190665	0.175924	0.101561	0.0481639	0.0306254	0.108962	0.075134	0.3801	0.137649	0.11282	0.0414707	0.14413	0.215787	0.0796632	0.0489739	0.0447361	0.11659	0.0581742	0.163489	0.0336803	0.282856	0.0735481	0.0664601	0.06121	0.254764	0.0437934	0.134871	0.0831464	0.121344
Gesamtergebnis	10.71	2.06126	6.07483	13.4184	1.57721	3.12269	4.91822	3.52465	1.44794	4.65975	2.95352	15.3209	10.3487	7.29492	9.64593	3.24223	1.57241	5.16587	11.2195	12.4024	3.74398	14.5329	7.64671	3.33394	2.48548	8.33711	7.90998	13.3745	6.83236	9.48132	2.20053	11.2236	7.86354	6.28566	1.36985	4.43231	4.83225	4.90487	7.08171	10.8889	23.762	6.1024	1.48992	4.65293	7.34068	4.40056	4.1565	8.50047	2.2824
[truncated: 89 more columns]
