# Supplementary material for: The Social Cost of Fossil and Industrial CO2 Emissions from 1950 to 2018
Source: Research Square preprint supplement (doi:10.21203/rs.3.rs-2244259/v1), 2022-11-17
Supplement: Supplementary file 60 [file rgdpna_Transposed.xlsx]

## Sheet: output
VariableCode	RegionCode	YearCode	AggValue
rgdpna	ABW	1970	262.309
rgdpna	ABW	1971	286.148
rgdpna	ABW	1972	312.155
rgdpna	ABW	1973	340.525
rgdpna	ABW	1974	371.474
rgdpna	ABW	1975	405.235
rgdpna	ABW	1976	442.065
rgdpna	ABW	1977	482.242
rgdpna	ABW	1978	526.07
rgdpna	ABW	1979	573.882
rgdpna	ABW	1980	626.039
rgdpna	ABW	1981	682.936
rgdpna	ABW	1982	745.005
rgdpna	ABW	1983	812.715
rgdpna	ABW	1984	886.578
rgdpna	ABW	1985	967.154
rgdpna	ABW	1986	1055.05
rgdpna	ABW	1987	1224.69
rgdpna	ABW	1988	1453.08
rgdpna	ABW	1989	1629.33
rgdpna	ABW	1990	1693.88
rgdpna	ABW	1991	1828.76
rgdpna	ABW	1992	1936.33
rgdpna	ABW	1993	2077.84
rgdpna	ABW	1994	2248.3
rgdpna	ABW	1995	2304.66
rgdpna	ABW	1996	2333.35
rgdpna	ABW	1997	2515.69
rgdpna	ABW	1998	2683.4
rgdpna	ABW	1999	2714.38
rgdpna	ABW	2000	2836.91
rgdpna	ABW	2001	2826.57
rgdpna	ABW	2002	2765.39
rgdpna	ABW	2003	2778.25
rgdpna	ABW	2004	2987.16
rgdpna	ABW	2005	3022.31
rgdpna	ABW	2006	3030.11
rgdpna	ABW	2007	3115.24
rgdpna	ABW	2008	3042.48
rgdpna	ABW	2009	2782.59
rgdpna	ABW	2010	2691.89
rgdpna	ABW	2011	2701.08
rgdpna	ABW	2012	2664.08
rgdpna	ABW	2013	2775.93
rgdpna	ABW	2014	2783.49
rgdpna	ABW	2015	2942.78
rgdpna	ABW	2016	3003.41
rgdpna	ABW	2017	3062.58
rgdpna	ABW	2018	3090.4
rgdpna	ABW	2019	3068.76
rgdpna	AGO	1970	54237.1
rgdpna	AGO	1971	57491.3
rgdpna	AGO	1972	57606.3
rgdpna	AGO	1973	62272.4
rgdpna	AGO	1974	64202.8
rgdpna	AGO	1975	60992.7
rgdpna	AGO	1976	57821.1
rgdpna	AGO	1977	58283.6
rgdpna	AGO	1978	55194.6
rgdpna	AGO	1979	55360.2
rgdpna	AGO	1980	56688.8
rgdpna	AGO	1981	54194.5
rgdpna	AGO	1982	54194.5
rgdpna	AGO	1983	56470.7
rgdpna	AGO	1984	59858.9
rgdpna	AGO	1985	61954
rgdpna	AGO	1986	63921.7
rgdpna	AGO	1987	68396.5
rgdpna	AGO	1988	72208.2
rgdpna	AGO	1989	72487.9
rgdpna	AGO	1990	72165.6
rgdpna	AGO	1991	72881.1
rgdpna	AGO	1992	68626.1
rgdpna	AGO	1993	52167.2
rgdpna	AGO	1994	52865.9
rgdpna	AGO	1995	60795.8
rgdpna	AGO	1996	69030.2
rgdpna	AGO	1997	74051.6
rgdpna	AGO	1998	77525.5
rgdpna	AGO	1999	79216.7
rgdpna	AGO	2000	81636.5
rgdpna	AGO	2001	84199.9
rgdpna	AGO	2002	96434.1
rgdpna	AGO	2003	99317.3
rgdpna	AGO	2004	110196
rgdpna	AGO	2005	126757
rgdpna	AGO	2006	141522
rgdpna	AGO	2007	161348
rgdpna	AGO	2008	179362
rgdpna	AGO	2009	180902
rgdpna	AGO	2010	189692
rgdpna	AGO	2011	196278
rgdpna	AGO	2012	213044
rgdpna	AGO	2013	223600
rgdpna	AGO	2014	234383
rgdpna	AGO	2015	236595
rgdpna	AGO	2016	230491
rgdpna	AGO	2017	230151
rgdpna	AGO	2018	225540
rgdpna	AGO	2019	222151
rgdpna	AIA	1970	26.5233
rgdpna	AIA	1971	25.8606
rgdpna	AIA	1972	28.8445
rgdpna	AIA	1973	30.0499
rgdpna	AIA	1974	29.9893
rgdpna	AIA	1975	31.0155
rgdpna	AIA	1976	31.4964
rgdpna	AIA	1977	31.5558
rgdpna	AIA	1978	33.9061
rgdpna	AIA	1979	37.1311
rgdpna	AIA	1980	38.9398
rgdpna	AIA	1981	40.3888
rgdpna	AIA	1982	39.9369
rgdpna	AIA	1983	39.9696
rgdpna	AIA	1984	41.7481
rgdpna	AIA	1985	47.1162
rgdpna	AIA	1986	53.1231
rgdpna	AIA	1987	58.7731
rgdpna	AIA	1988	67.9182
rgdpna	AIA	1989	73.6923
rgdpna	AIA	1990	92.4865
rgdpna	AIA	1991	75.6862
rgdpna	AIA	1992	97.4114
rgdpna	AIA	1993	104.645
rgdpna	AIA	1994	113.023
rgdpna	AIA	1995	110.4
rgdpna	AIA	1996	113.168
rgdpna	AIA	1997	125.263
rgdpna	AIA	1998	138.176
rgdpna	AIA	1999	143.271
rgdpna	AIA	2000	145.365
rgdpna	AIA	2001	148.602
rgdpna	AIA	2002	143.11
rgdpna	AIA	2003	151.841
rgdpna	AIA	2004	172.292
rgdpna	AIA	2005	194.885
rgdpna	AIA	2006	233.882
rgdpna	AIA	2007	265.812
rgdpna	AIA	2008	262.244
rgdpna	AIA	2009	213.812
rgdpna	AIA	2010	204.061
rgdpna	AIA	2011	211.23
rgdpna	AIA	2012	199.048
rgdpna	AIA	2013	197.738
rgdpna	AIA	2014	207.755
rgdpna	AIA	2015	214.294
rgdpna	AIA	2016	208.868
rgdpna	AIA	2017	195.635
rgdpna	AIA	2018	212.011
rgdpna	AIA	2019	223.457
rgdpna	ALB	1970	9084.57
rgdpna	ALB	1971	9448.03
rgdpna	ALB	1972	9827.27
rgdpna	ALB	1973	10222.1
rgdpna	ALB	1974	10628
rgdpna	ALB	1975	11058.8
rgdpna	ALB	1976	11504.4
rgdpna	ALB	1977	11945
rgdpna	ALB	1978	12458.8
rgdpna	ALB	1979	12952.2
rgdpna	ALB	1980	13370.7
rgdpna	ALB	1981	14138.9
rgdpna	ALB	1982	14555.8
rgdpna	ALB	1983	14716.7
rgdpna	ALB	1984	14532.5
rgdpna	ALB	1985	14791.2
rgdpna	ALB	1986	15618.8
rgdpna	ALB	1987	15495.7
rgdpna	ALB	1988	15275.5
rgdpna	ALB	1989	16778.7
rgdpna	ALB	1990	15105.7
rgdpna	ALB	1991	10875.8
rgdpna	ALB	1992	10094.1
rgdpna	ALB	1993	11059.1
rgdpna	ALB	1994	11977.3
rgdpna	ALB	1995	13572.9
rgdpna	ALB	1996	14808.3
rgdpna	ALB	1997	13203.4
rgdpna	ALB	1998	14369.2
rgdpna	ALB	1999	16221.5
rgdpna	ALB	2000	17348.3
rgdpna	ALB	2001	18787
rgdpna	ALB	2002	19639.3
rgdpna	ALB	2003	20725.1
rgdpna	ALB	2004	21868
rgdpna	ALB	2005	23076.6
rgdpna	ALB	2006	24438.7
rgdpna	ALB	2007	25900.9
rgdpna	ALB	2008	27843.5
rgdpna	ALB	2009	28777.4
rgdpna	ALB	2010	29844.2
rgdpna	ALB	2011	30603.8
rgdpna	ALB	2012	31037.6
rgdpna	ALB	2013	31348.6
rgdpna	ALB	2014	31904.8
rgdpna	ALB	2015	32612.7
rgdpna	ALB	2016	33693.8
rgdpna	ALB	2017	34974.9
rgdpna	ALB	2018	36398.9
rgdpna	ALB	2019	37204.8
rgdpna	ARE	1970	47921.8
rgdpna	ARE	1971	54870
rgdpna	ARE	1972	62826.1
rgdpna	ARE	1973	71936.2
rgdpna	ARE	1974	82365.6
rgdpna	ARE	1975	87495
rgdpna	ARE	1976	100656
rgdpna	ARE	1977	118210
rgdpna	ARE	1978	115438
rgdpna	ARE	1979	144167
rgdpna	ARE	1980	182257
rgdpna	ARE	1981	187436
rgdpna	ARE	1982	171972
rgdpna	ARE	1983	163326
rgdpna	ARE	1984	170380
rgdpna	ARE	1985	166310
rgdpna	ARE	1986	134770
rgdpna	ARE	1987	143204
rgdpna	ARE	1988	139770
rgdpna	ARE	1989	158683
rgdpna	ARE	1990	186851
rgdpna	ARE	1991	188458
rgdpna	ARE	1992	194762
rgdpna	ARE	1993	197219
rgdpna	ARE	1994	214184
rgdpna	ARE	1995	231787
rgdpna	ARE	1996	245370
rgdpna	ARE	1997	266596
rgdpna	ARE	1998	270942
rgdpna	ARE	1999	282823
rgdpna	ARE	2000	317375
rgdpna	ARE	2001	321741
rgdpna	ARE	2002	329570
rgdpna	ARE	2003	358574
rgdpna	ARE	2004	392877
rgdpna	ARE	2005	411952
rgdpna	ARE	2006	452476
rgdpna	ARE	2007	466885
rgdpna	ARE	2008	481787
rgdpna	ARE	2009	456528
rgdpna	ARE	2010	463994
rgdpna	ARE	2011	496150
rgdpna	ARE	2012	518400
rgdpna	ARE	2013	544596
rgdpna	ARE	2014	567929
rgdpna	ARE	2015	596927
rgdpna	ARE	2016	615198
rgdpna	ARE	2017	629800
rgdpna	ARE	2018	637294
rgdpna	ARE	2019	647986
rgdpna	ARG	1950	196688
rgdpna	ARG	1951	208305
rgdpna	ARG	1952	195898
rgdpna	ARG	1953	204165
rgdpna	ARG	1954	210813
rgdpna	ARG	1955	225537
rgdpna	ARG	1956	231485
rgdpna	ARG	1957	240381
rgdpna	ARG	1958	256257
rgdpna	ARG	1959	243847
rgdpna	ARG	1960	270342
rgdpna	ARG	1961	279139
rgdpna	ARG	1962	280925
rgdpna	ARG	1963	270609
rgdpna	ARG	1964	291642
rgdpna	ARG	1965	318470
rgdpna	ARG	1966	319221
rgdpna	ARG	1967	328119
rgdpna	ARG	1968	345067
rgdpna	ARG	1969	376696
rgdpna	ARG	1970	388738
rgdpna	ARG	1971	403359
rgdpna	ARG	1972	411739
rgdpna	ARG	1973	427156
rgdpna	ARG	1974	450247
rgdpna	ARG	1975	447577
rgdpna	ARG	1976	447527
rgdpna	ARG	1977	476099
rgdpna	ARG	1978	460763
rgdpna	ARG	1979	493095
rgdpna	ARG	1980	500261
rgdpna	ARG	1981	473162
rgdpna	ARG	1982	458204
rgdpna	ARG	1983	477047
rgdpna	ARG	1984	486614
rgdpna	ARG	1985	452765
rgdpna	ARG	1986	485109
rgdpna	ARG	1987	497396
rgdpna	ARG	1988	487683
rgdpna	ARG	1989	453493
rgdpna	ARG	1990	447423
rgdpna	ARG	1991	494385
rgdpna	ARG	1992	545328
rgdpna	ARG	1993	579421
rgdpna	ARG	1994	613237
rgdpna	ARG	1995	595789
rgdpna	ARG	1996	628716
rgdpna	ARG	1997	679712
rgdpna	ARG	1998	705882
rgdpna	ARG	1999	681984
rgdpna	ARG	2000	676604
rgdpna	ARG	2001	646773
rgdpna	ARG	2002	576311
rgdpna	ARG	2003	627240
rgdpna	ARG	2004	683876
rgdpna	ARG	2005	744411
rgdpna	ARG	2006	804315
rgdpna	ARG	2007	876765
rgdpna	ARG	2008	912337
rgdpna	ARG	2009	858340
rgdpna	ARG	2010	945251
rgdpna	ARG	2011	1.002e+06
rgdpna	ARG	2012	991718
rgdpna	ARG	2013	1.01557e+06
rgdpna	ARG	2014	990055
rgdpna	ARG	2015	1.01709e+06
rgdpna	ARG	2016	995936
rgdpna	ARG	2017	1.02251e+06
rgdpna	ARG	2018	997137
rgdpna	ARG	2019	975569
rgdpna	ARM	1990	19326.2
rgdpna	ARM	1991	17069.1
rgdpna	ARM	1992	9941.69
rgdpna	ARM	1993	9065.74
rgdpna	ARM	1994	9548.69
rgdpna	ARM	1995	10206.7
rgdpna	ARM	1996	10808.9
rgdpna	ARM	1997	11167.9
rgdpna	ARM	1998	11987.6
rgdpna	ARM	1999	12377.8
rgdpna	ARM	2000	13107.6
rgdpna	ARM	2001	14360.3
rgdpna	ARM	2002	16521.5
rgdpna	ARM	2003	18841.3
rgdpna	ARM	2004	20813.6
rgdpna	ARM	2005	23699.5
rgdpna	ARM	2006	26827.4
rgdpna	ARM	2007	30515.9
rgdpna	ARM	2008	32636.1
rgdpna	ARM	2009	28018.1
rgdpna	ARM	2010	28638.7
rgdpna	ARM	2011	29970.6
rgdpna	ARM	2012	32118.1
rgdpna	ARM	2013	33164.4
rgdpna	ARM	2014	34372.3
rgdpna	ARM	2015	35484.4
rgdpna	ARM	2016	35545.4
rgdpna	ARM	2017	38221.7
rgdpna	ARM	2018	40210.2
rgdpna	ARM	2019	43260.2
rgdpna	ATG	1970	266.395
rgdpna	ATG	1971	286.313
rgdpna	ATG	1972	307.475
rgdpna	ATG	1973	333.617
rgdpna	ATG	1974	344.971
rgdpna	ATG	1975	326.047
rgdpna	ATG	1976	296.848
rgdpna	ATG	1977	318.477
rgdpna	ATG	1978	329.715
rgdpna	ATG	1979	365.235
rgdpna	ATG	1980	389.718
rgdpna	ATG	1981	408.983
rgdpna	ATG	1982	410.588
rgdpna	ATG	1983	438.683
rgdpna	ATG	1984	471.394
rgdpna	ATG	1985	507.917
rgdpna	ATG	1986	550.662
rgdpna	ATG	1987	598.624
rgdpna	ATG	1988	643.978
rgdpna	ATG	1989	677.801
rgdpna	ATG	1990	698.214
rgdpna	ATG	1991	713.411
rgdpna	ATG	1992	721.676
rgdpna	ATG	1993	759.78
rgdpna	ATG	1994	810.508
rgdpna	ATG	1995	775.173
rgdpna	ATG	1996	826.369
rgdpna	ATG	1997	871.585
rgdpna	ATG	1998	912.82
rgdpna	ATG	1999	946.664
rgdpna	ATG	2000	1005.39
rgdpna	ATG	2001	959.665
rgdpna	ATG	2002	969.525
rgdpna	ATG	2003	1028.44
rgdpna	ATG	2004	1087.75
rgdpna	ATG	2005	1158.17
rgdpna	ATG	2006	1305.35
rgdpna	ATG	2007	1426.95
rgdpna	ATG	2008	1426.74
rgdpna	ATG	2009	1256.07
rgdpna	ATG	2010	1157.58
rgdpna	ATG	2011	1134.91
rgdpna	ATG	2012	1173.19
rgdpna	ATG	2013	1166.14
rgdpna	ATG	2014	1210.4
rgdpna	ATG	2015	1256.71
rgdpna	ATG	2016	1325.8
rgdpna	ATG	2017	1367.49
rgdpna	ATG	2018	1462.53
rgdpna	ATG	2019	1511.55
rgdpna	AUS	1950	127476
rgdpna	AUS	1951	130718
rgdpna	AUS	1952	125368
rgdpna	AUS	1953	138968
rgdpna	AUS	1954	150078
rgdpna	AUS	1955	155998
rgdpna	AUS	1956	156356
rgdpna	AUS	1957	159781
rgdpna	AUS	1958	170619
rgdpna	AUS	1959	181070
rgdpna	AUS	1960	185281
rgdpna	AUS	1961	187808
rgdpna	AUS	1962	199598
rgdpna	AUS	1963	213074
rgdpna	AUS	1964	226548
rgdpna	AUS	1965	231602
rgdpna	AUS	1966	245919
rgdpna	AUS	1967	258552
rgdpna	AUS	1968	277080
rgdpna	AUS	1969	297292
rgdpna	AUS	1970	309083
rgdpna	AUS	1971	321176
rgdpna	AUS	1972	329570
rgdpna	AUS	1973	343094
rgdpna	AUS	1974	347725
rgdpna	AUS	1975	356724
rgdpna	AUS	1976	369556
rgdpna	AUS	1977	372871
rgdpna	AUS	1978	387948
rgdpna	AUS	1979	399719
rgdpna	AUS	1980	413061
rgdpna	AUS	1981	426809
rgdpna	AUS	1982	417332
rgdpna	AUS	1983	436451
rgdpna	AUS	1984	459362
rgdpna	AUS	1985	477909
rgdpna	AUS	1986	490101
rgdpna	AUS	1987	518250
rgdpna	AUS	1988	538260
rgdpna	AUS	1989	557482
rgdpna	AUS	1990	555264
rgdpna	AUS	1991	557552
rgdpna	AUS	1992	580021
rgdpna	AUS	1993	603129
rgdpna	AUS	1994	626275
rgdpna	AUS	1995	650566
rgdpna	AUS	1996	676371
rgdpna	AUS	1997	707326
rgdpna	AUS	1998	743213
rgdpna	AUS	1999	772445
rgdpna	AUS	2000	787360
rgdpna	AUS	2001	818865
rgdpna	AUS	2002	843316
rgdpna	AUS	2003	877516
rgdpna	AUS	2004	905634
rgdpna	AUS	2005	930942
rgdpna	AUS	2006	966730
rgdpna	AUS	2007	1.00209e+06
rgdpna	AUS	2008	1.0215e+06
rgdpna	AUS	2009	1.04262e+06
rgdpna	AUS	2010	1.0683e+06
rgdpna	AUS	2011	1.11016e+06
rgdpna	AUS	2012	1.13885e+06
rgdpna	AUS	2013	1.1677e+06
rgdpna	AUS	2014	1.1933e+06
rgdpna	AUS	2015	1.22637e+06
rgdpna	AUS	2016	1254581
rgdpna	AUS	2017	1.29158e+06
rgdpna	AUS	2018	1.31949e+06
rgdpna	AUS	2019	1.31573e+06
rgdpna	AUT	1950	56946.1
rgdpna	AUT	1951	60474.6
rgdpna	AUT	1952	60239.3
rgdpna	AUT	1953	62218.3
rgdpna	AUT	1954	67352.9
rgdpna	AUT	1955	75065.1
rgdpna	AUT	1956	79692.4
rgdpna	AUT	1957	84319.7
rgdpna	AUT	1958	87404.6
rgdpna	AUT	1959	89975.3
rgdpna	AUT	1960	98201.6
rgdpna	AUT	1961	103343
rgdpna	AUT	1962	105400
rgdpna	AUT	1963	110027
rgdpna	AUT	1964	116711
rgdpna	AUT	1965	119796
rgdpna	AUT	1966	126480
rgdpna	AUT	1967	130593
rgdpna	AUT	1968	136248
rgdpna	AUT	1969	144989
rgdpna	AUT	1970	155272
rgdpna	AUT	1971	163211
rgdpna	AUT	1972	173343
rgdpna	AUT	1973	181815
rgdpna	AUT	1974	188985
rgdpna	AUT	1975	188300
rgdpna	AUT	1976	196919
rgdpna	AUT	1977	206922
rgdpna	AUT	1978	206486
rgdpna	AUT	1979	217547
rgdpna	AUT	1980	221314
rgdpna	AUT	1981	220995
rgdpna	AUT	1982	225439
rgdpna	AUT	1983	232142
rgdpna	AUT	1984	232261
rgdpna	AUT	1985	238064
rgdpna	AUT	1986	243543
rgdpna	AUT	1987	246848
rgdpna	AUT	1988	254984
rgdpna	AUT	1989	264896
rgdpna	AUT	1990	276407
rgdpna	AUT	1991	285920
rgdpna	AUT	1992	291906
rgdpna	AUT	1993	293444
rgdpna	AUT	1994	300492
rgdpna	AUT	1995	308510
rgdpna	AUT	1996	315758
rgdpna	AUT	1997	322369
rgdpna	AUT	1998	333914
rgdpna	AUT	1999	345789
rgdpna	AUT	2000	357462
rgdpna	AUT	2001	361992
rgdpna	AUT	2002	367970
rgdpna	AUT	2003	371435
rgdpna	AUT	2004	381594
rgdpna	AUT	2005	390157
rgdpna	AUT	2006	403633
rgdpna	AUT	2007	418678
rgdpna	AUT	2008	424793
rgdpna	AUT	2009	408801
rgdpna	AUT	2010	416311
rgdpna	AUT	2011	428479
rgdpna	AUT	2012	431395
rgdpna	AUT	2013	431505
rgdpna	AUT	2014	434358
rgdpna	AUT	2015	438765
rgdpna	AUT	2016	447494
rgdpna	AUT	2017	458232
rgdpna	AUT	2018	470054
rgdpna	AUT	2019	476723
rgdpna	AZE	1990	55394.7
rgdpna	AZE	1991	55006.9
rgdpna	AZE	1992	42575.4
rgdpna	AZE	1993	32740.3
rgdpna	AZE	1994	26305.3
rgdpna	AZE	1995	23197
rgdpna	AZE	1996	23488.1
rgdpna	AZE	1997	24851.9
rgdpna	AZE	1998	27328.6
rgdpna	AZE	1999	29350
rgdpna	AZE	2000	32606.1
rgdpna	AZE	2001	35834.9
rgdpna	AZE	2002	39217.3
rgdpna	AZE	2003	43220.7
rgdpna	AZE	2004	47220.3
rgdpna	AZE	2005	60423.8
rgdpna	AZE	2006	81249.6
rgdpna	AZE	2007	101938
rgdpna	AZE	2008	112735
rgdpna	AZE	2009	123297
rgdpna	AZE	2010	129202
rgdpna	AZE	2011	127170
rgdpna	AZE	2012	129972
rgdpna	AZE	2013	137566
rgdpna	AZE	2014	141415
rgdpna	AZE	2015	142899
rgdpna	AZE	2016	138521
rgdpna	AZE	2017	138734
rgdpna	AZE	2018	140816
rgdpna	AZE	2019	143940
rgdpna	BDI	1960	1941.15
rgdpna	BDI	1961	1664.43
rgdpna	BDI	1962	1805.29
rgdpna	BDI	1963	1912.75
rgdpna	BDI	1964	2037.7
rgdpna	BDI	1965	2137.31
rgdpna	BDI	1966	2223.69
rgdpna	BDI	1967	2539.04
rgdpna	BDI	1968	2531.01
rgdpna	BDI	1969	2484.99
rgdpna	BDI	1970	3059.89
rgdpna	BDI	1971	3159.28
rgdpna	BDI	1972	2970.31
rgdpna	BDI	1973	3175.31
rgdpna	BDI	1974	3158.49
rgdpna	BDI	1975	3159.14
rgdpna	BDI	1976	3487.6
rgdpna	BDI	1977	3803.19
rgdpna	BDI	1978	3988.43
rgdpna	BDI	1979	4053.37
rgdpna	BDI	1980	3979.46
rgdpna	BDI	1981	4413.73
rgdpna	BDI	1982	4394.72
rgdpna	BDI	1983	4531.34
rgdpna	BDI	1984	4526.83
rgdpna	BDI	1985	5055.83
rgdpna	BDI	1986	5248.93
rgdpna	BDI	1987	5463.83
rgdpna	BDI	1988	5731.15
rgdpna	BDI	1989	5816.16
rgdpna	BDI	1990	6019.72
rgdpna	BDI	1991	6340.78
rgdpna	BDI	1992	6455.27
rgdpna	BDI	1993	6001.57
rgdpna	BDI	1994	5816.44
rgdpna	BDI	1995	5408.06
rgdpna	BDI	1996	4942.55
rgdpna	BDI	1997	4961.31
rgdpna	BDI	1998	5184.05
rgdpna	BDI	1999	5132.23
rgdpna	BDI	2000	5086.01
rgdpna	BDI	2001	5192.85
rgdpna	BDI	2002	5426.49
rgdpna	BDI	2003	5361.37
rgdpna	BDI	2004	5585.96
rgdpna	BDI	2005	5636.79
rgdpna	BDI	2006	5942
rgdpna	BDI	2007	6144.99
rgdpna	BDI	2008	6446.12
rgdpna	BDI	2009	6690.25
rgdpna	BDI	2010	7030.93
rgdpna	BDI	2011	7314.66
rgdpna	BDI	2012	7638.22
rgdpna	BDI	2013	8012.41
rgdpna	BDI	2014	8351.78
rgdpna	BDI	2015	8317.77
rgdpna	BDI	2016	8583.94
rgdpna	BDI	2017	8945.59
rgdpna	BDI	2018	9089.61
rgdpna	BDI	2019	9250.68
rgdpna	BEL	1950	84999.1
rgdpna	BEL	1951	88196.5
rgdpna	BEL	1952	90342.4
rgdpna	BEL	1953	93326.2
rgdpna	BEL	1954	97440.6
rgdpna	BEL	1955	100903
rgdpna	BEL	1956	104080
rgdpna	BEL	1957	106104
rgdpna	BEL	1958	105541
rgdpna	BEL	1959	109254
rgdpna	BEL	1960	115497
rgdpna	BEL	1961	121345
rgdpna	BEL	1962	127778
rgdpna	BEL	1963	133334
rgdpna	BEL	1964	142690
rgdpna	BEL	1965	147661
rgdpna	BEL	1966	152047
rgdpna	BEL	1967	157895
rgdpna	BEL	1968	165205
rgdpna	BEL	1969	175439
rgdpna	BEL	1970	187135
rgdpna	BEL	1971	194158
rgdpna	BEL	1972	204362
rgdpna	BEL	1973	216874
rgdpna	BEL	1974	225982
rgdpna	BEL	1975	222983
rgdpna	BEL	1976	235588
rgdpna	BEL	1977	237063
rgdpna	BEL	1978	243800
rgdpna	BEL	1979	249508
rgdpna	BEL	1980	260684
rgdpna	BEL	1981	259956
rgdpna	BEL	1982	261503
rgdpna	BEL	1983	262318
rgdpna	BEL	1984	268788
rgdpna	BEL	1985	273228
rgdpna	BEL	1986	278208
rgdpna	BEL	1987	284626
rgdpna	BEL	1988	298069
rgdpna	BEL	1989	308410
rgdpna	BEL	1990	318086
rgdpna	BEL	1991	323916
rgdpna	BEL	1992	328874
rgdpna	BEL	1993	325711
rgdpna	BEL	1994	336222
rgdpna	BEL	1995	344240
rgdpna	BEL	1996	348789
rgdpna	BEL	1997	362021
rgdpna	BEL	1998	369123
rgdpna	BEL	1999	382200
rgdpna	BEL	2000	396405
rgdpna	BEL	2001	400764
rgdpna	BEL	2002	407605
rgdpna	BEL	2003	411835
rgdpna	BEL	2004	426543
rgdpna	BEL	2005	436446
rgdpna	BEL	2006	447586
rgdpna	BEL	2007	464043
rgdpna	BEL	2008	466117
rgdpna	BEL	2009	456698
rgdpna	BEL	2010	469779
rgdpna	BEL	2011	477740
rgdpna	BEL	2012	481271
rgdpna	BEL	2013	483481
rgdpna	BEL	2014	491071
rgdpna	BEL	2015	501096
rgdpna	BEL	2016	507444
rgdpna	BEL	2017	515604
rgdpna	BEL	2018	524948
rgdpna	BEL	2019	534102
rgdpna	BEN	1959	2360.06
rgdpna	BEN	1960	2509.54
rgdpna	BEN	1961	2542.07
rgdpna	BEN	1962	2448.48
rgdpna	BEN	1963	2584.91
rgdpna	BEN	1964	2693.43
rgdpna	BEN	1965	2834.84
rgdpna	BEN	1966	2935.39
rgdpna	BEN	1967	3136.87
rgdpna	BEN	1968	3300.04
rgdpna	BEN	1969	3486.49
rgdpna	BEN	1970	3551.25
rgdpna	BEN	1971	3625.22
rgdpna	BEN	1972	3981.23
rgdpna	BEN	1973	4152.79
rgdpna	BEN	1974	4435
rgdpna	BEN	1975	4131.5
rgdpna	BEN	1976	4189.99
rgdpna	BEN	1977	4371.59
rgdpna	BEN	1978	4348.41
rgdpna	BEN	1979	4696.65
rgdpna	BEN	1980	5138.96
rgdpna	BEN	1981	5427.98
rgdpna	BEN	1982	6013.25
rgdpna	BEN	1983	5751.92
rgdpna	BEN	1984	6208.06
rgdpna	BEN	1985	6675.44
rgdpna	BEN	1986	6818.86
rgdpna	BEN	1987	6716.58
rgdpna	BEN	1988	6920.39
rgdpna	BEN	1989	6871.43
rgdpna	BEN	1990	7488.21
rgdpna	BEN	1991	7804.65
rgdpna	BEN	1992	8035.49
rgdpna	BEN	1993	8504.46
rgdpna	BEN	1994	8676.28
rgdpna	BEN	1995	9555.34
rgdpna	BEN	1996	9969.31
rgdpna	BEN	1997	10541
rgdpna	BEN	1998	10958.5
rgdpna	BEN	1999	11543.9
rgdpna	BEN	2000	12220.1
rgdpna	BEN	2001	12871.8
rgdpna	BEN	2002	13469.5
rgdpna	BEN	2003	13933.3
rgdpna	BEN	2004	14550.5
rgdpna	BEN	2005	14799.8
rgdpna	BEN	2006	15383.4
rgdpna	BEN	2007	16304.3
rgdpna	BEN	2008	17102.7
rgdpna	BEN	2009	17499.3
rgdpna	BEN	2010	17869.3
rgdpna	BEN	2011	19525.5
rgdpna	BEN	2012	21683.5
rgdpna	BEN	2013	24594
rgdpna	BEN	2014	27807
rgdpna	BEN	2015	31427.9
rgdpna	BEN	2016	32477.4
rgdpna	BEN	2017	34319.4
rgdpna	BEN	2018	36617.9
rgdpna	BEN	2019	39131.9
rgdpna	BFA	1959	3825.29
rgdpna	BFA	1960	3841.94
rgdpna	BFA	1961	3339.48
rgdpna	BFA	1962	3498.69
rgdpna	BFA	1963	3432.82
rgdpna	BFA	1964	3493.63
rgdpna	BFA	1965	3441.36
rgdpna	BFA	1966	3431.05
rgdpna	BFA	1967	3725.59
rgdpna	BFA	1968	3888.23
rgdpna	BFA	1969	3951.07
rgdpna	BFA	1970	4013.39
rgdpna	BFA	1971	3995.67
rgdpna	BFA	1972	4892.14
rgdpna	BFA	1973	4638.59
rgdpna	BFA	1974	4894.36
rgdpna	BFA	1975	5010.94
rgdpna	BFA	1976	4961.27
rgdpna	BFA	1977	5312
rgdpna	BFA	1978	5932.42
rgdpna	BFA	1979	5970.37
rgdpna	BFA	1980	6070.06
rgdpna	BFA	1981	6336.38
rgdpna	BFA	1982	6477.73
rgdpna	BFA	1983	6402
rgdpna	BFA	1984	6505.73
rgdpna	BFA	1985	7355.63
rgdpna	BFA	1986	7940.39
rgdpna	BFA	1987	7921.5
rgdpna	BFA	1988	8380.85
rgdpna	BFA	1989	8561.42
rgdpna	BFA	1990	8509.29
rgdpna	BFA	1991	9281.42
rgdpna	BFA	1992	9302.57
rgdpna	BFA	1993	9625.17
rgdpna	BFA	1994	9751.35
rgdpna	BFA	1995	10308.9
rgdpna	BFA	1996	11444.4
rgdpna	BFA	1997	12167.3
rgdpna	BFA	1998	13056.5
rgdpna	BFA	1999	13871.6
rgdpna	BFA	2000	14133.6
rgdpna	BFA	2001	15068.3
rgdpna	BFA	2002	15724.2
rgdpna	BFA	2003	16951.1
rgdpna	BFA	2004	17710.2
rgdpna	BFA	2005	19244.3
rgdpna	BFA	2006	20447.6
rgdpna	BFA	2007	21288.3
rgdpna	BFA	2008	22523
rgdpna	BFA	2009	23190.2
rgdpna	BFA	2010	25148.9
rgdpna	BFA	2011	26814.4
rgdpna	BFA	2012	28544.6
rgdpna	BFA	2013	30198.1
rgdpna	BFA	2014	31504.7
rgdpna	BFA	2015	32740.1
rgdpna	BFA	2016	34690.7
rgdpna	BFA	2017	36842.7
rgdpna	BFA	2018	39322.7
rgdpna	BFA	2019	41563.9
rgdpna	BGD	1959	74930.1
rgdpna	BGD	1960	79232.7
rgdpna	BGD	1961	76698.6
rgdpna	BGD	1962	82362.7
rgdpna	BGD	1963	86704.9
rgdpna	BGD	1964	86306.6
rgdpna	BGD	1965	84616
rgdpna	BGD	1966	86482.3
rgdpna	BGD	1967	81550.1
rgdpna	BGD	1968	85694.3
rgdpna	BGD	1969	88617.6
rgdpna	BGD	1970	95964
rgdpna	BGD	1971	90705.6
rgdpna	BGD	1972	78030.7
rgdpna	BGD	1973	80625.7
rgdpna	BGD	1974	88359.3
rgdpna	BGD	1975	84747
rgdpna	BGD	1976	89544.8
rgdpna	BGD	1977	91938.4
rgdpna	BGD	1978	98442
rgdpna	BGD	1979	103169
rgdpna	BGD	1980	104014
rgdpna	BGD	1981	107545
rgdpna	BGD	1982	108868
rgdpna	BGD	1983	114195
rgdpna	BGD	1984	120391
rgdpna	BGD	1985	124017
rgdpna	BGD	1986	129399
rgdpna	BGD	1987	134810
rgdpna	BGD	1988	138707
rgdpna	BGD	1989	142202
rgdpna	BGD	1990	151626
rgdpna	BGD	1991	156781
rgdpna	BGD	1992	163409
rgdpna	BGD	1993	170884
rgdpna	BGD	1994	177864
rgdpna	BGD	1995	186624
rgdpna	BGD	1996	195250
rgdpna	BGD	1997	205770
rgdpna	BGD	1998	216526
rgdpna	BGD	1999	227069
rgdpna	BGD	2000	240568
rgdpna	BGD	2001	253254
rgdpna	BGD	2002	264437
rgdpna	BGD	2003	278336
rgdpna	BGD	2004	295789
rgdpna	BGD	2005	313404
rgdpna	BGD	2006	334181
rgdpna	BGD	2007	357770
rgdpna	BGD	2008	379285
rgdpna	BGD	2009	398420
rgdpna	BGD	2010	420620
rgdpna	BGD	2011	447810
rgdpna	BGD	2012	477014
rgdpna	BGD	2013	505700
rgdpna	BGD	2014	536350
rgdpna	BGD	2015	571496
rgdpna	BGD	2016	612149
rgdpna	BGD	2017	656739
rgdpna	BGD	2018	708383
rgdpna	BGD	2019	766135
rgdpna	BGR	1970	38062.5
rgdpna	BGR	1971	40687.5
rgdpna	BGR	1972	43804.7
rgdpna	BGR	1973	47381.2
rgdpna	BGR	1974	50957.8
rgdpna	BGR	1975	55453.1
rgdpna	BGR	1976	59062.5
rgdpna	BGR	1977	62770.3
rgdpna	BGR	1978	66281.2
rgdpna	BGR	1979	70678.1
rgdpna	BGR	1980	74714
rgdpna	BGR	1981	78375.2
rgdpna	BGR	1982	80204.9
rgdpna	BGR	1983	82956.1
rgdpna	BGR	1984	85773.7
rgdpna	BGR	1985	88075.4
rgdpna	BGR	1986	91781.3
rgdpna	BGR	1987	97338.2
rgdpna	BGR	1988	107992
rgdpna	BGR	1989	104439
rgdpna	BGR	1990	94916.7
rgdpna	BGR	1991	86900.6
rgdpna	BGR	1992	80598.4
rgdpna	BGR	1993	79405.3
rgdpna	BGR	1994	80849
rgdpna	BGR	1995	84740.7
rgdpna	BGR	1996	89095.4
rgdpna	BGR	1997	76450.3
rgdpna	BGR	1998	79726.4
rgdpna	BGR	1999	73124.3
rgdpna	BGR	2000	76621.2
rgdpna	BGR	2001	79545.9
rgdpna	BGR	2002	84281.4
rgdpna	BGR	2003	88623.4
rgdpna	BGR	2004	94332.4
rgdpna	BGR	2005	101080
rgdpna	BGR	2006	107956
rgdpna	BGR	2007	115035
rgdpna	BGR	2008	122036
rgdpna	BGR	2009	117858
rgdpna	BGR	2010	118529
rgdpna	BGR	2011	121316
rgdpna	BGR	2012	121753
rgdpna	BGR	2013	122141
rgdpna	BGR	2014	124455
rgdpna	BGR	2015	129420
rgdpna	BGR	2016	134353
rgdpna	BGR	2017	139065
rgdpna	BGR	2018	143354
rgdpna	BGR	2019	148187
rgdpna	BHR	1970	10346.4
rgdpna	BHR	1971	10512.7
rgdpna	BHR	1972	11676.7
rgdpna	BHR	1973	13302.5
rgdpna	BHR	1974	14429.5
rgdpna	BHR	1975	13154.7
rgdpna	BHR	1976	17163.8
rgdpna	BHR	1977	19398.1
rgdpna	BHR	1978	20147.3
rgdpna	BHR	1979	20846.3
rgdpna	BHR	1980	21384.2
rgdpna	BHR	1981	19962.6
rgdpna	BHR	1982	18464.2
rgdpna	BHR	1983	20029.1
rgdpna	BHR	1984	21010.3
rgdpna	BHR	1985	17636.7
rgdpna	BHR	1986	17843.5
rgdpna	BHR	1987	18184.9
rgdpna	BHR	1988	19825.2
rgdpna	BHR	1989	20305.4
rgdpna	BHR	1990	21245.3
rgdpna	BHR	1991	22213.2
rgdpna	BHR	1992	23945.1
rgdpna	BHR	1993	27030.5
rgdpna	BHR	1994	26458.5
rgdpna	BHR	1995	26970.2
rgdpna	BHR	1996	27850.4
rgdpna	BHR	1997	28493.7
rgdpna	BHR	1998	29886.5
rgdpna	BHR	1999	31665.7
rgdpna	BHR	2000	33888.1
rgdpna	BHR	2001	34732.2
rgdpna	BHR	2002	35895.2
rgdpna	BHR	2003	38155.4
rgdpna	BHR	2004	40819
rgdpna	BHR	2005	43582
rgdpna	BHR	2006	46400.5
rgdpna	BHR	2007	50248.9
rgdpna	BHR	2008	53385.4
rgdpna	BHR	2009	54741.6
rgdpna	BHR	2010	57115.7
rgdpna	BHR	2011	58248.5
rgdpna	BHR	2012	60420.2
rgdpna	BHR	2013	63693.1
rgdpna	BHR	2014	66463.9
rgdpna	BHR	2015	68366.7
rgdpna	BHR	2016	70806
rgdpna	BHR	2017	73566.2
rgdpna	BHR	2018	74875.1
rgdpna	BHR	2019	76237.6
rgdpna	BHS	1970	4646.32
rgdpna	BHS	1971	4721.89
rgdpna	BHS	1972	4556.75
rgdpna	BHS	1973	4901.59
rgdpna	BHS	1974	4080.36
rgdpna	BHS	1975	3476.34
rgdpna	BHS	1976	3656.6
rgdpna	BHS	1977	3991.36
rgdpna	BHS	1978	4557.31
rgdpna	BHS	1979	5748.56
rgdpna	BHS	1980	6121.95
rgdpna	BHS	1981	5557.11
rgdpna	BHS	1982	5929.38
rgdpna	BHS	1983	6142.66
rgdpna	BHS	1984	7013.14
rgdpna	BHS	1985	7351.82
rgdpna	BHS	1986	7483.93
rgdpna	BHS	1987	7707.29
rgdpna	BHS	1988	7885.31
rgdpna	BHS	1989	8415.78
rgdpna	BHS	1990	8281.37
rgdpna	BHS	1991	7935.26
rgdpna	BHS	1992	7631.49
rgdpna	BHS	1993	7654.95
rgdpna	BHS	1994	7896.23
rgdpna	BHS	1995	8241.83
rgdpna	BHS	1996	8589.98
rgdpna	BHS	1997	9111.4
rgdpna	BHS	1998	9541.09
rgdpna	BHS	1999	10222.8
rgdpna	BHS	2000	10646.9
rgdpna	BHS	2001	10926.4
rgdpna	BHS	2002	11221.9
rgdpna	BHS	2003	11080
rgdpna	BHS	2004	11177.9
rgdpna	BHS	2005	11557.4
rgdpna	BHS	2006	11848.3
rgdpna	BHS	2007	12019.7
rgdpna	BHS	2008	11740.4
rgdpna	BHS	2009	11250.1
rgdpna	BHS	2010	11423.2
rgdpna	BHS	2011	11493.3
rgdpna	BHS	2012	11848.1
rgdpna	BHS	2013	11530.7
rgdpna	BHS	2014	11652.2
rgdpna	BHS	2015	11679
rgdpna	BHS	2016	11847.7
rgdpna	BHS	2017	12216.8
rgdpna	BHS	2018	12586.5
rgdpna	BHS	2019	12739.8
rgdpna	BIH	1990	8624.27
rgdpna	BIH	1991	7818.07
rgdpna	BIH	1992	7314.83
rgdpna	BIH	1993	7155.27
rgdpna	BIH	1994	7951.79
rgdpna	BIH	1995	9221.56
rgdpna	BIH	1996	14219.6
rgdpna	BIH	1997	19429.8
rgdpna	BIH	1998	22658.3
rgdpna	BIH	1999	24815.7
rgdpna	BIH	2000	26159.3
rgdpna	BIH	2001	26862.8
rgdpna	BIH	2002	28216.9
rgdpna	BIH	2003	29316.9
rgdpna	BIH	2004	31168.2
rgdpna	BIH	2005	32384.1
rgdpna	BIH	2006	34137.4
rgdpna	BIH	2007	36137.5
rgdpna	BIH	2008	38104.1
rgdpna	BIH	2009	36959.2
rgdpna	BIH	2010	37279.2
rgdpna	BIH	2011	37636.9
rgdpna	BIH	2012	37327.6
rgdpna	BIH	2013	38204.7
rgdpna	BIH	2014	38645.5
rgdpna	BIH	2015	39839.4
rgdpna	BIH	2016	41094.2
rgdpna	BIH	2017	42397.5
rgdpna	BIH	2018	43983.2
rgdpna	BIH	2019	45161.2
rgdpna	BLR	1990	100208
rgdpna	BLR	1991	98819.2
rgdpna	BLR	1992	89289
rgdpna	BLR	1993	82538
rgdpna	BLR	1994	72894.6
rgdpna	BLR	1995	65278.7
rgdpna	BLR	1996	67091.2
rgdpna	BLR	1997	74753.9
rgdpna	BLR	1998	81066.5
rgdpna	BLR	1999	83862.1
rgdpna	BLR	2000	88715.7
rgdpna	BLR	2001	92907.8
rgdpna	BLR	2002	97561
rgdpna	BLR	2003	104385
rgdpna	BLR	2004	116313
rgdpna	BLR	2005	127295
rgdpna	BLR	2006	140022
rgdpna	BLR	2007	152033
rgdpna	BLR	2008	167608
rgdpna	BLR	2009	167866
rgdpna	BLR	2010	180876
rgdpna	BLR	2011	190906
rgdpna	BLR	2012	194242
rgdpna	BLR	2013	196089
rgdpna	BLR	2014	199515
rgdpna	BLR	2015	191874
rgdpna	BLR	2016	187147
rgdpna	BLR	2017	191910
rgdpna	BLR	2018	197955
rgdpna	BLR	2019	200419
rgdpna	BLZ	1970	374.026
rgdpna	BLZ	1971	399.226
rgdpna	BLZ	1972	417.795
rgdpna	BLZ	1973	415.142
rgdpna	BLZ	1974	453.74
rgdpna	BLZ	1975	456.742
rgdpna	BLZ	1976	453.74
rgdpna	BLZ	1977	472.611
rgdpna	BLZ	1978	509.922
rgdpna	BLZ	1979	529.65
rgdpna	BLZ	1980	552.809
rgdpna	BLZ	1981	560.075
rgdpna	BLZ	1982	558.49
rgdpna	BLZ	1983	546.467
rgdpna	BLZ	1984	557.301
rgdpna	BLZ	1985	562.982
rgdpna	BLZ	1986	588.879
rgdpna	BLZ	1987	655.058
rgdpna	BLZ	1988	715.293
rgdpna	BLZ	1989	808.42
rgdpna	BLZ	1990	901.151
rgdpna	BLZ	1991	924.399
rgdpna	BLZ	1992	980.143
rgdpna	BLZ	1993	1041.65
rgdpna	BLZ	1994	1043.3
rgdpna	BLZ	1995	1050.03
rgdpna	BLZ	1996	1065.02
rgdpna	BLZ	1997	1102.77
rgdpna	BLZ	1998	1144.02
rgdpna	BLZ	1999	1244.46
rgdpna	BLZ	2000	1406.48
rgdpna	BLZ	2001	1472.33
rgdpna	BLZ	2002	1542.03
rgdpna	BLZ	2003	1685.94
rgdpna	BLZ	2004	1766.68
rgdpna	BLZ	2005	1801.1
rgdpna	BLZ	2006	1887.96
rgdpna	BLZ	2007	1897.53
rgdpna	BLZ	2008	1963.75
rgdpna	BLZ	2009	1968.02
rgdpna	BLZ	2010	2027.13
rgdpna	BLZ	2011	2066.07
rgdpna	BLZ	2012	2115.99
rgdpna	BLZ	2013	2143.51
rgdpna	BLZ	2014	2221.48
rgdpna	BLZ	2015	2284.76
rgdpna	BLZ	2016	2286.69
rgdpna	BLZ	2017	2329.45
rgdpna	BLZ	2018	2377.9
rgdpna	BLZ	2019	2384.42
rgdpna	BMU	1970	1401.25
rgdpna	BMU	1971	1449.42
rgdpna	BMU	1972	1475.7
rgdpna	BMU	1973	1497.59
rgdpna	BMU	1974	1510.73
rgdpna	BMU	1975	1567.65
rgdpna	BMU	1976	1707.78
rgdpna	BMU	1977	1751.15
rgdpna	BMU	1978	1786.61
rgdpna	BMU	1979	1903.92
rgdpna	BMU	1980	1976.31
rgdpna	BMU	1981	1906.73
rgdpna	BMU	1982	1908.5
rgdpna	BMU	1983	1925.03
rgdpna	BMU	1984	1885.83
rgdpna	BMU	1985	1965.91
rgdpna	BMU	1986	2053.06
rgdpna	BMU	1987	2134.7
rgdpna	BMU	1988	2162.88
rgdpna	BMU	1989	2165.59
rgdpna	BMU	1990	2108.28
rgdpna	BMU	1991	2113.79
rgdpna	BMU	1992	2056.18
rgdpna	BMU	1993	2105.99
rgdpna	BMU	1994	2139.27
rgdpna	BMU	1995	2254.71
rgdpna	BMU	1996	2342.07
rgdpna	BMU	1997	2449.94
rgdpna	BMU	1998	2545.73
rgdpna	BMU	1999	2632.03
rgdpna	BMU	2000	2710.56
rgdpna	BMU	2001	2906.29
rgdpna	BMU	2002	2863.34
rgdpna	BMU	2003	2961
rgdpna	BMU	2004	3030.82
rgdpna	BMU	2005	3081.57
rgdpna	BMU	2006	3223.51
rgdpna	BMU	2007	3436.54
rgdpna	BMU	2008	3586.32
rgdpna	BMU	2009	3480.42
rgdpna	BMU	2010	3500.71
rgdpna	BMU	2011	3369.68
rgdpna	BMU	2012	3190.91
rgdpna	BMU	2013	3181.99
rgdpna	BMU	2014	3064.22
rgdpna	BMU	2015	3087.98
rgdpna	BMU	2016	3067.69
rgdpna	BMU	2017	3178.48
rgdpna	BMU	2018	3181.83
rgdpna	BMU	2019	3258.44
rgdpna	BOL	1950	15159.2
rgdpna	BOL	1951	16547.3
rgdpna	BOL	1952	16620.3
rgdpna	BOL	1953	13965.8
rgdpna	BOL	1954	14357.6
rgdpna	BOL	1955	15780.9
rgdpna	BOL	1956	15077.3
rgdpna	BOL	1957	15109.1
rgdpna	BOL	1958	14911.9
rgdpna	BOL	1959	15273.1
rgdpna	BOL	1960	15939.5
rgdpna	BOL	1961	16233.5
rgdpna	BOL	1962	17257
rgdpna	BOL	1963	18416.9
rgdpna	BOL	1964	19299.7
rgdpna	BOL	1965	20188.7
rgdpna	BOL	1966	21604.9
rgdpna	BOL	1967	23360.5
rgdpna	BOL	1968	20188.7
rgdpna	BOL	1969	20800.6
rgdpna	BOL	1970	20527.3
rgdpna	BOL	1971	21566.6
rgdpna	BOL	1972	23284.9
rgdpna	BOL	1973	24621.3
rgdpna	BOL	1974	25345.1
rgdpna	BOL	1975	27198
rgdpna	BOL	1976	28453.1
rgdpna	BOL	1977	29867.6
rgdpna	BOL	1978	30480.7
rgdpna	BOL	1979	30521.3
rgdpna	BOL	1980	30102.6
rgdpna	BOL	1981	30381
rgdpna	BOL	1982	29056.7
rgdpna	BOL	1983	27760
rgdpna	BOL	1984	27593
rgdpna	BOL	1985	27326.6
rgdpna	BOL	1986	26645.9
rgdpna	BOL	1987	27339.1
rgdpna	BOL	1988	28148
rgdpna	BOL	1989	29215
rgdpna	BOL	1990	30568.9
rgdpna	BOL	1991	32178.2
rgdpna	BOL	1992	32708.7
rgdpna	BOL	1993	34104.3
rgdpna	BOL	1994	35697.7
rgdpna	BOL	1995	37366.4
rgdpna	BOL	1996	38996.9
rgdpna	BOL	1997	40928.9
rgdpna	BOL	1998	42987.4
rgdpna	BOL	1999	43170.9
rgdpna	BOL	2000	44253.5
rgdpna	BOL	2001	44998.7
rgdpna	BOL	2002	46117.1
rgdpna	BOL	2003	47367.5
rgdpna	BOL	2004	49344.3
rgdpna	BOL	2005	51525.9
rgdpna	BOL	2006	53997.7
rgdpna	BOL	2007	56462.3
rgdpna	BOL	2008	59933.9
rgdpna	BOL	2009	61946.1
rgdpna	BOL	2010	64502.4
rgdpna	BOL	2011	67859.1
rgdpna	BOL	2012	71335
rgdpna	BOL	2013	76182.9
rgdpna	BOL	2014	80343
rgdpna	BOL	2015	84245.4
rgdpna	BOL	2016	87837.5
rgdpna	BOL	2017	91522.5
rgdpna	BOL	2018	95388.1
rgdpna	BOL	2019	97502.5
rgdpna	BRA	1950	145880
rgdpna	BRA	1951	153024
rgdpna	BRA	1952	167576
rgdpna	BRA	1953	176092
rgdpna	BRA	1954	190537
rgdpna	BRA	1955	202837
rgdpna	BRA	1956	210200
rgdpna	BRA	1957	231305
rgdpna	BRA	1958	246067
rgdpna	BRA	1959	265041
rgdpna	BRA	1960	285613
rgdpna	BRA	1961	325808
rgdpna	BRA	1962	342663
rgdpna	BRA	1963	364751
rgdpna	BRA	1964	379936
rgdpna	BRA	1965	406418
rgdpna	BRA	1966	422527
rgdpna	BRA	1967	446754
rgdpna	BRA	1968	496790
rgdpna	BRA	1969	528660
rgdpna	BRA	1970	586407
rgdpna	BRA	1971	652906
rgdpna	BRA	1972	730863
rgdpna	BRA	1973	832964
rgdpna	BRA	1974	900851
rgdpna	BRA	1975	947425
rgdpna	BRA	1976	1.04463e+06
rgdpna	BRA	1977	1.09613e+06
rgdpna	BRA	1978	1.15061e+06
rgdpna	BRA	1979	1.22839e+06
rgdpna	BRA	1980	1.34177e+06
rgdpna	BRA	1981	1.28474e+06
rgdpna	BRA	1982	1.29541e+06
rgdpna	BRA	1983	1.25745e+06
rgdpna	BRA	1984	1.32536e+06
rgdpna	BRA	1985	1.42938e+06
rgdpna	BRA	1986	1.53644e+06
rgdpna	BRA	1987	1.59068e+06
rgdpna	BRA	1988	1.58973e+06
rgdpna	BRA	1989	1.63996e+06
rgdpna	BRA	1990	1.56862e+06
rgdpna	BRA	1991	1.58478e+06
rgdpna	BRA	1992	1.56994e+06
rgdpna	BRA	1993	1.64587e+06
rgdpna	BRA	1994	1.74219e+06
rgdpna	BRA	1995	1.81577e+06
rgdpna	BRA	1996	1.85482e+06
rgdpna	BRA	1997	1917423
rgdpna	BRA	1998	1.9181e+06
rgdpna	BRA	1999	1.92297e+06
rgdpna	BRA	2000	2.00578e+06
rgdpna	BRA	2001	2.03212e+06
rgdpna	BRA	2002	2.08613e+06
rgdpna	BRA	2003	2110055
rgdpna	BRA	2004	2228845
rgdpna	BRA	2005	2.30022e+06
rgdpna	BRA	2006	2.39135e+06
rgdpna	BRA	2007	2.5365e+06
rgdpna	BRA	2008	2665716
rgdpna	BRA	2009	2662362
rgdpna	BRA	2010	2.86279e+06
rgdpna	BRA	2011	2976570
rgdpna	BRA	2012	3.03376e+06
rgdpna	BRA	2013	3.12491e+06
rgdpna	BRA	2014	3.14066e+06
rgdpna	BRA	2015	3.0293e+06
rgdpna	BRA	2016	2.93006e+06
rgdpna	BRA	2017	2.96883e+06
rgdpna	BRA	2018	3.00793e+06
rgdpna	BRA	2019	3042119
rgdpna	BRB	1960	963.443
rgdpna	BRB	1961	1032.5
rgdpna	BRB	1962	1083.33
rgdpna	BRB	1963	1033.89
rgdpna	BRB	1964	1074.05
rgdpna	BRB	1965	1184.34
rgdpna	BRB	1966	1219.13
rgdpna	BRB	1967	1401.58
rgdpna	BRB	1968	1517.26
rgdpna	BRB	1969	1661.72
rgdpna	BRB	1970	1832.37
rgdpna	BRB	1971	1904.06
rgdpna	BRB	1972	1928.32
rgdpna	BRB	1973	1954.17
rgdpna	BRB	1974	1863.29
rgdpna	BRB	1975	1937.91
rgdpna	BRB	1976	2022.41
rgdpna	BRB	1977	2096.07
rgdpna	BRB	1978	2198.3
rgdpna	BRB	1979	2371.81
rgdpna	BRB	1980	2475.53
rgdpna	BRB	1981	2427.78
rgdpna	BRB	1982	2308.06
rgdpna	BRB	1983	2319.78
rgdpna	BRB	1984	2402.17
rgdpna	BRB	1985	2428.09
rgdpna	BRB	1986	2551.82
rgdpna	BRB	1987	2617.24
rgdpna	BRB	1988	2707.65
rgdpna	BRB	1989	2805.15
rgdpna	BRB	1990	2712.58
rgdpna	BRB	1991	2606.44
rgdpna	BRB	1992	2424.39
rgdpna	BRB	1993	2454.01
rgdpna	BRB	1994	2546.89
rgdpna	BRB	1995	2598.42
rgdpna	BRB	1996	2701.48
rgdpna	BRB	1997	2829.53
rgdpna	BRB	1998	2935.37
rgdpna	BRB	1999	2944.93
rgdpna	BRB	2000	3076.07
rgdpna	BRB	2001	3003.25
rgdpna	BRB	2002	3027.01
rgdpna	BRB	2003	3092.74
rgdpna	BRB	2004	3136.24
rgdpna	BRB	2005	3260.59
rgdpna	BRB	2006	3445.42
rgdpna	BRB	2007	3521.29
rgdpna	BRB	2008	3545.86
rgdpna	BRB	2009	3365.88
rgdpna	BRB	2010	3288.89
rgdpna	BRB	2011	3266.74
rgdpna	BRB	2012	3252.06
rgdpna	BRB	2013	3206.16
rgdpna	BRB	2014	3202.1
rgdpna	BRB	2015	3280.44
rgdpna	BRB	2016	3361.97
rgdpna	BRB	2017	3378.03
rgdpna	BRB	2018	3358.33
rgdpna	BRB	2019	3355.1
rgdpna	BRN	1970	10634.4
rgdpna	BRN	1971	11697.1
rgdpna	BRN	1972	12883.8
rgdpna	BRN	1973	14117.3
rgdpna	BRN	1974	15746.5
rgdpna	BRN	1975	15803.1
rgdpna	BRN	1976	18988.3
rgdpna	BRN	1977	21060.6
rgdpna	BRN	1978	22492.5
rgdpna	BRN	1979	27562.7
rgdpna	BRN	1980	25634.3
rgdpna	BRN	1981	20552
rgdpna	BRN	1982	21363.9
rgdpna	BRN	1983	21471.1
rgdpna	BRN	1984	21600.5
rgdpna	BRN	1985	21278.4
rgdpna	BRN	1986	18837.1
rgdpna	BRN	1987	18895.5
rgdpna	BRN	1988	18827
rgdpna	BRN	1989	19242.6
rgdpna	BRN	1990	19452.2
rgdpna	BRN	1991	20064.2
rgdpna	BRN	1992	21019
rgdpna	BRN	1993	21083
rgdpna	BRN	1994	21746.1
rgdpna	BRN	1995	22720.1
rgdpna	BRN	1996	23374
rgdpna	BRN	1997	23029.6
rgdpna	BRN	1998	22900.6
rgdpna	BRN	1999	23599.7
rgdpna	BRN	2000	24273
rgdpna	BRN	2001	24939.3
rgdpna	BRN	2002	25904.9
rgdpna	BRN	2003	26657
rgdpna	BRN	2004	26791.4
rgdpna	BRN	2005	26895.3
rgdpna	BRN	2006	28078
rgdpna	BRN	2007	28120.7
rgdpna	BRN	2008	27576.4
rgdpna	BRN	2009	27089.4
rgdpna	BRN	2010	27793.4
rgdpna	BRN	2011	28834.1
rgdpna	BRN	2012	29097.4
rgdpna	BRN	2013	28479.2
rgdpna	BRN	2014	27764.9
rgdpna	BRN	2015	27656
rgdpna	BRN	2016	26970.7
rgdpna	BRN	2017	27329.1
rgdpna	BRN	2018	27343.4
rgdpna	BRN	2019	28401.3
rgdpna	BTN	1970	376.416
rgdpna	BTN	1971	386.493
rgdpna	BTN	1972	390.989
rgdpna	BTN	1973	396.725
rgdpna	BTN	1974	417.19
rgdpna	BTN	1975	403.392
rgdpna	BTN	1976	439.514
rgdpna	BTN	1977	474.241
rgdpna	BTN	1978	508.038
rgdpna	BTN	1979	532.378
rgdpna	BTN	1980	559.043
rgdpna	BTN	1981	623.062
rgdpna	BTN	1982	637.225
rgdpna	BTN	1983	688.897
rgdpna	BTN	1984	731.877
rgdpna	BTN	1985	773.917
rgdpna	BTN	1986	883.81
rgdpna	BTN	1987	1160.93
rgdpna	BTN	1988	1231.4
rgdpna	BTN	1989	1324.88
rgdpna	BTN	1990	1475.56
rgdpna	BTN	1991	1486.48
rgdpna	BTN	1992	1541.02
rgdpna	BTN	1993	1572.04
rgdpna	BTN	1994	1664.45
rgdpna	BTN	1995	1777.28
rgdpna	BTN	1996	1891.12
rgdpna	BTN	1997	2002.2
rgdpna	BTN	1998	2124.94
rgdpna	BTN	1999	2293.7
rgdpna	BTN	2000	2494.11
rgdpna	BTN	2001	2698.72
rgdpna	BTN	2002	2988.23
rgdpna	BTN	2003	3217.56
rgdpna	BTN	2004	3407.32
rgdpna	BTN	2005	3650.02
rgdpna	BTN	2006	3900.1
rgdpna	BTN	2007	4600.01
rgdpna	BTN	2008	4817.92
rgdpna	BTN	2009	5138.62
rgdpna	BTN	2010	5741.47
rgdpna	BTN	2011	6194.57
rgdpna	BTN	2012	6508.7
rgdpna	BTN	2013	6648.13
rgdpna	BTN	2014	6913.62
rgdpna	BTN	2015	7372.85
rgdpna	BTN	2016	7972.05
rgdpna	BTN	2017	8342.89
rgdpna	BTN	2018	8595.49
rgdpna	BTN	2019	8922.64
rgdpna	BWA	1960	439.072
rgdpna	BWA	1961	472.857
rgdpna	BWA	1962	509.09
rgdpna	BWA	1963	530.22
rgdpna	BWA	1964	560.604
rgdpna	BWA	1965	534.508
rgdpna	BWA	1966	572.883
rgdpna	BWA	1967	683.847
rgdpna	BWA	1968	781.455
rgdpna	BWA	1969	779.698
rgdpna	BWA	1970	877.893
rgdpna	BWA	1971	1104.57
rgdpna	BWA	1972	1395.76
rgdpna	BWA	1973	1693.1
rgdpna	BWA	1974	1842.06
rgdpna	BWA	1975	1997.64
rgdpna	BWA	1976	2210.34
rgdpna	BWA	1977	2444.57
rgdpna	BWA	1978	2729.67
rgdpna	BWA	1979	3119.64
rgdpna	BWA	1980	3500.82
rgdpna	BWA	1981	3911.9
rgdpna	BWA	1982	4241.93
rgdpna	BWA	1983	4746.65
rgdpna	BWA	1984	5392.63
rgdpna	BWA	1985	5890.32
rgdpna	BWA	1986	6322.51
rgdpna	BWA	1987	6842.52
rgdpna	BWA	1988	7678.89
rgdpna	BWA	1989	10233.9
rgdpna	BWA	1990	10963.2
rgdpna	BWA	1991	11777.1
rgdpna	BWA	1992	12130.6
rgdpna	BWA	1993	12363
rgdpna	BWA	1994	12811.8
rgdpna	BWA	1995	13712.5
rgdpna	BWA	1996	14511.9
rgdpna	BWA	1997	15676.7
rgdpna	BWA	1998	15789.9
rgdpna	BWA	1999	17316.3
rgdpna	BWA	2000	17660.5
rgdpna	BWA	2001	17704.8
rgdpna	BWA	2002	18779.4
rgdpna	BWA	2003	19648.1
rgdpna	BWA	2004	20179.7
rgdpna	BWA	2005	21099.2
rgdpna	BWA	2006	22863.9
rgdpna	BWA	2007	24756.4
rgdpna	BWA	2008	26302.5
rgdpna	BWA	2009	24289.7
rgdpna	BWA	2010	26369.8
rgdpna	BWA	2011	27964.8
rgdpna	BWA	2012	29210.9
rgdpna	BWA	2013	32524.4
rgdpna	BWA	2014	33874
rgdpna	BWA	2015	33298.8
rgdpna	BWA	2016	34731.9
rgdpna	BWA	2017	35740.5
rgdpna	BWA	2018	37341.3
rgdpna	BWA	2019	38448.8
rgdpna	CAF	1960	2730.01
rgdpna	CAF	1961	2860.88
rgdpna	CAF	1962	2718.06
rgdpna	CAF	1963	2721.85
rgdpna	CAF	1964	2769.62
rgdpna	CAF	1965	2803.51
rgdpna	CAF	1966	2823.18
rgdpna	CAF	1967	2906.91
rgdpna	CAF	1968	2978.88
rgdpna	CAF	1969	3220.65
rgdpna	CAF	1970	3280.42
rgdpna	CAF	1971	3180.83
rgdpna	CAF	1972	3118.11
rgdpna	CAF	1973	3259.29
rgdpna	CAF	1974	3162.06
rgdpna	CAF	1975	3219.62
rgdpna	CAF	1976	3362.57
rgdpna	CAF	1977	3632.96
rgdpna	CAF	1978	3676.9
rgdpna	CAF	1979	3586.26
rgdpna	CAF	1980	3425.64
rgdpna	CAF	1981	3478.67
rgdpna	CAF	1982	3541.15
rgdpna	CAF	1983	3325.24
rgdpna	CAF	1984	3565.49
rgdpna	CAF	1985	3684.46
rgdpna	CAF	1986	3816.29
rgdpna	CAF	1987	3628.11
rgdpna	CAF	1988	3703.73
rgdpna	CAF	1989	3795.41
rgdpna	CAF	1990	3736.77
rgdpna	CAF	1991	3780.86
rgdpna	CAF	1992	3730.54
rgdpna	CAF	1993	3717.54
rgdpna	CAF	1994	3909.98
rgdpna	CAF	1995	4111.46
rgdpna	CAF	1996	3801.12
rgdpna	CAF	1997	4033.78
rgdpna	CAF	1998	4217.43
rgdpna	CAF	1999	4467.86
rgdpna	CAF	2000	4553.73
rgdpna	CAF	2001	4582.44
rgdpna	CAF	2002	4554.49
rgdpna	CAF	2003	4233.32
rgdpna	CAF	2004	4350.5
rgdpna	CAF	2005	4454.12
rgdpna	CAF	2006	4665.87
rgdpna	CAF	2007	4853.96
rgdpna	CAF	2008	4980.79
rgdpna	CAF	2009	5120.86
rgdpna	CAF	2010	5357.99
rgdpna	CAF	2011	5582.74
rgdpna	CAF	2012	5864.88
rgdpna	CAF	2013	3730.53
rgdpna	CAF	2014	3733.56
rgdpna	CAF	2015	3895.49
rgdpna	CAF	2016	4080.54
rgdpna	CAF	2017	4265.27
rgdpna	CAF	2018	4426.9
rgdpna	CAF	2019	4558.39
rgdpna	CAN	1950	198131
rgdpna	CAN	1951	206790
rgdpna	CAN	1952	224111
rgdpna	CAN	1953	235150
rgdpna	CAN	1954	232511
rgdpna	CAN	1955	253993
rgdpna	CAN	1956	277510
rgdpna	CAN	1957	284566
rgdpna	CAN	1958	289269
rgdpna	CAN	1959	301028
rgdpna	CAN	1960	310435
rgdpna	CAN	1961	319221
rgdpna	CAN	1962	341186
rgdpna	CAN	1963	358758
rgdpna	CAN	1964	382187
rgdpna	CAN	1965	407080
rgdpna	CAN	1966	434902
rgdpna	CAN	1967	446617
rgdpna	CAN	1968	470046
rgdpna	CAN	1969	494939
rgdpna	CAN	1970	508118
rgdpna	CAN	1971	528292
rgdpna	CAN	1972	557399
rgdpna	CAN	1973	595502
rgdpna	CAN	1974	615036
rgdpna	CAN	1975	624023
rgdpna	CAN	1976	660707
rgdpna	CAN	1977	683423
rgdpna	CAN	1978	708597
rgdpna	CAN	1979	734894
rgdpna	CAN	1980	750735
rgdpna	CAN	1981	776817
rgdpna	CAN	1982	752058
rgdpna	CAN	1983	771621
rgdpna	CAN	1984	817212
rgdpna	CAN	1985	855927
rgdpna	CAN	1986	874286
rgdpna	CAN	1987	909895
rgdpna	CAN	1988	950023
rgdpna	CAN	1989	972034
rgdpna	CAN	1990	973635
rgdpna	CAN	1991	953324
rgdpna	CAN	1992	961907
rgdpna	CAN	1993	987502
rgdpna	CAN	1994	1.03188e+06
rgdpna	CAN	1995	1.05968e+06
rgdpna	CAN	1996	1.07684e+06
rgdpna	CAN	1997	1.12293e+06
rgdpna	CAN	1998	1.16668e+06
rgdpna	CAN	1999	1.22692e+06
rgdpna	CAN	2000	1.29044e+06
rgdpna	CAN	2001	1.31354e+06
rgdpna	CAN	2002	1.35318e+06
rgdpna	CAN	2003	1.37756e+06
rgdpna	CAN	2004	1.42009e+06
rgdpna	CAN	2005	1465589
rgdpna	CAN	2006	1.5042e+06
rgdpna	CAN	2007	1.53536e+06
rgdpna	CAN	2008	1.55078e+06
rgdpna	CAN	2009	1.50541e+06
rgdpna	CAN	2010	1.55192e+06
rgdpna	CAN	2011	1.60075e+06
rgdpna	CAN	2012	1.62894e+06
rgdpna	CAN	2013	1666875
rgdpna	CAN	2014	1714715
rgdpna	CAN	2015	1726018
rgdpna	CAN	2016	1.7433e+06
rgdpna	CAN	2017	1.7963e+06
rgdpna	CAN	2018	1.83994e+06
rgdpna	CAN	2019	1.87419e+06
rgdpna	CHE	1950	114843
rgdpna	CHE	1951	124148
rgdpna	CHE	1952	125173
rgdpna	CHE	1953	129605
rgdpna	CHE	1954	136859
rgdpna	CHE	1955	146101
rgdpna	CHE	1956	155784
rgdpna	CHE	1957	161982
rgdpna	CHE	1958	158513
rgdpna	CHE	1959	168527
rgdpna	CHE	1960	180308
rgdpna	CHE	1961	194928
rgdpna	CHE	1962	204264
rgdpna	CHE	1963	214231
rgdpna	CHE	1964	225492
rgdpna	CHE	1965	232667
rgdpna	CHE	1966	238392
rgdpna	CHE	1967	245678
rgdpna	CHE	1968	254494
rgdpna	CHE	1969	268830
rgdpna	CHE	1970	285973
rgdpna	CHE	1971	297627
rgdpna	CHE	1972	307153
rgdpna	CHE	1973	316521
rgdpna	CHE	1974	321126
rgdpna	CHE	1975	297738
rgdpna	CHE	1976	293559
rgdpna	CHE	1977	300703
rgdpna	CHE	1978	301933
rgdpna	CHE	1979	309456
rgdpna	CHE	1980	323697
rgdpna	CHE	1981	328880
rgdpna	CHE	1982	324574
rgdpna	CHE	1983	326648
rgdpna	CHE	1984	336475
rgdpna	CHE	1985	348836
rgdpna	CHE	1986	355319
rgdpna	CHE	1987	360953
rgdpna	CHE	1988	372783
rgdpna	CHE	1989	388928
rgdpna	CHE	1990	403220
rgdpna	CHE	1991	399527
rgdpna	CHE	1992	399352
rgdpna	CHE	1993	398849
rgdpna	CHE	1994	403913
rgdpna	CHE	1995	405856
rgdpna	CHE	1996	407860
rgdpna	CHE	1997	417115
rgdpna	CHE	1998	429901
rgdpna	CHE	1999	437405
rgdpna	CHE	2000	454798
rgdpna	CHE	2001	461965
rgdpna	CHE	2002	461940
rgdpna	CHE	2003	461723
rgdpna	CHE	2004	474751
rgdpna	CHE	2005	488436
rgdpna	CHE	2006	508047
rgdpna	CHE	2007	528347
rgdpna	CHE	2008	542906
rgdpna	CHE	2009	531615
rgdpna	CHE	2010	548989
rgdpna	CHE	2011	559532
rgdpna	CHE	2012	566343
rgdpna	CHE	2013	576660
rgdpna	CHE	2014	590770
rgdpna	CHE	2015	600563
rgdpna	CHE	2016	612846
rgdpna	CHE	2017	622558
rgdpna	CHE	2018	641319
rgdpna	CHE	2019	648257
rgdpna	CHL	1951	33495.7
rgdpna	CHL	1952	35102.8
rgdpna	CHL	1953	38292.9
rgdpna	CHL	1954	36161.1
rgdpna	CHL	1955	37979.8
rgdpna	CHL	1956	38214.4
rgdpna	CHL	1957	41160.4
rgdpna	CHL	1958	43080.9
rgdpna	CHL	1959	42408.1
rgdpna	CHL	1960	46879.4
rgdpna	CHL	1961	49135.7
rgdpna	CHL	1962	51391.9
rgdpna	CHL	1963	54650.9
rgdpna	CHL	1964	55904.4
rgdpna	CHL	1965	56405.7
rgdpna	CHL	1966	62673
rgdpna	CHL	1967	64678.6
rgdpna	CHL	1968	66934.8
rgdpna	CHL	1969	69441.7
rgdpna	CHL	1970	70945.9
rgdpna	CHL	1971	77299.2
rgdpna	CHL	1972	76361.5
rgdpna	CHL	1973	72112
rgdpna	CHL	1974	72814.7
rgdpna	CHL	1975	63414.2
rgdpna	CHL	1976	65645.1
rgdpna	CHL	1977	72117
rgdpna	CHL	1978	78043
rgdpna	CHL	1979	84506.2
rgdpna	CHL	1980	91220.2
rgdpna	CHL	1981	96887.1
rgdpna	CHL	1982	83722
rgdpna	CHL	1983	81376.1
rgdpna	CHL	1984	86165.5
rgdpna	CHL	1985	87861.5
rgdpna	CHL	1986	92778.5
rgdpna	CHL	1987	98896.5
rgdpna	CHL	1988	106127
rgdpna	CHL	1989	117334
rgdpna	CHL	1990	121673
rgdpna	CHL	1991	131370
rgdpna	CHL	1992	147500
rgdpna	CHL	1993	157805
rgdpna	CHL	1994	166812
rgdpna	CHL	1995	184540
rgdpna	CHL	1996	198221
rgdpna	CHL	1997	211315
rgdpna	CHL	1998	218142
rgdpna	CHL	1999	216482
rgdpna	CHL	2000	226201
rgdpna	CHL	2001	233839
rgdpna	CHL	2002	238947
rgdpna	CHL	2003	247961
rgdpna	CHL	2004	265358
rgdpna	CHL	2005	281748
rgdpna	CHL	2006	299546
rgdpna	CHL	2007	314242
rgdpna	CHL	2008	325333
rgdpna	CHL	2009	320242
rgdpna	CHL	2010	338960
rgdpna	CHL	2011	359672
rgdpna	CHL	2012	378802
rgdpna	CHL	2013	394124
rgdpna	CHL	2014	401087
rgdpna	CHL	2015	410327
rgdpna	CHL	2016	417349
rgdpna	CHL	2017	422309
rgdpna	CHL	2018	438987
rgdpna	CHL	2019	443616
rgdpna	CHN	1952	557468
rgdpna	CHN	1953	630467
rgdpna	CHN	1954	586751
rgdpna	CHN	1955	641581
rgdpna	CHN	1956	695460
rgdpna	CHN	1957	718725
rgdpna	CHN	1958	739635
rgdpna	CHN	1959	724461
rgdpna	CHN	1960	689787
rgdpna	CHN	1961	558305
rgdpna	CHN	1962	591366
rgdpna	CHN	1963	677433
rgdpna	CHN	1964	771683
rgdpna	CHN	1965	857507
rgdpna	CHN	1966	885351
rgdpna	CHN	1967	889345
rgdpna	CHN	1968	865986
rgdpna	CHN	1969	953460
rgdpna	CHN	1970	1.08534e+06
rgdpna	CHN	1971	1.18246e+06
rgdpna	CHN	1972	1.17358e+06
rgdpna	CHN	1973	1.26132e+06
rgdpna	CHN	1974	1.29935e+06
rgdpna	CHN	1975	1391712
rgdpna	CHN	1976	1.34988e+06
rgdpna	CHN	1977	1428767
rgdpna	CHN	1978	1.59476e+06
rgdpna	CHN	1979	1.71978e+06
rgdpna	CHN	1980	1.80473e+06
rgdpna	CHN	1981	1.8616e+06
rgdpna	CHN	1982	2.0317e+06
rgdpna	CHN	1983	2.17826e+06
rgdpna	CHN	1984	2414971
rgdpna	CHN	1985	2.60235e+06
rgdpna	CHN	1986	2780601
rgdpna	CHN	1987	3008488
rgdpna	CHN	1988	3142030
rgdpna	CHN	1989	3.15367e+06
rgdpna	CHN	1990	3165272
rgdpna	CHN	1991	3.30048e+06
rgdpna	CHN	1992	3.55638e+06
rgdpna	CHN	1993	3.92096e+06
rgdpna	CHN	1994	4256331
rgdpna	CHN	1995	4.65719e+06
rgdpna	CHN	1996	4990733
rgdpna	CHN	1997	5274995
rgdpna	CHN	1998	5.306e+06
rgdpna	CHN	1999	5573186
rgdpna	CHN	2000	5962253
rgdpna	CHN	2001	6370915
rgdpna	CHN	2002	6969823
rgdpna	CHN	2003	7496914
rgdpna	CHN	2004	8.22581e+06
rgdpna	CHN	2005	9019761
rgdpna	CHN	2006	9982318
rgdpna	CHN	2007	10976751
rgdpna	CHN	2008	11616248
rgdpna	CHN	2009	12577917
rgdpna	CHN	2010	13947309
rgdpna	CHN	2011	14918415
rgdpna	CHN	2012	15416000
rgdpna	CHN	2013	16562428
rgdpna	CHN	2014	17711682
rgdpna	CHN	2015	18379366
rgdpna	CHN	2016	19132416
rgdpna	CHN	2017	19687162
rgdpna	CHN	2018	19841296
rgdpna	CHN	2019	20572606
rgdpna	CIV	1960	8197.86
rgdpna	CIV	1961	9303.61
rgdpna	CIV	1962	9294.86
rgdpna	CIV	1963	10584.9
rgdpna	CIV	1964	12588.6
rgdpna	CIV	1965	12263.2
rgdpna	CIV	1966	13669.9
rgdpna	CIV	1967	14210.7
rgdpna	CIV	1968	16330.8
rgdpna	CIV	1969	17553.2
rgdpna	CIV	1970	19244.7
rgdpna	CIV	1971	21064.7
rgdpna	CIV	1972	21956.7
rgdpna	CIV	1973	23260.7
rgdpna	CIV	1974	24267.4
rgdpna	CIV	1975	26270.1
rgdpna	CIV	1976	29421.2
rgdpna	CIV	1977	30804
rgdpna	CIV	1978	33853.5
rgdpna	CIV	1979	34496.7
rgdpna	CIV	1980	30717.1
rgdpna	CIV	1981	31792.2
rgdpna	CIV	1982	31856.1
rgdpna	CIV	1983	30613.8
rgdpna	CIV	1984	29786.9
rgdpna	CIV	1985	31127.5
rgdpna	CIV	1986	32141.8
rgdpna	CIV	1987	32030.4
rgdpna	CIV	1988	32385
rgdpna	CIV	1989	36235.5
rgdpna	CIV	1990	35789.7
rgdpna	CIV	1991	35810
rgdpna	CIV	1992	35587
rgdpna	CIV	1993	35445.2
rgdpna	CIV	1994	36205.1
rgdpna	CIV	1995	38758.7
rgdpna	CIV	1996	41373
rgdpna	CIV	1997	43723.6
rgdpna	CIV	1998	45966.2
rgdpna	CIV	1999	46859.4
rgdpna	CIV	2000	45890.2
rgdpna	CIV	2001	45945.9
rgdpna	CIV	2002	45179.6
rgdpna	CIV	2003	44565.4
rgdpna	CIV	2004	45114.3
rgdpna	CIV	2005	45890.9
rgdpna	CIV	2006	46586.5
rgdpna	CIV	2007	47408.8
rgdpna	CIV	2008	48618.5
rgdpna	CIV	2009	50199.3
rgdpna	CIV	2010	54051.2
rgdpna	CIV	2011	54652.4
rgdpna	CIV	2012	63509.1
rgdpna	CIV	2013	73253.8
rgdpna	CIV	2014	84094.8
rgdpna	CIV	2015	96605.4
rgdpna	CIV	2016	103542
rgdpna	CIV	2017	111163
rgdpna	CIV	2018	118822
rgdpna	CIV	2019	126227
rgdpna	CMR	1960	13982.1
rgdpna	CMR	1961	14184.1
rgdpna	CMR	1962	14602.7
rgdpna	CMR	1963	15073.1
rgdpna	CMR	1964	15631.9
rgdpna	CMR	1965	16355.3
rgdpna	CMR	1966	17165.1
rgdpna	CMR	1967	15262.5
rgdpna	CMR	1968	16344.9
rgdpna	CMR	1969	16909.1
rgdpna	CMR	1970	17801.6
rgdpna	CMR	1971	18311.3
rgdpna	CMR	1972	18854.7
rgdpna	CMR	1973	19761.4
rgdpna	CMR	1974	20451.3
rgdpna	CMR	1975	21231.3
rgdpna	CMR	1976	20064.6
rgdpna	CMR	1977	22821.5
rgdpna	CMR	1978	27842.9
rgdpna	CMR	1979	29523.2
rgdpna	CMR	1980	33047.7
rgdpna	CMR	1981	35457.2
rgdpna	CMR	1982	38098.1
rgdpna	CMR	1983	41299.5
rgdpna	CMR	1984	44622.4
rgdpna	CMR	1985	45671.8
rgdpna	CMR	1986	43271.1
rgdpna	CMR	1987	40846.2
rgdpna	CMR	1988	39304.8
rgdpna	CMR	1989	38068.2
rgdpna	CMR	1990	35722.8
rgdpna	CMR	1991	34378.2
rgdpna	CMR	1992	33329.6
rgdpna	CMR	1993	32277
rgdpna	CMR	1994	32962.6
rgdpna	CMR	1995	34106.3
rgdpna	CMR	1996	35593.7
rgdpna	CMR	1997	37455.7
rgdpna	CMR	1998	39142.1
rgdpna	CMR	1999	40822.1
rgdpna	CMR	2000	42272.6
rgdpna	CMR	2001	44119.1
rgdpna	CMR	2002	45988.5
rgdpna	CMR	2003	48088.9
rgdpna	CMR	2004	51349.8
rgdpna	CMR	2005	52387.4
rgdpna	CMR	2006	54198.8
rgdpna	CMR	2007	56855.7
rgdpna	CMR	2008	58839.3
[truncated: 8,400 more rows]

## Sheet: Tabelle1
Summe von AggValue	Spaltenbeschriftungen
Zeilenbeschriftungen	MAR	ABW	AGO	AIA	ALB	ARE	ARG	ARM	ATG	AUS	AUT	AZE	BDI	BEL	BEN	BFA	BGD	BGR	BHR	BHS	BIH	BLR	BLZ	BMU	BOL	BRA	BRB	BRN	BTN	BWA	CAF	CAN	CHE	CHL	CHN	CIV	CMR	COD	COG	COL	COM	CPV	CRI	CUW	CYM	CYP	CZE	DEU	DJI
1950	15026						196688			127476	56946.1			84999.1											15159.2	145880						198131	114843					24227.8		42417.2			3443.43			1514.99		495205
1951	15215.6						208305			130718	60474.6			88196.5											16547.3	153024						206790	124148	33495.7				27769.4		43415.1			3561.31			1537.48		543257
1952	15956.2						195898			125368	60239.3			90342.4											16620.3	167576						224111	125173	35102.8	557468			29759.9		46287.6			4006.77			1698.81		593964
1953	16734.4						204165			138968	62218.3			93326.2											13965.8	176092						235150	129605	38292.9	630467			32793.6		49921.7			4706.36			1875.82		646874
1954	17122						210813			150078	67352.9			97440.6											14357.6	190537						232511	136859	36161.1	586751			34244.3		53759.4			4893.17			1918.3		697127
1955	15985.4						225537			155998	75065.1			100903											15780.9	202837						253993	146101	37979.8	641581			36441.3		56061			5412.02			2008.91		781496
1956	16295.5						231485			156356	79692.4			104080											15077.3	210200						277510	155784	38214.4	695460			38486.5		57498.9			5343.25			2359.36		841851
1957	15676.3						240381			159781	84319.7			106104											15109.1	231305						284566	161982	41160.4	718725			38868.8		57798.1			5706.46			2610.34		892922
1958	17479.8						256257			170619	87404.6			105541											14911.9	246067						289269	158513	43080.9	739635			38029.6		58373.4			6371.86			2423.11		932734
1959	17942.1						243847			181070	89975.3			109254	2360.06	3825.29	74930.1								15273.1	265041						301028	168527	42408.1	724461			38851.1		62282.6			6559.45			2559.05		1.00607e+06
1960	18344.5						270342			185281	98201.6		1941.15	115497	2509.54	3841.94	79232.7								15939.5	285613	963.443			439.072	2730.01	310435	180308	46879.4	689787	8197.86	13982.1	42396.9	2072.48	65859.7	338.617	303.875	7103.95			2274.15		1.09264e+06
1961	22057.8						279139			187808	103343		1664.43	121345	2542.07	3339.48	76698.6								16233.5	325808	1032.5			472.857	2860.88	319221	194928	49135.7	558305	9303.61	14184.1	37928.7	2442.15	69705.5	363.513	330.691	7052.36			2480.69		1.14727e+06
1962	25387.7						280925			199598	105400		1805.29	127778	2448.48	3498.69	82362.7								17257	342663	1083.33			509.09	2718.06	341186	204264	51391.9	591366	9294.86	14602.7	43331.8	2395.97	73088.5	413.769	295.265	7557.26			2718.66		1.20191e+06
1963	29423.9						270609			213074	110027		1912.75	133334	2584.91	3432.82	86704.9								18416.9	364751	1033.89			530.22	2721.85	358758	214231	54650.9	677433	10584.9	15073.1	44467.4	2276.71	75276.8	467.057	266.466	8037.87			2860.09		1.23469e+06
1964	30937.5						291642			226548	116711		2037.7	142690	2693.43	3493.63	86306.6								19299.7	379936	1074.05			560.604	2769.62	382187	225492	55904.4	771683	12588.6	15631.9	44651.3	2347.2	81225.7	518.5	290.15	8412.42			2581.71		1.31117e+06
1965	30836.6						318470			231602	119796		2137.31	147661	2834.84	3441.36	84616								20188.7	406418	1184.34			534.508	2803.51	407080	232667	56405.7	857507	12263.2	16355.3	43720.1	2451.11	82062.5	517.936	300.443	9339.45			3131.73		1.38766e+06
1966	29706.4						319221			245919	126480		2223.69	152047	2935.39	3431.05	86482.3								21604.9	422527	1219.13			572.883	2823.18	434902	238392	62673	885351	13669.9	17165.1	46401.8	2596.71	86632.6	575.514	364.56	9895.58			3353.98		1.42043e+06
1967	31058.6						328119			258552	130593		2539.04	157895	3136.87	3725.59	81550.1								23360.5	446754	1401.58			683.847	2906.91	446617	245678	64678.6	889345	14210.7	15262.5	45872.2	2913.93	90062.5	638.836	419.946	10456.4			3787.26		1420435
1968	33117						345067			277080	136248		2531.01	165205	3300.04	3888.23	85694.3								20188.7	496790	1517.26			781.455	2978.88	470046	254494	66934.8	865986	16330.8	16344.9	48832	3190.52	95959.2	641.439	460.443	11333.3			3996.04		1.49692e+06
1969	36446.9						376696			297292	144989		2484.99	175439	3486.49	3951.07	88617.6								20800.6	528660	1661.72			779.698	3220.65	494939	268830	69441.7	953460	17553.2	16909.1	52692.6	3537.46	102273	628.743	496.762	11965.6			4388.91		1.60618e+06
1970	38121.9	262.309	54237.1	26.5233	9084.57	47921.8	388738		266.395	309083	155272		3059.89	187135	3551.25	4013.39	95964	38062.5	10346.4	4646.32			374.026	1401.25	20527.3	586407	1832.37	10634.4	376.416	877.893	3280.42	508118	285973	70945.9	1.08534e+06	19244.7	17801.6	52561.2	3971.24	109445	647.082	551.909	12863.3		297.452	4519.12		1.68267e+06	773.284
1971	39678.3	286.148	57491.3	25.8606	9448.03	54870	403359		286.313	321176	163211		3159.28	194158	3625.22	3995.67	90705.6	40687.5	10512.7	4721.89			399.226	1449.42	21566.6	652906	1904.06	11697.1	386.493	1104.57	3180.83	528292	297627	77299.2	1.18246e+06	21064.7	18311.3	55717.5	4329.81	115969	674.786	581.519	13733.3		306.889	5105.06		1735382	821.399
1972	41234.7	312.155	57606.3	28.8445	9827.27	62826.1	411739		307.475	329570	173343		2970.31	204362	3981.23	4892.14	78030.7	43804.7	11676.7	4556.75			417.795	1475.7	23284.9	730863	1928.32	12883.8	390.989	1395.76	3118.11	557399	307153	76361.5	1.17358e+06	21956.7	18854.7	55801.7	4508.91	124863	689.697	594.971	14857.2		331.772	5457.52		1.81001e+06	849.022
1973	42712.3	340.525	62272.4	30.0499	10222.1	71936.2	427156		333.617	343094	181815		3175.31	216874	4152.79	4638.59	80625.7	47381.2	13302.5	4901.59			415.142	1497.59	24621.3	832964	1954.17	14117.3	396.725	1693.1	3259.29	595502	316521	72112	1.26132e+06	23260.7	19761.4	60342.5	5291.78	133257	740.196	604.519	16001.9		379.374	5596.7		1.89648e+06	891.403
1974	45096.2	371.474	64202.8	29.9893	10628	82365.6	450247		344.971	347725	188985		3158.49	225982	4435	4894.36	88359.3	50957.8	14429.5	4080.36			453.74	1510.73	25345.1	900851	1863.29	15746.5	417.19	1842.06	3162.06	615036	321126	72814.7	1.29935e+06	24267.4	20451.3	62231.6	5248.32	140914	762.687	618.797	16890.3		416.933	4650.06		1.91336e+06	860.041
1975	48504.5	405.235	60992.7	31.0155	11058.8	87495	447577		326.047	356724	188300		3159.14	222983	4131.5	5010.94	84747	55453.1	13154.7	3476.34			456.742	1567.65	27198	947425	1937.91	15803.1	403.392	1997.64	3219.62	624023	297738	63414.2	1391712	26270.1	21231.3	59131.4	5203.06	144188	812.843	514.172	17245.7		458.21	3766.2		1.89678e+06	957.069
1976	53745	442.065	57821.1	31.4964	11504.4	100656	447527		296.848	369556	196919		3487.6	235588	4189.99	4961.27	89544.8	59062.5	17163.8	3656.6			453.74	1707.78	28453.1	1.04463e+06	2022.41	18988.3	439.514	2210.34	3362.57	660707	293559	65645.1	1.34988e+06	29421.2	20064.6	55992.1	5450.39	151005	815.211	524.869	18196.5		503.574	4443.09		1990655	1039.99
1977	56995.7	482.242	58283.6	31.5558	11945	118210	476099		318.477	372871	206922		3803.19	237063	4371.59	5312	91938.4	62770.3	19398.1	3991.36			472.611	1751.15	29867.6	1.09613e+06	2096.07	21060.6	474.241	2444.57	3632.96	683423	300703	72117	1428767	30804	22821.5	56418.1	5048.95	157285	847.611	498.747	19816.5		553.428	5143.92		2.05729e+06	916.632
1978	58276.3	526.07	55194.6	33.9061	12458.8	115438	460763		329.715	387948	206486		3988.43	243800	4348.41	5932.42	98442	66281.2	20147.3	4557.31			509.922	1786.61	30480.7	1.15061e+06	2198.3	22492.5	508.038	2729.67	3676.9	708597	301933	78043	1.59476e+06	33853.5	27842.9	53402.4	5352.81	170607	873.386	546.951	21058.1		608.219	5537.13		2.11918e+06	845.88
1979	61073.9	573.882	55360.2	37.1311	12952.2	144167	493095		365.235	399719	217547		4053.37	249508	4696.65	5970.37	103169	70678.1	20846.3	5748.56			529.65	1903.92	30521.3	1.22839e+06	2371.81	27562.7	532.378	3119.64	3586.26	734894	309456	84506.2	1.71978e+06	34496.7	29523.2	53632.1	5955.4	179784	956.915	564.442	22098.9		668.434	6083.72		2.20713e+06	890.406
1980	63654.7	626.039	56688.8	38.9398	13370.7	182257	500261		389.718	413061	221314		3979.46	260684	5138.96	6070.06	104014	74714	21384.2	6121.95			552.809	1976.31	30102.6	1.34177e+06	2475.53	25634.3	559.043	3500.82	3425.64	750735	323697	91220.2	1.80473e+06	30717.1	33047.7	54809.2	6710.43	187132	1027.58	594.144	22265.1		734.61	6443.88		2.23823e+06	932.438
1981	61893.5	682.936	54194.5	40.3888	14138.9	187436	473162		408.983	426809	220995		4413.73	259956	5427.98	6336.38	107545	78375.2	19962.6	5557.11			560.075	1906.73	30381	1.28474e+06	2427.78	20552	623.062	3911.9	3478.67	776817	328880	96887.1	1.8616e+06	31792.2	35457.2	56097.6	8134.27	191393	1067.29	644.349	21762		807.338	6640.49		2250074	959.474
1982	67847.4	745.005	54194.5	39.9369	14555.8	171972	458204		410.588	417332	225439		4394.72	261503	6013.25	6477.73	108868	80204.9	18464.2	5929.38			558.49	1908.5	29056.7	1.29541e+06	2308.06	21363.9	637.225	4241.93	3541.15	752058	324574	83722	2.0317e+06	31856.1	38098.1	55840.8	10051.4	193208	1135.42	662.554	20176.6		887.267	7058.27		2.24119e+06	975.685
1983	67469.4	812.715	56470.7	39.9696	14716.7	163326	477047		438.683	436451	232142		4531.34	262318	5751.92	6402	114195	82956.1	20029.1	6142.66			546.467	1925.03	27760	1.25745e+06	2319.78	21471.1	688.897	4746.65	3325.24	771621	326648	81376.1	2.17826e+06	30613.8	41299.5	56629.1	10615.2	196249	1190.16	725.64	20753.5		1003.61	7433.69		2.27643e+06	987.776
1984	70390.5	886.578	59858.9	41.7481	14532.5	170380	486614		471.394	459362	232261		4526.83	268788	6208.06	6505.73	120391	85773.7	21010.3	7013.14			557.301	1885.83	27593	1.32536e+06	2402.17	21600.5	731.877	5392.63	3565.49	817212	336475	86165.5	2414971	29786.9	44622.4	59767	11381.5	202825	1239.08	753.087	22419.7		1078.26	8089.6		2.34069e+06	993.315
1985	74840.9	967.154	61954	47.1162	14791.2	166310	452765		507.917	477909	238064		5055.83	273228	6675.44	7355.63	124017	88075.4	17636.7	7351.82			562.982	1965.91	27326.6	1.42938e+06	2428.09	21278.4	773.917	5890.32	3684.46	855927	348836	87861.5	2.60235e+06	31127.5	45671.8	60046.6	11250.3	209127	1263.86	818.17	22581.2		1115.58	8469.25		2.39518e+06	991.322
1986	80906.5	1055.05	63921.7	53.1231	15618.8	134770	485109		550.662	490101	243543		5248.93	278208	6818.86	7940.39	129399	91781.3	17843.5	7483.93			588.879	2053.06	26645.9	1.53644e+06	2551.82	18837.1	883.81	6322.51	3816.29	874286	355319	92778.5	2780601	32141.8	43271.1	62879.1	10476.1	221307	1289.14	841.666	23829.7		1202.67	8791.82		2.44997e+06	979.535
1987	78896.1	1224.69	68396.5	58.7731	15495.7	143204	497396		598.624	518250	246848		5463.83	284626	6716.58	7921.5	134810	97338.2	18184.9	7707.29			655.058	2134.7	27339.1	1.59068e+06	2617.24	18895.5	1160.93	6842.52	3628.11	909895	360953	98896.5	3008488	32030.4	40846.2	64561.5	10495.9	233189	1310.26	877.929	24965.1		1314.65	9412.37		2.48432e+06	984.382
1988	87212.7	1453.08	72208.2	67.9182	15275.5	139770	487683		643.978	538260	254984		5731.15	298069	6920.39	8380.85	138707	107992	19825.2	7885.31			715.293	2162.88	28148	1.58973e+06	2707.65	18827	1231.4	7678.89	3703.73	950023	372783	106127	3142030	32385	39304.8	64865.2	10681.3	242666	1345.47	930.578	25823.6		1501.27	10190.2		2.57642e+06	996.186
1989	89377.8	1629.33	72487.9	73.6923	16778.7	158683	453493		677.801	557482	264896		5816.16	308410	6871.43	8561.42	142202	104439	20305.4	8415.78			808.42	2165.59	29215	1.63996e+06	2805.15	19242.6	1324.88	10233.9	3795.41	972034	388928	117334	3.15367e+06	36235.5	38068.2	64044	10869.8	250951	1323.45	983.611	27286.7		1633.98	11014.4		2676812	970.285
1990	92848.8	1693.88	72165.6	92.4865	15105.7	186851	447423	19326.2	698.214	555264	276407	55394.7	6019.72	318086	7488.21	8509.29	151626	94916.7	21245.3	8281.37	8624.27	100208	901.151	2108.28	30568.9	1.56862e+06	2712.58	19452.2	1475.56	10963.2	3736.77	973635	403220	121673	3165272	35789.7	35722.8	59837.4	10978.9	261696	1334.73	990.379	28255.9		1849.63	11867.7	224323	2.81748e+06	1026.91
1991	99301	1828.76	72881.1	75.6862	10875.8	188458	494385	17069.1	713.411	557552	285920	55006.9	6340.78	323916	7804.65	9281.42	156781	86900.6	22213.2	7935.26	7818.07	98819.2	924.399	2113.79	32178.2	1.58478e+06	2606.44	20064.2	1486.48	11777.1	3780.86	953324	399527	131370	3.30048e+06	35810	34378.2	54798.4	11241.8	266935	1358.5	1004.31	28895.2		1874.51	11947.8	198268	2961403	994.594
1992	95297.4	1936.33	68626.1	97.4114	10094.1	194762	545328	9941.69	721.676	580021	291906	42575.4	6455.27	328874	8035.49	9302.57	163409	80598.4	23945.1	7631.49	7314.83	89289	980.143	2056.18	32708.7	1.56994e+06	2424.39	21019	1541.02	12130.6	3730.54	961907	399352	147500	3.55638e+06	35587	33329.6	49044.6	11535.5	277732	1474.39	1034.88	31552.6		1932.16	13074.5	197263	3.01835e+06	1052.91
1993	94332.5	2077.84	52167.2	104.645	11059.1	197219	579421	9065.74	759.78	603129	293444	32740.3	6001.57	325711	8504.46	9625.17	170884	79405.3	27030.5	7654.95	7155.27	82538	1041.65	2105.99	34104.3	1.64587e+06	2454.01	21083	1572.04	12363	3717.54	987502	398849	157805	3.92096e+06	35445.2	32277	42438.8	11422.5	293591	1518.71	1110.56	33788.8		2024.64	13166	197386	2988868	1103.86
1994	104103	2248.3	52865.9	113.023	11977.3	214184	613237	9548.69	810.508	626275	300492	26305.3	5816.44	336222	8676.28	9751.35	177864	80849	26458.5	7896.23	7951.79	72894.6	1043.3	2139.27	35697.7	1.74219e+06	2546.89	21746.1	1664.45	12811.8	3909.98	1.03188e+06	403913	166812	4256331	36205.1	32962.6	40783.7	10795	308703	1438.58	1187.5	35305		2132.05	13926.7	203128	3.06036e+06	1077.11
1995	97254	2304.66	60795.8	110.4	13572.9	231787	595789	10206.7	775.173	650566	308510	23197	5408.06	344240	9555.34	10308.9	186624	84740.7	26970.2	8241.83	9221.56	65278.7	1050.03	2254.71	37366.4	1.81577e+06	2598.42	22720.1	1777.28	13712.5	4111.46	1.05968e+06	405856	184540	4.65719e+06	38758.7	34106.3	41069.1	11225.2	324763	1490.51	1276.44	36760.1		2234.49	15308.8	216333	3107615	1137.45
1996	109136	2333.35	69030.2	113.168	14808.3	245370	628716	10808.9	826.369	676371	315758	23488.1	4942.55	348789	9969.31	11444.4	195250	89095.4	27850.4	8589.98	14219.6	67091.2	1065.02	2342.07	38996.9	1.85482e+06	2701.48	23374	1891.12	14511.9	3801.12	1.07684e+06	407860	198221	4990733	41373	35593.7	40648.9	11942.8	331440	1470.54	1361.92	37215.2		2346.04	15499.8	225561	3.13266e+06	1079.54
1997	106704	2515.69	74051.6	125.263	13203.4	266596	679712	11167.9	871.585	707326	322369	24851.9	4961.31	362021	10541	12167.3	205770	76450.3	28493.7	9111.4	19429.8	74753.9	1102.77	2449.94	40928.9	1917423	2829.53	23029.6	2002.2	15676.7	4033.78	1.12293e+06	417115	211315	5274995	43723.6	37455.7	38365.7	11651.7	342809	1532.59	1465.95	39286.2		2475.02	15909.2	224391	3188799	1129.24
1998	114894	2683.4	77525.5	138.176	14369.2	270942	705882	11987.6	912.82	743213	333914	27328.6	5184.05	369123	10958.5	13056.5	216526	79726.4	29886.5	9541.09	22658.3	81066.5	1144.02	2545.73	42987.4	1.9181e+06	2935.37	22900.6	2124.94	15789.9	4217.43	1.16668e+06	429901	218142	5.306e+06	45966.2	39142.1	37742.5	12071	344762	1550.22	1589.29	42021.1		3224.41	16881.3	223591	3.25302e+06	1127.15
1999	115502	2714.38	79216.7	143.271	16221.5	282823	681984	12377.8	946.664	772445	345789	29350	5132.23	382200	11543.9	13871.6	227069	73124.3	31665.7	10222.8	24815.7	83862.1	1244.46	2632.03	43170.9	1.92297e+06	2944.93	23599.7	2293.7	17316.3	4467.86	1.22692e+06	437405	216482	5573186	46859.4	40822.1	36130.9	11756.9	330268	1579.98	1777.81	43678.2		3333.56	17725.1	226686	3.31441e+06	1164.07
2000	117342	2836.91	81636.5	145.365	17348.3	317375	676604	13107.6	1005.39	787360	357462	32606.1	5086.01	396405	12220.1	14133.6	240568	76621.2	33888.1	10646.9	26159.3	88715.7	1406.48	2710.56	44253.5	2.00578e+06	3076.07	24273	2494.11	17660.5	4553.73	1.29044e+06	454798	226201	5962253	45890.2	42272.6	33634.1	12647.3	339928	1617.81	1906.98	45352.4		3366.19	18782.5	235756	3.41094e+06	1176.44
2001	126203	2826.57	84199.9	148.602	18787	321741	646773	14360.3	959.665	818865	361992	35834.9	5192.85	400764	12871.8	15068.3	253254	79545.9	34732.2	10926.4	26862.8	92907.8	1472.33	2906.29	44998.7	2.03212e+06	3003.25	24939.3	2698.72	17704.8	4582.44	1.31354e+06	461965	233839	6370915	45945.9	44119.1	32927.7	13129.1	345632	1655.02	2024.01	46935.5		3384.93	19524.9	242930	3.4683e+06	1201.68
2002	130388	2765.39	96434.1	143.11	19639.3	329570	576311	16521.5	969.525	843316	367970	39217.3	5426.49	407605	13469.5	15724.2	264437	84281.4	35895.2	11221.9	28216.9	97561	1542.03	2863.34	46117.1	2.08613e+06	3027.01	25904.9	2988.23	18779.4	4554.49	1.35318e+06	461940	238947	6969823	45179.6	45988.5	33898	13730.8	354287	1693.09	2130.93	48480.5		3443.33	20251.7	246744	3.46143e+06	1244.84
2003	138625	2778.25	99317.3	151.841	20725.1	358574	627240	18841.3	1028.44	877516	371435	43220.7	5361.37	411835	13933.3	16951.1	278336	88623.4	38155.4	11080	29316.9	104385	1685.94	2961	47367.5	2110055	3092.74	26657	3217.56	19648.1	4233.32	1.37756e+06	461723	247961	7496914	44565.4	48088.9	35788.6	13841.7	368168	1728.64	2230.73	50543.5		3512.19	20783	255586	3.4372e+06	1288.96
2004	145281	2987.16	110196	172.292	21868	392877	683876	20813.6	1087.75	905634	381594	47220.3	5585.96	426543	14550.5	17710.2	295789	94332.4	40819	11177.9	31168.2	116313	1766.68	3030.82	49344.3	2228845	3136.24	26791.4	3407.32	20179.7	4350.5	1.42009e+06	474751	265358	8.22581e+06	45114.3	51349.8	38200.5	14335.9	387803	1761.49	2326.2	52735.4		3543.73	21827.6	267891	3.47759e+06	1332.22
2005	149608	3022.31	126757	194.885	23076.6	411952	744411	23699.5	1158.17	930942	390157	60423.8	5636.79	436446	14799.8	19244.3	313404	101080	43582	11557.4	32384.1	127295	1801.1	3081.57	51525.9	2.30022e+06	3260.59	26895.3	3650.02	21099.2	4454.12	1465589	488436	281748	9019761	45890.9	52387.4	40544.2	15432.2	406055	1810.81	2477.89	54776.7	3511.39	3773.89	22886.9	285576	3503034	1379.62
2006	161218	3030.11	141522	233.882	24438.7	452476	804315	26827.4	1305.35	966730	403633	81249.6	5942	447586	15383.4	20447.6	334181	107956	46400.5	11848.3	34137.4	140022	1887.96	3223.51	53997.7	2.39135e+06	3445.42	28078	3900.1	22863.9	4665.87	1.5042e+06	508047	299546	9982318	46586.5	54198.8	42701.6	17445.6	433329	1859.6	2729.2	58741.3	3568.83	3947.52	23965.8	304901	3.63673e+06	1554.83
2007	165580	3115.24	161348	265.812	25900.9	466885	876765	30515.9	1426.95	1.00209e+06	418678	101938	6144.99	464043	16304.3	21288.3	357770	115035	50248.9	12019.7	36137.5	152033	1897.53	3436.54	56462.3	2.5365e+06	3521.29	28120.7	4600.01	24756.4	4853.96	1.53536e+06	528347	314242	10976751	47408.8	56855.7	45374.4	16291.7	462528	1560.29	2965.25	63539.2	3656.98	3980.36	25187.5	321884	3.74497e+06	1632.57
2008	175388	3042.48	179362	262.244	27843.5	481787	912337	32636.1	1426.74	1.0215e+06	424793	112735	6446.12	466117	17102.7	22523	379285	122036	53385.4	11740.4	38104.1	167608	1963.75	3586.32	59933.9	2665716	3545.86	27576.4	4817.92	26302.5	4980.79	1.55078e+06	542906	325333	11616248	48618.5	58839.3	48199.4	17319.1	477715	1673.15	3162.45	66493.6	3737	4057.81	26106.1	330532	3780918	1714.2
2009	191114	2782.59	180902	213.812	28777.4	456528	858340	28018.1	1256.07	1.04262e+06	408801	123297	6690.25	456698	17499.3	23190.2	398420	117858	54741.6	11250.1	36959.2	167866	1968.02	3480.42	61946.1	2662362	3365.88	27089.4	5138.62	24289.7	5120.86	1.50541e+06	531615	320242	12577917	50199.3	60133	49575.5	19334.6	483159	1727.37	3122.27	65848.2	3717.14	3765.63	25579.9	315138	3.56564e+06	1952.49
2010	198698	2691.89	189692	204.061	29844.2	463994	945251	28638.7	1157.58	1.0683e+06	416311	129202	7030.93	469779	17869.3	25148.9	420620	118529	57115.7	11423.2	37279.2	180876	2027.13	3500.71	64502.4	2.86279e+06	3288.89	27793.4	5741.47	26369.8	5357.99	1.55192e+06	548989	338960	13947309	54051.2	62191	53099.3	21254.8	504875	1810.31	3168.07	69108.9	3720.2	3663.37	26095.4	322811	3.71468e+06	2181.74
2011	211161	2701.08	196278	211.23	30603.8	496150	1.002e+06	29970.6	1134.91	1.11016e+06	428479	127170	7314.66	477740	19525.5	26814.4	447810	121316	58248.5	11493.3	37636.9	190906	2066.07	3369.68	67859.1	2976570	3266.74	28834.1	6194.57	27964.8	5582.74	1.60075e+06	559532	359672	14918415	54652.4	64759.1	56749.8	21723.7	539954	1916.9	3293.8	72085.5	3742.99	3706.2	26200.1	328494	3.86049e+06	2461.47
2012	216014	2664.08	213044	199.048	31037.6	518400	991718	32118.1	1173.19	1.13885e+06	431395	129972	7638.22	481271	21683.5	28544.6	477014	121753	60420.2	11848.1	37327.6	194242	2115.99	3190.91	71335	3.03376e+06	3252.06	29097.4	6508.7	29210.9	5864.88	1.62894e+06	566343	378802	15416000	63509.1	67701.2	60771.5	23884.5	561080	2037.87	3329.44	75543.4	3737.79	3751.77	25297.1	325915	3.87664e+06	2785.03
2013	226645	2775.93	223600	197.738	31348.6	544596	1.01557e+06	33164.4	1166.14	1.1677e+06	431505	137566	8012.41	483481	24594	30198.1	505700	122141	63693.1	11530.7	38204.7	196089	2143.51	3181.99	76182.9	3.12491e+06	3206.16	28479.2	6648.13	32524.4	3730.53	1666875	576660	394124	16562428	73253.8	71360	65926.2	23714.4	589886	2219.79	3356.17	77257.5	3708.11	3799.77	23639.2	325765	3.89361e+06	3157.14
2014	235738	2783.49	234383	207.755	31904.8	567929	990055	34372.3	1210.4	1.1933e+06	434358	141415	8351.78	491071	27807	31504.7	536350	124455	66463.9	11652.2	38645.5	199515	2221.48	3064.22	80343	3.14066e+06	3202.1	27764.9	6913.62	33874	3733.56	1714715	590770	401087	17711682	84094.8	75558.9	72169.3	25126.6	616425	2306.27	3376.68	79973.4	3665.88	3900.64	23198.7	333134	3.97964e+06	3380.08
2015	247363	2942.78	236595	214.294	32612.7	596927	1.01709e+06	35484.4	1256.71	1.22637e+06	438765	142899	8317.77	501096	31427.9	32740.1	571496	129420	68366.7	11679	39839.4	191874	2284.76	3087.98	84245.4	3.0293e+06	3280.44	27656	7372.85	33298.8	3895.49	1726018	600563	410327	18379366	96605.4	79829	77161.1	24313.7	634646	2352.21	3410.68	82877.8	3676.1	4011.15	23981.7	351085	4039011	3640.23
2016	255306	3003.41	230491	208.868	33693.8	615198	995936	35545.4	1325.8	1254581	447494	138521	8583.94	507444	32477.4	34690.7	612149	134353	70806	11847.7	41094.2	187147	2286.69	3067.69	87837.5	2.93006e+06	3361.97	26970.7	7972.05	34731.9	4080.54	1.7433e+06	612846	417349	19132416	103542	83539.9	79013.1	21836.1	647893	2417.61	3571.18	86396.8	3639.83	4141.11	25599.6	359993	4.12908e+06	3882.41
2017	270102	3062.58	230151	195.635	34974.9	629800	1.02251e+06	38221.7	1367.49	1.29158e+06	458232	138734	8945.59	515604	34319.4	36842.7	656739	139065	73566.2	12216.8	42397.5	191910	2329.45	3178.48	91522.5	2.96883e+06	3378.03	27329.1	8342.89	35740.5	4265.27	1.7963e+06	622558	422309	19687162	111163	86504.8	81936.2	20824.4	656701	2552.9	3703.39	89731.8	3576.53	4269.59	26716	378600	4.23652e+06	4091.95
2018	280390	3090.4	225540	212.011	36398.9	637294	997137	40210.2	1462.53	1.31949e+06	470054	140816	9089.61	524948	36617.9	39322.7	708383	143354	74875.1	12586.5	43983.2	197955	2377.9	3181.83	95388.1	3.00793e+06	3358.33	27343.4	8595.49	37341.3	4426.9	1.83994e+06	641319	438987	19841296	118822	90019	86676	19532.4	673219	2651.12	3871.19	92119	3499.06	4445.77	27799.8	390645	4.29024e+06	4436.22
2019	290480	3068.76	222151	223.457	37204.8	647986	975569	43260.2	1511.55	1.31573e+06	476723	143940	9250.68	534102	39131.9	41563.9	766135	148187	76237.6	12739.8	45161.2	200419	2384.42	3258.44	97502.5	3042119	3355.1	28401.3	8922.64	38448.8	4558.39	1.87419e+06	648257	443616	20572606	126227	93489.3	90530.5	19356.2	695584	2735.2	4090.6	94038.7	3380.09	4589.53	28697.8	399767	4.31407e+06	4778.25
Gesamtergebnis	6.6407e+06	94392.7	5.34676e+06	5927.45	947720	1.4491e+07	3.78033e+07	697828	40700	3.98465e+07	1.75691e+07	2.38822e+06	300765	2.01321e+07	661524	782412	1.37085e+07	4.54254e+06	1.71302e+06	431538	850225	4.00144e+06	60714.5	122247	2.5929e+06	1.00127e+08	149501	1.14367e+06	140894	763884	229330	6.31354e+07	2.51651e+07	1.11121e+07	3.60869e+08	2.45416e+06	2.41684e+06	3.52027e+06	666947	1.81669e+07	79952.3	90007.4	2.27512e+06	54537.9	116285	813354	8.46008e+06	1.70653e+08	78780.7
[truncated: 135 more columns]
