# Supplementary material for: The Social Cost of Fossil and Industrial CO2 Emissions from 1950 to 2018
Source: Research Square preprint supplement (doi:10.21203/rs.3.rs-2244259/v1), 2022-11-17
Supplement: Supplementary file 61 [file rgdpo_Transposed.xlsx]

## Sheet: rgdpo
VariableCode	RegionCode	YearCode	AggValue
rgdpo	ABW	1970	463.304
rgdpo	ABW	1971	504.684
rgdpo	ABW	1972	550.489
rgdpo	ABW	1973	599.463
rgdpo	ABW	1974	652.476
rgdpo	ABW	1975	712.046
rgdpo	ABW	1976	776.679
rgdpo	ABW	1977	849.02
rgdpo	ABW	1978	924.477
rgdpo	ABW	1979	1006.47
rgdpo	ABW	1980	1097.32
rgdpo	ABW	1981	1197.65
rgdpo	ABW	1982	1306.71
rgdpo	ABW	1983	1425.28
rgdpo	ABW	1984	1555.42
rgdpo	ABW	1985	1692.19
rgdpo	ABW	1986	1848.22
rgdpo	ABW	1987	2143.88
rgdpo	ABW	1988	2543.25
rgdpo	ABW	1989	2657.24
rgdpo	ABW	1990	3012.51
rgdpo	ABW	1991	3177.46
rgdpo	ABW	1992	3370.54
rgdpo	ABW	1993	3698.53
rgdpo	ABW	1994	4172.82
rgdpo	ABW	1995	4184.16
rgdpo	ABW	1996	3977.09
rgdpo	ABW	1997	4282.01
rgdpo	ABW	1998	4660.58
rgdpo	ABW	1999	4854.15
rgdpo	ABW	2000	4129.51
rgdpo	ABW	2001	4728.45
rgdpo	ABW	2002	3555.26
rgdpo	ABW	2003	3701.98
rgdpo	ABW	2004	4227.81
rgdpo	ABW	2005	4568.42
rgdpo	ABW	2006	4846.38
rgdpo	ABW	2007	4755.24
rgdpo	ABW	2008	4888.02
rgdpo	ABW	2009	4247.34
rgdpo	ABW	2010	3933.47
rgdpo	ABW	2011	4009.23
rgdpo	ABW	2012	3899.81
rgdpo	ABW	2013	4674.1
rgdpo	ABW	2014	4075.2
rgdpo	ABW	2015	3921.18
rgdpo	ABW	2016	3320.98
rgdpo	ABW	2017	3062.58
rgdpo	ABW	2018	3444.66
rgdpo	ABW	2019	3467.3
rgdpo	AGO	1970	28522.5
rgdpo	AGO	1971	30435.8
rgdpo	AGO	1972	30127.4
rgdpo	AGO	1973	32514.1
rgdpo	AGO	1974	32680.6
rgdpo	AGO	1975	30533.3
rgdpo	AGO	1976	29695.1
rgdpo	AGO	1977	31375.7
rgdpo	AGO	1978	28078.9
rgdpo	AGO	1979	28697.1
rgdpo	AGO	1980	28927.4
rgdpo	AGO	1981	28634.1
rgdpo	AGO	1982	28998.7
rgdpo	AGO	1983	29083.1
rgdpo	AGO	1984	31850.7
rgdpo	AGO	1985	32966.5
rgdpo	AGO	1986	29358.7
rgdpo	AGO	1987	32969.5
rgdpo	AGO	1988	31056.7
rgdpo	AGO	1989	33118.7
rgdpo	AGO	1990	35987.3
rgdpo	AGO	1991	33312.2
rgdpo	AGO	1992	38985.8
rgdpo	AGO	1993	33555.6
rgdpo	AGO	1994	35790.5
rgdpo	AGO	1995	31983.1
rgdpo	AGO	1996	40620.8
rgdpo	AGO	1997	41782.3
rgdpo	AGO	1998	43945.7
rgdpo	AGO	1999	42790.3
rgdpo	AGO	2000	36538.8
rgdpo	AGO	2001	39557.4
rgdpo	AGO	2002	44386.9
rgdpo	AGO	2003	48612.6
rgdpo	AGO	2004	58740.8
rgdpo	AGO	2005	79999.5
rgdpo	AGO	2006	106584
rgdpo	AGO	2007	121459
rgdpo	AGO	2008	150207
rgdpo	AGO	2009	115505
rgdpo	AGO	2010	159625
rgdpo	AGO	2011	201858
rgdpo	AGO	2012	229563
rgdpo	AGO	2013	242490
rgdpo	AGO	2014	254875
rgdpo	AGO	2015	224713
rgdpo	AGO	2016	218671
rgdpo	AGO	2017	230151
rgdpo	AGO	2018	233805
rgdpo	AGO	2019	227856
rgdpo	AIA	1970	67.957
rgdpo	AIA	1971	66.2832
rgdpo	AIA	1972	73.9949
rgdpo	AIA	1973	77.0817
rgdpo	AIA	1974	76.783
rgdpo	AIA	1975	79.4036
rgdpo	AIA	1976	80.6635
rgdpo	AIA	1977	80.9693
rgdpo	AIA	1978	86.9384
rgdpo	AIA	1979	94.9147
rgdpo	AIA	1980	98.7262
rgdpo	AIA	1981	103.323
rgdpo	AIA	1982	103.586
rgdpo	AIA	1983	101.852
rgdpo	AIA	1984	105.554
rgdpo	AIA	1985	116.007
rgdpo	AIA	1986	142.273
rgdpo	AIA	1987	152.953
rgdpo	AIA	1988	164.518
rgdpo	AIA	1989	191.719
rgdpo	AIA	1990	247.739
rgdpo	AIA	1991	190.478
rgdpo	AIA	1992	251.871
rgdpo	AIA	1993	261.226
rgdpo	AIA	1994	268.285
rgdpo	AIA	1995	269.017
rgdpo	AIA	1996	259.435
rgdpo	AIA	1997	258.009
rgdpo	AIA	1998	296.841
rgdpo	AIA	1999	322.194
rgdpo	AIA	2000	306.233
rgdpo	AIA	2001	303.437
rgdpo	AIA	2002	269.882
rgdpo	AIA	2003	319.404
rgdpo	AIA	2004	361.694
rgdpo	AIA	2005	436.814
rgdpo	AIA	2006	462.818
rgdpo	AIA	2007	546.836
rgdpo	AIA	2008	550.751
rgdpo	AIA	2009	394.147
rgdpo	AIA	2010	381.683
rgdpo	AIA	2011	381.223
rgdpo	AIA	2012	352.689
rgdpo	AIA	2013	303.354
rgdpo	AIA	2014	288.303
rgdpo	AIA	2015	249.571
rgdpo	AIA	2016	225.619
rgdpo	AIA	2017	195.635
rgdpo	AIA	2018	150.345
rgdpo	AIA	2019	225.681
rgdpo	ALB	1970	6697.49
rgdpo	ALB	1971	6958.5
rgdpo	ALB	1972	7246.04
rgdpo	ALB	1973	7536.61
rgdpo	ALB	1974	7855.12
rgdpo	ALB	1975	8164.37
rgdpo	ALB	1976	8459.79
rgdpo	ALB	1977	8818.58
rgdpo	ALB	1978	9209.29
rgdpo	ALB	1979	9454.94
rgdpo	ALB	1980	9964.96
rgdpo	ALB	1981	10363.3
rgdpo	ALB	1982	10392
rgdpo	ALB	1983	10741.7
rgdpo	ALB	1984	10857.1
rgdpo	ALB	1985	10957
rgdpo	ALB	1986	11511.3
rgdpo	ALB	1987	11730.3
rgdpo	ALB	1988	11490.5
rgdpo	ALB	1989	12432.4
rgdpo	ALB	1990	12096.7
rgdpo	ALB	1991	10822.8
rgdpo	ALB	1992	9767.37
rgdpo	ALB	1993	11222.6
rgdpo	ALB	1994	12672.2
rgdpo	ALB	1995	13669.6
rgdpo	ALB	1996	15067.4
rgdpo	ALB	1997	14072.3
rgdpo	ALB	1998	15531.7
rgdpo	ALB	1999	16525.4
rgdpo	ALB	2000	16633.3
rgdpo	ALB	2001	17293.8
rgdpo	ALB	2002	17619.8
rgdpo	ALB	2003	18275.1
rgdpo	ALB	2004	18750.1
rgdpo	ALB	2005	20162.4
rgdpo	ALB	2006	21773.8
rgdpo	ALB	2007	23260.2
rgdpo	ALB	2008	25868.8
rgdpo	ALB	2009	27709.9
rgdpo	ALB	2010	31021.1
rgdpo	ALB	2011	31369.5
rgdpo	ALB	2012	32366.2
rgdpo	ALB	2013	30914.7
rgdpo	ALB	2014	32090.5
rgdpo	ALB	2015	33659.4
rgdpo	ALB	2016	33698
rgdpo	ALB	2017	34974.9
rgdpo	ALB	2018	35363.5
rgdpo	ALB	2019	36103
rgdpo	ARE	1970	70528.7
rgdpo	ARE	1971	80634.2
rgdpo	ARE	1972	75736.7
rgdpo	ARE	1973	85912.7
rgdpo	ARE	1974	84504.9
rgdpo	ARE	1975	107625
rgdpo	ARE	1976	130003
rgdpo	ARE	1977	168902
rgdpo	ARE	1978	163283
rgdpo	ARE	1979	195977
rgdpo	ARE	1980	307906
rgdpo	ARE	1981	296486
rgdpo	ARE	1982	271746
rgdpo	ARE	1983	249620
rgdpo	ARE	1984	252610
rgdpo	ARE	1985	236821
rgdpo	ARE	1986	197967
rgdpo	ARE	1987	171290
rgdpo	ARE	1988	193512
rgdpo	ARE	1989	225003
rgdpo	ARE	1990	264833
rgdpo	ARE	1991	245705
rgdpo	ARE	1992	256310
rgdpo	ARE	1993	207498
rgdpo	ARE	1994	219875
rgdpo	ARE	1995	242377
rgdpo	ARE	1996	256810
rgdpo	ARE	1997	275636
rgdpo	ARE	1998	265041
rgdpo	ARE	1999	285782
rgdpo	ARE	2000	347881
rgdpo	ARE	2001	360040
rgdpo	ARE	2002	359247
rgdpo	ARE	2003	392891
rgdpo	ARE	2004	424114
rgdpo	ARE	2005	502144
rgdpo	ARE	2006	591368
rgdpo	ARE	2007	646524
rgdpo	ARE	2008	712872
rgdpo	ARE	2009	593726
rgdpo	ARE	2010	618895
rgdpo	ARE	2011	726415
rgdpo	ARE	2012	777424
rgdpo	ARE	2013	771048
rgdpo	ARE	2014	798546
rgdpo	ARE	2015	693186
rgdpo	ARE	2016	670880
rgdpo	ARE	2017	629800
rgdpo	ARE	2018	633897
rgdpo	ARE	2019	645956
rgdpo	ARG	1950	50108.8
rgdpo	ARG	1951	51339.2
rgdpo	ARG	1952	46855.1
rgdpo	ARG	1953	49917.1
rgdpo	ARG	1954	52254.8
rgdpo	ARG	1955	56072.5
rgdpo	ARG	1956	57550.3
rgdpo	ARG	1957	60560.4
rgdpo	ARG	1958	65162.1
rgdpo	ARG	1959	61388
rgdpo	ARG	1960	65991.3
rgdpo	ARG	1961	68127.4
rgdpo	ARG	1962	69384.2
rgdpo	ARG	1963	66981.2
rgdpo	ARG	1964	70325.3
rgdpo	ARG	1965	79025.9
rgdpo	ARG	1966	80755.5
rgdpo	ARG	1967	83494.3
rgdpo	ARG	1968	85935.9
rgdpo	ARG	1969	94348.6
rgdpo	ARG	1970	97105.7
rgdpo	ARG	1971	100013
rgdpo	ARG	1972	101743
rgdpo	ARG	1973	107506
rgdpo	ARG	1974	112594
rgdpo	ARG	1975	111145
rgdpo	ARG	1976	111304
rgdpo	ARG	1977	118831
rgdpo	ARG	1978	117132
rgdpo	ARG	1979	124635
rgdpo	ARG	1980	125315
rgdpo	ARG	1981	126381
rgdpo	ARG	1982	132655
rgdpo	ARG	1983	143820
rgdpo	ARG	1984	153308
rgdpo	ARG	1985	149749
rgdpo	ARG	1986	166668
rgdpo	ARG	1987	177435
rgdpo	ARG	1988	188858
rgdpo	ARG	1989	181887
rgdpo	ARG	1990	204213
rgdpo	ARG	1991	240402
rgdpo	ARG	1992	283127
rgdpo	ARG	1993	325028
rgdpo	ARG	1994	378640
rgdpo	ARG	1995	424479
rgdpo	ARG	1996	548785
rgdpo	ARG	1997	566384
rgdpo	ARG	1998	565212
rgdpo	ARG	1999	532080
rgdpo	ARG	2000	528449
rgdpo	ARG	2001	496567
rgdpo	ARG	2002	425342
rgdpo	ARG	2003	461437
rgdpo	ARG	2004	504759
rgdpo	ARG	2005	548929
rgdpo	ARG	2006	599530
rgdpo	ARG	2007	665477
rgdpo	ARG	2008	718255
rgdpo	ARG	2009	684293
rgdpo	ARG	2010	784810
rgdpo	ARG	2011	882632
rgdpo	ARG	2012	902396
rgdpo	ARG	2013	904232
rgdpo	ARG	2014	879838
rgdpo	ARG	2015	913104
rgdpo	ARG	2016	908771
rgdpo	ARG	2017	1.02251e+06
rgdpo	ARG	2018	1.02113e+06
rgdpo	ARG	2019	977421
rgdpo	ARM	1990	24350.5
rgdpo	ARM	1991	22093.8
rgdpo	ARM	1992	12738.5
rgdpo	ARM	1993	12250.9
rgdpo	ARM	1994	9502.24
rgdpo	ARM	1995	9896.93
rgdpo	ARM	1996	10904.5
rgdpo	ARM	1997	11346.6
rgdpo	ARM	1998	10348.8
rgdpo	ARM	1999	11392.8
rgdpo	ARM	2000	11660.3
rgdpo	ARM	2001	12325.8
rgdpo	ARM	2002	13338.3
rgdpo	ARM	2003	15183.3
rgdpo	ARM	2004	16171.6
rgdpo	ARM	2005	17958.9
rgdpo	ARM	2006	20416.4
rgdpo	ARM	2007	23115.2
rgdpo	ARM	2008	25132.7
rgdpo	ARM	2009	23216.5
rgdpo	ARM	2010	25550.8
rgdpo	ARM	2011	28177.8
rgdpo	ARM	2012	33102.3
rgdpo	ARM	2013	32770
rgdpo	ARM	2014	31430.6
rgdpo	ARM	2015	32639.1
rgdpo	ARM	2016	33254.7
rgdpo	ARM	2017	38221.7
rgdpo	ARM	2018	40110.8
rgdpo	ARM	2019	43582.6
rgdpo	ATG	1970	400.109
rgdpo	ATG	1971	430.626
rgdpo	ATG	1972	461.309
rgdpo	ATG	1973	496.215
rgdpo	ATG	1974	484.847
rgdpo	ATG	1975	451.055
rgdpo	ATG	1976	406.511
rgdpo	ATG	1977	452.118
rgdpo	ATG	1978	456.775
rgdpo	ATG	1979	574.489
rgdpo	ATG	1980	492.558
rgdpo	ATG	1981	527.929
rgdpo	ATG	1982	549.063
rgdpo	ATG	1983	658.751
rgdpo	ATG	1984	609.989
rgdpo	ATG	1985	512.902
rgdpo	ATG	1986	667.644
rgdpo	ATG	1987	714.684
rgdpo	ATG	1988	748.249
rgdpo	ATG	1989	797.373
rgdpo	ATG	1990	844.709
rgdpo	ATG	1991	835.474
rgdpo	ATG	1992	835.783
rgdpo	ATG	1993	856.674
rgdpo	ATG	1994	937.686
rgdpo	ATG	1995	861.338
rgdpo	ATG	1996	932.192
rgdpo	ATG	1997	952.43
rgdpo	ATG	1998	653.439
rgdpo	ATG	1999	948.62
rgdpo	ATG	2000	1167.77
rgdpo	ATG	2001	960.738
rgdpo	ATG	2002	987.718
rgdpo	ATG	2003	1116.79
rgdpo	ATG	2004	879.781
rgdpo	ATG	2005	1335.9
rgdpo	ATG	2006	1514.74
rgdpo	ATG	2007	1901.75
rgdpo	ATG	2008	1946.3
rgdpo	ATG	2009	1832.51
rgdpo	ATG	2010	1850.27
rgdpo	ATG	2011	1945.68
rgdpo	ATG	2012	1951.8
rgdpo	ATG	2013	1746
rgdpo	ATG	2014	842.486
rgdpo	ATG	2015	1536.07
rgdpo	ATG	2016	1534.13
rgdpo	ATG	2017	1367.49
rgdpo	ATG	2018	1558.21
rgdpo	ATG	2019	1603.85
rgdpo	AUS	1950	114124
rgdpo	AUS	1951	110532
rgdpo	AUS	1952	109025
rgdpo	AUS	1953	122817
rgdpo	AUS	1954	131921
rgdpo	AUS	1955	138514
rgdpo	AUS	1956	140626
rgdpo	AUS	1957	141600
rgdpo	AUS	1958	152881
rgdpo	AUS	1959	162856
rgdpo	AUS	1960	165420
rgdpo	AUS	1961	170312
rgdpo	AUS	1962	179626
rgdpo	AUS	1963	192394
rgdpo	AUS	1964	201940
rgdpo	AUS	1965	204650
rgdpo	AUS	1966	218783
rgdpo	AUS	1967	228736
rgdpo	AUS	1968	246074
rgdpo	AUS	1969	264889
rgdpo	AUS	1970	275292
rgdpo	AUS	1971	285965
rgdpo	AUS	1972	295047
rgdpo	AUS	1973	308243
rgdpo	AUS	1974	297154
rgdpo	AUS	1975	303125
rgdpo	AUS	1976	316724
rgdpo	AUS	1977	322573
rgdpo	AUS	1978	337629
rgdpo	AUS	1979	348575
rgdpo	AUS	1980	360226
rgdpo	AUS	1981	376529
rgdpo	AUS	1982	367700
rgdpo	AUS	1983	389329
rgdpo	AUS	1984	404518
rgdpo	AUS	1985	415790
rgdpo	AUS	1986	427614
rgdpo	AUS	1987	462909
rgdpo	AUS	1988	490374
rgdpo	AUS	1989	507403
rgdpo	AUS	1990	507696
rgdpo	AUS	1991	507725
rgdpo	AUS	1992	527873
rgdpo	AUS	1993	547021
rgdpo	AUS	1994	572406
rgdpo	AUS	1995	602171
rgdpo	AUS	1996	635901
rgdpo	AUS	1997	667290
rgdpo	AUS	1998	690270
rgdpo	AUS	1999	725862
rgdpo	AUS	2000	746969
rgdpo	AUS	2001	771092
rgdpo	AUS	2002	789873
rgdpo	AUS	2003	823659
rgdpo	AUS	2004	853505
rgdpo	AUS	2005	917887
rgdpo	AUS	2006	937623
rgdpo	AUS	2007	964050
rgdpo	AUS	2008	1.01588e+06
rgdpo	AUS	2009	1.01371e+06
rgdpo	AUS	2010	1.11266e+06
rgdpo	AUS	2011	1.17505e+06
rgdpo	AUS	2012	1.17034e+06
rgdpo	AUS	2013	1.22713e+06
rgdpo	AUS	2014	1.22511e+06
rgdpo	AUS	2015	1.1658e+06
rgdpo	AUS	2016	1249462
rgdpo	AUS	2017	1.29158e+06
rgdpo	AUS	2018	1.3504e+06
rgdpo	AUS	2019	1.36468e+06
rgdpo	AUT	1950	41605
rgdpo	AUT	1951	43706.1
rgdpo	AUT	1952	44922.4
rgdpo	AUT	1953	47309.1
rgdpo	AUT	1954	50657.7
rgdpo	AUT	1955	55541.9
rgdpo	AUT	1956	59629.9
rgdpo	AUT	1957	62760.4
rgdpo	AUT	1958	65324.3
rgdpo	AUT	1959	67548.3
rgdpo	AUT	1960	72448.7
rgdpo	AUT	1961	76432.5
rgdpo	AUT	1962	78591.7
rgdpo	AUT	1963	81837.2
rgdpo	AUT	1964	85747.6
rgdpo	AUT	1965	88459.4
rgdpo	AUT	1966	92929.6
rgdpo	AUT	1967	95787.1
rgdpo	AUT	1968	99937
rgdpo	AUT	1969	104938
rgdpo	AUT	1970	111569
rgdpo	AUT	1971	117568
rgdpo	AUT	1972	124572
rgdpo	AUT	1973	130782
rgdpo	AUT	1974	135338
rgdpo	AUT	1975	136221
rgdpo	AUT	1976	139693
rgdpo	AUT	1977	145574
rgdpo	AUT	1978	145074
rgdpo	AUT	1979	151005
rgdpo	AUT	1980	152806
rgdpo	AUT	1981	152378
rgdpo	AUT	1982	153065
rgdpo	AUT	1983	156259
rgdpo	AUT	1984	155367
rgdpo	AUT	1985	158705
rgdpo	AUT	1986	166262
rgdpo	AUT	1987	173161
rgdpo	AUT	1988	184286
rgdpo	AUT	1989	194189
rgdpo	AUT	1990	205574
rgdpo	AUT	1991	214933
rgdpo	AUT	1992	223889
rgdpo	AUT	1993	228787
rgdpo	AUT	1994	240059
rgdpo	AUT	1995	250434
rgdpo	AUT	1996	256307
rgdpo	AUT	1997	269415
rgdpo	AUT	1998	280195
rgdpo	AUT	1999	290596
rgdpo	AUT	2000	306928
rgdpo	AUT	2001	299963
rgdpo	AUT	2002	306288
rgdpo	AUT	2003	313908
rgdpo	AUT	2004	326475
rgdpo	AUT	2005	357373
rgdpo	AUT	2006	364390
rgdpo	AUT	2007	376847
rgdpo	AUT	2008	390541
rgdpo	AUT	2009	373127
rgdpo	AUT	2010	385229
rgdpo	AUT	2011	402328
rgdpo	AUT	2012	409657
rgdpo	AUT	2013	404381
rgdpo	AUT	2014	423224
rgdpo	AUT	2015	430624
rgdpo	AUT	2016	436191
rgdpo	AUT	2017	458232
rgdpo	AUT	2018	470961
rgdpo	AUT	2019	477706
rgdpo	AZE	1990	76027.5
rgdpo	AZE	1991	109720
rgdpo	AZE	1992	79636.9
rgdpo	AZE	1993	44350.1
rgdpo	AZE	1994	34694.7
rgdpo	AZE	1995	21608.8
rgdpo	AZE	1996	20621.4
rgdpo	AZE	1997	19018.4
rgdpo	AZE	1998	19078.3
rgdpo	AZE	1999	20238.8
rgdpo	AZE	2000	22876.3
rgdpo	AZE	2001	26036.9
rgdpo	AZE	2002	26988.2
rgdpo	AZE	2003	28477.8
rgdpo	AZE	2004	30133.4
rgdpo	AZE	2005	46967
rgdpo	AZE	2006	68842.2
rgdpo	AZE	2007	94222
rgdpo	AZE	2008	105287
rgdpo	AZE	2009	107973
rgdpo	AZE	2010	129774
rgdpo	AZE	2011	165606
rgdpo	AZE	2012	178506
rgdpo	AZE	2013	164194
rgdpo	AZE	2014	179128
rgdpo	AZE	2015	140311
rgdpo	AZE	2016	134143
rgdpo	AZE	2017	138734
rgdpo	AZE	2018	154641
rgdpo	AZE	2019	159346
rgdpo	BDI	1960	2099.75
rgdpo	BDI	1961	1820.54
rgdpo	BDI	1962	1985.66
rgdpo	BDI	1963	2048.47
rgdpo	BDI	1964	2093.32
rgdpo	BDI	1965	2170.73
rgdpo	BDI	1966	2253.05
rgdpo	BDI	1967	2535.06
rgdpo	BDI	1968	2557.27
rgdpo	BDI	1969	2467.45
rgdpo	BDI	1970	2968.42
rgdpo	BDI	1971	3102.28
rgdpo	BDI	1972	2786.19
rgdpo	BDI	1973	3037.51
rgdpo	BDI	1974	3062.15
rgdpo	BDI	1975	3038.63
rgdpo	BDI	1976	3353
rgdpo	BDI	1977	3819.54
rgdpo	BDI	1978	3866.8
rgdpo	BDI	1979	3939.31
rgdpo	BDI	1980	4060.75
rgdpo	BDI	1981	4338.17
rgdpo	BDI	1982	4271.02
rgdpo	BDI	1983	4354.76
rgdpo	BDI	1984	4448.61
rgdpo	BDI	1985	4796.42
rgdpo	BDI	1986	5044.82
rgdpo	BDI	1987	5063.48
rgdpo	BDI	1988	5481.38
rgdpo	BDI	1989	5297.74
rgdpo	BDI	1990	5522.09
rgdpo	BDI	1991	5765.2
rgdpo	BDI	1992	5665.64
rgdpo	BDI	1993	5312.86
rgdpo	BDI	1994	5380.42
rgdpo	BDI	1995	4887.81
rgdpo	BDI	1996	4522.66
rgdpo	BDI	1997	4435.95
rgdpo	BDI	1998	4908.59
rgdpo	BDI	1999	4945.98
rgdpo	BDI	2000	4770.34
rgdpo	BDI	2001	4843.91
rgdpo	BDI	2002	5082.72
rgdpo	BDI	2003	5344.24
rgdpo	BDI	2004	5627.23
rgdpo	BDI	2005	5554.3
rgdpo	BDI	2006	5775.27
rgdpo	BDI	2007	5881.25
rgdpo	BDI	2008	6209.57
rgdpo	BDI	2009	6265.48
rgdpo	BDI	2010	6650.67
rgdpo	BDI	2011	7267.04
rgdpo	BDI	2012	7544.01
rgdpo	BDI	2013	8313.94
rgdpo	BDI	2014	8707.8
rgdpo	BDI	2015	8671
rgdpo	BDI	2016	9021.91
rgdpo	BDI	2017	8945.59
rgdpo	BDI	2018	9026.54
rgdpo	BDI	2019	9109.69
rgdpo	BEL	1950	72084.3
rgdpo	BEL	1951	75056.8
rgdpo	BEL	1952	76747.5
rgdpo	BEL	1953	79178.1
rgdpo	BEL	1954	82787.8
rgdpo	BEL	1955	86486.9
rgdpo	BEL	1956	88979.8
rgdpo	BEL	1957	90509.6
rgdpo	BEL	1958	89428.8
rgdpo	BEL	1959	92119.2
rgdpo	BEL	1960	96857.7
rgdpo	BEL	1961	102099
rgdpo	BEL	1962	107618
rgdpo	BEL	1963	111842
rgdpo	BEL	1964	119508
rgdpo	BEL	1965	123735
rgdpo	BEL	1966	127105
rgdpo	BEL	1967	131962
rgdpo	BEL	1968	137580
rgdpo	BEL	1969	146062
rgdpo	BEL	1970	154585
rgdpo	BEL	1971	160690
rgdpo	BEL	1972	170488
rgdpo	BEL	1973	182405
rgdpo	BEL	1974	190768
rgdpo	BEL	1975	189073
rgdpo	BEL	1976	201473
rgdpo	BEL	1977	204631
rgdpo	BEL	1978	212704
rgdpo	BEL	1979	219504
rgdpo	BEL	1980	234949
rgdpo	BEL	1981	224090
rgdpo	BEL	1982	216933
rgdpo	BEL	1983	210577
rgdpo	BEL	1984	210094
rgdpo	BEL	1985	199751
rgdpo	BEL	1986	214299
rgdpo	BEL	1987	226406
rgdpo	BEL	1988	244142
rgdpo	BEL	1989	249963
rgdpo	BEL	1990	261314
rgdpo	BEL	1991	265296
rgdpo	BEL	1992	275201
rgdpo	BEL	1993	276938
rgdpo	BEL	1994	284110
rgdpo	BEL	1995	296017
rgdpo	BEL	1996	295072
rgdpo	BEL	1997	308664
rgdpo	BEL	1998	310653
rgdpo	BEL	1999	325198
rgdpo	BEL	2000	346909
rgdpo	BEL	2001	348798
rgdpo	BEL	2002	358493
rgdpo	BEL	2003	374266
rgdpo	BEL	2004	383970
rgdpo	BEL	2005	429271
rgdpo	BEL	2006	417205
rgdpo	BEL	2007	430015
rgdpo	BEL	2008	467485
rgdpo	BEL	2009	451867
rgdpo	BEL	2010	489333
rgdpo	BEL	2011	487755
rgdpo	BEL	2012	491813
rgdpo	BEL	2013	490563
rgdpo	BEL	2014	493291
rgdpo	BEL	2015	484155
rgdpo	BEL	2016	492930
rgdpo	BEL	2017	515604
rgdpo	BEL	2018	507573
rgdpo	BEL	2019	517420
rgdpo	BEN	1959	3731.82
rgdpo	BEN	1960	4066.54
rgdpo	BEN	1961	4118.08
rgdpo	BEN	1962	4010.65
rgdpo	BEN	1963	4239.76
rgdpo	BEN	1964	4478.34
rgdpo	BEN	1965	4852.47
rgdpo	BEN	1966	4986.1
rgdpo	BEN	1967	5184.22
rgdpo	BEN	1968	5593.06
rgdpo	BEN	1969	5818.17
rgdpo	BEN	1970	6401.87
rgdpo	BEN	1971	6549.04
rgdpo	BEN	1972	6843.92
rgdpo	BEN	1973	7338.9
rgdpo	BEN	1974	7976.8
rgdpo	BEN	1975	6790.92
rgdpo	BEN	1976	7290.56
rgdpo	BEN	1977	7536.66
rgdpo	BEN	1978	7319.41
rgdpo	BEN	1979	7667.29
rgdpo	BEN	1980	8230.38
rgdpo	BEN	1981	10409.8
rgdpo	BEN	1982	7500.63
rgdpo	BEN	1983	7372.46
rgdpo	BEN	1984	7826.51
rgdpo	BEN	1985	8647.1
rgdpo	BEN	1986	7559.06
rgdpo	BEN	1987	6993.83
rgdpo	BEN	1988	7209.24
rgdpo	BEN	1989	6519.04
rgdpo	BEN	1990	6713.16
rgdpo	BEN	1991	7069.97
rgdpo	BEN	1992	7308.3
rgdpo	BEN	1993	7512.19
rgdpo	BEN	1994	7038.36
rgdpo	BEN	1995	7774.5
rgdpo	BEN	1996	8177.4
rgdpo	BEN	1997	9048.91
rgdpo	BEN	1998	9477.95
rgdpo	BEN	1999	10388.5
rgdpo	BEN	2000	11639.9
rgdpo	BEN	2001	12474.8
rgdpo	BEN	2002	13779.5
rgdpo	BEN	2003	14682.1
rgdpo	BEN	2004	15695.8
rgdpo	BEN	2005	16488.7
rgdpo	BEN	2006	16917.8
rgdpo	BEN	2007	17956.1
rgdpo	BEN	2008	18489.2
rgdpo	BEN	2009	18522.2
rgdpo	BEN	2010	19116.2
rgdpo	BEN	2011	20438.7
rgdpo	BEN	2012	23201.3
rgdpo	BEN	2013	25688.6
rgdpo	BEN	2014	29129
rgdpo	BEN	2015	32494.6
rgdpo	BEN	2016	34382.2
rgdpo	BEN	2017	34319.4
rgdpo	BEN	2018	35813.3
rgdpo	BEN	2019	38295.5
rgdpo	BFA	1959	5089.44
rgdpo	BFA	1960	5043.85
rgdpo	BFA	1961	4759.54
rgdpo	BFA	1962	5099.08
rgdpo	BFA	1963	4953.75
rgdpo	BFA	1964	5157.59
rgdpo	BFA	1965	5137.91
rgdpo	BFA	1966	5186.66
rgdpo	BFA	1967	5704.06
rgdpo	BFA	1968	5855.04
rgdpo	BFA	1969	5986.32
rgdpo	BFA	1970	5766.53
rgdpo	BFA	1971	5359.04
rgdpo	BFA	1972	6641.62
rgdpo	BFA	1973	6247.9
rgdpo	BFA	1974	6740.98
rgdpo	BFA	1975	6643.16
rgdpo	BFA	1976	6710.79
rgdpo	BFA	1977	7432.7
rgdpo	BFA	1978	8180.19
rgdpo	BFA	1979	8310.36
rgdpo	BFA	1980	8333.29
rgdpo	BFA	1981	8914.75
rgdpo	BFA	1982	8892.24
rgdpo	BFA	1983	8354.92
rgdpo	BFA	1984	8134.21
rgdpo	BFA	1985	8692.41
rgdpo	BFA	1986	9559.82
rgdpo	BFA	1987	9342.8
rgdpo	BFA	1988	9902.16
rgdpo	BFA	1989	9959.98
rgdpo	BFA	1990	9845.9
rgdpo	BFA	1991	10505
rgdpo	BFA	1992	10590.1
rgdpo	BFA	1993	11019.7
rgdpo	BFA	1994	9994.94
rgdpo	BFA	1995	11445.2
rgdpo	BFA	1996	12734.9
rgdpo	BFA	1997	13927.7
rgdpo	BFA	1998	14893.2
rgdpo	BFA	1999	16187
rgdpo	BFA	2000	16861
rgdpo	BFA	2001	17495
rgdpo	BFA	2002	18293.5
rgdpo	BFA	2003	19201.8
rgdpo	BFA	2004	20268.2
rgdpo	BFA	2005	22026.8
rgdpo	BFA	2006	22879.2
rgdpo	BFA	2007	22859.1
rgdpo	BFA	2008	23370.2
rgdpo	BFA	2009	23331.4
rgdpo	BFA	2010	25504.1
rgdpo	BFA	2011	26656.9
rgdpo	BFA	2012	29012.5
rgdpo	BFA	2013	30379.7
rgdpo	BFA	2014	30118.6
rgdpo	BFA	2015	31088.9
rgdpo	BFA	2016	34396.2
rgdpo	BFA	2017	36842.7
rgdpo	BFA	2018	40581.5
rgdpo	BFA	2019	43084.2
rgdpo	BGD	1959	75633.3
rgdpo	BGD	1960	81414.3
rgdpo	BGD	1961	80873.8
rgdpo	BGD	1962	85667.1
rgdpo	BGD	1963	91393.4
rgdpo	BGD	1964	90838.6
rgdpo	BGD	1965	89313.6
rgdpo	BGD	1966	90168.7
rgdpo	BGD	1967	87043.1
rgdpo	BGD	1968	89836.9
rgdpo	BGD	1969	93734.2
rgdpo	BGD	1970	100645
rgdpo	BGD	1971	99541.9
rgdpo	BGD	1972	95132
rgdpo	BGD	1973	81078.2
rgdpo	BGD	1974	82859.3
rgdpo	BGD	1975	79987
rgdpo	BGD	1976	90659.2
rgdpo	BGD	1977	97305.3
rgdpo	BGD	1978	100146
rgdpo	BGD	1979	106385
rgdpo	BGD	1980	106194
rgdpo	BGD	1981	108355
rgdpo	BGD	1982	108162
rgdpo	BGD	1983	110264
rgdpo	BGD	1984	121110
rgdpo	BGD	1985	126460
rgdpo	BGD	1986	129602
rgdpo	BGD	1987	130173
rgdpo	BGD	1988	135889
rgdpo	BGD	1989	151280
rgdpo	BGD	1990	157996
rgdpo	BGD	1991	164057
rgdpo	BGD	1992	168775
rgdpo	BGD	1993	173082
rgdpo	BGD	1994	181230
rgdpo	BGD	1995	189809
rgdpo	BGD	1996	195332
rgdpo	BGD	1997	195050
rgdpo	BGD	1998	193522
rgdpo	BGD	1999	187660
rgdpo	BGD	2000	194071
rgdpo	BGD	2001	199795
rgdpo	BGD	2002	210411
rgdpo	BGD	2003	216588
rgdpo	BGD	2004	222153
rgdpo	BGD	2005	231691
rgdpo	BGD	2006	252801
rgdpo	BGD	2007	282226
rgdpo	BGD	2008	316497
rgdpo	BGD	2009	343454
rgdpo	BGD	2010	391173
rgdpo	BGD	2011	452300
rgdpo	BGD	2012	470216
rgdpo	BGD	2013	498137
rgdpo	BGD	2014	533594
rgdpo	BGD	2015	580461
rgdpo	BGD	2016	605642
rgdpo	BGD	2017	656739
rgdpo	BGD	2018	714600
rgdpo	BGD	2019	759471
rgdpo	BGR	1970	38673.5
rgdpo	BGR	1971	41316.8
rgdpo	BGR	1972	44550.4
rgdpo	BGR	1973	48283
rgdpo	BGR	1974	52343.8
rgdpo	BGR	1975	57697.9
rgdpo	BGR	1976	61147.4
rgdpo	BGR	1977	64316.9
rgdpo	BGR	1978	68103.5
rgdpo	BGR	1979	73499.7
rgdpo	BGR	1980	74698.6
rgdpo	BGR	1981	80231.5
rgdpo	BGR	1982	83483.5
rgdpo	BGR	1983	88786.6
rgdpo	BGR	1984	90628.4
rgdpo	BGR	1985	95425.4
rgdpo	BGR	1986	96941.7
rgdpo	BGR	1987	105260
rgdpo	BGR	1988	108911
rgdpo	BGR	1989	105817
rgdpo	BGR	1990	106473
rgdpo	BGR	1991	110619
rgdpo	BGR	1992	112640
rgdpo	BGR	1993	83607.9
rgdpo	BGR	1994	82472.4
rgdpo	BGR	1995	86818.9
rgdpo	BGR	1996	82570.8
rgdpo	BGR	1997	62861.1
rgdpo	BGR	1998	73695.7
rgdpo	BGR	1999	73270.7
rgdpo	BGR	2000	79629.2
rgdpo	BGR	2001	81448.6
rgdpo	BGR	2002	84463.8
rgdpo	BGR	2003	86977.9
rgdpo	BGR	2004	90887
rgdpo	BGR	2005	100855
rgdpo	BGR	2006	106782
rgdpo	BGR	2007	115264
rgdpo	BGR	2008	123448
rgdpo	BGR	2009	119096
rgdpo	BGR	2010	123621
rgdpo	BGR	2011	122260
rgdpo	BGR	2012	125269
rgdpo	BGR	2013	119148
rgdpo	BGR	2014	122942
rgdpo	BGR	2015	127390
rgdpo	BGR	2016	133492
rgdpo	BGR	2017	139065
rgdpo	BGR	2018	143783
rgdpo	BGR	2019	149432
rgdpo	BHR	1970	4636.37
rgdpo	BHR	1971	4588.71
rgdpo	BHR	1972	4881.63
rgdpo	BHR	1973	5470.61
rgdpo	BHR	1974	6822.97
rgdpo	BHR	1975	6240.14
rgdpo	BHR	1976	7968.38
rgdpo	BHR	1977	8906.07
rgdpo	BHR	1978	9237.11
rgdpo	BHR	1979	7714.87
rgdpo	BHR	1980	9494.56
rgdpo	BHR	1981	8656.76
rgdpo	BHR	1982	7173.25
rgdpo	BHR	1983	7441.49
rgdpo	BHR	1984	8078.63
rgdpo	BHR	1985	4390.79
rgdpo	BHR	1986	5245.36
rgdpo	BHR	1987	5474.66
rgdpo	BHR	1988	6752.61
rgdpo	BHR	1989	6833.71
rgdpo	BHR	1990	7898.74
rgdpo	BHR	1991	7877.56
rgdpo	BHR	1992	8185.23
rgdpo	BHR	1993	9259.13
rgdpo	BHR	1994	9519.37
rgdpo	BHR	1995	9821.44
rgdpo	BHR	1996	9449.94
rgdpo	BHR	1997	11471.1
rgdpo	BHR	1998	10787.9
rgdpo	BHR	1999	13232.8
rgdpo	BHR	2000	18461
rgdpo	BHR	2001	18450.1
rgdpo	BHR	2002	17755.8
rgdpo	BHR	2003	22070.6
rgdpo	BHR	2004	24931.4
rgdpo	BHR	2005	34176.5
rgdpo	BHR	2006	39408.3
rgdpo	BHR	2007	44902.7
rgdpo	BHR	2008	61727.6
rgdpo	BHR	2009	52375.6
rgdpo	BHR	2010	57765.9
rgdpo	BHR	2011	61295.4
rgdpo	BHR	2012	73147.8
rgdpo	BHR	2013	72742.8
rgdpo	BHR	2014	70960.8
rgdpo	BHR	2015	66548.1
rgdpo	BHR	2016	66639.8
rgdpo	BHR	2017	73566.2
rgdpo	BHR	2018	77337
rgdpo	BHR	2019	77077.6
rgdpo	BHS	1970	4769.25
rgdpo	BHS	1971	4916.36
rgdpo	BHS	1972	4654.56
rgdpo	BHS	1973	5029.55
rgdpo	BHS	1974	4442.56
rgdpo	BHS	1975	3384.3
rgdpo	BHS	1976	3745.25
rgdpo	BHS	1977	3983.5
rgdpo	BHS	1978	4665.26
rgdpo	BHS	1979	4918.87
rgdpo	BHS	1980	6076.65
rgdpo	BHS	1981	5108.61
rgdpo	BHS	1982	5418.31
rgdpo	BHS	1983	5942.68
rgdpo	BHS	1984	7168.27
rgdpo	BHS	1985	7381.81
rgdpo	BHS	1986	7244.91
rgdpo	BHS	1987	8051.6
rgdpo	BHS	1988	7847.07
rgdpo	BHS	1989	8340.63
rgdpo	BHS	1990	7547.92
rgdpo	BHS	1991	7156.77
rgdpo	BHS	1992	7369.26
rgdpo	BHS	1993	7210.66
rgdpo	BHS	1994	6997.19
rgdpo	BHS	1995	6868.18
rgdpo	BHS	1996	8361.7
rgdpo	BHS	1997	8222.28
rgdpo	BHS	1998	8774.54
rgdpo	BHS	1999	9857.48
rgdpo	BHS	2000	10638.8
rgdpo	BHS	2001	10203.7
rgdpo	BHS	2002	12178.1
rgdpo	BHS	2003	11804.6
rgdpo	BHS	2004	11335.7
rgdpo	BHS	2005	12700.3
rgdpo	BHS	2006	11707.7
rgdpo	BHS	2007	12832
rgdpo	BHS	2008	12129.7
rgdpo	BHS	2009	12178.2
rgdpo	BHS	2010	11737.8
rgdpo	BHS	2011	12225
rgdpo	BHS	2012	13007.8
rgdpo	BHS	2013	11410.3
rgdpo	BHS	2014	12529.1
rgdpo	BHS	2015	11586.4
rgdpo	BHS	2016	11714.5
rgdpo	BHS	2017	12216.8
rgdpo	BHS	2018	12471.1
rgdpo	BHS	2019	12887.4
rgdpo	BIH	1990	4717.18
rgdpo	BIH	1991	4265.2
rgdpo	BIH	1992	4077.28
rgdpo	BIH	1993	4991.36
rgdpo	BIH	1994	6625.12
rgdpo	BIH	1995	9414.6
rgdpo	BIH	1996	18142.1
rgdpo	BIH	1997	22461
rgdpo	BIH	1998	23121.7
rgdpo	BIH	1999	25506.5
rgdpo	BIH	2000	24723.7
rgdpo	BIH	2001	25421
rgdpo	BIH	2002	25904.1
rgdpo	BIH	2003	25564
rgdpo	BIH	2004	25869.2
rgdpo	BIH	2005	29839.4
rgdpo	BIH	2006	32065.1
rgdpo	BIH	2007	34418.2
rgdpo	BIH	2008	37063.5
rgdpo	BIH	2009	36861.1
rgdpo	BIH	2010	37842.6
rgdpo	BIH	2011	38853.1
rgdpo	BIH	2012	39750.5
rgdpo	BIH	2013	39320.4
rgdpo	BIH	2014	39469.3
rgdpo	BIH	2015	40501.4
rgdpo	BIH	2016	41637.4
rgdpo	BIH	2017	42397.5
rgdpo	BIH	2018	44009.6
rgdpo	BIH	2019	45538.4
rgdpo	BLR	1990	145477
rgdpo	BLR	1991	141404
rgdpo	BLR	1992	125962
rgdpo	BLR	1993	133585
rgdpo	BLR	1994	87775.7
rgdpo	BLR	1995	84745.3
rgdpo	BLR	1996	88799.3
rgdpo	BLR	1997	93725.3
rgdpo	BLR	1998	91570.1
rgdpo	BLR	1999	90159.4
rgdpo	BLR	2000	97657
rgdpo	BLR	2001	95095.1
rgdpo	BLR	2002	96684.6
rgdpo	BLR	2003	101225
rgdpo	BLR	2004	108854
rgdpo	BLR	2005	115157
rgdpo	BLR	2006	129523
rgdpo	BLR	2007	142766
rgdpo	BLR	2008	165892
rgdpo	BLR	2009	160477
rgdpo	BLR	2010	177338
rgdpo	BLR	2011	199827
rgdpo	BLR	2012	190945
rgdpo	BLR	2013	186944
rgdpo	BLR	2014	190412
rgdpo	BLR	2015	186225
rgdpo	BLR	2016	175777
rgdpo	BLR	2017	191910
rgdpo	BLR	2018	200152
rgdpo	BLR	2019	204795
rgdpo	BLZ	1970	487.246
rgdpo	BLZ	1971	523.891
rgdpo	BLZ	1972	471.308
rgdpo	BLZ	1973	533.412
rgdpo	BLZ	1974	607.863
rgdpo	BLZ	1975	600.494
rgdpo	BLZ	1976	558.175
rgdpo	BLZ	1977	603.13
rgdpo	BLZ	1978	627.602
rgdpo	BLZ	1979	671.457
rgdpo	BLZ	1980	762.887
rgdpo	BLZ	1981	715.104
rgdpo	BLZ	1982	741.862
rgdpo	BLZ	1983	738.67
rgdpo	BLZ	1984	754.714
rgdpo	BLZ	1985	783.526
rgdpo	BLZ	1986	906.471
rgdpo	BLZ	1987	1009.85
rgdpo	BLZ	1988	1090.94
rgdpo	BLZ	1989	1205.53
rgdpo	BLZ	1990	1348.99
rgdpo	BLZ	1991	1309.45
rgdpo	BLZ	1992	1313.31
rgdpo	BLZ	1993	1397.42
rgdpo	BLZ	1994	1492.25
rgdpo	BLZ	1995	1613.23
rgdpo	BLZ	1996	1411.84
rgdpo	BLZ	1997	1364.13
rgdpo	BLZ	1998	1356.13
rgdpo	BLZ	1999	1409.36
rgdpo	BLZ	2000	1615.08
rgdpo	BLZ	2001	1606.79
rgdpo	BLZ	2002	1809.15
rgdpo	BLZ	2003	1999.16
rgdpo	BLZ	2004	2103.19
rgdpo	BLZ	2005	2215.2
rgdpo	BLZ	2006	2367.7
rgdpo	BLZ	2007	2447.64
rgdpo	BLZ	2008	2359.55
rgdpo	BLZ	2009	2230.18
rgdpo	BLZ	2010	2510.13
rgdpo	BLZ	2011	2660.1
rgdpo	BLZ	2012	2725.2
rgdpo	BLZ	2013	2520.8
rgdpo	BLZ	2014	2569.16
rgdpo	BLZ	2015	2380.29
rgdpo	BLZ	2016	2328.94
rgdpo	BLZ	2017	2329.45
rgdpo	BLZ	2018	2219.22
rgdpo	BLZ	2019	2186.92
rgdpo	BMU	1970	10812.6
rgdpo	BMU	1971	20503.9
rgdpo	BMU	1972	16385
rgdpo	BMU	1973	16076.2
rgdpo	BMU	1974	14219.9
rgdpo	BMU	1975	15377
rgdpo	BMU	1976	19162.7
rgdpo	BMU	1977	18009.2
rgdpo	BMU	1978	18021.8
rgdpo	BMU	1979	18100.4
rgdpo	BMU	1980	14872.6
rgdpo	BMU	1981	14867.6
rgdpo	BMU	1982	14242
rgdpo	BMU	1983	14774.7
rgdpo	BMU	1984	15839.5
rgdpo	BMU	1985	12181.7
rgdpo	BMU	1986	17245.5
rgdpo	BMU	1987	26872.2
rgdpo	BMU	1988	18485.7
rgdpo	BMU	1989	9919.88
rgdpo	BMU	1990	16860.1
rgdpo	BMU	1991	17870.4
rgdpo	BMU	1992	14697.7
rgdpo	BMU	1993	15712
rgdpo	BMU	1994	6352.28
rgdpo	BMU	1995	14312.8
rgdpo	BMU	1996	11841.3
rgdpo	BMU	1997	19130.2
rgdpo	BMU	1998	1307.49
rgdpo	BMU	1999	1420.91
rgdpo	BMU	2000	10151
rgdpo	BMU	2001	8379.73
rgdpo	BMU	2002	19907.3
rgdpo	BMU	2003	4158.08
rgdpo	BMU	2004	2949.02
rgdpo	BMU	2005	2949.02
rgdpo	BMU	2006	3116.44
rgdpo	BMU	2007	3150.51
rgdpo	BMU	2008	4018.54
rgdpo	BMU	2009	4056.81
rgdpo	BMU	2010	4458.85
rgdpo	BMU	2011	4590.29
rgdpo	BMU	2012	3668.35
rgdpo	BMU	2013	3276.8
rgdpo	BMU	2014	3270.44
rgdpo	BMU	2015	3122.56
rgdpo	BMU	2016	3071.92
rgdpo	BMU	2017	3178.48
rgdpo	BMU	2018	3132.48
rgdpo	BMU	2019	3142.39
rgdpo	BOL	1950	6936.6
rgdpo	BOL	1951	7515.32
rgdpo	BOL	1952	7477.66
rgdpo	BOL	1953	6208.86
rgdpo	BOL	1954	6456.5
rgdpo	BOL	1955	7024.06
rgdpo	BOL	1956	6641.11
rgdpo	BOL	1957	6554.06
rgdpo	BOL	1958	6334.78
rgdpo	BOL	1959	6743.56
rgdpo	BOL	1960	6939.53
rgdpo	BOL	1961	7168.22
rgdpo	BOL	1962	7437.76
rgdpo	BOL	1963	7927.59
rgdpo	BOL	1964	8419.76
rgdpo	BOL	1965	8964.34
rgdpo	BOL	1966	9679.18
rgdpo	BOL	1967	10465.4
rgdpo	BOL	1968	9258.39
rgdpo	BOL	1969	9591.52
rgdpo	BOL	1970	9393.34
rgdpo	BOL	1971	9977.07
rgdpo	BOL	1972	10161.6
rgdpo	BOL	1973	10989.9
rgdpo	BOL	1974	11777.3
rgdpo	BOL	1975	12460.1
rgdpo	BOL	1976	12984.4
rgdpo	BOL	1977	13663.7
rgdpo	BOL	1978	13597.8
rgdpo	BOL	1979	13887
rgdpo	BOL	1980	13809.3
rgdpo	BOL	1981	14236.7
rgdpo	BOL	1982	13993.3
rgdpo	BOL	1983	13887.9
rgdpo	BOL	1984	14485.8
rgdpo	BOL	1985	15270.3
rgdpo	BOL	1986	15340.8
rgdpo	BOL	1987	15983
rgdpo	BOL	1988	14351
rgdpo	BOL	1989	15052.3
rgdpo	BOL	1990	16026.9
rgdpo	BOL	1991	17120.1
rgdpo	BOL	1992	17977
rgdpo	BOL	1993	19213.3
rgdpo	BOL	1994	20845.1
rgdpo	BOL	1995	23298.5
rgdpo	BOL	1996	26058.8
rgdpo	BOL	1997	26415.6
rgdpo	BOL	1998	26996.5
rgdpo	BOL	1999	27045.1
rgdpo	BOL	2000	27483
rgdpo	BOL	2001	28672.5
rgdpo	BOL	2002	30088.9
rgdpo	BOL	2003	31589.2
rgdpo	BOL	2004	33584.6
rgdpo	BOL	2005	35975.1
rgdpo	BOL	2006	37964.7
rgdpo	BOL	2007	40330.2
rgdpo	BOL	2008	45558.2
rgdpo	BOL	2009	47438.8
rgdpo	BOL	2010	52741.2
rgdpo	BOL	2011	59436.6
rgdpo	BOL	2012	66667.9
rgdpo	BOL	2013	74217.3
rgdpo	BOL	2014	77702.9
rgdpo	BOL	2015	79743.3
rgdpo	BOL	2016	83909.1
rgdpo	BOL	2017	91522.5
rgdpo	BOL	2018	96384.9
rgdpo	BOL	2019	98835.7
rgdpo	BRA	1950	88442.7
rgdpo	BRA	1951	91100.4
rgdpo	BRA	1952	100770
rgdpo	BRA	1953	104141
rgdpo	BRA	1954	113028
rgdpo	BRA	1955	121660
rgdpo	BRA	1956	126157
rgdpo	BRA	1957	137198
rgdpo	BRA	1958	145166
rgdpo	BRA	1959	151863
rgdpo	BRA	1960	166540
rgdpo	BRA	1961	189671
rgdpo	BRA	1962	204087
rgdpo	BRA	1963	218231
rgdpo	BRA	1964	228095
rgdpo	BRA	1965	242628
rgdpo	BRA	1966	254559
rgdpo	BRA	1967	276456
rgdpo	BRA	1968	305421
rgdpo	BRA	1969	310830
rgdpo	BRA	1970	354428
rgdpo	BRA	1971	397864
rgdpo	BRA	1972	445992
rgdpo	BRA	1973	506448
rgdpo	BRA	1974	550841
rgdpo	BRA	1975	574167
rgdpo	BRA	1976	623541
rgdpo	BRA	1977	637973
rgdpo	BRA	1978	663618
rgdpo	BRA	1979	709012
rgdpo	BRA	1980	709314
rgdpo	BRA	1981	735148
rgdpo	BRA	1982	752343
rgdpo	BRA	1983	736501
rgdpo	BRA	1984	763958
rgdpo	BRA	1985	803910
rgdpo	BRA	1986	918831
rgdpo	BRA	1987	949521
rgdpo	BRA	1988	956652
rgdpo	BRA	1989	978164
rgdpo	BRA	1990	954572
rgdpo	BRA	1991	1.04185e+06
rgdpo	BRA	1992	1.07113e+06
rgdpo	BRA	1993	1.15515e+06
rgdpo	BRA	1994	1.30009e+06
rgdpo	BRA	1995	1.5139e+06
rgdpo	BRA	1996	1.81795e+06
rgdpo	BRA	1997	1.76159e+06
rgdpo	BRA	1998	1.68799e+06
rgdpo	BRA	1999	1.63069e+06
rgdpo	BRA	2000	1.65357e+06
rgdpo	BRA	2001	1.64585e+06
rgdpo	BRA	2002	1657569
rgdpo	BRA	2003	1651363
rgdpo	BRA	2004	1.73879e+06
rgdpo	BRA	2005	1.80295e+06
rgdpo	BRA	2006	1967472
rgdpo	BRA	2007	2.19164e+06
rgdpo	BRA	2008	2.43988e+06
rgdpo	BRA	2009	2.53159e+06
rgdpo	BRA	2010	2.93816e+06
rgdpo	BRA	2011	3.281e+06
rgdpo	BRA	2012	3271619
rgdpo	BRA	2013	3306056
rgdpo	BRA	2014	3.29754e+06
rgdpo	BRA	2015	3082939
rgdpo	BRA	2016	2931514
rgdpo	BRA	2017	2.96883e+06
rgdpo	BRA	2018	3.04212e+06
rgdpo	BRA	2019	3.08005e+06
rgdpo	BRB	1960	2174.02
rgdpo	BRB	1961	2230.53
rgdpo	BRB	1962	2297
rgdpo	BRB	1963	2274.63
rgdpo	BRB	1964	2279.01
rgdpo	BRB	1965	2391.03
rgdpo	BRB	1966	2528.5
rgdpo	BRB	1967	2798.75
rgdpo	BRB	1968	2907.69
rgdpo	BRB	1969	3344.17
rgdpo	BRB	1970	3685.27
rgdpo	BRB	1971	3810.46
rgdpo	BRB	1972	3882.19
rgdpo	BRB	1973	3773.22
rgdpo	BRB	1974	3415.07
rgdpo	BRB	1975	4068.9
rgdpo	BRB	1976	3216.33
rgdpo	BRB	1977	3258.93
rgdpo	BRB	1978	3110.29
rgdpo	BRB	1979	3273.28
rgdpo	BRB	1980	3227.88
rgdpo	BRB	1981	3206.82
rgdpo	BRB	1982	3260.09
rgdpo	BRB	1983	3367.61
rgdpo	BRB	1984	3459.93
rgdpo	BRB	1985	3024.29
rgdpo	BRB	1986	3533.9
rgdpo	BRB	1987	3861.82
rgdpo	BRB	1988	4046.08
rgdpo	BRB	1989	4371.98
rgdpo	BRB	1990	4125.81
rgdpo	BRB	1991	4363.15
rgdpo	BRB	1992	3306.6
rgdpo	BRB	1993	3489.93
rgdpo	BRB	1994	5760.76
rgdpo	BRB	1995	6294.12
rgdpo	BRB	1996	6741.35
rgdpo	BRB	1997	6281.65
rgdpo	BRB	1998	6565.78
rgdpo	BRB	1999	6513.78
rgdpo	BRB	2000	6407.14
rgdpo	BRB	2001	6275.5
rgdpo	BRB	2002	6215.99
rgdpo	BRB	2003	5736.71
rgdpo	BRB	2004	5944.78
rgdpo	BRB	2005	6088.04
rgdpo	BRB	2006	5707.13
rgdpo	BRB	2007	6052.81
rgdpo	BRB	2008	5582.19
rgdpo	BRB	2009	4945.92
rgdpo	BRB	2010	4747.02
rgdpo	BRB	2011	4333.07
rgdpo	BRB	2012	4045.71
rgdpo	BRB	2013	3726.78
rgdpo	BRB	2014	3727.57
rgdpo	BRB	2015	3620.52
rgdpo	BRB	2016	3592.68
rgdpo	BRB	2017	3378.03
rgdpo	BRB	2018	3442.4
rgdpo	BRB	2019	3506.67
rgdpo	BRN	1970	8942.62
rgdpo	BRN	1971	9807.72
rgdpo	BRN	1972	10966.1
rgdpo	BRN	1973	11787.9
rgdpo	BRN	1974	13076.7
rgdpo	BRN	1975	13841.3
rgdpo	BRN	1976	15180.4
rgdpo	BRN	1977	16140
rgdpo	BRN	1978	16689
rgdpo	BRN	1979	20418.7
rgdpo	BRN	1980	19854.1
rgdpo	BRN	1981	19124.8
rgdpo	BRN	1982	18487.4
rgdpo	BRN	1983	18150.2
rgdpo	BRN	1984	17935.9
rgdpo	BRN	1985	16727.2
rgdpo	BRN	1986	12268.2
rgdpo	BRN	1987	13277.2
rgdpo	BRN	1988	12030.4
rgdpo	BRN	1989	13575.1
rgdpo	BRN	1990	15692.7
rgdpo	BRN	1991	15077.6
rgdpo	BRN	1992	17565.1
rgdpo	BRN	1993	17178.6
rgdpo	BRN	1994	15893.2
rgdpo	BRN	1995	15167.6
rgdpo	BRN	1996	19704
rgdpo	BRN	1997	17168.6
rgdpo	BRN	1998	14943.7
rgdpo	BRN	1999	17125.3
rgdpo	BRN	2000	20162.4
rgdpo	BRN	2001	19613.8
rgdpo	BRN	2002	19790.8
rgdpo	BRN	2003	22519.6
rgdpo	BRN	2004	24977.1
rgdpo	BRN	2005	30377.8
rgdpo	BRN	2006	35479.9
rgdpo	BRN	2007	35326.6
rgdpo	BRN	2008	38154.8
rgdpo	BRN	2009	29102.2
rgdpo	BRN	2010	31861.4
rgdpo	BRN	2011	39790.7
rgdpo	BRN	2012	42672.1
rgdpo	BRN	2013	41027.5
rgdpo	BRN	2014	36772.9
rgdpo	BRN	2015	28476.1
rgdpo	BRN	2016	26492.6
rgdpo	BRN	2017	27329.1
rgdpo	BRN	2018	30037.2
rgdpo	BRN	2019	31737.8
rgdpo	BTN	1970	591.397
rgdpo	BTN	1971	607.127
rgdpo	BTN	1972	614.285
rgdpo	BTN	1973	623.713
rgdpo	BTN	1974	654.479
rgdpo	BTN	1975	633.513
rgdpo	BTN	1976	692.586
rgdpo	BTN	1977	740.384
rgdpo	BTN	1978	799.708
rgdpo	BTN	1979	847.49
rgdpo	BTN	1980	848.721
rgdpo	BTN	1981	1002.85
rgdpo	BTN	1982	1048.2
rgdpo	BTN	1983	1183.83
rgdpo	BTN	1984	1206.68
rgdpo	BTN	1985	1254.9
rgdpo	BTN	1986	1339.1
rgdpo	BTN	1987	1389.18
rgdpo	BTN	1988	1469.17
rgdpo	BTN	1989	1508.03
rgdpo	BTN	1990	1569.34
rgdpo	BTN	1991	1615.62
rgdpo	BTN	1992	1792.01
rgdpo	BTN	1993	1683.93
rgdpo	BTN	1994	1696.04
rgdpo	BTN	1995	1733.33
rgdpo	BTN	1996	1875.28
rgdpo	BTN	1997	2126.21
rgdpo	BTN	1998	2207.78
rgdpo	BTN	1999	2539.5
rgdpo	BTN	2000	2617.55
rgdpo	BTN	2001	2767.89
rgdpo	BTN	2002	3180.48
rgdpo	BTN	2003	3487.01
rgdpo	BTN	2004	4073.87
rgdpo	BTN	2005	4064.01
rgdpo	BTN	2006	4064.2
rgdpo	BTN	2007	4347.12
rgdpo	BTN	2008	4825.17
rgdpo	BTN	2009	5215.51
rgdpo	BTN	2010	6102.19
rgdpo	BTN	2011	6341.96
rgdpo	BTN	2012	6640.05
rgdpo	BTN	2013	6101.77
rgdpo	BTN	2014	6313.13
rgdpo	BTN	2015	7117.79
rgdpo	BTN	2016	7786.92
rgdpo	BTN	2017	8342.89
rgdpo	BTN	2018	8643.51
rgdpo	BTN	2019	8988
rgdpo	BWA	1960	274.04
rgdpo	BWA	1961	295.556
rgdpo	BWA	1962	318.29
rgdpo	BWA	1963	333.159
rgdpo	BWA	1964	355.037
rgdpo	BWA	1965	340.303
rgdpo	BWA	1966	369.31
rgdpo	BWA	1967	429.363
rgdpo	BWA	1968	475.175
rgdpo	BWA	1969	453.721
rgdpo	BWA	1970	519.802
rgdpo	BWA	1971	662.838
rgdpo	BWA	1972	830.759
rgdpo	BWA	1973	1023.25
rgdpo	BWA	1974	1145.95
rgdpo	BWA	1975	1275.12
rgdpo	BWA	1976	1440.37
rgdpo	BWA	1977	1638.83
rgdpo	BWA	1978	1842.91
rgdpo	BWA	1979	2082.46
rgdpo	BWA	1980	2332.49
rgdpo	BWA	1981	2672.55
rgdpo	BWA	1982	2860.31
rgdpo	BWA	1983	3360.73
rgdpo	BWA	1984	4228.82
rgdpo	BWA	1985	4911.23
rgdpo	BWA	1986	5464.92
rgdpo	BWA	1987	6040.65
rgdpo	BWA	1988	6687.51
rgdpo	BWA	1989	8526.06
rgdpo	BWA	1990	9271.94
rgdpo	BWA	1991	9977
rgdpo	BWA	1992	10366
rgdpo	BWA	1993	10681.3
rgdpo	BWA	1994	11102.3
rgdpo	BWA	1995	12153.2
rgdpo	BWA	1996	13892.9
rgdpo	BWA	1997	14865
rgdpo	BWA	1998	15367.1
rgdpo	BWA	1999	16918.5
rgdpo	BWA	2000	18182.1
rgdpo	BWA	2001	18095.6
rgdpo	BWA	2002	21365.7
rgdpo	BWA	2003	21088.4
rgdpo	BWA	2004	22081.4
rgdpo	BWA	2005	25194.1
rgdpo	BWA	2006	26259
rgdpo	BWA	2007	27367.5
rgdpo	BWA	2008	27741.2
rgdpo	BWA	2009	25780.4
rgdpo	BWA	2010	28866.9
rgdpo	BWA	2011	32090.7
rgdpo	BWA	2012	30051.6
rgdpo	BWA	2013	30666.2
rgdpo	BWA	2014	33817
rgdpo	BWA	2015	32224
rgdpo	BWA	2016	33786.4
rgdpo	BWA	2017	35740.5
rgdpo	BWA	2018	36344.6
rgdpo	BWA	2019	37975
rgdpo	CAF	1960	2240.15
rgdpo	CAF	1961	2425.17
rgdpo	CAF	1962	2421.12
rgdpo	CAF	1963	2278.19
rgdpo	CAF	1964	2381.95
rgdpo	CAF	1965	2407.22
rgdpo	CAF	1966	2401.45
rgdpo	CAF	1967	2385.14
rgdpo	CAF	1968	2708.63
rgdpo	CAF	1969	2712.75
rgdpo	CAF	1970	2834.48
rgdpo	CAF	1971	2725.89
rgdpo	CAF	1972	2611.42
rgdpo	CAF	1973	2913.55
rgdpo	CAF	1974	2625.14
rgdpo	CAF	1975	2584.75
rgdpo	CAF	1976	2572.7
rgdpo	CAF	1977	2705.21
rgdpo	CAF	1978	2774.15
rgdpo	CAF	1979	2725.35
rgdpo	CAF	1980	2506.76
rgdpo	CAF	1981	2925.53
rgdpo	CAF	1982	2955.16
rgdpo	CAF	1983	2793.04
rgdpo	CAF	1984	3006.83
rgdpo	CAF	1985	3345.89
rgdpo	CAF	1986	3313.3
rgdpo	CAF	1987	3088.23
rgdpo	CAF	1988	3251.9
rgdpo	CAF	1989	3439.12
rgdpo	CAF	1990	3391.61
rgdpo	CAF	1991	3339.99
rgdpo	CAF	1992	3207.99
rgdpo	CAF	1993	3145.85
rgdpo	CAF	1994	3830.6
rgdpo	CAF	1995	3943.51
rgdpo	CAF	1996	3353.62
rgdpo	CAF	1997	3519.93
rgdpo	CAF	1998	3701.73
rgdpo	CAF	1999	3661.08
rgdpo	CAF	2000	3778.81
rgdpo	CAF	2001	3832.77
rgdpo	CAF	2002	3839.52
rgdpo	CAF	2003	3661.69
rgdpo	CAF	2004	3766.61
rgdpo	CAF	2005	3847.3
rgdpo	CAF	2006	4037.82
rgdpo	CAF	2007	4264.89
rgdpo	CAF	2008	4371.63
rgdpo	CAF	2009	4706.12
rgdpo	CAF	2010	4916.85
rgdpo	CAF	2011	5002.91
rgdpo	CAF	2012	5549.8
rgdpo	CAF	2013	3658.05
rgdpo	CAF	2014	3516.55
rgdpo	CAF	2015	3920.76
rgdpo	CAF	2016	4131.6
rgdpo	CAF	2017	4265.27
rgdpo	CAF	2018	4441.05
rgdpo	CAF	2019	4642.45
rgdpo	CAN	1950	177335
rgdpo	CAN	1951	183434
rgdpo	CAN	1952	199360
rgdpo	CAN	1953	208588
rgdpo	CAN	1954	207756
rgdpo	CAN	1955	226019
rgdpo	CAN	1956	244570
rgdpo	CAN	1957	250775
rgdpo	CAN	1958	256755
rgdpo	CAN	1959	266930
rgdpo	CAN	1960	276341
rgdpo	CAN	1961	287788
rgdpo	CAN	1962	306239
rgdpo	CAN	1963	322409
rgdpo	CAN	1964	345038
rgdpo	CAN	1965	366616
rgdpo	CAN	1966	391093
rgdpo	CAN	1967	402488
rgdpo	CAN	1968	423943
rgdpo	CAN	1969	446109
rgdpo	CAN	1970	458854
rgdpo	CAN	1971	482862
rgdpo	CAN	1972	510280
rgdpo	CAN	1973	547976
rgdpo	CAN	1974	562724
rgdpo	CAN	1975	570347
rgdpo	CAN	1976	603769
rgdpo	CAN	1977	624671
rgdpo	CAN	1978	649281
rgdpo	CAN	1979	675725
rgdpo	CAN	1980	687911
rgdpo	CAN	1981	711281
rgdpo	CAN	1982	693444
rgdpo	CAN	1983	717049
rgdpo	CAN	1984	767395
rgdpo	CAN	1985	786766
rgdpo	CAN	1986	801484
rgdpo	CAN	1987	858473
rgdpo	CAN	1988	901253
rgdpo	CAN	1989	934354
rgdpo	CAN	1990	941469
rgdpo	CAN	1991	917014
rgdpo	CAN	1992	925954
rgdpo	CAN	1993	947826
rgdpo	CAN	1994	993124
rgdpo	CAN	1995	1.04229e+06
rgdpo	CAN	1996	1.06854e+06
rgdpo	CAN	1997	1.11129e+06
rgdpo	CAN	1998	1.12757e+06
rgdpo	CAN	1999	1208232
rgdpo	CAN	2000	1.28467e+06
rgdpo	CAN	2001	1.27373e+06
rgdpo	CAN	2002	1.28204e+06
rgdpo	CAN	2003	1.34611e+06
rgdpo	CAN	2004	1.40627e+06
rgdpo	CAN	2005	1.51408e+06
rgdpo	CAN	2006	1.52271e+06
rgdpo	CAN	2007	1.55535e+06
rgdpo	CAN	2008	1.62056e+06
rgdpo	CAN	2009	1.45723e+06
rgdpo	CAN	2010	1.55872e+06
rgdpo	CAN	2011	1.64948e+06
rgdpo	CAN	2012	1.66105e+06
rgdpo	CAN	2013	1723023
rgdpo	CAN	2014	1.78058e+06
rgdpo	CAN	2015	1.69129e+06
rgdpo	CAN	2016	1711195
rgdpo	CAN	2017	1.7963e+06
rgdpo	CAN	2018	1833635
rgdpo	CAN	2019	1.86621e+06
rgdpo	CHE	1950	74871.4
rgdpo	CHE	1951	81711.3
rgdpo	CHE	1952	81576.7
rgdpo	CHE	1953	84794
rgdpo	CHE	1954	90660.4
rgdpo	CHE	1955	97528
rgdpo	CHE	1956	104656
rgdpo	CHE	1957	108603
rgdpo	CHE	1958	104457
rgdpo	CHE	1959	112616
rgdpo	CHE	1960	122351
rgdpo	CHE	1961	132931
rgdpo	CHE	1962	139404
rgdpo	CHE	1963	145816
rgdpo	CHE	1964	154484
rgdpo	CHE	1965	158098
rgdpo	CHE	1966	161869
rgdpo	CHE	1967	167307
rgdpo	CHE	1968	173471
rgdpo	CHE	1969	183341
rgdpo	CHE	1970	195560
rgdpo	CHE	1971	203554
rgdpo	CHE	1972	210138
rgdpo	CHE	1973	216350
rgdpo	CHE	1974	219349
rgdpo	CHE	1975	198754
rgdpo	CHE	1976	196497
rgdpo	CHE	1977	200588
rgdpo	CHE	1978	204056
rgdpo	CHE	1979	211264
rgdpo	CHE	1980	221685
rgdpo	CHE	1981	221734
rgdpo	CHE	1982	220509
rgdpo	CHE	1983	222585
rgdpo	CHE	1984	225376
rgdpo	CHE	1985	230983
rgdpo	CHE	1986	244761
rgdpo	CHE	1987	249694
rgdpo	CHE	1988	254687
rgdpo	CHE	1989	266441
rgdpo	CHE	1990	281175
rgdpo	CHE	1991	277248
rgdpo	CHE	1992	279157
rgdpo	CHE	1993	283410
rgdpo	CHE	1994	291435
rgdpo	CHE	1995	296646
rgdpo	CHE	1996	300729
rgdpo	CHE	1997	313281
rgdpo	CHE	1998	322787
rgdpo	CHE	1999	334009
rgdpo	CHE	2000	338565
rgdpo	CHE	2001	337629
rgdpo	CHE	2002	338813
rgdpo	CHE	2003	345369
rgdpo	CHE	2004	358521
rgdpo	CHE	2005	389669
rgdpo	CHE	2006	417288
rgdpo	CHE	2007	460970
rgdpo	CHE	2008	495490
rgdpo	CHE	2009	487748
rgdpo	CHE	2010	505411
rgdpo	CHE	2011	557177
rgdpo	CHE	2012	575032
rgdpo	CHE	2013	573934
rgdpo	CHE	2014	588874
rgdpo	CHE	2015	592829
rgdpo	CHE	2016	603778
rgdpo	CHE	2017	622558
rgdpo	CHE	2018	636191
rgdpo	CHE	2019	646920
rgdpo	CHL	1951	29655.9
rgdpo	CHL	1952	32103.3
rgdpo	CHL	1953	32862.1
rgdpo	CHL	1954	35171.7
rgdpo	CHL	1955	34339.5
rgdpo	CHL	1956	33811.1
rgdpo	CHL	1957	37347
rgdpo	CHL	1958	38843.9
rgdpo	CHL	1959	38531
rgdpo	CHL	1960	41016.3
rgdpo	CHL	1961	39635.4
rgdpo	CHL	1962	49531.2
rgdpo	CHL	1963	51372.3
rgdpo	CHL	1964	53070.2
rgdpo	CHL	1965	51222.6
rgdpo	CHL	1966	57311.7
rgdpo	CHL	1967	60615.3
rgdpo	CHL	1968	62126.2
rgdpo	CHL	1969	66418.8
rgdpo	CHL	1970	66720.6
rgdpo	CHL	1971	75620.7
rgdpo	CHL	1972	75721.4
rgdpo	CHL	1973	73727
rgdpo	CHL	1974	70171.5
rgdpo	CHL	1975	59512.2
rgdpo	CHL	1976	61981
rgdpo	CHL	1977	67581.9
rgdpo	CHL	1978	72787.5
rgdpo	CHL	1979	78645
rgdpo	CHL	1980	83430.4
rgdpo	CHL	1981	87577.6
rgdpo	CHL	1982	76576.4
rgdpo	CHL	1983	74122.4
rgdpo	CHL	1984	76596.5
rgdpo	CHL	1985	76710.7
rgdpo	CHL	1986	80568.1
rgdpo	CHL	1987	86681.3
rgdpo	CHL	1988	95079.2
rgdpo	CHL	1989	103907
rgdpo	CHL	1990	106364
rgdpo	CHL	1991	114799
rgdpo	CHL	1992	128572
rgdpo	CHL	1993	137048
rgdpo	CHL	1994	149369
rgdpo	CHL	1995	171111
rgdpo	CHL	1996	179190
rgdpo	CHL	1997	182730
rgdpo	CHL	1998	180735
rgdpo	CHL	1999	172964
rgdpo	CHL	2000	179409
rgdpo	CHL	2001	178617
rgdpo	CHL	2002	180073
rgdpo	CHL	2003	188147
rgdpo	CHL	2004	209905
rgdpo	CHL	2005	235796
rgdpo	CHL	2006	275648
rgdpo	CHL	2007	299290
rgdpo	CHL	2008	290851
rgdpo	CHL	2009	296428
rgdpo	CHL	2010	342196
rgdpo	CHL	2011	379499
rgdpo	CHL	2012	401288
rgdpo	CHL	2013	415074
rgdpo	CHL	2014	421632
rgdpo	CHL	2015	417152
rgdpo	CHL	2016	411637
rgdpo	CHL	2017	422309
rgdpo	CHL	2018	436137
rgdpo	CHL	2019	440683
rgdpo	CHN	1952	558018
rgdpo	CHN	1953	628424
rgdpo	CHN	1954	583445
rgdpo	CHN	1955	642968
rgdpo	CHN	1956	688503
rgdpo	CHN	1957	711933
rgdpo	CHN	1958	726527
rgdpo	CHN	1959	694189
rgdpo	CHN	1960	652546
rgdpo	CHN	1961	554674
rgdpo	CHN	1962	600626
rgdpo	CHN	1963	674772
rgdpo	CHN	1964	762317
rgdpo	CHN	1965	843120
rgdpo	CHN	1966	867201
rgdpo	CHN	1967	892459
rgdpo	CHN	1968	866469
rgdpo	CHN	1969	951518
rgdpo	CHN	1970	1.06968e+06
rgdpo	CHN	1971	1.17345e+06
rgdpo	CHN	1972	1.13962e+06
rgdpo	CHN	1973	1.24244e+06
rgdpo	CHN	1974	1.26474e+06
rgdpo	CHN	1975	1323576
rgdpo	CHN	1976	1.27272e+06
rgdpo	CHN	1977	1364091
rgdpo	CHN	1978	1.57364e+06
rgdpo	CHN	1979	1.65397e+06
rgdpo	CHN	1980	1.67841e+06
rgdpo	CHN	1981	1.69071e+06
rgdpo	CHN	1982	1.81175e+06
rgdpo	CHN	1983	1951130
rgdpo	CHN	1984	2.21726e+06
rgdpo	CHN	1985	2.51314e+06
rgdpo	CHN	1986	2591463
rgdpo	CHN	1987	2.72728e+06
rgdpo	CHN	1988	2.89975e+06
rgdpo	CHN	1989	2.90451e+06
rgdpo	CHN	1990	2.85636e+06
rgdpo	CHN	1991	3.00609e+06
rgdpo	CHN	1992	3.28545e+06
rgdpo	CHN	1993	3.58754e+06
rgdpo	CHN	1994	3854175
rgdpo	CHN	1995	4257891
rgdpo	CHN	1996	4.58077e+06
rgdpo	CHN	1997	4.74223e+06
rgdpo	CHN	1998	4.75902e+06
rgdpo	CHN	1999	5.03756e+06
rgdpo	CHN	2000	5.42011e+06
rgdpo	CHN	2001	5898086
rgdpo	CHN	2002	6458509
rgdpo	CHN	2003	7.05666e+06
rgdpo	CHN	2004	7.87631e+06
rgdpo	CHN	2005	8767904
rgdpo	CHN	2006	9562662
rgdpo	CHN	2007	10522240
rgdpo	CHN	2008	11210087
rgdpo	CHN	2009	12166251
rgdpo	CHN	2010	13847619
rgdpo	CHN	2011	14969009
rgdpo	CHN	2012	15920895
rgdpo	CHN	2013	16563043
rgdpo	CHN	2014	17369238
rgdpo	CHN	2015	17985756
rgdpo	CHN	2016	18591710
rgdpo	CHN	2017	19687162
rgdpo	CHN	2018	19729128
rgdpo	CHN	2019	20257660
rgdpo	CIV	1960	5840.77
rgdpo	CIV	1961	6144.6
rgdpo	CIV	1962	6465.61
rgdpo	CIV	1963	7338.87
rgdpo	CIV	1964	8528.25
rgdpo	CIV	1965	8146.05
rgdpo	CIV	1966	9134.1
rgdpo	CIV	1967	9620.61
rgdpo	CIV	1968	10967.9
rgdpo	CIV	1969	12049.8
rgdpo	CIV	1970	13398.1
rgdpo	CIV	1971	14294.8
rgdpo	CIV	1972	14946.8
rgdpo	CIV	1973	15819.1
rgdpo	CIV	1974	17104.5
rgdpo	CIV	1975	17877.8
rgdpo	CIV	1976	20060.1
rgdpo	CIV	1977	21492
rgdpo	CIV	1978	23619.3
rgdpo	CIV	1979	24052.7
rgdpo	CIV	1980	21423.2
rgdpo	CIV	1981	22542.6
rgdpo	CIV	1982	23257.3
rgdpo	CIV	1983	23516.6
rgdpo	CIV	1984	24203.5
rgdpo	CIV	1985	26943.1
rgdpo	CIV	1986	28269.2
rgdpo	CIV	1987	27854
rgdpo	CIV	1988	28514
rgdpo	CIV	1989	31309.2
rgdpo	CIV	1990	28958
rgdpo	CIV	1991	29704
rgdpo	CIV	1992	31055.7
rgdpo	CIV	1993	30672.9
rgdpo	CIV	1994	30134.8
rgdpo	CIV	1995	34665.9
rgdpo	CIV	1996	37597.7
rgdpo	CIV	1997	37664.3
rgdpo	CIV	1998	38518.4
rgdpo	CIV	1999	37961.4
rgdpo	CIV	2000	37206.9
rgdpo	CIV	2001	37474.2
rgdpo	CIV	2002	36997.4
rgdpo	CIV	2003	41318.6
rgdpo	CIV	2004	39324.3
rgdpo	CIV	2005	39309.3
rgdpo	CIV	2006	41182.8
rgdpo	CIV	2007	43602
rgdpo	CIV	2008	46264
rgdpo	CIV	2009	50301.6
rgdpo	CIV	2010	57416.2
rgdpo	CIV	2011	60760.7
rgdpo	CIV	2012	72098.4
rgdpo	CIV	2013	80790.1
rgdpo	CIV	2014	92654.2
rgdpo	CIV	2015	105491
rgdpo	CIV	2016	108304
rgdpo	CIV	2017	111163
rgdpo	CIV	2018	120753
rgdpo	CIV	2019	129492
rgdpo	CMR	1960	8538.08
rgdpo	CMR	1961	8788.79
rgdpo	CMR	1962	8847.16
rgdpo	CMR	1963	9419.62
rgdpo	CMR	1964	9777.52
rgdpo	CMR	1965	10346.2
rgdpo	CMR	1966	10826.9
rgdpo	CMR	1967	9884.23
rgdpo	CMR	1968	10284.7
rgdpo	CMR	1969	10980.4
rgdpo	CMR	1970	11402.7
rgdpo	CMR	1971	11546.2
rgdpo	CMR	1972	12119.8
rgdpo	CMR	1973	12592.9
rgdpo	CMR	1974	12704.7
rgdpo	CMR	1975	13163.7
rgdpo	CMR	1976	12546.1
rgdpo	CMR	1977	14242.9
rgdpo	CMR	1978	17747.1
rgdpo	CMR	1979	18609.1
rgdpo	CMR	1980	20713.5
rgdpo	CMR	1981	23411.9
rgdpo	CMR	1982	26591.5
rgdpo	CMR	1983	30344.5
rgdpo	CMR	1984	34288.6
rgdpo	CMR	1985	35614
rgdpo	CMR	1986	34592
rgdpo	CMR	1987	34068
rgdpo	CMR	1988	33349.8
rgdpo	CMR	1989	32284.4
rgdpo	CMR	1990	31033.5
rgdpo	CMR	1991	29799.1
rgdpo	CMR	1992	29639.8
rgdpo	CMR	1993	30932.5
rgdpo	CMR	1994	29839.8
rgdpo	CMR	1995	33006.5
rgdpo	CMR	1996	35041
rgdpo	CMR	1997	36589.2
rgdpo	CMR	1998	38341.7
rgdpo	CMR	1999	39935.1
rgdpo	CMR	2000	41473.4
rgdpo	CMR	2001	42446.9
rgdpo	CMR	2002	43814.7
rgdpo	CMR	2003	46501.6
rgdpo	CMR	2004	47715.2
rgdpo	CMR	2005	49568.4
rgdpo	CMR	2006	51431.7
rgdpo	CMR	2007	54119.7
rgdpo	CMR	2008	57194.9
[truncated: 8,400 more rows]

## Sheet: Tabelle1
Summe von AggValue	Spaltenbeschriftungen
Zeilenbeschriftungen	MAR	ABW	AGO	AIA	ALB	ARE	ARG	ARM	ATG	AUS	AUT	AZE	BDI	BEL	BEN	BFA	BGD	BGR	BHR	BHS	BIH	BLR	BLZ	BMU	BOL	BRA	BRB	BRN	BTN	BWA	CAF	CAN	CHE	CHL	CHN	CIV	CMR	COD	COG	COL	COM	CPV	CRI	CUW	CYM	CYP	CZE	DEU	DJI
1950	13039.5						50108.8			114124	41605			72084.3											6936.6	88442.7						177335	74871.4					26857.6		40504.6			3368.58			1604.56		359302
1951	13171.2						51339.2			110532	43706.1			75056.8											7515.32	91100.4						183434	81711.3	29655.9				31369.7		41120.4			3494.87			1692.83		397637
1952	14124.6						46855.1			109025	44922.4			76747.5											7477.66	100770						199360	81576.7	32103.3	558018			33562.7		43874.6			3954.28			1878.14		434206
1953	14416						49917.1			122817	47309.1			79178.1											6208.86	104141						208588	84794	32862.1	628424			38040.5		47642.9			4730.39			2111.95		471546
1954	15215						52254.8			131921	50657.7			82787.8											6456.5	113028						207756	90660.4	35171.7	583445			39417.1		52188.2			4930.31			2369		512388
1955	15081.9						56072.5			138514	55541.9			86486.9											7024.06	121660						226019	97528	34339.5	642968			42134.3		54171.1			5374.41			2443.35		583818
1956	15450.3						57550.3			140626	59629.9			88979.8											6641.11	126157						244570	104656	33811.1	688503			43530.5		55390			5230.28			2720.3		629114
1957	15319.4						60560.4			141600	62760.4			90509.6											6554.06	137198						250775	108603	37347	711933			43074.7		55241			5607.58			2754.45		664997
1958	16323.7						65162.1			152881	65324.3			89428.8											6334.78	145166						256755	104457	38843.9	726527			42934.1		55161.3			6306.01			2417.64		687191
1959	17104.7						61388			162856	67548.3			92119.2	3731.82	5089.44	75633.3								6743.56	151863						266930	112616	38531	694189			42947.4		58454.7			6354.03			2563.76		745472
1960	17483.7						65991.3			165420	72448.7		2099.75	96857.7	4066.54	5043.85	81414.3								6939.53	166540	2174.02			274.04	2240.15	276341	122351	41016.3	652546	5840.77	8538.08	45535.1	2150.34	61971.2	363.88	247.263	6888.58			2433.94		816786
1961	22405.2						68127.4			170312	76432.5		1820.54	102099	4118.08	4759.54	80873.8								7168.22	189671	2230.53			295.556	2425.17	287788	132931	39635.4	554674	6144.6	8788.79	38455.1	2006.51	65937.4	391.803	296.946	6771.61			2743.73		849921
1962	25635.9						69384.2			179626	78591.7		1985.66	107618	4010.65	5099.08	85667.1								7437.76	204087	2297			318.29	2421.12	306239	139404	49531.2	600626	6465.61	8847.16	47457.6	2586.03	69062.1	471.424	252.757	7225.57			3222.19		881026
1963	30001.1						66981.2			192394	81837.2		2048.47	111842	4239.76	4953.75	91393.4								7927.59	218231	2274.63			333.159	2278.19	322409	145816	51372.3	674772	7338.87	9419.62	45735.9	2863.15	71111.8	512.469	210.884	7672.78			3264.84		901191
1964	31925.5						70325.3			201940	85747.6		2093.32	119508	4478.34	5157.59	90838.6								8419.76	228095	2279.01			355.037	2381.95	345038	154484	53070.2	762317	8528.25	9777.52	41536.5	3047.44	77066.6	580.424	227.882	8091.71			2798		968410
1965	31423.7						79025.9			204650	88459.4		2170.73	123735	4852.47	5137.91	89313.6								8964.34	242628	2391.03			340.303	2407.22	366616	158098	51222.6	843120	8146.05	10346.2	47408.5	3020.56	77275.8	607.421	239.82	8950.84			3593.39		1.01725e+06
1966	30331.4						80755.5			218783	92929.6		2253.05	127105	4986.1	5186.66	90168.7								9679.18	254559	2528.5			369.31	2401.45	391093	161869	57311.7	867201	9134.1	10826.9	50616.7	2796.58	81533.4	674.843	299.845	9475.79			3761		1.04558e+06
1967	31261.8						83494.3			228736	95787.1		2535.06	131962	5184.22	5704.06	87043.1								10465.4	276456	2798.75			429.363	2385.14	402488	167307	60615.3	892459	9620.61	9884.23	46412.6	2841.78	84639.6	748.502	335.384	9927.26			4185.64		1.03798e+06
1968	33351.9						85935.9			246074	99937		2557.27	137580	5593.06	5855.04	89836.9								9258.39	305421	2907.69			475.175	2708.63	423943	173471	62126.2	866469	10967.9	10284.7	50119.5	3200.67	90075.4	714.016	372.054	10562.3			4334.03		1098684
1969	37190.1						94348.6			264889	104938		2467.45	146062	5818.17	5986.32	93734.2								9591.52	310830	3344.17			453.721	2712.75	446109	183341	66418.8	951518	12049.8	10980.4	55849.6	3523.91	96192.7	699.638	406.757	11167.7			4938.7		1.18187e+06
1970	35353.7	463.304	28522.5	67.957	6697.49	70528.7	97105.7		400.109	275292	111569		2968.42	154585	6401.87	5766.53	100645	38673.5	4636.37	4769.25			487.246	10812.6	9393.34	354428	3685.27	8942.62	591.397	519.802	2834.48	458854	195560	66720.6	1.06968e+06	13398.1	11402.7	57608.7	3965.08	103985	804.287	459.604	12167.4		339.203	5112.9		1.23987e+06	1460.42
1971	37778.2	504.684	30435.8	66.2832	6958.5	80634.2	100013		430.626	285965	117568		3102.28	160690	6549.04	5359.04	99541.9	41316.8	4588.71	4916.36			523.891	20503.9	9977.07	397864	3810.46	9807.72	607.127	662.838	2725.89	482862	203554	75620.7	1.17345e+06	14294.8	11546.2	57196.5	4370.62	115133	839.169	483.769	12777		349.986	5608.34		1.2789e+06	1548.1
1972	38700.1	550.489	30127.4	73.9949	7246.04	75736.7	101743		461.309	295047	124572		2786.19	170488	6843.92	6641.62	95132	44550.4	4881.63	4654.56			471.308	16385	10161.6	445992	3882.19	10966.1	614.285	830.759	2611.42	510280	210138	75721.4	1.13962e+06	14946.8	12119.8	55141.4	4341.96	126567	857.838	494.71	13638.1		378.369	5884.63		1.34024e+06	1611.45
1973	39802.7	599.463	32514.1	77.0817	7536.61	85912.7	107506		496.215	308243	130782		3037.51	182405	7338.9	6247.9	81078.2	48283	5470.61	5029.55			533.412	16076.2	10989.9	506448	3773.22	11787.9	623.713	1023.25	2913.55	547976	216350	73727	1.24244e+06	15819.1	12592.9	60761.5	5033.28	140358	919.793	503.021	14590.4		432.651	5829.19		1.41486e+06	1679.12
1974	42919	652.476	32680.6	76.783	7855.12	84504.9	112594		484.847	297154	135338		3062.15	190768	7976.8	6740.98	82859.3	52343.8	6822.97	4442.56			607.863	14219.9	11777.3	550841	3415.07	13076.7	654.479	1145.95	2625.14	562724	219349	70171.5	1.26474e+06	17104.5	12704.7	64183.7	6083.18	151681	948.472	515.46	15060.3		475.633	4476.67		1.43801e+06	1613.13
1975	45319.9	712.046	30533.3	79.4036	8164.37	107625	111145		451.055	303125	136221		3038.63	189073	6790.92	6643.16	79987	57697.9	6240.14	3384.3			600.494	15377	12460.1	574167	4068.9	13841.3	633.513	1275.12	2584.75	570347	198754	59512.2	1323576	17877.8	13163.7	52089.1	5788.34	160806	1010.13	428.134	15599.9		522.585	3559.13		1.43752e+06	1840.96
1976	50276.3	776.679	29695.1	80.6635	8459.79	130003	111304		406.511	316724	139693		3353	201473	7290.56	6710.79	90659.2	61147.4	7968.38	3745.25			558.175	19162.7	12984.4	623541	3216.33	15180.4	692.586	1440.37	2572.7	603769	196497	61981	1.27272e+06	20060.1	12546.1	47206.2	6063.78	171553	1010.81	435.796	16839.5		574.359	4481.74		1.51561e+06	1922.55
1977	51875.3	849.02	31375.7	80.9693	8818.58	168902	118831		452.118	322573	145574		3819.54	204631	7536.66	7432.7	97305.3	64316.9	8906.07	3983.5			603.13	18009.2	13663.7	637973	3258.93	16140	740.384	1638.83	2705.21	624671	200588	67581.9	1364091	21492	14242.9	49432	6323.14	179799	1059.21	415.434	18767.1		631.166	5646.86		1.57234e+06	1697.93
1978	55107.3	924.477	28078.9	86.9384	9209.29	163283	117132		456.775	337629	145074		3866.8	212704	7319.41	8180.19	100146	68103.5	9237.11	4665.26			627.602	18021.8	13597.8	663618	3110.29	16689	799.708	1842.91	2774.15	649281	204056	72787.5	1.57364e+06	23619.3	17747.1	48712.9	6039.93	193374	1080.98	455.439	19743.9		693.251	6278.34		1.62662e+06	1764.02
1979	58461.4	1006.47	28697.1	94.9147	9454.94	195977	124635		574.489	348575	151005		3939.31	219504	7667.29	8310.36	106385	73499.7	7714.87	4918.87			671.457	18100.4	13887	709012	3273.28	20418.7	847.49	2082.46	2725.35	675725	211264	78645	1.65397e+06	24052.7	18609.1	55725.4	6836.44	200344	1178.37	476.872	20687.9		763.222	7219.24		1.70169e+06	1754.89
1980	59027.1	1097.32	28927.4	98.7262	9964.96	307906	125315		492.558	360226	152806		4060.75	234949	8230.38	8333.29	106194	74698.6	9494.56	6076.65			762.887	14872.6	13809.3	709314	3227.88	19854.1	848.721	2332.49	2506.76	687911	221685	83430.4	1.67841e+06	21423.2	20713.5	57589.8	6849.43	209898	1313.29	517	20820.3		836.884	7737.49		1725220	1833.33
1981	60037.4	1197.65	28634.1	103.323	10363.3	296486	126381		527.929	376529	152378		4338.17	224090	10409.8	8914.75	108355	80231.5	8656.76	5108.61			715.104	14867.6	14236.7	735148	3206.82	19124.8	1002.85	2672.55	2925.53	711281	221734	87577.6	1.69071e+06	22542.6	23411.9	55167.5	5588.92	211148	1282.73	555.684	20624.7		920.821	7795.25		1.68916e+06	1855.65
1982	67307.2	1306.71	28998.7	103.586	10392	271746	132655		549.063	367700	153065		4271.02	216933	7500.63	8892.24	108162	83483.5	7173.25	5418.31			741.862	14242	13993.3	752343	3260.09	18487.4	1048.2	2860.31	2955.16	693444	220509	76576.4	1.81175e+06	23257.3	26591.5	56350.8	5982.48	212126	1378.28	594.568	19279.1		1012.25	8389.94		1.65076e+06	1984.84
1983	72062.8	1425.28	29083.1	101.852	10741.7	249620	143820		658.751	389329	156259		4354.76	210577	7372.46	8354.92	110264	88786.6	7441.49	5942.68			738.67	14774.7	13887.9	736501	3367.61	18150.2	1183.83	3360.73	2793.04	717049	222585	74122.4	1951130	23516.6	30344.5	57990.6	9725.28	211168	1411.09	640.031	19503.5		1141.29	8814.32		1.65072e+06	1992.54
1984	78134.2	1555.42	31850.7	105.554	10857.1	252610	153308		609.989	404518	155367		4448.61	210094	7826.51	8134.21	121110	90628.4	8078.63	7168.27			754.714	15839.5	14485.8	763958	3459.93	17935.9	1206.68	4228.82	3006.83	767395	225376	76596.5	2.21726e+06	24203.5	34288.6	66699.4	11442.4	215570	1636.79	612.138	20973.9		1239.88	9843.76		1.66605e+06	1975.16
1985	85844.9	1692.19	32966.5	116.007	10957	236821	149749		512.902	415790	158705		4796.42	199751	8647.1	8692.41	126460	95425.4	4390.79	7381.81			783.526	12181.7	15270.3	803910	3024.29	16727.2	1254.9	4911.23	3345.89	786766	230983	76710.7	2.51314e+06	26943.1	35614	64053.5	10769.8	215326	1647.33	624.736	21324		1076.18	9665.76		1.66814e+06	1825.83
1986	94796.3	1848.22	29358.7	142.273	11511.3	197967	166668		667.644	427614	166262		5044.82	214299	7559.06	9559.82	129602	96941.7	5245.36	7244.91			906.471	17245.5	15340.8	918831	3533.9	12268.2	1339.1	5464.92	3313.3	801484	244761	80568.1	2591463	28269.2	34592	60423.8	6807.18	229038	1823.11	708.341	23604.3		1209.86	9842.91		1800300	1765.61
1987	97415.9	2143.88	32969.5	152.953	11730.3	171290	177435		714.684	462909	173161		5063.48	226406	6993.83	9342.8	130173	105260	5474.66	8051.6			1009.85	26872.2	15983	949521	3861.82	13277.2	1389.18	6040.65	3088.23	858473	249694	86681.3	2.72728e+06	27854	34068	59113.1	6431.02	231067	1825.37	740.734	23636.1		1448.3	10623.9		1.87988e+06	1792.92
1988	108480	2543.25	31056.7	164.518	11490.5	193512	188858		748.249	490374	184286		5481.38	244142	7209.24	9902.16	135889	108911	6752.61	7847.07			1090.94	18485.7	14351	956652	4046.08	12030.4	1469.17	6687.51	3251.9	901253	254687	95079.2	2.89975e+06	28514	33349.8	63540.2	5973.93	238497	1782.16	758.191	24281.1		1590.51	11254.4		1.97993e+06	1823.39
1989	110780	2657.24	33118.7	191.719	12432.4	225003	181887		797.373	507403	194189		5297.74	249963	6519.04	9959.98	151280	105817	6833.71	8340.63			1205.53	9919.88	15052.3	978164	4371.98	13575.1	1508.03	8526.06	3439.12	934354	266441	103907	2.90451e+06	31309.2	32284.4	65275	5995.48	244015	1693.65	812.756	25842.6		1775.57	12553		2.06458e+06	1727.05
1990	112782	3012.51	35987.3	247.739	12096.7	264833	204213	24350.5	844.709	507696	205574	76027.5	5522.09	261314	6713.16	9845.9	157996	106473	7898.74	7547.92	4717.18	145477	1348.99	16860.1	16026.9	954572	4125.81	15692.7	1569.34	9271.94	3391.61	941469	281175	106364	2.85636e+06	28958	31033.5	51503.1	7121.53	252406	1669.54	794.614	26685.4		2372.9	13056.9	250626	2.22145e+06	1666.09
1991	125826	3177.46	33312.2	190.478	10822.8	245705	240402	22093.8	835.474	507725	214933	109720	5765.2	265296	7069.97	10505	164057	110619	7877.56	7156.77	4265.2	141404	1309.45	17870.4	17120.1	1.04185e+06	4363.15	15077.6	1615.62	9977	3339.99	917014	277248	114799	3.00609e+06	29704	29799.1	42219.1	7981.37	253754	1597.74	801.686	27175.1		2282.62	12795.4	211436	2.34462e+06	1576.7
1992	126671	3370.54	38985.8	251.871	9767.37	256310	283127	12738.5	835.783	527873	223889	79636.9	5665.64	275201	7308.3	10590.1	168775	112640	8185.23	7369.26	4077.28	125962	1313.31	14697.7	17977	1.07113e+06	3306.6	17565.1	1792.01	10366	3207.99	925954	279157	128572	3.28545e+06	31055.7	29639.8	54573.1	5824.88	265917	1692	877.531	30037		2159.41	13630.4	209714	2428830	1944.45
1993	128341	3698.53	33555.6	261.226	11222.6	207498	325028	12250.9	856.674	547021	228787	44350.1	5312.86	276938	7512.19	11019.7	173082	83607.9	9259.13	7210.66	4991.36	133585	1397.42	15712	19213.3	1.15515e+06	3489.93	17178.6	1683.93	10681.3	3145.85	947826	283410	137048	3.58754e+06	30672.9	30932.5	42911	6164.3	283950	1640.51	930.641	32134.1		2512.98	13552.4	212731	2454800	2489.52
1994	143800	4172.82	35790.5	268.285	12672.2	219875	378640	9502.24	937.686	572406	240059	34694.7	5380.42	284110	7038.36	9994.94	181230	82472.4	9519.37	6997.19	6625.12	87775.7	1492.25	6352.28	20845.1	1.30009e+06	5760.76	15893.2	1696.04	11102.3	3830.6	993124	291435	149369	3854175	30134.8	29839.8	31580.3	5875.58	299682	1499.8	1094.88	33639		2367.09	14301.1	224293	2551067	1725.82
1995	142083	4184.16	31983.1	269.017	13669.6	242377	424479	9896.93	861.338	602171	250434	21608.8	4887.81	296017	7774.5	11445.2	189809	86818.9	9821.44	6868.18	9414.6	84745.3	1613.23	14312.8	23298.5	1.5139e+06	6294.12	15167.6	1733.33	12153.2	3943.51	1.04229e+06	296646	171111	4257891	34665.9	33006.5	32856.2	5681.29	313140	1775.01	1010.55	34974.8		2456.96	15180.4	232851	2.64274e+06	2105.6
1996	166334	3977.09	40620.8	259.435	15067.4	256810	548785	10904.5	932.192	635901	256307	20621.4	4522.66	295072	8177.4	12734.9	195332	82570.8	9449.94	8361.7	18142.1	88799.3	1411.84	11841.3	26058.8	1.81795e+06	6741.35	19704	1875.28	13892.9	3353.62	1.06854e+06	300729	179190	4.58077e+06	37597.7	35041	29417.2	6458.87	314394	1724.68	1223.51	34393.4		2454.98	15054.6	243425	2.67894e+06	1824.66
1997	154413	4282.01	41782.3	258.009	14072.3	275636	566384	11346.6	952.43	667290	269415	19018.4	4435.95	308664	9048.91	13927.7	195050	62861.1	11471.1	8222.28	22461	93725.3	1364.13	19130.2	26415.6	1.76159e+06	6281.65	17168.6	2126.21	14865	3519.93	1.11129e+06	313281	182730	4.74223e+06	37664.3	36589.2	30255.1	6169.09	322052	1784.79	1190.58	35942.8		2849.26	15594	234766	2.76733e+06	1973.91
1998	155597	4660.58	43945.7	296.841	15531.7	265041	565212	10348.8	653.439	690270	280195	19078.3	4908.59	310653	9477.95	14893.2	193522	73695.7	10787.9	8774.54	23121.7	91570.1	1356.13	1307.49	26996.5	1.68799e+06	6565.78	14943.7	2207.78	15367.1	3701.73	1.12757e+06	322787	180735	4.75902e+06	38518.4	38341.7	27435.8	4913.14	315011	1635.74	1341.01	39531.9		3243.82	15481.4	225792	2862586	1943.63
1999	149079	4854.15	42790.3	322.194	16525.4	285782	532080	11392.8	948.62	725862	290596	20238.8	4945.98	325198	10388.5	16187	187660	73270.7	13232.8	9857.48	25506.5	90159.4	1409.36	1420.91	27045.1	1.63069e+06	6513.78	17125.3	2539.5	16918.5	3661.08	1208232	334009	172964	5.03756e+06	37961.4	39935.1	28455.8	6340.43	298356	1648.26	1570.95	39908.7		3266.66	16683.5	224739	2978213	2060.48
2000	143536	4129.51	36538.8	306.233	16633.3	347881	528449	11660.3	1167.77	746969	306928	22876.3	4770.34	346909	11639.9	16861	194071	79629.2	18461	10638.8	24723.7	97657	1615.08	10151	27483	1.65357e+06	6407.14	20162.4	2617.55	18182.1	3778.81	1.28467e+06	338565	179409	5.42011e+06	37206.9	41473.4	25657.2	9096.72	307551	1600.54	1708.26	41665.4		3529.4	19121	231523	3.03547e+06	2083.79
2001	146764	4728.45	39557.4	303.437	17293.8	360040	496567	12325.8	960.738	771092	299963	26036.9	4843.91	348798	12474.8	17495	199795	81448.6	18450.1	10203.7	25421	95095.1	1606.79	8379.73	28672.5	1.64585e+06	6275.5	19613.8	2767.89	18095.6	3832.77	1.27373e+06	337629	178617	5898086	37474.2	42446.9	25649.1	8735.87	309163	1777.75	1790.42	43516.5		3483.51	19664.9	242380	3076616	2078.04
2002	144826	3555.26	44386.9	269.882	17619.8	359247	425342	13338.3	987.718	789873	306288	26988.2	5082.72	358493	13779.5	18293.5	210411	84463.8	17755.8	12178.1	25904.1	96684.6	1809.15	19907.3	30088.9	1657569	6215.99	19790.8	3180.48	21365.7	3839.52	1.28204e+06	338813	180073	6458509	36997.4	43814.7	26641.3	8702.93	313161	1818.95	1862.35	43845.9		3485.43	19093	238087	3065723	2015.83
2003	150062	3701.98	48612.6	319.404	18275.1	392891	461437	15183.3	1116.79	823659	313908	28477.8	5344.24	374266	14682.1	19201.8	216588	86977.9	22070.6	11804.6	25564	101225	1999.16	4158.08	31589.2	1651363	5736.71	22519.6	3487.01	21088.4	3661.69	1.34611e+06	345369	188147	7.05666e+06	41318.6	46501.6	29050.1	9113.2	324433	1806.04	1963.24	45280.4		3713.55	18078.2	249011	3.14056e+06	2191.64
2004	149635	4227.81	58740.8	361.694	18750.1	424114	504759	16171.6	879.781	853505	326475	30133.4	5627.23	383970	15695.8	20268.2	222153	90887	24931.4	11335.7	25869.2	108854	2103.19	2949.02	33584.6	1.73879e+06	5944.78	24977.1	4073.87	22081.4	3766.61	1.40627e+06	358521	209905	7.87631e+06	39324.3	47715.2	32086.7	10984	340382	1787.83	2126.06	47385.2		3593.36	18465.5	256095	3.23105e+06	2267.13
2005	148626	4568.42	79999.5	436.814	20162.4	502144	548929	17958.9	1335.9	917887	357373	46967	5554.3	429271	16488.7	22026.8	231691	100855	34176.5	12700.3	29839.4	115157	2215.2	2949.02	35975.1	1.80295e+06	6088.04	30377.8	4064.01	25194.1	3847.3	1.51408e+06	389669	235796	8767904	39309.3	49568.4	34905.7	15553.9	363744	2030	2177.73	50876.9	3869.42	4170.2	21365	279153	3.39187e+06	2421.21
2006	161235	4846.38	106584	462.818	21773.8	591368	599530	20416.4	1514.74	937623	364390	68842.2	5775.27	417205	16917.8	22879.2	252801	106782	39408.3	11707.7	32065.1	129523	2367.7	3116.44	37964.7	1967472	5707.13	35479.9	4064.2	26259	4037.82	1.52271e+06	417288	275648	9562662	41182.8	51431.7	38060.9	17263.1	398154	2009.59	2299.51	51939.4	4030.73	4560.51	22115.5	285494	3470312	2921.53
2007	170123	4755.24	121459	546.836	23260.2	646524	665477	23115.2	1901.75	964050	376847	94222	5881.25	430015	17956.1	22859.1	282226	115264	44902.7	12832	34418.2	142766	2447.64	3150.51	40330.2	2.19164e+06	6052.81	35326.6	4347.12	27367.5	4264.89	1.55535e+06	460970	299290	10522240	43602	54119.7	40470.3	14069.7	438976	1621.23	2637.4	55013.4	3960.07	4770.04	23687.3	310792	3.6654e+06	3086.35
2008	191486	4888.02	150207	550.751	25868.8	712872	718255	25132.7	1946.3	1.01588e+06	390541	105287	6209.57	467485	18489.2	23370.2	316497	123448	61727.6	12129.7	37063.5	165892	2359.55	4018.54	45558.2	2.43988e+06	5582.19	38154.8	4825.17	27741.2	4371.63	1.62056e+06	495490	290851	11210087	46264	57194.9	40075.8	19736.7	482275	1751.18	2916.56	58260.4	4090.68	4721.57	25492.7	327105	3.75063e+06	3479.24
2009	209099	4247.34	115505	394.147	27709.9	593726	684293	23216.5	1832.51	1.01371e+06	373127	107973	6265.48	451867	18522.2	23331.4	343454	119096	52375.6	12178.2	36861.1	160477	2230.18	4056.81	47438.8	2.53159e+06	4945.92	29102.2	5215.51	25780.4	4706.12	1.45723e+06	487748	296428	12166251	50301.6	57310.6	41042.1	15601.2	491105	1771.62	2994.79	61673.8	3684.89	4126.88	25696.6	314230	3498118	2891.54
2010	223103	3933.47	159625	381.683	31021.1	618895	784810	25550.8	1850.27	1.11266e+06	385229	129774	6650.67	489333	19116.2	25504.1	391173	123621	57765.9	11737.8	37842.6	177338	2510.13	4458.85	52741.2	2.93816e+06	4747.02	31861.4	6102.19	28866.9	4916.85	1.55872e+06	505411	342196	13847619	57416.2	59721.1	45981	24714.2	540688	1726.4	3229.99	62831	3786.54	3777.28	26422.6	318897	3672402	2565.94
2011	249933	4009.23	201858	381.223	31369.5	726415	882632	28177.8	1945.68	1.17505e+06	402328	165606	7267.04	487755	20438.7	26656.9	452300	122260	61295.4	12225	38853.1	199827	2660.1	4590.29	59436.6	3.281e+06	4333.07	39790.7	6341.96	32090.7	5002.91	1.64948e+06	557177	379499	14969009	60760.7	63652.5	49819.1	30923.9	603952	1929.97	3545.82	66766.7	3891.99	3857.6	26344.6	328852	3.86119e+06	3404.54
2012	255685	3899.81	229563	352.689	32366.2	777424	902396	33102.3	1951.8	1.17034e+06	409657	178506	7544.01	491813	23201.3	29012.5	470216	125269	73147.8	13007.8	39750.5	190945	2725.2	3668.35	66667.9	3271619	4045.71	42672.1	6640.05	30051.6	5549.8	1.66105e+06	575032	401288	15920895	72098.4	68232.2	53398.2	33997.1	630473	2143.79	3427.47	70761.7	3855.36	3725.3	27058	327438	3.83099e+06	3686.37
2013	257672	4674.1	242490	303.354	30914.7	771048	904232	32770	1746	1.22713e+06	404381	164194	8313.94	490563	25688.6	30379.7	498137	119148	72742.8	11410.3	39320.4	186944	2520.8	3276.8	74217.3	3306056	3726.78	41027.5	6101.77	30666.2	3658.05	1723023	573934	415074	16563043	80790.1	71237.4	58995.2	32287.2	643505	2213.46	3267.77	69764.1	3820.81	3658.7	24262.3	323382	3.83973e+06	3717.72
2014	246331	4075.2	254875	288.303	32090.5	798546	879838	31430.6	842.486	1.22511e+06	423224	179128	8707.8	493291	29129	30118.6	533594	122942	70960.8	12529.1	39469.3	190412	2569.16	3270.44	77702.9	3.29754e+06	3727.57	36772.9	6313.13	33817	3516.55	1.78058e+06	588874	421632	17369238	92654.2	75289.6	65687.3	30741.1	661345	2282.39	3243	73966.5	3778.36	3766.52	22666.7	338200	3.97396e+06	3983.37
2015	263587	3921.18	224713	249.571	33659.4	693186	913104	32639.1	1536.07	1.1658e+06	430624	140311	8671	484155	32494.6	31088.9	580461	127390	66548.1	11586.4	40501.4	186225	2380.29	3122.56	79743.3	3082939	3620.52	28476.1	7117.79	32224	3920.76	1.69129e+06	592829	417152	17985756	105491	78458.3	72035.2	22836.8	655635	2323.47	3419.15	79182.9	3783.49	3994.62	23929.6	347159	3.93108e+06	4342.93
2016	264156	3320.98	218671	225.619	33698	670880	908771	33254.7	1534.13	1249462	436191	134143	9021.91	492930	34382.2	34396.2	605642	133492	66639.8	11714.5	41637.4	175777	2328.94	3071.92	83909.1	2931514	3592.68	26492.6	7786.92	33786.4	4131.6	1711195	603778	411637	18591710	108304	83367.3	83571	19767.6	653550	2458.77	3571.02	84422.2	3716.56	3444.36	26193.9	355308	4.04852e+06	4320.93
2017	270102	3062.58	230151	195.635	34974.9	629800	1.02251e+06	38221.7	1367.49	1.29158e+06	458232	138734	8945.59	515604	34319.4	36842.7	656739	139065	73566.2	12216.8	42397.5	191910	2329.45	3178.48	91522.5	2.96883e+06	3378.03	27329.1	8342.89	35740.5	4265.27	1.7963e+06	622558	422309	19687162	111163	86504.8	81936.2	20824.4	656701	2552.9	3703.39	89731.8	3576.53	4269.59	26716	378600	4.23652e+06	4091.95
2018	279320	3444.66	233805	150.345	35363.5	633897	1.02113e+06	40110.8	1558.21	1.3504e+06	470961	154641	9026.54	507573	35813.3	40581.5	714600	143783	77337	12471.1	44009.6	200152	2219.22	3132.48	96384.9	3.04212e+06	3442.4	30037.2	8643.51	36344.6	4441.05	1833635	636191	436137	19729128	120753	90939.8	84834.8	25830.6	684435	2648.43	3711.7	91075.4	3487.04	3969.59	26906.8	391695	4.26303e+06	5741.16
2019	289000	3467.3	227856	225.681	36103	645956	977421	43582.6	1603.85	1.36468e+06	477706	159346	9109.69	517420	38295.5	43084.2	759471	149432	77077.6	12887.4	45538.4	204795	2186.92	3142.39	98835.7	3.08005e+06	3506.67	31737.8	8988	37975	4642.45	1.86621e+06	646920	440683	20257660	129492	94487.5	88673.4	25057.7	707660	2730.4	3998.62	93491.8	3458.31	4004.11	28054	401072	4275312	5970.28
Gesamtergebnis	7.34894e+06	145353	4.01358e+06	11396.7	861198	1.79828e+07	2.28619e+07	652185	49131.5	3.78411e+07	1.45746e+07	2.54718e+06	292122	1.80325e+07	731097	871488	1.30557e+07	4.6504e+06	1.26485e+06	430951	830372	4.20086e+06	73594.1	543224	1.77989e+06	8.17597e+07	246599	1.0755e+06	148915	752505	201309	6.1153e+07	1.97478e+07	1.03334e+07	3.4879e+08	2.21357e+06	2.13725e+06	3.39703e+06	616817	1.81656e+07	88920.1	82552.2	2.13172e+06	56790.8	122001	825114	8.51485e+06	1.46814e+08	122041
[truncated: 135 more columns]
