# Supplementary material for: The Social Cost of Fossil and Industrial CO2 Emissions from 1950 to 2018
Source: Research Square preprint supplement (doi:10.21203/rs.3.rs-2244259/v1), 2022-11-17
Supplement: Supplementary file 62 [file rnna_Tranposed.xlsx]

## Sheet: capital_stock
VariableCode	RegionCode	YearCode	AggValue
rnna	ABW	1970	688.414
rnna	ABW	1971	758.383
rnna	ABW	1972	834.936
rnna	ABW	1973	918.605
rnna	ABW	1974	1009.97
rnna	ABW	1975	1109.67
rnna	ABW	1976	1218.43
rnna	ABW	1977	1336.98
rnna	ABW	1978	1466.15
rnna	ABW	1979	1606.88
rnna	ABW	1980	1760.18
rnna	ABW	1981	1927.19
rnna	ABW	1982	2109.15
rnna	ABW	1983	2307.43
rnna	ABW	1984	2523.48
rnna	ABW	1985	2758.9
rnna	ABW	1986	3015.56
rnna	ABW	1987	3319.95
rnna	ABW	1988	3689.81
rnna	ABW	1989	4106.04
rnna	ABW	1990	4525.35
rnna	ABW	1991	4972.79
rnna	ABW	1992	5446.23
rnna	ABW	1993	5945.96
rnna	ABW	1994	6498.93
rnna	ABW	1995	7074.19
rnna	ABW	1996	7574.31
rnna	ABW	1997	8176.08
rnna	ABW	1998	8871.18
rnna	ABW	1999	9543.47
rnna	ABW	2000	10001.4
rnna	ABW	2001	10458.6
rnna	ABW	2002	10998
rnna	ABW	2003	11609.1
rnna	ABW	2004	12261.3
rnna	ABW	2005	13089.7
rnna	ABW	2006	13968.7
rnna	ABW	2007	14768.9
rnna	ABW	2008	15567.4
rnna	ABW	2009	16123.4
rnna	ABW	2010	16532.1
rnna	ABW	2011	16938
rnna	ABW	2012	17245.1
rnna	ABW	2013	17466.8
rnna	ABW	2014	17654.6
rnna	ABW	2015	17792
rnna	ABW	2016	17960.8
rnna	ABW	2017	18128.2
rnna	ABW	2018	18284.4
rnna	ABW	2019	18427.5
rnna	AGO	1970	295518
rnna	AGO	1971	314195
rnna	AGO	1972	332436
rnna	AGO	1973	352648
rnna	AGO	1974	373268
rnna	AGO	1975	391162
rnna	AGO	1976	406898
rnna	AGO	1977	423176
rnna	AGO	1978	437048
rnna	AGO	1979	450429
rnna	AGO	1980	462301
rnna	AGO	1981	474440
rnna	AGO	1982	490153
rnna	AGO	1983	501189
rnna	AGO	1984	513645
rnna	AGO	1985	519802
rnna	AGO	1986	522738
rnna	AGO	1987	527962
rnna	AGO	1988	529128
rnna	AGO	1989	527269
rnna	AGO	1990	526730
rnna	AGO	1991	546205
rnna	AGO	1992	586977
rnna	AGO	1993	613193
rnna	AGO	1994	637564
rnna	AGO	1995	671452
rnna	AGO	1996	729244
rnna	AGO	1997	764080
rnna	AGO	1998	821296
rnna	AGO	1999	858560
rnna	AGO	2000	862814
rnna	AGO	2001	863955
rnna	AGO	2002	867976
rnna	AGO	2003	876802
rnna	AGO	2004	892691
rnna	AGO	2005	913544
rnna	AGO	2006	935606
rnna	AGO	2007	963791
rnna	AGO	2008	1.00692e+06
rnna	AGO	2009	1.05438e+06
rnna	AGO	2010	1.09048e+06
rnna	AGO	2011	1.13209e+06
rnna	AGO	2012	1.17725e+06
rnna	AGO	2013	1.22129e+06
rnna	AGO	2014	1.26644e+06
rnna	AGO	2015	1.30726e+06
rnna	AGO	2016	1339176
rnna	AGO	2017	1.35166e+06
rnna	AGO	2018	1.36036e+06
rnna	AGO	2019	1.36746e+06
rnna	AIA	1970	210.097
rnna	AIA	1971	226.763
rnna	AIA	1972	245.93
rnna	AIA	1973	265.817
rnna	AIA	1974	285.155
rnna	AIA	1975	304.913
rnna	AIA	1976	324.7
rnna	AIA	1977	344.297
rnna	AIA	1978	365.641
rnna	AIA	1979	389.132
rnna	AIA	1980	413.007
rnna	AIA	1981	438.473
rnna	AIA	1982	464.254
rnna	AIA	1983	488.095
rnna	AIA	1984	510.903
rnna	AIA	1985	535.185
rnna	AIA	1986	575.389
rnna	AIA	1987	625.977
rnna	AIA	1988	660.169
rnna	AIA	1989	701.977
rnna	AIA	1990	754.089
rnna	AIA	1991	783.323
rnna	AIA	1992	827.231
rnna	AIA	1993	859.138
rnna	AIA	1994	893.555
rnna	AIA	1995	931.242
rnna	AIA	1996	970.096
rnna	AIA	1997	1005.21
rnna	AIA	1998	1066.68
rnna	AIA	1999	1156.39
rnna	AIA	2000	1242.89
rnna	AIA	2001	1295.69
rnna	AIA	2002	1319.32
rnna	AIA	2003	1349.86
rnna	AIA	2004	1413.35
rnna	AIA	2005	1496.36
rnna	AIA	2006	1622.51
rnna	AIA	2007	1823.63
rnna	AIA	2008	2037.91
rnna	AIA	2009	2083.06
rnna	AIA	2010	2103.14
rnna	AIA	2011	2094.91
rnna	AIA	2012	2096.17
rnna	AIA	2013	2106.67
rnna	AIA	2014	2143.9
rnna	AIA	2015	2188.02
rnna	AIA	2016	2213.54
rnna	AIA	2017	2237.24
rnna	AIA	2018	2361.48
rnna	AIA	2019	2379.58
rnna	ALB	1970	45241.1
rnna	ALB	1971	47517.2
rnna	ALB	1972	49922.1
rnna	ALB	1973	52459.7
rnna	ALB	1974	55119.6
rnna	ALB	1975	57897
rnna	ALB	1976	60821.2
rnna	ALB	1977	63838.6
rnna	ALB	1978	66962.7
rnna	ALB	1979	70332.9
rnna	ALB	1980	73616.4
rnna	ALB	1981	77063.2
rnna	ALB	1982	81254.5
rnna	ALB	1983	85338.6
rnna	ALB	1984	89562
rnna	ALB	1985	93036.3
rnna	ALB	1986	96722
rnna	ALB	1987	100378
rnna	ALB	1988	103851
rnna	ALB	1989	107772
rnna	ALB	1990	111546
rnna	ALB	1991	109313
rnna	ALB	1992	106938
rnna	ALB	1993	106315
rnna	ALB	1994	107272
rnna	ALB	1995	108662
rnna	ALB	1996	110854
rnna	ALB	1997	111119
rnna	ALB	1998	111620
rnna	ALB	1999	113134
rnna	ALB	2000	116279
rnna	ALB	2001	120678
rnna	ALB	2002	125316
rnna	ALB	2003	130430
rnna	ALB	2004	136398
rnna	ALB	2005	142896
rnna	ALB	2006	150049
rnna	ALB	2007	157554
rnna	ALB	2008	165337
rnna	ALB	2009	172987
rnna	ALB	2010	179376
rnna	ALB	2011	186237
rnna	ALB	2012	191951
rnna	ALB	2013	197251
rnna	ALB	2014	201883
rnna	ALB	2015	206730
rnna	ALB	2016	211704
rnna	ALB	2017	217176
rnna	ALB	2018	222788
rnna	ALB	2019	227805
rnna	ARE	1970	411435
rnna	ARE	1971	429071
rnna	ARE	1972	455644
rnna	ARE	1973	473551
rnna	ARE	1974	485428
rnna	ARE	1975	536809
rnna	ARE	1976	599646
rnna	ARE	1977	689038
rnna	ARE	1978	794961
rnna	ARE	1979	898561
rnna	ARE	1980	995415
rnna	ARE	1981	1.08468e+06
rnna	ARE	1982	1.17166e+06
rnna	ARE	1983	1.2596e+06
rnna	ARE	1984	1.34311e+06
rnna	ARE	1985	1.40578e+06
rnna	ARE	1986	1.46343e+06
rnna	ARE	1987	1.50414e+06
rnna	ARE	1988	1.54414e+06
rnna	ARE	1989	1.58753e+06
rnna	ARE	1990	1.6363e+06
rnna	ARE	1991	1.69025e+06
rnna	ARE	1992	1.75697e+06
rnna	ARE	1993	1.78558e+06
rnna	ARE	1994	1.82638e+06
rnna	ARE	1995	1.87279e+06
rnna	ARE	1996	1.92289e+06
rnna	ARE	1997	1.9782e+06
rnna	ARE	1998	2.03407e+06
rnna	ARE	1999	2.09168e+06
rnna	ARE	2000	2.15336e+06
rnna	ARE	2001	2.21324e+06
rnna	ARE	2002	2.27713e+06
rnna	ARE	2003	2.34762e+06
rnna	ARE	2004	2.41831e+06
rnna	ARE	2005	2.50667e+06
rnna	ARE	2006	2.61474e+06
rnna	ARE	2007	2797278
rnna	ARE	2008	2.97064e+06
rnna	ARE	2009	3.15909e+06
rnna	ARE	2010	3.31254e+06
rnna	ARE	2011	3.47032e+06
rnna	ARE	2012	3.61248e+06
rnna	ARE	2013	3.73214e+06
rnna	ARE	2014	3873116
rnna	ARE	2015	4.01923e+06
rnna	ARE	2016	4183935
rnna	ARE	2017	4.28727e+06
rnna	ARE	2018	4397732
rnna	ARE	2019	4506529
rnna	ARG	1950	360603
rnna	ARG	1951	395940
rnna	ARG	1952	422139
rnna	ARG	1953	450224
rnna	ARG	1954	475600
rnna	ARG	1955	505330
rnna	ARG	1956	530531
rnna	ARG	1957	559220
rnna	ARG	1958	591008
rnna	ARG	1959	616087
rnna	ARG	1960	664213
rnna	ARG	1961	714516
rnna	ARG	1962	752595
rnna	ARG	1963	774721
rnna	ARG	1964	812757
rnna	ARG	1965	851048
rnna	ARG	1966	883976
rnna	ARG	1967	918023
rnna	ARG	1968	957269
rnna	ARG	1969	1.01361e+06
rnna	ARG	1970	1.0691e+06
rnna	ARG	1971	1.1299e+06
rnna	ARG	1972	1.18867e+06
rnna	ARG	1973	1.23649e+06
rnna	ARG	1974	1.28595e+06
rnna	ARG	1975	1.33375e+06
rnna	ARG	1976	1.39029e+06
rnna	ARG	1977	1.46731e+06
rnna	ARG	1978	1.5225e+06
rnna	ARG	1979	1.58374e+06
rnna	ARG	1980	1.64804e+06
rnna	ARG	1981	1.69098e+06
rnna	ARG	1982	1712746
rnna	ARG	1983	1.73566e+06
rnna	ARG	1984	1755388
rnna	ARG	1985	1.76406e+06
rnna	ARG	1986	1.78108e+06
rnna	ARG	1987	1.80836e+06
rnna	ARG	1988	1.83247e+06
rnna	ARG	1989	1838712
rnna	ARG	1990	1835794
rnna	ARG	1991	1.85099e+06
rnna	ARG	1992	1.88946e+06
rnna	ARG	1993	1940462
rnna	ARG	1994	2002753
rnna	ARG	1995	2.04442e+06
rnna	ARG	1996	2093007
rnna	ARG	1997	2.15892e+06
rnna	ARG	1998	2.22912e+06
rnna	ARG	1999	2.27661e+06
rnna	ARG	2000	2313178
rnna	ARG	2001	2.33054e+06
rnna	ARG	2002	2.3102e+06
rnna	ARG	2003	2.31583e+06
rnna	ARG	2004	2.35352e+06
rnna	ARG	2005	2.40699e+06
rnna	ARG	2006	2.47505e+06
rnna	ARG	2007	2.56744e+06
rnna	ARG	2008	2665784
rnna	ARG	2009	2.7147e+06
rnna	ARG	2010	2.79708e+06
rnna	ARG	2011	2901287
rnna	ARG	2012	2.98263e+06
rnna	ARG	2013	3.06299e+06
rnna	ARG	2014	3.12671e+06
rnna	ARG	2015	3193485
rnna	ARG	2016	3.24654e+06
rnna	ARG	2017	3.31664e+06
rnna	ARG	2018	3.37281e+06
rnna	ARG	2019	3.39915e+06
rnna	ARM	1990	48186.5
rnna	ARM	1991	49834.5
rnna	ARM	1992	49188.8
rnna	ARM	1993	48231
rnna	ARM	1994	47964.2
rnna	ARM	1995	47554.2
rnna	ARM	1996	47330
rnna	ARM	1997	47190.2
rnna	ARM	1998	47270.5
rnna	ARM	1999	47391.9
rnna	ARM	2000	47747.7
rnna	ARM	2001	48192.9
rnna	ARM	2002	49242.1
rnna	ARM	2003	50928.7
rnna	ARM	2004	53145.9
rnna	ARM	2005	56348.8
rnna	ARM	2006	61026.5
rnna	ARM	2007	66674.1
rnna	ARM	2008	72985.8
rnna	ARM	2009	76998
rnna	ARM	2010	80693.2
rnna	ARM	2011	83560.6
rnna	ARM	2012	86210.8
rnna	ARM	2013	88388.2
rnna	ARM	2014	90360
rnna	ARM	2015	92338
rnna	ARM	2016	93674.6
rnna	ARM	2017	95323.9
rnna	ARM	2018	97052.5
rnna	ARM	2019	98812.8
rnna	ATG	1970	2167.82
rnna	ATG	1971	2180.77
rnna	ATG	1972	2194.02
rnna	ATG	1973	2208.81
rnna	ATG	1974	2232.63
rnna	ATG	1975	2249.48
rnna	ATG	1976	2256.78
rnna	ATG	1977	2239.1
rnna	ATG	1978	2219.12
rnna	ATG	1979	2284.49
rnna	ATG	1980	2332.03
rnna	ATG	1981	2389.26
rnna	ATG	1982	2382.4
rnna	ATG	1983	2370.19
rnna	ATG	1984	2388.34
rnna	ATG	1985	2433.19
rnna	ATG	1986	2525.35
rnna	ATG	1987	2682.04
rnna	ATG	1988	2877.67
rnna	ATG	1989	3103.9
rnna	ATG	1990	3276.31
rnna	ATG	1991	3459.59
rnna	ATG	1992	3610.5
rnna	ATG	1993	3733.05
rnna	ATG	1994	3861.82
rnna	ATG	1995	4004.21
rnna	ATG	1996	4172.27
rnna	ATG	1997	4359.87
rnna	ATG	1998	4582.69
rnna	ATG	1999	4824.24
rnna	ATG	2000	5076.48
rnna	ATG	2001	5156.8
rnna	ATG	2002	5273.43
rnna	ATG	2003	5436.17
rnna	ATG	2004	5627.16
rnna	ATG	2005	5901.95
rnna	ATG	2006	6421.24
rnna	ATG	2007	7011.5
rnna	ATG	2008	7589.05
rnna	ATG	2009	8058.98
rnna	ATG	2010	8279.3
rnna	ATG	2011	8353.72
rnna	ATG	2012	8481.08
rnna	ATG	2013	8656.77
rnna	ATG	2014	8887.13
rnna	ATG	2015	9132.25
rnna	ATG	2016	9417.61
rnna	ATG	2017	9718.63
rnna	ATG	2018	10396.4
rnna	ATG	2019	10993.4
rnna	AUS	1950	639991
rnna	AUS	1951	690114
rnna	AUS	1952	704562
rnna	AUS	1953	733107
rnna	AUS	1954	771454
rnna	AUS	1955	810404
rnna	AUS	1956	838408
rnna	AUS	1957	867267
rnna	AUS	1958	905469
rnna	AUS	1959	947253
rnna	AUS	1960	989917
rnna	AUS	1961	1.02095e+06
rnna	AUS	1962	1.06109e+06
rnna	AUS	1963	1.10249e+06
rnna	AUS	1964	1152809
rnna	AUS	1965	1.19697e+06
rnna	AUS	1966	1.24498e+06
rnna	AUS	1967	1.29392e+06
rnna	AUS	1968	1.3522e+06
rnna	AUS	1969	1.41403e+06
rnna	AUS	1970	1.4736e+06
rnna	AUS	1971	1533065
rnna	AUS	1972	1.59298e+06
rnna	AUS	1973	1.65511e+06
rnna	AUS	1974	1.70517e+06
rnna	AUS	1975	1.7572e+06
rnna	AUS	1976	1.81156e+06
rnna	AUS	1977	1.86768e+06
rnna	AUS	1978	1.93224e+06
rnna	AUS	1979	1.99503e+06
rnna	AUS	1980	2.06998e+06
rnna	AUS	1981	2.14918e+06
rnna	AUS	1982	2.20701e+06
rnna	AUS	1983	2.26768e+06
rnna	AUS	1984	2.3369e+06
rnna	AUS	1985	2.40909e+06
rnna	AUS	1986	2475880
rnna	AUS	1987	2.54897e+06
rnna	AUS	1988	2.63367e+06
rnna	AUS	1989	2712928
rnna	AUS	1990	2.76951e+06
rnna	AUS	1991	2.81645e+06
rnna	AUS	1992	2.87062e+06
rnna	AUS	1993	2930325
rnna	AUS	1994	3.00398e+06
rnna	AUS	1995	3076581
rnna	AUS	1996	3.15446e+06
rnna	AUS	1997	3.24256e+06
rnna	AUS	1998	3.33068e+06
rnna	AUS	1999	3.42686e+06
rnna	AUS	2000	3.49769e+06
rnna	AUS	2001	3.58011e+06
rnna	AUS	2002	3.68122e+06
rnna	AUS	2003	3793366
rnna	AUS	2004	3.91028e+06
rnna	AUS	2005	4.03803e+06
rnna	AUS	2006	4.16799e+06
rnna	AUS	2007	4311797
rnna	AUS	2008	4450216
rnna	AUS	2009	4.58547e+06
rnna	AUS	2010	4723137
rnna	AUS	2011	4.88694e+06
rnna	AUS	2012	5.05175e+06
rnna	AUS	2013	5.20316e+06
rnna	AUS	2014	5.33663e+06
rnna	AUS	2015	5454116
rnna	AUS	2016	5568053
rnna	AUS	2017	5.69332e+06
rnna	AUS	2018	5809769
rnna	AUS	2019	5913514
rnna	AUT	1950	336700
rnna	AUT	1951	351388
rnna	AUT	1952	359219
rnna	AUT	1953	361311
rnna	AUT	1954	369493
rnna	AUT	1955	386548
rnna	AUT	1956	400127
rnna	AUT	1957	414914
rnna	AUT	1958	429005
rnna	AUT	1959	443596
rnna	AUT	1960	467950
rnna	AUT	1961	492992
rnna	AUT	1962	514682
rnna	AUT	1963	536423
rnna	AUT	1964	565437
rnna	AUT	1965	594206
rnna	AUT	1966	628173
rnna	AUT	1967	659229
rnna	AUT	1968	691860
rnna	AUT	1969	727195
rnna	AUT	1970	770422
rnna	AUT	1971	821695
rnna	AUT	1972	880090
rnna	AUT	1973	935397
rnna	AUT	1974	991545
rnna	AUT	1975	1.03995e+06
rnna	AUT	1976	1.08944e+06
rnna	AUT	1977	1.14472e+06
rnna	AUT	1978	1.19033e+06
rnna	AUT	1979	1.23956e+06
rnna	AUT	1980	1.28957e+06
rnna	AUT	1981	1.33671e+06
rnna	AUT	1982	1.37299e+06
rnna	AUT	1983	1.40755e+06
rnna	AUT	1984	1440378
rnna	AUT	1985	1.47725e+06
rnna	AUT	1986	1.51392e+06
rnna	AUT	1987	1.55296e+06
rnna	AUT	1988	1.5971e+06
rnna	AUT	1989	1.64335e+06
rnna	AUT	1990	1.69278e+06
rnna	AUT	1991	1.74867e+06
rnna	AUT	1992	1.80117e+06
rnna	AUT	1993	1.84942e+06
rnna	AUT	1994	1.90188e+06
rnna	AUT	1995	1951910
rnna	AUT	1996	2.00496e+06
rnna	AUT	1997	2.05591e+06
rnna	AUT	1998	2.10809e+06
rnna	AUT	1999	2.15802e+06
rnna	AUT	2000	2.21196e+06
rnna	AUT	2001	2.26006e+06
rnna	AUT	2002	2.30015e+06
rnna	AUT	2003	2.34247e+06
rnna	AUT	2004	2.38323e+06
rnna	AUT	2005	2.42175e+06
rnna	AUT	2006	2.45952e+06
rnna	AUT	2007	2.50137e+06
rnna	AUT	2008	2.54275e+06
rnna	AUT	2009	2.57116e+06
rnna	AUT	2010	2.59457e+06
rnna	AUT	2011	2624820
rnna	AUT	2012	2.65403e+06
rnna	AUT	2013	2.68317e+06
rnna	AUT	2014	2.70958e+06
rnna	AUT	2015	2737205
rnna	AUT	2016	2.76828e+06
rnna	AUT	2017	2.80226e+06
rnna	AUT	2018	2.83884e+06
rnna	AUT	2019	2.87811e+06
rnna	AZE	1990	67479.4
rnna	AZE	1991	67142.1
rnna	AZE	1992	67990.7
rnna	AZE	1993	67939.4
rnna	AZE	1994	68004.7
rnna	AZE	1995	66896.1
rnna	AZE	1996	67133.4
rnna	AZE	1997	68314.3
rnna	AZE	1998	70293.5
rnna	AZE	1999	72087.1
rnna	AZE	2000	73861.9
rnna	AZE	2001	76304.1
rnna	AZE	2002	80057.4
rnna	AZE	2003	85811.7
rnna	AZE	2004	91594.5
rnna	AZE	2005	97621
rnna	AZE	2006	105547
rnna	AZE	2007	113445
rnna	AZE	2008	123455
rnna	AZE	2009	131845
rnna	AZE	2010	140741
rnna	AZE	2011	154715
rnna	AZE	2012	170581
rnna	AZE	2013	190610
rnna	AZE	2014	211835
rnna	AZE	2015	229176
rnna	AZE	2016	241648
rnna	AZE	2017	253676
rnna	AZE	2018	264709
rnna	AZE	2019	275832
rnna	BDI	1960	5602.16
rnna	BDI	1961	5510.44
rnna	BDI	1962	5447.28
rnna	BDI	1963	5366.85
rnna	BDI	1964	5286.87
rnna	BDI	1965	5228.53
rnna	BDI	1966	5207.58
rnna	BDI	1967	5207.38
rnna	BDI	1968	5241.9
rnna	BDI	1969	5275.26
rnna	BDI	1970	5242.13
rnna	BDI	1971	5333.28
rnna	BDI	1972	5238.87
rnna	BDI	1973	5238.9
rnna	BDI	1974	5355.91
rnna	BDI	1975	5390.39
rnna	BDI	1976	5525.23
rnna	BDI	1977	5797.62
rnna	BDI	1978	6128.22
rnna	BDI	1979	6470.38
rnna	BDI	1980	6779.8
rnna	BDI	1981	7192.5
rnna	BDI	1982	7614.13
rnna	BDI	1983	8118.56
rnna	BDI	1984	8670.67
rnna	BDI	1985	9124.61
rnna	BDI	1986	9583.92
rnna	BDI	1987	10016.7
rnna	BDI	1988	10160.7
rnna	BDI	1989	10358.5
rnna	BDI	1990	10292.3
rnna	BDI	1991	10239.5
rnna	BDI	1992	10238.1
rnna	BDI	1993	10299.6
rnna	BDI	1994	10195
rnna	BDI	1995	10085.9
rnna	BDI	1996	10064.6
rnna	BDI	1997	10038.9
rnna	BDI	1998	10043.2
rnna	BDI	1999	10396.4
rnna	BDI	2000	10377.5
rnna	BDI	2001	10408.8
rnna	BDI	2002	10456.3
rnna	BDI	2003	10795
rnna	BDI	2004	11294.9
rnna	BDI	2005	11631.9
rnna	BDI	2006	11937.5
rnna	BDI	2007	12210.2
rnna	BDI	2008	12491.1
rnna	BDI	2009	12957.3
rnna	BDI	2010	13559.5
rnna	BDI	2011	14167.8
rnna	BDI	2012	14768.8
rnna	BDI	2013	15361.7
rnna	BDI	2014	16005
rnna	BDI	2015	16461.5
rnna	BDI	2016	16948.2
rnna	BDI	2017	17445.5
rnna	BDI	2018	18189.8
rnna	BDI	2019	18936
rnna	BEL	1950	715409
rnna	BEL	1951	731287
rnna	BEL	1952	746504
rnna	BEL	1953	762698
rnna	BEL	1954	783743
rnna	BEL	1955	803018
rnna	BEL	1956	828550
rnna	BEL	1957	852395
rnna	BEL	1958	866390
rnna	BEL	1959	887441
rnna	BEL	1960	912627
rnna	BEL	1961	945409
rnna	BEL	1962	979162
rnna	BEL	1963	1.01101e+06
rnna	BEL	1964	1056853
rnna	BEL	1965	1.1003e+06
rnna	BEL	1966	1149124
rnna	BEL	1967	1195806
rnna	BEL	1968	1.24076e+06
rnna	BEL	1969	1.29327e+06
rnna	BEL	1970	1351375
rnna	BEL	1971	1.40356e+06
rnna	BEL	1972	1.4561e+06
rnna	BEL	1973	1.5125e+06
rnna	BEL	1974	1.57215e+06
rnna	BEL	1975	1.62487e+06
rnna	BEL	1976	1.67817e+06
rnna	BEL	1977	1.7278e+06
rnna	BEL	1978	1.77681e+06
rnna	BEL	1979	1.81784e+06
rnna	BEL	1980	1.87139e+06
rnna	BEL	1981	1.89687e+06
rnna	BEL	1982	1.91684e+06
rnna	BEL	1983	1930552
rnna	BEL	1984	1.946e+06
rnna	BEL	1985	1.9645e+06
rnna	BEL	1986	1.98463e+06
rnna	BEL	1987	2008635
rnna	BEL	1988	2.0484e+06
rnna	BEL	1989	2.09951e+06
rnna	BEL	1990	2157779
rnna	BEL	1991	2.20542e+06
rnna	BEL	1992	2.25161e+06
rnna	BEL	1993	2.29166e+06
rnna	BEL	1994	2330652
rnna	BEL	1995	2.3727e+06
rnna	BEL	1996	2412940
rnna	BEL	1997	2.4593e+06
rnna	BEL	1998	2.50493e+06
rnna	BEL	1999	2.55205e+06
rnna	BEL	2000	2.60196e+06
rnna	BEL	2001	2.64939e+06
rnna	BEL	2002	2685413
rnna	BEL	2003	2.71806e+06
rnna	BEL	2004	2761351
rnna	BEL	2005	2.81017e+06
rnna	BEL	2006	2.85802e+06
rnna	BEL	2007	2.91418e+06
rnna	BEL	2008	2.96963e+06
rnna	BEL	2009	3.01039e+06
rnna	BEL	2010	3.04958e+06
rnna	BEL	2011	3.09537e+06
rnna	BEL	2012	3.14017e+06
rnna	BEL	2013	3179373
rnna	BEL	2014	3.22579e+06
rnna	BEL	2015	3.27599e+06
rnna	BEL	2016	3330369
rnna	BEL	2017	3.38357e+06
rnna	BEL	2018	3.43959e+06
rnna	BEL	2019	3.49844e+06
rnna	BEN	1959	7526.52
rnna	BEN	1960	8398.79
rnna	BEN	1961	9217.21
rnna	BEN	1962	9975.42
rnna	BEN	1963	10799.9
rnna	BEN	1964	11461.5
rnna	BEN	1965	12037.7
rnna	BEN	1966	12638
rnna	BEN	1967	13606.5
rnna	BEN	1968	14656.4
rnna	BEN	1969	15734.1
rnna	BEN	1970	16648.3
rnna	BEN	1971	17576.6
rnna	BEN	1972	19014.7
rnna	BEN	1973	20136.8
rnna	BEN	1974	21356.5
rnna	BEN	1975	22464.9
rnna	BEN	1976	23105.1
rnna	BEN	1977	23681.1
rnna	BEN	1978	24089.4
rnna	BEN	1979	25288.7
rnna	BEN	1980	26568.8
rnna	BEN	1981	27636.2
rnna	BEN	1982	29815.7
rnna	BEN	1983	30412.8
rnna	BEN	1984	30600.8
rnna	BEN	1985	30366
rnna	BEN	1986	30521.8
rnna	BEN	1987	30853.2
rnna	BEN	1988	30885.1
rnna	BEN	1989	30881
rnna	BEN	1990	31123.1
rnna	BEN	1991	31478.8
rnna	BEN	1992	31895.3
rnna	BEN	1993	32403.3
rnna	BEN	1994	32818.4
rnna	BEN	1995	33462.8
rnna	BEN	1996	34078.4
rnna	BEN	1997	34823.5
rnna	BEN	1998	35588.4
rnna	BEN	1999	36437.9
rnna	BEN	2000	37200.7
rnna	BEN	2001	38296
rnna	BEN	2002	39228.3
rnna	BEN	2003	40348.7
rnna	BEN	2004	41309.1
rnna	BEN	2005	42059.4
rnna	BEN	2006	42767.9
rnna	BEN	2007	44109.6
rnna	BEN	2008	45445.7
rnna	BEN	2009	46962.7
rnna	BEN	2010	48786.5
rnna	BEN	2011	50878.2
rnna	BEN	2012	53159.9
rnna	BEN	2013	57517.3
rnna	BEN	2014	61714.5
rnna	BEN	2015	65726.5
rnna	BEN	2016	69553
rnna	BEN	2017	74870.3
rnna	BEN	2018	81241.4
rnna	BEN	2019	88271.8
rnna	BFA	1959	2497.68
rnna	BFA	1960	2494.8
rnna	BFA	1961	2518.11
rnna	BFA	1962	2555.05
rnna	BFA	1963	2583.96
rnna	BFA	1964	2616.37
rnna	BFA	1965	2707.84
rnna	BFA	1966	2794.18
rnna	BFA	1967	2864.11
rnna	BFA	1968	2940.67
rnna	BFA	1969	3052.14
rnna	BFA	1970	3167.73
rnna	BFA	1971	3680.5
rnna	BFA	1972	3950.43
rnna	BFA	1973	4289.91
rnna	BFA	1974	4688.4
rnna	BFA	1975	5001.24
rnna	BFA	1976	5291.21
rnna	BFA	1977	5563.2
rnna	BFA	1978	5857.56
rnna	BFA	1979	6707.37
rnna	BFA	1980	7417.6
rnna	BFA	1981	8156.28
rnna	BFA	1982	8919.93
rnna	BFA	1983	9537.96
rnna	BFA	1984	10098.3
rnna	BFA	1985	11026.4
rnna	BFA	1986	11907.9
rnna	BFA	1987	12823.8
rnna	BFA	1988	13713.9
rnna	BFA	1989	14754
rnna	BFA	1990	15618.3
rnna	BFA	1991	16672.4
rnna	BFA	1992	17632.1
rnna	BFA	1993	18521
rnna	BFA	1994	19741.6
rnna	BFA	1995	20750.1
rnna	BFA	1996	21835.8
rnna	BFA	1997	23094.8
rnna	BFA	1998	24243.6
rnna	BFA	1999	25212.4
rnna	BFA	2000	26108.6
rnna	BFA	2001	26904.3
rnna	BFA	2002	27738.3
rnna	BFA	2003	28789.1
rnna	BFA	2004	30105.4
rnna	BFA	2005	31634.7
rnna	BFA	2006	33317.4
rnna	BFA	2007	35326.6
rnna	BFA	2008	37364.7
rnna	BFA	2009	39933.1
rnna	BFA	2010	43073.9
rnna	BFA	2011	46767
rnna	BFA	2012	51008.8
rnna	BFA	2013	55496.3
rnna	BFA	2014	58780.9
rnna	BFA	2015	62797.2
rnna	BFA	2016	67448
rnna	BFA	2017	72456.4
rnna	BFA	2018	78982.2
rnna	BFA	2019	86734.5
rnna	BGD	1959	123809
rnna	BGD	1960	122373
rnna	BGD	1961	121768
rnna	BGD	1962	123743
rnna	BGD	1963	124205
rnna	BGD	1964	125965
rnna	BGD	1965	128423
rnna	BGD	1966	131082
rnna	BGD	1967	134585
rnna	BGD	1968	140704
rnna	BGD	1969	145745
rnna	BGD	1970	149870
rnna	BGD	1971	151644
rnna	BGD	1972	149593
rnna	BGD	1973	150764
rnna	BGD	1974	160716
rnna	BGD	1975	166602
rnna	BGD	1976	174043
rnna	BGD	1977	184290
rnna	BGD	1978	197911
rnna	BGD	1979	212717
rnna	BGD	1980	231999
rnna	BGD	1981	250878
rnna	BGD	1982	264532
rnna	BGD	1983	277912
rnna	BGD	1984	292412
rnna	BGD	1985	307613
rnna	BGD	1986	335784
rnna	BGD	1987	353070
rnna	BGD	1988	367368
rnna	BGD	1989	382342
rnna	BGD	1990	397158
rnna	BGD	1991	409119
rnna	BGD	1992	423664
rnna	BGD	1993	441010
rnna	BGD	1994	461140
rnna	BGD	1995	484053
rnna	BGD	1996	510506
rnna	BGD	1997	540778
rnna	BGD	1998	575615
rnna	BGD	1999	614655
rnna	BGD	2000	656721
rnna	BGD	2001	700188
rnna	BGD	2002	747268
rnna	BGD	2003	798756
rnna	BGD	2004	856532
rnna	BGD	2005	923092
rnna	BGD	2006	995964
rnna	BGD	2007	1.07408e+06
rnna	BGD	2008	1.16149e+06
rnna	BGD	2009	1.25555e+06
rnna	BGD	2010	1.35809e+06
rnna	BGD	2011	1.47117e+06
rnna	BGD	2012	1597954
rnna	BGD	2013	1.72999e+06
rnna	BGD	2014	1.87703e+06
rnna	BGD	2015	2.03477e+06
rnna	BGD	2016	2.20766e+06
rnna	BGD	2017	2399446
rnna	BGD	2018	2.61296e+06
rnna	BGD	2019	2.84418e+06
rnna	BGR	1970	41797.9
rnna	BGR	1971	46234.8
rnna	BGR	1972	50673.4
rnna	BGR	1973	55209.1
rnna	BGR	1974	59880.6
rnna	BGR	1975	64830.9
rnna	BGR	1976	69803.6
rnna	BGR	1977	75029.5
rnna	BGR	1978	80363.1
rnna	BGR	1979	85368.1
rnna	BGR	1980	91450.6
rnna	BGR	1981	97293.1
rnna	BGR	1982	102866
rnna	BGR	1983	108106
rnna	BGR	1984	112856
rnna	BGR	1985	117961
rnna	BGR	1986	123462
rnna	BGR	1987	129238
rnna	BGR	1988	136448
rnna	BGR	1989	143273
rnna	BGR	1990	144311
rnna	BGR	1991	143386
rnna	BGR	1992	142136
rnna	BGR	1993	139908
rnna	BGR	1994	138177
rnna	BGR	1995	141861
rnna	BGR	1996	137847
rnna	BGR	1997	140337
rnna	BGR	1998	146018
rnna	BGR	1999	153817
rnna	BGR	2000	163220
rnna	BGR	2001	174758
rnna	BGR	2002	186212
rnna	BGR	2003	198776
rnna	BGR	2004	213193
rnna	BGR	2005	233177
rnna	BGR	2006	255688
rnna	BGR	2007	281102
rnna	BGR	2008	313376
rnna	BGR	2009	335433
rnna	BGR	2010	349860
rnna	BGR	2011	362414
rnna	BGR	2012	374976
rnna	BGR	2013	387191
rnna	BGR	2014	399927
rnna	BGR	2015	412932
rnna	BGR	2016	423076
rnna	BGR	2017	433697
rnna	BGR	2018	445279
rnna	BGR	2019	456857
rnna	BHR	1970	25391.5
rnna	BHR	1971	27585.8
rnna	BHR	1972	29776.7
rnna	BHR	1973	32714.5
rnna	BHR	1974	36205.8
rnna	BHR	1975	37563.4
rnna	BHR	1976	42811.2
rnna	BHR	1977	48787.2
rnna	BHR	1978	52361.6
rnna	BHR	1979	57300.7
rnna	BHR	1980	61486.4
rnna	BHR	1981	65495.6
rnna	BHR	1982	71012.8
rnna	BHR	1983	79403.7
rnna	BHR	1984	88443.9
rnna	BHR	1985	91441.1
rnna	BHR	1986	94113.2
rnna	BHR	1987	96153.8
rnna	BHR	1988	98974.8
rnna	BHR	1989	102443
rnna	BHR	1990	106129
rnna	BHR	1991	110769
rnna	BHR	1992	115993
rnna	BHR	1993	122061
rnna	BHR	1994	126878
rnna	BHR	1995	130070
rnna	BHR	1996	133334
rnna	BHR	1997	137992
rnna	BHR	1998	142377
rnna	BHR	1999	144937
rnna	BHR	2000	149209
rnna	BHR	2001	152399
rnna	BHR	2002	158228
rnna	BHR	2003	165313
rnna	BHR	2004	171578
rnna	BHR	2005	181149
rnna	BHR	2006	194072
rnna	BHR	2007	213719
rnna	BHR	2008	237343
rnna	BHR	2009	250758
rnna	BHR	2010	266956
rnna	BHR	2011	279547
rnna	BHR	2012	293979
rnna	BHR	2013	312028
rnna	BHR	2014	330886
rnna	BHR	2015	346387
rnna	BHR	2016	364404
rnna	BHR	2017	384923
rnna	BHR	2018	407607
rnna	BHR	2019	429311
rnna	BHS	1970	6023.11
rnna	BHS	1971	6370.19
rnna	BHS	1972	6675.21
rnna	BHS	1973	7008.13
rnna	BHS	1974	7234
rnna	BHS	1975	7367.54
rnna	BHS	1976	7526.02
rnna	BHS	1977	7747.04
rnna	BHS	1978	7938.79
rnna	BHS	1979	8325.24
rnna	BHS	1980	8972.92
rnna	BHS	1981	9603.66
rnna	BHS	1982	10397.6
rnna	BHS	1983	11151.2
rnna	BHS	1984	11881.1
rnna	BHS	1985	12807.7
rnna	BHS	1986	13681.9
rnna	BHS	1987	14725.4
rnna	BHS	1988	15687.1
rnna	BHS	1989	17490.2
rnna	BHS	1990	18999.6
rnna	BHS	1991	20319.9
rnna	BHS	1992	21566
rnna	BHS	1993	22287.9
rnna	BHS	1994	23306.7
rnna	BHS	1995	24471
rnna	BHS	1996	25860.8
rnna	BHS	1997	28082.2
rnna	BHS	1998	31028.7
rnna	BHS	1999	33239.8
rnna	BHS	2000	35907.8
rnna	BHS	2001	37890.3
rnna	BHS	2002	39877.3
rnna	BHS	2003	41976.4
rnna	BHS	2004	43592.4
rnna	BHS	2005	46007.3
rnna	BHS	2006	49248.3
rnna	BHS	2007	52087
rnna	BHS	2008	54329.2
rnna	BHS	2009	55821.5
rnna	BHS	2010	56999.3
rnna	BHS	2011	58778.9
rnna	BHS	2012	61712
rnna	BHS	2013	63978.8
rnna	BHS	2014	66829.3
rnna	BHS	2015	68520.7
rnna	BHS	2016	70457.6
rnna	BHS	2017	72809.6
rnna	BHS	2018	74822.6
rnna	BHS	2019	77112.6
rnna	BIH	1990	24877.3
rnna	BIH	1991	25514.5
rnna	BIH	1992	25807
rnna	BIH	1993	26254.9
rnna	BIH	1994	27013.8
rnna	BIH	1995	26838.2
rnna	BIH	1996	30900.9
rnna	BIH	1997	36408.8
rnna	BIH	1998	42168.8
rnna	BIH	1999	46666.5
rnna	BIH	2000	51066.7
rnna	BIH	2001	55098.3
rnna	BIH	2002	59965
rnna	BIH	2003	64906.1
rnna	BIH	2004	69307.1
rnna	BIH	2005	75132.8
rnna	BIH	2006	79590.1
rnna	BIH	2007	85761.5
rnna	BIH	2008	93164.6
rnna	BIH	2009	97677.8
rnna	BIH	2010	100913
rnna	BIH	2011	104567
rnna	BIH	2012	108204
rnna	BIH	2013	111522
rnna	BIH	2014	115785
rnna	BIH	2015	119484
rnna	BIH	2016	123538
rnna	BIH	2017	128191
rnna	BIH	2018	133477
rnna	BIH	2019	138892
rnna	BLR	1990	355918
rnna	BLR	1991	367301
rnna	BLR	1992	373934
rnna	BLR	1993	379134
rnna	BLR	1994	381895
rnna	BLR	1995	380060
rnna	BLR	1996	378129
rnna	BLR	1997	378764
rnna	BLR	1998	380643
rnna	BLR	1999	381026
rnna	BLR	2000	381292
rnna	BLR	2001	381005
rnna	BLR	2002	381484
rnna	BLR	2003	384457
rnna	BLR	2004	389895
rnna	BLR	2005	398058
rnna	BLR	2006	411770
rnna	BLR	2007	428139
rnna	BLR	2008	450035
rnna	BLR	2009	471829
rnna	BLR	2010	499245
rnna	BLR	2011	530931
rnna	BLR	2012	554218
rnna	BLR	2013	580529
rnna	BLR	2014	602868
rnna	BLR	2015	617035
rnna	BLR	2016	625025
rnna	BLR	2017	634667
rnna	BLR	2018	645298
rnna	BLR	2019	659330
rnna	BLZ	1970	2096.56
rnna	BLZ	1971	2206.8
rnna	BLZ	1972	2313.95
rnna	BLZ	1973	2408.97
rnna	BLZ	1974	2512.1
rnna	BLZ	1975	2607.24
rnna	BLZ	1976	2696.36
rnna	BLZ	1977	2777.79
rnna	BLZ	1978	2876.13
rnna	BLZ	1979	2991.54
rnna	BLZ	1980	3052.33
rnna	BLZ	1981	3115.29
rnna	BLZ	1982	3130.53
rnna	BLZ	1983	3118.4
rnna	BLZ	1984	3139.41
rnna	BLZ	1985	3134.55
rnna	BLZ	1986	3148.71
rnna	BLZ	1987	3247.06
rnna	BLZ	1988	3423.21
rnna	BLZ	1989	3644.31
rnna	BLZ	1990	3861.58
rnna	BLZ	1991	4126.65
rnna	BLZ	1992	4392.4
rnna	BLZ	1993	4714.13
rnna	BLZ	1994	4864.73
rnna	BLZ	1995	5041.89
rnna	BLZ	1996	5174.64
rnna	BLZ	1997	5295.58
rnna	BLZ	1998	5401.87
rnna	BLZ	1999	5665.85
rnna	BLZ	2000	6092.02
rnna	BLZ	2001	6428.96
rnna	BLZ	2002	6700.66
rnna	BLZ	2003	6860.4
rnna	BLZ	2004	6982.42
rnna	BLZ	2005	7143.38
rnna	BLZ	2006	7304.36
rnna	BLZ	2007	7476.06
rnna	BLZ	2008	7803.2
rnna	BLZ	2009	7962.62
rnna	BLZ	2010	7990.76
rnna	BLZ	2011	8024.27
rnna	BLZ	2012	8066.35
rnna	BLZ	2013	8230.33
rnna	BLZ	2014	8424.73
rnna	BLZ	2015	8763.81
rnna	BLZ	2016	9139.44
rnna	BLZ	2017	9398.06
rnna	BLZ	2018	9692.22
rnna	BLZ	2019	9975.78
rnna	BMU	1970	7560.21
rnna	BMU	1971	7652.86
rnna	BMU	1972	7713.2
rnna	BMU	1973	7758.17
rnna	BMU	1974	7794.86
rnna	BMU	1975	7848.26
rnna	BMU	1976	7846.28
rnna	BMU	1977	7889.25
rnna	BMU	1978	7940.73
rnna	BMU	1979	8026.94
rnna	BMU	1980	8196.73
rnna	BMU	1981	8304.34
rnna	BMU	1982	8498.12
rnna	BMU	1983	8692.7
rnna	BMU	1984	8937.63
rnna	BMU	1985	9113.74
rnna	BMU	1986	9184.34
rnna	BMU	1987	9285.71
rnna	BMU	1988	9495.68
rnna	BMU	1989	9589.61
rnna	BMU	1990	9561.1
rnna	BMU	1991	9470.18
rnna	BMU	1992	9383.42
rnna	BMU	1993	9304.7
rnna	BMU	1994	9207.64
rnna	BMU	1995	9132.69
rnna	BMU	1996	9148.91
rnna	BMU	1997	9213.39
rnna	BMU	1998	9409
rnna	BMU	1999	9640.01
rnna	BMU	2000	9872.13
rnna	BMU	2001	10080.3
rnna	BMU	2002	10082.6
rnna	BMU	2003	10019.8
rnna	BMU	2004	10181.4
rnna	BMU	2005	10336.6
rnna	BMU	2006	10420.7
rnna	BMU	2007	10532.3
rnna	BMU	2008	10785.4
rnna	BMU	2009	10875.8
rnna	BMU	2010	10868.8
rnna	BMU	2011	10819.8
rnna	BMU	2012	10719.7
rnna	BMU	2013	10649.9
rnna	BMU	2014	10663
rnna	BMU	2015	10702.2
rnna	BMU	2016	10830
rnna	BMU	2017	11038.2
rnna	BMU	2018	11220
rnna	BMU	2019	11500.5
rnna	BOL	1950	23013.1
rnna	BOL	1951	24886.8
rnna	BOL	1952	26624.2
rnna	BOL	1953	27232.7
rnna	BOL	1954	28382.1
rnna	BOL	1955	30830.2
rnna	BOL	1956	32834.5
rnna	BOL	1957	34554.9
rnna	BOL	1958	36052.7
rnna	BOL	1959	36959.1
rnna	BOL	1960	38618.7
rnna	BOL	1961	39705.2
rnna	BOL	1962	42445.4
rnna	BOL	1963	44708
rnna	BOL	1964	47193.8
rnna	BOL	1965	49251.1
rnna	BOL	1966	51315
rnna	BOL	1967	52991.9
rnna	BOL	1968	54641.6
rnna	BOL	1969	56190.2
rnna	BOL	1970	57641.9
rnna	BOL	1971	59428.3
rnna	BOL	1972	61584.4
rnna	BOL	1973	63280.1
rnna	BOL	1974	65086.3
rnna	BOL	1975	67607.5
rnna	BOL	1976	70135.1
rnna	BOL	1977	72807
rnna	BOL	1978	75824.1
rnna	BOL	1979	77965.4
rnna	BOL	1980	78484.6
rnna	BOL	1981	78835.6
rnna	BOL	1982	77982.5
rnna	BOL	1983	76858.4
rnna	BOL	1984	76205.5
rnna	BOL	1985	76268.2
rnna	BOL	1986	76569
rnna	BOL	1987	77051.9
rnna	BOL	1988	77639.2
rnna	BOL	1989	78169.6
rnna	BOL	1990	79215.3
rnna	BOL	1991	80982.3
rnna	BOL	1992	83190
rnna	BOL	1993	85353.9
rnna	BOL	1994	86887.1
rnna	BOL	1995	89053.6
rnna	BOL	1996	91763.2
rnna	BOL	1997	95975.3
rnna	BOL	1998	102057
rnna	BOL	1999	105951
rnna	BOL	2000	108732
rnna	BOL	2001	109614
rnna	BOL	2002	111830
rnna	BOL	2003	113255
rnna	BOL	2004	114612
rnna	BOL	2005	116363
rnna	BOL	2006	118679
rnna	BOL	2007	121889
rnna	BOL	2008	126650
rnna	BOL	2009	131330
rnna	BOL	2010	136505
rnna	BOL	2011	144130
rnna	BOL	2012	151351
rnna	BOL	2013	159745
rnna	BOL	2014	169170
rnna	BOL	2015	178621
rnna	BOL	2016	187615
rnna	BOL	2017	198068
rnna	BOL	2018	208226
rnna	BOL	2019	216664
rnna	BRA	1950	608567
rnna	BRA	1951	654280
rnna	BRA	1952	705852
rnna	BRA	1953	737951
rnna	BRA	1954	780612
rnna	BRA	1955	820627
rnna	BRA	1956	854692
rnna	BRA	1957	911217
rnna	BRA	1958	963159
rnna	BRA	1959	1.03387e+06
rnna	BRA	1960	1.09586e+06
rnna	BRA	1961	1.16481e+06
rnna	BRA	1962	1.23568e+06
rnna	BRA	1963	1.29081e+06
rnna	BRA	1964	1.3552e+06
rnna	BRA	1965	1.43144e+06
rnna	BRA	1966	1.51444e+06
rnna	BRA	1967	1.58504e+06
rnna	BRA	1968	1.68115e+06
rnna	BRA	1969	1.84078e+06
rnna	BRA	1970	1.99009e+06
rnna	BRA	1971	2.16565e+06
rnna	BRA	1972	2.37456e+06
rnna	BRA	1973	2636271
rnna	BRA	1974	2.93174e+06
rnna	BRA	1975	3.24959e+06
rnna	BRA	1976	3579852
rnna	BRA	1977	3.88371e+06
rnna	BRA	1978	4192358
rnna	BRA	1979	4.50158e+06
rnna	BRA	1980	4864919
rnna	BRA	1981	5.13443e+06
rnna	BRA	1982	5358612
rnna	BRA	1983	5497325
rnna	BRA	1984	5.63644e+06
rnna	BRA	1985	5812272
rnna	BRA	1986	6086334
rnna	BRA	1987	6344587
rnna	BRA	1988	6568494
rnna	BRA	1989	6.79252e+06
rnna	BRA	1990	6967859
rnna	BRA	1991	7.17598e+06
rnna	BRA	1992	7.34235e+06
rnna	BRA	1993	7532847
rnna	BRA	1994	7.78776e+06
rnna	BRA	1995	8.06433e+06
rnna	BRA	1996	8321744
rnna	BRA	1997	8609659
rnna	BRA	1998	8872492
rnna	BRA	1999	9062699
rnna	BRA	2000	9271773
rnna	BRA	2001	9471979
rnna	BRA	2002	9629394
rnna	BRA	2003	9753476
rnna	BRA	2004	9915966
rnna	BRA	2005	10079144
rnna	BRA	2006	10269699
rnna	BRA	2007	10518991
rnna	BRA	2008	10830965
rnna	BRA	2009	11097102
rnna	BRA	2010	11482913
rnna	BRA	2011	11900607
rnna	BRA	2012	12295923
rnna	BRA	2013	12723252
rnna	BRA	2014	13080525
rnna	BRA	2015	13283081
rnna	BRA	2016	13382091
rnna	BRA	2017	13467872
rnna	BRA	2018	13584285
rnna	BRA	2019	13716485
rnna	BRB	1960	7811.38
rnna	BRB	1961	8047.38
rnna	BRB	1962	8275.58
rnna	BRB	1963	8530.41
rnna	BRB	1964	8767.03
rnna	BRB	1965	9046.19
rnna	BRB	1966	9323.79
rnna	BRB	1967	9680.01
rnna	BRB	1968	10226.4
rnna	BRB	1969	10762
rnna	BRB	1970	11455.6
rnna	BRB	1971	11960.9
rnna	BRB	1972	12464.7
rnna	BRB	1973	12934.6
rnna	BRB	1974	13514.4
rnna	BRB	1975	14064.8
rnna	BRB	1976	14960.1
rnna	BRB	1977	15582.3
rnna	BRB	1978	16439.9
rnna	BRB	1979	17193.4
rnna	BRB	1980	18010.9
rnna	BRB	1981	19035.9
rnna	BRB	1982	19675.6
rnna	BRB	1983	20115.3
rnna	BRB	1984	20391.5
rnna	BRB	1985	20587.9
rnna	BRB	1986	20897.8
rnna	BRB	1987	21252.4
rnna	BRB	1988	21704
rnna	BRB	1989	22285.9
rnna	BRB	1990	22749.3
rnna	BRB	1991	23192.8
rnna	BRB	1992	23056.6
rnna	BRB	1993	23116
rnna	BRB	1994	23470.5
rnna	BRB	1995	23721.5
rnna	BRB	1996	24008.4
rnna	BRB	1997	24829.9
rnna	BRB	1998	25867.9
rnna	BRB	1999	26684.6
rnna	BRB	2000	27309.2
rnna	BRB	2001	27798
rnna	BRB	2002	28682.3
rnna	BRB	2003	28946.6
rnna	BRB	2004	29262.6
rnna	BRB	2005	29596.5
rnna	BRB	2006	30366.3
rnna	BRB	2007	30720.8
rnna	BRB	2008	30979.1
rnna	BRB	2009	30993.4
rnna	BRB	2010	31398.2
rnna	BRB	2011	32032.3
rnna	BRB	2012	32474.6
rnna	BRB	2013	32980.4
rnna	BRB	2014	33420.1
rnna	BRB	2015	33904
rnna	BRB	2016	34313
rnna	BRB	2017	34193.3
rnna	BRB	2018	34092.9
rnna	BRB	2019	33979.6
rnna	BRN	1970	55885.4
rnna	BRN	1971	54673.8
rnna	BRN	1972	53780.9
rnna	BRN	1973	53210.1
rnna	BRN	1974	52283
rnna	BRN	1975	52316.6
rnna	BRN	1976	52841.5
rnna	BRN	1977	53049.3
rnna	BRN	1978	53608.7
rnna	BRN	1979	54815.2
rnna	BRN	1980	56179.7
rnna	BRN	1981	57712.5
rnna	BRN	1982	59312.9
rnna	BRN	1983	60998
rnna	BRN	1984	62865.9
rnna	BRN	1985	64876.7
rnna	BRN	1986	67139.4
rnna	BRN	1987	69008.2
rnna	BRN	1988	71155.2
rnna	BRN	1989	73879.8
rnna	BRN	1990	76693.4
rnna	BRN	1991	79748.2
rnna	BRN	1992	83734.7
rnna	BRN	1993	89128.1
rnna	BRN	1994	93086.5
rnna	BRN	1995	97595
rnna	BRN	1996	110196
rnna	BRN	1997	115249
rnna	BRN	1998	118641
rnna	BRN	1999	120084
rnna	BRN	2000	119377
rnna	BRN	2001	119334
rnna	BRN	2002	121877
rnna	BRN	2003	122539
rnna	BRN	2004	123445
rnna	BRN	2005	124483
rnna	BRN	2006	125659
rnna	BRN	2007	128567
rnna	BRN	2008	132367
rnna	BRN	2009	135822
rnna	BRN	2010	138769
rnna	BRN	2011	145135
rnna	BRN	2012	154895
rnna	BRN	2013	166092
rnna	BRN	2014	170982
rnna	BRN	2015	176552
rnna	BRN	2016	180449
rnna	BRN	2017	185221
rnna	BRN	2018	193420
rnna	BRN	2019	200460
rnna	BTN	1970	2639.29
rnna	BTN	1971	2771.07
rnna	BTN	1972	2901.38
rnna	BTN	1973	3031.5
rnna	BTN	1974	3169.26
rnna	BTN	1975	3294.08
rnna	BTN	1976	3438.99
rnna	BTN	1977	3595.35
rnna	BTN	1978	3768.99
rnna	BTN	1979	3960.46
rnna	BTN	1980	4131.11
rnna	BTN	1981	4363.64
rnna	BTN	1982	4631.86
rnna	BTN	1983	4997.11
rnna	BTN	1984	5324.95
rnna	BTN	1985	5738.09
rnna	BTN	1986	6164.66
rnna	BTN	1987	6587.12
rnna	BTN	1988	6976.11
rnna	BTN	1989	7297.89
rnna	BTN	1990	7571.01
rnna	BTN	1991	7872.09
rnna	BTN	1992	8335.1
rnna	BTN	1993	8913.54
rnna	BTN	1994	9532.2
rnna	BTN	1995	10165.3
rnna	BTN	1996	10820.5
rnna	BTN	1997	11488.2
rnna	BTN	1998	12212.8
rnna	BTN	1999	13271.5
rnna	BTN	2000	14602.1
rnna	BTN	2001	16328.2
rnna	BTN	2002	18382.2
rnna	BTN	2003	20413.2
rnna	BTN	2004	22732.5
rnna	BTN	2005	24580.8
rnna	BTN	2006	26259.9
rnna	BTN	2007	27437.2
rnna	BTN	2008	29268.7
rnna	BTN	2009	31528.6
rnna	BTN	2010	35074.6
rnna	BTN	2011	39003.2
rnna	BTN	2012	42807.4
rnna	BTN	2013	44423
rnna	BTN	2014	46952.7
rnna	BTN	2015	49920.5
rnna	BTN	2016	53235
rnna	BTN	2017	56321.7
rnna	BTN	2018	58912.5
rnna	BTN	2019	61362.5
rnna	BWA	1960	1523.39
rnna	BWA	1961	1542.03
rnna	BWA	1962	1583.86
rnna	BWA	1963	1640.54
rnna	BWA	1964	1732.49
rnna	BWA	1965	1715.67
rnna	BWA	1966	1854.19
rnna	BWA	1967	2058.5
rnna	BWA	1968	2406.42
rnna	BWA	1969	2562.34
rnna	BWA	1970	3111.12
rnna	BWA	1971	4067.6
rnna	BWA	1972	5255.39
rnna	BWA	1973	6522.57
rnna	BWA	1974	7335.62
rnna	BWA	1975	7959.58
rnna	BWA	1976	8423.44
rnna	BWA	1977	8861.14
rnna	BWA	1978	9353.85
rnna	BWA	1979	10123.6
rnna	BWA	1980	11237.7
rnna	BWA	1981	12572.9
rnna	BWA	1982	13817.2
rnna	BWA	1983	14779.9
rnna	BWA	1984	15531.4
rnna	BWA	1985	16530.6
rnna	BWA	1986	17587.3
rnna	BWA	1987	18582.2
rnna	BWA	1988	20153.7
rnna	BWA	1989	23506
rnna	BWA	1990	26913.3
rnna	BWA	1991	29894.2
rnna	BWA	1992	32440.1
rnna	BWA	1993	34707.7
rnna	BWA	1994	36761.4
rnna	BWA	1995	38940.7
rnna	BWA	1996	40969.4
rnna	BWA	1997	43691.7
rnna	BWA	1998	46743.1
rnna	BWA	1999	50286.1
rnna	BWA	2000	53694.6
rnna	BWA	2001	57188.9
rnna	BWA	2002	60684.8
rnna	BWA	2003	64231.2
rnna	BWA	2004	68335.5
rnna	BWA	2005	72608.2
rnna	BWA	2006	77495.9
rnna	BWA	2007	83286.4
rnna	BWA	2008	89082.5
rnna	BWA	2009	95496.8
rnna	BWA	2010	102590
rnna	BWA	2011	110742
rnna	BWA	2012	120230
rnna	BWA	2013	129485
rnna	BWA	2014	138520
rnna	BWA	2015	148453
rnna	BWA	2016	158478
rnna	BWA	2017	166636
rnna	BWA	2018	175853
rnna	BWA	2019	185836
rnna	CAF	1960	18634.3
rnna	CAF	1961	19581.4
rnna	CAF	1962	20539.8
rnna	CAF	1963	21341.9
rnna	CAF	1964	22202.5
rnna	CAF	1965	22968.5
rnna	CAF	1966	23701.6
rnna	CAF	1967	24078.8
rnna	CAF	1968	24578.3
rnna	CAF	1969	25092.9
rnna	CAF	1970	25771.6
rnna	CAF	1971	26436.6
rnna	CAF	1972	26992.1
rnna	CAF	1973	27872.7
rnna	CAF	1974	28043.3
rnna	CAF	1975	28069.6
rnna	CAF	1976	27981.3
rnna	CAF	1977	27996.5
rnna	CAF	1978	27733.7
rnna	CAF	1979	27762.1
rnna	CAF	1980	27258.1
rnna	CAF	1981	27053.5
rnna	CAF	1982	26468.2
rnna	CAF	1983	26408.1
rnna	CAF	1984	26305.3
rnna	CAF	1985	26810.4
rnna	CAF	1986	27226.2
rnna	CAF	1987	27497.3
rnna	CAF	1988	27462.3
rnna	CAF	1989	27582.5
rnna	CAF	1990	27888.4
rnna	CAF	1991	28238.3
rnna	CAF	1992	28536.1
rnna	CAF	1993	28536.6
rnna	CAF	1994	28890.2
rnna	CAF	1995	29503.6
rnna	CAF	1996	28956.7
rnna	CAF	1997	28618.9
rnna	CAF	1998	28400.9
rnna	CAF	1999	28762.5
rnna	CAF	2000	28950.8
rnna	CAF	2001	29078
rnna	CAF	2002	29154.5
rnna	CAF	2003	28864.4
rnna	CAF	2004	28675.6
rnna	CAF	2005	28839.8
rnna	CAF	2006	29082
rnna	CAF	2007	29245
rnna	CAF	2008	29446.9
rnna	CAF	2009	29682.1
rnna	CAF	2010	30068.9
rnna	CAF	2011	30269
rnna	CAF	2012	30312.1
rnna	CAF	2013	29772.3
rnna	CAF	2014	29995.6
rnna	CAF	2015	30255.4
rnna	CAF	2016	30569.7
rnna	CAF	2017	31075.3
rnna	CAF	2018	31578.3
rnna	CAF	2019	31898.4
rnna	CAN	1950	741700
rnna	CAN	1951	777442
rnna	CAN	1952	811697
rnna	CAN	1953	854122
rnna	CAN	1954	884598
rnna	CAN	1955	928226
rnna	CAN	1956	990494
rnna	CAN	1957	1.04654e+06
rnna	CAN	1958	1.09417e+06
rnna	CAN	1959	1.14758e+06
rnna	CAN	1960	1198070
rnna	CAN	1961	1246690
rnna	CAN	1962	1302543
rnna	CAN	1963	1.36015e+06
rnna	CAN	1964	1.42617e+06
rnna	CAN	1965	1.50854e+06
rnna	CAN	1966	1.59938e+06
rnna	CAN	1967	1.67453e+06
rnna	CAN	1968	1.75094e+06
rnna	CAN	1969	1.83741e+06
rnna	CAN	1970	1.90936e+06
rnna	CAN	1971	1.9889e+06
rnna	CAN	1972	2071290
rnna	CAN	1973	2163195
rnna	CAN	1974	2.25927e+06
rnna	CAN	1975	2.35759e+06
rnna	CAN	1976	2.46296e+06
rnna	CAN	1977	2568060
rnna	CAN	1978	2671612
rnna	CAN	1979	2.78232e+06
rnna	CAN	1980	2.89837e+06
rnna	CAN	1981	3.02928e+06
rnna	CAN	1982	3.12485e+06
rnna	CAN	1983	3214400
rnna	CAN	1984	3.30444e+06
rnna	CAN	1985	3409363
rnna	CAN	1986	3.51889e+06
rnna	CAN	1987	3.64719e+06
rnna	CAN	1988	3.79449e+06
rnna	CAN	1989	3.949e+06
rnna	CAN	1990	4.08462e+06
rnna	CAN	1991	4.20108e+06
rnna	CAN	1992	4.30379e+06
rnna	CAN	1993	4398278
rnna	CAN	1994	4505443
rnna	CAN	1995	4.60181e+06
rnna	CAN	1996	4.70673e+06
rnna	CAN	1997	4836438
rnna	CAN	1998	4.96451e+06
rnna	CAN	1999	5096084
rnna	CAN	2000	5.23219e+06
rnna	CAN	2001	5373983
rnna	CAN	2002	5510506
rnna	CAN	2003	5.65942e+06
rnna	CAN	2004	5.8317e+06
rnna	CAN	2005	6.02915e+06
rnna	CAN	2006	6.23997e+06
rnna	CAN	2007	6.4517e+06
rnna	CAN	2008	6.65925e+06
rnna	CAN	2009	6.80697e+06
rnna	CAN	2010	6.99702e+06
rnna	CAN	2011	7201987
rnna	CAN	2012	7422570
rnna	CAN	2013	7642909
rnna	CAN	2014	7.86718e+06
rnna	CAN	2015	8.05812e+06
rnna	CAN	2016	8222410
rnna	CAN	2017	8399451
rnna	CAN	2018	8580741
rnna	CAN	2019	8757839
rnna	CHE	1950	691651
rnna	CHE	1951	702278
rnna	CHE	1952	707798
rnna	CHE	1953	713657
rnna	CHE	1954	726833
rnna	CHE	1955	747445
rnna	CHE	1956	774207
rnna	CHE	1957	802370
rnna	CHE	1958	817643
rnna	CHE	1959	841324
rnna	CHE	1960	876000
rnna	CHE	1961	920593
rnna	CHE	1962	965074
rnna	CHE	1963	1.00859e+06
rnna	CHE	1964	1.05673e+06
rnna	CHE	1965	1.09783e+06
rnna	CHE	1966	1.13632e+06
rnna	CHE	1967	1.17617e+06
rnna	CHE	1968	1.21464e+06
rnna	CHE	1969	1.25611e+06
rnna	CHE	1970	1.31123e+06
rnna	CHE	1971	1373316
rnna	CHE	1972	1.43693e+06
rnna	CHE	1973	1500253
rnna	CHE	1974	1.55462e+06
rnna	CHE	1975	1.58955e+06
rnna	CHE	1976	1612048
rnna	CHE	1977	1.63581e+06
rnna	CHE	1978	1.66476e+06
rnna	CHE	1979	1.69724e+06
rnna	CHE	1980	1.73748e+06
rnna	CHE	1981	1.77563e+06
rnna	CHE	1982	1.8056e+06
rnna	CHE	1983	1.83812e+06
rnna	CHE	1984	1.8736e+06
rnna	CHE	1985	1.91068e+06
rnna	CHE	1986	1954023
rnna	CHE	1987	1.99931e+06
rnna	CHE	1988	2052580
rnna	CHE	1989	2108825
rnna	CHE	1990	2.16798e+06
rnna	CHE	1991	2219372
rnna	CHE	1992	2254403
rnna	CHE	1993	2282485
rnna	CHE	1994	2315234
rnna	CHE	1995	2353666
rnna	CHE	1996	2.38765e+06
rnna	CHE	1997	2.42437e+06
rnna	CHE	1998	2.46884e+06
rnna	CHE	1999	2.51169e+06
rnna	CHE	2000	2555740
rnna	CHE	2001	2.59113e+06
rnna	CHE	2002	2.62351e+06
rnna	CHE	2003	2.65107e+06
rnna	CHE	2004	2.68396e+06
rnna	CHE	2005	2719346
rnna	CHE	2006	2759447
rnna	CHE	2007	2.80367e+06
rnna	CHE	2008	2.84359e+06
rnna	CHE	2009	2867855
rnna	CHE	2010	2896271
rnna	CHE	2011	2926518
rnna	CHE	2012	2.96163e+06
rnna	CHE	2013	2.99446e+06
rnna	CHE	2014	3.02877e+06
rnna	CHE	2015	3.06431e+06
rnna	CHE	2016	3.10242e+06
rnna	CHE	2017	3.14394e+06
rnna	CHE	2018	3183201
rnna	CHE	2019	3.22146e+06
rnna	CHL	1951	111277
rnna	CHL	1952	113453
rnna	CHL	1953	117865
rnna	CHL	1954	120007
rnna	CHL	1955	123961
rnna	CHL	1956	128205
rnna	CHL	1957	132022
rnna	CHL	1958	135830
rnna	CHL	1959	139051
rnna	CHL	1960	144688
rnna	CHL	1961	151512
rnna	CHL	1962	157448
rnna	CHL	1963	165184
rnna	CHL	1964	175228
rnna	CHL	1965	184853
rnna	CHL	1966	200362
rnna	CHL	1967	213686
rnna	CHL	1968	228300
rnna	CHL	1969	244015
rnna	CHL	1970	261151
rnna	CHL	1971	277426
rnna	CHL	1972	288960
rnna	CHL	1973	299160
rnna	CHL	1974	312074
rnna	CHL	1975	320125
rnna	CHL	1976	325444
rnna	CHL	1977	332067
rnna	CHL	1978	340556
rnna	CHL	1979	351266
rnna	CHL	1980	365128
rnna	CHL	1981	381582
rnna	CHL	1982	387009
rnna	CHL	1983	389742
rnna	CHL	1984	395201
rnna	CHL	1985	402327
rnna	CHL	1986	409739
rnna	CHL	1987	421454
rnna	CHL	1988	436252
rnna	CHL	1989	458741
rnna	CHL	1990	480358
rnna	CHL	1991	499924
rnna	CHL	1992	525869
rnna	CHL	1993	558242
rnna	CHL	1994	591586
rnna	CHL	1995	633913
rnna	CHL	1996	678567
rnna	CHL	1997	727475
rnna	CHL	1998	775784
rnna	CHL	1999	807823
rnna	CHL	2000	843595
rnna	CHL	2001	880385
rnna	CHL	2002	916440
rnna	CHL	2003	955112
rnna	CHL	2004	999422
rnna	CHL	2005	1.0587e+06
rnna	CHL	2006	1.1195e+06
rnna	CHL	2007	1.18531e+06
rnna	CHL	2008	1.26673e+06
rnna	CHL	2009	1.32685e+06
rnna	CHL	2010	1.39652e+06
rnna	CHL	2011	1.47941e+06
rnna	CHL	2012	1.57161e+06
rnna	CHL	2013	1.66342e+06
rnna	CHL	2014	1742457
rnna	CHL	2015	1.81732e+06
rnna	CHL	2016	1.88685e+06
rnna	CHL	2017	1.94916e+06
rnna	CHL	2018	2.01584e+06
rnna	CHL	2019	2085805
rnna	CHN	1952	391298
rnna	CHN	1953	420299
rnna	CHN	1954	452993
rnna	CHN	1955	481567
rnna	CHN	1956	515699
rnna	CHN	1957	552719
rnna	CHN	1958	619747
rnna	CHN	1959	719134
rnna	CHN	1960	799646
rnna	CHN	1961	809718
rnna	CHN	1962	800808
rnna	CHN	1963	810642
rnna	CHN	1964	838339
rnna	CHN	1965	886865
rnna	CHN	1966	953755
rnna	CHN	1967	988321
rnna	CHN	1968	1.02126e+06
rnna	CHN	1969	1064488
rnna	CHN	1970	1.15546e+06
rnna	CHN	1971	1.25521e+06
rnna	CHN	1972	1.35246e+06
rnna	CHN	1973	1.45528e+06
rnna	CHN	1974	1.57402e+06
rnna	CHN	1975	1.71811e+06
rnna	CHN	1976	1.84897e+06
rnna	CHN	1977	1.98155e+06
rnna	CHN	1978	2.14575e+06
rnna	CHN	1979	2.30932e+06
rnna	CHN	1980	2499968
rnna	CHN	1981	2.67616e+06
rnna	CHN	1982	2.87582e+06
rnna	CHN	1983	3097478
rnna	CHN	1984	3.35517e+06
rnna	CHN	1985	3.671e+06
rnna	CHN	1986	4.00793e+06
rnna	CHN	1987	4364039
rnna	CHN	1988	4773436
rnna	CHN	1989	5062329
rnna	CHN	1990	5.31613e+06
rnna	CHN	1991	5.63594e+06
rnna	CHN	1992	6115865
rnna	CHN	1993	6.81139e+06
rnna	CHN	1994	7589382
rnna	CHN	1995	8430762
rnna	CHN	1996	9351290
rnna	CHN	1997	10317089
rnna	CHN	1998	11445109
rnna	CHN	1999	12598099
rnna	CHN	2000	13807774
rnna	CHN	2001	15183588
rnna	CHN	2002	16754779
rnna	CHN	2003	18678236
rnna	CHN	2004	20848848
rnna	CHN	2005	23268102
rnna	CHN	2006	25976578
rnna	CHN	2007	28985030
rnna	CHN	2008	32322166
rnna	CHN	2009	36652620
rnna	CHN	2010	41481220
rnna	CHN	2011	46622836
rnna	CHN	2012	52143048
rnna	CHN	2013	58108720
rnna	CHN	2014	64360792
rnna	CHN	2015	71041904
rnna	CHN	2016	78144448
rnna	CHN	2017	85568768
rnna	CHN	2018	93488032
rnna	CHN	2019	101703024
rnna	CIV	1960	9644.16
rnna	CIV	1961	11463.4
rnna	CIV	1962	12516.4
rnna	CIV	1963	14265.2
rnna	CIV	1964	16944
rnna	CIV	1965	19357.1
rnna	CIV	1966	21937.9
rnna	CIV	1967	24181.8
rnna	CIV	1968	26406
rnna	CIV	1969	29227.7
rnna	CIV	1970	32774.8
rnna	CIV	1971	36366.9
rnna	CIV	1972	39592.6
rnna	CIV	1973	43739.3
rnna	CIV	1974	47093.6
rnna	CIV	1975	51172.9
rnna	CIV	1976	56509.2
rnna	CIV	1977	64932.1
rnna	CIV	1978	75378.6
rnna	CIV	1979	83911.5
rnna	CIV	1980	90573.3
rnna	CIV	1981	96839.3
rnna	CIV	1982	101928
rnna	CIV	1983	104722
rnna	CIV	1984	104690
rnna	CIV	1985	104767
rnna	CIV	1986	105129
rnna	CIV	1987	105125
rnna	CIV	1988	104853
rnna	CIV	1989	104470
rnna	CIV	1990	103346
rnna	CIV	1991	102454
rnna	CIV	1992	101630
rnna	CIV	1993	100902
rnna	CIV	1994	100776
rnna	CIV	1995	101718
rnna	CIV	1996	103650
rnna	CIV	1997	105496
rnna	CIV	1998	107515
rnna	CIV	1999	109918
rnna	CIV	2000	109987
rnna	CIV	2001	109486
rnna	CIV	2002	110137
rnna	CIV	2003	109955
rnna	CIV	2004	110399
rnna	CIV	2005	110634
rnna	CIV	2006	111499
rnna	CIV	2007	113448
rnna	CIV	2008	115632
rnna	CIV	2009	117916
rnna	CIV	2010	122437
rnna	CIV	2011	123835
rnna	CIV	2012	129203
rnna	CIV	2013	140460
rnna	CIV	2014	155595
rnna	CIV	2015	174763
rnna	CIV	2016	193296
rnna	CIV	2017	212095
rnna	CIV	2018	232921
rnna	CIV	2019	256224
rnna	CMR	1960	21290.7
rnna	CMR	1961	21940.8
rnna	CMR	1962	22642.3
rnna	CMR	1963	23393.4
rnna	CMR	1964	24263.1
rnna	CMR	1965	25773.6
rnna	CMR	1966	27685
rnna	CMR	1967	29152.1
rnna	CMR	1968	30550.5
rnna	CMR	1969	31743.2
rnna	CMR	1970	33699
rnna	CMR	1971	35108.8
rnna	CMR	1972	36114.2
rnna	CMR	1973	37470.9
rnna	CMR	1974	39211.9
rnna	CMR	1975	40847.8
rnna	CMR	1976	42776
rnna	CMR	1977	45672.1
rnna	CMR	1978	50296.6
rnna	CMR	1979	53732.8
rnna	CMR	1980	57933.2
rnna	CMR	1981	62280.5
rnna	CMR	1982	67195.7
rnna	CMR	1983	72870.7
rnna	CMR	1984	79142.1
rnna	CMR	1985	85156
rnna	CMR	1986	90095.1
rnna	CMR	1987	94016
rnna	CMR	1988	97647.1
rnna	CMR	1989	99895.5
rnna	CMR	1990	101383
rnna	CMR	1991	102395
rnna	CMR	1992	102500
rnna	CMR	1993	104477
rnna	CMR	1994	106043
rnna	CMR	1995	107621
rnna	CMR	1996	109210
rnna	CMR	1997	111198
rnna	CMR	1998	113554
rnna	CMR	1999	116102
rnna	CMR	2000	118931
rnna	CMR	2001	123531
rnna	CMR	2002	128066
rnna	CMR	2003	131558
rnna	CMR	2004	135858
rnna	CMR	2005	139945
rnna	CMR	2006	143976
rnna	CMR	2007	147855
rnna	CMR	2008	153865
[truncated: 8,315 more rows]

## Sheet: Tabelle1
Summe von AggValue	Spaltenbeschriftungen
Zeilenbeschriftungen	MAR	ABW	AGO	AIA	ALB	ARE	ARG	ARM	ATG	AUS	AUT	AZE	BDI	BEL	BEN	BFA	BGD	BGR	BHR	BHS	BIH	BLR	BLZ	BMU	BOL	BRA	BRB	BRN	BTN	BWA	CAF	CAN	CHE	CHL	CHN	CIV	CMR	COD	COG	COL	COM	CPV	CRI	CYM	CYP	CZE	DEU	DJI	DMA
1950	103238						360603			639991	336700			715409											23013.1	608567						741700	691651					15847.1		139203			10709.3		26312.8		1.9183e+06
1951	107651						395940			690114	351388			731287											24886.8	654280						777442	702278	111277				17532.4		147453			11038.5		27141.2		2.05199e+06
1952	111537						422139			704562	359219			746504											26624.2	705852						811697	707798	113453	391298			19832.3		156117			11583.4		28045.4		2.20963e+06
1953	116580						450224			733107	361311			762698											27232.7	737951						854122	713657	117865	420299			22558.7		166643			12178.3		29278.6		2.36717e+06
1954	120805						475600			771454	369493			783743											28382.1	780612						884598	726833	120007	452993			25148.6		180466			12673.6		31372.6		2.55226e+06
1955	121995						505330			810404	386548			803018											30830.2	820627						928226	747445	123961	481567			27864.2		194796			13280.7		33691		2.80887e+06
1956	122338						530531			838408	400127			828550											32834.5	854692						990494	774207	128205	515699			30578.1		208451			13969.3		35957.1		3.06283e+06
1957	121134						559220			867267	414914			852395											34554.9	911217						1.04654e+06	802370	132022	552719			33094.7		219491			14774.1		37992.9		3.31311e+06
1958	123050						591008			905469	429005			866390											36052.7	963159						1.09417e+06	817643	135830	619747			35001.4		226571			15349.2		38579.4		3.55677e+06
1959	122403						616087			947253	443596			887441	7526.52	2497.68	123809								36959.1	1.03387e+06						1.14758e+06	841324	139051	719134			36422.9		234500			16253.1		39429.7		3847527
1960	123240						664213			989917	467950		5602.16	912627	8398.79	2494.8	122373								38618.7	1.09586e+06	7811.38			1523.39	18634.3	1198070	876000	144688	799646	9644.16	21290.7	37045.1	6912.42	246020	2102.59	1179.75	17047.3		39895.3		4206044
1961	123784						714516			1.02095e+06	492992		5510.44	945409	9217.21	2518.11	121768								39705.2	1.16481e+06	8047.38			1542.03	19581.4	1246690	920593	151512	809718	11463.4	21940.8	37429.5	8533.66	259386	2148.56	1304.06	17913.3		40975.7		4.5585e+06
1962	126215						752595			1.06109e+06	514682		5447.28	979162	9975.42	2555.05	123743								42445.4	1.23568e+06	8275.58			1583.86	20539.8	1302543	965074	157448	800808	12516.4	22642.3	37403.1	9229.7	270663	2274.32	1378.71	18916.3		43137.1		4910171
1963	129670						774721			1.10249e+06	536423		5366.85	1.01101e+06	10799.9	2583.96	124205								44708	1.29081e+06	8530.41			1640.54	21341.9	1.36015e+06	1.00859e+06	165184	810642	14265.2	23393.4	39009.6	9478.64	280882	2392.35	1408.4	19886.5		44923.8		5.23758e+06
1964	132280						812757			1152809	565437		5286.87	1056853	11461.5	2616.37	125965								47193.8	1.3552e+06	8767.03			1732.49	22202.5	1.42617e+06	1.05673e+06	175228	838339	16944	24263.1	40777.2	9656.43	293662	2561.44	1441.51	20567.5		45455.5		5621086
1965	135250						851048			1.19697e+06	594206		5228.53	1.1003e+06	12037.7	2707.84	128423								49251.1	1.43144e+06	9046.19			1715.67	22968.5	1.50854e+06	1.09783e+06	184853	886865	19357.1	25773.6	42530.5	9920.7	305244	2776.52	1490.85	21737.5		47401.4		6.02295e+06
1966	137770						883976			1.24498e+06	628173		5207.58	1149124	12638	2794.18	131082								51315	1.51444e+06	9323.79			1854.19	23701.6	1.59938e+06	1.13632e+06	200362	953755	21937.9	27685	44014.5	10588.4	318781	3031.06	1567.89	22926		49129.9		6.39387e+06
1967	143048						918023			1.29392e+06	659229		5207.38	1195806	13606.5	2864.11	134585								52991.9	1.58504e+06	9680.01			2058.5	24078.8	1.67453e+06	1.17617e+06	213686	988321	24181.8	29152.1	45224.9	11673.9	332478	3271.99	1622.04	24160.8		51174.9		6678766
1968	147620						957269			1.3522e+06	691860		5241.9	1.24076e+06	14656.4	2940.67	140704								54641.6	1.68115e+06	10226.4			2406.42	24578.3	1.75094e+06	1.21464e+06	228300	1.02126e+06	26406	30550.5	46524.3	12600	350059	3443.37	1703.61	25264.7		53160.1		7.01212e+06
1969	152819						1.01361e+06			1.41403e+06	727195		5275.26	1.29327e+06	15734.1	3052.14	145745								56190.2	1.84078e+06	10762			2562.34	25092.9	1.83741e+06	1.25611e+06	244015	1064488	29227.7	31743.2	48729.2	13391.3	367610	3599.51	1832.07	26647.3		56173.3		7408280
1970	161854	688.414	295518	210.097	45241.1	411435	1.0691e+06		2167.82	1.4736e+06	770422		5242.13	1351375	16648.3	3167.73	149870	41797.9	25391.5	6023.11			2096.56	7560.21	57641.9	1.99009e+06	11455.6	55885.4	2639.29	3111.12	25771.6	1.90936e+06	1.31123e+06	261151	1.15546e+06	32774.8	33699	50991	14070.5	389420	3888.54	1986.18	28265.3	550.017	59070		7845500	543.799	708.547
1971	170224	758.383	314195	226.763	47517.2	429071	1.1299e+06		2180.77	1533065	821695		5333.28	1.40356e+06	17576.6	3680.5	151644	46234.8	27585.8	6370.19			2206.8	7652.86	59428.3	2.16565e+06	11960.9	54673.8	2771.07	4067.6	26436.6	1.9889e+06	1373316	277426	1.25521e+06	36366.9	35108.8	54411.1	14967.5	411620	4182.73	2145.79	30181.2	608.877	61838.1		8.30038e+06	556.157	773.939
1972	176417	834.936	332436	245.93	49922.1	455644	1.18867e+06		2194.02	1.59298e+06	880090		5238.87	1.4561e+06	19014.7	3950.43	149593	50673.4	29776.7	6675.21			2313.95	7713.2	61584.4	2.37456e+06	12464.7	53780.9	2901.38	5255.39	26992.1	2071290	1.43693e+06	288960	1.35246e+06	39592.6	36114.2	58458.1	15884.8	431663	4474.21	2305.37	32102.1	672.799	64707.1		8749619	568.621	816.168
1973	182064	918.605	352648	265.817	52459.7	473551	1.23649e+06		2208.81	1.65511e+06	935397		5238.9	1.5125e+06	20136.8	4289.91	150764	55209.1	32714.5	7008.13			2408.97	7758.17	63280.1	2636271	12934.6	53210.1	3031.5	6522.57	27872.7	2163195	1500253	299160	1.45528e+06	43739.3	37470.9	62054.4	16732.6	453901	4787.37	2463.61	34140.7	747.396	67393		9179683	584.382	836.915
1974	186369	1009.97	373268	285.155	55119.6	485428	1.28595e+06		2232.63	1.70517e+06	991545		5355.91	1.57215e+06	21356.5	4688.4	160716	59880.6	36205.8	7234			2512.1	7794.86	65086.3	2.93174e+06	13514.4	52283	3169.26	7335.62	28043.3	2.25927e+06	1.55462e+06	312074	1.57402e+06	47093.6	39211.9	67043.3	17612.9	478439	5105.67	2622.3	36326	829.935	68321.4		9520939	597.271	831.154
1975	207639	1109.67	391162	304.913	57897	536809	1.33375e+06		2249.48	1.7572e+06	1.03995e+06		5390.39	1.62487e+06	22464.9	5001.24	166602	64830.9	37563.4	7367.54			2607.24	7848.26	67607.5	3.24959e+06	14064.8	52316.6	3294.08	7959.58	28069.6	2.35759e+06	1.58955e+06	320125	1.71811e+06	51172.9	40847.8	70814.6	18520.5	499818	5445.07	2730.92	38265.1	920.621	67698.5		9813580	612.887	853.488
1976	234372	1218.43	406898	324.7	60821.2	599646	1.39029e+06		2256.78	1.81156e+06	1.08944e+06		5525.23	1.67817e+06	23105.1	5291.21	174043	69803.6	42811.2	7526.02			2696.36	7846.28	70135.1	3579852	14960.1	52841.5	3438.99	8423.44	27981.3	2.46296e+06	1612048	325444	1.84897e+06	56509.2	42776	73288.2	19393.6	523846	5776.7	2842.41	40984.8	1020.27	67783.1		10116109	641.72	872.055
1977	267241	1336.98	423176	344.297	63838.6	689038	1.46731e+06		2239.1	1.86768e+06	1.14472e+06		5797.62	1.7278e+06	23681.1	5563.2	184290	75029.5	48787.2	7747.04			2777.79	7889.25	72807	3.88371e+06	15582.3	53049.3	3595.35	8861.14	27996.5	2568060	1.63581e+06	332067	1.98155e+06	64932.1	45672.1	79353.2	19937.8	546632	6125.13	2944.86	44069.3	1129.48	70062.3		10434062	652.306	891.166
1978	284303	1466.15	437048	365.641	66962.7	794961	1.5225e+06		2219.12	1.93224e+06	1.19033e+06		6128.22	1.77681e+06	24089.4	5857.56	197911	80363.1	52361.6	7938.79			2876.13	7940.73	75824.1	4192358	16439.9	53608.7	3768.99	9353.85	27733.7	2671612	1.66476e+06	340556	2.14575e+06	75378.6	50296.6	81340.6	20642.3	572214	6469.37	3064.09	47305.4	1249.16	73327.2		10767022	659.519	918.027
1979	300414	1606.88	450429	389.132	70332.9	898561	1.58374e+06		2284.49	1.99503e+06	1.23956e+06		6470.38	1.81784e+06	25288.7	6707.37	212717	85368.1	57300.7	8325.24			2991.54	8026.94	77965.4	4.50158e+06	17193.4	54815.2	3960.46	10123.6	27762.1	2.78232e+06	1.69724e+06	351266	2.30932e+06	83911.5	53732.8	84675	21794.6	597786	6862.82	3184.84	51072.6	1383.64	77371.1		11123019	681.624	939.648
1980	317055	1760.18	462301	413.007	73616.4	995415	1.64804e+06		2332.03	2.06998e+06	1.28957e+06		6779.8	1.87139e+06	26568.8	7417.6	231999	91450.6	61486.4	8972.92			3052.33	8196.73	78484.6	4864919	18010.9	56179.7	4131.11	11237.7	27258.1	2.89837e+06	1.73748e+06	365128	2499968	90573.3	57933.2	91548	24132	627973	7316.64	3286.31	53939.2	1526.67	81479.3		11472934	709.781	1026.17
1981	334154	1927.19	474440	438.473	77063.2	1.08468e+06	1.69098e+06		2389.26	2.14918e+06	1.33671e+06		7192.5	1.89687e+06	27636.2	8156.28	250878	97293.1	65495.6	9603.66			3115.29	8304.34	78835.6	5.13443e+06	19035.9	57712.5	4363.64	12572.9	27053.5	3.02928e+06	1.77563e+06	381582	2.67616e+06	96839.3	62280.5	99014.6	29015	659804	7709.5	3434.29	55164.3	1684.18	84847		11764738	738.794	1078.09
1982	351943	2109.15	490153	464.254	81254.5	1.17166e+06	1712746		2382.4	2.20701e+06	1.37299e+06		7614.13	1.91684e+06	29815.7	8919.93	264532	102866	71012.8	10397.6			3130.53	8498.12	77982.5	5358612	19675.6	59312.9	4631.86	13817.2	26468.2	3.12485e+06	1.8056e+06	387009	2.87582e+06	101928	67195.7	105978	36780.9	691444	8201	3605.2	55065.7	1855.81	88259.4		12006718	822.86	1120.17
1983	366396	2307.43	501189	488.095	85338.6	1.2596e+06	1.73566e+06		2370.19	2.26768e+06	1.40755e+06		8118.56	1930552	30412.8	9537.96	277912	108106	79403.7	11151.2			3118.4	8692.7	76858.4	5497325	20115.3	60998	4997.11	14779.9	26408.1	3214400	1.83812e+06	389742	3097478	104722	72870.7	113831	41344	722085	8663.5	3768.44	55320.6	2052.31	91305.4		12257449	909.893	1153.02
1984	378360	2523.48	513645	510.903	89562	1.34311e+06	1755388		2388.34	2.3369e+06	1440378		8670.67	1.946e+06	30600.8	10098.3	292412	112856	88443.9	11881.1			3139.41	8937.63	76205.5	5.63644e+06	20391.5	62865.9	5324.95	15531.4	26305.3	3.30444e+06	1.8736e+06	395201	3.35517e+06	104690	79142.1	121552	44679.3	752085	9173.26	3918.66	56532.7	2293.58	95567		12494807	994.438	1221.58
1985	393218	2758.9	519802	535.185	93036.3	1.40578e+06	1.76406e+06		2433.19	2.40909e+06	1.47725e+06		9124.61	1.9645e+06	30366	11026.4	307613	117961	91441.1	12807.7			3134.55	9113.74	76268.2	5812272	20587.9	64876.7	5738.09	16530.6	26810.4	3409363	1.91068e+06	402327	3.671e+06	104767	85156	128916	47654.1	777910	9683.81	4078.54	57909.1	2471.29	98822.3		12720738	1061.63	1256.33
1986	407097	3015.56	522738	575.389	96722	1.46343e+06	1.78108e+06		2525.35	2475880	1.51392e+06		9583.92	1.98463e+06	30521.8	11907.9	335784	123462	94113.2	13681.9			3148.71	9184.34	76569	6086334	20897.8	67139.4	6164.66	17587.3	27226.2	3.51889e+06	1954023	409739	4.00793e+06	105129	90095.1	135873	48728.5	807387	10323	4237.75	59725.8	2703.73	101405		12953005	1091.15	1272.29
1987	420450	3319.95	527962	625.977	100378	1.50414e+06	1.80836e+06		2682.04	2.54897e+06	1.55296e+06		10016.7	2008635	30853.2	12823.8	353070	129238	96153.8	14725.4			3247.06	9285.71	77051.9	6344587	21252.4	69008.2	6587.12	18582.2	27497.3	3.64719e+06	1.99931e+06	421454	4364039	105125	94016	142666	48877.5	835628	10791.2	4401.5	61865.4	2942.11	104279		13184100	1133.45	1297.39
1988	436362	3689.81	529128	660.169	103851	1.54414e+06	1.83247e+06		2877.67	2.63367e+06	1.5971e+06		10160.7	2.0484e+06	30885.1	13713.9	367368	136448	98974.8	15687.1			3423.21	9495.68	77639.2	6568494	21704	71155.2	6976.11	20153.7	27462.3	3.79449e+06	2052580	436252	4773436	104853	97647.1	149989	48655	869356	11218.6	4565.85	63603.2	3273.94	107812		13436262	1183.93	1364.43
1989	456181	4106.04	527269	701.977	107772	1.58753e+06	1838712		3103.9	2712928	1.64335e+06		10358.5	2.09951e+06	30881	14754	382342	143273	102443	17490.2			3644.31	9589.61	78169.6	6.79252e+06	22285.9	73879.8	7297.89	23506	27582.5	3.949e+06	2108825	458741	5062329	104470	99895.5	156441	48263.7	897652	11482.9	4730.24	65984.6	3594.28	112657		13726374	1220.89	1460.3
1990	476016	4525.35	526730	754.089	111546	1.6363e+06	1835794	48186.5	3276.31	2.76951e+06	1.69278e+06	67479.4	10292.3	2157779	31123.1	15618.3	397158	144311	106129	18999.6	24877.3	355918	3861.58	9561.1	79215.3	6967859	22749.3	76693.4	7571.01	26913.3	27888.4	4.08462e+06	2.16798e+06	480358	5.31613e+06	103346	101383	160063	48300.3	922232	11633.5	4909.4	68949.7	3918.4	116809	1902156	14059705	1264.99	1556.43
1991	495678	4972.79	546205	783.323	109313	1.69025e+06	1.85099e+06	49834.5	3459.59	2.81645e+06	1.74867e+06	67142.1	10239.5	2.20542e+06	31478.8	16672.4	409119	143386	110769	20319.9	25514.5	367301	4126.65	9470.18	80982.3	7.17598e+06	23192.8	79748.2	7872.09	29894.2	28238.3	4.20108e+06	2219372	499924	5.63594e+06	102454	102395	161751	48562.5	941675	11784.5	5082.47	70778.6	4245.87	120652	1.92437e+06	14411917	1345.44	1643.34
1992	513846	5446.23	586977	827.231	106938	1.75697e+06	1.88946e+06	49188.8	3610.5	2.87062e+06	1.80117e+06	67990.7	10238.1	2.25161e+06	31895.3	17632.1	423664	142136	115993	21566	25807	373934	4392.4	9383.42	83190	7.34235e+06	23056.6	83734.7	8335.1	32440.1	28536.1	4.30379e+06	2254403	525869	6115865	101630	102500	161846	48757	967960	11978	5253.86	74078.1	4576.52	125797	1.95697e+06	14778006	1431.43	1668.02
1993	529789	5945.96	613193	859.138	106315	1.78558e+06	1940462	48231	3733.05	2930325	1.84942e+06	67939.4	10299.6	2.29166e+06	32403.3	18521	441010	139908	122061	22287.9	26254.9	379134	4714.13	9304.7	85353.9	7532847	23116	89128.1	8913.54	34707.7	28536.6	4398278	2282485	558242	6.81139e+06	100902	104477	160954	49827.9	1.01134e+06	12019.7	5482.53	78059.7	4918.81	129327	1977204	15082445	1529.78	1687.1
1994	543835	6498.93	637564	893.555	107272	1.82638e+06	2002753	47964.2	3861.82	3.00398e+06	1.90188e+06	68004.7	10195	2330652	32818.4	19741.6	461140	138177	126878	23306.7	27013.8	381895	4864.73	9207.64	86887.1	7.78776e+06	23470.5	93086.5	9532.2	36761.4	28890.2	4505443	2315234	591586	7589382	100776	106043	160227	53286.3	1060248	12088.2	5807.68	81944.7	5276.12	132294	1.99636e+06	15408579	1611.47	1707.55
1995	560780	7074.19	671452	931.242	108662	1.87279e+06	2.04442e+06	47554.2	4004.21	3076581	1951910	66896.1	10085.9	2.3727e+06	33462.8	20750.1	484053	141861	130070	24471	26838.2	380060	5041.89	9132.69	89053.6	8.06433e+06	23721.5	97595	10165.3	38940.7	29503.6	4.60181e+06	2353666	633913	8430762	101718	107621	159572	54266	1.10635e+06	12240.5	6054.35	85971.6	5644.41	135130	2.02727e+06	15722325	1674.43	1759.11
1996	577102	7574.31	729244	970.096	110854	1.92289e+06	2093007	47330	4172.27	3.15446e+06	2.00496e+06	67133.4	10064.6	2412940	34078.4	21835.8	510506	137847	133334	25860.8	30900.9	378129	5174.64	9148.91	91763.2	8321744	24008.4	110196	10820.5	40969.4	28956.7	4.70673e+06	2.38765e+06	678567	9351290	103650	109210	158770	53905	1.14843e+06	12388.7	6380.16	89160.8	6022.15	137590	2.06275e+06	16019275	1725.22	1800.69
1997	595902	8176.08	764080	1005.21	111119	1.9782e+06	2.15892e+06	47190.2	4359.87	3.24256e+06	2.05591e+06	68314.3	10038.9	2.4593e+06	34823.5	23094.8	540778	140337	137992	28082.2	36408.8	378764	5295.58	9213.39	95975.3	8609659	24829.9	115249	11488.2	43691.7	28618.9	4836438	2.42437e+06	727475	10317089	105496	111198	157781	54055.7	1.18634e+06	12432.6	6630.23	93461.9	6414.9	140406	2.08604e+06	16305675	1800.21	1853.72
1998	619552	8871.18	821296	1066.68	111620	2.03407e+06	2.22912e+06	47270.5	4582.69	3.33068e+06	2.10809e+06	70293.5	10043.2	2.50493e+06	35588.4	24243.6	575615	146018	142377	31028.7	42168.8	380643	5401.87	9409	102057	8872492	25867.9	118641	12212.8	46743.1	28400.9	4.96451e+06	2.46884e+06	775784	11445109	107515	113554	156833	54451.8	1.21666e+06	12525.2	6866.92	99630	6972.43	141934	2.10306e+06	16609218	1883.53	1891.43
1999	646183	9543.47	858560	1156.39	113134	2.09168e+06	2.27661e+06	47391.9	4824.24	3.42686e+06	2.15802e+06	72087.1	10396.4	2.55205e+06	36437.9	25212.4	614655	153817	144937	33239.8	46666.5	381026	5665.85	9640.01	105951	9062699	26684.6	120084	13271.5	50286.1	28762.5	5096084	2.51169e+06	807823	12598099	109918	116102	156096	53933.5	1.2171e+06	12554.8	7203.66	104879	7526.53	144621	2113829	16928360	1871.88	1931.6
2000	671947	10001.4	862814	1242.89	116279	2.15336e+06	2313178	47747.7	5076.48	3.49769e+06	2.21196e+06	73861.9	10377.5	2.60196e+06	37200.7	26108.6	656721	163220	149209	35907.8	51066.7	381292	6092.02	9872.13	108732	9271773	27309.2	119377	14602.1	53694.6	28950.8	5.23219e+06	2555740	843595	13807774	109987	118931	155199	53779.2	1.21611e+06	12514.2	7456	109184	8063.58	147153	2.12839e+06	17241400	1880.63	1974.77
2001	696058	10458.6	863955	1295.69	120678	2.21324e+06	2.33054e+06	48192.9	5156.8	3.58011e+06	2.26006e+06	76304.1	10408.8	2.64939e+06	38296	26904.3	700188	174758	152399	37890.3	55098.3	381005	6428.96	10080.3	109614	9471979	27798	119334	16328.2	57188.9	29078	5373983	2.59113e+06	880385	15183588	109486	123531	154514	53908.8	1.22043e+06	12516.7	7741.08	113509	8583.26	149633	2.14447e+06	17504746	1913.35	1984.41
2002	722761	10998	867976	1319.32	125316	2.27713e+06	2.3102e+06	49242.1	5273.43	3.68122e+06	2.30015e+06	80057.4	10456.3	2685413	39228.3	27738.3	747268	186212	158228	39877.3	59965	381484	6700.66	10082.6	111830	9629394	28682.3	121877	18382.2	60684.8	29154.5	5510506	2.62351e+06	916440	16754779	110137	128066	154863	53728.7	1.23119e+06	12503.8	8133.62	118098	9094.35	152968	2158050	17693756	2006.29	1967.39
2003	752186	11609.1	876802	1349.86	130430	2.34762e+06	2.31583e+06	50928.7	5436.17	3793366	2.34247e+06	85811.7	10795	2.71806e+06	40348.7	28789.1	798756	198776	165313	41976.4	64906.1	384457	6860.4	10019.8	113255	9753476	28946.6	122539	20413.2	64231.2	28864.4	5.65942e+06	2.65107e+06	955112	18678236	109955	131558	155327	53837.2	1.24872e+06	12408	8493.46	123007	9597.52	156387	2.17058e+06	17858988	2213.76	1984.43
2004	784665	12261.3	892691	1413.35	136398	2.41831e+06	2.35352e+06	53145.9	5627.16	3.91028e+06	2.38323e+06	91594.5	11294.9	2761351	41309.1	30105.4	856532	213193	171578	43592.4	69307.1	389895	6982.42	10181.4	114612	9915966	29262.6	123445	22732.5	68335.5	28675.6	5.8317e+06	2.68396e+06	999422	20848848	110399	135858	155598	54384	1.2729e+06	12355.3	9014.38	127758	10073.6	160309	2.18427e+06	18013062	2374.17	2017.37
2005	819560	13089.7	913544	1496.36	142896	2.50667e+06	2.40699e+06	56348.8	5901.95	4.03803e+06	2.42175e+06	97621	11631.9	2.81017e+06	42059.4	31634.7	923092	233177	181149	46007.3	75132.8	398058	7143.38	10336.6	116363	10079144	29596.5	124483	24580.8	72608.2	28839.8	6.02915e+06	2719346	1.0587e+06	23268102	110634	139945	156361	56143.2	1.3056e+06	12312.9	9438.87	132743	10565.4	164817	2.20091e+06	18165114	2652.82	2067.49
2006	858683	13968.7	935606	1622.51	150049	2.61474e+06	2.47505e+06	61026.5	6421.24	4.16799e+06	2.45952e+06	105547	11937.5	2.85802e+06	42767.9	33317.4	995964	255688	194072	49248.3	79590.1	411770	7304.36	10420.7	118679	10269699	30366.3	125659	26259.9	77495.9	29082	6.23997e+06	2759447	1.1195e+06	25976578	111499	143976	157733	58269.2	1.35112e+06	12334.2	10004.4	138257	11064.7	171245	2.21957e+06	18365854	3266.52	2113.67
2007	906200	14768.9	963791	1823.63	157554	2797278	2.56744e+06	66674.1	7011.5	4311797	2.50137e+06	113445	12210.2	2.91418e+06	44109.6	35326.6	1.07408e+06	281102	213719	52087	85761.5	428139	7476.06	10532.3	121889	10518991	30720.8	128567	27437.2	83286.4	29245	6.4517e+06	2.80367e+06	1.18531e+06	28985030	113448	147855	159511	65165.7	1410987	12278.4	10916.2	145893	11548.3	178305	2248851	18579110	3859.23	2169.78
2008	963644	15567.4	1.00692e+06	2037.91	165337	2.97064e+06	2665784	72985.8	7589.05	4450216	2.54275e+06	123455	12491.1	2.96963e+06	45445.7	37364.7	1.16149e+06	313376	237343	54329.2	93164.6	450035	7803.2	10785.4	126650	10830965	30979.1	132367	29268.7	89082.5	29446.9	6.65925e+06	2.84359e+06	1.26673e+06	32322166	115632	153865	161444	70697.9	1.46158e+06	12296	11805.5	154644	12022.6	186132	2.27498e+06	18787008	4342.82	2250.62
2009	1.01655e+06	16123.4	1.05438e+06	2083.06	172987	3.15909e+06	2.7147e+06	76998	8058.98	4.58547e+06	2.57116e+06	131845	12957.3	3.01039e+06	46962.7	39933.1	1.25555e+06	335433	250758	55821.5	97677.8	471829	7962.62	10875.8	131330	11097102	30993.4	135822	31528.6	95496.8	29682.1	6.80697e+06	2867855	1.32685e+06	36652620	117916	159346	166348	76152.6	1.51236e+06	12291.6	12532.2	160958	12405.8	191815	2285786	18897208	4722.17	2310.22
2010	1.06287e+06	16532.1	1.09048e+06	2103.14	179376	3.31254e+06	2.79708e+06	80693.2	8279.3	4723137	2.59457e+06	140741	13559.5	3.04958e+06	48786.5	43073.9	1.35809e+06	349860	266956	56999.3	100913	499245	7990.76	10868.8	136505	11482913	31398.2	138769	35074.6	102590	30068.9	6.99702e+06	2896271	1.39652e+06	41481220	122437	164989	171947	82346.9	1.56775e+06	12285.9	13487.2	167756	12744.8	197086	2.29518e+06	19046656	4840.45	2360.56
2011	1116994	16938	1.13209e+06	2094.91	186237	3.47032e+06	2901287	83560.6	8353.72	4.88694e+06	2624820	154715	14167.8	3.09537e+06	50878.2	46767	1.47117e+06	362414	279547	58778.9	104567	530931	8024.27	10819.8	144130	11900607	32032.3	145135	39003.2	110742	30269	7201987	2926518	1.47941e+06	46622836	123835	172017	183241	87904.9	1.63266e+06	12351.4	14490.7	174765	13074.4	200822	2303938	19250234	5073.55	2395.48
2012	1.17093e+06	17245.1	1.17725e+06	2096.17	191951	3.61248e+06	2.98263e+06	86210.8	8481.08	5.05175e+06	2.65403e+06	170581	14768.8	3.14017e+06	53159.9	51008.8	1597954	374976	293979	61712	108204	554218	8066.35	10719.7	151351	12295923	32474.6	154895	42807.4	120230	30312.1	7422570	2.96163e+06	1.57161e+06	52143048	129203	179024	194074	95595.9	1.6959e+06	12463.9	15070.2	182975	13392.7	202457	2.30718e+06	19440828	5376.7	2419.24
2013	1.22437e+06	17466.8	1.22129e+06	2106.67	197251	3.73214e+06	3.06299e+06	88388.2	8656.77	5.20316e+06	2.68317e+06	190610	15361.7	3179373	57517.3	55496.3	1.72999e+06	387191	312028	63978.8	111522	580529	8230.33	10649.9	159745	12723252	32980.4	166092	44423	129485	29772.3	7642909	2.99446e+06	1.66342e+06	58108720	140460	186606	204090	104274	1.76492e+06	12531.9	15491	190766	13707.2	202822	2.30681e+06	19611996	6068.37	2433.16
2014	1.27395e+06	17654.6	1.26644e+06	2143.9	201883	3873116	3.12671e+06	90360	8887.13	5.33663e+06	2.70958e+06	211835	16005	3.22579e+06	61714.5	58780.9	1.87703e+06	399927	330886	66829.3	115785	602868	8424.73	10663	169170	13080525	33420.1	170982	46952.7	138520	29995.6	7.86718e+06	3.02877e+06	1742457	64360792	155595	196032	214443	114736	1.84153e+06	12596.2	16074.1	198721	14035.6	202506	2.30887e+06	19804598	6882.68	2465.63
2015	1.32245e+06	17792	1.30726e+06	2188.02	206730	4.01923e+06	3193485	92338	9132.25	5454116	2737205	229176	16461.5	3.27599e+06	65726.5	62797.2	2.03477e+06	412932	346387	68520.7	119484	617035	8763.81	10702.2	178621	13283081	33904	176552	49920.5	148453	30255.4	8.05812e+06	3.06431e+06	1.81732e+06	71041904	174763	205472	222858	127723	1.9181e+06	12656.8	16444.8	206834	14346.7	202256	2.3193e+06	20002378	7833.86	2480.43
2016	1.37927e+06	17960.8	1339176	2213.54	211704	4183935	3.24654e+06	93674.6	9417.61	5568053	2.76828e+06	241648	16948.2	3330369	69553	67448	2.20766e+06	423076	364404	70457.6	123538	625025	9139.44	10830	187615	13382091	34313	180449	53235	158478	30569.7	8222410	3.10242e+06	1.88685e+06	78144448	193296	215431	231274	137980	1.9871e+06	12666.6	17019.2	215368	14689.7	204902	2.32291e+06	20223006	8725.33	2517.89
2017	1.43203e+06	18128.2	1.35166e+06	2237.24	217176	4.28727e+06	3.31664e+06	95323.9	9718.63	5.69332e+06	2.80226e+06	253676	17445.5	3.38357e+06	74870.3	72456.4	2399446	433697	384923	72809.6	128191	634667	9398.06	11038.2	198068	13467872	34193.3	185221	56321.7	166636	31075.3	8399451	3.14394e+06	1.94916e+06	85568768	212095	225862	244157	140316	2.05616e+06	12683.9	17652.3	222964	15058.6	209223	2.33054e+06	20453238	9542.21	2560.52
2018	1.48349e+06	18284.4	1.36036e+06	2361.48	222788	4397732	3.37281e+06	97052.5	10396.4	5809769	2.83884e+06	264709	18189.8	3.43959e+06	81241.4	78982.2	2.61296e+06	445279	407607	74822.6	133477	645298	9692.22	11220	208226	13584285	34092.9	193420	58912.5	175853	31578.3	8580741	3183201	2.01584e+06	93488032	232921	237543	258422	140690	2.12475e+06	12790.3	18480.9	230721	15549.9	212374	2.3476e+06	20701212	10379	2747.04
2019	1.53615e+06	18427.5	1.36746e+06	2379.58	227805	4506529	3.39915e+06	98812.8	10993.4	5913514	2.87811e+06	275832	18936	3.49844e+06	88271.8	86734.5	2.84418e+06	456857	429311	77112.6	138892	659330	9975.78	11500.5	216664	13716485	33979.6	200460	61362.5	185836	31898.4	8757839	3.22146e+06	2085805	101703024	256224	250077	269611	141254	2.19675e+06	12924.1	19195.7	236931	16109.4	215441	2.36418e+06	20957202	11186.6	2833.9
Gesamtergebnis	3.5308e+07	412371	3.74526e+07	55232.1	6.0363e+06	1.02582e+08	1.20199e+08	1.96985e+06	241471	1.85151e+08	1.05023e+08	3.79635e+06	575013	1.38586e+08	2.04151e+06	1.33027e+06	4.03451e+07	9.62108e+06	7.7998e+06	1.57654e+06	2.22869e+06	13783916	264640	473000	6.04733e+06	4.21361e+08	1.30314e+06	5.12919e+06	908512	2.79421e+06	1.6506e+06	2.6595e+08	1.33673e+08	4.45823e+07	1.07506e+09	5.63784e+06	5.97006e+06	7.97571e+06	2.98791e+06	6.02401e+07	546691	399859	5.51347e+06	334754	7.47645e+06	6.53724e+07	8.43528e+08	137244	84243.9
[truncated: 132 more columns]
