# Supplementary material for: The Social Cost of Fossil and Industrial CO2 Emissions from 1950 to 2018
Source: Research Square preprint supplement (doi:10.21203/rs.3.rs-2244259/v1), 2022-11-17
Supplement: Supplementary file 65 [file CO2_Forcing.xlsx]

## Sheet: data
Model

## Sheet: Recommended Citation
Recommended Citation
