# Supplementary material for: The Social Cost of Fossil and Industrial CO2 Emissions from 1950 to 2018
Source: Research Square preprint supplement (doi:10.21203/rs.3.rs-2244259/v1), 2022-11-17
Supplement: Supplementary file 67 [file GDP.xlsx]

## Sheet: data
Model	Scenario	Region	Variable	Unit	2005	2010	2020	2030	2040	2050	2060	2070	2080	2090	2100	Notes
AIM/CGE	SSP3-Baseline	World	GDP|PPP	billion US$2005/yr	54728.1	64812.7	97448	130402	154577	173654	190084	207896	226734	247081	270265
GCAM4	SSP4-Baseline	World	GDP|PPP	billion US$2005/yr	56713.9	66937	99822.6	141254	182424	219114	251626	281788	307379	330348	352091
IMAGE	SSP1-Baseline	World	GDP|PPP	billion US$2005/yr	57407.9	68461.9	101815	155855	223196	291301	356291	419291	475419	524876	565390
MESSAGE-GLOBIOM	SSP2-Baseline	World	GDP|PPP	billion US$2005/yr	56532.8	67528.8	101244	143070	185955	231300	280515	336848	398498	465846	539332
REMIND-MAGPIE	SSP5-Baseline	World	GDP|PPP	billion US$2005/yr	56690	67570	101900	165800	260200	364700	478300	605800	740600	882300	1031000
© SSP Public Database (Version 2.0) https://tntcat.iiasa.ac.at/SspDb generated: 2021-06-08 23:20:28
For recommended citation please follow this link: https://tntcat.iiasa.ac.at/SspDb/dsd?Action=htmlpage&page=citation
		Scenario	SSP3-Baseline	SSP4-Baseline	SSP1-Baseline	SSP2-Baseline	SSP5-Baseline
		Region	World	World	World	World	World
		Variable	GDP|PPP	GDP|PPP	GDP|PPP	GDP|PPP	GDP|PPP
		Unit	billion US$2005/yr	billion US$2005/yr	billion US$2005/yr	billion US$2005/yr	billion US$2005/yr
		2005	54728.1	56713.9	57407.9	56532.8	56690
		2010	64812.7	66937	68461.9	67528.8	67570
		2020	97448	99822.6	101815	101244	101900
		2030	130402	141254	155855	143070	165800
		2040	154577	182424	223196	185955	260200
		2050	173654	219114	291301	231300	364700
		2060	190084	251626	356291	280515	478300
		2070	207896	281788	419291	336848	605800
		2080	226734	307379	475419	398498	740600
		2090	247081	330348	524876	465846	882300
		2100	270265	352091	565390	539332	1031000
		Scenario	SSP3-Baseline	SSP4-Baseline	SSP1-Baseline	SSP2-Baseline	SSP5-Baseline
		Region	World	World	World	World	World
		Variable	Emissions|CO2|Fossil Fuels and Industry	Emissions|CO2|Fossil Fuels and Industry	Emissions|CO2|Fossil Fuels and Industry	Emissions|CO2|Fossil Fuels and Industry	Emissions|CO2|Fossil Fuels and Industry
		Unit	Mt CO2/yr	Mt CO2/yr	Mt CO2/yr	Mt CO2/yr	Mt CO2/yr
		2005	29596.1	29385.7	29394.2	30874	29550
		2010	32637.7	32647	31981.5	33133.2	32200
		2020	41088.3	40417.5	36892.2	37148	39550
		2030	49158.9	47694.3	39680.3	42507.3	51160
		2040	55239.4	51591.2	41860.8	47740.7	65840
		2050	60206.5	53078.3	42668.6	53614.5	82130
		2060	64222.7	53692	43038.3	59467.1	101200
		2070	68480.6	52929.9	40936.4	65089.4	117700
		2080	72728.2	49420.8	35332.5	74068	129600
		2090	77572.2	46575.2	30633.4	81276.9	130900
		2100	82558.8	44329.3	27049	86165.8	127600
		Scenario	SSP3-Baseline	SSP4-Baseline	SSP1-Baseline	SSP2-Baseline	SSP5-Baseline
		Region	World	World	World	World	World
		Variable	Emissions|CO2|Fossil Fuels and Industry	Emissions|CO2|Fossil Fuels and Industry	Emissions|CO2|Fossil Fuels and Industry	Emissions|CO2|Fossil Fuels and Industry	Emissions|CO2|Fossil Fuels and Industry
		Unit	Mt CO2/yr	Mt CO2/yr	Mt CO2/yr	Mt CO2/yr	Mt CO2/yr
		2005	0.540784	0.51814	0.512025	0.546126	0.521256
		2010	0.50357	0.487727	0.467143	0.490653	0.476543
		2020	0.421643	0.404893	0.362345	0.366914	0.388126
		2030	0.37698	0.337649	0.254598	0.297109	0.308565
		2040	0.357359	0.282809	0.187552	0.256733	0.253036
		2050	0.346704	0.242241	0.146476	0.231796	0.225199
		2060	0.337865	0.21338	0.120795	0.211992	0.211583
		2070	0.329399	0.187836	0.0976324	0.193231	0.194289
		2080	0.320764	0.160781	0.0743186	0.185868	0.174993
		2090	0.313955	0.140989	0.0583631	0.174472	0.148362
		2100	0.305474	0.125903	0.0478414	0.159764	0.123763

## Sheet: Recommended Citation
Recommended Citation
For recommended citation please follow this link: https://tntcat.iiasa.ac.at/SspDb/dsd?Action=htmlpage&page=citation
© SSP Public Database (Version 2.0) https://tntcat.iiasa.ac.at/SspDb generated: 2021-06-08 23:20:28
