# Supplementary material for: The Social Cost of Fossil and Industrial CO2 Emissions from 1950 to 2018
Source: Research Square preprint supplement (doi:10.21203/rs.3.rs-2244259/v1), 2022-11-17
Supplement: Supplementary file 68 [file LandUse_CO2_Emissions.xlsx]

## Sheet: data
Model	Scenario	Region	Variable	Unit	2005	2010	2020	2030	2040	2050	2060	2070	2080	2090	2100	Notes
AIM/CGE	SSP3-Baseline	World	Emissions|CO2|Land Use	Mt CO2/yr	4777.85	6923.01	7414.45	5841.97	4637.86	3794.89	3739.59	3312.02	2843.31	2564.94	2656.12
GCAM4	SSP4-Baseline	World	Emissions|CO2|Land Use	Mt CO2/yr	2501.45	3128.79	1218.54	1375.24	2255.7	2586.18	3262.02	2968.29	1752.11	957.502	455.4
IMAGE	SSP1-Baseline	World	Emissions|CO2|Land Use	Mt CO2/yr	3771.83	3507.34	3176.77	2972.98	1917.71	-213.854	-1436.36	-1718.86	-1940.19	-2014.94	-2436.09
MESSAGE-GLOBIOM	SSP2-Baseline	World	Emissions|CO2|Land Use	Mt CO2/yr	6894.95	7161.44	5114.4	4220.25	3865.74	3037.16	1935.18	907.574	65.6516	-248.572	-481.563
REMIND-MAGPIE	SSP5-Baseline	World	Emissions|CO2|Land Use	Mt CO2/yr	5732.64	4171.12	5062.39	5566.45	4025.62	2306.47	150.416	-238.674	-147.852	-495.368	-1530.32
© SSP Public Database (Version 2.0) https://tntcat.iiasa.ac.at/SspDb generated: 2021-06-08 23:24:35
For recommended citation please follow this link: https://tntcat.iiasa.ac.at/SspDb/dsd?Action=htmlpage&page=citation
					year		SSP5		SSP4		SSP3		SSP2		SSP1
					2005	5732.64	1.57317	2501.45	0.68271	4777.85	1.304	6894.95	1.88181	3771.83	1.02943
					2010	4171.12	1.14466	3128.79	0.853926	6923.01	1.88947	7161.44	1.95454	3507.34	0.957243
					2020	5062.39	1.38924	1218.54	0.332571	7414.45	2.02359	5114.4	1.39585	3176.77	0.867022
					2030	5566.45	1.52757	1375.24	0.375337	5841.97	1.59442	4220.25	1.15181	2972.98	0.811402
					2040	4025.62	1.10472	2255.7	0.615639	4637.86	1.26579	3865.74	1.05506	1917.71	0.523392
					2050	2306.47	0.632949	2586.18	0.705835	3794.89	1.03572	3037.16	0.828919	-213.854	-0.0583664
					2060	150.416	0.0412778	3262.02	0.890289	3739.59	1.02063	1935.18	0.528161	-1436.36	-0.39202
					2070	-238.674	-0.0654978	2968.29	0.810122	3312.02	0.903935	907.574	0.2477	-1718.86	-0.469121
					2080	-147.852	-0.0405741	1752.11	0.478197	2843.31	0.776011	65.6516	0.017918	-1940.19	-0.529527
					2090	-495.368	-0.135941	957.502	0.261327	2564.94	0.700037	-248.572	-0.0678416	-2014.94	-0.54993
					2100	-1530.32	-0.419955	455.4	0.12429	2656.12	0.724924	-481.563	-0.131431	-2436.09	-0.664872

## Sheet: Recommended Citation
Recommended Citation
For recommended citation please follow this link: https://tntcat.iiasa.ac.at/SspDb/dsd?Action=htmlpage&page=citation
© SSP Public Database (Version 2.0) https://tntcat.iiasa.ac.at/SspDb generated: 2021-06-08 23:24:35
