# Supplementary material for: The Social Cost of Fossil and Industrial CO2 Emissions from 1950 to 2018
Source: Research Square preprint supplement (doi:10.21203/rs.3.rs-2244259/v1), 2022-11-17
Supplement: Supplementary file 69 [file Population.xlsx]

## Sheet: data
Model	Scenario	Region	Variable	Unit	2005	2010	2020	2030	2040	2050	2060	2070	2080	2090	2100	Notes
AIM/CGE	SSP3-Baseline	World	Population	million	6490.99	6879.59	7697.85	8514.31	9257.22	9957.13	10574.4	11117.4	11633.4	12134.3	12620.1	12620.1
GCAM4	SSP4-Baseline	World	Population	million	6506.64	6895.88	7626.35	8258.57	8765.68	9146.53	9377.45	9472.53	9471.44	9401.59	9292.45	9472.53
IMAGE	SSP1-Baseline	World	Population	million	6530.55	6921.8	7576.1	8061.94	8388.76	8530.5	8492.18	8298.95	7967.39	7510.45	6957.99	8530.5
MESSAGE-GLOBIOM	SSP2-Baseline	World	Population	million	6503.13	6867.39	7611.25	8261.99	8787.12	9169.11	9384.7	9456.88	9407.26	9253.95	9032.42	9456.88
REMIND-MAGPIE	SSP5-Baseline	World	Population	million	6505	6894	7552	8054	8403	8579	8589	8457	8200	7831	7375	8589
© SSP Public Database (Version 2.0) https://tntcat.iiasa.ac.at/SspDb generated: 2021-06-08 23:21:43
For recommended citation please follow this link: https://tntcat.iiasa.ac.at/SspDb/dsd?Action=htmlpage&page=citation

## Sheet: Recommended Citation
Recommended Citation
For recommended citation please follow this link: https://tntcat.iiasa.ac.at/SspDb/dsd?Action=htmlpage&page=citation
© SSP Public Database (Version 2.0) https://tntcat.iiasa.ac.at/SspDb generated: 2021-06-08 23:21:43
