# Supplementary material for: The Social Cost of Fossil and Industrial CO2 Emissions from 1950 to 2018
Source: Research Square preprint supplement (doi:10.21203/rs.3.rs-2244259/v1), 2022-11-17
Supplement: Supplementary file 71 [file Total_Forcing.xlsx]

## Sheet: data
Model	Scenario	Region	Variable	Unit	2005	2010	2020	2030	2040	2050	2060	2070	2080	2090	2100	Notes
AIM/CGE	SSP3-Baseline	World	Diagnostics|MAGICC6|Forcing	W/m2	1.87092	2.13203	2.61748	3.1809	3.75884	4.29286	4.83988	5.39527	5.9617	6.55243	7.16543
GCAM4	SSP4-Baseline	World	Diagnostics|MAGICC6|Forcing	W/m2	1.87092	2.13495	2.63358	3.18266	3.75666	4.28649	4.77658	5.25394	5.70629	6.08338	6.42549
IMAGE	SSP1-Baseline	World	Diagnostics|MAGICC6|Forcing	W/m2	1.87092	2.13427	2.57691	3.06776	3.45092	3.79874	4.08926	4.36641	4.62271	4.83399	5.00907
MESSAGE-GLOBIOM	SSP2-Baseline	World	Diagnostics|MAGICC6|Forcing	W/m2	1.87092	2.13727	2.62197	3.01656	3.46971	3.92237	4.3946	4.89746	5.42135	5.983	6.56088
REMIND-MAGPIE	SSP5-Baseline	World	Diagnostics|MAGICC6|Forcing	W/m2	1.87092	2.13797	2.70889	3.33642	4.0536	4.83749	5.64042	6.47909	7.30722	8.05274	8.69777
© SSP Public Database (Version 2.0) https://tntcat.iiasa.ac.at/SspDb generated: 2021-06-08 23:25:51
For recommended citation please follow this link: https://tntcat.iiasa.ac.at/SspDb/dsd?Action=htmlpage&page=citation
Scenario	SSP3-Baseline	SSP4-Baseline	SSP1-Baseline	SSP2-Baseline	SSP5-Baseline
Region	World	World	World	World	World
Variable	Diagnostics|MAGICC6|Forcing	Diagnostics|MAGICC6|Forcing	Diagnostics|MAGICC6|Forcing	Diagnostics|MAGICC6|Forcing	Diagnostics|MAGICC6|Forcing
Unit	W/m2	W/m2	W/m2	W/m2	W/m2
2005	1.87092	1.87092	1.87092	1.87092	1.87092
2010	2.13203	2.13495	2.13427	2.13727	2.13797
2020	2.61748	2.63358	2.57691	2.62197	2.70889
2030	3.1809	3.18266	3.06776	3.01656	3.33642
2040	3.75884	3.75666	3.45092	3.46971	4.0536
2050	4.29286	4.28649	3.79874	3.92237	4.83749
2060	4.83988	4.77658	4.08926	4.3946	5.64042
2070	5.39527	5.25394	4.36641	4.89746	6.47909
2080	5.9617	5.70629	4.62271	5.42135	7.30722
2090	6.55243	6.08338	4.83399	5.983	8.05274
2100	7.16543	6.42549	5.00907	6.56088	8.69777
Scenario	SSP3-Baseline	SSP4-Baseline	SSP1-Baseline	SSP2-Baseline	SSP5-Baseline
Region	World	World	World	World	World
Variable	Diagnostics|MAGICC6|Forcing|CO2	Diagnostics|MAGICC6|Forcing|CO2	Diagnostics|MAGICC6|Forcing|CO2	Diagnostics|MAGICC6|Forcing|CO2	Diagnostics|MAGICC6|Forcing|CO2
Unit	W/m2	W/m2	W/m2	W/m2	W/m2
2005	1.68978	1.68978	1.68978	1.68978	1.68978
2010	1.83786	1.83786	1.83786	1.83786	1.83786
2020	2.20061	2.17631	2.16796	2.15972	2.19241
2030	2.62056	2.55658	2.5045	2.50087	2.62967
2040	3.06635	2.96871	2.83506	2.87514	3.15735
2050	3.52514	3.38059	3.14121	3.28047	3.76443
2060	3.98916	3.78052	3.42169	3.70612	4.44678
2070	4.45645	4.16274	3.67899	4.14341	5.18652
2080	4.92855	4.50821	3.89497	4.60724	5.94726
2090	5.40888	4.81601	4.06715	5.1021	6.67367
2100	5.9014	5.1004	4.21066	5.60809	7.32699
Scenario	SSP3-Baseline	SSP4-Baseline	SSP1-Baseline	SSP2-Baseline	SSP5-Baseline
Region	World	World	World	World	World
Variable	Diagnostics|MAGICC6|Forcing|CO2	Diagnostics|MAGICC6|Forcing|CO2	Diagnostics|MAGICC6|Forcing|CO2	Diagnostics|MAGICC6|Forcing|CO2	Diagnostics|MAGICC6|Forcing|CO2
Unit	W/m2	W/m2	W/m2	W/m2	W/m2
2005	0.181132	0.181132	0.181132	0.181132	0.181132
2010	0.294173	0.297089	0.296407	0.299412	0.300109
2020	0.416867	0.457269	0.408954	0.462249	0.516485
2030	0.560333	0.626086	0.563254	0.515696	0.706752
2040	0.692481	0.78794	0.615861	0.594576	0.896248
2050	0.767723	0.905895	0.657532	0.641903	1.07306
2060	0.850716	0.996057	0.667564	0.688484	1.19363
2070	0.938817	1.0912	0.687425	0.754056	1.29256
2080	1.03315	1.19807	0.727738	0.814111	1.35996
2090	1.14355	1.26737	0.766847	0.880897	1.37907
2100	1.26403	1.32509	0.798412	0.952785	1.37078	1
0.351364
Annual increase	0.0111301	0.0118747	0.00545181	0.0073344	0.0124319	0.00791019

## Sheet: Recommended Citation
Recommended Citation
For recommended citation please follow this link: https://tntcat.iiasa.ac.at/SspDb/dsd?Action=htmlpage&page=citation
© SSP Public Database (Version 2.0) https://tntcat.iiasa.ac.at/SspDb generated: 2021-06-08 23:25:51
