# Supplementary material for: The Social Cost of Fossil and Industrial CO2 Emissions from 1950 to 2018
Source: Research Square preprint supplement (doi:10.21203/rs.3.rs-2244259/v1), 2022-11-17
Supplement: Supplementary file 72 [file StockAssessment.xlsx]

## Sheet: CountryAtmresults
			meanSCC		14.9708		Comparison		58.4024		Comparison		Capital	Share	Comparison	Share	Capital
			stdSCC		8.67118				33.3446				Stock	SDR: calib		SDR:expert	Stock
					stock_calibrated		flow_calibrated		stock_expert		flow_expert
Country	Catm	Temp	Dcatm	cumul. CO2	Mean	Std	Mean	Std	Mean	Std	Mean	Std
Country	Catm	Temp	GtCO2	GtCO2	Mrd	Mrd	Mrd	Mrd	Mrd	Mrd	Mrd	Mrd	PPP	percent		percent	National Prices					446820
total	408.687	1.19275	0															4.75817	2.84403
USA	386.614	1.04525	171.457	315.473	2566.84	1486.73	9832.85	714.145	10013.5	5717.16	20083.7	1404.91	7.08593e+07	3.62245	0.628205	14.1315	4.27039	5.76635	3.30919		315.473		315.473	178.85
China	391.859	1.09781	130.72	208.023	1956.98	1133.49	4835.16	416.532	7634.34	4358.8	12868.9	1240.9	6.65628e+07	2.94004	1.13022	11.4694	6.09985	2.60129	1.88027				208.023	117.945
Russian Federation	401.31	1.14391	57.3038	105.507	857.883	496.891	3334.48	256.403	3346.68	1910.77	6740.93	487.465	2.17962e+07	3.93592	1.07771	15.3544	6.90338	3.65212	2.22419				105.507	59.8368
Germany	404.399	1.16385	33.3122	62.5997	498.709	288.856	2104.39	159.184	1945.51	1110.78	4014.64	276.97	1.93949e+07	2.57134	0.357586	10.031	2.53283	7.19081	3.9604				62.5997	35.5161
Japan	404.353	1.16499	33.6704	59.4642	504.072	291.962	1709.66	130.393	1966.43	1122.73	3765.5	283.012	2.6902e+07	1.87374	0.351084	7.30961	2.24411	5.337	3.25724				59.4642	33.7388
India	404.813	1.17153	30.0974	47.437	450.581	260.98	1113.65	93.744	1757.76	1003.58	2935.72	279.144	2.35145e+07	1.91618	0.727488	7.47521	4.40411	2.63397	1.69733				47.437	26.9215
United Kingdom	406.052	1.1748	20.4677	38.8052	306.417	177.479	1335.43	102.16	1195.36	682.487	2491.83	170.984	1.02666e+07	2.98461	0.470728	11.6433	3.10834	6.34042	3.74581				38.8052	22.0288
Canada	406.645	1.1797	15.8669	28.1849	237.54	137.585	840.736	61.1652	926.664	529.075	1787.74	128.687	7.64129e+06	3.10863	0.591695	12.1271	4.07893	5.25378	2.9731				28.1849	16.0091
Ukraine	406.837	1.18008	14.3691	27.3111	215.116	124.597	914.525	73.72	839.188	479.131	1757.18	131.342	5.88217e+06	3.65709	10.3407	14.2666	12.8211	0.35366	1.11275				27.3111	15.5138
France	406.872	1.18061	14.1031	26.2399	211.135	122.291	863.641	65.1536	823.656	470.263	1680.21	116.971	1.42314e+07	1.48359	0.290189	5.78761	1.90316	5.11249	3.04105				26.2399	14.9066
Italy	407.08	1.18226	12.4811	22.393	186.852	108.226	664.636	50.5928	728.925	416.177	1422.86	105.234	1.10298e+07	1.69406	0.227099	6.60869	1.61116	7.45955	4.10183				22.393	12.7261
Poland	407.163	1.18269	11.8438	21.7846	177.311	102.7	696.772	52.6688	691.706	394.927	1392.53	98.7971	2.69596e+06	6.5769	1.18574	25.6571	7.9374	5.54668	3.23243				21.7846	12.3812
South Africa	407.285	1.18403	10.8914	18.8119	163.053	94.4411	525.29	38.8157	636.083	363.169	1186.12	90.3358	1.88955e+06	8.62915	1.02015	33.6631	7.97212	8.45867	4.22261				18.8119	10.6962
Mexico	407.322	1.18432	10.6076	18.1049	158.804	91.9802	485.357	37.4602	619.508	353.706	1138.38	90.523	9.64869e+06	1.64586	0.414491	6.42065	2.90724	3.9708	2.2085				18.1049	10.2955
Iran	407.365	1.18523	10.2701	16.545	153.752	89.0542	401.584	32.9027	599.8	342.454	1028.57	92.2371	3.73739e+06	4.11388	0.38202	16.0486	3.31564	10.7688	4.84029				16.545	9.41132
Australia	407.459	1.18511	9.54056	16.4857	142.83	82.7279	461.821	33.9368	557.192	318.126	1039.63	78.7538	5.86805e+06	2.43402	0.432725	9.49535	3.29245	5.62488	2.88398				16.4857	9.37768
South Korea	407.38	1.18516	10.1522	16.4485	151.986	88.0314	391.121	33.7079	592.912	338.521	1022.58	92.8678	8.34013e+06	1.82235	0.638187	7.10914	3.41787	2.85551	2.07999				16.4485	9.35662
Brazil	407.574	1.18613	8.64771	14.424	129.463	74.9858	375.56	28.9027	505.047	288.355	903.157	74.0597	8.05227e+06	1.60778	0.25402	6.27211	1.76206	6.32936	3.55952				14.424	8.20909
Saudi Arabia	407.551	1.18626	8.82507	14.202	132.118	76.5237	337.265	29.1073	515.405	294.269	882.325	80.8553	3.97657e+06	3.32241	0.341261	12.961	2.42369	9.73569	5.34764				14.202	8.08322
Spain	407.711	1.18654	7.58377	13.2575	113.535	65.7602	373.013	28.3379	442.911	252.878	837.709	64.2502	7.76463e+06	1.46221	0.278513	5.70421	1.82502	5.25006	3.12555				13.2575	7.54788
Indonesia	407.695	1.18715	7.70765	12.3073	115.39	66.8344	290.567	24.669	450.145	257.009	763.314	70.8067	1.08043e+07	1.06799	0.521602	4.16634	2.95517	2.04752	1.40985				12.3073	7.00927
Kazakhstan	407.793	1.18714	6.94903	12.3019	104.032	60.2563	370.733	27.8745	405.84	231.713	781.151	57.0894	1.3499e+06	7.70669	9.41838	30.0645	15.8535	0.818261	1.89639				12.3019	7.0062
Turkey	407.901	1.18825	6.10578	9.87309	91.4084	52.9444	240.228	19.6243	356.593	203.595	614.175	54.5736	6.33067e+06	1.4439	0.321702	5.63277	2.21806	4.48831	2.53951				9.87309	5.62952
Netherlands	408	1.18828	5.33553	9.64789	79.8771	46.2654	298.153	22.0953	311.608	177.911	614.368	43.6606	3.56749e+06	2.23903	0.327726	8.73467	2.35205	6.83201	3.71365				9.64789	5.50187
Czech Republic	408.064	1.18855	4.84183	9.08192	72.4859	41.9843	302.32	23.2528	282.774	161.449	582.798	41.2442	1.86896e+06	3.87841	5.51886	15.13	6.32301	0.702756	2.39285				9.08192	5.18107
Taiwan	408.052	1.18898	4.93507	8.10352	73.8819	42.7929	197.91	16.5576	288.22	164.558	505.091	44.5747	3.26336e+06	2.26398	0.782058	8.83201	4.32589	2.89491	2.04166				8.10352	4.62649
Belgium	408.152	1.18918	4.15471	7.73407	62.1993	36.0262	256.798	19.2267	242.645	138.537	495.208	34.0815	2.19502e+06	2.83366	0.438864	11.0544	2.86087	6.45679	3.86399				7.73407	4.41708
Romania	408.158	1.18916	4.11353	7.72471	61.5828	35.6692	251.897	20.6391	240.24	137.164	496.03	37.6412	1.28155e+06	4.80533	0.888243	18.746	5.25646	5.40993	3.56629				7.72471	4.41178
Argentina	408.126	1.18925	4.36236	7.5842	65.3079	37.8268	218.178	15.8318	254.772	145.461	479.086	35.4504	2.76726e+06	2.36002	0.385541	9.20666	2.88171	6.12132	3.19486				7.5842	4.33213
Venezuela	408.149	1.18933	4.18469	7.33886	62.6482	36.2862	212.557	15.3436	244.396	139.537	463.772	34.3288	222409	28.168	8.16488	109.886	68.3093	3.44989	1.60865				7.33886	4.19307
Thailand	408.131	1.18959	4.31736	6.86313	64.6343	37.4366	156.445	14.1899	252.145	143.961	424.769	40.8675	3.53329e+06	1.82929	0.517335	7.13625	3.07712	3.536	2.31913				6.86313	3.92341
Uzbekistan	408.245	1.18989	3.43514	6.16343	51.4268	29.7867	185.936	13.8712	200.621	114.543	391.895	28.3753	863794	5.95359	1.74058	23.2255	13.6525	3.42046	1.70119				6.16343	3.52681
Egypt	408.222	1.19009	3.61168	5.83151	54.0696	31.3175	142.239	11.5084	210.931	120.43	362.591	32.3461	2.26454e+06	2.38767	1.46906	9.31451	7.62788	1.6253	1.22111				5.83151	3.33867
Malaysia	408.248	1.1903	3.41574	5.36811	51.1364	29.6185	120.335	11.0577	199.488	113.897	331.517	32.7167	2.0966e+06	2.43901	0.653478	9.51482	3.92489	3.73236	2.42423				5.36811	3.076
North Korea	408.357	1.19048	2.56257	4.85243	38.3636	22.2205	156.538	13.9195	149.66	85.4478	312.065	25.81	#N/A	#N/A	#N/A	#N/A	#N/A	#N/A	#N/A				4.85243	2.7837
Pakistan	408.311	1.19064	2.92621	4.67282	43.8077	25.3737	111.994	9.29307	170.898	97.5735	290.125	26.4634	1.47059e+06	2.97891	0.772787	11.621	4.96078	3.85477	2.34258				4.67282	2.6819
Belarus	408.369	1.19064	2.46917	4.56952	36.9654	21.4106	145.719	12.2917	144.206	82.3336	292.772	22.4813	840824	4.39633	8.09503	17.1505	10.0723	0.54309	1.70273				4.56952	2.62335
United Arab Emirates	408.322	1.19072	2.83361	4.47793	42.4214	24.5707	102.642	9.17531	165.49	94.4857	277.035	26.8942	1.8651e+06	2.27448	0.338966	8.87296	2.49593	6.71005	3.55497				4.47793	2.57143
Algeria	408.355	1.1908	2.58237	4.2665	38.6601	22.3922	107.943	8.85706	150.817	86.1081	266.782	22.6577	2.28997e+06	1.68824	0.244349	6.58598	1.96188	6.90912	3.35697				4.2665	2.45159
Hungary	408.401	1.19082	2.22192	4.16576	33.2638	19.2666	138.391	10.6716	129.765	74.089	267.326	18.9791	1.04686e+06	3.17748	0.563715	12.3956	3.72779	5.63667	3.3252				4.16576	2.39449
Iraq	408.359	1.19093	2.55036	4.09305	38.1809	22.1147	101.064	8.19021	148.947	85.0409	254.697	22.7615	794385	4.80635	0.942427	18.75	6.04629	5.09997	3.10108				4.09305	2.35327
Sweden	408.415	1.19091	2.1156	3.99822	31.6722	18.3447	136.179	10.6697	123.556	70.5438	256.929	18.1608	2.43329e+06	1.30162	0.220593	5.07773	1.50156	5.90054	3.38164				3.99822	2.29952
Greece	408.397	1.19091	2.25182	3.89758	33.7115	19.5259	104.878	8.34767	131.512	75.086	245.559	19.8485	1.38846e+06	2.42797	0.267234	9.47174	2.01065	9.08557	4.71078				3.89758	2.24248
Austria	408.421	1.19103	2.0716	3.72033	31.0135	17.9633	113.953	8.31248	120.987	69.0769	236.543	16.7634	2.12407e+06	1.4601	0.288393	5.69597	1.81897	5.06287	3.13142				3.72033	2.14201
Nigeria	408.404	1.19108	2.19889	3.65511	32.9191	19.067	94.9992	7.88597	128.42	73.3211	228.956	19.4385	5.3192e+06	0.618873	0.0897255	2.41428	0.811161	6.8974	2.97633				3.65511	2.10504
Bulgaria	408.435	1.19107	1.9595	3.63691	29.3353	16.9912	116.861	9.47499	114.44	65.3388	233.049	17.3933	344066	8.52605	1.85897	33.2609	12.1251	4.58645	2.74315				3.63691	2.09473
Denmark	408.456	1.19119	1.79905	3.35156	26.9331	15.5999	109.075	8.26058	105.069	59.9885	214.632	15.1784	1.18445e+06	2.2739	0.342086	8.87069	2.27937	6.64715	3.89172				3.35156	1.93298
Viet Nam	408.417	1.19133	2.09636	3.22584	31.3842	18.1779	73.4384	6.6257	122.433	69.9025	198.811	20.4251	1.41707e+06	2.21473	0.797961	8.63987	4.70239	2.77549	1.83734				3.22584	1.86172
Colombia	408.449	1.1913	1.84828	3.1709	27.6702	16.0268	88.7862	6.57631	107.944	61.6303	199.9	15.221	2.13635e+06	1.29521	0.269726	5.05273	1.9654	4.80195	2.57084				3.1709	1.83058
Philippines	408.444	1.19135	1.89023	3.10733	28.2983	16.3906	80.3079	6.20953	110.394	63.0291	194.274	16.2088	2.12205e+06	1.33353	0.285617	5.20224	2.11635	4.66895	2.45812				3.10733	1.79455
Slovakia	408.481	1.19136	1.60125	2.99884	23.972	13.8847	99.6966	7.6022	93.5169	53.3931	192.374	13.5364	510162	4.69889	1.09303	18.3308	6.90519	4.29896	2.65464				2.99884	1.73305
Finland	408.473	1.19135	1.66743	2.9922	24.9628	14.4586	89.0053	6.78983	97.382	55.5999	190.165	14.0832	1.08308e+06	2.3048	0.284594	8.99124	2.12363	8.09855	4.2339				2.9922	1.72929
Kuwait	408.474	1.19151	1.65737	2.72472	24.8121	14.3714	69.5824	5.54784	96.7945	55.2644	170.15	14.4879	454566	5.45842	0.62766	21.2938	4.26762	8.69646	4.98962				2.72472	1.57767
Serbia	408.502	1.19155	1.43795	2.57454	21.5273	12.4688	76.8431	5.86896	83.98	47.9481	163.637	12.117	502913	4.28053	6.9391	16.6987	12.1244	0.61687	1.37728				2.57454	1.49255
Chile	408.492	1.19159	1.51619	2.54296	22.6985	13.1471	68.4263	5.06043	88.5489	50.5566	159.421	12.7457	1.32361e+06	1.71489	0.575767	6.68996	3.31327	2.97845	2.01914				2.54296	1.47465
Switzerland	408.511	1.19159	1.36952	2.49083	20.5027	11.8753	77.7137	5.81713	79.9831	45.666	158.804	11.2779	2.62277e+06	0.78172	0.0733748	3.04956	0.549541	10.6538	5.54929				2.49083	1.4451
Turkmenistan	408.502	1.19162	1.43661	2.48018	21.5072	12.4571	71.5163	5.28487	83.9017	47.9034	156.658	11.7181	705518	3.04843	1.40587	11.8922	8.69797	2.16836	1.36724				2.48018	1.43906
Portugal	408.514	1.19166	1.34707	2.31825	20.1668	11.6807	62.6046	4.85577	78.6724	44.9177	145.934	11.7021	1.56961e+06	1.28483	0.25409	5.01222	1.72333	5.05659	2.90845				2.31825	1.34728
Azerbaijan	408.526	1.1917	1.2506	2.2819	18.7224	10.8442	70.9527	5.84592	73.038	41.7007	145.789	11.0583	290672	6.44109	9.9157	25.1273	12.2022	0.649585	2.05924				2.2819	1.32668
Israel	408.513	1.19169	1.35161	2.27306	20.2346	11.72	59.0002	4.6094	78.9371	45.0688	142.42	11.7522	926415	2.18418	0.40026	8.5207	2.75558	5.45691	3.09216				2.27306	1.32167
Norway	408.531	1.19175	1.21508	2.14707	18.1907	10.5362	63.1584	4.64495	70.9637	40.5164	136.073	9.92878	1.57832e+06	1.15253	0.160661	4.49614	1.21391	7.17372	3.70384				2.14707	1.25025
Singapore	408.532	1.19177	1.20394	2.07417	18.0239	10.4396	55.2845	4.59805	70.313	40.1449	130.614	10.8165	1.3127e+06	1.37304	0.358559	5.35637	1.85227	3.82935	2.89179				2.07417	1.20893
Libya	408.538	1.19182	1.15803	1.97868	17.3367	10.0415	52.34	4.34383	67.6319	38.6142	124.424	10.223	#N/A	#N/A	#N/A	#N/A	#N/A	#N/A	#N/A				1.97868	1.15481
Qatar	408.527	1.19189	1.24601	1.92989	18.6537	10.8043	43.4375	3.93203	72.7698	41.5476	119.003	12.0249	896950	2.07968	0.940559	8.11302	4.61863	2.21111	1.75659				1.92989	1.12715
Ireland	408.546	1.19185	1.09573	1.92752	16.404	9.50129	55.7947	4.07842	63.9934	36.5368	121.965	9.03875	1.23916e+06	1.3238	0.39677	5.16426	2.27437	3.33644	2.27063				1.92752	1.1258
Syria	408.554	1.19189	1.03839	1.79142	15.5455	9.00404	46.6116	3.96993	60.6443	34.6246	112.652	9.68514	408828	3.80245	#N/A	14.8337	#N/A	#N/A	#N/A				1.79142	1.04866
Morocco	408.558	1.192	1.00425	1.63379	15.0344	8.70802	40.3004	3.23358	58.6505	33.4863	101.742	8.9086	933237	1.61099	0.563565	6.28464	3.26353	2.85858	1.92572				1.63379	0.959315
Peru	408.564	1.19201	0.961329	1.6251	14.3919	8.33586	44.4581	3.35724	56.144	32.0552	102.156	8.05244	1.02831e+06	1.39956	0.336087	5.45981	2.27188	4.16428	2.40321				1.6251	0.954389
Cuba	408.574	1.19202	0.876576	1.58618	13.123	7.60095	48.9742	3.72599	51.1941	29.2291	101.066	7.31903	#N/A	#N/A	#N/A	#N/A	#N/A	#N/A	#N/A				1.58618	0.93233
New Zealand	408.572	1.19202	0.896366	1.5667	13.4193	7.77255	45.2599	3.26843	52.3499	29.889	99.0223	7.30224	748955	1.79174	0.281717	6.98973	2.21874	6.36006	3.15031				1.5667	0.921284
Hong Kong	408.569	1.19203	0.918982	1.54679	13.7579	7.96866	39.8698	3.20898	53.6708	30.6431	96.9574	8.05672	1.76727e+06	0.778481	0.37097	3.03693	2.06778	2.0985	1.46869				1.54679	0.91
Estonia	408.591	1.19211	0.749044	1.39824	11.2138	6.4951	45.8859	3.64259	43.746	24.9766	89.7053	6.6059	164681	6.80941	8.87745	26.5641	9.92379	0.767045	2.67681				1.39824	0.825798
Bangladesh	408.573	1.19215	0.887414	1.36335	13.2853	7.69493	30.1669	2.781	51.8271	29.5905	83.9454	8.61165	2.00668e+06	0.662054	0.282764	2.58273	1.84115	2.34137	1.40278				1.36335	0.806023
Trinidad and Tobago	408.586	1.19215	0.784108	1.30116	11.7387	6.79914	33.1987	2.62755	45.7938	26.1458	81.312	6.92033	48476.6	24.2152	2.60475	94.4657	18.3368	9.29656	5.15171				1.30116	0.770771
Lithuania	408.6	1.19216	0.677931	1.28163	10.1492	5.87846	42.9154	3.48835	39.5928	22.6053	82.435	6.20839	294195	3.4498	0.591827	13.458	4.33565	5.82907	3.10403				1.28163	0.759702
Oman	408.591	1.19225	0.74515	1.13646	11.1555	6.46133	24.4043	2.38764	43.5185	24.8467	69.8186	7.44784	380860	2.92903	0.588462	11.4264	3.71083	4.97743	3.0792				1.13646	0.677415
Ecuador	408.6	1.19224	0.678553	1.1124	10.1585	5.88385	27.596	2.28752	39.6291	22.6261	69.4037	6.0377	741635	1.36974	0.247294	5.34348	1.97029	5.53892	2.71203				1.1124	0.66378
Croatia	408.613	1.19227	0.57709	1.02612	8.63949	5.00405	30.0719	2.28048	33.7035	19.2429	65.1021	4.84732	397319	2.17445	0.220598	8.48273	1.8364	9.85707	4.61922				1.02612	0.614875
Georgia	408.624	1.19232	0.489569	0.946783	7.32923	4.24514	33.5372	2.92389	28.592	16.3245	61.2419	4.97252	214184	3.42193	8.83859	13.3493	5.70491	0.387158	2.33996				0.946783	0.569904
Moldova	408.629	1.19235	0.450932	0.878449	6.7508	3.91011	30.5468	2.84309	26.3355	15.0361	56.897	4.892	184350	3.66195	9.49694	14.2856	7.67073	0.385593	1.86235				0.878449	0.53117
Tunisia	408.621	1.19236	0.511259	0.843343	7.65395	4.43322	21.2556	1.69379	29.8588	17.0477	52.6751	4.46826	408221	1.87495	0.550121	7.31437	3.82352	3.40826	1.91299				0.843343	0.511272
Bosnia and Herzegovina	408.625	1.19236	0.483476	0.841161	7.23802	4.19231	24.1246	1.95341	28.2362	16.1213	53.2217	4.16981	93122.1	7.77261	1.90988	30.3217	11.2221	4.06968	2.70195				0.841161	0.510035
Bahrain	408.623	1.19238	0.500405	0.811189	7.49146	4.3391	19.7339	1.63488	29.2249	16.6858	50.4786	4.50345	268141	2.79385	0.455407	10.8991	3.35616	6.13484	3.24749				0.811189	0.493046
Slovenia	408.63	1.19238	0.446578	0.793135	6.68562	3.87236	23.1927	1.75378	26.0812	14.891	50.3108	3.73955	278489	2.40068	0.471522	9.36528	3.2112	5.09135	2.91644				0.793135	0.482813
Luxembourg	408.637	1.19241	0.392982	0.736063	5.88324	3.40761	25.0635	1.92426	22.9511	13.1038	47.1952	3.25549	151054	3.89479	0.65967	15.1939	3.75764	5.90415	4.04348				0.736063	0.450463
Kyrgyzstan	408.637	1.19242	0.388954	0.732087	5.82295	3.37269	24.4142	2.20065	22.7159	12.9695	47.1223	3.85949	152559	3.81685	13.4295	14.8899	12.1158	0.284215	1.22897				0.732087	0.44821
Dominican Republic	408.633	1.19243	0.425086	0.699422	6.36388	3.686	17.3712	1.42634	24.8261	14.1743	43.6495	3.7819	555498	1.14562	0.336861	4.46916	2.38713	3.40086	1.87219				0.699422	0.429694
Latvia	408.64	1.19243	0.370735	0.69905	5.55019	3.21471	23.2602	1.87101	21.6518	12.362	44.9354	3.35154	355060	1.56317	0.52019	6.09807	3.32964	3.005	1.83145				0.69905	0.429484
Lebanon	408.634	1.19244	0.414735	0.680366	6.20891	3.59624	17.3856	1.34371	24.2215	13.8292	42.4778	3.59196	308440	2.013	0.217912	7.8529	1.77034	9.23768	4.43583				0.680366	0.418893
Angola	408.631	1.19245	0.436163	0.672949	6.5297	3.78205	15.097	1.39368	25.473	14.5437	41.453	4.32187	749415	0.871307	0.0979837	3.39905	0.835814	8.89236	4.06675				0.672949	0.414689
Zimbabwe	408.64	1.19244	0.366415	0.665633	5.48552	3.17725	20.6002	1.54905	21.3995	12.218	42.4283	3.10206	58292.2	9.41039	1.1817	36.7108	8.10669	7.96341	4.52846				0.665633	0.410542
Jordan	408.636	1.19245	0.401689	0.648998	6.01359	3.48311	15.4148	1.32394	23.4596	13.3942	40.3305	3.67172	288695	2.08303	0.4326	8.12607	2.7264	4.81513	2.98052				0.648998	0.401113
Mongolia	408.635	1.19249	0.407196	0.627136	6.09604	3.53087	14.941	1.33359	23.7812	13.5778	38.8206	4.04185	115377	5.2836	0.960519	20.6118	7.77628	5.50077	2.6506				0.627136	0.388721
Armenia	408.646	1.19246	0.323358	0.625838	4.84093	2.8039	22.1165	1.92794	18.8849	10.7823	40.4763	3.28635	135359	3.57637	9.4435	13.9518	6.33851	0.378713	2.20111				0.625838	0.387986
Yemen	408.641	1.19246	0.360959	0.614232	5.40384	3.12994	16.1469	1.27902	21.0809	12.036	38.4908	3.27853	151347	3.57049	0.361325	13.9288	3.42559	9.88166	4.06611				0.614232	0.381407
North Macedonia	408.647	1.19248	0.313685	0.571304	4.69611	2.72002	17.2628	1.41149	18.32	10.4597	36.4391	2.79346	162205	2.89517	5.55062	11.2943	8.64933	0.521594	1.3058				0.571304	0.357074
Bolivia	408.646	1.19252	0.316982	0.521702	4.74547	2.74861	13.8358	1.06873	18.5125	10.5697	32.5909	2.73072	170882	2.77704	0.365701	10.8335	3.11087	7.59375	3.48247				0.521702	0.328959
Myanmar	408.649	1.19254	0.299246	0.485806	4.47994	2.59481	12.6652	0.966872	17.4767	9.97823	30.331	2.59635	569634	0.786459	0.65544	3.06805	2.84065	1.19989	1.08005				0.485806	0.308612
Sri Lanka	408.651	1.19255	0.284611	0.458276	4.26085	2.46791	11.6264	0.896326	16.622	9.49024	28.5231	2.50799	669789	0.636148	0.203344	2.48167	1.18214	3.12844	2.09931				0.458276	0.293008
Jamaica	408.655	1.19255	0.247124	0.437263	3.69964	2.14286	12.6479	0.98687	14.4327	8.24027	27.7128	2.11132	141332	2.6177	0.462374	10.2119	3.75863	5.66143	2.71691				0.437263	0.281097
Kenya	408.654	1.19256	0.259326	0.431774	3.88231	2.24866	11.5988	0.862636	15.1453	8.64712	27.0615	2.18032	395022	0.982808	0.230276	3.83403	1.71205	4.26796	2.23943				0.431774	0.277986
Curaçao	408.659	1.19256	0.221197	0.418465	3.3115	1.91804	14.4608	1.36853	12.9185	7.37574	26.9429	2.20547	#N/A	#N/A	#N/A	#N/A	#N/A	#N/A	#N/A				0.418465	0.270442
Guatemala	408.655	1.19257	0.24823	0.403275	3.71619	2.15244	10.121	0.796578	14.4972	8.27713	25.1355	2.17569	314437	1.18186	0.265847	4.61054	1.9622	4.44563	2.34967				0.403275	0.261832
Sudan	408.655	1.19257	0.252068	0.399172	3.77365	2.18572	9.74447	0.813156	14.7214	8.4051	24.7734	2.31886	392381	0.961731	0.265006	3.7518	1.96988	3.62909	1.90458				0.399172	0.259506
Tajikistan	408.662	1.19258	0.199029	0.375252	2.97962	1.72582	12.8761	1.08668	11.6238	6.63654	24.1745	1.89462	571536	0.521336	11.5602	2.03378	9.50297	0.0450973	0.214015				0.375252	0.245948
Uruguay	408.662	1.19259	0.196846	0.356788	2.94694	1.70689	11.4102	0.848683	11.4963	6.56376	22.7304	1.5898	248690	1.18499	0.232932	4.62275	1.68227	5.08727	2.74791				0.356788	0.235482
Ghana	408.66	1.1926	0.208098	0.336274	3.11539	1.80446	8.43905	0.657859	12.1534	6.93896	20.9284	1.84941	449543	0.693013	0.0884568	2.70351	0.769549	7.83448	3.51311				0.336274	0.223854
Côte d'Ivoire	408.663	1.19261	0.188735	0.315644	2.82551	1.63655	8.31563	0.683716	11.0226	6.29329	19.8163	1.64365	185075	1.52668	0.419421	5.95571	3.07528	3.63997	1.93664				0.315644	0.212161
Brunei Darussalam	408.664	1.19261	0.178624	0.306528	2.67414	1.54888	8.59585	0.789355	10.4321	5.95614	19.3455	1.63378	136456	1.9597	0.386112	7.64498	2.58204	5.07547	2.96083				0.306528	0.206994
Panama	408.665	1.19262	0.175762	0.288235	2.63129	1.52406	7.43985	0.572075	10.2649	5.86071	18.0014	1.51925	440072	0.597923	0.265107	2.33255	1.54407	2.2554	1.51065				0.288235	0.196625
Cyprus	408.666	1.19262	0.165139	0.279412	2.47226	1.43195	7.30634	0.573741	9.64451	5.50649	17.53	1.43748	115057	2.14872	0.269032	8.38235	2.14838	7.98684	3.90171				0.279412	0.191624
Albania	408.668	1.19263	0.148861	0.26975	2.22857	1.2908	8.40951	0.709804	8.69387	4.96373	17.2208	1.34968	167527	1.33027	0.313255	5.18952	2.41495	4.24661	2.14891				0.26975	0.186147
Gabon	408.669	1.19263	0.141186	0.249689	2.11366	1.22425	7.16365	0.63586	8.24558	4.70778	15.846	1.28434	97684.1	2.16377	0.489733	8.44107	3.28813	4.41827	2.56714				0.249689	0.174776
Honduras	408.668	1.19264	0.148552	0.238807	2.22394	1.28812	5.78168	0.472323	8.67581	4.95342	14.8326	1.34651	157063	1.41596	0.351458	5.52378	2.45318	4.02881	2.25168				0.238807	0.168608
Costa Rica	408.669	1.19264	0.144437	0.238294	2.16234	1.25244	5.99488	0.47876	8.43547	4.8162	14.8781	1.27237	202292	1.06892	0.311084	4.16994	1.91477	3.4361	2.17778				0.238294	0.168317
Zambia	408.671	1.19265	0.124898	0.22983	1.86983	1.08302	7.99676	0.638919	7.29437	4.16469	14.7245	1.04713	219774	0.850796	0.598009	3.31903	2.99364	1.42272	1.1087				0.22983	0.16352
Ethiopia	408.668	1.19265	0.148086	0.22797	2.21696	1.28408	5.30709	0.46116	8.64858	4.93787	14.0791	1.41627	477571	0.464216	0.28553	1.81095	1.57683	1.62581	1.14847				0.22797	0.162466
Senegal	408.67	1.19265	0.135729	0.22109	2.03196	1.17693	5.61168	0.444355	7.92688	4.52582	13.7946	1.18962	136752	1.48588	0.383172	5.79655	3.21523	3.87784	1.80284				0.22109	0.158566
El Salvador	408.67	1.19265	0.13036	0.218571	1.95159	1.13037	5.6501	0.443376	7.61333	4.3468	13.6843	1.14138	115161	1.69466	0.315472	6.61103	2.34991	5.37183	2.81331				0.218571	0.157138
Tanzania	408.67	1.19266	0.134738	0.214504	2.01713	1.16834	5.30329	0.436412	7.86903	4.49279	13.3297	1.22924	420306	0.47992	0.164344	1.87221	1.10997	2.92021	1.68673				0.214504	0.154833
Cameroon	408.672	1.19266	0.119104	0.196144	1.78308	1.03277	4.99964	0.458035	6.95597	3.97148	12.2656	1.11437	221501	0.805001	0.119338	3.14038	1.01035	6.74558	3.10821				0.196144	0.144426
Democratic Republic of the Congo	408.675	1.19267	0.096263	0.182039	1.44113	0.834713	6.32557	0.50312	5.62199	3.20985	11.7056	0.845667	320775	0.449265	0.0560789	1.75263	0.436763	8.0113	4.01276				0.182039	0.136431
Afghanistan	408.674	1.19268	0.106795	0.170641	1.59881	0.926043	4.30629	0.379568	6.23711	3.56105	10.6186	1.06055	#N/A	#N/A	#N/A	#N/A	#N/A	#N/A	#N/A				0.170641	0.12997
Nicaragua	408.675	1.19267	0.0987149	0.16595	1.47784	0.855975	4.41954	0.338244	5.76519	3.29161	10.4124	0.836968	132816	1.1127	0.161784	4.34074	1.3145	6.87767	3.30221				0.16595	0.127311
Mozambique	408.675	1.19268	0.096709	0.163823	1.44781	0.838581	5.00137	0.401294	5.64804	3.22472	10.3462	0.852956	112176	1.29066	0.700533	5.03498	3.41004	1.84239	1.47652				0.163823	0.126105
Bahamas	408.676	1.19268	0.0863891	0.161994	1.29331	0.749096	5.37047	0.594442	5.04533	2.88061	10.4196	0.992198	45029.9	2.87212	0.655108	11.2044	3.82358	4.38419	2.93034				0.161994	0.125069
Paraguay	408.674	1.19268	0.100469	0.161332	1.50409	0.871181	3.90701	0.324473	5.86761	3.35009	10.0319	0.902681	285574	0.52669	0.133029	2.05467	0.920786	3.95922	2.23143				0.161332	0.124694
Papua New Guinea	408.675	1.19268	0.096903	0.156823	1.45071	0.840263	3.84651	0.317016	5.65937	3.23119	9.76395	0.866593	#N/A	#N/A	#N/A	#N/A	#N/A	#N/A	#N/A				0.156823	0.122138
Iceland	408.676	1.19268	0.0836874	0.145517	1.25287	0.725668	4.20978	0.30279	4.88754	2.79052	9.19093	0.676961	74783	1.67534	0.285289	6.53564	2.05265	5.87242	3.18401				0.145517	0.115729
New Caledonia	408.676	1.19269	0.0852082	0.142035	1.27563	0.738856	3.97653	0.303474	4.97637	2.84124	8.92581	0.715942	#N/A	#N/A	#N/A	#N/A	#N/A	#N/A	#N/A				0.142035	0.113756
Botswana	408.676	1.19269	0.0867527	0.13621	1.29876	0.752248	3.04341	0.288092	5.06657	2.89274	8.41738	0.83012	126888	1.02355	0.404153	3.99295	2.15735	2.53257	1.85086				0.13621	0.110454
Nepal	408.676	1.1927	0.087535	0.129054	1.31047	0.759032	2.72514	0.278468	5.11226	2.91882	7.90014	0.911813	305853	0.428464	0.13911	1.67148	0.923126	3.08004	1.81067				0.129054	0.106398
Cambodia	408.676	1.1927	0.088469	0.127814	1.32445	0.767131	2.67139	0.285828	5.1668	2.94997	7.79968	0.962626	149005	0.888863	0.157626	3.46754	1.60926	5.63905	2.15474				0.127814	0.105695
Equatorial Guinea	408.677	1.19269	0.0836309	0.125477	1.25202	0.725178	2.43995	0.323864	4.88424	2.78864	7.64213	1.0022	118370	1.05772	0.70787	4.12626	3.70077	1.49423	1.11497				0.125477	0.10437
Laos	408.675	1.19271	0.0939063	0.120842	1.40585	0.814278	2.25633	0.375925	5.48435	3.13127	7.26206	1.39965	128581	1.09336	0.299006	4.26529	2.04727	3.65664	2.0834				0.120842	0.101743
Suriname	408.679	1.1927	0.0627893	0.110656	0.940005	0.544457	3.25489	0.252851	3.66705	2.09369	7.01728	0.52553	40858.8	2.30062	0.469592	8.97492	3.20743	4.89919	2.79817				0.110656	0.0959694
Mauritius	408.679	1.1927	0.0673234	0.107787	1.00788	0.583774	2.56671	0.215409	3.93185	2.24487	6.68699	0.617356	79392.7	1.26949	0.436916	4.95241	2.83007	2.90558	1.74993				0.107787	0.0943431
Benin	408.678	1.19271	0.0692792	0.10358	1.03716	0.600732	2.1875	0.22051	4.04607	2.31009	6.34311	0.713664	79066.2	1.31177	0.471031	5.11732	3.41752	2.78489	1.49738				0.10358	0.0919588
Malta	408.68	1.1927	0.0581796	0.101292	0.870994	0.504486	2.74749	0.217568	3.39783	1.93998	6.38465	0.518182	36649.4	2.37656	0.310185	9.27116	2.26232	7.66174	4.09807				0.101292	0.090662
Guyana	408.68	1.19271	0.0541108	0.0957583	0.810081	0.469204	2.8864	0.218693	3.1602	1.8043	6.07831	0.44339	#N/A	#N/A	#N/A	#N/A	#N/A	#N/A	#N/A				0.0957583	0.0875251
Uganda	408.68	1.19271	0.0595161	0.0947422	0.891003	0.516075	2.395	0.194438	3.47588	1.98454	5.88887	0.543188	219692	0.405568	0.131869	1.58216	0.945561	3.07554	1.67325				0.0947422	0.0869491
Montenegro	408.68	1.19271	0.0526908	0.0917262	0.788823	0.456891	2.59056	0.204274	3.07727	1.75696	5.7989	0.447181	38356.1	2.05658	0.178422	8.0229	1.57973	11.5265	5.07865				0.0917262	0.0852396
Madagascar	408.68	1.19271	0.053889	0.089299	0.806761	0.467281	2.41575	0.182922	3.14725	1.79691	5.59833	0.455631	115038	0.701299	0.13549	2.73583	1.27574	5.17601	2.14451				0.089299	0.0838638
Kosovo	408.679	1.19271	0.0644805	0.08869	0.965324	0.559122	1.53383	0.270216	3.76582	2.15008	5.32041	0.915683	#N/A	#N/A	#N/A	#N/A	#N/A	#N/A	#N/A				0.08869	0.0835186
Guinea	408.681	1.19272	0.0468082	0.0781111	0.700755	0.405882	2.08063	0.160034	2.73371	1.5608	4.89799	0.395575	66206.3	1.05844	0.398436	4.12908	2.81454	2.65649	1.46705				0.0781111	0.0775223
Haiti	408.681	1.19272	0.0449102	0.0726784	0.67234	0.389424	1.82331	0.143702	2.62286	1.49751	4.52654	0.396928	107805	0.623664	0.0840549	2.43297	0.723454	7.41973	3.36299				0.0726784	0.0744429
Congo	408.682	1.19272	0.0444373	0.0719369	0.665262	0.385324	1.8387	0.157325	2.59525	1.48175	4.49024	0.409123	121249	0.548674	0.136263	2.14043	1.06917	4.02658	2.00195				0.0719369	0.0740226
Mauritania	408.682	1.19272	0.0430533	0.0691832	0.644542	0.373323	1.70341	0.158624	2.51442	1.4356	4.31049	0.407706	120470	0.535024	0.126575	2.08718	1.08778	4.22692	1.91874				0.0691832	0.0724617
Namibia	408.681	1.19272	0.0452762	0.0681909	0.67782	0.392598	1.38039	0.155461	2.64424	1.50972	4.171	0.476851	50822.1	1.33371	0.132418	5.20293	1.15767	10.072	4.4943				0.0681909	0.0718993
Togo	408.682	1.19272	0.0412171	0.0661167	0.617052	0.357401	1.59332	0.134971	2.40718	1.37437	4.1097	0.374758	39545.1	1.56038	0.196964	6.08717	1.71641	7.92212	3.54645				0.0661167	0.0707236
Aruba	408.682	1.19272	0.0375068	0.0650881	0.561506	0.325228	1.77724	0.150649	2.19049	1.25065	4.09691	0.364203	14000.9	4.0105	1.06985	15.6453	5.60417	3.74864	2.79173				0.0650881	0.0701406
Lesotho	408.682	1.19272	0.0371094	0.0582356	0.555557	0.321782	1.24738	0.136038	2.16728	1.2374	3.58877	0.381939	22788.5	2.43788	0.71242	9.51039	5.32303	3.42197	1.78665				0.0582356	0.0662564
Burkina Faso	408.683	1.19273	0.0368566	0.0558568	0.551772	0.31959	1.23099	0.115527	2.15252	1.22897	3.43512	0.364977	58292.5	0.946558	0.176396	3.69261	1.37258	5.36609	2.69027				0.0558568	0.0649081
Macao	408.683	1.19273	0.0338186	0.0555019	0.506291	0.293247	1.36449	0.11679	1.97509	1.12767	3.46383	0.306362	136883	0.369871	0.127175	1.4429	0.719844	2.90835	2.00446				0.0555019	0.0647069
Occupied Palestinian Territory	408.683	1.19273	0.035682	0.053816	0.534188	0.309405	1.09203	0.122543	2.08392	1.1898	3.29266	0.375678	107109	0.498733	#N/A	1.9456	#N/A	#N/A	#N/A				0.053816	0.0637513
Barbados	408.683	1.19273	0.0306288	0.0525176	0.458537	0.265588	1.42146	0.10922	1.7888	1.02131	3.305	0.261647	15774.4	2.90684	0.664695	11.3398	5.15562	4.37319	2.19951				0.0525176	0.0630154
Liberia	408.684	1.19273	0.0280003	0.0505881	0.419187	0.242796	1.6198	0.153682	1.63529	0.933661	3.23371	0.271772	28533.8	1.46909	0.238254	5.73105	1.90918	6.16607	3.00184				0.0505881	0.0619217
Fiji	408.683	1.19273	0.0300708	0.0502747	0.450184	0.260749	1.37426	0.104131	1.75621	1.0027	3.15751	0.253154	17858.6	2.52082	0.208587	9.83395	1.47696	12.0852	6.65823				0.0502747	0.0617441
Sint Maarten (Dutch part)	408.684	1.19273	0.02654	0.0498541	0.397325	0.230133	1.71118	0.16123	1.55	0.884967	3.2066	0.261338	#N/A	#N/A	#N/A	#N/A	#N/A	#N/A	#N/A				0.0498541	0.0615056
Mali	408.683	1.19273	0.0324917	0.0496453	0.486427	0.281742	1.12006	0.102085	1.8976	1.08342	3.05694	0.321337	70834.4	0.68671	0.395726	2.67892	2.23734	1.73532	1.19737				0.0496453	0.0613872
Malawi	408.684	1.19273	0.0260191	0.0444303	0.389527	0.225616	1.23012	0.0946133	1.51958	0.867597	2.79929	0.216908	31560.3	1.23423	0.208869	4.81484	1.36269	5.90912	3.53334				0.0444303	0.0584313
Niger	408.684	1.19273	0.0267837	0.0432071	0.400973	0.232246	1.074	0.0925166	1.56423	0.893092	2.69313	0.24533	95301.8	0.42074	0.0720784	1.64135	0.693887	5.83726	2.36544				0.0432071	0.057738
Swaziland	408.684	1.19273	0.0233703	0.0393171	0.349872	0.202648	NA	#VALUE!	1.36488	0.779275	#VALUE!	#VALUE!	23000.1	1.52118	#VALUE!	5.93426	3.23336	#VALUE!	1.83532				0.0393171	0.055533
South Sudan	408.684	1.19273	0.0220816	0.0354209	0.330579	0.191474	0.872957	0.0723453	1.28962	0.736304	2.20145	0.202529	#N/A	#N/A	#N/A	#N/A	#N/A	#N/A	#N/A				0.0354209	0.0533246
Sierra Leone	408.685	1.19273	0.0199535	0.0352382	0.29872	0.173021	1.08664	0.0866084	1.16533	0.665343	2.23812	0.168769	26955.3	1.1082	0.274053	4.32321	2.35177	4.04375	1.83828				0.0352382	0.053221
Somalia	408.685	1.19274	0.0179278	0.0316761	0.268393	0.155455	0.909653	0.0767148	1.04703	0.597796	2.00904	0.160727	#N/A	#N/A	#N/A	#N/A	#N/A	#N/A	#N/A				0.0316761	0.0512019
Faeroe Islands	408.685	1.19274	0.0168363	0.029226	0.252053	0.145991	0.812569	0.0627435	0.983282	0.561401	1.84532	0.143182	#N/A	#N/A	#N/A	#N/A	#N/A	#N/A	#N/A				0.029226	0.0498132
Greenland	408.685	1.19274	0.0157715	0.0283764	0.236111	0.136757	0.879215	0.0676933	0.921091	0.525893	1.80594	0.131586	#N/A	#N/A	#N/A	#N/A	#N/A	#N/A	#N/A				0.0283764	0.0493316
Bermuda	408.685	1.19274	0.0158221	0.0278212	0.236869	0.137196	0.806261	0.061272	0.924046	0.52758	1.76232	0.132453	5904.09	4.01194	#DIV/0!	15.651	#DIV/0!	#DIV/0!	#DIV/0!				0.0278212	0.0490169
French Polynesia	408.685	1.19274	0.0160239	0.0269819	0.23989	0.138946	0.701319	0.0566541	0.935832	0.53431	1.69232	0.140099	#N/A	#N/A	#N/A	#N/A	#N/A	#N/A	#N/A				0.0269819	0.0485412
Rwanda	408.685	1.19274	0.0158226	0.0262286	0.236876	0.1372	0.675301	0.058634	0.924077	0.527598	1.6436	0.141644	56561.5	0.418795	0.337616	1.63376	1.87358	1.24045	0.871998				0.0262286	0.0481142
Chad	408.685	1.19274	0.0149054	0.0240411	0.223146	0.129248	0.578552	0.0489669	0.870514	0.497016	1.49405	0.137392	42692.8	0.522679	0.0985088	2.03902	0.752965	5.30591	2.70799				0.0240411	0.0468742
Bonaire, Saint Eustatius and Saba	408.686	1.19274	0.0118491	0.0222725	0.17739	0.102745	0.765038	0.0721171	0.692015	0.395103	1.43271	0.116814	#N/A	#N/A	#N/A	#N/A	#N/A	#N/A	#N/A				0.0222725	0.0458718
Maldives	408.685	1.19274	0.0143133	0.0211272	0.214282	0.124114	0.421234	0.0468979	0.835934	0.477273	1.28844	0.152306	32589.8	0.657513	0.364416	2.56502	2.05551	1.80429	1.24788				0.0211272	0.0452226
Antigua and Barbuda	408.686	1.19274	0.011636	0.0206173	0.174201	0.100898	0.628022	0.0630604	0.679573	0.387999	1.31016	0.112017	6710.8	2.59583	#N/A	10.1266	#N/A	#N/A	#N/A				0.0206173	0.0449336
Djibouti	408.686	1.19274	0.0105806	0.0183051	0.158399	0.0917459	0.502904	0.0395688	0.61793	0.352805	1.15456	0.0908442	9533.46	1.66151	0.410592	6.4817	2.4805	4.04661	2.61306				0.0183051	0.043623
Belize	408.686	1.19274	0.0107043	0.017855	0.160252	0.0928193	0.464324	0.0361898	0.62516	0.356932	1.11839	0.0919943	6032.42	2.65652	0.544446	10.3633	4.14407	4.8793	2.50076				0.017855	0.0433678
Eritrea	408.686	1.19274	0.0102882	0.0160984	0.154022	0.0892106	0.340568	0.041583	0.600854	0.343055	0.99108	0.114254	#N/A	#N/A	#N/A	#N/A	#N/A	#N/A	#N/A				0.0160984	0.0423722
Bhutan	408.686	1.19274	0.010743	0.0155786	0.160831	0.0931544	0.31167	0.0351763	0.627416	0.358221	0.949527	0.116269	46701	0.344385	0.143064	1.34348	0.973368	2.4072	1.38023				0.0155786	0.0420776
Seychelles	408.686	1.19274	0.00950684	0.0152833	0.142325	0.0824355	#VALUE!	#VALUE!	0.555223	0.317002	#VALUE!	#VALUE!	10392.8	1.36946	#VALUE!	5.34239	1.97484	#VALUE!	2.70522				0.0152833	0.0419102
Andorra	408.686	1.19274	0.00878945	0.0140723	0.131585	0.0762149	0.308157	0.0340999	0.513325	0.293081	0.870059	0.0922667	#N/A	#N/A	#N/A	#N/A	#N/A	#N/A	#N/A				0.0140723	0.0412237
Gambia	408.686	1.19274	0.00799084	0.0129402	0.119629	0.06929	0.317351	0.0258892	0.466684	0.266451	0.805648	0.0710097	12388.2	0.965669	0.216047	3.76716	1.7288	4.46971	2.17906				0.0129402	0.0405821
Cape Verde	408.686	1.19275	0.00770196	0.0121466	0.115304	0.0667851	0.284909	0.025374	0.449813	0.256819	0.751181	0.0741785	18928.5	0.609158	0.101747	2.37638	0.795009	5.987	2.98913				0.0121466	0.0401322
Central African Republic	408.686	1.19275	0.00676482	0.0116882	0.101275	0.058659	0.326605	0.0255819	0.395082	0.22557	0.737649	0.057046	24835.4	0.407783	0.0505346	1.5908	0.479629	8.06938	3.31672				0.0116882	0.0398724
Burundi	408.686	1.19275	0.00703746	0.0115471	0.105356	0.0610231	0.296618	0.0243551	0.411005	0.234661	0.722495	0.0620325	20544.3	0.512824	0.0764562	2.00058	0.689039	6.70743	2.90343				0.0115471	0.0397924
Saint Lucia	408.686	1.19275	0.0069131	0.0114715	0.103495	0.0599448	0.286035	0.0238521	0.403742	0.230515	0.716718	0.0622571	7748.62	1.33565	0.367348	5.2105	2.57456	3.63593	2.02385				0.0114715	0.0397495
Solomon Islands	408.687	1.19275	0.00594828	0.00984686	0.0890505	0.0515786	0.244651	0.0202052	0.347394	0.198343	0.614876	0.0531864	#N/A	#N/A	#N/A	#N/A	#N/A	#N/A	#N/A				0.00984686	0.0388287
Guinea-Bissau	408.687	1.19275	0.00561145	0.00950159	0.0840078	0.0486579	0.255073	0.0200326	0.327722	0.187112	0.597428	0.0477456	6043.93	1.38995	0.100714	5.42233	0.954324	13.801	5.68186				0.00950159	0.038633
Grenada	408.687	1.19275	0.00466062	0.0076066	0.0697732	0.0404131	0.186674	0.015216	0.272192	0.155407	0.473674	0.041809	6028.77	1.15734	0.246578	4.51488	1.7888	4.6936	2.52398				0.0076066	0.0375588
Samoa	408.687	1.19275	0.0041038	0.00679345	0.0614371	0.0355848	0.174832	0.0139132	0.239672	0.13684	0.425147	0.0354272	#N/A	#N/A	#N/A	#N/A	#N/A	#N/A	#N/A				0.00679345	0.0370979
Saint Vincent and the Grenadines	408.687	1.19275	0.00410329	0.00661748	0.0614295	0.0355804	0.15731	0.0134463	0.239642	0.136823	0.410935	0.037975	6412.01	0.958038	0.195973	3.73739	1.86218	4.88862	2.007				0.00661748	0.0369982
Saint Kitts and Nevis	408.687	1.19275	0.00372395	0.00589157	0.0557505	0.0322911	0.13006	0.0127989	0.217488	0.124174	0.364022	0.0363519	7349.62	0.758549	#N/A	2.95917	#N/A	#N/A	#N/A				0.00589157	0.0365867
Liechtenstein	408.687	1.19275	0.00357033	0.00582496	0.0534507	0.030959	0.130787	0.0148097	0.208516	0.119051	0.361373	0.0385096	#N/A	#N/A	#N/A	#N/A	#N/A	#N/A	#N/A				0.00582496	0.036549
Palau	408.687	1.19275	0.00366154	0.0057554	0.0548161	0.0317498	0.122746	0.0140114	0.213843	0.122093	0.354638	0.0388541	#N/A	#N/A	#N/A	#N/A	#N/A	#N/A	#N/A				0.0057554	0.0365095
British Virgin Islands	408.687	1.19275	0.00323748	0.00521522	0.0484676	0.0280727	0.121079	0.0107589	0.189076	0.107952	0.323504	0.0304202	4075.77	1.18916	#N/A	4.63904	#N/A	#N/A	#N/A				0.00521522	0.0362034
Timor-Leste	408.687	1.19275	0.00376327	0.00521034	0.0563391	0.032632	0.0925941	0.013847	0.219784	0.125485	0.313488	0.0475522	#N/A	#N/A	#N/A	#N/A	#N/A	#N/A	#N/A				0.00521034	0.0362006
Nauru	408.687	1.19275	0.00254446	0.00472501	0.0380926	0.0220635	0.146314	0.0133216	0.148603	0.0848441	0.302841	0.0252916	#N/A	#N/A	#N/A	#N/A	#N/A	#N/A	#N/A				0.00472501	0.0359255
Comoros	408.687	1.19275	0.00284479	0.00453647	0.0425888	0.0246677	0.109023	0.00910631	0.166143	0.0948586	0.281771	0.0257514	10440.2	0.407931	0.0479979	1.59138	0.412937	8.49894	3.8538				0.00453647	0.0358186
Dominica	408.687	1.19275	0.00278805	0.00451518	0.0417393	0.0241757	0.10906	0.00902639	0.162829	0.0929666	0.280673	0.0253975	2331.65	1.79012	0.285023	6.98343	2.59325	6.28062	2.69293				0.00451518	0.0358066
Vanuatu	408.687	1.19275	0.00256774	0.00435901	0.0384411	0.0222653	0.120289	0.00968724	0.149962	0.0856204	0.27442	0.0219291	#N/A	#N/A	#N/A	#N/A	#N/A	#N/A	#N/A				0.00435901	0.035718
Martinique	408.687	1.19275	0.00230347	0.00419954	0.0344847	0.0199738	0.131573	0.012941	0.134528	0.0768082	0.267137	0.0226212	#N/A	#N/A	#N/A	#N/A	#N/A	#N/A	#N/A				0.00419954	0.0356277
Tonga	408.687	1.19275	0.00249445	0.00412167	0.0373439	0.0216298	0.104301	0.00839507	0.145682	0.0831765	0.257624	0.0218926	#N/A	#N/A	#N/A	#N/A	#N/A	#N/A	#N/A				0.00412167	0.0355835
Réunion	408.687	1.19275	0.00227598	0.00372434	0.0340732	0.0197354	0.0893121	0.00945759	0.132923	0.0758918	0.231027	0.0244198	#N/A	#N/A	#N/A	#N/A	#N/A	#N/A	#N/A				0.00372434	0.0353583
Saint Pierre and Miquelon	408.687	1.19275	0.00205156	0.00366262	0.0307134	0.0177894	0.112342	0.00834488	0.119816	0.0684084	0.232653	0.0168012	#N/A	#N/A	#N/A	#N/A	#N/A	#N/A	#N/A				0.00366262	0.0353233
Turks and Caicos Islands	408.687	1.19275	0.00236779	0.00350232	0.0354476	0.0205315	0.0685523	0.00804242	0.138284	0.0789529	0.213352	0.025735	1729.24	2.04989	#N/A	7.99681	#N/A	#N/A	#N/A				0.00350232	0.0352325
Micronesia (Federated States of)	408.687	1.19275	0.00218661	0.00342485	0.0327352	0.0189605	0.0727272	0.00830178	0.127703	0.0729116	0.210912	0.0232019	#N/A	#N/A	#N/A	#N/A	#N/A	#N/A	#N/A				0.00342485	0.0351885
Anguilla	408.687	1.19275	0.00205292	0.00316262	0.0307338	0.0178013	0.0653694	0.00723651	0.119896	0.0684539	0.19406	0.0215078	1268.14	2.42353	0.375395	9.45441	2.79012	6.45595	3.38854				0.00316262	0.0350399
Marshall Islands	408.687	1.19275	0.00202604	0.00312091	0.0303314	0.0175682	0.0645939	0.00728421	0.118326	0.0675576	0.191541	0.0212995	#N/A	#N/A	#N/A	#N/A	#N/A	#N/A	#N/A				0.00312091	0.0350163
Sao Tome and Principe	408.687	1.19275	0.00188904	0.0030903	0.0282804	0.0163802	0.0780423	0.00624049	0.110325	0.0629894	0.192874	0.0165707	3442.6	0.821484	0.234645	3.20469	1.93398	3.50096	1.65704				0.0030903	0.0349989
Kiribati	408.687	1.19275	0.00117481	0.0019705	0.0175878	0.010187	0.0526966	0.00423733	0.0686115	0.0391735	0.123665	0.0101373	#N/A	#N/A	#N/A	#N/A	#N/A	#N/A	#N/A				0.0019705	0.0343642
Cook Islands	408.687	1.19275	0.00116047	0.00191936	0.0173731	0.0100626	0.0483731	0.0043033	0.0677741	0.0386954	0.120075	0.0105493	#N/A	#N/A	#N/A	#N/A	#N/A	#N/A	#N/A				0.00191936	0.0343352
Montserrat	408.687	1.19275	0.000903407	0.00153609	0.0135247	0.0078336	NA	#VALUE!	0.0527611	0.0301238	#VALUE!	#VALUE!	923.739	1.46413	#VALUE!	5.7117	1.35731	#VALUE!	4.20811				0.00153609	0.034118
French Guiana	408.687	1.19275	0.000522398	0.000847669	0.00782071	0.00452981	0.0210047	0.002188	0.0305093	0.0174192	0.0525606	0.00542722	#N/A	#N/A	#N/A	#N/A	#N/A	#N/A	#N/A				0.000847669	0.0337277
Wallis and Futuna Islands	408.687	1.19275	0.000307255	0.000455474	0.00459985	0.00266426	0.0086785	0.00121813	0.0179444	0.0102453	0.0276908	0.0037555	#N/A	#N/A	#N/A	#N/A	#N/A	#N/A	#N/A				0.000455474	0.0335054
Saint Helena	408.687	1.19275	0.000215626	0.000352071	0.00322809	0.00186973	0.00818575	0.000804595	0.0125931	0.00718997	0.0218962	0.00209836	#N/A	#N/A	#N/A	#N/A	#N/A	#N/A	#N/A				0.000352071	0.0334468
Tuvalu	408.687	1.19275	0.000168426	0.000264296	0.00252147	0.00146046	0.00566431	0.000623438	0.00983651	0.00561611	0.0162885	0.00174906	#N/A	#N/A	#N/A	#N/A	#N/A	#N/A	#N/A				0.000264296	0.0333971
Niue	408.687	1.19275	0.000155822	0.000264133	0.00233277	0.00135116	0.00693181	0.000607198	0.00910036	0.00519581	0.0166044	0.00142528	#N/A	#N/A	#N/A	#N/A	#N/A	#N/A	#N/A				0.000264133	0.033397

## Sheet: capitalstocks
	Country		Capital
	MAR	Morocco	933237						AFG	Afghanistan
	ABW	Aruba	14000.9						ALB	Albania
	AGO	Angola	749415						DZA	Algeria
	AIA	Anguilla	1268.14						AND	Andorra
	ALB	Albania	167527						AGO	Angola
	ARE	United Arab Emirates	1.8651e+06						AIA	Anguilla
	ARG	Argentina	2.76726e+06						ATG	Antigua and Barbuda
	ARM	Armenia	135359						ARG	Argentina
	ATG	Antigua and Barbuda	6710.8						ARM	Armenia
	AUS	Australia	5.86805e+06						ABW	Aruba
	AUT	Austria	2.12407e+06						AUS	Australia
	AZE	Azerbaijan	290672						AUT	Austria
	BDI	Burundi	20544.3						AZE	Azerbaijan
	BEL	Belgium	2.19502e+06						BHS	Bahamas
	BEN	Benin	79066.2						BHR	Bahrain
	BFA	Burkina Faso	58292.5						BGD	Bangladesh
	BGD	Bangladesh	2.00668e+06						BRB	Barbados
	BGR	Bulgaria	344066						BLR	Belarus
	BHR	Bahrain	268141						BEL	Belgium
	BHS	Bahamas	45029.9						BLZ	Belize
	BIH	Bosnia and Herzegovina	93122.1						BEN	Benin
	BLR	Belarus	840824						BMU	Bermuda
	BLZ	Belize	6032.42						BTN	Bhutan
	BMU	Bermuda	5904.09							Bonaire, Saint Eustatius and Saba
	BOL	Bolivia	170882						BIH	Bosnia and Herzegovina
	BRA	Brazil	8.05227e+06						BWA	Botswana
	BRB	Barbados	15774.4						BRA	Brazil
	BRN	Brunei Darussalam	136456						VGB	British Virgin Islands
	BTN	Bhutan	46701						BRN	Brunei Darussalam
	BWA	Botswana	126888						BGR	Bulgaria
	CAF	Central African Republic	24835.4						BFA	Burkina Faso
	CAN	Canada	7.64129e+06						BDI	Burundi
	CHE	Switzerland	2.62277e+06						KHM	Cambodia
	CHL	Chile	1.32361e+06						CAN	Canada
	CHN	China	6.65628e+07						CPV	Cape Verde
	CIV	Côte d'Ivoire	185075						CAF	Central African Republic
	CMR	Cameroon	221501						TCD	Chad
	COD	Democratic Republic of the Congo	320775						CHL	Chile
	COG	Congo	121249						CHN	China
	COL	Colombia	2.13635e+06						COL	Colombia
	COM	Comoros	10440.2						COM	Comoros
	CPV	Cape Verde	18928.5						COG	Congo
	CRI	Costa Rica	202292						COK	Cook Islands
	CYM	Cayman Islands	9515.37						CRI	Costa Rica
	CYP	Cyprus	115057						CIV	Côte d'Ivoire
	CZE	Czech Republic	1.86896e+06						HRV	Croatia
	DEU	Germany	1.93949e+07						CUB	Cuba
	DJI	Djibouti	9533.46						CUW	Curaçao
	DMA	Dominica	2331.65						CYP	Cyprus
	DNK	Denmark	1.18445e+06						CZE	Czech Republic
	DOM	Dominican Republic	555498						PRK	North Korea
	DZA	Algeria	2.28997e+06						COD	Democratic Republic of the Congo
	ECU	Ecuador	741635						DNK	Denmark
	EGY	Egypt	2.26454e+06						DJI	Djibouti
	ESP	Spain	7.76463e+06						DMA	Dominica
	EST	Estonia	164681						DOM	Dominican Republic
	ETH	Ethiopia	477571						ECU	Ecuador
	FIN	Finland	1.08308e+06						EGY	Egypt
	FJI	Fiji	17858.6						SLV	El Salvador
	FRA	France	1.42314e+07						GNQ	Equatorial Guinea
	GAB	Gabon	97684.1						ERI	Eritrea
	GBR	United Kingdom	1.02666e+07						EST	Estonia
	GEO	Georgia	214184						ETH	Ethiopia
	GHA	Ghana	449543						FRO	Faeroe Islands
	GIN	Guinea	66206.3						FSM	Micronesia (Federated States of)
	GMB	Gambia	12388.2						FJI	Fiji
	GNB	Guinea-Bissau	6043.93						FIN	Finland
	GNQ	Equatorial Guinea	118370						FRA	France
	GRC	Greece	1.38846e+06						GUF	French Guiana
	GRD	Grenada	6028.77						PYF	French Polynesia
	GTM	Guatemala	314437						GAB	Gabon
	HKG	Hong Kong	1.76727e+06						GMB	Gambia
	HND	Honduras	157063						GEO	Georgia
	HRV	Croatia	397319						DEU	Germany
	HTI	Haiti	107805						GHA	Ghana
	HUN	Hungary	1.04686e+06						GRC	Greece
	IDN	Indonesia	1.08043e+07						GRL	Greenland
	IND	India	2.35145e+07						GRD	Grenada
	IRL	Ireland	1.23916e+06						GTM	Guatemala
	IRN	Iran	3.73739e+06						GIN	Guinea
	IRQ	Iraq	794385						GNB	Guinea-Bissau
	ISL	Iceland	74783						GUY	Guyana
	ISR	Israel	926415						HTI	Haiti
	ITA	Italy	1.10298e+07						HND	Honduras
	JAM	Jamaica	141332						HKG	Hong Kong
	JOR	Jordan	288695						HUN	Hungary
	JPN	Japan	2.6902e+07						ISL	Iceland
	KAZ	Kazakhstan	1.3499e+06						IND	India
	KEN	Kenya	395022						IDN	Indonesia
	KGZ	Kyrgyzstan	152559						IRQ	Iraq
	KHM	Cambodia	149005						IRL	Ireland
	KNA	Saint Kitts and Nevis	7349.62						IRN	Iran
	KOR	South Korea	8.34013e+06						ISR	Israel
	KWT	Kuwait	454566						ITA	Italy
	LAO	Laos	128581						JAM	Jamaica
	LBN	Lebanon	308440						JPN	Japan
	LBR	Liberia	28533.8						JOR	Jordan
	LCA	Saint Lucia	7748.62						KAZ	Kazakhstan
	LKA	Sri Lanka	669789						KEN	Kenya
	LSO	Lesotho	22788.5						KIR	Kiribati
	LTU	Lithuania	294195							Kosovo
	LUX	Luxembourg	151054						KWT	Kuwait
	LVA	Latvia	355060						KGZ	Kyrgyzstan
	MAC	Macao	136883						LAO	Laos
	MDA	Moldova	184350						LVA	Latvia
	MDG	Madagascar	115038						LBN	Lebanon
	MDV	Maldives	32589.8						LSO	Lesotho
	MEX	Mexico	9.64869e+06						LBR	Liberia
	MKD	North Macedonia	162205						LBY	Libya
	MLI	Mali	70834.4						LIE	Liechtenstein
	MLT	Malta	36649.4						LTU	Lithuania
	MMR	Myanmar	569634						LUX	Luxembourg
	MNE	Montenegro	38356.1						MAC	Macao
	MNG	Mongolia	115377						MKD	North Macedonia
	MOZ	Mozambique	112176						MDG	Madagascar
	MRT	Mauritania	120470						MWI	Malawi
	MSR	Montserrat	923.739						MYS	Malaysia
	MUS	Mauritius	79392.7						MDV	Maldives
	MWI	Malawi	31560.3						MLI	Mali
	MYS	Malaysia	2.0966e+06						MLT	Malta
	NAM	Namibia	50822.1							Marshall Islands
	NER	Niger	95301.8						MTQ	Martinique
	NGA	Nigeria	5.3192e+06						MRT	Mauritania
	NIC	Nicaragua	132816						MUS	Mauritius
	NLD	Netherlands	3.56749e+06						MEX	Mexico
	NOR	Norway	1.57832e+06						MNG	Mongolia
	NPL	Nepal	305853						MNE	Montenegro
	NZL	New Zealand	748955						MSR	Montserrat
	OMN	Oman	380860						MAR	Morocco
	PAK	Pakistan	1.47059e+06						MOZ	Mozambique
	PAN	Panama	440072						MMR	Myanmar
	PER	Peru	1.02831e+06						NAM	Namibia
	PHL	Philippines	2.12205e+06						NRU	Nauru
	POL	Poland	2.69596e+06						NPL	Nepal
	PRT	Portugal	1.56961e+06						NLD	Netherlands
	PRY	Paraguay	285574						NCL	New Caledonia
	PSE	Occupied Palestinian Territory	107109						NZL	New Zealand
	QAT	Qatar	896950						NIC	Nicaragua
	ROU	Romania	1.28155e+06						NER	Niger
	RUS	Russian Federation	2.17962e+07						NGA	Nigeria
	RWA	Rwanda	56561.5						NIU	Niue
	SAU	Saudi Arabia	3.97657e+06						NOR	Norway
	SDN	Sudan	392381						PSE	Occupied Palestinian Territory
	SEN	Senegal	136752						OMN	Oman
	SGP	Singapore	1.3127e+06						PAK	Pakistan
	SLE	Sierra Leone	26955.3						PLW	Palau
	SLV	El Salvador	115161						PAN	Panama
	SRB	Serbia	502913						PNG	Papua New Guinea
	STP	Sao Tome and Principe	3442.6						PRY	Paraguay
	SUR	Suriname	40858.8						PER	Peru
	SVK	Slovakia	510162						PHL	Philippines
	SVN	Slovenia	278489						BOL	Bolivia
	SWE	Sweden	2.43329e+06						POL	Poland
	SWZ	Swaziland	23000.1						PRT	Portugal
	SYC	Seychelles	10392.8						QAT	Qatar
	SYR	Syria	408828						CMR	Cameroon
	TCA	Turks and Caicos Islands	1729.24						KOR	South Korea
	TCD	Chad	42692.8						MDA	Moldova
	TGO	Togo	39545.1						SSD	South Sudan
	THA	Thailand	3.53329e+06						SDN	Sudan
	TJK	Tajikistan	571536						REU	Réunion
	TKM	Turkmenistan	705518						ROU	Romania
	TTO	Trinidad and Tobago	48476.6						RUS	Russian Federation
	TUN	Tunisia	408221						RWA	Rwanda
	TUR	Turkey	6.33067e+06							Saint Helena
	TWN	Taiwan	3.26336e+06						LCA	Saint Lucia
	TZA	Tanzania	420306						SXM	Sint Maarten (Dutch part)
	UGA	Uganda	219692						WSM	Samoa
	UKR	Ukraine	5.88217e+06						STP	Sao Tome and Principe
	URY	Uruguay	248690						SAU	Saudi Arabia
	USA	USA	7.08593e+07						SEN	Senegal
	UZB	Uzbekistan	863794						SRB	Serbia
	VCT	Saint Vincent and the Grenadines	6412.01						SYC	Seychelles
	VEN	Venezuela	222409						SLE	Sierra Leone
	VGB	British Virgin Islands	4075.77						SGP	Singapore
	VNM	Viet Nam	1.41707e+06						SVK	Slovakia
	YEM	Yemen	151347						SVN	Slovenia
	ZAF	South Africa	1.88955e+06						SLB	Solomon Islands
	ZMB	Zambia	219774						SOM	Somalia
	ZWE	Zimbabwe	58292.2						ZAF	South Africa
									ESP	Spain
									LKA	Sri Lanka
									KNA	Saint Kitts and Nevis
									SPM	Saint Pierre and Miquelon
									VCT	Saint Vincent and the Grenadines
									SUR	Suriname
									SWZ	Swaziland
									SWE	Sweden
									CHE	Switzerland
									SYR	Syria
									TWN	Taiwan
									TJK	Tajikistan
									THA	Thailand
									TLS	Timor-Leste
									TGO	Togo
									TON	Tonga
									TTO	Trinidad and Tobago
									TUN	Tunisia
									TUR	Turkey
									TKM	Turkmenistan
									TCA	Turks and Caicos Islands
									TUV	Tuvalu
									UGA	Uganda
									UKR	Ukraine
									ARE	United Arab Emirates
									GBR	United Kingdom
									TZA	Tanzania
									USA	USA
									URY	Uruguay
									UZB	Uzbekistan
									VUT	Vanuatu
									VEN	Venezuela
									VNM	Viet Nam
									WLF	Wallis and Futuna Islands
									YEM	Yemen
									ZMB	Zambia
									ZWE	Zimbabwe
