# Supplementary material for: The Social Cost of Fossil and Industrial CO2 Emissions from 1950 to 2018
Source: Research Square preprint supplement (doi:10.21203/rs.3.rs-2244259/v1), 2022-11-17
Supplement: Supplementary file 73 [file Stock_verus_Flow_Assessment.xlsx]

## Sheet: CountryAtmresults
			meanSCC		14.9708		Comparison		58.4024		Comparison
			stdSCC		8.67118				33.3446
					stock_calibrated		flow_calibrated		stock_expert		flow_expert
Country	Catm	Temp	Dcatm	cumul. CO2	Mean	Std	Mean	Std	Mean	Std	Mean	Std
Country	Catm	Temp	GtCO2	GtCO2	Mrd	Mrd	Mrd	Mrd	Mrd	Mrd	Mrd	Mrd
total	408.687	1.19275	0
USA	386.614	1.04525	171.457	315.473	2566.84	1486.73	9832.85	714.145	10013.5	5717.16	20083.7	1404.91
China	391.859	1.09781	130.72	208.023	1956.98	1133.49	4835.16	416.532	7634.34	4358.8	12868.9	1240.9
Russian Federation	401.31	1.14391	57.3038	105.507	857.883	496.891	3334.48	256.403	3346.68	1910.77	6740.93	487.465
Germany	404.399	1.16385	33.3122	62.5997	498.709	288.856	2104.39	159.184	1945.51	1110.78	4014.64	276.97
Japan	404.353	1.16499	33.6704	59.4642	504.072	291.962	1709.66	130.393	1966.43	1122.73	3765.5	283.012
India	404.813	1.17153	30.0974	47.437	450.581	260.98	1113.65	93.744	1757.76	1003.58	2935.72	279.144
United Kingdom	406.052	1.1748	20.4677	38.8052	306.417	177.479	1335.43	102.16	1195.36	682.487	2491.83	170.984
Canada	406.645	1.1797	15.8669	28.1849	237.54	137.585	840.736	61.1652	926.664	529.075	1787.74	128.687
Ukraine	406.837	1.18008	14.3691	27.3111	215.116	124.597	914.525	73.72	839.188	479.131	1757.18	131.342
France	406.872	1.18061	14.1031	26.2399	211.135	122.291	863.641	65.1536	823.656	470.263	1680.21	116.971
Italy	407.08	1.18226	12.4811	22.393	186.852	108.226	664.636	50.5928	728.925	416.177	1422.86	105.234
Poland	407.163	1.18269	11.8438	21.7846	177.311	102.7	696.772	52.6688	691.706	394.927	1392.53	98.7971
South Africa	407.285	1.18403	10.8914	18.8119	163.053	94.4411	525.29	38.8157	636.083	363.169	1186.12	90.3358
Mexico	407.322	1.18432	10.6076	18.1049	158.804	91.9802	485.357	37.4602	619.508	353.706	1138.38	90.523
Iran	407.365	1.18523	10.2701	16.545	153.752	89.0542	401.584	32.9027	599.8	342.454	1028.57	92.2371
Australia	407.459	1.18511	9.54056	16.4857	142.83	82.7279	461.821	33.9368	557.192	318.126	1039.63	78.7538
South Korea	407.38	1.18516	10.1522	16.4485	151.986	88.0314	391.121	33.7079	592.912	338.521	1022.58	92.8678
Brazil	407.574	1.18613	8.64771	14.424	129.463	74.9858	375.56	28.9027	505.047	288.355	903.157	74.0597
Saudi Arabia	407.551	1.18626	8.82507	14.202	132.118	76.5237	337.265	29.1073	515.405	294.269	882.325	80.8553
Spain	407.711	1.18654	7.58377	13.2575	113.535	65.7602	373.013	28.3379	442.911	252.878	837.709	64.2502
Indonesia	407.695	1.18715	7.70765	12.3073	115.39	66.8344	290.567	24.669	450.145	257.009	763.314	70.8067
Kazakhstan	407.793	1.18714	6.94903	12.3019	104.032	60.2563	370.733	27.8745	405.84	231.713	781.151	57.0894
Turkey	407.901	1.18825	6.10578	9.87309	91.4084	52.9444	240.228	19.6243	356.593	203.595	614.175	54.5736
Netherlands	408	1.18828	5.33553	9.64789	79.8771	46.2654	298.153	22.0953	311.608	177.911	614.368	43.6606
Czech Republic	408.064	1.18855	4.84183	9.08192	72.4859	41.9843	302.32	23.2528	282.774	161.449	582.798	41.2442
Taiwan	408.052	1.18898	4.93507	8.10352	73.8819	42.7929	197.91	16.5576	288.22	164.558	505.091	44.5747
Belgium	408.152	1.18918	4.15471	7.73407	62.1993	36.0262	256.798	19.2267	242.645	138.537	495.208	34.0815
Romania	408.158	1.18916	4.11353	7.72471	61.5828	35.6692	251.897	20.6391	240.24	137.164	496.03	37.6412
Argentina	408.126	1.18925	4.36236	7.5842	65.3079	37.8268	218.178	15.8318	254.772	145.461	479.086	35.4504
Venezuela	408.149	1.18933	4.18469	7.33886	62.6482	36.2862	212.557	15.3436	244.396	139.537	463.772	34.3288
Thailand	408.131	1.18959	4.31736	6.86313	64.6343	37.4366	156.445	14.1899	252.145	143.961	424.769	40.8675
Uzbekistan	408.245	1.18989	3.43514	6.16343	51.4268	29.7867	185.936	13.8712	200.621	114.543	391.895	28.3753
Egypt	408.222	1.19009	3.61168	5.83151	54.0696	31.3175	142.239	11.5084	210.931	120.43	362.591	32.3461
Malaysia	408.248	1.1903	3.41574	5.36811	51.1364	29.6185	120.335	11.0577	199.488	113.897	331.517	32.7167
North Korea	408.357	1.19048	2.56257	4.85243	38.3636	22.2205	156.538	13.9195	149.66	85.4478	312.065	25.81
Pakistan	408.311	1.19064	2.92621	4.67282	43.8077	25.3737	111.994	9.29307	170.898	97.5735	290.125	26.4634
Belarus	408.369	1.19064	2.46917	4.56952	36.9654	21.4106	145.719	12.2917	144.206	82.3336	292.772	22.4813
United Arab Emirates	408.322	1.19072	2.83361	4.47793	42.4214	24.5707	102.642	9.17531	165.49	94.4857	277.035	26.8942
Algeria	408.355	1.1908	2.58237	4.2665	38.6601	22.3922	107.943	8.85706	150.817	86.1081	266.782	22.6577
Hungary	408.401	1.19082	2.22192	4.16576	33.2638	19.2666	138.391	10.6716	129.765	74.089	267.326	18.9791
Iraq	408.359	1.19093	2.55036	4.09305	38.1809	22.1147	101.064	8.19021	148.947	85.0409	254.697	22.7615
Sweden	408.415	1.19091	2.1156	3.99822	31.6722	18.3447	136.179	10.6697	123.556	70.5438	256.929	18.1608
Greece	408.397	1.19091	2.25182	3.89758	33.7115	19.5259	104.878	8.34767	131.512	75.086	245.559	19.8485
Austria	408.421	1.19103	2.0716	3.72033	31.0135	17.9633	113.953	8.31248	120.987	69.0769	236.543	16.7634
Nigeria	408.404	1.19108	2.19889	3.65511	32.9191	19.067	94.9992	7.88597	128.42	73.3211	228.956	19.4385
Bulgaria	408.435	1.19107	1.9595	3.63691	29.3353	16.9912	116.861	9.47499	114.44	65.3388	233.049	17.3933
Denmark	408.456	1.19119	1.79905	3.35156	26.9331	15.5999	109.075	8.26058	105.069	59.9885	214.632	15.1784
Viet Nam	408.417	1.19133	2.09636	3.22584	31.3842	18.1779	73.4384	6.6257	122.433	69.9025	198.811	20.4251
Colombia	408.449	1.1913	1.84828	3.1709	27.6702	16.0268	88.7862	6.57631	107.944	61.6303	199.9	15.221
Philippines	408.444	1.19135	1.89023	3.10733	28.2983	16.3906	80.3079	6.20953	110.394	63.0291	194.274	16.2088
Slovakia	408.481	1.19136	1.60125	2.99884	23.972	13.8847	99.6966	7.6022	93.5169	53.3931	192.374	13.5364
Finland	408.473	1.19135	1.66743	2.9922	24.9628	14.4586	89.0053	6.78983	97.382	55.5999	190.165	14.0832
Kuwait	408.474	1.19151	1.65737	2.72472	24.8121	14.3714	69.5824	5.54784	96.7945	55.2644	170.15	14.4879
Serbia	408.502	1.19155	1.43795	2.57454	21.5273	12.4688	76.8431	5.86896	83.98	47.9481	163.637	12.117
Chile	408.492	1.19159	1.51619	2.54296	22.6985	13.1471	68.4263	5.06043	88.5489	50.5566	159.421	12.7457
Switzerland	408.511	1.19159	1.36952	2.49083	20.5027	11.8753	77.7137	5.81713	79.9831	45.666	158.804	11.2779
Turkmenistan	408.502	1.19162	1.43661	2.48018	21.5072	12.4571	71.5163	5.28487	83.9017	47.9034	156.658	11.7181
Portugal	408.514	1.19166	1.34707	2.31825	20.1668	11.6807	62.6046	4.85577	78.6724	44.9177	145.934	11.7021
Azerbaijan	408.526	1.1917	1.2506	2.2819	18.7224	10.8442	70.9527	5.84592	73.038	41.7007	145.789	11.0583
Israel	408.513	1.19169	1.35161	2.27306	20.2346	11.72	59.0002	4.6094	78.9371	45.0688	142.42	11.7522
Norway	408.531	1.19175	1.21508	2.14707	18.1907	10.5362	63.1584	4.64495	70.9637	40.5164	136.073	9.92878
Singapore	408.532	1.19177	1.20394	2.07417	18.0239	10.4396	55.2845	4.59805	70.313	40.1449	130.614	10.8165
Libya	408.538	1.19182	1.15803	1.97868	17.3367	10.0415	52.34	4.34383	67.6319	38.6142	124.424	10.223
Qatar	408.527	1.19189	1.24601	1.92989	18.6537	10.8043	43.4375	3.93203	72.7698	41.5476	119.003	12.0249
Ireland	408.546	1.19185	1.09573	1.92752	16.404	9.50129	55.7947	4.07842	63.9934	36.5368	121.965	9.03875
Syria	408.554	1.19189	1.03839	1.79142	15.5455	9.00404	46.6116	3.96993	60.6443	34.6246	112.652	9.68514
Morocco	408.558	1.192	1.00425	1.63379	15.0344	8.70802	40.3004	3.23358	58.6505	33.4863	101.742	8.9086
Peru	408.564	1.19201	0.961329	1.6251	14.3919	8.33586	44.4581	3.35724	56.144	32.0552	102.156	8.05244
Cuba	408.574	1.19202	0.876576	1.58618	13.123	7.60095	48.9742	3.72599	51.1941	29.2291	101.066	7.31903
New Zealand	408.572	1.19202	0.896366	1.5667	13.4193	7.77255	45.2599	3.26843	52.3499	29.889	99.0223	7.30224
Hong Kong	408.569	1.19203	0.918982	1.54679	13.7579	7.96866	39.8698	3.20898	53.6708	30.6431	96.9574	8.05672
Estonia	408.591	1.19211	0.749044	1.39824	11.2138	6.4951	45.8859	3.64259	43.746	24.9766	89.7053	6.6059
Bangladesh	408.573	1.19215	0.887414	1.36335	13.2853	7.69493	30.1669	2.781	51.8271	29.5905	83.9454	8.61165
Trinidad and Tobago	408.586	1.19215	0.784108	1.30116	11.7387	6.79914	33.1987	2.62755	45.7938	26.1458	81.312	6.92033
Lithuania	408.6	1.19216	0.677931	1.28163	10.1492	5.87846	42.9154	3.48835	39.5928	22.6053	82.435	6.20839
Oman	408.591	1.19225	0.74515	1.13646	11.1555	6.46133	24.4043	2.38764	43.5185	24.8467	69.8186	7.44784
Ecuador	408.6	1.19224	0.678553	1.1124	10.1585	5.88385	27.596	2.28752	39.6291	22.6261	69.4037	6.0377
Croatia	408.613	1.19227	0.57709	1.02612	8.63949	5.00405	30.0719	2.28048	33.7035	19.2429	65.1021	4.84732
Georgia	408.624	1.19232	0.489569	0.946783	7.32923	4.24514	33.5372	2.92389	28.592	16.3245	61.2419	4.97252
Moldova	408.629	1.19235	0.450932	0.878449	6.7508	3.91011	30.5468	2.84309	26.3355	15.0361	56.897	4.892
Tunisia	408.621	1.19236	0.511259	0.843343	7.65395	4.43322	21.2556	1.69379	29.8588	17.0477	52.6751	4.46826
Bosnia and Herzegovina	408.625	1.19236	0.483476	0.841161	7.23802	4.19231	24.1246	1.95341	28.2362	16.1213	53.2217	4.16981
Bahrain	408.623	1.19238	0.500405	0.811189	7.49146	4.3391	19.7339	1.63488	29.2249	16.6858	50.4786	4.50345
Slovenia	408.63	1.19238	0.446578	0.793135	6.68562	3.87236	23.1927	1.75378	26.0812	14.891	50.3108	3.73955
Luxembourg	408.637	1.19241	0.392982	0.736063	5.88324	3.40761	25.0635	1.92426	22.9511	13.1038	47.1952	3.25549
Kyrgyzstan	408.637	1.19242	0.388954	0.732087	5.82295	3.37269	24.4142	2.20065	22.7159	12.9695	47.1223	3.85949
Dominican Republic	408.633	1.19243	0.425086	0.699422	6.36388	3.686	17.3712	1.42634	24.8261	14.1743	43.6495	3.7819
Latvia	408.64	1.19243	0.370735	0.69905	5.55019	3.21471	23.2602	1.87101	21.6518	12.362	44.9354	3.35154
Lebanon	408.634	1.19244	0.414735	0.680366	6.20891	3.59624	17.3856	1.34371	24.2215	13.8292	42.4778	3.59196
Angola	408.631	1.19245	0.436163	0.672949	6.5297	3.78205	15.097	1.39368	25.473	14.5437	41.453	4.32187
Zimbabwe	408.64	1.19244	0.366415	0.665633	5.48552	3.17725	20.6002	1.54905	21.3995	12.218	42.4283	3.10206
Jordan	408.636	1.19245	0.401689	0.648998	6.01359	3.48311	15.4148	1.32394	23.4596	13.3942	40.3305	3.67172
Mongolia	408.635	1.19249	0.407196	0.627136	6.09604	3.53087	14.941	1.33359	23.7812	13.5778	38.8206	4.04185
Armenia	408.646	1.19246	0.323358	0.625838	4.84093	2.8039	22.1165	1.92794	18.8849	10.7823	40.4763	3.28635
Yemen	408.641	1.19246	0.360959	0.614232	5.40384	3.12994	16.1469	1.27902	21.0809	12.036	38.4908	3.27853
North Macedonia	408.647	1.19248	0.313685	0.571304	4.69611	2.72002	17.2628	1.41149	18.32	10.4597	36.4391	2.79346
Bolivia	408.646	1.19252	0.316982	0.521702	4.74547	2.74861	13.8358	1.06873	18.5125	10.5697	32.5909	2.73072
Myanmar	408.649	1.19254	0.299246	0.485806	4.47994	2.59481	12.6652	0.966872	17.4767	9.97823	30.331	2.59635
Sri Lanka	408.651	1.19255	0.284611	0.458276	4.26085	2.46791	11.6264	0.896326	16.622	9.49024	28.5231	2.50799
Jamaica	408.655	1.19255	0.247124	0.437263	3.69964	2.14286	12.6479	0.98687	14.4327	8.24027	27.7128	2.11132
Kenya	408.654	1.19256	0.259326	0.431774	3.88231	2.24866	11.5988	0.862636	15.1453	8.64712	27.0615	2.18032
Curaçao	408.659	1.19256	0.221197	0.418465	3.3115	1.91804	14.4608	1.36853	12.9185	7.37574	26.9429	2.20547
Guatemala	408.655	1.19257	0.24823	0.403275	3.71619	2.15244	10.121	0.796578	14.4972	8.27713	25.1355	2.17569
Sudan	408.655	1.19257	0.252068	0.399172	3.77365	2.18572	9.74447	0.813156	14.7214	8.4051	24.7734	2.31886
Tajikistan	408.662	1.19258	0.199029	0.375252	2.97962	1.72582	12.8761	1.08668	11.6238	6.63654	24.1745	1.89462
Uruguay	408.662	1.19259	0.196846	0.356788	2.94694	1.70689	11.4102	0.848683	11.4963	6.56376	22.7304	1.5898
Ghana	408.66	1.1926	0.208098	0.336274	3.11539	1.80446	8.43905	0.657859	12.1534	6.93896	20.9284	1.84941
Côte d'Ivoire	408.663	1.19261	0.188735	0.315644	2.82551	1.63655	8.31563	0.683716	11.0226	6.29329	19.8163	1.64365
Brunei Darussalam	408.664	1.19261	0.178624	0.306528	2.67414	1.54888	8.59585	0.789355	10.4321	5.95614	19.3455	1.63378
Panama	408.665	1.19262	0.175762	0.288235	2.63129	1.52406	7.43985	0.572075	10.2649	5.86071	18.0014	1.51925
Cyprus	408.666	1.19262	0.165139	0.279412	2.47226	1.43195	7.30634	0.573741	9.64451	5.50649	17.53	1.43748
Albania	408.668	1.19263	0.148861	0.26975	2.22857	1.2908	8.40951	0.709804	8.69387	4.96373	17.2208	1.34968
Gabon	408.669	1.19263	0.141186	0.249689	2.11366	1.22425	7.16365	0.63586	8.24558	4.70778	15.846	1.28434
Honduras	408.668	1.19264	0.148552	0.238807	2.22394	1.28812	5.78168	0.472323	8.67581	4.95342	14.8326	1.34651
Costa Rica	408.669	1.19264	0.144437	0.238294	2.16234	1.25244	5.99488	0.47876	8.43547	4.8162	14.8781	1.27237
Zambia	408.671	1.19265	0.124898	0.22983	1.86983	1.08302	7.99676	0.638919	7.29437	4.16469	14.7245	1.04713
Ethiopia	408.668	1.19265	0.148086	0.22797	2.21696	1.28408	5.30709	0.46116	8.64858	4.93787	14.0791	1.41627
Senegal	408.67	1.19265	0.135729	0.22109	2.03196	1.17693	5.61168	0.444355	7.92688	4.52582	13.7946	1.18962
El Salvador	408.67	1.19265	0.13036	0.218571	1.95159	1.13037	5.6501	0.443376	7.61333	4.3468	13.6843	1.14138
Tanzania	408.67	1.19266	0.134738	0.214504	2.01713	1.16834	5.30329	0.436412	7.86903	4.49279	13.3297	1.22924
Cameroon	408.672	1.19266	0.119104	0.196144	1.78308	1.03277	4.99964	0.458035	6.95597	3.97148	12.2656	1.11437
Democratic Republic of the Congo	408.675	1.19267	0.096263	0.182039	1.44113	0.834713	6.32557	0.50312	5.62199	3.20985	11.7056	0.845667
Afghanistan	408.674	1.19268	0.106795	0.170641	1.59881	0.926043	4.30629	0.379568	6.23711	3.56105	10.6186	1.06055
Nicaragua	408.675	1.19267	0.0987149	0.16595	1.47784	0.855975	4.41954	0.338244	5.76519	3.29161	10.4124	0.836968
Mozambique	408.675	1.19268	0.096709	0.163823	1.44781	0.838581	5.00137	0.401294	5.64804	3.22472	10.3462	0.852956
Bahamas	408.676	1.19268	0.0863891	0.161994	1.29331	0.749096	5.37047	0.594442	5.04533	2.88061	10.4196	0.992198
Paraguay	408.674	1.19268	0.100469	0.161332	1.50409	0.871181	3.90701	0.324473	5.86761	3.35009	10.0319	0.902681
Papua New Guinea	408.675	1.19268	0.096903	0.156823	1.45071	0.840263	3.84651	0.317016	5.65937	3.23119	9.76395	0.866593
Iceland	408.676	1.19268	0.0836874	0.145517	1.25287	0.725668	4.20978	0.30279	4.88754	2.79052	9.19093	0.676961
New Caledonia	408.676	1.19269	0.0852082	0.142035	1.27563	0.738856	3.97653	0.303474	4.97637	2.84124	8.92581	0.715942
Botswana	408.676	1.19269	0.0867527	0.13621	1.29876	0.752248	3.04341	0.288092	5.06657	2.89274	8.41738	0.83012
Nepal	408.676	1.1927	0.087535	0.129054	1.31047	0.759032	2.72514	0.278468	5.11226	2.91882	7.90014	0.911813
Cambodia	408.676	1.1927	0.088469	0.127814	1.32445	0.767131	2.67139	0.285828	5.1668	2.94997	7.79968	0.962626
Equatorial Guinea	408.677	1.19269	0.0836309	0.125477	1.25202	0.725178	2.43995	0.323864	4.88424	2.78864	7.64213	1.0022
Laos	408.675	1.19271	0.0939063	0.120842	1.40585	0.814278	2.25633	0.375925	5.48435	3.13127	7.26206	1.39965
Suriname	408.679	1.1927	0.0627893	0.110656	0.940005	0.544457	3.25489	0.252851	3.66705	2.09369	7.01728	0.52553
Mauritius	408.679	1.1927	0.0673234	0.107787	1.00788	0.583774	2.56671	0.215409	3.93185	2.24487	6.68699	0.617356
Benin	408.678	1.19271	0.0692792	0.10358	1.03716	0.600732	2.1875	0.22051	4.04607	2.31009	6.34311	0.713664
Malta	408.68	1.1927	0.0581796	0.101292	0.870994	0.504486	2.74749	0.217568	3.39783	1.93998	6.38465	0.518182
Guyana	408.68	1.19271	0.0541108	0.0957583	0.810081	0.469204	2.8864	0.218693	3.1602	1.8043	6.07831	0.44339
Uganda	408.68	1.19271	0.0595161	0.0947422	0.891003	0.516075	2.395	0.194438	3.47588	1.98454	5.88887	0.543188
Montenegro	408.68	1.19271	0.0526908	0.0917262	0.788823	0.456891	2.59056	0.204274	3.07727	1.75696	5.7989	0.447181
Madagascar	408.68	1.19271	0.053889	0.089299	0.806761	0.467281	2.41575	0.182922	3.14725	1.79691	5.59833	0.455631
Kosovo	408.679	1.19271	0.0644805	0.08869	0.965324	0.559122	1.53383	0.270216	3.76582	2.15008	5.32041	0.915683
Guinea	408.681	1.19272	0.0468082	0.0781111	0.700755	0.405882	2.08063	0.160034	2.73371	1.5608	4.89799	0.395575
Haiti	408.681	1.19272	0.0449102	0.0726784	0.67234	0.389424	1.82331	0.143702	2.62286	1.49751	4.52654	0.396928
Congo	408.682	1.19272	0.0444373	0.0719369	0.665262	0.385324	1.8387	0.157325	2.59525	1.48175	4.49024	0.409123
Mauritania	408.682	1.19272	0.0430533	0.0691832	0.644542	0.373323	1.70341	0.158624	2.51442	1.4356	4.31049	0.407706
Namibia	408.681	1.19272	0.0452762	0.0681909	0.67782	0.392598	1.38039	0.155461	2.64424	1.50972	4.171	0.476851
Togo	408.682	1.19272	0.0412171	0.0661167	0.617052	0.357401	1.59332	0.134971	2.40718	1.37437	4.1097	0.374758
Aruba	408.682	1.19272	0.0375068	0.0650881	0.561506	0.325228	1.77724	0.150649	2.19049	1.25065	4.09691	0.364203
Lesotho	408.682	1.19272	0.0371094	0.0582356	0.555557	0.321782	1.24738	0.136038	2.16728	1.2374	3.58877	0.381939
Burkina Faso	408.683	1.19273	0.0368566	0.0558568	0.551772	0.31959	1.23099	0.115527	2.15252	1.22897	3.43512	0.364977
Macao	408.683	1.19273	0.0338186	0.0555019	0.506291	0.293247	1.36449	0.11679	1.97509	1.12767	3.46383	0.306362
Occupied Palestinian Territory	408.683	1.19273	0.035682	0.053816	0.534188	0.309405	1.09203	0.122543	2.08392	1.1898	3.29266	0.375678
Barbados	408.683	1.19273	0.0306288	0.0525176	0.458537	0.265588	1.42146	0.10922	1.7888	1.02131	3.305	0.261647
Liberia	408.684	1.19273	0.0280003	0.0505881	0.419187	0.242796	1.6198	0.153682	1.63529	0.933661	3.23371	0.271772
Fiji	408.683	1.19273	0.0300708	0.0502747	0.450184	0.260749	1.37426	0.104131	1.75621	1.0027	3.15751	0.253154
Sint Maarten (Dutch part)	408.684	1.19273	0.02654	0.0498541	0.397325	0.230133	1.71118	0.16123	1.55	0.884967	3.2066	0.261338
Mali	408.683	1.19273	0.0324917	0.0496453	0.486427	0.281742	1.12006	0.102085	1.8976	1.08342	3.05694	0.321337
Malawi	408.684	1.19273	0.0260191	0.0444303	0.389527	0.225616	1.23012	0.0946133	1.51958	0.867597	2.79929	0.216908
Niger	408.684	1.19273	0.0267837	0.0432071	0.400973	0.232246	1.074	0.0925166	1.56423	0.893092	2.69313	0.24533
Swaziland	408.684	1.19273	0.0233703	0.0393171	0.349872	0.202648	NA	#VALUE!	1.36488	0.779275	#VALUE!	#VALUE!
South Sudan	408.684	1.19273	0.0220816	0.0354209	0.330579	0.191474	0.872957	0.0723453	1.28962	0.736304	2.20145	0.202529
Sierra Leone	408.685	1.19273	0.0199535	0.0352382	0.29872	0.173021	1.08664	0.0866084	1.16533	0.665343	2.23812	0.168769
Somalia	408.685	1.19274	0.0179278	0.0316761	0.268393	0.155455	0.909653	0.0767148	1.04703	0.597796	2.00904	0.160727
Faeroe Islands	408.685	1.19274	0.0168363	0.029226	0.252053	0.145991	0.812569	0.0627435	0.983282	0.561401	1.84532	0.143182
Greenland	408.685	1.19274	0.0157715	0.0283764	0.236111	0.136757	0.879215	0.0676933	0.921091	0.525893	1.80594	0.131586
Bermuda	408.685	1.19274	0.0158221	0.0278212	0.236869	0.137196	0.806261	0.061272	0.924046	0.52758	1.76232	0.132453
French Polynesia	408.685	1.19274	0.0160239	0.0269819	0.23989	0.138946	0.701319	0.0566541	0.935832	0.53431	1.69232	0.140099
Rwanda	408.685	1.19274	0.0158226	0.0262286	0.236876	0.1372	0.675301	0.058634	0.924077	0.527598	1.6436	0.141644
Chad	408.685	1.19274	0.0149054	0.0240411	0.223146	0.129248	0.578552	0.0489669	0.870514	0.497016	1.49405	0.137392
Bonaire, Saint Eustatius and Saba	408.686	1.19274	0.0118491	0.0222725	0.17739	0.102745	0.765038	0.0721171	0.692015	0.395103	1.43271	0.116814
Maldives	408.685	1.19274	0.0143133	0.0211272	0.214282	0.124114	0.421234	0.0468979	0.835934	0.477273	1.28844	0.152306
Antigua and Barbuda	408.686	1.19274	0.011636	0.0206173	0.174201	0.100898	0.628022	0.0630604	0.679573	0.387999	1.31016	0.112017
Djibouti	408.686	1.19274	0.0105806	0.0183051	0.158399	0.0917459	0.502904	0.0395688	0.61793	0.352805	1.15456	0.0908442
Belize	408.686	1.19274	0.0107043	0.017855	0.160252	0.0928193	0.464324	0.0361898	0.62516	0.356932	1.11839	0.0919943
Eritrea	408.686	1.19274	0.0102882	0.0160984	0.154022	0.0892106	0.340568	0.041583	0.600854	0.343055	0.99108	0.114254
Bhutan	408.686	1.19274	0.010743	0.0155786	0.160831	0.0931544	0.31167	0.0351763	0.627416	0.358221	0.949527	0.116269
Seychelles	408.686	1.19274	0.00950684	0.0152833	0.142325	0.0824355	#VALUE!	#VALUE!	0.555223	0.317002	#VALUE!	#VALUE!
Andorra	408.686	1.19274	0.00878945	0.0140723	0.131585	0.0762149	0.308157	0.0340999	0.513325	0.293081	0.870059	0.0922667
Gambia	408.686	1.19274	0.00799084	0.0129402	0.119629	0.06929	0.317351	0.0258892	0.466684	0.266451	0.805648	0.0710097
Cape Verde	408.686	1.19275	0.00770196	0.0121466	0.115304	0.0667851	0.284909	0.025374	0.449813	0.256819	0.751181	0.0741785
Central African Republic	408.686	1.19275	0.00676482	0.0116882	0.101275	0.058659	0.326605	0.0255819	0.395082	0.22557	0.737649	0.057046
Burundi	408.686	1.19275	0.00703746	0.0115471	0.105356	0.0610231	0.296618	0.0243551	0.411005	0.234661	0.722495	0.0620325
Saint Lucia	408.686	1.19275	0.0069131	0.0114715	0.103495	0.0599448	0.286035	0.0238521	0.403742	0.230515	0.716718	0.0622571
Solomon Islands	408.687	1.19275	0.00594828	0.00984686	0.0890505	0.0515786	0.244651	0.0202052	0.347394	0.198343	0.614876	0.0531864
Guinea-Bissau	408.687	1.19275	0.00561145	0.00950159	0.0840078	0.0486579	0.255073	0.0200326	0.327722	0.187112	0.597428	0.0477456
Grenada	408.687	1.19275	0.00466062	0.0076066	0.0697732	0.0404131	0.186674	0.015216	0.272192	0.155407	0.473674	0.041809
Samoa	408.687	1.19275	0.0041038	0.00679345	0.0614371	0.0355848	0.174832	0.0139132	0.239672	0.13684	0.425147	0.0354272
Saint Vincent and the Grenadines	408.687	1.19275	0.00410329	0.00661748	0.0614295	0.0355804	0.15731	0.0134463	0.239642	0.136823	0.410935	0.037975
Saint Kitts and Nevis	408.687	1.19275	0.00372395	0.00589157	0.0557505	0.0322911	0.13006	0.0127989	0.217488	0.124174	0.364022	0.0363519
Liechtenstein	408.687	1.19275	0.00357033	0.00582496	0.0534507	0.030959	0.130787	0.0148097	0.208516	0.119051	0.361373	0.0385096
Palau	408.687	1.19275	0.00366154	0.0057554	0.0548161	0.0317498	0.122746	0.0140114	0.213843	0.122093	0.354638	0.0388541
British Virgin Islands	408.687	1.19275	0.00323748	0.00521522	0.0484676	0.0280727	0.121079	0.0107589	0.189076	0.107952	0.323504	0.0304202
Timor-Leste	408.687	1.19275	0.00376327	0.00521034	0.0563391	0.032632	0.0925941	0.013847	0.219784	0.125485	0.313488	0.0475522
Nauru	408.687	1.19275	0.00254446	0.00472501	0.0380926	0.0220635	0.146314	0.0133216	0.148603	0.0848441	0.302841	0.0252916
Comoros	408.687	1.19275	0.00284479	0.00453647	0.0425888	0.0246677	0.109023	0.00910631	0.166143	0.0948586	0.281771	0.0257514
Dominica	408.687	1.19275	0.00278805	0.00451518	0.0417393	0.0241757	0.10906	0.00902639	0.162829	0.0929666	0.280673	0.0253975
Vanuatu	408.687	1.19275	0.00256774	0.00435901	0.0384411	0.0222653	0.120289	0.00968724	0.149962	0.0856204	0.27442	0.0219291
Martinique	408.687	1.19275	0.00230347	0.00419954	0.0344847	0.0199738	0.131573	0.012941	0.134528	0.0768082	0.267137	0.0226212
Tonga	408.687	1.19275	0.00249445	0.00412167	0.0373439	0.0216298	0.104301	0.00839507	0.145682	0.0831765	0.257624	0.0218926
Réunion	408.687	1.19275	0.00227598	0.00372434	0.0340732	0.0197354	0.0893121	0.00945759	0.132923	0.0758918	0.231027	0.0244198
Saint Pierre and Miquelon	408.687	1.19275	0.00205156	0.00366262	0.0307134	0.0177894	0.112342	0.00834488	0.119816	0.0684084	0.232653	0.0168012
Turks and Caicos Islands	408.687	1.19275	0.00236779	0.00350232	0.0354476	0.0205315	0.0685523	0.00804242	0.138284	0.0789529	0.213352	0.025735
Micronesia (Federated States of)	408.687	1.19275	0.00218661	0.00342485	0.0327352	0.0189605	0.0727272	0.00830178	0.127703	0.0729116	0.210912	0.0232019
Anguilla	408.687	1.19275	0.00205292	0.00316262	0.0307338	0.0178013	0.0653694	0.00723651	0.119896	0.0684539	0.19406	0.0215078
Marshall Islands	408.687	1.19275	0.00202604	0.00312091	0.0303314	0.0175682	0.0645939	0.00728421	0.118326	0.0675576	0.191541	0.0212995
Sao Tome and Principe	408.687	1.19275	0.00188904	0.0030903	0.0282804	0.0163802	0.0780423	0.00624049	0.110325	0.0629894	0.192874	0.0165707
Kiribati	408.687	1.19275	0.00117481	0.0019705	0.0175878	0.010187	0.0526966	0.00423733	0.0686115	0.0391735	0.123665	0.0101373
Cook Islands	408.687	1.19275	0.00116047	0.00191936	0.0173731	0.0100626	0.0483731	0.0043033	0.0677741	0.0386954	0.120075	0.0105493
Montserrat	408.687	1.19275	0.000903407	0.00153609	0.0135247	0.0078336	NA	#VALUE!	0.0527611	0.0301238	#VALUE!	#VALUE!
French Guiana	408.687	1.19275	0.000522398	0.000847669	0.00782071	0.00452981	0.0210047	0.002188	0.0305093	0.0174192	0.0525606	0.00542722
Wallis and Futuna Islands	408.687	1.19275	0.000307255	0.000455474	0.00459985	0.00266426	0.0086785	0.00121813	0.0179444	0.0102453	0.0276908	0.0037555
Saint Helena	408.687	1.19275	0.000215626	0.000352071	0.00322809	0.00186973	0.00818575	0.000804595	0.0125931	0.00718997	0.0218962	0.00209836
Tuvalu	408.687	1.19275	0.000168426	0.000264296	0.00252147	0.00146046	0.00566431	0.000623438	0.00983651	0.00561611	0.0162885	0.00174906
Niue	408.687	1.19275	0.000155822	0.000264133	0.00233277	0.00135116	0.00693181	0.000607198	0.00910036	0.00519581	0.0166044	0.00142528

## Sheet: capitalstocks
	Country		Capital
	MAR	Morocco	933237						AFG	Afghanistan
	ABW	Aruba	14000.9						ALB	Albania
	AGO	Angola	749415						DZA	Algeria
	AIA	Anguilla	1268.14						AND	Andorra
	ALB	Albania	167527						AGO	Angola
	ARE	United Arab Emirates	1.8651e+06						AIA	Anguilla
	ARG	Argentina	2.76726e+06						ATG	Antigua and Barbuda
	ARM	Armenia	135359						ARG	Argentina
	ATG	Antigua and Barbuda	6710.8						ARM	Armenia
	AUS	Australia	5.86805e+06						ABW	Aruba
	AUT	Austria	2.12407e+06						AUS	Australia
	AZE	Azerbaijan	290672						AUT	Austria
	BDI	Burundi	20544.3						AZE	Azerbaijan
	BEL	Belgium	2.19502e+06						BHS	Bahamas
	BEN	Benin	79066.2						BHR	Bahrain
	BFA	Burkina Faso	58292.5						BGD	Bangladesh
	BGD	Bangladesh	2.00668e+06						BRB	Barbados
	BGR	Bulgaria	344066						BLR	Belarus
	BHR	Bahrain	268141						BEL	Belgium
	BHS	Bahamas	45029.9						BLZ	Belize
	BIH	Bosnia and Herzegovina	93122.1						BEN	Benin
	BLR	Belarus	840824						BMU	Bermuda
	BLZ	Belize	6032.42						BTN	Bhutan
	BMU	Bermuda	5904.09							Bonaire, Saint Eustatius and Saba
	BOL	Bolivia	170882						BIH	Bosnia and Herzegovina
	BRA	Brazil	8.05227e+06						BWA	Botswana
	BRB	Barbados	15774.4						BRA	Brazil
	BRN	Brunei Darussalam	136456						VGB	British Virgin Islands
	BTN	Bhutan	46701						BRN	Brunei Darussalam
	BWA	Botswana	126888						BGR	Bulgaria
	CAF	Central African Republic	24835.4						BFA	Burkina Faso
	CAN	Canada	7.64129e+06						BDI	Burundi
	CHE	Switzerland	2.62277e+06						KHM	Cambodia
	CHL	Chile	1.32361e+06						CAN	Canada
	CHN	China	6.65628e+07						CPV	Cape Verde
	CIV	Côte d'Ivoire	185075						CAF	Central African Republic
	CMR	Cameroon	221501						TCD	Chad
	COD	Democratic Republic of the Congo	320775						CHL	Chile
	COG	Congo	121249						CHN	China
	COL	Colombia	2.13635e+06						COL	Colombia
	COM	Comoros	10440.2						COM	Comoros
	CPV	Cape Verde	18928.5						COG	Congo
	CRI	Costa Rica	202292						COK	Cook Islands
	CYM	Cayman Islands	9515.37						CRI	Costa Rica
	CYP	Cyprus	115057						CIV	Côte d'Ivoire
	CZE	Czech Republic	1.86896e+06						HRV	Croatia
	DEU	Germany	1.93949e+07						CUB	Cuba
	DJI	Djibouti	9533.46						CUW	Curaçao
	DMA	Dominica	2331.65						CYP	Cyprus
	DNK	Denmark	1.18445e+06						CZE	Czech Republic
	DOM	Dominican Republic	555498						PRK	North Korea
	DZA	Algeria	2.28997e+06						COD	Democratic Republic of the Congo
	ECU	Ecuador	741635						DNK	Denmark
	EGY	Egypt	2.26454e+06						DJI	Djibouti
	ESP	Spain	7.76463e+06						DMA	Dominica
	EST	Estonia	164681						DOM	Dominican Republic
	ETH	Ethiopia	477571						ECU	Ecuador
	FIN	Finland	1.08308e+06						EGY	Egypt
	FJI	Fiji	17858.6						SLV	El Salvador
	FRA	France	1.42314e+07						GNQ	Equatorial Guinea
	GAB	Gabon	97684.1						ERI	Eritrea
	GBR	United Kingdom	1.02666e+07						EST	Estonia
	GEO	Georgia	214184						ETH	Ethiopia
	GHA	Ghana	449543						FRO	Faeroe Islands
	GIN	Guinea	66206.3						FSM	Micronesia (Federated States of)
	GMB	Gambia	12388.2						FJI	Fiji
	GNB	Guinea-Bissau	6043.93						FIN	Finland
	GNQ	Equatorial Guinea	118370						FRA	France
	GRC	Greece	1.38846e+06						GUF	French Guiana
	GRD	Grenada	6028.77						PYF	French Polynesia
	GTM	Guatemala	314437						GAB	Gabon
	HKG	Hong Kong	1.76727e+06						GMB	Gambia
	HND	Honduras	157063						GEO	Georgia
	HRV	Croatia	397319						DEU	Germany
	HTI	Haiti	107805						GHA	Ghana
	HUN	Hungary	1.04686e+06						GRC	Greece
	IDN	Indonesia	1.08043e+07						GRL	Greenland
	IND	India	2.35145e+07						GRD	Grenada
	IRL	Ireland	1.23916e+06						GTM	Guatemala
	IRN	Iran	3.73739e+06						GIN	Guinea
	IRQ	Iraq	794385						GNB	Guinea-Bissau
	ISL	Iceland	74783						GUY	Guyana
	ISR	Israel	926415						HTI	Haiti
	ITA	Italy	1.10298e+07						HND	Honduras
	JAM	Jamaica	141332						HKG	Hong Kong
	JOR	Jordan	288695						HUN	Hungary
	JPN	Japan	2.6902e+07						ISL	Iceland
	KAZ	Kazakhstan	1.3499e+06						IND	India
	KEN	Kenya	395022						IDN	Indonesia
	KGZ	Kyrgyzstan	152559						IRQ	Iraq
	KHM	Cambodia	149005						IRL	Ireland
	KNA	Saint Kitts and Nevis	7349.62						IRN	Iran
	KOR	South Korea	8.34013e+06						ISR	Israel
	KWT	Kuwait	454566						ITA	Italy
	LAO	Laos	128581						JAM	Jamaica
	LBN	Lebanon	308440						JPN	Japan
	LBR	Liberia	28533.8						JOR	Jordan
	LCA	Saint Lucia	7748.62						KAZ	Kazakhstan
	LKA	Sri Lanka	669789						KEN	Kenya
	LSO	Lesotho	22788.5						KIR	Kiribati
	LTU	Lithuania	294195							Kosovo
	LUX	Luxembourg	151054						KWT	Kuwait
	LVA	Latvia	355060						KGZ	Kyrgyzstan
	MAC	Macao	136883						LAO	Laos
	MDA	Moldova	184350						LVA	Latvia
	MDG	Madagascar	115038						LBN	Lebanon
	MDV	Maldives	32589.8						LSO	Lesotho
	MEX	Mexico	9.64869e+06						LBR	Liberia
	MKD	North Macedonia	162205						LBY	Libya
	MLI	Mali	70834.4						LIE	Liechtenstein
	MLT	Malta	36649.4						LTU	Lithuania
	MMR	Myanmar	569634						LUX	Luxembourg
	MNE	Montenegro	38356.1						MAC	Macao
	MNG	Mongolia	115377						MKD	North Macedonia
	MOZ	Mozambique	112176						MDG	Madagascar
	MRT	Mauritania	120470						MWI	Malawi
	MSR	Montserrat	923.739						MYS	Malaysia
	MUS	Mauritius	79392.7						MDV	Maldives
	MWI	Malawi	31560.3						MLI	Mali
	MYS	Malaysia	2.0966e+06						MLT	Malta
	NAM	Namibia	50822.1							Marshall Islands
	NER	Niger	95301.8						MTQ	Martinique
	NGA	Nigeria	5.3192e+06						MRT	Mauritania
	NIC	Nicaragua	132816						MUS	Mauritius
	NLD	Netherlands	3.56749e+06						MEX	Mexico
	NOR	Norway	1.57832e+06						MNG	Mongolia
	NPL	Nepal	305853						MNE	Montenegro
	NZL	New Zealand	748955						MSR	Montserrat
	OMN	Oman	380860						MAR	Morocco
	PAK	Pakistan	1.47059e+06						MOZ	Mozambique
	PAN	Panama	440072						MMR	Myanmar
	PER	Peru	1.02831e+06						NAM	Namibia
	PHL	Philippines	2.12205e+06						NRU	Nauru
	POL	Poland	2.69596e+06						NPL	Nepal
	PRT	Portugal	1.56961e+06						NLD	Netherlands
	PRY	Paraguay	285574						NCL	New Caledonia
	PSE	Occupied Palestinian Territory	107109						NZL	New Zealand
	QAT	Qatar	896950						NIC	Nicaragua
	ROU	Romania	1.28155e+06						NER	Niger
	RUS	Russian Federation	2.17962e+07						NGA	Nigeria
	RWA	Rwanda	56561.5						NIU	Niue
	SAU	Saudi Arabia	3.97657e+06						NOR	Norway
	SDN	Sudan	392381						PSE	Occupied Palestinian Territory
	SEN	Senegal	136752						OMN	Oman
	SGP	Singapore	1.3127e+06						PAK	Pakistan
	SLE	Sierra Leone	26955.3						PLW	Palau
	SLV	El Salvador	115161						PAN	Panama
	SRB	Serbia	502913						PNG	Papua New Guinea
	STP	Sao Tome and Principe	3442.6						PRY	Paraguay
	SUR	Suriname	40858.8						PER	Peru
	SVK	Slovakia	510162						PHL	Philippines
	SVN	Slovenia	278489						BOL	Bolivia
	SWE	Sweden	2.43329e+06						POL	Poland
	SWZ	Swaziland	23000.1						PRT	Portugal
	SYC	Seychelles	10392.8						QAT	Qatar
	SYR	Syria	408828						CMR	Cameroon
	TCA	Turks and Caicos Islands	1729.24						KOR	South Korea
	TCD	Chad	42692.8						MDA	Moldova
	TGO	Togo	39545.1						SSD	South Sudan
	THA	Thailand	3.53329e+06						SDN	Sudan
	TJK	Tajikistan	571536						REU	Réunion
	TKM	Turkmenistan	705518						ROU	Romania
	TTO	Trinidad and Tobago	48476.6						RUS	Russian Federation
	TUN	Tunisia	408221						RWA	Rwanda
	TUR	Turkey	6.33067e+06							Saint Helena
	TWN	Taiwan	3.26336e+06						LCA	Saint Lucia
	TZA	Tanzania	420306						SXM	Sint Maarten (Dutch part)
	UGA	Uganda	219692						WSM	Samoa
	UKR	Ukraine	5.88217e+06						STP	Sao Tome and Principe
	URY	Uruguay	248690						SAU	Saudi Arabia
	USA	USA	7.08593e+07						SEN	Senegal
	UZB	Uzbekistan	863794						SRB	Serbia
	VCT	Saint Vincent and the Grenadines	6412.01						SYC	Seychelles
	VEN	Venezuela	222409						SLE	Sierra Leone
	VGB	British Virgin Islands	4075.77						SGP	Singapore
	VNM	Viet Nam	1.41707e+06						SVK	Slovakia
	YEM	Yemen	151347						SVN	Slovenia
	ZAF	South Africa	1.88955e+06						SLB	Solomon Islands
	ZMB	Zambia	219774						SOM	Somalia
	ZWE	Zimbabwe	58292.2						ZAF	South Africa
									ESP	Spain
									LKA	Sri Lanka
									KNA	Saint Kitts and Nevis
									SPM	Saint Pierre and Miquelon
									VCT	Saint Vincent and the Grenadines
									SUR	Suriname
									SWZ	Swaziland
									SWE	Sweden
									CHE	Switzerland
									SYR	Syria
									TWN	Taiwan
									TJK	Tajikistan
									THA	Thailand
									TLS	Timor-Leste
									TGO	Togo
									TON	Tonga
									TTO	Trinidad and Tobago
									TUN	Tunisia
									TUR	Turkey
									TKM	Turkmenistan
									TCA	Turks and Caicos Islands
									TUV	Tuvalu
									UGA	Uganda
									UKR	Ukraine
									ARE	United Arab Emirates
									GBR	United Kingdom
									TZA	Tanzania
									USA	USA
									URY	Uruguay
									UZB	Uzbekistan
									VUT	Vanuatu
									VEN	Venezuela
									VNM	Viet Nam
									WLF	Wallis and Futuna Islands
									YEM	Yemen
									ZMB	Zambia
									ZWE	Zimbabwe
