# Supplementary material for: The Social Cost of Fossil and Industrial CO2 Emissions from 1950 to 2018
Source: Research Square preprint supplement (doi:10.21203/rs.3.rs-2244259/v1), 2022-11-17
Supplement: Supplementary file 74 [file Table_SIT1.xlsx]

## Sheet: CountryData_Links
			Cumulative	Cumulative Wealth Borrowing								Cumulative Wealth Borrowing
			CO2 emissions	SDR:calibrated								SDR:expert-based
			1950--2018	All Impacts (billion USD)		Nordhaus		Weitzman		Howard&Sterner		All Impacts		Nordhaus		Weitzman		Howard&Sterner
	Country	ISO	MtC	Mean	Std	Mean	Std	Mean	Std	Mean	Std	Mean	Std	Mean	Std	Mean	Std	Mean	Std
	Afghanistan	AFG	46.5723	4.30629	0.379568	2.44318	0.0259823	2.71686	0.0516112	7.75884	0.0867047	10.6186	1.06055	6.04959	0.0259823	7.65375	0.406223	18.1525	0.671806
	Albania	ALB	73.6216	8.40951	0.709804	4.79676	0.0291959	5.21682	0.0590356	15.2149	0.0971796	17.2208	1.34968	9.8312	0.0291959	12.302	0.471956	29.5292	0.772441
	Algeria	DZA	1164.44	107.943	8.85706	61.2461	0.534322	68.0589	1.06735	194.525	1.78261	266.782	22.6577	151.995	0.534322	191.982	8.45013	456.371	13.9366
	Andorra	AND	3.84069	0.308157	0.0340999	0.174083	0.00216913	0.196854	0.00433331	0.553535	0.00723799	0.870059	0.0922667	0.495099	0.00216913	0.628588	0.0343466	1.48649	0.05666
	Angola	AGO	183.665	15.097	1.39368	8.5352	0.107259	9.62706	0.212746	27.1288	0.358058	41.453	4.32187	23.5925	0.107259	29.9855	1.67258	70.781	2.76908
	Anguilla	AIA	0.86316	0.0653694	0.00723651	0.0368566	0.000522075	0.0420142	0.00103827	0.117237	0.00174258	0.19406	0.0215078	0.110377	0.000522075	0.140572	0.00819052	0.331231	0.0135425
	Antigua and Barbuda	NA	5.62698	0.628022	0.0630604	0.358033	0.0024389	0.390296	0.00492148	1.13574	0.00811131	1.31016	0.112017	0.747761	0.0024389	0.937339	0.0392219	2.24537	0.0641892
	Argentina	ARG	2069.92	218.178	15.8318	124.213	0.814608	136.161	1.63206	394.16	2.71536	479.086	35.4504	273.285	0.814608	343.439	12.9521	820.536	21.3143
	Armenia	ARM	170.807	22.1165	1.92794	12.649	0.0680592	13.6066	0.138555	40.0938	0.22617	40.4763	3.28635	23.1401	0.0680592	28.7787	1.113	69.5101	1.81352
	Aruba	ABW	17.7642	1.77724	0.150649	1.01048	0.00843554	1.11356	0.0168691	3.20768	0.0281288	4.09691	0.364203	2.33576	0.00843554	2.94077	0.133825	7.0142	0.220507
	Australia	AUS	4499.37	461.821	33.9368	262.749	1.81384	288.785	3.6335	833.93	6.04767	1039.63	78.7538	592.877	1.81384	745.756	28.8428	1780.25	47.4812
	Austria	AUT	1015.38	113.953	8.31248	64.9729	0.373209	70.7859	0.751086	206.1	1.24295	236.543	16.7634	135.018	0.373209	169.169	5.98245	405.443	9.81691
	Azerbaijan	AZE	622.789	70.9527	5.84592	40.4688	0.238348	44.0201	0.482229	128.369	0.793279	145.789	11.0583	83.2274	0.238348	104.123	3.85748	250.017	6.31149
	Bahamas	BHS	44.2122	5.37047	0.594442	3.06743	0.0205501	3.31756	0.0418107	9.72641	0.0682668	10.4196	0.992198	5.95235	0.0205501	7.42499	0.335522	17.8815	0.546603
	Bahrain	BHR	221.394	19.7339	1.63488	11.1843	0.108292	12.4863	0.215676	35.531	0.361374	50.4786	4.50345	28.7493	0.108292	36.3853	1.70294	86.3011	2.81308
	Bangladesh	BGD	372.094	30.1669	2.781	17.0475	0.21332	19.2606	0.423479	54.1925	0.712192	83.9454	8.61165	47.7713	0.21332	60.7319	3.33132	143.333	5.51377
	Barbados	BRB	14.3334	1.42146	0.10922	0.808003	0.00604783	0.891221	0.0121068	2.56514	0.0201678	3.305	0.261647	1.88414	0.00604783	2.3728	0.0960789	5.65806	0.158241
	Belarus	BLR	1247.14	145.719	12.2917	83.1599	0.478524	90.2469	0.969952	263.75	1.59194	292.772	22.4813	167.181	0.478524	208.892	7.76923	502.244	12.6961
	Belgium	BEL	2110.83	256.798	19.2267	146.683	0.73403	158.646	1.48403	465.066	2.44082	495.208	34.0815	282.913	0.73403	353.212	11.8523	849.499	19.3793
	Belize	BLZ	4.87309	0.464324	0.0361898	0.263655	0.00216707	0.292094	0.00432887	0.837222	0.0072294	1.11839	0.0919943	0.63734	0.00216707	0.804249	0.0342742	1.91357	0.056525
	Benin	BEN	28.2698	2.1875	0.22051	1.23426	0.0178631	1.40335	0.0354228	3.92487	0.0596463	6.34311	0.713664	3.60836	0.0178631	4.59778	0.27829	10.8232	0.460905
	Bermuda	BMU	7.59311	0.806261	0.061272	0.459101	0.00298026	0.502823	0.00599138	1.45686	0.0099321	1.76232	0.132453	1.00535	0.00298026	1.26227	0.0477013	3.01934	0.0783671
	Bhutan	BTN	4.2518	0.31167	0.0351763	0.175525	0.00293166	0.201076	0.00581565	0.55841	0.00979161	0.949527	0.116269	0.539928	0.00293166	0.689406	0.0456656	1.61925	0.0756398
	Bonaire, Saint Eustatius and Saba	NA	6.07875	0.765038	0.0721171	0.437295	0.00243976	0.471587	0.00495471	1.38623	0.00810096	1.43271	0.116814	0.818798	0.00243976	1.02049	0.0396632	2.45886	0.0646303
	Bosnia and Herzegovina	BIH	229.575	24.1246	1.95341	13.7334	0.09432	15.0579	0.189417	43.5824	0.314299	53.2217	4.16981	30.3577	0.09432	38.1403	1.50602	91.1671	2.47492
	Botswana	BWA	37.1753	3.04341	0.288092	1.72038	0.0201151	1.94079	0.0400408	5.46905	0.0671413	8.41738	0.83012	4.79055	0.0201151	6.08246	0.315953	14.3791	0.522185
	Brazil	BRA	3936.69	375.56	28.9027	213.26	1.75337	236.241	3.49922	677.18	5.84928	903.157	74.0597	514.692	1.75337	649.546	27.6808	1545.23	45.6693
	British Virgin Islands	NA	1.42337	0.121079	0.0107589	0.0685259	0.000731279	0.0769317	0.00145595	0.217779	0.00244039	0.323504	0.0304202	0.184173	0.000731279	0.233455	0.0114983	0.552884	0.0189979
	Brunei Darussalam	BRN	83.6593	8.59585	0.789355	4.8906	0.0369487	5.37478	0.0741898	15.5222	0.12309	19.3455	1.63378	11.0323	0.0369487	13.8764	0.589515	33.1278	0.968546
	Bulgaria	BGR	992.608	116.861	9.47499	66.7022	0.370833	72.3389	0.751437	211.541	1.23373	233.049	17.3933	133.089	0.370833	166.257	6.01778	399.801	9.83574
	Burkina Faso	BFA	15.2448	1.23099	0.115527	0.695552	0.00912507	0.786323	0.0181029	2.21111	0.0304689	3.43512	0.364977	1.95478	0.00912507	2.4863	0.142237	5.86428	0.23552
	Burundi	BDI	3.15151	0.296618	0.0243551	0.16837	0.00147099	0.186788	0.00293812	0.534698	0.00490798	0.722495	0.0620325	0.411684	0.00147099	0.519797	0.0232428	1.236	0.0383386
	Cambodia	KHM	34.8837	2.67139	0.285828	1.50677	0.0244581	1.71594	0.0485035	4.79146	0.0817006	7.79968	0.962626	4.43654	0.0244581	5.65992	0.380541	13.3026	0.630507
	Canada	CAN	7692.4	840.736	61.1652	479.067	2.89501	523.248	5.81822	1519.89	9.6455	1787.74	128.687	1020.15	2.89501	1279.69	46.2979	3063.39	76.0496
	Cape Verde	PRK	3.31512	0.284909	0.025374	0.161299	0.0018142	0.180913	0.00360457	0.512515	0.00605514	0.751181	0.0741785	0.427687	0.0018142	0.542558	0.0283944	1.2833	0.0469642
	Central African Republic	CAF	3.19001	0.326605	0.0255819	0.185806	0.00130227	0.20426	0.00261221	0.589748	0.00434095	0.737649	0.057046	0.420651	0.00130227	0.529054	0.0207552	1.26324	0.0341383
	Chad	TCD	6.56142	0.578552	0.0489669	0.327793	0.00331168	0.366436	0.00659306	1.04143	0.0110519	1.49405	0.137392	0.850825	0.00331168	1.07738	0.0520473	2.55393	0.085999
	Chile	CHL	694.038	68.4263	5.06043	38.8902	0.302024	42.9315	0.602638	123.457	1.00746	159.421	12.7457	90.8791	0.302024	114.585	4.76563	272.799	7.86247
	China	CHN	56774.7	4835.16	416.532	2736.62	30.4615	3072.59	60.4987	8696.28	101.675	12868.9	1240.9	7326.42	30.4615	9294.77	476.341	21985.6	788.051
	Colombia	COL	865.42	88.7862	6.57631	50.5134	0.352052	55.5231	0.704961	160.322	1.17383	199.9	15.221	113.998	0.352052	143.415	5.59178	342.287	9.20674
	Comoros	COM	1.23812	0.109023	0.00910631	0.0617673	0.000624817	0.0690617	0.00124389	0.196241	0.00208553	0.281771	0.0257514	0.16046	0.000624817	0.203229	0.00981256	0.481624	0.0162165
	Congo	COG	19.6334	1.8387	0.157325	1.04356	0.00986075	1.15857	0.019643	3.31396	0.0329009	4.49024	0.409123	2.55846	0.00986075	3.23315	0.15496	7.67911	0.255901
	Cook Islands	COK	0.523843	0.0483731	0.0043033	0.0274433	0.000246356	0.0305081	0.000492747	0.0871677	0.000821716	0.120075	0.0105493	0.068408	0.000246356	0.0864011	0.00390533	0.205416	0.00643581
	Costa Rica	CRI	65.0365	5.99488	0.47876	3.40091	0.0302284	3.78191	0.0602976	10.8018	0.100859	14.8781	1.27237	8.47609	0.0302284	10.7112	0.476923	25.4471	0.787177
	Côte d'Ivoire	CIV	86.1474	8.31563	0.683716	4.72347	0.038275	5.22517	0.0766141	14.9983	0.127661	19.8163	1.64365	11.2941	0.038275	14.2405	0.607442	33.9142	1.00066
	Croatia	HRV	280.055	30.0719	2.28048	17.1282	0.108293	18.738	0.217883	54.3494	0.360837	65.1021	4.84732	37.1427	0.108293	46.6047	1.73621	111.559	2.85088
	Cuba	CUB	432.911	48.9742	3.72599	27.9288	0.160654	30.4027	0.32405	88.591	0.534907	101.066	7.31903	57.6923	0.160654	72.2355	2.58593	173.269	4.23814
	Curaçao	CUW	114.21	14.4608	1.36853	8.26682	0.0459067	8.91042	0.0932737	26.2053	0.152409	26.9429	2.20547	15.399	0.0459067	19.1848	0.746977	46.245	1.21679
	Cyprus	CYP	76.2586	7.30634	0.573741	4.14935	0.0334648	4.59372	0.0669379	13.1759	0.111626	17.53	1.43748	9.99038	0.0334648	12.599	0.530942	30.0004	0.87503
	Czech Republic	CZE	2478.69	302.32	23.2528	172.693	0.87752	186.72	1.77813	547.548	2.918	582.798	41.2442	332.959	0.87752	415.448	14.2317	999.989	23.2487
	North Korea	PRK	1324.35	156.538	13.9195	89.3565	0.54334	96.8549	1.10378	283.402	1.80786	312.065	25.81	178.219	0.54334	222.394	8.86327	535.581	14.474
	Democratic Republic of the Congo	COD	49.683	6.32557	0.50312	3.61658	0.0179225	3.89652	0.0363212	11.4636	0.0595469	11.7056	0.845667	6.69097	0.0179225	8.33648	0.290411	20.0895	0.47394
	Denmark	DNK	914.726	109.075	8.26058	62.2759	0.326373	67.4667	0.660261	197.481	1.08579	214.632	15.1784	122.59	0.326373	153.112	5.28006	368.193	8.63568
	Djibouti	DJI	4.99593	0.502904	0.0395688	0.285978	0.00207489	0.314918	0.00416093	0.907816	0.00691745	1.15456	0.0908442	0.658293	0.00207489	0.828311	0.0330686	1.97708	0.0544073
	Dominica	DMA	1.23231	0.10906	0.00902639	0.0617973	0.000612368	0.0690525	0.00121882	0.19633	0.00204357	0.280673	0.0253975	0.159842	0.000612368	0.202377	0.00962044	0.4798	0.0158974
	Dominican Republic	DOM	190.89	17.3712	1.42634	9.85109	0.0895548	10.9702	0.178762	31.2921	0.298814	43.6495	3.7819	24.8644	0.0895548	31.4307	1.41483	74.6534	2.3346
	Ecuador	ECU	303.603	27.596	2.28752	15.649	0.143603	17.4298	0.286438	49.7093	0.479133	69.4037	6.0377	39.5345	0.143603	49.9827	2.26491	118.694	3.73826
	Egypt	EGY	1591.57	142.239	11.5084	80.6211	0.781695	89.9848	1.556	256.111	2.6088	362.591	32.3461	206.512	0.781695	261.408	12.2789	619.853	20.2907
	El Salvador	SLV	59.6536	5.6501	0.443376	3.20775	0.0268278	3.55607	0.0535859	10.1865	0.0894978	13.6843	1.14138	7.7979	0.0268278	9.84178	0.424458	23.4132	0.700056
	Equatorial Guinea	GNQ	34.2458	2.43995	0.323864	1.3727	0.024533	1.57891	0.0487073	4.36824	0.0818889	7.64213	1.0022	4.3446	0.024533	5.55009	0.383717	13.0317	0.634957
	Eritrea	ERI	4.39366	0.340568	0.041583	0.192172	0.00269924	0.218332	0.00539068	0.611199	0.00900793	0.99108	0.114254	0.563807	0.00269924	0.717058	0.0427047	1.69238	0.070466
	Estonia	EST	381.615	45.8859	3.64259	26.2031	0.140442	28.3652	0.284717	83.0895	0.467161	89.7053	6.6059	51.2411	0.140442	63.9616	2.28058	153.913	3.7261
	Ethiopia	ETH	62.219	5.30709	0.46116	3.00387	0.0353169	3.37245	0.070101	9.54496	0.11792	14.0791	1.41627	8.01539	0.0353169	10.1744	0.55096	24.0474	0.91204
	Faeroe Islands	FRO	7.97654	0.812569	0.0627435	0.462212	0.00325193	0.508344	0.00652936	1.46715	0.0108418	1.84532	0.143182	1.05226	0.00325193	1.32331	0.0519496	3.16038	0.0854304
	Micronesia (Federated States of)	FSM	0.934731	0.0727272	0.00830178	0.0410429	0.00055179	0.0466067	0.00110084	0.130532	0.00184152	0.210912	0.0232019	0.119987	0.00055179	0.152583	0.00871163	0.360166	0.0143821
	Fiji	SYR	13.7213	1.37426	0.104131	0.781379	0.00598938	0.861124	0.0119615	2.48027	0.019978	3.15751	0.253154	1.80022	0.00598938	2.26824	0.0945924	5.40408	0.155987
	Finland	FIN	816.65	89.0053	6.78983	50.7132	0.31227	55.3981	0.628958	160.905	1.04027	190.165	14.0832	108.511	0.31227	136.052	5.01628	325.932	8.23115
	France	FRA	7161.54	863.641	65.1536	493.216	2.51621	533.833	5.08885	1563.88	8.36855	1680.21	116.971	959.802	2.51621	1198.55	40.6638	2882.27	66.4921
	French Guiana	GUF	0.231351	0.0210047	0.002188	0.0119112	0.000128231	0.0132728	0.000255871	0.03783	0.000427666	0.0525606	0.00542722	0.0299408	0.000128231	0.0379101	0.00202408	0.0898309	0.00333879
	French Polynesia	PYF	7.36405	0.701319	0.0566541	0.39822	0.00326466	0.441162	0.00652907	1.26458	0.0108891	1.69232	0.140099	0.964401	0.00326466	1.21652	0.0517664	2.89605	0.085314
	Gabon	GAB	68.1466	7.16365	0.63586	4.07806	0.0282295	4.47033	0.0569455	12.9426	0.094022	15.846	1.28434	9.0386	0.0282295	11.3459	0.4546	27.1535	0.745283
	Gambia	GMB	3.53172	0.317351	0.0258892	0.179903	0.0017092	0.200659	0.0034045	0.571492	0.00570384	0.805648	0.0710097	0.458875	0.0017092	0.580608	0.0268785	1.37746	0.0443995
	Georgia	GEO	258.401	33.5372	2.92389	19.1817	0.102969	20.6301	0.20963	60.7999	0.34217	61.2419	4.97252	35.0127	0.102969	43.5408	1.68383	105.172	2.74351
	Germany	DEU	17085.1	2104.39	159.184	1202.34	5.91693	1298.99	11.978	3811.85	19.6698	4014.64	276.97	2293.88	5.91693	2861.96	95.747	6888.09	156.423
	Ghana	GHA	91.7778	8.43905	0.657859	4.78719	0.0450765	5.32618	0.089623	15.2038	0.150434	20.9284	1.84941	11.9227	0.0450765	15.082	0.706185	35.7804	1.16751
	Greece	GRC	1063.75	104.878	8.34767	59.607	0.453281	65.7786	0.909124	189.249	1.51152	245.559	19.8485	139.982	0.453281	176.238	7.23024	420.456	11.8984
	Greenland	GRL	7.74466	0.879215	0.0676933	0.501436	0.00291471	0.545731	0.00586806	1.59048	0.00970348	1.80594	0.131586	1.03094	0.00291471	1.29118	0.0467338	3.09569	0.076642
	Grenada	GRD	2.07604	0.186674	0.015216	0.105826	0.00100054	0.118023	0.00199382	0.336173	0.00333878	0.473674	0.041809	0.269794	0.00100054	0.341321	0.0157559	0.809908	0.0260206
	Guatemala	GTM	110.064	10.121	0.796578	5.7413	0.0523381	6.38689	0.104291	18.2348	0.174667	25.1355	2.17569	14.3194	0.0523381	18.1053	0.823575	42.9817	1.36027
	Guinea	GIN	21.3185	2.08063	0.160034	1.1822	0.00935935	1.30641	0.0186829	3.75328	0.0312187	4.89799	0.395575	2.79184	0.00935935	3.52073	0.147754	8.3814	0.243708
	Guinea-Bissau	GNB	2.59323	0.255073	0.0200326	0.144961	0.00110731	0.160033	0.00221678	0.460226	0.00369279	0.597428	0.0477456	0.340559	0.00110731	0.429073	0.0175835	1.02265	0.0289603
	Guyana	GUY	26.1349	2.8864	0.218693	1.64513	0.00993749	1.79511	0.0199825	5.21897	0.0330999	6.07831	0.44339	3.46886	0.00993749	4.34996	0.15899	10.4161	0.261011
	Haiti	HTI	19.8358	1.82331	0.143702	1.03429	0.00960646	1.15072	0.0191235	3.28493	0.0320598	4.52654	0.396928	2.57871	0.00960646	3.26131	0.150861	7.7396	0.24928
	Honduras	HND	65.1765	5.78168	0.472323	3.27634	0.0326583	3.66024	0.0649689	10.4084	0.108996	14.8326	1.34651	8.44727	0.0326583	10.6974	0.512424	25.3531	0.847028
	Hong Kong	HKG	422.159	39.8698	3.20898	22.6335	0.187661	25.0968	0.37538	71.8791	0.625985	96.9574	8.05672	55.249	0.187661	69.7104	2.97729	165.913	4.90684
	Hungary	HUN	1136.94	138.391	10.6716	79.049	0.403725	85.4834	0.818138	250.64	1.34255	267.326	18.9791	152.722	0.403725	190.566	6.54901	458.69	10.6986
	Iceland	ISL	39.7154	4.20978	0.30279	2.39705	0.0155797	2.62622	0.0312057	7.60608	0.0519315	9.19093	0.676961	5.24308	0.0155797	6.58839	0.247587	15.7413	0.407474
	India	IND	12946.8	1113.65	93.744	630.499	6.86122	707.046	13.6324	2003.4	22.9038	2935.72	279.144	1671.48	6.86122	2119.96	107.339	5015.73	177.566
	Indonesia	IDN	3358.97	290.567	24.669	164.534	1.717	184.358	3.41654	522.809	5.73073	763.314	70.8067	434.621	1.717	550.822	26.9517	1304.5	44.5484
	Iraq	IRQ	1117.1	101.064	8.19021	57.3034	0.552906	63.8694	1.10048	182.02	1.84535	254.697	22.7615	145.076	0.552906	183.579	8.67743	435.435	14.3405
	Ireland	IRL	526.069	55.7947	4.07842	31.7698	0.205079	34.8011	0.411668	100.813	0.683547	121.965	9.03875	69.5767	0.205079	87.381	3.2741	208.938	5.38325
	Iran	IRN	4515.57	401.584	32.9027	227.585	2.23074	254.163	4.44029	723.004	7.44485	1028.57	92.2371	585.791	2.23074	741.622	35.0355	1758.3	57.8964
	Israel	ISR	620.377	59.0002	4.6094	33.5002	0.275508	37.12	0.550516	106.381	0.919057	142.42	11.7522	81.1602	0.275508	102.404	4.36212	243.696	7.19282
	Italy	ITA	6111.62	664.636	50.5928	378.675	2.33537	413.745	4.70328	1201.49	7.78006	1422.86	105.234	811.889	2.33537	1018.05	37.5079	2438.65	61.551
	Jamaica	JAM	119.34	12.6479	0.98687	7.20161	0.0472913	7.88867	0.0951104	22.8534	0.157585	27.7128	2.11132	15.8088	0.0472913	19.8467	0.75766	47.4827	1.24438
	Japan	JPN	16229.3	1709.66	130.393	973.323	6.3718	1066.84	12.8059	3088.82	21.2348	3765.5	283.012	2147.92	6.3718	2697.49	101.946	6451.09	167.504
	Jordan	JOR	177.128	15.4148	1.32394	8.73019	0.0880248	9.77382	0.175388	27.7403	0.293752	40.3305	3.67172	22.9648	0.0880248	29.0851	1.38571	68.9415	2.28873
	Kazakhstan	KAZ	3357.49	370.733	27.8745	211.301	1.2785	230.563	2.57179	670.335	4.25892	781.151	57.0894	445.8	1.2785	558.984	20.4699	1338.67	33.6037
	Kenya	KEN	117.842	11.5988	0.862636	6.5919	0.0518966	7.2783	0.103532	20.9263	0.173127	27.0615	2.18032	15.4264	0.0518966	19.453	0.818235	46.305	1.35016
	Kiribati	KIR	0.537799	0.0526966	0.00423733	0.0299449	0.000237991	0.0330764	0.000475433	0.0950683	0.000793663	0.123665	0.0101373	0.0704906	0.000237991	0.0888697	0.00376292	0.211634	0.00620315
	Kosovo	NA	24.2058	1.53383	0.270216	0.858969	0.0231175	1.00687	0.045746	2.73567	0.0771837	5.32041	0.915683	3.02222	0.0231175	3.88497	0.35881	9.05403	0.594763
	Kuwait	CUW	743.645	69.5824	5.54784	39.491	0.346246	43.8446	0.690133	125.412	1.15519	170.15	14.4879	96.9474	0.346246	122.483	5.45191	291.02	9.00071
	Kyrgyzstan	KGZ	199.806	24.4142	2.20065	13.9464	0.0808324	15.0751	0.164273	44.2211	0.268749	47.1223	3.85949	26.9213	0.0808324	33.5679	1.31804	80.8778	2.15022
	Laos	LAO	32.9809	2.25633	0.375925	1.26745	0.0363859	1.46795	0.0721865	4.03358	0.121631	7.26206	1.39965	4.12712	0.0363859	5.29793	0.565403	12.3611	0.937361
	Latvia	LVA	190.789	23.2602	1.87101	13.2866	0.070712	14.3651	0.143537	42.1289	0.23517	44.9354	3.35154	25.6718	0.070712	32.0185	1.15095	77.116	1.87913
	Lebanon	LBN	185.689	17.3856	1.34371	9.86725	0.0860569	10.9543	0.171527	31.3352	0.287156	42.4778	3.59196	24.2031	0.0860569	30.5787	1.35498	72.6516	2.23736
	Lesotho	LSO	15.894	1.24738	0.136038	0.70415	0.00912414	0.798696	0.0181892	2.23929	0.03045	3.58877	0.381939	2.04179	0.00912414	2.59574	0.143823	6.12877	0.237509
	Liberia	LBR	13.8068	1.6198	0.153682	0.924481	0.00583044	1.0031	0.0117992	2.93181	0.0193894	3.23371	0.271772	1.84661	0.00583044	2.309	0.09427	5.54552	0.154079
	Libya	LBY	540.033	52.34	4.34383	29.7335	0.23494	32.8742	0.470734	94.4122	0.783387	124.424	10.223	70.917	0.23494	89.3644	3.73871	212.992	6.15465
	Liechtenstein	LIE	1.58978	0.130787	0.0148097	0.073943	0.00089186	0.0833363	0.00178552	0.235082	0.00297545	0.361373	0.0385096	0.205678	0.00089186	0.260774	0.0141837	0.617667	0.0233722
	Lithuania	LTU	349.79	42.9154	3.48835	24.5173	0.130677	26.4929	0.265356	77.736	0.434555	82.435	6.20839	47.0987	0.130677	58.7259	2.12823	141.48	3.47385
	Luxembourg	LUX	200.891	25.0635	1.92426	14.3239	0.0696389	15.4595	0.140881	45.4071	0.231401	47.1952	3.25549	26.9705	0.0696389	33.642	1.12485	80.9729	1.83728
	Macao	MAC	15.1479	1.36449	0.11679	0.773563	0.00721351	0.862394	0.0144163	2.4575	0.0240697	3.46383	0.306362	1.97295	0.00721351	2.4943	0.114218	5.92424	0.188377
	North Macedonia	MKD	155.924	17.2628	1.41149	9.83957	0.0606071	10.7311	0.122508	31.2179	0.201813	36.4391	2.79346	20.7959	0.0606071	26.0414	0.979937	62.4799	1.60484
	Madagascar	MDG	24.372	2.41575	0.182922	1.37318	0.0108776	1.51509	0.0216977	4.35898	0.0362873	5.59833	0.455631	3.19151	0.0108776	4.02403	0.171378	9.57944	0.282797
	Malawi	MWI	12.1262	1.23012	0.0946133	0.699652	0.00501159	0.769923	0.0100375	2.22078	0.0167092	2.79929	0.216908	1.59618	0.00501159	2.00884	0.0796266	4.79285	0.131086
	Malaysia	MYS	1465.1	120.335	11.0577	68.0306	0.797109	76.7215	1.58484	216.254	2.66064	331.517	32.7167	188.679	0.797109	239.6	12.4946	566.271	20.6614
	Maldives	MDV	5.76615	0.421234	0.0468979	0.237199	0.00380873	0.271851	0.00755235	0.754652	0.0127174	1.28844	0.152306	0.732625	0.00380873	0.935315	0.059339	2.19737	0.098278
	Mali	MLI	13.5495	1.12006	0.102085	0.633349	0.00803804	0.713899	0.0159371	2.01294	0.0268365	3.05694	0.321337	1.7399	0.00803804	2.21153	0.125176	5.21941	0.207301
	Malta	MLT	27.6453	2.74749	0.217568	1.56186	0.0118133	1.72211	0.0236986	4.95851	0.0393927	6.38465	0.518182	3.6399	0.0118133	4.58123	0.188536	10.9328	0.310233
	Marshall Islands	NA	0.851775	0.0645939	0.00728421	0.0364211	0.000514809	0.0415091	0.00102464	0.115851	0.00171831	0.191541	0.0212995	0.108945	0.000514809	0.138735	0.00808855	0.326942	0.0133689
	Martinique	MTQ	1.14616	0.131573	0.012941	0.0750594	0.000488077	0.0816018	0.000986476	0.238058	0.00162256	0.267137	0.0226212	0.152524	0.000488077	0.190936	0.00787526	0.457949	0.0128751
	Mauritania	MRT	18.8819	1.70341	0.158624	0.96575	0.00968885	1.07665	0.0193488	3.06784	0.0323294	4.31049	0.407706	2.45521	0.00968885	3.10588	0.153027	7.37037	0.252454
	Mauritius	MUS	29.4178	2.56671	0.215409	1.45378	0.0149507	1.6273	0.0297514	4.61906	0.0498994	6.68699	0.617356	3.80775	0.0149507	4.82471	0.234741	11.4285	0.387988
	Mexico	MEX	4941.29	485.357	37.4602	275.824	2.09629	304.542	4.19613	875.707	6.99109	1138.38	90.523	648.917	2.09629	817.546	33.2958	1948.67	54.8441
	Mongolia	MNG	171.162	14.941	1.33359	8.46266	0.100747	9.47402	0.200158	26.8864	0.336424	38.8206	4.04185	22.1055	0.100747	28.0324	1.57369	66.3241	2.60426
	Montenegro	MNE	25.0344	2.59056	0.204274	1.47417	0.0101389	1.61877	0.0203542	4.67876	0.0337915	5.7989	0.447181	3.30721	0.0101389	4.1569	0.161845	9.9326	0.266064
	Montserrat	MSR	NA	NA	NA	NA	NA	NA	NA	NA	NA	NA	NA	NA	NA	NA	NA	NA	NA
	Morocco	MAR	445.904	40.3004	3.23358	22.8497	0.214184	25.4691	0.426593	72.5825	0.714746	101.742	8.9086	57.9527	0.214184	73.3129	3.36852	173.961	5.56443
	Mozambique	MOZ	44.7115	5.00137	0.401294	2.85145	0.0201327	3.10884	0.0402167	9.04382	0.0670997	10.3462	0.852956	5.90539	0.0201327	7.41501	0.317512	17.7183	0.523039
	Myanmar	MMR	132.589	12.6652	0.966872	7.19213	0.0630091	7.96767	0.125456	22.8357	0.210279	30.331	2.59635	17.2851	0.0630091	21.8327	0.989173	51.875	1.6343
	Namibia	NAM	18.6111	1.38039	0.155461	0.777725	0.0117257	0.889257	0.023294	2.47418	0.039145	4.171	0.476851	2.37199	0.0117257	3.02469	0.183441	7.11633	0.303506
	Nauru	NRU	1.28958	0.146314	0.0133216	0.0834439	0.000536129	0.0907812	0.0010881	0.264718	0.00178442	0.302841	0.0252916	0.172875	0.000536129	0.2161	0.00873231	0.519546	0.0142704
	Nepal	NPL	35.2222	2.72514	0.278468	1.53762	0.022957	1.74828	0.0455557	4.88952	0.0766756	7.90014	0.911813	4.49408	0.022957	5.72697	0.357805	13.4794	0.592577
	Netherlands	NLD	2633.16	298.153	22.0953	170.034	0.963138	185.085	1.94111	539.342	3.20702	614.368	43.6606	350.71	0.963138	439.166	15.4794	1053.23	25.38
	New Caledonia	NCL	38.765	3.97653	0.303474	2.26238	0.0170036	2.48733	0.0339532	7.17989	0.056712	8.92581	0.715942	5.09012	0.0170036	6.40991	0.268271	15.2774	0.442372
	New Zealand	NZL	427.592	45.2599	3.26843	25.7701	0.166937	28.2362	0.334723	81.7736	0.556449	99.0223	7.30224	56.4877	0.166937	70.9679	2.6589	169.611	4.37407
	Nicaragua	NIC	45.2921	4.41954	0.338244	2.51114	0.0196603	2.77488	0.0392796	7.97259	0.0655771	10.4124	0.836968	5.93506	0.0196603	7.48296	0.311023	17.8193	0.512814
	Niger	NER	11.7923	1.074	0.0925166	0.609075	0.00590981	0.678299	0.0117732	1.93464	0.0197201	2.69313	0.24533	1.53411	0.00590981	1.94025	0.0929041	4.60503	0.153434
	Nigeria	NGA	997.573	94.9992	7.88597	53.9419	0.457537	59.7661	0.91384	171.29	1.5261	228.956	19.4385	130.474	0.457537	164.659	7.23249	391.736	11.9262
	Niue	NIU	0.0720888	0.00693181	0.000607198	0.00393701	3.2697e-05	0.00435648	6.55639e-05	0.0125019	0.00010903	0.0166044	0.00142528	0.00946321	3.2697e-05	0.0119277	0.000520958	0.0284221	0.00085734
	Norway	NOR	585.992	63.1584	4.64495	35.9767	0.223879	39.3472	0.449793	114.151	0.746007	136.073	9.92878	77.6371	0.223879	97.4375	3.57871	233.144	5.88008
	Occupied Palestinian Territory	NA	14.6878	1.09203	0.122543	0.615314	0.00922902	0.703309	0.0183364	1.95747	0.0308104	3.29266	0.375678	1.87252	0.00922902	2.38749	0.144425	5.61797	0.238945
	Oman	NA	310.168	24.4043	2.38764	13.7775	0.184691	15.6275	0.366479	43.808	0.616591	69.8186	7.44784	39.7226	0.184691	50.5543	2.88215	119.179	4.77114
	Pakistan	PAK	1275.33	111.994	9.29307	63.4454	0.641301	70.9611	1.27679	201.576	2.14056	290.125	26.4634	165.214	0.641301	209.274	10.0746	495.886	16.6493
	Palau	PLW	1.5708	0.122746	0.0140114	0.0692805	0.000921889	0.0786254	0.00183963	0.220331	0.00307654	0.354638	0.0388541	0.20176	0.000921889	0.256511	0.0145624	0.605642	0.0240375
	Panama	PAN	78.6668	7.43985	0.572075	4.22369	0.0365444	4.684	0.072787	13.4119	0.121935	18.0014	1.51925	10.2578	0.0365444	12.9573	0.57449	30.7891	0.948836
	Papua New Guinea	PNG	42.8011	3.84651	0.317016	2.18054	0.0208688	2.43212	0.0415617	6.92687	0.0696407	9.76395	0.866593	5.56126	0.0208688	7.03671	0.328081	16.6939	0.541968
	Paraguay	PRY	44.0318	3.90701	0.324473	2.21402	0.0217552	2.47311	0.0433504	7.03389	0.0726105	10.0319	0.902681	5.7133	0.0217552	7.23269	0.342317	17.1499	0.565451
	Peru	PER	443.532	44.4581	3.35724	25.2786	0.189163	27.855	0.377864	80.2407	0.630831	102.156	8.05244	58.2434	0.189163	73.3656	2.99037	174.858	4.92971
	Philippines	PHL	848.071	80.3079	6.20953	45.5932	0.386982	50.5507	0.77194	144.78	1.29124	194.274	16.2088	110.705	0.386982	139.79	6.10076	332.328	10.0696
	Bolivia	BOL	142.386	13.8358	1.06873	7.86061	0.0656067	8.69217	0.130699	24.9546	0.218866	32.5909	2.73072	18.5764	0.0656067	23.4503	1.03144	55.746	1.70306
	Poland	POL	5945.58	696.772	52.6688	397.669	2.1381	431.492	4.32206	1261.15	7.11528	1392.53	98.7971	795.214	2.1381	994.086	34.5412	2388.29	56.5282
	Portugal	PRT	632.712	62.6046	4.85577	35.5845	0.268635	39.2563	0.538477	112.973	0.895895	145.934	11.7021	83.1936	0.268635	104.757	4.27979	249.852	7.04559
	Qatar	NA	526.715	43.4375	3.93203	24.5602	0.297312	27.6881	0.590181	78.0642	0.992519	119.003	12.0249	67.7312	0.297312	86.051	4.64305	203.227	7.6843
	Cameroon	CMR	53.5329	4.99964	0.458035	2.83734	0.0260909	3.15051	0.052163	9.01108	0.0870222	12.2656	1.11437	6.98852	0.0260909	8.82651	0.413158	20.9816	0.680952
	South Korea	KOR	4489.23	391.121	33.7079	221.519	2.2195	247.96	4.42444	703.882	7.40668	1022.58	92.8678	582.28	2.2195	737.355	34.9744	1748.11	57.7531
	Moldova	MDA	239.751	30.5468	2.84309	17.4647	0.100992	18.809	0.20575	55.3666	0.335658	56.897	4.892	32.521	0.100992	40.445	1.65427	97.725	2.69515
	South Sudan	NA	9.66727	0.872957	0.0723453	0.49494	0.00494517	0.551837	0.00982739	1.57209	0.0165027	2.20145	0.202529	1.25393	0.00494517	1.5874	0.0773996	3.76303	0.127983
	Sudan	SDN	108.944	9.74447	0.813156	5.52329	0.0569472	6.16535	0.113158	17.5448	0.190073	24.7734	2.31886	14.1095	0.0569472	17.8721	0.890764	42.3386	1.47325
	Réunion	REU	1.01647	0.0893121	0.00945759	0.0505977	0.000572027	0.0565866	0.00114284	0.160752	0.00190821	0.231027	0.0244198	0.131564	0.000572027	0.16664	0.00905858	0.394877	0.0149386
	Romania	ROU	2108.27	251.897	20.6391	143.825	0.79608	155.767	1.61545	456.099	2.64822	496.03	37.6412	283.318	0.79608	353.612	12.9542	851.16	21.1585
	Russian Federation	RUS	28795.6	3334.48	256.403	1902.58	10.5565	2066.58	21.3401	6034.29	35.1362	6740.93	487.465	3848.94	10.5565	4813.42	170.583	11560.4	279.213
	Rwanda	NA	7.15847	0.675301	0.058634	0.383346	0.00330162	0.425132	0.00660828	1.21743	0.0110125	1.6436	0.141644	0.936557	0.00330162	1.18194	0.052388	2.8123	0.0863061
	Saint Helena	NA	0.0960892	0.00818575	0.000804595	0.00463301	4.9019e-05	0.00519912	9.80297e-05	0.0147251	0.000163545	0.0218962	0.00209836	0.0124659	4.9019e-05	0.0157877	0.000777559	0.037435	0.00128191
	Saint Lucia	LCA	3.13085	0.286035	0.0238521	0.162227	0.00146187	0.180564	0.00292114	0.515315	0.00487733	0.716718	0.0622571	0.408284	0.00146187	0.515892	0.0231488	1.22598	0.038177
	Sint Maarten (Dutch part)	FRO	13.6065	1.71118	0.16123	0.978093	0.00546077	1.05486	0.011089	3.10058	0.0181321	3.2066	0.261338	1.83256	0.00546077	2.28406	0.0887644	5.50316	0.144646
	Samoa	WSM	1.85411	0.174832	0.0139132	0.0992456	0.000837351	0.110079	0.00167216	0.315172	0.00279355	0.425147	0.0354272	0.242256	0.000837351	0.305838	0.0132324	0.727345	0.0218265
	Sao Tome and Principe	STP	0.843423	0.0780423	0.00624049	0.0442784	0.000396928	0.0492206	0.000791043	0.140628	0.00132441	0.192874	0.0165707	0.109884	0.000396928	0.138876	0.00624782	0.329861	0.0103164
	Saudi Arabia	SAU	3876.08	337.265	29.1073	191.009	1.94902	213.857	3.88046	606.929	6.50416	882.325	80.8553	502.408	1.94902	636.394	30.629	1508.17	50.6049
	Senegal	SEN	60.3411	5.61168	0.444355	3.18432	0.0286677	3.5379	0.0570973	10.1128	0.0956601	13.7946	1.18962	7.85944	0.0286677	9.93332	0.450578	23.5911	0.744238
	Serbia	SRB	702.658	76.8431	5.86896	43.787	0.268442	47.817	0.54081	138.925	0.894247	163.637	12.117	93.3772	0.268442	117.068	4.31351	280.466	7.07709
	Seychelles	NA	NA	NA	NA	NA	NA	NA	NA	NA	NA	NA	NA	NA	NA	NA	NA	NA	NA
	Sierra Leone	SLE	9.61743	1.08664	0.0866084	0.619669	0.00378973	0.674776	0.00761628	1.96548	0.0126181	2.23812	0.168769	1.27759	0.00378973	1.60125	0.0605183	3.83551	0.0993303
	Singapore	ATG	566.094	55.2845	4.59805	31.4126	0.247231	34.7002	0.49577	99.7406	0.824355	130.614	10.8165	74.4509	0.247231	93.7668	3.94127	223.625	6.48569
	Slovakia	SVK	818.462	99.6966	7.6022	56.9477	0.288548	61.5805	0.584524	180.562	0.959555	192.374	13.5364	109.904	0.288548	137.147	4.67746	330.072	7.64237
	Slovenia	SVN	216.467	23.1927	1.75378	13.2092	0.0835848	14.4539	0.168169	41.9149	0.278516	50.3108	3.73955	28.7032	0.0835848	36.0185	1.34006	86.2106	2.20048
	Solomon Islands	SLB	2.68746	0.244651	0.0202052	0.138741	0.001258	0.154493	0.00251029	0.440717	0.00419702	0.614876	0.0531864	0.350258	0.001258	0.44269	0.0198656	1.05168	0.0327805
	Somalia	SOM	8.64522	0.909653	0.0767148	0.517855	0.00355035	0.56762	0.00715855	1.64349	0.0118291	2.00904	0.160727	1.14598	0.00355035	1.43863	0.0571454	3.44251	0.0937417
	South Africa	ZAF	5134.24	525.29	38.8157	298.834	2.08047	328.552	4.1676	948.483	6.93676	1186.12	90.3358	676.397	2.08047	850.901	33.0836	2031.06	54.4632
	Spain	ESP	3618.32	373.013	28.3379	212.245	1.45966	233.148	2.92969	673.646	4.866	837.709	64.2502	477.745	1.45966	600.55	23.3036	1434.83	38.325
	Sri Lanka	LKA	125.075	11.6264	0.896326	6.59732	0.0611877	7.33136	0.121702	20.9506	0.204218	28.5231	2.50799	16.2509	0.0611877	20.5528	0.958995	48.7657	1.58535
	Saint Kitts and Nevis	KNA	1.60796	0.13006	0.0127989	0.0734922	0.000872872	0.0830305	0.0017388	0.233659	0.00291316	0.364022	0.0363519	0.207155	0.000872872	0.26306	0.0137379	0.621851	0.0226951
	Saint Pierre and Miquelon	SPM	0.999624	0.112342	0.00834488	0.064057	0.000375105	0.0697821	0.000754729	0.203188	0.00124926	0.232653	0.0168012	0.132801	0.000375105	0.166425	0.00600884	0.398733	0.00986101
	Saint Vincent and the Grenadines	VCT	1.80608	0.15731	0.0134463	0.0890954	0.000913107	0.0997415	0.00181845	0.283093	0.00304734	0.410935	0.037975	0.233994	0.000913107	0.296408	0.0143624	0.702404	0.0237288
	Suriname	SUR	30.2008	3.25489	0.252851	1.85406	0.0117871	2.02774	0.0237018	5.88286	0.0392686	7.01728	0.52553	4.00371	0.0117871	5.02437	0.188647	12.0237	0.309769
	Swaziland	SWZ	NA	NA	NA	NA	NA	NA	NA	NA	NA	NA	NA	NA	NA	NA	NA	NA	NA
	Sweden	SWE	1091.22	136.179	10.6697	77.8265	0.383922	83.9863	0.778413	246.724	1.27584	256.929	18.1608	146.825	0.383922	183.043	6.22926	440.921	10.1665
	Switzerland	CHE	679.812	77.7137	5.81713	44.3289	0.24732	48.2093	0.498852	140.603	0.823343	158.804	11.2779	90.6615	0.24732	113.471	3.98044	272.279	6.52268
	Syria	SYR	488.926	46.6116	3.96993	26.4675	0.221736	29.3124	0.444481	84.055	0.739486	112.652	9.68514	64.1979	0.221736	80.9106	3.53438	192.847	5.81844
	Taiwan	TWN	2211.66	197.91	16.5576	112.179	1.05712	125.167	2.10924	356.385	3.52736	505.091	44.5747	287.676	1.05712	363.866	16.6907	863.731	27.5475
	Tajikistan	TJK	102.416	12.8761	1.08668	7.3598	0.0397738	7.93673	0.0808126	23.3318	0.132233	24.1745	1.89462	13.8158	0.0397738	17.2114	0.648073	41.4963	1.05729
	Thailand	THA	1873.12	156.445	14.1899	88.4916	0.987193	99.5776	1.96497	281.266	3.29484	424.769	40.8675	241.787	0.987193	306.763	15.5106	725.757	25.6337
	Timor-Leste	TLS	1.42204	0.0925941	0.013847	0.0519121	0.00120764	0.0605713	0.0023905	0.165299	0.00403286	0.313488	0.0475522	0.178105	0.00120764	0.228651	0.0187419	0.533709	0.0310691
	Togo	TGO	18.0449	1.59332	0.134971	0.90277	0.00905247	1.00902	0.0180257	2.86817	0.0302115	4.1097	0.374758	2.34041	0.00905247	2.9635	0.142254	7.02518	0.235033
	Tonga	TON	1.12491	0.104301	0.00839507	0.0591799	0.000516537	0.0657618	0.00103185	0.187961	0.00172346	0.257624	0.0218926	0.146777	0.000516537	0.185401	0.00817105	0.440694	0.0134781
	Trinidad and Tobago	TTO	355.12	33.1987	2.62755	18.8412	0.16474	20.9194	0.328369	59.8356	0.549602	81.312	6.92033	46.3295	0.16474	58.5203	2.59546	139.086	4.2847
	Tunisia	TUN	230.17	21.2556	1.69379	12.059	0.106055	13.4069	0.211614	38.3011	0.353857	52.6751	4.46826	30.0097	0.106055	37.9179	1.67395	90.0977	2.76251
	Turkey	TUR	2694.62	240.228	19.6243	136.151	1.31471	152.001	2.61837	432.532	4.38758	614.175	54.5736	349.794	1.31471	442.737	20.6721	1049.99	34.1515
	Turkmenistan	TKM	676.904	71.5163	5.28487	40.7179	0.270024	44.6255	0.540895	129.205	0.900074	156.658	11.7181	89.3637	0.270024	112.309	4.28992	268.301	7.05989
	Turks and Caicos Islands	TCA	0.955873	0.0685523	0.00804242	0.0385763	0.000639532	0.0443287	0.00126856	0.122752	0.00213518	0.213352	0.025735	0.121299	0.000639532	0.154938	0.0099747	0.36382	0.016516
	Tuvalu	TUV	0.0721332	0.00566431	0.000623438	0.00319759	4.17458e-05	0.00362662	8.3235e-05	0.0101687	0.00013932	0.0162885	0.00174906	0.0092672	4.17458e-05	0.011781	0.000658261	0.0278174	0.001087
	Uganda	UGA	25.8576	2.395	0.194438	1.35889	0.0133585	1.51087	0.0265398	4.31525	0.0445835	5.88887	0.543188	3.35502	0.0133585	4.24551	0.208831	10.0661	0.345383
	Ukraine	UKR	7453.91	914.525	73.72	522.463	2.76344	564.551	5.61168	1656.56	9.18962	1757.18	131.342	1003.95	2.76344	1251.67	45.0122	3015.91	73.4718
	United Arab Emirates	ARE	1222.14	102.642	9.17531	58.0682	0.657924	65.3046	1.30711	184.552	2.19589	277.035	26.8942	157.7	0.657924	200.109	10.2955	473.295	17.0289
	United Kingdom	GBR	10590.9	1335.43	102.16	763.369	3.63325	823.123	7.3582	2419.8	12.0703	2491.83	170.984	1424.18	3.63325	1775.28	58.8043	4276.03	95.9858
	Tanzania	TZA	58.5437	5.30329	0.436412	3.00708	0.0301675	3.35162	0.0599437	9.55117	0.100684	13.3297	1.22924	7.59271	0.0301675	9.61215	0.471834	22.7843	0.780319
	USA	USA	86100.8	9832.85	714.145	5608.68	31.1117	6100.61	62.6577	17789.2	103.589	20083.7	1404.91	11465.8	31.1117	14355.8	499.284	34429.4	818.824
	Uruguay	URY	97.3766	11.4102	0.848683	6.51216	0.0352127	7.06748	0.0708738	20.6508	0.117177	22.7304	1.5898	12.9805	0.0352127	16.2415	0.563981	38.9692	0.924563
	Uzbekistan	UZB	1682.16	185.936	13.8712	105.978	0.628947	115.616	1.26695	336.214	2.095	391.895	28.3753	223.655	0.628947	280.309	10.1027	671.721	16.5744
	Vanuatu	VUT	1.18969	0.120289	0.00968724	0.0684107	0.000508981	0.0753114	0.00101853	0.217145	0.00169683	0.27442	0.0219291	0.156471	0.000508981	0.196989	0.00807084	0.469799	0.0132899
	Venezuela	VEN	2002.96	212.557	15.3436	121.034	0.786032	132.584	1.57534	384.054	2.61997	463.772	34.3288	264.569	0.786032	332.379	12.5099	794.368	20.5829
	Viet Nam	VNM	880.416	73.4384	6.6257	41.5382	0.507598	46.7666	1.00719	132.01	1.69463	198.811	20.4251	113.164	0.507598	143.776	7.91837	339.492	13.1084
	Wallis and Futuna Islands	WLF	0.124311	0.0086785	0.00121813	0.00487876	9.17848e-05	0.00562865	0.000182333	0.0155281	0.000306387	0.0276908	0.0037555	0.01574	9.17848e-05	0.020123	0.00143704	0.0472094	0.0023775
	Yemen	YEM	167.64	16.1469	1.27902	9.17139	0.0771625	10.1488	0.153973	29.1205	0.257374	38.4908	3.27853	21.9373	0.0771625	27.6709	1.21889	65.8643	2.01085
	Zambia	ZMB	62.7265	7.99676	0.638919	4.57222	0.0226409	4.92652	0.0457403	14.4915	0.0752105	14.7245	1.04713	8.41677	0.0226409	10.4968	0.364216	25.2599	0.594994
	Zimbabwe	ZWE	181.668	20.6002	1.54905	11.7484	0.0679393	12.7857	0.137153	37.2664	0.226258	42.4283	3.10206	24.2207	0.0679393	30.3186	1.0957	72.7456	1.79562

## Sheet: Tabelle3
			Cumulative	Cumulative Wealth Borrowing								Cumulative Wealth Borrowing
			CO2 emissions	SDR:calibrated								SDR:expert-based
			1950--2018	All Impacts (billion USD)		Nordhaus		Weitzman		Howard&Sterner		All Impacts		Nordhaus		Weitzman		Howard&Sterner
	Country	ISO	MtC	Mean	Std	Mean	Std	Mean	Std	Mean	Std	Mean	Std	Mean	Std	Mean	Std	Mean	Std
	USA	USA	86100.8	9832.85	714.145	5608.68	31.1117	6100.61	62.6577	17789.2	103.589	20083.7	1404.91	11465.8	31.1117	14355.8	499.284	34429.4	818.824
	China	CHN	56774.7	4835.16	416.532	2736.62	30.4615	3072.59	60.4987	8696.28	101.675	12868.9	1240.9	7326.42	30.4615	9294.77	476.341	21985.6	788.051
	Russian Federation	RUS	28795.6	3334.48	256.403	1902.58	10.5565	2066.58	21.3401	6034.29	35.1362	6740.93	487.465	3848.94	10.5565	4813.42	170.583	11560.4	279.213
	Germany	DEU	17085.1	2104.39	159.184	1202.34	5.91693	1298.99	11.978	3811.85	19.6698	4014.64	276.97	2293.88	5.91693	2861.96	95.747	6888.09	156.423
	Japan	JPN	16229.3	1709.66	130.393	973.323	6.3718	1066.84	12.8059	3088.82	21.2348	3765.5	283.012	2147.92	6.3718	2697.49	101.946	6451.09	167.504
	India	IND	12946.8	1113.65	93.744	630.499	6.86122	707.046	13.6324	2003.4	22.9038	2935.72	279.144	1671.48	6.86122	2119.96	107.339	5015.73	177.566
	United Kingdom	GBR	10590.9	1335.43	102.16	763.369	3.63325	823.123	7.3582	2419.8	12.0703	2491.83	170.984	1424.18	3.63325	1775.28	58.8043	4276.03	95.9858
	Canada	CAN	7692.4	840.736	61.1652	479.067	2.89501	523.248	5.81822	1519.89	9.6455	1787.74	128.687	1020.15	2.89501	1279.69	46.2979	3063.39	76.0496
	Ukraine	UKR	7453.91	914.525	73.72	522.463	2.76344	564.551	5.61168	1656.56	9.18962	1757.18	131.342	1003.95	2.76344	1251.67	45.0122	3015.91	73.4718
	France	FRA	7161.54	863.641	65.1536	493.216	2.51621	533.833	5.08885	1563.88	8.36855	1680.21	116.971	959.802	2.51621	1198.55	40.6638	2882.27	66.4921
	Italy	ITA	6111.62	664.636	50.5928	378.675	2.33537	413.745	4.70328	1201.49	7.78006	1422.86	105.234	811.889	2.33537	1018.05	37.5079	2438.65	61.551
	Poland	POL	5945.58	696.772	52.6688	397.669	2.1381	431.492	4.32206	1261.15	7.11528	1392.53	98.7971	795.214	2.1381	994.086	34.5412	2388.29	56.5282
	South Africa	ZAF	5134.24	525.29	38.8157	298.834	2.08047	328.552	4.1676	948.483	6.93676	1186.12	90.3358	676.397	2.08047	850.901	33.0836	2031.06	54.4632
	Mexico	MEX	4941.29	485.357	37.4602	275.824	2.09629	304.542	4.19613	875.707	6.99109	1138.38	90.523	648.917	2.09629	817.546	33.2958	1948.67	54.8441
	Iran	IRN	4515.57	401.584	32.9027	227.585	2.23074	254.163	4.44029	723.004	7.44485	1028.57	92.2371	585.791	2.23074	741.622	35.0355	1758.3	57.8964
	Australia	AUS	4499.37	461.821	33.9368	262.749	1.81384	288.785	3.6335	833.93	6.04767	1039.63	78.7538	592.877	1.81384	745.756	28.8428	1780.25	47.4812
	South Korea	KOR	4489.23	391.121	33.7079	221.519	2.2195	247.96	4.42444	703.882	7.40668	1022.58	92.8678	582.28	2.2195	737.355	34.9744	1748.11	57.7531
	Brazil	BRA	3936.69	375.56	28.9027	213.26	1.75337	236.241	3.49922	677.18	5.84928	903.157	74.0597	514.692	1.75337	649.546	27.6808	1545.23	45.6693
	Saudi Arabia	SAU	3876.08	337.265	29.1073	191.009	1.94902	213.857	3.88046	606.929	6.50416	882.325	80.8553	502.408	1.94902	636.394	30.629	1508.17	50.6049
	Spain	ESP	3618.32	373.013	28.3379	212.245	1.45966	233.148	2.92969	673.646	4.866	837.709	64.2502	477.745	1.45966	600.55	23.3036	1434.83	38.325
	Indonesia	IDN	3358.97	290.567	24.669	164.534	1.717	184.358	3.41654	522.809	5.73073	763.314	70.8067	434.621	1.717	550.822	26.9517	1304.5	44.5484
	Kazakhstan	KAZ	3357.49	370.733	27.8745	211.301	1.2785	230.563	2.57179	670.335	4.25892	781.151	57.0894	445.8	1.2785	558.984	20.4699	1338.67	33.6037
	Turkey	TUR	2694.62	240.228	19.6243	136.151	1.31471	152.001	2.61837	432.532	4.38758	614.175	54.5736	349.794	1.31471	442.737	20.6721	1049.99	34.1515
	Netherlands	NLD	2633.16	298.153	22.0953	170.034	0.963138	185.085	1.94111	539.342	3.20702	614.368	43.6606	350.71	0.963138	439.166	15.4794	1053.23	25.38
	Czech Republic	CZE	2478.69	302.32	23.2528	172.693	0.87752	186.72	1.77813	547.548	2.918	582.798	41.2442	332.959	0.87752	415.448	14.2317	999.989	23.2487
	Taiwan	TWN	2211.66	197.91	16.5576	112.179	1.05712	125.167	2.10924	356.385	3.52736	505.091	44.5747	287.676	1.05712	363.866	16.6907	863.731	27.5475
	Belgium	BEL	2110.83	256.798	19.2267	146.683	0.73403	158.646	1.48403	465.066	2.44082	495.208	34.0815	282.913	0.73403	353.212	11.8523	849.499	19.3793
	Romania	ROU	2108.27	251.897	20.6391	143.825	0.79608	155.767	1.61545	456.099	2.64822	496.03	37.6412	283.318	0.79608	353.612	12.9542	851.16	21.1585
	Argentina	ARG	2069.92	218.178	15.8318	124.213	0.814608	136.161	1.63206	394.16	2.71536	479.086	35.4504	273.285	0.814608	343.439	12.9521	820.536	21.3143
	Venezuela	VEN	2002.96	212.557	15.3436	121.034	0.786032	132.584	1.57534	384.054	2.61997	463.772	34.3288	264.569	0.786032	332.379	12.5099	794.368	20.5829
	Thailand	THA	1873.12	156.445	14.1899	88.4916	0.987193	99.5776	1.96497	281.266	3.29484	424.769	40.8675	241.787	0.987193	306.763	15.5106	725.757	25.6337
	Uzbekistan	UZB	1682.16	185.936	13.8712	105.978	0.628947	115.616	1.26695	336.214	2.095	391.895	28.3753	223.655	0.628947	280.309	10.1027	671.721	16.5744
	Egypt	EGY	1591.57	142.239	11.5084	80.6211	0.781695	89.9848	1.556	256.111	2.6088	362.591	32.3461	206.512	0.781695	261.408	12.2789	619.853	20.2907
	Malaysia	MYS	1465.1	120.335	11.0577	68.0306	0.797109	76.7215	1.58484	216.254	2.66064	331.517	32.7167	188.679	0.797109	239.6	12.4946	566.271	20.6614
	North Korea	PRK	1324.35	156.538	13.9195	89.3565	0.54334	96.8549	1.10378	283.402	1.80786	312.065	25.81	178.219	0.54334	222.394	8.86327	535.581	14.474
	Pakistan	PAK	1275.33	111.994	9.29307	63.4454	0.641301	70.9611	1.27679	201.576	2.14056	290.125	26.4634	165.214	0.641301	209.274	10.0746	495.886	16.6493
	Belarus	BLR	1247.14	145.719	12.2917	83.1599	0.478524	90.2469	0.969952	263.75	1.59194	292.772	22.4813	167.181	0.478524	208.892	7.76923	502.244	12.6961
	United Arab Emirates	ARE	1222.14	102.642	9.17531	58.0682	0.657924	65.3046	1.30711	184.552	2.19589	277.035	26.8942	157.7	0.657924	200.109	10.2955	473.295	17.0289
	Algeria	DZA	1164.44	107.943	8.85706	61.2461	0.534322	68.0589	1.06735	194.525	1.78261	266.782	22.6577	151.995	0.534322	191.982	8.45013	456.371	13.9366
	Hungary	HUN	1136.94	138.391	10.6716	79.049	0.403725	85.4834	0.818138	250.64	1.34255	267.326	18.9791	152.722	0.403725	190.566	6.54901	458.69	10.6986
	Iraq	IRQ	1117.1	101.064	8.19021	57.3034	0.552906	63.8694	1.10048	182.02	1.84535	254.697	22.7615	145.076	0.552906	183.579	8.67743	435.435	14.3405
	Sweden	SWE	1091.22	136.179	10.6697	77.8265	0.383922	83.9863	0.778413	246.724	1.27584	256.929	18.1608	146.825	0.383922	183.043	6.22926	440.921	10.1665
	Greece	GRC	1063.75	104.878	8.34767	59.607	0.453281	65.7786	0.909124	189.249	1.51152	245.559	19.8485	139.982	0.453281	176.238	7.23024	420.456	11.8984
	Austria	AUT	1015.38	113.953	8.31248	64.9729	0.373209	70.7859	0.751086	206.1	1.24295	236.543	16.7634	135.018	0.373209	169.169	5.98245	405.443	9.81691
	Nigeria	NGA	997.573	94.9992	7.88597	53.9419	0.457537	59.7661	0.91384	171.29	1.5261	228.956	19.4385	130.474	0.457537	164.659	7.23249	391.736	11.9262
	Bulgaria	BGR	992.608	116.861	9.47499	66.7022	0.370833	72.3389	0.751437	211.541	1.23373	233.049	17.3933	133.089	0.370833	166.257	6.01778	399.801	9.83574
	Denmark	DNK	914.726	109.075	8.26058	62.2759	0.326373	67.4667	0.660261	197.481	1.08579	214.632	15.1784	122.59	0.326373	153.112	5.28006	368.193	8.63568
	Viet Nam	VNM	880.416	73.4384	6.6257	41.5382	0.507598	46.7666	1.00719	132.01	1.69463	198.811	20.4251	113.164	0.507598	143.776	7.91837	339.492	13.1084
	Colombia	COL	865.42	88.7862	6.57631	50.5134	0.352052	55.5231	0.704961	160.322	1.17383	199.9	15.221	113.998	0.352052	143.415	5.59178	342.287	9.20674
	Philippines	PHL	848.071	80.3079	6.20953	45.5932	0.386982	50.5507	0.77194	144.78	1.29124	194.274	16.2088	110.705	0.386982	139.79	6.10076	332.328	10.0696
	Slovakia	SVK	818.462	99.6966	7.6022	56.9477	0.288548	61.5805	0.584524	180.562	0.959555	192.374	13.5364	109.904	0.288548	137.147	4.67746	330.072	7.64237
	Finland	FIN	816.65	89.0053	6.78983	50.7132	0.31227	55.3981	0.628958	160.905	1.04027	190.165	14.0832	108.511	0.31227	136.052	5.01628	325.932	8.23115
	Kuwait	CUW	743.645	69.5824	5.54784	39.491	0.346246	43.8446	0.690133	125.412	1.15519	170.15	14.4879	96.9474	0.346246	122.483	5.45191	291.02	9.00071
	Serbia	SRB	702.658	76.8431	5.86896	43.787	0.268442	47.817	0.54081	138.925	0.894247	163.637	12.117	93.3772	0.268442	117.068	4.31351	280.466	7.07709
	Chile	CHL	694.038	68.4263	5.06043	38.8902	0.302024	42.9315	0.602638	123.457	1.00746	159.421	12.7457	90.8791	0.302024	114.585	4.76563	272.799	7.86247
	Switzerland	CHE	679.812	77.7137	5.81713	44.3289	0.24732	48.2093	0.498852	140.603	0.823343	158.804	11.2779	90.6615	0.24732	113.471	3.98044	272.279	6.52268
	Turkmenistan	TKM	676.904	71.5163	5.28487	40.7179	0.270024	44.6255	0.540895	129.205	0.900074	156.658	11.7181	89.3637	0.270024	112.309	4.28992	268.301	7.05989
	Portugal	PRT	632.712	62.6046	4.85577	35.5845	0.268635	39.2563	0.538477	112.973	0.895895	145.934	11.7021	83.1936	0.268635	104.757	4.27979	249.852	7.04559
	Azerbaijan	AZE	622.789	70.9527	5.84592	40.4688	0.238348	44.0201	0.482229	128.369	0.793279	145.789	11.0583	83.2274	0.238348	104.123	3.85748	250.017	6.31149
	Israel	ISR	620.377	59.0002	4.6094	33.5002	0.275508	37.12	0.550516	106.381	0.919057	142.42	11.7522	81.1602	0.275508	102.404	4.36212	243.696	7.19282
	Norway	NOR	585.992	63.1584	4.64495	35.9767	0.223879	39.3472	0.449793	114.151	0.746007	136.073	9.92878	77.6371	0.223879	97.4375	3.57871	233.144	5.88008
	Singapore	ATG	566.094	55.2845	4.59805	31.4126	0.247231	34.7002	0.49577	99.7406	0.824355	130.614	10.8165	74.4509	0.247231	93.7668	3.94127	223.625	6.48569
	Libya	LBY	540.033	52.34	4.34383	29.7335	0.23494	32.8742	0.470734	94.4122	0.783387	124.424	10.223	70.917	0.23494	89.3644	3.73871	212.992	6.15465
	Qatar	NA	526.715	43.4375	3.93203	24.5602	0.297312	27.6881	0.590181	78.0642	0.992519	119.003	12.0249	67.7312	0.297312	86.051	4.64305	203.227	7.6843
	Ireland	IRL	526.069	55.7947	4.07842	31.7698	0.205079	34.8011	0.411668	100.813	0.683547	121.965	9.03875	69.5767	0.205079	87.381	3.2741	208.938	5.38325
	Syria	SYR	488.926	46.6116	3.96993	26.4675	0.221736	29.3124	0.444481	84.055	0.739486	112.652	9.68514	64.1979	0.221736	80.9106	3.53438	192.847	5.81844
	Morocco	MAR	445.904	40.3004	3.23358	22.8497	0.214184	25.4691	0.426593	72.5825	0.714746	101.742	8.9086	57.9527	0.214184	73.3129	3.36852	173.961	5.56443
	Peru	PER	443.532	44.4581	3.35724	25.2786	0.189163	27.855	0.377864	80.2407	0.630831	102.156	8.05244	58.2434	0.189163	73.3656	2.99037	174.858	4.92971
	Cuba	CUB	432.911	48.9742	3.72599	27.9288	0.160654	30.4027	0.32405	88.591	0.534907	101.066	7.31903	57.6923	0.160654	72.2355	2.58593	173.269	4.23814
	New Zealand	NZL	427.592	45.2599	3.26843	25.7701	0.166937	28.2362	0.334723	81.7736	0.556449	99.0223	7.30224	56.4877	0.166937	70.9679	2.6589	169.611	4.37407
	Hong Kong	HKG	422.159	39.8698	3.20898	22.6335	0.187661	25.0968	0.37538	71.8791	0.625985	96.9574	8.05672	55.249	0.187661	69.7104	2.97729	165.913	4.90684
	Estonia	EST	381.615	45.8859	3.64259	26.2031	0.140442	28.3652	0.284717	83.0895	0.467161	89.7053	6.6059	51.2411	0.140442	63.9616	2.28058	153.913	3.7261
	Bangladesh	BGD	372.094	30.1669	2.781	17.0475	0.21332	19.2606	0.423479	54.1925	0.712192	83.9454	8.61165	47.7713	0.21332	60.7319	3.33132	143.333	5.51377
	Trinidad and Tobago	TTO	355.12	33.1987	2.62755	18.8412	0.16474	20.9194	0.328369	59.8356	0.549602	81.312	6.92033	46.3295	0.16474	58.5203	2.59546	139.086	4.2847
	Lithuania	LTU	349.79	42.9154	3.48835	24.5173	0.130677	26.4929	0.265356	77.736	0.434555	82.435	6.20839	47.0987	0.130677	58.7259	2.12823	141.48	3.47385
	Oman	NA	310.168	24.4043	2.38764	13.7775	0.184691	15.6275	0.366479	43.808	0.616591	69.8186	7.44784	39.7226	0.184691	50.5543	2.88215	119.179	4.77114
	Ecuador	ECU	303.603	27.596	2.28752	15.649	0.143603	17.4298	0.286438	49.7093	0.479133	69.4037	6.0377	39.5345	0.143603	49.9827	2.26491	118.694	3.73826
	Croatia	HRV	280.055	30.0719	2.28048	17.1282	0.108293	18.738	0.217883	54.3494	0.360837	65.1021	4.84732	37.1427	0.108293	46.6047	1.73621	111.559	2.85088
	Georgia	GEO	258.401	33.5372	2.92389	19.1817	0.102969	20.6301	0.20963	60.7999	0.34217	61.2419	4.97252	35.0127	0.102969	43.5408	1.68383	105.172	2.74351
	Moldova	MDA	239.751	30.5468	2.84309	17.4647	0.100992	18.809	0.20575	55.3666	0.335658	56.897	4.892	32.521	0.100992	40.445	1.65427	97.725	2.69515
	Tunisia	TUN	230.17	21.2556	1.69379	12.059	0.106055	13.4069	0.211614	38.3011	0.353857	52.6751	4.46826	30.0097	0.106055	37.9179	1.67395	90.0977	2.76251
	Bosnia and Herzegovina	BIH	229.575	24.1246	1.95341	13.7334	0.09432	15.0579	0.189417	43.5824	0.314299	53.2217	4.16981	30.3577	0.09432	38.1403	1.50602	91.1671	2.47492
	Bahrain	BHR	221.394	19.7339	1.63488	11.1843	0.108292	12.4863	0.215676	35.531	0.361374	50.4786	4.50345	28.7493	0.108292	36.3853	1.70294	86.3011	2.81308
	Slovenia	SVN	216.467	23.1927	1.75378	13.2092	0.0835848	14.4539	0.168169	41.9149	0.278516	50.3108	3.73955	28.7032	0.0835848	36.0185	1.34006	86.2106	2.20048
	Luxembourg	LUX	200.891	25.0635	1.92426	14.3239	0.0696389	15.4595	0.140881	45.4071	0.231401	47.1952	3.25549	26.9705	0.0696389	33.642	1.12485	80.9729	1.83728
	Kyrgyzstan	KGZ	199.806	24.4142	2.20065	13.9464	0.0808324	15.0751	0.164273	44.2211	0.268749	47.1223	3.85949	26.9213	0.0808324	33.5679	1.31804	80.8778	2.15022
	Dominican Republic	DOM	190.89	17.3712	1.42634	9.85109	0.0895548	10.9702	0.178762	31.2921	0.298814	43.6495	3.7819	24.8644	0.0895548	31.4307	1.41483	74.6534	2.3346
	Latvia	LVA	190.789	23.2602	1.87101	13.2866	0.070712	14.3651	0.143537	42.1289	0.23517	44.9354	3.35154	25.6718	0.070712	32.0185	1.15095	77.116	1.87913
	Lebanon	LBN	185.689	17.3856	1.34371	9.86725	0.0860569	10.9543	0.171527	31.3352	0.287156	42.4778	3.59196	24.2031	0.0860569	30.5787	1.35498	72.6516	2.23736
	Angola	AGO	183.665	15.097	1.39368	8.5352	0.107259	9.62706	0.212746	27.1288	0.358058	41.453	4.32187	23.5925	0.107259	29.9855	1.67258	70.781	2.76908
	Zimbabwe	ZWE	181.668	20.6002	1.54905	11.7484	0.0679393	12.7857	0.137153	37.2664	0.226258	42.4283	3.10206	24.2207	0.0679393	30.3186	1.0957	72.7456	1.79562
	Jordan	JOR	177.128	15.4148	1.32394	8.73019	0.0880248	9.77382	0.175388	27.7403	0.293752	40.3305	3.67172	22.9648	0.0880248	29.0851	1.38571	68.9415	2.28873
	Mongolia	MNG	171.162	14.941	1.33359	8.46266	0.100747	9.47402	0.200158	26.8864	0.336424	38.8206	4.04185	22.1055	0.100747	28.0324	1.57369	66.3241	2.60426
	Armenia	ARM	170.807	22.1165	1.92794	12.649	0.0680592	13.6066	0.138555	40.0938	0.22617	40.4763	3.28635	23.1401	0.0680592	28.7787	1.113	69.5101	1.81352
	Yemen	YEM	167.64	16.1469	1.27902	9.17139	0.0771625	10.1488	0.153973	29.1205	0.257374	38.4908	3.27853	21.9373	0.0771625	27.6709	1.21889	65.8643	2.01085
	North Macedonia	MKD	155.924	17.2628	1.41149	9.83957	0.0606071	10.7311	0.122508	31.2179	0.201813	36.4391	2.79346	20.7959	0.0606071	26.0414	0.979937	62.4799	1.60484
	Bolivia	BOL	142.386	13.8358	1.06873	7.86061	0.0656067	8.69217	0.130699	24.9546	0.218866	32.5909	2.73072	18.5764	0.0656067	23.4503	1.03144	55.746	1.70306
	Myanmar	MMR	132.589	12.6652	0.966872	7.19213	0.0630091	7.96767	0.125456	22.8357	0.210279	30.331	2.59635	17.2851	0.0630091	21.8327	0.989173	51.875	1.6343
	Sri Lanka	LKA	125.075	11.6264	0.896326	6.59732	0.0611877	7.33136	0.121702	20.9506	0.204218	28.5231	2.50799	16.2509	0.0611877	20.5528	0.958995	48.7657	1.58535
	Jamaica	JAM	119.34	12.6479	0.98687	7.20161	0.0472913	7.88867	0.0951104	22.8534	0.157585	27.7128	2.11132	15.8088	0.0472913	19.8467	0.75766	47.4827	1.24438
	Kenya	KEN	117.842	11.5988	0.862636	6.5919	0.0518966	7.2783	0.103532	20.9263	0.173127	27.0615	2.18032	15.4264	0.0518966	19.453	0.818235	46.305	1.35016
	Curaçao	CUW	114.21	14.4608	1.36853	8.26682	0.0459067	8.91042	0.0932737	26.2053	0.152409	26.9429	2.20547	15.399	0.0459067	19.1848	0.746977	46.245	1.21679
	Guatemala	GTM	110.064	10.121	0.796578	5.7413	0.0523381	6.38689	0.104291	18.2348	0.174667	25.1355	2.17569	14.3194	0.0523381	18.1053	0.823575	42.9817	1.36027
	Sudan	SDN	108.944	9.74447	0.813156	5.52329	0.0569472	6.16535	0.113158	17.5448	0.190073	24.7734	2.31886	14.1095	0.0569472	17.8721	0.890764	42.3386	1.47325
	Tajikistan	TJK	102.416	12.8761	1.08668	7.3598	0.0397738	7.93673	0.0808126	23.3318	0.132233	24.1745	1.89462	13.8158	0.0397738	17.2114	0.648073	41.4963	1.05729
	Uruguay	URY	97.3766	11.4102	0.848683	6.51216	0.0352127	7.06748	0.0708738	20.6508	0.117177	22.7304	1.5898	12.9805	0.0352127	16.2415	0.563981	38.9692	0.924563
	Ghana	GHA	91.7778	8.43905	0.657859	4.78719	0.0450765	5.32618	0.089623	15.2038	0.150434	20.9284	1.84941	11.9227	0.0450765	15.082	0.706185	35.7804	1.16751
	Côte d'Ivoire	CIV	86.1474	8.31563	0.683716	4.72347	0.038275	5.22517	0.0766141	14.9983	0.127661	19.8163	1.64365	11.2941	0.038275	14.2405	0.607442	33.9142	1.00066
	Brunei Darussalam	BRN	83.6593	8.59585	0.789355	4.8906	0.0369487	5.37478	0.0741898	15.5222	0.12309	19.3455	1.63378	11.0323	0.0369487	13.8764	0.589515	33.1278	0.968546
	Panama	PAN	78.6668	7.43985	0.572075	4.22369	0.0365444	4.684	0.072787	13.4119	0.121935	18.0014	1.51925	10.2578	0.0365444	12.9573	0.57449	30.7891	0.948836
	Cyprus	CYP	76.2586	7.30634	0.573741	4.14935	0.0334648	4.59372	0.0669379	13.1759	0.111626	17.53	1.43748	9.99038	0.0334648	12.599	0.530942	30.0004	0.87503
	Albania	ALB	73.6216	8.40951	0.709804	4.79676	0.0291959	5.21682	0.0590356	15.2149	0.0971796	17.2208	1.34968	9.8312	0.0291959	12.302	0.471956	29.5292	0.772441
	Gabon	GAB	68.1466	7.16365	0.63586	4.07806	0.0282295	4.47033	0.0569455	12.9426	0.094022	15.846	1.28434	9.0386	0.0282295	11.3459	0.4546	27.1535	0.745283
	Honduras	HND	65.1765	5.78168	0.472323	3.27634	0.0326583	3.66024	0.0649689	10.4084	0.108996	14.8326	1.34651	8.44727	0.0326583	10.6974	0.512424	25.3531	0.847028
	Costa Rica	CRI	65.0365	5.99488	0.47876	3.40091	0.0302284	3.78191	0.0602976	10.8018	0.100859	14.8781	1.27237	8.47609	0.0302284	10.7112	0.476923	25.4471	0.787177
	Zambia	ZMB	62.7265	7.99676	0.638919	4.57222	0.0226409	4.92652	0.0457403	14.4915	0.0752105	14.7245	1.04713	8.41677	0.0226409	10.4968	0.364216	25.2599	0.594994
	Ethiopia	ETH	62.219	5.30709	0.46116	3.00387	0.0353169	3.37245	0.070101	9.54496	0.11792	14.0791	1.41627	8.01539	0.0353169	10.1744	0.55096	24.0474	0.91204
	Senegal	SEN	60.3411	5.61168	0.444355	3.18432	0.0286677	3.5379	0.0570973	10.1128	0.0956601	13.7946	1.18962	7.85944	0.0286677	9.93332	0.450578	23.5911	0.744238
	El Salvador	SLV	59.6536	5.6501	0.443376	3.20775	0.0268278	3.55607	0.0535859	10.1865	0.0894978	13.6843	1.14138	7.7979	0.0268278	9.84178	0.424458	23.4132	0.700056
	Tanzania	TZA	58.5437	5.30329	0.436412	3.00708	0.0301675	3.35162	0.0599437	9.55117	0.100684	13.3297	1.22924	7.59271	0.0301675	9.61215	0.471834	22.7843	0.780319
	Cameroon	CMR	53.5329	4.99964	0.458035	2.83734	0.0260909	3.15051	0.052163	9.01108	0.0870222	12.2656	1.11437	6.98852	0.0260909	8.82651	0.413158	20.9816	0.680952
	Democratic Republic of the Congo	COD	49.683	6.32557	0.50312	3.61658	0.0179225	3.89652	0.0363212	11.4636	0.0595469	11.7056	0.845667	6.69097	0.0179225	8.33648	0.290411	20.0895	0.47394
	Afghanistan	AFG	46.5723	4.30629	0.379568	2.44318	0.0259823	2.71686	0.0516112	7.75884	0.0867047	10.6186	1.06055	6.04959	0.0259823	7.65375	0.406223	18.1525	0.671806
	Nicaragua	NIC	45.2921	4.41954	0.338244	2.51114	0.0196603	2.77488	0.0392796	7.97259	0.0655771	10.4124	0.836968	5.93506	0.0196603	7.48296	0.311023	17.8193	0.512814
	Mozambique	MOZ	44.7115	5.00137	0.401294	2.85145	0.0201327	3.10884	0.0402167	9.04382	0.0670997	10.3462	0.852956	5.90539	0.0201327	7.41501	0.317512	17.7183	0.523039
	Bahamas	BHS	44.2122	5.37047	0.594442	3.06743	0.0205501	3.31756	0.0418107	9.72641	0.0682668	10.4196	0.992198	5.95235	0.0205501	7.42499	0.335522	17.8815	0.546603
	Paraguay	PRY	44.0318	3.90701	0.324473	2.21402	0.0217552	2.47311	0.0433504	7.03389	0.0726105	10.0319	0.902681	5.7133	0.0217552	7.23269	0.342317	17.1499	0.565451
	Papua New Guinea	PNG	42.8011	3.84651	0.317016	2.18054	0.0208688	2.43212	0.0415617	6.92687	0.0696407	9.76395	0.866593	5.56126	0.0208688	7.03671	0.328081	16.6939	0.541968
	Iceland	ISL	39.7154	4.20978	0.30279	2.39705	0.0155797	2.62622	0.0312057	7.60608	0.0519315	9.19093	0.676961	5.24308	0.0155797	6.58839	0.247587	15.7413	0.407474
	New Caledonia	NCL	38.765	3.97653	0.303474	2.26238	0.0170036	2.48733	0.0339532	7.17989	0.056712	8.92581	0.715942	5.09012	0.0170036	6.40991	0.268271	15.2774	0.442372
	Botswana	BWA	37.1753	3.04341	0.288092	1.72038	0.0201151	1.94079	0.0400408	5.46905	0.0671413	8.41738	0.83012	4.79055	0.0201151	6.08246	0.315953	14.3791	0.522185
	Nepal	NPL	35.2222	2.72514	0.278468	1.53762	0.022957	1.74828	0.0455557	4.88952	0.0766756	7.90014	0.911813	4.49408	0.022957	5.72697	0.357805	13.4794	0.592577
	Cambodia	KHM	34.8837	2.67139	0.285828	1.50677	0.0244581	1.71594	0.0485035	4.79146	0.0817006	7.79968	0.962626	4.43654	0.0244581	5.65992	0.380541	13.3026	0.630507
	Equatorial Guinea	GNQ	34.2458	2.43995	0.323864	1.3727	0.024533	1.57891	0.0487073	4.36824	0.0818889	7.64213	1.0022	4.3446	0.024533	5.55009	0.383717	13.0317	0.634957
	Laos	LAO	32.9809	2.25633	0.375925	1.26745	0.0363859	1.46795	0.0721865	4.03358	0.121631	7.26206	1.39965	4.12712	0.0363859	5.29793	0.565403	12.3611	0.937361
	Suriname	SUR	30.2008	3.25489	0.252851	1.85406	0.0117871	2.02774	0.0237018	5.88286	0.0392686	7.01728	0.52553	4.00371	0.0117871	5.02437	0.188647	12.0237	0.309769
	Mauritius	MUS	29.4178	2.56671	0.215409	1.45378	0.0149507	1.6273	0.0297514	4.61906	0.0498994	6.68699	0.617356	3.80775	0.0149507	4.82471	0.234741	11.4285	0.387988
	Benin	BEN	28.2698	2.1875	0.22051	1.23426	0.0178631	1.40335	0.0354228	3.92487	0.0596463	6.34311	0.713664	3.60836	0.0178631	4.59778	0.27829	10.8232	0.460905
	Malta	MLT	27.6453	2.74749	0.217568	1.56186	0.0118133	1.72211	0.0236986	4.95851	0.0393927	6.38465	0.518182	3.6399	0.0118133	4.58123	0.188536	10.9328	0.310233
	Guyana	GUY	26.1349	2.8864	0.218693	1.64513	0.00993749	1.79511	0.0199825	5.21897	0.0330999	6.07831	0.44339	3.46886	0.00993749	4.34996	0.15899	10.4161	0.261011
	Uganda	UGA	25.8576	2.395	0.194438	1.35889	0.0133585	1.51087	0.0265398	4.31525	0.0445835	5.88887	0.543188	3.35502	0.0133585	4.24551	0.208831	10.0661	0.345383
	Montenegro	MNE	25.0344	2.59056	0.204274	1.47417	0.0101389	1.61877	0.0203542	4.67876	0.0337915	5.7989	0.447181	3.30721	0.0101389	4.1569	0.161845	9.9326	0.266064
	Madagascar	MDG	24.372	2.41575	0.182922	1.37318	0.0108776	1.51509	0.0216977	4.35898	0.0362873	5.59833	0.455631	3.19151	0.0108776	4.02403	0.171378	9.57944	0.282797
	Kosovo	NA	24.2058	1.53383	0.270216	0.858969	0.0231175	1.00687	0.045746	2.73567	0.0771837	5.32041	0.915683	3.02222	0.0231175	3.88497	0.35881	9.05403	0.594763
	Guinea	GIN	21.3185	2.08063	0.160034	1.1822	0.00935935	1.30641	0.0186829	3.75328	0.0312187	4.89799	0.395575	2.79184	0.00935935	3.52073	0.147754	8.3814	0.243708
	Haiti	HTI	19.8358	1.82331	0.143702	1.03429	0.00960646	1.15072	0.0191235	3.28493	0.0320598	4.52654	0.396928	2.57871	0.00960646	3.26131	0.150861	7.7396	0.24928
	Congo	COG	19.6334	1.8387	0.157325	1.04356	0.00986075	1.15857	0.019643	3.31396	0.0329009	4.49024	0.409123	2.55846	0.00986075	3.23315	0.15496	7.67911	0.255901
	Mauritania	MRT	18.8819	1.70341	0.158624	0.96575	0.00968885	1.07665	0.0193488	3.06784	0.0323294	4.31049	0.407706	2.45521	0.00968885	3.10588	0.153027	7.37037	0.252454
	Namibia	NAM	18.6111	1.38039	0.155461	0.777725	0.0117257	0.889257	0.023294	2.47418	0.039145	4.171	0.476851	2.37199	0.0117257	3.02469	0.183441	7.11633	0.303506
	Togo	TGO	18.0449	1.59332	0.134971	0.90277	0.00905247	1.00902	0.0180257	2.86817	0.0302115	4.1097	0.374758	2.34041	0.00905247	2.9635	0.142254	7.02518	0.235033
	Aruba	ABW	17.7642	1.77724	0.150649	1.01048	0.00843554	1.11356	0.0168691	3.20768	0.0281288	4.09691	0.364203	2.33576	0.00843554	2.94077	0.133825	7.0142	0.220507
	Lesotho	LSO	15.894	1.24738	0.136038	0.70415	0.00912414	0.798696	0.0181892	2.23929	0.03045	3.58877	0.381939	2.04179	0.00912414	2.59574	0.143823	6.12877	0.237509
	Burkina Faso	BFA	15.2448	1.23099	0.115527	0.695552	0.00912507	0.786323	0.0181029	2.21111	0.0304689	3.43512	0.364977	1.95478	0.00912507	2.4863	0.142237	5.86428	0.23552
	Macao	MAC	15.1479	1.36449	0.11679	0.773563	0.00721351	0.862394	0.0144163	2.4575	0.0240697	3.46383	0.306362	1.97295	0.00721351	2.4943	0.114218	5.92424	0.188377
	Occupied Palestinian Territory	NA	14.6878	1.09203	0.122543	0.615314	0.00922902	0.703309	0.0183364	1.95747	0.0308104	3.29266	0.375678	1.87252	0.00922902	2.38749	0.144425	5.61797	0.238945
	Barbados	BRB	14.3334	1.42146	0.10922	0.808003	0.00604783	0.891221	0.0121068	2.56514	0.0201678	3.305	0.261647	1.88414	0.00604783	2.3728	0.0960789	5.65806	0.158241
	Liberia	LBR	13.8068	1.6198	0.153682	0.924481	0.00583044	1.0031	0.0117992	2.93181	0.0193894	3.23371	0.271772	1.84661	0.00583044	2.309	0.09427	5.54552	0.154079
	Fiji	SYR	13.7213	1.37426	0.104131	0.781379	0.00598938	0.861124	0.0119615	2.48027	0.019978	3.15751	0.253154	1.80022	0.00598938	2.26824	0.0945924	5.40408	0.155987
	Sint Maarten (Dutch part)	FRO	13.6065	1.71118	0.16123	0.978093	0.00546077	1.05486	0.011089	3.10058	0.0181321	3.2066	0.261338	1.83256	0.00546077	2.28406	0.0887644	5.50316	0.144646
	Mali	MLI	13.5495	1.12006	0.102085	0.633349	0.00803804	0.713899	0.0159371	2.01294	0.0268365	3.05694	0.321337	1.7399	0.00803804	2.21153	0.125176	5.21941	0.207301
	Malawi	MWI	12.1262	1.23012	0.0946133	0.699652	0.00501159	0.769923	0.0100375	2.22078	0.0167092	2.79929	0.216908	1.59618	0.00501159	2.00884	0.0796266	4.79285	0.131086
	Niger	NER	11.7923	1.074	0.0925166	0.609075	0.00590981	0.678299	0.0117732	1.93464	0.0197201	2.69313	0.24533	1.53411	0.00590981	1.94025	0.0929041	4.60503	0.153434
	South Sudan	NA	9.66727	0.872957	0.0723453	0.49494	0.00494517	0.551837	0.00982739	1.57209	0.0165027	2.20145	0.202529	1.25393	0.00494517	1.5874	0.0773996	3.76303	0.127983
	Sierra Leone	SLE	9.61743	1.08664	0.0866084	0.619669	0.00378973	0.674776	0.00761628	1.96548	0.0126181	2.23812	0.168769	1.27759	0.00378973	1.60125	0.0605183	3.83551	0.0993303
	Somalia	SOM	8.64522	0.909653	0.0767148	0.517855	0.00355035	0.56762	0.00715855	1.64349	0.0118291	2.00904	0.160727	1.14598	0.00355035	1.43863	0.0571454	3.44251	0.0937417
	Faeroe Islands	FRO	7.97654	0.812569	0.0627435	0.462212	0.00325193	0.508344	0.00652936	1.46715	0.0108418	1.84532	0.143182	1.05226	0.00325193	1.32331	0.0519496	3.16038	0.0854304
	Greenland	GRL	7.74466	0.879215	0.0676933	0.501436	0.00291471	0.545731	0.00586806	1.59048	0.00970348	1.80594	0.131586	1.03094	0.00291471	1.29118	0.0467338	3.09569	0.076642
	Bermuda	BMU	7.59311	0.806261	0.061272	0.459101	0.00298026	0.502823	0.00599138	1.45686	0.0099321	1.76232	0.132453	1.00535	0.00298026	1.26227	0.0477013	3.01934	0.0783671
	French Polynesia	PYF	7.36405	0.701319	0.0566541	0.39822	0.00326466	0.441162	0.00652907	1.26458	0.0108891	1.69232	0.140099	0.964401	0.00326466	1.21652	0.0517664	2.89605	0.085314
	Rwanda	NA	7.15847	0.675301	0.058634	0.383346	0.00330162	0.425132	0.00660828	1.21743	0.0110125	1.6436	0.141644	0.936557	0.00330162	1.18194	0.052388	2.8123	0.0863061
	Chad	TCD	6.56142	0.578552	0.0489669	0.327793	0.00331168	0.366436	0.00659306	1.04143	0.0110519	1.49405	0.137392	0.850825	0.00331168	1.07738	0.0520473	2.55393	0.085999
	Bonaire, Saint Eustatius and Saba	NA	6.07875	0.765038	0.0721171	0.437295	0.00243976	0.471587	0.00495471	1.38623	0.00810096	1.43271	0.116814	0.818798	0.00243976	1.02049	0.0396632	2.45886	0.0646303
	Maldives	MDV	5.76615	0.421234	0.0468979	0.237199	0.00380873	0.271851	0.00755235	0.754652	0.0127174	1.28844	0.152306	0.732625	0.00380873	0.935315	0.059339	2.19737	0.098278
	Antigua and Barbuda	NA	5.62698	0.628022	0.0630604	0.358033	0.0024389	0.390296	0.00492148	1.13574	0.00811131	1.31016	0.112017	0.747761	0.0024389	0.937339	0.0392219	2.24537	0.0641892
	Djibouti	DJI	4.99593	0.502904	0.0395688	0.285978	0.00207489	0.314918	0.00416093	0.907816	0.00691745	1.15456	0.0908442	0.658293	0.00207489	0.828311	0.0330686	1.97708	0.0544073
	Belize	BLZ	4.87309	0.464324	0.0361898	0.263655	0.00216707	0.292094	0.00432887	0.837222	0.0072294	1.11839	0.0919943	0.63734	0.00216707	0.804249	0.0342742	1.91357	0.056525
	Eritrea	ERI	4.39366	0.340568	0.041583	0.192172	0.00269924	0.218332	0.00539068	0.611199	0.00900793	0.99108	0.114254	0.563807	0.00269924	0.717058	0.0427047	1.69238	0.070466
	Bhutan	BTN	4.2518	0.31167	0.0351763	0.175525	0.00293166	0.201076	0.00581565	0.55841	0.00979161	0.949527	0.116269	0.539928	0.00293166	0.689406	0.0456656	1.61925	0.0756398
	Andorra	AND	3.84069	0.308157	0.0340999	0.174083	0.00216913	0.196854	0.00433331	0.553535	0.00723799	0.870059	0.0922667	0.495099	0.00216913	0.628588	0.0343466	1.48649	0.05666
	Gambia	GMB	3.53172	0.317351	0.0258892	0.179903	0.0017092	0.200659	0.0034045	0.571492	0.00570384	0.805648	0.0710097	0.458875	0.0017092	0.580608	0.0268785	1.37746	0.0443995
	Cape Verde	PRK	3.31512	0.284909	0.025374	0.161299	0.0018142	0.180913	0.00360457	0.512515	0.00605514	0.751181	0.0741785	0.427687	0.0018142	0.542558	0.0283944	1.2833	0.0469642
	Central African Republic	CAF	3.19001	0.326605	0.0255819	0.185806	0.00130227	0.20426	0.00261221	0.589748	0.00434095	0.737649	0.057046	0.420651	0.00130227	0.529054	0.0207552	1.26324	0.0341383
	Burundi	BDI	3.15151	0.296618	0.0243551	0.16837	0.00147099	0.186788	0.00293812	0.534698	0.00490798	0.722495	0.0620325	0.411684	0.00147099	0.519797	0.0232428	1.236	0.0383386
	Saint Lucia	LCA	3.13085	0.286035	0.0238521	0.162227	0.00146187	0.180564	0.00292114	0.515315	0.00487733	0.716718	0.0622571	0.408284	0.00146187	0.515892	0.0231488	1.22598	0.038177
	Solomon Islands	SLB	2.68746	0.244651	0.0202052	0.138741	0.001258	0.154493	0.00251029	0.440717	0.00419702	0.614876	0.0531864	0.350258	0.001258	0.44269	0.0198656	1.05168	0.0327805
	Guinea-Bissau	GNB	2.59323	0.255073	0.0200326	0.144961	0.00110731	0.160033	0.00221678	0.460226	0.00369279	0.597428	0.0477456	0.340559	0.00110731	0.429073	0.0175835	1.02265	0.0289603
	Grenada	GRD	2.07604	0.186674	0.015216	0.105826	0.00100054	0.118023	0.00199382	0.336173	0.00333878	0.473674	0.041809	0.269794	0.00100054	0.341321	0.0157559	0.809908	0.0260206
	Samoa	WSM	1.85411	0.174832	0.0139132	0.0992456	0.000837351	0.110079	0.00167216	0.315172	0.00279355	0.425147	0.0354272	0.242256	0.000837351	0.305838	0.0132324	0.727345	0.0218265
	Saint Vincent and the Grenadines	VCT	1.80608	0.15731	0.0134463	0.0890954	0.000913107	0.0997415	0.00181845	0.283093	0.00304734	0.410935	0.037975	0.233994	0.000913107	0.296408	0.0143624	0.702404	0.0237288
	Saint Kitts and Nevis	KNA	1.60796	0.13006	0.0127989	0.0734922	0.000872872	0.0830305	0.0017388	0.233659	0.00291316	0.364022	0.0363519	0.207155	0.000872872	0.26306	0.0137379	0.621851	0.0226951
	Liechtenstein	LIE	1.58978	0.130787	0.0148097	0.073943	0.00089186	0.0833363	0.00178552	0.235082	0.00297545	0.361373	0.0385096	0.205678	0.00089186	0.260774	0.0141837	0.617667	0.0233722
	Palau	PLW	1.5708	0.122746	0.0140114	0.0692805	0.000921889	0.0786254	0.00183963	0.220331	0.00307654	0.354638	0.0388541	0.20176	0.000921889	0.256511	0.0145624	0.605642	0.0240375
	British Virgin Islands	NA	1.42337	0.121079	0.0107589	0.0685259	0.000731279	0.0769317	0.00145595	0.217779	0.00244039	0.323504	0.0304202	0.184173	0.000731279	0.233455	0.0114983	0.552884	0.0189979
	Timor-Leste	TLS	1.42204	0.0925941	0.013847	0.0519121	0.00120764	0.0605713	0.0023905	0.165299	0.00403286	0.313488	0.0475522	0.178105	0.00120764	0.228651	0.0187419	0.533709	0.0310691
	Nauru	NRU	1.28958	0.146314	0.0133216	0.0834439	0.000536129	0.0907812	0.0010881	0.264718	0.00178442	0.302841	0.0252916	0.172875	0.000536129	0.2161	0.00873231	0.519546	0.0142704
	Comoros	COM	1.23812	0.109023	0.00910631	0.0617673	0.000624817	0.0690617	0.00124389	0.196241	0.00208553	0.281771	0.0257514	0.16046	0.000624817	0.203229	0.00981256	0.481624	0.0162165
	Dominica	DMA	1.23231	0.10906	0.00902639	0.0617973	0.000612368	0.0690525	0.00121882	0.19633	0.00204357	0.280673	0.0253975	0.159842	0.000612368	0.202377	0.00962044	0.4798	0.0158974
	Vanuatu	VUT	1.18969	0.120289	0.00968724	0.0684107	0.000508981	0.0753114	0.00101853	0.217145	0.00169683	0.27442	0.0219291	0.156471	0.000508981	0.196989	0.00807084	0.469799	0.0132899
	Martinique	MTQ	1.14616	0.131573	0.012941	0.0750594	0.000488077	0.0816018	0.000986476	0.238058	0.00162256	0.267137	0.0226212	0.152524	0.000488077	0.190936	0.00787526	0.457949	0.0128751
	Tonga	TON	1.12491	0.104301	0.00839507	0.0591799	0.000516537	0.0657618	0.00103185	0.187961	0.00172346	0.257624	0.0218926	0.146777	0.000516537	0.185401	0.00817105	0.440694	0.0134781
	Réunion	REU	1.01647	0.0893121	0.00945759	0.0505977	0.000572027	0.0565866	0.00114284	0.160752	0.00190821	0.231027	0.0244198	0.131564	0.000572027	0.16664	0.00905858	0.394877	0.0149386
	Saint Pierre and Miquelon	SPM	0.999624	0.112342	0.00834488	0.064057	0.000375105	0.0697821	0.000754729	0.203188	0.00124926	0.232653	0.0168012	0.132801	0.000375105	0.166425	0.00600884	0.398733	0.00986101
	Turks and Caicos Islands	TCA	0.955873	0.0685523	0.00804242	0.0385763	0.000639532	0.0443287	0.00126856	0.122752	0.00213518	0.213352	0.025735	0.121299	0.000639532	0.154938	0.0099747	0.36382	0.016516
	Micronesia (Federated States of)	FSM	0.934731	0.0727272	0.00830178	0.0410429	0.00055179	0.0466067	0.00110084	0.130532	0.00184152	0.210912	0.0232019	0.119987	0.00055179	0.152583	0.00871163	0.360166	0.0143821
	Anguilla	AIA	0.86316	0.0653694	0.00723651	0.0368566	0.000522075	0.0420142	0.00103827	0.117237	0.00174258	0.19406	0.0215078	0.110377	0.000522075	0.140572	0.00819052	0.331231	0.0135425
	Marshall Islands	NA	0.851775	0.0645939	0.00728421	0.0364211	0.000514809	0.0415091	0.00102464	0.115851	0.00171831	0.191541	0.0212995	0.108945	0.000514809	0.138735	0.00808855	0.326942	0.0133689
	Sao Tome and Principe	STP	0.843423	0.0780423	0.00624049	0.0442784	0.000396928	0.0492206	0.000791043	0.140628	0.00132441	0.192874	0.0165707	0.109884	0.000396928	0.138876	0.00624782	0.329861	0.0103164
	Kiribati	KIR	0.537799	0.0526966	0.00423733	0.0299449	0.000237991	0.0330764	0.000475433	0.0950683	0.000793663	0.123665	0.0101373	0.0704906	0.000237991	0.0888697	0.00376292	0.211634	0.00620315
	Cook Islands	COK	0.523843	0.0483731	0.0043033	0.0274433	0.000246356	0.0305081	0.000492747	0.0871677	0.000821716	0.120075	0.0105493	0.068408	0.000246356	0.0864011	0.00390533	0.205416	0.00643581
	French Guiana	GUF	0.231351	0.0210047	0.002188	0.0119112	0.000128231	0.0132728	0.000255871	0.03783	0.000427666	0.0525606	0.00542722	0.0299408	0.000128231	0.0379101	0.00202408	0.0898309	0.00333879
	Wallis and Futuna Islands	WLF	0.124311	0.0086785	0.00121813	0.00487876	9.17848e-05	0.00562865	0.000182333	0.0155281	0.000306387	0.0276908	0.0037555	0.01574	9.17848e-05	0.020123	0.00143704	0.0472094	0.0023775
	Saint Helena	NA	0.0960892	0.00818575	0.000804595	0.00463301	4.9019e-05	0.00519912	9.80297e-05	0.0147251	0.000163545	0.0218962	0.00209836	0.0124659	4.9019e-05	0.0157877	0.000777559	0.037435	0.00128191
	Tuvalu	TUV	0.0721332	0.00566431	0.000623438	0.00319759	4.17458e-05	0.00362662	8.3235e-05	0.0101687	0.00013932	0.0162885	0.00174906	0.0092672	4.17458e-05	0.011781	0.000658261	0.0278174	0.001087
	Niue	NIU	0.0720888	0.00693181	0.000607198	0.00393701	3.2697e-05	0.00435648	6.55639e-05	0.0125019	0.00010903	0.0166044	0.00142528	0.00946321	3.2697e-05	0.0119277	0.000520958	0.0284221	0.00085734

## Sheet: Tabelle4
34429.4	(	818.824	)
21985.6	(	788.051	)
11560.4	(	279.213	)
6888.09	(	156.423	)
6451.09	(	167.504	)
5015.73	(	177.566	)
4276.03	(	95.9858	)
3063.39	(	76.0496	)
3015.91	(	73.4718	)
2882.27	(	66.4921	)
2438.65	(	61.551	)
2388.29	(	56.5282	)
2031.06	(	54.4632	)
1948.67	(	54.8441	)
1758.3	(	57.8964	)
1780.25	(	47.4812	)
1748.11	(	57.7531	)
1545.23	(	45.6693	)
1508.17	(	50.6049	)
1434.83	(	38.325	)
1304.5	(	44.5484	)
1338.67	(	33.6037	)
1049.99	(	34.1515	)
1053.23	(	25.38	)
999.989	(	23.2487	)
863.731	(	27.5475	)
849.499	(	19.3793	)
851.16	(	21.1585	)
820.536	(	21.3143	)
794.368	(	20.5829	)
725.757	(	25.6337	)
671.721	(	16.5744	)
619.853	(	20.2907	)
566.271	(	20.6614	)
535.581	(	14.474	)
495.886	(	16.6493	)
502.244	(	12.6961	)
473.295	(	17.0289	)
456.371	(	13.9366	)
458.69	(	10.6986	)
435.435	(	14.3405	)
440.921	(	10.1665	)
420.456	(	11.8984	)
405.443	(	9.81691	)
391.736	(	11.9262	)
399.801	(	9.83574	)
368.193	(	8.63568	)
339.492	(	13.1084	)
342.287	(	9.20674	)
332.328	(	10.0696	)
330.072	(	7.64237	)
325.932	(	8.23115	)
291.02	(	9.00071	)
280.466	(	7.07709	)
272.799	(	7.86247	)
272.279	(	6.52268	)
268.301	(	7.05989	)
249.852	(	7.04559	)
250.017	(	6.31149	)
243.696	(	7.19282	)
233.144	(	5.88008	)
223.625	(	6.48569	)
212.992	(	6.15465	)
203.227	(	7.6843	)
208.938	(	5.38325	)
192.847	(	5.81844	)
173.961	(	5.56443	)
174.858	(	4.92971	)
173.269	(	4.23814	)
169.611	(	4.37407	)
165.913	(	4.90684	)
153.913	(	3.7261	)
143.333	(	5.51377	)
139.086	(	4.2847	)
141.48	(	3.47385	)
119.179	(	4.77114	)
118.694	(	3.73826	)
111.559	(	2.85088	)
105.172	(	2.74351	)
97.725	(	2.69515	)
90.0977	(	2.76251	)
91.1671	(	2.47492	)
86.3011	(	2.81308	)
86.2106	(	2.20048	)
80.9729	(	1.83728	)
80.8778	(	2.15022	)
74.6534	(	2.3346	)
77.116	(	1.87913	)
72.6516	(	2.23736	)
70.781	(	2.76908	)
72.7456	(	1.79562	)
68.9415	(	2.28873	)
66.3241	(	2.60426	)
69.5101	(	1.81352	)
65.8643	(	2.01085	)
62.4799	(	1.60484	)
55.746	(	1.70306	)
51.875	(	1.6343	)
48.7657	(	1.58535	)
47.4827	(	1.24438	)
46.305	(	1.35016	)
46.245	(	1.21679	)
42.9817	(	1.36027	)
42.3386	(	1.47325	)
41.4963	(	1.05729	)
38.9692	(	0.924563	)
35.7804	(	1.16751	)
33.9142	(	1.00066	)
33.1278	(	0.968546	)
30.7891	(	0.948836	)
30.0004	(	0.87503	)
29.5292	(	0.772441	)
27.1535	(	0.745283	)
25.3531	(	0.847028	)
25.4471	(	0.787177	)
25.2599	(	0.594994	)
24.0474	(	0.91204	)
23.5911	(	0.744238	)
23.4132	(	0.700056	)
22.7843	(	0.780319	)
20.9816	(	0.680952	)
20.0895	(	0.47394	)
18.1525	(	0.671806	)
17.8193	(	0.512814	)
17.7183	(	0.523039	)
17.8815	(	0.546603	)
17.1499	(	0.565451	)
16.6939	(	0.541968	)
15.7413	(	0.407474	)
15.2774	(	0.442372	)
14.3791	(	0.522185	)
13.4794	(	0.592577	)
13.3026	(	0.630507	)
13.0317	(	0.634957	)
12.3611	(	0.937361	)
12.0237	(	0.309769	)
11.4285	(	0.387988	)
10.8232	(	0.460905	)
10.9328	(	0.310233	)
10.4161	(	0.261011	)
10.0661	(	0.345383	)
9.9326	(	0.266064	)
9.57944	(	0.282797	)
9.05403	(	0.594763	)
8.3814	(	0.243708	)
7.7396	(	0.24928	)
7.67911	(	0.255901	)
7.37037	(	0.252454	)
7.11633	(	0.303506	)
7.02518	(	0.235033	)
7.0142	(	0.220507	)
6.12877	(	0.237509	)
5.86428	(	0.23552	)
5.92424	(	0.188377	)
5.61797	(	0.238945	)
5.65806	(	0.158241	)
5.54552	(	0.154079	)
5.40408	(	0.155987	)
5.50316	(	0.144646	)
5.21941	(	0.207301	)
4.79285	(	0.131086	)
4.60503	(	0.153434	)
3.76303	(	0.127983	)
3.83551	(	0.0993303	)
3.44251	(	0.0937417	)
3.16038	(	0.0854304	)
3.09569	(	0.076642	)
3.01934	(	0.0783671	)
2.89605	(	0.085314	)
2.8123	(	0.0863061	)
2.55393	(	0.085999	)
2.45886	(	0.0646303	)
2.19737	(	0.098278	)
2.24537	(	0.0641892	)
1.97708	(	0.0544073	)
1.91357	(	0.056525	)
1.69238	(	0.070466	)
1.61925	(	0.0756398	)
1.48649	(	0.05666	)
1.37746	(	0.0443995	)
1.2833	(	0.0469642	)
1.26324	(	0.0341383	)
1.236	(	0.0383386	)
1.22598	(	0.038177	)
1.05168	(	0.0327805	)
1.02265	(	0.0289603	)
0.809908	(	0.0260206	)
0.727345	(	0.0218265	)
0.702404	(	0.0237288	)
0.621851	(	0.0226951	)
0.617667	(	0.0233722	)
0.605642	(	0.0240375	)
0.552884	(	0.0189979	)
0.533709	(	0.0310691	)
0.519546	(	0.0142704	)
0.481624	(	0.0162165	)
0.4798	(	0.0158974	)
0.469799	(	0.0132899	)
0.457949	(	0.0128751	)
0.440694	(	0.0134781	)
0.394877	(	0.0149386	)
0.398733	(	0.00986101	)
0.36382	(	0.016516	)
0.360166	(	0.0143821	)
0.331231	(	0.0135425	)
0.326942	(	0.0133689	)
0.329861	(	0.0103164	)
0.211634	(	0.00620315	)
0.205416	(	0.00643581	)
0.0898309	(	0.00333879	)
0.0472094	(	0.0023775	)
0.037435	(	0.00128191	)
0.0278174	(	0.001087	)
0.0284221	(	0.00085734	)
