# Supplementary material for: The Social Cost of Fossil and Industrial CO2 Emissions from 1950 to 2018
Source: Research Square preprint supplement (doi:10.21203/rs.3.rs-2244259/v1), 2022-11-17
Supplement: Supplementary file 75 [file Table_SIT2.xlsx]

## Sheet: CountryData_Links
			Cumulative	Disinvestment Share (percent)								Cumulative Wealth Borrowing
			CO2 emissions	SDR:calibrated								SDR:expert-based
			1950--2018	All Impacts		Nordhaus		Weitzman		Howard&Sterner		All Impacts		Nordhaus		Weitzman		Howard&Sterner
	Country	ISO	MtC	Mean	Std	Mean	Std	Mean	Std	Mean	Std	Mean	Std	Mean	Std	Mean	Std	Mean	Std
	Afghanistan	AFG	46.5723	NA	NA	NA	NA	NA	NA	NA	NA	NA	NA	NA	NA	NA	NA	NA	NA
	Albania	ALB	73.6216	0.313255	0.0264403	0.178718	0.00108778	0.194367	0.00219954	0.566661	0.0776591	2.41495	0.189271	2.41495	0.108281	1.7255	0.108281	4.1394	0.108281
	Algeria	DZA	1164.44	0.244349	0.0200496	0.138669	0.00120977	0.154093	0.00241661	0.440274	0.0546374	1.96188	0.166622	1.96188	0.102451	1.41206	0.102451	3.35488	0.102451
	Andorra	AND	3.84069	NA	NA	NA	NA	NA	NA	NA	NA	NA	NA	NA	NA	NA	NA	NA	NA
	Angola	AGO	183.665	0.0979837	0.00904537	0.0554062	0.000696274	0.0624939	0.00138103	0.176046	0.0204037	0.835814	0.0871416	0.835814	0.0558135	0.604699	0.0558135	1.42666	0.0558135
	Anguilla	AIA	0.86316	0.375395	0.0415569	0.21169	0.0029986	0.241313	0.0059634	0.673165	0.0716997	2.79012	0.309231	2.79012	0.194652	2.02138	0.194652	4.76094	0.194652
	Antigua and Barbuda	NA	5.62698	NA	NA	NA	NA	NA	NA	NA	NA	NA	NA	NA	NA	NA	NA	NA	NA
	Argentina	ARG	2069.92	0.385541	0.0279764	0.21954	0.00143978	0.240657	0.00288457	0.696406	0.0849618	2.88171	0.213234	2.88171	0.128158	2.06617	0.128158	4.9337	0.128158
	Armenia	ARM	170.807	NA	NA	NA	NA	NA	NA	NA	NA	NA	NA	NA	NA	NA	NA	NA	NA
	Aruba	ABW	17.7642	1.06985	0.0906869	0.608374	0.00507875	0.670434	0.0101563	1.93071	0.210041	5.60417	0.498193	5.60417	0.30155	4.02323	0.30155	9.59212	0.30155
	Australia	AUS	4499.37	0.432725	0.0317987	0.246244	0.0016999	0.270643	0.00340524	0.781263	0.0952256	3.29245	0.249409	3.29245	0.150315	2.3622	0.150315	5.63591	0.150315
	Austria	AUT	1015.38	0.288393	0.0210373	0.164465	0.000944697	0.179179	0.00190121	0.521521	0.0581141	1.81897	0.128907	1.81897	0.0754643	1.3011	0.0754643	3.11671	0.0754643
	Azerbaijan	AZE	622.789	NA	NA	NA	NA	NA	NA	NA	NA	NA	NA	NA	NA	NA	NA	NA	NA
	Bahamas	BHS	44.2122	0.655108	0.0725121	0.374246	0.00250724	0.404762	0.00510116	1.18628	0.144021	3.82358	0.364097	3.82358	0.200518	2.7251	0.200518	6.55972	0.200518
	Bahrain	BHR	221.394	0.455407	0.0377288	0.258151	0.00249957	0.288204	0.00497814	0.819845	0.0952238	3.35616	0.29942	3.35616	0.186971	2.41954	0.186971	5.73599	0.186971
	Bangladesh	BGD	372.094	0.282764	0.0260672	0.159817	0.00199983	0.180564	0.00397002	0.507898	0.0599865	1.84115	0.188877	1.84115	0.120903	1.33218	0.120903	3.14293	0.120903
	Barbados	BRB	14.3334	0.664695	0.0510729	0.37791	0.00282862	0.41683	0.00566243	1.19931	0.154141	5.15562	0.408155	5.15562	0.246759	3.70209	0.246759	8.82312	0.246759
	Belarus	BLR	1247.14	8.09503	0.943594	4.62015	0.0560378	5.01387	0.108094	14.6509	2.50841	10.0723	1.0836	10.0723	0.656868	7.27042	0.656868	17.2113	0.656868
	Belgium	BEL	2110.83	0.438864	0.0328582	0.250729	0.0012547	0.271177	0.00253668	0.794663	0.0953355	2.86087	0.196892	2.86087	0.111915	2.04092	0.111915	4.90584	0.111915
	Belize	BLZ	4.87309	0.544446	0.0424346	0.309211	0.00254151	0.342563	0.00507681	0.981537	0.117313	4.14407	0.340876	4.14407	0.209377	2.98056	0.209377	7.08816	0.209377
	Benin	BEN	28.2698	0.471031	0.0474821	0.265817	0.00384707	0.302232	0.00762881	0.845023	0.100369	3.41752	0.384506	3.41752	0.248259	2.4775	0.248259	5.82976	0.248259
	Bermuda	BMU	7.59311	NA	NA	NA	NA	NA	NA	NA	NA	NA	NA	NA	NA	NA	NA	NA	NA
	Bhutan	BTN	4.2518	0.143064	0.0161468	0.0805825	0.00134591	0.0923127	0.00266992	0.256292	0.0267912	0.973368	0.119188	0.973368	0.0775203	0.7068	0.0775203	1.6595	0.0775203
	Bonaire, Saint Eustatius and Saba	NA	6.07875	NA	NA	NA	NA	NA	NA	NA	NA	NA	NA	NA	NA	NA	NA	NA	NA
	Bosnia and Herzegovina	BIH	229.575	1.90988	0.154646	1.08743	0.00746838	1.1923	0.0149982	3.44983	0.365684	11.2221	0.879233	11.2221	0.5217	8.0433	0.5217	19.2175	0.5217
	Botswana	BWA	37.1753	0.404153	0.0382576	0.22849	0.00267156	0.257762	0.00531794	0.726194	0.0825502	2.15735	0.212758	2.15735	0.133806	1.55909	0.133806	3.68453	0.133806
	Brazil	BRA	3936.69	0.25402	0.0195491	0.14427	0.00118615	0.159816	0.00236721	0.457961	0.0510035	1.76206	0.144491	1.76206	0.0890716	1.26747	0.0890716	3.01376	0.0890716
	British Virgin Islands	NA	1.42337	NA	NA	NA	NA	NA	NA	NA	NA	NA	NA	NA	NA	NA	NA	NA	NA
	Brunei Darussalam	BRN	83.6593	0.386112	0.0354566	0.219719	0.00165998	0.241471	0.00333309	0.697127	0.0816281	2.58204	0.21806	2.58204	0.129229	1.85238	0.129229	4.42009	0.129229
	Bulgaria	BGR	992.608	1.85897	0.150724	1.06128	0.00590022	1.15096	0.0119559	3.36456	0.408534	12.1251	0.904935	12.1251	0.511554	8.65154	0.511554	20.7935	0.511554
	Burkina Faso	BFA	15.2448	0.176396	0.0165592	0.0996875	0.0013082	0.112697	0.00259523	0.316797	0.0396625	1.37258	0.145856	1.37258	0.0940929	0.993608	0.0940929	2.34252	0.0940929
	Burundi	BDI	3.15151	0.0764562	0.00627777	0.0434079	0.000379239	0.048156	0.000757482	0.1378	0.0194806	0.689039	0.05916	0.689039	0.0365489	0.495824	0.0365489	1.17831	0.0365489
	Cambodia	KHM	34.8837	0.157626	0.0168654	0.0889259	0.00144346	0.10127	0.00286256	0.282675	0.0409166	1.60926	0.198613	1.60926	0.130043	1.16798	0.130043	2.74368	0.130043
	Canada	CAN	7692.4	0.591695	0.043047	0.337225	0.00203785	0.368323	0.00409555	1.0695	0.124448	4.07893	0.293614	4.07893	0.173453	2.92026	0.173453	6.98696	0.173453
	Cape Verde	PRK	3.31512	0.101747	0.00906158	0.0576138	0.000648009	0.0646197	0.0012875	0.183002	0.0205561	0.795009	0.0785066	0.795009	0.049688	0.574308	0.049688	1.35772	0.049688
	Central African Republic	CAF	3.19001	0.0505346	0.0039582	0.0287555	0.000201541	0.0316114	0.000404266	0.0912336	0.0130585	0.479629	0.0370921	0.479629	0.0221874	0.344074	0.0221874	0.821012	0.0221874
	Chad	TCD	6.56142	0.0985088	0.00833749	0.0558231	0.000563979	0.0624039	0.00112279	0.177295	0.0216574	0.752965	0.0692423	0.752965	0.043328	0.543061	0.043328	1.28672	0.043328
	Chile	CHL	694.038	0.575767	0.0428245	0.327292	0.00256061	0.361301	0.00510723	1.03868	0.1112	3.31327	0.265878	3.31327	0.163987	2.38195	0.163987	5.66795	0.163987
	China	CHN	56774.7	1.13022	0.0973649	0.639777	0.0071214	0.718319	0.0141436	2.03254	0.2163	6.09985	0.588182	6.09985	0.373455	4.40616	0.373455	10.4189	0.373455
	Colombia	COL	865.42	0.269726	0.0199783	0.153486	0.00106971	0.168707	0.00214203	0.48697	0.0573667	1.9654	0.149652	1.9654	0.0904878	1.41029	0.0904878	3.36415	0.0904878
	Comoros	COM	1.23812	0.0479979	0.00400909	0.0271986	0.000275132	0.0304106	0.000547732	0.0863821	0.0102935	0.412937	0.0377389	0.412937	0.0237563	0.297891	0.0237563	0.705551	0.0237563
	Congo	COG	19.6334	0.136263	0.0116591	0.0773517	0.000730909	0.0858763	0.00145599	0.245554	0.0356629	1.06917	0.0974164	1.06917	0.0609125	0.769975	0.0609125	1.82787	0.0609125
	Cook Islands	COK	0.523843	NA	NA	NA	NA	NA	NA	NA	NA	NA	NA	NA	NA	NA	NA	NA	NA
	Costa Rica	CRI	65.0365	0.311084	0.0248436	0.176508	0.00156886	0.196281	0.00312945	0.560449	0.0581407	1.91477	0.16375	1.91477	0.101279	1.37868	0.101279	3.27405	0.101279
	Côte d'Ivoire	CIV	86.1474	0.419421	0.034485	0.238286	0.00193087	0.263594	0.00386496	0.75636	0.0931273	3.07528	0.255079	3.07528	0.15524	2.21035	0.15524	5.26138	0.15524
	Croatia	HRV	280.055	0.220598	0.0167289	0.125673	0.000794573	0.137485	0.00159865	0.398622	0.0543144	1.8364	0.136733	1.8364	0.0803852	1.31489	0.0803852	3.14558	0.0803852
	Cuba	CUB	432.911	NA	NA	NA	NA	NA	NA	NA	NA	NA	NA	NA	NA	NA	NA	NA	NA
	Curaçao	CUW	114.21	NA	NA	NA	NA	NA	NA	NA	NA	NA	NA	NA	NA	NA	NA	NA	NA
	Cyprus	CYP	76.2586	0.269032	0.0211262	0.152817	0.00123248	0.169182	0.00246525	0.485084	0.0583577	2.14838	0.17617	2.14838	0.1072	1.54435	0.1072	3.67535	0.1072
	Czech Republic	CZE	2478.69	NA	NA	NA	NA	NA	NA	NA	NA	NA	NA	NA	NA	NA	NA	NA	NA
	North Korea	PRK	1324.35	NA	NA	NA	NA	NA	NA	NA	NA	NA	NA	NA	NA	NA	NA	NA	NA
	Democratic Republic of the Congo	COD	49.683	0.0560789	0.00446038	0.0320695	0.000158925	0.0345517	0.000322073	0.101612	0.0150591	0.436763	0.0315537	0.436763	0.0176759	0.31112	0.0176759	0.749252	0.0176759
	Denmark	DNK	914.726	0.342086	0.0259074	0.195353	0.00102379	0.211635	0.00207116	0.619252	0.0742392	2.27937	0.161193	2.27937	0.0916759	1.62634	0.0916759	3.90871	0.0916759
	Djibouti	DJI	4.99593	0.410592	0.0323057	0.233526	0.00169433	0.257157	0.00339775	0.741075	0.087222	2.4805	0.195173	2.4805	0.116859	1.77981	0.116859	4.24649	0.116859
	Dominica	DMA	1.23231	0.285023	0.0235901	0.161538	0.00160073	0.180502	0.00318598	0.513014	0.0687197	2.59325	0.234657	2.59325	0.146828	1.87018	0.146828	4.43142	0.146828
	Dominican Republic	DOM	190.89	0.336861	0.0276596	0.191066	0.00173696	0.212772	0.00346717	0.606729	0.114316	2.38713	0.206827	2.38713	0.127637	1.71916	0.127637	4.08145	0.127637
	Ecuador	ECU	303.603	0.247294	0.0204989	0.140261	0.0012871	0.156221	0.00256732	0.445386	0.0517936	1.97029	0.171403	1.97029	0.106088	1.41919	0.106088	3.36842	0.106088
	Egypt	EGY	1591.57	1.46906	0.118859	0.832776	0.00807452	0.929495	0.0160727	2.64485	0.292246	7.62788	0.680469	7.62788	0.426758	5.49991	0.426758	13.0368	0.426758
	El Salvador	SLV	59.6536	0.315472	0.0247558	0.179138	0.00149821	0.198589	0.00299251	0.568671	0.0662354	2.34991	0.196001	2.34991	0.120175	1.69035	0.120175	4.01922	0.120175
	Equatorial Guinea	GNQ	34.2458	0.70787	0.0939584	0.398287	0.00711822	0.458118	0.0141323	1.26719	0.196334	3.70077	0.485322	3.70077	0.307433	2.68789	0.307433	6.30969	0.307433
	Eritrea	ERI	4.39366	NA	NA	NA	NA	NA	NA	NA	NA	NA	NA	NA	NA	NA	NA	NA	NA
	Estonia	EST	381.615	NA	NA	NA	NA	NA	NA	NA	NA	NA	NA	NA	NA	NA	NA	NA	NA
	Ethiopia	ETH	62.219	0.28553	0.0248111	0.161636	0.00190038	0.181469	0.00377208	0.513473	0.0601058	1.57683	0.15862	1.57683	0.102126	1.13963	0.102126	2.69273	0.102126
	Faeroe Islands	FRO	7.97654	NA	NA	NA	NA	NA	NA	NA	NA	NA	NA	NA	NA	NA	NA	NA	NA
	Micronesia (Federated States of)	FSM	0.934731	NA	NA	NA	NA	NA	NA	NA	NA	NA	NA	NA	NA	NA	NA	NA	NA
	Fiji	SYR	13.7213	0.208587	0.0158052	0.118621	0.000909251	0.130727	0.00181588	0.376402	0.0457173	1.47696	0.118416	1.47696	0.0729387	1.06118	0.0729387	2.52692	0.0729387
	Finland	FIN	816.65	0.284594	0.0217105	0.162188	0.000998686	0.177171	0.00201149	0.514408	0.0627822	2.12363	0.157272	2.12363	0.0918847	1.51962	0.0918847	3.63839	0.0918847
	France	FRA	7161.54	0.290189	0.021892	0.165757	0.000845629	0.179406	0.00171022	0.525387	0.0623902	1.90316	0.132492	1.90316	0.0752869	1.35784	0.0752869	3.26351	0.0752869
	French Guiana	GUF	0.231351	NA	NA	NA	NA	NA	NA	NA	NA	NA	NA	NA	NA	NA	NA	NA	NA
	French Polynesia	PYF	7.36405	NA	NA	NA	NA	NA	NA	NA	NA	NA	NA	NA	NA	NA	NA	NA	NA
	Gabon	GAB	68.1466	0.489733	0.0434696	0.278843	0.00193023	0.305664	0.00389372	0.884666	0.119933	3.28813	0.266506	3.28813	0.154597	2.35473	0.154597	5.63257	0.154597
	Gambia	GMB	3.53172	0.216047	0.0176249	0.122498	0.00116382	0.136631	0.00231816	0.389002	0.0475241	1.7288	0.152376	1.7288	0.0952422	1.24611	0.0952422	2.95482	0.0952422
	Georgia	GEO	258.401	NA	1.32475	5.05571	0.0706653	5.43743	0.135953	16.0224	2.96498	5.70491	0.737708	5.70491	0.438974	4.11676	0.438974	9.74907	0.438974
	Germany	DEU	17085.1	0.357586	0.0270491	0.204349	0.00100564	0.220774	0.00203577	0.647615	0.0830116	2.53283	0.17474	2.53283	0.0986474	1.80597	0.0986474	4.34393	0.0986474
	Ghana	GHA	91.7778	0.0884568	0.00689558	0.0501889	0.000472582	0.0558395	0.000939604	0.159337	0.0219483	0.769549	0.068004	0.769549	0.042914	0.554677	0.042914	1.31517	0.042914
	Greece	GRC	1063.75	0.267234	0.0213153	0.15191	0.00115782	0.167638	0.00232191	0.482139	0.0600523	2.01065	0.162714	2.01065	0.0975049	1.44335	0.0975049	3.44141	0.0975049
	Greenland	GRL	7.74466	NA	NA	NA	NA	NA	NA	NA	NA	NA	NA	NA	NA	NA	NA	NA	NA
	Grenada	GRD	2.07604	0.246578	0.0200989	0.139811	0.00132186	0.155924	0.00263412	0.443987	0.0507964	1.7888	0.157889	1.7888	0.098234	1.28917	0.098234	3.0576	0.098234
	Guatemala	GTM	110.064	0.265847	0.0209236	0.150834	0.00137501	0.167794	0.0027399	0.478899	0.0545854	1.9622	0.169845	1.9622	0.106155	1.41362	0.106155	3.35427	0.106155
	Guinea	GIN	21.3185	0.398436	0.030646	0.226432	0.00179263	0.250221	0.00357839	0.718634	0.091993	2.81454	0.227311	2.81454	0.14	2.02343	0.14	4.81475	0.14
	Guinea-Bissau	GNB	2.59323	0.100714	0.00790977	0.0572492	0.000437309	0.0632015	0.000875469	0.181686	0.0269317	0.954324	0.0762682	0.954324	0.0462402	0.685547	0.0462402	1.63285	0.0462402
	Guyana	GUY	26.1349	NA	NA	NA	NA	NA	NA	NA	NA	NA	NA	NA	NA	NA	NA	NA	NA
	Haiti	HTI	19.8358	0.0840549	0.00662467	0.0476905	0.000442947	0.0530587	0.000881767	0.151411	0.0205906	0.723454	0.0634389	0.723454	0.0398261	0.521337	0.0398261	1.23651	0.0398261
	Honduras	HND	65.1765	0.351458	0.0287117	0.199198	0.00198559	0.222538	0.00395003	0.632621	0.06866	2.45318	0.222701	2.45318	0.140049	1.76952	0.140049	4.19193	0.140049
	Hong Kong	HKG	422.159	0.37097	0.029858	0.210626	0.00174637	0.233548	0.00349326	0.668719	0.0710042	2.06778	0.171823	2.06778	0.104619	1.48688	0.104619	3.53742	0.104619
	Hungary	HUN	1136.94	0.563715	0.0434693	0.322059	0.00164485	0.348273	0.00333322	1.02078	0.123991	3.72779	0.264658	3.72779	0.149132	2.65789	0.149132	6.39389	0.149132
	Iceland	ISL	39.7154	0.285289	0.0205195	0.162475	0.00105602	0.178008	0.00211516	0.515367	0.0609855	2.05265	0.151188	2.05265	0.0909694	1.47168	0.0909694	3.51428	0.0909694
	India	IND	12946.8	0.727488	0.0612381	0.411937	0.00448278	0.461947	0.0089067	1.30855	0.13607	4.40411	0.418765	4.40411	0.266315	3.1807	0.266315	7.52265	0.266315
	Indonesia	IDN	3358.97	0.521602	0.0442838	0.295401	0.00308267	0.330991	0.00613397	0.938393	0.100163	2.95517	0.274128	2.95517	0.172429	2.13275	0.172429	5.04921	0.172429
	Iraq	IRQ	1117.1	0.942427	0.076374	0.534445	0.00515672	0.595682	0.0102637	1.69711	0.208138	6.04629	0.540338	6.04629	0.340329	4.35867	0.340329	10.3338	0.340329
	Ireland	IRL	526.069	0.39677	0.0290026	0.225962	0.00145861	0.247521	0.00292796	0.716807	0.0762283	2.27437	0.168552	2.27437	0.100357	1.62969	0.100357	3.8951	0.100357
	Iran	IRN	4515.57	0.38202	0.0312998	0.216541	0.00212249	0.241829	0.00422481	0.68767	0.0887582	3.31564	0.29733	3.31564	0.186561	2.39109	0.186561	5.66581	0.186561
	Israel	ISR	620.377	0.40026	0.0312703	0.227308	0.0018694	0.251868	0.00373539	0.721584	0.0790979	2.75558	0.227384	2.75558	0.139124	1.98166	0.139124	4.71359	0.139124
	Italy	ITA	6111.62	0.227099	0.0172871	0.129415	0.000798131	0.1414	0.00160738	0.410471	0.0481508	1.61116	0.11916	1.61116	0.0696704	1.15298	0.0696704	2.76034	0.0696704
	Jamaica	JAM	119.34	0.462374	0.0360774	0.263327	0.00172921	0.288448	0.0034777	0.83532	0.110121	3.75863	0.286355	3.75863	0.168706	2.69231	0.168706	6.43744	0.168706
	Japan	JPN	16229.3	0.351084	0.0267766	0.199911	0.00130871	0.219119	0.00263019	0.634205	0.0735437	2.24411	0.168666	2.24411	0.0997923	1.60789	0.0997923	3.8433	0.0997923
	Jordan	JOR	177.128	0.4326	0.0371852	0.245043	0.00247278	0.274335	0.00492672	0.778403	0.0909396	2.7264	0.248315	2.7264	0.154741	1.96649	0.154741	4.6592	0.154741
	Kazakhstan	KAZ	3357.49	NA	1.05981	5.36855	0.0702806	5.85792	0.134948	17.0284	3.37402	15.8535	1.71666	15.8535	1.06675	11.4677	1.06675	27.0688	1.06675
	Kenya	KEN	117.842	0.230276	0.0171262	0.130897	0.00103052	0.144526	0.00205585	0.415392	0.0518343	1.71205	0.137939	1.71205	0.0853896	1.23091	0.0853896	2.92852	0.0853896
	Kiribati	KIR	0.537799	NA	NA	NA	NA	NA	NA	NA	NA	NA	NA	NA	NA	NA	NA	NA	NA
	Kosovo	NA	24.2058	NA	NA	NA	NA	NA	NA	NA	NA	NA	NA	NA	NA	NA	NA	NA	NA
	Kuwait	CUW	743.645	0.62766	0.0504877	0.356287	0.00316833	0.395564	0.00631018	1.1311	0.127621	4.26762	0.366179	4.26762	0.227542	3.07312	0.227542	7.29642	0.227542
	Kyrgyzstan	KGZ	199.806	NA	NA	NA	NA	NA	NA	NA	NA	NA	NA	NA	NA	NA	NA	NA	NA
	Laos	LAO	32.9809	0.299006	0.0498172	0.167986	0.00482252	0.194558	0.00956743	0.534463	0.057385	2.04727	0.39458	2.04727	0.264193	1.49373	0.264193	3.48396	0.264193
	Latvia	LVA	190.789	0.52019	0.0421798	0.297201	0.00158554	0.321324	0.00321892	0.942016	0.114421	3.32964	0.249667	3.32964	0.139877	2.37296	0.139877	5.71198	0.139877
	Lebanon	LBN	185.689	0.217912	0.0168421	0.123701	0.00107886	0.137329	0.00215035	0.392694	0.0491907	1.77034	0.149701	1.77034	0.093213	1.27464	0.093213	3.02681	0.093213
	Lesotho	LSO	15.894	0.71242	0.077696	0.402232	0.00521199	0.456238	0.0103902	1.27876	0.149825	5.32303	0.566511	5.32303	0.352184	3.85067	0.352184	9.0879	0.352184
	Liberia	LBR	13.8068	0.238254	0.0226048	0.13601	0.000857775	0.147576	0.00173589	0.43116	0.0649861	1.90918	0.160454	1.90918	0.0909298	1.36352	0.0909298	3.27269	0.0909298
	Libya	LBY	540.033	NA	NA	NA	NA	NA	NA	NA	NA	NA	NA	NA	NA	NA	NA	NA	NA
	Liechtenstein	LIE	1.58978	NA	NA	NA	NA	NA	NA	NA	NA	NA	NA	NA	NA	NA	NA	NA	NA
	Lithuania	LTU	349.79	0.591827	0.0481063	0.338179	0.00180248	0.365428	0.00366016	1.07184	0.143577	4.33565	0.326529	4.33565	0.182633	3.08929	0.182633	7.43815	0.182633
	Luxembourg	LUX	200.891	0.65967	0.0506463	0.377074	0.00183324	0.406968	0.00370868	1.19493	0.13808	3.75764	0.259199	3.75764	0.146235	2.67899	0.146235	6.44489	0.146235
	Macao	MAC	15.1479	0.127175	0.0108853	0.07211	0.000672428	0.0803903	0.00134386	0.229021	0.025103	0.719844	0.0636674	0.719844	0.039138	0.518424	0.039138	1.23084	0.039138
	North Macedonia	MKD	155.924	5.55062	0.642376	3.16404	0.0377395	3.4507	0.073348	10.037	1.5845	8.64933	0.930863	8.64933	0.561112	6.23829	0.561112	14.7844	0.561112
	Madagascar	MDG	24.372	0.13549	0.0102594	0.0770334	0.000610216	0.0849938	0.0012172	0.244436	0.0407262	1.27574	0.103828	1.27574	0.0644177	0.917167	0.0644177	2.18208	0.0644177
	Malawi	MWI	12.1262	0.208869	0.0160649	0.118819	0.000851101	0.130753	0.00170463	0.377023	0.0471248	1.36269	0.10559	1.36269	0.0637914	0.978058	0.0637914	2.33239	0.0637914
	Malaysia	MYS	1465.1	0.653478	0.0600485	0.369492	0.00432931	0.416693	0.00860763	1.17422	0.129672	3.92489	0.387339	3.92489	0.244552	2.83703	0.244552	6.70248	0.244552
	Maldives	MDV	5.76615	0.364416	0.040572	0.20523	0.0032954	0.235211	0.00653445	0.652795	0.0752294	2.05551	0.242982	2.05551	0.156759	1.49229	0.156759	3.50493	0.156759
	Mali	MLI	13.5495	0.395726	0.0360672	0.223798	0.0028403	0.25226	0.00563147	0.711104	0.0785335	2.23734	0.235182	2.23734	0.151689	1.61875	0.151689	3.81921	0.151689
	Malta	MLT	27.6453	0.310185	0.0245629	0.176364	0.00133395	0.194458	0.00267602	0.559716	0.0829647	2.26232	0.183612	2.26232	0.109889	1.62358	0.109889	3.87257	0.109889
	Marshall Islands	NA	0.851775	NA	NA	NA	NA	NA	NA	NA	NA	NA	NA	NA	NA	NA	NA	NA	NA
	Martinique	MTQ	1.14616	NA	NA	NA	NA	NA	NA	NA	NA	NA	NA	NA	NA	NA	NA	NA	NA
	Mauritania	MRT	18.8819	0.126575	0.0117987	0.0717764	0.000720835	0.0800182	0.00143943	0.227925	0.0294321	1.08778	0.102945	1.08778	0.0637208	0.783943	0.0637208	1.85929	0.0637208
	Mauritius	MUS	29.4178	0.436916	0.0366678	0.24751	0.0025454	0.27705	0.00506522	0.786168	0.087015	2.83007	0.261277	2.83007	0.16416	2.04218	0.16416	4.83547	0.16416
	Mexico	MEX	4941.29	0.414491	0.0319907	0.235595	0.00179055	0.260123	0.00358411	0.747733	0.0835722	2.90724	0.231182	2.90724	0.140016	2.08824	0.140016	4.97492	0.140016
	Mongolia	MNG	171.162	0.960519	0.0857327	0.544147	0.006478	0.609175	0.0128701	1.72819	0.201599	7.77628	0.809635	7.77628	0.521489	5.61619	0.521489	13.2811	0.521489
	Montenegro	MNE	25.0344	0.178422	0.0140691	0.101553	0.000698455	0.111514	0.00140217	0.322187	0.0440465	1.57973	0.121821	1.57973	0.0724508	1.13265	0.0724508	2.7047	0.0724508
	Montserrat	MSR	NA	NA	NA	NA	NA	NA	NA	NA	NA	NA	NA	NA	NA	NA	0.0205888	0.0211407	0.0216749
	Morocco	MAR	445.904	0.563565	0.0452186	0.319582	0.00299563	0.356216	0.00596643	1.01487	0.109022	3.26353	0.285757	3.26353	0.178443	2.35191	0.178443	5.57867	0.178443
	Mozambique	MOZ	44.7115	0.700533	0.0562085	0.399462	0.0028204	0.435518	0.00563398	1.26659	0.135446	3.41004	0.281128	3.41004	0.172347	2.44423	0.172347	5.83837	0.172347
	Myanmar	MMR	132.589	0.65544	0.050037	0.37225	0.00326122	0.412389	0.00649332	1.18166	0.145745	2.84065	0.243161	2.84065	0.153034	2.04491	0.153034	4.85754	0.153034
	Namibia	NAM	18.6111	0.132418	0.0149131	0.0746192	0.00112503	0.0853199	0.00223495	0.237308	0.0273476	1.15767	0.132351	1.15767	0.0842115	0.839646	0.0842115	1.97451	0.0842115
	Nauru	NRU	1.28958	NA	NA	NA	NA	NA	NA	NA	NA	NA	NA	NA	NA	NA	NA	NA	NA
	Nepal	NPL	35.2222	0.13911	0.0142344	0.0785028	0.00117373	0.0892577	0.00232891	0.249564	0.0281231	0.923126	0.106616	0.923126	0.0692718	0.669286	0.0692718	1.57466	0.0692718
	Netherlands	NLD	2633.16	0.327726	0.0242869	0.186937	0.00105888	0.203484	0.00213407	0.59274	0.072678	2.35205	0.16715	2.35205	0.0971278	1.68162	0.0971278	4.03064	0.0971278
	New Caledonia	NCL	38.765	NA	NA	NA	NA	NA	NA	NA	NA	NA	NA	NA	NA	NA	NA	NA	NA
	New Zealand	NZL	427.592	0.281717	0.0203441	0.160437	0.0010393	0.175789	0.00208388	0.508909	0.0651051	2.21874	0.163618	2.21874	0.0979698	1.59045	0.0979698	3.79894	0.0979698
	Nicaragua	NIC	45.2921	0.161784	0.012484	0.0919431	0.000728867	0.101599	0.00145541	0.291802	0.0371996	1.3145	0.106505	1.3145	0.065271	0.945	0.065271	2.24857	0.065271
	Niger	NER	11.7923	0.0720784	0.00620895	0.0408847	0.000396702	0.0455314	0.000790287	0.129815	0.0185581	0.693887	0.0632097	0.693887	0.0395168	0.500005	0.0395168	1.18602	0.0395168
	Nigeria	NGA	997.573	0.0897255	0.0074482	0.050958	0.000432227	0.0564599	0.000863287	0.161754	0.0212299	0.811161	0.0688678	0.811161	0.0422351	0.583486	0.0422351	1.38729	0.0422351
	Niue	NIU	0.0720888	NA	NA	NA	NA	NA	NA	NA	NA	NA	NA	NA	NA	NA	NA	NA	NA
	Norway	NOR	585.992	0.160661	0.0118157	0.0915353	0.000569612	0.10011	0.0011444	0.290327	0.0356384	1.21391	0.0885751	1.21391	0.0524364	0.869409	0.0524364	2.07909	0.0524364
	Occupied Palestinian Territory	NA	14.6878	NA	NA	NA	NA	NA	NA	NA	NA	NA	NA	NA	NA	NA	NA	NA	NA
	Oman	NA	310.168	0.588462	0.0575731	0.332266	0.00445413	0.37688	0.00883819	1.05622	0.129206	3.71083	0.39585	3.71083	0.253519	2.68728	0.253519	6.33269	0.253519
	Pakistan	PAK	1275.33	0.772787	0.0641245	0.437861	0.00442586	0.489728	0.00881161	1.39074	0.146868	4.96078	0.452493	4.96078	0.284602	3.57884	0.284602	8.47664	0.284602
	Palau	PLW	1.5708	NA	NA	NA	NA	NA	NA	NA	NA	NA	NA	NA	NA	NA	NA	NA	NA
	Panama	PAN	78.6668	0.265107	0.0203849	0.150529	0.00130241	0.166933	0.00259406	0.477847	0.0516239	1.54407	0.130314	1.54407	0.0813654	1.11156	0.0813654	2.64025	0.0813654
	Papua New Guinea	PNG	42.8011	NA	NA	NA	NA	NA	NA	NA	NA	NA	NA	NA	NA	NA	NA	NA	NA
	Paraguay	PRY	44.0318	0.133029	0.0110479	0.0753977	0.000740864	0.0842205	0.00147628	0.239462	0.0271267	0.920786	0.0828529	0.920786	0.0518838	0.663958	0.0518838	1.57361	0.0518838
	Peru	PER	443.532	0.336087	0.0253795	0.191132	0.00143027	0.210612	0.00285704	0.606499	0.0683163	2.27188	0.179082	2.27188	0.109599	1.63187	0.109599	3.88749	0.109599
	Philippines	PHL	848.071	0.285617	0.0220844	0.162184	0.00137657	0.179818	0.00274594	0.514835	0.0585179	2.11635	0.176572	2.11635	0.109657	1.52307	0.109657	3.61903	0.109657
	Bolivia	BOL	142.386	0.365701	0.0282482	0.20781	0.00173444	0.229793	0.00345526	0.659477	0.0875051	3.11087	0.260653	3.11087	0.162499	2.2388	0.162499	5.31905	0.162499
	Poland	POL	5945.58	1.18574	0.0896296	0.676871	0.00363926	0.734439	0.00735655	2.14583	0.256578	7.9374	0.563143	7.9374	0.322093	5.6673	0.322093	13.6082	0.322093
	Portugal	PRT	632.712	0.25409	0.0197078	0.144451	0.00109049	0.159356	0.00218588	0.458449	0.0503402	1.72333	0.13819	1.72333	0.0831733	1.23728	0.0831733	2.9495	0.0831733
	Qatar	NA	526.715	0.940559	0.0851409	0.531871	0.00643852	0.599606	0.0127808	1.69017	0.202057	4.61863	0.4667	4.61863	0.298183	3.34001	0.298183	7.88605	0.298183
	Cameroon	CMR	53.5329	0.119338	0.0109329	0.0677388	0.000622895	0.075215	0.00124534	0.215052	0.026586	1.01035	0.0917943	1.01035	0.056071	0.7272	0.056071	1.72767	0.056071
	South Korea	KOR	4489.23	0.638187	0.0550337	0.3615	0.00362425	0.404647	0.00722445	1.14839	0.130745	3.41787	0.310494	3.41787	0.193046	2.46484	0.193046	5.84148	0.193046
	Moldova	MDA	239.751	NA	NA	NA	NA	NA	NA	NA	NA	NA	NA	NA	NA	NA	NA	NA	NA
	South Sudan	NA	9.66727	NA	NA	NA	NA	NA	NA	NA	NA	NA	NA	NA	NA	NA	NA	NA	NA
	Sudan	SDN	108.944	0.265006	0.0221142	0.150237	0.001549	0.167701	0.00307795	0.477068	0.0544869	1.96988	0.184387	1.96988	0.11711	1.42134	0.11711	3.36553	0.11711
	Réunion	REU	1.01647	NA	NA	NA	NA	NA	NA	NA	NA	NA	NA	NA	NA	NA	NA	NA	NA
	Romania	ROU	2108.27	0.888243	0.072778	0.507252	0.00280766	0.549369	0.00569747	1.60806	0.190313	5.25646	0.398887	5.25646	0.22414	3.74789	0.22414	9.0167	0.22414
	Russian Federation	RUS	28795.6	NA	NA	NA	NA	NA	NA	NA	NA	NA	NA	NA	NA	NA	NA	NA	NA
	Rwanda	NA	7.15847	0.337616	0.029314	0.191683	0.0016509	0.212577	0.00330431	0.608574	0.0730595	1.87358	0.161463	1.87358	0.0983604	1.34748	0.0983604	3.20509	0.0983604
	Saint Helena	NA	0.0960892	NA	NA	NA	NA	NA	NA	NA	NA	NA	NA	NA	NA	NA	NA	NA	NA
	Saint Lucia	LCA	3.13085	0.367348	0.0306326	0.208382	0.00187778	0.231934	0.0037522	0.661709	0.074337	2.57456	0.223637	2.57456	0.137096	1.85344	0.137096	4.40255	0.137096
	Sint Maarten (Dutch part)	FRO	13.6065	NA	NA	NA	NA	NA	NA	NA	NA	NA	NA	NA	NA	NA	NA	NA	NA
	Samoa	WSM	1.85411	NA	NA	NA	NA	NA	NA	NA	NA	NA	NA	NA	NA	NA	NA	NA	NA
	Sao Tome and Principe	STP	0.843423	0.234645	0.0187629	0.133156	0.00119366	0.148018	0.00237885	0.42275	0.0558143	1.93398	0.166157	1.93398	0.103408	1.39278	0.103408	3.30643	0.103408
	Saudi Arabia	SAU	3876.08	0.341261	0.0294521	0.193306	0.00197245	0.216427	0.0039271	0.614034	0.079154	2.42369	0.222105	2.42369	0.138964	1.74842	0.138964	4.14151	0.138964
	Senegal	SEN	60.3411	0.383172	0.0303411	0.217473	0.00195786	0.24162	0.00389945	0.690401	0.120013	3.21523	0.277274	3.21523	0.17341	2.31561	0.17341	5.4968	0.17341
	Serbia	SRB	702.658	NA	0.777538	3.95443	0.0490913	4.31837	0.0948435	12.5443	2.16404	12.1244	1.29332	12.1244	0.791745	8.75798	0.791745	20.7126	0.791745
	Seychelles	NA	NA	NA	NA	0	NA	0	NA	0	NA	1.97484	NA	1.97484	NA	1.42545	NA	3.37414	NA
	Sierra Leone	SLE	9.61743	0.274053	0.0218429	0.156316	0.00095599	0.170217	0.00192126	0.49561	0.0915754	2.35177	0.177339	2.35177	0.104333	1.68289	0.104333	4.0287	0.104333
	Singapore	ATG	566.094	0.358559	0.0298215	0.203763	0.0016037	0.225087	0.00321587	0.646812	0.0726697	1.85227	0.153392	1.85227	0.0919513	1.3299	0.0919513	3.17046	0.0919513
	Slovakia	SVK	818.462	1.09303	0.0833473	0.624473	0.00316414	0.675272	0.00640971	1.97928	0.234175	6.90519	0.485881	6.90519	0.274222	4.92369	0.274222	11.8436	0.274222
	Slovenia	SVN	216.467	0.471522	0.0356555	0.268604	0.00169966	0.293912	0.00341963	0.852024	0.0985691	3.2112	0.238685	3.2112	0.140402	2.29935	0.140402	5.50071	0.140402
	Solomon Islands	SLB	2.68746	NA	NA	NA	NA	NA	NA	NA	NA	NA	NA	NA	NA	NA	NA	NA	NA
	Somalia	SOM	8.64522	NA	NA	NA	NA	NA	NA	NA	NA	NA	NA	NA	NA	NA	NA	NA	NA
	South Africa	ZAF	5134.24	1.02015	0.0753832	0.580477	0.00404125	0.638201	0.00809542	1.84173	0.22591	7.97212	0.607163	7.97212	0.365918	5.72013	0.365918	13.6459	0.365918
	Spain	ESP	3618.32	0.278513	0.0211587	0.158503	0.00109006	0.174113	0.00218787	0.502908	0.0555731	1.82502	0.139975	1.82502	0.0834664	1.30857	0.0834664	3.12486	0.0834664
	Sri Lanka	LKA	125.075	0.203344	0.0156766	0.115404	0.00107033	0.128244	0.00212887	0.366375	0.0381608	1.18214	0.103943	1.18214	0.065687	0.851919	0.065687	2.02055	0.065687
	Saint Kitts and Nevis	KNA	1.60796	NA	NA	NA	NA	NA	NA	NA	NA	NA	NA	NA	NA	NA	NA	NA	NA
	Saint Pierre and Miquelon	SPM	0.999624	NA	NA	NA	NA	NA	NA	NA	NA	NA	NA	NA	NA	NA	NA	NA	NA
	Saint Vincent and the Grenadines	VCT	1.80608	0.195973	0.0167511	0.111016	0.00113777	0.124281	0.00226585	0.352611	0.0495486	1.86218	0.172086	1.86218	0.107489	1.34344	0.107489	3.18181	0.107489
	Suriname	SUR	30.2008	0.469592	0.0364796	0.267543	0.00170088	0.292603	0.00342018	0.848604	0.101613	3.20743	0.240207	3.20743	0.14154	2.29691	0.14154	5.4939	0.14154
	Swaziland	SWZ	NA	NA	NA	0	NA	0	NA	0	NA	3.23336	NA	3.23336	NA	2.3259	NA	5.53073	NA
	Sweden	SWE	1091.22	0.220593	0.0172835	0.126095	0.000622035	0.136075	0.00126119	0.399595	0.0502538	1.50156	0.106136	1.50156	0.0593925	1.06996	0.0593925	2.57585	0.0593925
	Switzerland	CHE	679.812	0.0733748	0.00549235	0.0418626	0.00023356	0.0455271	0.000471096	0.132731	0.0168192	0.549541	0.0390273	0.549541	0.0225628	0.392744	0.0225628	0.941845	0.0225628
	Syria	SYR	488.926	NA	NA	NA	NA	NA	NA	NA	NA	NA	NA	NA	NA	NA	NA	NA	NA
	Taiwan	TWN	2211.66	0.782058	0.06551	0.443349	0.00418334	0.494676	0.00834616	1.40812	0.15644	4.32589	0.382004	4.32589	0.236021	3.11681	0.236021	7.39555	0.236021
	Tajikistan	TJK	102.416	NA	NA	NA	NA	NA	NA	NA	NA	NA	NA	NA	NA	NA	NA	NA	NA
	Thailand	THA	1873.12	0.517335	0.0469235	0.292668	0.00326494	0.329332	0.00649872	0.929986	0.107335	3.07712	0.296054	3.07712	0.185648	2.22255	0.185648	5.25618	0.185648
	Timor-Leste	TLS	1.42204	NA	NA	NA	NA	NA	NA	NA	NA	NA	NA	NA	NA	NA	NA	NA	NA
	Togo	TGO	18.0449	0.196964	0.0166849	0.111621	0.00111928	0.124759	0.00222875	0.354502	0.045805	1.71641	0.156517	1.71641	0.0981236	1.23794	0.0981236	2.93293	0.0981236
	Tonga	TON	1.12491	NA	NA	NA	NA	NA	NA	NA	NA	NA	NA	NA	NA	NA	NA	NA	NA
	Trinidad and Tobago	TTO	355.12	2.60475	0.206156	1.47854	0.0129278	1.64162	0.0257683	4.69397	0.534753	18.3368	1.56061	18.3368	0.965939	13.1991	0.965939	31.3554	0.965939
	Tunisia	TUN	230.17	0.550121	0.0439879	0.312157	0.00275585	0.347047	0.00549765	0.991131	0.111283	3.82352	0.325003	3.82352	0.200878	2.75288	0.200878	6.53781	0.200878
	Turkey	TUR	2694.62	0.321702	0.0262799	0.182359	0.00176091	0.203588	0.003507	0.579143	0.0626101	2.21806	0.197089	2.21806	0.123299	1.59915	0.123299	3.79085	0.123299
	Turkmenistan	TKM	676.904	1.40587	0.10389	0.800577	0.00530909	0.877405	0.0106348	2.53955	0.277692	8.69797	0.650613	8.69797	0.391855	6.23661	0.391855	14.8919	0.391855
	Turks and Caicos Islands	TCA	0.955873	NA	NA	NA	NA	NA	NA	NA	NA	NA	NA	NA	NA	NA	NA	NA	NA
	Tuvalu	TUV	0.0721332	NA	NA	NA	NA	NA	NA	NA	NA	NA	NA	NA	NA	NA	NA	NA	NA
	Uganda	UGA	25.8576	0.131869	0.0107057	0.0748342	0.000735654	0.083204	0.00146155	0.237562	0.0279912	0.945561	0.0872182	0.945561	0.0554401	0.681795	0.0554401	1.61579	0.0554401
	Ukraine	UKR	7453.91	NA	NA	NA	NA	NA	NA	NA	NA	NA	NA	NA	NA	NA	NA	NA	NA
	United Arab Emirates	ARE	1222.14	0.338966	0.0303008	0.191799	0.00217312	0.215701	0.00431737	0.609384	0.0676968	2.49593	0.242302	2.49593	0.153373	1.80315	0.153373	4.2628	0.153373
	United Kingdom	GBR	10590.9	0.470728	0.0360104	0.269137	0.00128095	0.290203	0.00259423	0.852818	0.106682	3.10834	0.213288	3.10834	0.119688	2.21493	0.119688	5.33194	0.119688
	Tanzania	TZA	58.5437	0.164344	0.0136051	0.0932032	0.000941895	0.103882	0.00187078	0.29594	0.0331797	1.10997	0.102747	1.10997	0.065211	0.800591	0.065211	1.89665	0.065211
	USA	USA	86100.8	0.628205	0.0456256	0.358401	0.00198807	0.389834	0.00400388	1.13635	0.135122	4.27039	0.298725	4.27039	0.174043	3.05303	0.174043	7.31805	0.174043
	Uruguay	URY	97.3766	0.232932	0.0173254	0.132969	0.000718996	0.144308	0.00144714	0.421505	0.0594244	1.68227	0.117661	1.68227	0.068401	1.20225	0.068401	2.88302	0.068401
	Uzbekistan	UZB	1682.16	1.74058	0.129851	0.992285	0.00588893	1.08253	0.0118627	3.14683	0.432277	13.6525	0.988518	13.6525	0.577187	9.76703	0.577187	23.392	0.577187
	Vanuatu	VUT	1.18969	NA	NA	NA	NA	NA	NA	NA	NA	NA	NA	NA	NA	NA	NA	NA	NA
	Venezuela	VEN	2002.96	8.16488	0.593545	4.65021	0.0301075	5.09398	0.0604196	14.75	1.99761	68.3093	5.09886	68.3093	3.04793	48.9426	3.04793	116.974	3.04793
	Viet Nam	VNM	880.416	0.797961	0.071993	0.45141	0.00551625	0.508228	0.0109455	1.43421	0.158714	4.70239	0.483107	4.70239	0.309977	3.40105	0.309977	8.02807	0.309977
	Wallis and Futuna Islands	WLF	0.124311	NA	NA	NA	NA	NA	NA	NA	NA	NA	NA	NA	NA	NA	NA	NA	NA
	Yemen	YEM	167.64	0.361325	0.028621	0.205275	0.00172706	0.227152	0.00344623	0.651526	0.101707	3.42559	0.291781	3.42559	0.17889	2.46313	0.17889	5.85945	0.17889
	Zambia	ZMB	62.7265	0.598009	0.0477792	0.341978	0.00169342	0.368477	0.00342112	1.08354	0.178223	2.99364	0.212892	2.99364	0.120936	2.13438	0.120936	5.13424	0.120936
	Zimbabwe	ZWE	181.668	1.1817	0.0888593	0.674069	0.00389803	0.733579	0.00786917	2.1374	0.290213	8.10669	0.592704	8.10669	0.342959	5.79398	0.342959	13.8942	0.342959

## Sheet: CountryData_woLinks
			Cumulative	Disinvestment Share (percent)								Cumulative Wealth Borrowing
			CO2 emissions	SDR:calibrated								SDR:expert-based
			1950--2018	All Impacts		Nordhaus		Weitzman		Howard&Sterner		All Impacts		Nordhaus		Weitzman		Howard&Sterner
	Country	ISO	MtC	Mean	Std	Mean	Std	Mean	Std	Mean	Std	Mean	Std	Mean	Std	Mean	Std	Mean	Std
	USA	USA	86100.8	0.628205	0.0456256	0.358401	0.00198807	0.389834	0.00400388	1.13635	0.135122	4.27039	0.298725	4.27039	0.174043	3.05303	0.174043	7.31805	0.174043
	China	CHN	56774.7	1.13022	0.0973649	0.639777	0.0071214	0.718319	0.0141436	2.03254	0.2163	6.09985	0.588182	6.09985	0.373455	4.40616	0.373455	10.4189	0.373455
	Russian Federation	RUS	28795.6	NA	NA	NA	NA	NA	NA	NA	NA	NA	NA	NA	NA	NA	NA	NA	NA
	Germany	DEU	17085.1	0.357586	0.0270491	0.204349	0.00100564	0.220774	0.00203577	0.647615	0.0830116	2.53283	0.17474	2.53283	0.0986474	1.80597	0.0986474	4.34393	0.0986474
	Japan	JPN	16229.3	0.351084	0.0267766	0.199911	0.00130871	0.219119	0.00263019	0.634205	0.0735437	2.24411	0.168666	2.24411	0.0997923	1.60789	0.0997923	3.8433	0.0997923
	India	IND	12946.8	0.727488	0.0612381	0.411937	0.00448278	0.461947	0.0089067	1.30855	0.13607	4.40411	0.418765	4.40411	0.266315	3.1807	0.266315	7.52265	0.266315
	United Kingdom	GBR	10590.9	0.470728	0.0360104	0.269137	0.00128095	0.290203	0.00259423	0.852818	0.106682	3.10834	0.213288	3.10834	0.119688	2.21493	0.119688	5.33194	0.119688
	Canada	CAN	7692.4	0.591695	0.043047	0.337225	0.00203785	0.368323	0.00409555	1.0695	0.124448	4.07893	0.293614	4.07893	0.173453	2.92026	0.173453	6.98696	0.173453
	Ukraine	UKR	7453.91	NA	NA	NA	NA	NA	NA	NA	NA	NA	NA	NA	NA	NA	NA	NA	NA
	France	FRA	7161.54	0.290189	0.021892	0.165757	0.000845629	0.179406	0.00171022	0.525387	0.0623902	1.90316	0.132492	1.90316	0.0752869	1.35784	0.0752869	3.26351	0.0752869
	Italy	ITA	6111.62	0.227099	0.0172871	0.129415	0.000798131	0.1414	0.00160738	0.410471	0.0481508	1.61116	0.11916	1.61116	0.0696704	1.15298	0.0696704	2.76034	0.0696704
	Poland	POL	5945.58	1.18574	0.0896296	0.676871	0.00363926	0.734439	0.00735655	2.14583	0.256578	7.9374	0.563143	7.9374	0.322093	5.6673	0.322093	13.6082	0.322093
	South Africa	ZAF	5134.24	1.02015	0.0753832	0.580477	0.00404125	0.638201	0.00809542	1.84173	0.22591	7.97212	0.607163	7.97212	0.365918	5.72013	0.365918	13.6459	0.365918
	Mexico	MEX	4941.29	0.414491	0.0319907	0.235595	0.00179055	0.260123	0.00358411	0.747733	0.0835722	2.90724	0.231182	2.90724	0.140016	2.08824	0.140016	4.97492	0.140016
	Iran	IRN	4515.57	0.38202	0.0312998	0.216541	0.00212249	0.241829	0.00422481	0.68767	0.0887582	3.31564	0.29733	3.31564	0.186561	2.39109	0.186561	5.66581	0.186561
	Australia	AUS	4499.37	0.432725	0.0317987	0.246244	0.0016999	0.270643	0.00340524	0.781263	0.0952256	3.29245	0.249409	3.29245	0.150315	2.3622	0.150315	5.63591	0.150315
	South Korea	KOR	4489.23	0.638187	0.0550337	0.3615	0.00362425	0.404647	0.00722445	1.14839	0.130745	3.41787	0.310494	3.41787	0.193046	2.46484	0.193046	5.84148	0.193046
	Brazil	BRA	3936.69	0.25402	0.0195491	0.14427	0.00118615	0.159816	0.00236721	0.457961	0.0510035	1.76206	0.144491	1.76206	0.0890716	1.26747	0.0890716	3.01376	0.0890716
	Saudi Arabia	SAU	3876.08	0.341261	0.0294521	0.193306	0.00197245	0.216427	0.0039271	0.614034	0.079154	2.42369	0.222105	2.42369	0.138964	1.74842	0.138964	4.14151	0.138964
	Spain	ESP	3618.32	0.278513	0.0211587	0.158503	0.00109006	0.174113	0.00218787	0.502908	0.0555731	1.82502	0.139975	1.82502	0.0834664	1.30857	0.0834664	3.12486	0.0834664
	Indonesia	IDN	3358.97	0.521602	0.0442838	0.295401	0.00308267	0.330991	0.00613397	0.938393	0.100163	2.95517	0.274128	2.95517	0.172429	2.13275	0.172429	5.04921	0.172429
	Kazakhstan	KAZ	3357.49	NA	NA	NA	NA	NA	NA	NA	NA	NA	NA	NA	NA	NA	NA	NA	NA
	Turkey	TUR	2694.62	0.321702	0.0262799	0.182359	0.00176091	0.203588	0.003507	0.579143	0.0626101	2.21806	0.197089	2.21806	0.123299	1.59915	0.123299	3.79085	0.123299
	Netherlands	NLD	2633.16	0.327726	0.0242869	0.186937	0.00105888	0.203484	0.00213407	0.59274	0.072678	2.35205	0.16715	2.35205	0.0971278	1.68162	0.0971278	4.03064	0.0971278
	Czech Republic	CZE	2478.69	NA	NA	NA	NA	NA	NA	NA	NA	NA	NA	NA	NA	NA	NA	NA	NA
	Taiwan	TWN	2211.66	0.782058	0.06551	0.443349	0.00418334	0.494676	0.00834616	1.40812	0.15644	4.32589	0.382004	4.32589	0.236021	3.11681	0.236021	7.39555	0.236021
	Belgium	BEL	2110.83	0.438864	0.0328582	0.250729	0.0012547	0.271177	0.00253668	0.794663	0.0953355	2.86087	0.196892	2.86087	0.111915	2.04092	0.111915	4.90584	0.111915
	Romania	ROU	2108.27	0.888243	0.072778	0.507252	0.00280766	0.549369	0.00569747	1.60806	0.190313	5.25646	0.398887	5.25646	0.22414	3.74789	0.22414	9.0167	0.22414
	Argentina	ARG	2069.92	0.385541	0.0279764	0.21954	0.00143978	0.240657	0.00288457	0.696406	0.0849618	2.88171	0.213234	2.88171	0.128158	2.06617	0.128158	4.9337	0.128158
	Venezuela	VEN	2002.96	8.16488	NA	NA	NA	NA	NA	NA	NA	NA	NA	NA	NA	NA	NA	NA	NA
	Thailand	THA	1873.12	0.517335	0.0469235	0.292668	0.00326494	0.329332	0.00649872	0.929986	0.107335	3.07712	0.296054	3.07712	0.185648	2.22255	0.185648	5.25618	0.185648
	Uzbekistan	UZB	1682.16	1.74058	0.129851	0.992285	0.00588893	1.08253	0.0118627	3.14683	0.432277	13.6525	0.988518	13.6525	0.577187	9.76703	0.577187	23.392	0.577187
	Egypt	EGY	1591.57	1.46906	0.118859	0.832776	0.00807452	0.929495	0.0160727	2.64485	0.292246	7.62788	0.680469	7.62788	0.426758	5.49991	0.426758	13.0368	0.426758
	Malaysia	MYS	1465.1	0.653478	0.0600485	0.369492	0.00432931	0.416693	0.00860763	1.17422	0.129672	3.92489	0.387339	3.92489	0.244552	2.83703	0.244552	6.70248	0.244552
	North Korea	PRK	1324.35	NA	NA	NA	NA	NA	NA	NA	NA	NA	NA	NA	NA	NA	NA	NA	NA
	Pakistan	PAK	1275.33	0.772787	0.0641245	0.437861	0.00442586	0.489728	0.00881161	1.39074	0.146868	4.96078	0.452493	4.96078	0.284602	3.57884	0.284602	8.47664	0.284602
	Belarus	BLR	1247.14	8.09503	0.943594	4.62015	0.0560378	5.01387	0.108094	14.6509	2.50841	10.0723	1.0836	10.0723	0.656868	7.27042	0.656868	17.2113	0.656868
	United Arab Emirates	ARE	1222.14	0.338966	0.0303008	0.191799	0.00217312	0.215701	0.00431737	0.609384	0.0676968	2.49593	0.242302	2.49593	0.153373	1.80315	0.153373	4.2628	0.153373
	Algeria	DZA	1164.44	0.244349	0.0200496	0.138669	0.00120977	0.154093	0.00241661	0.440274	0.0546374	1.96188	0.166622	1.96188	0.102451	1.41206	0.102451	3.35488	0.102451
	Hungary	HUN	1136.94	0.563715	0.0434693	0.322059	0.00164485	0.348273	0.00333322	1.02078	0.123991	3.72779	0.264658	3.72779	0.149132	2.65789	0.149132	6.39389	0.149132
	Iraq	IRQ	1117.1	0.942427	0.076374	0.534445	0.00515672	0.595682	0.0102637	1.69711	0.208138	6.04629	0.540338	6.04629	0.340329	4.35867	0.340329	10.3338	0.340329
	Sweden	SWE	1091.22	0.220593	0.0172835	0.126095	0.000622035	0.136075	0.00126119	0.399595	0.0502538	1.50156	0.106136	1.50156	0.0593925	1.06996	0.0593925	2.57585	0.0593925
	Greece	GRC	1063.75	0.267234	0.0213153	0.15191	0.00115782	0.167638	0.00232191	0.482139	0.0600523	2.01065	0.162714	2.01065	0.0975049	1.44335	0.0975049	3.44141	0.0975049
	Austria	AUT	1015.38	0.288393	0.0210373	0.164465	0.000944697	0.179179	0.00190121	0.521521	0.0581141	1.81897	0.128907	1.81897	0.0754643	1.3011	0.0754643	3.11671	0.0754643
	Nigeria	NGA	997.573	0.0897255	0.0074482	0.050958	0.000432227	0.0564599	0.000863287	0.161754	0.0212299	0.811161	0.0688678	0.811161	0.0422351	0.583486	0.0422351	1.38729	0.0422351
	Bulgaria	BGR	992.608	1.85897	0.150724	1.06128	0.00590022	1.15096	0.0119559	3.36456	0.408534	12.1251	0.904935	12.1251	0.511554	8.65154	0.511554	20.7935	0.511554
	Denmark	DNK	914.726	0.342086	0.0259074	0.195353	0.00102379	0.211635	0.00207116	0.619252	0.0742392	2.27937	0.161193	2.27937	0.0916759	1.62634	0.0916759	3.90871	0.0916759
	Viet Nam	VNM	880.416	0.797961	0.071993	0.45141	0.00551625	0.508228	0.0109455	1.43421	0.158714	4.70239	0.483107	4.70239	0.309977	3.40105	0.309977	8.02807	0.309977
	Colombia	COL	865.42	0.269726	0.0199783	0.153486	0.00106971	0.168707	0.00214203	0.48697	0.0573667	1.9654	0.149652	1.9654	0.0904878	1.41029	0.0904878	3.36415	0.0904878
	Philippines	PHL	848.071	0.285617	0.0220844	0.162184	0.00137657	0.179818	0.00274594	0.514835	0.0585179	2.11635	0.176572	2.11635	0.109657	1.52307	0.109657	3.61903	0.109657
	Slovakia	SVK	818.462	1.09303	0.0833473	0.624473	0.00316414	0.675272	0.00640971	1.97928	0.234175	6.90519	0.485881	6.90519	0.274222	4.92369	0.274222	11.8436	0.274222
	Finland	FIN	816.65	0.284594	0.0217105	0.162188	0.000998686	0.177171	0.00201149	0.514408	0.0627822	2.12363	0.157272	2.12363	0.0918847	1.51962	0.0918847	3.63839	0.0918847
	Kuwait	CUW	743.645	0.62766	0.0504877	0.356287	0.00316833	0.395564	0.00631018	1.1311	0.127621	4.26762	0.366179	4.26762	0.227542	3.07312	0.227542	7.29642	0.227542
	Serbia	SRB	702.658	NA	NA	NA	NA	NA	NA	NA	NA	NA	NA	NA	NA	NA	NA	NA	NA
	Chile	CHL	694.038	0.575767	0.0428245	0.327292	0.00256061	0.361301	0.00510723	1.03868	0.1112	3.31327	0.265878	3.31327	0.163987	2.38195	0.163987	5.66795	0.163987
	Switzerland	CHE	679.812	0.0733748	0.00549235	0.0418626	0.00023356	0.0455271	0.000471096	0.132731	0.0168192	0.549541	0.0390273	0.549541	0.0225628	0.392744	0.0225628	0.941845	0.0225628
	Turkmenistan	TKM	676.904	1.40587	0.10389	0.800577	0.00530909	0.877405	0.0106348	2.53955	0.277692	8.69797	0.650613	8.69797	0.391855	6.23661	0.391855	14.8919	0.391855
	Portugal	PRT	632.712	0.25409	0.0197078	0.144451	0.00109049	0.159356	0.00218588	0.458449	0.0503402	1.72333	0.13819	1.72333	0.0831733	1.23728	0.0831733	2.9495	0.0831733
	Azerbaijan	AZE	622.789	NA	NA	NA	NA	NA	NA	NA	NA	NA	NA	NA	NA	NA	NA	NA	NA
	Israel	ISR	620.377	0.40026	0.0312703	0.227308	0.0018694	0.251868	0.00373539	0.721584	0.0790979	2.75558	0.227384	2.75558	0.139124	1.98166	0.139124	4.71359	0.139124
	Norway	NOR	585.992	0.160661	0.0118157	0.0915353	0.000569612	0.10011	0.0011444	0.290327	0.0356384	1.21391	0.0885751	1.21391	0.0524364	0.869409	0.0524364	2.07909	0.0524364
	Singapore	ATG	566.094	0.358559	0.0298215	0.203763	0.0016037	0.225087	0.00321587	0.646812	0.0726697	1.85227	0.153392	1.85227	0.0919513	1.3299	0.0919513	3.17046	0.0919513
	Libya	LBY	540.033	NA	NA	NA	NA	NA	NA	NA	NA	NA	NA	NA	NA	NA	NA	NA	NA
	Qatar	NA	526.715	0.940559	0.0851409	0.531871	0.00643852	0.599606	0.0127808	1.69017	0.202057	4.61863	0.4667	4.61863	0.298183	3.34001	0.298183	7.88605	0.298183
	Ireland	IRL	526.069	0.39677	0.0290026	0.225962	0.00145861	0.247521	0.00292796	0.716807	0.0762283	2.27437	0.168552	2.27437	0.100357	1.62969	0.100357	3.8951	0.100357
	Syria	SYR	488.926	NA	NA	NA	NA	NA	NA	NA	NA	NA	NA	NA	NA	NA	NA	NA	NA
	Morocco	MAR	445.904	0.563565	0.0452186	0.319582	0.00299563	0.356216	0.00596643	1.01487	0.109022	3.26353	0.285757	3.26353	0.178443	2.35191	0.178443	5.57867	0.178443
	Peru	PER	443.532	0.336087	0.0253795	0.191132	0.00143027	0.210612	0.00285704	0.606499	0.0683163	2.27188	0.179082	2.27188	0.109599	1.63187	0.109599	3.88749	0.109599
	Cuba	CUB	432.911	NA	NA	NA	NA	NA	NA	NA	NA	NA	NA	NA	NA	NA	NA	NA	NA
	New Zealand	NZL	427.592	0.281717	0.0203441	0.160437	0.0010393	0.175789	0.00208388	0.508909	0.0651051	2.21874	0.163618	2.21874	0.0979698	1.59045	0.0979698	3.79894	0.0979698
	Hong Kong	HKG	422.159	0.37097	0.029858	0.210626	0.00174637	0.233548	0.00349326	0.668719	0.0710042	2.06778	0.171823	2.06778	0.104619	1.48688	0.104619	3.53742	0.104619
	Estonia	EST	381.615	NA	NA	NA	NA	NA	NA	NA	NA	NA	NA	NA	NA	NA	NA	NA	NA
	Bangladesh	BGD	372.094	0.282764	0.0260672	0.159817	0.00199983	0.180564	0.00397002	0.507898	0.0599865	1.84115	0.188877	1.84115	0.120903	1.33218	0.120903	3.14293	0.120903
	Trinidad and Tobago	TTO	355.12	2.60475	0.206156	1.47854	0.0129278	1.64162	0.0257683	4.69397	0.534753	18.3368	1.56061	18.3368	0.965939	13.1991	0.965939	31.3554	0.965939
	Lithuania	LTU	349.79	0.591827	0.0481063	0.338179	0.00180248	0.365428	0.00366016	1.07184	0.143577	4.33565	0.326529	4.33565	0.182633	3.08929	0.182633	7.43815	0.182633
	Oman	NA	310.168	0.588462	0.0575731	0.332266	0.00445413	0.37688	0.00883819	1.05622	0.129206	3.71083	0.39585	3.71083	0.253519	2.68728	0.253519	6.33269	0.253519
	Ecuador	ECU	303.603	0.247294	0.0204989	0.140261	0.0012871	0.156221	0.00256732	0.445386	0.0517936	1.97029	0.171403	1.97029	0.106088	1.41919	0.106088	3.36842	0.106088
	Croatia	HRV	280.055	0.220598	0.0167289	0.125673	0.000794573	0.137485	0.00159865	0.398622	0.0543144	1.8364	0.136733	1.8364	0.0803852	1.31489	0.0803852	3.14558	0.0803852
	Georgia	GEO	258.401	NA	1.32475	5.05571	0.0706653	5.43743	0.135953	16.0224	2.96498	5.70491	0.737708	5.70491	0.438974	4.11676	0.438974	9.74907	0.438974
	Moldova	MDA	239.751	NA	NA	NA	NA	NA	NA	NA	NA	NA	NA	NA	NA	NA	NA	NA	NA
	Tunisia	TUN	230.17	0.550121	0.0439879	0.312157	0.00275585	0.347047	0.00549765	0.991131	0.111283	3.82352	0.325003	3.82352	0.200878	2.75288	0.200878	6.53781	0.200878
	Bosnia and Herzegovina	BIH	229.575	1.90988	0.154646	1.08743	0.00746838	1.1923	0.0149982	3.44983	0.365684	11.2221	0.879233	11.2221	0.5217	8.0433	0.5217	19.2175	0.5217
	Bahrain	BHR	221.394	0.455407	0.0377288	0.258151	0.00249957	0.288204	0.00497814	0.819845	0.0952238	3.35616	0.29942	3.35616	0.186971	2.41954	0.186971	5.73599	0.186971
	Slovenia	SVN	216.467	0.471522	0.0356555	0.268604	0.00169966	0.293912	0.00341963	0.852024	0.0985691	3.2112	0.238685	3.2112	0.140402	2.29935	0.140402	5.50071	0.140402
	Luxembourg	LUX	200.891	0.65967	0.0506463	0.377074	0.00183324	0.406968	0.00370868	1.19493	0.13808	3.75764	0.259199	3.75764	0.146235	2.67899	0.146235	6.44489	0.146235
	Kyrgyzstan	KGZ	199.806	NA	NA	NA	NA	NA	NA	NA	NA	NA	NA	NA	NA	NA	NA	NA	NA
	Dominican Republic	DOM	190.89	0.336861	0.0276596	0.191066	0.00173696	0.212772	0.00346717	0.606729	0.114316	2.38713	0.206827	2.38713	0.127637	1.71916	0.127637	4.08145	0.127637
	Latvia	LVA	190.789	0.52019	0.0421798	0.297201	0.00158554	0.321324	0.00321892	0.942016	0.114421	3.32964	0.249667	3.32964	0.139877	2.37296	0.139877	5.71198	0.139877
	Lebanon	LBN	185.689	0.217912	0.0168421	0.123701	0.00107886	0.137329	0.00215035	0.392694	0.0491907	1.77034	0.149701	1.77034	0.093213	1.27464	0.093213	3.02681	0.093213
	Angola	AGO	183.665	0.0979837	0.00904537	0.0554062	0.000696274	0.0624939	0.00138103	0.176046	0.0204037	0.835814	0.0871416	0.835814	0.0558135	0.604699	0.0558135	1.42666	0.0558135
	Zimbabwe	ZWE	181.668	1.1817	0.0888593	0.674069	0.00389803	0.733579	0.00786917	2.1374	0.290213	8.10669	0.592704	8.10669	0.342959	5.79398	0.342959	13.8942	0.342959
	Jordan	JOR	177.128	0.4326	0.0371852	0.245043	0.00247278	0.274335	0.00492672	0.778403	0.0909396	2.7264	0.248315	2.7264	0.154741	1.96649	0.154741	4.6592	0.154741
	Mongolia	MNG	171.162	0.960519	0.0857327	0.544147	0.006478	0.609175	0.0128701	1.72819	0.201599	7.77628	0.809635	7.77628	0.521489	5.61619	0.521489	13.2811	0.521489
	Armenia	ARM	170.807	NA	NA	NA	NA	NA	NA	NA	NA	NA	NA	NA	NA	NA	NA	NA	NA
	Yemen	YEM	167.64	0.361325	0.028621	0.205275	0.00172706	0.227152	0.00344623	0.651526	0.101707	3.42559	0.291781	3.42559	0.17889	2.46313	0.17889	5.85945	0.17889
	North Macedonia	MKD	155.924	5.55062	0.642376	3.16404	0.0377395	3.4507	0.073348	10.037	1.5845	8.64933	0.930863	8.64933	0.561112	6.23829	0.561112	14.7844	0.561112
	Bolivia	BOL	142.386	0.365701	0.0282482	0.20781	0.00173444	0.229793	0.00345526	0.659477	0.0875051	3.11087	0.260653	3.11087	0.162499	2.2388	0.162499	5.31905	0.162499
	Myanmar	MMR	132.589	0.65544	0.050037	0.37225	0.00326122	0.412389	0.00649332	1.18166	0.145745	2.84065	0.243161	2.84065	0.153034	2.04491	0.153034	4.85754	0.153034
	Sri Lanka	LKA	125.075	0.203344	0.0156766	0.115404	0.00107033	0.128244	0.00212887	0.366375	0.0381608	1.18214	0.103943	1.18214	0.065687	0.851919	0.065687	2.02055	0.065687
	Jamaica	JAM	119.34	0.462374	0.0360774	0.263327	0.00172921	0.288448	0.0034777	0.83532	0.110121	3.75863	0.286355	3.75863	0.168706	2.69231	0.168706	6.43744	0.168706
	Kenya	KEN	117.842	0.230276	0.0171262	0.130897	0.00103052	0.144526	0.00205585	0.415392	0.0518343	1.71205	0.137939	1.71205	0.0853896	1.23091	0.0853896	2.92852	0.0853896
	Curaçao	CUW	114.21	NA	NA	NA	NA	NA	NA	NA	NA	NA	NA	NA	NA	NA	NA	NA	NA
	Guatemala	GTM	110.064	0.265847	0.0209236	0.150834	0.00137501	0.167794	0.0027399	0.478899	0.0545854	1.9622	0.169845	1.9622	0.106155	1.41362	0.106155	3.35427	0.106155
	Sudan	SDN	108.944	0.265006	0.0221142	0.150237	0.001549	0.167701	0.00307795	0.477068	0.0544869	1.96988	0.184387	1.96988	0.11711	1.42134	0.11711	3.36553	0.11711
	Tajikistan	TJK	102.416	NA	NA	NA	NA	NA	NA	NA	NA	NA	NA	NA	NA	NA	NA	NA	NA
	Uruguay	URY	97.3766	0.232932	0.0173254	0.132969	0.000718996	0.144308	0.00144714	0.421505	0.0594244	1.68227	0.117661	1.68227	0.068401	1.20225	0.068401	2.88302	0.068401
	Ghana	GHA	91.7778	0.0884568	0.00689558	0.0501889	0.000472582	0.0558395	0.000939604	0.159337	0.0219483	0.769549	0.068004	0.769549	0.042914	0.554677	0.042914	1.31517	0.042914
	Côte d'Ivoire	CIV	86.1474	0.419421	0.034485	0.238286	0.00193087	0.263594	0.00386496	0.75636	0.0931273	3.07528	0.255079	3.07528	0.15524	2.21035	0.15524	5.26138	0.15524
	Brunei Darussalam	BRN	83.6593	0.386112	0.0354566	0.219719	0.00165998	0.241471	0.00333309	0.697127	0.0816281	2.58204	0.21806	2.58204	0.129229	1.85238	0.129229	4.42009	0.129229
	Panama	PAN	78.6668	0.265107	0.0203849	0.150529	0.00130241	0.166933	0.00259406	0.477847	0.0516239	1.54407	0.130314	1.54407	0.0813654	1.11156	0.0813654	2.64025	0.0813654
	Cyprus	CYP	76.2586	0.269032	0.0211262	0.152817	0.00123248	0.169182	0.00246525	0.485084	0.0583577	2.14838	0.17617	2.14838	0.1072	1.54435	0.1072	3.67535	0.1072
	Albania	ALB	73.6216	0.313255	0.0264403	0.178718	0.00108778	0.194367	0.00219954	0.566661	0.0776591	2.41495	0.189271	2.41495	0.108281	1.7255	0.108281	4.1394	0.108281
	Gabon	GAB	68.1466	0.489733	0.0434696	0.278843	0.00193023	0.305664	0.00389372	0.884666	0.119933	3.28813	0.266506	3.28813	0.154597	2.35473	0.154597	5.63257	0.154597
	Honduras	HND	65.1765	0.351458	0.0287117	0.199198	0.00198559	0.222538	0.00395003	0.632621	0.06866	2.45318	0.222701	2.45318	0.140049	1.76952	0.140049	4.19193	0.140049
	Costa Rica	CRI	65.0365	0.311084	0.0248436	0.176508	0.00156886	0.196281	0.00312945	0.560449	0.0581407	1.91477	0.16375	1.91477	0.101279	1.37868	0.101279	3.27405	0.101279
	Zambia	ZMB	62.7265	0.598009	0.0477792	0.341978	0.00169342	0.368477	0.00342112	1.08354	0.178223	2.99364	0.212892	2.99364	0.120936	2.13438	0.120936	5.13424	0.120936
	Ethiopia	ETH	62.219	0.28553	0.0248111	0.161636	0.00190038	0.181469	0.00377208	0.513473	0.0601058	1.57683	0.15862	1.57683	0.102126	1.13963	0.102126	2.69273	0.102126
	Senegal	SEN	60.3411	0.383172	0.0303411	0.217473	0.00195786	0.24162	0.00389945	0.690401	0.120013	3.21523	0.277274	3.21523	0.17341	2.31561	0.17341	5.4968	0.17341
	El Salvador	SLV	59.6536	0.315472	0.0247558	0.179138	0.00149821	0.198589	0.00299251	0.568671	0.0662354	2.34991	0.196001	2.34991	0.120175	1.69035	0.120175	4.01922	0.120175
	Tanzania	TZA	58.5437	0.164344	0.0136051	0.0932032	0.000941895	0.103882	0.00187078	0.29594	0.0331797	1.10997	0.102747	1.10997	0.065211	0.800591	0.065211	1.89665	0.065211
	Cameroon	CMR	53.5329	0.119338	0.0109329	0.0677388	0.000622895	0.075215	0.00124534	0.215052	0.026586	1.01035	0.0917943	1.01035	0.056071	0.7272	0.056071	1.72767	0.056071
	Democratic Republic of the Congo	COD	49.683	0.0560789	0.00446038	0.0320695	0.000158925	0.0345517	0.000322073	0.101612	0.0150591	0.436763	0.0315537	0.436763	0.0176759	0.31112	0.0176759	0.749252	0.0176759
	Afghanistan	AFG	46.5723	NA	NA	NA	NA	NA	NA	NA	NA	NA	NA	NA	NA	NA	NA	NA	NA
	Nicaragua	NIC	45.2921	0.161784	0.012484	0.0919431	0.000728867	0.101599	0.00145541	0.291802	0.0371996	1.3145	0.106505	1.3145	0.065271	0.945	0.065271	2.24857	0.065271
	Mozambique	MOZ	44.7115	0.700533	0.0562085	0.399462	0.0028204	0.435518	0.00563398	1.26659	0.135446	3.41004	0.281128	3.41004	0.172347	2.44423	0.172347	5.83837	0.172347
	Bahamas	BHS	44.2122	0.655108	0.0725121	0.374246	0.00250724	0.404762	0.00510116	1.18628	0.144021	3.82358	0.364097	3.82358	0.200518	2.7251	0.200518	6.55972	0.200518
	Paraguay	PRY	44.0318	0.133029	0.0110479	0.0753977	0.000740864	0.0842205	0.00147628	0.239462	0.0271267	0.920786	0.0828529	0.920786	0.0518838	0.663958	0.0518838	1.57361	0.0518838
	Papua New Guinea	PNG	42.8011	NA	NA	NA	NA	NA	NA	NA	NA	NA	NA	NA	NA	NA	NA	NA	NA
	Iceland	ISL	39.7154	0.285289	0.0205195	0.162475	0.00105602	0.178008	0.00211516	0.515367	0.0609855	2.05265	0.151188	2.05265	0.0909694	1.47168	0.0909694	3.51428	0.0909694
	New Caledonia	NCL	38.765	NA	NA	NA	NA	NA	NA	NA	NA	NA	NA	NA	NA	NA	NA	NA	NA
	Botswana	BWA	37.1753	0.404153	0.0382576	0.22849	0.00267156	0.257762	0.00531794	0.726194	0.0825502	2.15735	0.212758	2.15735	0.133806	1.55909	0.133806	3.68453	0.133806
	Nepal	NPL	35.2222	0.13911	0.0142344	0.0785028	0.00117373	0.0892577	0.00232891	0.249564	0.0281231	0.923126	0.106616	0.923126	0.0692718	0.669286	0.0692718	1.57466	0.0692718
	Cambodia	KHM	34.8837	0.157626	0.0168654	0.0889259	0.00144346	0.10127	0.00286256	0.282675	0.0409166	1.60926	0.198613	1.60926	0.130043	1.16798	0.130043	2.74368	0.130043
	Equatorial Guinea	GNQ	34.2458	0.70787	0.0939584	0.398287	0.00711822	0.458118	0.0141323	1.26719	0.196334	3.70077	0.485322	3.70077	0.307433	2.68789	0.307433	6.30969	0.307433
	Laos	LAO	32.9809	0.299006	0.0498172	0.167986	0.00482252	0.194558	0.00956743	0.534463	0.057385	2.04727	0.39458	2.04727	0.264193	1.49373	0.264193	3.48396	0.264193
	Suriname	SUR	30.2008	0.469592	0.0364796	0.267543	0.00170088	0.292603	0.00342018	0.848604	0.101613	3.20743	0.240207	3.20743	0.14154	2.29691	0.14154	5.4939	0.14154
	Mauritius	MUS	29.4178	0.436916	0.0366678	0.24751	0.0025454	0.27705	0.00506522	0.786168	0.087015	2.83007	0.261277	2.83007	0.16416	2.04218	0.16416	4.83547	0.16416
	Benin	BEN	28.2698	0.471031	0.0474821	0.265817	0.00384707	0.302232	0.00762881	0.845023	0.100369	3.41752	0.384506	3.41752	0.248259	2.4775	0.248259	5.82976	0.248259
	Malta	MLT	27.6453	0.310185	0.0245629	0.176364	0.00133395	0.194458	0.00267602	0.559716	0.0829647	2.26232	0.183612	2.26232	0.109889	1.62358	0.109889	3.87257	0.109889
	Guyana	GUY	26.1349	NA	NA	NA	NA	NA	NA	NA	NA	NA	NA	NA	NA	NA	NA	NA	NA
	Uganda	UGA	25.8576	0.131869	0.0107057	0.0748342	0.000735654	0.083204	0.00146155	0.237562	0.0279912	0.945561	0.0872182	0.945561	0.0554401	0.681795	0.0554401	1.61579	0.0554401
	Montenegro	MNE	25.0344	0.178422	0.0140691	0.101553	0.000698455	0.111514	0.00140217	0.322187	0.0440465	1.57973	0.121821	1.57973	0.0724508	1.13265	0.0724508	2.7047	0.0724508
	Madagascar	MDG	24.372	0.13549	0.0102594	0.0770334	0.000610216	0.0849938	0.0012172	0.244436	0.0407262	1.27574	0.103828	1.27574	0.0644177	0.917167	0.0644177	2.18208	0.0644177
	Kosovo	NA	24.2058	NA	NA	NA	NA	NA	NA	NA	NA	NA	NA	NA	NA	NA	NA	NA	NA
	Guinea	GIN	21.3185	0.398436	0.030646	0.226432	0.00179263	0.250221	0.00357839	0.718634	0.091993	2.81454	0.227311	2.81454	0.14	2.02343	0.14	4.81475	0.14
	Haiti	HTI	19.8358	0.0840549	0.00662467	0.0476905	0.000442947	0.0530587	0.000881767	0.151411	0.0205906	0.723454	0.0634389	0.723454	0.0398261	0.521337	0.0398261	1.23651	0.0398261
	Congo	COG	19.6334	0.136263	0.0116591	0.0773517	0.000730909	0.0858763	0.00145599	0.245554	0.0356629	1.06917	0.0974164	1.06917	0.0609125	0.769975	0.0609125	1.82787	0.0609125
	Mauritania	MRT	18.8819	0.126575	0.0117987	0.0717764	0.000720835	0.0800182	0.00143943	0.227925	0.0294321	1.08778	0.102945	1.08778	0.0637208	0.783943	0.0637208	1.85929	0.0637208
	Namibia	NAM	18.6111	0.132418	0.0149131	0.0746192	0.00112503	0.0853199	0.00223495	0.237308	0.0273476	1.15767	0.132351	1.15767	0.0842115	0.839646	0.0842115	1.97451	0.0842115
	Togo	TGO	18.0449	0.196964	0.0166849	0.111621	0.00111928	0.124759	0.00222875	0.354502	0.045805	1.71641	0.156517	1.71641	0.0981236	1.23794	0.0981236	2.93293	0.0981236
	Aruba	ABW	17.7642	1.06985	0.0906869	0.608374	0.00507875	0.670434	0.0101563	1.93071	0.210041	5.60417	0.498193	5.60417	0.30155	4.02323	0.30155	9.59212	0.30155
	Lesotho	LSO	15.894	0.71242	0.077696	0.402232	0.00521199	0.456238	0.0103902	1.27876	0.149825	5.32303	0.566511	5.32303	0.352184	3.85067	0.352184	9.0879	0.352184
	Burkina Faso	BFA	15.2448	0.176396	0.0165592	0.0996875	0.0013082	0.112697	0.00259523	0.316797	0.0396625	1.37258	0.145856	1.37258	0.0940929	0.993608	0.0940929	2.34252	0.0940929
	Macao	MAC	15.1479	0.127175	0.0108853	0.07211	0.000672428	0.0803903	0.00134386	0.229021	0.025103	0.719844	0.0636674	0.719844	0.039138	0.518424	0.039138	1.23084	0.039138
	Occupied Palestinian Territory	NA	14.6878	NA	NA	NA	NA	NA	NA	NA	NA	NA	NA	NA	NA	NA	NA	NA	NA
	Barbados	BRB	14.3334	0.664695	0.0510729	0.37791	0.00282862	0.41683	0.00566243	1.19931	0.154141	5.15562	0.408155	5.15562	0.246759	3.70209	0.246759	8.82312	0.246759
	Liberia	LBR	13.8068	0.238254	0.0226048	0.13601	0.000857775	0.147576	0.00173589	0.43116	0.0649861	1.90918	0.160454	1.90918	0.0909298	1.36352	0.0909298	3.27269	0.0909298
	Fiji	SYR	13.7213	0.208587	0.0158052	0.118621	0.000909251	0.130727	0.00181588	0.376402	0.0457173	1.47696	0.118416	1.47696	0.0729387	1.06118	0.0729387	2.52692	0.0729387
	Sint Maarten (Dutch part)	FRO	13.6065	NA	NA	NA	NA	NA	NA	NA	NA	NA	NA	NA	NA	NA	NA	NA	NA
	Mali	MLI	13.5495	0.395726	0.0360672	0.223798	0.0028403	0.25226	0.00563147	0.711104	0.0785335	2.23734	0.235182	2.23734	0.151689	1.61875	0.151689	3.81921	0.151689
	Malawi	MWI	12.1262	0.208869	0.0160649	0.118819	0.000851101	0.130753	0.00170463	0.377023	0.0471248	1.36269	0.10559	1.36269	0.0637914	0.978058	0.0637914	2.33239	0.0637914
	Niger	NER	11.7923	0.0720784	0.00620895	0.0408847	0.000396702	0.0455314	0.000790287	0.129815	0.0185581	0.693887	0.0632097	0.693887	0.0395168	0.500005	0.0395168	1.18602	0.0395168
	South Sudan	NA	9.66727	NA	NA	NA	NA	NA	NA	NA	NA	NA	NA	NA	NA	NA	NA	NA	NA
	Sierra Leone	SLE	9.61743	0.274053	0.0218429	0.156316	0.00095599	0.170217	0.00192126	0.49561	0.0915754	2.35177	0.177339	2.35177	0.104333	1.68289	0.104333	4.0287	0.104333
	Somalia	SOM	8.64522	NA	NA	NA	NA	NA	NA	NA	NA	NA	NA	NA	NA	NA	NA	NA	NA
	Faeroe Islands	FRO	7.97654	NA	NA	NA	NA	NA	NA	NA	NA	NA	NA	NA	NA	NA	NA	NA	NA
	Greenland	GRL	7.74466	NA	NA	NA	NA	NA	NA	NA	NA	NA	NA	NA	NA	NA	NA	NA	NA
	Bermuda	BMU	7.59311	NA	NA	NA	NA	NA	NA	NA	NA	NA	NA	NA	NA	NA	NA	NA	NA
	French Polynesia	PYF	7.36405	NA	NA	NA	NA	NA	NA	NA	NA	NA	NA	NA	NA	NA	NA	NA	NA
	Rwanda	NA	7.15847	0.337616	0.029314	0.191683	0.0016509	0.212577	0.00330431	0.608574	0.0730595	1.87358	0.161463	1.87358	0.0983604	1.34748	0.0983604	3.20509	0.0983604
	Chad	TCD	6.56142	0.0985088	0.00833749	0.0558231	0.000563979	0.0624039	0.00112279	0.177295	0.0216574	0.752965	0.0692423	0.752965	0.043328	0.543061	0.043328	1.28672	0.043328
	Bonaire, Saint Eustatius and Saba	NA	6.07875	NA	NA	NA	NA	NA	NA	NA	NA	NA	NA	NA	NA	NA	NA	NA	NA
	Maldives	MDV	5.76615	0.364416	0.040572	0.20523	0.0032954	0.235211	0.00653445	0.652795	0.0752294	2.05551	0.242982	2.05551	0.156759	1.49229	0.156759	3.50493	0.156759
	Antigua and Barbuda	NA	5.62698	NA	NA	NA	NA	NA	NA	NA	NA	NA	NA	NA	NA	NA	NA	NA	NA
	Djibouti	DJI	4.99593	0.410592	0.0323057	0.233526	0.00169433	0.257157	0.00339775	0.741075	0.087222	2.4805	0.195173	2.4805	0.116859	1.77981	0.116859	4.24649	0.116859
	Belize	BLZ	4.87309	0.544446	0.0424346	0.309211	0.00254151	0.342563	0.00507681	0.981537	0.117313	4.14407	0.340876	4.14407	0.209377	2.98056	0.209377	7.08816	0.209377
	Eritrea	ERI	4.39366	NA	NA	NA	NA	NA	NA	NA	NA	NA	NA	NA	NA	NA	NA	NA	NA
	Bhutan	BTN	4.2518	0.143064	0.0161468	0.0805825	0.00134591	0.0923127	0.00266992	0.256292	0.0267912	0.973368	0.119188	0.973368	0.0775203	0.7068	0.0775203	1.6595	0.0775203
	Andorra	AND	3.84069	NA	NA	NA	NA	NA	NA	NA	NA	NA	NA	NA	NA	NA	NA	NA	NA
	Gambia	GMB	3.53172	0.216047	0.0176249	0.122498	0.00116382	0.136631	0.00231816	0.389002	0.0475241	1.7288	0.152376	1.7288	0.0952422	1.24611	0.0952422	2.95482	0.0952422
	Cape Verde	PRK	3.31512	0.101747	0.00906158	0.0576138	0.000648009	0.0646197	0.0012875	0.183002	0.0205561	0.795009	0.0785066	0.795009	0.049688	0.574308	0.049688	1.35772	0.049688
	Central African Republic	CAF	3.19001	0.0505346	0.0039582	0.0287555	0.000201541	0.0316114	0.000404266	0.0912336	0.0130585	0.479629	0.0370921	0.479629	0.0221874	0.344074	0.0221874	0.821012	0.0221874
	Burundi	BDI	3.15151	0.0764562	0.00627777	0.0434079	0.000379239	0.048156	0.000757482	0.1378	0.0194806	0.689039	0.05916	0.689039	0.0365489	0.495824	0.0365489	1.17831	0.0365489
	Saint Lucia	LCA	3.13085	0.367348	0.0306326	0.208382	0.00187778	0.231934	0.0037522	0.661709	0.074337	2.57456	0.223637	2.57456	0.137096	1.85344	0.137096	4.40255	0.137096
	Solomon Islands	SLB	2.68746	NA	NA	NA	NA	NA	NA	NA	NA	NA	NA	NA	NA	NA	NA	NA	NA
	Guinea-Bissau	GNB	2.59323	0.100714	0.00790977	0.0572492	0.000437309	0.0632015	0.000875469	0.181686	0.0269317	0.954324	0.0762682	0.954324	0.0462402	0.685547	0.0462402	1.63285	0.0462402
	Grenada	GRD	2.07604	0.246578	0.0200989	0.139811	0.00132186	0.155924	0.00263412	0.443987	0.0507964	1.7888	0.157889	1.7888	0.098234	1.28917	0.098234	3.0576	0.098234
	Samoa	WSM	1.85411	NA	NA	NA	NA	NA	NA	NA	NA	NA	NA	NA	NA	NA	NA	NA	NA
	Saint Vincent and the Grenadines	VCT	1.80608	0.195973	0.0167511	0.111016	0.00113777	0.124281	0.00226585	0.352611	0.0495486	1.86218	0.172086	1.86218	0.107489	1.34344	0.107489	3.18181	0.107489
	Saint Kitts and Nevis	KNA	1.60796	NA	NA	NA	NA	NA	NA	NA	NA	NA	NA	NA	NA	NA	NA	NA	NA
	Liechtenstein	LIE	1.58978	NA	NA	NA	NA	NA	NA	NA	NA	NA	NA	NA	NA	NA	NA	NA	NA
	Palau	PLW	1.5708	NA	NA	NA	NA	NA	NA	NA	NA	NA	NA	NA	NA	NA	NA	NA	NA
	British Virgin Islands	NA	1.42337	NA	NA	NA	NA	NA	NA	NA	NA	NA	NA	NA	NA	NA	NA	NA	NA
	Timor-Leste	TLS	1.42204	NA	NA	NA	NA	NA	NA	NA	NA	NA	NA	NA	NA	NA	NA	NA	NA
	Nauru	NRU	1.28958	NA	NA	NA	NA	NA	NA	NA	NA	NA	NA	NA	NA	NA	NA	NA	NA
	Comoros	COM	1.23812	0.0479979	0.00400909	0.0271986	0.000275132	0.0304106	0.000547732	0.0863821	0.0102935	0.412937	0.0377389	0.412937	0.0237563	0.297891	0.0237563	0.705551	0.0237563
	Dominica	DMA	1.23231	0.285023	0.0235901	0.161538	0.00160073	0.180502	0.00318598	0.513014	0.0687197	2.59325	0.234657	2.59325	0.146828	1.87018	0.146828	4.43142	0.146828
	Vanuatu	VUT	1.18969	NA	NA	NA	NA	NA	NA	NA	NA	NA	NA	NA	NA	NA	NA	NA	NA
	Martinique	MTQ	1.14616	NA	NA	NA	NA	NA	NA	NA	NA	NA	NA	NA	NA	NA	NA	NA	NA
	Tonga	TON	1.12491	NA	NA	NA	NA	NA	NA	NA	NA	NA	NA	NA	NA	NA	NA	NA	NA
	Réunion	REU	1.01647	NA	NA	NA	NA	NA	NA	NA	NA	NA	NA	NA	NA	NA	NA	NA	NA
	Saint Pierre and Miquelon	SPM	0.999624	NA	NA	NA	NA	NA	NA	NA	NA	NA	NA	NA	NA	NA	NA	NA	NA
	Turks and Caicos Islands	TCA	0.955873	NA	NA	NA	NA	NA	NA	NA	NA	NA	NA	NA	NA	NA	NA	NA	NA
	Micronesia (Federated States of)	FSM	0.934731	NA	NA	NA	NA	NA	NA	NA	NA	NA	NA	NA	NA	NA	NA	NA	NA
	Anguilla	AIA	0.86316	0.375395	0.0415569	0.21169	0.0029986	0.241313	0.0059634	0.673165	0.0716997	2.79012	0.309231	2.79012	0.194652	2.02138	0.194652	4.76094	0.194652
	Marshall Islands	NA	0.851775	NA	NA	NA	NA	NA	NA	NA	NA	NA	NA	NA	NA	NA	NA	NA	NA
	Sao Tome and Principe	STP	0.843423	0.234645	0.0187629	0.133156	0.00119366	0.148018	0.00237885	0.42275	0.0558143	1.93398	0.166157	1.93398	0.103408	1.39278	0.103408	3.30643	0.103408
	Kiribati	KIR	0.537799	NA	NA	NA	NA	NA	NA	NA	NA	NA	NA	NA	NA	NA	NA	NA	NA
	Cook Islands	COK	0.523843	NA	NA	NA	NA	NA	NA	NA	NA	NA	NA	NA	NA	NA	NA	NA	NA
	French Guiana	GUF	0.231351	NA	NA	NA	NA	NA	NA	NA	NA	NA	NA	NA	NA	NA	NA	NA	NA
	Wallis and Futuna Islands	WLF	0.124311	NA	NA	NA	NA	NA	NA	NA	NA	NA	NA	NA	NA	NA	NA	NA	NA
	Saint Helena	NA	0.0960892	NA	NA	NA	NA	NA	NA	NA	NA	NA	NA	NA	NA	NA	NA	NA	NA
	Tuvalu	TUV	0.0721332	NA	NA	NA	NA	NA	NA	NA	NA	NA	NA	NA	NA	NA	NA	NA	NA
	Niue	NIU	0.0720888	NA	NA	NA	NA	NA	NA	NA	NA	NA	NA	NA	NA	NA	NA	NA	NA

## Sheet: Tabelle4
34429.4	(	818.824	)
21985.6	(	788.051	)
11560.4	(	279.213	)
6888.09	(	156.423	)
6451.09	(	167.504	)
5015.73	(	177.566	)
4276.03	(	95.9858	)
3063.39	(	76.0496	)
3015.91	(	73.4718	)
2882.27	(	66.4921	)
2438.65	(	61.551	)
2388.29	(	56.5282	)
2031.06	(	54.4632	)
1948.67	(	54.8441	)
1758.3	(	57.8964	)
1780.25	(	47.4812	)
1748.11	(	57.7531	)
1545.23	(	45.6693	)
1508.17	(	50.6049	)
1434.83	(	38.325	)
1304.5	(	44.5484	)
1338.67	(	33.6037	)
1049.99	(	34.1515	)
1053.23	(	25.38	)
999.989	(	23.2487	)
863.731	(	27.5475	)
849.499	(	19.3793	)
851.16	(	21.1585	)
820.536	(	21.3143	)
794.368	(	20.5829	)
725.757	(	25.6337	)
671.721	(	16.5744	)
619.853	(	20.2907	)
566.271	(	20.6614	)
535.581	(	14.474	)
495.886	(	16.6493	)
502.244	(	12.6961	)
473.295	(	17.0289	)
456.371	(	13.9366	)
458.69	(	10.6986	)
435.435	(	14.3405	)
440.921	(	10.1665	)
420.456	(	11.8984	)
405.443	(	9.81691	)
391.736	(	11.9262	)
399.801	(	9.83574	)
368.193	(	8.63568	)
339.492	(	13.1084	)
342.287	(	9.20674	)
332.328	(	10.0696	)
330.072	(	7.64237	)
325.932	(	8.23115	)
291.02	(	9.00071	)
280.466	(	7.07709	)
272.799	(	7.86247	)
272.279	(	6.52268	)
268.301	(	7.05989	)
249.852	(	7.04559	)
250.017	(	6.31149	)
243.696	(	7.19282	)
233.144	(	5.88008	)
223.625	(	6.48569	)
212.992	(	6.15465	)
203.227	(	7.6843	)
208.938	(	5.38325	)
192.847	(	5.81844	)
173.961	(	5.56443	)
174.858	(	4.92971	)
173.269	(	4.23814	)
169.611	(	4.37407	)
165.913	(	4.90684	)
153.913	(	3.7261	)
143.333	(	5.51377	)
139.086	(	4.2847	)
141.48	(	3.47385	)
119.179	(	4.77114	)
118.694	(	3.73826	)
111.559	(	2.85088	)
105.172	(	2.74351	)
97.725	(	2.69515	)
90.0977	(	2.76251	)
91.1671	(	2.47492	)
86.3011	(	2.81308	)
86.2106	(	2.20048	)
80.9729	(	1.83728	)
80.8778	(	2.15022	)
74.6534	(	2.3346	)
77.116	(	1.87913	)
72.6516	(	2.23736	)
70.781	(	2.76908	)
72.7456	(	1.79562	)
68.9415	(	2.28873	)
66.3241	(	2.60426	)
69.5101	(	1.81352	)
65.8643	(	2.01085	)
62.4799	(	1.60484	)
55.746	(	1.70306	)
51.875	(	1.6343	)
48.7657	(	1.58535	)
47.4827	(	1.24438	)
46.305	(	1.35016	)
46.245	(	1.21679	)
42.9817	(	1.36027	)
42.3386	(	1.47325	)
41.4963	(	1.05729	)
38.9692	(	0.924563	)
35.7804	(	1.16751	)
33.9142	(	1.00066	)
33.1278	(	0.968546	)
30.7891	(	0.948836	)
30.0004	(	0.87503	)
29.5292	(	0.772441	)
27.1535	(	0.745283	)
25.3531	(	0.847028	)
25.4471	(	0.787177	)
25.2599	(	0.594994	)
24.0474	(	0.91204	)
23.5911	(	0.744238	)
23.4132	(	0.700056	)
22.7843	(	0.780319	)
20.9816	(	0.680952	)
20.0895	(	0.47394	)
18.1525	(	0.671806	)
17.8193	(	0.512814	)
17.7183	(	0.523039	)
17.8815	(	0.546603	)
17.1499	(	0.565451	)
16.6939	(	0.541968	)
15.7413	(	0.407474	)
15.2774	(	0.442372	)
14.3791	(	0.522185	)
13.4794	(	0.592577	)
13.3026	(	0.630507	)
13.0317	(	0.634957	)
12.3611	(	0.937361	)
12.0237	(	0.309769	)
11.4285	(	0.387988	)
10.8232	(	0.460905	)
10.9328	(	0.310233	)
10.4161	(	0.261011	)
10.0661	(	0.345383	)
9.9326	(	0.266064	)
9.57944	(	0.282797	)
9.05403	(	0.594763	)
8.3814	(	0.243708	)
7.7396	(	0.24928	)
7.67911	(	0.255901	)
7.37037	(	0.252454	)
7.11633	(	0.303506	)
7.02518	(	0.235033	)
7.0142	(	0.220507	)
6.12877	(	0.237509	)
5.86428	(	0.23552	)
5.92424	(	0.188377	)
5.61797	(	0.238945	)
5.65806	(	0.158241	)
5.54552	(	0.154079	)
5.40408	(	0.155987	)
5.50316	(	0.144646	)
5.21941	(	0.207301	)
4.79285	(	0.131086	)
4.60503	(	0.153434	)
3.76303	(	0.127983	)
3.83551	(	0.0993303	)
3.44251	(	0.0937417	)
3.16038	(	0.0854304	)
3.09569	(	0.076642	)
3.01934	(	0.0783671	)
2.89605	(	0.085314	)
2.8123	(	0.0863061	)
2.55393	(	0.085999	)
2.45886	(	0.0646303	)
2.19737	(	0.098278	)
2.24537	(	0.0641892	)
1.97708	(	0.0544073	)
1.91357	(	0.056525	)
1.69238	(	0.070466	)
1.61925	(	0.0756398	)
1.48649	(	0.05666	)
1.37746	(	0.0443995	)
1.2833	(	0.0469642	)
1.26324	(	0.0341383	)
1.236	(	0.0383386	)
1.22598	(	0.038177	)
1.05168	(	0.0327805	)
1.02265	(	0.0289603	)
0.809908	(	0.0260206	)
0.727345	(	0.0218265	)
0.702404	(	0.0237288	)
0.621851	(	0.0226951	)
0.617667	(	0.0233722	)
0.605642	(	0.0240375	)
0.552884	(	0.0189979	)
0.533709	(	0.0310691	)
0.519546	(	0.0142704	)
0.481624	(	0.0162165	)
0.4798	(	0.0158974	)
0.469799	(	0.0132899	)
0.457949	(	0.0128751	)
0.440694	(	0.0134781	)
0.394877	(	0.0149386	)
0.398733	(	0.00986101	)
0.36382	(	0.016516	)
0.360166	(	0.0143821	)
0.331231	(	0.0135425	)
0.326942	(	0.0133689	)
0.329861	(	0.0103164	)
0.211634	(	0.00620315	)
0.205416	(	0.00643581	)
0.0898309	(	0.00333879	)
0.0472094	(	0.0023775	)
0.037435	(	0.00128191	)
0.0278174	(	0.001087	)
0.0284221	(	0.00085734	)
