# Supplementary material for: The Social Cost of Fossil and Industrial CO2 Emissions from 1950 to 2018
Source: Research Square preprint supplement (doi:10.21203/rs.3.rs-2244259/v1), 2022-11-17
Supplement: Supplementary file 76 [file disinvestment_calculations.xlsx]

## Sheet: disinvest_calculations_calib
			368.525	Mio	Mio	Mrd	Mrd	Mio	Mio	Mrd	Mrd
Country	ISO	CO2_MtC	CO2_GtC	SCC_RMQ	SCC_RMQ_std	SCC_RMQ	SCC_RMQ_std	SCC_Drupp	SCC_Drupp_std	SCC_Drupp	SCC_Drupp_std		Var_RMQ	Var_Drupp
Afghanistan	AFG	46.5723	0.0465723	4306.29	379.568	4.30629	0.379568	10618.6	1060.55	10.6186	1.06055	0.000126375	0.144072	1.12477	0.000110806	0.000124492	0.00101124	0.00127865		Sum	SD
Albania	ALB	73.6216	0.0736216	8409.51	709.804	8.40951	0.709804	17220.8	1349.68	17.2208	1.34968	0.000199774	0.503822	1.82162	0.000216387	0.000201895	0.0018968	0.00165462	RMQ	38.8632	0.919426
Algeria	DZA	1164.44	1.16444	107943	8857.06	107.943	8.85706	266782	22657.7	266.782	22.6577	0.00315972	78.4474	513.373	0.00277752	0.00312773	0.0237187	0.0276004	Drupp	85.2958	2.04348
Andorra	AND	3.84069	0.00384069	308.157	34.0999	0.308157	0.0340999	870.059	92.2667	0.870059	0.0922667	1.04218e-05	0.0011628	0.00851315	7.92928e-06	1.02005e-05	8.97262e-05	0.000110899
Angola	AGO	183.665	0.183665	15097	1393.68	15.097	1.39368	41453	4321.87	41.453	4.32187	0.000498378	1.94235	18.6786	0.000388466	0.000485991	0.00370201	0.00519897
Anguilla	AIA	0.86316	0.00086316	65.3694	7.23651	0.0653694	0.00723651	194.06	21.5078	0.19406	0.0215078	2.3422e-06	5.2367e-05	0.000462587	1.68204e-06	2.27514e-06	1.90409e-05	2.5798e-05
Antigua and Barbuda	0	5.62698	0.00562698	628.022	63.0604	0.628022	0.0630604	1310.16	112.017	1.31016	0.112017	1.52689e-05	0.00397661	0.0125477	1.61598e-05	1.53601e-05	0.000166705	0.000136386
Argentina	ARG	2069.92	2.06992	218178	15831.8	218.178	15.8318	479086	35450.4	479.086	35.4504	0.00561677	250.646	1256.73	0.00561399	0.00561676	0.0428477	0.0436858
Armenia	ARM	170.807	0.170807	22116.5	1927.94	22.1165	1.92794	40476.3	3286.35	40.4763	3.28635	0.000463489	3.71695	10.8001	0.000569085	0.00047454	0.00514028	0.00401711
Aruba	ABW	17.7642	0.0177642	1777.24	150.649	1.77724	0.150649	4096.91	364.203	4.09691	0.364203	4.82035e-05	0.0226951	0.132644	4.57306e-05	4.80318e-05	0.000402454	0.000442222
Australia	AUS	4499.37	4.49937	461821	33936.8	461.821	33.9368	1.03963e+06	78753.8	1039.63	78.7538	0.0122091	1151.71	6202.15	0.0118832	0.0121885	0.0917377	0.0968377
Austria	AUT	1015.38	1.01538	113953	8312.48	113.953	8.31248	236543	16763.4	236.543	16.7634	0.00275524	69.0973	281.01	0.00293215	0.00277321	0.0224858	0.0207459
Azerbaijan	AZE	622.789	0.622789	70952.7	5845.92	70.9527	5.84592	145789	11058.3	145.789	11.0583	0.00168995	34.1748	122.285	0.0018257	0.00170922	0.0156501	0.0135959
Bahamas	BHS	44.2122	0.0442122	5370.47	594.442	5.37047	0.594442	10419.6	992.198	10.4196	0.992198	0.000119971	0.353361	0.984457	0.000138189	0.000122159	0.00156412	0.00119949
Bahrain	BHR	221.394	0.221394	19733.9	1634.88	19.7339	1.63488	50478.6	4503.45	50.4786	4.50345	0.000600758	2.67282	20.281	0.000507777	0.000591806	0.0043749	0.00546685
Bangladesh	BGD	372.094	0.372094	30166.9	2781	30.1669	2.781	83945.4	8611.65	83.9454	8.61165	0.00100968	7.73397	74.1605	0.000776232	0.000984168	0.00738775	0.0103679
Barbados	BRB	14.3334	0.0143334	1421.46	109.22	1.42146	0.10922	3305	261.647	3.305	0.261647	3.8894e-05	0.011929	0.0684591	3.65758e-05	3.87475e-05	0.000294056	0.000320491
Belarus	BLR	1247.14	1.24714	145719	12291.7	145.719	12.2917	292772	22481.3	292.772	22.4813	0.00338414	151.086	505.408	0.00374953	0.00343244	0.0328485	0.0276099
Belgium	BEL	2110.83	2.11083	256798	19226.7	256.798	19.2267	495208	34081.5	495.208	34.0815	0.00572777	369.666	1161.55	0.00660774	0.00580577	0.0518838	0.0423085
Belize	BLZ	4.87309	0.00487309	464.324	36.1898	0.464324	0.0361898	1118.39	91.9943	1.11839	0.0919943	1.32232e-05	0.0013097	0.00846295	1.19476e-05	1.31119e-05	9.73163e-05	0.000112335
Benin	BEN	28.2698	0.0282698	2187.5	220.51	2.1875	0.22051	6343.11	713.664	6.34311	0.713664	7.67105e-05	0.0486245	0.509317	5.6287e-05	7.43661e-05	0.000582816	0.000855452
Bermuda	BMU	7.59311	0.00759311	806.261	61.272	0.806261	0.061272	1762.32	132.453	1.76232	0.132453	2.0604e-05	0.00375425	0.0175437	2.07461e-05	2.06613e-05	0.000165124	0.000162985
Bhutan	BTN	4.2518	0.0042518	311.67	35.1763	0.31167	0.0351763	949.527	116.269	0.949527	0.116269	1.15373e-05	0.00123737	0.0135184	8.01967e-06	1.11322e-05	9.24801e-05	0.000138897
Bonaire, Saint Eustatius and Saba	0	6.07875	0.00607875	765.038	72.1171	0.765038	0.0721171	1432.71	116.814	1.43271	0.116814	1.64948e-05	0.00520087	0.0136455	1.96854e-05	1.6797e-05	0.000191321	0.000142742
Bosnia and Herzegovina	BIH	229.575	0.229575	24124.6	1953.41	24.1246	1.95341	53221.7	4169.81	53.2217	4.16981	0.000622954	3.81581	17.3874	0.000620756	0.000623966	0.00523652	0.0051121
Botswana	BWA	37.1753	0.0371753	3043.41	288.092	3.04341	0.288092	8417.38	830.12	8.41738	0.83012	0.000100876	0.0829972	0.689099	7.83107e-05	9.86846e-05	0.000764099	0.00100153
Brazil	BRA	3936.69	3.93669	375560	28902.7	375.56	28.9027	903157	74059.7	903.157	74.0597	0.0106823	835.368	5484.84	0.00966365	0.0105885	0.0778051	0.0904567
British Virgin Islands	0	1.42337	0.00142337	121.079	10.7589	0.121079	0.0107589	323.504	30.4202	0.323504	0.0304202	3.86233e-06	0.000115754	0.000925386	3.11552e-06	3.79273e-06	2.86484e-05	3.68036e-05
Brunei Darussalam	BRN	83.6593	0.0836593	8595.85	789.355	8.59585	0.789355	19345.5	1633.78	19.3455	1.63378	0.000227011	0.623082	2.66922	0.000221182	0.000226805	0.00209743	0.001991
Bulgaria	BGR	992.608	0.992608	116861	9474.99	116.861	9.47499	233049	17393.3	233.049	17.3933	0.00269346	89.7754	302.525	0.00300697	0.00273225	0.025397	0.0214165
Burkina Faso	BFA	15.2448	0.0152448	1230.99	115.527	1.23099	0.115527	3435.12	364.977	3.43512	0.364977	4.13669e-05	0.0133464	0.133208	3.1675e-05	4.0273e-05	0.000306565	0.000438639
Burundi	BDI	3.15151	0.00315151	296.618	24.3551	0.296618	0.0243551	722.495	62.0325	0.722495	0.0620325	8.55169e-06	0.000593172	0.00384803	7.63237e-06	8.47047e-06	6.52183e-05	7.55045e-05
Cambodia	KHM	34.8837	0.0348837	2671.39	285.828	2.67139	0.285828	7799.68	962.626	7.79968	0.962626	9.46576e-05	0.0816979	0.926649	6.87382e-05	9.14427e-05	0.000753237	0.00114964
Canada	CAN	7692.4	7.6924	840736	61165.2	840.736	61.1652	1.78774e+06	128687	1787.74	128.687	0.0208735	3741.18	16560.4	0.0216332	0.0209594	0.165498	0.159008
Cape Verde	PRK	3.31512	0.00331512	284.909	25.374	0.284909	0.025374	751.181	74.1785	0.751181	0.0741785	8.99564e-06	0.000643839	0.00550246	7.33107e-06	8.80677e-06	6.75548e-05	8.9489e-05
Central African Republic	CAF	3.19001	0.00319001	326.605	25.5819	0.326605	0.0255819	737.649	57.046	0.737649	0.057046	8.65614e-06	0.000654432	0.00325425	8.40396e-06	8.64812e-06	6.87625e-05	7.00159e-05
Chad	TCD	6.56142	0.00656142	578.552	48.9669	0.578552	0.0489669	1494.05	137.392	1.49405	0.137392	1.78045e-05	0.00239776	0.0188765	1.48869e-05	1.75161e-05	0.000130828	0.000166454
Chile	CHL	694.038	0.694038	68426.3	5060.43	68.4263	5.06043	159421	12745.7	159.421	12.7457	0.00188329	25.6079	162.453	0.0017607	0.00186904	0.0136712	0.0155994
China	CHN	56774.7	56.7747	4.83516e+06	416532	4835.16	416.532	1.28689e+07	1.2409e+06	12868.9	1240.9	0.154059	173499	1.53982e+06	0.124415	0.150874	1.11147	1.49905
Colombia	COL	865.42	0.86542	88786.2	6576.31	88.7862	6.57631	199900	15221	199.9	15.221	0.00234833	43.2479	231.68	0.00228458	0.00234361	0.0177639	0.0187075
Comoros	COM	1.23812	0.00123812	109.023	9.10631	0.109023	0.00910631	281.771	25.7514	0.281771	0.0257514	3.35966e-06	8.29248e-05	0.000663136	2.80531e-06	3.30346e-06	2.43535e-05	3.12108e-05
Congo	COG	19.6334	0.0196334	1838.7	157.325	1.8387	0.157325	4490.24	409.123	4.49024	0.409123	5.32757e-05	0.0247513	0.167381	4.7312e-05	5.26431e-05	0.000420007	0.000495955
Cook Islands	COK	0.523843	0.000523843	48.3731	4.3033	0.0483731	0.0043033	120.075	10.5493	0.120075	0.0105493	1.42146e-06	1.85184e-05	0.000111287	1.2447e-06	1.40775e-06	1.14578e-05	1.28195e-05
Costa Rica	CRI	65.0365	0.0650365	5994.88	478.76	5.99488	0.47876	14878.1	1272.37	14.8781	1.27237	0.000176478	0.229211	1.61892	0.000154256	0.00017443	0.00128483	0.00154914
Côte d'Ivoire	CIV	86.1474	0.0861474	8315.63	683.716	8.31563	0.683716	19816.3	1643.65	19.8163	1.64365	0.000233762	0.467468	2.7016	0.000213972	0.000232324	0.00183067	0.00200578
Croatia	HRV	280.055	0.280055	30071.9	2280.48	30.0719	2.28048	65102.1	4847.32	65.1021	4.84732	0.000759935	5.20059	23.4965	0.000773787	0.000763251	0.00614688	0.00596989
Cuba	CUB	432.911	0.432911	48974.2	3725.99	48.9742	3.72599	101066	7319.03	101.066	7.31903	0.00117471	13.883	53.5681	0.00126017	0.00118488	0.0100403	0.00903812
Curaçao	CUW	114.21	0.11421	14460.8	1368.53	14.4608	1.36853	26942.9	2205.47	26.9429	2.20547	0.000309911	1.87288	4.8641	0.000372096	0.000315876	0.00362977	0.00269414
Cyprus	CYP	76.2586	0.0762586	7306.34	573.741	7.30634	0.573741	17530	1437.48	17.53	1.43748	0.000206929	0.329178	2.06635	0.000188001	0.00020552	0.00154185	0.00175574
Czech Republic	CZE	2478.69	2.47869	302320	23252.8	302.32	23.2528	582798	41244.2	582.798	41.2442	0.00672597	540.691	1701.09	0.00777908	0.00683267	0.0625987	0.05105
North Korea	PRK	1324.35	1.32435	156538	13919.5	156.538	13.9195	312065	25810	312.065	25.81	0.00359365	193.754	666.157	0.00402792	0.00365862	0.0370627	0.0315033
Democratic Republic of the Congo	COD	49.683	0.049683	6325.57	503.12	6.32557	0.50312	11705.6	845.667	11.7056	0.845667	0.000134816	0.253129	0.715152	0.000162765	0.000137236	0.00135065	0.00104455
Denmark	DNK	914.726	0.914726	109075	8260.58	109.075	8.26058	214632	15178.4	214.632	15.1784	0.00248213	68.2372	230.384	0.00280663	0.00251632	0.0222685	0.0187884
Djibouti	DJI	4.99593	0.00499593	502.904	39.5688	0.502904	0.0395688	1154.56	90.8442	1.15456	0.0908442	1.35565e-05	0.00156569	0.00825267	1.29404e-05	1.3536e-05	0.000106319	0.000111333
Dominica	DMA	1.23231	0.00123231	109.06	9.02639	0.10906	0.00902639	280.673	25.3975	0.280673	0.0253975	3.34389e-06	8.14757e-05	0.000645034	2.80625e-06	3.29059e-06	2.41563e-05	3.08018e-05
Dominican Republic	DOM	190.89	0.19089	17371.2	1426.34	17.3712	1.42634	43649.5	3781.9	43.6495	3.7819	0.000517984	2.03445	14.3028	0.000446982	0.000511743	0.00381946	0.00460025
Ecuador	ECU	303.603	0.303603	27596	2287.52	27.596	2.28752	69403.7	6037.7	69.4037	6.0377	0.000823832	5.23273	36.4538	0.000710081	0.000813682	0.0061211	0.00734206
Egypt	EGY	1591.57	1.59157	142239	11508.4	142.239	11.5084	362591	32346.1	362.591	32.3461	0.00431875	132.442	1046.27	0.00365999	0.00425098	0.0308524	0.039266
El Salvador	SLV	59.6536	0.0596536	5650.1	443.376	5.6501	0.443376	13684.3	1141.38	13.6843	1.14138	0.000161871	0.196582	1.30274	0.000145384	0.000160434	0.00119158	0.00139225
Equatorial Guinea	GNQ	34.2458	0.0342458	2439.95	323.864	2.43995	0.323864	7642.13	1002.2	7.64213	1.0022	9.29267e-05	0.104888	1.0044	6.2783e-05	8.95957e-05	0.000846477	0.00119441
Eritrea	ERI	4.39366	0.00439366	340.568	41.583	0.340568	0.041583	991.08	114.254	0.99108	0.114254	1.19223e-05	0.00172914	0.0130539	8.76324e-06	1.16193e-05	0.000108988	0.000136812
Estonia	EST	381.615	0.381615	45885.9	3642.59	45.8859	3.64259	89705.3	6605.9	89.7053	6.6059	0.00103552	13.2685	43.6379	0.0011807	0.0010517	0.00978022	0.00814424
Ethiopia	ETH	62.219	0.062219	5307.09	461.16	5.30709	0.46116	14079.1	1416.27	14.0791	1.41627	0.000168832	0.212669	2.00582	0.000136558	0.000165062	0.00122982	0.00170686
Faeroe Islands	FRO	7.97654	0.00797654	812.569	62.7435	0.812569	0.0627435	1845.32	143.182	1.84532	0.143182	2.16445e-05	0.00393674	0.0205011	2.09084e-05	2.16343e-05	0.000168855	0.000175685
Micronesia (Federated States of)	FSM	0.934731	0.000934731	72.7272	8.30178	0.0727272	0.00830178	210.912	23.2019	0.210912	0.0232019	2.53641e-06	6.89196e-05	0.00053833	1.87136e-06	2.47271e-06	2.18155e-05	2.78393e-05
Fiji	SYR	13.7213	0.0137213	1374.26	104.131	1.37426	0.104131	3157.51	253.154	3.15751	0.253154	3.72329e-05	0.0108433	0.064087	3.53614e-05	3.70184e-05	0.000280699	0.000309763
Finland	FIN	816.65	0.81665	89005.3	6789.83	89.0053	6.78983	190165	14083.2	190.165	14.0832	0.00221599	46.1017	198.337	0.00229022	0.00222947	0.018292	0.0173535
France	FRA	7161.54	7.16154	863641	65153.6	863.641	65.1536	1.68021e+06	116971	1680.21	116.971	0.019433	4245	13682.2	0.0222226	0.0196986	0.175699	0.145029
French Guiana	GUF	0.231351	0.000231351	21.0047	2.188	0.0210047	0.002188	52.5606	5.42722	0.0525606	0.00542722	6.27774e-07	4.78735e-06	2.94547e-05	5.40476e-07	6.16216e-07	5.77338e-06	6.53185e-06
French Polynesia	PYF	7.36405	0.00736405	701.319	56.6541	0.701319	0.0566541	1692.32	140.099	1.69232	0.140099	1.99825e-05	0.00320969	0.0196278	1.80458e-05	1.98406e-05	0.000151901	0.000170991
Gabon	GAB	68.1466	0.0681466	7163.65	635.86	7.16365	0.63586	15846	1284.34	15.846	1.28434	0.000184917	0.404318	1.64952	0.00018433	0.000185777	0.00169327	0.00157014
Gambia	GMB	3.53172	0.00353172	317.351	25.8892	0.317351	0.0258892	805.648	71.0097	0.805648	0.0710097	9.58339e-06	0.000670251	0.00504238	8.16585e-06	9.44535e-06	6.93609e-05	8.62717e-05
Georgia	GEO	258.401	0.258401	33537.2	2923.89	33.5372	2.92389	61241.9	4972.52	61.2419	4.97252	0.000701177	8.54912	24.726	0.000862956	0.000717994	0.00779562	0.00607822
Germany	DEU	17085.1	17.0851	2.10439e+06	159184	2104.39	159.184	4.01464e+06	276970	4014.64	276.97	0.0463606	25339.4	76712.4	0.0541487	0.0470673	0.429165	0.343739
Ghana	GHA	91.7778	0.0917778	8439.05	657.859	8.43905	0.657859	20928.4	1849.41	20.9284	1.84941	0.000249041	0.432779	3.42032	0.000217147	0.000245362	0.00176899	0.0022465
Greece	GRC	1063.75	1.06375	104878	8347.67	104.878	8.34767	245559	19848.5	245.559	19.8485	0.00288651	69.6836	393.964	0.00269865	0.00287891	0.0224084	0.0242709
Greenland	GRL	7.74466	0.00774466	879.215	67.6933	0.879215	0.0676933	1805.94	131.586	1.80594	0.131586	2.10153e-05	0.00458238	0.0173148	2.26233e-05	2.11726e-05	0.000182221	0.000162395
Grenada	GRD	2.07604	0.00207604	186.674	15.216	0.186674	0.015216	473.674	41.809	0.473674	0.041809	5.63336e-06	0.000231528	0.00174799	4.80336e-06	5.55331e-06	4.07686e-05	5.079e-05
Guatemala	GTM	110.064	0.110064	10121	796.578	10.121	0.796578	25135.5	2175.69	25.1355	2.17569	0.000298661	0.634537	4.73361	0.000260426	0.000294686	0.00214029	0.00264665
Guinea	GIN	21.3185	0.0213185	2080.63	160.034	2.08063	0.160034	4897.99	395.575	4.89799	0.395575	5.78482e-05	0.0256107	0.15648	5.35373e-05	5.74236e-05	0.000430826	0.000483744
Guinea-Bissau	GNB	2.59323	0.00259323	255.073	20.0326	0.255073	0.0200326	597.428	47.7456	0.597428	0.0477456	7.03677e-06	0.000401306	0.00227964	6.56336e-06	7.00419e-06	5.38344e-05	5.84375e-05
Guyana	GUY	26.1349	0.0261349	2886.4	218.693	2.8864	0.218693	6078.31	443.39	6.07831	0.44339	7.09175e-05	0.0478264	0.196595	7.42708e-05	7.12615e-05	0.000589518	0.000547144
Haiti	HTI	19.8358	0.0198358	1823.31	143.702	1.82331	0.143702	4526.54	396.928	4.52654	0.396928	5.38248e-05	0.0206502	0.157552	4.69161e-05	5.30688e-05	0.000386063	0.00048241
Honduras	HND	65.1765	0.0651765	5781.68	472.323	5.78168	0.472323	14832.6	1346.51	14.8326	1.34651	0.000176858	0.223089	1.81309	0.00014877	0.000173896	0.00126528	0.00163268
Hong Kong	HKG	422.159	0.422159	39869.8	3208.98	39.8698	3.20898	96957.4	8056.72	96.9574	8.05672	0.00114554	10.2975	64.9107	0.0010259	0.00113672	0.00860642	0.00983037
Hungary	HUN	1136.94	1.13694	138391	10671.6	138.391	10.6716	267326	18979.1	267.326	18.9791	0.00308512	113.884	360.205	0.00356097	0.0031341	0.0287227	0.0234836
Iceland	ISL	39.7154	0.0397154	4209.78	302.79	4.20978	0.30279	9190.93	676.961	9.19093	0.676961	0.000107768	0.0916819	0.458277	0.000108323	0.000107754	0.000820182	0.000834592
India	IND	12946.8	12.9468	1.11365e+06	93744	1113.65	93.744	2.93572e+06	279144	2935.72	279.144	0.0351313	8787.94	77921.3	0.0286556	0.0344182	0.250561	0.337494
Indonesia	IDN	3358.97	3.35897	290567	24669	290.567	24.669	763314	70806.7	763.314	70.8067	0.00911463	608.56	5013.59	0.00747665	0.00894903	0.0658949	0.085737
Iraq	IRQ	1117.1	1.1171	101064	8190.21	101.064	8.19021	254697	22761.5	254.697	22.7615	0.00303126	67.0796	518.084	0.00260051	0.00298604	0.0219541	0.0276276
Ireland	IRL	526.069	0.526069	55794.7	4078.42	55.7947	4.07842	121965	9038.75	121.965	9.03875	0.0014275	16.6335	81.699	0.00143567	0.00142991	0.0110302	0.0111369
Iran	IRN	4515.57	4.51557	401584	32902.7	401.584	32.9027	1.02857e+06	92237.1	1028.57	92.2371	0.0122531	1082.59	8507.69	0.0103333	0.0120589	0.0881217	0.111931
Israel	ISR	620.377	0.620377	59000.2	4609.4	59.0002	4.6094	142420	11752.2	142.42	11.7522	0.0016834	21.2465	138.113	0.00151815	0.00166972	0.0123924	0.0143471
Italy	ITA	6111.62	6.11162	664636	50592.8	664.636	50.5928	1.42286e+06	105234	1422.86	105.234	0.016584	2559.63	11074.2	0.0171019	0.0166815	0.136324	0.129687
Jamaica	JAM	119.34	0.11934	12647.9	986.87	12.6479	0.98687	27712.8	2111.32	27.7128	2.11132	0.000323832	0.973913	4.45766	0.000325447	0.000324902	0.0026535	0.00259479
Japan	JPN	16229.3	16.2293	1.70966e+06	130393	1709.66	130.393	3.7655e+06	283012	3765.5	283.012	0.0440385	17002.3	80096	0.0439918	0.0441464	0.351288	0.34825
Jordan	JOR	177.128	0.177128	15414.8	1323.94	15.4148	1.32394	40330.5	3671.72	40.3305	3.67172	0.00048064	1.75283	13.4815	0.000396641	0.000472831	0.00353355	0.00445124
Kazakhstan	KAZ	3357.49	3.35749	370733	27874.5	370.733	27.8745	781151	57089.4	781.151	57.0894	0.00911062	776.988	3259.2	0.00953943	0.00915814	0.0751914	0.0704356
Kenya	KEN	117.842	0.117842	11598.8	862.636	11.5988	0.862636	27061.5	2180.32	27.0615	2.18032	0.000319767	0.744142	4.75378	0.000298453	0.000317266	0.00232927	0.0026668
Kiribati	KIR	0.537799	0.000537799	52.6966	4.23733	0.0526966	0.00423733	123.665	10.1373	0.123665	0.0101373	1.45933e-06	1.7955e-05	0.000102765	1.35595e-06	1.44983e-06	1.13653e-05	1.2382e-05
Kosovo	0	24.2058	0.0242058	1533.83	270.216	1.53383	0.270216	5320.41	915.683	5.32041	0.915683	6.56828e-05	0.073017	0.838475	3.94675e-05	6.23759e-05	0.000701543	0.00108389
Kuwait	CUW	743.645	0.743645	69582.4	5547.84	69.5824	5.54784	170150	14487.9	170.15	14.4879	0.00201789	30.7786	209.9	0.00179044	0.00199482	0.0148905	0.017645
Kyrgyzstan	KGZ	199.806	0.199806	24414.2	2200.65	24.4142	2.20065	47122.3	3859.49	47.1223	3.85949	0.000542176	4.84287	14.8956	0.000628209	0.000552458	0.00585435	0.00471443
Laos	LAO	32.9809	0.0329809	2256.33	375.925	2.25633	0.375925	7262.06	1399.65	7.26206	1.39965	8.94941e-05	0.14132	1.95902	5.80581e-05	8.51397e-05	0.000977006	0.00165357
Latvia	LVA	190.789	0.190789	23260.2	1871.01	23.2602	1.87101	44935.4	3351.54	44.9354	3.35154	0.000517709	3.50068	11.2328	0.000598515	0.000526819	0.00501825	0.00412704
Lebanon	LBN	185.689	0.185689	17385.6	1343.71	17.3856	1.34371	42477.8	3591.96	42.4778	3.59196	0.000503872	1.80555	12.9021	0.000447353	0.000498006	0.00361589	0.00437693
Lesotho	LSO	15.894	0.015894	1247.38	136.038	1.24738	0.136038	3588.77	381.939	3.58877	0.381939	4.31286e-05	0.0185064	0.145877	3.20966e-05	4.20744e-05	0.000358185	0.000458987
Liberia	LBR	13.8068	0.0138068	1619.8	153.682	1.6198	0.153682	3233.71	271.772	3.23371	0.271772	3.7465e-05	0.0236181	0.0738602	4.16795e-05	3.79117e-05	0.000407551	0.000331316
Libya	LBY	540.033	0.540033	52340	4343.83	52.34	4.34383	124424	10223	124.424	10.223	0.00146539	18.8688	104.51	0.00134677	0.00145874	0.0116225	0.0124845
Liechtenstein	LIE	1.58978	0.00158978	130.787	14.8097	0.130787	0.0148097	361.373	38.5096	0.361373	0.0385096	4.3139e-06	0.000219327	0.00148299	3.36531e-06	4.2367e-06	3.893e-05	4.62752e-05
Lithuania	LTU	349.79	0.34979	42915.4	3488.35	42.9154	3.48835	82435	6208.39	82.435	6.20839	0.00094916	12.1686	38.5441	0.00110427	0.000966461	0.00934843	0.00763806
Luxembourg	LUX	200.891	0.200891	25063.5	1924.26	25.0635	1.92426	47195.2	3255.49	47.1952	3.25549	0.00054512	3.70276	10.5982	0.000644916	0.000553312	0.0051811	0.00404035
Macao	MAC	15.1479	0.0151479	1364.49	116.79	1.36449	0.11679	3463.83	306.362	3.46383	0.306362	4.11041e-05	0.0136399	0.0938577	3.51099e-05	4.06096e-05	0.000311783	0.00037212
North Macedonia	MKD	155.924	0.155924	17262.8	1411.49	17.2628	1.41149	36439.1	2793.46	36.4391	2.79346	0.000423101	1.99231	7.8034	0.000444195	0.000427208	0.00378092	0.00343122
Madagascar	MDG	24.372	0.024372	2415.75	182.922	2.41575	0.182922	5598.33	455.631	5.59833	0.455631	6.61338e-05	0.0334604	0.2076	6.21603e-05	6.56343e-05	0.00049312	0.000556841
Malawi	MWI	12.1262	0.0121262	1230.12	94.6133	1.23012	0.0946133	2799.29	216.908	2.79929	0.216908	3.29046e-05	0.00895168	0.0470489	3.16525e-05	3.28186e-05	0.000254708	0.000266178
Malaysia	MYS	1465.1	1.4651	120335	11057.7	120.335	11.0577	331517	32716.7	331.517	32.7167	0.00397556	122.273	1070.38	0.00309638	0.00388667	0.0293807	0.0394708
Maldives	MDV	5.76615	0.00576615	421.234	46.8979	0.421234	0.0468979	1288.44	152.306	1.28844	0.152306	1.56466e-05	0.00219941	0.0231972	1.08389e-05	1.51055e-05	0.000123369	0.000182193
Mali	MLI	13.5495	0.0135495	1120.06	102.085	1.12006	0.102085	3056.94	321.337	3.05694	0.321337	3.67667e-05	0.0104213	0.103257	2.88207e-05	3.58393e-05	0.000271382	0.000386393
Malta	MLT	27.6453	0.0276453	2747.49	217.568	2.74749	0.217568	6384.65	518.182	6.38465	0.518182	7.50161e-05	0.0473358	0.268512	7.06964e-05	7.4853e-05	0.00058428	0.000633427
Marshall Islands	0	0.851775	0.000851775	64.5939	7.28421	0.0645939	0.00728421	191.541	21.2995	0.191541	0.0212995	2.31131e-06	5.30597e-05	0.000453667	1.66208e-06	2.24561e-06	1.91512e-05	2.55442e-05
Martinique	MTQ	1.14616	0.00114616	131.573	12.941	0.131573	0.012941	267.137	22.6212	0.267137	0.0226212	3.11013e-06	0.000167469	0.00051172	3.38554e-06	3.13189e-06	3.42485e-05	2.75619e-05
Mauritania	MRT	18.8819	0.0188819	1703.41	158.624	1.70341	0.158624	4310.49	407.706	4.31049	0.407706	5.12363e-05	0.0251617	0.166224	4.38309e-05	5.05358e-05	0.000421127	0.000493085
Mauritius	MUS	29.4178	0.0294178	2566.71	215.409	2.56671	0.215409	6686.99	617.356	6.68699	0.617356	7.98256e-05	0.0464012	0.381128	6.60448e-05	7.83976e-05	0.000575878	0.000747755
Mexico	MEX	4941.29	4.94129	485357	37460.2	485.357	37.4602	1.13838e+06	90523	1138.38	90.523	0.0134083	1403.27	8194.42	0.0124889	0.0133463	0.100817	0.11084
Mongolia	MNG	171.162	0.171162	14941	1333.59	14.941	1.33359	38820.6	4041.85	38.8206	4.04185	0.00046445	1.77845	16.3366	0.000384452	0.00045513	0.00354998	0.00486246
Montenegro	MNE	25.0344	0.0250344	2590.56	204.274	2.59056	0.204274	5798.9	447.181	5.7989	0.447181	6.79314e-05	0.0417278	0.199971	6.66585e-05	6.79858e-05	0.00054877	0.000548989
Montserrat	MSR	0.419238	0.000419238									1.13761e-06	0	0	0	0	#DIV/0!	#DIV/0!
Morocco	MAR	445.904	0.445904	40300.4	3233.58	40.3004	3.23358	101742	8908.6	101.742	8.9086	0.00120997	10.456	79.3632	0.00103698	0.00119282	0.00867455	0.0108283
Mozambique	MOZ	44.7115	0.0447115	5001.37	401.294	5.00137	0.401294	10346.2	852.956	10.3462	0.852956	0.000121325	0.161037	0.727535	0.000128692	0.000121298	0.00107653	0.00104137
Myanmar	MMR	132.589	0.132589	12665.2	966.872	12.6652	0.966872	30331	2596.35	30.331	2.59635	0.000359782	0.934841	6.74103	0.000325891	0.000355597	0.00260461	0.00316091
Namibia	NAM	18.6111	0.0186111	1380.39	155.461	1.38039	0.155461	4171	476.851	4.171	0.476851	5.05014e-05	0.0241682	0.227387	3.55191e-05	4.89004e-05	0.000408752	0.000571199
Nauru	NRU	1.28958	0.00128958	146.314	13.3216	0.146314	0.0133216	302.841	25.2916	0.302841	0.0252916	3.49929e-06	0.000177465	0.000639665	3.76486e-06	3.55047e-06	3.54164e-05	3.08476e-05
Nepal	NPL	35.2222	0.0352222	2725.14	278.468	2.72514	0.278468	7900.14	911.813	7.90014	0.911813	9.55762e-05	0.0775445	0.831404	7.01213e-05	9.26205e-05	0.000735487	0.00109179
Netherlands	NLD	2633.16	2.63316	298153	22095.3	298.153	22.0953	614368	43660.6	614.368	43.6606	0.00714512	488.202	1906.25	0.00767186	0.00720279	0.0596808	0.0540177
New Caledonia	NCL	38.765	0.038765	3976.53	303.474	3.97653	0.303474	8925.81	715.942	8.92581	0.715942	0.000105189	0.0920965	0.512573	0.000102321	0.000104645	0.000817538	0.000876005
New Zealand	NZL	427.592	0.427592	45259.9	3268.43	45.2599	3.26843	99022.3	7302.24	99.0223	7.30224	0.00116028	10.6827	53.3227	0.0011646	0.00116093	0.0088499	0.00900154
Nicaragua	NIC	45.2921	0.0452921	4419.54	338.244	4.41954	0.338244	10412.4	836.968	10.4124	0.836968	0.000122901	0.114409	0.700516	0.00011372	0.000122075	0.000910979	0.00102391
Niger	NER	11.7923	0.0117923	1074	92.5166	1.074	0.0925166	2693.13	245.33	2.69313	0.24533	3.19987e-05	0.00855933	0.060187	2.76355e-05	3.1574e-05	0.000246872	0.000297404
Nigeria	NGA	997.573	0.997573	94999.2	7885.97	94.9992	7.88597	228956	19438.5	228.956	19.4385	0.00270693	62.1885	377.854	0.00244445	0.00268426	0.0210996	0.0236794
Niue	NIU	0.0720888	7.20888e-05	6.93181	0.607198	0.00693181	0.000607198	16.6044	1.42528	0.0166044	0.00142528	1.95614e-07	3.68689e-07	2.03142e-06	1.78364e-07	1.94668e-07	1.61838e-06	1.73485e-06
Norway	NOR	585.992	0.585992	63158.4	4644.95	63.1584	4.64495	136073	9928.78	136.073	9.92878	0.0015901	21.5756	98.5807	0.00162515	0.00159531	0.0125552	0.0122518
Occupied Palestinian Territory	0	14.6878	0.0146878	1092.03	122.543	1.09203	0.122543	3292.66	375.678	3.29266	0.375678	3.98555e-05	0.0150169	0.141134	2.80994e-05	3.86028e-05	0.000322251	0.000450046
Oman		310.168	0.310168	24404.3	2387.64	24.4043	2.38764	69818.6	7447.84	69.8186	7.44784	0.000841647	5.7008	55.4704	0.000627954	0.000818547	0.00632076	0.00894929
Pakistan	PAK	1275.33	1.27533	111994	9293.07	111.994	9.29307	290125	26463.4	290.125	26.4634	0.00346064	86.3612	700.314	0.00288175	0.0034014	0.0248652	0.0320778
Palau	PLW	1.5708	0.0015708	122.746	14.0114	0.122746	0.0140114	354.638	38.8541	0.354638	0.0388541	4.26238e-06	0.000196318	0.00150964	3.1584e-06	4.15774e-06	3.68192e-05	4.66285e-05
Panama	PAN	78.6668	0.0786668	7439.85	572.075	7.43985	0.572075	18001.4	1519.25	18.0014	1.51925	0.000213464	0.32727	2.30812	0.000191437	0.000211047	0.00154012	0.00185153
Papua New Guinea	PNG	42.8011	0.0428011	3846.51	317.016	3.84651	0.317016	9763.95	866.593	9.76395	0.866593	0.000116142	0.100499	0.750983	9.89756e-05	0.000114472	0.000848665	0.00105235
Paraguay	PRY	44.0318	0.0440318	3907.01	324.473	3.90701	0.324473	10031.9	902.681	10.0319	0.902681	0.000119481	0.105283	0.814833	0.000100532	0.000117614	0.000868127	0.00109516
Peru	PER	443.532	0.443532	44458.1	3357.24	44.4581	3.35724	102156	8052.44	102.156	8.05244	0.00120353	11.2711	64.8418	0.00114396	0.00119766	0.00905263	0.00986702
Philippines	PHL	848.071	0.848071	80307.9	6209.53	80.3079	6.20953	194274	16208.8	194.274	16.2088	0.00230125	38.5583	262.724	0.00206643	0.00227765	0.0167091	0.0197709
Bolivia	BOL	142.386	0.142386	13835.8	1068.73	13.8358	1.06873	32590.9	2730.72	32.5909	2.73072	0.000386366	1.14219	7.45685	0.000356013	0.000382093	0.00287608	0.00332978
Poland	POL	5945.58	5.94558	696772	52668.8	696.772	52.6688	1.39253e+06	98797.1	1392.53	98.7971	0.0161334	2774	9760.87	0.0179288	0.0163259	0.142006	0.122254
Portugal	PRT	632.712	0.632712	62604.6	4855.77	62.6046	4.85577	145934	11702.1	145.934	11.7021	0.00171687	23.5785	136.939	0.0016109	0.00171092	0.0130628	0.0143186
Qatar		526.715	0.526715	43437.5	3932.03	43.4375	3.93203	119003	12024.9	119.003	12.0249	0.00142925	15.4609	144.599	0.0011177	0.00139518	0.0104574	0.0144888
Cameroon	CMR	53.5329	0.0535329	4999.64	458.035	4.99964	0.458035	12265.6	1114.37	12.2656	1.11437	0.000145262	0.209796	1.24183	0.000128647	0.0001438	0.00121725	0.00135114
South Korea	KOR	4489.23	4.48923	391121	33707.9	391.121	33.7079	1.02258e+06	92867.8	1022.58	92.8678	0.0121816	1136.22	8624.42	0.010064	0.0119886	0.0899432	0.112602
Moldova	MDA	239.751	0.239751	30546.8	2843.09	30.5468	2.84309	56897	4892	56.897	4.892	0.000650569	8.08315	23.9317	0.000786007	0.000667055	0.00754826	0.00595382
South Sudan		9.66727	0.00966727	872.957	72.3453	0.872957	0.0723453	2201.45	202.529	2.20145	0.202529	2.62323e-05	0.00523385	0.0410181	2.24623e-05	2.58096e-05	0.00019359	0.000245363
Sudan	SDN	108.944	0.108944	9744.47	813.156	9.74447	0.813156	24773.4	2318.86	24.7734	2.31886	0.000295622	0.661223	5.3771	0.000250738	0.000290441	0.00217482	0.00280624
Réunion	REU	1.01647	0.00101647	89.3121	9.45759	0.0893121	0.00945759	231.027	24.4198	0.231027	0.0244198	2.7582e-06	8.94461e-05	0.000596327	2.29811e-06	2.70854e-06	2.49355e-05	2.93557e-05
Romania	ROU	2108.27	2.10827	251897	20639.1	251.897	20.6391	496030	37641.2	496.03	37.6412	0.00572084	425.974	1416.86	0.00648164	0.00581541	0.0552767	0.0462773
Russian Federation	RUS	28795.6	28.7956	3.33448e+06	256403	3334.48	256.403	6.74093e+06	487465	6740.93	487.465	0.0781373	65742.5	237622	0.0858005	0.07903	0.690278	0.602047
Rwanda		7.15847	0.00715847	675.301	58.634	0.675301	0.058634	1643.6	141.644	1.6436	0.141644	1.94246e-05	0.00343795	0.0200629	1.73764e-05	1.92694e-05	0.000156373	0.000172359
Saint Helena	0	0.0960892	9.60892e-05	8.18575	0.804595	0.00818575	0.000804595	21.8962	2.09836	0.0218962	0.00209836	2.6074e-07	6.47373e-07	4.40312e-06	2.1063e-07	2.56709e-07	2.12945e-06	2.53581e-06
Saint Lucia	LCA	3.13085	0.00313085	286.035	23.8521	0.286035	0.0238521	716.718	62.2571	0.716718	0.0622571	8.49563e-06	0.000568921	0.00387594	7.36006e-06	8.40273e-06	6.37966e-05	7.57148e-05
Sint Maarten (Dutch part)	FRO	13.6065	0.0136065	1711.18	161.23	1.71118	0.16123	3206.6	261.338	3.2066	0.261338	3.69214e-05	0.0259952	0.0682973	4.40308e-05	3.75938e-05	0.000427744	0.000319353
Samoa	WSM	1.85411	0.00185411	174.832	13.9132	0.174832	0.0139132	425.147	35.4272	0.425147	0.0354272	5.03115e-06	0.000193578	0.00125509	4.49866e-06	4.98438e-06	3.7349e-05	4.3217e-05
Sao Tome and Principe	STP	0.843423	0.000843423	78.0423	6.24049	0.0780423	0.00624049	192.874	16.5707	0.192874	0.0165707	2.28864e-06	3.89437e-05	0.000274587	2.00813e-06	2.26124e-06	1.67456e-05	2.01685e-05
Saudi Arabia	SAU	3876.08	3.87608	337265	29107.3	337.265	29.1073	882325	80855.3	882.325	80.8553	0.0105178	847.232	6537.58	0.00867826	0.0103443	0.0776597	0.09798
Senegal	SEN	60.3411	0.0603411	5611.68	444.355	5.61168	0.444355	13794.6	1189.62	13.7946	1.18962	0.000163737	0.197451	1.41519	0.000144396	0.000161727	0.00119332	0.00144751
Serbia	SRB	702.658	0.702658	76843.1	5868.96	76.8431	5.86896	163637	12117	163.637	12.117	0.00190667	34.4447	146.823	0.00197727	0.00191846	0.0158095	0.0149309
Seychelles		4.17122	0.00417122									1.13187e-05	0	0	0	0	#DIV/0!	#DIV/0!
Sierra Leone	SLE	9.61743	0.00961743	1086.64	86.6084	1.08664	0.0866084	2238.12	168.769	2.23812	0.168769	2.60971e-05	0.00750102	0.0284828	2.79606e-05	2.62395e-05	0.000232465	0.000207609
Singapore	ATG	566.094	0.566094	55284.5	4598.05	55.2845	4.59805	130614	10816.5	130.614	10.8165	0.0015361	21.142	116.997	0.00142254	0.00153131	0.0123007	0.0132012
Slovakia	SVK	818.462	0.818462	99696.6	7602.2	99.6966	7.6022	192374	13536.4	192.374	13.5364	0.00222091	57.7935	183.233	0.00256532	0.00225538	0.0204813	0.0167645
Slovenia	SVN	216.467	0.216467	23192.7	1753.78	23.1927	1.75378	50310.8	3739.55	50.3108	3.73955	0.000587387	3.07575	13.9842	0.000596777	0.000589839	0.00472841	0.00460632
Solomon Islands	SLB	2.68746	0.00268746	244.651	20.2052	0.244651	0.0202052	614.876	53.1864	0.614876	0.0531864	7.29247e-06	0.000408252	0.00282879	6.29517e-06	7.20875e-06	5.40817e-05	6.47027e-05
Somalia	SOM	8.64522	0.00864522	909.653	76.7148	0.909653	0.0767148	2009.04	160.727	2.00904	0.160727	2.34589e-05	0.00588517	0.025833	2.34065e-05	2.35538e-05	0.000205017	0.000196702
South Africa	ZAF	5134.24	5.13424	525290	38815.7	525.29	38.8157	1.18612e+06	90335.8	1186.12	90.3358	0.0139318	1506.66	8160.56	0.0135164	0.013906	0.104872	0.111025
Spain	ESP	3618.32	3.61832	373013	28337.9	373.013	28.3379	837709	64250.2	837.709	64.2502	0.00981836	803.036	4128.08	0.00959809	0.00982122	0.0763708	0.0789156
Sri Lanka	LKA	125.075	0.125075	11626.4	896.326	11.6264	0.896326	28523.1	2507.99	28.5231	2.50799	0.000339394	0.803401	6.29001	0.000299162	0.000334402	0.00241251	0.00304753
Saint Kitts and Nevis	KNA	1.60796	0.00160796	130.06	12.7989	0.13006	0.0127989	364.022	36.3519	0.364022	0.0363519	4.36323e-06	0.000163811	0.00132146	3.34662e-06	4.26776e-06	3.38715e-05	4.38279e-05
Saint Pierre and Miquelon	SPM	0.999624	0.000999624	112.342	8.34488	0.112342	0.00834488	232.653	16.8012	0.232653	0.0168012	2.7125e-06	6.9637e-05	0.000282281	2.89071e-06	2.7276e-06	2.25352e-05	2.07533e-05
Saint Vincent and the Grenadines	VCT	1.80608	0.00180608	157.31	13.4463	0.15731	0.0134463	410.935	37.975	0.410935	0.037975	4.90083e-06	0.000180802	0.0014421	4.04779e-06	4.81777e-06	3.58997e-05	4.59934e-05
Suriname	SUR	30.2008	0.0302008	3254.89	252.851	3.25489	0.252851	7017.28	525.53	7.01728	0.52553	8.19505e-05	0.0639337	0.276182	8.37524e-05	8.22699e-05	0.000680121	0.000646884
Swaziland	SWZ	10.7306	0.0107306									2.91178e-05	0	0	0	0	#DIV/0!	#DIV/0!
Sweden	SWE	1091.22	1.09122	136179	10669.7	136.179	10.6697	256929	18160.8	256.929	18.1608	0.00296104	113.842	329.814	0.00350405	0.00301222	0.0286787	0.0224813
Switzerland	CHE	679.812	0.679812	77713.7	5817.13	77.7137	5.81713	158804	11277.9	158.804	11.2779	0.00184468	33.839	127.191	0.00199967	0.0018618	0.015698	0.0139542
Syria	SYR	488.926	0.488926	46611.6	3969.93	46.6116	3.96993	112652	9685.14	112.652	9.68514	0.00132671	15.7604	93.802	0.00119938	0.00132072	0.0106019	0.0117874
Taiwan	TWN	2211.66	2.21166	197910	16557.6	197.91	16.5576	505091	44574.7	505.091	44.5747	0.00600137	274.154	1986.91	0.00509249	0.00592164	0.0442755	0.0541504
Tajikistan	TJK	102.416	0.102416	12876.1	1086.68	12.8761	1.08668	24174.5	1894.62	24.1745	1.89462	0.000277907	1.18086	3.58957	0.000331319	0.00028342	0.00290394	0.0023227
Thailand	THA	1873.12	1.87312	156445	14189.9	156.445	14.1899	424769	40867.5	424.769	40.8675	0.00508276	201.355	1670.16	0.00402553	0.00497995	0.0377341	0.0493758
Timor-Leste	TLS	1.42204	0.00142204	92.5941	13.847	0.0925941	0.013847	313.488	47.5522	0.313488	0.0475522	3.85872e-06	0.000191739	0.00226121	2.38256e-06	3.6753e-06	3.60732e-05	5.64408e-05
Togo	TGO	18.0449	0.0180449	1593.32	134.971	1.59332	0.134971	4109.7	374.758	4.1097	0.374758	4.89653e-05	0.0182171	0.140443	4.09982e-05	4.81817e-05	0.000360587	0.000454273
Tonga	TON	1.12491	0.00112491	104.301	8.39507	0.104301	0.00839507	257.624	21.8926	0.257624	0.0218926	3.05246e-06	7.04773e-05	0.000479284	2.68379e-06	3.02036e-06	2.25154e-05	2.66671e-05
Trinidad and Tobago	TTO	355.12	0.35512	33198.7	2627.55	33.1987	2.62755	81312	6920.33	81.312	6.92033	0.000963623	6.90401	47.891	0.000854246	0.000953294	0.0070566	0.00842865
Tunisia	TUN	230.17	0.23017	21255.6	1693.79	21.2556	1.69379	52675.1	4468.26	52.6751	4.46826	0.000624571	2.86892	19.9653	0.000546935	0.000617558	0.00454635	0.00544346
Turkey	TUR	2694.62	2.69462	240228	19624.3	240.228	19.6243	614175	54573.6	614.175	54.5736	0.0073119	385.114	2978.27	0.00618138	0.00720053	0.0525708	0.0662663
Turkmenistan	TKM	676.904	0.676904	71516.3	5284.87	71.5163	5.28487	156658	11718.1	156.658	11.7181	0.00183679	27.9299	137.314	0.0018402	0.00183664	0.0142785	0.0144256
Turks and Caicos Islands	TCA	0.955873	0.000955873	68.5523	8.04242	0.0685523	0.00804242	213.352	25.735	0.213352	0.025735	2.59378e-06	6.46806e-05	0.000662291	1.76394e-06	2.50132e-06	2.11108e-05	3.07609e-05
Tuvalu	TUV	0.0721332	7.21332e-05	5.66431	0.623438	0.00566431	0.000623438	16.2885	1.74906	0.0162885	0.00174906	1.95735e-07	3.88675e-07	3.05921e-06	1.4575e-07	1.90965e-07	1.64083e-06	2.101e-06
Uganda	UGA	25.8576	0.0258576	2395	194.438	2.395	0.194438	5888.87	543.188	5.88887	0.543188	7.0165e-05	0.037806	0.295053	6.16265e-05	6.90406e-05	0.000521123	0.000657958
Ukraine	UKR	7453.91	7.45391	914525	73720	914.525	73.72	1.75718e+06	131342	1757.18	131.342	0.0202263	5434.65	17250.7	0.0235319	0.020601	0.197692	0.1617
United Arab Emirates	ARE	1222.14	1.22214	102642	9175.31	102.642	9.17531	277035	26894.2	277.035	26.8942	0.00331631	84.1863	723.298	0.0026411	0.00324793	0.0244221	0.0324765
United Kingdom	GBR	10590.9	10.5909	1.33543e+06	102160	1335.43	102.16	2.49183e+06	170984	2491.83	170.984	0.0287387	10436.6	29235.6	0.0343623	0.0292139	0.275153	0.212327
Tanzania	TZA	58.5437	0.0585437	5303.29	436.412	5.30329	0.436412	13329.7	1229.24	13.3297	1.22924	0.000158859	0.190455	1.51104	0.00013646	0.000156276	0.00116843	0.00148899
USA	USA	86100.8	86.1008	9.83285e+06	714145	9832.85	714.145	2.00837e+07	1.40491e+06	20083.7	1404.91	0.233636	510003	1.97376e+06	0.253012	0.235459	1.93262	1.74102
Uruguay	URY	97.3766	0.0973766	11410.2	848.683	11.4102	0.848683	22730.4	1589.8	22.7304	1.5898	0.000264233	0.720263	2.52745	0.000293598	0.000266489	0.00229157	0.00197018
Uzbekistan	UZB	1682.16	1.68216	185936	13871.2	185.936	13.8712	391895	28375.3	391.895	28.3753	0.00456457	192.41	805.158	0.00478437	0.00459454	0.0374441	0.0350407
Vanuatu	VUT	1.18969	0.00118969	120.289	9.68724	0.120289	0.00968724	274.42	21.9291	0.27442	0.0219291	3.22824e-06	9.38426e-05	0.000480887	3.09519e-06	3.21727e-06	2.59798e-05	2.68401e-05
Venezuela	VEN	2002.96	2.00296	212557	15343.6	212.557	15.3436	463772	34328.8	463.772	34.3288	0.00543508	235.425	1178.46	0.00546937	0.00543722	0.0415472	0.0423023
Viet Nam	VNM	880.416	0.880416	73438.4	6625.7	73.4384	6.6257	198811	20425.1	198.811	20.4251	0.00238902	43.8999	417.185	0.00188966	0.00233084	0.0176252	0.0245887
Wallis and Futuna Islands	WLF	0.124311	0.000124311	8.6785	1.21813	0.0086785	0.00121813	27.6908	3.7555	0.0276908	0.0037555	3.37319e-07	1.48384e-06	1.41038e-05	2.23309e-07	3.24644e-07	3.17861e-06	4.47109e-06
Yemen	YEM	167.64	0.16764	16146.9	1279.02	16.1469	1.27902	38490.8	3278.53	38.4908	3.27853	0.000454893	1.63588	10.7488	0.00041548	0.000451263	0.00343472	0.00399287
Zambia	ZMB	62.7265	0.0627265	7996.76	638.919	7.99676	0.638919	14724.5	1047.13	14.7245	1.04713	0.000170209	0.408217	1.09648	0.000205767	0.000172629	0.00171458	0.00129544
Zimbabwe	ZWE	181.668	0.181668	20600.2	1549.05	20.6002	1.54905	42428.3	3102.06	42.4283	3.10206	0.00049296	2.39955	9.62275	0.000530068	0.000497426	0.00417851	0.00382709

## Sheet: Tabelle2
	1	USA	12054	856.058
	2	China	7161.93	679.756
	3	Russian Federation	4066.07	301.773
	4	Germany	2459.62	175.309
	5	Japan	2215.49	168.48
	6	India	1637.44	152.823
	7	United Kingdom	1535.83	109.3
	8	Canada	1060.85	77.0169
	9	Ukraine	1077.51	83.2144
	10	France	1023.63	73.3737
	11	Italy	844.355	63.4554
	12	Poland	842.352	61.3211
	13	South Africa	692.032	52.6799
	14	Mexico	657.761	52.3754
	15	Iran	578.698	51.2642
	16	Australia	607.004	45.9394
	17	South Korea	573.581	52.0298
	18	Brazil	517.477	42.0753
	19	Saudi Arabia	494.456	45.0777
	20	Spain	490.142	37.8293
	21	Indonesia	426.861	39.1948
	22	Kazakhstan	464.787	34.4202
	23	Turkey	346.032	30.4242
	24	Netherlands	368.102	26.6317
	25	Czech Republic	356.382	26.0462
	26	Taiwan	285.182	25.1336
	27	Belgium	302.296	21.4182
	28	Romania	302.067	23.6949
	29	Argentina	281.468	20.8163
	30	Venezuela	272.96	20.1802
	31	Thailand	235.746	22.6544
	32	Uzbekistan	233.445	17.1709
	33	Egypt	204.307	17.9793
	34	Malaysia	183.155	18.0026
	35	North Korea	189.782	16.2211
	36	Pakistan	162.821	14.6663
	37	Belarus	177.197	14.1143
	38	United Arab Emirates	153.8	14.7877
	39	Algeria	151.929	12.9029
	40	Hungary	163.404	11.9796
	41	Iraq	143.9	12.6402
	42	Sweden	158.019	11.5939
	43	Greece	142.188	11.5767
	44	Austria	141.338	10.1488
	45	Nigeria	131.145	11.1351
	46	Bulgaria	141.292	10.904
	47	Denmark	130.458	9.4768
	48	Viet Nam	109.932	11.0726
	49	Colombia	116.675	8.87006
	50	Philippines	111.054	9.14897
	51	Slovakia	117.586	8.5349
	52	Finland	112.91	8.49902
	53	Kuwait	96.9581	8.17128
	54	Serbia	97.2364	7.32313
	55	Chile	91.9911	7.25151
	56	Switzerland	95.4059	6.91954
	57	Turkmenistan	92.0699	6.88668
	58	Portugal	84.521	6.79572
	59	Azerbaijan	87.6286	6.86569
	60	Israel	81.601	6.70938
	61	Norway	80.4716	5.92133
	62	Singapore	75.4593	6.31901
	63	Libya	71.7111	5.95689
	64	Qatar	65.7063	6.54368
	65	Ireland	71.8332	5.34286
	66	Syria	64.7417	5.62213
	67	Morocco	57.5039	4.97673
	68	Peru	59.2302	4.63448
	69	Cuba	60.5627	4.48007
	70	New Zealand	58.2556	4.29731
	71	Hong Kong	55.5016	4.62407
	72	Estonia	54.6768	4.15562
	73	Bangladesh	46.1725	4.67524
	74	Trinidad and Tobago	46.3441	3.90649
	75	Lithuania	50.5401	3.93425
	76	Oman	38.1406	4.03792
	77	Ecuador	39.3191	3.41009
	78	Croatia	38.4989	2.90498
	79	Georgia	38.1336	3.1996
	80	Moldova	35.3065	3.14288
	81	Tunisia	29.9533	2.52573
	82	Bosnia and Herzegovina	31.2745	2.48633
	83	Bahrain	28.4433	2.51606
	84	Slovenia	29.7359	2.23947
	85	Luxembourg	28.9926	2.07187
	86	Kyrgyzstan	28.869	2.45836
	87	Dominican Republic	24.7413	2.13822
	88	Latvia	27.5026	2.1192
	89	Lebanon	24.2076	2.01751
	90	Angola	22.852	2.34355
	91	Zimbabwe	25.4524	1.89268
	92	Jordan	22.6106	2.05253
	93	Mongolia	21.7152	2.19251
	94	Armenia	25.1881	2.11341
	95	Yemen	22.1068	1.86631
	96	North Macedonia	21.7535	1.71484
	97	Bolivia	18.7123	1.5398
	98	Myanmar	17.3496	1.4484
	99	Sri Lanka	16.1982	1.38788
	100	Jamaica	16.333	1.26215
	101	Kenya	15.6079	1.23772
	102	Curaçao	16.6357	1.43385
	103	Guatemala	14.2611	1.21619
	104	Sudan	13.9373	1.27619
	105	Tajikistan	14.9141	1.20726
	106	Uruguay	13.7206	0.977962
	107	Ghana	11.8594	1.02365
	108	Côte d'Ivoire	11.4006	0.949896
	109	Brunei Darussalam	11.296	0.979203
	110	Panama	10.2781	0.852423
	111	Cyprus	10.0674	0.825226
	112	Albania	10.3501	0.836371
	113	Gabon	9.32997	0.782015
	114	Honduras	8.33904	0.745723
	115	Costa Rica	8.45446	0.717991
	116	Zambia	9.08564	0.669037
	117	Ethiopia	7.82908	0.766917
	118	Senegal	7.8473	0.666435
	119	El Salvador	7.83026	0.649881
	120	Tanzania	7.52299	0.677881
	121	Cameroon	6.99349	0.641554
	122	Democratic Republic of the Congo	7.23492	0.541045
	123	Afghanistan	6.01971	0.586096
	124	Nicaragua	5.9995	0.479426
	125	Mozambique	6.15032	0.499564
	126	Bahamas	6.3679	0.641058
	127	Paraguay	5.64667	0.503131
	128	Papua New Guinea	5.5114	0.484252
	129	Iceland	5.40579	0.397211
	130	New Caledonia	5.19805	0.410939
	131	Botswana	4.65134	0.459535
	132	Nepal	4.29407	0.487824
	133	Cambodia	4.22212	0.510889
	134	Equatorial Guinea	4.07984	0.547215
	135	Laos	3.8181	0.72589
	136	Suriname	4.15073	0.315777
	137	Mauritius	3.74579	0.341946
	138	Benin	3.44728	0.383491
	139	Malta	3.70412	0.302378
	140	Guyana	3.61546	0.267588
	141	Uganda	3.33771	0.299434
	142	Montenegro	3.39589	0.265173
	143	Madagascar	3.23347	0.258858
	144	Kosovo	2.75465	0.48757
	145	Guinea	2.82101	0.22589
	146	Haiti	2.56647	0.220944
	147	Congo	2.55796	0.230148
	148	Mauritania	2.43672	0.231346
	149	Namibia	2.25002	0.260135
	150	Togo	2.31009	0.208713
	151	Aruba	2.37663	0.210372
	152	Lesotho	1.96538	0.213525
	153	Burkina Faso	1.8864	0.196775
	154	Macao	1.96031	0.17394
	155	Occupied Palestinian Territory	1.77733	0.205038
	156	Barbados	1.91412	0.151688
	157	Liberia	1.95496	0.171429
	158	Fiji	1.82965	0.14496
	159	Sint Maarten (Dutch part)	1.9758	0.169471
	160	Mali	1.68655	0.173255
	161	Malawi	1.62955	0.126611
	162	Niger	1.52508	0.137717
	163	Swaziland
	164	South Sudan	1.24177	0.112044
	165	Sierra Leone	1.3379	0.102581
	166	Somalia	1.1831	0.0970676
	167	Faeroe Islands	1.0768	0.084255
	168	Greenland	1.08199	0.0804036
	169	Bermuda	1.03887	0.0789352
	170	French Polynesia	0.970494	0.0805734
	171	Rwanda	0.940504	0.0817951
	172	Chad	0.839412	0.0764666
	173	Bonaire, Saint Eustatius and Saba	0.882991	0.075774
	174	Maldives	0.691623	0.0818594
	175	Antigua and Barbuda	0.781182	0.0701696
	176	Djibouti	0.671564	0.0532942
	177	Belize	0.640885	0.052442
	178	Eritrea	0.541301	0.0643572
	179	Bhutan	0.509963	0.0620995
	180	Seychelles
	181	Andorra	0.479469	0.0521945
	182	Gambia	0.454799	0.0396767
	183	Cape Verde	0.418568	0.0407797
	184	Central African Republic	0.430666	0.0336172
	185	Burundi	0.412829	0.035268
	186	Saint Lucia	0.406877	0.0354047
	187	Solomon Islands	0.348639	0.0301203
	188	Guinea-Bissau	0.345282	0.0276739
	189	Grenada	0.267478	0.0234121
	190	Samoa	0.243006	0.0201652
	191	Saint Vincent and the Grenadines	0.230288	0.0211441
	192	Saint Kitts and Nevis	0.200729	0.0202429
	193	Liechtenstein	0.200508	0.022045
	194	Palau	0.194072	0.0218197
	195	British Virgin Islands	0.180382	0.0169398
	196	Timor-Leste	0.163472	0.0252056
	197	Nauru	0.182237	0.0157835
	198	Comoros	0.158236	0.0142751
	199	Dominica	0.157823	0.0141295
	200	Vanuatu	0.159536	0.0128035
	201	Martinique	0.160571	0.0142301
	202	Tonga	0.146701	0.0124271
	203	Réunion	0.129616	0.0139058
	204	Saint Pierre and Miquelon	0.139006	0.0101646
	205	Turks and Caicos Islands	0.114087	0.0138978
	206	Micronesia (Federated States of)	0.11529	0.0130026
	207	Anguilla	0.105289	0.011849
	208	Marshall Islands	0.103971	0.0117817
	209	Sao Tome and Principe	0.109644	0.00932044
	210	Kiribati	0.0713041	0.00583642
	211	Cook Islands	0.0683471	0.00607081
	212	Montserrat
	213	French Guiana	0.0296531	0.00309437
	214	Wallis and Futuna Islands	0.0147179	0.00205281
	215	Saint Helena	0.0122421	0.00119648
	216	Tuvalu	0.00892214	0.00097825
	217	Niue	0.00955449	0.000831802

## Sheet: Tabelle1
	Rank		Country		borrow		std			share		std
	1	&	USA	&	9832.85	(	714.145	)	&	1.59585	(	0.113335	)	\\
	2	&	China	&	4835.16	(	416.532	)	&	2.27216	(	0.215656	)	\\
	3	&	Russian Federation	&	3334.48	(	256.403	)	&	NA	(	NA	)	\\
	4	&	Germany	&	2104.39	(	159.184	)	&	0.574208	(	0.0409266	)	\\
	5	&	Japan	&	1709.66	(	130.393	)	&	0.418339	(	0.0318131	)	\\
	6	&	India	&	1113.65	(	93.744	)	&	0.488601	(	0.0456013	)	\\
	7	&	United Kingdom	&	1335.43	(	102.16	)	&	0.78288	(	0.0557149	)	\\
	8	&	Canada	&	840.736	(	61.1652	)	&	1.60336	(	0.116403	)	\\
	9	&	France	&	863.641	(	65.1536	)	&	0.462717	(	0.0331675	)	\\
	10	&	Ukraine	&	914.525	(	73.72	)	&	NA	(	NA	)	\\
	11	&	Italy	&	664.636	(	50.5928	)	&	0.310602	(	0.0233425	)	\\
	12	&	Poland	&	696.772	(	52.6688	)	&	2.30148	(	0.167542	)	\\
	13	&	South Africa	&	525.29	(	38.8157	)	&	4.1806	(	0.318242	)	\\
	14	&	Mexico	&	485.357	(	37.4602	)	&	0.725134	(	0.0577401	)	\\
	15	&	Iran	&	401.584	(	32.9027	)	&	1.44775	(	0.12825	)	\\
	16	&	South Korea	&	391.121	(	33.7079	)	&	0.219727	(	0.0199315	)	\\
	17	&	Australia	&	461.821	(	33.9368	)	&	1.21584	(	0.0920176	)	\\
	18	&	Brazil	&	375.56	(	28.9027	)	&	0.326494	(	0.0265468	)	\\
	19	&	Saudi Arabia	&	337.265	(	29.1073	)	&	2.85847	(	0.260596	)	\\
	20	&	Spain	&	373.013	(	28.3379	)	&	0.31062	(	0.0239737	)	\\
	21	&	Indonesia	&	290.567	(	24.669	)	&	0.381378	(	0.0350186	)	\\
	22	&	Kazakhstan	&	370.733	(	27.8745	)	&	NA	(	NA	)	\\
	23	&	Turkey	&	240.228	(	19.6243	)	&	0.511419	(	0.0449655	)	\\
	24	&	Netherlands	&	298.153	(	22.0953	)	&	0.443809	(	0.032109	)	\\
	25	&	Czech Republic	&	302.32	(	23.2528	)	&	0.780345	(	0.0570316	)	\\
