# Supplementary material for: The Social Cost of Fossil and Industrial CO2 Emissions from 1950 to 2018
Source: Research Square preprint supplement (doi:10.21203/rs.3.rs-2244259/v1), 2022-11-17
Supplement: Supplementary file 126 [file EL_external.xlsx]

## Sheet: Eland_params
f	1	2	3	4	5	6
0	0.892335	0.892335	0.892335	0.892335	0.892335	0.892335
1	1.08852	1.08852	1.08852	1.08852	1.08852	1.08852
2	1.10964	1.10964	1.10964	1.10964	1.10964	1.10964
3	1.10452	1.10452	1.10452	1.10452	1.10452	1.10452
4	1.15214	1.15214	1.15214	1.15214	1.15214	1.15214
5	1.19119	1.19119	1.19119	1.19119	1.19119	1.19119
6	1.24469	1.24469	1.24469	1.24469	1.24469	1.24469
7	1.27187	1.27187	1.27187	1.27187	1.27187	1.27187
8	1.31958	1.31958	1.31958	1.31958	1.31958	1.31958
9	1.2036	1.2036	1.2036	1.2036	1.2036	1.2036
10	1.19228	1.19228	1.19228	1.19228	1.19228	1.19228
11	1.24432	1.24432	1.24432	1.24432	1.24432	1.24432
12	1.23557	1.23557	1.23557	1.23557	1.23557	1.23557
13	1.24429	1.24429	1.24429	1.24429	1.24429	1.24429
14	1.25159	1.25159	1.25159	1.25159	1.25159	1.25159
15	1.26426	1.26426	1.26426	1.26426	1.26426	1.26426
16	1.2937	1.2937	1.2937	1.2937	1.2937	1.2937
17	1.29763	1.29763	1.29763	1.29763	1.29763	1.29763
18	1.2352	1.2352	1.2352	1.2352	1.2352	1.2352
19	1.23839	1.23839	1.23839	1.23839	1.23839	1.23839
20	1.19711	1.19711	1.19711	1.19711	1.19711	1.19711
21	1.07089	1.07089	1.07089	1.07089	1.07089	1.07089
22	1.04706	1.04706	1.04706	1.04706	1.04706	1.04706
23	1.0331	1.0331	1.0331	1.0331	1.0331	1.0331
24	1.03874	1.03874	1.03874	1.03874	1.03874	1.03874
25	1.03159	1.03159	1.03159	1.03159	1.03159	1.03159
26	1.09061	1.09061	1.09061	1.09061	1.09061	1.09061
27	1.09399	1.09399	1.09399	1.09399	1.09399	1.09399
28	1.09037	1.09037	1.09037	1.09037	1.09037	1.09037
29	1.06471	1.06471	1.06471	1.06471	1.06471	1.06471
30	1.02521	1.02521	1.02521	1.02521	1.02521	1.02521
31	1.04486	1.04486	1.04486	1.04486	1.04486	1.04486
32	1.19041	1.19041	1.19041	1.19041	1.19041	1.19041
33	1.22552	1.22552	1.22552	1.22552	1.22552	1.22552
34	1.26008	1.26008	1.26008	1.26008	1.26008	1.26008
35	1.27534	1.27534	1.27534	1.27534	1.27534	1.27534
36	1.2872	1.2872	1.2872	1.2872	1.2872	1.2872
37	1.29401	1.29401	1.29401	1.29401	1.29401	1.29401
38	1.31672	1.31672	1.31672	1.31672	1.31672	1.31672
39	1.32364	1.32364	1.32364	1.32364	1.32364	1.32364
40	1.31948	1.31948	1.31948	1.31948	1.31948	1.31948
41	1.38098	1.38098	1.38098	1.38098	1.38098	1.38098
42	1.30353	1.30353	1.30353	1.30353	1.30353	1.30353
43	1.2981	1.2981	1.2981	1.2981	1.2981	1.2981
44	1.2896	1.2896	1.2896	1.2896	1.2896	1.2896
45	1.27501	1.27501	1.27501	1.27501	1.27501	1.27501
46	1.2511	1.2511	1.2511	1.2511	1.2511	1.2511
47	1.21814	1.21814	1.21814	1.21814	1.21814	1.21814
48	1.21484	1.21484	1.21484	1.21484	1.21484	1.21484
49	1.18279	1.18279	1.18279	1.18279	1.18279	1.18279
50	1.1488	1.1488	1.1488	1.1488	1.1488	1.1488
51	1.132	1.132	1.132	1.132	1.132	1.132
52	1.2317	1.2317	1.2317	1.2317	1.2317	1.2317
53	1.2257	1.2257	1.2257	1.2257	1.2257	1.2257
54	1.2429	1.2429	1.2429	1.2429	1.2429	1.2429
55	1.1955	1.1955	1.1955	1.1955	1.1955	1.1955
56	1.165	1.165	1.165	1.165	1.165	1.165
57	1.1349	1.1349	1.1349	1.1349	1.1349	1.1349
58	1.1045	1.1045	1.1045	1.1045	1.1045	1.1045
59	1.0741	1.0741	1.0741	1.0741	1.0741	1.0741
60	1.0437	1.0437	1.0437	1.0437	1.0437	1.0437
61	1.02998	1.02998	1.02998	1.02998	1.02998	1.02998
62	1.01626	1.01626	1.01626	1.01626	1.01626	1.01626
63	1.00254	1.00254	1.00254	1.00254	1.00254	1.00254
64	0.98882	0.98882	0.98882	0.98882	0.98882	0.98882
65	0.9751	0.9751	0.9751	0.9751	0.9751	0.9751
66	0.96138	0.96138	0.96138	0.96138	0.96138	0.96138
67	0.94766	0.94766	0.94766	0.94766	0.94766	0.94766
68	0.93394	0.93394	0.93394	0.93394	0.93394	0.93394
69	0.911397	0.895349	0.908225	0.928895	0.914397	0.90126
70	0.889398	0.857689	0.88313	0.923972	0.895326	0.86937
71	0.86793	0.820938	0.858641	0.919167	0.876715	0.838249
72	0.846981	0.785075	0.834743	0.914479	0.858554	0.807879
73	0.826537	0.750077	0.811422	0.909903	0.84083	0.778242
74	0.806586	0.715924	0.788664	0.905438	0.823535	0.749321
75	0.787118	0.682595	0.766456	0.901081	0.806657	0.721097
76	0.768119	0.650071	0.744783	0.896829	0.790186	0.693555
77	0.749578	0.618331	0.723634	0.89268	0.774113	0.666678
78	0.731485	0.587358	0.702994	0.888631	0.758428	0.640449
79	0.713829	0.557132	0.682854	0.884679	0.743122	0.614854
80	0.696599	0.527636	0.663199	0.880823	0.728185	0.589876
81	0.679785	0.498852	0.644019	0.87706	0.713608	0.565502
82	0.663377	0.470763	0.625301	0.873388	0.699384	0.541715
83	0.647364	0.443352	0.607036	0.869804	0.685502	0.518503
84	0.631739	0.416602	0.589211	0.866307	0.671956	0.495851
85	0.61649	0.390498	0.571817	0.862895	0.658737	0.473746
86	0.60161	0.365024	0.554842	0.859564	0.645837	0.452174
87	0.587088	0.340165	0.538277	0.856315	0.633248	0.431123
88	0.572918	0.315906	0.522112	0.853143	0.620963	0.41058
89	0.559089	0.292233	0.506337	0.850048	0.608975	0.390533
90	0.545594	0.269131	0.490943	0.847028	0.597276	0.37097
91	0.532425	0.246587	0.475921	0.844081	0.585859	0.351879
92	0.519573	0.224586	0.461261	0.841205	0.574718	0.333249
93	0.507032	0.203117	0.446955	0.838398	0.563846	0.315069
94	0.494794	0.182166	0.432994	0.835659	0.553236	0.297327
95	0.482851	0.161721	0.41937	0.832986	0.542882	0.280014
96	0.471196	0.141769	0.406075	0.830378	0.532779	0.263118
97	0.459822	0.122299	0.393101	0.827832	0.522919	0.246631
98	0.448723	0.103299	0.380441	0.825348	0.513297	0.230541
99	0.437892	0.084757	0.368085	0.822924	0.503907	0.21484
100	0.427323	0.0666629	0.356028	0.820559	0.494744	0.199517
101	0.417008	0.0490056	0.344262	0.818251	0.485802	0.184565
102	0.406943	0.0317744	0.33278	0.815998	0.477076	0.169973
103	0.39712	0.0149592	0.321575	0.8138	0.468561	0.155734
104	0.387535	-0.00145013	0.310641	0.811654	0.460251	0.141838
105	0.378181	-0.0174634	0.299971	0.809561	0.452142	0.128278
106	0.369052	-0.0330901	0.289558	0.807518	0.444228	0.115045
107	0.360144	-0.0483397	0.279396	0.805524	0.436506	0.102131
108	0.351451	-0.0632211	0.26948	0.803579	0.42897	0.0895296
109	0.342968	-0.0777434	0.259803	0.80168	0.421616	0.0772319
110	0.33469	-0.0919151	0.25036	0.799828	0.414439	0.0652311
111	0.326611	-0.105745	0.241144	0.79802	0.407436	0.0535199
112	0.318728	-0.119241	0.232151	0.796255	0.400601	0.0420915
113	0.311034	-0.132411	0.223375	0.794534	0.393932	0.0309388
114	0.303527	-0.145263	0.214811	0.792853	0.387423	0.0200554
115	0.296201	-0.157805	0.206454	0.791214	0.381072	0.00943466
116	0.289051	-0.170044	0.198298	0.789614	0.374874	-0.000929716
117	0.282074	-0.181988	0.190339	0.788052	0.368825	-0.0110439
118	0.275266	-0.193644	0.182573	0.786528	0.362923	-0.020914
119	0.268621	-0.205018	0.174993	0.785042	0.357163	-0.0305458
120	0.262137	-0.216117	0.167597	0.78359	0.351542	-0.0399452
121	0.25581	-0.226949	0.160379	0.782174	0.346057	-0.0491177
122	0.249636	-0.237519	0.153336	0.780792	0.340704	-0.0580687
123	0.24361	-0.247835	0.146462	0.779444	0.33548	-0.0668037
124	0.23773	-0.257901	0.139755	0.778128	0.330383	-0.0753279
125	0.231992	-0.267724	0.133209	0.776844	0.325408	-0.0836463
126	0.226392	-0.27731	0.126821	0.775591	0.320554	-0.091764
127	0.220927	-0.286665	0.120588	0.774368	0.315816	-0.0996857
128	0.215595	-0.295794	0.114505	0.773174	0.311193	-0.107416
129	0.210391	-0.304702	0.108568	0.77201	0.306682	-0.11496
130	0.205313	-0.313396	0.102776	0.770873	0.30228	-0.122322
131	0.200357	-0.321879	0.0971224	0.769764	0.297983	-0.129506
132	0.195521	-0.330158	0.0916057	0.768682	0.293791	-0.136517
133	0.190801	-0.338237	0.0862222	0.767625	0.2897	-0.143358
134	0.186196	-0.346121	0.0809687	0.766595	0.285707	-0.150035
135	0.181702	-0.353815	0.0758419	0.765589	0.281811	-0.15655
136	0.177316	-0.361323	0.0708389	0.764607	0.278009	-0.162908
137	0.173036	-0.36865	0.0659566	0.763649	0.274298	-0.169112
138	0.168859	-0.3758	0.0611922	0.762715	0.270677	-0.175167
139	0.164783	-0.382778	0.0565428	0.761803	0.267144	-0.181075
140	0.160806	-0.389587	0.0520056	0.760912	0.263696	-0.186841
141	0.156925	-0.396231	0.047578	0.760044	0.260331	-0.192468
142	0.153137	-0.402715	0.0432572	0.759196	0.257047	-0.197959
143	0.14944	-0.409043	0.0390407	0.758369	0.253843	-0.203318
144	0.145833	-0.415218	0.0349259	0.757562	0.250716	-0.208547
145	0.142313	-0.421244	0.0309105	0.756774	0.247664	-0.213649
146	0.138878	-0.427125	0.0269921	0.756005	0.244686	-0.218629
147	0.135526	-0.432863	0.0231682	0.755255	0.24178	-0.223489
148	0.132255	-0.438463	0.0194365	0.754523	0.238944	-0.228231
149	0.129063	-0.443928	0.015795	0.753808	0.236177	-0.232859
150	0.125947	-0.449261	0.0122414	0.753111	0.233476	-0.237375
151	0.122907	-0.454465	0.00877352	0.752431	0.230841	-0.241782
152	0.119941	-0.459544	0.00538937	0.751767	0.228269	-0.246082
153	0.117046	-0.4645	0.0020869	0.751119	0.225759	-0.250279
154	0.11422	-0.469336	-0.00113586	0.750487	0.22331	-0.254375
155	0.111463	-0.474056	-0.00428082	0.74987	0.22092	-0.258371
156	0.108773	-0.478662	-0.00734988	0.749267	0.218588	-0.262272
157	0.106147	-0.483156	-0.0103449	0.74868	0.216311	-0.266078
158	0.103585	-0.487543	-0.0132675	0.748106	0.21409	-0.269792
159	0.101085	-0.491823	-0.0161197	0.747547	0.211923	-0.273416
160	0.0986451	-0.496	-0.018903	0.747001	0.209808	-0.276954
161	0.096264	-0.500076	-0.0216191	0.746468	0.207743	-0.280405
162	0.0939405	-0.504054	-0.0242696	0.745948	0.205729	-0.283774
163	0.091673	-0.507935	-0.0268562	0.74544	0.203763	-0.287061
164	0.0894602	-0.511723	-0.0293804	0.744945	0.201845	-0.290268
165	0.0873009	-0.51542	-0.0318436	0.744462	0.199973	-0.293399
166	0.0851937	-0.519027	-0.0342473	0.74399	0.198146	-0.296454
167	0.0831373	-0.522547	-0.0365931	0.74353	0.196364	-0.299435
168	0.0811306	-0.525983	-0.0388822	0.743081	0.194624	-0.302344
169	0.0791723	-0.529335	-0.0411161	0.742643	0.192926	-0.305182
170	0.0772613	-0.532607	-0.043296	0.742215	0.19127	-0.307953
171	0.0753964	-0.535799	-0.0454233	0.741798	0.189653	-0.310656
172	0.0735765	-0.538915	-0.0474993	0.74139	0.188075	-0.313294
173	0.0718006	-0.541955	-0.0495252	0.740993	0.186536	-0.315869
174	0.0700675	-0.544922	-0.0515022	0.740605	0.185033	-0.318381
175	0.0683762	-0.547817	-0.0534314	0.740227	0.183567	-0.320833
176	0.0667258	-0.550642	-0.0553141	0.739857	0.182136	-0.323226
177	0.0651152	-0.553399	-0.0571514	0.739497	0.18074	-0.32556
178	0.0635435	-0.55609	-0.0589442	0.739145	0.179377	-0.327839
179	0.0620097	-0.558716	-0.0606939	0.738802	0.178048	-0.330062
180	0.060513	-0.561278	-0.0624013	0.738467	0.17675	-0.332232
181	0.0590523	-0.563778	-0.0640674	0.73814	0.175484	-0.33435
182	0.057627	-0.566219	-0.0656934	0.737821	0.174248	-0.336416
183	0.056236	-0.5686	-0.0672801	0.73751	0.173042	-0.338432
184	0.0548786	-0.570923	-0.0688285	0.737206	0.171866	-0.3404
185	0.053554	-0.573191	-0.0703396	0.736909	0.170717	-0.34232
186	0.0522613	-0.575404	-0.0718141	0.73662	0.169597	-0.344194
187	0.0509999	-0.577563	-0.0732531	0.736338	0.168503	-0.346023
188	0.0497689	-0.579671	-0.0746573	0.736062	0.167436	-0.347807
189	0.0485676	-0.581727	-0.0760277	0.735793	0.166394	-0.349549
190	0.0473953	-0.583734	-0.077365	0.735531	0.165378	-0.351248
191	0.0462513	-0.585693	-0.07867	0.735275	0.164386	-0.352907
192	0.0451349	-0.587604	-0.0799434	0.735025	0.163419	-0.354525
193	0.0440454	-0.589469	-0.0811862	0.734781	0.162474	-0.356104
194	0.0429823	-0.591289	-0.082399	0.734543	0.161552	-0.357646
195	0.0419448	-0.593065	-0.0835824	0.734311	0.160653	-0.35915
196	0.0409324	-0.594798	-0.0847374	0.734085	0.159775	-0.360617
197	0.0399444	-0.596489	-0.0858644	0.733864	0.158919	-0.36205
198	0.0389802	-0.59814	-0.0869642	0.733648	0.158083	-0.363447
199	0.0380393	-0.599751	-0.0880375	0.733437	0.157267	-0.364811
200	0.0371212	-0.601322	-0.0890849	0.733232	0.156471	-0.366142
201	0.0362252	-0.602856	-0.090107	0.733031	0.155695	-0.367441
202	0.0353508	-0.604353	-0.0911044	0.732836	0.154937	-0.368709
203	0.0344975	-0.605814	-0.0920778	0.732645	0.154197	-0.369946
204	0.0336648	-0.607239	-0.0930277	0.732458	0.153475	-0.371153
205	0.0328522	-0.60863	-0.0939546	0.732276	0.15277	-0.372331
206	0.0320593	-0.609988	-0.0948592	0.732099	0.152083	-0.37348
207	0.0312854	-0.611313	-0.0957419	0.731926	0.151412	-0.374602
208	0.0305303	-0.612605	-0.0966033	0.731757	0.150758	-0.375697
209	0.0297934	-0.613867	-0.0974439	0.731592	0.150119	-0.376765
210	0.0290742	-0.615098	-0.0982643	0.731431	0.149495	-0.377808
211	0.0283724	-0.616299	-0.0990648	0.731274	0.148887	-0.378825
212	0.0276876	-0.617472	-0.099846	0.73112	0.148293	-0.379818
213	0.0270193	-0.618616	-0.100608	0.730971	0.147714	-0.380787
214	0.0263671	-0.619732	-0.101352	0.730825	0.147148	-0.381732
215	0.0257307	-0.620822	-0.102078	0.730683	0.146597	-0.382655
216	0.0251096	-0.621885	-0.102787	0.730544	0.146058	-0.383555
217	0.0245035	-0.622922	-0.103478	0.730408	0.145533	-0.384434
218	0.0239121	-0.623935	-0.104153	0.730276	0.14502	-0.385291
219	0.0233349	-0.624923	-0.104811	0.730146	0.14452	-0.386128
220	0.0227717	-0.625887	-0.105454	0.73002	0.144031	-0.386944
221	0.022222	-0.626828	-0.106081	0.729897	0.143555	-0.387741
222	0.0216856	-0.627746	-0.106693	0.729777	0.14309	-0.388519
223	0.0211622	-0.628642	-0.10729	0.72966	0.142636	-0.389277
224	0.0206514	-0.629517	-0.107872	0.729546	0.142193	-0.390018
225	0.0201529	-0.63037	-0.108441	0.729434	0.141761	-0.39074
226	0.0196665	-0.631203	-0.108996	0.729325	0.14134	-0.391446
227	0.0191918	-0.632016	-0.109537	0.729219	0.140928	-0.392134
228	0.0187285	-0.632809	-0.110066	0.729115	0.140526	-0.392805
229	0.0182765	-0.633583	-0.110582	0.729014	0.140135	-0.393461
230	0.0178353	-0.634338	-0.111085	0.728916	0.139752	-0.3941
231	0.0174048	-0.635075	-0.111576	0.728819	0.139379	-0.394724
232	0.0169847	-0.635794	-0.112055	0.728725	0.139015	-0.395333
233	0.0165748	-0.636496	-0.112523	0.728633	0.138659	-0.395928
234	0.0161747	-0.637181	-0.112979	0.728544	0.138312	-0.396508
235	0.0157843	-0.637849	-0.113424	0.728457	0.137974	-0.397074
236	0.0154033	-0.638501	-0.113859	0.728371	0.137644	-0.397626
237	0.0150315	-0.639138	-0.114283	0.728288	0.137321	-0.398165
238	0.0146687	-0.639759	-0.114697	0.728207	0.137007	-0.398691
239	0.0143146	-0.640365	-0.115101	0.728128	0.1367	-0.399204
240	0.0139691	-0.640956	-0.115495	0.72805	0.1364	-0.399705
241	0.0136319	-0.641534	-0.11588	0.727975	0.136108	-0.400194
242	0.0133029	-0.642097	-0.116255	0.727901	0.135823	-0.400671
243	0.0129818	-0.642647	-0.116621	0.727829	0.135544	-0.401136
244	0.0126684	-0.643183	-0.116979	0.727759	0.135273	-0.40159
245	0.0123626	-0.643706	-0.117328	0.727691	0.135008	-0.402034
246	0.0120642	-0.644217	-0.117668	0.727624	0.134749	-0.402466
247	0.011773	-0.644716	-0.118	0.727559	0.134497	-0.402888
248	0.0114889	-0.645202	-0.118324	0.727495	0.13425	-0.4033
249	0.0112116	-0.645677	-0.118641	0.727433	0.13401	-0.403702
250	0.0109409	-0.64614	-0.118949	0.727373	0.133775	-0.404095
251	0.0106768	-0.646592	-0.119251	0.727313	0.133546	-0.404478
252	0.0104191	-0.647034	-0.119545	0.727256	0.133323	-0.404851
253	0.0101676	-0.647464	-0.119831	0.7272	0.133105	-0.405216
254	0.00992222	-0.647884	-0.120111	0.727145	0.132892	-0.405572
255	0.00968273	-0.648294	-0.120385	0.727091	0.132684	-0.405919
256	0.00944901	-0.648694	-0.120651	0.727039	0.132482	-0.406257
257	0.00922094	-0.649085	-0.120911	0.726988	0.132284	-0.406588
258	0.00899837	-0.649466	-0.121165	0.726938	0.132091	-0.406911
259	0.00878117	-0.649838	-0.121413	0.726889	0.131903	-0.407226
260	0.00856921	-0.6502	-0.121655	0.726842	0.131719	-0.407533
261	0.00836237	-0.650554	-0.121891	0.726796	0.13154	-0.407833
262	0.00816053	-0.6509	-0.122121	0.72675	0.131365	-0.408125
263	0.00796355	-0.651237	-0.122346	0.726706	0.131194	-0.408411
264	0.00777133	-0.651566	-0.122565	0.726663	0.131027	-0.40869
265	0.00758375	-0.651887	-0.122779	0.726621	0.130865	-0.408961
266	0.0074007	-0.652201	-0.122988	0.72658	0.130706	-0.409227
267	0.00722207	-0.652507	-0.123192	0.72654	0.130551	-0.409486
268	0.00704775	-0.652805	-0.12339	0.726501	0.1304	-0.409739
269	0.00687763	-0.653096	-0.123585	0.726463	0.130253	-0.409985
270	0.00671162	-0.65338	-0.123774	0.726426	0.130109	-0.410226
271	0.00654962	-0.653658	-0.123959	0.72639	0.129968	-0.410461
272	0.00639153	-0.653928	-0.124139	0.726354	0.129831	-0.41069
273	0.00623725	-0.654192	-0.124315	0.72632	0.129697	-0.410913
274	0.0060867	-0.65445	-0.124487	0.726286	0.129567	-0.411132
275	0.00593979	-0.654702	-0.124654	0.726253	0.12944	-0.411345
276	0.00579641	-0.654947	-0.124818	0.726221	0.129315	-0.411553
277	0.0056565	-0.655187	-0.124977	0.72619	0.129194	-0.411755
278	0.00551997	-0.65542	-0.125133	0.726159	0.129076	-0.411953
279	0.00538673	-0.655648	-0.125285	0.72613	0.12896	-0.412146
280	0.00525671	-0.655871	-0.125434	0.7261	0.128847	-0.412335
281	0.00512983	-0.656088	-0.125578	0.726072	0.128737	-0.412519
282	0.00500601	-0.6563	-0.12572	0.726044	0.12863	-0.412698
283	0.00488517	-0.656507	-0.125857	0.726017	0.128525	-0.412874
284	0.00476726	-0.656709	-0.125992	0.725991	0.128423	-0.413044
285	0.00465219	-0.656906	-0.126123	0.725965	0.128323	-0.413211
286	0.0045399	-0.657098	-0.126251	0.72594	0.128226	-0.413374
287	0.00443032	-0.657286	-0.126376	0.725916	0.128131	-0.413533
288	0.00432338	-0.657469	-0.126498	0.725892	0.128038	-0.413688
289	0.00421902	-0.657647	-0.126617	0.725868	0.127948	-0.413839
290	0.00411719	-0.657822	-0.126733	0.725845	0.12786	-0.413987
291	0.00401781	-0.657992	-0.126847	0.725823	0.127773	-0.414131
292	0.00392083	-0.658158	-0.126957	0.725801	0.127689	-0.414271
293	0.00382619	-0.65832	-0.127065	0.72578	0.127607	-0.414409
294	0.00373384	-0.658478	-0.127171	0.72576	0.127527	-0.414543
295	0.00364371	-0.658632	-0.127274	0.725739	0.127449	-0.414673
296	0.00355576	-0.658783	-0.127374	0.72572	0.127373	-0.414801
297	0.00346993	-0.65893	-0.127472	0.725701	0.127298	-0.414925
298	0.00338618	-0.659073	-0.127567	0.725682	0.127226	-0.415047
299	0.00330445	-0.659213	-0.127661	0.725664	0.127155	-0.415165
300	0.00322468	-0.65935	-0.127752	0.725646	0.127086	-0.415281
301	0.00314685	-0.659483	-0.12784	0.725628	0.127018	-0.415393
302	0.00307089	-0.659613	-0.127927	0.725611	0.126953	-0.415504
303	0.00299677	-0.65974	-0.128012	0.725595	0.126888	-0.415611
304	0.00292443	-0.659864	-0.128094	0.725578	0.126826	-0.415716
305	0.00285385	-0.659985	-0.128175	0.725563	0.126764	-0.415818
306	0.00278496	-0.660102	-0.128253	0.725547	0.126705	-0.415918
307	0.00271774	-0.660218	-0.12833	0.725532	0.126646	-0.416016
308	0.00265214	-0.66033	-0.128405	0.725518	0.126589	-0.416111
309	0.00258812	-0.660439	-0.128478	0.725503	0.126534	-0.416203
310	0.00252565	-0.660546	-0.128549	0.725489	0.12648	-0.416294
311	0.00246469	-0.660651	-0.128618	0.725476	0.126427	-0.416382
312	0.0024052	-0.660753	-0.128686	0.725462	0.126375	-0.416469
313	0.00234714	-0.660852	-0.128753	0.725449	0.126325	-0.416553
314	0.00229049	-0.660949	-0.128817	0.725437	0.126276	-0.416635
315	0.0022352	-0.661044	-0.12888	0.725424	0.126228	-0.416715
316	0.00218125	-0.661136	-0.128942	0.725412	0.126181	-0.416793
317	0.0021286	-0.661226	-0.129002	0.7254	0.126136	-0.41687
318	0.00207722	-0.661314	-0.12906	0.725389	0.126091	-0.416944
319	0.00202708	-0.6614	-0.129118	0.725378	0.126048	-0.417017
320	0.00197816	-0.661484	-0.129173	0.725367	0.126005	-0.417088
321	0.00193041	-0.661565	-0.129228	0.725356	0.125964	-0.417157
322	0.00188381	-0.661645	-0.129281	0.725346	0.125923	-0.417224
323	0.00183834	-0.661723	-0.129333	0.725335	0.125884	-0.41729
324	0.00179397	-0.661799	-0.129384	0.725325	0.125846	-0.417355
325	0.00175067	-0.661873	-0.129433	0.725316	0.125808	-0.417417
326	0.00170841	-0.661945	-0.129481	0.725306	0.125771	-0.417479
327	0.00166717	-0.662016	-0.129528	0.725297	0.125736	-0.417539
328	0.00162693	-0.662085	-0.129574	0.725288	0.125701	-0.417597
329	0.00158766	-0.662152	-0.129619	0.725279	0.125667	-0.417654
330	0.00154934	-0.662218	-0.129663	0.725271	0.125633	-0.417709
331	0.00151194	-0.662282	-0.129705	0.725262	0.125601	-0.417764
332	0.00147545	-0.662344	-0.129747	0.725254	0.125569	-0.417816
333	0.00143984	-0.662405	-0.129788	0.725246	0.125539	-0.417868
334	0.00140508	-0.662465	-0.129827	0.725238	0.125508	-0.417918
335	0.00137117	-0.662523	-0.129866	0.725231	0.125479	-0.417968
336	0.00133807	-0.662579	-0.129904	0.725223	0.12545	-0.418016
337	0.00130577	-0.662635	-0.12994	0.725216	0.125422	-0.418062
338	0.00127425	-0.662689	-0.129976	0.725209	0.125395	-0.418108
339	0.0012435	-0.662741	-0.130012	0.725202	0.125368	-0.418153
340	0.00121348	-0.662793	-0.130046	0.725196	0.125342	-0.418196
341	0.00118419	-0.662843	-0.130079	0.725189	0.125317	-0.418239
342	0.00115561	-0.662892	-0.130112	0.725183	0.125292	-0.41828
343	0.00112772	-0.662939	-0.130144	0.725176	0.125268	-0.418321
344	0.0011005	-0.662986	-0.130175	0.72517	0.125244	-0.41836
345	0.00107393	-0.663032	-0.130205	0.725164	0.125221	-0.418399
346	0.00104801	-0.663076	-0.130235	0.725159	0.125199	-0.418436
347	0.00102271	-0.663119	-0.130263	0.725153	0.125177	-0.418473
348	0.000998028	-0.663161	-0.130292	0.725147	0.125156	-0.418509
349	0.000973938	-0.663203	-0.130319	0.725142	0.125135	-0.418543
350	0.00095043	-0.663243	-0.130346	0.725137	0.125114	-0.418578
351	0.000927489	-0.663282	-0.130372	0.725132	0.125094	-0.418611
352	0.000905102	-0.663321	-0.130398	0.725127	0.125075	-0.418643
353	0.000883255	-0.663358	-0.130422	0.725122	0.125056	-0.418675
354	0.000861935	-0.663394	-0.130447	0.725117	0.125038	-0.418706
355	0.00084113	-0.66343	-0.130471	0.725112	0.125019	-0.418736
356	0.000820828	-0.663465	-0.130494	0.725108	0.125002	-0.418765
357	0.000801015	-0.663499	-0.130516	0.725103	0.124985	-0.418794
358	0.00078168	-0.663532	-0.130538	0.725099	0.124968	-0.418822
359	0.000762813	-0.663564	-0.13056	0.725095	0.124952	-0.41885
360	0.0007444	-0.663596	-0.130581	0.725091	0.124936	-0.418876
361	0.000726432	-0.663626	-0.130601	0.725087	0.12492	-0.418902
362	0.000708898	-0.663656	-0.130621	0.725083	0.124905	-0.418928
363	0.000691787	-0.663686	-0.130641	0.725079	0.12489	-0.418952
364	0.000675089	-0.663714	-0.13066	0.725075	0.124876	-0.418977
365	0.000658794	-0.663742	-0.130678	0.725071	0.124861	-0.419
366	0.000642893	-0.663769	-0.130697	0.725068	0.124848	-0.419023
367	0.000627375	-0.663796	-0.130714	0.725064	0.124834	-0.419046
368	0.000612232	-0.663822	-0.130732	0.725061	0.124821	-0.419068
369	0.000597454	-0.663847	-0.130748	0.725058	0.124808	-0.419089
370	0.000583033	-0.663872	-0.130765	0.725054	0.124796	-0.41911
371	0.00056896	-0.663896	-0.130781	0.725051	0.124784	-0.419131
372	0.000555227	-0.66392	-0.130797	0.725048	0.124772	-0.41915
373	0.000541825	-0.663942	-0.130812	0.725045	0.12476	-0.41917
374	0.000528747	-0.663965	-0.130827	0.725042	0.124749	-0.419189
375	0.000515984	-0.663987	-0.130841	0.725039	0.124738	-0.419207
376	0.00050353	-0.664008	-0.130856	0.725037	0.124727	-0.419225
377	0.000491376	-0.664029	-0.130869	0.725034	0.124716	-0.419243
378	0.000479515	-0.664049	-0.130883	0.725031	0.124706	-0.41926
379	0.000467941	-0.664069	-0.130896	0.725029	0.124696	-0.419277
380	0.000456646	-0.664088	-0.130909	0.725026	0.124686	-0.419293
381	0.000445624	-0.664107	-0.130922	0.725024	0.124677	-0.419309
382	0.000434868	-0.664126	-0.130934	0.725021	0.124667	-0.419325
383	0.000424371	-0.664144	-0.130946	0.725019	0.124658	-0.41934
384	0.000414128	-0.664161	-0.130958	0.725017	0.124649	-0.419355
385	0.000404132	-0.664178	-0.130969	0.725014	0.124641	-0.419369
386	0.000394377	-0.664195	-0.13098	0.725012	0.124632	-0.419384
387	0.000384858	-0.664211	-0.130991	0.72501	0.124624	-0.419397
388	0.000375568	-0.664227	-0.131002	0.725008	0.124616	-0.419411
389	0.000366503	-0.664243	-0.131012	0.725006	0.124608	-0.419424
390	0.000357657	-0.664258	-0.131022	0.725004	0.1246	-0.419437
391	0.000349024	-0.664273	-0.131032	0.725002	0.124593	-0.419449
392	0.000340599	-0.664287	-0.131041	0.725	0.124586	-0.419462
393	0.000332378	-0.664301	-0.131051	0.724998	0.124578	-0.419474
394	0.000324355	-0.664315	-0.13106	0.724997	0.124571	-0.419485
395	0.000316526	-0.664328	-0.131069	0.724995	0.124565	-0.419496
396	0.000308886	-0.664341	-0.131078	0.724993	0.124558	-0.419508
397	0.00030143	-0.664354	-0.131086	0.724991	0.124552	-0.419518
398	0.000294155	-0.664366	-0.131094	0.72499	0.124545	-0.419529
399	0.000287054	-0.664379	-0.131103	0.724988	0.124539	-0.419539
400	0.000280126	-0.66439	-0.13111	0.724987	0.124533	-0.419549
401	0.000273364	-0.664402	-0.131118	0.724985	0.124527	-0.419559
402	0.000266766	-0.664413	-0.131126	0.724984	0.124522	-0.419569
403	0.000260327	-0.664424	-0.131133	0.724982	0.124516	-0.419578
404	0.000254043	-0.664435	-0.13114	0.724981	0.124511	-0.419587
405	0.000247911	-0.664446	-0.131147	0.724979	0.124505	-0.419596
406	0.000241927	-0.664456	-0.131154	0.724978	0.1245	-0.419605
407	0.000236088	-0.664466	-0.131161	0.724977	0.124495	-0.419613
408	0.000230389	-0.664476	-0.131167	0.724976	0.12449	-0.419621
409	0.000224828	-0.664485	-0.131174	0.724974	0.124485	-0.419629
410	0.000219401	-0.664494	-0.13118	0.724973	0.12448	-0.419637
411	0.000214106	-0.664503	-0.131186	0.724972	0.124476	-0.419645
412	0.000208938	-0.664512	-0.131192	0.724971	0.124471	-0.419652
413	0.000203894	-0.664521	-0.131197	0.72497	0.124467	-0.41966
414	0.000198973	-0.664529	-0.131203	0.724969	0.124463	-0.419667
415	0.00019417	-0.664538	-0.131209	0.724967	0.124459	-0.419674
416	0.000189483	-0.664546	-0.131214	0.724966	0.124455	-0.419681
417	0.00018491	-0.664553	-0.131219	0.724965	0.124451	-0.419687
418	0.000180447	-0.664561	-0.131224	0.724964	0.124447	-0.419694
419	0.000176091	-0.664569	-0.131229	0.724963	0.124443	-0.4197
420	0.000171841	-0.664576	-0.131234	0.724962	0.124439	-0.419706
421	0.000167693	-0.664583	-0.131239	0.724962	0.124436	-0.419712
422	0.000163645	-0.66459	-0.131243	0.724961	0.124432	-0.419718
423	0.000159695	-0.664597	-0.131248	0.72496	0.124429	-0.419724
424	0.000155841	-0.664603	-0.131252	0.724959	0.124425	-0.419729
425	0.000152079	-0.66461	-0.131257	0.724958	0.124422	-0.419735
426	0.000148408	-0.664616	-0.131261	0.724957	0.124419	-0.41974
427	0.000144826	-0.664622	-0.131265	0.724956	0.124416	-0.419745
428	0.00014133	-0.664628	-0.131269	0.724956	0.124413	-0.41975
429	0.000137919	-0.664634	-0.131273	0.724955	0.12441	-0.419755
430	0.00013459	-0.66464	-0.131276	0.724954	0.124407	-0.41976
431	0.000131341	-0.664645	-0.13128	0.724953	0.124404	-0.419765
432	0.000128171	-0.664651	-0.131284	0.724953	0.124401	-0.41977
433	0.000125077	-0.664656	-0.131287	0.724952	0.124399	-0.419774
434	0.000122058	-0.664661	-0.131291	0.724951	0.124396	-0.419778
435	0.000119112	-0.664666	-0.131294	0.724951	0.124394	-0.419783
436	0.000116237	-0.664671	-0.131297	0.72495	0.124391	-0.419787
437	0.000113431	-0.664676	-0.131301	0.724949	0.124389	-0.419791
438	0.000110693	-0.664681	-0.131304	0.724949	0.124386	-0.419795
439	0.000108022	-0.664685	-0.131307	0.724948	0.124384	-0.419799
440	0.000105414	-0.66469	-0.13131	0.724948	0.124382	-0.419803
441	0.00010287	-0.664694	-0.131313	0.724947	0.124379	-0.419806
442	0.000100387	-0.664698	-0.131315	0.724946	0.124377	-0.41981
443	9.79637e-05	-0.664702	-0.131318	0.724946	0.124375	-0.419813
444	9.55991e-05	-0.664706	-0.131321	0.724945	0.124373	-0.419817
445	9.32916e-05	-0.66471	-0.131324	0.724945	0.124371	-0.41982
446	9.10397e-05	-0.664714	-0.131326	0.724944	0.124369	-0.419823
447	8.88423e-05	-0.664718	-0.131329	0.724944	0.124367	-0.419827
448	8.66978e-05	-0.664722	-0.131331	0.724943	0.124365	-0.41983
449	8.46052e-05	-0.664725	-0.131333	0.724943	0.124364	-0.419833
450	8.2563e-05	-0.664729	-0.131336	0.724942	0.124362	-0.419836
451	8.05702e-05	-0.664732	-0.131338	0.724942	0.12436	-0.419839
452	7.86254e-05	-0.664735	-0.13134	0.724942	0.124358	-0.419841
453	7.67276e-05	-0.664739	-0.131342	0.724941	0.124357	-0.419844
454	7.48756e-05	-0.664742	-0.131345	0.724941	0.124355	-0.419847
455	7.30683e-05	-0.664745	-0.131347	0.72494	0.124354	-0.419849
456	7.13046e-05	-0.664748	-0.131349	0.72494	0.124352	-0.419852
457	6.95835e-05	-0.664751	-0.131351	0.72494	0.124351	-0.419854
458	6.79039e-05	-0.664754	-0.131353	0.724939	0.124349	-0.419857
459	6.62649e-05	-0.664757	-0.131354	0.724939	0.124348	-0.419859
460	6.46654e-05	-0.664759	-0.131356	0.724938	0.124346	-0.419862
461	6.31046e-05	-0.664762	-0.131358	0.724938	0.124345	-0.419864
462	6.15814e-05	-0.664765	-0.13136	0.724938	0.124344	-0.419866
463	6.0095e-05	-0.664767	-0.131361	0.724937	0.124342	-0.419868
464	5.86444e-05	-0.66477	-0.131363	0.724937	0.124341	-0.41987
465	5.72289e-05	-0.664772	-0.131365	0.724937	0.12434	-0.419872
466	5.58475e-05	-0.664774	-0.131366	0.724936	0.124339	-0.419874
467	5.44995e-05	-0.664777	-0.131368	0.724936	0.124338	-0.419876
468	5.31841e-05	-0.664779	-0.131369	0.724936	0.124336	-0.419878
469	5.19003e-05	-0.664781	-0.131371	0.724936	0.124335	-0.41988
470	5.06476e-05	-0.664783	-0.131372	0.724935	0.124334	-0.419882
471	4.94251e-05	-0.664785	-0.131374	0.724935	0.124333	-0.419884
472	4.82321e-05	-0.664787	-0.131375	0.724935	0.124332	-0.419885
473	4.70679e-05	-0.664789	-0.131376	0.724935	0.124331	-0.419887
474	4.59318e-05	-0.664791	-0.131378	0.724934	0.12433	-0.419889
475	4.48231e-05	-0.664793	-0.131379	0.724934	0.124329	-0.41989
476	4.37412e-05	-0.664795	-0.13138	0.724934	0.124328	-0.419892
477	4.26854e-05	-0.664797	-0.131381	0.724934	0.124327	-0.419893
478	4.16551e-05	-0.664799	-0.131382	0.724933	0.124326	-0.419895
479	4.06496e-05	-0.6648	-0.131384	0.724933	0.124326	-0.419896
480	3.96685e-05	-0.664802	-0.131385	0.724933	0.124325	-0.419898
481	3.8711e-05	-0.664804	-0.131386	0.724933	0.124324	-0.419899
482	3.77766e-05	-0.664805	-0.131387	0.724932	0.124323	-0.419901
483	3.68647e-05	-0.664807	-0.131388	0.724932	0.124322	-0.419902
484	3.59749e-05	-0.664808	-0.131389	0.724932	0.124321	-0.419903
485	3.51066e-05	-0.66481	-0.13139	0.724932	0.124321	-0.419904
486	3.42592e-05	-0.664811	-0.131391	0.724932	0.12432	-0.419906
487	3.34323e-05	-0.664813	-0.131392	0.724931	0.124319	-0.419907
488	3.26253e-05	-0.664814	-0.131393	0.724931	0.124319	-0.419908
489	3.18378e-05	-0.664815	-0.131394	0.724931	0.124318	-0.419909
490	3.10693e-05	-0.664817	-0.131395	0.724931	0.124317	-0.41991
491	3.03194e-05	-0.664818	-0.131395	0.724931	0.124317	-0.419911
492	2.95876e-05	-0.664819	-0.131396	0.724931	0.124316	-0.419912
493	2.88734e-05	-0.664821	-0.131397	0.72493	0.124315	-0.419913
494	2.81765e-05	-0.664822	-0.131398	0.72493	0.124315	-0.419915
495	2.74964e-05	-0.664823	-0.131399	0.72493	0.124314	-0.419915
496	2.68327e-05	-0.664824	-0.131399	0.72493	0.124314	-0.419916
497	2.6185e-05	-0.664825	-0.1314	0.72493	0.124313	-0.419917
498	2.5553e-05	-0.664826	-0.131401	0.72493	0.124312	-0.419918
499	2.49362e-05	-0.664827	-0.131402	0.72493	0.124312	-0.419919
500	2.43343e-05	-0.664828	-0.131402	0.724929	0.124311	-0.41992
501	2.37469e-05	-0.664829	-0.131403	0.724929	0.124311	-0.419921
502	2.31737e-05	-0.66483	-0.131404	0.724929	0.12431	-0.419922
503	2.26144e-05	-0.664831	-0.131404	0.724929	0.12431	-0.419923
504	2.20685e-05	-0.664832	-0.131405	0.724929	0.124309	-0.419923
505	2.15358e-05	-0.664833	-0.131405	0.724929	0.124309	-0.419924
506	2.1016e-05	-0.664834	-0.131406	0.724929	0.124309	-0.419925
507	2.05087e-05	-0.664835	-0.131407	0.724929	0.124308	-0.419926
508	2.00137e-05	-0.664836	-0.131407	0.724928	0.124308	-0.419926
509	1.95306e-05	-0.664837	-0.131408	0.724928	0.124307	-0.419927
510	1.90592e-05	-0.664837	-0.131408	0.724928	0.124307	-0.419928
511	1.85992e-05	-0.664838	-0.131409	0.724928	0.124306	-0.419928
512	1.81502e-05	-0.664839	-0.131409	0.724928	0.124306	-0.419929
513	1.77121e-05	-0.66484	-0.13141	0.724928	0.124306	-0.41993
514	1.72846e-05	-0.66484	-0.13141	0.724928	0.124305	-0.41993
515	1.68674e-05	-0.664841	-0.131411	0.724928	0.124305	-0.419931
516	1.64603e-05	-0.664842	-0.131411	0.724928	0.124305	-0.419931
517	1.6063e-05	-0.664843	-0.131412	0.724928	0.124304	-0.419932
518	1.56752e-05	-0.664843	-0.131412	0.724928	0.124304	-0.419933
519	1.52969e-05	-0.664844	-0.131413	0.724927	0.124304	-0.419933
520	1.49277e-05	-0.664844	-0.131413	0.724927	0.124303	-0.419934
521	1.45673e-05	-0.664845	-0.131413	0.724927	0.124303	-0.419934
522	1.42157e-05	-0.664846	-0.131414	0.724927	0.124303	-0.419935
523	1.38726e-05	-0.664846	-0.131414	0.724927	0.124302	-0.419935
524	1.35377e-05	-0.664847	-0.131415	0.724927	0.124302	-0.419936
525	1.3211e-05	-0.664847	-0.131415	0.724927	0.124302	-0.419936
526	1.28921e-05	-0.664848	-0.131415	0.724927	0.124301	-0.419937
527	1.25809e-05	-0.664848	-0.131416	0.724927	0.124301	-0.419937
528	1.22772e-05	-0.664849	-0.131416	0.724927	0.124301	-0.419938
529	1.19809e-05	-0.664849	-0.131416	0.724927	0.124301	-0.419938
530	1.16917e-05	-0.66485	-0.131417	0.724927	0.1243	-0.419938
531	1.14095e-05	-0.66485	-0.131417	0.724927	0.1243	-0.419939
532	1.11341e-05	-0.664851	-0.131417	0.724926	0.1243	-0.419939
533	1.08654e-05	-0.664851	-0.131418	0.724926	0.1243	-0.41994
534	1.06031e-05	-0.664852	-0.131418	0.724926	0.124299	-0.41994
535	1.03472e-05	-0.664852	-0.131418	0.724926	0.124299	-0.41994
536	1.00974e-05	-0.664853	-0.131418	0.724926	0.124299	-0.419941
537	9.85369e-06	-0.664853	-0.131419	0.724926	0.124299	-0.419941
538	9.61584e-06	-0.664854	-0.131419	0.724926	0.124299	-0.419941
539	9.38374e-06	-0.664854	-0.131419	0.724926	0.124298	-0.419942
540	9.15724e-06	-0.664854	-0.13142	0.724926	0.124298	-0.419942
