# Supplementary material for: The Social Cost of Fossil and Industrial CO2 Emissions from 1950 to 2018
Source: Research Square preprint supplement (doi:10.21203/rs.3.rs-2244259/v1), 2022-11-17
Supplement: Supplementary file 135 [file F_external.xlsx]

## Sheet: Fex_params
f	1	2	3	4	5	6
0	-0.0410404	-0.0410404	-0.0410404	-0.0410404	-0.0410404	-0.0410404
1	-0.0594258	-0.0594258	-0.0594258	-0.0594258	-0.0594258	-0.0594258
2	-0.0779556	-0.0779556	-0.0779556	-0.0779556	-0.0779556	-0.0779556
3	-0.0852044	-0.0852044	-0.0852044	-0.0852044	-0.0852044	-0.0852044
4	-0.0918651	-0.0918651	-0.0918651	-0.0918651	-0.0918651	-0.0918651
5	-0.0985601	-0.0985601	-0.0985601	-0.0985601	-0.0985601	-0.0985601
6	-0.105033	-0.105033	-0.105033	-0.105033	-0.105033	-0.105033
7	-0.111324	-0.111324	-0.111324	-0.111324	-0.111324	-0.111324
8	-0.113011	-0.113011	-0.113011	-0.113011	-0.113011	-0.113011
9	-0.105876	-0.105876	-0.105876	-0.105876	-0.105876	-0.105876
10	-0.0967086	-0.0967086	-0.0967086	-0.0967086	-0.0967086	-0.0967086
11	-0.104385	-0.104385	-0.104385	-0.104385	-0.104385	-0.104385
12	-0.115335	-0.115335	-0.115335	-0.115335	-0.115335	-0.115335
13	-0.115062	-0.115062	-0.115062	-0.115062	-0.115062	-0.115062
14	-0.113291	-0.113291	-0.113291	-0.113291	-0.113291	-0.113291
15	-0.109114	-0.109114	-0.109114	-0.109114	-0.109114	-0.109114
16	-0.103892	-0.103892	-0.103892	-0.103892	-0.103892	-0.103892
17	-0.100381	-0.100381	-0.100381	-0.100381	-0.100381	-0.100381
18	-0.0948973	-0.0948973	-0.0948973	-0.0948973	-0.0948973	-0.0948973
19	-0.0829352	-0.0829352	-0.0829352	-0.0829352	-0.0829352	-0.0829352
20	-0.0603903	-0.0603903	-0.0603903	-0.0603903	-0.0603903	-0.0603903
21	-0.033735	-0.033735	-0.033735	-0.033735	-0.033735	-0.033735
22	-0.0181687	-0.0181687	-0.0181687	-0.0181687	-0.0181687	-0.0181687
23	-0.0101221	-0.0101221	-0.0101221	-0.0101221	-0.0101221	-0.0101221
24	-0.00168982	-0.00168982	-0.00168982	-0.00168982	-0.00168982	-0.00168982
25	0.00662207	0.00662207	0.00662207	0.00662207	0.00662207	0.00662207
26	0.0105612	0.0105612	0.0105612	0.0105612	0.0105612	0.0105612
27	0.0150762	0.0150762	0.0150762	0.0150762	0.0150762	0.0150762
28	0.0292492	0.0292492	0.0292492	0.0292492	0.0292492	0.0292492
29	0.0465308	0.0465308	0.0465308	0.0465308	0.0465308	0.0465308
30	0.0541693	0.0541693	0.0541693	0.0541693	0.0541693	0.0541693
31	0.0560188	0.0560188	0.0560188	0.0560188	0.0560188	0.0560188
32	0.0548529	0.0548529	0.0548529	0.0548529	0.0548529	0.0548529
33	0.0541226	0.0541226	0.0541226	0.0541226	0.0541226	0.0541226
34	0.0614846	0.0614846	0.0614846	0.0614846	0.0614846	0.0614846
35	0.0727784	0.0727784	0.0727784	0.0727784	0.0727784	0.0727784
36	0.0831827	0.0831827	0.0831827	0.0831827	0.0831827	0.0831827
37	0.0908859	0.0908859	0.0908859	0.0908859	0.0908859	0.0908859
38	0.10257	0.10257	0.10257	0.10257	0.10257	0.10257
39	0.119012	0.119012	0.119012	0.119012	0.119012	0.119012
40	0.1343	0.1343	0.1343	0.1343	0.1343	0.1343
41	0.139103	0.139103	0.139103	0.139103	0.139103	0.139103
42	0.136582	0.136582	0.136582	0.136582	0.136582	0.136582
43	0.13964	0.13964	0.13964	0.13964	0.13964	0.13964
44	0.145195	0.145195	0.145195	0.145195	0.145195	0.145195
45	0.156397	0.156397	0.156397	0.156397	0.156397	0.156397
46	0.170156	0.170156	0.170156	0.170156	0.170156	0.170156
47	0.170277	0.170277	0.170277	0.170277	0.170277	0.170277
48	0.163047	0.163047	0.163047	0.163047	0.163047	0.163047
49	0.159997	0.159997	0.159997	0.159997	0.159997	0.159997
50	0.15362	0.15362	0.15362	0.15362	0.15362	0.15362
51	0.149074	0.149074	0.149074	0.149074	0.149074	0.149074
52	0.153265	0.153265	0.153265	0.153265	0.153265	0.153265
53	0.157713	0.157713	0.157713	0.157713	0.157713	0.157713
54	0.160502	0.160502	0.160502	0.160502	0.160502	0.160502
55	0.166283	0.166283	0.166283	0.166283	0.166283	0.166283
56	0.179783	0.179783	0.179783	0.179783	0.179783	0.179783
57	0.197598	0.197598	0.197598	0.197598	0.197598	0.197598
58	0.216677	0.216677	0.216677	0.216677	0.216677	0.216677
59	0.236971	0.236971	0.236971	0.236971	0.236971	0.236971
60	0.25476	0.25476	0.25476	0.25476	0.25476	0.25476
61	0.266387	0.266387	0.266387	0.266387	0.266387	0.266387
62	0.276213	0.276213	0.276213	0.276213	0.276213	0.276213
63	0.287416	0.287416	0.287416	0.287416	0.287416	0.287416
64	0.299051	0.299051	0.299051	0.299051	0.299051	0.299051
65	0.311306	0.311306	0.311306	0.311306	0.311306	0.311306
66	0.324143	0.324143	0.324143	0.324143	0.324143	0.324143
67	0.337511	0.337511	0.337511	0.337511	0.337511	0.337511
68	0.351364	0.351364	0.351364	0.351364	0.351364	0.351364
69	0.351364	0.351364	0.351364	0.351364	0.351364	0.351364
70	0.359364	0.356364	0.358364	0.362364	0.363364	0.363364
71	0.367364	0.361364	0.365364	0.373364	0.375364	0.375364
72	0.375364	0.366364	0.372364	0.384364	0.387364	0.387364
73	0.383364	0.371364	0.379364	0.395364	0.399364	0.399364
74	0.391364	0.376364	0.386364	0.406364	0.411364	0.411364
75	0.399364	0.381364	0.393364	0.417364	0.423364	0.423364
76	0.407364	0.386364	0.400364	0.428364	0.435364	0.435364
77	0.415364	0.391364	0.407364	0.439364	0.447364	0.447364
78	0.423364	0.396364	0.414364	0.450364	0.459364	0.459364
79	0.431364	0.401364	0.421364	0.461364	0.471364	0.471364
80	0.439364	0.406364	0.428364	0.472364	0.483364	0.483364
81	0.447364	0.411364	0.435364	0.483364	0.495364	0.495364
82	0.455364	0.416364	0.442364	0.494364	0.507364	0.507364
83	0.463364	0.421364	0.449364	0.505364	0.519364	0.519364
84	0.471364	0.426364	0.456364	0.516364	0.531364	0.531364
85	0.479364	0.431364	0.463364	0.527364	0.543364	0.543364
86	0.487364	0.436364	0.470364	0.538364	0.555364	0.555364
87	0.495364	0.441364	0.477364	0.549364	0.567364	0.567364
88	0.503364	0.446364	0.484364	0.560364	0.579364	0.579364
89	0.511364	0.451364	0.491364	0.571364	0.591364	0.591364
90	0.519364	0.456364	0.498364	0.582364	0.603364	0.603364
91	0.527364	0.461364	0.505364	0.593364	0.615364	0.615364
92	0.535364	0.466364	0.512364	0.604364	0.627364	0.627364
93	0.543364	0.471364	0.519364	0.615364	0.639364	0.639364
94	0.551364	0.476364	0.526364	0.626364	0.651364	0.651364
95	0.559364	0.481364	0.533364	0.637364	0.663364	0.663364
96	0.567364	0.486364	0.540364	0.648364	0.675364	0.675364
97	0.575364	0.491364	0.547364	0.659364	0.687364	0.687364
98	0.583364	0.496364	0.554364	0.670364	0.699364	0.699364
99	0.591364	0.501364	0.561364	0.681364	0.711364	0.711364
100	0.599364	0.506364	0.568364	0.692364	0.723364	0.723364
101	0.607364	0.511364	0.575364	0.703364	0.735364	0.735364
102	0.615364	0.516364	0.582364	0.714364	0.747364	0.747364
103	0.623364	0.521364	0.589364	0.725364	0.759364	0.759364
104	0.631364	0.526364	0.596364	0.736364	0.771364	0.771364
105	0.639364	0.531364	0.603364	0.747364	0.783364	0.783364
106	0.647364	0.536364	0.610364	0.758364	0.795364	0.795364
107	0.655364	0.541364	0.617364	0.769364	0.807364	0.807364
108	0.663364	0.546364	0.624364	0.780364	0.819364	0.819364
109	0.671364	0.551364	0.631364	0.791364	0.831364	0.831364
110	0.679364	0.556364	0.638364	0.802364	0.843364	0.843364
111	0.687364	0.561364	0.645364	0.813364	0.855364	0.855364
112	0.695364	0.566364	0.652364	0.824364	0.867364	0.867364
113	0.703364	0.571364	0.659364	0.835364	0.879364	0.879364
114	0.711364	0.576364	0.666364	0.846364	0.891364	0.891364
115	0.719364	0.581364	0.673364	0.857364	0.903364	0.903364
116	0.727364	0.586364	0.680364	0.868364	0.915364	0.915364
117	0.735364	0.591364	0.687364	0.879364	0.927364	0.927364
118	0.743364	0.596364	0.694364	0.890364	0.939364	0.939364
119	0.751364	0.601364	0.701364	0.901364	0.951364	0.951364
120	0.759364	0.606364	0.708364	0.912364	0.963364	0.963364
121	0.767364	0.611364	0.715364	0.923364	0.975364	0.975364
122	0.775364	0.616364	0.722364	0.934364	0.987364	0.987364
123	0.783364	0.621364	0.729364	0.945364	0.999364	0.999364
124	0.791364	0.626364	0.736364	0.956364	1.01136	1.01136
125	0.799364	0.631364	0.743364	0.967364	1.02336	1.02336
126	0.807364	0.636364	0.750364	0.978364	1.03536	1.03536
127	0.815364	0.641364	0.757364	0.989364	1.04736	1.04736
128	0.823364	0.646364	0.764364	1.00036	1.05936	1.05936
129	0.831364	0.651364	0.771364	1.01136	1.07136	1.07136
130	0.839364	0.656364	0.778364	1.02236	1.08336	1.08336
131	0.847364	0.661364	0.785364	1.03336	1.09536	1.09536
132	0.855364	0.666364	0.792364	1.04436	1.10736	1.10736
133	0.863364	0.671364	0.799364	1.05536	1.11936	1.11936
134	0.871364	0.676364	0.806364	1.06636	1.13136	1.13136
135	0.879364	0.681364	0.813364	1.07736	1.14336	1.14336
136	0.887364	0.686364	0.820364	1.08836	1.15536	1.15536
137	0.895364	0.691364	0.827364	1.09936	1.16736	1.16736
138	0.903364	0.696364	0.834364	1.11036	1.17936	1.17936
139	0.911364	0.701364	0.841364	1.12136	1.19136	1.19136
140	0.919364	0.706364	0.848364	1.13236	1.20336	1.20336
141	0.927364	0.711364	0.855364	1.14336	1.21536	1.21536
142	0.935364	0.716364	0.862364	1.15436	1.22736	1.22736
143	0.943364	0.721364	0.869364	1.16536	1.23936	1.23936
144	0.951364	0.726364	0.876364	1.17636	1.25136	1.25136
145	0.959364	0.731364	0.883364	1.18736	1.26336	1.26336
146	0.967364	0.736364	0.890364	1.19836	1.27536	1.27536
147	0.975364	0.741364	0.897364	1.20936	1.28736	1.28736
148	0.983364	0.746364	0.904364	1.22036	1.29936	1.29936
149	0.991364	0.751364	0.911364	1.23136	1.31136	1.31136
150	0.999364	0.756364	0.918364	1.24236	1.32336	1.32336
151	1	0.798	0.953	1.264	1.325	1.371
152	1	0.798	0.953	1.264	1.325	1.371
153	1	0.798	0.953	1.264	1.325	1.371
154	1	0.798	0.953	1.264	1.325	1.371
155	1	0.798	0.953	1.264	1.325	1.371
156	1	0.798	0.953	1.264	1.325	1.371
157	1	0.798	0.953	1.264	1.325	1.371
158	1	0.798	0.953	1.264	1.325	1.371
159	1	0.798	0.953	1.264	1.325	1.371
160	1	0.798	0.953	1.264	1.325	1.371
161	1	0.798	0.953	1.264	1.325	1.371
162	1	0.798	0.953	1.264	1.325	1.371
163	1	0.798	0.953	1.264	1.325	1.371
164	1	0.798	0.953	1.264	1.325	1.371
165	1	0.798	0.953	1.264	1.325	1.371
166	1	0.798	0.953	1.264	1.325	1.371
167	1	0.798	0.953	1.264	1.325	1.371
168	1	0.798	0.953	1.264	1.325	1.371
169	1	0.798	0.953	1.264	1.325	1.371
170	1	0.798	0.953	1.264	1.325	1.371
171	1	0.798	0.953	1.264	1.325	1.371
172	1	0.798	0.953	1.264	1.325	1.371
173	1	0.798	0.953	1.264	1.325	1.371
174	1	0.798	0.953	1.264	1.325	1.371
175	1	0.798	0.953	1.264	1.325	1.371
176	1	0.798	0.953	1.264	1.325	1.371
177	1	0.798	0.953	1.264	1.325	1.371
178	1	0.798	0.953	1.264	1.325	1.371
179	1	0.798	0.953	1.264	1.325	1.371
180	1	0.798	0.953	1.264	1.325	1.371
181	1	0.798	0.953	1.264	1.325	1.371
182	1	0.798	0.953	1.264	1.325	1.371
183	1	0.798	0.953	1.264	1.325	1.371
184	1	0.798	0.953	1.264	1.325	1.371
185	1	0.798	0.953	1.264	1.325	1.371
186	1	0.798	0.953	1.264	1.325	1.371
187	1	0.798	0.953	1.264	1.325	1.371
188	1	0.798	0.953	1.264	1.325	1.371
189	1	0.798	0.953	1.264	1.325	1.371
190	1	0.798	0.953	1.264	1.325	1.371
191	1	0.798	0.953	1.264	1.325	1.371
192	1	0.798	0.953	1.264	1.325	1.371
193	1	0.798	0.953	1.264	1.325	1.371
194	1	0.798	0.953	1.264	1.325	1.371
195	1	0.798	0.953	1.264	1.325	1.371
196	1	0.798	0.953	1.264	1.325	1.371
197	1	0.798	0.953	1.264	1.325	1.371
198	1	0.798	0.953	1.264	1.325	1.371
199	1	0.798	0.953	1.264	1.325	1.371
200	1	0.798	0.953	1.264	1.325	1.371
201	1	0.798	0.953	1.264	1.325	1.371
202	1	0.798	0.953	1.264	1.325	1.371
203	1	0.798	0.953	1.264	1.325	1.371
204	1	0.798	0.953	1.264	1.325	1.371
205	1	0.798	0.953	1.264	1.325	1.371
206	1	0.798	0.953	1.264	1.325	1.371
207	1	0.798	0.953	1.264	1.325	1.371
208	1	0.798	0.953	1.264	1.325	1.371
209	1	0.798	0.953	1.264	1.325	1.371
210	1	0.798	0.953	1.264	1.325	1.371
211	1	0.798	0.953	1.264	1.325	1.371
212	1	0.798	0.953	1.264	1.325	1.371
213	1	0.798	0.953	1.264	1.325	1.371
214	1	0.798	0.953	1.264	1.325	1.371
215	1	0.798	0.953	1.264	1.325	1.371
216	1	0.798	0.953	1.264	1.325	1.371
217	1	0.798	0.953	1.264	1.325	1.371
218	1	0.798	0.953	1.264	1.325	1.371
219	1	0.798	0.953	1.264	1.325	1.371
220	1	0.798	0.953	1.264	1.325	1.371
221	1	0.798	0.953	1.264	1.325	1.371
222	1	0.798	0.953	1.264	1.325	1.371
223	1	0.798	0.953	1.264	1.325	1.371
224	1	0.798	0.953	1.264	1.325	1.371
225	1	0.798	0.953	1.264	1.325	1.371
226	1	0.798	0.953	1.264	1.325	1.371
227	1	0.798	0.953	1.264	1.325	1.371
228	1	0.798	0.953	1.264	1.325	1.371
229	1	0.798	0.953	1.264	1.325	1.371
230	1	0.798	0.953	1.264	1.325	1.371
231	1	0.798	0.953	1.264	1.325	1.371
232	1	0.798	0.953	1.264	1.325	1.371
233	1	0.798	0.953	1.264	1.325	1.371
234	1	0.798	0.953	1.264	1.325	1.371
235	1	0.798	0.953	1.264	1.325	1.371
236	1	0.798	0.953	1.264	1.325	1.371
237	1	0.798	0.953	1.264	1.325	1.371
238	1	0.798	0.953	1.264	1.325	1.371
239	1	0.798	0.953	1.264	1.325	1.371
240	1	0.798	0.953	1.264	1.325	1.371
241	1	0.798	0.953	1.264	1.325	1.371
242	1	0.798	0.953	1.264	1.325	1.371
243	1	0.798	0.953	1.264	1.325	1.371
244	1	0.798	0.953	1.264	1.325	1.371
245	1	0.798	0.953	1.264	1.325	1.371
246	1	0.798	0.953	1.264	1.325	1.371
247	1	0.798	0.953	1.264	1.325	1.371
248	1	0.798	0.953	1.264	1.325	1.371
249	1	0.798	0.953	1.264	1.325	1.371
250	1	0.798	0.953	1.264	1.325	1.371
251	1	0.798	0.953	1.264	1.325	1.371
252	1	0.798	0.953	1.264	1.325	1.371
253	1	0.798	0.953	1.264	1.325	1.371
254	1	0.798	0.953	1.264	1.325	1.371
255	1	0.798	0.953	1.264	1.325	1.371
256	1	0.798	0.953	1.264	1.325	1.371
257	1	0.798	0.953	1.264	1.325	1.371
258	1	0.798	0.953	1.264	1.325	1.371
259	1	0.798	0.953	1.264	1.325	1.371
260	1	0.798	0.953	1.264	1.325	1.371
261	1	0.798	0.953	1.264	1.325	1.371
262	1	0.798	0.953	1.264	1.325	1.371
263	1	0.798	0.953	1.264	1.325	1.371
264	1	0.798	0.953	1.264	1.325	1.371
265	1	0.798	0.953	1.264	1.325	1.371
266	1	0.798	0.953	1.264	1.325	1.371
267	1	0.798	0.953	1.264	1.325	1.371
268	1	0.798	0.953	1.264	1.325	1.371
269	1	0.798	0.953	1.264	1.325	1.371
270	1	0.798	0.953	1.264	1.325	1.371
271	1	0.798	0.953	1.264	1.325	1.371
272	1	0.798	0.953	1.264	1.325	1.371
273	1	0.798	0.953	1.264	1.325	1.371
274	1	0.798	0.953	1.264	1.325	1.371
275	1	0.798	0.953	1.264	1.325	1.371
276	1	0.798	0.953	1.264	1.325	1.371
277	1	0.798	0.953	1.264	1.325	1.371
278	1	0.798	0.953	1.264	1.325	1.371
279	1	0.798	0.953	1.264	1.325	1.371
280	1	0.798	0.953	1.264	1.325	1.371
281	1	0.798	0.953	1.264	1.325	1.371
282	1	0.798	0.953	1.264	1.325	1.371
283	1	0.798	0.953	1.264	1.325	1.371
284	1	0.798	0.953	1.264	1.325	1.371
285	1	0.798	0.953	1.264	1.325	1.371
286	1	0.798	0.953	1.264	1.325	1.371
287	1	0.798	0.953	1.264	1.325	1.371
288	1	0.798	0.953	1.264	1.325	1.371
289	1	0.798	0.953	1.264	1.325	1.371
290	1	0.798	0.953	1.264	1.325	1.371
291	1	0.798	0.953	1.264	1.325	1.371
292	1	0.798	0.953	1.264	1.325	1.371
293	1	0.798	0.953	1.264	1.325	1.371
294	1	0.798	0.953	1.264	1.325	1.371
295	1	0.798	0.953	1.264	1.325	1.371
296	1	0.798	0.953	1.264	1.325	1.371
297	1	0.798	0.953	1.264	1.325	1.371
298	1	0.798	0.953	1.264	1.325	1.371
299	1	0.798	0.953	1.264	1.325	1.371
300	1	0.798	0.953	1.264	1.325	1.371
301	1	0.798	0.953	1.264	1.325	1.371
302	1	0.798	0.953	1.264	1.325	1.371
303	1	0.798	0.953	1.264	1.325	1.371
304	1	0.798	0.953	1.264	1.325	1.371
305	1	0.798	0.953	1.264	1.325	1.371
306	1	0.798	0.953	1.264	1.325	1.371
307	1	0.798	0.953	1.264	1.325	1.371
308	1	0.798	0.953	1.264	1.325	1.371
309	1	0.798	0.953	1.264	1.325	1.371
310	1	0.798	0.953	1.264	1.325	1.371
311	1	0.798	0.953	1.264	1.325	1.371
312	1	0.798	0.953	1.264	1.325	1.371
313	1	0.798	0.953	1.264	1.325	1.371
314	1	0.798	0.953	1.264	1.325	1.371
315	1	0.798	0.953	1.264	1.325	1.371
316	1	0.798	0.953	1.264	1.325	1.371
317	1	0.798	0.953	1.264	1.325	1.371
318	1	0.798	0.953	1.264	1.325	1.371
319	1	0.798	0.953	1.264	1.325	1.371
320	1	0.798	0.953	1.264	1.325	1.371
321	1	0.798	0.953	1.264	1.325	1.371
322	1	0.798	0.953	1.264	1.325	1.371
323	1	0.798	0.953	1.264	1.325	1.371
324	1	0.798	0.953	1.264	1.325	1.371
325	1	0.798	0.953	1.264	1.325	1.371
326	1	0.798	0.953	1.264	1.325	1.371
327	1	0.798	0.953	1.264	1.325	1.371
328	1	0.798	0.953	1.264	1.325	1.371
329	1	0.798	0.953	1.264	1.325	1.371
330	1	0.798	0.953	1.264	1.325	1.371
331	1	0.798	0.953	1.264	1.325	1.371
332	1	0.798	0.953	1.264	1.325	1.371
333	1	0.798	0.953	1.264	1.325	1.371
334	1	0.798	0.953	1.264	1.325	1.371
335	1	0.798	0.953	1.264	1.325	1.371
336	1	0.798	0.953	1.264	1.325	1.371
337	1	0.798	0.953	1.264	1.325	1.371
338	1	0.798	0.953	1.264	1.325	1.371
339	1	0.798	0.953	1.264	1.325	1.371
340	1	0.798	0.953	1.264	1.325	1.371
341	1	0.798	0.953	1.264	1.325	1.371
342	1	0.798	0.953	1.264	1.325	1.371
343	1	0.798	0.953	1.264	1.325	1.371
344	1	0.798	0.953	1.264	1.325	1.371
345	1	0.798	0.953	1.264	1.325	1.371
346	1	0.798	0.953	1.264	1.325	1.371
347	1	0.798	0.953	1.264	1.325	1.371
348	1	0.798	0.953	1.264	1.325	1.371
349	1	0.798	0.953	1.264	1.325	1.371
350	1	0.798	0.953	1.264	1.325	1.371
351	1	0.798	0.953	1.264	1.325	1.371
352	1	0.798	0.953	1.264	1.325	1.371
353	1	0.798	0.953	1.264	1.325	1.371
354	1	0.798	0.953	1.264	1.325	1.371
355	1	0.798	0.953	1.264	1.325	1.371
356	1	0.798	0.953	1.264	1.325	1.371
357	1	0.798	0.953	1.264	1.325	1.371
358	1	0.798	0.953	1.264	1.325	1.371
359	1	0.798	0.953	1.264	1.325	1.371
360	1	0.798	0.953	1.264	1.325	1.371
361	1	0.798	0.953	1.264	1.325	1.371
362	1	0.798	0.953	1.264	1.325	1.371
363	1	0.798	0.953	1.264	1.325	1.371
364	1	0.798	0.953	1.264	1.325	1.371
365	1	0.798	0.953	1.264	1.325	1.371
366	1	0.798	0.953	1.264	1.325	1.371
367	1	0.798	0.953	1.264	1.325	1.371
368	1	0.798	0.953	1.264	1.325	1.371
369	1	0.798	0.953	1.264	1.325	1.371
370	1	0.798	0.953	1.264	1.325	1.371
371	1	0.798	0.953	1.264	1.325	1.371
372	1	0.798	0.953	1.264	1.325	1.371
373	1	0.798	0.953	1.264	1.325	1.371
374	1	0.798	0.953	1.264	1.325	1.371
375	1	0.798	0.953	1.264	1.325	1.371
376	1	0.798	0.953	1.264	1.325	1.371
377	1	0.798	0.953	1.264	1.325	1.371
378	1	0.798	0.953	1.264	1.325	1.371
379	1	0.798	0.953	1.264	1.325	1.371
380	1	0.798	0.953	1.264	1.325	1.371
381	1	0.798	0.953	1.264	1.325	1.371
382	1	0.798	0.953	1.264	1.325	1.371
383	1	0.798	0.953	1.264	1.325	1.371
384	1	0.798	0.953	1.264	1.325	1.371
385	1	0.798	0.953	1.264	1.325	1.371
386	1	0.798	0.953	1.264	1.325	1.371
387	1	0.798	0.953	1.264	1.325	1.371
388	1	0.798	0.953	1.264	1.325	1.371
389	1	0.798	0.953	1.264	1.325	1.371
390	1	0.798	0.953	1.264	1.325	1.371
391	1	0.798	0.953	1.264	1.325	1.371
392	1	0.798	0.953	1.264	1.325	1.371
393	1	0.798	0.953	1.264	1.325	1.371
394	1	0.798	0.953	1.264	1.325	1.371
395	1	0.798	0.953	1.264	1.325	1.371
396	1	0.798	0.953	1.264	1.325	1.371
397	1	0.798	0.953	1.264	1.325	1.371
398	1	0.798	0.953	1.264	1.325	1.371
399	1	0.798	0.953	1.264	1.325	1.371
400	1	0.798	0.953	1.264	1.325	1.371
401	1	0.798	0.953	1.264	1.325	1.371
402	1	0.798	0.953	1.264	1.325	1.371
403	1	0.798	0.953	1.264	1.325	1.371
404	1	0.798	0.953	1.264	1.325	1.371
405	1	0.798	0.953	1.264	1.325	1.371
406	1	0.798	0.953	1.264	1.325	1.371
407	1	0.798	0.953	1.264	1.325	1.371
408	1	0.798	0.953	1.264	1.325	1.371
409	1	0.798	0.953	1.264	1.325	1.371
410	1	0.798	0.953	1.264	1.325	1.371
411	1	0.798	0.953	1.264	1.325	1.371
412	1	0.798	0.953	1.264	1.325	1.371
413	1	0.798	0.953	1.264	1.325	1.371
414	1	0.798	0.953	1.264	1.325	1.371
415	1	0.798	0.953	1.264	1.325	1.371
416	1	0.798	0.953	1.264	1.325	1.371
417	1	0.798	0.953	1.264	1.325	1.371
418	1	0.798	0.953	1.264	1.325	1.371
419	1	0.798	0.953	1.264	1.325	1.371
420	1	0.798	0.953	1.264	1.325	1.371
421	1	0.798	0.953	1.264	1.325	1.371
422	1	0.798	0.953	1.264	1.325	1.371
423	1	0.798	0.953	1.264	1.325	1.371
424	1	0.798	0.953	1.264	1.325	1.371
425	1	0.798	0.953	1.264	1.325	1.371
426	1	0.798	0.953	1.264	1.325	1.371
427	1	0.798	0.953	1.264	1.325	1.371
428	1	0.798	0.953	1.264	1.325	1.371
429	1	0.798	0.953	1.264	1.325	1.371
430	1	0.798	0.953	1.264	1.325	1.371
431	1	0.798	0.953	1.264	1.325	1.371
432	1	0.798	0.953	1.264	1.325	1.371
433	1	0.798	0.953	1.264	1.325	1.371
434	1	0.798	0.953	1.264	1.325	1.371
435	1	0.798	0.953	1.264	1.325	1.371
436	1	0.798	0.953	1.264	1.325	1.371
437	1	0.798	0.953	1.264	1.325	1.371
438	1	0.798	0.953	1.264	1.325	1.371
439	1	0.798	0.953	1.264	1.325	1.371
440	1	0.798	0.953	1.264	1.325	1.371
441	1	0.798	0.953	1.264	1.325	1.371
442	1	0.798	0.953	1.264	1.325	1.371
443	1	0.798	0.953	1.264	1.325	1.371
444	1	0.798	0.953	1.264	1.325	1.371
445	1	0.798	0.953	1.264	1.325	1.371
446	1	0.798	0.953	1.264	1.325	1.371
447	1	0.798	0.953	1.264	1.325	1.371
448	1	0.798	0.953	1.264	1.325	1.371
449	1	0.798	0.953	1.264	1.325	1.371
450	1	0.798	0.953	1.264	1.325	1.371
451	1	0.798	0.953	1.264	1.325	1.371
452	1	0.798	0.953	1.264	1.325	1.371
453	1	0.798	0.953	1.264	1.325	1.371
454	1	0.798	0.953	1.264	1.325	1.371
455	1	0.798	0.953	1.264	1.325	1.371
456	1	0.798	0.953	1.264	1.325	1.371
457	1	0.798	0.953	1.264	1.325	1.371
458	1	0.798	0.953	1.264	1.325	1.371
459	1	0.798	0.953	1.264	1.325	1.371
460	1	0.798	0.953	1.264	1.325	1.371
461	1	0.798	0.953	1.264	1.325	1.371
462	1	0.798	0.953	1.264	1.325	1.371
463	1	0.798	0.953	1.264	1.325	1.371
464	1	0.798	0.953	1.264	1.325	1.371
465	1	0.798	0.953	1.264	1.325	1.371
466	1	0.798	0.953	1.264	1.325	1.371
467	1	0.798	0.953	1.264	1.325	1.371
468	1	0.798	0.953	1.264	1.325	1.371
469	1	0.798	0.953	1.264	1.325	1.371
470	1	0.798	0.953	1.264	1.325	1.371
471	1	0.798	0.953	1.264	1.325	1.371
472	1	0.798	0.953	1.264	1.325	1.371
473	1	0.798	0.953	1.264	1.325	1.371
474	1	0.798	0.953	1.264	1.325	1.371
475	1	0.798	0.953	1.264	1.325	1.371
476	1	0.798	0.953	1.264	1.325	1.371
477	1	0.798	0.953	1.264	1.325	1.371
478	1	0.798	0.953	1.264	1.325	1.371
479	1	0.798	0.953	1.264	1.325	1.371
480	1	0.798	0.953	1.264	1.325	1.371
481	1	0.798	0.953	1.264	1.325	1.371
482	1	0.798	0.953	1.264	1.325	1.371
483	1	0.798	0.953	1.264	1.325	1.371
484	1	0.798	0.953	1.264	1.325	1.371
485	1	0.798	0.953	1.264	1.325	1.371
486	1	0.798	0.953	1.264	1.325	1.371
487	1	0.798	0.953	1.264	1.325	1.371
488	1	0.798	0.953	1.264	1.325	1.371
489	1	0.798	0.953	1.264	1.325	1.371
490	1	0.798	0.953	1.264	1.325	1.371
491	1	0.798	0.953	1.264	1.325	1.371
492	1	0.798	0.953	1.264	1.325	1.371
493	1	0.798	0.953	1.264	1.325	1.371
494	1	0.798	0.953	1.264	1.325	1.371
495	1	0.798	0.953	1.264	1.325	1.371
496	1	0.798	0.953	1.264	1.325	1.371
497	1	0.798	0.953	1.264	1.325	1.371
498	1	0.798	0.953	1.264	1.325	1.371
499	1	0.798	0.953	1.264	1.325	1.371
500	1	0.798	0.953	1.264	1.325	1.371
501	1	0.798	0.953	1.264	1.325	1.371
502	1	0.798	0.953	1.264	1.325	1.371
503	1	0.798	0.953	1.264	1.325	1.371
504	1	0.798	0.953	1.264	1.325	1.371
505	1	0.798	0.953	1.264	1.325	1.371
506	1	0.798	0.953	1.264	1.325	1.371
507	1	0.798	0.953	1.264	1.325	1.371
508	1	0.798	0.953	1.264	1.325	1.371
509	1	0.798	0.953	1.264	1.325	1.371
510	1	0.798	0.953	1.264	1.325	1.371
511	1	0.798	0.953	1.264	1.325	1.371
512	1	0.798	0.953	1.264	1.325	1.371
513	1	0.798	0.953	1.264	1.325	1.371
514	1	0.798	0.953	1.264	1.325	1.371
515	1	0.798	0.953	1.264	1.325	1.371
516	1	0.798	0.953	1.264	1.325	1.371
517	1	0.798	0.953	1.264	1.325	1.371
518	1	0.798	0.953	1.264	1.325	1.371
519	1	0.798	0.953	1.264	1.325	1.371
520	1	0.798	0.953	1.264	1.325	1.371
521	1	0.798	0.953	1.264	1.325	1.371
522	1	0.798	0.953	1.264	1.325	1.371
523	1	0.798	0.953	1.264	1.325	1.371
524	1	0.798	0.953	1.264	1.325	1.371
525	1	0.798	0.953	1.264	1.325	1.371
526	1	0.798	0.953	1.264	1.325	1.371
527	1	0.798	0.953	1.264	1.325	1.371
528	1	0.798	0.953	1.264	1.325	1.371
529	1	0.798	0.953	1.264	1.325	1.371
530	1	0.798	0.953	1.264	1.325	1.371
531	1	0.798	0.953	1.264	1.325	1.371
532	1	0.798	0.953	1.264	1.325	1.371
533	1	0.798	0.953	1.264	1.325	1.371
534	1	0.798	0.953	1.264	1.325	1.371
535	1	0.798	0.953	1.264	1.325	1.371
536	1	0.798	0.953	1.264	1.325	1.371
537	1	0.798	0.953	1.264	1.325	1.371
538	1	0.798	0.953	1.264	1.325	1.371
539	1	0.798	0.953	1.264	1.325	1.371
540	1	0.798	0.953	1.264	1.325	1.371
