# Supplementary material for: The Social Cost of Fossil and Industrial CO2 Emissions from 1950 to 2018
Source: Research Square preprint supplement (doi:10.21203/rs.3.rs-2244259/v1), 2022-11-17
Supplement: Supplementary file 160 [file L_external.xlsx]

## Sheet: L_external
f	1	2	3	4	5	6
0	2536.43	2536.43	2536.43	2536.43	2536.43	2536.43
1	2584.03	2584.03	2584.03	2584.03	2584.03	2584.03
2	2630.86	2630.86	2630.86	2630.86	2630.86	2630.86
3	2677.61	2677.61	2677.61	2677.61	2677.61	2677.61
4	2724.85	2724.85	2724.85	2724.85	2724.85	2724.85
5	2773.02	2773.02	2773.02	2773.02	2773.02	2773.02
6	2822.44	2822.44	2822.44	2822.44	2822.44	2822.44
7	2873.31	2873.31	2873.31	2873.31	2873.31	2873.31
8	2925.69	2925.69	2925.69	2925.69	2925.69	2925.69
9	2979.58	2979.58	2979.58	2979.58	2979.58	2979.58
10	3034.95	3034.95	3034.95	3034.95	3034.95	3034.95
11	3091.84	3091.84	3091.84	3091.84	3091.84	3091.84
12	3150.42	3150.42	3150.42	3150.42	3150.42	3150.42
13	3211	3211	3211	3211	3211	3211
14	3273.98	3273.98	3273.98	3273.98	3273.98	3273.98
15	3339.58	3339.58	3339.58	3339.58	3339.58	3339.58
16	3407.92	3407.92	3407.92	3407.92	3407.92	3407.92
17	3478.77	3478.77	3478.77	3478.77	3478.77	3478.77
18	3551.6	3551.6	3551.6	3551.6	3551.6	3551.6
19	3625.68	3625.68	3625.68	3625.68	3625.68	3625.68
20	3700.44	3700.44	3700.44	3700.44	3700.44	3700.44
21	3775.76	3775.76	3775.76	3775.76	3775.76	3775.76
22	3851.65	3851.65	3851.65	3851.65	3851.65	3851.65
23	3927.78	3927.78	3927.78	3927.78	3927.78	3927.78
24	4003.79	4003.79	4003.79	4003.79	4003.79	4003.79
25	4079.48	4079.48	4079.48	4079.48	4079.48	4079.48
26	4154.67	4154.67	4154.67	4154.67	4154.67	4154.67
27	4229.51	4229.51	4229.51	4229.51	4229.51	4229.51
28	4304.53	4304.53	4304.53	4304.53	4304.53	4304.53
29	4380.51	4380.51	4380.51	4380.51	4380.51	4380.51
30	4458	4458	4458	4458	4458	4458
31	4537	4537	4537	4537	4537	4537
32	4617.39	4617.39	4617.39	4617.39	4617.39	4617.39
33	4699.57	4699.57	4699.57	4699.57	4699.57	4699.57
34	4784.01	4784.01	4784.01	4784.01	4784.01	4784.01
35	4870.92	4870.92	4870.92	4870.92	4870.92	4870.92
36	4960.57	4960.57	4960.57	4960.57	4960.57	4960.57
37	5052.52	5052.52	5052.52	5052.52	5052.52	5052.52
38	5145.43	5145.43	5145.43	5145.43	5145.43	5145.43
39	5237.44	5237.44	5237.44	5237.44	5237.44	5237.44
40	5327.23	5327.23	5327.23	5327.23	5327.23	5327.23
41	5414.29	5414.29	5414.29	5414.29	5414.29	5414.29
42	5498.92	5498.92	5498.92	5498.92	5498.92	5498.92
43	5581.6	5581.6	5581.6	5581.6	5581.6	5581.6
44	5663.15	5663.15	5663.15	5663.15	5663.15	5663.15
45	5744.21	5744.21	5744.21	5744.21	5744.21	5744.21
46	5824.89	5824.89	5824.89	5824.89	5824.89	5824.89
47	5905.05	5905.05	5905.05	5905.05	5905.05	5905.05
48	5984.79	5984.79	5984.79	5984.79	5984.79	5984.79
49	6064.24	6064.24	6064.24	6064.24	6064.24	6064.24
50	6143.49	6143.49	6143.49	6143.49	6143.49	6143.49
51	6222.63	6222.63	6222.63	6222.63	6222.63	6222.63
52	6301.77	6301.77	6301.77	6301.77	6301.77	6301.77
53	6381.19	6381.19	6381.19	6381.19	6381.19	6381.19
54	6461.16	6461.16	6461.16	6461.16	6461.16	6461.16
55	6541.91	6541.91	6541.91	6541.91	6541.91	6541.91
56	6623.52	6623.52	6623.52	6623.52	6623.52	6623.52
57	6705.95	6705.95	6705.95	6705.95	6705.95	6705.95
58	6789.09	6789.09	6789.09	6789.09	6789.09	6789.09
59	6872.77	6872.77	6872.77	6872.77	6872.77	6872.77
60	6956.82	6956.82	6956.82	6956.82	6956.82	6956.82
61	7041.19	7041.19	7041.19	7041.19	7041.19	7041.19
62	7125.83	7125.83	7125.83	7125.83	7125.83	7125.83
63	7210.58	7210.58	7210.58	7210.58	7210.58	7210.58
64	7295.29	7295.29	7295.29	7295.29	7295.29	7295.29
65	7379.8	7379.8	7379.8	7379.8	7379.8	7379.8
66	7464.02	7464.02	7464.02	7464.02	7464.02	7464.02
67	7547.86	7547.86	7547.86	7547.86	7547.86	7547.86
68	7631.09	7631.09	7631.09	7631.09	7631.09	7631.09
69	7713.47	7713.47	7713.47	7713.47	7713.47	7713.47
70	7801.34	7735.53	7758.18	7821.94	7758.54	7737.03
71	7887.68	7757.02	7801.87	7928.79	7802.59	7759.99
72	7972.49	7777.96	7844.56	8034.01	7845.63	7782.36
73	8055.77	7798.36	7886.26	8137.58	7887.68	7804.16
74	8137.51	7818.24	7926.99	8239.5	7928.75	7825.4
75	8217.74	7837.6	7966.77	8339.74	7968.86	7846.09
76	8296.44	7856.45	8005.61	8438.32	8008.02	7866.25
77	8373.63	7874.81	8043.53	8535.21	8046.26	7885.89
78	8449.33	7892.7	8080.54	8630.41	8083.59	7905.02
79	8523.53	7910.11	8116.67	8723.94	8120.03	7923.64
80	8596.25	7927.07	8151.93	8815.78	8155.59	7941.79
81	8667.5	7943.59	8186.34	8905.95	8190.29	7959.45
82	8737.29	7959.66	8219.91	8994.43	8224.15	7976.66
83	8805.65	7975.32	8252.66	9081.26	8257.18	7993.41
84	8872.58	7990.55	8284.6	9166.42	8289.4	8009.72
85	8938.09	8005.39	8315.76	9249.93	8320.83	8025.6
86	9002.22	8019.83	8346.14	9331.8	8351.48	8041.06
87	9064.96	8033.88	8375.77	9412.04	8381.37	8056.11
88	9126.34	8047.56	8404.67	9490.67	8410.52	8070.76
89	9186.38	8060.87	8432.83	9567.7	8438.93	8085.02
90	9245.1	8073.83	8460.29	9643.14	8466.64	8098.9
91	9302.51	8086.44	8487.05	9717.01	8493.64	8112.4
92	9358.63	8098.71	8513.14	9789.33	8519.96	8125.55
93	9413.49	8110.65	8538.57	9860.11	8545.61	8138.34
94	9467.09	8122.27	8563.34	9929.37	8570.61	8150.79
95	9519.47	8133.58	8587.48	9997.14	8594.96	8162.91
96	9570.64	8144.58	8611	10063.4	8618.7	8174.7
97	9620.63	8155.28	8633.92	10128.3	8641.82	8186.17
98	9669.44	8165.69	8656.24	10191.6	8664.35	8197.33
99	9717.11	8175.82	8677.99	10253.6	8686.29	8208.19
100	9763.65	8185.67	8699.17	10314.2	8707.67	8218.76
101	9809.09	8195.26	8719.8	10373.4	8728.49	8229.03
102	9853.44	8204.58	8739.9	10431.2	8748.76	8239.03
103	9896.72	8213.65	8759.46	10487.7	8768.51	8248.76
104	9938.95	8222.48	8778.52	10542.9	8787.74	8258.22
105	9980.17	8231.06	8797.07	10596.9	8806.46	8267.43
106	10020.4	8239.41	8815.14	10649.5	8824.69	8276.38
107	10059.6	8247.52	8832.72	10700.9	8842.44	8285.09
108	10097.8	8255.42	8849.85	10751.1	8859.72	8293.56
109	10135.2	8263.1	8866.52	10800.1	8876.54	8301.8
110	10171.5	8270.57	8882.74	10847.9	8892.92	8309.81
111	10207	8277.83	8898.54	10894.6	8908.86	8317.6
112	10241.6	8284.89	8913.91	10940.1	8924.38	8325.18
113	10275.3	8291.76	8928.87	10984.5	8939.48	8332.55
114	10308.2	8298.44	8943.43	11027.9	8954.18	8339.72
115	10340.2	8304.93	8957.61	11070.1	8968.48	8346.69
116	10371.5	8311.25	8971.4	11111.3	8982.4	8353.47
117	10401.9	8317.39	8984.82	11151.5	8995.95	8360.06
118	10431.5	8323.36	8997.88	11190.7	9009.13	8366.47
119	10460.4	8329.16	9010.58	11229	9021.96	8372.7
120	10488.6	8334.81	9022.95	11266.2	9034.44	8378.76
121	10516	8340.3	9034.98	11302.5	9046.58	8384.65
122	10542.7	8345.63	9046.68	11338	9058.39	8390.38
123	10568.7	8350.82	9058.07	11372.5	9069.88	8395.95
124	10594.1	8355.86	9069.14	11406.1	9081.07	8401.36
125	10618.8	8360.77	9079.92	11438.9	9091.94	8406.63
126	10642.8	8365.54	9090.4	11470.8	9102.52	8411.75
127	10666.2	8370.17	9100.6	11501.9	9112.82	8416.72
128	10689	8374.68	9110.52	11532.2	9122.83	8421.56
129	10711.2	8379.06	9120.16	11561.7	9132.57	8426.27
130	10732.8	8383.31	9129.55	11590.5	9142.04	8430.84
131	10753.9	8387.45	9138.67	11618.5	9151.25	8435.28
132	10774.3	8391.48	9147.55	11645.8	9160.21	8439.61
133	10794.3	8395.39	9156.18	11672.4	9168.93	8443.81
134	10813.7	8399.19	9164.58	11698.2	9177.4	8447.89
135	10832.6	8402.89	9172.74	11723.4	9185.65	8451.86
136	10851	8406.48	9180.68	11748	9193.66	8455.72
137	10868.9	8409.98	9188.41	11771.9	9201.46	8459.47
138	10886.3	8413.37	9195.91	11795.1	9209.04	8463.12
139	10903.2	8416.67	9203.22	11817.8	9216.41	8466.67
140	10919.7	8419.88	9210.32	11839.8	9223.58	8470.11
141	10935.8	8423	9217.22	11861.2	9230.55	8473.46
142	10951.4	8426.03	9223.93	11882.1	9237.33	8476.72
143	10966.6	8428.97	9230.46	11902.5	9243.92	8479.88
144	10981.4	8431.83	9236.81	11922.2	9250.33	8482.96
145	10995.7	8434.62	9242.98	11941.5	9256.56	8485.95
146	11009.7	8437.32	9248.98	11960.2	9262.61	8488.85
147	11023.3	8439.95	9254.81	11978.5	9268.5	8491.68
148	11036.6	8442.51	9260.48	11996.2	9274.23	8494.42
149	11049.5	8444.99	9266	12013.5	9279.8	8497.09
150	11062	8447.4	9271.36	12030.3	9285.21	8499.68
151	11074.2	8449.75	9276.57	12046.6	9290.47	8502.2
152	11086.1	8452.03	9281.64	12062.5	9295.58	8504.65
153	11097.6	8454.24	9286.56	12078	9300.56	8507.03
154	11108.8	8456.4	9291.35	12093	9305.39	8509.35
155	11119.7	8458.49	9296.01	12107.7	9310.09	8511.6
156	11130.3	8460.52	9300.53	12121.9	9314.66	8513.78
157	11140.6	8462.5	9304.93	12135.8	9319.1	8515.91
158	11150.7	8464.42	9309.21	12149.3	9323.42	8517.97
159	11160.4	8466.29	9313.36	12162.4	9327.62	8519.98
160	11169.9	8468.1	9317.4	12175.1	9331.7	8521.93
161	11179.2	8469.87	9321.33	12187.5	9335.66	8523.82
162	11188.1	8471.58	9325.15	12199.6	9339.52	8525.67
163	11196.9	8473.25	9328.86	12211.3	9343.26	8527.46
164	11205.4	8474.87	9332.47	12222.7	9346.91	8529.2
165	11213.6	8476.44	9335.97	12233.8	9350.45	8530.89
166	11221.6	8477.97	9339.38	12244.6	9353.89	8532.53
167	11229.4	8479.45	9342.69	12255.1	9357.23	8534.13
168	11237	8480.9	9345.91	12265.3	9360.48	8535.68
169	11244.4	8482.3	9349.04	12275.3	9363.64	8537.18
170	11251.6	8483.66	9352.08	12284.9	9366.71	8538.65
171	11258.5	8484.99	9355.04	12294.3	9369.7	8540.07
172	11265.3	8486.28	9357.91	12303.4	9372.6	8541.46
173	11271.9	8487.53	9360.71	12312.3	9375.42	8542.8
174	11278.3	8488.74	9363.42	12320.9	9378.16	8544.11
175	11284.5	8489.92	9366.06	12329.3	9380.82	8545.38
176	11290.6	8491.07	9368.62	12337.5	9383.41	8546.61
177	11296.5	8492.19	9371.12	12345.4	9385.93	8547.81
178	11302.2	8493.27	9373.54	12353.1	9388.37	8548.98
179	11307.8	8494.33	9375.89	12360.6	9390.75	8550.11
180	11313.2	8495.35	9378.18	12367.9	9393.06	8551.21
181	11318.4	8496.35	9380.4	12375	9395.31	8552.28
182	11323.5	8497.31	9382.56	12381.9	9397.49	8553.32
183	11328.5	8498.25	9384.66	12388.6	9399.61	8554.33
184	11333.3	8499.16	9386.7	12395.1	9401.67	8555.31
185	11338	8500.05	9388.69	12401.4	9403.67	8556.27
186	11342.6	8500.91	9390.61	12407.5	9405.62	8557.19
187	11347	8501.75	9392.49	12413.5	9407.51	8558.09
188	11351.3	8502.57	9394.31	12419.3	9409.35	8558.97
189	11355.5	8503.36	9396.08	12425	9411.13	8559.82
190	11359.6	8504.13	9397.8	12430.5	9412.87	8560.65
191	11363.6	8504.87	9399.47	12435.8	9414.56	8561.45
192	11367.4	8505.6	9401.09	12441	9416.19	8562.23
193	11371.1	8506.3	9402.67	12446.1	9417.79	8562.99
194	11374.8	8506.99	9404.2	12451	9419.34	8563.72
195	11378.3	8507.66	9405.69	12455.7	9420.84	8564.44
196	11381.8	8508.3	9407.14	12460.4	9422.3	8565.13
197	11385.1	8508.93	9408.55	12464.9	9423.72	8565.81
198	11388.3	8509.54	9409.91	12469.2	9425.1	8566.47
199	11391.5	8510.14	9411.24	12473.5	9426.45	8567.11
200	11394.5	8510.71	9412.53	12477.6	9427.75	8567.73
201	11397.5	8511.27	9413.79	12481.7	9429.02	8568.33
202	11400.4	8511.82	9415.01	12485.6	9430.25	8568.91
203	11403.2	8512.35	9416.19	12489.4	9431.45	8569.48
204	11406	8512.86	9417.35	12493	9432.61	8570.04
205	11408.6	8513.36	9418.46	12496.6	9433.74	8570.57
206	11411.2	8513.85	9419.55	12500.1	9434.84	8571.1
207	11413.7	8514.32	9420.61	12503.5	9435.9	8571.6
208	11416.2	8514.78	9421.64	12506.8	9436.94	8572.1
209	11418.5	8515.22	9422.63	12510	9437.95	8572.58
210	11420.8	8515.66	9423.6	12513.1	9438.93	8573.04
211	11423.1	8516.08	9424.55	12516.1	9439.88	8573.49
212	11425.2	8516.49	9425.46	12519.1	9440.8	8573.93
213	11427.4	8516.88	9426.35	12521.9	9441.7	8574.36
214	11429.4	8517.27	9427.22	12524.7	9442.57	8574.77
215	11431.4	8517.64	9428.06	12527.4	9443.42	8575.18
216	11433.3	8518.01	9428.87	12530	9444.25	8575.57
217	11435.2	8518.36	9429.67	12532.6	9445.05	8575.95
218	11437.1	8518.71	9430.44	12535	9445.83	8576.32
219	11438.8	8519.04	9431.19	12537.5	9446.58	8576.68
220	11440.6	8519.37	9431.91	12539.8	9447.32	8577.03
221	11442.3	8519.68	9432.62	12542.1	9448.03	8577.37
222	11443.9	8519.99	9433.31	12544.3	9448.73	8577.7
223	11445.5	8520.29	9433.98	12546.4	9449.4	8578.02
224	11447	8520.58	9434.62	12548.5	9450.06	8578.33
225	11448.5	8520.86	9435.25	12550.5	9450.69	8578.63
226	11450	8521.13	9435.87	12552.5	9451.31	8578.93
227	11451.4	8521.4	9436.46	12554.4	9451.91	8579.21
228	11452.8	8521.65	9437.04	12556.3	9452.5	8579.49
229	11454.1	8521.9	9437.6	12558.1	9453.06	8579.76
230	11455.4	8522.15	9438.15	12559.8	9453.62	8580.02
231	11456.7	8522.38	9438.68	12561.5	9454.15	8580.27
232	11457.9	8522.61	9439.2	12563.2	9454.67	8580.52
233	11459.1	8522.84	9439.7	12564.8	9455.18	8580.76
234	11460.2	8523.06	9440.18	12566.4	9455.67	8581
235	11461.4	8523.27	9440.66	12567.9	9456.15	8581.22
236	11462.5	8523.47	9441.12	12569.4	9456.61	8581.44
237	11463.5	8523.67	9441.56	12570.8	9457.06	8581.66
238	11464.6	8523.86	9442	12572.2	9457.5	8581.87
239	11465.6	8524.05	9442.42	12573.6	9457.93	8582.07
240	11466.5	8524.24	9442.83	12574.9	9458.34	8582.26
241	11467.5	8524.41	9443.23	12576.2	9458.74	8582.46
242	11468.4	8524.59	9443.61	12577.4	9459.13	8582.64
243	11469.3	8524.75	9443.99	12578.6	9459.51	8582.82
244	11470.2	8524.92	9444.36	12579.8	9459.88	8583
245	11471	8525.07	9444.71	12580.9	9460.24	8583.17
246	11471.8	8525.23	9445.06	12582	9460.59	8583.33
247	11472.6	8525.38	9445.39	12583.1	9460.93	8583.49
248	11473.4	8525.52	9445.72	12584.2	9461.26	8583.65
249	11474.2	8525.66	9446.03	12585.2	9461.58	8583.8
250	11474.9	8525.8	9446.34	12586.2	9461.89	8583.95
251	11475.6	8525.93	9446.64	12587.1	9462.19	8584.09
252	11476.3	8526.06	9446.93	12588.1	9462.48	8584.23
253	11477	8526.19	9447.21	12589	9462.77	8584.37
254	11477.6	8526.31	9447.49	12589.9	9463.04	8584.5
255	11478.3	8526.43	9447.75	12590.7	9463.31	8584.63
256	11478.9	8526.55	9448.01	12591.6	9463.57	8584.75
257	11479.5	8526.66	9448.26	12592.4	9463.83	8584.87
258	11480.1	8526.77	9448.51	12593.2	9464.07	8584.99
259	11480.6	8526.87	9448.74	12593.9	9464.31	8585.1
260	11481.2	8526.98	9448.97	12594.7	9464.55	8585.21
261	11481.7	8527.08	9449.2	12595.4	9464.77	8585.32
262	11482.2	8527.17	9449.42	12596.1	9464.99	8585.42
263	11482.7	8527.27	9449.63	12596.8	9465.21	8585.52
264	11483.2	8527.36	9449.83	12597.4	9465.41	8585.62
265	11483.7	8527.45	9450.03	12598.1	9465.62	8585.72
266	11484.2	8527.53	9450.23	12598.7	9465.81	8585.81
267	11484.6	8527.62	9450.42	12599.3	9466	8585.9
268	11485	8527.7	9450.6	12599.9	9466.19	8585.99
269	11485.5	8527.78	9450.78	12600.5	9466.37	8586.08
270	11485.9	8527.86	9450.95	12601	9466.54	8586.16
271	11486.3	8527.93	9451.12	12601.6	9466.71	8586.24
272	11486.7	8528	9451.28	12602.1	9466.88	8586.32
273	11487	8528.08	9451.44	12602.6	9467.04	8586.39
274	11487.4	8528.14	9451.6	12603.1	9467.19	8586.47
275	11487.8	8528.21	9451.75	12603.6	9467.34	8586.54
276	11488.1	8528.28	9451.89	12604.1	9467.49	8586.61
277	11488.4	8528.34	9452.03	12604.5	9467.63	8586.68
278	11488.8	8528.4	9452.17	12605	9467.77	8586.74
279	11489.1	8528.46	9452.3	12605.4	9467.91	8586.81
280	11489.4	8528.52	9452.43	12605.8	9468.04	8586.87
281	11489.7	8528.57	9452.56	12606.2	9468.17	8586.93
282	11490	8528.63	9452.68	12606.6	9468.29	8586.99
283	11490.3	8528.68	9452.8	12607	9468.41	8587.05
284	11490.6	8528.73	9452.92	12607.4	9468.53	8587.1
285	11490.8	8528.78	9453.03	12607.7	9468.64	8587.15
286	11491.1	8528.83	9453.14	12608.1	9468.75	8587.21
287	11491.3	8528.88	9453.24	12608.4	9468.86	8587.26
288	11491.6	8528.93	9453.35	12608.7	9468.96	8587.31
289	11491.8	8528.97	9453.45	12609.1	9469.06	8587.36
290	11492.1	8529.01	9453.54	12609.4	9469.16	8587.4
291	11492.3	8529.06	9453.64	12609.7	9469.26	8587.45
292	11492.5	8529.1	9453.73	12610	9469.35	8587.49
293	11492.7	8529.14	9453.82	12610.3	9469.44	8587.53
294	11492.9	8529.18	9453.91	12610.6	9469.53	8587.58
295	11493.1	8529.21	9453.99	12610.8	9469.61	8587.62
296	11493.3	8529.25	9454.07	12611.1	9469.7	8587.66
297	11493.5	8529.28	9454.15	12611.3	9469.78	8587.69
298	11493.7	8529.32	9454.23	12611.6	9469.85	8587.73
299	11493.9	8529.35	9454.31	12611.8	9469.93	8587.77
300	11494	8529.39	9454.38	12612.1	9470	8587.8
301	11494.2	8529.42	9454.45	12612.3	9470.07	8587.84
302	11494.4	8529.45	9454.52	12612.5	9470.14	8587.87
303	11494.5	8529.48	9454.59	12612.7	9470.21	8587.9
304	11494.7	8529.51	9454.65	12612.9	9470.28	8587.93
305	11494.8	8529.53	9454.71	12613.2	9470.34	8587.96
306	11495	8529.56	9454.78	12613.4	9470.4	8587.99
307	11495.1	8529.59	9454.83	12613.5	9470.46	8588.02
308	11495.3	8529.61	9454.89	12613.7	9470.52	8588.05
309	11495.4	8529.64	9454.95	12613.9	9470.58	8588.07
310	11495.5	8529.66	9455	12614.1	9470.63	8588.1
311	11495.7	8529.69	9455.06	12614.3	9470.69	8588.13
312	11495.8	8529.71	9455.11	12614.4	9470.74	8588.15
313	11495.9	8529.73	9455.16	12614.6	9470.79	8588.18
314	11496	8529.75	9455.21	12614.7	9470.84	8588.2
315	11496.1	8529.78	9455.26	12614.9	9470.89	8588.22
316	11496.2	8529.8	9455.3	12615	9470.94	8588.24
317	11496.3	8529.82	9455.35	12615.2	9470.98	8588.27
318	11496.4	8529.84	9455.39	12615.3	9471.02	8588.29
319	11496.5	8529.85	9455.43	12615.5	9471.07	8588.31
320	11496.6	8529.87	9455.47	12615.6	9471.11	8588.33
321	11496.7	8529.89	9455.51	12615.7	9471.15	8588.34
322	11496.8	8529.91	9455.55	12615.9	9471.19	8588.36
323	11496.9	8529.92	9455.59	12616	9471.23	8588.38
324	11497	8529.94	9455.63	12616.1	9471.26	8588.4
325	11497.1	8529.96	9455.66	12616.2	9471.3	8588.42
326	11497.2	8529.97	9455.7	12616.3	9471.33	8588.43
327	11497.3	8529.99	9455.73	12616.4	9471.37	8588.45
328	11497.3	8530	9455.76	12616.5	9471.4	8588.46
329	11497.4	8530.02	9455.79	12616.6	9471.43	8588.48
330	11497.5	8530.03	9455.82	12616.7	9471.46	8588.49
331	11497.6	8530.04	9455.85	12616.8	9471.49	8588.51
332	11497.6	8530.06	9455.88	12616.9	9471.52	8588.52
333	11497.7	8530.07	9455.91	12617	9471.55	8588.54
334	11497.8	8530.08	9455.94	12617.1	9471.58	8588.55
335	11497.8	8530.09	9455.97	12617.2	9471.61	8588.56
336	11497.9	8530.1	9455.99	12617.3	9471.63	8588.57
337	11497.9	8530.12	9456.02	12617.4	9471.66	8588.59
338	11498	8530.13	9456.04	12617.4	9471.68	8588.6
339	11498.1	8530.14	9456.07	12617.5	9471.71	8588.61
340	11498.1	8530.15	9456.09	12617.6	9471.73	8588.62
341	11498.2	8530.16	9456.11	12617.7	9471.75	8588.63
342	11498.2	8530.17	9456.13	12617.7	9471.77	8588.64
343	11498.3	8530.18	9456.15	12617.8	9471.8	8588.65
344	11498.3	8530.19	9456.17	12617.9	9471.82	8588.66
345	11498.4	8530.19	9456.19	12617.9	9471.84	8588.67
346	11498.4	8530.2	9456.21	12618	9471.86	8588.68
347	11498.5	8530.21	9456.23	12618.1	9471.88	8588.69
348	11498.5	8530.22	9456.25	12618.1	9471.89	8588.7
349	11498.5	8530.23	9456.27	12618.2	9471.91	8588.71
350	11498.6	8530.24	9456.29	12618.2	9471.93	8588.72
351	11498.6	8530.24	9456.3	12618.3	9471.95	8588.72
352	11498.7	8530.25	9456.32	12618.3	9471.96	8588.73
353	11498.7	8530.26	9456.34	12618.4	9471.98	8588.74
354	11498.7	8530.26	9456.35	12618.4	9471.99	8588.75
355	11498.8	8530.27	9456.37	12618.5	9472.01	8588.75
356	11498.8	8530.28	9456.38	12618.5	9472.02	8588.76
357	11498.8	8530.28	9456.39	12618.6	9472.04	8588.77
358	11498.9	8530.29	9456.41	12618.6	9472.05	8588.77
359	11498.9	8530.3	9456.42	12618.7	9472.07	8588.78
360	11498.9	8530.3	9456.43	12618.7	9472.08	8588.79
361	11499	8530.31	9456.45	12618.7	9472.09	8588.79
362	11499	8530.31	9456.46	12618.8	9472.1	8588.8
363	11499	8530.32	9456.47	12618.8	9472.12	8588.8
364	11499.1	8530.32	9456.48	12618.9	9472.13	8588.81
365	11499.1	8530.33	9456.49	12618.9	9472.14	8588.82
366	11499.1	8530.33	9456.51	12618.9	9472.15	8588.82
367	11499.1	8530.34	9456.52	12619	9472.16	8588.83
368	11499.2	8530.34	9456.53	12619	9472.17	8588.83
369	11499.2	8530.35	9456.54	12619	9472.18	8588.84
370	11499.2	8530.35	9456.55	12619.1	9472.19	8588.84
371	11499.2	8530.36	9456.56	12619.1	9472.2	8588.84
372	11499.2	8530.36	9456.56	12619.1	9472.21	8588.85
373	11499.3	8530.36	9456.57	12619.1	9472.22	8588.85
374	11499.3	8530.37	9456.58	12619.2	9472.23	8588.86
375	11499.3	8530.37	9456.59	12619.2	9472.24	8588.86
376	11499.3	8530.37	9456.6	12619.2	9472.25	8588.87
377	11499.3	8530.38	9456.61	12619.3	9472.25	8588.87
378	11499.4	8530.38	9456.61	12619.3	9472.26	8588.87
379	11499.4	8530.39	9456.62	12619.3	9472.27	8588.88
380	11499.4	8530.39	9456.63	12619.3	9472.28	8588.88
381	11499.4	8530.39	9456.64	12619.4	9472.28	8588.88
382	11499.4	8530.39	9456.64	12619.4	9472.29	8588.89
383	11499.5	8530.4	9456.65	12619.4	9472.3	8588.89
384	11499.5	8530.4	9456.66	12619.4	9472.3	8588.89
385	11499.5	8530.4	9456.66	12619.4	9472.31	8588.9
386	11499.5	8530.41	9456.67	12619.5	9472.32	8588.9
387	11499.5	8530.41	9456.68	12619.5	9472.32	8588.9
388	11499.5	8530.41	9456.68	12619.5	9472.33	8588.9
389	11499.5	8530.41	9456.69	12619.5	9472.33	8588.91
390	11499.6	8530.42	9456.69	12619.5	9472.34	8588.91
391	11499.6	8530.42	9456.7	12619.5	9472.34	8588.91
392	11499.6	8530.42	9456.7	12619.6	9472.35	8588.92
393	11499.6	8530.42	9456.71	12619.6	9472.36	8588.92
394	11499.6	8530.43	9456.71	12619.6	9472.36	8588.92
395	11499.6	8530.43	9456.72	12619.6	9472.36	8588.92
396	11499.6	8530.43	9456.72	12619.6	9472.37	8588.92
397	11499.6	8530.43	9456.73	12619.6	9472.37	8588.93
398	11499.6	8530.43	9456.73	12619.7	9472.38	8588.93
399	11499.7	8530.44	9456.74	12619.7	9472.38	8588.93
400	11499.7	8530.44	9456.74	12619.7	9472.39	8588.93
401	11499.7	8530.44	9456.74	12619.7	9472.39	8588.93
402	11499.7	8530.44	9456.75	12619.7	9472.39	8588.94
403	11499.7	8530.44	9456.75	12619.7	9472.4	8588.94
404	11499.7	8530.44	9456.75	12619.7	9472.4	8588.94
405	11499.7	8530.45	9456.76	12619.7	9472.41	8588.94
406	11499.7	8530.45	9456.76	12619.8	9472.41	8588.94
407	11499.7	8530.45	9456.76	12619.8	9472.41	8588.94
408	11499.7	8530.45	9456.77	12619.8	9472.42	8588.95
409	11499.7	8530.45	9456.77	12619.8	9472.42	8588.95
410	11499.7	8530.45	9456.77	12619.8	9472.42	8588.95
411	11499.8	8530.45	9456.78	12619.8	9472.43	8588.95
412	11499.8	8530.46	9456.78	12619.8	9472.43	8588.95
413	11499.8	8530.46	9456.78	12619.8	9472.43	8588.95
414	11499.8	8530.46	9456.79	12619.8	9472.43	8588.95
415	11499.8	8530.46	9456.79	12619.8	9472.44	8588.96
416	11499.8	8530.46	9456.79	12619.8	9472.44	8588.96
417	11499.8	8530.46	9456.79	12619.9	9472.44	8588.96
418	11499.8	8530.46	9456.8	12619.9	9472.44	8588.96
419	11499.8	8530.46	9456.8	12619.9	9472.45	8588.96
420	11499.8	8530.46	9456.8	12619.9	9472.45	8588.96
421	11499.8	8530.47	9456.8	12619.9	9472.45	8588.96
422	11499.8	8530.47	9456.81	12619.9	9472.45	8588.96
423	11499.8	8530.47	9456.81	12619.9	9472.46	8588.97
424	11499.8	8530.47	9456.81	12619.9	9472.46	8588.97
425	11499.8	8530.47	9456.81	12619.9	9472.46	8588.97
426	11499.8	8530.47	9456.81	12619.9	9472.46	8588.97
427	11499.8	8530.47	9456.82	12619.9	9472.46	8588.97
428	11499.9	8530.47	9456.82	12619.9	9472.47	8588.97
429	11499.9	8530.47	9456.82	12619.9	9472.47	8588.97
430	11499.9	8530.47	9456.82	12619.9	9472.47	8588.97
431	11499.9	8530.47	9456.82	12619.9	9472.47	8588.97
432	11499.9	8530.48	9456.82	12620	9472.47	8588.97
433	11499.9	8530.48	9456.83	12620	9472.47	8588.97
434	11499.9	8530.48	9456.83	12620	9472.48	8588.97
435	11499.9	8530.48	9456.83	12620	9472.48	8588.98
436	11499.9	8530.48	9456.83	12620	9472.48	8588.98
437	11499.9	8530.48	9456.83	12620	9472.48	8588.98
438	11499.9	8530.48	9456.83	12620	9472.48	8588.98
439	11499.9	8530.48	9456.83	12620	9472.48	8588.98
440	11499.9	8530.48	9456.84	12620	9472.48	8588.98
441	11499.9	8530.48	9456.84	12620	9472.49	8588.98
442	11499.9	8530.48	9456.84	12620	9472.49	8588.98
443	11499.9	8530.48	9456.84	12620	9472.49	8588.98
444	11499.9	8530.48	9456.84	12620	9472.49	8588.98
445	11499.9	8530.48	9456.84	12620	9472.49	8588.98
446	11499.9	8530.48	9456.84	12620	9472.49	8588.98
447	11499.9	8530.48	9456.84	12620	9472.49	8588.98
448	11499.9	8530.48	9456.84	12620	9472.49	8588.98
449	11499.9	8530.48	9456.85	12620	9472.49	8588.98
450	11499.9	8530.49	9456.85	12620	9472.5	8588.98
451	11499.9	8530.49	9456.85	12620	9472.5	8588.98
452	11499.9	8530.49	9456.85	12620	9472.5	8588.98
453	11499.9	8530.49	9456.85	12620	9472.5	8588.99
454	11499.9	8530.49	9456.85	12620	9472.5	8588.99
455	11499.9	8530.49	9456.85	12620	9472.5	8588.99
456	11499.9	8530.49	9456.85	12620	9472.5	8588.99
457	11499.9	8530.49	9456.85	12620	9472.5	8588.99
458	11499.9	8530.49	9456.85	12620.1	9472.5	8588.99
459	11499.9	8530.49	9456.85	12620.1	9472.5	8588.99
460	11499.9	8530.49	9456.85	12620.1	9472.5	8588.99
461	11499.9	8530.49	9456.86	12620.1	9472.5	8588.99
462	11499.9	8530.49	9456.86	12620.1	9472.51	8588.99
463	11499.9	8530.49	9456.86	12620.1	9472.51	8588.99
464	11499.9	8530.49	9456.86	12620.1	9472.51	8588.99
465	11499.9	8530.49	9456.86	12620.1	9472.51	8588.99
466	11499.9	8530.49	9456.86	12620.1	9472.51	8588.99
467	11500	8530.49	9456.86	12620.1	9472.51	8588.99
468	11500	8530.49	9456.86	12620.1	9472.51	8588.99
469	11500	8530.49	9456.86	12620.1	9472.51	8588.99
470	11500	8530.49	9456.86	12620.1	9472.51	8588.99
471	11500	8530.49	9456.86	12620.1	9472.51	8588.99
472	11500	8530.49	9456.86	12620.1	9472.51	8588.99
473	11500	8530.49	9456.86	12620.1	9472.51	8588.99
474	11500	8530.49	9456.86	12620.1	9472.51	8588.99
475	11500	8530.49	9456.86	12620.1	9472.51	8588.99
476	11500	8530.49	9456.86	12620.1	9472.51	8588.99
477	11500	8530.49	9456.86	12620.1	9472.51	8588.99
478	11500	8530.49	9456.87	12620.1	9472.51	8588.99
479	11500	8530.49	9456.87	12620.1	9472.51	8588.99
480	11500	8530.49	9456.87	12620.1	9472.51	8588.99
481	11500	8530.49	9456.87	12620.1	9472.52	8588.99
482	11500	8530.49	9456.87	12620.1	9472.52	8588.99
483	11500	8530.49	9456.87	12620.1	9472.52	8588.99
484	11500	8530.49	9456.87	12620.1	9472.52	8588.99
485	11500	8530.49	9456.87	12620.1	9472.52	8588.99
486	11500	8530.49	9456.87	12620.1	9472.52	8588.99
487	11500	8530.49	9456.87	12620.1	9472.52	8588.99
488	11500	8530.5	9456.87	12620.1	9472.52	8588.99
489	11500	8530.5	9456.87	12620.1	9472.52	8588.99
490	11500	8530.5	9456.87	12620.1	9472.52	8588.99
491	11500	8530.5	9456.87	12620.1	9472.52	8589
492	11500	8530.5	9456.87	12620.1	9472.52	8589
493	11500	8530.5	9456.87	12620.1	9472.52	8589
494	11500	8530.5	9456.87	12620.1	9472.52	8589
495	11500	8530.5	9456.87	12620.1	9472.52	8589
496	11500	8530.5	9456.87	12620.1	9472.52	8589
497	11500	8530.5	9456.87	12620.1	9472.52	8589
498	11500	8530.5	9456.87	12620.1	9472.52	8589
499	11500	8530.5	9456.87	12620.1	9472.52	8589
500	11500	8530.5	9456.87	12620.1	9472.52	8589
501	11500	8530.5	9456.87	12620.1	9472.52	8589
502	11500	8530.5	9456.87	12620.1	9472.52	8589
503	11500	8530.5	9456.87	12620.1	9472.52	8589
504	11500	8530.5	9456.87	12620.1	9472.52	8589
505	11500	8530.5	9456.87	12620.1	9472.52	8589
506	11500	8530.5	9456.87	12620.1	9472.52	8589
507	11500	8530.5	9456.87	12620.1	9472.52	8589
508	11500	8530.5	9456.87	12620.1	9472.52	8589
509	11500	8530.5	9456.87	12620.1	9472.52	8589
510	11500	8530.5	9456.87	12620.1	9472.52	8589
511	11500	8530.5	9456.87	12620.1	9472.52	8589
512	11500	8530.5	9456.87	12620.1	9472.52	8589
513	11500	8530.5	9456.87	12620.1	9472.52	8589
514	11500	8530.5	9456.87	12620.1	9472.52	8589
515	11500	8530.5	9456.87	12620.1	9472.52	8589
516	11500	8530.5	9456.87	12620.1	9472.52	8589
517	11500	8530.5	9456.88	12620.1	9472.52	8589
518	11500	8530.5	9456.88	12620.1	9472.52	8589
519	11500	8530.5	9456.88	12620.1	9472.52	8589
520	11500	8530.5	9456.88	12620.1	9472.52	8589
521	11500	8530.5	9456.88	12620.1	9472.52	8589
522	11500	8530.5	9456.88	12620.1	9472.52	8589
523	11500	8530.5	9456.88	12620.1	9472.52	8589
524	11500	8530.5	9456.88	12620.1	9472.52	8589
525	11500	8530.5	9456.88	12620.1	9472.53	8589
526	11500	8530.5	9456.88	12620.1	9472.53	8589
527	11500	8530.5	9456.88	12620.1	9472.53	8589
528	11500	8530.5	9456.88	12620.1	9472.53	8589
529	11500	8530.5	9456.88	12620.1	9472.53	8589
530	11500	8530.5	9456.88	12620.1	9472.53	8589
531	11500	8530.5	9456.88	12620.1	9472.53	8589
532	11500	8530.5	9456.88	12620.1	9472.53	8589
533	11500	8530.5	9456.88	12620.1	9472.53	8589
534	11500	8530.5	9456.88	12620.1	9472.53	8589
535	11500	8530.5	9456.88	12620.1	9472.53	8589
536	11500	8530.5	9456.88	12620.1	9472.53	8589
537	11500	8530.5	9456.88	12620.1	9472.53	8589
538	11500	8530.5	9456.88	12620.1	9472.53	8589
539	11500	8530.5	9456.88	12620.1	9472.53	8589
540	11500	8530.5	9456.88	12620.1	9472.53	8589
