# Supplementary material for: The Social Cost of Fossil and Industrial CO2 Emissions from 1950 to 2018
Source: Research Square preprint supplement (doi:10.21203/rs.3.rs-2244259/v1), 2022-11-17
Supplement: Supplementary file 185 [file TFP_Nordhaus_external.xlsx]

## Sheet: A_params
f	1	2	3	4	5	6
0	1.98163	1.98163	1.98163	1.98163	1.98163	1.98163
1	2.0118	2.0118	2.0118	2.0118	2.0118	2.0118
2	2.00353	2.00353	2.00353	2.00353	2.00353	2.00353
3	2.02181	2.02181	2.02181	2.02181	2.02181	2.02181
4	1.9989	1.9989	1.9989	1.9989	1.9989	1.9989
5	2.03655	2.03655	2.03655	2.03655	2.03655	2.03655
6	2.03891	2.03891	2.03891	2.03891	2.03891	2.03891
7	2.03842	2.03842	2.03842	2.03842	2.03842	2.03842
8	2.0177	2.0177	2.0177	2.0177	2.0177	2.0177
9	2.03582	2.03582	2.03582	2.03582	2.03582	2.03582
10	2.06075	2.06075	2.06075	2.06075	2.06075	2.06075
11	2.05606	2.05606	2.05606	2.05606	2.05606	2.05606
12	2.08311	2.08311	2.08311	2.08311	2.08311	2.08311
13	2.11661	2.11661	2.11661	2.11661	2.11661	2.11661
14	2.1697	2.1697	2.1697	2.1697	2.1697	2.1697
15	2.19981	2.19981	2.19981	2.19981	2.19981	2.19981
16	2.22397	2.22397	2.22397	2.22397	2.22397	2.22397
17	2.22706	2.22706	2.22706	2.22706	2.22706	2.22706
18	2.26767	2.26767	2.26767	2.26767	2.26767	2.26767
19	2.31706	2.31706	2.31706	2.31706	2.31706	2.31706
20	2.32458	2.32458	2.32458	2.32458	2.32458	2.32458
21	2.35158	2.35158	2.35158	2.35158	2.35158	2.35158
22	2.39381	2.39381	2.39381	2.39381	2.39381	2.39381
23	2.46068	2.46068	2.46068	2.46068	2.46068	2.46068
24	2.44374	2.44374	2.44374	2.44374	2.44374	2.44374
25	2.39867	2.39867	2.39867	2.39867	2.39867	2.39867
26	2.44749	2.44749	2.44749	2.44749	2.44749	2.44749
27	2.47222	2.47222	2.47222	2.47222	2.47222	2.47222
28	2.49784	2.49784	2.49784	2.49784	2.49784	2.49784
29	2.52401	2.52401	2.52401	2.52401	2.52401	2.52401
30	2.50749	2.50749	2.50749	2.50749	2.50749	2.50749
31	2.48577	2.48577	2.48577	2.48577	2.48577	2.48577
32	2.43881	2.43881	2.43881	2.43881	2.43881	2.43881
33	2.4465	2.4465	2.4465	2.4465	2.4465	2.4465
34	2.49739	2.49739	2.49739	2.49739	2.49739	2.49739
35	2.52291	2.52291	2.52291	2.52291	2.52291	2.52291
36	2.54995	2.54995	2.54995	2.54995	2.54995	2.54995
37	2.58782	2.58782	2.58782	2.58782	2.58782	2.58782
38	2.63616	2.63616	2.63616	2.63616	2.63616	2.63616
39	2.66105	2.66105	2.66105	2.66105	2.66105	2.66105
40	2.6777	2.6777	2.6777	2.6777	2.6777	2.6777
41	2.64128	2.64128	2.64128	2.64128	2.64128	2.64128
42	2.62265	2.62265	2.62265	2.62265	2.62265	2.62265
43	2.6137	2.6137	2.6137	2.6137	2.6137	2.6137
44	2.6344	2.6344	2.6344	2.6344	2.6344	2.6344
45	2.66749	2.66749	2.66749	2.66749	2.66749	2.66749
46	2.71596	2.71596	2.71596	2.71596	2.71596	2.71596
47	2.76607	2.76607	2.76607	2.76607	2.76607	2.76607
48	2.77085	2.77085	2.77085	2.77085	2.77085	2.77085
49	2.81406	2.81406	2.81406	2.81406	2.81406	2.81406
50	2.89118	2.89118	2.89118	2.89118	2.89118	2.89118
51	2.9058	2.9058	2.9058	2.9058	2.9058	2.9058
52	2.93897	2.93897	2.93897	2.93897	2.93897	2.93897
53	2.99502	2.99502	2.99502	2.99502	2.99502	2.99502
54	3.0953	3.0953	3.0953	3.0953	3.0953	3.0953
55	3.17693	3.17693	3.17693	3.17693	3.17693	3.17693
56	3.27624	3.27624	3.27624	3.27624	3.27624	3.27624
57	3.36744	3.36744	3.36744	3.36744	3.36744	3.36744
58	3.37753	3.37753	3.37753	3.37753	3.37753	3.37753
59	3.2923	3.2923	3.2923	3.2923	3.2923	3.2923
60	3.40553	3.40553	3.40553	3.40553	3.40553	3.40553
61	3.46856	3.46856	3.46856	3.46856	3.46856	3.46856
62	3.48655	3.48655	3.48655	3.48655	3.48655	3.48655
63	3.53458	3.53458	3.53458	3.53458	3.53458	3.53458
64	3.58858	3.58858	3.58858	3.58858	3.58858	3.58858
65	3.62486	3.62486	3.62486	3.62486	3.62486	3.62486
66	3.65937	3.65937	3.65937	3.65937	3.65937	3.65937
67	3.70768	3.70768	3.70768	3.70768	3.70768	3.70768
68	3.73387	3.73387	3.73387	3.73387	3.73387	3.73387
69	3.75341	3.75341	3.75341	3.75341	3.75341	3.75341
70	3.81382	3.79094	3.79469	3.77593	3.79845	3.81346
71	3.8749	3.82866	3.83623	3.79847	3.8438	3.87417
72	3.93664	3.86656	3.878	3.82103	3.88946	3.93553
73	3.99905	3.90465	3.92002	3.84361	3.93543	3.99754
74	4.06213	3.94291	3.96227	3.86622	3.98171	4.06022
75	4.12588	3.98136	4.00477	3.88884	4.0283	4.12355
76	4.1903	4.01998	4.04751	3.91148	4.07519	4.18755
77	4.25539	4.05879	4.09048	3.93413	4.12239	4.25221
78	4.32116	4.09777	4.13369	3.95681	4.1699	4.31754
79	4.38761	4.13693	4.17714	3.9795	4.21771	4.38353
80	4.45474	4.17626	4.22083	4.0022	4.26583	4.45019
81	4.52255	4.21576	4.26475	4.02493	4.31425	4.51753
82	4.59104	4.25544	4.3089	4.04766	4.36297	4.58554
83	4.66022	4.29529	4.35328	4.07041	4.41199	4.65422
84	4.73009	4.33532	4.3979	4.09317	4.46132	4.72358
85	4.80064	4.37551	4.44274	4.11595	4.51094	4.79361
86	4.87188	4.41587	4.48782	4.13873	4.56086	4.86433
87	4.94382	4.4564	4.53312	4.16153	4.61109	4.93572
88	5.01645	4.49709	4.57865	4.18434	4.6616	5.0078
89	5.08977	4.53795	4.62441	4.20716	4.71242	5.08055
90	5.16379	4.57897	4.67038	4.22998	4.76353	5.154
91	5.2385	4.62015	4.71659	4.25282	4.81493	5.22812
92	5.31392	4.6615	4.76301	4.27567	4.86663	5.30293
93	5.39003	4.70301	4.80966	4.29852	4.91861	5.37843
94	5.46684	4.74467	4.85652	4.32138	4.97089	5.45462
95	5.54435	4.78649	4.90361	4.34424	5.02346	5.53149
96	5.62256	4.82847	4.95091	4.36711	5.07632	5.60906
97	5.70148	4.87061	4.99842	4.38999	5.12946	5.68731
98	5.78109	4.91289	5.04616	4.41287	5.18289	5.76625
99	5.86141	4.95533	5.0941	4.43576	5.2366	5.84589
100	5.94244	4.99793	5.14226	4.45864	5.29059	5.92622
101	6.02417	5.04067	5.19062	4.48153	5.34487	6.00723
102	6.1066	5.08356	5.2392	4.50443	5.39943	6.08894
103	6.18974	5.12659	5.28798	4.52732	5.45427	6.17135
104	6.27359	5.16978	5.33697	4.55022	5.50938	6.25445
105	6.35814	5.21311	5.38617	4.57311	5.56478	6.33824
106	6.4434	5.25658	5.43557	4.59601	5.62044	6.42272
107	6.52937	5.30019	5.48517	4.61891	5.67638	6.5079
108	6.61604	5.34395	5.53497	4.6418	5.7326	6.59377
109	6.70342	5.38784	5.58497	4.66469	5.78908	6.68033
110	6.79151	5.43187	5.63517	4.68758	5.84583	6.76759
111	6.8803	5.47604	5.68556	4.71047	5.90285	6.85554
112	6.9698	5.52035	5.73615	4.73335	5.96014	6.94418
113	7.06	5.56478	5.78693	4.75623	6.01769	7.03352
114	7.15091	5.60936	5.83791	4.77911	6.07551	7.12355
115	7.24253	5.65406	5.88907	4.80198	6.13358	7.21427
116	7.33485	5.69889	5.94043	4.82484	6.19192	7.30568
117	7.42788	5.74385	5.99197	4.8477	6.25051	7.39778
118	7.52161	5.78893	6.04369	4.87055	6.30937	7.49057
119	7.61604	5.83415	6.0956	4.89339	6.36847	7.58405
120	7.71118	5.87948	6.1477	4.91623	6.42783	7.67822
121	7.80702	5.92494	6.19997	4.93905	6.48744	7.77308
122	7.90356	5.97052	6.25242	4.96187	6.5473	7.86862
123	8.0008	6.01622	6.30506	4.98468	6.60741	7.96486
124	8.09873	6.06204	6.35786	5.00748	6.66777	8.06177
125	8.19737	6.10797	6.41084	5.03027	6.72837	8.15937
126	8.29671	6.15402	6.464	5.05305	6.78922	8.25766
127	8.39674	6.20019	6.51733	5.07581	6.8503	8.35662
128	8.49746	6.24647	6.57082	5.09857	6.91163	8.45627
129	8.59888	6.29285	6.62448	5.12131	6.97319	8.55659
130	8.701	6.33935	6.67831	5.14404	7.03499	8.6576
131	8.8038	6.38596	6.73231	5.16675	7.09702	8.75928
132	8.90729	6.43267	6.78646	5.18945	7.15928	8.86163
133	9.01148	6.47949	6.84078	5.21214	7.22178	8.96466
134	9.11635	6.52641	6.89526	5.23481	7.2845	9.06836
135	9.2219	6.57344	6.9499	5.25747	7.34745	9.17273
136	9.32814	6.62056	7.00469	5.28011	7.41062	9.27777
137	9.43506	6.66779	7.05963	5.30273	7.47402	9.38348
138	9.54265	6.71511	7.11473	5.32534	7.53764	9.48985
139	9.65093	6.76253	7.16998	5.34793	7.60147	9.59688
140	9.75988	6.81005	7.22538	5.3705	7.66553	9.70458
141	9.86951	6.85765	7.28093	5.39305	7.72979	9.81293
142	9.97981	6.90535	7.33662	5.41559	7.79428	9.92195
143	10.0908	6.95314	7.39245	5.4381	7.85897	10.0316
144	10.2024	7.00102	7.44843	5.4606	7.92387	10.1419
145	10.3147	7.04899	7.50455	5.48307	7.98898	10.2529
146	10.4277	7.09704	7.56081	5.50553	8.05429	10.3645
147	10.5413	7.14518	7.6172	5.52796	8.1198	10.4768
148	10.6556	7.1934	7.67373	5.55038	8.18552	10.5897
149	10.7706	7.24171	7.73039	5.57277	8.25143	10.7033
150	10.8862	7.29009	7.78719	5.59514	8.31755	10.8174
151	11.0024	7.33855	7.84411	5.61748	8.38385	10.9323
152	11.1193	7.38709	7.90116	5.6398	8.45035	11.0477
153	11.2369	7.4357	7.95834	5.6621	8.51704	11.1638
154	11.355	7.48439	8.01564	5.68438	8.58392	11.2806
155	11.4739	7.53316	8.07307	5.70663	8.65098	11.3979
156	11.5933	7.58199	8.13062	5.72886	8.71823	11.5159
157	11.7135	7.63089	8.18828	5.75106	8.78566	11.6345
158	11.8342	7.67986	8.24606	5.77324	8.85327	11.7537
159	11.9556	7.7289	8.30396	5.79539	8.92106	11.8735
160	12.0776	7.77801	8.36198	5.81751	8.98903	11.9939
161	12.2002	7.82717	8.4201	5.83961	9.05716	12.115
162	12.3234	7.8764	8.47833	5.86168	9.12547	12.2366
163	12.4473	7.92569	8.53668	5.88372	9.19395	12.3589
164	12.5718	7.97505	8.59512	5.90573	9.2626	12.4817
165	12.6968	8.02445	8.65368	5.92772	9.33141	12.6052
166	12.8225	8.07392	8.71233	5.94968	9.40038	12.7292
167	12.9488	8.12344	8.77109	5.97161	9.46952	12.8539
168	13.0757	8.17301	8.82995	5.99351	9.53881	12.9791
169	13.2032	8.22264	8.8889	6.01537	9.60826	13.1049
170	13.3313	8.27232	8.94795	6.03721	9.67786	13.2313
171	13.46	8.32204	9.0071	6.05902	9.74762	13.3582
172	13.5893	8.37182	9.06633	6.0808	9.81753	13.4857
173	13.7191	8.42164	9.12566	6.10255	9.88758	13.6138
174	13.8496	8.47151	9.18507	6.12426	9.95778	13.7425
175	13.9806	8.52142	9.24457	6.14595	10.0281	13.8717
176	14.1122	8.57137	9.30416	6.1676	10.0986	14.0015
177	14.2443	8.62136	9.36383	6.18922	10.1692	14.1319
178	14.3771	8.67139	9.42358	6.21081	10.24	14.2627
179	14.5103	8.72146	9.48341	6.23236	10.3109	14.3942
180	14.6442	8.77157	9.54331	6.25388	10.3819	14.5262
181	14.7786	8.82171	9.6033	6.27537	10.4531	14.6587
182	14.9135	8.87189	9.66335	6.29682	10.5243	14.7917
183	15.049	8.92209	9.72348	6.31823	10.5958	14.9253
184	15.1851	8.97233	9.78368	6.33962	10.6673	15.0595
185	15.3217	9.0226	9.84395	6.36097	10.7389	15.1941
186	15.4588	9.0729	9.90429	6.38228	10.8107	15.3293
187	15.5964	9.12322	9.96469	6.40356	10.8826	15.4649
188	15.7346	9.17357	10.0252	6.4248	10.9546	15.6011
189	15.8733	9.22394	10.0857	6.446	11.0267	15.7378
190	16.0125	9.27433	10.1463	6.46717	11.099	15.875
191	16.1522	9.32475	10.2069	6.4883	11.1713	16.0127
192	16.2925	9.37519	10.2676	6.5094	11.2437	16.1509
193	16.4332	9.42564	10.3284	6.53045	11.3163	16.2896
194	16.5744	9.47611	10.3892	6.55147	11.3889	16.4288
195	16.7162	9.5266	10.45	6.57246	11.4617	16.5685
196	16.8584	9.5771	10.5109	6.5934	11.5345	16.7086
197	17.0012	9.62762	10.5719	6.61431	11.6075	16.8492
198	17.1444	9.67814	10.6329	6.63517	11.6805	16.9903
199	17.2881	9.72868	10.6939	6.656	11.7536	17.1319
200	17.4322	9.77923	10.755	6.67679	11.8268	17.2739
201	17.5769	9.82978	10.8162	6.69754	11.9001	17.4163
202	17.722	9.88034	10.8773	6.71825	11.9735	17.5593
203	17.8675	9.93091	10.9385	6.73892	12.047	17.7026
204	18.0135	9.98148	10.9998	6.75955	12.1205	17.8464
205	18.16	10.0321	11.0611	6.78014	12.1941	17.9907
206	18.3069	10.0826	11.1224	6.80069	12.2678	18.1354
207	18.4543	10.1332	11.1837	6.82119	12.3416	18.2805
208	18.6021	10.1838	11.2451	6.84166	12.4154	18.426
209	18.7504	10.2343	11.3065	6.86209	12.4894	18.572
210	18.899	10.2849	11.3679	6.88247	12.5633	18.7184
211	19.0481	10.3355	11.4293	6.90281	12.6374	18.8652
212	19.1977	10.386	11.4908	6.92311	12.7115	19.0124
213	19.3476	10.4366	11.5523	6.94337	12.7856	19.16
214	19.4979	10.4871	11.6138	6.96359	12.8599	19.308
215	19.6487	10.5377	11.6753	6.98376	12.9341	19.4564
216	19.7999	10.5882	11.7369	7.00389	13.0085	19.6052
217	19.9514	10.6387	11.7984	7.02398	13.0829	19.7543
218	20.1034	10.6892	11.86	7.04402	13.1573	19.9039
219	20.2557	10.7397	11.9216	7.06402	13.2318	20.0538
220	20.4084	10.7901	11.9831	7.08398	13.3063	20.2041
221	20.5615	10.8406	12.0447	7.1039	13.3809	20.3548
222	20.715	10.891	12.1063	7.12377	13.4555	20.5058
223	20.8688	10.9414	12.1679	7.14359	13.5302	20.6572
224	21.023	10.9918	12.2296	7.16337	13.6049	20.8089
225	21.1776	11.0422	12.2912	7.18311	13.6796	20.961
226	21.3325	11.0925	12.3528	7.2028	13.7544	21.1134
227	21.4877	11.1428	12.4144	7.22245	13.8292	21.2662
228	21.6433	11.1931	12.476	7.24205	13.904	21.4192
229	21.7993	11.2434	12.5376	7.26161	13.9788	21.5727
230	21.9556	11.2936	12.5992	7.28113	14.0537	21.7264
231	22.1122	11.3439	12.6608	7.30059	14.1286	21.8804
232	22.2691	11.394	12.7224	7.32001	14.2035	22.0348
233	22.4264	11.4442	12.7839	7.33939	14.2785	22.1895
234	22.584	11.4943	12.8455	7.35872	14.3534	22.3445
235	22.7418	11.5444	12.907	7.378	14.4284	22.4998
236	22.9	11.5945	12.9685	7.39724	14.5034	22.6553
237	23.0585	11.6445	13.0301	7.41643	14.5784	22.8112
238	23.2173	11.6945	13.0916	7.43558	14.6534	22.9673
239	23.3764	11.7444	13.153	7.45468	14.7284	23.1238
240	23.5357	11.7943	13.2145	7.47373	14.8035	23.2805
241	23.6954	11.8442	13.2759	7.49273	14.8785	23.4374
242	23.8553	11.894	13.3373	7.51169	14.9535	23.5947
243	24.0155	11.9438	13.3987	7.5306	15.0286	23.7522
244	24.1759	11.9936	13.4601	7.54947	15.1036	23.9099
245	24.3366	12.0433	13.5214	7.56828	15.1786	24.0679
246	24.4976	12.093	13.5827	7.58705	15.2536	24.2261
247	24.6588	12.1426	13.6439	7.60578	15.3287	24.3846
248	24.8203	12.1921	13.7052	7.62445	15.4037	24.5434
249	24.982	12.2417	13.7664	7.64308	15.4787	24.7023
250	25.1439	12.2911	13.8276	7.66165	15.5537	24.8615
251	25.3061	12.3406	13.8887	7.68019	15.6286	25.0209
252	25.4685	12.39	13.9498	7.69867	15.7036	25.1805
253	25.6311	12.4393	14.0108	7.7171	15.7785	25.3403
254	25.794	12.4886	14.0719	7.73549	15.8534	25.5004
255	25.957	12.5378	14.1328	7.75383	15.9283	25.6606
256	26.1203	12.587	14.1938	7.77212	16.0032	25.8211
257	26.2838	12.6361	14.2546	7.79036	16.078	25.9817
258	26.4474	12.6851	14.3155	7.80855	16.1529	26.1425
259	26.6113	12.7341	14.3763	7.82669	16.2276	26.3035
260	26.7753	12.7831	14.437	7.84479	16.3024	26.4647
261	26.9395	12.832	14.4977	7.86283	16.3771	26.626
262	27.104	12.8808	14.5584	7.88083	16.4518	26.7876
263	27.2685	12.9296	14.619	7.89878	16.5265	26.9493
264	27.4333	12.9783	14.6795	7.91668	16.6011	27.1111
265	27.5982	13.0269	14.74	7.93453	16.6757	27.2731
266	27.7632	13.0755	14.8005	7.95233	16.7502	27.4353
267	27.9285	13.1241	14.8608	7.97008	16.8247	27.5976
268	28.0938	13.1725	14.9212	7.98778	16.8992	27.76
269	28.2594	13.2209	14.9814	8.00543	16.9736	27.9226
270	28.425	13.2692	15.0416	8.02304	17.048	28.0853
271	28.5908	13.3175	15.1018	8.04059	17.1223	28.2481
272	28.7567	13.3657	15.1619	8.0581	17.1966	28.4111
273	28.9228	13.4138	15.2219	8.07555	17.2708	28.5742
274	29.0889	13.4619	15.2818	8.09296	17.345	28.7373
275	29.2552	13.5099	15.3417	8.11031	17.4191	28.9006
276	29.4216	13.5578	15.4016	8.12762	17.4931	29.064
277	29.5881	13.6057	15.4613	8.14487	17.5671	29.2275
278	29.7547	13.6534	15.521	8.16208	17.641	29.3911
279	29.9214	13.7012	15.5806	8.17924	17.7149	29.5548
280	30.0882	13.7488	15.6402	8.19634	17.7887	29.7186
281	30.2551	13.7964	15.6997	8.2134	17.8625	29.8825
282	30.4221	13.8438	15.7591	8.23041	17.9362	30.0464
283	30.5891	13.8913	15.8184	8.24736	18.0098	30.2104
284	30.7562	13.9386	15.8776	8.26427	18.0833	30.3745
285	30.9234	13.9859	15.9368	8.28113	18.1568	30.5386
286	31.0907	14.033	15.9959	8.29793	18.2302	30.7028
287	31.258	14.0801	16.055	8.31469	18.3036	30.8671
288	31.4254	14.1272	16.1139	8.3314	18.3768	31.0314
289	31.5928	14.1741	16.1728	8.34805	18.45	31.1957
290	31.7603	14.221	16.2316	8.36466	18.5231	31.3601
291	31.9278	14.2678	16.2903	8.38122	18.5962	31.5245
292	32.0954	14.3145	16.3489	8.39772	18.6691	31.689
293	32.263	14.3611	16.4074	8.41418	18.742	31.8535
294	32.4306	14.4077	16.4659	8.43058	18.8148	32.018
295	32.5983	14.4541	16.5242	8.44694	18.8875	32.1825
296	32.7659	14.5005	16.5825	8.46325	18.9601	32.3471
297	32.9336	14.5468	16.6407	8.4795	19.0327	32.5117
298	33.1013	14.593	16.6988	8.49571	19.1051	32.6762
299	33.2691	14.6391	16.7569	8.51186	19.1775	32.8408
300	33.4368	14.6852	16.8148	8.52797	19.2498	33.0054
301	33.6045	14.7311	16.8726	8.54402	19.3219	33.17
302	33.7722	14.777	16.9304	8.56003	19.394	33.3345
303	33.9399	14.8228	16.988	8.57598	19.466	33.4991
304	34.1076	14.8684	17.0456	8.59189	19.5379	33.6636
305	34.2753	14.914	17.103	8.60774	19.6097	33.8281
306	34.443	14.9596	17.1604	8.62354	19.6815	33.9926
307	34.6106	15.005	17.2177	8.6393	19.7531	34.1571
308	34.7782	15.0503	17.2749	8.655	19.8246	34.3215
309	34.9458	15.0956	17.332	8.67066	19.896	34.4859
310	35.1133	15.1407	17.3889	8.68626	19.9673	34.6503
311	35.2808	15.1858	17.4458	8.70181	20.0385	34.8146
312	35.4483	15.2307	17.5026	8.71732	20.1096	34.9788
313	35.6157	15.2756	17.5593	8.73277	20.1806	35.1431
314	35.783	15.3204	17.6159	8.74818	20.2515	35.3072
315	35.9503	15.3651	17.6724	8.76353	20.3223	35.4713
316	36.1176	15.4097	17.7288	8.77883	20.393	35.6353
317	36.2848	15.4542	17.785	8.79409	20.4636	35.7993
318	36.4519	15.4986	17.8412	8.80929	20.534	35.9632
319	36.6189	15.5429	17.8973	8.82445	20.6044	36.127
320	36.7859	15.5871	17.9532	8.83955	20.6746	36.2907
321	36.9527	15.6312	18.0091	8.85461	20.7447	36.4544
322	37.1195	15.6753	18.0649	8.86961	20.8148	36.618
323	37.2862	15.7192	18.1205	8.88457	20.8846	36.7815
324	37.4529	15.763	18.176	8.89947	20.9544	36.9449
325	37.6194	15.8067	18.2315	8.91433	21.0241	37.1081
326	37.7858	15.8504	18.2868	8.92914	21.0936	37.2713
327	37.9522	15.8939	18.342	8.94389	21.1631	37.4344
328	38.1184	15.9373	18.3971	8.9586	21.2324	37.5974
329	38.2845	15.9807	18.4521	8.97326	21.3015	37.7603
330	38.4505	16.0239	18.507	8.98787	21.3706	37.923
331	38.6164	16.0671	18.5617	9.00243	21.4395	38.0857
332	38.7822	16.1101	18.6164	9.01694	21.5084	38.2482
333	38.9478	16.153	18.6709	9.0314	21.577	38.4106
334	39.1133	16.1959	18.7253	9.04581	21.6456	38.5729
335	39.2787	16.2386	18.7797	9.06018	21.7141	38.735
336	39.444	16.2812	18.8339	9.07449	21.7824	38.897
337	39.6091	16.3238	18.8879	9.08876	21.8505	39.0589
338	39.7741	16.3662	18.9419	9.10297	21.9186	39.2206
339	39.9389	16.4085	18.9957	9.11714	21.9865	39.3822
340	40.1036	16.4508	19.0495	9.13126	22.0543	39.5436
341	40.2682	16.4929	19.1031	9.14533	22.122	39.7049
342	40.4326	16.5349	19.1566	9.15935	22.1895	39.8661
343	40.5968	16.5768	19.21	9.17332	22.2569	40.027
344	40.7609	16.6186	19.2632	9.18724	22.3242	40.1879
345	40.9248	16.6603	19.3164	9.20112	22.3913	40.3485
346	41.0886	16.7019	19.3694	9.21495	22.4583	40.509
347	41.2522	16.7434	19.4223	9.22873	22.5252	40.6693
348	41.4156	16.7848	19.4751	9.24246	22.5919	40.8295
349	41.5788	16.8261	19.5277	9.25614	22.6585	40.9895
350	41.7419	16.8673	19.5802	9.26977	22.7249	41.1493
351	41.9048	16.9084	19.6327	9.28336	22.7912	41.3089
352	42.0675	16.9493	19.685	9.29689	22.8574	41.4683
353	42.23	16.9902	19.7371	9.31038	22.9234	41.6276
354	42.3923	17.031	19.7892	9.32382	22.9893	41.7866
355	42.5544	17.0716	19.8411	9.33722	23.0551	41.9455
356	42.7164	17.1122	19.8929	9.35056	23.1207	42.1042
357	42.8781	17.1526	19.9446	9.36386	23.1862	42.2627
358	43.0397	17.1929	19.9961	9.37711	23.2515	42.4209
359	43.201	17.2332	20.0475	9.39032	23.3167	42.579
360	43.3621	17.2733	20.0988	9.40347	23.3817	42.7369
361	43.523	17.3133	20.15	9.41658	23.4466	42.8945
362	43.6838	17.3532	20.201	9.42964	23.5113	43.052
363	43.8443	17.393	20.2519	9.44266	23.5759	43.2092
364	44.0045	17.4327	20.3027	9.45562	23.6404	43.3663
365	44.1646	17.4722	20.3534	9.46854	23.7047	43.5231
366	44.3244	17.5117	20.4039	9.48141	23.7689	43.6797
367	44.4841	17.5511	20.4543	9.49424	23.8329	43.836
368	44.6434	17.5903	20.5046	9.50702	23.8967	43.9921
369	44.8026	17.6295	20.5548	9.51975	23.9604	44.1481
370	44.9615	17.6685	20.6048	9.53244	24.024	44.3037
371	45.1202	17.7074	20.6547	9.54508	24.0874	44.4592
372	45.2787	17.7462	20.7045	9.55767	24.1507	44.6144
373	45.4369	17.7849	20.7541	9.57022	24.2138	44.7694
374	45.5949	17.8235	20.8036	9.58272	24.2767	44.9241
375	45.7526	17.862	20.853	9.59517	24.3396	45.0786
376	45.9101	17.9004	20.9022	9.60758	24.4022	45.2328
377	46.0673	17.9387	20.9513	9.61994	24.4647	45.3868
378	46.2243	17.9768	21.0003	9.63226	24.5271	45.5406
379	46.381	18.0149	21.0492	9.64453	24.5893	45.6941
380	46.5375	18.0528	21.0979	9.65675	24.6513	45.8473
381	46.6937	18.0906	21.1465	9.66893	24.7132	46.0003
382	46.8497	18.1284	21.1949	9.68106	24.7749	46.153
383	47.0054	18.166	21.2433	9.69315	24.8365	46.3055
384	47.1608	18.2035	21.2915	9.70519	24.8979	46.4577
385	47.316	18.2408	21.3395	9.71719	24.9592	46.6097
386	47.4709	18.2781	21.3875	9.72914	25.0203	46.7613
387	47.6255	18.3153	21.4353	9.74105	25.0812	46.9127
388	47.7799	18.3523	21.4829	9.75291	25.142	47.0639
389	47.9339	18.3893	21.5305	9.76473	25.2027	47.2148
390	48.0877	18.4261	21.5779	9.7765	25.2632	47.3654
391	48.2413	18.4628	21.6251	9.78823	25.3235	47.5157
392	48.3945	18.4995	21.6723	9.79991	25.3836	47.6657
393	48.5475	18.536	21.7193	9.81155	25.4437	47.8155
394	48.7001	18.5723	21.7661	9.82314	25.5035	47.965
395	48.8525	18.6086	21.8129	9.83469	25.5632	48.1142
396	49.0046	18.6448	21.8595	9.8462	25.6227	48.2631
397	49.1564	18.6808	21.9059	9.85766	25.6821	48.4117
398	49.308	18.7168	21.9523	9.86908	25.7413	48.5601
399	49.4592	18.7526	21.9985	9.88045	25.8003	48.7081
400	49.6101	18.7884	22.0445	9.89178	25.8592	48.8559
401	49.7608	18.824	22.0904	9.90307	25.918	49.0033
402	49.9111	18.8595	22.1362	9.91431	25.9765	49.1505
403	50.0611	18.8949	22.1819	9.92551	26.0349	49.2974
404	50.2109	18.9302	22.2274	9.93667	26.0932	49.444
405	50.3603	18.9653	22.2728	9.94778	26.1513	49.5902
406	50.5094	19.0004	22.3181	9.95885	26.2092	49.7362
407	50.6583	19.0353	22.3632	9.96988	26.2669	49.8819
408	50.8068	19.0702	22.4082	9.98086	26.3245	50.0273
409	50.955	19.1049	22.453	9.99181	26.382	50.1723
410	51.1029	19.1395	22.4978	10.0027	26.4392	50.3171
411	51.2504	19.174	22.5423	10.0136	26.4964	50.4615
412	51.3977	19.2084	22.5868	10.0244	26.5533	50.6057
413	51.5447	19.2427	22.6311	10.0351	26.6101	50.7495
414	51.6913	19.2769	22.6753	10.0459	26.6667	50.893
415	51.8376	19.311	22.7193	10.0566	26.7232	51.0362
416	51.9836	19.3449	22.7632	10.0672	26.7795	51.1791
417	52.1293	19.3788	22.807	10.0778	26.8356	51.3217
418	52.2746	19.4125	22.8506	10.0884	26.8916	51.4639
419	52.4196	19.4461	22.8941	10.0989	26.9474	51.6059
420	52.5643	19.4796	22.9375	10.1094	27.003	51.7475
421	52.7087	19.513	22.9807	10.1198	27.0585	51.8888
422	52.8528	19.5463	23.0238	10.1302	27.1138	52.0297
423	52.9965	19.5795	23.0668	10.1405	27.169	52.1704
424	53.1399	19.6126	23.1096	10.1509	27.2239	52.3107
425	53.2829	19.6456	23.1523	10.1611	27.2788	52.4507
426	53.4257	19.6784	23.1949	10.1714	27.3334	52.5903
427	53.5681	19.7112	23.2373	10.1816	27.3879	52.7297
428	53.7101	19.7438	23.2796	10.1917	27.4422	52.8687
429	53.8518	19.7763	23.3218	10.2018	27.4964	53.0074
430	53.9932	19.8088	23.3638	10.2119	27.5504	53.1457
431	54.1343	19.8411	23.4057	10.2219	27.6042	53.2837
432	54.275	19.8733	23.4474	10.2319	27.6579	53.4214
433	54.4154	19.9054	23.489	10.2418	27.7114	53.5587
434	54.5554	19.9373	23.5305	10.2517	27.7648	53.6958
435	54.6951	19.9692	23.5719	10.2616	27.8179	53.8324
436	54.8344	20.001	23.6131	10.2714	27.871	53.9688
437	54.9734	20.0326	23.6541	10.2812	27.9238	54.1048
438	55.1121	20.0642	23.6951	10.291	27.9765	54.2404
439	55.2504	20.0956	23.7359	10.3007	28.029	54.3757
440	55.3884	20.127	23.7766	10.3104	28.0814	54.5107
441	55.526	20.1582	23.8171	10.32	28.1336	54.6454
442	55.6633	20.1893	23.8575	10.3296	28.1856	54.7797
443	55.8002	20.2203	23.8978	10.3391	28.2375	54.9136
444	55.9367	20.2512	23.938	10.3486	28.2892	55.0472
445	56.073	20.282	23.978	10.3581	28.3407	55.1805
446	56.2088	20.3127	24.0178	10.3675	28.3921	55.3134
447	56.3444	20.3433	24.0576	10.3769	28.4433	55.446
448	56.4795	20.3738	24.0972	10.3863	28.4943	55.5782
449	56.6143	20.4041	24.1367	10.3956	28.5452	55.7101
450	56.7488	20.4344	24.176	10.4049	28.5959	55.8416
451	56.8829	20.4646	24.2152	10.4141	28.6465	55.9728
452	57.0167	20.4946	24.2543	10.4234	28.6969	56.1036
453	57.1501	20.5245	24.2932	10.4325	28.7471	56.2341
454	57.2831	20.5544	24.3321	10.4416	28.7971	56.3642
455	57.4158	20.5841	24.3707	10.4507	28.847	56.494
456	57.5481	20.6137	24.4093	10.4598	28.8968	56.6234
457	57.6801	20.6432	24.4477	10.4688	28.9463	56.7525
458	57.8117	20.6727	24.486	10.4778	28.9958	56.8812
459	57.9429	20.702	24.5241	10.4867	29.045	57.0096
460	58.0738	20.7312	24.5622	10.4956	29.0941	57.1376
461	58.2044	20.7603	24.6	10.5045	29.143	57.2653
462	58.3345	20.7893	24.6378	10.5133	29.1918	57.3926
463	58.4643	20.8182	24.6754	10.5221	29.2404	57.5196
464	58.5938	20.8469	24.7129	10.5309	29.2888	57.6462
465	58.7229	20.8756	24.7503	10.5396	29.3371	57.7724
466	58.8516	20.9042	24.7875	10.5483	29.3852	57.8983
467	58.9799	20.9327	24.8246	10.557	29.4331	58.0238
468	59.1079	20.961	24.8616	10.5656	29.4809	58.149
469	59.2356	20.9893	24.8985	10.5742	29.5285	58.2738
470	59.3628	21.0175	24.9352	10.5827	29.576	58.3983
471	59.4897	21.0455	24.9718	10.5912	29.6233	58.5224
472	59.6163	21.0735	25.0082	10.5997	29.6704	58.6461
473	59.7425	21.1013	25.0446	10.6081	29.7174	58.7695
474	59.8683	21.1291	25.0808	10.6165	29.7642	58.8926
475	59.9937	21.1567	25.1168	10.6249	29.8109	59.0152
476	60.1188	21.1843	25.1528	10.6332	29.8574	59.1375
477	60.2435	21.2117	25.1886	10.6415	29.9037	59.2595
478	60.3679	21.2391	25.2243	10.6498	29.9499	59.3811
479	60.4919	21.2663	25.2598	10.658	29.9959	59.5023
480	60.6155	21.2935	25.2953	10.6662	30.0418	59.6232
481	60.7387	21.3205	25.3306	10.6743	30.0875	59.7437
482	60.8616	21.3474	25.3657	10.6824	30.133	59.8639
483	60.9841	21.3743	25.4008	10.6905	30.1784	59.9837
484	61.1063	21.401	25.4357	10.6986	30.2236	60.1031
485	61.2281	21.4276	25.4705	10.7066	30.2687	60.2222
486	61.3495	21.4542	25.5052	10.7146	30.3136	60.3409
487	61.4705	21.4806	25.5397	10.7225	30.3583	60.4592
488	61.5912	21.507	25.5741	10.7304	30.4029	60.5772
489	61.7115	21.5332	25.6084	10.7383	30.4474	60.6949
490	61.8315	21.5593	25.6426	10.7462	30.4916	60.8121
491	61.951	21.5854	25.6766	10.754	30.5358	60.9291
492	62.0703	21.6113	25.7105	10.7618	30.5797	61.0456
493	62.1891	21.6372	25.7443	10.7695	30.6235	61.1618
494	62.3076	21.6629	25.778	10.7772	30.6672	61.2776
495	62.4257	21.6886	25.8115	10.7849	30.7107	61.3931
496	62.5434	21.7141	25.845	10.7926	30.754	61.5082
497	62.6608	21.7396	25.8783	10.8002	30.7972	61.623
498	62.7778	21.7649	25.9114	10.8078	30.8402	61.7374
499	62.8945	21.7902	25.9445	10.8153	30.8831	61.8514
500	63.0107	21.8153	25.9774	10.8228	30.9258	61.9651
501	63.1266	21.8404	26.0102	10.8303	30.9684	62.0784
502	63.2422	21.8654	26.0429	10.8378	31.0108	62.1913
503	63.3573	21.8902	26.0754	10.8452	31.053	62.3039
504	63.4722	21.915	26.1079	10.8526	31.0951	62.4161
505	63.5866	21.9397	26.1402	10.86	31.1371	62.528
506	63.7007	21.9643	26.1724	10.8673	31.1789	62.6395
507	63.8144	21.9887	26.2044	10.8746	31.2205	62.7507
508	63.9277	22.0131	26.2364	10.8818	31.262	62.8614
509	64.0407	22.0374	26.2682	10.8891	31.3033	62.9719
510	64.1533	22.0616	26.2999	10.8963	31.3445	63.082
511	64.2655	22.0857	26.3315	10.9034	31.3855	63.1917
512	64.3774	22.1098	26.363	10.9106	31.4264	63.301
513	64.4889	22.1337	26.3943	10.9177	31.4671	63.41
514	64.6001	22.1575	26.4255	10.9248	31.5077	63.5187
515	64.7109	22.1812	26.4566	10.9318	31.5481	63.6269
516	64.8213	22.2049	26.4876	10.9388	31.5884	63.7349
517	64.9313	22.2284	26.5185	10.9458	31.6285	63.8424
518	65.041	22.2519	26.5493	10.9528	31.6685	63.9497
519	65.1503	22.2752	26.5799	10.9597	31.7084	64.0565
520	65.2593	22.2985	26.6104	10.9666	31.748	64.163
521	65.3679	22.3217	26.6408	10.9734	31.7876	64.2692
522	65.4761	22.3448	26.6711	10.9803	31.8269	64.3749
523	65.584	22.3678	26.7013	10.9871	31.8662	64.4804
524	65.6915	22.3907	26.7313	10.9939	31.9053	64.5855
525	65.7987	22.4135	26.7612	11.0006	31.9442	64.6902
526	65.9055	22.4362	26.791	11.0073	31.983	64.7945
527	66.0119	22.4588	26.8207	11.014	32.0216	64.8986
528	66.118	22.4814	26.8503	11.0207	32.0601	65.0022
529	66.2237	22.5038	26.8798	11.0273	32.0985	65.1055
530	66.329	22.5262	26.9092	11.0339	32.1367	65.2085
531	66.434	22.5485	26.9384	11.0405	32.1747	65.3111
532	66.5386	22.5706	26.9675	11.047	32.2127	65.4133
533	66.6429	22.5927	26.9965	11.0535	32.2504	65.5152
534	66.7468	22.6147	27.0254	11.06	32.2881	65.6168
535	66.8504	22.6367	27.0542	11.0664	32.3255	65.718
536	66.9536	22.6585	27.0829	11.0729	32.3629	65.8188
537	67.0564	22.6802	27.1114	11.0793	32.4001	65.9193
538	67.1589	22.7019	27.1399	11.0856	32.4371	66.0195
539	67.261	22.7234	27.1682	11.092	32.474	66.1193
540	67.3628	22.7449	27.1964	11.0983	32.5108	66.2187
