# Supplementary material for: The Social Cost of Fossil and Industrial CO2 Emissions from 1950 to 2018
Source: Research Square preprint supplement (doi:10.21203/rs.3.rs-2244259/v1), 2022-11-17
Supplement: Supplementary file 186 [file TFP_Sterner_external.xlsx]

## Sheet: A_params
f	1	2	3	4	5	6
0	1.98217	1.98217	1.98217	1.98217	1.98217	1.98217
1	2.01235	2.01235	2.01235	2.01235	2.01235	2.01235
2	2.00409	2.00409	2.00409	2.00409	2.00409	2.00409
3	2.02237	2.02237	2.02237	2.02237	2.02237	2.02237
4	1.99945	1.99945	1.99945	1.99945	1.99945	1.99945
5	2.03712	2.03712	2.03712	2.03712	2.03712	2.03712
6	2.03949	2.03949	2.03949	2.03949	2.03949	2.03949
7	2.03901	2.03901	2.03901	2.03901	2.03901	2.03901
8	2.01829	2.01829	2.01829	2.01829	2.01829	2.01829
9	2.03644	2.03644	2.03644	2.03644	2.03644	2.03644
10	2.06141	2.06141	2.06141	2.06141	2.06141	2.06141
11	2.05674	2.05674	2.05674	2.05674	2.05674	2.05674
12	2.08383	2.08383	2.08383	2.08383	2.08383	2.08383
13	2.11737	2.11737	2.11737	2.11737	2.11737	2.11737
14	2.17051	2.17051	2.17051	2.17051	2.17051	2.17051
15	2.20068	2.20068	2.20068	2.20068	2.20068	2.20068
16	2.22489	2.22489	2.22489	2.22489	2.22489	2.22489
17	2.22803	2.22803	2.22803	2.22803	2.22803	2.22803
18	2.26872	2.26872	2.26872	2.26872	2.26872	2.26872
19	2.3182	2.3182	2.3182	2.3182	2.3182	2.3182
20	2.32582	2.32582	2.32582	2.32582	2.32582	2.32582
21	2.35294	2.35294	2.35294	2.35294	2.35294	2.35294
22	2.39532	2.39532	2.39532	2.39532	2.39532	2.39532
23	2.46237	2.46237	2.46237	2.46237	2.46237	2.46237
24	2.44557	2.44557	2.44557	2.44557	2.44557	2.44557
25	2.40061	2.40061	2.40061	2.40061	2.40061	2.40061
26	2.44962	2.44962	2.44962	2.44962	2.44962	2.44962
27	2.47452	2.47452	2.47452	2.47452	2.47452	2.47452
28	2.50033	2.50033	2.50033	2.50033	2.50033	2.50033
29	2.52672	2.52672	2.52672	2.52672	2.52672	2.52672
30	2.51037	2.51037	2.51037	2.51037	2.51037	2.51037
31	2.48883	2.48883	2.48883	2.48883	2.48883	2.48883
32	2.44199	2.44199	2.44199	2.44199	2.44199	2.44199
33	2.44987	2.44987	2.44987	2.44987	2.44987	2.44987
34	2.50102	2.50102	2.50102	2.50102	2.50102	2.50102
35	2.52678	2.52678	2.52678	2.52678	2.52678	2.52678
36	2.55408	2.55408	2.55408	2.55408	2.55408	2.55408
37	2.59225	2.59225	2.59225	2.59225	2.59225	2.59225
38	2.64093	2.64093	2.64093	2.64093	2.64093	2.64093
39	2.66614	2.66614	2.66614	2.66614	2.66614	2.66614
40	2.68314	2.68314	2.68314	2.68314	2.68314	2.68314
41	2.64696	2.64696	2.64696	2.64696	2.64696	2.64696
42	2.6286	2.6286	2.6286	2.6286	2.6286	2.6286
43	2.61993	2.61993	2.61993	2.61993	2.61993	2.61993
44	2.64098	2.64098	2.64098	2.64098	2.64098	2.64098
45	2.67448	2.67448	2.67448	2.67448	2.67448	2.67448
46	2.72343	2.72343	2.72343	2.72343	2.72343	2.72343
47	2.77405	2.77405	2.77405	2.77405	2.77405	2.77405
48	2.7792	2.7792	2.7792	2.7792	2.7792	2.7792
49	2.82287	2.82287	2.82287	2.82287	2.82287	2.82287
50	2.90058	2.90058	2.90058	2.90058	2.90058	2.90058
51	2.91558	2.91558	2.91558	2.91558	2.91558	2.91558
52	2.9492	2.9492	2.9492	2.9492	2.9492	2.9492
53	3.00582	3.00582	3.00582	3.00582	3.00582	3.00582
54	3.10687	3.10687	3.10687	3.10687	3.10687	3.10687
55	3.18927	3.18927	3.18927	3.18927	3.18927	3.18927
56	3.28947	3.28947	3.28947	3.28947	3.28947	3.28947
57	3.38163	3.38163	3.38163	3.38163	3.38163	3.38163
58	3.39242	3.39242	3.39242	3.39242	3.39242	3.39242
59	3.30752	3.30752	3.30752	3.30752	3.30752	3.30752
60	3.42206	3.42206	3.42206	3.42206	3.42206	3.42206
61	3.48624	3.48624	3.48624	3.48624	3.48624	3.48624
62	3.50518	3.50518	3.50518	3.50518	3.50518	3.50518
63	3.55437	3.55437	3.55437	3.55437	3.55437	3.55437
64	3.60962	3.60962	3.60962	3.60962	3.60962	3.60962
65	3.6471	3.6471	3.6471	3.6471	3.6471	3.6471
66	3.68285	3.68285	3.68285	3.68285	3.68285	3.68285
67	3.73254	3.73254	3.73254	3.73254	3.73254	3.73254
68	3.76002	3.76002	3.76002	3.76002	3.76002	3.76002
69	3.78081	3.78081	3.78081	3.78081	3.78081	3.78081
70	3.84167	3.81862	3.8224	3.8035	3.82618	3.84131
71	3.90319	3.85661	3.86424	3.8262	3.87186	3.90245
72	3.96539	3.89479	3.90631	3.84893	3.91786	3.96426
73	4.02825	3.93316	3.94864	3.87168	3.96417	4.02673
74	4.09179	3.9717	3.9912	3.89445	4.01078	4.08986
75	4.156	4.01043	4.03401	3.91723	4.05771	4.15366
76	4.22089	4.04933	4.07706	3.94004	4.10495	4.21812
77	4.28646	4.08842	4.12035	3.96286	4.15249	4.28326
78	4.35271	4.12769	4.16388	3.9857	4.20035	4.34906
79	4.41964	4.16713	4.20764	4.00855	4.24851	4.41554
80	4.48726	4.20675	4.25165	4.03143	4.29697	4.48269
81	4.55557	4.24655	4.29588	4.05431	4.34575	4.55051
82	4.62456	4.28651	4.34036	4.07721	4.39482	4.61902
83	4.69425	4.32666	4.38507	4.10013	4.44421	4.6882
84	4.76462	4.36697	4.43001	4.12306	4.49389	4.75807
85	4.83569	4.40746	4.47518	4.146	4.54388	4.82861
86	4.90746	4.44811	4.52059	4.16895	4.59416	4.89984
87	4.97992	4.48893	4.56622	4.19192	4.64475	4.97176
88	5.05308	4.52992	4.61208	4.21489	4.69564	5.04436
89	5.12694	4.57108	4.65817	4.23788	4.74683	5.11765
90	5.20149	4.6124	4.70449	4.26087	4.79831	5.19163
91	5.27675	4.65389	4.75103	4.28387	4.85009	5.2663
92	5.35272	4.69554	4.79779	4.30688	4.90216	5.34165
93	5.42938	4.73734	4.84478	4.3299	4.95453	5.4177
94	5.50675	4.77931	4.89198	4.35293	5.00719	5.49445
95	5.58483	4.82144	4.93941	4.37596	5.06014	5.57188
96	5.66361	4.86373	4.98706	4.399	5.11338	5.65001
97	5.74311	4.90617	5.03492	4.42204	5.16691	5.72884
98	5.8233	4.94876	5.083	4.44509	5.22073	5.80836
99	5.90421	4.99151	5.13129	4.46814	5.27483	5.88857
100	5.98583	5.03442	5.1798	4.4912	5.32922	5.96949
101	6.06815	5.07747	5.22852	4.51426	5.3839	6.0511
102	6.15119	5.12067	5.27745	4.53732	5.43885	6.1334
103	6.23494	5.16403	5.32659	4.56038	5.49409	6.21641
104	6.3194	5.20753	5.37594	4.58344	5.54961	6.30011
105	6.40457	5.25117	5.42549	4.60651	5.60541	6.38451
106	6.49045	5.29496	5.47525	4.62957	5.66148	6.46961
107	6.57704	5.33889	5.52522	4.65263	5.71783	6.55541
108	6.66435	5.38297	5.57538	4.67569	5.77445	6.64191
109	6.75237	5.42718	5.62575	4.69875	5.83135	6.72911
110	6.84109	5.47153	5.67631	4.72181	5.88852	6.817
111	6.93054	5.51603	5.72707	4.74486	5.94595	6.90559
112	7.02069	5.56065	5.77803	4.76791	6.00366	6.99488
113	7.11155	5.60542	5.82919	4.79096	6.06163	7.08487
114	7.20313	5.65031	5.88053	4.814	6.11987	7.17556
115	7.29541	5.69534	5.93207	4.83704	6.17837	7.26694
116	7.38841	5.7405	5.9838	4.86007	6.23713	7.35902
117	7.48211	5.78579	6.03572	4.88309	6.29615	7.45179
118	7.57653	5.8312	6.08782	4.90611	6.35543	7.54526
119	7.67165	5.87674	6.14011	4.92912	6.41497	7.63943
120	7.76748	5.92241	6.19258	4.95212	6.47476	7.73428
121	7.86402	5.9682	6.24524	4.97512	6.53481	7.82983
122	7.96126	6.01411	6.29808	4.9981	6.59511	7.92608
123	8.05921	6.06015	6.35109	5.02108	6.65566	8.02301
124	8.15787	6.1063	6.40429	5.04404	6.71646	8.12064
125	8.25723	6.15257	6.45765	5.067	6.7775	8.21895
126	8.35729	6.19896	6.5112	5.08994	6.83879	8.31795
127	8.45805	6.24546	6.56491	5.11287	6.90032	8.41764
128	8.55951	6.29208	6.6188	5.13579	6.96209	8.51801
129	8.66167	6.3388	6.67285	5.1587	7.0241	8.61907
130	8.76453	6.38564	6.72707	5.18159	7.08635	8.72081
131	8.86808	6.43259	6.78146	5.20448	7.14884	8.82323
132	8.97233	6.47964	6.83602	5.22734	7.21156	8.92633
133	9.07727	6.5268	6.89073	5.25019	7.27451	9.03011
134	9.18291	6.57407	6.94561	5.27303	7.33769	9.13457
135	9.28923	6.62143	7.00064	5.29585	7.4011	9.23971
136	9.39625	6.6689	7.05583	5.31866	7.46473	9.34551
137	9.50395	6.71647	7.11118	5.34145	7.52859	9.45199
138	9.61233	6.76414	7.16668	5.36422	7.59267	9.55914
139	9.7214	6.81191	7.22233	5.38697	7.65698	9.66695
140	9.83115	6.85977	7.27814	5.40971	7.7215	9.77544
141	9.94157	6.90772	7.33409	5.43243	7.78623	9.88458
142	10.0527	6.95577	7.39019	5.45513	7.85119	9.99439
143	10.1645	7.00391	7.44643	5.47781	7.91635	10.1049
144	10.2769	7.05214	7.50282	5.50047	7.98172	10.216
145	10.39	7.10046	7.55934	5.52311	8.04731	10.3278
146	10.5038	7.14886	7.61601	5.54573	8.1131	10.4402
147	10.6183	7.19735	7.67282	5.56832	8.17909	10.5533
148	10.7334	7.24593	7.72976	5.5909	8.24529	10.667
149	10.8492	7.29458	7.78684	5.61346	8.31168	10.7814
150	10.9656	7.34332	7.84405	5.63599	8.37828	10.8964
151	11.0827	7.39213	7.90138	5.6585	8.44507	11.0121
152	11.2005	7.44103	7.95885	5.68098	8.51205	11.1284
153	11.3189	7.49	8.01645	5.70345	8.57923	11.2453
154	11.438	7.53904	8.07417	5.72588	8.64659	11.3629
155	11.5577	7.58816	8.13202	5.7483	8.71415	11.4811
156	11.678	7.63735	8.18998	5.77069	8.78189	11.6
157	11.799	7.68661	8.24807	5.79305	8.84981	11.7194
158	11.9206	7.73594	8.30627	5.81539	8.91792	11.8395
159	12.0429	7.78533	8.36459	5.8377	8.9862	11.9602
160	12.1657	7.8348	8.42303	5.85999	9.05466	12.0815
161	12.2893	7.88432	8.48158	5.88224	9.12329	12.2034
162	12.4134	7.93391	8.54024	5.90448	9.1921	12.326
163	12.5382	7.98356	8.59901	5.92668	9.26108	12.4491
164	12.6635	8.03327	8.65788	5.94885	9.33023	12.5729
165	12.7895	8.08304	8.71686	5.971	9.39954	12.6972
166	12.9162	8.13287	8.77595	5.99312	9.46902	12.8222
167	13.0434	8.18275	8.83513	6.01521	9.53866	12.9477
168	13.1712	8.23269	8.89442	6.03727	9.60846	13.0738
169	13.2996	8.28268	8.9538	6.0593	9.67842	13.2006
170	13.4287	8.33272	9.01329	6.08129	9.74853	13.3279
171	13.5583	8.38281	9.07286	6.10326	9.81879	13.4557
172	13.6885	8.43295	9.13253	6.1252	9.88921	13.5842
173	13.8193	8.48313	9.19229	6.14711	9.95977	13.7132
174	13.9507	8.53336	9.25214	6.16898	10.0305	13.8428
175	14.0827	8.58364	9.31207	6.19082	10.1013	13.973
176	14.2152	8.63395	9.37209	6.21263	10.1723	14.1037
177	14.3483	8.68431	9.4322	6.23441	10.2435	14.235
178	14.482	8.73471	9.49238	6.25615	10.3148	14.3669
179	14.6163	8.78514	9.55265	6.27786	10.3862	14.4993
180	14.7511	8.83562	9.61299	6.29954	10.4577	14.6322
181	14.8865	8.88612	9.67342	6.32118	10.5294	14.7657
182	15.0224	8.93666	9.73391	6.34279	10.6012	14.8998
183	15.1589	8.98724	9.79448	6.36437	10.6731	15.0343
184	15.2959	9.03784	9.85512	6.38591	10.7452	15.1694
185	15.4335	9.08848	9.91583	6.40741	10.8174	15.305
186	15.5716	9.13914	9.9766	6.42888	10.8896	15.4412
187	15.7103	9.18983	10.0374	6.45031	10.9621	15.5779
188	15.8495	9.24055	10.0984	6.47171	11.0346	15.715
189	15.9892	9.29129	10.1593	6.49307	11.1072	15.8527
190	16.1294	9.34205	10.2203	6.51439	11.18	15.9909
191	16.2702	9.39284	10.2814	6.53568	11.2529	16.1297
192	16.4114	9.44364	10.3426	6.55693	11.3258	16.2689
193	16.5532	9.49446	10.4038	6.57814	11.3989	16.4086
194	16.6955	9.5453	10.465	6.59931	11.4721	16.5488
195	16.8382	9.59616	10.5263	6.62044	11.5454	16.6894
196	16.9815	9.64703	10.5877	6.64154	11.6187	16.8306
197	17.1253	9.69791	10.6491	6.6626	11.6922	16.9722
198	17.2695	9.74881	10.7105	6.68362	11.7658	17.1144
199	17.4143	9.79971	10.772	6.7046	11.8394	17.2569
200	17.5595	9.85063	10.8336	6.72554	11.9132	17.4
201	17.7052	9.90155	10.8951	6.74644	11.987	17.5435
202	17.8514	9.95248	10.9568	6.7673	12.0609	17.6875
203	17.998	10.0034	11.0184	6.78812	12.1349	17.8319
204	18.1451	10.0544	11.0801	6.8089	12.209	17.9767
205	18.2926	10.1053	11.1418	6.82964	12.2832	18.1221
206	18.4406	10.1562	11.2036	6.85034	12.3574	18.2678
207	18.5891	10.2072	11.2654	6.871	12.4317	18.414
208	18.7379	10.2581	11.3272	6.89161	12.5061	18.5606
209	18.8873	10.3091	11.389	6.91219	12.5805	18.7076
210	19.037	10.36	11.4509	6.93272	12.6551	18.8551
211	19.1872	10.4109	11.5128	6.95321	12.7296	19.0029
212	19.3378	10.4619	11.5747	6.97366	12.8043	19.1512
213	19.4889	10.5128	11.6366	6.99407	12.879	19.2999
214	19.6403	10.5637	11.6986	7.01443	12.9538	19.449
215	19.7922	10.6146	11.7606	7.03475	13.0286	19.5985
216	19.9444	10.6655	11.8226	7.05503	13.1035	19.7483
217	20.0971	10.7164	11.8846	7.07526	13.1784	19.8986
218	20.2501	10.7672	11.9466	7.09546	13.2534	20.0492
219	20.4036	10.8181	12.0086	7.1156	13.3284	20.2002
220	20.5574	10.8689	12.0706	7.13571	13.4035	20.3516
221	20.7116	10.9197	12.1327	7.15577	13.4786	20.5034
222	20.8662	10.9705	12.1947	7.17578	13.5538	20.6555
223	21.0212	11.0213	12.2568	7.19575	13.629	20.808
224	21.1765	11.0721	12.3188	7.21568	13.7042	20.9608
225	21.3322	11.1228	12.3809	7.23556	13.7795	21.114
226	21.4882	11.1735	12.443	7.25539	13.8548	21.2676
227	21.6446	11.2242	12.505	7.27519	13.9301	21.4214
228	21.8014	11.2749	12.5671	7.29493	14.0055	21.5756
229	21.9585	11.3255	12.6291	7.31463	14.0809	21.7302
230	22.1159	11.3761	12.6912	7.33429	14.1563	21.885
231	22.2736	11.4267	12.7532	7.3539	14.2318	22.0402
232	22.4317	11.4772	12.8152	7.37346	14.3072	22.1957
233	22.5901	11.5278	12.8773	7.39298	14.3827	22.3515
234	22.7489	11.5782	12.9393	7.41245	14.4582	22.5076
235	22.9079	11.6287	13.0013	7.43187	14.5338	22.664
236	23.0672	11.6791	13.0632	7.45125	14.6093	22.8207
237	23.2269	11.7295	13.1252	7.47058	14.6849	22.9777
238	23.3868	11.7799	13.1871	7.48987	14.7604	23.135
239	23.547	11.8302	13.2491	7.50911	14.836	23.2926
240	23.7076	11.8805	13.311	7.5283	14.9116	23.4504
241	23.8684	11.9307	13.3728	7.54744	14.9871	23.6086
242	24.0295	11.9809	13.4347	7.56654	15.0627	23.7669
243	24.1908	12.031	13.4965	7.58559	15.1383	23.9256
244	24.3524	12.0812	13.5583	7.60459	15.2139	24.0845
245	24.5143	12.1312	13.6201	7.62354	15.2895	24.2436
246	24.6765	12.1813	13.6819	7.64245	15.365	24.403
247	24.8389	12.2312	13.7436	7.66131	15.4406	24.5627
248	25.0015	12.2812	13.8053	7.68012	15.5161	24.7226
249	25.1644	12.3311	13.8669	7.69888	15.5917	24.8827
250	25.3275	12.3809	13.9285	7.7176	15.6672	25.043
251	25.4909	12.4307	13.9901	7.73626	15.7427	25.2036
252	25.6545	12.4804	14.0516	7.75488	15.8182	25.3644
253	25.8183	12.5301	14.1131	7.77345	15.8937	25.5254
254	25.9823	12.5797	14.1746	7.79197	15.9692	25.6866
255	26.1466	12.6293	14.236	7.81044	16.0446	25.848
256	26.311	12.6789	14.2974	7.82886	16.12	26.0096
257	26.4757	12.7283	14.3587	7.84724	16.1954	26.1714
258	26.6405	12.7778	14.42	7.86556	16.2708	26.3334
259	26.8056	12.8271	14.4813	7.88384	16.3461	26.4956
260	26.9708	12.8764	14.5424	7.90207	16.4214	26.6579
261	27.1362	12.9257	14.6036	7.92024	16.4967	26.8205
262	27.3019	12.9749	14.6647	7.93837	16.572	26.9832
263	27.4676	13.024	14.7257	7.95645	16.6472	27.146
264	27.6336	13.0731	14.7867	7.97448	16.7223	27.3091
265	27.7997	13.1221	14.8476	7.99246	16.7975	27.4722
266	27.966	13.171	14.9085	8.01039	16.8725	27.6356
267	28.1324	13.2199	14.9693	8.02827	16.9476	27.7991
268	28.299	13.2687	15.0301	8.0461	17.0226	27.9627
269	28.4657	13.3174	15.0908	8.06389	17.0976	28.1265
270	28.6326	13.3661	15.1515	8.08162	17.1725	28.2903
271	28.7996	13.4147	15.2121	8.0993	17.2473	28.4544
272	28.9667	13.4633	15.2726	8.11693	17.3221	28.6185
273	29.1339	13.5118	15.333	8.13451	17.3969	28.7828
274	29.3013	13.5602	15.3934	8.15205	17.4716	28.9472
275	29.4688	13.6085	15.4538	8.16953	17.5462	29.1117
276	29.6364	13.6568	15.514	8.18696	17.6208	29.2763
277	29.8042	13.705	15.5742	8.20434	17.6954	29.441
278	29.972	13.7531	15.6343	8.22168	17.7699	29.6057
279	30.1399	13.8012	15.6944	8.23896	17.8443	29.7706
280	30.3079	13.8492	15.7544	8.25619	17.9186	29.9356
281	30.476	13.8971	15.8143	8.27337	17.9929	30.1006
282	30.6442	13.9449	15.8741	8.2905	18.0671	30.2658
283	30.8125	13.9927	15.9339	8.30758	18.1413	30.431
284	30.9808	14.0404	15.9936	8.32461	18.2154	30.5963
285	31.1492	14.088	16.0532	8.34159	18.2894	30.7616
286	31.3177	14.1355	16.1127	8.35852	18.3633	30.927
287	31.4863	14.183	16.1722	8.3754	18.4372	31.0924
288	31.6549	14.2303	16.2316	8.39223	18.511	31.2579
289	31.8235	14.2776	16.2909	8.40901	18.5847	31.4235
290	31.9922	14.3248	16.3501	8.42573	18.6584	31.5891
291	32.161	14.372	16.4092	8.44241	18.7319	31.7547
292	32.3297	14.419	16.4683	8.45904	18.8054	31.9204
293	32.4986	14.466	16.5272	8.47561	18.8788	32.0861
294	32.6674	14.5129	16.5861	8.49214	18.9522	32.2518
295	32.8363	14.5597	16.6449	8.50862	19.0254	32.4175
296	33.0052	14.6064	16.7036	8.52504	19.0986	32.5833
297	33.1741	14.653	16.7622	8.54141	19.1716	32.7491
298	33.343	14.6995	16.8208	8.55774	19.2446	32.9148
299	33.512	14.746	16.8792	8.57401	19.3175	33.0806
300	33.6809	14.7924	16.9376	8.59023	19.3903	33.2464
301	33.8499	14.8387	16.9958	8.60641	19.463	33.4122
302	34.0188	14.8849	17.054	8.62253	19.5356	33.5779
303	34.1877	14.931	17.1121	8.6386	19.6082	33.7437
304	34.3567	14.977	17.17	8.65462	19.6806	33.9094
305	34.5256	15.0229	17.2279	8.67059	19.7529	34.0751
306	34.6945	15.0688	17.2857	8.68651	19.8252	34.2408
307	34.8633	15.1145	17.3434	8.70238	19.8973	34.4065
308	35.0321	15.1602	17.401	8.7182	19.9693	34.5721
309	35.2009	15.2058	17.4585	8.73396	20.0413	34.7377
310	35.3697	15.2513	17.5159	8.74968	20.1131	34.9033
311	35.5384	15.2966	17.5732	8.76535	20.1848	35.0688
312	35.7071	15.3419	17.6304	8.78097	20.2565	35.2342
313	35.8757	15.3871	17.6875	8.79653	20.328	35.3997
314	36.0443	15.4323	17.7445	8.81205	20.3994	35.565
315	36.2128	15.4773	17.8014	8.82752	20.4707	35.7303
316	36.3813	15.5222	17.8582	8.84293	20.5419	35.8955
317	36.5497	15.567	17.9149	8.8583	20.613	36.0607
318	36.718	15.6117	17.9715	8.87361	20.684	36.2258
319	36.8863	15.6564	18.028	8.88888	20.7548	36.3908
320	37.0544	15.7009	18.0843	8.90409	20.8256	36.5557
321	37.2225	15.7454	18.1406	8.91926	20.8962	36.7206
322	37.3906	15.7897	18.1968	8.93437	20.9667	36.8853
323	37.5585	15.834	18.2528	8.94944	21.0371	37.05
324	37.7263	15.8781	18.3088	8.96445	21.1074	37.2146
325	37.8941	15.9222	18.3646	8.97942	21.1776	37.3791
326	38.0617	15.9661	18.4203	8.99433	21.2476	37.5435
327	38.2293	16.01	18.4759	9.0092	21.3176	37.7078
328	38.3967	16.0537	18.5314	9.02401	21.3874	37.8719
329	38.564	16.0974	18.5868	9.03878	21.4571	38.036
330	38.7312	16.1409	18.6421	9.05349	21.5266	38.1999
331	38.8983	16.1844	18.6973	9.06816	21.5961	38.3638
332	39.0653	16.2277	18.7523	9.08278	21.6654	38.5275
333	39.2322	16.271	18.8072	9.09734	21.7346	38.6911
334	39.3989	16.3141	18.8621	9.11186	21.8037	38.8545
335	39.5655	16.3572	18.9168	9.12633	21.8726	39.0178
336	39.732	16.4001	18.9714	9.14075	21.9414	39.181
337	39.8983	16.443	19.0258	9.15512	22.0101	39.3441
338	40.0645	16.4857	19.0802	9.16944	22.0786	39.507
339	40.2305	16.5283	19.1344	9.18371	22.1471	39.6698
340	40.3964	16.5709	19.1886	9.19793	22.2154	39.8324
341	40.5622	16.6133	19.2426	9.2121	22.2835	39.9948
342	40.7278	16.6556	19.2965	9.22623	22.3515	40.1572
343	40.8932	16.6978	19.3502	9.2403	22.4194	40.3193
344	41.0585	16.74	19.4039	9.25433	22.4872	40.4813
345	41.2236	16.782	19.4574	9.2683	22.5548	40.6431
346	41.3886	16.8239	19.5108	9.28223	22.6223	40.8048
347	41.5534	16.8657	19.5641	9.29611	22.6896	40.9663
348	41.718	16.9074	19.6173	9.30994	22.7568	41.1276
349	41.8824	16.949	19.6703	9.32372	22.8239	41.2887
350	42.0467	16.9905	19.7232	9.33745	22.8909	41.4497
351	42.2107	17.0318	19.776	9.35114	22.9577	41.6105
352	42.3746	17.0731	19.8287	9.36477	23.0243	41.7711
353	42.5383	17.1143	19.8812	9.37836	23.0908	41.9315
354	42.7018	17.1553	19.9337	9.3919	23.1572	42.0917
355	42.8651	17.1963	19.986	9.40539	23.2234	42.2518
356	43.0283	17.2371	20.0381	9.41884	23.2895	42.4116
357	43.1912	17.2778	20.0902	9.43223	23.3555	42.5712
358	43.3539	17.3185	20.1421	9.44558	23.4213	42.7307
359	43.5164	17.359	20.1939	9.45888	23.4869	42.8899
360	43.6787	17.3994	20.2456	9.47213	23.5524	43.0489
361	43.8408	17.4397	20.2971	9.48534	23.6178	43.2077
362	44.0027	17.4799	20.3485	9.49849	23.683	43.3663
363	44.1644	17.52	20.3998	9.5116	23.7481	43.5247
364	44.3258	17.5599	20.451	9.52466	23.813	43.6829
365	44.4871	17.5998	20.502	9.53768	23.8778	43.8409
366	44.6481	17.6396	20.5529	9.55064	23.9424	43.9986
367	44.8089	17.6792	20.6037	9.56356	24.0069	44.1561
368	44.9694	17.7188	20.6543	9.57643	24.0712	44.3134
369	45.1297	17.7582	20.7049	9.58926	24.1354	44.4704
370	45.2898	17.7975	20.7552	9.60204	24.1994	44.6272
371	45.4497	17.8367	20.8055	9.61477	24.2633	44.7838
372	45.6093	17.8758	20.8556	9.62745	24.327	44.9401
373	45.7687	17.9148	20.9056	9.64009	24.3906	45.0962
374	45.9278	17.9537	20.9555	9.65268	24.454	45.2521
375	46.0867	17.9924	21.0052	9.66523	24.5173	45.4077
376	46.2453	18.0311	21.0548	9.67773	24.5804	45.5631
377	46.4037	18.0696	21.1043	9.69018	24.6433	45.7182
378	46.5618	18.1081	21.1537	9.70258	24.7061	45.8731
379	46.7197	18.1464	21.2029	9.71494	24.7688	46.0277
380	46.8773	18.1846	21.2519	9.72726	24.8313	46.1821
381	47.0347	18.2227	21.3009	9.73953	24.8936	46.3362
382	47.1918	18.2607	21.3497	9.75175	24.9558	46.49
383	47.3486	18.2986	21.3984	9.76392	25.0178	46.6436
384	47.5052	18.3364	21.4469	9.77605	25.0797	46.7969
385	47.6615	18.374	21.4953	9.78814	25.1414	46.95
386	47.8175	18.4116	21.5436	9.80018	25.203	47.1028
387	47.9732	18.449	21.5918	9.81217	25.2644	47.2553
388	48.1287	18.4863	21.6398	9.82412	25.3256	47.4075
389	48.2839	18.5236	21.6877	9.83602	25.3867	47.5595
390	48.4388	18.5607	21.7354	9.84788	25.4476	47.7112
391	48.5935	18.5976	21.783	9.8597	25.5084	47.8626
392	48.7479	18.6345	21.8305	9.87146	25.569	48.0138
393	48.9019	18.6713	21.8778	9.88319	25.6294	48.1646
394	49.0557	18.7079	21.9251	9.89487	25.6897	48.3152
395	49.2092	18.7445	21.9721	9.9065	25.7498	48.4655
396	49.3624	18.7809	22.0191	9.91809	25.8098	48.6155
397	49.5154	18.8172	22.0659	9.92964	25.8696	48.7652
398	49.668	18.8535	22.1125	9.94114	25.9292	48.9146
399	49.8203	18.8896	22.1591	9.9526	25.9887	49.0638
400	49.9724	18.9255	22.2055	9.96401	26.048	49.2126
401	50.1241	18.9614	22.2517	9.97538	26.1072	49.3611
402	50.2755	18.9972	22.2979	9.9867	26.1662	49.5094
403	50.4267	19.0328	22.3439	9.99798	26.225	49.6573
404	50.5775	19.0684	22.3897	10.0092	26.2837	49.805
405	50.728	19.1038	22.4354	10.0204	26.3422	49.9523
406	50.8782	19.1391	22.481	10.0316	26.4006	50.0994
407	51.0281	19.1743	22.5265	10.0427	26.4587	50.2461
408	51.1777	19.2094	22.5718	10.0537	26.5167	50.3925
409	51.327	19.2444	22.617	10.0648	26.5746	50.5387
410	51.476	19.2793	22.662	10.0757	26.6323	50.6845
411	51.6246	19.314	22.7069	10.0867	26.6898	50.83
412	51.773	19.3487	22.7517	10.0976	26.7472	50.9752
413	51.921	19.3832	22.7963	10.1084	26.8044	51.12
414	52.0687	19.4176	22.8408	10.1192	26.8614	51.2646
415	52.2161	19.452	22.8852	10.13	26.9183	51.4089
416	52.3632	19.4862	22.9294	10.1407	26.975	51.5528
417	52.5099	19.5203	22.9735	10.1514	27.0315	51.6964
418	52.6563	19.5542	23.0175	10.162	27.0879	51.8397
419	52.8024	19.5881	23.0613	10.1726	27.1441	51.9827
420	52.9481	19.6219	23.105	10.1832	27.2002	52.1253
421	53.0936	19.6555	23.1485	10.1937	27.2561	52.2676
422	53.2387	19.6891	23.192	10.2042	27.3118	52.4096
423	53.3834	19.7225	23.2352	10.2146	27.3673	52.5513
424	53.5279	19.7558	23.2784	10.225	27.4227	52.6926
425	53.672	19.789	23.3214	10.2353	27.4779	52.8336
426	53.8158	19.8221	23.3642	10.2456	27.533	52.9743
427	53.9592	19.8551	23.407	10.2559	27.5879	53.1147
428	54.1023	19.888	23.4496	10.2661	27.6426	53.2547
429	54.245	19.9207	23.492	10.2763	27.6972	53.3944
430	54.3875	19.9534	23.5344	10.2864	27.7516	53.5338
431	54.5295	19.9859	23.5766	10.2965	27.8058	53.6728
432	54.6713	20.0184	23.6186	10.3066	27.8599	53.8115
433	54.8127	20.0507	23.6605	10.3166	27.9138	53.9498
434	54.9537	20.0829	23.7023	10.3266	27.9675	54.0878
435	55.0944	20.115	23.744	10.3365	28.0211	54.2255
436	55.2348	20.147	23.7855	10.3464	28.0745	54.3628
437	55.3748	20.1789	23.8269	10.3563	28.1277	54.4998
438	55.5145	20.2107	23.8681	10.3661	28.1808	54.6365
439	55.6538	20.2424	23.9092	10.3759	28.2337	54.7728
440	55.7928	20.2739	23.9502	10.3856	28.2864	54.9087
441	55.9314	20.3054	23.991	10.3953	28.339	55.0444
442	56.0697	20.3367	24.0317	10.405	28.3914	55.1796
443	56.2076	20.368	24.0723	10.4146	28.4436	55.3146
444	56.3452	20.3991	24.1127	10.4242	28.4957	55.4491
445	56.4824	20.4301	24.153	10.4337	28.5476	55.5834
446	56.6193	20.461	24.1932	10.4432	28.5994	55.7173
447	56.7558	20.4918	24.2332	10.4527	28.651	55.8508
448	56.8919	20.5225	24.2731	10.4621	28.7024	55.984
449	57.0277	20.5531	24.3129	10.4715	28.7536	56.1168
450	57.1632	20.5836	24.3525	10.4809	28.8047	56.2493
451	57.2982	20.614	24.392	10.4902	28.8556	56.3815
452	57.433	20.6442	24.4314	10.4995	28.9064	56.5132
453	57.5673	20.6744	24.4706	10.5087	28.957	56.6447
454	57.7014	20.7045	24.5097	10.5179	29.0074	56.7758
455	57.835	20.7344	24.5487	10.527	29.0577	56.9065
456	57.9683	20.7642	24.5875	10.5362	29.1078	57.0369
457	58.1012	20.794	24.6262	10.5453	29.1577	57.1669
458	58.2338	20.8236	24.6648	10.5543	29.2075	57.2966
459	58.366	20.8531	24.7032	10.5633	29.2571	57.4259
460	58.4978	20.8825	24.7415	10.5723	29.3065	57.5548
461	58.6293	20.9119	24.7797	10.5812	29.3558	57.6834
462	58.7605	20.9411	24.8177	10.5901	29.4049	57.8117
463	58.8912	20.9702	24.8556	10.599	29.4539	57.9395
464	59.0216	20.9992	24.8934	10.6078	29.5026	58.0671
465	59.1516	21.028	24.931	10.6166	29.5513	58.1942
466	59.2813	21.0568	24.9685	10.6253	29.5997	58.321
467	59.4106	21.0855	25.0059	10.634	29.648	58.4475
468	59.5395	21.1141	25.0431	10.6427	29.6962	58.5736
469	59.6681	21.1426	25.0803	10.6514	29.7441	58.6993
470	59.7963	21.1709	25.1172	10.66	29.7919	58.8247
471	59.9241	21.1992	25.1541	10.6685	29.8396	58.9497
472	60.0516	21.2273	25.1908	10.6771	29.8871	59.0743
473	60.1787	21.2554	25.2274	10.6856	29.9344	59.1986
474	60.3054	21.2834	25.2639	10.694	29.9816	59.3226
475	60.4318	21.3112	25.3002	10.7024	30.0286	59.4461
476	60.5578	21.339	25.3364	10.7108	30.0754	59.5693
477	60.6834	21.3666	25.3725	10.7192	30.1221	59.6922
478	60.8086	21.3941	25.4084	10.7275	30.1686	59.8147
479	60.9335	21.4216	25.4443	10.7358	30.2149	59.9368
480	61.0581	21.4489	25.48	10.744	30.2611	60.0585
481	61.1822	21.4762	25.5155	10.7523	30.3072	60.1799
482	61.306	21.5033	25.5509	10.7604	30.353	60.301
483	61.4294	21.5303	25.5863	10.7686	30.3988	60.4216
484	61.5524	21.5573	25.6214	10.7767	30.4443	60.5419
485	61.6751	21.5841	25.6565	10.7848	30.4897	60.6619
486	61.7974	21.6108	25.6914	10.7928	30.5349	60.7815
487	61.9193	21.6375	25.7262	10.8008	30.58	60.9007
488	62.0409	21.664	25.7609	10.8088	30.6249	61.0195
489	62.1621	21.6904	25.7954	10.8167	30.6697	61.138
490	62.2829	21.7168	25.8298	10.8246	30.7143	61.2562
491	62.4034	21.743	25.8641	10.8325	30.7587	61.3739
492	62.5235	21.7691	25.8983	10.8403	30.803	61.4913
493	62.6432	21.7951	25.9323	10.8482	30.8471	61.6084
494	62.7625	21.8211	25.9662	10.8559	30.8911	61.7251
495	62.8815	21.8469	26	10.8637	30.9349	61.8414
496	63.0001	21.8726	26.0337	10.8714	30.9786	61.9573
497	63.1183	21.8983	26.0672	10.879	31.0221	62.0729
498	63.2362	21.9238	26.1006	10.8867	31.0654	62.1881
499	63.3537	21.9493	26.1339	10.8943	31.1086	62.303
500	63.4708	21.9746	26.1671	10.9019	31.1516	62.4175
501	63.5876	21.9999	26.2001	10.9094	31.1945	62.5316
502	63.7039	22.025	26.233	10.9169	31.2372	62.6454
503	63.82	22.0501	26.2658	10.9244	31.2798	62.7588
504	63.9356	22.075	26.2985	10.9318	31.3222	62.8719
505	64.0509	22.0999	26.331	10.9392	31.3644	62.9845
506	64.1658	22.1246	26.3635	10.9466	31.4065	63.0969
507	64.2803	22.1493	26.3958	10.954	31.4485	63.2088
508	64.3945	22.1739	26.4279	10.9613	31.4902	63.3204
509	64.5083	22.1983	26.46	10.9686	31.5319	63.4317
510	64.6217	22.2227	26.4919	10.9758	31.5734	63.5425
511	64.7348	22.247	26.5238	10.9831	31.6147	63.6531
512	64.8475	22.2712	26.5555	10.9902	31.6559	63.7632
513	64.9598	22.2953	26.587	10.9974	31.6969	63.873
514	65.0717	22.3193	26.6185	11.0045	31.7378	63.9824
515	65.1833	22.3432	26.6498	11.0116	31.7785	64.0915
516	65.2946	22.367	26.681	11.0187	31.8191	64.2002
517	65.4054	22.3907	26.7121	11.0257	31.8595	64.3086
518	65.5159	22.4144	26.7431	11.0327	31.8998	64.4166
519	65.626	22.4379	26.774	11.0397	31.9399	64.5242
520	65.7358	22.4613	26.8047	11.0467	31.9798	64.6315
521	65.8452	22.4847	26.8353	11.0536	32.0197	64.7384
522	65.9542	22.5079	26.8658	11.0605	32.0593	64.845
523	66.0629	22.5311	26.8962	11.0673	32.0988	64.9512
524	66.1712	22.5542	26.9265	11.0741	32.1382	65.057
525	66.2791	22.5771	26.9566	11.0809	32.1774	65.1625
526	66.3867	22.6	26.9867	11.0877	32.2165	65.2676
527	66.4939	22.6228	27.0166	11.0944	32.2554	65.3724
528	66.6007	22.6455	27.0464	11.1011	32.2942	65.4768
529	66.7072	22.6681	27.0761	11.1078	32.3328	65.5809
530	66.8133	22.6907	27.1056	11.1144	32.3713	65.6846
531	66.9191	22.7131	27.1351	11.1211	32.4097	65.788
532	67.0245	22.7354	27.1644	11.1277	32.4479	65.891
533	67.1295	22.7577	27.1936	11.1342	32.4859	65.9936
534	67.2342	22.7799	27.2227	11.1407	32.5238	66.0959
535	67.3385	22.8019	27.2517	11.1472	32.5616	66.1978
536	67.4424	22.8239	27.2806	11.1537	32.5992	66.2994
537	67.546	22.8458	27.3094	11.1602	32.6366	66.4007
538	67.6493	22.8676	27.338	11.1666	32.674	66.5015
539	67.7521	22.8894	27.3666	11.173	32.7111	66.6021
540	67.8546	22.911	27.395	11.1793	32.7482	66.7022
