# Supplementary material for: The Social Cost of Fossil and Industrial CO2 Emissions from 1950 to 2018
Source: Research Square preprint supplement (doi:10.21203/rs.3.rs-2244259/v1), 2022-11-17
Supplement: Supplementary file 187 [file TFP_Weitzman_external.xlsx]

## Sheet: A_params
f	1	2	3	4	5	6
0	1.98163	1.98163	1.98163	1.98163	1.98163	1.98163
1	2.0118	2.0118	2.0118	2.0118	2.0118	2.0118
2	2.00353	2.00353	2.00353	2.00353	2.00353	2.00353
3	2.02181	2.02181	2.02181	2.02181	2.02181	2.02181
4	1.9989	1.9989	1.9989	1.9989	1.9989	1.9989
5	2.03655	2.03655	2.03655	2.03655	2.03655	2.03655
6	2.03891	2.03891	2.03891	2.03891	2.03891	2.03891
7	2.03842	2.03842	2.03842	2.03842	2.03842	2.03842
8	2.0177	2.0177	2.0177	2.0177	2.0177	2.0177
9	2.03582	2.03582	2.03582	2.03582	2.03582	2.03582
10	2.06075	2.06075	2.06075	2.06075	2.06075	2.06075
11	2.05606	2.05606	2.05606	2.05606	2.05606	2.05606
12	2.08311	2.08311	2.08311	2.08311	2.08311	2.08311
13	2.11661	2.11661	2.11661	2.11661	2.11661	2.11661
14	2.1697	2.1697	2.1697	2.1697	2.1697	2.1697
15	2.19981	2.19981	2.19981	2.19981	2.19981	2.19981
16	2.22397	2.22397	2.22397	2.22397	2.22397	2.22397
17	2.22706	2.22706	2.22706	2.22706	2.22706	2.22706
18	2.26767	2.26767	2.26767	2.26767	2.26767	2.26767
19	2.31706	2.31706	2.31706	2.31706	2.31706	2.31706
20	2.32458	2.32458	2.32458	2.32458	2.32458	2.32458
21	2.35158	2.35158	2.35158	2.35158	2.35158	2.35158
22	2.39381	2.39381	2.39381	2.39381	2.39381	2.39381
23	2.46068	2.46068	2.46068	2.46068	2.46068	2.46068
24	2.44374	2.44374	2.44374	2.44374	2.44374	2.44374
25	2.39867	2.39867	2.39867	2.39867	2.39867	2.39867
26	2.44749	2.44749	2.44749	2.44749	2.44749	2.44749
27	2.47222	2.47222	2.47222	2.47222	2.47222	2.47222
28	2.49784	2.49784	2.49784	2.49784	2.49784	2.49784
29	2.52401	2.52401	2.52401	2.52401	2.52401	2.52401
30	2.50749	2.50749	2.50749	2.50749	2.50749	2.50749
31	2.48577	2.48577	2.48577	2.48577	2.48577	2.48577
32	2.43881	2.43881	2.43881	2.43881	2.43881	2.43881
33	2.4465	2.4465	2.4465	2.4465	2.4465	2.4465
34	2.49738	2.49738	2.49738	2.49738	2.49738	2.49738
35	2.52291	2.52291	2.52291	2.52291	2.52291	2.52291
36	2.54995	2.54995	2.54995	2.54995	2.54995	2.54995
37	2.58782	2.58782	2.58782	2.58782	2.58782	2.58782
38	2.63616	2.63616	2.63616	2.63616	2.63616	2.63616
39	2.66105	2.66105	2.66105	2.66105	2.66105	2.66105
40	2.6777	2.6777	2.6777	2.6777	2.6777	2.6777
41	2.64128	2.64128	2.64128	2.64128	2.64128	2.64128
42	2.62265	2.62265	2.62265	2.62265	2.62265	2.62265
43	2.6137	2.6137	2.6137	2.6137	2.6137	2.6137
44	2.6344	2.6344	2.6344	2.6344	2.6344	2.6344
45	2.66749	2.66749	2.66749	2.66749	2.66749	2.66749
46	2.71596	2.71596	2.71596	2.71596	2.71596	2.71596
47	2.76607	2.76607	2.76607	2.76607	2.76607	2.76607
48	2.77085	2.77085	2.77085	2.77085	2.77085	2.77085
49	2.81406	2.81406	2.81406	2.81406	2.81406	2.81406
50	2.89118	2.89118	2.89118	2.89118	2.89118	2.89118
51	2.9058	2.9058	2.9058	2.9058	2.9058	2.9058
52	2.93896	2.93896	2.93896	2.93896	2.93896	2.93896
53	2.99501	2.99501	2.99501	2.99501	2.99501	2.99501
54	3.09529	3.09529	3.09529	3.09529	3.09529	3.09529
55	3.17693	3.17693	3.17693	3.17693	3.17693	3.17693
56	3.27623	3.27623	3.27623	3.27623	3.27623	3.27623
57	3.36744	3.36744	3.36744	3.36744	3.36744	3.36744
58	3.37752	3.37752	3.37752	3.37752	3.37752	3.37752
59	3.2923	3.2923	3.2923	3.2923	3.2923	3.2923
60	3.40553	3.40553	3.40553	3.40553	3.40553	3.40553
61	3.46856	3.46856	3.46856	3.46856	3.46856	3.46856
62	3.48655	3.48655	3.48655	3.48655	3.48655	3.48655
63	3.53458	3.53458	3.53458	3.53458	3.53458	3.53458
64	3.58858	3.58858	3.58858	3.58858	3.58858	3.58858
65	3.62487	3.62487	3.62487	3.62487	3.62487	3.62487
66	3.65938	3.65938	3.65938	3.65938	3.65938	3.65938
67	3.70769	3.70769	3.70769	3.70769	3.70769	3.70769
68	3.73389	3.73389	3.73389	3.73389	3.73389	3.73389
69	3.75343	3.75343	3.75343	3.75343	3.75343	3.75343
70	3.81384	3.79096	3.79471	3.77595	3.79847	3.81348
71	3.87492	3.82868	3.83625	3.79849	3.84382	3.87419
72	3.93667	3.86658	3.87802	3.82105	3.88948	3.93555
73	3.99907	3.90467	3.92004	3.84364	3.93545	3.99757
74	4.06215	3.94293	3.96229	3.86624	3.98173	4.06024
75	4.1259	3.98138	4.00479	3.88886	4.02832	4.12357
76	4.19032	4.02	4.04753	3.9115	4.07521	4.18757
77	4.25541	4.05881	4.0905	3.93416	4.12241	4.25223
78	4.32118	4.09779	4.13372	3.95683	4.16992	4.31756
79	4.38763	4.13695	4.17717	3.97952	4.21773	4.38355
80	4.45476	4.17628	4.22085	4.00223	4.26585	4.45022
81	4.52257	4.21579	4.26477	4.02495	4.31427	4.51755
82	4.59106	4.25547	4.30892	4.04768	4.36299	4.58556
83	4.66024	4.29532	4.35331	4.07043	4.41201	4.65424
84	4.73011	4.33534	4.39792	4.09319	4.46134	4.7236
85	4.80067	4.37553	4.44277	4.11597	4.51096	4.79364
86	4.87191	4.41589	4.48784	4.13875	4.56089	4.86435
87	4.94385	4.45642	4.53314	4.16155	4.61111	4.93575
88	5.01648	4.49711	4.57867	4.18436	4.66163	5.00782
89	5.0898	4.53797	4.62443	4.20718	4.71244	5.08058
90	5.16382	4.57899	4.67041	4.23001	4.76355	5.15402
91	5.23853	4.62018	4.71661	4.25284	4.81496	5.22815
92	5.31395	4.66152	4.76304	4.27569	4.86665	5.30296
93	5.39006	4.70303	4.80968	4.29854	4.91864	5.37846
94	5.46687	4.7447	4.85655	4.3214	4.97092	5.45465
95	5.54438	4.78652	4.90363	4.34427	5.02349	5.53152
96	5.62259	4.8285	4.95093	4.36714	5.07634	5.60909
97	5.70151	4.87063	4.99845	4.39001	5.12949	5.68734
98	5.78112	4.91292	5.04618	4.41289	5.18291	5.76628
99	5.86145	4.95536	5.09413	4.43578	5.23663	5.84592
100	5.94247	4.99795	5.14228	4.45867	5.29062	5.92625
101	6.0242	5.04069	5.19065	4.48156	5.3449	6.00727
102	6.10664	5.08358	5.23923	4.50445	5.39946	6.08898
103	6.18978	5.12662	5.28801	4.52735	5.4543	6.17138
104	6.27362	5.16981	5.337	4.55024	5.50941	6.25448
105	6.35818	5.21313	5.3862	4.57314	5.56481	6.33827
106	6.44344	5.25661	5.43559	4.59604	5.62047	6.42275
107	6.5294	5.30022	5.48519	4.61893	5.67641	6.50793
108	6.61608	5.34398	5.535	4.64183	5.73263	6.5938
109	6.70346	5.38787	5.585	4.66472	5.78911	6.68037
110	6.79154	5.4319	5.6352	4.68761	5.84586	6.76762
111	6.88034	5.47607	5.68559	4.71049	5.90289	6.85557
112	6.96984	5.52038	5.73618	4.73338	5.96017	6.94422
113	7.06004	5.56481	5.78696	4.75626	6.01772	7.03355
114	7.15095	5.60939	5.83794	4.77913	6.07554	7.12358
115	7.24257	5.65409	5.8891	4.802	6.13362	7.2143
116	7.33489	5.69892	5.94046	4.82487	6.19195	7.30572
117	7.42792	5.74388	5.992	4.84772	6.25055	7.39782
118	7.52165	5.78896	6.04373	4.87057	6.3094	7.49061
119	7.61608	5.83418	6.09564	4.89342	6.36851	7.58409
120	7.71122	5.87951	6.14773	4.91625	6.42787	7.67826
121	7.80706	5.92497	6.2	4.93908	6.48748	7.77312
122	7.9036	5.97055	6.25246	4.9619	6.54734	7.86867
123	8.00084	6.01625	6.30509	4.98471	6.60745	7.9649
124	8.09878	6.06207	6.3579	5.00751	6.66781	8.06182
125	8.19742	6.10801	6.41088	5.0303	6.72841	8.15942
126	8.29675	6.15406	6.46403	5.05307	6.78925	8.2577
127	8.39678	6.20022	6.51736	5.07584	6.85034	8.35667
128	8.49751	6.2465	6.57086	5.09859	6.91166	8.45631
129	8.59893	6.29289	6.62452	5.12133	6.97323	8.55664
130	8.70104	6.33939	6.67835	5.14406	7.03502	8.65764
131	8.80385	6.38599	6.73234	5.16678	7.09706	8.75932
132	8.90734	6.43271	6.7865	5.18948	7.15932	8.86168
133	9.01152	6.47953	6.84082	5.21217	7.22182	8.96471
134	9.11639	6.52645	6.8953	5.23484	7.28454	9.06841
135	9.22195	6.57347	6.94993	5.25749	7.34749	9.17278
136	9.32819	6.6206	7.00472	5.28013	7.41066	9.27782
137	9.43511	6.66782	7.05967	5.30276	7.47406	9.38353
138	9.54271	6.71515	7.11477	5.32536	7.53768	9.4899
139	9.65098	6.76257	7.17002	5.34795	7.60151	9.59693
140	9.75994	6.81008	7.22542	5.37053	7.66557	9.70463
141	9.86957	6.85769	7.28096	5.39308	7.72984	9.81299
142	9.97987	6.90539	7.33666	5.41561	7.79432	9.922
143	10.0908	6.95318	7.39249	5.43813	7.85901	10.0317
144	10.2025	7.00106	7.44847	5.46063	7.92391	10.142
145	10.3148	7.04903	7.50459	5.4831	7.98902	10.253
146	10.4277	7.09708	7.56085	5.50556	8.05433	10.3646
147	10.5414	7.14522	7.61724	5.52799	8.11985	10.4769
148	10.6557	7.19344	7.67377	5.5504	8.18556	10.5898
149	10.7706	7.24174	7.73043	5.5728	8.25148	10.7033
150	10.8862	7.29013	7.78723	5.59517	8.31759	10.8175
151	11.0025	7.33859	7.84415	5.61751	8.3839	10.9323
152	11.1194	7.38713	7.90121	5.63984	8.4504	11.0478
153	11.2369	7.43574	7.95838	5.66213	8.51709	11.1639
154	11.3551	7.48443	8.01569	5.68441	8.58396	11.2806
155	11.4739	7.5332	8.07311	5.70666	8.65103	11.398
156	11.5934	7.58203	8.13066	5.72889	8.71828	11.5159
157	11.7135	7.63093	8.18833	5.75109	8.78571	11.6345
158	11.8343	7.6799	8.24611	5.77327	8.85332	11.7537
159	11.9556	7.72894	8.30401	5.79542	8.92111	11.8736
160	12.0776	7.77805	8.36202	5.81754	8.98907	11.994
161	12.2002	7.82721	8.42014	5.83964	9.05721	12.115
162	12.3235	7.87645	8.47838	5.86171	9.12552	12.2367
163	12.4473	7.92574	8.53672	5.88375	9.194	12.3589
164	12.5718	7.97509	8.59517	5.90576	9.26265	12.4818
165	12.6969	8.0245	8.65372	5.92775	9.33146	12.6053
166	12.8226	8.07396	8.71238	5.94971	9.40043	12.7293
167	12.9489	8.12348	8.77114	5.97164	9.46957	12.8539
168	13.0758	8.17306	8.83	5.99354	9.53886	12.9791
169	13.2033	8.22268	8.88895	6.01541	9.60831	13.1049
170	13.3314	8.27236	8.948	6.03725	9.67792	13.2313
171	13.4601	8.32209	9.00714	6.05906	9.74767	13.3583
172	13.5893	8.37186	9.06638	6.08083	9.81758	13.4858
173	13.7192	8.42169	9.12571	6.10258	9.88763	13.6139
174	13.8496	8.47155	9.18512	6.1243	9.95783	13.7426
175	13.9807	8.52146	9.24462	6.14598	10.0282	13.8718
176	14.1122	8.57141	9.30421	6.16763	10.0987	14.0016
177	14.2444	8.62141	9.36388	6.18925	10.1693	14.1319
178	14.3771	8.67144	9.42363	6.21084	10.24	14.2628
179	14.5104	8.72151	9.48346	6.23239	10.3109	14.3943
180	14.6443	8.77162	9.54336	6.25391	10.382	14.5262
181	14.7787	8.82176	9.60335	6.2754	10.4531	14.6588
182	14.9136	8.87193	9.66341	6.29685	10.5244	14.7918
183	15.0491	8.92214	9.72354	6.31827	10.5958	14.9254
184	15.1852	8.97238	9.78374	6.33965	10.6673	15.0595
185	15.3217	9.02265	9.844	6.361	10.739	15.1942
186	15.4589	9.07295	9.90434	6.38231	10.8108	15.3293
187	15.5965	9.12327	9.96474	6.40359	10.8827	15.465
188	15.7347	9.17362	10.0252	6.42483	10.9547	15.6012
189	15.8734	9.22399	10.0857	6.44604	11.0268	15.7379
190	16.0126	9.27438	10.1463	6.4672	11.099	15.8751
191	16.1523	9.3248	10.207	6.48834	11.1714	16.0128
192	16.2925	9.37524	10.2677	6.50943	11.2438	16.151
193	16.4333	9.42569	10.3284	6.53049	11.3163	16.2897
194	16.5745	9.47616	10.3892	6.55151	11.389	16.4289
195	16.7163	9.52665	10.4501	6.57249	11.4617	16.5686
196	16.8585	9.57715	10.511	6.59343	11.5346	16.7087
197	17.0012	9.62767	10.572	6.61434	11.6075	16.8493
198	17.1445	9.67819	10.633	6.63521	11.6806	16.9904
199	17.2881	9.72873	10.694	6.65604	11.7537	17.1319
200	17.4323	9.77928	10.7551	6.67682	11.8269	17.274
201	17.5769	9.82983	10.8162	6.69757	11.9002	17.4164
202	17.7221	9.8804	10.8774	6.71828	11.9736	17.5593
203	17.8676	9.93096	10.9386	6.73895	12.047	17.7027
204	18.0136	9.98153	10.9998	6.75958	12.1206	17.8465
205	18.1601	10.0321	11.0611	6.78017	12.1942	17.9908
206	18.307	10.0827	11.1224	6.80072	12.2679	18.1355
207	18.4544	10.1333	11.1838	6.82123	12.3417	18.2806
208	18.6022	10.1838	11.2451	6.8417	12.4155	18.4261
209	18.7505	10.2344	11.3065	6.86212	12.4894	18.5721
210	18.8991	10.285	11.3679	6.88251	12.5634	18.7185
211	19.0482	10.3355	11.4294	6.90285	12.6374	18.8653
212	19.1978	10.3861	11.4909	6.92315	12.7115	19.0125
213	19.3477	10.4366	11.5523	6.94341	12.7857	19.1601
214	19.498	10.4872	11.6139	6.96362	12.8599	19.3081
215	19.6488	10.5377	11.6754	6.9838	12.9342	19.4565
216	19.8	10.5882	11.7369	7.00393	13.0085	19.6053
217	19.9515	10.6387	11.7985	7.02402	13.0829	19.7545
218	20.1035	10.6892	11.86	7.04406	13.1574	19.904
219	20.2558	10.7397	11.9216	7.06406	13.2319	20.0539
220	20.4085	10.7902	11.9832	7.08402	13.3064	20.2042
221	20.5616	10.8406	12.0448	7.10393	13.381	20.3549
222	20.7151	10.8911	12.1064	7.1238	13.4556	20.5059
223	20.8689	10.9415	12.168	7.14363	13.5302	20.6573
224	21.0231	10.9919	12.2296	7.16341	13.6049	20.809
225	21.1777	11.0422	12.2912	7.18315	13.6797	20.9611
226	21.3326	11.0926	12.3528	7.20284	13.7544	21.1135
227	21.4879	11.1429	12.4145	7.22249	13.8292	21.2663
228	21.6435	11.1932	12.4761	7.24209	13.9041	21.4194
229	21.7994	11.2435	12.5377	7.26165	13.9789	21.5728
230	21.9557	11.2937	12.5993	7.28116	14.0538	21.7265
231	22.1123	11.3439	12.6608	7.30063	14.1287	21.8806
232	22.2692	11.3941	12.7224	7.32005	14.2036	22.0349
233	22.4265	11.4443	12.784	7.33943	14.2786	22.1896
234	22.5841	11.4944	12.8455	7.35876	14.3535	22.3446
235	22.742	11.5445	12.9071	7.37804	14.4285	22.4999
236	22.9001	11.5945	12.9686	7.39728	14.5035	22.6554
237	23.0586	11.6446	13.0301	7.41647	14.5785	22.8113
238	23.2174	11.6945	13.0916	7.43562	14.6535	22.9675
239	23.3765	11.7445	13.1531	7.45472	14.7285	23.1239
240	23.5358	11.7944	13.2146	7.47377	14.8035	23.2806
241	23.6955	11.8443	13.276	7.49277	14.8786	23.4375
242	23.8554	11.8941	13.3374	7.51173	14.9536	23.5948
243	24.0156	11.9439	13.3988	7.53064	15.0286	23.7523
244	24.176	11.9937	13.4601	7.54951	15.1037	23.91
245	24.3368	12.0434	13.5215	7.56833	15.1787	24.068
246	24.4977	12.093	13.5828	7.58709	15.2537	24.2263
247	24.659	12.1426	13.644	7.60582	15.3287	24.3848
248	24.8204	12.1922	13.7053	7.62449	15.4038	24.5435
249	24.9821	12.2417	13.7665	7.64312	15.4788	24.7024
250	25.1441	12.2912	13.8276	7.6617	15.5537	24.8616
251	25.3063	12.3406	13.8888	7.68023	15.6287	25.021
252	25.4687	12.39	13.9499	7.69871	15.7037	25.1806
253	25.6313	12.4394	14.0109	7.71714	15.7786	25.3405
254	25.7941	12.4886	14.0719	7.73553	15.8535	25.5005
255	25.9572	12.5379	14.1329	7.75387	15.9284	25.6608
256	26.1204	12.587	14.1938	7.77216	16.0033	25.8212
257	26.2839	12.6361	14.2547	7.7904	16.0781	25.9818
258	26.4476	12.6852	14.3156	7.80859	16.1529	26.1426
259	26.6114	12.7342	14.3764	7.82673	16.2277	26.3036
260	26.7755	12.7832	14.4371	7.84483	16.3025	26.4648
261	26.9397	12.832	14.4978	7.86287	16.3772	26.6262
262	27.1041	12.8809	14.5585	7.88087	16.4519	26.7877
263	27.2687	12.9296	14.6191	7.89882	16.5266	26.9494
264	27.4334	12.9784	14.6796	7.91672	16.6012	27.1112
265	27.5983	13.027	14.7401	7.93457	16.6758	27.2733
266	27.7634	13.0756	14.8005	7.95237	16.7503	27.4354
267	27.9286	13.1241	14.8609	7.97012	16.8248	27.5977
268	28.094	13.1726	14.9212	7.98782	16.8993	27.7601
269	28.2595	13.221	14.9815	8.00548	16.9737	27.9227
270	28.4252	13.2693	15.0417	8.02308	17.0481	28.0854
271	28.591	13.3176	15.1019	8.04063	17.1224	28.2483
272	28.7569	13.3658	15.1619	8.05814	17.1967	28.4112
273	28.9229	13.4139	15.222	8.07559	17.2709	28.5743
274	29.0891	13.462	15.2819	8.093	17.345	28.7375
275	29.2554	13.51	15.3418	8.11035	17.4192	28.9008
276	29.4218	13.5579	15.4016	8.12766	17.4932	29.0642
277	29.5883	13.6057	15.4614	8.14492	17.5672	29.2277
278	29.7549	13.6535	15.5211	8.16212	17.6411	29.3913
279	29.9216	13.7012	15.5807	8.17928	17.715	29.555
280	30.0884	13.7489	15.6403	8.19639	17.7888	29.7188
281	30.2553	13.7964	15.6997	8.21344	17.8626	29.8826
282	30.4222	13.8439	15.7591	8.23045	17.9363	30.0466
283	30.5893	13.8913	15.8185	8.24741	18.0099	30.2106
284	30.7564	13.9387	15.8777	8.26431	18.0834	30.3746
285	30.9236	13.9859	15.9369	8.28117	18.1569	30.5388
286	31.0909	14.0331	15.996	8.29798	18.2303	30.703
287	31.2582	14.0802	16.055	8.31473	18.3037	30.8672
288	31.4256	14.1272	16.114	8.33144	18.3769	31.0315
289	31.593	14.1742	16.1729	8.3481	18.4501	31.1959
290	31.7605	14.2211	16.2316	8.3647	18.5232	31.3603
291	31.928	14.2679	16.2903	8.38126	18.5963	31.5247
292	32.0956	14.3146	16.349	8.39777	18.6692	31.6892
293	32.2632	14.3612	16.4075	8.41422	18.7421	31.8537
294	32.4308	14.4077	16.466	8.43063	18.8149	32.0182
295	32.5984	14.4542	16.5243	8.44699	18.8876	32.1827
296	32.7661	14.5006	16.5826	8.46329	18.9602	32.3473
297	32.9338	14.5469	16.6408	8.47955	19.0328	32.5118
298	33.1015	14.5931	16.6989	8.49575	19.1052	32.6764
299	33.2692	14.6392	16.7569	8.51191	19.1776	32.841
300	33.437	14.6852	16.8149	8.52801	19.2499	33.0056
301	33.6047	14.7312	16.8727	8.54407	19.322	33.1701
302	33.7724	14.7771	16.9305	8.56007	19.3941	33.3347
303	33.9401	14.8228	16.9881	8.57603	19.4661	33.4993
304	34.1078	14.8685	17.0457	8.59193	19.538	33.6638
305	34.2755	14.9141	17.1031	8.60779	19.6099	33.8283
306	34.4432	14.9596	17.1605	8.62359	19.6816	33.9928
307	34.6108	15.0051	17.2178	8.63934	19.7532	34.1573
308	34.7784	15.0504	17.275	8.65505	19.8247	34.3217
309	34.946	15.0956	17.3321	8.6707	19.8961	34.4861
310	35.1135	15.1408	17.389	8.68631	19.9674	34.6505
311	35.281	15.1858	17.4459	8.70186	20.0386	34.8148
312	35.4485	15.2308	17.5027	8.71736	20.1097	34.979
313	35.6159	15.2757	17.5594	8.73282	20.1807	35.1432
314	35.7832	15.3205	17.616	8.74822	20.2516	35.3074
315	35.9505	15.3652	17.6725	8.76358	20.3224	35.4715
316	36.1178	15.4098	17.7288	8.77888	20.3931	35.6355
317	36.2849	15.4543	17.7851	8.79413	20.4637	35.7995
318	36.4521	15.4987	17.8413	8.80934	20.5341	35.9634
319	36.6191	15.543	17.8974	8.82449	20.6045	36.1272
320	36.7861	15.5872	17.9533	8.8396	20.6747	36.2909
321	36.9529	15.6313	18.0092	8.85465	20.7449	36.4546
322	37.1197	15.6753	18.065	8.86966	20.8149	36.6182
323	37.2864	15.7193	18.1206	8.88461	20.8848	36.7817
324	37.4531	15.7631	18.1761	8.89952	20.9545	36.945
325	37.6196	15.8068	18.2316	8.91438	21.0242	37.1083
326	37.786	15.8505	18.2869	8.92918	21.0937	37.2715
327	37.9524	15.894	18.3421	8.94394	21.1632	37.4346
328	38.1186	15.9374	18.3972	8.95865	21.2325	37.5976
329	38.2847	15.9808	18.4522	8.97331	21.3017	37.7605
330	38.4507	16.024	18.5071	8.98792	21.3707	37.9233
331	38.6166	16.0671	18.5618	9.00248	21.4397	38.0859
332	38.7824	16.1102	18.6165	9.01699	21.5085	38.2484
333	38.948	16.1531	18.671	9.03145	21.5772	38.4108
334	39.1135	16.196	18.7254	9.04586	21.6457	38.5731
335	39.2789	16.2387	18.7798	9.06023	21.7142	38.7352
336	39.4442	16.2813	18.834	9.07454	21.7825	38.8972
337	39.6093	16.3239	18.888	9.08881	21.8507	39.0591
338	39.7743	16.3663	18.942	9.10302	21.9187	39.2208
339	39.9391	16.4086	18.9958	9.11719	21.9866	39.3824
340	40.1038	16.4508	19.0496	9.13131	22.0544	39.5439
341	40.2684	16.493	19.1032	9.14538	22.1221	39.7051
342	40.4328	16.535	19.1567	9.1594	22.1896	39.8663
343	40.597	16.5769	19.2101	9.17337	22.257	40.0273
344	40.7611	16.6187	19.2633	9.18729	22.3243	40.1881
345	40.925	16.6604	19.3165	9.20117	22.3914	40.3487
346	41.0888	16.702	19.3695	9.215	22.4584	40.5092
347	41.2524	16.7435	19.4224	9.22877	22.5253	40.6696
348	41.4158	16.7849	19.4752	9.2425	22.592	40.8297
349	41.579	16.8262	19.5278	9.25619	22.6586	40.9897
350	41.7421	16.8674	19.5804	9.26982	22.7251	41.1495
351	41.905	16.9085	19.6328	9.28341	22.7914	41.3091
352	42.0677	16.9494	19.6851	9.29694	22.8575	41.4685
353	42.2302	16.9903	19.7372	9.31043	22.9236	41.6278
354	42.3925	17.0311	19.7893	9.32387	22.9895	41.7869
355	42.5547	17.0717	19.8412	9.33727	23.0552	41.9457
356	42.7166	17.1123	19.893	9.35061	23.1208	42.1044
357	42.8783	17.1527	19.9447	9.36391	23.1863	42.2629
358	43.0399	17.193	19.9962	9.37716	23.2516	42.4212
359	43.2012	17.2332	20.0476	9.39037	23.3168	42.5792
360	43.3624	17.2734	20.0989	9.40352	23.3818	42.7371
361	43.5233	17.3134	20.1501	9.41663	23.4467	42.8948
362	43.684	17.3533	20.2011	9.42969	23.5115	43.0522
363	43.8445	17.3931	20.2521	9.44271	23.5761	43.2095
364	44.0048	17.4328	20.3028	9.45567	23.6405	43.3665
365	44.1648	17.4723	20.3535	9.46859	23.7048	43.5233
366	44.3247	17.5118	20.404	9.48146	23.769	43.6799
367	44.4843	17.5512	20.4545	9.49429	23.833	43.8362
368	44.6437	17.5904	20.5047	9.50707	23.8969	43.9924
369	44.8028	17.6296	20.5549	9.5198	23.9606	44.1483
370	44.9618	17.6686	20.6049	9.53249	24.0241	44.304
371	45.1205	17.7075	20.6548	9.54513	24.0875	44.4594
372	45.2789	17.7463	20.7046	9.55772	24.1508	44.6146
373	45.4371	17.785	20.7542	9.57027	24.2139	44.7696
374	45.5951	17.8236	20.8037	9.58277	24.2769	44.9243
375	45.7528	17.8621	20.8531	9.59522	24.3397	45.0788
376	45.9103	17.9005	20.9023	9.60763	24.4023	45.2331
377	46.0676	17.9388	20.9514	9.61999	24.4648	45.3871
378	46.2246	17.9769	21.0004	9.63231	24.5272	45.5408
379	46.3813	18.015	21.0493	9.64458	24.5894	45.6943
380	46.5378	18.0529	21.098	9.6568	24.6514	45.8476
381	46.694	18.0907	21.1466	9.66898	24.7133	46.0005
382	46.8499	18.1285	21.1951	9.68111	24.7751	46.1533
383	47.0056	18.1661	21.2434	9.6932	24.8366	46.3057
384	47.1611	18.2036	21.2916	9.70524	24.8981	46.458
385	47.3162	18.2409	21.3396	9.71724	24.9593	46.6099
386	47.4711	18.2782	21.3876	9.72919	25.0204	46.7616
387	47.6258	18.3154	21.4354	9.7411	25.0814	46.913
388	47.7801	18.3524	21.483	9.75296	25.1422	47.0641
389	47.9342	18.3894	21.5306	9.76478	25.2028	47.215
390	48.088	18.4262	21.578	9.77655	25.2633	47.3656
391	48.2415	18.4629	21.6252	9.78828	25.3236	47.5159
392	48.3948	18.4995	21.6724	9.79996	25.3838	47.666
393	48.5477	18.5361	21.7194	9.8116	25.4438	47.8157
394	48.7004	18.5724	21.7662	9.8232	25.5036	47.9652
395	48.8528	18.6087	21.813	9.83475	25.5633	48.1144
396	49.0049	18.6449	21.8596	9.84625	25.6229	48.2633
397	49.1567	18.6809	21.906	9.85771	25.6822	48.412
398	49.3082	18.7169	21.9524	9.86913	25.7414	48.5603
399	49.4595	18.7527	21.9986	9.88051	25.8005	48.7084
400	49.6104	18.7885	22.0446	9.89184	25.8594	48.8561
401	49.761	18.8241	22.0906	9.90312	25.9181	49.0036
402	49.9114	18.8596	22.1364	9.91437	25.9767	49.1508
403	50.0614	18.895	22.182	9.92557	26.0351	49.2976
404	50.2111	18.9303	22.2275	9.93672	26.0933	49.4442
405	50.3606	18.9654	22.2729	9.94784	26.1514	49.5905
406	50.5097	19.0005	22.3182	9.95891	26.2093	49.7365
407	50.6585	19.0354	22.3633	9.96993	26.2671	49.8822
408	50.807	19.0703	22.4083	9.98092	26.3247	50.0275
409	50.9552	19.105	22.4532	9.99186	26.3821	50.1726
410	51.1031	19.1396	22.4979	10.0028	26.4394	50.3174
411	51.2507	19.1741	22.5425	10.0136	26.4965	50.4618
412	51.398	19.2085	22.5869	10.0244	26.5534	50.6059
413	51.5449	19.2428	22.6312	10.0352	26.6102	50.7498
414	51.6916	19.277	22.6754	10.0459	26.6669	50.8933
415	51.8379	19.3111	22.7194	10.0566	26.7233	51.0365
416	51.9839	19.345	22.7634	10.0673	26.7796	51.1794
417	52.1295	19.3789	22.8071	10.0779	26.8357	51.3219
418	52.2749	19.4126	22.8508	10.0884	26.8917	51.4642
419	52.4199	19.4462	22.8943	10.0989	26.9475	51.6061
420	52.5646	19.4797	22.9376	10.1094	27.0032	51.7477
421	52.709	19.5131	22.9809	10.1199	27.0586	51.889
422	52.8531	19.5464	23.024	10.1302	27.114	52.03
423	52.9968	19.5796	23.0669	10.1406	27.1691	52.1706
424	53.1402	19.6127	23.1098	10.1509	27.2241	52.311
425	53.2832	19.6457	23.1525	10.1612	27.2789	52.451
426	53.426	19.6785	23.195	10.1714	27.3336	52.5906
427	53.5683	19.7113	23.2374	10.1816	27.3881	52.73
428	53.7104	19.7439	23.2797	10.1918	27.4424	52.869
429	53.8521	19.7764	23.3219	10.2019	27.4966	53.0076
430	53.9935	19.8089	23.3639	10.2119	27.5506	53.146
431	54.1346	19.8412	23.4058	10.222	27.6044	53.284
432	54.2753	19.8734	23.4475	10.2319	27.6581	53.4217
433	54.4157	19.9055	23.4892	10.2419	27.7116	53.559
434	54.5557	19.9375	23.5306	10.2518	27.7649	53.696
435	54.6954	19.9693	23.572	10.2617	27.8181	53.8327
436	54.8347	20.0011	23.6132	10.2715	27.8711	53.9691
437	54.9737	20.0328	23.6543	10.2813	27.924	54.1051
438	55.1124	20.0643	23.6952	10.291	27.9766	54.2407
439	55.2507	20.0957	23.736	10.3007	28.0292	54.376
440	55.3887	20.1271	23.7767	10.3104	28.0815	54.511
441	55.5263	20.1583	23.8173	10.32	28.1337	54.6456
442	55.6635	20.1894	23.8577	10.3296	28.1857	54.7799
443	55.8005	20.2204	23.8979	10.3392	28.2376	54.9139
444	55.937	20.2513	23.9381	10.3487	28.2893	55.0475
445	56.0733	20.2821	23.9781	10.3582	28.3408	55.1808
446	56.2091	20.3128	24.018	10.3676	28.3922	55.3137
447	56.3447	20.3434	24.0577	10.377	28.4434	55.4463
448	56.4798	20.3739	24.0973	10.3864	28.4945	55.5785
449	56.6146	20.4042	24.1368	10.3957	28.5454	55.7104
450	56.7491	20.4345	24.1761	10.405	28.5961	55.8419
451	56.8832	20.4647	24.2153	10.4142	28.6466	55.9731
452	57.017	20.4947	24.2544	10.4234	28.697	56.1039
453	57.1504	20.5246	24.2934	10.4326	28.7472	56.2344
454	57.2834	20.5545	24.3322	10.4417	28.7973	56.3645
455	57.4161	20.5842	24.3709	10.4508	28.8472	56.4943
456	57.5484	20.6138	24.4094	10.4599	28.8969	56.6237
457	57.6804	20.6434	24.4478	10.4689	28.9465	56.7528
458	57.812	20.6728	24.4861	10.4779	28.9959	56.8815
459	57.9432	20.7021	24.5243	10.4868	29.0452	57.0099
460	58.0741	20.7313	24.5623	10.4957	29.0942	57.1379
461	58.2047	20.7604	24.6002	10.5046	29.1432	57.2656
462	58.3348	20.7894	24.6379	10.5134	29.1919	57.3929
463	58.4646	20.8183	24.6756	10.5222	29.2405	57.5199
464	58.5941	20.8471	24.7131	10.531	29.2889	57.6465
465	58.7232	20.8757	24.7504	10.5397	29.3372	57.7727
466	58.8519	20.9043	24.7877	10.5484	29.3853	57.8986
467	58.9803	20.9328	24.8248	10.557	29.4333	58.0241
468	59.1083	20.9611	24.8618	10.5656	29.4811	58.1493
469	59.2359	20.9894	24.8986	10.5742	29.5287	58.2741
470	59.3632	21.0176	24.9353	10.5827	29.5761	58.3986
471	59.4901	21.0456	24.9719	10.5913	29.6235	58.5227
472	59.6166	21.0736	25.0084	10.5997	29.6706	58.6465
473	59.7428	21.1014	25.0447	10.6082	29.7176	58.7698
474	59.8686	21.1292	25.0809	10.6166	29.7644	58.8929
475	59.994	21.1568	25.117	10.6249	29.811	59.0155
476	60.1191	21.1844	25.1529	10.6333	29.8575	59.1379
477	60.2438	21.2118	25.1887	10.6415	29.9039	59.2598
478	60.3682	21.2392	25.2244	10.6498	29.9501	59.3814
479	60.4922	21.2664	25.26	10.658	29.9961	59.5026
480	60.6158	21.2936	25.2954	10.6662	30.0419	59.6235
481	60.739	21.3206	25.3307	10.6744	30.0876	59.744
482	60.8619	21.3475	25.3659	10.6825	30.1332	59.8642
483	60.9844	21.3744	25.4009	10.6906	30.1786	59.984
484	61.1066	21.4011	25.4358	10.6986	30.2238	60.1034
485	61.2284	21.4278	25.4706	10.7067	30.2689	60.2225
486	61.3498	21.4543	25.5053	10.7146	30.3138	60.3412
487	61.4708	21.4807	25.5399	10.7226	30.3585	60.4596
488	61.5915	21.5071	25.5743	10.7305	30.4031	60.5776
489	61.7118	21.5333	25.6086	10.7384	30.4475	60.6952
490	61.8318	21.5595	25.6427	10.7462	30.4918	60.8125
491	61.9514	21.5855	25.6768	10.754	30.5359	60.9294
492	62.0706	21.6114	25.7107	10.7618	30.5799	61.0459
493	62.1894	21.6373	25.7445	10.7696	30.6237	61.1621
494	62.3079	21.663	25.7781	10.7773	30.6673	61.278
495	62.426	21.6887	25.8117	10.785	30.7108	61.3934
496	62.5438	21.7142	25.8451	10.7926	30.7542	61.5085
497	62.6611	21.7397	25.8784	10.8002	30.7974	61.6233
498	62.7782	21.765	25.9116	10.8078	30.8404	61.7377
499	62.8948	21.7903	25.9446	10.8154	30.8832	61.8517
500	63.0111	21.8154	25.9775	10.8229	30.926	61.9654
501	63.127	21.8405	26.0103	10.8304	30.9685	62.0787
502	63.2425	21.8655	26.043	10.8378	31.0109	62.1916
503	63.3577	21.8903	26.0756	10.8453	31.0532	62.3042
504	63.4725	21.9151	26.108	10.8527	31.0953	62.4165
505	63.5869	21.9398	26.1403	10.86	31.1372	62.5283
506	63.701	21.9644	26.1725	10.8673	31.179	62.6398
507	63.8147	21.9889	26.2046	10.8746	31.2207	62.751
508	63.9281	22.0133	26.2365	10.8819	31.2622	62.8618
509	64.041	22.0376	26.2683	10.8891	31.3035	62.9722
510	64.1536	22.0618	26.3	10.8963	31.3447	63.0823
511	64.2659	22.0859	26.3316	10.9035	31.3857	63.192
512	64.3778	22.1099	26.3631	10.9106	31.4266	63.3014
513	64.4893	22.1338	26.3944	10.9177	31.4673	63.4104
514	64.6004	22.1576	26.4257	10.9248	31.5079	63.519
515	64.7112	22.1814	26.4568	10.9319	31.5483	63.6273
516	64.8216	22.205	26.4878	10.9389	31.5886	63.7352
517	64.9317	22.2286	26.5186	10.9459	31.6287	63.8428
518	65.0414	22.252	26.5494	10.9528	31.6687	63.95
519	65.1507	22.2754	26.58	10.9597	31.7085	64.0569
520	65.2597	22.2986	26.6105	10.9666	31.7482	64.1634
521	65.3683	22.3218	26.6409	10.9735	31.7877	64.2695
522	65.4765	22.3449	26.6712	10.9803	31.8271	64.3753
523	65.5844	22.3679	26.7014	10.9871	31.8663	64.4807
524	65.6919	22.3908	26.7314	10.9939	31.9054	64.5858
525	65.799	22.4136	26.7614	11.0007	31.9444	64.6905
526	65.9058	22.4363	26.7912	11.0074	31.9832	64.7949
527	66.0123	22.459	26.8209	11.0141	32.0218	64.8989
528	66.1183	22.4815	26.8505	11.0207	32.0603	65.0026
529	66.224	22.504	26.8799	11.0273	32.0987	65.1059
530	66.3294	22.5263	26.9093	11.0339	32.1369	65.2088
531	66.4344	22.5486	26.9385	11.0405	32.1749	65.3114
532	66.539	22.5708	26.9677	11.0471	32.2128	65.4137
533	66.6433	22.5929	26.9967	11.0536	32.2506	65.5156
534	66.7472	22.6149	27.0256	11.06	32.2882	65.6171
535	66.8507	22.6368	27.0543	11.0665	32.3257	65.7183
536	66.9539	22.6586	27.083	11.0729	32.363	65.8192
537	67.0568	22.6804	27.1116	11.0793	32.4002	65.9197
538	67.1593	22.702	27.14	11.0857	32.4373	66.0198
539	67.2614	22.7236	27.1684	11.092	32.4742	66.1196
540	67.3632	22.745	27.1966	11.0983	32.511	66.2191
