# Supplementary material for: The Social Cost of Fossil and Industrial CO2 Emissions from 1950 to 2018
Source: Research Square preprint supplement (doi:10.21203/rs.3.rs-2244259/v1), 2022-11-17
Supplement: Supplementary file 200 [file calibration_eta_delta.xlsx]

## Sheet: out_kappa2
eta	delta	K	430.378
1.2	0.044	430.373	1.82532e-05
1.435	0.039	430.365	0.000157663
1.34	0.041	430.457	0.00631542
1.295	0.042	430.189	0.0355701
1.155	0.045	430.152	0.0510138
1.245	0.043	430.611	0.0543126
1.105	0.046	430.626	0.0614889
1.48	0.038	430.675	0.0886042
1.39	0.04	430.068	0.0957088
1.385	0.04	430.739	0.130941
1.485	0.038	430.007	0.137464
1.11	0.046	429.946	0.185993
1.25	0.043	429.936	0.195279
1.15	0.045	430.83	0.204745
1.29	0.042	430.863	0.235857
1.345	0.041	429.785	0.350877
1.43	0.039	431.036	0.433132
1.195	0.044	431.051	0.453266
1.205	0.044	429.698	0.462384
1.44	0.039	429.696	0.464405
1.335	0.041	431.131	0.567115
1.3	0.042	429.516	0.741427
1.16	0.045	429.475	0.814326
1.24	0.043	431.287	0.827748
1.475	0.038	431.345	0.936741
1.395	0.04	429.399	0.958091
1.38	0.04	431.412	1.07094
1.49	0.038	429.34	1.07626
1.115	0.046	429.269	1.22919
1.255	0.043	429.262	1.24337
1.145	0.045	431.51	1.28291
1.285	0.042	431.539	1.34954
1.35	0.041	429.115	1.59362
1.425	0.039	431.708	1.77046
1.445	0.039	429.029	1.81879
1.19	0.044	431.73	1.82949
1.21	0.044	429.024	1.83306
1.33	0.041	431.806	2.0405
1.305	0.042	428.846	2.34623
1.165	0.045	428.8	2.48734
1.235	0.043	431.966	2.52292
1.47	0.038	432.017	2.68899
1.4	0.04	428.731	2.71099
1.495	0.038	428.675	2.89798
1.375	0.04	432.087	2.92291
1.12	0.046	428.593	3.18371
1.26	0.043	428.591	3.19135
1.14	0.045	432.192	3.29297
1.28	0.042	432.217	3.38392
1.355	0.041	428.447	3.72744
1.42	0.039	432.382	4.01932
1.45	0.039	428.364	4.0563
1.215	0.044	428.352	4.10478
1.185	0.044	432.411	4.13612
1.325	0.041	432.483	4.43376
1.31	0.042	428.177	4.84283
1.17	0.045	428.127	5.06278
1.23	0.043	432.646	5.14721
1.405	0.04	428.065	5.34736
1.465	0.038	432.691	5.3525
1.5	0.038	428.012	5.59568
1.37	0.04	432.764	5.69411
1.265	0.043	427.922	6.03207
1.125	0.046	427.919	6.04223
1.135	0.045	432.876	6.24243
1.275	0.042	432.897	6.34637
1.36	0.041	427.78	6.74525
1.455	0.039	427.7	7.16995
1.415	0.039	433.058	7.18695
1.22	0.044	427.681	7.27037
1.18	0.044	433.094	7.38061
1.32	0.041	433.162	7.75422
1.315	0.042	427.51	8.22415
1.175	0.045	427.456	8.53341
1.225	0.043	433.328	8.70807
1.41	0.04	427.401	8.86021
1.46	0.038	433.367	8.93451
1.365	0.04	433.442	9.39185
1.27	0.043	427.254	9.7584
1.13	0.046	427.247	9.7975
1.13	0.045	433.562	10.1388
1.27	0.042	433.578	10.2443
1.365	0.041	427.116	10.6401
1.46	0.039	427.038	11.1528
1.41	0.039	433.736	11.2807
1.225	0.044	427.013	11.3227
1.175	0.044	433.779	11.5705
1.315	0.041	433.843	12.0093
1.32	0.042	426.844	12.4831
1.18	0.045	426.787	12.8921
1.22	0.043	434.013	13.213
1.415	0.04	426.739	13.2426
1.455	0.038	434.044	13.4423
1.36	0.04	434.122	14.0235
1.275	0.043	426.588	14.3633
1.135	0.046	426.577	14.4423
1.125	0.045	434.249	14.9898
1.265	0.042	434.262	15.0852
1.37	0.041	426.453	15.4049
1.5	0.037	434.365	15.8986
1.465	0.039	426.378	15.9981
1.23	0.044	426.346	16.2546
1.405	0.039	434.416	16.3078
1.17	0.044	434.466	16.7134
1.31	0.041	434.526	17.2064
1.325	0.042	426.181	17.6114
1.185	0.045	426.119	18.1316
1.42	0.04	426.078	18.4876
1.215	0.043	434.698	18.6696
1.45	0.038	434.723	18.8832
1.355	0.04	434.804	19.5965
1.28	0.043	425.923	19.8397
1.14	0.046	425.909	19.9695
1.12	0.045	434.939	20.8031
1.26	0.042	434.947	20.8765
1.375	0.041	425.791	21.0328
1.47	0.039	425.719	21.6988
1.495	0.037	435.043	21.771
1.235	0.044	425.681	22.0591
1.4	0.039	435.097	22.2757
1.165	0.044	435.154	22.8169
1.305	0.041	435.21	23.3531
1.33	0.042	425.519	23.6063
1.19	0.045	425.454	24.245
1.425	0.04	425.419	24.5885
1.21	0.043	435.386	25.0854
1.445	0.038	435.404	25.2645
1.35	0.04	435.488	26.1183
1.285	0.043	425.261	26.1807
1.145	0.046	425.242	26.372
1.38	0.041	425.132	27.517
1.115	0.045	435.63	27.5864
1.255	0.042	435.634	27.626
1.475	0.039	425.063	28.2483
1.49	0.037	435.724	28.5836
1.24	0.044	425.018	28.7292
1.395	0.039	435.781	29.1919
1.16	0.044	435.845	29.8888
1.335	0.042	424.859	30.4553
1.3	0.041	435.896	30.4568
1.195	0.045	424.79	31.2252
1.43	0.04	424.762	31.5384
1.205	0.043	436.076	32.4681
1.44	0.038	436.087	32.5938
1.29	0.043	424.6	33.3794
1.345	0.04	436.174	33.5965
1.15	0.046	424.577	33.6428
1.385	0.041	424.474	34.8507
1.25	0.042	436.322	35.3412
1.11	0.045	436.323	35.3474
1.48	0.039	424.408	35.6399
1.105	0.047	424.381	35.9566
1.245	0.044	424.356	36.258
1.485	0.037	436.406	36.3441
1.39	0.039	436.466	37.0639
1.155	0.044	436.537	37.9368
1.34	0.042	424.2	38.1569
1.295	0.041	436.584	38.5253
1.2	0.045	424.126	39.0826
1.435	0.04	424.106	39.3305
1.2	0.043	436.767	40.8255
1.435	0.038	436.771	40.8785
1.295	0.043	423.941	41.4289
1.155	0.046	423.914	41.7748
1.34	0.04	436.861	42.0386
1.39	0.041	423.818	43.027
1.485	0.039	423.754	43.8668
1.245	0.042	437.013	44.0297
1.105	0.045	437.018	44.0942
1.11	0.047	423.717	44.3606
1.25	0.044	423.696	44.6386
1.48	0.037	437.09	45.0597
1.385	0.039	437.152	45.8993
1.345	0.042	423.544	46.7006
1.15	0.044	437.231	46.9688
1.29	0.041	437.274	47.5662
1.205	0.045	423.467	47.7583
1.44	0.04	423.452	47.9583
1.43	0.038	437.458	50.1261
1.195	0.043	437.46	50.1654
1.3	0.043	423.284	50.3225
1.16	0.046	423.253	50.7611
1.335	0.04	437.551	51.4523
1.395	0.041	423.164	52.0394
1.49	0.039	423.103	52.9226
1.115	0.047	423.055	53.6205
1.24	0.042	437.706	53.6995
1.255	0.044	423.038	53.8642
1.475	0.037	437.776	54.738
1.38	0.039	437.841	55.7056
1.35	0.042	422.889	56.0808
1.145	0.044	437.927	56.9925
1.21	0.045	422.808	57.2975
1.445	0.04	422.8	57.415
1.285	0.041	437.966	57.5873
1.305	0.043	422.628	60.0533
1.425	0.038	438.146	60.3443
1.19	0.043	438.155	60.4955
1.165	0.046	422.593	60.5949
1.33	0.04	438.242	61.8453
1.4	0.041	422.511	61.881
1.495	0.039	422.453	62.8005
1.12	0.047	422.394	63.7295
1.26	0.044	422.382	63.9279
1.235	0.042	438.4	64.3583
1.47	0.037	438.464	65.3867
1.355	0.042	422.236	66.2908
1.375	0.039	438.532	66.4906
1.215	0.045	422.151	67.676
1.45	0.04	422.15	67.6942
1.14	0.044	438.625	68.0161
1.28	0.041	438.66	68.5963
1.31	0.043	421.974	70.6147
1.17	0.046	421.935	71.2693
1.42	0.038	438.836	71.5407
1.185	0.043	438.852	71.8239
1.405	0.041	421.86	72.5454
1.325	0.04	438.935	73.2254
1.5	0.039	421.805	73.494
1.125	0.047	421.736	74.6805
1.265	0.044	421.728	74.8231
1.23	0.042	439.096	76.014
1.465	0.037	439.153	77.0133
1.36	0.042	421.584	77.3241
1.37	0.039	439.224	78.2621
1.455	0.04	421.501	78.7891
1.22	0.045	421.496	78.8869
1.135	0.044	439.324	80.0474
1.275	0.041	439.355	80.601
1.315	0.043	421.322	81.998
1.175	0.046	421.279	82.7775
1.415	0.038	439.528	83.7231
1.41	0.041	421.211	84.026
1.18	0.043	439.551	84.1584
1.32	0.04	439.63	85.6004
1.13	0.047	421.079	86.4668
1.27	0.044	421.075	86.5431
1.225	0.042	439.794	88.6744
1.365	0.042	420.934	89.1741
1.46	0.037	439.845	89.6257
1.46	0.04	420.854	90.6934
1.225	0.045	420.842	90.9238
1.365	0.039	439.918	91.0277
1.13	0.044	440.026	93.0945
1.27	0.041	440.053	93.6095
1.32	0.043	420.672	94.2027
1.18	0.046	420.625	95.1128
1.415	0.041	420.563	96.3162
1.41	0.038	440.221	96.8992
1.175	0.043	440.252	97.5072
1.315	0.04	440.326	98.9781
1.275	0.044	420.424	99.0813
1.135	0.047	420.424	99.0817
1.37	0.042	420.286	101.834
1.22	0.042	440.494	102.348
1.455	0.037	440.538	103.231
1.465	0.04	420.209	103.401
1.23	0.045	420.19	103.78
1.36	0.039	440.615	104.795
1.125	0.044	440.73	107.166
1.325	0.043	420.023	107.216
1.265	0.041	440.752	107.63
1.185	0.046	419.972	108.269
1.42	0.041	419.918	109.41
1.5	0.036	440.868	110.041
1.405	0.038	440.917	111.077
1.17	0.043	440.955	111.878
1.28	0.044	419.774	112.431
1.14	0.047	419.77	112.518
1.31	0.04	441.025	113.367
1.375	0.042	419.64	115.298
1.47	0.04	419.565	116.904
1.215	0.042	441.196	117.042
1.235	0.045	419.54	117.449
1.45	0.037	441.233	117.838
1.355	0.039	441.313	119.573
1.33	0.043	419.376	121.034
1.19	0.046	419.321	122.238
1.12	0.044	441.435	122.269
1.26	0.041	441.453	122.669
1.425	0.041	419.274	123.3
1.495	0.036	441.562	125.096
1.4	0.038	441.614	126.264
1.285	0.044	419.127	126.586
1.145	0.047	419.118	126.77
1.165	0.043	441.659	127.28
1.305	0.04	441.725	128.774
1.38	0.042	418.995	129.559
1.475	0.04	418.923	131.198
1.24	0.045	418.892	131.923
1.21	0.042	441.9	132.765
1.445	0.037	441.93	133.454
1.35	0.039	442.012	135.369
1.335	0.043	418.731	135.649
1.195	0.046	418.672	137.015
1.43	0.041	418.631	137.981
1.115	0.044	442.142	138.413
1.255	0.041	442.156	138.737
1.49	0.036	442.259	141.16
1.29	0.044	418.481	141.539
1.15	0.047	418.468	141.831
1.395	0.038	442.314	142.469
1.16	0.043	442.366	143.72
1.385	0.042	418.352	144.611
1.3	0.04	442.428	145.208
1.48	0.04	418.283	146.276
1.105	0.048	418.28	146.342
1.245	0.045	418.245	147.197
1.205	0.042	442.606	149.526
1.44	0.037	442.629	150.088
1.34	0.043	418.087	151.056
1.345	0.039	442.714	152.191
1.2	0.046	418.025	152.592
1.435	0.041	417.99	153.445
1.11	0.044	442.852	155.605
1.25	0.041	442.861	155.841
1.295	0.044	417.836	157.285
1.155	0.047	417.82	157.693
1.485	0.036	442.957	158.241
1.39	0.038	443.015	159.699
1.39	0.042	417.711	160.447
1.155	0.043	443.074	161.207
1.485	0.04	417.644	162.131
1.11	0.048	417.631	162.471
1.295	0.04	443.132	162.677
1.25	0.045	417.6	163.265
1.345	0.043	417.445	167.248
1.2	0.042	443.313	167.331
1.435	0.037	443.329	167.746
1.205	0.046	417.379	168.964
1.44	0.041	417.351	169.688
1.34	0.039	443.418	170.046
1.3	0.044	417.194	173.816
1.105	0.044	443.563	173.855
1.245	0.041	443.568	173.988
1.16	0.047	417.173	174.351
1.48	0.036	443.657	176.347
1.395	0.042	417.071	177.061
1.385	0.038	443.718	177.962
1.49	0.04	417.008	178.758
1.115	0.048	416.984	179.397
1.15	0.043	443.785	179.75
1.255	0.045	416.957	180.119
1.29	0.04	443.838	181.189
1.35	0.043	416.805	184.219
1.21	0.046	416.735	186.123
1.195	0.042	444.023	186.191
1.43	0.037	444.032	186.437
1.445	0.041	416.714	186.702
1.335	0.039	444.123	188.944
1.305	0.044	416.553	191.127
1.165	0.047	416.528	191.799
1.24	0.041	444.277	193.189
1.4	0.042	416.433	194.448
1.475	0.036	444.359	195.485
1.495	0.04	416.372	196.15
1.12	0.048	416.338	197.114
1.38	0.038	444.423	197.267
1.26	0.045	416.315	197.753
1.145	0.043	444.497	199.356
1.285	0.04	444.546	200.752
1.355	0.043	416.166	201.962
1.215	0.046	416.092	204.064
1.45	0.041	416.078	204.482
1.19	0.042	444.734	206.113
1.425	0.037	444.736	206.17
1.33	0.039	444.831	208.893
1.31	0.044	415.913	209.211
1.17	0.047	415.885	210.028
1.405	0.042	415.797	212.6
1.235	0.041	444.987	213.449
1.5	0.04	415.739	214.301
1.125	0.048	415.694	215.614
1.47	0.036	445.063	215.665
1.265	0.045	415.675	216.162
1.375	0.038	445.13	217.622
1.14	0.043	445.211	220.034
1.36	0.043	415.529	220.472
1.28	0.04	445.256	221.375
1.22	0.046	415.452	222.78
1.455	0.041	415.444	223.021
1.42	0.037	445.442	226.952
1.185	0.042	445.448	227.105
1.315	0.044	415.276	228.062
1.175	0.047	415.244	229.034
1.325	0.039	445.54	229.9
1.41	0.042	415.162	231.512
1.23	0.041	445.7	234.78
1.13	0.048	415.051	234.893
1.27	0.045	415.037	235.338
1.465	0.036	445.769	236.894
1.37	0.038	445.838	239.035
1.365	0.043	414.894	239.741
1.135	0.043	445.927	241.793
1.225	0.046	414.813	242.265
1.46	0.041	414.811	242.313
1.275	0.04	445.968	243.066
1.32	0.044	414.64	247.674
1.415	0.037	446.151	248.791
1.18	0.047	414.604	248.81
1.18	0.042	446.163	249.176
1.415	0.042	414.529	251.178
1.32	0.039	446.251	251.975
1.135	0.048	414.411	254.943
1.275	0.045	414.4	255.276
1.225	0.041	446.415	257.187
1.46	0.036	446.477	259.18
1.37	0.043	414.26	259.765
1.365	0.038	446.549	261.515
1.465	0.041	414.18	262.352
1.23	0.046	414.175	262.512
1.13	0.043	446.645	264.642
1.27	0.04	446.682	265.834
1.325	0.044	414.006	268.04
1.185	0.047	413.966	269.35
1.42	0.042	413.898	271.59
1.41	0.037	446.861	271.697
1.175	0.042	446.88	272.335
1.315	0.039	446.964	275.125
1.14	0.048	413.772	275.757
1.28	0.045	413.765	275.969
1.375	0.043	413.628	280.537
1.22	0.041	447.131	280.681
1.455	0.036	447.186	282.531
1.47	0.041	413.551	283.133
1.235	0.046	413.54	283.516
1.36	0.038	447.262	285.069
1.125	0.043	447.365	288.588
1.33	0.044	413.373	289.155
1.265	0.04	447.398	289.687
1.19	0.047	413.329	290.647
1.425	0.042	413.268	292.745
1.5	0.035	447.525	294.031
1.405	0.037	447.573	295.676
1.17	0.042	447.599	296.591
1.145	0.048	413.134	297.331
1.285	0.045	413.132	297.411
1.31	0.039	447.68	299.359
1.38	0.043	412.998	302.05
1.475	0.041	412.923	304.648
1.24	0.046	412.906	305.269
1.215	0.041	447.85	305.27
1.45	0.036	447.898	306.957
1.355	0.038	447.976	309.707
1.335	0.044	412.742	311.012
1.195	0.047	412.694	312.696
1.12	0.043	448.087	313.641
1.26	0.04	448.115	314.633
1.43	0.042	412.64	314.635
1.495	0.035	448.236	318.922
1.29	0.045	412.5	319.597
1.15	0.048	412.499	319.657
1.4	0.037	448.287	320.739
1.165	0.042	448.321	321.951
1.385	0.043	412.369	324.299
1.305	0.039	448.397	324.686
1.105	0.049	412.319	326.121
1.48	0.041	412.297	326.894
1.245	0.046	412.273	327.767
1.21	0.041	448.57	330.962
1.445	0.036	448.611	332.465
1.34	0.044	412.113	333.606
1.35	0.038	448.692	335.436
1.2	0.047	412.061	335.49
1.435	0.042	412.013	337.254
1.115	0.043	448.811	339.81
1.255	0.04	448.835	340.681
1.295	0.045	411.87	342.519
1.155	0.048	411.865	342.73
1.49	0.035	448.949	344.896
1.395	0.037	449.003	346.893
1.39	0.043	411.742	347.278
1.16	0.042	449.044	348.425
1.11	0.049	411.684	349.455
1.485	0.041	411.673	349.862
1.25	0.046	411.642	351.003
1.3	0.039	449.116	351.113
1.345	0.044	411.485	356.93
1.205	0.041	449.292	357.767
1.205	0.047	411.43	359.023
1.44	0.036	449.327	359.064
1.44	0.042	411.388	360.597
1.345	0.038	449.411	362.266
1.3	0.045	411.242	366.173
1.16	0.048	411.232	366.543
1.11	0.043	449.537	367.103
1.25	0.04	449.557	367.84
1.395	0.043	411.117	370.982
1.485	0.035	449.664	371.96
1.115	0.049	411.051	373.531
1.49	0.041	411.05	373.548
1.39	0.037	449.72	374.146
1.255	0.046	411.013	374.971
1.155	0.042	449.769	376.021
1.295	0.039	449.837	378.651
1.35	0.044	410.859	380.979
1.21	0.047	410.8	383.289
1.445	0.042	410.765	384.658
1.2	0.041	450.017	385.692
1.435	0.036	450.044	386.762
1.34	0.038	450.131	390.205
1.305	0.045	410.615	390.553
1.165	0.048	410.602	391.09
1.4	0.043	410.493	395.403
1.105	0.043	450.265	395.53
1.245	0.04	450.28	396.119
1.495	0.041	410.429	397.946
1.12	0.049	410.419	398.343
1.26	0.046	410.386	399.665
1.48	0.035	450.381	400.123
1.385	0.037	450.44	402.508
1.15	0.042	450.496	404.749
1.355	0.044	410.234	405.747
1.29	0.039	450.559	407.307
1.215	0.047	410.172	408.282
1.45	0.042	410.143	409.431
1.195	0.041	450.743	414.747
1.43	0.036	450.763	415.568
1.31	0.045	409.99	415.651
1.17	0.048	409.973	416.366
1.335	0.038	450.853	419.261
1.405	0.043	409.871	420.537
1.5	0.041	409.809	423.05
1.125	0.049	409.789	423.884
1.265	0.046	409.76	425.08
1.24	0.04	451.006	425.526
1.475	0.035	451.099	429.394
1.36	0.044	409.612	431.227
1.38	0.037	451.162	431.987
1.22	0.047	409.545	433.996
1.145	0.042	451.225	434.618
1.455	0.042	409.523	434.91
1.285	0.039	451.284	437.09
1.315	0.045	409.367	441.463
1.175	0.048	409.345	442.364
1.19	0.041	451.471	444.941
1.425	0.036	451.484	445.491
1.41	0.043	409.25	446.377
1.33	0.038	451.578	449.444
1.13	0.049	409.161	450.149
1.27	0.046	409.136	451.208
1.235	0.04	451.733	456.071
1.365	0.044	408.99	457.414
1.47	0.035	451.82	459.782
1.225	0.047	408.92	460.425
1.46	0.042	408.905	461.09
1.375	0.037	451.885	462.591
1.14	0.042	451.956	465.636
1.32	0.045	408.745	467.983
1.28	0.039	452.011	468.01
1.18	0.048	408.719	469.078
1.415	0.043	408.631	472.919
1.185	0.041	452.201	476.283
1.42	0.036	452.207	476.539
1.135	0.049	408.534	477.132
1.275	0.046	408.513	478.045
1.325	0.038	452.304	480.762
1.37	0.044	408.371	484.303
1.23	0.047	408.297	487.564
1.23	0.04	452.463	487.762
1.465	0.042	408.288	487.965
1.465	0.035	452.543	491.294
1.37	0.037	452.611	494.331
1.325	0.045	408.124	495.204
1.185	0.048	408.095	496.503
1.135	0.042	452.689	497.812
1.275	0.039	452.74	500.075
1.42	0.043	408.013	500.155
1.14	0.049	407.909	504.827
1.28	0.046	407.892	505.585
1.415	0.036	452.932	508.722
1.18	0.041	452.934	508.782
1.375	0.044	407.753	511.887
1.32	0.038	453.032	513.224
1.235	0.047	407.675	515.407
1.47	0.042	407.672	515.529
1.225	0.04	453.194	520.609
1.33	0.045	407.506	523.122
1.46	0.035	453.267	523.941
1.19	0.048	407.473	524.633
1.365	0.037	453.339	527.214
1.425	0.043	407.398	528.081
1.13	0.042	453.424	531.156
1.145	0.049	407.286	533.227
1.27	0.039	453.471	533.294
1.285	0.046	407.273	533.821
1.38	0.044	407.136	540.161
1.41	0.036	453.659	542.047
1.175	0.041	453.668	542.446
1.475	0.042	407.059	543.776
1.24	0.047	407.055	543.947
1.315	0.038	453.762	546.84
1.335	0.045	406.889	551.73
1.195	0.048	406.852	553.461
1.22	0.04	453.928	554.62
1.43	0.043	406.783	556.691
1.455	0.035	453.994	557.73
1.36	0.037	454.068	561.249
1.15	0.049	406.664	562.328
1.29	0.046	406.655	562.749
1.125	0.042	454.162	565.677
1.265	0.039	454.204	567.676
1.385	0.044	406.521	569.12
1.105	0.05	406.492	570.512
1.48	0.042	406.446	572.702
1.245	0.047	406.436	573.179
1.5	0.034	454.341	574.268
1.405	0.036	454.388	576.524
1.17	0.041	454.404	577.286
1.34	0.045	406.273	581.024
1.31	0.038	454.494	581.618
1.2	0.048	406.233	582.983
1.435	0.043	406.171	585.98
1.215	0.04	454.663	589.804
1.155	0.049	406.044	592.123
1.295	0.046	406.039	592.363
1.45	0.035	454.722	592.671
1.355	0.037	454.8	596.446
1.39	0.044	405.908	598.757
1.11	0.05	405.871	600.565
1.12	0.042	454.901	601.385
1.485	0.042	405.836	602.301
1.25	0.047	405.819	603.098
1.26	0.039	454.938	603.231
1.495	0.034	455.07	609.693
1.345	0.045	405.659	610.996
1.4	0.036	455.119	612.162
1.205	0.048	405.615	613.192
1.165	0.041	455.143	613.31
1.44	0.043	405.559	615.941
1.305	0.038	455.228	617.567
1.16	0.049	405.425	622.606
1.3	0.046	405.424	622.656
1.21	0.04	455.401	626.172
1.445	0.035	455.453	628.772
1.395	0.044	405.296	629.068
1.115	0.05	405.252	631.306
1.49	0.042	405.227	632.566
1.35	0.037	455.533	632.813
1.255	0.047	405.204	633.698
1.115	0.042	455.642	638.288
1.255	0.039	455.675	639.967
1.35	0.045	405.047	641.642
1.21	0.048	404.999	644.082
1.49	0.034	455.8	646.279
1.445	0.043	404.95	646.569
1.395	0.036	455.852	648.971
1.16	0.041	455.883	650.528
1.305	0.046	404.811	653.624
1.165	0.049	404.809	653.773
1.3	0.038	455.965	654.697
1.4	0.044	404.686	660.046
1.12	0.05	404.634	662.733
1.495	0.042	404.619	663.494
1.205	0.04	456.141	663.731
1.26	0.047	404.59	664.972
1.44	0.035	456.185	666.043
1.345	0.037	456.269	670.36
1.355	0.045	404.436	672.957
1.215	0.048	404.384	675.649
1.11	0.042	456.385	676.396
1.45	0.043	404.342	677.86
1.25	0.039	456.414	677.894
1.485	0.034	456.532	684.033
1.31	0.046	404.2	685.26
1.17	0.049	404.193	685.617
1.39	0.036	456.587	686.958
1.155	0.041	456.625	688.95
1.405	0.044	404.078	691.687
1.295	0.038	456.703	693.016
1.125	0.05	404.018	694.838
1.5	0.042	404.013	695.078
1.265	0.047	403.978	696.917
1.2	0.04	456.882	702.493
1.435	0.035	456.92	704.493
1.36	0.045	403.827	704.934
1.22	0.048	403.771	707.887
1.34	0.037	457.006	709.096
1.455	0.043	403.735	709.807
1.105	0.042	457.13	715.72
1.245	0.039	457.155	717.022
1.315	0.046	403.59	717.56
1.175	0.049	403.58	718.133
1.48	0.034	457.266	722.967
1.41	0.044	403.471	723.985
1.385	0.036	457.324	726.133
1.13	0.05	403.403	727.616
1.15	0.041	457.37	728.584
1.27	0.047	403.368	729.525
1.29	0.038	457.443	732.535
1.365	0.045	403.219	737.568
1.225	0.048	403.16	740.789
1.46	0.043	403.13	742.406
1.195	0.04	457.626	742.465
1.43	0.035	457.656	744.13
1.335	0.037	457.746	749.03
1.32	0.046	402.982	750.518
1.18	0.049	402.967	751.314
1.415	0.044	402.865	756.933
1.24	0.039	457.898	757.359
1.135	0.05	402.79	761.062
1.275	0.047	402.759	762.792
1.475	0.034	458.002	763.088
1.38	0.036	458.063	766.506
1.145	0.041	458.116	769.44
1.37	0.045	402.613	770.855
1.285	0.038	458.185	773.262
1.23	0.048	402.55	774.352
1.465	0.043	402.527	775.65
1.19	0.04	458.371	783.658
1.325	0.046	402.375	784.128
1.425	0.035	458.395	784.965
1.185	0.049	402.356	785.188
1.33	0.037	458.488	790.171
1.42	0.044	402.261	790.529
1.14	0.05	402.179	795.169
1.28	0.047	402.15	796.77
1.235	0.039	458.643	798.915
1.47	0.034	458.74	804.406
1.375	0.045	402.009	804.788
1.375	0.036	458.804	808.086
1.235	0.048	401.942	808.568
1.47	0.043	401.925	809.535
1.14	0.041	458.865	811.528
1.28	0.038	458.929	815.207
1.33	0.046	401.77	818.386
1.19	0.049	401.748	819.654
1.425	0.044	401.659	824.765
1.185	0.04	459.119	826.081
1.42	0.035	459.135	827.006
1.145	0.05	401.569	829.933
1.285	0.047	401.546	831.281
1.325	0.037	459.231	832.53
1.38	0.045	401.406	839.362
1.23	0.039	459.39	841.7
1.24	0.048	401.335	843.465
1.475	0.043	401.325	844.055
1.465	0.034	459.48	846.93
1.37	0.036	459.547	850.882
1.335	0.046	401.167	853.285
1.195	0.049	401.141	854.801
1.135	0.041	459.616	854.858
1.275	0.038	459.676	858.379
1.43	0.044	401.058	859.636
1.15	0.05	400.961	865.347
1.29	0.047	400.941	866.492
1.18	0.04	459.869	869.744
1.415	0.035	459.878	870.262
1.385	0.045	400.804	874.572
1.32	0.037	459.977	876.115
1.245	0.048	400.731	878.941
1.48	0.043	400.726	879.206
1.225	0.039	460.139	885.723
1.34	0.046	400.564	888.821
1.2	0.049	400.535	890.593
1.46	0.034	460.222	890.669
1.365	0.036	460.293	894.904
1.435	0.044	400.459	895.139
1.13	0.041	460.368	899.44
1.155	0.05	400.354	901.407
1.295	0.047	400.339	902.34
1.27	0.038	460.424	902.789
1.39	0.045	400.204	910.413
1.175	0.04	460.621	914.656
1.41	0.035	460.622	914.744
1.485	0.043	400.129	914.981
1.25	0.048	400.127	915.087
1.315	0.037	460.724	920.937
1.345	0.046	399.964	924.988
1.205	0.049	399.93	927.023
1.22	0.039	460.89	930.994
1.44	0.044	399.861	931.266
1.455	0.034	460.966	935.634
1.16	0.05	399.749	938.108
1.3	0.047	399.737	938.819
1.36	0.036	461.04	940.162
1.125	0.041	461.123	945.282
1.395	0.045	399.606	946.88
1.265	0.038	461.174	948.445
1.49	0.043	399.533	951.377
1.255	0.048	399.525	951.884
1.5	0.033	461.322	957.573
1.405	0.035	461.369	960.461
1.17	0.04	461.375	960.828
1.35	0.046	399.365	961.781
1.21	0.049	399.327	964.115
1.31	0.037	461.474	967.003
1.445	0.044	399.265	968.013
1.165	0.05	399.145	975.442
1.305	0.047	399.138	975.926
1.215	0.039	461.643	977.523
1.45	0.034	461.712	981.833
1.4	0.045	399.009	983.967
1.355	0.036	461.789	986.664
1.495	0.043	398.939	988.387
1.26	0.048	398.925	989.273
1.12	0.041	461.88	992.396
1.26	0.038	461.927	995.358
1.355	0.046	398.768	999.195
1.215	0.049	398.727	1001.78
1.495	0.033	462.068	1004.28
1.45	0.044	398.67	1005.38
1.4	0.035	462.117	1007.42
1.165	0.04	462.131	1008.27
1.17	0.05	398.544	1013.41
1.31	0.047	398.539	1013.67
1.305	0.037	462.226	1014.33
1.405	0.045	398.413	1021.73
1.21	0.039	462.398	1025.32
1.5	0.043	398.346	1026.01
1.265	0.048	398.326	1027.3
1.445	0.034	462.46	1029.28
1.35	0.036	462.54	1034.42
1.36	0.046	398.172	1037.22
1.22	0.049	398.127	1040.1
1.115	0.041	462.639	1040.79
1.455	0.044	398.077	1043.35
1.255	0.038	462.681	1043.54
1.175	0.05	397.943	1052
1.315	0.047	397.943	1052.02
1.49	0.033	462.816	1052.22
1.395	0.035	462.868	1055.64
1.16	0.04	462.889	1056.99
1.41	0.045	397.819	1060.04
1.3	0.037	462.98	1062.91
1.27	0.048	397.729	1065.95
1.205	0.039	463.156	1074.39
1.365	0.046	397.577	1075.86
1.44	0.034	463.21	1077.97
1.225	0.049	397.529	1079.03
1.46	0.044	397.485	1081.93
1.345	0.036	463.293	1083.44
1.11	0.041	463.4	1090.48
1.32	0.047	397.348	1090.95
1.18	0.05	397.345	1091.16
1.25	0.038	463.438	1092.99
1.415	0.045	397.228	1098.9
1.485	0.033	463.565	1101.42
1.39	0.035	463.621	1105.12
1.275	0.048	397.133	1105.2
1.155	0.04	463.649	1107
1.295	0.037	463.736	1112.78
1.37	0.046	396.984	1115.11
1.23	0.049	396.932	1118.57
1.465	0.044	396.895	1121.1
1.2	0.039	463.915	1124.76
1.435	0.034	463.962	1127.93
1.325	0.047	396.754	1130.52
1.185	0.05	396.747	1131.02
1.34	0.036	464.049	1133.74
1.42	0.045	396.637	1138.42
1.105	0.041	464.163	1141.47
1.245	0.038	464.197	1143.73
1.28	0.048	396.539	1145.07
1.48	0.033	464.317	1151.89
1.375	0.046	396.393	1154.96
1.385	0.035	464.376	1155.87
1.15	0.04	464.412	1158.31
1.235	0.049	396.337	1158.73
1.47	0.044	396.306	1160.87
1.29	0.037	464.494	1163.92
1.33	0.047	396.162	1170.68
1.19	0.05	396.151	1171.45
1.195	0.039	464.676	1176.42
1.425	0.045	396.048	1178.53
1.43	0.034	464.717	1179.17
1.335	0.036	464.806	1185.32
1.285	0.048	395.945	1185.58
1.38	0.046	395.803	1195.4
1.24	0.038	464.957	1195.77
1.24	0.049	395.744	1199.49
1.475	0.044	395.719	1201.24
1.475	0.033	465.071	1203.62
1.38	0.035	465.132	1207.91
1.145	0.04	465.176	1210.93
1.335	0.047	395.572	1211.44
1.195	0.05	395.557	1212.49
1.285	0.037	465.254	1216.37
1.43	0.045	395.46	1219.23
1.29	0.048	395.355	1226.6
1.19	0.039	465.44	1229.38
1.425	0.034	465.473	1231.68
1.385	0.046	395.215	1236.43
1.33	0.036	465.565	1238.19
1.245	0.049	395.152	1240.87
1.48	0.044	395.133	1242.18
1.235	0.038	465.72	1249.12
1.34	0.047	394.983	1252.79
1.2	0.05	394.964	1254.12
1.47	0.033	465.827	1256.64
1.435	0.045	394.873	1260.56
1.375	0.035	465.891	1261.24
1.14	0.04	465.943	1264.87
1.295	0.048	394.765	1268.25
1.28	0.037	466.016	1270.12
1.39	0.046	394.628	1278.05
1.25	0.049	394.562	1282.79
1.185	0.039	466.206	1283.67
1.485	0.044	394.549	1283.71
1.42	0.034	466.231	1285.49
1.325	0.036	466.327	1292.37
1.345	0.047	394.395	1294.72
1.205	0.05	394.373	1296.34
1.44	0.045	394.289	1302.39
1.23	0.038	466.485	1303.78
1.3	0.048	394.177	1310.49
1.465	0.033	466.585	1310.95
1.37	0.035	466.652	1315.87
1.135	0.04	466.711	1320.14
1.395	0.046	394.042	1320.25
1.275	0.037	466.781	1325.18
1.255	0.049	393.973	1325.32
1.49	0.044	393.966	1325.82
1.35	0.047	393.809	1337.24
1.21	0.05	393.783	1339.16
1.18	0.039	466.974	1339.28
1.415	0.034	466.992	1340.6
1.445	0.045	393.706	1344.84
1.32	0.036	467.091	1347.86
1.305	0.048	393.59	1353.32
1.225	0.038	467.253	1359.77
1.4	0.046	393.458	1363.03
1.46	0.033	467.345	1366.57
1.26	0.049	393.385	1368.44
1.495	0.044	393.384	1368.49
1.365	0.035	467.416	1371.81
1.13	0.04	467.482	1376.75
1.355	0.047	393.225	1380.33
1.27	0.037	467.547	1381.57
1.215	0.05	393.195	1382.56
1.45	0.045	393.124	1387.85
1.175	0.039	467.744	1396.24
1.31	0.048	393.005	1396.72
1.41	0.034	467.754	1397.03
1.315	0.036	467.857	1404.68
1.405	0.046	392.876	1406.37
1.5	0.044	392.805	1411.73
1.265	0.049	392.799	1412.13
1.22	0.038	468.022	1417.09
1.455	0.033	468.107	1423.5
1.36	0.047	392.642	1424
1.22	0.05	392.608	1426.53
1.36	0.035	468.181	1429.09
1.455	0.045	392.543	1431.44
1.125	0.04	468.255	1434.71
1.265	0.037	468.316	1439.29
1.315	0.048	392.421	1440.69
1.41	0.046	392.295	1450.29
1.5	0.032	468.472	1451.21
1.17	0.039	468.516	1454.54
1.405	0.034	468.519	1454.78
1.27	0.049	392.215	1456.4
1.31	0.036	468.625	1462.83
1.365	0.047	392.06	1468.23
1.225	0.05	392.023	1471.08
1.46	0.045	391.964	1475.58
1.215	0.038	468.793	1475.76
1.45	0.033	468.871	1481.75
1.32	0.048	391.839	1485.23
1.355	0.035	468.948	1487.69
1.12	0.04	469.03	1494.03
1.415	0.046	391.715	1494.76
1.26	0.037	469.086	1498.36
1.275	0.049	391.632	1501.23
1.495	0.032	469.236	1509.99
1.37	0.047	391.48	1513.03
1.4	0.034	469.286	1513.86
1.165	0.039	469.29	1514.2
1.23	0.05	391.439	1516.2
1.465	0.045	391.386	1520.33
1.305	0.036	469.395	1522.33
1.325	0.048	391.258	1530.33
1.21	0.038	469.567	1535.79
1.42	0.046	391.137	1539.79
1.445	0.033	469.637	1541.33
1.28	0.049	391.05	1546.63
1.35	0.035	469.718	1547.64
1.115	0.04	469.808	1554.73
1.375	0.047	390.901	1558.38
1.255	0.037	469.859	1558.79
1.235	0.05	390.857	1561.88
1.47	0.045	390.811	1565.53
1.49	0.032	470.002	1570.1
1.395	0.034	470.055	1574.29
1.16	0.039	470.067	1575.23
1.33	0.048	390.679	1575.99
1.3	0.036	470.167	1583.18
1.425	0.046	390.561	1585.38
1.285	0.049	390.47	1592.59
1.205	0.038	470.342	1597.19
1.44	0.033	470.406	1602.26
1.38	0.047	390.324	1604.28
1.24	0.05	390.276	1608.13
1.345	0.035	470.489	1608.94
1.475	0.045	390.236	1611.33
1.11	0.04	470.587	1616.81
1.25	0.037	470.634	1620.59
1.335	0.048	390.101	1622.23
1.43	0.046	389.986	1631.51
1.485	0.032	470.77	1631.55
1.39	0.034	470.826	1636.07
1.155	0.039	470.845	1637.65
1.29	0.049	389.892	1639.11
1.295	0.036	470.941	1645.4
1.385	0.047	389.748	1650.74
1.245	0.05	389.697	1654.92
1.48	0.045	389.663	1657.69
1.2	0.038	471.12	1659.97
1.435	0.033	471.176	1664.54
1.34	0.048	389.525	1668.97
1.34	0.035	471.263	1671.61
1.435	0.046	389.412	1678.18
1.105	0.04	471.369	1680.28
1.245	0.037	471.411	1683.76
1.295	0.049	389.314	1686.2
1.48	0.032	471.54	1694.35
1.39	0.047	389.174	1697.73
1.385	0.034	471.599	1699.21
1.15	0.039	471.626	1701.46
1.25	0.05	389.118	1702.31
1.485	0.045	389.091	1704.56
1.29	0.036	471.718	1709
1.345	0.048	388.95	1716.28
1.195	0.038	471.9	1724.14
1.44	0.046	388.838	1725.5
1.43	0.033	471.949	1728.18
1.3	0.049	388.739	1733.77
1.335	0.035	472.039	1735.66
1.395	0.047	388.601	1745.27
1.24	0.037	472.191	1748.32
1.255	0.05	388.543	1750.16
1.49	0.045	388.52	1752.04
1.475	0.032	472.312	1758.52
1.38	0.034	472.374	1763.73
1.35	0.048	388.376	1764.12
1.145	0.039	472.409	1766.67
1.445	0.046	388.269	1773.15
1.285	0.036	472.496	1773.98
1.305	0.049	388.165	1781.94
1.19	0.038	472.683	1789.71
1.425	0.033	472.724	1793.2
1.4	0.047	388.03	1793.34
1.26	0.05	387.968	1798.59
1.495	0.045	387.952	1799.92
1.33	0.035	472.817	1801.09
1.355	0.048	387.803	1812.6
1.235	0.037	472.972	1814.29
1.45	0.046	387.699	1821.42
1.47	0.032	473.087	1824.07
1.375	0.034	473.152	1829.64
1.31	0.049	387.592	1830.59
1.14	0.039	473.194	1833.29
1.28	0.036	473.277	1840.36
1.405	0.047	387.46	1841.94
1.265	0.05	387.394	1847.56
1.5	0.045	387.385	1848.39
1.185	0.038	473.467	1856.7
1.42	0.033	473.501	1859.61
1.36	0.048	387.233	1861.41
1.325	0.035	473.597	1867.92
1.455	0.046	387.131	1870.23
1.315	0.049	387.021	1879.83
1.23	0.037	473.756	1881.66
1.465	0.032	473.863	1890.99
1.41	0.047	386.891	1891.06
1.37	0.034	473.931	1896.94
1.27	0.05	386.822	1897.06
1.135	0.039	473.982	1901.34
1.275	0.036	474.06	1908.15
1.365	0.048	386.664	1910.85
1.46	0.046	386.565	1919.55
1.18	0.038	474.254	1925.1
1.415	0.033	474.28	1927.41
1.32	0.049	386.451	1929.54
1.32	0.035	474.379	1936.15
1.415	0.047	386.324	1940.71
1.275	0.05	386.252	1947.09
1.225	0.037	474.541	1950.45
1.46	0.032	474.642	1959.32
1.37	0.048	386.097	1960.81
1.365	0.034	474.713	1965.65
1.465	0.046	386	1969.39
1.13	0.039	474.771	1970.82
1.27	0.036	474.845	1977.36
1.325	0.049	385.882	1979.87
1.42	0.047	385.758	1990.87
1.175	0.038	475.042	1994.94
1.41	0.033	475.061	1996.62
1.28	0.05	385.683	1997.64
1.315	0.035	475.164	2005.81
1.375	0.048	385.529	2011.37
1.47	0.046	385.436	2019.74
1.22	0.037	475.33	2020.68
1.455	0.032	475.423	2029.05
1.33	0.049	385.316	2030.58
1.36	0.034	475.497	2035.78
1.425	0.047	385.194	2041.57
1.125	0.039	475.563	2041.75
1.265	0.036	475.632	2048
1.285	0.05	385.115	2048.7
1.38	0.048	384.965	2062.27
1.5	0.031	475.797	2062.93
1.17	0.038	475.833	2066.23
1.405	0.033	475.845	2067.25
1.475	0.046	384.874	2070.6
1.31	0.035	475.951	2076.9
1.335	0.049	384.75	2081.87
1.215	0.037	476.12	2092.35
1.43	0.047	384.631	2092.73
1.45	0.032	476.205	2100.2
1.29	0.05	384.549	2100.28
1.355	0.034	476.283	2107.34
1.385	0.048	384.402	2113.77
1.12	0.039	476.357	2114.14
1.26	0.036	476.422	2120.09
1.48	0.046	384.313	2121.97
1.34	0.049	384.186	2133.66
1.495	0.031	476.58	2134.62
1.165	0.038	476.627	2138.97
1.4	0.033	476.63	2139.3
1.435	0.047	384.069	2144.52
1.305	0.035	476.739	2149.42
1.295	0.05	383.984	2152.36
1.21	0.037	476.912	2165.47
1.39	0.048	383.84	2165.76
1.445	0.032	476.991	2172.78
1.485	0.046	383.753	2173.82
1.35	0.034	477.072	2180.33
1.345	0.049	383.623	2185.97
1.115	0.039	477.154	2188.01
1.255	0.036	477.214	2193.63
1.44	0.047	383.505	2196.99
1.3	0.05	383.42	2204.97
1.49	0.031	477.364	2207.75
1.395	0.033	477.418	2212.8
1.16	0.038	477.422	2213.18
1.395	0.048	383.279	2218.26
1.3	0.035	477.531	2223.4
1.49	0.046	383.195	2226.18
1.35	0.049	383.062	2238.77
1.205	0.037	477.707	2240.07
1.44	0.032	477.778	2246.79
1.445	0.047	382.951	2249.28
1.345	0.034	477.862	2254.78
1.305	0.05	382.858	2258.06
1.11	0.039	477.952	2263.35
1.25	0.036	478.008	2268.63
1.4	0.048	382.72	2271.29
1.495	0.046	382.638	2279.03
1.485	0.031	478.151	2282.31
1.39	0.033	478.208	2287.74
1.155	0.038	478.22	2288.87
1.355	0.049	382.502	2292.07
1.295	0.035	478.324	2298.85
1.45	0.047	382.394	2302.45
1.31	0.05	382.298	2311.66
1.2	0.037	478.504	2316.13
1.435	0.032	478.567	2322.26
1.405	0.048	382.162	2324.75
1.34	0.034	478.655	2330.69
1.5	0.046	382.083	2332.36
1.105	0.039	478.753	2340.18
1.245	0.036	478.804	2345.11
1.36	0.049	381.944	2345.86
1.455	0.047	381.838	2356.11
1.48	0.031	478.94	2358.32
1.385	0.033	479	2364.15
1.315	0.05	381.739	2365.74
1.15	0.038	479.02	2366.05
1.29	0.035	479.119	2375.77
1.41	0.048	381.605	2378.71
1.195	0.037	479.303	2393.69
1.43	0.032	479.359	2399.19
1.365	0.049	381.386	2400.16
1.335	0.034	479.45	2408.08
1.46	0.047	381.283	2410.25
1.32	0.05	381.181	2420.34
1.24	0.036	479.602	2423.08
1.415	0.048	381.05	2433.25
1.475	0.031	479.731	2435.8
1.38	0.033	479.794	2442.03
1.145	0.038	479.822	2444.74
1.285	0.035	479.917	2454.17
1.37	0.049	380.83	2454.92
1.465	0.047	380.73	2464.87
1.19	0.037	480.104	2472.75
1.325	0.05	380.625	2475.36
1.425	0.032	480.153	2477.59
1.33	0.034	480.247	2486.95
1.42	0.048	380.497	2488.1
1.235	0.036	480.403	2502.54
1.375	0.049	380.276	2510.13
1.47	0.031	480.525	2514.74
1.47	0.047	380.178	2519.99
1.375	0.033	480.591	2521.39
1.14	0.038	480.626	2524.93
1.33	0.05	380.069	2530.92
1.28	0.035	480.717	2534.07
1.425	0.048	379.944	2543.51
1.185	0.037	480.908	2553.32
1.42	0.032	480.949	2557.47
1.38	0.049	379.723	2565.84
1.325	0.034	481.046	2567.32
1.475	0.047	379.628	2575.52
1.23	0.036	481.206	2583.52
1.335	0.05	379.515	2586.95
1.465	0.031	481.32	2595.17
1.43	0.048	379.393	2599.39
1.37	0.033	481.39	2602.25
1.135	0.038	481.433	2606.66
1.275	0.035	481.519	2615.48
1.385	0.049	379.172	2622.03
1.48	0.047	379.079	2631.55
1.18	0.037	481.714	2635.42
1.415	0.032	481.747	2638.85
1.34	0.05	378.963	2643.45
1.32	0.034	481.848	2649.19
1.435	0.048	378.842	2655.91
1.225	0.036	482.011	2666.02
1.46	0.031	482.118	2677.1
1.39	0.049	378.621	2678.7
1.365	0.033	482.191	2684.62
1.485	0.047	378.53	2688.16
1.13	0.038	482.242	2689.92
1.27	0.035	482.324	2698.42
1.345	0.05	378.412	2700.4
1.44	0.048	378.29	2713.15
1.175	0.037	482.522	2719.05
1.41	0.032	482.548	2721.74
1.315	0.034	482.652	2732.59
1.395	0.049	378.072	2735.82
1.49	0.047	377.982	2745.27
1.22	0.036	482.818	2750.05
1.35	0.05	377.863	2757.77
1.455	0.031	482.918	2760.53
1.36	0.033	482.994	2768.51
1.445	0.048	377.749	2769.8
1.125	0.038	483.053	2774.73
1.265	0.035	483.131	2782.88
1.4	0.049	377.525	2793.36
1.5	0.03	483.302	2800.97
1.495	0.047	377.44	2802.39
1.17	0.037	483.333	2804.23
1.405	0.032	483.351	2806.15
1.355	0.05	377.315	2815.65
1.31	0.034	483.458	2817.52
1.45	0.048	377.2	2827.85
1.215	0.036	483.628	2835.63
1.45	0.031	483.721	2845.48
1.405	0.049	376.979	2851.39
1.355	0.033	483.8	2853.93
1.5	0.047	376.896	2860.25
1.12	0.038	483.867	2861.11
1.26	0.035	483.94	2868.89
1.36	0.05	376.768	2873.97
1.455	0.048	376.659	2885.69
1.495	0.03	484.104	2886.49
1.165	0.037	484.145	2890.97
1.4	0.032	484.156	2892.08
1.305	0.034	484.266	2903.99
1.41	0.049	376.434	2909.86
1.21	0.036	484.44	2922.77
1.445	0.031	484.525	2931.96
1.365	0.05	376.223	2932.75
1.35	0.033	484.608	2940.89
1.46	0.048	376.116	2944.31
1.115	0.038	484.683	2949.06
1.255	0.035	484.751	2956.46
1.415	0.049	375.891	2968.79
1.49	0.03	484.908	2973.54
1.16	0.037	484.96	2979.28
1.395	0.032	484.963	2979.56
1.37	0.05	375.679	2991.97
1.3	0.034	485.077	2992.02
1.465	0.048	375.575	3003.37
1.205	0.036	485.254	3011.47
1.44	0.031	485.332	3019.98
1.42	0.049	375.349	3028.16
1.345	0.033	485.418	3029.41
1.11	0.038	485.501	3038.59
1.25	0.035	485.564	3045.6
1.375	0.05	375.136	3051.63
1.485	0.03	485.714	3062.13
1.47	0.048	375.034	3062.86
1.39	0.032	485.772	3068.6
1.155	0.037	485.778	3069.18
1.295	0.034	485.89	3081.61
1.425	0.049	374.808	3087.96
1.2	0.036	486.071	3101.76
1.435	0.031	486.141	3109.56
1.38	0.05	374.595	3111.74
1.34	0.033	486.23	3119.49
1.475	0.048	374.496	3122.8
1.105	0.038	486.321	3129.72
1.245	0.035	486.38	3136.31
1.43	0.049	374.265	3148.57
1.48	0.03	486.523	3152.28
1.385	0.032	486.584	3159.19
1.15	0.037	486.597	3160.67
1.385	0.05	374.055	3172.24
1.29	0.034	486.705	3172.79
1.48	0.048	373.958	3183.16
1.195	0.036	486.89	3193.65
1.43	0.031	486.952	3200.7
1.435	0.049	373.729	3209.05
1.335	0.033	487.045	3211.15
1.24	0.035	487.199	3228.62
1.39	0.05	373.515	3233.31
1.475	0.03	487.334	3243.99
1.485	0.048	373.421	3244.02
1.38	0.032	487.398	3251.37
1.145	0.037	487.419	3253.77
1.285	0.034	487.523	3265.55
1.44	0.049	373.191	3270.3
1.19	0.036	487.711	3287.14
1.425	0.031	487.766	3293.42
1.395	0.05	372.978	3294.72
1.33	0.033	487.861	3304.4
1.49	0.048	372.884	3305.56
1.235	0.035	488.019	3322.54
1.445	0.049	372.656	3331.78
1.47	0.03	488.147	3337.27
1.375	0.032	488.215	3345.14
1.14	0.037	488.244	3348.49
1.4	0.05	372.442	3356.54
1.28	0.034	488.342	3359.92
1.495	0.048	372.35	3367.21
1.185	0.036	488.535	3382.25
1.42	0.031	488.582	3387.73
1.45	0.049	372.121	3393.86
1.325	0.033	488.681	3399.26
1.23	0.035	488.842	3418.07
1.405	0.05	371.907	3418.79
1.5	0.048	371.821	3428.86
1.465	0.03	488.962	3432.15
1.37	0.032	489.033	3440.51
1.135	0.037	489.07	3444.85
1.275	0.034	489.165	3455.91
1.455	0.049	371.59	3455.95
1.18	0.036	489.361	3478.99
1.41	0.05	371.374	3481.46
1.415	0.031	489.4	3483.64
1.32	0.033	489.502	3495.73
1.225	0.035	489.667	3515.23
1.46	0.049	371.059	3518.71
1.46	0.03	489.78	3528.63
1.365	0.032	489.854	3537.49
1.13	0.037	489.899	3542.85
1.415	0.05	370.842	3544.53
1.27	0.034	489.989	3553.52
1.175	0.036	490.189	3577.38
1.41	0.031	490.22	3581.16
1.465	0.049	370.526	3582.25
1.315	0.033	490.326	3593.82
1.42	0.05	370.311	3608.02
1.22	0.035	490.494	3614.04
1.455	0.03	490.6	3626.72
1.36	0.032	490.678	3636.1
1.125	0.037	490.731	3642.52
1.47	0.049	369.999	3645.59
1.265	0.034	490.816	3652.78
1.425	0.05	369.781	3671.91
1.5	0.029	490.992	3674.13
1.17	0.036	491.019	3677.43
1.405	0.031	491.043	3680.31
1.31	0.033	491.152	3693.56
1.475	0.049	369.47	3709.67
1.215	0.035	491.324	3714.5
1.45	0.03	491.422	3726.44
1.43	0.05	369.253	3736.2
1.355	0.032	491.503	3736.35
1.12	0.037	491.565	3743.86
1.26	0.034	491.645	3753.69
1.48	0.049	368.945	3774.02
1.495	0.029	491.814	3774.44
1.165	0.036	491.852	3779.14
1.4	0.031	491.868	3781.1
1.305	0.033	491.981	3794.95
1.435	0.05	368.727	3800.83
1.21	0.035	492.156	3816.63
1.445	0.03	492.247	3827.79
1.35	0.032	492.331	3838.25
1.485	0.049	368.419	3838.82
1.115	0.037	492.401	3846.88
1.255	0.034	492.476	3856.27
1.44	0.05	368.202	3865.83
1.49	0.029	492.638	3876.39
1.16	0.036	492.688	3882.54
1.395	0.031	492.696	3883.54
1.3	0.033	492.812	3898.01
1.49	0.049	367.896	3903.97
1.205	0.035	492.991	3920.44
1.44	0.03	493.074	3930.8
1.445	0.05	367.677	3931.35
1.345	0.032	493.161	3941.82
1.11	0.037	493.239	3951.6
1.25	0.034	493.31	3960.53
1.495	0.049	367.374	3969.45
1.485	0.029	493.465	3979.99
1.155	0.036	493.525	3987.64
1.39	0.031	493.525	3987.65
1.45	0.05	367.153	3997.35
1.295	0.033	493.645	4002.74
1.2	0.035	493.828	4025.95
1.5	0.049	366.854	4035.21
1.435	0.03	493.903	4035.47
1.34	0.032	493.994	4047.06
1.105	0.037	494.08	4058.03
1.455	0.05	366.632	4063.54
1.245	0.034	494.146	4066.48
1.48	0.029	494.294	4085.25
1.385	0.031	494.357	4093.43
1.15	0.036	494.365	4094.44
1.29	0.033	494.48	4109.17
1.46	0.05	366.111	4130.17
1.195	0.035	494.667	4133.16
1.43	0.03	494.735	4141.82
1.335	0.032	494.829	4153.99
1.24	0.034	494.985	4174.13
1.475	0.029	495.125	4192.19
1.465	0.05	365.592	4197.11
1.38	0.031	495.192	4200.9
1.145	0.036	495.208	4202.97
1.285	0.033	495.318	4217.3
1.19	0.035	495.509	4242.1
1.425	0.03	495.568	4249.85
1.33	0.032	495.666	4262.63
1.47	0.05	365.074	4264.56
1.235	0.034	495.826	4283.51
1.47	0.029	495.958	4300.82
1.375	0.031	496.029	4310.07
1.14	0.036	496.053	4313.24
1.28	0.033	496.159	4327.15
1.475	0.05	364.558	4332.25
1.185	0.035	496.353	4352.76
1.42	0.03	496.405	4359.59
1.325	0.032	496.506	4372.98
1.23	0.034	496.669	4394.61
1.48	0.05	364.043	4400.31
1.465	0.029	496.794	4411.15
1.37	0.031	496.868	4420.96
1.135	0.036	496.9	4425.25
1.275	0.033	497.001	4438.73
1.18	0.035	497.2	4465.18
1.485	0.05	363.527	4468.99
1.415	0.03	497.243	4471.05
1.32	0.032	497.348	4485.07
1.225	0.034	497.515	4507.47
1.46	0.029	497.632	4523.2
1.365	0.031	497.709	4533.58
1.49	0.05	363.014	4537.84
1.13	0.036	497.75	4539.03
1.27	0.033	497.846	4552.05
1.175	0.035	498.048	4579.36
1.41	0.03	498.084	4584.23
1.315	0.032	498.193	4598.9
1.495	0.05	362.502	4607.04
1.22	0.034	498.363	4622.08
1.455	0.029	498.473	4636.97
1.36	0.031	498.553	4647.94
1.125	0.036	498.602	4654.58
1.265	0.033	498.694	4667.14
1.5	0.05	361.998	4675.77
1.5	0.028	498.874	4691.77
1.17	0.035	498.9	4695.31
1.405	0.03	498.928	4699.15
1.31	0.032	499.04	4714.48
1.215	0.034	499.214	4738.46
1.45	0.029	499.316	4752.48
1.355	0.031	499.4	4764.06
1.12	0.036	499.457	4771.92
1.26	0.033	499.544	4783.99
1.495	0.028	499.717	4807.91
1.165	0.035	499.754	4813.05
1.4	0.03	499.774	4815.83
1.305	0.032	499.889	4831.83
1.21	0.034	500.067	4856.63
1.445	0.029	500.161	4869.75
1.35	0.031	500.248	4881.94
1.115	0.036	500.314	4891.07
1.255	0.033	500.396	4902.62
1.49	0.028	500.562	4925.79
1.16	0.035	500.61	4932.59
1.395	0.03	500.622	4934.28
1.3	0.032	500.741	4950.97
1.205	0.034	500.923	4976.6
1.44	0.029	501.009	4988.79
1.345	0.031	501.1	5001.61
1.11	0.036	501.173	5012.04
1.25	0.033	501.251	5023.06
1.485	0.028	501.409	5045.45
1.155	0.035	501.469	5053.94
1.39	0.03	501.473	5054.5
1.295	0.032	501.595	5071.9
1.2	0.034	501.781	5098.39
1.435	0.029	501.859	5109.61
1.34	0.031	501.953	5123.07
1.105	0.036	502.035	5134.84
1.245	0.033	502.108	5145.31
1.48	0.028	502.259	5166.88
1.385	0.03	502.326	5176.53
1.15	0.035	502.33	5177.13
1.29	0.032	502.451	5194.65
1.195	0.034	502.641	5222
1.43	0.029	502.712	5232.22
1.335	0.031	502.809	5246.35
1.24	0.033	502.968	5269.38
1.475	0.028	503.111	5290.11
1.38	0.03	503.181	5300.36
1.145	0.035	503.194	5302.16
1.285	0.032	503.31	5319.21
1.19	0.034	503.504	5347.46
1.425	0.029	503.567	5356.64
1.33	0.031	503.668	5371.44
1.235	0.033	503.83	5395.3
1.47	0.028	503.965	5415.15
1.375	0.03	504.039	5426.02
1.14	0.035	504.06	5429.05
1.28	0.032	504.172	5445.62
1.185	0.034	504.369	5474.77
1.42	0.029	504.424	5482.89
1.325	0.031	504.529	5498.38
1.23	0.033	504.695	5523.06
1.465	0.028	504.822	5542.01
1.37	0.03	504.899	5553.51
1.135	0.035	504.928	5557.82
1.275	0.032	505.036	5573.88
1.18	0.034	505.237	5603.95
1.415	0.029	505.284	5610.97
1.32	0.031	505.392	5627.16
1.225	0.033	505.562	5652.7
1.46	0.028	505.682	5670.71
1.365	0.03	505.762	5682.85
1.13	0.035	505.799	5688.47
1.27	0.032	505.902	5704.01
1.175	0.034	506.107	5735.01
1.41	0.029	506.146	5740.9
1.315	0.031	506.258	5757.82
1.22	0.033	506.432	5784.22
1.455	0.028	506.544	5801.26
1.36	0.03	506.628	5814.06
1.125	0.035	506.673	5821.02
1.265	0.032	506.771	5836.02
1.5	0.027	506.954	5863.88
1.17	0.034	506.98	5867.98
1.405	0.029	507.011	5872.69
1.31	0.031	507.126	5890.35
1.215	0.033	507.304	5917.64
1.45	0.028	507.408	5933.67
1.355	0.03	507.495	5947.15
1.12	0.035	507.549	5955.49
1.26	0.032	507.643	5969.93
1.495	0.027	507.817	5996.94
1.165	0.034	507.856	6002.86
1.4	0.029	507.878	6006.37
1.305	0.031	507.997	6024.78
1.21	0.033	508.178	6052.97
1.445	0.028	508.275	6067.96
1.35	0.03	508.366	6082.13
1.115	0.035	508.428	6091.89
1.255	0.032	508.517	6105.74
1.49	0.027	508.684	6131.87
1.16	0.034	508.734	6139.67
1.395	0.029	508.748	6141.94
1.3	0.031	508.87	6161.11
1.205	0.033	509.056	6190.23
1.44	0.028	509.144	6204.14
1.345	0.03	509.238	6219.02
1.11	0.035	509.309	6230.23
1.25	0.032	509.393	6243.48
1.485	0.027	509.553	6268.69
1.155	0.034	509.614	6278.42
1.39	0.029	509.62	6279.41
1.295	0.031	509.746	6299.37
1.2	0.033	509.935	6329.43
1.435	0.028	510.016	6342.23
1.34	0.03	510.114	6357.83
1.105	0.035	510.193	6370.54
1.245	0.032	510.272	6383.16
1.48	0.027	510.424	6407.43
1.385	0.029	510.495	6418.81
1.15	0.034	510.497	6419.13
1.29	0.031	510.624	6439.57
1.195	0.033	510.817	6470.58
1.43	0.028	510.89	6482.24
1.335	0.03	510.991	6498.58
1.24	0.032	511.154	6524.8
1.475	0.027	511.298	6548.08
1.38	0.029	511.372	6560.14
1.145	0.034	511.383	6561.82
1.285	0.031	511.505	6581.73
1.19	0.033	511.702	6613.71
1.425	0.028	511.767	6624.18
1.33	0.03	511.872	6641.29
1.235	0.032	512.038	6668.41
1.47	0.027	512.174	6690.67
1.375	0.029	512.252	6703.42
1.14	0.034	512.271	6706.5
1.28	0.031	512.389	6725.85
1.185	0.033	512.59	6758.82
1.42	0.028	512.646	6768.08
1.325	0.03	512.754	6785.96
1.23	0.032	512.924	6814
1.465	0.027	513.053	6835.21
1.37	0.029	513.134	6848.68
1.135	0.034	513.161	6853.17
1.275	0.031	513.275	6871.95
1.18	0.033	513.48	6905.94
1.415	0.028	513.528	6913.95
1.32	0.03	513.64	6932.61
1.225	0.032	513.814	6961.59
1.46	0.027	513.934	6981.71
1.365	0.029	514.019	6995.91
1.13	0.034	514.055	7001.87
1.27	0.031	514.163	7020.05
1.175	0.033	514.372	7055.07
1.41	0.028	514.412	7061.79
1.315	0.03	514.528	7081.26
1.22	0.032	514.705	7111.2
1.455	0.027	514.818	7130.2
1.36	0.029	514.906	7145.14
1.125	0.034	514.951	7152.61
1.265	0.031	515.054	7170.17
1.5	0.026	515.237	7201.09
1.17	0.033	515.267	7206.24
1.405	0.028	515.299	7211.63
1.31	0.03	515.418	7231.92
1.215	0.032	515.6	7262.83
1.45	0.027	515.704	7280.68
1.355	0.029	515.796	7296.38
1.12	0.034	515.849	7305.4
1.26	0.031	515.948	7322.32
1.495	0.026	516.123	7352.24
1.165	0.033	516.165	7359.45
1.4	0.028	516.188	7363.48
1.305	0.03	516.311	7384.61
1.21	0.032	516.497	7416.52
1.445	0.027	516.593	7433.17
1.35	0.029	516.689	7449.65
1.115	0.034	516.75	7460.25
1.255	0.031	516.844	7476.51
1.49	0.026	517.011	7505.4
1.16	0.033	517.065	7514.73
1.395	0.028	517.08	7517.36
1.3	0.03	517.207	7539.35
1.205	0.032	517.396	7572.27
1.44	0.027	517.485	7587.69
1.345	0.029	517.584	7604.96
1.11	0.034	517.654	7617.18
1.25	0.031	517.743	7632.76
1.485	0.026	517.902	7660.59
1.155	0.033	517.968	7672.09
1.39	0.028	517.975	7673.28
1.295	0.03	518.105	7696.14
1.2	0.032	518.298	7730.09
1.435	0.027	518.379	7744.25
1.34	0.029	518.482	7762.33
1.105	0.034	518.56	7776.22
1.245	0.031	518.645	7791.09
1.48	0.026	518.796	7817.82
1.385	0.028	518.872	7831.26
1.15	0.033	518.874	7831.55
1.29	0.03	519.006	7855.01
1.195	0.032	519.203	7890.01
1.43	0.027	519.276	7902.87
1.335	0.029	519.382	7921.77
1.24	0.031	519.549	7951.51
1.475	0.026	519.692	7977.11
1.38	0.028	519.772	7991.31
1.145	0.033	519.782	7993.12
1.285	0.03	519.909	8015.97
1.19	0.032	520.111	8052.04
1.425	0.027	520.175	8063.56
1.33	0.029	520.285	8083.3
1.235	0.031	520.456	8114.04
1.47	0.026	520.591	8138.46
1.375	0.028	520.674	8153.45
1.14	0.033	520.693	8156.82
1.28	0.03	520.816	8179.03
1.185	0.032	521.021	8216.2
1.42	0.027	521.077	8226.34
1.325	0.029	521.19	8246.94
1.23	0.031	521.365	8278.69
1.465	0.026	521.492	8301.91
1.37	0.028	521.579	8317.69
1.135	0.033	521.606	8322.66
1.275	0.03	521.724	8344.22
1.18	0.032	521.934	8382.5
1.415	0.027	521.981	8391.22
1.32	0.029	522.098	8412.7
1.225	0.031	522.277	8445.49
1.46	0.026	522.396	8467.46
1.365	0.028	522.486	8484.06
1.13	0.033	522.522	8490.67
1.27	0.03	522.636	8511.55
1.175	0.032	522.849	8550.96
1.41	0.027	522.888	8558.22
1.315	0.029	523.009	8580.6
1.22	0.031	523.192	8614.44
1.455	0.026	523.303	8635.13
1.36	0.028	523.397	8652.56
1.125	0.033	523.441	8660.85
1.265	0.03	523.55	8681.03
1.5	0.025	523.73	8714.73
1.17	0.032	523.767	8721.59
1.405	0.027	523.798	8727.36
1.31	0.029	523.922	8750.65
1.215	0.031	524.109	8785.57
1.45	0.026	524.212	8804.94
1.355	0.028	524.31	8823.21
1.12	0.033	524.363	8833.23
1.26	0.03	524.466	8852.69
1.495	0.025	524.639	8885.23
1.165	0.032	524.688	8894.42
1.4	0.027	524.71	8898.65
1.305	0.029	524.839	8922.87
1.21	0.031	525.029	8958.88
1.445	0.026	525.124	8976.89
1.35	0.028	525.225	8996.04
1.115	0.033	525.287	9007.82
1.255	0.03	525.386	9026.54
1.49	0.025	525.55	9057.88
1.16	0.032	525.611	9069.45
1.395	0.027	525.625	9072.11
1.3	0.029	525.757	9097.29
1.205	0.031	525.952	9134.41
1.44	0.026	526.039	9151.02
1.345	0.028	526.143	9171.05
1.11	0.033	526.214	9184.65
1.25	0.03	526.308	9202.59
1.485	0.025	526.465	9232.71
1.155	0.032	526.537	9246.72
1.39	0.027	526.543	9247.76
1.295	0.029	526.679	9273.9
1.2	0.031	526.877	9312.16
1.435	0.026	526.956	9327.33
1.34	0.028	527.064	9348.26
1.105	0.033	527.144	9363.71
1.245	0.03	527.232	9380.86
1.48	0.025	527.381	9409.71
1.385	0.027	527.463	9425.6
1.15	0.032	527.466	9426.22
1.29	0.029	527.603	9452.73
1.195	0.031	527.805	9492.14
1.43	0.026	527.875	9505.84
1.335	0.028	527.987	9527.7
1.24	0.03	528.16	9561.37
1.475	0.025	528.301	9588.92
1.38	0.027	528.386	9605.67
1.145	0.032	528.398	9607.99
1.285	0.029	528.53	9633.81
1.19	0.031	528.736	9674.39
1.425	0.026	528.798	9686.58
1.33	0.028	528.914	9709.37
1.235	0.03	529.09	9744.14
1.47	0.025	529.223	9770.35
1.375	0.027	529.312	9787.97
1.14	0.032	529.332	9792.04
1.28	0.029	529.459	9817.14
1.185	0.031	529.67	9858.92
1.42	0.026	529.723	9869.54
1.325	0.028	529.843	9893.29
1.23	0.03	530.023	9929.18
1.465	0.025	530.147	9954.01
1.37	0.027	530.24	9972.53
1.135	0.032	530.269	9978.38
1.275	0.029	530.391	10002.7
1.18	0.031	530.606	10045.7
1.415	0.026	530.651	10054.8
1.32	0.028	530.774	10079.5
1.225	0.03	530.958	10116.5
1.46	0.025	531.075	10139.9
1.365	0.027	531.171	10159.4
1.13	0.032	531.209	10167
1.27	0.029	531.326	10190.6
1.175	0.031	531.545	10234.9
1.41	0.026	531.582	10242.2
1.315	0.028	531.709	10268
1.22	0.03	531.897	10306.2
1.455	0.025	532.005	10328.1
1.36	0.027	532.105	10348.5
1.125	0.032	532.152	10358
1.265	0.029	532.264	10380.8
1.17	0.031	532.487	10426.3
1.405	0.026	532.515	10432
1.31	0.028	532.646	10458.8
1.215	0.03	532.838	10498.1
1.45	0.025	532.938	10518.6
1.355	0.027	533.041	10539.9
1.12	0.032	533.097	10551.4
1.26	0.029	533.204	10573.3
1.165	0.031	533.432	10620.1
1.4	0.026	533.451	10624.1
1.305	0.028	533.585	10651.9
1.21	0.03	533.782	10692.4
1.445	0.025	533.873	10711.3
1.35	0.027	533.981	10733.6
1.115	0.032	534.046	10747.1
1.255	0.029	534.148	10768.2
1.16	0.031	534.379	10816.3
1.395	0.026	534.39	10818.5
1.3	0.028	534.528	10847.3
1.205	0.03	534.728	10889.1
1.44	0.025	534.811	10906.4
1.345	0.027	534.923	10929.7
1.11	0.032	534.997	10945.1
1.25	0.029	535.094	10965.4
1.155	0.031	535.329	11014.8
1.39	0.026	535.331	11015.2
1.295	0.028	535.473	11045.1
1.2	0.03	535.678	11088.2
1.435	0.025	535.752	11103.9
1.34	0.027	535.868	11128.1
1.105	0.032	535.95	11145.6
1.245	0.029	536.042	11165
1.385	0.026	536.275	11214.3
1.15	0.031	536.282	11215.8
1.29	0.028	536.422	11245.3
1.195	0.03	536.63	11289.6
1.43	0.025	536.696	11303.7
1.335	0.027	536.815	11328.9
1.24	0.029	536.994	11367
1.38	0.026	537.222	11415.8
1.145	0.031	537.238	11419.2
1.285	0.028	537.372	11447.9
1.19	0.03	537.585	11493.5
1.425	0.025	537.643	11505.8
1.33	0.027	537.765	11532.1
1.235	0.029	537.948	11571.4
1.375	0.026	538.172	11619.7
1.14	0.031	538.197	11625
1.28	0.028	538.326	11652.9
1.185	0.03	538.543	11699.8
1.42	0.025	538.592	11710.4
1.325	0.027	538.719	11737.8
1.23	0.029	538.905	11778.3
1.37	0.026	539.125	11825.9
1.135	0.031	539.158	11833.2
1.275	0.028	539.283	11860.3
1.18	0.03	539.504	11908.6
1.415	0.025	539.544	11917.3
1.32	0.027	539.674	11945.8
1.225	0.029	539.865	11987.6
1.365	0.026	540.08	12034.6
1.13	0.031	540.123	12044
1.27	0.028	540.242	12070.2
1.175	0.03	540.467	12119.8
1.41	0.025	540.499	12126.7
1.315	0.027	540.633	12156.3
1.22	0.029	540.828	12199.4
1.36	0.026	541.038	12245.8
1.125	0.031	541.09	12257.2
1.265	0.028	541.204	12282.6
1.17	0.03	541.434	12333.5
1.405	0.025	541.457	12338.6
1.31	0.027	541.595	12369.3
1.215	0.029	541.794	12413.6
1.355	0.026	541.999	12459.4
1.12	0.031	542.06	12472.9
1.26	0.028	542.169	12497.4
1.165	0.03	542.403	12549.7
1.4	0.025	542.417	12552.9
1.305	0.027	542.559	12584.7
1.21	0.029	542.763	12630.4
1.35	0.026	542.963	12675.5
1.115	0.031	543.033	12691.2
1.255	0.028	543.137	12714.7
1.16	0.03	543.375	12768.5
1.395	0.025	543.38	12769.7
1.3	0.027	543.526	12802.7
1.205	0.029	543.734	12849.7
1.345	0.026	543.93	12894.1
1.11	0.031	544.009	12912.1
1.25	0.028	544.108	12934.6
1.39	0.025	544.347	12989
1.155	0.03	544.35	12989.8
1.295	0.027	544.497	13023.1
1.2	0.029	544.708	13071.5
1.34	0.026	544.899	13115.2
1.105	0.031	544.988	13135.5
1.245	0.028	545.082	13157
1.385	0.025	545.316	13210.8
1.15	0.03	545.328	13213.7
1.29	0.027	545.47	13246.2
1.195	0.029	545.686	13295.9
1.335	0.026	545.872	13338.9
1.24	0.028	546.058	13382
1.38	0.025	546.288	13435.1
1.145	0.03	546.309	13440.2
1.285	0.027	546.445	13471.8
1.19	0.029	546.666	13522.9
1.33	0.026	546.847	13565.1
1.235	0.028	547.037	13609.5
1.375	0.025	547.262	13662
1.14	0.03	547.293	13669.3
1.28	0.027	547.424	13699.9
1.185	0.029	547.649	13752.5
1.325	0.026	547.825	13794
1.23	0.028	548.02	13839.7
1.37	0.025	548.24	13891.5
1.135	0.03	548.28	13901
1.275	0.027	548.406	13930.7
1.18	0.029	548.635	13984.7
1.32	0.026	548.806	14025.4
1.225	0.028	549.005	14072.5
1.365	0.025	549.22	14123.6
1.13	0.03	549.27	14135.3
1.27	0.027	549.39	14164.1
1.175	0.029	549.624	14219.6
1.315	0.026	549.79	14259.4
1.22	0.028	549.993	14307.9
1.36	0.025	550.204	14358.3
1.125	0.03	550.262	14372.4
1.265	0.027	550.378	14400.1
1.17	0.029	550.615	14457.2
1.31	0.026	550.777	14496.1
1.215	0.028	550.984	14546
1.355	0.025	551.19	14595.7
1.12	0.03	551.258	14612.1
1.26	0.027	551.368	14638.8
1.165	0.029	551.61	14697.4
1.305	0.026	551.767	14735.4
1.21	0.028	551.979	14786.8
1.35	0.025	552.179	14835.7
1.115	0.03	552.257	14854.5
1.255	0.027	552.362	14880.2
1.16	0.029	552.608	14940.3
1.3	0.026	552.76	14977.4
1.205	0.028	552.976	15030.3
1.345	0.025	553.172	15078.4
1.11	0.03	553.258	15099.6
1.25	0.027	553.358	15124.3
1.155	0.029	553.609	15186
1.295	0.026	553.756	15222.1
1.2	0.028	553.976	15276.5
1.34	0.025	554.167	15323.8
1.105	0.03	554.263	15347.6
1.245	0.027	554.358	15371.1
1.15	0.029	554.613	15434.4
1.29	0.026	554.754	15469.6
1.195	0.028	554.979	15525.4
1.335	0.025	555.165	15571.9
1.24	0.027	555.36	15620.6
1.145	0.029	555.62	15685.5
1.285	0.026	555.756	15719.7
1.19	0.028	555.985	15777.2
1.33	0.025	556.166	15822.7
1.235	0.027	556.365	15872.9
1.14	0.029	556.629	15939.5
1.28	0.026	556.761	15972.7
1.185	0.028	556.994	16031.7
1.325	0.025	557.17	16076.4
1.23	0.027	557.374	16128
1.135	0.029	557.642	16196.3
1.275	0.026	557.768	16228.4
1.18	0.028	558.006	16289
1.32	0.025	558.177	16332.7
1.225	0.027	558.385	16385.9
1.13	0.029	558.658	16455.9
1.27	0.026	558.779	16486.9
1.175	0.028	559.021	16549.1
1.315	0.025	559.187	16591.9
1.22	0.027	559.399	16646.6
1.125	0.029	559.677	16718.4
1.265	0.026	559.793	16748.3
1.17	0.028	560.039	16812.1
1.31	0.025	560.2	16854
1.215	0.027	560.417	16910.2
1.12	0.029	560.699	16983.7
1.26	0.026	560.81	17012.5
1.165	0.028	561.06	17078
1.305	0.025	561.217	17118.8
1.21	0.027	561.437	17176.7
1.115	0.029	561.724	17252
1.255	0.026	561.829	17279.6
1.16	0.028	562.085	17346.8
1.3	0.025	562.236	17386.6
1.205	0.027	562.461	17446
1.11	0.029	562.753	17523.1
1.25	0.026	562.852	17549.6
1.155	0.028	563.112	17618.5
1.295	0.025	563.258	17657.2
1.2	0.027	563.488	17718.3
1.105	0.029	563.784	17797.3
1.245	0.026	563.878	17822.4
1.15	0.028	564.143	17893.1
1.29	0.025	564.283	17930.8
1.195	0.027	564.517	17993.5
1.24	0.026	564.907	18098.2
1.145	0.028	565.176	18170.7
1.285	0.025	565.312	18207.2
1.19	0.027	565.55	18271.7
1.235	0.026	565.939	18377
1.14	0.028	566.213	18451.3
1.28	0.025	566.343	18486.7
1.185	0.027	566.586	18552.8
1.23	0.026	566.975	18658.8
1.135	0.028	567.253	18734.9
1.275	0.025	567.378	18769.1
[truncated: 160 more rows]
