# Supplementary material for: The Social Cost of Fossil and Industrial CO2 Emissions from 1950 to 2018
Source: Research Square preprint supplement (doi:10.21203/rs.3.rs-2244259/v1), 2022-11-17
Supplement: Supplementary file 201 [file mu_observed.xlsx]

## Sheet: Tabelle1
f	year	muo
0	1950	0
1	1951	0
2	1952	0
3	1953	0
4	1954	0
5	1955	0
6	1956	0
7	1957	0
8	1958	0
9	1959	0
10	1960	0
11	1961	0
12	1962	0
13	1963	0
14	1964	0
15	1965	0
16	1966	0
17	1967	0
18	1968	0
19	1969	0
20	1970	0
21	1971	0
22	1972	0
23	1973	0
24	1974	0
25	1975	0
26	1976	0
27	1977	0
28	1978	0
29	1979	0
30	1980	0
31	1981	0
32	1982	0
33	1983	0
34	1984	0
35	1985	0
36	1986	0
37	1987	0
38	1988	0
39	1989	0
40	1990	0
41	1991	0
42	1992	0
43	1993	0
44	1994	0
45	1995	0
46	1996	0
47	1997	0
48	1998	0
49	1999	0
50	2000	0
51	2001	0
52	2002	0
53	2003	0
54	2004	0
55	2005	0
56	2006	0
57	2007	0
58	2008	0
59	2009	0.0168871
60	2010	0
61	2011	0
62	2012	0
63	2013	0.0164968
64	2014	0.0352405
65	2015	0.0607484
66	2016	0.0838427
67	2017	0.0940986
68	2018	0.097604
69	2019	0.118007
70	2020	0.118007
71	2021	0.118007
72	2022	0.118007
73	2023	0.118007
74	2024	0.118007
75	2025	0.118007
76	2026	0.118007
77	2027	0.118007
78	2028	0.118007
79	2029	0.118007
80	2030	0.118007
81	2031	0.118007
82	2032	0.118007
83	2033	0.118007
84	2034	0.118007
85	2035	0.118007
86	2036	0.118007
87	2037	0.118007
88	2038	0.118007
89	2039	0.118007
90	2040	0.118007
91	2041	0.118007
92	2042	0.118007
93	2043	0.118007
94	2044	0.118007
95	2045	0.118007
96	2046	0.118007
97	2047	0.118007
98	2048	0.118007
99	2049	0.118007
100	2050	0.118007
101	2051	0.118007
102	2052	0.118007
103	2053	0.118007
104	2054	0.118007
105	2055	0.118007
106	2056	0.118007
107	2057	0.118007
108	2058	0.118007
109	2059	0.118007
110	2060	0.118007
111	2061	0.118007
112	2062	0.118007
113	2063	0.118007
114	2064	0.118007
115	2065	0.118007
116	2066	0.118007
117	2067	0.118007
118	2068	0.118007
119	2069	0.118007
120	2070	0.118007
121	2071	0.118007
122	2072	0.118007
123	2073	0.118007
124	2074	0.118007
125	2075	0.118007
126	2076	0.118007
127	2077	0.118007
128	2078	0.118007
129	2079	0.118007
130	2080	0.118007
131	2081	0.118007
132	2082	0.118007
133	2083	0.118007
134	2084	0.118007
135	2085	0.118007
136	2086	0.118007
137	2087	0.118007
138	2088	0.118007
139	2089	0.118007
140	2090	0.118007
141	2091	0.118007
142	2092	0.118007
143	2093	0.118007
144	2094	0.118007
145	2095	0.118007
146	2096	0.118007
147	2097	0.118007
148	2098	0.118007
149	2099	0.118007
150	2100	0.118007
151	2101	0.118007
152	2102	0.118007
153	2103	0.118007
154	2104	0.118007
155	2105	0.118007
156	2106	0.118007
157	2107	0.118007
158	2108	0.118007
159	2109	0.118007
160	2110	0.118007
161	2111	0.118007
162	2112	0.118007
163	2113	0.118007
164	2114	0.118007
165	2115	0.118007
166	2116	0.118007
167	2117	0.118007
168	2118	0.118007
169	2119	0.118007
170	2120	0.118007
171	2121	0.118007
172	2122	0.118007
173	2123	0.118007
174	2124	0.118007
175	2125	0.118007
176	2126	0.118007
177	2127	0.118007
178	2128	0.118007
179	2129	0.118007
180	2130	0.118007
181	2131	0.118007
182	2132	0.118007
183	2133	0.118007
184	2134	0.118007
185	2135	0.118007
186	2136	0.118007
187	2137	0.118007
188	2138	0.118007
189	2139	0.118007
190	2140	0.118007
191	2141	0.118007
192	2142	0.118007
193	2143	0.118007
194	2144	0.118007
195	2145	0.118007
196	2146	0.118007
197	2147	0.118007
198	2148	0.118007
199	2149	0.118007
200	2150	0.118007
201	2151	0.118007
202	2152	0.118007
203	2153	0.118007
204	2154	0.118007
205	2155	0.118007
206	2156	0.118007
207	2157	0.118007
208	2158	0.118007
209	2159	0.118007
210	2160	0.118007
211	2161	0.118007
212	2162	0.118007
213	2163	0.118007
214	2164	0.118007
215	2165	0.118007
216	2166	0.118007
217	2167	0.118007
218	2168	0.118007
219	2169	0.118007
220	2170	0.118007
221	2171	0.118007
222	2172	0.118007
223	2173	0.118007
224	2174	0.118007
225	2175	0.118007
226	2176	0.118007
227	2177	0.118007
228	2178	0.118007
229	2179	0.118007
230	2180	0.118007
231	2181	0.118007
232	2182	0.118007
233	2183	0.118007
234	2184	0.118007
235	2185	0.118007
236	2186	0.118007
237	2187	0.118007
238	2188	0.118007
239	2189	0.118007
240	2190	0.118007
241	2191	0.118007
242	2192	0.118007
243	2193	0.118007
244	2194	0.118007
245	2195	0.118007
246	2196	0.118007
247	2197	0.118007
248	2198	0.118007
249	2199	0.118007
250	2200	0.118007
251	2201	0.118007
252	2202	0.118007
253	2203	0.118007
254	2204	0.118007
255	2205	0.118007
256	2206	0.118007
257	2207	0.118007
258	2208	0.118007
259	2209	0.118007
260	2210	0.118007
261	2211	0.118007
262	2212	0.118007
263	2213	0.118007
264	2214	0.118007
265	2215	0.118007
266	2216	0.118007
267	2217	0.118007
268	2218	0.118007
269	2219	0.118007
270	2220	0.118007
271	2221	0.118007
272	2222	0.118007
273	2223	0.118007
274	2224	0.118007
275	2225	0.118007
276	2226	0.118007
277	2227	0.118007
278	2228	0.118007
279	2229	0.118007
280	2230	0.118007
281	2231	0.118007
282	2232	0.118007
283	2233	0.118007
284	2234	0.118007
285	2235	0.118007
286	2236	0.118007
287	2237	0.118007
288	2238	0.118007
289	2239	0.118007
290	2240	0.118007
291	2241	0.118007
292	2242	0.118007
293	2243	0.118007
294	2244	0.118007
295	2245	0.118007
296	2246	0.118007
297	2247	0.118007
298	2248	0.118007
299	2249	0.118007
300	2250	0.118007
301	2251	0.118007
302	2252	0.118007
303	2253	0.118007
304	2254	0.118007
305	2255	0.118007
306	2256	0.118007
307	2257	0.118007
308	2258	0.118007
309	2259	0.118007
310	2260	0.118007
311	2261	0.118007
312	2262	0.118007
313	2263	0.118007
314	2264	0.118007
315	2265	0.118007
316	2266	0.118007
317	2267	0.118007
318	2268	0.118007
319	2269	0.118007
320	2270	0.118007
321	2271	0.118007
322	2272	0.118007
323	2273	0.118007
324	2274	0.118007
325	2275	0.118007
326	2276	0.118007
327	2277	0.118007
328	2278	0.118007
329	2279	0.118007
330	2280	0.118007
331	2281	0.118007
332	2282	0.118007
333	2283	0.118007
334	2284	0.118007
335	2285	0.118007
336	2286	0.118007
337	2287	0.118007
338	2288	0.118007
339	2289	0.118007
340	2290	0.118007
341	2291	0.118007
342	2292	0.118007
343	2293	0.118007
344	2294	0.118007
345	2295	0.118007
346	2296	0.118007
347	2297	0.118007
348	2298	0.118007
349	2299	0.118007
350	2300	0.118007
351	2301	0.118007
352	2302	0.118007
353	2303	0.118007
354	2304	0.118007
355	2305	0.118007
356	2306	0.118007
357	2307	0.118007
358	2308	0.118007
359	2309	0.118007
360	2310	0.118007
361	2311	0.118007
362	2312	0.118007
363	2313	0.118007
364	2314	0.118007
365	2315	0.118007
366	2316	0.118007
367	2317	0.118007
368	2318	0.118007
369	2319	0.118007
370	2320	0.118007
371	2321	0.118007
372	2322	0.118007
373	2323	0.118007
374	2324	0.118007
375	2325	0.118007
376	2326	0.118007
377	2327	0.118007
378	2328	0.118007
379	2329	0.118007
380	2330	0.118007
381	2331	0.118007
382	2332	0.118007
383	2333	0.118007
384	2334	0.118007
385	2335	0.118007
386	2336	0.118007
387	2337	0.118007
388	2338	0.118007
389	2339	0.118007
390	2340	0.118007
391	2341	0.118007
392	2342	0.118007
393	2343	0.118007
394	2344	0.118007
395	2345	0.118007
396	2346	0.118007
397	2347	0.118007
398	2348	0.118007
399	2349	0.118007
400	2350	0.118007
401	2351	0.118007
402	2352	0.118007
403	2353	0.118007
404	2354	0.118007
405	2355	0.118007
406	2356	0.118007
407	2357	0.118007
408	2358	0.118007
409	2359	0.118007
410	2360	0.118007
411	2361	0.118007
412	2362	0.118007
413	2363	0.118007
414	2364	0.118007
415	2365	0.118007
416	2366	0.118007
417	2367	0.118007
418	2368	0.118007
419	2369	0.118007
420	2370	0.118007
421	2371	0.118007
422	2372	0.118007
423	2373	0.118007
424	2374	0.118007
425	2375	0.118007
426	2376	0.118007
427	2377	0.118007
428	2378	0.118007
429	2379	0.118007
430	2380	0.118007
431	2381	0.118007
432	2382	0.118007
433	2383	0.118007
434	2384	0.118007
435	2385	0.118007
436	2386	0.118007
437	2387	0.118007
438	2388	0.118007
439	2389	0.118007
440	2390	0.118007
441	2391	0.118007
442	2392	0.118007
443	2393	0.118007
444	2394	0.118007
445	2395	0.118007
446	2396	0.118007
447	2397	0.118007
448	2398	0.118007
449	2399	0.118007
450	2400	0.118007
451	2401	0.118007
452	2402	0.118007
453	2403	0.118007
454	2404	0.118007
455	2405	0.118007
456	2406	0.118007
457	2407	0.118007
458	2408	0.118007
459	2409	0.118007
460	2410	0.118007
461	2411	0.118007
462	2412	0.118007
463	2413	0.118007
464	2414	0.118007
465	2415	0.118007
466	2416	0.118007
467	2417	0.118007
468	2418	0.118007
469	2419	0.118007
470	2420	0.118007
471	2421	0.118007
472	2422	0.118007
473	2423	0.118007
474	2424	0.118007
475	2425	0.118007
476	2426	0.118007
477	2427	0.118007
478	2428	0.118007
479	2429	0.118007
480	2430	0.118007
481	2431	0.118007
482	2432	0.118007
483	2433	0.118007
484	2434	0.118007
485	2435	0.118007
486	2436	0.118007
487	2437	0.118007
488	2438	0.118007
489	2439	0.118007
490	2440	0.118007
491	2441	0.118007
492	2442	0.118007
493	2443	0.118007
494	2444	0.118007
495	2445	0.118007
496	2446	0.118007
497	2447	0.118007
498	2448	0.118007
499	2449	0.118007
500	2450	0.118007
501	2451	0.118007
502	2452	0.118007
503	2453	0.118007
504	2454	0.118007
505	2455	0.118007
506	2456	0.118007
507	2457	0.118007
508	2458	0.118007
509	2459	0.118007
510	2460	0.118007
511	2461	0.118007
512	2462	0.118007
513	2463	0.118007
514	2464	0.118007
515	2465	0.118007
516	2466	0.118007
517	2467	0.118007
518	2468	0.118007
519	2469	0.118007
520	2470	0.118007
521	2471	0.118007
522	2472	0.118007
523	2473	0.118007
524	2474	0.118007
525	2475	0.118007
526	2476	0.118007
527	2477	0.118007
528	2478	0.118007
529	2479	0.118007
530	2480	0.118007
531	2481	0.118007
532	2482	0.118007
533	2483	0.118007
534	2484	0.118007
535	2485	0.118007
536	2486	0.118007
537	2487	0.118007
538	2488	0.118007
539	2489	0.118007
540	2490	0.118007
