# Supplementary material for: The Social Cost of Fossil and Industrial CO2 Emissions from 1950 to 2018
Source: Research Square preprint supplement (doi:10.21203/rs.3.rs-2244259/v1), 2022-11-17
Supplement: Supplementary file 202 [file pback_external.xlsx]

## Sheet: pback_params
f	1	2	3	4	5	6
0	764.368	764.368	764.368	764.368	764.368	764.368
1	760.508	760.508	760.508	760.508	760.508	760.508
2	756.666	756.666	756.666	756.666	756.666	756.666
3	752.845	752.845	752.845	752.845	752.845	752.845
4	749.042	749.042	749.042	749.042	749.042	749.042
5	745.259	745.259	745.259	745.259	745.259	745.259
6	741.495	741.495	741.495	741.495	741.495	741.495
7	737.75	737.75	737.75	737.75	737.75	737.75
8	734.024	734.024	734.024	734.024	734.024	734.024
9	730.316	730.316	730.316	730.316	730.316	730.316
10	726.628	725.411	725.611	724.614	725.81	726.608
11	722.957	721.769	721.964	720.991	722.159	722.939
12	719.306	718.146	718.336	717.386	718.526	719.288
13	715.673	714.54	714.726	713.798	714.912	715.655
14	712.058	710.953	711.134	710.229	711.315	712.041
15	708.462	707.384	707.56	706.677	707.737	708.445
16	704.884	703.832	704.005	703.144	704.177	704.867
17	701.323	700.299	700.467	699.627	700.635	701.307
18	697.781	696.783	696.947	696.129	697.11	697.765
19	694.257	693.285	693.444	692.648	693.604	694.241
20	690.75	689.804	689.959	689.184	690.114	690.735
21	687.261	686.341	686.492	685.738	686.643	687.247
22	683.79	682.895	683.042	682.309	683.189	683.776
23	680.337	679.467	679.609	678.897	679.752	680.323
24	676.9	676.056	676.194	675.502	676.333	676.887
25	673.482	672.662	672.796	672.124	672.93	673.469
26	670.08	669.284	669.415	668.763	669.545	670.067
27	666.696	665.924	666.051	665.419	666.177	666.683
28	663.328	662.581	662.704	662.091	662.826	663.316
29	659.978	659.255	659.373	658.781	659.492	659.966
30	656.645	655.945	656.06	655.486	656.174	656.633
31	653.328	652.652	652.763	652.208	652.874	653.317
32	650.028	649.375	649.482	648.947	649.589	650.018
33	646.745	646.115	646.218	645.702	646.322	646.735
34	643.478	642.871	642.971	642.473	643.07	643.469
35	640.228	639.644	639.74	639.26	639.835	640.219
36	636.995	636.432	636.525	636.064	636.617	636.986
37	633.777	633.237	633.326	632.883	633.414	633.769
38	630.576	630.058	630.143	629.718	630.228	630.568
39	627.392	626.895	626.976	626.569	627.058	627.384
40	624.223	623.748	623.825	623.436	623.903	624.215
41	621.07	620.616	620.691	620.319	620.765	621.063
42	617.933	617.5	617.571	617.217	617.642	617.926
43	614.812	614.4	614.468	614.13	614.535	614.805
44	611.707	611.316	611.38	611.059	611.444	611.701
45	608.617	608.247	608.307	608.003	608.368	608.611
46	605.543	605.193	605.25	604.963	605.308	605.538
47	602.485	602.155	602.209	601.938	602.263	602.479
48	599.442	599.131	599.182	598.928	599.233	599.437
49	596.414	596.124	596.171	595.933	596.219	596.409
50	593.402	593.131	593.175	592.953	593.22	593.397
51	590.405	590.153	590.194	589.988	590.235	590.401
52	587.423	587.19	587.228	587.038	587.266	587.419
53	584.456	584.242	584.277	584.102	584.312	584.452
54	581.504	581.309	581.341	581.181	581.373	581.501
55	578.567	578.391	578.419	578.275	578.448	578.564
56	575.645	575.487	575.513	575.383	575.538	575.642
57	572.737	572.598	572.62	572.506	572.643	572.735
58	569.844	569.723	569.743	569.643	569.763	569.842
59	566.966	566.863	566.88	566.795	566.897	566.965
60	564.103	564.017	564.031	563.96	564.045	564.101
61	561.253	561.185	561.196	561.14	561.207	561.252
62	558.419	558.368	558.376	558.334	558.384	558.418
63	555.598	555.564	555.57	555.542	555.575	555.598
64	552.792	552.775	552.778	552.764	552.781	552.792
65	550	550	550	550	550	550
66	547.222	547.239	547.236	547.25	547.233	547.222
67	544.458	544.491	544.486	544.513	544.48	544.459
68	541.708	541.758	541.75	541.79	541.742	541.709
69	538.972	539.038	539.027	539.081	539.016	538.973
70	536.25	536.332	536.318	536.385	536.305	536.251
71	533.542	533.639	533.623	533.703	533.607	533.543
72	530.847	530.96	530.941	531.034	530.923	530.849
73	528.166	528.294	528.273	528.379	528.252	528.168
74	525.498	525.642	525.618	525.737	525.595	525.5
75	522.844	523.003	522.977	523.108	522.951	522.846
76	520.203	520.377	520.349	520.492	520.32	520.206
77	517.576	517.765	517.734	517.889	517.703	517.579
78	514.961	515.165	515.132	515.299	515.098	514.965
79	512.36	512.579	512.543	512.722	512.507	512.364
80	509.773	510.006	509.967	510.159	509.929	509.776
81	507.198	507.445	507.405	507.607	507.364	507.202
82	504.636	504.898	504.855	505.069	504.812	504.64
83	502.087	502.363	502.318	502.543	502.272	502.092
84	499.551	499.841	499.793	500.03	499.746	499.556
85	497.028	497.331	497.282	497.53	497.232	497.033
86	494.518	494.834	494.782	495.042	494.731	494.523
87	492.02	492.35	492.296	492.567	492.242	492.026
88	489.535	489.878	489.822	490.103	489.766	489.541
89	487.063	487.419	487.36	487.653	487.302	487.068
90	484.603	484.972	484.911	485.214	484.851	484.609
91	482.155	482.537	482.474	482.788	482.412	482.161
92	479.72	480.114	480.05	480.374	479.985	479.726
93	477.297	477.704	477.637	477.971	477.57	477.303
94	474.886	475.306	475.237	475.581	475.168	474.893
95	472.488	472.92	472.849	473.203	472.778	472.494
96	470.101	470.545	470.472	470.837	470.4	470.108
97	467.727	468.183	468.108	468.482	468.033	467.734
98	465.364	465.832	465.756	466.14	465.679	465.372
99	463.014	463.494	463.415	463.809	463.336	463.022
100	460.675	461.167	461.086	461.489	461.006	460.683
101	458.349	458.852	458.769	459.182	458.687	458.357
102	456.034	456.548	456.463	456.886	456.379	456.042
103	453.73	454.256	454.17	454.601	454.083	453.739
104	451.439	451.975	451.887	452.328	451.799	451.447
105	449.159	449.706	449.616	450.066	449.526	449.167
106	446.89	447.448	447.357	447.815	447.265	446.899
107	444.633	445.202	445.109	445.576	445.015	444.642
108	442.387	442.967	442.872	443.348	442.777	442.396
109	440.153	440.743	440.646	441.131	440.549	440.162
110	437.93	438.53	438.432	438.925	438.333	437.939
111	435.718	436.329	436.228	436.73	436.128	435.727
112	433.517	434.138	434.036	434.546	433.934	433.527
113	431.327	431.958	431.855	432.373	431.751	431.337
114	429.149	429.79	429.685	430.211	429.579	429.159
115	426.981	427.632	427.525	428.06	427.419	426.992
116	424.825	425.485	425.377	425.919	425.268	424.835
117	422.679	423.349	423.239	423.789	423.129	422.69
118	420.544	421.224	421.112	421.67	421.001	420.555
119	418.42	419.109	418.996	419.561	418.883	418.431
120	416.307	417.005	416.89	417.463	416.776	416.318
121	414.204	414.911	414.795	415.376	414.679	414.215
122	412.112	412.828	412.711	413.299	412.593	412.123
123	410.031	410.756	410.637	411.232	410.518	410.042
124	407.96	408.693	408.573	409.176	408.453	407.971
125	405.899	406.642	406.52	407.129	406.398	405.911
126	403.849	404.6	404.477	405.094	404.354	403.861
127	401.809	402.569	402.444	403.068	402.32	401.821
128	399.78	400.548	400.422	401.052	400.296	399.792
129	397.761	398.537	398.409	399.047	398.282	397.773
130	395.752	396.536	396.407	397.051	396.279	395.764
131	393.753	394.545	394.415	395.066	394.285	393.765
132	391.764	392.564	392.433	393.09	392.302	391.777
133	389.785	390.594	390.461	391.125	390.328	389.798
134	387.817	388.633	388.499	389.169	388.365	387.83
135	385.858	386.681	386.546	387.223	386.411	385.871
136	383.909	384.74	384.604	385.286	384.467	383.922
137	381.97	382.809	382.671	383.36	382.533	381.983
138	380.041	380.887	380.748	381.443	380.609	380.054
139	378.121	378.974	378.834	379.535	378.694	378.135
140	376.211	377.072	376.931	377.637	376.789	376.225
141	374.311	375.179	375.036	375.749	374.894	374.325
142	372.421	373.295	373.152	373.87	373.008	372.435
143	370.54	371.421	371.276	372	371.132	370.554
144	368.668	369.556	369.411	370.14	369.265	368.682
145	366.806	367.701	367.554	368.289	367.407	366.82
146	364.954	365.855	365.707	366.448	365.559	364.968
147	363.11	364.018	363.869	364.615	363.72	363.125
148	361.276	362.191	362.041	362.792	361.89	361.291
149	359.452	360.372	360.221	360.978	360.07	359.466
150	357.636	358.563	358.411	359.173	358.259	357.651
151	355.83	356.763	356.61	357.377	356.457	355.844
152	354.032	354.972	354.818	355.59	354.663	354.047
153	352.244	353.19	353.035	353.811	352.879	352.259
154	350.465	351.417	351.26	352.042	351.104	350.48
155	348.695	349.652	349.495	350.282	349.338	348.71
156	346.934	347.897	347.739	348.53	347.581	346.949
157	345.182	346.15	345.991	346.787	345.832	345.197
158	343.438	344.412	344.252	345.053	344.093	343.454
159	341.704	342.683	342.522	343.328	342.362	341.719
160	339.978	340.963	340.801	341.611	340.639	339.993
161	338.261	339.251	339.088	339.903	338.926	338.276
162	336.552	337.548	337.384	338.203	337.221	336.568
163	334.852	335.853	335.689	336.512	335.525	334.868
164	333.161	334.167	334.002	334.829	333.837	333.177
165	331.478	332.489	332.323	333.155	332.157	331.494
166	329.804	330.82	330.653	331.489	330.487	329.82
167	328.138	329.159	328.992	329.831	328.824	328.155
168	326.481	327.507	327.338	328.182	327.17	326.497
169	324.832	325.863	325.693	326.541	325.524	324.848
170	323.191	324.227	324.057	324.908	323.887	323.208
171	321.559	322.599	322.428	323.283	322.257	321.575
172	319.935	320.979	320.808	321.666	320.636	319.951
173	318.319	319.368	319.196	320.058	319.023	318.336
174	316.711	317.764	317.591	318.457	317.419	316.728
175	315.112	316.169	315.995	316.865	315.822	315.128
176	313.52	314.582	314.407	315.28	314.233	313.537
177	311.937	313.002	312.827	313.704	312.652	311.953
178	310.361	311.431	311.255	312.135	311.08	310.378
179	308.793	309.868	309.691	310.574	309.515	308.81
180	307.234	308.312	308.135	309.021	307.958	307.251
181	305.682	306.764	306.586	307.476	306.409	305.699
182	304.138	305.224	305.046	305.938	304.867	304.155
183	302.602	303.692	303.513	304.408	303.334	302.619
184	301.074	302.167	301.987	302.886	301.808	301.091
185	299.553	300.65	300.47	301.372	300.29	299.57
186	298.04	299.14	298.96	299.865	298.779	298.057
187	296.535	297.639	297.457	298.365	297.276	296.552
188	295.037	296.144	295.962	296.873	295.781	295.054
189	293.547	294.658	294.475	295.389	294.293	293.564
190	292.064	293.178	292.995	293.911	292.812	292.082
191	290.589	291.706	291.523	292.442	291.339	290.607
192	289.121	290.242	290.058	290.979	289.874	289.139
193	287.661	288.785	288.6	289.524	288.416	287.679
194	286.208	287.335	287.15	288.077	286.965	286.226
195	284.763	285.892	285.707	286.636	285.521	284.78
196	283.324	284.457	284.271	285.203	284.085	283.342
197	281.893	283.029	282.842	283.776	282.656	281.911
198	280.47	281.608	281.421	282.357	281.234	280.488
199	279.053	280.194	280.007	280.945	279.819	279.071
200	277.644	278.787	278.6	279.541	278.412	277.662
201	276.241	277.388	277.199	278.143	277.011	276.259
202	274.846	275.995	275.806	276.752	275.618	274.864
203	273.458	274.61	274.42	275.368	274.231	273.476
204	272.077	273.231	273.041	273.991	272.852	272.095
205	270.702	271.859	271.669	272.621	271.479	270.721
206	269.335	270.494	270.304	271.258	270.114	269.353
207	267.975	269.136	268.945	269.901	268.755	267.993
208	266.621	267.785	267.594	268.551	267.403	266.64
209	265.275	266.441	266.249	267.209	266.058	265.293
210	263.935	265.103	264.911	265.872	264.719	263.953
211	262.602	263.772	263.58	264.543	263.388	262.62
212	261.275	262.448	262.255	263.22	262.063	261.294
213	259.956	261.13	260.937	261.904	260.744	259.974
214	258.643	259.819	259.626	260.594	259.433	258.661
215	257.336	258.515	258.321	259.291	258.128	257.355
216	256.037	257.217	257.023	257.994	256.829	256.055
217	254.744	255.926	255.731	256.704	255.537	254.762
218	253.457	254.641	254.446	255.421	254.252	253.476
219	252.177	253.362	253.168	254.143	252.973	252.196
220	250.903	252.09	251.895	252.872	251.7	250.922
221	249.636	250.825	250.629	251.608	250.434	249.655
222	248.375	249.566	249.37	250.35	249.174	248.394
223	247.121	248.313	248.117	249.098	247.921	247.139
224	245.872	247.066	246.87	247.852	246.674	245.891
225	244.631	245.826	245.629	246.613	245.433	244.649
226	243.395	244.591	244.395	245.38	244.198	243.414
227	242.166	243.363	243.167	244.153	242.97	242.185
228	240.942	242.142	241.945	242.932	241.748	240.961
229	239.726	240.926	240.729	241.717	240.532	239.745
230	238.515	239.716	239.519	240.508	239.322	238.534
231	237.31	238.513	238.315	239.305	238.118	237.329
232	236.111	237.316	237.118	238.109	236.92	236.131
233	234.919	236.124	235.926	236.918	235.728	234.938
234	233.732	234.939	234.74	235.733	234.542	233.751
235	232.552	233.759	233.561	234.555	233.362	232.571
236	231.377	232.586	232.387	233.382	232.189	231.396
237	230.209	231.418	231.219	232.215	231.021	230.228
238	229.046	230.256	230.057	231.053	229.858	229.065
239	227.889	229.1	228.901	229.898	228.702	227.908
240	226.738	227.95	227.751	228.748	227.552	226.757
241	225.593	226.805	226.606	227.605	226.407	225.612
242	224.453	225.667	225.467	226.466	225.268	224.473
243	223.32	224.534	224.334	225.334	224.135	223.339
244	222.192	223.407	223.207	224.207	223.007	222.211
245	221.07	222.285	222.085	223.086	221.886	221.089
246	219.953	221.169	220.969	221.97	220.769	219.972
247	218.842	220.059	219.859	220.86	219.659	218.861
248	217.737	218.954	218.754	219.756	218.554	217.756
249	216.637	217.855	217.654	218.657	217.454	216.656
250	215.543	216.761	216.561	217.564	216.361	215.562
251	214.454	215.673	215.472	216.476	215.272	214.474
252	213.371	214.59	214.389	215.393	214.189	213.39
253	212.293	213.513	213.312	214.316	213.112	212.313
254	211.221	212.441	212.24	213.244	212.04	211.24
255	210.154	211.374	211.173	212.178	210.973	210.174
256	209.093	210.313	210.112	211.117	209.912	209.112
257	208.037	209.257	209.056	210.061	208.856	208.056
258	206.986	208.206	208.006	209.011	207.805	207.005
259	205.941	207.161	206.96	207.966	206.76	205.96
260	204.9	206.121	205.92	206.926	205.72	204.92
261	203.866	205.086	204.886	205.891	204.685	203.885
262	202.836	204.057	203.856	204.862	203.655	202.855
263	201.811	203.032	202.831	203.837	202.631	201.831
264	200.792	202.013	201.812	202.818	201.612	200.811
265	199.778	200.999	200.798	201.804	200.597	199.797
266	198.769	199.99	199.789	200.794	199.588	198.788
267	197.765	198.986	198.785	199.79	198.584	197.784
268	196.766	197.987	197.786	198.791	197.585	196.785
269	195.772	196.993	196.792	197.797	196.591	195.792
270	194.784	196.004	195.803	196.808	195.602	194.803
271	193.8	195.02	194.819	195.824	194.619	193.819
272	192.821	194.04	193.84	194.845	193.64	192.84
273	191.847	193.066	192.866	193.87	192.665	191.866
274	190.878	192.097	191.897	192.901	191.696	190.897
275	189.914	191.133	190.932	191.936	190.732	189.933
276	188.955	190.173	189.973	190.977	189.772	188.974
277	188	189.218	189.018	190.022	188.818	188.02
278	187.051	188.268	188.068	189.071	187.868	187.07
279	186.106	187.323	187.123	188.126	186.923	186.125
280	185.166	186.383	186.183	187.185	185.983	185.185
281	184.231	185.447	185.247	186.249	185.047	184.25
282	183.3	184.516	184.316	185.318	184.116	183.32
283	182.375	183.59	183.39	184.391	183.19	182.394
284	181.453	182.668	182.468	183.469	182.269	181.473
285	180.537	181.751	181.551	182.552	181.352	180.556
286	179.625	180.838	180.639	181.639	180.439	179.644
287	178.718	179.93	179.731	180.73	179.532	178.737
288	177.815	179.027	178.828	179.827	178.629	177.834
289	176.917	178.128	177.929	178.927	177.73	176.936
290	176.024	177.234	177.035	178.033	176.836	176.043
291	175.134	176.344	176.145	177.142	175.946	175.154
292	174.25	175.459	175.26	176.257	175.061	174.269
293	173.37	174.578	174.379	175.375	174.181	173.389
294	172.494	173.702	173.503	174.498	173.305	172.513
295	171.623	172.829	172.631	173.626	172.433	171.642
296	170.756	171.962	171.763	172.757	171.565	170.775
297	169.894	171.098	170.9	171.894	170.702	169.913
298	169.036	170.239	170.041	171.034	169.844	169.055
299	168.182	169.385	169.187	170.179	168.989	168.201
300	167.332	168.534	168.337	169.328	168.139	167.351
301	166.487	167.688	167.491	168.481	167.293	166.506
302	165.646	166.846	166.649	167.638	166.452	165.665
303	164.81	166.009	165.811	166.8	165.614	164.829
304	163.977	165.175	164.978	165.966	164.781	163.996
305	163.149	164.346	164.149	165.136	163.952	163.168
306	162.325	163.521	163.324	164.31	163.128	162.344
307	161.505	162.7	162.503	163.489	162.307	161.524
308	160.689	161.883	161.687	162.671	161.491	160.708
309	159.878	161.07	160.874	161.858	160.678	159.897
310	159.07	160.262	160.066	161.048	159.87	159.089
311	158.267	159.457	159.261	160.243	159.066	158.286
312	157.468	158.657	158.461	159.442	158.266	157.486
313	156.672	157.86	157.665	158.644	157.469	156.691
314	155.881	157.068	156.872	157.851	156.677	155.9
315	155.094	156.279	156.084	157.062	155.889	155.112
316	154.31	155.494	155.3	156.276	155.105	154.329
317	153.531	154.714	154.519	155.495	154.325	153.55
318	152.755	153.937	153.743	154.717	153.548	152.774
319	151.984	153.164	152.97	153.944	152.776	152.003
320	151.216	152.395	152.201	153.174	152.007	151.235
321	150.452	151.63	151.436	152.408	151.243	150.471
322	149.693	150.869	150.675	151.646	150.482	149.711
323	148.937	150.112	149.918	150.887	149.725	148.955
324	148.184	149.358	149.165	150.133	148.972	148.203
325	147.436	148.608	148.415	149.382	148.222	147.454
326	146.691	147.862	147.669	148.635	147.477	146.71
327	145.95	147.12	146.927	147.892	146.735	145.969
328	145.213	146.381	146.189	147.152	145.997	145.232
329	144.48	145.646	145.454	146.417	145.262	144.498
330	143.75	144.915	144.723	145.684	144.532	143.768
331	143.024	144.187	143.996	144.956	143.805	143.042
332	142.302	143.463	143.272	144.231	143.081	142.32
333	141.583	142.743	142.552	143.51	142.362	141.601
334	140.868	142.027	141.836	142.792	141.645	140.886
335	140.156	141.314	141.123	142.078	140.933	140.174
336	139.448	140.604	140.414	141.368	140.224	139.467
337	138.744	139.898	139.708	140.661	139.519	138.762
338	138.043	139.196	139.006	139.957	138.817	138.061
339	137.346	138.497	138.308	139.257	138.118	137.364
340	136.652	137.802	137.613	138.561	137.424	136.67
341	135.962	137.11	136.921	137.868	136.732	135.98
342	135.275	136.422	136.233	137.179	136.044	135.293
343	134.592	135.737	135.548	136.493	135.36	134.61
344	133.912	135.055	134.867	135.81	134.679	133.93
345	133.236	134.377	134.189	135.131	134.002	133.254
346	132.563	133.702	133.515	134.455	133.328	132.581
347	131.894	133.031	132.844	133.783	132.657	131.911
348	131.227	132.363	132.176	133.114	131.99	131.245
349	130.565	131.699	131.512	132.448	131.326	130.582
350	129.905	131.038	130.851	131.786	130.665	129.923
351	129.249	130.38	130.194	131.127	130.008	129.267
352	128.596	129.725	129.539	130.471	129.354	128.614
353	127.947	129.074	128.888	129.819	128.703	127.964
354	127.3	128.426	128.241	129.17	128.056	127.318
355	126.657	127.781	127.596	128.524	127.411	126.675
356	126.018	127.14	126.955	127.881	126.771	126.035
357	125.381	126.501	126.317	127.242	126.133	125.399
358	124.748	125.866	125.682	126.605	125.498	124.766
359	124.118	125.234	125.051	125.972	124.867	124.136
360	123.491	124.606	124.422	125.342	124.239	123.509
361	122.867	123.98	123.797	124.716	123.614	122.885
362	122.247	123.358	123.175	124.092	122.992	122.264
363	121.629	122.738	122.556	123.471	122.373	121.647
364	121.015	122.122	121.94	122.854	121.758	121.032
365	120.404	121.509	121.327	122.24	121.145	120.421
366	119.796	120.899	120.717	121.628	120.536	119.813
367	119.191	120.292	120.111	121.02	119.93	119.208
368	118.589	119.688	119.507	120.415	119.326	118.606
369	117.99	119.087	118.906	119.813	118.726	118.007
370	117.394	118.489	118.309	119.214	118.129	117.411
371	116.801	117.894	117.714	118.618	117.535	116.818
372	116.211	117.303	117.123	118.024	116.943	116.228
373	115.624	116.714	116.534	117.434	116.355	115.641
374	115.04	116.128	115.949	116.847	115.77	115.057
375	114.459	115.545	115.366	116.263	115.187	114.476
376	113.881	114.965	114.786	115.681	114.608	113.898
377	113.306	114.387	114.209	115.103	114.031	113.323
378	112.733	113.813	113.635	114.527	113.458	112.75
379	112.164	113.242	113.064	113.955	112.887	112.181
380	111.597	112.673	112.496	113.385	112.319	111.614
381	111.034	112.108	111.931	112.818	111.754	111.051
382	110.473	111.545	111.368	112.254	111.192	110.49
383	109.915	110.985	110.809	111.692	110.633	109.932
384	109.36	110.428	110.252	111.134	110.076	109.377
385	108.807	109.873	109.698	110.578	109.522	108.824
386	108.258	109.322	109.146	110.025	108.971	108.275
387	107.711	108.773	108.598	109.475	108.423	107.728
388	107.167	108.227	108.052	108.927	107.878	107.184
389	106.626	107.683	107.509	108.383	107.335	106.642
390	106.087	107.143	106.969	107.841	106.795	106.104
391	105.551	106.605	106.431	107.301	106.258	105.568
392	105.018	106.069	105.896	106.765	105.724	105.035
393	104.488	105.537	105.364	106.231	105.192	104.504
394	103.96	105.007	104.835	105.7	104.663	103.977
395	103.435	104.48	104.308	105.171	104.136	103.452
396	102.913	103.955	103.784	104.645	103.612	102.929
397	102.393	103.434	103.262	104.122	103.091	102.409
398	101.876	102.914	102.743	103.601	102.572	101.892
399	101.361	102.398	102.227	103.083	102.056	101.377
400	100.849	101.883	101.713	102.568	101.543	100.866
401	100.34	101.372	101.202	102.055	101.032	100.356
402	99.833	100.863	100.693	101.545	100.524	99.8493
403	99.3288	100.357	100.187	101.037	100.018	99.345
404	98.8271	99.8528	99.6839	100.532	99.5152	98.8433
405	98.328	99.3515	99.1829	100.029	99.0146	98.3441
406	97.8313	98.8527	98.6845	99.5286	98.5165	97.8474
407	97.3372	98.3564	98.1885	99.0309	98.0209	97.3533
408	96.8456	97.8626	97.6951	98.5357	97.5278	96.8616
409	96.3564	97.3713	97.2041	98.043	97.0372	96.3724
410	95.8698	96.8825	96.7156	97.5527	96.5491	95.8857
411	95.3856	96.3961	96.2296	97.0649	96.0634	95.4015
412	94.9038	95.9121	95.746	96.5795	95.5802	94.9197
413	94.4244	95.4306	95.2648	96.0966	95.0994	94.4403
414	93.9475	94.9515	94.7861	95.616	94.621	93.9634
415	93.473	94.4748	94.3098	95.1379	94.145	93.4888
416	93.0009	94.0005	93.8358	94.6621	93.6714	93.0167
417	92.5312	93.5286	93.3642	94.1888	93.2002	92.5469
418	92.0638	93.059	92.8951	93.7178	92.7314	92.0795
419	91.5988	92.5918	92.4282	93.2491	92.2649	91.6145
420	91.1362	92.127	91.9637	92.7828	91.8008	91.1518
421	90.6759	91.6644	91.5016	92.3189	91.339	90.6915
422	90.2179	91.2043	91.0417	91.8572	90.8795	90.2335
423	89.7622	90.7464	90.5842	91.3979	90.4223	89.7778
424	89.3089	90.2908	90.129	90.9408	89.9675	89.3244
425	88.8578	89.8375	89.676	90.4861	89.5149	88.8732
426	88.409	89.3865	89.2254	90.0336	89.0646	88.4244
427	87.9625	88.9377	88.777	89.5834	88.6166	87.9778
428	87.5182	88.4912	88.3309	89.1354	88.1708	87.5335
429	87.0762	88.0469	87.887	88.6897	87.7273	87.0915
430	86.6364	87.6049	87.4453	88.2462	87.286	86.6516
431	86.1988	87.1651	87.0058	87.8049	86.8469	86.214
432	85.7634	86.7275	86.5686	87.3658	86.41	85.7786
433	85.3302	86.292	86.1335	86.929	85.9753	85.3454
434	84.8993	85.8588	85.7007	86.4943	85.5428	84.9144
435	84.4704	85.4278	85.27	86.0617	85.1125	84.4855
436	84.0438	84.9989	84.8415	85.6314	84.6844	84.0589
437	83.6193	84.5722	84.4151	85.2032	84.2584	83.6343
438	83.197	84.1476	83.9909	84.7771	83.8345	83.212
439	82.7768	83.7251	83.5688	84.3532	83.4128	82.7917
440	82.3587	83.3048	83.1488	83.9314	82.9932	82.3736
441	81.9427	82.8865	82.731	83.5117	82.5757	81.9576
442	81.5288	82.4704	82.3152	83.0941	82.1603	81.5437
443	81.1171	82.0564	81.9016	82.6785	81.747	81.1319
444	80.7074	81.6444	81.49	82.2651	81.3358	80.7221
445	80.2997	81.2345	81.0804	81.8537	80.9267	80.3144
446	79.8941	80.8267	80.673	81.4444	80.5196	79.9088
447	79.4906	80.4209	80.2676	81.0371	80.1145	79.5053
448	79.0891	80.0171	79.8642	80.6319	79.7115	79.1038
449	78.6897	79.6154	79.4628	80.2287	79.3105	78.7043
450	78.2922	79.2157	79.0635	79.8275	78.9116	78.3068
451	77.8968	78.818	78.6662	79.4283	78.5146	77.9113
452	77.5034	78.4223	78.2708	79.0311	78.1197	77.5178
453	77.1119	78.0286	77.8775	78.6359	77.7267	77.1263
454	76.7224	77.6369	77.4861	78.2427	77.3357	76.7368
455	76.3349	77.2471	77.0967	77.8515	76.9467	76.3493
456	75.9494	76.8593	76.7093	77.4622	76.5596	75.9637
457	75.5658	76.4734	76.3238	77.0748	76.1745	75.5801
458	75.1841	76.0895	75.9402	76.6894	75.7913	75.1984
459	74.8044	75.7075	75.5586	76.3059	75.41	74.8186
460	74.4266	75.3274	75.1789	75.9243	75.0307	74.4407
461	74.0506	74.9492	74.8011	75.5447	74.6532	74.0648
462	73.6766	74.5729	74.4252	75.1669	74.2777	73.6907
463	73.3045	74.1985	74.0511	74.791	73.9041	73.3186
464	72.9343	73.826	73.679	74.417	73.5323	72.9483
465	72.5659	73.4554	73.3087	74.0449	73.1624	72.5799
466	72.1994	73.0866	72.9403	73.6746	72.7944	72.2134
467	71.8347	72.7197	72.5738	73.3062	72.4282	71.8487
468	71.4719	72.3546	72.2091	72.9396	72.0638	71.4858
469	71.1109	71.9913	71.8462	72.5749	71.7013	71.1248
470	70.7517	71.6299	71.4851	72.212	71.3406	70.7656
471	70.3944	71.2703	71.1259	71.8509	70.9818	70.4082
472	70.0389	70.9125	70.7684	71.4916	70.6247	70.0526
473	69.6851	70.5565	70.4128	71.1341	70.2694	69.6988
474	69.3331	70.2022	70.0589	70.7784	69.9159	69.3468
475	68.983	69.8498	69.7069	70.4244	69.5642	68.9966
476	68.6345	69.4991	69.3566	70.0723	69.2143	68.6482
477	68.2879	69.1502	69.008	69.7219	68.8661	68.3015
478	67.943	68.803	68.6612	69.3732	68.5197	67.9565
479	67.5998	68.4576	68.3162	69.0263	68.175	67.6133
480	67.2584	68.1139	67.9729	68.6811	67.8321	67.2719
481	66.9187	67.772	67.6313	68.3377	67.4909	66.9321
482	66.5807	67.4317	67.2914	67.996	67.1513	66.5941
483	66.2444	67.0932	66.9532	67.656	66.8135	66.2578
484	65.9098	66.7563	66.6168	67.3176	66.4774	65.9231
485	65.5769	66.4212	66.282	66.981	66.143	65.5902
486	65.2457	66.0877	65.9489	66.6461	65.8103	65.259
487	64.9162	65.7559	65.6175	66.3128	65.4793	64.9294
488	64.5883	65.4258	65.2877	65.9812	65.1499	64.6015
489	64.2621	65.0973	64.9596	65.6513	64.8221	64.2752
490	63.9375	64.7705	64.6332	65.323	64.4961	63.9506
491	63.6146	64.4454	64.3083	64.9963	64.1716	63.6276
492	63.2933	64.1218	63.9852	64.6713	63.8488	63.3063
493	62.9736	63.7999	63.6636	64.3479	63.5276	62.9866
494	62.6555	63.4796	63.3437	64.0261	63.2081	62.6685
495	62.3391	63.1609	63.0253	63.7059	62.8901	62.352
496	62.0242	62.8438	62.7086	63.3874	62.5737	62.0371
497	61.7109	62.5283	62.3935	63.0704	62.259	61.7238
498	61.3992	62.2144	62.0799	62.755	61.9458	61.4121
499	61.0891	61.902	61.7679	62.4412	61.6342	61.1019
500	60.7806	61.5912	61.4575	62.129	61.3241	60.7933
501	60.4736	61.282	61.1487	61.8183	61.0156	60.4863
502	60.1682	60.9744	60.8414	61.5092	60.7087	60.1809
503	59.8643	60.6682	60.5356	61.2016	60.4033	59.8769
504	59.5619	60.3637	60.2314	60.8955	60.0995	59.5745
505	59.2611	60.0606	59.9287	60.591	59.7971	59.2737
506	58.9618	59.7591	59.6276	60.288	59.4963	58.9743
507	58.664	59.4591	59.3279	59.9866	59.197	58.6765
508	58.3677	59.1605	59.0298	59.6866	58.8993	58.3801
509	58.0729	58.8635	58.7331	59.3881	58.603	58.0853
510	57.7795	58.568	58.438	59.0912	58.3082	57.792
511	57.4877	58.274	58.1443	58.7957	58.0149	57.5001
512	57.1974	57.9814	57.8521	58.5016	57.723	57.2097
513	56.9085	57.6903	57.5613	58.2091	57.4327	56.9208
514	56.621	57.4007	57.2721	57.918	57.1438	56.6333
515	56.3351	57.1125	56.9843	57.6284	56.8563	56.3473
516	56.0505	56.8258	56.6979	57.3402	56.5703	56.0627
517	55.7674	56.5405	56.413	57.0535	56.2857	55.7796
518	55.4858	56.2566	56.1295	56.7682	56.0026	55.4979
519	55.2055	55.9742	55.8474	56.4843	55.7209	55.2176
520	54.9267	55.6932	55.5667	56.2019	55.4406	54.9387
521	54.6493	55.4136	55.2875	55.9208	55.1617	54.6613
522	54.3732	55.1354	55.0096	55.6412	54.8842	54.3852
523	54.0986	54.8586	54.7332	55.363	54.6081	54.1106
524	53.8254	54.5832	54.4581	55.0861	54.3334	53.8373
525	53.5535	54.3091	54.1845	54.8106	54.0601	53.5654
526	53.283	54.0365	53.9122	54.5366	53.7881	53.2949
527	53.0139	53.7652	53.6412	54.2638	53.5176	53.0257
528	52.7462	53.4953	53.3717	53.9925	53.2483	52.7579
529	52.4797	53.2267	53.1034	53.7225	52.9805	52.4915
530	52.2147	52.9595	52.8366	53.4539	52.714	52.2264
531	51.951	52.6936	52.571	53.1866	52.4488	51.9626
532	51.6886	52.429	52.3069	52.9206	52.185	51.7002
533	51.4275	52.1658	52.044	52.656	51.9225	51.4391
534	51.1678	51.9039	51.7824	52.3927	51.6613	51.1793
535	50.9093	51.6433	51.5222	52.1307	51.4014	50.9209
536	50.6522	51.3841	51.2633	51.87	51.1428	50.6637
537	50.3964	51.1261	51.0057	51.6106	50.8855	50.4078
538	50.1418	50.8694	50.7494	51.3525	50.6296	50.1533
539	49.8886	50.614	50.4943	51.0957	50.3749	49.9
540	49.6366	50.3599	50.2406	50.8402	50.1215	49.648
