# Supplementary material for: The Social Cost of Fossil and Industrial CO2 Emissions from 1950 to 2018
Source: Research Square preprint supplement (doi:10.21203/rs.3.rs-2244259/v1), 2022-11-17
Supplement: Supplementary file 203 [file sccHS.xlsx]

## Sheet: sccHS
f	1	2	3	4	5	6
0	1.08397	1.04551	1.06452	1.12158	1.06931	1.053
1	1.13634	1.09557	1.11571	1.17621	1.1208	1.1035
2	1.22872	1.18415	1.20615	1.27231	1.21173	1.19281
3	1.3127	1.26457	1.28832	1.35978	1.29435	1.2739
4	1.36697	1.31631	1.34129	1.41652	1.34766	1.32612
5	1.44554	1.3914	1.41808	1.49849	1.42489	1.40186
6	1.5205	1.46296	1.4913	1.57678	1.49856	1.47406
7	1.60307	1.54177	1.57195	1.66303	1.57969	1.55358
8	1.68716	1.62197	1.65405	1.75093	1.66229	1.63451
9	1.75719	1.68857	1.72232	1.82432	1.73102	1.70176
10	1.87167	1.79781	1.83412	1.94393	1.84349	1.81198
11	1.97824	1.89936	1.93811	2.05541	1.94814	1.91447
12	2.12327	2.03771	2.07972	2.20696	2.09062	2.05406
13	2.26425	2.17203	2.21729	2.35447	2.22906	2.18963
14	2.40913	2.30993	2.35859	2.50619	2.37127	2.32883
15	2.55741	2.45092	2.50312	2.6616	2.51676	2.47117
16	2.71689	2.60245	2.65852	2.82885	2.6732	2.62418
17	2.90135	2.7777	2.83824	3.02231	2.85413	2.80114
18	3.09825	2.9646	3.03	3.22901	3.04721	2.98989
19	3.29812	3.15402	3.2245	3.43911	3.24308	3.18124
20	3.43493	3.2828	3.35717	3.58376	3.37682	3.3115
21	3.66167	3.49721	3.57757	3.8226	3.59884	3.52818
22	3.90326	3.72537	3.81224	4.07732	3.83529	3.75882
23	4.137	3.94556	4.03899	4.32431	4.06384	3.98149
24	4.29449	4.09261	4.19109	4.49202	4.21733	4.13044
25	4.51107	4.29553	4.40061	4.72195	4.42867	4.33584
26	4.70212	4.47364	4.58496	4.92566	4.61476	4.51629
27	4.93366	4.6897	4.80849	5.17234	4.84037	4.73516
28	5.19329	4.93181	5.05906	5.44912	5.09328	4.98045
29	5.48103	5.1999	5.33665	5.75608	5.37349	5.2521
30	5.68467	5.38754	5.53198	5.97536	5.57098	5.44261
31	5.88925	5.57548	5.72792	6.1962	5.76917	5.63352
32	6.11144	5.77944	5.94062	6.43621	5.98435	5.84071
33	6.39241	6.03811	6.21001	6.73897	6.25675	6.10336
34	6.69106	6.31247	6.49605	7.06137	6.54607	6.38206
35	7.06757	6.6591	6.85705	7.46707	6.9111	6.73403
36	7.40991	6.97221	7.18419	7.83795	7.24219	7.05234
37	7.755	7.28651	7.51326	8.21312	7.57544	7.37209
38	8.0523	7.55442	7.79526	8.53911	7.86142	7.6452
39	8.37234	7.8422	8.0985	8.89065	8.16904	7.93867
40	8.76084	8.19249	8.46711	9.31644	8.54283	8.29571
41	8.97955	8.38249	8.67079	9.56312	8.75045	8.49068
42	9.2512	8.62047	8.92483	9.86759	9.0091	8.73451
43	9.54917	8.88126	9.20335	10.2018	9.29271	9.00174
44	9.86468	9.15641	9.49774	10.5566	9.59263	9.28388
45	10.2557	9.49942	9.86366	10.9944	9.9651	9.63525
46	10.7973	9.97922	10.373	11.5962	10.4828	10.1258
47	11.3557	10.4715	10.8968	12.2189	11.0157	10.6296
48	11.7635	10.8219	11.2745	12.6826	11.4013	10.9898
49	12.3362	11.3206	11.8084	13.3271	11.9453	11.5013
50	13.0072	11.9058	12.4345	14.0817	12.5832	12.1013
51	13.6283	12.4408	13.0104	14.7863	13.1709	12.6512
52	14.309	13.0255	13.6407	15.5602	13.8144	13.2524
53	14.9637	13.5812	14.2434	16.3108	14.4308	13.8251
54	15.7952	14.2913	15.0112	17.2597	15.2152	14.5562
55	16.6601	15.0248	15.8071	18.2519	16.0292	15.3124
56	17.6433	15.8569	16.7109	19.3811	16.9539	16.1707
57	18.6479	16.6994	17.6304	20.542	17.8956	17.0413
58	19.292	17.2111	18.2047	21.3132	18.4884	17.5761
59	19.9143	17.6957	18.7544	22.0671	19.0573	18.0849
60	20.8429	18.4432	19.5876	23.1688	19.9157	18.8644
61	21.689	19.1072	20.3376	24.1882	20.6913	19.561
62	22.3825	19.6267	20.9392	25.0458	21.3177	20.1124
63	23.3289	20.3573	21.7715	26.195	22.1808	20.883
64	24.2621	21.0644	22.5853	27.3385	23.0272	21.6337
65	25.1393	21.7113	23.3405	28.4261	23.8163	22.3271
66	26.2688	22.5642	24.3234	29.8048	24.8406	23.2386
67	27.1059	23.1551	25.0296	30.8527	25.5854	23.8885
68	27.7972	23.6163	25.5977	31.7252	26.1924	24.4148
69	29.4118	25.0213	26.9962	31.5763	27.7777	26.6741
70	30.5208	25.8096	27.9228	32.7984	28.7662	27.5997
71	31.6762	26.6058	28.8668	34.0294	29.779	28.5617
72	32.8788	27.41	29.8287	35.2697	30.8164	29.5604
73	34.1295	28.2226	30.809	36.5193	31.8788	30.5963
74	35.4291	29.0439	31.8078	37.7785	32.9663	31.6699
75	36.7782	29.8741	32.8254	39.0473	34.0792	32.7817
76	38.1776	30.7135	33.8622	40.3256	35.2176	33.9321
77	39.6279	31.5622	34.9181	41.6133	36.3818	35.1216
78	41.1297	32.4204	35.9935	42.9105	37.5719	36.3505
79	42.6838	33.2885	37.0885	44.217	38.7881	37.6195
80	44.2906	34.1664	38.2033	45.5327	40.0307	38.929
81	45.9509	35.0545	39.3379	46.8575	41.2997	40.2794
82	47.6653	35.9528	40.4924	48.1912	42.5954	41.6713
83	49.4343	36.8616	41.6671	49.5337	43.9179	43.1052
84	51.2586	37.7809	42.862	50.8849	45.2675	44.5816
85	53.1387	38.711	44.0772	52.2445	46.6443	46.101
86	55.0754	39.652	45.3129	53.6124	48.0485	47.6639
87	57.0692	40.6039	46.5691	54.9885	49.4803	49.271
88	59.1207	41.5671	47.8459	56.3725	50.9398	50.9227
89	61.2305	42.5415	49.1434	57.7644	52.4273	52.6195
90	63.3993	43.5273	50.4617	59.1638	53.9429	54.3621
91	65.6277	44.5246	51.8009	60.5708	55.4867	56.151
92	67.9163	45.5335	53.1611	61.985	57.059	57.9868
93	70.2657	46.5543	54.5424	63.4063	58.6598	59.87
94	72.6765	47.5868	55.9448	64.8345	60.2895	61.8013
95	75.1493	48.6314	57.3684	66.2695	61.9481	63.7812
96	77.6849	49.688	58.8133	67.7111	63.6359	65.8103
97	80.2838	50.7568	60.2795	69.159	65.3529	67.8892
98	82.9466	51.8378	61.7673	70.6133	67.0993	70.0185
99	85.6739	52.9312	63.2765	72.0736	68.8754	72.1989
100	88.4665	54.0371	64.8073	73.5398	70.6811	74.4308
101	91.3249	55.1555	66.3598	75.0118	72.5168	76.715
102	94.2498	56.2865	67.9341	76.4893	74.3825	79.0521
103	97.2418	57.4301	69.5301	77.9723	76.2784	81.4426
104	100.302	58.5866	71.148	79.4605	78.2046	83.8871
105	103.43	59.7558	72.7878	80.9538	80.1612	86.3864
106	106.627	60.938	74.4495	82.4521	82.1484	88.941
107	109.893	62.1331	76.1334	83.9551	84.1662	91.5514
108	113.23	63.3413	77.8393	85.4628	86.2148	94.2185
109	116.638	64.5625	79.5673	86.9749	88.2944	96.9426
110	120.117	65.7968	81.3176	88.4914	90.4049	99.7245
111	123.668	67.0443	83.0901	90.012	92.5464	102.565
112	127.291	68.305	84.8849	91.5366	94.7191	105.464
113	130.988	69.579	86.702	93.065	96.923	108.423
114	134.759	70.8662	88.5415	94.5971	99.1581	111.441
115	138.603	72.1668	90.4033	96.1327	101.425	114.521
116	142.523	73.4807	92.2876	97.6716	103.722	117.661
117	146.518	74.8079	94.1944	99.2137	106.051	120.864
118	150.588	76.1485	96.1235	100.759	108.412	124.128
119	154.735	77.5025	98.0752	102.307	110.803	127.456
120	158.958	78.8698	100.049	103.857	113.226	130.846
121	163.259	80.2505	102.046	105.41	115.68	134.301
122	167.636	81.6446	104.065	106.965	118.165	137.819
123	172.092	83.052	106.106	108.522	120.681	141.402
124	176.625	84.4727	108.17	110.081	123.227	145.05
125	181.237	85.9067	110.256	111.642	125.805	148.764
126	185.927	87.3539	112.365	113.204	128.413	152.543
127	190.696	88.8144	114.496	114.767	131.051	156.388
128	195.543	90.288	116.649	116.331	133.718	160.299
129	200.469	91.7747	118.824	117.895	136.416	164.276
130	205.473	93.2744	121.021	119.46	139.143	168.32
131	210.556	94.7871	123.24	121.024	141.898	172.43
132	215.717	96.3127	125.48	122.588	144.682	176.607
133	220.955	97.851	127.743	124.151	147.494	180.851
134	226.272	99.4019	130.026	125.713	150.333	185.16
135	231.665	100.965	132.331	127.274	153.199	189.536
136	237.134	102.541	134.657	128.833	156.091	193.978
137	242.679	104.129	137.004	130.389	159.009	198.486
138	248.298	105.73	139.371	131.942	161.95	203.058
139	253.992	107.342	141.758	133.492	164.916	207.695
140	259.757	108.966	144.165	135.038	167.904	212.395
141	265.594	110.601	146.591	136.58	170.914	217.159
142	271.501	112.247	149.037	138.116	173.944	221.984
143	277.476	113.905	151.501	139.647	176.993	226.869
144	283.518	115.572	153.982	141.171	180.061	231.814
145	289.626	117.25	156.481	142.688	183.146	236.816
146	295.797	118.937	158.997	144.198	186.247	241.874
147	302.03	120.632	161.528	145.7	189.363	246.986
148	308.324	122.335	164.073	147.193	192.493	252.149
149	314.678	124.044	166.632	148.677	195.638	257.36
150	321.091	125.762	169.211	150.156	198.795	262.626
151	327.564	127.478	171.796	151.62	201.965	267.925
152	334.104	129.189	174.378	153.068	205.156	273.248
153	340.713	130.901	176.972	154.512	208.37	278.618
154	347.394	132.617	179.58	155.952	211.61	284.039
155	354.148	134.339	182.205	157.392	214.878	289.516
156	360.977	136.067	184.848	158.832	218.173	295.054
157	367.881	137.804	187.509	160.274	221.499	300.656
158	374.862	139.548	190.191	161.717	224.854	306.323
159	381.92	141.302	192.893	163.163	228.24	312.057
160	389.057	143.065	195.617	164.612	231.657	317.859
161	396.273	144.838	198.361	166.064	235.105	323.731
162	403.568	146.621	201.128	167.519	238.584	329.673
163	410.943	148.413	203.916	168.978	242.094	335.686
164	418.398	150.216	206.725	170.44	245.635	341.77
165	425.933	152.028	209.557	171.906	249.207	347.926
166	433.545	153.851	212.41	173.375	252.81	354.154
167	441.233	155.683	215.284	174.847	256.443	360.454
168	448.993	157.526	218.18	176.323	260.106	366.826
169	456.831	159.378	221.097	177.802	263.8	373.272
170	464.75	161.239	224.035	179.283	267.523	379.791
171	472.75	163.11	226.993	180.768	271.276	386.383
172	480.834	164.99	229.972	182.256	275.057	393.049
173	489.002	166.879	232.971	183.746	278.867	399.79
174	497.252	168.777	235.99	185.239	282.706	406.604
175	505.586	170.684	239.029	186.734	286.572	413.49
176	514.002	172.6	242.086	188.232	290.466	420.448
177	522.499	174.523	245.162	189.732	294.387	427.474
178	531.075	176.455	248.257	191.233	298.334	434.572
179	539.729	178.394	251.369	192.736	302.308	441.743
180	548.461	180.341	254.499	194.241	306.307	448.99
181	557.267	182.295	257.646	195.747	310.332	456.312
182	566.146	184.257	260.81	197.254	314.381	463.71
183	575.096	186.225	263.989	198.762	318.455	471.183
184	584.116	188.2	267.185	200.271	322.552	478.731
185	593.203	190.18	270.395	201.78	326.673	486.353
186	602.356	192.167	273.619	203.289	330.817	494.047
187	611.572	194.16	276.857	204.799	334.983	501.813
188	620.849	196.157	280.108	206.307	339.171	509.65
189	630.185	198.159	283.372	207.816	343.381	517.555
190	639.578	200.166	286.647	209.323	347.612	525.528
191	649.025	202.178	289.934	210.829	351.864	533.566
192	658.524	204.192	293.231	212.334	356.136	541.668
193	668.072	206.211	296.538	213.837	360.427	549.833
194	677.668	208.232	299.853	215.337	364.738	558.058
195	687.308	210.255	303.177	216.835	369.066	566.342
196	696.99	212.281	306.508	218.33	373.411	574.682
197	706.711	214.308	309.846	219.822	377.771	583.076
198	716.468	216.336	313.189	221.309	382.145	591.524
199	726.258	218.364	316.538	222.793	386.533	600.021
200	736.079	220.392	319.89	224.271	390.937	608.566
201	745.927	222.42	323.246	225.744	395.354	617.157
202	755.799	224.446	326.604	227.211	399.784	625.792
203	765.691	226.47	329.964	228.672	404.227	634.466
204	775.601	228.491	333.325	230.125	408.68	643.179
205	785.524	230.509	336.685	231.571	413.143	651.927
206	795.457	232.523	340.044	233.009	417.613	660.707
207	805.396	234.532	343.4	234.437	422.09	669.517
208	815.338	236.535	346.753	235.856	426.57	678.352
209	825.277	238.532	350.1	237.264	431.053	687.211
210	835.21	240.521	353.439	238.66	435.537	696.088
211	845.132	242.502	356.768	240.045	440.018	704.982
212	855.038	244.473	360.087	241.416	444.496	713.888
213	864.925	246.434	363.395	242.773	448.968	722.802
214	874.786	248.383	366.691	244.115	453.43	731.72
215	884.616	250.32	369.973	245.441	457.882	740.637
216	894.411	252.242	373.241	246.75	462.319	749.55
217	904.164	254.15	376.492	248.04	466.74	758.453
218	913.869	256.041	379.724	249.311	471.142	767.342
219	923.52	257.914	382.935	250.561	475.521	776.211
220	933.112	259.768	386.123	251.788	479.875	785.054
221	942.636	261.601	389.283	252.992	484.199	793.867
222	952.087	263.412	392.415	254.171	488.491	802.643
223	961.457	265.199	395.514	255.324	492.748	811.375
224	970.737	266.96	398.579	256.448	496.964	820.057
225	979.921	268.693	401.605	257.542	501.137	828.682
226	989	270.396	404.589	258.604	505.263	837.243
227	997.965	272.068	407.528	259.633	509.336	845.732
228	1006.81	273.706	410.417	260.626	513.353	854.141
229	1015.52	275.308	413.254	261.582	517.308	862.461
230	1024.08	276.871	416.034	262.497	521.197	870.683
231	1032.5	278.394	418.754	263.371	525.014	878.799
232	1040.75	279.873	421.407	264.201	528.755	886.798
233	1048.82	281.306	423.991	264.983	532.412	894.67
234	1056.71	282.69	426.5	265.716	535.981	902.403
235	1064.4	284.023	428.93	266.397	539.455	909.988
236	1071.88	285.3	431.275	267.023	542.827	917.411
237	1079.13	286.518	433.53	267.591	546.091	924.66
238	1086.14	287.675	435.689	268.098	549.238	931.722
239	1092.89	288.767	437.746	268.541	552.262	938.583
240	1099.37	289.79	439.695	268.916	555.155	945.229
241	1105.57	290.74	441.53	269.22	557.908	951.644
242	1111.46	291.612	443.244	269.449	560.512	957.812
243	1117.02	292.403	444.83	269.6	562.959	963.717
244	1122.25	293.109	446.281	269.668	565.238	969.34
245	1127.11	293.724	447.589	269.649	567.341	974.665
246	1131.59	294.244	448.746	269.54	569.256	979.671
247	1135.67	294.663	449.745	269.335	570.973	984.338
248	1139.32	294.976	450.576	269.029	572.48	988.645
249	1142.53	295.179	451.23	268.62	573.766	992.572
250	1145.26	295.264	451.699	268.1	574.818	996.093
251	1147.49	295.227	451.973	267.465	575.624	999.187
252	1149.2	295.061	452.041	266.711	576.17	1001.83
253	1150.36	294.76	451.895	265.831	576.443	1003.99
254	1150.94	294.318	451.522	264.819	576.428	1005.64
255	1150.91	293.727	450.913	263.671	576.112	1006.77
256	1150.24	292.982	450.056	262.381	575.479	1007.33
257	1148.9	292.073	448.939	260.942	574.513	1007.3
258	1146.86	290.996	447.552	259.348	573.199	1006.64
259	1144.08	289.741	445.881	257.594	571.52	1005.33
260	1140.54	288.303	443.915	255.673	569.46	1003.34
261	1136.19	286.672	441.642	253.58	567.002	1000.63
262	1131.01	284.842	439.048	251.308	564.129	997.162
263	1124.95	282.804	436.123	248.852	560.824	992.91
264	1117.99	280.553	432.853	246.205	557.071	987.838
265	1110.09	278.079	429.227	243.364	552.852	981.912
266	1101.21	275.376	425.232	240.321	548.151	975.097
267	1091.32	272.437	420.858	237.073	542.952	967.36
268	1080.39	269.255	416.094	233.615	537.24	958.67
269	1068.38	265.825	410.93	229.944	531	948.995
270	1055.26	262.141	405.357	226.057	524.22	938.306
271	1041.02	258.199	399.368	221.951	516.888	926.576
272	1025.63	253.996	392.956	217.626	508.995	913.783
273	1009.06	249.529	386.118	213.082	500.534	899.908
274	991.315	244.798	378.85	208.319	491.5	884.935
275	972.379	239.804	371.154	203.341	481.89	868.856
276	952.255	234.548	363.031	198.151	471.708	851.67
277	930.952	229.036	354.487	192.753	460.957	833.38
278	908.49	223.274	345.528	187.155	449.647	814
279	884.896	217.268	336.165	181.363	437.788	793.551
280	860.209	211.028	326.408	175.384	425.393	772.06
281	834.472	204.562	316.267	169.224	412.475	749.561
282	807.732	197.877	305.75	162.886	399.045	726.088
283	780.034	190.974	294.857	156.368	385.104	701.667
284	751.398	183.846	283.572	149.66	370.636	676.304
285	721.803	176.467	271.857	142.735	355.594	649.962
286	691.144	168.784	259.631	135.545	339.882	622.527
287	659.161	160.695	246.745	128.004	323.32	593.748
288	625.337	152.027	232.947	118.418	305.595	563.152
289	585.078	137.768	212.027	106.1	279.168	526.435
290	523.567	122.887	188.632	93.7023	248.571	470.698
291	460.925	107.774	164.909	81.2908	217.579	413.873
292	397.39	92.5098	141.016	68.9561	186.33	356.217
293	333.352	77.2148	117.179	56.8198	155.077	298.139
294	269.425	62.0714	93.7145	45.0441	124.234	240.27
295	206.62	47.3439	71.0589	33.8433	94.3735	183.669
296	146.526	33.411	49.812	23.4998	66.289	129.775
297	91.6252	20.8072	30.7877	14.3834	41.0636	80.8312
298	45.406	10.285	15.0829	6.97711	20.1685	39.8895
299	12.6465	2.86765	4.16705	1.90985	5.59046	11.0794
