# Supplementary material for: The Social Cost of Fossil and Industrial CO2 Emissions from 1950 to 2018
Source: Research Square preprint supplement (doi:10.21203/rs.3.rs-2244259/v1), 2022-11-17
Supplement: Supplementary file 207 [file sccHSp.xlsx]

## Sheet: sccHSp
f	1	2	3	4	5	6
0	96.2868	92.8704	94.5589	99.6275	94.9848	93.5363
1	95.2376	91.8206	93.5084	98.5792	93.9353	92.4854
2	94.2411	90.8224	92.5101	97.5842	92.938	91.4866
3	93.2784	89.858	91.5456	96.6234	91.9745	90.5214
4	92.3391	88.9169	90.6045	95.686	91.0344	89.5796
5	91.4205	87.9965	89.6841	94.7694	90.115	88.6585
6	90.5254	87.0994	88.7871	93.8764	89.219	87.7607
7	89.6507	86.2225	87.9103	93.0038	88.3432	86.8831
8	88.7895	85.3587	87.0469	92.1453	87.4809	86.0188
9	87.9393	84.5051	86.1942	91.2985	86.6293	85.1649
10	87.0901	83.6531	85.3428	90.4522	85.7789	84.3125
11	86.2405	82.8016	84.4911	89.6045	84.9284	83.4601
12	85.3951	81.9541	83.6436	88.7613	84.082	82.6119
13	84.5499	81.1063	82.7962	87.9188	83.2357	81.7634
14	83.6998	80.2532	81.9436	87.0717	82.3843	80.9099
15	82.8441	79.3943	81.0853	86.2192	81.5272	80.0505
16	81.9801	78.5271	80.2187	85.3584	80.6618	79.1827
17	81.1019	77.6457	79.338	84.4834	79.7822	78.3008
18	80.2006	76.741	78.4339	83.5853	78.8794	77.3956
19	79.274	75.8104	77.5044	82.6628	77.9511	76.4647
20	78.3243	74.8556	76.5513	81.7182	76.9993	75.5099
21	77.3434	73.8694	75.5669	80.7424	76.0162	74.5238
22	76.3184	72.8401	74.5388	79.7218	74.9894	73.4942
23	75.2619	71.7792	73.479	78.6695	73.931	72.4329
24	74.1884	70.7009	72.4021	77.6008	72.8555	71.3544
25	73.0884	69.5964	71.2988	76.5052	71.7535	70.2495
26	71.9596	68.4631	70.1666	75.3807	70.6227	69.1157
27	70.8217	67.3198	69.025	74.248	69.4825	67.9723
28	69.6773	66.169	67.8764	73.1097	68.3355	66.8216
29	68.5251	65.0103	66.7199	71.9638	67.1805	65.6629
30	67.3657	63.8446	65.5563	70.8105	66.0185	64.4972
31	66.2042	62.677	64.3906	69.6548	64.8543	63.3294
32	65.0402	61.5069	63.2223	68.4965	63.6876	62.159
33	63.8736	60.3334	62.051	67.3365	62.5181	60.9854
34	62.7058	59.1578	60.8782	66.1761	61.347	59.8099
35	61.5368	57.9803	59.7038	65.0152	60.1744	58.6327
36	60.3596	56.7943	58.521	63.8464	58.9935	57.447
37	59.1716	55.5969	57.3271	62.6671	57.8015	56.25
38	57.9802	54.3952	56.1294	61.4855	56.6058	55.0489
39	56.7935	53.1973	54.9359	60.3094	55.4144	53.8517
40	55.6102	52.0025	53.7457	59.1369	54.2263	52.6577
41	54.4312	50.812	52.5596	57.9686	53.0425	51.4678
42	53.2622	49.6308	51.3831	56.8109	51.8683	50.2874
43	52.0993	48.4553	50.2125	55.66	50.7001	49.1126
44	50.9469	47.289	49.0518	54.5205	49.5419	47.9473
45	49.8092	46.1361	47.9052	53.3968	48.3978	46.7958
46	48.6855	44.9968	46.7723	52.2876	47.2676	45.6579
47	47.5762	43.8716	45.6536	51.193	46.1517	44.534
48	46.4852	42.7641	44.5527	50.1172	45.0537	43.4279
49	45.4133	41.6748	43.4705	49.0612	43.9746	42.3401
50	44.363	40.6063	42.4095	48.0276	42.9166	41.2733
51	43.337	39.5608	41.372	47.0193	41.8825	40.2297
52	42.3276	38.5306	40.3506	46.0286	40.8644	39.2019
53	41.3299	37.5114	39.3405	45.0505	39.8579	38.1851
54	40.3453	36.5041	38.3428	44.0861	38.8639	37.1806
55	39.3762	35.5111	37.36	43.1383	37.885	36.1908
56	38.4217	34.5313	36.3912	42.2059	36.9202	35.2147
57	37.4817	33.5653	35.4365	41.2887	35.9697	34.2526
58	36.5577	32.6143	34.4973	40.3878	35.0348	33.3061
59	35.6421	31.6713	33.5662	39.4951	34.1082	32.3679
60	34.7267	30.7285	32.6352	38.602	33.1819	31.4303
61	33.8189	29.7931	31.7117	37.7158	32.2633	30.5007
62	32.9217	28.8683	30.7987	36.839	31.3554	29.5826
63	32.0355	27.9548	29.897	35.9713	30.4589	28.6769
64	31.1609	27.0539	29.0072	35.112	29.5748	27.7851
65	30.2998	26.1681	28.1317	34.2613	28.7052	26.9104
66	29.4512	25.2977	27.2701	33.4155	27.8499	26.0538
67	28.6154	24.4446	26.4235	32.5708	27.0103	25.2188
68	27.7972	23.6163	25.5977	31.7252	26.1924	24.4148
69	26.9965	22.8148	24.7948	30.8868	25.3978	23.64
70	26.2068	22.0345	24.0097	30.061	24.6203	22.8825
71	25.43	21.2756	23.2433	29.2493	23.8601	22.1427
72	24.6669	20.5381	22.4958	28.4521	23.1174	21.4208
73	23.9182	19.8218	21.7673	27.6697	22.3922	20.7169
74	23.1845	19.1265	21.0578	26.9022	21.6844	20.0309
75	22.466	18.4519	20.3671	26.1495	20.9941	19.3629
76	21.763	17.7978	19.6951	25.4119	20.3211	18.7126
77	21.0758	17.1636	19.0415	24.6891	19.6653	18.0801
78	20.4044	16.5492	18.4061	23.9812	19.0265	17.4651
79	19.7489	15.9541	17.7885	23.2882	18.4046	16.8675
80	19.1094	15.3779	17.1886	22.6099	17.7993	16.287
81	18.4857	14.8201	16.606	21.9464	17.2104	15.7234
82	17.8779	14.2804	16.0404	21.2975	16.6378	15.1764
83	17.2859	13.7584	15.4915	20.6632	16.0811	14.6457
84	16.7095	13.2536	14.9589	20.0434	15.5402	14.1311
85	16.1486	12.7655	14.4423	19.4378	15.0148	13.6323
86	15.603	12.2938	13.9414	18.8466	14.5046	13.1489
87	15.0726	11.8379	13.4558	18.2694	14.0093	12.6806
88	14.5571	11.3976	12.9852	17.7062	13.5286	12.2271
89	14.0564	10.9723	12.5292	17.1569	13.0623	11.7881
90	13.5701	10.5616	12.0875	16.6212	12.6101	11.3631
91	13.0982	10.1652	11.6598	16.0991	12.1717	10.952
92	12.6403	9.78255	11.2457	15.5904	11.7467	10.5543
93	12.1961	9.41329	10.8449	15.0948	11.3349	10.1698
94	11.7654	9.05703	10.457	14.6123	10.936	9.79797
95	11.348	8.71336	10.0817	14.1426	10.5496	9.4386
96	10.9435	8.38191	9.71873	13.6855	10.1755	9.09132
97	10.5516	8.0623	9.36768	13.2409	9.81341	8.7558
98	10.1722	7.75416	9.02826	12.8085	9.46295	8.43171
99	9.80485	7.45711	8.70015	12.3881	9.12386	8.11873
100	9.44933	7.17081	8.38303	11.9796	8.79583	7.81654
101	9.10533	6.89491	8.0766	11.5826	8.47858	7.52482
102	8.77258	6.62907	7.78054	11.197	8.17181	7.24325
103	8.45079	6.37297	7.49457	10.8226	7.87524	6.97154
104	8.13967	6.12627	7.21837	10.4592	7.58857	6.70938
105	7.83894	5.88866	6.95167	10.1064	7.31155	6.45648
106	7.54833	5.65984	6.69419	9.76412	7.04387	6.21254
107	7.26754	5.43951	6.44563	9.43211	6.78529	5.97729
108	6.99631	5.22738	6.20574	9.11013	6.53552	5.75046
109	6.73438	5.02317	5.97424	8.79795	6.29431	5.53176
110	6.48146	4.82661	5.75087	8.49534	6.06141	5.32094
111	6.23729	4.63742	5.53538	8.20209	5.83655	5.11773
112	6.00162	4.45536	5.32752	7.91795	5.61949	4.9219
113	5.7742	4.28017	5.12704	7.64272	5.41	4.73318
114	5.55476	4.1116	4.93372	7.37615	5.20783	4.55135
115	5.34307	3.94943	4.74731	7.11805	5.01276	4.37618
116	5.13888	3.79343	4.56759	6.86817	4.82456	4.20743
117	4.94196	3.64337	4.39434	6.62631	4.64302	4.04488
118	4.75208	3.49904	4.22736	6.39226	4.4679	3.88834
119	4.56901	3.36023	4.06642	6.1658	4.29902	3.73757
120	4.39254	3.22675	3.91133	5.94672	4.13616	3.5924
121	4.22244	3.0984	3.76189	5.73481	3.97913	3.45261
122	4.05851	2.97498	3.61792	5.52989	3.82773	3.31803
123	3.90054	2.85633	3.47921	5.33173	3.68177	3.18846
124	3.74833	2.74226	3.3456	5.14016	3.54108	3.06374
125	3.60169	2.63261	3.2169	4.95498	3.40548	2.94368
126	3.46043	2.52721	3.09295	4.776	3.27478	2.82812
127	3.32437	2.4259	2.97359	4.60304	3.14884	2.7169
128	3.19333	2.32854	2.85865	4.43591	3.02747	2.60986
129	3.06713	2.23497	2.74797	4.27444	2.91053	2.50686
130	2.94561	2.14504	2.64141	4.11845	2.79786	2.40773
131	2.8286	2.05864	2.53882	3.96778	2.68931	2.31235
132	2.71595	1.97561	2.44006	3.82226	2.58475	2.22058
133	2.6075	1.89584	2.345	3.68173	2.48402	2.13228
134	2.5031	1.81919	2.2535	3.54603	2.387	2.04732
135	2.4026	1.74556	2.16543	3.415	2.29355	1.96559
136	2.30588	1.67483	2.08066	3.28851	2.20354	1.88696
137	2.21279	1.60688	1.99909	3.16639	2.11686	1.81131
138	2.12319	1.54161	1.92059	3.04852	2.03339	1.73854
139	2.03698	1.47891	1.84506	2.93474	1.953	1.66854
140	1.95401	1.41869	1.77237	2.82493	1.87559	1.6012
141	1.87419	1.36086	1.70244	2.71896	1.80105	1.53643
142	1.79738	1.30531	1.63515	2.61669	1.72928	1.47412
143	1.72348	1.25196	1.57041	2.51801	1.66018	1.41419
144	1.65239	1.20072	1.50812	2.4228	1.59366	1.35653
145	1.584	1.15151	1.44819	2.33094	1.52961	1.30108
146	1.51822	1.10426	1.39054	2.24231	1.46796	1.24774
147	1.45495	1.05886	1.33507	2.15682	1.40861	1.19642
148	1.39411	1.01527	1.28171	2.07436	1.3515	1.14706
149	1.33561	0.973384	1.23037	1.99483	1.29655	1.09958
150	1.27937	0.933172	1.18103	1.9182	1.24367	1.05394
151	1.22531	0.894509	1.13352	1.84424	1.19281	1.01
152	1.17339	0.857316	1.08774	1.77287	1.14392	0.967695
153	1.12353	0.82159	1.04373	1.70412	1.09696	0.927032
154	1.07566	0.787289	1.00142	1.63794	1.05186	0.88797
155	1.02972	0.754368	0.960772	1.57423	1.00855	0.850463
156	0.985621	0.722781	0.921718	1.51292	0.966976	0.814462
157	0.943312	0.692482	0.884207	1.45392	0.927068	0.779915
158	0.902721	0.663422	0.848183	1.39717	0.888767	0.74677
159	0.863784	0.635557	0.813591	1.34258	0.85201	0.714977
160	0.826439	0.60884	0.780379	1.29007	0.81674	0.684486
161	0.790625	0.583226	0.748493	1.23958	0.782898	0.655245
162	0.756281	0.558672	0.717882	1.19101	0.750428	0.627208
163	0.723352	0.535136	0.688498	1.14432	0.719276	0.600326
164	0.691779	0.512576	0.660293	1.09941	0.689391	0.574556
165	0.661509	0.490955	0.63322	1.05624	0.660722	0.549851
166	0.632486	0.470233	0.607236	1.01473	0.63322	0.526171
167	0.604657	0.450374	0.582297	0.974824	0.60684	0.503475
168	0.577973	0.431342	0.558361	0.936457	0.581536	0.481722
169	0.552401	0.413105	0.53539	0.899573	0.557265	0.460875
170	0.527904	0.395629	0.513345	0.864115	0.533985	0.440898
171	0.504445	0.378883	0.49219	0.83003	0.511658	0.421755
172	0.481987	0.362836	0.471888	0.797265	0.490243	0.403413
173	0.460493	0.347461	0.452405	0.76577	0.469706	0.385837
174	0.439924	0.33273	0.43371	0.735496	0.45001	0.368996
175	0.420246	0.318615	0.415771	0.706398	0.431121	0.35286
176	0.401421	0.305092	0.398558	0.678429	0.413008	0.337396
177	0.383417	0.292135	0.38204	0.651547	0.395638	0.322577
178	0.366198	0.279722	0.366192	0.625711	0.378981	0.308381
179	0.349732	0.267829	0.350985	0.600879	0.363009	0.294785
180	0.333989	0.256436	0.336395	0.577013	0.347694	0.281769
181	0.318937	0.245521	0.322396	0.554077	0.333009	0.26931
182	0.304547	0.235064	0.308966	0.532033	0.31893	0.257386
183	0.290792	0.225047	0.29608	0.510849	0.305431	0.245976
184	0.277643	0.215452	0.283717	0.490491	0.292488	0.23506
185	0.265076	0.206259	0.271857	0.470927	0.28008	0.224616
186	0.253065	0.197454	0.260479	0.452127	0.268185	0.214627
187	0.241586	0.189019	0.249563	0.43406	0.256781	0.205072
188	0.230616	0.180939	0.239092	0.416699	0.24585	0.195933
189	0.220134	0.1732	0.229047	0.400016	0.235371	0.187194
190	0.210117	0.165787	0.219411	0.383985	0.225327	0.178837
191	0.200546	0.158686	0.210168	0.368581	0.2157	0.170845
192	0.191401	0.151885	0.201303	0.353779	0.206472	0.163204
193	0.182664	0.145371	0.192799	0.339557	0.197627	0.155898
194	0.174317	0.139131	0.184642	0.325891	0.18915	0.148913
195	0.166343	0.133155	0.176818	0.31276	0.181025	0.142234
196	0.158725	0.127431	0.169315	0.300144	0.173238	0.13585
197	0.151448	0.121949	0.162119	0.288022	0.165774	0.129746
198	0.144496	0.116698	0.155218	0.276375	0.15862	0.123911
199	0.137856	0.11167	0.148599	0.265185	0.151765	0.118333
200	0.131514	0.106854	0.142252	0.254434	0.145197	0.113001
201	0.125457	0.102241	0.136166	0.244105	0.138906	0.107905
202	0.119672	0.0978237	0.13033	0.234181	0.132879	0.103033
203	0.114146	0.0935932	0.124735	0.224646	0.127106	0.0983764
204	0.10887	0.0895417	0.119369	0.215487	0.121578	0.0939256
205	0.103831	0.0856616	0.114225	0.206687	0.116284	0.0896716
206	0.0990185	0.0819459	0.109293	0.198233	0.111213	0.0856058
207	0.0944233	0.0783874	0.104565	0.190111	0.106358	0.0817199
208	0.0900355	0.0749797	0.100032	0.182309	0.10171	0.078006
209	0.0858457	0.0717163	0.0956854	0.174813	0.0972582	0.0744567
210	0.0818453	0.0685912	0.0915185	0.167613	0.0929962	0.0710646
211	0.0780258	0.0655986	0.0875233	0.160696	0.0889155	0.0678228
212	0.0743791	0.0627328	0.0836937	0.154052	0.0850086	0.0647249
213	0.0708975	0.0599885	0.0800234	0.147669	0.0812681	0.0617644
214	0.0675736	0.0573605	0.0765063	0.141538	0.077687	0.0589352
215	0.0644005	0.054844	0.0731366	0.135648	0.0742586	0.0562317
216	0.0613713	0.0524343	0.0699083	0.129991	0.0709764	0.0536483
217	0.0584797	0.0501268	0.0668159	0.124557	0.0678343	0.0511797
218	0.0557195	0.0479172	0.063854	0.119338	0.0648262	0.0488208
219	0.0530847	0.0458014	0.0610171	0.114324	0.0619466	0.0465668
220	0.0505699	0.0437753	0.0583003	0.109509	0.05919	0.0444131
221	0.0481695	0.0418353	0.0556985	0.104884	0.056551	0.0423552
222	0.0458784	0.0399777	0.0532071	0.100441	0.0540248	0.0403889
223	0.0436918	0.0381989	0.0508215	0.0961748	0.0516066	0.0385102
224	0.0416049	0.0364956	0.0485374	0.092077	0.0492917	0.0367151
225	0.0396133	0.0348647	0.0463503	0.0881414	0.0470757	0.0350001
226	0.0377127	0.0333031	0.0442565	0.0843616	0.0449545	0.0333615
227	0.0358989	0.0318078	0.0422518	0.0807317	0.0429239	0.0317959
228	0.034168	0.030376	0.0403326	0.0772456	0.0409802	0.0303002
229	0.0325163	0.029005	0.0384953	0.0738977	0.0391196	0.0288712
230	0.0309403	0.0276923	0.0367365	0.0706828	0.0373386	0.027506
231	0.0294365	0.0264354	0.0350528	0.0675954	0.0356337	0.0262017
232	0.0280016	0.0252319	0.0334411	0.0646307	0.0340018	0.0249557
233	0.0266325	0.0240795	0.0318983	0.0617839	0.0324397	0.0237653
234	0.0253262	0.0229761	0.0304215	0.0590503	0.0309444	0.0226282
235	0.0240799	0.0219196	0.029008	0.0564255	0.0295131	0.0215418
236	0.0228909	0.0209079	0.027655	0.0539052	0.028143	0.0205041
237	0.0217566	0.0199393	0.0263599	0.0514854	0.0268315	0.0195127
238	0.0206744	0.0190119	0.0251204	0.0491621	0.0255762	0.0185657
239	0.019642	0.0181239	0.023934	0.0469316	0.0243745	0.017661
240	0.0186572	0.0172736	0.0227985	0.0447901	0.0232243	0.0167969
241	0.0177178	0.0164595	0.0217117	0.0427343	0.0221233	0.0159714
242	0.0168217	0.0156799	0.0206716	0.0407608	0.0210694	0.015183
243	0.0159669	0.0149336	0.0196762	0.0388664	0.0200607	0.0144298
244	0.0151515	0.0142189	0.0187235	0.0370479	0.0190951	0.0137104
245	0.0143739	0.0135347	0.0178118	0.0353024	0.0181708	0.0130232
246	0.0136321	0.0128795	0.0169392	0.0336271	0.0172861	0.0123669
247	0.0129247	0.0122522	0.0161043	0.0320192	0.0164393	0.01174
248	0.01225	0.0116516	0.0153052	0.0304762	0.0156288	0.0111413
249	0.0116065	0.0110766	0.0145406	0.0289954	0.014853	0.0105694
250	0.0109929	0.010526	0.0138089	0.0275744	0.0141104	0.0100232
251	0.0104077	0.00999885	0.0131087	0.026211	0.0133997	0.00950156
252	0.00984961	0.00949418	0.0124388	0.0249029	0.0127194	0.00900338
253	0.00931749	0.00901101	0.0117978	0.023648	0.0120683	0.00852761
254	0.00881009	0.00854845	0.0111845	0.0224442	0.0114452	0.00807327
255	0.00832631	0.00810563	0.0105977	0.0212895	0.0108488	0.0076394
256	0.00786506	0.00768172	0.0100363	0.0201821	0.0102781	0.0072251
257	0.00742532	0.00727593	0.00949928	0.0191201	0.00973191	0.00682951
258	0.00700612	0.00688751	0.00898557	0.0181019	0.00920926	0.0064518
259	0.00660652	0.00651574	0.00849421	0.0171257	0.00870916	0.00609118
260	0.00622563	0.00615992	0.00802425	0.01619	0.00823067	0.00574692
261	0.00586263	0.00581941	0.00757483	0.0152933	0.00777289	0.00541829
262	0.00551669	0.00549357	0.00714508	0.014434	0.00733496	0.00510462
263	0.00518707	0.00518181	0.0067342	0.0136109	0.00691609	0.00480525
264	0.00487303	0.00488357	0.00634143	0.0128225	0.0065155	0.00451959
265	0.00457389	0.0045983	0.00596603	0.0120677	0.00613244	0.00424704
266	0.00428899	0.00432549	0.00560732	0.0113452	0.00576623	0.00398704
267	0.0040177	0.00406465	0.00526462	0.0106539	0.0054162	0.00373907
268	0.00375945	0.00381533	0.00493731	0.00999274	0.00508172	0.00350264
269	0.00351368	0.00357709	0.00462481	0.00936059	0.0047622	0.00327726
270	0.00327985	0.00334952	0.00432656	0.00875652	0.00445707	0.0030625
271	0.00305748	0.00313222	0.00404201	0.0081796	0.00416581	0.00285793
272	0.00284609	0.00292483	0.00377069	0.00762894	0.00388792	0.00266315
273	0.00264525	0.00272702	0.0035121	0.0071037	0.00362292	0.0024778
274	0.00245453	0.00253845	0.00326582	0.00660308	0.00337037	0.00230151
275	0.00227355	0.00235882	0.00303141	0.00612634	0.00312986	0.00213397
276	0.00210195	0.00218785	0.00280849	0.00567275	0.00290098	0.00197485
277	0.00193938	0.00202526	0.00259668	0.0052416	0.00268337	0.00182388
278	0.00178552	0.0018708	0.00239562	0.00483223	0.00247667	0.00168077
279	0.00164006	0.00172422	0.00220496	0.00444395	0.00228054	0.00154527
280	0.00150272	0.00158527	0.00202436	0.00407609	0.00209463	0.00141712
281	0.0013732	0.0014537	0.00185346	0.00372793	0.00191861	0.00129608
282	0.00125123	0.00132924	0.00169191	0.00339873	0.00175212	0.0011819
283	0.00113651	0.00121159	0.0015393	0.00308764	0.00159476	0.00107431
284	0.00102871	0.00110042	0.00139518	0.00279368	0.0014461	0.000973025
285	0.00092748	0.000995299	0.00125902	0.00251572	0.00130562	0.000877705
286	0.000832361	0.000895713	0.00113016	0.00225235	0.00117265	0.000787939
287	0.000742785	0.000800981	0.00100777	0.00200182	0.0010464	0.000703202
288	0.000657999	0.000710207	0.000890786	0.00176246	0.000925789	0.000622812
289	0.000577101	0.000622829	0.000778483	0.00153366	0.000810023	0.000545968
290	0.000499594	0.00053885	0.000670865	0.00131569	0.000698955	0.000472254
291	0.000425502	0.000458383	0.000568173	0.00110899	0.00059275	0.000401725
292	0.000354919	0.000381647	0.000470752	0.000914201	0.000491764	0.000334519
293	0.000288054	0.000308991	0.000379089	0.000732257	0.00039654	0.000270886
294	0.000225261	0.000240945	0.000293869	0.000564439	0.00030782	0.000211225
295	0.000167096	0.000178272	0.000216034	0.000412473	0.000226615	0.00015613
296	0.000114587	0.000122042	0.000146859	0.000278654	0.000154288	0.000106687
297	6.93123e-05	7.37304e-05	8.80476e-05	0.000165988	9.26555e-05	6.42856e-05
298	3.32396e-05	3.53556e-05	4.18512e-05	7.83863e-05	4.41252e-05	3.07029e-05
299	8.96286e-06	9.56342e-06	1.12212e-05	2.08948e-05	1.18613e-05	8.25656e-06
