# Supplementary material for: The Social Cost of Fossil and Industrial CO2 Emissions from 1950 to 2018
Source: Research Square preprint supplement (doi:10.21203/rs.3.rs-2244259/v1), 2022-11-17
Supplement: Supplementary file 211 [file sccN.xlsx]

## Sheet: sccN
f	1	2	3	4	5	6
0	0.343251	0.331139	0.336952	0.354097	0.338325	0.333219
1	0.359815	0.346982	0.353137	0.371309	0.354597	0.349179
2	0.389049	0.375028	0.381748	0.401612	0.383347	0.377421
3	0.415618	0.400484	0.407734	0.429182	0.409464	0.40306
4	0.432779	0.416859	0.424481	0.447052	0.426305	0.41956
5	0.457627	0.440623	0.448759	0.472876	0.450713	0.4435
6	0.481333	0.463269	0.471907	0.497538	0.473988	0.466316
7	0.507443	0.488211	0.497402	0.524701	0.499623	0.491445
8	0.534032	0.51359	0.523354	0.552383	0.525721	0.517018
9	0.556168	0.53466	0.544928	0.575482	0.547423	0.538257
10	0.592365	0.569227	0.580266	0.613152	0.582958	0.573085
11	0.626054	0.601358	0.613132	0.648246	0.616013	0.605462
12	0.671906	0.645136	0.657891	0.695968	0.661022	0.64957
13	0.716474	0.687635	0.701367	0.742405	0.704749	0.692396
14	0.762266	0.73126	0.746016	0.790154	0.749661	0.736364
15	0.809127	0.775859	0.791681	0.839058	0.795602	0.781318
16	0.859521	0.823793	0.840775	0.891677	0.844996	0.829637
17	0.91781	0.879229	0.897555	0.952545	0.902126	0.885519
18	0.980024	0.938343	0.958129	1.01756	0.96308	0.945116
19	1.04316	0.998246	1.01956	1.08363	1.0249	1.00552
20	1.08635	1.03895	1.06142	1.12906	1.06708	1.04661
21	1.15796	1.10674	1.13102	1.20414	1.13714	1.115
22	1.23425	1.17888	1.20511	1.28419	1.21174	1.18777
23	1.30803	1.24848	1.27667	1.36176	1.28382	1.25801
24	1.3577	1.29493	1.32462	1.41435	1.33218	1.30494
25	1.42604	1.35906	1.39072	1.4865	1.39881	1.36971
26	1.48627	1.41531	1.44883	1.55035	1.45742	1.42655
27	1.55929	1.48356	1.51932	1.6277	1.52851	1.49552
28	1.64118	1.56005	1.59833	1.71449	1.6082	1.57282
29	1.73193	1.64474	1.68586	1.81074	1.69648	1.65842
30	1.79608	1.70397	1.74738	1.87936	1.75863	1.71838
31	1.8605	1.7633	1.80908	1.94842	1.82098	1.77845
32	1.93048	1.82768	1.87607	2.02349	1.88869	1.84364
33	2.019	1.90936	1.96093	2.11823	1.97442	1.92632
34	2.11308	1.99597	2.05101	2.21908	2.06546	2.01402
35	2.23172	2.10543	2.16475	2.34608	2.18037	2.12483
36	2.33954	2.20427	2.26777	2.46205	2.28453	2.22498
37	2.44818	2.30347	2.37136	2.57929	2.38933	2.32554
38	2.5417	2.38797	2.46005	2.68102	2.47918	2.41134
39	2.64239	2.47876	2.55544	2.79072	2.57583	2.50356
40	2.76465	2.5893	2.67142	2.92365	2.69332	2.61578
41	2.83329	2.64917	2.73534	3.00029	2.75839	2.67687
42	2.91861	2.72419	2.81513	3.095	2.83951	2.75334
43	3.01221	2.80642	2.90261	3.19896	2.92848	2.83716
44	3.11131	2.89316	2.99506	3.30931	3.02253	2.92563
45	3.23419	3.00135	3.11005	3.44559	3.13942	3.03588
46	3.40452	3.15274	3.27021	3.63316	3.30203	3.18996
47	3.58008	3.30805	3.43488	3.82715	3.46934	3.34811
48	3.70813	3.41854	3.55347	3.97119	3.59022	3.46104
49	3.88809	3.5759	3.72126	4.17171	3.76096	3.62154
50	4.09899	3.76051	3.91801	4.40652	3.96114	3.80981
51	4.29414	3.92933	4.09897	4.62561	4.14554	3.98229
52	4.50802	4.11383	4.29701	4.8662	4.34743	4.17087
53	4.71361	4.28916	4.48628	5.09929	4.54067	4.3504
54	4.97479	4.51323	4.72745	5.39417	4.78671	4.57964
55	5.24649	4.74469	4.97745	5.70239	5.04199	4.81672
56	5.55534	5.00731	5.26138	6.05317	5.33198	5.08584
57	5.87086	5.27324	5.55014	6.41359	5.62727	5.35876
58	6.07287	5.43476	5.73027	6.65217	5.81277	5.52599
59	6.26806	5.58787	5.90269	6.88522	5.99081	5.6851
60	6.55938	5.82385	6.16408	7.22626	6.2596	5.92904
61	6.8247	6.03354	6.39928	7.54131	6.5023	6.14684
62	7.04198	6.19772	6.58776	7.80568	6.69802	6.31896
63	7.3387	6.42856	6.84878	8.16056	6.96806	6.55988
64	7.63117	6.65205	7.10381	8.5132	7.23267	6.79434
65	7.90579	6.85655	7.3403	8.8479	7.47911	7.01067
66	8.25958	7.12611	7.64823	9.27256	7.79921	7.29523
67	8.52089	7.31276	7.86868	9.59328	8.03106	7.49723
68	8.73565	7.45812	8.04516	9.85819	8.21903	7.65986
69	9.22136	7.89151	8.46677	9.78128	8.69899	8.35234
70	9.57265	8.14457	8.76046	10.1603	9.01146	8.64457
71	9.93897	8.40064	9.06007	10.5422	9.332	8.94856
72	10.3205	8.65974	9.36562	10.9269	9.6606	9.26437
73	10.7175	8.92188	9.67717	11.3144	9.99728	9.59209
74	11.13	9.18711	9.99475	11.7046	10.3421	9.9318
75	11.5584	9.45547	10.3184	12.0974	10.695	10.2836
76	12.0027	9.72701	10.6482	12.4928	11.0561	10.6477
77	12.4632	10.0018	10.9841	12.8907	11.4254	11.0241
78	12.9401	10.2799	11.3263	13.291	11.8029	11.413
79	13.4335	10.5613	11.6746	13.6937	12.1888	11.8145
80	13.9437	10.8461	12.0293	14.0986	12.583	12.2288
81	14.4708	11.1344	12.3902	14.5057	12.9857	12.6561
82	15.015	11.4262	12.7574	14.9149	13.3968	13.0964
83	15.5765	11.7216	13.131	15.3261	13.8164	13.5499
84	16.1555	12.0205	13.511	15.7391	14.2446	14.0168
85	16.7522	12.3232	13.8973	16.1539	14.6815	14.4973
86	17.3667	12.6295	14.2901	16.5704	15.127	14.9914
87	17.9992	12.9396	14.6893	16.9885	15.5812	15.4994
88	18.65	13.2534	15.095	17.4081	16.0442	16.0215
89	19.3192	13.5712	15.5072	17.829	16.5161	16.5577
90	20.007	13.8928	15.9259	18.2512	16.9968	17.1083
91	20.7136	14.2183	16.3511	18.6745	17.4865	17.6735
92	21.4391	14.5478	16.7828	19.0989	17.9852	18.2533
93	22.1838	14.8814	17.2211	19.5241	18.4929	18.8481
94	22.9479	15.219	17.666	19.9503	19.0097	19.4579
95	23.7315	15.5606	18.1175	20.3771	19.5357	20.083
96	24.5347	15.9064	18.5756	20.8045	20.0709	20.7235
97	25.358	16.2564	19.0403	21.2323	20.6153	21.3796
98	26.2013	16.6105	19.5116	21.6605	21.1691	22.0515
99	27.0649	16.9689	19.9896	22.089	21.7322	22.7394
100	27.949	17.3316	20.4743	22.5176	22.3047	23.4435
101	28.8538	17.6986	20.9657	22.9461	22.8866	24.1639
102	29.7794	18.0699	21.4637	23.3746	23.4781	24.9009
103	30.7262	18.4455	21.9685	23.8027	24.0791	25.6547
104	31.6942	18.8256	22.48	24.2305	24.6897	26.4254
105	32.6836	19.21	22.9982	24.6578	25.3099	27.2133
106	33.6948	19.5989	23.5232	25.0845	25.9399	28.0185
107	34.7278	19.9923	24.0549	25.5103	26.5795	28.8413
108	35.7828	20.3902	24.5934	25.9352	27.229	29.6818
109	36.8601	20.7926	25.1387	26.3591	27.8882	30.5402
110	37.9599	21.1995	25.6907	26.7818	28.5573	31.4168
111	39.0823	21.611	26.2496	27.2031	29.2363	32.3118
112	40.2275	22.0271	26.8153	27.6229	29.9252	33.2253
113	41.3958	22.4478	27.3878	28.041	30.624	34.1577
114	42.5873	22.8731	27.9672	28.4572	31.3329	35.1089
115	43.8023	23.303	28.5533	28.8715	32.0517	36.0794
116	45.0408	23.7376	29.1464	29.2835	32.7806	37.0692
117	46.3032	24.1768	29.7462	29.6932	33.5195	38.0787
118	47.5895	24.6207	30.3529	30.1002	34.2685	39.1079
119	48.9	25.0693	30.9665	30.5045	35.0276	40.1571
120	50.2349	25.5226	31.5869	30.9057	35.7968	41.2265
121	51.5942	25.9806	32.2142	31.3037	36.5761	42.3163
122	52.9782	26.4433	32.8483	31.6982	37.3654	43.4267
123	54.3871	26.9107	33.4893	32.089	38.1648	44.5579
124	55.8209	27.3827	34.1371	32.4757	38.9743	45.71
125	57.2799	27.8595	34.7917	32.8582	39.7938	46.8833
126	58.7641	28.341	35.4532	33.2361	40.6233	48.078
127	60.2737	28.8272	36.1214	33.6091	41.4628	49.2941
128	61.8089	29.3181	36.7965	33.9769	42.3122	50.5319
129	63.3697	29.8136	37.4783	34.339	43.1715	51.7915
130	64.9563	30.3138	38.1669	34.6952	44.0405	53.0731
131	66.5687	30.8187	38.8622	35.0451	44.9192	54.3767
132	68.207	31.3281	39.5642	35.3882	45.8075	55.7027
133	69.8712	31.8422	40.2728	35.724	46.7053	57.051
134	71.5615	32.3609	40.988	36.0522	47.6125	58.4217
135	73.2779	32.8841	41.7098	36.3722	48.5288	59.8149
136	75.0203	33.4119	42.438	36.6834	49.4542	61.2308
137	76.7889	33.9441	43.1727	36.9854	50.3885	62.6693
138	78.5835	34.4808	43.9138	37.2775	51.3314	64.1305
139	80.4041	35.0218	44.6611	37.5591	52.2828	65.6143
140	82.2507	35.5672	45.4146	37.8295	53.2423	67.1207
141	84.1232	36.1169	46.1741	38.088	54.2098	68.6498
142	86.0216	36.6708	46.9396	38.3339	55.1849	70.2012
143	87.9458	37.2288	47.7109	38.5665	56.1675	71.7751
144	89.8956	37.7908	48.4879	38.7848	57.1571	73.371
145	91.8711	38.3566	49.2703	38.9881	58.1535	74.9889
146	93.8721	38.9261	50.058	39.1754	59.1564	76.6285
147	95.8986	39.4989	50.8507	39.3459	60.1657	78.2893
148	97.9508	40.0749	51.6481	39.4987	61.1811	79.9711
149	100.029	40.6536	52.45	39.6328	62.2027	81.6732
150	102.131	41.2362	53.2603	39.7529	63.229	83.4028
151	104.259	41.8194	54.0721	39.8458	64.2606	85.147
152	106.415	42.4014	54.8815	39.9064	65.2999	86.9001
153	108.601	42.9849	55.6952	39.9461	66.3479	88.6744
154	110.817	43.5704	56.5137	39.964	67.4051	90.4717
155	113.065	44.1585	57.3375	39.9591	68.4718	92.2933
156	115.345	44.7495	58.1669	39.9302	69.5485	94.1402
157	117.658	45.3435	59.0022	39.8759	70.6353	96.0134
158	120.004	45.9409	59.8435	39.7948	71.7325	97.9136
159	122.384	46.5417	60.6911	39.6855	72.8401	99.8415
160	124.799	47.146	61.5449	39.5461	73.9584	101.798
161	127.248	47.7539	62.4051	39.3751	75.0874	103.783
162	129.732	48.3655	63.2717	39.1704	76.2272	105.797
163	132.253	48.9808	64.1447	38.9301	77.3777	107.841
164	134.809	49.5998	65.0241	38.6521	78.5391	109.915
165	137.401	50.2225	65.91	38.3341	79.7114	112.02
166	140.03	50.8488	66.8022	37.9737	80.8945	114.155
167	142.695	51.4789	67.7008	37.5685	82.0884	116.322
168	145.397	52.1125	68.6057	37.1156	83.2928	118.52
169	148.135	52.7497	69.5168	36.6124	84.5084	120.75
170	150.911	53.3906	70.4342	36.0557	85.7348	123.011
171	153.723	54.0349	71.3576	35.4424	86.9721	125.305
172	156.571	54.6827	72.2871	34.7692	88.22	127.632
173	159.456	55.3339	73.2226	34.0323	89.4787	129.991
174	162.376	55.9884	74.1638	33.2281	90.7487	132.383
175	165.332	56.6463	75.1109	32.3524	92.0287	134.809
176	168.322	57.3073	76.0636	31.4011	93.3191	137.268
177	171.347	57.9716	77.0219	30.3697	94.62	139.761
178	174.406	58.6389	77.9855	29.2532	95.9313	142.288
179	177.498	59.3092	78.9545	28.0468	97.2529	144.849
180	180.621	59.9824	79.9291	26.7449	98.5847	147.446
181	183.775	60.6585	80.9082	25.342	99.9266	150.075
182	186.959	61.3374	81.8922	23.8319	101.278	152.74
183	190.172	62.0189	82.8809	22.2083	102.64	155.439
184	193.411	62.7029	83.8741	20.4644	104.012	158.174
185	196.676	63.3894	84.8715	18.5931	105.393	160.943
186	199.965	64.0782	85.8725	16.5867	106.784	163.749
187	203.276	64.7693	86.8779	14.4372	108.184	166.589
188	206.606	65.4625	87.8869	12.1362	109.593	169.464
189	209.956	66.1577	88.8993	9.67447	111.011	172.374
190	213.32	66.8548	89.9148	7.04258	112.437	175.32
191	216.697	67.5536	90.9332	4.23039	113.872	178.301
192	220.087	68.2539	91.9541	1.22717	115.317	181.317
193	223.483	68.9558	92.9773	-1.9784	116.768	184.369
194	226.882	69.6589	94.0024	-5.39835	118.227	187.455
195	230.286	70.3631	95.029	-9.0454	119.694	190.577
196	233.691	71.0683	96.0568	-12.933	121.168	193.733
197	237.086	71.7742	97.0854	-17.0755	122.648	196.924
198	240.472	72.4807	98.1115	-21.4878	124.201	200.151
199	243.855	73.1876	99.1402	-26.1861	125.699	203.41
200	247.226	73.8946	100.168	-31.1873	127.203	206.703
201	250.57	74.6017	101.195	-36.5094	128.713	210.029
202	253.9	75.3084	102.22	-42.1713	130.228	213.387
203	257.196	76.0147	103.243	-48.1933	131.748	216.778
204	260.445	76.7202	104.264	-54.5967	133.349	220.197
205	263.71	77.4246	105.281	-61.4044	134.882	223.65
206	266.852	78.1278	106.293	-68.6405	136.418	227.132
207	269.855	78.8293	107.301	-76.3306	137.958	230.644
208	273.155	79.529	108.303	-84.5022	139.5	234.185
209	276.672	80.2264	109.298	-93.1844	141.044	237.752
210	280.008	80.9213	110.29	-102.408	142.507	241.349
211	283.243	81.6133	111.27	-112.207	144.049	244.968
212	286.561	82.302	112.241	-122.617	145.592	248.61
213	290.091	82.987	113.201	-133.676	147.133	252.275
214	293.635	83.668	114.15	-145.426	148.674	255.961
215	297.184	84.3445	115.087	-157.912	150.211	259.667
216	300.694	85.016	116.009	-171.182	152.287	263.395
217	304.243	85.6822	116.917	-185.29	153.849	267.134
218	307.929	86.3424	117.808	-200.295	155.408	270.886
219	311.495	86.9962	118.681	-216.252	156.963	274.65
220	315.238	87.643	119.535	-233.195	158.513	278.423
221	319.203	88.2822	120.368	-251.174	160.057	282.202
222	323.417	88.9133	121.179	-270.259	161.744	285.997
223	327.592	89.5357	121.964	-290.525	163.273	289.782
224	332.072	90.1486	122.722	-312.055	164.792	293.566
225	336.882	90.7513	123.452	-334.936	166.299	297.343
226	341.969	91.3432	124.151	-359.262	167.794	301.112
227	348.201	91.9234	124.817	-385.139	169.274	304.867
228	354.871	92.4912	125.452	-412.682	170.596	308.658
229	362.039	93.0458	126.044	-442.019	172.042	312.377
230	369.701	93.586	126.595	-473.295	173.468	316.068
231	377.8	94.1112	127.102	-506.678	174.873	319.822
232	386.41	94.6202	127.562	-542.36	176.256	323.45
233	396.217	95.1121	127.972	-580.566	177.616	327.038
234	407.011	95.5858	128.333	-621.567	178.039	330.678
235	417.976	96.0402	128.632	-665.69	179.279	334.182
236	429.22	96.474	128.87	-713.336	180.486	337.632
237	440.629	96.886	129.043	-765.001	181.656	340.959
238	452.659	97.2748	129.146	-821.315	182.784	344.285
239	465.458	97.6393	129.175	-883.075	183.87	347.542
240	478.851	97.9776	129.125	-951.311	184.417	350.729
241	491.892	98.2883	128.992	-1027.36	185.374	353.831
242	507.162	98.57	128.769	-1112.95	186.276	356.843
243	521.605	99.1043	128.465	-1210.4	187.355	359.722
244	538.06	99.3411	128.048	-1322.71	188.156	362.533
245	553.428	99.5448	127.523	-1453.9	188.892	365.232
246	569.739	99.7137	126.882	-1609.31	189.68	367.79
247	585.032	99.8461	126.123	-1796.03	190.278	370.241
248	603.571	99.9396	125.236	-2023.47	190.798	372.553
249	621.151	99.9097	124.232	-439.939	192.601	374.654
250	639.59	99.9166	123.066	-249.181	193.034	376.658
251	656.38	99.879	121.748	-275.848	193.38	378.494
252	676.443	99.7943	120.282	-294.465	193.343	380.042
253	699.869	99.6595	118.631	-262.68	193.484	381.502
254	718.551	99.4731	116.8	-272.682	193.521	382.759
255	737.288	99.5794	114.669	-257.842	193.775	383.856
256	758.416	99.2974	112.436	-258.153	193.604	384.676
257	774.239	98.9575	109.988	-250.27	193.314	385.257
258	794.792	98.5557	107.287	-247.315	192.962	385.399
259	803.188	98.0884	104.369	-242.308	192.412	385.447
260	812.809	97.5549	101.198	-238.742	191.732	385.214
261	825.32	97.4754	97.7811	-234.969	191.006	384.516
262	850.823	96.84	94.058	-231.73	190.043	383.665
263	860.59	96.1331	90.0349	-228.714	188.926	382.487
264	868.644	95.3546	85.6864	-226.053	187.596	380.825
265	882.895	94.4993	81.0116	-223.701	186.131	378.935
266	884.382	93.5666	75.9833	-221.683	184.509	376.676
267	907.421	92.3731	70.599	-219.999	181.952	374.025
268	922.737	91.2527	64.8041	-218.655	179.935	370.979
269	919.338	90.0457	58.5926	-217.661	177.728	367.516
270	929.393	88.7552	51.9828	-217.031	175.398	363.65
271	931.343	87.3733	44.8676	-216.729	172.801	359.32
272	933.988	85.9048	37.2585	-216.901	170.008	354.539
273	949.865	84.3683	29.2287	-217.279	167.424	349.365
274	932.401	82.6902	20.547	-218.284	164.258	343.657
275	944.419	80.916	11.274	-219.472	160.891	337.475
276	958.653	79.0514	1.26483	-221.242	157.371	330.81
277	948.124	77.0936	-9.32338	-223.382	153.637	323.677
278	1024.18	75.045	-20.6395	-225.725	150.212	316.06
279	1077.33	73.7116	-32.8659	-229.783	145.692	307.845
280	1102.64	71.5136	-45.8371	-230.533	141.366	299.278
281	1102.66	69.2332	-59.7537	-235.655	136.847	290.246
282	1070.92	66.8598	-74.6719	-259.653	132.122	280.715
283	1037.06	64.4099	-90.8166	-192.388	127.25	270.77
284	1002.2	61.8589	-108.311	-196.205	122.704	259.965
285	964.608	60.3995	-127.591	-215.756	116.159	248.994
286	924.567	57.7188	-148.519	-237.577	110.642	237.52
287	880.95	54.9015	-171.685	-261.956	104.788	225.523
288	833.679	51.8662	-197.648	-284.153	98.7191	212.482
289	783.336	46.9254	-219.969	-303.57	89.3148	196.795
290	729.524	41.7864	-242.627	-324.65	79.1257	174.598
291	672.018	36.5775	-266.944	-347.76	68.8787	152.172
292	610.623	31.3292	-293.261	-373.335	58.6444	129.691
293	545.552	26.0863	-322.024	-402.008	48.5194	107.381
294	476.784	20.914	-353.811	-434.607	38.6352	85.5497
295	404.877	15.9047	-389.38	-472.213	29.1702	64.6085
296	329.516	11.188	-429.713	-516.227	20.3646	45.1032
297	251.011	6.9435	-476.093	-568.439	12.5394	27.7615
298	170.962	3.41842	-530.17	-631.061	6.12395	13.547
299	88.8981	0.950695	-594.021	-706.547	1.69049	3.73309
