# Supplementary material for: The Social Cost of Fossil and Industrial CO2 Emissions from 1950 to 2018
Source: Research Square preprint supplement (doi:10.21203/rs.3.rs-2244259/v1), 2022-11-17
Supplement: Supplementary file 215 [file sccNp.xlsx]

## Sheet: sccNp
f	1	2	3	4	5	6
0	30.4677	29.3926	29.9086	31.4305	30.0306	29.5773
1	30.1342	29.0595	29.575	31.0969	29.6972	29.2435
2	29.8174	28.7428	29.2579	30.7803	29.3804	28.9262
3	29.5113	28.4367	28.9515	30.4745	29.0744	28.6196
4	29.2127	28.1381	28.6526	30.1761	28.7757	28.3204
5	28.9206	27.846	28.3602	29.8843	28.4836	28.0278
6	28.6359	27.5613	28.0752	29.6	28.199	27.7425
7	28.3577	27.2829	27.7966	29.3222	27.9207	27.4637
8	28.0838	27.0088	27.5222	29.0488	27.6467	27.189
9	27.8134	26.7379	27.2513	28.7793	27.3761	26.9177
10	27.5433	26.4674	26.9808	28.5098	27.1059	26.6469
11	27.273	26.1971	26.7101	28.2397	26.8356	26.3759
12	27.004	25.9281	26.4407	27.971	26.5666	26.1063
13	26.7351	25.6589	26.1714	27.7027	26.2976	25.8366
14	26.4646	25.3882	25.9004	27.4329	26.027	25.5653
15	26.1924	25.1155	25.6277	27.1613	25.7546	25.2922
16	25.9175	24.8402	25.3523	26.8872	25.4796	25.0164
17	25.6382	24.5604	25.0724	26.6085	25.2001	24.7362
18	25.3515	24.2733	24.7851	26.3225	24.9132	24.4485
19	25.0568	23.9779	24.4898	26.0288	24.6182	24.1527
20	24.7549	23.6749	24.187	25.7283	24.3159	23.8494
21	24.4432	23.362	23.8744	25.4179	24.0037	23.5362
22	24.1174	23.0354	23.5479	25.0932	23.6776	23.2092
23	23.7816	22.6988	23.2113	24.7584	23.3414	22.8721
24	23.4404	22.3567	22.8694	24.4184	22.9999	22.5296
25	23.0909	22.0063	22.519	24.0699	22.65	22.1788
26	22.7321	21.6468	22.1596	23.7122	22.2909	21.8188
27	22.3706	21.2842	21.7971	23.352	21.929	21.4557
28	22.0072	20.9192	21.4326	22.9902	21.5649	21.0905
29	21.6412	20.5518	21.0656	22.626	21.1983	20.7228
30	21.273	20.1821	20.6963	22.2594	20.8295	20.3528
31	20.9041	19.8119	20.3263	21.8919	20.46	19.9821
32	20.5344	19.4409	19.9555	21.5236	20.0898	19.6106
33	20.1639	19.0688	19.5839	21.1548	19.7186	19.2382
34	19.7931	18.6962	19.2118	20.7861	19.3471	18.8653
35	19.4221	18.323	18.8393	20.4172	18.9751	18.4918
36	19.0484	17.9471	18.4641	20.0459	18.6005	18.1157
37	18.6714	17.5677	18.0855	19.6713	18.2225	17.736
38	18.2934	17.1869	17.7057	19.2961	17.8434	17.3551
39	17.9169	16.8074	17.3274	18.9227	17.4656	16.9756
40	17.5416	16.429	16.9501	18.5505	17.089	16.597
41	17.1676	16.052	16.5741	18.1795	16.7137	16.2198
42	16.7968	15.6779	16.2012	17.8119	16.3416	15.8456
43	16.428	15.3057	15.8303	17.4465	15.9713	15.4733
44	16.0627	14.9365	15.4625	17.0849	15.6044	15.1041
45	15.702	14.5716	15.0993	16.7284	15.2419	14.7393
46	15.3459	14.211	14.7405	16.3765	14.884	14.3788
47	14.9943	13.855	14.3862	16.0291	14.5305	14.0228
48	14.6485	13.5045	14.0376	15.6877	14.1828	13.6724
49	14.3089	13.16	13.6949	15.3526	13.841	13.3279
50	13.9761	12.822	13.359	15.0246	13.5061	12.9901
51	13.6511	12.4913	13.0306	14.7048	13.1787	12.6597
52	13.3314	12.1657	12.7074	14.3906	12.8565	12.3343
53	13.0155	11.8435	12.3878	14.0805	12.538	12.0126
54	12.7038	11.5251	12.0722	13.7747	12.2235	11.6947
55	12.3971	11.2114	11.7614	13.4743	11.9139	11.3816
56	12.0951	10.9019	11.4551	13.179	11.6088	11.0729
57	11.7978	10.5969	11.1533	12.8885	11.3083	10.7687
58	11.5057	10.2967	10.8566	12.6032	11.0129	10.4696
59	11.2163	9.99911	10.5625	12.3206	10.7202	10.1731
60	10.9269	9.70163	10.2684	12.0378	10.4275	9.87685
61	10.64	9.40657	9.97678	11.7573	10.1374	9.58321
62	10.3565	9.11489	9.68853	11.4797	9.85069	9.29321
63	10.0766	8.82687	9.40386	11.205	9.56764	9.00718
64	9.80022	8.54281	9.12297	10.933	9.28846	8.72555
65	9.52808	8.26353	8.84654	10.6635	9.01384	8.44927
66	9.25973	7.98901	8.57436	10.3954	8.74362	8.17862
67	8.99519	7.71981	8.30668	10.1273	8.4781	7.91455
68	8.73565	7.45812	8.04516	9.85819	8.21903	7.65986
69	8.48125	7.20456	7.79048	9.59095	7.96698	7.41406
70	8.23132	6.95849	7.54231	9.32892	7.72122	7.17458
71	7.98568	6.71938	7.30026	9.07158	7.48116	6.9409
72	7.74448	6.48711	7.06428	8.81894	7.24672	6.71294
73	7.50786	6.26155	6.83432	8.57097	7.01783	6.49068
74	7.27591	6.0426	6.61032	8.32767	6.79445	6.27407
75	7.04874	5.83014	6.39222	8.08904	6.57653	6.06309
76	6.82642	5.62407	6.17995	7.85505	6.36404	5.8577
77	6.609	5.42427	5.97345	7.62572	6.15692	5.65785
78	6.39652	5.23062	5.77263	7.40103	5.95512	5.46349
79	6.18901	5.04302	5.57741	7.18097	5.75861	5.27458
80	5.98648	4.86132	5.3877	6.96553	5.56732	5.09104
81	5.78893	4.68542	5.20342	6.7547	5.38119	4.9128
82	5.59634	4.51517	5.02447	6.54846	5.20016	4.73979
83	5.4087	4.35045	4.85076	6.34681	5.02417	4.57193
84	5.22599	4.19112	4.68218	6.14971	4.85313	4.40913
85	5.04815	4.03706	4.51865	5.95715	4.68697	4.2513
86	4.87515	3.88813	4.36005	5.7691	4.52562	4.09836
87	4.70694	3.7442	4.20629	5.58552	4.36899	3.9502
88	4.54346	3.60513	4.05726	5.4064	4.217	3.80672
89	4.38466	3.4708	3.91287	5.23168	4.06956	3.66782
90	4.23045	3.34108	3.773	5.06134	3.92658	3.53341
91	4.08078	3.21583	3.63755	4.89532	3.78798	3.40338
92	3.93557	3.09493	3.50642	4.73359	3.65366	3.27762
93	3.79474	2.97825	3.37951	4.5761	3.52353	3.15603
94	3.65821	2.86566	3.25671	4.42278	3.3975	3.03851
95	3.5259	2.75705	3.13792	4.2736	3.27547	2.92495
96	3.39773	2.6523	3.02303	4.12849	3.15734	2.81524
97	3.27362	2.55127	2.91195	3.9874	3.04304	2.70928
98	3.15346	2.45387	2.80457	3.85026	2.93245	2.60698
99	3.03718	2.35997	2.7008	3.71701	2.82549	2.50822
100	2.92469	2.26947	2.60054	3.58758	2.72206	2.41291
101	2.8159	2.18225	2.50368	3.46191	2.62207	2.32094
102	2.71072	2.09821	2.41014	3.33993	2.52544	2.23222
103	2.60905	2.01724	2.31981	3.22158	2.43206	2.14665
104	2.51081	1.93924	2.23262	3.10677	2.34184	2.06414
105	2.41591	1.86412	2.14845	2.99544	2.25471	1.98459
106	2.32426	1.79177	2.06723	2.88752	2.17056	1.90792
107	2.23578	1.72211	1.98887	2.78292	2.08932	1.83402
108	2.15037	1.65504	1.91328	2.68159	2.0109	1.76282
109	2.06794	1.59048	1.84037	2.58344	1.93522	1.69422
110	1.98842	1.52833	1.77007	2.48841	1.86219	1.62814
111	1.91171	1.46851	1.70228	2.39641	1.79173	1.56451
112	1.83774	1.41095	1.63694	2.30737	1.72376	1.50323
113	1.76642	1.35555	1.57396	2.22122	1.65821	1.44423
114	1.69768	1.30226	1.51326	2.13789	1.595	1.38744
115	1.63142	1.25098	1.45478	2.0573	1.53405	1.33277
116	1.56757	1.20165	1.39844	1.97938	1.4753	1.28016
117	1.50607	1.15421	1.34417	1.90406	1.41867	1.22954
118	1.44682	1.10857	1.2919	1.83127	1.36409	1.18083
119	1.38977	1.06468	1.24156	1.76093	1.3115	1.13398
120	1.33483	1.02248	1.19309	1.69299	1.26083	1.0889
121	1.28194	0.981891	1.14643	1.62736	1.21202	1.04555
122	1.23102	0.942869	1.1015	1.56398	1.16499	1.00387
123	1.18202	0.905351	1.05827	1.50279	1.1197	0.963777
124	1.13487	0.869283	1.01666	1.44371	1.07609	0.925231
125	1.0895	0.834611	0.976611	1.3867	1.03409	0.888174
126	1.04585	0.801283	0.93808	1.33167	0.993649	0.852549
127	1.00387	0.769249	0.901009	1.27858	0.954716	0.818305
128	0.963486	0.73846	0.865347	1.22736	0.917236	0.785391
129	0.924653	0.70887	0.831042	1.17795	0.881158	0.753758
130	0.887312	0.680435	0.798046	1.13029	0.846433	0.723358
131	0.85141	0.65311	0.766312	1.08433	0.813013	0.694146
132	0.816896	0.626853	0.735795	1.04001	0.780851	0.666076
133	0.783719	0.601625	0.70645	0.997273	0.749902	0.639105
134	0.75183	0.577386	0.678234	0.956074	0.720122	0.613193
135	0.721183	0.554099	0.651106	0.916358	0.691469	0.588299
136	0.691732	0.531727	0.625026	0.878076	0.663901	0.564383
137	0.663432	0.510235	0.599955	0.841178	0.637379	0.54141
138	0.636241	0.489589	0.575856	0.805616	0.611866	0.519341
139	0.610117	0.469758	0.552691	0.771346	0.587323	0.498144
140	0.585022	0.450709	0.530427	0.738322	0.563714	0.477783
141	0.560915	0.432413	0.509029	0.7065	0.541006	0.458227
142	0.537761	0.41484	0.488465	0.67584	0.519165	0.439443
143	0.515522	0.397961	0.468702	0.646299	0.498159	0.421403
144	0.494166	0.381751	0.449711	0.61784	0.477958	0.404076
145	0.473658	0.366181	0.431461	0.590423	0.458531	0.387434
146	0.453966	0.351227	0.413925	0.564012	0.43985	0.371451
147	0.435061	0.336863	0.397074	0.538571	0.421889	0.356101
148	0.416913	0.323065	0.380881	0.514068	0.404622	0.341357
149	0.399494	0.30981	0.365322	0.49047	0.388026	0.327197
150	0.382771	0.297087	0.350399	0.467813	0.372068	0.313624
151	0.366721	0.284853	0.336044	0.445919	0.35673	0.30057
152	0.35133	0.27308	0.322216	0.424728	0.342004	0.287999
153	0.336573	0.261771	0.308938	0.404353	0.32787	0.275937
154	0.322428	0.250913	0.296191	0.384766	0.314308	0.264368
155	0.308871	0.24049	0.283957	0.365937	0.301297	0.253276
156	0.29588	0.230489	0.272219	0.347837	0.288817	0.242643
157	0.283431	0.220894	0.260957	0.330437	0.276848	0.232453
158	0.271503	0.21169	0.250153	0.313712	0.265368	0.222688
159	0.260076	0.202862	0.23979	0.297633	0.25436	0.213333
160	0.249128	0.194397	0.229852	0.282176	0.243805	0.20437
161	0.23864	0.186279	0.22032	0.267315	0.233684	0.195784
162	0.228593	0.178496	0.211179	0.253027	0.22398	0.187558
163	0.218968	0.171033	0.202413	0.239288	0.214675	0.179679
164	0.209749	0.163879	0.194007	0.226076	0.205755	0.172132
165	0.200917	0.15702	0.185947	0.21337	0.197202	0.164903
166	0.192456	0.150444	0.178218	0.20115	0.189003	0.157978
167	0.184352	0.144141	0.170807	0.189394	0.181142	0.151345
168	0.176587	0.138099	0.163701	0.178085	0.173605	0.144992
169	0.169149	0.132307	0.156888	0.167204	0.16638	0.138907
170	0.162023	0.126755	0.150356	0.156733	0.159454	0.133077
171	0.155195	0.121434	0.144093	0.146655	0.152815	0.127494
172	0.148653	0.116334	0.138088	0.136955	0.14645	0.122145
173	0.142385	0.111445	0.132331	0.127616	0.140348	0.117022
174	0.136379	0.106759	0.126811	0.118623	0.1345	0.112114
175	0.130623	0.102269	0.121519	0.109961	0.128893	0.107413
176	0.125107	0.0979646	0.116445	0.101618	0.123517	0.10291
177	0.11982	0.0938395	0.11158	0.0935787	0.118364	0.0985959
178	0.114753	0.0898861	0.106917	0.085831	0.113425	0.0944632
179	0.109896	0.0860972	0.102445	0.0783624	0.10869	0.0905041
180	0.10524	0.0824661	0.0981594	0.0711609	0.104151	0.0867124
181	0.100777	0.0789862	0.0940498	0.0642151	0.0997995	0.0830788
182	0.0964973	0.0756513	0.0901099	0.057514	0.0956284	0.0795978
183	0.0923943	0.0724554	0.0863326	0.051047	0.09163	0.0762627
184	0.08846	0.0693928	0.0827114	0.0448039	0.0877972	0.0730674
185	0.0846873	0.0664578	0.0792397	0.038775	0.0841231	0.070006
186	0.0810693	0.0636453	0.0759108	0.0329508	0.0806018	0.0670732
187	0.0775994	0.0609501	0.0727199	0.0273223	0.0772257	0.0642628
188	0.0742713	0.0583675	0.0696608	0.0218809	0.0739893	0.06157
189	0.0710791	0.0558927	0.066728	0.0166181	0.070887	0.0589898
190	0.0680171	0.0535212	0.0639164	0.0115261	0.0679131	0.0565174
191	0.0650797	0.0512488	0.0612208	0.006597	0.0650624	0.0541483
192	0.0622617	0.0490713	0.0586366	0.00182352	0.0623303	0.0518779
193	0.0595583	0.0469849	0.0561591	-0.00280145	0.0597107	0.0497023
194	0.0569646	0.0449856	0.0537839	-0.00728474	0.0571996	0.0476175
195	0.0544762	0.04307	0.0515068	-0.0116329	0.0547925	0.0456196
196	0.0520887	0.0412344	0.0493236	-0.0158522	0.052485	0.0437048
197	0.0497981	0.0394757	0.0472306	-0.0199487	0.050273	0.0418698
198	0.0476004	0.0377905	0.0452227	-0.0239282	0.048178	0.0401114
199	0.0454921	0.0361759	0.0432989	-0.0277963	0.0461457	0.0384258
200	0.0434694	0.0346289	0.0414545	-0.0315582	0.0441976	0.0368102
201	0.0415291	0.0331466	0.0396861	-0.0352192	0.0423301	0.0352616
202	0.039668	0.0317264	0.0379908	-0.038784	0.04054	0.0337773
203	0.0378829	0.0303657	0.0363653	-0.0422575	0.0388239	0.0323545
204	0.0361708	0.0290619	0.0348069	-0.0456442	0.0372003	0.0309903
205	0.034529	0.0278128	0.0333127	-0.0489483	0.0356234	0.0296829
206	0.0329544	0.0266161	0.0318801	-0.0521742	0.0341117	0.0284296
207	0.0314445	0.0254695	0.0305065	-0.0553257	0.0326626	0.0272281
208	0.0299975	0.024371	0.0291895	-0.0584067	0.0312735	0.0260762
209	0.0286126	0.0233185	0.0279267	-0.061421	0.0299418	0.0249719
210	0.0272892	0.0223102	0.0267167	-0.0643722	0.0286487	0.0239134
211	0.0260253	0.0213441	0.0255557	-0.0672636	0.0274251	0.0228982
212	0.0248179	0.0204186	0.0244425	-0.0700988	0.0262523	0.0219249
213	0.0236646	0.0195319	0.0233751	-0.0728809	0.025128	0.0209916
214	0.0225642	0.0186824	0.0223515	-0.0756134	0.0240502	0.0200968
215	0.0215157	0.0178686	0.02137	-0.0782993	0.023017	0.0192387
216	0.0205181	0.0170889	0.0204287	-0.0809421	0.0221052	0.0184162
217	0.0195704	0.0163419	0.0195262	-0.083545	0.0211559	0.0176271
218	0.0186713	0.0156263	0.0186606	-0.0861117	0.0202461	0.0168704
219	0.0178196	0.0149407	0.0178306	-0.0886413	0.0193738	0.0161447
220	0.0170141	0.014284	0.0170346	-0.0911256	0.0185377	0.0154487
221	0.0162534	0.0136547	0.0162712	-0.093562	0.0177363	0.0147812
222	0.0155363	0.013052	0.0155392	-0.0959558	0.0169837	0.0141416
223	0.0148614	0.0124745	0.014837	-0.0983121	0.0162465	0.0135275
224	0.014227	0.0119213	0.0141635	-0.100636	0.0155397	0.0129385
225	0.0136314	0.0113913	0.0135175	-0.102932	0.014862	0.0123736
226	0.0130729	0.0108836	0.0128979	-0.105206	0.0142123	0.0118316
227	0.0125496	0.0103972	0.0123035	-0.107462	0.0135895	0.0113117
228	0.0120601	0.00993123	0.011734	-0.109708	0.0129816	0.0108149
229	0.0116026	0.00948486	0.0111871	-0.111949	0.0124096	0.0103363
230	0.0111754	0.00905722	0.0106624	-0.114195	0.0118612	0.00987721
231	0.0107765	0.00864755	0.0101591	-0.116455	0.0113355	0.00943945
232	0.0104039	0.0082551	0.00967625	-0.118741	0.0108315	0.00901679
233	0.0100558	0.00787913	0.00921297	-0.121069	0.0103483	0.00861133
234	0.00973025	0.00751895	0.00876882	-0.123457	0.00983484	0.00822479
235	0.00942557	0.00717392	0.00834232	-0.125928	0.00939005	0.00785183
236	0.00913981	0.00684337	0.00793306	-0.128513	0.00896366	0.00749416
237	0.00887104	0.00652671	0.00754033	-0.13125	0.00855485	0.00714981
238	0.00861741	0.00622335	0.00716345	-0.134188	0.00816289	0.00682097
239	0.00837729	0.00593273	0.00680175	-0.137389	0.00778709	0.00650569
240	0.0081492	0.00565431	0.00645462	-0.140932	0.00740699	0.00620351
241	0.00793174	0.00538757	0.00612144	-0.144921	0.00706132	0.00591378
242	0.00772357	0.00513204	0.00580162	-0.149486	0.00672989	0.00563603
243	0.00752371	0.00490125	0.00549522	-0.154799	0.00642015	0.00536922
244	0.00733109	0.00466689	0.00520052	-0.161077	0.00611566	0.00511403
245	0.00714491	0.00444238	0.00491759	-0.168602	0.00582372	0.00486944
246	0.00696421	0.0042273	0.00464585	-0.177735	0.00554737	0.00463476
247	0.00678835	0.00402128	0.00438503	-0.188943	0.00527893	0.00441012
248	0.0066165	0.00382391	0.0041346	-0.202826	0.00502157	0.00419484
249	0.00644831	0.00363185	0.0038947	-0.0420249	0.00480889	0.00398787
250	0.00628328	0.00345078	0.00366375	-0.0226834	0.00457249	0.00379018
251	0.00612098	0.00327736	0.00344195	-0.0239293	0.00434586	0.00360077
252	0.00596103	0.00311125	0.00322929	-0.0243417	0.00412239	0.0034183
253	0.00580318	0.00295213	0.00302467	-0.0206914	0.00391411	0.00324442
254	0.00564741	0.00279973	0.00282812	-0.020467	0.00371441	0.00307783
255	0.00549334	0.00266305	0.00263684	-0.0184408	0.00352892	0.00291865
256	0.00534068	0.00252319	0.00245543	-0.017592	0.00334541	0.00276579
257	0.00518919	0.00238928	0.00228115	-0.0162499	0.00316951	0.00261938
258	0.00503847	0.00226103	0.00211318	-0.0152996	0.00300189	0.00247796
259	0.00488837	0.00213819	0.0019523	-0.0142815	0.00284021	0.00234366
260	0.00473841	0.00202059	0.00179771	-0.0134058	0.0026854	0.00221506
261	0.0045883	0.0019183	0.00164958	-0.0125694	0.00253835	0.00209101
262	0.00443801	0.00181076	0.00150685	-0.0118088	0.00239629	0.00197313
263	0.00428791	0.00170785	0.00136971	-0.0111023	0.00226023	0.00186029
264	0.00413775	0.00160942	0.00123781	-0.0104519	0.00212932	0.00175165
265	0.0039874	0.00151527	0.0011112	-0.0098513	0.00200436	0.00164829
266	0.00383711	0.00142524	0.00098955	-0.00929734	0.00188492	0.00154943
267	0.00368671	0.00133655	0.00087289	-0.00878632	0.00176327	0.00145486
268	0.00353678	0.00125407	0.000760617	-0.0083149	0.00165398	0.00136446
269	0.00338771	0.00117524	0.000652773	-0.0078802	0.00154947	0.00127806
270	0.00323942	0.0011	0.000549642	-0.00747951	0.00145015	0.00119558
271	0.00309234	0.00102814	0.000450185	-0.00710873	0.00135469	0.00111674
272	0.00294632	0.000959603	0.000354688	-0.00676984	0.00126356	0.00104148
273	0.00280158	0.000894476	0.000263942	-0.00645182	0.00117951	0.000969872
274	0.00265919	0.000831877	0.000175963	-0.00616489	0.00109666	0.000901413
275	0.00252037	0.000772219	9.15408e-05	-0.00589383	0.00101771	0.00083619
276	0.00238621	0.000715457	9.73405e-06	-0.00564754	0.000942848	0.000774089
277	0.0022567	0.000661464	-6.79839e-05	-0.0054181	0.000871538	0.000715052
278	0.00213101	0.00061016	-0.000142535	-0.00519995	0.000806486	0.000658941
279	0.00200973	0.000567655	-0.000214858	-0.00502502	0.00073999	0.000605443
280	0.00189362	0.000521343	-0.000283507	-0.00478304	0.000678892	0.000554953
281	0.001782	0.000477479	-0.000349437	-0.00463559	0.000620987	0.000507143
282	0.00167467	0.000435895	-0.000412563	-0.00483881	0.000566104	0.000461856
283	0.00157025	0.000396608	-0.000473631	-0.00339346	0.000514368	0.000419137
284	0.00146791	0.000359378	-0.000532644	-0.00327207	0.000467441	0.000378232
285	0.00136715	0.000330664	-0.000590925	-0.00339752	0.000416532	0.000340103
286	0.00126747	0.000297328	-0.000646849	-0.00352708	0.000372917	0.000304154
287	0.00116862	0.000265643	-0.000701923	-0.00365961	0.000331394	0.000270284
288	0.00107047	0.000235244	-0.000756918	-0.00379637	0.000292319	0.000237847
289	0.000973244	0.000205998	-0.000812201	-0.00393914	0.000253618	0.000206794
290	0.000876907	0.000177926	-0.000868315	-0.00409028	0.000217777	0.000177468
291	0.000781397	0.00015107	-0.000925953	-0.00425278	0.000183754	0.00014963
292	0.000686724	0.000125511	-0.000985939	-0.00443048	0.000151653	0.000123378
293	0.000593362	0.000101373	-0.00104931	-0.00462836	0.000121628	9.88426e-05
294	0.00050148	7.88373e-05	-0.00111737	-0.00485272	9.38887e-05	7.62025e-05
295	0.000411809	5.81587e-05	-0.00119179	-0.00511155	6.87227e-05	5.56961e-05
296	0.000324105	3.96866e-05	-0.00127466	-0.00541498	4.65142e-05	3.76339e-05
297	0.000238747	2.38936e-05	-0.00136866	-0.00577572	2.77687e-05	2.24236e-05
298	0.000157237	1.14117e-05	-0.00147713	-0.00620961	1.31493e-05	1.05937e-05
299	7.90256e-05	3.07888e-06	-0.00160426	-0.00673571	3.51958e-06	2.82662e-06
