# Supplementary material for: The Social Cost of Fossil and Industrial CO2 Emissions from 1950 to 2018
Source: Research Square preprint supplement (doi:10.21203/rs.3.rs-2244259/v1), 2022-11-17
Supplement: Supplementary file 223 [file sccWp.xlsx]

## Sheet: sccWp
f	1	2	3	4	5	6
0	31.9522	29.8572	31.1612	34.3034	31.4246	30.8542
1	31.6196	29.5245	30.8284	33.9714	31.0922	30.5214
2	31.3041	29.2083	30.5123	33.657	30.7767	30.2053
3	30.9995	28.9028	30.2071	33.3536	30.4721	29.9
4	30.7022	28.6047	29.9093	33.0576	30.1748	29.6021
5	30.4115	28.3132	29.6181	32.7682	29.8841	29.3107
6	30.1284	28.029	29.3343	32.4864	29.6009	29.0268
7	29.8517	27.7513	29.0569	32.2112	29.3242	28.7493
8	29.5795	27.4778	28.784	31.9408	29.0518	28.4762
9	29.3111	27.2076	28.5147	31.6749	28.7832	28.2067
10	29.0428	26.9379	28.2456	31.4085	28.5147	27.9374
11	28.7738	26.6681	27.9761	31.1407	28.2458	27.6678
12	28.5063	26.3997	27.7079	30.8744	27.9782	27.3995
13	28.2391	26.1312	27.44	30.609	27.7109	27.1314
14	27.9705	25.8611	27.1705	30.3422	27.4421	26.8617
15	27.7001	25.5892	26.8993	30.0739	27.1715	26.5903
16	27.4271	25.3147	26.6254	29.8029	26.8983	26.3162
17	27.1496	25.0356	26.347	29.5273	26.6206	26.0376
18	26.8648	24.7493	26.0613	29.2445	26.3355	25.7516
19	26.5723	24.4548	25.7678	28.9545	26.0427	25.4578
20	26.273	24.1528	25.4672	28.6585	25.7429	25.1568
21	25.9639	23.8409	25.1568	28.3526	25.4332	24.8459
22	25.6403	23.5153	24.8321	28.0316	25.1093	24.5209
23	25.3068	23.1797	24.4974	27.7005	24.7753	24.1859
24	24.968	22.8386	24.1575	27.3645	24.4361	23.8456
25	24.6208	22.4893	23.809	27.0197	24.0884	23.4968
26	24.2642	22.1309	23.4514	26.6654	23.7315	23.1389
27	23.9053	21.7694	23.0911	26.3094	23.3721	22.7782
28	23.5447	21.4058	22.729	25.9523	23.0108	22.4155
29	23.1818	21.0397	22.3645	25.5929	22.6471	22.0505
30	22.8164	20.6714	21.9976	25.2307	22.281	21.683
31	22.4501	20.3025	21.6298	24.8674	21.9141	21.3148
32	22.083	19.9329	21.2612	24.5031	21.5464	20.9458
33	21.7154	19.5623	20.892	24.1387	21.1781	20.576
34	21.3479	19.1913	20.5226	23.7749	20.8096	20.206
35	20.9802	18.8197	20.1529	23.4114	20.4409	19.8356
36	20.61	18.4456	19.7807	23.0455	20.0697	19.4626
37	20.2365	18.068	19.4051	22.6763	19.6951	19.0862
38	19.8624	17.6891	19.0285	22.3071	19.3196	18.7088
39	19.4901	17.3116	18.6537	21.9403	18.9458	18.3329
40	19.1188	16.9352	18.2798	21.5744	18.5731	17.9581
41	18.7488	16.5602	17.9072	21.2096	18.2017	17.5845
42	18.3822	16.1882	17.5378	20.8483	17.8335	17.2141
43	18.0176	15.8181	17.1703	20.4893	17.4673	16.8456
44	17.6567	15.4511	16.8063	20.1347	17.1046	16.4804
45	17.3009	15.0886	16.4472	19.7857	16.7467	16.1199
46	16.9497	14.7303	16.0924	19.4415	16.3934	15.7638
47	16.6028	14.3766	15.742	19.1015	16.0444	15.4121
48	16.2619	14.0285	15.3974	18.7676	15.7013	15.0661
49	15.9272	13.6863	15.0588	18.4403	15.3643	14.7261
50	15.5995	13.3507	14.7271	18.1202	15.0341	14.3928
51	15.2799	13.0225	14.4031	17.8089	14.7119	14.0673
52	14.9658	12.6993	14.0844	17.5036	14.3949	13.7469
53	14.6557	12.3797	13.7695	17.2026	14.0818	13.4302
54	14.3499	12.0639	13.4587	16.9065	13.7729	13.1176
55	14.0495	11.7527	13.1529	16.6162	13.4691	12.81
56	13.7539	11.4458	12.8518	16.3315	13.1701	12.507
57	13.4632	11.1433	12.5553	16.052	12.8758	12.2086
58	13.1778	10.8455	12.2639	15.7779	12.5865	11.9152
59	12.895	10.5503	11.975	15.5067	12.3	11.6245
60	12.6122	10.255	11.6861	15.2351	12.0134	11.3339
61	12.3318	9.96192	11.3995	14.9658	11.7292	11.0459
62	12.0548	9.67211	11.1162	14.6998	11.4485	10.7615
63	11.7814	9.38576	10.8365	14.4368	11.1714	10.481
64	11.5115	9.10318	10.5604	14.1764	10.8981	10.2048
65	11.2457	8.82515	10.2886	13.9188	10.6293	9.93389
66	10.9836	8.55164	10.021	13.6626	10.3647	9.66848
67	10.7253	8.2832	9.75779	13.4065	10.1048	9.40957
68	10.4718	8.022	9.5005	13.1494	9.85107	9.15985
69	10.2233	7.76869	9.24989	12.8941	9.60429	8.91893
70	9.979	7.52257	9.00556	12.6438	9.36359	8.68415
71	9.73876	7.28312	8.76709	12.3982	9.12831	8.45488
72	9.5027	7.0502	8.53443	12.157	8.89835	8.23105
73	9.27093	6.8237	8.30752	11.9203	8.67364	8.01263
74	9.04354	6.6035	8.08629	11.6881	8.4541	7.79955
75	8.8206	6.38949	7.87066	11.4603	8.23968	7.59176
76	8.60217	6.18157	7.66055	11.2368	8.0303	7.38921
77	8.38826	5.97963	7.45588	11.0175	7.82589	7.19182
78	8.17889	5.78355	7.25654	10.8026	7.6264	6.99954
79	7.97406	5.59321	7.06244	10.5918	7.43174	6.81227
80	7.77376	5.4085	6.87348	10.3851	7.24183	6.62995
81	7.57795	5.22929	6.68955	10.1825	7.0566	6.45247
82	7.38661	5.05547	6.51054	9.98387	6.87597	6.27976
83	7.19968	4.8869	6.33635	9.78918	6.69984	6.1117
84	7.01711	4.72347	6.16686	9.59836	6.52812	5.9482
85	6.83885	4.56505	6.00197	9.41133	6.36074	5.78915
86	6.66482	4.41151	5.84155	9.22802	6.19758	5.63444
87	6.49495	4.26274	5.6855	9.04835	6.03856	5.48398
88	6.32917	4.11861	5.5337	8.87225	5.88358	5.33764
89	6.16739	3.979	5.38605	8.69964	5.73255	5.19531
90	6.00953	3.84378	5.24243	8.53044	5.58536	5.05689
91	5.85551	3.71285	5.10273	8.36457	5.44192	4.92226
92	5.70522	3.58608	4.96685	8.20194	5.30214	4.79131
93	5.5586	3.46336	4.83467	8.04248	5.1659	4.66394
94	5.41553	3.34457	4.70609	7.8861	5.03313	4.54002
95	5.27594	3.2296	4.581	7.73271	4.90372	4.41947
96	5.13973	3.11834	4.45931	7.58223	4.77758	4.30216
97	5.0068	3.01069	4.3409	7.43458	4.65462	4.188
98	4.87707	2.90654	4.22568	7.28968	4.53474	4.07688
99	4.75044	2.80579	4.11356	7.14744	4.41785	3.96871
100	4.62682	2.70833	4.00444	7.00778	4.30388	3.86338
101	4.50613	2.61407	3.89823	6.87062	4.19273	3.76081
102	4.38828	2.52291	3.79483	6.73589	4.08432	3.66089
103	4.27318	2.43476	3.69416	6.6035	3.97856	3.56355
104	4.16075	2.34952	3.59613	6.47338	3.87538	3.46869
105	4.05091	2.26712	3.50067	6.34546	3.77471	3.37623
106	3.94359	2.18745	3.40768	6.21966	3.67645	3.28609
107	3.83869	2.11044	3.3171	6.09592	3.58055	3.19819
108	3.73616	2.03599	3.22884	5.97417	3.48694	3.11246
109	3.63592	1.96405	3.14283	5.85435	3.39553	3.02881
110	3.5379	1.89451	3.05901	5.73639	3.30628	2.94719
111	3.44203	1.82731	2.9773	5.62024	3.21911	2.86753
112	3.34826	1.76238	2.89764	5.50583	3.13396	2.78976
113	3.25651	1.69964	2.81997	5.39312	3.05078	2.71382
114	3.16674	1.63902	2.74422	5.28204	2.9695	2.63965
115	3.07889	1.58046	2.67033	5.17257	2.89008	2.56719
116	2.9929	1.52388	2.59825	5.06464	2.81246	2.4964
117	2.90874	1.46923	2.52792	4.95821	2.73659	2.42722
118	2.82633	1.41645	2.4593	4.85325	2.66242	2.3596
119	2.74566	1.36546	2.39233	4.74971	2.58991	2.2935
120	2.66667	1.31622	2.32695	4.64757	2.51901	2.22888
121	2.58931	1.26867	2.26314	4.54678	2.44968	2.16568
122	2.51357	1.22275	2.20084	4.44731	2.38188	2.10387
123	2.43939	1.1784	2.14	4.34915	2.31556	2.04342
124	2.36675	1.13559	2.0806	4.25225	2.2507	1.98429
125	2.29562	1.09425	2.02259	4.15661	2.18725	1.92645
126	2.22596	1.05434	1.96592	4.06219	2.12518	1.86986
127	2.15775	1.01581	1.91058	3.96897	2.06446	1.81449
128	2.09097	0.978617	1.85651	3.87695	2.00505	1.76032
129	2.02558	0.942715	1.8037	3.78609	1.94692	1.70732
130	1.96157	0.908062	1.7521	3.69639	1.89006	1.65546
131	1.89892	0.874615	1.70169	3.60784	1.83441	1.60471
132	1.8376	0.842335	1.65244	3.52042	1.77997	1.55507
133	1.7776	0.811182	1.60432	3.43412	1.7267	1.5065
134	1.7189	0.781119	1.5573	3.34893	1.67458	1.45898
135	1.66147	0.752109	1.51136	3.26485	1.62358	1.41249
136	1.60532	0.724117	1.46647	3.18187	1.57368	1.36702
137	1.55041	0.697107	1.42261	3.09998	1.52486	1.32255
138	1.49674	0.671048	1.37976	3.01918	1.47709	1.27906
139	1.44429	0.645906	1.33789	2.93946	1.43036	1.23652
140	1.39305	0.621651	1.29698	2.86082	1.38464	1.19494
141	1.34301	0.59825	1.25701	2.78326	1.33992	1.15428
142	1.29415	0.575676	1.21796	2.70679	1.29618	1.11454
143	1.24646	0.553897	1.17981	2.63139	1.25341	1.0757
144	1.19994	0.532887	1.14255	2.55707	1.21158	1.03775
145	1.15458	0.512617	1.10614	2.48384	1.17069	1.00066
146	1.11036	0.493059	1.07057	2.41171	1.13074	0.964433
147	1.06729	0.474186	1.03582	2.34067	1.0917	0.929047
148	1.02537	0.455969	1.00188	2.27076	1.05359	0.894488
149	0.984587	0.438382	0.968716	2.20198	1.01642	0.860743
150	0.944952	0.421411	0.936369	2.13442	0.980162	0.827838
151	0.906474	0.405006	0.904738	2.06799	0.944858	0.795699
152	0.869175	0.389139	0.873796	2.00274	0.910539	0.764332
153	0.833054	0.373829	0.843639	1.93885	0.877217	0.733835
154	0.798106	0.359067	0.814278	1.87637	0.844891	0.704233
155	0.764319	0.344844	0.785717	1.81533	0.813552	0.675541
156	0.731679	0.331148	0.757956	1.75576	0.783191	0.647762
157	0.700167	0.317964	0.730989	1.69765	0.753791	0.620894
158	0.669764	0.305277	0.704807	1.641	0.725336	0.59493
159	0.640448	0.293074	0.679399	1.58582	0.697806	0.569857
160	0.612197	0.281337	0.654753	1.53208	0.671181	0.54566
161	0.584986	0.270051	0.630855	1.47978	0.645441	0.522324
162	0.558793	0.259201	0.607691	1.4289	0.620562	0.499829
163	0.533593	0.248771	0.585244	1.37942	0.596524	0.478156
164	0.50936	0.238747	0.563499	1.33131	0.573305	0.457286
165	0.48607	0.229113	0.542441	1.28457	0.550883	0.437199
166	0.463698	0.219855	0.522054	1.23916	0.529236	0.417873
167	0.442219	0.21096	0.502321	1.19506	0.508343	0.399287
168	0.421607	0.202414	0.483226	1.15225	0.488183	0.381421
169	0.401839	0.194203	0.464755	1.11071	0.468734	0.364255
170	0.382889	0.186316	0.446891	1.0704	0.449976	0.347768
171	0.364734	0.17874	0.429619	1.03131	0.431889	0.33194
172	0.347348	0.171463	0.412924	0.993406	0.414453	0.31675
173	0.330709	0.164474	0.39679	0.95667	0.397649	0.302179
174	0.314792	0.157762	0.381203	0.921073	0.381458	0.288208
175	0.299574	0.151316	0.366147	0.886592	0.365861	0.274817
176	0.285032	0.145127	0.35161	0.853201	0.350839	0.261988
177	0.271142	0.139183	0.337576	0.820875	0.336375	0.249703
178	0.257884	0.133476	0.324031	0.78959	0.322452	0.237944
179	0.245232	0.127997	0.310962	0.759321	0.309052	0.226692
180	0.233166	0.122737	0.298356	0.730044	0.296159	0.21593
181	0.221663	0.117687	0.286199	0.701734	0.283757	0.205643
182	0.210699	0.112839	0.274478	0.674367	0.271829	0.195812
183	0.200253	0.108186	0.26318	0.64792	0.26036	0.186421
184	0.190304	0.103719	0.252294	0.622369	0.249336	0.177455
185	0.180833	0.0994315	0.241806	0.59769	0.238741	0.168898
186	0.17182	0.0953166	0.231705	0.573861	0.228561	0.160733
187	0.163245	0.0913675	0.22198	0.550859	0.218782	0.152946
188	0.155089	0.0875775	0.212618	0.528661	0.209391	0.14552
189	0.147332	0.0839405	0.203608	0.507246	0.200374	0.13844
190	0.139957	0.0804504	0.19494	0.48659	0.191718	0.131693
191	0.132945	0.0771014	0.186602	0.466673	0.183411	0.125266
192	0.126279	0.073888	0.178585	0.447474	0.175442	0.119145
193	0.119943	0.0708048	0.170877	0.428972	0.167797	0.113316
194	0.11392	0.0678466	0.163469	0.411146	0.160466	0.107767
195	0.108196	0.0650086	0.15635	0.393976	0.153436	0.102484
196	0.102755	0.0622859	0.149513	0.377442	0.146699	0.0974564
197	0.0975846	0.0596739	0.142946	0.361525	0.140242	0.0926712
198	0.0926709	0.0571684	0.136641	0.346207	0.134056	0.0881172
199	0.0880015	0.0547649	0.130589	0.331467	0.128131	0.0837836
200	0.0835643	0.0524594	0.124782	0.317289	0.122456	0.0796598
201	0.079348	0.0502481	0.11921	0.303654	0.117023	0.0757359
202	0.0753417	0.0481271	0.113866	0.290545	0.111822	0.0720024
203	0.071535	0.0460929	0.108742	0.277945	0.106844	0.06845
204	0.067918	0.0441419	0.10383	0.265837	0.102081	0.0650701
205	0.0644815	0.0422708	0.0991222	0.254204	0.0975222	0.0618545
206	0.0612165	0.0404765	0.0946115	0.243031	0.0931612	0.0587952
207	0.0581146	0.0387557	0.0902907	0.232303	0.0889899	0.0558846
208	0.0551675	0.0371056	0.0861529	0.222004	0.0850005	0.0531157
209	0.0523678	0.0355233	0.0821913	0.212119	0.0811855	0.0504816
210	0.049708	0.0340061	0.0783995	0.202634	0.0775377	0.0479757
211	0.0471813	0.0325513	0.074771	0.193535	0.0740498	0.0455919
212	0.044781	0.0311564	0.0712997	0.184808	0.070715	0.0433243
213	0.0425009	0.029819	0.0679797	0.17644	0.0675267	0.0411673
214	0.040335	0.0285367	0.064805	0.168419	0.0644785	0.0391154
215	0.0382775	0.0273074	0.0617701	0.160731	0.0615644	0.0371637
216	0.0363232	0.0261288	0.0588696	0.153364	0.0587783	0.0353072
217	0.0344668	0.0249989	0.056098	0.146307	0.0561149	0.0335414
218	0.0327035	0.0239157	0.0534501	0.139548	0.0535685	0.0318619
219	0.0310287	0.0228773	0.050921	0.133076	0.0511342	0.0302643
220	0.0294379	0.0218819	0.0485056	0.126881	0.0488069	0.0287449
221	0.0279269	0.0209277	0.046199	0.12095	0.046582	0.0272998
222	0.0264917	0.020013	0.0439969	0.115276	0.0444549	0.0259254
223	0.0251286	0.0191363	0.0418949	0.109847	0.0424213	0.0246181
224	0.023834	0.0182959	0.0398887	0.104654	0.0404772	0.0233749
225	0.0226044	0.0174904	0.0379743	0.0996875	0.0386186	0.0221925
226	0.0214365	0.0167184	0.0361476	0.0949392	0.0368416	0.021068
227	0.0203273	0.0159784	0.0344047	0.0904003	0.0351427	0.0199986
228	0.0192738	0.0152692	0.0327418	0.0860623	0.0335185	0.0189816
229	0.0182733	0.0145894	0.0311554	0.0819171	0.0319657	0.0180144
230	0.017323	0.013938	0.0296421	0.077957	0.0304811	0.0170947
231	0.0164205	0.0133136	0.0281984	0.0741743	0.0290617	0.01622
232	0.0155633	0.0127153	0.0268212	0.0705619	0.0277047	0.0153882
233	0.0147492	0.0121418	0.0255076	0.0671126	0.0264073	0.0145971
234	0.0139761	0.0115923	0.0242546	0.0638196	0.0251668	0.0138449
235	0.0132417	0.0110656	0.0230593	0.0606764	0.0239808	0.0131296
236	0.0125443	0.010561	0.0219193	0.0576765	0.0228469	0.0124494
237	0.0118819	0.0100773	0.0208319	0.0548138	0.0217627	0.0118025
238	0.0112528	0.00961387	0.0197948	0.0520825	0.0207262	0.0111874
239	0.0106552	0.00916977	0.0188056	0.0494768	0.0197351	0.0106025
240	0.0100877	0.00874421	0.0178622	0.0469913	0.0187875	0.0100463
241	0.00954869	0.00833642	0.0169624	0.0446209	0.0178815	0.00951745
242	0.00903673	0.00794567	0.0161042	0.0423604	0.0170152	0.00901452
243	0.00855048	0.00757126	0.0152857	0.0402049	0.016187	0.00853629
244	0.00808863	0.0072125	0.0145052	0.0381499	0.015395	0.00808155
245	0.00764996	0.00686875	0.0137608	0.0361907	0.0146378	0.00764913
246	0.00723329	0.00653938	0.0130509	0.0343231	0.0139138	0.00723796
247	0.00683753	0.0062238	0.0123739	0.032543	0.0132216	0.00684698
248	0.00646162	0.00592143	0.0117283	0.0308465	0.0125597	0.00647521
249	0.00610456	0.00563174	0.0111127	0.0292297	0.0119269	0.00612171
250	0.00576541	0.00535419	0.0105256	0.0276891	0.0113218	0.00578558
251	0.00544326	0.00508828	0.00996586	0.0262212	0.0107433	0.00546597
252	0.00513726	0.00483353	0.00943213	0.0248227	0.0101901	0.00516208
253	0.0048466	0.00458948	0.00892324	0.0234905	0.0096613	0.00487313
254	0.00457052	0.00435569	0.00843805	0.0222216	0.00915567	0.00459839
255	0.00430828	0.00413173	0.00797548	0.021013	0.00867227	0.00433718
256	0.00405919	0.00391721	0.0075345	0.0198621	0.00821012	0.00408884
257	0.0038226	0.00371172	0.00711414	0.0187661	0.00776831	0.00385273
258	0.00359789	0.00351491	0.00671345	0.0177225	0.00734597	0.00362826
259	0.00338446	0.00332642	0.00633155	0.0167289	0.00694226	0.00341488
260	0.00318175	0.00314592	0.00596759	0.0157829	0.00655637	0.00321204
261	0.00298925	0.00297308	0.00562077	0.0148823	0.00618757	0.00301923
262	0.00280644	0.00280759	0.00529031	0.0140251	0.00583511	0.00283599
263	0.00263285	0.00264917	0.0049755	0.0132092	0.00549833	0.00266184
264	0.00246804	0.00249753	0.00467564	0.0124327	0.00517656	0.00249636
265	0.00231157	0.0023524	0.00439007	0.0116937	0.00486918	0.00233913
266	0.00216305	0.00221354	0.00411818	0.0109905	0.0045756	0.00218978
267	0.0020221	0.0020807	0.00385937	0.0103213	0.00429528	0.00204793
268	0.00188836	0.00195366	0.00361308	0.00968466	0.00402767	0.00191323
269	0.00176149	0.0018322	0.00337878	0.00907894	0.00377228	0.00178537
270	0.00164117	0.00171612	0.00315597	0.00850273	0.00352863	0.00166402
271	0.00152711	0.00160523	0.00294418	0.00795466	0.00329628	0.00154891
272	0.00141902	0.00149934	0.00274295	0.00743344	0.0030748	0.00143975
273	0.00131665	0.00139832	0.00255186	0.00693785	0.0028638	0.0013363
274	0.00121973	0.00130194	0.0023705	0.00646673	0.00266291	0.0012383
275	0.00112804	0.00121009	0.00219849	0.00601899	0.00247177	0.00114553
276	0.00104136	0.00112262	0.00203546	0.00559359	0.00229004	0.00105778
277	0.000959479	0.00103939	0.00188105	0.00518954	0.00211742	0.000974838
278	0.000882208	0.000960276	0.0017349	0.00480592	0.00195359	0.000896522
279	0.00080936	0.00088513	0.00159669	0.0044418	0.00179827	0.000822649
280	0.000740756	0.000813873	0.00146606	0.0040963	0.00165117	0.000753041
281	0.000676224	0.000746353	0.00134271	0.00376853	0.001512	0.000687528
282	0.000615588	0.000682435	0.00122632	0.00345756	0.00138045	0.000625936
283	0.000558669	0.000621968	0.00111653	0.00316241	0.0012562	0.000568087
284	0.000505275	0.000564779	0.00101295	0.00288201	0.00113888	0.000513788
285	0.000455189	0.000510656	0.000915154	0.00261511	0.00102806	0.000462824
286	0.000408159	0.000459341	0.000822614	0.00236023	0.000923223	0.000414942
287	0.000363877	0.000410496	0.00073471	0.00211557	0.000823717	0.000369836
288	0.000321956	0.00036368	0.00065067	0.00187932	0.000728707	0.00032712
289	0.000281958	0.000318626	0.000569927	0.00165072	0.000637553	0.000286364
290	0.000243639	0.000275348	0.000492401	0.00143001	0.000550147	0.000247337
291	0.000206987	0.000233919	0.000418206	0.00121763	0.000466644	0.000210037
292	0.000172075	0.000194461	0.000347553	0.00101432	0.000387293	0.000174549
293	0.000139092	0.000157165	0.000280778	0.000821232	0.00031247	0.000141048
294	0.000108281	0.000122312	0.000218386	0.000639996	0.000242725	0.000109769
295	7.99779e-05	9.02975e-05	0.000161094	0.000472896	0.000178832	8.10499e-05
296	5.4651e-05	6.16659e-05	0.000109891	0.000323032	0.000121859	5.53631e-05
297	3.2946e-05	3.71565e-05	6.61111e-05	0.000194529	7.32454e-05	3.33628e-05
298	1.57447e-05	1.77604e-05	3.15295e-05	9.28122e-05	3.49124e-05	1.59399e-05
299	4.23503e-06	4.79485e-06	8.47869e-06	2.49338e-05	9.39242e-06	4.28997e-06
