# Supplementary material for: The Social Cost of Fossil and Industrial CO2 Emissions from 1950 to 2018
Source: Research Square preprint supplement (doi:10.21203/rs.3.rs-2244259/v1), 2022-11-17
Supplement: Supplementary file 227 [file sigma_Nordhaus_external.xlsx]

## Sheet: sigma_params
f	1	2	3	4	5	6
0	0.536505	0.536505	0.536505	0.536505	0.536505	0.536505
1	0.547945	0.547945	0.547945	0.547945	0.547945	0.547945
2	0.535062	0.535062	0.535062	0.535062	0.535062	0.535062
3	0.525274	0.525274	0.525274	0.525274	0.525274	0.525274
4	0.523454	0.523454	0.523454	0.523454	0.523454	0.523454
5	0.544054	0.544054	0.544054	0.544054	0.544054	0.544054
6	0.557999	0.557999	0.557999	0.557999	0.557999	0.557999
7	0.556339	0.556339	0.556339	0.556339	0.556339	0.556339
8	0.558194	0.558194	0.558194	0.558194	0.558194	0.558194
9	0.565507	0.565507	0.565507	0.565507	0.565507	0.565507
10	0.569734	0.569734	0.569734	0.569734	0.569734	0.569734
11	0.553099	0.553099	0.553099	0.553099	0.553099	0.553099
12	0.547294	0.547294	0.547294	0.547294	0.547294	0.547294
13	0.55132	0.55132	0.55132	0.55132	0.55132	0.55132
14	0.547814	0.547814	0.547814	0.547814	0.547814	0.547814
15	0.546701	0.546701	0.546701	0.546701	0.546701	0.546701
16	0.546866	0.546866	0.546866	0.546866	0.546866	0.546866
17	0.544677	0.544677	0.544677	0.544677	0.544677	0.544677
18	0.546127	0.546127	0.546127	0.546127	0.546127	0.546127
19	0.552042	0.552042	0.552042	0.552042	0.552042	0.552042
20	0.576616	0.576616	0.576616	0.576616	0.576616	0.576616
21	0.573811	0.573811	0.573811	0.573811	0.573811	0.573811
22	0.571353	0.571353	0.571353	0.571353	0.571353	0.571353
23	0.567018	0.567018	0.567018	0.567018	0.567018	0.567018
24	0.549981	0.549981	0.549981	0.549981	0.549981	0.549981
25	0.541965	0.541965	0.541965	0.541965	0.541965	0.541965
26	0.543753	0.543753	0.543753	0.543753	0.543753	0.543753
27	0.536904	0.536904	0.536904	0.536904	0.536904	0.536904
28	0.534874	0.534874	0.534874	0.534874	0.534874	0.534874
29	0.527777	0.527777	0.527777	0.527777	0.527777	0.527777
30	0.513589	0.513589	0.513589	0.513589	0.513589	0.513589
31	0.490124	0.490124	0.490124	0.490124	0.490124	0.490124
32	0.482861	0.482861	0.482861	0.482861	0.482861	0.482861
33	0.474245	0.474245	0.474245	0.474245	0.474245	0.474245
34	0.466959	0.466959	0.466959	0.466959	0.466959	0.466959
35	0.466975	0.466975	0.466975	0.466975	0.466975	0.466975
36	0.457426	0.457426	0.457426	0.457426	0.457426	0.457426
37	0.454364	0.454364	0.454364	0.454364	0.454364	0.454364
38	0.451984	0.451984	0.451984	0.451984	0.451984	0.451984
39	0.443248	0.443248	0.443248	0.443248	0.443248	0.443248
40	0.439586	0.439586	0.439586	0.439586	0.439586	0.439586
41	0.444372	0.444372	0.444372	0.444372	0.444372	0.444372
42	0.424212	0.424212	0.424212	0.424212	0.424212	0.424212
43	0.421533	0.421533	0.421533	0.421533	0.421533	0.421533
44	0.413172	0.413172	0.413172	0.413172	0.413172	0.413172
45	0.408812	0.408812	0.408812	0.408812	0.408812	0.408812
46	0.40596	0.40596	0.40596	0.40596	0.40596	0.40596
47	0.393315	0.393315	0.393315	0.393315	0.393315	0.393315
48	0.384	0.384	0.384	0.384	0.384	0.384
49	0.376151	0.376151	0.376151	0.376151	0.376151	0.376151
50	0.369674	0.369674	0.369674	0.369674	0.369674	0.369674
51	0.364028	0.364028	0.364028	0.364028	0.364028	0.364028
52	0.361697	0.361697	0.361697	0.361697	0.361697	0.361697
53	0.365956	0.365956	0.365956	0.365956	0.365956	0.365956
54	0.364554	0.364554	0.364554	0.364554	0.364554	0.364554
55	0.36017	0.36017	0.36017	0.36017	0.36017	0.36017
56	0.353828	0.353828	0.353828	0.353828	0.353828	0.353828
57	0.347614	0.347614	0.347614	0.347614	0.347614	0.347614
58	0.346532	0.346532	0.346532	0.346532	0.346532	0.346532
59	0.348993	0.348993	0.348993	0.348993	0.348993	0.348993
60	0.343454	0.343454	0.343454	0.343454	0.343454	0.343454
61	0.341758	0.341758	0.341758	0.341758	0.341758	0.341758
62	0.338907	0.338907	0.338907	0.338907	0.338907	0.338907
63	0.335744	0.335744	0.335744	0.335744	0.335744	0.335744
64	0.333289	0.333289	0.333289	0.333289	0.333289	0.333289
65	0.332269	0.332269	0.332269	0.332269	0.332269	0.332269
66	0.331283	0.331283	0.331283	0.331283	0.331283	0.331283
67	0.329165	0.329165	0.329165	0.329165	0.329165	0.329165
68	0.328749	0.328749	0.328749	0.328749	0.328749	0.328749
69	0.328712	0.328712	0.328712	0.328712	0.328712	0.328712
70	0.323754	0.320173	0.325178	0.327338	0.323758	0.323864
71	0.318875	0.311863	0.321686	0.325971	0.318884	0.319092
72	0.314074	0.303778	0.318234	0.32461	0.314087	0.314395
73	0.30935	0.295909	0.314823	0.323257	0.309368	0.309772
74	0.304702	0.288252	0.311452	0.321911	0.304723	0.305221
75	0.300128	0.280801	0.308121	0.320572	0.300154	0.300742
76	0.295628	0.273549	0.304828	0.319239	0.295657	0.296332
77	0.291199	0.266491	0.301573	0.317914	0.291232	0.291992
78	0.286841	0.259623	0.298357	0.316595	0.286877	0.28772
79	0.282553	0.252938	0.295178	0.315283	0.282592	0.283514
80	0.278332	0.246431	0.292036	0.313978	0.278375	0.279373
81	0.274179	0.240099	0.288931	0.31268	0.274225	0.275298
82	0.270092	0.233935	0.285861	0.311388	0.270141	0.271285
83	0.26607	0.227935	0.282827	0.310103	0.266122	0.267336
84	0.262112	0.222095	0.279829	0.308824	0.262167	0.263447
85	0.258216	0.21641	0.276865	0.307552	0.258274	0.259619
86	0.254383	0.210876	0.273936	0.306286	0.254443	0.25585
87	0.25061	0.205489	0.27104	0.305027	0.250672	0.25214
88	0.246896	0.200245	0.268178	0.303775	0.246961	0.248487
89	0.243241	0.195139	0.265349	0.302528	0.243309	0.24489
90	0.239644	0.190169	0.262552	0.301288	0.239714	0.241349
91	0.236104	0.18533	0.259788	0.300055	0.236176	0.237863
92	0.232619	0.180619	0.257056	0.298827	0.232693	0.234431
93	0.229189	0.176032	0.254355	0.297606	0.229265	0.231051
94	0.225813	0.171566	0.251685	0.296391	0.225892	0.227724
95	0.22249	0.167218	0.249045	0.295183	0.222571	0.224447
96	0.21922	0.162984	0.246436	0.29398	0.219302	0.221221
97	0.216	0.158861	0.243857	0.292784	0.216084	0.218045
98	0.212831	0.154847	0.241308	0.291593	0.212917	0.214917
99	0.209712	0.150938	0.238787	0.290409	0.209799	0.211837
100	0.206641	0.147131	0.236295	0.28923	0.20673	0.208805
101	0.203618	0.143424	0.233832	0.288058	0.203708	0.205818
102	0.200643	0.139814	0.231397	0.286891	0.200734	0.202878
103	0.197714	0.136298	0.22899	0.285731	0.197807	0.199982
104	0.19483	0.132874	0.22661	0.284576	0.194924	0.19713
105	0.191992	0.12954	0.224257	0.283427	0.192087	0.194322
106	0.189197	0.126292	0.221931	0.282284	0.189294	0.191557
107	0.186446	0.123129	0.219631	0.281146	0.186544	0.188833
108	0.183738	0.120048	0.217358	0.280014	0.183836	0.186151
109	0.181071	0.117047	0.21511	0.278888	0.181171	0.18351
110	0.178446	0.114124	0.212888	0.277768	0.178547	0.180909
111	0.175862	0.111277	0.210691	0.276653	0.175963	0.178347
112	0.173317	0.108504	0.208518	0.275544	0.17342	0.175824
113	0.170812	0.105802	0.20637	0.27444	0.170915	0.173339
114	0.168345	0.10317	0.204247	0.273342	0.168449	0.170892
115	0.165917	0.100607	0.202147	0.272249	0.166022	0.168482
116	0.163526	0.0981091	0.200071	0.271162	0.163631	0.166108
117	0.161171	0.0956759	0.198019	0.27008	0.161278	0.16377
118	0.158853	0.0933055	0.195989	0.269004	0.15896	0.161467
119	0.156571	0.0909961	0.193982	0.267933	0.156678	0.159198
120	0.154323	0.088746	0.191998	0.266867	0.154431	0.156964
121	0.15211	0.0865538	0.190036	0.265807	0.152219	0.154763
122	0.149931	0.0844178	0.188096	0.264751	0.15004	0.152596
123	0.147785	0.0823366	0.186178	0.263701	0.147895	0.15046
124	0.145673	0.0803087	0.184281	0.262657	0.145782	0.148357
125	0.143592	0.0783327	0.182405	0.261617	0.143702	0.146285
126	0.141543	0.0764073	0.180551	0.260583	0.141653	0.144244
127	0.139525	0.074531	0.178717	0.259554	0.139636	0.142234
128	0.137538	0.0727026	0.176903	0.258529	0.137649	0.140254
129	0.135582	0.0709208	0.17511	0.25751	0.135693	0.138303
130	0.133655	0.0691844	0.173336	0.256496	0.133766	0.136381
131	0.131757	0.0674922	0.171583	0.255487	0.131868	0.134488
132	0.129888	0.065843	0.169848	0.254483	0.13	0.132623
133	0.128048	0.0642357	0.168133	0.253484	0.128159	0.130785
134	0.126235	0.0626691	0.166437	0.252489	0.126347	0.128975
135	0.12445	0.0611423	0.16476	0.2515	0.124561	0.127192
136	0.122692	0.0596542	0.163101	0.250516	0.122803	0.125435
137	0.12096	0.0582037	0.161461	0.249536	0.121072	0.123704
138	0.119254	0.0567899	0.159839	0.248561	0.119366	0.121999
139	0.117575	0.0554118	0.158234	0.247591	0.117686	0.120318
140	0.11592	0.0540684	0.156648	0.246626	0.116032	0.118663
141	0.11429	0.0527589	0.155079	0.245665	0.114402	0.117032
142	0.112685	0.0514824	0.153527	0.244709	0.112797	0.115425
143	0.111104	0.050238	0.151992	0.243758	0.111216	0.113842
144	0.109547	0.0490249	0.150474	0.242811	0.109658	0.112282
145	0.108013	0.0478423	0.148972	0.241869	0.108124	0.110745
146	0.106502	0.0466893	0.147488	0.240932	0.106613	0.10923
147	0.105014	0.0455652	0.146019	0.239999	0.105125	0.107738
148	0.103548	0.0444693	0.144566	0.239071	0.103658	0.106267
149	0.102104	0.0434008	0.14313	0.238147	0.102214	0.104818
150	0.100681	0.042359	0.141709	0.237228	0.100791	0.10339
151	0.0992798	0.0413432	0.140303	0.236313	0.0993897	0.101983
152	0.0978993	0.0403527	0.138913	0.235402	0.0980089	0.100597
153	0.0965393	0.0393869	0.137538	0.234496	0.0966487	0.0992303
154	0.0951996	0.0384452	0.136178	0.233595	0.0953087	0.0978839
155	0.0938798	0.0375269	0.134833	0.232698	0.0939885	0.0965571
156	0.0925795	0.0366314	0.133502	0.231805	0.092688	0.0952496
157	0.0912986	0.0357581	0.132186	0.230916	0.0914067	0.0939611
158	0.0900366	0.0349065	0.130884	0.230032	0.0901444	0.0926912
159	0.0887933	0.034076	0.129596	0.229152	0.0889007	0.0914398
160	0.0875684	0.0332661	0.128322	0.228276	0.0876755	0.0902065
161	0.0863616	0.0324762	0.127062	0.227404	0.0864683	0.088991
162	0.0851726	0.0317058	0.125816	0.226537	0.0852789	0.0877931
163	0.0840011	0.0309545	0.124583	0.225674	0.0841071	0.0866125
164	0.0828469	0.0302216	0.123363	0.224815	0.0829525	0.085449
165	0.0817097	0.0295068	0.122156	0.22396	0.0818148	0.0843022
166	0.0805892	0.0288097	0.120963	0.223109	0.0806939	0.0831719
167	0.0794852	0.0281296	0.119782	0.222262	0.0795895	0.0820579
168	0.0783973	0.0274663	0.118614	0.22142	0.0785012	0.0809599
169	0.0773255	0.0268192	0.117459	0.220581	0.0774289	0.0798776
170	0.0762693	0.0261881	0.116315	0.219746	0.0763723	0.0788109
171	0.0752286	0.0255723	0.115185	0.218916	0.0753312	0.0777595
172	0.0742031	0.0249717	0.114066	0.218089	0.0743052	0.0767232
173	0.0731926	0.0243857	0.112959	0.217266	0.0732943	0.0757016
174	0.0721969	0.0238141	0.111864	0.216447	0.072298	0.0746947
175	0.0712156	0.0232564	0.110781	0.215632	0.0713163	0.0737021
176	0.0702487	0.0227123	0.109709	0.214821	0.0703489	0.0727238
177	0.0692959	0.0221815	0.108649	0.214014	0.0693956	0.0717593
178	0.0683569	0.0216636	0.1076	0.213211	0.0684561	0.0708086
179	0.0674315	0.0211582	0.106562	0.212411	0.0675303	0.0698714
180	0.0665196	0.0206652	0.105535	0.211615	0.0666178	0.0689476
181	0.0656209	0.0201841	0.104519	0.210824	0.0657186	0.0680368
182	0.0647352	0.0197147	0.103514	0.210035	0.0648325	0.067139
183	0.0638624	0.0192566	0.10252	0.209251	0.0639591	0.066254
184	0.0630021	0.0188097	0.101536	0.20847	0.0630984	0.0653814
185	0.0621543	0.0183735	0.100562	0.207693	0.0622501	0.0645212
186	0.0613188	0.0179479	0.0995989	0.206919	0.061414	0.0636732
187	0.0604953	0.0175325	0.0986459	0.20615	0.06059	0.0628371
188	0.0596836	0.0171272	0.0977029	0.205384	0.0597778	0.0620128
189	0.0588837	0.0167316	0.0967698	0.204621	0.0589773	0.0612002
190	0.0580952	0.0163455	0.0958466	0.203862	0.0581883	0.060399
191	0.0573181	0.0159687	0.0949331	0.203107	0.0574107	0.0596091
192	0.0565522	0.015601	0.0940292	0.202355	0.0566442	0.0588302
193	0.0557972	0.0152421	0.0931348	0.201607	0.0558887	0.0580624
194	0.055053	0.0148918	0.0922498	0.200862	0.055144	0.0573053
195	0.0543195	0.0145499	0.0913741	0.20012	0.0544099	0.0565588
196	0.0535965	0.0142162	0.0905076	0.199383	0.0536864	0.0558227
197	0.0528838	0.0138904	0.0896501	0.198648	0.0529732	0.055097
198	0.0521813	0.0135724	0.0888016	0.197917	0.0522701	0.0543814
199	0.0514888	0.013262	0.087962	0.19719	0.0515771	0.0536758
200	0.0508062	0.012959	0.0871311	0.196466	0.0508939	0.0529801
201	0.0501333	0.0126633	0.0863089	0.195745	0.0502205	0.052294
202	0.04947	0.0123745	0.0854953	0.195028	0.0495566	0.0516175
203	0.0488161	0.0120926	0.0846901	0.194314	0.0489022	0.0509505
204	0.0481715	0.0118174	0.0838933	0.193603	0.048257	0.0502927
205	0.047536	0.0115488	0.0831048	0.192895	0.047621	0.049644
206	0.0469096	0.0112865	0.0823245	0.192191	0.046994	0.0490044
207	0.046292	0.0110304	0.0815523	0.19149	0.0463759	0.0483736
208	0.0456831	0.0107804	0.0807881	0.190793	0.0457665	0.0477515
209	0.0450829	0.0105363	0.0800318	0.190099	0.0451657	0.0471381
210	0.0444911	0.0102979	0.0792833	0.189407	0.0445734	0.0465331
211	0.0439077	0.0100652	0.0785426	0.188719	0.0439894	0.0459365
212	0.0433325	0.00983796	0.0778095	0.188035	0.0434137	0.0453482
213	0.0427654	0.00961607	0.077084	0.187353	0.042846	0.0447679
214	0.0422062	0.00939939	0.0763659	0.186675	0.0422863	0.0441956
215	0.041655	0.00918781	0.0756553	0.185999	0.0417345	0.0436313
216	0.0411114	0.00898119	0.074952	0.185327	0.0411905	0.0430746
217	0.0405755	0.00877942	0.0742559	0.184658	0.040654	0.0425257
218	0.0400471	0.00858238	0.0735669	0.183992	0.0401251	0.0419842
219	0.0395261	0.00838995	0.072885	0.183329	0.0396036	0.0414502
220	0.0390124	0.00820203	0.0722102	0.182669	0.0390893	0.0409235
221	0.0385059	0.00801849	0.0715422	0.182012	0.0385823	0.040404
222	0.0380065	0.00783924	0.0708811	0.181358	0.0380823	0.0398916
223	0.037514	0.00766416	0.0702267	0.180708	0.0375893	0.0393862
224	0.0370284	0.00749317	0.069579	0.18006	0.0371031	0.0388877
225	0.0365495	0.00732616	0.068938	0.179415	0.0366237	0.0383961
226	0.0360773	0.00716303	0.0683034	0.178773	0.036151	0.0379111
227	0.0356117	0.00700369	0.0676754	0.178134	0.0356849	0.0374327
228	0.0351525	0.00684805	0.0670537	0.177498	0.0352252	0.0369608
229	0.0346997	0.00669602	0.0664383	0.176864	0.0347719	0.0364953
230	0.0342532	0.00654751	0.0658293	0.176234	0.0343248	0.0360362
231	0.0338129	0.00640244	0.0652263	0.175607	0.033884	0.0355832
232	0.0333786	0.00626072	0.0646296	0.174982	0.0334492	0.0351365
233	0.0329504	0.00612228	0.0640388	0.17436	0.0330205	0.0346957
234	0.0325281	0.00598703	0.0634541	0.173741	0.0325976	0.0342609
235	0.0321116	0.0058549	0.0628752	0.173125	0.0321806	0.033832
236	0.0317008	0.00572581	0.0623022	0.172512	0.0317694	0.0334089
237	0.0312957	0.0055997	0.061735	0.171902	0.0313638	0.0329915
238	0.0308962	0.00547648	0.0611735	0.171294	0.0309638	0.0325797
239	0.0305022	0.0053561	0.0606177	0.170689	0.0305692	0.0321735
240	0.0301135	0.00523848	0.0600675	0.170087	0.0301801	0.0317727
241	0.0297302	0.00512355	0.0595228	0.169487	0.0297963	0.0313773
242	0.0293522	0.00501126	0.0589836	0.16889	0.0294178	0.0309873
243	0.0289794	0.00490154	0.0584498	0.168296	0.0290445	0.0306024
244	0.0286116	0.00479432	0.0579214	0.167705	0.0286762	0.0302227
245	0.0282489	0.00468956	0.0573982	0.167116	0.028313	0.0298481
246	0.0278911	0.00458718	0.0568803	0.16653	0.0279547	0.0294785
247	0.0275382	0.00448714	0.0563676	0.165946	0.0276014	0.0291139
248	0.0271901	0.00438938	0.0558601	0.165365	0.0272528	0.0287541
249	0.0268468	0.00429384	0.0553575	0.164787	0.026909	0.0283991
250	0.0265081	0.00420048	0.05486	0.164211	0.0265699	0.0280488
251	0.0261741	0.00410923	0.0543675	0.163638	0.0262353	0.0277032
252	0.0258446	0.00402006	0.0538799	0.163068	0.0259053	0.0273622
253	0.0255195	0.0039329	0.0533971	0.1625	0.0255798	0.0270258
254	0.0251989	0.00384772	0.0529191	0.161935	0.0252587	0.0266938
255	0.0248826	0.00376447	0.0524459	0.161372	0.024942	0.0263662
256	0.0245705	0.0036831	0.0519774	0.160811	0.0246295	0.0260429
257	0.0242627	0.00360357	0.0515135	0.160253	0.0243212	0.025724
258	0.0239591	0.00352583	0.0510543	0.159698	0.0240171	0.0254092
259	0.0236595	0.00344984	0.0505995	0.159145	0.0237171	0.0250986
260	0.023364	0.00337557	0.0501493	0.158595	0.0234212	0.0247921
261	0.0230725	0.00330296	0.0497035	0.158047	0.0231292	0.0244897
262	0.0227849	0.00323199	0.0492621	0.157501	0.0228412	0.0241912
263	0.0225012	0.00316261	0.0488251	0.156958	0.022557	0.0238967
264	0.0222213	0.00309479	0.0483924	0.156417	0.0222766	0.023606
265	0.0219451	0.00302849	0.047964	0.155879	0.022	0.0233192
266	0.0216726	0.00296367	0.0475397	0.155343	0.0217271	0.0230361
267	0.0214038	0.0029003	0.0471197	0.15481	0.0214579	0.0227568
268	0.0211386	0.00283835	0.0467037	0.154279	0.0211923	0.0224811
269	0.0208769	0.00277778	0.0462919	0.15375	0.0209302	0.022209
270	0.0206188	0.00271857	0.045884	0.153223	0.0206716	0.0219405
271	0.020364	0.00266067	0.0454802	0.152699	0.0204164	0.0216755
272	0.0201127	0.00260406	0.0450804	0.152177	0.0201647	0.0214139
273	0.0198647	0.00254871	0.0446844	0.151658	0.0199163	0.0211558
274	0.0196201	0.00249459	0.0442923	0.151141	0.0196712	0.020901
275	0.0193786	0.00244168	0.043904	0.150626	0.0194294	0.0206496
276	0.0191404	0.00238993	0.0435196	0.150113	0.0191908	0.0204014
277	0.0189054	0.00233934	0.0431388	0.149602	0.0189553	0.0201565
278	0.0186734	0.00228986	0.0427618	0.149094	0.018723	0.0199147
279	0.0184445	0.00224148	0.0423885	0.148588	0.0184937	0.019676
280	0.0182187	0.00219417	0.0420187	0.148085	0.0182675	0.0194405
281	0.0179959	0.0021479	0.0416526	0.147583	0.0180442	0.019208
282	0.017776	0.00210265	0.04129	0.147084	0.0178239	0.0189785
283	0.017559	0.0020584	0.0409309	0.146587	0.0176065	0.018752
284	0.0173448	0.00201512	0.0405753	0.146092	0.017392	0.0185284
285	0.0171335	0.0019728	0.0402232	0.145599	0.0171803	0.0183077
286	0.016925	0.0019314	0.0398744	0.145108	0.0169714	0.0180899
287	0.0167192	0.00189091	0.039529	0.14462	0.0167652	0.0178748
288	0.0165161	0.00185131	0.039187	0.144133	0.0165618	0.0176625
289	0.0163157	0.00181258	0.0388482	0.143649	0.016361	0.017453
290	0.0161179	0.0017747	0.0385127	0.143167	0.0161628	0.0172461
291	0.0159227	0.00173765	0.0381805	0.142687	0.0159673	0.0170419
292	0.01573	0.0017014	0.0378514	0.142209	0.0157743	0.0168403
293	0.0155399	0.00166595	0.0375255	0.141733	0.0155838	0.0166413
294	0.0153523	0.00163127	0.0372027	0.141259	0.0153958	0.0164449
295	0.0151671	0.00159734	0.036883	0.140787	0.0152102	0.0162509
296	0.0149843	0.00156415	0.0365664	0.140317	0.0150271	0.0160595
297	0.0148039	0.00153169	0.0362528	0.13985	0.0148464	0.0158704
298	0.0146259	0.00149993	0.0359422	0.139384	0.014668	0.0156838
299	0.0144501	0.00146886	0.0356346	0.13892	0.0144919	0.0154996
300	0.0142767	0.00143846	0.0353299	0.138459	0.0143181	0.0153177
301	0.0141055	0.00140872	0.0350281	0.137999	0.0141466	0.0151381
302	0.0139365	0.00137963	0.0347292	0.137541	0.0139773	0.0149608
303	0.0137698	0.00135116	0.0344332	0.137086	0.0138102	0.0147858
304	0.0136051	0.00132331	0.0341399	0.136632	0.0136452	0.014613
305	0.0134426	0.00129606	0.0338495	0.13618	0.0134824	0.0144423
306	0.0132822	0.0012694	0.0335618	0.13573	0.0133217	0.0142738
307	0.0131239	0.00124331	0.0332768	0.135282	0.013163	0.0141075
308	0.0129677	0.00121779	0.0329945	0.134836	0.0130064	0.0139433
309	0.0128134	0.00119281	0.0327149	0.134392	0.0128519	0.0137811
310	0.0126611	0.00116837	0.032438	0.13395	0.0126993	0.013621
311	0.0125108	0.00114445	0.0321637	0.13351	0.0125486	0.0134629
312	0.0123624	0.00112105	0.0318919	0.133072	0.0123999	0.0133068
313	0.0122159	0.00109814	0.0316227	0.132635	0.0122531	0.0131526
314	0.0120713	0.00107573	0.0313561	0.1322	0.0121082	0.0130004
315	0.0119286	0.0010538	0.031092	0.131768	0.0119652	0.0128501
316	0.0117877	0.00103233	0.0308303	0.131337	0.011824	0.0127017
317	0.0116486	0.00101133	0.0305712	0.130908	0.0116846	0.0125551
318	0.0115112	0.000990769	0.0303144	0.13048	0.0115469	0.0124104
319	0.0113756	0.000970648	0.0300601	0.130055	0.011411	0.0122675
320	0.0112418	0.000950955	0.0298081	0.129631	0.0112769	0.0121264
321	0.0111096	0.000931681	0.0295585	0.129209	0.0111445	0.011987
322	0.0109792	0.000912816	0.0293113	0.128789	0.0110137	0.0118494
323	0.0108504	0.000894351	0.0290663	0.128371	0.0108846	0.0117135
324	0.0107232	0.000876278	0.0288237	0.127955	0.0107572	0.0115792
325	0.0105977	0.000858587	0.0285833	0.12754	0.0106313	0.0114467
326	0.0104737	0.000841271	0.0283451	0.127127	0.0105071	0.0113158
327	0.0103513	0.000824321	0.0281092	0.126716	0.0103844	0.0111865
328	0.0102305	0.000807729	0.0278755	0.126306	0.0102633	0.0110588
329	0.0101112	0.000791487	0.0276439	0.125898	0.0101438	0.0109328
330	0.00999339	0.000775587	0.0274145	0.125492	0.0100257	0.0108082
331	0.00987708	0.000760022	0.0271872	0.125088	0.00990912	0.0106853
332	0.00976224	0.000744785	0.0269621	0.124685	0.00979401	0.0105638
333	0.00964885	0.000729867	0.026739	0.124285	0.00968035	0.0104438
334	0.00953689	0.000715263	0.026518	0.123885	0.00956813	0.0103253
335	0.00942633	0.000700966	0.026299	0.123488	0.00945731	0.0102083
336	0.00931717	0.000686968	0.0260821	0.123092	0.00934789	0.0100927
337	0.00920938	0.000673263	0.0258671	0.122698	0.00923984	0.00997857
338	0.00910294	0.000659845	0.0256542	0.122305	0.00913315	0.00986582
339	0.00899783	0.000646707	0.0254432	0.121914	0.00902779	0.00975444
340	0.00889404	0.000633844	0.0252341	0.121525	0.00892376	0.00964444
341	0.00879156	0.000621249	0.025027	0.121137	0.00882102	0.00953578
342	0.00869035	0.000608917	0.0248218	0.120751	0.00871957	0.00942846
343	0.00859041	0.000596841	0.0246185	0.120367	0.00861938	0.00932245
344	0.00849171	0.000585016	0.024417	0.119984	0.00852044	0.00921773
345	0.00839425	0.000573438	0.0242174	0.119603	0.00842274	0.0091143
346	0.008298	0.000562099	0.0240196	0.119223	0.00832625	0.00901212
347	0.00820295	0.000550996	0.0238236	0.118845	0.00823096	0.00891119
348	0.00810908	0.000540123	0.0236294	0.118469	0.00813686	0.00881149
349	0.00801638	0.000529475	0.023437	0.118094	0.00804393	0.00871301
350	0.00792482	0.000519047	0.0232463	0.117721	0.00795214	0.00861572
351	0.00783441	0.000508835	0.0230574	0.117349	0.0078615	0.00851962
352	0.00774511	0.000498834	0.0228702	0.116979	0.00777198	0.00842468
353	0.00765692	0.000489039	0.0226847	0.11661	0.00768356	0.00833089
354	0.00756982	0.000479445	0.0225009	0.116243	0.00759624	0.00823824
355	0.0074838	0.000470049	0.0223188	0.115877	0.00751	0.00814671
356	0.00739884	0.000460847	0.0221383	0.115513	0.00742482	0.00805629
357	0.00731493	0.000451834	0.0219595	0.11515	0.00734069	0.00796696
358	0.00723205	0.000443005	0.0217823	0.114789	0.00725759	0.0078787
359	0.00715019	0.000434358	0.0216067	0.11443	0.00717552	0.00779152
360	0.00706934	0.000425888	0.0214326	0.114071	0.00709446	0.00770538
361	0.00698948	0.000417591	0.0212602	0.113715	0.00701439	0.00762028
362	0.0069106	0.000409464	0.0210893	0.11336	0.00693531	0.0075362
363	0.0068327	0.000401503	0.0209199	0.113006	0.00685719	0.00745314
364	0.00675574	0.000393705	0.0207521	0.112654	0.00678003	0.00737107
365	0.00667973	0.000386065	0.0205858	0.112303	0.00670382	0.00728998
366	0.00660465	0.000378581	0.020421	0.111953	0.00662853	0.00720987
367	0.00653048	0.00037125	0.0202577	0.111605	0.00655417	0.00713072
368	0.00645723	0.000364068	0.0200958	0.111259	0.00648071	0.00705251
369	0.00638486	0.000357031	0.0199354	0.110914	0.00640815	0.00697524
370	0.00631338	0.000350138	0.0197764	0.11057	0.00633647	0.00689889
371	0.00624277	0.000343384	0.0196189	0.110228	0.00626567	0.00682345
372	0.00617301	0.000336767	0.0194627	0.109887	0.00619572	0.00674891
373	0.00610411	0.000330284	0.019308	0.109547	0.00612663	0.00667526
374	0.00603604	0.000323932	0.0191546	0.109209	0.00605837	0.00660248
375	0.0059688	0.000317708	0.0190027	0.108873	0.00599095	0.00653057
376	0.00590237	0.00031161	0.018852	0.108537	0.00592433	0.00645952
377	0.00583675	0.000305635	0.0187027	0.108203	0.00585853	0.0063893
378	0.00577192	0.000299781	0.0185548	0.107871	0.00579352	0.00631992
379	0.00570788	0.000294044	0.0184081	0.107539	0.00572929	0.00625136
380	0.00564461	0.000288422	0.0182628	0.107209	0.00566584	0.00618361
381	0.0055821	0.000282914	0.0181188	0.106881	0.00560316	0.00611667
382	0.00552035	0.000277516	0.017976	0.106554	0.00554123	0.00605051
383	0.00545934	0.000272226	0.0178345	0.106228	0.00548005	0.00598513
384	0.00539906	0.000267043	0.0176943	0.105903	0.0054196	0.00592053
385	0.00533951	0.000261963	0.0175552	0.10558	0.00535988	0.00585668
386	0.00528068	0.000256984	0.0174175	0.105258	0.00530087	0.00579359
387	0.00522255	0.000252105	0.0172809	0.104937	0.00524257	0.00573124
388	0.00516512	0.000247323	0.0171456	0.104618	0.00518497	0.00566962
389	0.00510837	0.000242637	0.0170114	0.1043	0.00512806	0.00560872
390	0.00505231	0.000238044	0.0168784	0.103983	0.00507184	0.00554854
391	0.00499692	0.000233543	0.0167466	0.103667	0.00501628	0.00548906
392	0.00494218	0.000229131	0.016616	0.103353	0.00496138	0.00543028
393	0.0048881	0.000224806	0.0164865	0.10304	0.00490715	0.00537219
394	0.00483467	0.000220568	0.0163581	0.102728	0.00485355	0.00531477
395	0.00478187	0.000216413	0.0162309	0.102418	0.0048006	0.00525803
396	0.0047297	0.000212341	0.0161048	0.102109	0.00474827	0.00520195
397	0.00467816	0.000208349	0.0159797	0.101801	0.00469657	0.00514652
398	0.00462722	0.000204437	0.0158558	0.101494	0.00464548	0.00509173
399	0.00457689	0.000200601	0.015733	0.101188	0.004595	0.00503758
400	0.00452715	0.000196841	0.0156112	0.100884	0.00454511	0.00498407
401	0.00447801	0.000193156	0.0154905	0.100581	0.00449582	0.00493117
402	0.00442945	0.000189543	0.0153709	0.100279	0.00444711	0.00487888
403	0.00438146	0.000186001	0.0152523	0.0999785	0.00439897	0.00482721
404	0.00433404	0.000182528	0.0151347	0.099679	0.0043514	0.00477613
405	0.00428718	0.000179124	0.0150181	0.0993807	0.0043044	0.00472564
406	0.00424087	0.000175787	0.0149026	0.0990837	0.00425795	0.00467573
407	0.0041951	0.000172515	0.0147881	0.0987878	0.00421204	0.0046264
408	0.00414988	0.000169307	0.0146745	0.0984931	0.00416668	0.00457764
409	0.00410519	0.000166162	0.014562	0.0981995	0.00412184	0.00452944
410	0.00406102	0.000163078	0.0144504	0.0979071	0.00407754	0.0044818
411	0.00401737	0.000160055	0.0143398	0.0976159	0.00403375	0.0044347
412	0.00397424	0.000157091	0.0142301	0.0973259	0.00399048	0.00438815
413	0.00393161	0.000154184	0.0141214	0.097037	0.00394772	0.00434213
414	0.00388947	0.000151334	0.0140136	0.0967492	0.00390545	0.00429664
415	0.00384784	0.00014854	0.0139068	0.0964626	0.00386368	0.00425167
416	0.00380669	0.000145799	0.0138008	0.0961771	0.0038224	0.00420721
417	0.00376601	0.000143112	0.0136958	0.0958927	0.0037816	0.00416327
418	0.00372582	0.000140478	0.0135917	0.0956095	0.00374127	0.00411982
419	0.00368609	0.000137894	0.0134885	0.0953274	0.00370141	0.00407687
420	0.00364682	0.00013536	0.0133861	0.0950464	0.00366202	0.00403441
421	0.00360802	0.000132875	0.0132847	0.0947665	0.00362309	0.00399244
422	0.00356966	0.000130439	0.0131841	0.0944877	0.00358461	0.00395094
423	0.00353175	0.000128049	0.0130844	0.09421	0.00354657	0.00390992
424	0.00349428	0.000125705	0.0129855	0.0939334	0.00350898	0.00386936
425	0.00345724	0.000123407	0.0128875	0.0936579	0.00347182	0.00382926
426	0.00342063	0.000121153	0.0127903	0.0933835	0.00343509	0.00378962
427	0.00338445	0.000118942	0.0126939	0.0931101	0.00339878	0.00375043
428	0.00334868	0.000116774	0.0125984	0.0928378	0.0033629	0.00371168
429	0.00331333	0.000114647	0.0125037	0.0925666	0.00332743	0.00367337
430	0.00327838	0.000112561	0.0124097	0.0922965	0.00329237	0.00363549
431	0.00324384	0.000110516	0.0123166	0.0920274	0.00325771	0.00359804
432	0.0032097	0.000108509	0.0122243	0.0917593	0.00322345	0.00356102
433	0.00317595	0.000106541	0.0121327	0.0914923	0.00318959	0.00352441
434	0.00314258	0.00010461	0.012042	0.0912264	0.00315611	0.00348821
435	0.0031096	0.000102716	0.011952	0.0909615	0.00312302	0.00345242
436	0.003077	0.000100859	0.0118627	0.0906976	0.00309031	0.00341703
437	0.00304478	9.90363e-05	0.0117742	0.0904348	0.00305797	0.00338204
438	0.00301292	9.72487e-05	0.0116865	0.0901729	0.00302601	0.00334745
439	0.00298142	9.54951e-05	0.0115995	0.0899121	0.00299441	0.00331324
440	0.00295029	9.37749e-05	0.0115132	0.0896523	0.00296317	0.00327941
441	0.00291951	9.20873e-05	0.0114277	0.0893935	0.00293228	0.00324597
442	0.00288909	9.04317e-05	0.0113429	0.0891357	0.00290175	0.00321289
443	0.00285901	8.88075e-05	0.0112588	0.088879	0.00287157	0.00318019
444	0.00282927	8.72141e-05	0.0111754	0.0886232	0.00284173	0.00314785
445	0.00279988	8.56508e-05	0.0110927	0.0883684	0.00281223	0.00311587
446	0.00277081	8.4117e-05	0.0110107	0.0881146	0.00278307	0.00308425
447	0.00274208	8.26122e-05	0.0109294	0.0878617	0.00275423	0.00305298
448	0.00271367	8.11358e-05	0.0108487	0.0876099	0.00272573	0.00302206
449	0.00268559	7.96872e-05	0.0107688	0.087359	0.00269754	0.00299148
450	0.00265782	7.82659e-05	0.0106895	0.0871091	0.00266968	0.00296125
451	0.00263037	7.68713e-05	0.0106108	0.0868602	0.00264213	0.00293134
452	0.00260323	7.5503e-05	0.0105329	0.0866122	0.00261489	0.00290177
453	0.0025764	7.41603e-05	0.0104555	0.0863651	0.00258796	0.00287253
454	0.00254986	7.28428e-05	0.0103789	0.0861191	0.00256134	0.00284361
455	0.00252363	7.155e-05	0.0103028	0.0858739	0.00253501	0.00281501
456	0.0024977	7.02813e-05	0.0102274	0.0856297	0.00250898	0.00278672
457	0.00247205	6.90365e-05	0.0101526	0.0853865	0.00248325	0.00275875
458	0.0024467	6.78148e-05	0.0100785	0.0851442	0.0024578	0.00273109
459	0.00242163	6.6616e-05	0.0100049	0.0849028	0.00243264	0.00270373
460	0.00239684	6.54396e-05	0.00993199	0.0846623	0.00240776	0.00267667
461	0.00237233	6.4285e-05	0.00985965	0.0844228	0.00238316	0.00264991
462	0.00234809	6.3152e-05	0.00978792	0.0841841	0.00235883	0.00262344
463	0.00232413	6.204e-05	0.00971677	0.0839464	0.00233478	0.00259726
464	0.00230043	6.09487e-05	0.00964622	0.0837096	0.002311	0.00257137
465	0.002277	5.98777e-05	0.00957625	0.0834737	0.00228748	0.00254576
466	0.00225383	5.88265e-05	0.00950685	0.0832387	0.00226423	0.00252044
467	0.00223092	5.77948e-05	0.00943803	0.0830046	0.00224123	0.00249539
468	0.00220826	5.67822e-05	0.00936977	0.0827713	0.00221849	0.00247061
469	0.00218586	5.57883e-05	0.00930207	0.082539	0.00219601	0.00244611
470	0.0021637	5.48128e-05	0.00923493	0.0823076	0.00217377	0.00242187
471	0.0021418	5.38553e-05	0.00916834	0.082077	0.00215178	0.0023979
472	0.00212013	5.29155e-05	0.0091023	0.0818473	0.00213003	0.00237418
473	0.00209871	5.19929e-05	0.00903679	0.0816185	0.00210853	0.00235073
474	0.00207752	5.10874e-05	0.00897183	0.0813905	0.00208727	0.00232753
475	0.00205657	5.01985e-05	0.00890739	0.0811634	0.00206623	0.00230458
476	0.00203585	4.93259e-05	0.00884348	0.0809372	0.00204544	0.00228188
477	0.00201536	4.84694e-05	0.0087801	0.0807118	0.00202487	0.00225943
478	0.0019951	4.76285e-05	0.00871723	0.0804873	0.00200453	0.00223721
479	0.00197506	4.68031e-05	0.00865487	0.0802636	0.00198441	0.00221524
480	0.00195524	4.59928e-05	0.00859302	0.0800408	0.00196452	0.00219351
481	0.00193564	4.51973e-05	0.00853167	0.0798188	0.00194484	0.00217201
482	0.00191625	4.44163e-05	0.00847083	0.0795976	0.00192538	0.00215075
483	0.00189708	4.36496e-05	0.00841047	0.0793773	0.00190614	0.00212971
484	0.00187812	4.28969e-05	0.00835061	0.0791578	0.0018871	0.0021089
485	0.00185937	4.21579e-05	0.00829123	0.0789392	0.00186828	0.00208831
486	0.00184082	4.14323e-05	0.00823233	0.0787213	0.00184966	0.00206795
487	0.00182248	4.07199e-05	0.00817391	0.0785043	0.00183124	0.0020478
488	0.00180433	4.00205e-05	0.00811596	0.0782881	0.00181303	0.00202787
489	0.00178639	3.93338e-05	0.00805848	0.0780727	0.00179502	0.00200815
490	0.00176864	3.86595e-05	0.00800146	0.0778581	0.0017772	0.00198864
491	0.00175109	3.79974e-05	0.00794491	0.0776443	0.00175957	0.00196935
492	0.00173372	3.73473e-05	0.00788881	0.0774313	0.00174214	0.00195026
493	0.00171655	3.6709e-05	0.00783316	0.0772191	0.0017249	0.00193137
494	0.00169956	3.60822e-05	0.00777796	0.0770077	0.00170785	0.00191268
495	0.00168276	3.54667e-05	0.0077232	0.0767971	0.00169098	0.0018942
496	0.00166614	3.48624e-05	0.00766888	0.0765873	0.0016743	0.00187591
497	0.0016497	3.42689e-05	0.007615	0.0763782	0.00165779	0.00185781
498	0.00163344	3.36861e-05	0.00756155	0.07617	0.00164147	0.00183991
499	0.00161736	3.31137e-05	0.00750852	0.0759625	0.00162532	0.0018222
500	0.00160145	3.25517e-05	0.00745592	0.0757558	0.00160934	0.00180467
501	0.00158571	3.19997e-05	0.00740375	0.0755498	0.00159354	0.00178733
502	0.00157014	3.14576e-05	0.00735199	0.0753446	0.00157791	0.00177018
503	0.00155474	3.09253e-05	0.00730064	0.0751402	0.00156245	0.0017532
504	0.00153951	3.04025e-05	0.0072497	0.0749365	0.00154716	0.00173641
505	0.00152444	2.9889e-05	0.00719917	0.0747336	0.00153203	0.00171979
506	0.00150954	2.93847e-05	0.00714904	0.0745315	0.00151706	0.00170335
507	0.00149479	2.88894e-05	0.0070993	0.0743301	0.00150226	0.00168709
508	0.0014802	2.84029e-05	0.00704997	0.0741294	0.00148761	0.00167099
509	0.00146577	2.79251e-05	0.00700102	0.0739295	0.00147312	0.00165506
510	0.0014515	2.74558e-05	0.00695247	0.0737303	0.00145879	0.0016393
511	0.00143737	2.69948e-05	0.00690429	0.0735318	0.0014446	0.00162371
512	0.0014234	2.65421e-05	0.0068565	0.0733341	0.00143058	0.00160828
513	0.00140958	2.60973e-05	0.00680909	0.0731371	0.0014167	0.00159301
514	0.00139591	2.56605e-05	0.00676205	0.0729409	0.00140297	0.0015779
515	0.00138238	2.52314e-05	0.00671539	0.0727453	0.00138938	0.00156295
516	0.00136899	2.48099e-05	0.00666909	0.0725505	0.00137594	0.00154816
517	0.00135575	2.43958e-05	0.00662316	0.0723564	0.00136265	0.00153352
518	0.00134265	2.3989e-05	0.00657759	0.072163	0.00134949	0.00151903
519	0.00132969	2.35895e-05	0.00653237	0.0719703	0.00133648	0.0015047
520	0.00131687	2.31969e-05	0.00648752	0.0717783	0.0013236	0.00149051
521	0.00130419	2.28113e-05	0.00644301	0.071587	0.00131087	0.00147647
522	0.00129163	2.24325e-05	0.00639886	0.0713965	0.00129826	0.00146258
523	0.00127922	2.20603e-05	0.00635505	0.0712066	0.00128579	0.00144883
524	0.00126693	2.16947e-05	0.00631158	0.0710174	0.00127345	0.00143523
525	0.00125477	2.13355e-05	0.00626846	0.0708289	0.00126125	0.00142177
526	0.00124275	2.09826e-05	0.00622567	0.0706411	0.00124917	0.00140844
527	0.00123085	2.06359e-05	0.00618322	0.070454	0.00123722	0.00139526
528	0.00121907	2.02952e-05	0.00614109	0.0702676	0.00122539	0.00138221
529	0.00120742	1.99605e-05	0.0060993	0.0700818	0.00121369	0.00136929
530	0.00119589	1.96316e-05	0.00605783	0.0698967	0.00120211	0.00135651
531	0.00118449	1.93085e-05	0.00601669	0.0697123	0.00119066	0.00134386
532	0.0011732	1.8991e-05	0.00597586	0.0695286	0.00117932	0.00133134
533	0.00116203	1.86791e-05	0.00593536	0.0693455	0.00116811	0.00131895
534	0.00115098	1.83725e-05	0.00589516	0.0691631	0.00115701	0.00130669
535	0.00114005	1.80713e-05	0.00585528	0.0689813	0.00114603	0.00129455
536	0.00112923	1.77754e-05	0.00581571	0.0688002	0.00113516	0.00128254
537	0.00111852	1.74845e-05	0.00577645	0.0686198	0.00112441	0.00127065
538	0.00110793	1.71987e-05	0.00573749	0.06844	0.00111377	0.00125889
539	0.00109744	1.69179e-05	0.00569883	0.0682609	0.00110324	0.00124724
540	0.00108707	1.66419e-05	0.00566047	0.0680824	0.00109282	0.00123571
