# Supplementary material for: The Social Cost of Fossil and Industrial CO2 Emissions from 1950 to 2018
Source: Research Square preprint supplement (doi:10.21203/rs.3.rs-2244259/v1), 2022-11-17
Supplement: Supplementary file 228 [file sigma_Sterner_external.xlsx]

## Sheet: sigma_params
f	1	2	3	4	5	6
0	0.536358	0.536358	0.536358	0.536358	0.536358	0.536358
1	0.547793	0.547793	0.547793	0.547793	0.547793	0.547793
2	0.534913	0.534913	0.534913	0.534913	0.534913	0.534913
3	0.525128	0.525128	0.525128	0.525128	0.525128	0.525128
4	0.523307	0.523307	0.523307	0.523307	0.523307	0.523307
5	0.5439	0.5439	0.5439	0.5439	0.5439	0.5439
6	0.55784	0.55784	0.55784	0.55784	0.55784	0.55784
7	0.556179	0.556179	0.556179	0.556179	0.556179	0.556179
8	0.558029	0.558029	0.558029	0.558029	0.558029	0.558029
9	0.565334	0.565334	0.565334	0.565334	0.565334	0.565334
10	0.569553	0.569553	0.569553	0.569553	0.569553	0.569553
11	0.552915	0.552915	0.552915	0.552915	0.552915	0.552915
12	0.547105	0.547105	0.547105	0.547105	0.547105	0.547105
13	0.551122	0.551122	0.551122	0.551122	0.551122	0.551122
14	0.547608	0.547608	0.547608	0.547608	0.547608	0.547608
15	0.546487	0.546487	0.546487	0.546487	0.546487	0.546487
16	0.54664	0.54664	0.54664	0.54664	0.54664	0.54664
17	0.544438	0.544438	0.544438	0.544438	0.544438	0.544438
18	0.545873	0.545873	0.545873	0.545873	0.545873	0.545873
19	0.551769	0.551769	0.551769	0.551769	0.551769	0.551769
20	0.57631	0.57631	0.57631	0.57631	0.57631	0.57631
21	0.57348	0.57348	0.57348	0.57348	0.57348	0.57348
22	0.570992	0.570992	0.570992	0.570992	0.570992	0.570992
23	0.566628	0.566628	0.566628	0.566628	0.566628	0.566628
24	0.54957	0.54957	0.54957	0.54957	0.54957	0.54957
25	0.541527	0.541527	0.541527	0.541527	0.541527	0.541527
26	0.54328	0.54328	0.54328	0.54328	0.54328	0.54328
27	0.536404	0.536404	0.536404	0.536404	0.536404	0.536404
28	0.53434	0.53434	0.53434	0.53434	0.53434	0.53434
29	0.527212	0.527212	0.527212	0.527212	0.527212	0.527212
30	0.512999	0.512999	0.512999	0.512999	0.512999	0.512999
31	0.489523	0.489523	0.489523	0.489523	0.489523	0.489523
32	0.482232	0.482232	0.482232	0.482232	0.482232	0.482232
33	0.473592	0.473592	0.473592	0.473592	0.473592	0.473592
34	0.466281	0.466281	0.466281	0.466281	0.466281	0.466281
35	0.46626	0.46626	0.46626	0.46626	0.46626	0.46626
36	0.456686	0.456686	0.456686	0.456686	0.456686	0.456686
37	0.453587	0.453587	0.453587	0.453587	0.453587	0.453587
38	0.451168	0.451168	0.451168	0.451168	0.451168	0.451168
39	0.442401	0.442401	0.442401	0.442401	0.442401	0.442401
40	0.438696	0.438696	0.438696	0.438696	0.438696	0.438696
41	0.443419	0.443419	0.443419	0.443419	0.443419	0.443419
42	0.423252	0.423252	0.423252	0.423252	0.423252	0.423252
43	0.420531	0.420531	0.420531	0.420531	0.420531	0.420531
44	0.412142	0.412142	0.412142	0.412142	0.412142	0.412142
45	0.407743	0.407743	0.407743	0.407743	0.407743	0.407743
46	0.404847	0.404847	0.404847	0.404847	0.404847	0.404847
47	0.392185	0.392185	0.392185	0.392185	0.392185	0.392185
48	0.382847	0.382847	0.382847	0.382847	0.382847	0.382847
49	0.374977	0.374977	0.374977	0.374977	0.374977	0.374977
50	0.368476	0.368476	0.368476	0.368476	0.368476	0.368476
51	0.362807	0.362807	0.362807	0.362807	0.362807	0.362807
52	0.360442	0.360442	0.360442	0.360442	0.360442	0.360442
53	0.36464	0.36464	0.36464	0.36464	0.36464	0.36464
54	0.363196	0.363196	0.363196	0.363196	0.363196	0.363196
55	0.358777	0.358777	0.358777	0.358777	0.358777	0.358777
56	0.352405	0.352405	0.352405	0.352405	0.352405	0.352405
57	0.346156	0.346156	0.346156	0.346156	0.346156	0.346156
58	0.345011	0.345011	0.345011	0.345011	0.345011	0.345011
59	0.347387	0.347387	0.347387	0.347387	0.347387	0.347387
60	0.341794	0.341794	0.341794	0.341794	0.341794	0.341794
61	0.340026	0.340026	0.340026	0.340026	0.340026	0.340026
62	0.337106	0.337106	0.337106	0.337106	0.337106	0.337106
63	0.333875	0.333875	0.333875	0.333875	0.333875	0.333875
64	0.331347	0.331347	0.331347	0.331347	0.331347	0.331347
65	0.330243	0.330243	0.330243	0.330243	0.330243	0.330243
66	0.329171	0.329171	0.329171	0.329171	0.329171	0.329171
67	0.326973	0.326973	0.326973	0.326973	0.326973	0.326973
68	0.326463	0.326463	0.326463	0.326463	0.326463	0.326463
69	0.32633	0.32633	0.32633	0.32633	0.32633	0.32633
70	0.321407	0.317852	0.322821	0.324965	0.321411	0.321517
71	0.316563	0.309603	0.319354	0.323608	0.316572	0.316779
72	0.311797	0.301576	0.315928	0.322257	0.31181	0.312116
73	0.307108	0.293764	0.312541	0.320914	0.307125	0.307526
74	0.302493	0.286163	0.309195	0.319578	0.302515	0.303009
75	0.297953	0.278765	0.305887	0.318248	0.297978	0.298562
76	0.293485	0.271566	0.302618	0.316925	0.293514	0.294184
77	0.289088	0.26456	0.299387	0.315609	0.289121	0.289876
78	0.284762	0.257741	0.296194	0.3143	0.284798	0.285634
79	0.280505	0.251104	0.293038	0.312998	0.280544	0.281459
80	0.276315	0.244645	0.289919	0.311702	0.276357	0.277348
81	0.272192	0.238358	0.286836	0.310413	0.272238	0.273302
82	0.268135	0.232239	0.283789	0.309131	0.268183	0.269319
83	0.264142	0.226283	0.280777	0.307855	0.264193	0.265398
84	0.260212	0.220485	0.277801	0.306585	0.260267	0.261537
85	0.256345	0.214841	0.274858	0.305323	0.256402	0.257737
86	0.252539	0.209347	0.27195	0.304066	0.252599	0.253996
87	0.248793	0.203999	0.269075	0.302816	0.248855	0.250312
88	0.245106	0.198793	0.266234	0.301573	0.245171	0.246686
89	0.241478	0.193725	0.263425	0.300335	0.241545	0.243115
90	0.237907	0.188791	0.260649	0.299104	0.237976	0.2396
91	0.234392	0.183987	0.257905	0.29788	0.234464	0.236139
92	0.230933	0.17931	0.255192	0.296661	0.231007	0.232732
93	0.227528	0.174756	0.252511	0.295449	0.227604	0.229376
94	0.224176	0.170323	0.24986	0.294243	0.224254	0.226073
95	0.220878	0.166006	0.24724	0.293043	0.220957	0.22282
96	0.217631	0.161802	0.24465	0.291849	0.217712	0.219618
97	0.214434	0.15771	0.24209	0.290661	0.214518	0.216464
98	0.211288	0.153724	0.239558	0.28948	0.211373	0.213359
99	0.208192	0.149843	0.237056	0.288304	0.208278	0.210302
100	0.205143	0.146064	0.234583	0.287134	0.205231	0.207291
101	0.202142	0.142384	0.232137	0.28597	0.202232	0.204326
102	0.199188	0.1388	0.22972	0.284812	0.199279	0.201407
103	0.196281	0.13531	0.22733	0.283659	0.196373	0.198532
104	0.193418	0.131911	0.224967	0.282513	0.193511	0.195701
105	0.1906	0.128601	0.222632	0.281372	0.190695	0.192914
106	0.187826	0.125376	0.220322	0.280237	0.187921	0.190168
107	0.185094	0.122236	0.218039	0.279108	0.185191	0.187465
108	0.182406	0.119178	0.215782	0.277985	0.182504	0.184802
109	0.179759	0.116199	0.213551	0.276867	0.179858	0.18218
110	0.177153	0.113297	0.211345	0.275754	0.177253	0.179598
111	0.174587	0.11047	0.209163	0.274648	0.174688	0.177054
112	0.172061	0.107717	0.207007	0.273546	0.172163	0.17455
113	0.169574	0.105035	0.204874	0.272451	0.169676	0.172083
114	0.167125	0.102422	0.202766	0.271361	0.167228	0.169653
115	0.164714	0.0998773	0.200682	0.270276	0.164818	0.167261
116	0.16234	0.0973979	0.198621	0.269196	0.162445	0.164904
117	0.160003	0.0949824	0.196583	0.268122	0.160109	0.162583
118	0.157702	0.0926292	0.194568	0.267054	0.157808	0.160296
119	0.155436	0.0903365	0.192576	0.265991	0.155542	0.158044
120	0.153205	0.0881027	0.190606	0.264933	0.153312	0.155826
121	0.151008	0.0859264	0.188659	0.26388	0.151115	0.153642
122	0.148844	0.0838059	0.186733	0.262832	0.148952	0.15149
123	0.146714	0.0817398	0.184828	0.26179	0.146823	0.14937
124	0.144617	0.0797266	0.182945	0.260753	0.144725	0.147282
125	0.142551	0.0777649	0.181083	0.259721	0.14266	0.145225
126	0.140517	0.0758534	0.179242	0.258694	0.140626	0.143199
127	0.138514	0.0739907	0.177421	0.257672	0.138624	0.141203
128	0.136541	0.0721756	0.175621	0.256655	0.136651	0.139237
129	0.134599	0.0704067	0.17384	0.255644	0.134709	0.1373
130	0.132686	0.0686829	0.17208	0.254637	0.132796	0.135392
131	0.130802	0.0670029	0.170339	0.253635	0.130913	0.133513
132	0.128947	0.0653657	0.168617	0.252638	0.129057	0.131661
133	0.127119	0.06377	0.166915	0.251646	0.12723	0.129837
134	0.12532	0.0622149	0.165231	0.250659	0.125431	0.12804
135	0.123548	0.0606991	0.163566	0.249677	0.123659	0.12627
136	0.121802	0.0592218	0.161919	0.2487	0.121913	0.124526
137	0.120083	0.0577818	0.160291	0.247727	0.120194	0.122807
138	0.11839	0.0563782	0.15868	0.246759	0.118501	0.121114
139	0.116722	0.0550101	0.157087	0.245796	0.116833	0.119446
140	0.11508	0.0536765	0.155512	0.244838	0.115191	0.117803
141	0.113462	0.0523765	0.153954	0.243884	0.113573	0.116184
142	0.111869	0.0511093	0.152414	0.242935	0.111979	0.114588
143	0.110299	0.0498739	0.15089	0.241991	0.11041	0.113017
144	0.108753	0.0486696	0.149383	0.241051	0.108864	0.111468
145	0.10723	0.0474955	0.147893	0.240116	0.107341	0.109942
146	0.10573	0.0463509	0.146419	0.239185	0.10584	0.108438
147	0.104253	0.0452349	0.144961	0.238259	0.104363	0.106957
148	0.102797	0.0441469	0.143519	0.237338	0.102907	0.105497
149	0.101364	0.0430862	0.142092	0.236421	0.101473	0.104058
150	0.0999514	0.0420519	0.140682	0.235508	0.100061	0.102641
151	0.0985602	0.0410435	0.139286	0.2346	0.0986692	0.101244
152	0.0971897	0.0400602	0.137906	0.233696	0.0972985	0.0998674
153	0.0958396	0.0391014	0.136541	0.232797	0.0959481	0.098511
154	0.0945095	0.0381665	0.135191	0.231902	0.0946178	0.0971744
155	0.0931993	0.0372549	0.133855	0.231011	0.0933072	0.0958572
156	0.0919085	0.0363659	0.132535	0.230124	0.0920161	0.0945592
157	0.0906368	0.0354989	0.131228	0.229242	0.0907441	0.09328
158	0.089384	0.0346535	0.129935	0.228364	0.089491	0.0920193
159	0.0881497	0.033829	0.128657	0.227491	0.0882563	0.090777
160	0.0869337	0.033025	0.127392	0.226621	0.08704	0.0895526
161	0.0857356	0.0322408	0.126141	0.225756	0.0858415	0.088346
162	0.0845552	0.031476	0.124904	0.224895	0.0846608	0.0871568
163	0.0833922	0.0307301	0.12368	0.224038	0.0834974	0.0859847
164	0.0822464	0.0300026	0.122469	0.223185	0.0823512	0.0848296
165	0.0811174	0.029293	0.121271	0.222336	0.0812218	0.0836911
166	0.080005	0.0286008	0.120086	0.221492	0.080109	0.082569
167	0.078909	0.0279257	0.118914	0.220651	0.0790126	0.0814631
168	0.0778291	0.0272672	0.117754	0.219815	0.0779322	0.080373
169	0.076765	0.0266248	0.116607	0.218982	0.0768677	0.0792986
170	0.0757165	0.0259982	0.115472	0.218153	0.0758187	0.0782397
171	0.0746833	0.025387	0.11435	0.217329	0.0747851	0.0771959
172	0.0736653	0.0247907	0.113239	0.216508	0.0737666	0.076167
173	0.0726621	0.024209	0.11214	0.215691	0.072763	0.0751529
174	0.0716735	0.0236415	0.111053	0.214878	0.071774	0.0741533
175	0.0706994	0.0230878	0.109978	0.214069	0.0707994	0.0731679
176	0.0697395	0.0225477	0.108914	0.213264	0.069839	0.0721966
177	0.0687936	0.0220207	0.107861	0.212463	0.0688926	0.0712392
178	0.0678614	0.0215065	0.10682	0.211665	0.0679599	0.0702954
179	0.0669427	0.0210049	0.105789	0.210872	0.0670408	0.069365
180	0.0660374	0.0205154	0.10477	0.210082	0.066135	0.0684478
181	0.0651452	0.0200378	0.103762	0.209295	0.0652423	0.0675437
182	0.064266	0.0195718	0.102764	0.208513	0.0643625	0.0666524
183	0.0633995	0.019117	0.101776	0.207734	0.0634955	0.0657737
184	0.0625455	0.0186733	0.1008	0.206959	0.062641	0.0649075
185	0.0617038	0.0182403	0.0998332	0.206187	0.0617988	0.0640535
186	0.0608743	0.0178178	0.098877	0.20542	0.0609688	0.0632116
187	0.0600568	0.0174054	0.0979308	0.204655	0.0601508	0.0623816
188	0.059251	0.017003	0.0969947	0.203895	0.0593445	0.0615633
189	0.0584569	0.0166103	0.0960684	0.203138	0.0585498	0.0607566
190	0.0576741	0.016227	0.0951519	0.202384	0.0577665	0.0599612
191	0.0569026	0.015853	0.094245	0.201634	0.0569945	0.059177
192	0.0561422	0.0154879	0.0933477	0.200888	0.0562336	0.0584038
193	0.0553927	0.0151316	0.0924598	0.200145	0.0554836	0.0576415
194	0.054654	0.0147839	0.0915812	0.199406	0.0547443	0.0568899
195	0.0539258	0.0144444	0.0907118	0.19867	0.0540155	0.0561488
196	0.053208	0.0141131	0.0898515	0.197937	0.0532972	0.0554181
197	0.0525005	0.0137897	0.0890003	0.197208	0.0525892	0.0546976
198	0.0518031	0.013474	0.0881579	0.196483	0.0518912	0.0539872
199	0.0511156	0.0131659	0.0873244	0.19576	0.0512032	0.0532868
200	0.050438	0.0128651	0.0864995	0.195042	0.050525	0.052596
201	0.0497699	0.0125715	0.0856833	0.194326	0.0498565	0.051915
202	0.0491114	0.0122848	0.0848755	0.193614	0.0491974	0.0512434
203	0.0484623	0.012005	0.0840762	0.192905	0.0485477	0.0505812
204	0.0478223	0.0117318	0.0832852	0.192199	0.0479073	0.0499281
205	0.0471915	0.0114651	0.0825024	0.191497	0.0472758	0.0492842
206	0.0465695	0.0112047	0.0817278	0.190798	0.0466534	0.0486491
207	0.0459564	0.0109505	0.0809611	0.190102	0.0460397	0.0480229
208	0.045352	0.0107023	0.0802025	0.18941	0.0454347	0.0474054
209	0.0447561	0.0104599	0.0794517	0.188721	0.0448383	0.0467964
210	0.0441686	0.0102233	0.0787086	0.188034	0.0442503	0.0461958
211	0.0435894	0.00999225	0.0779732	0.187351	0.0436705	0.0456035
212	0.0430184	0.00976665	0.0772455	0.186672	0.043099	0.0450194
213	0.0424554	0.00954636	0.0765252	0.185995	0.0425354	0.0444434
214	0.0419003	0.00933126	0.0758124	0.185321	0.0419798	0.0438753
215	0.041353	0.00912121	0.0751069	0.184651	0.041432	0.043315
216	0.0408134	0.00891609	0.0744087	0.183984	0.0408919	0.0427624
217	0.0402814	0.00871579	0.0737176	0.183319	0.0403593	0.0422174
218	0.0397568	0.00852017	0.0730337	0.182658	0.0398342	0.0416799
219	0.0392396	0.00832914	0.0723567	0.182	0.0393165	0.0411497
220	0.0387297	0.00814257	0.0716867	0.181345	0.038806	0.0406269
221	0.0382268	0.00796037	0.0710236	0.180693	0.0383026	0.0401111
222	0.037731	0.00778241	0.0703673	0.180044	0.0378062	0.0396025
223	0.0372421	0.00760861	0.0697177	0.179398	0.0373168	0.0391007
224	0.03676	0.00743886	0.0690747	0.178754	0.0368342	0.0386059
225	0.0362846	0.00727305	0.0684382	0.178114	0.0363583	0.0381177
226	0.0358158	0.00711111	0.0678083	0.177477	0.035889	0.0376363
227	0.0353535	0.00695292	0.0671848	0.176843	0.0354262	0.0371613
228	0.0348977	0.00679841	0.0665676	0.176211	0.0349699	0.0366929
229	0.0344482	0.00664748	0.0659568	0.175582	0.0345198	0.0362308
230	0.0340049	0.00650005	0.0653521	0.174957	0.034076	0.035775
231	0.0335678	0.00635603	0.0647535	0.174334	0.0336384	0.0353253
232	0.0331367	0.00621534	0.0641611	0.173714	0.0332068	0.0348818
233	0.0327115	0.0060779	0.0635746	0.173097	0.0327811	0.0344442
234	0.0322923	0.00594363	0.0629941	0.172482	0.0323614	0.0340126
235	0.0318788	0.00581246	0.0624195	0.17187	0.0319474	0.0335868
236	0.031471	0.00568431	0.0618506	0.171262	0.0315391	0.0331668
237	0.0310689	0.00555911	0.0612875	0.170656	0.0311364	0.0327524
238	0.0306722	0.00543679	0.0607301	0.170052	0.0307393	0.0323436
239	0.0302811	0.00531728	0.0601783	0.169452	0.0303476	0.0319403
240	0.0298953	0.00520051	0.0596321	0.168854	0.0299613	0.0315424
241	0.0295147	0.00508641	0.0590914	0.168258	0.0295803	0.0311499
242	0.0291395	0.00497494	0.0585561	0.167666	0.0292046	0.0307626
243	0.0287693	0.00486601	0.0580261	0.167076	0.0288339	0.0303806
244	0.0284042	0.00475957	0.0575015	0.166489	0.0284683	0.0300036
245	0.0280441	0.00465557	0.0569822	0.165905	0.0281078	0.0296318
246	0.0276889	0.00455393	0.056468	0.165323	0.0277521	0.0292648
247	0.0273386	0.00445462	0.0559591	0.164743	0.0274013	0.0289028
248	0.026993	0.00435756	0.0554551	0.164167	0.0270553	0.0285456
249	0.0266522	0.00426272	0.0549563	0.163593	0.026714	0.0281932
250	0.026316	0.00417003	0.0544624	0.163021	0.0263773	0.0278455
251	0.0259844	0.00407944	0.0539734	0.162452	0.0260452	0.0275024
252	0.0256572	0.00399092	0.0534893	0.161886	0.0257176	0.0271639
253	0.0253345	0.00390439	0.0530101	0.161322	0.0253944	0.0268299
254	0.0250162	0.00381983	0.0525356	0.160761	0.0250756	0.0265003
255	0.0247022	0.00373718	0.0520658	0.160202	0.0247612	0.0261751
256	0.0243924	0.0036564	0.0516006	0.159646	0.024451	0.0258542
257	0.0240869	0.00357745	0.0511401	0.159092	0.0241449	0.0255375
258	0.0237854	0.00350027	0.0506842	0.158541	0.023843	0.025225
259	0.0234881	0.00342484	0.0502328	0.157992	0.0235452	0.0249167
260	0.0231947	0.0033511	0.0497858	0.157445	0.0232514	0.0246124
261	0.0229053	0.00327902	0.0493432	0.156901	0.0229616	0.0243122
262	0.0226198	0.00320856	0.0489051	0.15636	0.0226756	0.0240159
263	0.0223381	0.00313969	0.0484712	0.15582	0.0223935	0.0237235
264	0.0220602	0.00307236	0.0480416	0.155284	0.0221152	0.0234349
265	0.021786	0.00300654	0.0476163	0.154749	0.0218406	0.0231502
266	0.0215155	0.00294219	0.0471951	0.154217	0.0215697	0.0228692
267	0.0212487	0.00287928	0.0467781	0.153688	0.0213024	0.0225918
268	0.0209854	0.00281778	0.0463652	0.15316	0.0210386	0.0223181
269	0.0207256	0.00275765	0.0459563	0.152635	0.0207785	0.022048
270	0.0204693	0.00269886	0.0455515	0.152113	0.0205217	0.0217815
271	0.0202164	0.00264138	0.0451506	0.151592	0.0202684	0.0215184
272	0.0199669	0.00258519	0.0447536	0.151074	0.0200185	0.0212587
273	0.0197207	0.00253024	0.0443605	0.150558	0.0197719	0.0210025
274	0.0194778	0.00247651	0.0439712	0.150045	0.0195286	0.0207495
275	0.0192382	0.00242398	0.0435858	0.149534	0.0192885	0.0204999
276	0.0190017	0.00237261	0.0432041	0.149025	0.0190516	0.0202535
277	0.0187683	0.00232238	0.0428261	0.148518	0.0188179	0.0200103
278	0.0185381	0.00227326	0.0424518	0.148014	0.0185872	0.0197703
279	0.0183109	0.00222523	0.0420812	0.147511	0.0183596	0.0195334
280	0.0180867	0.00217826	0.0417141	0.147011	0.0181351	0.0192996
281	0.0178654	0.00213233	0.0413507	0.146513	0.0179134	0.0190688
282	0.0176471	0.00208741	0.0409907	0.146018	0.0176947	0.018841
283	0.0174317	0.00204348	0.0406342	0.145524	0.0174789	0.0186161
284	0.0172191	0.00200051	0.0402812	0.145033	0.017266	0.0183941
285	0.0170093	0.0019585	0.0399316	0.144543	0.0170558	0.018175
286	0.0168023	0.0019174	0.0395854	0.144056	0.0168484	0.0179587
287	0.016598	0.00187721	0.0392425	0.143571	0.0166437	0.0177453
288	0.0163964	0.0018379	0.0389029	0.143088	0.0164417	0.0175345
289	0.0161974	0.00179945	0.0385666	0.142608	0.0162424	0.0173265
290	0.016001	0.00176184	0.0382336	0.142129	0.0160457	0.0171211
291	0.0158073	0.00172505	0.0379037	0.141652	0.0158515	0.0169184
292	0.015616	0.00168907	0.037577	0.141178	0.0156599	0.0167183
293	0.0154273	0.00165387	0.0372535	0.140705	0.0154708	0.0165207
294	0.015241	0.00161944	0.0369331	0.140235	0.0152842	0.0163257
295	0.0150571	0.00158576	0.0366157	0.139767	0.0151	0.0161331
296	0.0148757	0.00155282	0.0363014	0.1393	0.0149182	0.0159431
297	0.0146966	0.00152059	0.0359901	0.138836	0.0147388	0.0157554
298	0.0145198	0.00148906	0.0356817	0.138374	0.0145617	0.0155701
299	0.0143454	0.00145821	0.0353763	0.137913	0.0143869	0.0153872
300	0.0141732	0.00142803	0.0350738	0.137455	0.0142143	0.0152067
301	0.0140033	0.00139851	0.0347742	0.136999	0.014044	0.0150284
302	0.0138355	0.00136963	0.0344775	0.136544	0.013876	0.0148524
303	0.0136699	0.00134137	0.0341836	0.136092	0.0137101	0.0146786
304	0.0135065	0.00131372	0.0338925	0.135642	0.0135463	0.014507
305	0.0133452	0.00128667	0.0336041	0.135193	0.0133847	0.0143376
306	0.013186	0.0012602	0.0333185	0.134747	0.0132251	0.0141704
307	0.0130288	0.0012343	0.0330356	0.134302	0.0130676	0.0140052
308	0.0128737	0.00120896	0.0327554	0.133859	0.0129122	0.0138422
309	0.0127205	0.00118416	0.0324778	0.133418	0.0127587	0.0136812
310	0.0125693	0.0011599	0.0322029	0.132979	0.0126072	0.0135222
311	0.0124201	0.00113616	0.0319305	0.132542	0.0124577	0.0133653
312	0.0122728	0.00111292	0.0316608	0.132107	0.0123101	0.0132103
313	0.0121274	0.00109018	0.0313935	0.131674	0.0121643	0.0130573
314	0.0119838	0.00106793	0.0311288	0.131242	0.0120205	0.0129062
315	0.0118421	0.00104616	0.0308666	0.130812	0.0118785	0.0127569
316	0.0117022	0.00102485	0.0306069	0.130385	0.0117383	0.0126096
317	0.0115641	0.001004	0.0303496	0.129959	0.0115999	0.0124641
318	0.0114278	0.000983587	0.0300947	0.129534	0.0114632	0.0123204
319	0.0112932	0.000963612	0.0298422	0.129112	0.0113283	0.0121786
320	0.0111603	0.000944062	0.029592	0.128692	0.0111952	0.0120385
321	0.0110291	0.000924927	0.0293443	0.128273	0.0110637	0.0119001
322	0.0108996	0.000906199	0.0290988	0.127856	0.0109339	0.0117635
323	0.0107717	0.000887868	0.0288556	0.127441	0.0108057	0.0116286
324	0.0106455	0.000869926	0.0286147	0.127027	0.0106792	0.0114953
325	0.0105208	0.000852364	0.0283761	0.126615	0.0105543	0.0113637
326	0.0103978	0.000835173	0.0281397	0.126205	0.0104309	0.0112338
327	0.0102763	0.000818346	0.0279055	0.125797	0.0103092	0.0111054
328	0.0101563	0.000801874	0.0276734	0.125391	0.0101889	0.0109787
329	0.0100379	0.00078575	0.0274435	0.124986	0.0100702	0.0108535
330	0.00992095	0.000769965	0.0272158	0.124583	0.00995302	0.0107299
331	0.00980549	0.000754513	0.0269902	0.124181	0.00983729	0.0106078
332	0.00969148	0.000739386	0.0267666	0.123782	0.00972302	0.0104872
333	0.00957891	0.000724577	0.0265452	0.123384	0.00961019	0.0103681
334	0.00946776	0.000710079	0.0263258	0.122987	0.00949877	0.0102505
335	0.00935801	0.000695885	0.0261084	0.122593	0.00938876	0.0101343
336	0.00924963	0.000681988	0.025893	0.1222	0.00928013	0.0100196
337	0.00914262	0.000668383	0.0256796	0.121808	0.00917287	0.00990624
338	0.00903695	0.000655062	0.0254682	0.121419	0.00906695	0.0097943
339	0.00893261	0.00064202	0.0252588	0.12103	0.00896235	0.00968374
340	0.00882958	0.00062925	0.0250512	0.120644	0.00885907	0.00957453
341	0.00872783	0.000616746	0.0248456	0.120259	0.00875708	0.00946666
342	0.00862736	0.000604503	0.0246419	0.119876	0.00865636	0.00936012
343	0.00852814	0.000592515	0.02444	0.119494	0.0085569	0.00925487
344	0.00843016	0.000580776	0.02424	0.119114	0.00845868	0.00915092
345	0.0083334	0.000569281	0.0240418	0.118736	0.00836169	0.00904823
346	0.00823785	0.000558025	0.0238455	0.118359	0.0082659	0.0089468
347	0.00814349	0.000547002	0.0236509	0.117984	0.0081713	0.0088466
348	0.0080503	0.000536208	0.0234581	0.11761	0.00807788	0.00874762
349	0.00795827	0.000525637	0.0232671	0.117238	0.00798562	0.00864985
350	0.00786738	0.000515285	0.0230778	0.116867	0.0078945	0.00855327
351	0.00777762	0.000505147	0.0228903	0.116498	0.00780452	0.00845786
352	0.00768897	0.000495218	0.0227045	0.116131	0.00771564	0.00836361
353	0.00760142	0.000485494	0.0225203	0.115765	0.00762787	0.0082705
354	0.00751495	0.00047597	0.0223378	0.1154	0.00754118	0.00817852
355	0.00742955	0.000466642	0.022157	0.115037	0.00745556	0.00808766
356	0.00734521	0.000457507	0.0219779	0.114676	0.007371	0.00799789
357	0.0072619	0.000448558	0.0218003	0.114316	0.00728748	0.00790921
358	0.00717963	0.000439794	0.0216244	0.113957	0.00720499	0.0078216
359	0.00709836	0.000431209	0.02145	0.1136	0.00712351	0.00773504
360	0.0070181	0.000422801	0.0212773	0.113245	0.00704303	0.00764953
361	0.00693882	0.000414564	0.0211061	0.11289	0.00696355	0.00756504
362	0.00686051	0.000406496	0.0209364	0.112538	0.00688503	0.00748158
363	0.00678317	0.000398593	0.0207683	0.112187	0.00680749	0.00739911
364	0.00670677	0.000390851	0.0206017	0.111837	0.00673089	0.00731764
365	0.00663131	0.000383267	0.0204366	0.111489	0.00665522	0.00723714
366	0.00655677	0.000375837	0.020273	0.111142	0.00658049	0.00715761
367	0.00648315	0.000368559	0.0201108	0.110796	0.00650666	0.00707903
368	0.00641042	0.000361429	0.0199501	0.110452	0.00643374	0.00700139
369	0.00633858	0.000354443	0.0197909	0.11011	0.0063617	0.00692468
370	0.00626762	0.0003476	0.0196331	0.109769	0.00629054	0.00684888
371	0.00619752	0.000340895	0.0194767	0.109429	0.00622025	0.00677399
372	0.00612827	0.000334326	0.0193217	0.10909	0.00615081	0.00669999
373	0.00605986	0.00032789	0.019168	0.108753	0.00608222	0.00662687
374	0.00599229	0.000321584	0.0190158	0.108418	0.00601446	0.00655463
375	0.00592553	0.000315405	0.0188649	0.108083	0.00594752	0.00648324
376	0.00585959	0.000309352	0.0187154	0.10775	0.00588139	0.0064127
377	0.00579444	0.00030342	0.0185672	0.107419	0.00581606	0.00634299
378	0.00573009	0.000297608	0.0184203	0.107089	0.00575152	0.00627411
379	0.00566651	0.000291913	0.0182747	0.10676	0.00568776	0.00620605
380	0.00560369	0.000286332	0.0181304	0.106432	0.00562477	0.00613879
381	0.00554164	0.000280863	0.0179874	0.106106	0.00556254	0.00607233
382	0.00548033	0.000275504	0.0178457	0.105781	0.00550106	0.00600665
383	0.00541977	0.000270253	0.0177052	0.105458	0.00544032	0.00594175
384	0.00535993	0.000265107	0.017566	0.105135	0.00538031	0.00587761
385	0.00530081	0.000260064	0.017428	0.104814	0.00532102	0.00581423
386	0.0052424	0.000255121	0.0172912	0.104495	0.00526245	0.00575159
387	0.00518469	0.000250278	0.0171556	0.104176	0.00520457	0.0056897
388	0.00512768	0.000245531	0.0170213	0.103859	0.00514739	0.00562852
389	0.00507135	0.000240878	0.0168881	0.103544	0.00509089	0.00556807
390	0.00501569	0.000236319	0.0167561	0.103229	0.00503507	0.00550832
391	0.00496069	0.00023185	0.0166252	0.102916	0.00497992	0.00544928
392	0.00490636	0.00022747	0.0164955	0.102604	0.00492542	0.00539092
393	0.00485267	0.000223177	0.016367	0.102293	0.00487158	0.00533325
394	0.00479963	0.000218969	0.0162395	0.101984	0.00481837	0.00527625
395	0.00474721	0.000214845	0.0161132	0.101675	0.0047658	0.00521992
396	0.00469542	0.000210802	0.015988	0.101368	0.00471385	0.00516424
397	0.00464425	0.000206839	0.0158639	0.101063	0.00466253	0.00510921
398	0.00459368	0.000202955	0.0157409	0.100758	0.00461181	0.00505482
399	0.00454371	0.000199147	0.0156189	0.100455	0.00456169	0.00500107
400	0.00449434	0.000195415	0.0154981	0.100153	0.00451217	0.00494794
401	0.00444555	0.000191756	0.0153782	0.0998519	0.00446323	0.00489542
402	0.00439734	0.000188169	0.0152594	0.0995522	0.00441487	0.00484352
403	0.0043497	0.000184652	0.0151417	0.0992538	0.00436708	0.00479222
404	0.00430262	0.000181205	0.015025	0.0989565	0.00431986	0.00474151
405	0.0042561	0.000177826	0.0149093	0.0986604	0.0042732	0.00469138
406	0.00421013	0.000174513	0.0147946	0.0983655	0.00422708	0.00464184
407	0.0041647	0.000171264	0.0146809	0.0980717	0.00418151	0.00459287
408	0.0041198	0.00016808	0.0145681	0.0977791	0.00413647	0.00454446
409	0.00407543	0.000164958	0.0144564	0.0974877	0.00409197	0.00449661
410	0.00403158	0.000161896	0.0143456	0.0971975	0.00404798	0.00444931
411	0.00398825	0.000158895	0.0142358	0.0969084	0.00400451	0.00440256
412	0.00394543	0.000155952	0.0141269	0.0966204	0.00396156	0.00435634
413	0.00390311	0.000153067	0.014019	0.0963336	0.0039191	0.00431066
414	0.00386128	0.000150237	0.013912	0.0960479	0.00387714	0.00426549
415	0.00381995	0.000147463	0.013806	0.0957634	0.00383567	0.00422085
416	0.00377909	0.000144743	0.0137008	0.09548	0.00379469	0.00417672
417	0.00373872	0.000142075	0.0135965	0.0951977	0.00375418	0.00413309
418	0.00369881	0.000139459	0.0134932	0.0949165	0.00371415	0.00408996
419	0.00365937	0.000136894	0.0133907	0.0946364	0.00367458	0.00404732
420	0.00362039	0.000134379	0.0132891	0.0943574	0.00363548	0.00400517
421	0.00358186	0.000131912	0.0131884	0.0940796	0.00359683	0.0039635
422	0.00354378	0.000129493	0.0130885	0.0938028	0.00355862	0.0039223
423	0.00350615	0.000127121	0.0129895	0.0935271	0.00352086	0.00388158
424	0.00346895	0.000124794	0.0128914	0.0932525	0.00348354	0.00384131
425	0.00343218	0.000122513	0.0127941	0.092979	0.00344665	0.00380151
426	0.00339584	0.000120275	0.0126976	0.0927066	0.00341019	0.00376215
427	0.00335991	0.00011808	0.0126019	0.0924352	0.00337415	0.00372324
428	0.00332441	0.000115927	0.0125071	0.0921649	0.00333852	0.00368478
429	0.00328931	0.000113816	0.012413	0.0918957	0.00330331	0.00364674
430	0.00325462	0.000111746	0.0123198	0.0916275	0.0032685	0.00360914
431	0.00322033	0.000109715	0.0122273	0.0913603	0.0032341	0.00357196
432	0.00318643	0.000107722	0.0121357	0.0910942	0.00320009	0.0035352
433	0.00315292	0.000105768	0.0120448	0.0908292	0.00316647	0.00349886
434	0.0031198	0.000103852	0.0119547	0.0905651	0.00313324	0.00346293
435	0.00308706	0.000101972	0.0118653	0.0903021	0.00310038	0.0034274
436	0.0030547	0.000100127	0.0117767	0.0900402	0.00306791	0.00339226
437	0.00302271	9.83184e-05	0.0116889	0.0897792	0.00303581	0.00335753
438	0.00299108	9.65438e-05	0.0116018	0.0895193	0.00300407	0.00332318
439	0.00295981	9.48029e-05	0.0115154	0.0892604	0.0029727	0.00328922
440	0.00292891	9.30951e-05	0.0114298	0.0890025	0.00294169	0.00325564
441	0.00289835	9.14198e-05	0.0113449	0.0887456	0.00291103	0.00322244
442	0.00286815	8.97762e-05	0.0112607	0.0884896	0.00288072	0.0031896
443	0.00283829	8.81638e-05	0.0111772	0.0882347	0.00285075	0.00315714
444	0.00280877	8.65819e-05	0.0110944	0.0879808	0.00282113	0.00312503
445	0.00277958	8.503e-05	0.0110123	0.0877278	0.00279185	0.00309329
446	0.00275073	8.35073e-05	0.0109309	0.0874759	0.00276289	0.0030619
447	0.0027222	8.20134e-05	0.0108501	0.0872249	0.00273427	0.00303085
448	0.002694	8.05477e-05	0.0107701	0.0869749	0.00270597	0.00300016
449	0.00266612	7.91096e-05	0.0106907	0.0867258	0.00267799	0.0029698
450	0.00263856	7.76986e-05	0.010612	0.0864777	0.00265033	0.00293978
451	0.00261131	7.63141e-05	0.0105339	0.0862306	0.00262298	0.0029101
452	0.00258436	7.49557e-05	0.0104565	0.0859844	0.00259594	0.00288074
453	0.00255772	7.36227e-05	0.0103798	0.0857391	0.0025692	0.00285171
454	0.00253138	7.23148e-05	0.0103036	0.0854948	0.00254277	0.002823
455	0.00250534	7.10313e-05	0.0102281	0.0852515	0.00251664	0.0027946
456	0.00247959	6.97719e-05	0.0101533	0.085009	0.0024908	0.00276652
457	0.00245413	6.8536e-05	0.010079	0.0847676	0.00246525	0.00273875
458	0.00242896	6.73233e-05	0.0100054	0.084527	0.00243998	0.00271129
459	0.00240407	6.61332e-05	0.0099324	0.0842873	0.002415	0.00268413
460	0.00237946	6.49652e-05	0.00985999	0.0840486	0.00239031	0.00265726
461	0.00235513	6.38191e-05	0.00978818	0.0838108	0.00236588	0.0026307
462	0.00233107	6.26942e-05	0.00971697	0.0835739	0.00234174	0.00260442
463	0.00230728	6.15903e-05	0.00964634	0.0833379	0.00231786	0.00257843
464	0.00228375	6.05069e-05	0.0095763	0.0831028	0.00229425	0.00255273
465	0.00226049	5.94437e-05	0.00950683	0.0828686	0.0022709	0.00252731
466	0.00223749	5.84001e-05	0.00943794	0.0826353	0.00224781	0.00250217
467	0.00221475	5.73759e-05	0.00936961	0.0824029	0.00222499	0.0024773
468	0.00219225	5.63706e-05	0.00930185	0.0821714	0.00220241	0.0024527
469	0.00217001	5.53839e-05	0.00923464	0.0819407	0.00218009	0.00242838
470	0.00214802	5.44155e-05	0.00916799	0.081711	0.00215801	0.00240431
471	0.00212627	5.34649e-05	0.00910188	0.0814821	0.00213618	0.00238051
472	0.00210476	5.25319e-05	0.00903632	0.081254	0.0021146	0.00235697
473	0.0020835	5.16161e-05	0.00897129	0.0810269	0.00209325	0.00233369
474	0.00206246	5.07171e-05	0.0089068	0.0808006	0.00207214	0.00231066
475	0.00204166	4.98346e-05	0.00884283	0.0805751	0.00205126	0.00228787
476	0.00202109	4.89684e-05	0.00877938	0.0803505	0.00203061	0.00226534
477	0.00200075	4.81181e-05	0.00871645	0.0801268	0.00201019	0.00224305
478	0.00198064	4.72833e-05	0.00865404	0.0799039	0.00199	0.002221
479	0.00196074	4.64639e-05	0.00859213	0.0796818	0.00197003	0.00219919
480	0.00194107	4.56594e-05	0.00853073	0.0794606	0.00195028	0.00217761
481	0.00192161	4.48697e-05	0.00846983	0.0792402	0.00193074	0.00215627
482	0.00190236	4.40944e-05	0.00840942	0.0790207	0.00191143	0.00213516
483	0.00188333	4.33332e-05	0.00834951	0.078802	0.00189232	0.00211427
484	0.00186451	4.25859e-05	0.00829008	0.0785841	0.00187342	0.00209361
485	0.00184589	4.18523e-05	0.00823113	0.078367	0.00185474	0.00207317
486	0.00182748	4.1132e-05	0.00817266	0.0781507	0.00183625	0.00205296
487	0.00180927	4.04248e-05	0.00811466	0.0779353	0.00181797	0.00203295
488	0.00179125	3.97304e-05	0.00805713	0.0777206	0.00179989	0.00201317
489	0.00177344	3.90487e-05	0.00800007	0.0775068	0.001782	0.00199359
490	0.00175582	3.83793e-05	0.00794347	0.0772937	0.00176432	0.00197423
491	0.00173839	3.7722e-05	0.00788732	0.0770815	0.00174682	0.00195507
492	0.00172116	3.70766e-05	0.00783162	0.07687	0.00172952	0.00193612
493	0.00170411	3.64429e-05	0.00777638	0.0766594	0.0017124	0.00191737
494	0.00168724	3.58207e-05	0.00772158	0.0764495	0.00169547	0.00189882
495	0.00167056	3.52097e-05	0.00766722	0.0762404	0.00167872	0.00188047
496	0.00165406	3.46097e-05	0.00761329	0.0760321	0.00166216	0.00186231
497	0.00163774	3.40205e-05	0.0075598	0.0758246	0.00164577	0.00184434
498	0.0016216	3.34419e-05	0.00750674	0.0756178	0.00162957	0.00182657
499	0.00160563	3.28737e-05	0.0074541	0.0754119	0.00161354	0.00180899
500	0.00158984	3.23157e-05	0.00740188	0.0752066	0.00159768	0.00179159
501	0.00157422	3.17678e-05	0.00735008	0.0750022	0.00158199	0.00177438
502	0.00155876	3.12296e-05	0.00729869	0.0747985	0.00156648	0.00175735
503	0.00154347	3.07011e-05	0.00724772	0.0745955	0.00155113	0.0017405
504	0.00152835	3.01821e-05	0.00719715	0.0743934	0.00153594	0.00172382
505	0.00151339	2.96723e-05	0.00714698	0.0741919	0.00152092	0.00170733
506	0.00149859	2.91717e-05	0.00709722	0.0739912	0.00150607	0.00169101
507	0.00148395	2.868e-05	0.00704784	0.0737913	0.00149137	0.00167486
508	0.00146947	2.8197e-05	0.00699886	0.0735921	0.00147683	0.00165888
509	0.00145515	2.77227e-05	0.00695027	0.0733936	0.00146244	0.00164306
510	0.00144097	2.72568e-05	0.00690207	0.0731958	0.00144821	0.00162742
511	0.00142695	2.67992e-05	0.00685425	0.0729988	0.00143413	0.00161194
512	0.00141308	2.63497e-05	0.0068068	0.0728025	0.00142021	0.00159662
513	0.00139936	2.59082e-05	0.00675973	0.072607	0.00140643	0.00158146
514	0.00138579	2.54745e-05	0.00671304	0.0724121	0.0013928	0.00156646
515	0.00137236	2.50485e-05	0.00666671	0.072218	0.00137931	0.00155162
516	0.00135907	2.463e-05	0.00662075	0.0720246	0.00136597	0.00153694
517	0.00134593	2.4219e-05	0.00657515	0.0718319	0.00135277	0.0015224
518	0.00133292	2.38152e-05	0.00652991	0.0716399	0.00133971	0.00150802
519	0.00132006	2.34185e-05	0.00648502	0.0714486	0.00132679	0.00149379
520	0.00130733	2.30288e-05	0.00644049	0.071258	0.00131401	0.00147971
521	0.00129473	2.2646e-05	0.00639631	0.0710681	0.00130136	0.00146577
522	0.00128227	2.22699e-05	0.00635247	0.0708789	0.00128885	0.00145198
523	0.00126994	2.19004e-05	0.00630898	0.0706904	0.00127647	0.00143833
524	0.00125775	2.15375e-05	0.00626583	0.0705026	0.00126422	0.00142483
525	0.00124568	2.11808e-05	0.00622302	0.0703155	0.0012521	0.00141146
526	0.00123374	2.08305e-05	0.00618054	0.0701291	0.00124011	0.00139823
527	0.00122192	2.04863e-05	0.0061384	0.0699433	0.00122825	0.00138514
528	0.00121023	2.01481e-05	0.00609658	0.0697582	0.00121651	0.00137219
529	0.00119867	1.98158e-05	0.00605509	0.0695738	0.00120489	0.00135937
530	0.00118722	1.94893e-05	0.00601392	0.0693901	0.0011934	0.00134668
531	0.0011759	1.91685e-05	0.00597308	0.069207	0.00118203	0.00133412
532	0.0011647	1.88534e-05	0.00593255	0.0690246	0.00117078	0.00132169
533	0.00115361	1.85437e-05	0.00589233	0.0688428	0.00115964	0.00130939
534	0.00114264	1.82394e-05	0.00585243	0.0686617	0.00114862	0.00129722
535	0.00113178	1.79403e-05	0.00581284	0.0684813	0.00113772	0.00128517
536	0.00112104	1.76465e-05	0.00577356	0.0683015	0.00112693	0.00127325
537	0.00111041	1.73578e-05	0.00573458	0.0681224	0.00111626	0.00126144
538	0.0010999	1.70741e-05	0.0056959	0.0679439	0.0011057	0.00124976
539	0.00108949	1.67953e-05	0.00565752	0.0677661	0.00109524	0.0012382
540	0.00107919	1.65213e-05	0.00561944	0.0675889	0.0010849	0.00122676
