# Supplementary material for: The Social Cost of Fossil and Industrial CO2 Emissions from 1950 to 2018
Source: Research Square preprint supplement (doi:10.21203/rs.3.rs-2244259/v1), 2022-11-17
Supplement: Supplementary file 229 [file sigma_Weitzman_external.xlsx]

## Sheet: sigma_params
f	1	2	3	4	5	6
0	0.536505	0.536505	0.536505	0.536505	0.536505	0.536505
1	0.547945	0.547945	0.547945	0.547945	0.547945	0.547945
2	0.535062	0.535062	0.535062	0.535062	0.535062	0.535062
3	0.525274	0.525274	0.525274	0.525274	0.525274	0.525274
4	0.523454	0.523454	0.523454	0.523454	0.523454	0.523454
5	0.544054	0.544054	0.544054	0.544054	0.544054	0.544054
6	0.557999	0.557999	0.557999	0.557999	0.557999	0.557999
7	0.55634	0.55634	0.55634	0.55634	0.55634	0.55634
8	0.558194	0.558194	0.558194	0.558194	0.558194	0.558194
9	0.565507	0.565507	0.565507	0.565507	0.565507	0.565507
10	0.569734	0.569734	0.569734	0.569734	0.569734	0.569734
11	0.553099	0.553099	0.553099	0.553099	0.553099	0.553099
12	0.547294	0.547294	0.547294	0.547294	0.547294	0.547294
13	0.55132	0.55132	0.55132	0.55132	0.55132	0.55132
14	0.547814	0.547814	0.547814	0.547814	0.547814	0.547814
15	0.546701	0.546701	0.546701	0.546701	0.546701	0.546701
16	0.546866	0.546866	0.546866	0.546866	0.546866	0.546866
17	0.544677	0.544677	0.544677	0.544677	0.544677	0.544677
18	0.546127	0.546127	0.546127	0.546127	0.546127	0.546127
19	0.552042	0.552042	0.552042	0.552042	0.552042	0.552042
20	0.576616	0.576616	0.576616	0.576616	0.576616	0.576616
21	0.573811	0.573811	0.573811	0.573811	0.573811	0.573811
22	0.571353	0.571353	0.571353	0.571353	0.571353	0.571353
23	0.567018	0.567018	0.567018	0.567018	0.567018	0.567018
24	0.549981	0.549981	0.549981	0.549981	0.549981	0.549981
25	0.541965	0.541965	0.541965	0.541965	0.541965	0.541965
26	0.543753	0.543753	0.543753	0.543753	0.543753	0.543753
27	0.536904	0.536904	0.536904	0.536904	0.536904	0.536904
28	0.534874	0.534874	0.534874	0.534874	0.534874	0.534874
29	0.527777	0.527777	0.527777	0.527777	0.527777	0.527777
30	0.513589	0.513589	0.513589	0.513589	0.513589	0.513589
31	0.490125	0.490125	0.490125	0.490125	0.490125	0.490125
32	0.482861	0.482861	0.482861	0.482861	0.482861	0.482861
33	0.474245	0.474245	0.474245	0.474245	0.474245	0.474245
34	0.466959	0.466959	0.466959	0.466959	0.466959	0.466959
35	0.466975	0.466975	0.466975	0.466975	0.466975	0.466975
36	0.457426	0.457426	0.457426	0.457426	0.457426	0.457426
37	0.454364	0.454364	0.454364	0.454364	0.454364	0.454364
38	0.451984	0.451984	0.451984	0.451984	0.451984	0.451984
39	0.443248	0.443248	0.443248	0.443248	0.443248	0.443248
40	0.439586	0.439586	0.439586	0.439586	0.439586	0.439586
41	0.444372	0.444372	0.444372	0.444372	0.444372	0.444372
42	0.424212	0.424212	0.424212	0.424212	0.424212	0.424212
43	0.421533	0.421533	0.421533	0.421533	0.421533	0.421533
44	0.413172	0.413172	0.413172	0.413172	0.413172	0.413172
45	0.408812	0.408812	0.408812	0.408812	0.408812	0.408812
46	0.405961	0.405961	0.405961	0.405961	0.405961	0.405961
47	0.393316	0.393316	0.393316	0.393316	0.393316	0.393316
48	0.384001	0.384001	0.384001	0.384001	0.384001	0.384001
49	0.376152	0.376152	0.376152	0.376152	0.376152	0.376152
50	0.369674	0.369674	0.369674	0.369674	0.369674	0.369674
51	0.364028	0.364028	0.364028	0.364028	0.364028	0.364028
52	0.361698	0.361698	0.361698	0.361698	0.361698	0.361698
53	0.365956	0.365956	0.365956	0.365956	0.365956	0.365956
54	0.364555	0.364555	0.364555	0.364555	0.364555	0.364555
55	0.36017	0.36017	0.36017	0.36017	0.36017	0.36017
56	0.353828	0.353828	0.353828	0.353828	0.353828	0.353828
57	0.347614	0.347614	0.347614	0.347614	0.347614	0.347614
58	0.346533	0.346533	0.346533	0.346533	0.346533	0.346533
59	0.348993	0.348993	0.348993	0.348993	0.348993	0.348993
60	0.343454	0.343454	0.343454	0.343454	0.343454	0.343454
61	0.341758	0.341758	0.341758	0.341758	0.341758	0.341758
62	0.338907	0.338907	0.338907	0.338907	0.338907	0.338907
63	0.335744	0.335744	0.335744	0.335744	0.335744	0.335744
64	0.333289	0.333289	0.333289	0.333289	0.333289	0.333289
65	0.332268	0.332268	0.332268	0.332268	0.332268	0.332268
66	0.331282	0.331282	0.331282	0.331282	0.331282	0.331282
67	0.329164	0.329164	0.329164	0.329164	0.329164	0.329164
68	0.328748	0.328748	0.328748	0.328748	0.328748	0.328748
69	0.328711	0.328711	0.328711	0.328711	0.328711	0.328711
70	0.323752	0.320171	0.325177	0.327336	0.323756	0.323862
71	0.318873	0.311862	0.321684	0.325969	0.318882	0.31909
72	0.314072	0.303776	0.318233	0.324609	0.314085	0.314393
73	0.309349	0.295908	0.314822	0.323255	0.309366	0.30977
74	0.304701	0.288251	0.311451	0.321909	0.304722	0.30522
75	0.300127	0.280799	0.308119	0.32057	0.300152	0.30074
76	0.295626	0.273547	0.304826	0.319238	0.295655	0.296331
77	0.291198	0.26649	0.301572	0.317912	0.29123	0.29199
78	0.28684	0.259621	0.298355	0.316593	0.286876	0.287718
79	0.282551	0.252937	0.295176	0.315281	0.282591	0.283512
80	0.278331	0.24643	0.292034	0.313976	0.278374	0.279372
81	0.274178	0.240097	0.288929	0.312678	0.274224	0.275296
82	0.270091	0.233933	0.28586	0.311386	0.27014	0.271284
83	0.266069	0.227934	0.282826	0.310101	0.266121	0.267334
84	0.262111	0.222094	0.279827	0.308822	0.262165	0.263446
85	0.258215	0.216409	0.276864	0.30755	0.258273	0.259617
86	0.254381	0.210875	0.273934	0.306285	0.254442	0.255849
87	0.250608	0.205488	0.271039	0.305026	0.250671	0.252138
88	0.246895	0.200244	0.268176	0.303773	0.24696	0.248485
89	0.24324	0.195138	0.265347	0.302527	0.243308	0.244889
90	0.239643	0.190168	0.262551	0.301287	0.239713	0.241348
91	0.236102	0.185329	0.259787	0.300053	0.236175	0.237862
92	0.232618	0.180618	0.257054	0.298826	0.232692	0.23443
93	0.229188	0.176031	0.254353	0.297605	0.229264	0.23105
94	0.225812	0.171565	0.251683	0.29639	0.22589	0.227723
95	0.222489	0.167217	0.249044	0.295181	0.222569	0.224446
96	0.219218	0.162983	0.246435	0.293979	0.2193	0.22122
97	0.215999	0.15886	0.243856	0.292782	0.216083	0.218044
98	0.21283	0.154846	0.241306	0.291592	0.212915	0.214916
99	0.209711	0.150937	0.238786	0.290407	0.209798	0.211836
100	0.20664	0.14713	0.236294	0.289229	0.206729	0.208804
101	0.203617	0.143423	0.233831	0.288056	0.203707	0.205817
102	0.200642	0.139813	0.231396	0.28689	0.200733	0.202877
103	0.197713	0.136297	0.228989	0.285729	0.197805	0.199981
104	0.194829	0.132873	0.226609	0.284574	0.194923	0.197129
105	0.19199	0.129539	0.224256	0.283425	0.192086	0.194321
106	0.189196	0.126291	0.22193	0.282282	0.189293	0.191556
107	0.186445	0.123128	0.21963	0.281145	0.186543	0.188832
108	0.183737	0.120047	0.217357	0.280013	0.183835	0.18615
109	0.18107	0.117046	0.215109	0.278887	0.18117	0.183509
110	0.178445	0.114123	0.212887	0.277766	0.178546	0.180908
111	0.175861	0.111276	0.210689	0.276652	0.175962	0.178346
112	0.173316	0.108503	0.208517	0.275542	0.173419	0.175823
113	0.170811	0.105801	0.206369	0.274439	0.170914	0.173338
114	0.168344	0.10317	0.204246	0.27334	0.168449	0.170891
115	0.165916	0.100606	0.202146	0.272248	0.166021	0.168481
116	0.163525	0.0981085	0.20007	0.271161	0.16363	0.166107
117	0.161171	0.0956754	0.198017	0.270079	0.161277	0.163769
118	0.158852	0.093305	0.195988	0.269002	0.158959	0.161466
119	0.15657	0.0909956	0.193981	0.267931	0.156677	0.159197
120	0.154323	0.0887456	0.191997	0.266866	0.15443	0.156963
121	0.15211	0.0865533	0.190035	0.265805	0.152218	0.154762
122	0.14993	0.0844174	0.188095	0.26475	0.150039	0.152595
123	0.147785	0.0823362	0.186177	0.2637	0.147894	0.15046
124	0.145672	0.0803083	0.18428	0.262655	0.145781	0.148356
125	0.143591	0.0783323	0.182404	0.261616	0.143701	0.146285
126	0.141542	0.0764068	0.18055	0.260581	0.141652	0.144244
127	0.139525	0.0745306	0.178716	0.259552	0.139635	0.142233
128	0.137538	0.0727022	0.176902	0.258528	0.137648	0.140253
129	0.135581	0.0709204	0.175109	0.257509	0.135692	0.138302
130	0.133654	0.069184	0.173335	0.256495	0.133765	0.13638
131	0.131756	0.0674918	0.171582	0.255486	0.131868	0.134487
132	0.129887	0.0658426	0.169847	0.254482	0.129999	0.132622
133	0.128047	0.0642353	0.168132	0.253482	0.128159	0.130785
134	0.126234	0.0626688	0.166436	0.252488	0.126346	0.128974
135	0.124449	0.061142	0.164759	0.251499	0.124561	0.127191
136	0.122691	0.0596539	0.1631	0.250514	0.122803	0.125434
137	0.120959	0.0582034	0.16146	0.249535	0.121071	0.123703
138	0.119254	0.0567896	0.159838	0.24856	0.119365	0.121998
139	0.117574	0.0554115	0.158234	0.24759	0.117686	0.120318
140	0.115919	0.0540681	0.156647	0.246624	0.116031	0.118662
141	0.11429	0.0527587	0.155078	0.245664	0.114401	0.117031
142	0.112685	0.0514822	0.153526	0.244708	0.112796	0.115424
143	0.111104	0.0502378	0.151991	0.243757	0.111215	0.113841
144	0.109547	0.0490247	0.150473	0.24281	0.109658	0.112281
145	0.108013	0.047842	0.148972	0.241868	0.108124	0.110744
146	0.106502	0.0466891	0.147487	0.240931	0.106613	0.109229
147	0.105013	0.045565	0.146018	0.239998	0.105124	0.107737
148	0.103547	0.044469	0.144566	0.239069	0.103658	0.106266
149	0.102103	0.0434005	0.143129	0.238146	0.102214	0.104817
150	0.100681	0.0423587	0.141708	0.237226	0.100791	0.10339
151	0.0992793	0.0413429	0.140303	0.236311	0.0993891	0.101983
152	0.0978988	0.0403525	0.138912	0.235401	0.0980084	0.100596
153	0.0965388	0.0393867	0.137537	0.234495	0.0966482	0.0992298
154	0.0951991	0.038445	0.136177	0.233594	0.0953081	0.0978834
155	0.0938793	0.0375267	0.134832	0.232696	0.093988	0.0965566
156	0.092579	0.0366312	0.133501	0.231803	0.0926875	0.0952491
157	0.0912981	0.0357579	0.132185	0.230915	0.0914062	0.0939606
158	0.0900361	0.0349063	0.130883	0.230031	0.0901439	0.0926907
159	0.0887928	0.0340759	0.129596	0.229151	0.0889003	0.0914393
160	0.0875679	0.0332659	0.128322	0.228275	0.087675	0.090206
161	0.0863611	0.032476	0.127062	0.227403	0.0864678	0.0889906
162	0.0851721	0.0317057	0.125815	0.226536	0.0852785	0.0877927
163	0.0840007	0.0309543	0.124582	0.225673	0.0841066	0.0866121
164	0.0828465	0.0302215	0.123362	0.224814	0.082952	0.0854485
165	0.0817093	0.0295067	0.122156	0.223959	0.0818144	0.0843017
166	0.0805888	0.0288095	0.120962	0.223108	0.0806935	0.0831715
167	0.0794847	0.0281295	0.119781	0.222261	0.0795891	0.0820574
168	0.0783969	0.0274661	0.118613	0.221418	0.0785008	0.0809594
169	0.0773251	0.0268191	0.117458	0.22058	0.0774285	0.0798772
170	0.0762689	0.0261879	0.116315	0.219745	0.0763719	0.0788105
171	0.0752282	0.0255722	0.115184	0.218914	0.0753308	0.0777591
172	0.0742027	0.0249716	0.114065	0.218088	0.0743048	0.0767227
173	0.0731922	0.0243856	0.112958	0.217265	0.0732939	0.0757012
174	0.0721965	0.023814	0.111863	0.216446	0.0722977	0.0746943
175	0.0712153	0.0232563	0.11078	0.215631	0.071316	0.0737018
176	0.0702483	0.0227122	0.109708	0.21482	0.0703486	0.0727234
177	0.0692955	0.0221814	0.108648	0.214013	0.0693952	0.0717589
178	0.0683565	0.0216634	0.107599	0.21321	0.0684557	0.0708082
179	0.0674311	0.0211581	0.106561	0.21241	0.0675299	0.0698711
180	0.0665192	0.0206651	0.105535	0.211614	0.0666175	0.0689472
181	0.0656205	0.020184	0.104519	0.210822	0.0657183	0.0680365
182	0.0647349	0.0197146	0.103513	0.210034	0.0648321	0.0671387
183	0.063862	0.0192565	0.102519	0.20925	0.0639588	0.0662536
184	0.0630018	0.0188096	0.101535	0.208469	0.063098	0.0653811
185	0.062154	0.0183734	0.100562	0.207692	0.0622497	0.0645209
186	0.0613185	0.0179478	0.0995984	0.206918	0.0614137	0.0636728
187	0.060495	0.0175324	0.0986453	0.206149	0.0605896	0.0628368
188	0.0596833	0.0171271	0.0977024	0.205382	0.0597775	0.0620125
189	0.0588834	0.0167315	0.0967693	0.20462	0.058977	0.0611999
190	0.0580949	0.0163454	0.0958461	0.203861	0.058188	0.0603987
191	0.0573178	0.0159687	0.0949326	0.203106	0.0574104	0.0596087
192	0.0565519	0.0156009	0.0940287	0.202354	0.0566439	0.0588299
193	0.0557969	0.015242	0.0931343	0.201605	0.0558884	0.0580621
194	0.0550527	0.0148917	0.0922493	0.200861	0.0551437	0.057305
195	0.0543192	0.0145498	0.0913736	0.200119	0.0544097	0.0565585
196	0.0535962	0.0142161	0.0905071	0.199382	0.0536861	0.0558224
197	0.0528836	0.0138903	0.0896496	0.198647	0.0529729	0.0550967
198	0.0521811	0.0135723	0.0888011	0.197916	0.0522699	0.0543811
199	0.0514886	0.013262	0.0879615	0.197189	0.0515768	0.0536755
200	0.050806	0.012959	0.0871306	0.196465	0.0508937	0.0529798
201	0.0501331	0.0126632	0.0863084	0.195744	0.0502202	0.0522938
202	0.0494698	0.0123744	0.0854948	0.195027	0.0495564	0.0516173
203	0.0488159	0.0120926	0.0846896	0.194313	0.0489019	0.0509502
204	0.0481712	0.0118174	0.0838929	0.193602	0.0482568	0.0502924
205	0.0475358	0.0115487	0.0831044	0.192894	0.0476208	0.0496438
206	0.0469093	0.0112864	0.0823241	0.19219	0.0469938	0.0490041
207	0.0462917	0.0110304	0.0815518	0.191489	0.0463756	0.0483733
208	0.0456829	0.0107803	0.0807876	0.190792	0.0457662	0.0477513
209	0.0450826	0.0105362	0.0800313	0.190097	0.0451655	0.0471378
210	0.0444909	0.0102979	0.0792829	0.189406	0.0445731	0.0465329
211	0.0439074	0.0100651	0.0785421	0.188718	0.0439892	0.0459363
212	0.0433322	0.00983791	0.0778091	0.188034	0.0434134	0.0453479
213	0.0427651	0.00961601	0.0770835	0.187352	0.0428458	0.0447677
214	0.042206	0.00939934	0.0763655	0.186674	0.0422861	0.0441954
215	0.0416547	0.00918776	0.0756549	0.185998	0.0417343	0.043631
216	0.0411112	0.00898115	0.0749516	0.185326	0.0411902	0.0430744
217	0.0405753	0.00877938	0.0742555	0.184657	0.0406538	0.0425254
218	0.0400469	0.00858234	0.0735665	0.183991	0.0401249	0.041984
219	0.0395259	0.00838991	0.0728847	0.183328	0.0396034	0.04145
220	0.0390122	0.00820198	0.0722098	0.182668	0.0390891	0.0409233
221	0.0385057	0.00801845	0.0715418	0.182011	0.0385821	0.0404038
222	0.0380063	0.00783919	0.0708807	0.181357	0.0380821	0.0398914
223	0.0375138	0.00766412	0.0702263	0.180707	0.0375891	0.039386
224	0.0370282	0.00749313	0.0695786	0.180059	0.0371029	0.0388875
225	0.0365493	0.00732612	0.0689376	0.179414	0.0366235	0.0383958
226	0.0360771	0.00716299	0.0683031	0.178772	0.0361508	0.0379109
227	0.0356115	0.00700365	0.067675	0.178133	0.0356847	0.0374325
228	0.0351523	0.00684801	0.0670533	0.177497	0.035225	0.0369606
229	0.0346995	0.00669598	0.066438	0.176864	0.0347717	0.0364951
230	0.034253	0.00654747	0.0658289	0.176233	0.0343247	0.036036
231	0.0338127	0.0064024	0.065226	0.175606	0.0338838	0.0355831
232	0.0333784	0.00626069	0.0646292	0.174981	0.0334491	0.0351363
233	0.0329502	0.00612224	0.0640385	0.174359	0.0330203	0.0346955
234	0.0325279	0.005987	0.0634537	0.173741	0.0325975	0.0342608
235	0.0321114	0.00585487	0.0628749	0.173124	0.0321805	0.0338319
236	0.0317006	0.00572578	0.0623019	0.172511	0.0317692	0.0334087
237	0.0312955	0.00559967	0.0617347	0.171901	0.0313636	0.0329913
238	0.030896	0.00547646	0.0611732	0.171293	0.0309636	0.0325796
239	0.030502	0.00535607	0.0606174	0.170688	0.0305691	0.0321733
240	0.0301134	0.00523845	0.0600672	0.170086	0.0301799	0.0317726
241	0.0297301	0.00512353	0.0595225	0.169486	0.0297962	0.0313772
242	0.0293521	0.00501123	0.0589833	0.168889	0.0294176	0.0309871
243	0.0289792	0.00490151	0.0584495	0.168295	0.0290443	0.0306022
244	0.0286115	0.0047943	0.0579211	0.167704	0.0286761	0.0302226
245	0.0282487	0.00468953	0.0573979	0.167115	0.0283128	0.0298479
246	0.027891	0.00458716	0.05688	0.166529	0.0279546	0.0294784
247	0.0275381	0.00448712	0.0563673	0.165945	0.0276012	0.0291137
248	0.02719	0.00438936	0.0558598	0.165364	0.0272527	0.0287539
249	0.0268467	0.00429382	0.0553572	0.164786	0.0269089	0.0283989
250	0.026508	0.00420045	0.0548598	0.164211	0.0265697	0.0280487
251	0.0261739	0.00410921	0.0543672	0.163638	0.0262352	0.0277031
252	0.0258444	0.00402003	0.0538796	0.163067	0.0259052	0.0273621
253	0.0255194	0.00393288	0.0533968	0.162499	0.0255797	0.0270256
254	0.0251987	0.0038477	0.0529189	0.161934	0.0252586	0.0266936
255	0.0248824	0.00376445	0.0524456	0.161371	0.0249418	0.026366
256	0.0245704	0.00368308	0.0519771	0.16081	0.0246294	0.0260428
257	0.0242626	0.00360355	0.0515133	0.160253	0.0243211	0.0257238
258	0.023959	0.00352581	0.051054	0.159697	0.024017	0.0254091
259	0.0236594	0.00344982	0.0505993	0.159144	0.023717	0.0250985
260	0.0233639	0.00337555	0.050149	0.158594	0.0234211	0.024792
261	0.0230724	0.00330294	0.0497033	0.158046	0.0231291	0.0244895
262	0.0227848	0.00323197	0.0492619	0.1575	0.022841	0.0241911
263	0.0225011	0.00316259	0.0488249	0.156957	0.0225569	0.0238966
264	0.0222211	0.00309477	0.0483921	0.156417	0.0222765	0.0236059
265	0.021945	0.00302847	0.0479637	0.155878	0.0219999	0.0233191
266	0.0216725	0.00296365	0.0475395	0.155342	0.021727	0.023036
267	0.0214037	0.00290029	0.0471194	0.154809	0.0214578	0.0227567
268	0.0211385	0.00283834	0.0467035	0.154278	0.0211921	0.022481
269	0.0208768	0.00277777	0.0462916	0.153749	0.0209301	0.0222089
270	0.0206187	0.00271855	0.0458838	0.153222	0.0206715	0.0219404
271	0.0203639	0.00266066	0.04548	0.152698	0.0204163	0.0216754
272	0.0201126	0.00260405	0.0450801	0.152177	0.0201646	0.0214138
273	0.0198646	0.0025487	0.0446842	0.151657	0.0199162	0.0211557
274	0.0196199	0.00249458	0.0442921	0.15114	0.0196711	0.0209009
275	0.0193785	0.00244166	0.0439038	0.150625	0.0194293	0.0206495
276	0.0191403	0.00238992	0.0435193	0.150112	0.0191907	0.0204013
277	0.0189053	0.00233932	0.0431386	0.149602	0.0189552	0.0201563
278	0.0186733	0.00228985	0.0427616	0.149093	0.0187229	0.0199146
279	0.0184445	0.00224147	0.0423882	0.148587	0.0184936	0.0196759
280	0.0182186	0.00219415	0.0420185	0.148084	0.0182674	0.0194404
281	0.0179958	0.00214789	0.0416524	0.147582	0.0180441	0.0192079
282	0.0177759	0.00210264	0.0412898	0.147083	0.0178238	0.0189784
283	0.0175589	0.00205839	0.0409307	0.146586	0.0176065	0.0187519
284	0.0173447	0.00201511	0.0405751	0.146091	0.0173919	0.0185283
285	0.0171334	0.00197278	0.040223	0.145598	0.0171802	0.0183076
286	0.0169249	0.00193139	0.0398742	0.145107	0.0169713	0.0180898
287	0.0167191	0.0018909	0.0395288	0.144619	0.0167652	0.0178747
288	0.016516	0.00185131	0.0391868	0.144132	0.0165617	0.0176624
289	0.0163156	0.00181257	0.038848	0.143648	0.0163609	0.0174529
290	0.0161178	0.00177469	0.0385125	0.143166	0.0161628	0.017246
291	0.0159226	0.00173764	0.0381803	0.142686	0.0159672	0.0170418
292	0.0157299	0.00170139	0.0378512	0.142208	0.0157742	0.0168402
293	0.0155398	0.00166594	0.0375253	0.141732	0.0155837	0.0166412
294	0.0153522	0.00163126	0.0372025	0.141258	0.0153957	0.0164448
295	0.015167	0.00159733	0.0368828	0.140786	0.0152102	0.0162508
296	0.0149842	0.00156415	0.0365662	0.140317	0.015027	0.0160594
297	0.0148038	0.00153168	0.0362526	0.139849	0.0148463	0.0158704
298	0.0146258	0.00149992	0.035942	0.139383	0.0146679	0.0156837
299	0.0144501	0.00146885	0.0356344	0.13892	0.0144918	0.0154995
300	0.0142766	0.00143845	0.0353297	0.138458	0.014318	0.0153176
301	0.0141054	0.00140872	0.035028	0.137998	0.0141465	0.015138
302	0.0139365	0.00137962	0.0347291	0.137541	0.0139772	0.0149607
303	0.0137697	0.00135116	0.034433	0.137085	0.0138101	0.0147857
304	0.0136051	0.00132331	0.0341398	0.136631	0.0136451	0.0146129
305	0.0134426	0.00129606	0.0338493	0.136179	0.0134823	0.0144422
306	0.0132822	0.00126939	0.0335616	0.13573	0.0133216	0.0142738
307	0.0131239	0.00124331	0.0332766	0.135282	0.013163	0.0141074
308	0.0129676	0.00121778	0.0329944	0.134836	0.0130064	0.0139432
309	0.0128133	0.0011928	0.0327148	0.134392	0.0128518	0.013781
310	0.012661	0.00116836	0.0324378	0.13395	0.0126992	0.0136209
311	0.0125107	0.00114444	0.0321635	0.133509	0.0125486	0.0134628
312	0.0123623	0.00112104	0.0318918	0.133071	0.0123999	0.0133067
313	0.0122159	0.00109814	0.0316226	0.132634	0.0122531	0.0131525
314	0.0120713	0.00107573	0.0313559	0.1322	0.0121082	0.0130003
315	0.0119285	0.00105379	0.0310918	0.131767	0.0119651	0.01285
316	0.0117876	0.00103233	0.0308302	0.131336	0.0118239	0.0127016
317	0.0116485	0.00101132	0.030571	0.130907	0.0116845	0.012555
318	0.0115112	0.000990764	0.0303142	0.13048	0.0115469	0.0124103
319	0.0113756	0.000970643	0.0300599	0.130054	0.011411	0.0122674
320	0.0112417	0.00095095	0.029808	0.129631	0.0112768	0.0121263
321	0.0111096	0.000931676	0.0295584	0.129209	0.0111444	0.0119869
322	0.0109791	0.000912811	0.0293111	0.128789	0.0110137	0.0118493
323	0.0108503	0.000894346	0.0290662	0.12837	0.0108846	0.0117134
324	0.0107232	0.000876273	0.0288235	0.127954	0.0107571	0.0115792
325	0.0105976	0.000858583	0.0285831	0.127539	0.0106313	0.0114466
326	0.0104737	0.000841267	0.028345	0.127126	0.0105071	0.0113157
327	0.0103513	0.000824317	0.0281091	0.126715	0.0103844	0.0111865
328	0.0102304	0.000807725	0.0278753	0.126305	0.0102633	0.0110588
329	0.0101111	0.000791483	0.0276438	0.125898	0.0101437	0.0109327
330	0.00999334	0.000775583	0.0274144	0.125492	0.0100256	0.0108082
331	0.00987703	0.000760018	0.0271871	0.125087	0.00990906	0.0106852
332	0.00976219	0.000744781	0.0269619	0.124685	0.00979396	0.0105637
333	0.0096488	0.000729863	0.0267388	0.124284	0.0096803	0.0104438
334	0.00953684	0.00071526	0.0265178	0.123885	0.00956808	0.0103253
335	0.00942628	0.000700962	0.0262989	0.123487	0.00945726	0.0102083
336	0.00931712	0.000686964	0.0260819	0.123091	0.00934784	0.0100927
337	0.00920933	0.00067326	0.025867	0.122697	0.00923979	0.00997852
338	0.00910289	0.000659842	0.025654	0.122304	0.0091331	0.00986576
339	0.00899778	0.000646704	0.025443	0.121914	0.00902774	0.00975439
340	0.008894	0.000633841	0.025234	0.121524	0.00892371	0.00964439
341	0.00879151	0.000621246	0.0250269	0.121137	0.00882097	0.00953573
342	0.0086903	0.000608913	0.0248217	0.120751	0.00871952	0.00942841
343	0.00859036	0.000596838	0.0246183	0.120366	0.00861933	0.0093224
344	0.00849167	0.000585013	0.0244169	0.119983	0.0085204	0.00921768
345	0.0083942	0.000573434	0.0242172	0.119602	0.00842269	0.00911425
346	0.00829795	0.000562096	0.0240194	0.119223	0.00832621	0.00901207
347	0.0082029	0.000550993	0.0238235	0.118845	0.00823092	0.00891115
348	0.00810904	0.00054012	0.0236293	0.118468	0.00813682	0.00881145
349	0.00801633	0.000529472	0.0234369	0.118093	0.00804388	0.00871296
350	0.00792478	0.000519044	0.0232462	0.11772	0.0079521	0.00861568
351	0.00783437	0.000508832	0.0230573	0.117348	0.00786146	0.00851957
352	0.00774507	0.000498831	0.0228701	0.116978	0.00777194	0.00842463
353	0.00765688	0.000489036	0.0226846	0.116609	0.00768352	0.00833085
354	0.00756978	0.000479443	0.0225008	0.116242	0.0075962	0.0082382
355	0.00748376	0.000470047	0.0223187	0.115876	0.00750996	0.00814667
356	0.0073988	0.000460845	0.0221382	0.115512	0.00742478	0.00805624
357	0.00731489	0.000451831	0.0219594	0.11515	0.00734065	0.00796691
358	0.00723201	0.000443003	0.0217822	0.114789	0.00725755	0.00787866
359	0.00715015	0.000434356	0.0216065	0.114429	0.00717548	0.00779148
360	0.0070693	0.000425886	0.0214325	0.114071	0.00709442	0.00770534
361	0.00698944	0.000417589	0.0212601	0.113714	0.00701435	0.00762024
362	0.00691057	0.000409462	0.0210892	0.113359	0.00693527	0.00753616
363	0.00683266	0.000401501	0.0209198	0.113005	0.00685715	0.0074531
364	0.00675571	0.000393702	0.020752	0.112653	0.00677999	0.00737103
365	0.00667969	0.000386063	0.0205857	0.112302	0.00670378	0.00728995
366	0.00660461	0.000378579	0.0204209	0.111953	0.0066285	0.00720983
367	0.00653045	0.000371248	0.0202576	0.111605	0.00655413	0.00713068
368	0.00645719	0.000364066	0.0200957	0.111258	0.00648068	0.00705247
369	0.00638483	0.000357029	0.0199353	0.110913	0.00640812	0.0069752
370	0.00631334	0.000350136	0.0197763	0.110569	0.00633644	0.00689885
371	0.00624273	0.000343382	0.0196188	0.110227	0.00626564	0.00682342
372	0.00617298	0.000336765	0.0194626	0.109886	0.00619569	0.00674888
373	0.00610408	0.000330282	0.0193079	0.109547	0.0061266	0.00667522
374	0.00603601	0.00032393	0.0191545	0.109209	0.00605834	0.00660245
375	0.00596877	0.000317707	0.0190026	0.108872	0.00599091	0.00653054
376	0.00590234	0.000311609	0.0188519	0.108537	0.0059243	0.00645948
377	0.00583672	0.000305634	0.0187026	0.108203	0.0058585	0.00638927
378	0.00577189	0.000299779	0.0185547	0.10787	0.00579349	0.00631989
379	0.00570785	0.000294042	0.0184081	0.107539	0.00572926	0.00625133
380	0.00564458	0.000288421	0.0182627	0.107209	0.00566581	0.00618358
381	0.00558207	0.000282912	0.0181187	0.10688	0.00560313	0.00611663
382	0.00552032	0.000277515	0.0179759	0.106553	0.0055412	0.00605048
383	0.00545931	0.000272225	0.0178344	0.106227	0.00548002	0.0059851
384	0.00539903	0.000267041	0.0176942	0.105902	0.00541957	0.0059205
385	0.00533948	0.000261961	0.0175552	0.105579	0.00535985	0.00585665
386	0.00528065	0.000256983	0.0174174	0.105257	0.00530084	0.00579356
387	0.00522252	0.000252104	0.0172808	0.104937	0.00524255	0.00573121
388	0.00516509	0.000247322	0.0171455	0.104617	0.00518495	0.00566959
389	0.00510835	0.000242636	0.0170113	0.104299	0.00512804	0.00560869
390	0.00505228	0.000238043	0.0168783	0.103982	0.00507181	0.00554851
391	0.00499689	0.000233542	0.0167465	0.103667	0.00501625	0.00548903
392	0.00494216	0.00022913	0.0166159	0.103353	0.00496136	0.00543025
393	0.00488808	0.000224805	0.0164864	0.10304	0.00490712	0.00537216
394	0.00483464	0.000220567	0.016358	0.102728	0.00485353	0.00531475
395	0.00478185	0.000216412	0.0162308	0.102417	0.00480057	0.005258
396	0.00472968	0.00021234	0.0161047	0.102108	0.00474825	0.00520192
397	0.00467813	0.000208348	0.0159797	0.1018	0.00469654	0.00514649
398	0.0046272	0.000204436	0.0158557	0.101493	0.00464546	0.0050917
399	0.00457686	0.0002006	0.0157329	0.101188	0.00459497	0.00503756
400	0.00452713	0.00019684	0.0156111	0.100884	0.00454509	0.00498404
401	0.00447799	0.000193155	0.0154904	0.10058	0.00449579	0.00493114
402	0.00442942	0.000189542	0.0153708	0.100279	0.00444708	0.00487886
403	0.00438143	0.000186	0.0152522	0.0999779	0.00439895	0.00482718
404	0.00433401	0.000182527	0.0151346	0.0996785	0.00435138	0.0047761
405	0.00428715	0.000179123	0.0150181	0.0993802	0.00430437	0.00472561
406	0.00424084	0.000175786	0.0149025	0.0990831	0.00425792	0.00467571
407	0.00419508	0.000172514	0.014788	0.0987872	0.00421202	0.00462638
408	0.00414986	0.000169306	0.0146744	0.0984925	0.00416665	0.00457762
409	0.00410517	0.000166161	0.0145619	0.098199	0.00412182	0.00452942
410	0.004061	0.000163078	0.0144503	0.0979066	0.00407752	0.00448178
411	0.00401735	0.000160054	0.0143397	0.0976154	0.00403373	0.00443468
412	0.00397422	0.00015709	0.01423	0.0973254	0.00399046	0.00438813
413	0.00393159	0.000154183	0.0141213	0.0970365	0.00394769	0.00434211
414	0.00388945	0.000151333	0.0140135	0.0967487	0.00390543	0.00429662
415	0.00384782	0.000148539	0.0139067	0.0964621	0.00386366	0.00425165
416	0.00380666	0.000145799	0.0138008	0.0961766	0.00382238	0.00420719
417	0.00376599	0.000143112	0.0136957	0.0958922	0.00378158	0.00416324
418	0.0037258	0.000140477	0.0135916	0.095609	0.00374125	0.0041198
419	0.00368607	0.000137893	0.0134884	0.0953269	0.00370139	0.00407685
420	0.00364681	0.000135359	0.0133861	0.0950459	0.003662	0.00403439
421	0.003608	0.000132875	0.0132846	0.094766	0.00362307	0.00399242
422	0.00356964	0.000130438	0.013184	0.0944872	0.00358459	0.00395092
423	0.00353173	0.000128048	0.0130843	0.0942095	0.00354655	0.0039099
424	0.00349426	0.000125705	0.0129854	0.0939329	0.00350896	0.00386934
425	0.00345722	0.000123406	0.0128874	0.0936574	0.0034718	0.00382924
426	0.00342061	0.000121152	0.0127902	0.093383	0.00343507	0.0037896
427	0.00338443	0.000118942	0.0126939	0.0931096	0.00339877	0.00375041
428	0.00334866	0.000116773	0.0125983	0.0928373	0.00336288	0.00371166
429	0.00331331	0.000114647	0.0125036	0.0925661	0.00332741	0.00367335
430	0.00327837	0.000112561	0.0124097	0.092296	0.00329235	0.00363547
431	0.00324382	0.000110515	0.0123166	0.0920269	0.00325769	0.00359802
432	0.00320968	0.000108508	0.0122242	0.0917589	0.00322344	0.003561
433	0.00317593	0.00010654	0.0121327	0.0914919	0.00318957	0.00352439
434	0.00314257	0.000104609	0.0120419	0.0912259	0.0031561	0.00348819
435	0.00310959	0.000102716	0.0119519	0.090961	0.003123	0.0034524
436	0.00307699	0.000100858	0.0118627	0.0906971	0.00309029	0.00341701
437	0.00304476	9.90357e-05	0.0117742	0.0904343	0.00305796	0.00338203
438	0.0030129	9.72482e-05	0.0116864	0.0901724	0.00302599	0.00334743
439	0.00298141	9.54946e-05	0.0115994	0.0899116	0.00299439	0.00331322
440	0.00295028	9.37744e-05	0.0115132	0.0896518	0.00296315	0.00327939
441	0.0029195	9.20868e-05	0.0114276	0.0893931	0.00293227	0.00324595
442	0.00288907	9.04312e-05	0.0113428	0.0891353	0.00290174	0.00321288
443	0.00285899	8.88071e-05	0.0112587	0.0888785	0.00287155	0.00318017
444	0.00282926	8.72136e-05	0.0111753	0.0886227	0.00284171	0.00314783
445	0.00279986	8.56503e-05	0.0110926	0.0883679	0.00281222	0.00311586
446	0.0027708	8.41166e-05	0.0110106	0.0881141	0.00278305	0.00308424
447	0.00274207	8.26118e-05	0.0109293	0.0878613	0.00275422	0.00305297
448	0.00271366	8.11354e-05	0.0108487	0.0876094	0.00272571	0.00302205
449	0.00268557	7.96868e-05	0.0107687	0.0873586	0.00269753	0.00299147
450	0.00265781	7.82655e-05	0.0106894	0.0871086	0.00266966	0.00296123
451	0.00263036	7.68709e-05	0.0106108	0.0868597	0.00264212	0.00293133
452	0.00260322	7.55026e-05	0.0105328	0.0866117	0.00261488	0.00290176
453	0.00257638	7.41599e-05	0.0104555	0.0863647	0.00258795	0.00287251
454	0.00254985	7.28424e-05	0.0103788	0.0861186	0.00256132	0.00284359
455	0.00252362	7.15496e-05	0.0103028	0.0858735	0.002535	0.00281499
456	0.00249768	7.0281e-05	0.0102274	0.0856293	0.00250897	0.00278671
457	0.00247204	6.90361e-05	0.0101526	0.085386	0.00248323	0.00275873
458	0.00244668	6.78145e-05	0.0100784	0.0851437	0.00245779	0.00273107
459	0.00242161	6.66157e-05	0.0100049	0.0849023	0.00243262	0.00270371
460	0.00239682	6.54392e-05	0.00993193	0.0846619	0.00240775	0.00267665
461	0.00237231	6.42847e-05	0.0098596	0.0844223	0.00238315	0.00264989
462	0.00234808	6.31517e-05	0.00978786	0.0841837	0.00235882	0.00262342
463	0.00232411	6.20397e-05	0.00971672	0.083946	0.00233477	0.00259725
464	0.00230042	6.09484e-05	0.00964617	0.0837091	0.00231099	0.00257136
465	0.00227699	5.98774e-05	0.0095762	0.0834732	0.00228747	0.00254575
466	0.00225382	5.88262e-05	0.0095068	0.0832382	0.00226421	0.00252042
467	0.00223091	5.77945e-05	0.00943798	0.0830041	0.00224122	0.00249538
468	0.00220825	5.67819e-05	0.00936972	0.0827709	0.00221848	0.0024706
469	0.00218585	5.5788e-05	0.00930202	0.0825386	0.00219599	0.00244609
470	0.00216369	5.48125e-05	0.00923488	0.0823071	0.00217376	0.00242186
471	0.00214179	5.3855e-05	0.00916829	0.0820766	0.00215177	0.00239788
472	0.00212012	5.29152e-05	0.00910225	0.0818469	0.00213002	0.00237417
473	0.0020987	5.19927e-05	0.00903675	0.081618	0.00210852	0.00235072
474	0.00207751	5.10871e-05	0.00897178	0.0813901	0.00208725	0.00232751
475	0.00205656	5.01982e-05	0.00890735	0.081163	0.00206622	0.00230457
476	0.00203584	4.93257e-05	0.00884344	0.0809368	0.00204543	0.00228187
477	0.00201535	4.84691e-05	0.00878005	0.0807114	0.00202486	0.00225941
478	0.00199509	4.76283e-05	0.00871718	0.0804869	0.00200452	0.0022372
479	0.00197505	4.68029e-05	0.00865482	0.0802632	0.0019844	0.00221523
480	0.00195523	4.59926e-05	0.00859297	0.0800404	0.00196451	0.0021935
481	0.00193563	4.51971e-05	0.00853163	0.0798184	0.00194483	0.002172
482	0.00191624	4.44161e-05	0.00847078	0.0795972	0.00192537	0.00215073
483	0.00189707	4.36494e-05	0.00841043	0.0793769	0.00190613	0.0021297
484	0.00187811	4.28967e-05	0.00835056	0.0791574	0.00188709	0.00210889
485	0.00185936	4.21576e-05	0.00829118	0.0789387	0.00186827	0.0020883
486	0.00184081	4.14321e-05	0.00823229	0.0787209	0.00184965	0.00206793
487	0.00182247	4.07197e-05	0.00817387	0.0785039	0.00183123	0.00204779
488	0.00180432	4.00203e-05	0.00811592	0.0782877	0.00181302	0.00202786
489	0.00178638	3.93336e-05	0.00805844	0.0780723	0.00179501	0.00200814
490	0.00176863	3.86593e-05	0.00800142	0.0778577	0.00177719	0.00198863
491	0.00175108	3.79972e-05	0.00794487	0.0776439	0.00175957	0.00196934
492	0.00173371	3.73471e-05	0.00788876	0.0774309	0.00174213	0.00195025
493	0.00171654	3.67088e-05	0.00783312	0.0772187	0.00172489	0.00193136
494	0.00169955	3.6082e-05	0.00777791	0.0770073	0.00170784	0.00191267
495	0.00168275	3.54666e-05	0.00772316	0.0767967	0.00169097	0.00189419
496	0.00166613	3.48622e-05	0.00766884	0.0765869	0.00167429	0.0018759
497	0.00164969	3.42687e-05	0.00761496	0.0763778	0.00165778	0.0018578
498	0.00163343	3.36859e-05	0.00756151	0.0761696	0.00164146	0.0018399
499	0.00161735	3.31135e-05	0.00750848	0.0759621	0.00162531	0.00182219
500	0.00160144	3.25515e-05	0.00745588	0.0757554	0.00160934	0.00180466
501	0.0015857	3.19995e-05	0.00740371	0.0755494	0.00159354	0.00178732
502	0.00157013	3.14575e-05	0.00735195	0.0753442	0.00157791	0.00177017
503	0.00155474	3.09251e-05	0.0073006	0.0751398	0.00156244	0.0017532
504	0.0015395	3.04023e-05	0.00724966	0.0749361	0.00154715	0.0017364
505	0.00152443	2.98888e-05	0.00719913	0.0747332	0.00153202	0.00171978
506	0.00150953	2.93845e-05	0.007149	0.0745311	0.00151705	0.00170334
507	0.00149478	2.88892e-05	0.00709927	0.0743297	0.00150225	0.00168708
508	0.00148019	2.84027e-05	0.00704993	0.074129	0.0014876	0.00167098
509	0.00146576	2.79249e-05	0.00700098	0.0739291	0.00147311	0.00165505
510	0.00145149	2.74556e-05	0.00695243	0.0737299	0.00145878	0.00163929
511	0.00143737	2.69947e-05	0.00690426	0.0735314	0.0014446	0.0016237
512	0.00142339	2.65419e-05	0.00685647	0.0733337	0.00143057	0.00160827
513	0.00140957	2.60972e-05	0.00680905	0.0731367	0.00141669	0.001593
514	0.0013959	2.56603e-05	0.00676202	0.0729405	0.00140296	0.00157789
515	0.00138237	2.52312e-05	0.00671535	0.0727449	0.00138938	0.00156294
516	0.00136899	2.48097e-05	0.00666905	0.0725501	0.00137594	0.00154815
517	0.00135575	2.43957e-05	0.00662312	0.072356	0.00136264	0.00153351
518	0.00134265	2.39889e-05	0.00657755	0.0721626	0.00134949	0.00151902
519	0.00132969	2.35893e-05	0.00653234	0.0719699	0.00133647	0.00150469
520	0.00131686	2.31968e-05	0.00648748	0.0717779	0.0013236	0.0014905
521	0.00130418	2.28112e-05	0.00644298	0.0715867	0.00131086	0.00147647
522	0.00129163	2.24324e-05	0.00639882	0.0713961	0.00129825	0.00146257
523	0.00127921	2.20602e-05	0.00635501	0.0712062	0.00128578	0.00144883
524	0.00126692	2.16946e-05	0.00631155	0.071017	0.00127345	0.00143522
525	0.00125477	2.13354e-05	0.00626842	0.0708285	0.00126124	0.00142176
526	0.00124274	2.09825e-05	0.00622564	0.0706407	0.00124916	0.00140843
527	0.00123084	2.06357e-05	0.00618318	0.0704536	0.00123721	0.00139525
528	0.00121906	2.02951e-05	0.00614106	0.0702672	0.00122538	0.0013822
529	0.00120741	1.99604e-05	0.00609927	0.0700814	0.00121368	0.00136928
530	0.00119589	1.96315e-05	0.0060578	0.0698963	0.00120211	0.0013565
531	0.00118448	1.93084e-05	0.00601666	0.0697119	0.00119065	0.00134385
532	0.00117319	1.89909e-05	0.00597583	0.0695282	0.00117932	0.00133134
533	0.00116203	1.8679e-05	0.00593533	0.0693451	0.0011681	0.00131895
534	0.00115098	1.83724e-05	0.00589513	0.0691627	0.001157	0.00130668
535	0.00114004	1.80712e-05	0.00585525	0.068981	0.00114602	0.00129455
536	0.00112922	1.77753e-05	0.00581568	0.0687999	0.00113516	0.00128253
537	0.00111852	1.74844e-05	0.00577642	0.0686194	0.0011244	0.00127065
538	0.00110792	1.71986e-05	0.00573746	0.0684397	0.00111376	0.00125888
539	0.00109744	1.69178e-05	0.0056988	0.0682605	0.00110323	0.00124723
540	0.00108706	1.66418e-05	0.00566044	0.0680821	0.00109282	0.00123571
