# Supplementary material for: The Social Cost of Fossil and Industrial CO2 Emissions from 1950 to 2018
Source: Research Square preprint supplement (doi:10.21203/rs.3.rs-2244259/v1), 2022-11-17
Supplement: Supplementary file 232 [file startvalues_Weitzman.xlsx]

## Sheet: Tabelle1
f	year	Qgross0ini	K0ini	I0ini	R10ini	R20ini	R30ini	R40ini	C0ini	CCA0ini	TMF0ini	TMS0ini	TDF0ini	TDS0ini	alpha0ini	dalpha0ini	EInd0ini
0	1950	10.9864	21.6015	2.49181	14.9961	9.1392	2.19645	0.286248	304.618	89.911	0.208662	0.0233368	-0.00523584	0.0546607	0.223047	39.3055	1.6087
1	1951	11.6013	23.2945	2.83786	15.2513	9.29841	2.25863	0.312592	305.121	91.3349	0.209636	0.0238271	-0.00526028	0.0558091	0.223892	39.1671	1.73496
2	1952	12.0388	25.2709	2.7708	15.5393	9.49012	2.357	0.354563	305.741	92.8312	0.209479	0.0243046	-0.00525635	0.0569275	0.224653	39.0431	1.75806
3	1953	12.6039	27.1072	2.90562	15.8319	9.68467	2.45018	0.359962	306.327	94.4446	0.209132	0.0247774	-0.00524764	0.058035	0.225453	38.9138	1.80691
4	1954	12.9163	29.0104	2.98438	16.1289	9.88202	2.53887	0.366772	306.917	96.0926	0.209217	0.0252528	-0.00524978	0.0591485	0.226319	38.7747	1.84527
5	1955	13.6204	30.922	3.31892	16.4347	10.0866	2.62938	0.379168	307.53	97.7766	0.209691	0.0257315	-0.00526167	0.0602697	0.227248	38.6265	2.02245
6	1956	14.1366	33.0975	3.49889	16.7626	10.3121	2.73892	0.408486	308.222	99.5085	0.210573	0.0262146	-0.00528379	0.0614013	0.228249	38.4682	2.1529
7	1957	14.6455	35.3725	3.63838	17.1092	10.555	2.8611	0.433529	308.959	101.329	0.211904	0.0267039	-0.00531719	0.0625472	0.229348	38.2959	2.22377
8	1958	15.0095	37.7028	3.63492	17.4659	10.806	2.98329	0.447918	309.703	103.232	0.213892	0.0272028	-0.00536709	0.0637158	0.230566	38.1069	2.28662
9	1959	15.6471	39.9435	3.99302	17.8338	11.0665	3.10744	0.464472	310.472	105.191	0.217146	0.0277203	-0.00544874	0.064928	0.231959	37.8928	2.415
10	1960	16.3864	42.4595	4.21759	18.203	11.3262	3.22071	0.468764	311.219	107.211	0.221945	0.0282634	-0.00556915	0.0662001	0.233564	37.6492	2.548
11	1961	16.9123	45.1069	4.28472	18.5846	11.5967	3.33937	0.487773	312.008	109.261	0.227131	0.0288226	-0.00569928	0.0675098	0.235239	37.3984	2.553
12	1962	17.7009	47.7236	4.42519	18.972	11.8712	3.45447	0.49873	312.796	111.371	0.231608	0.0293853	-0.00581162	0.0688277	0.236878	37.1563	2.644
13	1963	18.5685	50.3841	4.68133	19.3679	12.1522	3.56987	0.512944	313.603	113.524	0.236003	0.0299567	-0.00592189	0.0701661	0.238541	36.914	2.794
14	1964	19.6572	53.2022	5.15039	19.7799	12.4479	3.69587	0.537319	314.461	115.725	0.241051	0.0305457	-0.00604857	0.0715458	0.240316	36.6588	2.939
15	1965	20.6154	56.3853	5.48176	20.2074	12.7574	3.83074	0.561579	315.357	117.997	0.246895	0.0311558	-0.00619522	0.0729748	0.242234	36.3872	3.076
16	1966	21.5673	59.7819	5.76038	20.6503	13.0804	3.97355	0.586104	316.29	120.34	0.253603	0.0317898	-0.00636353	0.0744598	0.244306	36.0985	3.219
17	1967	22.3469	63.3316	5.75587	21.1107	13.4194	4.1269	0.614248	317.271	122.753	0.261013	0.0324482	-0.00654947	0.0760018	0.246517	35.7957	3.322
18	1968	23.5019	66.7456	6.0798	21.582	13.7673	4.2814	0.634739	318.265	125.245	0.26904	0.0331315	-0.00675089	0.0776023	0.248863	35.4801	3.503
19	1969	24.8031	70.3572	6.5509	22.0655	14.1255	4.43896	0.656943	319.287	127.797	0.278039	0.0338455	-0.00697669	0.0792747	0.251382	35.1478	3.737
20	1970	25.7159	74.3063	6.93692	22.5731	14.5064	4.61554	0.695339	320.39	130.411	0.288807	0.0346023	-0.00724689	0.0810473	0.254175	34.787	4.047
21	1971	26.8824	78.4955	7.17897	23.1082	14.9133	4.81405	0.740177	321.576	133.119	0.301861	0.0354128	-0.00757444	0.0829457	0.257332	34.3885	4.21
22	1972	28.255	82.7717	7.57451	23.647	15.3219	5.00243	0.757102	322.728	135.933	0.316319	0.0362728	-0.00793722	0.0849601	0.260763	33.9664	4.406
23	1973	29.9831	87.2854	8.37677	24.2034	15.7465	5.2006	0.79008	323.941	138.792	0.330903	0.0371703	-0.00830318	0.0870623	0.264283	33.5449	4.64
24	1974	30.7787	92.4345	8.59405	24.7822	16.1922	5.41443	0.831601	325.22	141.727	0.345328	0.0381019	-0.00866513	0.0892443	0.267874	33.1264	4.62
25	1975	31.1866	97.6104	8.18156	25.3596	16.6342	5.61172	0.844557	326.45	144.754	0.359644	0.0390676	-0.00902435	0.0915063	0.271555	32.7093	4.613
26	1976	32.7349	102.182	9.03061	25.9355	17.0727	5.79476	0.854369	327.657	147.814	0.373555	0.0400637	-0.00937343	0.0938392	0.275254	32.3016	4.858
27	1977	34.0601	107.434	9.50325	26.5424	17.5412	6.00751	0.905058	328.996	150.898	0.387053	0.0410885	-0.00971212	0.0962396	0.278963	31.9039	4.991
28	1978	35.443	112.965	9.93387	27.1633	18.0219	6.22515	0.940815	330.351	154.083	0.40091	0.04215	-0.0100598	0.098726	0.282833	31.5007	5.174
29	1979	36.8776	118.721	10.3148	27.8025	18.5193	6.45357	0.980786	331.756	157.342	0.415762	0.043257	-0.0104325	0.101319	0.286935	31.0855	5.312
30	1980	37.7109	124.646	10.44	28.4531	19.0264	6.68372	1.01402	333.177	160.677	0.431057	0.0444055	-0.0108163	0.104009	0.291206	30.6663	5.286
31	1981	38.4398	130.477	10.4598	29.097	19.5247	6.89258	1.02388	334.538	164.076	0.445831	0.045585	-0.011187	0.106771	0.295507	30.2571	5.142
32	1982	38.7297	136.112	9.97386	29.7283	20.008	7.07475	1.02163	335.833	167.491	0.459619	0.0467881	-0.011533	0.10959	0.299743	29.8662	5.104
33	1983	39.8042	141.052	10.0441	30.3705	20.5009	7.26357	1.04646	337.181	170.898	0.472493	0.048013	-0.011856	0.112459	0.303903	29.4935	5.152
34	1984	41.6022	145.88	10.77	31.0212	21.0007	7.45525	1.07393	338.551	174.344	0.485183	0.0492657	-0.0121745	0.115393	0.308118	29.1269	5.302
35	1985	43.0759	151.256	10.8743	31.6908	21.5182	7.66333	1.11558	339.988	177.831	0.498428	0.0505547	-0.0125068	0.118412	0.312499	28.7571	5.49
36	1986	44.5999	156.537	11.1543	32.3811	22.0553	7.88943	1.16399	341.49	181.382	0.512358	0.051883	-0.0128563	0.121523	0.317085	28.3817	5.568
37	1987	46.3601	161.902	11.653	33.0805	22.6	8.11764	1.20058	342.999	185.008	0.526672	0.0532487	-0.0132155	0.124722	0.321845	28.0042	5.749
38	1988	48.3794	167.568	12.5907	33.7992	23.1629	8.36142	1.24774	344.571	188.687	0.541418	0.0546532	-0.0135855	0.128011	0.326777	27.6258	5.968
39	1989	50.0687	173.963	13.1307	34.5424	23.7495	8.62726	1.30581	346.225	192.433	0.557076	0.0561031	-0.0139784	0.131408	0.331969	27.2404	6.057
40	1990	51.636	180.66	13.3245	35.2955	24.3445	8.89485	1.34956	347.884	196.263	0.57368	0.0576016	-0.0143951	0.134917	0.337448	26.8479	6.195
41	1991	52.1435	187.304	13.1057	36.0622	24.952	9.17004	1.39539	349.58	200.151	0.5904	0.059141	-0.0148146	0.138523	0.343073	26.4591	6.324
42	1992	52.9114	193.484	12.981	36.8484	25.5781	9.46037	1.45014	351.337	204.096	0.606334	0.0607105	-0.0152144	0.142199	0.348701	26.0837	6.126
43	1993	53.8127	199.31	12.9163	37.6065	26.1737	9.70319	1.44792	352.931	208.113	0.621489	0.0623079	-0.0155947	0.145941	0.354342	25.7207	6.191
44	1994	55.2918	204.856	13.385	38.3706	26.7742	9.94697	1.47027	354.562	212.112	0.636355	0.0639367	-0.0159677	0.149756	0.360006	25.3688	6.235
45	1995	57.0735	210.665	13.9075	39.1384	27.3772	10.1887	1.49773	356.202	216.126	0.65146	0.0656025	-0.0163468	0.153658	0.365806	25.0208	6.368
46	1996	59.2434	216.783	14.3148	39.9182	27.9914	10.4401	1.53817	357.888	220.162	0.667216	0.0673107	-0.0167421	0.157659	0.371819	24.6726	6.564
47	1997	61.502	223.081	14.7831	40.7156	28.6227	10.7081	1.59105	359.637	224.233	0.682925	0.0690551	-0.0171363	0.161744	0.377944	24.3306	6.602
48	1998	62.7936	229.615	14.8286	41.5135	29.2533	10.9698	1.62765	361.364	228.358	0.69751	0.0708221	-0.0175023	0.165883	0.384005	24.0039	6.581
49	1999	64.9513	235.952	15.2077	42.309	29.8802	11.2219	1.65439	363.065	232.513	0.711025	0.072609	-0.0178414	0.170069	0.389988	23.6924	6.668
50	2000	67.9528	242.435	16.1374	43.11	30.5118	11.4756	1.68744	364.785	236.684	0.723718	0.0744161	-0.0181599	0.174301	0.39592	23.3938	6.856
51	2001	69.5905	249.607	15.9119	43.9268	31.1584	11.7439	1.73584	366.565	240.879	0.735756	0.0762429	-0.0184619	0.17858	0.401832	23.1058	6.914
52	2002	71.6394	256.289	15.9342	44.7478	31.8082	12.0112	1.77618	368.343	245.12	0.747892	0.0780966	-0.0187665	0.182922	0.407878	22.8208	7.072
53	2003	74.2599	262.746	16.6361	45.595	32.484	12.3065	1.84185	370.227	249.393	0.760637	0.0799837	-0.0190863	0.187342	0.414146	22.535	7.417
54	2004	78.0933	269.666	18.0096	46.4769	33.1943	12.6395	1.92998	372.241	253.729	0.773943	0.0819052	-0.0194202	0.191843	0.420658	22.2478	7.77
55	2005	81.6585	277.703	19.0412	47.3965	33.9423	13.0124	2.03346	374.385	258.157	0.787951	0.0838639	-0.0197717	0.196431	0.427473	21.9576	8.24051
56	2006	85.8455	286.475	20.357	48.3375	34.7111	13.4025	2.12489	376.576	262.693	0.803202	0.0858683	-0.0201543	0.201125	0.434721	21.6598	8.44365
57	2007	90.0257	296.239	21.6348	49.3023	35.5033	13.8126	2.21605	378.834	267.319	0.820122	0.0879266	-0.0205789	0.205946	0.442484	21.3526	8.64922
58	2008	92.1888	306.919	22.022	50.2896	36.3177	14.2416	2.30793	381.157	272.028	0.83871	0.0900432	-0.0210453	0.210904	0.450774	21.0371	8.84508
59	2009	91.7015	317.591	19.8294	51.2919	37.1468	14.6797	2.39301	383.511	276.817	0.858778	0.0922201	-0.0215489	0.216003	0.459571	20.7157	9.03372
60	2010	96.4716	325.676	21.9593	52.2777	37.9582	15.0868	2.43677	385.759	281.669	0.879839	0.0944554	-0.0220774	0.221238	0.468778	20.3931	9.23468
61	2011	100.102	335.592	23.2025	53.3069	38.8139	15.5437	2.53782	388.202	286.533	0.901257	0.0967438	-0.0226148	0.226598	0.478224	20.0758	9.50293
62	2012	102.566	346.385	23.7332	54.3647	39.6987	16.0291	2.65001	390.742	291.469	0.922726	0.0990823	-0.0231535	0.232076	0.487911	19.7638	9.76525
63	2013	105.957	357.309	24.4532	55.4365	40.5972	16.5229	2.75093	393.308	296.488	0.944284	0.101471	-0.0236944	0.237671	0.49786	19.4565	10.0379
64	2014	109.609	368.549	25.4796	56.5131	41.5005	17.014	2.83624	395.864	301.573	0.965991	0.103912	-0.0242391	0.243387	0.508076	19.154	10.3081
65	2015	112.826	380.4	26.241	57.5955	42.4092	17.5044	2.91565	398.425	306.705	0.987845	0.106403	-0.0247875	0.249223	0.518542	18.8567	10.5913
66	2016	116.05	392.574	26.2948	58.6756	43.3154	17.9843	2.98271	400.958	311.873	1.00984	0.108947	-0.0253393	0.255181	0.529252	18.5647	10.8679
67	2017	119.704	404.352	27.6185	59.7546	44.2202	18.4567	3.04538	403.477	317.061	1.03194	0.111541	-0.0258939	0.261258	0.540187	18.2786	11.1525
68	2018	122.767	417.018	28.7803	60.8453	45.1371	18.9393	3.12256	406.044	322.26	1.05419	0.114188	-0.0264522	0.267458	0.551351	17.9981	11.422
69	2019	125.692	430.378	0	61.9548	46.0734	19.4413	3.21764	408.687	327.483	1.07587	0.116879	-0.0269963	0.27376	0.56259	17.7266	11.6922
70	2020	0	0	0	0	0	0	0	0	0	0	0	0	0	0	0	0
71	2021	0	0	0	0	0	0	0	0	0	0	0	0	0	0	0	0
72	2022	0	0	0	0	0	0	0	0	0	0	0	0	0	0	0	0
73	2023	0	0	0	0	0	0	0	0	0	0	0	0	0	0	0	0
74	2024	0	0	0	0	0	0	0	0	0	0	0	0	0	0	0	0
75	2025	0	0	0	0	0	0	0	0	0	0	0	0	0	0	0	0
76	2026	0	0	0	0	0	0	0	0	0	0	0	0	0	0	0	0
77	2027	0	0	0	0	0	0	0	0	0	0	0	0	0	0	0	0
78	2028	0	0	0	0	0	0	0	0	0	0	0	0	0	0	0	0
79	2029	0	0	0	0	0	0	0	0	0	0	0	0	0	0	0	0
80	2030	0	0	0	0	0	0	0	0	0	0	0	0	0	0	0	0
81	2031	0	0	0	0	0	0	0	0	0	0	0	0	0	0	0	0
82	2032	0	0	0	0	0	0	0	0	0	0	0	0	0	0	0	0
83	2033	0	0	0	0	0	0	0	0	0	0	0	0	0	0	0	0
84	2034	0	0	0	0	0	0	0	0	0	0	0	0	0	0	0	0
85	2035	0	0	0	0	0	0	0	0	0	0	0	0	0	0	0	0
86	2036	0	0	0	0	0	0	0	0	0	0	0	0	0	0	0	0
87	2037	0	0	0	0	0	0	0	0	0	0	0	0	0	0	0	0
88	2038	0	0	0	0	0	0	0	0	0	0	0	0	0	0	0	0
89	2039	0	0	0	0	0	0	0	0	0	0	0	0	0	0	0	0
90	2040	0	0	0	0	0	0	0	0	0	0	0	0	0	0	0	0
91	2041	0	0	0	0	0	0	0	0	0	0	0	0	0	0	0	0
92	2042	0	0	0	0	0	0	0	0	0	0	0	0	0	0	0	0
93	2043	0	0	0	0	0	0	0	0	0	0	0	0	0	0	0	0
94	2044	0	0	0	0	0	0	0	0	0	0	0	0	0	0	0	0
95	2045	0	0	0	0	0	0	0	0	0	0	0	0	0	0	0	0
96	2046	0	0	0	0	0	0	0	0	0	0	0	0	0	0	0	0
97	2047	0	0	0	0	0	0	0	0	0	0	0	0	0	0	0	0
98	2048	0	0	0	0	0	0	0	0	0	0	0	0	0	0	0	0
99	2049	0	0	0	0	0	0	0	0	0	0	0	0	0	0	0	0
100	2050	0	0	0	0	0	0	0	0	0	0	0	0	0	0	0	0
101	2051	0	0	0	0	0	0	0	0	0	0	0	0	0	0	0	0
102	2052	0	0	0	0	0	0	0	0	0	0	0	0	0	0	0	0
103	2053	0	0	0	0	0	0	0	0	0	0	0	0	0	0	0	0
104	2054	0	0	0	0	0	0	0	0	0	0	0	0	0	0	0	0
105	2055	0	0	0	0	0	0	0	0	0	0	0	0	0	0	0	0
106	2056	0	0	0	0	0	0	0	0	0	0	0	0	0	0	0	0
107	2057	0	0	0	0	0	0	0	0	0	0	0	0	0	0	0	0
108	2058	0	0	0	0	0	0	0	0	0	0	0	0	0	0	0	0
109	2059	0	0	0	0	0	0	0	0	0	0	0	0	0	0	0	0
110	2060	0	0	0	0	0	0	0	0	0	0	0	0	0	0	0	0
111	2061	0	0	0	0	0	0	0	0	0	0	0	0	0	0	0	0
112	2062	0	0	0	0	0	0	0	0	0	0	0	0	0	0	0	0
113	2063	0	0	0	0	0	0	0	0	0	0	0	0	0	0	0	0
114	2064	0	0	0	0	0	0	0	0	0	0	0	0	0	0	0	0
115	2065	0	0	0	0	0	0	0	0	0	0	0	0	0	0	0	0
116	2066	0	0	0	0	0	0	0	0	0	0	0	0	0	0	0	0
117	2067	0	0	0	0	0	0	0	0	0	0	0	0	0	0	0	0
118	2068	0	0	0	0	0	0	0	0	0	0	0	0	0	0	0	0
119	2069	0	0	0	0	0	0	0	0	0	0	0	0	0	0	0	0
120	2070	0	0	0	0	0	0	0	0	0	0	0	0	0	0	0	0
121	2071	0	0	0	0	0	0	0	0	0	0	0	0	0	0	0	0
122	2072	0	0	0	0	0	0	0	0	0	0	0	0	0	0	0	0
123	2073	0	0	0	0	0	0	0	0	0	0	0	0	0	0	0	0
124	2074	0	0	0	0	0	0	0	0	0	0	0	0	0	0	0	0
125	2075	0	0	0	0	0	0	0	0	0	0	0	0	0	0	0	0
126	2076	0	0	0	0	0	0	0	0	0	0	0	0	0	0	0	0
127	2077	0	0	0	0	0	0	0	0	0	0	0	0	0	0	0	0
128	2078	0	0	0	0	0	0	0	0	0	0	0	0	0	0	0	0
129	2079	0	0	0	0	0	0	0	0	0	0	0	0	0	0	0	0
130	2080	0	0	0	0	0	0	0	0	0	0	0	0	0	0	0	0
131	2081	0	0	0	0	0	0	0	0	0	0	0	0	0	0	0	0
132	2082	0	0	0	0	0	0	0	0	0	0	0	0	0	0	0	0
133	2083	0	0	0	0	0	0	0	0	0	0	0	0	0	0	0	0
134	2084	0	0	0	0	0	0	0	0	0	0	0	0	0	0	0	0
135	2085	0	0	0	0	0	0	0	0	0	0	0	0	0	0	0	0
136	2086	0	0	0	0	0	0	0	0	0	0	0	0	0	0	0	0
137	2087	0	0	0	0	0	0	0	0	0	0	0	0	0	0	0	0
138	2088	0	0	0	0	0	0	0	0	0	0	0	0	0	0	0	0
139	2089	0	0	0	0	0	0	0	0	0	0	0	0	0	0	0	0
140	2090	0	0	0	0	0	0	0	0	0	0	0	0	0	0	0	0
141	2091	0	0	0	0	0	0	0	0	0	0	0	0	0	0	0	0
142	2092	0	0	0	0	0	0	0	0	0	0	0	0	0	0	0	0
143	2093	0	0	0	0	0	0	0	0	0	0	0	0	0	0	0	0
144	2094	0	0	0	0	0	0	0	0	0	0	0	0	0	0	0	0
145	2095	0	0	0	0	0	0	0	0	0	0	0	0	0	0	0	0
146	2096	0	0	0	0	0	0	0	0	0	0	0	0	0	0	0	0
147	2097	0	0	0	0	0	0	0	0	0	0	0	0	0	0	0	0
148	2098	0	0	0	0	0	0	0	0	0	0	0	0	0	0	0	0
149	2099	0	0	0	0	0	0	0	0	0	0	0	0	0	0	0	0
150	2100	0	0	0	0	0	0	0	0	0	0	0	0	0	0	0	0
151	2101	0	0	0	0	0	0	0	0	0	0	0	0	0	0	0	0
152	2102	0	0	0	0	0	0	0	0	0	0	0	0	0	0	0	0
153	2103	0	0	0	0	0	0	0	0	0	0	0	0	0	0	0	0
154	2104	0	0	0	0	0	0	0	0	0	0	0	0	0	0	0	0
155	2105	0	0	0	0	0	0	0	0	0	0	0	0	0	0	0	0
156	2106	0	0	0	0	0	0	0	0	0	0	0	0	0	0	0	0
157	2107	0	0	0	0	0	0	0	0	0	0	0	0	0	0	0	0
158	2108	0	0	0	0	0	0	0	0	0	0	0	0	0	0	0	0
159	2109	0	0	0	0	0	0	0	0	0	0	0	0	0	0	0	0
160	2110	0	0	0	0	0	0	0	0	0	0	0	0	0	0	0	0
161	2111	0	0	0	0	0	0	0	0	0	0	0	0	0	0	0	0
162	2112	0	0	0	0	0	0	0	0	0	0	0	0	0	0	0	0
163	2113	0	0	0	0	0	0	0	0	0	0	0	0	0	0	0	0
164	2114	0	0	0	0	0	0	0	0	0	0	0	0	0	0	0	0
165	2115	0	0	0	0	0	0	0	0	0	0	0	0	0	0	0	0
166	2116	0	0	0	0	0	0	0	0	0	0	0	0	0	0	0	0
167	2117	0	0	0	0	0	0	0	0	0	0	0	0	0	0	0	0
168	2118	0	0	0	0	0	0	0	0	0	0	0	0	0	0	0	0
169	2119	0	0	0	0	0	0	0	0	0	0	0	0	0	0	0	0
170	2120	0	0	0	0	0	0	0	0	0	0	0	0	0	0	0	0
171	2121	0	0	0	0	0	0	0	0	0	0	0	0	0	0	0	0
172	2122	0	0	0	0	0	0	0	0	0	0	0	0	0	0	0	0
173	2123	0	0	0	0	0	0	0	0	0	0	0	0	0	0	0	0
174	2124	0	0	0	0	0	0	0	0	0	0	0	0	0	0	0	0
175	2125	0	0	0	0	0	0	0	0	0	0	0	0	0	0	0	0
176	2126	0	0	0	0	0	0	0	0	0	0	0	0	0	0	0	0
177	2127	0	0	0	0	0	0	0	0	0	0	0	0	0	0	0	0
178	2128	0	0	0	0	0	0	0	0	0	0	0	0	0	0	0	0
179	2129	0	0	0	0	0	0	0	0	0	0	0	0	0	0	0	0
180	2130	0	0	0	0	0	0	0	0	0	0	0	0	0	0	0	0
181	2131	0	0	0	0	0	0	0	0	0	0	0	0	0	0	0	0
182	2132	0	0	0	0	0	0	0	0	0	0	0	0	0	0	0	0
183	2133	0	0	0	0	0	0	0	0	0	0	0	0	0	0	0	0
184	2134	0	0	0	0	0	0	0	0	0	0	0	0	0	0	0	0
185	2135	0	0	0	0	0	0	0	0	0	0	0	0	0	0	0	0
186	2136	0	0	0	0	0	0	0	0	0	0	0	0	0	0	0	0
187	2137	0	0	0	0	0	0	0	0	0	0	0	0	0	0	0	0
188	2138	0	0	0	0	0	0	0	0	0	0	0	0	0	0	0	0
189	2139	0	0	0	0	0	0	0	0	0	0	0	0	0	0	0	0
190	2140	0	0	0	0	0	0	0	0	0	0	0	0	0	0	0	0
191	2141	0	0	0	0	0	0	0	0	0	0	0	0	0	0	0	0
192	2142	0	0	0	0	0	0	0	0	0	0	0	0	0	0	0	0
193	2143	0	0	0	0	0	0	0	0	0	0	0	0	0	0	0	0
194	2144	0	0	0	0	0	0	0	0	0	0	0	0	0	0	0	0
195	2145	0	0	0	0	0	0	0	0	0	0	0	0	0	0	0	0
196	2146	0	0	0	0	0	0	0	0	0	0	0	0	0	0	0	0
197	2147	0	0	0	0	0	0	0	0	0	0	0	0	0	0	0	0
198	2148	0	0	0	0	0	0	0	0	0	0	0	0	0	0	0	0
199	2149	0	0	0	0	0	0	0	0	0	0	0	0	0	0	0	0
200	2150	0	0	0	0	0	0	0	0	0	0	0	0	0	0	0	0
201	2151	0	0	0	0	0	0	0	0	0	0	0	0	0	0	0	0
202	2152	0	0	0	0	0	0	0	0	0	0	0	0	0	0	0	0
203	2153	0	0	0	0	0	0	0	0	0	0	0	0	0	0	0	0
204	2154	0	0	0	0	0	0	0	0	0	0	0	0	0	0	0	0
205	2155	0	0	0	0	0	0	0	0	0	0	0	0	0	0	0	0
206	2156	0	0	0	0	0	0	0	0	0	0	0	0	0	0	0	0
207	2157	0	0	0	0	0	0	0	0	0	0	0	0	0	0	0	0
208	2158	0	0	0	0	0	0	0	0	0	0	0	0	0	0	0	0
209	2159	0	0	0	0	0	0	0	0	0	0	0	0	0	0	0	0
210	2160	0	0	0	0	0	0	0	0	0	0	0	0	0	0	0	0
211	2161	0	0	0	0	0	0	0	0	0	0	0	0	0	0	0	0
212	2162	0	0	0	0	0	0	0	0	0	0	0	0	0	0	0	0
213	2163	0	0	0	0	0	0	0	0	0	0	0	0	0	0	0	0
214	2164	0	0	0	0	0	0	0	0	0	0	0	0	0	0	0	0
215	2165	0	0	0	0	0	0	0	0	0	0	0	0	0	0	0	0
216	2166	0	0	0	0	0	0	0	0	0	0	0	0	0	0	0	0
217	2167	0	0	0	0	0	0	0	0	0	0	0	0	0	0	0	0
218	2168	0	0	0	0	0	0	0	0	0	0	0	0	0	0	0	0
219	2169	0	0	0	0	0	0	0	0	0	0	0	0	0	0	0	0
220	2170	0	0	0	0	0	0	0	0	0	0	0	0	0	0	0	0
221	2171	0	0	0	0	0	0	0	0	0	0	0	0	0	0	0	0
222	2172	0	0	0	0	0	0	0	0	0	0	0	0	0	0	0	0
223	2173	0	0	0	0	0	0	0	0	0	0	0	0	0	0	0	0
224	2174	0	0	0	0	0	0	0	0	0	0	0	0	0	0	0	0
225	2175	0	0	0	0	0	0	0	0	0	0	0	0	0	0	0	0
226	2176	0	0	0	0	0	0	0	0	0	0	0	0	0	0	0	0
227	2177	0	0	0	0	0	0	0	0	0	0	0	0	0	0	0	0
228	2178	0	0	0	0	0	0	0	0	0	0	0	0	0	0	0	0
229	2179	0	0	0	0	0	0	0	0	0	0	0	0	0	0	0	0
230	2180	0	0	0	0	0	0	0	0	0	0	0	0	0	0	0	0
231	2181	0	0	0	0	0	0	0	0	0	0	0	0	0	0	0	0
232	2182	0	0	0	0	0	0	0	0	0	0	0	0	0	0	0	0
233	2183	0	0	0	0	0	0	0	0	0	0	0	0	0	0	0	0
234	2184	0	0	0	0	0	0	0	0	0	0	0	0	0	0	0	0
235	2185	0	0	0	0	0	0	0	0	0	0	0	0	0	0	0	0
236	2186	0	0	0	0	0	0	0	0	0	0	0	0	0	0	0	0
237	2187	0	0	0	0	0	0	0	0	0	0	0	0	0	0	0	0
238	2188	0	0	0	0	0	0	0	0	0	0	0	0	0	0	0	0
239	2189	0	0	0	0	0	0	0	0	0	0	0	0	0	0	0	0
240	2190	0	0	0	0	0	0	0	0	0	0	0	0	0	0	0	0
241	2191	0	0	0	0	0	0	0	0	0	0	0	0	0	0	0	0
242	2192	0	0	0	0	0	0	0	0	0	0	0	0	0	0	0	0
243	2193	0	0	0	0	0	0	0	0	0	0	0	0	0	0	0	0
244	2194	0	0	0	0	0	0	0	0	0	0	0	0	0	0	0	0
245	2195	0	0	0	0	0	0	0	0	0	0	0	0	0	0	0	0
246	2196	0	0	0	0	0	0	0	0	0	0	0	0	0	0	0	0
247	2197	0	0	0	0	0	0	0	0	0	0	0	0	0	0	0	0
248	2198	0	0	0	0	0	0	0	0	0	0	0	0	0	0	0	0
249	2199	0	0	0	0	0	0	0	0	0	0	0	0	0	0	0	0
250	2200	0	0	0	0	0	0	0	0	0	0	0	0	0	0	0	0
251	2201	0	0	0	0	0	0	0	0	0	0	0	0	0	0	0	0
252	2202	0	0	0	0	0	0	0	0	0	0	0	0	0	0	0	0
253	2203	0	0	0	0	0	0	0	0	0	0	0	0	0	0	0	0
254	2204	0	0	0	0	0	0	0	0	0	0	0	0	0	0	0	0
255	2205	0	0	0	0	0	0	0	0	0	0	0	0	0	0	0	0
256	2206	0	0	0	0	0	0	0	0	0	0	0	0	0	0	0	0
257	2207	0	0	0	0	0	0	0	0	0	0	0	0	0	0	0	0
258	2208	0	0	0	0	0	0	0	0	0	0	0	0	0	0	0	0
259	2209	0	0	0	0	0	0	0	0	0	0	0	0	0	0	0	0
260	2210	0	0	0	0	0	0	0	0	0	0	0	0	0	0	0	0
261	2211	0	0	0	0	0	0	0	0	0	0	0	0	0	0	0	0
262	2212	0	0	0	0	0	0	0	0	0	0	0	0	0	0	0	0
263	2213	0	0	0	0	0	0	0	0	0	0	0	0	0	0	0	0
264	2214	0	0	0	0	0	0	0	0	0	0	0	0	0	0	0	0
265	2215	0	0	0	0	0	0	0	0	0	0	0	0	0	0	0	0
266	2216	0	0	0	0	0	0	0	0	0	0	0	0	0	0	0	0
267	2217	0	0	0	0	0	0	0	0	0	0	0	0	0	0	0	0
268	2218	0	0	0	0	0	0	0	0	0	0	0	0	0	0	0	0
269	2219	0	0	0	0	0	0	0	0	0	0	0	0	0	0	0	0
270	2220	0	0	0	0	0	0	0	0	0	0	0	0	0	0	0	0
271	2221	0	0	0	0	0	0	0	0	0	0	0	0	0	0	0	0
272	2222	0	0	0	0	0	0	0	0	0	0	0	0	0	0	0	0
273	2223	0	0	0	0	0	0	0	0	0	0	0	0	0	0	0	0
274	2224	0	0	0	0	0	0	0	0	0	0	0	0	0	0	0	0
275	2225	0	0	0	0	0	0	0	0	0	0	0	0	0	0	0	0
276	2226	0	0	0	0	0	0	0	0	0	0	0	0	0	0	0	0
277	2227	0	0	0	0	0	0	0	0	0	0	0	0	0	0	0	0
278	2228	0	0	0	0	0	0	0	0	0	0	0	0	0	0	0	0
279	2229	0	0	0	0	0	0	0	0	0	0	0	0	0	0	0	0
280	2230	0	0	0	0	0	0	0	0	0	0	0	0	0	0	0	0
281	2231	0	0	0	0	0	0	0	0	0	0	0	0	0	0	0	0
282	2232	0	0	0	0	0	0	0	0	0	0	0	0	0	0	0	0
283	2233	0	0	0	0	0	0	0	0	0	0	0	0	0	0	0	0
284	2234	0	0	0	0	0	0	0	0	0	0	0	0	0	0	0	0
285	2235	0	0	0	0	0	0	0	0	0	0	0	0	0	0	0	0
286	2236	0	0	0	0	0	0	0	0	0	0	0	0	0	0	0	0
287	2237	0	0	0	0	0	0	0	0	0	0	0	0	0	0	0	0
288	2238	0	0	0	0	0	0	0	0	0	0	0	0	0	0	0	0
289	2239	0	0	0	0	0	0	0	0	0	0	0	0	0	0	0	0
290	2240	0	0	0	0	0	0	0	0	0	0	0	0	0	0	0	0
291	2241	0	0	0	0	0	0	0	0	0	0	0	0	0	0	0	0
292	2242	0	0	0	0	0	0	0	0	0	0	0	0	0	0	0	0
293	2243	0	0	0	0	0	0	0	0	0	0	0	0	0	0	0	0
294	2244	0	0	0	0	0	0	0	0	0	0	0	0	0	0	0	0
295	2245	0	0	0	0	0	0	0	0	0	0	0	0	0	0	0	0
296	2246	0	0	0	0	0	0	0	0	0	0	0	0	0	0	0	0
297	2247	0	0	0	0	0	0	0	0	0	0	0	0	0	0	0	0
298	2248	0	0	0	0	0	0	0	0	0	0	0	0	0	0	0	0
299	2249	0	0	0	0	0	0	0	0	0	0	0	0	0	0	0	0
300	2250	0	0	0	0	0	0	0	0	0	0	0	0	0	0	0	0
301	2251	0	0	0	0	0	0	0	0	0	0	0	0	0	0	0	0
302	2252	0	0	0	0	0	0	0	0	0	0	0	0	0	0	0	0
303	2253	0	0	0	0	0	0	0	0	0	0	0	0	0	0	0	0
304	2254	0	0	0	0	0	0	0	0	0	0	0	0	0	0	0	0
305	2255	0	0	0	0	0	0	0	0	0	0	0	0	0	0	0	0
306	2256	0	0	0	0	0	0	0	0	0	0	0	0	0	0	0	0
307	2257	0	0	0	0	0	0	0	0	0	0	0	0	0	0	0	0
308	2258	0	0	0	0	0	0	0	0	0	0	0	0	0	0	0	0
309	2259	0	0	0	0	0	0	0	0	0	0	0	0	0	0	0	0
310	2260	0	0	0	0	0	0	0	0	0	0	0	0	0	0	0	0
311	2261	0	0	0	0	0	0	0	0	0	0	0	0	0	0	0	0
312	2262	0	0	0	0	0	0	0	0	0	0	0	0	0	0	0	0
313	2263	0	0	0	0	0	0	0	0	0	0	0	0	0	0	0	0
314	2264	0	0	0	0	0	0	0	0	0	0	0	0	0	0	0	0
315	2265	0	0	0	0	0	0	0	0	0	0	0	0	0	0	0	0
316	2266	0	0	0	0	0	0	0	0	0	0	0	0	0	0	0	0
317	2267	0	0	0	0	0	0	0	0	0	0	0	0	0	0	0	0
318	2268	0	0	0	0	0	0	0	0	0	0	0	0	0	0	0	0
319	2269	0	0	0	0	0	0	0	0	0	0	0	0	0	0	0	0
320	2270	0	0	0	0	0	0	0	0	0	0	0	0	0	0	0	0
321	2271	0	0	0	0	0	0	0	0	0	0	0	0	0	0	0	0
322	2272	0	0	0	0	0	0	0	0	0	0	0	0	0	0	0	0
323	2273	0	0	0	0	0	0	0	0	0	0	0	0	0	0	0	0
324	2274	0	0	0	0	0	0	0	0	0	0	0	0	0	0	0	0
325	2275	0	0	0	0	0	0	0	0	0	0	0	0	0	0	0	0
326	2276	0	0	0	0	0	0	0	0	0	0	0	0	0	0	0	0
327	2277	0	0	0	0	0	0	0	0	0	0	0	0	0	0	0	0
328	2278	0	0	0	0	0	0	0	0	0	0	0	0	0	0	0	0
329	2279	0	0	0	0	0	0	0	0	0	0	0	0	0	0	0	0
330	2280	0	0	0	0	0	0	0	0	0	0	0	0	0	0	0	0
331	2281	0	0	0	0	0	0	0	0	0	0	0	0	0	0	0	0
332	2282	0	0	0	0	0	0	0	0	0	0	0	0	0	0	0	0
333	2283	0	0	0	0	0	0	0	0	0	0	0	0	0	0	0	0
334	2284	0	0	0	0	0	0	0	0	0	0	0	0	0	0	0	0
335	2285	0	0	0	0	0	0	0	0	0	0	0	0	0	0	0	0
336	2286	0	0	0	0	0	0	0	0	0	0	0	0	0	0	0	0
337	2287	0	0	0	0	0	0	0	0	0	0	0	0	0	0	0	0
338	2288	0	0	0	0	0	0	0	0	0	0	0	0	0	0	0	0
339	2289	0	0	0	0	0	0	0	0	0	0	0	0	0	0	0	0
340	2290	0	0	0	0	0	0	0	0	0	0	0	0	0	0	0	0
341	2291	0	0	0	0	0	0	0	0	0	0	0	0	0	0	0	0
342	2292	0	0	0	0	0	0	0	0	0	0	0	0	0	0	0	0
343	2293	0	0	0	0	0	0	0	0	0	0	0	0	0	0	0	0
344	2294	0	0	0	0	0	0	0	0	0	0	0	0	0	0	0	0
345	2295	0	0	0	0	0	0	0	0	0	0	0	0	0	0	0	0
346	2296	0	0	0	0	0	0	0	0	0	0	0	0	0	0	0	0
347	2297	0	0	0	0	0	0	0	0	0	0	0	0	0	0	0	0
348	2298	0	0	0	0	0	0	0	0	0	0	0	0	0	0	0	0
349	2299	0	0	0	0	0	0	0	0	0	0	0	0	0	0	0	0
350	2300	0	0	0	0	0	0	0	0	0	0	0	0	0	0	0	0
351	2301	0	0	0	0	0	0	0	0	0	0	0	0	0	0	0	0
352	2302	0	0	0	0	0	0	0	0	0	0	0	0	0	0	0	0
353	2303	0	0	0	0	0	0	0	0	0	0	0	0	0	0	0	0
354	2304	0	0	0	0	0	0	0	0	0	0	0	0	0	0	0	0
355	2305	0	0	0	0	0	0	0	0	0	0	0	0	0	0	0	0
356	2306	0	0	0	0	0	0	0	0	0	0	0	0	0	0	0	0
357	2307	0	0	0	0	0	0	0	0	0	0	0	0	0	0	0	0
358	2308	0	0	0	0	0	0	0	0	0	0	0	0	0	0	0	0
359	2309	0	0	0	0	0	0	0	0	0	0	0	0	0	0	0	0
360	2310	0	0	0	0	0	0	0	0	0	0	0	0	0	0	0	0
361	2311	0	0	0	0	0	0	0	0	0	0	0	0	0	0	0	0
362	2312	0	0	0	0	0	0	0	0	0	0	0	0	0	0	0	0
363	2313	0	0	0	0	0	0	0	0	0	0	0	0	0	0	0	0
364	2314	0	0	0	0	0	0	0	0	0	0	0	0	0	0	0	0
365	2315	0	0	0	0	0	0	0	0	0	0	0	0	0	0	0	0
366	2316	0	0	0	0	0	0	0	0	0	0	0	0	0	0	0	0
367	2317	0	0	0	0	0	0	0	0	0	0	0	0	0	0	0	0
368	2318	0	0	0	0	0	0	0	0	0	0	0	0	0	0	0	0
369	2319	0	0	0	0	0	0	0	0	0	0	0	0	0	0	0	0
370	2320	0	0	0	0	0	0	0	0	0	0	0	0	0	0	0	0
371	2321	0	0	0	0	0	0	0	0	0	0	0	0	0	0	0	0
372	2322	0	0	0	0	0	0	0	0	0	0	0	0	0	0	0	0
373	2323	0	0	0	0	0	0	0	0	0	0	0	0	0	0	0	0
374	2324	0	0	0	0	0	0	0	0	0	0	0	0	0	0	0	0
375	2325	0	0	0	0	0	0	0	0	0	0	0	0	0	0	0	0
376	2326	0	0	0	0	0	0	0	0	0	0	0	0	0	0	0	0
377	2327	0	0	0	0	0	0	0	0	0	0	0	0	0	0	0	0
378	2328	0	0	0	0	0	0	0	0	0	0	0	0	0	0	0	0
379	2329	0	0	0	0	0	0	0	0	0	0	0	0	0	0	0	0
380	2330	0	0	0	0	0	0	0	0	0	0	0	0	0	0	0	0
381	2331	0	0	0	0	0	0	0	0	0	0	0	0	0	0	0	0
382	2332	0	0	0	0	0	0	0	0	0	0	0	0	0	0	0	0
383	2333	0	0	0	0	0	0	0	0	0	0	0	0	0	0	0	0
384	2334	0	0	0	0	0	0	0	0	0	0	0	0	0	0	0	0
385	2335	0	0	0	0	0	0	0	0	0	0	0	0	0	0	0	0
386	2336	0	0	0	0	0	0	0	0	0	0	0	0	0	0	0	0
387	2337	0	0	0	0	0	0	0	0	0	0	0	0	0	0	0	0
388	2338	0	0	0	0	0	0	0	0	0	0	0	0	0	0	0	0
389	2339	0	0	0	0	0	0	0	0	0	0	0	0	0	0	0	0
390	2340	0	0	0	0	0	0	0	0	0	0	0	0	0	0	0	0
391	2341	0	0	0	0	0	0	0	0	0	0	0	0	0	0	0	0
392	2342	0	0	0	0	0	0	0	0	0	0	0	0	0	0	0	0
393	2343	0	0	0	0	0	0	0	0	0	0	0	0	0	0	0	0
394	2344	0	0	0	0	0	0	0	0	0	0	0	0	0	0	0	0
395	2345	0	0	0	0	0	0	0	0	0	0	0	0	0	0	0	0
396	2346	0	0	0	0	0	0	0	0	0	0	0	0	0	0	0	0
397	2347	0	0	0	0	0	0	0	0	0	0	0	0	0	0	0	0
398	2348	0	0	0	0	0	0	0	0	0	0	0	0	0	0	0	0
399	2349	0	0	0	0	0	0	0	0	0	0	0	0	0	0	0	0
400	2350	0	0	0	0	0	0	0	0	0	0	0	0	0	0	0	0
401	2351	0	0	0	0	0	0	0	0	0	0	0	0	0	0	0	0
402	2352	0	0	0	0	0	0	0	0	0	0	0	0	0	0	0	0
403	2353	0	0	0	0	0	0	0	0	0	0	0	0	0	0	0	0
404	2354	0	0	0	0	0	0	0	0	0	0	0	0	0	0	0	0
405	2355	0	0	0	0	0	0	0	0	0	0	0	0	0	0	0	0
406	2356	0	0	0	0	0	0	0	0	0	0	0	0	0	0	0	0
407	2357	0	0	0	0	0	0	0	0	0	0	0	0	0	0	0	0
408	2358	0	0	0	0	0	0	0	0	0	0	0	0	0	0	0	0
409	2359	0	0	0	0	0	0	0	0	0	0	0	0	0	0	0	0
410	2360	0	0	0	0	0	0	0	0	0	0	0	0	0	0	0	0
411	2361	0	0	0	0	0	0	0	0	0	0	0	0	0	0	0	0
412	2362	0	0	0	0	0	0	0	0	0	0	0	0	0	0	0	0
413	2363	0	0	0	0	0	0	0	0	0	0	0	0	0	0	0	0
414	2364	0	0	0	0	0	0	0	0	0	0	0	0	0	0	0	0
415	2365	0	0	0	0	0	0	0	0	0	0	0	0	0	0	0	0
416	2366	0	0	0	0	0	0	0	0	0	0	0	0	0	0	0	0
417	2367	0	0	0	0	0	0	0	0	0	0	0	0	0	0	0	0
418	2368	0	0	0	0	0	0	0	0	0	0	0	0	0	0	0	0
419	2369	0	0	0	0	0	0	0	0	0	0	0	0	0	0	0	0
420	2370	0	0	0	0	0	0	0	0	0	0	0	0	0	0	0	0
421	2371	0	0	0	0	0	0	0	0	0	0	0	0	0	0	0	0
422	2372	0	0	0	0	0	0	0	0	0	0	0	0	0	0	0	0
423	2373	0	0	0	0	0	0	0	0	0	0	0	0	0	0	0	0
424	2374	0	0	0	0	0	0	0	0	0	0	0	0	0	0	0	0
425	2375	0	0	0	0	0	0	0	0	0	0	0	0	0	0	0	0
426	2376	0	0	0	0	0	0	0	0	0	0	0	0	0	0	0	0
427	2377	0	0	0	0	0	0	0	0	0	0	0	0	0	0	0	0
428	2378	0	0	0	0	0	0	0	0	0	0	0	0	0	0	0	0
429	2379	0	0	0	0	0	0	0	0	0	0	0	0	0	0	0	0
430	2380	0	0	0	0	0	0	0	0	0	0	0	0	0	0	0	0
431	2381	0	0	0	0	0	0	0	0	0	0	0	0	0	0	0	0
432	2382	0	0	0	0	0	0	0	0	0	0	0	0	0	0	0	0
433	2383	0	0	0	0	0	0	0	0	0	0	0	0	0	0	0	0
434	2384	0	0	0	0	0	0	0	0	0	0	0	0	0	0	0	0
435	2385	0	0	0	0	0	0	0	0	0	0	0	0	0	0	0	0
436	2386	0	0	0	0	0	0	0	0	0	0	0	0	0	0	0	0
437	2387	0	0	0	0	0	0	0	0	0	0	0	0	0	0	0	0
438	2388	0	0	0	0	0	0	0	0	0	0	0	0	0	0	0	0
439	2389	0	0	0	0	0	0	0	0	0	0	0	0	0	0	0	0
440	2390	0	0	0	0	0	0	0	0	0	0	0	0	0	0	0	0
441	2391	0	0	0	0	0	0	0	0	0	0	0	0	0	0	0	0
442	2392	0	0	0	0	0	0	0	0	0	0	0	0	0	0	0	0
443	2393	0	0	0	0	0	0	0	0	0	0	0	0	0	0	0	0
444	2394	0	0	0	0	0	0	0	0	0	0	0	0	0	0	0	0
445	2395	0	0	0	0	0	0	0	0	0	0	0	0	0	0	0	0
446	2396	0	0	0	0	0	0	0	0	0	0	0	0	0	0	0	0
447	2397	0	0	0	0	0	0	0	0	0	0	0	0	0	0	0	0
448	2398	0	0	0	0	0	0	0	0	0	0	0	0	0	0	0	0
449	2399	0	0	0	0	0	0	0	0	0	0	0	0	0	0	0	0
450	2400	0	0	0	0	0	0	0	0	0	0	0	0	0	0	0	0
451	2401	0	0	0	0	0	0	0	0	0	0	0	0	0	0	0	0
452	2402	0	0	0	0	0	0	0	0	0	0	0	0	0	0	0	0
453	2403	0	0	0	0	0	0	0	0	0	0	0	0	0	0	0	0
454	2404	0	0	0	0	0	0	0	0	0	0	0	0	0	0	0	0
455	2405	0	0	0	0	0	0	0	0	0	0	0	0	0	0	0	0
456	2406	0	0	0	0	0	0	0	0	0	0	0	0	0	0	0	0
457	2407	0	0	0	0	0	0	0	0	0	0	0	0	0	0	0	0
458	2408	0	0	0	0	0	0	0	0	0	0	0	0	0	0	0	0
459	2409	0	0	0	0	0	0	0	0	0	0	0	0	0	0	0	0
460	2410	0	0	0	0	0	0	0	0	0	0	0	0	0	0	0	0
461	2411	0	0	0	0	0	0	0	0	0	0	0	0	0	0	0	0
462	2412	0	0	0	0	0	0	0	0	0	0	0	0	0	0	0	0
463	2413	0	0	0	0	0	0	0	0	0	0	0	0	0	0	0	0
464	2414	0	0	0	0	0	0	0	0	0	0	0	0	0	0	0	0
465	2415	0	0	0	0	0	0	0	0	0	0	0	0	0	0	0	0
466	2416	0	0	0	0	0	0	0	0	0	0	0	0	0	0	0	0
467	2417	0	0	0	0	0	0	0	0	0	0	0	0	0	0	0	0
468	2418	0	0	0	0	0	0	0	0	0	0	0	0	0	0	0	0
469	2419	0	0	0	0	0	0	0	0	0	0	0	0	0	0	0	0
470	2420	0	0	0	0	0	0	0	0	0	0	0	0	0	0	0	0
471	2421	0	0	0	0	0	0	0	0	0	0	0	0	0	0	0	0
472	2422	0	0	0	0	0	0	0	0	0	0	0	0	0	0	0	0
473	2423	0	0	0	0	0	0	0	0	0	0	0	0	0	0	0	0
474	2424	0	0	0	0	0	0	0	0	0	0	0	0	0	0	0	0
475	2425	0	0	0	0	0	0	0	0	0	0	0	0	0	0	0	0
476	2426	0	0	0	0	0	0	0	0	0	0	0	0	0	0	0	0
477	2427	0	0	0	0	0	0	0	0	0	0	0	0	0	0	0	0
478	2428	0	0	0	0	0	0	0	0	0	0	0	0	0	0	0	0
479	2429	0	0	0	0	0	0	0	0	0	0	0	0	0	0	0	0
480	2430	0	0	0	0	0	0	0	0	0	0	0	0	0	0	0	0
481	2431	0	0	0	0	0	0	0	0	0	0	0	0	0	0	0	0
482	2432	0	0	0	0	0	0	0	0	0	0	0	0	0	0	0	0
483	2433	0	0	0	0	0	0	0	0	0	0	0	0	0	0	0	0
484	2434	0	0	0	0	0	0	0	0	0	0	0	0	0	0	0	0
485	2435	0	0	0	0	0	0	0	0	0	0	0	0	0	0	0	0
486	2436	0	0	0	0	0	0	0	0	0	0	0	0	0	0	0	0
487	2437	0	0	0	0	0	0	0	0	0	0	0	0	0	0	0	0
488	2438	0	0	0	0	0	0	0	0	0	0	0	0	0	0	0	0
489	2439	0	0	0	0	0	0	0	0	0	0	0	0	0	0	0	0
490	2440	0	0	0	0	0	0	0	0	0	0	0	0	0	0	0	0
491	2441	0	0	0	0	0	0	0	0	0	0	0	0	0	0	0	0
492	2442	0	0	0	0	0	0	0	0	0	0	0	0	0	0	0	0
493	2443	0	0	0	0	0	0	0	0	0	0	0	0	0	0	0	0
494	2444	0	0	0	0	0	0	0	0	0	0	0	0	0	0	0	0
495	2445	0	0	0	0	0	0	0	0	0	0	0	0	0	0	0	0
496	2446	0	0	0	0	0	0	0	0	0	0	0	0	0	0	0	0
497	2447	0	0	0	0	0	0	0	0	0	0	0	0	0	0	0	0
498	2448	0	0	0	0	0	0	0	0	0	0	0	0	0	0	0	0
499	2449	0	0	0	0	0	0	0	0	0	0	0	0	0	0	0	0
500	2450	0	0	0	0	0	0	0	0	0	0	0	0	0	0	0	0
501	2451	0	0	0	0	0	0	0	0	0	0	0	0	0	0	0	0
502	2452	0	0	0	0	0	0	0	0	0	0	0	0	0	0	0	0
503	2453	0	0	0	0	0	0	0	0	0	0	0	0	0	0	0	0
504	2454	0	0	0	0	0	0	0	0	0	0	0	0	0	0	0	0
505	2455	0	0	0	0	0	0	0	0	0	0	0	0	0	0	0	0
506	2456	0	0	0	0	0	0	0	0	0	0	0	0	0	0	0	0
507	2457	0	0	0	0	0	0	0	0	0	0	0	0	0	0	0	0
508	2458	0	0	0	0	0	0	0	0	0	0	0	0	0	0	0	0
509	2459	0	0	0	0	0	0	0	0	0	0	0	0	0	0	0	0
510	2460	0	0	0	0	0	0	0	0	0	0	0	0	0	0	0	0
511	2461	0	0	0	0	0	0	0	0	0	0	0	0	0	0	0	0
512	2462	0	0	0	0	0	0	0	0	0	0	0	0	0	0	0	0
513	2463	0	0	0	0	0	0	0	0	0	0	0	0	0	0	0	0
514	2464	0	0	0	0	0	0	0	0	0	0	0	0	0	0	0	0
515	2465	0	0	0	0	0	0	0	0	0	0	0	0	0	0	0	0
516	2466	0	0	0	0	0	0	0	0	0	0	0	0	0	0	0	0
517	2467	0	0	0	0	0	0	0	0	0	0	0	0	0	0	0	0
518	2468	0	0	0	0	0	0	0	0	0	0	0	0	0	0	0	0
519	2469	0	0	0	0	0	0	0	0	0	0	0	0	0	0	0	0
520	2470	0	0	0	0	0	0	0	0	0	0	0	0	0	0	0	0
521	2471	0	0	0	0	0	0	0	0	0	0	0	0	0	0	0	0
522	2472	0	0	0	0	0	0	0	0	0	0	0	0	0	0	0	0
523	2473	0	0	0	0	0	0	0	0	0	0	0	0	0	0	0	0
524	2474	0	0	0	0	0	0	0	0	0	0	0	0	0	0	0	0
525	2475	0	0	0	0	0	0	0	0	0	0	0	0	0	0	0	0
526	2476	0	0	0	0	0	0	0	0	0	0	0	0	0	0	0	0
527	2477	0	0	0	0	0	0	0	0	0	0	0	0	0	0	0	0
528	2478	0	0	0	0	0	0	0	0	0	0	0	0	0	0	0	0
529	2479	0	0	0	0	0	0	0	0	0	0	0	0	0	0	0	0
530	2480	0	0	0	0	0	0	0	0	0	0	0	0	0	0	0	0
531	2481	0	0	0	0	0	0	0	0	0	0	0	0	0	0	0	0
532	2482	0	0	0	0	0	0	0	0	0	0	0	0	0	0	0	0
533	2483	0	0	0	0	0	0	0	0	0	0	0	0	0	0	0	0
534	2484	0	0	0	0	0	0	0	0	0	0	0	0	0	0	0	0
535	2485	0	0	0	0	0	0	0	0	0	0	0	0	0	0	0	0
536	2486	0	0	0	0	0	0	0	0	0	0	0	0	0	0	0	0
537	2487	0	0	0	0	0	0	0	0	0	0	0	0	0	0	0	0
538	2488	0	0	0	0	0	0	0	0	0	0	0	0	0	0	0	0
539	2489	0	0	0	0	0	0	0	0	0	0	0	0	0	0	0	0
540	2490	0	0	0	0	0	0	0	0	0	0	0	0	0	0	0	0
