# Supplementary material for: The Social Cost of Fossil and Industrial CO2 Emissions from 1950 to 2018
Source: Research Square preprint supplement (doi:10.21203/rs.3.rs-2244259/v1), 2022-11-17
Supplement: Supplementary file 341 [file sccHSp.xlsx]

## Sheet: sccHSp
f	1	2	3	4	5	6
0	106.442	101.842	108.766	150.612	111.959	97.4293
1	106.438	101.835	108.763	150.662	111.965	97.4168
2	106.452	101.844	108.779	150.737	111.989	97.4203
3	106.472	101.859	108.801	150.821	112.019	97.4297
4	106.494	101.875	108.824	150.906	112.051	97.4402
5	106.516	101.893	108.849	150.993	112.084	97.4519
6	106.543	101.915	108.878	151.087	112.122	97.4676
7	106.573	101.939	108.909	151.184	112.162	97.4858
8	106.61	101.97	108.948	151.292	112.21	97.5097
9	106.657	102.011	108.999	151.417	112.27	97.543
10	106.692	102.041	109.037	151.525	112.317	97.5657
11	106.713	102.055	109.058	151.611	112.347	97.5744
12	106.733	102.069	109.08	151.698	112.378	97.5832
13	106.759	102.089	109.108	151.796	112.415	97.5961
14	106.785	102.107	109.135	151.895	112.451	97.6078
15	106.808	102.123	109.16	151.994	112.486	97.6173
16	106.826	102.133	109.179	152.086	112.514	97.6209
17	106.836	102.135	109.191	152.171	112.535	97.6167
18	106.837	102.129	109.194	152.248	112.548	97.6038
19	106.836	102.119	109.195	152.328	112.558	97.5873
20	106.837	102.112	109.199	152.418	112.572	97.5712
21	106.825	102.09	109.189	152.495	112.572	97.5413
22	106.781	102.036	109.146	152.532	112.539	97.4813
23	106.721	101.966	109.087	152.551	112.489	97.4043
24	106.651	101.886	109.018	152.565	112.43	97.3179
25	106.561	101.785	108.928	152.553	112.35	97.2106
26	106.449	101.662	108.816	152.519	112.247	97.0823
27	106.336	101.537	108.703	152.49	112.144	96.9513
28	106.221	101.409	108.588	152.464	112.04	96.8161
29	106.093	101.268	108.461	152.427	111.922	96.6683
30	105.947	101.107	108.314	152.368	111.785	96.5017
31	105.782	100.928	108.148	152.287	111.629	96.3174
32	105.602	100.733	107.965	152.188	111.457	96.1176
33	105.416	100.531	107.777	152.089	111.279	95.9104
34	105.225	100.323	107.584	151.99	111.096	95.6967
35	105.026	100.105	107.383	151.887	110.906	95.4733
36	104.811	99.8699	107.165	151.768	110.698	95.233
37	104.578	99.6163	106.928	151.632	110.472	94.9741
38	104.336	99.3527	106.683	151.494	110.239	94.7049
39	104.087	99.0809	106.432	151.354	109.998	94.4271
40	103.821	98.7908	106.162	151.196	109.739	94.1316
41	103.536	98.4801	105.872	151.017	109.46	93.8165
42	103.242	98.1583	105.571	150.83	109.171	93.4906
43	102.935	97.8226	105.257	150.633	108.869	93.1509
44	102.623	97.4804	104.939	150.437	108.562	92.8045
45	102.309	97.1343	104.618	150.246	108.254	92.4537
46	101.985	96.7771	104.287	150.046	107.935	92.0923
47	101.648	96.4044	103.941	149.831	107.601	91.7164
48	101.304	96.0236	103.587	149.612	107.26	91.3329
49	100.956	95.6363	103.229	149.392	106.915	90.9433
50	100.605	95.2439	102.866	149.172	106.565	90.5489
51	100.257	94.8523	102.506	148.962	106.219	90.1552
52	99.9054	94.4551	102.142	148.754	105.869	89.7559
53	99.5451	94.0469	101.769	148.542	105.51	89.3462
54	99.1778	93.6292	101.388	148.327	105.144	88.9274
55	98.8071	93.2059	101.003	148.115	104.774	88.503
56	98.4305	92.7744	100.612	147.904	104.399	88.0707
57	98.0451	92.3318	100.212	147.688	104.014	87.628
58	97.6496	91.8769	99.8004	147.465	103.619	87.1739
59	97.2354	91.4011	99.3693	147.224	103.205	86.7004
60	96.791	90.8933	98.9068	146.951	102.759	86.1971
61	96.3239	90.3612	98.4209	146.655	102.291	85.6714
62	95.835	89.8055	97.9124	146.336	101.801	85.1245
63	95.3208	89.2232	97.3779	145.989	101.286	84.5544
64	94.7761	88.6094	96.8122	145.603	100.741	83.9572
65	94.195	87.9589	96.2094	145.169	100.159	83.3296
66	93.5647	87.2593	95.5565	144.666	99.5292	82.662
67	92.8675	86.4944	94.8359	144.065	98.8339	81.9422
68	92.0786	85.6406	94.0218	143.321	98.0483	81.154
69	91.2342	84.7382	93.1545	142.488	97.2129	80.3302
70	90.3715	83.8305	92.2756	141.623	96.3654	79.5
71	89.5033	82.9288	91.3994	140.753	95.5186	78.6721
72	88.6308	82.0335	90.5264	139.876	94.6729	77.8468
73	87.7548	81.1449	89.657	138.994	93.8284	77.0246
74	86.8758	80.2631	88.7912	138.107	92.9852	76.2054
75	85.9944	79.3879	87.9289	137.214	92.1431	75.3892
76	85.1107	78.5193	87.0702	136.316	91.3022	74.5761
77	84.2249	77.6572	86.2148	135.412	90.4623	73.766
78	83.3373	76.8014	85.3627	134.502	89.6232	72.9589
79	82.448	75.9518	84.5136	133.586	88.7851	72.1546
80	81.5571	75.1082	83.6675	132.664	87.9476	71.3531
81	80.6648	74.2707	82.8242	131.736	87.111	70.5544
82	79.7712	73.4389	81.9837	130.801	86.275	69.7585
83	78.8764	72.613	81.1458	129.86	85.4396	68.9653
84	77.9807	71.7927	80.3104	128.913	84.605	68.1749
85	77.0841	70.978	79.4775	127.959	83.771	67.3873
86	76.1869	70.1689	78.6472	127	82.9378	66.6024
87	75.2892	69.3654	77.8192	126.034	82.1054	65.8203
88	74.3911	68.5673	76.9937	125.062	81.2738	65.0411
89	73.493	67.7747	76.1706	124.083	80.4431	64.2647
90	72.5949	66.9875	75.3499	123.099	79.6134	63.4913
91	71.697	66.2058	74.5317	122.109	78.7847	62.7208
92	70.7996	65.4295	73.716	121.114	77.9572	61.9534
93	69.9029	64.6587	72.9028	120.113	77.1309	61.1891
94	69.0069	63.8932	72.0921	119.107	76.306	60.4279
95	68.1121	63.1332	71.2841	118.096	75.4825	59.6699
96	67.2184	62.3787	70.4788	117.079	74.6605	58.9152
97	66.3263	61.6296	69.6761	116.059	73.8403	58.1638
98	65.4357	60.886	68.8763	115.033	73.0217	57.4158
99	64.547	60.1478	68.0793	114.004	72.2051	56.6713
100	63.6604	59.4152	67.2852	112.97	71.3905	55.9304
101	62.776	58.6881	66.4941	111.932	70.5779	55.193
102	61.894	57.9665	65.7061	110.891	69.7676	54.4593
103	61.0146	57.2504	64.9212	109.847	68.9596	53.7293
104	60.138	56.5399	64.1395	108.799	68.154	53.0032
105	59.2644	55.8349	63.361	107.749	67.3509	52.2808
106	58.394	55.1355	62.5859	106.695	66.5505	51.5624
107	57.527	54.4418	61.8142	105.64	65.7528	50.848
108	56.6634	53.7536	61.046	104.582	64.958	50.1377
109	55.8036	53.071	60.2813	103.522	64.1662	49.4314
110	54.9476	52.3941	59.5202	102.46	63.3774	48.7293
111	54.0957	51.7227	58.7628	101.397	62.5918	48.0314
112	53.248	51.057	58.0092	100.333	61.8094	47.3378
113	52.4047	50.397	57.2593	99.2672	61.0303	46.6485
114	51.5659	49.7426	56.5134	98.2007	60.2548	45.9636
115	50.7318	49.0938	55.7714	97.1336	59.4827	45.2832
116	49.9026	48.4507	55.0334	96.066	58.7143	44.6072
117	49.0785	47.8133	54.2994	94.9981	57.9496	43.9359
118	48.2595	47.1815	53.5696	93.9303	57.1887	43.2691
119	47.4459	46.5553	52.844	92.8626	56.4317	42.607
120	46.6378	45.9348	52.1226	91.7952	55.6787	41.9497
121	45.8354	45.3198	51.4055	90.7285	54.9298	41.2971
122	45.0389	44.7106	50.6927	89.6625	54.185	40.6495
123	44.2484	44.1069	49.9844	88.5974	53.4444	40.0067
124	43.4641	43.5088	49.2804	87.5335	52.7082	39.3689
125	42.6861	42.9164	48.581	86.4709	51.9764	38.7362
126	41.9147	42.3295	47.8862	85.4098	51.249	38.1086
127	41.1499	41.7482	47.1959	84.3504	50.5263	37.4862
128	40.392	41.1724	46.5103	83.2928	49.8081	36.869
129	39.641	40.6022	45.8294	82.2373	49.0947	36.2572
130	38.8972	40.0375	45.1532	81.1839	48.3861	35.6507
131	38.1606	39.4783	44.4818	80.1329	47.6824	35.0498
132	37.4313	38.9246	43.8153	79.0844	46.9836	34.4543
133	36.7093	38.3763	43.1536	78.0386	46.2899	33.8645
134	35.9946	37.8335	42.4969	76.9955	45.6013	33.2802
135	35.287	37.2961	41.8451	75.9555	44.9179	32.7016
136	34.5865	36.7641	41.1983	74.9185	44.2396	32.1285
137	33.8936	36.2375	40.5565	73.8847	43.5667	31.561
138	33.2088	35.7162	39.9199	72.8544	42.899	30.9989
139	32.5323	35.2003	39.2884	71.8275	42.2366	30.442
140	31.8643	34.6896	38.662	70.8042	41.5795	29.8908
141	31.205	34.1842	38.0409	69.7847	40.9276	29.3455
142	30.5544	33.684	37.425	68.7691	40.2808	28.8063
143	29.9127	33.1889	36.8144	67.7574	39.6392	28.2733
144	29.2798	32.699	36.2091	66.7499	39.0031	27.7466
145	28.6556	32.2142	35.6091	65.7466	38.3727	27.2261
146	28.0403	31.7344	35.0146	64.7476	37.7481	26.7119
147	27.4337	31.2595	34.4253	63.753	37.1296	26.204
148	26.8359	30.7895	33.8415	62.7631	36.5171	25.7022
149	26.2468	30.3242	33.2631	61.778	35.9109	25.2065
150	25.6668	29.8642	32.6896	60.7973	35.3111	24.716
151	25.096	29.4081	32.1213	59.8222	34.7181	24.2315
152	24.5343	28.9555	31.5586	58.8535	34.1322	23.7538
153	23.9818	28.5075	31.0014	57.8913	33.5535	23.2823
154	23.4387	28.0641	30.4501	56.9361	32.9824	22.8174
155	22.9048	27.6258	29.9048	55.9885	32.4189	22.3592
156	22.3803	27.1925	29.3656	55.0489	31.8631	21.9079
157	21.8651	26.7644	28.8329	54.1178	31.3149	21.4637
158	21.3591	26.3415	28.3069	53.1953	30.7745	21.0266
159	20.8622	25.9239	27.7878	52.2817	30.2418	20.5966
160	20.3744	25.5115	27.2757	51.3771	29.7168	20.1737
161	19.8956	25.1043	26.7707	50.4818	29.1994	19.7578
162	19.4256	24.7024	26.2729	49.5959	28.6894	19.349
163	18.9644	24.3055	25.7821	48.7194	28.187	18.9472
164	18.512	23.9139	25.2986	47.8525	27.6919	18.5522
165	18.068	23.5274	24.8221	46.9952	27.2042	18.1641
166	17.6325	23.146	24.3527	46.1476	26.7237	17.7827
167	17.2054	22.7697	23.8903	45.3097	26.2503	17.408
168	16.7865	22.3984	23.4348	44.4816	25.7839	17.0398
169	16.3757	22.0321	22.9862	43.6632	25.3245	16.6781
170	15.973	21.6708	22.5445	42.8545	24.872	16.3228
171	15.5781	21.3143	22.1095	42.0554	24.4262	15.9738
172	15.191	20.9626	21.6811	41.266	23.9872	15.631
173	14.8115	20.6157	21.2594	40.4864	23.5547	15.2943
174	14.4396	20.2734	20.8442	39.7168	23.1287	14.9637
175	14.0752	19.9358	20.4355	38.9572	22.7092	14.639
176	13.7181	19.6027	20.0331	38.2077	22.296	14.3201
177	13.3682	19.2742	19.6371	37.4683	21.889	14.007
178	13.0254	18.95	19.2472	36.7388	21.4881	13.6996
179	12.6896	18.6303	18.8635	36.0195	21.0933	13.3978
180	12.3608	18.3148	18.4859	35.3101	20.7045	13.1015
181	12.0387	18.0036	18.1143	34.6106	20.3216	12.8105
182	11.7233	17.6966	17.7486	33.921	19.9445	12.525
183	11.4145	17.3937	17.3887	33.2412	19.5731	12.2446
184	11.1121	17.0949	17.0346	32.5712	19.2073	11.9694
185	10.8162	16.8001	16.6862	31.9109	18.8471	11.6993
186	10.5265	16.5093	16.3435	31.2601	18.4924	11.4342
187	10.243	16.2224	16.0062	30.619	18.143	11.1741
188	9.9655	15.9393	15.6744	29.9873	17.799	10.9187
189	9.69402	15.66	15.3481	29.3649	17.4602	10.6682
190	9.42841	15.3845	15.027	28.7519	17.1266	10.4223
191	9.16857	15.1126	14.7112	28.1482	16.798	10.1811
192	8.91442	14.8443	14.4006	27.5535	16.4744	9.94434
193	8.66585	14.5797	14.0951	26.968	16.1558	9.71209
194	8.42277	14.3186	13.7946	26.3915	15.842	9.48423
195	8.18509	14.0609	13.4991	25.8238	15.533	9.26069
196	7.95272	13.8067	13.2085	25.265	15.2287	9.0414
197	7.72556	13.5558	12.9228	24.715	14.9291	8.82629
198	7.50353	13.3083	12.6418	24.1736	14.634	8.6153
199	7.28653	13.0641	12.3654	23.6408	14.3434	8.40834
200	7.07449	12.8231	12.0938	23.1165	14.0572	8.20536
201	6.8673	12.5853	11.8266	22.6007	13.7754	8.0063
202	6.66489	12.3506	11.564	22.0932	13.4979	7.81108
203	6.46718	12.119	11.3058	21.5939	13.2246	7.61963
204	6.27407	11.8905	11.052	21.1028	12.9555	7.43191
205	6.08548	11.665	10.8025	20.6198	12.6905	7.24784
206	5.90134	11.4425	10.5572	20.1449	12.4295	7.06736
207	5.72156	11.2229	10.3162	19.6778	12.1725	6.89042
208	5.54607	11.0061	10.0792	19.2186	11.9194	6.71695
209	5.37478	10.7922	9.84629	18.7672	11.6701	6.54689
210	5.20761	10.5811	9.61739	18.3234	11.4247	6.38019
211	5.0445	10.3728	9.39243	17.8873	11.183	6.21678
212	4.88536	10.1672	9.17135	17.4587	10.9449	6.05662
213	4.73012	9.96424	8.9541	17.0375	10.7105	5.89964
214	4.57871	9.76395	8.74061	16.6237	10.4796	5.7458
215	4.43106	9.56627	8.53084	16.2171	10.2523	5.59503
216	4.28708	9.37116	8.32473	15.8178	10.0284	5.44728
217	4.14672	9.17858	8.12222	15.4256	9.80789	5.30251
218	4.00991	8.9885	7.92325	15.0405	9.59074	5.16066
219	3.87657	8.80088	7.72778	14.6623	9.37688	5.02167
220	3.74663	8.6157	7.53575	14.291	9.16626	4.88551
221	3.62004	8.4329	7.34711	13.9266	8.95884	4.75212
222	3.49672	8.25248	7.16181	13.5689	8.75457	4.62145
223	3.37662	8.07438	6.9798	13.2178	8.55339	4.49345
224	3.25966	7.89858	6.80103	12.8734	8.35526	4.36808
225	3.14579	7.72505	6.62544	12.5355	8.16013	4.24529
226	3.03495	7.55375	6.453	12.204	7.96795	4.12504
227	2.92707	7.38466	6.28365	11.879	7.77869	4.00728
228	2.82209	7.21775	6.11734	11.5602	7.59229	3.89196
229	2.71996	7.05299	5.95404	11.2477	7.40871	3.77905
230	2.62062	6.89035	5.79369	10.9413	7.22792	3.66851
231	2.52401	6.7298	5.63625	10.6411	7.04986	3.56028
232	2.43008	6.57132	5.48167	10.3469	6.8745	3.45433
233	2.33877	6.41488	5.32992	10.0587	6.70179	3.35062
234	2.25004	6.26046	5.18095	9.77642	6.53171	3.24911
235	2.16381	6.10803	5.03472	9.49997	6.3642	3.14976
236	2.08006	5.95756	4.89119	9.22931	6.19923	3.05254
237	1.99871	5.80904	4.75031	8.96437	6.03677	2.95739
238	1.91973	5.66244	4.61205	8.7051	5.87678	2.8643
239	1.84307	5.51774	4.47637	8.45142	5.71922	2.77322
240	1.76867	5.37492	4.34323	8.20328	5.56406	2.68412
241	1.6965	5.23396	4.21259	7.9606	5.41127	2.59696
242	1.6265	5.09483	4.08442	7.72332	5.26082	2.51171
243	1.55862	4.95753	3.95869	7.49137	5.11266	2.42833
244	1.49284	4.82203	3.83535	7.26465	4.96679	2.3468
245	1.42909	4.68831	3.71438	7.04307	4.82315	2.26708
246	1.36734	4.55637	3.59573	6.82651	4.68174	2.18914
247	1.30755	4.42617	3.47939	6.61484	4.54251	2.11294
248	1.24967	4.29772	3.36531	6.40801	4.40545	2.03847
249	1.19366	4.171	3.25346	6.206	4.27052	1.96569
250	1.1395	4.04599	3.14383	6.00872	4.13771	1.89458
251	1.08713	3.92269	3.03637	5.81608	4.00699	1.82509
252	1.03652	3.80108	2.93107	5.62797	3.87835	1.75722
253	0.987628	3.68116	2.82789	5.44428	3.75176	1.69093
254	0.940425	3.56291	2.7268	5.26488	3.6272	1.6262
255	0.894873	3.44634	2.6278	5.08966	3.50466	1.563
256	0.850937	3.33143	2.53084	4.9185	3.38411	1.50131
257	0.808582	3.21819	2.43592	4.75127	3.26556	1.44111
258	0.767776	3.10661	2.343	4.58786	3.14898	1.38237
259	0.728486	2.9967	2.25207	4.42814	3.03436	1.32508
260	0.69068	2.88844	2.16311	4.27202	2.9217	1.26921
261	0.654327	2.78186	2.0761	4.11936	2.81099	1.21474
262	0.619397	2.67695	1.99103	3.97008	2.70222	1.16167
263	0.58586	2.57372	1.90789	3.82406	2.59539	1.10995
264	0.553687	2.47218	1.82665	3.68121	2.4905	1.0596
265	0.52285	2.37234	1.74731	3.54143	2.38756	1.01058
266	0.493322	2.27423	1.66987	3.40463	2.28656	0.962879
267	0.465075	2.17785	1.5943	3.27074	2.18751	0.916492
268	0.438083	2.08322	1.52061	3.13966	2.09043	0.871402
269	0.41232	1.99038	1.44879	3.01133	1.99532	0.8276
270	0.387762	1.89934	1.37883	2.88568	1.9022	0.785075
271	0.364383	1.81013	1.31074	2.76265	1.8111	0.743818
272	0.34216	1.7228	1.24452	2.64218	1.72202	0.703823
273	0.321068	1.63736	1.18015	2.52423	1.635	0.665081
274	0.301083	1.55387	1.11765	2.40873	1.55005	0.627586
275	0.28218	1.47235	1.05701	2.29565	1.46722	0.591333
276	0.264333	1.39285	0.998221	2.18494	1.38652	0.556314
277	0.247514	1.31539	0.941286	2.07655	1.30798	0.522522
278	0.231695	1.24001	0.886188	1.97042	1.23163	0.489947
279	0.216839	1.16672	0.832907	1.86648	1.15748	0.458578
280	0.202908	1.09551	0.781406	1.76464	1.08554	0.428395
281	0.189853	1.02635	0.73163	1.66476	1.01577	0.399374
282	0.177615	0.959157	0.683493	1.56663	0.948127	0.371478
283	0.166119	0.89378	0.63686	1.46995	0.882499	0.344655
284	0.155262	0.829975	0.591524	1.37423	0.81869	0.318832
285	0.144936	0.767357	0.547233	1.27869	0.75638	0.293903
286	0.135	0.705345	0.503595	1.18238	0.695064	0.269707
287	0.12526	0.643483	0.460176	1.08494	0.634164	0.245982
288	0.115499	0.581707	0.416829	0.986601	0.573431	0.222488
289	0.105608	0.520097	0.373628	0.887578	0.512928	0.199168
290	0.0955145	0.45878	0.330654	0.788124	0.452751	0.176047
291	0.0851504	0.39795	0.288014	0.688563	0.393043	0.153163
292	0.0744788	0.337895	0.245868	0.589345	0.334055	0.130571
293	0.0635077	0.279036	0.20445	0.491097	0.276248	0.10835
294	0.0523112	0.221981	0.164101	0.394719	0.220206	0.0868277
295	0.0410502	0.167594	0.12532	0.301528	0.166729	0.0663111
296	0.0300056	0.117097	0.0888439	0.21349	0.116943	0.0471745
297	0.0195848	0.0722057	0.0557828	0.133573	0.0724652	0.0299159
298	0.0104434	0.0353072	0.0278566	0.0662725	0.0356344	0.0152474
299	0.00317025	0.00971439	0.0077935	0.0183722	0.00984078	0.0043727
