# Supplementary material for: The Social Cost of Fossil and Industrial CO2 Emissions from 1950 to 2018
Source: Research Square preprint supplement (doi:10.21203/rs.3.rs-2244259/v1), 2022-11-17
Supplement: Supplementary file 349 [file sccNp.xlsx]

## Sheet: sccNp
f	1	2	3	4	5	6
0	36.4923	33.2596	36.4046	51.0267	36.8222	32.2982
1	36.4851	33.2541	36.3951	51.0186	36.8157	32.2885
2	36.4851	33.2547	36.3932	51.0226	36.8166	32.285
3	36.4876	33.2575	36.3939	51.0303	36.82	32.2837
4	36.4902	33.2605	36.3946	51.038	36.8236	32.2826
5	36.4932	33.2639	36.3958	51.046	36.8275	32.2819
6	36.4979	33.2688	36.3986	51.0566	36.8332	32.2826
7	36.5035	33.2744	36.4023	51.0685	36.8397	32.2841
8	36.5121	33.2825	36.4092	51.086	36.8494	32.2881
9	36.5257	33.2946	36.4215	51.1133	36.8642	32.2962
10	36.5341	33.3023	36.4281	51.1309	36.8736	32.2999
11	36.5353	33.3041	36.427	51.1353	36.8756	32.2973
12	36.5369	33.3061	36.4263	51.141	36.878	32.295
13	36.5412	33.3101	36.4286	51.1525	36.8832	32.2947
14	36.5458	33.3141	36.4311	51.1656	36.8887	32.2944
15	36.55	33.3174	36.4334	51.1791	36.8939	32.2936
16	36.5521	33.3187	36.4334	51.1901	36.8969	32.2907
17	36.5515	33.3174	36.4305	51.1976	36.8971	32.2851
18	36.5482	33.3133	36.425	51.2028	36.8946	32.2768
19	36.5455	33.3089	36.4203	51.2121	36.8928	32.2682
20	36.5456	33.306	36.419	51.2305	36.8941	32.2615
21	36.5414	33.2987	36.4132	51.2442	36.891	32.2502
22	36.5247	33.2802	36.3943	51.239	36.8752	32.2277
23	36.5025	33.2562	36.3697	51.2277	36.8536	32.1996
24	36.478	33.2295	36.3429	51.2157	36.8299	32.1688
25	36.4457	33.1956	36.308	51.1932	36.7982	32.1307
26	36.406	33.1544	36.2654	51.1611	36.7588	32.0854
27	36.3677	33.1135	36.2245	51.1355	36.7211	32.0405
28	36.33	33.0722	36.1846	51.1149	36.6842	31.9954
29	36.2885	33.027	36.1408	51.0905	36.6433	31.9464
30	36.2397	32.9749	36.0892	51.0555	36.5949	31.8904
31	36.1839	32.9163	36.0301	51.0102	36.5393	31.8278
32	36.1224	32.8523	35.965	50.9574	36.4778	31.7598
33	36.0601	32.7866	35.8993	50.907	36.4156	31.6902
34	35.9976	32.7197	35.8335	50.8601	36.3531	31.6196
35	35.9331	32.6501	35.7658	50.8134	36.2887	31.5464
36	35.8632	32.575	35.6925	50.761	36.2188	31.4676
37	35.7877	32.494	35.6133	50.7033	36.1432	31.383
38	35.7108	32.4105	35.5329	50.6479	36.0662	31.2961
39	35.6328	32.3249	35.4515	50.5948	35.9881	31.2073
40	35.5485	32.2332	35.3634	50.5336	35.9035	31.1122
41	35.457	32.1344	35.2674	50.4621	35.8113	31.0101
42	35.3625	32.0323	35.1684	50.3886	35.7161	30.9046
43	35.264	31.9257	35.0651	50.3115	35.6168	30.7949
44	35.1654	31.8178	34.9617	50.238	35.5172	30.6839
45	35.0674	31.7094	34.859	50.1693	35.4184	30.5726
46	34.9662	31.5974	34.7529	50.0973	35.3161	30.4577
47	34.8593	31.4799	34.6404	50.0166	35.2079	30.3374
48	34.7504	31.3599	34.5255	49.9342	35.0973	30.2145
49	34.6402	31.238	34.4091	49.8517	34.9855	30.0898
50	34.5292	31.1146	34.2915	49.769	34.8725	29.9637
51	34.4204	30.9921	34.1761	49.6926	34.7617	29.8388
52	34.3113	30.8683	34.0604	49.6187	34.6506	29.7128
53	34.1998	30.7413	33.9419	49.5439	34.5369	29.5837
54	34.0867	30.6116	33.8215	49.4694	34.4214	29.4522
55	33.9738	30.4808	33.7014	49.399	34.3061	29.3199
56	33.8602	30.348	33.5804	49.3314	34.19	29.1859
57	33.7446	30.2121	33.4572	49.264	34.0719	29.0493
58	33.6264	30.0727	33.3312	49.1957	33.951	28.9095
59	33.5024	29.9269	33.199	49.1216	33.8241	28.7637
60	33.3682	29.7707	33.0561	49.0351	33.6868	28.6079
61	33.2272	29.607	32.9061	48.9421	33.5427	28.4454
62	33.0798	29.4362	32.7495	48.843	33.3921	28.2765
63	32.925	29.2572	32.5851	48.7358	33.234	28.1007
64	32.7607	29.0683	32.4111	48.6173	33.0666	27.9164
65	32.5852	28.8679	32.2256	48.4842	32.888	27.7227
66	32.3942	28.6517	32.0242	48.3298	32.6941	27.5163
67	32.182	28.4146	31.8013	48.1451	32.4793	27.2932
68	31.9395	28.1481	31.5473	47.913	32.2346	27.0472
69	31.6788	27.8656	31.2758	47.6525	31.9738	26.7896
70	31.416	27.5853	31.0046	47.3873	31.7137	26.5334
71	31.1527	27.3075	30.7354	47.1229	31.4549	26.2789
72	30.8889	27.0321	30.468	46.8585	31.1971	26.0258
73	30.6246	26.7591	30.2023	46.5938	30.9403	25.774
74	30.3598	26.4883	29.9381	46.3283	30.6841	25.5235
75	30.0946	26.2197	29.6753	46.062	30.4287	25.2742
76	29.829	25.9531	29.4138	45.7945	30.1738	25.026
77	29.563	25.6885	29.1535	45.5257	29.9193	24.7788
78	29.2965	25.4258	28.8943	45.2555	29.6652	24.5327
79	29.0297	25.1649	28.6362	44.9838	29.4115	24.2875
80	28.7625	24.9058	28.3791	44.7106	29.1581	24.0434
81	28.4951	24.6484	28.123	44.4356	28.905	23.8001
82	28.2273	24.3927	27.8677	44.159	28.6522	23.5579
83	27.9593	24.1387	27.6134	43.8806	28.3996	23.3165
84	27.6912	23.8862	27.3598	43.6005	28.1473	23.0761
85	27.4228	23.6354	27.1071	43.3186	27.8953	22.8367
86	27.1544	23.3861	26.8552	43.0349	27.6435	22.5982
87	26.886	23.1384	26.6041	42.7494	27.392	22.3607
88	26.6176	22.8922	26.3538	42.4622	27.1408	22.1242
89	26.3493	22.6476	26.1042	42.1732	26.89	21.8887
90	26.0811	22.4045	25.8555	41.8826	26.6395	21.6542
91	25.8132	22.163	25.6076	41.5904	26.3894	21.4208
92	25.5455	21.9229	25.3605	41.2966	26.1397	21.1885
93	25.2782	21.6844	25.1143	41.0012	25.8905	20.9572
94	25.0113	21.4474	24.8689	40.7043	25.6418	20.7271
95	24.7449	21.2119	24.6244	40.4061	25.3936	20.4982
96	24.479	20.978	24.3807	40.1065	25.1459	20.2704
97	24.2137	20.7456	24.138	39.8056	24.8989	20.0438
98	23.9492	20.5148	23.8963	39.5035	24.6524	19.8184
99	23.6853	20.2855	23.6555	39.2003	24.4067	19.5943
100	23.4223	20.0577	23.4156	38.8961	24.1616	19.3715
101	23.1601	19.8315	23.1768	38.5909	23.9173	19.15
102	22.8988	19.6068	22.939	38.2848	23.6738	18.9298
103	22.6385	19.3837	22.7023	37.9778	23.4311	18.7109
104	22.3793	19.1622	22.4667	37.6702	23.1892	18.4934
105	22.1211	18.9422	22.2322	37.3619	22.9482	18.2773
106	21.8641	18.7238	21.9988	37.053	22.7082	18.0626
107	21.6082	18.507	21.7665	36.7436	22.469	17.8493
108	21.3536	18.2918	21.5354	36.4338	22.2308	17.6374
109	21.1002	18.0782	21.3055	36.1236	21.9937	17.427
110	20.8481	17.8661	21.0769	35.8132	21.7575	17.218
111	20.5974	17.6557	20.8495	35.5026	21.5224	17.0105
112	20.3481	17.4468	20.6233	35.1919	21.2884	16.8045
113	20.1001	17.2395	20.3984	34.8811	21.0555	16.5999
114	19.8536	17.0338	20.1748	34.5704	20.8238	16.3969
115	19.6086	16.8297	19.9525	34.2597	20.5931	16.1954
116	19.3651	16.6273	19.7315	33.9492	20.3636	15.9954
117	19.1231	16.4264	19.5119	33.6388	20.1354	15.7969
118	18.8826	16.2271	19.2936	33.3288	19.9083	15.5999
119	18.6437	16.0294	19.0766	33.0191	19.6824	15.4044
120	18.4064	15.8333	18.8611	32.7098	19.4578	15.2105
121	18.1706	15.6387	18.6469	32.4009	19.2344	15.0181
122	17.9365	15.4458	18.4341	32.0925	19.0123	14.8272
123	17.7039	15.2545	18.2227	31.7847	18.7914	14.6378
124	17.473	15.0647	18.0127	31.4775	18.5718	14.45
125	17.2437	14.8765	17.8041	31.1708	18.3535	14.2636
126	17.016	14.6899	17.5969	30.8649	18.1365	14.0788
127	16.7899	14.5049	17.3912	30.5597	17.9208	13.8954
128	16.5655	14.3214	17.1869	30.2552	17.7064	13.7135
129	16.3427	14.1395	16.984	29.9515	17.4933	13.5332
130	16.1215	13.9592	16.7825	29.6486	17.2815	13.3542
131	15.902	13.7804	16.5824	29.3466	17.071	13.1768
132	15.684	13.6032	16.3838	29.0455	16.8618	13.0008
133	15.4677	13.4275	16.1866	28.7452	16.6539	12.8262
134	15.253	13.2533	15.9908	28.4459	16.4474	12.6531
135	15.0398	13.0807	15.7965	28.1475	16.2421	12.4814
136	14.8283	12.9096	15.6035	27.85	16.0382	12.3111
137	14.6183	12.74	15.412	27.5536	15.8355	12.1422
138	14.4099	12.5719	15.2218	27.2581	15.6341	11.9746
139	14.203	12.4053	15.0331	26.9636	15.434	11.8084
140	13.9977	12.2402	14.8457	26.6701	15.2352	11.6435
141	13.7939	12.0766	14.6597	26.3777	15.0377	11.48
142	13.5916	11.9144	14.4751	26.0863	14.8414	11.3177
143	13.3909	11.7537	14.2919	25.7959	14.6464	11.1568
144	13.1916	11.5944	14.11	25.5066	14.4527	10.9971
145	12.9939	11.4366	13.9294	25.2183	14.2602	10.8387
146	12.7976	11.2802	13.7501	24.9311	14.0689	10.6815
147	12.6028	11.1251	13.5722	24.645	13.879	10.5255
148	12.4095	10.9714	13.3955	24.36	13.6903	10.3707
149	12.2177	10.819	13.2201	24.0762	13.503	10.217
150	12.0274	10.6686	13.0469	23.7946	13.3167	10.0649
151	11.8386	10.5191	12.8744	23.5129	13.1316	9.91369
152	11.6515	10.3701	12.702	23.2306	12.948	9.76307
153	11.4661	10.2224	12.531	22.9501	12.7661	9.61371
154	11.2825	10.0761	12.3615	22.6715	12.5859	9.46571
155	11.1005	9.93114	12.1934	22.3948	12.4074	9.31912
156	10.9204	9.78764	12.0268	22.12	12.2306	9.17398
157	10.742	9.64562	11.8617	21.8472	12.0556	9.03032
158	10.5654	9.50507	11.6981	21.5764	11.8823	8.88814
159	10.3906	9.36601	11.5361	21.3075	11.7108	8.74747
160	10.2176	9.22845	11.3756	21.0407	11.541	8.60829
161	10.0463	9.09237	11.2166	20.7758	11.3729	8.47061
162	9.87674	8.95778	11.0591	20.5129	11.2065	8.33442
163	9.70895	8.82466	10.9031	20.252	11.0418	8.19972
164	9.54289	8.69301	10.7486	19.993	10.8788	8.06649
165	9.37852	8.56282	10.5956	19.736	10.7175	7.93473
166	9.21583	8.43408	10.444	19.481	10.5578	7.80442
167	9.05477	8.30677	10.2939	19.2279	10.3998	7.67555
168	8.89528	8.18089	10.1452	18.9767	10.2434	7.5481
169	8.73738	8.05642	9.99801	18.7274	10.0886	7.42207
170	8.58116	7.93335	9.85218	18.48	9.93538	7.29745
171	8.42668	7.81167	9.70775	18.2345	9.78377	7.1742
172	8.274	7.69136	9.56471	17.9908	9.63374	7.05232
173	8.12314	7.57241	9.42304	17.7491	9.48526	6.93178
174	7.97415	7.4548	9.28273	17.5092	9.33833	6.81257
175	7.82703	7.33853	9.14377	17.2711	9.19292	6.69464
176	7.68181	7.22357	9.00614	17.0348	9.04902	6.57797
177	7.53848	7.10993	8.86984	16.8004	8.90663	6.46254
178	7.39705	6.99757	8.73484	16.5677	8.76572	6.3484
179	7.25753	6.8865	8.60114	16.3369	8.62629	6.23557
180	7.11989	6.77669	8.46873	16.1078	8.48832	6.12408
181	6.98414	6.66813	8.33759	15.8805	8.3518	6.01395
182	6.85027	6.56082	8.20771	15.6549	8.21672	5.90519
183	6.71826	6.45473	8.07909	15.4311	8.08306	5.7978
184	6.58811	6.34986	7.9517	15.209	7.95081	5.69179
185	6.4598	6.24619	7.82554	14.9886	7.81997	5.58715
186	6.33332	6.14371	7.7006	14.7699	7.69051	5.48389
187	6.20865	6.0424	7.57687	14.5529	7.56244	5.382
188	6.08577	5.94226	7.45433	14.3377	7.43573	5.28147
189	5.96468	5.84327	7.33299	14.124	7.31037	5.18228
190	5.84535	5.74542	7.21282	13.9121	7.18636	5.08445
191	5.72776	5.64869	7.09382	13.7018	7.06368	4.98794
192	5.6119	5.55308	6.97598	13.4932	6.94231	4.89276
193	5.49776	5.45857	6.85929	13.2862	6.82224	4.79888
194	5.38531	5.36515	6.74374	13.0808	6.70346	4.7063
195	5.27453	5.27281	6.62933	12.877	6.58595	4.61501
196	5.16541	5.18154	6.51604	12.6748	6.46968	4.52499
197	5.05792	5.09133	6.40387	12.4743	6.35466	4.43623
198	4.95206	5.00215	6.2928	12.2753	6.2409	4.34872
199	4.8478	4.91401	6.18284	12.0779	6.1284	4.26243
200	4.74513	4.82689	6.07397	11.8821	6.01717	4.17737
201	4.64402	4.74078	5.96619	11.6879	5.90722	4.09351
202	4.54446	4.65566	5.85949	11.4952	5.79853	4.01084
203	4.44643	4.57154	5.75386	11.304	5.69111	3.92935
204	4.34991	4.48839	5.6493	11.1144	5.58494	3.84902
205	4.25489	4.4062	5.5458	10.9264	5.48003	3.76984
206	4.16134	4.32497	5.44335	10.7398	5.37636	3.6918
207	4.06925	4.24469	5.34194	10.5548	5.27393	3.61488
208	3.97861	4.16534	5.24158	10.3713	5.17272	3.53907
209	3.88938	4.08691	5.14225	10.1893	5.07273	3.46436
210	3.80156	4.00939	5.04394	10.0088	4.97395	3.39073
211	3.71513	3.93278	4.94666	9.8298	4.87636	3.31817
212	3.63008	3.85706	4.85039	9.65228	4.77995	3.24666
213	3.54638	3.78222	4.75513	9.47624	4.68472	3.17619
214	3.46401	3.70826	4.66086	9.30168	4.59065	3.10676
215	3.38297	3.63516	4.56758	9.12858	4.49773	3.03834
216	3.30324	3.56291	4.47528	8.95695	4.40595	2.97093
217	3.22479	3.49151	4.38394	8.78678	4.3153	2.90451
218	3.14761	3.42095	4.29359	8.61807	4.22576	2.83906
219	3.0717	3.35121	4.20422	8.4508	4.13733	2.77459
220	2.99702	3.28228	4.11585	8.28498	4.04999	2.71106
221	2.92356	3.21417	4.02846	8.1206	3.96373	2.64849
222	2.85132	3.14686	3.94208	7.95765	3.87855	2.58684
223	2.78027	3.08033	3.85668	7.79614	3.79442	2.52611
224	2.7104	3.01459	3.77227	7.63605	3.71134	2.46628
225	2.64169	2.94962	3.68885	7.47739	3.6293	2.40736
226	2.57413	2.88542	3.60642	7.32016	3.54828	2.34932
227	2.50771	2.82198	3.52496	7.16434	3.46828	2.29215
228	2.4424	2.75929	3.44448	7.00993	3.38929	2.23584
229	2.3782	2.69734	3.36497	6.85695	3.31129	2.18039
230	2.31509	2.63613	3.28643	6.70537	3.23427	2.12578
231	2.25306	2.57564	3.20884	6.5552	3.15823	2.072
232	2.19209	2.51587	3.1322	6.40645	3.08315	2.01903
233	2.13216	2.45682	3.05652	6.2591	3.00902	1.96688
234	2.07328	2.39847	2.98177	6.11315	2.93584	1.91553
235	2.01541	2.34083	2.90796	5.96861	2.8636	1.86497
236	1.95856	2.28388	2.83507	5.82548	2.79228	1.81519
237	1.9027	2.22761	2.76311	5.68375	2.72188	1.76619
238	1.84782	2.17203	2.69207	5.54343	2.65239	1.71794
239	1.79391	2.11712	2.62193	5.40452	2.58379	1.67045
240	1.74097	2.06288	2.5527	5.26701	2.51609	1.6237
241	1.68897	2.00931	2.48438	5.13092	2.44927	1.57769
242	1.6379	1.95639	2.41694	4.99623	2.38333	1.53241
243	1.58775	1.90413	2.35039	4.86297	2.31826	1.48785
244	1.53852	1.85252	2.28473	4.73112	2.25405	1.44399
245	1.49019	1.80156	2.21995	4.6007	2.1907	1.40085
246	1.44274	1.75123	2.15604	4.47171	2.12819	1.35839
247	1.39618	1.70154	2.093	4.34415	2.06653	1.31663
248	1.35048	1.65249	2.03082	4.21803	2.00571	1.27555
249	1.30564	1.60407	1.96951	4.09336	1.94571	1.23514
250	1.26164	1.55627	1.90906	3.97015	1.88655	1.1954
251	1.21849	1.5091	1.84946	3.8484	1.82821	1.15633
252	1.17616	1.46256	1.79071	3.72812	1.77068	1.11791
253	1.13465	1.41663	1.73282	3.60933	1.71398	1.08014
254	1.09396	1.37133	1.67577	3.49203	1.65808	1.04302
255	1.05406	1.32665	1.61956	3.37625	1.603	1.00654
256	1.01496	1.28258	1.5642	3.26199	1.54872	0.970692
257	0.976649	1.23913	1.50969	3.14926	1.49526	0.935479
258	0.939115	1.19631	1.45601	3.0381	1.4426	0.900894
259	0.902355	1.15411	1.40318	2.9285	1.39074	0.866934
260	0.866361	1.11253	1.35118	2.8205	1.3397	0.833597
261	0.831127	1.07157	1.30002	2.71412	1.28947	0.800879
262	0.796649	1.03125	1.24969	2.60937	1.24005	0.768779
263	0.762921	0.991565	1.2002	2.50629	1.19145	0.737296
264	0.72994	0.952518	1.15155	2.40489	1.14367	0.70643
265	0.697701	0.914116	1.10377	2.3052	1.09672	0.676179
266	0.666201	0.876369	1.05686	2.20726	1.0506	0.646545
267	0.635439	0.839282	1.01084	2.1111	1.00533	0.617529
268	0.605413	0.802866	0.965716	2.01674	0.960903	0.589134
269	0.576121	0.767131	0.921504	1.92422	0.917341	0.561361
270	0.547564	0.732087	0.878216	1.83358	0.874651	0.534216
271	0.519743	0.697747	0.835865	1.74484	0.832846	0.507702
272	0.492658	0.664124	0.794465	1.65805	0.791937	0.481826
273	0.466311	0.63123	0.754027	1.57322	0.751936	0.456592
274	0.440707	0.59908	0.714564	1.4904	0.712857	0.432007
275	0.415846	0.567685	0.676088	1.40961	0.67471	0.40808
276	0.391734	0.537058	0.638609	1.33086	0.637506	0.384816
277	0.368372	0.507209	0.602132	1.25417	0.60125	0.362222
278	0.345763	0.478143	0.566661	1.17952	0.565948	0.340304
279	0.323908	0.44986	0.532191	1.1069	0.531609	0.319065
280	0.302802	0.422351	0.498707	1.03625	0.49823	0.298504
281	0.282438	0.395594	0.466183	0.967497	0.465795	0.278614
282	0.262798	0.369551	0.43457	0.9005	0.434266	0.259379
283	0.243853	0.344157	0.403797	0.835069	0.403581	0.24077
284	0.225555	0.319313	0.373756	0.770932	0.373641	0.22274
285	0.207827	0.294876	0.344291	0.70771	0.344303	0.205213
286	0.190552	0.270639	0.315187	0.645074	0.315358	0.188076
287	0.173553	0.246447	0.286241	0.582981	0.286589	0.171163
288	0.156677	0.222291	0.257413	0.52158	0.257923	0.154341
289	0.13988	0.198215	0.228779	0.461057	0.229428	0.13758
290	0.123161	0.174287	0.200437	0.401647	0.2012	0.120901
291	0.106595	0.150605	0.17252	0.343648	0.173363	0.104402
292	0.0903009	0.127307	0.145206	0.287439	0.146089	0.0881965
293	0.0744113	0.104583	0.118731	0.233507	0.119611	0.0724211
294	0.0590881	0.0826966	0.093407	0.182468	0.0942378	0.0572532
295	0.0445484	0.0620028	0.069647	0.13511	0.0703804	0.0429291
296	0.0310957	0.0429807	0.0479906	0.0924383	0.048583	0.0297678
297	0.0191609	0.0262709	0.0291419	0.05573	0.0295605	0.0182018
298	0.00935846	0.0127252	0.014015	0.0266131	0.0142484	0.00881598
299	0.00256108	0.00347212	0.00379243	0.00715821	0.00386655	0.00239733
