# Supplementary material for: The Social Cost of Fossil and Industrial CO2 Emissions from 1950 to 2018
Source: Research Square preprint supplement (doi:10.21203/rs.3.rs-2244259/v1), 2022-11-17
Supplement: Supplementary file 357 [file sccWp.xlsx]

## Sheet: sccWp
f	1	2	3	4	5	6
0	42.4323	36.9733	44.1543	69.6001	45.4638	38.5547
1	42.4322	36.9723	44.155	69.6238	45.4692	38.5529
2	42.4402	36.9781	44.1645	69.6618	45.4832	38.5583
3	42.451	36.9863	44.177	69.7044	45.5002	38.5663
4	42.462	36.9947	44.1896	69.7471	45.5174	38.5744
5	42.4734	37.0035	44.2027	69.7904	45.535	38.583
6	42.4868	37.014	44.2177	69.837	45.5547	38.5933
7	42.5012	37.0253	44.2339	69.8852	45.5756	38.6045
8	42.5192	37.0394	44.2539	69.9404	45.6002	38.6188
9	42.543	37.0581	44.2804	70.0073	45.6313	38.6381
10	42.5608	37.0719	44.3003	70.0631	45.6559	38.6522
11	42.5707	37.0792	44.3113	70.1037	45.6718	38.6592
12	42.5811	37.0868	44.323	70.1461	45.6885	38.6666
13	42.5948	37.0968	44.3383	70.1957	45.7087	38.6766
14	42.6091	37.1068	44.3543	70.2474	45.7296	38.687
15	42.6231	37.1165	44.3702	70.3002	45.7504	38.697
16	42.6351	37.1241	44.3839	70.3504	45.7691	38.7049
17	42.6444	37.1289	44.3946	70.397	45.7849	38.71
18	42.6511	37.1311	44.4028	70.4415	45.7981	38.7126
19	42.659	37.1334	44.4126	70.4917	45.8129	38.7156
20	42.6707	37.1379	44.4271	70.5531	45.8322	38.7214
21	42.6781	37.1379	44.437	70.6098	45.847	38.7228
22	42.6721	37.1262	44.4326	70.6453	45.8477	38.7119
23	42.6604	37.1088	44.4223	70.6744	45.8425	38.6952
24	42.6469	37.0889	44.4102	70.7034	45.8356	38.6763
25	42.6251	37.0614	44.3894	70.7208	45.82	38.6496
26	42.5956	37.0265	44.3603	70.7279	45.7964	38.6153
27	42.5684	36.9924	44.3342	70.7433	45.7755	38.5824
28	42.5427	36.9585	44.31	70.7653	45.7564	38.5501
29	42.5131	36.9206	44.2819	70.7836	45.7335	38.5139
30	42.4759	36.8755	44.2453	70.79	45.7023	38.4703
31	42.4312	36.8236	44.2007	70.7852	45.6633	38.4197
32	42.3807	36.7661	44.1497	70.7722	45.618	38.3634
33	42.33	36.7073	44.0988	70.7629	45.5728	38.3062
34	42.2798	36.6477	44.0487	70.7584	45.5283	38.2486
35	42.2281	36.5858	43.9971	70.755	45.4823	38.1889
36	42.1712	36.5183	43.94	70.7461	45.431	38.1239
37	42.1088	36.4449	43.8772	70.732	45.374	38.0531
38	42.0458	36.3695	43.8139	70.7217	45.3166	37.9807
39	41.9823	36.2925	43.7505	70.7149	45.2589	37.9072
40	41.9125	36.2091	43.6801	70.6997	45.1945	37.8273
41	41.8352	36.1185	43.6013	70.6733	45.1219	37.74
42	41.7553	36.0245	43.5196	70.6453	45.0467	37.6497
43	41.6717	35.9263	43.4341	70.6143	44.9676	37.5554
44	41.5887	35.8272	43.3492	70.5884	44.8892	37.4606
45	41.5072	35.728	43.266	70.5688	44.8125	37.3664
46	41.4228	35.6253	43.1794	70.5461	44.7326	37.2688
47	41.3325	35.5168	43.086	70.5142	44.6462	37.1654
48	41.2404	35.4059	42.9905	70.4811	44.5579	37.0599
49	41.1477	35.2933	42.8939	70.4487	44.4686	36.953
50	41.0544	35.1792	42.7965	70.4169	44.3787	36.8451
51	40.9644	35.0666	42.7022	70.3931	44.2921	36.7393
52	40.8748	34.953	42.6083	70.3733	44.206	36.633
53	40.7834	34.8364	42.5123	70.3537	44.1179	36.5243
54	40.691	34.7174	42.4149	70.3356	44.0287	36.4138
55	40.5998	34.5977	42.3188	70.3237	43.9408	36.3034
56	40.5088	34.4765	42.2227	70.3161	43.8532	36.1923
57	40.4164	34.3524	42.1252	70.3102	43.7642	36.0791
58	40.3221	34.225	42.0254	70.3046	43.6732	35.9633
59	40.2223	34.0911	41.9196	70.294	43.5766	35.8418
60	40.1123	33.9465	41.8029	70.271	43.4694	35.7104
61	39.996	33.7946	41.6795	70.2425	43.3558	35.5726
62	39.8738	33.6355	41.55	70.209	43.2363	35.4289
63	39.7445	33.4682	41.4131	70.1684	43.1097	35.2787
64	39.6062	33.291	41.2669	70.1174	42.9742	35.1203
65	39.4569	33.1021	41.1094	70.053	42.828	34.9528
66	39.2924	32.8974	40.9364	69.9682	42.6667	34.7729
67	39.1071	32.6714	40.7422	69.8544	42.4852	34.5767
68	38.8915	32.4158	40.517	69.6941	42.2737	34.3577
69	38.6577	32.1437	40.2742	69.5056	42.0463	34.1271
70	38.4208	31.8729	40.0303	69.3089	41.8183	33.8972
71	38.1835	31.6044	39.7885	69.1137	41.5917	33.669
72	37.9456	31.338	39.5486	68.9193	41.3662	33.4421
73	37.7072	31.0735	39.3103	68.7249	41.1415	33.2165
74	37.4681	30.8109	39.0734	68.5302	40.9174	32.992
75	37.2284	30.55	38.8379	68.3349	40.6938	32.7684
76	36.988	30.2908	38.6034	68.1387	40.4704	32.5456
77	36.7467	30.033	38.37	67.9413	40.2472	32.3235
78	36.5047	29.7767	38.1373	67.7425	40.024	32.1021
79	36.2617	29.5217	37.9054	67.5421	39.8006	31.8811
80	36.0177	29.2679	37.6741	67.3399	39.577	31.6605
81	35.7728	29.0153	37.4432	67.1357	39.353	31.4402
82	35.5267	28.7638	37.2127	66.9292	39.1286	31.2201
83	35.2794	28.5133	36.9824	66.7204	38.9035	31.0001
84	35.031	28.2638	36.7523	66.5091	38.6779	30.7801
85	34.7812	28.0153	36.5221	66.295	38.4514	30.5601
86	34.5302	27.7676	36.292	66.078	38.2242	30.3399
87	34.2777	27.5209	36.0616	65.8581	37.996	30.1196
88	34.0238	27.275	35.8311	65.6349	37.7668	29.8989
89	33.7683	27.0299	35.6003	65.4084	37.5366	29.6778
90	33.5114	26.7855	35.369	65.1784	37.3052	29.4563
91	33.2528	26.542	35.1373	64.9448	37.0727	29.2344
92	32.9925	26.2992	34.9051	64.7075	36.8389	29.0118
93	32.7305	26.0572	34.6723	64.4662	36.6037	28.7886
94	32.4668	25.8159	34.4389	64.221	36.3672	28.5646
95	32.2012	25.5754	34.2047	63.9716	36.1293	28.3399
96	31.9338	25.3356	33.9697	63.7179	35.8898	28.1143
97	31.6644	25.0965	33.7339	63.4599	35.6488	27.8878
98	31.3931	24.8581	33.4973	63.1973	35.4062	27.6604
99	31.1198	24.6204	33.2597	62.9301	35.1619	27.4319
100	30.8444	24.3835	33.021	62.6581	34.9159	27.2023
101	30.567	24.1473	32.7814	62.3812	34.6682	26.9716
102	30.2874	23.9119	32.5407	62.0994	34.4187	26.7397
103	30.0056	23.6772	32.2988	61.8125	34.1673	26.5065
104	29.7217	23.4432	32.0558	61.5203	33.9141	26.272
105	29.4355	23.21	31.8116	61.2229	33.659	26.0362
106	29.1471	22.9776	31.5661	60.9201	33.4019	25.7989
107	28.8564	22.7459	31.3193	60.6117	33.1429	25.5603
108	28.5634	22.515	31.0712	60.2978	32.8819	25.3201
109	28.2681	22.285	30.8218	59.9781	32.6188	25.0784
110	27.9704	22.0557	30.571	59.6527	32.3537	24.8352
111	27.6704	21.8272	30.3188	59.3215	32.0865	24.5903
112	27.3682	21.5996	30.0651	58.9843	31.8172	24.3439
113	27.0636	21.3727	29.8101	58.6412	31.5458	24.0958
114	26.7566	21.1468	29.5535	58.2919	31.2723	23.8461
115	26.4474	20.9217	29.2955	57.9366	30.9967	23.5948
116	26.136	20.6975	29.036	57.575	30.719	23.3417
117	25.8223	20.4741	28.7751	57.2072	30.4391	23.087
118	25.5064	20.2517	28.5126	56.8332	30.1571	22.8306
119	25.1884	20.0302	28.2486	56.4528	29.873	22.5726
120	24.8683	19.8096	27.9831	56.0661	29.5867	22.3129
121	24.5462	19.5899	27.7161	55.6731	29.2984	22.0515
122	24.2222	19.3712	27.4476	55.2736	29.008	21.7885
123	23.8962	19.1534	27.1776	54.8677	28.7155	21.524
124	23.5685	18.9367	26.9062	54.4555	28.421	21.2578
125	23.239	18.7209	26.6333	54.0368	28.1245	20.9902
126	22.908	18.5061	26.359	53.6118	27.826	20.721
127	22.5754	18.2923	26.0832	53.1803	27.5255	20.4504
128	22.2415	18.0795	25.8061	52.7425	27.2231	20.1785
129	21.9063	17.8678	25.5276	52.2984	26.9189	19.9052
130	21.57	17.6571	25.2478	51.848	26.6128	19.6306
131	21.2327	17.4475	24.9667	51.3913	26.3049	19.3548
132	20.8945	17.2389	24.6844	50.9284	25.9952	19.078
133	20.5556	17.0315	24.4008	50.4593	25.6839	18.8
134	20.2161	16.8251	24.116	49.9841	25.3709	18.5211
135	19.8762	16.6198	23.8301	49.5029	25.0563	18.2413
136	19.5361	16.4156	23.5432	49.0158	24.7401	17.9608
137	19.1959	16.2125	23.2552	48.5227	24.4225	17.6795
138	18.8557	16.0105	22.9662	48.0238	24.1034	17.3976
139	18.5158	15.8097	22.6763	47.5191	23.783	17.1152
140	18.1764	15.61	22.3854	47.0089	23.4612	16.8324
141	17.8375	15.4114	22.0938	46.4931	23.1383	16.5493
142	17.4995	15.214	21.8014	45.9718	22.8142	16.266
143	17.1625	15.0177	21.5082	45.4452	22.4891	15.9826
144	16.8267	14.8225	21.2144	44.9135	22.163	15.6992
145	16.4923	14.6284	20.9199	44.3767	21.8362	15.4159
146	16.1595	14.4354	20.6249	43.8351	21.5086	15.1329
147	15.8286	14.2434	20.3292	43.2889	21.1806	14.8501
148	15.5	14.0524	20.0331	42.7383	20.8524	14.5678
149	15.1738	13.8624	19.7365	42.1836	20.5242	14.2861
150	14.8504	13.6739	19.4401	41.6258	20.1962	14.005
151	14.5303	13.486	19.1428	41.0641	19.869	13.7246
152	14.2138	13.2981	18.8446	40.499	19.5432	13.4453
153	13.9013	13.1112	18.5468	39.9328	19.2192	13.1679
154	13.5931	12.9255	18.2497	39.3661	18.8974	12.8929
155	13.2894	12.7412	17.9536	38.7998	18.5781	12.6207
156	12.9904	12.5584	17.6588	38.2343	18.2614	12.3518
157	12.6963	12.3771	17.3656	37.6701	17.9476	12.0864
158	12.4071	12.1973	17.0741	37.1077	17.6369	11.8247
159	12.1231	12.0193	16.7845	36.5473	17.3293	11.5669
160	11.8442	11.8429	16.4969	35.9893	17.0249	11.3132
161	11.5705	11.6682	16.2114	35.4339	16.724	11.0636
162	11.3019	11.4952	15.9282	34.8814	16.4265	10.8183
163	11.0385	11.3239	15.6473	34.332	16.1325	10.5774
164	10.7803	11.1544	15.3688	33.7858	15.8422	10.3408
165	10.5273	10.9866	15.0928	33.2432	15.5555	10.1085
166	10.2797	10.8205	14.8194	32.7043	15.2725	9.88052
167	10.0372	10.6562	14.5486	32.1691	14.9934	9.65695
168	9.80001	10.4935	14.2805	31.638	14.718	9.43778
169	9.56791	10.3327	14.0152	31.1109	14.4465	9.22301
170	9.34086	10.1735	13.7527	30.5881	14.1789	9.01263
171	9.1188	10.016	13.4931	30.0696	13.9151	8.80657
172	8.90162	9.86025	13.2363	29.5557	13.6552	8.6048
173	8.68924	9.70617	12.9825	29.0463	13.3992	8.40725
174	8.48157	9.55378	12.7317	28.5416	13.147	8.21385
175	8.2785	9.40307	12.484	28.0418	12.8986	8.02453
176	8.07995	9.25401	12.2393	27.5468	12.6541	7.83921
177	7.88583	9.10661	11.9976	27.0568	12.4135	7.65783
178	7.69603	8.96085	11.7592	26.5719	12.1767	7.4803
179	7.51047	8.81673	11.5238	26.0921	11.9437	7.30655
180	7.32905	8.67422	11.2917	25.6175	11.7145	7.1365
181	7.15169	8.53332	11.0627	25.1482	11.4891	6.97009
182	6.97829	8.39401	10.837	24.6842	11.2673	6.80722
183	6.80877	8.25629	10.6145	24.2256	11.0491	6.64784
184	6.64305	8.12014	10.3952	23.7725	10.8345	6.49187
185	6.48104	7.98555	10.1792	23.3248	10.6234	6.33924
186	6.32265	7.85251	9.96645	22.8826	10.4158	6.18988
187	6.16781	7.721	9.75698	22.446	10.2116	6.04371
188	6.01644	7.59101	9.55079	22.0149	10.0107	5.90068
189	5.86846	7.46253	9.34788	21.5895	9.81317	5.76072
190	5.72379	7.33555	9.14825	21.1696	9.61884	5.62376
191	5.58236	7.21004	8.95189	20.7554	9.4277	5.48973
192	5.4441	7.08601	8.75879	20.3468	9.23969	5.35859
193	5.30893	6.96343	8.56894	19.9439	9.05475	5.23025
194	5.17679	6.84229	8.38233	19.5466	8.87284	5.10467
195	5.0476	6.72258	8.19892	19.155	8.69391	4.98179
196	4.9213	6.60429	8.0187	18.769	8.5179	4.86155
197	4.79783	6.48739	7.84163	18.3886	8.34477	4.74388
198	4.67711	6.37189	7.66765	18.0138	8.17447	4.62874
199	4.55909	6.25776	7.49677	17.6447	8.00694	4.51607
200	4.44371	6.14498	7.32897	17.2811	7.84214	4.40582
201	4.3309	6.03356	7.1642	16.923	7.68003	4.29793
202	4.2206	5.92347	7.00245	16.5705	7.52056	4.19235
203	4.11276	5.8147	6.84367	16.2235	7.36368	4.08904
204	4.00733	5.70723	6.68781	15.8819	7.20936	3.98794
205	3.90424	5.60106	6.53483	15.5457	7.05754	3.889
206	3.80344	5.49617	6.38469	15.2149	6.90818	3.79219
207	3.70488	5.39254	6.23733	14.8895	6.76124	3.69744
208	3.60851	5.29016	6.09271	14.5694	6.61669	3.60472
209	3.51428	5.18902	5.95078	14.2545	6.47448	3.51398
210	3.42215	5.08911	5.81149	13.9448	6.33456	3.42518
211	3.33205	4.99041	5.67479	13.6403	6.19691	3.33827
212	3.24395	4.89291	5.54065	13.3408	6.06148	3.25322
213	3.1578	4.79659	5.409	13.0465	5.92824	3.16997
214	3.07355	4.70144	5.27981	12.7571	5.79714	3.0885
215	2.99117	4.60746	5.15302	12.4726	5.66816	3.00877
216	2.91061	4.51462	5.02861	12.193	5.54125	2.93073
217	2.83183	4.42292	4.90651	11.9183	5.41638	2.85434
218	2.75478	4.33233	4.7867	11.6483	5.29351	2.77958
219	2.67944	4.24286	4.66912	11.3829	5.17262	2.7064
220	2.60576	4.15448	4.55373	11.1223	5.05367	2.63477
221	2.5337	4.06719	4.4405	10.8661	4.93662	2.56466
222	2.46323	3.98096	4.32939	10.6145	4.82145	2.49603
223	2.39431	3.8958	4.22035	10.3674	4.70812	2.42885
224	2.32691	3.81168	4.11335	10.1246	4.59661	2.36309
225	2.261	3.7286	4.00835	9.88608	4.48687	2.29871
226	2.19653	3.64655	3.90531	9.65183	4.37889	2.23569
227	2.13349	3.56551	3.8042	9.42175	4.27263	2.174
228	2.07183	3.48547	3.70498	9.19578	4.16806	2.11361
229	2.01154	3.40642	3.60762	8.97385	4.06517	2.05448
230	1.95257	3.32835	3.51208	8.75589	3.96391	1.9966
231	1.8949	3.25126	3.41833	8.54184	3.86427	1.93993
232	1.8385	3.17512	3.32634	8.33163	3.76622	1.88445
233	1.78334	3.09993	3.23608	8.12518	3.66972	1.83014
234	1.72941	3.02568	3.14751	7.92244	3.57477	1.77696
235	1.67666	2.95235	3.06061	7.72334	3.48133	1.72489
236	1.62509	2.87995	2.97534	7.5278	3.38938	1.67392
237	1.57465	2.80846	2.89168	7.33577	3.2989	1.62401
238	1.52533	2.73787	2.8096	7.14718	3.20986	1.57515
239	1.47711	2.66817	2.72907	6.96197	3.12224	1.5273
240	1.42996	2.59935	2.65006	6.78006	3.03603	1.48046
241	1.38386	2.53141	2.57255	6.6014	2.9512	1.43461
242	1.33879	2.46434	2.49652	6.42592	2.86773	1.38971
243	1.29473	2.39813	2.42193	6.25356	2.7856	1.34575
244	1.25166	2.33277	2.34876	6.08426	2.7048	1.30271
245	1.20955	2.26826	2.277	5.91795	2.6253	1.26058
246	1.1684	2.20459	2.20661	5.75457	2.54708	1.21933
247	1.12817	2.14175	2.13759	5.59408	2.47014	1.17895
248	1.08886	2.07973	2.06989	5.4364	2.39446	1.13943
249	1.05045	2.01854	2.00352	5.28148	2.32001	1.10073
250	1.01292	1.95817	1.93844	5.12926	2.24679	1.06286
251	0.976245	1.89861	1.87463	4.97969	2.17478	1.02579
252	0.94042	1.83986	1.81209	4.83272	2.10397	0.989518
253	0.905428	1.78192	1.75079	4.68829	2.03435	0.954017
254	0.871254	1.72477	1.69071	4.54634	1.9659	0.919279
255	0.837882	1.66843	1.63184	4.40684	1.89861	0.88529
256	0.805301	1.61289	1.57416	4.26973	1.83247	0.85204
257	0.773497	1.55814	1.51766	4.13496	1.76748	0.819515
258	0.742457	1.50419	1.46232	4.00249	1.70363	0.787705
259	0.71217	1.45104	1.40812	3.87228	1.64091	0.7566
260	0.682624	1.39869	1.35505	3.74429	1.5793	0.726188
261	0.653808	1.34715	1.30309	3.61847	1.51882	0.696462
262	0.625713	1.29641	1.25223	3.49479	1.45945	0.667412
263	0.598328	1.24647	1.20243	3.37323	1.4012	0.639031
264	0.571645	1.19736	1.15369	3.25374	1.34406	0.611311
265	0.545656	1.14906	1.10602	3.13629	1.28803	0.584245
266	0.520352	1.1016	1.0594	3.02088	1.23311	0.557828
267	0.495726	1.05497	1.01383	2.90747	1.17931	0.532055
268	0.471773	1.0092	0.969291	2.79604	1.12663	0.50692
269	0.448485	0.964283	0.925785	2.68659	1.07508	0.482421
270	0.425858	0.920244	0.883301	2.57909	1.02466	0.458555
271	0.403888	0.877094	0.841832	2.47355	0.975393	0.435319
272	0.382569	0.83485	0.801373	2.36995	0.92728	0.412712
273	0.361899	0.793526	0.761919	2.26829	0.880335	0.390733
274	0.341873	0.753141	0.723466	2.16856	0.834572	0.369384
275	0.322489	0.71371	0.686012	2.07074	0.790001	0.348663
276	0.303744	0.675249	0.649553	1.97483	0.746635	0.328572
277	0.285634	0.637769	0.614084	1.88079	0.704483	0.309112
278	0.268153	0.60128	0.579598	1.78858	0.663547	0.290281
279	0.251297	0.565782	0.546083	1.69811	0.623826	0.27208
280	0.235056	0.531264	0.513515	1.60926	0.585305	0.254503
281	0.219416	0.497701	0.481861	1.52186	0.547952	0.237543
282	0.204359	0.465044	0.451065	1.43566	0.51171	0.221183
283	0.189856	0.433213	0.421046	1.35026	0.476489	0.205398
284	0.175861	0.402083	0.391679	1.26516	0.442163	0.190145
285	0.162311	0.37147	0.362787	1.17962	0.408548	0.175357
286	0.149102	0.341109	0.334115	1.09289	0.375375	0.160932
287	0.136076	0.310798	0.305415	1.00464	0.342349	0.146712
288	0.123093	0.280519	0.276605	0.914916	0.309348	0.13256
289	0.11016	0.250324	0.247727	0.823825	0.276419	0.118458
290	0.0973231	0.220292	0.218844	0.731558	0.243636	0.104458
291	0.0846236	0.190539	0.190053	0.638451	0.211106	0.090614
292	0.0721109	0.161234	0.161502	0.545039	0.178995	0.0769876
293	0.059852	0.13261	0.133413	0.452135	0.147542	0.0636615
294	0.0479439	0.104995	0.106103	0.360922	0.117095	0.0507539
295	0.0365301	0.0788328	0.0800233	0.273073	0.0881392	0.0384372
296	0.0258253	0.0547316	0.0558021	0.190904	0.0613505	0.0269646
297	0.0161566	0.0335082	0.0343028	0.117563	0.0376549	0.0167078
298	0.00802951	0.0162583	0.0166976	0.0572735	0.0183092	0.00821014
299	0.0022325	0.00444249	0.00456254	0.0156329	0.00500432	0.00226104
